# Supplementary material for: FAK suppresses antigen processing and presentation to promote immune evasion in pancreatic cancer
Source: PubMed Central journal article supplement (PMC10715489; doi:10.1136/gutjnl-2022-327927), 2023-03-28
Supplement: gutjnl-2022-327927supp002.pdf [file gutjnl-2022-327927supp002.pdf]

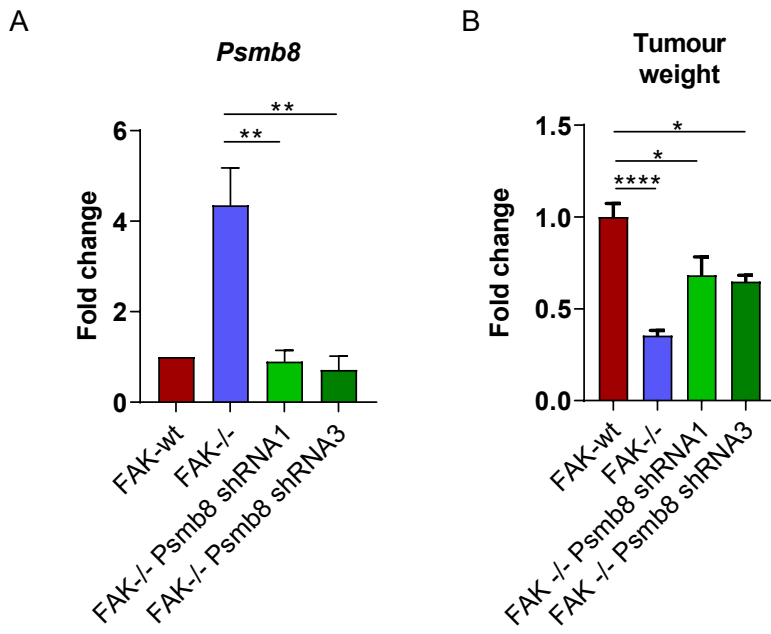

**Supplementary Figure 2. *Psmb8* depletion promotes growth of Panc47 FAK<sup>-/-</sup> tumours.**
