# Supplementary material for: FAK suppresses antigen processing and presentation to promote immune evasion in pancreatic cancer
Source: HighWire-hosted journal article supplement (doi:10.1136/gutjnl-2022-327927), 2023-03-28
Supplement: gutjnl-2022-327927supp004_data_supplement.pdf [file gutjnl-2022-327927supp004_data_supplement.pdf]

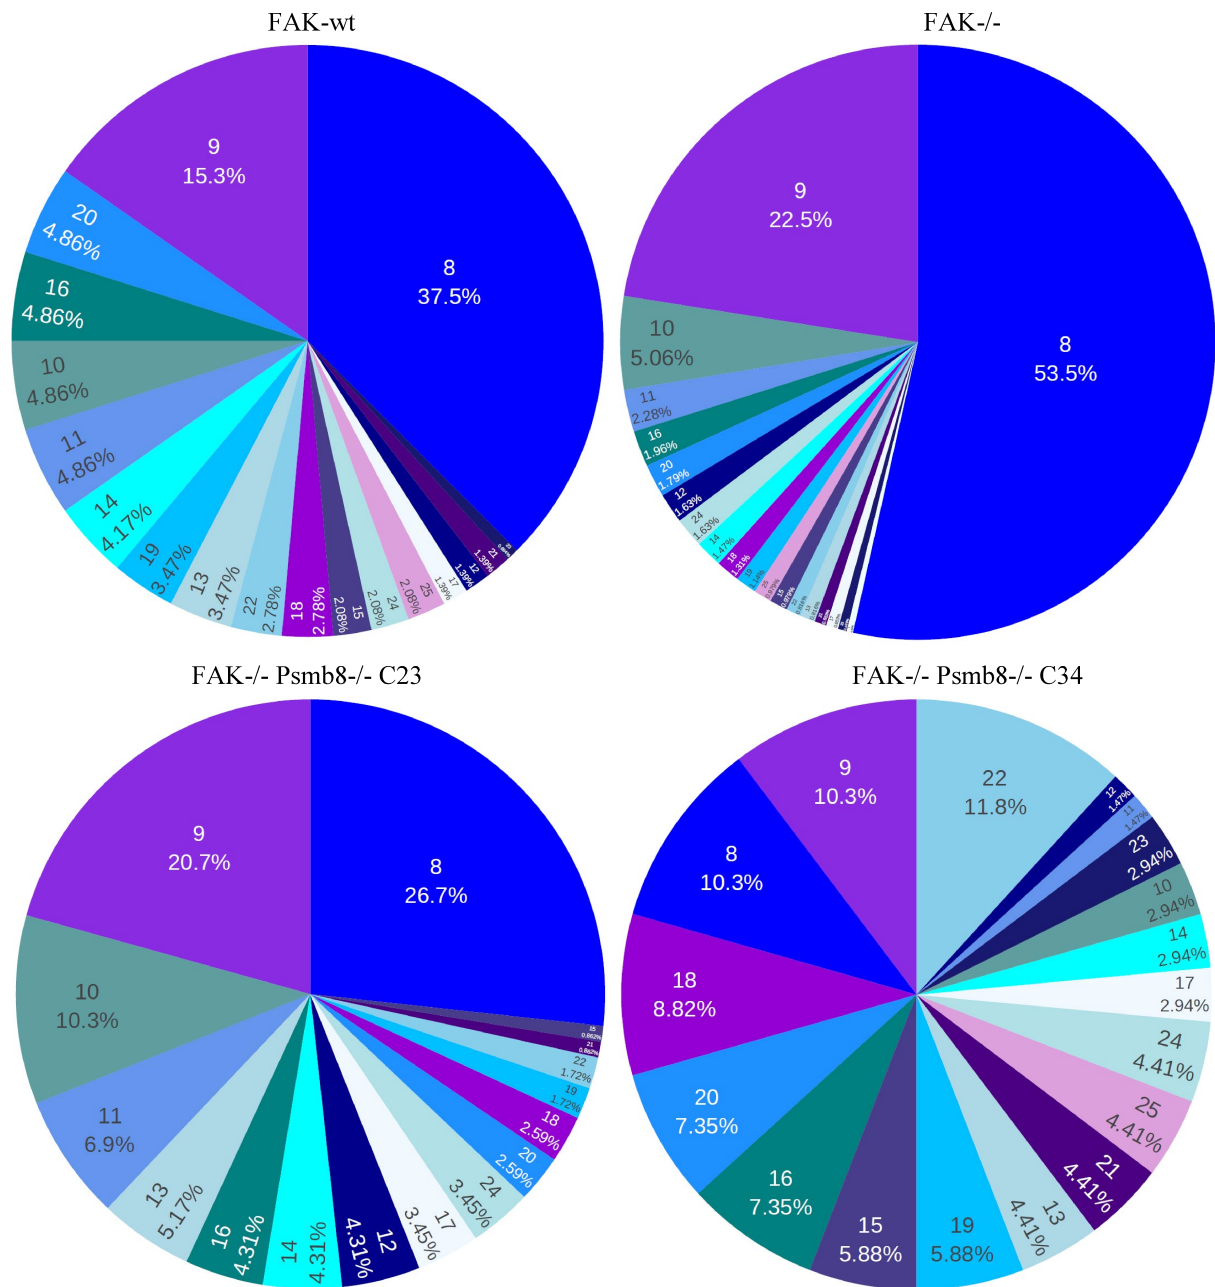

Supplementary Figure 4. FAK depletion alters peptide antigen length distribution in a Psmb8-dependent manner.
