# Supplementary material for: FAK suppresses antigen processing and presentation to promote immune evasion in pancreatic cancer
Source: PubMed Central journal article supplement (PMC10715489; doi:10.1136/gutjnl-2022-327927), 2023-03-28
Supplement: gutjnl-2022-327927supp007.pdf [file gutjnl-2022-327927supp007.pdf]

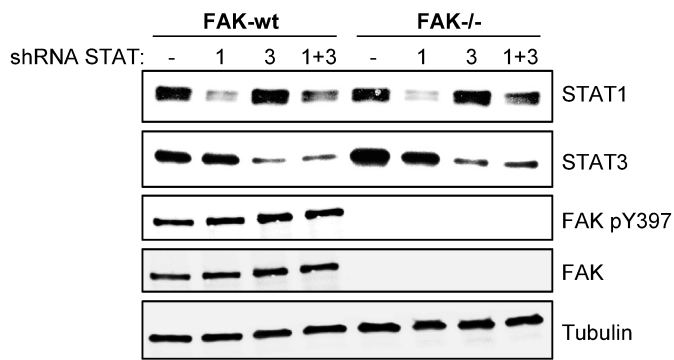

**Supplementary Figure 7. STAT1 and STAT3 shRNA in FAK-wt and FAK-/- cells.**
