# Supplementary material for: FAK suppresses antigen processing and presentation to promote immune evasion in pancreatic cancer
Source: HighWire-hosted journal article supplement (doi:10.1136/gutjnl-2022-327927), 2023-03-28
Supplement: gutjnl-2022-327927supp009_data_supplement.pdf [file gutjnl-2022-327927supp009_data_supplement.pdf]

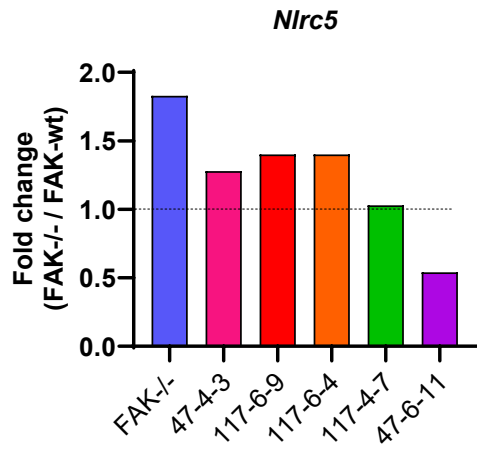

**Supplementary Figure 9. Fold-change in *Nlrc5* gene expression in FAK-/- cells relative to their FAK-wt counterparts.**
