# Supplementary material for: FAK suppresses antigen processing and presentation to promote immune evasion in pancreatic cancer
Source: HighWire-hosted journal article supplement (doi:10.1136/gutjnl-2022-327927), 2023-03-28
Supplement: gutjnl-2022-327927supp015_data_supplement.pdf [file gutjnl-2022-327927supp015_data_supplement.pdf]

**FAK -/- hydrophobicity data**

| <b>S.No.</b> | <b>Score</b> | <b>Frequency</b> | <b>Hydrophobicity</b> | <b>Residues</b> | <b>Percentage</b> |
|--------------|--------------|------------------|-----------------------|-----------------|-------------------|
| 1            | 3.8          | 327              | Hydrophobic           | L               | 53.30             |
| 2            | 4.2          | 63               | Hydrophobic           | V               | 10.30             |
| 3            | 1.9          | 51               | Hydrophobic           | M               | 8.32              |
| 4            | -4.5         | 37               | Hydrophilic           | R               | 6.04              |
| 5            | 2.8          | 31               | Hydrophobic           | F               | 5.06              |
| 6            | 4.5          | 31               | Hydrophobic           | I               | 5.06              |
| 7            | -3.9         | 25               | Hydrophilic           | K               | 4.08              |
| 8            | -0.4         | 12               | Neutral               | G               | 1.96              |
| 9            | -3.5         | 11               | Hydrophilic           | D/E/N/Q         | 1.79              |
| 10           | -0.8         | 7                | Neutral               | S               | 1.14              |
| 11           | 1.8          | 7                | Hydrophobic           | A               | 1.14              |
| 12           | -0.9         | 4                | Neutral               | W               | 0.63              |
| 13           | -3.2         | 3                | Hydrophilic           | H               | 0.49              |
| 14           | -1.6         | 2                | Neutral               | P               | 0.33              |
| 15           | -1.3         | 2                | Neutral               | Y               | 0.33              |

**FAK WT hydrophobicity data**

| <b>S.No.</b> | <b>Score</b> | <b>Frequency</b> | <b>Hydrophobicity</b> | <b>Residues</b> | <b>Percentage</b> |
|--------------|--------------|------------------|-----------------------|-----------------|-------------------|
| 1            | 3.8          | 54               | Hydrophobic           | L               | 37.50             |
| 2            | -4.5         | 20               | Hydrophilic           | R               | 13.90             |
| 3            | -3.9         | 13               | Hydrophilic           | K               | 9.03              |
| 4            | 1.9          | 13               | Hydrophobic           | M               | 9.03              |
| 5            | 4.2          | 11               | Hydrophobic           | V               | 7.64              |
| 6            | -0.4         | 6                | Neutral               | G               | 4.17              |
| 7            | 2.8          | 6                | Hydrophobic           | F               | 4.17              |
| 8            | 1.8          | 5                | Hydrophobic           | A               | 3.47              |
| 9            | -3.5         | 5                | Hydrophilic           | D/E/N/Q         | 3.47              |
| 10           | 4.5          | 4                | Hydrophobic           | I               | 2.78              |
| 11           | -1.6         | 2                | Neutral               | P               | 1.40              |
| 12           | -0.8         | 2                | Neutral               | S               | 1.40              |
| 13           | -3.2         | 1                | Hydrophilic           | H               | 0.69              |
| 14           | -1.3         | 1                | Neutral               | Y               | 0.69              |
| 15           | -0.7         | 1                | Neutral               | T               | 0.69              |

**Clone 23 hydrophobicity data**

| <b>S.No.</b> | <b>Score</b> | <b>Frequency</b> | <b>Hydrophobicity</b> | <b>Residues</b> | <b>Percentage</b> |
|--------------|--------------|------------------|-----------------------|-----------------|-------------------|
| 11           | 3.8          | 48               | Hydrophobic           | L               | 41.40             |
| 9            | 1.9          | 13               | Hydrophobic           | M               | 11.20             |
| 10           | 2.8          | 11               | Hydrophobic           | F               | 9.48              |
| 1            | -4.5         | 10               | Hydrophilic           | R               | 8.62              |
| 2            | -3.9         | 8                | Hydrophilic           | K               | 6.90              |
| 3            | -3.5         | 7                | Hydrophilic           | D/E/N/Q         | 6.03              |
| 12           | 4.2          | 6                | Hydrophobic           | V               | 5.17              |
| 8            | 1.8          | 4                | Hydrophobic           | A               | 3.45              |
| 13           | 4.5          | 3                | Hydrophobic           | I               | 2.59              |
| 6            | -0.7         | 2                | Neutral               | T               | 1.72              |
| 7            | -0.4         | 2                | Neutral               | G               | 1.72              |
| 4            | -3.2         | 1                | Hydrophilic           | H               | 0.90              |
| 5            | -0.8         | 1                | Neutral               | S               | 0.90              |

**Clone 34 hydrophobicity data**

| <b>S.No.</b> | <b>Score</b> | <b>Frequency</b> | <b>Hydrophobicity</b> | <b>Residues</b> | <b>Percentage</b> |
|--------------|--------------|------------------|-----------------------|-----------------|-------------------|
| 1            | 3.8          | 16               | Hydrophobic           | L               | 23.50             |
| 2            | -4.5         | 13               | Hydrophilic           | R               | 19.10             |
| 3            | -3.9         | 10               | Hydrophilic           | K               | 14.70             |
| 4            | 1.8          | 8                | Hydrophobic           | A               | 11.80             |
| 5            | -3.5         | 6                | Hydrophilic           | D/E/N/Q         | 8.82              |
| 6            | -0.4         | 5                | Neutral               | G               | 7.35              |
| 7            | -0.8         | 4                | Neutral               | S               | 5.88              |
| 8            | 2.8          | 2                | Hydrophobic           | F               | 2.94              |
| 9            | 1.9          | 1                | Hydrophobic           | M               | 1.47              |
| 10           | -1.6         | 1                | Neutral               | P               | 1.47              |
| 11           | 4.2          | 1                | Hydrophobic           | V               | 1.47              |
| 12           | 4.5          | 1                | Hydrophobic           | I               | 1.47              |
