# Supplementary material for: FAK suppresses antigen processing and presentation to promote immune evasion in pancreatic cancer
Source: HighWire-hosted journal article supplement (doi:10.1136/gutjnl-2022-327927), 2023-03-28
Supplement: gutjnl-2022-327927supp018_data_supplement.pdf [file gutjnl-2022-327927supp018_data_supplement.pdf]

>ENSMUSP00000043594\_c.3228:A>G\_p.I1077V ENSMUST00000041447.5|Trpa1-201|ENSMUSG00000032769|-|chr1:g.14943879:T>C  
 MKRGLRRILLPEERKEVQGVYRGGVGEDMDCSKESFKVDIEGDMCRLEDFIKNRRKLSKYEDENLCPHAAAA  
 EGQVELMELIINGSSCEVLNIMDGYGNTPLHCAAENQVESVKFLLSQGANPNLRNRNMMSPLHIAVHGMUNE  
 VIKVLTEHKATNINLEGENGNTALMSTCAKDNSEALQILLEKGAKLCKSNKWGDYPVHQAAFSGAKKCMELIL  
 AYGEKNGYSRETHINFVNHHKASPLHLAVQSGDLDMIKMCLDNGAHDMMENAKCMALHFAATQGATDIVKLM  
 ISSYTGSSDIVNAVDGNQETLLHRASLFDHHDLAEYLSVGDINSTDSEGRSPLILATASASWNIVNLLLCK  
 GAKVDIKDHLGRNFLHLTVQQPYGLRNLRPEFMQMQHIKELVMDEDNDGCTPLHYACRQGVVSVNLLGFNV  
 SIHSSKDKKSPHFAASYGRINTCQRLLQDISDTRLLNEGDLHGMPHLHLAAKNGHDKVVQLLLKKGALFLS  
 DHNGWTALHHAASMGYQTMTKVIIDTNLKTDRLEEGNTALHFAAREGHAKAVAMLLSYNADILLNKKQASFL  
 LHIALHNKRKEVVLTTIRNKRWDECLQVFTHNSPSNRCPIMEMVEYLPECMKVLDFCMIPTSTEDKSCQDYHI  
 EYNFKYLQCPPLSMTKKVAPTQDVVYEPLTILNVMVQHNRIELLNHPVCREYLLMKWCAYGFRAHMMNLGSYCL  
 GLIPMTLLVVKIQQPGMAFNSTGIINGTSSTHEERIDTLNSFPKIKMILVFLSSIFGYCKEVIQIFQQRNYF  
 LDYNNALEWVIYTTSIIFVLPFLNIPAYMQWQCGAIAIFFYWMNLLYLQRFENCGIFIVMLEVIFKTLRLS  
 TGVFIFLLAFGLSFYVLLNFQDAFSTPLLSLIQTFSMMLGDINRDAFLEPLFRNELAYPVLTFGQLIAFTM  
 FVPVIVLMNLLIGLAVGDIAEVQKHASLKRIAMQVELHTNLEKPLWYLRKVDQRSTIVYPNRPGRHMLRFF  
 HYFLNMQETRQEVNIDTCEMEILKQKYLKDLTSLLEKQHELIKLI IQKMEIVSETEDEDNHCSFQDRFKK  
 ERLEQMHSKWNFVNLNAVKTTHCSISHPDF\*

>ENSMUSP00000157371\_c.3138:A>G\_p.I1047V ENSMUST00000235071.2|Trpa1-202|ENSMUSG00000032769|-|chr1:g.14943879:T>C  
 MKRGLRRILLPEERKEVQGVYRGGVGEDMDCSKESFKVDIEGDMCRLEDFIKNRRKLSKYEDENLCPHAAAA  
 EGQVELMELIINGSSCEVLNIMDGYGNTPLHCAAENQVESVKFLLSQGANPNLRNRNMMSPLHIAVHGMUNE  
 VIKVLTEHKATNINLEGENGNTALMSTCAKDNSEALQILLEKGAKLCKSNKWGDYPVHQAAFSGAKKCMELIL  
 AYGEKNGYSRETHINFVNHHKASPLHLAVQSGDLDMIKMCLDNGAHDMMENAKCMALHFAATQGATDIVKLM  
 ISSYTGSSDIVNAVDGNQETLLHRASLFDHHDLAEYLSVGDINSTDSEGRSPLILATASASWNIVNLLLCK  
 GAKVDIKDHLGRNFLHLTVQQPYGLRNLRPEFMQMQHIKELVMDEDNDGCTPLHYACRQGVVSVNLLGFNV  
 SIHSSKDKKSPHFAASYGRINTCQRLLQDISDTRLLNEGDLHGMPHLHLAAKNGHDKVVQLLLKKGALFLS  
 DHNGWTALHHAASMGYQTMTKVIIDTNLKTDRLEEGNTALHFAAREGHAKAVAMLLSYNADILLNKKQASFL  
 LHIALHNKRKEVVLTTIRNKRWDECLQVFTHNSPSNRCPIMEMVEYLPECMKVLDFCMIPTSTEDKSCQDYHI  
 EYNFKYLQCPPLSMTKKVAPTQDVVYEPLTILNVMVQHNRIELLNHPVCREYLLMKWCAYGFRAHMMNLGSYCL  
 GLIPMTLLVVKIQQPGMAFNSTGIINGTSSTHEERIDTLKRNFLDYNNALEWVIYTTSIIFVLPFLNIPAYM  
 QWQCGAIAIFFYWMNLLYLQRFENCGIFIVMLEVIFKTLRLSTGVFIFLLAFGLSFYVLLNFQDAFSTPLLS  
 LIQTFSMMLGDINRDAFLEPLFRNELAYPVLTFGQLIAFTMFPVIVLMNLLIGLAVGDIAEVQKHASLKRI  
 AMQVELHTNLEKPLWYLRKVDQRSTIVYPNRPGRHMLRFFHYFLNMQETRQEVNIDTCEMEILKQKYL  
 LKDLTSLLEKQHELIKLI IQKMEIVSETEDEDNHCSFQDRFKKERLEQMHSKWNFVNLNAVKTTHCSISHPDF  
 \*

>ENSMUSP00000043594\_c.505:C>A\_p.A169D ENSMUST00000041447.5|Trpa1-201|ENSMUSG00000032769|-|chr1:g.14976196:G>T  
 MKRGLRRILLPEERKEVQGVYRGGVGEDMDCSKESFKVDIEGDMCRLEDFIKNRRKLSKYEDENLCPHAAAA  
 EGQVELMELIINGSSCEVLNIMDGYGNTPLHCAAENQVESVKFLLSQGANPNLRNRNMMSPLHIAVHGMUNE  
 VIKVLTEHKATNINLEGENGNTDLMSTCAKDNSEALQILLEKGAKLCKSNKWGDYPVHQAAFSGAKKCMELIL  
 AYGEKNGYSRETHINFVNHHKASPLHLAVQSGDLDMIKMCLDNGAHDMMENAKCMALHFAATQGATDIVKLM  
 ISSYTGSSDIVNAVDGNQETLLHRASLFDHHDLAEYLSVGDINSTDSEGRSPLILATASASWNIVNLLLCK  
 GAKVDIKDHLGRNFLHLTVQQPYGLRNLRPEFMQMQHIKELVMDEDNDGCTPLHYACRQGVVSVNLLGFNV  
 SIHSSKDKKSPHFAASYGRINTCQRLLQDISDTRLLNEGDLHGMPHLHLAAKNGHDKVVQLLLKKGALFLS  
 DHNGWTALHHAASMGYQTMTKVIIDTNLKTDRLEEGNTALHFAAREGHAKAVAMLLSYNADILLNKKQASFL  
 LHIALHNKRKEVVLTTIRNKRWDECLQVFTHNSPSNRCPIMEMVEYLPECMKVLDFCMIPTSTEDKSCQDYHI  
 EYNFKYLQCPPLSMTKKVAPTQDVVYEPLTILNVMVQHNRIELLNHPVCREYLLMKWCAYGFRAHMMNLGSYCL  
 GLIPMTLLVVKIQQPGMAFNSTGIINGTSSTHEERIDTLNSFPKIKMILVFLSSIFGYCKEVIQIFQQRNYF  
 LDYNNALEWVIYTTSIIFVLPFLNIPAYMQWQCGAIAIFFYWMNLLYLQRFENCGIFIVMLEVIFKTLRLS  
 TGVFIFLLAFGLSFYVLLNFQDAFSTPLLSLIQTFSMMLGDINRDAFLEPLFRNELAYPVLTFGQLIAFTM  
 FVPVIVLMNLLIGLAVGDIAEVQKHASLKRIAMQVELHTNLEKPLWYLRKVDQRSTIVYPNRPGRHMLRFF  
 HYFLNMQETRQEVNIDTCEMEILKQKYLKDLTSLLEKQHELIKLI IQKMEIIVSETEDEDNHCSFQDRFKK  
 ERLEQMHSKWNFVNLNAVKTTHCSISHPDF\*

>ENSMUSP00000157371\_c.505:C>A\_p.A169D ENSMUST00000235071.2|Trpa1-202|ENSMUSG00000032769|-|chr1:g.14976196:G>T  
 MKRGLRRILLPEERKEVQGVYRGGVGEDMDCSKESFKVDIEGDMCRLEDFIKNRRKLSKYEDENLCPHAAAA  
 EGQVELMELIINGSSCEVLNIMDGYGNTPLHCAAENQVESVKFLLSQGANPNLRNRNMMSPLHIAVHGMUNE

VIKVLTEHKATNINLEGENGNTDLMSTCAKDNSEALQILLEKGAKLCKSNKWGDYPVHQAAFSGAKKCMELIL  
 AYGEKNGYSRETHINFVNHHKASPLHLAVQSGDLDMIKMCLDNGAHDMMENAKCMALHFAATQGATDIVKLM  
 ISSYTGSSDIVNAVDGNQETLLHRASLFDHHDLAEYLISVGADINSTDSEGRSPLILATASASWNIVNLLCK  
 GAKVDIKDHLGRNFLHLTVQQPYGLRNLRPEFQMOMHIKELVMDEDNDGCTPLHYACRQGVPSVNNLLGFNV  
 SIHKSJKDKKSPLHFAASYGRINTCQRLLQDISDTRLLNEGDLHGMPHLHLAAKNGHDKVVQLLLKKGALFLS  
 DHNGWTALHSHASMGYQTMTKVIILDTNLKCTDRLEEGNTALHFAAREGHAKAVAMLLSYNADILLNKKQAS  
 LHIALHNKRKEVVLTTIRNKRWDECLQVFTHNSPSNRCPIMEMVEYLPECMKVLDFDCMIPSTEDKSCQDYHI  
 EYNFKYLQCPPLSMTKKVAPTQDVVYEPLTILNVMVQHNRIELLNHPVCREYLLMKWCAYGFRAHMMNLGSYCL  
 GLIPMTLLVVKIQPGMAFNSTGIINGTSSTHEERIDTLKRNFLDYNNALEWVIYTTSIIFVLPFLFNI  
 PAYM  
 QWQCGAIAIFFYWMNLLYLQRFENCGIFIVMLEVIFKTLRSTGVFIFLLAFGLSFYVLLNFQDAFSTPLL  
 SLIQTFSMMLGDINRDAFLPLFRNELAYPVLTFGQLIAFTMFVPIVLMNLLIGLAVGDIAEVQKHASLKRI  
 AMQVELHTNLEKKLPLWYLRKVDQRSTIVYPNRPRHGRMLRFFHYFLNMQETRQEVPNIDTCLEMEILKQKYR  
 LKDLTSLLEKQHELKLIQKMEI I SETEDEDNHCSFQDRFKKERLEQMHSKWNFVNAVKTHTCSISHPDF  
 \*

>ENSMUSP00000140422\_c.162:GA>CT\_p.N55L ENSMUST00000188641.7|Eloc-  
 208|ENSMUSG00000079658|-|chr1:g.16713688:TC>AG  
 MDGEEKTYGGCEGPDAMYVKLISSDGHEFIVKREHALTSGTIKAMLSGPGQFAEL\*NQRGQF\*RDPLTCAIKS  
 VHVLYLQGPLY\*QLH\*NS\*IPNCT\*NCTGTADGCKLPRLL

>ENSMUSP00000111009\_c.162:GA>CT\_p.N55L ENSMUST00000115352.10|Eloc-  
 201|ENSMUSG00000079658|-|chr1:g.16713688:TC>AG  
 MDGEEKTYGGCEGPDAMYVKLISSDGHEFIVKREHALTSGTIKAMLSGPGQFAEL\*NQRGQF\*RDPLTCAIKS  
 VHVLYLQGPLY\*QLH\*NS\*IPNCT\*NCTGTADGCKLPRLL

>ENSMUSP00000140962\_c.162:GA>CT\_p.N55L ENSMUST00000186948.7|Eloc-  
 206|ENSMUSG00000079658|-|chr1:g.16713688:TC>AG  
 MDGEEKTYGGCEGPDAMYVKLISSDGHEFIVKREHALTSGTIKAMLSGPGQFAEL\*NQRGQF\*RDPLTCAIKS  
 VHVLYLQGPLY\*QLH\*NS\*IPNCT\*NCTGTADGCKLPRLL

>ENSMUSP00000139480\_c.228:GA>CT\_p.N77L ENSMUST00000187910.7|Eloc-  
 207|ENSMUSG00000079658|-|chr1:g.16713688:TC>AG  
 MDSLELEEEEEEGGSGRRRHDGEEKTYGGCEGPDAMYVKLISSDGHEFIVKREHALTSGTIKAMLSGPGQ  
 FAEL\*NQRGQF\*RDPLTCAIKSVHVLYLQGPLY\*QLH\*NS\*IPNCT\*NCTGTADGCKLPRLL

>ENSMUSP00000139675\_c.162:GA>CT\_p.N55L ENSMUST00000185771.7|Eloc-  
 203|ENSMUSG00000079658|-|chr1:g.16713688:TC>AG  
 MDGEEKTYGGCEGPDAMYVKLISSDGHEFIVKREHALTSGTIKAMLSGPGQFAEL\*NQRGQF\*RDPLTCAIKS  
 VHVLYLQGPLY\*QLH\*NS\*IPNCT\*NCTGTADGCKLPRLL

>ENSMUSP00000140161\_c.162:GA>CT\_p.N55L ENSMUST00000185393.7|Eloc-  
 202|ENSMUSG00000079658|-|chr1:g.16713688:TC>AG  
 MDGEEKTYGGCEGPDAMYVKLISSDGHEFIVKREHALTSGTIKAMLSGPGQFAEL\*NQRGQF\*RDPLTCAIKS  
 VHVLYLQGPLY\*QLH\*NS\*IPN

>ENSMUSP00000158584\_c.3647:C>G\_p.H1216Q ENSMUST00000238425.2|Vwa3b-  
 211|ENSMUSG00000050122|+|chr1:g.37226023:C>G  
 MAEQSLLSSERWLQLHGLKSKKLTQILSQIGFPQSEYVTSRRLVASRYADGLFPQIYTAEDGRLYNLTA  
 KTELICQFVDYLTQAVESYKQRMDWLTSGSRQIFGVILEQRVTIVLDFGDVLMEEELNLCRDALKMVLQEQVAL  
 ITRFNMIWVSAEPVKWQYAYAILVTEHSIAAAISWIEKMTFEPKPVREVSGLDALLEAGKDKTIEAIYYFVVG  
 VPQEFQKLLLTGVLEIPIPVCTVSNFARGEETIAFLKDLSTKTHSRFHAFARTECEEFSAFSTEGVDGSMTW  
 NSRKLKGRLLPPGAGVREDVFLIWRMEMEACRILAQVRSVLDKAPQSDVSPADCKSRPAESKENAEDTWSQKW  
 LQKYGLKAQKLTIFYDVLHCSFRHADGVVDIKAKPENESVQTSADTNKKTIAHAKYCSRFIHIPWKDGLVHV  
 ITKEKYKWRERIHATALAMIQRRIKWLQNGSHILFGKARGECIYVLIDTSCSMKSRLNLVKDKIIQFIQEQLR  
 YKSKFNFTVFDGQAIWREKLAEVNEDNLKQAQSWIRGIKVGSSSTNTLNALKIAFADEETQVIYLLTDGRPDQ  
 PPEMVMHDVVKLFQNIPICAISFSYNDEVANEFKELAAALTGGEFRAYNFGCKDPIQDTQDEDLNLQEMEQQ  
 HSDLEKMQELYMESLVVDWWYNADKDTDSKHQKEILSMVSTPEERANSQPADADSLASSPPNVSTGSWKFL  
 TQKKKILHAESTKTSLLRSHISNFKSSSNKSSNSSRSHTSALSREMSVLLTNKCLDDKLSSESASNGSQV  
 SGHTSSDTSSKTWLTQTHGLVAKKLTADALAGAMVPHSSSTYVPILNKNVSVKVFDEVFPLAHVCNNSNMVLI  
 NPHGINLNIYKQNEQAIKSYEKCLNKIVWQALSEEKELDAIKPIQYLENKDVNLKALERLNWPISLKELS  
 VLENEILVGMKIYQALELQETSARKNYQSKTLQEQKCLQGYPTKKIKSRKLDPLKQKQVIAARCEENGFYFPGV  
 VKKCVSSSHALVDFRYGDTKVVPI SFIMPVGGAMPKQPLQVGDYVFAKIMTSKGFDFYVPAIVIALPNHNVAS  
 EKFYTVLKCNNRREFCPRALIKISQNKYALSCSMIHSSLVEKNGAGEEVDGSNSSNIWTVTEEATGNLKQPR  
 QENLRKKRKRTRKRLPLQELMCSDFDGSRRSTRFSTRGLRRLRPRQTATRSPALTESSHPQRKGLRTHR\*

>ENSMUSP00000158612\_c.6691:A>C\_p.H2231P ENSMUST00000238212.2|Dnah7b-207|ENSMUSG00000041144|+|chr1:g.46272697:A>C

MSSKKDKLSTKGTSKPPARFLPQLPMDKLSREKDKLPTTVLPQLTSTGVKPKQWQQIAPSFHLMNKQENPILE  
 PYPVKNEQSFADYMEYFQKQKQLYQIDDKRSGPSTSRSKVKSPQKERENFRSTLVKLIQQDGDLESDVIDE  
 SGIPKATTTAREKDISRYYYYIRHGLDTHVAPMEDSWLEHVLQVLPQHLKILNNSIMVLSDEIREDYLLSVK  
 KSIVDFVLKDPKDDDDGKI TELPPHRAEMEVLKPKWRRSFLSACS YIRDHLNAMNPMMLAVLDLWHSTFKKL  
 RLVDIEEFHNRQDSLELSEFQNI VIKHMESAKEMLLKTFWPEVQNIYYKGNKKKQLPTGKSSAKLDSFFNCAA  
 TLMTLQQLDLILVSMQDFDLDIAQPPESTRAFEPGFIMRLI LDKKT IKFAPDFNDYIDILINVEYIMIKMVS  
 FVPRVETKLYSQWESKSKPTTLKPIILNEIIDTHKEKIREVVLRRESVAPTEHLKMYDKYQFLITGKAERDIDE  
 FLFQSQNYERLIEEIRKYQKLEEEIQYTSRKAVRLGMFEMHCEELIKSLVKRADVICGKLIAMFRDHQEVNT  
 MLCDEFEKIAEKALSMPLNTAELMEMKAHVQKLETTDMLELRQLVDSKNCLAFLEICVNFSPADIRLNNVSVF  
 QWYGRMGEIFDEHRKI IKDKTEQYQEAALKFR CERFVEELESYAKQVEEFHTFGDLDLVQRYLKAQVNLGKLD  
 AAADKIEQFNAAAAEAYGWVPSVY PQRKKIQDGLNPYLRLYETAVEFSTKHRGWTEGYPYHKVNPQVQV EADVGN  
 WRGLYKLEKVFHDSPNALAMTKVQSMVEEFKQYIPLIQVICNPLRPRHWEAMSTIVGFPLPSDDSTVFSF  
 IDMNLEPFLDRFEGISEAASKEYSLEKAMDKMMTEWDSMEFVILPYRESGTYILSSVDDIQMLLDDHIKTQT  
 MRGSPFIKPYEKQMRWEWEGKLLLLQEILDEWLKVQATWLYLEPIFSSPDIMSQMPEEGRRFKAVDKTWRDVMK  
 TVVQDKRVLAVVTIERMLERLKKSNELLELILKGLNEYLEKKRLEFFRFFFLSNDELLEILSETKDPTRVQPH  
 LKKCFEGIAKVEFTETLDITHMKSEGEVVELVDITSTAKARGQVEKWLVELELERTMIKSIHKVIGDAIAAYTK  
 NSRISWVRDWPQGQTVLVCVSQTFWTVVQTAIPKGHRALEGYLAKCNHQIDDI VTLVVRGKLSKQNRVTLGALVV  
 LDVHARDVLAASLVDKKISDDSDFWLSQLRYWQENNLETKMINAGLRYGYEYLGNSPRLVITPLTDRCYRTL  
 FGALHLHLGGAPEGPAGTGKTEETKDLAKAVAKQCVVFNCS DGLDY LALGKFFKGLLSCGAWACDFEFNRIDL  
 EVLSVVAQQILTIQGINAGTELLVFEGTELKLDPTCAVFITMNPYAGRSEL PDNLKALFRVAMMVPDYAM  
 IAEIVLYSCGFVTARPLSIKIVATYRLCSEQLSSQHNYNYGMRAVKSVLTAAGNLKLYPNENEEILLRSII  
 DVNLPKFLSHDLPLFEGITSDLFPGVKLPKPDYNELLA AIRENCHTMNLQMTDFDFSEKILQIYEMMIVRHGFM  
 IVGEPFGGKTSAYRVLGALNDICEKGLMEENKVLITVLPKSVTMGQLYGQFDLVSHWSDGILAVSFRAFA  
 ASSTPDRKWLIFDGPVDAVWIENMNTVLDNKKLCLMSGEIIQMS PQMNLIFEPMDLEVASPATVSRCGMIYM  
 EPHMLGWRPLMVSWINTLPQS VSI IQKEFIEGLFDRMIVPLSVVEFIRRHTELKLSPTDNLVLSMNLIDCFMD  
 DFADENKQKERNDRESFSLLEGI FMFSLAWSVGATCTDDDRLKFDKILRELMEGPI SDLTRNKFKLLSGTEQT  
 SSKVFI VPFPEKGTIYEYQFIEPEGLGRWDKWKIKKLADTPPIPKDVQFIEIIVPTLDTIRYSALMHLLTTHQKP  
 SIFVGTGTGKSVYIINFLNQLNKDIYKPLIVNFSAQTTAAQTQNIIMSKLDRKRGVFGPPLGKRMI VFDV  
 DVNMPAREVYGAQPPIELLRQWLDHWNWYDLKDCSVIKLVDIQIMCAMGPPGGGRNPITPRYMRHFNI VINE  
 FSDKSMFTIFSRILAWHLRTCYKFPDDFLDITQIVNGTMALYKDAMKNLLPTPAKSHYLFNLRDFSRVIQGV  
 CLSRPETAENKEAIKRLWVHEVLRVYDRLVDNADRSLWIPYIQEILKNYMQEDFHDLFKNLDFNQDGTVEED  
 DLRLSMFCDFHDPKREDFGYREIANVDALRMIVEGHLDEYNNMSKPKMNLVLFRAIEHISRI SRI LKQPRSH  
 ALLVGVGSGRQSVTRLAHMADYSLFQVEISKYGSHEWEDLKVILRKCAENDMQGVFLFTDTQIKRESFL  
 EDVNNLLNAGEVPNLFDALDEKQEICEKMRQLDRQRDKTRQTDGSPIALFNMFIDRCRNQLHVVLAMSPIGDAF  
 RIRLRKFPALVNCCTIDWFQSWPEDALEAVASRFLEDIEMSEEIQEGCIDMKRFHTSTINLSTSFHNELQRY  
 NYVTPTSYLELISTFKLLLEKRNEMKMRRYEVGLDKLDSASSQVATMQSELEALHPQLKVASREVDMMI  
 IIERESMEVAKTEKIVKADETVANDQAMA AAIKDECDADLAEALPILESALAAALDTLTAQDITVVKSMKSP  
 AGVKLVMEAI CILKGIKADKIPDPTGSGKKIEDFWGPAKRL LGDIRFLQSLHEYDKDNIPPAYMNIIRKSYIP  
 NPDFVPEKIRNASTAAEGLCKWVIAMDSYDKVAKIVAPKKIKLAAAEGLRIAMEGLRKKQAALYEVQDKLAK  
 LQDTLELNKQKKADLENQVDLCSKKLERAELIGGLGGEKTRWSNSALELGHLYINLTGDI LISSGVVAYLGA  
 FTSNYRQNTQEQWSQCKERDIPCSDDYSLMGTLGEAVTIRAWN IAGLPSDSFSIDNGI IIMNARRWPLMIDP  
 QGQANKWIKNMEKTNLQLIKLSDPDYVRTLENCIQFGTPVLEENVGEELDPILEPLLLKQTFKQGGSTCIRL  
 GDSTIEYAPDFRFYITTKLRNPHYLPETSVKVTLNLFMITPEGMQDQLLGIVVARERPDLEEEKQSLIVQGD  
 NKRQLKEIEDKILEVLSLSEGNILEDETAIKILSSSKSLANEISQKQEVAAETEKKIDNTRMGYRIIAIHSSI  
 LFFSIADLANIEPMYQYSLTWFINLFI LS IENSEKSDILSKRLQILRDHFTYSLYVNICRSLFEKDKLLFSFC  
 LTVNLLIHENAINKTEWRFLLTGGI GLDNPYTNPCTWLPQKSWDEICRLDDLPAFKTIRREFMRLKDGWKKVY  
 DSMEPHHEMFPEWENKANDFQRMLIIRCLRDPKVI PMLQEFIIKKLGRPFIEPPPFLAKAFGDSNCCAPLI  
 FVLSPGADPMNALLKFADDQYGGSKLSSLSLGGQGGPIAMKMLEKAVKDGTVWVVLQNCHLATSWMPTELEKVC  
 EELSAESTHPDFRIWLTSYSPNFPVSVLQNGVKMTNEAPKGLRANIIRSYLMDPISDPEFFGSCCKPPEEFK  
 LLYGLCFFHALVQERRKFGPLGWNIPYEFNETDLRISVQQLHMF LDQYEE LPYDALRYMTGECNYGGRVTDW  
 DRRTLRSILNKFFCTSELLENPQYKFDSSGIYFVPPSGDHKSYIN YTKTLPLI PAPEVFGMNNADITKQDSET  
 QLLFDNILLTQSQSSSGTSSSDEVVNEVAGDILSKLPNNFDVEAAMRRYPTTYTQSMNTVLVQEMGRFNKLL  
 ITIRESCINIQAIAKGLVVMSTELEEVVSSILNVKIPVMWVGKSYPSLKPLGYSYVNDFLERLKFLLQWYEVGP  
 PPVFWLSGFFFTQAFLTGAQQNFARKFTIPIDLGF DYEVMDDEKEYKNAPEDGVYIHGLFLDGASWNRKTKKL  
 AESHPKVLVDTPVMWLKPCCKSDIPKRPSYVAPLYKTSERRGTLSTTGHSTNFVIAMILPSDQPKHEHWIGR  
 VALLCQLNS\*

>ENSMUSP00000068738\_c.6823:A>C\_p.H2275P ENSMUST00000069293.10|Dnah7b-201|ENSMUSG00000041144|+|chr1:g.46272697:A>C

MPQRATLLDLSESSAPNLADADDRKWIPPQRSRPIILPGPQVLAAMSSKKDKLSTKGTSKPPARFLPQLPMDKLSREKDKLPTTVLPQLTSTGVKPPWQQIAPSFHLMNKQENPILEPYPVKNEQSFADYMEYFQQKGKQLYQIDDKRSRGPSTSRSKVKSPOKERENFRSTLVKLIQQDGDLESVDI DESGIPKATTTAREKDISRYYYYIRHGLDTHVAPMEDSWLEHVLQVLPQHLKILNNSIMVLSDEIREDYLLSVKKSIVDFVLKDPKDDDDGKITELPPHRAEMEVLKPKWRRSFLSACSIRDHNLNAMNPMMLAVLDLWHSTFKKLRLVDIEEFHNRQDSLELSEFQNVIKHME SAKEMLLKTFWPFVQNIYYKGNKKQLPTGKSSAKLDSFFNCAATLMTLQLQDLILVSMQDFDLDIAQPPESTRAFEHPGFIMRLILDKKTIKFAPDFNDYIDILINVEYIMIKMVSFVPRVETKLYSQWESKSKPTTLKPIILNEIIDTHKEKIREVVLRESVAPTEHLKMYDKYQFLITGKAERDIDEFQSQNYERLIEEIRKYQKLEEEIQYTSRKAVRLGMFEMHCEELIKSLVKRADVICGKLIAMFRDHQEVNTMLCDEFKIAEKALSMPLNLAELMEMKAHVQKLETTDMLERLQRLVDSKNCLAFLEICVNFSPADIRLNNVWFQWYGRMGEIFDEHRKIIKDKTEQYQEALEKFR CERFVEELESYAKQVEEFHTFGDLDLVQRYLKAQVLNGLKDAADKIEQFNAEEEEAYGWVPSVYPQRKKIQDGLNPLYRLYETAVEFSTKHRGWTEGYPYHKVNPQVEADVGNVWRGLYKLEKVFHDSPNALAMTKKVQSMVEEFKQYIPLIQVICNPLRPRHWEAMSTIVGFPLPSDDSTVFSFIDMNLPEFLDRFEGISEAASKEYSLEKAMDMMTEWDSMEFVILPYRESGTYLSSVDDIQMLLDDHIKTKQTMGRGSPFIKPYEKQMWREWEGKLLLLQEILD EWLKVQATWLYLEPIFSSPDIMSQMPEEGRRFKAVDKTRDVMKTVVQDKRVLAVVTIERMLERLKKSNELLE LILKGLNEYLEKRLFFPRFFFLSNDELLEILSETKDPTRVQPHLKKCFEGIAKVEFTETLDITHMKSSEGEVVELVDTISTAKARGQVEKWLVELEERTMIKSIHKVIGDAIAAYTKNSRISWVRDWPQGTVLVCVSTFWTVEVQTAIPKGHRALEGYLAKCNHQIDDIVTLVRGKLSKQNRVTLGALVVLVDVHARDVLAASLVDKKISDSDSFQWLSQL RYYWQENNLETKMINAGLRYGYEYLGNSPRLVITPLTDRCYRTLFGALHLHLGGAPEGPAGTGKTEETKDLAK AVAKQCVVFNCSDDLALGKFFKGLLSCGAWACFDEFNRIDLEVLVSVVAAQIILTIQGINAGTELLVFEFT ELKLDPTCAVFIITMNPYAGRSELPDNLKALFRTVAMMVPDYAMIAEIVLYSCGFVTARPLSIKIVATYRLCS EQLSSQHHYNYGMRAVKSVLTAAGNLKLYPNENEEILLRSIIDVNLPKFLSHDLPLFEGITSDLFPGVKLP KPDYNELLAAIRENCHTMNLQMTDFSEKILQIYEMMIVRHGFMIIVGEPFGGKTSAYRVLGALNDICEKGLM EENKVQITVLPKSVTMGQLYGQFDLVSHEDSADGILAVSFRAFAASSTPDRKWLIFDGPVDAVWIENMNTVLD DNKKLCLMSGEIIQMSQMNLIIFEPMDLEVASPATAVSRGMIYMEPHMLGWRPLMVSWINTLPQSVSIIQKEF IEGFLDRMVPVLSVEFIRRHTEKELSPTSDTNLVQSLMNLIDCFMDDFADENKQKERNDRESFSLLEGI FMFSLA WSVGATCTDDDRLKFDKILRELMEGPISDLTRNKFKLLSGTEQTSSKVFIVPFPEKGTIYEYQFPEGLGRWD KWIKKLADTPPIPKDVQFIEIIVPTLDTIRYSALMHLTTHQKPSIFVGPVTGTGKSVYIINFLNQLNKDIYK PLIVNFSAQTTAAQTQNIIMSKLDRRRKGVFGPPLGKRMIVFVDDVNMVPAREVYGAQPPIELLRQWLDHWNWY DLKDCSVIKLVDIQIMCAMGPPGGGRNPITPRYMRHFNIIVTINEFSDKSMFTIFSRILAWHLRTCYKFPDDFL DLTQIVNGTMALYKDAMKNLLPTPAKSHYLFNLRDFSRVIQGVCLSRPETAEENKAIKRLWVHEVLRVYDR LVDNADRSLWLIPIYIQEILKNYMQEDFHDLFKNLDFNQDGTVEEDDLRSLMFCDFHDPKREDFGYREIANVDAL RMIVEGHLDEYNNMSKPMNLVLFRAIEHISRISRIKQPRSHALLVGVGGSGRQSVTRLAHAMADYSLFQV EISKGYGSHEWEDLKVILRKCAENDMQGVFLFTDTQIKRESFLEDVNNLLNAGEVPNLFALEKQEI CEKMR QLDRQRDKTRQTDGSPIALFNMFIDRCRNQLHVVLAMSPIGDAFRIRLRKFPALVNCCTIDWFQSWPEDALEA VASRFLEDIEMSEEQEGCIDMCKRFHTSTINLSTSFHNELQRYNYVTPTSYLELISTFKLLEKRNEMKMKRRYEVGLDKLDSASSQVATMQSELEALHPQLKVASREVDEMMIIIERESMEVAKTEKIVKADETVANDQAMA AKAIKDECDADLAEALPILESALALDTLTAQDITVVKSMKSPAGVKLVMEAIICILKGIKADKIPDPTGSGK KIEDFWGPAKRLGDIRFLQSLHEYDKDNIPPAYMNIIRKSYIPNPDFVPEKIRNASTAAEGLCKWVIAMDSY DKVAKIVAPKKIKLAAEGLRIAMEGLRKKQAALYEVQDKLAKLQDTLELNKQKKADLENQVDLCSKLLERA EQLIGGLGGEKTRWSNSALELGHLYINLTGDIILISSGVVAYLGAFVTSNYRQNTQEQSWQSKERDIPCSDDYS LMGTLGEAVTIRAWNIAGLPSDFSIDNGIIMNARRWPLMIDPQQQANKWIKNMEKTNLQLIKLSDPDYVR TLENCIQFGTTPVLENVGEEELDPILEPLLLKQTFKQGGSTCIRLGDSTIEYAPDFRYIITTKLRNPHYLPETS VKVTLNFMITPEGMQDQLLGIIVARERPDLEEEKQSLIVQGADNKRQLKEIEDKILEVLSLSEGNILEDETA IKILSSSKSLANEISQKQEVAAETEKKIDNTRMGYRIIAIHSSILFFSIADLANIEPMYQYSLTWFINLFILS IENSEKSDILSKRLQILRDHFTYSLYVNICRSLFEKDKLLFSFCLTVNLLIHENAINKTEWRFLLTGGIGLDN PYTNPCTWLPQKSWDEICRLDDLPAFKTIRREFMRLKDGWKKVYDSMEPHHEMFPEWENKANDFQRMLIIRC LRDPKVI PMLQEFIIKKLGRPFIEPPFFDLAKAFGDSNCCAPLIFVLSPGADPMNALLKFADDQYGGSKLSS LSLGQGGQPIAMKMLEKAVKDGTVVVLQNLHATSWMPTLEKVCHEELSAESTHPDFRIWLTSYSPNFPVSVL QNGVKMTNEAPKGLRANIIRSYLMDPISDPEFFGSCCKPEEFKLLYGLCFFHALVQERRKFGPLGWNIPYEF NETDLRISVQQLHMFLDQYEEELPYDALRYMTGECNYGGRVTDWDRRTLRSLINLKFCTELVENPQYKFDSSG IYFVPPSGDHSYINYTKTLPPIPAPEVFGMNNANADITKDQSETQLLFDNILLTQSQSSSGTKSSDEVVNEV AGDILSKLPNNFDVEAAMRRYPTTYTQSMNTVLVQEMGRFNKLLITIRESCINIQAIAKGLVMSTELEEVVS SILNVKIPVMWMMGKSYPSLPLGSYVNDFLERLKLFLQWYEVGPPVFWLSGFFFTQAFLTGAQQNFARKFTI PIDLLGFDYEVMDKEYKNAPEDGVYIHGLFLDGASWNRKTKKLAESHKPVLYDTPVMMWLKPKCKSDIPKRP SYVAPLYKTSERRGTLSTTGHSTNFVIAMILPSDQPKHEHWIGRVALLCQLNS\*

>ENSMUSP00000092571\_c.11792:T>G\_p.D3931E ENSMUST00000094964.7|Dnah7a-201|ENSMUSG00000096141|-|chr1:g.53444910:A>C

MSSKKDKLSTKGKSKTPVRFPLPQLPMDKLSKKEKVKLPPTTVLPQLSLTGVKPQWQQTAPSFHLNIKQENPVLE  
PYTVKNEQSFAEYMEHCQKKGKLLDQIDDDRSAPSTSRSKIKSPQKERENLRSTLAKVIMQKDGGLSDVIDE  
SGIPKETTSAEKDISRYYYYIRQGLDTHVAPMEDSWLEHVLQVPEHLKVLTNISIKVLSDEIREDYLLSVK  
KSIVDFVLKDPREKDDDGKITELEPPHRAEMEVLKPKWRRSFLSACSYIRDHLNAMNPMMLAVLDLWHSTFKKL  
RLVDIEEFHSCQDALELSEFQNIIVIKHMESAKETLLKTFWPEVQNI FNQGNKKKQLPTGKSTAKLDSFFNCAA  
TLMTLQQLDLILVSMQDFTDLIAQPLESIRVFEHPGFIMRLVLDKEAIKFEPEFNEYIDSLINIYEIMIKAVS  
FVPRVETKLYSQWESKSKPTTLKPIILNEIIDTHKEKIREVILRESVAPTEHLKMYDKYQFLITGKAERDIDE  
LLFQONQNYERLIEEIRKYQKLGEEIQYTSQKTVCLGMFEMHCEELIRSLVKRADVICGKLIAMFRDHQEVNT  
MLCDEFEKIAEKALSTPLNTAELMEMKAHVQKLETTDMLELQRLVDSKICLAFLIECVNFSPADIRLNKSVF  
QWYGRMGEIFDEHRKIIEKTELYQEFKFRFCERFVEELESYAKQVEEFHAFGLLDLVQRYLQKAQVNLGKLD  
AAADKIDQFNAEEEEAFGWVPSAYPQRKKIQDALNPYLHLYETAVEFSTKHRGWTEGPYHKVNPQVEADVGN  
WRGLYKLEKVFHDSNALAMTKKVHSMVEEFKQYIPLIQVFCNPLRPRHWEAMSTIVGYPLQPSDDSTVFSF  
IDMNLFPFLDRFGSISEAASKEYSLEKAMDKMMTEWDSMEFVILPYRESGTYILSSVDDIQMLDDHIKTQT  
MRGSPFIKPYEKQMRWEWEGKLLLLQEILDEWLKVQATWLYLEPIFSSRDIMSQMPEEGRFRTAVDKTWRDVMK  
TVVQDKQVLAVVTIERMLERLKKSNELLELILKGLNEYLEKKRLEFFRFFFLSNDELLEILSETKDPTRVQPH  
LKKCFEGIAKVEFTETLDITHMKSEGEVVELVDTIISTAKARGQVEKWLVELELERTMIKSIHKVIRDAIVAYTK  
TSRISWVRDWPQQTIVLCSVQTFWTVVQIAIPEGHRALEGYLAKCNHQIDDIIVTLVRGKLSKQNRVTLGALVV  
LDVHARDVLAASLVDKKISDDSDQWLSQLRYWQENNLETKMINAGLRYGYEYLGNSPRLVITPLTDRCYRTL  
FGALHLHLGGAPEGPAGTGKTEETKDLAKAVAKQCVVFNCSGGLDYLALGKFFKGLLSCGAWACDFEFNRIDL  
EVLSSVVAQQILTIQGINAGTDLVFEGETELKLDPTCAVFIITMNPYAGRSELDPNLKALFRVAMMVPDYAM  
IAEIVLYSCGFVTARPLSIKIVATYRLCSEQLSSQHHDYGMRAVKSVLTAAGNLKLYPNENEEILLRSII  
DVNLPKFLSHDLPLFEGITSDLPFGVKLPKPDYNDLLAIRDNCHSMNLQMTDFEFSEKILQIYEMMIVRHGFM  
IVGEPFGGKTSAYRVLGALNDICEKGLMEENKVLITVLNPKSVTMGQLYGQFDLVSHWSDGVLAVSFRAFA  
ASSTPDRKWLIFDGPVDAVWIENMNTVLDNKKLCLMSGEIQMSPQMNLIFEPMDLEVASPATVSRGMIY  
EPHMLGWRPLMVSWINTLPQSVSIIQKEFIEGLFDRMVPKLSVEFIRRHTELKELSDTNLVRSLMNLIDCFMD  
DFADENKQKERNDRESFSLLEGIFFLSLIWSVGATCTDDDRLKFDKILRELELLEGPISNLTRNKFKLLSGTEQT  
SSKVFIVPFPEKGTIYDYQFIEPGLGRWDKWKIDLADTPIPKDVQFNEIIVPTLDTIRYSALMNLTTTHQKP  
SIFVGTGTGKSVYIINFLNQLNKDIYKPLIVNFSAQTTAAQTQNIIMSKLDRKRGVFGPPLGKRMIIVFD  
DVNMPAREVYGAQPPIELLRQWLDHWNWYDLKDCSVIKLVDIQIMCAMGPPGGGRNPITPRYMRHFNIIVTINE  
FSNKSMTIFSRILAWHLRTCYKFPDDFLDLTTQIVNGTMALYKDAMKNLLPTPAKSHYLFNLDFSRVYQGV  
CLSRPETAENKEAIKRLWVHEVLRVYDRLVDNADRSLINIIQEIILKNYMQEDFHDLFKNLDFNHDGTVEED  
DLRSLMFCDFHDPKREDFGYREIANVDALRMIVEGHLDEYNNMSKPKMNLVLFRAIEHISRIIRILKQPRSH  
ALLVGVGSGRQSVTRLAHMADYSLFQVEISKGYGSHWEDLKVILRKCAESDMQGVFLFTDTQIKRESFL  
EDVNNLLNAGEVPNLFDLDEKQIECEKMRQIDRQRDKSKQTDGSPIALFNMFIDCCRNQLHVVLAMSPIGDAF  
RIRLRKFPALVNCCTIDWFQSWPEDALEAVASRFLEDIEMSEIIEGCIIDMKRFHTSTINLSTSFHNELQRY  
NYVTPTSYLELISTFKLLLEKRNEMKMRRYEVGLDKLDSASSQVATMQSELEALHPQLKVASREVDMMI  
I IERESMEVAKTEKIVKADETVANDQAMAAKAIKDECDADLAGALPILESALAALDTLTAQDITVVKSMKSP  
AGVKLVMEAVCILKGIKADKIPDPTGSGKKTEDFWGPAKRLGDIRFLQSLHEYDKDNIIPPAYMNIIRKSYIP  
NPDFVPEKIRNASTAAEGLCKWVIAMDSYDKVAKIVAPKKIKLAAAEGLKLVAMEGLRKKQAALHEVQDKLAK  
LQDTLELNKQKADLEHQVDLCSKKLERAELIGGLGGEKTRWSNSALELGHLYINLTGDIILISSGVVAYLGA  
FTSNYRQNTKQWSQCKERDIPCSDDYSLMGTLGEAVTIRAWNIAGLPSDSFSDNGIIMNARRWPLMIDP  
QGQANKWIKNMEKTNLQLIKLSDPYSYVRTLENCIQFGTPVLEENVGEELDPILEPLLLKQTFKQGGSTCIRL  
GDSTIEYSPDFRFYITTKLRNPHYLPETSVKVTLNLFMITPEGMQDQLLGIIVARERPDLEEEKQALILQCAD  
NKRQLKEIEDKILEVLSLSEGNILEDETAIKILSSSKSLANEISQKQVEAEETEKKIDITRMGYRPIAIIHSSI  
LFFSIADLANIEPMYQYSLTWFINLFIILSENSEKSDILSKRLQILRDHFTYSLYVNICRSLFEKDKLLFSFC  
LTVNLLIHDNAINKTEWRFLLTGGIIGLDNPNYTNCTWLPQKSWDEICRLDDLPAFKTIREEFMRLKDGWKKVY  
DSMEPHHEMFPEDWGNKANDEFQRLIIRCLRDPKVIIPMLQEFIIKKLGRSFIEPPPFDLAKAFGDSNCCAPLI  
FVLSPGADPMNALLKFADDQYGGSKLSSLSLGGQGGPIAMKMLEKAVKDGTVWVVLQNCHLATSWMPTELEKVC  
EELSAESTHPDFRIWLTSYSPNFPVSVLQNGVKMTNEAPKGLRANIRSYLMDPISDPEFFGSCCKPEEFKK  
LLYGLCFFHALVQERRKFGPLGWNIPYEFNETDLRISVQQLHMFLDQYEEELPYDALRYMTGECNYGGRVTDW  
DRRTLRSILNKFFCTSELLENPQYKFDSSGIYFVPPSGDHSYIDYTKTLPLIPEPEVFGMNNANADITKQDSET  
QLLFDNILLTQSHSSSGSTKSDEVVNEVAGDILGKLPNNFDVEAAMRRYPTTYTQSMNTVVLVQEMGRFNKLL  
ITIRESCINIQAOKVGLVVMSTELEEVVSSILNVKIPAMWVGKSYPSLKPLGYSYVNDFLERLKLFLQQWYEVGP  
PPVFWLSGFFFTQAFLTGAQQNYARKFTIPIDLLGFDYEVMDDEKEYKAPEDGVYIHGLFLEGASWDRKTKKL  
AESHKVLVYDTPVMMWLKPCCKSDIPRRPSYVAPLYKTSERRGTLSTTGHSTNFVIAMILPSVHPKEHWIGRG  
VALLCQLNS\*

>ENSMUSP00000109881\_c.801:A>G\_p.T268A ENSMUST00000114243.8|Gm973-201|ENSMUSG00000047361|+|chr1:g.59590296:A>G  
MKAVAREPDATSRLPQQRRNTSTEARASAGDYLNWKSPEDYILVSKAQNGDSASQHSWNLFPLKTFSTRKGALILYSEGLAVSAWTPRDRKRGRPRKKQDLGLHTLRDLKEAILAYGRKRKQDSAWRPYLYFRSKPESQTRQIQPGYSAKRYLRGFLRTWPPDIMHRLQCAGHIKDSVLLQDSQLGIPKNLRPQQDLSGVPPKYHLLPVI PSFRIQQRS SYAQLDEWEIDTYMDQGSVAQNHSNPDTHLMSVRRQLWQEDELQAEDALRESHLRVHASEQSHNGKSQQASREVLGRASFYSYFQLPTDKSLFSFYCGAFPDKQRNMKPKHARGGCLSQEPPVERCLFPPLASAVGSEQNTLGETK KKKALRTLKLPVSEPPGVVLRPRRSRFRKDESEPPKELFIIPMEIHFHAAQPPKEKASRRGARHPSEPEEATP LWWPPMKHLYLERPRGITVHLPVDSQDTPSPQEDGDILAQSVNQPLGGLPMPKGGKSSIEQRMDRTRTSGF SSPTGCPNERAPPAGPEDSRDLTLKHFLSPDGENVCLTLPRLMGTEVLPPLGQANAGAGASLHGNLYETSSRL AQAAESQERGSSELDSSHEEPGGPLRGNKDSQDPELNRKTLACLSTSLAEYNQPSEADTLKSMGDYNVHHLHR GPLKREPAFPKLASETPRKKKKRKRKLLNQKTGVGINHGKDLVDKAKRKRKTKTHQAKALKKEREERGLGQA EAAGGKPKHSHKIKKSELTPKKEKLRKMKRTHKERNMEMAAGLSKSDITNSKEAGGTSHQGLLRSHSAAGQL SLELDALESQVAIDGRSSIQATDVASDMCEEEERSHEDPSKALQDKKQEKASRDRIIEKAEMRWLKVQR RREQEELTWLHKEQLEKAEKMEELELEQQRRTEENLRKQRLEEEERQQQEEAEKKRRLQLQAARERARQQQE ELRRKLEIQIRKKQQAEEAERAEAEKQRQKELEMQLAEQKRLMEMAEERLEYYQQQKLAEEKARQEAEEERRK QEEEAAKLALAEATKLAQEQRIRYLDRGTTAVRACSEA\*

>ENSMUSP00000141102\_c.798:A>G\_p.T267A ENSMUST00000186434.3|Gm973-205|ENSMUSG00000047361|+|chr1:g.59590296:A>G  
MFTLSLLSRGHGKLAQNKQKLEVFEPEDYLNWKSPEYILVSKAQNGDSASQHSWNLFPLKTFSTRKGALILYSEGLAVSAWTPRDRKRGRPRKKQDLGLHTLRDLKEAILAYGRKRKQDSAWRPYLYFRSKPESQTRQIQPGY SAKRYLRGFLRTWPPDIMHRLQCAGHIKDSVLLQDSQLGIPKNLRPQQDLSGVPPKYHLLPVI PSFRIQQRSS YAQGLDEWEIDTYMDQGSVAQNHSNPDTHLMSVRRQLWQEDELQAEDALRESHLRVHASEQSHNGKSQQASRE VLGRASFYSYFQLPTDKSLFSFYCGAFPDKQRNMKPKHARGGCLSQEPPVERCLFPPLASAVGS

>ENSMUSP00000006462\_c.1213:T>C\_p.L405P ENSMUST00000006462.14|Aamp-201|ENSMUSG00000006299|-|chr1:g.74319960:A>G  
MESESESGAAADTPPLETSLFHGDEEIEVVELDPGPPDPDDLQEMEDVDVFEEEEEEEEEGNDEGWVLEPQEG VVGSMEGPDDSEVTFALHSASVFCVSLDPKTNLAVTGGEDDKAFVWRLGDGELLFECAGHKDSVTCAGFSDH STLIVATGDMSSGLLKVVQVDTKEEVWSFEAGDLEWMEWHPRAPVLLAGTADGNTWMMKVPNGDCKTFQGPNCPA TCGRVLPDGKRAVVGYEDGTIRIWDLKQGNPIHVLKGTGEHQGPLTCVATNQDGSILITGSVDCQAKLVSATT GKVVGVFRPETVASQPSLGESESESNVESLGFCSVMPLAAVGYLDGTLAIYDLSTQTLRHQCQHQSIVQL LW EAGTAVVYTCSLDGVVRLWDARTGRLLTDYRGHTAEIPDFALSKDASLVVTTSGDHHKAKVFCVQRPDR\*

>ENSMUSP00000136644\_c.1216:T>C\_p.L406P ENSMUST00000178235.8|Aamp-202|ENSMUSG00000006299|-|chr1:g.74319960:A>G  
MESESESGAAADTPPLETSLFHGDEEIEVVELDPGPPDPDDLQEMEDVDVFEEEEEEEEEGNDEGWVLEPQEG VVGSMEGPDDSEVTFALHSASVFCVSLDPKTNLAVTGGEDDKAFVWRLGDGELLFECAGHKDSVTCAGFSDH DSTLIVATGDMSSGLLKVVQVDTKEEVWSFEAGDLEWMEWHPRAPVLLAGTADGNTWMMKVPNGDCKTFQGPNCPC ATCGRVLPDGKRAVVGYEDGTIRIWDLKQGNPIHVLKGTGEHQGPLTCVATNQDGSILITGSVDCQAKLVSAT TGKVVGVFRPETVASQPSLGESESESNVESLGFCSVMPLAAVGYLDGTLAIYDLSTQTLRHQCQHQSIVQL LLWEAGTAVVYTCSLDGVVRLWDARTGRLLTDYRGHTAEIPDFALSKDASLVVTTSGDHHKAKVFCVQRPDR\*

>ENSMUSP00000159251\_c.811:T>G\_p.L271W ENSMUST00000239185.2|Gm7582-201|ENSMUSG00000118640|-|chr1:g.85005754:A>C  
MNSSSEHCNVSDWLRLEATVKASVYVVAFSITTSITSLTIVIIAIVSQSLQRKEVRLVLLCHHLLCISYCYGLGV VFQGMWALLANSPLLLCWLVFGAQLSVGEGILLTLTFMALNTYLAICYPLNSPSFVDSAKYRILAGTWTTVIL KNVGLFLIEGTSPTPASVVFQSAFLCPVILNGMPARVIGMFLAFLLSVILVSYCLIIYREGKRAGHFNKSNIKA RRTVLVHLLQISLHVIPPTLIIIGLGKRCGVFFFALNLALFGIFAFVQCFNPWFYGLHNRDVQSKLYPFLCCRK KLLP\*

>ENSMUSP00000159251\_c.793:C>T\_p.A265V ENSMUST00000239185.2|Gm7582-201|ENSMUSG00000118640|-|chr1:g.85005772:G>A  
MNSSSEHCNVSDWLRLEATVKASVYVVAFSITTSITSLTIVIIAIVSQSLQRKEVRLVLLCHHLLCISYCYGLGV VFQGMWALLANSPLLLCWLVFGAQLSVGEGILLTLTFMALNTYLAICYPLNSPSFVDSAKYRILAGTWTTVIL KNVGLFLIEGTSPTPASVVFQSAFLCPVILNGMPARVIGMFLAFLLSVILVSYCLIIYREGKRAGHFNKSNIKA RRTVLVHLLQISLHVIPPTLIIIGLGKRCGVFFFALNLALFGIFAFVQCFNPWFYGLHNRDVQSKLYPFLCCRK KLLP\*

>ENSMUSP00000159251\_c.399:T>A\_p.Y134N ENSMUST00000239185.2|Gm7582-201|ENSMUSG00000118640|-|chr1:g.85006166:A>T  
MNSSSEHCNVSDWLRLEATVKASVYVVAFSITTSITSLTIVIIAIVSQSLQRKEVRLVLLCHHLLCISYCYGLGV VFQGMWALLANSPLLLCWLVFGAQLSVGEGILLTLTFMALNTYLAICYPLNSPSFVDSAKNRIILAGTWTTVIL

KNVGLFLIEGTSPTPASVQFQAPLCPVILNGMPARVIGMFLSLAFLLSVILVSYCLIYREGKRAGHFNKSNIKA  
RRTVLVHLLQISLHV IPTLII IGLGKRCGVFFFALNLALFGIFAFACFNPLFYGLHNRDVQSKLYPFLCCRK  
KLLP\*

>ENSMUSP00000123750\_c.450:A>G\_p.N151D ENSMUST00000161724.8|A530032D15Rik-  
203|ENSMUSG00000089844|-|chr1:g.85068890:T>C  
MAGGDNELSSRTIPEDQNEEESDDYQLMFKHFKENKVEIASAITKPFPPFLMSLRDRDFISEQKFQEQETCKN  
LAPVERVVYDILSNVQKKFSRDLLKVI FSKTHLKVYPDLKETLKHFFLNASKTNDEQAEEMLSLPQCNGGVLA  
QEHSNPHVKRSVPVSCVPQHMCQKTWKQGWEEAAKEKVWAPGGTFLQENPRSREEKRKATTGQNQNGESQ\*

>ENSMUSP00000125122\_c.450:A>G\_p.N151D ENSMUST00000160792.8|A530032D15Rik-  
201|ENSMUSG00000089844|-|chr1:g.85068890:T>C  
MAGGDNELSSRTIPEDQNEEESDDYQLMFKHFKENKVEIASAITKPFPPFLMSLRDRDFISEQKFQEQETCKN  
LAPVERVVYDILSNVQKKFSRDLLKVI FSKTHLKVYPDLKETLKHFFLNASKTNDEQAEEMLSLPQCNGGVLA  
QEHSNPHVKRSVPVSCVPQHMCQKTWKQGWEEAAKEKVWAPGGTFLQENPRSRESWQVWSLHCRPW\*

>ENSMUSP00000123750\_c.75:C>T\_p.Q26\* ENSMUST00000161724.8|A530032D15Rik-  
203|ENSMUSG00000089844|-|chr1:g.85078372:G>A  
MAGGDNELSSRTIPEDQNEEESDDY\*LMFKHFKENKVEIASAITKPFPPFLMSLRDRDFISEQKFQEQETCKN  
LAPVERVVYDILSNVQKKFSRDLLKVI FSKTHLKVYPDLKETLKHFFLNASKTNDEQAEEMLSLPQCNGGVLA  
QEHSNPHVKRSVPVSCVPQHMCQKTWKQGWEEAAKEKVWAPGGTFLQENPRSREEKRKATTGQNQNGESQ\*

>ENSMUSP00000125122\_c.75:C>T\_p.Q26\* ENSMUST00000160792.8|A530032D15Rik-  
201|ENSMUSG00000089844|-|chr1:g.85078372:G>A  
MAGGDNELSSRTIPEDQNEEESDDY\*LMFKHFKENKVEIASAITKPFPPFLMSLRDRDFISEQKFQEQETCKN  
LAPVERVVYDILSNVQKKFSRDLLKVI FSKTHLKVYPDLKETLKHFFLNASKTNDEQAEEMLSLPQCNGGVLA  
QEHSNPHVKRSVPVSCVPQHMCQKTWKQGWEEAAKEKVWAPGGTFLQENPRSRESWQVWSLHCRPW\*

>ENSMUSP00000123812\_c.75:C>T\_p.Q26\* ENSMUST00000161675.3|A530032D15Rik-  
202|ENSMUSG00000089844|-|chr1:g.85078372:G>A  
MAGGDNELSSRTIPEDQNEEESDDY\*LMFKHFKENKVEIASAITKPFPPFLMSLRDRDFISEQKFQEQETCKN  
LAPVERVVYDILSNVQKKFSRDLLKVI FSKTHLKVYPDLKETLKHFFLNASKTNDEQAEEMLSLPQCNGGVLA  
QEHSNPHVKRSVPVSCVPQHMCQKTWKQGWEEAAKEKVWAPGGTFLQENPRSRESWQVWSLHCRPW\*

>ENSMUSP00000123750\_c.60:G>A\_p.E21K ENSMUST00000161724.8|A530032D15Rik-  
203|ENSMUSG00000089844|-|chr1:g.85078387:C>T  
MAGGDNELSSRTIPEDQNEEKSDDYQLMFKHFKENKVEIASAITKPFPPFLMSLRDRDFISEQKFQEQETCKN  
LAPVERVVYDILSNVQKKFSRDLLKVI FSKTHLKVYPDLKETLKHFFLNASKTNDEQAEEMLSLPQCNGGVLA  
QEHSNPHVKRSVPVSCVPQHMCQKTWKQGWEEAAKEKVWAPGGTFLQENPRSREEKRKATTGQNQNGESQ\*

>ENSMUSP00000125122\_c.60:G>A\_p.E21K ENSMUST00000160792.8|A530032D15Rik-  
201|ENSMUSG00000089844|-|chr1:g.85078387:C>T  
MAGGDNELSSRTIPEDQNEEKSDDYQLMFKHFKENKVEIASAITKPFPPFLMSLRDRDFISEQKFQEQETCKN  
LAPVERVVYDILSNVQKKFSRDLLKVI FSKTHLKVYPDLKETLKHFFLNASKTNDEQAEEMLSLPQCNGGVLA  
QEHSNPHVKRSVPVSCVPQHMCQKTWKQGWEEAAKEKVWAPGGTFLQENPRSRESWQVWSLHCRPW\*

>ENSMUSP00000123812\_c.60:G>A\_p.E21K ENSMUST00000161675.3|A530032D15Rik-  
202|ENSMUSG00000089844|-|chr1:g.85078387:C>T  
MAGGDNELSSRTIPEDQNEEKSDDYQLMFKHFKENKVEIASAITKPFPPFLMSLRDRDFISEQKFQEQETCKN  
LAPVERVVYDILSNVQKKFSRDLLKVI FSKTHLKVYPDLKETLKHFFLNASKTNDEQAEEMLSLPQCNGGVLA  
QEHSNPHVKRSVPVSCVPQHMCQKTWKQGWEEAAKEKVWAPGGTFLQENPRSRESWQVWSLHCRPW\*

>ENSMUSP00000124435\_c.222:G>C\_p.V75L ENSMUST00000161267.8|C130026I21Rik-  
205|ENSMUSG00000052477|-|chr1:g.85090303:C>G  
MAGGNLSSRTIPEDQNEEESDDYQLMFKHFKENKVEIASAITKPFPPFLMSLRDRDFISEQKFQEQETCKN  
LLPLERVVYDILSNVQKKFSRDLLKVI FSKTHLKAYPEIRNQVHQL\*

>ENSMUSP00000125215\_c.270:G>C\_p.V91L ENSMUST00000162421.2|C130026I21Rik-  
207|ENSMUSG00000052477|-|chr1:g.85090303:C>G  
MDEPHMSHTCLSPGSTALLPQMSWKKRTIPEDQNEEESDDYQLMFKHFKENKVEIASAITKPFPPFLMSLRDRD  
FISEQKFQEQETCKNLLPLERVVYDILSNVQKKFSRDLLKVI FSKTHLKAYPEIRNQVHQL\*

>ENSMUSP00000159243\_c.88:C>A\_p.S30\* ENSMUST00000161424.5|Gm7609-  
202|ENSMUSG00000079457|+|chr1:g.85190459:C>A  
MNSSEHCCNVSDWLRLEATVKASVYVAF\*ITTSLTVVIIAIVSQSLQRKEVPLVLLCHHLLCISYCGLV  
VFQGMREALLANSPLLLCWLVFQAQLSVGEGILLTLTLMALNTYLAICYPLNSPSFVDSAKYRIILAGTWTTVIL  
KNVGLFLIEGTSPTPASVQFQAPLCPVILNGMPARVIGMFLSLAFLLSVILVSYCLIYREGKWAGHFNKSNIKA  
RRTVLVHLLQISLHV IPTLII IGLGKRCGVFFFALNLALFGIFAFACFNHLVYGLHNRDLQSKLYPWLCRRK  
KLLP\*

>ENSMUSP00000159200\_c.88:C>A\_p.S30\* ENSMUST00000113402.4|Gm7609-  
201|ENSMUSG00000079457|+|chr1:g.85190459:C>A

MNSSSEHCNVSDWLRLEATVKASVYVAF\*ITTSLTVVIAIVSQSLQRKEVPLVLLCHHLLCISSYCGLGV  
VFQGM RALLANSPLLLCWL VFGAQLSVGEGILLTLTLMALNTYLAICYPLNSPSFVDSAKYRILAGTWTTVIL  
KNVGLFLIEGTSPTPASVFQSAPLCPVILNGMPARVIGMFSLAFLLSVILVSYCLIYREGKWAGHFNKSNIKA  
RRTVLVHLLQISLHV IPTLIIIGLGKRCGVFFFALNLALFGIFAFQAQCFNHLVYGLHNRDLQSKLYPWLCCRK  
KLLP\*

>rs107861961\_ENSMUSP00000159243\_c.558:T>C\_p.S187P  
ENSMUST00000161424.5|Gm7609-202|ENSMUSG00000079457|+|chr1:g.85190929:T>C  
MNSSSEHCNVSDWLRLEATVKASVYVAFSITTSLTVVIAIVSQSLQRKEVPLVLLCHHLLCISSYCGLGV  
VFQGM RALLANSPLLLCWL VFGAQLSVGEGILLTLTLMALNTYLAICYPLNSPSFVDSAKYRILAGTWTTVIL  
KNVGLFLIEGTSPTPASVFQSAPLCPVILNGMPARVIGMFPLAFLLSVILVSYCLIYREGKWAGHFNKSNIKA  
RRTVLVHLLQISLHV IPTLIIIGLGKRCGVFFFALNLALFGIFAFQAQCFNHLVYGLHNRDLQSKLYPWLCCRK  
KLLP\*

>rs107861961\_ENSMUSP00000159200\_c.558:T>C\_p.S187P  
ENSMUST00000113402.4|Gm7609-201|ENSMUSG00000079457|+|chr1:g.85190929:T>C  
MNSSSEHCNVSDWLRLEATVKASVYVAFSITTSLTVVIAIVSQSLQRKEVPLVLLCHHLLCISSYCGLGV  
VFQGM RALLANSPLLLCWL VFGAQLSVGEGILLTLTLMALNTYLAICYPLNSPSFVDSAKYRILAGTWTTVIL  
KNVGLFLIEGTSPTPASVFQSAPLCPVILNGMPARVIGMFPLAFLLSVILVSYCLIYREGKWAGHFNKSNIKA  
RRTVLVHLLQISLHV IPTLIIIGLGKRCGVFFFALNLALFGIFAFQAQCFNHLVYGLHNRDLQSKLYPWLCCRK  
KLLP\*

>ENSMUSP00000125160\_c.359:C>A\_p.F120L ENSMUST00000159582.8|C130026I21Rik-  
204|ENSMUSG00000052477|-|chr1:g.85237423:G>T  
MAGGNLSSRTIPEDQNEEESDDYQLMFKHFENKVEIASAITKPF PFLMSLRDRDFISEQKFQEYQETCKN  
LVPVERVVYDVL SNVQKKFSRDLKVI FSKTHLKAYPDLKETLKHFLNASKTNDEQAEEMLSLPQCNGGEGS  
SSCEQTCDEQEPQDDLPS SLRQEAAARRKKRPNWSNSKRRLQKKKPRQDEMMEISKEASKTSGIKR PSTARRT  
Q

>ENSMUSP00000091224\_c.359:C>A\_p.F120L  
ENSMUST00000093506.12|C130026I21Rik-202|ENSMUSG00000052477|-  
|chr1:g.85237423:G>T  
MAGGNLSSRTIPEDQNEEESDDYQLMFKHFENKVEIASAITKPF PFLMSLRDRDFISEQKFQEYQETCKN  
LVPVERVVYDVL SNVQKKFSRDLKVI FSKTHLKAYPDLKETLKHFLNVDSDSHRTHQRINGRNV EERPLPS  
VVREASKTNDEQAEEMLSLPQCNGGEGSSSCEQTCDEQEPQDDLPS SLRQEAAARRKKRPNWSNSKRRLQKKK  
RQDEM MGVPSPGHGVQEKLKAVSRRTLWKDDSSSTNVKEVTKTLRARMRCGTCHWKGS AWANLSELVQGS RDT\*  
>ENSMUSP00000066587\_c.359:C>A\_p.F120L ENSMUST00000064341.9|C130026I21Rik-  
201|ENSMUSG00000052477|-|chr1:g.85237423:G>T  
MAGGNLSSRTIPEDQNEEESDDYQLMFKHFENKVEIASAITKPF PFLMSLRDRDFISEQKFQEYQETCKN  
LVPVERVVYDVL SNVQKKFSRDLKVI FSKTHLKAYPDLKETLKHFLNASKTNDEQAEEMLSLPQCNGGEGS  
SSCEQTCDEQEPQDDLPS SLRQEAAARRKKRPNWSNSKRRLQKKKPRQDEM MGVPSPGHGVQEKLKAVSRRTLW  
KDDSSSTNVKEVTKTLRARMRCGTCHWKGS AWANLSELVQGS RDT\*  
>ENSMUSP00000159221\_c.477:A>C\_p.T160P ENSMUST00000113407.11|Gm7592-  
201|ENSMUSG00000118607|+|chr1:g.85477885:A>C  
MNSSSEHCNVSDWLRLEATVKASVYVAFSITTSLTVVIAIVSQSLQRKEVRLVLLCHHLLCISSYCGLGV  
VFQGM RALLANSPLLLCWL VFGAQLSVGEGILLTLTLMALNTYLAICYPLNSPSFVDSAKYRILAGTWTM VIL  
KNVGLFLIEGTSPPPASVFQSAPLCPVILNGMPARVIGMFSLAFLLSVILVSYLIYQEGKRAGHFNKSNIKA  
QRTVLVHLLQISLHV IPTLIIIGLGKRCGVFFFALNLALFGIFAFQAQCFNPLVYGLHNRDLQSKLYPWLCCRK  
KLLP\*

>ENSMUSP00000159207\_c.585:A>C\_p.T196P ENSMUST00000239236.2|Gm7592-  
202|ENSMUSG00000118607|+|chr1:g.85477885:A>C  
MTVLC ELFNEVNMEKYPDLNLIRRSFECGAKPALKTMNSSSEHCNVSDWLRLEATVKASVYVAFSITTSLTV  
VIAIVSQSLQRKEVRLVLLCHHLLCISSYCGLGVVFQGM RALLANSPLLLCWL VFGAQLSVGEGILLTLT  
MALNTYLAICYPLNSPSFVDSAKYRILAGTWTM VILKNVGLFLIEGTSPPPASVFQSAPLCPVILNGMPARV  
GMFSLAFLLSVILVSYLIYQEGKRAGHFNKSNIKAQRTVLVHLLQISLHV IPTLIIIGLGKRCGVFFFALNL  
ALFGIFAFQAQCFNPLVYGLHNRDLQSKLYPWLCCRKLLP\*

>ENSMUSP00000091226\_c.1322:A>T\_p.Q441H ENSMUST00000093508.7|Sp110-  
201|ENSMUSG00000070034|-|chr1:g.85505028:T>A  
MFTLTKALEKALLQHFIYMKVNIAYAINKPF PFEALRDN SFITERMYKESLEACQNLVPLSKV VHNILTSLE  
QTFHPSVLLTLFSKVN LREYPSLV AIFRSFRNVGYTYEENRPP LTTLEDLANPAEGCSLQTLPPPRPQISL  
PSHLSSAPRVCDPRATAQPIIEILDEQPS SPRAVPLLCIQEGKTTVPVSSRDHQ RKDKEDSREMPHSPSGPE  
SVVKDDSPAANDLEMAREV PCTPANKKARRKKRPNWSNSKRRLQKKKPRQDEM MGVPSPGHGVQEKLKAVSRR



TLWKDDSSSTNVKEVTKTQTRMRRAQTSNSQEI SKEASKTSGRKR PSTARRTTQVPEKTKNDVDFSP TLPVT  
CGKAKGTLFQEK LKQGASKKCIQNEAGDWLTVKEFLNEGGRATSKDWKGVIRCNGETLRHLEQKGLLFFTSKS  
KPHKKA\*

>rs108615523\_ENSMUSP00000091226\_c.1047:A>G\_p.K350E  
ENSMUST00000093508.7|Sp110-201|ENSMUSG00000070034|-|chr1:g.85507458:T>C  
MFTLTKALEKALLQHFIYMKVNIAYAINKPF PFFFEALRDN SFITERMYKESLEACQNLVPLSKVVHNILTSLE  
QTFHPSVLLTLFSKVNLR EYPSLVAIFRSFRNVGYTYEENRPP LTLLEDLANPAEGCSLQTLPPPRPQISL  
PSHLSSAPRVCDPRATAQPIIEILDEQPS PPRAVPLLGCIQEGKTFVSSRDHQKDKEDSREMPHSPSGPE  
SVVKDDSPAANDLEMAREVPC TPANKKARRKKRPNWSNSKRRRQKKKPRQDEMMGVASPGHGVQEK LKAVSRR  
TLWKDDSSSTNVKEVTKTQTRMRRAQTSNSQEI SKEASKTSGRKR PSTARRTTQVPEETKNDVDFSP TLPVT  
CGKAKGTLFQEK LKQGASKKCIQNEAGDWLTVKEFLNEGGRATSKDWKGVIRCNGETLRHLEQKGLLFFTSKS  
KPQKKA\*

>ENSMUSP00000091226\_c.138:A>G\_p.M47V ENSMUST00000093508.7|Sp110-  
201|ENSMUSG00000070034|-|chr1:g.85523691:T>C  
MFTLTKALEKALLQHFIYMKVNIAYAINKPF PFFFEALRDN SFITERVYKESLEACQNLVPLSKVVHNILTSLE  
QTFHPSVLLTLFSKVNLR EYPSLVAIFRSFRNVGYTYEENRPP LTLLEDLANPAEGCSLQTLPPPRPQISL  
PSHLSSAPRVCDPRATAQPIIEILDEQPS PPRAVPLLGCIQEGKTFVSSRDHQKDKEDSREMPHSPSGPE  
SVVKDDSPAANDLEMAREVPC TPANKKARRKKRPNWSNSKRRRQKKKPRQDEMMGVASPGHGVQEK LKAVSRR  
TLWKDDSSSTNVKEVTKTQTRMRRAQTSNSQEI SKEASKTSGRKR PSTARRTTQVPEKTKNDVDFSP TLPVT  
CGKAKGTLFQEK LKQGASKKCIQNEAGDWLTVKEFLNEGGRATSKDWKGVIRCNGETLRHLEQKGLLFFTSKS  
KPQKKA\*

>rs48330068\_ENSMUSP00000079095\_c.25:G>A\_p.S9N  
ENSMUST00000080204.11|Sp140-201|ENSMUSG00000070031|+|chr1:g.85528906:G>A  
MAGGYNELNSRTIPEDQNEEESDDYQLMFKHFKENKVEIASAITKPF PFLMSLRDRDFISEQKFQ EYQETCKN  
LVPVERVVYDILSNVQK FSRDLLKVI FSKTHLKAYPDLKETLKHFFLNASKTNDEQAEEMQCNGGEGSNSCE  
QTRQTRQEPQDDLPSSLRQEAGAQQPTREKKKSCVICSP TYVPEDLEARMGSSQGEVCVTRRNI PARKPKKQR  
RKKKGHNWSKPRWRKPM SVQRKRLRRRRKENANFSAELLPVTCGNLKGVLHKEKFKQGISVKS IQCQNGNWFT  
PSEFEMMGY GSKSNWKL SLRCHNWPLKLLIQRNFLPNP PRIHRKRKEQRTQNLHRSPADPSIQNSDKCEVCR  
DGGLLFCCDTCFRAF HEDCHIPTVEAEITPWSCIFCRMQSLGSPSLPESEILQREMAPQEQLKCEYVLLRVY  
CCSESSFFSKMPYYYY FREMTVSVQEP MWLDI IKKKLSDQAYCQVEDFVQDMRLIFRNHKITFKDPKFGEMGF  
RLESKFESKFKEVFAIQETNEKS\*

>ENSMUSP00000079095\_c.26:C>A\_p.S9R ENSMUST00000080204.11|Sp140-  
201|ENSMUSG00000070031|+|chr1:g.85528907:C>A  
MAGGYNELNSRTIPEDQNEEESDDYQLMFKHFKENKVEIASAITKPF PFLMSLRDRDFISEQKFQ EYQETCKN  
LVPVERVVYDILSNVQK FSRDLLKVI FSKTHLKAYPDLKETLKHFFLNASKTNDEQAEEMQCNGGEGSNSCE  
QTRQTRQEPQDDLPSSLRQEAGAQQPTREKKKSCVICSP TYVPEDLEARMGSSQGEVCVTRRNI PARKPKKQR  
RKKKGHNWSKPRWRKPM SVQRKRLRRRRKENANFSAELLPVTCGNLKGVLHKEKFKQGISVKS IQCQNGNWFT  
PSEFEMMGY GSKSNWKL SLRCHNWPLKLLIQRNFLPNP PRIHRKRKEQRTQNLHRSPADPSIQNSDKCEVCR  
DGGLLFCCDTCFRAF HEDCHIPTVEAEITPWSCIFCRMQSLGSPSLPESEILQREMAPQEQLKCEYVLLRVY  
CCSESSFFSKMPYYYY FREMTVSVQEP MWLDI IKKKLSDQAYCQVEDFVQDMRLIFRNHKITFKDPKFGEMGF  
RLESKFESKFKEVFAIQETNEKS\*

>rs108167277\_ENSMUSP00000079095\_c.1598:G>C\_p.K533N  
ENSMUST00000080204.11|Sp140-201|ENSMUSG00000070031|+|chr1:g.85572397:G>C  
MAGGYNELSSRTIPEDQNEEESDDYQLMFKHFKENKVEIASAITKPF PFLMSLRDRDFISEQKFQ EYQETCKN  
LVPVERVVYDILSNVQK FSRDLLKVI FSKTHLKAYPDLKETLKHFFLNASKTNDEQAEEMQCNGGEGSNSCE  
QTRQTRQEPQDDLPSSLRQEAGAQQPTREKKKSCVICSP TYVPEDLEARMGSSQGEVCVTRRNI PARKPKKQR  
RKKKGHNWSKPRWRKPM SVQRKRLRRRRKENANFSAELLPVTCGNLKGVLHKEKFKQGISVKS IQCQNGNWFT  
PSEFEMMGY GSKSNWKL SLRCHNWPLKLLIQRNFLPNP PRIHRKRKEQRTQNLHRSPADPSIQNSDKCEVCR  
DGGLLFCCDTCFRAF HEDCHIPTVEAEITPWSCIFCRMQSLGSPSLPESEILQREMAPQEQLKCEYVLLRVY  
CCSESSFFSKMPYYYY FREMTVSVQEP MWLDI IKKKLSDQAYCQVEDFVQDMRLIFRNHKITFKDPKFGEMGF  
RLESKFESKFKEVFAIQETNENS\*

>rs108167277\_ENSMUSP00000125026\_c.548:G>C\_p.K183N  
ENSMUST00000161497.2|Sp140-205|ENSMUSG00000070031|+|chr1:g.85572397:G>C  
XISVKS IQCQNGNWFT PSEFEMMGY GSKSNWKL SLRCHNWPLKLLIQRNFLPNP PRIHRKRKEQRTQNLHRS  
PADPSIQNSDKCEVCRDGGLLFCCDTCFRAF HEDCHIPTVEAEITPWSCIFCRMQSLGSPSLPESEILQREM  
APQEQLDPKFGEMGFRLESKFESKFKEVFAIQETNENS\*

>ENSMUSP00000118481\_c.1272:G>A\_p.D425N ENSMUST00000155094.8|Sp100-  
213|ENSMUSG00000026222|+|chr1:g.85627381:G>A

MEGSDGSPRMSTEQENTEMHLLIECMLKHFKTQKVAISNAIRSTFPFLESIRDHEFITGKMYEDLLDSCRSLVP  
VDKVIYRALEELEKKFDMTVLCELFNEVNMEKYPDLNLIIRRSFGCVFPNELCFQGIDGGNPNSQLSLEQGP  
SYSQGSPNGSSLDLSASEGWRNSNDRRNSNLMQANQTENHQLAESPGHLDSCSELQVQLNNRDATPESCSLLPQ  
EERAVQLNYELQINPCFVQLVDVKKENSSFSLAGNQQTARNTQNEDESEIELSSGSDNGENFSEATTTVPS  
QPAPAYSRKPPPTLRRDRGGDTSDTESSIIIRRRKRTGRKKRERLGSYLIRNIKIPMKPSWKTAFLARSANPSS  
QRRRKRGPRIPREENADFGGAELPVVCGNAQGFLDKEKFKQGIYVRSIRGKTGRLFTPMNFEIEGNCEKAKNW  
RQSIRCKGWTLRELIQKGVLDPPRKKKETPRNPRQTRRQVNAL\*

>ENSMUSP00000116942\_c.1218:G>A\_p.D407N ENSMUST00000147552.8|Sp100-  
210|ENSMUSG00000026222|+|chr1:g.85627381:G>A

MEGSDGSPRMSTEQENTEMHLLIECMLKHFKTQKVAISNAIRSTFPFLESIRDHEFITGKMYEDLLDSCRSLVP  
VDKVIYRALEELEKKFDMTVLCELFNEVNMEKYPDLNLIIRRSFGCVFPNELCFQGIDGGNPNSQLSLEQGP  
SYSQGSPNGSSLDLSASEGWRNSNDRRNSNLMQANQTENHQLAESPGHLDSCSELQVQLNNRDATPESCSLLPQ  
EERAVQLNYELQINPCFVQLVDVKKENSSFSLAGNQQTARNTQNEDESEIELSSGSDNGENFSEATTTVPS  
QPAPAYSRKPPPTLRRDRGGGKRELRGSLYLRNIKIPMKPSWKTAFLARSANPSSQRRRKRGPRIPREENADF  
GGAEPLVVCGNAQGFLDKEKFKQGIYVRSIRGKTGRLFTPMNFEIEGNCEKAKNWRQSIRCKGWTLRELIQK  
VLQDPPRKKKETPRNPRQTRRQVNAL\*

>ENSMUSP00000122670\_c.1197:G>A\_p.D400N ENSMUST00000153574.8|Sp100-  
212|ENSMUSG00000026222|+|chr1:g.85627381:G>A

MEGSDGSPRMSTEQENTEMHLLIECMLKHFKTQKVAISNAIRSTFPFLESIRDHEFITGKMYEDLLDSCRSLVP  
VDKVIYRALEELEKKFDMTVLCELFNEVNMEKYPDLNLIIRRSFGCVFPNELCFQGIDGGNPNSQLSLEQGP  
SYSQGSPNGSSLDLSASEGWRNSNDRRNSNLMQANQTENHQLAESPGHLDSCSELQVQLNNRDATPESCSLLPQ  
EERAVQLNYELQINPCFVQLVDVKKENSSFSLAGNQQTARNTQNEDESEIELSSGSDNGENFSEATTTVPS  
QPAPAYSRKPPPTLRRDRGGDTSDTESSIIIRRRKRTGPFLLARSANPSSQRRRKRGPRIPREENADFGGAELP  
VCGNAQGFLDKEKFKQGIYVRSIRGKTGRLFTPMNFEIEGNCEKAKNWRQSIRCKGWTLRELIQKGVLDPP  
KKKETPRNPRQTRRQKRFKNLGIIVGKKFEKNFKRIFSIEDTSEQHEPCNHTVLLT\*

>ENSMUSP00000122899\_c.1143:G>A\_p.D382N ENSMUST00000150967.8|Sp100-  
211|ENSMUSG00000026222|+|chr1:g.85627381:G>A

MEGSDGSPRMSTEQENTEMHLLIECMLKHFKTQKVAISNAIRSTFPFLESIRDHEFITGKMYEDLLDSCRSLVP  
VDKVIYRALEELEKKFDMTVLCELFNEVNMEKYPDLNLIIRRSFGCVFPNELCFQGIDGGNPNSQLSLEQGP  
SYSQGSPNGSSLDLSASEGWRNSNDRRNSNLMQANQTENHQLAESPGHLDSCSELQVQLNNRDATPESCSLLPQ  
EERAVQLNYELQINPCFVQLVDVKKENSSFSLAGNQQTARNTQNEDESEIELSSGSDNGENFSEATTTVPS  
QPAPAYSRKPPPTLRRDRGGAFLLARSANPSSQRRRKRGPRIPREENADFGGAELPVVCGNAQGFLDKEKFKQGI  
YVRSIRGKTGRLFTPMNFEIEGNCEKAKNWRQSIRCKGWTLRELIQKGVLDPP

>ENSMUSP00000066399\_c.1272:G>A\_p.D425N ENSMUST00000066427.11|Sp100-  
202|ENSMUSG00000026222|+|chr1:g.85627381:G>A

MEGSDGSPRMSTEQENTEMHLLIECMLKHFKTQKVAISNAIRSTFPFLESIRDHEFITGKMYEDLLDSCRSLVP  
VDKVIYRALEELEKKFDMTVLCELFNEVNMEKYPDLNLIIRRSFGCVFPNELCFQGIDGGNPNSQLSLEQGP  
SYSQGSPNGSSLDLSASEGWRNSNDRRNSNLMQANQTENHQLAESPGHLDSCSELQVQLNNRDATPESCSLLPQ  
EERAVQLNYELQINPCFVQLVDVKKENSSFSLAGNQQTARNTQNEDESEIELSSGSDNGENFSEATTTVPS  
QPAPAYSRKPPPTLRRDRGGDTSDTESSIIIRRRKRTGRKKRERLGSYLIRNIKIPMKPSWKTAFLARSANPSS  
QRRRKRGPRIPREENADFGGAELPVVCGNAQGFLDKEKFKQGIYVRSIRGKTGRLFTPMNFEIEGNCEKAKNW  
RQSIRCKGWTLRELIQKGVLDPPRKKKETPRNPRQTRRQKCELLLLTIYCYPKSGFFIPKPKQRKEKFPDLR  
EHMWLNKIKNRLNKKAYHSVRRFVEDMRLIFHNHSIFYKKRFKNLGIIVGKKFEKNFKRIFSIEDTSEQHEPC  
NHTVLLT\*

>ENSMUSP00000120267\_c.171:G>A\_p.D58N ENSMUST00000132641.8|Sp100-  
204|ENSMUSG00000026222|+|chr1:g.85627381:G>A

RRKRGPRIPREENADFGGAELPVVCGNAQGFLDKEKFKQGIYVRSIRGKTGRLFTPMNFEIEGNCEKAKNWRQ  
SIRCKGWTLRELIQKGVLDPPRKKKETPRNPRQTRRQGNPKACKVCGQPRKVHPCTACKEFYHKNCHIPPV  
EDKRSRWHCAFCKRKNQLRGQKTQACHKEAEVLKRKMSPEEQKCELLLLTIYCYPKSGFFIPKPKQRKEKFP  
DLREHMWLNKIKNRLNKKAYHSVRRFVEDMRLIFHNHSIFYKKRFKNLGIIVGKKFEKNFKRIFSIEDTSEQH  
EPCNHTVLLT\*

>ENSMUSP00000120267\_c.558:G>A\_p.E187K ENSMUST00000132641.8|Sp100-  
204|ENSMUSG00000026222|+|chr1:g.85634667:G>A

RRKRGPRIPREENADFGGAELPVVCGNAQGFLDKEKFKQGIYVRSIRGKTGRLFTPMDFEIEGNCEKAKNWRQ  
SIRCKGWTLRELIQKGVLDPPRKKKETPRNPRQTRRQGNPKACKVCGQPRKVHPCTACKEFYHKNCHIPPV  
EDKRSRWHCAFCKRKNQLRGQKTQACHKEAEVLKRKMSPEKQLKCELLLLTIYCYPKSGFFIPKPKQRKEKFP  
DLREHMWLNKIKNRLNKKAYHSVRRFVEDMRLIFHNHSIFYKKRFKNLGIIVGKKFEKNFKRIFSIEDTSEQH  
EPCNHTVLLT\*

>ENSMUSP00000119301\_c.315:G>A\_p.E106K ENSMUST00000141709.2|Sp100-207|ENSMUSG00000026222|+|chr1:g.85634667:G>A  
XHPGRRRLRQLPRMQNWTLGAFPLFGGFLVRRGNPKACKVCGQPRKVHPCTACKEFYHKNCHIPPVEDKSRSWH  
CAFCKRKNQLRGQKTQACHKEAEVLKRRKMSPEKQLKCELLLLTIYCYPKSGFFIPKPKQRKEK  
>rs107748797\_ENSMUSP00000122670\_c.1380:A>G\_p.I461V  
ENSMUST00000153574.8|Sp100-212|ENSMUSG00000026222|+|chr1:g.85636735:A>G  
MEGSDGSPRMSTEQENTEMHLIECMLKHFKTKQVAISNAIRSTFPFLESIRDHEFITGKMYEDLLDSCRSLVP  
VDKVIYRALEEELEKKFDMTVLCELFNEVNMEKYPDLNLIIRRSFGCVFPNELCFQGDGIDGNNPNSQLSLEQGP  
SYSQGSPNGSSLDLSASEGWRNSNDRRNSNLMQANQTENHQLAESPGHLDSCSELQVQLNRRDATPESCSLLPQN  
EERAVQLNYELQINPCFVQLVDVKKENSSFSLAGNQOQTRARTNQNEDESEIELSSGSDNGENFSEATTTVPS  
QPAPAYSRKPPPTLRDRGGDTSDESSIIIRRRKRTGPFLLARSANPSSQRRRKRGPRIPREENADFGGAELPV  
VCGNAQGFLDKEKFKQGIYVRSIRGKTGRLFTPMDFEIEGNCEKAKNWRQSIRCKGWTLRELIQKGVLDPPR  
KKKETPRNPRQTRRQKRFKNLGVIVGKKFEKNFKRIFSIEDTSEQHEPCNHTVLLT\*  
>rs107748797\_ENSMUSP00000066399\_c.1671:A>G\_p.I558V  
ENSMUST00000066427.11|Sp100-202|ENSMUSG00000026222|+|chr1:g.85636735:A>G  
MEGSDGSPRMSTEQENTEMHLIECMLKHFKTKQVAISNAIRSTFPFLESIRDHEFITGKMYEDLLDSCRSLVP  
VDKVIYRALEEELEKKFDMTVLCELFNEVNMEKYPDLNLIIRRSFGCVFPNELCFQGDGIDGNNPNSQLSLEQGP  
SYSQGSPNGSSLDLSASEGWRNSNDRRNSNLMQANQTENHQLAESPGHLDSCSELQVQLNRRDATPESCSLLPQN  
EERAVQLNYELQINPCFVQLVDVKKENSSFSLAGNQOQTRARTNQNEDESEIELSSGSDNGENFSEATTTVPS  
QPAPAYSRKPPPTLRDRGGDTSDESSIIIRRRKRTGRKKRERLGSYLIRNIKIPMKPSWKTAFLARSANPSS  
QRRRKRGPRIPREENADFGGAELPVVCGNAQGFLDKEKFKQGIYVRSIRGKTGRLFTPMDFEIEGNCEKAKN  
RQSIRCKGWTLRELIQKGVLDPPRKKKETPRNPRQTRRQKCELLLLTIYCYPKSGFFIPKPKQRKEKFPDLR  
EHMWLNKIKNRLNKKAYHSVRRFVEDMRLIFHNHSIFYKKRFKNLGVIVGKKFEKNFKRIFSIEDTSEQHEPC  
NHTVLLT\*  
>rs107748797\_ENSMUSP00000120267\_c.804:A>G\_p.I269V  
ENSMUST00000132641.8|Sp100-204|ENSMUSG00000026222|+|chr1:g.85636735:A>G  
RKRKRGPRIPREENADFGGAELPVVCGNAQGFLDKEKFKQGIYVRSIRGKTGRLFTPMDFEIEGNCEKAKNWRQ  
SIRCKGWTLRELIQKGVLDPPRKKKETPRNPRQTRRQGNPKACKVCGQPRKVHPCTACKEFYHKNCHIPPV  
EDKSRSWHCAFCKRKNQLRGQKTQACHKEAEVLKRRKMSPEEQKCELLLLTIYCYPKSGFFIPKPKQRKEKFP  
DLREHMWLNKIKNRLNKKAYHSVRRFVEDMRLIFHNHSIFYKKRFKNLGVIVGKKFEKNFKRIFSIEDTSEQH  
EPCNHTVLLT\*  
>ENSMUSP00000124137\_c.523:G>T\_p.S175I ENSMUST00000159122.8|A630001G21Rik-202|ENSMUSG00000052760|-|chr1:g.85646080:C>A  
MFGVIQKEERFNEVFLNYFKENKIEIAHAITKLFPPLESIRDHSFITDKIYADSYEACRNSVPIVEVVYVNVLS  
HLERLSDSSFLWALFNVRNLKEYPALREIHKSLGTELDQGYSPQCKQEEQKKLATVHPSYEQGTNLCTHEKW  
AQPCFVKQDNLQPEPIQQNQVDEIILISIESSECSDEDEEDQALGTGLRRQMNKEAEDSSPPGFQNIELPAGS  
HTSCVWTNHS\*  
>ENSMUSP00000070374\_c.523:G>T\_p.S175I  
ENSMUST00000064788.14|A630001G21Rik-201|ENSMUSG00000052760|-  
|chr1:g.85646080:C>A  
MFGVIQKEERFNEVFLNYFKENKIEIAHAITKLFPPLESIRDHSFITDKIYADSYEACRNSVPIVEVVYVNVLS  
HLERLSDSSFLWALFNVRNLKEYPALREIHKSLGTELDQGYSPQCKQEEQKKLATVHPSYEQGTNLCTHEKW  
AQPCFVKQDNLQPEPIQQNQVDEIILISIESSECSDEDEEDQALGTGLRRQMNKEAEDSSPPGFQNIELPAGS  
HTSCVWTNHS\*  
>ENSMUSP00000124137\_c.445:C>A\_p.P149H ENSMUST00000159122.8|A630001G21Rik-202|ENSMUSG00000052760|-|chr1:g.85646814:G>T  
MFGVIQKEERFNEVFLNYFKENKIEIAHAITKLFPPLESIRDHSFITDKIYADSYEACRNSVPIVEVVYVNVLS  
HLERLSDSSFLWALFNVRNLKEYPALREIHKSLGTELDQGYSPQCKQEEQKKLATVHPSYEQGTNLCTHEKW  
AQHCFVKQDNLQPEPIQQNQVDEIILISSESSECSDEDEEDQALGTGLRRQMNKEAEDSSPPGFQNIELPAGS  
HTSCVWTNHS\*  
>ENSMUSP00000070374\_c.445:C>A\_p.P149H  
ENSMUST00000064788.14|A630001G21Rik-201|ENSMUSG00000052760|-  
|chr1:g.85646814:G>T  
MFGVIQKEERFNEVFLNYFKENKIEIAHAITKLFPPLESIRDHSFITDKIYADSYEACRNSVPIVEVVYVNVLS  
HLERLSDSSFLWALFNVRNLKEYPALREIHKSLGTELDQGYSPQCKQEEQKKLATVHPSYEQGTNLCTHEKW  
AQHCFVKQDNLQPEPIQQNQVDEIILISSESSECSDEDEEDQALGTGLRRQMNKEAEDSSPPGFQNIELPAGS  
HTSCVWTNHS\*

>ENSMUSP00000072983\_c.481:T>A\_p.F161Y ENSMUST00000073252.9|Chrnd-201|ENSMUSG00000026251|+|chr1:g.87120327:T>A  
MAGPVLTLGLLAALVVCALPGSWG LNEEQRLIQHLFNEKGYDKDLRPVARKEDKVDVALSLTSLNLSLKEVE  
ETLTTNVWIDHAWVDSRLQWDANDFGNITVLR LPPDMVWLPEIVLENNNDGSFQISYACNVLVYDSGYVTWLP  
PAIFRSSCPI SVTYYPFDWQNC SLKFSSSLKYTAKEITLSLKQEEENNRSYPIEWIIIDPEGFTENGWEIVHR  
AAKLNVDPSVPM DSTNHQDVTFYLI IRRKPLFYI INILVPCV LISFMINLVFYLPGDCGEKTSVAISVLLAQS  
VFLLLISKRLPATSM AIPLVGKFL LFGMVLV TMVVVICVIVLNIHFRT PSTHVLSEGVKFFLETLPKLLHMS  
RPAEEDPGPRALIRRSSSLGYICKAE EYFSLKSRSDLMFEKQSERHGLARRLT TARRPPASSEQVQQELFNEM  
KPAVDGANFIVNHMRDQNSYNEEKDNWNQVARTVDR LCLFVVTPVMVVGTAWIFLQGVYNQ PPLQPFPGDPFS  
YSEQDKRFI\*

>ENSMUSP00000139537\_c.154:T>A\_p.F52Y ENSMUST00000186373.2|Chrnd-202|ENSMUSG00000026251|+|chr1:g.87120327:T>A  
MVWLPEIVLENNNDGSFQISYACNVLVYDSGYVTWLP PAIFRSSCPI SVTYYPFDWQNC SLKFSSSLKYTAKEI  
TSLKQEEENNRSYPIEWIIIDPEGFTENGWEIVHRAAKLNVDPSVPM DSTNHQDVTFYLI IRRKPLFYI IN  
ILVPCV LISFMINLVFYLPGDCGEKTSVAISVLLAQS VFLLLISKRLPATSM AIPLVGKFL LFGMVLV TMVV  
ICVIVLNIHFRT PSTHVLSEGVKFFLETLPKLLHMSRPAEEDPGPRALIRRSSSLGYICKAE EYFSLKSRSD  
LMFEKQSERHGLARRLT TARRPPASSEQVQQELFNEMKPAVDGANFIVNHMRDQNSYNEEKDNWNQVARTVDR  
LCLFVVTPVMVVGTAWIFLQGVYNQ PPLQPFPGDPFSYSEQDKRFI\*

>ENSMUSP00000108739\_c.106:A>C\_p.Y36S ENSMUST00000113114.10|Trpm8-202|ENSMUSG00000036251|+|chr1:g.88246798:A>C  
MSFEGARLSMRSRRNGTMGSTR TLYSSVSRSTDVSSSDSDLVNF IQANFKKREC VFFTRDSKAMENICKG  
QSQHIEGTQINQNEKWN YKKHTKEFPTDAFGDIQFETLGKKGKYLRLSCD TDSETLYELLTQHWHLKT PNLVI  
SVTGGAKNFALKPRMRKIFSR LIYIAQSKGAWIL TGGTHYGLMKYIGEVVRDNTISR NSEENIVAIGIAAWGM  
VSNRDTLIRSCDDEGHFSAQYIMDDFTRDPLYILDNNHTHLLLV DNGCHGHPTVEAKLRN QLEKYISERTSOD  
SNYGGKIPIVCFAQGGGRET LKAINTSVSKS KIPCVVVEGSGQIADVIASLVEVEDVLTSSMVKEKLV RFLPRT  
VSRLP EEEIESWIKWLKEI LESSHLLTVIKMEEAGDEIVSNAISYALYKAFSTNEQDKDNWNGQLK LLEWNQ  
LDLASDEIFTNDRRWE S ADLQEV MFTALIKDRPKFVRLFLENGLNLQKFLTNEVLT E L FSTH FSTL VYRNLQI  
AKNSYNDALLTFVWKL VANFRRSFWKEDRSSREDLDVELHDA SLTTRHPLQALFIWAILQNKKELSKVIWEQT  
KGCTLAALGASKLLKTLAKVKNDINAAGESEELANEYETRAVELFTECYSNEDDLAEQLLVYSCEAWGGSNCL  
ELAVEATDQHFI AQPGVQNF LSKQWYGEISRDTKNWKIILCLFI IPLVGCGLV SFRKKPIDKHKLLWYVAF  
FTSPFVVFSWNVV FYIAFLLLFAYVLLMDFH SVPH TPELILYALV FVLCDEVRQWYMGVNYFTDLWNVMDT  
LGLFYFIAGIVFRLHSSNKSSLYSGRVI FCLDYIIFTLRLIHI FTVSRNLGPKIIMLQRMLIDVFFF LFLFAV  
WMVAFGVARQGILRQNEQRWRWIFRSVIYEPY LAMFGQVPSD V DSTTYDFSHCTFSGNESKPLCVELDEHNLP  
RFPEWITIPLVCIYMLSTNILLVNLVAMFGYTVGIVQENNDQVWKFOR YFLVQ EYCNRLNIPFPVVFAYFY  
MVVKKCFKCCCKEKNMESNACCFRNE DNETLAWEGVMKENYLVKINTKANDNSEEMRHRFRQLDSKLN DLKSL  
LKEIANNIK\*

>ENSMUSP00000036991\_c.106:A>C\_p.Y36S ENSMUST00000040210.14|Trpm8-201|ENSMUSG00000036251|+|chr1:g.88246798:A>C  
MSFEGARLSMRSRRNGTMGSTR TLYSSVSRSTDVSSSDSDLVNF IQANFKKREC VFFTRDSKAMENICKG  
QSQHIEGTQINQNEKWN YKKHTKEFPTDAFGDIQFETLGKKGKYLRLSCD TDSETLYELLTQHWHLKT PNLVI  
SVTGGAKNFALKPRMRKIFSR LIYIAQSKGAWIL TGGTHYGLMKYIGEVVRDNTISR NSEENIVAIGIAAWGM  
VSNRDTLIRSCDDEGHFSAQYIMDDFTRDPLYILDNNHTHLLLV DNGCHGHGHPTVEAKLRN QLEKYISERTSOD  
SNYGGKIPIVCFAQGGGRET LKAINTSVSKS KIPCVVVEGSGQIADVIASLVEVEDVLTSSMVKEKLV RFLPRT  
VSRLP EEEIESWIKWLKEI LESSHLLTVIKMEEAGDEIVSNAISYALYKAFSTNEQDKDNWNGQLK LLEWNQ  
LDLASDEIFTNDRRWE S ADLQEV MFTALIKDRPKFVRLFLENGLNLQKFLTNEVLT E L FSTH FSTL VYRNLQI  
AKNSYNDALLTFVWKL VANFRRSFWKEDRSSREDLDVELHDA SLTTRHPLQALFIWAILQNKKELSKVIWEQT  
KGCTLAALGASKLLKTLAKVKNDINAAGESEELANEYETRAVELFTECYSNEDDLAEQLLVYSCEAWGGSNCL  
ELAVEATDQHFI AQPGVQNF LSKQWYGEISRDTKNWKIILCLFI IPLVGCGLV SFRKKPIDKHKLLWYVAF  
FTSPFVVFSWNVV FYIAFLLLFAYVLLMDFH SVPH TPELILYALV FVLCDEVRQWYMGVNYFTDLWNVMDT  
LGLFYFIAGIVFRLHSSNKSSLYSGRVI FCLDYIIFTLRLIHI FTVSRNLGPKIIMLQRMLIDVFFF LFLFAV  
WMVAFGVARQGILRQNEQRWRWIFRSVIYEPY LAMFGQVPSD V DSTTYDFSHCTFSGNESKPLCVELDEHNLP  
RFPEWITIPLVCIYMLSTNILLVNLVAMFGYTVGIVQENNDQVWKFOR YFLVQ EYCNRLNIPFPVVFAYFY  
MVVKKCFKCCCKEKNMESNACCFRNE DNETLAWEGVMKENYLVKINTKANDNSEEMRHRFRQLDSKLN DLKSL  
LKEIANNIK\*

>ENSMUSP00000131209\_c.106:A>C\_p.Y36S ENSMUST00000171176.3|Trpm8-204|ENSMUSG00000036251|+|chr1:g.88246798:A>C  
MSFEGARLSMRSRRNGTMGSTR TLYSSVSRSTDVSSSDSDLVNF IQANFKKREC VFFTRDSKAMENICKG  
QSQHIEGTQINQNEKWN YKKHTKEFPTDAFGDIQFETLGKKGKYLRLSCD TDSETLYELLTQHWHLKT PNLVI

SVTGGAKNFALKPRMRKIFSRLIYIAQSKGAWILTGGTHYGLMKYIGEVVRDNTISRNSEENIVAIGIAAWGM  
VSNRDTLIRSCDDEGHFSAQYIMDDFTRDPLYILDNNHTHLLLVDNGCHGHPTVEAKLRNQLEKYISERTSQD  
SNYGGKIPIVCFAQGGGRETAKAINTSVKSKI PCVVVEGSGQIADVIASLVEVEDVLTSSMVKEKLVRFPLRT  
VSRLPEEEIESWIKWLKEILESSHLLTVIKMEEAGDEIVSNAISYALYKAFSTNEQDKDNWNGQLKLLLEWNQ  
LDLASDEIFTNDRRWEADLQEVMTALIKDRPKFVRLFLENGLNQKFLTNEVLTTELSTHFSTLVYRNLQI  
AKNSYNDALLTFVWKLVANFRRSFWKEDRSSREDLDVELHDASLTTRHPLQALFIWAILQNKKELSKVIWEQT  
KGCTLAALGASKLLKTLAKVKNDINAAGESEELANEYETRAVELFTECYSNDEDLAEQLLVYSCEAWGGSNCL  
ELAVEATDQHFIAQPGVQNFLSKQWYGEISRDTKNWKIILCLFIIPLVGCGLVSRKPKPIDKHKLLWYVAV  
FTSPFVVFVSWNVVFIYIAFLLLFAYVLLMDFHSPHTPELILYALVFLFCDEVQRQWYMNQVNYFTDLWNVMDT  
LGLFYFIAGIVFRLHSSNKSSLYSGRVIFCLDYIIFTLRLIHFITVSRNLGPKIIMLQRMIDVFFFLLFAV  
WMVAFGVARQGILRQNEQRWRWIFRSVIYEPYLAMFGQVPSDSDSTTYDFSHCTFSGNESKPLCVELDEHNLP  
RFPEWITIPLVCIYMLSTNILLVNLVAMFGYTVGIVQENNDQVWKQRYFLVQEYCNRLNIPFPVVFAYFY  
MVVKKCFKCCCKEKNMESNACCFRNEDNETLAWEGVMKENYLVKINTKANDNSEEMRHRFRQLDSKLNLDKSL  
LKEIANNIK\*

>rs50202562\_ENSMUSP00000108739\_c.145:T>C\_p.F49S

ENSMUST00000113114.10|Trpm8-202|ENSMUSG00000036251|+|chr1:g.88248614:T>C  
MSFEGARLSMRSRRTMGSTRITLYSSVSRSTDVSYSDSLVNFIQANSKKRECVFFTRDSKAMENICKCGYA  
SQHIEGTQINQNEKWNKKHTKEFPTDAFGDIQFETLGKKGKYLRLSCDTSSETLYELLTQHWHLKTPNLVI  
SVTGGAKNFALKPRMRKIFSRLIYIAQSKGAWILTGGTHYGLMKYIGEVVRDNTISRNSEENIVAIGIAAWGM  
VSNRDTLIRSCDDEGHFSAQYIMDDFTRDPLYILDNNHTHLLLVDNGCHGHPTVEAKLRNQLEKYISERTSQD  
SNYGGKIPIVCFAQGGGRETAKAINTSVKSKI PCVVVEGSGQIADVIASLVEVEDVLTSSMVKEKLVRFPLRT  
VSRLPEEEIESWIKWLKEILESSHLLTVIKMEEAGDEIVSNAISYALYKAFSTNEQDKDNWNGQLKLLLEWNQ  
LDLASDEIFTNDRRWEADLQEVMTALIKDRPKFVRLFLENGLNQKFLTNEVLTTELSTHFSTLVYRNLQI  
AKNSYNDALLTFVWKLVANFRRSFWKEDRSSREDLDVELHDASLTTRHPLQALFIWAILQNKKELSKVIWEQT  
KGCTLAALGASKLLKTLAKVKNDINAAGESEELANEYETRAVELFTECYSNDEDLAEQLLVYSCEAWGGSNCL  
ELAVEATDQHFIAQPGVQNFLSKQWYGEISRDTKNWKIILCLFIIPLVGCGLVSRKPKPIDKHKLLWYVAV  
FTSPFVVFVSWNVVFIYIAFLLLFAYVLLMDFHSPHTPELILYALVFLFCDEVQRQWYMNQVNYFTDLWNVMDT  
LGLFYFIAGIVFRLHSSNKSSLYSGRVIFCLDYIIFTLRLIHFITVSRNLGPKIIMLQRMIDVFFFLLFAV  
WMVAFGVARQGILRQNEQRWRWIFRSVIYEPYLAMFGQVPSDSDSTTYDFSHCTFSGNESKPLCVELDEHNLP  
RFPEWITIPLVCIYMLSTNILLVNLVAMFGYTVGIVQENNDQVWKQRYFLVQEYCNRLNIPFPVVFAYFY  
MVVKKCFKCCCKEKNMESNACCFRNEDNETLAWEGVMKENYLVKINTKANDNSEEMRHRFRQLDSKLNLDKSL  
LKEIANNIK\*

>rs50202562\_ENSMUSP00000036991\_c.145:T>C\_p.F49S

ENSMUST00000040210.14|Trpm8-201|ENSMUSG00000036251|+|chr1:g.88248614:T>C  
MSFEGARLSMRSRRTMGSTRITLYSSVSRSTDVSYSDSLVNFIQANSKKRECVFFTRDSKAMENICKCGYA  
SQHIEGTQINQNEKWNKKHTKEFPTDAFGDIQFETLGKKGKYLRLSCDTSSETLYELLTQHWHLKTPNLVI  
SVTGGAKNFALKPRMRKIFSRLIYIAQSKGAWILTGGTHYGLMKYIGEVVRDNTISRNSEENIVAIGIAAWGM  
VSNRDTLIRSCDDEGHFSAQYIMDDFTRDPLYILDNNHTHLLLVDNGCHGHPTVEAKLRNQLEKYISERTSQD  
SNYGGKIPIVCFAQGGGRETAKAINTSVKSKI PCVVVEGSGQIADVIASLVEVEDVLTSSMVKEKLVRFPLRT  
VSRLPEEEIESWIKWLKEILESSHLLTVIKMEEAGDEIVSNAISYALYKAFSTNEQDKDNWNGQLKLLLEWNQ  
LDLASDEIFTNDRRWEADLQEVMTALIKDRPKFVRLFLENGLNQKFLTNEVLTTELSTHFSTLVYRNLQI  
AKNSYNDALLTFVWKLVANFRRSFWKEDRSSREDLDVELHDASLTTRHPLQALFIWAILQNKKELSKVIWEQT  
KGCTLAALGASKLLKTLAKVKNDINAAGESEELANEYETRAVELFTECYSNDEDLAEQLLVYSCEAWGGSNCL  
ELAVEATDQHFIAQPGVQNFLSKQWYGEISRDTKNWKIILCLFIIPLVGCGLVSRKPKPIDKHKLLWYVAV  
FTSPFVVFVSWNVVFIYIAFLLLFAYVLLMDFHSPHTPELILYALVFLFCDEVQRQWYMNQVNYFTDLWNVMDT  
LGLFYFIAGIVFRLHSSNKSSLYSGRVIFCLDYIIFTLRLIHFITVSRNLGPKIIMLQRMIDVFFFLLFAV  
WMVAFGVARQGILRQNEQRWRWIFRSVIYEPYLAMFGQVPSDSDSTTYDFSHCTFSGNESKPLCVELDEHNLP  
RFPEWITIPLVCIYMLSTNILLVNLVAMFGYTVGIVQENNDQVWKQRYFLVQEYCNRLNIPFPVVFAYFY  
MVVKKCFKCCCKEKNMESNACCFRNEDNETLAWEGVMKENYLVKINTKANDNSEEMRHRFRQLDSKLNLDKSL  
LKEIANNIK\*

>rs50202562\_ENSMUSP00000131209\_c.145:T>C\_p.F49S

ENSMUST00000171176.3|Trpm8-204|ENSMUSG00000036251|+|chr1:g.88248614:T>C  
MSFEGARLSMRSRRTMGSTRITLYSSVSRSTDVSYSDSLVNFIQANSKKRECVFFTRDSKAMENICKCGYA  
SQHIEGTQINQNEKWNKKHTKEFPTDAFGDIQFETLGKKGKYLRLSCDTSSETLYELLTQHWHLKTPNLVI  
SVTGGAKNFALKPRMRKIFSRLIYIAQSKGAWILTGGTHYGLMKYIGEVVRDNTISRNSEENIVAIGIAAWGM  
VSNRDTLIRSCDDEGHFSAQYIMDDFTRDPLYILDNNHTHLLLVDNGCHGHPTVEAKLRNQLEKYISERTSQD  
SNYGGKIPIVCFAQGGGRETAKAINTSVKSKI PCVVVEGSGQIADVIASLVEVEDVLTSSMVKEKLVRFPLRT  
VSRLPEEEIESWIKWLKEILESSHLLTVIKMEEAGDEIVSNAISYALYKAFSTNEQDKDNWNGQLKLLLEWNQ

LDLASDEIFTNDRRWESADLQEVMTALIKDRPKFVRLFLENGLNLQKFLTNEVLTELFSTHFSTLVYRNLQI  
AKNSYNDALLTFVWKLWANFRRSFWKEDRSSREDLDVELHDASLTTRHPLQALFIWAILQNKKELSKVIWEQT  
KGCTLAALGASKLLKTLAKVKNDINAAGESEELANEYETRAVELFTECYSNDEDLAEQLLVYSCEAWGGSNCL  
ELAVEATDQHFIQAQPGVQNFSLKQWYGEISRDTKNWKIILCLFIIPLVGCGLVSRKPKPIDKHKLLWYVAF  
FTSPFVVFVSWNVVFIYIAFLLLFAYVLLMDFHSPHTPELIIYALVFLFCDEVRQWYMNQVNYFTDLWNVMDT  
LGLFYFIAGIVFRLHSSNKSSLYSGRVIIFCLDYIIFTLRLIHFITVSRNLGPKIIMLQRMIDVFFFLLFAV  
WMVAFGVARQGILRQNEQRWRWIFRSVIYEPYLAAMFGQVPSVDSTTYDFSHCTFSGNESKPLCVELDEHNLP  
RFPEWITIPLVCIYMLSTNILLVNLVAMFGYTVGIVQENNDQVWKFORQYFLVQEYCNRLNIPFPVVFAYFY  
MVVKCFKCCCKEKNMESNACCFRNEEDNETLAWEGVMKENYLVKINTKANDNSEEMRHRFRQLDSKLNLDLKS  
LKEIANNIK\*

>rs51885729\_ENSMUSP00000108739\_c.186:G>A\_p.A63T

ENSMUST00000113114.10|Trpm8-202|ENSMUSG00000036251||+|chr1:g.88248655:G>A  
MSFEGARLSMRSRRNGTMGSTRITLYSSVSRSTDVSYSDSDLVNFIAQANFKKRECVFFTRDSKTMENICKCGYA  
QSQHIEGTQINQNEKWNKKHTKEFPTDAFGDIQFETLGKKGKYLRLSCDTDSETLYELLTQHWHLKTPNLVI  
SVTGGAKNFALKPRMRKIFSRLIYIAQSKGAWILTTGGTHYGLMKYIGEVVRDNTISRNSEENIVAIGIAAWGM  
VSNRDTLIRSCDDEGHFSAQYIMDDFTRDPLYILDNNHTHLLVDNGCHGHPTVEAKLRNQLKEYISERTSQD  
SNYGGKIPIVCFQAQGGGRETAKAINTSVKSKIICVVEGSGQIADVIAASLVEVEDVLTSSMVKEKLVRFPLPRT  
VSRLEPEEIESWIKWLKEILESSHLLTVIKMEEAGDEIVSNAISYALYKAFSTNEQDKDNWNGQLKLLLEWNQ  
LDLASDEIFTNDRRWESADLQEVMTALIKDRPKFVRLFLENGLNLQKFLTNEVLTELFSTHFSTLVYRNLQI  
AKNSYNDALLTFVWKLWANFRRSFWKEDRSSREDLDVELHDASLTTRHPLQALFIWAILQNKKELSKVIWEQT  
KGCTLAALGASKLLKTLAKVKNDINAAGESEELANEYETRAVELFTECYSNDEDLAEQLLVYSCEAWGGSNCL  
ELAVEATDQHFIQAQPGVQNFSLKQWYGEISRDTKNWKIILCLFIIPLVGCGLVSRKPKPIDKHKLLWYVAF  
FTSPFVVFVSWNVVFIYIAFLLLFAYVLLMDFHSPHTPELIIYALVFLFCDEVRQWYMNQVNYFTDLWNVMDT  
LGLFYFIAGIVFRLHSSNKSSLYSGRVIIFCLDYIIFTLRLIHFITVSRNLGPKIIMLQRMIDVFFFLLFAV  
WMVAFGVARQGILRQNEQRWRWIFRSVIYEPYLAAMFGQVPSVDSTTYDFSHCTFSGNESKPLCVELDEHNLP  
RFPEWITIPLVCIYMLSTNILLVNLVAMFGYTVGIVQENNDQVWKFORQYFLVQEYCNRLNIPFPVVFAYFY  
MVVKCFKCCCKEKNMESNACCFRNEEDNETLAWEGVMKENYLVKINTKANDNSEEMRHRFRQLDSKLNLDLKS  
LKEIANNIK\*

>rs51885729\_ENSMUSP00000036991\_c.186:G>A\_p.A63T

ENSMUST00000040210.14|Trpm8-201|ENSMUSG00000036251||+|chr1:g.88248655:G>A  
MSFEGARLSMRSRRNGTMGSTRITLYSSVSRSTDVSYSDSDLVNFIAQANFKKRECVFFTRDSKTMENICKCGYA  
QSQHIEGTQINQNEKWNKKHTKEFPTDAFGDIQFETLGKKGKYLRLSCDTDSETLYELLTQHWHLKTPNLVI  
SVTGGAKNFALKPRMRKIFSRLIYIAQSKGAWILTTGGTHYGLMKYIGEVVRDNTISRNSEENIVAIGIAAWGM  
VSNRDTLIRSCDDEGHFSAQYIMDDFTRDPLYILDNNHTHLLVDNGCHGHPTVEAKLRNQLKEYISERTSQD  
SNYGGKIPIVCFQAQGGGRETAKAINTSVKSKIICVVEGSGQIADVIAASLVEVEDVLTSSMVKEKLVRFPLPRT  
VSRLEPEEIESWIKWLKEILESSHLLTVIKMEEAGDEIVSNAISYALYKAFSTNEQDKDNWNGQLKLLLEWNQ  
LDLASDEIFTNDRRWESADLQEVMTALIKDRPKFVRLFLENGLNLQKFLTNEVLTELFSTHFSTLVYRNLQI  
AKNSYNDALLTFVWKLWANFRRSFWKEDRSSREDLDVELHDASLTTRHPLQALFIWAILQNKKELSKVIWEQT  
KGCTLAALGASKLLKTLAKVKNDINAAGESEELANEYETRAVELFTECYSNDEDLAEQLLVYSCEAWGGSNCL  
ELAVEATDQHFIQAQPGVQNFSLKQWYGEISRDTKNWKIILCLFIIPLVGCGLVSRKPKPIDKHKLLWYVAF  
FTSPFVVFVSWNVVFIYIAFLLLFAYVLLMDFHSPHTPELIIYALVFLFCDEVRQWYMNQVNYFTDLWNVMDT  
LGLFYFIAGIVFRLHSSNKSSLYSGRVIIFCLDYIIFTLRLIHFITVSRNLGPKIIMLQRMIDVFFFLLFAV  
WMVAFGVARQGILRQNEQRWRWIFRSVIYEPYLAAMFGQVPSVDSTTYDFSHCTFSGNESKPLCVELDEHNLP  
RFPEWITIPLVCIYMLSTNILLVNLVAMFGYTVGIVQENNDQVWKFORQYFLVQEYCNRLNIPFPVVFAYFY  
MVVKCFKCCCKEKNMESNACCFRNEEDNETLAWEGVMKENYLVKINTKANDNSEEMRHRFRQLDSKLNLDLKS  
LKEIANNIK\*

>rs51885729\_ENSMUSP00000131209\_c.186:G>A\_p.A63T

ENSMUST00000171176.3|Trpm8-204|ENSMUSG00000036251||+|chr1:g.88248655:G>A  
MSFEGARLSMRSRRNGTMGSTRITLYSSVSRSTDVSYSDSDLVNFIAQANFKKRECVFFTRDSKTMENICKCGYA  
QSQHIEGTQINQNEKWNKKHTKEFPTDAFGDIQFETLGKKGKYLRLSCDTDSETLYELLTQHWHLKTPNLVI  
SVTGGAKNFALKPRMRKIFSRLIYIAQSKGAWILTTGGTHYGLMKYIGEVVRDNTISRNSEENIVAIGIAAWGM  
VSNRDTLIRSCDDEGHFSAQYIMDDFTRDPLYILDNNHTHLLVDNGCHGHPTVEAKLRNQLKEYISERTSQD  
SNYGGKIPIVCFQAQGGGRETAKAINTSVKSKIICVVEGSGQIADVIAASLVEVEDVLTSSMVKEKLVRFPLPRT  
VSRLEPEEIESWIKWLKEILESSHLLTVIKMEEAGDEIVSNAISYALYKAFSTNEQDKDNWNGQLKLLLEWNQ  
LDLASDEIFTNDRRWESADLQEVMTALIKDRPKFVRLFLENGLNLQKFLTNEVLTELFSTHFSTLVYRNLQI  
AKNSYNDALLTFVWKLWANFRRSFWKEDRSSREDLDVELHDASLTTRHPLQALFIWAILQNKKELSKVIWEQT  
KGCTLAALGASKLLKTLAKVKNDINAAGESEELANEYETRAVELFTECYSNDEDLAEQLLVYSCEAWGGSNCL  
ELAVEATDQHFIQAQPGVQNFSLKQWYGEISRDTKNWKIILCLFIIPLVGCGLVSRKPKPIDKHKLLWYVAF

FTSPFVVFVSWNVVFIYIAFLLLFAYVLLMDFHSPHTPELILYALVFLFCDEVRQWYMNNGVNYFTDLWNVMDT  
LGLFYFIAGIVFRLHSSNKSSLYSGRVI FCLDYII FTLRLLIHIFTVSRNLGPKI IMLQRMLIDVFFFLLFAV  
WMVAFGVARQGILRQNEQRWRWIFRSVIYEPYLAMFGQVPSVDSTTYDFSHCTFSGNESKPLCVELDEHNLP  
RFPEWITIPLVCIYMLSTNILLVNLVAMFGYTVGIVQENNDQVWKFORYFLVQEYCNRLNIPFPFVVFAYFY  
MVVKKCFKCCCKEKNMESNACCFRNEDNETLAWEGVMKENYLVKINTKANDNSEEMRHRFRQLDSKLNLDLKS  
LKEIANNIK\*

>rs51130807\_ENSMUSP00000108739\_c.210:G>C\_p.G71R

ENSMUST00000113114.10|Trpm8-202|ENSMUSG00000036251|+|chr1:g.88253123:G>C  
MSFEGARLSMRSRRNGTMGSTRTLYSSVSRSTDVSYSDSDLVNF IQANFKKRECVFFTRDSKAMENICKCRYA  
QSQHIEGTQINQNEKWNKKHTKEFPTDAFGDIQFETLGKKGKYLRLSCD TDSETLYELLTQHWHLKT PNLVI  
SVTGGAKNFALKPRMRKIFSRLIYIAQSKGAWILTTGGTHYGLMKYIGEVRDNTISRNSEENIVAIGIAAWGM  
VSNRDTLIRSCDDEGHFSAQYIMDDFTRDPLYILDNNHTHLLVDNGCHGHPTVEAKLRNQLEKYISERTSQD  
SNYGGKIPIVCF AQGGGRETLKAINTSVSKSIPCVVVEGSGQIADVIASLVEVEDVLTSSMVKEKLVRF LPR  
VSRLPEEEIESWIKWLKEI LESSHLLTVIKMEEAGDEIVSNAISYALYKAFSTNEQDKDNWNGQLKLLLEWNQ  
LDLASDEIFTNDRRWEADLQEVMTALIKDRPKFVRLFLENGLNQKFLTNEVLT E L FSTH FSTLVYRNLQI  
AKNSYNDALLTFVWKL VANFRRSFWKEDRSSRELDVELHDASLTTRHPLQALFIWAILQNKKELSKVIWEQT  
KGCTLAALGASKLLKTLAKVKNDINAAGESEELANEYETR AVELFTECYSNEDLAEQLLVYSCEAWGGSNCL  
ELAVEATDQHFI AQPGVQNF LSKQWYGEISRDTKNWKIILCLFIIPLVGCGLV SFRKKPIDKHKLLWYVAF  
FTSPFVVFVSWNVVFIYIAFLLLFAYVLLMDFHSPHTPELILYALVFLFCDEVRQWYMNNGVNYFTDLWNVMDT  
LGLFYFIAGIVFRLHSSNKSSLYSGRVI FCLDYII FTLRLLIHIFTVSRNLGPKI IMLQRMLIDVFFFLLFAV  
WMVAFGVARQGILRQNEQRWRWIFRSVIYEPYLAMFGQVPSVDSTTYDFSHCTFSGNESKPLCVELDEHNLP  
RFPEWITIPLVCIYMLSTNILLVNLVAMFGYTVGIVQENNDQVWKFORYFLVQEYCNRLNIPFPFVVFAYFY  
MVVKKCFKCCCKEKNMESNACCFRNEDNETLAWEGVMKENYLVKINTKANDNSEEMRHRFRQLDSKLNLDLKS  
LKEIANNIK\*

>rs51130807\_ENSMUSP00000036991\_c.210:G>C\_p.G71R

ENSMUST00000040210.14|Trpm8-201|ENSMUSG00000036251|+|chr1:g.88253123:G>C  
MSFEGARLSMRSRRNGTMGSTRTLYSSVSRSTDVSYSDSDLVNF IQANFKKRECVFFTRDSKAMENICKCRYA  
QSQHIEGTQINQNEKWNKKHTKEFPTDAFGDIQFETLGKKGKYLRLSCD TDSETLYELLTQHWHLKT PNLVI  
SVTGGAKNFALKPRMRKIFSRLIYIAQSKGAWILTTGGTHYGLMKYIGEVRDNTISRNSEENIVAIGIAAWGM  
VSNRDTLIRSCDDEGHFSAQYIMDDFTRDPLYILDNNHTHLLVDNGCHGHPTVEAKLRNQLEKYISERTSQD  
SNYGGKIPIVCF AQGGGRETLKAINTSVSKSIPCVVVEGSGQIADVIASLVEVEDVLTSSMVKEKLVRF LPR  
VSRLPEEEIESWIKWLKEI LESSHLLTVIKMEEAGDEIVSNAISYALYKAFSTNEQDKDNWNGQLKLLLEWNQ  
LDLASDEIFTNDRRWEADLQEVMTALIKDRPKFVRLFLENGLNQKFLTNEVLT E L FSTH FSTLVYRNLQI  
AKNSYNDALLTFVWKL VANFRRSFWKEDRSSRELDVELHDASLTTRHPLQALFIWAILQNKKELSKVIWEQT  
KGCTLAALGASKLLKTLAKVKNDINAAGESEELANEYETR AVELFTECYSNEDLAEQLLVYSCEAWGGSNCL  
ELAVEATDQHFI AQPGVQNF LSKQWYGEISRDTKNWKIILCLFIIPLVGCGLV SFRKKPIDKHKLLWYVAF  
FTSPFVVFVSWNVVFIYIAFLLLFAYVLLMDFHSPHTPELILYALVFLFCDEVRQWYMNNGVNYFTDLWNVMDT  
LGLFYFIAGIVFRLHSSNKSSLYSGRVI FCLDYII FTLRLLIHIFTVSRNLGPKI IMLQRMLIDVFFFLLFAV  
WMVAFGVARQGILRQNEQRWRWIFRSVIYEPYLAMFGQVPSVDSTTYDFSHCTFSGNESKPLCVELDEHNLP  
RFPEWITIPLVCIYMLSTNILLVNLVAMFGYTVGIVQENNDQVWKFORYFLVQEYCNRLNIPFPFVVFAYFY  
MVVKKCFKCCCKEKNMESNACCFRNEDNETLAWEGVMKENYLVKINTKANDNSEEMRHRFRQLDSKLNLDLKS  
LKEIANNIK\*

>rs51130807\_ENSMUSP00000131209\_c.210:G>C\_p.G71R

ENSMUST00000171176.3|Trpm8-204|ENSMUSG00000036251|+|chr1:g.88253123:G>C  
MSFEGARLSMRSRRNGTMGSTRTLYSSVSRSTDVSYSDSDLVNF IQANFKKRECVFFTRDSKAMENICKCRYA  
QSQHIEGTQINQNEKWNKKHTKEFPTDAFGDIQFETLGKKGKYLRLSCD TDSETLYELLTQHWHLKT PNLVI  
SVTGGAKNFALKPRMRKIFSRLIYIAQSKGAWILTTGGTHYGLMKYIGEVRDNTISRNSEENIVAIGIAAWGM  
VSNRDTLIRSCDDEGHFSAQYIMDDFTRDPLYILDNNHTHLLVDNGCHGHPTVEAKLRNQLEKYISERTSQD  
SNYGGKIPIVCF AQGGGRETLKAINTSVSKSIPCVVVEGSGQIADVIASLVEVEDVLTSSMVKEKLVRF LPR  
VSRLPEEEIESWIKWLKEI LESSHLLTVIKMEEAGDEIVSNAISYALYKAFSTNEQDKDNWNGQLKLLLEWNQ  
LDLASDEIFTNDRRWEADLQEVMTALIKDRPKFVRLFLENGLNQKFLTNEVLT E L FSTH FSTLVYRNLQI  
AKNSYNDALLTFVWKL VANFRRSFWKEDRSSRELDVELHDASLTTRHPLQALFIWAILQNKKELSKVIWEQT  
KGCTLAALGASKLLKTLAKVKNDINAAGESEELANEYETR AVELFTECYSNEDLAEQLLVYSCEAWGGSNCL  
ELAVEATDQHFI AQPGVQNF LSKQWYGEISRDTKNWKIILCLFIIPLVGCGLV SFRKKPIDKHKLLWYVAF  
FTSPFVVFVSWNVVFIYIAFLLLFAYVLLMDFHSPHTPELILYALVFLFCDEVRQWYMNNGVNYFTDLWNVMDT  
LGLFYFIAGIVFRLHSSNKSSLYSGRVI FCLDYII FTLRLLIHIFTVSRNLGPKI IMLQRMLIDVFFFLLFAV  
WMVAFGVARQGILRQNEQRWRWIFRSVIYEPYLAMFGQVPSVDSTTYDFSHCTFSGNESKPLCVELDEHNLP  
RFPEWITIPLVCIYMLSTNILLVNLVAMFGYTVGIVQENNDQVWKFORYFLVQEYCNRLNIPFPFVVFAYFY

MVVKKCFKCCCCKEKNMESNACCFRNEDNETLAWEGVMKENYLVKINTKANDNSEEMRHRFRQLDSKLNLDKSL  
 LKEIANNIK\*  
 >ENSMUSP00000108739\_c.302:C>CAGTGA\_p.D101ins-fs  
 ENSMUST00000113114.10|Trpm8-  
 202|ENSMUSG00000036251|+|chr1:g.88253215:C>CAGTGA  
 MSFEGARLSMRSRRNGTMGSTRTRYSSVSRSTDVSYSDSDLVNF IQANFKKRECVFFTRDSKAMENICKCGYA  
 SQSHIEGTQINQNEKWNKKHTKEFPTDSEPSGTFSRLRWGRKASTYACPVTPTLKLTSTNC  
 >ENSMUSP00000036991\_c.302:C>CAGTGA\_p.D101ins-fs  
 ENSMUST00000040210.14|Trpm8-  
 201|ENSMUSG00000036251|+|chr1:g.88253215:C>CAGTGA  
 MSFEGARLSMRSRRNGTMGSTRTRYSSVSRSTDVSYSDSDLVNF IQANFKKRECVFFTRDSKAMENICKCGYA  
 SQSHIEGTQINQNEKWNKKHTKEFPTDSEPSGTFSRLRWGRKASTYACPVTPTLKLTSTNC  
 >ENSMUSP00000131209\_c.302:C>CAGTGA\_p.D101ins-fs  
 ENSMUST00000171176.3|Trpm8-  
 204|ENSMUSG00000036251|+|chr1:g.88253215:C>CAGTGA  
 MSFEGARLSMRSRRNGTMGSTRTRYSSVSRSTDVSYSDSDLVNF IQANFKKRECVFFTRDSKAMENICKCGYA  
 SQSHIEGTQINQNEKWNKKHTKEFPTDSEPSGTFSRLRWGRKASTYACPVTPTLKLTSTNC  
 >rs45725458\_ENSMUSP00000108739\_c.480:A>T\_p.M161L  
 ENSMUST00000113114.10|Trpm8-202|ENSMUSG00000036251|+|chr1:g.88254259:A>T  
 MSFEGARLSMRSRRNGTMGSTRTRYSSVSRSTDVSYSDSDLVNF IQANFKKRECVFFTRDSKAMENICKCGYA  
 SQSHIEGTQINQNEKWNKKHTKEFPTDAFGDIQFETLGKKGKYLRLSCD TDSETLYELLTQHWHLKT PNLVI  
 SVTGAKNFALKPRLRKFISRLIYIAQSKGAWILTGTHYGLMKYIGEVVRDNTISRNSEENIVAIGIAAWGM  
 VSNRDTLIRSCDDEGHFSAQYIMDDFTRDPLYILDNNHTHLLLVDNGCHGHPTVEAKLRNQLEKYISERTSQD  
 SNYGGKIPIVCFQAQGGGRET LKAINTSVSKSIPCVVVEGSGQIADV IASLVEVEDVLTSSMVKEKLVRF LPR  
 VSRLPEEEIESWIKWLKEILESSHLLTVIKMEEAGDEIVSNAISYALYKAFSTNEQDKDNWNGQLKLLLEWNQ  
 LDLASDEIFTNDRRWEADLQEVMTALIKDRPKFVRLFLENGLNQKFLTNEVLTSTHSTHSTLVYRNLOI  
 AKNSYNDALLTFVWKL VANFRRSFWKEDRSSRELDLVELHDASL TTRHPLQALFIWAILQNKKELSKVIWEQT  
 KGCTLAALGASKLLKTLAKVKNDINAAGESEELANEYETRAVELFTECYSNDEDLAEQLLVYSCEAWGGSNCL  
 ELAVEATDQHFIAPGVQNF LSKQWYGEISRDTKNWKIILCLFI IPLVGCGLVSRKPKPIDKHKLLWYVAF  
 FTSPFVVFVSWNVVFIYIAFLLLFAYVLLMDFHVPHTPELILYALVFLFCDEVRQWYMNQVNYFTDLWNVMDT  
 LGLFYFIAGIVFRLHSSNKSSLYSGRVIFCLDYII FTLR LIHI FTVSRNLGPKIIMLQRM LIDVFFF LFLFAV  
 WMVAFGVARQGILRQNEQRWRWIFRSVIYEPYLA MFGQVPSD VDSSTYDFSHCTFSGNESKPLCVELDEHNLP  
 RFPEWITIPLVCIYMLSTNILLVNLVAMFGYTVGIVQENNDQVWKQRYFLVQYEYCNRLNIPFPVVFAYFY  
 MVVKKCFKCCCCKEKNMESNACCFRNEDNETLAWEGVMKENYLVKINTKANDNSEEMRHRFRQLDSKLNLDKSL  
 LKEIANNIK\*  
 >rs45725458\_ENSMUSP00000036991\_c.480:A>T\_p.M161L  
 ENSMUST00000040210.14|Trpm8-201|ENSMUSG00000036251|+|chr1:g.88254259:A>T  
 MSFEGARLSMRSRRNGTMGSTRTRYSSVSRSTDVSYSDSDLVNF IQANFKKRECVFFTRDSKAMENICKCGYA  
 SQSHIEGTQINQNEKWNKKHTKEFPTDAFGDIQFETLGKKGKYLRLSCD TDSETLYELLTQHWHLKT PNLVI  
 SVTGAKNFALKPRLRKFISRLIYIAQSKGAWILTGTHYGLMKYIGEVVRDNTISRNSEENIVAIGIAAWGM  
 VSNRDTLIRSCDDEGHFSAQYIMDDFTRDPLYILDNNHTHLLLVDNGCHGHPTVEAKLRNQLEKYISERTSQD  
 SNYGGKIPIVCFQAQGGGRET LKAINTSVSKSIPCVVVEGSGQIADV IASLVEVEDVLTSSMVKEKLVRF LPR  
 VSRLPEEEIESWIKWLKEILESSHLLTVIKMEEAGDEIVSNAISYALYKAFSTNEQDKDNWNGQLKLLLEWNQ  
 LDLASDEIFTNDRRWEADLQEVMTALIKDRPKFVRLFLENGLNQKFLTNEVLTSTHSTHSTLVYRNLOI  
 AKNSYNDALLTFVWKL VANFRRSFWKEDRSSRELDLVELHDASL TTRHPLQALFIWAILQNKKELSKVIWEQT  
 KGCTLAALGASKLLKTLAKVKNDINAAGESEELANEYETRAVELFTECYSNDEDLAEQLLVYSCEAWGGSNCL  
 ELAVEATDQHFIAPGVQNF LSKQWYGEISRDTKNWKIILCLFI IPLVGCGLVSRKPKPIDKHKLLWYVAF  
 FTSPFVVFVSWNVVFIYIAFLLLFAYVLLMDFHVPHTPELILYALVFLFCDEVRQWYMNQVNYFTDLWNVMDT  
 LGLFYFIAGIVFRLHSSNKSSLYSGRVIFCLDYII FTLR LIHI FTVSRNLGPKIIMLQRM LIDVFFF LFLFAV  
 WMVAFGVARQGILRQNEQRWRWIFRSVIYEPYLA MFGQVPSD VDSSTYDFSHCTFSGNESKPLCVELDEHNLP  
 RFPEWITIPLVCIYMLSTNILLVNLVAMFGYTVGIVQENNDQVWKQRYFLVQYEYCNRLNIPFPVVFAYFY  
 MVVKKCFKCCCCKEKNMESNACCFRNEDNETLAWEGVMKENYLVKINTKANDNSEEMRHRFRQLDSKLNLDKSL  
 LKEIANNIK\*  
 >rs45725458\_ENSMUSP00000131209\_c.480:A>T\_p.M161L  
 ENSMUST00000171176.3|Trpm8-204|ENSMUSG00000036251|+|chr1:g.88254259:A>T  
 MSFEGARLSMRSRRNGTMGSTRTRYSSVSRSTDVSYSDSDLVNF IQANFKKRECVFFTRDSKAMENICKCGYA  
 SQSHIEGTQINQNEKWNKKHTKEFPTDAFGDIQFETLGKKGKYLRLSCD TDSETLYELLTQHWHLKT PNLVI  
 SVTGAKNFALKPRLRKFISRLIYIAQSKGAWILTGTHYGLMKYIGEVVRDNTISRNSEENIVAIGIAAWGM



VSNRDTLIRSCDDEGHFSAQYIMDDFTRDPLYILDNNHHTHLLLVNDNGCHGHPTVEAKLRNQLEKYISERTSQD  
SNYGGKIPIVCFAQGGGRETLLKAINTSVKSKIIPCVVVEGSGQIADVIASLVEVEDVLTSSMVKEKLVRFPLPRT  
VSRLPEEEIESWIKWLKEILESSHLLTVIKMEEAGDEIVSNAISYALYKAFSTNEQDKDNWNGQLKLLLEWNQ  
LDLASDEIFTNDRRWESADLQEVMTALIKDRPKFVRLFLENGLNQKFLTNEVLTELFSTHSTLVYRNLQI  
AKNSYNDALLTFVWKLVANFRRSFWKEDRSSREDLDVELHDASLTTRHPLQALFIWAILQNKKELSKVIWEQT  
KGCTLAALGASKLLKTLAKVKNDINAAGESEELANEYETRAVELFTECYSNEDDLAEQLLVYSCEAWGGSNCL  
ELAVEATDQHFIAPGVQNFSLKQWYGEISRDTKNWKIILCLFIIPLVGCGLVSRKPKPIDKHKLLWYVAF  
FTSPFVVFVSWNVVFIYIAFLLLFAYVLLMDFHSPVHTPELILYALVFLFCDEVRQWYMNQVNYFTDLWNVMDT  
LGLFYFIAGIVFRLHSSNKSSLYSGRVIIFCLDYIIFTLRLIHFIVSRNLGPKIIMLQRMLIDVFFFLFLFAV  
WMVAFGVARQGILRQNEQRWRWIFRSVIYEPYLAAMFGQVPSDSDSTTYDFSHCTFSGNESKPLCVELDEHNLP  
RFPEWITIPLVCIYMLSTNILLVNLVAMFGYTVGIVQENNDQVWKFQRYFLVQEYCNRLNIPFPVVFAYFY  
MVVKKCFKCCCKEKNMESNACCFRNEDNETLAWEGVMKENYLVKINTKANDNSEEMRHRFRQLDSKLNLDKSL  
LKEIANNIK\*

>rs47939991\_ENSMUSP00000108739\_c.702:C>A\_p.H235N  
ENSMUST00000113114.10|Trpm8-202|ENSMUSG00000036251|+|chr1:g.88258421:C>A  
MSFEGARLSMRSRRNGTMGSTRTLYSSVSRSTDVSYSDSDLVNFIQANFKKRECIVFFTRDSKAMENICKCGYA  
QSQHIQGTQINQNEKWNKHTKEFPTDAFGDIQFETLGGKGYLRLSCDSDSETLYELLTQHWHLKTPLNVI  
SVTGGAKNFALKPRMRKIFSRLIYIAQSKGAWILTGTHYGLMKYIGEVVRDNTISRNSEENIVAIGIAAWGM  
VSNRDTLIRSCDDEGNFSAQYIMDDFTRDPLYILDNNHHTHLLLVNDNGCHGHPTVEAKLRNQLEKYISERTSQD  
SNYGGKIPIVCFAQGGGRETLLKAINTSVKSKIIPCVVVEGSGQIADVIASLVEVEDVLTSSMVKEKLVRFPLPRT  
VSRLPEEEIESWIKWLKEILESSHLLTVIKMEEAGDEIVSNAISYALYKAFSTNEQDKDNWNGQLKLLLEWNQ  
LDLASDEIFTNDRRWESADLQEVMTALIKDRPKFVRLFLENGLNQKFLTNEVLTELFSTHSTLVYRNLQI  
AKNSYNDALLTFVWKLVANFRRSFWKEDRSSREDLDVELHDASLTTRHPLQALFIWAILQNKKELSKVIWEQT  
KGCTLAALGASKLLKTLAKVKNDINAAGESEELANEYETRAVELFTECYSNEDDLAEQLLVYSCEAWGGSNCL  
ELAVEATDQHFIAPGVQNFSLKQWYGEISRDTKNWKIILCLFIIPLVGCGLVSRKPKPIDKHKLLWYVAF  
FTSPFVVFVSWNVVFIYIAFLLLFAYVLLMDFHSPVHTPELILYALVFLFCDEVRQWYMNQVNYFTDLWNVMDT  
LGLFYFIAGIVFRLHSSNKSSLYSGRVIIFCLDYIIFTLRLIHFIVSRNLGPKIIMLQRMLIDVFFFLFLFAV  
WMVAFGVARQGILRQNEQRWRWIFRSVIYEPYLAAMFGQVPSDSDSTTYDFSHCTFSGNESKPLCVELDEHNLP  
RFPEWITIPLVCIYMLSTNILLVNLVAMFGYTVGIVQENNDQVWKFQRYFLVQEYCNRLNIPFPVVFAYFY  
MVVKKCFKCCCKEKNMESNACCFRNEDNETLAWEGVMKENYLVKINTKANDNSEEMRHRFRQLDSKLNLDKSL  
LKEIANNIK\*

>rs47939991\_ENSMUSP00000036991\_c.702:C>A\_p.H235N  
ENSMUST00000040210.14|Trpm8-201|ENSMUSG00000036251|+|chr1:g.88258421:C>A  
MSFEGARLSMRSRRNGTMGSTRTLYSSVSRSTDVSYSDSDLVNFIQANFKKRECIVFFTRDSKAMENICKCGYA  
QSQHIQGTQINQNEKWNKHTKEFPTDAFGDIQFETLGGKGYLRLSCDSDSETLYELLTQHWHLKTPLNVI  
SVTGGAKNFALKPRMRKIFSRLIYIAQSKGAWILTGTHYGLMKYIGEVVRDNTISRNSEENIVAIGIAAWGM  
VSNRDTLIRSCDDEGNFSAQYIMDDFTRDPLYILDNNHHTHLLLVNDNGCHGHPTVEAKLRNQLEKYISERTSQD  
SNYGGKIPIVCFAQGGGRETLLKAINTSVKSKIIPCVVVEGSGQIADVIASLVEVEDVLTSSMVKEKLVRFPLPRT  
VSRLPEEEIESWIKWLKEILESSHLLTVIKMEEAGDEIVSNAISYALYKAFSTNEQDKDNWNGQLKLLLEWNQ  
LDLASDEIFTNDRRWESADLQEVMTALIKDRPKFVRLFLENGLNQKFLTNEVLTELFSTHSTLVYRNLQI  
AKNSYNDALLTFVWKLVANFRRSFWKEDRSSREDLDVELHDASLTTRHPLQALFIWAILQNKKELSKVIWEQT  
KGCTLAALGASKLLKTLAKVKNDINAAGESEELANEYETRAVELFTECYSNEDDLAEQLLVYSCEAWGGSNCL  
ELAVEATDQHFIAPGVQNFSLKQWYGEISRDTKNWKIILCLFIIPLVGCGLVSRKPKPIDKHKLLWYVAF  
FTSPFVVFVSWNVVFIYIAFLLLFAYVLLMDFHSPVHTPELILYALVFLFCDEVRQWYMNQVNYFTDLWNVMDT  
LGLFYFIAGIVFRLHSSNKSSLYSGRVIIFCLDYIIFTLRLIHFIVSRNLGPKIIMLQRMLIDVFFFLFLFAV  
WMVAFGVARQGILRQNEQRWRWIFRSVIYEPYLAAMFGQVPSDSDSTTYDFSHCTFSGNESKPLCVELDEHNLP  
RFPEWITIPLVCIYMLSTNILLVNLVAMFGYTVGIVQENNDQVWKFQRYFLVQEYCNRLNIPFPVVFAYFY  
MVVKKCFKCCCKEKNMESNACCFRNEDNETLAWEGVMKENYLVKINTKANDNSEEMRHRFRQLDSKLNLDKSL  
LKEIANNIK\*

>rs47939991\_ENSMUSP00000131209\_c.702:C>A\_p.H235N  
ENSMUST00000171176.3|Trpm8-204|ENSMUSG00000036251|+|chr1:g.88258421:C>A  
MSFEGARLSMRSRRNGTMGSTRTLYSSVSRSTDVSYSDSDLVNFIQANFKKRECIVFFTRDSKAMENICKCGYA  
QSQHIQGTQINQNEKWNKHTKEFPTDAFGDIQFETLGGKGYLRLSCDSDSETLYELLTQHWHLKTPLNVI  
SVTGGAKNFALKPRMRKIFSRLIYIAQSKGAWILTGTHYGLMKYIGEVVRDNTISRNSEENIVAIGIAAWGM  
VSNRDTLIRSCDDEGNFSAQYIMDDFTRDPLYILDNNHHTHLLLVNDNGCHGHPTVEAKLRNQLEKYISERTSQD  
SNYGGKIPIVCFAQGGGRETLLKAINTSVKSKIIPCVVVEGSGQIADVIASLVEVEDVLTSSMVKEKLVRFPLPRT  
VSRLPEEEIESWIKWLKEILESSHLLTVIKMEEAGDEIVSNAISYALYKAFSTNEQDKDNWNGQLKLLLEWNQ  
LDLASDEIFTNDRRWESADLQEVMTALIKDRPKFVRLFLENGLNQKFLTNEVLTELFSTHSTLVYRNLQI

AKNSYNDALLTFVWKLVANFRRSFWKEDRSSREDLDVELHDASLTTRHPLQALFIWAILQNKKELSKVIWEQT  
KGCTLAALGASKLLKTLAKVKNDINAAGESEELANEYETRAVELFTECYSNDEDLAEQLLVYSCEAWGGSNCL  
ELAVEATDQHFIQAQPGVQNFSLKQWYGEISRDTKNWKIILCLFIIPLVGCGLVSRKPKPIDKHKLLWYVAF  
FTSPFVVFVSWNVVFIYIAFLLLFAYVLLMDFHSPHTPELILYALVFLFCDEVRQWYMGVNYFTDLWNVMDT  
LGLFYFIAQIVFRLHSSNKSSLYSGRVIIFCLDYIIFTLRLIHIIFTVSRNLGPKIIMLQRMIDVFFFLLFAV  
WMVAFGVARQGILRQNEQRWRWIFRSVIYEPYLAAMFGQVPSVDSTTYDFSHCTFSGNESKPLCVLDEHNLP  
RFPEWITIPLVCIYMLSTNILLVNLVAMFGYTVGIVQENNDQVWKQRYFLVQEYCNRLNIPFPVVFAYFY  
MVVKKCFKCCCKEKNMESNACCFRNEDNETLAWEGVMKENYLKINTKANDNSEEMRHRFRQLDSKLNLDKSL  
LKEIANNIK\*

>ENSMUSP00000108739\_c.702:C>G\_p.H235D ENSMUST00000113114.10|Trpm8-  
202|ENSMUSG00000036251|+|chr1:g.88258421:C>G

MSFEGARLSMRSRRNGTMGSTRTYSSVSRSTDVSYSDSDLVNF IQANFKKRECVFFTRDSKAMENICKCGYA  
QSQHIEGTQINQNEKWNKKHTKEFPTDAFGDIQFETLGKKGKYLRLSCD TDSETLYELLTQHWHLKT PNLVI  
SVTGGAKNFALKPRMRKIFSRILYIAQSKGAWILTTGGTHYGLMKYIGEVVRDNTISRNSEENIVAIGIAAWGM  
VSNRDTLIRSCDDEGDFSAQYIMDDFTRDPLYILDNNHTHLLLVNDGCHGHPTVEAKLRNQLEKYISERTSQD  
SNYGGKIPIVCFAQGGGRET LKAINTSVKSKI PCVVVEGSGQIADVIASLVEVEDVLTSSMVKEKLVRF LPR  
VSRLPEEEIESWIKWLKEILESSHLLTVIKMEEAGDEIVSNAISYALYKAFSTNEQDKDNWNGQLKLLLEWNQ  
LDLASDEIFTNDRRWEADLQEVMTALIKDRPKFVRLFLENGLNLQKFLTNEVLTTELSTHFTSLVYRNLQI  
AKNSYNDALLTFVWKLVANFRRSFWKEDRSSREDLDVELHDASLTTRHPLQALFIWAILQNKKELSKVIWEQT  
KGCTLAALGASKLLKTLAKVKNDINAAGESEELANEYETRAVELFTECYSNDEDLAEQLLVYSCEAWGGSNCL  
ELAVEATDQHFIQAQPGVQNFSLKQWYGEISRDTKNWKIILCLFIIPLVGCGLVSRKPKPIDKHKLLWYVAF  
FTSPFVVFVSWNVVFIYIAFLLLFAYVLLMDFHSPHTPELILYALVFLFCDEVRQWYMGVNYFTDLWNVMDT  
LGLFYFIAQIVFRLHSSNKSSLYSGRVIIFCLDYIIFTLRLIHIIFTVSRNLGPKIIMLQRMIDVFFFLLFAV  
WMVAFGVARQGILRQNEQRWRWIFRSVIYEPYLAAMFGQVPSVDSTTYDFSHCTFSGNESKPLCVLDEHNLP  
RFPEWITIPLVCIYMLSTNILLVNLVAMFGYTVGIVQENNDQVWKQRYFLVQEYCNRLNIPFPVVFAYFY  
MVVKKCFKCCCKEKNMESNACCFRNEDNETLAWEGVMKENYLKINTKANDNSEEMRHRFRQLDSKLNLDKSL  
LKEIANNIK\*

>ENSMUSP00000036991\_c.702:C>G\_p.H235D ENSMUST00000040210.14|Trpm8-  
201|ENSMUSG00000036251|+|chr1:g.88258421:C>G

MSFEGARLSMRSRRNGTMGSTRTYSSVSRSTDVSYSDSDLVNF IQANFKKRECVFFTRDSKAMENICKCGYA  
QSQHIEGTQINQNEKWNKKHTKEFPTDAFGDIQFETLGKKGKYLRLSCD TDSETLYELLTQHWHLKT PNLVI  
SVTGGAKNFALKPRMRKIFSRILYIAQSKGAWILTTGGTHYGLMKYIGEVVRDNTISRNSEENIVAIGIAAWGM  
VSNRDTLIRSCDDEGDFSAQYIMDDFTRDPLYILDNNHTHLLLVNDGCHGHPTVEAKLRNQLEKYISERTSQD  
SNYGGKIPIVCFAQGGGRET LKAINTSVKSKI PCVVVEGSGQIADVIASLVEVEDVLTSSMVKEKLVRF LPR  
VSRLPEEEIESWIKWLKEILESSHLLTVIKMEEAGDEIVSNAISYALYKAFSTNEQDKDNWNGQLKLLLEWNQ  
LDLASDEIFTNDRRWEADLQEVMTALIKDRPKFVRLFLENGLNLQKFLTNEVLTTELSTHFTSLVYRNLQI  
AKNSYNDALLTFVWKLVANFRRSFWKEDRSSREDLDVELHDASLTTRHPLQALFIWAILQNKKELSKVIWEQT  
KGCTLAALGASKLLKTLAKVKNDINAAGESEELANEYETRAVELFTECYSNDEDLAEQLLVYSCEAWGGSNCL  
ELAVEATDQHFIQAQPGVQNFSLKQWYGEISRDTKNWKIILCLFIIPLVGCGLVSRKPKPIDKHKLLWYVAF  
FTSPFVVFVSWNVVFIYIAFLLLFAYVLLMDFHSPHTPELILYALVFLFCDEVRQWYMGVNYFTDLWNVMDT  
LGLFYFIAQIVFRLHSSNKSSLYSGRVIIFCLDYIIFTLRLIHIIFTVSRNLGPKIIMLQRMIDVFFFLLFAV  
WMVAFGVARQGILRQNEQRWRWIFRSVIYEPYLAAMFGQVPSVDSTTYDFSHCTFSGNESKPLCVLDEHNLP  
RFPEWITIPLVCIYMLSTNILLVNLVAMFGYTVGIVQENNDQVWKQRYFLVQEYCNRLNIPFPVVFAYFY  
MVVKKCFKCCCKEKNMESNACCFRNEDNETLAWEGVMKENYLKINTKANDNSEEMRHRFRQLDSKLNLDKSL  
LKEIANNIK\*

>ENSMUSP00000131209\_c.702:C>G\_p.H235D ENSMUST00000171176.3|Trpm8-  
204|ENSMUSG00000036251|+|chr1:g.88258421:C>G

MSFEGARLSMRSRRNGTMGSTRTYSSVSRSTDVSYSDSDLVNF IQANFKKRECVFFTRDSKAMENICKCGYA  
QSQHIEGTQINQNEKWNKKHTKEFPTDAFGDIQFETLGKKGKYLRLSCD TDSETLYELLTQHWHLKT PNLVI  
SVTGGAKNFALKPRMRKIFSRILYIAQSKGAWILTTGGTHYGLMKYIGEVVRDNTISRNSEENIVAIGIAAWGM  
VSNRDTLIRSCDDEGDFSAQYIMDDFTRDPLYILDNNHTHLLLVNDGCHGHPTVEAKLRNQLEKYISERTSQD  
SNYGGKIPIVCFAQGGGRET LKAINTSVKSKI PCVVVEGSGQIADVIASLVEVEDVLTSSMVKEKLVRF LPR  
VSRLPEEEIESWIKWLKEILESSHLLTVIKMEEAGDEIVSNAISYALYKAFSTNEQDKDNWNGQLKLLLEWNQ  
LDLASDEIFTNDRRWEADLQEVMTALIKDRPKFVRLFLENGLNLQKFLTNEVLTTELSTHFTSLVYRNLQI  
AKNSYNDALLTFVWKLVANFRRSFWKEDRSSREDLDVELHDASLTTRHPLQALFIWAILQNKKELSKVIWEQT  
KGCTLAALGASKLLKTLAKVKNDINAAGESEELANEYETRAVELFTECYSNDEDLAEQLLVYSCEAWGGSNCL  
ELAVEATDQHFIQAQPGVQNFSLKQWYGEISRDTKNWKIILCLFIIPLVGCGLVSRKPKPIDKHKLLWYVAF  
FTSPFVVFVSWNVVFIYIAFLLLFAYVLLMDFHSPHTPELILYALVFLFCDEVRQWYMGVNYFTDLWNVMDT

LGLFYFIAGIVFRLHSSNKSSLYSGRVIFCLDYIIFTLRLIHIFTVSRNLGPKIIMLQRMIDVFFFLLFAV  
WMVAFGVARQGILRQNEQRWRWIFRSVIYEPYLAMFGQVPSDSDVSTTYDFSHCTFSGNESKPLCVELDEHNLP  
RFPEWITIPLVCIYMLSTNILLVNLVAMFGYTVGIVQENNDQVWKQRYFLVQEYCNRLNIPFPVVFAYFY  
MVKKCFKCCCKEKNMESNACCFRNEDNETLAWEGVMKENYLVKINTKANDNSEEMRHRFRQLDSKLNLDKSL  
LKEIANNIK\*

>rs236575408\_ENSMUSP00000108739\_c.702:C>CA\_p.H235ins-fs  
ENSMUST00000113114.10|Trpm8-202|ENSMUSG00000036251|+|chr1:g.88258421:C>CA  
MSFEGARLSMRSRRNGTMGSTRTRYSSVSRSTDVSYSDSDLVNFIQANFKKRECVFFTRDSKAMENICKCGYA  
QSQHIEGTQINQNEKWNKKHTKEFPTDAFGDIQFETLGKKGKYLRLSCDSDSETLYELLTQHWHLKTPNLVI  
SVTGGAKNFALKPRMRKIFSRLIYIAQSKGAWILTTGGTHYGLMKYIGEVVRDNTISRNSEENIVAIGIAAWGM  
VSNRDTLIRSCDDEGQFFSSIHHG

>rs236575408\_ENSMUSP00000036991\_c.702:C>CA\_p.H235ins-fs  
ENSMUST00000040210.14|Trpm8-201|ENSMUSG00000036251|+|chr1:g.88258421:C>CA  
MSFEGARLSMRSRRNGTMGSTRTRYSSVSRSTDVSYSDSDLVNFIQANFKKRECVFFTRDSKAMENICKCGYA  
QSQHIEGTQINQNEKWNKKHTKEFPTDAFGDIQFETLGKKGKYLRLSCDSDSETLYELLTQHWHLKTPNLVI  
SVTGGAKNFALKPRMRKIFSRLIYIAQSKGAWILTTGGTHYGLMKYIGEVVRDNTISRNSEENIVAIGIAAWGM  
VSNRDTLIRSCDDEGQFFSSIHHG

>rs236575408\_ENSMUSP00000131209\_c.702:C>CA\_p.H235ins-fs  
ENSMUST00000171176.3|Trpm8-204|ENSMUSG00000036251|+|chr1:g.88258421:C>CA  
MSFEGARLSMRSRRNGTMGSTRTRYSSVSRSTDVSYSDSDLVNFIQANFKKRECVFFTRDSKAMENICKCGYA  
QSQHIEGTQINQNEKWNKKHTKEFPTDAFGDIQFETLGKKGKYLRLSCDSDSETLYELLTQHWHLKTPNLVI  
SVTGGAKNFALKPRMRKIFSRLIYIAQSKGAWILTTGGTHYGLMKYIGEVVRDNTISRNSEENIVAIGIAAWGM  
VSNRDTLIRSCDDEGQFFSSIHHG

>rs243361112\_ENSMUSP00000108739\_c.766:A>G\_p.N256S  
ENSMUST00000113114.10|Trpm8-202|ENSMUSG00000036251|+|chr1:g.88258485:A>G  
MSFEGARLSMRSRRNGTMGSTRTRYSSVSRSTDVSYSDSDLVNFIQANFKKRECVFFTRDSKAMENICKCGYA  
QSQHIEGTQINQNEKWNKKHTKEFPTDAFGDIQFETLGKKGKYLRLSCDSDSETLYELLTQHWHLKTPNLVI  
SVTGGAKNFALKPRMRKIFSRLIYIAQSKGAWILTTGGTHYGLMKYIGEVVRDNTISRNSEENIVAIGIAAWGM  
VSNRDTLIRSCDDEGHFSAQYIMDDFTRDPLYILDNSHTHLLLVDNGCHGHPTVEAKLRNQLEKYISERTSQD  
SNYGGKIPIVCFAQGGGRETAKINTSVKSKIICVVEGSGQIADVIASLVEVEDVLTSSMVKEKLVRFPLPRT  
VSRLPEEEIESWIKWLKEILESSHLLTVIKMEEAGDEIVSNAISYALYKAFSTNEQDKDNWNGQLKLLLEWNQ  
LDLASDEIFTNDRRWEADLQEVMTALIKDRPKFVRLFLENGLNLQKFLTNEVLTTELFTSTHFTLVYRNLQI  
AKNSYNDALLTFVWKLVANFRSEFWKEDRSSRELDLDELHDSASLTTRHPLQALFIWAILQNKKELSKVIWEQT  
KGCTLAALGASKLLKTLAKVKNDINAAGESEELANEYETRAVELFTECYSNEDLAEQLLVYSCEAWGGSNCL  
ELAVEATDQHFIQAQPGVQNFLSKQWYGEISRDTKNWKIILCLFIIPLVGCGLVSRKPKPIDKHKKLLWYVAF  
FTSPFVVFVSWNVVFIYIAFLLLFAYVLLMDFHSVPHTPELILYALVFLFCDEVRQWYMNQVNYFTDLWNVMDT  
LGLFYFIAGIVFRLHSSNKSSLYSGRVIFCLDYIIFTLRLIHIFTVSRNLGPKIIMLQRMIDVFFFLLFAV  
WMVAFGVARQGILRQNEQRWRWIFRSVIYEPYLAMFGQVPSDSDVSTTYDFSHCTFSGNESKPLCVELDEHNLP  
RFPEWITIPLVCIYMLSTNILLVNLVAMFGYTVGIVQENNDQVWKQRYFLVQEYCNRLNIPFPVVFAYFY  
MVKKCFKCCCKEKNMESNACCFRNEDNETLAWEGVMKENYLVKINTKANDNSEEMRHRFRQLDSKLNLDKSL  
LKEIANNIK\*

>rs243361112\_ENSMUSP00000036991\_c.766:A>G\_p.N256S  
ENSMUST00000040210.14|Trpm8-201|ENSMUSG00000036251|+|chr1:g.88258485:A>G  
MSFEGARLSMRSRRNGTMGSTRTRYSSVSRSTDVSYSDSDLVNFIQANFKKRECVFFTRDSKAMENICKCGYA  
QSQHIEGTQINQNEKWNKKHTKEFPTDAFGDIQFETLGKKGKYLRLSCDSDSETLYELLTQHWHLKTPNLVI  
SVTGGAKNFALKPRMRKIFSRLIYIAQSKGAWILTTGGTHYGLMKYIGEVVRDNTISRNSEENIVAIGIAAWGM  
VSNRDTLIRSCDDEGHFSAQYIMDDFTRDPLYILDNSHTHLLLVDNGCHGHPTVEAKLRNQLEKYISERTSQD  
SNYGGKIPIVCFAQGGGRETAKINTSVKSKIICVVEGSGQIADVIASLVEVEDVLTSSMVKEKLVRFPLPRT  
VSRLPEEEIESWIKWLKEILESSHLLTVIKMEEAGDEIVSNAISYALYKAFSTNEQDKDNWNGQLKLLLEWNQ  
LDLASDEIFTNDRRWEADLQEVMTALIKDRPKFVRLFLENGLNLQKFLTNEVLTTELFTSTHFTLVYRNLQI  
AKNSYNDALLTFVWKLVANFRSEFWKEDRSSRELDLDELHDSASLTTRHPLQALFIWAILQNKKELSKVIWEQT  
KGCTLAALGASKLLKTLAKVKNDINAAGESEELANEYETRAVELFTECYSNEDLAEQLLVYSCEAWGGSNCL  
ELAVEATDQHFIQAQPGVQNFLSKQWYGEISRDTKNWKIILCLFIIPLVGCGLVSRKPKPIDKHKKLLWYVAF  
FTSPFVVFVSWNVVFIYIAFLLLFAYVLLMDFHSVPHTPELILYALVFLFCDEVRQWYMNQVNYFTDLWNVMDT  
LGLFYFIAGIVFRLHSSNKSSLYSGRVIFCLDYIIFTLRLIHIFTVSRNLGPKIIMLQRMIDVFFFLLFAV  
WMVAFGVARQGILRQNEQRWRWIFRSVIYEPYLAMFGQVPSDSDVSTTYDFSHCTFSGNESKPLCVELDEHNLP  
RFPEWITIPLVCIYMLSTNILLVNLVAMFGYTVGIVQENNDQVWKQRYFLVQEYCNRLNIPFPVVFAYFY

MVVKKCFKCCCCKEKNMESNACCFRNEDNETLAWEGVMKENYLKINTKANDNSEEMRHRFRQLDSKLNLDKSL  
LKEIANNIK\*  
>rs243361112\_ENSMUSP00000131209\_c.766:A>G\_p.N256S  
ENSMUST00000171176.3|Trpm8-204|ENSMUSG00000036251|+|chr1:g.88258485:A>G  
MSFEGARLSMRSRRNGTMGSTRITLYSSVSRSTDVSYSDSDLVNF IQANFKKRECVFFTRDSKAMENICKCGYA  
QSQHIEGTQINQNEKWNKKHTKEFPTDAFGDIQFETLGKKGKYLR LSCD TDSETLYELLTQHWHLKT PNLVI  
SVTGGAKNFALKPRMRKIFSR LIYIAQSKGAWIL TGGTHYGLMKY IGEVVRDNTISR NSEENI VAIGIAAWGM  
VSNRDTLIRSCDDEGHFSAQYIMDDFTRDPLYILDNSHTHLLVDNGCHGHPTVEAKLRNLEKYISERTSQD  
SNYGGKIPIVCFAQGGGRET LKAINTSVKSKIPCVVVEGSGQIADV IASLVEVEDVLTSSMVKEKLVRF LPR T  
VSR LPEEEIESWIKWLKEI LESSHLLTVIKMEEAGDEIVSNAISYALYKAFSTNEQDKDNWNGQLKLLLEWNQ  
LDLASDEIFTNDRRWEADLQEVMTALIKDRPKFVRLFL ENGLNLQKFLTNEVLT E L FSTH FSTLVYRNLQI  
AKNSYNDALLTFVWKL VANFRRSFWKEDRSSRELDLVELHDASLTTRHPLQALFIWAILQNKKELSKVIWEQT  
KGCTLAALGASKLLKTLAKVKN DINAAGESEELANEYETRAVELFTECYSNDEDLAEQLLVYSCEAWGGSNCL  
ELAVEATDQHFI AQPGVQNF LSKQWYGEISRDTKNWKIILCLFI I PLVGCGLV SFRKKPIDKHKKLLWYVFAF  
FTSPFVVFVSWNVVFI AFLLLFAYVLLMDFH SVPH TPELILYALV FV LFCDEVRQWYMN GVN YFTDLWNVMDT  
LGLFYFIAGIVFRLHSSNKSSLYSGRVI FCLDYII FT LRLIHI FTVSRNLGPKI IMLQRMLIDVFFF LFLFAV  
WMVAFGVARQGILRQNEQRWRWI FRSVIYEPYLA MFGQVPSD VSTTYDFSHCTFSGNESKPLCVELDEHNLP  
RFPEWIT I PLVCIYMLSTN ILLVNL L VAMFGYTVGIVQENNDQVWKFQRYFLVQ EYCNRLNI PFPFVVFAYFY  
MVVKKCFKCCCCKEKNMESNACCFRNEDNETLAWEGVMKENYLKINTKANDNSEEMRHRFRQLDSKLNLDKSL  
LKEIANNIK\*  
>rs212640068\_ENSMUSP00000108739\_c.819:G>C\_p.E274Q  
ENSMUST00000113114.10|Trpm8-202|ENSMUSG00000036251|+|chr1:g.88258538:G>C  
MSFEGARLSMRSRRNGTMGSTRITLYSSVSRSTDVSYSDSDLVNF IQANFKKRECVFFTRDSKAMENICKCGYA  
QSQHIEGTQINQNEKWNKKHTKEFPTDAFGDIQFETLGKKGKYLR LSCD TDSETLYELLTQHWHLKT PNLVI  
SVTGGAKNFALKPRMRKIFSR LIYIAQSKGAWIL TGGTHYGLMKY IGEVVRDNTISR NSEENI VAIGIAAWGM  
VSNRDTLIRSCDDEGHFSAQYIMDDFTRDPLYILDNNHTHLLVDNGCHGHPTVQAKLRNLEKYISERTSQD  
SNYGGKIPIVCFAQGGGRET LKAINTSVKSKIPCVVVEGSGQIADV IASLVEVEDVLTSSMVKEKLVRF LPR T  
VSR LPEEEIESWIKWLKEI LESSHLLTVIKMEEAGDEIVSNAISYALYKAFSTNEQDKDNWNGQLKLLLEWNQ  
LDLASDEIFTNDRRWEADLQEVMTALIKDRPKFVRLFL ENGLNLQKFLTNEVLT E L FSTH FSTLVYRNLQI  
AKNSYNDALLTFVWKL VANFRRSFWKEDRSSRELDLVELHDASLTTRHPLQALFIWAILQNKKELSKVIWEQT  
KGCTLAALGASKLLKTLAKVKN DINAAGESEELANEYETRAVELFTECYSNDEDLAEQLLVYSCEAWGGSNCL  
ELAVEATDQHFI AQPGVQNF LSKQWYGEISRDTKNWKIILCLFI I PLVGCGLV SFRKKPIDKHKKLLWYVFAF  
FTSPFVVFVSWNVVFI AFLLLFAYVLLMDFH SVPH TPELILYALV FV LFCDEVRQWYMN GVN YFTDLWNVMDT  
LGLFYFIAGIVFRLHSSNKSSLYSGRVI FCLDYII FT LRLIHI FTVSRNLGPKI IMLQRMLIDVFFF LFLFAV  
WMVAFGVARQGILRQNEQRWRWI FRSVIYEPYLA MFGQVPSD VSTTYDFSHCTFSGNESKPLCVELDEHNLP  
RFPEWIT I PLVCIYMLSTN ILLVNL L VAMFGYTVGIVQENNDQVWKFQRYFLVQ EYCNRLNI PFPFVVFAYFY  
MVVKKCFKCCCCKEKNMESNACCFRNEDNETLAWEGVMKENYLKINTKANDNSEEMRHRFRQLDSKLNLDKSL  
LKEIANNIK\*  
>rs212640068\_ENSMUSP00000036991\_c.819:G>C\_p.E274Q  
ENSMUST00000040210.14|Trpm8-201|ENSMUSG00000036251|+|chr1:g.88258538:G>C  
MSFEGARLSMRSRRNGTMGSTRITLYSSVSRSTDVSYSDSDLVNF IQANFKKRECVFFTRDSKAMENICKCGYA  
QSQHIEGTQINQNEKWNKKHTKEFPTDAFGDIQFETLGKKGKYLR LSCD TDSETLYELLTQHWHLKT PNLVI  
SVTGGAKNFALKPRMRKIFSR LIYIAQSKGAWIL TGGTHYGLMKY IGEVVRDNTISR NSEENI VAIGIAAWGM  
VSNRDTLIRSCDDEGHFSAQYIMDDFTRDPLYILDNNHTHLLVDNGCHGHPTVQAKLRNLEKYISERTSQD  
SNYGGKIPIVCFAQGGGRET LKAINTSVKSKIPCVVVEGSGQIADV IASLVEVEDVLTSSMVKEKLVRF LPR T  
VSR LPEEEIESWIKWLKEI LESSHLLTVIKMEEAGDEIVSNAISYALYKAFSTNEQDKDNWNGQLKLLLEWNQ  
LDLASDEIFTNDRRWEADLQEVMTALIKDRPKFVRLFL ENGLNLQKFLTNEVLT E L FSTH FSTLVYRNLQI  
AKNSYNDALLTFVWKL VANFRRSFWKEDRSSRELDLVELHDASLTTRHPLQALFIWAILQNKKELSKVIWEQT  
KGCTLAALGASKLLKTLAKVKN DINAAGESEELANEYETRAVELFTECYSNDEDLAEQLLVYSCEAWGGSNCL  
ELAVEATDQHFI AQPGVQNF LSKQWYGEISRDTKNWKIILCLFI I PLVGCGLV SFRKKPIDKHKKLLWYVFAF  
FTSPFVVFVSWNVVFI AFLLLFAYVLLMDFH SVPH TPELILYALV FV LFCDEVRQWYMN GVN YFTDLWNVMDT  
LGLFYFIAGIVFRLHSSNKSSLYSGRVI FCLDYII FT LRLIHI FTVSRNLGPKI IMLQRMLIDVFFF LFLFAV  
WMVAFGVARQGILRQNEQRWRWI FRSVIYEPYLA MFGQVPSD VSTTYDFSHCTFSGNESKPLCVELDEHNLP  
RFPEWIT I PLVCIYMLSTN ILLVNL L VAMFGYTVGIVQENNDQVWKFQRYFLVQ EYCNRLNI PFPFVVFAYFY  
MVVKKCFKCCCCKEKNMESNACCFRNEDNETLAWEGVMKENYLKINTKANDNSEEMRHRFRQLDSKLNLDKSL  
LKEIANNIK\*  
>rs212640068\_ENSMUSP00000131209\_c.819:G>C\_p.E274Q  
ENSMUST00000171176.3|Trpm8-204|ENSMUSG00000036251|+|chr1:g.88258538:G>C

MSFEGARLSMRSRRNGTMGSTRTRYSSVSRSTDVSYSDSDLVNFQANFKKREC VFFTRDSKAMENICKCGYA  
QSQHIEGTQINQNEKWNKKHTKEFPTDAFGDIQFETLGKKGKYLRLSCD TDSETLYELLTQHWHLKT PNLVI  
SVTGGAKNFALKPRMRKIFSR LIYIAQSKGAWIL TGGTHYGLMKY IGEVVRDNTISR NSEENIVAIGIAAWGM  
VSNRDTLIRSCDDEGHFSAQYIMDDFTRDPLYILDNNHTHLLVDNGCHGHPTVQAKLRNQLEKYISERTSQD  
SNYGGKIPIVCFAQGGGRET LKAINTSVKSKI PCVVVEGSGQIADV IASLVEVEDVLTSSMVKEKLVRF LPR T  
VSRLPEEEIESWIKWLKEI LESSHLLTVIKMEEAGDEIVSNAISYALYKAFSTNEQDKDNWNGQLKLLLEWNQ  
LDLASDEIFTNDRRWESADLQEVMTALIKDRPKFVRLFLENGLN LQKFLTNEVLT E L FSTH FSTLVYRNLQI  
AKNSYNDALLTFVWKL VANFRRSFWKEDRSSRELDVELHDASLTTRHPLQALFIWAILQNKKELSKVIWEQT  
KGCTLAALGASKLLKTLAKVKNDINAAGESEELANEYETRAVELFTECYSNDEDLAEQLLVYSCEAWGGSNCL  
ELAVEATDQHFIAPGVQNF LSKQWYGEISRDTKNWKIILCLFI IPLVGCGLVSFRKKPIDKHKLLWYVAV  
FTSPFVVSFVSWNVFYIAFLLLFAYVLLMDFHSPHTPELILYALVFLFCDEVRQWYMNQVNYFTDLWNVMDT  
LGLFYFIAGIVFRLHSSNKSSLYSGRVIFCLDYIIFTLRLIHI FTVSRNLGPKIIMLQRM LIDVFFF LFLFAV  
WMVAFGVARQGILRQNEQRWRWIFRSVIYEPYLA MFGQVPSD VDS TTYDFSHCTFSGNESKPLCVELDEHNLP  
RPEWITITPLVCIYMLSTNILLVNLVAMFGYTVGIVQENNDQVWKFQRYFLVQEYCNRLNIPFPFVVFAYFY  
MVVKKCFKCCCCKEKNMESNACCFRNEDNETLAWEGVMKENYLKINTKANDNSEEMRHRFRQLDSKLNLDKSL  
LKEIANNIK\*

>rs49882804\_ENSMUSP00000108739\_c.1126:G>A\_p.S376N

ENSMUST00000113114.10|Trpm8-202|ENSMUSG00000036251|+|chr1:g.88265019:G>A  
MSFEGARLSMRSRRNGTMGSTRTRYSSVSRSTDVSYSDSDLVNFQANFKKREC VFFTRDSKAMENICKCGYA  
QSQHIEGTQINQNEKWNKKHTKEFPTDAFGDIQFETLGKKGKYLRLSCD TDSETLYELLTQHWHLKT PNLVI  
SVTGGAKNFALKPRMRKIFSR LIYIAQSKGAWIL TGGTHYGLMKY IGEVVRDNTISR NSEENIVAIGIAAWGM  
VSNRDTLIRSCDDEGHFSAQYIMDDFTRDPLYILDNNHTHLLVDNGCHGHPTVEAKLRNQLEKYISERTSQD  
SNYGGKIPIVCFAQGGGRET LKAINTSVKSKI PCVVVEGSGQIADV IASLVEVEDVLTSSMVKEKLVRF LPR T  
VSRLPEEEIENWIKWLKEI LESSHLLTVIKMEEAGDEIVSNAISYALYKAFSTNEQDKDNWNGQLKLLLEWNQ  
LDLASDEIFTNDRRWESADLQEVMTALIKDRPKFVRLFLENGLN LQKFLTNEVLT E L FSTH FSTLVYRNLQI  
AKNSYNDALLTFVWKL VANFRRSFWKEDRSSRELDVELHDASLTTRHPLQALFIWAILQNKKELSKVIWEQT  
KGCTLAALGASKLLKTLAKVKNDINAAGESEELANEYETRAVELFTECYSNDEDLAEQLLVYSCEAWGGSNCL  
ELAVEATDQHFIAPGVQNF LSKQWYGEISRDTKNWKIILCLFI IPLVGCGLVSFRKKPIDKHKLLWYVAV  
FTSPFVVSFVSWNVFYIAFLLLFAYVLLMDFHSPHTPELILYALVFLFCDEVRQWYMNQVNYFTDLWNVMDT  
LGLFYFIAGIVFRLHSSNKSSLYSGRVIFCLDYIIFTLRLIHI FTVSRNLGPKIIMLQRM LIDVFFF LFLFAV  
WMVAFGVARQGILRQNEQRWRWIFRSVIYEPYLA MFGQVPSD VDS TTYDFSHCTFSGNESKPLCVELDEHNLP  
RPEWITITPLVCIYMLSTNILLVNLVAMFGYTVGIVQENNDQVWKFQRYFLVQEYCNRLNIPFPFVVFAYFY  
MVVKKCFKCCCCKEKNMESNACCFRNEDNETLAWEGVMKENYLKINTKANDNSEEMRHRFRQLDSKLNLDKSL  
LKEIANNIK\*

>rs49882804\_ENSMUSP00000036991\_c.1126:G>A\_p.S376N

ENSMUST00000040210.14|Trpm8-201|ENSMUSG00000036251|+|chr1:g.88265019:G>A  
MSFEGARLSMRSRRNGTMGSTRTRYSSVSRSTDVSYSDSDLVNFQANFKKREC VFFTRDSKAMENICKCGYA  
QSQHIEGTQINQNEKWNKKHTKEFPTDAFGDIQFETLGKKGKYLRLSCD TDSETLYELLTQHWHLKT PNLVI  
SVTGGAKNFALKPRMRKIFSR LIYIAQSKGAWIL TGGTHYGLMKY IGEVVRDNTISR NSEENIVAIGIAAWGM  
VSNRDTLIRSCDDEGHFSAQYIMDDFTRDPLYILDNNHTHLLVDNGCHGHPTVEAKLRNQLEKYISERTSQD  
SNYGGKIPIVCFAQGGGRET LKAINTSVKSKI PCVVVEGSGQIADV IASLVEVEDVLTSSMVKEKLVRF LPR T  
VSRLPEEEIENWIKWLKEI LESSHLLTVIKMEEAGDEIVSNAISYALYKAFSTNEQDKDNWNGQLKLLLEWNQ  
LDLASDEIFTNDRRWESADLQEVMTALIKDRPKFVRLFLENGLN LQKFLTNEVLT E L FSTH FSTLVYRNLQI  
AKNSYNDALLTFVWKL VANFRRSFWKEDRSSRELDVELHDASLTTRHPLQALFIWAILQNKKELSKVIWEQT  
KGCTLAALGASKLLKTLAKVKNDINAAGESEELANEYETRAVELFTECYSNDEDLAEQLLVYSCEAWGGSNCL  
ELAVEATDQHFIAPGVQNF LSKQWYGEISRDTKNWKIILCLFI IPLVGCGLVSFRKKPIDKHKLLWYVAV  
FTSPFVVSFVSWNVFYIAFLLLFAYVLLMDFHSPHTPELILYALVFLFCDEVRQWYMNQVNYFTDLWNVMDT  
LGLFYFIAGIVFRLHSSNKSSLYSGRVIFCLDYIIFTLRLIHI FTVSRNLGPKIIMLQRM LIDVFFF LFLFAV  
WMVAFGVARQGILRQNEQRWRWIFRSVIYEPYLA MFGQVPSD VDS TTYDFSHCTFSGNESKPLCVELDEHNLP  
RPEWITITPLVCIYMLSTNILLVNLVAMFGYTVGIVQENNDQVWKFQRYFLVQEYCNRLNIPFPFVVFAYFY  
MVVKKCFKCCCCKEKNMESNACCFRNEDNETLAWEGVMKENYLKINTKANDNSEEMRHRFRQLDSKLNLDKSL  
LKEIANNIK\*

>rs49882804\_ENSMUSP00000131209\_c.1126:G>A\_p.S376N

ENSMUST00000171176.3|Trpm8-204|ENSMUSG00000036251|+|chr1:g.88265019:G>A  
MSFEGARLSMRSRRNGTMGSTRTRYSSVSRSTDVSYSDSDLVNFQANFKKREC VFFTRDSKAMENICKCGYA  
QSQHIEGTQINQNEKWNKKHTKEFPTDAFGDIQFETLGKKGKYLRLSCD TDSETLYELLTQHWHLKT PNLVI  
SVTGGAKNFALKPRMRKIFSR LIYIAQSKGAWIL TGGTHYGLMKY IGEVVRDNTISR NSEENIVAIGIAAWGM  
VSNRDTLIRSCDDEGHFSAQYIMDDFTRDPLYILDNNHTHLLVDNGCHGHPTVEAKLRNQLEKYISERTSQD

SNYGGKIPIVCFAQGGGRETLLKAINTSVKSKI PCVVVEGSGQIADV IASLVEVEDVLTSSMVKEKLVRF LPR T  
VSRLPEEEIENWIKWLKEI LESSHLLTVIKMEEAGDEIVSNAISYALYKAFSTNEQDKDNWNGQLKLLLEWNQ  
LDLASDEIFTNDRRWESADLQEVMTALIKDRPKFVRLFLENGLNQKFLTNEVLTTELSTHSTLVYRNLQI  
AKNSYNDALLTFVWKL VANFRRSFWKEDRSSREDLDVELHDASLTTRHPLQALFIWAILQNKKELSKVIWEQT  
KGCTLAALGASKLLKTLAKVKNDINAAGESEELANEYETRAVELFTECYSNDEDLAEQLLVYSCEAWGGSNCL  
ELAVEATDQHFI AQPGVQNF LSKQWYGEISRDTKNWKIILCLFI I PLVGCGLVSFRKKPIDKHKLLWYVAF  
FTSPFVVF SWNVVFI AFLLLFAYVLLMDFHVPHTPELILYALVFLFCDEVRQWYMNQVNYFTDLWNVMDT  
LGLFYFIAGIVFRLHSSNKSSLYSGRVIFCLDYII FTLR LIHIFTVSRNLGPKI IMLQRMLIDVFFF LFLFAV  
WMVAFGVARQGILRQNEQRWRWIFRSVIYEPYLA MFGQVPSD VDSSTYDFSHCTFSGNESKPLCVLDEHNLP  
RFPEWITIPLVCIYMLSTNILLVNLVAMFGYTVGIVQENNDQVWKQRYFLVQEYCNRLNIPFPFVVFAYFY  
MVVKKCFKCCCKEKNMESNACCFRNEDNETLAWEGVMKENYLVKINTKANDNSEEMRHRFRQLDSKLNLDKSL  
LKEIANNIK\*

>rs49585932\_ENSMUSP00000108739\_c.1135:A>G\_p.K379R

ENSMUST00000113114.10|Trpm8-202|ENSMUSG00000036251|+|chr1:g.88265028:A>G  
MSFEGARLSMRSRRNGTMGSTR TLYSSVSRSTDVSYSDSDLVNF IQANFKKREC VFFTRDSKAMENICKCGYA  
QSQHIEGTQINQNEKWN YKKHTKEFPTDAFGDIQFETLGKKGKYLRLSCD TDSETLYELLTQHWHLKT PNLVI  
SVTGGAKNFALKPRMKI FSR LIYIAQSKGAWIL TGGTHYGLMKY IGEVVRDNTISR NSEENI VAIGIAAWGM  
VSNRDTLIRSCDDEGHFSAQYIMDDFTRDPLYILDNNHTHLLVDNGCHGHPTVEAKLRNQL EKYISERTSQD  
SNYGGKIPIVCFAQGGGRETLLKAINTSVKSKI PCVVVEGSGQIADV IASLVEVEDVLTSSMVKEKLVRF LPR T  
VSRLPEEEIESWIRWLKEI LESSHLLTVIKMEEAGDEIVSNAISYALYKAFSTNEQDKDNWNGQLKLLLEWNQ  
LDLASDEIFTNDRRWESADLQEVMTALIKDRPKFVRLFLENGLNQKFLTNEVLTTELSTHSTLVYRNLQI  
AKNSYNDALLTFVWKL VANFRRSFWKEDRSSREDLDVELHDASLTTRHPLQALFIWAILQNKKELSKVIWEQT  
KGCTLAALGASKLLKTLAKVKNDINAAGESEELANEYETRAVELFTECYSNDEDLAEQLLVYSCEAWGGSNCL  
ELAVEATDQHFI AQPGVQNF LSKQWYGEISRDTKNWKIILCLFI I PLVGCGLVSFRKKPIDKHKLLWYVAF  
FTSPFVVF SWNVVFI AFLLLFAYVLLMDFHVPHTPELILYALVFLFCDEVRQWYMNQVNYFTDLWNVMDT  
LGLFYFIAGIVFRLHSSNKSSLYSGRVIFCLDYII FTLR LIHIFTVSRNLGPKI IMLQRMLIDVFFF LFLFAV  
WMVAFGVARQGILRQNEQRWRWIFRSVIYEPYLA MFGQVPSD VDSSTYDFSHCTFSGNESKPLCVLDEHNLP  
RFPEWITIPLVCIYMLSTNILLVNLVAMFGYTVGIVQENNDQVWKQRYFLVQEYCNRLNIPFPFVVFAYFY  
MVVKKCFKCCCKEKNMESNACCFRNEDNETLAWEGVMKENYLVKINTKANDNSEEMRHRFRQLDSKLNLDKSL  
LKEIANNIK\*

>rs49585932\_ENSMUSP00000036991\_c.1135:A>G\_p.K379R

ENSMUST00000040210.14|Trpm8-201|ENSMUSG00000036251|+|chr1:g.88265028:A>G  
MSFEGARLSMRSRRNGTMGSTR TLYSSVSRSTDVSYSDSDLVNF IQANFKKREC VFFTRDSKAMENICKCGYA  
QSQHIEGTQINQNEKWN YKKHTKEFPTDAFGDIQFETLGKKGKYLRLSCD TDSETLYELLTQHWHLKT PNLVI  
SVTGGAKNFALKPRMKI FSR LIYIAQSKGAWIL TGGTHYGLMKY IGEVVRDNTISR NSEENI VAIGIAAWGM  
VSNRDTLIRSCDDEGHFSAQYIMDDFTRDPLYILDNNHTHLLVDNGCHGHPTVEAKLRNQL EKYISERTSQD  
SNYGGKIPIVCFAQGGGRETLLKAINTSVKSKI PCVVVEGSGQIADV IASLVEVEDVLTSSMVKEKLVRF LPR T  
VSRLPEEEIESWIRWLKEI LESSHLLTVIKMEEAGDEIVSNAISYALYKAFSTNEQDKDNWNGQLKLLLEWNQ  
LDLASDEIFTNDRRWESADLQEVMTALIKDRPKFVRLFLENGLNQKFLTNEVLTTELSTHSTLVYRNLQI  
AKNSYNDALLTFVWKL VANFRRSFWKEDRSSREDLDVELHDASLTTRHPLQALFIWAILQNKKELSKVIWEQT  
KGCTLAALGASKLLKTLAKVKNDINAAGESEELANEYETRAVELFTECYSNDEDLAEQLLVYSCEAWGGSNCL  
ELAVEATDQHFI AQPGVQNF LSKQWYGEISRDTKNWKIILCLFI I PLVGCGLVSFRKKPIDKHKLLWYVAF  
FTSPFVVF SWNVVFI AFLLLFAYVLLMDFHVPHTPELILYALVFLFCDEVRQWYMNQVNYFTDLWNVMDT  
LGLFYFIAGIVFRLHSSNKSSLYSGRVIFCLDYII FTLR LIHIFTVSRNLGPKI IMLQRMLIDVFFF LFLFAV  
WMVAFGVARQGILRQNEQRWRWIFRSVIYEPYLA MFGQVPSD VDSSTYDFSHCTFSGNESKPLCVLDEHNLP  
RFPEWITIPLVCIYMLSTNILLVNLVAMFGYTVGIVQENNDQVWKQRYFLVQEYCNRLNIPFPFVVFAYFY  
MVVKKCFKCCCKEKNMESNACCFRNEDNETLAWEGVMKENYLVKINTKANDNSEEMRHRFRQLDSKLNLDKSL  
LKEIANNIK\*

>rs49585932\_ENSMUSP00000131209\_c.1135:A>G\_p.K379R

ENSMUST00000171176.3|Trpm8-204|ENSMUSG00000036251|+|chr1:g.88265028:A>G  
MSFEGARLSMRSRRNGTMGSTR TLYSSVSRSTDVSYSDSDLVNF IQANFKKREC VFFTRDSKAMENICKCGYA  
QSQHIEGTQINQNEKWN YKKHTKEFPTDAFGDIQFETLGKKGKYLRLSCD TDSETLYELLTQHWHLKT PNLVI  
SVTGGAKNFALKPRMKI FSR LIYIAQSKGAWIL TGGTHYGLMKY IGEVVRDNTISR NSEENI VAIGIAAWGM  
VSNRDTLIRSCDDEGHFSAQYIMDDFTRDPLYILDNNHTHLLVDNGCHGHPTVEAKLRNQL EKYISERTSQD  
SNYGGKIPIVCFAQGGGRETLLKAINTSVKSKI PCVVVEGSGQIADV IASLVEVEDVLTSSMVKEKLVRF LPR T  
VSRLPEEEIESWIRWLKEI LESSHLLTVIKMEEAGDEIVSNAISYALYKAFSTNEQDKDNWNGQLKLLLEWNQ  
LDLASDEIFTNDRRWESADLQEVMTALIKDRPKFVRLFLENGLNQKFLTNEVLTTELSTHSTLVYRNLQI  
AKNSYNDALLTFVWKL VANFRRSFWKEDRSSREDLDVELHDASLTTRHPLQALFIWAILQNKKELSKVIWEQT

KGCTLAALGASKLLKTLAKVKNDINAAGESEELANEYETRAVELFTECYSNDEDLAEQLLVYSCEAWGGSNCL  
ELAVEATDQHFIAPQGVQNFSLKQWYGEISRDTKNWKIILCLFIIPLVGCGLVSRKPKPIDKHKKLLWYVAF  
FTSPFVVFVSWNVVFIYIAFLLLFAYVLLMDFHVPHTPELILYALVFLFCDEVRQWYMNQVNYFTDLWNVMDT  
LGLFYFIAGIVFRLHSSNKSSLYSGRVIFCLDYIIIFTLRLIHIFTVSRNLGPKIIMLQRMIDVFFFLLFLFAV  
WMVAFGVARQGILRQNEQRWRWIFRSVIYEPYLAAMFGQVPSDSDSTTYDFSHCTFSGNESKPLCVLDELHNL  
RFPPEWITIPLVCIYMLSTNILLVNLVAMFGYTVGIVQENNDQVVKFQRYFLVQEYCNRLNIPFPFVVFAYFY  
MVVKCFKCCCCKEKNMESNACCFRNEDNETLAWEGVMKENYLKINTKANDNSEEMRHRFRQLDSKLNLDLKS  
LKEIANNIK\*

>ENSMUSP00000108739\_c.1702:C>G\_p.A568G ENSMUST00000113114.10|Trpm8-  
202|ENSMUSG00000036251|+|chr1:g.88277618:C>G

MSFEGARLSMRSRRNGTMGSTRTYSSVSRSTDVSYSDSDLVNF IQANFKKRECVFFTRDSKAMENICKCGYA  
QSQHIEGTQINQNEKWNKKHTKEFPTDAFGDIQFETLGKKGKYLRLSCD TDSETLYELLTQHWHLKT PNLVI  
SVTGAKNFALKPRMRKIFSRLIYIAQSKGAWILTGTHYGLMKYIGEVVRDNTISRNSEENIVAIGIAAWGM  
VSNRDTLIRSCDDEGHFSAQYIMDDFTRDPLYILDNNHTHLLVDNGCHGHTVEAKLRNQLEKYISERTSQD  
SNYGGKIPIVCFAQGGGRETLKAINTSVSKSIPCVVVEGSGQIADV IASLVEVEDVLTSSMVKEKLVRF  
VSRPPEEIESWIKWLKEILESSHLLTVIKMEEAGDEIVSNAISYALYKAFSTNEQDKDNWNGQLKLLLEWNQ  
LDLASDEIFTNDRRWEADLQEVMTALIKDRPKFVRLFLENGLNQKFLTNEVLTSTHSTLTVYRNLQI  
AKNSYNDALLTFVWKLVANFRRSFWKEDRSSREDLDVELHDASLTTRHPLQALFIWGIQNKKEKLSKVIWEQT  
KGCTLAALGASKLLKTLAKVKNDINAAGESEELANEYETRAVELFTECYSNDEDLAEQLLVYSCEAWGGSNCL  
ELAVEATDQHFIAPQGVQNFSLKQWYGEISRDTKNWKIILCLFIIPLVGCGLVSRKPKPIDKHKKLLWYVAF  
FTSPFVVFVSWNVVFIYIAFLLLFAYVLLMDFHVPHTPELILYALVFLFCDEVRQWYMNQVNYFTDLWNVMDT  
LGLFYFIAGIVFRLHSSNKSSLYSGRVIFCLDYIIIFTLRLIHIFTVSRNLGPKIIMLQRMIDVFFFLLFLFAV  
WMVAFGVARQGILRQNEQRWRWIFRSVIYEPYLAAMFGQVPSDSDSTTYDFSHCTFSGNESKPLCVLDELHNL  
RFPPEWITIPLVCIYMLSTNILLVNLVAMFGYTVGIVQENNDQVVKFQRYFLVQEYCNRLNIPFPFVVFAYFY  
MVVKCFKCCCCKEKNMESNACCFRNEDNETLAWEGVMKENYLKINTKANDNSEEMRHRFRQLDSKLNLDLKS  
LKEIANNIK\*

>ENSMUSP00000036991\_c.1702:C>G\_p.A568G ENSMUST00000040210.14|Trpm8-  
201|ENSMUSG00000036251|+|chr1:g.88277618:C>G

MSFEGARLSMRSRRNGTMGSTRTYSSVSRSTDVSYSDSDLVNF IQANFKKRECVFFTRDSKAMENICKCGYA  
QSQHIEGTQINQNEKWNKKHTKEFPTDAFGDIQFETLGKKGKYLRLSCD TDSETLYELLTQHWHLKT PNLVI  
SVTGAKNFALKPRMRKIFSRLIYIAQSKGAWILTGTHYGLMKYIGEVVRDNTISRNSEENIVAIGIAAWGM  
VSNRDTLIRSCDDEGHFSAQYIMDDFTRDPLYILDNNHTHLLVDNGCHGHTVEAKLRNQLEKYISERTSQD  
SNYGGKIPIVCFAQGGGRETLKAINTSVSKSIPCVVVEGSGQIADV IASLVEVEDVLTSSMVKEKLVRF  
VSRPPEEIESWIKWLKEILESSHLLTVIKMEEAGDEIVSNAISYALYKAFSTNEQDKDNWNGQLKLLLEWNQ  
LDLASDEIFTNDRRWEADLQEVMTALIKDRPKFVRLFLENGLNQKFLTNEVLTSTHSTLTVYRNLQI  
AKNSYNDALLTFVWKLVANFRRSFWKEDRSSREDLDVELHDASLTTRHPLQALFIWGIQNKKEKLSKVIWEQT  
KGCTLAALGASKLLKTLAKVKNDINAAGESEELANEYETRAVELFTECYSNDEDLAEQLLVYSCEAWGGSNCL  
ELAVEATDQHFIAPQGVQNFSLKQWYGEISRDTKNWKIILCLFIIPLVGCGLVSRKPKPIDKHKKLLWYVAF  
FTSPFVVFVSWNVVFIYIAFLLLFAYVLLMDFHVPHTPELILYALVFLFCDEVRQWYMNQVNYFTDLWNVMDT  
LGLFYFIAGIVFRLHSSNKSSLYSGRVIFCLDYIIIFTLRLIHIFTVSRNLGPKIIMLQRMIDVFFFLLFLFAV  
WMVAFGVARQGILRQNEQRWRWIFRSVIYEPYLAAMFGQVPSDSDSTTYDFSHCTFSGNESKPLCVLDELHNL  
RFPPEWITIPLVCIYMLSTNILLVNLVAMFGYTVGIVQENNDQVVKFQRYFLVQEYCNRLNIPFPFVVFAYFY  
MVVKCFKCCCCKEKNMESNACCFRNEDNETLAWEGVMKENYLKINTKANDNSEEMRHRFRQLDSKLNLDLKS  
LKEIANNIK\*

>ENSMUSP00000131209\_c.1702:C>G\_p.A568G ENSMUST00000171176.3|Trpm8-  
204|ENSMUSG00000036251|+|chr1:g.88277618:C>G

MSFEGARLSMRSRRNGTMGSTRTYSSVSRSTDVSYSDSDLVNF IQANFKKRECVFFTRDSKAMENICKCGYA  
QSQHIEGTQINQNEKWNKKHTKEFPTDAFGDIQFETLGKKGKYLRLSCD TDSETLYELLTQHWHLKT PNLVI  
SVTGAKNFALKPRMRKIFSRLIYIAQSKGAWILTGTHYGLMKYIGEVVRDNTISRNSEENIVAIGIAAWGM  
VSNRDTLIRSCDDEGHFSAQYIMDDFTRDPLYILDNNHTHLLVDNGCHGHTVEAKLRNQLEKYISERTSQD  
SNYGGKIPIVCFAQGGGRETLKAINTSVSKSIPCVVVEGSGQIADV IASLVEVEDVLTSSMVKEKLVRF  
VSRPPEEIESWIKWLKEILESSHLLTVIKMEEAGDEIVSNAISYALYKAFSTNEQDKDNWNGQLKLLLEWNQ  
LDLASDEIFTNDRRWEADLQEVMTALIKDRPKFVRLFLENGLNQKFLTNEVLTSTHSTLTVYRNLQI  
AKNSYNDALLTFVWKLVANFRRSFWKEDRSSREDLDVELHDASLTTRHPLQALFIWGIQNKKEKLSKVIWEQT  
KGCTLAALGASKLLKTLAKVKNDINAAGESEELANEYETRAVELFTECYSNDEDLAEQLLVYSCEAWGGSNCL  
ELAVEATDQHFIAPQGVQNFSLKQWYGEISRDTKNWKIILCLFIIPLVGCGLVSRKPKPIDKHKKLLWYVAF  
FTSPFVVFVSWNVVFIYIAFLLLFAYVLLMDFHVPHTPELILYALVFLFCDEVRQWYMNQVNYFTDLWNVMDT  
LGLFYFIAGIVFRLHSSNKSSLYSGRVIFCLDYIIIFTLRLIHIFTVSRNLGPKIIMLQRMIDVFFFLLFLFAV

WMVAFGVARQGILRQNEQRWRWIFRSVIYEPYLAMFGQVPSDSDVSTTYDFSHCTFSGNESKPLCVELDEHNLP  
RFPEWITITPLVCIYMLSTNILLVNLLVAMFGYTVGIVQENNDQVWKQRYFLVQEYCNRLNIPFPFVVFAYFY  
MVVKKCFKCCCCKEKNMESNACCFRNEDNETLAWEGVMKENYLKINTKANDNSEEMRHRFRQLDSKLNLDKSL  
LKEIANNIK\*

>ENSMUSP00000108739\_c.1745:G>T\_p.E582D ENSMUST00000113114.10|Trpm8-  
202|ENSMUSG00000036251|+|chr1:g.88277661:G>T

MSFEGARLSMRSRRNGTMGSTRTRYSSVSRSTDVSYSDSDLVNF IQANFKKRECVFFTRDSKAMENICKCGYA  
QSQHIEGTQINQNEKWNYYKHTKEFPTDAFGDIQFETLGKKGKYLRLSCD TDSETLYELLTQHWHLKTPNLVI  
SVTGGAKNFALKPRMRKIFSRLLIYAQSKGAWILTGTHYGLMKYIGEVVRDNTISRNSEENIVAIGIAAWGM  
VSNRDTLIRSCDDEGHFSAQYIMDDFTRDPLYILDNNHTHLLLVDNGCHGHPTVEAKLRNQLEKYISERTSQD  
SNYGGKIPIVCFAQGGGRET LKAINTSVKSKI PCVVVEGSGQIADVIASLVEVEDVLTSSMVKEKLVRF LPR T  
VSRLPEEEIESWIKWLKEI LESSHLLTVIKMEEAGDEIVSNAISYALYKAFSTNEQDKDNWNGQLKLLLEWNQ  
LDLASDEIFTNDRRWESADLQEVMTALIKDRPKFVRLFLENGLN LQKFLTNEVLT E L FSTH FSTLVYRNLQI  
AKNSYNDALLTFVWKL VANFRRSFWKEDRSSREDLDVELHDASLTTRHPLQALFIWAILQNKKELSKVIWDQT  
KGCTLAALGASKLLKTLAKVKNDINAAGESEELANEYETRAVELFTECYSNEDDLAEQLLVYSCEAWGGSNCL  
ELAVEATDQHFI AQPGVQNF LSKQWYGEISRDTKNWKIILCLFI I PLVGCGLVSFRKKPIDKHKLLWYVAF  
FTSPFVVFVSWNVVFIYIAFLLLFAYVLLMDFHVPHTPELILYALVFLFCDEVRQWYMGVNYFTDLWNVMDT  
LGLFYFIAGIVFRLHSSNKSSLYSGRVI FCLDYIIFTLRLIHI FTVSRNLGPKIIMLQRMLIDVFFFLFLFAV  
WMVAFGVARQGILRQNEQRWRWIFRSVIYEPYLAMFGQVPSDSDVSTTYDFSHCTFSGNESKPLCVELDEHNLP  
RFPEWITITPLVCIYMLSTNILLVNLLVAMFGYTVGIVQENNDQVWKQRYFLVQEYCNRLNIPFPFVVFAYFY  
MVVKKCFKCCCCKEKNMESNACCFRNEDNETLAWEGVMKENYLKINTKANDNSEEMRHRFRQLDSKLNLDKSL  
LKEIANNIK\*

>ENSMUSP00000036991\_c.1745:G>T\_p.E582D ENSMUST00000040210.14|Trpm8-  
201|ENSMUSG00000036251|+|chr1:g.88277661:G>T

MSFEGARLSMRSRRNGTMGSTRTRYSSVSRSTDVSYSDSDLVNF IQANFKKRECVFFTRDSKAMENICKCGYA  
QSQHIEGTQINQNEKWNYYKHTKEFPTDAFGDIQFETLGKKGKYLRLSCD TDSETLYELLTQHWHLKTPNLVI  
SVTGGAKNFALKPRMRKIFSRLLIYAQSKGAWILTGTHYGLMKYIGEVVRDNTISRNSEENIVAIGIAAWGM  
VSNRDTLIRSCDDEGHFSAQYIMDDFTRDPLYILDNNHTHLLLVDNGCHGHPTVEAKLRNQLEKYISERTSQD  
SNYGGKIPIVCFAQGGGRET LKAINTSVKSKI PCVVVEGSGQIADVIASLVEVEDVLTSSMVKEKLVRF LPR T  
VSRLPEEEIESWIKWLKEI LESSHLLTVIKMEEAGDEIVSNAISYALYKAFSTNEQDKDNWNGQLKLLLEWNQ  
LDLASDEIFTNDRRWESADLQEVMTALIKDRPKFVRLFLENGLN LQKFLTNEVLT E L FSTH FSTLVYRNLQI  
AKNSYNDALLTFVWKL VANFRRSFWKEDRSSREDLDVELHDASLTTRHPLQALFIWAILQNKKELSKVIWDQT  
KGCTLAALGASKLLKTLAKVKNDINAAGESEELANEYETRAVELFTECYSNEDDLAEQLLVYSCEAWGGSNCL  
ELAVEATDQHFI AQPGVQNF LSKQWYGEISRDTKNWKIILCLFI I PLVGCGLVSFRKKPIDKHKLLWYVAF  
FTSPFVVFVSWNVVFIYIAFLLLFAYVLLMDFHVPHTPELILYALVFLFCDEVRQWYMGVNYFTDLWNVMDT  
LGLFYFIAGIVFRLHSSNKSSLYSGRVI FCLDYIIFTLRLIHI FTVSRNLGPKIIMLQRMLIDVFFFLFLFAV  
WMVAFGVARQGILRQNEQRWRWIFRSVIYEPYLAMFGQVPSDSDVSTTYDFSHCTFSGNESKPLCVELDEHNLP  
RFPEWITITPLVCIYMLSTNILLVNLLVAMFGYTVGIVQENNDQVWKQRYFLVQEYCNRLNIPFPFVVFAYFY  
MVVKKCFKCCCCKEKNMESNACCFRNEDNETLAWEGVMKENYLKINTKANDNSEEMRHRFRQLDSKLNLDKSL  
LKEIANNIK\*

>ENSMUSP00000131209\_c.1745:G>T\_p.E582D ENSMUST00000171176.3|Trpm8-  
204|ENSMUSG00000036251|+|chr1:g.88277661:G>T

MSFEGARLSMRSRRNGTMGSTRTRYSSVSRSTDVSYSDSDLVNF IQANFKKRECVFFTRDSKAMENICKCGYA  
QSQHIEGTQINQNEKWNYYKHTKEFPTDAFGDIQFETLGKKGKYLRLSCD TDSETLYELLTQHWHLKTPNLVI  
SVTGGAKNFALKPRMRKIFSRLLIYAQSKGAWILTGTHYGLMKYIGEVVRDNTISRNSEENIVAIGIAAWGM  
VSNRDTLIRSCDDEGHFSAQYIMDDFTRDPLYILDNNHTHLLLVDNGCHGHPTVEAKLRNQLEKYISERTSQD  
SNYGGKIPIVCFAQGGGRET LKAINTSVKSKI PCVVVEGSGQIADVIASLVEVEDVLTSSMVKEKLVRF LPR T  
VSRLPEEEIESWIKWLKEI LESSHLLTVIKMEEAGDEIVSNAISYALYKAFSTNEQDKDNWNGQLKLLLEWNQ  
LDLASDEIFTNDRRWESADLQEVMTALIKDRPKFVRLFLENGLN LQKFLTNEVLT E L FSTH FSTLVYRNLQI  
AKNSYNDALLTFVWKL VANFRRSFWKEDRSSREDLDVELHDASLTTRHPLQALFIWAILQNKKELSKVIWDQT  
KGCTLAALGASKLLKTLAKVKNDINAAGESEELANEYETRAVELFTECYSNEDDLAEQLLVYSCEAWGGSNCL  
ELAVEATDQHFI AQPGVQNF LSKQWYGEISRDTKNWKIILCLFI I PLVGCGLVSFRKKPIDKHKLLWYVAF  
FTSPFVVFVSWNVVFIYIAFLLLFAYVLLMDFHVPHTPELILYALVFLFCDEVRQWYMGVNYFTDLWNVMDT  
LGLFYFIAGIVFRLHSSNKSSLYSGRVI FCLDYIIFTLRLIHI FTVSRNLGPKIIMLQRMLIDVFFFLFLFAV  
WMVAFGVARQGILRQNEQRWRWIFRSVIYEPYLAMFGQVPSDSDVSTTYDFSHCTFSGNESKPLCVELDEHNLP  
RFPEWITITPLVCIYMLSTNILLVNLLVAMFGYTVGIVQENNDQVWKQRYFLVQEYCNRLNIPFPFVVFAYFY  
MVVKKCFKCCCCKEKNMESNACCFRNEDNETLAWEGVMKENYLKINTKANDNSEEMRHRFRQLDSKLNLDKSL  
LKEIANNIK\*



>rs51912375\_ENSMUSP00000108739\_c.1788:C>T\_p.L597F  
 ENSMUST00000113114.10|Trpm8-202|ENSMUSG00000036251|+|chr1:g.88278617:C>T  
 MSFEGARLSMRSRRNGTMGSTRTRYSSVSRSTDVSYSDSDLVNF IQANFKKRECVFFTRDSKAMENICKCGYA  
 QSQHIEGTQINQNEKWNKKHTKEFPTDAFGDIQFETLGKKGKYLRLSCD TDSETLYELLTQHWHLKT PNLVI  
 SVTGGAKNFALKPRMRKIFSR LIYIAQSKGAWIL TGGTHYGLMKY IGEVVRDNTISRNSEENIVAIGIAAWGM  
 VSNRDTLIRSCDDEGHFSAQYIMDDFTRDPLYILDNNHTHLLLVDNGCHGHPTVEAKLRNQLEKYISERTSQD  
 SNYGGKIPIVCFAQGGGRET LKAINTSVKSKI PCVVVEGSGQIADVIASLVEVEDVLTSSMVKEKLVRF LPR T  
 VSRLPEEEIESWIKWLKEI LESSHLLTVIKMEEAGDEIVSNAISYALYKAFSTNEQDKDNWNGQLKLLLEWNQ  
 LDLASDEIFTNDRRWESADLQEVMTALIKDRPKFVRLFLENGLNLQKFLTNEVLT E L F S T H F S T L V Y R N L Q I  
 AKNSYNDALLTFVWKL VANFRRSFWKEDRSSREDLDVELHDASLTTRHPLQALFIWAILQNKKELSKVIWEQT  
 KGCTLAALGASKFLKTLAKVKNDINAAGESEELANEYETRAVELFTECYSNEDDLAEQLLVYSCEAWGGSNCL  
 ELAVEATDQHFI AQPGVQNF LSKQWYGEISRDTKNWKIILCLFI I PLVGCGLV SFRKKPIDKHKLLWYVAF  
 FTSPFVVFVSWNVVFIYIAFLLLFAYVLLMDFHVPHTPELILYALVFLFCDEVRQWYMGVNYFTDLWNVMDT  
 LGLFYFIAGIVFRLHSSNKSSLYSGRVI FCLDYII FTLR LIHI FTVSRNLGPKI IMLQRMLIDVFFF LFLFAV  
 WMVAFGVARQGILRQNEQRWRWIFRSVIYEPYLA MFGQVPSVDSTTYDFSHCTFSGNESKPLCVELDEHNLP  
 RFPEWITIPLVCIYMLSTNILLVNLVAMFGYTVGIVQENNDQVWKFOR YFLVQ EYCNRLNIPFPVVFAYFY  
 MVVKKCFKCCCKEKNMESNACCFRNE DNETLAWEGVMKENYLVKINTKANDNSEEMRHRFRQLDSKLN DLKSL  
 LKEIANNIK\*

>rs51912375\_ENSMUSP00000036991\_c.1788:C>T\_p.L597F  
 ENSMUST00000040210.14|Trpm8-201|ENSMUSG00000036251|+|chr1:g.88278617:C>T  
 MSFEGARLSMRSRRNGTMGSTRTRYSSVSRSTDVSYSDSDLVNF IQANFKKRECVFFTRDSKAMENICKCGYA  
 QSQHIEGTQINQNEKWNKKHTKEFPTDAFGDIQFETLGKKGKYLRLSCD TDSETLYELLTQHWHLKT PNLVI  
 SVTGGAKNFALKPRMRKIFSR LIYIAQSKGAWIL TGGTHYGLMKY IGEVVRDNTISRNSEENIVAIGIAAWGM  
 VSNRDTLIRSCDDEGHFSAQYIMDDFTRDPLYILDNNHTHLLLVDNGCHGHPTVEAKLRNQLEKYISERTSQD  
 SNYGGKIPIVCFAQGGGRET LKAINTSVKSKI PCVVVEGSGQIADVIASLVEVEDVLTSSMVKEKLVRF LPR T  
 VSRLPEEEIESWIKWLKEI LESSHLLTVIKMEEAGDEIVSNAISYALYKAFSTNEQDKDNWNGQLKLLLEWNQ  
 LDLASDEIFTNDRRWESADLQEVMTALIKDRPKFVRLFLENGLNLQKFLTNEVLT E L F S T H F S T L V Y R N L Q I  
 AKNSYNDALLTFVWKL VANFRRSFWKEDRSSREDLDVELHDASLTTRHPLQALFIWAILQNKKELSKVIWEQT  
 KGCTLAALGASKFLKTLAKVKNDINAAGESEELANEYETRAVELFTECYSNEDDLAEQLLVYSCEAWGGSNCL  
 ELAVEATDQHFI AQPGVQNF LSKQWYGEISRDTKNWKIILCLFI I PLVGCGLV SFRKKPIDKHKLLWYVAF  
 FTSPFVVFVSWNVVFIYIAFLLLFAYVLLMDFHVPHTPELILYALVFLFCDEVRQWYMGVNYFTDLWNVMDT  
 LGLFYFIAGIVFRLHSSNKSSLYSGRVI FCLDYII FTLR LIHI FTVSRNLGPKI IMLQRMLIDVFFF LFLFAV  
 WMVAFGVARQGILRQNEQRWRWIFRSVIYEPYLA MFGQVPSVDSTTYDFSHCTFSGNESKPLCVELDEHNLP  
 RFPEWITIPLVCIYMLSTNILLVNLVAMFGYTVGIVQENNDQVWKFOR YFLVQ EYCNRLNIPFPVVFAYFY  
 MVVKKCFKCCCKEKNMESNACCFRNE DNETLAWEGVMKENYLVKINTKANDNSEEMRHRFRQLDSKLN DLKSL  
 LKEIANNIK\*

>rs51912375\_ENSMUSP00000131209\_c.1788:C>T\_p.L597F  
 ENSMUST00000171176.3|Trpm8-204|ENSMUSG00000036251|+|chr1:g.88278617:C>T  
 MSFEGARLSMRSRRNGTMGSTRTRYSSVSRSTDVSYSDSDLVNF IQANFKKRECVFFTRDSKAMENICKCGYA  
 QSQHIEGTQINQNEKWNKKHTKEFPTDAFGDIQFETLGKKGKYLRLSCD TDSETLYELLTQHWHLKT PNLVI  
 SVTGGAKNFALKPRMRKIFSR LIYIAQSKGAWIL TGGTHYGLMKY IGEVVRDNTISRNSEENIVAIGIAAWGM  
 VSNRDTLIRSCDDEGHFSAQYIMDDFTRDPLYILDNNHTHLLLVDNGCHGHPTVEAKLRNQLEKYISERTSQD  
 SNYGGKIPIVCFAQGGGRET LKAINTSVKSKI PCVVVEGSGQIADVIASLVEVEDVLTSSMVKEKLVRF LPR T  
 VSRLPEEEIESWIKWLKEI LESSHLLTVIKMEEAGDEIVSNAISYALYKAFSTNEQDKDNWNGQLKLLLEWNQ  
 LDLASDEIFTNDRRWESADLQEVMTALIKDRPKFVRLFLENGLNLQKFLTNEVLT E L F S T H F S T L V Y R N L Q I  
 AKNSYNDALLTFVWKL VANFRRSFWKEDRSSREDLDVELHDASLTTRHPLQALFIWAILQNKKELSKVIWEQT  
 KGCTLAALGASKFLKTLAKVKNDINAAGESEELANEYETRAVELFTECYSNEDDLAEQLLVYSCEAWGGSNCL  
 ELAVEATDQHFI AQPGVQNF LSKQWYGEISRDTKNWKIILCLFI I PLVGCGLV SFRKKPIDKHKLLWYVAF  
 FTSPFVVFVSWNVVFIYIAFLLLFAYVLLMDFHVPHTPELILYALVFLFCDEVRQWYMGVNYFTDLWNVMDT  
 LGLFYFIAGIVFRLHSSNKSSLYSGRVI FCLDYII FTLR LIHI FTVSRNLGPKI IMLQRMLIDVFFF LFLFAV  
 WMVAFGVARQGILRQNEQRWRWIFRSVIYEPYLA MFGQVPSVDSTTYDFSHCTFSGNESKPLCVELDEHNLP  
 RFPEWITIPLVCIYMLSTNILLVNLVAMFGYTVGIVQENNDQVWKFOR YFLVQ EYCNRLNIPFPVVFAYFY  
 MVVKKCFKCCCKEKNMESNACCFRNE DNETLAWEGVMKENYLVKINTKANDNSEEMRHRFRQLDSKLN DLKSL  
 LKEIANNIK\*

>rs48579533\_ENSMUSP00000108739\_c.2109:T>A\_p.L704I  
 ENSMUST00000113114.10|Trpm8-202|ENSMUSG00000036251|+|chr1:g.88282215:T>A  
 MSFEGARLSMRSRRNGTMGSTRTRYSSVSRSTDVSYSDSDLVNF IQANFKKRECVFFTRDSKAMENICKCGYA  
 QSQHIEGTQINQNEKWNKKHTKEFPTDAFGDIQFETLGKKGKYLRLSCD TDSETLYELLTQHWHLKT PNLVI

SVTGGAKNFALKPRMRKIFSRLIYIAQSKGAWILTTGGTHYGLMKYIGEVVRDNTISRNSEENIVAIGIAAWGM  
VSNRDTLIRSCDDEGHFSAQYIMDDFTRDPLYILDNNHTHLLLVDNGCHGHPTVEAKLRNQLEKYISERTSQD  
SNYGGKIPIVCFAQGGGRETLLKAINTSVKSKI PCVVVEGSGQIADVIASLVEVEDVLTSSMVKEKLVRFPLRT  
VSRLPEEEIESWIKWLKEILESSHLLTVIKMEEAGDEIVSN AISYALYKAFSTNEQDKDNWNGQLKLLLEWNQ  
LDLASDEIFTNDRRWEADLQEVMTALIKDRPKFVRLFLENGLNLQKFLTNEVLTTELSTHFSTLVYRNLQI  
AKNSYNDALLTFVWKL VANFRRSFWKEDRSSRELDDELHDASLTTRHPLQALFIWAILQNKKELSKVIWEQT  
KGCTLAALGASKLLKTLAKVKNDINAAGESEELANEYETRAVELFTECYSNDEDLAEQLLVYSCEAWGGSNCL  
ELAVEATDQHFIAQPGVQNFSLKQWYGEISRDTKNWKIILCLFIPIVGCGLVSRKPKPIDKHKLLWYVAV  
FTSPFVVFVSWNVVFIYIAFLLLFAYVLLMDFHSPHTPELILYALVFLFCDEVQRQWYMNQVNYFTDLWNVMDT  
LGLFYFIAGIVFRLHSSNKSSLYSGRVIFCLDYIIFTLRLIHFITVSRNLGPKIMLQRMIDVFFFLLFAV  
WMVAFGVARQGILRQNEQRWRWIFRSVIYEPYLAMFGQVPSDSDVSTTYDFSHCTFSGNESKPLCVELDEHNLP  
RFPEWITITPLVCIYMLSTNILLVNLVAMFGYTVGIVQENNDQVWKQRYFLVQEYCNRLNIPFPFVVFAYFY  
MVVKKCFKCCCKEKNMESNACCFRNEEDNETLAWEGVMKENYLKINTKANDNSEEMRHRFRQLDSKLNLDLKS  
LKEIANNIK\*

>rs48579533\_ENSMUSP00000036991\_c.2109:T>A\_p.L704I

ENSMUST00000040210.14|Trpm8-201|ENSMUSG00000036251|+|chr1:g.88282215:T>A  
MSFEGARLSMRSRRTMGSTRITLYSSVSRSTDVSYSDSLVNF IQANFKKRECVFFTRDSKAMENICKCGYA  
SQHIEGTQINQNEKWNKKHTKEFPTDAFGDIQFETLGKKGKYLRLSCD TDSETLYELLTQHWHLKTPNLVI  
SVTGGAKNFALKPRMRKIFSRLIYIAQSKGAWILTTGGTHYGLMKYIGEVVRDNTISRNSEENIVAIGIAAWGM  
VSNRDTLIRSCDDEGHFSAQYIMDDFTRDPLYILDNNHTHLLLVDNGCHGHPTVEAKLRNQLEKYISERTSQD  
SNYGGKIPIVCFAQGGGRETLLKAINTSVKSKI PCVVVEGSGQIADVIASLVEVEDVLTSSMVKEKLVRFPLRT  
VSRLPEEEIESWIKWLKEILESSHLLTVIKMEEAGDEIVSN AISYALYKAFSTNEQDKDNWNGQLKLLLEWNQ  
LDLASDEIFTNDRRWEADLQEVMTALIKDRPKFVRLFLENGLNLQKFLTNEVLTTELSTHFSTLVYRNLQI  
AKNSYNDALLTFVWKL VANFRRSFWKEDRSSRELDDELHDASLTTRHPLQALFIWAILQNKKELSKVIWEQT  
KGCTLAALGASKLLKTLAKVKNDINAAGESEELANEYETRAVELFTECYSNDEDLAEQLLVYSCEAWGGSNCL  
ELAVEATDQHFIAQPGVQNFSLKQWYGEISRDTKNWKIILCLFIPIVGCGLVSRKPKPIDKHKLLWYVAV  
FTSPFVVFVSWNVVFIYIAFLLLFAYVLLMDFHSPHTPELILYALVFLFCDEVQRQWYMNQVNYFTDLWNVMDT  
LGLFYFIAGIVFRLHSSNKSSLYSGRVIFCLDYIIFTLRLIHFITVSRNLGPKIMLQRMIDVFFFLLFAV  
WMVAFGVARQGILRQNEQRWRWIFRSVIYEPYLAMFGQVPSDSDVSTTYDFSHCTFSGNESKPLCVELDEHNLP  
RFPEWITITPLVCIYMLSTNILLVNLVAMFGYTVGIVQENNDQVWKQRYFLVQEYCNRLNIPFPFVVFAYFY  
MVVKKCFKCCCKEKNMESNACCFRNEEDNETLAWEGVMKENYLKINTKANDNSEEMRHRFRQLDSKLNLDLKS  
LKEIANNIK\*

>rs48579533\_ENSMUSP00000131209\_c.2109:T>A\_p.L704I

ENSMUST00000171176.3|Trpm8-204|ENSMUSG00000036251|+|chr1:g.88282215:T>A  
MSFEGARLSMRSRRTMGSTRITLYSSVSRSTDVSYSDSLVNF IQANFKKRECVFFTRDSKAMENICKCGYA  
SQHIEGTQINQNEKWNKKHTKEFPTDAFGDIQFETLGKKGKYLRLSCD TDSETLYELLTQHWHLKTPNLVI  
SVTGGAKNFALKPRMRKIFSRLIYIAQSKGAWILTTGGTHYGLMKYIGEVVRDNTISRNSEENIVAIGIAAWGM  
VSNRDTLIRSCDDEGHFSAQYIMDDFTRDPLYILDNNHTHLLLVDNGCHGHPTVEAKLRNQLEKYISERTSQD  
SNYGGKIPIVCFAQGGGRETLLKAINTSVKSKI PCVVVEGSGQIADVIASLVEVEDVLTSSMVKEKLVRFPLRT  
VSRLPEEEIESWIKWLKEILESSHLLTVIKMEEAGDEIVSN AISYALYKAFSTNEQDKDNWNGQLKLLLEWNQ  
LDLASDEIFTNDRRWEADLQEVMTALIKDRPKFVRLFLENGLNLQKFLTNEVLTTELSTHFSTLVYRNLQI  
AKNSYNDALLTFVWKL VANFRRSFWKEDRSSRELDDELHDASLTTRHPLQALFIWAILQNKKELSKVIWEQT  
KGCTLAALGASKLLKTLAKVKNDINAAGESEELANEYETRAVELFTECYSNDEDLAEQLLVYSCEAWGGSNCL  
ELAVEATDQHFIAQPGVQNFSLKQWYGEISRDTKNWKIILCLFIPIVGCGLVSRKPKPIDKHKLLWYVAV  
FTSPFVVFVSWNVVFIYIAFLLLFAYVLLMDFHSPHTPELILYALVFLFCDEVQRQWYMNQVNYFTDLWNVMDT  
LGLFYFIAGIVFRLHSSNKSSLYSGRVIFCLDYIIFTLRLIHFITVSRNLGPKIMLQRMIDVFFFLLFAV  
WMVAFGVARQGILRQNEQRWRWIFRSVIYEPYLAMFGQVPSDSDVSTTYDFSHCTFSGNESKPLCVELDEHNLP  
RFPEWITITPLVCIYMLSTNILLVNLVAMFGYTVGIVQENNDQVWKQRYFLVQEYCNRLNIPFPFVVFAYFY  
MVVKKCFKCCCKEKNMESNACCFRNEEDNETLAWEGVMKENYLKINTKANDNSEEMRHRFRQLDSKLNLDLKS  
LKEIANNIK\*

>ENSMUSP00000108739\_c.2505:T>A\_p.Y836N ENSMUST00000113114.10|Trpm8-202|ENSMUSG00000036251|+|chr1:g.88288365:T>A

MSFEGARLSMRSRRTMGSTRITLYSSVSRSTDVSYSDSLVNF IQANFKKRECVFFTRDSKAMENICKCGYA  
SQHIEGTQINQNEKWNKKHTKEFPTDAFGDIQFETLGKKGKYLRLSCD TDSETLYELLTQHWHLKTPNLVI  
SVTGGAKNFALKPRMRKIFSRLIYIAQSKGAWILTTGGTHYGLMKYIGEVVRDNTISRNSEENIVAIGIAAWGM  
VSNRDTLIRSCDDEGHFSAQYIMDDFTRDPLYILDNNHTHLLLVDNGCHGHPTVEAKLRNQLEKYISERTSQD  
SNYGGKIPIVCFAQGGGRETLLKAINTSVKSKI PCVVVEGSGQIADVIASLVEVEDVLTSSMVKEKLVRFPLRT  
VSRLPEEEIESWIKWLKEILESSHLLTVIKMEEAGDEIVSN AISYALYKAFSTNEQDKDNWNGQLKLLLEWNQ

LDLASDEIFTNDRRWEADLQEVMTALIKDRPKFVRLFLENGLNQKFLTNEVLTELFSTHSTLVYRNLQI  
AKNSYNDALLTFVWKLVANFRRSFWKEDRSSREDLDVELHDASLTTRHPLQALFIWAILQNKKELSKVIWEQT  
KGCTLAALGASKLLKTLAKVKNDINAAGESEELANEYETRAVELFTECYSNDEDLAEQLLVYSCEAWGGSNCL  
ELAVEATDQHFIQAQPGVQNFSLKQWYGEISRDTKNWKIILCLFIIPLVGCGLVSRKPKPIDKHKLLWYYVAF  
FTSPFVVFVSWNVVFIYIAFLLLFAYVLLMDFHSPHTPELILYALVFLFCDEVRQWYMNQVNYFTDLWNVMDT  
LGLFYFIAGIVFRLHSSNKSSLYSGRVI FCLDNIIFTLRLIHFITVSRNLGPKIIMLQRMIDVFFFLLFAV  
WMVAFGVARQGILRQNEQRWRWIFRSVIYEPYLAAMFGQVPSVDSTTYDFSHCTFSGNESKPLCVELDEHNLP  
RFPEWITIPLVCIYMLSTNILLVNLVAMFGYTVGIVQENNDQVWKQRYFLVQEYCNRLNIPFPFVVFAYFY  
MVVKCFKCCCKEKNMESNACCFRNEEDNETLAWEGVMKENYLVKINTKANDNSEEMRHRFRQLDSKLNLDLKS  
LKEIANNIK\*

>ENSMUSP00000036991\_c.2505:T>A\_p.Y836N ENSMUST00000040210.14|Trpm8-  
201|ENSMUSG00000036251|+|chr1:g.88288365:T>A

MSFEGARLSMRSRRNGTMGSTRITLYSSVSRSTDVSYSDSDLVNFIQANFKKRECVFFTRDSKAMENICKCGYA  
QSQHIEGTQINQNEKWNKKHTKEFPTDAFGDIQFETLGKKGKYLRLSCDTDSETLYELLTQHWHLKTPNLVI  
SVTGGAKNFALKPRMRKIFSRILIYAQSKGAWILTTGGTHYGLMKYIGEVRDNTISRNSEENIVAIGIAAWGM  
VSNRDTLIRSCDDEGHFSAQYIMDDFTRDPLYILDNNHTHLLVDNGCHGHPTVEAKLRNQLKEYISERTSQD  
SNYGGKIPIVCFQAQGGGRETAKAINTSVKSKI PCVVVEGSGQIADVIA SLVEVEDVLTSSMVKEKLVRFPLRT  
VSRLEPEEEIESWIKWLKEILESSHLLTVIKMEEAGDEIVSNAI SYALYKAFSTNEQDKDNWNGQLKLLLEWNQ  
LDLASDEIFTNDRRWEADLQEVMTALIKDRPKFVRLFLENGLNQKFLTNEVLTELFSTHSTLVYRNLQI  
AKNSYNDALLTFVWKLVANFRRSFWKEDRSSREDLDVELHDASLTTRHPLQALFIWAILQNKKELSKVIWEQT  
KGCTLAALGASKLLKTLAKVKNDINAAGESEELANEYETRAVELFTECYSNDEDLAEQLLVYSCEAWGGSNCL  
ELAVEATDQHFIQAQPGVQNFSLKQWYGEISRDTKNWKIILCLFIIPLVGCGLVSRKPKPIDKHKLLWYYVAF  
FTSPFVVFVSWNVVFIYIAFLLLFAYVLLMDFHSPHTPELILYALVFLFCDEVRQWYMNQVNYFTDLWNVMDT  
LGLFYFIAGIVFRLHSSNKSSLYSGRVI FCLDNIIFTLRLIHFITVSRNLGPKIIMLQRMIDVFFFLLFAV  
WMVAFGVARQGILRQNEQRWRWIFRSVIYEPYLAAMFGQVPSVDSTTYDFSHCTFSGNESKPLCVELDEHNLP  
RFPEWITIPLVCIYMLSTNILLVNLVAMFGYTVGIVQENNDQVWKQRYFLVQEYCNRLNIPFPFVVFAYFY  
MVVKCFKCCCKEKNMESNACCFRNEEDNETLAWEGVMKENYLVKINTKANDNSEEMRHRFRQLDSKLNLDLKS  
LKEIANNIK\*

>ENSMUSP00000131209\_c.2505:T>A\_p.Y836N ENSMUST00000171176.3|Trpm8-  
204|ENSMUSG00000036251|+|chr1:g.88288365:T>A

MSFEGARLSMRSRRNGTMGSTRITLYSSVSRSTDVSYSDSDLVNFIQANFKKRECVFFTRDSKAMENICKCGYA  
QSQHIEGTQINQNEKWNKKHTKEFPTDAFGDIQFETLGKKGKYLRLSCDTDSETLYELLTQHWHLKTPNLVI  
SVTGGAKNFALKPRMRKIFSRILIYAQSKGAWILTTGGTHYGLMKYIGEVRDNTISRNSEENIVAIGIAAWGM  
VSNRDTLIRSCDDEGHFSAQYIMDDFTRDPLYILDNNHTHLLVDNGCHGHPTVEAKLRNQLKEYISERTSQD  
SNYGGKIPIVCFQAQGGGRETAKAINTSVKSKI PCVVVEGSGQIADVIA SLVEVEDVLTSSMVKEKLVRFPLRT  
VSRLEPEEEIESWIKWLKEILESSHLLTVIKMEEAGDEIVSNAI SYALYKAFSTNEQDKDNWNGQLKLLLEWNQ  
LDLASDEIFTNDRRWEADLQEVMTALIKDRPKFVRLFLENGLNQKFLTNEVLTELFSTHSTLVYRNLQI  
AKNSYNDALLTFVWKLVANFRRSFWKEDRSSREDLDVELHDASLTTRHPLQALFIWAILQNKKELSKVIWEQT  
KGCTLAALGASKLLKTLAKVKNDINAAGESEELANEYETRAVELFTECYSNDEDLAEQLLVYSCEAWGGSNCL  
ELAVEATDQHFIQAQPGVQNFSLKQWYGEISRDTKNWKIILCLFIIPLVGCGLVSRKPKPIDKHKLLWYYVAF  
FTSPFVVFVSWNVVFIYIAFLLLFAYVLLMDFHSPHTPELILYALVFLFCDEVRQWYMNQVNYFTDLWNVMDT  
LGLFYFIAGIVFRLHSSNKSSLYSGRVI FCLDNIIFTLRLIHFITVSRNLGPKIIMLQRMIDVFFFLLFAV  
WMVAFGVARQGILRQNEQRWRWIFRSVIYEPYLAAMFGQVPSVDSTTYDFSHCTFSGNESKPLCVELDEHNLP  
RFPEWITIPLVCIYMLSTNILLVNLVAMFGYTVGIVQENNDQVWKQRYFLVQEYCNRLNIPFPFVVFAYFY  
MVVKCFKCCCKEKNMESNACCFRNEEDNETLAWEGVMKENYLVKINTKANDNSEEMRHRFRQLDSKLNLDLKS  
LKEIANNIK\*

>rs30294597\_ENSMUSP00000108739\_c.2541:A>G\_p.T848A

ENSMUST00000113114.10|Trpm8-202|ENSMUSG00000036251|+|chr1:g.88288401:A>G  
MSFEGARLSMRSRRNGTMGSTRITLYSSVSRSTDVSYSDSDLVNFIQANFKKRECVFFTRDSKAMENICKCGYA  
QSQHIEGTQINQNEKWNKKHTKEFPTDAFGDIQFETLGKKGKYLRLSCDTDSETLYELLTQHWHLKTPNLVI  
SVTGGAKNFALKPRMRKIFSRILIYAQSKGAWILTTGGTHYGLMKYIGEVRDNTISRNSEENIVAIGIAAWGM  
VSNRDTLIRSCDDEGHFSAQYIMDDFTRDPLYILDNNHTHLLVDNGCHGHPTVEAKLRNQLKEYISERTSQD  
SNYGGKIPIVCFQAQGGGRETAKAINTSVKSKI PCVVVEGSGQIADVIA SLVEVEDVLTSSMVKEKLVRFPLRT  
VSRLEPEEEIESWIKWLKEILESSHLLTVIKMEEAGDEIVSNAI SYALYKAFSTNEQDKDNWNGQLKLLLEWNQ  
LDLASDEIFTNDRRWEADLQEVMTALIKDRPKFVRLFLENGLNQKFLTNEVLTELFSTHSTLVYRNLQI  
AKNSYNDALLTFVWKLVANFRRSFWKEDRSSREDLDVELHDASLTTRHPLQALFIWAILQNKKELSKVIWEQT  
KGCTLAALGASKLLKTLAKVKNDINAAGESEELANEYETRAVELFTECYSNDEDLAEQLLVYSCEAWGGSNCL  
ELAVEATDQHFIQAQPGVQNFSLKQWYGEISRDTKNWKIILCLFIIPLVGCGLVSRKPKPIDKHKLLWYYVAF

FTSPFVVFVSWNVVFIYIAFLLLFAYVLLMDFHSPHTPELILYALVFLVFCDEVRQWYMNQVNYFTDLWNVMDT  
LGLFYFIAGIVFRLHSSNKSSLYSGRVI FCLDYII FTLRLLIHFVAVSRNLGPKI IMLQRMLIDVFFFLLFAV  
WMVAFGVARQGILRQNEQRWRWIFRSVIYEPYLA MFGQVPSVDSTYDFSHCTFSGNESKPLCVELDEHNL P  
RFPEWITIPLVCIYMLSTNILLVNLVAMFGYTVGIVQENNDQVWKFORYFLVQEYCNRLNI PFPFVVFAYFY  
MVVKKCFKCCCKEKNMESNACCFRNEDNETLAWEGVMKENYLVKINTKANDNSEEMRHRFRQLDSKLNLDLKS L  
LKEIANNIK\*

>rs30294597\_ENSMUSP00000036991\_c.2541:A>G\_p.T848A

ENSMUST00000040210.14|Trpm8-201|ENSMUSG00000036251|+|chr1:g.88288401:A>G  
MSFEGARLSMRSRRNGTMGSTRTLYSSVSRSTDVSYSDSDLVNF IQANFKKRECVFFTRDSKAMENICKCGYA  
QSQHIEGTQINQNEKWNKKHTKEFPTDAFGDIQFETLGKKGKYLRLSCD TDSETLYELLTQHWHLKT PNLVI  
SVTGGAKNFALKPRMRKIFSR LIYIAQSKGAWIL TGGTHYGLMKYIGEVRDNTISRNSEENI VAIGIAAWGM  
VSNRDTLIRSCDDEGHFSAQYIMDDFTRDPLYILDNNHTHLLVDNGCHGHTVEAKLRNQLEKYISERTSQD  
SNYGGKIPIVCF AQGGGRETLKAINTSVKSKI PCVVVEGSGQIADVIASLVEVEDVLTSSMVKEKLV RFLPRT  
VSRLPEEEIESWIKWLKEI LESSHLLTVIKMEEAGDEIVSNAISYALYKAFSTNEQDKDNWNGQLKLLLEWNQ  
LDLASDEIFTNDRRWESADLQEVMTALIKDRPKFVRLFLENGLN LQKFLTNEVLT E L FSTH FSTLVYRNLQI  
AKNSYNDALLTFVWKL VANFRRSFWKEDRSSRELDVELHDASLTTRHPLQALFIWAILQNKKELSKVIWEQT  
KGCTLAALGASKLLKTLAKVKN DINAAGESEELANEYETRAVELFTECYSNDEDLAEQLLVYSCEAWGGSNCL  
ELAVEATDQHFI AQPGVQNF LSKQWYGEISRDTKNWKI ILCFLIIPLVGCGLV SFRKKPIDKHKKLLWYVAF  
FTSPFVVFVSWNVVFIYIAFLLLFAYVLLMDFHSPHTPELILYALVFLVFCDEVRQWYMNQVNYFTDLWNVMDT  
LGLFYFIAGIVFRLHSSNKSSLYSGRVI FCLDYII FTLRLLIHFVAVSRNLGPKI IMLQRMLIDVFFFLLFAV  
WMVAFGVARQGILRQNEQRWRWIFRSVIYEPYLA MFGQVPSVDSTYDFSHCTFSGNESKPLCVELDEHNL P  
RFPEWITIPLVCIYMLSTNILLVNLVAMFGYTVGIVQENNDQVWKFORYFLVQEYCNRLNI PFPFVVFAYFY  
MVVKKCFKCCCKEKNMESNACCFRNEDNETLAWEGVMKENYLVKINTKANDNSEEMRHRFRQLDSKLNLDLKS L  
LKEIANNIK\*

>rs30294597\_ENSMUSP00000131209\_c.2541:A>G\_p.T848A

ENSMUST00000171176.3|Trpm8-204|ENSMUSG00000036251|+|chr1:g.88288401:A>G  
MSFEGARLSMRSRRNGTMGSTRTLYSSVSRSTDVSYSDSDLVNF IQANFKKRECVFFTRDSKAMENICKCGYA  
QSQHIEGTQINQNEKWNKKHTKEFPTDAFGDIQFETLGKKGKYLRLSCD TDSETLYELLTQHWHLKT PNLVI  
SVTGGAKNFALKPRMRKIFSR LIYIAQSKGAWIL TGGTHYGLMKYIGEVRDNTISRNSEENI VAIGIAAWGM  
VSNRDTLIRSCDDEGHFSAQYIMDDFTRDPLYILDNNHTHLLVDNGCHGHTVEAKLRNQLEKYISERTSQD  
SNYGGKIPIVCF AQGGGRETLKAINTSVKSKI PCVVVEGSGQIADVIASLVEVEDVLTSSMVKEKLV RFLPRT  
VSRLPEEEIESWIKWLKEI LESSHLLTVIKMEEAGDEIVSNAISYALYKAFSTNEQDKDNWNGQLKLLLEWNQ  
LDLASDEIFTNDRRWESADLQEVMTALIKDRPKFVRLFLENGLN LQKFLTNEVLT E L FSTH FSTLVYRNLQI  
AKNSYNDALLTFVWKL VANFRRSFWKEDRSSRELDVELHDASLTTRHPLQALFIWAILQNKKELSKVIWEQT  
KGCTLAALGASKLLKTLAKVKN DINAAGESEELANEYETRAVELFTECYSNDEDLAEQLLVYSCEAWGGSNCL  
ELAVEATDQHFI AQPGVQNF LSKQWYGEISRDTKNWKI ILCFLIIPLVGCGLV SFRKKPIDKHKKLLWYVAF  
FTSPFVVFVSWNVVFIYIAFLLLFAYVLLMDFHSPHTPELILYALVFLVFCDEVRQWYMNQVNYFTDLWNVMDT  
LGLFYFIAGIVFRLHSSNKSSLYSGRVI FCLDYII FTLRLLIHFVAVSRNLGPKI IMLQRMLIDVFFFLLFAV  
WMVAFGVARQGILRQNEQRWRWIFRSVIYEPYLA MFGQVPSVDSTYDFSHCTFSGNESKPLCVELDEHNL P  
RFPEWITIPLVCIYMLSTNILLVNLVAMFGYTVGIVQENNDQVWKFORYFLVQEYCNRLNI PFPFVVFAYFY  
MVVKKCFKCCCKEKNMESNACCFRNEDNETLAWEGVMKENYLVKINTKANDNSEEMRHRFRQLDSKLNLDLKS L  
LKEIANNIK\*

>ENSMUSP00000150858\_c.910:T>A\_p.V304E ENSMUST00000213247.2|Olf12-202|ENSMUSG00000061616|+|chr1:g.92548540:T>A

MATAVHRNGSLTPVSLRVFVLVGFVGGGALTQALLFAVFLVLYVTVLGNLTMIVVITLDARLHSPMYFFLKNL  
SFVDLCYSSAIAPNALANFLSTSKVISFEACATQFFFFSLLATTETFLAVMAYDRFMAICSPLYPVTMCPT  
TCTRLVLGTFVCGCLNSIVQTSLTFQLPFCSSNRIDHFYCDVPPLLQLACASTALNELFLFGLCGFIIVSTTL  
AVLVSYGYITVTILRMHSGSGRHKVFSTCGSHLTAVSLFYGTFLV MYAQPGALTSMEQ GKVVSI FYTLVIPML  
NPLIYSLRNKDEKDALQRLGQRHSLVKAVRGCPAAGGNASV\*

>ENSMUSP00000080027\_c.910:T>A\_p.V304E ENSMUST00000081274.6|Olf12-201|ENSMUSG00000061616|+|chr1:g.92548540:T>A

MATAVHRNGSLTPVSLRVFVLVGFVGGGALTQALLFAVFLVLYVTVLGNLTMIVVITLDARLHSPMYFFLKNL  
SFVDLCYSSAIAPNALANFLSTSKVISFEACATQFFFFSLLATTETFLAVMAYDRFMAICSPLYPVTMCPT  
TCTRLVLGTFVCGCLNSIVQTSLTFQLPFCSSNRIDHFYCDVPPLLQLACASTALNELFLFGLCGFIIVSTTL  
AVLVSYGYITVTILRMHSGSGRHKVFSTCGSHLTAVSLFYGTFLV MYAQPGALTSMEQ GKVVSI FYTLVIPML  
NPLIYSLRNKDEKDALQRLGQRHSLVKAVRGCPAAGGNASV\*

>ENSMUSP00000036916\_c.331:T>G\_p.L111R ENSMUST00000049027.10|Slc26a9-201|ENSMUSG00000042268|+|chr1:g.131680924:T>G

MNQPRPRYVVDRAAYSLSLFDDEFEKDRAYPVGEKLRNTFRCS SAKFKAFVFGLLPVLSWLPKYKIKDYIIP  
 DLLGGLSGGCIQVPQGMFAFALLANLPAVNGLYSSFFPRLTYFFLGGIHQMVPGTFAVISILVGNICLQLAPES  
 KFQIFNNVTNETYVDTAAMEAERLHVSATLACLTAVIQMALGFMQGFVAIYLSSEFIRGFMTAAGLQILISV  
 LKYIFGLTIPSYTGPISIVFTFIDICKNLPHTNIASLIFALVSGVFLVVKELNARYMHKIHFPITEMIVVV  
 VATAISGSCMKPKYHMQIVGEIRQGFPTPVAPMVSQWKDMVGTAFSLAIVGYVINLAMGRTLASKHGYDVDS  
 NQEMIALGCSNFFGSFFKIHVICCALSVTLAVDGGGKSQVASLVCVSLVVMITMLVLGYSYLYPLPKAVLGALI  
 AVNLKNSLKLQTDPPYLLWRKSKLDCCVWVVSFLSSFFLSLPYGVAVGVAFSILVVI FQTQFRNGSTLAQVMDT  
 DIYVNPKTYNRAQEIAGVKIVTYCSPLYFANSEIFRQKVI AKTGMDFQKVLAKQKYLKQEKRTAIP TQQRK  
 SLFMKTKTVSLQELQQDFESAPSTDPNNQAPAAEAHISYITFSPDASTAAACELPASTRSPQEASDTLASVP  
 PFVTFHTLILDMSGVSFV DLMGIKALAKLSSTYEKIGVQIFLVNIHAQVYNDISHGGVFEDGCVQRSHVFP  
 HDVAFLFAQANAREAPDRNFHGAPGDTEFSLYDSEEEGPSYWDLEQEMFGTMTFHTETLTAL\*  
 >ENSMUSP00000122075\_c.331:T>G\_p.L111r ENSMUST00000147800.2|Slc26a9-  
 203|ENSMUSG00000042268|+|chr1:g.131680924:T>G  
 MNQPRPRYVVDRAAYSLSLFDDEFEKDRAYPVGEKLRNTFRCS SAKFKAFVFGLLPVLSWLPKYKIKDYIIP  
 DLLGGLSGGCIQVPQGMFAFALLANLPAVNGLYSSFFPRLTYFFLGGIHQMVPGTFAVISILVGNICLQLAPES  
 KFQIFNNVTNETYVDTAAMEAERLHVSATLACL  
 >rs239134730\_ENSMUSP00000140443\_c.423:G>A\_p.V142I  
 ENSMUST00000188145.7|Edem3-203|ENSMUSG00000043019|+|chr1:g.151651683:G>A  
 MSKAGGCRGCGCRVPQRASWSLVAATAALCLVLATSVCTAGAAPMSREEKQKLGQVLEMFDHAYGNMEHAY  
 PADELMPLTCRGRVGRGQEPSRGD VDDALGKFSLTLDLSDTLVVLNKTKEFEDAVRKVLRD VNLNDNDVIVSVF  
 ETNIRVLGGLLGGHSLAIMLKEKGEHMOWYNDELHMAKQLGYKLLPAFN TTSGLPYPRINLKFGRKPEART  
 GTETDCTACAGTLILEFAALS RFTGATIFEEYARKALDFLWEKRQRSSNLVGV TINIHTGDWVRKDSG V GAG  
 IDSYYEYLLKAYVLLGDDSF LERFNTHYDAIMRYISQPPLLLDVHIHKPMLNARTWMDALLAFFPGLQVLKGD  
 IRPAIETHEMLYQVIKKNFLPEAF TDFRVHWAQHPLRPEFAESTYFLYKATGDPYYLEVGKTLIENLNKYA  
 RVPCGFAAMKDVRTGSHEDRMSFFLAEMFKYL YLLFADKEDIIFDIEDYIFTTEAHL LPLWLSTNRSISKK  
 NTTSEYTELDDSNFDWTC PNTQILFPNDPLYAQSI REPLKNVVDKSCPRGIIRVEESFRSGAKPPLRARDFMA  
 TNPEHLEILKMGVSLIHLK DGRVQLVQHAIQAASSIDAEDGLRFMQEMIELSSQQQKEQQLP PRAVQIISHP  
 FFGRVVLTAGPAQFGLDLSKHKETRGFVASSKPYNGCSEL TNPEAVMGKIALIQRGQCMFAEKARNIQNAGAI  
 GGIVIDDNEGSSSDTAPLFQ MAGDGKDTDDIKIPMLFLFSKEGSIILDAIREHEQVEVLLSDKARDRAAILKG  
 KMIPSYIINSNPEMENEDQPSSENDSONQSAEQMLSLSQTVDLADKESPEHPADSHSEASPSDSEEAAGFAPS  
 EQISGSTENHETTSLDGECTDLDNQVQE QSETEEDSSPNVSWGTKAQPID SILADWNEDIEAFEMMEKDEL\*  
 >rs239134730\_ENSMUSP00000058941\_c.423:G>A\_p.V142I  
 ENSMUST00000059498.12|Edem3-201|ENSMUSG00000043019|+|chr1:g.151651683:G>A  
 MSKAGGCRGCGCRVPQRASWSLVAATAALCLVLATSVCTAGAAPMSREEKQKLGQVLEMFDHAYGNMEHAY  
 PADELMPLTCRGRVGRGQEPSRGD VDDALGKFSLTLDLSDTLVVLNKTKEFEDAVRKVLRD VNLNDNDVIVSVF  
 ETNIRVLGGLLGGHSLAIMLKEKGEHMOWYNDELHMAKQLGYKLLPAFN TTSGLPYPRINLKFGRKPEART  
 GTETDCTACAGTLILEFAALS RFTGATIFEEYARKALDFLWEKRQRSSNLVGV TINIHTGDWVRKDSG V GAG  
 IDSYYEYLLKAYVLLGDDSF LERFNTHYDAIMRYISQPPLLLDVHIHKPMLNARTWMDALLAFFPGLQVLKGD  
 IRPAIETHEMLYQVIKKNFLPEAF TDFRVHWAQHPLRPEFAESTYFLYKATGDPYYLEVGKTLIENLNKYA  
 RVPCGFAAMKDVRTGSHEDRMSFFLAEMFKYL YLLFADKEDIIFDIEDYIFTTEAHL LPLWLSTNRSISKK  
 NTTSEYTELDDSNFDWTC PNTQILFPNDPLYAQSI REPLKNVVDKSCPRGIIRVEESFRSGAKPPLRARDFMA  
 TNPEHLEILKMGVSLIHLK DGRVQLVQHAIQAASSIDAEDGLRFMQEMIELSSQQQKEQQLP PRAVQIISHP  
 FFGRVVLTAGPAQFGLDLSKHKETRGFVASSKPYNGCSEL TNPEAVMGKIALIQRGQCMFAEKARNIQNAGAI  
 GGIVIDDNEGSSSDTAPLFQ MAGDGKDTDDIKIPMLFLFSKEGSIILDAIREHEQVEVLLSDKARDRDP  
 EDQPSSENDSONQSAEQMLSLSQTVDLADKESPEHPADSHSEASPSDSEEAAGFAPSEQISGSTENHETTSLD  
 GECTDLDNQVQE QSETEEDSSPNVSWGTKAQPID SILADWNEDIEAFEMMEKDEL\*  
 >rs239134730\_ENSMUSP00000140775\_c.423:G>A\_p.V142I  
 ENSMUST00000187951.7|Edem3-202|ENSMUSG00000043019|+|chr1:g.151651683:G>A  
 MSKAGGCRGCGCRVPQRASWSLVAATAALCLVLATSVCTAGAAPMSREEKQKLGQVLEMFDHAYGNMEHAY  
 PADELMPLTCRGRVGRGQEPSRGD VDDALGKFSLTLDLSDTLVVLNKTKEFEDAVRKVLRD VNLNDNDVIVSVF  
 ETNIRVLGGLLGGHSLAIMLKEKGEHMOWYNDELHMAKQLGYKLLPAFN TTSGLPYPRINLKFGRKPEART  
 GTETDCTACAGTLILEFAALS RFTGATIFEEYARKALDFLWEKRQRSSNLVGV TINIHTGDWVRKDSG V GAG  
 IDSYYEYLLKAYVLLGDDSF LERFNTHYDAIMRYISQPPLLLDVHIHKPMLNARTWMDALLAFFPGLQVLKGD  
 IRPAIETHEMLYQVIKKNFLPEAF TDFRVHWAQHPLRPEFAESTYFLYKATGDPYYLEVGKTLIENLNKYA  
 RVPCGFAAMKDVRTGSHEDRMSFFLAEMFKYL YLLFADKEDIIFDIEDYIFTTEAHL LPLWLSTNRSISKK  
 NTTSEYTELDDSNFDWTC PNTQILFPNDPLYAQSI REPLKNVVDKSCPRGIIRVREESFRSGAKPPLRARDFM  
 ATNPEHLEILKMGGAASSIDAEDGLRFMQEMIELSSQQQKEQQLP PRAVQIISHPFFGRVVLTAGPAQFGLDL  
 SKHKETRGFVASSKPYNGCSEL TNPEAVMGKIALIQRGQCMFAEKARNIQNAGAI GGIVIDDNEGSSSDTAPL

FQMAGDGKDTDDIKIPMLFLLFSKEGSIILDAIREHEQVEVLLSDKARDRDPENEDQPSSENDSQNQSAEQM  
LSLSQTVDLADKESPEHPADSHSEASPSDSEEAAGFAPSEQISGSTENHETTSLDGECTDLDNQVQEQSETEE  
DSSPNVSWGTKAQPIDSLADWNEDIAEFEMMEKDEL\*

>rs239134730\_ENSMUSP00000140234\_c.423:G>A\_p.V142I  
ENSMUST00000191070.2|Edem3-204|ENSMUSG00000043019|+|chr1:g.151651683:G>A  
MSKAGGCRGCGCRVPQRASWSLVAATAALCLVLATSVCTAGAAPMSREEKQKLGQVLEMFHDHAYGNYMEHAY  
PADELMPLTCRGRVVRGQEPSRGDVEDALGKFSLTLDLSDTLVVLNKTKEFEDAVRKLVRDNLNDVIVSVF  
ETNIRVLGGLLGGHSLAIMLKEKGEHMOWYNDELHMAKQLGYKLLPAFNNTSGLPYPRINLKFGRKPEART  
GTETDCTACAGTLILEFAALSRTGATIFEEYARKALDFLWEKRQRSSNLVGVVTINIHTGDWVRKDSGVGAG  
IDSYYEYLLKAYVLLGDDSFLEFRNTHYDAIMRYISQPPLLLDVHIIHKPMLNARTWMDALLAFFPGLQVLKGD  
IRPAIETHEMLYQVIKKNHFLPEAFITDFRVHWAQHPLRPEFAESTYFLYKATGDPYYLEVVGKTLIENLNKYA  
RVPCGFAAMKDVRTGSHEDRMSFFLAEMFKYLYLLFADKEDIIFDIEDYIFTTEAHLPLWLSTNRSISKK  
NTTSEYTELDDSNFDWTCNPNTQILFPNDPLYAQSIREPLKNVVDKSCPRGIIIRVEESFRSGAKPPLRARDFMA  
TNPEHLEILKMGGAASSIDAEDGLRFMQEMIELSSQQQEQQLPRAVQIISHPFFGRVVLTAGPAQFGLDLS  
KHKETRGRFVASSKPYNGCSELTNPEAVMGKIALIQRGQCMFAEKARNIQNAGAIGGIVIDDNEGSSSDTAPLF  
QMAGDGKDTDDIKIPMLFLLFSKEGSIILDAIREHEQVEVLLSDKARDRAAILKDPENEDQPSSENDSQNQS  
AEQMLSLSQTVDLADKESPEHPADSHSEASPSDSEEAAGFAPSEQISGSTENHETTSLDGECTDLDNQVQEQS  
ETEEDSSPNVSWGTKAQPIDSLADWNEDIAEFEMMEKDEL\*

>ENSMUSP00000073144\_c.549:T>G\_p.S184A ENSMUST00000073441.13|Smg7-  
202|ENSMUSG00000042772|-|chr1:g.152736207:A>C  
MSLQSAQYLRQAEVLKAEMTDSKLGPAEVWTSRQALQDLYQKMLVTDLEYALDKKVEQDLWNHAFKNQITTLQ  
GQAKNRANPNRSEVQANLSLFLEAASGFYTTQLLQELCTVFNVDLPCRKSSQLGIIISNKQTHSSTIVKPOSSS  
CSYICQHCLVHLGDIARYRNQTSQAESYRHAALVLPANGQPYNQLAILASSKGDHLTTIFYYCRSIAVKFPF  
PAASTNLQKALSKALESRDELKTKWGVSDFIKAFIKFHGHVYLSKSLKLSPLREKLEEQFKRLLFQKAFNSQ  
QLVHVTVINLFLHHLRDFSNETEQHSYSQDEQLCWTQLLALFMSFLGILCKCPLQNDQSQESNNAYPPLPAVKV  
SMDWLRPRVVFQAEAVVDERQYIWPWLISLLNSFHPREDDLSNTNATPLPEEFELQGFALRPSFRNLDFSKG  
HQGITGDKGQGITGDKGQRRIRQQRLLISIGKWIADNQPRLIQCENEVKGKLLFITEIPELILEDPEAKENLILQETS  
ESLATDGSPLKSVLSTGRNPNNSCDSGEKPVVTFKENIKPREVNQGRSFPKPEVRRDCSKGVTVTQEDGQKD  
SSKRAETKRCTLGKLEQETGKQSVAVQVKSQTELKRPVSEARKTPVTQTPSQTSSNSQFIPIIHHPGAFPLPS  
RPGFPPTTYVIPPVAFSMGSGYTFPAGVSVPGTFLQSTAHSPAGNQVQAGKQSHIPIYSQQRPSGPGPMNQG  
QQSQPPSPPPLTSLPAQPTAQSTSOLQVQALAQQQSPTKVIIPALGKSPPHSGFQQYQQADASKQLWNPPQV  
QSPGKIMPVKQSYLQTDPIKLFEPQLPPVVIQQQPLEKMKPFMEPYNHNPNSEVKVPEFYWDSYSMAD  
NRAVMAQQPNMDRRSKRSPGVFRPEQDPVPRMPFEKSLLEKPSSELMSSSSFLSLTGFVSNQERYPNSSMFNE  
VYGKNTTSSKAELNPSVASQETSLSYSLFEGTPWSPSLPASSDHSTPASQSPHSSNPSSLPSPPTHNHNSAP  
FSNFGPIGTPDNRDRRPADRWKTDKAMGGFGVDYLSATSSSESSWHQASTPSGTWTGHGSPMEDSSAVLMES  
LKSIIWSSMMHPGPSALEQLLMQKQKQQRGQAMNPPH\*

>ENSMUSP00000041241\_c.573:T>G\_p.S192A ENSMUST00000043560.15|Smg7-  
201|ENSMUSG00000042772|-|chr1:g.152736207:A>C  
MRTENLKSEEHLKSSNIRQAEVLKAEMTDSKLGPAEVWTSRQALQDLYQKMLVTDLEYALDKKVEQDLWNHAF  
KNQITTLQGQAKNRANPNRSEVQANLSLFLEAASGFYTTQLLQELCTVFNVDLPCRKSSQLGIIISNKQTHSST  
IVKPOSSSCSYICQHCLVHLGDIARYRNQTSQAESYRHAALVLPANGQPYNQLAILASSKGDHLTTIFYYCR  
SIAVKFPFPAASTNLQKALSKALESRDELKTKWGVSDFIKAFIKFHGHVYLSKSLKLSPLREKLEEQFKRLL  
FQKAFNSQQLVHVTVINLFLHHLRDFSNETEQHSYSQDEQLCWTQLLALFMSFLGILCKCPLQNDQSQESNNA  
YPLPAVKVSMDWLRPRVVFQAEAVVDERQYIWPWLISLLNSFHPREDDLSNTNATPLPEEFELQGFALRPSF  
RNLDFSKGHQGITGDKGQRRIRQQRLLISIGKWIADNQPRLIQCENEVKGKLLFITEIPELILEDPEAKENL  
ILQETS SVVESLATDGSPLKSVLSTGRNPNNSCDSGEKPVVTFKENIKPREVNQGRSFPKPEVKSQTELKRP  
VSEARKTPVTQTPSQTSSNSQFIPIIHHPGAFPLPSRPGFPPTTYVIPPVAFSMGSGYTFPAGVSVPGTFLQ  
TAHSPAGNQVQAGKQSHIPIYSQQRPSGPGPMNQGPPQSPPSPPPLTSLPAQPTAQSTSOLQVQALAQQQS  
TKVIIPALGKSPPHSGFQQYQQADASKQLWNPPQVQSPGKIMPVKQSYLQTDPIKLFEPQLPPVVIQQQ  
LEKMKPFMEPYNHNPNSEVKVPEFYWDSYSMADNRAVMAQQPNMDRRSKRSPGVFRPEQDPVPRMPFEDPK  
SSPLLPDLLKSLAALEEEEEELIFSNPPDLYPALLGPLASLPGRSFLKSLLEKPSSELMSSSSFLSLTGFVSN  
QERYPNSSMFNEVYGKNTTSSKAELNPSVASQETSLSYSLFEGTPWSPSLPASSDHSTPASQSPHSSNPSSLP  
SSPPTHNHNSAPFSNFGPIGTPDNRDRRPADRWKTDKAMGGFGVDYLSATSSSESSWHQASTPSGTWTGHG  
SPMEDSSAVLMESLKSIIWSSMMHPGPSALEQLLMQKQKQQRGQAMNPPH\*

>ENSMUSP00000107467\_c.549:T>G\_p.S184A ENSMUST00000111836.4|Smg7-  
203|ENSMUSG00000042772|-|chr1:g.152736207:A>C  
MSLQSAQYLRQAEVLKAEMTDSKLGPAEVWTSRQALQDLYQKMLVTDLEYALDKKVEQDLWNHAFKNQITTLQ  
GQAKNRANPNRSEVQANLSLFLEAASGFYTTQLLQELCTVFNVDLPCRKSSQLGIIISNKQTHSSTIVKPOSSS

CSYICQHCLVHLGDIARYRNQTSQAESYRHAHQLVLPANGQPYNQLAILASSKGDHLTTIFYYCRSIAVKFPF  
 PAASTNLQKALSKALESRDELKTKWGVSDFIKAFIKFHGHVYLSKSLKLSPLREKLEEQFKRLLFQKAFNSQ  
 QLVHVTVINLFLQLHHLRDFSNETEQHSYSQDEQLCWTQLLALFMSFLGILCKCPLQNDQSQESNNAYPLPAVKV  
 SMDWLRRLRPRVFQEAUVDERQYIWPWLISLLNSFHPREDDLSNTNATPLPEEFELQGFALRPSFRNLDFSKG  
 HQGITGDKQRRIRQRLISIGKWIADNQPRLIQCENEVGKLLFITEIPELILEDPSEAKENLILQETSVV  
 ESLATDGSPLKSVLSTGRNPSNSCDSGEKPVVTFKENIKPREVNQGRSFPPKEVKSQTELKRKTPVSEARKTP  
 VTQTSPQTSNSQFIPIHHPGAFPLPSRPGFPPPTYVI PPPVAFSMGSGYTFPAGVSVPGTFLQSTAHSPAGN  
 QVQAGKQSHI PYSQQRPSGPGPMNQGPQQSQPPSPPLTSLPAQPTAQSTSQLQVQALAQQQQSPTKVI PALG  
 KSPPHHSGFQQYQADASKQLWNPPQVQSPGLGIMPVKQSYLQTDPIKLFEPQLPPVIQQQPLEKKMKPF  
 PMEPYNHNPSEVKVPEFYWDSSYSMADNRAVMAQQPNMDRRSKRSPGVFRPEQDPVPRMPFEDPKSSPLPPD  
 LLKSLAALEEEELIFSNPPDLYPALLGPLASLPGRSFLKSLLEKPSSELMSSSSFLSLTGFSVNVQERYPNSS  
 MFNEVYGNLTTSSKAELNPSVASQETSLSYLFEGTPWSPSLPASSDHSTPASQSPHSSNPSSLPSSPPTHNH  
 NSAPFSNFGPIGTPDNRDRPADRWKTDKPMGGGVDYLSATSSSESSWHQASTPSGTWTGHGSPMEDSSAV  
 LMEISLKIWSSSMMHPGSALEQLLMQKQKQQRGQAMNPPH\*  
 >ENSMUSP00000106947\_c.2008:A>T\_p.K670M ENSMUST00000111315.9|Adams4-  
 202|ENSMUSG00000006403|+|chr1:g.171085397:A>T  
 MSQMLHPRRGLTGHWLQRFQPCPLPHTVQWRLLLLLAFLLSLAWPASPLPREEEIVFPEKLNSSILPGSGV  
 PARLLYRLPAFGEMLLLELEQDPGVQVEGLTVQYLGQAPEMLGGAEPGTYLTGTINGDPESVASLHWDGGALL  
 GVLQYRGAELHLQPLEGGALNSAGGPGAHLRKRKSPASSQGPMTVKAPSGSPSPISRRTKRFAVLSRFVETL  
 VVADDKMAAFHGTGLKRYLLTVMAAAAKAFKHPSIRNPVNLVVTRLVILGSGQEGPQVGPSSAAQTLRSFCTWQ  
 RGLNTPNDSDPDHFDTAILFTRQDLCGVSTCDTLGMADVGTVCDFPARSCAIVEDDGLQSAFTAHELGHVFNM  
 LHDNSKPCNTLNGQGGSSRHVMAVMAHVDPEEPWSPCSARFITDFLDNGYGHCLLDKPEAPLHLPATFPKGD  
 YDADRQCQLTFGPDSSHCPQLPPCAALWCSGHLNGHAMCQTKHSPWADGTPCGSSQACMGRCLHVDQLKDF  
 NVPQAGGWGPWGPWGDCSRTCGGGVQFSSRDCTRVPVPRNGGKYCEGRRTFRSCNTENCPHGSALTFREEQCA  
 AYNHRTDLFKSFPGPMDWVPRYTGVA PRDQCKLTCQARALGYVLEPRVADGTPCSPDTSVVCVQGRCIHAG  
 CDRIIGSKKKFDMCMVCGGDSRCSKQSGSFKKFRYGYSDVVTIPAGATHILVRQQGGGSLKSIYLALKLSDG  
 SYALNGEYTLMPSPDVLVPLGAVSLRYSGATAAASETLSGHGPLAQPLTLQVLVAGNPQNARLRYSFVPRPVP  
 STPRPPPQDWLQRRAEILKILRKRPAWGRK\*  
 >ENSMUSP00000106946\_c.1453:A>T\_p.K485M ENSMUST00000111314.2|Adams4-  
 201|ENSMUSG00000006403|+|chr1:g.171085397:A>T  
 MKGGERDLRLLSLIFFLLLLKRFAVLSRFVETLVVADDKMAAFHGTGLKRYLLTVMAAAAKAFKHPSIRNPV  
 NLVVTRLVILGSGQEGPQVGPSSAAQTLRSFCTWQRGLNTPNDSDPDHFDTAILFTRQDLCGVSTCDTLGMADV  
 GTVCDFPARSCAIVEDDGLQSAFTAHELGHVFNMLHDNSKPCNTLNGQGGSSRHVMAVMAHVDPEEPWSPCS  
 ARFITDFLDNGYGHCLLDKPEAPLHLPATFPKGDYDADRQCQLTFGPDSSHCPQLPPCAALWCSGHLNGHAM  
 CQTKHSPWADGTPCGSSQACMGRCLHVDQLKDFNVPQAGGWGPWGPWGDCSRTCGGGVQFSSRDCTRVPVPRN  
 GKRYCEGRRTFRSCNTENCPHGSALTFREEQCAAYNHRTDLFKSFPGPMDWVPRYTGVA PRDQCKLTCQARA  
 LGYVLEPRVADGTPCSPDTSVVCVQGRCIHAGCDRIIGSKKKFDMCMVCGGDSRCSKQSGSFKKFRYGYSD  
 DVVTIPAGATHILVRQQGGGSLKSIYLALKLSDGSYALNGEYTLMPSPDVLVPLGAVSLRYSGATAAASETLSG  
 HGPLAQPLTLQVLVAGNPQNARLRYSFVPRPVPSTPRPPPQDWLQRRAEILKILRKRPAWGRK\*  
 >ENSMUSP00000151387\_c.2044:A>T\_p.K682M ENSMUST00000219033.2|Adams4-  
 203|ENSMUSG00000006403|+|chr1:g.171085397:A>T  
 MASIHPSPCSPGTMSQMLHPRRGLTGHWLQRFQPCPLPHTVQWRLLLLLAFLLSLAWPASPLPREEEIVFPEK  
 LNGSSILPGSGVPARLLYRLPAFGEMLLLELEQDPGVQVEGLTVQYLGQAPEMLGGAEPGTYLTGTINGDPES  
 VASLHWDGGALLGVLQYRGAELHLQPLEGGALNSAGGPGAHLRKRKSPASSQGPMTVKAPSGSPSPISRRTK  
 RFASLSRFVETLVVADDKMAAFHGTGLKRYLLTVMAAAAKAFKHPSIRNPVNLVVTRLVILGSGQEGPQVGPSS  
 AAQTLRSFCTWQRGLNTPNDSDPDHFDTAILFTRQDLCGVSTCDTLGMADVGTVCDFPARSCAIVEDDGLQSAF  
 TAAHELGHVFNMLHDNSKPCNTLNGQGGSSRHVMAVMAHVDPEEPWSPCSARFITDFLDNGYGHCLLDKPEA  
 PLHLPATFPKGDYDADRQCQLTFGPDSSHCPQLPPCAALWCSGHLNGHAMCQTKHSPWADGTPCGSSQACMG  
 GRCLHVDQLKDFNVPQAGGWGPWGPWGDCSRTCGGGVQFSSRDCTRVPVPRNGGKYCEGRRTFRSCNTENC  
 PHGSALTFREEQCAAYNHRTDLFKSFPGPMDWVPRYTGVA PRDQCKLTCQARALGYVLEPRVADGTPCSPDTS  
 SVCVQGRCIHAGCDRIIGSKKKFDMCMVCGGDSRCSKQSGSFKKFRYGYSDVVTIPAGATHILVRQQGGGSL  
 KSIYLALKLSDGSYALNGEYTLMPSPDVLVPLGAVSLRYSGATAAASETLSGHGPLAQPLTLQVLVAGNPQNAR  
 LRYSFVPRPVPSTPRPPPQDWLQRRAEILKILRKRPAWGRK\*  
 >ENSMUSP00000134646\_c.892:A>T\_p.Q298L ENSMUST00000160565.4|Ifi206-  
 201|ENSMUSG00000037849|-|chr1:g.173309102:T>A  
 MVNYKQIVLLSGLLEYMNDYNFRALKSLLNHDLKLTKNMQDDYDRIKIADLMEEKFPEDAGLSKLIIEVCEDIP  
 ELADHVDILRKKKKEKVNKTKIKSESSPPPLTSSLMEAVEVEPAMVTASSEESKDTIPESPDMTTQFLEEKP  
 KFPLLSTTSTSQAEGEPLTPQRFPTASSSLQTPLEPPEISSTILATSQSSVPYSTCDKSSRVPVPTASSST

QTIQTCLATSTLPCSHQATLKS PKTEPSSVQATQMTQAIKASGHNCQVPAAPVSSSF IKPQVTPAMLLSGVQ  
 APLMPLATVPSCAQT FEMNPATMTNGCNSPQMSAATVHSSYSNPRVTPVTVASSGQSFRLTPSRWSSGFNSPH  
 VSAATISSYSKPHVTLAIVPHNAQTLQOTPAAMTSGCNSPQMSAATISSYNNPQVTPATVPRSAQSLLIPO  
 VAVPSSAFQMI FQMTPAAMAHGCNSPQISAATVHSSYSNPRVTPATVASSGQSFQLTPSRWSSGFNSPHVSA  
 TISHSYKPHVTLAIVPHNAQTLRQTPAAMTSGCNSPQMSAATISSYNNPQVTPATVPRSAQSLLIPOVAVP  
 SSAFQMI FQMTPAAMANGCNSPQISAATVHSNYSNPRVTPATVASSDQSYRLTPSRWSSGFNSPHVSAATIPS  
 SYQNSPQVSSATMRRSFPAMSLSPATPPKKPRLKVKVQKQSEENGHQGFKQVMVLKVTEPFTYDIRKDKRMF  
 HATVATETEFFRVKVFIDIALEEKFI PRKVIIVISDYIGYNGFLEIYTASCVSEVNDNSVMNIPTSLRQKANATP  
 KISTLCTQRAGTFVNGTFTVYEKTVRSEFIYGGIEDRTGRMEVVVYGQFTKLYCEPGDKLSLFCFELSSSLDM  
 WQLRSVRHSYMQVIQARKRDYELPNVHAI IETAQSSLSWIPEQQW\*  
 >ENSMUSP00000030039\_c.1048:A>T\_p.E350V ENSMUST00000030039.13|Fmn2-  
 201|ENSMUSG00000028354|+|chr1:g.174330660:A>T  
 MGNQDQGLKRSAGDASHEGGGAEDAAGPRDAEITTKKASGSKKALGKHGKGGGGSGGETSKKKKSKSDSRASVFSN  
 LRIRKNLTGKKGACDSREDVLDLQALPIGELDSAHSIVTKTPDLLSLAEETGLSDTECADPFEVIHPGASRPA  
 EAGVGIQATAEDLETAAGA QDQRTSSGSDTDIYSFHSATEQEDLLSDIQQAIRLQQQQQQKLLQLDSEEPAA  
 PPTAISPPQGAFLGLDQFLLGPRSEAEKDTVQALPVRPDLPETTKSLVPEHPPSSGSHLTSETPGYATAPSAV  
 TDSLSSPAFTFPEAGPGEAGAAGVPVAGTGDTECEEDAFEDAPRGSFGEWVPEVEVASQRLEKEPEEGMRE  
 SITSAVVSPLPGSPAPSPRCFKPYPLITPCYIKTTTRQLSSPNHSPSQSNQSPRIKKRPDPSVSRSTALAS  
 AAAPAKKHRLEGLTGGLSRSADWTEELGVRTPGAGGSVHLLGRGATADDSGGGSPVLAAPGAPATADGFQ  
 NVFTGRITLLEKLFSSQENGPEEAEKFCRSRI IAMGLLLPFSDCFREPCNQAGSSSAPFDQDQLYTAAVVSQP  
 THSM DYSEGQFPRREPSMWPSSKLP EEEPSPKD VDTPEKSSILESPKCSNGVQQEVFVVKSEGQATVIQQLE  
 QTIEDLRTKIAIELEKQYPALDLEGRGLSGL ENGLTASADVSLDALVHLHGKVAQPPRTLEAKSIQTSPTTEGR  
 ILLTLPKAPPEGLLGSAAAESALLTSPSGPQTKFCSEISLIVSPRISVQLDAQQIQSASQLPPPPPLL  
 GSDSQGQPSQPSLHTESETSHEHSVSSSFGNNCNPVPPAPPLPCTESSSFMPLGMAI PPPPCLSDITVPALPS  
 PTAPALQFSLNQGPEMLPAPPQPPPLPGLGVPPPPAPPLPGMGI PPPPPLPGMGI PPPPPLPGMGI SPLPPL  
 PGMGI PPPPPLPGVGI PPPPPLPGVGI PPPPPLPGVGI PPPPPLPGVGI PPPPPLPGVGI PPPPPLPGVGI  
 PPPPPLPGVGI PPPPPLPGVGI PPPPPLPGVGI PPPPPLPGVGI PPPPPLPGVGI PPPPPLPGVGI  
 SGPPHSSQVGSSTLPAAPQGCGLFPLPPTGLFGLGMNQDRVARKQLIEPCRPMKPLYWTRIQHLHSHKRDSSPS  
 LIWEKIEEPSIDCHEFEELFSKTAVKERKKPISDTISKTKAKQVVKLLSNKRSQAVGILMSSLHLDMDKIQA  
 VVNLDNSVVDLETLQALYENRAQSDELEKIEKHSRSSKDKENAKSLDKPEQFLYELSLIPNFSERVF CILFQS  
 TFSESI CSIRKLELLQKLCETLKNPGVMQVLGLVLAFGNYMAGNKTRGQADGFGLDILPKLKDVKSSDNS  
 RSLLSYIVSYLRFNFD DEDAGKEQC VFLAEPQELFQASQMKFEDFQKDLRKLKDLKACEAEAGKYVQVSSAE  
 HMQPFKENMEQFISQAKIDQESQEAALTE THKCFLETTAYYFMKPKLGEKEVSPNVFFSVWHFEFSSDFKDAWK  
 KENKLI LQERVKEAEEVCRQKKGKSLYKVKPRHDSGIKAKISMKT\*  
 >rs265450187\_ENSMUSP00000046686\_c.1444:T>GT\_p.L482ins-fs  
 ENSMUST00000044190.12|Hhat-201|ENSMUSG00000037375|-|chr1:g.192196247:A>AC  
 MLPGWELTLCLLVSLGFHFRSFYEVYKVSREHEEELDQEFELMDTLFGGLKKDPTDFEWNFWMEWGRRLVW  
 LFI GHMAVSQ L ATLLTKKHPWIVMVYGMWACWCVLGAPGVVMVLLHSTIAFCVAQFRSVLLSWLCSLLLLST  
 LRLQSV EEVKRRWYKTENEYLLQFTLTVRCLYYSFSL ELCRQPPSAQPTPSAQGASHSYPLLTYVFYYPV  
 FHNGPILNFPEFFRQMQPELNSLQHS LCIVAKGLGRLLCWWWLAE L MVHLMYMHALYSSAPLLESVSCWTLG  
 GLALAQV LFFYVKYLVLFGVPALLMRLDGLTPPPLPRCVSTMFSFTGMWRYFDVGLHNFLIRYVYIPLGGSQH  
 GLLGTLLSTATTF AFVSYWHGSYEDLWCWAALNWLGVTVESGVRRLLETPCVRET LARHLS PQAHHRLHALLA  
 ACSTSM LILFNLVFLGGIQVGKTYWNRIFLQGWVWVTL SVLGFVLLFSRGHCLGSDI HSSL  
 >ENSMUSP00000014290\_c.880:A>T\_p.N294I ENSMUST00000014290.15|Apbblip-  
 201|ENSMUSG00000026786|+|chr2:g.22739607:A>T  
 MGESNEDIDQMFSTLLGEMDLLTQSLGVDTLPPDPNPPREEFN YTVGFKDLNESLNALEDQDL DALMADLVA  
 DISEAEQRTIQAQKESSQNQDRFALLRASDGQTASGGYGASAAAIDVSHHEEALPPPPVEPMLDLLPPPPPP  
 PPELLSKEEEEEAKAKADKIKLAL EKLKEAKVKKLVVKVHMDDSSTKSLM VDERQLARDVLDNLF EKTHCDN  
 VDWC LYEI IYPELQIERVFE DHENVEVLSDWTRDTENKVL FLEKEERYAVFKNPQNFYLDNKGKKENKETNEK  
 MIAKNKEYLLEESFCGTSIIVPELEGALY LKEDGKKS WKRRYFLLRASGIYVVPKGKTKTSRDLACFIQFENV  
 NIYYGIQCKMKYKAPT DHC FVLKHPQIQKESQYIKYLCCDDARTLSQWVMGIRIAKYGKTLYDNYQRAVARAG  
 LASRWTNLGTVGTPMPAQ PSTVSSGLKTGTSQPNGQMPQAI PSAGPPLQEAQTQIETTKDEKQGLGNHSPGAT  
 RENHRPKSSLPPPPPPVRRSSDTCGSPALPSKVKGPCTCFPHPPENFLPPPPPPPEEDNSGLLPPPPPPY  
 LEEPDPFVPPPPPAAVEDSALPPPPPPPPCLSQEITKSSPLPKKPLVPPPKRQENQGLPGAPGNSEQDFMSD  
 LMKALQKRRGNIP\*  
 >rs228911540\_ENSMUSP00000109957\_c.1728:C>T\_p.Q577\*  
 ENSMUST00000114318.10|Grin1-208|ENSMUSG00000026959|-|chr2:g.25187693:G>A



MSTMHLLTFALLFSCSFARAACDPKIVNIGAVLSTRKHEQMFREAVNQANKRHGSKWIKLQNLATSVTHKPNAIQ  
MALSVCEDLISSQVYAILVSHPPPTNDHFTPTPVSYTAGFYRIPVLGLTTRMSIYSDKSIHLSFLRTVPPYSH  
QSSVWFEMMRVYNWNHII LLVSDDEHGAAQKRLETLLEERESKSKKRNENLDQLSDYDNKRGPKAQKVLQFD  
PGTKNVTALLMEARDLEARVILSASEDDAATVYRAAAMLNMTGSGYVWLVGEREISGNALRYAPDGI IGLQL  
INGKNESAHI SDAVGVVAQAVHELLEKENITDPPRGCVGNTNIWKTGPLFKRVLMSKYADGVTGRVEFNEDG  
DRKFANYSIMNLQNRKLVQVGIYNGTHVIPNDRKI IWPGGETEKPRGYQMSTRLKIVT IHQEPFVYVKTMSD  
GTCKEEFTVNGDPVKKVIC TGPNDTSPGSPRHTVPQCCYGFCDLLIKLARTMNFTYEVHVLVADGKFGTQERV  
NNSNKKEWNGMMGELLSGQADMIVAPLTINNERAQYIEFSKPFKYQGLTILVKKEIPRSTLDSFM\* PFQSTLW  
LLVGLSVHVAVMLYLLDRFSPFGRFKVNSEEEEEEDALTSSAMWFSWGVLLNSGIGEGAPRSFARILGMVW  
AGFAMI IVASYTANLAAFLVLDLDRPEERITGINDPRLRNPSDKFIYATVKQSSVDIYFRRQVELSTMYRHMEKH  
NYESAAEAIQAVRDNKLHAFIWD SAVLEFEASQKCDLVTGELFFRSGFGIGMRKDSPWKQNVLSILKSHEN  
GFMEDLDKTTWVRYQECDSRSNAPATLTFENMAGVFMLVAGGIVAGIFLIFIEIAYKRHKDARRKQMLAFAAV  
NVWRKNLQDRKSGRAEPDPKKKATFRAITSTLASSFKRRRSSKDTQYHPTDITGPLNLSDPVSVTVV\*

>rs228911540\_ENSMUSP00000109949\_c.1728:C>T\_p.Q577\*

ENSMUST00000114310.10|Grin1-204|ENSMUSG00000026959|-|chr2:g.25187693:G>A  
MSTMHLLTFALLFSCSFARAACDPKIVNIGAVLSTRKHEQMFREAVNQANKRHGSKWIKLQNLATSVTHKPNAIQ  
MALSVCEDLISSQVYAILVSHPPPTNDHFTPTPVSYTAGFYRIPVLGLTTRMSIYSDKSIHLSFLRTVPPYSH  
QSSVWFEMMRVYNWNHII LLVSDDEHGAAQKRLETLLEERESKSKKRNENLDQLSDYDNKRGPKAQKVLQFD  
PGTKNVTALLMEARDLEARVILSASEDDAATVYRAAAMLNMTGSGYVWLVGEREISGNALRYAPDGI IGLQL  
INGKNESAHI SDAVGVVAQAVHELLEKENITDPPRGCVGNTNIWKTGPLFKRVLMSKYADGVTGRVEFNEDG  
DRKFANYSIMNLQNRKLVQVGIYNGTHVIPNDRKI IWPGGETEKPRGYQMSTRLKIVT IHQEPFVYVKTMSD  
GTCKEEFTVNGDPVKKVIC TGPNDTSPGSPRHTVPQCCYGFCDLLIKLARTMNFTYEVHVLVADGKFGTQERV  
NNSNKKEWNGMMGELLSGQADMIVAPLTINNERAQYIEFSKPFKYQGLTILVKKEIPRSTLDSFM\* PFQSTLW  
LLVGLSVHVAVMLYLLDRFSPFGRFKVNSEEEEEEDALTSSAMWFSWGVLLNSGIGEGAPRSFARILGMVW  
AGFAMI IVASYTANLAAFLVLDLDRPEERITGINDPRLRNPSDKFIYATVKQSSVDIYFRRQVELSTMYRHMEKH  
NYESAAEAIQAVRDNKLHAFIWD SAVLEFEASQKCDLVTGELFFRSGFGIGMRKDSPWKQNVLSILKSHEN  
GFMEDLDKTTWVRYQECDSRSNAPATLTFENMAGVFMLVAGGIVAGIFLIFIEIAYKRHKDARRKQMLAFAAV  
NVWRKNLQDRKSGRAEPDPKKKATFRAITSTLASSFKRRRSSKDTSTGGGRGALQNQKDTVLPRAIEREEGQ  
LQLCSRHRRES\*

>rs228911540\_ENSMUSP00000109947\_c.1728:C>T\_p.Q577\*

ENSMUST00000114308.10|Grin1-203|ENSMUSG00000026959|-|chr2:g.25187693:G>A  
MSTMHLLTFALLFSCSFARAACDPKIVNIGAVLSTRKHEQMFREAVNQANKRHGSKWIKLQNLATSVTHKPNAIQ  
MALSVCEDLISSQVYAILVSHPPPTNDHFTPTPVSYTAGFYRIPVLGLTTRMSIYSDKSIHLSFLRTVPPYSH  
QSSVWFEMMRVYNWNHII LLVSDDEHGAAQKRLETLLEERESKSKKRNENLDQLSDYDNKRGPKAQKVLQFD  
PGTKNVTALLMEARDLEARVILSASEDDAATVYRAAAMLNMTGSGYVWLVGEREISGNALRYAPDGI IGLQL  
INGKNESAHI SDAVGVVAQAVHELLEKENITDPPRGCVGNTNIWKTGPLFKRVLMSKYADGVTGRVEFNEDG  
DRKFANYSIMNLQNRKLVQVGIYNGTHVIPNDRKI IWPGGETEKPRGYQMSTRLKIVT IHQEPFVYVKTMSD  
GTCKEEFTVNGDPVKKVIC TGPNDTSPGSPRHTVPQCCYGFCDLLIKLARTMNFTYEVHVLVADGKFGTQERV  
NNSNKKEWNGMMGELLSGQADMIVAPLTINNERAQYIEFSKPFKYQGLTILVKKEIPRSTLDSFM\* PFQSTLW  
LLVGLSVHVAVMLYLLDRFSPFGRFKVNSEEEEEEDALTSSAMWFSWGVLLNSGIGEGAPRSFARILGMVW  
AGFAMI IVASYTANLAAFLVLDLDRPEERITGINDPRLRNPSDKFIYATVKQSSVDIYFRRQVELSTMYRHMEKH  
NYESAAEAIQAVRDNKLHAFIWD SAVLEFEASQKCDLVTGELFFRSGFGIGMRKDSPWKQNVLSILKSHEN  
GFMEDLDKTTWVRYQECDSRSNAPATLTFENMAGVFMLVAGGIVAGIFLIFIEIAYKRHKDARRKQMLAFAAV  
NVWRKNLQSTGGGRGALQNQKDTVLPRAIEREEGQLQLCSRHRRES\*

>rs228911540\_ENSMUSP00000109956\_c.1728:C>T\_p.Q577\*

ENSMUST00000114317.10|Grin1-207|ENSMUSG00000026959|-|chr2:g.25187693:G>A  
MSTMHLLTFALLFSCSFARAACDPKIVNIGAVLSTRKHEQMFREAVNQANKRHGSKWIKLQNLATSVTHKPNAIQ  
MALSVCEDLISSQVYAILVSHPPPTNDHFTPTPVSYTAGFYRIPVLGLTTRMSIYSDKSIHLSFLRTVPPYSH  
QSSVWFEMMRVYNWNHII LLVSDDEHGAAQKRLETLLEERESKSKKRNENLDQLSDYDNKRGPKAQKVLQFD  
PGTKNVTALLMEARDLEARVILSASEDDAATVYRAAAMLNMTGSGYVWLVGEREISGNALRYAPDGI IGLQL  
INGKNESAHI SDAVGVVAQAVHELLEKENITDPPRGCVGNTNIWKTGPLFKRVLMSKYADGVTGRVEFNEDG  
DRKFANYSIMNLQNRKLVQVGIYNGTHVIPNDRKI IWPGGETEKPRGYQMSTRLKIVT IHQEPFVYVKTMSD  
GTCKEEFTVNGDPVKKVIC TGPNDTSPGSPRHTVPQCCYGFCDLLIKLARTMNFTYEVHVLVADGKFGTQERV  
NNSNKKEWNGMMGELLSGQADMIVAPLTINNERAQYIEFSKPFKYQGLTILVKKEIPRSTLDSFM\* PFQSTLW  
LLVGLSVHVAVMLYLLDRFSPFGRFKVNSEEEEEEDALTSSAMWFSWGVLLNSGIGEGAPRSFARILGMVW  
AGFAMI IVASYTANLAAFLVLDLDRPEERITGINDPRLRNPSDKFIYATVKQSSVDIYFRRQVELSTMYRHMEKH  
NYESAAEAIQAVRDNKLHAFIWD SAVLEFEASQKCDLVTGELFFRSGFGIGMRKDSPWKQNVLSILKSHEN

GFMEDLDKTTWVRYQECDSRSNAPATLTFENMAGVFMLVAGGIVAGIFLIFIEIAYKRHKDARRKQMLAFAAV  
 NVWRKNLQQYHPTDITGPLNLSDPSVSTVV\*  
 >rs228911540\_ENSMUSP0000028335\_c.1665:C>T\_p.Q556\*  
 ENSMUST0000028335.13|Grin1-201|ENSMUSG0000026959|-|chr2:g.25187693:G>A  
 MSTMHLLTFALLFSCSFARAACDPKIVNIGAVLSTRKHEQMFREAVNQANKRHGSKWIKLQNLATSVTHKPNAIQ  
 MALSVCEDLISSQVYAILVSHPPPTNDHFTPTPVSYTAGFYRIPVLGLTTRMSIYSDKSIHLSFLRTVPPYSH  
 QSSVWFEMMRVYNWNHII LLVSDDEHGRAAQKRLETLLEERESKAQKVLQFDPGKNTVALLMEARDLEARVI  
 ILSASEDDAATVYRAAAMLNMTGSGYVWLVGEREISGNALRYAPDGI IGLQLINGKNESAHISDAVGVAQAV  
 HELLEKENITDPPRGCVGNTNIWKTGPLFKRVLMSKYADGVTGRVEFNEDGDRKFANYSIMNLQNRKLVQVG  
 IYNGTHVIPNDRKI IWPGGETEKPRGYQMSTRLKI VTIHQEPFVYVKPTMSDGTCKEEFTVNGDPVKKVICTG  
 PNDTSPGSPRHTVPQCCYGFCVDLLIKLARTMNFTYEVHLVADGKFGTQERVNNSNKKEWNGMMGELLSGQAD  
 MIVAPLTIINNERAQYIEFSKPFKYQGLTILVKKEI PRSTLDSFM\*PFQSTLWLLVGLSVHVAVMMLYLLDRFS  
 PFGRFKVNSEEEEEEDALTLSAMWFSWGVLLNSGIGEGAPRSFSARILGMVWAGFAMI IVASYTANLAAFLVL  
 DRPEERITGINDPRLRNPDKFIYATVKQSSVDIYFRRQVELSTMYRHMEKHNYESAAEAIQAVRDNKLHAFI  
 WDSAVLEFEASQKCDLVTGELFFRSFGF IGMRKDSPWKQNVLSILKSHENGFMEDLDKTTWVRYQECDSRSN  
 APATLTFENMAGVFMLVAGGIVAGIFLIFIEIAYKRHKDARRKQMLAFAAVNVWRKNLQDRKSGRAEPDPKK  
 KATFRAITSTLASSFKRRRSSKDTSTGGGRGALQNQKDTVLPRAIEREEGQLQLCSRHRRES\*  
 >rs228911540\_ENSMUSP00000109953\_c.1665:C>T\_p.Q556\*  
 ENSMUST00000114314.10|Grin1-206|ENSMUSG0000026959|-|chr2:g.25187693:G>A  
 MSTMHLLTFALLFSCSFARAACDPKIVNIGAVLSTRKHEQMFREAVNQANKRHGSKWIKLQNLATSVTHKPNAIQ  
 MALSVCEDLISSQVYAILVSHPPPTNDHFTPTPVSYTAGFYRIPVLGLTTRMSIYSDKSIHLSFLRTVPPYSH  
 QSSVWFEMMRVYNWNHII LLVSDDEHGRAAQKRLETLLEERESKAQKVLQFDPGKNTVALLMEARDLEARVI  
 ILSASEDDAATVYRAAAMLNMTGSGYVWLVGEREISGNALRYAPDGI IGLQLINGKNESAHISDAVGVAQAV  
 HELLEKENITDPPRGCVGNTNIWKTGPLFKRVLMSKYADGVTGRVEFNEDGDRKFANYSIMNLQNRKLVQVG  
 IYNGTHVIPNDRKI IWPGGETEKPRGYQMSTRLKI VTIHQEPFVYVKPTMSDGTCKEEFTVNGDPVKKVICTG  
 PNDTSPGSPRHTVPQCCYGFCVDLLIKLARTMNFTYEVHLVADGKFGTQERVNNSNKKEWNGMMGELLSGQAD  
 MIVAPLTIINNERAQYIEFSKPFKYQGLTILVKKEI PRSTLDSFM\*PFQSTLWLLVGLSVHVAVMMLYLLDRFS  
 PFGRFKVNSEEEEEEDALTLSAMWFSWGVLLNSGIGEGAPRSFSARILGMVWAGFAMI IVASYTANLAAFLVL  
 DRPEERITGINDPRLRNPDKFIYATVKQSSVDIYFRRQVELSTMYRHMEKHNYESAAEAIQAVRDNKLHAFI  
 WDSAVLEFEASQKCDLVTGELFFRSFGF IGMRKDSPWKQNVLSILKSHENGFMEDLDKTTWVRYQECDSRSN  
 APATLTFENMAGVFMLVAGGIVAGIFLIFIEIAYKRHKDARRKQMLAFAAVNVWRKNLQDRKSGRAEPDPKK  
 KATFRAITSTLASSFKRRRSSKDTQYHPTDITGPLNLSDPSVSTVV\*  
 >rs228911540\_ENSMUSP00000109946\_c.1665:C>T\_p.Q556\*  
 ENSMUST00000114307.8|Grin1-202|ENSMUSG0000026959|-|chr2:g.25187693:G>A  
 MSTMHLLTFALLFSCSFARAACDPKIVNIGAVLSTRKHEQMFREAVNQANKRHGSKWIKLQNLATSVTHKPNAIQ  
 MALSVCEDLISSQVYAILVSHPPPTNDHFTPTPVSYTAGFYRIPVLGLTTRMSIYSDKSIHLSFLRTVPPYSH  
 QSSVWFEMMRVYNWNHII LLVSDDEHGRAAQKRLETLLEERESKAQKVLQFDPGKNTVALLMEARDLEARVI  
 ILSASEDDAATVYRAAAMLNMTGSGYVWLVGEREISGNALRYAPDGI IGLQLINGKNESAHISDAVGVAQAV  
 HELLEKENITDPPRGCVGNTNIWKTGPLFKRVLMSKYADGVTGRVEFNEDGDRKFANYSIMNLQNRKLVQVG  
 IYNGTHVIPNDRKI IWPGGETEKPRGYQMSTRLKI VTIHQEPFVYVKPTMSDGTCKEEFTVNGDPVKKVICTG  
 PNDTSPGSPRHTVPQCCYGFCVDLLIKLARTMNFTYEVHLVADGKFGTQERVNNSNKKEWNGMMGELLSGQAD  
 MIVAPLTIINNERAQYIEFSKPFKYQGLTILVKKEI PRSTLDSFM\*PFQSTLWLLVGLSVHVAVMMLYLLDRFS  
 PFGRFKVNSEEEEEEDALTLSAMWFSWGVLLNSGIGEGAPRSFSARILGMVWAGFAMI IVASYTANLAAFLVL  
 DRPEERITGINDPRLRNPDKFIYATVKQSSVDIYFRRQVELSTMYRHMEKHNYESAAEAIQAVRDNKLHAFI  
 WDSAVLEFEASQKCDLVTGELFFRSFGF IGMRKDSPWKQNVLSILKSHENGFMEDLDKTTWVRYQECDSRSN  
 APATLTFENMAGVFMLVAGGIVAGIFLIFIEIAYKRHKDARRKQMLAFAAVNVWRKNLQSTGGGRGALQNQK  
 DTVLPRAIEREEGQLQLCSRHRRES\*  
 >rs228911540\_ENSMUSP00000109951\_c.1665:C>T\_p.Q556\*  
 ENSMUST00000114312.2|Grin1-205|ENSMUSG0000026959|-|chr2:g.25187693:G>A  
 MSTMHLLTFALLFSCSFARAACDPKIVNIGAVLSTRKHEQMFREAVNQANKRHGSKWIKLQNLATSVTHKPNAIQ  
 MALSVCEDLISSQVYAILVSHPPPTNDHFTPTPVSYTAGFYRIPVLGLTTRMSIYSDKSIHLSFLRTVPPYSH  
 QSSVWFEMMRVYNWNHII LLVSDDEHGRAAQKRLETLLEERESKAQKVLQFDPGKNTVALLMEARDLEARVI  
 ILSASEDDAATVYRAAAMLNMTGSGYVWLVGEREISGNALRYAPDGI IGLQLINGKNESAHISDAVGVAQAV  
 HELLEKENITDPPRGCVGNTNIWKTGPLFKRVLMSKYADGVTGRVEFNEDGDRKFANYSIMNLQNRKLVQVG  
 IYNGTHVIPNDRKI IWPGGETEKPRGYQMSTRLKI VTIHQEPFVYVKPTMSDGTCKEEFTVNGDPVKKVICTG  
 PNDTSPGSPRHTVPQCCYGFCVDLLIKLARTMNFTYEVHLVADGKFGTQERVNNSNKKEWNGMMGELLSGQAD  
 MIVAPLTIINNERAQYIEFSKPFKYQGLTILVKKEI PRSTLDSFM\*PFQSTLWLLVGLSVHVAVMMLYLLDRFS  
 PFGRFKVNSEEEEEEDALTLSAMWFSWGVLLNSGIGEGAPRSFSARILGMVWAGFAMI IVASYTANLAAFLVL

DRPEERITGINDPRLRNPSDKFIYATVKQSSVDIYFRQVELSTMYRHMKEKHNYESAAEAIQAVRDNKLHAFI  
WDSAVLEFEASQKCDLVTGELFFRSGFGIGMRKSDPWKQNVLSILKSHENGFMEDLDKTTWVRYQECDSRSN  
APATLTFENMAGVFMVLVAGGIVAGIFLIFIEIAYKRHKDARRKQMLAFAAVNVWRKNLQQYHPTDITGPLNL  
SDPSVSTVV\*

>ENSMUSP00000028170\_c.549:C>T\_p.R184C ENSMUST00000028170.15|Ralgds-  
201|ENSMUSG00000026821|+|chr2:g.28433696:C>T  
MMVDCQSSTQEIGEELINGVIYSISLRKVQLHQGATKGQRWLGCEENESALNLYETCKVRTVKAGTLEKLVEHL  
VPAFQGSDDLVSVTVFLCTYRAFTTTQQVLDLFLFKRYGRCDALTASSRYGCILPYSSSEDGGPQDQLKNAISSIL  
GTWLDQYSEDFCQPPDFPCLKQLVAVYVQLNMPGSDLECRHLLLAQLEDLEPSEAASEALSAPVLSLKPASQ  
LEPALLLTPSQVVTSTPVREPAAPVPLASSPVVAPAPELEPVPEPPQEPEPSLALAPELEPAVSQSLELES  
APVPTPALEPSWSLPEATENGLTEKPHLLLFPDDLVAEQFTLMDAELFKKVVPYHCLGSIWSQRDKKGEHLA  
PTIRATVAQFNNVANCVITTCCLGDQSMKAPDRARVVEHWIEVARECRALKNFSSLYAILSALQSNAIHRLKKT  
WEEVSRDSFRVFQKLSEIFSDENNYLSRELLIKEGTSKFATLEMNPRRAQRRQKETGVIQGTVPYLGTFLLTD  
LVMLDTAMKDYLYGRLINFEKRRKEFEVIAQIKLLQSACNNYSIAPEEHFGTWFRAMERLSEAESYTLSCLE  
PPSESASNTLRSKKSTAIVKRWSRQAPSTELSTSSSAHKSQCDQLRCSPLYLGSGLDITDALS VHSAGSSSDV  
EEINMSFVPESPDGQEKKFWESASQSSPETSGISSASSSTSSSSASTTPVSTTRTHKRSVSGVCSYSSSLPLY  
NQVGDCCIIRVSLDNDNGNMYKSILVTSQDKAPTIRKAMDKNLDEDEPEDYELVQIISEDHKLKIPENAN  
VFYAMNSTANYDFILKKRTFTKGAKVKHGASSTLPRMKQKGLRIAKGIF\*

>ENSMUSP00000158697\_c.717:C>T\_p.R240C ENSMUST00000238699.2|Ralgds-  
211|ENSMUSG00000026821|+|chr2:g.28433696:C>T  
MAREADRVHARPAVPRGRKGSVFFACVSVVTARRWAIARRTTAHSPTPPTPCPAPLLAPTAESSTQEIGEELI  
NGVIYSISLRKVQLHQGATKGQRWLGCEENESALNLYETCKVRTVKAGTLEKLVEHLVPAFQGSDDLVSVTVFLC  
TYRAFTTTQQVLDLFLFKRYGRCDALTASSRYGCILPYSSSEDGGPQDQLKNAISSILGTWLDQYSEDFCQPPDF  
PCLKQLVAVYVQLNMPGSDLECRHLLLAQLEDLEPSEAASEALSAPVLSLKPASQLEPALLLTPSQVVTSTP  
VREPAAPVPLASSPVVAPAPELEPVPEPPQEPEPSLALAPELEPAVSQSLELESAPVPTPALEPSWSLPEA  
TENGLTEKPHLLLFPDDLVAEQFTLMDAELFKKVVPYHCLGSIWSQRDKKGEHLAPTIRATVAQFNNVANCV  
ITTCCLGDQSMKAPDRARVVEHWIEVARECRALKNFSSLYAILSALQSNAIHRLKKTWEEVSRDSFRVFQKLSE  
IFSDENNYLSRELLIKEGTSKFATLEMNPRRAQRRQKETGVIQGTVPYLGTFLLTDLVMLDTAMKDYLYGRLI  
NFEKRRKEFEVIAQIKLLQSACNNYSIAPEEHFGTWFRAMERLSEAESYTLSCLEPPSESASNTLRSKKSTA  
IVKRWSRQAPSTELSTSSSAHKSQCDQLRCSPLYLGSGLDITDALS VHSAGSSSDVVEEINMSFVPESPDGQEK  
KFWESASQSSPETSGISSASSSTSSSSASTTPVSTTRTHKRSVSGVCSYSSSLPLYNQVGDCCIIRVSLDND  
NGNMYKSILVTSQDKAPTIRKAMDKNLDEDEPEDYELVQIISEDHTEDSRKRQCVLCHELYRQL\*

>ENSMUSP00000109526\_c.678:C>T\_p.R227C ENSMUST00000113893.8|Ralgds-  
203|ENSMUSG00000026821|+|chr2:g.28433696:C>T  
MVQRMWAEAAAGPIGGTEPLFPGSRRSRSVWDAVRLEVGVPDSCPVLHLSFTQLDPLDRLESSTQEIGEELIN  
GVIYSISLRKVQLHQGATKGQRWLGCEENESALNLYETCKVRTVKAGTLEKLVEHLVPAFQGSDDLVSVTVFLC  
YRAFTTTQQVLDLFLFKRYGRCDALTASSRYGCILPYSSSEDGGPQDQLKNAISSILGTWLDQYSEDFCQPPDF  
PCLKQLVAVYVQLNMPGSDLECRHLLLAQLEDLEPSEAASEALSAPVLSLKPASQLEPALLLTPSQVVTSTP  
VREPAAPVPLASSPVVAPAPELEPVPEPPQEPEPSLALAPELEPAVSQSLELESAPVPTPALEPSWSLPEA  
TENGLTEKPHLLLFPDDLVAEQFTLMDAELFKKVVPYHCLGSIWSQRDKKGEHLAPTIRATVAQFNNVANCV  
ITTCCLGDQSMKAPDRARVVEHWIEVARECRALKNFSSLYAILSALQSNAIHRLKKTWEEVSRDSFRVFQKLSE  
IFSDENNYLSRELLIKEGTSKFATLEMNPRRAQRRQKETGVIQGTVPYLGTFLLTDLVMLDTAMKDYLYGRLI  
NFEKRRKEFEVIAQIKLLQSACNNYSIAPEEHFGTWFRAMERLSEAESYTLSCLEPPSESASNTLRSKKSTA  
IVKRWSRQAPSTELSTSSSAHKSQCDQLRCSPLYLGSGLDITDALS VHSAGSSSDVVEEINMSFVPESPDGQEK  
KFWESASQSSPETSGISSASSSTSSSSASTTPVSTTRTHKRSVSGVCSYSSSLPLYNQVGDCCIIRVSLDND  
NGNMYKSILVTSQDKAPTIRKAMDKNLDEDEPEDYELVQIISEDHTEDSRKRQCVLCHELYRQL\*

>ENSMUSP00000097812\_c.714:C>T\_p.R239C ENSMUST00000100241.10|Ralgds-  
202|ENSMUSG00000026821|+|chr2:g.28433696:C>T  
MVQRMWAEAAAGPIGGTEPLFPGSRRSRSVWDAVRLEVGVPDSCPVLHLSFTQLDPLDRLESSTQEIGEELIN  
GVIYSISLRKVQLHQGATKGQRWLGCEENESALNLYETCKVRTVKAGTLEKLVEHLVPAFQGSDDLVSVTVFLC  
YRAFTTTQQVLDLFLFKRYGRCDALTASSRYGCILPYSSSEDGGPQDQLKNAISSILGTWLDQYSEDFCQPPDF  
PCLKQLVAVYVQLNMPGSDLECRHLLLAQLEDLEPSEAASEALSAPVLSLKPASQLEPALLLTPSQVVTSTP  
VREPAAPVPLASSPVVAPAPELEPVPEPPQEPEPSLALAPELEPAVSQSLELESAPVPTPALEPSWSLPEA  
TENGLTEKPHLLLFPDDLVAEQFTLMDAELFKKVVPYHCLGSIWSQRDKKGEHLAPTIRATVAQFNNVANCV  
ITTCCLGDQSMKAPDRARVVEHWIEVARECRALKNFSSLYAILSALQSNAIHRLKKTWEEVSRDSFRVFQKLSE  
IFSDENNYLSRELLIKEGTSKFATLEMNPRRAQRRQKETGVIQGTVPYLGTFLLTDLVMLDTAMKDYLYGRLI  
NFEKRRKEFEVIAQIKLLQSACNNYSIAPEEHFGTWFRAMERLSEAESYTLSCLEPPSESASNTLRSKKSTA

VKRWSDRQAPSTELSTSSSAHSKSCDQLRCSPLYLGSDDITDALSVHSAGSSSSDVEEINMSFVPEPDPGQEKK  
FWESASQSSPETSGLISSASSSTSSSASTTPVSTTRTHKRSVSGVCSYSSSLPLYNQVGDCCIIRVSLDVDN  
GNMYKSILVTSQDKAPTIVIRKAMDKNLDEDEPEDYELVQIISEDHKLKIPENANVFYAMNSTANYDFILKKR  
TFTKGAKVKHGASSTLPRMKQKGLRIAKGIF\*

>ENSMUSP00000066492\_c.6232:A>T\_p.Q2078L ENSMUST00000065398.13|Nup214-  
201|ENSMUSG00000001855|+|chr2:g.31942139:A>T  
MGDEMDAMIPEREMKDFQFRALKKVRIFDSPEELPKERSVLTISNKYGMFAGGTNGLNVFPKSLLIQNKP  
GDDPNKIVDTIQGLNVPKFPVHHLALSCDSLTLACMMSSEYGSIIAFFDVRTFSNQAKPLKRPFTYHKVSN  
DASGMVNDMKWNPTVPSMVAVCLADGSI SVLQVTDVVKVCATLPPSTGVTCVCWSPKQKQLAVGKQNGTVVQY  
LPTLQEKKVI PCPPFYESDHPVRVLDVLWIGTYVFTIVYAGADGTLETCPDVVMALLPKKEEKHPEIFVNFME  
PCYSSCTERQHYYLSYIEEWDLVLAASAASTEVSILARQNDQTNWESWLLDSSRAELPVTDKSDDSLPMGV  
AIDYTNEVEVTINEEKTLPAPVLLLLSTDGVLCPFYMINQNPVRSI LKTLLELISTEGERQPKSSGSPFGTP  
SSPQAPQNLDPATASSPLPPVSAAPTSTFPMPAAGSPSVFSGPSSFKSSASVTGEPPLYPTGSDSSRAAP  
GSGTSTFSFAPPSKGLASTPAVAVPATSAAFTFGFKPTLESTPMSSTPNTGMKPSFPPSASSVKVNLNEKF  
TAVASSAPVHSSSTSTPSVLPFSSSPKPTASGPLSHPTPLPASSSSMPLKSSVSPSPAAGRSTQTAPSSAPSTG  
QKSPRVNPPVVKSGSSQAKALQPPVTEKQRPQWKSDPVLGIGEEIAHFQKELEELKARTAKACLQVGTSEE  
MKMLRTESDDLHTFLFEIRETTESLHGDISTLKTTLLEGFAGVEEAREQHGRNHDSGYLHLLLYKRP LDPKSEA  
QLQEIRRLHQYVKFAVQDVNDVLDLEWDRHLEQKKRQRLIVPERETLENTLANNREIINQQRKLNQLVDSL  
QQLRLYNHTAPWSLPSALSTQNSHSFSDLECLLKTITESHKPSRVPVKLSPAKQAQLRNFLAKRKTTPPV  
RSTAPASLSRSAFLSQRYEDLDEGSSASSVAQPLEGEDARPTCTSV AQPLEGEDAQPICKEEEAVVPVPRHA  
PVVRTPSIQPSLLPQSMFPAKPHLIHSSSPAVMSSAVSTSATKVI PQGADSTMLATKTVKHGAPGPSHTVAAP  
QAAAAAALRRQMASQAPAMSTLTESTLKTVPQVVNVQELRSNPPSAAMGSAVQHSAAKTPHAVLTPVANSQ  
AKQGSLLINSFKPSGPTAASCQLSSGDKAVGQGTAKTESAATSTPSAAGQLNKPFASFASPGTFTFGTITPTPSS  
SFTATPGAGPPTKEPTQLEAFSFGGGGKPFSEAI PGNSPATGATSAPSTSVTAASLEDSAPSSSKPAAPPETT  
VSSASSKLETPPSKLGE LFPSSLAGETLGSFSGLRVQGAEDSTKPVSKASSTNLAGAQAQPAKPSGVSFPNTSV  
LGKPVPAVTSVSPAPAPASALNVSTSSSASTVFGSVPLTSAGPGLISFGGAALASSKASFSGNQQTSS  
STASSATPTSTSVAPSLPASFP TLSFGGLSSSPASSLPVSSGKSTEEAAPPVAVPDKSDSSEVATTPSLPVQ  
PQSTQASLQTSDPVKKEPVLVQTTDSSPSRPASSASFVASTESMPVTLGAPDSKIEAVSPASTFAGPGQAAVA  
TAVLPGAGSAATEASGTPTTSTVSSSSPTSATETAVFGTATSGSSVFTQPPAASSSSAFS QLSNTATAPSAT  
PVFGQVAASITSTAAATPQASSSGFGSPAFGASAPGVFGQTAFGQTPAFGQATSSPASGFSFSQPGFSSVPAF  
GQSVSSTPASTSANVFGATSSSTSPGFSFSGQASTNTGGTLFGQNNPFAFGQSPGFGQSSVFGGTSATTSTA  
APSGFSFCQASGFGSSNTGSVFGQAANTGGSVFGQSSTSSGGVFGSGNATRGGGFFSGLGGKPSQDAANKNPF  
SSAGGGFGSTAAPNTSNLFGNSGAKTFGGFGSSSFGEQKPAFTFSSGGGSVASQGFGFSTPNKTGGFGAAPVF  
GSPPTFGGSPGFGVPAFGSAPAF TSPPLGSGTGGKVFEGETAASAGGFGFGSSGNTASFGTLASQNAPTFGSL  
SQQTSGFGTPSSGFAGFGSGTGAF TFGSSNSSVLGFGGWRS\*

>ENSMUSP00000115665\_c.1720:A>T\_p.Q574L ENSMUST00000138012.2|Nup214-  
208|ENSMUSG00000001855|+|chr2:g.31942139:A>T  
TEEAAPPVAVPDKSDSSEVSATTPSLPVQPQSTQASLQTS DPVKKEPVLVQTTDSSPSRPASSASFVASTESMP  
VTLGAPDSKIEAVSPASTFAGPGQAAVATAVLPGAGSAATEASGTPTTSTVSSSSPTSATETAVFGTATSGSS  
VFTQPPAASSSSAFS QLSNTATAPSATPVFGQVAASITSTAAATPQASSSGFGSPAFGASAPGVFGQTAFGQ  
TPAFGQATSSPASGFSFSQPGFSSVPAFGQSVSSTPASTSANVFGATSSSTSPGFSFSGQASTNTGGTLFGQN  
NPPAFGQSPGFGQSSVFGGTSATTSTAAPSGFSFCQASGFGSSNTGSVFGQAANTGGSVFGQSSSTSSGGVF  
GSGNATRGGGFFSGLGGKPSQDAANKNPFSSAGGGFGSTAAPNTSNLFGNSGAKTFGGFGSSSFGEQKPAFT  
SSGGGSVASQGFGFSTPNKTGGFGAAPVFGSPPTFGGSPGFGVPAFGSAPAF TSPPLGSGTGGKVFEGETAAS  
AGGFGFGSSGNTASFGTLASQNAPTFGSLSQQTSGFGTPSSGFAGFGSGTGAF TFGSSNSSVLGFGGWRS\*

>ENSMUSP00000142255\_c.225:A>T\_p.R76W ENSMUST00000152791.4|Nup214-  
210|ENSMUSG00000001855|+|chr2:g.31942139:A>T  
GGSVASQGFGFSTPNKTGSGAAA I LHPVSPVPRTHPPSGPCPSRPQALGPRAVDSLGLDRAQEPSPLDHLTR  
LSWASVAGEAELMSAFPQVPVSSCAHPSTATDCQKNFLMKTLSQEETLETKAQQCLTNCLFPAFKFYIKFFVC  
Y\*

>ENSMUSP00000050219\_c.1608:T>C\_p.W537R ENSMUST00000053087.4|K1h123-  
201|ENSMUSG000000042155|+|chr2:g.69664261:T>C  
MALKGQEDYIFHFKDSSHPVDFLDAFRTFYMDGLFTDITLQCPSGIIFHCHRAVLAACSNYFKAMFTADMKEK  
FKSKIKLSGIHHDILEGLVNYAYTSQIEITKRNVQSLLEAADLLQFLSVKKACEQFLVRHLDIDNCIGMHSFA  
EFHVCSELEKESRRILCSRFEVWQEEFLEISLEKFLF ILSRKNLSVWKEEAILEPVIKWT AHDVENRIECI  
YNLLSYINIDIDPVYLKTA LGLQRSCLLTENKIRSLIYNALNPMHKEISQRSTATMYIIGGYYWHPLSEVHIW  
DPLTNVWIQGAIEIPDYTRESYGVTC LGPNIIYVTGGYRTDNIDALDVTWIIYNSEGDEWTEGLPMLNARYYHCAV  
TLGGCVYALGGYRKGAPAEAEFYDPLKEKWLPIANMIKGVGNATACVLHEVIYVIGGHCGYRGSC TYDKVQS

YNSDINEWSLITASPHPEYGLCSVPFENKLYLVGGQTTITECYDPEQNEWRETAPMMERRMECGAVIMNGCIY  
VTGGYSYSKGTYLQSIKDYDPLNKREIVGNLPSAMRSHGCVVYVNV\*  
>ENSMUSP00000011934\_c.57582:A>C\_p.K19195Q ENSMUST00000011934.13|Ttn-  
201|ENSMUSG00000051747|-|chr2:g.76568328:T>G  
MTTQAPMFTQPLQSVVLEGGSTATFEAHVSGSPVPEVSWFRDGGVISTSTLPGVQISFSDGRARLMI PAVTKA  
NSGRYSLRATNGSGQATSTAELLVTAETAPPNFSQRLQSMTRVQGSQVRLQVRVTGIPTPVVKFYRDGAEIQS  
SLDFQISQEGDLYSLLIAEAYPEDSGTYSVNATNSVGRATSTAELVVQGEVVPAAKTKTIVSTAQISETROT  
RIEKKIEAHFDARSIATVEMVIDGATGQLPHKTPPRI PPKPKRSRPTPPSIAAKAQLARQQSPSIRHSPSPV  
RHVRAPTPSPVRSVPAGRISTSPIRSVKSPLLIRKTQTTMATGPEVPPPWKQEGYVASSTEAMRETTMTS  
STQIRREERWEGRYGVQEQVTISGAAAAAASASVSSSFTAGAITTGTKEVKQETDKSAAVATVVAAVDMARVR  
EPAISAVEQTAQRTTTTAVHIQPAQEQRKEAEKTAVTKVVAADKAKEQELKSRTREVMVTTQEQTTHISHEQ  
IRKETEKAQFVQVVISATKAKEQETRITGEITTKQEQKRI TQETMMKETRKTVPKIVIVATPKIKEQDLVSRS  
REAITTKRDQVQITQEKKRKEVETALSTIAVATAKAKEQETVLRSRREAMATRQEHIQVTHGQVGVGKKAQAV  
ATVVAAVDQARVREPPTHVEESHQQTTLLEYGYKEHISTTKVPEQPRRPASEPHVVPQAVKPAVIQAPSET  
HIKTTDQMGMHISSQVKKTTDISTERLVHVDKRPRTASPHFTVSKISVPKTEHGYEASIAAGSAIATLQKELSA  
TSSTQKITKSVKAPTVPKGETRVRAEPTPSPQFPFADMPPTDYKQAGIEVKKEVGVVISGTVVREEHFEVL  
RGREAKVTETARVPAPAEPVPTPPTLVSGLNVTVIEGESVLECHISGYSPKVTWYREDYQIESSIDFQIT  
FQGGIARLMI REAFAEDSGRFTCSAVNEAGTVSTSCYLAVQVSEEFDKETTLTEKFATEEKRFVESRDVMTD  
TSITEEQAGPGEPAAPFFISKPVVQKLVGEGSVVFECQIGGNPKPHVYWKSGVPLTTGYRYKVSYNKQGTGEC  
RLVISMTFADDAGEYTI VIRNKHGETSASASLLEEADYEALVKTQEQEMLYQTMSTFIQEPKVG EIAPGFAYS  
EYEKEYEKEQALIRKKMAKDTVMVRFVVEDQEFHISSFEERLIKEIEYRI IKTTLEELLEEDGEEKMAVDISE  
SEAIESGFDIRIKNYRILEGMGVTFHCKMSGYPLPKIAWYKDGKRI RHGERYQMDFLQDGRASLRI PVLVLPED  
EGLYTAFASNIKGNACISGKLYVEPAAPFSAPTYMPTPEAVSRIRSVSPRSLRSRSPIRMS PAMSPARMS PARM  
SPARMS PARMSPGRRL EETDESQLERLYKPVFVLKPA SFKCLEGQTARFDLKVVGRPMPETFWFHNGQQIVND  
YTHKVIKEDGTQSLI VPPASPSDSGEWTVVAQN RAGKSTISVTLTVEAVEHQIKPAFVEKLNKVN IKEGSR  
EMKVRATGNPNPDI VLVKNSDI IVPHKYPRRIEGRGAEALKIDSII SQDSAWYTATAINKAGRDTTRCKVN  
VEVEFAEPENPRKLI I PRGTYRAKEIAAPELEPLHLRYGAEQWEEGDLYDKEKQKPKFFKKLTHSLRLKRFGP  
AHFECRLTPIGDPTMVVEWLHDGKPLEAANRLRMINEFGYCSLDYGAAYSRDSGVI TCRATNKYGTDHTSATL  
IVKDEKSLVEESQLPDGKGLQRIEELERMAHEGALTGVTTDQKEKQKPDIVLFPPEPVRVLEGETARFCRVT  
GYPQPKVNWYLNGLIRKSKRFRVRYDGIHYLDIVDCKSYDTGEVKTVAENPEGVTEHKVKLEIQQREDFRSV  
LRRAPPEPKPEFHVHEPGKLQFEVQKVD RVPDTSSETKEVVKLRAERITHEKVSESEELRSKFKRRTEEGYIE  
AITAVELKSRKDES YEELLKTKDELLHWTKELT EEEKKALAEKGK I T I PTFKPERIELSPSMEAPKIFERI  
QSQT VGGSDAHFRVRVVGKPDPECEWYKNGVKIERSDRIYWYWPEDNVCELVIRDVTAEDSASIMVKA INIA  
GETSSHAFLLVQAKQLITFTQELQDVVAK EKDTMATFECETSEPFIKVKWKDGEIEVHAGDKYRMHSDRKVHF  
LSVLTIDTSDAEDYSCVLVEDENIKTTAKLIVEGAVVEFVKELQDIEVPESYSGELECIISPENIEGKWHND  
VELKSNKYSITSRGRQNLTVKDVTKEDQGEYSFVVDGKKTCKLKMKPRPIAILQGLSDQKVCEDGDIVQLE  
VKVSLNVEGVMMKDGQEVQHSRDRVHIVIDKQSHMLLIEDMTKEDAGNYSFTIPALGLSTSGNVSVYSVDVIT  
PLKDVNVI EGTKAVLECKVSPDVT SVKWYLNDEQIKPDDRVSIVKGTQKQLVINRTHASDEGPYKLMVGRV  
ETSCNLSVEKIKIIRGLRDLTCTETQNVVFEVELSHSGIDVWVNFKGKEIKPSSKYKIEAHGKIYKLTVLNMM  
KDDEGEYAFYAGENTTSGKLTVAGGAI STPLTDQTVAESQEA VFECEVANPESEGEWLKDGKHLALSNNFRGE  
SDGHKRLVIAAAKLD DAGEYTYKVATSKTSAKLVKVEAVKIKKTLRNLTVTETQDAVFSVELTHPDVKGVQWI  
KNGVVLDSNDKYEISVKGTLYSLKIKNCAMADESVYGFKLGR LGASARLHVETVKI IKKPKDVTALENATVTF  
EVSVSHDTPVVKWFHKNVEIKPSDKHRLVSEKRVHKLMLQSI SPSDAGEYTAMVGQLECKAKLFVETLHITKT  
MKSIEVPETKAASFCEVSHFNVP SMWLKNGVEIEMSEKFKI VVQGLHQLI IMNTSTEDSAEYTFVCGNDQV  
SATLTVTPIMITSMLKDINAEEKDTITFEVTVNYEGISYKWLKNGVEIKSTDRCQMRTKKLTSLNIRNVHFG  
DAADYTFVAGKATSTATLYVEARHIEFRKH IKDKVLEKKRAMFECEVSEPDITVQWMDGQELQIADR IKIQ  
KEYVHRLLI PSTRMSDAGKYTVVAGNMSTANL FVEGRDVRIRS IKKEVQVIEKQRAVVEFEVNEDDVDAH  
YKDGIEINFQVQERHQYVVERRIHRMFI SETRHS DAGEYTFVAGRNRSSVTLVNAPEPPQVLQELQPVTVQS  
GKPARFCAVISGRPQPKISWYKEEQLLSTGFKCKFLHDGQEYTLLEAFPEDAAVYTCEAKNDYGVATTSSAS  
LSVEVPEVVS PDQEMPVYPPAIVTPLQDVTV TSEGRPARFQCQVSGTDLKVS WYCKDKKIKPSRFRMTQFEDT  
YQLEIAEAYPEDEGTYAFVANNAVGVSSSTATLRLEAPESILHERIGQQIEMEMKEIASLLSAEEDFQTYSSD  
LRLPNANETLELLSEPPARSTQFDSRQEGAAPVFI REISDVEISVEDVAKLSVTVTGCPKPKIQWFFNGMLLT  
PSADYKVFVGDGTHSLIILFTRFQDEGEYTCLASNEYGKAVCSAHLRISPRGERSTEMSEGEKKALEKPKGCP  
PPYFFKELKFPVHCGPGIPAVFEYSVHGEPAPT VLFKEDMPLYSVCYTI IHSPDGSGETFIVNDPQRGDSGLY  
LCKAQN LWGESTCAEELLVLPEDTDVDPDASCKEESTLGVPGDFLET SARGPLVQGVDSRQEITAF AEGTISKA  
ALIAEETLQLSYERSVDDSEVGTGVTI GAQKLPPVVLSTPQGTGELPSIDGAVHTQPRGPPPTLNLQAVQAQ  
TTL PKEATLQFEEPEGVFPGASSAAQVSPVTIKPLITLTAEPKGNYPQSSTAAPDHALLSSVAEETLQLGEEK  
IPEVDKAQRALLLSQSLAEGCVESLEVPDVAVSNMRSEPQVPFQHTCTEGKILMASADTLKSTGQDVALRTEE

GKSLSFPLALEEKQVLLKEEQSEVVAVPTSQTSKSEKEPEAIKGVKEVREQELLSKETLFPSPMPEEQRLHLKT
QVRRALQAAVAREQANLFSEWLRNIDKVEVTAVNFTQEPKRILCTYLITSVSSLTEELTVTIEDIDPQMANLE
TGLKDALCSIVCEERNILMAEDPRIHEEDKIDVQGGRDHLSDAQKQVETVIEAEADSKYLVSKKEEVSWSKVESQ
LKDGDVTNEVPQAETLKLAEESGTQKTSTEMSQEEAEGTLADLCPAVLKHLVDTI SEEEDTVHLTSSISNAKEV
HWYFKGNLVP SDGKFKCLKEQNAYTLVIEAVKTEDEGEYVCEASND SGKAKTSAKLT VGERAAPVIKRRIEPL
EVALGHLAKFTCEIQGAPNVRWFQWFKAGREIYESDKCSIRSSNYVSSLEILRTQVVDCGEYTCASNEYGSVS
CTATLTVTVPTAEKKVRKLLPEPKPQPKKEEVVLKSVLRKKPEEEEEPKVEPKKVEKAKKPEEPQPPKAVEVEA
PPEPTPKERKVPPEPAKVPEIKPAIPLPGPEPKPKPEPEVKTMKAPPIEPAPTPIAAPVTAPVVGKKAEEKPKD
EAAKPKGPIKGVAKKTPSPIEAERKLRPGSGGEEKPPDEAPFTYQLKAVPLKFVKEIKDIVLTEAESVGS SAI
FECLVSPSTAITTMMKDGSNIRESPKHRFIADGKDRKHLI IDVQLSDAGEYTCVLRRLGNKEKTSTAKLIVEEL
PVRVFKTLEEEVTVVKGQPLYLSCNELNKERDVVWRKDGKIVVEKPGRIVPGVIGLMRALTINDADDTDAGTYT
VTVENANNLECCSSCVKVEI IREWLVKPIRDQHVKPKGTAVFTCDIAKDTPNIKWFKGYDEI PLEPNDKTEIL
KEGNHLFLKVKNAMPEIDIYAVEIEGKRYPAKLTTLGEREVELLKP IEDVTIYEKESASFDAEISEEDI PGEW
KLGELLRPSPTCEIKAEGGKRFLLHKVKLDQAGEVLYQACNAITTAILT VKEI ELDFAVPLKDVTVPEKRQ
ARFECVLTREANVIWSKGPDI IKASDKFDI IADGKKHILVINDSQFDDGEGVYTAEEVGGKTSQAFLVFTGIRLK
FISPLEDQTVKEGQTATFVCELSHEKMHVVWFKNDVKLHTRTVLMSSEGKTYKLEIRETTLDDISQIKAQVK
NLSSTANLKVLEADPYFTVKLHDKTGVEKDEIILKCEVSKDVPVKWFKDGEEI VPSPKHVKTDGLRRLIKIK
KAECLKDKEGYVDCDGTDTTKANVTVEARLIKVEKPLYGVEVFGETARFEI ELSPEPDVHGQWKLKGEPLTASP
DCEI IEDGKKHVLVLYNCQLDMTGEISFQAANAKSAANLKVKEPLIFITPLSDVKVFEKDEAKFECEVSREP
KTFRWLKGTEITGDDRFELIKDGRHSLVIKSAAFEDEAKYMF EAEDKRTSGKLIIEGIRLKF LTP LKDVTA
KERENAVFTVELSHDNI PVSWFKNQRLHTSKRVSMHDEGKTHSITFKDLSIDDTSQIRVEAMGISSEAKLTV
LEGDYFTGKLGQDYTGVEKDEVILQCEISKADAPVKWFKDGKEIKPSKNVVIKADGKKRMLI LKALKSDIGQ
YTCDCGTDQTSKGLDIEDREIKLVRPLYSVVEMETETARFETEISEDDIHANWKLKGEALLQTPCECIKEEGK
IHVLIHLNCRLDQTTGGVDFQAANVKSSAHLRVKPRVIGLLRPLKDVTVTAGEATATFDCELSYEDI PVEWYKLG
KKLEPNDKVVTRSEGRVHTLTLRDVKLEDAAGEVQLTAKDFKTQANL FVKEPPVEFTKPLEDQTV EEEATAVLE
CEVSRNAKVKWFKNGTEI LKSKKYEIVADGRVRKLI IHGCTPEDIKTYTCDAKDFKTS CNLN VVPPHVEFLR
PLTDLQVKEKTEVDTAEQTSFRI SEAKKDDKGRYKIVLQNKHGKAEGF INLQVIDVPGPVRNLEVTETFDGEVSL
AWEEP L TDGGSKI IGYVVERRDIKRTWVLTDRADSCEFTVTGLQKGGVEYLFVRSARNRVGTGEPVETDSP
VEARSKYDVP GPPLNVTITD VNRFGVSLTWEPP EYDGGAEITNYVIELRDKTSIRWDTAMTVRAEDLSATVTD
VVEGQEYSFRVRAQNRIGVGKPSAATPFVKVADPIERPSPVNLNASEQTQSSVQLTWEPP LKDGGSPI LGYI
IERREEGKDNWIRCNM KPVELTYKVTGLQKGNKYLYRVS AENAAGVSDPSEILGLPTADDAFVEPTMDLSAF
KDGLEVIVPNPIKILVPSTGYPRPKATWTFGDQVLEEGDRVKMKTISAYAELVISP SERTDKGIYTLTENPV
KSI SGEIN NVVIAPPSAPKELKFSDI TKDSVHLTWEPPDDDDGGSPLTG YVVEKRDMSRKTWTKVMDVFTDLEF
TVPDLVQGKEYL FKV CARNKCGPEPAYTDEPVNMSAPATVPDP PENVKWRDRTANSIFL TWDPKNDGGSRI
KGYIVEKCP RGS DKWVACGEPV PDKMEV TGLEEGKWAYR V KALNRQ GASKPSKPTTEEIQAVDTQEAPEIFL
DVKLLAGITVKAGTKIELPATVTGKPEPKITWTKADTLKPKDQRIT IENVPKKSTVTITDSKRS DTGTI IEA
VNVCGRATAVVEVNVLDKPGPPAAFDITDVTNESCLL TWNPPRDDGGSKI TNYVVERKATDS DVWHKLSSTVK
DTNFKATKLT PNKEYIFRVAENMYGVGEPVQAAPII AKYQFDP PGPPTRELP SDITKDAVTLTWCEPDDDDGG
SPITGYWVERLDPD TDKWVRCNKMPVKD TTYRVKGLTNKKKYRFRVLAENLAGPGKPSRSTEPILIKDPIDPP
WPPGKPTVKDIGKTSLVLNWTKPEHDGGAKIESYVIEMLKTGTDEWVRVAEGVPTTEHLLTGLMEGQEYSFRV
RAVNKAGESEPSEPSDPVLCREKLYPPSPRWLEVINITKN TADLKWTVPEKDGGSPITNYIVEKRDVRRKGW
QTVDTTVKDKTCTVTPLTEGSLYVFRVAENAIGQSDYTEIGDSVLAKDTFTTPGPPYALT VVDVTKRHVDLK
WEPKNDGGRPIQRYIIEKKEKLGTRWVKAGKTS GPD CNFRVTDVIEGTEVQFQVRAENEAGVGHSEPTEIL
SIDPTSPSPPLDLHVT DAGRKHIAIAWK PPEKNKGSPI IGYHVEMCPVGT EKMWRVNSRPIKDLKFKV EEG
IVPDK EYVLRVRAVNAVGVSEPS EISENVVAKDPDCKSPITDLETHDIVVIEGEKLNIPVFRVAVPVTVSWHK
DGKEVKASDR LTMKNDHISAHLEVPKSVHADAGVYTTI LENKLSATASINVKVIGLPGPKDIKASDITKSS
CKLTWEPP EFDGGSPI LHVYLERREAGRRTYIPVM SGENKLSWTVKDLIPNGEYFFRVKAVNKI GGGEYIELK
NPVIAQDPKQPPDPVDVEVHNPTAKAMTITWK PPLYDGGSKIMGYIEK ITKGEDRWKRCNEHLVPLTYTA
KGLEEGKEYQFRVRAENAAGIGEPSRATPPTKAVDPIDAPKVI LRTSLEVKRGDEIALDATISGSPYPTITWI

KDENVIVPEEIKKRAAPPVRRKKGEAESEEFPSLPLTERLSINNSKQGESQLRIRDSLRPDHGQYMIKVENDH  
GVAKAPCSVSVLDTPGPPINFVVEDIRKDSVLCKWEPPLDDGGSEIINYTLEKKDKTKPDSDWIVITSTLRNC  
KYSVTKLIEGKEYLFRVRAENRFGPGPPCVSKPLLAKDPFEPDAPDKPIVEDVTSNSMLVKWNEPKDNGSPI  
LGYWLEKREVNSTHWSRVNKTLLSSLKTKVDGLLEGLTYVFRVCAENAAGPGKFSPPSDPKTARDPISPPGPP  
VPRVADTSSTTIELEWEPFAFNNGGGEIMGYFVVKQLVGTNEWRSRCEKMIKVRQFTVKEIREGADYKLRVSAV  
NAAGEGPPGETEPTVVAEPQEPPTVELDVSVKGGIQIMAGKTLRIPA EVTGRPVPTKVWTTIEGELDKERVI  
ENVGTKSELIKKNALRKDHGRYVITATNSCGSFAAVRVEVFDVPGPVLDLKPVVTRNKMCLLNWSDPADDGG  
SDITGFIIEERKDAKMHTWRQPIETERSKCDITGLIEGQEYKFRVIAKNKFGCGPPVEIGPILAVDPLGPPTSP  
ERLTYTERTKSTITLDWKEPRSDGGSPIQGYIIIEKRRHDKPDFERVNKRLCPTTSFLVENLDEHQMYEFRVKA  
VNDVGESEPSLPLNVVIQDDEVPTIKLRLAVRGDTIKVKAGEPVNIPADVTGLPMPKIEWSKNEKVIDKPTD  
TLNITKEEVSRSSEAKTELSIPKAAREDKGTYTITASNRLGSVFRNVHVEVYDRPSPPRNLAVTDIKAESCYLT  
WDAPLDNNGSEITHYIIDKRDASRKKSEWEEVTNTAVERRYGIWKLIPNGQYEFVRVAVNKYGISDECKSDKV  
VIQDPYRLPGPPGPKVLERKSGMLVSWTPPLDNGGSPITGYWLEKREEGGTYWSRVSRAPITKVLGKGVF  
NVPRLIEGVKYQFRAMAINAAGIGPPSEPSDPAVAGDPIYPPGPPSCPEVKDKTKSSI SLAWKPPAKDGGSPI  
KGYIVEMQEEGTTDWPVNEPDKLLTACECVVNLKELRKYRFRVKAVNEAGESEPSDTTGEIPATDIQEVPE  
VFIDIGAQDCLVCKAGSQVKIPAVIKGRPTPKSSWEFDFGKAKKAMKDGVDHIDEDAQLETAENSSVIIIEPT  
RAHSGKYSITAKNKAGQKTANCRVKVMDAPGPPKDLKVS DITRSGRCLSWKMPDDDDGGDRIKGYVIEKKTIDG  
KAWTKVNPNCGSTTFVVPDLISEQQYFFRVAENRFGIGPPAETIQRTTARDPIYPPDPPIKLIKGLITKNTV  
HLSWKPPKNDGGSPVTHYIVECLAWDPTGKKKEAWRQCNRRDVEELEFTVEDLIEGGEYEFVRVAVNEAGVSK  
PSATVGPVIVKDQTCPPAIELKEFMEVEEGTDVNIVAKIKGVFPPTLTWFKAPPKPKDSKEPVVYDTHVNVKQV  
VDDTCTLVI PQSRRSDTGLYSITAVNNLGTASKEMRLNVLGRPGPPVGP I K F E S I S A D Q M T L S W L P P K D D G G S  
KITNYVIEKREANRKTWVRVSSEPKEMYTI PKLLEGHEYVFRIMAQNKYGI GEPLDSEPETARNLFSVPGAP  
DKPTVSSVTRNSMTVNWEEPEYDGGSPVTGYWLEMKDTTSKRWRVNRDPIKAMTLGVSYKVTGLIEGSDYQF  
RVYAINAAGVGPASLPSPVPTARDPVAPPGPPFPKVTDWTKSSVDLEWSPPLKDDGGSKITGYIVEYKEEGKEE  
WEKGDKEVRGKLLVVTGLKEGAFYKFRVAVNVAGVGEVGEVTDVIEMKDRIVSPDLQLDASVRDRIVVHAG  
GVIRI IAYVSGKPPPTVTWSMNERALPQEAAIETTAISSMV I K N C Q R S H Q G V Y S L L A K N E G G E R K K T I D V D V  
LDVPGPVGIPFLSDNLTWFSPEDDGGSPITNYVIQKREADRRAWTPTVYTVTRQNTATVQGLIQGKS  
YFFRIAAENSIGMPFVETPNALVIRDPI TVPERPEDLEVKEVTKNTVSLTWNPPKYDGGSEIINYVLESRLI  
GTEKFHKVTNDNLLSRKYTVKGLKEGDTYEVRSVAVNIVGQKPSFCTKPI TCKDELAPPTLDDLFRDKLTVR  
VGESFALTGRYSKPKPKIDWFKDEADVLEDDRTHIKTPTTLLALEKTKAKRSDSGKYCVVENSTGSRKGF  
QNVVDRPGPPVGPVIFDEVTKYMVISWKPPPLDDGGSEITNYIEKKELGKDIWMPVTSASAKTCKVPKLL  
EGKDYIFRIHAENLYGISDPLVSDSMKAKDRFRVPDAPEQPVVTEVTKDSALVTWNKPNDDGGKPI TNYILEKR  
ETMSKRWRVTKPEIHPYTKYRVPDLLEGQCYEFVRVSAENEIGIGDPSPPSKPVFARDPIAKPSPPINPEAID  
TTCNSVELTWQPPRHDDGGSKILGYIVEYQKVGDEEWRRANHTPESCPETKYKVTGLRDGQSYKFRVLAVNEAG  
ESDPAHVPEVVLKDRLEPPELIL DANMAREQH I R V G D T L R L S A I I K G V P F P K V T W K K E D R E A P T K A Q I D V T P  
VGSKLEIRNAAHEDGGIYSLTVENPAGTKTVSVKVLVLDKPGPPRDLEVSEIRKDSCYLTWKEPLDDGGSVVT  
NYVVERKDVATAQWSPSTTSKKKSHMAKHLTEGNQYLFRVAAENQYGRGPFVETPKPIKALDPLHPPGPPKD  
LHHVDVVKTEVSLVWVKPDRDGGSPITGYLVEYQEEGDKDWIKFKTVKNLDCVVTGLQQGKTYRFRVKAENII  
GLGLPDTTIPIECQEKLVPPSVELDVKLI EGLVVKAGTTVRFPAIIRGVVPVPTAKWTTDGTEIKTDDHYTVET  
DSFSSVLTIKNCLRKDTGEYQLTVSNAAGTKTVAVHLTVLDVPGPPTGPINILDVTPEYMTISWQPKDDGG  
PVINYIVEKQDTRKGTWGVVSAGSSKLLKLVPHLQKGCEYVFRVKAENKMGVGPPLDSIPTVAKHKFSPPSP  
GKPVVTDITENAATVSWTLPKSDGGSPITGYVERREITGKVVVRVNTPIADLKFRVTGLYEGNTYEFRVFAE  
NLAGLSNPSPPSDPIKACRPKPPGPPINPKLKDKSKESADLVWTKPLSDGGSPILGYVVEYQKPGTAQWDRI  
NKDELIRQCAFRVPGPIEGNEYRFRIRAANIVGEGEPRELAESVIAKDILHPPPEVELDVTCDRVI TVRVGQTI  
RILARVGRPEPDI TWSKEGKVLVKDKRVDL I HDLPRVELQIKEAVRADHGKYII SAKNSSGHAQGSIAVNVL  
DRPGPCQNLKVSNTKENCTISWENPLDNGGSEITNFIVEYRKNQKGSIVASDVTKRLVKANLLANNEYF  
RVCAENKVGVPPTIETKTPILAINPIDRGPENLHIADKGTFFVYLKWRPDYDGGSPNLSYHVERRLKGS  
DWERVHKS IKETHYMDKCVENQIYEFRVQTKNEGGESDWVRTEEVVVKEDLQKPVLDLKLSGVLTVKAGDT  
IRLEAGVRGKPFPEVAWTKDKDATDLTRS PRVKIDTSAESSKFSLTAKRSDGGKYVITATNPAGSFVAYATV  
NVLDKPGPVRNLKIDTVSSDRCTIRWDPPEDDGGCEIQNYILEKCESKRMVWSTYSANVLTPSATVTRLIEGN  
EYIFRVRAENKIGTGPPTESKPVIAKTKYDRPGRDPPEVTKVSKEEMTVVWNAPEYDGGKSI TGYYLEKKEK  
HAVRWVPVNSAIPERRLVQNLLPGHEYQFRVKAENEVIGEPSLPSRPVAKDPIEPPGPPNFKVVDTTK  
SSITLAWGKPVYDGGAPIIGYVEMRPKIADASVDEGWKRCNAAQLIRMEFTVTSLDENQYEFRVCAQNV  
GIGRPAELKEAIKPKIELEPPEIDL DASMRRKLVVVRAGCPIRLFAIVRGRPAKVTWRKVGDVNVVRKGGVDL  
VDTMAFLVIPNSTRDSDGKYSLTLVNPAGEKAVFVNVKVLDTPGPVADLVSDVTKTSCHVSWAPPENDGGSQ  
VTHYIVEKREAERKTWSTVTEPVKTSFNVTNLVPGNEYFFRVTAVNEYGPGVPTDIPKPVLASDPLSEPP  
RKLEVTEMTKNSATLAWLPLLRDGGAKIDGYIISYREEDQPADRWTEYSVVKDLSLIVTGLKEGKKYKFRVAA  
RNAVGVSMPREAEVYEAKEQLLPKILMPEQITIKAGKCLRVEAHVYKPNPICWKKGDDEVVTS SHLAIH

KADGSSVLI IKDVTTRKDSGYSLTAENSSGSDTQKIKVTVMDAPGPPQPPFDISEIDADACSLSWHIPLEDGG  
SNITNYIVEKCDVSRGDWVTALASVTKTSCRVGKLI PGQEYIFRVRAENRFGISEPLTSPKMLAKFPFDVDPSE  
PKNARVTKVKNKDCIFVAWDRPDSGGSPITGYLIERKERNSSLWVKANDTIVRSTEYPCAGLVEGLEYSFRIY  
ALNKAGSSPPSKPTEYVTARMPVDPGKPEVVDVTKNSASLIWARPKHDGGSRIIGYFVEACKLPGDKWVRN  
TTPHQIPQEEYTATGLEENAQYQFRAIAKTAVNISQPSEPSDPVTILAENVPPRIELSVEMKSLTLVKAGTNV  
CLDATVFGKPMPTVSWKKDTPIKQAEGIKAMKRNLCLELFSVNRKDSGDYTTITAENSSGSKSATIKLKVL  
DKPGPPASVKINKMYADRAMLSEWEPLEDGGSEITNYIIDKRETSRPNWAQVSATVPITSTCTVEKLIEGHEYQ  
FRICAENKYGVGDPILTEPAIAKNPYDPPGRCDPPVINSITKDHMTVSWKAPADDGGSPITGYLVEKRETQAV  
NWTKNVRKPIERTLTKATGLQEGTEYEFVTAINKAGPGKPSDASKAVYAQDPLYPPGPPAFPKVYDTRSSV  
SLSWGKPAYDGGSPIIGYLVEVKRADS DHWVRCNLPEKLOKTRFEVTLGMENTEYQFRVYAVNKIGYSDPSDV  
PDKHCPKDI LIPPEGELDAELRKTILIRAGVTMRLYVPVKGRPPPKITWSKPNVNLRRERIGLDIKSTDFDTFL  
RCENVNKYDAGKYILTLNENSCGKKEYTIVVKVLDTPGPPVNVTVKEVSKDSAYVTWDPPIIDGGSPIINYVVE  
KRDAERKSWSTVTTECSKTSFRVSNLEEGKSYFFRVFAENEYIGDGPGETRDAVKASET PGPVVDL KALAITK  
SSCTIGWKKPRSDGGSRITGYVVDLFTENKQVRMKSLSLQYSTKDLKEGKEYTFRVSAENENEGETPSEIV  
VVAKDDVVAPDLDLKDLPLCYLAKENSFRLKIPKIKGPPASVSWKKGEDPLATDTRVSVESTAVNTTLVVY  
DCQKSDAGKYITLKNVAGTKEGTLISKVVGKPGIPTGPIKFDEVTAEAMTLKWGPPKDDGGSEITNYVLEKR  
DSVNNKWVTCASAVQKTTFRVTRLHEGIEYTFRVSAENKYGVGEGKSEPIVAKHPFDVDPAPPPIVIVDRH  
DSVSLTWTDPKKTGGSPITGYHIEFKERNSSLWKRANKTPIRMKDFKVTGLTEGLEEYFRVMAINLAGVSKPS  
LPSEPVVALDPIDPPGKPEVISVTRNSVTLIWTPEKYDGGHKLTYIVEKRDLPKSKWMKANHVNPDCAFV  
TDLVEGGKYEFRIRAKNTAGAI SAPSESTGTIICKDEYEAPTIVLDPTIKDGLTVKAGDSIVLSAISILGKPL  
PKSSWSRAGKDIRPSDIAQITSTPTSSMLTVKYATRKDAGEYTIITATNPFGTKEEHVKVSVLDVPGPPGPIEI  
SNVSAEKATLTWTPPLEDGGSPIKAYVLEKRETSRLLWTVVSEDIQACRHVVTKLIQGNEYLFRVSAVNHYGK  
GEFVQSEPVKMDRFGPPGPPGKPEISNVTKNTATVSWKRPTDDGGSEITGYHVERREKKGLRWVRATKTPVS  
DLRCKVTGLQEGNTYEFVSAENRAGIGPPSDASNVLMDVAYPPGPPSNAHVTDTTKKSASLAWGKPHYDG  
GLEITGYVVEHQVGDDAWIKDGTGTALRITQFVVDLQTKKEYNFRISAINDAGVGEPAVINVEIVEKEVA  
PDFELDAELRRTLVVRAGLSIRIFVPIKGRPAPEVWTWTKDNINLKHRIANIENTESFTLLIIEPCNRYDTGKFV  
MTIENPAGKKS GFVNRVLDTPGVLNLRPTDITKDSVTLHWDLPLIDGGSRITNYIVEKREATRKSYSVTVT  
KCHKCTYKVTGLTEGCEYFFRVMAENEYGVGEPTETTEPVRASEAPLPDSL NIMDITKNTVSLAWPKPRHDG  
GSKIITGYVIEAQRKGSQWTHISTVKGLECVVRNLTEGEEYTFQVMAVNSAGRSAPRESRPVIVKEQTMPEL  
DLRGIYQKLV IARAGDNIKVEIPVLGRPKPTVTWKKGDQILKQTRQVNVENTATSTILNINECVRSDSGPYPL  
TAKNTVGEVGDVITIQVHDI PGPPPTGPIKFDEVSSDFVTFSWEPPENDGGVPI SNYVEMRQTDSTTWELAT  
TVIRTTYKATRLTTGVEYQFRVRAQNRYGVGPGITSASVVANYPFKVP GPPGTPQVTA VTKDSMTISWHEPLS  
DGGSPILGYHIERKERNGLWQTVSKALVPGNIFKSTGLTDGIA YEFRVIAENMAGKSKPSKSPSEPMFALDPI  
DPPGKPVPLNITRHTVALKWAKPEYTG GFKITSYVVEKRDLPNGRWLKANFNSI LENEFTVSGLTEDAA YEFR  
VIAKNAAGAI SPPSEPSDAITCRDLEAPRIMVDVRFKDTITL KAGEAFKLEADVSGRPPPTMEWTKDGKELE  
GTGKLEIKIADFTHLINKDSSRDTSGAYILTATNPGGF AKHIFNVKVLDRPGPPEGFLAVSDVTEKCVLSW  
LPLDLDGGAKIDHYIVQKRETSRLAWTNVATEVQVTKLKVTKLLK GNEYIFRVMAVNKYGVGEPELESEPV LAV  
DPYGPDPDPKNPEVTTITKDSMVVCWGH PDSGGSEIINYIVERRDKAGQRWVKCNK KALTDLRFKVSGLTEG  
HEYEFRI MAENAAGISAPSATSPFYKACD TVFKPGPPGNRVLDTSRSSISIAWNKPIYDGGSEITGYMVEIA  
LPEEDEVQVVTTPAGLKATS YTTITSLIENQEYKIRIYAMNSEGLGEPALVPGTPKAEERMLPPEIELDADLRK  
VVTIRACCTLR LRFVPIKGRPAPEVKWAREHGESLDKASIESTSSY TLLVVG NVNRFD SGKYILTVENSSGSKS  
AFVNVRLDTPGPPQNLKIKEVTKTSVTLTWE PPLLDGGSKIKNYIVEKRESTRKAYSTVATNCHKTSWKVDQ  
LQEGCSYFRVLAENEYIGLPAETAESVKASERPLPPGKITLTDVTRNSVLSWEKPEHDGGSRI LGYIVEM  
QSKGSDRWATCATVKVTEATITGLIQGEEYSFRVSAQNEKGISDPRQLSVPVIAKDLVIPP AFKLLFNTFTVL  
AGEDLKIDVFPFGRPPPAVTWHKDDIPLKQTTTRVNAESTENSSLTIKEACREDVGHYTVKLTNSAGEATE TL  
NVIVLDKPGPPTGPVKMDEVTADSVTLSEWPPKYDGGSSINNYIVEKRD TSTTAWQIVSATVARTTIKACRLK  
TGCEYQFRIAAENRYGKSTYLNSEPVVAQYPFKVP GPPGTPFVTLASKDSMEVQWHEPVSDGGSKVIGYHLER  
KERN SILWVKLNKTPIPQTKFKTGLEEGIEYEFVSAENIVGIGKPSKPSSECYAAHDPDPPGRPEAIIVTR  
NSVTLQWKKPTYDGGSKIITGYIVEKKELPDGRWMKASFTNIIDTQFEV TGLLEDHRYEFRVIARNAAGVFSEP  
SESTGAITARDEVEPPRISMDPKYRDTVVVQAGESFKIDADIYKGP IPTTQWVKGDQELSSSTARLEIKSTDF A  
TSLSVKDAVRVDSGNYILKAKNVAGEKSVTINVKVLDRPGPPEGPVAISGVTAEKCTLAWK PPLQDGGSDITN  
YIVERRETSRLVWTLVDANVQTL SCKVVLKLEGNEYIFRIMAVNKYGVGEPELESESLIAKNPFVVPDAPKAPE  
VTAVTKSMILVWVERPASDGGSEILGYVLEKRDKEGIRWTRCHKRLIGELRLRV TGLLENHNYEFVSAENAA  
GLSEPSPPSAYQKACDPIYKPGPPNNPKVMDVTRSSVFLSWTKPIYDGGCEIQGYIVEKCDVSVGEWMTCTPP  
TGINKNTNLEVEKLEKHEYNFRI CAINKAGVGEHADVP GPMVEEKLEAPDIDLDELKRVINIRAGGSLR LF  
VPIKGRPTPEVKWGKVDGDIRDAAIIDVTSSTSLVLDNVNRYDSGKYTLTLENSSGTKSAFVTVRVLDT PSP  
PVNLKVTEITKDSV SITWEPPLLDGGSKIKNYIVEKREATRKS YAAVVTNCHKNSWKIDQLQEGCSYFRVTA  
ENEYIGL PARTADPIKVAEVPQPGKITVDDVTRNSVLSWTKPEHDGGSKI IQYIVEMQAKNTDKWSECAR



VKSLDAVITNLTQGEYYLFRVIAVNEKGRSDPRSLAVPI IAKDLVIEPDVRPAFSSYSVQVGGQDLKIEVPI SG  
RPKPSISWTKDGMPLKQTRINVTDSLDTLTLISIKETHKDDGGQYGITVSNVVGQKTAIEIITLTKDPDPKG  
PVKFDEISAESITLSWNPPLYTGGCQITNYIVQKRDTTTTVDVVSATVARTTLKVTKLKTGTEYQFRI FAEN  
RYGQSFALESEPVVAQYPYKEPGPPGTPFVTAISKESMVVQWHEP INNGGSPVIGYHLERKERN SILWTKVNK  
TIIHDTQFKALNLEEGIEYEFRVYAENIVGVGKASKNSECYVARPCDPPGTPEAIIVKRNETLQWTKPVYD  
GGSMITGYIVEKRDLEGRWMMKASFNTVIETQFTVSGLTEDQRYEFVIAKNAAGAISKPSDSTGPI TAKDEV  
ELPRISMDPKFRDITIVNAGETFRLEADVHGKPLPTIEWLRGDKEIEESARCEIKNTDFKALLIVKDAIRIDG  
QQYILRASNVAGSKSFPVNVKVLDRPGPPEGVPQVTGVTAEKCTLAWSPPLQDGGSDISHYVVEKRETSRLAW  
TVVASEVVTNSLKVTKLLEGNKYIFRIMAVNKYGVGEPLESAVLMKNPFVLPGLPKSLEVKENIAKDSMTVCW  
NRPDSDDGGSEIIGYIVEKRDRSGIRWIKCNKRITDLRLRVTGLTEDHEYEFRVSAENAAGVGEPSPATVYYK  
ACDPVFKPGPPTNAHVVDTTKNSITLAWSKPIYDGGSEILGYVVEICKADEEEWQIVTPQTGLRVTRFEIAKL  
IEHQEYKIRVCALNKVGLGEAASVPGTVKPEDKLEAPELDDSELRKGI VVRAGGSARIHIPFKGRPTPEITW  
SKEEGEFTDKVQIEKGINFTQLSIDNCDRNDAGKYILKLENSGSKSAFVTVKVLDTPGPPQNLAVKEVRKDS  
VLLVWEPPIIDGGAKVKNYVIDKRESTRKAYANVSSKCNKTSFRVENLTEGAIYYFRVMAENEFVGVPTETS  
DAVKASEPPSPGKVTLDVVSQTSASLMWEKPEHDGGSRI LGYVEMQPKGTEKWSVVAESKVCNAVVSGLSS  
GQEQYQFRVKAYNEKGS DPRVLGIPVIAKDLTIQPSFKLPFNTYSVQAGEDLKIEIPVIGRPRPKISWVKDGE  
PLKQTRVNVEETATSTILHIKESKDDFGKYSVTATNSAGTATENLSVIVLEKPGPPVGPVKFEVSDAFVV  
ISWEPAYTGGCQISNYIVEKRDTTTTNWQMV SATVARTTIKISKLKTGTEYQFRI FAENRYGKSTPLDSKPV  
VVQYPFKEPGPPGTPFVTSISKDQMLVQWHEP VNDGGSKVTGYHLEQKEKNSILWVKLNKIPIQDTKFKTTGL  
DEGLEEYFRVSAENIVGIGKPSKVSECYVARPCDPPGRPEAIVITRNSVTLKWKPKVYDGGSKI TGYIVEKK  
DLPDGRWMMKASFNTNVETEFTVTGLVEDQRYEFVIA RNAADNFSEPSSESSGAI TARDEIDAPNASLDPKYRD  
VIVHAGETFVLEADIRGKPI PDI IWSKDGNLEETAARMEIKSTLQKTTLIVKDCIRTDGGQYTLKLSNVGG  
TKTIPITVKVLD RGPPEGLKVTGVTAEKCYLAWNPP LQDGGASISHYIEKRETSRLSWTQVSNVEVQALNY  
KVTKLLPGNEYIFRMAVNKYGIGEALSEPVIA CNPYKRPGPPSTPEASAITKDSMVLWTWRPVDGGAIE  
GYILEKRDKEGIRWTKCNKKTLDLRFRTVGLTEGHSYEFVRAAENAAGVGEPEPSVFFYRACDALYPPGPPS  
NPKVTDTSRSTSVSLAWNKPIYDGGAPVRGYVIELKKAADDEWTTCTPPSGLQKQFTVTKLKENTENFRICA  
FNTEGVGEPATIPGSVVAQERMEAPEIELDADLKRVTTHVLRASATLRLRFVTIKGRPEPEVKWEKAEGILTERAQ  
IEVTSSYTMLVIDNVTRFDSGRYNLTLENNSGSKTAFVNVRLDSDSPAPVNLTIREVKKDSVTLTSLWEPLIDG  
GAKITNYIVEKRETRKAYATITNCTKNFKIENLQEGCSYFRVLASNEYGIGLPAETAEPVKVSEPLPP  
GRVTLVDVTRNTATIKWEKPESDGGSKITGYVEMQTKGSEKWSACTQVKTLETTISGLTAGEEYFRVA AVN  
EKGRSDPRQLGVPVIAKDIEIKPSVELPFNTFNVKANDQLKIDI PFKGRPQATVAWKKDGOVLR ETRVNVAS  
SKTVTTLTSLIKEASREDVGTIELCVSNTAGSITVPI TVIVLDRPGPPGPIRIDEVSCDNVSI SWNPPEYDGGCQ  
ISNYIVEKRETTSTTWQVVSQAVARTSIKIVRLTTGSEYQFRVCAENRYGKSSYSESSAVVAEYFPSPGPPG  
TPKVVHATKSTMVVSWQVPVNDGGSQVIGYHLEYKERSSILWSKANKVLIADTQMKVSGLDEGLMYEYRVYAE  
NIAGIGKCSKACEPVPARDPCDPGQPEVTNITRKS VSLKWSKPRYDGGAKITGYIVERREL PDGRWLQCNFT  
NVQETTYFEVTELTEDQRYEFVRFARNAADSVSEPESTGPI TVKDDVEAPRIMMDVKFRDVIIVKAGEVLKIN  
ADIAGRPLPVISWAKDVEIEERAKTEIVSTDYTTTTLTVKDCVRRDTGQYVLT LKNVAGTRTMAVNCKVLDKP  
GPPAGPLEINGLTAEKCSLSWGRPQEDGGADIDYIVEKRETSRLAWTICEAELRTTCKVTLLKLGNEYIFR  
VTGVNKYGVGEPLESMVAVKALDPFTTSPSPTSLEITSVTKDSMTLCWSRPETDGGSDISGYIERREKNSLRW  
MRVNKKPVYDLRVKSTGLREGCEYERVFAENAAGLSLPSETSPLVRAEDPVFLPSPSPKPKIVDSGKTTITI  
GWVKPLFDGGAPITGYTVEYKKEETDWKVAIQSFRGTEYTMSGLTTGDEYVFRVRS LNKMGASDPSDSSDPQ  
VAKEREEEPVFDVDSEMRKTLIVKAGSSFTMTVPFRGRPIPNVSWSKPDTDLRTRAYIDSTDSRLLTIENAN  
RNDSGKYTLTIQNVLSAASMTFVVKVLDSPGPPANITVREVTKETAMLSWDVPENDGGAPVKNYHIEKREASK  
KAWSVTNNCNRLSYKVTNLQEGAIYYFRVSGENEFGVGVPAETKEGVKITEKPSPEKLGVT SVSKDSVLS  
WLKPEHDGGSRIIHYVVEALEKGQKTWVKCAVVKTTTHVVSGLRESHEYFFRVFAENQAGLSDPRELLLPVLI  
KDQLEPPEIDMKNFPSHTVYVRAGSNLKVDIPI SGKPLPKVTL SRDGVPLKATMRFNTEITAENLTINLKE SV  
TTDAGRYEITAANSSGTTKTFINIIVLDRPGPPTGPVAISDI TEESVTLKWEPPKYDGGSHVTNYIVLKRETS  
TAVWSEVSATVARTMIKVMKLTGEEYQFRIKAENRFGISDHIDSVCVVVKLPYTTGPPSTPWVSNVTRESI  
TVGWHEPVSNGGSAVTGYHLEMKDRNSILWQKANKMI IRTTHFKVTTISAGLIYEFRVYAENAAGIKP SHPS  
EPVLAI DACEPPRNVRITDISKNSVNL SWQQPAFDGGSKITGYIVERRDLPDGRWTKASFNTV IETQFTVSGL  
TQNSQYEFRVFARNAVGSVSNPSEVVGPITCIDSYGGPVIDLPLEYTEVVKYRAGTSVKLRAGISGKPEPTIE  
WYKDDKELQTNALVCVENSTDLASILIKDANRLNSGSYELKLRNAMGSASATIRVQILDKPGPPGGPIEFKTV  
TAEKITLLWRPPADDGGAKITHYIVEKRETSRVVWDRVAENLEECIVTTTKIKGNEYFRVRAVNKYGIGEP  
LESEPVVAKNAFVTPGPPSIPVTKITKNSMTVVWDRPTVDGGSEINGYFLERRDKKSLAWVLKETIRDTR  
QKVTGLTENSDFYQYRVCVAVNAAGVGPFPSEPSDFYKAADPIDPPGPPAKIRIADSTKSSITLWWSKPVYDGGSD  
VTGYVEMKQGDDEEWTIVSTRGEVRTTEYVVSNLKPGVNYFYQVSAVNCAGQGEPI TMTPEAQAKDVLEEPE  
IDLDVALRTSVIAKAGEDVQLLIPFKGRPPPTVTRKDEKNLGS DTRYSIQNTDSSLLVLPQVTRNDTGKYI  
LTIENGVGQPKSSTVSVKVLDTPAACQKLQVKHVS LGTVTLLWDPPLIDGGSPI INYVIEKR DATKRTWSVVS

HKCSGTSFKVTDLSEKTPFFFRVLAENEIGIGEPCEETTEPVKAAEVPAPIRDLMSMKDSTKTSVVLWSWTKPDFD  
GGSII TDYLVVERKKGKEQAWSHAGISKTCEIEIGQLKEQSVLEFRVSARNEKQSDPVTIGPLTVKELVITPE  
VDLSEIPGAQISVRIGHNVHLELPYKKGPKPSISWLKDG LPLKESEYVRF SKTENKITLSIKNSKKEHGKYT  
VILDNAVCRNSFPITIIITLGPSPKPKGPIRFDEIKADSAIMSWDIPEDDGGGEITCYSIEKREASQTNWKMVC  
SSVARTTFKVSNLVKDSEYQFRVRAENRYGVSEPLASNIIVAKHQFRIPGPPGPKVIYNVTS DGM SLTWDAPV  
YDGGSEVTGFHVEKKERNSILWQRVNTSPISGREYRATGLIEGLDYQFRVYAENSAGLSSPSPDPSKFTLAVSP  
VDPGPTPDYIDVTRETITLKWNPPLRDGGSKIVAYSIEKRQGS DRWVR CNFTDVSECQYTVTGLSPGDRYEFR  
I IARNAVGTISPPSQSSGLIMTRDENVPPTVEFGPEYFDGLVIKSGDSLRIKALVQGRPVPRVTWFKDGV EIE  
RRMNEITDVLGSTSLFVRDATRDHRGVYTVVEAKNVSGSTKAEVTVKVQDTPGKVVGPIRFNTITGEKMTLWW  
EAPLNDGCAPVTHYII EKRETSRLAWALIEDNCEALS YTAIKLITGNEYQFRISAVNKFVGRPLESDPVVAQ  
IQYTI PDAPGVPEPSNVTGNSITLWTRPESDGGSEIQHYILERREKKSTRWVKVISKRPIS ETRFKVTGLVE  
GNEYEFHVMAENAAGIGPASGISRLIKCREPVNPPSAPS VVKVTDTSKTTVSLWARPVFDGGMEIIGYI IEM  
CKADLGDWHKVNTEPCVKTRYTVTDLQAGEEYKFRVSAVNGAGKGDSC EVTGTIKAVDRLSAPELDIDANFKQ  
THIVRAGVSI RLFIA YQGRPTPTAVWSKPD SNLSIRADIHTTDSFSTLTVENCNRNDAGKYTLTVENNSGKKS  
ITFTVKVLDSPGPPGPIITFKDVTRGSATLMWDAPLLDGGARIHHYVIEKREASRRSQV VSEKTRQILKVSE  
LTEGV PYYFRVSAENEYGVGPEPYEMPEPIVATEQPAPRRLDVVDTSKSSAVLAWLKP DHDGGSRI TSYLLEM  
RQKGSDFWVEAGHTKQLTFTVERLVENTEYEFVRVKAKNDAGYSEPREAFSSV I IKEPQIEPTADLTGITNQLI  
TCKAGSTFTIDVPI SGRPAKVTWKLEEMRLKETDRMSIATTKDR TLT TVKDSMRGDSGRYFLTLENTAGVKT  
FTITVVVIGRPGPVTGPIEVSSVSAESCVLSWTEPKDDGGTEITNY IVEKRESGTTAWQLINSVVKRTQIKVT  
HLTKYKEYCFRVSSENRFVSKPLESVPIVAEHPFVPPSAPTRPEVYVVSANAMSIRWEEPYHDGGSKIVGYW  
VEKKERNTILWVKENKVPCLCNYKVTGLVEGLE YQFRTYALNAAGVSKASEASRP IMAQNPVDPGRPEVTD  
VTRSTVSLIWSAPVYDGGSKVGYI IERKPVSEVGDGRWLKCN YTI VSDNFFT V TALS EGDYEFVRVLAKNAA  
GVISKGSESTGPVTCRDEYAPKAELDARLQGD LVTIRAGSDLVLDAAVGGKPEPKI IWTKGDKELDLCEKIS  
LQYTGKRATAVIKYCDRSDSGKYTLTVKNASGTKSVSVMVKVLDSPGPGKLT VSRVTEEKCTLAWSLPQEDG  
GAEITHYIVERRETSRLNWVIVEGECLTASYVVTRLIKNNEYTFRVRAVNKYGLGVPVESEPIVARN SFTIPS  
QPGIPEEVGAGKEHII IQWTKPESDGGNEISNYLVDKREKKS LRWTRV NKDYVVYDTRLKVITSLMEGCDYQFR  
VTAVNAAGNSEPSEASNFI SCREPSYTPGPPSAPRVVDTKRSI SLAWTKPMYDGGTDI IGYVLEMQEKD TDQ  
WCRVHTNATIRNNEFTVPDLKMGQKYSFRVAAVNAKGMSDYSETTAEIEPVERLEIPDLELADDLKKTIVIRA  
GASLRMLMSVSGRPSPVITWSKKGIDLANRAIIDNTE SYSLIIVDKVNRYDAGKYTIEAENQSGKKSATVLVK  
VYDTPGPCPSVSVKEVSRDSVTITWEIPTIDGGAPVNNYI IEKREAA MRAFKTVTTKCSKTL YRISGLVEGTM  
YYFRVL PENIYGIGEPCE TSDAVLVSEVPLVPTKLEVV DVTKSTVTLAW EKPLYDGGSR L TG YVLEACKAGTE  
RWMKVVT LKPTVLEHTV I SLNEGEQYLFRVRAQNEKGVSEPREIVTPVTVQDLRVLPTIDLSTMPQKTIHVPA  
GRPIELV IPI TGRPPPTASWFFAGSKLRESERVTVETHTKVTKL TIRETTIRDTGEY TLELKNVTGTTSETIK  
VIILDKPGPPTGPIKIDEIDATSVTISWEPPELDGGAPLSGYVVEQRDAHRPGWLPVSESVTRPTFKFTRLTE  
GNEYVFRVAATNRFGIGSYLQSEVIECRSSISIPGPPETLQIFDVS RDGMTLTWYPPEDDGGSQVTGYIVERK  
EVRADRWRVNKVPVMTTRYRSTGLIEGLE YEHRVTA INARGTKP SRPSKPTVAMDP IAPGPKQNPRVTD T  
TRTSVSLAWSVPEDEGGSKVTGYLIEMQKVDQREWTKCNTTPTKIREYTLTHLPQGA EYFRVLACNAGGPGE  
PAEVPGTVKVTEMLEYPDYELDERYQEGV FVRQGGVIRLTIPIKGPFPVCKWTKEGQDISKRAMIATSEHT  
ELVIKEADRNDSGTYDLVLENKCGKKT VYIKVKVIGSPNTPEGPLEYDDIQARSVRVSWRPPADDGGADILGY  
ILERREVPKAAWYTI DSRVRGTSLVVKGLKENVEYHFRVSAENQFGISKPLKSEEPVI PKTPLNPP EPPSNPP  
EVL DVTKSSVLSWSRPKDDGGSRV TGY IERKETSTDKWVRHNKTQITTTMYTVTGLVPDAEYQFRI IAQND  
VGLSETSPASEPVVCKDPFDKPSQPGELEILSISKDSVTLQWEKPECDGGKEILGYWVEYRQSGDSAWKKS NK  
ERIKDRQFTIGLLEATEYEFRVFAENETGLSRPRRTAMSVKTKLTSGEAPGVRKEMADVTTKLGEAAQLSCQ  
IVGRPLPDIKWRFRGKELIQSRKYKMSDGRHTLTVMTDEQEDEGVYTCVATNEVGEVESSSKLLQLAAPQF  
HPGYPLKEKYYGAVGSTLRHLV MYIGRPVPAMTWFHGQKLLQNSEKITIENTEHYTHLVMKNVQRKTHAGKYK  
VQLSNAFGTV DATLDVEIQDKPKPTGPIVIEALLKNSVVISWKPPADDGGSWITNYVVEKCEAKEGAEWQLV  
SSAISVTTCRIVNLTENAGYFRVSAQNTFGISEPLEVASIVI IKS PF EKPGVPGKPTITAVTKDSCVVAWKP  
PASDGGAKIRNYLERREKKQNKWIAVTTEEIRETVFSVQNLIEGLE YEFVRKCNLGGESEWSEISEPVTPK  
SDVPIQAPHFKEELRNLNVRYSNATLVCKVTGHPKPIVKWYRQK E IADGLKYRIQEFKGGYHQLI IASVT  
DDDATVYQVRATNQQGSSVSGTASLEVEVPAKIHLPKTLEGMGAVHALRGEVVS IKIPFSGKPDVITWQKGQD  
LIDNNGHYQVIVTRSFTSLVFSNGVERKDAGFYV VCAKNRFGIDQKTVELD VADVPDPPRGVKVSDVSRDSVN  
LTWTEPASDGGSKVTNYIVEKCATTAERWLRVQKARETRYTVINLFGKTSYQFRVIAENKFGLSKPS EPT  
VTKEDKTRAMNYDEVD ETRVTTKASHSKTKELYKEMIAEDLGRGEFGIVHRCVETSSKRTFMAKFVKV  
GTDQVLVKKEISILNIARHNILYLHESFESMEELVYEFISGLDIFERINTSAFELNEREIVSVRVQVCEA  
LEFLHSQNI GHFDIRPENI IYQTRKNSTIKI IEFQARQLKPGDNFRLLFTAPEY YAPEVHQHDVVSTATDMW  
SLGTLVYVLLSGINPFLAETNQQM IENIMNAEYTFDEEAFKEISLEAMDFVDRLLVKERKSRMTASEALQHPW  
LKQRIDRVSTKVIRT LKHRRYHTLIKKDLNMV VSAARISCGGAI RSQRGVSAKVVASIEIGPVSGQIMHA  
IGEEGGYVYVCKIENYDQSTQVTWYFGVRQLENSEKYEITYEDGVATMYVKDITKFDGTYRCKVNDYGED

SSYAEFLVKGVREVDYDCRRTKVKRRRTDAMRLLERPPEFTLPLYNKTAIVGENVRFVGTITVHPEPRVTWY  
KSGQKIKPGDDEKKYTFESDKGLYQLTINSVTTDDDAEYTVVARNKHGEDSCKAKLTVTLHPPPTETTLRPMF  
KRLLANAECHEGQSVCFEIRVSGIPAPTLKWEKDGQPLSLGPHIEIVHEGLDYYALHIRDTLPEDTGYRVTA  
TNTAGSTSCQAHLQVERLRYVKQEFQSKKEERERHVQKQIDKTLRMAEILSGTETVPLTPVAQEAALREAAIYK  
PAVSTKTVKGEYRLQTEEKKEERKLMPYEVPEPRRFKQATVEEDQRIKQFVPMSPDMKWYKKIRDQYEMPGKL  
DRVVQKRPKRIRLSRWEQFYVMPPLPRITDQYRPKWRIPKLTQDDLEMRPARRRTPSPDYDLYYRRRRRSLG  
DMSDELELLPIDDYLAMKRTEERLRLEEELELGFSSASPPSRSPRFELSSLYSSPPAHVKVEDRRRDFRYS  
TYHVPTKEETSTSYAELRERHAQASYRQPKLRQRIMAEKEEEELRPVTTTQRLSEYKSELDYMSKEEKSKK  
SKRQRQVTEITEIEEYIEISRRAQRESSSSVSRLLRRRRSLSPYIELMRPVSELIRSHRPAEYEDDAERR  
SPTPERTRPRSPSPVSSERSLSRFERSARFDIFSRYESMKAALKTQKTSEKYEVLSSQPPFTLDHAPRITLRM  
RSHRVPCGQNTFRILNVQSKPTAEVKWYHNGVELQESSKIHYTNTSGVLTLEILDCQTEDGGTYRAVCTNYKG  
EASDYATLDVTTGGAYTTYASQRRDEEVPKSVFPELTKTEAYAVSSFKRTSELEAASSVREVKSQMTETRESLS  
TYEHYASAEMKSATSEEKSLEEKATVRKIKTTLAARILTKPRSI TVHEGESARFSCDTDGEVPVPTVTLWREGQ  
VVSTSARHQVTTTTKYKSTFEISSVQASDEGNYSVVVENS DGKQEAQFTLTVQKARVIEKAVTSPPRVKSPEPR  
VKSPETVKSPKRVKSPEPVTSHPKAVSPTETKPKTEKGQHLVPSAPPKITQSLKAEASKDIAKLTCAVESSALC  
AKEVAWYKDGKCLKENGHFQFHYADGTYELKIHNLS EDCGEYVCEVSGEGGTSKTSFQFTGQSFKSIHEQV  
SSISETTKSVQKTAESA EAKKSAQKTAESVEDKKAQKTVESA EAKKPAQKTAESPEAKKPAQKTAESPEAKK  
QEP IAPESISSKPVIVTGLRDTTVSSDSVAKFTIKVTGEPQPTITWTKDGKAI AQGSKYKLSNKEEFIL EIL  
KTETSDGGLYACTVTNSAGSVSSCKLTIKAVKDTEAQKVSTQKTSEVTSQKKAQAQEEISQKALTSEEIKMS  
EVKSHETLAIKEEASKVLI AEEVKRSAAA SLEKSI VHEEVTKTSQASEEVKTHAEIKTLSTQMNITKGQRATL  
KANIAGATDVKWLNGTELPNSEERYGVSGSDQTLTIKQASHREEGILSCIGKTSQGVKQCQFDLTLSEELS  
DAPSFITQPRSQNINEGQNVLFCEVSGEPSP EIEWFKNLPISSNISVSRSRNVYTL EIRNAAVSDSGKY  
TIKAKNFHGQCSATASLTVLPVVEEPPREVVLKTS SDVSLHGSVSSQSVQMSASKQEASFSSSSASSMTE  
MKFASMSAQMSMSMQESFVEMSSSSFMGKSSMTQLESSTSRMLKAGGRGIPPKIEALPSDISIDEGKVLTVAC  
AFTGEPTPEITWSCGGRKI QNQEQGRFHIENTDDLTTLIIMDVQKQDGGLYTSLGNEFGSDSATVNINIRS  
M\*

>ENSMUSP00000097561\_c.82938:A>C\_p.K27647Q\_ENSMUST00000099981.10|Ttn-  
203|ENSMUSG00000051747|-|chr2:g.76568328:T>G  
MTTQAPMFTQPLQSVVVLGSTATFEAHVSGSPVPEVSWFRDQGVISTSTLPGVQISFSDGRARLMI PAVTKA  
NSGRYSLRATNGSGQATSTAELLVTAETAPPNFSQRLQSM TVRQGSQVRLQVRVTGIPTPVVKFYRDGA EIQS  
SLDFQISQEGDLYSLLIAEAYPEDSGTYSVNATNSVGRATSTAELVVQGEVVP AKKTKTIVSTAQISETRQT  
RIEKKIEAHFDARS IATVEMVIDGATGQLPHKTPPRI PPKPKRSPTPPSIAAKAQLARQQSPSPIRHSPSPV  
RHVRAPTPSPVRSVSPAGRISTSP IRSVKSPLLIRKTQTTMATGPEVPPPWKQEGYVASSTEAMRETTMTS  
STQIRREERWEGRYGVQEQTISGAAAAAASASVSSSFTAGAITTGTKEVKQETDKSAAVATVVAAVDMARVR  
EPAISAVEQTAQRTTTTAVHIQPAQE QARKEAEKTA VTKVVAADKAKEQELKSRTREVMVTTQEQTHISHEQ  
IRKETEKAFVPKVVISATKAKEQETRIITGEITTKQEQRITQETIRQETEEIAASMVVATAKSTKLEAAVGV  
QEETAIQDDQMHLETHEQMMKETRKT VVPKIVATPKIKEQDLVSR SREAITTKRDQVQITQEKKRKEVETTAL  
STIAVATAKAKEQETVLR SREAMATRQEHIQVTHGQVGVGKKA EAVATVVAAVDQARVREP REPTHVEESHQ  
QTTLEYGYKEHISTTKVPEQPRRPA SEPHVVPQAVKPAVIQAPSETHIKTTDQMGMHISSQVKKTTDISTERL  
VHVDKRPRTPASPHFTVSKISVPKTEHG YEAS IAGSAIATLQKELSATSSSTQKITKSVKAPTVPKGETRVRAEP  
TPSPQFPFADMP PPDYK SQAGIEVKKEVGVSI SGSTVREEHFVLRGREA KVTETARVPAPAEVPTPPTLV  
SGLKNVTVIEGESVTL ECHISGYSPKVTWYREDYQIESSIDFQITFQGGIARLMIREAFAEDSGRFTCSAVN  
EAGTVSTSCYLAVQVSEEFDKETTLTEKFATEEKRFVESRDVMTDTSITEEQAGPGEPAAPFFISKPVVQKL  
VEGGSVVFECQIGGNPKPHVYWKKSGVPLTTGYRYKVSYNKQTGECLVISMTFADDAGEYTI VIRNKHGETS  
ASALLEEADYEALVKTQQEMLYQTQMSTFIQEPKVGEIAPGFAYSEYEKEYEKEQALIRKKMAKDTVMVRTF  
VEDQEFHISSEFEERLIKEIEYRIKTTLEELLEEDGEEKMAVDISESEAIESGFDIRIKNYRILEGMGVTFHC  
KMSGYPLPKIAWYKDGKRIRHGERYQMDFLQDGRASLRIPVVLPEDEGIYTAFA SNIKGNAICSGKLYVEPAA  
PFSAPTYMPTPEAVSRIRSVSPRSLSRSP IRMS PAMSPARMS PAMSPARMS PAMSPARRLEETDESQLERL  
YKPVFVLPKPA SFKLEGQTARFDLKV VGRPMPETFWFHNGQQI VNDYTHKVV IKEDGTQSLIIVPASPSDSGE  
WTVVAQNRAGKSTISVTLTVEAVEHQIKPAFVEKLNKVN IEGSRLEMKVRATGNPNPDI VWLKNSDIIVPHK  
YPRIRIEGTRGEAALKIDSII SQDSAWYTATAINKAGRDTTRCKVNVEVEFAEPEPERKLIIPRGTYRAKEIA  
APELEPLHLRYGQE QWEEGDLYDKEKQKQPF FKKKLTSLRLKRF GPAHFECRLTPIGDPTMVVWV LHDGKPLE  
AANRLRMALTEFGYCSLDYGAAYS RDSGVI TCRATNKYGT DHTSATLIVKDEKSLVEESQLPDGKKG LQRIEEL  
ERMAHEGALGTVTTDQYKQKPDIVLFPPEVRLEGTARFR CRVTGY PQKVNWYLNGLIRKSKRFRVRYD  
GIHYLDIVDCKSDTGEVKVTAENPEGVTEHKVKLEIQQREDFRSVLRRAPEPKPEFHVHEPGKLQFEVQKVD  
RPVDTSETKEVVKL KRAERITHEKVSEESEELRSKFKRRTEEGYEAITAVELKSRKKDES YEELKKTKDEL  
LHWTKELTEEEKKALAE EGKITITPTFKPERIELSPSMEAPKIFERIQSQT VGGSDAHFRVRVVGKPDPECEW  
YKNGVKIERSDRIYWYWPEDNVCELVIRDVTAEDSASIMVKAINIAGETSSHAFLLVQAKQLITFTQELQDVV

AKEKDTMATFECETSEPFIKVKWYKDGIEVHAGDKYRMHSDRKVHFLSVLTIIDTSDAEDYSCVLVEDENIKTT AKLIVEGAVVEFVKELQDIEVPESYSGELECIISPENIEGKWHNDVELKSNKYSITSRGRQNLTVKDVTK EDQGEYSFVVDGKKTCKLKMKPRPIAILQGLSDQKVCEGDIVQLEVKVSLENVEGVMMKDGQEVQHSRVDHI VIDKQSHMLLIEDMTKEDAGNYSFTIPALGLSTSGNVSVYSVDVITPLKDVNVEIEGTVKAVLECKVSPDVT SV KWLNDQIKPDDRVQSIKVGTKQRLVINRTHASDEGPYKLMVGRVETSCNLSVEKIKIRGLRDLTCTETQN VVFEVELSHSGIDVWVNFKGKEIKPSSKYKIEAHGKIYKLTVLNMMKDDEGEYAFYAGENTTSGLKTVAGGAI STPLTDQTVAESQEAVFCEVANPESEGEWLKDGKHLALSNNFRGESDGHKRRLVIAAAKLDAGEYTYKVAT SKTSAKLVKVEAVKIKKTLRNLTVTETQDAVFSVELTHPDVKGQVQWIKNGVVLDSNDKYEISVKGTLVSLKIKN CAMADESVYGFKLGRGLGASARLHVETVKIKKPKDVTALENATVTFEVSVSHDTPVKWFKHKNVEIKPSDKHR LVSEKRVHKLMLQSI SPSDAGEYTAMVQGLECKAKLFVETLHITKTMKSEVPETKAASFCEVSHFNVPMSW LKNGVEIEMSEKFKIVVQGLHQLIMNTSTEDSAEYTFVCGNDQVSATLTVTPIMITSMLKDINAEEKDIT FEVTVNYEGISYKWLKNGVEIKSTDRQMRKTLHSLNIRNVHFGDAADYTFVAGKATSTATLYVEARHIEF RKHIKDIKVLKRAMFECEVSEPDITVQWMDGQELQIADRIKIQKEKYVHRLLIIPSTRMSDAGKYTVVAGG NMSTANLVEGRDVRIRS IKKEVQVIEKQRAVVEFEVNEDDVAHWYKDGIEINFQVQERHQYVVERRIHRMF ISETRHSDAGEYTFVAGRNRSSVTLYVNAPEPPQVLQELQPVTVQSGKPARFCAVISGRPQPKISWYKEEQLL STGFKCKFLHDGQEYTLLEAFPEDAAVYTCEAKNDYGVATTASLSLSEVPEVSPDQEMPVYPPAIVTFLQ DTVTSEGRPARFQCQVSGTDLKVSQWYCKDKKIKPSRFRMTQFEDTYQLEIAEAYPEDEGTAFVANNVAGQV SSTATLRLEGFSKSEEVTSKSWHTSPSVSLKKEALGQKPIFIQPLSSLRVHSGETVRFHARVSGVPKPAIQW FHNHQPIPLPSKDVVVFHFEESTGMALMLIVDAYPEHAGKYS CRAANSAGEATCAATLTVTAKAPESILHERIGQ QIEMEMKEIASLLSAEEDFQTYSSDLRLPNANETLELLSEPPARSTQFDSRQEGAAPVFIRESIDVEISVEDV AKLSVTVTGC PKPKIQWFFNGMLLTPSADYKFVFDGDTHSLIILFTRFQDEGEYTCLASNEYKAVCSAHLRI SPRGERSTEMESGEKKALEKPKGPCPPYFFKELKPVHCGPGIPAVFEYSVHGEPAPTVLWFKEDMPLYTSVCY TIIHSPDGSGTFIVNDPQRGDSGLYLCKAQNLWGESTCAEELLVLPEDTDVPDASCKEESTLGPVDFLETSA RGPLVQGVDSRQEITAFAGETISKAALIAEETLQLSYERSVDDSEVGTGVTIGAQKLPPVVLSTPQGTGELPS IDGAVHTQHRGPPPTLNLQAVQAQTTLPKKATLQFEEPEGVFPGASSAAQVSPVTIKPLITLTAEPKGNYPQ SSTAAPDHALLSSVAEETLQLEKKEIPEVDKAQRAALLSLSLAEGCVESLEVPDVAVSNMRSEPVFQHTCT EGKILMASADTLKSTQDVALRTEEGKSLSPFLAKLEEKQVLLKKEEQSEVVAVPTSQTSKSEKEPEAIKGVKEV REQELLSKETLFPSPMPEEQRLHLKTQVRRALQAAVAREQANLSEWLRNIDKVEVAVNFTQEPKRIICTYLI TSVSSLTEELTVTIEDIDPQMANLETGLKDALCSIVCEERNILMAEDPRIHEEDKIDVQGGRDHLSDAQKQVET VIEAEADSKYLVSKKEVSWKVESQLKDGDTNEVPQAETLKLAEESGTQKTSTEMSQEEAEGTLADLCPAVLK HLVDTISEEGDVTHTSSISNAKEVHWYFKGNLVPDGGFKCLKEQNAYTLVIEAVKTEDEGEYVCEASNDSG KAKTSAKLVGERAAPVIKRRIEPLEVALGHLAKFTCEIQGAPNVRFQWFKAGREIYESDKCSIRSSNYVSSL EILRTQVVDGCEYTCASNEYGSVCTATLTVTEAYPPTFLSRPKALTTFVKGAAKFLCTVSGTPVIEI IWQK DGAALSPPDCRVTADANKHSLLESLNLTVQDRGIYSCKASNKFGADICQAEITIDKPHFIKELEAVQSAINK KIHLECQVDEDRKVTITWSKDGQKLPAGKDYKIYFEDKIASLEIPLAKLKDSGTYTCTASNEAGSSSSAAVA VREPPSFVKKVDPSYMLPGESARLHCKLKGSPVIQVTFWKNNKELSESNTVRSFVNSEALDITDVKVDDS GTYSCEATNDVGS DSCSTEVIKEPPSFIKLEPADIVRGANALLQCEIAGTGPFEVNWFKDKKQIRSSSKYR LFTQKTFVYLEISSFNADVDGYECVVANEVGKCGCVATHLLKEPPTFVKVDDFTALAGQVTVLQAAVARGSE PISVMWMMKQGEVIKEDGKIKMSFSNGVAVLTI PDVQISLGGKYTCLAENEAGSQT SVGELIVKEPAKIERAE LIQVTAGDPATLEYTVSGTPELKPWKYKDGRLPLVASKYRISFKNNIAQLKFYS AELHDSGQYTFEISNEVGS SSCETTFTVLDRIAPLFTKPLRNVDVGGACRLDCKIAGSLPMRVSWFKDGKELTASDRYQIAFVEGTASL EISRVDMDNAGNFTCRATNSVSGSKDSSGALIVQEPFVTKPGSRDVLPGSAVCLKSAFQGSAPLTIKWFKGD KELVSGGSCYITKETSESSLELYAVKTS DSGTYTCKVSNVAGSVECSADL FVKEPATFIEKLEPSQLLKKGDG TQLACKVTGTPPIKITW FANDRELRESSKHKMSFAESTAVLRLTDVAIEDSGEYMCEAQNEAGSDHCTGIVIV KESPYFTKEFKSIEVLKEYDVMLLAEVAGT PPPFEITWFKDNTLRSGRKYKTFLQDQLVSLQVLKFAAADAGE YQCRVTNEVGSSTCSARVTLREPPSFIKKEIATSSLRGGTAAFQATLKGSLPITVTVLKDNDIETEDDNIRMT FENNVASLYLSGIEVKHDGKYVCQAKNDAGIQRC SALLSVKEPATIMEEAVSIDVTQGD PATLQVKFSGTKEI SAKWFKDQELTLGPKYKISVTDTVSILKII STEKKDSGEYTFEVQNDVGRSSCKASINVLDLIIPPSFTKKL RKMSDIKGSFIDLECI VAGSHPI SIQWFKDDQEISASDKHKFSFHDNTAFLEISQLEGTDSGTYTCSATNKAG HSQCSGHLTVKEPPYFVEKPPSQD VNPGRVQLKALVGGTAPMTIKWFKDNKELHPGAARSVWKDDTSTILEL FSAKAADS GTYICQLSNDVGTSSKATIFVKEPPQFIKPPSPVLVLRNGQSTTFECQVTGTPEIRVSWYLDGN EITDLRKYGISFVDGLATFQISNARVENSGTYVCEARN DAGTASCSELKVKKEPPIFIRELEPVEVVKDS DVE LECEVMTGTFEVTWLKNNKEIRSGKTYTMSEKMSVFLYHITKCDP SDVGEYQCIANEGGSCASARVALKE PPSFIKKEIENVTTVLKSSATFQSTVAGSPPI SITWLKDDQILEENDNVHISFEDSVATLQVRSDNNGHSGRYT CQAKNESGIERTYAFLLVQEPAQIIEKAKSV DVTEKDPVTLCEV VAGTPELKVKWLKDGKQIVPSRYFMSFE NNVASFRIQSVMKQDSGQYTFKVENDFGSSSCDAYLRVLDQDIPPSFTKKLTKMDKVLGSSIHMECKVSGSLP ISAQWFKDGKEISTSAKYRLVCHENTVSLEVSNLELEDTANYTCKVSNVAGDNACSGILTVKEPPSFLVKPER QQAI PDSTVEFKAVLKGTPPFKIKWLKDDVELVSGPKCFIGLEGSTSFNLVSVDS SSKTGQYTCQVTNDVGS D

SCTTMLLVTEPPKFVKKLEASKI IKAGDSARLECKITGSPEIQVVWYRNEHELTASDKYQMTFFIDSVAVIQMN
SLGTEDSGDFICEAQNPA GSTSCSTKVIVKEPPVFSSFPPIVETLKNTEVSLECELSGTPPFVWVYKDKRQL
RSSKKYKVASKNFHASIHLNVESTDI GEYHCKAQNEVGS DACVCAVKLKEPPKFISKLNSLTVVAGEPAELQ
ASIEGAQPI SVQWLKEKEEVIRESENIRISFVNNAVTLQFAKVEPANAGKYICQVKNDDGGVRENMATLTVLEP
AVII EKAGSMTVTVGETCALECKVAGTPELSVEWYKDGKLLTSSQKHKFSFYNKISSKILSVEKEDAGTYTF
QVQNNVGKSSCTAVVDVSDRMVPPSFTRRLKDTGGVLGTSCILECKVAGSSPISIAWFHEKTKIVSGAKYQTT
FSDNVCTLQLNSLDSSDMGSYTCVAANVAGSDECRALLTVQEPSPFVKEPEPELVLPGNITFTSVIRGTPPF
KVGWFRGARELVKGNRCNIYFEDTVAELELFNIDISQSGEYTCVVSNNAGQASCTTRLFVKEPATFVKKLSDH
SVEPGKSIILEGTYTGTLPISVTWKKDGVSI TP SERCNIVTTEKTCILEILSSTKGDAGHYSEIENEAGRDA
CDALVSTLEPPYFVTELEPLEASVGDSVSLQCQVAGTPEITVSWFKGDTKLRSTPEYRXYFTNNVATLVFNKV
SINDSGEYTCMAENSIGTAASKTIFRIQERQLPPSFARQLKDIEQTVGLPVTLTCLNGSAPIQVCWYRDGVL
LRDDENLQMSFVDNVATLKILQTDLSHSGQYSCSASNPLGTASSTARLTAREPKKSPFFDIKPVSIDVIAGES
ADFECHVTGAQPMRVTWSKDNKEIRPGGNYTITCVGNTPHLRILKVGKGDGSGQYTCQATNDVGMDCSAQLSV
KEPPKFIKKLDASKVAKQGESIQLECKISGSPEIKVWFRNDSELHESWKYNMSFVNSVALLTINEASAEDTG
DYICEAHNGVDASCSTALKVKAPPVFTQKPPVPGALKGSDVILQCEISGTPPFVWVWVKDRKQVRSKKFKI
TSKNFDTSLHIFNLEAPDIGEYHCKATNEVGS DTC ACTVFKEPFRFVKKLSDA STLIGDPVELQAVVEGFQP
ISVVWLKDKGEVIRESENVRI SFVDNIATLQLGSPASQSGKYVCQIKNDAGMRECSAVLTVLEPATIVEKPE
PMTVVTGNPFTLECVVAGTPELSAKWFKDGRELSSGSRHHITFVRNLASLKI PSAEMNDKGLYTFEVENRVGK
SSCTVSVHVSDRVVPPSFVRRLKDTSATLGASVVLECRVSGSAPISVWFLDGNIEISSPKCQSSFADNVCTL
TLSSLEPSDTGAYTCVAANVAGQDESSAVLTVQEPSPFEQTPDSVEVLPGMSLTFTSVIRGTPPFVKVWFKGS
RELVSGEACTISLEDFVTELELLEVEPGQSGDY SCLVTNDAGSASCTH L FVKEPATFVKRLADTSVETGSP I
VLEATYSGTPPISVSWMKNEYPLSQSPNCGITTTTEKSSILEILESTIEDYAQYACLIENEAGQDICEALVSVL
EPYFIEPLEHVEAAIGEPITLQCKVDGTPEIRISWYKEHTKLRSA PAYKMQFKNNVASLVINKVDHSDVGEY
TCKAENSVGAVASSAVLVIKERKLP SFARKLKD V HETLGFVAFECRINGSEPLQVSWYKDGELLKDDANLQ
MSFVHHVATLQILQTDQSHVQYNC SASNPLGTASSAKLILSEHEVPPFFDLKPVSVDLALGESG SFKCHVT
GTAPIKITWAKDNREIRPGGNYKMTLVENTATLTVLKVAKGDAGQYTCYASNVAGKDS CSAQLGVQEPFRFIK
KLDQSRIVKQDEYTRIEYCKIGGPEIKVLWYKGDTEVEI QESSKFRMSFEDSVAILEMHSLSVSDSGDYTC EARN
AAGSASSSTSLKVKEPPVFRKKPFVETLKGADVHLECELQGT PPFQVSWHKDKREL RSGK KYKIMSENLLTS
IHLNVDTADIGEYQCKATNDVGS DTCVGSVTMKAPPQFVKKLTDISTIIGKEVQLQTTIEGAEPISVAWFKD
KGEIVRESDNIIWISY SENIATLQFSRAEPANAGKYTCQIKNDAGMQECYATLSVLEPAAIVEKPE SIKVTTGD
TCTLECTVSGTPELSTKWFKDGKELTS DNKYKISFFNKVSGLKI INVVPGDSGVYSFEVQNPVGKDSCKVSIQ
VSDRIIPPSFTRK LKETNGLSGSSVMECKVYGS PPI SVLWFHDGNEISSGRKYQTTLTDNTCALTVNMLEEA
DAGDYTCIATNVAGSDECSAPLTVREPPSFVQKPDMDVLTGSNVTFTSIVKGSPPFTVSWFKGSTELVPGAR
CNVSLQDSVGELELFDVDTSQSGEYTCIVSNEAGRASCTTRLFVKAPAI FVKRLNDYSIEKGKPLILEGTFSG
TPPISVTWKKNGINVIASQR CNITTEKSAILEILSSTVEDSGQYNCYIENASGKDS CSAQILILEPPYFVKQ
LEPVKVTVGDSASLQCQLAGTPEIGVSWYKGDTKLRPTATCKMHFKNNVATLVFTQVDS SSGEYICRAENSV
GEVSSSTFLTQEQKLP SF SRQLRDVQETVGLPVVFECAVSGSEPISVSWYKDGKPLKDS PNIQTSFLDNIA
TLNIFKTRDSLQYSCTATNP IGSASSGAKLILTEGKNPPFFDIPLAPMDAVVGESADLECHVTGTQPIKVT
WAKDNREIRSGGNYQISYLENSAHLTIVKVDKGDGSGQYTCYAVNEVGKDSCTAQLNIKERLIPPSFTKLS E
VEETEGNSFKLEGRVAGSQPITVAWYKNNVEIHPTSNCEIMFKNNALLQVKRASMADAGLYTCKATNDAGSA
LCTSSIVIKEPKKPPVFDQHLAPVTASEGDSVQLSCHVQGSEPIRIQWLKAGREVKPSDRCSF SFASGTAMLE
LKETA KADSGDYVCKASNVAGSDTSKCKVTI KEKPAAPAAKAAVDGK LFFVSE PQSIRVVEKTATTFIAKV
GGDPIPNVKWTKGKWRQLNQGRILIHQKGDEAKLEIRDTTKTD SGLYRCVAFNKHGEIESNVNLQVDERKKQ
EKIEGDLRAMLKKT PALKKGSGEEEEIDIMELLKNVDPKEYEKYARMYGITDFRGLLQAFEL LKQSQEEETHR
LEIEBELEKSERDEKEFEELVAFIQRLTQTEPVTLIKDIENQTVLKDND AIFEIDIKINYPEIKLSWYKTEK
LEPSNKYEISIDGDRHTLRVKNCPKDQGNRYRLVCGPHIASAKLTVIEPAWERHLQDVTLKEGQCTMTQCQFS
VPNVKSEWFRNGRVLK PQGRVKTEVEHKVHKLT IADVRAEDQGYTC KHEDLETS AELRIEAEPIQFTKRIQN
IIVSEHQ SATFECEV SFDDAIVTWYKGPTELTESQYKFNDRNGRCHYMTIHNVT PDDEGVYSVIARLEPRGEA
RSTAELYLT TKEIKLEMKPPDIPDSRVPIPTMPIRAVPPEEIPPAVAPSIPLLLPLPEEKKPPAKRIEVTKKG
VKKDTKKVVTKPKEEAPPPVAKKPPPTPMIPAKASEIDVSSKAEVKITITIRKKEVHKKEAVYEREEA
VYEKKVHI EPWEEPYEELETEPEYTEPEYEEPYEEPEDEYEEIKVEAKKQVHEEWEEDEFEEGQ EY YEREEGYDE
GEEWEIEIYHEREIQVQKEVHEELHEKKIPAKVPEKKVPPPKVVKPVVEKVEKTRRMEEKVVQVIKVPV
SKKIVPQKPSRTPVQEEIEVKVPAVHTKKMVI SEEMKFASHTEEEVSVSPEVQKKTVTEEKI HVAVSKKI
EPPKVPPEPPKPPVEEVVPIPKKVEPPAAKVPPEAKPKVPEEKKVPV I PKKKEPAAPPQVPEAPKPAPE
EKIPVPVTKKKEAPPAKVPEVQKVVTEEKIAIITQREESPPPAVPEIPKKKVPEEKRPVPRKEEVPPPKVPV
PPKAVPEAVVPAPIPKKAPPRAEVSKKT VVEEKRF AAEKLSVAVPQRVELMRHEEEEWYSEEEERVSVS
YREEERDEEEAEITEYEVLEEP EYVVEEKMHFI SKKVEVEPAKVPEKKIIPKPKVPKIEPPPTKVPEPPK
KIVPEKKVPAPAPKKVPPAKAPEESKRFPVPEKRAPAEVGVIEEPPPTKVAERHMKITQEEKVLVAVTKEAPP

RARVPEEPKPKVAPEERFPKPKLPRREEEPPAKVTEVRKRAVKEEKVSIEVPKREPRPTKEVTVTEKKWSYTRE
EETVSEHREEEYEDYEDYEEYKEFEYEPTEEYDQYDEYAEREVEHYEEHVEEYVTEPKKVPVVKPAQEPVPAK
PKAPPPKVLKKAAPPEEKAPLPKQKLLKPLPPKAPPEPKKVVEEKIQISITKREKQOVTEPVAKVPMPKRVVP
EAKIPAPTKEVAVPVRVPGVPKPKRELEEVVVFKEEVEAHEEYIVEEEEEYVHEEEYVHKEEYVHEEEYVHKEE
YIHEEEHLHEEEETIAEEVVVPAVVKVPVVPKPKVPPEEKKVPVVPKPKKEAPPKAVPEIPKKPEEKVPVPI
KKEKAPPKAVPEVPKPKVPPEEKPPVVPVVKVEPPPAPKVPPEKVPPEKVPAPTPKKVEAPPKAVPEVPKPK
IPEEKPTALLKMEAPPKAPKKREVVPVVALPREEEEEVPFEEVPEEEILPEEEVPSEEEAPPEEVPPE
EEVLPPEEEVLPPEEEVLPPEEEVQPEEEALPEIKPKVPKPAVPPKKTVPPEKVPVVPKPKVEPPPPKVPPE
IKKVPPEKVVVPKKEEAPPKVPPEVSKKVEERRIIPKKEEVPPEAEVYEEAEEPTPEEIPPEPPSIEEEIV
EEEEEEVLPVPPRAPEVVKKAVPEAPTPVVKKAEAPPKVPKPIPEEKVPVVPQKKEAPPKAVPEKKIPEKK
VPVVKKEAVPPAKGKAVFEKISVAYQQEELVQERIELELVEAKVEEAEEEEFHEVQEYFEEEFHEVEEFTI
RVEERRFQEEHKVEEVHRVIEFLEAEVEVEYKPKIPPKKGPEVSEKVIIPKPKPTKVIIPRKEPPKAVPEVTK
KTVVEEKIRAPEEPKVPAPKAPPEVKKITPEEKVREAVPKKPEVPPKVPPEVVKKIIOEEKLPVVLPEDEIY
MYEASEETVIEEEHVTLTPQKARLKVAKVPAPPQTVVTEEKTYVTIRKTRTLALKESETTREAFPELKSYKAV
PEIPEPPSPEDLEIIEDVLPKEKRPASKRRKTQLPTAPEAPREMPPEMNTFEEISVEPEMLPTQVLDTYQEAT
VEKTLRISRKKPELPSDEEVPEAPREVVAKKVLPPQVPEVVPVKVPGAPKEVVSERKSLEPPKPAVRPV
TVPEEPKEVIPEKVVSLVPPKPAAPPVTVPEAPEEVEFSEDEETLAPPQPEAPPAKVEAPKEVPEKVVSV
VPKKEAPPKAVPEAPKEAAPEKKVPVAPKPKPEAPPVVKVPEAPKPKVPEKKLPAAPKPKPEAPAAVEVP
KTAVPQKKIPEAIPPKPESPPLEVEVPPKEVTPPEKKVPAAPPTKPEIPPPKVPPEAPQAAVVEEKTPEALPKK
AEAAPVVPVQVQETVPEKTRPVGPPKKPEATTVPVVKVQKTIPEKTRPEAPPKRPEARTVPETVPEKTRPMA
PKKPEATTLPVPEVQETVPEKTRPVGPPKKPEATTVPVPEVQETIPEKTRPPKKPEATVPVPEVQETVPEKT
RVPVPPKKPEATTVPVPEVQETIPEKTRPAAPPKKPEATAVPETIPEKTRPEAPPKRPEATTVPVPEADQAV
PEKVPVVPKPKVEAPPITVPEEPKEVIPEKVVSLVPPKPAAPPVTVPEAPEEVEFSEDEETLAPPQPEAPPA
AKVPEAPKEVVPPEKVVSVPPKPEAPPKAVPEAPKEAAPEKVPVAPKPKPEAPPVVKVPEAPKVVPEKKL
VAAPKPEAPAAVEVPEPKAAVPQKKIPEAIPPKPESPPPEVYEEPEEEIVPEEPPEEAVEEPVAPPPKVPTE
PPKVPPEKAPPVVKKEPEPPKAVPEVPEKPEAPPEKVPKPKPEAPPKAVPEVPEKVVPEKVVAVPKKVP
PAKVPEVPPKPIEKKPAIPVVEKVASPPAEVYEEPEEVTAEEEEPAPAVEEEEEYEAAPPPAPVPEEPPKVV
EKKFPVIKKPEAPPKVPPEVVKAVVKKVPVVKKPEPPEAEVPEVPPKLVVVKKEVPVVTKKTPEVLPKEVPE
APKKITPEKKEVSVVPEEPEAPPASVEETPEETIYEKATITIGRKETPPVEEREIEKFIQPEEPELEPEPEE
IPVQEPPEKKEVIEKPKLPRPPARPPSPKEDVKEKMFQLKAVSKKKVPEKPEVVEKVEPAPLKVPTAEKKV
RKLLEPKPQPKKEEVVLKSVLRKKPEEEEPKVEPKKVEKAKKPEEPQPPKAVEVEAPPEPTPKERKVPPEAK
VPEIKPAIPLPGPEPKPKPEPEVKTMKAPPIEPAPTPIAAPVTAAPVVGKKAEEKPKDEAAKPKGPIKGVAKKT
PSPIEAERKLRPGSGGKPPDEAPFTYQLKAVPLKFKVKEIKDIVLTAESVGSAAIFECVSPSTAITTWK
DGSNIRESPKHRFIADGKDRKLHIIDVQLSDAGEYTCVLRNLNKEKSTAKLIVEELPVRVFKTLEEEVTVVK
GQPLYLSCELNKERDVVWRKDGKIVVEKPGRIVPGVIGLMLRALTINDADDDTAGTYTVTVENANNLECSVCV
VVEIIREWLVPKPIRDQHVKPKGTAVFTCDIAKDTPNIKWFKGYDEIPLPNDKTEILKEGNHLFLKVKNAMPE
DIDEYAVEIEGKRYPAKLTTLGEREVELLKPIEDVTIYEKESASFDAEISEEDIPGEWKLKGEELLRPSPTCEIK
AEGGKRFLTLHKVKLDQAGEVLYQACNAITTAILTVEIEELDFAVPLKDVTVPEKRQARFECVLTREANVIWS
KGPDIKASDKFDIADGKHHILVINDSQFDDEGVYTAEEVGGKTSQQLFVTGIRLKFISPLEDQTVKEGQTA
TFVCELSHEKMHVVWFKNVVKLHTRTRVLMSSSEGKTYKLEIRETTLDDISQIKAQVKNLSSTANLKVLEADPY
FTVKLHDKTGVEKDEIILKCEVSKDVPVKWFKDGEEIIVSPKHSVKTDGLRRILKIKKAEKDKGEYVDCDGT
DTTKANVTVEARLIKVEKPLYGVEVVFGETARFEIEELSEPDVHGQWKLKGEPLTASPDCEIIEDGKKHVVLV
NCQLDMTGEISFQAANAKSAANLKVKELPLIFITPLSDVKVFEKDEAKFECEVSREPKTFRWLKGTQETIGDD
RFELIKDGRHSLVIKSAAFEDEAKYMFEEADKRTSGKLIIEGIRLKFPLTKDVTAKERENAVFTVELSHDN
IPVSWFKNDQRLHTSKRVSMHDEGKTHSITFKDLSIDDTSQIRVEAMGISSEAKLTVLEGDYPFTGKLQDYTG
VEKDEVILQCEISKADAPVKWFKDGKEIKPSKNVVIKADGKRMILILKALKSDIGQYTCDCGTDQTSGLDI
EDREIKLVRPLYSVEVMEETETARFETEISEDDIHANWKLKGEALLQTPECEIKEEGKIHVLILHNCRLDQTTGG
VDFQAANVKSSAHLRVKPRVIGLLRPLKDVTVTAGEATATFDCELSYEDIPEVWYLKGGKLEPNKVVTRSEGR
VHTLTLRDVKLEDAAGEVQLTAKDFKTQANLKVVEKPPVEFTKPLEDQTVVEEATAVLECEVSRENKVKWFKNG
TEILKSKKYEIVADGRVRKLIHGCTPEDIKTYTCDKDFKTSNCLNVVPPHVEFLRPLTDLQVKEKETARFE
CEISKENEKVQWFKDGAIEKKGKDYDIISKGAVRILVINKCLLNDEAEYSCEVTRTARTSGMLTVLEEEAVFTK
NLANLEVSEGDTIKLVCEVSKPGAIEVIWYKGDDEEIIETGRFEILTDRKRILIIQNAQLEDAGSYNCRPLSSR
TDSKVVHLEAAEFISKPQNLLEILEGEKAEFVCTISKESFEVQWKRDDQTLSESGDKYDIADGKRVLVVKDA
TLQDMGTYYVMVGAARAAHLTVIEKLRIIVPLKDTKVKKEQVEVVFNCEVNTGAKAKWFRNEEAIFDSSKYI
ILQKDLVYTLRIRDARLDDQANFNVSILTNHRGENVSAANLIVEEEDLRIVEPLKDIETMEKKSVTFWCKVNR
LNVTLKWTNGEEVAFDNRISYRIDKYKHSILIKDCGFPDEGEYVVTAGQDKSVAELLIIEAPTEFVEHLEDQ
TVTEFDDAVFSCQLSREKANVKWYRNGREIKEGKYYKFEKDGSIHRLIKDCRLEDECEYACGVEDRKSARL
FVEEIPVEIIRPPQDILEAPGADVIFLAELNKDKVEVQWLRNMIIVVQGDKHQMMSEGKIHRQLICDIKPRDQ

GEYRFIAKDKEARAKLELAAAPKIKTADQDLVVDAGQPLTMVVPYDAYPKAEAEWFKENEPLSTKTVDTTAEQ
TSFRISEAKKDDKGRYKIVLQNKHGKAEGFINLQVIDVPGPVRNLEVTETFDGEVSLAWEEPLTDGGSKIIGY
VVERRDIKRKTWVLVTD RADSCFEFTVGLQKGGVEYLFVRSARNRVGTGEPVETDSPVEARSKYDVPGPPLNV
TITDVRNRFVSLTWEPP EYDGGAEITNYVIELRDKTSIRWDTAMTVRAEDLSATVTDVVEGQEYSFRVRAQNR
IGVGKPSAATPFVKVADPIERPSPVNLNASEQTQSSVQLTWEPP LKDGGSPIILGYI IERREEGKNWIRCNM
KPVPELTYKVTGLQKGNKYLYRVS AENAAGVSDPSEILGPLTADDAFVEPTMDLSAFKDGLEIVPNPIKILV
PSTGYPRPKATWTFGDQVLEEGDRVKMKTISAYAELVISPSERTDKGIYTLTLENPVKSSISGEINNV IAPPS
APKELKFSDI TKDSVHLTWEPPDDDDGGSPLTGYVVEKRDMSRKTWTVMDFVTDLEFTVPDLVQK EYLFKVC
ARNKCGPGEPAYTDEPVNMSAPATVPDPENVKWRDRANSIFLTWDPKNDGGSRIKGYI VEKCPRGSDKWW
ACGEPVPDTKMEVTGLEEGKWYAYRVKALNRQGASKPSKPT EEQAVDTQEAP EIFLDVKLLAGITVKAGTKI
ELPATVTGKPEPKITWTKADTLLKPDQRIT IENVPKSTVTITDSKRSDTGTYI IEAVNVCGRATAVVEVNVL
DKPGPPAAFDITDVTNESCLLTWNPRDDGGSKIITNYVVERKATDSDVWHKLSSTVKDTNFKATKLT PNKEYI
FRVAENMYGVGEPVQAAP IIAKYQFDPGPPTRLEPSDITKDAVTLTWCEPDDDDGGSPIITGYWVERLDPD TD
KWVRCNKMPVKD TTYRVKGLTNKKYRFRVLAENLAGPGKPSRSTEPILIKDPI DPPWPPGKPTVKDIGKTS L
VLNWTKPEHDGGAKIESYVIEMLKTGTDEWVRVAEGVPTTEHLLTGLMEGQEYSFRVRAVNKAGESE PSEPSD
PVLCREKLYPPSPRRWLEVINITKNTADLKWTVPEKDDGGSPIITNYI VEKRDVRRKGWQTVDTTKVKTCTVTP
LTEGSLYVFRVAENAIGQSDYTEIGDSVLAKDTFTTGP PYPALTVVDVTKRHVDLKWEPKNDGGRPIQRYI
IEKKEKLGTRWVKAGKTSGLPDCNFRVTDVIEGTEVQFVRAENEAAGVGHPS EPT EILSIEDPTSPSPPLDLH
VTDAGRKHIAIAWKPPEKNGGSP IIGYHVEMCPVGTEKWMRVNSRP IKDLKFVVEEGIVPDK EYVLRVAVNA
VGVSEPSEISENVVAKDPDCKPTIDLETHDIVVIEGEKLNIPVPFRAVPVPTVSWHKDGKEVKASDR LTMKND
HISAHLEVPKSVHADAGVYIT ILENKLG SATASINVKVI GLPGCKDIKASDITKSSCKLTWEPP EFDGGSP I
LHYVLERREAGRRTYI PVMSGENKLSWTVKDLIPNGEYFFRVKAVNK IGGGEYIELKNPVIAQDPKQPPDPV
DVEVHNPTAKAMTITWK PPLYDGGSKIMGYIEKITKGEDRWKRCNEHLVPVLTYTAKGLEEGKEYQFRVRAE
NAAGIGEPSRATPPTKAVDPI DAPKVI LRSTSLEV KRGDEIALDATISGSPYPTITWIKDENVI VPEEIKKRAA
PPVRRKKGEAE EEEFSLPLTERLSINNSKQGESQLRIRDSLRPDHGQYMIKVENDHGVAKAPCSVSVLDT PG
PPINFVFEDIRKDSVLCKWEPP LDDGGSEIINYTELEKDKTKPDSDWIVITSTLRNCKYSVTKLIEGKEYLFR
VRAENRFGPGPCVSKPLLAKDPFEPDAPDKPIVEDVTNSMVLVKNWEPKDN GSPILGYVLEKREVENSTHWS
RVNKTLLSSLKTKVDGLLEGLTYVFRVCAENAAGPGKFSPPSDPKTARDPISPPGPPVPRVADTSSTTIELEW
EPPAFNGGGEIMGYFVDKQLVGTNEWSRCTEKMIKVRQFTVKEIREGADYKLRVSAVNAAGEGPPGETEPVTV
AEPQEPPTVELDVSVKGGI QIMAGKTLRI PAEVTGRPVPTKVWTIEEGELDKERVI IENVGKSELI IKNALR
KDHGRYVITATNSCGSKFAAVRVEVFDVPGPVL DLKPVVTNRKMCLLNWSDPADDGGSDITGFI IERKDAKM H
TWRQPIETERSKCDITGLIEGQ EYKFRVIAKNKFGCGPPVEIGPILAVDPLGPPTS PERLTYTERTKSTITLD
WKEPRSDGGSP IQGYIEKRRHDKPDFERVNKRLCPTTSFLVENLDEHQMYEFRVKA VNDVGESEPSLPLNVV
IQDDEVPTIKLRLAVRGDTIKVKAGEPVNI PADVTGLMPKIEWSKNEKVIDKPTDTLNI TKEEVS RSEAKT
ELSI PKAAREDKGTYTITASNRLGSVFRNVHVEVYDRPSPPRNLAVTD IKAESCYLTWDAPLNDGGSEITHYI
IDKRDASRKKSEWEGVTNTAVERYGIWKLI PNGQYEFVRVAVNKYGISDECKSDKVV I QDPYRLGPPGPKP
VLERTKGSMLVSWTPPLDNGGSPITGYWLEKREEGGTYWSRVSRAPITKVGLKGVEFNVPRLIEGVKYQFRAM
AINAAGIGPPSEPSDPAVAGDPIYPPGPPSCPEVKDKTKSSISLAWKPPAKDGGSP I KGYIVEMQEEGTTDWK
PVNEPDKLLTACECVPNLKELRKYRFRVKAVNEAGESEPSDTTGEIPATDIQEVPEV FIDIGAQDCLVCKAG
SQVKIPAVIKGRPTPKSSW EFDGKAKKAMKDGVDHIDPEDAQLETAENSSV I I IPECTRAHSGKYSITAKNKAG
QKTANCRVKVMDAPGPPKDLKVDITRGSCLSWKMPDDDDGGDR I KGYVIEKKTIDGKA WTKVNPNCGSTTFV
VPDLISEQQYFFRVRAENRFGIGPPAETIQR TTARDPIYPPDPP I KLIKGLITKNTVHLSWKPPKNDGGSPVT
HYIVECLAWDPTGKKKEAWRQCNR RDVEELEFTVEDLIEGGEYEFRVKAVNEAGVSKPSATVGPVIVKDQTC P
PAIELKEFMEVEEGTDVNI VAKIKGVFPPTLTWFKAPPKPDSKEPVVYDTHVNKQVDDTCTLVI PQSRRSD
TGLYSITAVNNLGTASKEMRLNVLGRPGPPVGP I K FESISADQMTLSWLPKDDGGSKIITNYI VEKREANRKT
WVRVSSEPKECMYTI PKLLEGHEYVFRIMAQNKYGIGEP LDSEPETARNLFSVPGAPDKPTVSSVTRNSMTVN
WEEPEYDGGSPVTGYWLEMKD TTSKRWKVRNRDPIKAMTLGVS YKVTGLIEGSDYQFRVYAINAAGVPASLP
SDPVTARDPVAPP GPPFPKVTDWTKSSVDLEWSPPLKDGGSKITGYIVEYKEEGKEEWEKGDKEVRGTKLVV
TGLKEGAFYKFRVAVNVAGVGEPEVTDVIE MKDRIVSPDLQLDASVRDRIVVHAGGVIRI IAYVSGKPPPT
VTWSMNERALPQEA A IETTAISSSMVIKNCQRSHQGVYSL LAKNEGGERKKT I IVDVLDVPGPVG I PFLSDNL
TNDSCKLTWFSPEDDGGSPITNYVI QKREADRRAWTPV TYTVTRQNATVQGLIQGKSYFFRIAAENSIGMGPF
VETPNALVIRDPITVPERPEDLEVKEVTKNVSLTWNPPKYDGGSEIIN YVLESRLIGTEKFHKVTNDNLLSR
KYTVKGLKEGDTY EYRVS AVNIVGQGKPSFCTKPICTCKDELAPPTL DLDFRDKLTVRVGSES FALTGRYS GKPK
PKIDWFKDEADVLEDDRTHIKTPTTLALEKTKAKRSDSGKYCVVVENSTGSRKGFQCVNVVDTRGPPVGPVI
FDEVTK EYMVISWK PPLDDGGSEITNYI IEKKELGKDIWMPVTSASAKTTCVKPKLLEGKDYIFRIHAENLYG
ISDPLVSDSMKAKDRFRVPDAPEQPVVTEVTKDSALVTWNKPNDDGGKPIITNYI LEKRETM SKRWVRVTK EPIH
PYTKYRVPDLLEG CQYEFVSAENEIGIGDPSPPSKPVFARDPIAKPSPPINPEAIDTTCNSVELTWQPPRHD
GGSKILGYIVEYQKVGDEEWRRANHTPESC PETKYKVTGLRDGQSYKFRVLAVNEAGESDPAHVPEPVLVKDR

LEPPELILDANMAREQHIRVGDTRLRLSAI IKGVFPKVTWKEDREAPTKAQIDVTPVGSKLEIRNAAHEDGG IYSLTVENPAGTKTVSVKVLVLDKPGPPRDLEVSEIRKDCSYLTWKEPLDDGGSVVTNYVVERKDVATAQWSP LSTTSKKKSHMAKHLTEGNQYLFVAAENQYGRGPFVETPKPIKALDPLHPPGPPKDLHHVDVKTEVSLVWN KPDRDGGSPITGYLVEYQEEGDKDWIKFKTVKNLDCVVTGLQQGKTYRFRVKAENI IGLGLPDTTPIECQEK LVPPSVELDVKLIIEGLVVKAGTTRVRFPAI IRGVPVPTAKWTTDGTETIKTDDHYTVETDSFSSVLTIKNCLRKD TGEYQLTVSNAAGTKTVAVHLTVLDVPGPPTGPINILDVTPPEYMTISWQPPKDDGGGSPVINYIVEKQDTRKGT WGVVSAGSSKLLKLVPHLQKGEYVFRVKAENKMGVGPPLDSIPTVAKHKFSPSPGKPVVTDITENAATVS WTLPKSDGGSPITGYVVERREITGKWVRVNKPTIADLKFRVTGLYEGNTYEFVFAENLAGLSNPSPSSDPIK ACRPIKPPGPPINPKLKDKSKESADLWTKPLSDGGSPILGYVVEYQKPGTAQWDRINKDELIRQCAFVRPGL IEGNEYRFRIRAANIVGEGEPRELAESVIAKDILHPPEVELDVTCDVITVRVGQTIIRILARVKGRPEPDI TW SKEGKVLVKDKRVDLIHDLPRVELQIKEAVRADHGKYIIISAKNSSGHAQGSIVNVLDPRGPCQNLKVSNTK ENCTISWENPLDNGGSEITNFIVEYRKPNOQKWSIVASDVTKRLVKANLLANNEYFRVCAENKVGVPPTIET KTPILAINPIDRPGEPENLHIADKGTFFVYLKWRPPDYDGGSPNLSYHVERRLKGSADWERVHKGSIKETHYM VDKCVENQIYEFVQTKNEGGEVDWVRETEVVVVEDLQKPVLDLKLKSGVLTVKAGDTRLEAGVGRKPFPEVA WTKDKDATDLTRSPRVKIDTSAESSKFSLTAKAKRSDGGKYVITATNPAGSFVAYATVNVLDKPGPVRNLKIDT VSSDRCTIRWDPPEDDGGCEIQNYILEKCESKRMVWSTYSANVLTSPSATVTRLIEGNEYIFRVRAENKIGTGP PTESKPVIAKTKYDRPGRPDPEVTKVSKEMTVVWNAPEYDGGKSIPTYLEKKEKHAVRWVPVNSAI PER RLKVQNLPLPGHEYQFRVKAENEVGI GEPSPSRPVVAKDPIEPPGPTNFKVVDTTKSSITLAWGKPVYDGGGA PIIGYVEMRPKIADASPDEGWKRCNAAAQLIRMEFTVTSLDENQYEFVCAQNQVIGRPAELKEAIKPK EILEPPEIDL DASMRLVVRAGCPIRLFAIVRGRPAKVTWRKVGIDNVVRKQVLDVDTMAFLVIPNSTRDD SGKYSLTLVNPAGEKAVFVNVKVLDTPGPVADLVSDVTKTSCHVSWAPPENDGGSQVTHYIVEKREAEKRW STVTPVVKKTSFNVTNLVPGNEYFRVTA VNEYGPGVPTDIKPKVLASDPLSEPDPPRKLVEVTEMTKNSATLA WLPPLRDGGAKIDGYIISYREEDQPADRWTEYSVVKDLSLIVTGLKEGKYYKFRVAARNAVGVSMPREAEGVY EAKEQLLPKILMPEQITIKAGKLRVEAHVYGKPNPICKWKKGDDEVVTSSHLAIHKADGSSVLIKDVTRK DSGYSLTAENSSGSDTQKIKVTVMDAPGPPQPPFDISEIDADACLSLWHIPLDGGSNITNYIVEKCDVSRG DWVTALASVTKTSCRVGKLI PGQYIFRVRAENRFGISEPLTSPKMLAKFPFDVVPSEPNARVTVNKDCIFV AWRPDSGGKTYTGYLIERKERNLLWVKANDTIVRSTYPCAGLVEGLEYSFRIYALNKAGSSVTKVSKPTEY VTARMPVDPGKPEVVDVTKNSASLIWARPKHDGGSRIIGYFVEACKLPGDKWVRNCTTTPHQIQEYATATGL EENAQYQFRAIAKTAVNISQPSESPDPVTILAENVPPRIELSVEMKSLTLVKAGTNVCLDATVFGKPMPTVSW KKDTPPIKQAEGIKAMKRNLCLELFSVNRKDSGDTITTAENSSGSKSATIKLKVLDKPGPPASVKINKMYA DRAMLSWEPPELDDGGSEITNYIIDKRETSRPNWAQVSATVPI TSCVTEKLIIEGHEYQFRICAENKYGVGDPIL TEPALIAKNPYDPPGRCDPPIVSNITKDHMTVSWKAPADDGGSPITGYLVEKRETQAVNWTKVNRKPIERTLK ATGLQEGTEYEFVTAINKAGPGKPSDASKAVYAQDPLYPPGPPAFPKVYDTRSSVLSLWKGKPAYDGGSP I GYLVEVKRADSDHWVRNCLPEKLQKTRFEVTEGLMENTEYQFRVYAVNKIGYSDPSDVPDKHCPKIDILIPPEGE LDAELRKTILIRAGVTMRLYVPVKGRPPPKITWSKPNVLRERIGLDIKSTDFDTFLRCENVNKYDAGKYILT LENS CGKKEYTIVVKVLDTPGPPVNVTVKEVSKDSAYVTWDPPIIDGGSPINIVVEKRD AERKSWSTVTEC SKTSFRVSNLEEGKSYFFRVFAENEYGI GDPGETRDAVKASETPGPPVLDKALAITKSSCTIGWKKPRSDGGS RITGYVVDLFTENKQVRMKSLSLQYSTKDLKEGKEYTFRVSAENENGEPTSEIVVVAKDDVAPDLDLKD LPDLCYLAKENSFNRLKPIKIGKPPASVSWKKGEDPLATDRVSVESTAVNTTLVYDCQKSDAGKYTITLKN VAGTKEGTLKIKVVGKPGIPTGPIKFDEVTAEAMTLKWGPPKDDGGSEITNYVLEKRDVSVNNKWT CASAVQK TFRVTRLHEGIEYTFRVSAENKYGVGGLKSEPIVAKHPFDVDPAPPPNIVDVRHDSVSLTWTDPKKTGGS PITGYHIEFKERNLLWKRANKTPIRMKDFKVTGLTEGLEYEFRVMAINLAGVKGKPSLPSEPVVALDPI DPPP KPEVISVTRNSVTLIWTEPKYDGGHKLTYGIVEKRDLPSKSWMKANHVNPDCAFVTDLVEGGKYEFRIRAK NTAGALISAPSESTGTICKDEYEAPTIVLDPTIKDGLTVKAGDSIVLSAISILGKPLPKSSWSRAGKDIRPSD IAQITSTPTSSMLTVKYATRKDAGEYTIATNPFGTKEEHVKVSVLDVPGPPGPIEISNVSAEKATLTWT PPL EDGGSPIKAYVLEKRETSRLLWTVVSEDIQACRHVVTKLIQGNEYLFRVSAVNHYGKGEVQSEPVMVDRFG PPGPPGKPEISNVTKNTATVSWKRPTDDGGSEITGYHVERREKGLRWVRATKTPVSDLRCKVTGLQEGNTYE FRVSAENRAGIGPPSDASNPVLMKDVAYPPGPPSNAHVTDTTKKSASLAWGKPHYDGGLEITGYVVEHQKVG DDAWIKDTTGTALRITQFVVPDLQTKKYNFRISAINDAGVGEPAVIPNVEIVEKEVAPDFELDAELRRLTVVR AGLSIRIFVPIKGRPAPEVWTWKDNINLKHRIENIENTESFTLLIIEPCNRYDTGKFMVTIENPAGKKS GFVNV RVLDTPGPVNLNRPTDITKDSVTLHWDPLIDGGSRITNYIVEKREATRKSYSTVTTKCHKCTYKVTGLTEGC EYFFRVMAENEYGVGEPTEETETEPVRASEAPLPPDSLNIIMDITKNTVSLAWPKPRHDGGSKI TGYVIEAQRKGS DQWTHI SVLGRKLECVNRNLTEGEEYTFQVMANVENSAGRSAPRESRPVIVKEQTMLPELDRGIYQKLV IARAGD NIKVEIPVTKGRPKPTVTKKGDQILKQTRVNVNTASTILNINECVRSDSGYPPLTAKNTVGEVGDVITIQ VHDIPGPPTGPIKFDEVSSDFVTFVSWEPPEPNDGGVPI SNYVEMRQTDSTTWVELATTVIRTTYKATRLTTGV EYQFRVRAQNRYGVGPGITSASVVANYPFKVPGPPGTPQVTA VTKDSMTISWHEPLSDGGSPILGYHIERKER NGILWQTVSKALVPGNIFKSTGLTDGIAYEFVRIAENMAGKSKPSKPSSEPMFALDPI DPPP GPVPLNITRHTV ALKWAKPEYTGGFKITSYVVEKRDLPNGRWLVKANFNSILENEFTVSGLTEDAAYEFVRIAKNAAGAI SPPSEP



SDAITCRDDLEAPRIMVDVRFKDTITLKGAEAFKLEADVSGRPPPTMEWTKDGKELEGTGKLEIKIADFSTHL  
INKDSSRTDSGAYILTATNPGGFAKHFNVKVLDRPGPPEGLAVSDVTSEKCVLSWLPPLDDGGAKIDHYIV  
QKRETSRLAWTNVATEVQVTKLKVTKLLKGNEYIFRVMVANKYGVGEPLSESEPVLAVDYPGPPDPKPNPEVTT  
ITKDSMVVCWGHPPSDGGSEIINYIVERRRDKAGQRWVKCNKKALDRLFKVSGLTEGHEYEFRIMAENAAGIS  
APSATSFPFYKACDVTFKPGPPGNPRVLDTSRSSISIAWNKPIYDGGSEITGYMVEIALPEEDEWQVVTTPAGL  
KATSYTITSLIENQEYKIRIYAMNSEGLGEPALVPGTPKAEERMLPPEIELDADLRKVVTIRACCTLRFLVPI  
KGRPAPEVVKWAREHGESLTKASIESTSSYTLVVGNVNRFDSGKIILTVENSSGSKSAFVNVRVLDTPGPPQN  
LKIKEVTKTSVTLTWEPPLLDGGSKIKNYIVEKRESTRKAYSTVATNCHKTSWKVDQLQEGCSYFRVLAENE  
YGIGLPAETAESVKASERPLPPGKITLTDVTRNSVLSWEKPEHDGGSRIILGYIVEMQSKGSDRWATCATVKV  
TEATITGLIQGEEYSFRVSAQNEKGISDPRQLSVPVIAKDLVIPPFAKLLFNTFTVLAGEDLKDVPPIGRPP  
PAVTWHKDDIPLKQTTTRVNAESTENNSLLTIKEACREVDGHYTVKLTNSAGEATETLNVIIVLDKPGPPTGPVK  
MDEVTAADSVTLSEPPKYDGGSSINNYIVEKRDSTTAWQIVSATVARTTIKACRLKTGCEYQFRIAENRYG  
KSTYLNSEPVVAQYPFKVPGPPGTPFVTLASKDSMEVQWHEPVSDDGGSKVIGYHLERKERNISILWVKLNKTP  
PQTKFKTTGLEEGIEYEFVSAENIVGIGKPSKPSSECYAAHDPCDPPGRPEAIVTRNSVTLQWKPTYDGG  
KITGYIVEKKELPDGRWMMKASFTNIIDTQFEVTGLEDHRYEFRVIARNAAGVFSEPESTGAI TARDEVEPP  
RISMDPKYRDTVVVQAGESFKIDADIYGKPIPTTQVWKGQDLELSSTARLEIKSTDFATSLSVKDAVRVDSGNY  
ILKAKNVAGEKSVTINVKVLDRPGPPEGPVAISGVTAEKCTLAWKPLQDGGSDITNYIVERRET SRLVWTKLV  
DANVQTLSDCKVLLLEGNEYIFRIMAVNKYGVGEPLSESLIAKNPFVVPDAPKAPEVTAVTKDSMIVVWERP  
ASDGGSEILGYVLEKRDKEGIRWTRCHKRLIGELRLRVTLGLENHNYEFRVSAENAAGLSEPPSPSAYQKACD  
PIYKPGPPNNPKVMDVTRSSVFLSWTKPIYDGGCEIQGYIVEKCDVSVGEWTMCTPPTGINKTNLEVEKLEK  
HEYNFRICAINKAGVGEHADVPGPVMVEEKLEAPDIDLDLELRKVINIRAGGSLRFLVPIKGRPTPEVKWGV  
DGDIRDAAIIDVTSSTSLVLDNVNRYDSGKYTLTLENSSGTKSAFVTVRVLDTSPSPVNLKVTEITKDSVSI  
TWEPPLLDGGSKIKNYIVEKREATRKSAAVVTNCHKNSWKIDQLQEGCSYFRVTAENEYIGLIPARTADPI  
KVAEVPQPPGKITVDDVTRNSVLSWTKPEHDGGSKI IQYIVEMQAKNTDKWSECARVKS LDAVITNLTQGEE  
YLFVIAVNEKGRSDPRSLAVPIIAKDLVIEPDVRPAFSSYSVQVQDLKIEVPI SGRPKPSISWTKDGMPLK  
QTRINVTDSLDTLTLKIKETHKDDGGQYGITVSNVVGQKTA AIEIITLTKDPDPKGPVKFDEISAESITLSW  
NPPLYTGGCQITNYIVQKRDTTTTVWDDVVSATVARTTLKVTKLKGTGEYQFRIFAENRYGSDFALESEPVVAQ  
YPYKEPGPPGTPFVTAISKESMVVQWHEPINNGSPVIGYHLERKERNISLWTKVNKTI IHDQTQKALNLEEG  
IEYEFVRYAENIVGVGKASKNSECYVARDPCDPPGTPEAIVKRNEITLQWTKPVYDGGSMITGYIVEKRDLP  
EGRWMKASFTNVIETQFTVSGLTEDQRYEFRVIAKNAAGAI SKPSDSTGPI TAKDEVELPRI SMDPKFRDITV  
VNAGETFRLEADVHGKPLPTIEWLRGDKEIEESARCEIKNTDFKALLIVKDAIRIDGGQYILRASNVAGSKSF  
PVNVKVLDRPGPPEGPVQVTGVTAEKCTLAWS PPLQDGGSDISHYVVEKRETSRLAWTVVASEVVTNSLKVTK  
LLEGNKYIFRIMAVNKYGVGEPLSAPVLMKNPFVLPGP PKSLVVTNIAKDSMTVCWNRPDSDDGGSEIIGYIV  
EKRDRSGIRWIKCNKRITDLRLRVTLGLEDHEYEFVSAENAAGVGEPS PATVYKACDPVFKPGPPTNAHV  
VDTTKNSITLAWSKPIYDGGSEILGYVVEICKADEEWQIVTPQTGLRVTRFEIAKLIHEQEYKIRV CALNKV  
GLGEAASVPGTVKPEDKLEAPEL DLDSELKGI VVRAGGSAR IHIIPFKGRPTPEITWSKEEGEFTDKVQIEKG  
INFTQLSIDNCDNRNDAGKYILKLENSSGSKSAFVTVKVLDTPGPPQN LAVKEVRKDSVLLVWEPPIIDGGAKV  
KNYVIDKRESTRKAYANVSSKCNKTSFRVENLTEGAIYFRVMAENEFVGVPTETS DAVKASEPPSPGKVT  
LTDVSQTSASLMWEKPEHDGGSRIILGYVEMQPKGTEKWSVVAESKVCNAVVSGLSSGQEQFRVKAYNEK GK  
SDPRVLGIPVIAKDLTIQPSFKLPFNTYSVQAGEDLKEIIPVIGRPRPKISWVKDGEPLKQTTTRVNVEETATS  
TILHIKESKDDFGKYSVTATNSAGTATENLSVIVLEKPGPPVGPVKFDEVSAD FVVI SWEPPAYTGGCQISN  
YIVEKRDTTTTNQMVSATVARTTIKISKLKTGTEYQFRIFAENRYGKSTPLDSKPVVVQYPFKEPGPPGTPF  
VTSISKDQMLVQWHEPVNDGGSKVTGYHLEQKEKNSILWVKLNKIP IQDTKFKTTGLDEGLEYEFRVSAENIV  
GIGKPSKVSECYVARDPCDPPGRPEAIVITRNSVTLKWKPKVYDGGSKITGYIVEKLDLPDGRWMKASFTNVV  
ETEFTVTGLVEDQRYEFRVIAARNAADNFSEPSSESGAITARDEIDAPNASLDPKYRDIIVHAGETFVLEADI  
RGKPIPDI IWSKDGNELEETAARMEIKSTLQKTTLIVKDCIRTDGGQYTLKLSNVGGTKTIPITVKVLD RGP  
PEGPLKVTGVTAEKCYLAWNPPQLDGGASISHYIIEKRETSRLSWTQVSNEVQALNYKVTKLLPGNEYIFRVM  
AVNKYGIGEALSESPVIACNPYKRP GPPSTPEASAITKDSMVL TWTRPVDDGGAEIEGYILEKRDKEGIRWTK  
CNKKTLDLDRFRVTGLTEGHSYEFVRAENAAGVGEPSVVFYRACDALYPPGPPSPNKVTDTSRSSVSLAW  
NKPIYDGGAPVRGYVIELKAAADEWTTCTPPSGLQKQFTVTKL KENTENFRICAFNTEGVGEPATIPGSV  
VAQERMEAPEIELDADLRKVVTLRASATLRLFVTIKGRPEPEVKWEKAEGILTEAQIEVTSSYTMLVIDNVT  
RFDSGRYNLTLNENSGSKTAFVNVRVLDSPSAPVNLTIREVKKDSVTLSEWPPPIDGGAKITNYIVEKRETR  
KAYATITNNCTKNTFKIENLQEGCSYFRVLAENYIGLPAETAEPVKVSEPPLPGRVTLVDVTRNTAIK  
WEKPESDGSKITGYVEMQTKGSEKWSACTQVNETLTTISGLTAGEEYFRVVAENKGRSDPRQLGVPVIA  
KDIEIKPSVELPFNTFNKANDQLKIDIPFKGRPQATVAWKKDGQVLRRETRVNVA SSKVTTLIKEASRED  
VGTIELCVSNTAGSITVPIITVIVLDRPGPPGPIRIDEVSCDNVSI SWNPPEYDGGCQISNYIVEKRETTSTTW  
QVVSQAVARTSIKIVRLTTGSEYQFRVCAENRYGKSSYSESSAVVAEYFPSPGPPGTPKVVHATKSTMVSW  
QVPVNDGGSQVIGYHLEYKERS SILWSKANKVLIADTQMKVSGLDEGLMYEYRVYAENIAGIGKCSKACEPVP

ARDPCDPPGQPEVTNITRKSVS LKWSKPRYDGGAKITGYIVERRELDPGRWLQCNTNVQETYFEVTELTEDQ
RYEFRVFNARNAADSVSESTGPI TVKDDVEAPRIMMDVKFRDVI IVKAGEVLKINADIAGRPLPVISWAKD
GVEIEERAKTEIVSTDYTTTLTVKDCVRRDGTQYVLT LKNVAGTRTMAVNCKVLDKPGPPAGPLE INGLTAEK
CSLSWGRPQEDGGADIDYIIVEKRETSRLAWTICEAELRTTSCKVTKLLKGN EYIFRVTGVNKYGVGEPLESM
AVKALDPFTTTPSPPTSLEITSVTKDSMTLCWSRPETDGGSDISGY I IERREKNSLRWMRVNKKPVYDLRVKST
GLREGCEYEYRVFAENAAGLSLPSETSPLVRAEDPVFLPSPSPKPKIVDSGKTTITIGWVKPLFDGGAPITGY
TVEYKKSEETDWKVAIQSFRGTEYTM SGLTTGDEYVFRVRSLNKMGASDPSSSDPQVAKEREEEPVFDVDSE
MRKTLIVKAGSSFTMTVPFRGRPIPNVSWSKPDTDLRTRAYIDSTDSRLLTIENANRND SGKYTLTIQNVLS
AASMTFVVKVLDSPGPPANITVREVTKETAMLSDVDPENDGGAPVKNYHIEKREASKAWSVTNNCNRLSYK
VTNLQEGAIYYFRVSGENEFGVGVPAETKEGVKITEKPSPEKLGVT SVSKDSVLSWLKPEHDGGSRI IHYV
VEALEKGQKTWVKCAVVKTHHVVSGLRESHEYFFRVFAENQAGLSDPRELLLPVLIKDQLEPPEIDMKNFPS
HTVYVRAGSNLKV DIPISGKPLPKVTL SRDGVPLKATMRFNTEITAE NLTINLKESVTTDAGRYEITAA NSSG
TTKTFINIIVLDRPGPPTGPVAISDITEESVTLKWEPPKYDGGSHVTNYIVLKRETSTAVWSEVSATVARTMI
KVMKLTTEGEEYQFRIKAENRFGISDHIDSVCVVVKLPYTPGPPSTPWVSNVTRESITV GWHEPVSNGGSAVT
GYHLEMKDRNSILWQKANKMIIRTHFKVTTISAGLIYEFRVYAENAAGIGKPSHPSEPVLAIDACEPPRNV R
ITDISKNSVNLWQQPAFDGGSKITGYIVERRDLDPGRWTKASF TNVIETQFTVSGLTQNSQYEFRVFARNAV
GSVSNPSEVVGPI TCIDSYGGPVIDLPLEYTEVVKYRAGTSVKLRAGISGKPEPTIEWYKDDKELQTNALVCV
ENSTDLASILIKDANRLNSGSYELKLRNAMGSASATIRVQILDKPGPPGGPIEFKTVTAEK IITLLWRPADDG
GAKITHYIVEKRETSRVVWSMVAENLEECIVTTTKI IKGNEYVFRVRAVNKYGIGEPLESEPVVAKNAFVTPG
PPSIPEVTKITKNSMTVVWDRPTVDGGSEINGYFLERRDKKSLAWLKV LKETIRDTRQKV TGLTENS DYQYRV
CAVNAAGVGFSEPSDFYKAADPIDPPGPPAKIRIADSTKSSITLGWSKPVYDGGSDVTGYVEMKQGD EEEW
TIVSTRGEVRTTEYVVSNLKPGVNYFQVSAVNCAGQGEPI TMTEPAQAKDVLEPEIDLDVALRTSVI AKAG
EDVQLLIPFKGRPPPTVTRKDEKNLGS DTRYSIQNTDSSSLV I PQVTRNDTGKYILT IENGVGQPKSSTVS
VKVLDTPAACQKQLQV KHVSLGTVTLWDPPLIDGGSPI INYVIEKR DATKRTWSV VSHKCSGTSFKVTDLSEK
TPFFFRVLAENEIGIGEP CETTEPVKAAEVPAPIRDLSMKDSTKTSV VLSWTKP DFDGGS IITDYLVERKKGK
EQAWSHAGISKTCEIEIGQLKEQSVLEFRV SARNEKQSDPVTIGPLTVKELVITPEVDLSEIPGAQISVRIG
HNVHLELPYKQPKPSISWLKDLPLKESEYVRFSGTENKITLS IKNKKEHGGKYTVI LDNAVCRNSFPIT I
ITLGPPSKPKGPIRFDEIKADSAIMSWDI PEDDGGGEITCYSIEKREASQTNWKMVCS SVARTTFKVS NLVKD
SEYQFRVRAENRYGVSEPLASNIIVAKHQFRIPGPPGKPIY NVTSDGMSLTWDAPVYDGGSEVTGFHVEKKE
RNSILWQRVNTSPISGREYRATGLIEGLDYQFRVYAENSAGLSSPSPDPSKFTLAVSPVDPPGTPDYIDVTRET
ITLKNWPPLRDGGSKIVAYSIEKRQGS DRWVRCNFTDVSECQYTVTGLSPGDRYEFRIIARNAVGTISPPSQS
SGLLIMTRDENVPPTVEFGPEYFDGLVIKSGDSLRIKALVQGRPVPRVTFWKD GVEIERRMMEITDVLGSTSL
FVRDATRDHRGVYTV EAKNVSGSTKAEVTVKVQDTPGKVVGPIRFTNI TGEKMTLWWEAPLNDGCAPVTHYII
EKRETSRLAWALIEDNCEALS YTAIKLITGNEYQFRI SAVNKFVGRPLESDPVVAIQIYTI PDAPGVPEPSN
VTGNSITL TWTRPESDGGSEIQHY I LERREKKS TRWVKV I SKRPISETRFKVTGLVEGNEYEFHMAENAAGI
GPASGISRLIKREPVNPPSAPS VVKVTDTSKTTVSLWARPVFDGGM EIIGYI IEMCKADLGDWHKVNTEPC
VKTRYTVTDLQAGEEYKFRVSAVNGAGKGDSC EVTGTIKAVDRLSAPELDIDANFKQTHIVRAGVSIRLFIAY
QGRPTPTAVWSKPD SNLSIRADIHTTDSFSTLTVENCN RNDAGKYTLTVENNSGKKSITFTVKVLDSPGPPGP
ITFKDVTRGSATLMWDAPLLDGGAR IHHYVIEKREASRRSWQV VSEKTRQILKVSELTEGVPY YFRVSAENE
YGVGEPYEMPEPIVATEQPAPPRRLDVVDTSKSSAVLAWLKP DHDGGSRI TSYLLEMRQKGSDFWVEAGHTKQ
LFTFTVERLVENTEYEFRVKAKNDAGYSEPREAFSSVI I KE PQIEPTADLTGITNQLITCKAGSTFTIDVPI SG
RPAPKV TWKLEEMRLKETDRMSIATTKDR TTLTVKDSMRGDSGRYFLTLENTAGVKTFTITVVVIGRPGPVTG
PIEVSSVSAESC VLSWTEPKDDGGTEITNYI VEKRESGTTAWQLINSSVKRTQIKVTHLTKYKEYCFRVSEN
RFGVSKPLESVPIVAEHPFVPPSAPTRPEVYVVSANAMSIRWEEPHYDGGSKIVGYVWEKKERNTILWVKENK
VPCLECNKYKTGLVEGLE YQFRTYALNAAGVSKASEASRPIM AQNPVDP PGRPEVTDVTRSTVSLIWSAPVYD
GGSKVVGYI IERKPVSEVGDGRWLKCN YTIVSDNFFT V TALS EGDTYEFRVLAKNAAGVISKGSESTGPVTCR
DEYAPPKAELDARLQGD LVTIRAGSDLVLDAAVGGKPEPKI IWTKGDKELDLCEKISLQYTGKRATAVIKYCD
RSDSGKYTLTVKNASGTSVSV MVKVLDSPGPCGKLT VSRVTEEKCTLAWSLPQEDGGAEITHYIVERRETSR
LNWVIVEGECLTASYVVTRLIKNNEYTFRVRAVNKYGLGVPVESEPIVARN SFTIPSQGP IPEEVGAGKEHII
IQWTKPESDGGNEISNYLVDKREKKS LRWTRVNKDYV VYDTRLKV TSLMEGCDYQFRVTAVNAAGNSEPSEAS
NFISCREPSYTPGPPSAPRVVDTTKRSISLAWTKPMYDGGTDIIGYVLEMQEKD TDQWCRVHTNATIRNNEFT
VPDLKMGQKYSFRVA AVNAKMSDYSETTAEIEPVERLEIPDLELADDL KKTIVIRAGASLR LMSVSGRPS P
VITWSKKGIDLANRAI DNTESYSLI VDKVNRYDAGKYT IEAENQSGKKSATV LVKVYDTPGPCPSVSKVEV
SRDSVTITWEIPTIDGGAPVNNY IIEKREAA MRAFKVTVTTKESKTYLRI SGLVEGTMYYFRVLPENIYGIGEP
CETSDAVLVSEVPLVPTKLEVVDVTKSTVTLAW EKPLYDGGSRLTGYVLEACKAGTERWMMKVVT LKPTVLEHT
VISLNEGEQYLFRVRAQNEKGVSEPREIVTPVTQDLRVLPTIDLSTMPQKTIHVPAGRPIELVPIPTGRPPP
TASWFFAGSKLRESERVTVETHTKVTKLTI RETTIRDTGEY TLELKNVTGTTSETIKVI ILDKPGPPTGPIKI
DEIDATSVTISWEPPELDGGAPLSGYVVEQRDAHRPGWLPVSESVTRPTFKFTRLTEGNEYVFRVAATNRFGI

GSYLQSEVIECRSSISIPGPPETLQIFDVSRDGMTLTWYPPEDDGGSQVTGYIVERKEVRADRWRVVRNKPVPT  
MTRYRSTGLIEGLEYEHRVTAIARGTGKPSRPSKPTVAMDP IAPPKQPNPRVTDTRTSVSLAWSVPEDEG  
GSKVTGYLIEMQKVDQREWTKCNTTPTKIREYTLTHLPQGAERYFRVLACNAGGPGEPAEVPGTVKVTEMLEY  
PDYELDERYQEGVFRQGGVIRLTIPIKKGKPPVCKWTKEGQDISKRAMIATSEHTELVIKEADRNDSTGYD  
LVLENKCGKKTVYIKVKVIGSPNTPEGPLEYDDIQARSVRVSWRPPADDGGADILGYILERRREVPKAAWYTD  
SRVRGTSLVVVKGLKENVEYHFRVSAENQFGISKPLKSEEPVI PKTPLNPPEPPSNPPEVLDVTKSSVLSWSR  
PKDDGGSRVTYGYYIERKETSTDKWVRHNKTQITTTMYTGTGLVDAEYQFRI IAQNDVGLSETSPASEPVCV  
DPFDKPSQGELEILSISKDSVTLQWEKPECDGGKEILGYWVEYRQSGDSAWKKSNNKERIKDRQFTIGLLEA  
TEYEFVFAENETGLSRPRRTAMS VKTKLTSGEAPGRKEMADVTTKLGEAAQLSCQIVGRPLD IKWYRFGK  
ELIQSRKYMSSDGRHTTLTVMTDEQEDEGVYTCVATNEVGEVESSSKLLLQAAPQFHPGYPLKEKYYGAVGS  
TLRLHVMYIGRPVAMPWFHGGKLLQNSEKITIENTEHYTHLVMKNVQRKTHAGKYKVQLSNAFGTVDATLDV  
EIQDKPDKPTGPIVIEALLKNSVVISWKPPADDGGSWITNYVVEKCEAKEGAEWQLVSSAISVTTCRIVNLTE  
NAGYYFRVSAQNTFGISEPLEVASIVI KSPFEKPGVPGKPTITAVTKDSCVVAWKPPASDGGAKIRNYLER  
REKKQNKWIAVTTEEIRETVFSVQNLIEGLEYEFRVKCENLGGSEWSEI SEPVTPKSDVP IQAPHFKEELRN  
LNVRYQSNATLVCKVTGHPKPIVKWYRQKEIIADGLKYRIQEFKGGYHQLIIASVTDDDQVYQVRATNQQG  
SVSGTASLEVEVPAKIHLPKTLEGMGAVHALRGEVSVIKIPFSGKPDVITWQKQDLIDNNGHYQVIVTRSF  
TSLVFSNGVERKDAFGYVCAKNRFGIDQKTVELDVADVPDPPRGVKVSDVSRDSVNLTWTEPASDGGSKVTN  
YIVEKCATTAERWLRVGOARETRYTVINLFGKTSYQFRVIAENKFLGSKPSEPSEPTVTKEDKTRAMNYDDEV  
DETREVTTTKASHSKTKELYEKYMAEDLGRGEFGIVHRCVETSSKRTFMAKFKVVKGTQDQVLVKEISILNI  
ARHRNIIYLHESFESMEELVMIFEFISGLDIFERINTSAFELNEREIVSYVRQVCEALEFLHSQNIHFDIRP  
ENIIYQTRKNSTIKIIEFGQARQLKPGDNFRLLFTAPEYYAPEVHQHDVVSTATDMWSLGTLVYVLLSGINPF  
LAETNQMIENIMNAEYTFDEEAFKEISLEAMDFVDRLLVKERKSRMTASEALQHPWLKQRIDRVSTKVRTL  
KHRRYHTLIKKDLNMVSAARISCGGAIRSQRGVSAKVVASIEIGPVSGQIMHAI GEEGGYVKYVCKIEN  
YDQSTQVTWYFGVRQLENSEKYEITYEDGVATMYVKDITKFDGTYRCKVVNDYGEDSSYAEFLVKGVREVYD  
YYCRRTKKVRRDAMRLLERPEFTLPLYNKTAAYVGENVRFVGTITVHPEPRVTWYKSGQKIKPGDDEKKYT  
FESDKVLYQLTINSVTTDDDAEYTVVARNKHGDESCKAKLVTLHPPPTETTLRPMFKRLLANAECHEGQSV  
FEIRVSGI PAPTLLKWEKDGQPLSLGPHIEIVHEGLDYALHIRDTPEDTGYRVTATNTAGTSCQAHQVE  
RLRYVKQEFQSKERERHVQKQIDKTLRMAEILSGTETVPLTPVAQEALREAAI LYKPAVSTKTVKGEYRLQT  
EEKKEERKLRMPYEVPEPRRFKQATVEEDQRIKQFVPMSSDMKWYKIRDQYEMPGKLDVQKRPKRIRLSRW  
EQFYVMPLPRITDQYRPKWRIPKLTQDDLEMVRPARRTPSPDYDLYYRRRRRSLGDMSDEELLPIDDYLA  
MKRTEEERLRLEEELELGFSA SPPSRSPRFELSSLRYSPPAHVKVEDRRRDFRYSTYHVPTKEETSTSYAE  
LREHAQASQRPKLRQRIMAEKEEEELLRPVTTTQRLSEYKSELDYMSKEEKSKKSKRQRQVTEI TEIEEE  
YEISRAQRESSSSVSRLRRRRSLSPYIELMRPVSELIRSHRPAEYEDDAERRSPTPERTRPRSPSPVS  
SERSLSRFERSARFDIFSRYESMKAALKTKTQKTSERKYEVLSSQPFLLDHA PRITLMRSHRVP CGQNTFRILN  
VQSKPTAEVKWYHNGVELQESSKIHNTSGVLTLEILDCQTEDGGTYRAVCTNYKGEASDYATLDVTTGGAYT  
TYASQRDEEVPKSVFPELTKTEAYAVSSFKRTSELEAASSVREVKSQMTETRESLSTYEHYASAEKMSATSE  
EKSLEEKATVRKIKTTLAARILTKPRSITVHEGESARFSCD TDGEPVPTVTLWREGQVVST SARHQVTTTKYK  
STFEISSVQASDEGNYSVVVENS DGKQEAQFTLTVQKARVIEKAVTSPPRVKSPEPRVKSPEVKS PKRVKSP  
EPVTSHPKAVSPTETKPTKEGQHLVPSAPPKITQSLKAEASKDI AKLTCAVESSALCAKEVAVYKDGKLLKEN  
GHFQFHYADGTYELKIHNLSEDCGEYVCEVSGEGGTSKTSFQFTGQSFKSIHEQVSS ISETTKSVQKTAES  
AEAKKSAQKTAESVEDKKAQKTVESAEAKKPAQKTAESPEAKKPAQKTAESPEAKKQEP IAPESISSKPVIV  
TGLRDTTVSSDSVAKFTIKVTGEPQPTITWTKDGAIAQGSKYKLSNKEEFILKLTETS DGGLYACTVTN  
SAGSVSSSCKLTIKAVKDTEAQKVTQKTSEVTSQKASAEQEEISQKALTSEEIKMSEVKSHE TLAIKEEASK  
VLIAEEVKRSAAASLEKSI VHEEVTKTSQASEEVKTHAEIKTLSTQMNITKGQRATLKANIAGATDVKWVNLN  
TELPNSEEYRYGVSGSDQTLTIKQASHREEGILSCIGKTSQGVVKCQFDLTLSEELSDAPSFITQPRSONINE  
GQNVLFSCVSGEPSPEIEWFKNNLPISISSNISVSRSRNVYTLERNAAVSDSGKYTIKAKNFHQCSATAS  
LTVLPLVEEPPREVVLTSSDVS LHGSVSSQSVQMSASKQEA SFSFSSSASSMTEMKFASMSAQSMSMQE  
SFVEMSSSFMGKSSMTQLESSTSRMLKAGGRGIPPKIEALPSDISIDEGKVLTVACAFTGEPTEPITWSCGG  
RKIQNQEQGRFHIENTDDLTTLIMDVQKQDGGLYTTLGNEFGSDSATVNINIRSM\*

>ENSMUSP00000107477\_c.77325:A>C\_p.K25776Q ENSMUST00000111846.9|Ttn-  
204|ENSMUSG00000051747|-|chr2:g.76568328:T>G  
MTTQAPMFTQPLQSVVVLGSTATFEAHVSGSPVPEVSWFRDQVISTSTLPGVQISFSDGRARLMI PAVTKA  
NSGRYSLRATNGSGQATSTAE LLVTAETAPPNFSQRLQSMTRVQGSQVRLQVRVTGIPTPVVKFYRDGAEIQS  
SLDFQISQEGDLISLLIAEAYPEDSGTYSVNATNSVGRATSTAE LLVVQGEVVP AKKTKTIVSTAQISETRQT  
RIEKKIEAHFDARS IATVEMVIDGATGQLPHKTPPRI PPKPKSRSPTPPSIAAKAQLARQQSPSPIRHSPSPV  
RHVRAPTSPVRSVSPAGRISTSP IRSVKSPLLIRKTQTTT MATGPEVPPPWKQEGYVASSTEAE MRETTMTS  
STQIRREERWEGRYGVQEQVTISGAAAAAASASVSSSFTAGAITTGTKEVKQETDKSAAVATVVAAVDMARVR  
EPAISAVEQTAQRTTTTAVHIQPAQE QARKEAEKTAVTKVVVAADKAKEQELKSRTREVMVTTQEQTTHISHEQ

IRKETEKA FV PKVVISATKAKEQETRITGEITTKQEQKRITQETIRQETEEIAASMVVVATAKSTKLEAAVGV
QEETAIQDDQMHLETHEQMMKETRKTVPKVIIVATPKIKEQDLVSRSEAIITTKRDQVQITQEKRRKEVETTAL
STIAVATAKAKEQETVLRSTREAMATRQEHIQVTHGQVGVGKKA EAVATVVAAVDQARVREPREPHTHVEESH SQ
QTLEYGYKEHISTTKVPEQPRRPA SEPHVVPQAVKPAVIQAPSETHIKTTDQMGMHISSQVKKTTDISTERL
VHVDKRPRTASPHFTVSKI SVPKTEHGYEAS IAGSAIATLQKELSATSSTQKITKSVKAPTVPKGETRVRAEP
TPSPQFPFADMPPPDTYKSQAGIEVKKEVGVSI SGSTVREEHFVLRGREAKVTETARVPAPAEVPTPPTLV
SGLKNVTVIEGESVTLECHISGYSPKVTWYREYQI ESSIDFQITFQGGIARLMIREAFAEDSGRFTCSAVN
EAGTVSTSCYLAVQVSEEFDKETTLTEKFATEEKRFVESRDVMTDTSITEEQAGPGEPAAPFFISKPVVQKL
VEGGSVVFECQIGGNPKPHVYWKSGVPLTTGYRYKVSYNKQTGECRLVISMTFADDAGEYTTIVIRNKHGETS
ASASLLEEADYEALVKTQQEMLYQTQMSTFIQEPKVG E IAPGFAYSEYEKEYEKEQALIRKKMAKDTVMVRTF
VEDQEFHISSFEERLIKEIEYRIKTTLEELLEEDGEEKMAVDISESEAIESGFDIRIKNYRILEGMGVTFHC
KMSGYPLPKIAWYKDGKRIRHGERYQMDFLQDGRASLRIPVVLPEDEGIYTA FASNIGNAICSGKLYVEPAA
PFSAPTYMPTPEAVSRIRSVSPRSLSRSPIRMSPAMSPARMSPARMSPARMSPARMSPARMSPARMSPARMS
YKPVFVLKPA SFKCLEGQTARFDLKVVG RMPMPETFWFHNGQQIVNDYTHKVVIKEDGTQSLIIVPASPSDSGE
WTVVAQNRAGKSTISVTLTVEAVEHQIKPAFVEKLNKVNNIKEGSRLEMKVRATGNPNPDI VWLKNSDIIVPHK
YPRIRIEGTRGEAALKIDSII SQDSAWYTATAINKAGRDTTRCKVNVEVEFAEPEPERKLIIPRGTYRAKEIA
APELEPLHLRYGQEQWEEGDLYDKEKQKQKPF FKKKLSRLKRF GPAHFECRLTPIGDPTMVVEWLHDGKPLE
AANRLRMINIEFGYCSLDYGAAYS RDSGVI TCRATNKYGT DHTSATLIVKDEKSLVEESQLPDGKGLGRIEEL
ERMAHEGALTGVTTDQKEKQKPDIVLFPPEVVRVLEGETARFR CRTGYPQPKVNWYLNQGLIRKSKRFRVRYD
GIHYLDIVDCKSYDTGEVKVTAENPEGVTEHKVKLEIQQREDFRSVLRRAPEPKPEFHVHEPGKLFQFEVQKVD
RPVDTSETKEVVKLKRAERITHEKVSESEELRSKFKRRTEEGYEAITAVELKSRKKDES YEELLKKTDEL
LHWTKELETEEEKKALAE EGKITITPTFKPERIELSPSMEAPKIFERIQSQT VGGSDAHFRVRVVGKPDPECEW
YKNGVKIERSDRIYWYWPEDNVC ELVIRDVTAEDSASIMVKA INIAGETS SHAFLLVQAKQLITFTQELQDVV
AKEKDTMATFECETSEPFIKVKWYKDGIEVHAGDKYRMSDRKVHFLSVLTI DTSDAEDYSCVLVEDENIKTT
AKLIVEGAVVEFVKELQDIEVPESYSGELECIISPENIEGKWHNDVELKSN GKYSITSRGRQNLTVKDVTK
EDQGEYSFVVVDGKTTCKLKMKPRP IAILQGLSDQKVEGDIQLEVKVSL ENVEGVMMKDGQEVQHSDRVHI
VIDKQSHMLLIEDMTKEDAGNYSFTIPALGLSTSGNVSVYSDVITPLKDVNVI EGTKAVLEQVSVDPDVT SV
KWYLNDEQIKPDDRVSIVKGTQRQLVINRTHASDEGPYKLMVGRVETSCNLSVEKIKIIRGLRDLTCTETQN
VVFEVELSHSGIDVWVNFKGKEIKPSSKYKIEAHGKIYKLTVLNMMKDDEGEYAFYAGENTTSGLTVAGGAI
STPLTDQTVAESQEA VFECEVANPESEGEWLKDGKHLALSNNFRGESDGHKRRLVIAAAKLD DAGEYTYKVAT
SKTSAKLKVEAVKIKKTLRNLTVTETQDAVFSVELTHPDKVQWIKNGVVLDSNDKYEISVKGTL YSLKIKN
CAMADESVYGFKLGR LGASARLHVETVKI IKKPKDVTALENATVTFEVSVSHDTPVVKWFHKNVEIKPSDKHR
LVSERKVHKLMLQSI SPSDAGEYTAMVGQLECKAKLFVETLHITKTMKSI EVPETKAASFCEVSHFNVP SMW
LKNVGEIEMSEKFKIIVVQGLHQLIIMNTSTEDSAEYTFVCGNDQVSATLTVTPIMITSMLKDINAEKDTIT
FEVTVNYEGISYKWLKNGVEIKSTDR CQMRTKKLTHSLNIRNVHFGDAADYTFVAGKATSTATLYVEARHIEF
RKHIKDIKVLEKKRAMFECEVSEPDITVQWMMKDGQELQIADR I KIQKEKYVHRLLI PSTRMSDAGKYTVVAGG
NMSTANL FVEGRDVRIRS IKKEVQVIEKQRAVVEFEVNEDDVAHWYKDGIEINFQVQERHQYVVERRIHRMF
ISETRHS DAGEYTFVAGRNRSSVTLYVNAPEPPQVLQELQPVTVQSGKPARFCAVISGRPQPKISWYKEEQLL
STGFKCKFLHDGQEY TLLLIEAFPEDA AVYTCEAKNDYGVATTSASLSVEVPEVVS PDQEMPVYPPAIVTPLQ
DTVTSEGRPARFQCQVSGTDLK VSWYCKDKKIKPSRFFRMTQFEDTYQLEIAEAYPEDEGTYAFVANNAVGVQV
SSTATLRLEAPESILHERIGQQIEMEMKAAPVIKRRIEPLEVALGHLAKFTCEIQGAPNVR FQWFKAGREIYE
SDKCSIRSSNYVSSLEILRTQV VDCGEYTCKASNEYGSV SCTATLTVTEAYPPTFLSRPKALTTFVGKAAKFL
CTVSGTPVIEI IWQKDGAALSPSPDCRVTDADNKHSLELSNLTVQDRGIYSCKASNKFGADICQAE LTIIDKP
HFIKELEAVQSAINKKIHLECCQVDEDRKVTITWSKDGQKLPAGKDYKIYFEDKIASLEIPLAKLKDSGTYTCT
ASNEAGSSSSSAAVAVREPPS FVKVDP SYLMLPGESARLHCKLKGSPVIQVTFWFKNNKELSESNTRVMSFVN
SEAILDITDVKVDDSGTYSCEATNDVGS DSCSTEVVIKEPPSFKTLEPADIVRGANALLQCEIAGTGF FEVN
WFKDKKQIRSSKKYRLFTQKTFVYLEISSFN SADVGDYECVVANEV GKCGCVATHLLKEPPTFVKVDDFTAL
AGQTVTLQAAVRGSEPI SVMWMMKGQEV IKEDGKIKMSFSNGVAVLTPDVQISLGGKYTCLAENEAGS QTSVG
ELIVKEPAKIIERAELIQVTAGDPATLEYTVSGTPELKP KWKYKDG RPLVASKKYRISFKNNIAQLK FYS AELH
DSGQYTFEISNEVGSSSCE TTFVLDRDIAPLFTKPLRN VDSVVGACRLDCKIAGSLP MRVSWFKDGKELTA
SDRYQIAFVEGTASLEISRVD MNDAGNFTCRATNSVSGSKDSSGALIVQEP SFVTKPGSRDVLPGSAVCLKSA
FQGSAPLTIKWFKGDKELVSGGSCYITKETSESSLELYAVKTS DSGTYTCKVSNVAGSVECSADLFVKEPATF
IEKLEPSDHLKGDGTQLACKVTGTPPIKITW FANDRELRESSKHKMSFAESTAVLRLTDVAIEDSGEYMC EA
QNEAGSDHCTGIVIVKESPYFTKEFKSIEVLKEDV MLLAEVAGT PPF EITWFKDNTLRSGRKYKTFLODQL
VSLQVLKFAADAGEYQCRVTNEVGSSTCSARVTLREPPSFIKKEATSSLRGGTAA FQATLKGSLPITVTWL
KDNDEITEDDNIRMTFENNVASLYLSGIEVKHDKGYVCQAKNDAGIQ RCSALLSVKEPATIMEEAVS IDVTQG
DPATLQVKFSGTKEISAKWFKDGQELTLGPKYKISVTDTVSILKIIISTEKKDSGEYTFEVQNDVGRSSCKASI
NVLDLIIPPSFTKKLRKMDSIKGSFIDLECI VAGSHPI SIQWFKDDQEI SASDKHKFSFHDNTAFLEISQLEG

TDSGTYTCSATNKAGHSQCSGHLTVKEPPYFVEKPPSQSDVNPGRVQLKALVGGTAPMTIKWFKDNKELHPGA  
 ARSVWKKDDTSTILELFSAKAADSGTYICQLSNDVGTSSKATIFVKEPPQFIKKPSPVLVLRNGQSTTFECQV  
 TGTPEIRVSWYLDGNEITDLRKYGISFVDGLATFQISNARVENSCTYVCEARNADAGTASCSIELKVKPEPPIFI  
 RELEPVEVVKDSDVELECEVMTGTPFEVTVLWLNKNEIRSGKKTMSKMSVLYLHITKCDPSPDVGEYQCIAN  
 EGGSCACARSVALKEPPSFIKKIENVTTVLKSSATFQSTVAGSPPI SITWLKDDQILEENDNVHISFEDSVAT  
 LQVRSVDNGHSGRYTCQAKNESGIERCYAFLLVQEPAQIIEKAKSVDVTEKDPVTELEVAGTPELVKVKWLD  
 GKQIVPSRYFMSFENNVASFRIQSVMKQDSGQYTFKVENDFGSSSCDAYLRVLDQDIPPSFTKLLTKMDKVL  
 GSSIHMCKVSGSLPI SAQWFKDGKEISTSAKYRLVCHENTVSLEVSNLEEDTANYTCKVSNVAGDNACSGI  
 LTVKEPPSFLVKPERQQAIPDSTVEFKAVLKGTPPFKIKWLKDDVELVSGPKCFIGLEGSTSFNLNLSVDSSK  
 TGQYTCQVTVNDVEPPKFKVKKLEASKIKAGDSARLECKITGSPETQVWVWRNEHELTASDKYQMTFIDSVAVI  
 QMNSLGTEDSGDFICEAQNPAAGSTSCSTKVIKPEPPVSSFPPIVETLKNTEVSLECELSGTPPFVWVYKDK  
 RQLRSSKKYKVASKNFHASIHILNVESTDIGEYHCKAQNEVGS DACVAVKLEPPKFI SKLNSLTVVAGEPA  
 ELQASIEGAQPI SVQWLKEKEEVIRESENIRISFVNNVATLQFAKVEPANAGKYICQVKNDDGGVRENMATLTV  
 LEPAVIEKAGSMTVTVGETCALECKVAGTPELSVEWYKDGKLLTSQKHKFSFYNKISSLKILSVEKEDAGT  
 YTFQVQNNVKGSSCTAVVDVSDRMVPPSFTRRLLKDTGGVLGTSCILECKVAGSSPISIAWFHEKTKIVSGAKY  
 QTFSDNVCTLQLNSLSDSDMGSYTCVAANVAGSDECRALLTVQEPFVKEPEPELVLPKGNITFTSVIRGT  
 PPFKVGWFRGARELVKGNRCNIYFEDTVAELELFNIDISQSGEYTCVSNAGQASCTTRLFVKEPATFVKKL  
 SDHSVEPGKSIILEGTYTGTLPISVWTKKDGVSITPSERCNIIVTEKTCILEILSSTKGDAGHYSCIEINEAG  
 RDACDALVSTLEPPYFVTELEPLEASVGDVSLQCVAGTPEITVSWFKGDTKLRSTPEYRITYFTNNVATLVF  
 NKVINDSGEYTCMAENSIGTAASKTIFRIQERQLPPSFARQLKDIEQTVGLPVTLTCLNLSGAPIQVCWYRD  
 GVLLRDDENLQMSFVDNVATLKI LQTDLSHSGQYSCSASNPLGTASSTARLTAREPKKSPFFDIKPVSIDVIA  
 GESADFECHVTGAQPMRVTWKDNKEIRPGGNYTITCVGNTPHLRILKVGKGDGSGQYTCQATNDVKGDMCSAQ  
 LSVKEPPKFIKKLDASKVAKQGESIQLECKISGSPKIVVWFRNDELHE SWKYNMSFVNSVALLTINEASAE  
 DTGDYICEAHNGVGDASCSTALKVKAPPVFTQKPPVGVGALGSDVILQCEISGTPPFVWVWVDRKQVRSSK  
 FKITSKNFDTSLHIFNLEAPDIGEYHCKATNEVGS DCTACTVKEPPEPRFVKKLSDASTLIGDPVELQAVVEG  
 FQPI SVVWLTKDKEGVIRESNVRISFVDNIATLQGLSPEASQSGKYVCQIKNDAGMRECSAVLTVLEPATIVE  
 KPEPMTVTGNPFTLECVVAGTPELSAKWFKDGRELLSSGSRHHITFVRNLASLKI PSAEMNDKGLYTFEVENR  
 V GKSSCTVSVHVS DRVPPS FVRRLKDT SATLGASVLECRVSGSAPISVGVWFLDGNEI ISSPKQSSFADNV  
 CTLTLSSLEPSDTGAYTCVAANVAGQDESSAVLTVQEPSPFEQTPDSVEVLPGMSLTFTSVIRGT PPFKVKWF  
 KGSRELVSGEACTISLEDFVTELELLEVEPGQSGDYSCLVNDAGSASCTTHLFVKEPATFVKRLADTSVETG  
 SPIVLEATYSGTPPISVSWMKNEYPLSQSPNCGITTEKSSILEILESTIEDYAQYACLIENEAGQDICEALV  
 SVLEPPYFIEPLEHVEAAIGEPITLQCKVDGTPEIRISWYKEHTKLRSA PAYKMQFKNNVASLVINKVDHSDV  
 GEYTCKAENSVGAVASSAVLVIKERKLPPSFARKLKD VHE TLGFVFAFECRINGSEPLQVSWYKDGELKDDA  
 NLQMSFVHHVATLQILQTDQSHVQYNCASNPLGTASSAKLILSEHEVPPFFDLKPVSVLDLALGESGSFKC  
 HVTGTAPIKITWAKDNREIRPGGNYKMTLVENTATLTVLKVAKGDAGQYTCYASNVAGKDCSCSAQLGVQEP  
 FIKKLDQSRIVKQDEYTRYECKIGGSPKIVLWYKDEVEIQESSKFRMSFEDSVAILEMHLSVDESGDYTCE  
 ARNAAGSASSSTSLKVKPEPPVFRKPPFVETLKGADVHLECELQGT PPFQVSWHKDKRELRSKGYKIMS ENL  
 LTSIHILNVDTADIGEYQCKATNDVGS DTCVGSVTMKAPPQFVKKLTDISTIGKEVQLQTTIEGAEPISVAW  
 FKDKGEIVRESDNIIWISYSENIA TLQFSRAEPANAGKYTCQIKNDAGMQECYATLSVLEPA AIVEKPESIKVT  
 TGDTCTLECTVSGTPELSTKWFKDGKELTSDNKYKISFFNKVSLKI INVVPDGSVYSFEVQNPVKGDSCKV  
 SIQVSDRI PPSFTRKLEKTNGLSGSSVMECKVYGSPI SVLWFHDGNEISSGRKYQTTLTDNTCALTVNML  
 EEADAGDYTCIATNVAGSDECSAPLTVREPPS FVQKPDMDVLTGSNVTFTSIVKGSPPFTVSWFKGSTELVP  
 GARCNSVSLQDSVGELELFDVDTSSQSGEYTCIVSNEAGRASCTTRLFVKAPAI FVKRLNDYSIEKGKPLILEGT  
 FSGTPPISVWTKKNGINVIASQRCNITTEKSAILEILSSTVEDSGQYNCYIENASGKDCSCSAQILILEPPYF  
 VKQLEPVKVTVGDSASLQCLAGTPEIGVSWYKGDTKLRPTATCKMHFKNNVATLVFTQVDS SSGEYICRAE  
 NSVGEVSSSTFLTVQEQKLPSPFSRQLRDVQETVGLPVVFECAVSGSEPI SVSWYKDGKPLKDS PNIQTSFLD  
 NIATLNI FKTDRSLSGQYSC TATNP IGSASSGAKLILTEGKNPPFFDIPLAPMDAVVGESADLECHVTGTQPI  
 KVTWAKDNREIRSGGNYQISYLENSAHLTIVKVDKGDGSGQYTCYAVNEVKGDSCTAQLNIKERLIPPSFTKLL  
 SETVEETEGNSFKLEGRVAGSQPITVAWYKNNVEIHPTSNCEIMFKNNALLLQVKRASMADAGLYTCKATNDA  
 GSALCTSSIVIKEPKKPPVFDQHLAPVTASEGDSVQLSCHVQSGSEPIRIQWLKAGREVKPSDRCSF SFASGTA  
 MLELKETAKADSGDYVCKASNAGSDTSKCKVTIKEKPAAAPAAKKA AVDGLKFFVSEPPQSIRVVEKTTATFI  
 AKVGGDPIPNVKWTKGKWRQLNQGGRI LIHQKGDEAKLEIRD TTKTDSGLYRCVAFNKHGEIESNVNLQVDER  
 KKQEKIEGDLRAMLKKT PALKKS GSEEEEIDIMELLKNVDKPEYK YARMYGITDFRGLLQAFELKQSQEEE  
 THRLEIEELEKSERDEKEFEELVAFIQQRILTQTEPVTLIKDIENQTVLKDNDIAIFEIDIKINYPEIKLSWYK  
 TEKLEPSNKYEISIDGDRHTLRVKNCPKQDGNYRLVCGPHIASAKLTVIEPAWERHLQDVTLKEGQCTMTC  
 QFSVPNVKSEWFRNVRVLPQGRVTEVEHKVHKLTIADVRAEDQGYTC KHEDLETS AELRIEAEPIQFTKR  
 IQNIVVSEHQSATFECEVSFDDAIVTWYKGPTTELTESQKYNFRNDGRCHYMTIHNVT PDDEGVYSVIARLEPR  
 GEARSTAELYLTTEIKLEMKPPDIPDSRVPIPTMPIRAVPPEEIPPAVAPSIPLLLPLPEEKPPAKRIEVT

KKGVKDKTKKVVTKPKEEAPPPVPEVAKKPPPPTPMIPAKASEIIDVSSKAEEVKITITTRKKEVHKEKEAV
YEREEAVYEKKVHIEPWEPEYEELETEPYTEPYEPPYEEPPDEDEYEEIKVEAKKQVHEEWEEDFEEGQYER
EEGYDEGEEWEIEIHEREIIQVQKEVHEELHEKKIPAKVPEKKVPPKVVKKPVVEKVEKTRRMEEEKVQV
IKVPEVSKKIVPQKPSRTPVQEEIEVVKVPAVHTKKMVISEEKMFASHTEEEVSVSVEVQKKTVTEEKIHV
AVSKKIEPPPKVPEPPKKPVPEEVVVPVPIPKKVEPPAAKVPEAPKKPVPEEKKPVPIPKKKEPAAAPQVPEAP
KKPAPEEKIPVPVTKKKEAPPKAVPEVQKQVTEEKIAIITQREESPPPAVPEIPKKKVPEEKRPVPRKEEVP
PPKVPVPPKAVPEAVVPAPIPKKAPPRAEVSKKTVEEKRFAAEEKLSVAVPQVRELMRHEEEEWYSEEEE
RVSVSVEEERDEEEAEITEYEVLEEPPEYVVEEKMHFISKKVEVEPAKVPEKKIIPKPKVPAKIEEPPPTK
VPEPPKKIVPEKKVPAPAPKVPKPAKAPPEESKRPVPEKRAPAEVGEIEPPPTKVAERHMKITQEEKVLVAVT
KKEAPPRARVPEEPKVAPEERFPKPKPRREEEPKAVTEVRKRAVKEEKVSEVVKREPRPTKEVTVTEKK
WSYTRREETVSEHREEEYEDYEDYEEYKEFEEYEPTTEYDQYDEYAEREVEHYEEHEEYVTEPKKVPVQPAQ
EPVPAKPKAPPKVLKAVPEEKAPLPKQKLLKPLPKAPEEPKVVVEEKIQISITKREKQVTEPVAKVPMK
PKRVVPEAKIPAPTKEVAVPVRESLSFVICGSVLLKCLNFIEELENSQLKDDIFKVPVGVKPKRELEEVVVFKE
EVEAHEEYIVEEEEYVHEEEYVHKEEYVHEEEYVHKEEYIHEEEHLHEEEETIAEEEVVPAVVKVVPVVK
KPVPEEKKVPVVPKKEAPPKAVPEIPKKPEEKVPVPIPKKEKAPPKAVPEVPKPKVPPEEKPPVVPKKEVEP
PAKVEVPKPKVPPEKKVPAPTPKKVEAPPKAVPEVPKPIPEEKKTALLKMEAPPKAPKKREVVPVVAL
PREEEEEEVFFEEVPEEELPEEEVPSEEEAPPEEVPEEEVLPPEEEVLPPEEEVLPPEEEVQPEEEALPE
IKPKVPKPAVPEIKKKVPEKKVVVPKKEEAPPTKVPEVSKKVEERRIIPKKEEVPPAEVYEEAEPTPEEI
PEEPPSIEEEIEVEEEEEEEVLPPEEVEVVKAVPEAPTVPKKAAPPKAVPKPIPEEKVPVQVQKKEAPP
AKVPEVPKPKVPEKKKIPKPKVPKKEAVPPAKGKAVFEEKISVAYQEEELVQERIELELVEAKVEEAFEEEE
FHEVQYEFEEEFHEVEEFIRVEERRFQEEHKEVEVHRVIEFLEAEVEVEYKPKPIPKKGPVSEKVIIPKK
PPTKVIIPRKEPPKAVPEVTKKTVEEKIRAPEEPKVPAPKEVVEKKSVPVPPKKEAPPKAVPEAPKEAAPE
KKVPVAPKPKPEAPPKVPVPEVPTAVPQKPIPEAIIPKPESPLEVPPEAPKEVVEKKSVPVPPKPEAPPK
VPEAPKEAAPEKKVPVAPKPKPEAPPKVPVPEVPAVPPQKPIPEAIIPKPESPPEVYEEPEEEIVPEEPEE
AVEEVPVAPPKVPTEPPKVPPEKKAPPVVKKPEPPKAVPEVPKEAPPEKKVPKPKPEAPPKAVPEVPKEV
VTEKKVAVPKKVPVPAKVPPEVPPKVIIEKPAIPVVEKVASPPAEVYEEPEEVTAEPEEPPAEVEEYEAPE
PPEAPVPEKPKVPEKFPVVKPEAPPKPEPEKPKVIEKPKLKRPPARPPSPKPEEEDVKEKMFQLKAVSK
KKVPEKPEVVEKVEPAPLKVPTAEKKVRKLLPEPKQPKKEEVVLSVLRKKPEEEEPKVEPKKVEKAKKPEEP
QPPKAVEVEAPPEPTPKERKVPPEKAVPEIKPAIPLGPEPKPEPEVKTMTKAPPIEPAPTPIAAPVTPAV
VGKKAEEKPKDEAAKPKGPIKGVAKKTPSPIEAERKKLRPGSGGKPPDEAPFTYQLKAVPLKVFKEIKDIVL
TEAESVGSSEAI FECLVSPSTAITTWMKDGSNIRESPKHRFIADGKDRKLIIDVQLSDAGEYTCVLRNLNKEK
TSTAKLIVEELPVRFVKTLEEEVTVVKGQPLYLSCELNKERDVVWRKDGKIVVEKPGRIVPGVIGLMRALTIN
DADDDTAGTYTVTVENANNLECSSCVKVEIIREWLVKPIRDQHVKPKGTAVFTCDIAKDTPNIKWFKGYDEI
PLEPNDKTEILKEGNHFLKVKNAMPEDI DEYAVEIEGKRYPAKLT LGEREVELLKP IEDVTIYEKESASFDA
EISEEDIPEGWKLKGLLELRSPPTCEIKAEGGKRFLLTKVKLDQAGEVLYQACNAITTAITLTKVEIELDFAVP
LKDVTVPEKRVARFECVLTREANVWISKGPDI IKASDKFDI IADGKKHILVINDSQFDDEGVYTAEEVGGKTS
AQLFVTGIRLKFISPLEDQTVKEGQTATFVCELSHEKMHVWVFNKNDVKLHTTRTVLMSSEGKTYKLEIRETTL
DDISQIKAQVKNLSSTANLKVLEADPYFTVKLHDKTGVEKDEIILKCEVSKDVPVKWFKDGEIIVSPKHSVK
TDGLRRLIKIKKAEKLDKGEYVDCDGTDTTKANVTVEARLIKVEKPLYGVEVFGVGETARFEIELSEPDVHGQW
KLKGEPLTASPDCEIIEEDGKKHVLVLYNCQLDMTGEISFQAANAKSAANLKVKEPLIFITPLSDVKVFEKDE
AKFECEVSREPKTFRWLKGTQEIITGDDRFELIKDGTSHSLVIKSAAFEDEAKYMFEEADKRTSGKLIIEGIRL
KFLTPLKDVTAKERENAVFTVELSHDNIPVSWFKNDQRLHTSKRVSMHDEGKTHSITFKDLSIDDTSQIRVEA
MGISSEAKLTVLEGDPYFTGKLQDYTGVEKDEVILQCEISKADAPVKWFKDGKEIKPSKNVVIKADGKRRMLI
LKKALKSDIGQYTCDCGTDQTSGLDIEDREIKLVRPLYSVEVMEETETARFETEISEDDIHANWKLKGEALLQ
TPECEIKEEGKIHVLIILHNCRLDQTTGGVDFQAANVKS SAHLRVKPRVIGLLRPLKDVTVTAGEATATFDCELSY
EDIPVEWYLKGGKLEPNDKVTRSEGRVHTLTLRDVKLEDAAGEVQLTAKDFKTQANLNFVKEPPVEFTKPLEDQ
TVEEEEATAVLECEVSRENKVKWFKNGTEILKSKKYEIVADGRVRKLI IHGCTPEDIKTYTCDKDFKTSNCL
NVVPPHVEFLRPLTDLQVKEKETARFECEISKENEKVQWFKDGAIEKKGKDYDIISKGAVRILVINKCLLNDE
AEYSCEVRTARTSGMLTVLEEEAVFTKNLANLEVSEGDTIKLVCEVSKPGAIEVIWYKGDDEEIIETGRFEILTD
GRRRILIIQNAQLEDAGSYNCR LPSRRTDSKVKVHELAAEFISKPQNLEIIEGEKAEFVCTISKESFEVQWKR
DDQTLESGDKYDI IADGKKRVLVVKDATLQDMGTYVVMVGAARAAAHLTVIEKLRIIVPLKDTKVKEQQEVVF
NCEVNTGAKAKWFRNEEAI FDSKYYIILQKDLVYTLRIRDARLDDQANFVSLTNHRGENVKSANLIVEEE
DLRIVEPLKDIETMEKKSVTFWCKVNRNLNVTLKWTKNGEVAFDNRISYRIDKYKHSIIKDCGFPDEGEYVV
TAGQDKSVAELIIIEAPTEFVEHLEDQTVTEFDVDFSCQLSREKANVKWYRNGREIKEGKVKFEKDGSIHR
LIIKDCRLEDECEYACGVEDRKSARLRFVEEIPVEIIRPPQDILEAPGADVIFLAELNKDKVEVQWLRNNMIV
VQGDKHQMMSEGKIHR LQICDIKPRDQGEYRFIAKDKEARAKLELAAAPKIKTADQDLVDAGQPLTMVVPYD
AYPKAEAEWFKENEPLSTKTVDTTAEQTSFRISEAKKDDKGRYKIVLQNKHGKAEGFINLQVIDVPGFVRNLE
VTETFDGEVSLAWEEPLTDGSGKIIIGYVVERRDIKRKTWVLTDRADSCEFTVTGLQGGVEYLFVRSARNRV

GTGEPVETDSPVEARSKYDVPGPPLNVTITDVRNRFVSLTWEPPPEYDGGAEITNYVIELRDKTISRWDTAMTV
RAEDLSATVTDVVEGQEYSFRVRAQNRIGVGKPSAATPFVKVADPIERPSPPVNLNASEQTQSSVQLTWEPPPL
KDGGSPIILGYIIEERREEGKDNWIRCNMMPVPELTYKVTGLQKGNKYLYRVSAENAAGVSDPSEILGLTADDA
FVEPTMDLSAFKDGLEIVPNPIKILVLPSTGYPRPKATWTFGDQVLEEGDRVKMKTISAYAEIIVSISERTDK
GIYTLTLENPVKSIISGEINNVIIAPPKAPKELKFSITKDSVHLTWEPPDDDDGGSPLTGYVVEKRDMSRKTWT
KVMDFVTDLEFTVVDLQVQKEYLKFVCARNKCGPGEPAATDEPVNMSAPATVPDPPENVKWRDRTRANSIFLTV
DPPKNDGGSRIKGYIVEKCPGRSDKWVACGEPVDPDKMEVTGLEEGKWAYRVKALNRQGASKPSKPTTEIIQA
VDTQEAPFIIFLDVKLLAGITVKAGTKIELPATVVTGKPEPKITWTKADTLLKPDQRITIEINVPKKSTVITITDSK
RSDTGTYIIEAVNVCGRATAVVEVNVLDKPGPPAAFDITDVTNESCLLTWNPDRDDGGSKITNYVVERKATDS
DVVHKLSSSTVKDTNFKATKLTNPKEYIFRVAENMYGVGEPVQAAPIIAKYQFDPPGPPTRLEPSDITKDAVT
LTWCEPDDDDGGSPIITGYWVERLDPDTPDKWVRNKNMPVKDTPYRVKGLTNKKKYRFRVLAENLAGPGKPSRSTE
PILIKDPIDPPWPPGKPTVKDIGKTSVLNNTKPEHDGGAKIESYVIEMLKTGTDEWVRVAEVPTEHLLTG
LMEGQEYSFRVRAVNKAGESESEPSDPVLCREKLYPPSPRRWLEVINITKNATDLKWTVPEKDGGSPIITNYI
VEKRDVRRKGWQTVDTTVKDTKCTVPLTEGSLYVFRVAENAIQGSDYTEIGDSVLAKDTFTTTPGPPYALTV
VDVTKRHVDLKWEPKNDGGRPIQRYIIEKKEKLGTRVWKAGKTSGPDCNFRVTDVIEGTEVQFQVRAENEAG
VGHPEPTEILSIEDPTSPSPPLDLHVTDAGRKHIAIAWKPPPEKNGGSPIIIGYHVEMCPVGTAKWVRVNSRP
IKDLKFKVEEIVDPKKEYVLRVRAVNAVGVSEPISENVVAKDPCKPTIDLETHDIVIEGEKLNIPVPPFR
AVPVPTVSWHKDGKEVKASDRLTMKNDHIISAHLEVPKSVHADAGVYITITLENKLGSAENINVKVIGLPGPCK
DIKASDITKSSCKLTWEPPPEFDGGSPILHYVLERREAGRRTYIPVMSGENKLSWTVKDLIPNGEYFFRVKAVN
KIGGGEYIELKNPVIAQDPKQPPDPVDVEVHNPTAKAMTITWKPLYDGGSKIMGYIIEKITKGEDRWKRCN
EHLVPVLTYTAKGLEEGKEYQFRVRAENAAGIGEPSRATPPTKAVDPIIDAPKVIILRTSLEVVRGDEIALDATI
SGSPYPTITWIKDENVIIVPEEIKKRAAPPVRRKKGEAESEEPFSLPLTERLSINNSKQGESQLRIRDSLRPDH
GQYMIKVENHDGVAKAPCSVSLDTPGPPINFVFEDIRKDSVLCCKWEPPLDDGGSEIINYTLEKKDKTKPDS
WIVITSTLRNCKYSVTKLIEGKEYLFRVRAENRFGGPPPCVSKPLLAKDPFEPPDAPDKPIVEDVTSNSMLVK
WNEPKDNGSPILGYWLEKREVNSTHWSRVNKTLLSSLTKTKVDGLLEGLTYVFRVCAENAAGPGKFSPPSDPKT
ARDPISPPGPPVNRAGDTSSTIELEWEPFANGGTEIMGYFVDKQLVGTNEWSRCKTEKMIKVRQFTVKEIRE
GADYKLRVSAVNAAGEGPPGETEPTVAEPQEPTEVELDVSVKGGIQIMAGKTLRIPAEVTGRPVPTKVVMTIE
EGELDKERVIIEENVGKSELIIEKNALRKDHGRYVITATNSCGSKFAAVRVEVFDVPGPVLDLKPVVTRNKMCL
LNWSDPADDGGSIDITGFIIEKDAKMHTWRQPIETERSKCDITGLIEGQYKFRVIAKNKFGCGPPVEIGPIL
AVDPLGPPSPERLTYTERTKSTITLDWKEPRSDGGSPIQGYIIEKRRHDKPDEFERVNKRLCPTTSFLVENLD
EHQMYEFVRKAVNDVGESEPSLPLNVVQDDEVPPTIKLRLAVRGDTIKVKAGEPVNIPADVTGLPMPKIEWS
KNEKVIDKPTDTLNIITKEEVSRSSEAKTELSIPKAAREDKGTYITITASNRLGSVFRNVHVEVYDRPSPRNLAV
TDIKAESCYLTDAPLNDGGSEITHYIIDKRASRKKSEWEEVTNTAVERRYGIWKLIPNGQYEFVRVAVNKY
GISDECKSDKVVIIQDPYRPLPGPPGPKVLERLTKGSMVLSWTPPLDNGGSPITGYWLEKREEGGTYSRVSRAP
ITKVLKGVFEFNVPRLIEGVKYQFRAMAINAAGIGPPSEPSDPAVAGDPIYPPGPPSCPEVKDKTKSSIILAW
KPPAKDGGSPIKGYIVEMQEEGTTDWKPVNEPKLLLTACECVVNLKELRKYRFRVAVNEAGESEPSDPTTGE
IPATDIQEVPEVFIIDIGAQDCLVCKAGSQVKIPAVIKGRPTPKSSWEFDGKAKKAMKDGVDHIDPEDAQLETA
NSSVVIIEPECTRAHSGKYSITAKNKAGQKTANCRVKVMDAPGPPKDLKVSIDITRGSCLSWKMPDDDDGGDR
IKGYVIEKKTIDGKAWTKVNPNCGSTTFVVPDLISEQQYFFRVRAENRFGIGPPAETIQRRTARDPIYPPDPP
IKLIGLITKNTVHLSWKPPKNDGGSPVTHYIVECLAWDPTGKKKEAWRQCNRRDVEELEFTVEDLIEGGEYEF
VKAVNEAGVSKPSATVGPVIVKDQTCPPAIELKEFMEVEEGTDVNIIVAKIKGVFPFTLTWFKAPPKPKPSKEP
VVYDTHVKNQVVDCTTLVPIQSRSDTGLYSITAVNNLGTASKEMRLNVLGRPGPPVGPPIKFESISADQMTL
SWLPPKDDGGSKITNYVIEKREANRKTWVRVSSSEPKCEMYTI PKLLEGHEYVFRIMAQNKYIGIGEPDSEPET
ARNLFSVPGAPDKPTVSSVTRNSMTVNWEEPEYDGGSPVTGYWLEMKDTTSKRWRKVRNRPDIKAMTLGVSYKV
TGLIEGSDYQFRVYAINAAGVGPASLPSDPVTARDPVAPPGPPFPKVTDWTKSSVDLEWSPPLKDDGGSKITGY
IVEYKEEGKEEWEKGDKEVVRGTLVVVTGLKEGAFYKFRVRAVNAVGVGEPGEVTDVIEKMDRIVSPDLQLDA
SVRDRIIVHAGGVIRIIAYVSGKPPPTVTWSMNERALPQEAIAIETAISSSMVIKNCQRSHQGVYSLAKNEG
GERKKTIIIVDVLVDPGPGVPIPFVSDNLTNDSCKLTWFSPEDDGGSPITNYVIQKREADRRAWTPVTVTRQN
ATVQGLIQGKSYFFRIAAENSIGMGPFVETPNALVIRDPIITVPERPEDLEVKEVTKNTVSLTWNPKYDGGSE
IINYVLESRLIGTEKFHKVTNDNLLSRKYTVKGLKEGDTYEVYRVSANIVGQGKPSFCTKPIITCKDELAPPTL
DLDFRDKLTVRVGESFALTGRYSKPKPKIDWFKDEADVLEDDRTHIKTPTTLALEKTKAKRSDSGKYCVVV
ENSTGSRKGCQVNVVDRPGPPVGPVIFDEVTKYMVISWKPPLDDGGSEITNYIIEKKEKLDIWMVPTSAS
AKTTCVKVPLLEGKDYIFRIHAENLYGISDPLVSDSMKAKDRFRVDAPEQPVVTEVTKDSALVTWKNPNDGG
KPIITNYILEKRETTMSKRWRVTKPIHPYTKYRVPDLLEGQYEFVRVSAENEIGIDPSPSPKPVFARDPIAK
PSPPIINPEAIDTTTNSVELTWQPPRHDDGGSKILGYIVEYQKVGDEEWRRANHTPESCPETKYKVTGLRDQSY
KFRVLAVNEAGESDPAHVPEPVLVKDRLEPPELILDANMAREQHIRVGDTLRLSAIIKGVFPFKVTKKEDRE
APTQAQIDVTPVGSKLEIRNAAHEDGGIYSLTVENPAGTKTVSVKVLVLDKPGPPRDLEVSEIRKDCSYLTWK
EPLDDGGSVVNTNYVVERKDVATAQWSPLSTTSKSKSHMAKHLTEGNQYLFVRAAENQYGRGPFVETPKPIKAL

DPLHPPGPPKDLHHVDVDKTEVSLVWNKPRDRGGSPITGYLVEYQEEGDKDWIKFKTKVKNLDCVVTGLQQGKT  
YRFRVKAENI IGLGLPDTTPIECQEKLVPSSVELDVKLI EGLVVKAGTTVRFPAI IRGVPVPTAKWTTDGTE  
IKTDDHYTVE TDSFSSVLT IKNCLRKDTGEYQLTVSNAAGTKTVAVHLTVLDVPGPPTGPI NILDVTPEYMTI  
SWQPPKDDGGSPVINYIVEKQDTRKGTWGVVSAGSSKLLKVPHLQKGCYVFRVKAENKMGVGPPLDSIPTV  
AKHKFSPPSPGKPVVTDITENAATVSWTLPKSDGGSPITGYVERREITGKWVRVNTPIADLKFVRTGLYE  
GNTYEFVFAENLAGLSNPSPPSSDPKACRPKPPGPPINPKLKDKSKESADLVWTKPLSDGGSPILGYVVEY  
QKPGTAQWDRINKDELIRQCAFVRVPLIEGNEYFRIRAAANIVGEGEPRELAESVIAKDILHPPEVELDVTCT  
DVI TVRVGQTI RILARVKGRPEPDI TWSKEGKVLVVKDRVDLI HDLPRVELQIKEAVRADHGKYI ISAKNSSG  
HAQGSAINVLD RGPQC NLKVS NVTKENCTI SWENPLDNGGSEITNFIVEYRKNQKGSIVASDVTKRLVK  
ANLLANNEYFRVCAENKVGVPPTIETKTPILAINPIDRGPENLHIADKGTFFVYLKWRPDPYDGGSPNLS  
YHVERRLKGSADWERVHKGSIKETHYMDKVENQIYEFVQTKNEGGS DWVRTEEVVVKEDLQKPVLDLKL  
SGVLTVKAGDTIRLEAGVRGKPFPEVAWTKDKDATDLTRSPRVKIDTSAESSKFSLTAKAKRSDGGKYVITATN  
PAGSFVAYATVNVLDKPGPVRNLKIDTVSSDRCTIRWDPEDDGGCEIQNYILEKCESKRMVWSTYSANVLT  
SATVTRLIEGNEYIFRVAENKIGTGPPTESKPVIAKTKYDRPGRDPPEVTKVSKEEMTVVWNAPEYDGGKS  
ITGYYLEKKEKHAVRWVFNKSAIPERRLKVQNLPGHEYQFRVKAENEVGI GEPSPSRPVVAKDPIEPPGP  
PTNFKVVDTTKSSITLAWGKPVYDGGAPIIGYVEMRPKIADASPDEGWKRCNAAAQLIRMEFTVTSLDENQE  
YEFVCAQNVGIGRPAELKEAIKPKIELEPPEIDL DASMRLVVRAGCPIRLFAIVRGRPAKVTWRKVG  
DNVVRKQVLDLVTMAFLVIPNSTRDDSGKYSLLTVNPAGEKAVFVNVKVLDTPGPVADLKVSDVTKTSCHVS  
WAPPENDGGSQVTHYIVEKREARKTWSTVTPPEVKKTSFNVTNLVPGNEYFFRVTAVNEYGPGVPTDIPKPV  
ASDPLSEPDPPRKLVEVTEMTKNSATLAWLPLLRDGGAKIDGYIISYREEDQPADRWTEYSVVKDLSLIVTGLK  
EGKYYKFRVAARNAVGVSMPREAEGVYEAKEQLLPPKILMPEQITIKAGKKLRVEAHVYKPNPICKWKKGDD  
EVTSSHLAIHKADGSSVLI IKDVTTRKDSGYSLTAENSSGSDTQIKVTVMDAPGPPQPPFDISEIDADACS  
LSWHI PLEDGGSNITNYIVEKCDVSRGDWVTALASVTKTSCRVGKLI PGQEYIFRVAENRFGISEPLTSPKM  
LAKFPFDVPPSEPKNARVTKVNDKCIFVAWDRPDSGGSPITGYLIERKERNLLWVKANDTIVRSTEYPCAGL  
VEGLEYSFRIYALNKAGSSPPSKPTEYV TARMVDPGPKPEVVDVTKNSASLIWARPKHDGGSRIIGYFVEAC  
KLPDGKWRNCNTTPHQIQEEYTATGLEENAQYQFRAIAKTAVNI SQPSEPSDPVTILAENVPRIELSVEMK  
SLLTVKAGTVNLDATVFGKMPPTVSWKKDTPIKQAEGIKMMAMKRNLCLELFSVNRKGSVDYITITVAENSSG  
SKSATIKLVLDKPGPPASVKINKMYADRAMLSWEPPELDDGGSEITNYIDKRETSRPNWAQVSATVPI TST  
VEKLEIEGHEYQFRICAENKYGVGDPILTEPAIAKNPYDPPGRCDPPVISNITKDHMTVSWKAPADDGGSPITG  
YLVEKRETQAVNWTKVNRPVIERTLKATGLOEGTEYEFVTAINKAGPGKPSDASKAVYAQDPLYPGPPAF  
PKVYDTRSSVLSLWGPAYDGGSP IIGYLVEVKRADS DHWVR CNLPEKLQKTRFEVTGLMENTEYQFRVYAV  
NKIGYSDPSDVPDKHCPKIDILIPPEGELDAELRKTILRAGVTMRLYVPVKGRPPPKITWSKPNVNLRRERIGL  
DIKSTDFDTFLRCENVNKYDAGKYILTLNENSCGKKEYTIVVKVLDTPGPPVNVTVKEVSKDSAYVTWDPPIID  
GGSPIINYVVEKRDAERKSWSVTECSKTSFRVSNLEEGKSYFFRVFAENEYIGIDPGETRDAVKASETPGP  
VVDLKAALITKSSCTIGWKKPRSDGGSRTIGYVVDFTLEENKQVRVMSLSLQYSTKDLKEGKEYTFRVSAEN  
ENEGTPESEIVVAKDDVAPDLDLKDLPLCYLAKENSFNRLKIPKGGKPPSVSWKKGEDPLATDTRVSVE  
STAVNTTLVVYDCQKSDAGKYITILKNVAGTKEGTLSEIKVVGKPGIPTGPIKFDEVTAEMTLKWGPPKDDGG  
SEITNYVLEKRDVNNKVVTCASAVQKTTFRVTRLHEGIEYTFRVAENKYGVGEGGLKSEPIVAKHPFDVPA  
PPPPNIVDVRHDSVSLTWTDPKKTGGSPITGYHIEFKERNLLWKRANKTPIRMKDFKVTGLTEGLEEYFRVM  
AINLAGVKGKPLPSEPVVALDPI DPPGKPEVISVTRNSVTLIWTEPKYDGGHKLTYIVEKRDLPKSKWMKAN  
HVNVPDCAFTVTDLVEGGKYEFRIRAKNTAGAI SAPSESTGTIICKDEYEAPTIVLDPTIKDGLTVKAGDSIV  
LSAISILGKPLPKSSWSRAGKDIRPSDIAQITSTPTSSMLTVKYATRKDAGEYTTATNPFGTKEEHVKVSVL  
DVPGPPGPIEISNVSAEKATLTWTPPLEDDGGSPIKAYVLEKRETSRLLWTVVSEDIQACRHVVTKLIQGNEYL  
FRVSAVNHYGKGEVQSEPVKMVDRFGPPGPPGKPEISNVTKNATVSWKRPTDDGGSEITGYHVERREKKGL  
RWRATKTPVSDLRKVTGLQEENTYEFVSAENRAGIGPPSDASNVLMDVAYPPGPPSNAHVDTTKKSA  
SLAWGKPHYDGGLEITGYVVEHQKVGDDAWIKDTTGTALRITQFVVPDLQTKKEYNFRI SAINDAGVEPAVI  
PNVEIVEKEVAPDFELDAELRRLTVVRAGLSIRIFVPIKGRPAPEVWTKNINLKHANIENTESFTLLIIP  
ECNRYDTGKFVMTIENPAGKKS GFVNVRLDTPGPVNLNRPTDITKDSVTLHWDLPLIDGGSRITNYIVEKRE  
ATRSYSTVTTKCHKCTYKVTGLTEGCEYFFRVMAENEYGVGEPTEETEPVRASEAPLPPDSLNIMDITKNTV  
SLAWPKPRHDGGSKITGYVIEAQRKGSQWTHISTVKGLECVVRNLTEGEEYTFQVMVNSAGRSAPRESRPV  
IVKEQTMPELDRGIYQKLVIAARAGDNKVEIPVLGRPKPTVTWKKGDQILKQTRVNVNTATSTILNINE  
CVRSDSGPYPLTAKNTVGEVGDVITIQVHDI PGPPGPIKDFEVSSDFVTFWEPPENDGGVPI SNYVEMRQ  
TDSTWVELATTVIRTYKATRLTGV EYQFRVRAQNRALVGVGPI TSASVVANYPFKVPVGPPTQVAVTKD  
SMTISWHEPLSDGGSPILGYHIERKERNILWQTVSKALVPGNIFKSTGLTDGIAEYFRVIAENMAGKSKPSK  
PSEPMFALDPI DPPGKPVPLNITRHTVALKWAPEYTGFFKITSYVVEKRDLPNGRWLKFANFSNILENEFTVS  
GLTEDAAEYFRVIAKNAAGAI SPPSEPSDAITCRDDLEAPRIMVDVRFKDTITLKAGEAFKLEADVSGRPPPT  
MEWTKDGKELEGTGKLEIKIADFSTHLINKDSSRTDSGAYILTATNPGGFAKHFNVKVLDRPGPPEGLAVS  
DVTSEKCVLSWLPLDDGGAKIDHYIVQKRETSRLAWTNVATEVQVTKLVTKLLKGNEYIFRVMVAVNKYGVG



EPLSEFVLAVDPYGPPDPPKNPEVTTITKDSMVVCWGHPPDSGGSEIINYIVERRRDKAGQRVWVKCNKALTD
LRFKVSGLTEGHEYEFRIMAENAAGISAPSATSPPFYKACDVTFKPGPPGNPRVLDTSRSSISIAWNKPIYDGG
SEITGYMVEIALPEEDEWQVVTTPAGLKATSYTITSLIENQYKIRIYAMNSEGLGEPALVPGTPKAEERMLP
PEIELDADLRKVVTIRACCTLRFLVPIKGRPAPEVKWAREHGESLDKASIESTSSYTLLVGVNVRNFDGSKYI
LTVENSSGSKSAFVNVRVLDTPGPPQNLKIKEVTKTSVTLTWEPLLDGGSKIKNYIVEKRESTRKAYSTVAT
NCHKTSWKVDQLQEGCSYFRVLAENEYIGLPAETAESVKASERPLPPGKITLTDVTRNSVLSWEKPEHDG
GSRILGYIVEMQSKGSDRWATCATVKVTEATITGLIQGEEYSFRVSAQNEKGISDPRQLSVPVIAKDLVIPP
FKLLFNTFTVLAGEDLKI DVPFIFGRPPPAVTWHKDDIPLKQTTTRVNAESTENNSLLTIKEACREDVGHYTVKL
TNSAGEATE TLNVI VLDKPGPPTGPKMDEV TADSVTLSEPPKYDGGSSINNYIVEKRDTSTTAWQIVSATV
ARTTIKACRLKTGCEYQFRIA AENRYGKSTYLNSEPVVAQYPFKVP GPPGTPFVTLASKDSMEVQWHEPVSDG
GSKVIGYHLERKERN SILWVKLNKTPIPQTKFKTTGLEEGIEYEFVSAENIVGIGKPSKSPSECYAAHDFCDP
PGRPEAIIVTRNSVTLQWKKPTYDGGSKITGYIVEKKELPDGRWMKASFTNIIDTQFEVTLGLEDHRYEFRVI
ARNAAGVFSEPESTGAITARDEVEPPRISMDPKYRDTVVVQAGESFKIDADIYGKPIPTTQVWKGQDQELSST
ARLEIKSTDFATSLSVKDAVRVDSGNYILKAKNVAGEKSVTINVKVLDRPGPPEGPVAISGVTAEKCTLAWKP
PLQDGGSDITNYIVERRETSRLVWTLVDANVQTLSCVKVLKLEGGNEYIFRIMAVNKYGVGEPLESESLIAKNP
FVVPDAPKAPEVTA VTKDSMIVWERPASDGGSEILGYVLEKRDKEGIRWTRCHKRLIGELRLRVTGLLENHN
YEFVSAENAAGLSEPPSPSAYQKACDPIYKPGPPNPKVMDVTRSSVFLSWTKPIYDGGCIEIQYIVEKCDV
SVGEWMTCTPPTGINKTNLEVEKLEKHEYNFRICAINKAGVGEHADVPGPVMVEEKLEAPDIDLDELARKVI
NIRAGGSLRFLVPIKGRPTPEVKWGKVDGDIRDAAIIDVTSSTSLVLDNVNRYDSGKYTLTLENSSGTKSAF
VTVRVLDTPSPVNLKVTETITKDSVSI TWEPLLDGGSKIKNYIVEKREATRKS YAAVVTNCHKNSWKIDQLQ
EGCSYFRVTAENEYIGLPARTADPIKVAEVPQPPGKITVDDVTRNSVLSWTKPEHDGGSKI IQYIVEMQA
KNTDKWSECARVKS LDAVITNL TQGEYLF RVI AVNEKGRSDPRSLAVPI IAKDLVIEPDRPAFSSYSVQVG
QDLKIEVPI SGRPKPSISWTKDGMPLKQTTTRINVTDSLDTLS IKETHKDDGGQYGITVSNVVGQKTA AIEI
ITLQDPPPKGPVKFDEISAESITLSWNPPLYTGGCQITNYIVQKRDTTTTVWVVSATVARTTLKVTKLKTG
TEYQFRIFAENRYGGSFALESEPVVAQYPYKEPGPPGTPFVTAISKESMVVQWHEPINNGGSPVIGYHLERKE
RNSILWTKPVNKTIIHDTQFKALNLEEGIEYEFVSAENIVGVGASKNSECYVARDPCDPPGTPPEAIIVKRNE
ITLQWTKPVNDGGSMITGYIVEKRDLEPGRWMAKFTNVIETQFTVSGLTEDQRYEFRVIAKNAAGAIKSPSD
STGPI TAKDEVELPRI SMDPKFRDTIVVNAGETFRLEADVHGKPLPTIEWLRGDKEIEESARCEIKNTDFKAL
LIVKDAIRIDGGQYILRASNVAGSKSFPVNVKVLDRPGPPEGPVQVTGVTAEKCTLAWSPPLQDGGSDISHYV
VEKRETSRLAWTVVASEVVTNSLKVTKLLEGNKYIFRIMAVNKYGVGEPLESA PVL MKNPFVLP GPPKSLEVT
NIAKDSMTVCWNRPDS DGGSEI IGYIVEKRDRSGIRWIKCNKRITDLRLRVTGLTEDHEYEFRVSAENAAGV
GEPSPATVYKACDPVFKPGPPTNAHVVDTTKNSITLAWSKPIYDGGSEILGYVVEICKADEEWEQIVTPQTG
LRVTRFEIAKLIHQEYKIRVCA LNKVGLGEAASVPGTVKPEDKLEAPELDDLSELKGI VVRAGGSARIHIP
FKGRPTPEITWSKEEGEFTDKVQIEKGINFTQLSIDNCDRNDAGKYLKLENSGSKSAFVTVKVLDTGPPQ
NLAVKEVRKDSVLLWVEPPIIDGGAKVKNYVIDKRESTRKAYANVSSKCNKTSFRVENLTEGAIYFRVMAEN
EFGVGVPTETSDAVKASEPPSPGKVTLTDVSTASALMWEKPEHDGSGRILGYVVEMQPKGTEKWSVVAESK
VCNAVVSGLSSGQEYQFRVKAYNEKGKSDPRVLGIPVIAKDLTIQPSFKLPFNTYSVQAGEDLKIEIPVIGRP
RPKISWVKDGEPLKQTTTRVNVEETATSTILHIKESKDDFGKYSVTATNSAGTATENLSVIVLEKPGPPVGPV
KFDEVSADFVVISWEPAYTGGCQISNYIVEKRDTTTTNWQMV SATVARTTIKISKLKTGTEYQFRIFAENRY
GKSTPLDSKPVVVQYPFKEPGPPGTPFVTSISKDQMLVQWHEPVNDGGSKVTGYHLEQKEKNSILWVKLNKIP
IQDTKFKTTGLDEGLEYEFRVSAENIVGIGKPSKVSECYVARDPCDPPGRPEAIVITRNSVTLKWKPKVYDGG
SKITGYIVEKKDLPDGRWMKASF TNVVEFTVTGLVEDQRYEFRVIARNAADNFSEPSSESSGAI TARDEIDA
PNASLDPKYRDVIVHAGETVFLVLEADIRGKPI PDI IWSKDGNELEETAARMEIKSTLQKTTLIVKDCIRTDGG
QYTLKLSNVGGTKTIPITVKVLDRPGPPEGLKVTGVTAEKCYLAWNPPLQDGGASISHYIEKRETSRLSWT
QVSNEVQALNYKVTLLPGNEYIFRVMANVNYGIGEALSEPVIA CNPKRPGPPSTPEASAITKDSMVLWTWT
RPVDDGGAEIEGYILEKRDKEGIRWTKCNKKTLDLFRVVTGLTEGHSYEFVAAENAAGVGEPESEPSVFYRA
CDALYPPGPPSNPKVTDTSRSSVSLAWN KPIYDGGAPVRGYVIELKAAADEWTTCTPPSGLQKQFTVTKLK
ENTEYNFRICAFNTEGVGEPATIPGSVVAQERMEAPEIELDADLRKVVTLRASATLRLFVTIKGRPEPEVKWE
KAEGILTERAQIEVTSSTMLVIDNVTRFDSGRYNLTLENNSGSKTAFVNVRVLDSPSAPVNLTIREVKKDSV
TLSWEPPLIDGGAKITNYIVEKRETRKAYATITNCTKNFKIENLQEGCSYFRVLASNEYIGLPAETAE
PVKVSEPLPPGRVTLVDVTRNTATIKWEKPESDGGSKITGYVEMQTKGSEKWSACTQVKTLETTISGLTAG
EEYVFRVAANEKGRSDPRQLGVPVIAKDI EIKPSVELPFNTFNVKANDQLKIDIPFKGRPQATVAWKKDGQV
LRETTRVNVASSKTVTTL SIKESREDVGTIELCVSNTAGSITVPI TVIVLDRPGPPGPIRIDEVSCDNVSI
WNPPEYDGGCQISNYIVEKRETTSTWQVVSQAVARTS I KIVRLTGTSEYQFRVCAENRYGKSSYSESSAVVA
EYFPSPGPPGTPKVVHATKSTMVVSQVVDGGSQVIGYHLEYKERS SILWSKANKVLIADTQMKVSGLDE
GLMYEYRVYAENIAGIGKCSKACEPVPARDPCDPPGQPEVTNITRKS VSLKWSKPRYDGGAKITGYIVERREL
PDGRWLQCNFTNVQETYFEVTELTEDQRYEFRVFARNAADSVSEPESTGPI TVKDDVEAPRIMMDVKFRDVI
IVKAGEVLKINADIAGRPLPVISWAKDGEIEERAKTEIVSTDYTTTLTVKDCVRRDGTQYVLT LKNVAGTRT

MAVNCVKLDPKPGPPAGPLEINGLTAEKCSLSWGRPQEDGGADIDYIIVEKRETSRLAWTICEAELRTTSCKVT  
KLLKNGEYIFRVTGVNKYGVGEPLSMVAVKALDPFTTSPPTSLIETSVTKDSMTLCWSRPETDGGSDISGYI  
IERREKNSLRWMRVKNKPVYDLRVKSTGLREGCEYEYRVFAENAAGLSLPSETSPLVRAEDPVFLPSPSPKPK  
IVDSGKTTITIGVWKPLFDGGAPITGYTVEYKSEETDWKVAIQSFRGTEYTMSSGLTTGDEYVFRVRSLNKMG  
ASDPDSDSDPQVAKEREEEPVFDVDSEMRKTLIVKAGSSFTMTVPFRGRPIPNVSWSKPDTDLRTRAYIDSTD  
SRTLLTIENANRNDGKYTLTIQNVLSAASMTFVVKVLDSPGPPANITVREVTKETAMLSWDVPENDGGAPVK  
NYHIEKREASKAWVSVTNNCNRLSYKVTNLQEGAIYYFRVSGENEFVGVPAETKEGVKITEKPSPEKLG  
TSVSKDSVLSLWKPEHDGGSRIIHYVVEALEKQKTVWKCVAVKTHHVVSGLRESHEYFFRVAENQAGLS  
DPRELLLPVLIKDQLEPPEIDMKNFPSHTVYVVRAGSNLKVDPISGKPLPKVTLSDRGVPLKATMRFNTEITA  
ENLTINLKESVTTDAGRYEITAANSSTTKTFINIIVLDRPGPPTGPVAISDITEESVTLKWEPPKYDGGSHV  
TNYIVLKRETSTAVWSEVSATVARTMIKVMKLTGEEYQFRIKAENRFGISDHIDSVCVVVKLPYTPGPPST  
PWVSNVTRESITVWHEPVSNGGSAVTGYHLEMKDRNSILWQKANKMIIRTTFKVTTISAGLIYEFVRYAEN  
AAGIGKPSHPSEPVLAIDACEPPRNVITDISKNSVNLWQQPAFDGGSKITGYIVERDLPDRWTKASFTN  
VIETQFTVSGLTQNSQYEFRVFARNAVGSVSNPSEVVGPIITCIDSYGGPVIDLPLEYTEVVKYRAGTSVKLRA  
GISGKPEPTIEWYKDDKELQTNALVCVENSTDLASILIKDANRLNSGSYELKLRNAMGSASATIRVQILDKPG  
PPGGPIEFKTVTAEKITLLWRPPADDGGAKITHYIVEKRETSRVVWSMVAENLEECIVTTTKIKGNEYVFRV  
RAVNYKIGEPLESEPVVAKNAFVTPGPPSIEVTKITKNSMTVVWDRPTVDGGSEINGYFLERRDKKSLAWL  
KVLKETIRDTRQKVTGLTENSQYQYRVCANVAGVGFSEPSDFYKAADPIDPPGPAKIRIADSKSSITLG  
WSKPVYDGGSDVTGYVEMKQGDDEEWTIVSTRGEVTRTEYVVSNLKPGVNYFQVSAVNCAGQGEPIITMTEP  
AQAKDVLEPEIDLVALRTSVIAKAGEDVQLLIPFKGRPPPTVTRKDEKNLGS DTRYSIQNTDSSSLVIP  
QVTRNDTGKYILTIENGVGQPKSSTVSVKVLDTPAACQKLVKHVSLGTVTLLWDPPLIDGGSPIINYVIEKR  
DATKRTWSVSSHKCSGTSFKVTDLSEKTPFFFRVLAENEIGIGEPCEETPEVKAEEVPAPIRDLMSKDKSTKTS  
VVLWTKPDFDGGSIITDYLVERKKGGEQAWSHAGISKTCEIEIGQLKEQSVLEFRVSARNEKQSDPVTIGP  
LTVKELVITPEVDLSEIPGAQISVRIGHNVHLELPYKPKPSISWLKDG LPLKESEYVRFSKTENKITLSIK  
NSKKEHGGKYTVILDNAVCRNSFPITITITLGPSSKPKGPIRFDEIKADSAIMSWDIPEDDGGGEITCYSIEKR  
EASQTNWKMVPCSSVARTTFKVSNLVKDSEYQFRVRAENRYGVSEPLASNIIVAKHQFRI PGPPGKPIYNVTS  
DGMSLTWDAPVYDGGSEVTFGHVEKKERNISLWQRVNTSPISGREYRATGLIEGLDYQVRVYAENSAAGLS SPS  
DPSKFTLAVSPVDPPTDYIDVTRETITLKNPPLRDGGSKIVAYSIEKRQGS DRWVRCNFTD VSECQYTVT  
GLSPGDRYEFRIIARNAVGTISPPSQSSGLIMTRDENVPPTVEFGPEYFDGLVIKSGDSLRIKALVQGRVPR  
VTWFKDGEIERRMMEITDVLGSTSLFVRDATRDHRGVYVTEAKNVSGSTKAEVTVKVQDTPGKVVGP IRFT  
NITGEKMTLWWEAPLNDGCAPVTHYIEKRETSRLAWALIEDNCEALS YTAIKLITGNEYQFRISAVNKFVGV  
RPLESDPVVAQIQYTI PDAPGVPEPSNVTGNSITLWTRPESDGGSEIQHYILERREKKSTRWVKVISKRPIS  
ETRFKVTGLVEGNEYEFHVMANAAGIGPASGISRLIKREPVNPPSAPS VVKVTDTSKTTVSLWARPVFDG  
GMEIGYIIECKADLDGWHKVNTEPCVKTRYTVTDLQAGEEYKFRVSAVNGAGKGDSC EVTGTIKAVDRLSA  
PELDIDANFKQTHIVRAGVSI RLF IAYQGRPTTAVWSKPDNSLIRADIHTTDSFSTLTVENCNRNDAGKYT  
LTVENNSGKKSITFTVKVLDSPGPPGPIITFKDVTRGSATLMWDA PLLDGGARIHHYVIEKREASRSWQVSE  
KCTRQILKSELTEGVPYFRVSAENEYGVGEPYEMPEPIVATEQPAPRRRLDVVDTSKSSAVLAWLKP DHDG  
GSRIITSYLLEMRQKGSDFWVEAGHTKQLTFTVERLVENTEYEFVVKAKNDAGYSEPREAFSSV I IKEPQIEPT  
ADLTGITNQLITCKAGSTFTIDVPI SGRPAPKVTWKLEEMRLKETDRMSIATTKDRTTLVKDSMRGDSGRYF  
LTLTENTAGVKTFTITVVVIGRPGPVTGPIEVSSVSAESC VLSWTEPKDDGGTEITNYIVEKRESGTTAWQLIN  
SSVKRTQIKVTHLTKYKEYCFRVSENRFGVSKPLESVP IVAEHPFVPPSAPTRPEVYVVSANAMIRWEEPY  
HDGGSKIVGYWVEKKERNILWVKENKVPCLCNYKVTGLVEGLE YQFRTYALNAAGVSKASEASRP IMAQNP  
VDPGRPEVTDVTRSTVSLIWSAPVYDGGSKVGYI IERKPVSEVGDGRWLKCN YTI VSDNFFTVTALSEGDT  
YEFVRLAKNAAGVISKGSESTGPVTCRDEYAPPKAELDARLQGD LVTIRAGSDLVLDAAVGGKPEPKI IWTKG  
DKELDLCEKISLQYTGKRATAVIKYCDRSDSGKYTLTVKNASGTKSVSVMVKVLDSPGCGKLT VSRVTEEK  
TLAWSLPQEDGGAETHYIVERRETSRLNWVIVEGECLTASYVVT RLKKNNEYTFRVRVAVNKYGLVPESE  
IVARNSFTIPSQPIPEEVGAGKEHII IQWTKPESDGGNEISNYLVDKREKSLRWTRVNKYVYVDTRLKVT  
SLMEGCDYQFRVTAVNAAGNSEPSEASNFI SCREPSYTPGPPSAPRVVDTTKRSISLAWTKPMYDGGTDIGY  
VLEMQEKD TDQWCRVHTNATIRNNEFTVPDLKMGQKYSFRVAAVNAKGMSDYSETTAEIEPVERLEIPDLELA  
DDLKKTIVIRAGASRLMVS VSGRPSPIITWSKKGIDLANRAI IDNTE SYSLIIVDKVNR YDAGKYT IEAENQ  
SGKKSATVLVKVYDTPGPCPSVSVKEVSRDSVTITWEIPTIDGGAPVNNYIIEKREAMRAFKTVTTKCSKTL  
YRISGLVEGTMYYFRVL PENIYGIGEPCE TSDAVLVSEVPLVPTKLEVV DVTKSTVTLAWEKPLYDGGSR L TG  
YVLEACKAGTERMWMKVTLPKPTVLEHTV ISLNEFGEQYLFVRVAQNEKGVSEPREIVTPVTVQDLRVLPTIDLS  
TMPQKTIHVPAGRPIELVPIITGRPPPTASWFFAGSKLRESERVTEHTKVTKLTIRETTIRDTG EY TLEL K  
NVTGTTSETIKVILDKPGPPTGPIKIDEIDATSVTISWEPPELDGGAPLSGYVVEQRDAHRPGWLPVSESVT  
RPTFKFTRLTEGNEYVFRVAATNRFGIGSYLQSEVIECRSSISIPGPPETLQIFDVSRDGMTLWTWYPPEDDGG  
SQVTGYIVERKEVRADRWRVNVKVPVTMTRYRSTGLIEGLE YEHVTA INARGTGKPSRPSKPTVAMDFIAPP  
GKPNPRVTDTRTSVSLAWSVPEDEGGSKVTGYLIEMQKVDQREWTKCNTTPTKIREYTLTHLPQGA EYFR

VLACNAGGPGEPAEVPVGTVKVTEMLEYDPYELDERYQEGVFVRQGGVIRLTIPIKKGKPPVCKWTKEGQDISK  
RAMIATSEHTELVIKEADRNDSTYDLVLENKCGKKTIVYIKVKVIGSPNTPPEGPLEYDDIQARSVRVSWRPP  
ADDGGADILGYILERREVPKAAWYITDSRVRGTSLVVKGLENVEYHFRVSAENQFGISKPLKSEEPVPIPKTP  
LNPPEPPSNPPEVLDTVKSSVLSWSRPKDDGGSRVGTGYIERKETSTDKWVRHNKTQITTTMYTVTGLVDPDA  
EYQFRIIAQNVDVGLSETSPASEPVVCKDPFDKPSQPGELEILSISKDSVTLQWEKPECDGGKEILGYWVEYRQ  
SGDSAWKKSNERIKDRQFTIGGLLEATEYEFVRVFAENETGLSRPRRTAMSVKTKLTSGEAPGVRKEMADVTT  
KLGEAAQLSCQIVGRPLPDIKWYRFGKELIQSRKYKMSDGRTHTLTVMTDEQEDEGVYTCVATNEVGEVSS  
SKLLLQAAPQFHPGYPLKEKYGAVGSTLRHLVMIYGRPVAMPWFHGOQKLLQNSEKITIENTEHTYTHLVMKN  
VQRKTHAGKYKVLQSLNAFGTVDATLDVEIQDKPKPTGPIVIEALLKNSVVI SWKPPADDGGSWI TNYVVEKC  
EAKEGAEWQLVSSAISVTTTCRIVNLTENAGYYFRVSAQNTFGISEPLEVASIVI IKSPEFKPGVPGKPTITAV  
TKDSCVVAWKPPASDGGAKIRNYLERREKKQNKWIAVTTEEIRETVFSVQNLIEGLEEYFRVKCENLGGESE  
WSEISEPVTPKSDVPIQAPHFKEELRNLNVRVYQSNATLVCKVTGHPKPIVKWYRQKKEIIADGLKYRIQEFKG  
GYHQLIIASVTDDDQVYQVRATNQGGSVSGTASLEVEVPAKIHLPKTLGEMGAVHALRGEVVSIKIPFSGKP  
DPIVTWQKQDLIDNNGHYQVIVTRSFSTLVFSNGVERKDAGFYVCAKNRFGIDQKTVELDVADVPDPGRGV  
KVSVDVSRDSVNLTWTEPASDGGSKVTNYIVEKCATTAERWLRVGGQARETRYTVINLFGKTSYQFRVIAENKFG  
LSKPSEPEPTTKEDKTRAMNYDDEVDETREVTTHKASHSKTKELYEKYMAEDLGRGEFGIVHRCVETSSK  
RTFMAKRVKGTDRDQVLVKEISILNIARHRNLIYLHESFESMEELVMI FEFISGLDIFERINTSAFELNERE  
IVSYVRQVCEALEFLHSQNIHFDIRPENIIYQTRKNSTIKIIEFGQARQLKPGDNFRLLFTAPEYVYAEVHQ  
HDVVSTATDMWSLGLTVLVLLSGINPFLAETNQMIENIMNAEYTFDEEAFKEISLEAMDFVDRLLVKERKSR  
MTASEALQHPWLKQRIDRVSTKVIRTLKHRRYYHTLIKKDLNMVSAARISCGGAIRSQRGVSAKVVASIE  
IGPVSGQIMHAI GEEGGYVYVCKIENYDQSTQVTVYFGVRQLENSEKYEITYEDGVATMYVKDITKFDGTY  
RCKVVNDYGEDSSYAEFVKGVREVYDYYCRRTKVKRRTDAMRLLERPPFTLPLYNKTAAYGVENVRFGVTI  
TVHPEPRVTWYKSGQKIKPGDDEKKTFFESDKGLYQLTINSVTTDDAEYTVVARNKHGEDSCKAKLTVTLHP  
PPTETTLRPMFKRLLANAECHEGQSVCFEIRVSGIPAPTLKWEKDGQPLSLGPHIEIVHEGLDYALHIRDTL  
PEDTGYRVTATNTAGSTSCQAHLQVERLRYVKQEFQSKEEERHVQKQIDKTLRMAEILSGTETVPLTPVAQ  
EALREAAI LYKPAVSTVKGEYRLQTEEKKEERKLMPYVPEPRRFKQATVEEDQRIKQFVPMSPMDKWKYK  
IRDQYEMPGKLDREVQKRPKRI RLSRWEQFYVAMPLPRITDQYRPKWRI PKLTQDDLEMRPARRRTPSPDYDL  
YYRRRRRSLGDMSDEELLPIDY LAMKRTEEERLRLEEELELGF SASPPSRSPPRFELSLSRYSSPPAHVK  
VEDRRRDFRYSTYHVPTKEETSTSYAELRERHAQASYRQPKLRQRI MAEKEEEELLRPVTTTQRLSEYKSELD  
YMSKEEKSKKKSKRQRQVTEITEIEEYEISRRAQRESSSSVSRLRRRRSLSPTYIELMRPVSELIRSHPRP  
AEEYEDDAERRSPTPERTRPRSPSPVSSERSLSRFERSARFDIFSRYESMKAALKTKTQKTSERKYEVLSQQPFT  
LDHAPRITLRMRSHRVP CGQNTREILNVQSKPTAEVKWYHNGVELQESSKIHYTNTSGVLTLEILDQTEDGG  
TYRAVCTNYKGEASDYATLDVTGGAYTTYASQRRDEEVKPSVFPPELTKTEAYAVSSFKRTSELEAASSVREVK  
SQMTETRESLSTYEHYASAEMKSATSEEKSLEEKATVRKIKTTLAARILTKPRSITVHEGESARFSCDTDGEF  
VPTVTVLWREGQVST SARHQVTTTKYKSTFEISSVQASDEGNYSVVVENS DGKQEAQFTLTVQKARVIEKAVT  
SPRVRKSPERVKSPETVKS PKRVKSPPEVTSHPKAVSPTEKPKTEKGQHLVPSAPPKITQSLKAEASKDIAK  
LTCAVESSALCAKEVAVYKDGKCLKENGHFQFHYSADGTYELKIHNLSESDCGEYVCEVSGEGGTSKTSFQFT  
GQSFKSIHQVSSISETTKSVQKTAESA EAKKSEPIAPESISSKPIVTVGLRDTTVSSDSVAKFTIKVTGEPQ  
PTITWTKDGKAI AQGSKYKLSNKEEFLEILKTETS DGGLYACTVNSAGSVSSSCKLTIKAVKDTEAQKVS  
TQKTSEVTSQKKASAEQEEISQKALTSEEIKMSEVKS HETLAIKEEASKVLI AEEVKRSAAASLEKSI VHEEVT  
KTSQASEEVKTHAEIKTLSTQMNITKGQRATLKANIAGATDVKVVNLNGTELPNSEEYRYGVSGSDQTLTIKQA  
SHREEGILSCIGKTSQGVVKQFDLTLSEELSDAPSFITQPRSQININEGNVLFSCVSGEPSPEIEWFKNL  
PISISSNISVSRSRNVYTLERNAAVSDSGKYTIKAKNFHGOCSATASLTVLPLVEEPPREVVLKTS SDVSLH  
GSVSSQSVQMSASKQEA SFSSFSASSMTEMKFASMSAQMSMSMQESFVEMSSSSFMGKSSMTQLESSTSR  
MLKAGGRGIPPKIEALPSDISIDEGKVLTVACFTGEPTPEITWSCGGRKIQNQEQGRFHIENTDDLTTLII  
MDVQKQDGGLYTTLGNEFGSDSATVNINIRSM\*

>ENSMUSP00000107513\_c.77325:A>C\_p.K25776Q ENSMUST00000111882.9|Ttn-  
205|ENSMUSG00000051747|-|chr2:g.76568328:T>G  
MTTQAPMFTQPLQSVVLEGSTATFEAHVSGSPVPEVSWFRDQVISTSTLPGVQISFSDGRARLMI PAVTKA  
NSGRYSLRATNGSGQATSTAELLVTAETAPPNFSQRLQSM TVRQGSQVRLQVRVTGIPTPVVKFYRDGAEIQS  
SLDFQISQEGDLYSLLIAEAYPEDSGTYSVNATNSVGRATSTAELVVQGEVVP AKKTKTIVSTAQISETRQT  
RIEKKIEAHFDARS IATVEMVIDGATGQLPHKTPPRI PPKPKRSRPTPPSIAAKAQLARQQSPSPIRHSPSPV  
RHVRAPTPSPVRSVPAGRISTSP IRSVKSPLLIRKTQTTMATGPEVPPPWKQEGYVASSTEAMRETTMTS  
STQIRREERWEGRYGVQEV TISGAAAAAASAVSSSFTAGAITTGTKEVKQETDKSAAVATVVAAVDMARVR  
EPAISAVEQTAQRTTTTAVHIQPAQE QARKEAEKTA VTKVVVAADKAKEQELKSR TREVMVTTQEQT HISHQ  
IRKETEKA FVPKVVISATKAKEQETRI TGEITTKQE QKRITQETIRQETEEIAASMVV VATAKSTKLEAAVGV  
QEETAIQDDQMH LTHEQMMKETRKT VVPKVI VATPKI KEQDLVSR SREAITTKRDQVQITQEKKRKEVET TAL  
STIAVATAKAKEQETVLR SREAMATRQEHIQVTHGQVGVGKKA EAVATVVAAVDQARVREPREPTHVEESHQ

QTTLEYGYKEHISTTKVPEQPRRPASEPHVVPQAVKPAVIQAPSETHIKTTDQMGMHISSQVKKTTDISTERL  
VHVDKRPRPTASPHFTVSKISVPKTEHGYEAS IAGSAIATLQKELSATSSSTQKITKSVKAPTVPKGETRVRAEP  
TPSPQFPFADMPPTDYKYSQAGIEVKKEVGVSSISGSTVREEHFVLRGREAKVTETARVPAPAEVPVTPPTLV  
SGLKNVTVIEGESVTTLECHISGYSPKVTWYREYDQIESSIDFQITFQGGIARLMIREAFAEDSGRFTCSAVN  
EAGTVSTSCYLAVQVSEEFDKETTLTEKFATEEKRFVESRDVMTDTSITEEQAGPGEPAAPFFISKPVVQKL  
VEGGSVVFECQIGGNPKPHVYWKKSQVPLTTGYYRYKVSYNKQGTGECRLVISMFTADDAGEYTIIVIRNKHGETS  
ASASLLEEADYEALVKTQEQEMLYQTQMSTFIQEPKVGEIAPGFAYSEYEKEYEKEQALIRKKMAKDTVMVRTF  
VEDQEFHISSFEERLIKEIEYRIKTTLEELLEEDGEEKMAVDISESEAIESGFDIRIKNYRILEGMGVTFHC  
KMSGYPLPKIAWYKDKRIRHGERYQMDFLQDGRASLRIPVVLPEDEGIYTAFAFASNIKNAICSGKLYVEPAA  
PFSAPTYMPTPEAVSRIRSVSPRSLSRSPIRMSPAMSPARMSPARMSPARMSPARMSPARMSPARMSPARMS  
YKPVFVLKPAFVKCLEGQTARFDLKVGRPMPETFWFHNGQQIIVNDYTHKVVIKEDGTQSLIIVPASPSDSGE  
WTVVAQNRAKSTISVTLTVEAVEHQIKPAFVEKLNKVNNIKEGSRLEMKVRATGNPNPDIIVLKNSDIIVPHK  
YPRIRIEGTRGEAALKIDSIIISQDSAWYTATAINKAGRDTTRCKVNVEVEFAEPEPERKLIIPRGTYRAKEIA  
APELEPLHLRYGQEQWEEGDLVDKEKQKPFKFKLTSRLKRFPAHFECRLTPIGDPTMVVEVLHDGKPLE  
AANRLRMINEFGYCSLDYGAAYSRDSGVI TCRATNKYGTDHTSATLIVKDEKSLVEESQLPDGKGLQRIEEL  
ERMAHEGALTGVTTDQKEKQKPDIVLFPFVVRVLEGETARFRCRVTGYPQPKVNWYLNGLIRKSKRFRVRYD  
GIHYLDIVDCKSYDTEGVKVTAEENPEGVTEHKVKLEIQQREDFRSVLRRAPEPKPEFHVHEPGKLFQEVQKVD  
RPVDTSETHEKVVKLKRAERITHEKVVSESEELRSKFKRRTTEEGYEAITAVELKSRKKDESYEELLKKTDEL  
LHWTKELETEEEKALAEEGKITIPTFKPERIELSPSMEAPKIFERIQSQVTGQGSDAHFRVVRVVGKPDPECEW  
YKNGVKIERSDRIYWYWPEDNVCELVIRDVTAEDSASIMVKAINIAGETS SHAFLLVQAKQLITFTQELQDVV  
AKEKDTMATFECETSEPFIVKWKYKDGIEVHAGDKYRMHSDRKVHFLSVLTIDTSDAEDYSCVLVEDENIKTT  
AKLIVEGAVVEFVKELQDIEVPESYSGELECIISPENIEGKWYHNDVELKSNGKYSITSRGRQNLTVKDVTK  
EDQGEYSFVVDGKKTCKLKMKPRPAILQLGSLDQKVCEGDIQLEVKVSVLENVEGVMMKDGQEVQHS DRVHI  
VIDKQSHMLLIEDMTKEDAGNYSFTIPALGLSTSGNVSVYSVDVITPLKDVNVIEGTAKAVLECKVSVDPVTSV  
KWYLNDEQIKPDDRVQSIKVGTKQRLVINRTHASDEGPYKLMVGRVETSCNLSVEKIKIRGLRDLTCTETQN  
VVFELVLSHSGIDVWVNFKGEIKIPSSKYKIEAHGKIYKLTVLNMMKDEGEYAFYAGENTSGKLTVAGGAI  
STPLTDQTVAESVCEVANEPESEGEWLKDGHKHALSNNFRGESDGHKRRRLVIAAAKTTDAGEYTYKVVAT  
SKTSALKLVEAVKIKKTLRNLTVTETQDAVFSVELTHPDVKGQVWIKNGVVLDSNDKYEISVKGTLYSLKIKN  
CAMADESVYGFKLGRLGASARLHVETVKI IKKPKDVTALENATVTFEVSVSHDTPVVKWVFNKVEIKPSDKHR  
LVSERKVHKLMLQSI SPSDAGEYTAMVGQLECKAKLFVETLHITKTMKSIEVPETKAASFCEVSHFNVPMSM  
LKNVGIEMSEKFKIVVQGLHQLIIMNTSTEDSAEYTFVCGNDQVSATLTVTPIMITSMLKIDINAEKDTIT  
FEVTVNYEGISYKWLKNGVEIKSTDRCQMRKTKLTHSLNIRNVHFGDAADYTFVAGKATSTATLYVEARHIEF  
RKHIDIKVLEKRAMFECEVSEPDITVQWMKDGQELQIADRIKIQKEKYVHRLIIPSTRMSDAGKYTVVAGG  
NMSTANLFVEGRDVRIRS IKKEVQVIEKQRAVVEFEVNEDDVAHWYKDGIEINFQVQERHQYVVERRIHRMF  
ISETRHS DAGEYTFVAGRNRSVTLYVNAPEPPQVQLQELQPVTVQSGKPARFCAVISGRPQPKISWYKEEQLL  
STGFKCKFLHDGQEQYETLLLEAFPEDAAVYTCEAKNDYGVATTSASLSVEVPEVVS PDQEMPVYPPAIVTPLQ  
DVTVSEGRPARFQCQVSGTDLKVSWYCKDKKIKPSRFFRMTQFEDTYQLEIAEAYPEDEGTYAFVANNAVQV  
SSTATLRLEAPESILHERIGQQIEMEMKAAPVIKRRIEPLVALGHLAKFTCEIQGAPNVRFQWFKAGREIYE  
SDKCSIRSSNYVSSLEILRTQVVDCGEYTCASNEYGSVCTATLTVTEAYPPTFLSRPKALTTFVGKAAKFL  
CTVSGTPVIEIIWQKDGAALSPSPDCRVTDADNKHSLELSNLTVDQDRGIYSCKASNKFGADICQALTIIDKP  
HFIKELEAVQSAINKKIHLECVQDEDRKVTITWSKDGQKLPAKDYKIYFEDKIASLEIPLAKLKDSTYTCT  
ASNEAGSSSSAAVAVREPPSFVKKVDPSYLMPLPGESARLHCKLKGSPVIQVTWFKNNKELSENTVRMSFVN  
SEAILDITDVKVDDSGTYSCEATNDVGS DSCSTEVVIKEPPSFIKTLEPADIVRGANALLQCEIAGTGFPEVN  
WFKDKKQIRSSSKYRFLTQKTFVYLEISSFNADVGDYECVANEVVKCGCVATHLLKEPPTFVKVDDFTAL  
AGQTVTLQAAVRGESEPI SVMMKQGEVIKEDGKIKMSFSNGVAULTIPDVQISLGGKYTCLAENEAGSQTSVG  
ELIVKEPAKIERAELIQVTAGDPATLEYTVSGTPELKPKWYKDRPLVASKKYRISFKNNIAQLKIFYSAELH  
DSGQYTFEISNEVGSSSCETTFTVLDRDIAPLFTKPLRNVDVVGACRLDCKIAGSLPMRVSWFKDGKELTA  
SDRYQIAFVEGTASLEISRVDMNDAGNFTCRATNSVSGSKDSSGALIVQEPPSFVTKPGSRDVLPGSAVCLKSA  
FQGSAPLTIKWFKGDKELVSGGSCYITKETSSESSLELYAVKTS DSGTYTCKVSNVAGSVECSADLFVKPATF  
IEKLEPSQLLKKGDGTQLACKVGTGTPPIKITWFANDRELRESKHKMSFAESTAVLRRLTDVAIEDSGEYMCEA  
QNEAGSDHCTGIVIVKESPYFTKEFKSIEVLKEYDVMLLAEVAGTTPFEITWFKDNTTLRSRGRKYKTFQLDQL  
VSLQVLKFVAADAGEYQCRVTNEVGSSTCSARVTLREPPSFIKKIEATSSLRGGTAAAFQATLKGSLPITVTWL  
KDNDIEITEDDNRMTFENNVASLYLSGIEVKHYDKGYVCAKNDAGIQRCSALLSVKEPATIMEEAVSIDVTQG  
DPATLQVKFSNRTKIEISAKWFKDQELTLGPKYKISVTDTVSILKII STEKKDSGEYTFEVNDVGRSSCKASI  
NVLDLIIPPSFTKLRKMDSIKGSFIDLECEIVAGSHPI SIQWFKDDQEISASDKHKFSFHDNTAFLEISQLEG  
TDSGTYTCSATNKAGHSQC SGHLTVKEPPYFVEKPKSQSDVNPGTRVQLKALVGGTAPMTIKWFKDNKELHPGA  
ARSVWKDDTSTILELFSAKAADSGTYICQLSNDVGTSSKATIFVKEPPQFIKKPSVPLVLRNGQSTTFECQV  
TGTPEIRVSWYLDGNEITDLRKYGISFVDGLATFQISNARVENS GTYVCEARN DAGTASCSIELKVKEPPIFI

RELEPVEVVKDSVLECEVMTTPFEVTVLKNKEIRSGKMYTMSEKMSVLYLHITKCDPSDVGEYQCI IAN  
EGGSCAC SARVALKEPPSFIKKIENVTTVLKSSATFQSTVAGSPPISITWLKDDQILEENDNVHISFEDSVAT  
LQVRSDVNGHSGRYTCQAKNESGIERCYAFLLVQEPAQI IEKAKSV DVTEKDPVTLECVVAGTPELVKVKWLKD  
GKQIVPSRYFSMSFENNVASFRIQSVMKQDSGQYTFKVENDFGSSSCDAYLRVLDQDI PPSFTKCLKTKMDKVL  
GSSIHMECKVSGSLPI SAQWFKDGKEISTSAKYRLVCHENTVSLVSNLELEDTANYTCKVSNVAGDNACSGI  
LTVKEPPSFLVKPERQQAIPDSTVEFKAVLKGTPPFKIKWLKDDVELVSGPKCFIGLEGSTSFNLNLYSDSSK  
TGQYTCQVTVNDVEPPKFVKKLEASKI IKAGDSARLECKITGSP EI QVVWYRNEHELTASDKYQMTFIDSVAVI  
QMNSLGTEDSGDFICEAQNAPAGSTSCSTKVI VKEPPVFSFPPI VETLKNTEVLSLECELSGT PPFVWVYKDK  
RQLRS SKKYK VASKNFHASIHILNVESTDIGEYHCKAQNEVGS DACVCAVKLKEPPKFI SKLNSLTVVAGEPA  
ELQASIEGAQPI SVQWLKEKEEVIRESENIRISFVNNVATLQFAKVEPANAGKYICQVKNDDGGVRENMATLTV  
LEPAVIEKAGSMTVTVGETCALECKVAGTPELSVEWYKDGKLLTSSQKHKFSFYNKISSLKI LSVEKEDAGT  
YTFQVQNNVKGSSCTAVVDVSDRMVPPSFTRLKDTGGVLGTSCILECKVAGSSPISIAWFHEKTKIVSGAKY  
QTTFSDNVCTLQLNSLSDSDMGSYTCVAANVAGSDECRALLTVQEPSPFVKEPEPLEVLPKGNITFTSVIRGT  
PPFKVGVFRGARELVKGNRCNIYFEDTVAELELFNIDISQSGEYTCVVSNNAGQASCTTRLFVKEPATFVKKL  
SDHSVEPGKSIILEGTYTGTLPISVTWKKDGVSI TSPERCNI VTEKTCILEILSSTKGDAGHYSCEIENEAG  
RDACDALVSTLEPPYFVTELEPLEASVGDVSLQCVAGTPEITVSWFKGDTKLRSTPEYRITYFTNNVATLVF  
NKVSI NDSGEYTCMAENSIGTAASKTIFRIQERQLPPSFARQLKDIEQTVGLPVTLTCLRLNGSAPIQVCWYRD  
GVLRLDDENLQMSFVDNVATLKLQTDLSHSGQYSCSASNPLGTASSTARLTAREPKKSPFFDIKPVSIDVIA  
GESADFECHVTGAQPMRVTWSKDNKEIRPGGNYTITCVGNTPHLRI LKVGKGD SGQYTCQATNDV GKMCSAQ  
LSVKEPPKFIKKLDASKVAKQGESIQLECKISGSPEIKVVWFRNDELHESWKYNSMFVNSVALLTINEASAE  
DTGDYICEAHNGVGDASCSTALKVKAPPVFTQKPPVVGALGSDVILQCEISGTPPFVWVVKDRKQVRSSKK  
FKITSKNFDTSLHIFNLEAPDIGEYHCKATNEVGS DTCAC TVKFKEPFRFVKKLSDASTLIGDPVELQAVVEG  
FQPI SVVWLKDKGEVIRESENVRI SFVDNIATLQLGSP EASQSGKYVCQIKNDAGMRECSAVLTVLEPATIVE  
KPEPMTVTTGNPFTLECVVAGTPELSAKWFKDGRELSSGSRHHITFVRNLASLKI PSAEMNDKGLYTFEVENR  
VGKSSCTVSVHVS DRVPPS FVRRLKDT SATLAVS VVLECECRVSGSAPI SVGWFLDGN EIISSPKCQSSFADNV  
CTLTLSSLEPDTGAYTCVAANVAGQDESSAGLTVQEPSPFEQTPDSVEVLPGMSLTFTSVIRGT PPFVKWKF  
KGSRELVSGEACTISLEDFVTELELLEVEPGQSGDYSCLVTNDAGSASCTHFLVKEPATFVKRLADTSVETG  
SPIVLEATYSGTPPISVSWMKNEYPLSQSPNCGITTTTEKSSILEILESTIEDYAQYACLIENEAGQDICEALV  
SVLEPPYFIEPLEHVEAAIGEPITLQCKVDGTPEIRISWYKEHTKLR SAPAYKMQFKNNVASLVINKVDHSDV  
GEYTCKAENSVGAVASSAVLVIKERKLPPSFARKLKD VHE TLGFPVAFECRINGSEPLQVSWYKDGELLDKDA  
NLQMSFVHHVATLQILQTDQSHVGYNC SASNPLGTASSAKLILSEHEVPPFFDLKPVSDLALGESG SFKC  
HVTGTAPIKITWAKDNREIRPGGNYKMTLVENTATLTVLKVAKGDAGQYTCYASNVAGK DSCSAQLGVQEP  
FIKKLDQSRIVKQDEYTRYECKIGGSPEIKVLWYKDEVEIQESSKFRMSFEDSVAILEMHSLSVEDSGDYTCE  
ARNAAGSASSSTSLVKPEPPVFRKKPFPVETLKGADVHLECELOGT PPFQVSWHKDKRELRS GKKYKIMS ENL  
LTSIHILNVDTADIGEYCKATNDVGS DTCVGSVTMKAPPQFVKKLTDISTIIGKEVQLQTTIEGAEPI SVAW  
FKDKGEIVRES DNIWISYSENIATLQFSRAEPANAGKYTCQIKNDAGMQECYATLSVLEPA AIVEKPE SIKVT  
TGD TCTLECTVSGTPELSTKWFKDGKELTSDNKYKISFFNKVSGLKI INVVPGD SGVYSFEVQNPV GKDCKV  
SIQVSDRIIPPSFTRK LKETNGLSGSSVMECKVYGSPPISVLWFHDGNEISSGRKYQTTLTDNTCALTVNML  
EEADAGDYTCIATNVAGSDECSAPLTVREPPS FVQKPDMDVLTGSNVTFTSIVKGSPPFTVSWFKGSTELVP  
GARC NVSLQDSVGELELFDVDTQS GEYTCIVSNEAGRASCTTRLFVKAPAI FVKRLNDYSIEKGPLILEGT  
FSGT PPI SVTWKKNGINVIASQR CNITTTTEKSAILEILSSTVEDSGQYNCYIENASGKDSCSAQILILEPPYF  
VKQLEPVKVTVGDSASLQ CQLAGTPEIGVSWYKGDTKLRPTATCKMHFKNNVATLVFTQVDSSDSGEYICRAE  
NSVGEVSSSTFLTVQEQKLPPSFSRQLRDVQETVGLPVVFECAVSGSEPI SVSWYKDGKPLKDS PNIQTSFLD  
NIATLNI FKTDRSLSGQY SCTATNP IGSASSGAKLILTEGKNPPFFDI PLAPMDAVVGESADLECHVTGTQPI  
KVTWAKDNREIRSGGNYQISYLENSAHLTIVKVDKGD SGQYTCYAVNEVGKDSCTAQLNIKERLIPPSFTKKL  
SETVEETE GNSFKLEGRVAGSQPITVAWYKNNVEIHPTSNCEIMFKNNALLLQVKRASMADAGLYTCKATNDA  
GSALCTSSIVIKEPKKPPVFDQHLAPVTASEGDSVQLSCHVQGSEPIRIQWLKAGREVKPSDRCSFSFASGTA  
MLELKETAKADSGDYVCKASNVAGSDTSKCKVTI KEKPAAPAAKKA AVDGKLFVSE PQSIRVVEKTATFI  
AKVGGDPIPNVKWTKGKWRQLNQGGRI LIHQKGDEAKLEIRD TTKTDSGLYRCVAFNKHGEIESNVNLQVDER  
KKQEKIEGDLRAMLKKT PALKKGSGEEEEIDIMELLKNVDPKEYEKYARMYGITDFRGLLQAFELKQSQEEE  
THRLEIEELEKSERDEKEFEELVAFIQORLTQTEPVTLIKDIENQTVLKDND AIFEIDIKINYPEIKLSWYK  
TEKLEPSNKYEISIDGDRHTLRVKNCPKDKQGNRYLVC GPHIASAKLTVIEPAWERHLQDVTLKEGQCTMTC  
QFSVPNVKSEWFRNCEVLSFKPQGRVKTEVEHKVHKLTIADVRAEDQGYTCCKHEDLETSAELRIEAEPIQFTKR  
IQNI VVSEHQ SATFEECEVLSFDDAIVTWYKGPTELTESSQYKNFRNDGRCHYMTIHNVT PDDEGVYSVIARLEPR  
GEARSTAEALYLTTEKIEKLEMKPPDIPDSRVPIPTMPIR AVPPEEIPPAVAPS IPLLPLPEEKKPAKRIEVT  
KKGVKKDTKKVVTKPKEEAPPPVPEVAKKPPPPTPMIPAKASEIIDVSSKAEEVKITITTRKKEVHKEKEAV  
YEREEAVYEKKVHIEPWEPEYEELETEPYTEPYEPEYEEPEDEYEEIKVEAKKQVHEEWEEDFEEGQYER  
EEGYDEGEEWEIEIYHEREIIQVQKEVHEELHEKKIPAKVPEKKVPPKVVKKPVVEKVEKTRRMEEEKVQV

IKVPEVSKKIVPQKPSRTPVQEEIIEVKVPAVHTKKMVIISSEKMFASHTEEVSVSVPEVQKKTVTEEKIHV  
AVSKKIEPPPKVPEPPKKVPEEVVVPVPIPKKVEPPAAKVPEAPKKVPEEKKVPVPIPKKKEPAAPPQVPEAP  
KKPAPEEKIPVPVTKKKEAPPKAVPEVQKKVVTEEKIAIITQREESPPPAVPEIPKKKVPEEKRVPVPRKEEVP  
PPKVVPVPPKAVPEAVVPAPIPKKAPPRAEVSKKTVEEKRFAAEEKLSVAVPQRVELMRHEEEEWYSEEEE  
RVSVSVYREEEERDEEEAEITEYEVLEEPEEYVVEEKMHFISKKVEVEPAKVPEKKIIPKKVPAKIEEPPPTK  
VPEPPKKIVPEKKVPAPAPKKVPPAKAPEESKRPVPEKRAPAEVGIIEEPPPTKVAERHMKITQEEKVLVAVT  
KKEAPPRARVPEEPKKVAPPEERFPKLPKPRREEEPPAKVTEVRKRAVKEEKVSIIEVPKREPRPTKEVTVTEEKK  
WSYTRREEETVSEHREEEYEDYEDYEEYKEFEYEPTEEYDQYDEYAEREVEHYEEHEEYVTEPKKVPVVKPAQ  
EPVPAKPKAPPKVLKKAPEEKAPLPIQKKLKLPPKAPEEPPKKVVEEKIQISITKKEQQVTEPVAKVPMK  
PKRVVPEAKIPAPTKEVAVPVRESLSFVICGSVLLKCLNFIEELENSQLKDDIFKVPVGPVKKRELEEVEVVFKE  
EVEAHEEYIVEEEEEEYVHEEEYVHKEEYVHEEEYVHKEEYIHEEEHLHEEEETIAEEVVPVAPVKVPVVPK  
KPVPEEKKVPVPPKKEAPPKAVPEIPKKPEEKVPVPIPKKEKAPPKAVPEVPKKVPPEEKPPVVPVPPKVEPP  
PAKVPEVPKKVPPEKKVPAPTPKKVEAPPKAVPEVPKKPIPEEKKPTALLKKMEAPPPKAPKKREVVVPVVAL  
PREEEEEVVPFEVPEEEILPEEEVPSSEEAPEEVPPEEEVLPPEEEVLPPEEEVLPPEEEVQPEEEALPE  
IKPKVPKAPVPEIKKKVPEKKVVVPKKEEAPPTKVPEVSKKVEERRIIPPKEEEVPPAEVYEEAEETPEEI  
PEEPPSIEEEIIVEEEEEEEVLPRAPEVVKAVPEAPTVPKKAAPPKAVPKKIPPEKVPVVPQKKEAPP  
AKVPEVPKKVPEKKKIPKKVVPKKEAVPPAKGKAVFEKISVAYQEEELVQERIELELVEAKVEEAFEEEE  
FHEVQYEFEEEEFHEVEEFIRVEERRFQEEHKVVEVHRVIEFLAEEVEVVEYKPKIPKKGPEVSEKVIPPKK  
PPTKVIIPRKEPPKAVPEVTTKTVVEEKIRAPEEPKVPAPKEVPEKKVSVVPPKKPEAPPKAVPEAPKEAAPE  
KKVPVAPKKKPEAPPVKVPEVPKTAVPQKKIPEAIPPKPESPPLEVPPEAPKEVVEKKSVPVPPKKPEAPPK  
VPEAPKEAAPEKKVPVAPKKKPEAPVVKVPEVPAVPPQKKIPEAIPPKPESPPPEVYEEPEEEIVPEEPPPE  
AVEEVPVAPPKVPTEPPKKVPPEKKAPPVVKKPEPPPAKVPEVPKEAPPEKKVPPKKPEAPPKAVPEVPKEV  
VTEKKVAVPKKPEVPPKAVPEVPKVPVIEEKPAIPVVEKVASPPAEVYEEPEEVTAESEEPAPAVEEEYEA  
PPPAPVPEEPKVVPEKKFPVIKKPEAPPKEPEPEKKVIEKPKLPRPPARPPSPKEDVKEKMFQLKAVSK  
KKVPEKPEVVEKPEAPLKVPTAEKKVRKLLPEPKQPKEEVLKSVLRKKPEEEEPKVEPKKVEKAKKPEEP  
QPPKAVEVEAPEPTPKERKVPPEKAVPEIKPAIPLGPEPKPEPEVTKMKAPPIEAPPTPIAAPVTDAPV  
VGKKAFAKPKAAKPKGPIKGVAKKTPSIEAERKKLRPGSGGKPPDEAPTYQLKAVPLKFVKEIKDIVL  
TEAESVGSASIFECLVSPSTAITTWMKDGSNIRESPKHRFIADGKDRKLIIDVQLSDAGEYTCVLRRLGNKEK  
TSTAKLIVEELPVRVFKTLEEEVTVVKQPLYLSCLELNKERDVVWRKDGKIVVEKPGRIVPGVIGLMRALTIN  
DADDDAGTYTVTVENANNLECSSCVKVEIIREWLKPIRDQHVKPKGTAVFTCDIAKDTPNIKWFKGYDEI  
PLEPNDKTEILKEGNHFLKVKNAMPEDIDEYAVEIEGKRYPAKLTGGEREVLLKPIEDVTIYEKESASFDA  
EISEEDIPEGWKLKGEELLRPSPTCEIKAEGGKRFLTLHKVKLDQAGEVLYQACNAITTAITLTVKEIELDFAVP  
LKDVTVPKEKRQARFECVLTREANVIEWSKGPDIKASDKFDIADGKKHILVINDSQFDDEGVYTAEEVGGKTS  
AQLFVTGIRLKFISPLEDQTVKEGQTATFVCELSHEKMHVWVFNKNDVKLHTTRTVLMSSEGKTYKLEIRETTL  
DDISQIKAQVKNLSSTANLKVLEADPYFTVKLHDKTGVEKDEIILKCEVSKDVPVKWFKDGEIIVSPKHSVK  
TDGLRRLIKIKKAELKDKGEYVCDGTDTKANVTVEARLIKVEKPLYGVEVVFVGETARFEIELSEPDVHGQW  
KLKGEPLTASPDCEIIEEDGKKHVLVLYNCQLDMTGEISFQAANAKSAANLKVKELPLIFITPLSDVKVFEKDE  
AKFECEVSREPKTFRWLKGTQEITGDDRFELIKDGTRHSLVIKSAAFEDEAKYMFEAEDKRTSGKLIIEGIRL  
KFLTPLKDVTAKEARENNAVFTVELSHDNIPVSWFKNDQRLHTSKRVSMHDEGKTHSITFKDLSIDDTSQIRVEA  
MGISSEAKLTVLEGDYFTGKLQDYTGVEKDEVILQCEISKADAPVKWFKDGKEIKPSKNVVIKADGKKRMLI  
LKKALKSDIGQYTCDCGTDQTSGLKDIEDREIKLVRPLYSVEMETETARFETEISEDDIHANWKLKGEALLQ  
TPECEIKEEGKIHVLI LHNCRLDQTTGGVDFQAANVKS SAHLRVKPRVIGLLRPLKDVTVTAGEATFDCELSY  
EDIPVEWYLKGGKLEPNDKVVTRSEGRVHTLTLRDVKLEDAVEVQLTAKDFKTQANLRFVKEPPVEFTKPLEDQ  
TVVEEATAVLECEVSRENKVKWFKNGTEILKSKKYEIVADGRVRKLI IHGCTPEDIKTYTCDKDFKTLSCNL  
NVVPPHVEFLRPLTDLQVKEKETARFECEISKENEKVQWFKDGAELKKGKDYDIISKGAVRILVINKCLLNDE  
AEYSCEVRTARTSGMLTVLEEEAVFTKNLANLEVSEGDTIKLVCEVSKPGAIEVIWYKGDDEEIIETGRFEILTD  
GRKRILIIQNAQLEDAGSYNCRLPSSRTDSKVKVHELAAEFISKPQNLEILEGEKAEFVCTISKESFEVQWKR  
DDQTTLESGDKYDIADGKKRVLVVKDATLQDMGTYVVMVGAARAAHLTVIEKLRIIVPLKDTKVKEQQEVVF  
NCEVNTGAKAKWFRNEEAI FDSKYIILQKDLVYTLRIRDARLDDQANFVSLTNHRGENVKSANLIVEEE  
DLRIVEPLKDIETMEKKSVTFWCKVNRLNVTLKWTKNGEEVAFDNRISYRIDKYKHSILIKDCGFPEDEGEYVV  
TAGQDKSVAELLIIEAPTEFVEHLEDQTVTEFDDAVFSCQLSREKANVKWYRNGREIKEGKKYKFEKDGSIHR  
LIIKDCRLEDECEYACGVEDRKSARLVEEIPVEIIRPPQDILEAPGADVIFLAELNKDKVEVQWLRNMIIV  
VQGDKHQMSSEGIHRLQICDIKPRDQGEYRFIAKDKKARAKLELAAAPKIKTADQDLVVDAGQPLTMVVPYD  
AYPKAABAEWFKENEPLSTKTVDTAEQTSFRISEAKKEDKGRYKIVLQNKHGKAEGFINLQVIVDVPGPVNRLE  
VTETFDGEVSLAWEELTDGGSKIIGYVVERRDIKRTTWVLTDRADSCEFTVTGLQKGGYVLFVRSARNRV  
GTGEPVETDSPVEARSKYDVPGPPLNVTITDVRNRFVSLTWEPPPEYDGGAEITNYVIELRDKTISRWDTAMTV  
RAEDLSATVTDVVEGQEYSFRVRAQNRIGVGKPSAATPFVKVADPIERPSPPVNLNASEQTQSSVQLTWEPPPL  
KDGGSPILGYIIEERREEGKDNWIRCNMMPVPELTYKVTGLQKGNKYLYRVSAENAAGVSDPSEILGPLTADDA

FVEPTMDLSAFKDGLEVI VPNPIKILVLPSTGYPRPKATWTFGDQVLEEGDRVKMKTISAYAE LVI SPSERTDK  
GIYTLTLENPVKSI SGEINVNVIAPPSAPKELKFS DITKDSVHLTWEPPDDDDGGSPLTGYVVEKRDMSRKTWT  
KVMDFVTDLEFTVPDLVQGEYLFKVCARNKCGPGEPAYTDEPVNMSAPATVPDPPENVKWRDRTANSIFL TW  
DPPKNDGGSRIKGYIVEKCPRGSDKWVACGEPVPD TKMEVTGLEEGKWYAYRVKALNRQGASKPSKPTTEE IQA  
VDTQEAP E IFLDVKLLAGITVKAGTKIELPATVTGKPEPKITWTKADTLLKPDQRIT IENVPKSTVTITDSK  
RSDTGTYIEAVNVCGRATAVVEVNVLDKPGPPAAF DITDVTNESCLLTWNPPRDDGGSKITNYVVERKATDS  
DVWHKLSSTVKDTNFKATKLT PNKEYIFRVAENMYGVGEPVQAAP IIAKYQFDPPGPPTRLEPSDI TKDAVT  
LTWCEPDDDDGGSPI TGYWVERLDPD TDKWVRCNKMPVKD TTYRVKGLTNKKKYRFRVLAENLAGPGKPSRSTE  
PILIKDPIDPPWPPGKPTVKDIGK TSLVLNWTKPEHDGGAKIESYVIEMLKTGTDEWVRVAEGVPTTEHLLTG  
LMEGQEYSFRVRAVNKAGESESESPDPVLCREKLYPPSPRRWLEVINITKNTADLKWTVPEKDDGGSPI TNYI  
VEKRDVRRKGWQTVDTTVKDTKCTV TPLEGSLYVFRVAENAIGQSDYTEIGDSVLAKDTFTTPGPPYALT V  
VDVTKRHVDLKWEPKNDGGRPIQRYIEKKEKLGTRVWKAGK TSGPDCNFRVTDVIEGTEVQFQVRAENEAG  
VGHPS EPT EILSIEDPTSPSPPLDLHVT DAGRKHIAIAWKPPPEKNGGSP IIGYHVEMCPVGTEKWMRVNSRP  
IKDLKFKVEEGIVPDK EYVLRVRAVNAVGVSESEISENVVAKDPDCKPTIDLETHDIVVIEGEKLNIPVPFR  
AVPVPTVSWHKDGKEVKASDRLTMKNDHISAHLEVPKSVHADAGVY TITLENKLG SATASINVKVI GLPGPCK  
DIKASDITKSSCKLTWEPPEFDGGSPI LHVYLERREAGRRTYIPVMSENGKLSWTVKDLIPNGEYFRVKAVN  
KIGGGEYIELKNPIAQDPKQPPDPVDVEVHNPTAKAMTITWK PPLYDGGSKIMGYIEKIKTEGDRWKRCN  
EHLVPVLTYTAKGLEEGKEYQFRVRAENAAGIGEPSRATPPTKA VDPIDAPKVI LRSTLEVKRGDEI ALDATI  
SGSPYPTITWIKDENVI VPEEIKKRAAPPVRRKKGEAE EEEEPFSLPLTERLSINNSKQGESQLRIRDSLRPDH  
GQYMIKVENDHGVAKAPCSVSVLDTPGPPINFV FEDIKDSVLCKWEPPLDDGGSEIINYTLEKKDKTKPDS  
WIVITSTLRNCKYSVTKLI EGKEYLFRVRAENRFGPGPCVSKP LLAKDPFEPPDAPDKPIVEDVTSNSMLVK  
WNEPKDNGSPILGYWLEKREVNSTHWSRVNKTLLSSLKTKVDGLLEGLTYVFRVCAENAAGPGKFSPPSDPKT  
ARDPISPPGPPVPRVADTSSTTIELEWEP PAFNGGGEIMGYFVDKQLVGTNEWSRCKTEKMIKVRQFTVKEIRE  
GADYKLRVSAVNAAGEGPPGETEPVTVAE PQEPPTVELDVS VKGGIQIMAGKTLRI PAEVTGRPVPTKVW TIE  
EGELDKERVI IENVGTKSELI IKNALRKDHGRYVITATNSCGSKFAAVRVEVFDVPGPVLDLKP VVTNRKMCL  
LNWSDPADDDGGS DITGFI IERKDAKMHTWRQPIETERSKCDITGLIEGQEYKFRVIAKNKFGCGPVEI GPIL  
AVDPLGPPTYSPERLTYTERTKSTITLDWKEPRSDGGSPIQGYIEKRRRHDKPDFERVNKRCLPTTSEFLVNL D  
EHQMYEFRVKA VNDVGESEPSLPLNVV IQDDEVPPTIKLRLAVRGDTIKVKAGEPVNIPADVTGLPMPKIEWS  
KNEKVIDKPTDTL NITKEEVS RSEAKTELSIPKAAREDKGTYTITASNRLG SVFRNVHVEVYDRSPPRNLAV  
TDIKAESCYL TWDA PLDNGGSEITHYI IDKR DASRKKSEWEEVTNTA VERRYGIWKLI PNGQYEFVRVAVNKY  
GISDECKSDKVV IQDPYR LPPGPKPKVLERTKGSMLVSWT PPLDNGGSPITGYWLEKREEGGYWSRVSRAP  
ITKVGLKGVEFNVPRLIEGVKYQFRAMA INAAGIGPPSEPSDPAVAGDPIYPPGPPSCPEVKDKTKSSISLAW  
KPPAKDDGGSPIKGYIVEMQEEGTTDWKPVNEPDKLLTACECVV PNLKELRKYRFRVKAVNEAGESESPD TTGE  
IPATDIQEVPEV FIDIGAQDCLVCKAGS QVKIPAVIKGRPTPKSSWEFDGKAKKAMKDG VHDIPEDAQLETAE  
NSSV I I IPECTRAHSGKYSITAKNKAGQKTANCRVKVMDAPGPPKDLKVS DITRGSCLRSWKMPDDDDGGDRIK  
GYVIEKKTIDGKAWTKVNPNCGS TTFVVPDLISEQYFFRVRAENRFGIGPPAETIQR TARTARDPIYPPDPIK  
LKIGLITKNTVHLSWKPPKNDGGS PVTHYIVECLAWDPTGKKKEAWRQCNR RDVEELEFTVEDLIEGGEYEF R  
VKAVNEAGVSKPSATVGPVIVKDQTCPPAIELKEFMEVEEGTDVNI VAKIKGVFPPTLTWFKAPPKPKDSKEP  
VVYDTHVNKQVDDTCTLVI PQSRRSDTGLYSITAVNNLGTASKEMRLNVLGRPGPPVGP I K FESISADQMTL  
SWLPPKDDGGSKITNYVIEKREANRKTWVRVSSEPKECMYTI PKLLEGHEYVFRIMAQNKYGIGEP L DSEPET  
ARNLFSVPGADKPTVSSVTRNSMTVNWEEPEYDGGSPVTGYWLEMKDTT SKRWKRVNRDPIKAMTLGVSYKV  
TGLIEGSDYQFRVYAINAAGVGPASLSPDPVTARDPVAPP GPPFPKVTDWTKSSVDLEWSPPLKDDGGSKITGY  
IVEYKEEGKEEWEKGDKEVRGTKLVVTGLKEGAFYKFRVRAVNAVGVGEPGEVTDVIEMKDRIVSPDLQLDA  
SVRDRIVVHAGGVIRI IAYVSGKPPPTVTWSMNERALPQEA A IETTAISSSMVIKNCQRSHQGVYSLAKNEG  
GERKKT I IVDVLDVPGPVGI PFLSDNL TNDSCKLTWFS PEDDGGSPITNYVI QKREADRRAWTPVYTVTRQN  
ATVQGLIQKSYFFRIAAENSIGMGPFVETPNALVIRDPI TVPERPEDLEVKEVTKNTVSLTWNPPKYDGGSE  
IINYVLESRLIGTEKFHKVTNDNLLSRKYTVKGLKEGDTY EYRVS AVNIVGQGKPSFCTK PITCKDELAPPTL  
DLDFRDKLTVRVGESFALTGRYS GKPKPIDWFKDEADVLEDDRTHIKTPTTLALEKTKAKRSDSGKYCVVV  
ENSTGSRKGFCQVNVVDRPGPPVGPVIFDEVTK EYMVISWKPPLDDGGSEITNYIEKKELGKDIWMPVTSAS  
AKTTCCKVPKLLLEGKDYIFRIHAENLYGIDPLVSDSMKAKDRFRVPDAPEQPVVTEVTKDSALVTWNKPNDDG  
KPITNYILEKRETM SKRWVRVTKEP IHPYTKYRVPDLLEGQYEF RVS AENEIGIGDPSPPSKPVFARDPIAK  
PSPPINPEAIDTTCNSVELTWQPPRHDDGGSKILGYIVEYQKVGDEEWRANHTPESC PETKYKVTGLR DGQSY  
KFRVLAVNEAGESDPAHVPEPVLVKDRLEPPELIL DANMAREQH IRVGDTLRLSAI IKGVPFPKVTWKKEDRE  
APTKAQIDVTPEVSGKLEIRNAAHEDGGIYSLTVENPAGTKTVSVKVLVLDKPGPPRDLEVFSEIRKDS CYLTKW  
EPLDDGGSVVTNYVVERKDVATAQWSPLSTTSK KSHMAKHLTEGNQYLF RVAENQYGRGPFVETPKPIKAL  
DPLHPPGPPKDLHHDVVDKTEVSLVWNKPD RDGGSPITGYLVEYQEEGDKDWIKFKTVKNLDCVVTGLQOQGT  
YRFRVKAENI IGLGLPDTTPIECQEKLVPSSVELDVK LIEGLVVKAGTTVRFP AIIRGVPVPTAKWTTDGTE  
IKTDDHYTVETDSFSSVLT IKNCLRKDTGEYQLTVSNAAGTKTVAVH LTVLDVPGPPTGPINIL DVTPEYMTI

SWQPPKDDGGSPVINYIVEKQDTRKGTWGVVSVAGSSKLLKLVPHLQKGEYVFRVKAENKMGVGPPLDLSIPTV  
AKHKFSPSPSPGKPVVTDITENAAVSWTLPKSDGGSPITGYVERREITGKWVRVNTPIADLKFRVTGLYE  
GNTYEFVFAENLAGLSNPSPPSDPIKACRPIKPPGPPINPKLKDKSKESADLVWTKPLSDGGSPILGYVVEY  
QKPGTAQWDRINKDELIRQCAFVPLIEGNEYRFRIRAAANIVGEGEPRELAESVIAKDILHPPEVELDVTCT  
DVITVRVGTIRILARVKRPEPDI TWSKEGKVLVKDKRVDLIHDLPVELQIKEAVRADHGKYIISAKNSSG  
HAQGSAINVLDPRGPGCNLKVSNVTKENCTISWENPLDNGGSEITNFIVEYRKPQKGSIVASDVTKRLVK  
ANLLANNEYFRVCAENKVGVPETIETKTPILAINPIDRGPENLHIADKGTFFVYLKWRPDPYDGGSPNLS  
YHVERRLKGSADWERVHKGSIKETHYMVDKCVENQIYEFVQTKNEGGESDWRTEEVVVKEDLQKPVLDLKL  
SGVLTVKAGDTRLEAGVRGKPFPEVAWTKDKDATDLTRS PRVKIDTSAESSKFSLTAKRSDGGKYVITATN  
PAGSFVAYATVNVLDKPGPVRNLKIDVSSDRCTIRWDPPEDDGGCEIQNYILEKCESKRMVWSTYSANVLT  
SATVTRLIEGNEYIFRVRAENKIGTGPPTESKPVIAKTKYDRPGRDPPEVTKVSKEEMTVVWNAPEYDGGKS  
ITGYYLEKKEKHAVRWVFNKSAIPERRLKVQNLPLGHEYQFRVKAENEVGI GEPSPSRPVVAKDPIEPPGP  
PTNFVVDTTKSSITLAWGKPVYDGGAPIIGYVEMRPKIADASPDEGWKRCNAAAQLIRMEFTVTSLDENQE  
YEFVCAQNVGIGRPAELKEAIKPKELIPEPIDLDASMRKLVVVRAGCPIRLFAIVRGRPAKVTWRKVG  
DNVVRKQVLDVDTMAFLVIPNSTRDSDGKYSLTLVNPAGEKAVFVNVKVLDTPGPVADLVKSDVTKTSCHVS  
WAPPENDGGSQVTHYIVEKREAEKRTWSTVTEPVKTSFNVTNLVPGNEYFFRVTAVNEYGPGVPTDIPKPV  
ASDPLSEPPRKLVEVTEMTKNSATLAWLPLLRDGGAKIDGYIISYREEDQPADRWTEYSVVKDLSLIVTGLK  
EGKKYKFRVAARNAVGVSMPREAEGVYEAKQLLPPKILMPEQITIKAGKLRVEAHVYKGNPICKWKKGDD  
EVVTSSSLAIHKADGSSVLIKDVTRKDSGYSLTAENSSGSDTQKIKVTVM DAPGPPQPPFDISEIDADACS  
LSWHIPLDGGSNITNYIVEKCDVSRGDWVTALASVTKTSCRVGKLI PGQYIFRVRAENRFGISEPLTSPKM  
LAKFPFDVPSKPNARVTKVNDKCFVAWDRPDSGGSPITGYLIERKERNLLVVKANDTIVRSTEYPCAGL  
VEGLEYSFRIYALNKAGSSPPSKPTEYVTARMPVDPGKPEVVDVTKNSASLIWARPKHDGGSRIIGYFVEAC  
KLPDGVKVRNCTTPHQIQPEEYATATGLEENAQYQFRAIAKTAVNISQPSEPSDPVTILAENVPPRIELSVEMK  
SLLTVKAGTNVCLDATVFGKPMPTVSWKKDTPKQAEGIKMAMKRNLCLELFSVNRKDSGDYTTAENSSG  
SKSATIKLVLDKPGPPASVKINKMYADRAMSWEPPLEDGGSEITNYIIDKRETSRPNWAQVSATVPI TSCT  
VEKLEIGHYQFRICAENKYGVGDPILTEPAIAKNQYDPPGRCDPVI SNITKDHMTVSWKAPADGGSPITG  
YLVEKRETQAVNWTKVNRPVIERLTKATGLQEGTEYEFVTAINKAGPGKPSDASKAVYAQDPLYPPGPAF  
PKVYDTRSSVLSWGKPAYDGGSPIGYLVVVKRADS DHVVRNLPKELQKTRFEVTLGMENTEYQFRVYAV  
NKIGYSDPSDVPDKHCPKIDILIPPEGELDAELRKTILRAGVTMRLYVPVKGRPPPKITWSPKPNVLRERIGL  
DIKSTDFDTFLRCENVNKYDAGKYLTLNENSCGKKEYTIVVKVLDTPGPPVNVTVKEVSKDSAYVTWDPPIID  
GGSPIINVVVEKRDAERKSWSVTTECSKTSFRVSNLEEGKSYFFRVFAENEYIGIDPGETRDAVKASETPGP  
VVDLKAALITKSSCTIGWKKPRSDGGSRIIGYVVDLFTENKQVRVMKSLSLQYSTKDLKEGKEYTFRVSAEN  
ENGEPTSEIVVVAKDDVVPDLDLKLDLPDLCYLAKENSFNRLKIPKPKPAPSVSWKKGEDPLATDTRVSV  
STAVNTLVVYDCQKSDAGKYITLKNVAGTKEGTLKIKVVGKPGIPTGPIKFDEVTAEAMTLKWGPPKDDGG  
SEITNYVLEKRDSVNNKVTCSAVQKTFRVRTLHEGIEYTFRVSAENKYGVGEGKSEPIVAKHPFDVDPDA  
PPPNIVDVRHDSVSLTWTDPKKTGGSPITGYHIEFKERNLLWKRANKTPIRMKDFKVTGLTEGLEYEFRVM  
AINLAGVKGKPSLSEPVVALDPI DPPGKPEVISVTRNSVTLIWTEPKYDGGHKLTYIVEKRDLPKSKWMKAN  
HVNVPDCAFTVTDLVEGGKYEFRIRAKNTAGAISAPSESTGTIICKDEYEAPTIVLDPTIKDGLTVKAGDSIV  
LSAISILGKPLPKSSWSRAGKDIRPSDIAQITSTPTSSMLTVKYATRKDAGEYTTATNPFGTKEEHVKVSVL  
DVPGPPGPIEISNVSAEKATLTWTPPLEDGGSPIKAYVLEKRETSRLLWTVVSEDIQACRHVVTKLIQGNEYL  
FRVSAVNHYGKGEVQSEPVKMDRFPGPPGPKPEISNVTKNTATVSWKRPTDDGGSEITGYHVERREKGL  
RWVRATKTPVSDLRCKVTGLQEGNTYEFVSAENRAGIGPPSDASNVLMDVAYPPGPPSNAHVTDTTKSA  
SLAWGKPHYDGGLEITGYVVEHQKVGDDAWIKDTTGTALRITQFVVPDLQTKKEYNFRISAINDAGVGEPAVI  
PNVEIVEKEVAPDFELDAELRRTLVRAGLSIRIFVPIKGRPAPEVTWTKDNINLKHRIANIENTESFTLLIIP  
ECNRYDTGKFVMTIENPAGKSGFVNRVLDTPGPVNLNRPTDITKDSVTLHWDLPLIDGGSRITNYIVEKRE  
ATRKSYSTVTTKCHKCTYKVTGLTEGCEYFFRVMAENEYGVGEPTEPETEPVRASEAPLPPDSLIMDITKNTV  
SLAWPKPRHDGGSKITGYVIEAQRKGSQWTHISTVKGLECVVRNLTEGEEYTFQVMVNSAGRSAPRESRPV  
IVKEQTMPELDRGIYQKLVVIARAGDNKVEIPVLGRPKPTVTWKKGDQILKQTRVNVENTATSTILNINE  
CVRSDSGPYPLTAKNTVGEVGDVITIQVHDI PGPPTGPIKFDEVSDFVTFVSWEPPEPNDGGVPI SNYVEMRQ  
TDSTTWVELATTVIRTTYKATRLTGVVEYQFRVRAQNRVGVGPGIT SASVVANYPFKVPGPGTQVAVTKD  
SMTISWHEPLSDGGSPILGYHIERKERNILWQTVSKALVPGNIFKSTGLTDGIAYEFVRIAENMAGKSKPSK  
PSEPMFALDPI DPPGKPVPLNITRHTVALKWAKPEYTGFKITSYVVEKRDLPNGRWLKANFNSI LENEFTVS  
GLTEDAAVEFRVIAKNAAGAI SPPSEPSDAITCRDLDLSEAPRIMVDVRFKDTITLKGAEFKLEADVSGRPPPT  
MEWTKDGKELEGTGKLEIKIADFSTHLINKDSSRTDSGAYILTATNPGGFAKHIFNVKVLDRPPEGFLAVS  
DVTSEKCVLSWLPPLDDGGAKIDHYIVQKRETSRLAWTNVATEVQVTKLVTKLLKNEYIFRVMVAVNKYGVG  
EPLSEPVLAVDPYGPPDPPKNPEVTTITKDSMVVCWGHPPSDGGSEIINYIVERRDKAGQRVVKCNKKALTD  
LRFKVSGLTEGHEYEFRIMAENAAGISAPSATS PFYKACDVTVFKPGPPGNPRVLDTSRSSISIAWNKPIYDGG  
SEITGYMVEIALPEEDEVQVTPPAGLKATSYTITSLIENQYKIRIYAMNSEGLGEPALVPGTPKAERMLP



PEIELDADLRKVVVTRACCTLRFLVPIKGRPAPEVKWAREHGESLDKASIESTSSYTLVVGNVNRFDSGKYI  
LTVENSSGSKSAFVNVRLDTPGPPQNLKIKEVTKTSVTLTWEPLLDGGSKIKNYIVEKRESTRKAYSTVAT  
NCHKTSWKVDQLQEGCSYYFRVLAENEYIGLPAETAESVKASERPLPPGKITLTDVTRNSVLSWEKPEHDG  
GSRILGYIVEMQSKGSDRWATCATVKVTEATITGLIQGEEYSFRVSAQNEKGISDPRQLSVPVIAKDLVIPP  
FKLLENTFTVLAGEDLKDVPFGRPPPAVTWHKDDIPLKQTRVNAESTENNSLLTIKEACREVDGHYTVKL  
TNSAGEATETLNVIVLDPGPPPTGPVKMDEVTAADSVTLSEWEPKYDGGSSINNYIVEKRDSTTAWQIVSATV  
ARTTIKACRLKTGCEYQFRIAENRYGKSTYLNSEPVVAQYPPFKVPGPPGTFVTLASKDSMEVQWHEPVS  
GSKVIGYHLERKERNISILWVKLNKTFIPQTKFKTTGLEEGIEYEFVSAENIVGIGKPSKPECYAAHDFCDP  
PGRPEAIVTRNSVTLQWKKPTYDGGSKIITGYIVEKKELPDGRWMKASFTNIIDTQFEVTGLEDHRYEFRVI  
ARNAAGVFSEPESTGAITARDEVEPPRISMDPKYRDTVVVQAGESFKIDADIYGKPIPTTQWVKGDQELS  
ARLEIKSTDFATSLSVKDAVRVDSGNYILKAKNVAGEKSVTINVKVLDRPGPPEGPVAISGVTAEKCTLAWK  
PLQDGGSDITNYIVERRETSRLVWTLVDANVQTLSCVKLKLLEGNEYIFRIMAVNKYGVGEPLESESLIAKNP  
FVVDPAPKAPEVTAVTKDSMIVVWERPASDGGSEILGYVLEKRDKEGIRWTRCHKRLIGELRLRVTLLENHN  
YEFVSAENAAGLSESPSPSAYQKACDPIYKPGPPNNPKVMDVTRSSVFLSWTKPIYDGGCEIQGYIVEKCDV  
SVGEWTMCTPPTGINKTNLEVEKLEKHEYNFRICAINKAGVGEHADVPGPVMVEEKLEAPDIDLDELRLKVI  
NIRAGGSLRFLVPIKGRPTPEVKWGVKVDGDIRDAAIIDVTSSFTSLVLDNVNRYDSGKYTLTLENSSGTKSAF  
VTVRVLDTSPPPVNLKVTEITKDSVSIITWEPPLLDGGSKIKNYIVEKREATRKSAYAAVVTNCHKNSWKIDQLQ  
EGCSYYFRVTAENEYIGLPAETAESVKASERPLPPGKITVDDVTRNSVLSWTKPEHDGGSKI IQYIVEMQA  
KNTDKWSECARVKS L DAVITNL TQGE EYLFRVIAVNEKGRSDPRSLAVPI IAKDLVIEPDVRPAFSSYSVQVG  
QDLKIEVPI SGRPKPSISWTKDGMPLKQTRINVTDSLDTLTLSEIKETHKDDGGQYGITVSNVVGQKTA AIEI  
ITLTKDPDPKGPVKFDEISAESITLSWNPPLYTGGCQITNYIVQKRDTTTTVWVVSATVARTTLKVTKLKTG  
TEYQFRIFAENRYGQSFALESEPVVAQYPYKEPGPPGTFVTAISKESMVVQWHEPINNGGSPVIGYHLERKE  
RNSILWTKVNKTI IHD TQFKALNLEEGIEYEFVSAENIVGVGKASKNSECYVARPCDPPGTPPEAIVKRNE  
ITLQWTKPVYDGGSMITGYIVEKRDLEPGRWMKASFTNVIETQFTVSGLTEDQRYEFRVIAKNAAGAI SKPSD  
STGPI TAKDEVELPRI SMDPKFRDTIVVNAGETFRLEADVHGKPLPTIEWLRGDKEIEESARCEIKNTDFKAL  
LIVKDAIRIDGGQYILRASNVAGSKSFPVNVKVLDRPGPPEGPVQVTGVTAEKCTLAWSPQLDGGSDISHYV  
VEKRETSRLAWTVVASEVVTNSLKVTKLLEGNKYIFRIMAVNKYGVGEPLESAVLMKNPFVLPGPPEKSLLEV  
NIAKDSMTVCWNRPDS DGGSEI IGYIVEKRD RSGIRWIKCNKRRITDLRLRV TGLTEDHEYEFRVSAENAAGV  
GEPSPATVYYKACDPVFKPGPPPTNAHVVDTTKNSITLAWSKPIYDGGSEILGYVVEICKADEEEWQIVTPQTG  
LRVTRFEIAK LIEHQEYKIRVCA LNKVGLGEAASVPGTVKPEDKLEAPELDDLSELRKGIVVRAGGSARIHIP  
FKGRPTPEITWSKEEGEFTDKVQIEKGINFTQLSIDNCDNRNDAGKYILKLENSSGSKSAFVTVKVLDTGPPQ  
NLAVKEVRKDSVLLVWEPPIIDGGAKVKNYVIDKRESTRKAYANVSSKCNKTSFRVENLTEGAIYFRVMAEN  
EFGVGVPTETS DAVKASEPPSPGKVTLT DVSQTSASLMWEKPEHDGGSRI LGYV VEMQPKGTEKWSVVAESK  
VCNAVVSGLSSGQYQFRVKAYNEK GKSDPRVLGIPVIAKDLTIQPSFKLPFNTYSVQAGEDLKIEIPVIGRP  
RPKISWVKDGEPLKQTRVNVEETATSTILHIKESKDDDFGKYSVTATNSAGTATENLSVILEKPGPPVGPV  
KFDEVSADFVVISWEPPAYTGGCQISNYIVEKRDTTTTNWMVSATVARTTIKISKLKTGTEYQFRIFAENRY  
GKSTPLDSKPVVQYPFKEPGPPGTFVTSISKDQMLVQWHEPVNDGGSKVTGYHLEQKEKNSILWVKLNKIP  
IQDTKFKTTGLDEGLEYEFRVSAENIVGIGKPSKVSECYVARPCDPPGRPEAIVITRNSVTLKWKPVYDGG  
SKITGYIVEKKDLDPGRWMKASFTNVVETEFTVTGLVEDQRYEFRVIA RNAADNFSEPESSGAI TARDEIDA  
PNASLDPKYRDVIVHAGETFVLEADIRGKPI PDI IWSKD GNELEETAARMEIKSTLQKTTLIVKDCIRTDGG  
QYTLKLSNVGGTKTIPITVKVLDRPGPPEGLKVTGVTAEKCYLAWNPPLQDGGASISHYIEKRETSRLSWT  
QVSNEVQALNYKVTKLLPGNEYIFRIMAVNKYGIGEALESEPV IACNPYKRPGPSTPEASAITKDSMVL TWT  
RPVDDGGAIEGYILEKRDKEGIRWTKCNKKTLDLFRVVTGLTEGHSYEFVAAENAAGVGEPESEPSV FYRA  
CDALYPPGPPSNPKVTDTSRSSVSLAWN KPIYDGGAPVRGYVIELKKA ADEWTTCTPPSGLQKQFTVTKLK  
ENTEYNFRICAFNTEGVGEPATIPGSVVAQERMEAPEI EL DADLRKVVTLRASATLRLFVTIKGRPEPEVKWE  
KAEGILTERAQIEVTSYTMLVIDNVTRFDSGRYNLTLENSGSKTAFVNVRLDSPSAPVNLITREVKKDSV  
TLSWEPPLIDGAKITNYIVEKRETRKAYATITNCTKNFKIENLQEGCSYYFRVLAENEYIGLPAETA  
PVKVSEPLPPGRVTLVDVTRNTATIKWEKPESDGGSKITGYVEMQTKGSEKWSACTQVKTLETTISGLTAG  
EEYVFRVA AVNEKGRSDPRQLGVPVIAKDIEIKPSVELPNTFNVKANDQLKIDIPFKGRPQATVAWKDQV  
LRETTRVNVASSKVTTLTIKEASREVDGTYELCVSNTAGSITVPI TVIVLDRPGPPGPIRIDEVSCDNVSI  
WNPPEYDGGCQISNYIVEKRETTSTWQVVSQAVARTSIKIVRLTTGSEYQFRVCAENRYGKSSYSESSAVVA  
EYPFSPGPPGTPKVVHATKSTMVSVQVPVNDGGSQVIGYHLEYKERSSILWSKANKVLIADTQMKVSGLDE  
GLMYEYRVYAENIAGIGKCSKACEPVPARDPCDPPGQPEVNTITRKS VSLKWSKPRYDGGAKITGYIVERREL  
PDGRWLQCNFNTVQETIYFEVTELTEDQRYEFRVFAARNAADVSEPESTGPI TVKDDVEAPRIMMDVKFRDVI  
IVKAGEV LKINADIAGRPLPVI SWAKD GVEIEERAKTEIVSTDYTTTLTVKDCVRRDTGQYVLT LKNVAGTRT  
MAVNCKVLDKPGPPAGPLEINGLTAEKCSLSWGRPQEDGGADIDYIVEKRETSRLAWTICEAELRTTSCKVT  
KLLKGNEYIFRVTGVNKYGVGEPLESM AVKALDPFTTSPPTSL EITSVTKDSMTLCWSRPETDGGSDISGYI  
IERREKNSLRWMRV NKKPVYDLRVKSTGLREGCEYEYRVFAENAAGLSLPSETSP LVRAEDPVFLPSPSKPK

IVDSGKTTITIGWVKPLFDGGAPITGYTVEYKSEETDWKVAIQSFRGTEYTMGLTTGDEYVFRVRSLNKMG  
 ASDPSDSSDPQVAKEREPEVFDVDSEMRKTLIVKAGSSFTMTVPFRGRP IPNVSWSKPDTDLRTRAYIDSTD  
 SRTLLTIENANRNDGKYTLTIQNVLSAASMTFVVKVLDSPGPPANITVREVTKETAMLSWDVPENDGGAPVK  
 NYHIEKREASKKAWVSVTNNCNRLSYKVTNLQEGAIYYFRVSGENEFVGVPAETKEGVKITEKPSPEKLG  
 TSVSKDSVSLSWLKPEHDGGSRI IHVVEALEKQKTVWKCAVVKTTTHVVSGLRESHEYFFRVFAENQAGLS  
 DPRELLLPVLIKDQLEPPEIDMKNFPSHTVYVVRAGSNLKVDPISGKPLPKVTLSRDGVPLKATMRFNTEITA  
 ENLTI NLKESVTTDAGRYEITAAANSSTTKTFINIIVLDRPGPPTGPVAISDITEESVTLKWEPPKYDGGSHV  
 TNYIVLKRETSTAVWSEVTSVARTMIKVMKLTGEEYQFRIKAENRFGISDHIDSVCVVVKLPYTTFGPPST  
 PWSNVNTRESITVGVWHEPVSNGGSAVTGYHLEMKDRNSILWQKANKMIRTTTHFKVTTISAGLIYEFVYAEN  
 AAGIGKPSHPSEPVLAIDACEPPRNVRIITDISKNSVNLWQQPAFDGGSKITGYIVERRDLPDRWTKASFTN  
 VIETQFTVSGLTQNSQYEFRVFARNAVGSVSNPSEVVGPIITCIDSYGGPVIDLPLEYTEVVKYRAGTSVKLRA  
 GISGKPEPTIEWYKDDKELQTNALVCVENSTDLASILIKDANRLNSGSYELKLRNAMGSASATIRVQILDKPG  
 PPGPIEFKTVTAEKITLLWRPPADDGGAKITHYIVEKRETSRVVWMSVAENLEECIVTTTKIKGNEYVFRV  
 RAVNKYGI GEPESEPVAKNAFVTPGPPSIPVTKITKNSMTVVWDRPTVDGGSEINGYFLERRDKKSLAWL  
 KVLKETIRDTRQKVTGLTENS DYQYRCAVNAAGVGFSEPSDFYKAADPIDPPGPPAKIRIADSTKSSITLG  
 WSKPVYDGGSDVTGYVEMKQGDDEEWTIVSTRGEVTRTEYVSNLKPQVNYFQVSAVNCAGQGEPIITMTEP  
 AQAKDVEEPEIDLVALRTSVIAKAGEDVQLLIPFKGRPPPTVTRKDEKNLGS DTRYSIQNTDSSSLVPI  
 QVTRNDTGKYILTIENGVGQPKSSTVSVKVLDTPAACQKLVKHVSLGTVTLLWDPPLIDGGSPIINYVIEKR  
 DATKRTWSVSVSHKCSGTSFKVTDLSEKTPFFFRVLAENEIGIGEPCEETPEVKAAEVPAPIRDLSMKDSTKTS  
 VVLSWTKPFDGGSIIITDYLVERKKGGEQAWSHAGISKTCEIEIGQLKEQSVLEFRVSARNEKGQSDPVTIGP  
 LTVKELVITPEVDLSEIPGAQISVRI GHNHLELPHYKPKPSISWLKDG LPLKESEYVRF SKTENKITLSIK  
 NSKKEHGGKYTVILDNAVCRNSFPITITILGPPSKPKGPIRFD EIKADSAIMSWDIPEDDGGGEITCYSIEKR  
 EASQTNWKMVCSSVARTTFKVSNLVKDSEYQFRVRAENRYGVSEPLASNIIVAKHQFRI PGPPGKPIYINVT  
 DGMSLTWDAPVYDGGSEVTGFHVEKKERN SILWQRVNTSPISGREYRATGLIEGLDYQFRVYAENSAGLSSPS  
 DPSKFTLAVSPVDPPGTPDYIDVTRETITLKNPPLRDGGSKIVAYSIEKRQGS DRWVRCNFTDVSECQYTVT  
 GLSPGDRYEFRIIARNAVGTISPPSQSSGLIMTRDENVPTVEFGPEYFDGLVIKSGSDTRIKALVQGRPVPR  
 VTWFKDVEIERRMNEITDVLGSTSLFVRDATRDHGVYVTEAKNVSGSTKAEVTVKVDQDTPGKVVGPVIRFT  
 NITGEKMTLWWEAPLNDGCAPVTHYIEKRETSRLAWALIEDNCEALS YTAIKLITGNEYQFRISAVNKFVGV  
 RPLES DPVVAQIQYTIIPDAPGVPEPSNVTGNSITLWTRPESDGGSEIQHYILERREKKSTRWVKVISKRPIS  
 ETRFKVTGLVEGNEYEFHVMANAAGIGPASGISRLIKREPVPNPPSAPS VVKVTDTSKTTVSLEWARPVFDG  
 GMEIIGYIEMCKADLGDWHKVNTPCVKTRYTVTDLQAGEEYKFRVSAVNGAGKGDSC EVTGTIKAVDRLSA  
 PELDIDANFKQTHIVRAGVIRLFIAYQGRPTPTAVWSKPDNSLIRADIHTTDSFSTLTVENCNRNDAGKYT  
 LTVENNSGKKSITFTVKVLDSPGPPGPIITFKDVTRGSATLWMDAPLLDGGARIHHYVIEKREASRRSQV VSE  
 KCTRQILKSELTEGVPPYFRVSAENEYGVGPEYEMPEPIVATEQPAPPRRLDVVDTSKSSAVLAWLKP DHG  
 GSRTSYLLEMRQKGSDFWEAGHTKQLTFTVERLVENTEYEFRVKAKNDAGYSEPREAFSSVIKPEQIEPT  
 ADLTGITNQLITCKAGSTFTIDVPI SGRPAPKVTWKLEEMRLKETDRMSIATTKDRTTLTVKDSMRGDSGRYF  
 LTLTAGVKTFTITVVVIGRPGPVTGP IEVSSVSAESC VLSWTEPKDDGGTEITNYIVEKRESGTTAWQLIN  
 SSVKRTQIKVTHLTKYKEYCFRVSSENRFGVSKPLESVP IVAEHPFVPPSAPTRPEVYVVSANAMSIRWEEPY  
 HDGSKIVGYVVEKKERNTILWVKENKVPCLCNYKVTGLVEGLE YQFRTYALNAAGVSKASEASRP IMAQNP  
 VDPPGRPEVTDVTRSTVSLIWSAPVYDGGSKVVGYYIERKPVSEVGDGRWLKCN YTIIVSDNFFTVALSEGDT  
 YEFVRLAKNAAGVISKGSESTGPVTCRDEYAPKAELDARLQGD LVTIRAGSDLVLDAAVGGKPEPKI IWTKG  
 DKELDLCEKISLQYTGKRATAVIKYCDRSDSGKYTLTVKNASGTKSVSVMVKVLDSPGPGKLT VSRVTEEK  
 TLAWSLPQEDGGAEITHYIVERRETSRLNWVIVEGECLTASYVVTRLIKNNEYTFRVRAV NKYGLVPESE  
 IVARNSFTIP SQPIPEEVGAGKEHII IQWTKPESDGGNEISNYLVDKREKSLRWTRVNKDYVVDTRLKVT  
 SLMEGCDYQFRVTAVNAAGNSEPSEASNFISCREPSYTPGPPSAPRVVDTTKRSISLAWTKPMYDGGTDIIGY  
 VLEMQEKD TDQWCRVHTNATIRNNEFTVPDLKMGQKYSFRVAAVNAKGMSDYSETTAEIEPVERLEIPDLELA  
 DDLKKTIVIRAGASRLMVS VSGRPSVITWSSKKGIDLANRAIIDNTESYSLLIVDKVNRYDAGKYTIEAENQ  
 SGKKSATVLVKVYDTPGPCPSVSVKEVSRDSVTITWEIPTIDGGAPVNNYIEKREAA MRAFKVTVTKCSKTL  
 YRISGLVEGTMYYFRVLPENIYGIGEPCE TSDAVLVSEVPLVPTKLEVVVDVTKSTVTLAWEKPLYDGG SRLTG  
 YVLEACKAGTERWMKVVT LKPTVLEHTV I SLNEGEQYLFRVRAQNEKGVSEPREIVTPVTQDLRVLPTIDLS  
 TMPQKTIHVPAGRPIELVPIITGRPPPTASWFFAGSKLRESERVTVETHTKVTKLTIRETTIRD TGEYTLK  
 NVTGTTSETIKV IILDKPGPPTGPIKIDEIDATSVTISWEPPELDGGAPLSGYVVEQRDAHRPGWLPVSESVT  
 RPTFKFTRLTEGNEYVFRVAATNRFGIGSYLQSEVIECRSSISIPGPPETLQIFDVSRDGM LTLWYPPEDDGG  
 SQVTGYIVERKEVADRVRVNVKVPVMTMYRSTGLIEGLEVEYHRVTA INARGTKPSRPSKPTVAMPDIAPP  
 GKPNRVTDTTRTSVSLAWSVPEDEGGSKVTGYLIEMQVDEQREWTKCNTTPTKIREYTLTHLPQGA EYRFR  
 VLACNAGGPGEPAEVPGTVKVTEMLEYPDYELDERYQEGVFRQGGVIRLTIPIK GKPPVCKWTKEGQDISK  
 RAMIATSETHTELVIKEADRNDSGTYDLVLENKCGKKT VYIKVKVIGSPNTPEGPLEYDDIQARSVRVSWRPP  
 ADDGGADILGYILERREVPKAAWYITDSRVRGTSLVVKGLKENVEYHFRVSAENQFGISKPLKSEEPV I PKTP

LNPPEPPSNPPEVLDTVKSSVLSWSRPKDDGGSRTVGYIERKETSTDKWVRHNKTQITTTMYTGTGLVPDA  
 EYQFRIIAQNDVGLSETSPASEPVVCKDPDFDKPSQPGELEILSISKDSVTLQWEKPECDGGKEILGYWVEYRQ  
 SGDSAWKKSNERIKDRQFTIGGLLEATEYEFVFAENETGLSRPRRTAMSVKTKLTSGEAPGVRKEMADVTT  
 KLGEAAQLSCQIVGRPLPDIKWYRFGKELIQSRKYKMSDGRHTHTLVMTDEQEDEGVYTCVATNEVGEVESS  
 SKLLLQAAPQFHPGYPLKEKYYGAVGSTLRLHVMYIGRPVPAMTWFGQKLLQNSEKITIENTEYHHLVLMKN  
 VQRKTHAGKYKVLNSAFGTVDATLDVEIQDKPDKPTGPIVIEALLKNSVVIISWKPPADDGGSWITNYVVEKC  
 EAKEGAEWQLVSSAISVTTTRIVNLTENAGYYFRVSAQNTFGISEPLEVASIVIISKSPFEKPGVPGKPTITAV  
 TKDSCVVAWKPPASDGGAKIRNYLERREKKQNKWIAVTTTEIRETVFSVQNLIIEGLEVEYFRVKCENLGGESE  
 WSEISEPVTPKSDVPIQAPHFKEELRNLNVRYSQSNATLVCKVTGHPKPIVKWYRQGKEIADGLKYRIQEFKG  
 GYHQLIIASVTDDDATVYQVRATNQGGSVSGTASLEVEVPAKIHLPKTLGEMGAVHALRGEVVSIKIPFSGKP  
 DPVITWQKQDLIDNNGHYQVIVTRSFSLVFSNGVERKDAGFYVCAKNRFGIDQKTVELDVADVPDPPRGV  
 KVSDVSRDSVNLTWTEPASDGGSKVTNYIVEKCATTAEWRVVGQARETRYTVINLFGKTSYQFRVIAENKFG  
 LSKPSEPTVTTKEDKTRAMNYDDEVDETREVTTTKASHSKTKELYEKYMIADLGRGEFGIVHRCVETSSK  
 RTFMAKFKVKGTDQVLVKEISILNIARHRNIIYLHESFESMEELVMIFEFISGLDIFERINTSAFELNERE  
 IVSYVRQVCEALEFLHSQNIHGFDIRPENIIYQTRKNSTIKIEFGQARQLKPGDNFRLLFTAPEYYAPEVHQ  
 HDVVSTATDMWSLGLTLVYVLLSGINPFLAETNQMIENIMNAEYTFDEEAFKEISLEAMDFVDRLLVKERKSR  
 MTASEALQHPWLKQRIDRVSTKVIKIRLKHRRYYHTLIKKDLNMVSAARIISCGGAIRSQRGVSVAKVVASIE  
 IGPVSGQIMHAIGEEGGYKIVCKIENYDQSTQVTWYFGVRQLENSEKYEITYEDGVATMYVKDITKFDGTY  
 RCKVVNDYGEDSSYAEFLVKGVREVYDYYCRRTKVKRRRTDAMLLERPEFTLPLYNKTAAYGENVRFVGTI  
 TVHPEPRVTWYKSGQIKIPGDDKKTFFESDKGLYQLTINSVTTDDDAEYTVVARNKHGEDSCKAKLTVTLHP  
 PPTETTLRPMFKRLLANAECHEGQSVCFEIRVSGIPAPTLKWEKDGQPLSLGPHIEIVHEGLDYALHIRDTL  
 PEDTGYRVTATNTAGSTSCQAHLQVERLRYVKQEFQSKKEERERHVQKQIDKTLRMAEILSGTETVPLTPVAQ  
 EALREAAIILYKPAVSTKTKVGEYRLQTEEKKEERKLRMPYEVPEPRRFKQATVEEDQRIKQFVPMMDMKWYK  
 IRDQYEMPGKLDREVQKRPKRIRLSRWEQFYVMPLPRITDQYRKPWRIPKLTQDDLEMVRPARRRTPSPDYDL  
 YYYRRRRRSLGDMDEELLPIIDDYLAMKRTEEERLRLEEELELGFSAFPSRSPRPFELSLRYSSPPAHVK  
 VEDRRDRFRYSTYHVPTKEETSTSYAELRERHAQASYRQPKLRQIRMAEKEEEELLRPVTTTQRLSEYKSELD  
 YMSKEEKSKKSRKRVQVTEITEIEEYIEISRAAQRESSSVSRLLRRRRRSLSPITYIELMRPVSELRSHPRP  
 AEEYEDDAERRSPTPERTRPRSPSPVSSERSLSRFERSARFDIFSRYESMKAALKTKQTSERKYEVLSSQQPFT  
 LDHAPRITLRRMRSHRVPCCQNTRFILNVQSKPTAEVKWYHNGVELQESSKIHNTSGVLTLEILDQCQTEDGG  
 TYRAVCTNYKGEASDYATLDVTGGAYTTYASQRRDEEVKSVFPELTKTEAYAVSSFKRTSELEAASSVREVK  
 SQMTEETRESLSTYEHYASAEMKSATSEEKSLEEKATVRKIKTTLAARILTKPRSITVHEGESARFSCDTDGE  
 VPTVTLWREGQVSTARSQVTTTKYKSTFEISSVQASDEGNYSVVENSQKQEAQFTTLTVQKARVIEKAVT  
 SPPRVKSPPEPRVKSPEVTKSPKRVKSPPEVTSHPKAVSPTETKPTKEGQHLVPSAPPKITQSLKAEASKDIAK  
 LTCAVESALCAKEVAWYKDGKLLKENGHFQFHYSADGTYELKIHNLSESDCGEYVCEVSGEGGTSKTSFQFT  
 GQSFKSIHEQVSSISETTKSVQKTAESAIAEKQEPPIAPESISSKPVIVTGLRDTTVSSDSVAKFTIKVTGEPQ  
 PTLTWTGDKAIAQEGSKYKLSNKEEFLEILKTEPISDGGLYACTVINSAGSVSSSCKLTIKAVKDEAQKVS  
 TQKTSEVTSQKASAEQEEISQKALTSEEIKMSEVKSSETLAIKEEASKVLIIEEVKRSAAASLEKSVHHEEVT  
 KTSQASEEVKTHAEIKTLSTQMNITKQQRATLKNIAAGATDVKVVNLNGTELPNSEEYRYGVSGSDQTLTIKQA  
 SHREEGILSCIGKTSQGVKQFDLTLSEELSDAPSFITQPRSQNINEGQNVLFSCVSGEPSPEIEWFKNL  
 PISISSNISVSRSRNVYTLIRNAAVSDSGKYTIKAKNFHGQCSATASLTVLPLVEPPREVLKTSDDVSLH  
 GSVSSQSVQMSASKQEAFFSSSSASSMTEMKFASMSAQSMSMQESFVEMSSSSFMGKSSMTQLESSTSR  
 MLKAGGRGIPPKIEALPSDISIDEGKVLTVACAFTEPTPEITWSSCGGRKIQNQEQGRFHIENTDDLTTLII  
 MDVQKQDGGLYTLTLGNEFGSDSATVNINIRSM\*  
 >rs218903976\_ENSMUSP00000150405\_c.751:T>C\_p.L251P  
 ENSMUST00000215548.3|01fr1002-202|ENSMUSG00000075214|-  
 |chr2:g.85477912:A>G  
 MMHRNQTVVTEFFFTGLTSSFHLQIVLFLTFLCVYLATLLGNLGMILIHQDTRLHIPMYFFLSHLSFVDACS  
 SSVISPKMLSDIFVDKVISFLGCAIQFCLFSQFVVTECFLLASMAVDYVAICKPLLYTLIMSQRVCVQLVI  
 GPYSIGLISTVVHTTSAFILPYCGPNLINHFFCDLLPVLVSLACADTQMNKHLIFIMAGILGVFSGIILVSYV  
 YIAITILKINSADGRRKAFSTCSHSLTAVSIPYGTLLFFIYVRPSSSFLDINKVVSFLYTAVIMPLNPFYISL  
 RNKEVKDALIRTFEKKFCYSLQDKIL\*  
 >rs218903976\_ENSMUSP00000097504\_c.751:T>C\_p.L251P  
 ENSMUST00000099920.2|01fr1002-201|ENSMUSG00000075214|-  
 |chr2:g.85477912:A>G  
 MMHRNQTVVTEFFFTGLTSSFHLQIVLFLTFLCVYLATLLGNLGMILIHQDTRLHIPMYFFLSHLSFVDACS  
 SSVISPKMLSDIFVDKVISFLGCAIQFCLFSQFVVTECFLLASMAVDYVAICKPLLYTLIMSQRVCVQLVI  
 GPYSIGLISTVVHTTSAFILPYCGPNLINHFFCDLLPVLVSLACADTQMNKHLIFIMAGILGVFSGIILVSYV

YIAITILKINSADGRRKAFSTCSSHLTAVSIPYGTLLFFIYVRPSSSFSLDINKVVSLFYTAVIPMLNPFIIYSL  
RNKEVKDALIRTFEKKFCYSLQDKIL\*  
>ENSMUSP00000150405\_c.282:CT>AA\_p.L95N ENSMUST00000215548.3|Olfr1002-  
202|ENSMUSG00000075214|-|chr2:g.85478381:AG>TT  
MMHRNQTVVTEFFFTGLTSSFHLQIVLFLFTFLCVYLATLLGNLGMILIIHQDTRLHIPMYFFLSHLSFVDACS  
SSVISPKMLSDIFVDKKVISFNRLCYPVLFIQPVCSRDMFPPGLHGL\*\*ICCHL\*AFAVYSHHVPASLCTVSD  
WPLQHRPYKHCOPYFYFCIYSSILWSKSHQSLFL\*PSSCPLTGMCRYSD\*TFAFHHGWDPRCIQWYNHIGVLC  
LHCHHHPKDQFC\*WEAQSLHLLFTPDSSLYSLRDSLLYLCTSKLQLLSGYQ\*SCVTILHCCNPYVEPIHL\*L  
EK\*GSQRCINQDI\*KEVLLQLAR\*NII  
>ENSMUSP00000097504\_c.282:CT>AA\_p.L95N ENSMUST00000099920.2|Olfr1002-  
201|ENSMUSG00000075214|-|chr2:g.85478381:AG>TT  
MMHRNQTVVTEFFFTGLTSSFHLQIVLFLFTFLCVYLATLLGNLGMILIIHQDTRLHIPMYFFLSHLSFVDACS  
SSVISPKMLSDIFVDKKVISFNRLCYPVLFIQPVCSRDMFPPGLHGL\*\*ICCHL\*AFAVYSHHVPASLCTVSD  
WPLQHRPYKHCOPYFYFCIYSSILWSKSHQSLFL\*PSSCPLTGMCRYSD\*TFAFHHGWDPRCIQWYNHIGVLC  
LHCHHHPKDQFC\*WEAQSLHLLFTPDSSLYSLRDSLLYLCTSKLQLLSGYQ\*SCVTILHCCNPYVEPIHL\*L  
EK\*GSQRCINQDI\*KEVLLQLAR\*NII  
>ENSMUSP00000150405\_c.52:C>T\_p.T18I ENSMUST00000215548.3|Olfr1002-  
202|ENSMUSG00000075214|-|chr2:g.85478611:G>A  
MMHRNQTVVTEFFFTGLISSFHLQIVLFLFTFLCVYLATLLGNLGMILIIHQDTRLHIPMYFFLSHLSFVDACS  
SSVISPKMLSDIFVDKKVISFLGCAIQFCLFSQFVVTECFLLASMAVDYVAICKPLLYTLIMSQRVCVQLVI  
GPYSIGLISTVVHTTSAFILPYCGPNLINHFFCDLLPVLSLACADTQMKNHLLFIMAGILGVFSGIILVSYV  
YIAITILKINSADGRRKAFSTCSSHLTAVSILYGTLLFFIYVRPSSSFSLDINKVVSLFYTAVIPMLNPFIIYSL  
RNKEVKDALIRTFEKKFCYSLQDKIL\*  
>ENSMUSP00000097504\_c.52:C>T\_p.T18I ENSMUST00000099920.2|Olfr1002-  
201|ENSMUSG00000075214|-|chr2:g.85478611:G>A  
MMHRNQTVVTEFFFTGLISSFHLQIVLFLFTFLCVYLATLLGNLGMILIIHQDTRLHIPMYFFLSHLSFVDACS  
SSVISPKMLSDIFVDKKVISFLGCAIQFCLFSQFVVTECFLLASMAVDYVAICKPLLYTLIMSQRVCVQLVI  
GPYSIGLISTVVHTTSAFILPYCGPNLINHFFCDLLPVLSLACADTQMKNHLLFIMAGILGVFSGIILVSYV  
YIAITILKINSADGRRKAFSTCSSHLTAVSILYGTLLFFIYVRPSSSFSLDINKVVSLFYTAVIPMLNPFIIYSL  
RNKEVKDALIRTFEKKFCYSLQDKIL\*  
>ENSMUSP00000149830\_c.474:C>A\_p.Q159K ENSMUST00000216566.3|Olfr1039-  
203|ENSMUSG00000075204|-|chr2:g.85961531:G>T  
MAEGNSSTVFQFILEGLTDDPELEVTLFAVFLVIYLTTLVGNLGLIMLIQVSPQLHTPMYFFLCHLAFVDFCY  
TSSVTPNTIINFLREIKSITFYACATQVCCFITFAVCEMYLLSVMAYDRYVAIWNPLLYVVLMPKKLCLQVIT  
STYIYGFTVGLAKAVATFRLSFCGSNVINHFYCDVPLVALACSDTHVKELMLLIIAGFNLTCLSLVIVVISYI  
CILFAILRIHSAEGRRKAFSTCASHLTSITIFYGTIIFMYLQPKSSHSLNTDKFVSVFYVYVVI PMLNPLIYSL  
RNKEVKNALKRFTEKLSLTIHDSRKSE\*  
>ENSMUSP00000150584\_c.474:C>A\_p.Q159K ENSMUST00000214364.2|Olfr1039-  
202|ENSMUSG00000075204|-|chr2:g.85961531:G>T  
MAEGNSSTVFQFILEGLTDDPELEVTLFAVFLVIYLTTLVGNLGLIMLIQVSPQLHTPMYFFLCHLAFVDFCY  
TSSVTPNTIINFLREIKSITFYACATQVCCFITFAVCEMYLLSVMAYDRYVAIWNPLLYVVLMPKKLCLQVIT  
STYIYGFTVGLAKAVATFRLSFCGSNVINHFYCDVPLVALACSDTHVKELMLLIIAGFNLTCLSLVIVVISYI  
CILFAILRIHSAEGRRKAFSTCASHLTSITIFYGTIIFMYLQPKSSHSLNTDKFVSVFYVYVVI PMLNPLIYSL  
RNKEVKNALKRFTEKLSLTIHDSRKSE\*  
>ENSMUSP00000097494\_c.474:C>A\_p.Q159K ENSMUST00000099910.2|Olfr1039-  
201|ENSMUSG00000075204|-|chr2:g.85961531:G>T  
MAEGNSSTVFQFILEGLTDDPELEVTLFAVFLVIYLTTLVGNLGLIMLIQVSPQLHTPMYFFLCHLAFVDFCY  
TSSVTPNTIINFLREIKSITFYACATQVCCFITFAVCEMYLLSVMAYDRYVAIWNPLLYVVLMPKKLCLQVIT  
STYIYGFTVGLAKAVATFRLSFCGSNVINHFYCDVPLVALACSDTHVKELMLLIIAGFNLTCLSLVIVVISYI  
CILFAILRIHSAEGRRKAFSTCASHLTSITIFYGTIIFMYLQPKSSHSLNTDKFVSVFYVYVVI PMLNPLIYSL  
RNKEVKNALKRFTEKLSLTIHDSRKSE\*  
>ENSMUSP00000149099\_c.118:C>G\_p.T40R ENSMUST00000217575.3|Olfr1166-  
202|ENSMUSG00000101078|-|chr2:g.87955209:G>C  
MAYEVMNQTSATTFILVGFSEYPQLQKPLFLFLAIYSVRLVGNLGLIVVIVKVNPKLHTPMYFFLSHLSFLDI  
CYSSVFTPKLLQILIMEDRTVSPKACMVQFFICTFVITEMFMLAVMAYDRFVAVCNPLLYTVVMPFQFCALL  
VAGTYMIGGLCTVILLYTLLQLSYCEYGIINHFGCEYSAVISVSCSDSSFSQLTSLVIAIVSESSSVLITLAS  
YVFIIVVTI IKMPSKGLRKAFASTCTSHLTAISIFHGIILLLYCVPNSNSRFLVVKVATALYTITIMIPMLNPLIY  
SLRNKDVKDTVRRLLISSKLHSHLT\*

>ENSMUSP00000097421\_c.118:C>G\_p.T40R ENSMUST00000099833.6|Olfr1166-201|ENSMUSG000000101078|-|chr2:g.87955209:G>C  
MAYEVMNQTSATTFILVGFSEYPQLQKPLFLLFLAIYSVRLVGNLGIIVVIVKVNPKLHTPMYFFLSHLSFLDI  
CYSSVFTPKLLQILIMEDRTVSFKACMVQFFFICTFVITEMFMLAVMAYDRFVAVCNPLLYTVVMPFQFCALL  
VAGTYMIGGLCTVILLYTLLQLSYCEYGIINHFGEYSAVISVSCSDSSFSQLTSLVIAIVSESSVLITLAS  
YVFIVVTIIKMPKSGGLRKAFASTCTSHLTAISIFHGIILLLYCVPNSNSRSLFVKVATALYTIMIPMLNPLIY  
SLRNKDVKDTVRRLISSKLSHSLT\*

>ENSMUSP00000149507\_c.520:A>C\_p.H174P ENSMUST00000216587.2|Olfr1254-203|ENSMUSG00000075074|-|chr2:g.89619174:T>G  
MGKNNNVTEFILLGLTQDPVGQKALFVLFLLMYIVTMAGNLIIVVTIIASPSLSSPMYFFLAYLSLMDAIYST  
AISPKLIMDLLCNKKTISFRACMGQLFVEHLFGATEIFLLVAMAYDRYVAICKPLHYLTIMNHRVCILLVMAT  
WVGGAHSMQVLFVYDLPFCGPNVIDPFACDMYPLLVLVCSPTYFLGLTVIANDGAICMVVFIILLASYGII  
LNSLKTSHSQEGRKALSTCSSHIMVVILFFVPCIFMYVRPVSNEFPVDSVTIFYTVVTPMLNPLIYTLRNSEI  
KHSMLKLWSKILHSDRLRKSCC\*

>ENSMUSP00000107148\_c.520:A>C\_p.H174P ENSMUST00000111523.3|Olfr1254-202|ENSMUSG00000075074|-|chr2:g.89619174:T>G  
MGKNNNVTEFILLGLTQDPVGQKALFVLFLLMYIVTMAGNLIIVVTIIASPSLSSPMYFFLAYLSLMDAIYST  
AISPKLIMDLLCNKKTISFRACMGQLFVEHLFGATEIFLLVAMAYDRYVAICKPLHYLTIMNHRVCILLVMAT  
WVGGAHSMQVLFVYDLPFCGPNVIDPFACDMYPLLVLVCSPTYFLGLTVIANDGAICMVVFIILLASYGII  
LNSLKTSHSQEGRKALSTCSSHIMVVILFFVPCIFMYVRPVSNEFPVDSVTIFYTVVTPMLNPLIYTLRNSEI  
KHSMLKLWSKILHSDRLRKSCC\*

>ENSMUSP00000097352\_c.520:A>C\_p.H174P ENSMUST00000099764.2|Olfr1254-201|ENSMUSG00000075074|-|chr2:g.89619174:T>G  
MGKNNNVTEFILLGLTQDPVGQKALFVLFLLMYIVTMAGNLIIVVTIIASPSLSSPMYFFLAYLSLMDAIYST  
AISPKLIMDLLCNKKTISFRACMGQLFVEHLFGATEIFLLVAMAYDRYVAICKPLHYLTIMNHRVCILLVMAT  
WVGGAHSMQVLFVYDLPFCGPNVIDPFACDMYPLLVLVCSPTYFLGLTVIANDGAICMVVFIILLASYGII  
LNSLKTSHSQEGRKALSTCSSHIMVVILFFVPCIFMYVRPVSNEFPVDSVTIFYTVVTPMLNPLIYTLRNSEI  
KHSMLKLWSKILHSDRLRKSCC\*

>ENSMUSP00000149507\_c.234:T>G\_p.L79V ENSMUST00000216587.2|Olfr1254-203|ENSMUSG00000075074|-|chr2:g.89619460:A>C  
MGKNNNVTEFILLGLTQDPVGQKALFVLFLLMYIVTMAGNLIIVVTIIASPSLSSPMYFFLAYLSLMDAIYST  
AISPKVIMDLLCNKKTISFRACMGQLFVEHLFGATEIFLLVAMAYDRYVAICKPLHYLTIMNHRVCILLVMAT  
WVGGAHSMQVLFVYDLPFCGPNVIDHFAACDMYPLLVLVCSPTYFLGLTVIANDGAICMVVFIILLASYGII  
LNSLKTSHSQEGRKALSTCSSHIMVVILFFVPCIFMYVRPVSNEFPVDSVTIFYTVVTPMLNPLIYTLRNSEI  
KHSMLKLWSKILHSDRLRKSCC\*

>ENSMUSP00000107148\_c.234:T>G\_p.L79V ENSMUST00000111523.3|Olfr1254-202|ENSMUSG00000075074|-|chr2:g.89619460:A>C  
MGKNNNVTEFILLGLTQDPVGQKALFVLFLLMYIVTMAGNLIIVVTIIASPSLSSPMYFFLAYLSLMDAIYST  
AISPKVIMDLLCNKKTISFRACMGQLFVEHLFGATEIFLLVAMAYDRYVAICKPLHYLTIMNHRVCILLVMAT  
WVGGAHSMQVLFVYDLPFCGPNVIDHFAACDMYPLLVLVCSPTYFLGLTVIANDGAICMVVFIILLASYGII  
LNSLKTSHSQEGRKALSTCSSHIMVVILFFVPCIFMYVRPVSNEFPVDSVTIFYTVVTPMLNPLIYTLRNSEI  
KHSMLKLWSKILHSDRLRKSCC\*

>ENSMUSP00000097352\_c.234:T>G\_p.L79V ENSMUST00000099764.2|Olfr1254-201|ENSMUSG00000075074|-|chr2:g.89619460:A>C  
MGKNNNVTEFILLGLTQDPVGQKALFVLFLLMYIVTMAGNLIIVVTIIASPSLSSPMYFFLAYLSLMDAIYST  
AISPKVIMDLLCNKKTISFRACMGQLFVEHLFGATEIFLLVAMAYDRYVAICKPLHYLTIMNHRVCILLVMAT  
WVGGAHSMQVLFVYDLPFCGPNVIDHFAACDMYPLLVLVCSPTYFLGLTVIANDGAICMVVFIILLASYGII  
LNSLKTSHSQEGRKALSTCSSHIMVVILFFVPCIFMYVRPVSNEFPVDSVTIFYTVVTPMLNPLIYTLRNSEI  
KHSMLKLWSKILHSDRLRKSCC\*

>ENSMUSP00000028672\_c.345:A>G\_p.T116A ENSMUST00000028672.13|Mdk-201|ENSMUSG00000027239|-|chr2:g.91761214:T>C  
MQHRGFLLALLALLVVTSAVAKKKEKVKKGSECSEWTWGPCTPSSKDCGMGFREGTCGAQTQRVHCKVPCNW  
KKEFGADCKYKFESWGACDGSSTGKARQGTLLKARYNAQCQEAIRVTKPCTSKTKSKTKAKKKGKGD\*

>ENSMUSP00000068413\_c.345:A>G\_p.T116A ENSMUST00000069423.13|Mdk-202|ENSMUSG00000027239|-|chr2:g.91761214:T>C  
MQHRGFLLALLALLVVTSAVAKKKEKVKKGSECSEWTWGPCTPSSKDCGMGFREGTCGAQTQRVHCKVPCNW  
KKEFGADCKYKFESWGACDGSSTGKARQGTLLKARYNAQCQEAIRVTKPCTSKTKSKTKAKKKGKGD\*

>ENSMUSP00000088090\_c.345:A>G\_p.T116A ENSMUST00000090602.6|Mdk-203|ENSMUSG00000027239|-|chr2:g.91761214:T>C  
MQHRGFFLLALLLALLLVVTSAVAKKKEKVKKGSECESEWTWGPCTPSSKDCGMGFREGTTCGAQTQRVHCKVPCNW  
KKEFGADCKYKFESWGACDGTGTKARQGTLLKARYNAQCQEAI RVTKPCTSKTKSKTKAKKKGKGD\*  
>ENSMUSP00000106941\_c.345:A>G\_p.T116A ENSMUST00000111309.8|Mdk-204|ENSMUSG00000027239|-|chr2:g.91761214:T>C  
MQHRGFFLLALLLALLLVVTSAVAKKKEKVKKGSECESEWTWGPCTPSSKDCGMGFREGTTCGAQTQRVHCKVPCNW  
KKEFGADCKYKFESWGACDGTGTKARQGTLLKARYNAQCQEAI RVTKPCTSKTKSKTKAKKKGKGD\*  
>ENSMUSP00000028612\_c.326:G>T\_p.K109N ENSMUST00000028612.8|Pamr1-201|ENSMUSG00000027188|+|chr2:g.102417016:G>T  
MELDRWAQLGLVFLQLLLLISSLPREYTVINEACPGAENWIMCRECCEYDQIECLCPGKKEVGYTIPCCRNED  
NECDSCLIHPGCTIFENCKSCRNGSWGGLDDFYVNGFYCAECRAGWYGGDCMRCGQVLRASKGQILLESYPL  
NAHCWEWIHARPGFIIQLRFGLSLEFDYMCQYDYVEVRDGDNSDSPIIKRFCGNERPAPIRSTGSSLHVLFH  
SDGSKNFDGFHAVFEEITACSSSPCFHDGTCLLDTTGSFKACLAGYTGQRCEENLLEERNCSDLGGPVNGYKK  
ITEGPGLLNERHVKIGTVVVSFFCNGSYVLSGNEKRTCQQNGEWSGKQPVCMKACREPKISDLVRRRVLSMQVQ  
SRETPLHLQLYSTAFSKQKLDASTKKPALPFGDLPPGYQHLHTQVQYECISPFYRRLGSSRRCTCLRTGKWSGR  
APSCIPICGKIESTPSPKTQGRWPWQAAYRRTSGVHDGGLHKGAWFLVCSGALVNERTVVAACHVTELKAT  
ATIIKTADLKVVVLGKFYRDDDRDEKSIQNLRVSAIILHPNYDPIILLDTDIAVLKLLDKARISTVLRVQPICLATT  
RDLSTSFQESHITVAGWNILADVRSFGKNDTLHYGMVRVVDPLMCEEQHEDHGIPVSVTDNMFCAKDPSTP  
SDICTAETGGIAALSFPGRASPEPRWHLVGLVSWSYDKTCSNGLSTAFTKVLFPKDWIERNMK\*  
>ENSMUSP00000155023\_c.262:C>T\_p.T88I ENSMUST00000136156.9|D430041D05Rik-202|ENSMUSG00000068373|-|chr2:g.104088826:G>A  
MALQEAKPQGPSEAEPAAREPRDRLREQGLCGAGGIAARCGVRSSEARRSEDVLLRRPLLLGLLLLAALS  
CWADSGTDNLQIHVIPTSESPFLGKLLPISPTWPFLEVKSSSAADRFRKNVGLGQPPDNTLLKLSQTPPKAHR  
RTRAHVDFSSSPYQGSGHASLDLAKDPTETLVQTRPEGGREAADMSVETSVSSKGEALSATAAATATTLFLR  
RSSPAPLSAALTAKGTGSSSSNLAKSSLTTALAKNVTNKAASGPKVTAAGTIHTAFPFPTPTMYLARTAHSLSTH  
TAMQGATGSSVGLLSTHLPKPKQAMHTGLPNPTRPDTPRASTPRPLTITAALTSMTASVKATRLPSLQTGNT  
DAAFPVAVSTAMATTGRMASNLDCQMSHKFLVKTVFVFLTQRRIQSSESLKLGVTGKLTQALRKAHFQNDVSAHV  
DILEYSHNVTVGYYATKGRVLYLPAVVMVLDVGVYGVSNVTADLKQHTPNLQSVAVLASPWKPPAGAFQKLT  
LQFVVSQSDNIQSCRFAQTMEQRLQKAFQDAERKVLSTRSNLTVQIVVSTSNASQAVTLVYAVGNQSSFLNGTVA  
SSLLSQLSAELVGFYLYPPLTIAEPLFYPNLDTSETTRDYWVITVLQGVNLSLVGLHNQSFARVMEQRLAQL  
FMMSQQQGRFRKRAATLGSYTVQVMKQRPVGPDPKPAELTYTYLYNGKPLLGTAAAKILSTIDSQRMALTLHH  
VVLLQADPVVKNPPNLLWIIAAVLAPIAVVTIIIIITAVLCRKNKNDFKPDTMINLPQRAKPVQGFQYAKQH  
LGQQGADEEVIPTVQETVVLPIPVVDRTPQERDQAQDGSIAIKTAKSTETRRSRSPSENGSVISNESGKPSGR  
SPQNGMTQKQVTKESRKRNVASDEEEGAGLFDSAGKAAADPFDTSAGSVQLIAIKPSALPVVHPASDRGQES  
SSAALNGEVNKALKQKSDIEHYRNKLRKAKRKYDFPPVEAGKGLAERKMYEKAPKEVEHVLADPELFCAP  
FAESKNRQMKNSVYRSRQSLNSPSPGETEMDLLVTRERPRRGIRNSGYDTEPEIEETNVDRVHEPRGYGRA  
RQAKGHSETSTLSSQPSIDEVRQMHMLLEEFSLASAGHAGQSRHQETYGSTQHLPHYSEVVTAPGTMTRPR  
AGVQVWPVPTYPPEMYQYSLPRPAYRFSQLEPVMGSPPPPVPRTGPVAVASLRRSTSDIGSKTRMAESTGPEP  
TQLHDSASFAQVSRGPVSVTQLDQASALNYSNTVPAVFAIPAANRPGFTGYFIPTPPSSYSRQAWMSYAGENE  
LPSQWADSVPLPGYIEAYPRSRYQQSSPSRLPRQYSQPANLHPSLEQAPVPSAAASQQSLTENEPDPTPLTNI  
STAALVKAIREEVAKLAKKQTDMEFQV\*  
>ENSMUSP00000106756\_c.262:C>T\_p.T88I ENSMUST00000089726.10|D430041D05Rik-201|ENSMUSG00000068373|-|chr2:g.104088826:G>A  
MALQEAKPQGPSEAEPAAREPRDRLREQGLCGAGGIAARCGVRSSEARRSEDVLLRRPLLLGLLLLAALS  
CWADSGTDNLQIHVIPTSESPFLGKLLPISPTWPFLEVKSSSAADRFRKNVGLGQPPDNTLLKLSQTPPKAHR  
RTRAHVDFSSSPYQGSGHASLDLAKDPTETLVQTRPEGGREAADMSVETSVSSKGEALSATAAATATTLFLR  
RSSPAPLSAALTAKGTGSSSSNLAKSSLTTALAKNVTNKAASGPKVTAAGTIHTAFPFPTPTMYLARTAHSLSTH  
TAMQGATGSSVGLLSTHLPKPKQAMHTGLPNPTRPDTPRASTPRPLTITAALTSMTASVKATRLPSLQTGNT  
DAAFPVAVSTAMATTGRMASNLDCQMSHKFLVKTVFVFLTQRRIQSSESLKLGVTGKLTQALRKAHFQNDVSAHV  
DILEYSHNVTVGYYATKGRVLYLPAVVMVLDVGVYGVSNVTADLKQHTPNLQSVAVLASPWKPPAGAFQKLT  
LQFVVSQSDNIQSCRFAQTMEQRLQKAFQDAERKVLSTRSNLTVQIVVSTSNASQAVTLVYAVGNQSSFLNGTVA  
SSLLSQLSAELVGFYLYPPLTIAEPLFYPNLDTSETTRDYWVITVLQGVNLSLVGLHNQSFARVMEQRLAQL  
FMMSQQQGRFRKRAATLGSYTVQVMKQRPVGPDPKPAELTYTYLYNGKPLLGTAAAKILSTIDSQRMALTLHH  
VVLLQADPVVKNPPNLLWIIAAVLAPIAVVTIIIIITAVLCRKNKNDFKPDTMINLPQRAKPVQGFQYAKQH  
LGQQGADEEVIPTVQETVVLPIPVVDRTPQERDQAQDGSIAIKTAKSTETRRSRSPSENGSVISNESGKPSGR  
PQNGMTQKQVTKESRKRNVASDEEEGAGLFDSAGKAAADPFDTSAGSVQLIAIKPSALPVVHPASDRGQES  
SAALNGEVNKALKQKSDIEHYRNKLRKAKRKYDFPPVEAGKGLAERKMYEKAPKEVEHVLADPELFCAPF

AESKNRQQMKNSVYRSRQSLNSPSPGETEMDLLVTRERPRRGIRNSGYDTEPEIIEETNVDRVHEPRGYGRAR QAKGHSETSTLSSQPSIDEVRQQMHMLLEEAFSLASAGHAGQSRHQETYGSTQHLPHYSEVVTSAAGTMRPRA GVQWVPTYPREMYQYSLPRPAYRFSQLPEMVMGSPPPPVPPTGTPVAVASLRRSTSDIGSKTRMAESTGPEPT QLHDSASFAQVSRGPVSVTQLDQASALNYSNGTVPVAVFAIPAAANRPGFTGYFIPTPPSSYRSQAWMSYAGENEL PSQWADSVPLPGYIEAYPRSRYYQQSSPSRLPRQYSQPANLHPSLEQAPVPSAAASQQSLTENEPDPTPLTNIS TAALVKAIREEVAKLAKKQTDMEFFQV\*

>ENSMUSP00000155485\_c.148:C>T\_p.T50I ENSMUST00000230671.2|D430041D05Rik-207|ENSMUSG00000068373|-|chr2:g.104088826:G>A

MCCCGRCCWDSCCWLPSPGTAGTPCILIPLHMLMWSFTGTDNLQIHVIPTSESFPLGKLLPISPTWPFLEV KSSSAADRFRKNVLGQPPDNTLLKLSQTPLPKAHRRTTRAHVDFSSSPYQSGHSASLDLAKDPTETLVQTRPE GGREAADMSGLPRTSMLPPLTAPSATSSAVSPSQPLVGMFPLSKHPLRSDSSLLPPSSSSSLAPDSPHSIP TPKPVQHPHTKVLFPQMTPADFSSGQSPVNVNLPFFHKTNLFPSTRDAQTLIGTPRLDFSTSSTKQYSEPSLSE SPRPAASPTPGVLSIAEQDHLSPSLAPGGLPGVTSSRSMWEEALSPVSTQPFRTSGPVRGRGAESLPIYLR TLAASYGAWAPRFQTAESVMTSRELAPVPPTNSFANWPHLSEVPESSRKPTLSPENKPSLVPFPQPLTTLTSLQ GQMVHPEAAPGSPKGTGTPLSLLTVRQPNDHASAPVPEAPLSREGAHDEYLPDAATQLLSSKLPNPPPTI WTFPQQKEDRAAAI FWTNEKANGTTS LWALPTKEAPSRRAVGTSTDFNTGRLSPLIMTALRDLSPPGSPPS SALTTOAASPRSSGKTLES LAAVTSQSEL PASASKQVTELPSTDVHGLPTMGGRKPAATDFWFSFLSAETA SLATQSGISGSQQQTNHDVNTHTINSTHRELRPASVALPGGTTSAANALQSRNFKEIAGQLVAADSFNFQDPV LSPRTSQPLQPSEEAUVESHDTDFPPTGKHARDFDTEMVHYSSSTSQNPMSQLPIRPAHPFWPTWPSLASAASL HQMLSDGTDAGSHISSDIYLSPGENGSPQFQSVLEYHSSTASPSVPTGAFSRTPSKVLRTSRRPKKWTGAATH TVETSVSSKGELSATAAATATTTFLRRSSPAPLSAALTAKGTGSSSNLAKSSLTALAKNVTNKAASGPKV TAGTIHTAFPTPTMYLARTAHLSLTHAMQGATGSVSGLLSTHLPKPKQAMHTGLPNPTRPDTPRASTPRP LTIITAALTSMASVKATRLPSLQGTGNTDAAFPAVSTAMATTGRMASNLDCQMSHKFLVKTVFFLTQRRIQSSE SLKLGVTGKLTQALRKAHFQNDVSAHVDILEYSHNVTVGYATKGRLLVYLPVAVMDVLGVYGVSNVTADLQKH TPNLQSVAVLASPWKQPAGAFQKTVLQFVVSQSDNIQSCRFAQTMEQRLQKAFQDAERKVLSTRSNLTVQIV STSNASQAVTLVYAVGNQSSFLNGTVASSLLSQQLSAELVGFYLYTYPPLTIAEPLYENLDTSETTRDYWVITV LQGVDNSLVGLHNSCFARVMEQRLAQLFMMSQQQGRFRFRATTLGSYTVQMVKMQRVPGPKDPAELTYTYTLN GKPLLGTAALKILSTIDSQRMALTLHHVLLQADPVVKNPPNNLWI IAAVLAPIAVVTIIIIITAVLCRKNK NDFKPDPTMINLPQRAKPVQGFQDYAKQHLGQQGADEEVIPTVQETVVLPIVPRDTPQERDTAQDGSIAIKTAKST ETRRSRSPSENGSVISNESGKPSGRRSPQNGMTQKQVTKESRKRNVTVASDEEEGAGLFDSDAGKAAADPFDT SSGSVQLIAIKPSALPVVHPASDRGQESSAALNGEVNKALKQKSDIEHYRNLRLKAKRKGYYDFPPVEAGKG LAERKMYEKAPKEVEHVLADPELCAFPFAESKNRQQMKNSVYRSRQSLNSPSPGETEMDLLVTRERPRRGIRN SGYDTEPEIIEETNVDRVHEPRGYGRARQAKGHSETSTLSSQPSIDEVRQQMHMLLEEAFSLASAGHAGQSRH QETYGSTQHLPHYSEVVTSAAGTMRPRAVQWVPTYPREMYQYSLPRPAYRFSQLPEMVMGSPPPPVPPTGTP VAVASLRRSTSDIGSKTRMAESTGPEPTQLHDSASFAQVSRGPVSVTQLDQASALNYSNGTVPVAVFAIPAAANR PGTGYFIPTPPSSYRSQAWMSYAGENELPSQWADSVPLPGYIEAYPRSRYYQQSSPSRLPRQYSQPANLHPSLE QAPVPSAAASQQSLTENEPDPTPLTNISTAALVKAIREEVAKLAKKQTDMEFFQV\*

>ENSMUSP00000150073\_c.843:A>G\_p.M282V ENSMUST00000214801.3|Olfr1317-203|ENSMUSG00000050776|+|chr2:g.111973135:A>G

MDGGNHSVVSEFLLLGLTNSWRIQILLFLFFTVFYVASMLGNLLIVLTIISDHHLHSPMYFLLANLSFIDTGV SSIATPKMIYDLFRKHKVISLNGCITQMFFIHTVGGTEMVLLIVMAYDRYIAICKPLHYLTIMSLRMCIVLLA LAWIIGLIHSAQLAFVNLFPFCGANKMDSFYCDFPRFIKLACTDTYRLEFLVTANSGFISMATFFILIVSYI FILVTVRKHSSGASSKALSTLSAHTVVVFFFGPCIIVYVWPFPTLPIDKFLAIFDAIITPSVNPVIYTLRKN EMKVAMRRLFARALSFIDSLRDSN\*

>ENSMUSP00000149091\_c.843:A>G\_p.M282V ENSMUST00000216988.2|Olfr1317-204|ENSMUSG00000050776|+|chr2:g.111973135:A>G

MDGGNHSVVSEFLLLGLTNSWRIQILLFLFFTVFYVASMLGNLLIVLTIISDHHLHSPMYFLLANLSFIDTGV SSIATPKMIYDLFRKHKVISLNGCITQMFFIHTVGGTEMVLLIVMAYDRYIAICKPLHYLTIMSLRMCIVLLA LAWIIGLIHSAQLAFVNLFPFCGANKMDSFYCDFPRFIKLACTDTYRLEFLVTANSGFISMATFFILIVSYI FILVTVRKHSSGASSKALSTLSAHTVVVFFFGPCIIVYVWPFPTLPIDKFLAIFDAIITPSVNPVIYTLRKN EMKVAMRRLFARALSFIDSLRDSN\*

>ENSMUSP00000058587\_c.843:A>G\_p.M282V ENSMUST00000060098.2|Olfr1317-201|ENSMUSG00000050776|+|chr2:g.111973135:A>G

MDGGNHSVVSEFLLLGLTNSWRIQILLFLFFTVFYVASMLGNLLIVLTIISDHHLHSPMYFLLANLSFIDTGV SSIATPKMIYDLFRKHKVISLNGCITQMFFIHTVGGTEMVLLIVMAYDRYIAICKPLHYLTIMSLRMCIVLLA LAWIIGLIHSAQLAFVNLFPFCGANKMDSFYCDFPRFIKLACTDTYRLEFLVTANSGFISMATFFILIVSYI FILVTVRKHSSGASSKALSTLSAHTVVVFFFGPCIIVYVWPFPTLPIDKFLAIFDAIITPSVNPVIYTLRKN EMKVAMRRLFARALSFIDSLRDSN\*

>ENSMUSP00000106076\_c.114:A>C\_p.I39L ENSMUST00000110446.9|Fam227b-201|ENSMUSG00000027209|-|chr2:g.125968958:T>G  
MELPVPQKLPDPPRSFDEFKLSQNWDYWPRDVFHFRDSDLWEDTLKKLEEAI SYTSIYSYLWTVNPRLYDIVDS  
LESKLEKESSHLLQHHASRLFESDKMISKKRSYTNLERYKAFVKEHYRPPKIALSDRMETEKNI EGCTFLFNQN  
EVTQLPRHLDAKQIYLYVLKTHNFEEKVFKVWKTHTVLSDCSIALHDSFWWWFLHKFKPKDRDEDFLFDRIAE  
SYVTLFIKIPLRKDAFFKMPDCLTQAVYTTTFQESFPESCSLFNDKFKEDLGNTIFLWLSGLKPE TGFWTHW  
KLQDLCTTTIHGSRVPVKLRRSVIPSQEHIPGIRD LKIEDILKNPRAYAMPKLMKESVASKAATKPSHYRSL  
GPEFHKVLDFDFGGQSPLILYLYLKMHELGGISVTHNPKGTFKFTKILREPSAPPTYCDIIRD AKRKFADNKKDFK  
RVKQRIKDDIKFLREQQELIDKELDRIQAKASKNLQEVKNEFENFLHKQRVEAKLKEEYGGSTSASESPQSMQ  
SPQSSSFPTISED FNNVEEG\*

>ENSMUSP00000136349\_c.114:A>C\_p.I39L ENSMUST00000178118.8|Fam227b-204|ENSMUSG00000027209|-|chr2:g.125968958:T>G  
MELPVPQKLPDPPRSFDEFKLSQNWDYWPRDVFHFRDSDLWEDTLKKLEEAI SYTSIYSYLWTVNPRLYDIVDS  
LESKLEKESSHLLQHHASRLFESDKMISKKRSYTNLERYKAFVKEHYRPPKIALSDRMETEKNI EGCTFLFNQN  
EVTQLPRHLDAKQIYLYVLKTHNFEEKVFKVWKTHTVLSDCSIALHDSFWWWFLHKFKPKDRDEDFLFDRIAE  
SYVTLFIKIPLRKDAFFKMPDCLTQAVYTTTFQESFPESCSLFNDKFKEDLGNTIFLWLSGLKPE TGFWTHW  
KLQDLCTTTIHGSRVPVKLRRSVIPSQEHIPGIRD LKIEDILKNPRAYAMPKLMKESVASKAATKPSHYRSL  
GPEFHKVLDFDFGGQSPLILYLYLKMHELGGISVTHNPKGTFKFTKILREPSAPPTYCDIIRD AKRKFADNKKDFK  
RVKQRIKDDIKFLREQQELIDKELDRIQAKASKNLQEVKNEFENFLHKQRVEAKLKEEYGGSTSASESPQSMQ  
SPQSSSFPTISED FNNVEEG\*

>ENSMUSP00000106078\_c.114:A>C\_p.I39L ENSMUST00000110448.3|Fam227b-202|ENSMUSG00000027209|-|chr2:g.125968958:T>G  
MELPVPQKLPDPPRSFDEFKLSQNWDYWPRDVFHFRDSDLWEDTLKKLEEAI SYTSIYSYLWTVNPRLYDIVDS  
LESKLEKESSHLLQHHASRLFESDKMISKKRSYTNLERYKAFVKEHYRPPKIALSDRMETEKNI EGCTFLFNQN  
EVTQLPRHLDAKQIYLYVLKTHNFEEKVFKVWKTHTVLSDCSIALHDSFWWWFLHKFKPKDRDEDFLFDRIAE  
SYVTLFIKIPLRKDAFFKMPDCLTQAVYTTTFQESFPESCSLFNDKFKEDLGNTIFLWLSGLKPE TGFWTHW  
KLQDLCTTTIHGSRVPVKLRRSVIPSQEHIPGIRD LKIEDILKNPRAYAMPKLMKESVASKAATKPSHYRSL  
GPEFHKVLDFDFGGQSPLILYLYLKMHELGGISVTHNPKGTFKFTKILREPSAPPTYCDIIRD AKRKFADNKKDFK  
RVKQRIKDDIKFLREQQELIDKELDRIQAKASKNLQEVKNEFENFLHKQRVEAKLKEEYGGSTSASESPQSMQ  
SPQSSSFPTISED FNNVEEG\*

>rs262016965\_ENSMUSP00000028897\_c.448:A>G\_p.D150G  
ENSMUST00000028897.8|CpXM1-201|ENSMUSG00000027408|-|chr2:g.130237860:T>C  
MWGLLLAVTAFAPSVGLGLGAPSASVPG LAPGSTLAPHSSVAQPSTKANETSERHVRLRVIKKKKIVVKKRKK  
LRHPGLGTARPVVPVTHPAKTLTLPEKQEPGCPPLGLES LRVS DSQLEASSSQS FGLGAHRGRNLNIQSGLEDG  
DLYGGAWCAEQDTEPWLQVDAKNPVRFAGIVTQGRNSVWRYDWVTSFKVQFSNDSQTTWWKSRNSTGMDIVFP  
ANSDAETPVLNLLPEPQVARFIRLLLPQTFWQGGAPCLRAEILACPVSDPNDLFPEAHTLGSSNSLDFRHHNYK  
AMRKLKMQVNEQCPNITRIYSIGKSHQGLKLYVME MS DHPGEHELGEPEVRYVAGMHGNEALGRELLLLLLMQF  
LCHEFLRGDPRVTRLLTETRIHLLPSMNP DGYETAYHRGSELVGVWAEGRWTHQGIDLNHN FADLNTQLWYAED  
DGLVPDTPVNHHLPLPTYTLPNATVAPETWAVIKW MKRIPFVLSANLHG GELVVSYPFDMTRTPWAARELTP  
TPDDAVFRWLSTVYAGTNRAMQDTRRPCHS QDFSLHGNVINGADWHTVPGSMNDFS YLHTNCFEVTVELSCD  
KFPHEKELPQEWENNKDALLTYLEQVRMGITGVVRDKDELGIADAVI AVEGINHDVTTAWGGDYWRLLTPGD  
YVVTASAEGYHTVRQHCQVTFEEGVPVPCNFLLTKTPKERLRELLATRGKLPD LRRKLERLRGQK\*

>ENSMUSP00000119606\_c.166:G>C\_p.S56T ENSMUST00000150843.9|Pank2-204|ENSMUSG00000037514|+|chr2:g.131104616:G>C  
LGGWLGRQRRLLRMGAGRFGAPMERQGRAAATSAAVGESADSEARRRDPLRRR ASTAAPSGSGEAE SVRRERP  
GSLGGSTSAGRPRAEGLRKRRLPFPWFGLDIGGTLVKLVYFEPKDI TAE EEEKEEVE SLKSIRKYLTSNVAYGS  
TGIRDVHLELKD LTL CGRKNLHFIRFPTHDMPAFIQMRDKNFSSLHTVFCATGGGSYKFEQDFLTIGDLQL  
RKLDELDC LIK GILYIDS VGFNGRSQCYYFENPADSEK CQKLPFDLKNPYPLLLVNI GSGVSI LAVYSKDN YK  
RVTGTS LGGGTF FGLCCLLTGCSTFEEALEMASRGDSTKV DKLVRDIYGGDYERFGLPGWAVASSFGNMMSKE  
KREAASKEDLARATLITITN NIGSIARMCALNENINQVVFVGNFLRVNTIAMRLLAYALDYWSKGQLKALFSE  
HEGYFGAVGALLELLKIP\*

>ENSMUSP00000138992\_c.166:G>C\_p.S56T ENSMUST00000184105.9|Pank2-207|ENSMUSG00000037514|+|chr2:g.131104616:G>C  
LGGWLGRQRRLLRMGAGRFGAPMERQGRAAATSAAVGESADSEARRRDPLRRR ASTAAPSGSGEAE SVRRERP  
GSLGGSTSAGRPRAEGLRKRRLPFPWFGLDIGGTLVKLVYFEPKDI TAE EEEKEEVE SLKSIRKYLTSNVAYGS  
TGIRDVHLELKD LTL CGRKRDR\*

>ENSMUSP00000139259\_c.130:G>C\_p.S44T ENSMUST00000184932.9|Pank2-208|ENSMUSG00000037514|+|chr2:g.131104616:G>C



XMGAGRFGAPMERQGRAAATSAAVGESADSEARRRDPLRRRASTAAPSGSGEAEVRRERPGSLGGSTSAGRP  
RAEGLRKRRLPFPWFLDIGGTLVKLVYFEPKIDITAEKEEVEESLKSIRKYLTSNVAYGSTGIRDVHLELKD  
LTLGCRKVLET\*

>ENSMUSP00000000369\_c.182:T>TC\_p.P61ins-fs ENSMUST00000000369.4|Rem1-  
201|ENSMUSG00000000359|+|chr2:g.152470198:T>TC  
MTLNTQQEAKTTLRRRASTPLPLSSRGHPGRLCTAPSAPSQHPRLGQSVSLNPPVRKPSRPGWVVL  
>ENSMUSP00000119532\_c.182:T>TC\_p.P61ins-fs ENSMUST00000150913.2|Rem1-  
203|ENSMUSG00000000359|+|chr2:g.152470198:T>TC  
MTLNTQQEAKTTLRRRASTPLPLSSRGHPGRLCTAPSAPSQHPRLGQSVSLNPPVRKPSRPGWVVL  
>ENSMUSP00000105198\_c.484:T>TG\_p.L162ins-fs ENSMUST00000109570.8|Aar2-  
202|ENSMUSG00000027628|+|chr2:g.156393097:T>TG  
MSSMQMDPELAKQLFFEGATVVILNMPKGTEFGIDYNSWEVGPVKFRGVKMI PPGIHFYLYSSVDKANPREVGP  
RMGFFLSLKQRGLTVLRWNAVQEEVDLSPAPEAEVEAMRANLPDLLDQFLGYPYPYATLKKWISLTNFI SEATME  
KLQPESRQICAFSDVLACAFHEAHQGGGAEPAPLRHRVQKLPKRGPSPAARDEAQQGWRDPLLRVAHSDVPSR  
SHTSRDHQAQHGLELCPNCAQQAVPWQPPGCAW  
>ENSMUSP00000029158\_c.484:T>TG\_p.L162ins-fs ENSMUST00000029158.4|Aar2-  
201|ENSMUSG00000027628|+|chr2:g.156393097:T>TG  
MSSMQMDPELAKQLFFEGATVVILNMPKGTEFGIDYNSWEVGPVKFRGVKMI PPGIHFYLYSSVDKANPREVGP  
RMGFFLSLKQRGLTVLRWNAVQEEVDLSPAPEAEVEAMRANLPDLLDQFLGYPYPYATLKKWISLTNFI SEATME  
KLQPESRQICAFSDVLACAFHEAHQGGGAEPAPLRHRVQKLPKRGPSPAARDEAQQGWRDPLLRVAHSDVPSR  
SHTSRDHQAQHGLELCPNCAQQAVPWQPPGCAW  
>ENSMUSP00000070052\_c.132:A>C\_p.T45P ENSMUST00000069600.13|Ndr3-  
201|ENSMUSG00000027634|-|chr2:g.156792020:T>G  
MDELQDVQLTEIKPLLNDKNGTRNFQDFDCQEHDIETPHGMVHVP IIRGLPKGNRPVILTYHDI GLNHKSCFNT  
FFNFEDMQEITQHFAVCHVDAPGQQEAAPSFTGYQYPTMDELAEMLPVLT HLSMKSIIGIGVGAGAYILSR  
FALNHPELVEGLV LINIDPACAKGWIDWAASKLSGFTTNI VDI I LAHHFGQEELQANLDLIQTYRLHIAQDINQ  
ENLQLFLG SYNGRRDLEIERPILGQNDNRLKTLKSTLLVVGDN SPAVEAVVECN S RLDPI NT TLLK MADCGG  
LPQVVQPGKLT EAFKYFLQGMGYIPYVQLSHLSSESVP SASMTR LARS RTHSTSSSIGSGESPF SRSVTSNQ S  
DGTQESCESPDVLD RHQTMEVSC\*

>ENSMUSP00000072144\_c.132:A>C\_p.T45P ENSMUST00000072298.13|Ndr3-  
202|ENSMUSG00000027634|-|chr2:g.156792020:T>G  
MDELQDVQLTEIKPLLNDKNGTRNFQDFDCQEHDIETPHGMVHVP IIRGLPKGNRPVILTYHDI GLNHKSCFNT  
FFNFEDMQEITQHFAVCHVDAPGQQEAAPSFTGYQYPTMDELAEMLPVLT HLSMKSIIGIGVGAGAYILSR  
FALNHPELVEGLV LINIDPACAKGWIDWAASKLSGFTTNI VDI I LAHHFGQEELQANLDLIQTYRLHIAQDINQ  
ENLQLFLG SYNGRRDLEIERPILGQNDNRLKTLKSTLLVVGDN SPAVEAVVECN S RLDPI NT TLLK MADCGG  
LPQVVQPGKLT EAFKYFLQGMGYIPYVQLSHLSSESVP SASMTR LARS RTHSTSSSIGSGESPF SRSVTSNQ S  
DRHQTMEVSC\*

>ENSMUSP00000105185\_c.132:A>C\_p.T45P ENSMUST00000109558.2|Ndr3-  
203|ENSMUSG00000027634|-|chr2:g.156792020:T>G  
MDELQDVQLTEIKPLLNDKNGTRNFQDFDCQEHDIETPHGMVHVP IIRGLPKGNRPVILTYHDI GLNHKSCFNT  
FFNFEDMQEITQHFAVCHVDAPGQQEAAPSFTGYQYPTMDELAEMLPVLT HLSMKSIIGIGVGAGAYILSR  
FALNHPELVEGLV LINIDPACAKGWIDWAASKLSGFTTNI VDI I LAHHFGQEELQANLDLIQTYRLHIAQDINQ  
ENLQLFLG SYNGRRDLEIERPILGQNDNRLKTLK\*

>ENSMUSP00000105038\_c.6:A>C\_p.M3L ENSMUST00000109411.8|Hnf4a-  
202|ENSMUSG00000017950|+|chr2:g.163389258:A>C  
MDLADYSAALDPAYTTLEFENVQVLTMGNDTSPSEGANLNSSNSLGV SALCAICGDRATGKHYGASSCDGCKG  
FFRRSVRKNHMYSCRFSRQCVDKDKRNQCRYCRLKCKFRAGMKKEAVQNERDRISTRSSYEDSSLPSINAL  
LQAEVLSQQITSPISGINGDIRAKKIANITDVCESMKEQLLVLVEWAKYIPAFCELLLDDQVALLRAHAGEHL  
LLGATKRSMVFKDVLVLLGNDYIVPRHCPELAEMSRV SIRILDELVL PFQELQIDDNEYACLKAI IFFDPDAKG  
LSDPGKIKRLRSQVQSLEDY INDRQYDSRGRFGELLLLLPTLQSI TWQMIEQIQFIKLFGMAKIDNLLQEML  
LGGASDAPHTHHPHPLMQEHMGTNVI VANTMPSHLSNGQMCEWPRPRGQAATPETPQSPSPSGSGSES YK  
LLPGAITTVKPPSAIPQPTITKQEI\*

>ENSMUSP00000018094\_c.33:A>C\_p.M12L ENSMUST00000018094.13|Hnf4a-  
201|ENSMUSG00000017950|+|chr2:g.163389258:A>C  
MRLSKTLAGMDLADYSAALDPAYTTLEFENVQVLTMGNDTSPSEGANLNSSNSLGV SALCAICGDRATGKHYG  
ASSCDGCKGFFRRSVRKNHMYSCRFSRQCVDKDKRNQCRYCRLKCKFRAGMKKEAVQNERDRISTRSSYED  
SSLPSINALLQAEVLSQQITSPISGINGDIRAKKIANITDVCESMKEQLLVLVEWAKYIPAFCELLLDDQVAL  
LRAHAGEHLLLGATKRSMVFKDVLVLLGNDYIVPRHCPELAEMSRV SIRILDELVL PFQELQIDDNEYACLKAI

IFFDPDAKGLSDPGKIKRLRSQVQVSLLEDYINDRQYDSRGRFGELELLLLLPTLQSIWQMIQIQFIKLFVMAK  
IDNLLQEMLLGGSASDAPHTHHPLHPLHMQEHMGTNVIVANTMPSHLSNGQMCEWPRPRGQAATPETPQPSPF  
SGSGSESYKLLPGAITTIKPPSAIQPTITKQEI\*

>ENSMUSP00000041806\_c.430:A>T\_p.E144V ENSMUST00000042775.5|Neur12-  
201|ENSMUSG00000039873|-|chr2:g.164674930:T>A  
MAAPSEHVGLGGPRSPARPEPPTRFHQVHGANIRMDPSGTRATRIVESFAHGVCFSREPLAPGQVFLVEIEEK  
ELGWCGLRLGLTALDPAASLAAPVPEFSLPDLVSLGHSWVFAITRHHNRVPREGQPEAAAVPSGPQALLVVPY  
LRIEQFRI PRDRLVGRSRPGLYSHLLDQLYEQNVLPPTARRSRLGVLFCPREDGTADMHIIINGEDMGPSARG  
LPAAQPLYAVVDVFASTKSVRLVQLEYGLPSLQTLCLRLVIQKRVVHRLAIDVLHLPKGLKDFCKYE\*

>ENSMUSP00000074198\_c.2630:A>T\_p.R877S ENSMUST00000074618.10|Nfatc2-  
202|ENSMUSG00000027544|-|chr2:g.168346462:T>A  
MDVPEPQDPDGGDGPHEGPGSPQDELDFSI LFDYDYLNP IEEEEPIAHKAISSPSGLAYPDDVDLDYGLKPCN  
PLASLSGEPGPRFGEPDSIGFQNF LSPVKPAGASGSPRIEITPSHELMQAGGALRGRDAGLSPEQPALALAG  
VAASPRFTLPVPGYEGYREPLCLSPASSGSSASFISDTFSPYTPCVSPNNAGPDDLCQFQNI PAHYSPRTS  
PIMSPRTSLAEDSCLGRHSPVPRPASRSSSPGAKRRHS CAEALVAPLPAASPQRSRSPSPQPSPHVALQDDSI  
PAGYPPTAGSAVLM DALNTLATDSPCGIPSKIWKTS PDPTPVSTAPSKAGLARHIYPTVEFLGPCEQEERRNS  
APESILLVPPTWPKQLVPAIPICSI PVTASLPPLEWPLSNQSGSYELRIEVQPKPHHRAHYETEGSRGAVKAP  
TGGHPVVQLHGYMENKPLGLQIFIGTADERILKPHAFYQVHRITGKTVTTTSYEKIVGNTKVLEI PLEPKNNM  
RATIDCAGILKLRNADIELRKGETD IGRKNTRVRLVFRVHVPEPSGRIVSLQAASNPIECSQRSASHELPMVER  
QDMSCLVYGGQMMILTGQNF TAESKVVFMKTTDGGQI WEMEATVDKDKSQPNMLFVEI PEYRNKHIRVPVK  
VNFYVINGKRRRSQPQHFTYHPVPAIKTEPSDEYEPSLICSPAHHGLGSGPYYPQHPMLAESPSCLVATMAPC  
QQFRSGLSSPDARYQQQSPAAALYQRSKSLSPGLLGYQQPSLLAAPLGLADAHRSVLVHAGSQGQGGSTLPH  
TSSASQQASPVIIHYSPTNQQLRGGGHQEFQHIMYCENFGPSSARPGPPP INQGQRLSPGAYPTVIQQQTAPSQ  
SAAKNGPSDQKEALPTGVTVKQEQLNDQTYLDDVNEI IRKEFSGPPSRNQT\*

>ENSMUSP00000104812\_c.2630:A>T\_p.R877S ENSMUST00000109184.8|Nfatc2-  
204|ENSMUSG00000027544|-|chr2:g.168346462:T>A  
MDVPEPQDPDGGDGPHEGPGSPQDELDFSI LFDYDYLNP IEEEEPIAHKAISSPSGLAYPDDVDLDYGLKPCN  
PLASLSGEPGPRFGEPDSIGFQNF LSPVKPAGASGSPRIEITPSHELMQAGGALRGRDAGLSPEQPALALAG  
VAASPRFTLPVPGYEGYREPLCLSPASSGSSASFISDTFSPYTPCVSPNNAGPDDLCQFQNI PAHYSPRTS  
PIMSPRTSLAEDSCLGRHSPVPRPASRSSSPGAKRRHS CAEALVAPLPAASPQRSRSPSPQPSPHVALQDDSI  
PAGYPPTAGSAVLM DALNTLATDSPCGIPSKIWKTS PDPTPVSTAPSKAGLARHIYPTVEFLGPCEQEERRNS  
APESILLVPPTWPKQLVPAIPICSI PVTASLPPLEWPLSNQSGSYELRIEVQPKPHHRAHYETEGSRGAVKAP  
TGGHPVVQLHGYMENKPLGLQIFIGTADERILKPHAFYQVHRITGKTVTTTSYEKIVGNTKVLEI PLEPKNNM  
RATIDCAGILKLRNADIELRKGETD IGRKNTRVRLVFRVHVPEPSGRIVSLQAASNPIECSQRSASHELPMVER  
QDMSCLVYGGQMMILTGQNF TAESKVVFMKTTDGGQI WEMEATVDKDKSQPNMLFVEI PEYRNKHIRVPVK  
VNFYVINGKRRRSQPQHFTYHPVPAIKTEPSDEYEPSLICSPAHHGLGSGPYYPQHPMLAESPSCLVATMAPC  
QQFRSGLSSPDARYQQQSPAAALYQRSKSLSPGLLGYQQPSLLAAPLGLADAHRSVLVHAGSQGQGGSTLPH  
TSSASQQASPVIIHYSPTNQQLRGGGHQEFQHIMYCENFGPSSARPGPPP INQGQRLSPGAYPTVIQQQTAPSQ  
SAAKNGPSDQKEALPTGVTVKQEQLNDQTYLDDDELIDTHLSWIQNIL\*

>ENSMUSP00000116617\_c.558:T>A\_p.Y187N ENSMUST00000128657.8|Gm14418-  
202|ENSMUSG00000078867|-|chr2:g.177079435:A>T  
MDLVTYDDVHVNF TQE EWALLHPSQKSLYKGVMLETYRNLT AIGYI WEEHTIEDHFQTSRSHGRHERSCSAEQ  
PPEFIQCGKAFAYESGRQRHQIKHTGGKHHCNQCCKDFRTRNAPQIHKRTH TGEKPYDCNQYKAFARISHL  
RVHKRTH TGEKPYECNQCGKAFASSDLQKHKRTH TGEKPYECNQCGKAFASSHLRIHKRTHAGDKRYECNQ  
CGKAFTQSNLQIHKGTHAGEKRYECNQCGKAFASSDLQKHKRTH TGEKPYECNQCGKAFASCDLQKHKRT  
HTGEKPYECKQCGKAFASITLQIHNRTHTGEKPYECKQCGKAFASNLRIHKQTHTGERLYECN\*

>ENSMUSP00000116617\_c.388:C>T\_p.P130L ENSMUST00000128657.8|Gm14418-  
202|ENSMUSG00000078867|-|chr2:g.177079605:G>A  
MDLVTYDDVHVNF TQE EWALLHPSQKSLYKGVMLETYRNLT AIGYI WEEHTIEDHFQTSRSHGRHERSCSAEQ  
PPEFIQCGKAFAYESGRQRHQIKHTGGKHHCNQCCKDFRTRNAPQIHKRTH TGEKLYDCNQYKAFARISHL  
RVHKRTH TGEKPYECNQCGKAFASSDLQKHKRTH TGEKPYECNQCGKAFASSHLRIHKRTHAGDKRYECNQ  
CGKAFTQSNLQIHKGTHAGEKRYECNQCGKAFASSDLQKHKRTH TGEKPYECNQCGKAFASCDLQKHKRT  
HTGEKPYECKQCGKAFASITLQIHNRTHTGEKPYECKQCGKAFASNLRIHKQTHTGERLYECN\*

>rs107973180\_ENSMUSP00000079909\_c.504:C>A\_p.Q169K  
ENSMUST00000081134.10|Sycp2-201|ENSMUSG00000060445|-|chr2:g.178037639:G>T  
MPVRPDLQOLEKCID DALRNDFKPLLALLQIDICEDVKIKCSKQFLRKLDDLICRELNKKDIQTVSSILISI  
GRCSKNIFILGQAGLQTMIKQGLVQKMWVWFENSKEIILNQQSKDEAVMMIEDLFDLLMVIYDISDEGKNQ  
VLESFIPQICALVIDSRVNFCKIQAELKMMNMLDRI PQDANKILSNQEMLTLMNSMGERILDVGDYELQVGI

VEALCRMTTEKRRQELAYEWFSDMFIANAFKEIKDCEFETDCRIFLNLVNGILGDKRRVYTFPCLSAFLGKYE  
LQIPSEDEKLEEFWIDFNLSHTLSFYIAGDEEDHQWEAVTVPEEKVQMYNIEVRESKLLTLTLKNIKISKK  
EGKELLFYFDESLEITNVTKKVFVGGNKYKEFTRKQGISVAKTSHVLFSDASGSQILVPESQSPVKENLIHLK  
EKSDIQKKLVNPLELGNSSSQDEITTPSRKKMSEASMIVPDTRDYTVRSPILLINTSTPRRSREPLQAINSV  
KAVSKTSESGMDYAASPKSRQSDGRKRWNANRANHNKTTAVIQNKQYEDNESPDQNFNEIEDTLNSVSSAVGKV  
DKPVLPGVLDISKNTTHSRWACWTPVTTIKLCNNQRSRALPGDCTQDTGVNKKCTKQKSVSDDDSEETQKGG  
YSKDVIKCNKSDEAEFCERNIQEQNHPKYSQKKNANAKKSDWHIESETTYKSVLLNKTTEESLIYKKTCVLS  
KDVNTTICDKSPSRKSRNHTKSRKELMSELTSCLEEEIPVRENSKGRFTGASESLINQISRRYNPDSMMS  
TRKLKEPQDGSFGSKPDLQFNKVQRKSYRKLKATVVNVTVSECLDDVYNFSLNGADEPVIKLGIEFQATTR  
EASMDNSLKLKVNHDHDPFLKTKDKRMLSYEKKTLSDTETECGDDSKTDISWLKEPKTKRLMDYSRNKNT  
TKYKSRKSRSSMEKQPRPTMVLNKNMSKNDYEVVVDGRTRLPRRATKTKKNYKDLSTSESESESEKECSYLF  
KDKLPTKEETIHSRAQTKKLEKQKVFNSEALKGQPSSEEQKNSRLREGREDSLCLSSASVSRSSSVEMR  
CTEKITERDFTQDYDYITKLSLSPYKAPSPFLNGNNSVVGGRQSPRISSETSAMCVKRSYSPASGPPSPRHT  
PTKNNSVVMKANSVINNRQTHCNSYSVSSNSSEKLYMEPESEPCDNHMQNKREGNHAASPLSLSSEKI  
EKMWFDMPSENTHVSQPSQRGSKRRMYLEDELNSNSNEAEVEEAEEREHLLSKKRCQWENSQHTFKTSLSTP  
DFSVPKDWQOELQAGMFYDNISSDYKRKTDSDQHKIMDDFTTKTLKLTQQHLMAMTSQAQGRDENVEKQVLT  
LLELEKVEKDSQTLRDLLEKELVDIEEKLQKMRAYHRCERERFRVLKTSLDKSFVLYNSVYEEVSFTSEMCL  
MKANMKMLQDKLLKEMHEEEVNLIRRLQSLFKAHEGND\*

>rs107973180\_ENSMUSP00000116917\_c.504:C>A\_p.Q169K  
ENSMUST00000138175.2|Sycp2-204|ENSMUSG0000060445|-|chr2:g.178037639:G>T  
MPVRPDLQOLEKCIDDALRKNDFKPLLALLQIDICEDVKIKCSKQFLRKLDDLICRELNKKDIQTVSSILISI  
GRCSKNIFILGQAGLQTMIKQGLVQKMSVWFENSKEIILNQOQSKDEAVMMIEDLFDLLMVIYDISDEGKNQ  
VLESFIPQICALVIDSRVNFICKQEALKKMNMLDRI PQ

>ENSMUSP0000015791\_c.1006:G>A\_p.G336D ENSMUST0000015791.6|Lama5-  
201|ENSMUSG0000015647|-|chr2:g.179844265:C>T  
MAKRGQQLCAGSAPGALGPRSPAPRPLLLLLLAGLALVGEARTPGDGFSLHPPYFNLAEGARITASATCGEEA  
PTRSVSRPTEDLYLGGPVAGGDPNQTIQGGYCDICTAANSNKAHPVSNALDGTERRWQSPPLSRGLEYNE  
VNVTLDLGQVHVAVYVLIKVFANSRPRDLWVLERSTDFGHTYQPPWQFFASSKRDCLEFRGPRTLERITQDDVI  
CTTEYSRIVPLENGEIVVSLVNGRPGALNFSYSPLLRDFTKATNIRLRFLRTNTLLGHLMGKALRDPVTRRY  
YYSIKDISIGRCVCHGHADVCDADPLDPFRLQACQHNCTGDCDRCCPGFNQPPWKPATTDSANECQSCN  
CHGHAYDCYYDPEVDRNASQNDNVYQGGVCLDCQHHTTGINCERCLPGFFRAPDQPLDSPHVCPCDCES  
DFTDGTCEDLTGRCYCRPNFTGELCAACAEGYTDFFPHYPLPSFPHNDTREQVLPAQQIVNCDNAAGTQGNA  
CRKDPRLGRVCVKPNFRGAHCELCAPGFHGPSCHPCQCSSPGVANSLCDPESGQCMCRTGFEGDRCDHCALGY  
FHFFPLCQLCGCSPAGTLPEGCDEAGRCQCRPGFDGPHCDRCLPGYHGYPDCHACACDPRGALDQQCGVGGGLCH  
CRPGYTGATQCECSPGFYGFPCIPCHCSADGSLHTTCDPTTGQCRPRVTLGLHCDMCPVGAYNFPYCEAGS  
CHPAGLAPANPALPETQAPCMCRAHVEGSPCDRCKPGYWGLSASNPEGCTRCSDPRGTLGGVTECQNGQC  
CKAHVCGKTCACACKDGFGLDYADYFGCRSCRCVGGALGQGCPEKGTGACRCRPNTPQGPTCSEPAKDHYLPDL  
HHMRLELEEAATPEGHAVRFGFNPLEFENFSWRGYAHMMAIQPRIVARLNVTSPLDRLVFRYVNRGSTSVNG  
QISVREEGLSSCTNCTEQSQPVAFPPSTEPAFVTVPQRGFGEFVNLNPGIALLVEAEGVLLDYVLLPSTY  
YEAALLQHRVTEACTYRPSALHSTENCLVYAHPLDGFPSAAGTEALCRHDNSLPRPCPTEQLSPSPHPLATC  
FGSDVDIQLEMAVPQPGQYVLVVEYVGEDSHQEMGVAVHTPQRAPQGVNLNHPCPYSSLCRSPARDTQHHLA  
IFYLDSEASIRLTAEQAHFLLHSVTLVPEVEFSTEFVEPRVFCVSSHGTFNPSSAACLASRFKPPQPIILKD  
CQVLPPLPDLPLTQSQELSPGAPPEGPQPRPPTAVDPNAEPTLLRHPQGTVVFTTQVPTLGRYAFLLHGYPV  
HPSFPVEVLINGGRIWQGHANASFCPHGYGCRTLVLCGQTMLDVTDNELTVTVVRVPEGRWLWLDYVLI  
VPEDEAYSSYLQEEPLDKSYDFISHCATQGYHISPPSSSPFCRNAATSLSLFYNNGALPCGCEHVGAVSPTCEPFGG  
QCPCRGHVIGRDCSRCATGYWGFNCRPCDCGARLCELTGQCICPRTVPPDCLVCPQSFQGHPLVGCCEC  
NCSGPGVQELTDPTCDMDSGQCRCRPNVAGRCDTCAFGYGYPSRCPCDCHEAGTMASVCDPLTGQCHCKEN  
VQGSRCQCRVGTFSLDAANPKGCTRCFCFGATERCGNSNLARHEFVDMEGWVLLSSDRQVVPHEHRPEIELL  
HADLRVADTFSELYWQAPPSYLGDRVSSYGGTLHYELHSETQRGDIPIYESRPDVVLQGNQMSIAFLELAY  
PPPGQVHRGQLQLVEGNFRHLETHNPVSREELMMVLAGLEQLQIRALFSQTSVSLRRVVLEVASEAGRGP  
ASNVELCMCPANYRGDSCQECAPGYRDTKGLFLGRVPCQCCHGSDRCLPGSGICVGCQHNTGDCQECRCR  
GFVSSDPSNPASPCVPCPLAVPSNMFADGCVLRNGRTQCLCRPGYAGASCERCAPGFFGNPLVLGSSCQPC  
DCSGNGDPNMFSDCPLTGACRGLRHTTGPHLRCERCAPGYGNALLPGNCTRCDSPCGTETCDPQSGRCLC  
KAGVTGQRCDRCLEGLYFGEQCGCRPCACGPAKGCSECHPQSGQCHCQPGTTGPPQCLECAPGYWGLPEKGC  
RCQCPRGCDPHTGHCTCPPGLSGERCDCSQQHQVVPVPGKPGGHGHCVEVCDHCVVLLDDLERAGALLPAI  
REQLQGINASSAAWARLHRLNASIADLQSKLRSPPGPRYQAAQQLQTLQEQSISLQDTERLGSQATGVQQA  
GQLLDTTESTLGRAQKLLSVRAVGRALNELASRMGQSPGDALVPSGEQLRWALAEVERLLWDMRTRDLGAQ  
GAVAEAEALAEQRLMARVQEQLTSFWEENQSLATHIRDQLAQYESGLMDLREALNQAVNTTREAELNSRNE

RLKEALQWKQELSQDNATLKATLQAASLILGHVSELLQGIDQAKEDLEHLAASLDGAWTPLLKRMQAFSPASS  
 KVDLVEAAEAHAQKLNQLAINLSGIILGINQDRFIQRAVEASNAISSILQAVQAAEDAAGQALRQASRTWEMV  
 VQRGLAAGARQLLANSSALEETILGHQGRGLGAQGRQAAGIQLHNVWARKNQLAAQIQEAQAMLAMDTSETS  
 EKIAHAKAVAAEALSTATHVQSQQLQGMQKNVERWQSQLGGGLQGGDLQOVERDASSSVSTLEKTLPLQLLAKLSR  
 LENRGVHNASLALSANIGRVRKLIQAARSAASKVKVSMKFNGRSGVRLRTPRDLADLAAYTALKFHIQSPVPA  
 PEPGKNTGDHFVLYMGSQRATGDYMGVSLRNQKVHVWYRLGKAGPTTSLIDENIGEQAFAVSIIDRTLQFGHMS  
 VTVEKQMVHEIKGDTVAPGSEGLLNHPDDFVYVGGYPSNFTPEPLRFPGYLGCIEMETLNEEVVSLYNFE  
 QTFMLDTAVDKPCARSKATGDPWLTGDSYLDGSGFARISFEKQFSNTKRFDQELRLVSYNGIIFFLKQESQFL  
 CLAVQEGTLVLFYDFGSLKKADPLQPPQALTAASKAIQVFLLAGNRKRVLVRVERATVFSVDQDNMLEMADA  
 YYLGGVPPEQLPLSLRQLFPSSGGSVRCIKGKIKALGKYVDLKRNLNTTGISFGCTADLLVGRMTTFHGHGFLPL  
 ALPDVAPITEVVYSGFGFRGTQDNNLLYRTSPDGPYQVSLREGHVTLRFMNQEVETQRFVADGAPHYVAFYS  
 NVTGVWLYVDDQLQLVKSHERTT PMLQLQPEEPSRLLLGGPLVSGTFHNFSGCISNVFVQRLRGPQRFVFDLHQ  
 NMGSVNVSVGCTPAQLIETSRAQKVSRRSRQPSQDLACTTPWLPGTIQDAYQFGGPLPSYLQFVGISPSHR  
 NRLHLMLVLRPHAASQGLLLSTAPMSGRSPSLVFLNHHGFVAQTEGPGPRLQVQSRQHSRAGQWHRVSVRWG  
 MQQIQLVVDGQSQTWSQKALHHRVPRAERPQPYTSLVGGPLPASSYSSKLPVSVGFGSGLKQLDKRPLRTPQ  
 MVGVTPCVSGPLEDGLFFPGSEGVVTELEPKAKMPYVSLLEMRPLAAAGLI FHLGQALATPYMQLKVLTEQV  
 LLQANDGAGEFSTWVTYPKLCDRWHRVAVIMGRDTRLEVDTSQSNHTTGRLPESLAGSPALLHLGSLPKSST  
 AREPELPAYRGCLRKLLINGAPVNVVTASVQIQGAVGMRGCPSTLALSQKQKALTQRQAKPSVSPLLWH\*  
 >ENSMUSP00000139512\_c.157:C>GC\_p.A53ins-fs ENSMUST00000185384.7|Rbis-  
 202|ENSMUSG00000078784|-|chr3:g.14672310:G>GC  
 MAKNKLGKQKSRNVFHIASHKTFKAKNKAKPVTTNLKKNIMNHEKVNRMNRGFCYKERTERTCKLLKPPFS  
 >ENSMUSP00000104002\_c.283:C>GC\_p.A95ins-fs ENSMUST00000108365.4|Rbis-  
 201|ENSMUSG00000078784|-|chr3:g.14672310:G>GC  
 MAAAAAPRALFCQLLVLYRFLVGDRTPGVPRPETLRPPLSRMAKNKLGKQKSRNVFHIASHKTFKAKNKAKP  
 VTNLKKNIMNHEKVNRMNRGFCYKERTERTCKLLKPPFS  
 >ENSMUSP00000139464\_c.157:C>GC\_p.A53ins-fs ENSMUST00000186870.7|Rbis-  
 204|ENSMUSG00000078784|-|chr3:g.14672310:G>GC  
 MAKNKLGKQKSRNVFHIASHKTFKAKNKAKPVTTNLKKNIMNHEKVNRMNRGFCYKERTERTCKLLKPPFS  
 >ENSMUSP00000096807\_c.87:G>A\_p.E30K ENSMUST00000099201.9|Sirpbla-  
 201|ENSMUSG00000095788|-|chr3:g.15482239:C>T  
 MLLLDAAWTHIPHSVLLLLILLGFKGA AVRKLKVIQPVKSFFVAGGSATLNCTVTSLLPVGPIRWYRGVQSR  
 LLIYPFTGEHSPRITNVSDVTKRNNMDFSIRISNVTPADSGTYCVKQFQSGSSEPDIEIQSGGGTELLVLAKP  
 SSPMVSGPAARAVPQQT VTFTRSHGFFPRNLTLKWFKNGDEISHLETSVEPEETS SVSYRVSSSTVQVLEPRD  
 VRSQIICEVDHVTLDRAPLRGIAHISEFIQVPPTLEIRQQPTMVWNVINVTTCQIQKFYPPSFQLTWLENGNIS  
 RREVPFTLIVNKDGTYNWISCLLVNISALEENMVVTCQVEHDEQAEVIETHHTVLVTEHQVRVKGTATKSELKTA  
 GIAKIPVAVLLGSKILLLLIAATVIYMHKKQNA\*  
 >ENSMUSP00000141504\_c.87:G>A\_p.E30K ENSMUST00000192700.3|Sirpbla-  
 203|ENSMUSG00000095788|-|chr3:g.15482239:C>T  
 MLLLDAAWTHIPHSVLLLLILLGFKGA AVRKLKVIQPVKSFFVAGGSATLNCTVTSLLPVGPIRWYRGVQSR  
 LLIYPFTGEHSPRITNVSDVTKRNNMDFSIRISNVTPADSGTYCVKQFQSGSSEPDIEIQSGGGTELLVLAKP  
 SSPMVSGPAARAVPQQT VTFTRSHGFFPRNLTLKWFKNGDEISHLETSVEPEETS SVSYRVSSSTVQVLEPRD  
 VRSQIICEVDHVTLDRAPLRGIAHISEFIQVPPTLEIRQQPTMVWNVINVTTCQIQKFYPPSFQLTWLENGNIS  
 RREVPFTLIVNKDGTYNWISCLLVNISALEENMVVTCQVEHDEQAEVIETHHTVLVTEHQVRVKELKTAGIAKIP  
 VAVLLGSKILLLLIAATVIYMHKKQNA\*  
 >rs49659380\_ENSMUSP00000103989\_c.1177:A>G\_p.K393R  
 ENSMUST00000108352.9|Sirpblc-204|ENSMUSG00000074677|-|chr3:g.15856671:T>C  
 MLLLDAAWTHIPHCVLLLLILLGGLKGAAMRELKVIQPVKSFFVAGGSATLNCTVTSLLPVGPIRWFKGVQSR  
 LLIYSFTGERFPRITNVSDVTKRNSLDFSIRISNVTPADSGTYCVKQFQSGPSEPDMEIQSGGGTELSVFAKP  
 SSPMVSGPAARAVPQQTVAFTCRSHGFFPRNLTLKWFKNGNEISHLETSVEPEETS SVSYRVSSSTVQVLEPRD  
 VRSQIICEVDHVTLDRAPLRGIAHISEFIQVPPTLEISQQPTMVWNVIIIVTCQIQKFYPPRFQVWLENGNIS  
 RREVPFTLIVNKDGTYNWISCLLVNISALEENMVVTCQVEHDEQAEVIETHHTVVVTEHQVRVKGTATKSELKTA  
 GIAKIPVAVLLGSKILLLLIAATVIYMRKQNA\*  
 >rs49659380\_ENSMUSP00000061216\_c.1159:A>G\_p.K387R  
 ENSMUST00000050623.11|Sirpblc-201|ENSMUSG00000074677|-  
 |chr3:g.15856671:T>C  
 MLLLDAAWTHIPHCVLLLLILLGGLKGAAMRELKVIQPVKSFFVAGGSATLNCTVTSLLPVGPIRWFKGVQSR  
 LLIYSFTGERFPRITNVSDVTKRNSLDFSIRISNVTPADSGTYCVKQFQSGPSEPDMEIQSGGGTELSVFAKP  
 SSPMVSGPAARAVPQQTVAFTCRSHGFFPRNLTLKWFKNGNEISHLETSVEPEETS SVSYRVSSSTVQVLEPRD

VRSQIICEVDHVTLDRAPLRGIAHISEFIQVPPTLEISQQPTMVWVNIIVTCQIQKFYPPRFQVWLENGNIS  
RREVPFTLIVNKDGTYNWISCLLVNISALEENMVVTCQVEHDGQAEVIETHHTVVVTEHQRVKELKTAGIAKIP  
VAVLLGSKILLLLIAATVIYMRKKQNA\*

>ENSMUSP00000103989\_c.1164:A>T\_p.I389F ENSMUST00000108352.9|Sirpblc-  
204|ENSMUSG00000074677|-|chr3:g.15856684:T>A  
MLLLDAWTHIPHCVLLLLLLLGLKGAAMRELKVIQPVKSFFVGAGGSATLNCTVTSLLPVGPIRWFKGVGQSR  
LLIYSFTGERFPRITNVSDVTKRSNLDFSIRISNVTPADSGTYCVKQFQRPSEPDMEIQSGGGTELSVFAKP  
SSPMVSGPAARAVPQQTVAFTCRSHGFFPRNLTLKWFKNGNEISHLETSVEPEETS SVSYRVSSTVQVVLEPRD  
VRSQIICEVDHVTLDRAPLRGIAHISEFIQVPPTLEISQQPTMVWVNIIVTCQIQKFYPPRFQVWLENGNIS  
RREVPFTLIVNKDGTYNWISCLLVNISALEENMVVTCQVEHDGQAEVIETHHTVVVTEHQRVKGTATKSELKTA  
GIAKIPVAVLLGSKILLLLIAATVFYMRKKQNA\*

>ENSMUSP00000061216\_c.1146:A>T\_p.I383F ENSMUST00000050623.11|Sirpblc-  
201|ENSMUSG00000074677|-|chr3:g.15856684:T>A  
MLLLDAWTHIPHCVLLLLLLLGLKGAAMRELKVIQPVKSFFVGAGGSATLNCTVTSLLPVGPIRWFKGVGQSR  
LLIYSFTGERFPRITNVSDVTKRSNLDFSIRISNVTPADSGTYCVKQFQRPSEPDMEIQSGGGTELSVFAKP  
SSPMVSGPAARAVPQQTVAFTCRSHGFFPRNLTLKWFKNGNEISHLETSVEPEETS SVSYRVSSTVQVVLEPRD  
VRSQIICEVDHVTLDRAPLRGIAHISEFIQVPPTLEISQQPTMVWVNIIVTCQIQKFYPPRFQVWLENGNIS  
RREVPFTLIVNKDGTYNWISCLLVNISALEENMVVTCQVEHDGQAEVIETHHTVVVTEHQRVKELKTAGIAKIP  
VAVLLGSKILLLLIAATVFYMRKKQNA\*

>rs219323197\_ENSMUSP00000120527\_c.232:G>A\_p.S78N  
ENSMUST00000148194.8|Sirpblc-207|ENSMUSG00000074677|-|chr3:g.15887212:C>T  
XQSGGGTELSVFAKPSSPMVSGPAARAVPQQTVAFTCRSHGFFPRNLTLKWFKNGNEISHLETSVEPEETS SVS  
YRVSNTVQVVLEPRDVRSQIICEVDHVTLDRAPLRGIAHISEFIQVPPTLEISQQPTMVWVNIIVTCQIQKFY  
PPRFQVWLENGNISRREVPFTLIVNKDGTYNWISCLLVNISALEENMVVTCQVEHDGQAEVIETHHTVVVTEH  
QRVKGTATKSEAPNGNKC\*

>rs219323197\_ENSMUSP00000103991\_c.625:G>A\_p.S209N  
ENSMUST00000108354.8|Sirpblc-205|ENSMUSG00000074677|-|chr3:g.15887212:C>T  
MLLLDAWTHIPHCVLLLLLLLGLKGAAMRELKVIQPVKSFFVGAGGSATLNCTVTSLLPVGPIRWFKGVGQSR  
LLIYSFTGERFPRITNVSDVTKRSNLDFSIRISNVTPADSGTYCVKQFQRPSEPDMEIQSGGGTELSVFAKP  
SSPMVSGPAARAVPQQTVAFTCRSHGFFPRNLTLKWFKNGNEISHLETSVEPEETS SVSYRVSNTVQVVLEPRD  
VRSQIICEVDHVTLDRAPLRGIAHISEFIQVPPTLEISQQPTMVWVNIIVTCQIQKFYPPRFQVWLENGNIS  
RREVPFTLIVNKDGTYNWISCLLVNISALEENMVVTCQVEHDGQAEVIETHHTVVVTEHQRVKEAPNGNKC\*

>rs219323197\_ENSMUSP00000103989\_c.625:G>A\_p.S209N  
ENSMUST00000108352.9|Sirpblc-204|ENSMUSG00000074677|-|chr3:g.15887212:C>T  
MLLLDAWTHIPHCVLLLLLLLGLKGAAMRELKVIQPVKSFFVGAGGSATLNCTVTSLLPVGPIRWFKGVGQSR  
LLIYSFTGERFPRITNVSDVTKRSNLDFSIRISNVTPADSGTYCVKQFQRPSEPDMEIQSGGGTELSVFAKP  
SSPMVSGPAARAVPQQTVAFTCRSHGFFPRNLTLKWFKNGNEISHLETSVEPEETS SVSYRVSNTVQVVLEPRD  
VRSQIICEVDHVTLDRAPLRGIAHISEFIQVPPTLEISQQPTMVWVNIIVTCQIQKFYPPRFQVWLENGNIS  
RREVPFTLIVNKDGTYNWISCLLVNISALEENMVVTCQVEHDGQAEVIETHHTVVVTEHQRVKGTATKSELKTA  
GIAKIPVAVLLGSKILLLLIAATVIYMRKKQNA\*

>rs219323197\_ENSMUSP00000061216\_c.625:G>A\_p.S209N  
ENSMUST00000050623.11|Sirpblc-201|ENSMUSG00000074677|-  
|chr3:g.15887212:C>T  
MLLLDAWTHIPHCVLLLLLLLGLKGAAMRELKVIQPVKSFFVGAGGSATLNCTVTSLLPVGPIRWFKGVGQSR  
LLIYSFTGERFPRITNVSDVTKRSNLDFSIRISNVTPADSGTYCVKQFQRPSEPDMEIQSGGGTELSVFAKP  
SSPMVSGPAARAVPQQTVAFTCRSHGFFPRNLTLKWFKNGNEISHLETSVEPEETS SVSYRVSNTVQVVLEPRD  
VRSQIICEVDHVTLDRAPLRGIAHISEFIQVPPTLEISQQPTMVWVNIIVTCQIQKFYPPRFQVWLENGNIS  
RREVPFTLIVNKDGTYNWISCLLVNISALEENMVVTCQVEHDGQAEVIETHHTVVVTEHQRVKELKTAGIAKIP  
VAVLLGSKILLLLIAATVIYMRKKQNA\*

>rs219323197\_ENSMUSP00000103987\_c.625:G>A\_p.S209N  
ENSMUST00000108350.8|Sirpblc-203|ENSMUSG00000074677|-|chr3:g.15887212:C>T  
MLLLDAWTHIPHCVLLLLLLLGLKGAAMRELKVIQPVKSFFVGAGGSATLNCTVTSLLPVGPIRWFKGVGQSR  
LLIYSFTGERFPRITNVSDVTKRSNLDFSIRISNVTPADSGTYCVKQFQRPSEPDMEIQSGGGTELSVFAKP  
SSPMVSGPAARAVPQQTVAFTCRSHGFFPRNLTLKWFKNGNEISHLETSVEPEETS SVSYRVSNTVQVVLEPRD  
VRSQIICEVDHVTLDRAPLRGIAHISEFIQVPPTLEISQQPTMVWVNIIVTCQIQKFYPPRFQVWLENGNIS  
RREVPFTLIVNKDGTYNWISCLLVNISALEENMVVTCQVEHDGQAEVIETHHTVVVTEHQRVKGTATKSGEVFT  
PPLCLNVNWAFFMYKVTFLIIVALIS\*

>rs219323197\_ENSMUSP00000103986\_c.619:G>A\_p.S207N  
ENSMUST00000108349.2|Sirpblc-202|ENSMUSG00000074677|-|chr3:g.15887212:C>T  
MLLLDAWTHI PHCVLLLI LLLGLKAMRELKVIQPVKSFFVGGAGGSATLNCTVTSLLPVGPIRWFKGVGQSRLL  
IYSFTGERFPRITNVSDVTKRSNLDFSIRISNVTPADSGTYCVKFORGPSEPDMEIQSGGGTELSVFAKPSS  
PMVSGPAARAVPQQIVAFVTCRSHGFFPRNLTLKWFKNGNEISHLETSVEPEETS SVSYRVSNTVQVVLEPRDVR  
SQIICEVDHVTLDRAPLRGIAHISEFIQVPPTLEISQQPTMVWNVIIVTCQIQKFYPPRFQVWLENGNISRR  
EVPFTLIVNKDGTYNWISCLLVNISALEENMVVTCQVEHDGQAEVIETHTVVVTEHQVRVKGATATKSGEVFTPP  
LCLNVNWSAFFMYKVTFLIIVAL S\*

>ENSMUSP00000120527\_c.94:C>T\_p.T32I ENSMUST00000148194.8|Sirpblc-  
207|ENSMUSG00000074677|-|chr3:g.15887350:G>A  
XQSGGGTELSVFAKPSSPMVSGPAARAVPQQIVAFVTCRSHGFFPRNLTLKWFKNGNEISHLETSVEPEETS SVS  
YRVSSTVQVVLEPRDVR SQIICEVDHVTLDRAPLRGIAHISEFIQVPPTLEISQQPTMVWNVIIVTCQIQKFY  
PPRFQVWLENGNISRRVFPFTLIVNKDGTYNWISCLLVNISALEENMVVTCQVEHDGQAEVIETHTVVVTEH  
QVRVKGATATKSEAPNGNKC\*

>ENSMUSP00000103991\_c.487:C>T\_p.T163I ENSMUST00000108354.8|Sirpblc-  
205|ENSMUSG00000074677|-|chr3:g.15887350:G>A  
MLLLDAWTHI PHCVLLLI LLLGLKGAAMRELKVIQPVKSFFVGGAGGSATLNCTVTSLLPVGPIRWFKGVGQSR  
LLIYSFTGERFPRITNVSDVTKRSNLDFSIRISNVTPADSGTYCVKFORGPSEPDMEIQSGGGTELSVFAKP  
SSPMVSGPAARAVPQQIVAFVTCRSHGFFPRNLTLKWFKNGNEISHLETSVEPEETS SVSYRVSSTVQVVLEPRD  
VRSQIICEVDHVTLDRAPLRGIAHISEFIQVPPTLEISQQPTMVWNVIIVTCQIQKFYPPRFQVWLENGNIS  
RREVPFTLIVNKDGTYNWISCLLVNISALEENMVVTCQVEHDGQAEVIETHTVVVTEHQVRVKEAPNGNKC\*

>ENSMUSP00000103989\_c.487:C>T\_p.T163I ENSMUST00000108352.9|Sirpblc-  
204|ENSMUSG00000074677|-|chr3:g.15887350:G>A  
MLLLDAWTHI PHCVLLLI LLLGLKGAAMRELKVIQPVKSFFVGGAGGSATLNCTVTSLLPVGPIRWFKGVGQSR  
LLIYSFTGERFPRITNVSDVTKRSNLDFSIRISNVTPADSGTYCVKFORGPSEPDMEIQSGGGTELSVFAKP  
SSPMVSGPAARAVPQQIVAFVTCRSHGFFPRNLTLKWFKNGNEISHLETSVEPEETS SVSYRVSSTVQVVLEPRD  
VRSQIICEVDHVTLDRAPLRGIAHISEFIQVPPTLEISQQPTMVWNVIIVTCQIQKFYPPRFQVWLENGNIS  
RREVPFTLIVNKDGTYNWISCLLVNISALEENMVVTCQVEHDGQAEVIETHTVVVTEHQVRVKGATATKSELKTA  
GIAKIPVAVLLGSKILLLIAATVIYMRKKQNA\*

>ENSMUSP00000061216\_c.487:C>T\_p.T163I ENSMUST00000050623.11|Sirpblc-  
201|ENSMUSG00000074677|-|chr3:g.15887350:G>A  
MLLLDAWTHI PHCVLLLI LLLGLKGAAMRELKVIQPVKSFFVGGAGGSATLNCTVTSLLPVGPIRWFKGVGQSR  
LLIYSFTGERFPRITNVSDVTKRSNLDFSIRISNVTPADSGTYCVKFORGPSEPDMEIQSGGGTELSVFAKP  
SSPMVSGPAARAVPQQIVAFVTCRSHGFFPRNLTLKWFKNGNEISHLETSVEPEETS SVSYRVSSTVQVVLEPRD  
VRSQIICEVDHVTLDRAPLRGIAHISEFIQVPPTLEISQQPTMVWNVIIVTCQIQKFYPPRFQVWLENGNIS  
RREVPFTLIVNKDGTYNWISCLLVNISALEENMVVTCQVEHDGQAEVIETHTVVVTEHQVRVKEKLTAGIAKIP  
VAVLLGSKILLLIAATVIYMRKKQNA\*

>ENSMUSP00000103987\_c.487:C>T\_p.T163I ENSMUST00000108350.8|Sirpblc-  
203|ENSMUSG00000074677|-|chr3:g.15887350:G>A  
MLLLDAWTHI PHCVLLLI LLLGLKGAAMRELKVIQPVKSFFVGGAGGSATLNCTVTSLLPVGPIRWFKGVGQSR  
LLIYSFTGERFPRITNVSDVTKRSNLDFSIRISNVTPADSGTYCVKFORGPSEPDMEIQSGGGTELSVFAKP  
SSPMVSGPAARAVPQQIVAFVTCRSHGFFPRNLTLKWFKNGNEISHLETSVEPEETS SVSYRVSSTVQVVLEPRD  
VRSQIICEVDHVTLDRAPLRGIAHISEFIQVPPTLEISQQPTMVWNVIIVTCQIQKFYPPRFQVWLENGNIS  
RREVPFTLIVNKDGTYNWISCLLVNISALEENMVVTCQVEHDGQAEVIETHTVVVTEHQVRVKGATATKSGEVFT  
PPLCLNVNWSAFFMYKVTFLIIVAL S\*

>ENSMUSP00000103986\_c.481:C>T\_p.T161I ENSMUST00000108349.2|Sirpblc-  
202|ENSMUSG00000074677|-|chr3:g.15887350:G>A  
MLLLDAWTHI PHCVLLLI LLLGLKAMRELKVIQPVKSFFVGGAGGSATLNCTVTSLLPVGPIRWFKGVGQSRLL  
IYSFTGERFPRITNVSDVTKRSNLDFSIRISNVTPADSGTYCVKFORGPSEPDMEIQSGGGTELSVFAKPSS  
PMVSGPAARAVPQQIVAFVTCRSHGFFPRNLTLKWFKNGNEISHLETSVEPEETS SVSYRVSSTVQVVLEPRDVR  
SQIICEVDHVTLDRAPLRGIAHISEFIQVPPTLEISQQPTMVWNVIIVTCQIQKFYPPRFQVWLENGNISRR  
EVPFTLIVNKDGTYNWISCLLVNISALEENMVVTCQVEHDGQAEVIETHTVVVTEHQVRVKGATATKSGEVFTPP  
LCLNVNWSAFFMYKVTFLIIVAL S\*

>ENSMUSP00000043492\_c.1044:G>T\_p.A349S ENSMUST00000037141.9|Setd7-  
201|ENSMUSG00000037111|-|chr3:g.51428784:C>A  
MDSDDVEVVEEAVEGHLDDDGPHGFCTVYSSDTRFEGNFVHGEKNGRKGFFFDGSLTEGYVDDALQGGV  
YTYEDGGVLQGTYYVDGELNGPAQEYDSDGRLIFKGYKDNRRHGVGCWIHYPDGGSVGEVNEDEGEMTGEKIA  
YVPDQRTALYKGFIDGEMLEGLATLMATEEGRPHFEVTS GSSVYHFDDKSTSSCISSDALLPDPYESERVYVA

DSLISSAGEGLFSKVAVGPNVTVMSEFYNGVRITHQEVDSDRDWALNGNTLSLDEETVIDVPEPYNHVSKYCASLG  
 HKANHSFTPNVCVYDLFVHPRFGPIKCIRTLRAVEAEELTVAYGYDHSPPGKSGPESPEWYQVELKAFQATQQ  
 K\*  
 >ENSMUSP00000029419\_c.814:T>G\_p.F272C ENSMUST00000029419.8|Veph1-  
 201|ENSMUSG00000027831|-|chr3:g.66112988:A>C  
 MHQLFRLVLGQKDLKAGDLFSLDDAEIEDSLTEALEQIKVISSSLDYQTNNNDQAVVEICITRITTAIRETE  
 SIEKHARALVGLWDSCLEHNLRPAGKDEDTPHAKIASDIMSCILQYNRTFVMVLAVPIAVKFLHRGSKELCR  
 NMSNYLSLAAITKADLLADHTEGIIKSILQGNAMLLRVLPAVYEKQFPINRHLAELLALMSQLEQTEQYHLL  
 RLLHVAAKRKDVEVVQKCVFLIRNLKDYNDIILNILEIAGHEPLALNSCLPMLKEIAEQFPYLTGQMAR  
 IFGAVGHVDEERARSCLRYLVSQLANMEHPFHILLLEIKSITDAFSSILGPHSRDIFRMSNSFTNIAKLLSR  
 QLENSKADSSRRKTSTEVSIPEKLELNSMEPESEDHEKLVKIQAFEDKINAESNTPGSGRRYSLDHISKEE  
 RKSIRFSRSLALNTVLTNGVSVEDNEVEEKAGMHASISLSQIDPLSHGIGKLPFKTDTHGSPLRNSSASHP  
 SIIHTEPETMPETFKENIQEEILEAATSPIEYQDKLYLHLRENLSKVKAYALEIAKKVPIPDQCTIEDTMRSC  
 VAKLFFTCSLKGYCLYSKSSFILVSOAPQPWIQVMFLSQSLFPEPLSIQSGSVQFLKALWEKTQDTGAHSF  
 EVAMTESTFPQKDLQQLHLEEVRFDFVGFSETAGAWQCFMCNNEKATVVNQDGOPLIEGKLKEKQVRW  
 KFIKRWKTHYFTLAGNQLLFQKGSKDDPDDSPIELSKVQSVKAVAKKRRDRSLPRAFEIFTDSTKYVFKAKD  
 EKNAEELWQCINVALAQAKERESREVTYTL\*  
 >ENSMUSP00000056728\_c.123:C>G\_p.P42A ENSMUST00000054825.5|Rarres1-  
 201|ENSMUSG00000049404|-|chr3:g.67422625:G>C  
 MQPRQPPMALLLSLWLLPSLALAAAVTEPADLEYTEVPRQAAAVGLPRGILQLAARAALHFFNFRAGSPSAL  
 RVLATVQEGRAWVNPQEGCEVDLVFSTEQYNPEQEGERLGKCSARVFFKNEKPRPAVNVTCARLFDKVKRQEK  
 DYRLYKQMKQLKTPHLSISIPDSHGHDNSLRPLWDLAFLGSSVVMWEKTTQVLHYYLVQLSSVERLKTDDDS  
 IDFDFTVLLHEFSTQEIIPCRHLVWYPGKPLKVNHYHCQEQQSPPEEASGTMEASAMAPPEFGNF\*  
 >ENSMUSP00000135168\_c.1170:A>C\_p.I391L ENSMUST00000175903.9|Arhgef2-  
 207|ENSMUSG00000028059|+|chr3:g.88540665:A>C  
 MNRSVGPEFUGEDPVPVHGLPQCCPAAVESREQLLEVEGREENQEDNKDGFHTSLLRSGAFRARSYTTDSFK  
 RHSWGPGEKQDPIISRRRLQSSECPGSGEAPFLQSLLEELGTPLGAQQQEQQQEQEQRQPFHRGQSFQCYPSA  
 ASSVPSVTGMLSKAVSMSDINLLSDCSDPNGNSPQSYVTDLSKCGKQLEEDSGTWAGSSLRRTFSFLLGMTGR  
 DKTREKEKMEAKDARYTNGHLFTTISVSGMTMCYACNKSITAKEALICPTCNVTIHNRCRDLTANCTKVQKQ  
 QKKAALLRNNTALQSVSLRSKTTTRERPTSAIYPSDSFRQSLGSRRLSSLSLAKSVSTTNIAGHFNDESPL  
 GLRQILSQSTDSLNRNRNTLSVESLLDEEVFYNELMSDFEMDEKDFEADSWSLAVDSSFLQHQKKEVMKKQDV  
 IYELIQTELHHVRTLKIMTRLFRFTGMLEELQMEPEVVQGLFPCVDELSDIHTRFLNQLLERRRQALCPGSTRN  
 FVIHRLGDLISQFSGSNAEQMRKTYSEFCSRHTKALKLYKELYARDKRFQQFIRKMTSAVLRKHGVQECIL  
 LVTQRITKYPVLINRILQNSHGVEEYQDLASALGLVKELLSNVDQDVHELEKEARLQEIYNRMDPRAQTPVP  
 GKGFGRDELLRRLKLIHEGCLLWKTATGRFKDVLVLLMTDVLVFLQEKDQKIYFTSLDKPSVSVLQNLIVRDI  
 ANQAKGMFLISSGPPEMYEVHAAASRDRTTIRVIQSVRLCPSREDFPLIETEDKAYLRRIKTKLQKQKQAL  
 VELLQKNVELFAEMVHFQALKAGFVGMPPALPRGLFRLESFESLRGERLLKDALREVEGLKDLLGPCVDLP  
 MTSREPALPLDSDSGSCPGVTANGEARTFNNGSIELCRADSDSSQKDRNGNQLRSPQEEVLQPLINLYGLLHGL  
 QAVVVQERLMEALFPEGPERWEKLSRANSRDGEAGRAAVASVTPEKQATELALLQRQHTLLQEEELRRCQRLG  
 EERATEAGSLEARLRESEQARALLEREAEIIRQLAALGQNEPLPAEAPWARRPLDPRRSLPAGDALYLSFN  
 PPQPSRGHDRLDLPVTVRSLHRPFDREAQELGSPEDRLQDSSDPDTGSEEEVSSRSLSPPHSPRDFTRMQDIP  
 EETESRDGEPTASES\*  
 >ENSMUSP00000134859\_c.519:A>C\_p.I174L ENSMUST00000177023.8|Arhgef2-  
 225|ENSMUSG00000028059|+|chr3:g.88540665:A>C  
 MTGRDKTREKEKMEAKDARYTNGHLFTTISVSGMTMCYACNKSITAKEALICPTCNVTIHNRCRDLTANCTK  
 VKQKQKKAALLRNNTALQSVSLRSTTTTRERPTSAIYPSDSFRQSLGSRRLSSLSLAKSVSTTNIAGHFNDES  
 PLGLRQILSQSTDSLNRNRNTLSVESLLDEGVEVFYNELMSDFEMDEKDFEADSWSLAVDSS  
 >ENSMUSP00000135612\_c.525:A>C\_p.I176L ENSMUST00000176539.8|Arhgef2-  
 222|ENSMUSG00000028059|+|chr3:g.88540665:A>C  
 MTGRDKTREKEKMEAKDARYTNGHLFTTISVSGMTMCYACNKSITAKEALICPTCNVTIHNRCRDLTANCTK  
 VKQKQKKAALLRNNTALQSVSLRSTTTTRERPTSAIYPSDSFRQSLGSRRLSSLSLAKSVSTTNIAGHFND  
 ESPLGLRQILSQSTDSLNRNRNTLSVESLLDEGVEVFYNELMSDFEMDEKDFEADSWSLAVDSSFLQHQKKEV  
 MKKQDVYELIQTELHHVRTLKIMTRLFRFTGMLEELQ  
 >ENSMUSP00000134840\_c.519:A>C\_p.I174L ENSMUST00000177498.8|Arhgef2-  
 231|ENSMUSG00000028059|+|chr3:g.88540665:A>C  
 MTGRDKTREKEKMEAKDARYTNGHLFTTISVSGMTMCYACNKSITAKEALICPTCNVTIHNRCRDLTANCTK  
 VKQKQKKAALLRNNTALQSVSLRSTTTTRERPTSAIYPSDSFRQSLGSRRLSSLSLAKSVSTTNIAGHFNDES  
 PLGLRQILSQSTDSLNRNRNTLSVESLLDEGVEVFYNELMSDFEMDEKDFEADSWSLAVDSSFLQHQKKEVMK

KQDVIYELIQTELHHVRTLKIMTRLFRFTGMLEELQMEPEVVQGLFPCVDELSDIHTRFLNQLLERRRQALCPG  
STRNFVIHRLGDLLISQFSGSNAEQMRKTYSEFCSRHTKALKLYKELYARDKRFQQFIRKMTRS AVLKRHGVO  
ECILLVTVQRITKYPVLINRILQNSHGVEEYQDLASALGLVKELLSNVDQDVHELEKEARLQEIYNRMDPRAQ  
TPVPGKGFGRDELRLRRLIHEGCLLWKTATGRFKDVLLLLMTDVLVFLQEKDQKYIFTSLDKPSSVSLQNL  
VVDIANQAKGMFLISSGPPMEYEVHAASRDDRTTWIRVIQQSVRLCPSREDFPLIETEDKAYLRRIKTKLQK  
NQALVELLQKNVELFAEMVHFQALKAGFVGMPPALPRGLFRLESFESLRGERLLKDALREVEGLKDLLGPC  
VDLPMTSREPALPLDSGSCPGVTANGEARTFNCSI ELCRADSDSSQKDRNGNQLRSPQEEVLQPLINLYGL  
LHGLQAVVVQERLMEALFPEGPERWEKLSRANSRDGEAGRAAVASVTPEKQATELALLQRQHTLLQEELRRC  
QRLGEERATEAGSLEARLRESEQARALLEREAEIIRQLAALGQNEPLPAEAPWARRPLDPRRRSLPAGDALY  
LSFNPPQPSRGRDRLDLPVTVRSLHRPFDDREAQELGSPEDRLQDSSDPDTGSEEEVSSRSLSPPHSPRDFTRM  
QDIPEETESRDGEPTASES\*

>ENSMUSP00000134834\_c.525:A>C\_p.I176L ENSMUST00000176500.8|Arhgef2-  
219|ENSMUSG00000028059|+|chr3:g.88540665:A>C

MTGRDKTREKEKMEAKDARYTNGHLFTTISVSGMTMCYACNKSITAKEALICPTCNVTIHNRC KDTLANCTK  
VKQKQQAALLRNNTALQSVSLRSKTTTRERPTS AIYPSDSFRQSLGSRRLSLSLAKSVSTTNIAGHFND  
ESPLGLRQILSQSTDLSNMRNRTLSVESLLDEGVEVFYNE LMSDFEMDEKDFEADSWSLAVDSSFLQQHKEV  
MKKQDVIYELIQTELHHVRTLKIMTRLFRFTGMLEELQMEPEVVQGLFPCVDELSDIHTRFLNQLLERRRQALC  
PGSTRNFVIHRLGDLLISQFSGSNAEQMRKTYSEFCSRHTKALKLYKELYARDKRFQQFIRKMTRS AVLKRHG  
VQECILLVTVQRITKYPVLINRILQNSHGVEEYQDLASALGLVKELLSNVDQDVHELEKEARLQEIYNRMDP  
AQTTPVPGKGFGRDELRLRRLIHEGCLLWKTATGRFKDVLLLLMTDVLVFLQEKDQKYIFTSLDKPSSVSLQ  
LIVVDIANQAKGMFLISSGPPMEYEVHAASRDDRTTWIRVIQQSVRLCPSREDFPLIETEDKAYLRRIKTKLQ  
QKNQALVELLQKNVELFAEMVHFQALKAGFVGMPPALPRGLFRLESFESLRGERLLKDALREVEGLKDLLG  
PCVDLPMTSREPALPLDSGSCPGVTANGEARTFNCSI ELCRADSDSSQKDRNGNQLRSPQEEVLQPLINLY  
GLLHGLQAVVVQERLMEALFPEGPERWEKLSRANSRDGEAGRAAVASVTPEKQATELALLQRQHTLLQEELR  
RCQRLGEERATEAGSLEARLRESEQARALLEREAEIIRQLAALGQNEPLPAEAPWARRPLDPRRRSLPAGDA  
LYLSFNPPQPSRGRDRLDLPVTVRSLHRPFDDREAQELGSPEDRLQDSSDPDTGSEEEVSSRSLSPPHSPRDFTRM  
QDIPEETESRDGEPTASES\*

>ENSMUSP00000135177\_c.525:A>C\_p.I176L ENSMUST00000175779.8|Arhgef2-  
206|ENSMUSG00000028059|+|chr3:g.88540665:A>C

MTGRDKTREKEKMEAKDARYTNGHLFTTISVSGMTMCYACNKSITAKEALICPTCNVTIHNRC KDTLANCTK  
VKQKQQAALLRNNTALQSVSLRSKTTTRERPTS AIYPSDSFRQSLGSRRLSLSLAKSVSTTNIAGHFND  
ESPLGLRQILSQSTDLSNMRNRTLSVESLLDEGVEVFYNE LMSDFEMDEKDFEADSWSLAVDSSFLQQHKEV  
MKKQDVIYELIQTELHHVRTLKIMTRLFRFTGMLEELQMEPEVVQGLFPCVDELSDIHTRFLNQLLERRRQALC  
PGSTRNFVIHRLGDLLISQFSGSNAEQMRKTYSEFCSRHTKALKLYKELYARDKRFQQFIRKMTRS AVLKRHG  
VQECILLVTVQRITKYPVLINRILQNSHGVEEYQDLASALGLVKELLSNVDQDVHELEKEARLQEIYNRMDP  
AQTTPVPGKGFGRDELRLRRLIHEGCLLWKTATGRFKDVLLLLMTDVLVFLQEKDQKYIFTSLDKPSSVSLQ  
LIVVDIANQAKGMFLISSGPPMEYEVHAASRDDRTTWIRVIQQSVRLCPSREDFPLIETEDKAYLRRIKTKLQ  
QKNQALVELLQKNVELFAEMVHFQALKAGFVGMPPALPRGLFRLESFESLRGERLLKDALREVEGLKDLLG  
PCVDLPMTSREPALPLDSGSCPGVTANGEARTFNCSI ELCRADSDSSQKDRNGNQLRSPQEEVLQPLINLY  
GLLHGLQAVVVQERLMEALFPEGPERWEKLSRANSRDGEAGRAAVASVTPEKQATELALLQRQHTLLQEELR  
RCQRLGEERATEAGSLEARLRESEQARALLEREAEIIRQLAALGQNEPLPAEAPWARRPLDPRRRSLPAGDA  
LYLSFNPPQPSRGRDRLDLPVTVRSLHRPFDDREAQELGSPEDRLQDSSDPDTGSEEEVSSRSLSPPHSPRDFTRM  
QDIPEETESRDGEPTASES\*

>ENSMUSP00000029694\_c.570:A>C\_p.I191L ENSMUST00000029694.14|Arhgef2-  
201|ENSMUSG00000028059|+|chr3:g.88540665:A>C

MSRIESLTRARIDRSKEQATKTREKEKMEAKDARYTNGHLFTTISVSGMTMCYACNKSITAKEALICPTCNV  
TIHNRC KDTLANCTKVKQKQQAALLRNNTALQSVSLRSKTTTRERPTS AIYPSDSFRQSLGSRRLSLSL  
AKSVSTTNIAGHFNDESPLGLRQILSQSTDLSNMRNRTLSVESLLDEGVEVFYNE LMSDFEMDEKDFEADSW  
LAVDSSFLQQHKEVMKKQDVIYELIQTELHHVRTLKIMTRLFRFTGMLEELQMEPEVVQGLFPCVDELSDIHT  
RFLNQLLERRRQALCPGSTRNFVIHRLGDLLISQFSGSNAEQMRKTYSEFCSRHTKALKLYKELYARDKRFQQ  
FIRKMTRS AVLKRHGVOQECILLVTVQRITKYPVLINRILQNSHGVEEYQDLASALGLVKELLSNVDQDVHELE  
KEARLQEIYNRMDPRAQTTPVPGKGFGRDELRLRRLIHEGCLLWKTATGRFKDVLLLLMTDVLVFLQEKDQKY  
IFTSLDKPSSVSLQNLIVVDIANQAKGMFLISSGPPMEYEVHAASRDDRTTWIRVIQQSVRLCPSREDFPLIE  
TEDKAYLRRIKTKLQKNQALVELLQKNVELFAEMVHFQALKAGFVGMPPALPRGLFRLESFESLRGERLLK  
DALREVEGLKDLLGPCVDLPMTSREPALPLDSGSCPGVTANGEARTFNCSI ELCRADSDSSQKDRNGNQL  
RSPQEEVLQPLINLYGLLHGLQAVVVQERLMEALFPEGPERWEKLSRANSRDGEAGRAAVASVTPEKQATEL  
ALLQRQHTLLQEELRRCQRLGEERATEAGSLEARLRESEQARALLEREAEIIRQLAALGQNEPLPAEAPWAR



RPLDPRRSLPAGDALYLSFNPPQPSRGHDRLDLPVTVRSLHRPFDDREAQELGSPEDRLQDSSDPDTGSEEE  
VSSRLSPPHSPRDFTRMQDIPEETESRDGEPTASES\*  
>ENSMUSP00000135397\_c.570:A>C\_p.I191L ENSMUST00000176804.8|Arhgef2-  
223|ENSMUSG00000028059|+|chr3:g.88540665:A>C  
MSRIESLTRARIDRSKEQATKTREKEKMKAKDARYTNGHLFTTISVSGMTMICYACNKSI TAKEALICPTCNV  
TIHNRCKDTLANCTKVKQKQKKAALLRNNTALQSVSLRSKTTTTRERPTSAIYPSDSFRQSLGSRRLGSSLSL  
AKSVSTTNIAGHFNDESPLGLRQILSQSTDSLNMNRNRTLSVESLLDEEVFYNELMSDFEMDEKDFEADSWSLA  
VDSSFLQQHKKEVMKKQDVIYELIQTE LHVVRLTKIMTRLFRTGMLEELQMEPEVVQGLFPCVDELSDIHTRF  
LNQLLERRRQALCPGSTRNFVIHRLGDLLISQFSGSNAEQMRKTYSEFCSRHTKALKLYKELYARDKRFQQFI  
RKMTRS AVLKRHGVQECILLVTQRITKYPVLINRILQNSHGVEEYQDLASALGLVKELLSNVDQDVHELEKE  
ARLQEIYNRMDPRAQTPVPGKGFGRDELRLRKLIEHGCLLWKTATGRFKDVLVLLM TDVLFVFLQEKDQKYIF  
TSLDKPSVVS LQNLIVRDIANQAKGMFLISSGPPMEYEVHAASRDDRTTWIRVIQQSVRLCPSREDFPLIETE  
DKAYLRRIKTKLQKNQALVELLQKNVELFAEMVHFQALKAGFVGMPPALPRGLFRLESFESLGRERLLKDA  
LREVEGLKDLLLGPVCLPMTSREPALPLDSDSGSCPGVTANGEARTFNNGSIELCRADSDSSQKDRNGNQLRS  
PQEEVLQPLINLYGLLHGLQAVVVQQERLMEALFPEGPERWEKLSRANSRDGEAGRAAVASVTPEKQATELAL  
LQRQHTLLQEELRRCQRLGEERATEAGSLEARLRESEQARALLEREAEERRQLAALGQNEPLPAEAPWARRP  
LDPRRRSLPAGDALYLSFNPPQPSRGHDRLDLPVTVRSLHRPFDDREAQELGSPEDRLQDSSDPDTGSEEEVS  
SRLSPPHSPRDFTRMQDIPEETESRDGEPTASES\*  
>ENSMUSP00000103134\_c.489:A>C\_p.I164L ENSMUST00000107510.10|Arhgef2-  
202|ENSMUSG00000028059|+|chr3:g.88540665:A>C  
MKEAKDARYTNGHLFTTISVSGMTMICYACNKSI TAKEALICPTCNVTI HNRCKDTLANCTKVKQKQKKAALLR  
NNTALQSVSLRSKTTTTRERPTSAIYPSDSFRQSLGSRRLGSSLSLAKSVSTTNIAGHFNDESPLGLRQILSQ  
STDSLNMNRNRTLSVESLLDEGVFVYNELMSDFEMDEKDFEADSWSLAVDSSFLQQHKKEVMKKQDVIYELIQ  
TELHHVRLTKIMTRLFRTGMLEELQMEPEVVQGLFPCVDELSDIHTRFLNQLLERRRQALCPGSTRNFVIHRL  
GDLLISQFSGSNAEQMRKTYSEFCSRHTKALKLYKELYARDKRFQQFIRKMTRS AVLKRHGVQECILLVTQRIT  
TKYPVLINRILQNSHGVEEYQDLASALGLVKELLSNVDQDVHELEKEARLQEIYNRMDPRAQTPVPGKGFPG  
RDELLRRKLIHEGCLLWKTATGRFKDVLVLLM TDVLFVFLQEKDQKYIFTSLDKPSVVS LQNLIVRDIANQAKG  
MFLISSGPPMEYEVHAASRDDRTTWIRVIQQSVRLCPSREDFPLIETEDKAYLRRIKTKLQKNQALVELLQK  
NVELFAEMVHFQALKAGFVGMPPALPRGLFRLESFESLGRERLLKDALREVEGLKDLLLGPVCLPMTSREP  
ALPLDSDSGSCPGVTANGEARTFNNGSIELCRADSDSSQKDRNGNQLRS PQEEVLQPLINLYGLLHGLQAVVVQ  
QERLMEALFPEGPERWEKLSRANSRDGEAGRAAVASVTPEKQATELALLQRQHTLLQEELRRCQRLGEERATE  
AGSLEARLRESEQARALLEREAEERRQLAALGQNEPLPAEAPWARRPLDPRRSLPAGDALYLSFNPPQPSR  
GHDRDLDPVTVRSLHRPFDDREAQELGSPEDRLQDSSDPDTGSEEEVSSRLSPPHSPRDFTRMQDIPEETESR  
DGEPTASES\*  
>ENSMUSP00000127843\_c.483:A>C\_p.I162L ENSMUST00000170653.9|Arhgef2-  
203|ENSMUSG00000028059|+|chr3:g.88540665:A>C  
MKEAKDARYTNGHLFTTISVSGMTMICYACNKSI TAKEALICPTCNVTI HNRCKDTLANCTKVKQKQKKAALLR  
NNTALQSVSLRRTTTRERPTSAIYPSDSFRQSLGSRRLGSSLSLAKSVSTTNIAGHFNDESPLGLRQILSQST  
DSLNMNRNRTLSVESLLDEGVFVYNELMSDFEMDEKDFEADSWSLAVDSSFLQQHKKEVMKKQDVIYELIQTE  
LHHVRLTKIMTRLFRTGMLEELQMEPEVVQGLFPCVDELSDIHTRFLNQLLERRRQALCPGSTRNFVIHRLGD  
LLISQFSGSNAEQMRKTYSEFCSRHTKALKLYKELYARDKRFQQFIRKMTRS AVLKRHGVQECILLVTQRITK  
YPVLINRILQNSHGVEEYQDLASALGLVKELLSNVDQDVHELEKEARLQEIYNRMDPRAQTPVPGKGFGRD  
ELLRRKLIHEGCLLWKTATGRFKDVLVLLM TDVLFVFLQEKDQKYIFTSLDKPSVVS LQNLIVRDIANQAKGMF  
LISSGPPMEYEVHAASRDDRTTWIRVIQQSVRLCPSREDFPLIETEDKAYLRRIKTKLQKNQALVELLQKNV  
ELFAEMVHFQALKAGFVGMPPALPRGLFRLESFESLGRERLLKDALREVEGLKDLLLGPVCLPMTSREPAL  
PLDSDSGSCPGVTANGEARTFNNGSIELCRADSDSSQKDRNGNQLRS PQEEVLQPLINLYGLLHGLQAVVVQ  
RLMEALFPEGPERWEKLSRANSRDGEAGRAAVASVTPEKQATELALLQRQHTLLQEELRRCQRLGEERATEAG  
SLEARLRESEQARALLEREAEERRQLAALGQNEPLPAEAPWARRPLDPRRSLPAGDALYLSFNPPQPSRGH  
DRDLDPVTVRSLHRPFDDREAQELGSPEDRLQDSSDPDTGSEEEVSSRLSPPHSPRDFTRMQDIPEETESRDG  
EPTASES\*  
>ENSMUSP00000135131\_c.489:A>C\_p.I164L ENSMUST00000177303.8|Arhgef2-  
229|ENSMUSG00000028059|+|chr3:g.88540665:A>C  
MKEAKDARYTNGHLFTTISVSGMTMICYACNKSI TAKEALICPTCNVTI HNRCKDTLANCTKVKQKQKKAALLR  
NNTALQSVSLRSKTTTTRERPTSAIYPSDSFRQSLGSRRLGSSLSLAKSVSTTNIAGHFNDESPLGLRQILSQ  
STDSLNMNRNRTLSVESLLDEEVFYNELMSDFEMDEKDFEADSWSLAVDSSFLQQHKKEVMKKQDVIYELIQTE  
LHHVRLTKIMTRLFRTGMLEELQMEPEVVQGLFPCVDELSDIHTRFLNQLLERRRQALCPGSTRNFVIHRLGD  
LLISQFSGSNAEQMRKTYSEFCSRHTKALKLYKELYARDKRFQQFIRKMTRS AVLKRHGVQECILLVTQRITK  
YPVLINRILQNSHGVEEYQDLASALGLVKELLSNVDQDVHELEKEARLQEIYNRMDPRAQTPVPGKGFGRD

ELLRRKLIHEGCLLWKTATGRFKDVLVLLMDDVLLVFLQEKDQKYIFTSLDKPSVSVSLQNLIVRDIANQAKGMFLISSGPPPEMYEVHAASRDDRTTWIRVIQQSVRLCPSREDFPLIETEDKAYLRRIKTKLQKNQALVELLQKNV

>ENSMUSP00000135428\_c.546:A>C\_p.I183L ENSMUST00000175911.8|Arhgef2-208|ENSMUSG00000028059|+|chr3:g.88540665:A>C

MSGNRRQPSRRGQTREKEKMKAKDARYTNGHLFTTISVSGMTMCYACNKSITAKEALICPTCNVTIHNRCKD

>ENSMUSP00000135771\_c.483:A>C\_p.I162L ENSMUST00000176243.8|Arhgef2-212|ENSMUSG00000028059|+|chr3:g.88540665:A>C

MKEAKDARYTNGHLFTTISVSGMTMCYACNKSITAKEALICPTCNVTIHNRCKDLANCTKVKQKQQAALLRNNTALQSVSLRRTTTRERPTSAIYPSDSFRQSLGSRRLSSLSLAKSVSTTNIAGHFNDESPLGLRQILSQSTD

>ENSMUSP00000140251\_c.876:G>A\_p.A293T ENSMUST00000186583.7|Ash11-202|ENSMUSG00000028053|+|chr3:g.88888999:G>A

MDPRNTAMGLGSDSEGFSRKSPTINPGTLASKREAEIEGATEEEDPRKRNRRERGTEAGKEDGSTDAQQFQSVKETNFSEGNLKLKIGLQAKRTKKPPKNLENYVCRPAIKTTIKHSRKALKSGKMTDEKNEHCPSKWDSSKLFK

LQMKPMSNRERNFVLKHHVFLVRNWEKIHQKQEEVKHTRDIHSASLYTRWNGLCRDDGNIKSDVFMTOFSAQ  
TARSVRTRRLAAAEENLEVARAARLAQIFKEICDGIISYRDSSQOTLAAPLLNLPKKNADYYEKISDPLDL  
STIEKQILIGYYKTVEAFDADMLKVFNRNAEKYYGRKSPIGRDVCRLRKAYYSARHEASAQIDEIVGETASEAD  
SSETSVSEKESGHEKDDDDVIRICGLYKDEGLMIQCCKMVWQHCDMCMVNTDVEHYLCEQC DPRPVDREVPM  
IPRPHYAQPGCVYFICLLRDDLRLRQDCVYLMRDSRRTPDGHPVQRQSYRLLSHINRDKLDIFRIEKLWKNEK  
EERFAFGHHYFRPHETHHSPSRFRYHNELFRVPLYEIIIPLEAVVGTCCVLDLYTYCKGRPKGIKEQDVYICDY  
RLDKSAHLFYKIHRNRYPVCTKPYAFDHFPPKLTTPKRDFSPHYVPDNYKRNGGRSSWKSERSKPPKLDLGQED  
DALPLIEEVLASQEAAREVPSPEEPDQERATGDIGDAEKKPEESSQEAQLASTPEERRHSQRERLNQILLNL  
LEKIPGKNAIDVTYLLEEGSGRKLRRRTLFI PENSFRK\*  
>ENSMUSP00000088451\_c.876:G>A\_p.A293T ENSMUST00000090933.5|Ash11-  
201|ENSMUSG00000028053|+|chr3:g.88888999:G>A  
MDPRNTAMGLGSDSEGF SRKSPSTINPGTLASKREAEIEGATEEEDPRKRNRRERGTEAGKEDGSTDAQQOFS  
VKETNFSEGNLKLKIGLQAKRTKKPKNLENYVCRPAIKTTIKHSRKALKSGKMTDEKNEHCPSKWDSSKLFK  
KAGDATAIDCQAEESIHLHSQGESNPLSKKLSPVHSQMADYISAAPSLVGSRDPIKDRALLNGGT SVTEKLA  
QLIATCPPSKSSKAKPKLGTGTTVGLVSKDLIRKPGVGS IAGI IHKDLIKK PALSTAVGLVTKDPGKKPMFN  
TAVGLINKDSVKKLGTGTAVFINKDLGKKPGAITTVGLLSKESGKKGIGIIVPGLVNKESGKKGIGLGTVVGL  
VNKELGKLLSSTVGLVAKDVTTKIVASSAMGLVNKDIGKLLNCPMAGQLGSKDALNLKSEALLPTQEQLKAS  
CSANISNHDSQELPESLKDSATGKAFEKSVMRHSKESMLEKFSVRKEITNLEKEMFNEGTCIQDDNFSSSERG  
AFETSKHEKQPPVYCTSPDFQIGGASDASTAKSPFSAVGESNLPSSSPTVSVNPVTRSPPEASSQLVNPPLLL  
NSTAEQMEIISESIGKSQFTAESTHLNVGHRSLGHLSIECKGIDKELNESKNTHLDIPRISSSLGKKPSLTS  
DSGIHAITPSVVNFTSLFSNKPFLKLGAVTAPDKHCQVAESLSSSFQSKPLKKRKRGRKPRWTKVVARSTCRSP  
KGLDLERSELFKNVSCSSLSNSSEPAKFMKTIGASSFVDHDFLKRRLPKLSKSSAPSLALLTDSEKPSHKSF  
THKLSSSM CVTSDLSDIYKPKRGRPKSKEMPQLEGPPKRTLKI PASKVFSLSQSKEEQEPIIQPEIEI PSFK  
QSLSVSPFPKRRGRPKRQMRSPVKMKPPVLSVAPFVATESPSKLESESENHRSSSDFFESEDQLQD TDDLDDS  
HRQVCSMSDLEMEDKIKSRNNGQLMKTIRKINKMKT LKRKLLNQLISSSVESNKGKGVQSKLHNTVSS  
LAATFVSGKLGQINVSKGTIYIGKRRGRKPKTVLNGLLSGSPASLAVLEQTAQQAAGSALGQILPPLLPSPA  
SSSEILPSPICQSSSGTSGGQSPVSSDAGFVEPSSPYLHVHSRQGSMIQTLAMKKASKGRRRLSPPTLLPNS  
PSHLSLSELTSLKEATSPVSESHSDETI PSDSGIGTDNNSTSDRAEKFCGQKRRHSFEHISLIPPETSTVLNS  
LKEKHKHKCKRRSHDLYSYDKMKRQKRKRKKYPQLRNRQDPDFIAELEELISRLSEIRITHRSHHFIPRDL  
PTIFRINFNSFYTHPSFPLDPLHYIRKPD LKKRGRPPKMRAMAEMPFMHLSLSPLSSTGFYPSYGMYPSPS  
PLTAAPIGLGYYGRYPPTLYPPPPSPSFTTLPPLPPSYMHAGHLLNPTKYHKKKHKLLRQEAFLTTSRTPLLS  
MSTYPSVPPMAYGWMVEHKHRHRHKHREHRSEQPQVSMDSGSSRSVLES LKRYRFGKDTVGDYKHKKEKHC  
HMSCPHLSPSKNLINREEQWVSREPSESSSLALGLQTPLOIDCESSPSLSLGGFTPNSEPASSDEHMNLF  
AIGSCRVSNPNSSCRKLTDS PGLFPVQDTALNRPHRKEPLPSSERAIQSLAGS QSASDKPSQRSSESTNCSP  
TRKRSSSESTSTVNGVPSRS PRLVASMDDSDVSLQLRI VHHDEQESMEKNGDASITTVSAPSSSPGHYSK  
ERALGKSDSLLVPAVPNDSCSNIPLLSEKASARCSPHHIKRSVVEAMQRQARKMCNYDKILATKKNLDHVNKI  
LKAKKLQRQARTGNFVKKRRPGRPRKCPLQAVVSMQAFQAAQVSPPELNEGEDMSLHLSPDTVTVDIEAVVQS  
VNLTSEHKKGVKRKNWLLLEEQTRKKQKTVPEEEQENNKSFIE TPVEIPSPLET PAEPSE PENTLQPV LALIP  
REKKAPRPPKKKYQRAGLYSDVYKTIDPKSRLIQLKKEKLEYTPGEHEYG LFPAPIHV GKYLRQKRIDFQLPY  
DILWQWKHNQLYKKPDVPLYKKIRSNVYVDVKPLSGYEATTCNCKPDD DTRKGC GDDCLNRMIFAECSPNTC  
PCGEQCCNQRIRHEWVQCLERFRAEEKGWGIRTKEPLKAGQFIEYLG EVVSEQEFNRNMIQYHNHSDHYC  
LNLDSGMVIDSYRMGNearFINHSCDPNCEMOKWSVNGVYRIGLYALKDMPAGTELTYDYNFHSFNVEKQQLC  
KCGFEKCRGIIGGKSQRMNGLPSHKGSSSTHRKSARAKEKRKSKHKLKRRKGGHPSEEPS ENINTPRTLTPQ  
LQMKPMSNRERNFVLKHHVFLVRNWEKIHQKQEEVKHTRDIHSASLYTRWNGLCRDDGNIKSDVFMTOFSAQ  
TARSVRTRRLAAAEENLEVARAARLAQIFKEICDGIISYRDSSQOTLAAPLLNLPKKNADYYEKISDPLDL  
STIEKQILIGYYKTVEAFDADMLKVFNRNAEKYYGRKSPIGRDVCRLRKAYYSARHEASAQIDEIVGETASEAD  
SSETSVSEKESGHEKDDDDVIRICGLYKDEGLMIQCCKMVWQHCDMCMVNTDVEHYLCEQC DPRPVDREVPM  
IPRPHYAQPGCVYFICLLRDDLRLRQDCVYLMRDSRRTPDGHPVQRQSYRLLSHINRDKLDIFRIEKLWKNEK  
EERFAFGHHYFRPHETHHSPSRFRYHNELFRVPLYEIIIPLEAVVGTCCVLDLYTYCKGRPKGIKEQDVYICDY  
RLDKSAHLFYKIHRNRYPVCTKPYAFDHFPPKLTTPKRDFSPHYVPDNYKRNGGRSSWKSERSKPPKLDLGQED  
DALPLIEEVLASQEAAREVPSPEEPDQERATGDIGDAEKKPEESSQEAQLASTPEERRHSQRERLNQILLNL  
LEKIPGKNAIDVTYLLEEGSGRKLRRRTLFI PENSFRK\*  
>ENSMUSP00000142428\_c.186:G>A\_p.G63R ENSMUST00000199538.5|S100a14-  
203|ENSMUSG000000042306|+|chr3:g.90435394:G>A  
MGQCRSANAEDAQEFSDVERA IETLIKNFHKYSVAGKKTLPALERDLVTQQLPHLMPSNCRLEEKIANLGN  
CND SKLEFGSFWELIGEAAKSVKMERPVTRS\*  
>ENSMUSP00000129862\_c.39:G>A\_p.G14R ENSMUST00000164481.7|S100a14-  
201|ENSMUSG000000042306|+|chr3:g.90435394:G>A

MGQCRSANAESNCRLEEKIANLGNCSKLEFGSFWELIGEAAKSVKMERPVTRS\*  
 >ENSMUSP00000126821\_c.186:G>A\_p.G63R ENSMUST00000167598.6|S100a14-  
 202|ENSMUSG00000042306|+|chr3:g.90435394:G>A  
 MGQCRSANAEDAQEFSDVERAIEETLIKFNHFKYSVAGKKETLTPAELRDLVTTQQLPHLMPSNCRLEEKIANLGN  
 CNDKLEFGSFWELIGEAAKSVKMERPVTRS\*  
 >ENSMUSP00000088366\_c.650:T>A\_p.F217L ENSMUST00000090853.5|Gm5773-  
 201|ENSMUSG00000068879|+|chr3:g.93680980:T>A  
 MSGDMEAKIWGSTQISVKEFCYEWITISNFSFCMGGIRRKIKSPVFSVLVANEVAVWCLRHPNGFDEESKDYLS  
 VYLVLVNCPCRQVRKFEFWIKNSQGEKYQYTQSLNVPSFQRKQNWGFSKFILRDSLLSHRNWLLPKDKLTLC  
 CKVSI VGAILNMPGQNMIPA IKDPRHMLTDDDLGKLWENPLFTDCSLLVAGHEIRAHKAILAARS PVFRAMLEH  
 QMEERLANCFEIQELDFQVFKEMMDFIYTGKAPTLHSHSMACDVLA AA EKYGLEGLKVICEDSLCRNLSVENA  
 AHTLIVADLHSTEQLKTRALHFIAVHASEVSKSSGWSMVEHSHPLVDERFHSLASASQSVFLESSFKCLKGF\*  
 >ENSMUSP00000089793\_c.4394:A>T\_p.Q1465H ENSMUST00000092155.12|Col11a1-  
 201|ENSMUSG00000027966|+|chr3:g.113999472:A>T  
 MEPWSRWKTKRWIWDLTISTLALTFLFQAREVRGAAPVDILKALDFHNSPVGISKTTGFCNTNRKNSKDPDVA  
 RVTEEAQISAPTKQLFPGGIFPQDFSFILFTIKPKKGTQAFLLSLYNEHGIQQLGVEVGRSPVFLFEDHTGKPT  
 PENYPLFSTVNIADGKWHRVAISVEKKTVMIVDCKKI TKPLDRSERSIVDTNGIMVFGTRILETDVFGQDI  
 QQFLITGDPKAAADYCDHYS PDCDLT SKAAQAQEPHIDEYAPEDIIEYDYEYGETDYKEAESVTEMPFTTEET  
 VAQTEANIVDDFQDYNYGTMEPEYQTETPRRVSGSNENPNVVEEGFTEEYLTGEDYDVQRNTSEDI LYGNKGV  
 RDSDLLVDGDLGEYDFEYKEYEERTTTS PNEEFPGVPAPETDFTETS INGHGAYGEKQKGEPAVVEPGMLV  
 EGPPGAGPAGLMPGPGQPSGLPGDPGDRGPPGRPGLPGADGLPGPPGTMLMLPFYRGGDGSKGPTISAQE  
 AQAQAILQQARIALRPPGPMGLTGRPGVGGPGSAGAKGESGDPGPGQPRGVQGGPPGPTGKPKGRGRPGADG  
 GRGMPGESGSKGDRGFDGLPGLPGDKGHRGERGPPGPPGDDGMRGEDGEIGPRGLPGEAGPRGLLGRGT  
 PGPPGQPGIGGIDGPPQPKGNMGPQGEPPGPPGQGNPGPQGLPGPQGP I GPPGEGKGPQKPGLAGLPGADGPP  
 GHPGKEGQSGEKALGPPGPPGPIGYPGPRGVKADGVRGLKGSKEKGEDGFPFGKDMGLKDRGEVGVQV  
 PRGEDGPEGKGRAGPTGDPGSPQAGEKGLGVPLPGY PGRQGPKGSTGFPFGFPGANGEKARGIAGKPGP  
 RGQRGPTGPRKSRGARTGPKGPKGTSGDGPVPPGPPGERGPPGQPGVGFPGPKGPPGAGKDLPLGHPGQR  
 GETGFQKGTGPPGPGVVGPPGTGETGPIGERGHPGPPGPPGEGQLPGAAGKEGAKGDPGPGQGISGKDG  
 IRGFPGERGLPGAQAGPLKGGEGPQGPVGGSPGERGSAGTAGPIGLPGRPGPQGGPPGAGEKAGPGEKGP  
 QGPAGR DGVQGPVGLPGPAGPAGSPGEDGDKGEIGEPGQKSGDKGKENGPPGPPGLQGPVGPAGIAGGDGEP  
 GPRGQGMFGQKGDGARGFPGLPGPIGLQGLPGPPGKEKGENGDVGPMPGPPGPPGPRGPQGPNGADGPPG  
 SIGSVGVVGDKEPGEAGNPGPPGEAGSGGLKGERGEKGEAGPPGAAGPAGIKGPPGDDGPKGNPVPVGFPGD  
 PGPPGEPGAGQDGVGGDKGEDGDPGPPGPPGSGEAGPPGPPGKRGPPGASGSEGRQGEKGAKEGAEAGPP  
 GKTGVPVGPQGPSKPGPEGLRGI PGVVEQGLPGAAGQDGPPLGPPGLPGLKGDPSKGEKHPGLIGLIG  
 PPGEHGEKDRGLPGTQSGPAKGDGGIPGAPGPIGPPGPPGLPGPAGPKGNKSSGPTGQKGDGMPGPPG  
 PGPPGEVIGPLPILSPKKTRRHTESI QGDAGDNILDYSDGMEEIFGSLNSLKQDIEHMKFPMGTQTNPARTCK  
 DLQLSHPDFPDGEYWIDPNQGCSDSFKVYCNFTAGGETCIYDPKKSEGVRISSWPKEKPGSWYSEFKRGLL  
 SYLDVEGNSINMVQMTFLKLLTASARQNFTYNCHQSAAWYDVLSGSYDKALRFLGSNDEEMS YENPHIKALY  
 DGCASRKGYEKTVIEINTPKIDQVPIIDVMINDFGDNQKFGFEVGPACFLG\*  
 >ENSMUSP00000138879\_c.974:A>T\_p.Q325H ENSMUST00000184978.2|Col11a1-  
 204|ENSMUSG00000027966|+|chr3:g.113999472:A>T  
 KGENGPPGPPGLQGPVGPAGIAGGDGEPGPRGQGMFGQKGDGARGFPGLPGPIGLQGLPGPPGKEKGENGDV  
 GMPGPPGPPGPRGPQGPNGADGPPGPGS IGSVGVVGDKEPGEAGNPGPPGEAGSGGLKGERGEKGEAGPPG  
 AAGPAGIKGPPGDDGPKGNPVPVGFPGDPGPPGEPGAGQDGVGGDKGEDGDPGQPPGPPGSGEAGPPGPPGK  
 RGPPGASGSEGRQGEKGAKEGAEAGPPGKGTGPVGPQGPSPGKPGPEGLRGI PGVVEQGLPGAAGQDGP  
 GPPGLPGLKGDPSKGEKHPGLIGLIGPPGEHGEKDRGLPGTQSGSPGAKGDGGIPGAPGPIGPPGPPGLP  
 PAGPKGNKSSGPTGQKGDGMPGPPGPPGPPGPEVIQPLPILSPKKTRRHTESI QGDAGDNILDYSDGMEEIF  
 GSLNSLKQDIEHMKFPMGTQTNPARTCKDLQLSHPDFPDGEYWIDPNQGCSDSFKVYCNFTAGGETCIYDPK  
 KSEGMYSLGTCLLSKILWLSMTQHS\*  
 >ENSMUSP00000029569\_c.867:T>G\_p.L290V ENSMUST00000029569.9|Slc35a3-  
 201|ENSMUSG00000027957|-|chr3:g.116468842:A>C  
 MSANLKYLSLGLILVFQTTSLVLTMRYSRTLKEEGPRYLSSTAVVVAEFLKIMACIFLVYKDSKCSVRALNRVL  
 HDEILNKPMETLKLAI PSGIYTLQNNLLYVALSNLDAATYQVTYQLKILTTALFSVSMGLKGLVYQWLSLVI  
 LMAGVAVVQWPSDSQELNSKDLSTG SQFVGLMAVLTACFSSGFAGVYFEKILKETKQSVWIRNIQLGFFGSIF  
 GLMGVYVYDQELVSKNGFFQGYNQLTWIVVALQALGLLVIAAVIKYADNIIKGFATSLSIIILSTIISYFVWQD  
 FVPTSVFFLGAILVIAATFLYGYDPKPAGNPTKA\*  
 >ENSMUSP00000112674\_c.867:T>G\_p.L290V ENSMUST00000120120.8|Slc35a3-  
 202|ENSMUSG00000027957|-|chr3:g.116468842:A>C

MSANLKYLSLGLVLFQTTSLVLTMRYSRTLKEEGPRYLSSTAVVVAEFLKIMACIFLVYKDSKCSVRALNRVL  
HDEILNKPMETLKLAIPSGIYTLQNNLLYVALSNLDAATYQVTYQLKILTALFSVSMGLKGLVYQWLSLVI  
LMAGVAFVQWPSDSQELNSKDLSTGSQFVGLMAVLTACFSSGFAGVYFEKILKETKQSVWIRNIQLGFFGSI  
GLMGVYVYDDELVSKNQFFQYGNQLTWIVVALQALGGLVIAAVIKYADNLIKGFATSLSIILSTIISYFWVQD  
FVPTSVFFLGAILVIAATFLYGYDPKPAKNPTKA\*

>ENSMUSP00000096149\_c.617:C>A\_p.S206R ENSMUST00000098549.4|Clca4b-  
201|ENSMUSG00000074195|-|chr3:g.144631886:G>T

MMAFSRGPVFLFLLYLLWGSDSLKLNNGYEDIIAIDPAVPEDTTIEHIKGMVTKASTYLFEATEKRF  
FFKNVSIILIPESWKNSSQYRRPKQESYKHADIKVAPPAFEGRDEPYTRQFTQCEEKAEYIHFPTDFVLGRKQV  
EYGDGKLLVHEWAHLRWGVFDEYNEDQPFYSASSKKIEATRCSTGITGMNRVHTCQGGRCITRRCRTNSTTK  
LYEKDCQFFPDQVQSEKASIMFMQSIDSVTEFCKKENHNREAPTLHNEKCQWRSTWEVISSSEDFNSSTPMET  
PPAPFFSLLRISERIVCLVLDVSGSMSSDRLNRMNQAAYFLSQIENRSWVGMVHFSSQATIVHELIQMN  
SDIERNKLLQTLPTSAIGGTSICSGIKTAFQVFKNGEYQTDGTEILLSDGEDSTAKDCIDEVKDGSIVHFI  
ALGPSADLAVTNMSILTGGNHKLATDEAQNGLIDAFGALASENTDITQKSLQLESKGAILLNSLWLNDDTVVI  
DSTVGRDFTFLVTSKQAPAIYLRDPKGTQTTNFTMDFVSKMAYLSIPGTAEVGVWVTYNLEAKENSEILTITV  
TSRAANSSVPPISVNAKVNTDTNTFSPMIVYAEVLQGYTPIIGARVTATIESNSGKTEELVLLDNGAGADAF  
KDDGVYSRFFTAYSVNGRYSLKVRADGGTNSARRSLRHPSSRAAYIPGWVVDGEIQGNPPREPMTEATQPVLE  
NFSRTASGGAFVMSNPVIGPLPDQYPPNRITDLQATLDGEEISLWTAPGDDYDVGVRVQYIIRTSENIIDLR  
DNFNNSLRVDTTKLTPEANSKETFAFKPENISEENATYIFIAIESVDKNNLSSGSPNIAQVAMFTPAEPVP  
DESPRSSGVSISTIVLSVVGSVVLVCIIVSTTICILKNKRSSSGAATTF\*

>ENSMUSP00000029671\_c.165:A>T\_p.S56C ENSMUST00000029671.9|Ifi44-  
201|ENSMUSG00000028037|-|chr3:g.151455058:T>A

MAMRTRLTWQOEKCLQNYFGGKRFCLLYKASVQKFSHQNLCTCENQGPTMIVVYCEKCVIGMYLKEGFQGGK  
VSIITIFALQETGFSLCAKGPDSPYLLFHKRKTNDFSILLDEKAVIVSSAICKMLQLTARNNVIPIQECEAFRC  
EELLDERKTRGIAVLHNSLLQALRDYKPYGDLVQQTTRVLLGLPIGAGKSSFVNSVKSIVFKGSIHQILVGCDE  
DGISDKYRTYSIKAKDDSDPLPFI LDCSLGLGENAGLHTDDVWHILKGHTPDYQFDSMKPITSNHPNYTHDP  
LLKDRIHCVVVFVDINSFEMHSELVAKIKKIRRDLIKHGILHLALLTHVDSLDELITKEDMDTIYNSPVKSK  
LEAFHGVGFALSILVSNVSEWQLDPVKDMLILSALKEILYTANEFLEDLPLNK\*

>ENSMUSP00000036227\_c.840:A>T\_p.M281L ENSMUST00000044278.6|St6galnac5-  
201|ENSMUSG00000039037|-|chr3:g.152527315:T>A

MKTLMRHGLAVCLVLTMMCTSLLLVYSSLGSKERPPQQQQQQQQAATATGSTQLVLESSPQPRRTAPAGP  
RQLEGYLGAVDHKPLKMHCKDCALVTSSGHLRSQQGPHIDQTECVIRMNDAPTRGYGLDVGNRTSLRVIAHS  
SIQRILRNHRDLNVSQGTVFIFWGPSSYMRRDGKQAYNNLQLLSQVLPRLKAFMITRHRMLQFDELFKQET  
GKDRKISNTWLSTGWFTMTIALELCDRIDVYGMVPPDFCRDPKHPSPVPHYHYPSPGPDCECTLYLSHERGRKGS  
HHRFITEKRVFKNWARTFNIHFFQPDWKPESPAVNHAEKPVF\*

>ENSMUSP00000143365\_c.4563:G>T\_p.D1522Y ENSMUST00000200196.5|Irrc7-  
206|ENSMUSG00000028176|-|chr3:g.157790108:C>A

XIGRLVPCRCFRGEEEEISVLDYSHCSLQVQPKVFNFFERTLEELYLDANQIEELPKQLFNCQALRKLSSIPDN  
DLSSLPTSIAASLVNLKELDISKNGVQEFPENIKCKCLTIEASVNPI SKLPDGFTQLLNLTLQYLNDAFLEF  
LPANFGRVLKLRILELRENHLKTLPKSMHKLALQLERLDLGNNEFSELPEVLDQIQNLRELWMDNNALQVLPGS  
IGKLMVLYLDMSKNRIETVDMDISGCEALEDLLSSNMLQQLPDSIGLLKLTTLKVDDNQLTMLPNTIGNL  
SLLEEFDCSCNELESPLPTIGYLHSLRTLAVDENFLPELPREIGSCKNVTVMSLRSNKLEFLPEEIGQMORLR  
VLNLSDNRLKLNLPFSFTKLKELALWLSDNQSKALIPLQTEAHPETKQRVLTNYMFPQQPRGDEDFQSDSDSF  
NPTLWEEQRQQRMTVAFEFEDKKEDESAGKVKALSCAPWDRGQRGITLQPARLSGDCCTPWARCDQQIQDM  
PVPQSDPQLAWGCSISGLQQERSMCAPLVAAQSTTLPSLSGRQVEINLKRYPTPYPEDLKNMVKSVQNLVGGK  
SHGVRVENSNTANTEQTVKEKFEHKWPVAPKEITVEDSFVHPANEMRIGELHPSLAETPLYPPKLVLLGKDK  
KESTDESEVDKTHCLNNSVSSGTYSYDSSQASSASNTRMKVGSLQATAKDAVHNSLWGNRIAPFPQPLDA  
KPLLSQREAVPPGNIPQRPDRLPMSDAFPDNDWTDGSHYDNTGVFVSEEAAGENANNNPLSSKARSVPAHGRP  
LIRQERIVGVPLELEQSTHRHTPETEVPPSNPWQNWTRTPSPFEDRTAFPSKLETTPTTSPLPERKDHMKEPT  
ETPGPFPSPGVPEYHDPTPNRSLGNVFSQIHCPRDSSKGVIAISKSTERLSPLMKDIKSNKFKKSQSIDEIDV  
GTYKVYNIPLENYASGSDHLGSHERPDKFLGPEHGMSMSRSQSVPMDDDEMLMYGSSKGGPPQKASMTKKVY  
QFDQSFNPQGAVEVKAEKRIPPPFAHNSEYVQQPSKNIADLVSPRAYRGYPPEQMFSSQPSVNEADAMVNA  
QFASQGPFRAGLRRADSLASSTEMAMFRVSEPHLPGRDRYGRATYRGGLEGQSSISMTDPQLFRNGRYED  
EHPSYQEVKAQAGSFPAKNLTQRRPLSARSYSTESYASGATRPVARSPTMAALLEKIPSDYNLGNYGDKTSDN  
SDIKTRPTPVKGEESCGKMPADWRQQLLRHIEARRLDRNAAYKHNTVNLGMLPYGGISAMHAGRSMTLNLQTK  
SKFDLQDLPLQKTPSQSNILDNGQEDVSPSGQWNPYPLGRRDVPDITTKAGSHIQTLMGSSQLQHSREQ  
QPYEGNINKVTIQFQSPPIQIPSSQATRGPQPGRCIQTKGQRSMDGYPEQFCVRIEKNPGLGFSISGGIS  
GQGNPFKPSDKGIFVTRVQPDGPASNLLQPGDKILQANGHSFVHMEHEKAVLLLLKSFQNTVYLVIQRELTV\*

>ENSMUSP00000142498\_c.4455:G>T\_p.D1486Y ENSMUST00000200137.5|Lrrc7-205|ENSMUSG00000028176|-|chr3:g.157790108:C>A  
 MQCLEMTTKRKLIGRLVPCRCFRGEEEEIISVLDYSHCSLQQVPKEVFNFFERTLEELYLDANQIEELPKQLFNC  
 QALRKLSPDNDLSSLPTSIAASLVNKLKELDISKNGVQEFPENIKCCKCLTIEASVNPI SKLPDGFQTQLLNLT  
 QLYLNDAFLEFLPANFGRVLKLRILELRENHLKTLPKSMHKLQALERLDLGNNEFSELPEVLDQIQNLRELWMD  
 DNNALQVLPQSIGKLMVLYLDM SKNRIETVDMDISGCEALEDLLSSNMLQQLPDSIGLLKLTTLKVDDNQ  
 LTMLPNTIGNLSLLEEFDCSCNELESPLPTIGYLHSLRTLAVDENFLPELPREIGSCKNVTVM SLRSNKLEFL  
 PEEIGQMQRRLVNLSDNRLKLNLPFSFTKLKELALWLSDNQSKALIPLQTEAHPETKQRVLTNYMFPQQPRG  
 DEDFQSDSDSFNPTLWEEQRQQRMTVAFEFEDKEDDESAGKVKALSCQAPWDRGQRGITLQPARLSGDCTP  
 WARCDDQIQDMPVPPQSDPQLAWGCISGLQQERSMCAPLPVAAQSTTLP SLSGRQVEINLKRYPTYPEDLKNM  
 VKSVQNLVKGKPSHGVRVENSNTANTEQTVKEKFEHKWPVAPKEITVEDSFVHPANEMRIGELHPSLAETPLY  
 PPKLVLLGKDKKKESTDESEVDKTHCLNNSVSSGTYS DYSPSQASSASNTRMKVGSLQATAKDAVHNSLWGNR  
 IAPFPQPLDAKPLLSQREAVPPGNIQRPDRLPMSDAFPDNDWTDGSHYDNTGTFVSEEAAGENANNNPLSSK  
 ARSVPAGHRRPLIRQERIVGVPLELEQSTHRHTPETEVPPSNPWQNWTRTPSPFEDRTAFPSKLETTPTTSPL  
 PERKDHMKEPTETPGPFSPGVPWEYHDPTPNRSLGNVFSQIHCPRDSSKGVIAISKSTERLSPLMKDIKSNKF  
 KKSQSIDEIDVGT YKVYNIPL ENYASGSDHLGSHERPDKFLGPEHGMSMSRSQSVPMDDDEMLMYGSSKGP  
 QQKASMTKKVYQDFQSFNPQGAVEVKA EKRI PPPFAHNSEYVQQPSKNI AKDLVSPRAYRGYPMEQMF SFSQ  
 PSVNE DAMVNAQFASQGP RAGFLRRADSLASSTEMAMFRRVSEPHELPPGDRYGRATYRGGLEQSSISMTDP  
 QFLKRNRYEDEHPSYQEVKAQAGSFPAKNLQRRPLSARSYSTESYGASQTRPV SARPTMAALLEKIPSDYN  
 LGNYGDKTSDNSDIKTRPTPVKGEESCGKMPADWRQQLLRHIEARRLDRTPSQSNILDNGQEDVSPSGQWNP  
 YPLGRRDVPDITITKAGSHIQTLMGSSQLQHSREQQPYEGNINKVTIQQFQSPLPIQIPSSQATRGPQGR  
 CLIQTKGQRSMDGYPEQFCVRIEKNPGLGFSISGGISGQGNPFKPSDKGIFVTRVQPDGPASNLLQPGDKILQ  
 ANGH SFVHMEHEKAVLLLKSFQNTVYLVIQRELTV\*

>ENSMUSP00000158628\_c.4434:G>T\_p.D1479Y ENSMUST00000238317.3|Lrrc7-207|ENSMUSG00000028176|-|chr3:g.157790108:C>A  
 MMESLIRGRNPPQYQSPCKEARAALRKRPEEELQCLEMTTKRKLIGRLVPCRCFRGEEEEIISVLDYSHCSLQ  
 QVPKEVFNFFERTLEELYLDANQIEELPKQLFNCQALRKLSPDNDLSSLPTSIAASLVNKLKELDISKNGVQEF  
 ENIKCCKCLTIEASVNPI SKLPDGFQTQLLNLTQLYLNDAFLEFLPANFGRVLKLRILELRENHLKTLPKSMH  
 KLAQLERLDLGNNEFSELPEVLDQIQNLRELWMDNNAALQVLPQSIGKLMVLYLDM SKNRIETVDMDISGCEA  
 LEDLLLSSNMLQQLPDSIGLLKLTTLKVDDNQLTMLPNTIGNLSLLEEFDCSCNELESPLPTIGYLHSLRTL  
 AVDENFLPELPREIGSCKNVTVM SLRSNKLEFLPEEIGQMQRRLVNLSDNRLKLNLPFSFTKLKELALWLS  
 NQSKALIPLQTEAHPETKQRVLTNYMFPQQPRGDEDFQSDSDSFNPTLWEEQRQQRMTVAFEFEDKEDDESA  
 GKVKALSCQAPWDRGQRGITLQPARLSGDCTPWARCDDQIQDMPVPPQSDPQLAWGCISGLQQERSMCAPLV  
 AAQSTTLP SLSGRQVEINLKRYPTYPEDLKNMVKSVQNLVKGKPSHGVRVENSNTANTEQTVKEKFEHKWPV  
 APKEITVEDSFVHPANEMRIGELHPSLAETPLYPPKLVLLGKDKKKESTDESEVDKTHCLNNSVSSGTYS DYSP  
 SQASSASNTRMKVGSLQATAKDAVHNSLWGNRIAPFPQPLDAKPLLSQREAVPPGNIQRPDRLPMSDAFP  
 DNWTDGSHYDNTGTFVSEEAAGENANNNPLSSKARSVPAGHRRPLIRQERIVGVPLELEQSTHRHTPETEVPP  
 SNPWQNWTRTPSPFEDRTAFPSKLETTPTTSPLPERKDHMKEPTETPGPFSPGVPWEYHDPTPNRSLGNVFSQ  
 IHCPRDSSKGVIAISKSTERLSPLMKDIKSNKFKKSQSIDEIDVGT YKVYNIPL ENYASGSDHLGSHERPDKF  
 LGPEHGMSMSRSQSVPMDDDEMLMYGSSKGPQQKASMTKKVYQDFQSFNPQGAVEVKA EKRI PPPFAHNSE  
 YVQQPSKNI AKDLVSPRAYRGYPMEQMF SFSQPSVNE DAMVNAQFASQGP RAGFLRRADSLASSTEMAMFRR  
 VSEPHELPPGDRYGRATYRGGLEQSSISMTDPQFLKRNRYEDEHPSYQEVKAQAGSFPAKNLQRRPLSAR  
 SYSTESYGASQTRPV SARPTMAALLEKIPSDY NLGNYGDKTSDNSDIKTRPTPVKGEESCGKMPADWRQQLLR  
 HIEARRLDLAGSHIQTLMGSSQLQHSREQQPYEGNINKVTIQQFQSPLPIQIPSSQATRGPQGRCLIQTKG  
 QRSMDGYPEQFCVRIEKNPGLGFSISGGISGQGNPFKPSDKGIFVTRVQPDGPASNLLQPGDKILQANGHSFV  
 HMEHEKAVLLLKSFQNTVYLVIQRELTV\*

>ENSMUSP00000101659\_c.4596:G>T\_p.D1533Y ENSMUST00000106044.6|Lrrc7-201|ENSMUSG00000028176|-|chr3:g.157790108:C>A  
 MQCLEMTTKRKLIGRLVPCRCFRGEEEEIISVLDYSHCSLQQVPKEVFNFFERTLEELYLDANQIEELPKQLFNC  
 QALRKLSPDNDLSSLPTSIAASLVNKLKELDISKNGVQEFPENIKCCKCLTIEASVNPI SKLPDGFQTQLLNLT  
 QLYLNDAFLEFLPANFGRVLKLRILELRENHLKTLPKSMHKLQALERLDLGNNEFSELPEVLDQIQNLRELWMD  
 DNNALQVLPQSIGKLMVLYLDM SKNRIETVDMDISGCEALEDLLSSNMLQQLPDSIGLLKLTTLKVDDNQ  
 LTMLPNTIGNLSLLEEFDCSCNELESPLPTIGYLHSLRTLAVDENFLPELPREIGSCKNVTVM SLRSNKLEFL  
 PEEIGQMQRRLVNLSDNRLKLNLPFSFTKLKELALWLSDNQSKALIPLQTEAHPETKQRVLTNYMFPQQPRG  
 DEDFQSDSDSFNPTLWEEQRQQRMTVAFEFEDKEDDESAGKVKALSCQAPWDRGQRGITLQPARLSGDCTP  
 WARCDDQIQDMPVPPQSDPQLAWGCISGLQQERSMCAPLPVAAQSTTLP SLSGRQVEINLKRYPTYPEDLKNM  
 VKSVQNLVKGKPSHGVRVENSNTANTEQTVKEKFEHKWPVAPKEITVEDSFVHPANEMRIGELHPSLAETPLY  
 PPKLVLLGKDKKKESTDESEVDKTHCLNNSVSSGTYS DYSPSQASSASNTRMKVGSLQATAKDAVHNSLWGNR

IAPFPQPLDAKPLLSQREAVPPGNIPQRPDRLPMSDAFPDNDWDGSHYDNTGFVSEEAAGENANNPLLSK  
ARSVPAHGRRPLIRQERIVGVPLELEQSTHRHTPETEVPPSNPWQNWTRTPSPFEDRTAFPSKLETTPTTSPL  
PERKDHMKEPTETPGPFSPGVPEYHDPTPNRSLGNVFSQIHCPRDSSKGVIAISKSTERLSPLMKDIKSNKF  
KKSQSIDEIDVGTYKVYNIPLENYASGSDHLGSHERPDKFLGPEHGMSSMSRSQSVPMLDDEMLMYGSSKGGP  
QQKASMTKKVYQFDQSFNPQGAVEVKAEKRIPPPFAHNSEYVQQPSKNIKDLVSPRAYRGYPMEQMF'SFSQ  
PSVNEDAMVNAQFASQGPFRAGFLRRADSLASSTEMAMFRVSEPHLPPGDRYGRATYRGGLGQSSISMTDP  
QFLKRNRYEDEHPSYQEVKAQAGSFPAKNLTQRRPLSARSYTESYASQTRPV SARPTMAALLEKIPSDYN  
LGNYGDKTSDNSDIKTRPTPVKGEESCGKMPADWRQQLLRHIEARRLDRNAAYKHNTVNLGMLPYGGISAMHA  
GRSMTLNLQTKSKFDLQDLPLQKTPSQSNILDNGQEDVSPSGQWNPYPLGRRDVPDITIKKAGSHIQTLMG  
SQSLQHREREQPYEGNINKVTIQQFQSPLEPIQIPSSQATRGQPGRCLIQTKGQRSMGDYPEQFCVRIEKNP  
GLGFSISGGISGQGNPFKPSDKGIFVTRVQPDGPASNLLQPGDKILQANGHSFVHMEHEKAVLLLKSFQNTVY  
LVIQRELTV\*

>ENSMUSP00000154142\_c.823:C>T\_p.S275F ENSMUST00000226198.2|Vmn1r2-  
202|ENSMUSG00000115072|+|chr4:g.3172906:C>T  
MKMDPGNFAIETFLFCQITVGMFGNSSILFYIILIFTEKHLTSKDLIEHLTFANYLTVILRGFPQTMSYFG  
FKNFLDDMGCKLIVYISRITRGVSLYALCLLSCFQAITTSNNRWIKLKYRATKYIGPSCSVSCLVHLLLNI  
LTPRESGTNYKKNATNRLSYGYCSLFASDSVATTLYISLVCFSDFVCLGLMACSSISMVSILYRHERQVKHI  
HSAQYFLKVYPEDRATQTILILLCTFVISYSFSSIVAIIRTYLNYPVIWGVNIFTFLEIFFPMFCPFVLITNM  
RSSNLFLPCLGKR\*

>ENSMUSP00000100791\_c.823:C>T\_p.S275F ENSMUST00000105160.5|Vmn1r2-  
201|ENSMUSG00000115072|+|chr4:g.3172906:C>T  
MKMDPGNFAIETFLFCQITVGMFGNSSILFYIILIFTEKHLTSKDLIEHLTFANYLTVILRGFPQTMSYFG  
FKNFLDDMGCKLIVYISRITRGVSLYALCLLSCFQAITTSNNRWIKLKYRATKYIGPSCSVSCLVHLLLNI  
LTPRESGTNYKKNATNRLSYGYCSLFASDSVATTLYISLVCFSDFVCLGLMACSSISMVSILYRHERQVKHI  
HSAQYFLKVYPEDRATQTILILLCTFVISYSFSSIVAIIRTYLNYPVIWGVNIFTFLEIFFPMFCPFVLITNM  
RSSNLFLPCLGKR\*

>ENSMUSP00000154142\_c.840:C>T\_p.P281S ENSMUST00000226198.2|Vmn1r2-  
202|ENSMUSG00000115072|+|chr4:g.3172923:C>T  
MKMDPGNFAIETFLFCQITVGMFGNSSILFYIILIFTEKHLTSKDLIEHLTFANYLTVILRGFPQTMSYFG  
FKNFLDDMGCKLIVYISRITRGVSLYALCLLSCFQAITTSNNRWIKLKYRATKYIGPSCSVSCLVHLLLNI  
LTPRESGTNYKKNATNRLSYGYCSLFASDSVATTLYISLVCFSDFVCLGLMACSSISMVSILYRHERQVKHI  
HSAQYFLKVYPEDRATQTILILLCTFVISYSFSSIVAIIRTYLNYPVIWGVNIFTSLEIFFSMFCPFVLITNM  
RSSNLFLPCLGKR\*

>ENSMUSP00000100791\_c.840:C>T\_p.P281S ENSMUST00000105160.5|Vmn1r2-  
201|ENSMUSG00000115072|+|chr4:g.3172923:C>T  
MKMDPGNFAIETFLFCQITVGMFGNSSILFYIILIFTEKHLTSKDLIEHLTFANYLTVILRGFPQTMSYFG  
FKNFLDDMGCKLIVYISRITRGVSLYALCLLSCFQAITTSNNRWIKLKYRATKYIGPSCSVSCLVHLLLNI  
LTPRESGTNYKKNATNRLSYGYCSLFASDSVATTLYISLVCFSDFVCLGLMACSSISMVSILYRHERQVKHI  
HSAQYFLKVYPEDRATQTILILLCTFVISYSFSSIVAIIRTYLNYPVIWGVNIFTSLEIFFSMFCPFVLITNM  
RSSNLFLPCLGKR\*

>ENSMUSP00000154142\_c.882:A>T\_p.S295C ENSMUST00000226198.2|Vmn1r2-  
202|ENSMUSG00000115072|+|chr4:g.3172965:A>T  
MKMDPGNFAIETFLFCQITVGMFGNSSILFYIILIFTEKHLTSKDLIEHLTFANYLTVILRGFPQTMSYFG  
FKNFLDDMGCKLIVYISRITRGVSLYALCLLSCFQAITTSNNRWIKLKYRATKYIGPSCSVSCLVHLLLNI  
LTPRESGTNYKKNATNRLSYGYCSLFASDSVATTLYISLVCFSDFVCLGLMACSSISMVSILYRHERQVKHI  
HSAQYFLKVYPEDRATQTILILLCTFVISYSFSSIVAIIRTYLNYPVIWGVNIFTSLEIFFPMFCPFVLITNM  
RSCSNLFLPCLGKR\*

>ENSMUSP00000100791\_c.882:A>T\_p.S295C ENSMUST00000105160.5|Vmn1r2-  
201|ENSMUSG00000115072|+|chr4:g.3172965:A>T  
MKMDPGNFAIETFLFCQITVGMFGNSSILFYIILIFTEKHLTSKDLIEHLTFANYLTVILRGFPQTMSYFG  
FKNFLDDMGCKLIVYISRITRGVSLYALCLLSCFQAITTSNNRWIKLKYRATKYIGPSCSVSCLVHLLLNI  
LTPRESGTNYKKNATNRLSYGYCSLFASDSVATTLYISLVCFSDFVCLGLMACSSISMVSILYRHERQVKHI  
HSAQYFLKVYPEDRATQTILILLCTFVISYSFSSIVAIIRTYLNYPVIWGVNIFTSLEIFFPMFCPFVLITNM  
RSCSNLFLPCLGKR\*

>ENSMUSP00000100790\_c.882:A>T\_p.S295C ENSMUST00000105159.5|Vmn1r3-  
201|ENSMUSG00000115466|-|chr4:g.3184423:T>A  
MKMGPGNFAIETFLFCQITVGMFGNSSIPFYIILIFTEKHLTPKDLIEHLTFANYLTVILRGFPQTMSYFG  
FKNFLDDMGCKLLVYISRITRGVSLYAMCLLSCFQAITTSNNRWIKLKYRATKYIGPSCSVSCLVHLLLNI

LTPLRESGTNYKKNATNRLSYGYCSLFASDSVATTLYISLVCFSDFVCLGLMACSSISMVSIYRHKRQVKHI  
HSAQHFLKVPEDRATQTILILLCTFVISYSFSSIVAIIRTYLNYPVIWGVNIFTSLEIFFPMFCPFVLITNM  
RSCSNLFLPCLGKR\*

>ENSMUSP00000100790\_c.840:C>T\_p.P281S ENSMUST00000105159.5|Vmn1r3-  
201|ENSMUSG00000115466|-|chr4:g.3184465:G>A  
MKMGPGNFAIETFLFCQITVGMFGNSSIPFYIILIFTEKHLTPKDLEIHLTFANYLTVILRGFPQTMSYFG  
FKNFLDDMGCKLLVYISRITRGVSLYAMCLLSCFQAITTSNNNSRWIKLYRATKYIGPSCSVSCLVHLLLNI  
LTPLRESGTNYKKNATNRLSYGYCSLFASDSVATTLYISLVCFSDFVCLGLMACSSISMVSIYRHKRQVKHI  
HSAQHFLKVPEDRATQTILILLCTFVISYSFSSIVAIIRTYLNYPVIWGVNIFTSLEIFFSMFCPFVLITNM  
RSSSNLFLPCLGKR\*

>ENSMUSP00000100790\_c.823:C>T\_p.S275F ENSMUST00000105159.5|Vmn1r3-  
201|ENSMUSG00000115466|-|chr4:g.3184482:G>A  
MKMGPGNFAIETFLFCQITVGMFGNSSIPFYIILIFTEKHLTPKDLEIHLTFANYLTVILRGFPQTMSYFG  
FKNFLDDMGCKLLVYISRITRGVSLYAMCLLSCFQAITTSNNNSRWIKLYRATKYIGPSCSVSCLVHLLLNI  
LTPLRESGTNYKKNATNRLSYGYCSLFASDSVATTLYISLVCFSDFVCLGLMACSSISMVSIYRHKRQVKHI  
HSAQHFLKVPEDRATQTILILLCTFVISYSFSSIVAIIRTYLNYPVIWGVNIFTFLEIFFPMFCPFVLITNM  
RSSSNLFLPCLGKR\*

>ENSMUSP00000100790\_c.614:G>A\_p.M205I ENSMUST00000105159.5|Vmn1r3-  
201|ENSMUSG00000115466|-|chr4:g.3184691:C>T  
MKMGPGNFAIETFLFCQITVGMFGNSSIPFYIILIFTEKHLTPKDLEIHLTFANYLTVILRGFPQTMSYFG  
FKNFLDDMGCKLLVYISRITRGVSLYAMCLLSCFQAITTSNNNSRWIKLYRATKYIGPSCSVSCLVHLLLNI  
LTPLRESGTNYKKNATNRLSYGYCSLFASDSVATTLYISLVCFSDFVCLGLMACSSISIVSILYRHKRQVKHI  
HSAQHFLKVPEDRATQTILILLCTFVISYSFSSIVAIIRTYLNYPVIWGVNIFTSLEIFFPMFCPFVLITNM  
RSSSNLFLPCLGKR\*

>ENSMUSP00000100790\_c.531:G>A\_p.V178I ENSMUST00000105159.5|Vmn1r3-  
201|ENSMUSG00000115466|-|chr4:g.3184774:C>T  
MKMGPGNFAIETFLFCQITVGMFGNSSIPFYIILIFTEKHLTPKDLEIHLTFANYLTVILRGFPQTMSYFG  
FKNFLDDMGCKLLVYISRITRGVSLYAMCLLSCFQAITTSNNNSRWIKLYRATKYIGPSCSVSCLVHLLLNI  
LTPLRESGTNYKKNATNRLSYGYCSLFASDSIATTLYISLVCFSDFVCLGLMACSSISMVSIYRHKRQVKHI  
HSAQHFLKVPEDRATQTILILLCTFVISYSFSSIVAIIRTYLNYPVIWGVNIFTSLEIFFPMFCPFVLITNM  
RSSSNLFLPCLGKR\*

>ENSMUSP00000100790\_c.334:C>T\_p.T112I ENSMUST00000105159.5|Vmn1r3-  
201|ENSMUSG00000115466|-|chr4:g.3184971:G>A  
MKMGPGNFAIETFLFCQITVGMFGNSSIPFYIILIFTEKHLTPKDLEIHLTFANYLTVILRGFPQTMSYFG  
FKNFLDDMGCKLLVYISRITRGVSLYAMCLLSCFQAITTSNNNSRWIKLYRATKYIGPSCSVSCLVHLLLNI  
LTPLRESGTNYKKNATNRLSYGYCSLFASDSVATTLYISLVCFSDFVCLGLMACSSISMVSIYRHKRQVKHI  
HSAQHFLKVPEDRATQTILILLCTFVISYSFSSIVAIIRTYLNYPVIWGVNIFTSLEIFFPMFCPFVLITNM  
RSSSNLFLPCLGKR\*

>ENSMUSP00000100790\_c.283:G>A\_p.G95E ENSMUST00000105159.5|Vmn1r3-  
201|ENSMUSG00000115466|-|chr4:g.3185022:C>T  
MKMGPGNFAIETFLFCQITVGMFGNSSIPFYIILIFTEKHLTPKDLEIHLTFANYLTVILRGFPQTMSYFG  
FKNFLDDMGCKLLVYISRITREVSLYAMCLLSCFQAITTSNNNSRWIKLYRATKYIGPSCSVSCLVHLLLNI  
LTPLRESGTNYKKNATNRLSYGYCSLFASDSVATTLYISLVCFSDFVCLGLMACSSISMVSIYRHKRQVKHI  
HSAQHFLKVPEDRATQTILILLCTFVISYSFSSIVAIIRTYLNYPVIWGVNIFTSLEIFFPMFCPFVLITNM  
RSSSNLFLPCLGKR\*

>ENSMUSP00000100790\_c.255:C>A\_p.L86I ENSMUST00000105159.5|Vmn1r3-  
201|ENSMUSG00000115466|-|chr4:g.3185050:G>T  
MKMGPGNFAIETFLFCQITVGMFGNSSIPFYIILIFTEKHLTPKDLEIHLTFANYLTVILRGFPQTMSYFG  
FKNFLDDMGCKLLVYISRITRGVSLYAMCLLSCFQAITTSNNNSRWIKLYRATKYIGPSCSVSCLVHLLLNI  
LTPLRESGTNYKKNATNRLSYGYCSLFASDSVATTLYISLVCFSDFVCLGLMACSSISMVSIYRHKRQVKHI  
HSAQHFLKVPEDRATQTILILLCTFVISYSFSSIVAIIRTYLNYPVIWGVNIFTSLEIFFPMFCPFVLITNM  
RSSSNLFLPCLGKR\*

>ENSMUSP00000100790\_c.85:C>T\_p.P29L ENSMUST00000105159.5|Vmn1r3-  
201|ENSMUSG00000115466|-|chr4:g.3185220:G>A  
MKMGPGNFAIETFLFCQITVGMFGNSSILFYIILIFTEKHLTPKDLEIHLTFANYLTVILRGFPQTMSYFG  
FKNFLDDMGCKLLVYISRITRGVSLYAMCLLSCFQAITTSNNNSRWIKLYRATKYIGPSCSVSCLVHLLLNI  
LTPLRESGTNYKKNATNRLSYGYCSLFASDSVATTLYISLVCFSDFVCLGLMACSSISMVSIYRHKRQVKHI



HSAQHFLKVSPEDRATQTILILLCTFVISYSFSSIVAIIRTYLNYPVWVNIFTSLEIFFPMFCPFVLIITNM  
 RSSSNLFLPCLGKR\*  
 >ENSMUSP00000062039\_c.547:G>A\_p.G183D ENSMUST00000058183.9|Ndufaf6-  
 201|ENSMUSG00000050323|-|chr4:g.11062082:C>T  
 MATSMLGSVRGPFPFLANLFRQPPRDAWERVRRLPGPSAVRRSVAAASGPGIPGSHLYCLELLRKRDIYESY  
 LCSLLFPAECQRSASALRAFVVELAQVKDSVSEKTIGLMRMQFWKKAVEDMYCDNPPHPQVVAIELWKAVKKHN  
 LTKRWLMRIIDEREKNLDDKAYRSMQELENYAENTQDSSLYLTLLEV LGVKDLHADHAASHIGKAQGI V T C L R A  
 TPYHSSRRQVFLPMDVVCVQHGVSQEDFLRRNQDKNVRDVVYDIASQAHLHLKHARSFHRSPVAEAFPAFLQTV  
 SLEDYLKKIQRVDFDI FHPSLQQKNMLLPLSLYIQSWRKRY\*  
 >ENSMUSP00000115154\_c.267:A>G\_p.N90D ENSMUST00000131145.9|Tmem67-  
 203|ENSMUSG00000049488|-|chr4:g.12085959:T>C  
 XMVTRTRPVAAMAVRSRSSRTGTAYLLLVLCEVSWAQIFSFPPRRPETCDFNQYFDISALSCAPCGANQRRD  
 ALGTSCVCLPGYHMISDNNGGPSICKKCPENMKGVTKDGWDCISCPGLTAEKGKCHCPTGHILVERNVS G S L L  
 AQATCELCDESENSFTKANALGTRCVRCEPTFVNTRS CSCSCEPHTLV D Y V S A T Q G I F I N V \*  
 >ENSMUSP00000103928\_c.471:A>G\_p.N158D ENSMUST00000108293.3|Tmem67-  
 202|ENSMUSG00000049488|-|chr4:g.12085959:T>C  
 METTLPSPGDPKPMHRLSAHAQSRPNQPLGALNARAQTYCFGYS D W R V S A D S P R R L L G S W R L R T Q D M G T M V T R  
 TRPVAAMAVRSRSSRTGTAYLLLVLCEVSWAQIFSFPPRRPETCDFNQYFDISALSCAPCGANQRRDALGTS  
 CVCLPGYHMISDNNGGPSICKKCPENMKGVTKDGWDCISCPGLTAEKGKCHCPTGHILVERNVS G S L L A Q A T C  
 ELCDSENSFTKANALGTRCVRCEPTFVNTRS CSCSCEPHTLTGGLCF S N T G N F H Q R V I S T A R Y G E L G M S L N S  
 EWFAYLQATAAACWTHANLTSQALGNMCMVMNNSYDSTTLDACRLFHYIFESTAGLISVHVSVPFWRQNL PW  
 L F Y G D Q P G L A P Q V L S T T P L P T N F S F K G Q N Q L K F V A A S Y D I R G N F I K W Q P L E G G V L Q L C P D T E R R L D A A Y A F G T  
 TYQQNCEISLSKLLVDFSSPVFYDVYLEYTDDEEQHRYLWPI PVLN L N L Q H N K L F V N Q D S S S K W L L T R R I F L V  
 DAVSGRENDLGNQPRVIRVATQISLSIRLVPNTKNGNIYTPLLTIAYS D I D I K N A H S Q S A K I S F S V K Y E M N Q G  
 DASVHTDIALGVLGGLAVLSSLLKTAGWKRRIGSPMIDLQTVMKFLLYYAGDLANVFFIITVGTGLYWLIFFK  
 A Q K S V S V L L P M P V Q E E R F V T Y V G C A F A M K A L Q F L H K F I S Q I S I D I F F I D W E R P K G K V L K A V E G E G G V R S A T V P  
 V S I W R T Y F V A N E W N E I Q T V R K I N P L F Q V L T T L F F L E V V G F K N L A L M D S S S S L S R N P S D Y T A P Y S R I L R Y A V A T  
 AIWLVIIGIIQVVFFAAFYERFIEDKIRQFVDLCSMSNVSVFLLSHRCFGYYIHGRSVHGHADTNMEEMNMLK  
 REAENLCSQRGLVPNTDQTFQIAVSSQMRQHYDRIHETLRRNGPARLLSSSGSTFEQSIKAYHAMNKFLGS  
 FIDHVKEMDYFIKDKLLLERILGMEFMEPMEKSI FYNDEGHSFSSVLYYGNEATLLIFD L L F F C V V D L A C Q D  
 FV L A S F L T Y L Q Q E I F R F I R N T V G Q K N L A T K T L V D E R F L I \*  
 >ENSMUSP00000052644\_c.273:A>G\_p.N92D ENSMUST00000050686.10|Tmem67-  
 201|ENSMUSG00000049488|-|chr4:g.12085959:T>C  
 MGTMVTRTRPVAAMAVRSRSSRTGTAYLLLVLCEVSWAQIFSFPPRRPETCDFNQYFDISALSCAPCGANQR  
 RDALGTSCVCLPGYHMISDNNGGPSICKKCPENMKGVTKDGWDCISCPGLTAEKGKCHCPTGHILVERNVS G S  
 L L A Q A T C E L C D E S E N S F T K A N A L G T R C V R C E P T F V N T S R S C S C E P H T L T G G L C F S N T G N F H Q R V I S T A R Y G E  
 LGMSLNSEWFAYLQATAAACWTHANLTSQALGNMCMVMNNSYDSTTLDACRLFHYIFESTAGLISVHVSVPF  
 WRQNL P W L F Y G D Q P G L A P Q V L S T T P L P T N F S F K G Q N Q L K F V A A S Y D I R G N F I K W Q P L E G G V L Q L C P D T E R R L D  
 A A Y A F G T T Y Q Q N C E I S L S K L L V D F S S P V F Y D V Y L E Y T D E E Q H R Y L W P I P V L N L N L Q H N K L F V N Q D S S S K W L L  
 T R R I F L V D A V S G R E N D L G N Q P R V I R V A T Q I S L S I R L V P N T K N G N I Y T P L L T I A Y S D I D I K N A H S Q S A K I S F S V  
 K Y E M N Q G D A S V H T D I A L G V L G G L A V L S S L L K T A G W K R R I G S P M I D L Q T V M K F L L Y Y A G D L A N V F F I I T V G T G L  
 Y W L I F F K A Q K S V S V L L P M P V Q E E R F V T Y V G C A F A M K A L Q F L H K F I S Q I S I D I F F I D W E R P K G K V L K A V E G E G G  
 V R S A T V P V S I W R T Y F V A N E W N E I Q T V R K I N P L F Q V L T T L F F L E V V G F K N L A L M D S S S S L S R N P S D Y T A P Y S R I  
 L R Y A V A T A I W L V I G I I Q V V F F A A F Y E R F I E D K I R Q F V D L C S M S N V S V F L L S H R C F G Y Y I H G R S V H G H A D T N M E  
 E M N M N L K R E A E N L C S Q R G L V P N T D G Q T F Q I A V S S Q M R Q H Y D R I H E T L T R R N G P A R L L S S S G S T F E Q S I K A Y H A  
 M N K F L G S F I D H V H K E M D Y F I K D K L L L E R I L G M E F M E P M E K S I F Y N D E G H S F S S V L Y Y G N E A T L L I F D L L F F C V  
 V D L A C Q D F V L A S F L T Y L Q Q E I F R F I R N T V G Q K N L A T K T L V D E R F L I \*  
 >ENSMUSP00000041789\_c.217:C>G\_p.S73C ENSMUST00000042221.14|Slc26a7-  
 201|ENSMUSG00000040569|-|chr4:g.14593896:G>C  
 MTGAKRKRKRSVLWGKMHTPHREDIKQWCKRRLPILEWAPQYNLKENLLPDTVSGIMLAVQQVAQGLSFAMLS  
 VHPVFGLYGSLFPAIIYAFGMGRHVATGT F A L T S L I S A N A V E R L V P Q S S R N L T T Q S N S S V L G L S E F E L Q R I G  
 V A A A V S F L G G V I Q L V M F V L Q L G S A T F L L T E P V I S A M T T G A A T H V V T S Q V K Y L L G I K M P Y I S G P L G F F Y I Y A Y V  
 F E N I K S V Q L E A L L S L L S I I V L V L V K E L N E Q F K R A I K Q V L P V D L V L I A A S F A C Y C T N M E N T Y G L E V V G H I P N  
 G I P P R A P P M N I L S A V L T E A F G V A L V G Y V A S L A L A G G S A K K F K Y S V D D N Q E F L A H G L S N V I P S F L F C I P S A A A  
 M G R T A G L Y S T G A K T V A C L I S C I F V L I V I Y A I G P L L Y W L P M C V L A S I I V V G L K G M L I Q F R D L K K Y W N V D K I D W  
 G I W I S T Y I F T I C F A A N V G L L F G V I C T I A I V L G R F P R A K T L S I T D M K E M E L K V K T E M H D E T S Q Q I K I I S I N N P L  
 V F L N A K K F S A D L M K I I L K E S D S N Q P L D D V S K C E Q N T L L S S L S N G N C N E E A S Q P C S S E K C S L V L N C S G L T F F D Y  
 T G V S T L V E L Y L D C K S R S V D V F L A N C T A S L I K A M T Y Y G D L D T E K P I F F D S V P A A I S I I Q S N K N L S K A S D H S E V \*

>ENSMUSP00000116157\_c.217:C>G\_p.S73C ENSMUST00000149633.2|Slc26a7-204|ENSMUSG00000040569|-|chr4:g.14593896:G>C  
 MTGAKRKKRSVLWGKMHTPHREDIKQWCKRRLPILEWAPQYNLKENLLPDTVSGIMLAVQQVAQGLSFAMLSV  
 VHPVFGLYGSLFPAAIIYAIIFGMGRHVATGTFALTSLISANAVERLVPQSSRNLTQSNSSVLGLSEFELQRIG  
 VAAAVSFLGGVIQLVMFVLQLSATFLLTEPVISAMTTGAATHVVTSQVKYLLG  
 >ENSMUSP00000122870\_c.217:C>G\_p.S73C ENSMUST00000143105.2|Slc26a7-203|ENSMUSG00000040569|-|chr4:g.14593896:G>C  
 MTGAKRKKRSVLWGKMHTPHREDIKQWCKRRLPILEWAPQYNLKENLLPDTVSGIMLAVQQVAQGLSFAMLSV  
 VHPVFGLYGSLFPAAIIYAIIFGMGRHV  
 >ENSMUSP00000055293\_c.105:C>T\_p.R36C ENSMUST00000054538.13|Arhgef39-201|ENSMUSG00000051517|-|chr4:g.43499502:G>A  
 MESSGSAACCPVLQQRARWERKRVCTARELLETERCYQEQLGLVATYFLRILKAKGTLRPPPELQTLFGTWELI  
 YAASLELLPYLEEGQWGLGLQGFPHLELYAQFAANAERSQTTLQAQLKKNKRRFRFVKLQEGRPEFRGLQLQ  
 DLLPLPLQRLQQYENLVVALAENTV PNSPDYQQLTRAARLVSETAQKVHAIQSQKNDQHLLRVQALLSGRKA  
 KGLTSGRWFLRQGWLLVVPPTGEP RPRMFFLFSADVLLMAKPRPPLHLLKSGTFVCRALYPMSQCHLSRVFGHS  
 GGPCGGLLSLSPHEKLLMSTDQEELSQWHHSLTLAIRSQKSTHRSVTAT\*  
 >ENSMUSP00000103497\_c.324:C>A\_p.H109N ENSMUST00000107865.9|Tmem8b-202|ENSMUSG00000078716|+|chr4:g.43685342:C>A  
 MNMPQSLGTQPLPPEPPSLGTPIEGSGAIAPTEHCWPVRPTLRNELDTFVSHFYIFFGSPVALPPERPAVFAL  
 RLLPVLDSDGGVLSLELQLNASSLRQENVTVFGLTNEVPLSLGDAAVTCSKESLAGFLLSVSATSRRVARLRIP  
 FPQTGTWFLTLRSLCGVGRFVRCRNATAEVRRLRTFLSPCVDDCGPYGQCKLLRTHNYLYAAACEKAGWRGWG  
 CTDSADALTYGFQLLSTLLLCLSNLMFLPPVVLAI RSRVLEAAVYFTMFFSTFYHACDQPGIVVFCIMDYD  
 VLQFCDFLGLSLSVWVTVIAMARLQPVIKQVLYLLGAMLLSMALQLDRHGLWNLLGPSLFALGILATAWTVRS  
 VRRRHCPPTWRRWFLYLCPGSLIAGSAVLLYAFVETRDNYFYIHSIWHMLIAGSVGFLLP PRAKTD RRVPSG  
 ARARGCGYQLCINEQEELGLVGP GGT VSSICVS\*  
 >ENSMUSP00000129760\_c.324:C>A\_p.H109N ENSMUST00000167153.8|Tmem8b-209|ENSMUSG00000078716|+|chr4:g.43685342:C>A  
 MNMPQSLGTQPLPPEPPSLGTPIEGSGAIAPTEHCWPVRPTLRNELDTFVSHFYIFFGSPVALPPERPAVFAL  
 RLLPVLDSDGGVLSLELQLNASSLRQENVTVFGLTNEVPLSLGDAAVTCSKESLAGFLLSVSATSRRVARLRIP  
 FPQTGTWFLTLRSLCGVGRFVRCRNATAEVRRLRTFLSPCVDDCGPYGQCKLLRTHNYLYAAACEKAGWRGWG  
 CTDSADALTYGFQLLSTLLLCLSNLMFLPPVVLAI RSRVLEAAVYFTMFFSTFYHACDQPGIVVFCIMDYD  
 VLQFCDFLGLSLSVWVTVIAMARLQPVIKQVLYLLGAMLLSMALQLDRHGLWNLLGPSLFALGILATAWTVRS  
 VRRRHCPPTWRRWFLYLCPGSLIAGSAVLLYAFVETRDNYFYIHSIWHMLIAGSVGFLLP PRAKTD RRVPSG  
 ARARGCGYQLCINEQEELGLVGP GGT VSSICVS\*  
 >ENSMUSP00000103496\_c.324:C>A\_p.H109N ENSMUST00000107864.8|Tmem8b-201|ENSMUSG00000078716|+|chr4:g.43685342:C>A  
 MNMPQSLGTQPLPPEPPSLGTPIEGSGAIAPTEHCWPVRPTLRNELDTFVSHFYIFFGSPVALPPERPAVFAL  
 RLLPVLDSDGGVLSLELQLNASSLRQENVTVFGLTNEVPLSLGDAAVTCSKESLAGFLLSVSATSRRVARLRIP  
 FPQTGTWFLTLRSLCGVGRFVRCRNATAEVRRLRTFLSPCVDDCGPYGQCKLLRTHNYLYAAACEKAGWRGWG  
 CTDSADALTYGFQLLSTLLLCLSNLMFLPPVVLAI RSRVLEAAVYFTMFFSTFYHACDQPGIVVFCIMDYD  
 VLQFCDFLGLSLSVWVTVIAMARLQPVIKQVLYLLGAMLLSMALQLDRHGLWNLLGPSLFALGILATAWTVRS  
 VRRRHCPPTWRRWFLYLCPGSLIAGSAVLLYAFVETRDNYFYIHSIWHMLIAGSVGFLLP PRAKTD RRVPSG  
 ARARGCGYQLCINEQEELGLVGP GGT VSSICVS\*  
 >ENSMUSP00000103498\_c.1701:C>A\_p.H568N ENSMUST00000107866.9|Tmem8b-203|ENSMUSG00000078716|+|chr4:g.43685342:C>A  
 MAQPLSRPLILSQFQPWPATPSRFRPNLSRPRVPSQRMSRSRSP LQPRSLPPAWPLSPRRPLFHP LPSQFPAQ  
 HLTLSHSPRLKPLAQPPQLLQSPSHPLLP SHLLPLFEP RCSVQRHPKKAQSLPPSLCLPKSLPLGPRLSHTL  
 PLSQPRLRSLQLPALLLLLLFSVLGPGAGGLFLTDYSTCSPRKLSPFRSFASTELFH FHVPE DTF LAVWNL  
 IIFKEQGGTFGDHCPDQSVTVYFRSGAPPVINPLH THFPADTAVPGVFS LTL SWTLPNRTSGIFNVSSPLPGD  
 WFLAAHL PQAHGHI SVKGLQDE CQYLLQPQLIVRRLLDVAVLVPGRPSEQTLSSHNR SALYKVFVPSFTYRVS  
 AQLVCVGGRGASVCPLTLRLRPKAPPLHNSSSVACGGASVCQLELALPPWGHVYVRVETPSRGPGR TISFQL  
 CVRLQECQP SLSRALVPGAAMNPQSLGTQPLPPEPPSLGTPIEGSGAIAPTEHCWPVRPTLRNELDTFVSH  
 FYIFFGSPVALPPERPAVFALRLLPVLDSDGGVLSLELQLNASSLRQENVTVFGLTNEVPLSLGDAAVTCSKE  
 SLAGFLLSVSATSRRVARLRIPFPQTGTWFLTLRSLCGVGRFVRCRNATAEVRRLRTFLSPCVDDCGPYGQCKL  
 LRTHNYLYAAACEKAGWRGWGCTDSADALTYGFQLLSTLLLCLSNLMFLPPVVLAI RSRVLEAAVYFTMFF  
 STFYHACDQPGIVVFCIMDYDVLQFCDFLGLSLSVWVTVIAMARLQPVIKQVLYLLGAMLLSMALQLDRHGLW  
 NLLGPSLFALGILATAWTVRSVRRRHCPPTWRRWFLYLCPGSLIAGSAVLLYAFVETRDNYFYIHSIWHMLI  
 AGSVGFLLP PRAKTD RRVPSGARARGCGYQLCINEQEELGLVGP GGT VSSICVS\*

>ENSMUSP00000130133\_c.324:C>A\_p.H109N ENSMUST00000143339.8|Tmem8b-206|ENSMUSG00000078716|+|chr4:g.43685342:C>A  
 MNMPQSLGTQPLPPEPPSLGTPIEGSGAIAPTEHCWPVRPTLRNELDTFSVHFYIFFGSPVALPPERPAVFAL  
 RLLPVLDSSGGVLSLELQLNASSLRQENVTVFGCLTNEVPLSLGDAAVTCSKVPGRPLPSLGQCHLQSGQASNPI  
 PTDGDLVP

>ENSMUSP00000080908\_c.440:C>G\_p.D147E ENSMUST00000082287.3|Mup5-201|ENSMUSG00000058523|-|chr4:g.61750865:G>C  
 MKLLLLLLELTLYVYHAESESEGQNLNVEKINGKWFSSILLASDKREKIEEHGTMRVFVEHIDVLENSLAFK  
 FHTVIDEECTEIIYLVADKTEKAGEYSVTDYDFNTFTILKTDYDNYIMFHLINKKDEENFQLMELFGREPDLSS  
 EIKEKFAKLCEEHGIVRENIIDLSNANRCLQARE\*

>ENSMUSP00000056520\_c.3685:A>T\_p.H1229L ENSMUST00000053414.13|Ccdc171-201|ENSMUSG00000052407|+|chr4:g.83736316:A>T  
 MSLNTSSNATPGDTQRLKNASLDVKQMLKNETESDIIADLRKKLHRAKKEKLEMTTKHNAELSSYESQIARLR  
 SEVEKGEALRQRLEYDLAVARKEAGLGRRAAEERLAEAQRIQERLCAQNSSELQGKANEIEKTFQISQEKWREE  
 CRRFEHDLEERDNI IQNCNQEYESLMQEKTRLOKTLQEI LEKHEQEKELESRVRETALGEFRLQTEEWEAER  
 RELQLIVQEQDSAVQSMQKQVEQLEAEHMDCSDLLRRQTSELEFSTQREERLRKEFEATTLRVKLEENIEAE  
 RAAHLESKFNSEIIQLRIRDLEGALQVEKASQAEAVADLEMIKNEFKEVESAYEREKQNTQESCAKLNLLERE  
 YFSQNKKLNEEIEDQKKVIIDLSKRLQYNEKSCGELQEELVMAKHHQAFLVETCENNVRELESILGSFSVSAQ  
 WTSVGHKDKDKPPSFSVLETLRRTLTDYQNKLEDASNEEKTSNELDSTKQKIETHIKNTKELQDKLTEVHKE  
 LSHLRKACADREALITSLKVELQNVLHCWEKEKACAAQCESELQKLSQAFQKDSEEKLTFLHTLYQHLVAGCV  
 LIKQPEGMLDKFSWSELCAVLQENVDALIADLNANRANEKISHLEYICKNKSDTMRELQQTQEDTFNKVAEQIKA  
 QESCWQKQKKELEFQYSELLEVVQRRRAQKQFQIEAEKNSEKLNRIETSHEQLVRENHFKTTLSRTQREQTCLL  
 AACALMAGALCPLYSRSCALSTQRDFLQEQVNSLELFKLEIRTLAQALS AVDEKKQEEAKTKKTKFKGLVRFV  
 RKGVI AILAANRLKLLGQSCAFLFTWMESCKEGIGMLVCTGEPKDKRQFPKHQREQLRCLQALAWLTSSDLLG  
 TVISSMTELQEVISKTDPNRIRCGHLLIGAANKSFAKLMDKLSSAMASIPHSSRSITYVEKDSLVRQLARGL  
 HKVNTLALKYGLCSHIPIMKSTAALQKQIFGFTQRLHAAEVERRSLRLEVTEYKRTVHEMKKELDKSLSLQTLQ  
 LNEFKHKLITHEKFESACEELNALLREQQAQMLLNEQAQQLQELNRYRLELHSSSEADKNQTLGEAVKSLSE  
 AKMELRRKQSLRQLNRHLTQLEQDKRRLEENIRDAESALRMAAKDKECVANHMRTIENMLHKVRDQISLSRT  
 AATRNDFTLQPLKHLLET FAMEGLQGGPEVVACQAMIKSFMVDVYQLASARISTLEKEMTSLRSHIATLKSELH  
 TACLRENESLQSMGSRDHSNLSVPSRAAAPMDTVGDLPLQAEELDTTYTFLKET FVNTAPHSLSSQSSPGVPT  
 NAKRPSQIGL\*

>ENSMUSP00000155912\_c.3709:A>T\_p.H1237L ENSMUST00000231339.2|Ccdc171-206|ENSMUSG00000052407|+|chr4:g.83736316:A>T  
 MSLNTSSNATPGDTQRLKNASLDVKQMLKNETESDIIADLRKKLHRAKKEKLEMTTKHNAELSSYESQIARLR  
 SEVEKGEALRQRLEYDLAVARKEAGLGRRAAEERLAEAQRIQERLCAQNSSELQGKANEIEKTFQISQEKWREE  
 CRRFEHDLEERDNI IQNCNQEYESLMQEKTRLOKTLQEI LEKHEQEKELESRVRETALGEFRLQTEEWEAER  
 RELQLIVQEQDSAVQSMQKQVEQLEAEHMDCSDLLRRQTSELEFSTQREERLRKEFEATTLRVKLEENIEAE  
 RAAHLESKFNSEIIQLRIRDLEGALQVEKASQAEAVADLEMIKNEFKEVESAYEREKQNTQESCAKLNLLERE  
 YFSQNKKLNEEIEDQKKVIIDLSKRLQYNEKSCGELQEELVMAKHHQAFLVETCENNVRELESILGSFSVSAQ  
 WTSVGHKDKDKPPSFSVLETLRRTLTDYQNKLEDASNELNINDAKEKTSNELDSTKQKIETHIKNTKELQD  
 KLTEVHKELSHLRKACADREALITSLKVELQNVLHCWEKEKACAAQCESELQKLSQAFQKDSEEKLTFLHTLY  
 QHLVAGCVLIKQPEGMLDKFSWSELCAVLQENVDALIADLNANRANEKISHLEYICKNKSDTMRELQQTQEDTFN  
 KVAEQIKAQESCWQKQKKELEFQYSELLEVVQRRRAQKQFQIEAEKNSEKLNRIETSHEQLVRENHFKTTLSRT  
 QREQTCLLAACALMAGALCPLYSRSCALSTQRDFLQEQVNSLELFKLEIRTLAQALS AVDEKKQEEAKTKKTK  
 FKGLVRFVFRKGVIAILAANRLKLLGQSCAFLFTWMESCKEGIGMLVCTGEPKDKRQFPKHQREQLRCLQALAW  
 LTSSDLGTVISSMTELQEVISKTDPNRIRCGHLLIGAANKSFAKLMDKLSSAMASIPHSSRSITYVEKDSL  
 VQRLARGLHKVNTLALKYGLCSHIPIMKSTAALQKQIFGFTQRLHAAEVERRSLRLEVTEYKRTVHEMKKELDK  
 KSLSLQTLQNEFKHKLITHEKFESACEELNALLREQQAQMLLNEQAQQLQELNRYRLELHSSSEADKNQTLG  
 EAVKSLSEAKMELRRKQSLRQLNRHLTQLEQDKRRLEENIRDAESALRMAAKDKECVANHMRTIENMLHKVR  
 DQISLSRTAATRNDFTLQPLKHLLET FAMEGLQGGPEVVACQAMIKSFMVDVYQLASARISTLEKEMTSLRSHI  
 ATLKSELHTACLRENESLQSMGSRDHSNLSVPSRAAAPMDTVGDLPLQAEELDTTYTFLKET FVNTAPHSLSS  
 QSSPGVPTNAKRPSQIGL\*

>ENSMUSP00000092521\_c.402:A>C\_p.S135R ENSMUST00000094916.5|Ldlrad1-201|ENSMUSG00000070877|+|chr4:g.107073369:A>C  
 MSVGCERAEFCPACFWFLGQADAESNITTRKARPGDEGCGPLCCSRRGACLSVGLLLLLLAMLALAVATIL  
 GHPPRTPETHSCVTLANRTGFLCHDRRHCI PAHAVCDGIRTCPHGEDEAESLCRDVPQSLPRFLTTTCGDPDS  
 WIYSDQKCDGVNNGDCSDELSPTTCCPPCGPGWWRCSPTVFKYCSCVPRDLCRDSVQHCSWDSDEYSCPGP\*

>ENSMUSP00000118617\_c.282:C>T\_p.H95Y ENSMUST00000152717.8|Hspb11-204|ENSMUSG00000063172|+|chr4:g.107135132:C>T  
MRKVDLCSVTEGTEVILATSSDEKHPPENIIDGNPETFWTTTGMFPQEFIIICFHKKHVKIEKLVIQSYLVRTLRIEKTTSKEPLDFEQWVEKDLVYTEGQLQNEEIVARDGYATFLRFIIVSAFDHFASVHSISAEGLTVSSLP  
>ENSMUSP00000102360\_c.282:C>T\_p.H95Y ENSMUST00000106749.8|Hspb11-202|ENSMUSG00000063172|+|chr4:g.107135132:C>T  
MRKVDLCSVTEGTEVILATSSDEKHPPENIIDGNPETFWTTTGMFPQEFIIICFHKKHVKIEKLVIQSYLVRTLRIEKTTSKEPLDFEQWVEKDLVYTEGQLQNEEIVARDGYATFLRFIIVSAFDHFASVHSISAEGLTVSSLP\*  
>ENSMUSP00000048810\_c.282:C>T\_p.H95Y ENSMUST00000046558.8|Hspb11-201|ENSMUSG00000063172|+|chr4:g.107135132:C>T  
MRKVDLCSVTEGTEVILATSSDEKHPPENIIDGNPETFWTTTGMFPQEFIIICFHKKHVKIEKLVIQSYLVRTLRIEKTTSKEPLDFEQWVEKDLVYTEGQLQNEEIVARDGYATFLRFIIVSAFDHFASVHSISAEGLTVSSLP\*  
>ENSMUSP00000049474\_c.2941:T>A\_p.I981N ENSMUST00000044823.4|Zswim5-201|ENSMUSG00000033948|+|chr4:g.116843905:T>A  
MAEGGEREELLSPPPISPAKRLCSWSPQAHHPRGTPGAAGGGAGGGGGGCLAPGARPHLQPESELLDCAAKTV  
AEKWAYERVEERFERIPEPVQRRIVYWSFPRNEREICMYSSFQYRGGPGAGAAAGAAGASPVEEGPPPPPGAA  
APAGSAPGAAGAGSSPGLGAGTGTASGGCGGEGLPFRRGIRLLDSGSVENVLQVGFHLSGTVTEPAMASEPA  
VTYKVAISFDRCKITSVSCGCGNKDIFYCAHVVALSLYRIRKPDQVKLRPLPISETLQMNDRDQLQKFIQYLIT  
AHHTEVLPTAQKLADEILSSNSEINQVNGAPDPTAGASIDDENCWHLDEEQVKEQVKLFSLQGGYYSGSKQLN  
SMFAKVRMLRMRDSNGARMLTLITEQFMADPRLLTLWRQQGTSMTDKCRQLWDELGALWVCIIILNPHCKLEEK  
SCWLQQLQKWSDDLICPLEDGNYGHELPNITNALSQSASHSPDLSLRPRRTVFTRAIEGRELHWQDSDLQRII  
SSGIYTAPACQRENERLLFNHSGQPLWLEHVPTACARVDALRSHGYPKEALRLTVAIINTLRLQQQRQLEIYK  
HQKKEQLLQRGTTTTITNLEGGWVGHPLDPIGCLFLTLTEACRLNDDSYMMSDMNESRLPVYQHVVPVAGCPNSN  
ESYLSLALVALMGMGQQRVMPEGLYAQDKVCRNEEQLLSOLQELQDDELVQTLRQKQICILLEGGPFSGLGE  
VIHRESVPMHTFAKYLFSALLPHDPLDSYKALRAMRLPVLNSSSAGDTSHPHMHVSVVPSRYPRWFTLGH  
ESQQCELASTMTAAKGDTLRLRTLLEAIQKHIHSPSLIFKLAQDAFKIATPTDSSTDTLLNVALELGLQVM  
RMTLSTLNWRRLREMRWLVTCATEVGVVALVSLQSWYTLFTPTTEATSIVAATAVSHTTILRLSLDYVQREEL  
ASCARTLALQCAMKDPQSCALSALTCEKDHNAFEAAYQIAIDAAAGGMTHSQLFTIARYMELRGYPLRAFKL  
ASLAMSHLNLAYNQDTHPAINDVLWACALSHSLGKNEALAALPLVVKSVHCATVLSIDLRRCTVTAPGLAGIP  
GRRSSGKLMSTDKAPLRQLLDATINAYINTTHSRLTHISPRHYGEFIEFLSKARETFLLPQDGHLOFAQFIDN  
LKQIYKGGKKLMLLVRRERFG\*  
>rs46360603\_ENSMUSP00000149966\_c.412:T>C\_p.L138P  
ENSMUST00000216226.2|olfr1342-202|ENSMUSG00000043383|-  
|chr4:g.118547235:A>G  
MQTLRKDNCSSVSEFLLGFSSSESQVRVALFIFLLLYMITLLGNGLIITLIYLDLSDRLHTPMYFFLSILSLVD  
MSYVTTTVPQMLVNMVCPRRITISWGACVAQMFIIFLLGLIAECVLYAIMAYDRYVAICFPLHYSVPMRSLVCIK  
MVTVCWSISITGALIYTVFTMRLPYCGPYKINHFFCEVPAVLKACADTSFNDRLDLDFILGFIIFLLVPLSLILA  
SYACIFASILRIRSSQGRKLSFSTCASHITVVTMFYGPAMIMYMRPGSWYDPERDKKALFYNNVSAFLNPII  
YSLRNKDVKGAFKVLGDRGAAK\*  
>rs46360603\_ENSMUSP00000053925\_c.412:T>C\_p.L138P  
ENSMUST00000060562.6|olfr1342-201|ENSMUSG00000043383|-  
|chr4:g.118547235:A>G  
MQTLRKDNCSSVSEFLLGFSSSESQVRVALFIFLLLYMITLLGNGLIITLIYLDLSDRLHTPMYFFLSILSLVD  
MSYVTTTVPQMLVNMVCPRRITISWGACVAQMFIIFLLGLIAECVLYAIMAYDRYVAICFPLHYSVPMRSLVCIK  
MVTVCWSISITGALIYTVFTMRLPYCGPYKINHFFCEVPAVLKACADTSFNDRLDLDFILGFIIFLLVPLSLILA  
SYACIFASILRIRSSQGRKLSFSTCASHITVVTMFYGPAMIMYMRPGSWYDPERDKKALFYNNVSAFLNPII  
YSLRNKDVKGAFKVLGDRGAAK\*  
>rs213024301\_ENSMUSP00000138958\_c.2263:G>A\_p.G755D  
ENSMUST00000184063.3|Csm2-205|ENSMUSG00000028804|+|chr4:g.128266349:G>A  
MPRSRGPEQCCGCPAVRARGEIGI WALVPGTGSRWGRPPPPPPPPPPPLLLLLLWGLLSASAAGQNCTF  
HLQGPNGTVESPGFPYGYPNYANCTWTITAEDQHRIQLVQSFAL EEDFDVLSVFDGPPQAENLRTRLTGFQL  
PATIVSAASTLSLSLISDYAVSAQGFRASEYVLPSTHTCGNPGRLPNGIQQGSTFNLGDKVRYSCNPGFFLEGH  
AVLTCCHASSEANTWDFPLPSCRADDACGGTLRGQSGIISPHFPAEYHNNADCTWTILAE LGDTIALVFI DF  
QLEDGDFLEVTGTGESSLWFTGASLPAPVISKKNWLRHLHFTSDGNHRQRFSAQYQVKKQIELKSRGVKLM  
SKDNNQKTSVLTQVGVSSQGHNMCPDPGIPKPKGKRLGDFRLGSSVQFTCNEGYDLQGSKRITCMKVSMDMFAAW  
SDHRPVCRRAMCDAHLRGPSTGIIITSPNFPIQYDNNAHCVWIIITALNPAKVIKLAFFEEFDLERYDTLTVGDGG  
QDGDQKTVLYILTGTSPDLIVSTHHQMWLLFQSDSSGSSLGFKASYEEIEQGS CGDPGIPAYGQREGSRFRH  
GDTLEFECQPAFELVQKSSITCQKNNQWSAKKPGCVFSCFFNF TSPSGIVLSPNYPEDYGNHLHCVWLLILARP

ESRIHLAFNDIDVEPQDFDLVIKDGATAEAPVLGTFSGNQLPSSITSSGHVARLEFQTDHSTGKRGFNITFTT  
FRHNECPDPGVPVNGKRFGDSLQLDSSISFLCDEGFLGTQGSETITCVLKEGSSVVWNSAVLRCEAPCGHLTS  
PSGTILSPGWPGFYKDALSACAWVIEAQPYPYIKITFDRFKTEVNYDTLEVRDGRYTSAPLIGVYHGTQVPOFL  
ISTSNYLYLLFSTDKSHSDIGFQLRYETITLQSDHCLDPIVNGQRHGNDYFVGALVTFSCDSGYTLDGEP  
LECEPNFQWSHALPSCEALCGGFIQSSGTILSPGFDFYNNLNCTWVIETSHGKGVFFTFHTFHLES GHDY  
LLITENGSFSQPLRQLTGSRLPAPISAGLYGNFTAQVRFISDFSMSYEGFNITFSEYDLEPCEPEVPAYSIR  
KGLQFGVGDTLTFSCFPYRLEGTARITCLGGRRRLWSSPLPRCVAECGNSVTGTQGTLLSPNFVNYNNNHE  
CIYSIQTPGKGIQLKAKAFELAEGLLKVYDGTNNSARLLGVFSRSEMLGVTLNSTSSSLWDFITDAENTS  
KGFELQFSSFELIRCEDPGTPQFGYKVDHGGHFAGSSVTFSCDPGYSLRGSEELMCLSGERRTWRPLPTCVA  
ECGGTVRGEVSGQVLSPGYPAPYEHNLNCIWTIEADAGCTIGLHFLVFDTEEVHDVLRIDWGPVSEGVLLKEL  
SGPMLPKDLHSTFNSSVVLQFSTDFFTSKQGFQFVSVSTATSCNDPQVQNGSRSGDSWEAGDSTVFQCDPGY  
ALQGSAEISCVKIQRNRFWQSPPTCIAPCGGDLTGPSGVILSPNYPEPYPPGKECDWKVTVSPDYVIALVFN  
TFNLEPGYDFLHIYDGRDLSLPLIGSFYGSQPLSRIESSNSLFLAFRSDASVSNAGFVIDYTENPRESCFDP  
GSIKNGTRVGSDLKLGSSVYCHGGYEVEGASTLSCILGPDGKPMWNNPRPVCTAPCGGQYVGS DGVVLSN  
YPQNYTSGQTCLYFVTVPKDYVVFQGAFFHTALNDIVEVHDGYSQHSRLLSSLSGSHTGESLPLATSNQVLI  
KFSAKGQVARGFFHVVYQAVPRTSATQCSSVPEPRYGRKLGSDFSVGAIIRFECNSGYALQGSPEIECLPVP  
ALAQNVSAPTQVPCGGNLTERRGTLSPGFPEYLNLSLNCVWKIMVPEGAGIQIQVISFVTEQNWDSLEVF  
DGADNTVTMLGFSFGTTPALLNSTSNQLYLHFYSDISVSAAGFHLEYKTVGLSSCPEPAVPSNGVKTGERYL  
VNDVVSFQCEPGYALQGHAIHSCMPGTVRRWNYPPPLCIAQCGGAVEEMEGVILSPGFPNGYPSNMDCSWKIS  
LPVGFGAHIQFLNFSTEPNHDFLEIRSGPSETSRMMGRFSGSELPGLSLLSTSHDSIVYFHS DHSQNRPGFKLE  
YQAYELQECDPPEPFANGIVRGAGYNVQSVTFECLPGYQLTGQPVLTQCQHGTRNRNDHPLRCEVPCGGNIT  
SFNGTVYSPGYSPYSSQDCVWQITVPIGHGVHLNLSLLQIEPFDYITVWDGPPQTSLQLVGVTSLSKKI  
AHSNNSQVLLKFRDRTATGGIFAIAFSAAYPLTKCPPPTILPNAEVVTENEENIGDIVRYRCLPGFTLVGSEI  
LTCKLGTYLQFEGPPPICEVHCPTNELLTDSTGVILS QSYPGSYPQFQTC SWLVRVEPEYNISITVEYFLSEK  
QYDEFEIFDGPSPGSPLLKALSGNYSAPLIVTSSSNYSVYLRWSSDHAYNRKGFKIRYSAPYCSLPKAPLHGFI  
LGQTTTQPGGSIHFACNTGYRLVGHSMACITRHPQGYHLWSEAIPLCQALSCGLPADAPKNGIVFGKEYVTGTK  
AVYSCNEGYSHLQAGAEATAECLDTGLWSNSNVPPQCVPVLTCPDISSISVEHGRWRLLIFETQYQFQALMLICD  
PGYYTQGRVIRCQANGRWSLGE SMPTCQIISCGELPTPPSGHRIGTMSVYGATAIFSCNSGYTLVGSRVREC  
MANGLWSGSEVRCLAGHCCTPEPIVNGHINGENFNRYGVS VVYQCRAGFRLIGMSVRICQDDHHWSGKTPFCVP  
ITCGHPGNPVNGLTQGSQFNLDVVKFICNPGYIAEGAARSQCLASGQWSDTLPTCRIINCTDPGHQENSVRQ  
VHTSGPHRFSFGTTVSYQCNGHFYLLGTPALSCQDGTWDRPRPQCLLVSCGHGPGSPPHAQMSGDSYIVGAVV  
RYSCTGKRTL VGNS TRMCGLDGHWGSLPHCSGTSTGVC DPGI PAHGIRLGDSFAPGSVMRFS CDAGHVLRG  
SSERMCOANGSWSGSQPECGVISCGNPGTPSNARVVFSDGLV FSSSVVYECREGYATGLLSRHCSVNGTWTG  
SDPECTVINCGDPGIPANGIRLGNDFRYNKTVTYQCVPGYVMESHRSVLSCTKDRTWNGTKPVCKAIMCKPP  
QLIPNGKVSCHAPLVLVGSPPRRFCQSDGTWSGTQPSCIDPTLTTCADPGMPQFGIQNSSQGYQVGSVTLFRCQKG  
YLLQGSTTRTCLPNLTWSGTPDCVPHHKQPETPTHANVGALDLP SMGYTLIYSCQEGFSLRGGSEHRTCKA  
DGSWTGKPPVCLEVRPSGRPI NTAREPMLTQASVPGDVFAKNSLWKGAYEYQGKKQPAMLRVTGFQVANSKVN  
ATMIDHSGVELHLHLAGNYKKEDFRLLQVYQVTGPVESFVNKFKDDHWALDGHVSSSESSGGTFVYQGSVKQGF  
GQFGFQRLDLRLLES DPESIGRHFASNSSSVAAILVPIALIIAGFVLYLYKHRRRPKVPFNGYAGHENTNV  
RATFENPMYDRNIQPTDIMSNEAEFTVSTVCTAV\*

>ENSMUSP00000101487\_c.2030:G>T\_p.E677D ENSMUST00000105861.8|Srrm1-203|ENSMUSG00000028809|-|chr4:g.135052315:C>A

MDAGFFRGTSAEQDNRFNSNKQKLLKQLKFAECLKVKVMSKVNLEVIKPVITKRVTEILGFEDDVVIEFIFN  
QLEVKNPDSKMMQINLTGFLNGKNAREFMGELWPLLLSAQENIAGIPSAFLELKKKEIKQRQIEQEKLASLKK  
QDEDKDKRDKKEEKESREKRERSRSPRRRKSRSRSPRRRSPVRRERKRSHRSRSPRHRTKSRSPSPAPEKKEK  
SPELPEPSVRMKDSSVQEATSTSDILKAPKEPVPEPKEPSPEKNSKKEKEKTRPRRSRSRSKRSRTRRSRSPS  
HTRPRRRHRSRSRSYSPRRRPSRRRPSRRRTPPRRMPPPPHRRRSRSPGRRRRRSSASLSGSSSSSSSSRS  
RSPPKKPKRTSSPPKTRRLSPSASPPRRRRHRPSSPATPPPKTRHSPTPQQSNRTRKSRVSVSPGRTSGKVT  
KHKGTEKRESPPAPKPRKVELSEEDKGSKMAAADSVQQRQYRRQNQQSSSDSGSSSTSEDERPKRSHVK  
NGEVGRRRRHSPRSASPSPRKRQKETS PRSRRRRSPSPPPARRRRSPSPAPPPPPPPPPRRRRSPTPPRR  
RTPSPPPRRRSPSPRRYSPPIQRYSRSPSPPKRRTASPPPPKRRASPSPPPKRRVSHSPPPKQRSPTVTKRR  
SPSLSSKHKKSSPGRSTRDARSQPKNRHSPPRAPQTSPPPVRRGASAS PQGRQSPSPSTRPIRRVSR  
TPEPKIKKKAASPS PQSVRRVSSRSVSGSPEPAKAKPPAPSPVQSQSPSTNWS PAVPAKAKSPTPSLSPA  
RNSDQEGGGKKKKKKDKKHKKDKKHKKHKKHKKAVTIATPATAAPAAVA SAATTTSAQEPEAAAEPRKET  
ESEAEDDNLDDLERHLREKALRSRKAQVSPQS\*

>ENSMUSP00000081906\_c.2057:G>T\_p.E686D ENSMUST00000084846.12|Srrm1-202|ENSMUSG00000028809|-|chr4:g.135052315:C>A

MDAGFFRGTSAEQDNRFNSNKQKLLKQLKFAECLKVVMSKVNLEVIKPWITKRVTEILGFEDDVVIEFIFN  
QLEVKNPDSKMMQINLTGFLNGKNAREFMGELWPLLLSAQENIAGIPSAFLELKKKEIKQRQIEQEKLASLKK  
QDEDKDKRDKEEKESSREKRERSRSPRRRKSRSRSPRRRSSPVRREKRKSHSRSPRHRTKRSRSPAPEKKEK  
SPELPEPSVRMKDSSVQEATSTSDILKAPKEPVPEPKEPSPEKNSKKEKEKTRPRRSRRSKRSRSTRRSRSPS  
HTRPRRRHRSRSTRSPRRRPSPRRRTPPRRMPPPPRHRRRSRSPGRRRRRSSASLSGSSSSSSSSSRSRSPPK  
KPPKRTSSPPKTRRLSPSASP RRHRPSSPATPPPKTRHSPTPQQSNRTRKSRVSVSPGRTSGKVTKHKGT  
EKRESPPAPKPRKVELSESEEDKGSKMAAADSVQRRQYRRQNQQSSSDSGSSSTSEDERPKRSHVKNGEVG  
RRRRHSPSRASPSPRKRQKETS PRMQMGRWQSPVTKSSRRRRRSPSPPPARRRRSPSPAPPPPPPPPPRRR  
RSPTPPRRRTSPSPRRRSPSPRRYSPIQRRYSRSPPPKRRRTASPPPPKRRASPSPPKRRVSHSPPPKQ  
RSPTVTKRRSPSLSSKHRKGSSPGRSTRDARSPQPNKRHSRSPRPRAPQTSSPPPVRRGASASPOGRQSPSPS  
TRPIRRVSRTPPEPKKIKKAASPSQSVRRVSSSRVSGSPEPAKKPPAPPSPVQSQSPSTNWSPAVPAKKAK  
SPTPSLSPARNSDQEGGGKKKKKKDKKHKKDKKHKKHKKHKKEKAVTIATPATAAPA AVSAATTTSAQEPA  
AAPEPRKETESEAEEDNLDLDERHLREKALRSMRKAQVSPQS\*

>ENSMUSP00000125003\_c.2072:G>T\_p.E691D ENSMUST00000136342.9|Srrm1-  
208|ENSMUSG00000028809|-|chr4:g.135052315:C>A

MDAGFFRGTSAEQDNRFNSNKQKLLKQLKFAECLKVVMSKVNLEVIKPWITKRVTEILGFEDDVVIEFIFN  
QLEVKNPDSKMMQINLTGFLNGKNAREFMGELWPLLLSAQENIAGIPSAFLELKKKEIKQRQIEQEKLASLKK  
QDEDKDKRDKEEKESSREKRERSRSPRRRKSRSRSPRRRSSPVRREKRKSHSRSPRHRTKRSRSPAPEKKEK  
SPELPEPSVRMKDSSVQEATSTSDILKAPKEPVPEPKEPSPEKNSKKEKEKTRPRRSRRSKRSRSTRRSRSPS  
HTRPRRRHRSRSTRSPRRRPSPRRRTPPRRMPPPPRHRRRSRSPGRRRRRSSASLSGSSSSSSSSSRSRSPPK  
RSPPKKPPKRTSSPPKTRRLSPSASP RRHRPSSPATPPPKTRHSPTPQQSNRTRKSRVSVSPGRTSGKVTKHKGT  
KHKGT EKRESPPAPKPRKVELSESEEDKGSKMAAADSVQRRQYRRQNQQSSSDSGSSSTSEDERPKRSHVKN  
NGEVGRRRRHSPSRASPSPRKRQKETS PRMQMGRWQSPVTKSSRRRRRSPSPPPARRRRSPSPAPPPPPPPPP  
PPRRRRSPTPPRRRTSPSPRRRSPSPRRYSPIQRRYSRSPPPKRRRTASPPPPKRRASPSPPKRRVSHS  
PPPKQRSPTVTKRRSPSLSSKHRKGSSPGRSTRDARSPQPNKRHSRSPRPRAPQTSSPPPVRRGASASPOGRQ  
SPSPSTRPIRRVSRTPPEPKKIKKAASPSQSVRRVSSSRVSGSPEPAKKPPAPPSPVQSQSPSTNWSPAV  
AKKAKSPTPSLSPARNSDQEGGGKKKKKKDKKHKKDKKHKKHKKHKKEKAVTIATPATAAPA AVSAATTTSA  
QEPAAPAAPEPRKETESEAEEDNLDLDERHLREKALRSMRKAQVSPQS\*

>ENSMUSP00000030613\_c.2072:G>T\_p.E691D ENSMUST00000030613.11|Srrm1-  
201|ENSMUSG00000028809|-|chr4:g.135052315:C>A

MDAGFFRGTSAEQDNRFNSNKQKLLKQLKFAECLKVVMSKVNLEVIKPWITKRVTEILGFEDDVVIEFIFN  
QLEVKNPDSKMMQINLTGFLNGKNAREFMGELWPLLLSAQENIAGIPSAFLELKKKEIKQRQIEQEKLASLKK  
QDEDKDKRDKEEKESSREKRERSRSPRRRKSRSRSPRRRSSPVRREKRKSHSRSPRHRTKRSRSPAPEKKEK  
SPELPEPSVRMKDSSVQEATSTSDILKAPKEPVPEPKEPSPEKNSKKEKEKTRPRRSRRSKRSRSTRRSRSPS  
HTRPRRRHRSRSTRSPRRRPSPRRRTPPRRMPPPPRHRRRSRSPGRRRRRSSASLSGSSSSSSSSSRSRSPPK  
RSPPKKPPKRTSSPPKTRRLSPSASP RRHRPSSPATPPPKTRHSPTPQQSNRTRKSRVSVSPGRTSGKVTK  
KHKGT EKRESPPAPKPRKVELSESEEDKGSKMAAADSVQRRQYRRQNQQSSSDSGSSSTSEDERPKRSHVKN  
NGEVGRRRRHSPSRASPSPRKRQKETS PRMQMGRWQSPVTKSSRRRRRSPSPPPARRRRSPSPAPPPPPPPPP  
PPRRRRSPTPPRRRTSPSPRRRSPSPRRYSPIQRRYSRSPPPKRRRTASPPPPKRRASPSPPKRRVSHS  
PPPKQRSPTVTKRRSPSLSSKHRKGSSPGRSTRDARSPQPNKRHSRSPRPRAPQTSSPPPVRRGASASPOGRQ  
SPSPSTRPIRRVSRTPPEPKKIKKAASPSQSVRRVSSSRVSGSPEPAKKPPAPPSPVQSQSPSTNWSPAV  
AKKAKSPTPSLSPARNSDQEGGGKKKKKKDKKHKKDKKHKKHKKHKKEKAVTIATPATAAPA AVSAATTTSA  
QEPAAPAAPEPRKVFPTPLPAV\*

>ENSMUSP00000120952\_c.410:G>T\_p.E137D ENSMUST00000140050.3|Srrm1-  
211|ENSMUSG00000028809|-|chr4:g.135052315:C>A

XSRRRRSPSPPPARRRRSPSPAPPPPPPPPPRRRRSPTPPRRRTSPSPRRRSPSPRRYSPIQRRYSRSP  
PPKRRRTASPPPPKRRASPSPPKRRVSHSPPPKQRSPTVTKRRSPSLSSKHRKGSSPGRSTRDARSPQPNKR  
HSPSPRPRAPQTSSPPPVRRGASASPOGRQSPSPSTRPIRRVSRTPPEPKKIKKSVSGSPEPAKKPPAPPSPV  
QSQSPSTNWSPAVPAKKAKSPTPSLSPARNSDQEGGGKKKKKKDKKHKKDKKHKKHKKHKKEKAVTIATPAT  
AAPAAVSAATTTSAQEPAAPAAPEPRK

>ENSMUSP00000101442\_c.42:G>TAAAG\_p.V15ins-fs ENSMUST00000105816.8|Pink1-  
202|ENSMUSG00000028756|-|chr4:g.138043014:C>CTTTA  
MAPEVSTAHSGPSA

>ENSMUSP00000030536\_c.1278:G>TAAAG\_p.V427ins-fs  
ENSMUST00000030536.13|Pink1-201|ENSMUSG00000028756|-  
|chr4:g.138043014:C>CTTTA  
MAVRQALGRGLQLGRALLLRFPKPGPLFGWGKPGPAAAWGRGERPGQVVSPPGAQPRPVGLPLPDRYRFFRQS  
VAGLAARIQRQFMVRARGGAGPCGRAVFLAFGLGLGLIEEKQAEGRRAASACQEIQAIFTQKTRKRVSDPLDTR

CWQGFRLLEDYLIGQAIGKGCNAAVYEATMPTLPQHLEKAKHLGLIGKGPDVVLKGDAGEQAPGTPFPFAIKM  
MWNISAGSSSEAILS SKMSQELVPASRVALAGEYGAVTYRRSRDGPQLAPHPNI IRVFRAFTSSVPLLPGALA  
DYPDMLPPHYYPEGLGHGRTLFLVMKNYPCTLRQYLEEQTPSSRLATMMTLQLLEGVVDHLVQQGIAHRDLKSD  
NILVEWDS DGC PWLVISDFGCCLADQHVGLRLFPNSSSVERGGNGSLMAPEVSTAHSGPSA  
>ENSMUSP00000101443\_c.1188:G>TAAAG\_p.V397ins-fs  
ENSMUST00000105817.4|Pink1-203|ENSMUSG00000028756|-  
|chr4:g.138043014:C>CTTTA  
MAVRQALGRGLQLERPGQVSPGAQPRPVGLPLPDRYRFFRQSVAGLAARIQRQFMVRARGGAGPCGRAVFLA  
FGLGLGLIEEKQAEGRRAASACQEIQAIFQKTKRVSDPLDTRCWQGFRLLEDYLIGQAIGKGCNAAVYEATMP  
TLPQHLEKAKHLGLIGKGPDVVLKGDAGEQAPGTPFPFAIKMMWNISAGSSSEAILS SKMSQELVPASRVALA  
GEYGAVTYRRSRDGPQLAPHPNI IRVFRAFTSSVPLLPALADYPDMLPPHYYPEGLGHGRTLFLVMKNYP  
TLRQYLEEQTPSSRLATMMTLQLLEGVVDHLVQQGIAHRDLKSDNILVEWDS DGC PWLVISDFGCCLADQHVGL  
RLFPNSSSVERGGNGSLMAPEVSTAHSGPSA  
>rs50525384\_ENSMUSP00000030536\_c.1155:T>C\_p.C386R  
ENSMUST00000030536.13|Pink1-201|ENSMUSG00000028756|-|chr4:g.138043407:A>G  
MAVRQALGRGLQLGRALLLRFPKPGPLFGWGKPGPAAAWGRGERPGQVSPGAQPRPVGLPLPDRYRFFRQSV  
VAGLAARIQRQFMVRARGGAGPCGRAVFLAFGLGLGLIEEKQAEGRRAASACQEIQAIFQKTKRVSDPLDTR  
CWQGFRLLEDYLIGQAIGKGCNAAVYEATMPTLPQHLEKAKHLGLIGKGPDVVLKGDAGEQAPGTPFPFAIKM  
MWNISAGSSSEAILS SKMSQELVPASRVALAGEYGAVTYRRSRDGPQLAPHPNI IRVFRAFTSSVPLLPGALA  
DYPDMLPPHYYPEGLGHGRTLFLVMKNYPCTLRQYLEEQTPSSRLATMMTLQLLEGVVDHLVQQGIAHRDLKSD  
NILVEWDS DGC PWLVISDFGRCLADQHVGLRLFPNSSSVERGGNGSLMAPEVSTAHSGPSAVIDYSKADTWAV  
GAIAYEIFGLANPFYGGQSAHLESRSYQEAQLPEMPESVPPPEARLRVRSLLQREASKRPSARLAANVLHLSLW  
GEHLLALKNLKLDKMIAWLLQQAATLLADRLREKSCVETKLMFLANLECEALCQAALLLSSWRAAP\*  
>rs50525384\_ENSMUSP00000101443\_c.1065:T>C\_p.C356R  
ENSMUST00000105817.4|Pink1-203|ENSMUSG00000028756|-|chr4:g.138043407:A>G  
MAVRQALGRGLQLERPGQVSPGAQPRPVGLPLPDRYRFFRQSVAGLAARIQRQFMVRARGGAGPCGRAVFLA  
FGLGLGLIEEKQAEGRRAASACQEIQAIFQKTKRVSDPLDTRCWQGFRLLEDYLIGQAIGKGCNAAVYEATMP  
TLPQHLEKAKHLGLIGKGPDVVLKGDAGEQAPGTPFPFAIKMMWNISAGSSSEAILS SKMSQELVPASRVALA  
GEYGAVTYRRSRDGPQLAPHPNI IRVFRAFTSSVPLLPALADYPDMLPPHYYPEGLGHGRTLFLVMKNYP  
TLRQYLEEQTPSSRLATMMTLQLLEGVVDHLVQQGIAHRDLKSDNILVEWDS DGC PWLVISDFGRCLADQHVGL  
RLFPNSSSVERGGNGSLMAPEVSTAHSGPSAVIDYSKADTWAVGAIAYEIFGLANPFYGGQSAHLESRSYQEA  
QLPEMPESVPPPEARLRVRSLLQREASKRPSARLAANVLHLSLWGEHLLALKNLKLDKMIAWLLQQAATLLAD  
RLREKSCVETKLMFLANLECEALCQAALLLSSWRAAP\*  
>ENSMUSP00000115949\_c.53:G>T\_p.L18F ENSMUST00000148204.8|Szrd1-  
205|ENSMUSG00000040842|-|chr4:g.140847667:C>A  
VAESWEEAADSGEIDRRFEKCLKITQKERKSKSPKVPVIVIQDDSLPTGPPPQIRILKRPTSNVSSPNSTS  
RPALPVKSLAQREAEYAEARRRILGSASPEEEQEKPIIDRPRTRISQPEDSRQPSNVIRQPLGPDGSGQFKQRR  
\*  
>ENSMUSP00000099545\_c.68:G>T\_p.L23F ENSMUST00000102487.4|Szrd1-  
203|ENSMUSG00000040842|-|chr4:g.140847667:C>A  
MEDEEVAESWEEAADSGEIDRRFEKCLKITQKESRKS SPKVPVIVIQDDSLPTGPPPQIRILKRPTSNVSS  
SPNSTSRPALPVKSLAQREAEYAEARRRILGSASPEEEQEKPIIDRPRTRISQPEDSRQPSNVIRQPLGPDGSGQ  
GFKQRR\*  
>ENSMUSP00000077761\_c.646:G>C\_p.W216S ENSMUST00000078695.5|Pramel24-  
201|ENSMUSG00000046435|+|chr4:g.143453540:G>C  
MSFKDPPTLQQLARRSLLKDEALTISALPNLPMQLFPPLFKDAFTNKHPNILRQMVVAVPFPPTLPVGSMLKIP  
HLET LKAVLDGLDLLMSQKDRPSRWNLQVLDLRDAHKDFWDGWAGLLHEVCSQDVFGKNQPVGNHPILGGKQT  
MTIKMNL SLSRRPSKYLYRWAKERKNGIQVCEKLEFGAIPAYDPLDVLKLCDAASIQELAINTCSDIY  
TLASLALGVGQMKNLQKLLFKEICISWDRPWDLEKEARIVTEIFSEFSKLHKLQHLYLNDVYFLTERLDQMLR  
CFESPLETLAITHCTLSSESDMSYLSQCPSIHQLKHLDLGVTLLLSHPFLQSLLERLTATLQTLKLGCKLMD  
WQISDLLPALSQCSQLTEVDFVENFFSMDSLKLLQNTANLTLTLEKYPAPDEVYDDSDGVIIDRFLQLCSE  
LIDTLKVVVRQPKQVYFVSKRCLYCRNFCIYSFVGN\*  
>rs108334209\_ENSMUSP00000092103\_c.849:C>T\_p.L284F  
ENSMUST00000094526.5|Pramel31-  
201|ENSMUSG00000070619|+|chr4:g.144089533:C>T  
MSFQAPPTLLSLAVQSLAKNEALAINALQELPRELFPPLFKAAFTGRHTKILKEMVGAWPLPCLPVGALMNIP  
DMTVLQAVLDGVDMLTGNFHPKSKRKLQVLDLRNVHHHFWVDSAGPEDEDSSAETVCQKQKATHPHRYALRRR  
LKVVTDLHLQFDLEEHQTYFLQWAQERRASLNLCCVKLQIRGLAMHTVRKILQIFQPYCIEELELNTGWTLST

LACFAPCLGQMKNLRLHLTLVHEKLEFTFLHTSTDIQEKSVTKFISQFSKLNLSLQHLALAGLYFFTGHMNEELL  
GCLKTPLEFLSMALCKYSQSDMESFAQCQSLHHLKHLHLAGIILHDLSLVPLGIFLENVANTLKTLELEHCRM  
TDSQVIAFIPALNKCSQLIEVNFCDNDISTSVLMNLLHHTANLSQLIMELYPAPLECYETGFVLRRAERFVQLS  
SELMNILRTRVQPHSICFASQLCLICSQRCTYGLETRLCHCCQ\*

>rs46446139\_ENSMUSP00000101364\_c.430:T>C\_p.V144A  
ENSMUST00000105738.9|Zfp980-201|ENSMUSG00000058186|+|chr4:g.145427703:T>C  
MFAPHQESGRRTTKRMSASLENTAQCLLTFKDVFLDFSSEEWECNFAQRTLYMDVMLENYNNLLFVENHCIC  
GNYEKEKVLQDQTQIHVNEHGHNRRKSSKCNELRNVIHESSESTPYNTNHRDATLQSSNLKRHKGTGTTKEACT  
YKDCVNCLKGSSIIISLNQGTHIEKKEHNRNKNLDEVLVSRQNNSEMSTYTCGEFDKCFQSDNLQSQQRIPY  
KKSIIYSESDKCFTQLSHLSIHHTIHSGEKPYKCSECDKCFDFTLRKHQRIHTGEKPYKCNECDKCFDCKG  
SLRVHQRIHTGEKPYKCSECDKCFQPSHLSIHRRIHSGEKPYKCSECDKCFDCKSSLRVHQRIHTGEKPYQC  
SECDKCFDCKGSLRVVHRIHAGEKPYQCSECDKCFDCKGSLRVVHRIHAGEKPYKCSECDKCFTHKDSL RVH  
RIHAGEKPYKCSECDKCFTEKNGLRRHQRIHTGEKPYKCSECDKCFDCKSSLRVHQRIHTGEKPYQCSECDK  
FTDKGSLRVVHRIHAGEKPYKCSECDKCFDCKGYLRVHRIHAGEKPYKCSECDKCFTHKGSRLRVHRIHAGE  
KPYKCSECDKCFTEKNGLRRHQRIHTGEKPYKCSECDKCFTRKSHLSIHQNSYRRETVQMQ\*

>rs46446139\_ENSMUSP00000137589\_c.430:T>C\_p.V144A  
ENSMUST00000180014.2|Zfp980-202|ENSMUSG00000058186|+|chr4:g.145427703:T>C  
MFAPHQESGRRTTKRMSASLENTAQCLLTFKDVFLDFSSEEWECNFAQRTLYMDVMLENYNNLLFVENHCIC  
GNYEKEKVLQDQTQIHVNEHGHNRRKSSKCNELRNVIHESSESTPYNTNHRDATLQSSNLKRHKGTGTTKEACT  
YKDCVNCLKGSSIIISLNQGTHIEKKEHNRNKNLDEVLVSRQNNSEMSTYTCGEFDKCFQSDNLQSQQRIPY  
KKSIIYSESDKCFTQLSHLSIHHTIHSGEKPYKCSECDKCFDFTLRKHQRIHTGEKPYKCNECDKCFDCKG  
SLRVHQRIHTGEKPYKCSECDKCFQPSHLSIHRRIHSGEKPYKCSECDKCFDCKSSLRVHQRIHTGEKPYQC  
SECDKCFDCKGSLRVVHRIHAGEKPYQCSECDKCFDCKGSLRVVHRIHAGEKPYKCSECDKCFTHKDSL RVH  
RIHAGEKPYKCSECDKCFTEKNGLRRHQRIHTGEKPYKCSECDKCFDCKSSLRVHQRIHTGEKPYQCSECDK  
FTDKGSLRVVHRIHAGEKPYKCSECDKCFDCKGYLRVHRIHAGEKPYKCSECDKCFTHKGSRLRVHRIHAGE  
KPYKCSECDKCFTEKNGLRRHQRIHTGEKPYKCSECDKCFTRKSHLSIHQNSYRRETVQMQ\*

>ENSMUSP00000101364\_c.816:C>G\_p.H273D ENSMUST00000105738.9|Zfp980-  
201|ENSMUSG00000058186|+|chr4:g.145428089:C>G  
MFAPHQESGRRTTKRMSASLENTAQCLLTFKDVFLDFSSEEWECNFAQRTLYMDVMLENYNNLLFVENHCIC  
GNYEKEKVLQDQTQIHVNEHGHNRRKSSKCNELRNVIHESSESTPYNTNHRDATLQSSNLKRHKGTGTTKEVCT  
YKDCVNCLKGSSIIISLNQGTHIEKKEHNRNKNLDEVLVSRQNNSEMSTYTCGEFDKCFQSDNLQSQQRIPY  
KKSIIYSESDKCFTQLSHLSIHHTIHSGEKPYKCSECDKCFDFTLRKHQRIHTGEKPYKCNECDKCFDCKG  
SLRVHQRIHTGEKPYKCSECDKCFQPSHLSIHRRIHSGEKPYKCSECDKCFDCKSSLRVHQRIHTGEKPYQC  
SECDKCFDCKGSLRVVHRIHAGEKPYQCSECDKCFDCKGSLRVVHRIHAGEKPYKCSECDKCFTHKDSL RVH  
RIHAGEKPYKCSECDKCFTEKNGLRRHQRIHTGEKPYKCSECDKCFDCKSSLRVHQRIHTGEKPYQCSECDK  
FTDKGSLRVVHRIHAGEKPYKCSECDKCFDCKGYLRVHRIHAGEKPYKCSECDKCFTHKGSRLRVHRIHAGE  
KPYKCSECDKCFTEKNGLRRHQRIHTGEKPYKCSECDKCFTRKSHLSIHQNSYRRETVQMQ\*

>ENSMUSP00000137589\_c.816:C>G\_p.H273D ENSMUST00000180014.2|Zfp980-  
202|ENSMUSG00000058186|+|chr4:g.145428089:C>G  
MFAPHQESGRRTTKRMSASLENTAQCLLTFKDVFLDFSSEEWECNFAQRTLYMDVMLENYNNLLFVENHCIC  
GNYEKEKVLQDQTQIHVNEHGHNRRKSSKCNELRNVIHESSESTPYNTNHRDATLQSSNLKRHKGTGTTKEVCT  
YKDCVNCLKGSSIIISLNQGTHIEKKEHNRNKNLDEVLVSRQNNSEMSTYTCGEFDKCFQSDNLQSQQRIPY  
KKSIIYSESDKCFTQLSHLSIHHTIHSGEKPYKCSECDKCFDFTLRKHQRIHTGEKPYKCNECDKCFDCKG  
SLRVHQRIHTGEKPYKCSECDKCFQPSHLSIHRRIHSGEKPYKCSECDKCFDCKSSLRVHQRIHTGEKPYQC  
SECDKCFDCKGSLRVVHRIHAGEKPYQCSECDKCFDCKGSLRVVHRIHAGEKPYKCSECDKCFTHKDSL RVH  
RIHAGEKPYKCSECDKCFTEKNGLRRHQRIHTGEKPYKCSECDKCFDCKSSLRVHQRIHTGEKPYQCSECDK  
FTDKGSLRVVHRIHAGEKPYKCSECDKCFDCKGYLRVHRIHAGEKPYKCSECDKCFTHKGSRLRVHRIHAGE  
KPYKCSECDKCFTEKNGLRRHQRIHTGEKPYKCSECDKCFTRKSHLSIHQNSYRRETVQMQ\*

>rs30953777\_ENSMUSP00000101364\_c.902:T>A\_p.H301Q  
ENSMUST00000105738.9|Zfp980-201|ENSMUSG00000058186|+|chr4:g.145428175:T>A  
MFAPHQESGRRTTKRMSASLENTAQCLLTFKDVFLDFSSEEWECNFAQRTLYMDVMLENYNNLLFVENHCIC  
GNYEKEKVLQDQTQIHVNEHGHNRRKSSKCNELRNVIHESSESTPYNTNHRDATLQSSNLKRHKGTGTTKEVCT  
YKDCVNCLKGSSIIISLNQGTHIEKKEHNRNKNLDEVLVSRQNNSEMSTYTCGEFDKCFQSDNLQSQQRIPY  
KKSIIYSESDKCFTQLSHLSIHHTIHSGEKPYKCSECDKCFDFTLRKHQRIHTGEKPYKCNECDKCFDCKG  
SLRVHQRIHTGEKPYKCSECDKCFQPSHLSIHRRIHSGEKPYKCSECDKCFDCKSSLRVHQRIHTGEKPYQC  
SECDKCFDCKGSLRVVHRIHAGEKPYQCSECDKCFDCKGSLRVVHRIHAGEKPYKCSECDKCFTHKDSL RVH  
RIHAGEKPYKCSECDKCFTEKNGLRRHQRIHTGEKPYKCSECDKCFDCKSSLRVHQRIHTGEKPYQCSECDK  
FTDKGSLRVVHRIHAGEKPYKCSECDKCFDCKGYLRVHRIHAGEKPYKCSECDKCFTHKGSRLRVHRIHAGE  
KPYKCSECDKCFTEKNGLRRHQRIHTGEKPYKCSECDKCFTRKSHLSIHQNSYRRETVQMQ\*



FTDKGSLRVHHRHAGEKPYKCSECDKCFDCKGSLRVHHRHAGEKPYKCSECDKCFTHKGSLRVHHRHAGE  
KPYKCSECDKCFTEKNGLRRHQRIHTGEKPYKCSECDKCFTRKSHLSIHQNSYRRETVQMQ\*  
>rs30953777\_ENSMUSP00000137589\_c.902:T>A\_p.H301Q  
ENSMUST00000180014.2|zfp980-202|ENSMUSG00000058186|+|chr4:g.145428175:T>A  
MFAPHQESGRRTTKRMSASLENTAQCLLTFKDVFLDFSSEEWECNFAQRTLYMDVMLENYNNLLFVENHCIC  
GNYEKEKVLEQDTQHIVNEHGHNRRKSSKCNELRNVIHESSESTPYNTNHRDATLQSSNLKRHKGTGTTKEVCT  
YKDCVNCLKGSSIIISLNQGTHIEKKEHNRNKNLDEVLSVRQNNSEMSTYTCGEFDKCFDQSDNLQSQRIYPG  
KKSYYISESDKCFDQSLSHLSIHHTIHSGEKPYKCSECDKCFDCKFTLRKHQRIHTGEKPYKCNECDKCFDCKG  
SLRVHQRIHTGEKPYKCSECDKCFDQPSHLSIHRRIHSGEKPYKCSECDKCFDCKSSLRVHQRIHTGEKPYQC  
SECDKCFDCKGSLRVHHRHAGEKPYQCSECDKCFDCKGSLRVHHRHAGEKPYKCSECDKCFTHKDSL RVH  
RIHAGEKPYKCSECDKCFTEKNGLRRHQRIHTGEKPYKCSECDKCFDCKSSLRVHQRIHTGEKPYQCSECDK  
FTDKGSLRVHHRHAGEKPYKCSECDKCFDCKGSLRVHHRHAGEKPYKCSECDKCFTHKGSLRVHHRHAGE  
KPYKCSECDKCFTEKNGLRRHQRIHTGEKPYKCSECDKCFTRKSHLSIHQNSYRRETVQMQ\*  
>rs108218830\_ENSMUSP00000101364\_c.1317:A>G\_p.I440V  
ENSMUST00000105738.9|zfp980-201|ENSMUSG00000058186|+|chr4:g.145428590:A>G  
MFAPHQESGRRTTKRMSASLENTAQCLLTFKDVFLDFSSEEWECNFAQRTLYMDVMLENYNNLLFVENHCIC  
GNYEKEKVLEQDTQHIVNEHGHNRRKSSKCNELRNVIHESSESTPYNTNHRDATLQSSNLKRHKGTGTTKEVCT  
YKDCVNCLKGSSIIISLNQGTHIEKKEHNRNKNLDEVLSVRQNNSEMSTYTCGEFDKCFDQSDNLQSQRIYPG  
KKSYYISESDKCFDQSLSHLSIHHTIHSGEKPYKCSECDKCFDCKFTLRKHQRIHTGEKPYKCNECDKCFDCKG  
SLRVHQRIHTGEKPYKCSECDKCFDQPSHLSIHRRIHSGEKPYKCSECDKCFDCKSSLRVHQRIHTGEKPYQC  
SECDKCFDCKGSLRVHHRHAGEKPYQCSECDKCFDCKGSLRVHHRHAGEKPYKCSECDKCFTHKDSL RVH  
RVHAGEKPYKCSECDKCFTEKNGLRRHQRIHTGEKPYKCSECDKCFDCKSSLRVHQRIHTGEKPYQCSECDK  
FTDKGSLRVHHRHAGEKPYKCSECDKCFDCKGSLRVHHRHAGEKPYKCSECDKCFTHKGSLRVHHRHAGE  
KPYKCSECDKCFTEKNGLRRHQRIHTGEKPYKCSECDKCFTRKSHLSIHQNSYRRETVQMQ\*  
>rs108218830\_ENSMUSP00000137589\_c.1317:A>G\_p.I440V  
ENSMUST00000180014.2|zfp980-202|ENSMUSG00000058186|+|chr4:g.145428590:A>G  
MFAPHQESGRRTTKRMSASLENTAQCLLTFKDVFLDFSSEEWECNFAQRTLYMDVMLENYNNLLFVENHCIC  
GNYEKEKVLEQDTQHIVNEHGHNRRKSSKCNELRNVIHESSESTPYNTNHRDATLQSSNLKRHKGTGTTKEVCT  
YKDCVNCLKGSSIIISLNQGTHIEKKEHNRNKNLDEVLSVRQNNSEMSTYTCGEFDKCFDQSDNLQSQRIYPG  
KKSYYISESDKCFDQSLSHLSIHHTIHSGEKPYKCSECDKCFDCKFTLRKHQRIHTGEKPYKCNECDKCFDCKG  
SLRVHQRIHTGEKPYKCSECDKCFDQPSHLSIHRRIHSGEKPYKCSECDKCFDCKSSLRVHQRIHTGEKPYQC  
SECDKCFDCKGSLRVHHRHAGEKPYQCSECDKCFDCKGSLRVHHRHAGEKPYKCSECDKCFTHKDSL RVH  
RVHAGEKPYKCSECDKCFTEKNGLRRHQRIHTGEKPYKCSECDKCFDCKSSLRVHQRIHTGEKPYQCSECDK  
FTDKGSLRVHHRHAGEKPYKCSECDKCFDCKGSLRVHHRHAGEKPYKCSECDKCFTHKGSLRVHHRHAGE  
KPYKCSECDKCFTEKNGLRRHQRIHTGEKPYKCSECDKCFTRKSHLSIHQNSYRRETVQMQ\*  
>ENSMUSP00000101364\_c.1398:A>G\_p.R467G ENSMUST00000105738.9|zfp980-  
201|ENSMUSG00000058186|+|chr4:g.145428671:A>G  
MFAPHQESGRRTTKRMSASLENTAQCLLTFKDVFLDFSSEEWECNFAQRTLYMDVMLENYNNLLFVENHCIC  
GNYEKEKVLEQDTQHIVNEHGHNRRKSSKCNELRNVIHESSESTPYNTNHRDATLQSSNLKRHKGTGTTKEVCT  
YKDCVNCLKGSSIIISLNQGTHIEKKEHNRNKNLDEVLSVRQNNSEMSTYTCGEFDKCFDQSDNLQSQRIYPG  
KKSYYISESDKCFDQSLSHLSIHHTIHSGEKPYKCSECDKCFDCKFTLRKHQRIHTGEKPYKCNECDKCFDCKG  
SLRVHQRIHTGEKPYKCSECDKCFDQPSHLSIHRRIHSGEKPYKCSECDKCFDCKSSLRVHQRIHTGEKPYQC  
SECDKCFDCKGSLRVHHRHAGEKPYQCSECDKCFDCKGSLRVHHRHAGEKPYKCSECDKCFTHKDSL RVH  
RIHAGEKPYKCSECDKCFTEKNGLRRHQRIHTGEKPYKCSECDKCFDCKSSLRVHQRIHTGEKPYQCSECDK  
FTDKGSLRVHHRHAGEKPYKCSECDKCFDCKGSLRVHHRHAGEKPYKCSECDKCFTHKGSLRVHHRHAGE  
KPYKCSECDKCFTEKNGLRRHQRIHTGEKPYKCSECDKCFTRKSHLSIHQNSYRRETVQMQ\*  
>ENSMUSP00000137589\_c.1398:A>G\_p.R467G ENSMUST00000180014.2|zfp980-  
202|ENSMUSG00000058186|+|chr4:g.145428671:A>G  
MFAPHQESGRRTTKRMSASLENTAQCLLTFKDVFLDFSSEEWECNFAQRTLYMDVMLENYNNLLFVENHCIC  
GNYEKEKVLEQDTQHIVNEHGHNRRKSSKCNELRNVIHESSESTPYNTNHRDATLQSSNLKRHKGTGTTKEVCT  
YKDCVNCLKGSSIIISLNQGTHIEKKEHNRNKNLDEVLSVRQNNSEMSTYTCGEFDKCFDQSDNLQSQRIYPG  
KKSYYISESDKCFDQSLSHLSIHHTIHSGEKPYKCSECDKCFDCKFTLRKHQRIHTGEKPYKCNECDKCFDCKG  
SLRVHQRIHTGEKPYKCSECDKCFDQPSHLSIHRRIHSGEKPYKCSECDKCFDCKSSLRVHQRIHTGEKPYQC  
SECDKCFDCKGSLRVHHRHAGEKPYQCSECDKCFDCKGSLRVHHRHAGEKPYKCSECDKCFTHKDSL RVH  
RIHAGEKPYKCSECDKCFTEKNGLRRHQRIHTGEKPYKCSECDKCFDCKSSLRVHQRIHTGEKPYQCSECDK  
FTDKGSLRVHHRHAGEKPYKCSECDKCFDCKGSLRVHHRHAGEKPYKCSECDKCFTHKGSLRVHHRHAGE  
KPYKCSECDKCFTEKNGLRRHQRIHTGEKPYKCSECDKCFTRKSHLSIHQNSYRRETVQMQ\*

>ENSMUSP00000101364\_c.1702:T>A\_p.F568Y ENSMUST00000105738.9|Zfp980-201|ENSMUSG00000058186|+|chr4:g.145428975:T>A  
MFAPHQESGRRTTKRMSASLENTAQCLLTfkdVfLDFsSSEWECLNFAQRTLYMDVMLENYNNLLFVENHCIC  
GNYEKEKVLQDQTQHIVNEHGHNRRKSSKCNELRNVIHESSESTPYNTNHRDATLQSSNLKRHKGTGTTKEVCT  
YKDCVNCLKGSSIIISLNQGTHIEKKEHNRNKNLDEVLSVRQNNSEMSTYTCGEFDKCFQSDNLQSQQRIPG  
KKSYYISESDKCFQLSHLSIHHTIHSGEKPYKCSECDKCFDkFtLRKHQRIHTGEKPYKCNECDKCFDkG  
SLRVHQRIHTGEKPYKCSECDKCFQPSHLSIHRRHSGEKPYKCSECDKCFDkSSLRVHQRIHTGEKPYQC  
SECDKCFDkGSLRVHHRHAGEKPYQCSECDKCFDkGSLRVHHRHAGEKPYKCSECDKCFTHKDSL RVH  
RIHAGEKPYKCSECDKCFTEKNGLRRHQRIHTGEKPYKCSECDKCFDkSSLRVHQRIHTGEKPYQCSECDK  
FTDkGSLRVHHRHAGEKPYKCSECDKCFDkGYLRVHHRHAGEKPYKCSECDKCYTHKGS LRVHHRHAGE  
KPYKCSECDKCFTEKNGLRRHQRIHTGEKPYKCSECDKCFTRKSHLSIHQNSYRRETVMQ\*  
>ENSMUSP00000137589\_c.1702:T>A\_p.F568Y ENSMUST00000180014.2|Zfp980-202|ENSMUSG00000058186|+|chr4:g.145428975:T>A  
MFAPHQESGRRTTKRMSASLENTAQCLLTfkdVfLDFsSSEWECLNFAQRTLYMDVMLENYNNLLFVENHCIC  
GNYEKEKVLQDQTQHIVNEHGHNRRKSSKCNELRNVIHESSESTPYNTNHRDATLQSSNLKRHKGTGTTKEVCT  
YKDCVNCLKGSSIIISLNQGTHIEKKEHNRNKNLDEVLSVRQNNSEMSTYTCGEFDKCFQSDNLQSQQRIPG  
KKSYYISESDKCFQLSHLSIHHTIHSGEKPYKCSECDKCFDkFtLRKHQRIHTGEKPYKCNECDKCFDkG  
SLRVHQRIHTGEKPYKCSECDKCFQPSHLSIHRRHSGEKPYKCSECDKCFDkSSLRVHQRIHTGEKPYQC  
SECDKCFDkGSLRVHHRHAGEKPYQCSECDKCFDkGSLRVHHRHAGEKPYKCSECDKCFTHKDSL RVH  
RIHAGEKPYKCSECDKCFTEKNGLRRHQRIHTGEKPYKCSECDKCFDkSSLRVHQRIHTGEKPYQCSECDK  
FTDkGSLRVHHRHAGEKPYKCSECDKCFDkGYLRVHHRHAGEKPYKCSECDKCYTHKGS LRVHHRHAGE  
KPYKCSECDKCFTEKNGLRRHQRIHTGEKPYKCSECDKCFTRKSHLSIHQNSYRRETVMQ\*  
>ENSMUSP00000101364\_c.1771:A>G\_p.E591G ENSMUST00000105738.9|Zfp980-201|ENSMUSG00000058186|+|chr4:g.145429044:A>G  
MFAPHQESGRRTTKRMSASLENTAQCLLTfkdVfLDFsSSEWECLNFAQRTLYMDVMLENYNNLLFVENHCIC  
GNYEKEKVLQDQTQHIVNEHGHNRRKSSKCNELRNVIHESSESTPYNTNHRDATLQSSNLKRHKGTGTTKEVCT  
YKDCVNCLKGSSIIISLNQGTHIEKKEHNRNKNLDEVLSVRQNNSEMSTYTCGEFDKCFQSDNLQSQQRIPG  
KKSYYISESDKCFQLSHLSIHHTIHSGEKPYKCSECDKCFDkFtLRKHQRIHTGEKPYKCNECDKCFDkG  
SLRVHQRIHTGEKPYKCSECDKCFQPSHLSIHRRHSGEKPYKCSECDKCFDkSSLRVHQRIHTGEKPYQC  
SECDKCFDkGSLRVHHRHAGEKPYQCSECDKCFDkGSLRVHHRHAGEKPYKCSECDKCFTHKDSL RVH  
RIHAGEKPYKCSECDKCFTEKNGLRRHQRIHTGEKPYKCSECDKCFDkSSLRVHQRIHTGEKPYQCSECDK  
FTDkGSLRVHHRHAGEKPYKCSECDKCFDkGYLRVHHRHAGEKPYKCSECDKCFTHKGS LRVHHRHAGE  
KPYKCSGCDKCFTEKNGLRRHQRIHTGEKPYKCSECDKCFTRKSHLSIHQNSYRRETVMQ\*  
>ENSMUSP00000137589\_c.1771:A>G\_p.E591G ENSMUST00000180014.2|Zfp980-202|ENSMUSG00000058186|+|chr4:g.145429044:A>G  
MFAPHQESGRRTTKRMSASLENTAQCLLTfkdVfLDFsSSEWECLNFAQRTLYMDVMLENYNNLLFVENHCIC  
GNYEKEKVLQDQTQHIVNEHGHNRRKSSKCNELRNVIHESSESTPYNTNHRDATLQSSNLKRHKGTGTTKEVCT  
YKDCVNCLKGSSIIISLNQGTHIEKKEHNRNKNLDEVLSVRQNNSEMSTYTCGEFDKCFQSDNLQSQQRIPG  
KKSYYISESDKCFQLSHLSIHHTIHSGEKPYKCSECDKCFDkFtLRKHQRIHTGEKPYKCNECDKCFDkG  
SLRVHQRIHTGEKPYKCSECDKCFQPSHLSIHRRHSGEKPYKCSECDKCFDkSSLRVHQRIHTGEKPYQC  
SECDKCFDkGSLRVHHRHAGEKPYQCSECDKCFDkGSLRVHHRHAGEKPYKCSECDKCFTHKDSL RVH  
RIHAGEKPYKCSECDKCFTEKNGLRRHQRIHTGEKPYKCSECDKCFDkSSLRVHQRIHTGEKPYQCSECDK  
FTDkGSLRVHHRHAGEKPYKCSECDKCFDkGYLRVHHRHAGEKPYKCSECDKCFTHKGS LRVHHRHAGE  
KPYKCSGCDKCFTEKNGLRRHQRIHTGEKPYKCSECDKCFTRKSHLSIHQNSYRRETVMQ\*  
>ENSMUSP00000101364\_c.1786:T>C\_p.F596S ENSMUST00000105738.9|Zfp980-201|ENSMUSG00000058186|+|chr4:g.145429059:T>C  
MFAPHQESGRRTTKRMSASLENTAQCLLTfkdVfLDFsSSEWECLNFAQRTLYMDVMLENYNNLLFVENHCIC  
GNYEKEKVLQDQTQHIVNEHGHNRRKSSKCNELRNVIHESSESTPYNTNHRDATLQSSNLKRHKGTGTTKEVCT  
YKDCVNCLKGSSIIISLNQGTHIEKKEHNRNKNLDEVLSVRQNNSEMSTYTCGEFDKCFQSDNLQSQQRIPG  
KKSYYISESDKCFQLSHLSIHHTIHSGEKPYKCSECDKCFDkFtLRKHQRIHTGEKPYKCNECDKCFDkG  
SLRVHQRIHTGEKPYKCSECDKCFQPSHLSIHRRHSGEKPYKCSECDKCFDkSSLRVHQRIHTGEKPYQC  
SECDKCFDkGSLRVHHRHAGEKPYQCSECDKCFDkGSLRVHHRHAGEKPYKCSECDKCFTHKDSL RVH  
RIHAGEKPYKCSECDKCFTEKNGLRRHQRIHTGEKPYKCSECDKCFDkSSLRVHQRIHTGEKPYQCSECDK  
FTDkGSLRVHHRHAGEKPYKCSECDKCFDkGYLRVHHRHAGEKPYKCSECDKCFTHKGS LRVHHRHAGE  
KPYKCSECDKCFTEKNGLRRHQRIHTGEKPYKCSECDKCFTRKSHLSIHQNSYRRETVMQ\*  
>ENSMUSP00000137589\_c.1786:T>C\_p.F596S ENSMUST00000180014.2|Zfp980-202|ENSMUSG00000058186|+|chr4:g.145429059:T>C

MFAPHQESGRRTTKRMSASLENTAQCLLTFKDVFLDFSSEEWECNFAQRTLYMDVMLENYNNLLFVENHCIC  
 GNYEKEKVLEQDTQHIVNEHGHNRRKSSKCNELRNVIHESSESTPYNTNHRDATLQSSNLKRHKGTGTTKEVCT  
 YKDCVNCLKGSSIIISLNQGTHIEKKEHNRNKNLDEVLVSRQNNSEMSTYTTCGEFDKCFQSDNLQSQORIYPG  
 KKSYYIYSESDKCFQLSHLSIHHTIHSGEKPYKCSECDKCFDFTLRKHQRIHTGEKPYKCNECDKCFDCKG  
 SLRVHQRIHTGEKPYKCSECDKCFQPSHLSIHRRIHSGEKPYKCSECDKCFDCKSSLRVHQRIHTGEKPYQC  
 SECDKCFDCKGSLRVVHRIHAGEKPYQCSECDKCFDCKGSLRVVHRIHAGEKPYKCSECDKCFTHKDSL RVHH  
 RIHAGEKPYKCSECDKCFTEKNGLRRHQRIHTGEKPYKCSECDKCFDCKSSLRVHQRIHTGEKPYQCSECDK  
 FTDKGSRLRVHRIHAGEKPYKCSECDKCFDCKGSLRVVHRIHAGEKPYKCSECDKCFTHKGSRLRVHRIHAGE  
 KPYKCSECDKCFTEKNGLRRHQRIHTGEKPYKCSECDKCFTRKSHLSIHQNSYRRETVQMQ\*  
 >ENSMUSP00000101364\_c.1798:A>G\_p.N600S ENSMUST00000105738.9|Zfp980-  
 201|ENSMUSG00000058186|+|chr4:g.145429071:A>G  
 MFAPHQESGRRTTKRMSASLENTAQCLLTFKDVFLDFSSEEWECNFAQRTLYMDVMLENYNNLLFVENHCIC  
 GNYEKEKVLEQDTQHIVNEHGHNRRKSSKCNELRNVIHESSESTPYNTNHRDATLQSSNLKRHKGTGTTKEVCT  
 YKDCVNCLKGSSIIISLNQGTHIEKKEHNRNKNLDEVLVSRQNNSEMSTYTTCGEFDKCFQSDNLQSQORIYPG  
 KKSYYIYSESDKCFQLSHLSIHHTIHSGEKPYKCSECDKCFDFTLRKHQRIHTGEKPYKCNECDKCFDCKG  
 SLRVHQRIHTGEKPYKCSECDKCFQPSHLSIHRRIHSGEKPYKCSECDKCFDCKSSLRVHQRIHTGEKPYQC  
 SECDKCFDCKGSLRVVHRIHAGEKPYQCSECDKCFDCKGSLRVVHRIHAGEKPYKCSECDKCFTHKDSL RVHH  
 RIHAGEKPYKCSECDKCFTEKNGLRRHQRIHTGEKPYKCSECDKCFDCKSSLRVHQRIHTGEKPYQCSECDK  
 FTDKGSRLRVHRIHAGEKPYKCSECDKCFDCKGSLRVVHRIHAGEKPYKCSECDKCFTHKGSRLRVHRIHAGE  
 KPYKCSECDKCFTEKNGLRRHQRIHTGEKPYKCSECDKCFTRKSHLSIHQNSYRRETVQMQ\*  
 >ENSMUSP00000137589\_c.1798:A>G\_p.N600S ENSMUST00000180014.2|Zfp980-  
 202|ENSMUSG00000058186|+|chr4:g.145429071:A>G  
 MFAPHQESGRRTTKRMSASLENTAQCLLTFKDVFLDFSSEEWECNFAQRTLYMDVMLENYNNLLFVENHCIC  
 GNYEKEKVLEQDTQHIVNEHGHNRRKSSKCNELRNVIHESSESTPYNTNHRDATLQSSNLKRHKGTGTTKEVCT  
 YKDCVNCLKGSSIIISLNQGTHIEKKEHNRNKNLDEVLVSRQNNSEMSTYTTCGEFDKCFQSDNLQSQORIYPG  
 KKSYYIYSESDKCFQLSHLSIHHTIHSGEKPYKCSECDKCFDFTLRKHQRIHTGEKPYKCNECDKCFDCKG  
 SLRVHQRIHTGEKPYKCSECDKCFQPSHLSIHRRIHSGEKPYKCSECDKCFDCKSSLRVHQRIHTGEKPYQC  
 SECDKCFDCKGSLRVVHRIHAGEKPYQCSECDKCFDCKGSLRVVHRIHAGEKPYKCSECDKCFTHKDSL RVHH  
 RIHAGEKPYKCSECDKCFTEKNGLRRHQRIHTGEKPYKCSECDKCFDCKSSLRVHQRIHTGEKPYQCSECDK  
 FTDKGSRLRVHRIHAGEKPYKCSECDKCFDCKGSLRVVHRIHAGEKPYKCSECDKCFTHKGSRLRVHRIHAGE  
 KPYKCSECDKCFTEKNGLRRHQRIHTGEKPYKCSECDKCFTRKSHLSIHQNSYRRETVQMQ\*  
 >ENSMUSP00000101364\_c.1836:A>G\_p.K613E ENSMUST00000105738.9|Zfp980-  
 201|ENSMUSG00000058186|+|chr4:g.145429109:A>G  
 MFAPHQESGRRTTKRMSASLENTAQCLLTFKDVFLDFSSEEWECNFAQRTLYMDVMLENYNNLLFVENHCIC  
 GNYEKEKVLEQDTQHIVNEHGHNRRKSSKCNELRNVIHESSESTPYNTNHRDATLQSSNLKRHKGTGTTKEVCT  
 YKDCVNCLKGSSIIISLNQGTHIEKKEHNRNKNLDEVLVSRQNNSEMSTYTTCGEFDKCFQSDNLQSQORIYPG  
 KKSYYIYSESDKCFQLSHLSIHHTIHSGEKPYKCSECDKCFDFTLRKHQRIHTGEKPYKCNECDKCFDCKG  
 SLRVHQRIHTGEKPYKCSECDKCFQPSHLSIHRRIHSGEKPYKCSECDKCFDCKSSLRVHQRIHTGEKPYQC  
 SECDKCFDCKGSLRVVHRIHAGEKPYQCSECDKCFDCKGSLRVVHRIHAGEKPYKCSECDKCFTHKDSL RVHH  
 RIHAGEKPYKCSECDKCFTEKNGLRRHQRIHTGEKPYKCSECDKCFDCKSSLRVHQRIHTGEKPYQCSECDK  
 FTDKGSRLRVHRIHAGEKPYKCSECDKCFDCKGSLRVVHRIHAGEKPYKCSECDKCFTHKGSRLRVHRIHAGE  
 KPYKCSECDKCFTEKNGLRRHQRIHTGEEPYKCSECDKCFTRKSHLSIHQNSYRRETVQMQ\*  
 >ENSMUSP00000137589\_c.1836:A>G\_p.K613E ENSMUST00000180014.2|Zfp980-  
 202|ENSMUSG00000058186|+|chr4:g.145429109:A>G  
 MFAPHQESGRRTTKRMSASLENTAQCLLTFKDVFLDFSSEEWECNFAQRTLYMDVMLENYNNLLFVENHCIC  
 GNYEKEKVLEQDTQHIVNEHGHNRRKSSKCNELRNVIHESSESTPYNTNHRDATLQSSNLKRHKGTGTTKEVCT  
 YKDCVNCLKGSSIIISLNQGTHIEKKEHNRNKNLDEVLVSRQNNSEMSTYTTCGEFDKCFQSDNLQSQORIYPG  
 KKSYYIYSESDKCFQLSHLSIHHTIHSGEKPYKCSECDKCFDFTLRKHQRIHTGEKPYKCNECDKCFDCKG  
 SLRVHQRIHTGEKPYKCSECDKCFQPSHLSIHRRIHSGEKPYKCSECDKCFDCKSSLRVHQRIHTGEKPYQC  
 SECDKCFDCKGSLRVVHRIHAGEKPYQCSECDKCFDCKGSLRVVHRIHAGEKPYKCSECDKCFTHKDSL RVHH  
 RIHAGEKPYKCSECDKCFTEKNGLRRHQRIHTGEKPYKCSECDKCFDCKSSLRVHQRIHTGEKPYQCSECDK  
 FTDKGSRLRVHRIHAGEKPYKCSECDKCFDCKGSLRVVHRIHAGEKPYKCSECDKCFTHKGSRLRVHRIHAGE  
 KPYKCSECDKCFTEKNGLRRHQRIHTGEEPYKCSECDKCFTRKSHLSIHQNSYRRETVQMQ\*  
 >ENSMUSP00000116281\_c.628:A>G\_p.K210R ENSMUST00000123460.2|Zfp986-  
 201|ENSMUSG00000078500|+|chr4:g.145625970:A>G  
 MSVCLVNTPOGLLTFKDVFLDFSLEEWECNFAQRTLYMDVMLENYNNLLFVENHCIRGKNGKVLDDQDSQYIV  
 HEHMNIQEKSSKWDKLSNVILESILQCTPYKTNHSSDALQFSNQRLKPRNTKEVCKYNDVSNLSLFSSTISLN  
 QGINMQKKKHNRNAELEKVFVSKHKVMVKKDNIAGNPYKSEFHKYLTQREKLQSQORIYHGKRPYESSKSDK

CFTHQIHLHSIHQEIHTEEKIYKCECDKCFKNKFNLTMHQRIHTGEKPYKCECDKCFKQSNLSIHQRIHTG  
EKPYKCECDKCFKQSNLSIHQRIHTGEKPYKCECGKCFTEKGLRIHQRIHTGEKPYKCECDKCFKQSNLS  
NLTIHQRIHTGEKPYKCECGKCFTEKSSLRHQRI  
>ENSMUSP00000089493\_c.1225:A>G\_p.K409R ENSMUST00000091878.6|zfp987-  
201|ENSMUSG00000066009|+|chr4:g.146061795:A>G  
MSVCLVNTPOGLLTFKDVLDVDFSLLEEWELSFQAQRTLYMDVMLENYNNLLFVENHCIRGKNGKVLDDQDSQYIV  
HEHMNIQEKSSKWDKLSNVILESLQCTPYKTNHSSDALQFSNQRLKPRNTKEVCKYNDVNSLSLSTISLN  
QGINMQKKKHNRNAELDKIFVSKHKVMVKKDNIAGNPYKCESEFHKYLTQRENLSQQRIYHGKPKYKSSKSDK  
CFTHQIHLHSIHQEIHTEEKIYKCECDKCFKNKFNLTMHQRIHTGEKPYKCECDKCFKQSNLSIHQRIHTG  
EKPYKCECDKCFKQSNLSIHQRIHTGEKPYKCECGKCFTEKSSLRHQRIHTGEKPYKCECDKCFKQSNLS  
HLSIHQRIHTGEKPYKCECDKCFKQSNLSIHQRIHTGEKPYKCECGKCFTEKSSLRHQRIHTGEKPYK  
SECGKCFTEKSSLRHQRIHTGEKPYKCECGKCFTEKSSLRHQRIHTGEKPYKCECGKCFTEKSSLRHQ  
KIHTGEKPYKCECDKCFKPSHLSIHQRIHTGEKPYKCECEKCFNEKNILKIHQRIHTGERPYKCECDK  
FSRKFHLGIHQRIHTGKPKYKCECDKCFKQSNLSIHQKIHTGEKPYK\*  
>ENSMUSP00000090425\_c.1121:C>A\_p.D374E ENSMUST00000092750.12|zfp600-  
201|ENSMUSG00000066007|+|chr4:g.146132455:C>A  
MFAPHQESGRRTTKRMSASLENTAQCLLTFKDVLDVDFSLLEEWELNFAQRTLYMDVMLENYNNLLFVENHCIC  
GNYEKEKVLQETQHIIVNEHGHNRKSSKCNVNRNVIHESSESTPYNTNHRDATLQSSNLKRHKGTTKGVCT  
YKDCVNLKGSIIISLNQGTHIEKKEHNRNKNLDEVLVSRQNNSEMNTYTTCGEFDKCFKQSNLSQSQRIYPG  
KKSYYISESDKCFKPSHLSIHHTIHSGEKPYKCECDKCFKQSNLSIHQRIHTGEKPYKCECDKCFKQSNLS  
TLRKHQRIHTGEKPYKCECDKCFKQSNLSIHQRIHTGEKPYKCECDKCFKQSNLSIHQRIHTGEKPYK  
SECDKCFTEKCTLRKHQRIHTGEKPYKCECDKCFTEKCTLRKHQRIHTGEKPYKCECDKCFKQSNLSIHQ  
RIHTGEKPYKCECDKCFKPSHLSIHQRIHTGEKPYKCECDKCFKQSNLSIHQRIHTGEKPYKCECDK  
FTDKGSLRVHQRIHTGEKPYKCECDKCFKQSNLSIHQRIHTGEKPYKCECDKCFKQSNLSIHQRIHTGE  
KPYQCSECDKCFKQSNLSIHQRIHTGEKPYKCECDKCFKQSNLSIHQRIHTGEKPYKCECDKCFKQSNLS  
LRVHHRHTGEKPYKCECDKCFTRKSHLSIHQRIHTGEKLYKNECDKCFSDKHSLLRRHQRIHTGETPYKCN  
ECDKCF\*

>ENSMUSP00000126879\_c.1121:C>A\_p.D374E ENSMUST00000168483.9|zfp600-  
204|ENSMUSG00000066007|+|chr4:g.146132455:C>A  
MFAPHQESGRRTTKRMSASLENTAQCLLTFKDVLDVDFSLLEEWELNFAQRTLYMDVMLENYNNLLFVENHCIC  
GNYEKEKVLQETQHIIVNEHGHNRKSSKCNVNRNVIHESSESTPYNTNHRDATLQSSNLKRHKGTTKGVCT  
YKDCVNLKGSIIISLNQGTHIEKKEHNRNKNLDEVLVSRQNNSEMNTYTTCGEFDKCFKQSNLSQSQRIYPG  
KKSYYISESDKCFKPSHLSIHHTIHSGEKPYKCECDKCFKQSNLSIHQRIHTGEKPYKCECDKCFKQSNLS  
TLRKHQRIHTGEKPYKCECDKCFKQSNLSIHQRIHTGEKPYKCECDKCFKQSNLSIHQRIHTGEKPYK  
SECDKCFTEKCTLRKHQRIHTGEKPYKCECDKCFTEKCTLRKHQRIHTGEKPYKCECDKCFKQSNLSIHQ  
RIHTGEKPYKCECDKCFKPSHLSIHQRIHTGEKPYKCECDKCFKQSNLSIHQRIHTGEKPYKCECDK  
FTDKGSLRVHQRIHTGEKPYKCECDKCFKQSNLSIHQRIHTGEKPYKCECDKCFKQSNLSIHQRIHTGE  
KPYQCSECDKCFKQSNLSIHQRIHTGEKPYKCECDKCFKQSNLSIHQRIHTGEKPYKCECDKCFKQSNLS  
LRVHHRHTGEKPYKCECDKCFTRKSHLSIHQRIHTGEKLYKNECDKCFSDKHSLLRRHQRIHTGETPYKCN  
ECDKCF\*

>ENSMUSP00000101359\_c.391:A>ATT\_p.N131ins-fs ENSMUST00000105733.3|zfp992-  
201|ENSMUSG00000070605|+|chr4:g.146550672:A>ATT  
MSVCLVNTPOGLLTFKDVLDVDFSLLEEWELSFQAQRTLYMDVMLENYNNLLFVENHCICGKYEKVLDDQDSQYIV  
HEHMNIQEKSSKWDKLSNVILEAPQCTPYKTNHTSDALQFSNQRLKPRNTKEVCKYNLTL  
>rs240941694 ENSMUSP00000101359\_c.565:T>G\_p.F189C  
ENSMUST00000105733.3|zfp992-201|ENSMUSG00000070605|+|chr4:g.146550846:T>G  
MSVCLVNTPOGLLTFKDVLDVDFSLLEEWELSFQAQRTLYMDVMLENYNNLLFVENHCICGKYEKVLDDQDSQYIV  
HEHMNIQEKSSKWDKLSNVILEAPQCTPYKTNHTSDALQFSNQRLKPRNTKEVCKYNDVNSLSLSTISLN  
QGIHMQKKKHNGNAESEKAFISKHKVMVKNRNTGVNPNYKCSKCDKYLTDQDKLQSQRIYHEKHKFRSSKSDK  
CFTHQIDLSIHQGIHAEEKIYKCECDKCFTHKFNLIHQRIHTGEKPYKCECDKCFKQSNLSIHQRIHTG  
EKPYKCECDKCFTEKGNLRIHQRIHTGDKPYKCECDKCFKQSNLSIHQRIHTGEKPYKCSKCDKSFTENG  
HLRIHQRNHTGEKPYKCSQCDKSFTENGLRIHQRIHTGEKPYKCECDKCFKQSNLSIHQRIHTGEKPYK  
SECDKCFTEKGNLRIHQRIHTGEKPYKCECDKCFTEKGNLRIHQRIHTGEKPYKCECDKCFTEKGNLRIHQ  
RIHTGEKPYKCECDKCFTEKGNLRIHQRIHTGEKPYKCECDKCFTEKGNLRIHQRIHTGEKPYKCECDKCF  
>ENSMUSP00000101359\_c.649:G>C\_p.S217T ENSMUST00000105733.3|zfp992-  
201|ENSMUSG00000070605|+|chr4:g.146550930:G>C  
MSVCLVNTPOGLLTFKDVLDVDFSLLEEWELSFQAQRTLYMDVMLENYNNLLFVENHCICGKYEKVLDDQDSQYIV  
HEHMNIQEKSSKWDKLSNVILEAPQCTPYKTNHTSDALQFSNQRLKPRNTKEVCKYNDVNSLSLSTISLN

QGIHMQKKKHNGNAESEKAFISKHKVMVKNRNTGVNPKYKSKFDKYLQORDKLSQQRIYHEKKHFRSSKTDK  
CFTHQIDLSIHQGIHAAEKIYKCECDKCFTHKFLNIHQRIHTGEKPYKCECDKCFQKSHLNIHQRIHTG  
EKPYKCIKCEKCFTEKGNLRIHQRIHTGDKPYKCECDKCFQKSHLNIHQRIHTGEKPYKCSKCDKSFTENG  
HLRIHQRNHTGEKPYKCSQCDKSFTENGHLRIHQRIHTGEKPYKCECDKCFQKSHLNIHQRIHTG  
SECDKCFQKSHLNIHQRIHTGEKPYKCECDKCFTEKGFSLRIHQRIHGEKPYK  
SECDKCFQKSHLNIHQRIHTGEKPYKCECDKSFTENGCLRIHQRIHTGEKPYKCECDKCFQKSHLNIHQ  
RIHTGEKPYKCECDKSFTEKGLRIHQRIHTGEKPYKCECDKCFTEKGFSLRIHQRIHTGEIPIYK\*  
>ENSMUSP00000101359\_c.700:A>G\_p.H234R ENSMUST00000105733.3|Zfp992-  
201|ENSMUSG00000070605|+|chr4:g.146550981:A>G  
MSVCLVNTPOGLLTFKDVDFSLSEEWESLSFAQRTLYMDVMLENYNNLLFVENHCICGKYEKVLDDQDSQYIV  
HEHMNIQEKSSKWDKLSNVILEAPQCTPYKTNHTSDALQFSNQRLKPRNTKEVCKYNDVSNLTLFSTISLN  
QGIHMQKKKHNGNAESEKAFISKHKVMVKNRNTGVNPKYKSKFDKYLQORDKLSQQRIYHEKKHFRSSKSDK  
CFTHQIDLSIHQGIHAAEKIYKCECDKCFTHKFLNIHQRIHTGEKPYKCECDKCFQKSHLNIHQRIHTG  
EKPYKCIKCEKCFTEKGNLRIHQRIHTGDKPYKCECDKCFQKSHLNIHQRIHTGEKPYKCSKCDKSFTENG  
HLRIHQRNHTGEKPYKCSQCDKSFTENGHLRIHQRIHTGEKPYKCECDKCFQKSHLNIHQRIHTG  
SECDKCFQKSHLNIHQRIHTGEKPYKCECDKSFTENGCLRIHQRIHTGEKPYKCECDKCFQKSHLNIHQ  
RIHTGEKPYKCECDKSFTEKGLRIHQRIHTGEKPYKCECDKCFTEKGFSLRIHQRIHTGEIPIYK\*  
>ENSMUSP00000121301\_c.285:G>A\_p.A96T ENSMUST00000130825.8|Zfp993-  
202|ENSMUSG00000063245|+|chr4:g.146741963:G>A  
MSVCLVNTPOGLLTFKDVDFSLSEEWESLSFAQRTLYMDVMLENYNNLLFVENHCICGKYEKVLDDQDSQYIV  
HEHMNIQEKSSKWDKLSNVILETPQCTPYKTNHTSDALQFSNQRLKPRNTKEVCKYNDVSNLTLFSTVSLN  
QGIHMQKKKHNGNAESEKAFISKHKVMVKNRNTGVNPKYKSKFDKYLQORDKLSQQRIYHEKKHYRSSKSDK  
CFTHQIDLSIHQGIHAAEKIYKCECDKCFTHKFLNIHQRIHTGEKPYKCECDKCFQKSHLNIHQRIHTG  
EKPYKCIKCEKCFTEKGNLRI  
>ENSMUSP00000065923\_c.285:G>A\_p.A96T ENSMUST00000070932.4|Zfp993-  
201|ENSMUSG00000063245|+|chr4:g.146741963:G>A  
MSVCLVNTPOGLLTFKDVDFSLSEEWESLSFAQRTLYMDVMLENYNNLLFVENHCICGKYEKVLDDQDSQYIV  
HEHMNIQEKSSKWDKLSNVILETPQCTPYKTNHTSDALQFSNQRLKPRNTKEVCK  
>ENSMUSP00000158852\_c.997:T>C\_p.F333S ENSMUST00000238583.2|Gm21411-  
202|ENSMUSG00000045699|-|chr4:g.146976275:A>G  
MSVCLVNTPOGLLTFKDVDFSLSEEWESLSFAQRTLYMDVMLENYNNLLFVENHCICGKYEKVLDDQDSQYIV  
HEHMNIQEKSSKWDKLSNVILESLQCTPYKTNHSSDALQFSNQRLKPRNTKEVCKYNHVFNLSLSTISLN  
QGINMQKKKHNRNAELEKVFVSKHKVVVKNNIAGNPYKSEFHKYLTQREKLSQQRIYHGKPYESSKSDK  
CFTHQIHLSIHQGIHTEEKIYKCECDKCFKHKFNLTMHQRIHTGETPNKCECDKCFQKSHLNIHQRIHTG  
EKPYKCECDKCFQKSHLNIHQRIHTGEKPYKCECDKCFQKSHLNIHQRIHTGEKPYKCECDKCFTEK  
SLRIHQRI  
>ENSMUSP00000075179\_c.592:G>A\_p.G198D ENSMUST00000075775.6|Rex2-  
201|ENSMUSG00000067919|+|chr4:g.147142106:G>A  
MFAPHQESGRRTTKRMSASLENTAQCLLTFKDVFLDFSSSEWECLNFAQRTLYMDVMLENYNNLLFVENHCIC  
GNYEKEKVLQDQTHIVNEHGHNRRKSSKCNELRNVIHESSESTPYNTNHRDATLQSSNLKRHKGTGTTKVCT  
YKDCVNCLKSSIIISLNQGTHIEKKEHNRNKNLDEVLSRQNNSEMNTYTCDEFDCKCFQSDNLQSQRIYPG  
KKSYYKSESCKCFQKSHLNIHQRIHTGEKPYKCECDKCFQKSHLNIHQRIHTGEKPYKCECDKCFQKSHLNIHQ  
TLRKHQRIHTGEKPYKCECDKCFQKSHLNIHQRIHTGEKPYKCECDKCFQKSHLNIHQRIHTGEKPYK  
SECDKCFQKSHLNIHQRIHTGEKPYKCECDKCFTEKFTLRKHQRIHTGEKPYKCECDKCFQKSHLNIHQ  
RIHTGEKPYKCECDKCFQKSHLNIHQRIHTGEKPYKCECDKCFQKSHLNIHQRIHTGEKPYKCECDKCF  
FTDKGSLRVHQRIHIGEKPYKCECDKCFQKSHLNIHQRIHTGEKPYKCECDKCFQKSHLNIHQRIHTGEK  
KPYKCECDKCFTEKGNLRRHQRIHTGEKPYKCECDKCFTRKSHLSIHQRIHTGEKLYKCECDKCFQKSHLNIHQ  
LSIHQKIHSGENLTAMNATNALVTNTV\*  
>ENSMUSP00000075179\_c.695:T>A\_p.F232L ENSMUST00000075775.6|Rex2-  
201|ENSMUSG00000067919|+|chr4:g.147142209:T>A  
MFAPHQESGRRTTKRMSASLENTAQCLLTFKDVFLDFSSSEWECLNFAQRTLYMDVMLENYNNLLFVENHCIC  
GNYEKEKVLQDQTHIVNEHGHNRRKSSKCNELRNVIHESSESTPYNTNHRDATLQSSNLKRHKGTGTTKVCT  
YKDCVNCLKSSIIISLNQGTHIEKKEHNRNKNLDEVLSRQNNSEMNTYTCGEFDKCFQSDNLQSQRIYPG  
KKSYYKSESCKCFQKSHLNIHQRIHTGEKPYKCECDKCFQKSHLNIHQRIHTGEKPYKCECDKCFQKSHLNIHQ  
TLRKHQRIHTGEKPYKCECDKCFQKSHLNIHQRIHTGEKPYKCECDKCFQKSHLNIHQRIHTGEKPYK  
SECDKCFQKSHLNIHQRIHTGEKPYKCECDKCFTEKFTLRKHQRIHTGEKPYKCECDKCFQKSHLNIHQ  
RIHTGEKPYKCECDKCFQKSHLNIHQRIHTGEKPYKCECDKCFQKSHLNIHQRIHTGEKPYKCECDKCF  
FTDKGSLRVHQRIHIGEKPYKCECDKCFQKSHLNIHQRIHTGEKPYKCECDKCFQKSHLNIHQRIHTGEK  
KPYKCECDKCFTEKGNLRRHQRIHTGEKPYKCECDKCFTRKSHLSIHQRIHTGEKLYKCECDKCFQKSHLNIHQ  
LSIHQKIHSGENLTAMNATNALVTNTV\*

KPYKCECDKCFTEKNGLRHRIHTGEKPYKCECDKCFTRKSHLSIHQRIHTGEKLYKCECDKCFDQCH  
LSIHQKIHSGENLTNAMNATNALVTNTV\*  
>ENSMUSP00000081167\_c.133:A>T\_p.N45I ENSMUST00000084149.10|Zfp991-  
201|ENSMUSG00000067916|+|chr4:g.147261307:A>T  
MSVCLVNTPOGLLTFKDVLDVDFSLLEEWESLSFAQRTLYMDVMLEIYNNLLFVENHCICGKYEKVLDQDSQYIV  
HEHMNIQEKSSKWDKLSNVILEAPQCTPYKTNHTSDALQFSNQRLKPRNTKEVCKYNDVSNLSLTFSTISLN  
QGIHMQKKKHNGNAESEKAFISKHKVMVKNRNTGVNPKYKCSKFDKYLTDQDKLQSQQRIYHEKKHYRSSKSDK  
CFTHQIDLSIHQGIHAEKIIYKCECDKCFTHKFLNIHQRIHTGEKPYKCECDKCFDQKSHLNIHQRIHTG  
EKPYKCIKCEKCFTEKGNLRIHQRIHTGDKPYKCECDKCFDQKSHLNIHQRIHTGEKPYKCSQCDKSFTEG  
HLRIHQRNHTGEKPYKCSRCDKSFTEGHLRIHQRIHTGEKPYKCECDKCFDQKSHLNIHQRIHTGEKPYK  
CECDKCFDQKSHLNIHQRIHTGEKPYKCECDKSFTEGHLRIHQRIHTGEKPYKCECDKCFDQKSHLNIHQ  
RIHTGEKPYKCECDKSFTEKGLRIHQRIHKGKPYKCECDKCFTEKGHQRIHTGEIAYK\*  
>rs49128380\_ENSMUSP00000081167\_c.1183:T>C\_p.L395P  
ENSMUST00000084149.10|Zfp991-  
201|ENSMUSG00000067916|+|chr4:g.147263808:T>C  
MSVCLVNTPOGLLTFKDVLDVDFSLLEEWESLSFAQRTLYMDVMLEYNNLLFVENHCICGKYEKVLDQDSQYIV  
HEHMNIQEKSSKWDKLSNVILEAPQCTPYKTNHTSDALQFSNQRLKPRNTKEVCKYNDVSNLSLTFSTISLN  
QGIHMQKKKHNGNAESEKAFISKHKVMVKNRNTGVNPKYKCSKFDKYLTDQDKLQSQQRIYHEKKHYRSSKSDK  
CFTHQIDLSIHQGIHAEKIIYKCECDKCFTHKFLNIHQRIHTGEKPYKCECDKCFDQKSHLNIHQRIHTG  
EKPYKCIKCEKCFTEKGNLRIHQRIHTGDKPYKCECDKCFDQKSHLNIHQRIHTGEKPYKCSQCDKSFTEG  
HLRIHQRNHTGEKPYKCSRCDKSFTEGHPRIHQRIHTGEKPYKCECDKCFDQKSHLNIHQRIHTGEKPYK  
CECDKCFDQKSHLNIHQRIHTGEKPYKCECDKSFTEGHLRIHQRIHTGEKPYKCECDKCFDQKSHLNIHQ  
RIHTGEKPYKCECDKSFTEKGLRIHQRIHKGKPYKCECDKCFTEKGHQRIHTGEIAYK\*  
>ENSMUSP00000081167\_c.1315:G>A\_p.S439N ENSMUST00000084149.10|Zfp991-  
201|ENSMUSG00000067916|+|chr4:g.147263940:G>A  
MSVCLVNTPOGLLTFKDVLDVDFSLLEEWESLSFAQRTLYMDVMLEYNNLLFVENHCICGKYEKVLDQDSQYIV  
HEHMNIQEKSSKWDKLSNVILEAPQCTPYKTNHTSDALQFSNQRLKPRNTKEVCKYNDVSNLSLTFSTISLN  
QGIHMQKKKHNGNAESEKAFISKHKVMVKNRNTGVNPKYKCSKFDKYLTDQDKLQSQQRIYHEKKHYRSSKSDK  
CFTHQIDLSIHQGIHAEKIIYKCECDKCFTHKFLNIHQRIHTGEKPYKCECDKCFDQKSHLNIHQRIHTG  
EKPYKCIKCEKCFTEKGNLRIHQRIHTGDKPYKCECDKCFDQKSHLNIHQRIHTGEKPYKCSQCDKSFTEG  
HLRIHQRNHTGEKPYKCSRCDKSFTEGHPRIHQRIHTGEKPYKCECDKCFDQKSHLNIHQRIHTGEKPYK  
CECDKCFDQKSHLNIHQRIHTGEKPYKCECDKSFTEGHLRIHQRIHTGEKPYKCECDKCFDQKSHLNIHQ  
RIHTGEKPYKCECDKSFTEKGLRIHQRIHKGKPYKCECDKCFTEKGHQRIHTGEIAYK\*  
>ENSMUSP00000081167\_c.1362:C>T\_p.Q455\* ENSMUST00000084149.10|Zfp991-  
201|ENSMUSG00000067916|+|chr4:g.147263987:C>T  
MSVCLVNTPOGLLTFKDVLDVDFSLLEEWESLSFAQRTLYMDVMLEYNNLLFVENHCICGKYEKVLDQDSQYIV  
HEHMNIQEKSSKWDKLSNVILEAPQCTPYKTNHTSDALQFSNQRLKPRNTKEVCKYNDVSNLSLTFSTISLN  
QGIHMQKKKHNGNAESEKAFISKHKVMVKNRNTGVNPKYKCSKFDKYLTDQDKLQSQQRIYHEKKHYRSSKSDK  
CFTHQIDLSIHQGIHAEKIIYKCECDKCFTHKFLNIHQRIHTGEKPYKCECDKCFDQKSHLNIHQRIHTG  
EKPYKCIKCEKCFTEKGNLRIHQRIHTGDKPYKCECDKCFDQKSHLNIHQRIHTGEKPYKCSQCDKSFTEG  
HLRIHQRNHTGEKPYKCSRCDKSFTEGHLRIHQRIHTGEKPYKCECDKCFDQKSHLNIHQRIHTGEKPYK  
CECDKCFDQKSHLNIHQRIHTGEKPYKCECDKSFTEGHLRIHQRIHTGEKPYKCECDKCFDQKSHLNIHQ  
RIHTGEKPYKCECDKSFTEKGLRIHQRIHKGKPYKCECDKCFTEKGHQRIHTGEIAYK\*  
>rs252974414\_ENSMUSP00000120413\_c.109:T>G\_p.L37W  
ENSMUST00000148762.4|Zfp988-201|ENSMUSG00000078498|+|chr4:g.147413518:T>G  
MSVCLVNTPOGLLTFKDVLDVDFSLLEEWESLSFAQRSWYMDVMLEYNNLLFVENHCIRGKNGKVLDDQDSQYIV  
HEHMNIQEKSSKWDKLSNVILESLQCTPYKTNHSSDALQFSNQRLKPRNTKEVCKYNDVSNLSLTFSTISLN  
QGINMQKKKHNRNAELDNIFVSKHKVMVKKDNIAGNPKYKSEFHKYLTQRENLSQSQRIYHGKPKYKSSKSDK  
CFTHQIHLSIHQGIHTEEIIYKCECDKCFKKNFNLTMHQRIHTGEKPYKCECGKCFTEKSSLRIHQRIHTG  
EKPYKCECDKCFDQKSHLNIHQRIHTGEKPYKCECDKCFDQKSHLNIHQRIHTGEKPYKCECGKCFTEKSS  
SLRIHQRIHTGEKPYKCECDKCFTRKFLGIHQRIHTGEKPYKCECDKCFDQKSHLNIHQRIHTGEKPYK  
PECGKCFTEKSSSLRIHQRIHTGEKPYKCECGKCFTEKSSSLRIHQRIHTGEKPYKCECGKCFTEKSSSLRIHQ  
RIHTGEKPYKCECGKCFDQKSHLNIHQRIHTGEKPYKCECDKCFDQKSHLNIHQRIHTGEKPYKCECGK  
FSRKLHLGIHQRIHTGERPYKCECEKCFSRKFLGIHQRIHTGKPKYK\*  
>ENSMUSP00000120413\_c.751:A>G\_p.N251S ENSMUST00000148762.4|Zfp988-  
201|ENSMUSG00000078498|+|chr4:g.147416319:A>G  
MSVCLVNTPOGLLTFKDVLDVDFSLLEEWESLSFAQRSWYMDVMLEYNNLLFVENHCIRGKNGKVLDDQDSQYIV  
HEHMNIQEKSSKWDKLSNVILESLQCTPYKTNHSSDALQFSNQRLKPRNTKEVCKYNDVSNLSLTFSTISLN

QGINMQKKKHNRNAELDNIFVSKHKVMVKKDNIAGNPYKCFSEFHKYLTQRENLQSQQRIYHGKPKYKSSKSDK  
CFTHQIHLSIHQGIHTEEIIYKCECDKCFKSKFNLTMHQRIHTGEKPYKCECGKCFTEKSSLRHQRHTG  
EKPYKCECDKCFKQSNLSIHQRHTGEKPYKCECDKCFKQSNLSIHQRHTGEKPYKCECGKCFTEKSSLRHQRHTG  
EKPYKCECDKCFTRKFHLGIHQRIHTGEKPYKCECDKCFKQSNLSIHQRHTGEKPYKCECDKCFKQSNLSIHQRHTGEKPYK  
PECGKCFTEKSSLRHQRHTGEKPYKCECGKCFTEKSSLRHQRHTGEKPYKCECDKCFKQSNLSIHQRHTGEKPYK  
RIHTGEKPYKCECGKCFKQSNLSIHQRHTGEKPYKCECDKCFKQSNLSIHQRHTGEKPYKCECDKCFKQSNLSIHQRHTGEKPYKCECEKC  
FSRKLHLGIHQRIHTGERPYKCFSECEKCFSRKFHLGIHQRIHTGKPKYK\*

>rs48329995\_ENSMUSP00000120413\_c.838:A>T\_p.K280I  
ENSMUST00000148762.4|zfp988-201|ENSMUSG00000078498|+|chr4:g.147416406:A>T  
MSVCLVNTPOGLLTFKDVDFSLLEWECLSFQAQRSLYMDVMLENYNNLLFVENHCIRGKNGKVLDDQDSQYIV  
HEHMNIQEKSSKWDKLSNVILESLQCTPYKTNHSSDALQFSNQRLKPRNTKEVCKYNDVNSLSLSTISLN  
QGINMQKKKHNRNAELDNIFVSKHKVMVKKDNIAGNPYKCFSEFHKYLTQRENLQSQQRIYHGKPKYKSSKSDK  
CFTHQIHLSIHQGIHTEEIIYKCECDKCFKSKFNLTMHQRIHTGEKPYKCECGKCFTEISSLRHQRHTG  
EKPYKCECDKCFKQSNLSIHQRHTGEKPYKCECDKCFKQSNLSIHQRHTGEKPYKCECGKCFTEKSSLRHQRHTG  
EKPYKCECDKCFTRKFHLGIHQRIHTGEKPYKCECDKCFKQSNLSIHQRHTGEKPYKCECDKCFKQSNLSIHQRHTGEKPYK  
PECGKCFTEKSSLRHQRHTGEKPYKCECGKCFTEKSSLRHQRHTGEKPYKCECDKCFKQSNLSIHQRHTGEKPYK  
RIHTGEKPYKCECGKCFKQSNLSIHQRHTGEKPYKCECDKCFKQSNLSIHQRHTGEKPYKCECDKCFKQSNLSIHQRHTGEKPYKCECEKC  
FSRKLHLGIHQRIHTGERPYKCFSECEKCFSRKFHLGIHQRIHTGKPKYK\*

>ENSMUSP00000120413\_c.1106:TCAT>C\_p.H370del ENSMUST00000148762.4|zfp988-  
201|ENSMUSG00000078498|+|chr4:g.147416674:TCAT>C  
MSVCLVNTPOGLLTFKDVDFSLLEWECLSFQAQRSLYMDVMLENYNNLLFVENHCIRGKNGKVLDDQDSQYIV  
HEHMNIQEKSSKWDKLSNVILESLQCTPYKTNHSSDALQFSNQRLKPRNTKEVCKYNDVNSLSLSTISLN  
QGINMQKKKHNRNAELDNIFVSKHKVMVKKDNIAGNPYKCFSEFHKYLTQRENLQSQQRIYHGKPKYKSSKSDK  
CFTHQIHLSIHQGIHTEEIIYKCECDKCFKSKFNLTMHQRIHTGEKPYKCECGKCFTEKSSLRHQRHTG  
EKPYKCECDKCFKQSNLSIHQRHTGEKPYKCECDKCFKQSNLSIHQRHTGEKPYKCECGKCFTEKSSLRHQRHTG  
EKPYKCECDKCFTRKFHLGIHQRIHTGEKPYKCECDKCFKQSNLSIHQRHTGEKPYKCECDKCFKQSNLSIHQRHTGEKPYKCP  
ECGKCFTEKSSLRHQRHTGEKPYKCECGKCFTEKSSLRHQRHTGEKPYKCECDKCFKQSNLSIHQRHTGEKPYKCECGKCFTEKSSLRHQR  
IHTGEKPYKCECGKCFKQSNLSIHQRHTGEKPYKCECDKCFKQSNLSIHQRHTGEKPYKCECEKCF  
SRKLHLGIHQRIHTGERPYKCFSECEKCFSRKFHLGIHQRIHTGKPKYK\*

>rs47993660\_ENSMUSP00000120413\_c.1218:C>G\_p.P407A  
ENSMUST00000148762.4|zfp988-201|ENSMUSG00000078498|+|chr4:g.147416786:C>G  
MSVCLVNTPOGLLTFKDVDFSLLEWECLSFQAQRSLYMDVMLENYNNLLFVENHCIRGKNGKVLDDQDSQYIV  
HEHMNIQEKSSKWDKLSNVILESLQCTPYKTNHSSDALQFSNQRLKPRNTKEVCKYNDVNSLSLSTISLN  
QGINMQKKKHNRNAELDNIFVSKHKVMVKKDNIAGNPYKCFSEFHKYLTQRENLQSQQRIYHGKPKYKSSKSDK  
CFTHQIHLSIHQGIHTEEIIYKCECDKCFKSKFNLTMHQRIHTGEKPYKCECGKCFTEKSSLRHQRHTG  
EKPYKCECDKCFKQSNLSIHQRHTGEKPYKCECDKCFKQSNLSIHQRHTGEKPYKCECGKCFTEKSSLRHQRHTG  
EKPYKCECDKCFTRKFHLGIHQRIHTGEKPYKCECDKCFKQSNLSIHQRHTGEKPYKCECDKCFKQSNLSIHQRHTGEKPYK  
PECGKCFTEKSSLRHQRHTGEKPYKCECGKCFTEKSSLRHQRHTGEKPYKCECDKCFKQSNLSIHQRHTGEKPYK  
RIHTGEKPYKCECGKCFKQSNLSIHQRHTGEKPYKCECDKCFKQSNLSIHQRHTGEKPYKCECDKCFKQSNLSIHQRHTGEKPYKCECEKC  
FSRKLHLGIHQRIHTGERPYKCFSECEKCFSRKFHLGIHQRIHTGKPKYK\*

>rs108848453\_ENSMUSP00000120413\_c.1618:G>A\_p.R540K  
ENSMUST00000148762.4|zfp988-201|ENSMUSG00000078498|+|chr4:g.147417186:G>A  
MSVCLVNTPOGLLTFKDVDFSLLEWECLSFQAQRSLYMDVMLENYNNLLFVENHCIRGKNGKVLDDQDSQYIV  
HEHMNIQEKSSKWDKLSNVILESLQCTPYKTNHSSDALQFSNQRLKPRNTKEVCKYNDVNSLSLSTISLN  
QGINMQKKKHNRNAELDNIFVSKHKVMVKKDNIAGNPYKCFSEFHKYLTQRENLQSQQRIYHGKPKYKSSKSDK  
CFTHQIHLSIHQGIHTEEIIYKCECDKCFKSKFNLTMHQRIHTGEKPYKCECGKCFTEKSSLRHQRHTG  
EKPYKCECDKCFKQSNLSIHQRHTGEKPYKCECDKCFKQSNLSIHQRHTGEKPYKCECGKCFTEKSSLRHQRHTG  
EKPYKCECDKCFTRKFHLGIHQRIHTGEKPYKCECDKCFKQSNLSIHQRHTGEKPYKCECDKCFKQSNLSIHQRHTGEKPYK  
PECGKCFTEKSSLRHQRHTGEKPYKCECGKCFTEKSSLRHQRHTGEKPYKCECDKCFKQSNLSIHQRHTGEKPYK  
RIHTGEKPYKCECGKCFKQSNLSIHQRHTGEKPYKCECDKCFKQSNLSIHQRHTGEKPYKCECDKCFKQSNLSIHQRHTGEKPYKCECEKC  
FSRKLHLGIHQRIHTGERPYKCFSECEKCFSRKFHLGIHQRIHTGKPKYK\*

>rs108848453\_ENSMUSP00000120413\_c.1618:G>A\_p.R540K  
ENSMUST00000148762.4|zfp988-201|ENSMUSG00000078498|+|chr4:g.147417186:G>A  
MSVCLVNTPOGLLTFKDVDFSLLEWECLSFQAQRSLYMDVMLENYNNLLFVENHCIRGKNGKVLDDQDSQYIV  
HEHMNIQEKSSKWDKLSNVILESLQCTPYKTNHSSDALQFSNQRLKPRNTKEVCKYNDVNSLSLSTISLN  
QGINMQKKKHNRNAELDNIFVSKHKVMVKKDNIAGNPYKCFSEFHKYLTQRENLQSQQRIYHGKPKYKSSKSDK  
CFTHQIHLSIHQGIHTEEIIYKCECDKCFKSKFNLTMHQRIHTGEKPYKCECGKCFTEKSSLRHQRHTG  
EKPYKCECDKCFKQSNLSIHQRHTGEKPYKCECDKCFKQSNLSIHQRHTGEKPYKCECGKCFTEKSSLRHQRHTG  
EKPYKCECDKCFTRKFHLGIHQRIHTGEKPYKCECDKCFKQSNLSIHQRHTGEKPYKCECDKCFKQSNLSIHQRHTGEKPYK  
PECGKCFTEKSSLRHQRHTGEKPYKCECGKCFTEKSSLRHQRHTGEKPYKCECDKCFKQSNLSIHQRHTGEKPYK  
RIHTGEKPYKCECGKCFKQSNLSIHQRHTGEKPYKCECDKCFKQSNLSIHQRHTGEKPYKCECDKCFKQSNLSIHQRHTGEKPYKCECEKC  
FSRKLHLGIHQRIHTGERPYKCFSECEKCFSRKFHLGIHQRIHTGKPKYK\*

>ENSMUSP00000120413\_c.1819:G>A\_p.S607N ENSMUST00000148762.4|zfp988-  
201|ENSMUSG00000078498|+|chr4:g.147417387:G>A  
MSVCLVNTPOGLLTFKDVDFSLLEWECLSFQAQRSLYMDVMLENYNNLLFVENHCIRGKNGKVLDDQDSQYIV  
HEHMNIQEKSSKWDKLSNVILESLQCTPYKTNHSSDALQFSNQRLKPRNTKEVCKYNDVNSLSLSTISLN  
QGINMQKKKHNRNAELDNIFVSKHKVMVKKDNIAGNPYKCFSEFHKYLTQRENLQSQQRIYHGKPKYKSSKSDK  
CFTHQIHLSIHQGIHTEEIIYKCECDKCFKSKFNLTMHQRIHTGEKPYKCECGKCFTEKSSLRHQRHTG  
EKPYKCECDKCFKQSNLSIHQRHTGEKPYKCECDKCFKQSNLSIHQRHTGEKPYKCECGKCFTEKSSLRHQRHTG  
EKPYKCECDKCFTRKFHLGIHQRIHTGEKPYKCECDKCFKQSNLSIHQRHTGEKPYKCECDKCFKQSNLSIHQRHTGEKPYK  
PECGKCFTEKSSLRHQRHTGEKPYKCECGKCFTEKSSLRHQRHTGEKPYKCECDKCFKQSNLSIHQRHTGEKPYK  
RIHTGEKPYKCECGKCFKQSNLSIHQRHTGEKPYKCECDKCFKQSNLSIHQRHTGEKPYKCECDKCFKQSNLSIHQRHTGEKPYKCECEKC  
FSRKLHLGIHQRIHTGERPYKCFSECEKCFSRKFHLGIHQRIHTGKPKYK\*

SLRIHQRIHTGEKTYKCECDKCFTRKFLGHIHQRIHTGEKPYKCECDKCFQQSNLTIHQRIHTGEKPYKC  
PECGKCFTEKSSLRHQRIHTGEKPYKCECGKCFTEKSSLRHQRIHTGEKPYKCECGKCFTEKSSLRHQ  
RIHTGEKPYKCECGKCFTRKFLGHIHQRIHTGEKPYKCECDKCFTRKFLGHIHQRIHTGEKPYKCECGK  
FSRKLHLGHIHQRIHTGERPYKCECEKCFSRKFLGHIHQRIHTGKPKYK\*

>rs48702416\_ENSMUSP00000115135\_c.170:G>A\_p.M57I  
ENSMUST00000133078.8|zfp978-201|ENSMUSG00000078497|+|chr4:g.147472874:G>A  
MFAPHQESGRRTTKRMSASLENTAQCLLTFKDVFLDFSSEEWELNFAQRTLYMDVILENYNNLLFVENHCIC  
GNYEKEKVVEQDTQHIFNEHGHIQ

>rs48702416\_ENSMUSP00000114248\_c.170:G>A\_p.M57I  
ENSMUST00000154154.2|zfp978-202|ENSMUSG00000078497|+|chr4:g.147472874:G>A  
MFAPHQESGRRTTKRMSASLENTAQCLLTFKDVFLDFSSEEWELNFAQRTLYMDVILENYNNLLFVENHCIC  
GNYEKEKVVEQDTQHIFNEHGHIQEKSFKNESNIIHESSESTPHKTNHRDATLQSSNLKRHKGTGTTKQVCT  
YKDCVNCLKGSSIIISLNQGTVEKKEHNRNKNLDEVLVSKHKPIVRQNNSEMNTYTTCGEFDKCFQSDNLQSQ  
QRIYPGKKSYPKSESDKCFQPSHLSIHHTIHSGEKPYKCECDKCFTRKFLGHIHQRIHTGEKPYKCECDK  
CFTRKFLGHIHQRIHTGERPYKCECEKCFTRKFLGHIHQRIHTGKPKYK\*

>rs52171009\_ENSMUSP00000114248\_c.403:G>A\_p.R135K  
ENSMUST00000154154.2|zfp978-202|ENSMUSG00000078497|+|chr4:g.147474858:G>A  
MFAPHQESGRRTTKRMSASLENTAQCLLTFKDVFLDFSSEEWELNFAQRTLYMDVILENYNNLLFVENHCIC  
GNYEKEKVVEQDTQHIFNEHGHIQEKSFKNESNIIHESSESTPHKTNHRDATLQSSNLKRHKGTGTTKQVCT  
YKDCVNCLKGSSIIISLNQGTVEKKEHNRNKNLDEVLVSKHKPIVRQNNSEMNTYTTCGEFDKCFQSDNLQSQ  
QRIYPGKKSYPKSESDKCFQPSHLSIHHTIHSGEKPYKCECDKCFTRKFLGHIHQRIHTGEKPYKCECDK  
CFTRKFLGHIHQRIHTGERPYKCECEKCFTRKFLGHIHQRIHTGKPKYK\*

>rs108687733\_ENSMUSP00000114248\_c.801:G>T\_p.D268Y  
ENSMUST00000154154.2|zfp978-202|ENSMUSG00000078497|+|chr4:g.147475256:G>T  
MFAPHQESGRRTTKRMSASLENTAQCLLTFKDVFLDFSSEEWELNFAQRTLYMDVILENYNNLLFVENHCIC  
GNYEKEKVVEQDTQHIFNEHGHIQEKSFKNESNIIHESSESTPHKTNHRDATLQSSNLKRHKGTGTTKQVCT  
YKDCVNCLKGSSIIISLNQGTVEKKEHNRNKNLDEVLVSKHKPIVRQNNSEMNTYTTCGEFDKCFQSDNLQSQ  
QRIYPGKKSYPKSESDKCFQPSHLSIHHTIHSGEKPYKCECDKCFTRKFLGHIHQRIHTGEKPYKCECDK  
CFTRKFLGHIHQRIHTGERPYKCECEKCFTRKFLGHIHQRIHTGKPKYK\*

>ENSMUSP00000101346\_c.579:T>G\_p.C194G ENSMUST00000105721.9|zfp982-  
202|ENSMUSG00000078496|+|chr4:g.147597224:T>G  
MSVFLVNTPQGLLTFKDVAVEFSLLEEWERLSFAQRSLYIDVMLENYNNLLFVENHFICAKCGKALDEDSQYIV  
HEHMNIQEKSSKWNKLSNVILESPHCVPHKCEWDCFKFSQRSLSIHQKIHTGEKPYKCECDKCFTEKGILR  
IHQKIHSGEKSYKYHECDKCFPKKSHLSIHLRIHKGEKPYKSDCDKGFTEKRKLRRHQKIHTGEKPYKCEC  
DKCFIQKYSLSDHQRIHTGEKPYKCECNKCFIQKSSLNHQS IHTGEKPYKCECDKCFTRKFLGHIHQRIHT  
TGEKPYKCECEKCFTRKFLGHIHQRIHTGEKPYKCECEKCFTRKFLGHIHQRIHTGKPKYK\*

>ENSMUSP00000068021\_c.579:T>G\_p.C194G ENSMUST00000063704.8|zfp982-  
201|ENSMUSG00000078496|+|chr4:g.147597224:T>G  
MSVFLVNTPQGLLTFKDVAVEFSLLEEWERLSFAQRSLYIDVMLENYNNLLFVENHFICAKCGKALDEDSQYIV  
HEHMNIQEKSSKWNKLSNVILESPHCVPHKCEWDCFKFSQRSLSIHQKIHTGEKPYKCECDKCFTEKGILR  
IHQKIHSGEKSYKYHECDKCFPKKSHLSIHLRIHKGEKPYKSDCDKGFTEKRKLRRHQKIHTGEKPYKCEC  
DKCFIQKYSLSDHQRIHTGEKPYKCECNKCFIQKSSLNHQS IHTGEKPYKCECDKCFTRKFLGHIHQRIHT  
TGEKPYKCECEKCFTRKFLGHIHQRIHTGEKPYKCECEKCFTRKFLGHIHQRIHTGKPKYK\*

>ENSMUSP00000101346\_c.950:G>T\_p.Q317H ENSMUST00000105721.9|zfp982-  
202|ENSMUSG00000078496|+|chr4:g.147597595:G>T  
MSVFLVNTPQGLLTFKDVAVEFSLLEEWERLSFAQRSLYIDVMLENYNNLLFVENHFICAKCGKALDEDSQYIV  
HEHMNIQEKSSKWNKLSNVILESPHCVPHKCEWDCFKFSQRSLSIHQKIHTGEKPYKCECDKCFTEKGILR  
IHQKIHSGEKSYKYHECDKCFPKKSHLSIHLRIHKGEKPYKSDCDKGFTEKRKLRRHQKIHTGEKPYKCEC  
DKCFIQKYSLSDHQRIHTGEKPYKCECNKCFIQKSSLNHQS IHTGEKPYKCECDKCFTRKFLGHIHQRIHT  
TGEKPYKCECEKCFTRKFLGHIHQRIHTGEKPYKCECEKCFTRKFLGHIHQRIHTGKPKYK\*

>ENSMUSP00000068021\_c.950:G>T\_p.Q317H ENSMUST00000063704.8|zfp982-  
201|ENSMUSG00000078496|+|chr4:g.147597595:G>T  
MSVFLVNTPQGLLTFKDVAVEFSLLEEWERLSFAQRSLYIDVMLENYNNLLFVENHFICAKCGKALDEDSQYIV  
HEHMNIQEKSSKWNKLSNVILESPHCVPHKCEWDCFKFSQRSLSIHQKIHTGEKPYKCECDKCFTEKGILR  
IHQKIHSGEKSYKYHECDKCFPKKSHLSIHLRIHKGEKPYKSDCDKGFTEKRKLRRHQKIHTGEKPYKCEC



DKCFIQKYSLSHDHQRIHTGEKPYKCSECNKCFIQKSSLNHQS IHTGEKPYKCSECDKCFD KRNLRHQKIHT  
TGEKPYKCSECEKCFD KGS LRRH HKIHTGEKPYKCSECEKCYTD KGS LRRHQKIHTGKGLTNAVNVNALLK  
KAI\*

>ENSMUSP00000101346\_c.1051:A>G\_p.E351G ENSMUST00000105721.9|Zfp982-  
202|ENSMUSG00000078496|+|chr4:g.147597696:A>G  
MSVFLVNT PQGLLTFKDVAVEFSL EEWERLSFAQRSLYIDVMLENYNNLLFVENHFICAKCGKALDEDSQYIV  
HEHMNIQEKSSKWNKLSNVILESPHCVP HKCSEWDKCF SQRSHLSIHQKIHTGEKPYKCSECDKCFTEKGILR  
IHQKIHSGEKSYKYHECDKCFPKKSHLSIHLRIHKGEKPYKSCDCDKCFTEKRKLRRHQKIHTGEKPYKCSEC  
DKCFIQKYSLSHDHQRIHTGEKPYKCSECNKCFIQKSSLNHQS IHTGEKPYKCSECDKCFD KRNLRHQKIHT  
TGEKPYKCSECEKCFD KGS LRRH HKIHTGEKPYKCSECEKCYTD KGS LRRHQKIHTGKGLTNAVNVNALLK  
KAI\*

>ENSMUSP00000068021\_c.1051:A>G\_p.E351G ENSMUST00000063704.8|Zfp982-  
201|ENSMUSG00000078496|+|chr4:g.147597696:A>G  
MSVFLVNT PQGLLTFKDVAVEFSL EEWERLSFAQRSLYIDVMLENYNNLLFVENHFICAKCGKALDEDSQYIV  
HEHMNIQEKSSKWNKLSNVILESPHCVP HKCSEWDKCF SQRSHLSIHQKIHTGEKPYKCSECDKCFTEKGILR  
IHQKIHSGEKSYKYHECDKCFPKKSHLSIHLRIHKGEKPYKSCDCDKCFTEKRKLRRHQKIHTGEKPYKCSEC  
DKCFIQKYSLSHDHQRIHTGEKPYKCSECNKCFIQKSSLNHQS IHTGEKPYKCSECDKCFD KRNLRHQKIHT  
TGEKPYKCSECEKCFD KGS LRRH HKIHTGEKPYKCSECEKCYTD KGS LRRHQKIHTGKGLTNAVNVNALLK  
KAI\*

>ENSMUSP00000101346\_c.1066:C>A\_p.A356E ENSMUST00000105721.9|Zfp982-  
202|ENSMUSG00000078496|+|chr4:g.147597711:C>A  
MSVFLVNT PQGLLTFKDVAVEFSL EEWERLSFAQRSLYIDVMLENYNNLLFVENHFICAKCGKALDEDSQYIV  
HEHMNIQEKSSKWNKLSNVILESPHCVP HKCSEWDKCF SQRSHLSIHQKIHTGEKPYKCSECDKCFTEKGILR  
IHQKIHSGEKSYKYHECDKCFPKKSHLSIHLRIHKGEKPYKSCDCDKCFTEKRKLRRHQKIHTGEKPYKCSEC  
DKCFIQKYSLSHDHQRIHTGEKPYKCSECNKCFIQKSSLNHQS IHTGEKPYKCSECDKCFD KRNLRHQKIHT  
TGEKPYKCSECEKCFD KGS LRRH HKIHTGEKPYKCSECEKCYTD KGS LRRHQKIHTGKGLTNAVNVNALLK  
KAI\*

>ENSMUSP00000068021\_c.1066:C>A\_p.A356E ENSMUST00000063704.8|Zfp982-  
201|ENSMUSG00000078496|+|chr4:g.147597711:C>A  
MSVFLVNT PQGLLTFKDVAVEFSL EEWERLSFAQRSLYIDVMLENYNNLLFVENHFICAKCGKALDEDSQYIV  
HEHMNIQEKSSKWNKLSNVILESPHCVP HKCSEWDKCF SQRSHLSIHQKIHTGEKPYKCSECDKCFTEKGILR  
IHQKIHSGEKSYKYHECDKCFPKKSHLSIHLRIHKGEKPYKSCDCDKCFTEKRKLRRHQKIHTGEKPYKCSEC  
DKCFIQKYSLSHDHQRIHTGEKPYKCSECNKCFIQKSSLNHQS IHTGEKPYKCSECDKCFD KRNLRHQKIHT  
TGEKPYKCSECEKCFD KGS LRRH HKIHTGEKPYKCSECEKCYTD KGS LRRHQKIHTGKGLTNAVNVNALLK  
KAI\*

>ENSMUSP00000123296\_c.412:T>C\_p.F138S ENSMUST00000139784.8|Zfp985-  
202|ENSMUSG00000065999|+|chr4:g.147667546:T>C  
MSESLVNT PQGLLTFKDV ALDFSLEEWERLSFAQRTLYIDVMLENYNNLLFVENHCIRGKYRKVLDQDSQYIV  
HEHMNIQEKSSKWDKLSKVL L DSPQYTPYKTYHSSLQYWNQKRLKPRNTKEVCKYNDVSVSLSSTISLNQG  
IHMQ

>ENSMUSP00000080438\_c.412:T>C\_p.F138S ENSMUST00000081742.7|Zfp985-  
201|ENSMUSG00000065999|+|chr4:g.147667546:T>C  
MSESLVNT PQGLLTFKDV ALDFSLEEWERLSFAQRTLYIDVMLENYNNLLFVENHCIRGKYRKVLDQDSQYIV  
HEHMNIQEKSSKWDKLSKVL L DSPQYTPYKTYHSSLQYWNQKRLKPRNTKEVCKYNDVSVSLSSTISLNQG  
IHMQKKKHKRNAEF EKVFVSKHKDMVKQNTGVNPKCSEFHKYL TQREKLQTRQRIYHGKPKYKSSKSDKCF  
THQIHLRSHQGIHTGEKPHKCSECDKCFTHKFNLRHQRIHTGEKLYKCSECDKCFTHKSRNLNYHQRIHTGEK  
PHKCSECDKCFTHKFNLRHQIHTGEKPHKCSECDKCFTHKFNLRHQRIHTGEKPYKCSECDKCFTRKFHL  
GIHHR IHTGEKPYKCSECDKCF TGKSLRIHQRIHIGEKPYKCSECDKCF TGKSLRIHQRIHTGERPHKCSE  
CDKCF TGKSLRIHQRMHTGEKPYKCSECDKCF TQKSHLNIHQIHTGEKPYKCSECDKCF THKSHLNIHQKI  
HTGEKPYK\*

>ENSMUSP00000080438\_c.598:A>G\_p.Q200R ENSMUST00000081742.7|Zfp985-  
201|ENSMUSG00000065999|+|chr4:g.147667732:A>G  
MSESLVNT PQGLLTFKDV ALDFSLEEWERLSFAQRTLYIDVMLENYNNLLFVENHCIRGKYRKVLDQDSQYIV  
HEHMNIQEKSSKWDKLSKVL L DSPQYTPYKTYHSSLQYWNQKRLKPRNTKEVCKYNDVSVSLSSTISLNQG  
IHMQKKKHKRNAEF EKVFVSKHKDMVKQNTGVNPKCSEFHKYL TQREKLQTRQRIYHGKPKYKSSKSDKCF  
THQIHLRSHQGIHTGEKPHKCSECDKCFTHKFNLRHQRIHTGEKLYKCSECDKCFTHKSRNLNYHQRIHTGEK  
PHKCSECDKCFTHKFNLRHQIHTGEKPHKCSECDKCFTHKFNLRHQRIHTGEKPYKCSECDKCFTRKFHL  
GIHHR IHTGEKPYKCSECDKCF TGKSLRIHQRIHIGEKPYKCSECDKCF TGKSLRIHQRIHTGERPHKCSE

CDKCF TGKGLRIHQRMHTGEKPYKCECDKCF TQKSHLNIHQGIHTGEKPYKCECDKCF THKSHLINHQKI  
HTGEKPYK\*  
>ENSMUSP00000080438\_c.865:C>T\_p.T289I ENSMUST00000081742.7|zfp985-  
201|ENSMUSG00000065999|+|chr4:g.147667999:C>T  
MSESLVNT PQGLLTFKDVALDFSL EEWERLSFAQRTLYIDVMLENYNNLLFVENHCIRGKYRKVLDQDSQYIV  
HEHMNIQEKSSKWDKLSKVL LDPQYTPYKTYHSS LQYWNQKRLKPRNTKEVCKYNDVNSVSLFSTISLNQG  
IHMQKKKHKR NAEFEKVFVSKHKDMVKQNTGVNPKYKSEFHKYLTQREKLQTQQRIYHGKPKYKSSKSDKCF  
THQIHLRSHQGIHTGEKPHKCECDKCF THKFNLRHQRIHTGEKLYKCECDKCF THKSRLNYHQRIHIGEK  
PHKCECDKCF THKFNLRHQI IHTGEKPHKCECDKCF THKFNLRHQRIHTGEKPYKCECDKCF TRKFHL  
GIHHR IHTGEKPYKCECDKCF TGKGLRIHQRIHIGEKPYKCECDKCF TGKGLRIHQRIHTGERPHKCE  
CDKCF TGKGLRIHQRMHTGEKPYKCECDKCF TQKSHLNIHQGIHTGEKPYKCECDKCF THKSHLINHQKI  
HTGEKPYK\*  
>ENSMUSP00000080438\_c.1506:T>C\_p.S503P ENSMUST00000081742.7|zfp985-  
201|ENSMUSG00000065999|+|chr4:g.147668640:T>C  
MSESLVNT PQGLLTFKDVALDFSL EEWERLSFAQRTLYIDVMLENYNNLLFVENHCIRGKYRKVLDQDSQYIV  
HEHMNIQEKSSKWDKLSKVL LDPQYTPYKTYHSS LQYWNQKRLKPRNTKEVCKYNDVNSVSLFSTISLNQG  
IHMQKKKHKR NAEFEKVFVSKHKDMVKQNTGVNPKYKSEFHKYLTQREKLQTQQRIYHGKPKYKSSKSDKCF  
THQIHLRSHQGIHTGEKPHKCECDKCF THKFNLRHQRIHTGEKLYKCECDKCF THKSRLNYHQRIHIGEK  
PHKCECDKCF THKFNLRHQI IHTGEKPHKCECDKCF THKFNLRHQRIHTGEKPYKCECDKCF TRKFHL  
GIHHR IHTGEKPYKCECDKCF TGKGLRIHQRIHIGEKPYKCECDKCF TGKGLRIHQRIHTGERPHKCE  
CDKCF TGKGLRIHQRMHTGEKPYKCECDKCF TQKSHLNIHQGIHTGEKPYKCECDKCF THKSHLINHQKI  
HTGEKPYK\*  
>rs47730106\_ENSMUSP00000113561\_c.1179:A>G\_p.N394D  
ENSMUST00000117638.2|zfp534-201|ENSMUSG00000062518|-|chr4:g.147759488:T>C  
MSVCLVNT PQGLLTFKDVALDFSL EEWEC L SFAQRS LYMDVMLENYNNLLFVENHCIRGKNGKVL DQDSQYIV  
HEHMNIQEKSSKWDKLSNVILESLQCTPYKTNHSSDALQFSTQKRLKPRNTKEVCKYNDVNSVSLFSTISLN  
QG INMQKKKHN RNAELDKIFVSKHKVMVKKDNIAGNPKYKSEFHKYLTQREKLQSQQRIYHGKPKYESSKSDK  
CFTHQIHLRSIHQGIHTEEKIYKCECDKCFKNKFNLTMHQRIHKGEKPYKCECGKCF TDKTSLRIHQRIHTG  
EKPYKCECGKCFTEKSSLR IHQRIHTGEKPYKCECGKCFTEKSSLR IHQRIHTGEKPYKCECDKCF TQQS  
YLSIHQRIHTGEKPYKCECDKCF TQSDLSIHQRIHTGEKPYKCECDKCF TQSHLSIHQRIHTGEKPYK  
CECDKCF TQSYLSIHQRIHAGEKPYKCECDKCF TTKGNLIHQRIHTREKPYKCECGKCFTEKSSLR IHQ  
RIHTGEKPYKCECDKCF TQSKLSIHQRIHTGEKPYKCECEKCFNEKNSLKIHQRIHTGERPYKCECDK  
FTQKSYLNIHQRIHAGEKPYKCECDKCF TTKGNLIHQRIHTREKPYKCECDKCF TQKSLSIHQKIHTGE  
KPYK\*  
>rs107953444\_ENSMUSP00000113561\_c.729:G>A\_p.E244K  
ENSMUST00000117638.2|zfp534-201|ENSMUSG00000062518|-|chr4:g.147759938:C>T  
MSVCLVNT PQGLLTFKDVALDFSL EEWEC L SFAQRS LYMDVMLENYNNLLFVENHCIRGKNGKVL DQDSQYIV  
HEHMNIQEKSSKWDKLSNVILESLQCTPYKTNHSSDALQFSTQKRLKPRNTKEVCKYNDVNSVSLFSTISLN  
QG INMQKKKHN RNAELDKIFVSKHKVMVKKDNIAGNPKYKSEFHKYLTQREKLQSQQRIYHGKPKYESSKSDK  
CFTHQIHLRSIHQGIHTEEKIYKCECDKCFKNKFNLTMHQRIHKGEKPYKCECGKCF TDKTSLRIHQRIHTG  
EKPYKCECGKCFTEKSSLR IHQRIHTGEKPYKCECGKCFTEKSSLR IHQRIHTGEKPYKCECDKCF TQQS  
YLSIHQRIHTGEKPYKCECDKCF TQSNLSIHQRIHTGEKPYKCECDKCF TQSHLSIHQRIHTGEKPYK  
CECDKCF TQSYLSIHQRIHAGEKPYKCECDKCF TTKGNLIHQRIHTREKPYKCECGKCFTEKSSLR IHQ  
RIHTGEKPYKCECDKCF TQSKLSIHQRIHTGEKPYKCECEKCFNEKNSLKIHQRIHTGERPYKCECDK  
FTQKSYLNIHQRIHAGEKPYKCECDKCF TTKGNLIHQRIHTREKPYKCECDKCF TQKSLSIHQKIHTGE  
KPYK\*  
>ENSMUSP00000114023\_c.452:G>C\_p.K151N ENSMUST00000122309.2|zfp984-  
202|ENSMUSG00000078495|-|chr4:g.147840397:C>G  
MSVSLVNT PQGLLTFKDVALYFSL EEWEC L SFAQRTLYMDVMLENYNNLLFVENHCIRGKYKGLVGEESQYIV  
HEHVNIQEKSSKWDKLIKVILESPQCTPYKTNHSS LQYSNQKRLKPRNTKEVCKYNDVNSVSLFSTISLNQG  
IHLQNKKHN RNAEAEFEKVFVSKHKVMVKRNNTGVNPKYKSEFDKYLTQREKLQSQQRIYHGKPKYRSSKSDKCF  
THQIHLRSIHQGIHAEKIYKCECDKCF THKSHLNIHQRIHTGENPYKCECDKCF KHKFSFMSHQRIHTGEK  
PYKCECDKCF TQKSHLSVHQRIHTGEKPYKCECDKCF THKSHLSHQRIHTGEKPYKCECDKCF TKNGL  
RIHQRIHTGENPYKCECDKCF THKSNLNIHQRIHTGEKPYKCECDKCF THKSHLSHQRIHTGEKPYKCE  
CDKCF TRKFHLSIHQRIHTGENPYKCECDKCF TQKSNLNIHQRIHTGEKPYKCECDKCF TEKGLRIHQRI  
HTGENPYKCECDKCF TRKFHLSIHQKIHTGEKPYK\*  
>ENSMUSP00000101360\_c.452:G>C\_p.K151N ENSMUST00000105734.10|zfp984-  
201|ENSMUSG00000078495|-|chr4:g.147840397:C>G

MSVSLVNTPOGLTTFKDVVALYFSLSEWECLSFQAORTLYMDVMLENYNNLLFVENHCHGKYGKVLGEEESQYIV  
 HEHVNIQEKSSKWDKLIKVILESPQCTPYKTNHSSLOYSNQKRLKPRNTKEVCKYNDVSNVSLFSTISLNQG  
 IHLQNKHNRAEFAFEKVFVSKHKVMVKNRNTGVNPKYKSEFDKYLTOREKLQSQQRIYHGKPKYRSSKSDKCF  
 THQIHLSIHQGIHAEKIYKCECDKCFTHKSHLNHQRHTGENPKYKCECDKCFKHKFSFSMHQRHTGK  
 PYKCECDKCFTHKSHLSVHQRIHTGKPYKCECDKCFTHKSHLNHQRHTGKPYKCECDKCFTHKSHLNHQRHTGKPYKCE  
 CDKCFTRKFHLSIHQRHTGENPKYKCECDKCFTHKSHLNHQRHTGKPYKCECDKCFTHKSHLNHQRHTGKPYKCE  
 CDKCFTRKFHLSIHQRHTGENPKYKCECDKCFTHKSHLNHQRHTGKPYKCECDKCFTHKSHLNHQRHTGKPYKCECDKCFTEKGSRLIHQRI  
 HTGENPKYKCECDKCFTRKFHLSIHQRHTGKPYK\*

>ENSMUSP00000095395\_c.1668:G>T\_p.A57S ENSMUST00000097788.11|Mthfr-  
 202|ENSMUSG00000029009|+|chr4:g.148139481:G>T  
 MVNEARGSGSPNPRSESSSSGSESSKDSRCSTPSLDPERHERLREKMRRRMDSGDKWFSLEFFPPRTAEGAV  
 NLISRFDRMAAGGPLFVDVTHWPAGDPGSDKETSSMMIASTAVNYCGLETILHMTCCQQRPEEITGHLHRAKQ  
 LGLKNIMALRGDPVGDHWEAEEGGFSYATDLVKHIRTEFADYFDICVAGYPRGHPDAESFEDDLKHLKEKVS  
 AGADFIITQLFFEASTFFSFVKACTEIGISCPILPGIFPIQGYTSLRQLVKLSKLEVPQKIKDVIEPIKDNDA  
 IRNYGIELAVSLCRELLDGLVPLGHFYTLNREVATMEVLKQLGMWTEPRRPLPWALSAHPKRREEDVRPIF  
 WASRPKSYIYRTQDWDFPNRGNWSSSPAFGELKDYLLFYLKSKSPREELLKMWGEELTSEESVFEVFEHYL  
 SGEPNRHGYRVTCPLWNDEPLAAETSLMKEELLRVNRLGILTINSQPNINAKPSSDPVVGWGPSSGGYVQKAY  
 LEFFTSRETVEALLQVLKTYELRVNYHIVDVKGENITNAPELQPNVSWGIFPGREIIQPTVVDPISEFMFKD  
 EAFALWIEQWGLYEEESPSRMI IQYIHDNYFLVNLVDNEFPLDSCWQVVEDTFELLNRHPTERETQAP\*

>ENSMUSP00000069774\_c.1791:G>T\_p.A598S ENSMUST00000069604.15|Mthfr-  
 201|ENSMUSG00000029009|+|chr4:g.148139481:G>T  
 MNHQKAKVLPAGHCYPSLGMWASEAGCVRLSVPPSISRNPAMVNEARGSGSPNPRSESSSSGSESSKDSRCS  
 TPSLDPERHERLREKMRRRMDSGDKWFSLEFFPPRTAEGAVNLISRFDRMAAGGPLFVDVTHWPAGDPGSDKE  
 TSSMMIASTAVNYCGLETILHMTCCQQRPEEITGHLHRAKQLGLKNIMALRGDPVGDHWEAEEGGFSYATDLV  
 KHIRTEFADYFDICVAGYPRGHPDAESFEDDLKHLKEKVSAGADFIITQLFFEASTFFSFVKACTEIGISCP  
 LPGIFPIQGYTSLRQLVKLSKLEVPQKIKDVIEPIKDNDAAIRNYGIELAVSLCRELLDGLVPLGHFYTLN  
 EVATMEVLKQLGMWTEPRRPLPWALSAHPKRREEDVRPIFWASRPKSYIYRTQDWDFPNRGNWSSSPAFG  
 ELKDYLLFYLKSKSPREELLKMWGEELTSEESVFEVFEHYLSGEPNRHGYRVTCPLWNDEPLAAETSLMKEEL  
 LRVNRLGILTINSQPNINAKPSSDPVVGWGPSSGGYVQKAYLEFFTSRETVEALLQVLKTYELRVNYHIVDV  
 KGENITNAPELQPNVSWGIFPGREIIQPTVVDPISEFMFKDEAFALWIEQWGLYEEESPSRMI IQYIHDNYF  
 LVNLVDNEFPLDSCWQVVEDTFELLNRHPTERETQAP\*

>ENSMUSP00000117095\_c.1716:G>T\_p.A573S ENSMUST00000152498.8|Mthfr-  
 206|ENSMUSG00000029009|+|chr4:g.148139481:G>T  
 GCVRLSVPPSISRNPAMVNEARGSGSPNPRSESSSSGSESSKDSRCSTPSLDPERHERLREKMRRRMDSGDK  
 WFSLEFFPPRTAEGAVNLISRFDRMAAGGPLFVDVTHWPAGDPGSDKETSSMMIASTAVNYCGLETILHMTCC  
 QQRPEEITGHLHRAKQLGLKNIMALRGDPVGDHWEAEEGGFSYATDLVKHIRTEFADYFDICVAGYPRGHPDA  
 ESFEDDLKHLKEKVSAGADFIITQLFFEASTFFSFVKACTEIGISCPILPGIFPIQGYTSLRQLVKLSKLEVP  
 QKIKDVIEPIKDNDAAIRNYGIELAVSLCRELLDGLVPLGHFYTLNREVATMEVLKQLGMWTEPRRPLPWA  
 LSAHPKRREEDVRPIFWASRPKSYIYRTQDWDFPNRGNWSSSPAFGELKDYLLFYLKSKSPREELLKMWGE  
 ELTSEESVFEVFEHYLSGEPNRHGYRVTCPLWNDEPLAAETSLMKEELLRVNRLGILTINSQPNINAKPSSDP  
 VVGWGPSSGGYVQKAYLEFFTSRETVEALLQVLKTYELRVNYHIVDVKGENITNAPELQPNVSWGIFPGREI  
 IQPTVVDPISEFMFKDEAFALWIEQWGLYEEESPSRMI IQYIHDNYFLVNLVDNEFPLDSCWQVVEDTFEL  
 LNRHPTERETQAP\*

>ENSMUSP00000116840\_c.162:G>T\_p.A55S ENSMUST00000156113.2|Mthfr-  
 207|ENSMUSG00000029009|+|chr4:g.148139481:G>T  
 XGYVQKAYLEFFTSRETVEALLQVLKTYELRVNYHIVDVKGENITNAPELQPNVSWGIFPGREIIQPTVVD  
 PISFMFKDEAFALWIEQWGLYEEESPSRMI IQYIHDNYFLVNLVDNEFPLDSCWQVVEDTFELLNRHPT  
 RETQAP\*

>ENSMUSP00000030949\_c.328:T>C\_p.M110T ENSMUST00000030949.4|Tas1r3-  
 201|ENSMUSG00000029072|-|chr4:g.155947355:A>G  
 MPALAIMGLSLAAFLGLMGASLCLSQQFKAQGDYILGGLFPLGSTEEATLNQRTQPNISPCNRFSPGLGLFLA  
 MAMKMAVEEINNGSALLPGLRLGYDLFDTCSEPVVTTKSSLMFLAKVGSQSIAYCNYTQYQPRVLAVIGPHS  
 SELALITGKSFASFFLMPQVSYASMDRLSDRETFFSFVFRTPVSDRVQLQAVVTLQNFVSNWVAALGSDDDY  
 REGLSIFGSSLANARGICIAHEGLVPQHDTSQQQLGKVLVLRQVNSKVQVVVLFASARAVYSLSYSIHGSL  
 SPKVVVASESWLTSDLVMTLPIARVGTVLGFLQRGALLPEFSHYVETHLALAADPAFCASLNAELDLEEHVM  
 GQRCPRCDDIMLQNLSSGLLQNLASAGLHHQIFATYAAVYSVAQALHNTLQCNVSHCHVSEHVLPWQLLENMY  
 NMSFHARDLTLQFDAEGNVDMYDLKMWVWQSPTPVLHTVGTFTNGTLQLQOSKMYWPGNQVPSQCSRQCKDG  
 QVRRVKGHSCCYDCVDCAGSYRKHPPDFTCTPCNQDQWSPEKSTACLPRRPFKFLAWGEPVVLSSLLLLLCLV

LGLALAAALGLSVHHWDSPLVQASGGSSQFCFGLICLGLFCLSVLLFPGRPSSASCLAQQPMAHLPLTGCLSTLF  
LQAAETFVESELPLSWANWLCSYLRGLWAWLVLLATFVEAALCAWYLIAFPPEVVDWSVLPTEVLEHCHVR  
SWVSLGLVHITNAMLAFLCFLGTFLVQSOPGRYNRARGLTFAMLAYFITWVSVFVPLLANVQVAYQPAVQMGAI  
LVCALGILVTFHLPKCYVLLWLPKLNTOEFFFLGRNAKKAADENSGGEEAAQGHNE\*  
>ENSMUSP00000101194\_c.1180:G>T\_p.G394V ENSMUST00000105569.5|Klh117-  
201|ENSMUSG00002076083|-|chr4:g.156316259:C>A  
MQPRGERPAGRTQSPHSSPGPGPEAPPPPPQPPAPEAERARPRQARPAAPMEGAMQLLSREGHSAHNSKRHY  
HDAFVAMSRMRQRGLLCDIVLHVAAKEIRAHKVVLASCSFYHAMFTNEMSESRQTHVTLHDI DPQALDQLVQ  
FAYTAEIVVGEENVQTLTPAASLLQLNGVRDACCKFLLSQLDPSNCLGIRGFADTHSCSDLLKAAHRYVLQHF  
VDVAKTEEFMLLPLKQVLELVSSDSLNVPSSEEDVYRAVLSWVKHDVDTRRQHVPRMLKCVRLPILLSRDFLLGH  
VDAESLVRHHPDCKDLLIEALKFHLLPEQRGVLGTSRTRPRRCEGAGPVLFAVGGGSLFAIHGDCEAYDTRTD  
RWHVVASMSTRRARVGVAAVGNRLYAVGVYDGTSDLATVESYDPVTNTWQPEVSMGTRRSCLGVAALHGLLYA  
AGGYDGASCLNSAERYDPLTGTWTSIAAMSTRRRYVRVATLDGNLYAVGGYDSSSHLATVEKEYEPQVNSWTPV  
ASMLSRSSAGVAVLEGALYVAGNDGTSCLSNVERYSTKAGAWESVAPMNI RRSTHDLVAMDGWLYAVGGND  
GSSSLNSIEKYNPRNTKWWAASCMFTRRSSVGVAVLELLNFPPSSPTLSVSSTSL\*  
>ENSMUSP000001091659\_c.52:G>T\_p.G18V ENSMUST00020183129.1|Klh117-  
204|ENSMUSG00002076083|-|chr4:g.156316259:C>A  
XARVGVAAVGNRLYAVGVYDGTSDLATVESYDPVTNTWQPEVSMGTRRSCLGVAALHGLLYAAGGYDGASCLN  
SAERYDPLTGTWTSIAAMSTRRRYVRVATLDGNLYAVGGYDSSSHLATVEKEYEPQEHT\*  
>ENSMUSP00000101194\_c.1161:C>T\_p.R388\* ENSMUST00000105569.5|Klh117-  
201|ENSMUSG00002076083|-|chr4:g.156316278:G>A  
MQPRGERPAGRTQSPHSSPGPGPEAPPPPPQPPAPEAERARPRQARPAAPMEGAMQLLSREGHSAHNSKRHY  
HDAFVAMSRMRQRGLLCDIVLHVAAKEIRAHKVVLASCSFYHAMFTNEMSESRQTHVTLHDI DPQALDQLVQ  
FAYTAEIVVGEENVQTLTPAASLLQLNGVRDACCKFLLSQLDPSNCLGIRGFADTHSCSDLLKAAHRYVLQHF  
VDVAKTEEFMLLPLKQVLELVSSDSLNVPSSEEDVYRAVLSWVKHDVDTRRQHVPRMLKCVRLPILLSRDFLLGH  
VDAESLVRHHPDCKDLLIEALKFHLLPEQRGVLGTSRTRPRRCEGAGPVLFAVGGGSLFAIHGDCEAYDTRTD  
RWHVVASMSTRRARVGVAAVGN\*LYAVGGYDGTSDLATVESYDPVTNTWQPEVSMGTRRSCLGVAALHGLLYA  
AGGYDGASCLNSAERYDPLTGTWTSIAAMSTRRRYVRVATLDGNLYAVGGYDSSSHLATVEKEYEPQVNSWTPV  
ASMLSRSSAGVAVLEGALYVAGNDGTSCLSNVERYSTKAGAWESVAPMNI RRSTHDLVAMDGWLYAVGGND  
GSSSLNSIEKYNPRNTKWWAASCMFTRRSSVGVAVLELLNFPPSSPTLSVSSTSL\*  
>ENSMUSP000001091659\_c.33:C>T\_p.R12\* ENSMUST00020183129.1|Klh117-  
204|ENSMUSG00002076083|-|chr4:g.156316278:G>A  
XARVGVAAVGN\*LYAVGGYDGTSDLATVESYDPVTNTWQPEVSMGTRRSCLGVAALHGLLYAAGGYDGASCLN  
SAERYDPLTGTWTSIAAMSTRRRYVRVATLDGNLYAVGGYDSSSHLATVEKEYEPQEHT\*  
>ENSMUSP00000101194\_c.1038:G>C\_p.G347R ENSMUST00000105569.5|Klh117-  
201|ENSMUSG00002076083|-|chr4:g.156316401:C>G  
MQPRGERPAGRTQSPHSSPGPGPEAPPPPPQPPAPEAERARPRQARPAAPMEGAMQLLSREGHSAHNSKRHY  
HDAFVAMSRMRQRGLLCDIVLHVAAKEIRAHKVVLASCSFYHAMFTNEMSESRQTHVTLHDI DPQALDQLVQ  
FAYTAEIVVGEENVQTLTPAASLLQLNGVRDACCKFLLSQLDPSNCLGIRGFADTHSCSDLLKAAHRYVLQHF  
VDVAKTEEFMLLPLKQVLELVSSDSLNVPSSEEDVYRAVLSWVKHDVDTRRQHVPRMLKCVRLPILLSRDFLLGH  
VDAESLVRHHPDCKDLLIEALKFHLLPEQRGVLGTSRTRPRRCEGAGPVLFAVGRGSLFAIHGDCEAYDTRTD  
RWHVVASMSTRRARVGVAAVGNRLYAVGGYDGTSDLATVESYDPVTNTWQPEVSMGTRRSCLGVAALHGLLYA  
AGGYDGASCLNSAERYDPLTGTWTSIAAMSTRRRYVRVATLDGNLYAVGGYDSSSHLATVEKEYEPQVNSWTPV  
ASMLSRSSAGVAVLEGALYVAGNDGTSCLSNVERYSTKAGAWESVAPMNI RRSTHDLVAMDGWLYAVGGND  
GSSSLNSIEKYNPRNTKWWAASCMFTRRSSVGVAVLELLNFPPSSPTLSVSSTSL\*  
>ENSMUSP00000137253\_c.180:C>A\_p.P61T ENSMUST00000179543.8|Noc21-  
201|ENSMUSG00000095567|+|chr4:g.156320766:C>A  
MAASRAPRRRLEDLSVDEFLASGFESGSESELEGAEEAAAEERRARGAAWNRRERRGARTSTGPAGRPRKGRAS  
EHKQDLSRLKDRDPEFYKFLQENDRSLDFSDSDSSAESEEPHSLPDTLEEASETEEDGGEDSDALPRGLRS  
KKNEPVPVTLAMVERWRQGSRHLS PRLFHEVVQAFRAAVATTQGEQEAETCRFQVADSAVFNALVTF CIRD  
LCGCLQKLLFGKTPKDSNRLPSSSPLWGKLRVDVKTYLSAVVQLVACLAEATVSAAVLQHISSLVPPYLTFFP  
KQCRMLLKRMMVVLWSTGEESLRVLAFLVLRVCRHKKEAFLGPILKQMYIMYVRNCKFTSPSTLPLISFMQRT  
LTEMALDPSVSYQTHAFYIRQLAVHLRNAMTAGKKEHQSYVNWQYVHCLYLWCRVLTLSGSEILQPLLYP  
LSQIIIGCIKLLPHTARFYPLRMHCVRALTLLSQTIQTFIPVLPFILEIFQQVDFNRRRPMSSKPI N FSVILK  
LSSTNLQEKAYRDGLLEQLCDLTLEYLHLSQAHSIAFPELVLPVTLQKLSFLRECKVANYCROVRQLLEKVQEN  
AQHIQSLRQSATFSVSDQMAVDAAWEKQVREEGTPLTRYGHWKKLRDREIQLEISGKERLEDLNFPEIKRRKV  
EDRKDEDRKELKDLFELDSSEGEDSTDFFERGVPRLPPEAHQGLKEDQEEDKEEGDSSEGDGTDGVDLSEL  
WQLAQGPQDELEDLQLSEED\*

>ENSMUSP00000137253\_c.1791:A>G\_p.S598G ENSMUST00000179543.8|Noc21-201|ENSMUSG00000095567|+|chr4:g.156329744:A>G  
MAASRAPRRRLEDLSVDEFLASGFESGSESELEGAEEAAAEERRARGAAWNRRERRGARTSPGPAGRPRKGRAS  
EHKQDLSRLKDRDPEFYKFLQENDRSLDFSDSDSSAESEEPFHSLPDTLEEASETEEDGGEDSDALPRGLRS  
KKNEPVPVTLAMVERWRQGSRRHLSRPLFHEVVQAFRAAVATTQGEQEAETCRFQVADSAVNALVTFCIRD  
LCGCLQKLLFGKTPKDSNRLPSSSPLWGKLRVDVKTYLSAVVQLVACLAETVSAAVLQHISSLVPPYLTFF  
KQCRMLLKRMMVVLWSTGEESLRVLAFLVLIIRVCRHKKEAFLGPIILKQMYIMYVRNCKFTSPSTLPLISFMQRT  
LTEMALDPSVSYQHAFLYIRQLAVHLRNAMTAGKKETHQSVYNWQYVHCLYLWCRVLSTLGSSEILQPLLYP  
LSQIIIGCIKLLPTARFYPLRMHCVRALTLLSQTIGTFIPVLPFILEIFQQVDFNRRPGRMSSKPINFSVILK  
LSSTNLQEKAYRDGLLEQLCDLTLEYLHLSQAHSIAFPELVLPVTLQKLSFLRECKVANYCRQVRQLEKQVEN  
AQHIQSLRQSATFGVSDQMAVDAAWEKQVREEGTPLTRYGHWKLRDREIQLEISGKERLEDLNFPEIKRRKV  
EDRKDEDRKELKDLFELDSSEGEDSTDFFERGVPRPPEAHQGLKEDQEEDKEEGSDSSEDGDTDTGVDLSEL  
WQLAQGPQDELEDLQLSEED\*

>rs30778148\_ENSMUSP00000137253\_c.1843:A>G\_p.E615G  
ENSMUST00000179543.8|Noc21-201|ENSMUSG00000095567|+|chr4:g.156329915:A>G  
MAASRAPRRRLEDLSVDEFLASGFESGSESELEGAEEAAAEERRARGAAWNRRERRGARTSPGPAGRPRKGRAS  
EHKQDLSRLKDRDPEFYKFLQENDRSLDFSDSDSSAESEEPFHSLPDTLEEASETEEDGGEDSDALPRGLRS  
KKNEPVPVTLAMVERWRQGSRRHLSRPLFHEVVQAFRAAVATTQGEQEAETCRFQVADSAVNALVTFCIRD  
LCGCLQKLLFGKTPKDSNRLPSSSPLWGKLRVDVKTYLSAVVQLVACLAETVSAAVLQHISSLVPPYLTFF  
KQCRMLLKRMMVVLWSTGEESLRVLAFLVLIIRVCRHKKEAFLGPIILKQMYIMYVRNCKFTSPSTLPLISFMQRT  
LTEMALDPSVSYQHAFLYIRQLAVHLRNAMTAGKKETHQSVYNWQYVHCLYLWCRVLSTLGSSEILQPLLYP  
LSQIIIGCIKLLPTARFYPLRMHCVRALTLLSQTIGTFIPVLPFILEIFQQVDFNRRPGRMSSKPINFSVILK  
LSSTNLQEKAYRDGLLEQLCDLTLEYLHLSQAHSIAFPELVLPVTLQKLSFLRECKVANYCRQVRQLEKQVEN  
AQHIQSLRQSATFVSVDQMAVDAAWEKQVREGGTPLTRYGHWKLRDREIQLEISGKERLEDLNFPEIKRRKV  
EDRKDEDRKELKDLFELDSSEGEDSTDFFERGVPRPPEAHQGLKEDQEEDKEEGSDSSEDGDTDTGVDLSEL  
WQLAQGPQDELEDLQLSEED\*

>ENSMUSP00000137253\_c.2188:T>C\_p.L730P ENSMUST00000179543.8|Noc21-201|ENSMUSG00000095567|+|chr4:g.156331512:T>C  
MAASRAPRRRLEDLSVDEFLASGFESGSESELEGAEEAAAEERRARGAAWNRRERRGARTSPGPAGRPRKGRAS  
EHKQDLSRLKDRDPEFYKFLQENDRSLDFSDSDSSAESEEPFHSLPDTLEEASETEEDGGEDSDALPRGLRS  
KKNEPVPVTLAMVERWRQGSRRHLSRPLFHEVVQAFRAAVATTQGEQEAETCRFQVADSAVNALVTFCIRD  
LCGCLQKLLFGKTPKDSNRLPSSSPLWGKLRVDVKTYLSAVVQLVACLAETVSAAVLQHISSLVPPYLTFF  
KQCRMLLKRMMVVLWSTGEESLRVLAFLVLIIRVCRHKKEAFLGPIILKQMYIMYVRNCKFTSPSTLPLISFMQRT  
LTEMALDPSVSYQHAFLYIRQLAVHLRNAMTAGKKETHQSVYNWQYVHCLYLWCRVLSTLGSSEILQPLLYP  
LSQIIIGCIKLLPTARFYPLRMHCVRALTLLSQTIGTFIPVLPFILEIFQQVDFNRRPGRMSSKPINFSVILK  
LSSTNLQEKAYRDGLLEQLCDLTLEYLHLSQAHSIAFPELVLPVTLQKLSFLRECKVANYCRQVRQLEKQVEN  
AQHIQSLRQSATFVSVDQMAVDAAWEKQVREEGTPLTRYGHWKLRDREIQLEISGKERLEDLNFPEIKRRKV  
EDRKDEDRKELKDLFELDSSEGEDSTDFFERGVPRPPEAHQGLKEDQEEDKEEGSDSSEDGDTDTGVDLSEP  
WQLAQGPQDELEDLQLSEED\*

>ENSMUSP00000136611\_c.219:G>A\_p.A74T ENSMUST00000179919.3|Samd11-201|ENSMUSG00000096351|-|chr4:g.156336502:C>T  
MPEHPRHCFQRGVVEIGLPGGGDLLGKRLSCPCITSHCSSEKKARSKDPQGESPTLEKDAATSLLEPELSTM  
TPEDHYHQLMSALSEASSFEETQRLYHLGIPSHDLLRVRQEVATATLRGPGSGLVHLPSSADHRRKQGLVQR  
REGAVPAAATSFSEMERMSQPPPLSPQNAAHITMSSHLRPPFLGMPAVCQTPGFSFLPSAQAEMLARQOELL  
RKQSLARLEMSELLRQKELGSVHRPPLPAPEVALHIPEGPDELQRRGSMVLVKHSSAPLLALPPQPPPGPGPP  
IPPKEARSRSSEKGLGVQPSQPKETTGAQLWAQEVSEEPSKSDSDGDPETAAREGTSTPSQVPAGGTRAEG  
RGLLSGSTLPPPLPLGFCGAVSPYFHTGTMGGLFTDEETTTLEDVNKWTVDDVCNPFVGGLSGCGEYARVFGE  
QGIDGETLPLLTEEHLNMTMGLKLGPAKIRAQVAKRLGRVFMASFPVALPLQPPSLQAPELSPGHQPLSPA  
TTTSPYEGTHLPTGQASPKQENGSGTIALLSGAPDPSQLLQ\*

>ENSMUSP00000151756\_c.189:G>A\_p.A64T ENSMUST00000217934.2|Samd11-202|ENSMUSG00000096351|-|chr4:g.156336502:C>T  
MPEHPRHCFQRGVVEIGLPGGGDLLGKRLSCPCITSHCSSEKKARSKDPQATSLLPELESTMTPEDHYHQLM  
SALSEASSFEETQRLYHLGIPSHDLLRVRQEVATATLRGPGSGLVHLPSSADHRRKQGLVQRREGAVPAAAT  
SFSEMERMSQPPPLSPQNAAHITMSSHLRPPFLGMPAVCQTPGFSFLPSAQAEMLARQOELLRQSLARLEM  
SELLRQKELGSVHRPPLPAPEVALHIPEGPDELQRRGSMVLVKHSSAPLLALPPQPPPGPGPPIPPKEARSRS  
SEKGLGVQPSQPKETTGAQLWAQEVSEEPSKSDSDGDPETAAREGTSTPSQVPAGGTRAEGRGLLSGSTLPL  
PPLPLGFCGAVSPYFHTGTMGGLFTDEETTTLEDVNKWTVDDVCNPFVGGLSGCGEYARVFGEQGIDGETLPL

LTEEHLNLTMLGKLGPAKIRAQVAKRLGRVVFYMASFPVALPLQPPSLQAPELSPGHQPLSPATTTSPYEGTH  
LPTGQASPKQENGSGTIALLSGAPDPSQLLQ\*  
>ENSMUSP00000151442\_c.189:G>A\_p.A64T ENSMUST00000218788.2|Samd11-  
204|ENSMUSG00000096351|-|chr4:g.156336502:C>T  
MPEHPRHCDFQRGNVEIGLPGGGDLLGKRLSCPCITSHCSSEKKARSKDPQATSLLPELESTMTPEDHYHQLM  
SALSEASSFEETQRLYHLGIPSHDLLRVRQEVATATLRGPGSGLEVHLPSSADHRRKQGLVQRREGAVPAAAT  
SFSEREMSQPPPLLSPQNAAHITMSSHLRPPFLGMPTAVCQTPGFSLPSAQAEMLARQQEELLRQSLARLEM  
SELLRQKELGVSVHRPLLPAPEVALHIPEGPDELQRRGSMMLVLKHSAPLLALPPQGGPPGPPPIPPKESARSR  
SEKGLGVQPSQPKETTGAQLWAQEVSEEPSKSDSDGEDPETAAAREGTSTPSQVPAGGTRAEGRGLLSGSTLP  
PPLPLGFPFCGAVSPYFHTGTMGGLFTDEETTTLEDVNKWTVDVVCNFCVGGLSGCGEYARVFGEEQIDGETLPL  
LTEEHLNLTMLGKLGPAKIRAQVAKRLGRVVFYMASFPVALPLQPPSLQAPELSPGHQPLSPATTTSPYEGTH  
LPTGQASPKQENGSGTIALLSGAPDPSQLLQ\*  
>ENSMUSP00000151261\_c.219:G>A\_p.A74T ENSMUST00000220228.2|Samd11-  
209|ENSMUSG00000096351|-|chr4:g.156336502:C>T  
MPEHPRHCDFQRGNVEIGLPGGGDLLGKRLSCPCITSHCSSEKKARSKDPQGESPTLEKDAATSLLPELESTM  
TPEDHYHQMLSALSEASSFEETQRLYHLGIPSHADHRRKQGLVQRREGAVPAAATSFSEREMSQPPPLLSPQN  
AAHITMSSHLRPPFLGMPTAVCQTPGFSLPSAQAEMLARQQEELLRQSLARLEMSELLRQKELGVSVHRPLLP  
APEVALHIPEGPDELQRRGSMMLVLKH  
>ENSMUSP00000151817\_c.189:G>A\_p.A64T ENSMUST00000219393.2|Samd11-  
206|ENSMUSG00000096351|-|chr4:g.156336502:C>T  
MPEHPRHCDFQRGNVEIGLPGGGDLLGKRLSCPCITSHCSSEKKARSKDPQATSLLPELESTMTPEDHYHQLM  
SALSEASSFEETQRLYHLGIPSHDLLRVRQEVATATLRGPGSGLEVHLPSSADHRRKQGLVQR  
>ENSMUSP00000041597\_c.748:A>T\_p.D250V ENSMUST00000035980.9|Gm9758-  
201|ENSMUSG00000033219|-|chr5:g.14960484:T>A  
MALFARLCRLFQRANVDGRENREGRKDADIPSERNEGRRRGRTWRMWMALRQTSSPVPVVISKKQFEKEEKKLIK  
EIQLTTEETNELRDRLTYVTEGSMNKRPYHRQNPLYEKLKKEKEIMTFLHNLEMEMNEAQENKQELKKETHF  
YRNLHSRLLMEENLIKKKSMPLQQESKEVQADWAIHQRLVELNLSGKDEQEENSLETPEYQVSEAAARELGLA  
TAEEDSILQNELPGQEAPAEHHLQHPQSSSVESSSI\*  
>ENSMUSP00000041597\_c.748:A>G\_p.D250G ENSMUST00000035980.9|Gm9758-  
201|ENSMUSG00000033219|-|chr5:g.14960484:T>C  
MALFARLCRLFQRANVDGRENREGRKDADIPSERNEGRRRGRTWRMWMALRQTSSPVPVVISKKQFEKEEKKLIK  
EIQLTTEETNELRDRLTYVTEGSMNKRPYHRQNPLYEKLKKEKEIMTFLHNLEMEMNEAQENKQELKKETHF  
YRNLHSRLLMEENLIKKKSMPLQQESKEVQADWAIHQRLVELNLSGKDEQEENSLETPEYQVSEAAARELGLA  
TAEEDSILQNELPGQEAPAEHHLQHPQSSSGESSI\*  
>ENSMUSP00000125587\_c.232:C>G\_p.T78S ENSMUST00000159973.3|Speer4e-  
201|ENSMUSG00000091255|-|chr5:g.14987171:G>C  
MALFARLCRLFQRANVDGSDTREGRKDADLPSENEGRSRGTWRMWMALRQTSSPVPVVISKKQFEKEEKKLIK  
EIQLSTEETNELRDRLIYVTEGSMNKRPYHRQNPLYEKLKKEKEIMTFLHNLEMEMNEAKETKQELKKETHF  
YRNLHSRLLMEENLIKKKLMPLQQESKEVQADWAIHQCLLELNLNSGKDEQEENSLETPEYQVSEAAARELGLA  
TAEEDSILQNELPGQEAPAEHHLQHPQSSSDESSSI\*  
>ENSMUSP00000094716\_c.703:A>G\_p.Q235R ENSMUST00000096953.5|Gm10354-  
201|ENSMUSG00000072188|-|chr5:g.15024578:T>C  
MALFARLCRLFQRANVDGRETRGRKDADLPSENEGRRRGRTWRMCMALRQTSSPVPVVISKKQFEKEEKKLIK  
EIQLTMEETNELRDRLIYVTEGSMNKRPYHRQNPLYEKLKKEKEIMTFLHNLEMEMNEAKETKQELKKETHF  
YHNLHSRLLMEENLIKKKLMPLQQESKEVQADWAIHQRLVELNLSGKDEQEENSLETPEYQVSEAAARELGL  
ATAEEDSILQNELPGQEAPAEHHLQHPQSSSDESSSI\*  
>rs49800592\_ENSMUSP00000094716\_c.516:A>G\_p.K173E  
ENSMUST00000096953.5|Gm10354-201|ENSMUSG00000072188|-|chr5:g.15025509:T>C  
MALFARLCRLFQRANVDGRETRGRKDADLPSENEGRRRGRTWRMCMALRQTSSPVPVVISKKQFEKEEKKLIK  
EIQLTMEETNELRDRLIYVTEGSMNKRPYHRQNPLYEKLKKEKEIMTFLHNLEMEMNEAKETKQELKKETHF  
YHNLHSRLLMEENLIKKKLMPLQQESKEVQADWAIHQRLVELNLSGKDEQEENSLETPEYQVSEAAARELGL  
ATAEEDSILQNELPGQEAPAEHHLQHPQSSSDESSSI\*  
>ENSMUSP00000094716\_c.262:G>A\_p.R88H ENSMUST00000096953.5|Gm10354-  
201|ENSMUSG00000072188|-|chr5:g.15027612:C>T  
MALFARLCRLFQRANVDGRETRGRKDADLPSENEGRRRGRTWRMCMALRQTSSPVPVVISKKQFEKEEKKLIK  
EIQLTMEETNELRDHLIYVTEGSMNKRPYHRQNPLYEKLKKEKEIMTFLHNLEMEMNEAKETKQELKKETHF  
YHNLHSRLLMEENLIKKKLMPLQQESKEVQADWAIHQRLVELNLSGKDEQEENSLETPEYQVSEAAARELGL  
ATAEEDSILQNELPGQEAPAEHHLQHPQSSSDESSSI\*

>ENSMUSP00000143356\_c.462:CC>TT\_p.L155F ENSMUST00000197995.2|Gm21149-201|ENSMUSG00000099762|-|chr5:g.15678133:GG>AA  
MALFARLCRLFQRANVDRRETREGRKDADLPPDSNEGRRRGTRWRMWMALRQTSSPVPVVISKKQFEKEEKKLIK  
EIQLTTEETNELRDLRIYVTEGSMNKRPYHRQNPLYEKLLKKEKEIMTFLHNLEMEMNEAQENKQELKKETHF  
YRNLHSRLFDGGESYKEEVDDIAAGEQGSTG\*LGHHSPTFGGIEPEW\*RRRTGEQQS\*DSRISGLRNCKRAGIG  
HS\*RRQHPAE\*VARPGGPC\*APSPAPTIFLG\*IFFHI  
>ENSMUSP00000143356\_c.168:C>T\_p.P57S ENSMUST00000197995.2|Gm21149-201|ENSMUSG00000099762|-|chr5:g.15680276:G>A  
MALFARLCRLFQRANVDRRETREGRKDADLPPDSNEGRRRGTRWRMWMALRQTSSPVSVISKKQFEKEEKKLIK  
EIQLTTEETNELRDLRIYVTEGSMNKRPYHRQNPLYEKLLKKEKEIMTFLHNLEMEMNEAQENKQELKKETHF  
YRNLHSRLMEENLIKKSMTLQQESKEVQADWAIHQRLVELNLSGKDEQENSLETPEYQVSETARELGLA  
TAEEDSILQNELPGQEAPAEHHLQHPOSSDESSESSI\*  
>ENSMUSP00000158761\_c.1020:T>G\_p.C341G ENSMUST00000238335.2|Tmub1-206|ENSMUSG00000028958|-|chr5:g.24650653:A>C  
MALIEGVGDEVTVLFAVLACLLVLALAWVSTHTTESTDPPQPPGTTPAQPSEAMSASDSIREEAPGAESPS  
LRHRGSAQPEPDTGVTASTPPDSPQEPDLLRLKFLNDSEQVARAWPQDTIGSLKRSLSPQDPVSRPGTAGSA  
HLPRSTARRRHSDDRQSPAPQLRSPLPRVHESRSPSSSLPTGVRARPLRAGNRQPSVAPAASAAAALVLPD  
PVPALLSPDRYPGSGRLHPAPQSPGLCHVSAVVPRAFGSVASPSGPHSPRRKGSCLPRPTSPAACLFPLPW  
SPALRRRGLRVLAEAAPCDLHSSRPSGAAGQPPLAVGSSGSGTCCRGLGRQGTMPGPS\*  
>rs387511256\_ENSMUSP00000030795\_c.1139:T>GGT\_p.V380ins-fs  
ENSMUST00000030795.10|Abcf2-201|ENSMUSG00000028953|-|chr5:g.24773748:A>ACC  
MPSDLAKKKAAKKKEAAKARQRPRKGHEENGDAVTEPQVAEEKIEEANGRETTGDGEVDLLTKELEDFEMKKA  
AARAVTGVVLASHPNSTDVHIINLSLTFHGQELLSDTKLELNSGRRYGLIGLNGIGKSMLLSAIGKREVPPIEH  
IDIYHLTREMPPSEKTPQCVMEDTERAMLEREAERLAHEDAECEKLMELYERLEELDADKAEMRASRILHG  
LGFTPAMQRKLLKDFSGGWRMRVALARALFIRPFMLLLDEPTNHLDLDACVWLEELKTFKRIILVLVSHSQDF  
LNGVCTNI IHMHNKLLKYYTYGNYDQYVVKTRLELEENQMKRFHWEQDQIAHMKNYIARFHHGSAKLARQAQSKE  
KTLQKMMASGLTERVV  
>ENSMUSP00000085578\_c.103:T>G\_p.I35S ENSMUST00000088244.6|Actr3b-201|ENSMUSG00000056367|+|chr5:g.26014786:T>G  
MAGSLPPCVVDCGTGYTKLGYAGNTEPQFIIIPSCSAIRESAKVVDQAQRRVLRGVDDLLDFFIGDEAIDKPTYA  
TKWPIRHGIVEDWDLMERFMEQVVFYKYLRAEPEDHYFLMTEPPLNTPENREYLAEIMFESFNVPGLYIAVQAV  
LALAASWTSRQVGERTLTGIVIDSGDGVTHVIPVAEGYVIGSCIKHIPIAGRDITYFIQQLLREREVGIPEEQ  
SLETAKAIKEKYCYICPDIVREFAKYDVPDKWIKQYTGINAINQKFFIIDVGYERFLGPEIFFHPEFANPDF  
MESISDVVDEVIQSCPIDVRRPLYKNVVLSSGGSTMFDFGRRLQDLKRVVDARLKLSQELSGGRIPKPKPVEV  
QVVTHHMQRVAVWFGGSMPLASTPEFFQVCHTKKDYEEYGPSICRHNPFVFGVMS\*  
>ENSMUSP00000085578\_c.226:G>A\_p.W76\* ENSMUST00000088244.6|Actr3b-201|ENSMUSG00000056367|+|chr5:g.26016916:G>A  
MAGSLPPCVVDCGTGYTKLGYAGNTEPQFIIIPSCIAIRESAKVVDQAQRRVLRGVDDLLDFFIGDEAIDKPTYA  
TK\*PIRHGIVEDWDLMERFMEQVVFYKYLRAEPEDHYFLMTEPPLNTPENREYLAEIMFESFNVPGLYIAVQAV  
LALAASWTSRQVGERTLTGIVIDSGDGVTHVIPVAEGYVIGSCIKHIPIAGRDITYFIQQLLREREVGIPEEQ  
SLETAKAIKEKYCYICPDIVREFAKYDVPDKWIKQYTGINAINQKFFIIDVGYERFLGPEIFFHPEFANPDF  
MESISDVVDEVIQSCPIDVRRPLYKNVVLSSGGSTMFDFGRRLQDLKRVVDARLKLSQELSGGRIPKPKPVEV  
QVVTHHMQRVAVWFGGSMPLASTPEFFQVCHTKKDYEEYGPSICRHNPFVFGVMS\*  
>ENSMUSP00000085578\_c.240:G>T\_p.G81C ENSMUST00000088244.6|Actr3b-201|ENSMUSG00000056367|+|chr5:g.26016930:G>T  
MAGSLPPCVVDCGTGYTKLGYAGNTEPQFIIIPSCIAIRESAKVVDQAQRRVLRGVDDLLDFFIGDEAIDKPTYA  
TKWPIRHGIVEDWDLMERFMEQVVFYKYLRAEPEDHYFLMTEPPLNTPENREYLAEIMFESFNVPGLYIAVQAV  
LALAASWTSRQVGERTLTGIVIDSGDGVTHVIPVAEGYVIGSCIKHIPIAGRDITYFIQQLLREREVGIPEEQ  
SLETAKAIKEKYCYICPDIVREFAKYDVPDKWIKQYTGINAINQKFFIIDVGYERFLGPEIFFHPEFANPDF  
MESISDVVDEVIQSCPIDVRRPLYKNVVLSSGGSTMFDFGRRLQDLKRVVDARLKLSQELSGGRIPKPKPVEV  
QVVTHHMQRVAVWFGGSMPLASTPEFFQVCHTKKDYEEYGPSICRHNPFVFGVMS\*  
>ENSMUSP00000121629\_c.119:A>T\_p.E40D ENSMUST00000128727.8|Actr3b-202|ENSMUSG00000056367|+|chr5:g.26027450:A>T  
MERFMEQVVFYKYLRAEPEDHYFLMTEPPLNTPENREYLADIMFESFNVPGLYIAVQAVLALAASWTSRQVGER  
TLTGIVIDSGDGVTHVIPVAEGYVIGSCIKHIPIAGRDITYFIQQLLREREVGIPEEQSLETAKAIKEKYCYI  
CPDIVREFAKYDVPDKWIKQYTGINAINQKFFIIDVGYERFLGPEIFFHPEFANPDFMESISDVVDEVIQSC

PIDVRRPLYKNNVLSGGSTMFRDFGRRLQRDLKRVVDARLKLSQELSGGRIKPKPVEVQVVTHHMQRVAVWFG  
 GSMLASTPEFFQVCHTKKDYEEYGPSICRHNPFVFGVMS\*  
 >ENSMUSP00000085578\_c.383:A>T\_p.E128D ENSMUST00000088244.6|Actr3b-  
 201|ENSMUSG00000056367|+|chr5:g.26027450:A>T  
 MAGSLPPCVVDCGTGYTKLGYAGNTEPQFIIPSCIAIRESAKVVDQAQRRLRGVDDLDFFIGDEAIDKPTYA  
 TKWPIRHGIVEDWDLMERFMEQVVFVKYLRAEPEDHYFLMTEPPLNTPENREYLADIMFESFNVPGLYIAVQAV  
 LALAASWTSRQVGERTLTGIVIDSGDGVTHVIPVAEGYVIGSCIKHIPIAGRDITYFIQQLLREREVGPPEQ  
 SLETAKAIKEKYCYICPDIVREFAKYDVPDRKWKIKQYTGINAINQKKFIIDVGYERFLGPEIFFHPEFANPDF  
 MESISDVVDEVIQSCPIDVRRPLYKNNVLSGGSTMFRDFGRRLQRDLKRVVDARLKLSQELSGGRIKPKPVEV  
 QVVTHHMQRVAVWFGGSMLASTPEFFQVCHTKKDYEEYGPSICRHNPFVFGVMS\*  
 >rs50914511\_ENSMUSP00000121629\_c.456:G>T\_p.E153\*  
 ENSMUST00000128727.8|Actr3b-202|ENSMUSG00000056367|+|chr5:g.26036645:G>T  
 MERFMEQVVFVKYLRAEPEDHYFLMTEPPLNTPENREYLAEIMFESFNVPGLYIAVQAVLALAASWTSRQVGER  
 TLTGIVIDSGDGVTHVIPVAEGYVIGSCIKHIPIAGRDITYFIQQLLREREVGPPEQSLETAKAIKEKYCYI  
 CPDIVR\*FAKYDVPDRKWKIKQYTGINAINQKKFIIDVGYERFLGPEIFFHPEFANPDFMESISDVVDEVIQSC  
 PIDVRRPLYKNNVLSGGSTMFRDFGRRLQRDLKRVVDARLKLSQELSGGRIKPKPVEVQVVTHHMQRVAVWFG  
 GSMLASTPEFFQVCHTKKDYEEYGPSICRHNPFVFGVMS\*  
 >rs50914511\_ENSMUSP00000085578\_c.720:G>T\_p.E241\*  
 ENSMUST00000088244.6|Actr3b-201|ENSMUSG00000056367|+|chr5:g.26036645:G>T  
 MAGSLPPCVVDCGTGYTKLGYAGNTEPQFIIPSCIAIRESAKVVDQAQRRLRGVDDLDFFIGDEAIDKPTYA  
 TKWPIRHGIVEDWDLMERFMEQVVFVKYLRAEPEDHYFLMTEPPLNTPENREYLAEIMFESFNVPGLYIAVQAV  
 LALAASWTSRQVGERTLTGIVIDSGDGVTHVIPVAEGYVIGSCIKHIPIAGRDITYFIQQLLREREVGPPEQ  
 SLETAKAIKEKYCYICPDIVR\*FAKYDVPDRKWKIKQYTGINAINQKKFIIDVGYERFLGPEIFFHPEFANPDF  
 MESISDVVDEVIQSCPIDVRRPLYKNNVLSGGSTMFRDFGRRLQRDLKRVVDARLKLSQELSGGRIKPKPVEV  
 QVVTHHMQRVAVWFGGSMLASTPEFFQVCHTKKDYEEYGPSICRHNPFVFGVMS\*  
 >ENSMUSP00000121629\_c.723:G>C\_p.D242H ENSMUST00000128727.8|Actr3b-  
 202|ENSMUSG00000056367|+|chr5:g.26053396:G>C  
 MERFMEQVVFVKYLRAEPEDHYFLMTEPPLNTPENREYLAEIMFESFNVPGLYIAVQAVLALAASWTSRQVGER  
 TLTGIVIDSGDGVTHVIPVAEGYVIGSCIKHIPIAGRDITYFIQQLLREREVGPPEQSLETAKAIKEKYCYI  
 CPDIVREFAKYDVPDRKWKIKQYTGINAINQKKFIIDVGYERFLGPEIFFHPEFANPDFMESISDVVDEVIQSC  
 PIDVRRPLYKNNVLSGGSTMFRDFGRRLQRDLKRVVDARLKLSQELSGGRIKPKPVEVQVVTHHMQRVAVWFG  
 GSMLASTPEFFQVCHTKKDYEEYGPSICRHNPFVFGVMS\*  
 >ENSMUSP00000085578\_c.987:G>C\_p.D330H ENSMUST00000088244.6|Actr3b-  
 201|ENSMUSG00000056367|+|chr5:g.26053396:G>C  
 MAGSLPPCVVDCGTGYTKLGYAGNTEPQFIIPSCIAIRESAKVVDQAQRRLRGVDDLDFFIGDEAIDKPTYA  
 TKWPIRHGIVEDWDLMERFMEQVVFVKYLRAEPEDHYFLMTEPPLNTPENREYLAEIMFESFNVPGLYIAVQAV  
 LALAASWTSRQVGERTLTGIVIDSGDGVTHVIPVAEGYVIGSCIKHIPIAGRDITYFIQQLLREREVGPPEQ  
 SLETAKAIKEKYCYICPDIVREFAKYDVPDRKWKIKQYTGINAINQKKFIIDVGYERFLGPEIFFHPEFANPDF  
 MESISDVVDEVIQSCPIDVRRPLYKNNVLSGGSTMFRDFGRRLQRDLKRVVDARLKLSQELSGGRIKPKPVEV  
 QVVTHHMQRVAVWFGGSMLASTPEFFQVCHTKKDYEEYGPSICRHNPFVFGVMS\*  
 >ENSMUSP00000129503\_c.952:G>A\_p.G318E ENSMUST00000165512.4|Mnx1-  
 202|ENSMUSG00000001566|-|chr5:g.29679129:C>T  
 MEKSKNFRIDALLAVDPPRAASTQSAPLALVTSLATTVSGPGRGGSGGGGTSSGASRSCSPASSEATAAPGDR  
 LRAESPPRLLAAHCALLPKPGFLGAGGGGGAAGGPGTPHHHAHPGAAAAAAAAAAAAAAAAAGGLALGLHPGGA  
 QGGAGLPAQAALYGHVPVYSYAAAAAAAAALAGQHPALSYSYPQVQGAHPAHPADPIKLGASTFQLDQWLRATA  
 GMILPKMPDFSSQAQSNLLGKCRPRPTAFTSQQLLELEHQFKLNKYLRSRPKRFEVATSLMLTETQVKIWFQNR  
 RMKWKRSKKAKEQAAQEAQKQGGEGTGKGGSEEKTEEELMGPPVSGDKASGRRLRDLRSDPDEDEDDEEE  
 DNFPYSNGAGAHAASSDCSSEDDSPPPRLGGPGHQPLPQ\*  
 >ENSMUSP00000001608\_c.952:G>A\_p.G318E ENSMUST00000001608.8|Mnx1-  
 201|ENSMUSG00000001566|-|chr5:g.29679129:C>T  
 MEKSKNFRIDALLAVDPPRAASTQSAPLALVTSLATTVSGPGRGGSGGGGTSSGASRSCSPASSEATAAPGDR  
 LRAESPPRLLAAHCALLPKPGFLGAGGGGGAAGGPGTPHHHAHPGAAAAAAAAAAAAAAAAAGGLALGLHPGGA  
 QGGAGLPAQAALYGHVPVYSYAAAAAAAAALAGQHPALSYSYPQVQGAHPAHPADPIKLGASTFQLDQWLRATA  
 GMILPKMPDFSSQAQSNLLGKCRPRPTAFTSQQLLELEHQFKLNKYLRSRPKRFEVATSLMLTETQVKIWFQNR  
 RMKWKRSKKAKEQAAQEAQKQGGEGTGKGGSEEKTEEELMGPPVSGDKASGRRLRDLRSDPDEDEDDEEE  
 DNFPYSNGAGAHAASSDCSSEDDSPPPRLGGPGHQPLPQ\*



```

>rs218645019_ENSMUSP00000144615_c.613:TG>T_p.L205del-fs
ENSMUST00000201203.4|Tmem214-
202|ENSMUSG00000038828|+|chr5:g.31029176:TG>T
MAARSAGSGGWEVVKRGRPGASSGGRGGGGSDRRALGEANGVLKYDLSSPIQTTSTLYERGFEKIMKRQNK
EQVPPPAAESKPKPINKKQPKKVTAVPSQNKQKQGFRRLEDALKALDVAALQKELDKSQSVFTGNPSVWLKDLA
SYLNYKLTQTPRMEPTLSQYPHDYPYSLVSRELIRGLLTKAAGSVLFFDHLCLFTMLKSWIKHQGSRMG
ASVFKPFCKTSLRLSPQTWTSS
>ENSMUSP00000143938_c.204:C>T_p.P69S ENSMUST00000202520.4|Slc5a6-
205|ENSMUSG00000006641|-|chr5:g.31200479:G>A
MSVASTAAPFHHTTSGSSGAISTFSVVDYVVFGLLLVLSLVIGLYHACRGGHHTVGELLMADRKMGCCLSVALS
LLATFQSAVAAILGAPAEIFRFGTQYWFLGCSYFLGLLIPAHIFIPVFYRLHLTSAYEYLELRFNKAVRICGTV
TFIFQMVIYMGVALYAPSLALNAVTGFDLWLSVLALGIVCNIYTALGGLKAVIWTDFVQTLVMFLGQLVVIIV
GAARVGGGLGHVWNVTSQHGLISGINLDPDPFVRHTFWTLAFGGVFMMLSLYGVNQAQVQRYLSSHSERAAVLS
CYAVFPCQQVALCMSCLIGLVMFAYYNMYSMSPELKQAAPDQLVLYFVMDLLKDMPLPGLFVACLFSGSLST
ISSAFNSLATVTMEDLIQWFPQLTETRAIMLSRGLAFAYGLVCLGMAYISSHLGSLVQAALSIFGMVGGPLL
GLFCLGLFFPCANPLGAIVGLLTGLTMAFWIGIGSIVSRMSSAVAPPPLNGSSSFLPANVTVAAVTTVMPSTL
SKPTGLQHFFYSLSYLWYSAHNSTTVIVVGLIVSLLTGGMRGRSLNPGTIYPVLPKLLALLPLSCQKRLCWRSH
SQDIPVIPNLFPEKMRNGVLQDSTDKERMAEDGLVHQPCSPITYVVQETSLS*
>ENSMUSP00000110316_c.204:C>T_p.P69S ENSMUST00000114668.7|Slc5a6-
202|ENSMUSG00000006641|-|chr5:g.31200479:G>A
MSVASTAAPFHHTTSGSSGAISTFSVVDYVVFGLLLVLSLVIGLYHACRGGHHTVGELLMADRKMGCCLSVALS
LLATFQSAVAAILGAPAEIFRFGTQYWFLGCSYFLGLLIPAHIFIPVFYRLHLTSAYEYLELRFNKAVRICGTV
TFIFQMVIYMGVALYAPSLALNAVTGFDLWLSVLALGIVCNIYTALGGLKAVIWTDFVQTLVMFLGQLVVIIV
GAARVGGGLGHVWNVTSQHGLISGINLDPDPFVRHTFWTLAFGGVFMMLSLYGVNQAQVQRYLSSHSERAAVLS
CYAVFPCQQVALCMSCLIGLVMFAYYNMYSMSPELKQAAPDQLVLYFVMDLLKDMPLPGLFVACLFSGSLST
ISSAFNSLATVTMEDLIQWFPQLTETRAIMLSRGLAFAYGLVCLGMAYISSHLGSLVQAALSIFGMVGGPLL
GLFCLGLFFPCANPLGAIVGLLTGLTMAFWIGIGSIVSRMSSAVAPPPLNGSSSFLPANVTVAAVTTVMPSTL
SKPTGLQHFFYSLSYLWYSAHNSTTVIVVGLIVSLLTGGMRGRSLNPGTIYPVLPKLLALLPLSCQKRLCWRSH
SQDIPVIPNLFPEKMRNGVLQDSTDKERMAEDGLVHQPCSPITYVVQETSLS*
>ENSMUSP00000079291_c.204:C>T_p.P69S ENSMUST00000080431.8|Slc5a6-
201|ENSMUSG00000006641|-|chr5:g.31200479:G>A
MSVASTAAPFHHTTSGSSGAISTFSVVDYVVFGLLLVLSLVIGLYHACRGGHHTVGELLMADRKMGCCLSVALS
LLATFQSAVAAILGAPAEIFRFGTQYWFLGCSYFLGLLIPAHIFIPVFYRLHLTSAYEYLELRFNKAVRICGTV
TFIFQMVIYMGVALYAPSLALNAVTGFDLWLSVLALGIVCNIYTALGGLKAVIWTDFVQTLVMFLGQLVVIIV
GAARVGGGLGHVWNVTSQHGLISGINLDPDPFVRHTFWTLAFGGVFMMLSLYGVNQAQVQRYLSSHSERAAVLS
CYAVFPCQQVALCMSCLIGLVMFAYYNMYSMSPELKQAAPDQLVLYFVMDLLKDMPLPGLFVACLFSGSLST
ISSAFNSLATVTMEDLIQWFPQLTETRAIMLSRGLAFAYGLVCLGMAYISSHLGSLVQAALSIFGMVGGPLL
GLFCLGLFFPCANPLGAIVGLLTGLTMAFWIGIGSIVSRMSSAVAPPPLNGSSSFLPANVTVAAVTTVMPSTL
SKPTGLQHFFYSLSYLWYSAHNSTTVIVVGLIVSLLTGGMRGRSLNPGTIYPVLPKLLALLPLSCQKRLCWRSH
SQDIPVIPNLFPEKMRNGVLQDSTDKERMAEDGLVHQPCSPITYVVQETSLS*
>ENSMUSP00000143993_c.204:C>T_p.P69S ENSMUST00000202556.4|Slc5a6-
206|ENSMUSG00000006641|-|chr5:g.31200479:G>A
MSVASTAAPFHHTTSGSSGAISTFSVVDYVVFGLLLVLSLVIGLYHACRGGHHTVGELLMADRKMGCCLSVALS
LLATFQSAVAAILGAPAEIFRFGTQYWFLGCSYFLGLLIPAHIFIPVFYRLHLTSAYEYLELRFNKAVRICGTV
TFIFQMVIYMGVALYAPSLALNAVTGFDLWLSVLALGIVCNIYTALGGLKAVIWTDFVQTLVMFLGQLVVIIV
GAARVGGGLGHVWNVTSQHGLISGINLDPDPFVRHTFWTLAFGGVFMMLSLYGVNQAQVQRYLSSHSERAAVLS
CYAVFPCQQVALCMSCLIGLVMFAYYNMYSMSPELKQAAPDQLVLYFVMDLLKDMPLPGLFVACLFSGSLST
ISSAFNSLATVTMEDLIQWFPQLTETRAIMLSRGLAFAYGLVCLGMAYISSHLGSLVQAALSIFGMVGGPLL
GLFCLGLFFPCANPLGAIVGLLTGLTMAFWIGIGSIVSRMSSAVAPPPLNGSSSFLPANVTVAAVTTVMPSTL
SKPTGLQHFFYSLSYLWYSAHNSTTVIVVGLIVSLLTGGMRGRSLNPGTIYPVLPKLLALLPLSCQKRLCWRSH
SQDIPVIPNLFPEKMRNGVLQDSTDKERMAEDGLVHQPCSPITYVVQETSLS*
>ENSMUSP00000144665_c.204:C>T_p.P69S ENSMUST00000200816.2|Slc5a6-
203|ENSMUSG00000006641|-|chr5:g.31200479:G>A
MSVASTAAPFHHTTSGSSGAISTFSVVDYVVFGLLLVLSLVIGLYHACRGGHHTVGELLMADRKMGCCLSVALS
LLATFQSA
>ENSMUSP00000142442_c.238:T>G_p.I80S ENSMUST00000199534.5|Ldb2-
207|ENSMUSG00000039706|-|chr5:g.44699198:A>C

```

MSSTPHDPFYSSPFGPFYRRHTPYMVQPEYRIYEMNKRLQSRTESDNLWWDAFATEFFEDDATLTLSCLED  
GPKRYTSGRTLIPRYFSTVFEGGVTDLYYILKHSKESYHNSSIIVDCDQCAMVTQHKGPMFTKVCTEGRLILE  
FTFDDLMRIKTWHFTIRQYRELVPRSILAMHAQDPQVLDQLSKNITRMGLTNFTLNLYLRLCVILEPMQELMSR  
HKTYNLSRPDCLKTCLFQKWQRMVAPPAEPTRQPTTKRRKRKNSTSSSTSNSSAGNTTNSAGSKKTPAASLSL  
ATQVPGLGAI PNCSLNPGRDGLCHSTAVTPSGQFKEKH\*

>ENSMUSP00000067737\_c.238:T>G\_p.I80S ENSMUST00000070748.10|Ldb2-  
201|ENSMUSG00000039706|-|chr5:g.44699198:A>C

MSSTPHDPFYSSPFGPFYRRHTPYMVQPEYRIYEMNKRLQSRTESDNLWWDAFATEFFEDDATLTLSCLED  
GPKRYTSGRTLIPRYFSTVFEGGVTDLYYILKHSKESYHNSSIIVDCDQCAMVTQHKGPMFTKVCTEGRLILE  
FTFDDLMRIKTWHFTIRQYRELVPRSILAMHAQDPQVLDQLSKNITRMGLTNFTLNLYLRLCVILEPMQELMSR  
HKTYNLSRPDCLKTCLFQKWQRMVAPPAEPTRQPTTKRRKRKNSTSSSTSNSSAGNTTNSAGSKKTPAASLSL  
ATQVPDVMVVGEP TLMGGFEGDEDERLITRLENTQYDAANGMDDEEDFNNSPALGNNSPWNSKPPATQETKSE  
NAPPQASQ\*

>ENSMUSP00000143775\_c.238:T>G\_p.I80S ENSMUST00000199256.5|Ldb2-  
204|ENSMUSG00000039706|-|chr5:g.44699198:A>C

MSSTPHDPFYSSPFGPFYRRHTPYMVQPEYRIYEMNKRLQSRTESDNLWWDAFATEFFEDDATLTLSCLED  
GPKRYTSGRTLIPRYFSTVFEGGVTDLYYILKHSKESYHNSSIIVDCDQCAMVTQHKGPMFTKVCTEGRLILE  
FTFDDLMRIKTWHFTIRQYRELVPRSILAMHAQDPQVLDQLSKNITRMGLTNFTLNLYLRLCVILEPMQELMSR  
HKTYNLSRPDCLKTCLFQKWQRMVAPPAEPTRQPTTKRRKRKNSTSSSTSNSSAGNTTNSAGSKKTPAASLSL  
ATQGLGAI PNCSLNPGRDGLCHSTAVTPSGQFKEKH\*

>ENSMUSP00000143289\_c.238:T>G\_p.I80S ENSMUST00000199261.2|Ldb2-  
205|ENSMUSG00000039706|-|chr5:g.44699198:A>C

MSSTPHDPFYSSPFGPFYRRHTPYMVQPEYRIYEMNKRLQSRTESDNLWWDAFATEFFEDDATLTLSCLED  
GPKRYTSGRTLIPRYFSTVFEGGVTDLYYILKHSKESYHNSSIIVDCDQCAMVTQHKGPMFTKVCTEGRLILE  
FTFDDLMRIKTWHFTIRQYRELVPRSILAMHAQDPQVLDQLSKNITRMGLTNFTLNLYLRLCVILEPMQELMSR  
HKTYNLSRPDCLKTCLFQKWQRMVAPPAEPTRQPTTKRRKRKNSTSSSTSNSSAGNTTNSAGSKKTPAASLSL  
ATQDVMVVGEP TLMGGFEGDEDERLITRLENTQYDAANGMDDEEDFNNSPALGNNSPWNSKPPATQETKSENA  
PPQASQ\*

>rs230178563\_ENSMUSP00000133840\_c.1389:G>GA\_p.A464ins-fs  
ENSMUST00000173107.8|Slit2-208|ENSMUSG00000031558|+|chr5:g.48377374:G>GA  
MSGIGWQTLSSLGLVLSILNKVAPQACPAQCSCSGSTVDCHGLALRSVPRNIPRNTERLDLNGNITRITKI  
DFAGLRHLRVLQLMENRISTIERGAFQDLKELERLRLNRNNLQLFPELLFLGTAKLYRLDLSENQIQAI PRKA  
FRGAVDIKNLQLDYDYNQISCIEDGAFRALRDLEVLTLNNTNITRLSVASFNHMPKLRTRFLHSNNLYCDCHLAW  
LSDWLRQRPRVGLYTQCMGPHLRGHNVAEVQKREFVCSGHQSFMAPSCSVLHCPAACTCSNNIVDCRGKGLT  
EIP TNL PETITEIRLEQNSIRVIPP GAFSPYKLRRLDLSNNQISELAPDAFQGLRSLNSLVLYGNKITE L PK  
SLFEGFLSLQLLLLNANKINCLRVDAFQDLHNLNLLSLYDNKLQTVAKGTF SALRAIQTMHLAQNPFC DCHL  
KWLADYLHTNPIETSGARCTSPRRLDKQKNWTDQKQEIP LFRYRRLSIIKIKWRLLCRLGLS

>rs230178563\_ENSMUSP00000033967\_c.1389:G>GA\_p.A464ins-fs  
ENSMUST00000033967.15|Slit2-201|ENSMUSG00000031558|+|chr5:g.48377374:G>GA  
MSGIGWQTLSSLGLVLSILNKVAPQACPAQCSCSGSTVDCHGLALRSVPRNIPRNTERLDLNGNITRITKI  
DFAGLRHLRVLQLMENRISTIERGAFQDLKELERLRLNRNNLQLFPELLFLGTAKLYRLDLSENQIQAI PRKA  
FRGAVDIKNLQLDYDYNQISCIEDGAFRALRDLEVLTLNNTNITRLSVASFNHMPKLRTRFLHSNNLYCDCHLAW  
LSDWLRQRPRVGLYTQCMGPHLRGHNVAEVQKREFVCSGHQSFMAPSCSVLHCPAACTCSNNIVDCRGKGLT  
EIP TNL PETITEIRLEQNSIRVIPP GAFSPYKLRRLDLSNNQISELAPDAFQGLRSLNSLVLYGNKITE L PK  
SLFEGFLSLQLLLLNANKINCLRVDAFQDLHNLNLLSLYDNKLQTVAKGTF SALRAIQTMHLAQNPFC DCHL  
KWLADYLHTNPIETSGARCTSPRRLDKQKNWTDQKQEIP LFRYRRLSIIKIKWRLLCRLGLS

>rs230178563\_ENSMUSP00000133912\_c.1401:G>GA\_p.A468ins-fs  
ENSMUST00000174313.8|Slit2-216|ENSMUSG00000031558|+|chr5:g.48377374:G>GA  
MSGIGWQTLSSLGLVLSILNKVAPQACPAQCSCSGSTVDCHGLALRSVPRNIPRNTERLDLNGNITRITKI  
DFAGLRHLRVLQLMENRISTIERGAFQDLKELERLRLNRNNLQLFPELLFLGTAKLYRLDLSENQIQAI PRKA  
FRGAVDIKNLQLDYDYNQISCIEDGAFRALRDLEVLTLNNTNITRLSVASFNHMPKLRTRFLHSNNLYCDCHLAW  
LSDWLRQRPRVGLYTQCMGPHLRGHNVAEVQKREFVCSDEEGHQSFMAPSCSVLHCPAACTCSNNIVDCRG  
KGLTEIP TNL PETITEIRLEQNSIRVIPP GAFSPYKLRRLDLSNNQISELAPDAFQGLRSLNSLVLYGNKITE  
ELPKSLFEGFLSLQ LLLLNANKINCLRVDAFQDLHNLNLLSLYDNKLQTVAKGTF SALRAIQTMHLAQNPFC  
DCHL KWLADYLHTNPIETSGARCTSPRRLDKQKNWTDQKQEIP LFRYRRLSIIKIKWRLLCRLGLS

>rs230178563\_ENSMUSP00000134263\_c.1401:G>GA\_p.A468ins-fs  
ENSMUST00000174421.8|Slit2-217|ENSMUSG00000031558|+|chr5:g.48377374:G>GA

MSGIGWQTLSSLGLVLSILNKVAPQACPAQCSCSGSTVDCHGLALRSVPRNIPRNTERLDLNGNNITRITKI  
DFAGLRHLRVLQLMENRISTIERGAFQDLKELERLRNLRNQLFPELLFLGTAKLYRLDLSNQIQAI PRKA  
FRGAVDIKNLQLDYDNI SCIEDGAFRALRDLEVLTLNNNNITRISVASFNHMPKLRTRFRLHSNNLYCDCHLAW  
LSDWLRQRPRVGLYTQCMGPSHLRGHNVAEVQKREFVCSDEEEGHQSFMAPSCSVLHCPAACTCSNNIVDCRG  
KGLTEIPTNLPETITEIRLEQNSIRVI PPGAFSPYKLRRLDLSNNQISELAPDAFQGLRSLNSLVLYGNKIT  
ELPKSLFEGLFSLQLLLLLNANKINCLRVDAFQDLHNLNLLSLYDNKLQTVAKGTFSALRAIQTMHLAQNPFI C  
DCHLKLWADYLHTNPIETSGARCTSPRRLDKQKNWTDQKQEIPLFS  
>rs230178563\_ENSMUSP00000127615\_c.1401:G>GA\_p.A468ins-fs  
ENSMUST00000170109.9|Slit2-202|ENSMUSG00000031558|+|chr5:g.48377374:G>GA  
MSGIGWQTLSSLGLVLSILNKVAPQACPAQCSCSGSTVDCHGLALRSVPRNIPRNTERLDLNGNNITRITKI  
DFAGLRHLRVLQLMENRISTIERGAFQDLKELERLRNLRNQLFPELLFLGTAKLYRLDLSNQIQAI PRKA  
FRGAVDIKNLQLDYDNI SCIEDGAFRALRDLEVLTLNNNNITRISVASFNHMPKLRTRFRLHSNNLYCDCHLAW  
LSDWLRQRPRVGLYTQCMGPSHLRGHNVAEVQKREFVCSDEEEGHQSFMAPSCSVLHCPAACTCSNNIVDCRG  
KGLTEIPTNLPETITEIRLEQNSIRVI PPGAFSPYKLRRLDLSNNQISELAPDAFQGLRSLNSLVLYGNKIT  
ELPKSLFEGLFSLQLLLLLNANKINCLRVDAFQDLHNLNLLSLYDNKLQTVAKGTFSALRAIQTMHLAQNPFI C  
DCHLKLWADYLHTNPIETSGARCTSPRRLDKQKNWTDQKQEIPLFS  
>ENSMUSP00000031121\_c.1506:C>A\_p.P503T ENSMUST00000031121.10|Gabra4-  
201|ENSMUSG00000029211|-|chr5:g.71729194:G>T  
MVSQVQVPAIALCSGVSLALLHFLCLAACLNESPGQNSKDEKLCPENFTRILDSLLDGYDNRLRPGFGGPVTE  
VKTDIYVTSFGPVSDEVEMEYTMDFVFRQTWIDKRLKYDGP I EILRLNMMVTKVWTPDTPFRNGKKS VSHNMT  
APNKLFRIMRNGTILYTMRLTISAECPMRLVDFPMDGHACPLKFGSYAYPKSEMIYTWTKGPEKSVEVPKES  
SLVQYDLIGQTVSSETIKSITGEYIVMTVYFHLRRKMGYFMIQTYIPCIMTVILSQVSWINKESVPARTVFG  
ITTVLTMTTSLISARHSLPKVSYATAMDWFI AVCFVFSALIEFAAVNYFTNIQMOKAKKKISKPPPEVPAA  
PVLKEKHTETSLQNTHANLNMRKRTNALVHSESDVKSRTVEVGNHSSKTSAVQESSEATPKAHLASSPNPFSRA  
NAAETMSAAARGLSSAASPSPHGTLRPAASLGASTRPAFGSRLGRIKTTVNTTGAAGNVSATPPTPAPPSPGS  
GTSKIDKYARILFPVTFGAFNMVYVVYLSKDTMEKSES LM\*  
>ENSMUSP00000143675\_c.1584:C>A\_p.P529T ENSMUST00000199357.2|Gabra4-  
205|ENSMUSG00000029211|-|chr5:g.71729194:G>T  
MVSQVQVPAIALCSGVSLALLHFLCLAACLNESPGQNSKDEKLCPENFTRILDSLLDGYDNRLRPGFGGTD  
KTCKCALSRLWSACLVEILGPVTEVKTDIYVTSFGPVSDEVEMEYTMDFVFRQTWIDKRLKYDGP I EILRLN  
NMMVTKVWTPDTPFRNGKKS VSHNMTAPNKLFRIMRNGTILYTMRLTISAECPMRLVDFPMDGHACPLKFGS  
YAYPKSEMIYTWTKGPEKSVEVPKES  
SLVQYDLIGQTVSSETIKSITGEYIVMTVYFHLRRKMGYFMIQTYIPCIMTVILSQVSWINKESVPARTVFG  
ITTVLTMTTSLISARHSLPKVSYATAMDWFI AVCFVFSALIEFAAVNYFTNIQMOKAKKKISKPPPEVPAA  
PVLKEKHTETSLQNTHANLNMRKRTNALVHSESDVKSRTVEVGNHSSKTSAVQESSEATPKAHLASSPNPFSRA  
NAAETMSAAARGLSSAASPSPHGTLRPAASLGASTRPAFGSRLGRIKTTVNTTGAAGNVSATPPTPAPPSPGS  
GTSKIDKYARILFPVTFGAFNMVYVVYLSKDTMEKSES LM\*  
>ENSMUSP00000079231\_c.804:A>G\_p.K269E ENSMUST00000080359.12|Rest-  
201|ENSMUSG00000029249|+|chr5:g.77416592:A>G  
MATQVMGQSSGGSLFNNSANMGMALTNMDYDLHELKSKAELAAPQLIMLANVALTGEASGSCCDYL VGEERQM  
AELMPVGDNHFSESEGEGLSEADLKGLENMELGSLSELSAVEPQVFEASAAPEIYSANKDPAPETPVAEDKC  
RSSKAKPFRCKPCQYEAEESEEFVHHIRIHSAKKFFVEESA EKQAKAWESGSSPAEEGEFSKGP I RCDRCGYN  
TNRDYDHMAHLKHHLRAGENERIYKCI ICTYTTVSEYHWRKHLRNHFPREVYTC SKCNYFSDRKNYVQHVRT  
HTGERPYKCELCPYSSSQKTHLTRHMRTHSGEKPFKCDQCNYVASNQHEVTRHARQVHNGPKPLNCPHCYKT  
ADRSNFKKHVELHVNPRQFNCPVCDYAASKKCNLQYHFKSKHPTCP SKTMDVSKVKLKKTKKREADLLNNAVS  
NEKMENEQTKTKGDVSGKNEKPKAVGKDASKEKPGSSVSVVQVTRTRKSAVAEATKAAEVKHTDQGTGN  
NPEKPKAKKNRKKDAEAHPSEEPVNEGVPVTKKKKSECKSIGTNPVKGGRAEERPGVKKQSASLKKGTK  
KTPPKTKTSKKGKGLAPKGMGQTEPSSGALAQVGVSPDPALIQAEVTGSGSSQTELPSPMDIAKSEPAQMEVS  
LTGPPPVEPAQMEPSPAKPPQVEAPTYQPPQRPAPPTGPAPPTGPAPPTGLAEMEPTPEPSQKE  
PPPSMEPPCPEELPQAEPMPMEDCQKELPSPVEPAQIEVAQTAPTQVQEEPPVSEPPRVKPTKRSSLRKDRA  
EKELSLLEMARQEQLMGVGLVVRDSKLLKGNKSAQDPPAPPSPSPKNSREETPKDQEMVSDGEGTIVFP  
LKKGGPEEAGESPAELAALKESARVSSSEQNSAMPEGGASHSKCQTGSSGLCDVDTEQKTDTPVMKDSAAEPV  
SPPTPTVDRDAGSPAVVASPPI TLAENESQEI DEDEGIHSHDGS DLSDNMSEGSDDSGLHGARPTPEATSKN  
GKAGLAGKVTEGEFVCI FCDRSFRKEKDYSKHLNRHLVNVYFLEEAABEEQEEQEEREQEE\*  
>ENSMUSP00000109076\_c.804:A>G\_p.K269E ENSMUST00000113449.2|Rest-  
202|ENSMUSG00000029249|+|chr5:g.77416592:A>G  
MATQVMGQSSGGSLFNNSANMGMALTNMDYDLHELKSKAELAAPQLIMLANVALTGEASGSCCDYL VGEERQM  
AELMPVGDNHFSESEGEGLSEADLKGLENMELGSLSELSAVEPQVFEASAAPEIYSANKDPAPETPVAEDKC  
RSSKAKPFRCKPCQYEAEESEEFVHHIRIHSAKKFFVEESA EKQAKAWESGSSPAEEGEFSKGP I RCDRCGYN

TNRYDHYMAHLKHHLRAGENERIYKCIICTYTTVSEYHWRKHLRNHFPREVYTCSKCNYSFSDRKNYVQHVRT  
HTGERPYKCELCOPYSSSQKTHLTRHMRTHSGEKPFKCDQCNYVASNQHEVTRHARQVHNGPKPLNCPHCDYKT  
ADRSNFKKHVELHVNPRQFNCPVCDYAASKKCNLQYHFKSKHPTCPSKTMDSKVKLKKTKKREADLLNNAVS  
NEKMENEQTKTKGDVSGKNEKPKAVGKDASKEKKPGSSVSVVQVTRTRKSAVAEETKAAEVKHTDGQTGN  
NPEKPKAKKNRKKDAEAHPSEEPVNEGVPVTKKKKSECKSKI GTNVPKGGGAEERPGVKKQSASLKKGTK  
KTPPKTKTSKKGKGLAPKGMGTQTEPSSGALAQVGVSPDPALIQAEVTGSGSSQTELPSPMDIAKSEPAQMEVS  
LTGPPPVEPAQMEPSPAKPPQVEAPTYPPQPPQRPAPPTGPAPPTGPAPPTGPAPPTGLAEMEPSPTEPSQKE  
PPPSMEPPCPEELPQAEPMPMEDCQKELPSPVEPAQIEVAQTAPTQVQEEPPPVSPPRVKPTKRSSLRKDRA  
EKELSLLESEMARQEQLMGVGLVPVRDSKLLKGNKSAQDPPAPPSPPKGNREETPKDQEMVSDGEGTIVFP  
LKKGGPEEAGESPAELAALKE SARVSSSEQNSAMPEGGASHKSCQTGSSGLCDVDTEQKTDTPVPMKDSAAEPV  
SPPTPTVDRDAGSPAVVASPITLAENESQEI DEDEGIHSHDGS DLSDNMSEGSDDSGLHGARPTPEATSKN  
GKAGLAGKVTGEFVCIFCDRSFRKEKDYSKHLNRHLVNVYFLEEAAEEQEEQEEEREEQE\*

>ENSMUSP00000079231\_c.834:T>A\_p.F279I ENSMUST00000080359.12|Rest-  
201|ENSMUSG00000029249|+|chr5:g.77416622:T>A  
MATQVMGQSSGGSLFNNSANMGMALTNMDYDLHELKSKAELAAPQLIMLANVALTGEASGCCDYLVGEERQM  
AELMPVGDNHFSSESEGLEESADLKGLNEMELGSLELSAVEPQPVFEASAAPEIYSANKDPAPETPVAEDKC  
RSSKAKPFRCKPCQYEAESSEEQFVHHIRIHSAKKFFVEESAQAKAWESGSSPAEEGFSKGP I RCDRCGYN  
TNRYDHYMAHLKHHLRAGENERIYKCIICTYTTVSEYHWRKHLRNHFPRKVYTC SKCNYISDRKNYVQHVRT  
HTGERPYKCELCOPYSSSQKTHLTRHMRTHSGEKPFKCDQCNYVASNQHEVTRHARQVHNGPKPLNCPHCDYKT  
ADRSNFKKHVELHVNPRQFNCPVCDYAASKKCNLQYHFKSKHPTCPSKTMDSKVKLKKTKKREADLLNNAVS  
NEKMENEQTKTKGDVSGKNEKPKAVGKDASKEKKPGSSVSVVQVTRTRKSAVAEETKAAEVKHTDGQTGN  
NPEKPKAKKNRKKDAEAHPSEEPVNEGVPVTKKKKSECKSKI GTNVPKGGGAEERPGVKKQSASLKKGTK  
KTPPKTKTSKKGKGLAPKGMGTQTEPSSGALAQVGVSPDPALIQAEVTGSGSSQTELPSPMDIAKSEPAQMEVS  
LTGPPPVEPAQMEPSPAKPPQVEAPTYPPQPPQRPAPPTGPAPPTGPAPPTGPAPPTGLAEMEPSPTEPSQKE  
PPPSMEPPCPEELPQAEPMPMEDCQKELPSPVEPAQIEVAQTAPTQVQEEPPPVSPPRVKPTKRSSLRKDRA  
EKELSLLESEMARQEQLMGVGLVPVRDSKLLKGNKSAQDPPAPPSPPKGNREETPKDQEMVSDGEGTIVFP  
LKKGGPEEAGESPAELAALKE SARVSSSEQNSAMPEGGASHKSCQTGSSGLCDVDTEQKTDTPVPMKDSAAEPV  
SPPTPTVDRDAGSPAVVASPITLAENESQEI DEDEGIHSHDGS DLSDNMSEGSDDSGLHGARPTPEATSKN  
GKAGLAGKVTGEFVCIFCDRSFRKEKDYSKHLNRHLVNVYFLEEAAEEQEEQEEEREEQE\*

>ENSMUSP00000109076\_c.834:T>A\_p.F279I ENSMUST00000113449.2|Rest-  
202|ENSMUSG00000029249|+|chr5:g.77416622:T>A  
MATQVMGQSSGGSLFNNSANMGMALTNMDYDLHELKSKAELAAPQLIMLANVALTGEASGCCDYLVGEERQM  
AELMPVGDNHFSSESEGLEESADLKGLNEMELGSLELSAVEPQPVFEASAAPEIYSANKDPAPETPVAEDKC  
RSSKAKPFRCKPCQYEAESSEEQFVHHIRIHSAKKFFVEESAQAKAWESGSSPAEEGFSKGP I RCDRCGYN  
TNRYDHYMAHLKHHLRAGENERIYKCIICTYTTVSEYHWRKHLRNHFPRKVYTC SKCNYISDRKNYVQHVRT  
HTGERPYKCELCOPYSSSQKTHLTRHMRTHSGEKPFKCDQCNYVASNQHEVTRHARQVHNGPKPLNCPHCDYKT  
ADRSNFKKHVELHVNPRQFNCPVCDYAASKKCNLQYHFKSKHPTCPSKTMDSKVKLKKTKKREADLLNNAVS  
NEKMENEQTKTKGDVSGKNEKPKAVGKDASKEKKPGSSVSVVQVTRTRKSAVAEETKAAEVKHTDGQTGN  
NPEKPKAKKNRKKDAEAHPSEEPVNEGVPVTKKKKSECKSKI GTNVPKGGGAEERPGVKKQSASLKKGTK  
KTPPKTKTSKKGKGLAPKGMGTQTEPSSGALAQVGVSPDPALIQAEVTGSGSSQTELPSPMDIAKSEPAQMEVS  
LTGPPPVEPAQMEPSPAKPPQVEAPTYPPQPPQRPAPPTGPAPPTGPAPPTGPAPPTGLAEMEPSPTEPSQKE  
PPPSMEPPCPEELPQAEPMPMEDCQKELPSPVEPAQIEVAQTAPTQVQEEPPPVSPPRVKPTKRSSLRKDRA  
EKELSLLESEMARQEQLMGVGLVPVRDSKLLKGNKSAQDPPAPPSPPKGNREETPKDQEMVSDGEGTIVFP  
LKKGGPEEAGESPAELAALKE SARVSSSEQNSAMPEGGASHKSCQTGSSGLCDVDTEQKTDTPVPMKDSAAEPV  
SPPTPTVDRDAGSPAVVASPITLAENESQEI DEDEGIHSHDGS DLSDNMSEGSDDSGLHGARPTPEATSKN  
GKAGLAGKVTGEFVCIFCDRSFRKEKDYSKHLNRHLVNVYFLEEAAEEQEEQEEEREEQE\*

>ENSMUSP00000079231\_c.1713:G>T\_p.V572F ENSMUST00000080359.12|Rest-  
201|ENSMUSG00000029249|+|chr5:g.77429296:G>T  
MATQVMGQSSGGSLFNNSANMGMALTNMDYDLHELKSKAELAAPQLIMLANVALTGEASGCCDYLVGEERQM  
AELMPVGDNHFSSESEGLEESADLKGLNEMELGSLELSAVEPQPVFEASAAPEIYSANKDPAPETPVAEDKC  
RSSKAKPFRCKPCQYEAESSEEQFVHHIRIHSAKKFFVEESAQAKAWESGSSPAEEGFSKGP I RCDRCGYN  
TNRYDHYMAHLKHHLRAGENERIYKCIICTYTTVSEYHWRKHLRNHFPRKVYTC SKCNYISDRKNYVQHVRT  
HTGERPYKCELCOPYSSSQKTHLTRHMRTHSGEKPFKCDQCNYVASNQHEVTRHARQVHNGPKPLNCPHCDYKT  
ADRSNFKKHVELHVNPRQFNCPVCDYAASKKCNLQYHFKSKHPTCPSKTMDSKVKLKKTKKREADLLNNAVS  
NEKMENEQTKTKGDVSGKNEKPKAVGKDASKEKKPGSSVSVVQVTRTRKSAVAEETKAAEVKHTDGQTGN  
NPEKPKAKKNRKKDAEAHPSEEPVNEGVPVTKKKKSECKSKI GTNVPKGGGAEERPGVKKQSASLKKGTK  
KTPPKTKTSKKGKGLAPKGMGTQTEPSSGALAQVGVSPDPALIQAEVTGSGSSQTELPSPMDIAKSEPAQMEVS  
LTGPPPVEPAQMEPSPAKPPQVEAPTYPPQPPQRPAPPTGPAPPTGPAPPTGPAPPTGLAEMEPSPTEPSQKE

PPPSMEPPCPEELPQAEPPPMEDCQKELPSPVEPAQIEVAQTAPTQVQEEPPPVSSEPPRVKPTKRSSLRKDRA  
EKELSLLESEMARQEQVLMGVGLVVRDSKLLKGNKSAQDPPAPPSPSPKNSREETPKDQEMVSDGEGTIVFP  
LKKGGPEEAGESPAELAALKE SARVSSSEQNSAMPEGGASHKSCQTGSSGLCDVDTEQKTDTPVPMKDSAAEPV  
SPPTPTVDRDAGSPAVVASPPITLAENESQEI DEDEGIHSHDGS DLSDNMSEGSDDSGLHGARPTPEATSKN  
GKAGLAGKVTGEFVCIFCDRSFRKEKDYSKHLNRHLVNVYFLEEAEEQEEQEEREEQE\*

>ENSMUSP00000109076\_c.1713:G>T\_p.V572F ENSMUST00000113449.2|Rest-  
202|ENSMUSG00000029249|+|chr5:g.77429296:G>T

MATQVMGQSSGGSLFNNSANMGMALTNMDYDLHELKSKAELAAPQLIMLANVALTGEASGSCCDYLVEERQM  
AELMPVGDNHSESEGEGLLEESADLKGLNEMELGSLELSAVEPQPVFEEASAAPEIYSANKDPAPETPVAEDKC  
RSSKAKPFRCKPCQYEAEESEEQFVHHIRIHSAKKFFVEESA EKQAKAWESGSSPAEEGEFSGKPIRCDCRCYN  
TNRYDHYMAHLKHHLRAGENERIYKCI ICTYTTVSEYHWRKHLRNHFPRKVYTC SKCNYSFDRKNYVQHVRT  
HTGERPYKCELCPYSSSQKTHLTRHMRTHSGEKPFKCDQCNYVASNQHEVTRHARQVHNGPKPLNCPHC DYKT  
ADRSNFKKHVELHVNPRQFNC P VCDYAASKKCNLQYHFKSKHPTCPSKTM DVSKVKLKKTKKREADLLNNAVS  
NEKMENEQTKTKGDVSGKKNEKPKAVGKDASKEKKPGSSVSVVQVTRTRKSAVA AETKAAEVKHTDGQTGN  
NPEKPKAKKNKRKKDAEAHPSEEPVNEGVPVTKKKKSECKSKI GTNVPKGGG RAEERP GFKKQSASLKKGTK  
KTPPKTKTSKKGGK LAPKGMGQTEPSSGALAQVGVSPDPALIQAEVTGSGSSQTELPSPMDIAKSEPAQMEVS  
LTGPPVPEPAQMEPSPAKPPQVEAPTY P QPPRG PAPPTGPAPPTGPAPPTGLAEMEPS TEP SQKE  
PPPSMEPPCPEELPQAEPPPMEDCQKELPSPVEPAQIEVAQTAPTQVQEEPPPVSSEPPRVKPTKRSSLRKDRA  
EKELSLLESEMARQEQVLMGVGLVVRDSKLLKGNKSAQDPPAPPSPSPKNSREETPKDQEMVSDGEGTIVFP  
LKKGGPEEAGESPAELAALKE SARVSSSEQNSAMPEGGASHKSCQTGSSGLCDVDTEQKTDTPVPMKDSAAEPV  
SPPTPTVDRDAGSPAVVASPPITLAENESQEI DEDEGIHSHDGS DLSDNMSEGSDDSGLHGARPTPEATSKN  
GKAGLAGKVTGEFVCIFCDRSFRKEKDYSKHLNRHLVNVYFLEEAEEQEEQEEREEQE\*

>ENSMUSP00000031181\_c.1518:G>A\_p.V507M ENSMUST00000031181.16|Ugt2b34-  
201|ENSMUSG00000029260|-|chr5:g.87039141:C>T

MPVKMTAALLLLLLLQLSGFFGSGTGKVLVWPMFESHWNLKTILDEL LKKGHEVMVLRPSASLSYEVDNTSA  
IEFETYPTSYSLSELEEI FWESLKKYIYELPKQSFWGYFLMLQEMVWVDSKYFESLCKDVFNKELMTKLQKS  
RFDVILADPFIPCGDLLAEVLKIPLVYSLRFFPGSTYEKYSGLPLPPSYVPVVMSELSDRMTFMERVRNVIY  
MLCFDFWFQTFNEKNWNQLYTEVLGRPTTLSETMAKADIWLIRTYWDLEFPHPVLPNDFDIGGLHCRPAKPLP  
KEIEDFVQSSGEHGVVVFSLGSMVGSITEERANVIAAGLAQIPQKVLWRFEGKPKETLGSNTRLYKWIPQNDL  
LGHSKTRAFITHGGTNGIYEAIYHGIPVVGIPLFGDQYDNIVHLKAKGA AVRDLFTMSSTDLHTALKTVTND  
PSYKENAMRLSRIHHDQPVKPLDRAVFWIEFVMRHKGAKHLRVA AHDL SWVQYHSLDVLGLLACVLTMMFIL  
KKCLFCCQKLTAKGRKKKGE\*

>ENSMUSP00000046636\_c.985:C>A\_p.P329Q ENSMUST00000049209.13|Gc-  
201|ENSMUSG00000035540|-|chr5:g.89586153:G>T

MKRVLVLLLALFGHALERGRDYEKDKVCNELAMLGKEDFRSLSLILYSRKFFSSTFEQVNQLVKEVVS LTEE  
CCAEGADPTCYDTRTSEL SVKSCESDAPFPVHPGTPECCTKEGLERKLCMAALSHQPQEFPTYVEPTNDEICE  
AFRRDPKGFADQFLYEYSSNYGQAPLPLLVAYTKNYLSMVGSCCTS ANPTVCFVKERLQMKHLSLLTMSNRV  
CSQYAAYGKEKSRLSHLIKLAQKVPTANLENVLP LAEDFTEILSRCEESTSEDCMASELPEHTIKICQNL SKK  
NSKFEECCQENTPMNIFMCTYFMPAAEPLQLPAIKLQTKGDLGQSTTQAMDQYTFELSRRTQVPEVFLSKVL  
EPTLKTRECCDTQDSVACFSTQSP LKRQLTSFIEKGQEMCADYSENTFTEYK KLAERLRKTPTNTSPAEL  
KDMVEKHSDFA SKCCSINSPPLYCSSQIDAEMIDTLQS\*

>ENSMUSP00000043764\_c.1034:T>G\_p.N345K ENSMUST00000049146.12|Ephx4-  
201|ENSMUSG00000033805|+|chr5:g.107577712:T>G

MAPRPRRLLPALRALLYWSLVGYCGLCASVHLLKLLWSIGRAPAQTFRRAARANPPACLNDPSLGHCHYVR  
IKDSGLRFHYVAAGERGKPLMLLLHGFPEFWYSWRHQLREFKSEYRVVALDLRGYGESDAPAHQESYKLDCLI  
ADIKDILD SLGYSKCVLIGHDWGMIAWLI AVCYPEMIMKLI VINFPHPVVFTEYILRHQAQLFRSSFYFFQ  
IPRFPEFMFSINDFKALKHLFTSQSTGIGRKGRLTTEDLEAYVYVFSQPGALSGPINHYRNIFSCPLKHHM  
VTPTLLLWGEEDAFMEVEMA EVTKIYVKNYFRLTILSEGSHWLQDQDPDIVKGLIWAFLKEETRRD\*

>ENSMUSP00000107978\_c.430:C>T\_p.T144I ENSMUST00000112359.9|Hps4-  
202|ENSMUSG00000042328|+|chr5:g.112511458:C>T

MATTTTPPETKSAAWWNYFFLYDGSKVKGEGDPTRAGICYFPQPQLLDQOELLCGQLAGVVRCLWDLSGT PPM  
LIRMRLNKFAIRADGDYLWALGCGVEISDASCRIQFLDQLIGFFHFYMGVSLAYKSHPQEELS LQWDTSI IQV  
LRSTSESHRIFINALWNLDRTKVEPLLLLKAA LIQTCQRSHPVLGACILYKGLIVNSQPLLDPSLTAKVLLHQTV  
PADQRLPHGAGAAPQETGAALPPDVQITSVFLSEEEVARSHEFVPEHETRLQGS SVQYPPWDQSSPTQAEDAWA  
SAAIPEPTPHDGACPSGSGADERLPRLEQECAGPTGLCTTACGQSGSLSSRLQKELCLSREELDSSEMHSV  
QEAFFPLPALGDLETLHSSHSAPTLPEDTAIC SCLHPCPLERLPESGRGLQADLPLTNGQTQVPGTDP LPSS  
MPVALPPQHPVGVPEPSVEPYNGAQESH SALPRSSRSPD SPGPSADRTGFKPSPSGRHAGLVPMNLYTHSV  
NGLVLSLLAEETLLSDTAAIEEVYHSSLASLNGLEVHLKETLPRDEASLTSSTYNFLHYDRIQSVLSANLPLV

TAPQDRRFLQAVNLMHSDFALLPMLYEMTIRNASTAVYACSSPAQETYFQQQLAPTARSSGFPNPQDCAFSLAG  
KAKQKLLKHGVNLL\*

>ENSMUSP00000047920\_c.430:C>T\_p.T144I ENSMUST00000035279.4|Hps4-  
201|ENSMUSG00000042328|+|chr5:g.112511458:C>T  
MATTTTPPETKSAAWWNYFFLYDGSVKVKGEGDPTRAGICYFYPPQTLLDQQEQLLCCGQLAGVVRCLWDLSTGTPPM  
LIRMRNLKFAIRADGDYLWALGCGVEISDASCROFLDQLIGFFHFYMGFVSLAYKSHPQEELSLOQWDTSI IQV  
LRSTSESHRIFNALWNLDRTKVEPLLLLKAALILQTCQRSPhVLGACILYKGLIVNSQLLPSLTAKVLLHQTV  
PADQRLPGAGAAPQETGAALPPDVQITSVFLSEEEVASLHEFPVEHETRLQGSSVQYPPWDQSSPTQAEDAWA  
SAAIPEPTPHDGCPSGSGADERLPRLEQECAGPTGLCTTACGQGSGLSSRLQKELCLSREELDSSEMHVSEA  
QEAFPLPALGDLETLHSSHSAPTLPEDTAICSLHPCPLERLPESGRGLQADLPLTNGQTQVPGTDPLPSS  
MPVALPPQHPVGVPEPSVEPYNGAQESHASLPRSSRSPDSPGPSADRTGFKPSPSGRHAGLVPMNLYTHSV  
NGLVLSLLAEETLLSDTAAIEEVYHSSLASLNGLEVHLKETLPRDEASLTSSTYNFLHYDRIQSVLSANLPLV  
TAPQDRRFLQAVNLMHSDFALLPMLYEMTIRNASTAVYACSSPAQETYFQQQLAPTARSSGFPNPQDCAFSLAG  
KAKQKLLKHGVNLL\*

>ENSMUSP00000031590\_c.2342:A>C\_p.K781N ENSMUST00000031590.12|Rbm19-  
201|ENSMUSG00000029594|+|chr5:g.120279677:A>C  
MSRLIVKNLPLNGMKEERFRQLFAAFGLTDCSLKFTKDGKFRKFGFIFGFKSEEEAQAALNHFHRSFIDTTRIT  
VEFCKSFGDPSKPRAWSKHAQKSSQPKQPSQDSVSPDTKKDKKKKGPSDLEKLKEDAKFQEFLSIHQKRTQVA  
TWANDALEAKLPKAKTKASSDYLNFDSDNSDSGQSEEEEPAREDPPEEQGLQPAAVQKELSDMDYLKSKMV  
RAEVSSSEDEDEDESEDEAVNCEEGSEEEEEEGSPASPAKQGGVSRGAVPGVLRPQEAAGKVEKPVSQKEPTTP  
YTVKLRGAPFNVTEKNVIEFLAPLKPVAIRIVRNAHGKNTGYVFDLSSEEEVKKALKCNDRYMGGRYIEVFR  
EKQAPTARGPPKSTTPWQGRTLGENEEEEEDLADSGRLFVRNLSYTSSEEDLEKLFSAYGPLSELHYPIDSLTK  
KPKGFVAVTTFMFPEHAVKAYAEVDGQVFQGRMLHVLVLPSTIKKEASQEANAPGSSYKKKKEAMDKANSSSHNW  
NTLFMGPNAVADAIQAQYNATKSQVFDHETRGSAVAVRVALGETQLVQEVRSFLIDNGVCLDSFSQAAAERSKT  
VILAKNLPAGTLAAEIQETFSRFGSLGRVLLPEGGITAIVEFLEPLEARKAFRHLAYSKFHHVPLYLEWAPIG  
VFGAAPQKKDSQHEQPAEKAEVEQETVLDPEGEKASVEGAEASTGKMEEEEEEEEEEEEESIPGCTLFIKNLN  
FSTTEETLKGVSFKVGAIKSCTISKKKNKAGVLLSMGFGFVEYKKPEQAQNALKQLQGHTVVDGHKLEVRISER  
ATKPALSTRRKQVPKQTTSKILVRNIPFQANQREIRELFSSTFGELKTVRLPKKMTGTGAHRGFGFVDFITK  
QDAKAFNALCHSTHLYGRRLVLEWADSEVTVQTLRRKTARHFQEPKPKKRSVLDGILEQLEDEDNDSGEQA  
LQL\*

>ENSMUSP00000144339\_c.2342:A>C\_p.K781N ENSMUST00000202777.2|Rbm19-  
209|ENSMUSG00000029594|+|chr5:g.120279677:A>C  
MSRLIVKNLPLNGMKEERFRQLFAAFGLTDCSLKFTKDGKFRKFGFIFGFKSEEEAQAALNHFHRSFIDTTRIT  
VEFCKSFGDPSKPRAWSKHAQKSSQPKQPSQDSVSPDTKKDKKKKGPSDLEKLKEDAKFQEFLSIHQKRTQVA  
TWANDALEAKLPKAKTKASSDYLNFDSDNSDSGQSEEEEPAREDPPEEQGLQPAAVQKELSDMDYLKSKMV  
RAEVSSSEDEDEDESEDEAVNCEEGSEEEEEEGSPASPAKQGGVSRGAVPGVLRPQEAAGKVEKPVSQKEPTTP  
YTVKLRGAPFNVTEKNVIEFLAPLKPVAIRIVRNAHGKNTGYVFDLSSEEEVKKALKCNDRYMGGRYIEVFR  
EKQAPTARGPPKSTTPWQGRTLGENEEEEEDLADSGRLFVRNLSYTSSEEDLEKLFSAYGPLSELHYPIDSLTK  
KPKGFVAVTTFMFPEHAVKAYAEVDGQVFQGRMLHVLVLPSTIKKEASQEANAPGSSYKKKKEAMDKANSSSHNW  
NTLFMGPNAVADAIQAQYNATKSQVFDHETRGSAVAVRVALGETQLVQEVRSFLIDNGVCLDSFSQAAAERSKT  
VILAKNLPAGTLAAEIQETFSRFGSLGRVLLPEGGITAIVEFLEPLEARKAFRHLAYSKFHHVPLYLEWAPIG  
VFGAAPQKKDSQHEQPAEKAEVEQETVLDPEGEKASVEGAEASTGKMEEEEEEEEEEEEESIPGCTLFIKNLN  
FSTTEETLKGVSFKVGAIKSCTISKKKNKAGVLLSMGFGFVEYKKPEQAQNALKQLQGHTVVDGHKLEVRISER  
ATKPALSTRRKQVPKQTTSKILVRNIPFQANQREIRELFSSTFGELKTVRLPKKMTGTESLQCAVS\*

>ENSMUSP00000042188\_c.2354:T>G\_p.H785Q ENSMUST00000046426.10|Tpcn1-  
201|ENSMUSG00000032741|-|chr5:g.120674272:A>C  
MAVSLDDDDVPLILTLDEAESAPLPPSNSLQGEQLPSKNGGSHSIHNSQVPSLVSGADSPSSPTGHNWEMNYQ  
EAAIYLOEQGNNDKFFTHPKDARALAAFLVHNHFYMMELLTALLLLLLSLCESPAVPVVKLHTYVHATLEL  
FALMVVVFELCMKLRWLGFTFVRHKRTMVKTSVLVQVIEAIVVLRQTSHVRVTRALRCIFLVDCRYCGGV  
RRNLRFQIFQSLPPFMDILLLLLFFMIIFAILGFYLFSTNPSDPYFSTLENSIVNLFVLLTTANFPDVMMPYS  
RNPWSCVFFIVYLSIELYFIMNLLLAVVFDTFNDIEKHKFKSLLLHKRTAIQHAYGLLASQRRPAGISYRQFE  
GLMRFYKPRMSARERFLTFKALNQSNTPLLSLKDFYDIYEVAALQWKAKRNRQHWDFELPRTAFLIFKGINIL  
VNSKAFQYFMYLVVAVNGVWILVETFMKKGNGFTSKHVPKSYLVFLTYIGVELFMKVAGLGPVEYLSGWNLF  
DFSVTAFALGLLALTLNMEPFYFIVVLRPLQLLRLFLKWRKRYRNVLDTMFELLPRMASLGLTLLTFYYSFAI  
VGMEFFNGRLTPNCNCTSTVADAYRFINHTVGNKTKVEEGYYLNNFDNILNSFVTLFELTVVNNWYIIMEGV  
TSQTSHWSRLYFMTFYIVTMVMTIIVAFILEAFVFRMNYSRKSQDSEVDSGIVIEKEMSKEELMAVLELYRE  
ERGTSSDVTRLLDTLQMEKYQQNSMVFLGRRSRTKSDLSLKMYQEEIQEWYEEQAREQEQQLRGSVPGPAA  
QQPPGSRQRSQTVT\*

>ENSMUSP00000031607\_c.1585:A>C\_p.N529T ENSMUST00000031607.7|Dt x1-  
201|ENSMUSG00000029603|-|chr5:g.120820259:T>G  
MSRPGQGVMPVNLGLFPPQNVARVVVWVWLNHNSRWRPYTATVCHHIENVLKEEDARGSVVLGQVDAQLVPII  
IDLQSMHQFRQDTGTMRPVRNRYDPSSAPGKGIWVWENDGGAWTAYDMDICITIQNAYEKQHPWLDLSSLG  
FCYLIYFNMSQMNRQTRRRRLRRLDLAYPLTVGSI PKSQSWPVGASSGQPCSCQCCLLVNSTRAASNAIL  
ASQRRKAPIAPAAPPAPPPPPPLPPGGPPGALVVRPSATFAGAALWAAAPATGPTEPAPPPGVP PRSPSAPNG  
APTGPQNNLSRPGPQRSTSVSARASIPPGVPALPVKNLNGTGPVHPALAGMTGILLCAAGLPVCLTRAPKPII  
HPPPVSKSDVKVPVPGVGVCRKTKKKHLKKSKNPEDVRRYMQVKVKNPPDEEDCTICMERLVTASGYEGVLRNK  
SVRPELVGRLGRCGHMYHLCLVAMY SNGNKDGLQCPTCKAIYGEKGTGQPPGKMEFHLP HSLPGFADTQT  
IRIVYDIPTGIQGPPEHPTPGKFTARGFPRHCYLPNNEKGRKVLRLLI TAWERRLI FTIGTSNTTGESD TVVW  
NEIHHKTEFGSNLTGHGYPDASYLDNVLAELTAQGVSEAMAKA\*  
>ENSMUSP00000045196\_c.11712:A>G\_p.T3905A ENSMUST00000041226.11|Muc3-  
201|ENSMUSG00000037390|-|chr5:g.137178627:T>C  
MSTRRWVRQTAALCLLAFILHSLPRHIAAENGTTESGSVWDGGGNTQDSDQETQFRTVLKTKTTDGENSEAW  
PRQEYQQRSSSPSTTKAEVTTTADVTTTADVTTTAEITTTSDVTTTAEITNTDDVTTTGEVTTTADVTTTSDV  
PTTSEVTTSTDDVITTTAEVTTTAEVPTDDVTTTSEVTTTGDVTTTGDVITITGDLTTTADVTTKADFTTTDDVT  
TTADGSTTADLTTTAKVTTTDDVTTTGEITTTSEITTTSDVTTTAEITTTDIVTTTGEVTTTADVTTTSDVTT  
TSEETPTADITTTADLTTTAEVTTTDDVTTTVEITTTSEITTTSDVTTTAEITTTDIVTTTGEVTTTADVTTT  
SDVTTTSEETTTADITTTADLTTTAEITTTDDVTTTVEITTTSDVTTTTEITTTDIVTTTGEVTTTADVTTTAS  
DVTTTSEETPTADITTTADLTTTAEVTTTDDVTTTGEVTTTADVTTTSDVTTTSEETTTADVTTTSDVTTTAE  
ITTTDDITSTADVTTTADVTTTSDVPTTSEETTTADVTTTSDVTTTAEITTTDDITSTADVTTTADVTTTSDV  
TTTTEENPTADITTTADLTTTAEVTTTDDVTTTVEITTTSEITTTSDVTTTAEITTTDIVTTTDEDTTADVT  
TTSADVTTTSEETPTADITTTADLTTTADVTTTSDVTTTSEETTTADVTTTSDVTTTAEITTTDDITSTADVTT  
TTNVTTTSDVPTTSEVTTSTDDVITTTVEVTTTAEI IPTDDVTTTSEVTTTGDVTTTGDVMTGDLTTTADVTTT  
ADLTTTDEVTTTADGSTTADLTTTAEVTTTDDVTTTVQITTTSEITTTSDVTTTAEITTTDNVTTTGEVTTTA  
DVTTTSDVTTTSEETPTADITTTADLNTTAEVTTTDEDVTTTVEITTTSEITTTSDITTTAEITTTDIVTTTGE  
VTTTADVTTTNDVTTTSEETPTADITTTADLTTTAEVTTTDDITSTADVTTTNDVTTTSDVTTTSEVTTSTDDV  
ITTTVEVTTTAEI IPTDDVTTTSEVTTTGDVTTTGDVMTGDLTTTADVTTTADLTTTDEVTTTADGSTTADLT  
TTAEVTTTDDVTTTVQITTTSEITTTSDVTTTAEITTTDNVTTTGEVTTTADVTTTSDVTTTSEETPTADITT  
TADLTTTAEVTTTDEDVTTTVEITTTSEITTTSDITTTAEITTTDIVTTTGEVTTTADVTTTNDVTTTSEETPT  
ADITTTADLTTTAEITTTDDVTTTGEVTTTADVTTTSDVTTTSEETPTADITTTADLTTTAEITTTDDVTTTG  
EVTTTADVTTTSDITTTSEETPTADITTTADLTTTAEVTTTDDVTTTGEVTTTADVTTTSDITTTSEETPTAD  
ITTTADLTTTAEVTTTDDVTTTVEITTTSEITTTSDVTTTAEITTTDIVTTTGEVTTTADVTTTSDVTTTSEQ  
TPTADITTTADLTTTAEVTTTDDVTTTVEITTTSEITTTSDVTTTAEITTTDIVTTTGEVTTTADITTTSDVT  
TTSEETTTADVTTTDDVTTTSEETTTGDGKTTTAEITTTDDITTTADVTTTPDVTTTAAVTTTGEITPTDDVTT  
TTSEVTTTGDVTTSTGDVTTTGEVTTTAEVTTTADVTTTSDVTTTSEETPTADITTTADLTTTAEVTTTDDVTT  
TGEVTTTADVTTTSDTTTTSEETPTADITTTVDLTTTAEVTTTDDVTTTVEITTTSEITTTSDVTTTAEITTS  
DIFTTTGEVTTTADITTTSDVTTTSEETPTADITTTADLTTTAEITTTDDVTTTVEITTTSEITTTSEVTTTP  
DVTTTSDVTTTSEETPTADITTTADLTTTAEVTTTDDVTTTVEITTTSEITTTSDVTTTAEITTTDIVTTTGE  
VTTTVDVTTTNDVTTTSEETPTADITTTADLTTTAEVTTTDDVTTTGEVTTTADVTTTSDITTTSEETPTADI  
TTTVDLTTTVEITTTSEITTTSDVTTTAEITTTDIVTTTGEVTTTADVTTTSDVTTTSEETPTADITTTADLT  
TTAEVTTTDDVTTTVEITTTSEITTTSDVTTTAEITTTDIVTTSGEVTTTADVTTTSDVTTTSEETTTADVTT  
TTDVTTTSEETTTGDGTTTTAEITTTDDLTTTADVTTTTPDVTTTAAVTTTAEITPTDDVTTTSEVTTTGDVTT  
TGEVTTTAEVTTTDDVTTTGDVTTTGDLTMMADVTTTADFTTTDDVTTTADASTTADLATTAEVTTTDDVTTT  
VEITTTAEITTTAEVTTTDDVTTTGEVTTTADVTTTDDVTTTSEVTTTADVTTTNDVTTTAEITTTDDITTTA  
DVTTTADVTTTSYVPTTSEVTTSTDDVTTTAEVTTTAEITPTDDVTTTSEVTTTGDVTTTGDVMTCDLTTTAD  
VTTTADFTTTDDVTTKADGSTTADLTTTAEVTTTNDVTTTGEVTTTAEITTTSDVTTTAEITTTDIVTTTGEV  
TTTADVTTTSDVTTTSEETTTADITTTADLTTTAEVTTTDDVTTTVEITTTSEITTTSDVTTTAEITTTDIVT  
TTGEVTTTADVTTTNDVTTTSEETPTADITTTADLTTTAEVTTTDDVTTTGEVTTTADVTTTSDVTTTSEETP  
TADITTTADLTTTAEVTTTDDVTTTVEITTTSEITTTSDVTTTAEITTTDIVTTTGEVTTTADITTTSDVTTT  
SEETTTADVTTTDDVTTTSEETTTGDGKTTTAEITTTDDITTTADVTTTTPDVTTTAAVTTTGEITPTDDVTTT  
SEVTTTGDVTTTGDVTTTGEVTTTAEVTTTDDVTTTGDVTTTGDLTTTADVTTTAYFTTTDDVTTTADGSTTA  
DLTTTAEVTTTDDVTTTVEITTTAEITTTDDVTTTGEVTTTADVTTTSDVTTTSEETPTADITTTADLTTTAE  
VTTTDDVTTTDDVTTTVEITTTSEITTTSDVTTTAEITTTDIVTTTGEVTTTADVTTTSDVTTTSEETPTADI  
TTADLTTTAEVTTTDDVTTTVEITTTAEITTTDDVTTTGEVTTTADVTTTAEVITTTSDVTTTADVTTMPDFTT  
TAEVTTTLDVTTNDEVTTTSSVTTTPEITTAGDVTTTSEVTTTADLTTTPEITTTGDVTTTADVTTTADITTT  
SDVTTTADVTTTADITTTSDVTTTADVTTIADLSTTPEITTTGDFSSTTDVTTSTGDVTTTADVTTTADVTTTG

DVTTTAEVTTTAEVTTTAEATTTADLNTTPEITTTDDVTTTGDVVTITAEVTTTAYVTTTTDFTTTAEVNTTDD  
VTTIADLTTTAEVTTTNDVTTSTAEITTTADLTTTTEVTTTADFITTGDVTTTADVTTMADVTTTADVTTADLT  
TTVDVTTMDDVTTTAEVITSGDVTTTSEVTTTNSLNTTPEITTTIDFTSTVDVTTTGDVTTTADVTTSDVTT  
TSKVTTTGDVTTTADTTSTADVTTTADVITTAEVTTTADFNTGDVTTTADVTTTADLTTMPDLTTAEVTTT  
ADVTTTSEFTTTADVTTTADVTTSTADVTTTAEVTTTGDVTTTADVNTGDIITIGDVTTTTTEITTTAYLTTTL  
EITTTGEVTTSTADVTTSAEVTTTDEITTTDVVTTTGDVTPTAESTTTDDVTTTSDVTTTGDFTTTADVTTTAY  
VTTTDPVTTTVEVTTTADFTTTGVVNTTADVTTTADVTTTSEVTTTADLTTTPEITTTVDFTSTADVTTTADV  
ITTEVTTTSDVTTTAEVITTTADVTTTADVTTTVEVTTTGDVVTITADVTTTPEITTTVDFTSTADVTTTADV  
TTADVTTTSDVTTITPDVTTTAEVTTTVEITTTDDVATTGEVTTTADVTTTSDVTTTSEETTTADITTTSDVST  
TSEVTTTAYVTTTADTTSTAEVTTTADVTTTADVTTTADVTTTADVTTTVEVTTTGDVTTTADVTTTAEVTTT  
AEITTTGDVTTTADVTTTAEVTTTAEITTTGDVTTTADVTTTADVTTTADVTTTIDVTTTADVTTTSAEVTTTA  
DVTTTTEVTTTTEVATTPEPTTTPAPTAVNCMNGGFWTGDKCICPNGFGGDRNCENIVNVNCENGGTWDGL  
KCQCTSLFYGPRCEELVESVEIEPTVAASVEVSVTVTSQEYSEKLQDRKSEEFNSFNKFTFKQMALIYAGIPE  
YEGVLIKNSKSGSIVVDYDVILKAKYTPGFENTLDTVVKNLETKIKNATEVQVQDVNNNCALLCFNSTATKV  
QNSATVSVNPEETCKKEAGEDFAKVFVTLGQKGDKWFCITPCSAGYSTSKNCSYGKQCQLQRSGPQCLCLITDTH  
WYSGENCWDWGIQKSLVYGLGGAGVAVLLVILVILLVFSIRFRKDAQRQRSRVSEMYKWGEEEGRASPGTFHNF  
GFDHNEERENYMPPLDSVYNTFQPSLNHINPERKIQIQRPQVMTSL\*

>ENSMUSP00000045196\_c.10645:A>T.D3549V ENSMUST00000041226.11|Muc3-  
201|ENSMUSG00000037390|-|chr5:g.137179694:T>A

MSTRRWVRQTAALCLLAFILHSLPRHIAAENGTTESGSVWDGGGNSQDDSQETQFRTVLKTKTTDGENSEAW  
PRQEQQRSSSPSTTKAEVTTTADVTTTADVTTTAEITTTSDVTTTAEITNTDDVTTTGEVTTTADVTTTSDV  
PTTSEVTTSTDDVITTAEVTTTAEVTTTPTDDVTTTSEVTTTGDVTTTGDVVTITGDLTTTADVTTKADFTTTDDV  
TTADGSTTADLTTTAKVTTTDDVTTTGEITTTSEITTTSDVTTTAEITTTDIVTTTGEVTTTADVTTTSDVTT  
TSEETPTADITTTADLTTTAEVTTTDDVTTTVEITTTSEITTTSDVTTTAEITTTDIVTTTGEVTTTADVTTT  
SDVTTTSEETTTADITTTADLTTTAEITTTDDVTTTVEITTTSDVTTTTEITTTDIVTTTGEVTTTADVTTAS  
DVTTTSEETPTADITTTADLTTTAEVTTTDDVTTTGEVTTTADVTTTSDVTTTSEETTTADVTTTSDVTTTAE  
ITTTDDITSTADVTTTADVTTTSDVPTTSEETTTADVTTTSDVTTTAEITTTDDITSTADVTTTADVTTTSDV  
TTTTEENPTADITTTADLTTTAEVTTTDDVTTTVEITTTSEITTTSDVTTTAEITTTDIVTTTDEDTTADV  
TTSDVTTTSEETPTADITTTADLTTTADVTTTSDVTTTSEETTTADVTTTSDVTTTAEITTTDDITSTADVTT  
TTNVTTTSDVPTTSEVTTSTDDVITTEVTTTAEIIPDDVTTTSEVTTTGDVTTTGDVMTGDLTTTADVTTT  
ADLTTTDEVTTTADGSTTADLTTTAEVTTTDDVTTTVQITTTSEITTTSDVTTTAEITTTDNVTTTGEVTTTA  
DVTTTSDVTTTSEETPTADITTTADLNTTAEVTTTDEVTTTVEITTTSEITTTSDITTTAEITTTDIVTTTGE  
VTTTADVTTTNDVTTTSEETPTADITTTADLTTTAEITTTDDITSTADVTTTADVTTTSDVPTTSEVTTSTDDV  
ITTEVTTTAEIIPDDVTTTSEVTTTGDVTTTGDVMTGDLTTTADVTTTADLTTTDEVTTTADGSTTADLT  
TTAEVTTTDDVTTTVQITTTSEITTTSDVTTTAEITTTDNVTTTGEVTTTADVTTTSDVTTTSEETPTADIT  
TADLTTTAEVTTTDEVTTTVEITTTSEITTTSDITTTAEITTTDIVTTTGEVTTTADVTTTNDVTTTSEETPT  
ADITTTADLTTTAEITTTDDVTTTGEVTTTADVTTTSDVTTTSEETPTADITTTADLTTTAEITTTDDVTTTGE  
EVTTTADVTTTSDITTTSEETPTADITTTADLTTTAEVTTTDDVTTTGEVTTTADVTTTSDITTTSEETPTAD  
ITTTADLTTTAEVTTTDDVTTTVEITTTSEITTTSDVTTTAEITTTDIVTTTGEVTTTADVTTTSDVTTTSEQ  
TPTADITTTADLTTTAEVTTTDDVTTTVEITTTSEITTTSDVTTTAEITTTDIVTTTGEVTTTADITTTSDV  
TTSEETTTADVTTTDDVTTTSEETTTGDGKTTTAEITTTDDITTTADVTTTADVTTTAAVTTTGEITPTDDV  
TTSEVTTTGDVTTSTGDVTTTGEVTTTAEVTTTADVTTTSDVTTTSEETPTADITTTADLTTTAEVTTTDDV  
TGEVTTTADVTTTSDTTTTSEETPTADITTTVDLTTTAEVTTTDDVTTTVEITTTSEITTTSDVTTTAEITTS  
DIFTTTGEVTTTADITTTSDVTTTSEETPTADITTTADLTTTAEITTTDDVTTTVEITTTSEITTTSEVTTT  
DVTTTSDVTTTSEETPTADITTTADLTTTAEVTTTDDVTTTVEITTTSEITTTSDVTTTAEITTTDIVTTTGE  
VTTTVDVTTTNDVTTTSEETPTADITTTADLTTTAEVTTTDDVTTTGEVTTTADVTTTSDITTTSEETPTADI  
TTTVDLTTTVEITTTSEITTTSDVTTTAEITTTDIVTTTGEVTTTADVTTTSDVTTTSEETPTADITTTADLT  
TTAEVTTTDDVTTTVEITTTSEITTTSDVTTTAEITTTDIVTTTSGEVTTTADVTTTSDVTTTSEETTTADV  
TTDDVTTTSEETTTGDGTTTTAEITTTDDLTTTADVTTTADVTTTAAVTTTAEITPTDDVTTTSEVTTTGDV  
TGEVTTTAEVTTTDDVTTTGDVTTTGDVTTMADVTTTADFTTTDDVTTTADASTTADLTTAEVTTTDDVTT  
VEITTTAEITTTAEVTTTDDVTTTGEVTTTADVTTTADVTTTSEVTTTADVTTTNDVTTTAEITTTDDITTTA  
DVTTTADVTTTSYVPTTSEVTTSTDDVTTTAEVTTTAEIIPDDVTTTSEVTTTGDVTTTGDVMTCDLTTSD  
VTTTADFTTTDDVTTTKADGSTTADLTTTAEVTTTNDVTTTGEVTTTAEITTTSDVTTTAEITTTDIVTTTGE  
VTTTADVTTTSDVTTTSEETTTADITTTADLTTTAEVTTTDDVTTTVEITTTSEITTTSDVTTTAEITTTDIV  
TTGEVTTTADVTTTNDVTTTSEETPTADITTTADLTTTAEVTTTDDVTTTGEVTTTADVTTTSDVTTTSEET  
TADITTTADLTTTAEVTTTDDVTTTVEITTTSEITTTSDVTTTAEITTTDIVTTTGEVTTTADITTTSDVTT  
SEETTTADVTTTDDVTTTSEETTTGDGKTTTAEITTTDDITTTADVTTTADVTTTAAVTTTGEITPTDDVTT  
SEVTTTGDVTTTGDVTTTGEVTTTAEVTTTDDVTTTGDVTTTGDVTTTADVTTTAYFTTTDDVTTTADGSTTA



DLTTAEVTTTDDVTTTVEITTTAEITTTDDVTTTGEVTTTADVTTTSDVTTTSEETPTADITTTADLTTTAE  
VTTTDDVTTTVEITTTSEITTTSDVTTTAEITTTDIVTTTGEVTTTADVTTTSDVTTTSEETPTADITTTADL  
TTTAEVTTTDDVTTTVEITTTSEITTTSDVTTTAEITTTDIVTTTGEVTTTADVTTTSDVTTTSEETPTADIT  
TTADLTTTAEVTTTDDVTTTVEITTTAEITTTDDVTTTGEVTTTADVTTTAEVITTTSDVTTTADVTTMPDFTT  
TAEVTTTLDVTTNDEVTTTTSVVTTPETITTAGDVTTTSEVTTTADLTTTPEITTTGDVTTTADVTTADITTT  
SDVTTTADVTTTADITTTSDVTTTADVTTIADLSTTPEITTTGDFSSTTDDVTSTGDVTTTADVTTTADVTTT  
DVTTTAEVTTTAEVTTTAEATTTADLNTTPEITTTDDVTTTGDVTTTAEVTTTAYVTTTDFTTTAEVNTTDD  
VTTIADLTTTAEVTTTNDVTTSTAEITTTADLTTTTEVTTTADFITTGDVTTTADVTTTADVTTTADVTTADLT  
TTVDVTTMDDVTTTAEVITSGDVTTTSEVTTTSTNLNTTPEITTTIDFTSTVDVTTTGDVTTTADVTTTSDVTT  
TSKVTTTGDVTTTADTTSTADVTTTADVITTAEVTTTADFNTTGVVTTTADVTTTADLTTMPDLTTTAEVTTT  
ADVTTTSEFTTTADVTTTADVTTSTADVTTTAEVTTTGDVTTTADVTTTGDVTTTIGDVTTTTEITTTAYLTTTL  
EITTTGEVTTSTADVTTTAEVTTTDEITTTDVTTTGDVTPTAESTTTDDVTTTSDVTTTGDFTTTADVTTTAY  
VTTTDPVTTTVEVTTTADFNTTGVVNTTADVTTTADVTTTSEVTTTADLTTTPEITTTVDFTSTADVTTTADV  
ITTEVTTTSDVTTTAEVITTTADVTTTADVTTTVEVTTTGDVTTTADVTTTPEITTTVDFTSTADVTTTADV  
TTADVTTTSDVTTTADVTTTAEVTTTVEITTTDDVTTTGEVTTTADVTTTSDVTTTSEETTTADITTTSDVST  
TSEVTTTAYVTTTADTTSTAEVTTTADVTTTADVTTTADVTTTADVTTTVEVTTTGDVTTTADVTTTAEVTTT  
AEITTTGDVTTTADVTTTAEVTTTAEITTTGDVTTTADVTTTADVTTTADVTTTADVTTTADVTTTADVTTT  
DVTTTTEVTTTTEVATTPEPTTTPAPTAVNCMNGGFWTGDKCICPNGFGGDRNCENIVNVNCGNGGTWDGL  
KCQCTSLFYGPRCEELVESVEIEPTVAASVEVSVTVTSQEYSEKLQDRKSEEFNSFNKFTTKQMALIYAGIPE  
YEGVVIKNSKGSIVVDYDVLKAKYTPGFENTLDTVVKNLETKIKNATEVQVQDVNNNCSALLCFNSTATKV  
QNSATVSVNPEETCKKEAGEDFAKFTVLGQKGDWFCITPCSAGYSTSKNCSYGKCLQSRGQPCLCLITDTH  
WYSGENCWDWGIQKSLVYGLGGAGVAVLLVILVILLVFSIRFRKDAQRQSRVSEMYKWGEEEGRASPGTFHNF  
GFDHNEERENYMLDSVYNTFQPSLNHINPERKIQIQRPQVVMVMTSL\*  
>ENSMUSP00000045196\_c.10258:C>G\_p.T3420S ENSMUST00000041226.11|Muc3-  
201|ENSMUSG00000037390|-|chr5:g.137180081:G>C  
MSTRRWVRQSTAALCLLAFILHSLPRHIAAENGTTESGSVWDGGGNSQTQDSQETQFRTVLKTKTTDGENSEAW  
PRQEYQQRSSSPSTTTAEVTTTADVTTTADVTTTAEITTTSDVTTTAEITNTDDVTTTGEVTTTADVTTTSDV  
PTTSEVTTSTDDVITTAEVTTTAEVTTTAEVTTTAEVTTTAEVTTTAEVTTTAEVTTTAEVTTTAEVTTTAEV  
TTADGSTTADLTTTAKVTTTDDVTTTGEITTTSEITTTSDVTTTAEITTTDIVTTTGEVTTTADVTTTSDVTT  
TSEETPTADITTTADLTTTAEVTTTDDVTTTVEITTTSEITTTSDVTTTAEITTTDIVTTTGEVTTTADVTTT  
SDVTTTSEETTTADITTTADLTTTAEITTTDDVTTTVEITTTSDVTTTTEITTTDIVTTTGEVTTTADVTTAS  
DVTTTSEETPTADITTTADLTTTAEVTTTDDVTTTGEVTTTADVTTTSDVTTTSEETTTADVTTTSDVTTTAE  
ITTTDDITSTADVTTTADVTTTSDVPTTSEETTTADVTTTSDVTTTAEITTTDDITSTADVTTTADVTTTSDV  
TTTTEENPTADITTTADLTTTAEVTTTDDVTTTVEITTTSEITTTSDVTTTAEITTTDIVTTTDEDTTADVTT  
TTSADVTTTSEETPTADITTTADLTTTADVTTTSDVTTTSEETTTADVTTTSDVTTTAEITTTDDITSTADVTT  
TTNVTTTSDVPTTSEVTTSTDDVITTEVTTTAEIIPDDVTTTSEVTTTGDVTTTGDVTTTGDVTTTGDVTTT  
ADLTTTDEVTTTADGSTTADLTTTAEVTTTDDVTTTVEITTTSEITTTSDVTTTAEITTTDNVTTTGEVTTTA  
DVTTTSDVTTTSEETPTADITTTADLNTTAEVTTTDEVTTTVEITTTSEITTTSDITTTAEITTTDIVTTTGE  
VTTTADVTTTNDVTTTSEETPTADITTTADLTTTAEITTTDDITSTADVTTTDDVTTTSDVPTTSEVTTSTDDV  
ITTEVTTTAEIIPDDVTTTSEVTTTGDVTTTGDVTTTGDVTTTGDVTTTGDVTTTGDVTTTGDVTTTGDVTT  
TTAEVTTTDDVTTTVEITTTSEITTTSDVTTTAEITTTDNVTTTGEVTTTADVTTTSDVTTTSEETPTADIT  
TADLTTTAEVTTTDEVTTTVEITTTSEITTTSDITTTAEITTTDIVTTTGEVTTTADVTTTNDVTTTSEETPT  
ADITTTADLTTTAEITTTDDVTTTGEVTTTADVTTTSDVTTTSEETPTADITTTADLTTTAEITTTDDVTTT  
EVTTTADVTTTSDITTTSEETPTADITTTADLTTTAEVTTTDDVTTTGEVTTTADVTTTSDITTTSEETPTAD  
ITTTADLTTTAEVTTTDDVTTTVEITTTSEITTTSDVTTTAEITTTDIVTTTGEVTTTADVTTTSDVTTTSEQ  
TPTADITTTADLTTTAEVTTTDDVTTTVEITTTSEITTTSDVTTTAEITTTDIVTTTGEVTTTADITTTSDV  
TTSEETTTADVTTTDDVTTTSEETTTGDGKTTTAEITTTDDITTTADVTTTDPVTTTAAVTTTGEITPTDDV  
TTSEVTTTGDVTTSTGDVTTTGEVTTTAEVTTTADVTTTSDVTTTSEETPTADITTTADLTTTAEVTTTDDV  
TGEVTTTADVTTTSDITTTSEETPTADITTTVDLTTTAEVTTTDDVTTTVEITTTSEITTTSDVTTTAEITTS  
DIFTTTGEVTTTADITTTSDVTTTSEETPTADITTTADLTTTAEITTTDDVTTTVEITTTSEITTTSEVTTTP  
DVTTTSDVTTTSEETPTADITTTADLTTTAEVTTTDDVTTTVEITTTSEITTTSDVTTTAEITTTDIVTTTGE  
VTTTVDVTTTNDVTTTSEETPTADITTTADLTTTAEVTTTDDVTTTGEVTTTADVTTTSDITTTSEETPTADI  
TTTVDLTTTVEITTTSEITTTSDVTTTAEITTTDIVTTTGEVTTTADVTTTSDVTTTSEETPTADITTTADL  
TTAEVTTTDDVTTTVEITTTSEITTTSDVTTTAEITTTDIVTTTGEVTTTADVTTTSDVTTTSEETPTADIT  
TTADLTTTAEVTTTDDVTTTVEITTTSEITTTSDVTTTAEITTTDIVTTTGEVTTTADVTTTSDVTTTSEVTT  
TTDVTTTSEETTTGDGTTTAEITTTDDLTTTADVTTTDPVTTTAAVTTTAEITPTDDVTTTSEVTTTGDVTT  
TGEVTTTAEVTTTDDVTTTGDVTTTGDVTTTGDVTTTGDVTTTGDVTTTGDVTTTGDVTTTGDVTTTGDVTT  
VEITTTAEITTTAEVTTTDDVTTTGEVTTTADVTTTDDVTTTSEVTTTADVTTTNDVTTTAEITTTDDITTTA  
DVTTTADVTTTTSYVPTTSEVTTSTDDVTTTAEVTTTAEITPTDDVTTTSEVTTTGDVTTTGDVTTTGDVTT

VTTTADFTTTDDVTTKADGSTTADLTTTAEVTTNDDVTTTGGELTTTAEITTTSDVTTTAEITTTDIVTTTGEV  
TTTADVTTTSDVTTTSEETTTADITTTADLTTTAEVTTTDDVTTTVEITTTSEITTTSDVTTTAEITTTDIVT  
TTGEVTTTADVTTTNDVTTTSEETPTADITTTADLTTTAEVTTTDDVTTTGEVTTTADVTTTSDVTTTSEETP  
TADITTTADLTTTAEVTTTDDVTTTVEITTTSEITTTSDVTTTAEITTTDIVTTTGEVTTTADITTTSDVTTT  
SEETTTADVTTTDDVTTTSEETTTGDGKTTTAEITTTDDITTTADVTTTPDVTTTAAVTTTGEITPTDDVTTT  
SEVTTTGDVTTTGDVTTTGEVTTTAEVTTTDDVTTTGDVTTTGDLLTTADVTTTAYFTTTDDVTTTADGSTTA  
DLTTTAEVTTTDDVTTTVEITTTAEITTTDDVTTTGEVTTTADVTTTSDVTTTSEETPTADITTTADLTTTAE  
VTTTDDVTTTVEITTTSEITTTSDVTTTAEITTTDIVTTTGEVTTTADVTTTSDVTTTSEETPTADITTTADL  
TTTAEVTTTDDVTTTVEITTTSEITTTSDVTTTAEITTTDIVTTTGEVTTTADVTTTSDVTTTSEETPTADIT  
TTADLTTTAEVTTTDDVTTTVEITTTAEITTTDDVTTTGEVTTTADVTTTAEVITTTSDVTTTADVTTMPDFTT  
TAEVTTTLDVTTNDEVTTTSSVTTTPEITTAGDVTTTSEVTTTADLTTTPEITTTGDVTTTADVTTTADITTT  
SDVTTTADVTTTADITTTSDVTTTADVTTIADLSTTPEITTTGDFSSTTDVTTSTGDVTTTADVTTTADVTTTGD  
DVTTTAEVTTTAEVTTTAEATTTADLNTTPEITTTDDVTTTGDVTTTAEVTTTAYVTTTDFTTTAEVNTTDD  
VTTIADLTTTAEVTTTNDVTTSTAEITTTADLTTTTEVTTTADFTTTGDVTTTADVTTMADVSTTADVTTADLT  
TTVDVTTMDDVTTTAEVITTSADVTTTSEVTTTNSLNTTPEITTTIDFTSTVDVTTTGDVTTTADVTTTSDVTT  
TSKVTTTGDVTTTADTTSTADVTTTADVITTAEVTTTADFNTGDVTTTADVTTTADLTTMPDLTTTAEVTTT  
ADVTTTSEFTTTADVTTTADVTTSTADVTTTAEVTTTGDVTTTADVTTTADVNTGDIITTIIGDVTTTTEITTTAYLTTTL  
EITTTGEVTTSTADVTTTAEVTTTDEITTTDVTTTGDVTTTAEVTTTDDVTTTSDVTTTGDFTTTADVTTTAY  
VTTTTPDVTTTVEVTTTADFTTTGVVNTTADVTTTADVTTTSEVTTTADLTTTPEITTTVDFTSTADVTTTADV  
ITTEVTTTSDVTTTAEVITTTADVTTTADVTTTVEVTTTGDVTTTADVTTTPEITTTVDFTSTADVTTTADVTT  
TTADVTTTSDVTTTPDVTTTAEVTTTVEITTTDDVTTTGEVTTTADVTTTSDVTTTSEETTTADITTTSDVST  
TSEVTTTAYVTTTADTTSTAEVTTTADVTTTADVTTTADVTTTADVTTTVEVTTTGDVTTTADVTTTAEVTTT  
AEITTTGDVTTTADVTTTAEVTTTAEITTTGDVTTTADVTTTADVTTTADVTTTIDVTTTADVTTTAEVTTTA  
DVTTTTEVTTTTEVATTPEPTTTPAPTAVNCMNGGFWTGDKCICPNFGGDRCCENIVNVNCENGGTWDGL  
KCQCTSLFYGRCEELVESVEIEPTVAASVEVSVTVTSQEYSEKLQDRKSEEFNSFNKFTTKQMALIYAGIPE  
YEGV I IKNLSKGSIVVDYDVI LKAKYTPGFENTLDTVVKNLKTKIKNATEVQVQDVNNNSALLCFNSTATKV  
QNSATVSVNPEETCKEAGEDFAKEFVTLGQKGDKWFICIPCSAGYSTSKNCSYGKCLQRSGPQCLCLITDTH  
WYSGENCWDWGIQKSLVYGLGGAGVAVLLVILVILLVFSIRFRKDAQRQRSRVSEMYKWGEEEGRASPGTFHNF  
GFDHNEERENYMLDSVYNTFQPSLNHINPERKIQIQRPVVMTSL\*

>ENSMUSP00000045196\_c.10093:T>C\_p.L3365P ENSMUST00000041226.11|Muc3-  
201|ENSMUSG00000037390|-|chr5:g.137180246:A>G

MSTRRWVRQTAALCLLAFILHSLPRHIAAENGTTESGSVWDGGGNSTQDDSQETQFRTVLKTKTTDGENSEAW  
PRQEYQQRSSSPSTTKAEVTTTADVTTTADVTTTAEITTTSDVTTTAEITNTDDVTTTGEVTTTADVTTTSDV  
PTTSEVTTSTDDVITTAEVTTTAEVTTTDDVTTTSEVTTTGDVTTTGDVTTITGDLTTTADVTTKADFTTTDDVTT  
TTADGSTTADLTTAKVTTTDDVTTTGEITTTSEITTTSDVTTTAEITTTDIVTTTGEVTTTADVTTTSDVTT  
TSEETPTADITTTADLTTTAEVTTTDDVTTTVEITTTSEITTTSDVTTTAEITTTDIVTTTGEVTTTADVTTT  
SDVTTTSEETTTADITTTADLTTTAEITTTDDVTTTVEITTTSDVTTTTEITTTDIVTTTGEVTTTADVTTAS  
DVTTTSEETPTADITTTADLTTTAEVTTTDDVTTTGEVTTTADVTTTSDVTTTSEETTTADVTTTSDVTTTAE  
ITTTDDITSTADVTTTADVTTTSDVPTTSEETTTADVTTTSDVTTTAEITTTDDITSTADVTTTADVTTTSDV  
TTTTEENPTADITTTADLTTTAEVTTTDDVTTTVEITTTSEITTTSDVTTTAEITTTDIVTTTDEDTTTADVTT  
TTSVTTTSEETPTADITTTADLTTTADVTTTSDVTTTSEETTTADVTTTSDVTTTAEITTTDDITSTADVTT  
TTNVTTTSDVPTTSEVTTSTDDVITTTVEVTTTAEIIPDDVTTTSEVTTTGDVTTTGDVTTMTGDLTTTADVTTT  
ADLTTTDEVTTTADGSTTADLTTTAEVTTTDDVTTTQIITTTSEITTTSDVTTTAEITTTDNVTTTGEVTTTA  
DVTTTSDVTTTSEETPTADITTTADLNTTAEVTTTEDVTTTVEITTTSEITTTSDITTTAEITTTDIVTTTGE  
VTTTADVTTTNDVTTTSEETPTADITTTADLTTTAEITTTDDITSTADVTTTDDVTTTSDVPTTSEVTTSTDDV  
ITTTVEVTTTAEIIPDDVTTTSEVTTTGDVTTTGDVTTMTGDLTTTADVTTTADLTTTDEVTTTADGSTTADLT  
TTAEVTTTDDVTTTQIITTTSEITTTSDVTTTAEITTTDNVTTTGEVTTTADVTTTSDVTTTSEETPTADIT  
TADLTTTAEVTTTDEVTTTVEITTTSEITTTSDITTTAEITTTDIVTTTGEVTTTADVTTTNDVTTTSEETPT  
ADITTTADLTTTAEITTTDDVTTTGEVTTTADVTTTSDVTTTSEETPTADITTTADLTTTAEITTTDDVTTTGD  
EVTTTADVTTTSDITTTSEETPTADITTTADLTTTAEVTTTDDVTTTGEVTTTADVTTTSDITTTSEETPTAD  
ITTTADLTTTAEVTTTDDVTTTVEITTTSEITTTSDVTTTAEITTTDIVTTTGEVTTTADVTTTSDVTTTSEQ  
TPTADITTTADLTTTAEVTTTDDVTTTVEITTTSEITTTSDVTTTAEITTTDIVTTTGEVTTTADITTTSDVTT  
TTSEETTTADVTTTDDVTTTSEETTTGDGKTTTAEITTTDDITTTADVTTTTPDVTTTAAVTTTGEITPTDDVTT  
TTSEVTTTGDVTTTSTADVTTTGEVTTTAEVTTTADVTTTSDVTTTSEETPTADITTTADLTTTAEVTTTDDVTT  
TGEVTTTADVTTTSDITTTSEETPTADITTTVDLTTTAEVTTTDDVTTTVEITTTSEITTTSDVTTTAEITTT  
DIFTTTGEVTTTADITTTSDVTTTSEETPTADITTTADLTTTAEITTTDDVTTTVEITTTSEITTTSEVTTTP  
DVTTTSDVTTTSEETPTADITTTADLTTTAEVTTTDDVTTTVEITTTSEITTTSDVTTTAEITTTDIVTTTGE  
VTTTVDVTTTNDVTTTSEETPTADITTTADLTTTAEVTTTDDVTTTGEVTTTADVTTTSDITTTSEETPTADI

TTTVDLTTTVEITTTSEITTTSDVTTTAEITTTDIVTTTGEVTTTADVTTTSDVTTTSEETPTADITTTADLT  
TAEVTTTDDVTTTVEITTTSEITTTSDVTTTAEITTTDIVTTTSGEVTTTADVTTTSDVTTTSEETTTADVTT  
TTDVTTTSEETTTGDGTTTAEITTTDDLTTTADVTTTTPDVTTTAAVTTTAEITPTDDVTTTSEVTTTGDVTT  
TGEVTTTAEVTTTDDVTTTGDVTTTGLDITTMADVTTTADFVTTTDDVTTTADASTTADLATTAEVTTTDDVTTT  
VEITTTAEITTTAEVTTTDDVTTTGEVTTTADVTTTDDVTTTSEVTTTADVTTTNDVTTTAEITTTDDITTTA  
DVTTTADVTTTTSYVPTTSEVTTSTDDVTTTAEVTTTAEITPTDDVTTTSEVTTTGDVTTTGDVTTMCDLTTSD  
VTTTADFVTTTDDVTTTKADGSTTADLTTTAEVTTTNDVTTTGEVTTTAEITTTSDVTTTAEITTTDIVTTTGEV  
TTTADVTTTSDVTTTSEETTTADITTTADLTTTAEVTTTDDVTTTVEITTTSEITTTSDVTTTAEITTTDIVT  
TTGEVTTTADVTTTNDVTTTSEETPTADITTTADLTTTAEVTTTDDVTTTGEVTTTADVTTTSDVTTTSEETP  
TADITTTADLTTTAEVTTTDDVTTTVEITTTSEITTTSDVTTTAEITTTDIVTTTGEVTTTADITTTSDVTTT  
SEETTTADVTTTDDVTTTSEETTTGDGKTAAEITTTDDITTTADVTTTTPDVTTTAAVTTTGEITPTDDVTTT  
SEVTTTGDVTTTGDVTTTGEVTTTAEVTTTDDVTTTGDVTTTGLDITTADVTTTAYFTTTDDVTTTADGSTTA  
DLTTTAEVTTTDDVTTTVEITTTAEITTTDDVTTTGEVTTTADVTTTSDVTTTSEETPTADITTTADLTTTAE  
VTTTDDVTTTVEITTTSEITTTSDVTTTAEITTTDIVTTTGEVTTTADVTTTSDVTTTSEETPTADITTTADL  
TTTAEVTTTDDVTTTVEITTTSEITTTSDVTTTAEITTTDIVTTTGEVTTTADVTTTSDVTTTSEETPTADIT  
TTADLTTTAEVTTTDDVTTTVEITTTAEITTTDDVTTTGEVTTTADVTTTAEVITTTSDVTTTADVTTMPDFTT  
TAEVTTTLDVTTTNDVTTTSEVTTTPEITTAGDVTTTSEVTTTADLTTTPEITTTGDVTTTADVTTTADVTTT  
SDVTTTADVTTTADITTTSDVTTTADVTTIADLSTTPEITTTGDFSSTTDVTTSTGDVTTTADVTTTADVTTT  
DVTTTAEVTTTAEVTTTAEATTTADLNTTPEITTTDDVTTTGDVTTTAEVTTTAYVTTTDFTTTAEVNTTDD  
VTTIADPTTTAEVTTTNDVTTSTAEITTTADLTTTTEVTTTADFITTTGDVTTTADVTTMADVTTTADVTTADLT  
TTVDVTTMDDVTTTAEVITSGDVTTTSEVTTTSNLNTTPEITTTIDFTSTVDVTTTGDVTTTADVTTTSDVTT  
TSKVTTTGDVTTTADTTSTADVTTTADVITTAEVTTTADFNTGDVTTTADVTTTADLTTMPDLTTTAEVTTT  
ADVTTTSEFTTTADVTTTADVTTTADVTTTAEVTTTGDVTTTADVTTTADVTTTADVTTTADVTTTADVTTT  
EITTTGEVTTSTADVTTTAEVTTTDEITTTDVVTTTGDVTTTAEVTTTADVTTTADVTTTADVTTTADVTTT  
VTTTADVTTTADVTTTADVTTTADVTTTADVTTTADVTTTADVTTTADVTTTADVTTTADVTTTADVTTTADV  
ITTTAEVTTTSDVTTTAEVITTTADVTTTADVTTTADVTTTADVTTTADVTTTADVTTTADVTTTADVTTTADV  
TTADVTTTSDVTTTADVTTTADVTTTADVTTTADVTTTADVTTTADVTTTADVTTTADVTTTADVTTTADV  
TSEVTTTAYVTTTADTTSTAEVTTTADVTTTADVTTTADVTTTADVTTTADVTTTADVTTTADVTTTADVTTT  
AEITTTGDVTTTADVTTTAEVTTTAEITTTGDVTTTADVTTTADVTTTADVTTTADVTTTADVTTTADVTTT  
DVTTTTEVTTTTEVATTPEPTTTPAPTAVNCMNGGFWTGDKICPNGFGGDRCCENIVNVVNCENGGTWDGL  
KCQCTSLFYGPRCEELVESVEIEPTVAASVEVSVTVTSQEYSEKLQDRKSEEFNSFNKFTFKQMALIYAGIPE  
YEGVILKNSKGSIVVDYDVLKAKYTPGFENTLDTVVKNLETKIKNATEVQVQDVNNNSALLCFNSTATKV  
QNSATVSVNPEETCKKEAGEDFAKVFVTLGQKGDWFCITPCSAGYSTSKNCSYGKQQLQSRGPPQCLCLITDTH  
WYSGENCWDWGIQKSLVYGLGGAGVAVLLVILVILLVFSIRFRKDAQQRSRVSEMYKWGEEGRASPPTFHNF  
GFDHNEERENYMLPLDSVYNTFQPSLNHNINPERKIQIQRPQVVMVMTSL\*

>ENSMUSP0000072406\_c.4533:G>C\_p.A1512P ENSMUST00000072607.9|Ints1-  
201|ENSMUSG00000029547|-|chr5:g.139744221:C>G

MTERASDSRRLPLGEGASSRGARAAGRMNRAKPTTVRRPSAAAKPSGHPPPGDFIALGSKGQASESKTTSTLL  
KPAPSGLPSEKRKRDASASLSGTSALTGLTKRPKLSSTPPLSALGRLAEEAAVAEKRAISPSIKEPSVVPPIEVL  
TVLLDEIEAAELEGNDDRIEGVLGAVKQKLVTRAKPDSTLYLSLMLYLAIKPNIFATEGVIEALCSLLRRDA  
SVNFKAKGNSLVSVLACNLLMAAYEEDENWPEIFVKVYIEDSLGERIWWDSPHCRTFVDNIQTAFNTKMPKPS  
VLLQGEGARSGGELGAGSSPHPSLTHEEDSQTELLIAEEKLSPQEGLMPRYDELTEVVEEYVLDMLRDQLN  
RRQPIDNVSRLNLLRLTATCGYKEVRLAVQRLEMWLNPKLTRPAQDLLMSVCMNCNSHGSEDMDVISHLIK  
IRLKPVKVLLNHYMLCIRELLNAHKDNLGTTIKFVIFNELSNARNPNMQILYTVLQHSSELAPKFLAMVFQDL  
LTKNDYLRASRALLREIIKQTKHEINFQAFCLGLMQERKEPQYLEMEFKERFVVHITDVLAVSMMLGITAQV  
KEAGVAWDKGEKRNLEVLRTFQNIQAAIQRDVAVWVHTVVPVSVSKLAPKDYVHCLHKVLFTEQPEITYKWDNW  
PPESDRNFFLRRCSEVPILEDTLMRVLVIGLSRELPLGPADAMELADHLVKRAAAVQADDVEVLKVERIQID  
AVLNLCTYHHPENIQLPQYQPPNLAISTLYWKAWPLLLVVAAFNPENIGLAAWEEYPTLKLMMEMVMTNYS  
YPPCTLTDEETRTEMINRELQISQREKQEIILAFEGHLAAASTKQITTESSSLLLSQLTSLDPQGP RRPPPHI  
LDQVKALNQSLRLGHLRCRSRNPDFLLHI IQRQASSQSMPWLADLVQSSEGLDVLVPVQCLCEFLHDAADST  
ASGEEDDEGESREQKAKKRQRQKQRLGRLQDLLLLGPKADEQTTCEVLDYFLRRLGSSQVASRVLAMKGLS  
LVLSEGGRLDKEEKEPPMEEDIGETDALQGYQWLLRDLRPLPLFDSVRTTALALQQA IHMETDPQTI SAYLI  
YLSQHTPVVEEQGPHSDLALDVARLVVERSTIMAHLFSPKSCSTASDAVLSALLSVFSRYVRRMRKSKEGEEVY  
SWSESQDQVFLRWSSGETATMHI LVVHAMVILLTLGPPKSGDSEFSELLDIWFPEKKPLPTAFVLDVTTSEEALL  
LPDWLKLRLMIRSEVPRLVDAALQDLEPQQLLLFVQSFGIPVSSMSKLLQYLDQAVAQDPQTLEQINMDKNYMA  
HLVEVQHERGASGGQTFHSLLTASLPPRRDSTEAPKPESSPEPPPGQGRTRAGTQVPVLPEDDLAGIFLQIF  
PLSPDPRWQSSSPRPLALALQALGQELARVRQGNPEVPGITVRLQAMTLLSSPHGGTLALAMHSHFLSC  
PLMRQLYQYQRAVPQDTGFSSFLKVLQMILQWLDSPAVEDGPLQAQLKLPTRY SARHRI SDVRSGLLHLAD

ALSFHGDLEVANSTARAVIATLRSGEKCPVEPELISKVLRGLIEVRSPHLEELLTALFSATTETSCPSPASGP  
 IVVVSSLLLQEKELLGPKSQEVEGASTEAMRLGPASGLLDVWLETLDPEVVCSCPDLQWKLLFSRRKKGKHI  
 SAQVLSFRPYLLALLTHQASWSTLHCCIRVLLGKSREQRDLPSASLDLFWACIHPRIWQGRDQRTPOKRREE  
 LVLHVQGPPELLSLVELILSEAETRSQDGDSAARTLIQTRLPLLLSCCRSNDESIGKVTEHLTSCIQQWGDSVL  
 GQRCRDLQLYLQRPVVRPEVLLQSEGATSSSICKLDGLVHRFITLLADTSDSRSSSERVADANMACRK  
 LAVAHVPLLRLHPLMIAALLHGRTHLNFOEFRQONHLAFFLHVLGILELLQPRVFQSEHQGALWDCLRSFIRL  
 LLNYRKSRRHLAPFISKFVQFIHKYVGCSPAFAVFLQKHAEPLHDLSDNSDLVMLKSLLAGLSLPSRDGRT  
 DQGLDEEGEDERSAGSLPLVSVSLSTPLTVADVAPHMKRLSRGRAVEDVLETLSIDIEMSRRRPEVLGFFSTN  
 LQRLMSSAAEESCRNLAFSLALRSIQNNPSIAADFLPTFMYCLGSRDFEVVQTALRNLPEYTLQCQEHAAVLLH  
 RAFLVGVYQIDTSAQISEALKILHMEAVM\*

>ENSMUSP00000143789\_c.4539:G>C\_p.A1514P ENSMUST00000200393.5|Ints1-  
 210|ENSMUSG00000029547|-|chr5:g.139744221:C>G

MTERASDSRRLPLPGEAGASSRGARAGRMRNAKPTTVRRPSPAAPSGHPPPGDFIALGSKGQASESKTTSTLL  
 KPAPSGLPSEKRKASASLSGTALTGLTKRPKLSSTPPLSALGRLAEAAVAEKRAISPSIKEPSVVPVIEVLP  
 TVLLDEIEAAELEGNDRIEGLVCGAVKQKLVTRAKPDSTLYLSIMYLAKIKPNIFATEGVIEALCSLLRDA  
 SVNFKAKGNSLVSVLACNLLMAAYEEDENWPEIFVKVYIEDSLGERIWDVSPHCRTFVDNIQTAFNTKMPKPKS  
 VLLQGEGARSGGELGAGSSPHSLTEEEDSQTELLIAEEKLSPQEGLMPPRPYDELTEVSVEEYVLDMLRDQ  
 LNRRQPIDNVSRLRLLTATCGYKEVRLAVQRLEMWLNPKLTPAQDLLMSVCMNCNSHGSEMDMVI SHL  
 IKIRLKPVKVLLNHYMLCIRELLNAHKDNLGTTIKFVIFNELSNARNPNMQLIYTVLQHSSELAPKFLAMVFO  
 DLLTNKDDYLASRALLREIKQTKHEINFQAFCLGLMQRKEPQYLEMEFKERFVVHITDVLAVSMMLGITA  
 QVKEAGVAWDKGEKRNLEVLRTFQNIQAAIQORDAVWWLHTVVPVSVKLAPKDYVHCLHKVLFTEQPEYTKWD  
 NWPPESDRNFFLRCLCEVPILEDTLMRVLVIGLSRELPLGPADAMELADHLVKRAAAVQADDVEVLKVERIQ  
 IDAVLNLCYHHPENIQLPQYQPPNLAISTLYWKAWPLLIVVAAFNPENIGLAAWEEYPTLKMMLMEMVMTNN  
 YSYPCTLTDEETRTMINRELQISQREKQEIILAFEGHLLAAASTKQITITESSSLLLSQLTSLDPQGP  
 HILDQVKALNQLSLRGLLCSRNPDFLLHI IQRQASSQSMPLADLVQSSEGLDVLVQCLCEFLHDAAD  
 STASGEEDGESREKQAKKRQKQKQKQKQKQKQKQKQKQKQKQKQKQKQKQKQKQKQKQKQKQKQKQKQ  
 LSLVLSSEGGLRKEEKEPMEEDIGETDALQGYQWLLRDLRPLPLFDSVVRTTALALQQAIIHMETDPTISAY  
 LIYLSQHTPVVEEQGPHSDLALDVARLVVERSTIMAHFLSKPSCSTASDAVLSALLSVFSRYVRRMRKSKEGEE  
 VYSWSESQDQVFLRWSSGETATMHILVVHAMVILLTLGPPRSGDSEFSELLDIWFPEKKPLPTAFVLDTSEE  
 LLLPDWLKLRMIRSEVPRLDVAALQDLEPQQLLQVQSFQIPVSSMSKLLQYLDQAVAQDPQTLQNI  
 MAHLVEVQHERGASGGQTFHSLTASLPPRRDSTEAPKPESSPEPPPGQGRTRAGTQVVPVLPEDLAGIFLQ  
 IFPLSPDRWQSSSRPLALALQALQELARVRQGNPEVPGITVRLQAMTLLSSPHGGTLALAMHSHFL  
 SCPLMRQLYQYQRAVPQDTGFSSSLFKVLMQILQWLDSPAVEDGPLQAQLKFLPTRY SARHRI SDVRSGLLHL  
 ADALSFHGDLEVANSTARAVIATLRSGEKCPVEPELISKVLRGLIEVRSPHLEELLTALFSATTETSCPSPAS  
 GPIVVVSSLLLQEKELLGPKSQEVEGASTEAMRLGPASGLLDVWLETLDPEVVCSCPDLQWKLLFSRRKKGK  
 HISAQVLSFRPYLLALLTHQASWSTLHCCIRVLLGKSREQRDLPSASLDLFWACIHPRIWQGRDQRTPOKR  
 EELVLHVQGPPELLSLVELILSEAETRSQDGDSAARTLIQTRLPLLLSCCRSNDESIGKVTEHLTSCIQQWGDS  
 VLGQRCRDLQLYLQRPVVRPEVLLQSEGATSSSICKLDGLVHRFITLLADTSDSRSSSERVADANMAC  
 RKLAVAHVPLLRLHPLMIAALLHGRTHLNFOEFRQONHLAFFLHVLGILELLQPRVFQSEHQGALWDCLRSFI  
 RLLLNRYKSSRRHLAPFISKFVQFIHKYVGCSPAFAVFLQKHAEPLHDLSDNSDLVMLKSLLAGLSLPSRDG  
 RTDQGLDEEGEDERSAGSLPLVSVSLSTPLTVADVAPHMKRLSRGRAVEDVLETLSIDIEMSRRRPEVLGFFS  
 TNLQRLMSSAAEESCRNLAFSLALRSIQNNPSIAADFLPTFMYCLGSRDFEVVQTALRNLPEYTLQCQEHAAV  
 LHRAFLVGVYQIDTSAQISEALKILHMEAVM\*

>ENSMUSP00000041863\_c.1314:C>G\_p.L439V ENSMUST00000038699.13|Ap5z1-  
 201|ENSMUSG00000039623|+|chr5:g.142459666:C>G

MFSAGAESLLHQAREIQDEELRRFCRVTKLLQEQAPGPATVDALQRLFLIVSATKYPRRLEKMCVDLLQTTLC  
 LPASPEQLQVLCAILREMSPFNDLALSCDHTPNTRQLSLVASVLLAQGDRKGEIRCVSQRIFKILENRQPEG  
 PSVRPLLPILSKVIGLAPGILMEDQTNLLSKRLVDWLYASIQGLPYSGGFFSTPRTROPGPITEVDGAVAS  
 DFFTVLSTGQHFTEDQWVNMQAFSMLRKWLLHSGPEDPCSPDADKSELEGSTLSVLSAASTASRLPPRERL  
 REVAFEYCQRLLQSNRRALRKGSDQLQKACLVEAVSVLDVLCRQDPSFLYRTLSCCLKALHRRLEGDPGSE  
 LVPLAQFFLNHGEEAAMDAAEAVYQQLRGLPSERFHSPTLAFEVIFHCTHNLALFDSHFLSLLRSLFSLFKF  
 VAWNSPPLTAEFVLLPALVDAGTAVEMHALLDLPLCLTAALDLQLRSTQTPSERLLWDISLRVPSCLEAFQD  
 PQFQGLFRHLRRTKASGSTERLTPHQLVKPMASCARVLTQCAEAVPVLLQAFFSAVTQADGALINQLALLL  
 ERSADSLVPPVQYEAARHGVLSSQLLVLCCKLPSLVLELSELEFVGSVSSIHSRASVFTCVVWAIGEYLSVT  
 WDKRCTAEQINKFEALEALLFEVTQSRPLADLPCPPEVVTALMTTLTKLASRSQDLIPRVSFLSKMRTLA  
 QNPATSSVHSEEGAESIRTRASELLTLLKMPVSAQFVFTPPAGVCQPRYHRDTNVALPLALRTVSRIVEKEAG  
 LLPG\*

>ENSMUSP00000143179\_c.1314:C>G\_p.L439V ENSMUST00000196055.2|Ap5z1-202|ENSMUSG00000039623|+|chr5:g.142459666:C>G  
MFSAGAESLLHQAREIQDEELRRFCSRVTKLLQEAPGPATVDALQRLFLIVSATKYPRRLEKMCVDLLQTTLC  
LPASPEQLQVLC AAILREMSPFNDLALSCDHTPNTRQLSLVASVLLAQGDRKGEIRCVSQRIFKILENRQPEG  
PSVRPLLPILSKVIGLAPGILMEDQTNLLSKRLVDWLRYSIQQGLPYSGGFFSTPRTRQPGPI TEVDGAVAS  
DFFTVLSTGQHFTEDQWVNMQAFSMLRKWLLHSGPEDPCSPDADDKSELEGSTLSVLSAASTASRLLPPRERL  
REVAFEYCQRLLQSNRRALRKGDSDLQKACLVEAVSVLDVLCRQDPSFLYRTL SCLKALHRRRLGEDPGSERA  
LVPLAQFFLNHGEEAAMDAAEAVYGQLLRGLPSERFHSPTLAFEVIHFCTHNLALFDSHFLSLLRLSFP SLFKF  
VAWNSPPLTAEFVLLPALVDAGTAVEMHLALLDLPLCLTAALDLQLRVPSCLEAFQDPQFQGLFRHLLRKTAS  
GSTERLTPHLQVLPKPMASCARVTQCAEAVPVLLQAFFSAVTQTADGALINQLALLLLERSDSLYPVPQYEARV  
HGVLSQQLLVLCCLKPSLVVLSRELLFVGSVSSIHSRASVFTCVVWAI GEYLSVTWDRKCTAEQINKFFEA  
LEALLFEVTQSRPLADLPCCPPEVVTALMTTLTKLASRSQDLIPRVSLFSLKMRTLAQN PATSSVHSEEGAES  
IRTRASELLTLLKMP SVAQVFVTPPAGVCQPRYHRDTNVALPLALR TVSRLVEKEAGLLPG\*  
>ENSMUSP00000064539\_c.3039:C>G\_p.R1014G ENSMUST00000063635.15|Radil-201|ENSMUSG00000029576|-|chr5:g.142471235:G>C  
MFYGTQLIMSPPTKNKLRQS QLLSTMLSR TLSYKYRDL DSTFC SLGASDDPSELSTQLSAPGV LKVF GDSVC  
TGTHYKSVLATGSSSAQELVKEALERYALDPECAGQYVLC DVVQGAGDSGQRWQAQCFRVFGDNEKPLLIQEL  
WKPREGLSRRFELRKKSDVEELASRDVDTT TAGINAQARRLQIRAKGTPALTSEAAQSSPPTRLRRTVSETS  
LSPAPSLPEAAQRPEEPVPEAMRYSLYQC PHLLLLLQGY SQQHDSL VYVLSKERHTV GQRT PSSKPSISLSAPD  
I LPLHCTIRRHQSPEGGPAGTRLVLEPITGASVSVNFSEVGRNPVVLQHGDL LSLGLY YLLL FDKDPGQAQPLP  
ACALARLGAAPQSCRMCGAVLRARGAPSLPAAVVRRRSLLLEFE PDVEDTLLQRIIMTLIEPGDDHKLT PAF L  
LCLCIQHSAMHFQPGTFRHLLKISKRV RDTVWEKTKELAEKQAQLQEPI SWASFP MADLVPDLQHILFWMSN  
SIELLYFIQQKSPLYVQSMEEELDVTGSKESLF SCTLTASEEAMAALEEVVLYAFQQC VY YLSKCLYVCLPAL  
LECPPFQTERRESWRSGPALPEELRRVSVFQATL DLLQQLQMHPEVASQMLAYLFFFSGTLLLNQVLDKGPS  
LSCFHWPRGVQVCARLQQFLEWARSAGLGAPAERFFRKL SCTLHLLATPRAQLIQMSWATLRVTFPALNPAQL  
HRLLTQYQLASAMGPVSAWEPGAPDGPEAFQSEDI LESYENPPP I VLP SQGFQVDLEADCVEDSIYQHLLYIR  
HFPLWGLRGQASPD SGPAQ PESI EGLYHTIPEGHLEHGCGPLANRDPGRVAVETAPPHSLPVTGAPRAQGPGR  
QPTRGDRRGSQAGSLHTDSSCMLTTPSTPLGLEPAGPSWPEPSGLCGRAVL DQQRNGPGLPGAVLEGD AIQD  
AEPPEAEASSPSSAEDFCYVFMVELERGPSGLGMGLIDGMHTPLGAQGLYIQ TLLPGSPAASDGGLSLGDQIL  
EVNGSSLRGVSYMRVLDLIRHGGKMRFLVAKSDMETAKKIRFRNPPS\*  
>ENSMUSP00000082910\_c.3126:C>G\_p.R1043G ENSMUST00000085758.10|Radil-202|ENSMUSG00000029576|-|chr5:g.142471235:G>C  
MGSSIFLGLQPSPSHWLKSSVVIHEDAPT MFYGTQLIMSPPTKNKLRQS QLLSTMLSR TLSYKYRDL DSTFC  
SLGASDDPSELSTQLSAPGV LKVF GDSVCTGTHYKSVLATGSSSAQELVKEALERYALDPECAGQYVLC DVVQG  
QAGDSGQRWQAQCFRVFGDNEKPLLIQELWKPREGLSRRFELRKKSDVEELASRDVDTT TAGINAQARRLQIR  
RAKGTPALTSEAAQSSPPTRLRRTVSETSLS PAPS LPEAAQRPEEPVPEAMRYSLYQC PHLLLLLQGY SQQHDS  
LVYVLSKERHTV GQRT PSSKPSISLSAPD I LPLHCTIRRHQSPEGGPAGTRLVLEPITGASVSVNFSEVGRNP  
VVLQHGDL LSLGLY YLLL FDKDPGQAQPLPACALARLGAAPQSCRMCGAVLRARGAPSLPAAVVRRRSLLLEFE  
PDVEDTLLQRIIMTLIEPGDDHKLT PAF L LCLCIQHSAMHFQPGTFRHLLKISKRV RDTVWEKTKELAEKQA  
QLQEPI SWASFP MADLVPDLQHILFWMSNSIELLYFIQQKSPLYVQSMEEELDVTGSKESLF SCTLTASEEAM  
AALEEVVLYAFQQC VY YLSKCLYVCLPALLECPPFQTERRESWRSGPALPEELRRVSVFQATL DLLQQLQMH  
PEVASQMLAYLFFFSGTLLLNQVLDKGPSLSCFHWPRGVQVCARLQQFLEWARSAGLGAPAERFFRKL SCTLH  
LLATPRAQLIQMSWATLRVTFPALNPAQLHRLLTQYQLASAMGPVSAWEPGAPDGPEAFQSEDI LESYENPPP  
I VLP SQGFQVDLEADCVEDSIYQHLLYIRHFLWGLRGQASPD SGPAQ PESI EGLYHTIPEGHLEHGCGPLANR  
DPGRVAVETAPPHSLPVTGAPRAQGPGRQPTRGDRRGSQAGSLHTDSSCMLTTPSTPLGLEPAGPSWPEPSG  
LCGRAVL DQQRNGPGLPGAVLEGD AIQDAEPPEAEASSPSSAEDFCYVFMVELERGPSGLGMGLIDGMHTPL  
GAQGLYIQ TLLPGSPAASDGGLSLGDQILEVNGSSLRGVSYMRVLDLIRHGGKMRFLVAKSDMETAKKIRFR  
NPPS\*  
>ENSMUSP00000106411\_c.2319:C>G\_p.R774G ENSMUST00000110784.8|Radil-203|ENSMUSG00000029576|-|chr5:g.142471235:G>C  
MRYSLYQC PHLLLLLQGY SQQHDSL VYVLSKERHTV GQRT PSSKPSISLSAPD I LPLHCTIRRHQSPEGGPAGT  
RLVLEPITGASVSVNFSEVGRNPVVLQHGDL LSLGLY YLLL FDKDPGQAQPLPACALARLGAAPQSCRMCGAVL  
RARGAPSLPAAVVRRRSLLLEFE PDVEDTLLQRIIMTLIEPGDDHKLT PAF L LCLCIQHSAMHFQPGTFRHLL  
LKISKRV RDTVWEKTKELAEKQAQLQEPI SWASFP MADLVPDLQHILFWMSNSIELLYFIQQKSPLYVQSMEE  
ELDVTGSKESLF SCTLTASEEAMAALEEVVLYAFQQC VY YLSKCLYVCLPALLECPPFQTERRESWRSGPALP  
EELRRVSVFQATL DLLQQLQMHPEVASQMLAYLFFFSGTLLLNQVLDKGPSLSCFHWPRGVQVCARLQQFLE  
WARSAGLGAPAERFFRKL SCTLHLLATPRAQLIQMSWATLRVTFPALNPAQLHRLLTQYQLASAMGPVSAWEP  
GAPDGPEAFQSEDI LESYENPPP I VLP SQGFQVDLEADCVEDSIYQHLLYIRHFLWGLRGQASPD SGPAQ PESI

IEGLYHTIPEGHLEGHGCPLANRDPGRVAVETAPPHSLPVTGAPRAQGPPGRQPTRGDRRGSQAGSLHTDSSC  
MLTPPSTPLGLEPAGPSWPEPSGLCGRAVLGDQQRNGPGLPGAVLEGDAIQDAEPPAEASSPSSSAEDFCYVF  
MVELERGPSSGLMGLIDGMHTPLGAQGLYIQTLLPGSPAASDGGLSLGDQILEVNGSSLRGVSYMRVAVDLIRH  
GGKMRFLVAKSDMETAKKIRFRNPPS\*

>ENSMUSP00000106412\_c.3108:C>G\_p.R1037G ENSMUST00000110785.2|Rad1-  
204|ENSMUSG00000029576|-|chr5:g.142471235:G>C  
MFYGTQLIMSPPTKNKLRQSLLSTMLSRTLASYKYRDLDTFCSLGASDDPSELSTQLSAPGVLVKVFSDSVC  
TGTHYKSVLATGSSSAQELVKEALERYALDPECAGQYVLCVVGQAGDSGQRWQAQCFRVFGDNEKPLLIQEL  
WKPREGLSRRFELRKKSDVEELASRDVDTTATAGINAQARRLQIRIRAKGTPALTSEAAQSSPPTLRRTVSETS  
LSPAPSLPEAAQRPEEPVPEAMRYSLYQCPhLLLLLQGYSSQHQHDSLVVYVLSKERHTVQRTPESSKPSISLSAPD  
IILPLHCTIRRHQSPPEGGPAGTRLVLEPITGASVSVNFSEVGRNPVVLQHGDLSSLGLYLLLFKDPGQAQPLP  
ACALARLGAAPQSCRMCGAVLRARGAPSLPAAVVRRRSLLEFEFDPVEDTLLQRIIMTLIEPGDDHKLTPAFL  
LCLCIQHSAMHFQPGTFRHLLKISKRVDRDVTVEKTKELAEKQAQLQEPISWASFPMDLVPDLQHILFWMNSN  
SIELLYFIQQKSPLYVQSMEEELDVTGSKESLFSCTLTASEEAMAALEEVVLYAFQQCQVYLLSKCLYVCLPAL  
LECPFFQTERRESWRSGPALPEELRRVSVVFQATLDDLQQLQMHPEVASQMLAYLFFFSGTLLLNQVLDKGPS  
LSCFHWPRGVQVCARLQGFLEWARSAGLGAPAEFRFRKLSCTLHLLATPRAQLIQMSWATLRVTFPALNPAQL  
HRLLTQYQLASAMGPVSAWEPGAPDGEAFQSEDILESYENPPPIVLPSSQGFQVDLEADCVEDSIYQHLLYIR  
HFLWGLRGQASPDSPGPAQPESEIEGAIMDTWAIIPSSGPQRLSTFSSQGLYHTIPEGHLEGHGCPLANRDPGRVA  
VETAPPHSLPVTGAPRAQGPPGRQPTRGDRRGSQAGSLHTDSSCMLTPPSTPLGLEPAGPSWPEPSGLCGRAV  
LDGQRNGPGLPGAVLEGDAIQDAEPPAEASSPSSSAEDFCYVFMVELERGPSSGLMGLIDGMHTPLGAQGLY  
IQTLLPGSPAASDGGLSLGDQILEVNGSSLRGVSYMRVAVDLIRHGGKMRFLVAKSDMETAKKIRFRNPPS\*

>ENSMUSP00000124899\_c.117:GT>G\_p.V40del-fs ENSMUST00000160629.8|Cpsf4-  
205|ENSMUSG00000029625|+|chr5:g.145107339:GT>G  
MQEIIASVDHIKFDLEIAVEQQQLGAQPLPFPFGMDKSGAAAVNSF

>ENSMUSP00000069243\_c.117:GT>G\_p.V40del-fs ENSMUST00000070487.12|Cpsf4-  
201|ENSMUSG00000029625|+|chr5:g.145107339:GT>G  
MQEIIASVDHIKFDLEIAVEQQQLGAQPLPFPFGMDKSGAAAVNSF

>ENSMUSP00000125019\_c.117:GT>G\_p.V40del-fs ENSMUST00000160422.8|Cpsf4-  
202|ENSMUSG00000029625|+|chr5:g.145107339:GT>G  
MQEIIASVDHIKFDLEIAVEQQQLGAQPLPFPFGMDKSGAAAVNSF

>ENSMUSP00000124966\_c.117:GT>G\_p.V40del-fs ENSMUST00000162244.8|Cpsf4-  
207|ENSMUSG00000029625|+|chr5:g.145107339:GT>G  
MQEIIASVDHIKFDLEIAVEQQQLGAQPLPFPFGMDKSGAAAVNSF

>ENSMUSP00000137910\_c.117:GT>G\_p.V40del-fs ENSMUST00000160574.8|Cpsf4-  
204|ENSMUSG00000029625|+|chr5:g.145107339:GT>G  
MQEIIASVDHIKFDLEIAVEQQQLGAQPLPFPFGMDKSGAAAVNSF

>ENSMUSP00000125640\_c.21:GT>G\_p.V8del-fs ENSMUST00000160762.2|Cpsf4-  
206|ENSMUSG00000029625|+|chr5:g.145107339:GT>G  
XDKSGAAAVNSF

>ENSMUSP00000124899\_c.118:T>TGG\_p.V40ins-fs ENSMUST00000160629.8|Cpsf4-  
205|ENSMUSG00000029625|+|chr5:g.145107340:T>TGG  
MQEIIASVDHIKFDLEIAVEQQQLGAQPLPFPFGMDKSGAAAVNSF

>ENSMUSP00000069243\_c.118:T>TGG\_p.V40ins-fs ENSMUST00000070487.12|Cpsf4-  
201|ENSMUSG00000029625|+|chr5:g.145107340:T>TGG  
MQEIIASVDHIKFDLEIAVEQQQLGAQPLPFPFGMDKSGAAAVNSF

>ENSMUSP00000125019\_c.118:T>TGG\_p.V40ins-fs ENSMUST00000160422.8|Cpsf4-  
202|ENSMUSG00000029625|+|chr5:g.145107340:T>TGG  
MQEIIASVDHIKFDLEIAVEQQQLGAQPLPFPFGMDKSGAAAVNSF

>ENSMUSP00000124966\_c.118:T>TGG\_p.V40ins-fs ENSMUST00000162244.8|Cpsf4-  
207|ENSMUSG00000029625|+|chr5:g.145107340:T>TGG  
MQEIIASVDHIKFDLEIAVEQQQLGAQPLPFPFGMDKSGAAAVNSF

>ENSMUSP00000137910\_c.118:T>TGG\_p.V40ins-fs ENSMUST00000160574.8|Cpsf4-  
204|ENSMUSG00000029625|+|chr5:g.145107340:T>TGG  
MQEIIASVDHIKFDLEIAVEQQQLGAQPLPFPFGMDKSGAAAVNSF

>ENSMUSP00000125640\_c.22:T>TGG\_p.V8ins-fs ENSMUST00000160762.2|Cpsf4-  
206|ENSMUSG00000029625|+|chr5:g.145107340:T>TGG  
XDKSGAAAVNSF

>rs108505794\_ENSMUSP00000091659\_c.1296:T>C\_p.Y433H  
ENSMUST00000094111.6|Cyp3a41a-201|ENSMUSG00000075551|-  
|chr5:g.145635069:A>G  
MNLFSALSALDITWVLLAIILVLLYRYGTRTHGLFKKQGI PGPKPLPFLGTVLNYYKGLWKFDMECYEKYKGTWG  
LFDGQMPFLVITDPEMIKNVLVKECF SVFTNRREFGPGVIMSKAISISKDEEWKRYRALLSPTFTSGKLEKEMF  
PVIEQYGDILVKYLMQEAEGKGPVTMKDVLGAYSIDVITSTSTSGVNVDSLNNPEDPFVEKAKGILRVDFDPL  
VFSVVLFPFLTPVYEMLNICMFPKDSIEFFKKFVNRMKESRLDSKQKHRVDFLQMMNAHNNKDKD SHKALS  
DMEITAQSI VFI FAGYETTSSTLSFTLYCLATHPDIQKQLQEEI DETLPNKAPPTYDTVMEMEYLDMLVNETL  
RLYPIGNRLERFCKKDVELNGVYIPKGSTVMIPSYALHHD PQHWPEPEEFQPERFSKENKGSIDPYLYMPFGI  
GPRNCIGMRFAFMTMKLALTKVMQNFSFQPCQETQIPLKLSRQGLLQPEKPIVLKVVPRD VVITGA\*  
>ENSMUSP00000091659\_c.877:A>C\_p.D293A ENSMUST00000094111.6|Cyp3a41a-  
201|ENSMUSG00000075551|-|chr5:g.145639089:T>G  
MNLFSALSALDITWVLLAIILVLLYRYGTRTHGLFKKQGI PGPKPLPFLGTVLNYYKGLWKFDMECYEKYKGTWG  
LFDGQMPFLVITDPEMIKNVLVKECF SVFTNRREFGPGVIMSKAISISKDEEWKRYRALLSPTFTSGKLEKEMF  
PVIEQYGDILVKYLMQEAEGKGPVTMKDVLGAYSIDVITSTSTSGVNVDSLNNPEDPFVEKAKGILRVDFDPL  
VFSVVLFPFLTPVYEMLNICMFPKDSIEFFKKFVNRMKESRLDSKQKHRVDFLQMMNAHNNKDKD SHKALS  
AMEITAQSI VFI FAGYETTSSTLSFTLYCLATHPDIQKQLQEEI DETLPNKAPPTYDTVMEMEYLDMLVNETL  
RLYPIGNRLERFCKKDVELNGVYIPKGSTVMIPSYALHHD PQHWPEPEEFQPERFSKENKGSIDPYLYMPFGI  
GPRNCIGMRFAFMTMKLALTKVMQNFSFQPCQETQIPLKLSRQGLLQPEKPIVLKVVPRD VVITGA\*  
>rs108243600\_ENSMUSP00000091659\_c.493:A>G\_p.E165G  
ENSMUST00000094111.6|Cyp3a41a-201|ENSMUSG00000075551|-  
|chr5:g.145645714:T>C  
MNLFSALSALDITWVLLAIILVLLYRYGTRTHGLFKKQGI PGPKPLPFLGTVLNYYKGLWKFDMECYEKYKGTWG  
LFDGQMPFLVITDPEMIKNVLVKECF SVFTNRREFGPGVIMSKAISISKDEEWKRYRALLSPTFTSGKLEKEMF  
PVIEQYGDILVKYLMQEAEGKGPVTMKDVLGAYSIDVITSTSTSGVNVDSLNNPEDPFVEKAKGILRVDFDPL  
VFSVVLFPFLTPVYEMLNICMFPKDSIEFFKKFVNRMKESRLDSKQKHRVDFLQMMNAHNNKDKD SHKALS  
DMEITAQSI VFI FAGYETTSSTLSFTLYCLATHPDIQKQLQEEI DETLPNKAPPTYDTVMEMEYLDMLVNETL  
RLYPIGNRLERFCKKDVELNGVYIPKGSTVMIPSYALHHD PQHWPEPEEFQPERFSKENKGSIDPYLYMPFGI  
GPRNCIGMRFAFMTMKLALTKVMQNFSFQPCQETQIPLKLSRQGLLQPEKPIVLKVVPRD VVITGA\*  
>ENSMUSP00000091659\_c.376:G>T\_p.W126L ENSMUST00000094111.6|Cyp3a41a-  
201|ENSMUSG00000075551|-|chr5:g.145645910:C>A  
MNLFSALSALDITWVLLAIILVLLYRYGTRTHGLFKKQGI PGPKPLPFLGTVLNYYKGLWKFDMECYEKYKGTWG  
LFDGQMPFLVITDPEMIKNVLVKECF SVFTNRREFGPGVIMSKAISISKDEELKRYRALLSPTFTSGKLEKEMF  
PVIEQYGDILVKYLMQEAEGKGPVTMKDVLGAYSIDVITSTSTSGVNVDSLNNPEDPFVEKAKGILRVDFDPL  
VFSVVLFPFLTPVYEMLNICMFPKDSIEFFKKFVNRMKESRLDSKQKHRVDFLQMMNAHNNKDKD SHKALS  
DMEITAQSI VFI FAGYETTSSTLSFTLYCLATHPDIQKQLQEEI DETLPNKAPPTYDTVMEMEYLDMLVNETL  
RLYPIGNRLERFCKKDVELNGVYIPKGSTVMIPSYALHHD PQHWPEPEEFQPERFSKENKGSIDPYLYMPFGI  
GPRNCIGMRFAFMTMKLALTKVMQNFSFQPCQETQIPLKLSRQGLLQPEKPIVLKVVPRD VVITGA\*  
>ENSMUSP00000091659\_c.291:T>C\_p.C98R ENSMUST00000094111.6|Cyp3a41a-  
201|ENSMUSG00000075551|-|chr5:g.145650350:A>G  
MNLFSALSALDITWVLLAIILVLLYRYGTRTHGLFKKQGI PGPKPLPFLGTVLNYYKGLWKFDMECYEKYKGTWG  
LFDGQMPFLVITDPEMIKNVLVKECF SVFTNRREFGPGVIMSKAISISKDEEWKRYRALLSPTFTSGKLEKEMF  
PVIEQYGDILVKYLMQEAEGKGPVTMKDVLGAYSIDVITSTSTSGVNVDSLNNPEDPFVEKAKGILRVDFDPL  
VFSVVLFPFLTPVYEMLNICMFPKDSIEFFKKFVNRMKESRLDSKQKHRVDFLQMMNAHNNKDKD SHKALS  
DMEITAQSI VFI FAGYETTSSTLSFTLYCLATHPDIQKQLQEEI DETLPNKAPPTYDTVMEMEYLDMLVNETL  
RLYPIGNRLERFCKKDVELNGVYIPKGSTVMIPSYALHHD PQHWPEPEEFQPERFSKENKGSIDPYLYMPFGI  
GPRNCIGMRFAFMTMKLALTKVMQNFSFQPCQETQIPLKLSRQGLLQPEKPIVLKVVPRD VVITGA\*  
>rs107987353\_ENSMUSP00000091659\_c.111:A>G\_p.I38V  
ENSMUST00000094111.6|Cyp3a41a-201|ENSMUSG00000075551|-  
|chr5:g.145654788:T>C  
MNLFSALSALDITWVLLAIILVLLYRYGTRTHGLFKKQGVPGPKPLPFLGTVLNYYKGLWKFDMECYEKYKGTWG  
LFDGQMPFLVITDPEMIKNVLVKECF SVFTNRREFGPGVIMSKAISISKDEEWKRYRALLSPTFTSGKLEKEMF  
PVIEQYGDILVKYLMQEAEGKGPVTMKDVLGAYSIDVITSTSTSGVNVDSLNNPEDPFVEKAKGILRVDFDPL  
VFSVVLFPFLTPVYEMLNICMFPKDSIEFFKKFVNRMKESRLDSKQKHRVDFLQMMNAHNNKDKD SHKALS  
DMEITAQSI VFI FAGYETTSSTLSFTLYCLATHPDIQKQLQEEI DETLPNKAPPTYDTVMEMEYLDMLVNETL  
RLYPIGNRLERFCKKDVELNGVYIPKGSTVMIPSYALHHD PQHWPEPEEFQPERFSKENKGSIDPYLYMPFGI  
GPRNCIGMRFAFMTMKLALTKVMQNFSFQPCQETQIPLKLSRQGLLQPEKPIVLKVVPRD VVITGA\*

>ENSMUSP00000069932\_c.972:C>T\_p.H325Y ENSMUST00000067479.6|Cyp3a44-201|ENSMUSG00000054417|-|chr5:g.145725227:G>A  
MNLFSALS LDTLVLLAIIILVLLYRYGTRTHGLFKKQGI PGPKPLPFLGTVLNYYTGIWKFDMECEYKYGKTWG  
LFDGQTPLLVITDPETIKNVLVKDCLSVFTNRREFGPGVIMSKAISISKDEEWKRYRALLSPTFTSGRLKEMF  
PVIEQYGDILVKYLRQEAEKGM P VAMKDVLGAYSM D VITSTSF GVNVD SLNPNEDPFVVEAKFLRVDFFDPL  
LFSVVLFP LLTPVYEMLNICMF P NDSIEF FKKFVDRMQESRLDSNQKHRVDLFLQ LMMNSHNNSKDKDSHKAFS  
NMEITVQSIIIFISAGYETTSTLSFTLYCLATYPDIQKKLQAEIDKALPNKATPTCDTVMEMEYLD MVLNETL  
RLYP I VTRLRERVCKKDVELNGVYI PKGSMVMIPSYALHHD PQHWPDP EEFQPERF SKENKGSIDPYVYLPFGI  
GPRNCIGMRFALMNMKLA VTKVLQNF SFQPCQETQIPLKLSRQGI LQPEKPIVLKVVPRDAVITGA\*  
>ENSMUSP00000069932\_c.769:A>G\_p.Q257R ENSMUST00000067479.6|Cyp3a44-201|ENSMUSG00000054417|-|chr5:g.145728453:T>C  
MNLFSALS LDTLVLLAIIILVLLYRYGTRTHGLFKKQGI PGPKPLPFLGTVLNYYTGIWKFDMECEYKYGKTWG  
LFDGQTPLLVITDPETIKNVLVKDCLSVFTNRREFGPGVIMSKAISISKDEEWKRYRALLSPTFTSGRLKEMF  
PVIEQYGDILVKYLRQEAEKGM P VAMKDVLGAYSM D VITSTSF GVNVD SLNPNEDPFVVEAKFLRVDFFDPL  
LFSVVLFP LLTPVYEMLNICMF P NDSIEF FKKFVDRMRERLDSNQKHRVDLFLQ LMMNSHNNSKDKDSHKAFS  
NMEITVQSIIIFISAGYETTSTLSFTLYCLATHPDIQKKLQAEIDKALPNKATPTCDTVMEMEYLD MVLNETL  
RLYP I VTRLRERVCKKDVELNGVYI PKGSMVMIPSYALHHD PQHWPDP EEFQPERF SKENKGSIDPYVYLPFGI  
GPRNCIGMRFALMNMKLA VTKVLQNF SFQPCQETQIPLKLSRQGI LQPEKPIVLKVVPRDAVITGA\*  
>ENSMUSP00000158111\_c.547:T>C\_p.F183S ENSMUST00000202355.2|Vmn1r261-201|ENSMUSG00000106893|-|chr6:g.3143954:A>G  
MFGNSSILFYIIILIFTEKHLTPKDLIEHLTFANYLTVILRGFPQTMSYFGFNFLDDMGCKLIVYIS\*ITR  
GVSLYAMCLLSCFQA ITTSPNNSRWIKLKYRATKYIGPSCSVSWLVHLLLNILTPRESGTNYKKNATNRLSY  
GYGLFASDSVATTLYISLVCFSDFVFLGLMACSSISMVSI LYRHKRQVKHHSQAQFLKVS PEDRATQTILI  
LLCTFVISYSFSSIVAIIRTYLNY PVIWGVNI FTSL EIFFPFCPFVLI TNMRS S SNLFLPCLGKR\*  
>rs48847283\_ENSMUSP00000158111\_c.220:G>A\_p.G74E  
ENSMUST00000202355.2|Vmn1r261-201|ENSMUSG00000106893|-|chr6:g.3144281:C>T  
MFGNSSILFYIIILIFTEKHLTPKDLIEHLTFANYLTVILRGFPQTMSYFGFNFLDDMGCKLIVYIS\*ITR  
EVSLYAMCLLSCFQA ITTSPNNSRWIKLKYRATKYIGPSCSVSWLVHLLLNILTPRESGTNYKKNATNRLSY  
GYGLFASDSVATTLYISLVCFSDFVFLGLMACSSIFMVSILYRHKRQVKHHSQAQFLKVS PEDRATQTILI  
LLCTFVISYSFSSIVAIIRTYLNY PVIWGVNI FTSL EIFFPFCPFVLI TNMRS S SNLFLPCLGKR\*  
>ENSMUSP00000158111\_c.207:T>C\_p.70R ENSMUST00000202355.2|Vmn1r261-201|ENSMUSG00000106893|-|chr6:g.3144294:A>G  
MFGNSSILFYIIILIFTEKHLTPKDLIEHLTFANYLTVILRGFPQTMSYFGFNFLDDMGCKLIVYISRITR  
GVSLYAMCLLSCFQA ITTSPNNSRWIKLKYRATKYIGPSCSVSWLVHLLLNILTPRESGTNYKKNATNRLSY  
GYGLFASDSVATTLYISLVCFSDFVFLGLMACSSIFMVSILYRHKRQVKHHSQAQFLKVS PEDRATQTILI  
LLCTFVISYSFSSIVAIIRTYLNY PVIWGVNI FTSL EIFFPFCPFVLI TNMRS S SNLFLPCLGKR\*  
>ENSMUSP00000135076\_c.862:C>A\_p.P288Q ENSMUST00000176551.3|Peg10-203|ENSMUSG00000092035|+|chr6:g.4756288:C>A  
MLQIHMPGRPTLFV RAMIDSGASGNFIDQDFVIQNAIPLRIKDWPMVEAIDGHPIASGP IILETHHLIVDLG  
DHREILSFDVTQSPFFPIVLGIRWLSTHDPHITWSTRSIVFNSDYCRLRCRMFAQIPSNLLFTVPQPNLHPLYL  
LHHVHPHVHPMHQHLHQLHFLHPDPHQYPHPDPHYHHHQADMQHQLQYLYQYLYYHLYPVMHHHLPPD  
QHEHLHEYLHQYLYHQLHQLHFLHHHLHPDLHQYLYQYLYHNHMNDP HHHPHDPDPDPHPPHQPDPHQPDPHQ  
DPPHQPDPHQPDPHQPDPHQPDPHQPDPHQPDPHQPDPHQPDPHQPDPHQPDPHQPDPHQPDPHQPDPHQPDPH  
HPQPQPHQPQHPNHPQPPFFYHMAGFR IYHPVRYYYIQNVYTPVDEHVYPGHRVVDPNIEMIPGAHSLPSGH  
LYSMSESEMNALRNFVDRNVKGLMTPTVAPNGAQLVQVLRGKWLQVTYNCRAPQSGT IQNQYL R MSLPNMGD  
PAHLASYGEFVQVPGY PYPAYVY YTS PHMTAWY PVGRD VHGRI I VVPV VITW S QNTNRQPPV PQY P P P P P  
PPPPPPPPPPPPPASSCSAA\*  
>ENSMUSP00000127306\_c.2065:C>A\_p.P689Q ENSMUST00000166678.2|Peg10-201|ENSMUSG00000092035|+|chr6:g.4756288:C>A  
MAAAGSSNC P P P P P P P P N N N N N N N T P K S P G V P D A E D D D E R R H D E L P E D I N N F D E D M N R Q F E N M N L L D Q V E L  
LAQS Y S L L D H L D D F D D D D E D D D F D P E P D Q D E L P E Y S D D D D L E L Q G A A A A P I P N F F S D D D C L E D L P E K F D G N P D  
MLGP F M Y Q C Q L F M E K S T R D F S V D R I R V C F V T S M L I G R A A R W A T A K L Q R C T Y L M H N Y T A F M M E L K H V F E D P Q R R  
E A A K R K I R R L Q G P G P V V D Y S N A F Q M I A Q D L D W T E P A L M D Q F Q E G L N P D I R A E L S R Q E A P K T L A A L I T A C I H I  
E R R L A R D A A A K P D P S P R A L V M P P N S Q T D P T E P V G G A R M R L S K E E K E R R R K M N L D Y C G N G H F A D T C P A K A S K  
N S P P G L P G P A V G G P S A T G P E R I R S P P S E A S T Q H L Q V M L Q I H M P G R P T L F V R A M I D S G A S G N F I D Q D F V I Q N A I  
P L R I K D W P M V E A I D G H P I A S G P I I L E T H H L I V D L G D H R E I L S F D V T Q S P F F P I V L G I R W L S T H D P H I T W S T R  
S I V F N S D Y C R L R C R M F A Q I P S N L L F T V P Q P N L H P Y L L H H V H P H V H P M H Q H L H Q H L H Q F L H P D P H Q Y P H P D P H  
Y H H H Q Q A D M Q H Q L Q Q Y L Y Q Y L Y H L Y P V M H H H L P P D Q H E H L H E Y L H Q Y L H Q Y L H Q F L H H H L H P D L H Q Y L Y Q Y L



HNHMNPDPHHPHPDPPQDPHHPHQDPHQHDPHQDPPHQDPHQHDPHQDPPHQDPHQHDPHQDPPHQDP  
 HQDAHQHQDQPHQDAHQDQPHQDAHQDQPHMDPHLHQHQHPQPPHPQHPNHPQPPFFYHMAGFRIYHPVRYYY  
 IQNVYTPVDEHVYPGHRVVDPNIEIPGAHSLPSGHLYSMSESEMNALRNFVDRNVKDGMLTPTVAPNGAQVL  
 QVKGWKLQVTYNCRAPQSGTIQNQYLRLMSLPLNMGDPAHLASGEFVQVPGYYPAYVYYTSPHMMAWYPVG  
 RDVHGRIIVVPVVI TW SQNTNRQPPVPQYPPPQPPPPPPPPPPPPPPPPASSCSAA\*  
 >ENSMUSP00000135076\_c.879:CCTC>G\_p.PP294del ENSMUST00000176551.3|Peg10-  
 203|ENSMUSG00000092035|+|chr6:g.4756305:CCTC>G  
 MLQIHMFGPRTL FVRAMIDSGASGNFIDQDFVIQNAI PLRIKDW PVMVEAIDGHPIASGP I ILETHHLIVDLG  
 DHREILSFVDTQSPFFPIVLGIRWLSTHDPHITWSTRSIVFNNDYCR LRCRMFAQIPSNLLFTVPQPNLHYPYL  
 LHHVHPVHPMHPHMHQHLHQHLLHQFLHPDPHQYHPDPHYHHHQQADMQHQLQOYLQYL YHYHLYPVMHLLPDP  
 QHEHLHEYLHQYLHQYLHQYLFHLLHLPDLHQYLQYLHNNMNPDPHHPHPDPPQDPHHPHQDPHQDPPHQ  
 DAHQDPHQHPDHPQDPPHQDPHQHPDHPQDPPHQDQDAHQHQDHPQDAHQDHPQDAHQDHPMDPHLHQHQ  
 PQQPHPQQHPNHPQPPFFYHMAGFRIYHPVRYYYIQNVYTPVDEHVYPGHRVVDPNIEIPGAHSLPSGHLY  
 SMSESEMNALRNFVDRNVKDGMLTPTVAPNGAQVLQVKGWKLQVTYNCRAPQSGTIQNQYLRLMSLPLNMGDP  
 AHLASGEFVQVPGYYPAYVYYTSPHMMAWYPVGRDVHGRIIVVPVVI TW SQNTNRQPPVPQYPPPQPPPP  
 PPPPPPPPPPPASSCSAA\*  
 >ENSMUSP00000127306\_c.2082:CCTC>G\_p.PP695del ENSMUST00000166678.2|Peg10-  
 201|ENSMUSG00000092035|+|chr6:g.4756305:CCTC>G  
 MAAAGSSNCPPPPPPPPNNTPKSPGVPDAEDDERRHDELPEDEINNFDEDMNRQFENMNLDDQVEL  
 LAQSYSLLDLHDDDFDDDDDDDFDPEPDQDELPEYSDDDDLELQGAAAAPIPNFFSDDDCLEDLPEKFDGNPD  
 MLGPFMYQCQLFMEKSTRDFSVDRI RVCFTSMLI GRAARWATAKLQ RCTYLMHNYTAFMMELKHVFEDPQRR  
 EAAKRKIRRLRQGPGPVDYSNAFQMIAQDLWTEPALMDQFQEGLNPDIRAELSRQEA P KTLAALI TACIHI  
 ERLARDAAAKPDPSRALVMPNSQTDPTPEVGGARMRLSKEEERRRKMNLCLYCGNGGFADTCPAKASK  
 NSPPLGPAVGGPSATGPERIRSPSEASTQHLQVMLQIHMFGPRTL FVRAMIDSGASGNFIDQDFVIQNAI  
 PLRIKDW PVMVEAIDGHPIASGP I ILETHHLIVDLGDHREILSFVDTQSPFFPIVLGIRWLSTHDPHITWSTR  
 SIVFNNDYCR LRCRMFAQIPSNLLFTVPQPNLHYPYLHHPVHPMHPHMHQHLHQHLLHQFLHPDPHQYHPDPH  
 YHHHQADMQHQLQOYLQYL YHYHLYPVMHLLPDPQHEHLHEYLHQYLHQYLHQYLFHLLHLPDLHQYLQYL  
 HNHMNPDPHHPHPDPPQDPHHPHQDPHQHDPHQDQDAHQDPHQHPDHPQDPPHQDHPHQHPDHPQDPPHQDP  
 QDAHQHQDHPQDAHQDHPQDAHQDHPMDPHLHQHQHPQPPHPQQHPNHPQPPFFYHMAGFRIYHPVRYYYI  
 QNVYTPVDEHVYPGHRVVDPNIEIPGAHSLPSGHLYSMSESEMNALRNFVDRNVKDGMLTPTVAPNGAQVLQ  
 VKGWKLQVTYNCRAPQSGTIQNQYLRLMSLPLNMGDPAHLASGEFVQVPGYYPAYVYYTSPHMMAWYPVGR  
 DVHGRIIVVPVVI TW SQNTNRQPPVPQYPPPQPPPPPPPPPPPPPPPPASSCSAA\*  
 >ENSMUSP00000135076\_c.901:AGCATCC>A\_p.QHP301del  
 ENSMUST00000176551.3|Peg10-  
 203|ENSMUSG00000092035|+|chr6:g.4756327:AGCATCC>A  
 MLQIHMFGPRTL FVRAMIDSGASGNFIDQDFVIQNAI PLRIKDW PVMVEAIDGHPIASGP I ILETHHLIVDLG  
 DHREILSFVDTQSPFFPIVLGIRWLSTHDPHITWSTRSIVFNNDYCR LRCRMFAQIPSNLLFTVPQPNLHYPYL  
 LHHVHPVHPMHPHMHQHLHQHLLHQFLHPDPHQYHPDPHYHHHQQADMQHQLQOYLQYL YHYHLYPVMHLLPDP  
 QHEHLHEYLHQYLHQYLHQYLFHLLHLPDLHQYLQYLHNNMNPDPHHPHPDPPQDPHHPHQDPHQDPPHQ  
 DPPHQDHPQDPPHQDPPHQDHPHQHPDHPQDPPHQDQDAHQHQDHPQDAHQDHPQDAHQDHPMDPHLHQHQHP  
 PQQPHPQQHPNHPQPPFFYHMAGFRIYHPVRYYYIQNVYTPVDEHVYPGHRVVDPNIEIPGAHSLPSGHLY  
 SMSESEMNALRNFVDRNVKDGMLTPTVAPNGAQVLQVKGWKLQVTYNCRAPQSGTIQNQYLRLMSLPLNMGDPA  
 HLASGEFVQVPGYYPAYVYYTSPHMMAWYPVGRDVHGRIIVVPVVI TW SQNTNRQPPVPQYPPPQPPPP  
 PPPPPPPPPPPASSCSAA\*  
 >ENSMUSP00000127306\_c.2104:AGCATCC>A\_p.QHP702del  
 ENSMUST00000166678.2|Peg10-  
 201|ENSMUSG00000092035|+|chr6:g.4756327:AGCATCC>A  
 MAAAGSSNCPPPPPPPPNNTPKSPGVPDAEDDERRHDELPEDEINNFDEDMNRQFENMNLDDQVEL  
 LAQSYSLLDLHDDDFDDDDDDDFDPEPDQDELPEYSDDDDLELQGAAAAPIPNFFSDDDCLEDLPEKFDGNPD  
 MLGPFMYQCQLFMEKSTRDFSVDRI RVCFTSMLI GRAARWATAKLQ RCTYLMHNYTAFMMELKHVFEDPQRR  
 EAAKRKIRRLRQGPGPVDYSNAFQMIAQDLWTEPALMDQFQEGLNPDIRAELSRQEA P KTLAALI TACIHI  
 ERLARDAAAKPDPSRALVMPNSQTDPTPEVGGARMRLSKEEERRRKMNLCLYCGNGGFADTCPAKASK  
 NSPPLGPAVGGPSATGPERIRSPSEASTQHLQVMLQIHMFGPRTL FVRAMIDSGASGNFIDQDFVIQNAI  
 PLRIKDW PVMVEAIDGHPIASGP I ILETHHLIVDLGDHREILSFVDTQSPFFPIVLGIRWLSTHDPHITWSTR  
 SIVFNNDYCR LRCRMFAQIPSNLLFTVPQPNLHYPYLHHPVHPMHPHMHQHLHQHLLHQFLHPDPHQYHPDPH  
 YHHHQADMQHQLQOYLQYL YHYHLYPVMHLLPDPQHEHLHEYLHQYLHQYLHQYLFHLLHLPDLHQYLQYL  
 HNHMNPDPHHPHPDPPQDPHHPHQDPHQHDPHQDPPHQDHPQDPPHQDQDAHQHQDHPQDAHQDHPMDPHLHQHQ  
 DAHQHQDHPQDAHQDHPQDAHQDHPMDPHLHQHQHPQPPHPQQHPNHPQPPFFYHMAGFRIYHPVRYYYIQ

NVYTPVDEHVYPGHRVVDPNIEMIPGAHSLPSGHLYSMSESEMNALRNFVDRNVKDGLMTPTVAPNGAQVLQV  
KRGWKLQVTYNCRAPQSGTIQNYLRMSLPNMGDPAHLASYGEFVQVPGYPYPAYVYYTSPHMMTAWYPVGRD  
VHGRIIVVPVVIWTSQNTNRQPPVPQYPPPPQPPPPPPPPPPPPPPPPASSCSAA\*

>ENSMUSP00000135076\_c.924:CCTC>G\_p.PP309del ENSMUST00000176551.3|Peg10-  
203|ENSMUSG00000092035|+|chr6:g.4756350:CCTC>G  
MLQIHMGRPTLFFVRAMIDSGASGNFIDQDFVIQNAIPLRIKDWVPMVEAIDGHPIASGPIILETHHLIVDLG  
DHREILSFDVTSQSPFFPIVLGIRWLSTHDPHITWSTRSIVFNSDYCRLRCRMFAQIPSNLLFTVPQPNLHPYL  
LHHVHPHVHPMHQHLHQHLHQFLHPDPHQYHPDPHYHHHQADMQHQLQQYLYQYLYHLYPVMHHHLPPD  
QHEHLHEYLHQYLYHQYLYHQFLHHHLHPDLHQYLYQYLYLHNHMNPDPHHHPDPPQDPHHPHQDPHQDPHQ  
DPPHQDPHQDPHQDPHQDPHQDPHQDPHQDPHQDPHQDPHQDPHQDPHQDPHQDPHQDPHQDPHQDPHQDPHQ  
PQPQHPQHPNHPQPPFFYHMAGFRIYHPVRYYYIQNVYTPVDEHVYPGHRVVDPNIEMIPGAHSLPSGHL  
YSMSESEMNALRNFVDRNVKDGLMTPTVAPNGAQVLQVGRGWKLQVTYNCRAPQSGTIQNYLRMSLPNMGD  
AHLASYGEFVQVPGYPYPAYVYYTSPHMMTAWYPVGRDVHGRIIVVPVVIWTSQNTNRQPPVPQYPPPPQPPPP  
PPPPPPPPPPPPASSCSAA\*

>ENSMUSP00000127306\_c.2127:CCTC>G\_p.PP710del ENSMUST00000166678.2|Peg10-  
201|ENSMUSG00000092035|+|chr6:g.4756350:CCTC>G  
MAAAGSSNCPPPPPPPPNNNNNNNTPKSPGVPDAEDDDERRHDELPEIDNNFDEDMNRQFENMNLLDQVEL  
LAQSYSLDLHLDLDDFDDDDDDDFDEPDQDELPEYSDDDDLELQGAAAAPINPFFSDDDCLEDLPEKFDGNPD  
MLGPFMYQCQLFMEKSTRDFSVDRIKRVCFVTSMLIGRAARWATAKLQRCTYLMHNYTAFMMELKHVFEDPQRR  
EAAKRKIRRLRQGGPVDYSNAFQMIADLDWTEPALMDQFQEGLNPDIRAELSRQEAPKTLAALITACIHI  
ERRLARDAAAKPDPSPRALVMPNSQTDPTPEVGGARMRLSKEEKERRRKMNLCLYCGNGGFADTCPAKASK  
NSPPGLPGPAVGGPSATGPERIRSPPSEASTQHLQVMLQIHMGRPTLFFVRAMIDSGASGNFIDQDFVIQNAI  
PLRIKDWVPMVEAIDGHPIASGPIILETHHLIVDLGDHREILSFDVTSQSPFFPIVLGIRWLSTHDPHITWSTR  
SIVFNSDYCRLRCRMFAQIPSNLLFTVPQPNLHPYLLHHVHPHVHPMHQHLHQHLHQFLHPDPHQYHPDPH  
YHHHQADMQHQLQQYLYQYLYHLYPVMHHHLPPDQHEHLHEYLHQYLYHQYLYHQFLHHHLHPDLHQYLYQYL  
HNHMNPDPHHHPDPPQDPHHPHQDPHQDPHQDPHQDPHQDPHQDPHQDPHQDPHQDPHQDPHQDPHQDPHQ  
QDAHQHQDPHQDAHQPDPHQDPHMDPHLHQHPQHPQHPQHPNHPQPPFFYHMAGFRIYHPVRYYYIQNVYTP  
VDEHVYPGHRVVDPNIEMIPGAHSLPSGHLYSMSESEMNALRNFVDRNVKDGLMTPTVAPNGAQVLQV  
VGRGWKLQVTYNCRAPQSGTIQNYLRMSLPNMGDPAHLASYGEFVQVPGYPYPAYVYYTSPHMMTAWYPVGR  
DVHGRIIVVPVVIWTSQNTNRQPPVPQYPPPPQPPPPPPPPPPPPPPPPASSCSAA\*

>ENSMUSP00000135076\_c.967:ATCC>A\_p.DP323del ENSMUST00000176551.3|Peg10-  
203|ENSMUSG00000092035|+|chr6:g.4756393:ATCC>A  
MLQIHMGRPTLFFVRAMIDSGASGNFIDQDFVIQNAIPLRIKDWVPMVEAIDGHPIASGPIILETHHLIVDLG  
DHREILSFDVTSQSPFFPIVLGIRWLSTHDPHITWSTRSIVFNSDYCRLRCRMFAQIPSNLLFTVPQPNLHPYL  
LHHVHPHVHPMHQHLHQHLHQFLHPDPHQYHPDPHYHHHQADMQHQLQQYLYQYLYHLYPVMHHHLPPD  
QHEHLHEYLHQYLYHQYLYHQFLHHHLHPDLHQYLYQYLYLHNHMNPDPHHHPDPPQDPHHPHQDPHQDPHQ  
DPPHQDPHQDPHQDPHQDPHQDPHQDPHQDPHQDPHQDPHQDPHQDPHQDPHQDPHQDPHQDPHQDPHQDPHQ  
PQPQHPQHPNHPQPPFFYHMAGFRIYHPVRYYYIQNVYTPVDEHVYPGHRVVDPNIEMIPGAHSLPSGHL  
YSMSESEMNALRNFVDRNVKDGLMTPTVAPNGAQVLQVGRGWKLQVTYNCRAPQSGTIQNYLRMSLPNMGD  
AHLASYGEFVQVPGYPYPAYVYYTSPHMMTAWYPVGRDVHGRIIVVPVVIWTSQNTNRQPPVPQYPPPPQPPPP  
PPPPPPPPPPPPASSCSAA\*

>ENSMUSP00000127306\_c.2170:ATCC>A\_p.DP724del ENSMUST00000166678.2|Peg10-  
201|ENSMUSG00000092035|+|chr6:g.4756393:ATCC>A  
MAAAGSSNCPPPPPPPPNNNNNNNTPKSPGVPDAEDDDERRHDELPEIDNNFDEDMNRQFENMNLLDQVEL  
LAQSYSLDLHLDLDDFDDDDDDDFDEPDQDELPEYSDDDDLELQGAAAAPINPFFSDDDCLEDLPEKFDGNPD  
MLGPFMYQCQLFMEKSTRDFSVDRIKRVCFVTSMLIGRAARWATAKLQRCTYLMHNYTAFMMELKHVFEDPQRR  
EAAKRKIRRLRQGGPVDYSNAFQMIADLDWTEPALMDQFQEGLNPDIRAELSRQEAPKTLAALITACIHI  
ERRLARDAAAKPDPSPRALVMPNSQTDPTPEVGGARMRLSKEEKERRRKMNLCLYCGNGGFADTCPAKASK  
NSPPGLPGPAVGGPSATGPERIRSPPSEASTQHLQVMLQIHMGRPTLFFVRAMIDSGASGNFIDQDFVIQNAI  
PLRIKDWVPMVEAIDGHPIASGPIILETHHLIVDLGDHREILSFDVTSQSPFFPIVLGIRWLSTHDPHITWSTR  
SIVFNSDYCRLRCRMFAQIPSNLLFTVPQPNLHPYLLHHVHPHVHPMHQHLHQHLHQFLHPDPHQYHPDPH  
YHHHQADMQHQLQQYLYQYLYHLYPVMHHHLPPDQHEHLHEYLHQYLYHQYLYHQFLHHHLHPDLHQYLYQYL  
HNHMNPDPHHHPDPPQDPHHPHQDPHQDPHQDPHQDPHQDPHQDPHQDPHQDPHQDPHQDPHQDPHQDPHQ  
QDAHQHQDPHQDAHQPDPHQDPHMDPHLHQHPQHPQHPQHPNHPQPPFFYHMAGFRIYHPVRYYYIQNVYTP  
VDEHVYPGHRVVDPNIEMIPGAHSLPSGHLYSMSESEMNALRNFVDRNVKDGLMTPTVAPNGAQVLQV  
VGRGWKLQVTYNCRAPQSGTIQNYLRMSLPNMGDPAHLASYGEFVQVPGYPYPAYVYYTSPHMMTAWYPVGR  
DVHGRIIVVPVVIWTSQNTNRQPPVPQYPPPPQPPPPPPPPPPPPPPPPASSCSAA\*

>ENSMUSP00000135076\_c.972:CCACATCAGGATCCACATCAGGATGCACATCAGCATCAGGATCCCCA  
TCAGGATG>C\_p.PHQDPHQDAHQHQDPHQDA325del ENSMUST00000176551.3|Peg10-  
203|ENSMUSG00000092035|+|chr6:g.4756398:CCACATCAGGATCCACATCAGGATGCACATCAG  
CATCAGGATCCCCATCAGGATG>C  
MLQIHMPGRPTLFVVRAMIDSGASGNFIDQDFVIQNAIPLRIKDWPMVEAIDGHPIASGPIILETHHLIVDLG  
DHREILSFDVTSQSPFFPIVLGIRWLSTHDPHITWSTRSIVFNSDYCRLRCRMFAQIPSNLLFTVPQPNLHPYL  
LHHVHPHVHPHMHQHLHQHLHQFLHPDPHQYPHDPHYHHHQQADMQHQLQOYLYQYLYYHLYPVMHHHLPPD  
QHEHLHEYHLHQYLYHQYLYHQFLHHHLHPDLHQYLYQYLYLHNHMNPDPHHPHPDPDPDPHHPHPDPDPHQ  
DPPHQDPHQHPDPHQDPHPHQDPHQDPHQDPHQDAHQDPHMDPHLHQHQHPQPPHPPHPPHPPHPPHPPHPPH  
PPFYHMAGFRIYHPVRYYYIQNVYTPVDEHVYPGHRVDPNIEMIPGAHSLSGHLYSMSESEMNALRNFVDR  
NVKDGLMTPTVAPNGAQVLQVKGWKLQVTYNCRAPQSGTIQNYLRMSLPNMGDAHLASGEFVQVPGYPY  
PAYVYYTSPHMMTAWYPVGRDVGRIIVVPVVIWTSQNTNRQPPVPQYPPPPQPPPPPPPPPPPPPPASSCS  
AA\*

>ENSMUSP00000127306\_c.2175:CCACATCAGGATCCACATCAGGATGCACATCAGCATCAGGATCCCC  
ATCAGGATG>C\_p.PHQDPHQDAHQHQDPHQDA726del ENSMUST00000166678.2|Peg10-  
201|ENSMUSG00000092035|+|chr6:g.4756398:CCACATCAGGATCCACATCAGGATGCACATCAG  
CATCAGGATCCCCATCAGGATG>C  
MAAAGSSNCPPPPPPPPNNNNNNNTPKSPGVDAEDDDERRHDELPEIDNNFDEDMNRQFENMNLDDQVEL  
LAQSYSLLDHLDLDDFDDDDDEDDDFDPEPDQDELPEYSDDDDLELQGAAAAPIPNFFSDDDCLEDLPEKFDGNPD  
MLGPFMYQCQLFMEKSTRDFSVDRIKRVCFVTSMLIGRAARWATAKLQRCTYLMHNYTAFMMELKHVFEDPQRR  
EAAKRKIRRLRQGGPVPVVDYSNAFQMIQDLWTEPALMDQFQEGLNPDIRAELSRQEAPKTLAALITACIHI  
ERRLARDAAAKPDPSPRALVMPNSQTDPTPEVGGARMRLSKEEKERRRKMNLCLYCGNGGFADTCPAKASK  
NSPPGLPGPAVGGPSATGPERIRSPSEASTQHLQVMLQIHMPGRPTLFVVRAMIDSGASGNFIDQDFVIQNAI  
PLRIKDWPMVEAIDGHPIASGPIILETHHLIVDLGDHREILSFDVTSQSPFFPIVLGIRWLSTHDPHITWSTR  
SIVFNSDYCRLRCRMFAQIPSNLLFTVPQPNLHPYLLHHVHPHVHPHMHQHLHQHLHQFLHPDPHQYPHDPH  
YHHHQQADMQHQLQOYLYQYLYYHLYPVMHHHLPPDQHEHLHEYHLHQYLYHQYLYHQFLHHHLHPDLHQYLYQY  
LHNHMNPDPHHPHPDPDPHPPHPPHPPHPPHPPHPPHPPHPPHPPHPPHPPHPPHPPHPPHPPHPPHPPHPPH  
HQDAHQDPHMDPHLHQHQHPQPPHPPHPPHPPHPPHPPHPPHPPHPPHPPHPPHPPHPPHPPHPPHPPHPPH  
VDPNIEMIPGAHSLSGHLYSMSESEMNALRNFVDRNVKDGLMTPTVAPNGAQVLQVKGWKLQVTYNCRAPQ  
SGTIQNYLRMSLPNMGDAHLASGEFVQVPGYPYPAYVYYTSPHMMTAWYPVGRDVGRIIVVPVVIWTSQ  
NTNRQPPVPQYPPPPQPPPPPPPPPPPPPPPPPPPPASSCSAA\*

>ENSMUSP00000135076\_c.984:C>G\_p.P329A ENSMUST00000176551.3|Peg10-  
203|ENSMUSG00000092035|+|chr6:g.4756410:C>G  
MLQIHMPGRPTLFVVRAMIDSGASGNFIDQDFVIQNAIPLRIKDWPMVEAIDGHPIASGPIILETHHLIVDLG  
DHREILSFDVTSQSPFFPIVLGIRWLSTHDPHITWSTRSIVFNSDYCRLRCRMFAQIPSNLLFTVPQPNLHPYL  
LHHVHPHVHPHMHQHLHQHLHQFLHPDPHQYPHDPHYHHHQQADMQHQLQOYLYQYLYYHLYPVMHHHLPPD  
QHEHLHEYHLHQYLYHQYLYHQFLHHHLHPDLHQYLYQYLYLHNHMNPDPHHPHPDPDPDPHHPHPDPDPHQ  
DPPHQDPHQHPDPHQDPHPHQDPHQDPHQDPHQDAHQDAHQHQDPHQDAHQDPHQDAHQDPHMDPHLHQHQ  
HPQPPHPPHPPHPPHPPHPPHPPHPPHPPHPPHPPHPPHPPHPPHPPHPPHPPHPPHPPHPPHPPHPPH  
LYSMSESEMNALRNFVDRNVKDGLMTPTVAPNGAQVLQVKGWKLQVTYNCRAPQSGTIQNYLRMSLPNMGD  
PAHLASGEFVQVPGYPYPAYVYYTSPHMMTAWYPVGRDVGRIIVVPVVIWTSQNTNRQPPVPQYPPPPQPP  
PPPPPPPPPPPPASSCSAA\*

>ENSMUSP00000127306\_c.2187:C>G\_p.P730A ENSMUST00000166678.2|Peg10-  
201|ENSMUSG00000092035|+|chr6:g.4756410:C>G  
MAAAGSSNCPPPPPPPPNNNNNNNTPKSPGVDAEDDDERRHDELPEIDNNFDEDMNRQFENMNLDDQVEL  
LAQSYSLLDHLDLDDFDDDDDEDDDFDPEPDQDELPEYSDDDDLELQGAAAAPIPNFFSDDDCLEDLPEKFDGNPD  
MLGPFMYQCQLFMEKSTRDFSVDRIKRVCFVTSMLIGRAARWATAKLQRCTYLMHNYTAFMMELKHVFEDPQRR  
EAAKRKIRRLRQGGPVPVVDYSNAFQMIQDLWTEPALMDQFQEGLNPDIRAELSRQEAPKTLAALITACIHI  
ERRLARDAAAKPDPSPRALVMPNSQTDPTPEVGGARMRLSKEEKERRRKMNLCLYCGNGGFADTCPAKASK  
NSPPGLPGPAVGGPSATGPERIRSPSEASTQHLQVMLQIHMPGRPTLFVVRAMIDSGASGNFIDQDFVIQNAI  
PLRIKDWPMVEAIDGHPIASGPIILETHHLIVDLGDHREILSFDVTSQSPFFPIVLGIRWLSTHDPHITWSTR  
SIVFNSDYCRLRCRMFAQIPSNLLFTVPQPNLHPYLLHHVHPHVHPHMHQHLHQHLHQFLHPDPHQYPHDPH  
YHHHQQADMQHQLQOYLYQYLYYHLYPVMHHHLPPDQHEHLHEYHLHQYLYHQYLYHQFLHHHLHPDLHQYLYQY  
LHNHMNPDPHHPHPDPDPHPPHPPHPPHPPHPPHPPHPPHPPHPPHPPHPPHPPHPPHPPHPPHPPHPPHPPH  
HQDAHQHQDPHQDAHQDPHQDAHQDPHMDPHLHQHQHPQPPHPPHPPHPPHPPHPPHPPHPPHPPHPPHPPH  
IQNVYTPVDEHVYPGHRVDPNIEMIPGAHSLSGHLYSMSESEMNALRNFVDRNVKDGLMTPTVAPNGAQVL  
QVKGWKLQVTYNCRAPQSGTIQNYLRMSLPNMGDAHLASGEFVQVPGYPYPAYVYYTSPHMMTAWYPV  
RDVHGRIVVPVVIWTSQNTNRQPPVPQYPPPPQPPPPPPPPPPPPPPPPPPPPASSCSAA\*

>rs52535223\_ENSMUSP00000135076\_c.996:G>C\_p.A333P  
ENSMUST00000176551.3|Peg10-203|ENSMUSG00000092035|+|chr6:g.4756422:G>C  
MLQIHMPGRPTLFVVRAMIDSGASGNFIDQDFVIQNAIPLRIKDWPMVEAIDGHPIASGPIILETHHLIVDLG  
DHREILSFDVTQSPFFPIVLGIRWLSTHDPHITWSTRSIVFNSDYCRLRCRMFAQIPSNLLFTVPQPNLHPYL  
LHHVHPHVHPMHQHLHQHLHQFLHPDPHQYPHDPHYHHHQADMQHQLQQYLYQYLYHLYPVMHHHLPPD  
QHEHLHEYLHQYLYHQYLYHQFLHHHLHPDLHQYLYQYLYHNHNMNPDPHHHPDPFPQDPHHPHQDPHQDPHQ  
DPHQDPHQDPHQDPHQDPHQDPHQDPHQDPHQDPHQDPHQDPHQDPHQDPHQDPHQDPHQDPHQDPHQDPHQ  
HPQDPHQDPHQDPHQDPHQDPHQDPHQDPHQDPHQDPHQDPHQDPHQDPHQDPHQDPHQDPHQDPHQDPHQ  
LYSMSESEMNALRNFVDRNVKDGMLMPTPTVAPNGAQVLQVKGWKLQVTYNCRAPQSGTIQNQYLRMSLPNMGD  
PAHLASYGEFVQVPGYPYPAYVYYTSPHMMTAWYPVGRDVHGRIIVVPVITWSQNTNRQPPVPQYPPPQPPP  
PPPPPPPPPPPPASSCSAA\*

>rs52535223\_ENSMUSP00000127306\_c.2199:G>C\_p.A734P  
ENSMUST00000166678.2|Peg10-201|ENSMUSG00000092035|+|chr6:g.4756422:G>C  
MAAAGSSNCPPPPPPPPNNNNNNTPKSPGVDAEDDDERRHDELPEIDINNFDEDMNRQFENMNLDDQVEL  
LAQSYSLDHLDDDFDDDEDDDFDPEPDQDELPEYSDDDDLELQGAAAAPIPNFFSDDDCLEDLPEKFDGNPD  
MLGPFMYQCQLFMEKSTRDFSVDIRVCFVTSMLIGRAARWATAKLQRCTYLMHNYTAFMMELKHVFEDPQRR  
EAAKRKIRRLRQGPGPVVDYSNAFQMIQDLDWTEPALMDQFQEGLNPDIRAELSRQEAPKTLAALITACIHI  
ERRLARDAAAKPDPSPRALVMPNSQTDPTPEVVGARMRLSKEEKERRRKMNLCLYCGNGGFADTCPAKASK  
NSPPLGPGPAVGGPSATGPERIRSPSEASTQHLQVMLQIHMPGRPTLFVVRAMIDSGASGNFIDQDFVIQNAI  
PLRIKDWPMVEAIDGHPIASGPIILETHHLIVDLGDHREILSFDVTQSPFFPIVLGIRWLSTHDPHITWSTR  
SIVFNSDYCRLRCRMFAQIPSNLLFTVPQPNLHPYLLHHVHPHVHPMHQHLHQHLHQFLHPDPHQYPHDPH  
YHHHQADMQHQLQQYLYQYLYHLYPVMHHHLPPDQHEHLHEYLHQYLYHQYLYHQFLHHHLHPDLHQYLYQYL  
HNHNMNPDPHHHPDPFPQDPHHPHQDPHQDPHQDPHQDPHQDPHQDPHQDPHQDPHQDPHQDPHQDPHQDP  
HQDPHQDPHQDPHQDAHQDPHQDAHQDPHQDPHQDPHQDPHQDPHQDPHQDPHQDPHQDPHQDPHQDPHQ  
IQNQYLRMSLPNMGDPAHLASYGEFVQVPGYPYPAYVYYTSPHMMTAWYPVGRDVHGRIIVVPVITWSQNTNRQPPVPQYPPPQPPP  
RVDVHGRIIVVPVITWSQNTNRQPPVPQYPPPQPPPPPPPPPPPPPPPPPPPPPPASSCSAA\*

>rs52233015\_ENSMUSP00000135076\_c.1009:A>C\_p.Q337P  
ENSMUST00000176551.3|Peg10-203|ENSMUSG00000092035|+|chr6:g.4756435:A>C  
MLQIHMPGRPTLFVVRAMIDSGASGNFIDQDFVIQNAIPLRIKDWPMVEAIDGHPIASGPIILETHHLIVDLG  
DHREILSFDVTQSPFFPIVLGIRWLSTHDPHITWSTRSIVFNSDYCRLRCRMFAQIPSNLLFTVPQPNLHPYL  
LHHVHPHVHPMHQHLHQHLHQFLHPDPHQYPHDPHYHHHQADMQHQLQQYLYQYLYHLYPVMHHHLPPD  
QHEHLHEYLHQYLYHQYLYHQFLHHHLHPDLHQYLYQYLYHNHNMNPDPHHHPDPFPQDPHHPHQDPHQDPHQ  
DPHQDPHQDPHQDPHQDPHQDPHQDPHQDPHQDPHQDPHQDPHQDPHQDPHQDPHQDPHQDPHQDPHQDPHQ  
HPQDPHQDPHQDPHQDPHQDPHQDPHQDPHQDPHQDPHQDPHQDPHQDPHQDPHQDPHQDPHQDPHQDPHQ  
LYSMSESEMNALRNFVDRNVKDGMLMPTPTVAPNGAQVLQVKGWKLQVTYNCRAPQSGTIQNQYLRMSLPNMGD  
PAHLASYGEFVQVPGYPYPAYVYYTSPHMMTAWYPVGRDVHGRIIVVPVITWSQNTNRQPPVPQYPPPQPPP  
PPPPPPPPPPPPASSCSAA\*

>rs52233015\_ENSMUSP00000127306\_c.2212:A>C\_p.Q738P  
ENSMUST00000166678.2|Peg10-201|ENSMUSG00000092035|+|chr6:g.4756435:A>C  
MAAAGSSNCPPPPPPPPNNNNNNTPKSPGVDAEDDDERRHDELPEIDINNFDEDMNRQFENMNLDDQVEL  
LAQSYSLDHLDDDFDDDEDDDFDPEPDQDELPEYSDDDDLELQGAAAAPIPNFFSDDDCLEDLPEKFDGNPD  
MLGPFMYQCQLFMEKSTRDFSVDIRVCFVTSMLIGRAARWATAKLQRCTYLMHNYTAFMMELKHVFEDPQRR  
EAAKRKIRRLRQGPGPVVDYSNAFQMIQDLDWTEPALMDQFQEGLNPDIRAELSRQEAPKTLAALITACIHI  
ERRLARDAAAKPDPSPRALVMPNSQTDPTPEVVGARMRLSKEEKERRRKMNLCLYCGNGGFADTCPAKASK  
NSPPLGPGPAVGGPSATGPERIRSPSEASTQHLQVMLQIHMPGRPTLFVVRAMIDSGASGNFIDQDFVIQNAI  
PLRIKDWPMVEAIDGHPIASGPIILETHHLIVDLGDHREILSFDVTQSPFFPIVLGIRWLSTHDPHITWSTR  
SIVFNSDYCRLRCRMFAQIPSNLLFTVPQPNLHPYLLHHVHPHVHPMHQHLHQHLHQFLHPDPHQYPHDPH  
YHHHQADMQHQLQQYLYQYLYHLYPVMHHHLPPDQHEHLHEYLHQYLYHQYLYHQFLHHHLHPDLHQYLYQYL  
HNHNMNPDPHHHPDPFPQDPHHPHQDPHQDPHQDPHQDPHQDPHQDPHQDPHQDPHQDPHQDPHQDPHQDP  
HQDAHQDPHQDAHQDPHQDAHQDPHQDPHQDPHQDPHQDPHQDPHQDPHQDPHQDPHQDPHQDPHQDPHQDP  
IQNQYLRMSLPNMGDPAHLASYGEFVQVPGYPYPAYVYYTSPHMMTAWYPVGRDVHGRIIVVPVITWSQNTNRQPPVPQYPPPQPPP  
RVDVHGRIIVVPVITWSQNTNRQPPVPQYPPPQPPPPPPPPPPPPPPPPPPPPPPASSCSAA\*

>ENSMUSP00000135076\_c.1026:G>CTC\_p.A343PP-ins  
ENSMUST00000176551.3|Peg10-203|ENSMUSG00000092035|+|chr6:g.4756452:G>CTC  
MLQIHMPGRPTLFVVRAMIDSGASGNFIDQDFVIQNAIPLRIKDWPMVEAIDGHPIASGPIILETHHLIVDLG  
DHREILSFDVTQSPFFPIVLGIRWLSTHDPHITWSTRSIVFNSDYCRLRCRMFAQIPSNLLFTVPQPNLHPYL

```
LHHVHPHVHPMHQHLHQHLHQFLHPDPHQYHPDPHYHHHQADMQHQLQQYLYQYLYYHLYPVMHHHLPPD
QHEHLHEYLHQYLYHQYLYHQYLYLHQLHLLHLPDLHQYLYQYLYLHNHMNPDPHHHHPDPPQDPHPPHQPDPHQ
DPHQPDPHQDPHQPDPHQPDPHQPDPHQPDPHQPDPHQPDPHQPDPHQPDPHQPDPHQPDPHQPDPHQPDPHQP
QHPQPQHPHPQHPNHPQPPFFYHMAGFRIYHPVRYYYIQNVYTPVDEHVYPGHRVVDPNIEMIPGAHSLPSG
HLYSMSESEMNALRNFVDRNVKDGMLTPTVAPNGAQVLQVKGWKLQVTYNCRAPQSGTIQNQYLRMSLPMNG
DPAHLASYGEFVQVPGYPYPAYVYYTSPHMMTAWYPVGRDVGRIIVVPVITWSQNTNRQPPVPQYPPPPQPP
PPPPPPPPPPPPASSCSAA*
>ENSMUSP00000127306_c.2229:G>CCTC_p.A744PP-ins
ENSMUST00000166678.2|Peg10-201|ENSMUSG00000092035|+|chr6:g.4756452:G>CCTC
MAAAGGSSNCPPPPPPPPPNNNNNNNTPKSPGVPAEDDDERRHDELPEIDINNFDEDMNRQFENMNLDDQVEL
LAQSYSLLDLHDDDFDDDEDDDDFDEPDQDELPEYSDDDDLELQGAAAAPIPNFFSDDDCLEDLPEKFDGNPD
MLGPFMYQCQLFMEKSTRDFSVDRIRVCFVTSMLIGRAARWATAKLQRCCTYLMHNYTAFMMELKHVFEDPQRR
EAAKRKIRRLRQGPGPVVDYSNAFQMI AQDLWTEPALMDQFQEGLNPDIRAELSRQEAPKTLAALI TACIHI
ERRLARDAAAKPDPSRALVMPNSQTDPTPEVGGARMRLSKEEKERRRKMNLCLYCGNGGFADTCPAKASK
NSPPGLPGPAVGGPSATGPERIRSPSEASTQHLQVMLQIHMGRPTLFFVRAMIDSGASGNFIDQDFVIQNAI
PLRIKDWPMVEAIDGHPIASGPIILETHHLIVDLGDHREILSFDVTSQSPFFPIVLGIRWLSHDPHITWSTR
SIVFNSDYCRLRCRMFAQIPSNLLFTVPQPNLHPYLLHHVHPHVHPMHQHLHQHLHQFLHPDPHQYHPDPH
YHHHQADMQHQLQQYLYQYLYYHLYPVMHHHLPPDQHEHLHEYLHQYLYHQYLYHQYLYLHQLHLLHLPDLHQYLY
HNHMNPDPHHHHPDPPQDPHPPHQPDPHQPDPHQPDPHQPDPHQPDPHQPDPHQPDPHQPDPHQPDPHQPDP
HQDAHQHQDPHQPDPHQPDPHQPDPHQPDPHQPDPHQPDPHQPDPHQPDPHQPDPHQPDPHQPDPHQPDPHQP
HPQPQHPHPQHPNHPQPPFFYHMAGFRIYHPVRYYYIQNVYTPVDEHVYPGHRVVDPNIEMIPGAHSLPSGH
LYSMSESEMNALRNFVDRNVKDGMLTPTVAPNGAQVLQVKGWKLQVTYNCRAPQSGTIQNQYLRMSLPMNGD
PAHLASYGEFVQVPGYPYPAYVYYTSPHMMTAWYPVGRDVGRIIVVPVITWSQNTNRQPPVPQYPPPPQPP
PPPPPPPPPPPPASSCSAA*
>ENSMUSP00000135076_c.1050:G>C_p.A351P ENSMUST00000176551.3|Peg10-
203|ENSMUSG00000092035|+|chr6:g.4756476:G>C
MLQIHMGRPTLFFVRAMIDSGASGNFIDQDFVIQNAIPLRIKDWPMVEAIDGHPIASGPIILETHHLIVDLG
DHREILSFDVTSQSPFFPIVLGIRWLSHDPHITWSTRSIVFNSDYCRLRCRMFAQIPSNLLFTVPQPNLHPYL
LHHVHPHVHPMHQHLHQHLHQFLHPDPHQYHPDPHYHHHQADMQHQLQQYLYQYLYYHLYPVMHHHLPPD
QHEHLHEYLHQYLYHQYLYHQYLYLHQLHLLHLPDLHQYLYQYLYLHNHMNPDPHHHHPDPPQDPHPPHQPDP
DPHQPDPHQPDPHQPDPHQPDPHQPDPHQPDPHQPDPHQPDPHQPDPHQPDPHQPDPHQPDPHQPDPHQP
HPQPQHPHPQHPNHPQPPFFYHMAGFRIYHPVRYYYIQNVYTPVDEHVYPGHRVVDPNIEMIPGAHSLPSGH
LYSMSESEMNALRNFVDRNVKDGMLTPTVAPNGAQVLQVKGWKLQVTYNCRAPQSGTIQNQYLRMSLPMNGD
PAHLASYGEFVQVPGYPYPAYVYYTSPHMMTAWYPVGRDVGRIIVVPVITWSQNTNRQPPVPQYPPPPQPP
PPPPPPPPPPPPASSCSAA*
>ENSMUSP00000127306_c.2253:G>C_p.A752P ENSMUST00000166678.2|Peg10-
201|ENSMUSG00000092035|+|chr6:g.4756476:G>C
MAAAGGSSNCPPPPPPPPPNNNNNNNTPKSPGVPAEDDDERRHDELPEIDINNFDEDMNRQFENMNLDDQVEL
LAQSYSLLDLHDDDFDDDEDDDDFDEPDQDELPEYSDDDDLELQGAAAAPIPNFFSDDDCLEDLPEKFDGNPD
MLGPFMYQCQLFMEKSTRDFSVDRIRVCFVTSMLIGRAARWATAKLQRCCTYLMHNYTAFMMELKHVFEDPQRR
EAAKRKIRRLRQGPGPVVDYSNAFQMI AQDLWTEPALMDQFQEGLNPDIRAELSRQEAPKTLAALI TACIHI
ERRLARDAAAKPDPSRALVMPNSQTDPTPEVGGARMRLSKEEKERRRKMNLCLYCGNGGFADTCPAKASK
NSPPGLPGPAVGGPSATGPERIRSPSEASTQHLQVMLQIHMGRPTLFFVRAMIDSGASGNFIDQDFVIQNAI
PLRIKDWPMVEAIDGHPIASGPIILETHHLIVDLGDHREILSFDVTSQSPFFPIVLGIRWLSHDPHITWSTR
SIVFNSDYCRLRCRMFAQIPSNLLFTVPQPNLHPYLLHHVHPHVHPMHQHLHQHLHQFLHPDPHQYHPDPH
YHHHQADMQHQLQQYLYQYLYYHLYPVMHHHLPPDQHEHLHEYLHQYLYHQYLYHQYLYLHQLHLLHLPDLHQYLY
HNHMNPDPHHHHPDPPQDPHPPHQPDPHQPDPHQPDPHQPDPHQPDPHQPDPHQPDPHQPDPHQPDPHQPDP
HQDAHQHQDPHQPDPHQPDPHQPDPHQPDPHQPDPHQPDPHQPDPHQPDPHQPDPHQPDPHQPDPHQPDPHQP
HPQPQHPHPQHPNHPQPPFFYHMAGFRIYHPVRYYYIQNVYTPVDEHVYPGHRVVDPNIEMIPGAHSLPSGH
LYSMSESEMNALRNFVDRNVKDGMLTPTVAPNGAQVLQVKGWKLQVTYNCRAPQSGTIQNQYLRMSLPMNGD
PAHLASYGEFVQVPGYPYPAYVYYTSPHMMTAWYPVGRDVGRIIVVPVITWSQNTNRQPPVPQYPPPPQPP
PPPPPPPPPPPPASSCSAA*
>ENSMUSP00000135076_c.1050:GCA>CCC_p.A351P ENSMUST00000176551.3|Peg10-
203|ENSMUSG00000092035|+|chr6:g.4756476:GCA>CCC
MLQIHMGRPTLFFVRAMIDSGASGNFIDQDFVIQNAIPLRIKDWPMVEAIDGHPIASGPIILETHHLIVDLG
DHREILSFDVTSQSPFFPIVLGIRWLSHDPHITWSTRSIVFNSDYCRLRCRMFAQIPSNLLFTVPQPNLHPYL
LHHVHPHVHPMHQHLHQHLHQFLHPDPHQYHPDPHYHHHQADMQHQLQQYLYQYLYYHLYPVMHHHLPPD
QHEHLHEYLHQYLYHQYLYHQYLYLHQLHLLHLPDLHQYLYQYLYLHNHMNPDPHHHHPDPPQDPHPPHQPDP
DPHQPDPHQPDPHQPDPHQPDPHQPDPHQPDPHQPDPHQPDPHQPDPHQPDPHQPDPHQPDPHQPDPHQP
DPPHQPDPHQPDPHQPDPHQPDPHQPDPHQPDPHQPDPHQPDPHQPDPHQPDPHQPDPHQPDPHQPDPHQP
HPQPQHPHPQHPNHPQPPFFYHMAGFRIYHPVRYYYIQNVYTPVDEHVYPGHRVVDPNIEMIPGAHSLPSGH
LYSMSESEMNALRNFVDRNVKDGMLTPTVAPNGAQVLQVKGWKLQVTYNCRAPQSGTIQNQYLRMSLPMNGD
PAHLASYGEFVQVPGYPYPAYVYYTSPHMMTAWYPVGRDVGRIIVVPVITWSQNTNRQPPVPQYPPPPQPP
PPPPPPPPPPPPASSCSAA*
SIRSRRIHNSILTILSSHSSSTWLDSEFTTL*GITIFRMCIHLLSMSIRVTGWLTTLTLR*FLERTACPVD
```

ICTQCCLSLK\*MLCEISWTGMLKMGs\*LPLWRPMEPKSCK\*KEGGNSKSLTIAELHRVAPSKIStyACLFQIWE  
 TLHTWQAMVNLskFLATHIQPMFTIQARI\*\*LRGTQ\*DEMYMDE\*SLCLL\*SPGLKIRTASLRCPsILLRSHL  
 HHHHLHRHHHLHQHHPAVLR  
 >ENSMUSP00000127306\_c.2253:GCA>CCC\_p.A752P ENSMUST00000166678.2|Peg10-  
 201|ENSMUSG00000092035|+|chr6:g.4756476:GCA>CCC  
 MAAAGSSNCPppppppppnnnnnnntPKSPGVPDAEDDDERRHDELPEdINNFDEdMNRQFENMNLDDQVEL  
 LAQSYSLDDHLDDDFDDDDDDDFDPEPDQDELPEYSDDDDLELQAAAAPIPNFFSDDDCLEDLPEKFDGNPD  
 MLGPFMYQCQLFMEKSTRDFSVDRIRVCFVTSMLIGRAARWATAKLQRCTYLMHNYTAFMMELKHVFEDPQRR  
 EAAKRKIRRLRQGPGPVVDYSNAFQMIQDLDWTEPALMDQFQEGLNPDIRAELSRQEAPKTLAALITACIHI  
 ERLARDAAAKPDPSRALVMPPNSQTDPTPEVGGARMRLSKEEKERRRKMNLCLYCGNGGHFADTCPAKASK  
 NSPPGLPGPAVGGPSATGPERIRSPSEASTQHLQVMLQIHMPGRPTLFVRAMIDSGASGNFIDQDFVIQNAI  
 PLRIKDWPMVEAIDGHPIASGPIILETHHLIVDLGDHREILSFVDTQSPFFPIVLGIRWLSTHDPHITWSTR  
 SIVFNSDYCRLRCRMFAQIPSNLFTVPQPNLHPYLLHHVHPHVHPMHQHHLHQHLHQFLHPDPHQYHPDPH  
 YHHHQADMQHQLQYLYYLYHLYPVMHHHLPPDQHEHLEHLYLHQYLHQYLHQFLHHHLHPDLHQYLYQYL  
 HNHMNPDPHHHPDPDPDPDPHQPDPHQPDPHQPDPHQPDPHQPDPHQPDPHQPDPHQPDPHQPDPHQPDPH  
 HQDAHQHQPDPHQPDPHQPDPHIRIPIWIHTCISTSIrSRsRIHNSILTILSSHSSTTWLdSEFTTL\*GIT  
 IFRMCIHLLMSMIRVTGWLTTLTLR\*FLERTACPDICTQCCLSLK\*MLCEISWTGMLKMGs\*LPLWRPMEPKS  
 CK\*KEGGNSKSLTIAELHRVAPSKIStyACLFQIWEtlHTWQAMVNLskFLATHIQPMFTIQARI\*\*LRGTQ\*  
 DEMYMDE\*SLCLL\*SPGLKIRTASLRCPsILLRSHLHHHHHLHRHHHLHQHHPAVLR  
 >ENSMUSP00000158794\_c.4095:C>A\_p.L1366I ENSMUST00000238599.2|Mgam-  
 208|ENSMUSG00000068587|+|chr6:g.40666353:C>A  
 MAGRRFKKfSKLELVLIVLVLVLFIAVVLIVLLANSTPENAIgAETTGTPTTvtRtTLNSPNCpVLSELER  
 INCIpDQSSNKGTCDErGCCWDpQGSISVPCYYSRNHGyKMEsDVVNTNAGFTATLKNLPSAPVFGNSIENIL  
 LTAEYQTSNRfHFkLTDQTKKRyEVPHEHVQPFSGNAPSSLNyKVEVSKEPFsIKVTRKSNRVLFDSSIGPL  
 LFSdQFLQFSTHLPSANVYGLGEHVHQQRHNMNWKTPMfSRDTPNEDGTNLyGVQTFFLCLEDNSGLSFG  
 VFMLNSNAMEVTLQPTPAITYRTGGILDFYVFLGNTPEQVQYELELIGRPALPSYTWLQFLRSYDYKSLD  
 NMKAVERNRAAQLPYDVQHADIDYMDQKKDFTYDPVNFKGFPEFVKELHNNNGQKLVIILDPAISNNSFSNP  
 YGPYDRGSAMKIWNSSDGISPVIGKVPWGTTFVFPDYTSpNCAVWWTKEfELFHKEVEFDGIWIDMNEVSNFI  
 DGSfSGCSQNNLNyPPFTPKVLDGYLFSKTLcMDAVQHWGKQYDVHNLyGYSMAIATAKAVKDVFPDKRSFII  
 TRSTfAGSGKFAAHWLGDNtATWkDLQWSIPGMLEFNLFGIPMVGADICGFAQDTYEELCRRWMLGAFYpFS  
 RNHNGQGYKdQDPASFGNSSLNLSRHYLNIRYTLPLyLTYLfyRAHSRGDTVARPLLHEfyDDNNTWGI DR  
 QFLWGPGLLITPVLdQGAEKVKAyVPNATWYDYETGEELGWRKQSIEMQLPGDKIGLHLRGGYIFPTQQPATT  
 TEASRKNPLGLIVALDENKEARGELFWDDGESKDTVAQNIYLFSEfSVTQNHLDVTISSPNYKDPNNLEFQEI  
 KIFGTREFRNVRVKQNGNLLQMSpQVTYNPNLKVATITNIHLRLGEAYTVEWDFFTREEERIDCYpDEHGASE  
 ANCSARGCIWEASNTTRGPPCYFAHELySVSNVQYDShGATADISLKASTYSNAFPSTPVNKLKLQVTYHKNE  
 MLQFKIYDPNHSRYEVPVPLNIPSAPlSTPEGRlyDVLIKENPFGIQIRKTTGTVIWDSQLLGFTFNDMFI  
 ISTRLPSTYIYGfGETEHTTFKIDMNWHTWGMfSRDEPPGYKKNsYGVHPYMGLEEDGNAHGvLLMNSNAMD  
 VTFQMPALTYRTIGGILDFYVFLGPTPEIVTQQYTELIGRPVMVPYWSLGFQLCRYGYENDTEIANLYDEMv  
 AKQIPYDVQYSDIDYMERQLDFKLSPKfSGFPALINRMKANGMRVILILDPAISGNETQPYPAFTQGVENDVf  
 IRYPNNGGIVWgKVWpDYpNITVDSSLDWDIqVERYRAYVAFpDFFRDSTAIWKKKEIKELHSNSQDQAKSLK  
 FDGLWIDMNEPSSfVNGAVPSGCSDATLNHPpYMPHVEGRDRGLSSKTLcMESEHILPDGSRVRHYDVHSlyG  
 WSQTRPTYEAMQEVtGERGIVITRSTfPSSGRWGGHWLGDNtAAWdQLGKSIIGMMDFSLFGISyTGSdICGF  
 FQDAEYEMCVRWMLGAFYpFSRNHNTIGTKRQDPVSWDKTFEDISRSVLETRYTLPLyLTYLmYKAHKEGST  
 VVRPLLHEFLADRETWNIDKQFLLGPAFLVSPVLEPNARNVTAYfPKAQWYDYTTGADINSTGWTTLPAPLEH  
 INLHVrGGYILPWQPALNTNLSRKKPLGLLIALDEKKEARGELFWDDGQSKDTVAKNIYLFSEfSVTQNHLD  
 VTISSPNYKDPNNLEFQEIKIIFGTQEFsNVRVKQNGNLLQMSpQVTYNPNLKVATITNIHLRLGEAYTVEWGF  
 FTREEERIDCYpDEHGASEANCSARGCIWEESNTIGVPTCYFAHELySVSNVQYDShGATADISLKASTYSNA  
 FPSTPVNKLKLQVTYHKNEMLQFKIYDPNNSRYEVPVPLNIPSApSSSTNEGRlyDVLIKENPFGIQVRRKSTG  
 TVIWDSQLLGFTFNDMFIIRISTRLPSTYIYGfGETEHTTFKIDMNWHTWGMfSRDEPPGYKKNsYGVHPYMG  
 LEEDGNAHGvLLMNSNAMDVTFQMPALTYRTTGGILDFYVLLGPTPEIVTQQYTELIGRPVMVPYWSLGFQL  
 CRYGYENDSEIASLYDEMVDKQIPYDVQYSDIDYMERQLDFKLSPKfSGFPALINRMKANGMRVILILDPAIS  
 GNETQPYPAFTTRGVENDVfIRYPNNGSIVWgKVWpDYpNITVDPSLGDWHQVEQYRAYVAFpDFFRNSTATWw  
 KKEIEBLYTNTHEPEKSLKFDGLWIDMNEPSSfVNGAVPSGCSDATLNHPpYMPHVEGRDRGLSSKTLcMESE  
 HILPDGSRVQHYDVHSlyGWSQTRPTYEAVQEVtGERGIVITRSTfPSSGRWGGHWLGDNtAAWdQLGKSIIG  
 MMDfSLFGISyTGSdICGFQDAEYEMCVRWMLGAFYpFSRNHNTIGTKRQDPVSWDKTFEDISRSVLETRY  
 TLLPYLYTLMYKAHMEGSTVVRPLLHEfVSDRKTWNIDKQFLLGPAFLVSPVLEPNARNISAYfPTALWYDYY  
 TGANINSTGEWKTLPAPLEHINLHVrGGYILPWQRPALNTHLSRKNPLGLLIALDENKEARGELFWDDGQSKD  
 LTTNNILCKfSVTQNRLDVSTLQSTYMNPDNLAFQEIKIIFGTRPLYNVTVKHNGMVNQMAPQVSyDfSMKVAV

ITGLQLLLNESYTVIEWDDSIIRDEEKIDCYPDQHGASETSCARGCVWEESNSDVPVFCYFVNELYSVSNVQYG  
SHGATANISLKASPYSAGFPSTPVKELQLQVYHKNEMLQFKIYDPNHSRYEVPVPLNIPSAPSTPESRLYD  
VLIKENPFGIEIRRKGTGTVVWDSQLLGFTFSDFMIRISTRPLSTYIYGFGETEHTTFKIDMNWNKGMFSRD  
EPPGYRKNYSYGVHPYMGLEEDGNAHGVLLMNSNAMDVTFQPMALTYRRTGGILDFYVFLGPTPEFVTQQYT  
ELIGRPVMPVYWSLGFQLCRYGYENDSEIASLYDEMVDKIPYDVQYSDIDYMERQLDFKLSPKFSGFPALIN  
RMKANGMRVILILDPAISGNETEPEYPAFTRGVENDVFIIRYPNNGSIVWGKVPDPYDNITVDPSLGDWHQVEQY  
RAYVAFPDFFRNSTATWWKKEIKELHSNTQDPAKSLKFDGLWIDMNEPSSFVNGAVPSGCSDATLNHPPYMPY  
LEARDRGLSSKTLCESEQILPDGSRVRHYDVHNLVYGSQTRPTYEAVQEVGTGERGIVITRSTFPSSGRWGGH  
WLGDNATAAWDLGKSIIGMMDFSLFGISYTGSDICGFFQDAEYEMCVRWMLGAFYPPSRNHNTIGTRRQDPV  
SWNKTFEDISRSVLETRYTLPLPYLYTLMYKAHEGSTVVRPLLHEFVSDRETWNIDKQFLLGPAFLVSPVLEP  
NARKVEAYFPRARWYDYYKGVNDINATGEWKTLEAPLEYINLHIRGGYILPWQEPAMNTHLSRQKFMGLRAALN  
AEGRAEGWLFWDGKRINTDQYYLARFSVNQTLLTHEKFNNYLTGTAPLYLGYIDIWGLSSSSITNVSISWN  
TNNEEVFANYNSTTKILSVNMTDKISLHTFNLSLWSSS\*

>ENSMUSP00000153815\_c.208:T>A\_p.I70N ENSMUST00000227909.2|Vmn1r20-  
202|ENSMUSG00000115253|+|chr6:g.57408884:T>A  
MFSLKNVLYFQAGLGVLANMSLLCFYIFIVGHRPKPTDLISCQLTFIHMVFLTGGDLLLTDIFESLNNND  
FKCKATFYISRVMRCLSICTSCLLSVFQAVTISPSTSLAKFKQKLRKYMVYVFLCIWSFSFSYSSSRIFYVR  
GFTNVSETNQMQITKSCLLFRMNSIRVFIIFTVTTSRDVFLVGMMLTTSTYMVIILCRHQKCKHLHSIKHLR  
ASPEKRATQTILLLVIFVVMYVWDFIISTISVLLWRYDTVILRVQKFLMYAYPTISPLVQISSDNRIIMVK  
NMYSKHHQRFF\*

>ENSMUSP00000153909\_c.208:T>A\_p.I70N ENSMUST00000226808.2|Vmn1r20-  
201|ENSMUSG00000115253|+|chr6:g.57408884:T>A  
MFSLKNVLYFQAGLGVLANMSLLCFYIFIVGHRPKPTDLISCQLTFIHMVFLTGGDLLLTDIFESLNNND  
FKCKATFYISRVMRCLSICTSCLLSVFQAVTISPSTSLAKFKQKLRKYMVYVFLCIWSFSFSYSSSRIFYVR  
GFTNVSETNQMQITKSCLLFRMNSIRVFIIFTVTTSRDVFLVGMMLTTSTYMVIILCRHQKCKHLHSIKHLR  
ASPEKRATQTILLLVIFVVMYVWDFIISTISVLLWRYDTVILRVQKFLMYAYPTISPLVQISSDNRIIMVK  
NMYSKHHQRFF\*

>ENSMUSP00000087096\_c.486:T>A\_p.C163S ENSMUST00000089667.8|Reg3d-  
201|ENSMUSG00000068341|-|chr6:g.78353095:A>T  
MVSHKTLHSMWMLLCCMLSLSWVQGEQSQKLLSPRISCPQEAQAYGSYCYLLILEPQTWANAIEHCQKHFS  
GHLAFLLLTYGEEIFVSSLVKNSLTFPYIWIWGLHDLGLSLPNENGWGWSSSDPLTFYNWEIPPSMSAHHGYC  
AALSQASGYQKWRDYSDTIFPYVCKFKG\*

>ENSMUSP00000144715\_c.348:T>A\_p.C117S ENSMUST00000205240.2|Reg3d-  
203|ENSMUSG00000068341|-|chr6:g.78353095:A>T  
MVSHKTLHSMWMLLCCMLSLSWVQGEQSQKLLSPRISCPQEAQAYGSYCYLLILEPQTWANAIEGSLPNENG  
WKWSSSDPLTFYNWEIPPSMSAHHGYCAALSQASGYQKWRDYSDTIFPYVCKFKG\*

>ENSMUSP00000132220\_c.348:T>A\_p.C117S ENSMUST00000167492.4|Reg3d-  
202|ENSMUSG00000068341|-|chr6:g.78353095:A>T  
MVSHKTLHSMWMLLCCMLSLSWVQGEQSQKLLSPRISCPQEAQAYGSYCYLLILEPQTWANAIEGSLPNENG  
WKWSSSDPLTFYNWEIPPSMSAHHGYCAALSQASGYQKWRDYSDTIFPYVCKFKG\*

>ENSMUSP00000131840\_c.4165:C>G\_p.S1389\* ENSMUST00000163139.8|Plxna1-  
202|ENSMUSG00000030084|-|chr6:g.89306663:G>C  
MPLPPLSSRTLLLLLLLLLLLRGVWIAISSPPAGLGPQAFRTFVASDWGLTHLVVHEQTGEVYVAVNRRIYKLS  
GNLTLRAHVTPVEDNEKCYPPPSVQSCPHGLGSTDNVNKLKLLLDYAANRLLACGSASQGCQFLRLDDLK  
LGEPPHRRKEHYLSSVREAGSMAGVLIAGPPGQQAFLVGTPIIDGKSEYFPTLSSRRLMANEEDADMFGFVYQ  
DEFVSSQLKIPSDTLKFPFADIIYVYSFRSEQFVYLLTLQLDQLTSPDAAGEHFFTSKIVRLCVDNPKFYS  
YVEFPICEQAGVEYRLVQDAYLSRPGQALAKQLGLAEDEEVLFVFAQQKQNRVKPPKESALCLFTLRAIKE  
KIKERIQSCYRGEKLSLWLLNKELGINSPLQIDDDFCGQDFNQPLGGTVTIEGTPLFVKEDGLTAVAAAY  
DYQGRVTVFAGTRSGRIRKILVDLANPSGRPALAYESVVAQEGNPILRDLVLSPNRQYLYAMTEKQVTVQVVE  
SCVQYTSCELCLGSRDPHCGWCVLHSCSRQDACERAEEPQRFASDLLQCVQLTVQPRNVSVTMSQVPLVLA  
WVNPDLASGVNCSFEDFTETESILEDGRIHCHSPSAREVAPITQQGQDQRVVKLYLKSKETGKKFASVDFVY  
NCSVHQSQLACVNGSFPCHWCKYRHVCTNNAADCAFLEGRVNMSSEDCPQILPSTHIYVPGVVKPITLAARNL  
PQPQSGQRGYECLFLHIGSPARVATLRFNSSLQCRQNSSSYEGNDVSDLPVNLSSVWNGNFVIDNPQNIQAH  
LYKCPALRQCEGLKADPRFECGWCVAERSSCLRHHCSPASWMMHAHHGSSRCTDPKILKLSPETGPRQG  
GTRLTITGENLGLRFEDVRLGVHVGKVLCSPESEYISAEQIVCEIGDASTLRAHDALVEVCVRDCSLHYRAL  
SPKRFTFVTPTFYRVSPSRGPLSGGTWIGIEGSHLNAGSDVAVSIIGRPFCSFSWRNSREIRCLTTPPGHTPGSA  
PIVININRAQLSNPEVKYNYTEDPTILRIDPEWSINSGGTLTGTNLTATVREPRIRAKYGGIERENSCMVY  
NDTMTMCRAPSIDNPKRSPPELGERPDEIGFIMDNVRTLLVLNSSSFLYYPDPVLEPLSPTGLELPLSSPLI

LKGRNLLPPAPGNSRLNYTVLIGSTPCILTVSETQLLCEAPNLTGQHKVTVRAGGFEFSPGMLQVYSDSLLTL  
PAIVGIGGGGGLLLLLVIVAVLIA YKRKSRDADRTLKRLQLQMDNLESRVALECKEAFaelQTDIHELTSDLG  
AGIPFLDYRTYAMRVLPFGIEDHPVLKEMEVQANVEKSLTLFGQLLTKKHFLTLFIRTLEAQRFSMRDRGNV  
A\*LIMTALQGEMEYATGVLKQLLSDLIEKNLESKNHPKLLLRRTESVAEKMLTNWFTFLLYKFLKECAGEPLF  
MLYCAIKQQMEKGPIDAITGEARYSLSEDKLIQQIDYKTLTLNCVNPENHNAPEVPVKGLNCDTQVQVEKL  
LDAVYKGVYPYSQRPKAGDMLEWRQGRMARIILQDEDEVTTKIDNDWKRLNTLAHYQVTDGSSVALVPKQTSAY  
NISNSSTFTKLSRYESMLRTASSPDSLRSRTPMITPDLESGTKLWHLVKNHDHLDQREGDRGSKMVSEIYLT  
RLLATKGTLOKQFVDDLFEFIFSTAHRGSALPLAIKYMFDLDEQADKHQIHDSVDRHTWKSNCPLRFWVNV  
KNPQFVFDIHKNSITDACLSVAQTFMDCSTSEHKLKGDSPSNKLLYAKDIPNYKSWVERYADIAKMPAIS  
DQDMSAYLAEQSRHLHSQFNMSALHEIYSYIAKYKDEILVALEKDEQARRQRLRSKLEQVVDTMALSS\*  
>ENSMUSP00000063066\_c.4165:C>G\_p.S1389\* ENSMUST00000049845.6|Plxna1-  
201|ENSMUSG00000030084|-|chr6:g.89306663:G>C  
MPLPPLSSRTLLLLLLLLLLLRGVWIAISSPPAGLGPQAFRTFVASDWGLTHLVVHEQTGEVYVAVNRIYKLS  
GNLTLRAHVTPVEDNEKCYPPPSVQSCPHGLGSTDNVNKL LLLDYAANRLLACGSASQGICQFLRLDDLDFK  
LGEPHHRKEHYLSSVREAGSMAGVLIAGPPGQQAklfVGTPIIDGKSEYFPTLSSRRLMANEEDADMFGFVYQ  
DEFVSSQLKIPSDTLKFPFADIIYVYSFRSEQFVYYLTLQLDQTLPDAAGEHFFTSKIVRLCVNDPKFYS  
YVEFPICGEQAGVEYRLVQDAYLSRPGALAKQLGLAEDEEVLFVFAQKQNRVKKPKESALCLFTRAIKE  
KIKERIQCSCYRGEGKLSPLWLLNKELGICINSPLQIDDDFCGQDFNQPLGGTVTIEGTPLFVDEGLTAVAA  
DYQGRTVVFAGTRSGRIRKILVLDLANPSGRPALAYESVVAQEGNPILRDLVLSPNRQYLYAMTEKQVTVPVE  
SCVQYTSCELCLGSRDPHCWCVLHSICSRQDACERAEPPQRFASDLLQCVQLTVQPRNVSVTMSQVPLVLA  
WNVLDLSAGVNCSEFEDFTETESILEDGRIHCHSPSAREVAPITQGGDQRVVKLYLKSKETGKFFASVDFVY  
NCSVHQSLACVNGSFPCWCKYRHVCTNNAADCAFLEGRVNMSDCPQILPSTHIYVPGVVKPITLAARNL  
PQPQSGQRGYECLFHI PGSPARVTALRFNSSSLQCQNSSYSYEGNDVSDLPVNLVSVWNGNFVIDNPQNIQAH  
LYKCPALRQSCGLCLKADPRFECGWCAERRCSLRHHC PADS PASWMHAHGGSSRCTDPKILKLSPETGPRQG  
GTRLTITGENLGLRFEDVRLGVHVGKVLCSPESEYISAEQIVCEIGDASTLRAHDALVEVCVRDCSLHYRQ  
SPKRFTFVTPTFYRVEVSPSRGPLSGGTWIGIEGSHLNAGSDVAVSIGGRPCSF SWRNSREIRCLTPPGHTPGSA  
PIVININRAQLSNPEVKYNYTEDPTILRIDPEWSINSGGTLTGTGNLATVREPRIRAKYGGIERENSCMVY  
NDTTMVCRAPSIDNPKRSPPELGERPDEIGFIMDNVRTLLVNLSSSFLYYPDPVLEPLSPTGELLEKPSPLI  
LKGRNLLPPAPGNSRLNYTVLIGSTPCILTVSETQLLCEAPNLTGQHKVTVRAGGFEFSPGMLQVYSDSLLTL  
PAIVGIGGGGGLLLLLVIVAVLIA YKRKSRDADRTLKRLQLQMDNLESRVALECKEAFaelQTDIHELTSDLG  
AGIPFLDYRTYAMRVLPFGIEDHPVLKEMEVQANVEKSLTLFGQLLTKKHFLTLFIRTLEAQRFSMRDRGNV  
A\*LIMTALQGEMEYATGVLKQLLSDLIEKNLESKNHPKLLLRRTESVAEKMLTNWFTFLLYKFLKECAGEPLF  
MLYCAIKQQMEKGPIDAITGEARYSLSEDKLIQQIDYKTLTLNCVNPENHNAPEVPVKGLNCDTQVQVEKL  
LDAVYKGVYPYSQRPKAGDMLEWRQGRMARIILQDEDEVTTKIDNDWKRLNTLAHYQVTDGSSVALVPKQTSAY  
NISNSSTFTKLSRYESMLRTASSPDSLRSRTPMITPDLESGTKLWHLVKNHDHLDQREGDRGSKMVSEIYLT  
RLLATKGTLOKQFVDDLFEFIFSTAHRGSALPLAIKYMFDLDEQADKHQIHDSVDRHTWKSNCPLRFWVNV  
KNPQFVFDIHKNSITDACLSVAQTFMDCSTSEHKLKGDSPSNKLLYAKDIPNYKSWVERYADIAKMPAIS  
DQDMSAYLAEQSRHLHSQFNMSALHEIYSYIAKYKDEILVALEKDEQARRQRLRSKLEQVVDTMALSS\*  
>ENSMUSP00000154788\_c.680:TA>GTG\_p.L227ins-fs  
ENSMUST00000226436.2|Vmn1r42-202|ENSMUSG00000068232|-  
|chr6:g.89821887:TA>CAC  
MGDILFSSPQSMFSHTMNKNSILHTHSIIIGKTFEIGIGISGNSFLLLHVHILKFIRGHRPRLTDLPIGLLSL  
IHLLMLLVAAFIATDIFISRRGWDDIICKFLVLYRVLGRGFLCTTSMLSILQAIILSPRSSCLAKFKHISPH  
HISGAILFLSVLYMLIGSQLLVSI IATPNLTMNDFIYVTQSCSILPLSYLMQSIYSTLLAIREFFLISLMVLS  
NWYMVALL  
>ENSMUSP00000154442\_c.680:TA>GTG\_p.L227ins-fs  
ENSMUST00000227279.2|Vmn1r42-203|ENSMUSG00000068232|-  
|chr6:g.89821887:TA>CAC  
MGDILFSSPQSMFSHTMNKNSILHTHSIIIGKTFEIGIGISGNSFLLLHVHILKFIRGHRPRLTDLPIGLLSL  
IHLLMLLVAAFIATDIFISRRGWDDIICKFLVLYRVLGRGFLCTTSMLSILQAIILSPRSSCLAKFKHISPH  
HISGAILFLSVLYMLIGSQLLVSI IATPNLTMNDFIYVTQSCSILPLSYLMQSIYSTLLAIREFFLISLMVLS  
NWYMVALL  
>ENSMUSP00000086840\_c.680:TA>GTG\_p.L227ins-fs  
ENSMUST00000089419.3|Vmn1r42-201|ENSMUSG00000068232|-  
|chr6:g.89821887:TA>CAC  
MGDILFSSPQSMFSHTMNKNSILHTHSIIIGKTFEIGIGISGNSFLLLHVHILKFIRGHRPRLTDLPIGLLSL  
IHLLMLLVAAFIATDIFISRRGWDDIICKFLVLYRVLGRGFLCTTSMLSILQAIILSPRSSCLAKFKHISPH



HISGAILFLSVLYMLIGSQLLVSI IATPNLTMNDFIYVTQSCSILPLSYLMQSIYSTLLAIREFFLISLMVLS  
 NWYMVALL  
 >ENSMUSP00000114304\_c.2360:G>C\_p.Q787H ENSMUST00000130418.8|Aldh11l-  
 203|ENSMUSG00000030088|+|chr6:g.90573863:G>C  
 MKIAVIGQSLFGQEVYQCLRKEGHEVVGVTIPDKDGKADPLGLEAEKDGVPVFKFPRWRARGQALPEVVAKY  
 QALGAELNVLPFCSQFIPMEVINAPRHGSI IYHPSLLPRHRGASAINWTLIHGDKKGGFTIFWADDGLDTGDL  
 LLQKECDVLPDDTVSTLYNRFLFPEGIKGMVQAVRLIAEGTAPRRPQPEEGATYEGIQKKETAMINWDQPAEA  
 IHNWIRGNDKVPGAWTEACGQKLTFFNSTLNTSGLVAQGEALPIPGAHRPGLVTKAGLILFGNDRMLLVKNI  
 QLEDGKMMPASQFFFKGSASSALELTHEELATAEAVRSSWMRILPNVPEVEDSTDFFKSGAASVDVRLVEEVK  
 ELCDGLELENEDEVYMATTFGDFIQLLVRKLRGEDGESECVINYVEKAVKLLTLQMPYQLFIGGEFVDAEGAKT  
 YSTINPTDGSVICQVSLAQVSDVDKAVAAAKEAFENGLWGKINARDRGRLLYRLADLMEQHQEELATIEALDA  
 GAVYTLALKTHVGMISIQTFRYFAGWCDKIQGATIPINQARPNRNLTLTKKEPVGVCGIVIPWNYPLMMLSWKT  
 AACLAAGNTVVIKPAQVTPLTALKFAELTLKAGIPKGVNINILPGSGSLVGQRLSDHPDVRKIGFTGSTEVEGKH  
 IMKSCALS NVKVSLELGGKSP LIIFADC DLNKAVQMGMSVFFNKGENCIAAGRLFVEDSIHQFVQKVVVEE  
 VGKMKIGNPLDRDTHGPNHEAHLRKLVEYQCQRGVKEGATLVCCGNQVPRPGFFHFPTVFTDVEDHMYIAKE  
 ESFGPIMIISRFADGDVDAVLSRANATEFGLASGVFTRDINKALYVSDKLQAGTVFVNTYKTDVAAPFGGFK  
 QSGFGKDLGEAALNEYLRIKTDTFEY\*  
 >ENSMUSP00000032175\_c.2360:G>C\_p.Q787H ENSMUST00000032175.11|Aldh11l-  
 201|ENSMUSG00000030088|+|chr6:g.90573863:G>C  
 MKIAVIGQSLFGQEVYQCLRKEGHEVVGVTIPDKDGKADPLGLEAEKDGVPVFKFPRWRARGQALPEVVAKY  
 QALGAELNVLPFCSQFIPMEVINAPRHGSI IYHPSLLPRHRGASAINWTLIHGDKKGGFTIFWADDGLDTGDL  
 LLQKECDVLPDDTVSTLYNRFLFPEGIKGMVQAVRLIAEGTAPRRPQPEEGATYEGIQKKETAMINWDQPAEA  
 IHNWIRGNDKVPGAWTEACGQKLTFFNSTLNTSGLVAQGEALPIPGAHRPGLVTKAGLILFGNDRMLLVKNI  
 QLEDGKMMPASQFFFKGSASSALELTHEELATAEAVRSSWMRILPNVPEVEDSTDFFKSGAASVDVRLVEEVK  
 ELCDGLELENEDEVYMATTFGDFIQLLVRKLRGEDGESECVINYVEKAVKLLTLQMPYQLFIGGEFVDAEGAKT  
 YSTINPTDGSVICQVSLAQVSDVDKAVAAAKEAFENGLWGKINARDRGRLLYRLADLMEQHQEELATIEALDA  
 GAVYTLALKTHVGMISIQTFRYFAGWCDKIQGATIPINQARPNRNLTLTKKEPVGVCGIVIPWNYPLMMLSWKT  
 AACLAAGNTVVIKPAQVTPLTALKFAELTLKAGIPKGVNINILPGSGSLVGQRLSDHPDVRKIGFTGSTEVEGKH  
 IMKSCALS NVKVSLELGGKSP LIIFADC DLNKAVQMGMSVFFNKGENCIAAGRLFVEDSIHQFVQKVVVEE  
 VGKMKIGNPLDRDTHGPNHEAHLRKLVEYQCQRGVKEGATLVCCGNQVPRPGFFHFPTVFTDVEDHMYIAKE  
 ESFGPIMIISRFADGDVDAVLSRANATEFGLASGVFTRDINKALYVSDKLQAGTVFVNTYKTDVAAPFGGFK  
 QSGFGKDLGEAALNEYLRIKTDTFEY\*  
 >ENSMUSP00000080469\_c.2562:A>G\_p.R855G ENSMUST00000081777.8|Mug2-  
 201|ENSMUSG00000030131|+|chr6:g.122048798:A>G  
 MWKSRRAQLCLFVLLAFLPSASSLNGDSKYMVLVPSQLYTETPEKICLHLYHLNETVTVTASLVSQTGRNRL  
 FDELVVVDKDLFQCVSFI IPTLNSPDEEEFLYVDIKGPTHEFSKRNAVLVKNKESVVFVQTDKPVYKPGQSVKF  
 RVVSMDKTLRPLNELLPPLAYIEDPKKNRIMQWRDIKTENGLKQMSFSLAAEPIQGPYKIVVHKQSGVKEEHSF  
 TVMEFVLPFRFNVLDKVPNAISVNDEVLQVTVCGKYTYGKPVPGQVKISICHETEAGCKEVNSKLDNNGCSTQE  
 VNITELQSKKRNYEVQLFHVNATVTEEGTGLEFNGYGTTKIERITNKLI FLKADSHFRHGIPFFVKVRLVDIK  
 GDPI PNERVFIKAQVLGYTSATTTDQHGLAKFSIDTAGFSGSSLHIKVNHKGKDCSYFFYCMEEERYASAETHVA  
 YAVYSLSKSYIYLVKETSSILPCNQIHTVQAHFILKGDGLVLELVFYLVMAQGSIIQTGNHHTQVEPGEAP  
 VKGNFDLEIPVEFSMAPMAKMLIYTI LDPGEVIADSVNFEIEKCLRNVKVDLSFSSSQSLPASQTRLQVTASPO  
 SLCGLRAVDQSVLLKPEDELSPSWIYNLPGMQHNKFI PSSSLEDREDCILYSSWVAEKHTDWPVPHGREKDV  
 YRYVEDMDLKAFTNLKIKLPKICFDSAPMSGPRGKFDLAFSSEVSGTLQKGSKRQPPEEPREDPPPDKDPLA  
 ETIRKYFPETWVWDIVTVNSTGVAEEMTVPDTITETWKAGALCLSNDTGLGLSSVPLQAFQPFVVEVSLPYS  
 VVRGEAFMLKATVMNYLPTSMRMSVQLEASPDFTAVPVGDDHDSYCLSANGGHTSSWLVTPKSLGNVNFVSVV  
 EAQQSSEPCGSEVATVPETGRKDTVVKVLIVEPEGIKQEHTFNSLFCASDAEISEKMSLVLPPTVVKDSARAH  
 FSVMGDILSSAIKNTQNLHMPYGCGEQNMVLFAPNIYVLKYLDKTQQLTQKIKTKALGFLRAGYQRELNYKH  
 KDGSYSAFGDQNGEREGNTWLTAFVLKSFAQARAFIFIDESHITHAFTWLSQQQKDNCGFRSSGSLFHNDIKH  
 PVVSKALSCLLESSWKTIEQGRNANFVYTKALMAYAFALAGNQDKRNEILKSLDEEAIKEDNSIHWERPQKPRK  
 SEHNLYKQPQASSVEVEMNAYVVLARLTAQPAPSPEDLTLRSSTIMWLTQQNSNGGFSSTQDVTVALDALSKY  
 GAVTFSTRRQKTSLVTIQSTGFSQKQVENSNCLLLQVPLPDI PGDYTISVSGEGCVYAQTTLRYNMHLEKQ  
 QSAFALRVQTVPLTCNNPKGHNSFQISLEISYTGSRPASNMVIADV KMLSGFIPLPKTPVKKLERLEHISRTEV  
 SNNVLLYLDQVLTNQTAFSFI IQQDISVRNLQPAIVKVYDYETDEVAAYEYSSPCSSDKQNV\*  
 >ENSMUSP00000048092\_c.460:G>T\_p.C154F ENSMUST00000042081.9|C3ar1-  
 201|ENSMUSG00000040552|-|chr6:g.122827755:C>A  
 MESFDADTNSTDLHSRPLFQPQDIASMVILGLTCLLGLLGNGLVVLWVAGVKMKTTVNTVWFLHLTLADFLCCL  
 SLPFSLAHLILQGHWPYGLFLCKLIPSI IILNMFASVLLTAISLDRCLIVHKPIWCQNHRNVRTAFAICGCV

WVVAFVMFVPVVFYRDLFIMDNRSICRYNFDSSRSYDYWDYVYKLSLPESTNDNSTAQLTGHMNDRSAPSSV  
QARDYFWVTVTALQSQPFLTSPEDSFSLDSANQQPHYGGKPPNVLTAAVPSGFPVEDRKSNTLNADAFLSAHT  
ELFPTASSGHLYPYDFQGDYVDQFTYDNHVPTPLMAITITRLVVGFLVPPFFIMVICYSLIVFRMRKTNFTKSR  
NKTFRVAVAVVTVFFICWTPYHLVGVLLLITDPESSLGEAVMSWDHMSIALASANSFCNPNFLYALGKDFRKK  
ARQSIKGIIEAAAFSEELTHSTNCTQDKASSKRNNMSTDV\*  
>ENSMUSP00000125303\_c.1135:T>G\_p.I379R ENSMUST00000160496.8|Ano2-  
204|ENSMUSG00000038115|+|chr6:g.125840466:T>G  
MAAPGLRDIPLLPSPRRSSRTVARGSQGPKHGQQYLKVPGHRAPGQRDNSSLHPSQVSRRESSRDRSVINN  
YLDANEPPSSEARLSRMHFHDNRKVDYVLAHYHRKRGGAHLGHGSPGHSLAVISNGETGKERHGGGPGDVELG  
PLDALEEEERREQRDEFEHNLMAAGLELEKDLKESKSGSVFVRIHAPQVLAAREAEFLKIKVPTKKMYEIKAGG  
SIAKKFSAILQTLSSPLQPRVPEHSNNRMKNLSYFSSREKMYLYNIQEKDTFFDNATRSRIVHEILKRTACSR  
ANNTMGINSLIANNIYEAAYPLHDGEYDSPGDDMNDRKLLEYQEWARYGVFYKFPIDLIRKYFGEKIGLYFAW  
LGLYTSFLIPSSVRGVIVFLYGCATIEEDI PSKEMCDHQNAFTMCPLCDKSCDYWNLSACGTARASHLFDNP  
ATVFFSIFMALWATMFLENWKRLQMRGLGYFWDLTGIEEEEERSQEHSRPEYETKVREKLLKESGKSAVQKLEA  
NSPEDEDEDKLTWKDRFPGYLMNFASILFMIALTFSIVFGVIVYRITTAALSLNKATRSNVRVTATAV  
IINLVVILILDEIYGAVAKWLTKEIEVPKTEQTFEERLILKAFLLKFNAYSPIFYVAFFKGRFVGRPGSYVYV  
FDGYRMEECAPGGCLMELCIQLSIIMLGKQLIQNNIFEIGVPKLKLFRKLKDETEPGESDPDHSKRPEQWDL  
DHSLEPYTGLTPEYMEMIIQFGFVTLFVASFPLAPVFALLNNVIEVRLDAKKFVTELRPPDAVRTKDIGIWF  
ILSGIGKFSVIINAFVIAVTSDFIPRLVYQYSYSHNGTLHGFMNHTLSFFNVSQKKEGTQPENSQFDQEVQFC  
RFKDYREPPWAPNPYEFKQYWSVLSARLAFVIFQNLVFMFLSVLVDWMIPIPTDISDQIKKEKSLLVDFFL  
KEEHEKVKLADEPTQRSQGGGDRSRRSRAASSAPSGRSQPGSIASSGSQHTNV\*  
>ENSMUSP00000125426\_c.1045:T>G\_p.I349R ENSMUST00000161619.8|Ano2-  
206|ENSMUSG00000038115|+|chr6:g.125840466:T>G  
XKHGQQYLKVPGHRAPGQRDNSSLHPSQVSRRESSRDRSVINNYLDANEPPSSEARLSRMHFHDNRKVDYV  
LAHYHRKRGGAHLGHGSPGHSLAVISNGETGKERHGGGPGDVELGPLDALEEEERREQRDEFEHNLMAAGLELEK  
DLKESKSGSVFVRIHAPQVLAAREAEFLKIKVPTKKMYEIKAGGSIAKKFSAILQTLSSPLQPRVPEHSNNRMK  
NLSYFSSREKMYLYNIQEKDTFFDNATRSRIVHEILKRTACSRANNTMGINSLIANNIYEAAYPLHDGEYDSP  
GDDMNDRKLLEYQEWARYGVFYKFPIDLIRKYFGEKIGLYFAWLGLYTSFLIPSSVRGVIVFLYGCATIEEDI  
PSKEMCDHQNAFTMCPLCDKSCDYWNLSACGTARASHLFDNPATVFFSIFMALWATMFLENWKRLQMRGLGYF  
WDLTGIEEEEERSQEHSRPEYETKVREKLLKESGKSAVQKLEANSPEDEPSTS\*  
>ENSMUSP00000123965\_c.145:T>G\_p.I49R ENSMUST00000159984.2|Ano2-  
202|ENSMUSG00000038115|+|chr6:g.125840466:T>G  
LLEYQEWARYGVFYKFPIDLIRKYFGEKIGLYFAWLGLYTSFLIPSSVRGVIVFLYGCATIEEDI PSKEMCDH  
QNAFTMCPLCDKSCDYWNLSACGTARASHLFDNPATVFFSIFMALWATMFLENWKRLQMRGLGYFWDLTGIEE  
EEHSRPEYETKVREKLLKESGKSAVQKLEANSPEDEPSTS\*  
>ENSMUSP00000125303\_c.1150:T>G\_p.F384C ENSMUST00000160496.8|Ano2-  
204|ENSMUSG00000038115|+|chr6:g.125840481:T>G  
MAAPGLRDIPLLPSPRRSSRTVARGSQGPKHGQQYLKVPGHRAPGQRDNSSLHPSQVSRRESSRDRSVINN  
YLDANEPPSSEARLSRMHFHDNRKVDYVLAHYHRKRGGAHLGHGSPGHSLAVISNGETGKERHGGGPGDVELG  
PLDALEEEERREQRDEFEHNLMAAGLELEKDLKESKSGSVFVRIHAPQVLAAREAEFLKIKVPTKKMYEIKAGG  
SIAKKFSAILQTLSSPLQPRVPEHSNNRMKNLSYFSSREKMYLYNIQEKDTFFDNATRSRIVHEILKRTACSR  
ANNTMGINSLIANNIYEAAYPLHDGEYDSPGDDMNDRKLLEYQEWARYGVFYKFPIDLIRKYFGEKIGLYFAW  
LGLYTSFLIPSSVIGVIVCLYGCATIEEDI PSKEMCDHQNAFTMCPLCDKSCDYWNLSACGTARASHLFDNP  
ATVFFSIFMALWATMFLENWKRLQMRGLGYFWDLTGIEEEEERSQEHSRPEYETKVREKLLKESGKSAVQKLEA  
NSPEDEDEDKLTWKDRFPGYLMNFASILFMIALTFSIVFGVIVYRITTAALSLNKATRSNVRVTATAV  
IINLVVILILDEIYGAVAKWLTKEIEVPKTEQTFEERLILKAFLLKFNAYSPIFYVAFFKGRFVGRPGSYVYV  
FDGYRMEECAPGGCLMELCIQLSIIMLGKQLIQNNIFEIGVPKLKLFRKLKDETEPGESDPDHSKRPEQWDL  
DHSLEPYTGLTPEYMEMIIQFGFVTLFVASFPLAPVFALLNNVIEVRLDAKKFVTELRPPDAVRTKDIGIWF  
ILSGIGKFSVIINAFVIAVTSDFIPRLVYQYSYSHNGTLHGFMNHTLSFFNVSQKKEGTQPENSQFDQEVQFC  
RFKDYREPPWAPNPYEFKQYWSVLSARLAFVIFQNLVFMFLSVLVDWMIPIPTDISDQIKKEKSLLVDFFL  
KEEHEKVKLADEPTQRSQGGGDRSRRSRAASSAPSGRSQPGSIASSGSQHTNV\*  
>ENSMUSP00000125426\_c.1060:T>G\_p.F354C ENSMUST00000161619.8|Ano2-  
206|ENSMUSG00000038115|+|chr6:g.125840481:T>G  
XKHGQQYLKVPGHRAPGQRDNSSLHPSQVSRRESSRDRSVINNYLDANEPPSSEARLSRMHFHDNRKVDYV  
LAHYHRKRGGAHLGHGSPGHSLAVISNGETGKERHGGGPGDVELGPLDALEEEERREQRDEFEHNLMAAGLELEK  
DLKESKSGSVFVRIHAPQVLAAREAEFLKIKVPTKKMYEIKAGGSIAKKFSAILQTLSSPLQPRVPEHSNNRMK  
NLSYFSSREKMYLYNIQEKDTFFDNATRSRIVHEILKRTACSRANNTMGINSLIANNIYEAAYPLHDGEYDSP  
GDDMNDRKLLEYQEWARYGVFYKFPIDLIRKYFGEKIGLYFAWLGLYTSFLIPSSVIGVIVCLYGCATIEEDI

PSKEMCDHQNAFTMCPLCDKSCDYWNLSACGTARASHLFDNPATVFFSIFMALWATMFLENWKRLQMRGLGYF  
WDLTGIEEEEEERSQEHSRPEYETKVKREKLLKESGKSAVQKLEANSPEDEPSTS\*  
>ENSMUSP00000123965\_c.160:T>G\_p.F54C ENSMUST00000159984.2|Ano2-  
202|ENSMUSG00000038115|+|chr6:g.125840481:T>G  
LLYQEWARYGVFYKFPIDLIRKYFGEKIGLYFAWLGLYTSFLIPSSVIGVIVCLYGCATIEEDIPSKEMCDH  
QNAFTMCPLCDKSCDYWNLSACGTARASHLFDNPATVFFSIFMALWATMFLENWKRLQMRGLGYFWDLTGIEE  
EEHSRPEYETKVKREKLLKESGKSAVQKLEANSPEDEPSTS\*  
>ENSMUSP00000032396\_c.337:A>C\_p.E113A ENSMUST00000032396.13|Lrmp-  
201|ENSMUSG00000030263|+|chr6:g.145093777:A>C  
MLCVKGPPEQEPEDGALDVTRGCQCPLPTEGSILGQELLDCTRMNEDQSTDENGADHLYSESPSQLREYLTQP  
SSEQTSSSESTVTSSESGSDILHMASGDLDCCKPLCEKEEAARAASAMQGTSLAPAAAGDYTSVGVAKAASQLE  
AGEELRTTENGKGSAPGETEISMPPKASVKLVNFQQSENTSANEKEVEAEFLRLSLGLKCDWFTLEKRVKLE  
ERSRDLAEENLKKEITNCLKLESLESLTPLCEEDNQAQEIIVKKLEKSIVLLSQCTARVASRAEMLGAINQESRVS  
RAVEVMIQHVENLKRMYAKEHAELEDLKQALLQNDRSFNSLPDEDDCQIKKRSSSLNSKPSSLRRVTIASLPR  
NLGNVGLVSGMENNDRFSSRRSSWRILGKQGEHRPSLHRFISTYSWADAEDERSDVKARDAPEPQGEAEVEG  
TRKPSLSERRSSTLAWDRGTICSSVASWVTHLQASFRANRALWLTGLIIILIAALMSFLTGLFQTAVEAAP  
TQEGDWSLSLEHILWPFTRLGHGDLPLV\*  
>ENSMUSP00000120166\_c.397:A>C\_p.E133A ENSMUST00000152571.8|Lrmp-  
209|ENSMUSG00000030263|+|chr6:g.145093777:A>C  
MLCVKGPPEQEPEDGALDVTRGCQCPLPTEGSILGQELLDCTRMNEDQSTDVSRITLFLSSEHLNGHRVQFEEN  
GADHLYSESPSQLREYLTQPSSEQTSSSESTVTSSESGSDILHMASGDLDCCKPLCEKEEAARAASAMQGTSLA  
PAAAGDYTSVGVAKAASQLEAGEELRTTENGKGSAPGETEISMPPKASVKL  
>ENSMUSP00000115043\_c.235:A>C\_p.E79A ENSMUST00000156849.8|Lrmp-  
210|ENSMUSG00000030263|+|chr6:g.145093777:A>C  
XLFSFWGLLRGVSQSAENGADHLYSESPSQLREYLTQPSSEQTSSSESTVTSSESGSDILHMASGDLDCCKPL  
CEKEEAARAASAMQGTSLAPAAAGDYTSVGVAKAASQLEAGEELRTTENGKGSAPGETEISMPPKASVKLVN  
FQQSENTSANEKEVEAEFLRLSLGLKCDWFTLEKRVKLEERSRDLAEENLKKEITNCLKLESLESLTPLCEEDNQA  
QEIIVKKLEKSIVLLSQCTARVASRAEMLGAINQESRVSRAVEVMIQHVENLKRMYAKEHAELEDLKQALLQND  
RSFNSLPDEDDCQIKKRSSSLNSKPSSLRRVTIASLPRNLGNVGLVSGMENNDRFSSRRSSWRILGKQGEHR  
PSLHRFISTYSWADAEDERSDVKARDAPEPQGEAEVEGTRKPSLSERRSSTLAWDRGTICSSVASWVTHLQAS  
FRANRALWLTGLIIILIAALMSFLTGLFQTAVEAAP  
>ENSMUSP00000120248\_c.232:A>C\_p.E78A ENSMUST00000132948.2|Lrmp-  
204|ENSMUSG00000030263|+|chr6:g.145093777:A>C  
XFSFWGLLRGVSQSAENGADHLYSESPSQLREYLTQPSSEQTSSSESTVTSSESGSDILHMASGDLDCCKPLC  
EKEEAARAASAMQGTSLAPAAAGDYTSVGVAKAASQLEAGEELRTTENGKGSAPGETEISMPPKASVKLVNF  
QQSENTSANEKEVEAEFLRLSLGLKCDWFTLEKRVKLEERSRDLAEENLKKEITNCLKLESLESLTPLCEEDNQA  
QEIIVKKLEKSIVLLSQCTARVASRAEMLGAINQESRVSRAVEVMIQHVENLKRMYAKEHAELEDLKQALLQND  
RSFNSLPDEDDCQIKKRSSSLNSKPSSLRRVTIASLPRNLGNVGLVSGMENNDRFSSRRSSWRILGKQGEHR  
PSLHRFISTYSWADAEDERSDVKARDAPEPQGEAEVEGTRKPSLSERRSSTLAWDRGTICSSVASWVTHLQAS  
FRANRALWLTGLIIILIAALMSFLTGLFQTAVEAAP  
>ENSMUSP00000032396\_c.585:G>A\_p.A196T ENSMUST00000032396.13|Lrmp-  
201|ENSMUSG00000030263|+|chr6:g.145106603:G>A  
MLCVKGPPEQEPEDGALDVTRGCQCPLPTEGSILGQELLDCTRMNEDQSTDENGADHLYSESPSQLREYLTQP  
SSEQTSSSESTVTSSESGSDILHMASGDLDCCKPLCEKEEAARAASAMQGTSLAPAAAGDYTSVGVAKAASQLE  
AGEELRTTENGKGSAPGETEISMPPKASVKLVNFQQSENTSANEKEVEAEFLRLSLGLKCDWFTLEKRVKLE  
ERSRDLAEENLKKEITNCLKLESLESLTPLCEEDNQAQEIIVKKLEKSIVLLSQCTARVASRAEMLGAINQESRVS  
RAVEVMIQHVENLKRMYAKEHAELEDLKQALLQNDRSFNSLPDEDDCQIKKRSSSLNSKPSSLRRVTIASLPR  
NLGNVGLVSGMENNDRFSSRRSSWRILGKQGEHRPSLHRFISTYSWADAEDERSDVKARDAPEPQGEAEVEG  
TRKPSLSERRSSTLAWDRGTICSSVASWVTHLQASFRANRALWLTGLIIILIAALMSFLTGLFQTAVEAAP  
TQEGDWSLSLEHILWPFTRLGHGDLPLV\*  
>ENSMUSP00000115043\_c.483:G>A\_p.A162T ENSMUST00000156849.8|Lrmp-  
210|ENSMUSG00000030263|+|chr6:g.145106603:G>A  
XLFSFWGLLRGVSQSAENGADHLYSESPSQLREYLTQPSSEQTSSSESTVTSSESGSDILHMASGDLDCCKPL  
CEKEEAARAASAMQGTSLAPAAAGDYTSVGVAKAASQLEAGEELRTTENGKGSAPGETEISMPPKASVKLVN  
FQQSENTSANEKEVEAEFLRLSLGLKCDWFTLEKRVKLEERSRDLAEENLKKEITNCLKLESLESLTPLCEEDNQA  
QEIIVKKLEKSIVLLSQCTARVASRAEMLGAINQESRVSRAVEVMIQHVENLKRMYAKEHAELEDLKQALLQND  
RSFNSLPDEDDCQIKKRSSSLNSKPSSLRRVTIASLPRNLGNVGLVSGMENNDRFSSRRSSWRILGKQGEHR

PSLHRFISTYSWADAEDERSDVKARDAPEPQGEEAVEGTRKPSLSERRSSTLAWDRGTICSSVASWVTHLQAS  
 FFRANRALWLTGLIIILIAALMSFLTGLFQTAVEAAPTQEGDWSLSLEHILWPFTRLGHGDLPLV\*  
 >ENSMUSP00000107357\_c.924:C>G\_p.L309V ENSMUST00000111728.8|Cascl-  
 203|ENSMUSG00000043541|-|chr6:g.145137143:G>C  
 MTKAERLRMLQEEEEERLKEEEEEARLKFEKEEQERLEIQRIEREKWSLLEKKDLERRSQELEEALLEGCFPE  
 AEKQKREIRALAQWKHYTECDGSPDPWVAQEMNTFISLWEEKNQAFEQVMEKSKLVLSLIEKVKLILLETPT  
 YELDHRTVLQHQGSILRLQELLSLKINVATELLLRQASNLADLDTGNMEKIIKDENVTLVWVANLKKNPRHRS  
 VRFSETQIGFEIPRILATSNVALRLLHTRYDHTPLFPPIAVTEQNQNVPVGAEQVNVEESTEKAMTEEKLFTTE  
 KAANEDEQPKAEQEREVNLVQEEENKYEAIENTVLQRTSDSEGEDSQTQLELEMKLLSEAVLAAQLCLVENNV  
 ELPEASQAYKVDLCHFSTLGGVYHLDVLELPPQCKPVKGWVLEILQEGLRQRFIYPPDTEEPDPDVTFFPIE  
 VTLEIHKSVIFFERPRVVRWDNEGKFWRS DGISSVYNNREDRLLTF SMDTLGPVTLIQDAHVNPYQSWEMSP  
 CGMNKVLIVKTVFMELQIYIKENLCMLASVKLRGKGLEFHLK GKWMAPIPFILALKEAGLNIFPAVYSHFYV  
 VINNKVREQLSEETEHTTWSLLMFGDRAQMLKMQEENDKFSEALREGTEFHSTLYHMMKDFASPVAMERVRH  
 SNCQFIDSVCYMLLSIRVLSYS\*

>ENSMUSP00000062279\_c.963:C>G\_p.L322V ENSMUST00000060797.10|Cascl-  
 201|ENSMUSG00000043541|-|chr6:g.145137143:G>C  
 MAPKSKKAPSKKKMTKAERLRMLQEEEEERLKEEEEEARLKFEKEEQERLEIQRIEREKWSLLEKKDLERRSQE  
 LEEALLEGCFPEAEKQKREIRALAQWKHYTECDGSPDPWVAQEMNTFISLWEEKNQAFEQVMEKSKLVLSL  
 IEKVKLILLETPTYELDHRTVLQHQGSILRLQELLSLKINVATELLLRQASNLADLDTGNMEKIIKDENVTLV  
 VWANLKKNPRHRSVRFSETQIGFEIPRILATSNVALRLLHTRYDHTPLFPPIAVTEQNQNVPVGAEQVNVEEST  
 EKAMTEEKLFTTEKAANEDEQPKAEQEREVNLVQEEENKYEAIENTVLQRTSDSEGEDSQTQLELEMKLLSEA  
 VLAAQLCLVENNVVELPEASQAYKVDLCHFSTLGGVYHLDVLELPPQCKPVKGWVLEILQEGLRQRFIYPPDTE  
 EEPDPDVTFFPIEVTLEIHKSVIFFERPRVVRWDNEGKFWRS DGISSVYNNREDRLLTF SMDTLGPVTLIQDA  
 HVNPYQSWEMSPCGMNKVLIVKTVFMELQIYIKENLCMLASVKLRGKGLEFHLK GKWMAPIPFILALKEAG  
 LNIFPAVYSHFYVVINNKVPQVELKAYRQMA LSSAFSFGWSKWNMVCNSTRVVRVREQLSEETEHTTWSLL  
 MFGDRAQMLKMQEENDKFSEALREGTEFHSTLYHMMKDFASPVAMERVRHSNCQFIDSVCYMLLSIRVLSYS  
 \*

>ENSMUSP00000144783\_c.963:C>G\_p.L322V ENSMUST00000204105.2|Cascl-  
 208|ENSMUSG00000043541|-|chr6:g.145137143:G>C  
 MAPKSKKAPSKKKMTKAERLRMLQEEEEERLKEEEEEARLKFEKEEQERLEIQRIEREKWSLLEKKDLERRSQE  
 LEEALLEGCFPEAEKQKREIRALAQWKHYTECDGSPDPWVAQEMNTFISLWEEKNQAFEQVMEKSKLVLSL  
 IEKVKLILLETPTYELDHRTVLQHQGSILRLQELLSLKINVATELLLRQASNLADLDTGNMEKIIKDENVTLV  
 VWANLKKNPRHRSVRFSETQIGFEIPRILATSNVALRLLHTRYDHTPLFPPIAVTEQNQNVPVGAEQVNVEEST  
 EKAMTEEKLFTTEKAANEDEQPKAEQEREVNLVQEEENKYEAIENTVLQRTSDSEGEDSQTQLELEMKLLSEA  
 VLAAQLCLVENNVVELPEASQAYKVDLCHFSTLGGVYHLDVLELPPQCKPVKGWVLEILQEGLRQRFIYPPDTE  
 EEPDPDVTFFPIEVTLEIHKSVIFFERPRVVRWDNEGKFWRS DGISSVYNNREDRLLTF SMDTLGPVTLIQDA  
 HVNPYQSWEMSPCGMNKVLIVKTVFMELQIYIKENLCMLASVKLRGKGLEFHLK GKWMAPIPFILALKEAG  
 LNIFPAVYSHFYVVINNKVPQVELKAYRQMA LSSAFSFGWSKWNMVCNSTRVVRVIRHWGG\*

>ENSMUSP00000107357\_c.556:T>C\_p.L186S ENSMUST00000111728.8|Cascl-  
 203|ENSMUSG00000043541|-|chr6:g.145138618:A>G  
 MTKAERLRMLQEEEEERLKEEEEEARLKFEKEEQERLEIQRIEREKWSLLEKKDLERRSQELEEALLEGCFPE  
 AEKQKREIRALAQWKHYTECDGSPDPWVAQEMNTFISLWEEKNQAFEQVMEKSKLVLSLIEKVKLILLETPT  
 YELDHRTVLQHQGSILRLQELLSLKINVATELLLRQASNSADLDTGNMEKIIKDENVTLVWVANLKKNPRHRS  
 VRFSETQIGFEIPRILATSNVALRLLHTRYDHTPLFPPIAVTEQNQNVPVGAEQVNVEESTEKAMTEEKLFTTE  
 KAANEDEQPKAEQERELNLVQEEENKYEAIENTVLQRTSDSEGEDSQTQLELEMKLLSEAVLAAQLCLVENNV  
 ELPEASQAYKVDLCHFSTLGGVYHLDVLELPPQCKPVKGWVLEILQEGLRQRFIYPPDTEEPDPDVTFFPIE  
 VTLEIHKSVIFFERPRVVRWDNEGKFWRS DGISSVYNNREDRLLTF SMDTLGPVTLIQDAHVNPYQSWEMSP  
 CGMNKVLIVKTVFMELQIYIKENLCMLASVKLRGKGLEFHLK GKWMAPIPFILALKEAGLNIFPAVYSHFYV  
 VINNKVREQLSEETEHTTWSLLMFGDRAQMLKMQEENDKFSEALREGTEFHSTLYHMMKDFASPVAMERVRH  
 SNCQFIDSVCYMLLSIRVLSYS\*

>ENSMUSP00000062279\_c.595:T>C\_p.L199S ENSMUST00000060797.10|Cascl-  
 201|ENSMUSG00000043541|-|chr6:g.145138618:A>G  
 MAPKSKKAPSKKKMTKAERLRMLQEEEEERLKEEEEEARLKFEKEEQERLEIQRIEREKWSLLEKKDLERRSQE  
 LEEALLEGCFPEAEKQKREIRALAQWKHYTECDGSPDPWVAQEMNTFISLWEEKNQAFEQVMEKSKLVLSL  
 IEKVKLILLETPTYELDHRTVLQHQGSILRLQELLSLKINVATELLLRQASNSADLDTGNMEKIIKDENVTLV  
 VWANLKKNPRHRSVRFSETQIGFEIPRILATSNVALRLLHTRYDHTPLFPPIAVTEQNQNVPVGAEQVNVEEST  
 EKAMTEEKLFTTEKAANEDEQPKAEQERELNLVQEEENKYEAIENTVLQRTSDSEGEDSQTQLELEMKLLSEA  
 VLAAQLCLVENNVVELPEASQAYKVDLCHFSTLGGVYHLDVLELPPQCKPVKGWVLEILQEGLRQRFIYPPDTE

EEPDPDVTFPPIEVTLIHKSVIFFERPRVVRWDNEGKFWRS DGISSVYNNREDRLTFSMDTLGPVTLIQDA  
HVNMPYQSWEMSPCGMKNVLLIVKTVFMELQIYIKENLCMLASVKLRGKGLEFHLKGKWMAPIPFILALKEAG  
LNIFPAVYSHFYVVINNKVPQVELKAYRQ MALLSSAFSFGWSKWNMVCNSTRV V IRVREQLSEETEHTWSLL  
MFGSDRAQMLKMQEENDKFSEALREGTEFHSTLYHMMKDFASPVAMERVRHSNCQFIDSVCYMLLSIRVLSYS  
\*

>ENSMUSP00000144783\_c.595:T>C\_p.L199S ENSMUST00000204105.2|Cascl-  
208|ENSMUSG00000043541|-|chr6:g.145138618:A>G

MAPKSKKAPSKKKMTKAERLRMQEEEEERLKEEEEEARLKFEKEEQERLEIQRIEREKWSLLEKKDLERRSQE  
LEELALLEGC FPEAEKQKREIRALAQWKHYTECDGSPVPWVAQEMNTFISLWEEKNQAFEQVMEKSKLVLSL  
IEKVKLILLETPTYELDHRTVLQHQGSILRLQELLSLKINVATELLLRQASNSADLDTGNMEKIIKDENVTLY  
VWANLKKNPRHRSVRFSETQIGFEIPRILATSNVALRLLHTRYDHTPLFPPIAVTEQNQNPVGAEQVNVVEEST  
EKAMTEEKLFTTEEKAANEDEQPKAEQERELNLVQEENKYEAIENTVLQRTSDSEGEDSQTQTQLELEMKLLSEA  
VLAACLCLVENNVVPEASQAYKVDLCHFSTLGGVYHLDVLELPPQCKPVKGVWVLEILQEGLRFIYPPDPTT  
EEPDPDVTFPPIEVTLIHKSVIFFERPRVVRWDNEGKFWRS DGISSVYNNREDRLTFSMDTLGPVTLIQDA  
HVNMPYQSWEMSPCGMKNVLLIVKTVFMELQIYIKENLCMLASVKLRGKGLEFHLKGKWMAPIPFILALKEAG  
LNIFPAVYSHFYVVINNKVPQVELKAYRQ MALLSSAFSFGWSKWNMVCNSTRV V IRHWGG\*

>ENSMUSP00000107357\_c.292:A>T\_p.D98V ENSMUST00000111728.8|Cascl-  
203|ENSMUSG00000043541|-|chr6:g.145142644:T>A

MTKAERLRMQEEEEERLKEEEEEARLKFEKEEQERLEIQRIEREKWSLLEKKDLERRSQELEELALLEGC FPE  
AEKQKREIRALAQWKHYTECDGSPVPWVAQEMNTFISLWEEKNQAFEQVMEKSKLVLSLIEKVKLILLETPT  
YELDHRTVLQHQGSILRLQELLSLKINVATELLLRQASNLADLDTGNMEKIIKDENVTLYVWANLKKNPRHR  
SVRFSETQIGFEIPRILATSNVALRLLHTRYDHTPLFPPIAVTEQNQNPVGAEQVNVVEESTEKAMTEEKLFTTE  
KAANEDEQPKAEQERELNLVQEENKYEAIENTVLQRTSDSEGEDSQTQTQLELEMKLLSEAVLAAQLCLVENNV  
ELPEASQAYKVDLCHFSTLGGVYHLDVLELPPQCKPVKGVWVLEILQEGLRFIYPPDPTTEEPDPDVTFPPIE  
VTLEIHKSVIFFERPRVVRWDNEGKFWRS DGISSVYNNREDRLTFSMDTLGPVTLIQDAHVNMPYQSWEMSP  
CGMKNVLLIVKTVFMELQIYIKENLCMLASVKLRGKGLEFHLKGKWMAPIPFILALKEAGLNIFPAVYSHFYV  
VINNKVREQLSEETEHTWSLLMFGSDRAQMLKMQEENDKFSEALREGTEFHSTLYHMMKDFASPVAMERVRH  
SNCQFIDSVCYMLLSIRVLSYS\*

>ENSMUSP00000062279\_c.331:A>T\_p.D111V ENSMUST00000060797.10|Cascl-  
201|ENSMUSG00000043541|-|chr6:g.145142644:T>A

MAPKSKKAPSKKKMTKAERLRMQEEEEERLKEEEEEARLKFEKEEQERLEIQRIEREKWSLLEKKDLERRSQE  
LEELALLEGC FPEAEKQKREIRALAQWKHYTECDGSPVPWVAQEMNTFISLWEEKNQAFEQVMEKSKLVLSL  
IEKVKLILLETPTYELDHRTVLQHQGSILRLQELLSLKINVATELLLRQASNLADLDTGNMEKIIKDENVTLY  
VWANLKKNPRHRSVRFSETQIGFEIPRILATSNVALRLLHTRYDHTPLFPPIAVTEQNQNPVGAEQVNVVEEST  
EKAMTEEKLFTTEEKAANEDEQPKAEQERELNLVQEENKYEAIENTVLQRTSDSEGEDSQTQTQLELEMKLLSEA  
VLAACLCLVENNVVPEASQAYKVDLCHFSTLGGVYHLDVLELPPQCKPVKGVWVLEILQEGLRFIYPPDPTT  
EEPDPDVTFPPIEVTLIHKSVIFFERPRVVRWDNEGKFWRS DGISSVYNNREDRLTFSMDTLGPVTLIQDA  
HVNMPYQSWEMSPCGMKNVLLIVKTVFMELQIYIKENLCMLASVKLRGKGLEFHLKGKWMAPIPFILALKEAG  
LNIFPAVYSHFYVVINNKVPQVELKAYRQ MALLSSAFSFGWSKWNMVCNSTRV V IRVREQLSEETEHTWSLL  
MFGSDRAQMLKMQEENDKFSEALREGTEFHSTLYHMMKDFASPVAMERVRHSNCQFIDSVCYMLLSIRVLSYS  
\*

>ENSMUSP00000144783\_c.331:A>T\_p.D111V ENSMUST00000204105.2|Cascl-  
208|ENSMUSG00000043541|-|chr6:g.145142644:T>A

MAPKSKKAPSKKKMTKAERLRMQEEEEERLKEEEEEARLKFEKEEQERLEIQRIEREKWSLLEKKDLERRSQE  
LEELALLEGC FPEAEKQKREIRALAQWKHYTECDGSPVPWVAQEMNTFISLWEEKNQAFEQVMEKSKLVLSL  
IEKVKLILLETPTYELDHRTVLQHQGSILRLQELLSLKINVATELLLRQASNLADLDTGNMEKIIKDENVTLY  
VWANLKKNPRHRSVRFSETQIGFEIPRILATSNVALRLLHTRYDHTPLFPPIAVTEQNQNPVGAEQVNVVEEST  
EKAMTEEKLFTTEEKAANEDEQPKAEQERELNLVQEENKYEAIENTVLQRTSDSEGEDSQTQTQLELEMKLLSEA  
VLAACLCLVENNVVPEASQAYKVDLCHFSTLGGVYHLDVLELPPQCKPVKGVWVLEILQEGLRFIYPPDPTT  
EEPDPDVTFPPIEVTLIHKSVIFFERPRVVRWDNEGKFWRS DGISSVYNNREDRLTFSMDTLGPVTLIQDA  
HVNMPYQSWEMSPCGMKNVLLIVKTVFMELQIYIKENLCMLASVKLRGKGLEFHLKGKWMAPIPFILALKEAG  
LNIFPAVYSHFYVVINNKVPQVELKAYRQ MALLSSAFSFGWSKWNMVCNSTRV V IRHWGG\*

>ENSMUSP00000032399\_c.509:G>T\_p.M170I ENSMUST00000032399.12|Kras-  
201|ENSMUSG00000030265|-|chr6:g.145166391:C>A

MTEYKLVVVGAGGVGKSALTIQLIQNHFDVDEYDPTIEDSYRKQVVIDGETCLLDILDITAGQEEYSAMRDQYMR  
TGEGFLCVFAINNTKSFEDIHHYREQIKRVKDSQVPMVVLVGNKCDLPSRTVDTKQAQELARSYGIPFIETSA  
KTRQGVDDAFYTLVREIRKHKKEKISKDGKSKKKKSRTRCTVM\*

>ENSMUSP00000145294\_c.170:G>T\_p.M57I ENSMUST00000203147.3|Kras-  
207|ENSMUSG00000030265|-|chr6:g.145166391:C>A  
MTEYKLVVVGAGGVGKSALTIQLIQNHVFVDEYDPTIEGVDDAFYTLVREIRKHKKEKISKDGKKKKKKSRTRCT  
VM\*  
>ENSMUSP00000032399\_c.325:T>AT\_p.V109ins-fs ENSMUST00000032399.12|Kras-  
201|ENSMUSG00000030265|-|chr6:g.145177945:A>AT  
MTEYKLVVVGAGGVGKSALTIQLIQNHVFVDEYDPTIEDSYRKQVVIDGETCLLDILDITAGQEEYSAMRDQYMR  
TGEGFLCVFAINNTKSFEDIHHYREQIKRVKDESDDAYGPGRE  
>ENSMUSP00000107339\_c.325:T>AT\_p.V109ins-fs ENSMUST00000111710.8|Kras-  
202|ENSMUSG00000030265|-|chr6:g.145177945:A>AT  
MTEYKLVVVGAGGVGKSALTIQLIQNHVFVDEYDPTIEDSYRKQVVIDGETCLLDILDITAGQEEYSAMRDQYMR  
TGEGFLCVFAINNTKSFEDIHHYREQIKRVKDESDDAYGPGRE  
>ENSMUSP00000120740\_c.300:A>T\_p.K101\* ENSMUST00000148739.8|Lmntd1-  
205|ENSMUSG00000054966|-|chr6:g.145363221:T>A  
MSIQVHSSGRYPRTPAQQAAVSSPKGGILSSLGEIKIAEVNIKGLFVRLVNSSNEKEVEIGNHILQQNVNGHA  
VSLYQFPDNITLQANSTVTVWAAASEA\*PQPPTDFVWEEQSKFRSSPDCTTILCKPNGEAIAWYTPPIHWKQAW  
EKLETDIEFERCSVVVPSMRNHMFGWITASVSSTNEEKEEPIQKTPSQVYPVLYREKEIPPTVLPNKSPWCRN  
PNTSPHPYSSLIDSHSDISESSLDTQLKPQPTKPKPDPGTGKTKKKAKS\*  
>ENSMUSP00000107335\_c.588:A>T\_p.K197\* ENSMUST00000111706.8|Lmntd1-  
201|ENSMUSG00000054966|-|chr6:g.145363221:T>A  
MDS DSTLIPLSRFSQEMPIGFYQITSTQNSSTLSSRGQLASKSTILSCSHKSSSLGKQSTSSMVP RRQPQS  
SSD VDTYTFGNGEDYFLSLFGESKLLTAHTPQAENVSEHLSVILEEVGQFTSSSLGEIKIAEVNIKGLFVRLV  
NSSNEKEVEIGNHILQQNVNGHAVSLYQFPDNITLQANSTVTVWAAASEA\*PQPPTDFVWEEQSKFRSSPDCT  
TILCKPNGEAIAWYTPPIHWKQAW EKLETDIEFERCSVVVPSMRNHMFGWITASVSSTNEEKEEPIQKTPSQVY  
PVLYREKEIPPTVLPNKSPWCRNPNTSPHPYSSLIDSHSDISESSLDTQLKPQPTKPKPDPGTGKTKKKAKS\*  
>ENSMUSP00000107337\_c.738:A>T\_p.K247\* ENSMUST00000111708.9|Lmntd1-  
202|ENSMUSG00000054966|-|chr6:g.145363221:T>A  
MMKEASEPLASVTSINKQDSKVQDGEIRKEKIGTITPSKQHSVHFFPKIMSDSTLIPLSRFSQEMPIGF  
YQITSTQNSSTLSSRGQLASKSTILSCSHKSSSLGKQSTSSMVP RRQPQSSSD VDTYTFGNGEDYFLSLFGES  
KLLTAHTPQAENVSEHLSVILEEVGQFTSSSLGEIKIAEVNIKGLFVRLVNSSNEKEVEIGNHILQQNVNGHA  
VSLYQFPDNITLQANSTVTVWAAASEA\*PQPPTDFVWEEQSKFRSSPDCTTILCKPNGEAIAWYTPPIHWKQAW  
EKLETDIEFERCSVVVPSMRNHMFGWITASVSSTNEEKEEPIQKTPSQVYPVLYREKEIPPTVLPNKSPWCRN  
PNTSPHPYSSLIDSHSDISESSLDTQLKPQPTKPKPDPGTGKTKKKAKS\*  
>ENSMUSP00000120740\_c.291:T>C\_p.S98P ENSMUST00000148739.8|Lmntd1-  
205|ENSMUSG00000054966|-|chr6:g.145363230:A>G  
MSIQVHSSGRYPRTPAQQAAVSSPKGGILSSLGEIKIAEVNIKGLFVRLVNSSNEKEVEIGNHILQQNVNGHA  
VSLYQFPDNITLQANSTVTVWAAAPEAKPQPPTDFVWEEQSKFRSSPDCTTILCKPNGEAIAWYTPPIHWKQAW  
EKLETDIEFERCSVVVPSMRNHMFGWITASVSSTNEEKEEPIQKTPSQVYPVLYREKEIPPTVLPNKSPWCRN  
PNTSPHPYSSLIDSHSDISESSLDTQLKPQPTKPKPDPGTGKTKKKAKS\*  
>ENSMUSP00000107335\_c.579:T>C\_p.S194P ENSMUST00000111706.8|Lmntd1-  
201|ENSMUSG00000054966|-|chr6:g.145363230:A>G  
MDS DSTLIPLSRFSQEMPIGFYQITSTQNSSTLSSRGQLASKSTILSCSHKSSSLGKQSTSSMVP RRQPQS  
SSD VDTYTFGNGEDYFLSLFGESKLLTAHTPQAENVSEHLSVILEEVGQFTSSSLGEIKIAEVNIKGLFVRLV  
NSSNEKEVEIGNHILQQNVNGHAVSLYQFPDNITLQANSTVTVWAAAPEAKPQPPTDFVWEEQSKFRSSPDCT  
TILCKPNGEAIAWYTPPIHWKQAW EKLETDIEFERCSVVVPSMRNHMFGWITASVSSTNEEKEEPIQKTPSQVY  
PVLYREKEIPPTVLPNKSPWCRNPNTSPHPYSSLIDSHSDISESSLDTQLKPQPTKPKPDPGTGKTKKKAKS\*  
>ENSMUSP00000107337\_c.729:T>C\_p.S244P ENSMUST00000111708.9|Lmntd1-  
202|ENSMUSG00000054966|-|chr6:g.145363230:A>G  
MMKEASEPLASVTSINKQDSKVQDGEIRKEKIGTITPSKQHSVHFFPKIMSDSTLIPLSRFSQEMPIGF  
YQITSTQNSSTLSSRGQLASKSTILSCSHKSSSLGKQSTSSMVP RRQPQSSSD VDTYTFGNGEDYFLSLFGES  
KLLTAHTPQAENVSEHLSVILEEVGQFTSSSLGEIKIAEVNIKGLFVRLVNSSNEKEVEIGNHILQQNVNGHA  
VSLYQFPDNITLQANSTVTVWAAAPEAKPQPPTDFVWEEQSKFRSSPDCTTILCKPNGEAIAWYTPPIHWKQAW  
EKLETDIEFERCSVVVPSMRNHMFGWITASVSSTNEEKEEPIQKTPSQVYPVLYREKEIPPTVLPNKSPWCRN  
PNTSPHPYSSLIDSHSDISESSLDTQLKPQPTKPKPDPGTGKTKKKAKS\*  
>ENSMUSP00000120740\_c.160:A>G\_p.N54S ENSMUST00000148739.8|Lmntd1-  
205|ENSMUSG00000054966|-|chr6:g.145365529:T>C  
MSIQVHSSGRYPRTPAQQAAVSSPKGGILSSLGEIKIAEVNIKGLFVRLVNSSSEKEVEIGNHILQQNVNGHA  
VSLYQFPDNITLQANSTVTVWAAASEAKPQPPTDFVWEEQSKFRSSPDCTTILCKPNGEAIAWYTPPIHWKQAW

EKLETDIEFERC SVVVP SMRNHMF GWITASVSSTNEEKEEP IQKTPSQVYPVLYREKEIPPTVLPNKSPWCRN  
PNTSPHPYSSLIDSHSDISESSLDTQLKPQPTKPKPDPGTTKTKKAKS\*  
>ENSMUSP00000107335\_c.448:A>G\_p.N150S ENSMUST00000111706.8|Lmntd1-  
201|ENSMUSG00000054966|-|chr6:g.145365529:T>C  
MDS DSTTLIPLSRFSQEMPIGFYQITSTQNSSTLSSRGQLASKSTILSCSHKDSGLKQSTSSMVP RRQPQS  
SSD VDTYTFGNGEDYFLSLFGESKKLTAHTPQAENVSEHLSVILEEVGQFTSSSLGEIKIAEVNIKGLFVRLV  
NNSSEKEVEIGNHILQQNVNGHAVSLYQFPDNITLQANSTVTVWAAASEAKQPPTDFVWEEQSKFRSSPDCT  
TILCKPNGEAI AWYTP IHWKQAW EKLETDIEFERC SVVVP SMRNHMF GWITASVSSTNEEKEEP IQKTPSQVY  
PVLYREKEIPPTVLPNKSPWCRN PNTSPHPYSSLIDSHSDISESSLDTQLKPQPTKPKPDPGTTKTKKAKS\*  
>ENSMUSP00000107337\_c.598:A>G\_p.N200S ENSMUST00000111708.9|Lmntd1-  
202|ENSMUSG00000054966|-|chr6:g.145365529:T>C  
MMKEASEPLASVTSINKQDSKVQDGEIRKEKIGTITPSKQHS SVHFFPKIMDS DSTTLIPLSRFSQEMPIGF  
YQITSTQNSSTLSSRGQLASKSTILSCSHKDSGLKQSTSSMVP RRQPQSSSD VDTYTFGNGEDYFLSLFGES  
KKLTAHTPQAENVSEHLSVILEEVGQFTSSSLGEIKIAEVNIKGLFVRLV NNSSEKEVEIGNHILQQNVNGHA  
VSLYQFPDNITLQANSTVTVWAAASEAKQPPTDFVWEEQSKFRSSPDCTTILCKPNGEAI AWYTP IHWKQAW  
EKLETDIEFERC SVVVP SMRNHMF GWITASVSSTNEEKEEP IQKTPSQVYPVLYREKEIPPTVLPNKSPWCRN  
PNTSPHPYSSLIDSHSDISESSLDTQLKPQPTKPKPDPGTTKTKKAKS\*  
>ENSMUSP00000107335\_c.337:T>C\_p.L113P ENSMUST00000111706.8|Lmntd1-  
201|ENSMUSG00000054966|-|chr6:g.145373044:A>G  
MDS DSTTLIPLSRFSQEMPIGFYQITSTQNSSTLSSRGQLASKSTILSCSHKDSGLKQSTSSMVP RRQPQS  
SSD VDTYTFGNGEDYFLSLFGESKKLTAHTPQAENVSEHPSVILEEVGQFTSSSLGEIKIAEVNIKGLFVRLV  
NNSNEKEVEIGNHILQQNVNGHAVSLYQFPDNITLQANSTVTVWAAASEAKQPPTDFVWEEQSKFRSSPDCT  
TILCKPNGEAI AWYTP IHWKQAW EKLETDIEFERC SVVVP SMRNHMF GWITASVSSTNEEKEEP IQKTPSQVY  
PVLYREKEIPPTVLPNKSPWCRN PNTSPHPYSSLIDSHSDISESSLDTQLKPQPTKPKPDPGTTKTKKAKS\*  
>ENSMUSP00000107337\_c.487:T>C\_p.L163P ENSMUST00000111708.9|Lmntd1-  
202|ENSMUSG00000054966|-|chr6:g.145373044:A>G  
MMKEASEPLASVTSINKQDSKVQDGEIRKEKIGTITPSKQHS SVHFFPKIMDS DSTTLIPLSRFSQEMPIGF  
YQITSTQNSSTLSSRGQLASKSTILSCSHKDSGLKQSTSSMVP RRQPQSSSD VDTYTFGNGEDYFLSLFGES  
KKLTAHTPQAENVSEHPSVILEEVGQFTSSSLGEIKIAEVNIKGLFVRLV NNSNEKEVEIGNHILQQNVNGHA  
VSLYQFPDNITLQANSTVTVWAAASEAKQPPTDFVWEEQSKFRSSPDCTTILCKPNGEAI AWYTP IHWKQAW  
EKLETDIEFERC SVVVP SMRNHMF GWITASVSSTNEEKEEP IQKTPSQVYPVLYREKEIPPTVLPNKSPWCRN  
PNTSPHPYSSLIDSHSDISESSLDTQLKPQPTKPKPDPGTTKTKKAKS\*  
>ENSMUSP00000107337\_c.13:C>T\_p.A5V ENSMUST00000111708.9|Lmntd1-  
202|ENSMUSG00000054966|-|chr6:g.145379478:G>A  
MMKEVSEPLASVTSINKQDSKVQDGEIRKEKIGTITPSKQHS SVHFFPKIMDS DSTTLIPLSRFSQEMPIGF  
YQITSTQNSSTLSSRGQLASKSTILSCSHKDSGLKQSTSSMVP RRQPQSSSD VDTYTFGNGEDYFLSLFGES  
KKLTAHTPQAENVSEHLSVILEEVGQFTSSSLGEIKIAEVNIKGLFVRLV NNSNEKEVEIGNHILQQNVNGHA  
VSLYQFPDNITLQANSTVTVWAAASEAKQPPTDFVWEEQSKFRSSPDCTTILCKPNGEAI AWYTP IHWKQAW  
EKLETDIEFERC SVVVP SMRNHMF GWITASVSSTNEEKEEP IQKTPSQVYPVLYREKEIPPTVLPNKSPWCRN  
PNTSPHPYSSLIDSHSDISESSLDTQLKPQPTKPKPDPGTTKTKKAKS\*  
>ENSMUSP00000123226\_c.13:C>T\_p.A5V ENSMUST00000149666.2|Lmntd1-  
206|ENSMUSG00000054966|-|chr6:g.145379478:G>A  
MMKEVSEPLASVTSINKQDSKVQDGEIRKEKIGTITPSKQHS SVHFFPKIMDS DSTTLIPLSRFSQEMPI  
>ENSMUSP00000107333\_c.448:A>T\_p.E150V ENSMUST00000111704.8|Rassf8-  
203|ENSMUSG00000030259|+|chr6:g.145761124:A>T  
MELKVVVDGVRIVCGVTEVTTCQEVVIALAQAI GRTGRYTLIEKWRDTERH LAPHENPIVSLNKWGQYASDV  
QLILRR TGPSLSERPTSDSVARIPERTLYRQSLPLAKLRPQADKSIRRREP KRKSLTFTGGAKGLTDIFGKG  
KETVFRQKVL SNCRATAEELKRLIRLQ TGKLOAIEKQLESSEAEIRFWEQKYSCSLEEEIVRLEQR IKRNDVE  
IEEEEFWENELQIEQENEKQLDQLEEIRQKVTDCEGR LKDYLAQIHTMESGLQAEKLHREVQEAQVNEEEVK  
GKIEKVKGEMDLQGQSLRLENGIRAVERSLGQATKRLQDKELEQLTKELRQVNLQQFIQQTGTKVTVLPA  
EPTIEIASQADIETEAPFQSGSLKRP GSSRQLPSNLRILQNPVSSGFNPEGIYV\*  
>ENSMUSP00000032388\_c.448:A>T\_p.E150V ENSMUST00000032388.5|Rassf8-  
201|ENSMUSG00000030259|+|chr6:g.145761124:A>T  
MELKVVVDGVRIVCGVTEVTTCQEVVIALAQAI GRTGRYTLIEKWRDTERH LAPHENPIVSLNKWGQYASDV  
QLILRR TGPSLSERPTSDSVARIPERTLYRQSLPLAKLRPQADKSIRRREP KRKSLTFTGGAKGLTDIFGKG  
KETVFRQKVL SNCRATAEELKRLIRLQ TGKLOAIEKQLESSEAEIRFWEQKYSCSLEEEIVRLEQR IKRNDVE  
IEEEEFWENELQIEQENEKQLDQLEEIRQKVTDCEGR LKDYLAQIHTMESGLQAEKLHREVQEAQVNEEEVK

GKIEKVKGEMDLQGQQLRLENGIRAVERSLGQATKRLQDKEQELEQLTKELRQVNLQQFIQQGTGKVTVLP  
EPTIEASQADIETEAPFQSGSLKRPGSSRQLPSNLRILQNPVSSGFNPEGIYV\*  
>ENSMUSP00000107333\_c.471:A>T\_p.N158Y ENSMUST00000111704.8|Rassf8-  
203|ENSMUSG00000030259|+|chr6:g.145761147:A>T  
MELKVVVDGVRIVCGVTEVTTCQEVVIALAQAIGRTGRYTLIEKWRDTERHLPHENPIVSLNKWGQYASDV  
QLILRRTGPSLSERPTSDSVARIPERTLYRQSLPPLAKLRPQADKSIRREPKRKSFTFTGGAKGLTDIFGKG  
KETEFRQKVLVSYCRATAEELKRLIRLQGTGKLOAIEKQLESSEAEIRFWEQKYSKSLSEEEIVRLEQRIKRN  
VEIEEEEFWENELQIEQENKQLDQLEEIRQKVTDCGRLKDYLAQIHTMESGLQAEKLRHREVQEAQVNEE  
EVK GKIEKVKGEMDLQGQQLRLENGIRAVERSLGQATKRLQDKEQELEQLTKELRQVNLQQFIQQGTGK  
VTVLP EPTIEASQADIETEAPFQSGSLKRPGSSRQLPSNLRILQNPVSSGFNPEGIYV\*  
>ENSMUSP00000032388\_c.471:A>T\_p.N158Y ENSMUST00000032388.5|Rassf8-  
201|ENSMUSG00000030259|+|chr6:g.145761147:A>T  
MELKVVVDGVRIVCGVTEVTTCQEVVIALAQAIGRTGRYTLIEKWRDTERHLPHENPIVSLNKWGQYASDV  
QLILRRTGPSLSERPTSDSVARIPERTLYRQSLPPLAKLRPQADKSIRREPKRKSFTFTGGAKGLTDIFGKG  
KETEFRQKVLVSYCRATAEELKRLIRLQGTGKLOAIEKQLESSEAEIRFWEQKYSKSLSEEEIVRLEQRIKRN  
VEIEEEEFWENELQIEQENKQLDQLEEIRQKVTDCGRLKDYLAQIHTMESGLQAEKLRHREVQEAQVNEE  
EVK GKIEKVKGEMDLQGQQLRLENGIRAVERSLGQATKRLQDKEQELEQLTKELRQVNLQQFIQQGTGK  
VTVLP EPTIEASQADIETEAPFQSGSLKRPGSSRQLPSNLRILQNPVSSGFNPEGIYV\*  
>ENSMUSP00000107333\_c.1114:C>CTT\_p.A372ins-fs  
ENSMUST00000111704.8|Rassf8-  
203|ENSMUSG00000030259|+|chr6:g.145762345:C>CTT  
MELKVVVDGVRIVCGVTEVTTCQEVVIALAQAIGRTGRYTLIEKWRDTERHLPHENPIVSLNKWGQYASDV  
QLILRRTGPSLSERPTSDSVARIPERTLYRQSLPPLAKLRPQADKSIRREPKRKSFTFTGGAKGLTDIFGKG  
KETEFRQKVLVSNCRATAEELKRLIRLQGTGKLOAIEKQLESSEAEIRFWEQKYSKSLSEEEIVRLEQRIKRN  
VEIEEEEFWENELQIEQENKQLDQLEEIRQKVTDCGRLKDYLAQIHTMESGLQAEKLRHREVQEAQVNEE  
EVK GKIEKVKGEMDLQGQQLRLENGIRAVERSLGQATKRLQDKEQELEQLTKELRQVNLQQFIQQGTGK  
VTVLP EPTIEASRRQT  
>ENSMUSP00000032388\_c.1114:C>CTT\_p.A372ins-fs  
ENSMUST00000032388.5|Rassf8-  
201|ENSMUSG00000030259|+|chr6:g.145762345:C>CTT  
MELKVVVDGVRIVCGVTEVTTCQEVVIALAQAIGRTGRYTLIEKWRDTERHLPHENPIVSLNKWGQYASDV  
QLILRRTGPSLSERPTSDSVARIPERTLYRQSLPPLAKLRPQADKSIRREPKRKSFTFTGGAKGLTDIFGKG  
KETEFRQKVLVSNCRATAEELKRLIRLQGTGKLOAIEKQLESSEAEIRFWEQKYSKSLSEEEIVRLEQRIKRN  
VEIEEEEFWENELQIEQENKQLDQLEEIRQKVTDCGRLKDYLAQIHTMESGLQAEKLRHREVQEAQVNEE  
EVK GKIEKVKGEMDLQGQQLRLENGIRAVERSLGQATKRLQDKEQELEQLTKELRQVNLQQFIQQGTGK  
VTVLP EPTIEASRRQT  
>ENSMUSP00000130671\_c.141:GA>G\_p.E48del-fs ENSMUST00000058538.7|Rassf8-  
202|ENSMUSG00000030259|+|chr6:g.145765813:GA>G  
FICEASVGIIDRSCPLTVQIDITIRGQLGIAPPSRACTVKMQLMVLAVGVAARTDRSALLHS  
>ENSMUSP00000130671\_c.283:T>C\_p.L95S ENSMUST00000058538.7|Rassf8-  
202|ENSMUSG00000030259|+|chr6:g.145765955:T>C  
FICEASVGIIDRSCPLTVQIDITIRGQLGIAPPSRACTVKMQLMVLAVECGSTDRQISTPPQLRQPSAATQLL  
VSAKRSATRSLEHLQHLGTSSQVRTLID\*  
>ENSMUSP00000122279\_c.346:G>C\_p.G116A ENSMUST00000139979.8|Ints13-  
207|ENSMUSG00000040250|-|chr6:g.146455512:C>G  
XAGVIVKESLTEEDVLCNKQKTIYNLVDMERKNDPLPVSTVGTRGKGPKRDEQYRIMWNELETLVRAHISNSEK  
HQRVLECLMACRSKPPPEEERKKRGRKREDREDKSEQAGKEHATEKARPDADRLKGILERGKEELAEAEVIKD  
SPDSEPPNKKPLVETDETPHMEKSKGPVSLLSLWSNRINTANSRKHQEFAGRLNSVNNRAELYQHLKEENGM  
ETTENGKASRQ\*  
>ENSMUSP00000145229\_c.637:G>C\_p.G213A ENSMUST00000203545.3|Ints13-  
209|ENSMUSG00000040250|-|chr6:g.146455512:C>G  
TNSIELHYCTGAYRISPVVNSRPSCLTNFLNRSVLLQPRKSGSKVISHMLSSHGGEIFLHVLSSRSI  
LEDPPSISEGCGGRVTDRITVPLAGVIVKESLTEEDVLCNKQKTIYNLVDMERKNDPLPVSTVGTRGKGPKR  
DEQYRIMWNELETLVRAHISNSEKHQRVLECLMACRSKPPPEEERKKRGRKREDREDKSEQAGKEHATEKAR  
PDADRLKGILERGKEELAEAEVIKSDPDSEPPNKKPLVETDETPHMEKSKGPVSLLSLWSNRINTANSRKHQ  
EFAGRLNSVNNRAELYQHLKEENGMETTENGKASRQ\*  
>ENSMUSP00000032427\_c.1774:G>C\_p.G592A ENSMUST00000032427.15|Ints13-  
201|ENSMUSG00000040250|-|chr6:g.146455512:C>G



MKIFSESHKTVFVVDHCPYMAESCRQHVEFDMLVKNRTQGIIPLAPISKSLWTCVSESSMEYCRIMYDIFPFK  
 KLVNFIVSDSGAHLVNSWTQEDQNLQELMAALATVGGPPNPRADPECCSILHGLVAAVETLCKITEYQHEARTL  
 LMENAEVGNRGRICITNAKSDSHVRMLEDCVQETIHEHNKLAANSDHLMQIQKCELVLIIHTYPVGEDSLVS  
 DRPKKELSPVLTSEVHVSVRAGRHLATKLNVLVQQHFDLASTTITNIPMKEEQHANTSANYDVELLHHKDAHVD  
 FLRSGDSHSGSSSREGPFKETVTLKWCTPRTNSIELHYCTGAYRISPVDVNSRPSSCLTNFLLNGRSVLLQP  
 RKSQSGKVISHMLSSHGGEIFLHVLSSSRILEDPSSISEGCGGRVTDYRITDFGEFMRENRLTPFLDPYKID  
 ASLEIPLERAKDQLEKHTRYWPMIISQTTIFNMQAVVPLAGVIVKESLTHEEDVLNCKQKTIYNLVDMERKNDPL  
 PVSTVGTGRGKPKRDEQYRIMWNELETLVRAHISNSEKHQRVLECLMACRSKPPPEEEERKKRGRKREDREKDS  
 EQAGKEHATEKARPDADRLKGIILERGKEELAAEVIKDS PDSPEPPNKKPLVETDETPHMEKSKGPVSLLSLW  
 SNRINTANSRKHQEFAGRLNSVNNRAELYQHLKEENGEVGLTGGPRTAIPFLKCPSPVNNRMETTENGKAS  
 RQ\*

>ENSMUSP00000098352\_c.528:A>G\_p.R177G ENSMUST00000067404.13|Fgfrlop2-  
 203|ENSMUSG00000040242|+|chr6:g.146498811:A>G  
 MSCTIEKALADAKALVERLRDHDAAESLIEQTTALSKRVEAMKQYQEEIQELNEVARHRPRSTLVMGIQQEN  
 RQIRELQQENKELRTSLEEHQSALELIMSKYREQMFRLLMASKKDDPGIIMKLKEQHSKELQAHVDQITEMAA  
 VMRKAIEIDEQQGCKEQERIFQLEQENKGLGEILQITRESFLNLRKDDASESTLSLALVTNSDLRKS\*

>ENSMUSP00000107292\_c.642:A>G\_p.R215G ENSMUST00000111663.9|Fgfrlop2-  
 204|ENSMUSG00000040242|+|chr6:g.146498811:A>G  
 MSCTIEKALADAKALVERLRDHDAAESLIEQTTALSKRVEAMKQYQEEIQELNEVARHRPRSTLVMGIQQEN  
 RQIRELQQENKELRTSLEEHQSALELIMSKYREQMFRLLMASKKDDPGIIMKLKEQHSKIDMVHRNSCEGFFL  
 DASRHILEAPQHGLERRHLEANQNELQAHVDQITEMAAVMRKAIEIDEQQGCKEQERIFQLEQENKGLGEILQ  
 ITRESFLNLRKDDASESTLSLALVTNSDLRKS\*

>ENSMUSP00000045650\_c.1498:G>A\_p.R500K ENSMUST00000037709.16|Tm7sf3-  
 201|ENSMUSG00000040234|-|chr6:g.146505456:C>T  
 MWRLRLVLAVALAAGSAEAQANS SDGFLEFSVKGFTYFVLSKSSPQEAVLRHISSNVTFLLFQIHSQYQNTTV  
 SFTKTLPLPSTSGTGNDRGLVFLRPEQAVCTWYLETGDTKPVQSVALTLSYSERDPIPGGCNLEFDLDDIDPNL  
 YLDYNFFETTIFKAPANIGYARATEPPPCDVSTSRESRWRLRYDVYQYFLPEGDLTEASLLHHLQRMAQVAQV  
 KASAIKVATLTADDKTAVSFSSLPQGVIYNVIVWDP SLNTSAAVVPVHTYACSFESVDGNCAFPGRVSTKVF  
 STLVALLGLFVCFVGHFRFWKTDLFFIGFIFLGGFFFYILITRLTPLQYDVRLALTA VAGSFGG LLLVASWWRFG  
 ILLTCLMLCVGLVGLVFLVSSGTFFTPLGNLNVFHDDGVFWVTFSCIALLVPIVFMGCLRILNIIACGVVGSYSV  
 VLAVNSYMFTSLSYITLNLVLRALNTDFRGAVIRVPFQNTDYIILAVWGMLAVSGITLQIRKERGQPPFPHP  
 YKLWKQERERRVTNILDPSHHIPLRERLYGRVARIKELFQKEQPAGERTPLLL\*

>ENSMUSP00000045650\_c.762:G>A\_p.D255N ENSMUST00000037709.16|Tm7sf3-  
 201|ENSMUSG00000040234|-|chr6:g.146520122:C>T  
 MWRLRLVLAVALAAGSAEAQANS SDGFLEFSVKGFTYFVLSKSSPQEAVLRHISSNVTFLLFQIHSQYQNTTV  
 SFTKTLPLPSTSGTGNDRGLVFLRPEQAVCTWYLETGDTKPVQSVALTLSYSERDPIPGGCNLEFDLDDIDPNL  
 YLDYNFFETTIFKAPANIGYARATEPPPCDVSTSRESRWRLRYDVYQYFLPEGDLTEASLLHHLQRMAQVAQV  
 KASAIKVATLTADDKTAVSFSSLPQGVIYNVIVWNP SLNTSAAVVPVHTYACSFESVDGNCAFPGRVSTKVF  
 STLVALLGLFVCFVGHFRFWKTDLFFIGFIFLGGFFFYILITRLTPLQYDVRLALTA VAGSFGG LLLVASWWRFG  
 ILLTCLMLCVGLVGLVFLVSSGTFFTPLGNLNVFHDDGVFWVTFSCIALLVPIVFMGCLRILNIIACGVVGSYSV  
 VLAVNSYMFTSLSYITLNLVLRALNTDFRGAVIRVPFQNTDYIILAVWGMLAVSGITLQIRRERGQPPFPHP  
 YKLWKQERERRVTNILDPSHHIPLRERLYGRVARIKELFQKEQPAGERTPLLL\*

>ENSMUSP0000001675\_c.427:T>C\_p.V143A ENSMUST0000001675.14|Stk381-  
 201|ENSMUSG00000001630|+|chr6:g.146668951:T>C  
 MAMTAGATTTFPMSNHTRERVTAKLTLENFYSNLILQHEERETRQKKLEVAMEEEGLADEEKKLRSSQHARK  
 ETEFLRLKRTRLGLDDFESLKVIGRGAFGEVRLVQKKDTGHIYAMKILRKADMLEKEQVAHIRAERDILAEAD  
 GAWVVKMFYSFQDKRNLYLIMEFLPGGDMMTLLMKKDTLTHEETQFYISETVLAIDAIHQLGFIHRDVKPDNL  
 LLDAKGHVKLSDFGLCTGLKKAHRTEFYRNLTHNPPSDFSFQNMNSKRKAETWKKNRRQLAYSTVGTDPYIAP  
 EVFMQTGYNKLCDWWSLGVIMYEMLIGFPPFCSETPQETYRKMVSWKETLAFPPPEVPVSEKAKDLILRFCTDS  
 ENRIGNGGVEEIKGHPFFEGVDWGHIRERPAAPIEIRSIDDTSNFDFFPESDILQVPVNTTEPDYKSKDWVF  
 LNYTYKRFEGLTQRGSIPTYMKAGKL\*

>ENSMUSP00000107271\_c.427:T>C\_p.V143A ENSMUST00000111644.2|Stk381-  
 202|ENSMUSG00000001630|+|chr6:g.146668951:T>C  
 MAMTAGATTTFPMSNHTRERVTAKLTLENFYSNLILQHEERETRQKKLEVAMEEEGLADEEKKLRSSQHARK  
 ETEFLRLKRTRLGLDDFESLKVIGRGAFGEVRLVQKKDTGHIYAMKILRKADMLEKEQVAHIRAERDILAEAD  
 GAWVVKMFYSFQDKRNLYLIMEFLPGGDMMTLLMKKDTLTHEETQFYISETVLAIDAIHQLGFIHRDVKPDNL  
 LLDAKGHVKLSDFGLCTGLKKAHRTEFYRNLTHNPPSDFSFQNMNSKRKAETWKKNRRQLAYSTVGTDPYIAP  
 EVFMQTGYNKLCDWWSLGVIMYEMLIGFPPFCSETPQETYRKMVSWKETLAFPPPEVPVSEKAKDLILRFCTDS

ENRIGNGGVEEIKGHPFFEGVDWGHIRERPAAIPIEIRSIDDTSNFDDFPESDILQPVAFFLFLVPNTTEPDY  
KSKDWVFLNYTYKRFEGLTQRGSIPTYMKAGKL\*  
>ENSMUSP00000001675\_c.501:G>A\_p.E168K ENSMUST00000001675.14|Stk381-  
201|ENSMUSG00000001630|+|chr6:g.146669025:G>A  
MAMTAGATTTFPMSNHTRETRVAKLTLENFYNSLILQHEERETRQKKLEVAMEEEGLADEEKKLRRSQHARK  
ETEFRLRLKRLGLDDFESLKVIGRGAFGEVRLVQKKDTGHIYAMKILRKADMLEKEQVAHIRAERDILVEAD  
GAWVVKMFYSFQDKRNLYLIMKFLPGGDMTLLMKKDTLTHEETQFYISETVLAIDAIHQLGFIHRDVKPDNL  
LLDAKGHVKLSDFGLCTGLKKAHRTEFYRNLTNPPSDFSFQNMNSKRKAETWKKNRRQLAYSTVGTDPDIAP  
EVFMQTGYNKLCDWWSLGVIMYEMLIGFPPFCSETPQETRYKVMWSKETLAFPPPEVPVSEKAKDLILRFCTDS  
ENRIGNGGVEEIKGHPFFEGVDWGHIRERPAAIPIEIRSIDDTSNFDDFPESDILQPVPNTTEPDYKSKDWVF  
LNYTYKRFEGLTQRGSIPTYMKAGKL\*  
>ENSMUSP00000107271\_c.501:G>A\_p.E168K ENSMUST00000111644.2|Stk381-  
202|ENSMUSG00000001630|+|chr6:g.146669025:G>A  
MAMTAGATTTFPMSNHTRETRVAKLTLENFYNSLILQHEERETRQKKLEVAMEEEGLADEEKKLRRSQHARK  
ETEFRLRLKRLGLDDFESLKVIGRGAFGEVRLVQKKDTGHIYAMKILRKADMLEKEQVAHIRAERDILVEAD  
GAWVVKMFYSFQDKRNLYLIMKFLPGGDMTLLMKKDTLTHEETQFYISETVLAIDAIHQLGFIHRDVKPDNL  
LLDAKGHVKLSDFGLCTGLKKAHRTEFYRNLTNPPSDFSFQNMNSKRKAETWKKNRRQLAYSTVGTDPDIAP  
EVFMQTGYNKLCDWWSLGVIMYEMLIGFPPFCSETPQETRYKVMWSKETLAFPPPEVPVSEKAKDLILRFCTDS  
ENRIGNGGVEEIKGHPFFEGVDWGHIRERPAAIPIEIRSIDDTSNFDDFPESDILQPVAFFLFLVPNTTEPDY  
KSKDWVFLNYTYKRFEGLTQRGSIPTYMKAGKL\*  
>ENSMUSP00000001675\_c.832:A>G\_p.Q278R ENSMUST00000001675.14|Stk381-  
201|ENSMUSG00000001630|+|chr6:g.146670650:A>G  
MAMTAGATTTFPMSNHTRETRVAKLTLENFYNSLILQHEERETRQKKLEVAMEEEGLADEEKKLRRSQHARK  
ETEFRLRLKRLGLDDFESLKVIGRGAFGEVRLVQKKDTGHIYAMKILRKADMLEKEQVAHIRAERDILVEAD  
GAWVVKMFYSFQDKRNLYLIMEFLPGGDMTLLMKKDTLTHEETQFYISETVLAIDAIHQLGFIHRDVKPDNL  
LLDAKGHVKLSDFGLCTGLKKAHRTEFYRNLTNPPSDFSFQNMNSKRKAETWKKNRRQLAYSTVGTDPDIAP  
EVFMQTGYNKLCDWWSLGVIMYEMLIGFPPFCSETPQETRYKVMWSKETLAFPPPEVPVSEKAKDLILRFCTDS  
ENRIGNGGVEEIKGHPFFEGVDWGHIRERPAAIPIEIRSIDDTSNFDDFPESDILQPVPNTTEPDYKSKDWVF  
LNYTYKRFEGLTQRGSIPTYMKAGKL\*  
>ENSMUSP00000107271\_c.832:A>G\_p.Q278R ENSMUST00000111644.2|Stk381-  
202|ENSMUSG00000001630|+|chr6:g.146670650:A>G  
MAMTAGATTTFPMSNHTRETRVAKLTLENFYNSLILQHEERETRQKKLEVAMEEEGLADEEKKLRRSQHARK  
ETEFRLRLKRLGLDDFESLKVIGRGAFGEVRLVQKKDTGHIYAMKILRKADMLEKEQVAHIRAERDILVEAD  
GAWVVKMFYSFQDKRNLYLIMEFLPGGDMTLLMKKDTLTHEETQFYISETVLAIDAIHQLGFIHRDVKPDNL  
LLDAKGHVKLSDFGLCTGLKKAHRTEFYRNLTNPPSDFSFQNMNSKRKAETWKKNRRQLAYSTVGTDPDIAP  
EVFMQTGYNKLCDWWSLGVIMYEMLIGFPPFCSETPQETRYKVMWSKETLAFPPPEVPVSEKAKDLILRFCTDS  
ENRIGNGGVEEIKGHPFFEGVDWGHIRERPAAIPIEIRSIDDTSNFDDFPESDILQPVPNTTEPDYKSKDWVF  
LNYTYKRFEGLTQRGSIPTYMKAGKL\*  
>ENSMUSP00000001675\_c.912:G>A\_p.D305N ENSMUST00000001675.14|Stk381-  
201|ENSMUSG00000001630|+|chr6:g.146673155:G>A  
MAMTAGATTTFPMSNHTRETRVAKLTLENFYNSLILQHEERETRQKKLEVAMEEEGLADEEKKLRRSQHARK  
ETEFRLRLKRLGLDDFESLKVIGRGAFGEVRLVQKKDTGHIYAMKILRKADMLEKEQVAHIRAERDILVEAD  
GAWVVKMFYSFQDKRNLYLIMEFLPGGDMTLLMKKDTLTHEETQFYISETVLAIDAIHQLGFIHRDVKPDNL  
LLDAKGHVKLSDFGLCTGLKKAHRTEFYRNLTNPPSDFSFQNMNSKRKAETWKKNRRQLAYSTVGTDPDIAP  
EVFMQTGYNKLCDWWSLGVIMYEMLIGFPPFCSETPQETRYKVMWSKETLAFPPPEVPVSEKAKDLILRFCTDS  
ENRIGNGGVEEIKGHPFFEGVDWGHIRERPAAIPIEIRSIDDTSNFDDFPESDILQPVPNTTEPDYKSKDWVF  
LNYTYKRFEGLTQRGSIPTYMKAGKL\*  
>ENSMUSP00000107271\_c.912:G>A\_p.D305N ENSMUST00000111644.2|Stk381-  
202|ENSMUSG00000001630|+|chr6:g.146673155:G>A  
MAMTAGATTTFPMSNHTRETRVAKLTLENFYNSLILQHEERETRQKKLEVAMEEEGLADEEKKLRRSQHARK  
ETEFRLRLKRLGLDDFESLKVIGRGAFGEVRLVQKKDTGHIYAMKILRKADMLEKEQVAHIRAERDILVEAD  
GAWVVKMFYSFQDKRNLYLIMEFLPGGDMTLLMKKDTLTHEETQFYISETVLAIDAIHQLGFIHRDVKPDNL  
LLDAKGHVKLSDFGLCTGLKKAHRTEFYRNLTNPPSDFSFQNMNSKRKAETWKKNRRQLAYSTVGTDPDIAP  
EVFMQTGYNKLCDWWSLGVIMYEMLIGFPPFCSETPQETRYKVMWSKETLAFPPPEVPVSEKAKDLILRFCTDS  
ENRIGNGGVEEIKGHPFFEGVDWGHIRERPAAIPIEIRSIDDTSNFDDFPESDILQPVAFFLFLVPNTTEPDY  
KSKDWVFLNYTYKRFEGLTQRGSIPTYMKAGKL\*  
>ENSMUSP00000032433\_c.283:G>A\_p.G95D ENSMUST00000032433.9|Smco2-  
201|ENSMUSG00000030292|+|chr6:g.146760429:G>A

MMSLQLGTAGKERQLAEKSRDLQNVSMTEGSEEVSEMDHISDRPDEKDKPSENLOTDSDLYKMDTEKWDGLEQE  
SEHSQDPPSKPDEQEVTLCVCEQPVSQVLSQSPSTDESTPIPELTHKLNWHAKMGLQMKELGADHGDWLERINN  
IIQNINNTTESTVKSLLEVISLENQSKNLESDQEQADIEEKITEIRRQLKEVNIKLTQVDACEEARELKEKLV  
EQIESFHKEMNVLNSKLEMYYTQGSADSHNSEDDVTEQEEPLVPEASPSLSASPTPPCSAVWKNALKLFVIV  
YVVTITGLSCYILFVDATFLFERVLPSVLGHRTMWDLREMMAPFLNLEAEDLLPS\*  
>ENSMUSP00000032433\_c.687:A>G\_p.N230D ENSMUST00000032433.9|Smco2-  
201|ENSMUSG00000030292|+|chr6:g.146769605:A>G  
MMSLQLGTAGKERQLAEKSRDLQNVSMTEGSEEVSEMDHISDRPDEKDKPSENLOTDSDLYKMDTEKWDGLEQE  
SEHSQDPPSKPDEQEVTLCVCEQPVSQVLSQSPSTDESTPIPELTHKLNWHAKMGLQMKELGADHGDWLERINN  
IIQNINNTTESTVKSLLEVISLENQSKNLESDQEQADIEEKITEIRRQLKEVNIKLTQVDACEEARELKEKLV  
EQIESFHKEMNVLNSKLEMYYTQGSADSHNSEDDVTEQEEPLVPEASPSLSASPTPPCSAVWKNALKLFVIV  
YVVTITGLSCYILFVDATFLFERVLPSVLGHRTMWDLREMMAPFLNLEAEDLLPS\*  
>ENSMUSP00000032433\_c.768:G>A\_p.E257K ENSMUST00000032433.9|Smco2-  
201|ENSMUSG00000030292|+|chr6:g.146769686:G>A  
MMSLQLGTAGKERQLAEKSRDLQNVSMTEGSEEVSEMDHISDRPDEKDKPSENLOTDSDLYKMDTEKWDGLEQE  
SEHSQDPPSKPDEQEVTLCVCEQPVSQVLSQSPSTDESTPIPELTHKLNWHAKMGLQMKELGADHGDWLERINN  
IIQNINNTTESTVKSLLEVISLENQSKNLESDQEQADIEEKITEIRRQLKEVNIKLTQVDACEEARELKEKLV  
EQIESFHKEMNVLNSKLEMYYTQGSADSHNSEDDVTEQEEPLVPEASPSLSASPTPPCSAVWKNALKLFVIV  
YVVTITGLSCYILFVDATFLFERVLPSVLGHRTMWDLREMMAPFLNLEAEDLLPS\*  
>ENSMUSP00000032433\_c.934:T>C\_p.L312P ENSMUST00000032433.9|Smco2-  
201|ENSMUSG00000030292|+|chr6:g.146772734:T>C  
MMSLQLGTAGKERQLAEKSRDLQNVSMTEGSEEVSEMDHISDRPDEKDKPSENLOTDSDLYKMDTEKWDGLEQE  
SEHSQDPPSKPDEQEVTLCVCEQPVSQVLSQSPSTDESTPIPELTHKLNWHAKMGLQMKELGADHGDWLERINN  
IIQNINNTTESTVKSLLEVISLENQSKNLESDQEQADIEEKITEIRRQLKEVNIKLTQVDACEEARELKEKLV  
EQIESFHKEMNVLNSKLEMYYTQGSADSHNSEDDVTEQEEPLVPEASPSLSASPTPPCSAVWKNALKLFVIV  
YVVTITGLSCYILFVDATFLFERVLPSVLGHRTMWDLREMMAPFLNLEAEDLLPS\*  
>ENSMUSP00000043802\_c.685:C>T\_p.S229F  
ENSMUST00000036592.15|1700034J05Rik-201|ENSMUSG00000040163|-  
|chr6:g.146853970:G>A  
MTTSPSSSDYSSTEDSIYECKSNQASVGYPPSENTFSYEDLVSREETASVDSLHVHFLPPVQSTWRTESTRRL  
FRKRDQVEHDPEQFSKLSITLAWDIDVDSNHADSLANLDLNAHSQWMDKWPEDKTKLTPCKLYNLVQKLETFL  
GKEKGGQHDGCVLPESTQKEDVHLNSTTPPHTAQVSPKERDVCQDLSKQRSLENEEDICQVLEDPRLKDEVV  
QEIRQASESFLETSSVSSPQPEGASRSHNIFCMNFRWVFQWLRTQIFSRWRRQRPSQATNTWHQKAVRNHSL  
RSNRIPQPE\*  
>ENSMUSP000000107249\_c.682:C>T\_p.S228F ENSMUST00000111622.2|1700034J05Rik-  
202|ENSMUSG00000040163|-|chr6:g.146853970:G>A  
MTTSPSSSDYSSTEDSIYECKSNQASVGYPPSENTFSYEDLVSREETASVDSLHVHFLPPVQSTWRTESTRRL  
FRKRDQVEHDPEQFSKLSITLAWDIDVDSNHADSLANLDLNAHSQWMDKWPEDKTKLTPCKLYNLVQKLETFL  
GKEKGGQHDGCVLPESTQKEDVHLNSTTPPHTAQVSPKERDVCQDLSKQRSLENEEDICQVLEDPRLKDEVV  
EIRQASESFLETSSVSSPQPEGASRSHNIFCMNFRWVFQWLRTQIFSRWRRQRPSQATNTWHQKAVRNHSLR  
SNRIPQPE\*  
>ENSMUSP00000043802\_c.666:A>T\_p.R223\*  
ENSMUST00000036592.15|1700034J05Rik-201|ENSMUSG00000040163|-  
|chr6:g.146853989:T>A  
MTTSPSSSDYSSTEDSIYECKSNQASVGYPPSENTFSYEDLVSREETASVDSLHVHFLPPVQSTWRTESTRRL  
FRKRDQVEHDPEQFSKLSITLAWDIDVDSNHADSLANLDLNAHSQWMDKWPEDKTKLTPCKLYNLVQKLETFL  
GKEKGGQHDGCVLPESTQKEDVHLNSTTPPHTAQVSPKERDVCQDLSKQRSLENEEDICQVLEDPRLKDEVV  
QEI\*QASESLETSSVSSPQPEGASRSHNIFCMNFRWVFQWLRTQIFSRWRRQRPSQATNTWHQKAVRNHSLR  
RSNRIPQPE\*  
>ENSMUSP000000107249\_c.663:A>T\_p.R222\* ENSMUST00000111622.2|1700034J05Rik-  
202|ENSMUSG00000040163|-|chr6:g.146853989:T>A  
MTTSPSSSDYSSTEDSIYECKSNQASVGYPPSENTFSYEDLVSREETASVDSLHVHFLPPVQSTWRTESTRRL  
FRKRDQVEHDPEQFSKLSITLAWDIDVDSNHADSLANLDLNAHSQWMDKWPEDKTKLTPCKLYNLVQKLETFL  
GKEKGGQHDGCVLPESTQKEDVHLNSTTPPHTAQVSPKERDVCQDLSKQRSLENEEDICQVLEDPRLKDEVV  
EI\*QASESLETSSVSSPQPEGASRSHNIFCMNFRWVFQWLRTQIFSRWRRQRPSQATNTWHQKAVRNHSLR  
SNRIPQPE\*

>rs249638215\_ENSMUSP00000043802\_c.641:G>AG\_p.L214ins-fs  
ENSMUST00000036592.15|1700034J05Rik-201|ENSMUSG00000040163|-  
|chr6:g.146854399:C>CT  
MTTSPSSSDYSSTEDSIYECKSNQSASVGYYPSENTFSYEDLVSREETASVDSLHVHFLPPVQSTWRTESLRRLL  
FRKRDQVEHDPEQFSKLSITLAWDIDVDSNHADSLANLDDLNAHSQWMDKWPEDKTKLTPCKLYNLVQKLETFL  
GKEKGGQHDGCVLPSTQKEDVHLNSTTPPHTAQVSPKERDVCQDLSKQRSLENEEDICQVLEDPRLLEERRSC  
AGDKTGI  
>rs249638215\_ENSMUSP00000107249\_c.641:G>AG\_p.L214ins-fs  
ENSMUST00000111622.2|1700034J05Rik-202|ENSMUSG00000040163|-  
|chr6:g.146854399:C>CT  
MTTSPSSSDYSSTEDSIYECKSNQSASVGYYPSENTFSYEDLVSREETASVDSLHVHFLPPVQSTWRTESLRRLL  
FRKRDQVEHDPEQFSKLSITLAWDIDVDSNHADSLANLDDLNAHSQWMDKWPEDKTKLTPCKLYNLVQKLETFL  
GKEKGGQHDGCVLPSTQKEDVHLNSTTPPHTAQVSPKERDVCQDLSKQRSLENEEDICQVLEDPRLLEERRSC  
GDKTGI  
>ENSMUSP00000043802\_c.421:A>G\_p.K141R  
ENSMUST00000036592.15|1700034J05Rik-201|ENSMUSG00000040163|-  
|chr6:g.146854619:T>C  
MTTSPSSSDYSSTEDSIYECKSNQSASVGYYPSENTFSYEDLVSREETASVDSLHVHFLPPVQSTWRTESLRRLL  
FRKRDQVEHDPEQFSKLSITLAWDIDVDSNHADSLANLDDLNAHSQWMDKWPEDKTKLTPCKLYNLVQKLETFL  
GKEKGGQHDGCVLPSTQKEDVHLNSTTPPHTAQVSPKERDVCQDLSKQRSLENEEDICQVLEDPRLLEERRSC  
QEIRQASESSLETSSVSSPQPEGASRSHNIFCMNFRWVFQWLRQTQIFSRWRRQRPSQATNTWHQKAVRNIIHSL  
RSNRIQPQE\*  
>ENSMUSP00000107249\_c.421:A>G\_p.K141R ENSMUST00000111622.2|1700034J05Rik-  
202|ENSMUSG00000040163|-|chr6:g.146854619:T>C  
MTTSPSSSDYSSTEDSIYECKSNQSASVGYYPSENTFSYEDLVSREETASVDSLHVHFLPPVQSTWRTESLRRLL  
FRKRDQVEHDPEQFSKLSITLAWDIDVDSNHADSLANLDDLNAHSQWMDKWPEDKTKLTPCKLYNLVQKLETFL  
GKEKGGQHDGCVLPSTQKEDVHLNSTTPPHTAQVSPKERDVCQDLSKQRSLENEEDICQVLEDPRLLEERRSC  
EIRQASESSLETSSVSSPQPEGASRSHNIFCMNFRWVFQWLRQTQIFSRWRRQRPSQATNTWHQKAVRNIIHSLR  
SNRIQPQE\*  
>ENSMUSP00000043802\_c.223:G>T\_p.R75M ENSMUST00000036592.15|1700034J05Rik-  
201|ENSMUSG00000040163|-|chr6:g.146854817:C>A  
MTTSPSSSDYSSTEDSIYECKSNQSASVGYYPSENTFSYEDLVSREETASVDSLHVHFLPPVQSTWRTESLRRLL  
FMKRDQVEHDPEQFSKLSITLAWDIDVDSNHADSLANLDDLNAHSQWMDKWPEDKTKLTPCKLYNLVQKLETFL  
GKEKGGQHDGCVLPSTQKEDVHLNSTTPPHTAQVSPKERDVCQDLSKQRSLENEEDICQVLEDPRLLEERRSC  
QEIRQASESSLETSSVSSPQPEGASRSHNIFCMNFRWVFQWLRQTQIFSRWRRQRPSQATNTWHQKAVRNIIHSL  
RSNRIQPQE\*  
>ENSMUSP00000107249\_c.223:G>T\_p.R75M ENSMUST00000111622.2|1700034J05Rik-  
202|ENSMUSG00000040163|-|chr6:g.146854817:C>A  
MTTSPSSSDYSSTEDSIYECKSNQSASVGYYPSENTFSYEDLVSREETASVDSLHVHFLPPVQSTWRTESLRRLL  
FMKRDQVEHDPEQFSKLSITLAWDIDVDSNHADSLANLDDLNAHSQWMDKWPEDKTKLTPCKLYNLVQKLETFL  
GKEKGGQHDGCVLPSTQKEDVHLNSTTPPHTAQVSPKERDVCQDLSKQRSLENEEDICQVLEDPRLLEERRSC  
EIRQASESSLETSSVSSPQPEGASRSHNIFCMNFRWVFQWLRQTQIFSRWRRQRPSQATNTWHQKAVRNIIHSLR  
SNRIQPQE\*  
>ENSMUSP00000122515\_c.329:G>T\_p.M110I ENSMUST00000154221.2|Pp fibp1-  
208|ENSMUSG00000016487|+|chr6:g.146898375:G>T  
EKLNATEEMLQOELLRSRTSLETQKLELMAEISNLKLLTAVEKDRLDYEDRFRDTEGLIQEINDLRLKVNEMD  
GERLQYEEKLSTKSLMAKLSMKIKVGMQYEQRIEQWETLKDELASLKEQLEEKECEVKRLQERLVCKA  
KGGIEVLDRDIEVQMKKAVESLMAANEKERRKIEDLRQCLSRYRKMQDPAVLAQGDSECEGLFHSSSIST  
LLDAQGFSDLERSTSSTPGMGSP  
>ENSMUSP00000121270\_c.428:G>C\_p.E143D ENSMUST00000155415.8|Pp fibp1-  
209|ENSMUSG00000016487|+|chr6:g.146914424:G>C  
XQDPAVLAQGDSECEGLFHSSSISTLLDAQGFSDLERSTSSTPGMGSPSRDLLHTSAPEEFHTSVLQASIPS  
LLPPSVDVDTCEKPKLPTKPEFSFEEDGRAILGAAAEVSLSDGVSTSSLQKSSSLGNLKEASDGTGKDSIQ  
KLSEDKAPTDSRTFGTLPKVPKGHEASVDNPFPGTRAKARSSFGRGFFKIKSGKRTASAPNLAETEKETAEHLN  
LACTSRKSGSQTSPFPMSPPSPDRKKSIRGMLR  
>ENSMUSP0000016631\_c.2904:G>A\_p.V969I ENSMUST0000016631.14|Pp fibp1-  
201|ENSMUSG00000016487|+|chr6:g.146931893:G>A

MMSDASDMLAAALEQMDGIIAGSKALEYSNGIFDCQSPTSPFMGSLRALHLVEDLRGLLEMMETDEKEGLRCQ  
 IPDSTAIEVLIIEWLQNQMTNGHLPNGDQVYQERLARLENDKESLVLQVSVLTDQVEAQGEKIRDLEFCLEEHRE  
 KLNATEEMLQQEELLSRTSLETQKLELMAEISNLKLLKTAVEKDRLDYEDRFRDTEGLIQEINDLRRLKVNEMDG  
 ERLQYEKKLKSTKDELASLKEQLEEKKECEVKRLQERLVCKAKGEGIEVLDRDIEVQKMKKAVESLMAANEEKE  
 RKIEDLRQCLSRYRKMQDPAVLAQQQDSECEGLFHSSSISTLLDAQGFSDLERSTSSSTPGMGSPSRDLLHTSA  
 PEEFHTSVLQASIPSLPPSVVDVDTCEKPKLPKPKPETSFEEDGGRAILGAAAEEVSLSDGVSTSSSLQKSSSLGN  
 LKKEASDGTDKAPTDSRTFGTLPKVPVPGHEASVDDNPFGRTRKARSSFGRGFFKIKSGKRTASAPNLAETEKET  
 AEHLNLAGTSRSKSGSQTSPFPMSPPSPDSRKKSRGIMRFLGKLRSSQSTTFNPDDMSEPEFKRGGTRATAGP  
 RLGWSRDLGQSNSDLMPFAKWTKEQVCSWLAEQGLGSYLSGKHWIISGQTLQASQQDLEKELGIKHSLHR  
 KKLQALQALGSEETNYGKLDNFNWRWLDLDDIGLPQYKTQFDEGRVDGRMLHYMTVDDLLSLKVVSVLHHL  
 IKRAIQVLRINNFEPNCLRRRPSDENSIPTSEVQQWNTNHRVMEWLRSDLAEYAPNLRGSGVHGGLMVLEPRF  
 NVETMAQLLNIPPNTLLRRHLATHFNLLIGAEAQHQKRDAMELDPYVLLTATAKVKPKKLTFSNFGNLRKKK  
 HEDGEYVCPMELGQASGSSQKGFPRGLDMRLYEEDDLDRLEQMEDSEGTVRQIGAFSEGNNLTHMLKEDDM  
 FKDFAARSPSASITDEDSNI\*

>ENSMUSP00000107250\_c.2937:G>A\_p.V980I ENSMUST00000111623.9|Pp fibp1-  
 202|ENSMUSG00000016487|+|chr6:g.146931893:G>A

MMSDASDMLAAALEQMDGIIAGSKALEYSNGIFDCQSPTSPFMGSLRALHLVEDLRGLLEMMETDEKEGLRCQ  
 IPDSTAIEVLIIEWLQNQMTNGHLPNGDQVYQERLARLENDKESLVLQVSVLTDQVEAQGEKIRDLEFCLEEHRE  
 KLNATEEMLQQEELLSRTSLETQKLELMAEISNLKLLKTAVEKDRLDYEDRFRDTEGLIQEINDLRRLKVNEMDG  
 ERLQYEKKLKSTKDELASLKEQLEEKKECEVKRLQERLVCKAKGEGIEVLDRDENIKKKLKEKNIEVQKMKKAV  
 ESLMAANEEKERKIEDLRQCLSRYRKMQDPAVLAQQQDSECEGLFHSSSISTLLDAQGFSDLERSTSSSTPGMG  
 SPSRDLHTSAPEEFHTSVLQASIPSLPPSVVDVDTCEKPKLPKPKPETSFEEDGGRAILGAAAEEVSLSDGVST  
 SSLQKSSSLGNLKKKEASDGTDKAPTDSRTFGTLPKVPVPGHEASVDDNPFGRTRKARSSFGRGFFKIKSGKRTAS  
 APNLAETEKETAEHLNLAGTSRSKSGSQTSPFPMSPPSPDSRKKSRGIMRFLGKLRSSQSTTFNPDDMSEPEF  
 KRGGTRATAGPRLGWSRDLGQSNSDLMPFAKWTKEQVCSWLAEQGLGSYLSGKHWIISGQTLQASQQDLE  
 KELGIKHSLHRKKLQALQALGSEETNYGKLDNFNWRWLDLDDIGLPQYKTQFDEGRVDGRMLHYMTVDDLLS  
 LKVVSVLHHLKIKRAIQVLRINNFEPNCLRRRPSDENSIPTSEVQQWNTNHRVMEWLRSDLAEYAPNLRGSGV  
 HGGLMVLEPRFNVTMAQLLNIPPNTLLRRHLATHFNLLIGAEAQHQKRDAMELDPYVLLTATAKVKPKKLT  
 FSNFGNLRKKKHEDGEYVCPMELGQASGSSQKGFPRGLDMRLYEEDDLDRLEQMEDSEGTVRQIGAFSEGIN  
 NLTHMLKEDDMFKDFAARSPSASITDEDSNI\*

>ENSMUSP00000037503\_c.16:C>T\_p.S6L ENSMUST00000036194.6|Rep15-  
 201|ENSMUSG00000040121|+|chr6:g.146934179:C>T

MGQKALQQVAPKDSQEVLAMCEVVSAAISHAAQKLKEYLGFYPLSRLCLAASSLTVFLVHFVTFQCQERGAD  
 EWLTTTKMTHKQAWLFGADWIWTFWGPDKQIRLQVAVQTLRMASLPLTDPKSCESRGEESWKKGRFDKLEFC  
 NLVGEDCLGLFIIIFGVGPEPKAIRGVVLESVRNGMMESQLPGRKAVEQFVLETKDCISIKELGNCLSKRDGL  
 SDMGRVYIRIL\*

>ENSMUSP00000048348\_c.171:G>T\_p.D58Y ENSMUST00000036111.10|Mrps35-  
 201|ENSMUSG00000040112|+|chr6:g.146949659:G>T

MAAAALQLRQTLCPGARVLRTFSSVASPAAPRAGPRTASRSERPMMRKALPPRTEKMYTDQDWPVSYPTAAPF  
 KPSAVPLPVRMGYPVKKGVMPMAKEGNLELLKIPNLFHLTPVAIKRHCAALKDFCTEWPAAALDSDEKCEEHPV  
 EIDTADYVSSGSPSIRNPKARAVTLRVKLSLNLNDNHAKKKLIKLVGERYCKATDVLTIITDRCPKLRQNC  
 DYAVYLLTVLYHESWKTEDWENSKTEEDMDEYVWAKSSSENSVLQTLQMRAAESSVAPSREELLGTKEVEDYQKC  
 IVRLKNEGENEASLAQYKESVKRLLNLA\*

>ENSMUSP00000144920\_c.39:G>T\_p.D14Y ENSMUST00000137556.3|Mrps35-  
 203|ENSMUSG00000040112|+|chr6:g.146949659:G>T

MRRKALPPRTEKMYTDQDWPVSYPTAAPFKPSAVPLPVRMGYPVKKGVMPMAKEGNLELLKIPNLFHLTPVAIK  
 RHCAALKDFCTE

>ENSMUSP00000048348\_c.777:C>CACCTGTTTACTTTGCAAACCTCTCTA\_p.L260ins-fs  
 ENSMUST00000036111.10|Mrps35-  
 201|ENSMUSG00000040112|+|chr6:g.146972136:C>CACCTGTTTACTTTGCAAACCTCTCTA  
 MAAAALQLRQTLCPGARVLRTFSSVASPAAPRAGPRTASRSERPMMRKALPPRTEKMDTDQDWPVSYPTAAPF  
 KPSAVPLPVRMGYPVKKGVMPMAKEGNLELLKIPNLFHLTPVAIKRHCAALKDFCTEWPAAALDSDEKCEEHPV  
 EIDTADYVSSGSPSIRNPKARAVTLRVKLSLNLNDNHAKKKLIKLVGERYCKATDVLTIITDRCPKLRQNC  
 DYAVYLLTVLYHESWKTEDWENSKTEEDMDEYVWAKSSSENSVHLFTLQTSLFRPCCR

>ENSMUSP00000042558\_c.147:G>A\_p.V50M ENSMUST00000036003.8|Klh142-  
 201|ENSMUSG00000040102|+|chr6:g.146993177:G>A

MSAEEMVQIRLEDRCYPVSKSKLIEQSDYFRALYRSGMREAVRPEVGPPEMQQLRGLSAPGLRLVLDIFINAGGA  
 REGWGLSEDELAASVLSMVEAASFLLQVTALLRLLLSHVRLGNCLLEYRLAQVYGLPDLQDACLRFMVLRFH

QVLCQPQFPPLLSPPQAPGDCSLKQRLREARMRGT PVLVALGDFLGGPLAPHPYQGEPPSMLRYEETTERWFP  
LANNLPPDLVNVGRYGSAILDNYLFIVGGYRITSQEISAAHSYNPITNEWLQVASMNQKRSNFKLVAVNSKLY  
AIGGQAVSNVECYNPEQDAWNFVAPLPNPLAEFSACECKGKIYVIGGYTTRDRNMNIIQYCPADLWTLFETC  
DVHIRKQOMVSVEETIYIVGGCLHELGPNNRRSSQSEDMLTVQSYNTVTRQWLYLKENTSKSGLNLTALHNDG  
IYIMSRDVTLSLEHRVFLKYNIFADSWEAFRRFPAPFGHNLLISSLYLPNKAET\*  
>rs246022839\_ENSMUSP00000042558\_c.247:A>AC\_p.E83ins-fs  
ENSMUST00000036003.8|Klh142-  
201|ENSMUSG00000040102|+|chr6:g.146993277:A>AC  
MSAEEMVQIRLEDRCYPVSKSKLIEQSDYFRALYRSGMREAVRPEVGPVQQLRGLSAPGLRLVLDLFINAGGA  
REGWGLSEDDAGRG  
>ENSMUSP00000042558\_c.446:G>GTCTCTCCCTCCCCGC\_p.L149ins-fs  
ENSMUST00000036003.8|Klh142-  
201|ENSMUSG00000040102|+|chr6:g.146993476:G>GTCTCTCCCTCCCCGC  
MSAEEMVQIRLEDRCYPVSKSKLIEQSDYFRALYRSGMREAVRPEVGPVQQLRGLSAPGLRLVLDLFINAGGA  
REGWGLSEDELAASVLSMVEAASFLQVTALLRLLLSHVRLGNCLELYRLAQVYGLPDLQDACLRMFLRFH  
QVLSLPSPLSAAIPATVVAAGPRGLQPEAAEGGPHARDPGGPGGLPRGTCPAPVSGGTPVHA  
>ENSMUSP00000042558\_c.478:C>T\_p.P160L ENSMUST00000036003.8|Klh142-  
201|ENSMUSG00000040102|+|chr6:g.146993508:C>T  
MSAEEMVQIRLEDRCYPVSKSKLIEQSDYFRALYRSGMREAVRPEVGPVQQLRGLSAPGLRLVLDLFINAGGA  
REGWGLSEDELAASVLSMVEAASFLQVTALLRLLLSHVRLGNCLELYRLAQVYGLPDLQDACLRMFLRFH  
QVLCQPQFPPLLSLPPQAPGDCSLKQRLREARMRGT PVLVALGDFLGGPLAPHPYQGEPPSMLRYEETTERWFP  
LANNLPPDLVNVGRYGSAILDNYLFIVGGYRITSQEISAAHSYNPITNEWLQVASMNQKRSNFKLVAVNSKLY  
AIGGQAVSNVECYNPEQDAWNFVAPLPNPLAEFSACECKGKIYVIGGYTTRDRNMNIIQYCPADLWTLFETC  
DVHIRKQOMVSVEETIYIVGGCLHELGPNNRRSSQSEDMLTVQSYNTVTRQWLYLKENTSKSGLNLTALHNDG  
IYIMSRDVTLSLEHRVFLKYNIFADSWEAFRRFPAPFGHNLLISSLYLPNKAET\*  
>ENSMUSP00000042558\_c.486:G>A\_p.A163T ENSMUST00000036003.8|Klh142-  
201|ENSMUSG00000040102|+|chr6:g.146993516:G>A  
MSAEEMVQIRLEDRCYPVSKSKLIEQSDYFRALYRSGMREAVRPEVGPVQQLRGLSAPGLRLVLDLFINAGGA  
REGWGLSEDELAASVLSMVEAASFLQVTALLRLLLSHVRLGNCLELYRLAQVYGLPDLQDACLRMFLRFH  
QVLCQPQFPPLLSPPQTPGDCSLKQRLREARMRGT PVLVALGDFLGGPLAPHPYQGEPPSMLRYEETTERWFP  
LANNLPPDLVNVGRYGSAILDNYLFIVGGYRITSQEISAAHSYNPITNEWLQVASMNQKRSNFKLVAVNSKLY  
AIGGQAVSNVECYNPEQDAWNFVAPLPNPLAEFSACECKGKIYVIGGYTTRDRNMNIIQYCPADLWTLFETC  
DVHIRKQOMVSVEETIYIVGGCLHELGPNNRRSSQSEDMLTVQSYNTVTRQWLYLKENTSKSGLNLTALHNDG  
IYIMSRDVTLSLEHRVFLKYNIFADSWEAFRRFPAPFGHNLLISSLYLPNKAET\*  
>ENSMUSP00000042558\_c.703:G>A\_p.G235D ENSMUST00000036003.8|Klh142-  
201|ENSMUSG00000040102|+|chr6:g.146993733:G>A  
MSAEEMVQIRLEDRCYPVSKSKLIEQSDYFRALYRSGMREAVRPEVGPVQQLRGLSAPGLRLVLDLFINAGGA  
REGWGLSEDELAASVLSMVEAASFLQVTALLRLLLSHVRLGNCLELYRLAQVYGLPDLQDACLRMFLRFH  
QVLCQPQFPPLLSPPQAPGDCSLKQRLREARMRGT PVLVALGDFLGGPLAPHPYQGEPPSMLRYEETTERWFP  
LANNLPPDLVNVGRYGSAILDNYLFIVGGYRITSQEISAAHSYNPITNEWLQVASMNQKRSNFKLVAVNSKLY  
AIGGQAVSNVECYNPEQDAWNFVAPLPNPLAEFSACECKGKIYVIGGYTTRDRNMNIIQYCPADLWTLFETC  
DVHIRKQOMVSVEETIYIVGGCLHELGPNNRRSSQSEDMLTVQSYNTVTRQWLYLKENTSKSGLNLTALHNDG  
IYIMSRDVTLSLEHRVFLKYNIFADSWEAFRRFPAPFGHNLLISSLYLPNKAET\*  
>ENSMUSP00000042558\_c.888:C>T\_p.Q297\* ENSMUST00000036003.8|Klh142-  
201|ENSMUSG00000040102|+|chr6:g.147003116:C>T  
MSAEEMVQIRLEDRCYPVSKSKLIEQSDYFRALYRSGMREAVRPEVGPVQQLRGLSAPGLRLVLDLFINAGGA  
REGWGLSEDELAASVLSMVEAASFLQVTALLRLLLSHVRLGNCLELYRLAQVYGLPDLQDACLRMFLRFH  
QVLCQPQFPPLLSPPQAPGDCSLKQRLREARMRGT PVLVALGDFLGGPLAPHPYQGEPPSMLRYEETTERWFP  
LANNLPPDLVNVGRYGSAILDNYLFIVGGYRITSQEISAAHSYNPITNEWLQVASMNQKRSNFKLVAVNSKLY  
AIGG\*AVSNVECYNPEQDAWNFVAPLPNPLAEFSACECKGKIYVIGGYTTRDRNMNIIQYCPADLWTLFETC  
DVHIRKQOMVSVEETIYIVGGCLHELGPNNRRSSQSEDMLTVQSYNTVTRQWLYLKENTSKSGLNLTALHNDG  
IYIMSRDVTLSLEHRVFLKYNIFADSWEAFRRFPAPFGHNLLISSLYLPNKAET\*  
>ENSMUSP00000042558\_c.1224:T>C\_p.Y409H ENSMUST00000036003.8|Klh142-  
201|ENSMUSG00000040102|+|chr6:g.147009387:T>C  
MSAEEMVQIRLEDRCYPVSKSKLIEQSDYFRALYRSGMREAVRPEVGPVQQLRGLSAPGLRLVLDLFINAGGA  
REGWGLSEDELAASVLSMVEAASFLQVTALLRLLLSHVRLGNCLELYRLAQVYGLPDLQDACLRMFLRFH  
QVLCQPQFPPLLSPPQAPGDCSLKQRLREARMRGT PVLVALGDFLGGPLAPHPYQGEPPSMLRYEETTERWFP  
LANNLPPDLVNVGRYGSAILDNYLFIVGGYRITSQEISAAHSYNPITNEWLQVASMNQKRSNFKLVAVNSKLY

AIGGQAVSNVECYNPEQDAWNFVAPLPNPLAEFSACECKGKIYVIGGYTTRDRNMNIIQYCPASDLWTLFETC  
DVHIRKQOMVSVEETIYIVGGCLHELGNRRSSQSEDMLTVQSHNTVTRQWLYLKENTSKSGLNLTCALHNDG  
IYIMSRDVTLSLEHRVFLKYNIFADSWAEFRFPFAGHNLLISSLYLPNKAET\*

>ENSMUSP00000032441\_c.531:A>C\_p.K178Q ENSMUST00000032441.14|Ccdc91-  
201|ENSMUSG00000030301|+|chr6:g.147438931:A>C  
MDDDDFGGFEAAETFDGEGGNQAVSPAVPWATFPAVSGVRLSPASPELILDHHDHSSPSTGHLPPDAVISSAD  
DTHADSSLMSQTISSKAQIQSAHNLNIPFLPGLTDEPSHGALALEDEPEGPGVHVSNSQLRQKISSLETKL  
KASEEEKQRIKKDVESLMEKHSVLEKGFLEKEQEQDAVSEFQARYRELQEKHKQELEDMRKAGHEALSIVDEYK  
ALLQSSVKQQLDAIEKQYVSAIEKQAHRCHELLHAHQRLLDVLDTEKELLREKIQEALTQSSQEQKESLEKC  
LQEQEMQRNKETLESVAVKLEKEAMKDVIITKAVGEERENLEKVHAEERELWKTEHARDQERVAEAIQAAVQEQQR  
MSQFAVKAAIVEEQRRSEKAMEEAVKTRTRDELVEYVREQRRLDQVTRQRSLSLELFLSQAQKQLSALIAATEP  
VDIE\*

>rs244165131\_ENSMUSP00000032441\_c.535:A>AT\_p.E179ins-fs  
ENSMUST00000032441.14|Ccdc91-  
201|ENSMUSG00000030301|+|chr6:g.147438935:A>AT  
MDDDDFGGFEAAETFDGEGGNQAVSPAVPWATFPAVSGVRLSPASPELILDHHDHSSPSTGHLPPDAVISSAD  
DTHADSSLMSQTISSKAQIQSAHNLNIPFLPGLTDEPSHGALALEDEPEGPGVHVSNSQLRQKISSLETKL  
KASEEEKQRIKKDVESLMEKHSVLEKGFLEKEDAGCCILSSQIP

>ENSMUSP00000041180\_c.4515:A>G\_p.M1506V ENSMUST00000046689.13|Resf1-  
201|ENSMUSG00000032712|+|chr6:g.149236197:A>G  
MNWNTKQENVPKPPPYSKTQSSILQHFLMTSTTSQSSFNYSFHNQAEASQTSFNYSLHNQAEACMYSGNSNSVSO  
PLLSGRNYITPQTQISVSNMPTRTIVASQSSMERVVSTNGKGPQQPNHNLQTVSSGIMQNVWLPSTHTEATISH  
NPDGGTNMPYMHPPQNQLVTSDTYSMQLQMAPLHSGKVPMTHQSSQGLNHFI PDQLVDWTQYTSNELSYPEYR  
PPPQKQYSYILPATTSLQVKNQLPTTYTQSLQSKHSVPLSSHQYAAEASKRLSALPYSCRYENQHVVQNAQPVSK  
HLPMEVQPSSEVHSSEKKTDRYRQVQWQNPNEKVSIGQFSEVKINIKQPYSESVRPSGDGVQALVQNNQEK  
RKTYTNPNTNQVIDTNAATKEKLVKDIKSLVEIKKKFSELARKIKINKSLLMAAGCSKTANTSYTEPIQHSEFS  
AKEMSAKNGNDCSMELLATCLSLWKNQPSKTTEENVKPLEEKQCNTSRI STTVVGSANPTNEVHVKSLCSGV  
GNSQKMMSSSQTVLPVLI PCESSGVAVGKGTTELQIAVVSPLVLSDTNTLPGKDSVPEVLPETLYPVVKEGSV  
CSLQTPPTETVALPFDVIGAVASNNISAEIPLPVDKEKQHKPIQGDPIADSSLGKHSPLGTEVLPKPMDSI  
VSGPMLQIESICSLAEGDVSYSQIAEIFNSVQTEPQKPSNPQVIDSQEQVYDITENKDFSLQKDKCVQCTD  
VPHEVPEQPEPLQPEEPASSEYVEANREATEESCREYTGRKESTAKDVCLPAAIQQDPPHRETDMFSKSDHSL  
PAINEINDESEPI SYLHDQSELLEKFFPYGIETFNREHVS LDQQKTHKIVENQTGGKTSNVSGDSTDQIKITV  
LNSEQIKELFPEDDQPCDKLAEPENKEI VAEVKS PCDSDQIPREESHDLGMLDPEKDKIHCCALGWLSMVYEGV  
PQCHCSSTEKKEKQCLDINSKQGEQPCNSGITIFEINPVSNNSKTPLTQATEEGHFSAVHGEKTKASKTKD  
NREGQELACHFSKAKYKDKGNFKIRHDTSLKMEQKLNKISSKCDIPNPSKCNKIAAPEILHVTTSNAKMN  
PFSKQASQESLQKKHTSQDLGVPKAPIELSSNTDPCRSNTSSVQSVSPEKKKLKFAGGSRLKYFEKRKTDHV  
IIPDVEIKKKKYEKQEQNKNAGDTLKLCSILTESNERASVQEKTVPSPESSDPKSSSKSTRVITVQEQYLQQR  
KDKQITGNNASRNICVETVLCDSGHGHTKSKHSAVSWGKLVGQSSISAETAKELEHNSSSHGKDFKIHSEAS  
RTHSVSNNNKGFQDGKQPKMFKNKTSMNNE SNQMPLOVKEQRKQYLNRAVFKCTERESICLTKLDSASKKLS  
IEKKSGEYTSKTKDTPKSMLEFKLCPDVLKNTSTVDKQDCPGPGPEKEQAPVQVSGIKSTKEDWLKCIPT  
TKMPESSQRDSADSRLSKRSLSADEFEILQNPVKESNIMFRTYKKVYLEKRSRSLGSSPVK\*

>ENSMUSP00000140026\_c.4515:A>G\_p.M1506V ENSMUST00000189932.7|Resf1-  
209|ENSMUSG00000032712|+|chr6:g.149236197:A>G  
MNWNTKQENVPKPPPYSKTQSSILQHFLMTSTTSQSSFNYSFHNQAEASQTSFNYSLHNQAEACMYSGNSNSVSO  
PLLSGRNYITPQTQISVSNMPTRTIVASQSSMERVVSTNGKGPQQPNHNLQTVSSGIMQNVWLPSTHTEATISH  
NPDGGTNMPYMHPPQNQLVTSDTYSMQLQMAPLHSGKVPMTHQSSQGLNHFI PDQLVDWTQYTSNELSYPEYR  
PPPQKQYSYILPATTSLQVKNQLPTTYTQSLQSKHSVPLSSHQYAAEASKRLSALPYSCRYENQHVVQNAQPVSK  
HLPMEVQPSSEVHSSEKKTDRYRQVQWQNPNEKVSIGQFSEVKINIKQPYSESVRPSGDGVQALVQNNQEK  
RKTYTNPNTNQVIDTNAATKEKLVKDIKSLVEIKKKFSELARKIKINKSLLMAAGCSKTANTSYTEPIQHSEFS  
AKEMSAKNGNDCSMELLATCLSLWKNQPSKTTEENVKPLEEKQCNTSRI STTVVGSANPTNEVHVKSLCSGV  
GNSQKMMSSSQTVLPVLI PCESSGVAVGKGTTELQIAVVSPLVLSDTNTLPGKDSVPEVLPETLYPVVKEGSV  
CSLQTPPTETVALPFDVIGAVASNNISAEIPLPVDKEKQHKPIQGDPIADSSLGKHSPLGTEVLPKPMDSI  
VSGPMLQIESICSLAEGDVSYSQIAEIFNSVQTEPQKPSNPQVIDSQEQVYDITENKDFSLQKDKCVQCTD  
VPHEVPEQPEPLQPEEPASSEYVEANREATEESCREYTGRKESTAKDVCLPAAIQQDPPHRETDMFSKSDHSL  
PAINEINDESEPI SYLHDQSELLEKFFPYGIETFNREHVS LDQQKTHKIVENQTGGKTSNVSGDSTDQIKITV  
LNSEQIKELFPEDDQPCDKLAEPENKEI VAEVKS PCDSDQIPREESHDLGMLDPEKDKIHCCALGWLSMVYEGV  
PQCHCSSTEKKEKQCLDINSKQGEQPCNSGITIFEINPVSNNSKTPLTQATEEGHFSAVHGEKTKASKTKD  
NREGQELACHFSKAKYKDKGNFKIRHDTSLKMEQKLNKISSKCDIPNPSKCNKIAAPEILHVTTSNAKMN

PFSKQASQESLQKKHTSQDLGPVKAPIELSSNTDPCRSNTSSVQSVSPEKKKLKFAGGSRKLYFEKRKTDHV  
 IIPDVEIKKKKYEKQEONKNAGDTLKLCSILTESNERASVQEKTVPSPESSDPKGSSSKSTRVITVQEYLQRQ  
 KDKQITGNNASRNICVETVLCDSGHTKTSKHSAAVSWGKLVGQSI SAETAKELEHNSSSHGKDFKIHSEAS  
 RTHSVSNNNKGFDFGKQPDKMFKNKTSMNNESNQMPLOVKEQRKQYLNRVAFKCTERESICLTKLDSASKKLS  
 IEKKSGETYSKTKDTPKSMLEFKLCPDVLKNTSTVVKQDCPGPGPEKEQAPVQVSGIKSTKEDWLKCIPT  
 TKMPESQRDSADSRLSKRSLSADEFEILQNPVKESNIMFRITYKKVYLEKRSRSLGSSPVK\*  
 >ENSMUSP00000098328\_c.4515:A>G\_p.M1506V ENSMUST00000100765.11|Resf1-  
 202|ENSMUSG00000032712|+|chr6:g.149236197:A>G  
 MNWNTKQENVPKPPPYSKTQSSILQHFLMTSTTSQSSFNYSPhNQEASQTSFNYSLHNQEACMYSGNSNSVSQ  
 PLLSGRNYITPQTQISVSNMPTRTIVASQSSMERVVSTNGKGPQQPNHNLQTVSSGIMQNVWLPSHTEATISH  
 NPDGGTNMPYMHPPQNQLVTSDTYSMQLQMAPLHSGKVPMTHQGSQGLNHFI PDQLVDWTQYTSNELSYPEYR  
 PPPKQYSYILPATTSLQVKNQLPTYTQSLQSKHSVPLSSHQYAAEASKRSLALPYSCRYENQHVQNAQPVSK  
 HLPMEVPQSSSEVHSSEKKTDRYRFGKQWQNPNEKVSIGQFSEVKINIKQPYSESVRPSGDGVQALVQNNQEK  
 RKYTYNPNTNQVIDTNATKEKLRDVKSLVEIKKKFSELARKIKINKSLLMAAGCSKTANTSYTEPIQHSEFS  
 AKEMSAKNGNDCSMELLATCLSLWKNQPSKTTEENVPKPLEEKQCNTSRI STTVVGSANPTNEVHVKSLCSGV  
 GNSQKMMSSSQTVLPVLI PCESSGVAVGKGTTELQIAVVSPLVLSDTNTLPGKDSVPEVLPETLYPVVKEGSV  
 CSLQTPPTETVALPFDVIGAVASNNISAEIPLPVDKEKQHKPIQGDPDIADSSLGKHSPLGTEVLPKPMDS  
 TVSGPMLQIESICSLAEGDVSYNSQIAEIFNSVQTEPQKPSPNQVIDSQEQVYDVTENKDFSLQKDKCVQCTD  
 VPHEVPEQPEPLQPEEPASSEYVEANREATEESCREYTGRKESTAKDVCLPAAIQQDPPHRETDMFSKSDHSL  
 PAINEINDESEPI SYLHDQLSELLKEFPYGIETFNREHVS LDQQKTHKIVENQTGGKTSNVSGDSTDQIKITV  
 LNSEQIKELFPEDDQPCDKLAEPENKEIVA EVKSPCDSQI PREESHDLGMLDPEKDKIHCCALGWLMSVYEGV  
 PQCHCSSTEKKEKDQCLDINSKQGEQPCNSGITIFEINPVSNNSKTPLTQATEEGHFSAVHGEKTKASKTKD  
 NREGQELACHFSKCYKDKGNFKIRHDTSLKMEQKLNIS SKCDIPNPSKCNKIAAPEILHVTTNSAKNM  
 PFSKQASQESLQKKHTSQDLGPVKAPIELSSNTDPCRSNTSSVQSVSPEKKKLKFAGGSRKLYFEKRKTDHV  
 IIPDVEIKKKKYEKQEONKNAGDTLKLCSILTESNERASVQEKTVPSPESSDPKGSSSKSTRVITVQEYLQRQ  
 KDKQITGNNASRNICVETVLCDSGHTKTSKHSAAVSWGKLVGQSI SAETAKELEHNSSSHGKDFKIHSEAS  
 RTHSVSNNNKGFDFGKQPDKMFKNKTSMNNESNQMPLOVKEQRKQYLNRVAFKCTERESICLTKLDSASKKLS  
 IEKKSGETYSKTKDTPKSMLEFKLCPDVLKNTSTVVKQDCPGPGPEKEQAPVQVSGIKSTKEDWLKCIPT  
 TKMPESQRDSADSRLSKRSLSADEFEILQNPVKESNIMFRITYKKVYLEKRSRSLGSSPVK\*  
 >ENSMUSP00000139660\_c.4509:A>G\_p.M1504V ENSMUST00000189837.2|Resf1-  
 208|ENSMUSG00000032712|+|chr6:g.149236197:A>G  
 MNWNTKQENVPKPPPYSKTQSSILQHFLMTSTTSQSSFNYSPhNQEASQTSFNYSLHNQEACMYSGNSNSVSQ  
 PLLSGRNYITPQTQISVSNMPTRTIVASQSSMERVVSTNGKGPQQPNHNLQTVSSGIMQNVWLPSHTEATISH  
 NPDGGTNMPYMHPPQNQLVTSDTYSMQLQMAPLHSGKVPMTHQGSQGLNHFI PDQLVDWTQYTSNELSYPEYR  
 PPPKQYSYILPATTSLQVKNQLPTYTQSLQSKHSVPLSSHQYAAEASKRSLALPYSCRYENQHVQNAQPVSK  
 HLPMEVPQSSSEVHSSEKKTDRYRFGKQWQNPNEKVSIGQFSEVKINIKQPYSESVRPSGDGVQALVQNNQEK  
 RKYTYNPNTNQVIDTNATKEKLRDVKSLVEIKKKFSELARKIKINKSLLMAAGCSKTANTSYTEPIQHSEFS  
 AKEMSAKNGNDCSMELLATCLSLWKNQPSKTTEENVPKPLEEKQCNTSRI STTVVGSANPTNEVHVKSLCSGV  
 GNSQKMMSSSQTVLPVLI PCESSGVAVGKGTTELQIAVVSPLVLSDTNTLPGKDSVPEVLPETLYPVVKEGSV  
 CSLQTPPTETVALPFDVIGAVASNNISAEIPLPVDKEKQHKPIQGDPDIADSSLGKHSPLGTEVLPKPMDS  
 TVSGPMLQIESICSLAEGDVSYNSQIAEIFNSVQTEPQKPSPNQVIDSQEQVYDVTENKDFSLQKDKCVQCTD  
 VPHEVPEQPEPLQPEEPASSEYVEANREATEESCREYTGRKESTAKDVCLPAAIQQDPPHRETDMFSKSDHSL  
 PAINEINDESEPI SYLHDQLSELLKEFPYGIETFNREHVS LDQQKTHKIVENQTGGKTSNVSGDSTDQIKITV  
 LNSEQIKELFPEDDQPCDKLAEPENKEIVA EVKSPCDSQI PREESHDLGMLDPEKDKIHCCALGWLMSVYEGV  
 PQCHCSSTEKKEKDQCLDINSKQGEQPCNSGITIFEINPVSNNSKTPLTQATEEGHFSAVHGEKTKASKTKD  
 NREGQELACHFSKCYKDKGNFKIRHDTSLKMEQKLNIS SKCDIPNPSKCNKIAAPEILHVTTNSAKNM  
 PFSKQASQESLQKKHTSQDLGPVKAPIELSSNTDPCRSNTSSVQSVSPEKKKLKFAGGSRKLYFEKRKTDHV  
 IIPDVEIKKKKYEKQEONKNAGDTLKLCSILTESNERASVQEKTVPSPESSDPKGSSSKSTRVITVQEYLQRQ  
 KDKQITGNNASRNICVETVLCDSGHTKTSKHSAAVSWGKLVGQSI SAETAKELEHNSSSHGKDFKIHSEAS  
 RTHSVSNNNKGFDFGKQPDKMFKNKTSMNNESNQMPLOVKEQRKQYLNRVAFKCTERESICLTKLDSASKKLS  
 IEKKSGETYSKTKDTPKSMLEFKLCPDVLKNTSTVVKQDCPGPGPEKEQAPVQVSGIKSTKEDWLKCIPT  
 TKMPESQRDSADSRLSKRSLSADEFEILQNPVKESNIMFRITYKKVYLEKRSRSLGSSPVK\*  
 >ENSMUSP00000145740\_c.478:A>CA\_p.K160ins-fs ENSMUST00000206928.2|Gp6-  
 202|ENSMUSG000000078810|-|chr7:g.4387989:T>TG  
 MSPASPTFFCIGLCLVLIQTQSGPLPKPSLQAQPSLLVPLGQSVILRCQGPDPDVLRYLEKLEKPEKYEDQDF  
 LFIPTMERSNAGRYRCSYQNGSHWSLPSDQLELIATGVYAKPSLSAHPSSAVPQGRDVTLCQSPYSFDEFVL  
 YKEGDTGSYKRPETMVPVPGQFPHHHSDCCSQWDVPLVQLLQLISIPVVSPE



>ENSMUSP00000104231\_c.478:A>CA\_p.K160ins-fs ENSMUST00000108590.4|Gp6-  
201|ENSMUSG00000078810|-|chr7:g.4387989:T>TG  
MSPASPTFFCIGLCVQLVQIQTSQSGPLPKPSLQAQPSSLVPLGQSVILRCQGPDPVDLYRLEKLEKPEKYEDQDF  
LFIPMERSNAGRYRCSYQNGSHWSLPSDQLELIATGVYAKPSLSAHPSSAVPQGRDVTLCQSPYSFDEFVL  
YKEGDTGSYKRPETMVPQGFPHHSDCCSQWDVVPVQLQLLQISIPVVSPE  
>ENSMUSP00000130452\_c.196:A>T\_p.D66V ENSMUST00000168578.3|Tmem238-  
201|ENSMUSG00000030431|-|chr7:g.4792345:T>A  
MAAASPVCQSASAVGASSPPAPAPAPAAGLGRCRMALLLAVALDVAGMAALLTGVAQLQVRGRVFGDLLIY  
SGALLVFLSLLGWILWYTGNIERSQELERDYLGRPSAIARLARLKLRRWSAPATASPRTTAGLRSARRANRA  
PQPSSSSGRRVRLQLATLEAGSVAAGTGSE\*  
>ENSMUSP00000074613\_c.2287:C>A\_p.T763N ENSMUST00000075108.9|Vmn2r31-  
201|ENSMUSG00000096373|-|chr7:g.7387282:G>T  
MFTLMGVFFFLNIPLFMANFIDPRCFWRINLNEIQDEYLGLTCAFI LAAVQKPIEKDYFNKTLNLFKTKTKNHK  
YALALAFAMDEINRNPDLNPMSLIIRYTLGRCDGKTVIPTPYLFHKKKQSPINNYFCNEETMCSFLLTGPNW  
GVSISFWKYLDSFSLPRILQLTYGPFSSIFSDDEQYPYLYQMAPKDTSLALAMVSFIFYFNWNWIGLVI PDDD  
QGNQFLLELKKQSENKEICFAFVKMISVDDISFEHKTEMYKQIVMSSSNV I I YEETINFIDLI FRMWEPPV  
LQRIWITTKQWNFPKRDITHTGTFYGLTFLPHGGISGFKDFVQTFWHLRSKDLYLVMPEWKYFKYESSAS  
KCKILKNNSSDASFDLMEQKFDMAFSESSHNIYNVAVHAIHAHALHEVNLQQVDNQAI DNGK GASSHCLKVN SF  
LRKIHF'TNPLGDKVIMKQRVIMQEEYDIFHFGNLSQHLGKIKVKGKFSYFVSHGRNFHLYVDMLEVATGSRKM  
PSSVCSAECSPGFRRLWKEGMAACCFVCSPCPENEISNETNMDQCVNCPYQYANTEQNKCIQKGVTFLSYED  
PLGMALALMAFCFSAFTAVVLCVFKHHDTPIVKANNRILSYLLLSLMSCFLCSFFYIGHPNRATCVLQQIT  
FGIVFTVAVSTVLAKTIVTVLAFKVTDPGRRLRNFLVSGTPNYIIPICSLQLQCVLCAIWI EVSPPFVDIDEHS  
QHGHIIIVCNKGSVTAFCVGLYLAACLALGSFNLAFLAKNLPDFTNEAKFLTFSMLVFFSVVWVTFPLVYHSTK  
GKVMVAVEIFSI LASSAGMLGCI FAPKIYIILMRPERNSTQKIKVRNSTQKIKEKSYF\*  
>ENSMUSP00000156838\_c.1624:G>T\_p.S542I ENSMUST00000233892.2|Vmn2r53-  
203|ENSMUSG00000096002|-|chr7:g.12318665:C>A  
MWLCTLLSVLFGCLSGSALSGPRVWII PRQSPRFDRPGDVI VGGSF SIFHFS DGTLSNFTAPPPVLKTS SASM  
WSYRVAQS FVFAIEEINRSAHLLPNLTLGFSIRNSGDSVHGALYETMGFLT GQEEPIPNYTCQHGSPPQAALVG  
DTRSSLSVSMARLLGLYKFPQVSYSSSLP SLSDKIQFP SFIRTLTSDLTCSHAVTQLVIHFQWSWV I I LAHDD  
DFGQQASSLATQMLTPAGVCIEYHLHVP SHQSFGKIEETVQKM QKCTARVVLVFLSNSNFQ L I LHGLLAVPVS  
GQVWVSMDTLHMALALTI PGISQVLQGT FGLLYHSSRAIGFPEFLAHLRPSQTPEDMF I KKFWEFTFDCTWPY  
QNSTVTEGVQFCTGNESLKNKPHFPPEVSRIDAAYTAVYSIAHALHNMLACEHQERKGTNSHNHFSWQLLHNL  
RNVYFKTSDGNKIMFDANGDLVTQFDIFQGKKT PAGVFHLVHVGLIDPQASSGNKMMVQLKQDLQVSSLNAEI  
TVPTSICSESLPGFSQVPRLGAPHCCFDCIPCPEGQFTDQRDMKRCLLCPKEQYSSHTRDHCLPRTEIFLAF  
EPLGFI LALVALLLAGLAVLVLGVFLKHRDTPVVRANNR T LSYFLLI SLSL CALCALLFLGRPTVT T CLLRQ  
TIFAVVFTVAVSSVLAKTTLTVLAFRVTRPRSRIQVCLSSGASTSVVLIASLIQVVLCGIWLITSPFPDRDM  
ISEPRHTVIQCHEGSGANFFCVLGLGFLAGGTFSVAFLARGLPDVFNETKFLTFSMLLFC SVWTAFLPLYHS  
ARGKSTVAVEIFSI LASTAGLLGGIFIPKCYI ILLKPEKNTPAWLRQGHQVQHNRQCEMLQRRCVSSGESLGS  
SL\*  
>ENSMUSP00000126979\_c.1408:G>T\_p.S470I ENSMUST00000170412.2|Vmn2r53-  
201|ENSMUSG00000096002|-|chr7:g.12318665:C>A  
MWSYRVAQS FVFAIEEINRSAHLLPNLTLGFSIRNSGDSVHGALYETMGFLT GQEEPIPNYTCQHGSPPQAALV  
GDTRSSLSVSMARLLGLYKFPQVSYSSSLP SLSDKIQFP SFIRTLTSDLTCSHAVTQLVIHFQWSWV I I LAHD  
DDFGQQASSLATQMLTPAGVCIEYHLHVP SHQSFGKIEETVQKM QKCTARVVLVFLSNSNFQ L I LHGLLAVPVS  
SGQVWVSMDTLHMALALTI PGISQVLQGT FGLLYHSSRAIGFPEFLAHLRPSQTPEDMF I KKFWEFTFDCTWP  
YQNSTVTEGVQFCTGNESLKNKPHFPPEVSRIDAAYTAVYSIAHALHNMLACEHQERKGTNSHNHFSWQLLHNL  
LRNVYFKTSDGNKIMFDANGDLVTQFDIFQGKKT PAGVFHLVHVGLIDPQASSGNKMMVQLKQDLQVSSLNAEI  
ITVPTSICSESLPGFSQVPRLGAPHCCFDCIPCPEGQFTDQRDMKRCLLCPKEQYSSHTRDHCLPRTEIFLA  
FEPLGFI LALVALLLAGLAVLVLGVFLKHRDTPVVRANNR T LSYFLLI SLSL CALCALLFLGRPTVT T CLLR  
QTIFAVVFTVAVSSVLAKTTLTVLAFRVTRPRSRIQVCLSSGASTSVVLIASLIQVVLCGIWLITSPFPDRD  
MISEPRHTVIQCHEGSGANFFCVLGLGFLAGGTFSVAFLARGLPDVFNETKFLTFSMLLFC SVWTAFLPLYH  
SARGKSTVAVEIFSI LASTAGLLGGIFIPKCYI ILLKPEKNTPAWLRQGHQVQHNRQCEMLQRRCVSSGESLGS  
SSL\*  
>ENSMUSP00000134531\_c.741:T>A\_p.S248T ENSMUST00000174443.8|Obox3-  
206|ENSMUSG00000066772|-|chr7:g.15359926:A>T  
MAEGPSLHPKLQVANSIPIELSSQIPQDPARNLAFQMCQNPLMTPGSTMQSRLSVPERNLLQQESQGPTRQSG  
RMPLSDRYVNKQTGPMALRKFRKERTVYSKEQQCLLQKHDFEQYPNEKKIVELALSVGVTKREIKIWFKNNR  
AKYRRMKLQNIKQALPETNESSKAVSESTHFPGSI PVVSDNGESMCSGTFGEDSIPKLNCSQESSLHCFQAC

DGDMCCPQEYQEYQEYLLHGHPVTAWNTGQSAAFESQTDLAVAEVFPVGLAYAAQAPEDAHNSSGPCEDELWQR  
ILEDLDTSDDWLTLRNLSTPVYTTEVLDQSKPYSHEEV CYTHL\*  
>ENSMUSP00000133427\_c.741:T>A\_p.S248T ENSMUST00000173912.8|Obox3-  
204|ENSMUSG00000066772|-|chr7:g.15359926:A>T  
MAEGPSLHPKLQVASNIPIELSSQIPQDPARNLAFQMCQNPLMTPGSTMQSRLSVPERNLLQQESQGPTRQSG  
RMPLSDRYVVKQTGPMALRKFRKERTVYSKEQQCLLQKHFDEFQYPNEKKIVELALSVGVTKREIKIWFKNR  
AKYRRMKLQNIKQALPETNESSKAVSESTHFPFSIPVVDSDNGESMCSGTFGEDSIPKLNCSQESSLHCFQAC  
DGDMCCPQEYQEYQEYLLHGHPVTAWNTGQSAAFESQTDLAVAEVFPVGLAYAAQAPEDAHNSSGPCEDELWQR  
ILEDLDTSDDWLTLRNLSTPVYTTEVLDQSKPYSHEEV CYTHL\*  
>ENSMUSP00000092842\_c.741:T>A\_p.S248T ENSMUST00000095217.11|Obox3-  
202|ENSMUSG00000066772|-|chr7:g.15359926:A>T  
MAEGPSLHPKLQVASNIPIELSSQIPQDPARNLAFQMCQNPLMTPGSTMQSRLSVPERNLLQQESQGPTRQSG  
RMPLSDRYVVKQTGPMALRKFRKERTVYSKEQQCLLQKHFDEFQYPNEKKIVELALSVGVTKREIKIWFKNR  
AKYRRMKLQNIKQALPETNESSKAVSESTHFPFSIPVVDSDNGESMCSGTFGEDSIPKLNCSQESSLHCFQAC  
DGDMCCPQEYQEYQEYLLHGHPVTAWNTGQSAAFESQTDLAVAEVFPVGLAYAAQAPEDAHNSSGPCEDELWQR  
ILEDLDTSDDWLTLRNLSTPVYTTEVLDQSKPYSHEEV CYTHL\*  
>ENSMUSP00000083291\_c.741:T>A\_p.S248T ENSMUST00000086122.10|Obox3-  
201|ENSMUSG00000066772|-|chr7:g.15359926:A>T  
MAEGPSLHPKLQVASNIPIELSSQIPQDPARNLAFQMCQNPLMTPGSTMQSRLSVPERNLLQQESQGPTRQSG  
RMPLSDRYVVKQTGPMALRKFRKERTVYSKEQQCLLQKHFDEFQYPNEKKIVELALSVGVTKREIKIWFKNR  
AKYRRMKLQNIKQALPETNESSKAVSESTHFPFSIPVVDSDNGESMCSGTFGEDSIPKLNCSQESSLHCFQAC  
DGDMCCPQEYQEYQEYLLHGHPVTAWNTGQSAAFESQTDLAVAEVFPVGLAYAAQAPEDAHNSSGPCEDELWQR  
ILEDLDTSDDWLTLRNLSTPVYTTEVLDQSKPYSHEEV CYTHL\*  
>ENSMUSP00000147475\_c.304:A>G\_p.Q102R ENSMUST00000209369.2|Zfp541-  
202|ENSMUSG00000078796|+|chr7:g.15806171:A>G  
MEPYSLGEEGALPSEGHLPSEFSESQVLNCSDTLNRDLGPSTRDLYAGLSGLDLDPSTLSDMPSEVLEDNLD  
TSLSYSGKDSDSVKLLEEYADSESQTSRDLGLGALKVPKEADEGGRATGSTRKGKRQHSSPQNPLLDLDCSLCG  
KVFSSASSLSKHYLTHSQERKHVCKVCSKAFKRQDHLTGHMLTHQTKPFVCIQGCSSKSYCDYRSLRRHYEV  
QHGVCIKQETPPEEEAYGDPHNDVANQPPPSGLRSLGPPPEARSPGSLVLPNRDLRLRCIVSSIVHQKIPSPGP  
AVGSPDTEARSSACACPTSLGSSSCTPASTPVALGTLGSEIPEETHPPRKEAATEVFTPVQSRRAENGVPDPP  
ESELESESPRLQRPSSLEGWPEGSSLPACLPLFRGHVSPSGSQPSSHNFWQLRNLPGCPKNKGSNVFMVHKPP  
AVASREGSEGGGSGPSSTPVSVEPSPLGTTQEELLFPFPALLKAPGEASSEVRQAAGEDETWAPKCKCPDCE  
SFPWQSPTELGLQDAQNPGLPSDATPLFRQLFMKSQESLVSHEQMQLVQMIAKSQRIFSHQVATASAQRP  
PEGKQSTLKLQGPWPQTLPAPTVDSFQIGPGHSEPEGSPVRRRKTMPAVSRETSPPGGPRRDTKGGPKVAS  
APPSLTGPGLLPSRNPDSSSLAKGTLDLGDIIPNAGSRQSQLGGDEPAGTQLVKGKQGGENGLASGAMRGEKG  
PACPRGGGYRLFSGHPRQRFSGFRKEKVKMDVCCAASPSQVAMASFSSAGPLADPPRDMKSKLTFNRIQGG  
NIYRLPHVPKKEESLAGGCHQPNGGPTDWMESKSTFVCKNCSQMFYTEKGLSSHMCFHSDQWPSPRGKQEQQVK  
GQMVASVKKRAGREEGAVEDMKRHYDCSSSEPQDVTILSMLVSSGCGVTPVVLSSLLQGGQEKDGEERDSKES  
CQYRKRKRKRPQKALFAPPAPSALGEPGPGGCHQSCLHSPVFLVDHLLKGLFQCSPYTPPPMLSPIREGSGLY  
FNTLCSTSRAGPHLISPVLQVDSFQICVVKDDTKISIEPHINVSFRQAEIPELQERLLARVDENVASLW  
KPWGDVMTNPETQDRVMELCNVACSSVMPGGGTNLELALHCLHDAQGSVQVALETLLLRGPQKPRTHPLADYR  
YTGSDIWTPEKRLFKKAFCAHKKDFYLIHKMIQTKSVAQCVEYYYIWKKMVKFDCGRAPGLEKRRRELDEV  
ERTEDKVTCSPRERPTHRPTPELKIKTYSRRESILHSSPSAAPKRTPEPPGSGVESQGVFPCECERVFDDKIK  
SRNAHMKRHLRQEHVEPVRVKWPVKPYPLKEEEEEEEEEELGADMGPLQW\*  
>ENSMUSP00000148143\_c.304:A>G\_p.Q102R ENSMUST00000210805.2|Zfp541-  
203|ENSMUSG00000078796|+|chr7:g.15806171:A>G  
MEPYSLGEEGALPSEGHLPSEFSESQVLNCSDTLNRDLGPSTRDLYAGLSGLDLDPSTLSDMPSEVLEDNLD  
TSLSYSGKDSDSVKLLEEYADSESQTSRDLGLGALKVPKEADEGGRATGSTRKGKRQHSSPQNPLLDLDCSLCG  
KVFSSASSLSKHYLTHSQERKHVCKVCSKAFKRQDHLTGHMLTHQTKPFVCIQGCSSKSYCDYRSLRRHYEV  
QHGVCIKQETPPEEEAYGDPHNDVANQPPPSGLRSLGPPPEARSPGSLVLPNRDLRLRCIVSSIVHQKIPSPGP  
AVGSPDTEARSSACACPTSLGSSSCTPASTPVALGTLGSEIPEETHPPRKEAATEVFTPVQSRRAENGVPDPP  
ESELESESPRLQRPSSLEGWPEGSSLPACLPLFRGHVSPSGSQPSSHNFWQLRNLPGCPKNKGSNVFMVHKPP  
AVASREGSEGGGSGPSSTPVSVEPSPLGTTQEELLFPFPALLKAPGEASSEVRQAAGEDETWAPKCKCPDCE  
SFPWQSPTELGLQDAQNPGLPSDATPLFRQLFMKSQESLVSHEQMQLVQMIAKSQRIFSHQVATASAQRP  
PEGKQSTLKLQGPWPQTLPAPTVDSFQIGPGHSEPEGSPVRRRKTMPAVSRETSPPGGPRRDTKGGPKVAS  
APPSLTGPGLLPSRNPDSSSLAKGTLDLGDIIPNAGSRQSQLGGDEPAGTQLVKGKQGGENGLASGAMRGEKG  
PACPRGGGYRLFSGHPRQRFSGFRKEKVKMDVCCAASPSQVAMASFSSAGPLADPPRDMKSKLTFNRIQGG  
NIYRLPHVPKKEESLAGGCHQPNGGPTDWMESKSTFVCKNCSQMFYTEKGLSSHMCFHSDQWPSPRGKQEQQVQ

EKDGEERDSKESQYRKRKRKRPQPKALFAPPAPSALGEPGGGCHQSCLSHSPVFLVDHLLKGLFQCSPYTPPP  
 MLSPIREGSGLYFNTLCSTSRAGPHLISPVLQVDSSFGICVVKDDTKISIEPHINVGSRFQAEIPELQERLL  
 ARVDENVASLWKPWGDVMTNPETQDRVMELCNVACSSVMPGGGTNLELALHCLHDAQGSVQVALETLLLRGP  
 QKPRTHPLADYRYTGSDIWTPMEKRLFKKAFCAHKKDFYLIHKMIQTKSVAQCVEYYYIWKKMVKFCGRAPG  
 LEKRGRRELDEVERTEDKVTCSPRERPTHPTPELKIKTYSYRRESILHSSPSAAPKRTPEPPGSVESQGVFP  
 CRECERVFDKIKSRNAHMKRHLQEHVEPVRVKWPKPYPLKEEEEEEEEEELGADMGPLQW\*  
 >ENSMUSP00000104149\_c.304:A>G\_p.Q102R ENSMUST00000108509.2|zfp541-  
 201|ENSMUSG00000078796|+|chr7:g.15806171:A>G  
 MEPYSLGEEGALPSEGLPSFSESQVLNCSDTLNRDLGPSTRDRLLYAGLSGLDLDPSLSTSDMPSEVLEDNLD  
 TLSLYSGKDSDSVKLLEEYADSESTSLRDLGLGALKVPKEADEGGRATGSTRKGRQHSSPQNPLLDLDCSLCG  
 KVFSSASSLSKHYLTHSQERKHVCKVCSKAFKRQDHLTGMLTHQKTKPFVCI EQGCSKSYCDYRSLRRHYEV  
 QHGVCILKETPPEEEAYGDPTHNHDVANQPPPSGLRSLGPEARS PGSVLPNRDLLRCIVSSIVHQIPSPGP  
 AVGSPDTEARSSACACPTSLGSSCTPASTPVALGTLGSEIPEETHPPRKEAATEVFTPVQSRAAENGVPDPP  
 ESELESESPRLQRPSSLEGWPEGSSLPACLPLFRGHVSPSGSQSSHNFWQLRNLPGCPKNKGSNVFMVHKPP  
 AVASREGSEGGGSGPSSTPTSVEPSPSLGTTEELLFPFPALLKAPGEASSEVRQAAGEDETWAPKKCKPDCE  
 SFPWQSPTELGLQDAQNPGGLPSDATPLFRQLFMKSQESLVSHEQMQLVQMIAKSQRIFSHQVATASAQRP  
 PEGKQSTLKPLOGPWPPTLPPAPTVDVDFQIGPGHSEPEGSPVRRRKTMPAVSRETSPPGGPRRDTKGGPKVAS  
 APBSLTGPGLLPSRNPDSSSLAKGTLDLGDIPNAGSRQSQLGGDEPAGTQLVKGQGGENGLASGAMRKEGK  
 PACPRGGGYRLFSGHPRAQRFSGFRKEKVKMDVCCAASPSQVAMASFSSAGPLADPPRDMKSKLTI FNRIQGG  
 NIYRLPHPVKEESLAGGCHQPNGGPTDWMESKSTFVCKNCSQMFYTEKGLSSHMCFHSDQWPSPRGKQEQQVK  
 GQMVASVKKRAGREEGAVEDMKRHYDCSSSEPQDVTILSMLVSSGCGVTPVVLSSLLQGOEKDGEERDSKES  
 CQYRKRKRKRPQPKALFAPPAPSALGEPGGGCHQSCLSHSPVFLVDHLLKGLFQCSPYTPPPMLSPIREGSGLY  
 FNTLCSTSRAGPHLISPVLQVDSSFGICVVKDDTKISIEPHINVGSRFQAEIPELQERLLARVDENVASLW  
 KPWGDVMTNPETQDRVMELCNVACSSVMPGGGTNLELALHCLHDAQGSVQVALETLLLRGPQKPRTHPLADYR  
 YTGSDIWTPMEKRLFKKAFCAHKKDFYLIHKMIQTKSVAQCVEYYYIWKKMVKFCGRAPGLEKRGRRELDEV  
 ERTEDKVTCSPRERPTHPTPELKIKTYSYRRESILHSSPSAAPKRTPEPPGSVESQGVFPCECERVFVKIK  
 SRNAHMKRHLQEHVEPVRVKWPKPYPLKEEEEEEEEEELGADMGPLQW\*  
 >ENSMUSP00000071348\_c.1137:A>G\_p.T380A ENSMUST00000071399.13|Psg16-  
 201|ENSMUSG00000066760|+|chr7:g.16864544:A>G  
 MGQMYSGREIVSSNGSLWIHNVTRKDTGLYTLRTVNRGEIVSTSFTFLYVYTSLFICGRPSFPAKLTIESVP  
 PSVAEGGSVLLRVHNLQDKLRGLSWYKGAHVSRNLEIARQIIAKNSSVPGPAHSGRETIVYNSGSLLLQNVTRN  
 DTGFYTLQTLRHRKMELAHVQLQVDTLSLSCCDDLSTQLIIDMPRYAAEGESILLRVLNLPEDFQVFCWY  
 KGALIFQIFKIAEYSRARNSTKGAQSRTERVYTNGLSLLQDVTEKDTGLYTLQTLIDRNFKIEKAHVQIQVN  
 KPVTQPFMRVTDSTVRVQSSVVFCTCFSDNTGVS IHWLFNQNLSQLTERITLSPSKCQLRINPVRKEDGGGEYQY  
 EDHQNRPLIGMQEATDTMGFPSPDLSVP\*  
 >ENSMUSP00000146795\_c.399:A>C\_p.T134P ENSMUST00000208221.2|Psg22-  
 203|ENSMUSG00000044903|+|chr7:g.18453706:A>C  
 MEVSSELLSNGWTSWQRVLLTASLLTCWLLPITAGVTIESVPPKLVGENVLLRVDNLPENLRVFWYRGVTD  
 MSLGIALYSLDYSTSVTGPKHSGRETLYRNGSLWIQNVTRDTGYYTLQTIKNGKVVSNPSIFLQVNSSLFI  
 CGRPSPPALLTIESVPPASVAEGGSVLLLVHSLPDNLQSLWYKGLTVFNKVEIARHRTVKNSSEMGPAYSGRE  
 IVYNSGSLLLQNVTWEDTGFYTLQIVNRYWKMELAHIYLQVDTLSLSCCDDFNSVQLRINPVPHPAAEGERV  
 LQVHNLPEQVQTFWLWYKGVYSTQSFKITEYSIVTESLINGYAHSGREILFINGSLLLQDVTEKDSGFYTLVTI  
 DSNVKVETAHVQVNVNKLVTQPMRVTDSTVRIQGSVVVFCTCFSDNTGVSIRWLFNQNQLQLTERMTLSPSKCQ  
 LRIHTVRKEDAGEYQCEAFNPVSSKTSLPVRLTMNE\*  
 >ENSMUSP00000104121\_c.516:A>C\_p.T173P ENSMUST00000108481.8|Psg22-  
 202|ENSMUSG00000044903|+|chr7:g.18453706:A>C  
 MCSCLENSAQKEEGQSPGALQEQSSPLRKASTVRRDMEVSSELLSNGWTSWQRVLLTASLLTCWLLPITA  
 GVTIESVPPKLVGENVLLRVDNLPENLRVFWYRGVTDMSLGIALYSLDYSTSVTGPKHSGRETLYRNGSLW  
 IQNVTRDTGYYTLQTIKNGKVVSNPSIFLQVNSSLFICGRPSPPALLTIESVPPASVAEGGSVLLLVHSLPD  
 NLQSLWYKGLTVFNKVEIARHRTVKNSSEMGPAYSGREIVYNSGSLLLQNVTWEDTGFYTLQIVNRYWKME  
 LAHIYLQVDTLSLSCCDDFNSVQLRINPVPHPAAEGERVLLQVHNLPEQVQTFWLWYKGVYSTQSFKITEYS  
 IVTESLINGYAHSGREILFINGSLLLQDVTEKDSGFYTLVTIDSNVKVETAHVQVNVNKLVTQPMRVTDSTVRI  
 QGSVVVFCTCFSDNTGVSIRWLFNQNQLQLTERMTLSPSKCQLRIHTVRKEDAGEYQCEAFNPVSSKTSLPVRLT  
 V MNE\*  
 >ENSMUSP00000050633\_c.399:A>C\_p.T134P ENSMUST00000051973.9|Psg22-  
 201|ENSMUSG00000044903|+|chr7:g.18453706:A>C  
 MEVSSELLSNGWTSWQRVLLTASLLTCWLLPITAGVTIESVPPKLVGENVLLRVDNLPENLRVFWYRGVTD  
 MSLGIALYSLDYSTSVTGPKHSGRETLYRNGSLWIQNVTRDTGYYTLQTIKNGKVVSNPSIFLQVNSSLFI

CGRSPSPALLTIESVPASVAEGGSVLLLVHSLPDNLQSLWYKGLTVFNKVEIARHRTVKNSSEMGPAYSGRE  
IVYNSGSLLLQNVTWEDTGFYTLQIVNRYWKMELAHIYLVQVDTSLSSCCDDFNSVQLRINPVPHPAAEGERVL  
LQVHNLPEDVQTFWLWYKGVYSTQSFKITEYSIVTESLINGYAHSGREILFINGSLLLQDVTEKDSGFYTLVTI  
DSNVKVETAHVQVNVNKLVTQPVMRVTDSTVRIQGSVVFTCFSDNTGVSIRWLFNNQNLQLTERMTLSPSKCQ  
LRIHTVRKEDAGEYQCEAFNPVSSKTSLPVRLTMNE\*  
>rs235733715\_ENSMUSP00000104093\_c.760:A>C\_p.K254T  
ENSMUST00000108453.2|zfp296-201|ENSMUSG00000011267|+|chr7:g.19313907:A>C  
MSRRKAGRVPRRVDPDPTDIEDPDLVMDVKPDLDLRSLAQGPWIARDMPI SDVKRQLQTASRPLGAPSTCAP  
RMPLSSKSSDRQPWTDKHPDLLTCGRGKIFPLGAI IAFMDHKKQGCQLLQVSDPI SESKELKALSCLQCGRQ  
YTSPWKL LCHAQWDHGLCIYQTQHLDTP EAPLLGLAEVAAAMSAVAVVAPVESKPPPVSSAARRSPTCDVCKK  
TLSSFSNLKVHMSHTGERPYSQDCSYACAQSSTLNRHKKTHRQLAPGSPSTSASSRGVSPAAPPEPAAAYAA  
APASTLPSQTV EKAGAAATAGVQEPGAPGSGAQGGPGFVWGAPAKVERTDPVKIEKTAPRKSHGPGGKCEFC  
GKSFTNSSNLTVHRRSHTGERPYTCDQCPYACAQSSKLNRRRTHGLGTGKTVKCPHCLVPFGLQATLDKHLR  
QKHPEMA\*  
>ENSMUSP00000104093\_c.770:A>C\_p.R257S ENSMUST00000108453.2|zfp296-  
201|ENSMUSG00000011267|+|chr7:g.19313917:A>C  
MSRRKAGRVPRRVDPDPTDIEDPDLVMDVKPDLDLRSLAQGPWIARDMPI SDVKRQLQTASRPLGAPSTCAP  
RMPLSSKSSDRQPWTDKHPDLLTCGRGKIFPLGAI IAFMDHKKQGCQLLQVSDPI SESKELKALSCLQCGRQ  
YTSPWKL LCHAQWDHGLCIYQTQHLDTP EAPLLGLAEVAAAMSAVAVVAPVESKPPPVSSAARRSPTCDVCKK  
TLSSFSNLKVHMSHTGERPYSQDCSYACAQSSKLNHSHKTHRQLAPGSPSTSASSRGVSPAAPPEPAAAYAA  
APASTLPSQTV EKAGAAATAGVQEPGAPGSGAQGGPGFVWGAPAKVERTDPVKIEKTAPRKSHGPGGKCEFC  
GKSFTNSSNLTVHRRSHTGERPYTCDQCPYACAQSSKLNRRRTHGLGTGKTVKCPHCLVPFGLQATLDKHLR  
QKHPEMA\*  
>ENSMUSP00000066880\_c.109:GT>CG\_p.G37A ENSMUST00000068023.8|Cadm4-  
201|ENSMUSG00000054793|+|chr7:g.24198626:GT>CG  
MGRARRFQWPLLLLWAAAAGPGTQGEVQ TENVTVAEAWG\* DHLPSASVRWVHSRHSEPSPADPLFQWHQSSE  
GRAIPAGGVLPAPGAHQALRRPPGGRGGLL PALHGGHPPSDRHAHCLSGSGESCGGGPRASSGRRGQTLP  
GSAVAPRSGPALVSGSQGVERSEQRPGERQGV ERGKHRVPCGSGRRWYCHLRSTPGAALGTQQADAVRAG  
CAVFPHSADPRLSSCEGGRHSGADL CCHREPQAKPDPLEPWE\* VSAREGGGGGRDAHATWP GICR\*RHLHLR  
GGEQARPREGALRACGL\* PRCSGRGSDIGSLRHCRHPGATGVS DHMCASGHGLVLRPTEGILSDP\* QWLG\*  
AGRSQRSLPQWRRWTQTERRILHL  
>ENSMUSP00000003529\_c.1156:C>T\_p.A386V ENSMUST00000003529.9|Paf1-  
201|ENSMUSG00000003437|+|chr7:g.28098148:C>T  
MAPTIQTQAQRE DGHPRNSHRTLPERSGVVC RVKYCNSLPDI PFDPKFITYPFQNRVQYKATSLEKQHKHD  
LLTEPDLGVTIDLINPDTYRIDPNVLLDPADEKLEEEIQAPTS SKRSQQHAKVVPWMRKTEYISTEFNRYGI  
SNEKPEVKIGVSVKQFT EEEIYKDRDSQITAI EKT FEDAQKSI SQHYSKPRVTPVEVMPVFPDFKMWINPCA  
QVIFDSDPAPKDTSGAAALEMMSQAMIRGMMDEEGNQFVAYFLPVEETLKKRKR DQEEEMDYAPDDVYDYKIA  
REYNWNVKNKASKGYEENYFFIFREGDGVYNELETRVRLSKRRAKAGVQSGTNALLVVKHRDMNEKELEAQE  
ARKAQLENHEPEEEEEEMEVEEKEAGGSDEEQEKGSSEKEGESEDEHSGSESDREEGRDEASDKSGSGEDE  
SSEDEARAARDKEE IFGSDADSEDDADSDDEDRGQAHRGSDNDS DSGSDGGGQRSRSRSRSRSASFPFSGS  
EHSAQEDGSEAAA S DSSEADSDSD\*  
>ENSMUSP00000146824\_c.568:A>C\_p.H190P ENSMUST00000207873.2|zfp14-  
203|ENSMUSG00000053985|-|chr7:g.29738415:T>G  
MALAQGLVTFGDVAVDFSQEWEFLDPAQKNLYRDVMWETYSNFI SLDLERSFKTDTSSSDKGICEVYSLQWE  
LIEKIKNLSPPQSGLSDDQECKHKTGLQKEPQEGYFGQLKITSEKVTYEKHSFLSEYQRVQNGEK FYECKEKR  
KTFIRRSTLSQHLRIHTGEKPYKCKEKGQPFQRRAHLIRHHLPTGEKPYECKDCGKAFTVLQELTQHQR LHT  
GEKPYECKEKGKAFRVHQQLARHQRIHTGEKPYECKEKGKTFRQC THLTRHQR LHTSEKLYECKEKGKAFVCG  
PDLRVHQIHFGEKPYACKDCGKSFRICQQLTVHQSIHTGEKPYECKEKGKTFRLRQQLVRHQRIHTHERPYE  
CLECWKTFSSYSQLISHQSIHVGERPYECECGKAFRLLSQLTQHQS IHTGEKPYECKEKRKPFRLLSQLTQH  
RSIHTGEKPYECKDCGKAFRLYSFLSQHQR IHTGEKPYKCKEKGKAFRQSHL TQHQKIHSGT\*  
>ENSMUSP00000146913\_c.568:A>C\_p.H190P ENSMUST00000207072.2|zfp14-  
202|ENSMUSG00000053985|-|chr7:g.29738415:T>G  
MALAQGLVTFGDVAVDFSQEWEFLDPAQKNLYRDVMWETYSNFI SLDLERSFKTDTSSSDKGICEVYSLQWE  
LIEKIKNLSPPQSGLSDDQECKHKTGLQKEPQEGYFGQLKITSEKVTYEKHSFLSEYQRVQNGEK FYECKEKR  
KTFIRRSTLSQHLRIHTGEKPYKCKEKGQPFQRRAHLIRHHLPTGEKPYECKDCGKAFTVLQELTQHQR LHT  
GEKPYECKEKGKAFRVHQQLARHQRIHTGEKPYECKEKGKTFRQC THLTRHQR LHTSEKLYECKEKGKAFVCG  
PDLRVHQIHFGEKPYACKDCGKSFRICQQLTVHQSIHTGEKPYECKEKGKTFRLRQQLVRHQRIHTHERPYE



>ENSMUSP00000127022\_c.583:A>T\_p.D195V ENSMUST00000098433.5|Mrgprx2-  
201|ENSMUSG00000074109|-|chr7:g.48132233:T>A  
MEERNISGRDLRVDNSITYWGTNITAVNESNHTGMSFCEVVSCTMVFLSLIVALVGLVGNATVWLFLGFQMRR  
NAFSVYILNLAGADFLFCFQIGYCFHMLDIDSIPIEIDLFLYLVLNFPYFCGLSILSAISIERCLSVMWPI  
WYHCQRPRHTSAVICTLWVLSLVCSLLEGKECGFLYYS DPGWCKTFVLITATWLVLFVALLGSSIALVIT  
IFWGLHKIPVTRLYVAIVFTVLVFLFGLPYGIYWFLLVWIEKFYYVLPCSIYPVTVFLSCVNSSAKPIIYCL  
VGSIRHHRFORKTLKFLQRAMQDTPEEEECEGEMGSSGRSREIKTIWKGLRAALIRHKEL\*  
>rs236992428\_ENSMUSP00000047775\_c.728:T>CT\_p.A243ins-fs  
ENSMUST00000042318.6|Fs d2-201|ENSMUSG00000038663|-|chr7:g.81202849:A>AG  
MEEEAEESGLGRSAAPKDFHFYHMDLYDSEDRLQLFPGDSSRIRREVTQAEDDRELGDEFVDEHRLGTLGYP  
SYGMRRRDPGREPRDWGEAAEADLGYGGGQGPLDQCQDLREAYRYTHGRASEEYECYVIEEEDEEPPADVF  
CITCKTPVVRTVEKDFDTHKEHEVTPISKALEHAKDEVHKNMCKLEQQIEMENFASHLEEVFITVEENFGRQE  
QNFECHYNGILETLAQKYEEKIQASGGEKERETGSLIRTTGQLWREPRCLQGADGNRRGDVS  
>ENSMUSP00000076687\_c.7:C>T\_p.S3F ENSMUST00000077478.8|Vmn2r73-  
201|ENSMUSG00000070458|-|chr7:g.85525139:G>A  
MFFLIFIFWFLKISYIFCHLSNPRCFWRIKDTKDKLGDKETYCFFSISAKHGYIRNDYFSWNLDKHVTPKTNH  
LIFS VYLAL E EINKNSHILPNISLVVNI ECVLLKYGEK TGLGLKHEEFIPNYCANERRYLIVLTAPIWAVST  
KLGPF L FMSRIPELYCGHFHLP L S DNEQFP HLYQISPKD TSLPLAMVSLV VHFWRWNWIGVIITNDNHGIQFLS  
ELRGETQKQIVCLSVV I I Q T D D I T A Y K E Y H M N Y N K I V M S S A K V V I V Y G D H N S P I K F V L F L W K S Q G I F R I W V S  
V S Q F D M I T P L G D F M L Y S A S G T L I F S H Q Q S E L S G F E K F I K T V K P S N Y S S E F S F A K L W W T Y F R C S S L P P S N C K K L  
K N C P T K T V F R W L F M T P L G M A M S D T C Y N L Y N A I Y A V A H S L H E M L L Q Q V D T W S E N A G K E L E F D S W K M F S I L K T M Q  
F V N P A G D L V N M N Q N L K Q E R E Y D I F Y I M D F Q K D Y G L K M K I G K F S G H L P S H Q Q L Y M S K E M I E W A T D M D Q I L P S I C  
S M P C R P G L R K S P Q E G K D I C C F V C N P C P E N E I S N M T N M D Q C V K C P E D Q Y A N E D H T L C L Q K I V A I L D Y R D P L G K A  
L A G F A L C F C V I T S G V L C I F L K H R E T P I V K A N N Q T L S Y V L L I S L I F C F I C S L L Y I G H P T I V I C V L Q Q S T F A I S F  
T V A A S T I L A K T I T V V L A F K V T V P G R M R W L L V A G A P K Y I I L I C T M I Q L I L C G V W L G T S P P F V D A D L H M V H G H I I  
I V C N K G S V I A F Y F V L G Y M G S I A L A S F T V A F L A R N L P D T F N E A K L L T F S M L V F C S V W V T F I P V Y Y S T K G K T M V A  
V E V F C I L A S S A G L L L C I F A P K C Y N I L L R P G K N S S H M F K K L H A K T E N I I \*  
>ENSMUSP00000156568\_c.7:C>T\_p.S3F ENSMUST00000233729.2|Vmn2r73-  
207|ENSMUSG00000070458|-|chr7:g.85525139:G>A  
MFFLIFIFWFLKISYIFCHLSNPRCFWRIKDTKDKLGDKETYCFFSISAKHGYIRNDYFSWNLDKHVTPKTNH  
LIFS VYLAL E EINKNSHILPNISLVVNI ECVLLKYGEK TGLGLKHEEFIPNYCANERRYLIVLTAPIWAVST  
KLGPF L FMSRIPE I S P K D T S L P L A M V S L V V H F R W N W I G V I I T N D N H G I Q F L S E L R G E T Q K Q I V C L S V V I I I Q T  
D D I T A Y K E Y H M N Y N K I V M S S A K V V I V Y G D H N S P I K F V L F L W K S Q G I F R I W V S V S Q F D M I T P L G D F M L Y S A S G T  
L I F S H Q Q S E L S G F E K F I K T V K P S N Y S S E F S F A K L W W T Y F R C S S L P P S N C K K L K N C P T K T V F R W L F M T P L G M A M  
S D T C Y N L Y N A I Y A V A H S L H E M L L Q Q V D T W S E N A G K E L E F D S W K M F S I L K T M Q F V N P A G D L V N M N Q N L K Q E R E Y  
D I F Y I M D F Q K D Y G L K M K I G K F S G H L P S H Q Q L Y M S K E M I E W A T D M D Q I L P S I C S M P C R P G L R K S P Q E G K D I C C F  
V C N P C P E N E I S N M T N M D Q C V K C P E D Q Y A N E D H T L C L Q K I V A I L D Y R D P L G K A L A G F A L C F C V I T S G V L C I F L K  
H R E T P I V K A N N Q T L S Y V L L I S L I F C F I C S L L Y I G H P T I V I C V L Q Q S T F A I S F T V A A S T I L A K T I T V V L A F K V T  
V P G R M R W L L V A G A P K Y I I L I C T M I Q L I L C G V W L G T S P P F V D A D L H M V H G H I I V C N K G S V I A F Y F V L G Y M G S I  
A L A S F T V A F L A R N L P D T F N E A K L L T F S M L V F C S V W V T F I P V Y Y S T K G K T M V A V E V F C I L A S S A G L L L C I F A P K  
C Y N I L L R P G K N S S H M F K K L H A K T E N I I \*  
>ENSMUSP00000156903\_c.7:C>T\_p.S3F ENSMUST00000233079.2|Vmn2r73-  
204|ENSMUSG00000070458|-|chr7:g.85525139:G>A  
MFFLIFIFWFLKISYIFCHLSNPRCFWRIKDTKDKLGDKETYCFFSISAKHGYIRNDYFSWNLDKHVTPKTNH  
LIFS VYLAL E EINKNSHILPNISLVVNI ECVLLKYGEK TGLGLKHEEFIPNYCANERRYLIVLTAPIWAVST  
KLGPF L FMSRIPELYCGHFHLP L S DNEQFP HLYQISPKD TSLPLAMVSLV VHFWRWNWIGVIITNDNHGIQFLS  
ELRGETQKQIVCLSVV I I Q T D D I T A Y K E Y H M N Y N K I V M S S A K V V I V Y G D H N S P I K F V L F L W K S Q G I F R I W V S  
V S Q F D M I T P L G D F M L Y S A S G T L I F S H Q Q S E L S G F E K F I K T V K P S N Y S S E F S F A K L W W T Y F R C S S L P P S N C K K L  
K N C P T K T V F R W L F M T P L G M A M S D T C Y N L Y N A I Y A V A H S L H E M L L Q Q V D T W S E N A G K E L E F D S W K I L P S I C S M P  
C R P G L R K S P Q E G K D I C C F V C N P C P E N E I S N M T N M D Q C V K C P E D Q Y A N E D H T L C L Q K I V A I L D Y R D P L G K A L A G  
F A L C F C V I T S G V L C I F L K H R E T P I V K A N N Q T L S Y V L L I S L I F C F I C S L L Y I G H P T I V I C V L Q Q S T F A I S F T V A  
A S T I L A K T I T V V L A F K V T V P G R M R W L L V A G A P K Y I I L I C T M I Q L I L C G V W L G T S P P F V D A D L H M V H G H I I V C  
N K G S V I A F Y F V L G Y M G S I A L A S F T V A F L A R N L P D T F N E A K L L T F S M L V F C S V W V T F I P V Y Y S T K G K T M V A V E V  
F C I L A S S A G L L L C I F A P K C Y N I L L R P G K N S S H M F K K L H A K T E N I I \*  
>ENSMUSP00000156619\_c.7:C>T\_p.S3F ENSMUST00000233315.2|Vmn2r73-  
206|ENSMUSG00000070458|-|chr7:g.85525139:G>A  
MFFLIFIFWFLKISYIFCHLSNPRCFWRIKDTKDKLGDKETYCFFSISAKHGYIRNDYFSWNLDKHVTPKTNH  
LIFS VYLAL E EINKNSHILPNISLVVNI ECVLLKYGEK TGLGLKHEEFIPNYCANERRYLIVLTAPIWAVST

KLGPFLEMSRIPEISPKDTSPLAMVSLVVHFRWNWIGVITNDNHGIQFLSELRGETQKQIVCLSVVII IQT  
 DDITAYKEYHMNYNKIVMSSAKVVIVYGDHNSPIKFLVFLWKSQGI FRIWVSVSQFDMITPLGDFMLYSASGT  
 LIFSHQQSELSGFEEKFIKTVKPSNYSSEFSFAKLWWTYFRCSLPPSNCKKLKNCPTKTVFRWLFMTPLGMAM  
 SDTCYNLYNAIYAVAHSLHEMLLQQVDTWSENAGKELEFDSWKILPSICSMPCRPLGRKSPQEGKDICCFCVN  
 PCPENEISNMTNMDQCVPEDQYANEDHTLCLQKIVAILDYRDLGKALAGFALCFVCVITSGVLCIFLKHRE  
 TPIVKANNQTLISVLLISLIFCFICSLLYIGHPTIVICVLQQSTFAISFTVAASTILAKTITVVLAFKVTVP  
 RMRWLLVAGAPKYIILICTMIQLILCGVWLGTSPFFVDADLHMVHGHIIVCNKGSVIAFYFVLGYMGSIALA  
 SFTVAFLARNLPDTFNEAKLLTFMSLVFCSVWVTFIPVYYSTKGKTMVAVEVFCILASSAGLLLCIFAPKCYN  
 ILLRPGKNSHMFKKLHAKTENI I\*  
 >ENSMUSP00000156444\_c.7:C>T\_p.S3F ENSMUST00000233115.2|Vmn2r73-  
 205|ENSMUSG00000070458|-|chr7:g.85525139:G>A  
 MFFLIFIFWFLKISYIFCHLSNPRCFWRIKDTKDKLGDKETYCFFSISAKHGYIRNDYFSWNLDKHVTPKTNH  
 LIFSVMYLALEEINKNSHILPNISLVVNIIECVLLKYGEKTGLGLKHEEFIPNYCANERRYLIVLTAPIWAVST  
 KLGPFLEMSRIPELYCGHFHPLSDNEQFPHLYQISPKDTSPLAMVSLVVHFRWNWIGVITNDNHGIQFLS  
 ELRGETQKQIVCLSVVII IQTDDITAYKEYHMNYNKIVMSSAKVVIVYGDHNSPIKFLVFLWKSQGI FRIWVS  
 VSQFDMITPLGDFMLYSASGT LIFSHQQSELSGFEEKFIKTVKPSNYSSEFSFAKLWWTYFRCSLPPSNCKKL  
 KNCPTKTVFRWLFMTPLGMAMSDTCYNLYNAIYAVAHSLHEMLLQQVDTWSENAGKELEFDSWKMFSLKTMQ  
 FVNPAGDLVNMNQLKQEREYDIFYIMDFQKDYGLKMKIGKFSGHLPSHQQLYMSKEMIEWATDMDQILPSIC  
 SMPCRPLGRKSPQEGKDICCFCVNCPCPENEISNMTSFLCLYICLLFRYGSVCEMSRRSICQ\*  
 >ENSMUSP00000156901\_c.7:C>T\_p.S3F ENSMUST00000233748.2|Vmn2r73-  
 208|ENSMUSG00000070458|-|chr7:g.85525139:G>A  
 MFFLIFIFWFLKISYIFCHLSNPRCFWRIKDTKDKLGDKETYCFFSISAKHGYIRNDYFSWNLDKHVTPKTNH  
 LIFSVMYLALEEINKNSHILPNISLVVNIIECVLLKYGEKTGLGLKHEEFIPNYCANERRYLIVLTAPIWAVST  
 KLGPFLEMSRIPEISPKDTSPLAMVSLVVHFRWNWIGVITNDNHGIQFLSELRGETQKQIVCLSVVII IQT  
 DDITAYKEYHMNYNKIVMSSAKVVIVYGDHNSPIKFLVFLWKSQGI FRIWVSVSQFDMITPLGDFMLYSASGT  
 LIFSHQQSELSGFEEKFIKTVKPSNYSSEFSFAKLWWTYFRCSLPPSNCKKLKNCPTKTVFRWLFMTPLGMAM  
 SDTCYNLYNAIYAVAHSLHEMLLQQVDTWSENAGKELEFDSWKMFSLKTMQFVNPAGDLVNMNQLKQEREY  
 DIFYIMDFQKDYGLKMKIGKFSGHLPSHQQLYMSKEMIEWATDMDQILPSICSMPCRPLGRKSPQEGKDICC  
 FCVNCPCPENEISNMTSFLCLYICLLFRYGSVCEMSRRSICQ\*  
 >ENSMUSP00000156768\_c.7:C>T\_p.S3F ENSMUST00000232965.2|Vmn2r73-  
 203|ENSMUSG00000070458|-|chr7:g.85525139:G>A  
 MFFLIFIFWFLKISYIFCHLSNPRCFWRIKDTKDKLGDKETYCFFSISAKHGYIRNDYFSWNLDKHVTPKTNH  
 LIFSVMYLALEEINKNSHILPNISLVVNIIECVLLKYGEKTGLGLKHEEFIPNYCANERRYLIVLTAPIWAVST  
 KLGPFLEMSRIPELYCGHFHPLSDNEQFPHLYQISPKDTSPLAMVSLVVHFRWNWIGVITNDNHGIQFLS  
 ELRGETQKQIVCLSVVII IQTDDITAYKEYHMNYNKIVMSSAKVVIVYGDHNSPIKFLVFLWKSQGI FRIWVS  
 VSQFDMITPLGDFMLYSASGT LIFSHQQSELSGFEEKFIKTVKPSNYSSEFSFAKLWWTYFRCSLPPSNCKKL  
 KNCPTKTVFRWLFMTPLGMAMSDTCYNLYNAIYAVAHSLHEMLLQQVDTWSENAGKELEFDSWKILPSICSM  
 PCRPLGRKSPQEGKDICCFCVNCPCPENEISNMTSFLCLYICLLFRYGSVCEMSRRSICQ\*  
 >ENSMUSP00000156472\_c.7:C>T\_p.S3F ENSMUST00000232897.2|Vmn2r73-  
 202|ENSMUSG00000070458|-|chr7:g.85525139:G>A  
 MFFLIFIFWFLKISYIFCHLSNPRCFWRIKDTKDKLGDKETYCFFSISAKHGYIRNDYFSWNLDKHVTPKTNH  
 LIFSVMYLALEEINKNSHILPNISLVVNIIECVLLKYGEKTGLGLKHEEFIPNYCANERRYLIVLTAPIWAVST  
 KLGPFLEMSRIPEISPKDTSPLAMVSLVVHFRWNWIGVITNDNHGIQFLSELRGETQKQIVCLSVVII IQT  
 DDITAYKEYHMNYNKIVMSSAKVVIVYGDHNSPIKFLVFLWKSQGI FRIWVSVSQFDMITPLGDFMLYSASGT  
 LIFSHQQSELSGFEEKFIKTVKPSNYSSEFSFAKLWWTYFRCSLPPSNCKKLKNCPTKTVFRWLFMTPLGMAM  
 SDTCYNLYNAIYAVAHSLHEMLLQQVDTWSENAGKELEFDSWKILPSICSMPCRPLGRKSPQEGKDICCFCVN  
 PCPENEISNMTSFLCLYICLLFRYGSVCEMSRRSICQ\*  
 >ENSMUSP00000134377\_c.871:G>A\_p.R291K ENSMUST00000174158.3|Olfr309-  
 202|ENSMUSG00000054054|-|chr7:g.85955448:C>T  
 MMNFSIVSEFMILGLTQKSELQGILFIVFLFIYLVALLGNMLIVVAIIYNTTLHTPMYILLLALAVVDI ICTT  
 SIIPKMLGTMLTSKNSISYGGCMSQLFFFTWSLGAEMVLF TTMAYDRYVAICFPLRYSTIMNHYTCVGLLSIV  
 MAIAVTNSWVHTGLILRLTFCGPNIIDHFFCEIPPLLALSCSPVRVNEVMVYVADITLAVGDFTLTLCISYGF  
 IAAILRIRTTTEGKKKAFSTCSSHLMVVSLYSPVIYTYIRPASSYTFDKDKVVAALYTLVTPTLNPIVYSFKN  
 KEMQSGIKKVF AFLKG\*  
 >ENSMUSP00000061929\_c.871:G>A\_p.R291K ENSMUST00000055690.3|Olfr309-  
 201|ENSMUSG00000054054|-|chr7:g.85955448:C>T  
 MMNFSIVSEFMILGLTQKSELQGILFIVFLFIYLVALLGNMLIVVAIIYNTTLHTPMYILLLALAVVDI ICTT  
 SIIPKMLGTMLTSKNSISYGGCMSQLFFFTWSLGAEMVLF TTMAYDRYVAICFPLRYSTIMNHYTCVGLLSIV

MAIAVTNSWVHTGLILRLTFCGPNIIDHFFCEIPPLLALSCSPVRVNEVMVYVADITLAVGDFTLTCISYGFII  
IAAILRIRTTTEGKKKAFSTCSSHLMVVSLYSPVIYTYIRPASSYTFDKDKVVAALYTLVTPTLNPIVYSFKN  
KEMQSGIKKVFVAFKLG\*

>ENSMUSP00000032967\_c.661:A>G\_p.K221R ENSMUST00000032967.4|Lipt2-  
201|ENSMUSG00000030725|+|chr7:g.99809576:A>G  
MSLFPVVRVWLGRVHYSELLALQEHWLRRLQADPRPGTSLGKAGVLLVCEPAGPVYTGGLRGGLTPEETTRL  
RALGAEVRATGRGGLATFHGPGQLLCHPVLDLRLGLRLRTHVAALEACAVRLCELRLQGARARPPPYTGVM  
LGERKICAIGVRCGRHITSHGLALNCSTDLTWFEHIVPCGLVGTGVTSLSALQRLVTVDEVMPVFLVAFKET  
FRCTLISESDSPS\*

>ENSMUSP00000149045\_c.647:T>A\_p.D216E ENSMUST00000216516.2|Olfr617-  
203|ENSMUSG00000073946|+|chr7:g.103233878:T>A  
MATSTTLNNTNRDIWYTMIGIPGLEIAHIWISIPICSMYIVAIAGNALLLFLIITERSLHEPMLYFLSMLA  
LADIFLSTVTTPKMLAIFWFRAGGISFASCVSQMFFLHFIFVAESAILLAMAFDRYVAICYPLRYTTILTTSV  
IIKMGIAAVIRSFFICFPLIFLVYRLTYCGKSTIRHSYCEHMGIAARLACDSIKVNIYYGVIVALFSTCLEAVL  
IIVSYALILCAVFRIPSRDARLALGTGCGSHVCVILLFYTPAFFSFFAHRFGGHSIPLHVHILLANLYVVVPP  
SVNPIIYGVKTKQIQERVIQVFSGLG\*

>ENSMUSP00000150982\_c.647:T>A\_p.D216E ENSMUST00000215755.2|Olfr617-  
202|ENSMUSG00000073946|+|chr7:g.103233878:T>A  
MATSTTLNNTNRDIWYTMIGIPGLEIAHIWISIPICSMYIVAIAGNALLLFLIITERSLHEPMLYFLSMLA  
LADIFLSTVTTPKMLAIFWFRAGGISFASCVSQMFFLHFIFVAESAILLAMAFDRYVAICYPLRYTTILTTSV  
IIKMGIAAVIRSFFICFPLIFLVYRLTYCGKSTIRHSYCEHMGIAARLACDSIKVNIYYGVIVALFSTCLEAVL  
IIVSYALILCAVFRIPSRDARLALGTGCGSHVCVILLFYTPAFFSFFAHRFGGHSIPLHVHILLANLYVVVPP  
SVNPIIYGVKTKQIQERVIQVFSGLG\*

>ENSMUSP00000040319\_c.647:T>A\_p.D216E ENSMUST00000048265.5|Olfr617-  
201|ENSMUSG00000073946|+|chr7:g.103233878:T>A  
MATSTTLNNTNRDIWYTMIGIPGLEIAHIWISIPICSMYIVAIAGNALLLFLIITERSLHEPMLYFLSMLA  
LADIFLSTVTTPKMLAIFWFRAGGISFASCVSQMFFLHFIFVAESAILLAMAFDRYVAICYPLRYTTILTTSV  
IIKMGIAAVIRSFFICFPLIFLVYRLTYCGKSTIRHSYCEHMGIAARLACDSIKVNIYYGVIVALFSTCLEAVL  
IIVSYALILCAVFRIPSRDARLALGTGCGSHVCVILLFYTPAFFSFFAHRFGGHSIPLHVHILLANLYVVVPP  
SVNPIIYGVKTKQIQERVIQVFSGLG\*

>ENSMUSP00000023934\_c.207:A>G\_p.T70A ENSMUST00000023934.8|Hbb-bs-  
201|ENSMUSG00000052305|-|chr7:g.103476762:T>C  
MVHLTDAEKAASVGLWGKVNADVEVGGEALGRLLVVYPWTQRYFDSFGDLSSASAIMGNKVKAHGKKVIAAFN  
DGLNHLDSLKGTFASLSELHCDKLHVDPENFRLGGMIVIVLGHHLGKDFTPAAQAAFQKVVAGVAAALAHKY  
H\*

>ENSMUSP00000115607\_c.207:A>G\_p.T70A ENSMUST00000153218.2|Hbb-bs-  
203|ENSMUSG00000052305|-|chr7:g.103476762:T>C  
MVHLTDAEKAASVGLWGKVNADVEVGGEALGRLLVVYPWTQRYFDSFGDLSSASAIMGNKVKAHGKKVIAAFN  
DGLNHLDSLKGTFASLSELHCDKLHVDPEN

>ENSMUSP00000023934\_c.192:G>A\_p.G65S ENSMUST00000023934.8|Hbb-bs-  
201|ENSMUSG00000052305|-|chr7:g.103476777:C>T  
MVHLTDAEKAASVGLWGKVNADVEVGGEALGRLLVVYPWTQRYFDSFGDLSSASAIMGNKVKAHSKKVIITAFN  
DGLNHLDSLKGTFASLSELHCDKLHVDPENFRLGGMIVIVLGHHLGKDFTPAAQAAFQKVVAGVAAALAHKY  
H\*

>ENSMUSP00000115607\_c.192:G>A\_p.G65S ENSMUST00000153218.2|Hbb-bs-  
203|ENSMUSG00000052305|-|chr7:g.103476777:C>T  
MVHLTDAEKAASVGLWGKVNADVEVGGEALGRLLVVYPWTQRYFDSFGDLSSASAIMGNKVKAHSKKVIITAFN  
DGLNHLDSLKGTFASLSELHCDKLHVDPEN

>ENSMUSP00000150733\_c.24:A>G\_p.N9D ENSMUST00000216247.2|Olfr681-  
205|ENSMUSG00000095248|+|chr7:g.104770690:A>G  
MTAHKNDTDPGTGVSDFLLNCFVRSVPSWQLWLSLPLSLLFLLAMGANAILLITIRMEASLHEPMLYLLSLLSML  
DIILCLTVIPKVLAIWFWDLRAIGFPACFLQMYIMNSFLAMESCTFMIMAFDRYIAICHPLRYPYIITDQFVV  
KAATFIVLRNVLIPPLIPILSRLHYCGRNVIENICANMSVSRSLCDDVTVNRLYQFAGGWTLGSDLVLIIF  
LSYTLILRAVLRKLAEGAVAKALSTCGSHFILILFFSTILLVVFILTHVAKRKVSSDVPILLNLVHHVIPAALN  
PIVYGVRTQEIQGIKLLKRGW\*

>ENSMUSP00000151022\_c.24:A>G\_p.N9D ENSMUST00000215517.2|Olfr681-  
203|ENSMUSG00000095248|+|chr7:g.104770690:A>G



MTAHKNDTDPGTGVSDFLLNCFVRSQWQLWLSLPLSLLFLLAMGANAILLITIRMEASLHEPMPYLLSLLSML  
 DIILCLTVIPKVLAIWFWDLRAIGFPACFLQMYIMNSFLAMESCTFMIMAFDRYIAICHPLRYPSIITDQFVV  
 KAATFILVRNVLIPLPIPIILSGRLHYCGRNVIENCICANMSVSRSLCDDVTVNRLYQFAGGWTLGSDLVLI  
 LSYTLILRAVLRRLKAEGAVAKALSTCGSHFILILFFSTILLVFIILTHVAKRKVSSDVPILLNLVHHVIPAALN  
 PIVYGVRTQEIKQGIKLLKRGW\*

>ENSMUSP00000149338\_c.24:A>G\_p.N9D ENSMUST00000215564.2|Olfr681-  
 204|ENSMUSG00000095248|+|chr7:g.104770690:A>G

MTAHKNDTDPGTGVSDFLLNCFVRSQWQLWLSLPLSLLFLLAMGANAILLITIRMEASLHEPMPYLLSLLSML  
 DIILCLTVIPKVLAIWFWDLRAIGFPACFLQMYIMNSFLAMESCTFMIMAFDRYIAICHPLRYPSIITDQFVV  
 KAATFILVRNVLIPLPIPIILSGRLHYCGRNVIENCICANMSVSRSLCDDVTVNRLYQFAGGWTLGSDLVLI  
 LSYTLILRAVLRRLKAEGAVAKALSTCGSHFILILFFSTILLVFIILTHVAKRKVSSDVPILLNLVHHVIPAALN  
 PIVYGVRTQEIKQGIKLLKRGW\*

>ENSMUSP00000095760\_c.24:A>G\_p.N9D ENSMUST00000098157.4|Olfr681-  
 201|ENSMUSG00000095248|+|chr7:g.104770690:A>G

MTAHKNDTDPGTGVSDFLLNCFVRSQWQLWLSLPLSLLFLLAMGANAILLITIRMEASLHEPMPYLLSLLSML  
 DIILCLTVIPKVLAIWFWDLRAIGFPACFLQMYIMNSFLAMESCTFMIMAFDRYIAICHPLRYPSIITDQFVV  
 KAATFILVRNVLIPLPIPIILSGRLHYCGRNVIENCICANMSVSRSLCDDVTVNRLYQFAGGWTLGSDLVLI  
 LSYTLILRAVLRRLKAEGAVAKALSTCGSHFILILFFSTILLVFIILTHVAKRKVSSDVPILLNLVHHVIPAALN  
 PIVYGVRTQEIKQGIKLLKRGW\*

>ENSMUSP00000150733\_c.192:T>C\_p.Y65H ENSMUST00000216247.2|Olfr681-  
 205|ENSMUSG00000095248|+|chr7:g.104770858:T>C

MTAHKNDTNPVTGVSDFLLNCFVRSQWQLWLSLPLSLLFLLAMGANAILLITIRMEASLHEPMPYHLLSLLSML  
 DIILCLTVIPKVLAIWFWDLRAIGFPACFLQMYIMNSFLAMESCTFMIMAFDRYIAICHPLRYPSIITDQFVV  
 KAATFILVRNVLIPLPIPIILSGRLHYCGRNVIENCICANMSVSRSLCDDVTVNRLYQFAGGWTLGSDLVLI  
 LSYTLILRAVLRRLKAEGAVAKALSTCGSHFILILFFSTILLVFIILTHVAKRKVSSDVPILLNLVHHVIPAALN  
 PIVYGVRTQEIKQGIKLLKRGW\*

>ENSMUSP00000151022\_c.192:T>C\_p.Y65H ENSMUST00000215517.2|Olfr681-  
 203|ENSMUSG00000095248|+|chr7:g.104770858:T>C

MTAHKNDTNPVTGVSDFLLNCFVRSQWQLWLSLPLSLLFLLAMGANAILLITIRMEASLHEPMPYHLLSLLSML  
 DIILCLTVIPKVLAIWFWDLRAIGFPACFLQMYIMNSFLAMESCTFMIMAFDRYIAICHPLRYPSIITDQFVV  
 KAATFILVRNVLIPLPIPIILSGRLHYCGRNVIENCICANMSVSRSLCDDVTVNRLYQFAGGWTLGSDLVLI  
 LSYTLILRAVLRRLKAEGAVAKALSTCGSHFILILFFSTILLVFIILTHVAKRKVSSDVPILLNLVHHVIPAALN  
 PIVYGVRTQEIKQGIKLLKRGW\*

>ENSMUSP00000149338\_c.192:T>C\_p.Y65H ENSMUST00000215564.2|Olfr681-  
 204|ENSMUSG00000095248|+|chr7:g.104770858:T>C

MTAHKNDTNPVTGVSDFLLNCFVRSQWQLWLSLPLSLLFLLAMGANAILLITIRMEASLHEPMPYHLLSLLSML  
 DIILCLTVIPKVLAIWFWDLRAIGFPACFLQMYIMNSFLAMESCTFMIMAFDRYIAICHPLRYPSIITDQFVV  
 KAATFILVRNVLIPLPIPIILSGRLHYCGRNVIENCICANMSVSRSLCDDVTVNRLYQFAGGWTLGSDLVLI  
 LSYTLILRAVLRRLKAEGAVAKALSTCGSHFILILFFSTILLVFIILTHVAKRKVSSDVPILLNLVHHVIPAALN  
 PIVYGVRTQEIKQGIKLLKRGW\*

>ENSMUSP00000095760\_c.192:T>C\_p.Y65H ENSMUST00000098157.4|Olfr681-  
 201|ENSMUSG00000095248|+|chr7:g.104770858:T>C

MTAHKNDTNPVTGVSDFLLNCFVRSQWQLWLSLPLSLLFLLAMGANAILLITIRMEASLHEPMPYHLLSLLSML  
 DIILCLTVIPKVLAIWFWDLRAIGFPACFLQMYIMNSFLAMESCTFMIMAFDRYIAICHPLRYPSIITDQFVV  
 KAATFILVRNVLIPLPIPIILSGRLHYCGRNVIENCICANMSVSRSLCDDVTVNRLYQFAGGWTLGSDLVLI  
 LSYTLILRAVLRRLKAEGAVAKALSTCGSHFILILFFSTILLVFIILTHVAKRKVSSDVPILLNLVHHVIPAALN  
 PIVYGVRTQEIKQGIKLLKRGW\*

>ENSMUSP00000154052\_c.510:T>A\_p.C171S ENSMUST00000214399.4|Olfr682-ps1-  
 202|ENSMUSG00000059768|-|chr7:g.104775966:A>T

VSEFLMICFPGMQDTQHWLSIILAPLLVLALAAANFVLLFTIHQEASLHEPMPYLLAILSVLDVILCLTVIPKV  
 LLIFWFNMKPIISFVGCFLQMFVMTFLPMESSTFLVMAYDRYVAICHPLRYPSIITEQFVINAAIFIVARNLL  
 ATLPTPVLAARLNVCASNVEENCISANISVAKLSCGDIRLNKLYQFVSVWCLLGSDLVLLILLSYCFILRVVMC  
 QQSGGTVTKALSTCGSHLILILFLTLVFIIFTNKAGKPISEVPILLNLVHHLIIPALNPIVYGVRTQEIKQ  
 GIILKLFK

>ENSMUSP00000154164\_c.540:T>A\_p.C181S ENSMUST00000071242.5|Olfr682-ps1-  
 201|ENSMUSG00000059768|-|chr7:g.104775966:A>T

MVSPNNTGVQVSEFLMICFPGMQDTQHWLSIILAPLLVLALAAANFVLLFTIHQEASLHEPMPYLLAILSVLDV  
 ILCLTVIPKVLILIFWFNMKPIISFVGCFLQMFVMTFLPMESSTFLVMAYDRYVAICHPLRYPSIITEQFVINA

AIFIVARNLLATLPTPVLAARLNYCASNVVENCISANISVAKLSCGDIRLNKLYQFVSVWCLLGSDLVLLILLS  
YCFILRVVMCQQSGGTVTKALSTCGSHLILILFLYFVASLYLHKQGRKEDTVRGTNSS\*CAASSHPTCPQSHC  
VWSTNPGNQAGDYQAIQTL  
>ENSMUSP00000147446\_c.886:A>T\_p.D296V ENSMUST00000210644.3|Olfr707-  
203|ENSMUSG00000069390|-|chr7:g.106490428:T>A  
MGEDNRTSVTEFIFLGLSQDPQTQVLLFFLFLFIYLLTVLGNLLIIVLIHSDPRLHTPMYFFLRNLSFADLCF  
STTTVPQVLVHFLVKKRKTISFAGCSTQIVVLLLVGCTECALLAVMSYDRYVAVCKPLHYSTIMTHWVCVQLAA  
GSWASGALVSLVDTTFTLRLPYRGNNVINHFFCEPPALLKLASADTYSTEMAIFAMGVVILLAPVSLILTSYW  
NIVSTVIQMOSGEGRLKVFSTCGSHLIVVVLFYGSAIFAYMRPNSKIMNEKDKMISVFYSAVTPMLNPIIYSL  
RNKVVKGALRRITLK\*  
>ENSMUSP00000150100\_c.886:A>T\_p.D296V ENSMUST00000214112.2|Olfr707-  
205|ENSMUSG00000069390|-|chr7:g.106490428:T>A  
MGEDNRTSVTEFIFLGLSQDPQTQVLLFFLFLFIYLLTVLGNLLIIVLIHSDPRLHTPMYFFLRNLSFADLCF  
STTTVPQVLVHFLVKKRKTISFAGCSTQIVVLLLVGCTECALLAVMSYDRYVAVCKPLHYSTIMTHWVCVQLAA  
GSWASGALVSLVDTTFTLRLPYRGNNVINHFFCEPPALLKLASADTYSTEMAIFAMGVVILLAPVSLILTSYW  
NIVSTVIQMOSGEGRLKVFSTCGSHLIVVVLFYGSAIFAYMRPNSKIMNEKDKMISVFYSAVTPMLNPIIYSL  
RNKVVKGALRRITLK\*  
>ENSMUSP00000150235\_c.886:A>T\_p.D296V ENSMUST00000213251.2|Olfr707-  
204|ENSMUSG00000069390|-|chr7:g.106490428:T>A  
MGEDNRTSVTEFIFLGLSQDPQTQVLLFFLFLFIYLLTVLGNLLIIVLIHSDPRLHTPMYFFLRNLSFADLCF  
STTTVPQVLVHFLVKKRKTISFAGCSTQIVVLLLVGCTECALLAVMSYDRYVAVCKPLHYSTIMTHWVCVQLAA  
GSWASGALVSLVDTTFTLRLPYRGNNVINHFFCEPPALLKLASADTYSTEMAIFAMGVVILLAPVSLILTSYW  
NIVSTVIQMOSGEGRLKVFSTCGSHLIVVVLFYGSAIFAYMRPNSKIMNEKDKMISVFYSAVTPMLNPIIYSL  
RNKVVKGALRRITLK\*  
>ENSMUSP00000146644\_c.886:A>T\_p.D296V ENSMUST00000208759.2|Olfr707-  
202|ENSMUSG00000069390|-|chr7:g.106490428:T>A  
MGEDNRTSVTEFIFLGLSQDPQTQVLLFFLFLFIYLLTVLGNLLIIVLIHSDPRLHTPMYFFLRNLSFADLCF  
STTTVPQVLVHFLVKKRKTISFAGCSTQIVVLLLVGCTECALLAVMSYDRYVAVCKPLHYSTIMTHWVCVQLAA  
GSWASGALVSLVDTTFTLRLPYRGNNVINHFFCEPPALLKLASADTYSTEMAIFAMGVVILLAPVSLILTSYW  
NIVSTVIQMOSGEGRLKVFSTCGSHLIVVVLFYGSAIFAYMRPNSKIMNEKDKMISVFYSAVTPMLNPIIYSL  
RNKVVKGALRRITLK\*  
>ENSMUSP00000086062\_c.886:A>T\_p.D296V ENSMUST00000088687.3|Olfr707-  
201|ENSMUSG00000069390|-|chr7:g.106490428:T>A  
MGEDNRTSVTEFIFLGLSQDPQTQVLLFFLFLFIYLLTVLGNLLIIVLIHSDPRLHTPMYFFLRNLSFADLCF  
STTTVPQVLVHFLVKKRKTISFAGCSTQIVVLLLVGCTECALLAVMSYDRYVAVCKPLHYSTIMTHWVCVQLAA  
GSWASGALVSLVDTTFTLRLPYRGNNVINHFFCEPPALLKLASADTYSTEMAIFAMGVVILLAPVSLILTSYW  
NIVSTVIQMOSGEGRLKVFSTCGSHLIVVVLFYGSAIFAYMRPNSKIMNEKDKMISVFYSAVTPMLNPIIYSL  
RNKVVKGALRRITLK\*  
>ENSMUSP00000033342\_c.81:G>A\_p.A28T ENSMUST00000033342.7|Eif3f-  
201|ENSMUSG00000031029|+|chr7:g.108533720:G>A  
MASPAVPANVPPATAAAAPAPVVTAAPTSAPTSTPAPTAAATPAASPAPVSSDPAAVAAPAAPGQTPASAPAP  
AQTAPASQPGPALPGPFPGGRVVRHLHPVILASIVDSYERRNEGAARVIGTLLGTVDKHSVEVTNCFVPHNES  
EDEVAVDMEFAKNMYELHKKVSPNELILGWYATGHDITEHSVLIHEYYSSREAPNPIHLTVDTGLQHGGRMSIKA  
YVSTLMGVPPGRTMGVMFTPLTVKYAYYDTERIGVDLIMKTCFSPNRVIGLSSDLQOVGGASARIQDALSTVLQ  
YAEVDLSGKVSADNTVGRFLMSLVNQVPKIVPDDFETMLNSNINDLLMVTYLANLTQSQIALNEKLVNL\*  
>ENSMUSP00000051263\_c.1269:G>GC\_p.G424ins-fs  
ENSMUST00000059390.13|Vps351-  
202|ENSMUSG00000030982|+|chr7:g.118379484:G>GC  
MASGAGPSFPGCEKRGWTRKTGDHVTGKMAVFPWHSRNRNYKAEELASCRLETVPLECGDYHPLKPIITVTESKT  
KKVSRKGSTSSTSSSSSSSIDPLSSVLDGTDPLSMFAATS DPAAATGTVTDS SRKKRDKDENS FVGPDFEPWA  
NKRVEILARYTTTEKLSINLFGSEKGRGGAAASAMSEKVRTRLEELDDFEEGSQKELLNLTQQDYVNRIEEL  
NQSLKDAWASDQKVKALKIIVIQCSKLLSDTSVIQFYPSKFLVITDILDITFGKLVYERISSMCVDSRSALPDHF  
SPENVNDTAKETCLNWFKIASIRELIPRFYVEASILKCNKFLSKTGI SECLPRLTCMIRGIGDPLVSVYARA  
YLCRVGIEVAPHLKESLNKNFFDFLLTFKQIHGDTVQNQLVAQGVVELLSYLPYSPAMALDLPVCLLPRSRGF  
ADGDDGKM  
>ENSMUSP00000102163\_c.1197:G>GC\_p.G400ins-fs ENSMUST00000106553.8|Vps351-  
204|ENSMUSG00000030982|+|chr7:g.118379484:G>GC

VTGKMAVFPWHSRNRNYKAELASCRLETVPLECGDYHPLKPI TVTESKTKKVSRRKGSTSSTSSSSSSSSVIDPL  
SSVLDGTDPLSMFAATSDPAATGTVDSSRKKRDKDENSVFGPDFEPWANKRVEILARYTTTEKLSINLFMGS  
EKGRGGAASAMSEKVRTRLEELDDFEEGSQKELLNLTQQDYVNRIBELNQLSKDAWASDQKVKALKI VIQCS  
KLLSDTSVIQFYPSKFVLTITDILDTFGKLVYERISSMCVDSRSALPDHFS PENVNNDTAKETCLNWFVKIASIR  
ELIPRFYVEASILKCNKFLSKTGI SECLPRLTCMIRGIGDPLVSVYARAYLCRVGIEVAPHLKESLNKNFFDF  
LLTFKQIHGDTVQNQLVAQGVVELLSYLPLYSPAMALDLPVCLLPRSRGFADGDDGKM  
>ENSMUSP00000033280\_c.480:G>GC\_p.G161ins-fs ENSMUST00000033280.14|Vps351-  
201|ENSMUSG00000030982|+|chr7:g.118379484:G>GC  
MLLAGHGKLVYERISSMCVDSRSALPDHFS PENVNNDTAKETCLNWFVKIASIRELIPRFYVEASILKCNKFLS  
KTGISECLPRLTCMIRGIGDPLVSVYARAYLCRVGIEVAPHLKESLNKNFFDFLLTFKQIHGDTVQNQLVAQGV  
VELLSYLPLYSPAMALDLPVCLLPRSRGFADGDDGKM  
>ENSMUSP00000044177\_c.1377:C>T\_p.Q460\* ENSMUST00000047025.15|Otoa-  
201|ENSMUSG00000034990|+|chr7:g.120724700:C>T  
MSQGPRTC SLLLVL LLSHGGAYQREPSRQDLHPLLQKMAEEIEG SYLNALLDLTLFERSHVTADLSHRVL  
AYLNSKNVAFTIPSLQAVMEAHLEQYLYQPQKLEDLRATDNQQFHTAMKCLEDEKWKHLDLEDVVINLGD  
DEALQSPGVNRSFLITLERC FQVLNALECEVEVLGRVLRGSSGSFLQPDITERLPQDLHEDAFKNLSAVFKDL  
YDQTS AHTQRALYSWMTGILRTPFNVT DGSVSWVAEKLWILGRYMVHLSFEEIMNISPIEIGLFI SYDNATK  
QLDMVYDITPELAQAFLEIRICSSFDVRNISTIHRLGLLVCFYDGLELLDATALAQVLLHQMLKCSRLRGFQAG  
VQKLANLLDIATENQTLNETLGSLSDAVVGLTSSQLESLSSDAVHSAISTLNQVTGWGRSQIVILSAKYLAQ  
EKVLSFYNVCMGVLLAGVGT\*AFYSMDHKDLWQVLRSPSLQDMSDLSPVQQQVGLKLM EAEDATSGIAEVP  
RALFKEVSLYDLWKE SRFNATVLKAKELRRSQALFLYEF LGKTERPEELLSAGQLVKGVP CSHIDAMSDHLF  
LALFQYFDNNFSLSPDQVNCLAWKYWEVSRSSMPPFLATLPSRFLSSI PPSRCVRFLISLGRRLETLVLD  
SDKRSVVVRKVQQCLDGVIADEYTVDIVGHLLCHLPASFIERGISPRAWAAALHGLRSCTALSSEQKAAVRVR  
LLEQWGPENWTAETTKDLAPFLAFFSGDELHTVATKFEILQQTASKMVGVL LKPEFLWAVFESVQNSSNES  
PSFDPTFGCHGVVTPSSDDIFKLAEANACWDPEVLLCMEEDTFIRNVELLGA VKGFSRAQLMALKEKAIQVWD  
LPSRWKEHHIVSLGRIALALSESELEQLDLSSIDTASLQQTETWTPGQAKSILQAFLEDSSGYGIQDLKSFHL  
VGFGPTLCAMPDIEIQLIKTSEFRAVVARIGTLFCSTPVLGFKKKA EVVFGRPTEWTS SIIQELGTIAAGIT  
KAELRMLNKELMTYFQPSAIRCLPGEVFKELSTEQIASLGPQNAASVTHSQRLQLSSAQLQSLQRALDGA KTH  
SWQTDPLSSSPTWPASTGSPTEGPASQALWLGC TLLLLTAKS\*  
>ENSMUSP00000114873\_c.195:C>T\_p.H66Y ENSMUST00000130498.2|Bo1a2-  
203|ENSMUSG00000047721|+|chr7:g.126295761:C>T  
MELSADYLREKLRQDLEAEHVEVEDTTLNRCATSFRVLVVS AKFEGKPLLQRHRLVNECLAEELPYIHAF EQK  
TLTPEQWTRQRE\*  
>ENSMUSP00000035535\_c.148:T>C\_p.L50S ENSMUST00000037248.10|Hirip3-  
201|ENSMUSG00000042606|+|chr7:g.126461855:T>C  
MAPGDEM RKFTRSFFRACPDLS SVTHAIVRQKFLIHVGRDHLEPEEKQASKRLVEEELPKMQADAGTREGKPD  
FIKVKRSPAPCSDPKKKRFRFNSESESSSSPSSPDGSGPSTKNRTTKKTC LRRALKKAVESTDEDHQTD LDAK  
MGLEESSEGEAE GSVRSKGVTEEEEDMKQE QKQVRKQAGAKDKQVPLKADRQVREESGSSEEEAVLQRAKV  
EGSTGANCQE ESEESGEESPAKKKELSEPRSRSNRAERTAREKRSYKQKSRPGRPTGGLRDSEAEKEGGTVGS  
GDSSEEGEAKEGGTVGSGDSSEKGEAEKEEGTVGSGDSSEEGEEH SVKRKSKVVRTQTESGRRQNTSSRDDS  
STQE QAAAQGTTKSGSLGSSNGDS DTEREVSDSQAGQNTKEERKSRSSNKSSKNGQARS C SSSSDSSPEPTGQ  
K GKARSSSSSSSDSGPEPTGRKAASRCGEDHPAVARLKRYIRACGAHRNYK KLLGSCSSHKARLSVLR AELEAL  
GMKGNPSLEKCRALKLQREAAEVAALDVANIISSTGRPRRRNAWNPSGEGTSPGETYRRTLDSEEEQPRQAP  
PDWSHMRDIISSDGSS\*  
>ENSMUSP00000052641\_c.3025:A>C\_p.E1009A ENSMUST00000050383.8|zfp646-  
201|ENSMUSG00000049739|+|chr7:g.127480850:A>C  
MEDMPLSFSCSDCQRHFPNLPELARHREL RHSSAKQDGEADGIPHPYGSHPENLANHQRNHETLFFPCTTCG  
KDFS NR LALQSHMRTHAPESHRRHGPPHAME TAPHLGSETMATDSWGQRLGSGEGWENQTKLVRETHDWESGA  
DPRAASGTWEDPPTKQRQGLEMQPDSKGGTADWVPVAVSSEGASPLPTPASNLLSNLEQYLAESV VNFTEAQEP  
TEPLPTEGERKYRCSECGKYKHAGSLTNHRQSHTLGIYPCSI CFKEFSNLMALKNHSRLHAQYRPHYCPCP  
RAFRLPRDLLEHQQSHEGLKQE QPWEDKEMPTTNGHADERSWGQLSKTGMLNGSGELSSSGQLEDGGSE EYRP  
FCCGDCGRTYRHAGSLINHRKSHQTGIYPCSICSKQLFNAAALKNHIRAHRHPRQGAGEGGQSSVSTAL TSA  
ENTPKVDEVPTASLDHRPYKCNCEGRAYRHRGSLVNHRSHTRTGEYQCSLCPRKYPNLMLRNHVRVHCKATR  
RSTDPGTEGSPSPVKKEQHDPVGM EAAFHGDEEHACKREEEATSNPMSMADRTVPQVCSICGMLFEDLKSLEHH  
SVTHREGEKSRDSTVSPTRTFACQDCGKSYRHSGLINHRQTHQTGDFSCGACAKHFHTMAAMKSHLRRHSR  
QWNRRRQKQDSGTGEVATLPPGGAWTLKLENDEDPDSSQDPLGESPCETEDNLERDGDCLQAGSRGNECVLKR  
EEACFLGDKEGTEEGLEEREACFLDDLGT PGDECNETGFCGGLPGMDSDRKRGICHSDSSSHPADADTVW KAA  
ATHTCSDCGDSFSHAAGLLSHRSCHPPGIYQCSLCPKEFDSL PALRSHFQTHRPGEVASAQPF LCCGMIFF

GRTGYRRHLRQAHGASAMTEGSEEEEEEGTAETASTHSPPLQLSEAE LLNQLQREVEALDGAGYGHICGCCGQT  
YDDLGLSLERHHQSQSSSNRTENVP SHLEGAGDATEMVADHGFEGTVTSVSEEGGDIKSEAGVGGTVADSLCMQ  
AGESFLESHRPPFCQNCQCGKTYRHGGS LVNHRKIHQTGDFICPVCSRCPNLAAYRNHLRNHPRCKGSEPMQ  
PISEAGGCSEPNAAEAGQEQA VIGQLQEELKVEPLEELAGVKEEVWEGTAVKEEELEQELETGCQTEVTSER  
PFCEVCGRTYKHAGSLINHRQSHQ TGHFGCQACSKGFSNLMSLKNHRRIHADPRQFRCSECGKAFRLRKQLA  
NHQRVHAERRRSRGTQKLTREDRPFR CGQCGRTYRHAGSLMNHQCNPEASRYSCPFCKTYSNR TALKDHQRV  
HSDSQRRRQSGCPQRAAAVRCTLCGCGFSGGGSLEQHLQEHEDTKLEVASGQGGQHATEGSEENLDDWGLEGR  
SDGTEVLQVEHETKRPGGHSQSPSPACSGGTESTQQVGKVDGSGQDRGQMNHNGAWVLQDQLTKPEGKLEDT  
VSRNPCHLSESQSNGPTLRYRDSWKGADSGS QLQPESHCCSQCGKAYCQPDG LLNPSINGKDCHICLLCSKEF  
LNPVTEIHNHTTAQRFACSNCSKVCE SHSELATHMKTHAVEHSQMSGQMEKTRGPQAGMAE VGGPPGPKAQE  
APSELPGDPEENGVPANGGQGIHFPA AEDKERPFCCAQCGRSYRHAGSLLNHQKAHTIGLYPCSLCPKLLPNL  
LSLKNHSRTHTDPKRYSCNICGKA FRTAARLQGHGRVHAPQEGPFTCSHCPRRFRHRISFLRHQQQHQE EWPV  
SSSGASVAPAASREDSSTASLPNPSQW PADLSLSL\*

>ENSMUSP00000145675\_c.2368:A>C\_p.E790A ENSMUST00000206340.2|zfp646-  
204|ENSMUSG00000049739|+|chr7:g.127480850:A>C  
XEPLPTEGERKYRCSECGKTYKHAGSLTNHRQSHTLGIYPCSI CFKEFSNLMA LKNHSRLHAQYRPHYCHPCP  
RAFRLPRDLLEHQSHHEGLKQEQPWEDKEMPTTNGHADERSWGQLSKTGMLNGSGELSSSGQLEDG GSEYRP  
FCGDCGRTYRHAGSLINHRKSHQ TGIYPCSI CSKQLFNAAALKNHIRAHHRPRQGAGEGGQSSVSTALTSA  
ENTPKVDEVPTASLDHRPYKCN ECGRAYRHRGSLVNHRHSHRTGEYQCSLCPRKYPNLMALRNHVRVHCKATR  
RSTDPGTEGSPSPVKKEQHDPVGM EAAAFHGDEEHACKREEEATSNPSMADRTVPQVCSICGMLFEDLKSLEHH  
SVTHREGEKSRDSTVSPTRTFACQDCGKSYRHSGSLINHRQTHQTGDFSCGACAKHFHTMAAMKSHLRRHSR  
QWNRQRQKQDSGTGEVATLPPGGAWTLKLEND EDPDSSQDPLGESPCETEDNLERDGDCLQAGSRGNECVLKR  
EEACFLGDKEGTEEGLEEREACFLDD LGTPGDECNETGFCGGLPGMDSDRKRGICHSDSSHPADADTVWAAA  
ATHTCSDCGDSFSHAAGLLSHRSCHPPGIYQC SLCPKEFDSL PALRSHFQTHRPGEVASAQPFLCCLCGMIFP  
GRTGYRRHLRQAHGASAMTEGSEEEEEEGTAETASTHSPPLQLSEAE LLNQLQREVEALDGAGYGHICGCCGQT  
YDDLGLSLERHHQSQSSSNRTENVP SHLEGAGDATEMVADHGFEGTVTSVSEEGGDIKSEAGVGGTVADSLCMQ  
AGESFLESHRPPFCQNCQCGKTYRHGGS LVNHRKIHQTGDFICPVCSRCPNLAAYRNHLRNHPRCKGSEPMQ  
PISEAGGCSEPNAAEAGQEQA VIGQLQEELKVEPLEELAGVKEEVWEGTAVKEEELEQELETGCQTEVTSER  
PFCEVCGRTYKHAGSLINHRQSHQ TGHFGCQACSKGFSNLMSLKNHRRIHADPRQFRCSECGKAFRLRKQLA  
NHQRVHAERRRSRGTQKLTREDRPFR CGQCGRTYRHAGSLMNHQCNPEASRYSCPFCKTYSNR TALKDHQRV  
HSDSQRRRQSGCPQRAAAVRCTLCGCGFSGGGSLEQHLQEHEDTKLEVASGQGGQHATEGSEENLDDWGLEGR  
SDGTEVLQVEHETKRPGGHSQSPSPACSGGTESTQQVGKVDGSGQDRGQMNHNGAWVLQDQLTKPEGKLEDT  
VSRNPCHLSESQSNGPTLRYRDSWKGADSGS QLQPESHCCSQCGKAYCQPDG LLNPSINGKDCHICLLCSKEF  
LNPVTEIHNHTTAQRFACSNCSKVCE SHSELATHMKTHAVEHSQMSGQMEKTRGPQAGMAE VGGPPGPKAQE  
APSELPGDPEENGVPANGGQGIHFPA AEDKERPFCCAQCGRSYRHAGSLLNHQKAHTIGLYPCSLCPKLLPNL  
LSLKNHSRTHTDPKRYSCNICGKA FRTAARLQGHGRVHAPQEGPFTCSHCPRRFRHRISFLRHQQQHQE EWPV  
SSSGMWLGRGLRGRSRRRWAQRRESMARSR\*

>ENSMUSP00000123566\_c.262:A>G\_p.D88G ENSMUST00000126662.2|Gm21974-  
201|ENSMUSG00000030804|-|chr7:g.127492558:T>C  
XDVGTAISCSRVFSSRWGRGFLVEHMLGADSVLNQSN SIFGCLFYTLQ LLLGCLRGRWASILLVLSLVSVA  
GSVYLAWILFFVLYGFCIVCITTYA INVGLMLLSFQKVPEHKTKKH\*

>ENSMUSP00000033074\_c.388:A>G\_p.D130G ENSMUST00000033074.8|Vkorc1-  
201|ENSMUSG00000096145|-|chr7:g.127492558:T>C  
MGTTRWSPGLVRLALCLAGLALS LYLALHVKAARARDENYRALCDVGT AISCSRVFSSRWGRGFLVEHMLGAD  
SVLNQSN SIFGCLFYTLQ LLLGCLRGRWASILLVLSLVS VAGSVYLAWILFFVLYGFCIVCITTYA INVGLM  
LLSFQKVPEHKTKKH\*

>ENSMUSP00000145795\_c.241:A>G\_p.D81G ENSMUST00000206053.2|Vkorc1-  
203|ENSMUSG00000096145|-|chr7:g.127492558:T>C  
MMGRLEEAGWGRGFLVEHMLGADSVLNQSN SIFGCLFYTLQ LLLGCLRGRWASILLVLSLVS VAGSVYLAW  
ILFFVLYGFCIVCITTYA INVGLMLLSFQKVPEHKTKKH\*

>ENSMUSP00000112542\_c.184:A>G\_p.D62G ENSMUST00000119922.2|Vkorc1-  
202|ENSMUSG00000096145|-|chr7:g.127492558:T>C  
MLGADSVLNQSN SIFGCLFYTLQ LLLGCLRGRWASILLVLSLVS VAGSVYLAWILFFVLYGFCIVCITTYAI  
NVGLMLLSFQKVPEHKTKKH\*

>ENSMUSP00000158736\_c.52:A>G\_p.K18R ENSMUST00000238294.2|D7Ert443e-  
211|ENSMUSG00000030994|-|chr7:g.134100653:T>C  
MVSDLVKRGWLPSQRRARVCFIHTCPSLKVTEQPASGYEPEELRSFDS PKDSYPFTYKSRL LAPRLHTCYST  
NDQIALKNLQSDVTERKLD FSKETLASQNTRMISPVVISRLIDEK KSMENGAILPQAIAQPQLCPTK PALARR

DGVSMHRRFALSPDRLGILTPSDDQGLETEPLSTGDNLKGKSHSGFSSITITARRVGPASSLVWDTFRDPLC  
 PKCKAKDALFQEPVLAGDAHLQHNRPFTCTESPSNGSVEGMKVFQAHSRLSARQDYVWVHTNDNEDSFSSD  
 NSPSRKVPLVFSSCVHFRV  
 >ENSMUSP00000128276\_c.6079:C>A\_p.S2027\* ENSMUST00000165147.3|Muc5b-  
 201|ENSMUSG00000066108|+|chr7:g.141413135:C>A  
 MGSRNWSWALVWASVALLMVWPAESQQAELSSEHLELTGDSQRVYSDSISSSSTRHVTFPIPIITVFPSMSALH  
 LAHNGRVCSTWGFDFHYKTFDGDVFRFPGLCNVYFSSSHCGATYEDFNIQLRRGLEGSRPTVTYVLLRAQGLVIE  
 LSNQSVLVNNGHREKLPYSRAGLLMEKSSGYVKISIRLVLTFLWNEEDSALLELDISKYINQTCGLCGDFNGLPA  
 VSEFYTHNTRLTPVQFGNLQKLDGPTQCQDVLPSAVSNCTDTEIDICRRTLLGPAFDKCTALVDVSMYLDACV  
 QDLRCRCPTPCPATFAEYSRQCAHAGGYPQNWRHPDLCNWTCPFNMEYRECSSPCVDTCSNPQRSQLEDHCMD  
 GCFCPPGTVLDVDRHLGCLPLEQCHCTHGGRIYAPGESFNNTSCRSCCTCFGGLWKCKDLPCPGTCSVQGGSHIF  
 TFDEKLYNVHGDCSIILTKKCADSSFTVLVLDLRKCGVTDTENCLKAVTLNLSGDTVIRIQVNGAVFLNSIFT  
 QMPLSAGNITIFKPSFFIIVQTMGLQLQVQLVPLMQVFRVLRDRSYQGMCGLCGNFNQADDFALSGVV  
 EGTGAAFSNTWKTQASCPNSKNTYEDPCSYSVENENFAREWCSMLTESSGVFSACHATVSPVPFYSNCLFDTC  
 NCENSEDCMAALSSYVFACAAKGVLLSGWRDKVCYKYTNNPCQTKGYFYSVSSCQPTCRSLSEADVTCVVPF  
 VTVDGCTCPEGTFLNDKDHCVPEECPYFHGTVVAPREVVDNGVVCSTNGKLTCLGALMQKSTECQAPMV  
 YLDCNNASVGHGHAELKSCHTLDVECFSTQCVSGCVPSGLVADGNGGCIAEEDCPCIHNEVTYRPEIIRV  
 DCNNCTCKNRRWECTNKPCMGACVAYGDGHFVTFDGERYIFEGSCEYTLAQDYCRGNTSTNGTFRIVTENVPC  
 GTTGTTCSTIKIFVESYELILHEGNFKVVEQGPSGDPYKIRFMGIFLVIEIRSGIVVSWDRKTSVFRVRLQQ  
 HYKGRVCGLCGNFDDNAINDFTTRSQSVVGDVLEFGNSWKFSPPCPDAPVPKDPCIANPYRKSWAQKKCSIIN  
 SATFAACHSQVDSTKYEACVHDCACDSGGDCECFCTAVAAAYAQACRDVGVCLSWRTPDICPLFCDYNNPHG  
 ECEWHYQPCGAPCLKTCRNPTGHCLVLDLPGLEGYPCQPASQPFNEDQMKCVAQCGCYDDNGNYHDIGTQVP  
 TAENCQSCLECTPGGLQCVYNLTACTCTYEGRTYNYNDVVYNTTDGLGACLVAICKDNGTIARTTEVCHEVPST  
 TPFTFTTTLAPLATNGSASTVSTVCVHEVCQWSIWYDESHPEAGMSGGDFETFENLRKKGHQVCQTPVGIETR  
 AVKFPMSDLEKLGQKVNCDPSSGLSCFNSEQSPPLCHDYELRVLCCDYVPCGSSLTGISTTSPQPDTSRRPS  
 SPTLTHTASSEQSRTWREKKTSVDKSSSRQTVTPTNSRLTSTSMSSASSLPLSNNGDIETIYENIRANGEKI  
 LSRRTAVFTSQTSTRPSTVQPISSPETSSTTQPCQWTKWIDVDYVSSSINGGDIETIYENIRANGEKI  
 CEKPDQDIRCMAQNHGPNVDELGQKVKCDVSSGLVCYNKDQGGTFQMCYNYLIKVLCCSVSHCQGSTTPEGSV  
 STTETATSTPQTLSKPLPNTSSFETWSPSGPTTSMSEASEMPTFWTLRTSVSSPPTTPLTVTSVSTQHPKSLE  
 SSGSPSVVTARSTSQGYSLPSSPHTTNSLSATTSKASLSSMTTISTSLTTPGPSSPPHGGTTTHPVTTASTT  
 RAVTETLSSRPHTKTTSELPTVSSASSTAGPGTQTFSTTCQPQCQWTKWIDVDYVSSSINGGDIETIYENIRAN  
 GEKICEKPDQDIRCMAQNYPGVNDKLGQKVKCDVSSGLVCYNKDQGGTFQMCYNYLIKVLCCSVSHCQGSTT  
 EGSVSTTETTTATPQTLSKPLPNTSSIETWSPSGPTTSMSEASEMPTFWTLRTSV\*SPPTTPLTVTSVSTQHP  
 KSLESSGSPSVVTARSTSPGHSQPPSSPYATNSLSATTSKASLSSMTTISTSLTTPGPSSPPHGGTTTHPVTT  
 ASTTRAVTETLSSRPHTKTTSELPTVSSVSSTAGPGTQGTGSTRPNTVTQPASSPETSSTTCQPQCQWTKWID  
 VDYVSSSINGGDIETIYENIRANGEKICEKPDQDIRCMAQNHGPNVDELGQKVKCDVSSGLVCYNKDQGGTFQ  
 CNYNYLIKVLCCSVSHCQGSTTPEGSVSTTETTTATPQTLSKPLPNTSSIETWSPSGPTTSMSEASEMPTFWTL  
 RTSVSSPPTTPLTVTSVSTQHPKSLESSGSPSVVTARSTSPGHSQPPSSPYATNSLSATTSKASLSSMTTIST  
 SLTTPGPSSPPHGGTTTHPVTTASTTRAVTETLSSRPHTKTTSELPTVSSVSSTAGPGTQGTGSTRPNTVTQ  
 ASSPETSSTTCQPQCQWTKWIDVDYVSSSINGGDIETIYENIRANGEKICEKPDQDIRCMAQNHGPNVDELGQ  
 VKCDVSSGLVCYNKDQGGTFQMCYNYLIKVLCCSVSHCQRSTTPAGSAPTTGTAPTATSGTATHTSWPASSMP  
 TSTTESPSSSGKTTILTASSLATGTPRETQTSLLTGLSSALTTGTTSTGCKSQCTWTDWLDSDKPPQPGQ  
 FEGDIETYYHIQNKTKIKICKKPVIECEAVLFPNISFQKLGQEVVENVDFGLICRNSKQSDNQICFNYHIRV  
 LCCEEDTSCISTTGLLSTSTAPGFPSTVSTSTSKLPSEEPVSTSTSTSRPSTPRTEKIVSIATARTTG  
 SFPVSSLSTFPASPTSLPTSEEPHSGKPTSSWTASSNVPTAKPTTSTGRQFPRTKTTLWNSLPSSTPTMA  
 TRSIHPISTMTTKNPQTLVTSIDSKSNSMLPSRPHITASSVSTSGSQISKYSSTSLTTAGPSSPPHGGTT  
 THPVTTASTTRAVTETLSSRPHTKTTSELPTVSSVSSTAGPGTQGTGSTRPNTVTQPVSSPETSSTTCQPQCQ  
 WTRWINVDYVSSSINGGDIETIYENIRANGEKICEKPDQDIRCMAQNYPGVNDKLGQKVKCDVSSGLVCYNKDQ  
 GGTQKMCYNYLIKVLCCSVSHCQGSTTPEGSVSTTETASSIPQTLSSKPLPNTSSFETWSPSGPTTSMSEASEM  
 PTFWTLRTSVSSPPTTPLTVTSVSTQHPKSLESSGSPSVVTARSTSQGHSLPSSPHTTNSLSATTSKASLSS  
 MTTISTSLTTEPSSPPHGGTTTHPVTTASTTRAVTETLSSRPHTKTTSELPTVPSASSTAGPGTQGTGSTRP  
 STVTQPASSPETSSTTCQPQCQWTKWIDVDYVSSSINGGDIETIYENIRANGEKICEKPDQDIRCMAQNHGPNV  
 DELGQKVKCDVSSGLVCYNKDQGGTFQMCYNYLIKVLCCSVSHCQGSTTTPGSAPMTGSATTATQTLSSMPLP  
 NTSLTVTSPHSASITAEATSTETSSPRSVSSIHITPKIFPETLQSTGLTTQOTSSTGIATWSMLTGTAGTVSS  
 TSLSTLESTTGITEVSTSMPTSTLPTVTNATTPQGTTLCPCKKTEWFDVDSPTSGSVKGMETIYENIR  
 ASGKTLCAPEKIECRAENYPAVSIDKVGQVVCNLETGLVCKNEDQKDDFKMCFNYNIRVLCDDYSHCPPTT  
 TYTTIKSPLAPFTTSVSSSMESTFQTRNPASPSGPSTQASTWSTLPSGCTPRCKWTEWFDADYPNPGRGGD  
 FEVYAVFREVGYIFCDQPKDIECRSEKEPDRPLETLEQVVCQDVRFLICKNINQSGPLQYCDNYHVRLCCD

NYSHCTSSPMATMSTALSSSHLPSTHTSLALNNTTFFPGLSSSSSEPHSSSLMSTHTSTMLTTETSPIATGPTV  
 APSSTSGTPYTPKVPSSQVTFVSTAFSSVSTPRPVFSSHASSPSPFCQAFGQLFLPGDIIYNKTDGAGC  
 QFYAICNQYCDVDRFQGTCPSSSPMSSTTVPLPPLLPGCDNAIPPRQVNESWTLENCTVARCQGNQIILLE  
 PEPVDNVTCANRHLPIKVVDQEPCHFHYECECFCSGWGHSYLTFDGTSYTFLDNCTSVLMREIHPRHGNSI  
 LAHSYYCGATTNVTSCPRALSVYYSMEIILTISTTESGKDESLIWDQMWIRSGFSKNGVTVSLGATTMSV  
 NISTIGTIITFDGNIFQIWLPHYRYSNTEGQCGTCTNSQIDDCRRPDGTIASDCQDMAKEWLVPGNSSSSCL  
 AQPSPLPSTTPQTPVSSSTLTSTPCPSAPLCELMLSQVFAECHRLIPPDAFFRSCVSDHCNANITDMLCQSLEA  
 YAALCRAQGVCTNWRNATGGGLDLSCPPTKEYRPCGPHLPASCNSRTQDSTTGMLAEGCFCEPENQLFNSRMD  
 ICVSECPVGDGLPKFPGEHWISNCQACVCEPGSVSVQSEFVKCEAQDKPPQCTEAGFVTVWPSADNPCCP  
 ETLCVCNSTTCPKSLPTCEPGYELVQTHENS SCCPSYSCRPKLCTYNDTIYGVGTTFFGGPCHTCTCLSDGDQ  
 EPKVECKETNCTTSCPPQGFYTLVPEQCCGECLQNACTPEGHAVQPNETWVNSPVDNCTAYHCAENGYYVL  
 TPIPTSCPDVSNCTGTLRKTGCCYSCKEKDSSTCQVHVNATVLRKGCETE VNITFCGEGSCSGISKYSMEAQA  
 MERQCTCCQESKVHDAVVMQCPDGTVIQHTYTHIDECNCAPACSSLPGTSMIAS\*  
 >ENSMUSP00000096508\_c.457:c>T\_p.T153I ENSMUST00000098909.5|4930467E23Rik-  
 201|ENSMUSG00000096265|+|chr8:g.19783749:c>T  
 MEEEINYDSQTMNIPRRRRWYTHLWRSCLGLRCMHPPQKKKYPYLYLIGYDPIGQLQRAASVGDLDLDTTEKLIHS  
 SQHHVDESRRKRTSLHYACAHNHPDVVTLLENNSSINIRDDDEGCTPLIKATQRDNVDCASVLLTHNADPNL  
 IDSSGNIAFHHAISRGNIRIVKMLLEHNVDIEAKTEYGLTPLQLATFEQKPEMVEFLAAKCAKSVTPSWSPS  
 PTVSPCPSSTSPSSLGLPVCNPGTSSLSSEDRKSSSARRIKLSTGSSAQRTVEVKHVRFNEEIILYFKEERPLS  
 CEARPPGQLKSILKNTVQYNTVNEKITRRTSLWCSKAEDVRYTSCIKVKCFVSKSSFL\*  
 >ENSMUSP00000081041\_c.1410:T>G\_p.W471G ENSMUST00000084027.13|Fgfr1-  
 201|ENSMUSG00000031565|+|chr8:g.26058330:T>G  
 MWGWKCLLFWAVLVTATLCTARPAPTLPEQAQPWGVPEVESLLVHVPDGLLQLRCLRDRDDVQSINWLRDGVQL  
 VESNRTRITGEEVEVRDSSIPADSGLYACVTSSPSGSDTTYFSVNVSDALPSEDDDDDDSSSEEKETDNTKP  
 NRRPVAPYWTSPKMEKKLHAVPAAKTVKFKCPSSGTPNPTLRWLKNGKEFKPDHRIGGYKVRYATWSIIMDS  
 VVPSDKGNITCIVENEYGSINHTYQLDVVERSPhRPILQAGLPANKTVALGNSVFMCKVYSDPQPHIQWLKH  
 IEVNGSKI GPDNLPYVQILKTAGVNTTDKEMEVLHLRNVSFEDAGEYTCLAGNSIGLSHSAWLVLEALEER  
 PAVMTSPLYLEII IYCTGAFLISCM LGSVIIYKMKSGTKKSDFHSMQMAVHKLAKSIPLRRQVTVSADSSASM  
 SGVLLVRPSRLSSSGTPMLAGVSEYELPEDPRGELPRDRLVGLKPLGEGCFGQVVLAEAI GLDKDKPNRVTKV  
 AVKMLKSDATEKDLSDLISEMEMMKMIGKHKNI INLLGACTQDGPYVIVEYASKGNLREYLQARRPPGLEYC  
 YNPSHNPEEQ LSSKDLVSCAYQVARGMEYLASKKCIHRDLAARNVLVTE DNMKIA DFLGLARDIHHIDYKKT  
 TNGRLPVKWMPEALFDRIYTHQSDVWSFGVLLWEIFTLGGSYPYGPVVEELFKLLKEGHRMDKPSNCTNELY  
 MMRDCWHAVPSQRPTFKQLVEDLDRIVALTSNQEYLDLSIPLDQYSPSPDTRSSSTCSSGEDSVFSHEPLPE  
 EPCLPRHPTQLANSGLKRR\*  
 >ENSMUSP00000137515\_c.1143:T>G\_p.W382G ENSMUST00000178276.8|Fgfr1-  
 214|ENSMUSG00000031565|+|chr8:g.26058330:T>G  
 MWGWKCLLFWAVLVTATLCTARPAPTLPEQDALPSEDDDDDDSSSEEKETDNTKPNPVAPYWTSPKMEKK  
 LHAVPAAKTVKFKCPSSGTPNPTLRWLKNGKEFKPDHRIGGYKVRYATWSIIMDSVVPSDKGNITCIVENEY  
 SINHTYQLDVVERSPhRPILQAGLPANKTVALGNSVFMCKVYSDPQPHIQWLKHIEVNGSKI GPDNLPYVQI  
 LKHSGINSSDAEVLTLFNVTEAQSGEYVCKVSNYIGEANQSAWLVTRPVAKALEERP AVMTSPLYLEII IY  
 TGAFLISCM LGSVIIYKMKSGTKKSDFHSMQMAVHKLAKSIPLRRQVTVSADSSASMNSGVLLVRPSRLSSSGT  
 PMLAGVSEYELPEDPRGELPRDRLVGLKPLGEGCFGQVVLAEAI GLDKDKPNRVTKVAVKMLKSDATEKDLS  
 DLISEMEMMKMIGKHKNI INLLGACTQDGPYVIVEYASKGNLREYLQARRPPGLEYCYNPSHNPEEQ LSSKDL  
 VSCAYQVARGMEYLASKKCIHRDLAARNVLVTE DNMKIA DFLGLARDIHHIDYKKT TNGRLPVKWMPEALF  
 DRIYTHQSDVWSFGVLLWEIFTLGGSYPYGPVVEELFKLLKEGHRMDKPSNCTNELYMMMRDCWHAVPSQRPT  
 FKQLVEDLDRIVALTSNQEYLDLSIPLDQYSPSPDTRSSSTCSSGEDSVFSHEPLPEEPCLPRHPTQLANSGL  
 KRR\*  
 >ENSMUSP00000136640\_c.1443:T>G\_p.W482G ENSMUST00000179592.8|Fgfr1-  
 215|ENSMUSG00000031565|+|chr8:g.26058330:T>G  
 MWGWKCLLFWAVLVTATLCTARPAPTLPEQVGSWPLWAAAAQPWGVPEVESLLVHVPDGLLQLRCLRDRD  
 VQSINWLRDGVQLVESNRTRITGEEVEVRDSSIPADSGLYACVTSSPSGSDTTYFSVNVSDALPSEDDDDDD  
 SSSEEKETDNTKPNPVAPYWTSPKMEKKLHAVPAAKTVKFKCPSSGTPNPTLRWLKNGKEFKPDHRIGGYKV  
 RYATWSIIMDSVVPSDKGNITCIVENEYGSINHTYQLDVVERSPhRPILQAGLPANKTVALGNSVFMCKVY  
 DPQPHIQWLKHIEVNGSKI GPDNLPYVQILKTAGVNTTDKEMEVLHLRNVSFEDAGEYTCLAGNSIGLSHSA  
 WLVLEALEERP AVMTSPLYLEII IYCTGAFLISCM LGSVIIYKMKSGTKKSDFHSMQMAVHKLAKSIPLRRQV  
 TVSADSSASMNSGVLLVRPSRLSSSGTPMLAGVSEYELPEDPRGELPRDRLVGLKPLGEGCFGQVVLAEAI GL  
 DKDKPNRVTKVAVKMLKSDATEKDLSDLISEMEMMKMIGKHKNI INLLGACTQDGPYVIVEYASKGNLREYL  
 QARRPPGLEYCYNPSHNPEEQ LSSKDLVSCAYQVARGMEYLASKKCIHRDLAARNVLVTE DNMKIA DFLGLAR

DIHHIDYKKTNGRLPVKWMPEALFDRIYTHQSDVWSFGVLLWEIFTLGGSPYPGVPVEELFKLLKEGHRM  
DKPSNCTNELYMMMRDCWHAVPSQRPTFKQLVEDLDRIVALTSNQEYLDLSIPLDQYSPSPFDTRSSTCSSGE  
DSVFSHEPLPEEPCLPRHPTQLANSGLKRR\*

>ENSMUSP00000113855\_c.1143:T>G\_p.W382G ENSMUST00000119398.10|Fgfr1-  
203|ENSMUSG00000031565|+|chr8:g.26058330:T>G  
MWGWKCLLFWAVLVATLCTARPAPTLPEQDALPSSSEDDDDDDSSSEEKETDNTKPNRRPVAPYWTSPEKME  
KKLHAVPAAKTVKFKCPSSGTPNPTLRWLKNGKEFKPDHRIGGYKVRATWSIIMDSVVPDKNYTCIVENE  
YGSINHTYQLDVVERSHPRPILQAGLPANKTVALGNSVEFMCKVYSDPQPHIQWLKHIEVNGSKIGPDNLPYV  
QILKTAGVNTTDKEMEVLHLRNVSFEDAGEYTCLAGNSIGLSHHSAWLTVLEALEERPAMVMTSPLYLEIIYC  
TGAFLLISCMGSLGVI IYKMKSGTKKSDFHSMQMAVHKLAKSIPLRRQVTVSADSSASMNSGVLLVRSRLLSSSGT  
PMLAGVSEYELPEDPRGELPRDRLVLGKPLGEGCFGQVVLAEAIGLDKDKPNRVTKVAVKMLKSDATEKDLSD  
LISEMEMMMKMGKHKNIINLLGACTQDGPLYVIVEYASKGNLREYLQARRPPGLECYNPSHNPEEQLSKDL  
VSCAYQVARGMEYLASKKCIHRDLAARNVLVTEEDNVMKIAFDGLARDIHHIDYKKTNGRLPVKWMPEALF  
DRIYTHQSDVWSFGVLLWEIFTLGGSPYPGVPVEELFKLLKEGHRMDKPSNCTNELYMMMRDCWHAVPSQRPT  
FKQLVEDLDRIVALTSNQEYLDLSIPLDQYSPSPFDTRSSTCSSGEDSVFSHEPLPEEPCLPRHPTQLANSGL  
KRR\*

>ENSMUSP00000113909\_c.1404:T>G\_p.W469G ENSMUST00000117179.9|Fgfr1-  
202|ENSMUSG00000031565|+|chr8:g.26058330:T>G  
MWGWKCLLFWAVLVATLCTARPAPTLPEQAQPWGPVVEVESLLVHVPDGLLQRCRLRDDVQSINWLRDGVQL  
VESNRTRITGEEVEVRDSSIPADSGLYACVTSSPSGSDTTYFSVNVSDALPSSSEDDDDDDSSSEEKETDNTK  
NPVAPYWTSPEKMEKKLHAVPAAKTVKFKCPSSGTPNPTLRWLKNGKEFKPDHRIGGYKVRATWSIIMDSV  
PSDKNYTCIVENEYGSINHTYQLDVVERSHPRPILQAGLPANKTVALGNSVEFMCKVYSDPQPHIQWLKHIE  
VNGSKIGPDNLPYVQILKTAGVNTTDKEMEVLHLRNVSFEDAGEYTCLAGNSIGLSHHSAWLTVLEALEERPA  
VMTSPLYLEIIICYTGAFLLISCMGSLGVI IYKMKSGTKKSDFHSMQMAVHKLAKSIPLRRQVTVSADSSASMNSG  
VLLVRSRLLSSSGTPMLAGVSEYELPEDPRGELPRDRLVLGKPLGEGCFGQVVLAEAIGLDKDKPNRVTKVAV  
KMLKSDATEKDLSDLISEMEMMMKMGKHKNIINLLGACTQDGPLYVIVEYASKGNLREYLQARRPPGLECYN  
PSHNPEEQLSKDLVSCAYQVARGMEYLASKKCIHRDLAARNVLVTEEDNVMKIAFDGLARDIHHIDYKKTNG  
RRLPVKWMPEALFDRIYTHQSDVWSFGVLLWEIFTLGGSPYPGVPVEELFKLLKEGHRMDKPSNCTNELYMM  
MRDCWHAVPSQRPTFKQLVEDLDRIVALTSNQEYLDLSIPLDQYSPSPFDTRSSTCSSGEDSVFSHEPLPEEP  
CLPRHPTQLANSGLKRR\*

>ENSMUSP00000131343\_c.1143:T>G\_p.W382G ENSMUST00000167764.2|Fgfr1-  
213|ENSMUSG00000031565|+|chr8:g.26058330:T>G  
MWGWKCLLFWAVLVATLCTARPAPTLPEQDALPSSSEDDDDDDSSSEEKETDNTKPNPVAPYWTSPEKMEKK  
LHAVPAAKTVKFKCPSSGTPNPTLRWLKNGKEFKPDHRIGGYKVRATWSIIMDSVVPDKNYTCIVENEY  
GSINHTYQLDVVERSHPRPILQAGLPANKTVALGNSVEFMCKVYSDPQPHIQWLKHIEVNGSKIGPDNLPYV  
QILKTAGVNTTDKEMEVLHLRNVSFEDAGEYTCLAGNSIGLSHHSAWLTVTRPVAKALEERPAMVMTSPLYLEIIYC  
TGAFLLISCMGSLGVI IYKMKSGTKKSDFHSMQMAVHKLAKSIPLRRQVTVSADSSASMNSGVLLVRSRLLSSSGT  
PMLAGVSEYELPEDPRGELPRDRLVLGKPLGEGCFGQVVLAEAIGLDKDKPNRVTKVAVKMLKSDATEKDLSD  
LISEMEMMMKMGKHKNIINLLGACTQDGPLYVIVEYASKGNLREYLQARRPPGLECYNPSHNPEEQLSKDL  
VSCAYQVARGMEYLASKKCIHRDLAARNVLVTEEDNVMKIAFDGLARDIHHIDYKKTNGRLPVKWMPEALF  
DRIYTHQSDVWSFGVLLWEIFTLGGSPYPGVPVEELFKLLKEGHRMDKPSNCTNELYMMMRDCWHAVPSQRPT  
FKQLVEDLDRIVALTSNQEYLDLSIPLDQYSPSPFDTRSSTCSSGEDSVFSHEPLPEEPCLPRHPTQLANSGL  
KRR\*

>rs221982749\_ENSMUSP00000033990\_c.382:A>GA\_p.K128ins-fs  
ENSMUST00000033990.7|Wrn-201|ENSMUSG00000031583|-|chr8:g.33833108:T>TC  
METTSLQRKFPPEWMSMQSQRCAEETKACVQKSVLEDNLPFLFPGSIVYSYEASDCSFLSEDISMRLSDGDVV  
GFDMEWPPIYKPGKRSRVAVIQLCVSESKCYLFHISSMSVFPQGLKMLLENKSIREGRGD  
>rs221982749\_ENSMUSP00000033991\_c.382:A>GA\_p.K128ins-fs  
ENSMUST00000033991.13|Wrn-202|ENSMUSG00000031583|-|chr8:g.33833108:T>TC  
METTSLQRKFPPEWMSMQSQRCAEETKACVQKSVLEDNLPFLFPGSIVYSYEASDCSFLSEDISMRLSDGDVV  
GFDMEWPPIYKPGKRSRVAVIQLCVSESKCYLFHISSMSVFPQGLKMLLENKSIREGRGD  
>ENSMUSP00000148728\_c.711:A>T\_p.K238\* ENSMUST00000212436.2|Iqcn-  
201|ENSMUSG000000110622|+|chr8:g.71161520:A>T  
MQPAAQLQFQNLMSPSGSLPQPTPIHQEKVAKLCPQLQHDYFYPEELAVLPSQEVPRLARAVVESQAFRNILV  
DEMMDMVSRAATVIQASWKGYRLRQKLSQMTAAKAIQEAWRRFSTRRLMHSNRLTVKKAKREDEEDI  
PYHQ  
QQVRFHAPEDQPPVMVTKETQFSPFDNLVPSQATAGPCASRVPGGLHPQYVINRLTVPKYQPCMLTKTFRSS  
CLMRHLEGDSLKIRHVAS\*TIKVGAAEAATGRYGMHGSLSKTQTQAHTESDVPKAPLRIYVKNKTHTKVCP  
MAAAVPESSATMSTAPRSAPQARPTSPATVMKMQATTSPVIRLPAPVGPNSLSSNTTPQMQRVYMMFPGAR

IQPPGSAVASTIKALPHFGAPVMKVPLQGTGPGFTMTKTSLQMRPMTRSQAQTYTVSTSSKTSPPSSPTVKPSPQ  
 TRLAAMLTKTPAQLRSVAAVFRTLCCGTTTEAVASSPRCSPQSPVVAGNTPSQVHLNSTRTKVTVSTKQATTVV  
 KVNSQSYLGRCSQGNLDTIVPKPPATYPLEVEKMKSCPARSPKKEAALKTNTTIAARALSWTKMMEDRSKAL  
 TQIKQRAEIIKVHFRVYMPEEIPVTLTQAQLAVPLTKSSSQIQPPCHARTQPTSPFCQAVSQSCMPSSGLAHG  
 TPEGQRPPVGLSASLSSSPLAAHMLSLTAQLQPACEQARSVSRDHLTRSCPASASLQARSSGTIVPEVYPNT  
 YSPTSAPQHMMASLLAKSSSQHLHPPAEHAKTMNTKTKAACQVCPCSTKLSKAPSLAQLITCLAKVPSQAQLAT  
 ETAKCLLAAHPTTDRHSKTQSQTFLSSSKASVQLWQHLGLTSTGSRAPDDRVAQVQLHSHAPNKTMQNPRS  
 VVTDSQGLIPLMTPSGHPVCNAESWGDGSGRAQTPPSPVFNQAVPCHDDLAASVASLACADLVAMLGSPEDLR  
 TLLVKTLSQGEVHTALSQALSREVLGSPVVKALPQGLGMALMKALSWGELGISLSRALSRGELRPELNKATQ  
 GKLAEVLCKALTEEERATLSQALCQGELGAVFTQSLAQMAQRTGTFLPKATSKTVGSRMTTAPAPVEVTCSSGS  
 LSVANGPAMGPVGARCSKGPVDAGLASGQSWNSKVPNVSVRATAHAGAPQGVWYPSRGHKPWPDPGAEAEELDR  
 KPSAELLMSVQGMKVVVQAVVTIQACARGYLVRRTVKVWHQWATI IQATWRGYRVRNLERLFRATTIQAA  
 WRGYCIRRARARQVLLPIAWPEHSGRTKGTLDNRNSSEHRCFLSCQPDVCSVCQSLGPPVESPPSVVMLVGSQ  
 PRTCHVCGHTLSTRVVGFGQGISGQPVSRWASASQONTLLSQHRACTIIQAAWKGYRTRRQLSQKQSAAKM  
 VQAVWRGHYTRSCLTDDALLGTGGPWSISRDTSRHSSRAYSLHWPGV\*

>ENSMUSP00000037929\_c.298:A>C\_p.K100T ENSMUST00000038626.10|Mpv1712-  
 201|ENSMUSG00000035559|-|chr8:g.71213073:T>G  
 MALGGWRWARKALAAGRPLFQGRALLLNTLGLCGVLMAGDGARQVWEVRARPGQRFSAARRSASMFVGCSSMG  
 PFLHFYWLWLDRLLPASGLRSLPSVMTKVLVDQTVASPI LGVWYFLGLGSLEGQTLLEESCQELRAKFWDFYKA  
 DWCVWPAQLVNFLFIPSHFRVTYINGLTLGWDTYLSYLYWVPEPLQTPGCAD\*

>ENSMUSP00000148307\_c.37:A>C\_p.K13T ENSMUST00000212617.2|Mpv1712-  
 203|ENSMUSG00000035559|-|chr8:g.71213073:T>G  
 XASGLRSLPSVMTKVLVDQTVASPI LGVWYFLGFFV\*

>ENSMUSP00000148316\_c.2835:C>G\_p.R946G ENSMUST00000212935.2|Myo9b-  
 206|ENSMUSG00000004677|+|chr8:g.71800279:C>G  
 MSAHEAGSSGRRQATYHLHIYPQLSSAGSQTSRVTATKDDSTSDV IQDVVASLHLDGSKHYVIVEVKESGG  
 EEWVLDASDSPVHRVLLWPRRAQDEHPQEDGYYFLLQERNADGSIQYLPIQLLAQPTAACRLVERGLLPRPQA  
 DFDDLCNLPELTHEANLLQNLKLRFMQKIIYTYAGSILVAINPFKFLPIYNPKYVKMYENQQLGKLEPHVFALA  
 DVAYYAMLRKHVNQCIVISGESGSGKTQSTNFLIHCLTALSQKGYASGVERTILGAGPVLEAFGNAKTAHNNN  
 SSRFGKFIQVNYLENGIVRGAVVEKYLEKSRVLSQEKDERNYHVFYLLLVSEEEERLEFQKQPDYFYLN  
 QHNLNIEDGEDLKHDFERLQQAMEMVGFPLPATKKQIFSVLSAILYLGNVTYKKRATGRDEGLEVGPEVLDLTL  
 SLLKVKRETLVEVLTTRKKTVTVDKILIPYSLSEAITARDSMAKSLYSALFDWIVLRINHALLNKDMEEAV  
 SCLSIGVLDIFGFEDFERNSEFCINYANEQLQYYFTQHI FKLEQEEYQGGEGISWHNIDYTDNVGCIHLISK  
 KPTGLFYLLDEESNFPHATSHTLAKFKQOHEDNKYFLGTPVLEPAFIIQHFAGRVKYQIKDFREKNMDYMRP  
 DIVALLRGSDDSSVYRQLIGMDPVAVFRWAVLRAAIRAMAVLREAGRLRAERAKEAAAGISSPATRSHMEELPR  
 GASTPSEKLYRDLHNQIIKSLKGLPWQGEDPRRLQLSLSLFQKPRTSFLKSKGIKQKQIIPKNLLDSKSLRLI  
 ISMTLHDRTTKSLHLHLHKKKPPSISAQFQTSLNKLEALGKAEPPFIRCIRSNAEKKELCFDDLEVLQQLRY  
 TGMLETVRIRRSYGSAKYTFQDFTEQFQVLLPKDVQPCREAI AALLEKLVDRQNYQIGKTKVFLKETEGQTL  
 QEKLHGEVLRRIQLQSWFRMVLERKHFVQMKHAALT IQACWRSYRVRALERTQAAYVYLAQAWRGYLQRYAY  
 HHQRHSIIRLQSLCRGHLQRRSFSQMVSEKQKAEQAREAAGGKLESEGEPPVAAGEQLSEHPVEDPELGV  
 EAEETWVNKSPDGMSPKKETPSPEMETAQKTVPAESHEKVSSSREKRESRRQRGLEHVERQNKHIQSCREESSTH  
 REPSRRASLEIGESFPEGTKGPREDGLEAWTETTPASSSKQAQVVGDPGSPSPVQRPPTLLALDSRVSPVLP  
 SSLESKPKDKKDESSTKAQDKPESPSGSTQIQRYQHPDTERLATAVEIWRGKKLASAVLSQSLDLSEKHRATG  
 AALTPTTEERRISFSTSDVSKLSPVKTSAEIDGDFSSKKPSIHKKKSGDPSAGPDAGLSPGSGQDSKSAFKRFL  
 LHKAKDKKPSLEGVEETESNGGQAAQETPARKTLDVSSSQHRHTTEKPLKGGKNNRNVGQITVSEKWRES  
 VFRKITNANELKFLDEFLNKVNDLRSQKTPIESLFI EATERFRSNIKTMYSVPNGKIHVGYKDLMENYQIVV  
 SNLAAERGEKDTNLVNLVQSLLEDEFTRSYNKTDFERAKQSKAQKKRQKQERAVQEHNGHVFASYQVNI PQSC  
 EQCLSYIWLMDKALLCSVCKMTCHKKCVHKIQSYCSYTGRRKSELGAE PGHFGVCVDSLTSKASVP IVLEKL  
 LEHVEMHGLYTEGLYRKS GAANRTRELRLQALQTDPAAVKLEDFPIHAITGVLKQWLRELPEPLMTFAQYGD  
 FLRAVELPEKQEQLSAIYAVLDHLPEANHTSLERLIFHLVKVALLEDVNRMSPGALAIIFAPCLLRCPDNDPLT  
 SMKDVLIKITTCVEMLIKEQMRKYKMKMEEINHLEAAESIAFRRLSLLRQNAIKSPRTPVVQDLEL GALPEE  
 EAA GGDEDEKEILMERIQSIKEEKEDITYRLELDPGRSDEENLDSETSASTESLLEERGVRGAVEE\*

>ENSMUSP00000129220\_c.2832:C>G\_p.R945G ENSMUST00000170242.8|Myo9b-  
 203|ENSMUSG00000004677|+|chr8:g.71800279:C>G  
 MSAHEAGSSGRRQATYHLHIYPQLSSAGSQTSRVTATKDDSTSDV IQDVVASLHLDGSKHYVIVEVKESGG  
 EEWVLDASDSPVHRVLLWPRRAQDEHPQEDGYYFLLQERNADGSIQYLPIQLLAQPTAACRLVERGLLPRPQA  
 DFDDLCNLPELTHEANLLQNLKLRFMQKIIYTYAGSILVAINPFKFLPIYNPKYVKMYENQQLGKLEPHVFALA  
 DVAYYAMLRKHVNQCIVISGESGSGKTQSTNFLIHCLTALSQKGYASGVERTILGAGPVLEAFGNAKTAHNNN



SSRFGKFIQVNYLENGIVRGAVVEKYLLEKSRLVSQEKDERNYHVFYLLLVSEEEERLEFQLKQPQDYFYLN  
 QHNLNIEDGEDLKHDFERLQQAMEMVGFLPATKKQIFSVLSAILYLGNVYTKKRATGRDEGLEVGPPVLDLTL  
 SQLLKVKRETLVEVLTKRKTVTVNDKILIPYSLSEAITARDSMAKSLYSALFDWIVLRINHALLNKKDMEEAV  
 SCLSIGVLDIFGFEDFERNSEFEQFCINYANEQLQYYFTQHI FKLEQEYQEGEISWHNIDYTDNVGCIHLISK  
 KPTGLFYLLDEESNFPHATSHTLAKFKQQHEDNKYFLGTPVLEPAFI IQHFAGRVKYQIKDFREKNMDYMRP  
 DIVALLRGS DSSYVRQLIGMDPVAVFRWAVLRAAIRAMAVLREAGRLRAERA EKAAGISSPATRSHMEELPRG  
 ASTPSEKLYRDLHNQIIKSLKGLPWQGEDPRRLQSLSLFQKPRTSFLKSKGKIKQKQIIPKNLLDSKSLRLII  
 SMTLHDRTTKSLLHLHKKKKPPSISAQFQTSLNKLLLEALGKAEPFFIRCIRSNAEKKELCFDDELVLQQLRYT  
 GMLTVRIRRSYGSAKYTFQDFTEQFQVLLPKDVQPCREAI AALLEKLVDRQNYQIGKTKVFLKETEGQTLQ  
 EKLHGEVLRILQLQSWFRMVLERKHFVQMKHAALTIQACWRSYRVRRALERTQAAVYLQAAWRGYLQRQAYH  
 HQRHSIIRLQSLCRGHLQRRSFSQMVSEKQKAEQAREAAGGKLESEGEPPVAAGEQLSEHPVEDPESLGVEAE  
 TWMNKSPDGMSPKKETPSPEMETAAQKTVPAESHEKVSSSREKRESRRQRGLEHVERQNKHIQSCREESSTR  
 EPSRRASLEIGESFPEGTKGPREDEGLEAWTETTAPSSSKQAQVVGDPGSPSPVQRPTTLALDSRVSFPLPSS  
 SLEVSPVLPSSSLES PKDKDKDESSTKAQDKPESPSGSTQIQRYQHPDTERLATAVEIWRGKKLASAVLSQSL  
 DLSEKHRATGAALTPTTEERRISFSTSDVSKLSPVKVQTSAEIDGDFSSKKPSIHKKSGDPSAGPDAGLSPGS  
 QGDSKSAFKRFLFLHAKADKKPSLEGVEETESNGGQAAQETPARKTLDVPSQOHRHTTGEKPLKGGKNNRNV  
 GQITVSEKWRESVFRKITNANELKFLDEFLLNKVNDLRSQKTPIESLFI EATERFRSNIKTMYSVPNGKIHVG  
 YKDLMENYQIVVSNLAAERGEKDTNLVNLVNFQSLLEDEFTRS YNKTDFERAKQSKAQKKRQERAVQEHNGHV  
 FASYQVNI PQSCEQCLSYIWLMDKALLCSVCKMTCHKKCVHKIQSYCSYTGRRKSELGAEPGHFGVCVDSLTS  
 DKASVPIVLEKLEHVMHGLYTEGLYRKSGAANRTRELRLQALQTDPAAVKLEDFPIHAITGVLKQWLRELPE  
 PLMTFAQYGDFLRAVELPEKQEQLSAIYAVLDHLPEANHTSLERLI FHLVKVALLEDVNRMSPGALAIIFAPC  
 LLRCPDNDSDPLTSMKDVLIKTTCVEMLIKEQMRKYKMKMEEINHLEAAESIAFRRLSLLRQNAWPPLKLGFS  
 PYEGVRIKSPRTPVVQDLEL GALPEEAAGGDEDREKEILMERIQSIKEEKEDITYRLELDPDPRGSDEENLDSE  
 TSASTESLLEERGVRGAVEGPPAPALPCPISPTLSPLPEAAAPRGRPTS FVTVRVKT PRTRTPIMMANIKLP  
 PGLPLHLT SWAPALQEA VVPKRREPPARRQDQVHSVYIAPGADLPSQSTLIALDHDTILPGTKRRYS DPPTY  
 CLPPSSGQANG\*

>ENSMUSP00000071827\_c.2832:C>G\_p.R945G ENSMUST00000071935.7|Myo9b-  
 201|ENSMUSG00000004677|+|chr8:g.71800279:C>G

MSAHEAGSSGRRQATYHLHIYPQLSSAGSQTSCRVTATKDSSTSDVIQDVVASLHLDGSKHYVLVEVKESGG  
 EEWVLDASDSPVHRVLLWPRRAQDEHPQEDGYYFLLQERNADGSIQYLP IQLLAQPTAACRLVERGLLPRPQA  
 DFDDL CNLPEL TEANLLQNLKLRFMQKQIYTYAGSILVA INPFKFLPIYNPKYVKMYENQQLGKLEPHVFALA  
 DVAYYAML RKHVNQCIVISGESGSGKTQSTNFLIHCLTALSQKYGASGVERTILGAGPVLEAFGNAKTAHNNN  
 SSRFGKFIQVNYLENGIVRGAVVEKYLLEKSRLVSQEKDERNYHVFYLLLVSEEEERLEFQLKQPQDYFYLN  
 QHNLNIEDGEDLKHDFERLQQAMEMVGFLPATKKQIFSVLSAILYLGNVYTKKRATGRDEGLEVGPPVLDLTL  
 SQLLKVKRETLVEVLTKRKTVTVNDKILIPYSLSEAITARDSMAKSLYSALFDWIVLRINHALLNKKDMEEAV  
 SCLSIGVLDIFGFEDFERNSEFEQFCINYANEQLQYYFTQHI FKLEQEYQEGEISWHNIDYTDNVGCIHLISK  
 KPTGLFYLLDEESNFPHATSHTLAKFKQQHEDNKYFLGTPVLEPAFI IQHFAGRVKYQIKDFREKNMDYMRP  
 DIVALLRGS DSSYVRQLIGMDPVAVFRWAVLRAAIRAMAVLREAGRLRAERA EKAAGISSPATRSHMEELPRG  
 ASTPSEKLYRDLHNQIIKSLKGLPWQGEDPRRLQSLSLFQKPRTSFLKSKGKIKQKQIIPKNLLDSKSLRLII  
 SMTLHDRTTKSLLHLHKKKKPPSISAQFQTSLNKLLLEALGKAEPFFIRCIRSNAEKKELCFDDELVLQQLRYT  
 GMLTVRIRRSYGSAKYTFQDFTEQFQVLLPKDVQPCREAI AALLEKLVDRQNYQIGKTKVFLKETEGQTLQ  
 EKLHGEVLRILQLQSWFRMVLERKHFVQMKHAALTIQACWRSYRVRRALERTQAAVYLQAAWRGYLQRQAYH  
 HQRHSIIRLQSLCRGHLQRRSFSQMVSEKQKAEQAREAAGGKLESEGEPPVAAGEQLSEHPVEDPESLGVEAE  
 TWMNKSPDGMSPKKETPSPEMETAAQKTVPAESHEKVSSSREKRESRRQRGLEHVERQNKHIQSCREESSTR  
 EPSRRASLEIGESFPEGTKGPREDEGLEAWTETTAPSSSKQAQVVGDPGSPSPVQRPTTLALDSRVSFPLPSS  
 SLES PKDKDKDESSTKAQDKPESPSGSTQIQRYQHPDTERLATAVEIWRGKKLASAVLSQSLDLSEKHRATGA  
 ALTPTEERRISFSTSDVSKLSPVKVQTSAEIDGDFSSKKPSIHKKSGDPSAGPDAGLSPGSQGDSKSAFKRFL  
 HKAKADKKPSLEGVEETESNGGQAAQETPARKTLDVPSQOHRHTTGEKPLKGGKNNRNVGQITVSEKWRESV  
 FRKITNANELKFLDEFLLNKVNDLRSQKTPIESLFI EATERFRSNIKTMYSVPNGKIHVGKDLMENYQIVVS  
 NLAAERGEKDTNLVNLVNFQSLLEDEFTRS YNKTDFERAKSKAQKKRQERAVQEHNGHV FASYQVNI PQSCEQ  
 CLSYIWLMDKALLCSVCKMTCHKKCVHKIQSYCSYTGRRKSELGAEPGHFGVCVDSLTS DKASVPIVLEKLE  
 HVEMHGLYTEGLYRKSGAANRTRELRLQALQTDPAAVKLEDFPIHAITGVLKQWLRELPEPLMTFAQYGDFLRA  
 VELPEKQEQLSAIYAVLDHLPEANHTSLERLI FHLVKVALLEDVNRMSPGALAIIFAPCLLRCPDNDSDPLTSM  
 KDVLKITTTCVEMLIKEQMRKYKMKMEEINHLEAAESIAFRRLSLLRQNAIKSPRTPVVQDLEL GALPEEAAGG  
 DEDREKEILMERIQSIKEEKEDITYRLELDPDPRGSDEENLDSETSASTESLLEERGVRGAVEE\*

>ENSMUSP00000131635\_c.2832:C>G\_p.R945G ENSMUST00000168839.9|Myo9b-  
 202|ENSMUSG00000004677|+|chr8:g.71800279:C>G

MSAHEAGSSGRRQQATYHLHIYPQLSSAGSQTSCRVTATKDDSTSDVIQDVVASLHLDGSKHYVLVEVKESGG  
 EEWVLDASDSPVHRVLLWPRRAQDEHPQEDGYYFLLQERNADGSIQYLP IQLLAQPTAACRLVERGLLPRPQA  
 DFDDL CNLPEL TEANLLQNLKLRFMQQKIYTYAGSILVA INPFKFLPIYNPKYVKMYENQQLGKLEPHVFALA  
 DVAYYAML RKHV NQCIVISGESGSGKTQSTNFLIHCLTALSQKGYASGVERTILGAGPVLEAFGNAKTAHNNN  
 SSRFGKFIQVNYLENGIVRGAVVEKYLLEKSRLVSQEKDERNYHV FYLLLVGVEEERLEFQLKQPQDYFYLN  
 QHNLNIEDGEDLKHDFERLQQAMEMVGFLPATKKQIFSVLSAILYLGNAVTYKKRATGRDEGLEVGPEVLDLTL  
 SLLKVKRET LVEVLT KRKT VTVNDK LILPYSLSEAITARDSMAKSLSYALFDWIVLRINHALLNKKDMEEAV  
 SCLSIGVLDIFGFEDFERN SFEQFCIN YANEQLQYYFTQHIFKLEQE EYQGE G I SWHNI DYTDNVGCIHLISK  
 KPTGLFYLLDEESNFP HATSH TLLAKFKQQHEDNKYFLGTPVLEPAFI IQHFAGRVKYQIKDFREKNMDYMRP  
 DIVALLRGS DSSYVRQLIGMDPVAVFRWAVLRAAIRAMAVLREAGRLRAERA EKAAGI SSPATRSHMEELPRG  
 ASTPSEKLYRDLHNQIIKSLKGLPWQGEDPRRLQLSLSLFQKPRTSFLKSKGIKQKQIIIPKNLLDSKSLRLII  
 SMTLHDR TTKSLLHLHKKKPPSISAQFQTSLNKLLALGKAE PFFIRCIRSNAEKKELCFDDELVLQQLRYT  
 GMLETVRIRRSYGYS AKYTFQDFTEQFQVLLPKDVQPCREAI AALLEKLVQDRQNYQIGKTKVFLKETEGQTLQ  
 EKLHGEVLRRI LQLQSWFRMVLERKHFVQMKHAALTIQACWRSYRVRRALERTQA AVYLQA AWRGYLQRQAYH  
 HQRHSIIRLQSLCRGHLQRRSFSQM VSEKQKAEQAREAAGGKLESEGE PGPVAAGEQLSEHPVEDPESLGV EAE  
 TWMNKSPDGMSPK KETPSPEMETAAQKT VPAESHEKVSSSREKRESRRQRGLEHVERQNKHIQSCREESSTR  
 EPSRRASLEIGESFPEGTKGPRE DGLEAWTETTAPSSSKQAQVVGDPGSPSPVQRPTTLALDSRVFMLPSS  
 SLEVSPVLPSSSLES PKDKDKDESSTKAQDKPESPSGSTQIQRYQHPDTERLATAVEIWRGKLLASAVLSQSL  
 DLSEKHRATGAALT PTEERRISFSTSDVSKLSPVKVQTSAEIDGDFSSKKPSIHKKSGDPSAGPDAGLSPGS  
 QGDSKSAFKRLFLHKAKDKKPSLEGVEETESNGGQAAQETPARKTLDVPSSQQHRHTTGEKPLKGGKNRNRKV  
 GQITVSEKWRESVFRKITNANELKFLDEFLLNKVNDLRSQKTPIESLFEATERFRSNIKTMYSPNGKIHVG  
 YKDLMENYQIVVSNLAAERGEKDTNLVNLVNFQSLLEDEFTRS YNKTDFERAKQSKAQKKRQKQERAVQEHNGHV  
 FASYQVNI PQSCEQCLSYIWLMDKALLCSVCKMTCHKKCVHKIQSYCSYTGRRKSELGAEPGHFGVCVDSLTS  
 DKASVPIVLEKLLHEVEMHGLYTEGLYRKS GAANRTRELRQALQTDPAAVKLEDFPIHAITGV LKQWLRELPE  
 PLMTFAQYGDFLRAVELPEKQEQLSAIYAVLDHLPEANHTSLERLI FHLVKVALLEDVNRMSPGALAIIFAPC  
 LLRCPD NSDPLTSMKDV LKITTCVEMLIKEQMRKYKMKMEEINHLEAAESIAFRRLSLLRQNAIKSPRTFVVQ  
 DLEL GALPEEAAGGDE DREKEILMERIQS IKEEKEDITYRLPELDP RGSDEENLDSETSASTESLLEERGVRG  
 AVEE\*

>ENSMUSP00000148316\_c.3322:CT>G\_p.P1108del-fs ENSMUST00000212935.2|Myo9b-206|ENSMUSG00000004677|+|chr8:g.71801166:CT>G

MSAHEAGSSGRRQQATYHLHIYPQLSSAGSQTSCRVTATKDDSTSDVIQDVVASLHLDGSKHYVLVEVKESGG  
 EEWVLDASDSPVHRVLLWPRRAQDEHPQEDGYYFLLQERNADGSIQYLP IQLLAQPTAACRLVERGLLPRPQA  
 DFDDL CNLPEL TEANLLQNLKLRFMQQKIYTYAGSILVA INPFKFLPIYNPKYVKMYENQQLGKLEPHVFALA  
 DVAYYAML RKHV NQCIVISGESGSGKTQSTNFLIHCLTALSQKGYASGVERTILGAGPVLEAFGNAKTAHNNN  
 SSRFGKFIQVNYLENGIVRGAVVEKYLLEKSRLVSQEKDERNYHV FYLLLVGVEEERLEFQLKQPQDYFYLN  
 QHNLNIEDGEDLKHDFERLQQAMEMVGFLPATKKQIFSVLSAILYLGNAVTYKKRATGRDEGLEVGPEVLDLTL  
 SLLKVKRET LVEVLT KRKT VTVNDK LILPYSLSEAITARDSMAKSLSYALFDWIVLRINHALLNKKDMEEAV  
 SCLSIGVLDIFGFEDFERN SFEQFCIN YANEQLQYYFTQHIFKLEQE EYQGE G I SWHNI DYTDNVGCIHLISK  
 KPTGLFYLLDEESNFP HATSH TLLAKFKQQHEDNKYFLGTPVLEPAFI IQHFAGRVKYQIKDFREKNMDYMRP  
 DIVALLRGS DSSYVRQLIGMDPVAVFRWAVLRAAIRAMAVLREAGRLRAERA EKAAGI SSPATRSHMEELPR  
 GASTPSEKLYRDLHNQIIKSLKGLPWQGEDPRRLQLSLSLFQKPRTSFLKSKGIKQKQIIIPKNLLDSKSLRLII  
 ISMTLHDR TTKSLLHLHKKKPPSISAQFQTSLNKLLALGKAE PFFIRCIRSNAEKKELCFDDELVLQQLRY  
 TGMLETVRIRRSYGYS AKYTFQDFTEQFQVLLPKDVQPCREAI AALLEKLVQDRQNYQIGKTKVFLKETEQTL  
 QEKLHGEVLRRI LQLQSWFRMVLERKHFVQMKHAALTIQACWRSYRVRRALERTQA AVYLQA AWRGYLQRQAY  
 HHQRHSIIRLQSLCRGHLQRRSFSQM VSEKQKAEQAREAAGGKLESEGE PGPVAAGEQLSEHPVEDPESLGV EAE  
 ETWMNKSPDGM SRRRRHPAQRWRPQPKRQCQLKVMRKS PVAERSESHGGNEGWSMLNDRINTSNPAGRRAPT  
 ENLEPEGQAWK

>ENSMUSP00000129220\_c.3319:CT>G\_p.P1107del-fs ENSMUST00000170242.8|Myo9b-203|ENSMUSG00000004677|+|chr8:g.71801166:CT>G

MSAHEAGSSGRRQQATYHLHIYPQLSSAGSQTSCRVTATKDDSTSDVIQDVVASLHLDGSKHYVLVEVKESGG  
 EEWVLDASDSPVHRVLLWPRRAQDEHPQEDGYYFLLQERNADGSIQYLP IQLLAQPTAACRLVERGLLPRPQA  
 DFDDL CNLPEL TEANLLQNLKLRFMQQKIYTYAGSILVA INPFKFLPIYNPKYVKMYENQQLGKLEPHVFALA  
 DVAYYAML RKHV NQCIVISGESGSGKTQSTNFLIHCLTALSQKGYASGVERTILGAGPVLEAFGNAKTAHNNN  
 SSRFGKFIQVNYLENGIVRGAVVEKYLLEKSRLVSQEKDERNYHV FYLLLVGVEEERLEFQLKQPQDYFYLN  
 QHNLNIEDGEDLKHDFERLQQAMEMVGFLPATKKQIFSVLSAILYLGNAVTYKKRATGRDEGLEVGPEVLDLTL  
 SLLKVKRET LVEVLT KRKT VTVNDK LILPYSLSEAITARDSMAKSLSYALFDWIVLRINHALLNKKDMEEAV  
 SCLSIGVLDIFGFEDFERN SFEQFCIN YANEQLQYYFTQHIFKLEQE EYQGE G I SWHNI DYTDNVGCIHLISK  
 KPTGLFYLLDEESNFP HATSH TLLAKFKQQHEDNKYFLGTPVLEPAFI IQHFAGRVKYQIKDFREKNMDYMRP

DIVALLRGS DSSYVRQLIGMDPVAVFRWAVLRAAIRAMAVLREAGRLRAERA EKAAGISSPATRSHMEELPRG  
ASTPSEKLYRDLHNQIIKSLKGLPWQGEDPRLLQSLSLFQKPRTSFLKSKGIKQKQIIIPKNLLD SKSLRLII  
SMTLHDRTTKSLLLHLHKKKKPPSISAQFQTSLNKLLLEALGKAEPFFIRCIRSNAEKKELCFDDELVLQQLRYT  
GMLETVRIRRRSGYS AKYTFQDFTEQFQVLLPKDVQPCREAI AALLEKLQVDRQNYQIGKTKVFLKETERQTLQ  
EKLHGEVLRRLILQLQSWFRMVLERKHFVQMKHAALTIQACWRSYRVRRALERTQA AAVYLQA AWRGYLQRQAYH  
HQRHSIIRLQSLCRGHLQRRSFSQMVSEKQKAEQAREAAGGKLESEGE PGPVAAGEQLSEHPVEDPESLGVEAE  
TWMNKSPDGM SRRRRHPAQRWRPQPKRQCQLKVMRKS PVAERSESHGGNEGWSMLNDRINTSNPAGRRAAPTE  
NLPEGQAWK

>ENSMUSP00000071827\_c.3319:CT>G\_p.P1107del-fs ENSMUST00000071935.7|Myo9b-  
201|ENSMUSG00000004677|+|chr8:g.71801166:CT>G

MSAHEAGSSGRRQQATYHLHIYPQLSSAGSQTSCRVTATKDSSTSDVIQDVVASLHLDGSKHYV LVEVKESGG  
EEWVLDASDSPVHRVLLWPRRAQDEHPQEDGYYFLLQERNADGSIQYLPIQLLAQPTAACRLVERGLLPRPQA  
DFDDL CNLPEL TEANLLQNLKLRFMQKQIYTYAGSILVA INPFKFLPIYNPKYVKMYENQQLGKLEPHVFALA  
DVAYYAML RKHVNQCIVISGESGSGKTQSTNFLIHCLTALSQKGYASGVERTILGAGPVLEAFGNAKTAHNNN  
SSRFGKFIQVNYLENGIVRGAVVEKYLLEKSRLVSQEKDERNYHVFYLLLG VSEEEERLEFQ LKQPQDYFYLN  
QHNLNIEDGEDLKHDFERLQQAMEMVGFLPATKKQIFSVLSA ILYLGNVTYKKRATGRDEGLEVGPP EVDLTL  
SOLLKVKRETLVEVLTKRKTVTVNDKILIPYSLSEAITARDSMAKS LYSALFDWIVLRINHALLNKMDMEEAV  
SCLSIGVLDIFGFEDFERN SFEQFCINYANEQLQYYFTQHI FKLEQEEYQGE GEGISWHNIDYTDNVC IHLISK  
KPTGLFYLLDEESNFP HATSH TLLAKFKQ QHEDNKYFLGTPVLEPAFI IQHFAGRVKYQIKDFREKNMDYMRP

DIVALLRGS DSSYVRQLIGMDPVAVFRWAVLRAAIRAMAVLREAGRLRAERA EKAAGISSPATRSHMEELPRG  
ASTPSEKLYRDLHNQIIKSLKGLPWQGEDPRLLQSLSLFQKPRTSFLKSKGIKQKQIIIPKNLLD SKSLRLII  
SMTLHDRTTKSLLLHLHKKKKPPSISAQFQTSLNKLLLEALGKAEPFFIRCIRSNAEKKELCFDDELVLQQLRYT  
GMLETVRIRRRSGYS AKYTFQDFTEQFQVLLPKDVQPCREAI AALLEKLQVDRQNYQIGKTKVFLKETERQTLQ  
EKLHGEVLRRLILQLQSWFRMVLERKHFVQMKHAALTIQACWRSYRVRRALERTQA AAVYLQA AWRGYLQRQAYH  
HQRHSIIRLQSLCRGHLQRRSFSQMVSEKQKAEQAREAAGGKLESEGE PGPVAAGEQLSEHPVEDPESLGVEAE  
TWMNKSPDGM SRRRRHPAQRWRPQPKRQCQLKVMRKS PVAERSESHGGNEGWSMLNDRINTSNPAGRRAAPTE  
NLPEGQAWK

>ENSMUSP00000131635\_c.3319:CT>G\_p.P1107del-fs ENSMUST00000168839.9|Myo9b-  
202|ENSMUSG00000004677|+|chr8:g.71801166:CT>G

MSAHEAGSSGRRQQATYHLHIYPQLSSAGSQTSCRVTATKDSSTSDVIQDVVASLHLDGSKHYV LVEVKESGG  
EEWVLDASDSPVHRVLLWPRRAQDEHPQEDGYYFLLQERNADGSIQYLPIQLLAQPTAACRLVERGLLPRPQA  
DFDDL CNLPEL TEANLLQNLKLRFMQKQIYTYAGSILVA INPFKFLPIYNPKYVKMYENQQLGKLEPHVFALA  
DVAYYAML RKHVNQCIVISGESGSGKTQSTNFLIHCLTALSQKGYASGVERTILGAGPVLEAFGNAKTAHNNN  
SSRFGKFIQVNYLENGIVRGAVVEKYLLEKSRLVSQEKDERNYHVFYLLLG VSEEEERLEFQ LKQPQDYFYLN  
QHNLNIEDGEDLKHDFERLQQAMEMVGFLPATKKQIFSVLSA ILYLGNVTYKKRATGRDEGLEVGPP EVDLTL  
SOLLKVKRETLVEVLTKRKTVTVNDKILIPYSLSEAITARDSMAKS LYSALFDWIVLRINHALLNKMDMEEAV  
SCLSIGVLDIFGFEDFERN SFEQFCINYANEQLQYYFTQHI FKLEQEEYQGE GEGISWHNIDYTDNVC IHLISK  
KPTGLFYLLDEESNFP HATSH TLLAKFKQ QHEDNKYFLGTPVLEPAFI IQHFAGRVKYQIKDFREKNMDYMRP

DIVALLRGS DSSYVRQLIGMDPVAVFRWAVLRAAIRAMAVLREAGRLRAERA EKAAGISSPATRSHMEELPRG  
ASTPSEKLYRDLHNQIIKSLKGLPWQGEDPRLLQSLSLFQKPRTSFLKSKGIKQKQIIIPKNLLD SKSLRLII  
SMTLHDRTTKSLLLHLHKKKKPPSISAQFQTSLNKLLLEALGKAEPFFIRCIRSNAEKKELCFDDELVLQQLRYT  
GMLETVRIRRRSGYS AKYTFQDFTEQFQVLLPKDVQPCREAI AALLEKLQVDRQNYQIGKTKVFLKETERQTLQ  
EKLHGEVLRRLILQLQSWFRMVLERKHFVQMKHAALTIQACWRSYRVRRALERTQA AAVYLQA AWRGYLQRQAYH  
HQRHSIIRLQSLCRGHLQRRSFSQMVSEKQKAEQAREAAGGKLESEGE PGPVAAGEQLSEHPVEDPESLGVEAE  
TWMNKSPDGM SRRRRHPAQRWRPQPKRQCQLKVMRKS PVAERSESHGGNEGWSMLNDRINTSNPAGRRAAPTE  
NLPEGQAWK

>ENSMUSP00000002469\_c.522:A>G\_p.K175E ENSMUST00000002469.9|Ocell-  
201|ENSMUSG00000002396|+|chr8:g.71825438:A>G

MQIHAGPASRRRGRGLARLSGPEATCNSRPAARGRQRAAAPRMPAPERPRSRRPQS QPGPGELCVRPRKIVF  
ADELRPREPLHPEKHPRDLGPRLNVPDYELKYPV TNRDRSRYA AVFQDQYGEFSELQREVGA TQAKLQQL  
EALLLSLPPPRSQKEARMAAHVREFEKERGD PGLDKQARCN YLKGKLRHLKAQIRKFD DQQDSNSED SVYF  
\*

>ENSMUSP00000002466\_c.104:A>TAA\_p.S35ins-fs ENSMUST00000002466.9|Nr2f6-  
201|ENSMUSG00000002393|-|chr8:g.71833811:T>TTA

MAMVTGGWGD PGGDTNGVDKAGGSYPRATEDDSASNL PGRPATRSRATRSVRGCRWTAWCAGTSPVESITACS  
PARAARVSSAASAAISATPAGPTVTVRLISTTGTSVSTVGSRSASGWACARRPCSEAASRMRS PVQRPVPR  
ARRASNL SRGRQCPS

>ENSMUSP00000121648\_c.10:A>TAA\_p.H4ins-fs ENSMUST00000137058.2|Nr2f6-205|ENSMUSG00000002393|-|chr8:g.71833811:T>TTA  
 IRRLLTSRGDQRRGAGRRGASGVAGGLRGVVRGQVQWKALRRVHLRGLQEFLLQAQHPPQSQLHLPVRDPPLVFP  
 GLQAHQWEPWPVSPGPTVTVRLISTTGTSTVTVGSRASGWACARRPCSEASRMRSVPVQRPVPRARRASNL  
 SRGRQCPS  
 >rs387475422\_ENSMUSP00000045668\_c.1824:C>T\_p.Q609\*  
 ENSMUST00000049184.9|Ushbp1-201|ENSMUSG00000034911|-|chr8:g.71838600:G>A  
 MSARATRRPRRRGRHPLPGELDPVAESSEEV DANNGRFETKPELHQEYLGPGQLQSPRNWIKEGCDVGS  
 HAVLS LSPEEQCEPEVEAHQVLQEA PLDSGPAEISVPSVYETLQCRLSSLEAVVAALRHHSLSFPKSV  
 EAEDRDQGAP GPFGEKEDAGPGQQAARLIERNAWLRLALCNREDELACTQASLQDAQAEKETLQRQV  
 QELED SLMQMEASP PTPILRAGRRNSNSSTSGAERRPWVQDSSMAHPFLQRLRSDSSTQSF  
 GCLSTQHPAPETYLMEDQMGLQGS IEKLLKCFNRLLLAVLQGYKGRCELSIKLAKREAEATA  
 LRLLALQYSEDCEEVYEVLLALKMAGLGTGVGTTKG DLQAAEKEASRLLMKKEATMEVET  
 PQPSSESGVGDKPTPEELASQLHG YVQHLRERWALVKIPEELGPVTAPK ATMPHAEATVQA  
 ILEIQPGPTLPHLEKSQIQD LAATRDRDLADLVLRQLTQREKRGLELREAA LRAQGP  
 AHQ LLLQQLRWERAHFAGDGSSGGSSSEDPSSEEEAGEDRQHQYQGPLALLDQMGK  
 VWDSENVSQELSASLARAI DLRAQLQSLRQQLEQVTQKGRTRRV\*SAELSRELCKAHSALALAF  
 RGAHRKQEEQRLKLEQQVARIQAQQAEEL AVLTATARALGKPGAPQPAQTFL\*  
 >ENSMUSP00000045668\_c.1606:A>G\_p.D536G ENSMUST00000049184.9|Ushbp1-201|ENSMUSG00000034911|-|chr8:g.71840043:T>C  
 MSARATRRPRRRGRHPLPGELDPVAESSEEV DANNGRFETKPELHQEYLGPGQLQSPRNWIKEGCDVGS  
 HAVLS LSPEEQCEPEVEAHQVLQEA PLDSGPAEISVPSVYETLQCRLSSLEAVVAALRHHSLSFPKSV  
 EAEDRDQGAP GPFGEKEDAGPGQQAARLIERNAWLRLALCNREDELACTQASLQDAQAEKETLQRQV  
 QELED SLMQMEASP PTPILRAGRRNSNSSTSGAERRPWVQDSSMAHPFLQRLRSDSSTQSF  
 GCLSTQHPAPETYLMEDQMGLQGS IEKLLKCFNRLLLAVLQGYKGRCELSIKLAKREAEATA  
 LRLLALQYSEDCEEVYEVLLALKMAGLGTGVGTTKG DLQAAEKEASRLLMKKEATMEVET  
 PQPSSESGVGDKPTPEELASQLHG YVQHLRERWALVKIPEELGPVTAPK ATMPHAEATVQA  
 ILEIQPGPTLPHLEKSQIQD LAATRDRDLADLVLRQLTQREKRGLELREAA LRAQGP  
 AHQ LLLQQLRWERAHFAGDGSSGGSSSEDPSSEEEAGEDRQHQYQGPLALLDQMGK  
 VWDSENVSQELSASLARAI DLRAQLQSLRQQLEQVTQKGRTRRVQSAELSRELCKAHSALALAF  
 RGAHRKQEEQRLKLEQQVARIQAQQAEEL AVLTATARALGKPGAPQPAQTFL\*  
 >rs108499415\_ENSMUSP00000045668\_c.1260:C>T\_p.R421C  
 ENSMUST00000049184.9|Ushbp1-201|ENSMUSG00000034911|-|chr8:g.71841567:G>A  
 MSARATRRPRRRGRHPLPGELDPVAESSEEV DANNGRFETKPELHQEYLGPGQLQSPRNWIKEGCDVGS  
 HAVLS LSPEEQCEPEVEAHQVLQEA PLDSGPAEISVPSVYETLQCRLSSLEAVVAALRHHSLSFPKSV  
 EAEDRDQGAP GPFGEKEDAGPGQQAARLIERNAWLRLALCNREDELACTQASLQDAQAEKETLQRQV  
 QELED SLMQMEASP PTPILRAGRRNSNSSTSGAERRPWVQDSSMAHPFLQRLRSDSSTQSF  
 GCLSTQHPAPETYLMEDQMGLQGS IEKLLKCFNRLLLAVLQGYKGRCELSIKLAKREAEATA  
 LRLLALQYSEDCEEVYEVLLALKMAGLGTGVGTTKG DLQAAEKEASRLLMKKEATMEVET  
 PQPSSESGVGDKPTPEELASQLHG YVQHLRERWALVKIPEELGPVTAPK ATMPHAEATVQA  
 ILEIQPGPTLPHLEKSQIQD LAATRDRDLADLVLRQLTQREKRGLELREAA LRAQGP  
 AHQ LLLQQLRWERAHFAGDGSSGGSSSEDPSSEEEAGEDRQHQYQGPLALLDQMGK  
 VWDSENVSQELSASLARAI DLRAQLQSLRQQLEQVTQKGRTRRVQSAELSRELCKAHSALALAF  
 RGAHRKQEEQRLKLEQQVARIQAQQAEEL AVLTATARALGKPGAPQPAQTFL\*  
 >ENSMUSP00000002473\_c.16:C>T\_p.A6V ENSMUST00000002473.10|Babam1-201|ENSMUSG00000031820|+|chr8:g.71850389:C>T  
 MEVAEVNSPTEEEEEEEEEEGEETISEPRPHTRS NPEGAEDRALGAQASVGSRSSEGEAGEAATADGGAASV  
 PGAG PKPWQVPASASEVQIRTPRVNCPKVIICLDLSEEMSVPKLESFN GSRTNALNVSQKMVEMFVRTKHKIDKSH  
 EFALVVVNDSDAWLSGLTSDPRELCSCLYDLETASCSTFNLEGLFSLIQKTELPTVENVQTI PPPYVVRTIL  
 VYSRPPCQPQFSLTEPMKMFQCPYFFFDIVYIHNGTEEKEEDMSWKDMFAFMGSLDTKGASYKYEVALAGPA  
 LELHNCMAKLLAHPLQRPCQTHASYSLLEEDDEEAGEEEATV\*  
 >ENSMUSP00000002473\_c.180:A>T\_p.T61S ENSMUST00000002473.10|Babam1-201|ENSMUSG00000031820|+|chr8:g.71850553:A>T  
 MEVAEANSPTEEEEEEEEEGEETISEPRPHTRS NPEGAEDRALGAQASVGSRSSEGEAGEAASADGGAASV  
 PGAG PKPWQVPASASEVQIRTPRVNCPKVIICLDLSEEMSVPKLESFN GSRTNALNVSQKMVEMFVRTKHKIDKSH  
 EFALVVVNDSDAWLSGLTSDPRELCSCLYDLETASCSTFNLEGLFSLIQKTELPTVENVQTI PPPYVVRTIL  
 VYSRPPCQPQFSLTEPMKMFQCPYFFFDIVYIHNGTEEKEEDMSWKDMFAFMGSLDTKGASYKYEVALAGPA  
 LELHNCMAKLLAHPLQRPCQTHASYSLLEEDDEEAGEEEATV\*  
 >ENSMUSP00000002473\_c.219:C>T\_p.P74S ENSMUST00000002473.10|Babam1-201|ENSMUSG00000031820|+|chr8:g.71850592:C>T

MEVAEANSPTEEEEEEEEEGEETISEPRPHTRSNEPEGAEDRALGAQASVGSRSSEGEGEAATADGGAASVPGAG  
SKPWQVPASASEVQIRTPRVNCPKVIICLDLSEEMSVPKLESFNRSRTNALNVSQKVMEMFVRTKHKIDKSH  
EFALVVVNDSSAWLSGLTSDPRELCSCLYDLETASCSTFNLEGLFSLIQQKTELPTVENVQTI PPPYVVRTIL  
VYSRPPCQPQFSLTEPMKMFQCPYFFFDIVYIHNGTEEKEEDMSWKDMFAFMGSLDTKGASYKYEVALAGPA  
LELHNCMAKLLAHPLQRPCQTHASYSLLEEDDEEAGEEEATV\*  
>rs51871462\_ENSMUSP00000113162\_c.615:A>C\_p.S206R  
ENSMUST00000119976.8|Ankle1-201|ENSMUSG00000046295|+|chr8:g.71860039:A>C  
MADTACLALRLLAALREEEARAVEELLRLGADPNLVLDGAAAVHLAARASHPRALHCLRMLLRWGADPNARS  
AEGLTVPVHVAAWGCCGALELLLSRGGDPTLRDQDGLRPLDWALQQRHHNCARVLQELDTPTQPDETREPTET  
FHVAQGSFETETCQGPALAESSGVSQDSELHVHRAELEVEAVEVAVHPQSSEATENS DYRS DAS FVTAVEDSL  
QPGRPGGALELVAGLWVTRGAVSAGK GAPNCQPQVLTLTARDTDKPVLPDGDGLGALHHPSSVPPMSDLQLLQ  
ALRALGYS PGPVTPFTRGHYLRRLQEAQASRADVGHQSQELAEALRTGTIPDCQVDEEALAQCFQRLDPLKKWR  
EGITKSSFTYLLLDPRLTKDLPARASSLT LAECLQCFVRAIFYVKGTRARPDAHLWEAFGYHDQPRKQVCPK  
VRRILDIWASGRGIISLHCFQHVVAMEAYTREACLLDALGLQTLTNQKQGHYYGVVAHWPPSRRRRLGVHLLQ  
RALLVFLAEGERE LRPQDIQARG\*  
>rs51871462\_ENSMUSP00000112797\_c.555:A>C\_p.S186R  
ENSMUST00000120725.2|Ankle1-202|ENSMUSG00000046295|+|chr8:g.71860039:A>C  
MADTACLALRLLAALREEEARAVEELLRLGADPNLVLDGAAAVHLAARASHPRALHCLRMLLRWGADPNARS  
AEGLTVPVHVAAWGCCGALELLLSRGGDPTLRDQDGLRPLDWALQQRHHNCARVLQELDTPTQPDETREPTAE  
SSGVSQDSELHVHRAELEVEAVEVAVHPQSSEATENS DYRS DAS FVTAVEDSLQPGRPGGALELVAGLWVTRG  
AVSAGK GAPNCQPQVLTLTARDTDKPVLPDGDGLGALHHPSSVPPMSDLQLLQALRALGYS PGPVTPFTRGHY  
LRRLQEAQASRADVGHQSQELAEALRTGTIPDCQVDEEALAQCFQRLDPLKKWREGITKSSFTYLLLDPRLT  
L PARASSLT LAECLQCFVRAIFYVKGTRARPDAHLWEAFGYHDQPRKQVCPK VRRILDIWASGRGIISLHCF  
QHVVAMEAYTREACLLDALGLQTLTNQKQGHYYGVVAHWPPSRRRRLGVHLLQ RALLVFLAEGERE LRPQDIQ  
ARG\*  
>ENSMUSP00000140285\_c.200:T>TCATTCTCCCTCCACCCCAAACATGACGATCCACTCTAGCTCCAC  
CCCAAATTAACAATC\_p.V67HSPSTPNMTIHSSSTPKLTI-ins  
ENSMUST00000188685.7|Zfp709-  
203|ENSMUSG00000056019|+|chr8:g.72642773:T>TCATTCTCCCTCCACCCCAAACATGACGAT  
CCACTCTAGCTCCACCCCAAATTAACAATC  
MGSVSFQDVAVTFTVEEWALLDPSQKKLHKDVMEETFRNLAAIGKTQEGQNIDEDHRYSRRNQRNEVHSPSTP  
NMTIHSSSTPKLTIIVERLLEHSGTESKEIFRQIPNTIVNRKSSHRTMLSENHVYKDNVLISSSSLTVSVPLQ  
TPHKPHEYELHGENLYKFGECEKAFIYPECFLLKHKDSGTRQRSYELNQCEEIFKSNDYIQIRVNDETREEIC  
DKQHYAFNYPDFLQYVEKVHTGKKPYACKQCGKTF SFLSNIKRHERIHSGEKPYRCNICDKAFTCS TNFQEH  
RTHTGEKPYLCTQCGKSF SFLSNIRRHERHTHTGEKPYRCNACGKAFSYLTNFQDHERHTHTGEKPYVCTQCGK  
FTYYYSFQTHKRCHTGEKPYVCKQCGKAFSYNSIQTHKRCHTGEKPYVCKLCAKAF TLLSSLR YHERIHSGE  
KPHVCLQCGKGFNSSTLRIHERHTHTGEKPYKCKKCGKVFSDSSLRCHERIHSGEKPYVCKQCGKAFTRHTS  
LRCHERIHSGEKPYICKQCGKGFISSNFRKHEWTHS GEKLCVCKL CGKAF TGHS SLQRHERIHSGEKPYVCK  
HCGKDFSSLSGCQRHEQIHTGEKPYVCKNCGKAF TNPSALRNHERIHSGEKPYVCGQCGKGFISFSKFR IHER  
IHTGEKPYKCKQCGKAF TGHS SLRRHERIHSGEKPFVCKHCGKSFYTLSDCQRHEQIHTGEKPFICKQCGKAF  
TRSSSLKIHDKTHSRSP\*  
>ENSMUSP00000034259\_c.197:T>TCATTCTCCCTCCACCCCAAACATGACGATCCACTCTAGCTCCAC  
CCCAAATTAACAATC\_p.V66HSPSTPNMTIHSSSTPKLTI-ins  
ENSMUST00000034259.8|Zfp709-  
201|ENSMUSG00000056019|+|chr8:g.72642773:T>TCATTCTCCCTCCACCCCAAACATGACGAT  
CCACTCTAGCTCCACCCCAAATTAACAATC  
GSVSFQDVAVTFTVEEWALLDPSQKKLHKDVMEETFRNLAAIGKTQEGQNIDEDHRYSRRNQRNEVHSPSTPN  
MTIHSSSTPKLTIIVERLLEHSGTESKEIFRQIPNTIVNRKSSHRTMLSENHVYKDNVLISSSSLTVSVPLQ  
PHKPHEYELHGENLYKFGECEKAFIYPECFLLKHKDSGTRQRSYELNQCEEIFKSNDYIQIRVNDETREEICID  
KQHYAFNYPDFLQYVEKVHTGKKPYACKQCGKTF SFLSNIKRHERIHSGEKPYRCNICDKAFTCS TNFQEH  
RTHTGEKPYLCTQCGKSF SFLSNIRRHERHTHTGEKPYRCNACGKAFSYLTNFQDHERHTHTGEKPYVCTQCGKAF  
TYYSFQTHKRCHTGEKPYVCKQCGKAFSYNSIQTHKRCHTGEKPYVCKLCAKAF TLLSSLR YHERIHSGEK  
PHVCLQCGKGFNSSTLRIHERHTHTGEKPYKCKKCGKVFSDSSLRCHERIHSGEKPYVCKQCGKAFTRHTS  
LRCHERIHSGEKPYICKQCGKGFISSNFRKHEWTHS GEKLCVCKL CGKAF TGHS SLQRHERIHSGEKPYVCK  
CGKDFSSLSGCQRHEQIHTGEKPYVCKNCGKAF TNPSALRNHERIHSGEKPYVCGQCGKGFISFSKFR IHER  
IHTGEKPYKCKQCGKAF TGHS SLRRHERIHSGEKPFVCKHCGKSFYTLSDCQRHEQIHTGEKPFICKQCGKAF  
RSSSLKIHDKTHSRSP\*

>ENSMUSP00000140285\_c.301:T>C\_p.M101T ENSMUST00000188685.7|Zfp709-203|ENSMUSG00000056019|+|chr8:g.72642874:T>C  
MGSVSFQDVAVTFTVEEWALLDPSQKKLHKDVMEEETFRNLAAIGKTQEGQNIDEDHRYSRRNQRNEVVERLLE  
HSGTESKEIFRQIPNTIVNRKSSHRTTLESENHVKDNVLISQSSLTVSVPLQTPHKPHEYELHGENLYKFGE  
CEKAFIYPECFLLKHKDSGTRQRSYELNQCEEIFKSNDYIQIRVNDETREEICIDKQHYAFNYPDFLQYVEKVH  
TGKKPYACKQCGKTFSSFLSNIKRHERIHSGEKPYRCNICDKAFTCTSTNFQEHERTHTGEKPYLCTQCGKSFSF  
LSNIRRHERHTHTGEKPYRCNACGKAFSYLTNFQDHERHTHTGEKPYVCTQCGKAFTYYYSFQTHKRCHTGEKPY  
VCKQCGKAFSYYNSIQTHKRCHTGEKPYVCKLCAKAFTTLLSSLRHERIHSGEKPHVCLQCGKGFNSSTLRI  
HERHTHTGEKPYKCKKCGKVFSDSSLRCHERIHSGEKPYVCKQCGKAFTTRHTSLRCHERIHCGEKPYICKQCG  
KGFISSSNFRKHEWTHSGEKLCVCKLCGKAFTGHSSLRHERIHSGEKPYVCKHCGKDFSSLSGCQRHEQIHT  
GEKPYVCKNCGKAFTNPSALRNHERIHSGEKPYVCGQCGKGFISFSKFRHERIHTGEKPYKCKQCGKAFTGH  
SSLRRHERIHSGEKPFVCKHCGKSFYTLSDCQRHEQIHTGEKPFICKQCGKAFTRRSSSLKIHDKTHSRSP\*  
>ENSMUSP00000034259\_c.298:T>C\_p.M100T ENSMUST00000034259.8|Zfp709-201|ENSMUSG00000056019|+|chr8:g.72642874:T>C  
GSVSFQDVAVTFTVEEWALLDPSQKKLHKDVMEEETFRNLAAIGKTQEGQNIDEDHRYSRRNQRNEVVERLLEH  
SKGTESKEIFRQIPNTIVNRKSSHRTTLESENHVKDNVLISQSSLTVSVPLQTPHKPHEYELHGENLYKFGE  
EKAFIYPECFLLKHKDSGTRQRSYELNQCEEIFKSNDYIQIRVNDETREEICIDKQHYAFNYPDFLQYVEKVHT  
GKKPYACKQCGKTFSSFLSNIKRHERIHSGEKPYRCNICDKAFTCTSTNFQEHERTHTGEKPYLCTQCGKSFSF  
SNIRRHERHTHTGEKPYRCNACGKAFSYLTNFQDHERHTHTGEKPYVCTQCGKAFTYYYSFQTHKRCHTGEKPYV  
CKQCGKAFSYYNSIQTHKRCHTGEKPYVCKLCAKAFTTLLSSLRHERIHSGEKPHVCLQCGKGFNSSTLRIH  
ERTHTHTGEKPYKCKKCGKVFSDSSLRCHERIHSGEKPYVCKQCGKAFTTRHTSLRCHERIHCGEKPYICKQCGK  
GFISSSNFRKHEWTHSGEKLCVCKLCGKAFTGHSSLRHERIHSGEKPYVCKHCGKDFSSLSGCQRHEQIHTG  
EKPYVCKNCGKAFTNPSALRNHERIHSGEKPYVCGQCGKGFISFSKFRHERIHTGEKPYKCKQCGKAFTGH  
SLRRHERIHSGEKPFVCKHCGKSFYTLSDCQRHEQIHTGEKPFICKQCGKAFTRRSSSLKIHDKTHSRSP\*  
>ENSMUSP00000140285\_c.351:T>TTTCTAGCTCCACCTCACCATGATGATCCATTCTAGCTCCATACC  
TCCAAGACAATCCATTCTAGCTCCACGCCACCATGACGACCCATTCAGTCTCCACTTTCTAGCTCCACCCCA  
CCATAACAATCCAATCTAGCTCACCCTCAGAGACGCTCCATTCTAGCTCTACACCACCATAACAATTCAT  
CTACCTCCACCACAACCATGACAATCCA\_p.S118ins-fs ENSMUST00000188685.7|Zfp709-203|ENSMUSG00000056019|+|chr8:g.72642924:T>TTTCTAGCTCCACCTCACCATGATGATCCA  
TTCTAGCTCCATACCCTCAAGACAATCCATTCTAGCTCCACGCCACCATGACGACCCATTAGTCTCCACTT  
TCTAGCTCCACCCACCATAACAATCCAATCTAGCTCACCCTCAGAGACGCTCCATTCTAGCTCTACACCA  
CCATAACAATTCATCTACCTCCACCACAACCATGACAATCCA  
MGSVSFQDVAVTFTVEEWALLDPSQKKLHKDVMEEETFRNLAAIGKTQEGQNIDEDHRYSRRNQRNEVVERLLE  
HSGTESKEIFRQIPNTIVNRKSSHRTMLESENHVKDNVLISQSFLLAPPHDDPF  
>ENSMUSP00000034259\_c.348:T>TTTCTAGCTCCACCTCACCATGATGATCCATTCTAGCTCCATACC  
TCCAAGACAATCCATTCTAGCTCCACGCCACCATGACGACCCATTCAGTCTCCACTTTCTAGCTCCACCCCA  
CCATAACAATCCAATCTAGCTCACCCTCAGAGACGCTCCATTCTAGCTCTACACCACCATAACAATTCAT  
CTACCTCCACCACAACCATGACAATCCA\_p.S117ins-fs ENSMUST00000034259.8|Zfp709-201|ENSMUSG00000056019|+|chr8:g.72642924:T>TTTCTAGCTCCACCTCACCATGATGATCCA  
TTCTAGCTCCATACCCTCAAGACAATCCATTCTAGCTCCACGCCACCATGACGACCCATTAGTCTCCACTT  
TCTAGCTCCACCCACCATAACAATCCAATCTAGCTCACCCTCAGAGACGCTCCATTCTAGCTCTACACCA  
CCATAACAATTCATCTACCTCCACCACAACCATGACAATCCA  
MGSVSFQDVAVTFTVEEWALLDPSQKKLHKDVMEEETFRNLAAIGKTQEGQNIDEDHRYSRRNQRNEVVERLLEH  
HSGTESKEIFRQIPNTIVNRKSSHRTMLESENHVKDNVLISQSFLLAPPHDDPF  
>ENSMUSP00000140285\_c.458:T>A\_p.Y153\* ENSMUST00000188685.7|Zfp709-203|ENSMUSG00000056019|+|chr8:g.72643031:T>A  
MGSVSFQDVAVTFTVEEWALLDPSQKKLHKDVMEEETFRNLAAIGKTQEGQNIDEDHRYSRRNQRNEVVERLLE  
HSGTESKEIFRQIPNTIVNRKSSHRTMLESENHVKDNVLISQSSLTVSVPLQTPHKPHEYELHGENLYKFGE  
CEKAFI\*PECFLKHKDSGTRQRSYELNQCEEIFKSNDYIQIRVNDETREEICIDKQHYAFNYPDFLQYVEKVH  
TGKKPYACKQCGKTFSSFLSNIKRHERIHSGEKPYRCNICDKAFTCTSTNFQEHERTHTGEKPYLCTQCGKSFSF  
LSNIRRHERHTHTGEKPYRCNACGKAFSYLTNFQDHERHTHTGEKPYVCTQCGKAFTYYYSFQTHKRCHTGEKPY  
VCKQCGKAFSYYNSIQTHKRCHTGEKPYVCKLCAKAFTTLLSSLRHERIHSGEKPHVCLQCGKGFNSSTLRI  
HERHTHTGEKPYKCKKCGKVFSDSSLRCHERIHSGEKPYVCKQCGKAFTTRHTSLRCHERIHCGEKPYICKQCG  
KGFISSSNFRKHEWTHSGEKLCVCKLCGKAFTGHSSLRHERIHSGEKPYVCKHCGKDFSSLSGCQRHEQIHT  
GEKPYVCKNCGKAFTNPSALRNHERIHSGEKPYVCGQCGKGFISFSKFRHERIHTGEKPYKCKQCGKAFTGH  
SSLRRHERIHSGEKPFVCKHCGKSFYTLSDCQRHEQIHTGEKPFICKQCGKAFTRRSSSLKIHDKTHSRSP\*  
>ENSMUSP00000034259\_c.455:T>A\_p.Y152\* ENSMUST00000034259.8|Zfp709-201|ENSMUSG00000056019|+|chr8:g.72643031:T>A

GSVVSFQDVAVTFTVEEWALLDPSQKHLHKDVMEEETFRNLAAIGKTQEGQNIDEDHRYSRRNQRNEVVERLLEH  
SKGTESKEIFRQIPNTIVNRKSSHRTMLSENHVKDNLVLSQSSLTVSVPLQTPHKPHEYELHGENLYKFGEC  
EKAFIY\*PECFLKHKDMSGTRQRSYELNQCEEIIFKSNDYIQIRVNDEETREEICIDKQHYAFNYPDFLQYVEKVHT  
GKKPYACKQCGKTFSSFLSNIKRHERIHSGEKPYRCNICDKAFTCSTNFQEHERTHTGEKPYLCTQCGKSFSFSL  
SNIRRHERTHTGEKPYRCNACGKAFSYLTNFDHERHTHTGEKPYVCTQCGKAFTYYSFQTHKRCHTGEKPYV  
CKQCGKAFSYYSIQTHKRCHTGEKPYVCKLCAKAFTTSSSLRYHERIHSGEKPHVCLQCGKGFNSSTLRH  
ERTHTGEKPYKCKKCGKVFVSDSSLRCHERIHSGEKPYVCKQCGKAFTRHTSLRCHERIHCGEKPYICKQCGK  
GFISSNFRKHEWTHSGEKLCVCKLQCGKAFTGHSSLRHERIHSGEKPYVCKHCGKDFSSLSGCQRHEQIHTG  
EKPYVCKNCGKAFTNPSALRNHERIHSGEKPYVCGQCGKGFISFSKFRHERIHTGEKPYKCKQCGKAFTGHS  
SLRRHERIHSGEKPFVCKHCGKSFYTLSDCQRHEQIHTGEKPFICKQCGKAFTRSSSLKIHDKTHSRSP\*  
>ENSMUSP00000140285\_c.524:T>G\_p.C175W ENSMUST00000188685.7|Zfp709-  
203|ENSMUSG00000056019|+|chr8:g.72643097:T>G  
MGSVVSFQDVAVTFTVEEWALLDPSQKHLHKDVMEEETFRNLAAIGKTQEGQNIDEDHRYSRRNQRNEVVERLLE  
HSGTESKEIFRQIPNTIVNRKSSHRTMLSENHVKDNLVLSQSSLTVSVPLQTPHKPHEYELHGENLYKFGEC  
CEKAFIYPECFLKHKDMSGTRQRSYELNQWEEIIFKSNDYIQIRVNDEETREEICIDKQHYAFNYPDFLQYVEKVH  
TGKKPYACKQCGKTFSSFLSNIKRHERIHSGEKPYRCNICDKAFTCSTNFQEHERTHTGEKPYLCTQCGKSFSF  
LSNIRRHERTHTGEKPYRCNACGKAFSYLTNFDHERHTHTGEKPYVCTQCGKAFTYYSFQTHKRCHTGEKPY  
VCKQCGKAFSYYSIQTHKRCHTGEKPYVCKLCAKAFTTSSSLRYHERIHSGEKPHVCLQCGKGFNSSTLRH  
HERHTHTGEKPYKCKKCGKVFVSDSSLRCHERIHSGEKPYVCKQCGKAFTRHTSLRCHERIHCGEKPYICKQCG  
KGFISSNFRKHEWTHSGEKLCVCKLQCGKAFTGHSSLRHERIHSGEKPYVCKHCGKDFSSLSGCQRHEQIHT  
GEKPYVCKNCGKAFTNPSALRNHERIHSGEKPYVCGQCGKGFISFSKFRHERIHTGEKPYKCKQCGKAFTGH  
SSLRHERIHSGEKPFVCKHCGKSFYTLSDCQRHEQIHTGEKPFICKQCGKAFTRSSSLKIHDKTHSRSP\*  
>ENSMUSP00000034259\_c.521:T>G\_p.C174W ENSMUST00000034259.8|Zfp709-  
201|ENSMUSG00000056019|+|chr8:g.72643097:T>G  
GSVVSFQDVAVTFTVEEWALLDPSQKHLHKDVMEEETFRNLAAIGKTQEGQNIDEDHRYSRRNQRNEVVERLLEH  
SKGTESKEIFRQIPNTIVNRKSSHRTMLSENHVKDNLVLSQSSLTVSVPLQTPHKPHEYELHGENLYKFGEC  
EKAFIYPECFLKHKDMSGTRQRSYELNQWEEIIFKSNDYIQIRVNDEETREEICIDKQHYAFNYPDFLQYVEKVHT  
GKKPYACKQCGKTFSSFLSNIKRHERIHSGEKPYRCNICDKAFTCSTNFQEHERTHTGEKPYLCTQCGKSFSFSL  
SNIRRHERTHTGEKPYRCNACGKAFSYLTNFDHERHTHTGEKPYVCTQCGKAFTYYSFQTHKRCHTGEKPYV  
CKQCGKAFSYYSIQTHKRCHTGEKPYVCKLCAKAFTTSSSLRYHERIHSGEKPHVCLQCGKGFNSSTLRH  
ERTHTGEKPYKCKKCGKVFVSDSSLRCHERIHSGEKPYVCKQCGKAFTRHTSLRCHERIHCGEKPYICKQCGK  
GFISSNFRKHEWTHSGEKLCVCKLQCGKAFTGHSSLRHERIHSGEKPYVCKHCGKDFSSLSGCQRHEQIHTG  
EKPYVCKNCGKAFTNPSALRNHERIHSGEKPYVCGQCGKGFISFSKFRHERIHTGEKPYKCKQCGKAFTGH  
SSLRHERIHSGEKPFVCKHCGKSFYTLSDCQRHEQIHTGEKPFICKQCGKAFTRSSSLKIHDKTHSRSP\*  
>ENSMUSP00000140285\_c.529:A>ATTCTAGCTCCACTTCCACCATGACTATCCAATCGAGCTTCACCC  
CCACCATAAGTCTCCTTCTAGCACCAACCCACCATTAGGATCCATTCTATCACCATCCCCCTCCAAGATGATCC  
C\_p.E177ins-fs ENSMUST00000188685.7|Zfp709-  
203|ENSMUSG00000056019|+|chr8:g.72643102:A>ATTCTAGCTCCACTTCCACCATGACTATCC  
AATCGAGCTTCACCCCCACCATAATGCTCCTTCTAGCACCAACCCACCATTAGGATCCATTCTATCACCATCC  
CCTCCAAGATGATCCC  
MGSVVSFQDVAVTFTVEEWALLDPSQKHLHKDVMEEETFRNLAAIGKTQEGQNIDEDHRYSRRNQRNEVVERLLE  
HSGTESKEIFRQIPNTIVNRKSSHRTMLSENHVKDNLVLSQSSLTVSVPLQTPHKPHEYELHGENLYKFGEC  
CEKAFIYPECFLKHKDMSGTRQRSYELNQCEDSSSTSTMTIQSSFTPTIMLLAPTHH  
>ENSMUSP00000034259\_c.526:A>ATTCTAGCTCCACTTCCACCATGACTATCCAATCGAGCTTCACCC  
CCACCATAAGTCTCCTTCTAGCACCAACCCACCATTAGGATCCATTCTATCACCATCCCCCTCCAAGATGATCC  
C\_p.E176ins-fs ENSMUST00000034259.8|Zfp709-  
201|ENSMUSG00000056019|+|chr8:g.72643102:A>ATTCTAGCTCCACTTCCACCATGACTATCC  
AATCGAGCTTCACCCCCACCATAATGCTCCTTCTAGCACCAACCCACCATTAGGATCCATTCTATCACCATCC  
CCTCCAAGATGATCCC  
GSVVSFQDVAVTFTVEEWALLDPSQKHLHKDVMEEETFRNLAAIGKTQEGQNIDEDHRYSRRNQRNEVVERLLEH  
SKGTESKEIFRQIPNTIVNRKSSHRTMLSENHVKDNLVLSQSSLTVSVPLQTPHKPHEYELHGENLYKFGEC  
EKAFIYPECFLKHKDMSGTRQRSYELNQCEDSSSTSTMTIQSSFTPTIMLLAPTHH  
>ENSMUSP00000140285\_c.536:C>G\_p.F179L ENSMUST00000188685.7|Zfp709-  
203|ENSMUSG00000056019|+|chr8:g.72643109:C>G  
MGSVVSFQDVAVTFTVEEWALLDPSQKHLHKDVMEEETFRNLAAIGKTQEGQNIDEDHRYSRRNQRNEVVERLLE  
HSGTESKEIFRQIPNTIVNRKSSHRTMLSENHVKDNLVLSQSSLTVSVPLQTPHKPHEYELHGENLYKFGEC  
CEKAFIYPECFLKHKDMSGTRQRSYELNQCEEILKSNDYIQIRVNDEETREEICIDKQHYAFNYPDFLQYVEKVH  
TGKKPYACKQCGKTFSSFLSNIKRHERIHSGEKPYRCNICDKAFTCSTNFQEHERTHTGEKPYLCTQCGKSFSF

LSNIRRHERHTHTGEKPYRCNACGKAFSYLTNFDHERHTHTGEKPYVCTQCGKAFTYYSFQTHKRCHTGEKPY  
VCKQCGKAFSYNSIQTHKRCHTGEKPYVCKLCAKAFTTSSSLRYHERIHSGEKPHVCLQCGKGFNSSTLRI  
HERHTHTGEKPYKCKKCGKVFSDSSLRCHERIHSGEKPYVCKQCGKAFTTRHTSLRCHERIHCGEKPYICKQCG  
KGFISSSNFRKHEWTHSGEKLCVCKLQCGKAFTGHSSSLQRHERIHSGEKPYVCKHCGKDFSSLSGCQRHEQIHT  
GEKPYVCKNCGKAFTNPSALRNHERIHSGEKPYVCGQCGKGFISFSKFRHERIHTGEKPYKCKQCGKAFTGH  
SSLRRHERIHSGEKPFVCKHCGKSFYTLSDCQRHEQIHTGEKPFICKQCGKAFTTRSSSLKIHDKTHSRSP\*  
>ENSMUSP00000034259\_c.533:C>G\_p.F178L ENSMUST00000034259.8|zfp709-  
201|ENSMUSG00000056019|+|chr8:g.72643109:C>G  
GSVVSFQDVAVTFTVEEWALLDPSQKLLHKDVMEEETFRNLAAIGKTQEGQNIDEDHRYSRNRQNEVVERLLEH  
SKGTESKEIFRQIPNTIVNRKSSHRTMLSENHVYKDNVLISQSSLTVSVPLQTPHKPHEYELHGENLYKFGEC  
EKAFIYPECFLLKHKDSGTRQRSYELNQCEEILKSNDYIQIRVNDETREEICIDKQHYAFNYPDFLQYVEKVHT  
GKKPYACKQCGKTFSSLSNIKRHERIHSGEKPYRCNICDKAFTCSTNFQEHERTHTGEKPYLCTQCGKSFSFL  
SNIRRHERHTHTGEKPYRCNACGKAFSYLTNFDHERHTHTGEKPYVCTQCGKAFTYYSFQTHKRCHTGEKPYV  
CKQCGKAFSYNSIQTHKRCHTGEKPYVCKLCAKAFTTSSSLRYHERIHSGEKPHVCLQCGKGFNSSTLRIH  
ERTHTHTGEKPYKCKKCGKVFSDSSLRCHERIHSGEKPYVCKQCGKAFTTRHTSLRCHERIHCGEKPYICKQCGK  
GFISSSNFRKHEWTHSGEKLCVCKLQCGKAFTGHSSSLQRHERIHSGEKPYVCKHCGKDFSSLSGCQRHEQIHTG  
EKPYVCKNCGKAFTNPSALRNHERIHSGEKPYVCGQCGKGFISFSKFRHERIHTGEKPYKCKQCGKAFTGH  
SSLRRHERIHSGEKPFVCKHCGKSFYTLSDCQRHEQIHTGEKPFICKQCGKAFTTRSSSLKIHDKTHSRSP\*  
>ENSMUSP00000140285\_c.554:T>G\_p.I185M ENSMUST00000188685.7|zfp709-  
203|ENSMUSG00000056019|+|chr8:g.72643127:T>G  
MGSVVSFQDVAVTFTVEEWALLDPSQKLLHKDVMEEETFRNLAAIGKTQEGQNIDEDHRYSRNRQNEVVERLLE  
HSKGTESKEIFRQIPNTIVNRKSSHRTMLSENHVYKDNVLISQSSLTVSVPLQTPHKPHEYELHGENLYKFGEC  
CEKAFIYPECFLLKHKDSGTRQRSYELNQCEEIFKSNDYMQIRVNDETREEICIDKQHYAFNYPDFLQYVEKVH  
TGKKPYACKQCGKTFSSLSNIKRHERIHSGEKPYRCNICDKAFTCSTNFQEHERTHTGEKPYLCTQCGKSFSF  
LSNIRRHERHTHTGEKPYRCNACGKAFSYLTNFDHERHTHTGEKPYVCTQCGKAFTYYSFQTHKRCHTGEKPY  
VCKQCGKAFSYNSIQTHKRCHTGEKPYVCKLCAKAFTTSSSLRYHERIHSGEKPHVCLQCGKGFNSSTLRI  
HERHTHTGEKPYKCKKCGKVFSDSSLRCHERIHSGEKPYVCKQCGKAFTTRHTSLRCHERIHCGEKPYICKQCG  
KGFISSSNFRKHEWTHSGEKLCVCKLQCGKAFTGHSSSLQRHERIHSGEKPYVCKHCGKDFSSLSGCQRHEQIHT  
GEKPYVCKNCGKAFTNPSALRNHERIHSGEKPYVCGQCGKGFISFSKFRHERIHTGEKPYKCKQCGKAFTGH  
SSLRRHERIHSGEKPFVCKHCGKSFYTLSDCQRHEQIHTGEKPFICKQCGKAFTTRSSSLKIHDKTHSRSP\*  
>ENSMUSP00000034259\_c.551:T>G\_p.I184M ENSMUST00000034259.8|zfp709-  
201|ENSMUSG00000056019|+|chr8:g.72643127:T>G  
GSVVSFQDVAVTFTVEEWALLDPSQKLLHKDVMEEETFRNLAAIGKTQEGQNIDEDHRYSRNRQNEVVERLLE  
HSKGTESKEIFRQIPNTIVNRKSSHRTMLSENHVYKDNVLISQSSLTVSVPLQTPHKPHEYELHGENLYKFGEC  
CEKAFIYPECFLLKHKDSGTRQRSYELNQCEEIFKSNDYMQIRVNDETREEICIDKQHYAFNYPDFLQYVEKVH  
TGKKPYACKQCGKTFSSLSNIKRHERIHSGEKPYRCNICDKAFTCSTNFQEHERTHTGEKPYLCTQCGKSFSF  
LSNIRRHERHTHTGEKPYRCNACGKAFSYLTNFDHERHTHTGEKPYVCTQCGKAFTYYSFQTHKRCHTGEKPY  
VCKQCGKAFSYNSIQTHKRCHTGEKPYVCKLCAKAFTTSSSLRYHERIHSGEKPHVCLQCGKGFNSSTLRI  
HERHTHTGEKPYKCKKCGKVFSDSSLRCHERIHSGEKPYVCKQCGKAFTTRHTSLRCHERIHCGEKPYICKQCG  
KGFISSSNFRKHEWTHSGEKLCVCKLQCGKAFTGHSSSLQRHERIHSGEKPYVCKHCGKDFSSLSGCQRHEQIHTG  
EKPYVCKNCGKAFTNPSALRNHERIHSGEKPYVCGQCGKGFISFSKFRHERIHTGEKPYKCKQCGKAFTGH  
SSLRRHERIHSGEKPFVCKHCGKSFYTLSDCQRHEQIHTGEKPFICKQCGKAFTTRSSSLKIHDKTHSRSP\*  
>ENSMUSP00000140285\_c.587:A>C\_p.E196D ENSMUST00000188685.7|zfp709-  
203|ENSMUSG00000056019|+|chr8:g.72643160:A>C  
MGSVVSFQDVAVTFTVEEWALLDPSQKLLHKDVMEEETFRNLAAIGKTQEGQNIDEDHRYSRNRQNEVVERLLE  
HSKGTESKEIFRQIPNTIVNRKSSHRTMLSENHVYKDNVLISQSSLTVSVPLQTPHKPHEYELHGENLYKFGEC  
CEKAFIYPECFLLKHKDSGTRQRSYELNQCEEIFKSNDYIQIRVNDETREDICIDKQHYAFNYPDFLQYVEKVH  
TGKKPYACKQCGKTFSSLSNIKRHERIHSGEKPYRCNICDKAFTCSTNFQEHERTHTGEKPYLCTQCGKSFSF  
LSNIRRHERHTHTGEKPYRCNACGKAFSYLTNFDHERHTHTGEKPYVCTQCGKAFTYYSFQTHKRCHTGEKPY  
VCKQCGKAFSYNSIQTHKRCHTGEKPYVCKLCAKAFTTSSSLRYHERIHSGEKPHVCLQCGKGFNSSTLRI  
HERHTHTGEKPYKCKKCGKVFSDSSLRCHERIHSGEKPYVCKQCGKAFTTRHTSLRCHERIHCGEKPYICKQCG  
KGFISSSNFRKHEWTHSGEKLCVCKLQCGKAFTGHSSSLQRHERIHSGEKPYVCKHCGKDFSSLSGCQRHEQIHT  
GEKPYVCKNCGKAFTNPSALRNHERIHSGEKPYVCGQCGKGFISFSKFRHERIHTGEKPYKCKQCGKAFTGH  
SSLRRHERIHSGEKPFVCKHCGKSFYTLSDCQRHEQIHTGEKPFICKQCGKAFTTRSSSLKIHDKTHSRSP\*  
>ENSMUSP00000034259\_c.584:A>C\_p.E195D ENSMUST00000034259.8|zfp709-  
201|ENSMUSG00000056019|+|chr8:g.72643160:A>C  
GSVVSFQDVAVTFTVEEWALLDPSQKLLHKDVMEEETFRNLAAIGKTQEGQNIDEDHRYSRNRQNEVVERLLEH  
SKGTESKEIFRQIPNTIVNRKSSHRTMLSENHVYKDNVLISQSSLTVSVPLQTPHKPHEYELHGENLYKFGEC



EKAFIYPECFLLKHKDSGTRQRSYELNQCEEIIFKSNDYIQIRVNDETTREIDICIDKQHYAFNYPDFLQYVEKVHT  
GKKPYACKQCGKTFSSFLSNIKRHERIHSGEKPYRCNICDKAFTCSTNFQEHERTHTGEKPYLCTQCGKSFSSFL  
SNIRRHERTHTGEKPYRCNACGKAFSYLTNFQDHERHTHTGEKPYVCTQCGKAFTYYSFQTHKRCHTGEKPYV  
CKQCGKAFSYNSIQTHKRCHTGEKPYVCKLCAKAFTTSSSLRYHERIHSGEKPHVCLQCGKGFNSSTLRH  
ERTHTGEKPYKCKKCGKVFSDSSLRCHERIHSGEKPYVCKQCGKAFTRHTSLRCHERIHCGEKPYICKQCGK  
GFISSSNFRKHEWTHSSEKLCVCKLCKGKAFTGHSSLRHERIHSGEKPYVCKHCGKDFSSLSGCQRHEQIHTG  
EKPYVCKNCGKAFTNPSALRNHERIHSGEKPYVCGQCGKGFISFSKFRHERIHTGEKPYKCKQCGKAFTGHS  
SLRRHERIHSGEKPFVCKHCGKSFYTLSDCQRHEQIHTGEKPFICKQCGKAFTRSSSLKIHDKTHSRSP\*  
>rs218700520\_ENSMUSP00000140285\_c.639:T>A\_p.Y214N  
ENSMUST00000188685.7|zfp709-203|ENSMUSG00000056019|+|chr8:g.72643212:T>A  
MGSVSFQDVAVTFTVEEWALLDPSQKLLHKDVMETFRNLAAIGKTQEGQNIDEDHRYSRNRQNEVVERLLE  
HSKGTESKEIFRQIPNTIVNRKSSHRTMLSENHVYKDNVLISQSSSLTVSVPLQTPHKPHEYELHGENLYKFG  
CEKAFIYPECFLLKHKDSGTRQRSYELNQCEEIIFKSNDYIQIRVNDETTREEICIDKQHYAFNYPDFLQNV  
TGKKPYACKQCGKTFSSFLSNIKRHERIHSGEKPYRCNICDKAFTCSTNFQEHERTHTGEKPYLCTQCGKSF  
LSNIRRHERTHTGEKPYRCNACGKAFSYLTNFQDHERHTHTGEKPYVCTQCGKAFTYYSFQTHKRCHTGEKPY  
VCKQCGKAFSYNSIQTHKRCHTGEKPYVCKLCAKAFTTSSSLRYHERIHSGEKPHVCLQCGKGFNSSTLRH  
ERTHTGEKPYKCKKCGKVFSDSSLRCHERIHSGEKPYVCKQCGKAFTRHTSLRCHERIHCGEKPYICKQCG  
KGFISSSNFRKHEWTHSSEKLCVCKLCKGKAFTGHSSLRHERIHSGEKPYVCKHCGKDFSSLSGCQRHEQIHT  
GEKPYVCKNCGKAFTNPSALRNHERIHSGEKPYVCGQCGKGFISFSKFRHERIHTGEKPYKCKQCGKAFTGH  
SSLRHERIHSGEKPFVCKHCGKSFYTLSDCQRHEQIHTGEKPFICKQCGKAFTRSSSLKIHDKTHSRSP\*  
>rs218700520\_ENSMUSP00000034259\_c.636:T>A\_p.Y213N  
ENSMUST00000034259.8|zfp709-201|ENSMUSG00000056019|+|chr8:g.72643212:T>A  
GSVSVFQDVAVTFTVEEWALLDPSQKLLHKDVMETFRNLAAIGKTQEGQNIDEDHRYSRNRQNEVVERLLEH  
SKGTESKEIFRQIPNTIVNRKSSHRTMLSENHVYKDNVLISQSSSLTVSVPLQTPHKPHEYELHGENLYKFG  
EKAFIYPECFLLKHKDSGTRQRSYELNQCEEIIFKSNDYIQIRVNDETTREEICIDKQHYAFNYPDFLQNV  
TGKKPYACKQCGKTFSSFLSNIKRHERIHSGEKPYRCNICDKAFTCSTNFQEHERTHTGEKPYLCTQCGKSF  
LSNIRRHERTHTGEKPYRCNACGKAFSYLTNFQDHERHTHTGEKPYVCTQCGKAFTYYSFQTHKRCHTGEKPY  
VCKQCGKAFSYNSIQTHKRCHTGEKPYVCKLCAKAFTTSSSLRYHERIHSGEKPHVCLQCGKGFNSSTLRH  
ERTHTGEKPYKCKKCGKVFSDSSLRCHERIHSGEKPYVCKQCGKAFTRHTSLRCHERIHCGEKPYICKQCG  
KGFISSSNFRKHEWTHSSEKLCVCKLCKGKAFTGHSSLRHERIHSGEKPYVCKHCGKDFSSLSGCQRHEQIHT  
GEKPYVCKNCGKAFTNPSALRNHERIHSGEKPYVCGQCGKGFISFSKFRHERIHTGEKPYKCKQCGKAFTGH  
SSLRHERIHSGEKPFVCKHCGKSFYTLSDCQRHEQIHTGEKPFICKQCGKAFTRSSSLKIHDKTHSRSP\*  
>ENSMUSP00000064823\_c.583:T>G\_p.F195C ENSMUST00000067912.8|klf2-  
201|ENSMUSG00000055148|+|chr8:g.73073781:T>G  
MALSEPIILPSGFATFASPCERGLQERWPRNEPEAGGTDEDLNNVLDLDFILSMGLDGLGAENPPEPPPPQPPPPAFY  
YEPFGAPPPYSIPAASLGTETLLRDLDPQGPALHGRFLLAPPGRVLVKAEPPEVDGGGYGCAPGLAHGPRGLK  
LEGAPGATGACMRGPAGRPPPPDPPLSPDGPLRIPASGPRNPFPPPCGPGPSFGGPGPALHYGPPAPGAFG  
LFEDAAAAAALGLAPPATRGLLTPSSPLELLEAKPKRGRRSWPKRAATHTCYTNCGKTYTKSSHLKAHL  
RTHHTGEKPYHCNWECCGWKFARSDDELTRHYRKHTGHRPFQCHLCDRAFSRSDHLALHMKRHM\*  
>rs47424793\_ENSMUSP00000105539\_c.1158:G>A\_p.G387S  
ENSMUST00000109913.9|Nr3c2-204|ENSMUSG00000031618|+|chr8:g.77636059:G>A  
METKGYHSLPEGLDMERRWSQVSTLERSLGAERTNENSYMEIVNVSCVSGATPNNSTQGSSKEKHELLPC  
LQQDNSRSGILPDSIKTELESKELSATVAESMGLYMDSVRDAEYTYDQQNQGGSLSPAKIYQNMELVKFYKE  
NGHRSSSTLSAISRPLRSFMPDSGTSMNGGALRAIVKSPIICHEKSPSVCSPLNMPSSVCS PAGINSMSSTAS  
FGSFPVHSPITQGTSLTCSPSVENRGRSRSHSPVHASNVGSPSSPLSSMKSPISPPSHCSVKSPVSSPNNVP  
LRSSVSSPANLNNRCSVSSPNTNNRSTLSSPTASTVGSIGSPISNAFSYTTSGASAGAGAIQDMVSPDTH  
EKGAHDVFPFKTEEVEKAI NSVVTGQLNIVQYIKPEPDGAFSSSSCLGGNNKINPSSPFSVPIKQESSKHSCSG  
ASFKNPTVNPFFMDGSYFSFMDDKDYSLSGILGPPVPGFDSSCEGSAFPGGIKQEPDDGSYFPETSIPSS  
AIGVNSGGQSFHYRIGAQGTISLSRSPRDQSFQHLSSFPVNALVESWKP HGLDSSRRSDGYPVLEYPEN  
SSSTLRSVSTGSSRPSKICLVCGDEASGCHYGVVTCGSKVFFKRAVEGQHNYLCAGRNDICIDKIRKNC  
CRLQKCLQAGMNLGARKSKKLGLKGLHEEQPPPPPPQSPPEEGTTYIAPTKEPSVNSALVPQLASITRAL  
TPSPMILENIEPEIVYAGYDNSKPDTAESLLSTLNRLAGKQMIQVVKWAKVLPGFKNLPLEDQITLIQYSWM  
CLSSFALSWRSYKHTNSQFLYFAPDLVFNEEKMHQSAMYELCQGMROI SLQFVRLQLTFEYESIMKVL LLLST  
VPKDLGKSAFAEEMRTNYIKELRKMVTKCPNNSGGQSWQRFYQLTKLLDMSMDLVNDLLEFCFYTFRESQALK  
VEFPAMLVEIISDQLPKVESGNAPLYFHRK\*  
>rs47424793\_ENSMUSP00000118222\_c.1158:G>A\_p.G387S  
ENSMUST00000148106.8|Nr3c2-208|ENSMUSG00000031618|+|chr8:g.77636059:G>A

METKGYHSLPEGLDMERRWSQVSQTLERSLGAERTNENSYMEIVNVSCVSGATPNNSTQGSSKEKHELLPC  
LQQDNSRSGILPSDIKTELESKELSATVAESMGLYMDSVRDAEYTYDQQNQOGLSLSPAKIYQNMEQLVKFYKE  
NGHRSSSTLSAISRPLRSFMPDSTSMNGGALRAIVKSPIICHEKSPSVCSPLNMPSSVCS PAGINSMSSSTAS  
FGSFPVHSPITQGTSLTCSPSVENRGRSRSHSPVHASNVGSPSSPLSSMKSPISSPPSHCSVKSPVSSPNNVP  
LRSSVSSPANLNNSRCSVSSPNTNNRSTLSSPTASTVGSIGSPISNAFSYTTSGASAGAGAIQDMVPSPDTH  
EKGADHVPFPKTEEVEKAI S NSVTGQLNIVQYIKPEPDGAFSSSCLGGNNKINPSSPFSVPIKQESSKHSCSG  
ASFKNPTVNPFFMDGYSYFSMDDKDYYSLSGILGPPVPGFDSCEGSAFPGGIKQEPDDGYSYFPETSIPSS  
AIIGVNSGGQSFHYRIGAQGTISLSRSPRDQSFQHLSSFPVNALVESWKPHGDLSSRRSDGYPVLEYIPENV  
SSSTLRVSTGSSRPSKICLVCGEASGCHYGVTTCGCKVFFKRAVEGQHNYLCAGRNDICIIDKIRRKNCPA  
CRLQKCLQAGMNLGERRCISLPCMSCARGCGRSAFSSCGFS\*

>rs47424793\_ENSMUSP00000105538\_c.1158:G>A\_p.G387S

ENSMUST00000109912.8|Nr3c2-203|ENSMUSG00000031618|+|chr8:g.77636059:G>A  
METKGYHSLPEGLDMERRWSQVSQTLERSLGAERTNENSYMEIVNVSCVSGATPNNSTQGSSKEKHELLPC  
LQQDNSRSGILPSDIKTELESKELSATVAESMGLYMDSVRDAEYTYDQQNQOGLSLSPAKIYQNMEQLVKFYKE  
NGHRSSSTLSAISRPLRSFMPDSTSMNGGALRAIVKSPIICHEKSPSVCSPLNMPSSVCS PAGINSMSSSTAS  
FGSFPVHSPITQGTSLTCSPSVENRGRSRSHSPVHASNVGSPSSPLSSMKSPISSPPSHCSVKSPVSSPNNVP  
LRSSVSSPANLNNSRCSVSSPNTNNRSTLSSPTASTVGSIGSPISNAFSYTTSGASAGAGAIQDMVPSPDTH  
EKGADHVPFPKTEEVEKAI S NSVTGQLNIVQYIKPEPDGAFSSSCLGGNNKINPSSPFSVPIKQESSKHSCSG  
ASFKNPTVNPFFMDGYSYFSMDDKDYYSLSGILGPPVPGFDSCEGSAFPGGIKQEPDDGYSYFPETSIPSS  
AIIGVNSGGQSFHYRIGAQGTISLSRSPRDQSFQHLSSFPVNALVESWKPHGDLSSRRSDGYPVLEYIPENV  
SSSTLRVSTGSSRPSKICLVCGEASGCHYGVTTCGCKVFFKRAVEGQHNYLCAGRNDICIIDKIRRKNCPA  
CRLQKCLQAGMNLGARKSKKLGKLGHEEQPPPPPPQSPPEEGTTYIAPTKEPSVNSALVPQLASITRAL  
TPSPSMILENIEPEIVYAGYDNSKPDTAESLLSTLNRLAGKQMIQVVKWAKVLPGFKNLPLEDQITLIQYSWM  
CLSSFALSWSRYKHTNSQFLYFAPDLVFNEEKMHQSAMYELCQGMROI SLQFVRLQLTFFEEYSIMKVLLLLST  
VPKDGLKSQA AFEEMRTNYIKELRKMVTKCPNSSGQSWQRFYQLTKLLDSMHDLVNDLLEFCFYTFRESQALK  
VEFPAMLVEIISDQLPKVESGNAKPLYFHRK\*

>rs47424793\_ENSMUSP00000105537\_c.1158:G>A\_p.G387S

ENSMUST00000109911.8|Nr3c2-202|ENSMUSG00000031618|+|chr8:g.77636059:G>A  
METKGYHSLPEGLDMERRWSQVSQTLERSLGAERTNENSYMEIVNVSCVSGATPNNSTQGSSKEKHELLPC  
LQQDNSRSGILPSDIKTELESKELSATVAESMGLYMDSVRDAEYTYDQQNQOGLSLSPAKIYQNMEQLVKFYKE  
NGHRSSSTLSAISRPLRSFMPDSTSMNGGALRAIVKSPIICHEKSPSVCSPLNMPSSVCS PAGINSMSSSTAS  
FGSFPVHSPITQGTSLTCSPSVENRGRSRSHSPVHASNVGSPSSPLSSMKSPISSPPSHCSVKSPVSSPNNVP  
LRSSVSSPANLNNSRCSVSSPNTNNRSTLSSPTASTVGSIGSPISNAFSYTTSGASAGAGAIQDMVPSPDTH  
EKGADHVPFPKTEEVEKAI S NSVTGQLNIVQYIKPEPDGAFSSSCLGGNNKINPSSPFSVPIKQESSKHSCSG  
ASFKNPTVNPFFMDGYSYFSMDDKDYYSLSGILGPPVPGFDSCEGSAFPGGIKQEPDDGYSYFPETSIPSS  
AIIGVNSGGQSFHYRIGAQGTISLSRSPRDQSFQHLSSFPVNALVESWKPHGDLSSRRSDGYPVLEYIPENV  
SSSTLRVSTGSSRPSKICLVCGEASGCHYGVTTCGCKVFFKRAVEGQHNYLCAGRNDICIIDKIRRKNCPA  
CRLQKCLQAGMNLGGFKNLPLEDQITLIQYSWMCLSSFALSWSRYKHTNSQFLYFAPDLVFNEEKMHQSAMYEL  
LCQGMROI SLQFVRLQLTFFEEYSIMKVLLLLSTVPKDGLKSQA AFEEMRTNYIKELRKMVTKCPNSSGQSWQ  
RFYQLTKLLDSMHDLVNDLLEFCFYTFRESQALKVEFPAMLVEIISDQLPKVESGNAKPLYFHRK\*

>rs47424793\_ENSMUSP00000034031\_c.1158:G>A\_p.G387S

ENSMUST00000034031.6|Nr3c2-201|ENSMUSG00000031618|+|chr8:g.77636059:G>A  
METKGYHSLPEGLDMERRWSQVSQTLERSLGAERTNENSYMEIVNVSCVSGATPNNSTQGSSKEKHELLPC  
LQQDNSRSGILPSDIKTELESKELSATVAESMGLYMDSVRDAEYTYDQQNQOGLSLSPAKIYQNMEQLVKFYKE  
NGHRSSSTLSAISRPLRSFMPDSTSMNGGALRAIVKSPIICHEKSPSVCSPLNMPSSVCS PAGINSMSSSTAS  
FGSFPVHSPITQGTSLTCSPSVENRGRSRSHSPVHASNVGSPSSPLSSMKSPISSPPSHCSVKSPVSSPNNVP  
LRSSVSSPANLNNSRCSVSSPNTNNRSTLSSPTASTVGSIGSPISNAFSYTTSGASAGAGAIQDMVPSPDTH  
EKGADHVPFPKTEEVEKAI S NSVTGQLNIVQYIKPEPDGAFSSSCLGGNNKINPSSPFSVPIKQESSKHSCSG  
ASFKNPTVNPFFMDGYSYFSMDDKDYYSLSGILGPPVPGFDSCEGSAFPGGIKQEPDDGYSYFPETSIPSS  
AIIGVNSGGQSFHYRIGAQGTISLSRSPRDQSFQHLSSFPVNALVESWKPHGDLSSRRSDGYPVLEYIPENV  
SSSTLRVSTGSSRPSKICLVCGEASGCHYGVTTCGCKVFFKRAVEGKCSRQHNYLCAGRNDICIIDKIRRK  
NCPACRLQKCLQAGMNLGARKSKKLGKLGHEEQPPPPPPQSPPEEGTTYIAPTKEPSVNSALVPQLASI  
TRALTPSPSMILENIEPEIVYAGYDNSKPDTAESLLSTLNRLAGKQMIQVVKWAKVLPGFKNLPLEDQITLIQ  
YSWMCLSSFALSWSRYKHTNSQFLYFAPDLVFNEEKMHQSAMYELCQGMROI SLQFVRLQLTFFEEYSIMKVLL  
LLSTVPKDGLKSQA AFEEMRTNYIKELRKMVTKCPNSSGQSWQRFYQLTKLLDSMHDLVNDLLEFCFYTFRES  
QALKVEFPAMLVEIISDQLPKVESGNAKPLYFHRK\*

>rs387004511\_ENSMUSP00000105539\_c.2820:A>G\_p.T941A

ENSMUST00000109913.9|Nr3c2-204|ENSMUSG00000031618|+|chr8:g.77969037:A>G

METKGYHSLPEGLDMERRWSQVSQTLERSLGAERTNENSYMEIVNVSCVSGATPNNSTQGSSKEKHELLPC
LQQDNSRSGILPSDIKTELESKELSATVAESMGLYMDSVRDAEYTYDQQNQOGLSLPAKIYQNMEQLVKFYKE
NGHRSSSTLSAISRPLRSFMPDSGTSMNGGALRAIVKSPIICHEKSPSVCSPLNMPSSVCSPAGINSMSSSTAS
FGSFPVHSPITQGTSLTCSPSVENRGRSRSHSPVHASNVGSPSSPLSSMKSPISSPPSHCSVKSPVSSPNNVP
LRSSVSSPANLNNRSCSVSSPNTNNRSTLSSPTASTVGSIGSPISNAFSYTTSGASAGAGAIQDMVPSPDTH
EKGADHVPFPKTEEEVEKAISNGVTGQLNIVQYIKPEPDGAFSSSCLGGNNKINPSSPFSVPIKQESSKHSCSG
ASFKNPTVNPFFMDGYSYFSMDDKDYSLSGILGPPVPGFDSCEGSAFPGGIKQEPDDGYSYPETSIPSS
AIGVNSGGQSFHYRIGAQGTISLSRSPRDQSFQHLSSFPVNALVESWKPHGDLSSRRSDGYPVLEYIPENV
SSSTLRVSTGSSRPSKICLVCGEASGCHYGVTTCGSKVFFKRAVEGQHNYLCAGRNDICIIDKIRRNKCPA
CRLQKCLQAGMNLGARKSKKLGKLGHEEQPQQPPPPPPQSPPEEGTTYIAPTKEPSVNSALVPQLASITRAL
TPSPSMILENIEPEIVYAGYDNSKPDTAESLLSTLNRLAGKQMIQVVKWAKVLPGFKNLPLEDQITLIQYSWM
CLSSFALSWSRSYKHTNSQFLYFAPDLVFNEEKMHQSAMYELCQGMROI SLQFVRLQLTFFEEYSIMKVLLLLST
VPKDGLKSQAAFEEMRTNYIKELRKMVTKCPNSSGQSWORFYQLTKLLDSMHDLVNDLLEFCFYAFRESQALK
VEFPAMLVEIISDQLPKVESGNAKPLYFHRK\*

>rs387004511\_ENSMUSP00000105538\_c.2820:A>G\_p.T941A

ENSMUST00000109912.8|Nr3c2-203|ENSMUSG00000031618|+|chr8:g.77969037:A>G
METKGYHSLPEGLDMERRWSQVSQTLERSLGAERTNENSYMEIVNVSCVSGATPNNSTQGSSKEKHELLPC
LQQDNSRSGILPSDIKTELESKELSATVAESMGLYMDSVRDAEYTYDQQNQOGLSLPAKIYQNMEQLVKFYKE
NGHRSSSTLSAISRPLRSFMPDSGTSMNGGALRAIVKSPIICHEKSPSVCSPLNMPSSVCSPAGINSMSSSTAS
FGSFPVHSPITQGTSLTCSPSVENRGRSRSHSPVHASNVGSPSSPLSSMKSPISSPPSHCSVKSPVSSPNNVP
LRSSVSSPANLNNRSCSVSSPNTNNRSTLSSPTASTVGSIGSPISNAFSYTTSGASAGAGAIQDMVPSPDTH
EKGADHVPFPKTEEEVEKAISNGVTGQLNIVQYIKPEPDGAFSSSCLGGNNKINPSSPFSVPIKQESSKHSCSG
ASFKNPTVNPFFMDGYSYFSMDDKDYSLSGILGPPVPGFDSCEGSAFPGGIKQEPDDGYSYPETSIPSS
AIGVNSGGQSFHYRIGAQGTISLSRSPRDQSFQHLSSFPVNALVESWKPHGDLSSRRSDGYPVLEYIPENV
SSSTLRVSTGSSRPSKICLVCGEASGCHYGVTTCGSKVFFKRAVEGQHNYLCAGRNDICIIDKIRRNKCPA
CRLQKCLQAGMNLGARKSKKLGKLGHEEQPQQPPPPPPQSPPEEGTTYIAPTKEPSVNSALVPQLASITRAL
TPSPSMILENIEPEIVYAGYDNSKPDTAESLLSTLNRLAGKQMIQVVKWAKVLPGFKNLPLEDQITLIQYSWM
CLSSFALSWSRSYKHTNSQFLYFAPDLVFNEEKMHQSAMYELCQGMROI SLQFVRLQLTFFEEYSIMKVLLLLST
VPKDGLKSQAAFEEMRTNYIKELRKMVTKCPNSSGQSWORFYQLTKLLDSMHDLVNDLLEFCFYAFRESQALK
VEFPAMLVEIISDQLPKVESGNAKPLYFHRK\*

>rs387004511\_ENSMUSP00000105537\_c.2481:A>G\_p.T828A

ENSMUST00000109911.8|Nr3c2-202|ENSMUSG00000031618|+|chr8:g.77969037:A>G
METKGYHSLPEGLDMERRWSQVSQTLERSLGAERTNENSYMEIVNVSCVSGATPNNSTQGSSKEKHELLPC
LQQDNSRSGILPSDIKTELESKELSATVAESMGLYMDSVRDAEYTYDQQNQOGLSLPAKIYQNMEQLVKFYKE
NGHRSSSTLSAISRPLRSFMPDSGTSMNGGALRAIVKSPIICHEKSPSVCSPLNMPSSVCSPAGINSMSSSTAS
FGSFPVHSPITQGTSLTCSPSVENRGRSRSHSPVHASNVGSPSSPLSSMKSPISSPPSHCSVKSPVSSPNNVP
LRSSVSSPANLNNRSCSVSSPNTNNRSTLSSPTASTVGSIGSPISNAFSYTTSGASAGAGAIQDMVPSPDTH
EKGADHVPFPKTEEEVEKAISNGVTGQLNIVQYIKPEPDGAFSSSCLGGNNKINPSSPFSVPIKQESSKHSCSG
ASFKNPTVNPFFMDGYSYFSMDDKDYSLSGILGPPVPGFDSCEGSAFPGGIKQEPDDGYSYPETSIPSS
AIGVNSGGQSFHYRIGAQGTISLSRSPRDQSFQHLSSFPVNALVESWKPHGDLSSRRSDGYPVLEYIPENV
SSSTLRVSTGSSRPSKICLVCGEASGCHYGVTTCGSKVFFKRAVEGQHNYLCAGRNDICIIDKIRRNKCPA
CRLQKCLQAGMNLGGFKNLPLEDQITLIQYSWMCLSSFALSWSRSYKHTNSQFLYFAPDLVFNEEKMHQSAMYE
LCQGMROI SLQFVRLQLTFFEEYSIMKVLLLLSTVPKDGLKSQAAFEEMRTNYIKELRKMVTKCPNSSGQSWOR
FYQLTKLLDSMHDLVNDLLEFCFYAFRESQALKVEFPAMLVEIISDQLPKVESGNAKPLYFHRK\*

>rs387004511\_ENSMUSP00000034031\_c.2832:A>G\_p.T945A

ENSMUST00000034031.6|Nr3c2-201|ENSMUSG00000031618|+|chr8:g.77969037:A>G
METKGYHSLPEGLDMERRWSQVSQTLERSLGAERTNENSYMEIVNVSCVSGATPNNSTQGSSKEKHELLPC
LQQDNSRSGILPSDIKTELESKELSATVAESMGLYMDSVRDAEYTYDQQNQOGLSLPAKIYQNMEQLVKFYKE
NGHRSSSTLSAISRPLRSFMPDSGTSMNGGALRAIVKSPIICHEKSPSVCSPLNMPSSVCSPAGINSMSSSTAS
FGSFPVHSPITQGTSLTCSPSVENRGRSRSHSPVHASNVGSPSSPLSSMKSPISSPPSHCSVKSPVSSPNNVP
LRSSVSSPANLNNRSCSVSSPNTNNRSTLSSPTASTVGSIGSPISNAFSYTTSGASAGAGAIQDMVPSPDTH
EKGADHVPFPKTEEEVEKAISNGVTGQLNIVQYIKPEPDGAFSSSCLGGNNKINPSSPFSVPIKQESSKHSCSG
ASFKNPTVNPFFMDGYSYFSMDDKDYSLSGILGPPVPGFDSCEGSAFPGGIKQEPDDGYSYPETSIPSS
AIGVNSGGQSFHYRIGAQGTISLSRSPRDQSFQHLSSFPVNALVESWKPHGDLSSRRSDGYPVLEYIPENV
SSSTLRVSTGSSRPSKICLVCGEASGCHYGVTTCGSKVFFKRAVEGKCSRQHNYLCAGRNDICIIDKIRRN
NCPACRLQKCLQAGMNLGARKSKKLGKLGHEEQPQQPPPPPPQSPPEEGTTYIAPTKEPSVNSALVPQLASI
TRALTPSPSMILENIEPEIVYAGYDNSKPDTAESLLSTLNRLAGKQMIQVVKWAKVLPGFKNLPLEDQITLIQ
YSWMCLSSFALSWSRSYKHTNSQFLYFAPDLVFNEEKMHQSAMYELCQGMROI SLQFVRLQLTFFEEYSIMKVLL

LLSTVPKDGLKSQAAFEEMRTNYIKELRKMVTKCPNSSGQSWQRFYQLTKLLDSMHDLVNDLLEFCFYAFRES  
QALKVEFPAMLVEIISDQLPKVESGNAKPLYFHRK\*  
>rs47888503\_ENSMUSP00000075658\_c.1918:C>G\_p.S640C  
ENSMUST00000076316.6|Arhgap10-201|ENSMUSG00000037148|-  
|chr8:g.78003885:G>C  
MGLQPLEFSDCYLDSPWFRERIRAHEAEELERTNKFIKELIKDGKNLISATKSLSAAQRKFAHSLRDFKFEFIG  
DAETDDERCIDASLREFSNFLKNLEEQREIMALSVTETLIKPLEKFRKEQLGAVKKEKKKFKDETEKNYSLID  
KHLTLSARKKDSLQEADLQVEQNRQHIFYELSLEYVCKLQEIQERKKFEFVEPMLSFFQGMFTFYHQHELK  
DFNHYKMELQINIQNTRNRFEGTRSEVEELMNKIRQNPDKQKRASQFTAEGYLYVQEKRPAPFGSSWVKHYCM  
YRKTAKKFNMIPFEHRSGGKLDGGEAFFLKECTKRHMDSTDRRFCFDIEAADRPGVPLTVQAFSEEEKQWLE  
ALGGKEALFHTFNRAIVPRPEGGAQLDKMGFTILRKCISAVETRGINDQGLYRVVGVSSKVRLLSMLMDVKM  
CNELDLENSADWEVKTVTSAKQYLRSLPEPLMTYELHRDFIVPAKSGSPESRVNAIHFLVHKLPEKNKEMLD  
ILVKHLTNVSSHSKQNLMTVANLGVVFGPTLMRPQEETVAAIMDLKFQNIIVVEILINHEKIFRTSPDITFAE  
PTCLSASPPNAPPRQSKRQGQRTKRPVAVYNLCLELEEGDSPSPKEDPPSSSQDCLSTPSPITSAAHGPPGL  
DGNHLLAADGGSCGDATATTPSQTRPSMVQWLNMQSPITPSSNPAGTPPSPRMSPFPLSPAASIVDKLPECVIN  
RKARAVYPCEAEHSSELSFEIGAI FEDVQTSREPGWLEGLTNGKRGLIPQNYVKLL\*  
>rs47888503\_ENSMUSP00000147485\_c.1918:C>G\_p.S640C  
ENSMUST000000210922.2|Arhgap10-203|ENSMUSG00000037148|-  
|chr8:g.78003885:G>C  
MGLQPLEFSDCYLDSPWFRERIRAHEAEELERTNKFIKELIKDGKNLISATKSLSAAQRKFAHSLRDFKFEFIG  
DAETDDERCIDASLREFSNFLKNLEEQREIMALSVTETLIKPLEKFRKEQLGAVKKEKKKFKDETEKNYSLID  
KHLTLSARKKDSLQEADLQVEQNRQHIFYELSLEYVCKLQEIQERKKFEFVEPMLSFFQGMFTFYHQHELK  
DFNHYKMELQINIQNTRNRFEGTRSEVEELMNKIRQNPDKQKRASQFTAEGYLYVQEKRPAPFGSSWVKHYCM  
YRKTAKKFNMIPFEHRSGGKLDGGEAFFLKECTKRHMDSTDRRFCFDIEAADRPGVPLTVQAFSEEEKQWLE  
ALGGKEALFHTFNRAIVPRPEGGAQLDKMGFTILRKCISAVETRGINDQGLYRVVGVSSKVRLLSMLMDVKM  
CNELDLENSADWEVKTVTSAKQYLRSLPEPLMTYELHRDFIVPAKSGSPESRVNAIHFLVHKLPEKNKEMLD  
ILVKHLTNVSSHSKQNLMTVANLGVVFGPTLMRPQEETVAAIMDLKFQNIIVVEILINHEKIFRTSPDITFAE  
PTCLSASPPNAPPRQSKRQGQRTKRPVAVYNLCLELEEGDSPSPKEDPPSSSQDCLSTPSPITSAAHGPPGL  
DGNHLLAADGGSCGDATATTVINRKARAVYPCEAEHSSELSFEIGAI FEDVQTSREPGWLEGLTNGKRGLIPQNYVKLL\*  
>rs47888503\_ENSMUSP00000147493\_c.1852:C>G\_p.S618C  
ENSMUST000000210519.2|Arhgap10-202|ENSMUSG00000037148|-  
|chr8:g.78003885:G>C  
MGLQPLEFSDCYLDSPWFRERIRAHEAEELERTNKFIKELIKDGKNLISATKSLSAAQRKFAHSLRDFKFEFIG  
DAETDDERCIDASLREFSNFLKNLEEQREIMALSVTETLIKPLEKFRKEQLGAVKKEKKKFKDETEKNYSLID  
KHLTLSARKKDSLQEADLQVEQNRQHIFYELSLEYVCKLQEIQERKKFEFVEPMLSFFQGMFTFYHQHELK  
DFNHYKMELQINIQNTRNRFEGTRSEVEELMNKIRQNPDKQKRASQFTAEGYLYVQEKRPAPFGSSWVKHYCM  
YRKTAKKFNMIPFEHRSGGKLDGGEAFFLKECTKRHMDSTDRRFCFDIEAADRPGVPLTVQAFSEEEKQWLE  
ALGGKEALFHTFNRAIVPRPEGGINDQGLYRVVGVSSKVRLLSMLMDVKMCNELDLENSADWEVKTVTSAK  
QYLRSLPEPLMTYELHRDFIVPAKSGSPESRVNAIHFLVHKLPEKNKEMLDILVKHLTNVSSHSKQNLMTVAN  
LGVVFGPTLMRPQEETVAAIMDLKFQNIIVVEILINHEKIFRTSPDITFAEPTCLSASPPNAPPRQSKRQGQ  
TKRPVAVYNLCLELEEGDSPSPKEDPPSSSQDCLSTPSPITSAAHGPPGLDGNHLLAADGGSCGDATATTPSQ  
TRPSMVQWLNMQSPITPSSNPAGTPPSPRMSPFPLSPAASIVDKLPECVINRKARAVYPCEAEHSSELSFEIG  
AIFEDVQTSREPGWLEGLTNGKRGLIPQNYVKLL\*  
>rs50544875\_ENSMUSP00000075658\_c.1783:C>T\_p.A595V  
ENSMUST00000076316.6|Arhgap10-201|ENSMUSG00000037148|-  
|chr8:g.78037443:G>A  
MGLQPLEFSDCYLDSPWFRERIRAHEAEELERTNKFIKELIKDGKNLISATKSLSAAQRKFAHSLRDFKFEFIG  
DAETDDERCIDASLREFSNFLKNLEEQREIMALSVTETLIKPLEKFRKEQLGAVKKEKKKFKDETEKNYSLID  
KHLTLSARKKDSLQEADLQVEQNRQHIFYELSLEYVCKLQEIQERKKFEFVEPMLSFFQGMFTFYHQHELK  
DFNHYKMELQINIQNTRNRFEGTRSEVEELMNKIRQNPDKQKRASQFTAEGYLYVQEKRPAPFGSSWVKHYCM  
YRKTAKKFNMIPFEHRSGGKLDGGEAFFLKECTKRHMDSTDRRFCFDIEAADRPGVPLTVQAFSEEEKQWLE  
ALGGKEALFHTFNRAIVPRPEGGAQLDKMGFTILRKCISAVETRGINDQGLYRVVGVSSKVRLLSMLMDVKM  
CNELDLENSADWEVKTVTSAKQYLRSLPEPLMTYELHRDFIVPAKSGSPESRVNAIHFLVHKLPEKNKEMLD  
ILVKHLTNVSSHSKQNLMTVANLGVVFGPTLMRPQEETVAAIMDLKFQNIIVVEILINHEKIFRTSPDITFAE  
PTCLSASPPNVPPRQSKRQGQRTKRPVAVYNLCLELEEGDSPSPKEDPPSSSQDCLSTPSPITSAAHGPPGL  
DGNHLLAADGGSCGDATATTPSQTRPSMVQWLNMQSPITPSSNPAGTPPSPRMSPFPLSPAASIVDKLPECVIN  
RKARAVYPCEAEHSSELSFEIGAI FEDVQTSREPGWLEGLTNGKRGLIPQNYVKLL\*

>rs50544875\_ENSMUSP00000147485\_c.1783:C>T\_p.A595V  
 ENSMUST00000210922.2|Arhgap10-203|ENSMUSG00000037148|-  
 |chr8:g.78037443:G>A  
 MGLQPLEFSDCYLDSPWFRERIRAHEAEELERTNKFIKELIKDGKNLISATKSLSAQRKFAHSLRDFKFEFIG  
 DAETDDERCIDASLREFSNFLKNLEEQREIMALSVTETLIKPLEKFRKEQLGAVKKEKKKFDKETEKNYSLID  
 KHLTSLARKKDSLQEQADLQVEQNRQHFYELSLEYVCKLQEIQRKKEFEFVEPMLSFQGMFTFYHQGHLSK  
 DFNHYKMELQINIQNTRNRFEGTRSEVEELMNKIRQNPDKQKRASQFTAEGYLYVQEKRPAPFGSSWVKHYCM  
 YRKTAKKFNMIPEHRSGGKLDGGEAFFLKECTKRHMSTDRRFCFDIEAADRPGVPLTVQAFSEEEKQWLE  
 ALGGKEALFHTFNRAIVPRPEGGAQLDKMGFTILRKCISAVETRGINDQGLYRVVGVSSKVQRLLSMLMDVKM  
 CNELDLENSADWEVKTVTSAKQYLRLSLEPELMTYELHRDFIVPAKSGSPESRVNAIHFLVHKLPEKNKEMLD  
 ILVKHLTNVSSHQKQNLMTVANLGVVFGPTLMRPQEETVAAIMDLKFQNIIVVEILINHEKIFRTSPDITFAE  
 PTCLSASPPNPPRQSKRQGRQTRKRPVAVYNLCLELEEGDPSPLKEDPPSSSQDSLSTPSPITSAAHGPPGL  
 DGNHLAADGGSCGDATATTVINRKARAVYPCEAEHSSELSFEIGAFEDVQTSREPGWLEGLTNGKRGLIPQN  
 YVKLL\*

>rs50544875\_ENSMUSP00000147493\_c.1717:C>T\_p.A573V  
 ENSMUST00000210519.2|Arhgap10-202|ENSMUSG00000037148|-  
 |chr8:g.78037443:G>A  
 MGLQPLEFSDCYLDSPWFRERIRAHEAEELERTNKFIKELIKDGKNLISATKSLSAQRKFAHSLRDFKFEFIG  
 DAETDDERCIDASLREFSNFLKNLEEQREIMALSVTETLIKPLEKFRKEQLGAVKKEKKKFDKETEKNYSLID  
 KHLTSLARKKDSLQEQADLQVEQNRQHFYELSLEYVCKLQEIQRKKEFEFVEPMLSFQGMFTFYHQGHLSK  
 DFNHYKMELQINIQNTRNRFEGTRSEVEELMNKIRQNPDKQKRASQFTAEGYLYVQEKRPAPFGSSWVKHYCM  
 YRKTAKKFNMIPEHRSGGKLDGGEAFFLKECTKRHMSTDRRFCFDIEAADRPGVPLTVQAFSEEEKQWLE  
 ALGGKEALFHTFNRAIVPRPEGGINDQGLYRVVGVSSKVQRLLSMLMDVKMCNELDLENSADWEVKTVTSAK  
 QYLRLSLEPELMTYELHRDFIVPAKSGSPESRVNAIHFLVHKLPEKNKEMLDILVKHLTNVSSHQKQNLMTVAN  
 LGVVFGPTLMRPQEETVAAIMDLKFQNIIVVEILINHEKIFRTSPDITFAEPTCLSASPPNPPRQSKRQGR  
 TRKRPVAVYNLCLELEEGDPSPLKEDPPSSSQDSLSTPSPITSAAHGPPGLDGNHLAADGGSCGDATATTPSQ  
 TRPSMVQWLNMQSPTTTPSSNPAGTTPSPRMSPFPLSPAASIVDKLPECVINRKARAVYPCEAEHSSELSFEIG  
 AIFEDVQTSREPGWLEGLTNGKRGLIPQNYVKLL\*

>rs230726632\_ENSMUSP00000075658\_c.1189:C>T\_p.T397I  
 ENSMUST00000076316.6|Arhgap10-201|ENSMUSG00000037148|-  
 |chr8:g.78109392:G>A  
 MGLQPLEFSDCYLDSPWFRERIRAHEAEELERTNKFIKELIKDGKNLISATKSLSAQRKFAHSLRDFKFEFIG  
 DAETDDERCIDASLREFSNFLKNLEEQREIMALSVTETLIKPLEKFRKEQLGAVKKEKKKFDKETEKNYSLID  
 KHLTSLARKKDSLQEQADLQVEQNRQHFYELSLEYVCKLQEIQRKKEFEFVEPMLSFQGMFTFYHQGHLSK  
 DFNHYKMELQINIQNTRNRFEGTRSEVEELMNKIRQNPDKQKRASQFTAEGYLYVQEKRPAPFGSSWVKHYCM  
 YRKTAKKFNMIPEHRSGGKLDGGEAFFLKECTKRHMSTDRRFCFDIEAADRPGVPLTVQAFSEEEKQWLE  
 ALGGKEALFHTFNRAIVPRPEGGAQLDKMGFTILRKCISAVETRGINDQGLYRVVGVSSKVQRLLSMLMDVKM  
 CNELDLENSADWEVKTVTSAKQYLRLSLEPELMTYELHRDFIVPAKSGSPESRVNAIHFLVHKLPEKNKEMLD  
 ILVKHLTNVSSHQKQNLMTVANLGVVFGPTLMRPQEETVAAIMDLKFQNIIVVEILINHEKIFRTSPDITFAE  
 PTCLSASPPNAPPRQSKRQGRQTRKRPVAVYNLCLELEEGDPSPLKEDPPSSSQDSLSTPSPITSAAHGPPGL  
 DGNHLAADGGSCGDATATTPSQTRPSMVQWLNMQSPTTTPSSNPAGTTPSPRMSPFPLSPAASIVDKLPECVIN  
 RKARAVYPCEAEHSSELSFEIGAFEDVQTSREPGWLEGLTNGKRGLIPQNYVKLL\*

>rs230726632\_ENSMUSP00000147485\_c.1189:C>T\_p.T397I  
 ENSMUST00000210922.2|Arhgap10-203|ENSMUSG00000037148|-  
 |chr8:g.78109392:G>A  
 MGLQPLEFSDCYLDSPWFRERIRAHEAEELERTNKFIKELIKDGKNLISATKSLSAQRKFAHSLRDFKFEFIG  
 DAETDDERCIDASLREFSNFLKNLEEQREIMALSVTETLIKPLEKFRKEQLGAVKKEKKKFDKETEKNYSLID  
 KHLTSLARKKDSLQEQADLQVEQNRQHFYELSLEYVCKLQEIQRKKEFEFVEPMLSFQGMFTFYHQGHLSK  
 DFNHYKMELQINIQNTRNRFEGTRSEVEELMNKIRQNPDKQKRASQFTAEGYLYVQEKRPAPFGSSWVKHYCM  
 YRKTAKKFNMIPEHRSGGKLDGGEAFFLKECTKRHMSTDRRFCFDIEAADRPGVPLTVQAFSEEEKQWLE  
 ALGGKEALFHTFNRAIVPRPEGGAQLDKMGFTILRKCISAVETRGINDQGLYRVVGVSSKVQRLLSMLMDVKM  
 CNELDLENSADWEVKTVTSAKQYLRLSLEPELMTYELHRDFIVPAKSGSPESRVNAIHFLVHKLPEKNKEMLD  
 ILVKHLTNVSSHQKQNLMTVANLGVVFGPTLMRPQEETVAAIMDLKFQNIIVVEILINHEKIFRTSPDITFAE  
 PTCLSASPPNAPPRQSKRQGRQTRKRPVAVYNLCLELEEGDPSPLKEDPPSSSQDSLSTPSPITSAAHGPPGL  
 DGNHLAADGGSCGDATATTVINRKARAVYPCEAEHSSELSFEIGAFEDVQTSREPGWLEGLTNGKRGLIPQN  
 YVKLL\*

>rs51928797\_ENSMUSP00000112692\_c.369:T>C\_p.F124L  
 ENSMUST00000118622.2|Prmt9-202|ENSMUSG00000037134|+|chr8:g.78285539:T>C

MPNSRPRRRGAGGGAGAAGRDRDLVARSLQSAEHCLGDQDFGTAYAHYLLVLSLAPELKDDVKETFQYTLFKW  
 AEELHALSRIQDLLGCYEQAELFPDDEVICNSMGEHLFRMGFRDEAAGYLHKAVKLNPFNDAKENFYRVAN  
 WLVERWHFIMLNDTRRNMYNAAIQKAVCLGSRVLDIGTGTGILSMFAKKAGAQSVAACELSKTMYELACDV  
 VAANKMENGIKLLHMKSLDIEIPKHIPERLSLVVTETVDAGVFGGIVESLIHAWEHLLLQPKTKEENGNCCK  
 YGKVI PAGAVIFGMAVECAEIRRHRVGVAKDIAGIHLPTNVKQSPAYTSVDTEETVEPYTTEKMSGIPGGYL  
 PLTECFQIMKVFNNLQELKSLATKKPHSLNVPAIKEGVLDAMVWVFLQLDDEYSLSTSPSEETCWEQAVYP  
 VQALEDYCIQPGDRVTMEASCHDCYLRIQGISILHLEHEMEVMKGFTKSKDLLSLGNEAELCSALANLQTSRP  
 EALEQTCMLEPTEIALLNNIPYHEGFKTAMRKVLSLAPPELLWQPMTHCQYMEMNSGSGQSDAAPSTADPFY  
 VLDVSEGFSLLPILAGTLGHVKPYSSVEKDQHCIALDLIAEANHFPKETLEFWRHIEDEAAVLQRPKSDKWL  
 SIIILDVIEPSGLIQQELMEKAAISRCLLQSGGKIFPQYVLMFGMLVESQTLVEESAVQGTHTLGLNIAPFI  
 NQFQVPIRVCLDLSSLPCVPLSQPVELLRLDLMTPLYNTSNKEVKVRVCRSGRVTAVPFWFHLCLDDEVRLDT  
 SGEASHWKQAAVVDNPIQVQAGEELVLSVEHHKSNVSIIVKPK\*

>rs51928797\_ENSMUSP00000148193\_c.369:T>C\_p.F124L  
 ENSMUST00000210040.2|Prmt9-205|ENSMUSG00000037134|+|chr8:g.78285539:T>C  
 MPNSRPRRRGAGGGAGAAGRDRDLVARSLQSAEHCLGDQDFGTAYAHYLLVLSLAPELKDDVKETFQYTLFKW  
 AEELHALSRIQDLLGCYEQAELFPDDEVICNSMGEHLFRMGFRDEAAGYLHKAVKLNPFNDAKENFYRVAN  
 WLVERWHFIMLNDTRRNMYNAAIQKAVCLGSRVLDIGTGTGILSMFAKKAGAQSVAACELSKTMYELACDV  
 VAANKMENGIKLLHMKSLDIEIPKHIPERCIWRRNCGEFNCSMGTFTSATKDQRRKWKLEWVESDTSRCCYI  
 WDGSRVCRDTKAS\*

>rs51928797\_ENSMUSP00000050181\_c.369:T>C\_p.F124L  
 ENSMUST00000056237.15|Prmt9-201|ENSMUSG00000037134|+|chr8:g.78285539:T>C  
 MPNSRPRRRGAGGGAGAAGRDRDLVARSLQSAEHCLGDQDFGTAYAHYLLVLSLAPELKDDVKETFQYTLFKW  
 AEELHALSRIQDLLGCYEQAELFPDDEVICNSMGEHLFRMGFRDEAAGYLHKAVKLNPFNDAKENFYRVAN  
 WLVERWHFIMLNDTRRNMYNAAIQKAVCLGSRVLDIGTGTGILSMFAKKAGAQSVAACELSKTMYELACDV  
 VAANKMENGIKLLHMKSLDIEIPKHIPERVSLVVTETVDAGVFGGIVESLIHAWEHLLLQPKTKEENGNCCK  
 YGKVI PAGAVIFGMAVECAEIRRHRVGVAKDIAGIHLPTNVKQSPAYTSVDTEETVEPYTTEKMSGIPGGYL  
 PLTECFQIMKVFNNLQELKSLATKKPHSLNVPAIKEGVLDAMVWVFLQLDDEYSLSTSPSEETCWEQAVYP  
 VQALEDYCIQPGDRVTMEASCHDCYLRIQGISILHLEHEMEVMKGFTKSKDLLSLGNEAELCSALANLQTSRP  
 EALEQTCMLEPTEIALLNNIPYHEGFKTAMRKVLSLAPPELLWQPMTHCQYMEMNSGSGQSDAAPSTADPFY  
 VLDVSEGFSLLPILAGTLGHVKPYSSVEKDQHCIALDLIAEANHFPKETLEFWRHIEDEAAVLQRPKSDKWL  
 SIIILDVIEPSGLIQQELMEKAAISRCLLQSGGKIFPQYVLMFGMLVESQTLVEESAVQGTHTLGLNIAPFI  
 NQFQVPIRVCLDLSSLPCVPLSQPVELLRLDLMTPLYNTSNKEVKVRVCRSGRVTAVPFWFHLCLDDEVRLDT  
 SGEASHWKQAAVVDNPIQVQAGEELVLSVEHHKSNVSIIVKPK\*

>rs254367289\_ENSMUSP00000112692\_c.1410:A>C\_p.I471L  
 ENSMUST00000118622.2|Prmt9-202|ENSMUSG00000037134|+|chr8:g.78298718:A>C  
 MPNSRPRRRGAGGGAGAAGRDRDLVARSLQSAEHCLGDQDFGTAYAHYLLVLSLAPELKDDVKETFQYTLFKW  
 AEELHALSRIQDLLGCYEQAELFPDDEVICNSMGEHLFRMGFRDEAAGYFHKAVKLNPFNDAKENFYRVAN  
 WLVERWHFIMLNDTRRNMYNAAIQKAVCLGSRVLDIGTGTGILSMFAKKAGAQSVAACELSKTMYELACDV  
 VAANKMENGIKLLHMKSLDIEIPKHIPERLSLVVTETVDAGVFGGIVESLIHAWEHLLLQPKTKEENGNCCK  
 YGKVI PAGAVIFGMAVECAEIRRHRVGVAKDIAGIHLPTNVKQSPAYTSVDTEETVEPYTTEKMSGIPGGYL  
 PLTECFQIMKVFNNLQELKSLATKKPHSLNVPAIKEGVLDAMVWVFLQLDDEYSLSTSPSEETCWEQAVYP  
 VQALEDYCIQPGDRVTMEASCHDCYLRIQGISLHLEHEMEVMKGFTKSKDLLSLGNEAELCSALANLQTSRP  
 EALEQTCMLEPTEIALLNNIPYHEGFKTAMRKVLSLAPPELLWQPMTHCQYMEMNSGSGQSDAAPSTADPFY  
 VLDVSEGFSLLPILAGTLGHVKPYSSVEKDQHCIALDLIAEANHFPKETLEFWRHIEDEAAVLQRPKSDKWL  
 SIIILDVIEPSGLIQQELMEKAAISRCLLQSGGKIFPQYVLMFGMLVESQTLVEESAVQGTHTLGLNIAPFI  
 NQFQVPIRVCLDLSSLPCVPLSQPVELLRLDLMTPLYNTSNKEVKVRVCRSGRVTAVPFWFHLCLDDEVRLDT  
 SGEASHWKQAAVVDNPIQVQAGEELVLSVEHHKSNVSIIVKPK\*

>rs254367289\_ENSMUSP00000050181\_c.1410:A>C\_p.I471L  
 ENSMUST00000056237.15|Prmt9-201|ENSMUSG00000037134|+|chr8:g.78298718:A>C  
 MPNSRPRRRGAGGGAGAAGRDRDLVARSLQSAEHCLGDQDFGTAYAHYLLVLSLAPELKDDVKETFQYTLFKW  
 AEELHALSRIQDLLGCYEQAELFPDDEVICNSMGEHLFRMGFRDEAAGYFHKAVKLNPFNDAKENFYRVAN  
 WLVERWHFIMLNDTRRNMYNAAIQKAVCLGSRVLDIGTGTGILSMFAKKAGAQSVAACELSKTMYELACDV  
 VAANKMENGIKLLHMKSLDIEIPKHIPERVSLVVTETVDAGVFGGIVESLIHAWEHLLLQPKTKEENGNCCK  
 YGKVI PAGAVIFGMAVECAEIRRHRVGVAKDIAGIHLPTNVKQSPAYTSVDTEETVEPYTTEKMSGIPGGYL  
 PLTECFQIMKVFNNLQELKSLATKKPHSLNVPAIKEGVLDAMVWVFLQLDDEYSLSTSPSEETCWEQAVYP  
 VQALEDYCIQPGDRVTMEASCHDCYLRIQGISLHLEHEMEVMKGFTKSKDLLSLGNEAELCSALANLQTSRP  
 EALEQTCMLEPTEIALLNNIPYHEGFKTAMRKVLSLAPPELLWQPMTHCQYMEMNSGSGQSDAAPSTADPFY  
 VLDVSEGFSLLPILAGTLGHVKPYSSVEKDQHCIALDLIAEANHFPKETLEFWRHIEDEAAVLQRPKSDKWL

SIIILDVIEPSGLIQQELMEKAAISRCLLQSGGKIFPQYVLMFGMLVESQTLVEESAVQGTEHTLGLNIAPFI  
 NQFQVPIRVCLDLSLPCVPLSQPVELLRLDLMTPLYLNTSNKEVKVRVCRSGRVTAVPFWFHLCLDDEVRLDT  
 SGEASHWKQAAVVLDNPIQVQAGEELVLSVEHHKSNVSIIVK\*  
 >rs32616028\_ENSMUSP00000112692\_c.2380:G>T\_p.C794F  
 ENSMUST00000118622.2|Prmt9-202|ENSMUSG00000037134|+|chr8:g.78307718:G>T  
 MPNSRPRRRGAGGGAGAAGRDRLVARSLSQSAEHLGDDFGTAYAHYLLVLSLAPELKDDVKETFQYTLFKW  
 AEELHALSRIQDLLGCYEQAELFPDDEVICNSMGEHLFRMGFRDEAAGYFHKAVKLNPDFNDAKENFYRVAN  
 WLVERWHFIMLNDTRRNVMVYNAIQKAVCLGSRTVLDIGTGTGILSMFAKKAGAQSVYACELSKTMYELACDV  
 VAANKMENGIKLLHMKSLDIEIPKHIPERLSLVVTETVDAGVFGEGIVESLIHAWEHLLLQPKTKEENGNCCK  
 YGKVIPAGAVIFGMAVECAEIRRHRVGVAKDIAGIHLPTNVKQSPAYTSVDTEETVEPYTTEKMSGIPGGYL  
 PLTECFQIMKVDFFNNLQELKSLATKKPHSLNVPKIEGVLDAIMVWFVLQDDEYSLSTSPSEETCWEQAVYP  
 VQALEDYCIQPGDRVTMEASCHDCYLRIQGISILHLEHEMEVMKGFTKSKDLLSLGNEAELCSALANLQTSRP  
 EALEQTCMLEPTEIALNNIPIYHEGFKTAMRKVLSLAPPELLWQPMTHCQYMEMNSGSGQSDAAPSTADPFY  
 VLDVSEGFSLLPILAGTLGHVKPYSSVEKDQHCIALDLIAEANHFPKETLEFWRHIEDEAAVLQRPKSDKLW  
 SIIILDVIEPSGLIQQELMEKAAISRCLLQSGGKIFPQYVLMFGMLVESQTLVEESAVQGTEHTLGLNIAPFI  
 NQFQVPIRVCLDLSLPCVPLSQPVELLRLDLMTPLYLNTSNKEVKVRVCRSGRVTAVPFWFHLFLDDEVRLDT  
 SGEASHWKQAAVVLDNPIQVQAGEELVLSVEHHKSNVSIIVK\*  
 >rs32616028\_ENSMUSP00000050181\_c.2380:G>T\_p.C794F  
 ENSMUST00000056237.15|Prmt9-201|ENSMUSG00000037134|+|chr8:g.78307718:G>T  
 MPNSRPRRRGAGGGAGAAGRDRLVARSLSQSAEHLGDDFGTAYAHYLLVLSLAPELKDDVKETFQYTLFKW  
 AEELHALSRIQDLLGCYEQAELFPDDEVICNSMGEHLFRMGFRDEAAGYFHKAVKLNPDFNDAKENFYRVAN  
 WLVERWHFIMLNDTRRNVMVYNAIQKAVCLGSRTVLDIGTGTGILSMFAKKAGAQSVYACELSKTMYELACDV  
 VAANKMENGIKLLHMKSLDIEIPKHIPERVSLVVTETVDAGVFGEGIVESLIHAWEHLLLQPKTKEENGNCCK  
 YGKVIPAGAVIFGMAVECAEIRRHRVGVAKDIAGIHLPTNVKQSPAYTSVDTEETVEPYTTEKMSGIPGGYL  
 PLTECFQIMKVDFFNNLQELKSLATKKPHSLNVPKIEGVLDAIMVWFVLQDDEYSLSTSPSEETCWEQAVYP  
 VQALEDYCIQPGDRVTMEASCHDCYLRIQGISILHLEHEMEVMKGFTKSKDLLSLGNEAELCSALANLQTSRP  
 EALEQTCMLEPTEIALNNIPIYHEGFKTAMRKVLSLAPPELLWQPMTHCQYMEMNSGSGQSDAAPSTADPFY  
 VLDVSEGFSLLPILAGTLGHVKPYSSVEKDQHCIALDLIAEANHFPKETLEFWRHIEDEAAVLQRPKSDKLW  
 SIIILDVIEPSGLIQQELMEKAAISRCLLQSGGKIFPQYVLMFGMLVESQTLVEESAVQGTEHTLGLNIAPFI  
 NQFQVPIRVCLDLSLPCVPLSQPVELLRLDLMTPLYLNTSNKEVKVRVCRSGRVTAVPFWFHLFLDDEVRLDT  
 SGEASHWKQAAVVLDNPIQVQAGEELVLSVEHHKSNVSIIVK\*  
 >rs47583370\_ENSMUSP00000034030\_c.1239:A>G\_p.S414G  
 ENSMUST00000034030.15|Tmem184c-201|ENSMUSG00000031617|-  
 |chr8:g.78323621:T>C  
 MPCACNRSNWRRRWRIPLLVLFYATTILVAVPICIWKFKQMKVGMHTKSWFIAGIFLLLTIPVSLWGILOHLVH  
 YTPQLKQPIIRILWMPYIYVDSWVALVYPKIAIYVDTWRECYEAYVIYNFMIFLTNYLTIRFPNLILHLEA  
 KDQQNHILPLCCPPWAMGEMLLFRCKLGVLYQTVVRPITTTVTALVCEILDVYDEGNFGFSNAWYTYLVILNNL  
 SQLFAMYCLLLFYKVLKEELSPIQPVGKFLCVKLVVFSFWQAVLIALLVKLGVISEKRTWEWQSAEAVATGL  
 QDFIICIEMFFAAIAHHTYFSYKPYVHEAEEGSCFDSFLAMWDVSDIRDDISEQVRRVGRMTGRYPKPKCFPG  
 DDPDHNEHSSLLSSSSQDLTSGSSKVPSPGGLYQGGFHTISSQSPISIAGIYEEIMNDIPEEQKLLNPGQDVT  
 INIPEEQKLNLTGKDVMLDRQITTSRPIASIASIYEKIMIDIPEEQKLTDTGQDVMINRQITITPPRPISTIS  
 IYEEVLIDITEKQKLNLTGKNVMINIPEEQKLDIKRDKVMDIPEQNAIPDNSQYQDQEQIVTLQALFPST  
 ETSSENSMIDTSESQQESSDLCTESSDSSTESSDLSTDP\*  
 >rs387604461\_ENSMUSP00000034115\_c.508:C>T\_p.A170V  
 ENSMUST00000034115.5|Pou4f2-201|ENSMUSG00000031688|-|chr8:g.79162093:G>A  
 MMMMSLNSKQAFSMPHAGSLHVEPKYSALHSASPGSSAPAAPSASSPSSSSNAGGGGGGGGGGGGRSSSSS  
 SSGSGSGGGGGSEAMRACLPTPPSNIFGGLDESLLARAEALAAVDIVSQSKSHHHPPHSPFKPDPATYHT  
 MNTIPCTSAASSSSVPI SHPSALVGTTHHHHHHHHHHHQPHQALEGELLEHLSPGLALGAMAGPDGTVVSTPA  
 HAPHMATMNPMPHQAALSMHAHGLPSHMGCMDSVDADPRDLEAFERFKQRRIKLGVTQADVGSALANLKI PG  
 VGSLSQSTICRFESLTLSHNNMIALKPILQAWLEEAESHREKLTPELFGAEEKRKRRTSIAAPEKRSLEAY  
 FAIQPRPSSEKIAAIAEKLDLKKNVVRVWFCNQKQKQKRMKYSAGI\*  
 >rs387536632\_ENSMUSP00000085238\_c.196:C>T\_p.S66F  
 ENSMUST00000087927.11|Zfp827-201|ENSMUSG00000071064|+|chr8:g.79787032:C>T  
 MPRRKQEQPKRLPSHVSRQDEAEGDFSEGEQWYGNSSSETPSEASYGEVQENYKLSLEDRIQEQTFFDTSLSGS  
 ATPSSHTLELVALDGEVLRDSLQCGHLSPGVSSVCDPPSSNKPLSSNLRLLEAGSLKLDGTANGRVESP  
 VNVGPSLSFSPPSHHAQQLSVLARKLAEKQDQSDQFTPSNRFIWNQGWLPNSTTTTCGLSPDSAILKKAAN  
 AVLQDKLSLRTEESLRFESFSSPFSSQSASSTLAALS KKVSESLTPGQEHPPPASSFLSLASMTSSAALLKE  
 VAARAAGSLLAEKSSLLPDDPLPLPSSEKKPEKVTPPPPPPPTAQPQSLLELLLPLVSKGRASKPSNSAPEE

ESGKPFQCPICGLVIKRKSYWKRHMVIHTGLKSHQCPLCPFRCAKDNLKSHMKVSHLPRRGRGFVLFSTAGG  
FLADREHCGGAGLRKLTLGCE\*  
>rs387536632\_ENSMUSP00000113199\_c.196:C>T\_p.S66F  
ENSMUST00000119254.8|zfp827-203|ENSMUSG00000071064|+|chr8:g.79787032:C>T  
MPRRKQEQPKRLPSHVSQRDEAEGDFSEGEQWYGNSSSETPSEASYGEVQENYKLSLEDRIQEQTFFPDTSLGS  
ATPSSHTLELVALDGEVLRDLSLQCQGHLSPGVSSVCDDDDPPSSNKPLSSNLRLRLEAGSLKLDGTANGRVES  
VNVGPSLSFSPPSHHAQQLSVLARKLAEKQDQSDQFTPSNRFIWNQGWLPNSTTTTCGLSPDSAILKKAAN  
AVLQDKLSLRTEESLRFESFSSPFSSQSASSTLAALS KKVSESLTPGQEHPPPASSFSLASMTSSAALLKE  
VAARAAGSLLAEKSSLLPDDPLPLPSSEKKPEKVTPPPPPPPTAQPQSLLELLLPLVSKGRASKPSNSAPEE  
ESGKPFQCPICGLVIKRKSYWKRHMVIHTGLKSHQCPLCPFRCAKDNLKSHMKVSHLPRRGRGFVLFSTAGG  
SSRHFSKLLHMRCHQHFLRTEAKVKEEIPDPDVKGSPLSDSGCLGQQREGGGTELVTMTSNTPERTGQGG  
AGVAPLLVKEEPKEDNGLPTSFTLNAADR PANHTKLDKDPSEYVSNSAAVLFSDISVKMASDFLMKLSAANQK  
EPMNLNFKVKEEPKEEESLSMPLPRSSYVFSPEPEVSTPSVSEDPLTPQEGKGSVLRDRMSAKAASELLMKLS  
AESYKETQAVTVKEEPMEVDIQDSPASISPSRNIGYSTLMGREKTEPLQKLEGRVPPERNLFSQDISVKMAS  
ELLFQLSEKVSKEHNHTKENAMRTTTSPPFFSEDFTFRQSPFTSNSKDLLPGESVLHGRVSAPETEKIVLEAGNG  
LPSWKFNQDLFPDVCVKVFRQQTLSRHLSLHTEERKYKCHLCPYAAKCRANLNQHLTVHVSVKLVSTDTEDI  
VSAVTSEGS DGKKHPYYSCHVCGFETELNVQFVSHMSLHVDKEQWMFSCCTACDFVTMEEAEIKTHIGTKH  
TGDDRKTPESENPSSSSLSTLSDSANGKDDSDSSQKNKGGNNLLVIVSVVPGSQPSLNNEEKPEKGFECVFCN  
FVCKTKNMFERHLQIHLITRMFECVCHKFMKTPEQLLEHKKCHTVPTGGLK\*  
>rs387536632\_ENSMUSP00000158613\_c.196:C>T\_p.S66F  
ENSMUST00000238669.2|zfp827-209|ENSMUSG00000071064|+|chr8:g.79787032:C>T  
MPRRKQEQPKRLPSHVSQRDEAEGDFSEGEQWYGNSSSETPSEASYGEVQENYKLSLEDRIQEQTFFPDTSLGS  
ATPSSHTLELVALDGEVLRDLSLQCQGHLSPGVSSVCDDDDPPSSNKPLSSNLRLRLEAGSLKLDGTANGRVES  
VNVGPSLSFSPPSHHAQQLSVLARKLAEKQDQSDQFTPSNRFIWNQGWLPNSTTTTCGLSPDSAILKKAAN  
AVLQDKLSLRTEESLRFESFSSPFSSQSASSTLAALS KKVSESLTPGQEHPPPASSFSLASMTSSAALLKE  
VAARAAGSLLAEKSSLLPDDPLPLPSSEKKPEKVTPPPPPPPTAQPQSLLELLLPLVSKGRASKPSNSAPEE  
ESGKPFQCPICGLVIKRKSYWKRHMVIHTGLKSHQCPLCPFRCAKDNLKSHMKVSHLPRRGRGFVLFSTAGG  
SSRHFSKLLHMRCHQHFLRTEAKVKEEIPDPDVKGSPLSDSGCLGQQREGGGTELVTMTSNTPERTGQGG  
AGVAPLLVKEEPKEDNGLPTSFTLNAADR PANHTKLDKDPSEYVSNSAAVLFSDISVKMASDFLMKLSAANQK  
EPMNLNFKVKEEPKEEESLSMPLPRSSYVFSPEPEVSTPSVSEDPLTPQEGKGSVLRDRMSAKAASELLMKLS  
AESYKETQAVTVKEEPMEVDIQDSPASISPSRNIGYSTLMGREKTEPLQKLEGRVPPERNLFSQDISVKMAS  
ELLFQLSEKVSKEHNHTKENAMRTTTSPPFFSEDFTFRQSPFTSNSKDLLPGESVLHGRVSAPETEKIVLEAGNG  
LPSWKFNQDLFPDVCVKVFRQQTLSRHLSLHTEERKYKCHLCPYAAKCRANLNQHLTVHVSVKLVSTDTEDI  
VSAVTSEGS DGKKHPYYSCHVCGFETELNVQFVSHMSLHVDKEQWMFSCCTACDFVTMEEAEIKTHIGTKH  
TGDDRKTPESENPSSSSLSTLSDSANGKDDSDSSQKNKGGNNLLVIVSVVPGSQPSLNNEEKPEKGFECVFCN  
FVCKTKNMFERHLQIHLITRMFECVCHKFMKTPEQLLEHKKCHTVPTGGLKCPFCIYSTNRPAAMECHLKTH  
YKMEYKCRICQTVKANQLELETHTREHRLGNHYKCEQCGYLSKTANKLIEHVRVHTGERPFHCDQCSYSCKRK  
DNLNLHKKLKHAPRQTFSCGCELFKTHFPVFSRHVKKHQSGDGPEDDKGLSPASREPAGPGAPLLVVGGR  
SLLSPLSVMSASQALQTVALSAAHGSSEPNLALKALAFSGSPLHLDKYRNSDVAHLIPLTMLYPRNHLDLTF  
HPPRPQTAPPSIPSPKHSFLAYLGLRERAGTV\*  
>rs387536632\_ENSMUSP00000096214\_c.196:C>T\_p.S66F  
ENSMUST00000098614.9|zfp827-202|ENSMUSG00000071064|+|chr8:g.79787032:C>T  
MPRRKQEQPKRLPSHVSQRDEAEGDFSEGEQWYGNSSSETPSEASYGEVQENYKLSLEDRIQEQTFFPDTSLGS  
ATPSSHTLELVALDGEVLRDLSLQCQGHLSPGVSSVCDDDDPPSSNKPLSSNLRLRLEAGSLKLDGTANGRVES  
VNVGPSLSFSPPSHHAQQLSVLARKLAEKQDQSDQFTPSNRFIWNQGWLPNSTTTTCGLSPDSAILKKAAN  
AVLQDKLSLRTEESLRFESFSSPFSSQSASSTLAALS KKVSESLTPGQEHPPPASSFSLASMTSSAALLKE  
VAARAAGSLLAEKSSLLPDDPLPLPSSEKKPEKVTPPPPPPPTAQPQSLLELLLPLVSKGRASKPSNSAPEE  
ESGKPFQCPICGLVIKRKSYWKRHMVIHTGLKSHQCPLCPFRCAKDNLKSHMKVSHLPRRGRGFVLFSTAGG  
SSRHFSKLLHMRCHQHFLRTEAKVKEEIPDPDVKGSPLSDSGCLGQQREGGGTELVTMTSNTPERTGQGG  
AGVAPLLVKEEPKEDNGLPTSFTLNAADR PANHTKLDKDPSEYVSNSAAVLFSDISVKMASDFLMKLSAANQK  
EPMNLNFKVKEEPKEEESLSMPLPRSSYVFSPEPEVSTPSVSEDPLTPQEGKGSVLRDRMSAKAASELLMKLS  
AESYKETQAVTVKEEPMEVDIQDSPASISPSRNIGYSTLMGREKTEPLQKLEGRVPPERNLFSQDISVKMAS  
ELLFQLSEKVSKEHNHTKENAMRTTTSPPFFSEDFTFRQSPFTSNSKDLLPGESVLHGRVSAPETEKIVLEAGNG  
LPSWKFNQDLFPDVCVKVFRQQTLSRHLSLHTEERKYKCHLCPYAAKCRANLNQHLTVHVSVKLVSTDTEDI  
VSAVTSEGS DGKKHPYYSCHVCGFETELNVQFVSHMSLHVDKEQWMFSCCTACDFVTMEEAEIKTHIGTKH  
TGDDRKTPESENPSSSSLSTLSDSANGKDDSDSSQKNKGGNNLLVIVSVVPGSQPSLNNEEKPEKGFECVFCN  
FVCKTKNMFERHLQIHLITRMFECVCHKFMKTPEQLLEHKKCHTVPTGGLNSGQW\*



>rs226857452\_ENSMUSP00000113199\_c.2470:G>T\_p.G824V  
ENSMUST00000119254.8|zfp827-203|ENSMUSG00000071064|+|chr8:g.79902558:G>T  
MPRRKQEQPKRLPSHVSQRQDEAEQDFSEGEQWYGNSSSETPSEASYGEVQENYKLSLEDRIQEQTSPDTSLSGS  
ATPSSHTLELVALDGEVLRDSLQCGHLSPGVSSVCDPPSSNKPLSSNLRRLLEAGSLKLDGTANGRVESP  
VNVGPSLSFSPPSHHAQQLSVLARKLAEKQDQSDQFTPSNRFIWNQGWLPNSTTTTCGLSPDSAILKKAAN  
AVLQDKSLSRTEESLRFESFSSPFSSQSASSTLAALS KKVSESLTPGQEHPPASSFSLASMTSSAALLKE  
VAARAAGSLLAEKSSLLPDDPLPLPSSSEKKPEKVTPPPPPPPTAQPPOSLELLLLPVSKGRASKPSNSAPEE  
ESGKPFQCPICGLVIKRSYWKRMVHTGLKSHQCPLCFRCARKDNLKSHMKVHQHQRGETFQCQLCPFT  
SSRHFSKLHMRCHQHFLRTEAKVKEEIPDPDVKGSPLSDSGCLGQQREGGGTELVTMTSNTPERTGQGG  
AGVAPLLVKEEPKEDNGLPTSFTLNAADR PANHTKLDKDPSEYVSNSAAVLFSDISVKMASDFLMLKLSAANQK  
EPMNLNFKVKEEPKEEESLSMPLPRSSYVFSPEPEVSTPSVSEDPLTPQEGKGSVLRDMSAKAASELLMKLS  
AESYKETQAVTVKEEPMEVDIQDSPASISPSRNIGYSTLMGREKTEPLQKLEGRVPPERNLFSQDISVKMAS  
ELLFQLSEKVSKEHNHTKENAMRTTSPFFSED TFRQSPFTSNSKDLLPGESVLHGRVSAPETEKIVLEAGNG  
LPSWKFNQDLFPCDVCVKVFRQQLSRHLSLHTEERKYKCHLCPYAAKCRANLNQHLT VHSVKLVSTDTEDI  
VSAVTSEGS DGKKHPYYSCHVCGFETELNVQFVSHMSLHVDKEQWMF SICCTACDFVTMEEAEIKTHIGTKH  
TGDDRKTPSESNPSSSSSLSTLSDSANGKDDSDSSQKNKGGNNLLVISVVPGSQPSLNNEEKPEKGFECVFCN  
FVCKTKNMFERHLQIHLITRMFECVCHKFMKTPEQLLEHKKCHTVPTGGLK\*

>rs226857452\_ENSMUSP00000158613\_c.2470:G>T\_p.G824V  
ENSMUST00000238669.2|zfp827-209|ENSMUSG00000071064|+|chr8:g.79902558:G>T  
MPRRKQEQPKRLPSHVSQRQDEAEQDFSEGEQWYGNSSSETPSEASYGEVQENYKLSLEDRIQEQTSPDTSLSGS  
ATPSSHTLELVALDGEVLRDSLQCGHLSPGVSSVCDPPSSNKPLSSNLRRLLEAGSLKLDGTANGRVESP  
VNVGPSLSFSPPSHHAQQLSVLARKLAEKQDQSDQFTPSNRFIWNQGWLPNSTTTTCGLSPDSAILKKAAN  
AVLQDKSLSRTEESLRFESFSSPFSSQSASSTLAALS KKVSESLTPGQEHPPASSFSLASMTSSAALLKE  
VAARAAGSLLAEKSSLLPDDPLPLPSSSEKKPEKVTPPPPPPPTAQPPOSLELLLLPVSKGRASKPSNSAPEE  
ESGKPFQCPICGLVIKRSYWKRMVHTGLKSHQCPLCFRCARKDNLKSHMKVHQHQRGETFQCQLCPFT  
SSRHFSKLHMRCHQHFLRTEAKVKEEIPDPDVKGSPLSDSGCLGQQREGGGTELVTMTSNTPERTGQGG  
AGVAPLLVKEEPKEDNGLPTSFTLNAADR PANHTKLDKDPSEYVSNSAAVLFSDISVKMASDFLMLKLSAANQK  
EPMNLNFKVKEEPKEEESLSMPLPRSSYVFSPEPEVSTPSVSEDPLTPQEGKGSVLRDMSAKAASELLMKLS  
AESYKETQAVTVKEEPMEVDIQDSPASISPSRNIGYSTLMGREKTEPLQKLEGRVPPERNLFSQDISVKMAS  
ELLFQLSEKVSKEHNHTKENAMRTTSPFFSED TFRQSPFTSNSKDLLPGESVLHGRVSAPETEKIVLEAGNG  
LPSWKFNQDLFPCDVCVKVFRQQLSRHLSLHTEERKYKCHLCPYAAKCRANLNQHLT VHSVKLVSTDTEDI  
VSAVTSEGS DGKKHPYYSCHVCGFETELNVQFVSHMSLHVDKEQWMF SICCTACDFVTMEEAEIKTHIGTKH  
TGDDRKTPSESNPSSSSSLSTLSDSANGKDDSDSSQKNKGGNNLLVISVVPGSQPSLNNEEKPEKGFECVFCN  
FVCKTKNMFERHLQIHLITRMFECVCHKFMKTPEQLLEHKKCHTVPTGGLKCPFCIYSTNRPAAMECHLKTH  
YKMEYKCRICQTVKANQLELEHTREHRLGNHYKCEQCGLSKTANKLIEHVRVHTGERPFHCDQCSYSCKRK  
DNLNLHKKLKHAPRQTFSCGECLFKTTHPFVSRHVKKHQSGDGEEDKGLSPASREPAGPGAPLLVVGGR  
SLLSPLSVMSASQALQTVALSAAHGSSEPNLALKALAFSGSPLHLDKYRNSDVAHLIPLTMLYPRNHLDLTF  
HPPRPQTAPPSIPSPKHSFLAYLGLRERAGTV\*

>rs226857452\_ENSMUSP00000120913\_c.346:G>T\_p.G116V  
ENSMUST00000148713.8|zfp827-206|ENSMUSG00000071064|+|chr8:g.79902558:G>T  
PEGRVPPERNLFSQDISVKMA SELLFQLSEKVSKEHNHTKENAMRTTSPFFSED TFRQSPFTSNSKDLLPGE  
SVLHGRVSAPETEKIVLEAGNGLPSWKFNQDLFPCDVCVKVFRQQLSRHLSLHTEERKYKCHLCPYAAKCR  
ANLNQHLT VHSVKLVSTDTEDIVSAVTSEGS DGKKHPYYSCHVCGFETELNVQFVSHMSLHVDKEQWMF SIC  
CTACDFVTMEEAEIKTHIGTKHTGDDRKTPSESNPSSSSSLSTLSDSANGKDDSDSSQKNKGGNNLLVISVVP  
GSQPSLNNEEKPEKGFECVFCNFVCKTKNMFERHLQIHLITRMFECVCHKFMKTPEQLLEHKKCHTVPTGGL  
NSGQW\*

>rs226857452\_ENSMUSP00000114208\_c.259:G>T\_p.G87V  
ENSMUST00000145827.8|zfp827-205|ENSMUSG00000071064|+|chr8:g.79902558:G>T  
XKVSKEHNHTKENAMRTTSPFFSED TFRQSPFTSNSKDLLPGESVLHGRVSAPETEKIVLEAGNGLPSWKFN  
DQLFPCDVCVKVFRQQLSRHLSLHTVLVSPPEERKYKCHLCPYAAKCRANLNQHLT VHSVKLVSTDTEDIV  
SAVTSEGS DGKKHPYYSCHVCGFETELNVQFVSHMSLHVDKEQWMF SICCTACDFVTMEEAEIKTHIGTKHT  
GDDRKTPSESNPSSSSSLSTLSDSANGKDDSDSSQKNKGGNNLLVISVVPGSQPSLNNEEKPEKGFECVFCNF  
VCKTKNMFERHLQIHLITRMFECVCHKFMKTPEQLLEHKKCHTVPTGGLK\*

>rs226857452\_ENSMUSP00000096214\_c.2470:G>T\_p.G824V  
ENSMUST00000098614.9|zfp827-202|ENSMUSG00000071064|+|chr8:g.79902558:G>T  
MPRRKQEQPKRLPSHVSQRQDEAEQDFSEGEQWYGNSSSETPSEASYGEVQENYKLSLEDRIQEQTSPDTSLSGS  
ATPSSHTLELVALDGEVLRDSLQCGHLSPGVSSVCDPPSSNKPLSSNLRRLLEAGSLKLDGTANGRVESP  
VNVGPSLSFSPPSHHAQQLSVLARKLAEKQDQSDQFTPSNRFIWNQGWLPNSTTTTCGLSPDSAILKKAAN

AVLQDKLSRTEESLRFESFSSPFSSQSASSTLAALSCKVRSERSLTPGQEHPPPASSFSLASMTSSAALLKE  
VAARAAGSLLAEKSSLLPDDPLPLPSSEKKPEKVTPPPPPPPTAQPQSLLELLLLPVSKGRASKPSNSAPEE  
ESGKPFQCPICGLVIKRKSYWKRHMVIHTGLKSHQCPLCPFRCAKDNLKSMMKVVHQHQRGETFQCQLCPFT  
SSRHFSKLLHMRCHQHFLRTEAKVKEEIPDPDVKGSPLSDSGCLGQQREGGGTELVTMTSNTPERTGQGG  
AGVAPLLVKEEPKEDNGLPTSFTLNAADR PANHTKLDKDPSEYVNSAAVLFSDISVKMASDFLMKLSAANQK  
EPMNLNFKVKEEPKEEESLSMPLPRSSYVFSPEPEVSTPSVSEDPLTPQEGKGSVLRDMSAKAASELLMKLS  
AESYKETQAVTVKEEPMEVDIQDSPASISPSRNIGYSTLMGREKTEPLQKLEGRVPPERNLFSQDISVKMAS  
ELLFQLSEKVSKEHNHTKENAMRTTSPFFSEDFTFRQSPFTSNKDLLPGESVLHGRVSAPETEKIVLEAGNG  
LPSWKFNQDLFPCDVCGKVFGRQHTLSRHLSLHTEERKYKCHLCPYAAKCRANLNQHLTVHSVKLVSTDTEDI  
VSAVTSEGS DGKKHPYYSCHVCGFETELNVQFVSHMSLHVDKEQWMF SICCTACDFVTMEEAEIKTHIGTKH  
TGDDRKTPESENPSSSSSLSLSDSANGKDDSDSSQKNKGGNNLLVISVVPGSQPSLNNEEKPEKGFECVFCN  
FVCKTKNMFERHLQIHLITRMFECVDVCHKFMKTPEQLLEHKKCHTVPTGGLNSGQW\*

>rs247337923\_ENSMUSP00000113199\_c.2480:G>T\_p.Q827H  
ENSMUST00000119254.8|zfp827-203|ENSMUSG00000071064|+|chr8:g.79902568:G>T  
MPRRKQEQPKRLPSHVSRQDEAEGDFSEGEQWYGNSSSETPSEASYGEVQENYKLSLEDRIQEQTSPDTSLSGS  
ATPSSHTLELVALDGEVLRDLSLQCCGHLSPGVSSVCDPPSSNKPLSSNLRRLLEAGSLKLDGTANGRVES  
VNVGPSLSFSPPSHHAQQLSVLARKLAEKQDQSDQFTPSNRFIWNQGWLPNSTTTTCGLSPDSAILKKAAN  
AVLQDKLSRTEESLRFESFSSPFSSQSASSTLAALSCKVRSERSLTPGQEHPPPASSFSLASMTSSAALLKE  
VAARAAGSLLAEKSSLLPDDPLPLPSSEKKPEKVTPPPPPPPTAQPQSLLELLLLPVSKGRASKPSNSAPEE  
ESGKPFQCPICGLVIKRKSYWKRHMVIHTGLKSHQCPLCPFRCAKDNLKSMMKVVHQHQRGETFQCQLCPFT  
SSRHFSKLLHMRCHQHFLRTEAKVKEEIPDPDVKGSPLSDSGCLGQQREGGGTELVTMTSNTPERTGQGG  
AGVAPLLVKEEPKEDNGLPTSFTLNAADR PANHTKLDKDPSEYVNSAAVLFSDISVKMASDFLMKLSAANQK  
EPMNLNFKVKEEPKEEESLSMPLPRSSYVFSPEPEVSTPSVSEDPLTPQEGKGSVLRDMSAKAASELLMKLS  
AESYKETQAVTVKEEPMEVDIQDSPASISPSRNIGYSTLMGREKTEPLQKLEGRVPPERNLFSQDISVKMAS  
ELLFQLSEKVSKEHNHTKENAMRTTSPFFSEDFTFRQSPFTSNKDLLPGESVLHGRVSAPETEKIVLEAGNG  
LPSWKFNQDLFPCDVCGKVFGRQHTLSRHLSLHTEERKYKCHLCPYAAKCRANLNQHLTVHSVKLVSTDTEDI  
VSAVTSEGS DGKKHPYYSCHVCGFETELNVQFVSHMSLHVDKEQWMF SICCTACDFVTMEEAEIKTHIGTKH  
TGDDRKTPESENPSSSSSLSLSDSANGKDDSDSSQKNKGGNNLLVISVVPGSQPSLNNEEKPEKGFECVFCN  
FVCKTKNMFERHLQIHLITRMFECVDVCHKFMKTPEQLLEHKKCHTVPTGGLK\*

>rs247337923\_ENSMUSP00000158613\_c.2480:G>T\_p.Q827H  
ENSMUST00000238669.2|zfp827-209|ENSMUSG00000071064|+|chr8:g.79902568:G>T  
MPRRKQEQPKRLPSHVSRQDEAEGDFSEGEQWYGNSSSETPSEASYGEVQENYKLSLEDRIQEQTSPDTSLSGS  
ATPSSHTLELVALDGEVLRDLSLQCCGHLSPGVSSVCDPPSSNKPLSSNLRRLLEAGSLKLDGTANGRVES  
VNVGPSLSFSPPSHHAQQLSVLARKLAEKQDQSDQFTPSNRFIWNQGWLPNSTTTTCGLSPDSAILKKAAN  
AVLQDKLSRTEESLRFESFSSPFSSQSASSTLAALSCKVRSERSLTPGQEHPPPASSFSLASMTSSAALLKE  
VAARAAGSLLAEKSSLLPDDPLPLPSSEKKPEKVTPPPPPPPTAQPQSLLELLLLPVSKGRASKPSNSAPEE  
ESGKPFQCPICGLVIKRKSYWKRHMVIHTGLKSHQCPLCPFRCAKDNLKSMMKVVHQHQRGETFQCQLCPFT  
SSRHFSKLLHMRCHQHFLRTEAKVKEEIPDPDVKGSPLSDSGCLGQQREGGGTELVTMTSNTPERTGQGG  
AGVAPLLVKEEPKEDNGLPTSFTLNAADR PANHTKLDKDPSEYVNSAAVLFSDISVKMASDFLMKLSAANQK  
EPMNLNFKVKEEPKEEESLSMPLPRSSYVFSPEPEVSTPSVSEDPLTPQEGKGSVLRDMSAKAASELLMKLS  
AESYKETQAVTVKEEPMEVDIQDSPASISPSRNIGYSTLMGREKTEPLQKLEGRVPPERNLFSQDISVKMAS  
ELLFQLSEKVSKEHNHTKENAMRTTSPFFSEDFTFRQSPFTSNKDLLPGESVLHGRVSAPETEKIVLEAGNG  
LPSWKFNQDLFPCDVCGKVFGRQHTLSRHLSLHTEERKYKCHLCPYAAKCRANLNQHLTVHSVKLVSTDTEDI  
VSAVTSEGS DGKKHPYYSCHVCGFETELNVQFVSHMSLHVDKEQWMF SICCTACDFVTMEEAEIKTHIGTKH  
TGDDRKTPESENPSSSSSLSLSDSANGKDDSDSSQKNKGGNNLLVISVVPGSQPSLNNEEKPEKGFECVFCN  
FVCKTKNMFERHLQIHLITRMFECVDVCHKFMKTPEQLLEHKKCHTVPTGGLKCPFCIYSTNRPAAMECHLKTH  
YKMEYKCRICQTVKANQLELETHTREHRLGNHYKCEQCGYLSKTANKLIEHVRVHTGERPFHCDQCSYSCKRK  
DNLNLHKKLKHAPRQTFSCGECLFKTTHPFVFSRHVKKHQSGDGPEDKKGKLSPASREPAGPGAPLLVGGGR  
SLLSPLSVMSASQALQTVALSAAHGSSEPNLALKALAFSGSPLHLDKYRNSDVAHLIPLTMLYPRNHLDLTF  
HPPRPQTAPPSIPSPKHSFLAYLGLRERAGTV\*

>rs247337923\_ENSMUSP00000120913\_c.356:G>T\_p.Q119H  
ENSMUST00000148713.8|zfp827-206|ENSMUSG00000071064|+|chr8:g.79902568:G>T  
PEGRVPPERNLFSQDISVKMASELFLQSEKVSKEHNHTKENAMRTTSPFFSEDFTFRQSPFTSNKDLLPGE  
SVLHGRVSAPETEKIVLEAGNGLPSWKFNQDLFPCDVCGKVFGRQHTLSRHLSLHTEERKYKCHLCPYAAKCR  
ANLNQHLTVHSVKLVSTDTEDI VSAVTSEGS DGKKHPYYSCHVCGFETELNVQFVSHMSLHVDKEQWMF SIC  
CTACDFVTMEEAEIKTHIGTKHTGDDRKTPESENPSSSSSLSLSDSANGKDDSDSSQKNKGGNNLLVISVVP  
GSQPSLNNEEKPEKGFECVFCNFVCKTKNMFERHLQIHLITRMFECVDVCHKFMKTPEQLLEHKKCHTVPTGGL  
NSGQW\*

>rs247337923\_ENSMUSP00000114208\_c.269:G>T\_p.Q90H  
ENSMUST00000145827.8|zfp827-205|ENSMUSG00000071064|+|chr8:g.79902568:G>T  
XKVSKEHNHTKENAMRTTTSPPFFSEDTFRQSPFTSNKDLLPGESVLHGRVSAPETEKIVLEAGNGLPSWKFN  
DQLFPCDVCVKVFRQHTLSRHLSTLHTVLSVPPPEERKYKCHLCPYAAKCRANLNQHLTIVHSVKLVSTDTEDIV  
SAVTSEGS DGKKHPYYYSCHVCGFETELNVQFVSHMSLHVDKEQWMF SICCTACDFVTMEEAEIKTHIGTKHT  
GDDRKTPSESNSPSSSSSLSTLSDSANGKDDSDSSQKNKGGNNLLVISVVPGSQPSLNNEEKPEKGFECVFCNF  
VCKTKNMFERHLQIHLITRMFECVCHKFMKTPEQLLEHKKCHTVPTGGLK\*  
>rs247337923\_ENSMUSP00000096214\_c.2480:G>T\_p.Q827H  
ENSMUST00000098614.9|zfp827-202|ENSMUSG00000071064|+|chr8:g.79902568:G>T  
MPRRKQEQPKRLPSHVSQRDEAEGDFSEGEQWYGNSSSETPSEASYGEVQENYKLSLEDRIQEQTSPDTSLSGS  
ATPSSHTLELVALDGEVLRDLSLQCQGHLSPGVSSVCDPPSSNKPLSSNLRLLEAGSLKLDGTANGRVESP  
VNVGPSLSFSPPSHHAQQLSVLARKLAEKQDQSDQFTPSNRFIWNQGWLPNSTTTTCGLSPDASAILKKAAN  
AVLQDKSLSRTEESLRFESFSSPSSQSASSTLAALS KKVSESLTPGQEHPPPASSFLSLASMTSSAALLKE  
VAARAAGSLLAEKSSLLPDDPLPLPSSEKKPEKVTPPPPPPPTAQPPQSLELLLLLPVSKGRASKPSNSAPEE  
ESGKPFQCPICGLVIKRSYWKRMVIHTGLKSHQCPLCPFRCAKDNLKSHMKVHQHQRGETFQCQLCPFT  
SSRHFSKLHMRCHQHFLRTEAKVKEEIPDPDVKGSPLSDSGCLGQQREGGTELVTMTSNTPERTGQGG  
AGVAPLLVKEEKPENGLPTSFTLNAADR PANHTKLDKDPSEYVNSAAVLFSDISVKMASDFLMLKLSAANQK  
EPMNLNFKVKEEPEKEESLSPMLPRSSYVFSPEPEVSTPSVSEDPLTPQEGKGSVLRDMSAKAASELLMKLS  
AESYKETQAVTVKEEPMVVDIQDSPASISPSRNIGYSTLMGREKTEPLQKLPEGRVPPERNLFSQDISVKMAS  
ELLFQLSEKVSKEHNHTKENAMRTTTSPPFFSEDTFRQSPFTSNKDLLPGESVLHGRVSAPETEKIVLEAGNG  
LPSWKFN DQLFPCDVCVKVFRQHTLSRHLSTLHTVLSVPPPEERKYKCHLCPYAAKCRANLNQHLTIVHSVKLVSTDTEDI  
VSAVTSEGS DGKKHPYYYSCHVCGFETELNVQFVSHMSLHVDKEQWMF SICCTACDFVTMEEAEIKTHIGTKH  
TGDDRKTPSESNSPSSSSSLSTLSDSANGKDDSDSSQKNKGGNNLLVISVVPGSQPSLNNEEKPEKGFECVFCNF  
FVCKTKNMFERHLQIHLITRMFECVCHKFMKTPEQLLEHKKCHTVPTGGLNSGQW\*  
>rs253661095\_ENSMUSP00000114208\_c.318:G>C\_p.E107Q  
ENSMUST00000145827.8|zfp827-205|ENSMUSG00000071064|+|chr8:g.79905536:G>C  
XKVSKEHNHTKENAMRTTTSPPFFSEDTFRQSPFTSNKDLLPGESVLHGRVSAPETEKIVLEAGNGLPSWKFN  
DQLFPCDVCVKVFRQHTLSRHLSTLHTVLSVPPQERKYKCHLCPYAAKCRANLNQHLTIVHSVKLVSTDTEDIV  
SAVTSEGS DGKKHPYYYSCHVCGFETELNVQFVSHMSLHVDKEQWMF SICCTACDFVTMEEAEIKTHIGTKHT  
GDDRKTPSESNSPSSSSSLSTLSDSANGKDDSDSSQKNKGGNNLLVISVVPGSQPSLNNEEKPEKGFECVFCNF  
VCKTKNMFERHLQIHLITRMFECVCHKFMKTPEQLLEHKKCHTVPTGGLK\*  
>rs38121230\_ENSMUSP00000071035\_c.1198:T>G\_p.F400C  
ENSMUST00000066091.14|Smad1-202|ENSMUSG00000031681|-|chr8:g.80070338:A>C  
MNVTSLSFSFTSPAVKRLGKQGDDEEKWAEKAVDALVKKLKKKKGAMEELEKALSCPGQPSNCVTIPRSLDG  
RLQVSHRKGKGLPHVIYCRVWRWPDLSHHEKPLECCEFPFGSKQKEVCINPYHYKRVPSPVLPVPRHSEY  
NPQHSLLAQFRNLGQNEPHMPLNATFPDSFQPNSHFPSPNSYPNSPGSSSTYPHSPSTSDPGSPFQMP  
ADTPPPAYLPPEDPMAQDGSQPMDTNMMAAPLPAEISRGDVQAVAYEYEPKHWCSIVYYELNRRVGEAFHASST  
SVLVDGFTDPSNKNRFLGLLSNVNRNSTIENTRRHIGKGVHLYYVGGEVYAECLSDSSIFVQSRNCNYHHG  
FHPTTVCKIPSGCSLKIFNNQEFQQLLAQSVNHGCETVYELTKMCTIRMSFVKGWGAEYHRQDVTSTPCWIEI  
HLHGPLQWLDKVLQMGSPHNPISSVS\*  
>rs38121230\_ENSMUSP00000105511\_c.1198:T>G\_p.F400C  
ENSMUST00000109885.8|Smad1-203|ENSMUSG00000031681|-|chr8:g.80070338:A>C  
MNVTSLSFSFTSPAVKRLGKQGDDEEKWAEKAVDALVKKLKKKKGAMEELEKALSCPGQPSNCVTIPRSLDG  
RLQVSHRKGKGLPHVIYCRVWRWPDLSHHEKPLECCEFPFGSKQKEVCINPYHYKRVPSPVLPVPRHSEY  
NPQHSLLAQFRNLGQNEPHMPLNATFPDSFQPNSHFPSPNSYPNSPGSSSTYPHSPSTSDPGSPFQMP  
ADTPPPAYLPPEDPMAQDGSQPMDTNMMAAPLPAEISRGDVQAVAYEYEPKHWCSIVYYELNRRVGEAFHASST  
SVLVDGFTDPSNKNRFLGLLSNVNRNSTIENTRRHIGKGVHLYYVGGEVYAECLSDSSIFVQSRNCNYHHG  
FHPTTVCKIPSGCSLKIFNNQEFQQLLAQSVNHGCETVYELTKMCTIRMSFVKVSSAHPHSHG\*  
>rs50549994\_ENSMUSP00000149251\_c.268:A>G\_p.K90R  
ENSMUST00000214156.2|O1fr370-203|ENSMUSG00000047286|+|chr8:g.84268043:A>G  
MECVNDTVVREFVFLGFSSLAELQLLLFAIFLSLYLFTLSTNAVIVSTIVLDRALHTPMYFFLSVLSSETCY  
TFVIVPKMLVDLLARKRSISFLGCAIQMFTFLFLGCSHSFLLAAMGYDRYVAICHPLRYTVLMGHRVCVGLVA  
AACVCGFTVAQVITSLVFRLPFRSSNLHFFCDISPVLQLASHHPHSTQITIFLLCALVLPFLFLILVSYI  
HIISTILQFPSTLGRYKAFSTCASHLIVVIVHYGCASFIYLRPKSSYSSSQDALISVSYTILTPLFNFVIYSL  
RNKDFKSALHRVIGRTVTLRQH\*  
>rs50549994\_ENSMUSP00000147834\_c.268:A>G\_p.K90R  
ENSMUST00000209408.4|O1fr370-202|ENSMUSG00000047286|+|chr8:g.84268043:A>G

MECVNDTVVREFVFLGFSSLAELQLLLFAIFLSLYLFTLSTNAVIVSTIVLDRALHTPMYFFLSVLSCSETCY  
TFVIVPKMLVDLLARKRSISFLGCAIQMFTFLFLGCSHSLFLAAMGYDRYVAICHPLRYTVLMGHRVCVGLVA  
AACVCGFTVAQVITSLVFRLLPFRSSNQLHHFFCDISPVLQLASHHHPSTQITIFLLCALVLPFLFLILVSYI  
HIISTILQFPSTLGRYKAFSTCASHLIVVIVHYGCASFIYLRPKSSYSSSQDALISVSYTILTPLFNPVIYSL  
RNKDFKSALHRVIGRTVTLRQH\*

>rs50549994\_ENSMUSP00000055435\_c.268:A>G\_p.K90R  
ENSMUST00000058609.5|Olfr370-201|ENSMUSG00000047286|+|chr8:g.84268043:A>G  
MECVNDTVVREFVFLGFSSLAELQLLLFAIFLSLYLFTLSTNAVIVSTIVLDRALHTPMYFFLSVLSCSETCY  
TFVIVPKMLVDLLARKRSISFLGCAIQMFTFLFLGCSHSLFLAAMGYDRYVAICHPLRYTVLMGHRVCVGLVA  
AACVCGFTVAQVITSLVFRLLPFRSSNQLHHFFCDISPVLQLASHHHPSTQITIFLLCALVLPFLFLILVSYI  
HIISTILQFPSTLGRYKAFSTCASHLIVVIVHYGCASFIYLRPKSSYSSSQDALISVSYTILTPLFNPVIYSL  
RNKDFKSALHRVIGRTVTLRQH\*

>rs48118666\_ENSMUSP00000019577\_c.930:T>A\_p.F311I  
ENSMUST00000019577.10|Gipc1-201|ENSMUSG00000019433|+|chr8:g.84390827:T>A  
MPLGLGRRKKAPPLVENEAEPSRSGLVGEPGLGSSAAGESQMGLPPPPAALRPLRVFHTQLAHGSPTGRI  
EGFTNVKELYGKIAEAFRLPAAEVMFCTLNTHKVDMDKLLGGQIGLEDFIFAHVKGQRKEVEVFKSEALGLT  
ITDNAGAYAFIKRIKEGVIDHIQLISVGMIEAINGQSLGCRHYEVARLLKELPRGRTFTLKLTEPRKAFD  
MISQRSAGGHPGSGPQLGTGRGTLRLRSRGPATVDELPSAFEEKAIEKVDDLLESYMGIRDTELAATMVVELGK  
DKRNPDELAELDERLGDIAFPDEFVFDVWGAIGDAKVGRY\*

>rs36969597\_ENSMUSP00000019608\_c.277:C>T\_p.P93L  
ENSMUST00000019608.7|Ptger1-201|ENSMUSG00000019464|+|chr8:g.84394802:C>T  
MSPCGLNLSLADEAATCATPRLPNTSVVLPTGDNGTSPALPIFSMTLGAVSNVLALALLAQVAGRMRRRRSAA  
TFLLFVASLLAIDLGHVILGALVLRLYTAGRAPAGGACHFLGGCMVFFGLCPLLGGMAVERCVGVTQPLI  
HAARVSVARARLALAVLAAMALAVALLPLVHVGRYELQYPGTWCFISLGPGRGWQALLAGLFAGLGLAALLA  
ALVCNTLSGLALLRARWRRRRRRRFRKTAGPDDRRRWSRGPRLASASSASSITSATATLRSSRGGGSARRVH  
AHDVEMVQVLVIMVSCICWSPLLVVLVAIGGWNNSLQRPLFLAVRLASWNQILDWPVYIILRQAMLRLQL  
LRLPLRVSAKGGPTELGLTKSAWEASSLRSSRHSGFSLH\*

>rs50201871\_ENSMUSP00000005616\_c.2582:G>C\_p.R861S  
ENSMUST00000005616.16|Pkn1-201|ENSMUSG00000057672|-|chr8:g.84397422:C>G  
MAGDAVQSEPRSWSLLEQLGLAGADLAAPGVQQOLELERERLKRERKELKLKEGAENLRATTDLGRSLAPV  
ELLLRGSARRLDLLHQQLQELHAHVLPDPAAGSDATQSLAEGSPICSSSTNLSRVAGLEKQLAIELKVKQGAE  
NMIQTYSNGSSKDRKLLLTAAQMLQDSKTKIDIRMQLRRALQALQAGELESQAAPDEAQGDPELGAVELRIE  
ELRHHRFVEHAVAEGAENVLRLLSGAKAPDRKAVSEAQEKLTESNQKLGLLRESLERRLGELPADHPKGRLLR  
EELTAASSSAFSAIILPGPPATHYSTLSKPAPLTGTLEVRVVGCKNLPETIPWSPPPSVGASGTPESRTPFLS  
RPARGLYSRSGLSGRSSLRGEAENATEVSTVLKLDNTVVGQTAWKPCGNPAWDQSFTLELERARELELAVFW  
RDQRGLCALFKLEDFLDNERHEVQLDMEPQGCLVAEVTFRNPIIERIPRLQRQKKIFSKQQGAFQRRARQM  
NIDVATWVRLRLRILPSAVATGTFSPNASPGAIEIRHTGDISMEKLNLGADSDSSSQKSPGGLPSTSCSLSSPT  
HESTTSPPELSETQETPGPGLCSPLRKSPLTLEDFKFLAVLGRGHFGKVLLESEFRSSGELFAIKALKKGDIVA  
RDEVESLMCEKRILAAVTRAGHPFLVNLFGCFQTPHEVCFVMEYSAGGDLMLHIHSDVDFSEPRAVFYSACVVL  
GLQFLHEHKIVYRDLKLDNLLDTEGYVKIADFGLCKEGMGYGDRTSTFCGTPPEFLAPEVLTDTSYTRAVDWW  
GLGVLLYEMLVGESPFPGDDEEEVFDSIVNDEVRYPRFLSAEAIIGMRLLRRNPERSLGSTERDAEDVKKQP  
FFRSLGWDVLLARRLPPPFVPTLSGRTDVSNFDEEFTGEAPTLSPPRDARPLTAAEQAAFRDFDFVAGGY\*

>rs50201871\_ENSMUSP00000116235\_c.2597:G>C\_p.R866S  
ENSMUST00000114258.8|Pkn1-208|ENSMUSG00000057672|-|chr8:g.84397422:C>G  
MAADPPLDSELESEPRSWSLLEQLGLAGADLAAPGVQQOLELERERLKRERKELKLKEGAENLRATTDLGR  
SLAPVELLLRGSARRLDLLHQQLQELHAHVLPDPAAGSDATQSLAEGSPICSSSTNLSRVAGLEKQLAIELKV  
KQGAENMIQTYSNGSSKDRKLLLTAAQMLQDSKTKIDIRMQLRRALQALQAGELESQAAPDEAQGDPELGA  
ELRIEELRHHRFVEHAVAEGAENVLRLLSGAKAPDRKAVSEAQEKLTESNQKLGLLRESLERRLGELPADHPK  
GRLLREELTAASSSAFSAIILPGPPATHYSTLSKPAPLTGTLEVRVVGCKNLPETIPWSPPPSVGASGTPESR  
TPFLSRPARGLYSRSGLSGRSSLRGEAENATEVSTVLKLDNTVVGQTAWKPCGNPAWDQSFTLELERARELE  
LAVFWRDQRGLCALFKLEDFLDNERHEVQLDMEPQGCLVAEVTFRNPIIERIPRLQRQKKIFSKQQGKAFQ  
RARQMNIDVATWVRLRLRILPSAVATGTFSPNASPGAIEIRHTGDISMEKLNLGADSDSSSQKSPGGLPSTSCS  
LSSPTHESTTSPPELSETQETPGPGLCSPLRKSPLTLEDFKFLAVLGRGHFGKVLLESEFRSSGELFAIKALKK  
GDIVARDEVESLMCEKRILAAVTRAGHPFLVNLFGCFQTPHEVCFVMEYSAGGDLMLHIHSDVDFSEPRAVFYS  
ACVVLGLQFLHEHKIVYRDLKLDNLLDTEGYVKIADFGLCKEGMGYGDRTSTFCGTPPEFLAPEVLTDTSYTR  
AVDWWGLGVLLYEMLVGESPFPGDDEEEVFDSIVNDEVRYPRFLSAEAIIGMRLLRRNPERSLGSTERDAED  
VKKQPFFRSLGWDVLLARRLPPPFVPTLSGRTDVSNFDEEFTGEAPTLSPPRDARPLTAAEQAAFRDFDFVAG  
GY\*

>ENSMUSP00000005616\_c.2137:G>A\_p.S713N ENSMUST00000005616.16|Pkn1-201|ENSMUSG000000057672|-|chr8:g.84398812:C>T  
MAGDAVQSEPRSWSLLEQLGLAGADLAAPGVQQQLELERERLKRERIRKELKLKEGAENLRATDGLRSLAPV  
ELLLRGSARRLDLLHQQLQELHAHVLPDPAAGSDATQSLAEGSPICSSSTNLSRVAGLEKQLAIELKVKQGAENMIQTY  
SNGSSKDRKLLLTAAQMLQDSKTKIDIIRMQLRRALQALQAGELESQAAPDEAQQDPELGAVELRIEELRH  
HFRVEHAVAEGAKNVLRLLSGAKAPDRKAVSEAQEKLTESNQKLGLLRESLERRLGELPADHPKGRLLR  
EELTAASSSAFSAIILPGPFPPATHYSTLSKPAPLTGTLEVRVVGCKNLPETIPWSPPPSVGASGTPESRTPFLS  
RPARGLYSRSGSLSGRSSLRGEAENATEVSTVLKLDNTVVGQTAWKPCGNPAWDQSFTLELERARELELAVFW  
RDQRGLCALFKLEDFLDNERHEVQLDMEPQGCLVAEVTFRNPIIERIPRLQRQKKIFSKQQGKAFQARQM  
NIDVATWVRLRLRRLIPSAVATGTFSPNASPGAIEIRHTGDISMEKLNLGADSDSSSQKSPGGLPSTSCSLSSPT  
HESTTSPPELSETQETPGPGLCSPLRKSPLTLEDFKFLAVLGRGHFGKVLLESEFRSSGELFAIKALKKGDIVA  
RDEVESLMCEKRILAAVTRAGHPFLVNLFGCFQTPHEVCFVMEYSAGGDLMLHIHNDVFSEPRAVFYSACVV  
LGLQFLHEHKIVYRDLKLDNLLDTEGYVKIADFGLCKEGMGYGDRTSTFCGTPEFLAPEVLTDTSYTRAVDWW  
GLGVLLYEMLVGESPFPGDDEEEVFDSIVNDEVRYPRFLSAEAIIGIMRRLRRNPERRLGSTERDAEDVKKQP  
FFRSLGWDVLLARLLPPFPVPTLSGRTDVSNFDEEFTGEAPTLSPPRDARPLTAAEQAAFRDFDFVAGGY\*  
>ENSMUSP00000116235\_c.2152:G>A\_p.S718N ENSMUST00000144258.8|Pkn1-208|ENSMUSG000000057672|-|chr8:g.84398812:C>T  
MAADPPLDSELESEPRSWSLLEQLGLAGADLAAPGVQQQLELERERLKRERIRKELKLKEGAENLRATDGLR  
SLAPVELLLRGSARRLDLLHQQLQELHAHVLPDPAAGSDATQSLAEGSPICSSSTNLSRVAGLEKQLAIELKV  
KQGAENMIQTYNSGSSKDRKLLLTAAQMLQDSKTKIDIIRMQLRRALQALQAGELESQAAPDEAQQDPELGAV  
ELRIEELRHFRVEHAVAEGAKNVLRLLSGAKAPDRKAVSEAQEKLTESNQKLGLLRESLERRIGELPADHPK  
GRLREELTAASSSAFSAIILPGPFPPATHYSTLSKPAPLTGTLEVRVVGCKNLPETIPWSPPPSVGASGTPESR  
TPFLSRPARGLYSRSGSLSGRSSLRGEAENATEVSTVLKLDNTVVGQTAWKPCGNPAWDQSFTLELERARELE  
LAVFWRDQRGLCALFKLEDFLDNERHEVQLDMEPQGCLVAEVTFRNPIIERIPRLQRQKKIFSKQQGKAFQ  
RARQMNIIDVATWVRLRLRRLIPSAVATGTFSPNASPGAIEIRHTGDISMEKLNLGADSDSSSQKSPGGLPSTSCS  
LSSPTHESTTSPPELSETQETPGPGLCSPLRKSPLTLEDFKFLAVLGRGHFGKVLLESEFRSSGELFAIKALKK  
GDIVARDEVESLMCEKRILAAVTRAGHPFLVNLFGCFQTPHEVCFVMEYSAGGDLMLHIHNDVFSEPRAVFYS  
ACVVLLGLQFLHEHKIVYRDLKLDNLLDTEGYVKIADFGLCKEGMGYGDRTSTFCGTPEFLAPEVLTDTSYTR  
AVDWWGLGVLLYEMLVGESPFPGDDEEEVFDSIVNDEVRYPRFLSAEAIIGIMRRLRRNPERRLGSTERDAED  
VKKQPFPRSLGWDVLLARLLPPFPVPTLSGRTDVSNFDEEFTGEAPTLSPPRDARPLTAAEQAAFRDFDFVAG  
GY\*  
>ENSMUSP00000115054\_c.2173:G>A\_p.S725N ENSMUST00000132945.8|Pkn1-204|ENSMUSG000000057672|-|chr8:g.84398812:C>T  
MACRPCRAGRIWCCRSHKSEPRSWSLLEQLGLAGADLAAPGVQQQLELERERLKRERIRKELKLKEGAENLR  
ATDGLRSLAPVELLLRGSARRLDLLHQQLQELHAHVLPDPAAGSDATQSLAEGSPICSSSTNLSRVAGLEKQ  
LAIELKVKQGAENMIQTYNSGSSKDRKLLLTAAQMLQDSKTKIDIIRMQLRRALQALQAGELESQAAPDEAQQ  
DPELGAVELRIEELRHFRVEHAVAEGAKNVLRLLSGAKAPDRKAVSEAQEKLTESNQKLGLLRESLERRLGE  
LPADHPKGRLLREELTAASSSAFSAIILPGPFPPATHYSTLSKPAPLTGTLEVRVVGCKNLPETIPWSPPPSVGA  
SGTPESRTPFLSRPARGLYSRSGSLSGRSSLRGEAENATEVSTVLKLDNTVVGQTAWKPCGNPAWDQSFTLE  
LERARELELAVFWRDQRGLCALFKLEDFLDNERHEVQLDMEPQGCLVAEVTFRNPIIERIPRLQRQKKIFSK  
QQGKAFQARQMNIIDVATWVRLRLRRLIPSAVATGTFSPNASPGAIEIRHTGDISMEKLNLGADSDSSSQKSPG  
LPSTSCSLSSPTHESTTSPPELSETQETPGPGLCSPLRKSPLTLEDFKFLAVLGRGHFGKVLLESEFRSSGEL  
FAIKALKKGDIVARDEVESLMCEKRILAAVTRAGHPFLVNLFGCFQTPHEVCFVMEYSAGGDLMLHIHNDVFSE  
PRAVFYSACVVLLGLQFLHEHKIVYRDLGLWGPDQHVLRNSGVPGAGSAHRHILHASSGLVGTGRAAL\*  
>rs47450140\_ENSMUSP00000005616\_c.1764:A>G\_p.T589A  
ENSMUST00000005616.16|Pkn1-201|ENSMUSG000000057672|-|chr8:g.84400315:T>C  
MAGDAVQSEPRSWSLLEQLGLAGADLAAPGVQQQLELERERLKRERIRKELKLKEGAENLRATDGLRSLAPV  
ELLLRGSARRLDLLHQQLQELHAHVLPDPAAGSDATQSLAEGSPICSSSTNLSRVAGLEKQLAIELKVKQGAENMIQTY  
SNGSSKDRKLLLTAAQMLQDSKTKIDIIRMQLRRALQALQAGELESQAAPDEAQQDPELGAVELRIEELRH  
HFRVEHAVAEGAKNVLRLLSGAKAPDRKAVSEAQEKLTESNQKLGLLRESLERRLGELPADHPKGRLLR  
EELTAASSSAFSAIILPGPFPPATHYSTLSKPAPLTGTLEVRVVGCKNLPETIPWSPPPSVGASGTPESRTPFLS  
RPARGLYSRSGSLSGRSSLRGEAENATEVSTVLKLDNTVVGQTAWKPCGNPAWDQSFTLELERARELELAVFW  
RDQRGLCALFKLEDFLDNERHEVQLDMEPQGCLVAEVTFRNPIIERIPRLQRQKKIFSKQQGKAFQARQM  
NIDVATWVRLRLRRLIPSAVATGTFSPNASPGAIEIRHTGDISMEKLNLGADSDSSSQKSPGGLPSTSCSLSSPT  
HESTASPPELSETQETPGPGLCSPLRKSPLTLEDFKFLAVLGRGHFGKVLLESEFRSSGELFAIKALKKGDIVA  
RDEVESLMCEKRILAAVTRAGHPFLVNLFGCFQTPHEVCFVMEYSAGGDLMLHIHSDVFSEPRAVFYSACVV  
LGLQFLHEHKIVYRDLKLDNLLDTEGYVKIADFGLCKEGMGYGDRTSTFCGTPEFLAPEVLTDTSYTRAVDWW

GLGVLLYEMLVGESPPFGDDEEEVFDIVNDEVRYPRFLSAEAI GIMRRLRRNPERRLGSTERDAEDVKKQP  
FFRSLGWDVLLARRLPPPFVPTLSGRTDVSNFDEEFTGEAPTLSPPRDARPLTAAEQAAFRDFDFVAGGY\*  
>rs47450140\_ENSMUSP00000116235\_c.1779:A>G\_p.T594A  
ENSMUST00000144258.8|Pkn1-208|ENSMUSG00000057672|-|chr8:g.84400315:T>C  
MAADPPLDSELESEPRWSLLEQLGLAGADLAAPGVQQQLELERERLKRERIRKELKLKEGAENLRRATTDLGR  
SLAPVELLLRGSARRLDLLHQQLQELHAHVVLDPDPAAGSDATQSLAEGSPICSSSTNLSRVAGLEKQLAIELKV  
KQGAENMIQTYSNSSKDRKLLLTAAQMLQDSKTKIDIIRMQLRRALQALQAGELESQAAPDEAQDPELGAV  
ELRIEELRHHFRVEHAVAEGAKNVLRLLSGAKAPDRKAVSEAQEKLTESNQKLGLLRESLERRLGELPADHPK  
GRLLEELTAASSAFSAILPGFPFATHYSTLSKPAPLTGTLEVRVVGCKNLPETIPWSPPPSVGASGTPESR  
TPFLSRPARGLYSRGSLSGRSSLRGEAENATEVSTVLKLDNTVVGQTAWKPCGNPAWDQSFTLELERARELE  
LAVFWRDQRGLCALFKLEDFLDNERHEVQLDMEPQGCLVAEVTFRNPIIERIPRLQRQKKIFSKQQGKAFQ  
RARQMNIDVATWVRLRLRRLIPSAVATGTFSPNASPGAIEIRHTGDISMEKLNLGADSDSSSQSPGGLPSTSCS  
LSSPTHESTASPELSETQETPGPGLCSPLRKSPLTLEDFKFLAVLGRGHFGKVLLSEFRSSGELFAIKALKK  
GDIVARDEVESLMCEKRILAAVTRAGHPFLVNLFGCFQTPHVCVFMVEYSAGGDLMLHIHSDVFSEPRAVFYS  
ACVVVLGLQFLHEHKIVYRDLDLNDLLDTEGYVKIADFLCKEKGMYGDRSTSTFCGTPFLAPEVLTDTSYTR  
AVDWWGLGVLLYEMLVGESPPFGDDEEEVFDIVNDEVRYPRFLSAEAI GIMRRLRRNPERRLGSTERDAED  
VKKQPFPRSLGWDVLLARRLPPPFVPTLSGRTDVSNFDEEFTGEAPTLSPPRDARPLTAAEQAAFRDFDFVAG  
GY\*  
>rs47450140\_ENSMUSP00000115054\_c.1800:A>G\_p.T601A  
ENSMUST00000132945.8|Pkn1-204|ENSMUSG00000057672|-|chr8:g.84400315:T>C  
MACRPCRAGRIWCCRSHKSEPRWSLLEQLGLAGADLAAPGVQQQLELERERLKRERIRKELKLKEGAENLRR  
ATTDLGRSLAPVELLLRGSARRLDLLHQQLQELHAHVVLDPDPAAGSDATQSLAEGSPICSSSTNLSRVAGLEKQ  
LAIELKVKQGAENMIQTYSNSSKDRKLLLTAAQMLQDSKTKIDIIRMQLRRALQALQAGELESQAAPDEAQQ  
DPELGAVELRIEELRHHFRVEHAVAEGAKNVLRLLSGAKAPDRKAVSEAQEKLTESNQKLGLLRESLERRLGE  
LPADHPKGRLLREELTAASSAFSAILPGFPFATHYSTLSKPAPLTGTLEVRVVGCKNLPETIPWSPPPSVGA  
SGTPESTRTPFLSRPARGLYSRGSLSGRSSLRGEAENATEVSTVLKLDNTVVGQTAWKPCGNPAWDQSFTLE  
ERARELELAVFWRDQRGLCALFKLEDFLDNERHEVQLDMEPQGCLVAEVTFRNPIIERIPRLQRQKKIFSK  
QQGKAFQRRARQMNIDVATWVRLRLRRLIPSAVATGTFSPNASPGAIEIRHTGDISMEKLNLGADSDSSSQSPG  
LPSTSCSLSSPTHESTASPELSETQETPGPGLCSPLRKSPLTLEDFKFLAVLGRGHFGKVLLSEFRSSGELF  
AIKALKKGDIVARDEVESLMCEKRILAAVTRAGHPFLVNLFGCFQTPHVCVFMVEYSAGGDLMLHIHSDVFSE  
PRAVFYSACVVVLGLQFLHEHKIVYRDGLWGPDQHVLRNSGVPGAGSAHRHILHASSGLVGTGRAAL\*  
>rs33561266\_ENSMUSP00000005616\_c.862:G>A\_p.G288E  
ENSMUST00000005616.16|Pkn1-201|ENSMUSG00000057672|-|chr8:g.84410748:C>T  
MAGDAVQSEPRWSLLEQLGLAGADLAAPGVQQQLELERERLKRERIRKELKLKEGAENLRRATTDLGRSLAPV  
ELLLRGSARRLDLLHQQLQELHAHVVLDPDPAAGSDATQSLAEGSPICSSSTNLSRVAGLEKQLAIELKVKQGA  
ENMIQTYSNSSKDRKLLLTAAQMLQDSKTKIDIIRMQLRRALQALQAGELESQAAPDEAQQDPELGAVELRIE  
ELRHHFRVEHAVAEGAKNVLRLLSGAKAPDRKAVSEAQEKLTESNQKLGLLRESLERRLGELPADHPKERLLR  
EELTAASSAFSAILPGFPFATHYSTLSKPAPLTGTLEVRVVGCKNLPETIPWSPPPSVGASGTPESRTPFLS  
RPARGLYSRGSLSGRSSLRGEAENATEVSTVLKLDNTVVGQTAWKPCGNPAWDQSFTLELERARELELAVFW  
RDQRGLCALFKLEDFLDNERHEVQLDMEPQGCLVAEVTFRNPIIERIPRLQRQKKIFSKQQGKAFQRRARQ  
MNIDVATWVRLRLRRLIPSAVATGTFSPNASPGAIEIRHTGDISMEKLNLGADSDSSSQSPGGLPSTSCSLSSPT  
HESTTSPPELSETQETPGPGLCSPLRKSPLTLEDFKFLAVLGRGHFGKVLLSEFRSSGELFAIKALKKGDIVA  
RDEVESLMCEKRILAAVTRAGHPFLVNLFGCFQTPHVCVFMVEYSAGGDLMLHIHSDVFSEPRAVFYSACVV  
LGLQFLHEHKIVYRDLDLNDLLDTEGYVKIADFLCKEKGMYGDRSTSTFCGTPFLAPEVLTDTSYTRAVDWW  
GLGVLLYEMLVGESPPFGDDEEEVFDIVNDEVRYPRFLSAEAI GIMRRLRRNPERRLGSTERDAEDVKKQP  
FFRSLGWDVLLARRLPPPFVPTLSGRTDVSNFDEEFTGEAPTLSPPRDARPLTAAEQAAFRDFDFVAGGY\*  
>rs33561266\_ENSMUSP00000116235\_c.877:G>A\_p.G293E  
ENSMUST00000144258.8|Pkn1-208|ENSMUSG00000057672|-|chr8:g.84410748:C>T  
MAADPPLDSELESEPRWSLLEQLGLAGADLAAPGVQQQLELERERLKRERIRKELKLKEGAENLRRATTDLGR  
SLAPVELLLRGSARRLDLLHQQLQELHAHVVLDPDPAAGSDATQSLAEGSPICSSSTNLSRVAGLEKQLAIELKV  
KQGAENMIQTYSNSSKDRKLLLTAAQMLQDSKTKIDIIRMQLRRALQALQAGELESQAAPDEAQDPELGAV  
ELRIEELRHHFRVEHAVAEGAKNVLRLLSGAKAPDRKAVSEAQEKLTESNQKLGLLRESLERRLGELPADHPK  
ERLLREELTAASSAFSAILPGFPFATHYSTLSKPAPLTGTLEVRVVGCKNLPETIPWSPPPSVGASGTPESR  
TPFLSRPARGLYSRGSLSGRSSLRGEAENATEVSTVLKLDNTVVGQTAWKPCGNPAWDQSFTLELERARELE  
LAVFWRDQRGLCALFKLEDFLDNERHEVQLDMEPQGCLVAEVTFRNPIIERIPRLQRQKKIFSKQQGKAFQ  
RARQMNIDVATWVRLRLRRLIPSAVATGTFSPNASPGAIEIRHTGDISMEKLNLGADSDSSSQSPGGLPSTSCS  
LSSPTHESTTSPPELSETQETPGPGLCSPLRKSPLTLEDFKFLAVLGRGHFGKVLLSEFRSSGELFAIKALKK  
GDIVARDEVESLMCEKRILAAVTRAGHPFLVNLFGCFQTPHVCVFMVEYSAGGDLMLHIHSDVFSEPRAVFYS

ACVVVLGLQFLHEHKIVYRDLKLDNLLLDTEGYVKIADFLGCKEGMGYGDRSTSTFCGTPEFLAPEVLTDTSYTR  
AVDWWGLGVLLYEMLVGESPFPGDDEEEVFDIVNDEVRYPRFLSAEAI GIMRLLRRNPERRLGSTERDAED  
VKKQPFFRSLGWDVLLARLPPPFVPTLSGRTDVSNFDEEFTGEAPTLSPPRDARPLTAAEQAAFDFDFVAG  
GY\*

>rs33561266\_ENSMUSP00000115054\_c.898:G>A\_p.G300E  
ENSMUST00000132945.8|Pkn1-204|ENSMUSG00000057672|-|chr8:g.84410748:C>T  
MACRPCRAGRIWCCRSHKSEPRSWSLLEQLGLAGADLAAPGVQQLELERERLKRERKELKKEGAENLRR  
ATTDLGRSLAPVELLLRGSARRLDLHQQQLQELHAHVLPDPAAGSDATQSLAEGSPICSSSTNLSRVAGLEKQ  
LAIELKVKQGAENMIQTYNSGSSKDRKLLLTAAQQMLQDSKTKIDIIRMQLRRALQALQAGELESQAAPDEAQQ  
DPELGAVELRIEELRHHRFVEHAVAEGAKNVLRLLSGAKAPDRKAVSEAEQKLTESNQKLGLLRESLERRLGE  
LPADHPKERLLREELTAASSSAFSAIILPGFPFATHYSTLSKPPAPLTGTLEVRVVGCKNLPETIPWSPPPSVGA  
SGTPESRTPFLSRPARGLYSRSGSLSGRSSLRGEAENATEVSTVLKLDNTVVGQTAWKPCGNQWDSFTLEL  
ERARELELAVFWRDQRGLCALKFLKLEDFLDNERHEVQLDMEPQGCCLVAEVTFRNPIIERIPRLQRQKKIFSK  
QQGKAFQARQMNIDVATWVRLRRLIPSAVATGTFSPNASPGAIEIRHTGDISMEKLNLGADSDSSSQKSPPG  
LPSTSCSLSSPHESTTPELPESETQETPGPGLCSPLRKSPLTLEDFKFLAVLGRGHFGKVLLEFRSSGELF  
AIKALKKGDIVARDEVESLMCEKRI LAAVTRAGHPFLVNLFGCFQTPHVCVFMVEYSAGGDLMLHIHSDVDFSE  
PRAVFYSACVVVLGLQFLHEHKIVYRDLGWPDPQHVLRNSGVPGAGSAHRHILHASSGLVGTGRAAL\*

>rs46055145\_ENSMUSP0000019576\_c.198:C>G\_p.P67A  
ENSMUST0000019576.15|Ddx39a-201|ENSMUSG00000005481|+|chr8:g.84446218:C>G  
MAEQDVENELLDYDEDEEPQAPQESTPAPPKKDVKGSYVSIHSSGFRDFLLKPELLRAIVDCGFHASEVQHE  
CIPQAILGMDVLCQAKSGMGKTAVFVLATLQQIEPVNGQVSVLVMCHTRELAFQISKEYERFSKYMPVSVKVS  
FFGGLSIKKDEDVLLKKNCPHVVGTPGRILALVRSRSLNLRNVKHFVLDCECDKMLEQLDMRRDVQEIFRLTPH  
EKQCMFMSATLSKEIRPVCRKFMQDPMEVFVDDTKLTLHGLQQYYVKLKDSEKNRKLFDLLDVLEFNQVVI  
VKSQVRCMALAQLLVEQNFPPIAIAIHRGMAQEERLSRYQQFKDFQRRILVATNLFGRGMDIERNVIVFNQVVI  
DSDTYLHRVARAGRFGTKGLAVTFVSDENDAKILNDVQDRFEVNVVAELPEEIDISTYIEQSR\*

>rs46055145\_ENSMUSP00000116101\_c.198:C>G\_p.P67A  
ENSMUST00000140521.8|Ddx39a-205|ENSMUSG00000005481|+|chr8:g.84446218:C>G  
MAEQDVENELLDYDEDEEPQAPQESTPAPPKKDVKGSYVSIHSSGFRDFLLKPELLRAIVDCGFHASEVQHE  
CIPQAILGMDVLCQAKSGMGKTAVFVLATLQQIEPVNGQVSVLVMCHTRELAFQISKEYERFSKYMPVSVKVS  
FFGGLSIKKDEDVLLKKNCPHVVGTPGRILALVRSRSLNLRNVKHFVLDCECDKMLEQLGSL\*

>rs46055145\_ENSMUSP00000148329\_c.198:C>G\_p.P67A  
ENSMUST00000212949.2|Ddx39a-207|ENSMUSG00000005481|+|chr8:g.84446218:C>G  
MAEQDVENELLDYDEDEEPQAPQESTPAPPKKDVKGSYVSIHSSGFRDFLLKPELLRAIVDCGFHASEVQHE  
CIPQAILGMDVLCQAKSGMGKTAVFVLATLQQIEPVNGQVSVLVMCHTRELAFQISKEYERFSKYMPVSVKVS  
FFGGLSIKKDEDVLLKKNCPHVVGTPGRILALVRSRSLNLRNVKHFVLDCECDKMLEQLDMRRDVQEIFRLTPH  
EKQCMFMSATLSKEIRPVCRKFMQDPMEVFVDDTKLTLHGLQQYYVKLKDSEKNRKLFDLLDVLEFNQVVI  
VKSQVRCMALAQLLVEQNFPPIAIAIHRGMAQEERLSRYQQFKDFQRRILVATNLFGRGMDIERNVIVFNQVVI  
DSDTYLHRVARAGRFGTKGLAVTFVSDENDAKILNDVQDRFEVNVVAELPEEIDISTYIEQSR\*

>rs46055145\_ENSMUSP00000105435\_c.198:C>G\_p.P67A  
ENSMUST00000109810.2|Ddx39a-202|ENSMUSG00000005481|+|chr8:g.84446218:C>G  
MAEQDVENELLDYDEDEEPQAPQESTPAPPKKDVKGSYVSIHSSGFRDFLLKPELLRAIVDCGFHASEVQHE  
CIPQAILGMDVLCQAKSGMGKTAVFVLATLQQIEPVNGQVSVLVMCHTRELAFQISKEYERFSKYMPVSVKVS  
FFGGLSIKKDEDVLLKKNCPHVVGTPGRILALVRSRSLNLRNVKHFVLDCECDKMLEQLDMRRDVQEIFRLTPH  
EKQCMFMSATLSKEIRPVCRKFMQDPMEVFVDDTKLTLHGLQQYYVKLKDSEKNRKLFDLLDVLEFNQVVI  
VKSQVRCMALAQLLVEQNFPPIAIAIHRGMAQEERLSRYQQFKDFQRRILVATNLFGRGMDIERNVIVFNQVVI  
DSDTYLHRVARAGRFGTKGLAVTFVSDENDAKILNDVQDRFEVNVVAELPEEIDISTYIEQSR\*

>rs46055145\_ENSMUSP00000132222\_c.198:C>G\_p.P67A  
ENSMUST00000172396.8|Ddx39a-206|ENSMUSG00000005481|+|chr8:g.84446218:C>G  
MAEQDVENELLDYDEDEEPQAPQESTPAPPKKDVKGSYVSIHSSGFRDFLLKPELLRAIVDCGFHASEVQHE  
CIPQAILGMDVLCQAKSGMGKTAVFVLATLQQIEPVNGQVSVLVMCHTRELAFQISKEYERFSKYMPVSVKVS  
FFGGLSIKKDEDVLLKKNCPHVVGTPGRILALVRSRSLNLRNVKHFVLDCECDKMLEQLDMRRDVQEIFRLTPH  
EKQCMFMSATLSKEIRPVCRKFMQDPMEVFVDDTKLTLHGLQQYYVKLKDSEKNRKLFDLLDVLEFNQVVI  
VKSQVRCMALAQLLVEQNFPPIAIAIHRGMAQEERLSRYQQFKDFQRRILVATNLFGRGMDIERNVIVFNQVVI  
DSDTYLHRVARAGRFGTKGLAVTFVSDENDAKILNDVQDRFEVNVVAELPEEIDISTYIEQSR\*

>ENSMUSP00000128220\_c.1528:T>ATGTCATGAGGCAGGCTCTGCCTT\_p.L510ins-fs  
ENSMUST00000166939.8|Adgre5-208|ENSMUSG00000002885|-  
|chr8:g.84451578:A>AAGCAAGACCCTGCCTCATGTACAT

MRGVRCPLLVCILLSLSGAGTQKAENCAKWCIPINSKCVSNRSCVCKPGFSSEKELITNPAESCEDINECLL  
PGFSCGDFAMCKNSEGSYTCVNCNLGYKLLSGAESFVNESENTCQDVDECSSGQHQCHNSTVCKNTVGSYKCHC  
RPGWKPTSGSLRGPDTICQEPFPPTWTLPTAHSQTLRLRFSVEVQNLRLDFNPATVNYTIQKLEAVDKLLED  
PMETETQQVAAQLLSNLEQSLRSLAQFLPKGPFTYTSPSNTELSLMVKEQDNKDVTTVHHGQTMELDWAVTA  
GAKISENGSSVAGILSSPNMEKLLGNTPLNLEQRRASLEDFYGSPIPSVSLKLLSNINSVFLTNTEKLAN  
VTFKFDFTSVESIEPRHELICAFWKAHNGNGYWDTDGCSMNGTGFCNCNHLTSFMAILMAQYHVQDPRLELITK  
VGLLLSLICLLLCILTFLLVKPIQSSRTMVHLHLICICLFLGSIIFLVGVENEGGEVGLRCLVAVMLHFCFHV  
HEAGSCLGRLLLDGTGGRGALLPGGACVPGPRPEYMATLPDWLRGAPPHRGHLNGSCQNGWLWACNILLAGL  
>ENSMUSP0000002964\_c.1534:T>ATGTACATGAGGCAGGGTCTTGCCTT\_p.L512ins-fs  
ENSMUST0000002964.14|Adgre5-201|ENSMUSG0000002885|-  
|chr8:g.84451578:A>AAGCAAGACCCTGCCTCATGTACAT  
MRGVRCPLLVCILLSLSGAGTQKAESKNCAKWCIPINSKCVSNRSCVCKPGFSSEKELITNPAESCEDINEC  
LLPGFSCGDFAMCKNSEGSYTCVNCNLGYKLLSGAESFVNESENTCQDVDECSSGQHQCHNSTVCKNTVGSYK  
HCRPGWKPTSGSLRGPDTICQEPFPPTWTLPTAHSQTLRLRFSVEVQNLRLDFNPATVNYTIQKLEAVDKLL  
EDPMETETQQVAAQLLSNLEQSLRSLAQFLPKGPFTYTSPSNTELSLMVKEQDNKDVTTVHHGQTMELDWAV  
TAGAKISENGSSVAGILSSPNMEKLLGNTPLNLEQRRASLEDFYGSPIPSVSLKLLSNINSVFLTNTEKLA  
SNVTFKFDFTSVESIEPRHELICAFWKAHNGNGYWDTDGCSMNGTGFCNCNHLTSFMAILMAQYHVQDPRLELITK  
VGLLLSLICLLLCILTFLLVKPIQSSRTMVHLHLICICLFLGSIIFLVGVENEGGEVGLRCLVAVMLHFCF  
HVHEAGSCLGRLLLDGTGGRGALLPGGACVPGPRPEYMATLPDWLRGAPPHRGHLNGSCQNGWLWACNILLAGL  
>ENSMUSP00000075240\_c.1816:T>ATGTACATGAGGCAGGGTCTTGCCTT\_p.L606ins-fs  
ENSMUST00000075240.13|Adgre5-202|ENSMUSG0000002885|-  
|chr8:g.84451578:A>AAGCAAGACCCTGCCTCATGTACAT  
MRGVRCPLLVCILLSLSGAGTQKAESKNCAKWCIPINSKCVSNRSCVCKPGFSSEKELITNPAESCEDINEC  
LLPGFSCGDFAMCKNSEGSYTCVNCNLGYKLLSGAESFVNESENTCQASVNTGMTVPVPSRIHTVTTAPGNLPEQ  
TTTVHQTMQDSEERTPKDVNECISGQNHCHQSTHCINKLGGYSCICRQGWKVPVPGSPNGPVSTVCEDVDECS  
SGQHCHNSTVCKNTVGSYKCHCRPGWKPTSGSLRGPDTICQEPFPPTWTLPTAHSQTLRLRFSVEVQNLRL  
FNPATVNYTIQKLEAVDKLLEDPMETETQQVAAQLLSNLEQSLRSLAQFLPKGPFTYTSPSNTELSLMVKEQ  
DNKDVTTVHHGQTMELDWAVTAGAKISENGSSVAGILSSPNMEKLLGNTPLNLEQRRASLEDFYGSPIPSVS  
LKLLSNINSVFLTNTEKLANVTFKFDFTSVESIEPRHELICAFWKAHNGNGYWDTDGCSMNGTGFCNCN  
LTSFMAILMAQYHVQDPRLELITKVGLLLSLICLLLCILTFLLVKPIQSSRTMVHLHLICICLFLGSIIFLVGVE  
NEGGEVGLRCLVAVMLHFCFHVHEAGSCLGRLLLDGTGGRGALLPGGACVPGPRPEYMATLPDWLRGAPP  
GHLNGSCQNGWLWACNILLAGL  
>ENSMUSP00000105427\_c.1681:T>ATGTACATGAGGCAGGGTCTTGCCTT\_p.L561ins-fs  
ENSMUST00000105427.3|Adgre5-203|ENSMUSG0000002885|-  
|chr8:g.84451578:A>AAGCAAGACCCTGCCTCATGTACAT  
MRGVRCPLLVCILLSLSGAGTQKAESKNCAKWCIPINSKCVSNRSCVCKPGFSSEKELITNPAESCEDINEC  
LLPGFSCGDFAMCKNSEGSYTCVNCNLGYKLLSGAESFVNESENTCQDVNECISGQNHCHQSTHCINKLGGYSC  
ICRQGWKVPVPGSPNGPVSTVCEDVDECSGQHQCHNSTVCKNTVGSYKCHCRPGWKPTSGSLRGPDTICQEP  
FPPTWTLPTAHSQTLRLRFSVEVQNLRLDFNPATVNYTIQKLEAVDKLLEDPMETETQQVAAQLLSNLEQSLR  
TLAQFLPKGPFTYTSPSNTELSLMVKEQDNKDVTTVHHGQTMELDWAVTAGAKISENGSSVAGILSSPNMEK  
LLGNTPLNLEQRRASLEDFYGSPIPSVSLKLLSNINSVFLTNTEKLANVTFKFDFTSVESIEPRHELICA  
FWKAHNGNGYWDTDGCSMNGTGFCNCNHLTSFMAILMAQYHVQDPRLELITKVGLLLSLICLLLCILTFLLVKP  
IQSSRTMVHLHLICICLFLGSIIFLVGVENEGGEVGLRCLVAVMLHFCFHVHEAGSCLGRLLLDGTGGRGALL  
PGGACVPGPRPEYMATLPDWLRGAPPHRGHLNGSCQNGWLWACNILLAGL  
>rs47983638\_ENSMUSP00000128220\_c.1488:C>T\_p.R497C  
ENSMUST00000128220.8|Adgre5-208|ENSMUSG0000002885|-|chr8:g.84451618:G>A  
MRGVRCPLLVCILLSLSGAGTQKAENCAKWCIPINSKCVSNRSCVCKPGFSSEKELITNPAESCEDINECLL  
PGFSCGDFAMCKNSEGSYTCVNCNLGYKLLSGAESFVNESENTCQDVDECSSGQHQCHNSTVCKNTVGSYKCHC  
RPGWKPTSGSLRGPDTICQEPFPPTWTLPTAHSQTLRLRFSVEVQNLRLDFNPATVNYTIQKLEAVDKLLED  
PMETETQQVAAQLLSNLEQSLRSLAQFLPKGPFTYTSPSNTELSLMVKEQDNKDVTTVHHGQTMELDWAVTA  
GAKISENGSSVAGILSSPNMEKLLGNTPLNLEQRRASLEDFYGSPIPSVSLKLLSNINSVFLTNTEKLAN  
VTFKFDFTSVESIEPRHELICAFWKAHNGNGYWDTDGCSMNGTGFCNCNHLTSFMAILMAQYHVQDPRLELITK  
VGLLLSLICLLLCILTFLLVKPIQSSRTMVHLHLICICLFLGSIIFLVGVENEGGEVGLRCLVAVMLHFCFLA  
AFCWMALEGVELYFLVVRVFGQGLSTWQRCLIGYGVPLLIVAI SMAVVKMDGYGHATYCWLD FRKQGF LWSF  
SGPVAFIIFCNAAFVITVWKLTKKFSEINPNMKKLRKARVLTITSIAQLLVLGCTWGFGLFLFNPHSTWLSY  
IFTLNCLQGLFLYVMLCLLNKKVREYWKWACMVTGSKYTEFNSSTTGTGTSQTRALRSSESGM\*



>rs47983638\_ENSMUSP00000002964\_c.1494:C>T\_p.R499C  
ENSMUST00000002964.14|Adgre5-201|ENSMUSG00000002885|-|chr8:g.84451618:G>A  
MRGVRCPLLVCILLSLSGAGTQKAESKNCAKWCIPINSKCVSNRSCVCKPGFSSEKELITNPAESCEDINEC  
LLPGFSCGDFAMCKNSEGSYTCVCNLGYKLLSGAESFVNESENTCQDVDECSSGQHQCCHNSTVCKNTVGSYKC  
HCRPGWKPTSGSLRGPDTICQEPFPTWTLLPTAHSQTLLRFSVEVQNLLRDFNPATVNYTIQKLEAVDKLL  
EDPMETETQQVAAQLLSNLEQSLRRTLAQFLPKGPFYTSPSNTELSLMVKEQDNKDVTTVHHGQTMELDWA  
TAGAKISENGSSVAGILSSPNMEKLLGNTPLNLEQRRASLEDFYGSPIPSVSLKLLSNINSVFLTNTNTEKLA  
SNVTFKFDFTSVESIEPRHELICAFWKAHNGNGYWDTDGCSMNGTGFCCHNLT SFAILMAQYHVQDPRLELI  
TKVGLLLSLICLLLCILTFLLVKPIQSSRTMVHLHLICICLFLGSIIFLVGVENEGGEVGLCCRLVAVMLHFCF  
LAAFCWMALEGVELYFLVVRVFGQGLSTWQRCLIGYGVPLLIVAI SMAVVKMDGYGHATYCWLD FRKQGF  
SFSGPVAFIIFCNAAIFVITVWKLTKKFSEINPNMKLKRARVLTITSI AQLLVLGCTWGFGLFLFNPHSTW  
SYIFTLLNCLQGLFLYVMLCLLNKVVREYWKWACMVTGSKYTEFNSSTTGTGTSQTRALRSSESGM\*

>rs47983638\_ENSMUSP00000075240\_c.1776:C>T\_p.R593C  
ENSMUST00000075843.13|Adgre5-202|ENSMUSG00000002885|-|chr8:g.84451618:G>A  
MRGVRCPLLVCILLSLSGAGTQKAESKNCAKWCIPINSKCVSNRSCVCKPGFSSEKELITNPAESCEDINEC  
LLPGFSCGDFAMCKNSEGSYTCVCNLGYKLLSGAESFVNESENTCQASVNTGMTVPVPSRIHTVTTAPGNLPEQ  
TTTVHQTMQGDSEERTPKDVNECISGQNHCHQSTHCINKLGGYSCICRQGWKVPVPGSPNGPVSTVCEDEV  
SGQHQCCHNSTVCKNTVGSYKCHCRPGWKPTSGSLRGPDTICQEPFPTWTLLPTAHSQTLLRFSVEVQNLLR  
FNPATVNYTIQKLEAVDKLLEDPMETETQQVAAQLLSNLEQSLRRTLAQFLPKGPFYTSPSNTELSLMVKEQ  
DNKDVTTVHHGQTMELDWA VTAGAKISENGSSVAGILSSPNMEKLLGNTPLNLEQRRASLEDFYGSPIPSV  
LKLLSNINSVFLTNTNTEKLASNVTFKFDFTSVESIEPRHELICAFWKAHNGNGYWDTDGCSMNGTGFCCHN  
LTSFAILMAQYHVQDPRLELITKVGLLLSLICLLLCILTFLLVKPIQSSRTMVHLHLICICLFLGSIIFLVGVE  
NEGGEVGLCCRLVAVMLHFCFLAAFCWMALEGVELYFLVVRVFGQGLSTWQRCLIGYGVPLLIVAI SMAVVK  
MDGYGHATYCWLD FRKQGF LWSFSGPVAFIIFCNAAIFVITVWKLTKKFSEINPNMKLKRARVLTITSI AQL  
LVLGCTWGFGLFLFNPHSTWLSYIFTLLNCLQGLFLYVMLCLLNKVVREYWKWACMVTGSKYTEFNSSTTGT  
GTSQTRALRSSESGM\*

>rs47983638\_ENSMUSP00000105427\_c.1641:C>T\_p.R548C  
ENSMUST00000109802.3|Adgre5-203|ENSMUSG00000002885|-|chr8:g.84451618:G>A  
MRGVRCPLLVCILLSLSGAGTQKAESKNCAKWCIPINSKCVSNRSCVCKPGFSSEKELITNPAESCEDINEC  
LLPGFSCGDFAMCKNSEGSYTCVCNLGYKLLSGAESFVNESENTCQDVNECISGQNHCHQSTHCINKLGGYSC  
ICRQGWKVPVPGSPNGPVSTVCEDEVDECSSGQHQCCHNSTVCKNTVGSYKCHCRPGWKPTSGSLRGPDTICQEP  
FPTWTLLPTAHSQTLLRFSVEVQNLLRDFNPATVNYTIQKLEAVDKLLEDPMETETQQVAAQLLSNLEQSLR  
TLAQFLPKGPFYTSPSNTELSLMVKEQDNKDVTTVHHGQTMELDWA VTAGAKISENGSSVAGILSSPNMEK  
LLGNTPLNLEQRRASLEDFYGSPIPSVSLKLLSNINSVFLTNTNTEKLASNVTFKFDFTSVESIEPRHELIC  
AFWKAHNGNGYWDTDGCSMNGTGFCCHNLT SFAILMAQYHVQDPRLELITKVGLLLSLICLLLCILTFLLVK  
PIQSSRTMVHLHLICICLFLGSIIFLVGVENEGGEVGLCCRLVAVMLHFCFLAAFCWMALEGVELYFLVVRV  
FGQGLSTWQRCLIGYGVPLLIVAI SMAVVKMDGYGHATYCWLD FRKQGF LWSFSGPVAFIIFCNAAIFVITV  
WKLTKKFSEINPNMKLKRARVLTITSI AQLLVLGCTWGFGLFLFNPHSTWLSYIFTLLNCLQGLFLYVML  
CLLNKVVREYWKWACMVTGSKYTEFNSSTTGTGTSQTRALRSSESGM\*

>rs32903748\_ENSMUSP00000075240\_c.445:C>A\_p.T149K  
ENSMUST00000075843.13|Adgre5-202|ENSMUSG00000002885|-|chr8:g.84458579:G>T  
MRGVRCPLLVCILLSLSGAGTQKAESKNCAKWCIPINSKCVSNRSCVCKPGFSSEKELITNPAESCEDINEC  
LLPGFSCGDFAMCKNSEGSYTCVCNLGYKLLSGAESFVNESENTCQASVNTGMTVPVPSRIHTVTTAPGNLPEQ  
TTKVHQTMQGDSEERTPKDVNECISGQNHCHQSTHCINKLGGYSCICRQGWKVPVPGSPNGPVSTVCEDEV  
SGQHQCCHNSTVCKNTVGSYKCHCRPGWKPTSGSLRGPDTICQEPFPTWTLLPTAHSQTLLRFSVEVQNLLR  
FNPATVNYTIQKLEAVDKLLEDPMETETQQVAAQLLSNLEQSLRRTLAQFLPKGPFYTSPSNTELSLMVKEQ  
DNKDVTTVHHGQTMELDWA VTAGAKISENGSSVAGILSSPNMEKLLGNTPLNLEQRRASLEDFYGSPIPSV  
LKLLSNINSVFLTNTNTEKLASNVTFKFDFTSVESIEPRHELICAFWKAHNGNGYWDTDGCSMNGTGFCCHN  
LTSFAILMAQYHVQDPRLELITKVGLLLSLICLLLCILTFLLVKPIQSSRTMVHLHLICICLFLGSIIFLVGVE  
NEGGEVGLRCLVAVMLHFCFLAAFCWMALEGVELYFLVVRVFGQGLSTWQRCLIGYGVPLLIVAI SMAVVK  
MDGYGHATYCWLD FRKQGF LWSFSGPVAFIIFCNAAIFVITVWKLTKKFSEINPNMKLKRARVLTITSI AQL  
LVLGCTWGFGLFLFNPHSTWLSYIFTLLNCLQGLFLYVMLCLLNKVVREYWKWACMVTGSKYTEFNSSTTGT  
GTSQTRALRSSESGM\*

>rs49019694\_ENSMUSP00000075240\_c.373:G>A\_p.G125E  
ENSMUST00000075843.13|Adgre5-202|ENSMUSG00000002885|-|chr8:g.84458651:C>T  
MRGVRCPLLVCILLSLSGAGTQKAESKNCAKWCIPINSKCVSNRSCVCKPGFSSEKELITNPAESCEDINEC  
LLPGFSCGDFAMCKNSEGSYTCVCNLGYKLLSGAESFVNESENTCQASVNTMTVPVPSRIHTVTTAPGNLPEQ  
TTTVHQTMQGDSEERTPKDVNECISGQNHCHQSTHCINKLGGYSCICRQGWKVPVPGSPNGPVSTVCEDEV  
DECS

SGQHQCCHNSTVCKNTVGSYKCHCRPGWKPTSGLRGPDTICQEPFPFTWTLPTAHSQTLLRFSVEVQNLLRD  
FNPATVNYTIQKLEI EAVDKLLEDPMETETQQVAAQLLSNLEQSLRSLAQFLPKGPFTYTSPTSNTLSLMVKEQ  
DNKDVTTVHHGQTMWELDWAVTAGAKISENGSSVAGILSSPNMEKLLGNTPLNLEQRRASLEDFYGSPIPSVS  
LKLLSNINSVFLTNTNTEKLASNVTFKFDFTSVESIEPRHELICAFWKAHNGNGYWDTDGCSMNGTGFCCHCNH  
LTSFAILMAQYHVQDPRLELITKVGLLLSLICLLCILTFLLVKPIQSSRTMVHLHLICLFLGSIIFLVGVE  
NEGGEVGLRCLVAVMLHFCFLAAFCWMALEGEVLYFLVVRVFGQGLSTWQRCLIGYGVPLLIVAIMAVVK  
MDGYGHATYCWLD FRKQGF LWSFSGPFVAFIIFCNAAFVITVWKLTKKFSEINPNMKKLRKARVLTITSTIAQL  
LVLGCTWGFGLFLFNPHSTWLSYIFTLNCLQGLFLYVMLCLLNKKVREEYWKWACMVTGSKYTEFNSSTTGT  
GTSQTRALRSSESGM\*

>rs33291739\_ENSMUSP00000118452\_c.104:G>A\_p.M35I

ENSMUST00000141158.8|Adgr11-207|ENSMUSG0000013033|+|chr8:g.84645483:G>A  
MARLAAALWLSLCVTTVLVTSATQGLSRAGLPFGLIRRELACEGYPIELRCPGSDVIMVENANYGRD DDKICDA  
DPFQ MENVQCYLPDAFKIMSQR CNNR TQC VV VAGSDA FPDPCPGTYKYLEVQYDCVPYIFVCPGTLQK VLEPT  
STHESEHQSGAWCKDPLQAGDRIYVMPWIPYRTDTL TEYASWEDYVAARHTT TYRLPNRVDGTGFVVDGAVF  
Y NKERTRNIVKYDLRTRIKSGETVINTANYHDTSPYRWGGKTDIDLAVDENGLWVIYATEGNNGRLVVSQ LNP  
YTLRFEGTWTETGYDKRSASNAFMVCGVLYVLR SVYVDDDSEAAGNRVDYAFNTNANREEPVSLAFP NPYQFVS  
SVDYNPRDNQLVWNNYFVVRYSLEFGPPDPSAGPATSPPLSTTTTARPTPLTSTASPAATPLRRAPLTTHP  
VGAINQLGPDLPATAPAPSTRPPAPNLHVSPELFCEPREVRRVQWPATQQGMLVERPCPKGTRG IASFQCL  
PALGLWNPRGPDLSNCTSPWVNQVAQKIKSGENAANIASELARHTRGSIYAGDVSSSVKLMEQLL DILDAQLQ  
ALRPIERESAGKNYNKMKRERTCKDYIKAVVETVDNLLRPEALESWKDMNATEQVHTATMLLDVLEEGAFLL  
ADNVREPARFLAAKQNVVLEVTVLNTEGQVQELVFPQ EYPSSENSIQLSANTIKQNSRNGVVKVVFILYNNLGL  
FLSTENATVKLAGEAGTGGPGGASLVVNSQVIAASINKESSRVFLMDPVI FTVAHLEAKNHFNANC SFWNYSE  
RSMGLGYWSTQGCR LVESENKTHHTCACSHLTNF AVLMAHREIYQGRINELL SVITWVGIVISLVCLAI CISTF  
CFLRGLQTD RNTIHKNL CINFLAELLFLV GIDKTYEVACPIFAGLLHYFFLAAFSWLCLEGVHLYLLLVEV  
FESEYSRTKYYLGGYCFPALVVGIAAAIDYRSYGTEKACWLRVDNYFIWSFIGPVSFVI VVNLVFLM VTLHK  
MIRSSSVLKP DSSRLDNIKSWALGAIALLFLLGLT WAFGLLFINKESVVMAYLFTTFNAFQGVFI FV FHCALQ  
KKVHKEYSKLRSHSYCCIRSPGGTHGSLKTSAMRSNTRYTGTQSRIRRMWNDTVRKQTES SFMAGDINSTP  
TLNRGTMGNHLLTNPVLQPRGGTSPYNTLIAESVGFNPSSPPVFNSPGSYREPKHPLGGREACGMDTLPLNGN  
FNNSYSLRSGDFPPGDGGPEPPRGRNLADAAAF EKMIISELVHNNLRGASGGAKGPPPEPPVPPVPGVSEDEA  
GGPGSADRAEIELLYKALEEPLLLPRAQSVLYQSDLDESE SCTAEDGATSRPLSSPPGRD SLYASGANLRD SP  
SYPDSSPEGPNEALPPPPAPPGPEIYYTSRPPALVARNPLQGYVRRRPSHEGYLAAPSLEGPDPGDGQM  
QLVTSL\*

>rs33291739\_ENSMUSP00000116064\_c.104:G>A\_p.M35I

ENSMUST00000124355.8|Adgr11-202|ENSMUSG0000013033|+|chr8:g.84645483:G>A  
MARLAAALWLSLCVTTVLVTSATQGLSRAGLPFGLIRRELACEGYPIELRCPGSDVIMVENANYGRD DDKICDA  
DPFQ MENVQCYLPDAFKIMSQR CNNR TQC VV VAGSDA FPDPCPGTYKYLEVQYDCVPYINGGVS PGDRE\*

>rs33291739\_ENSMUSP00000048422\_c.104:G>A\_p.M35I

ENSMUST00000045393.15|Adgr11-201|ENSMUSG0000013033|+|chr8:g.84645483:G>A  
MARLAAALWLSLCVTTVLVTSATQGLSRAGLPFGLIRRELACEGYPIELRCPGSDVIMVENANYGRD DDKICDA  
DPFQ MENVQCYLPDAFKIMSQR CNNR TQC VV VAGSDA FPDPCPGTYKYLEVQYDCVPYKVEQKVFCPGLQK  
VLEPTSTHESEHQSGAWCKDPLQAGDRIYVMPWIPYRTDTL TEYASWEDYVAARHTT TYRLPNRVDGTGFV VY  
DGA VFY NKERTRNIVKYDLRTRIKSGETVINTANYHDTSPYRWGGKTDIDLAVDENGLWVIYATEGNNGRLV V  
SQLNPYTLRFEGTWTETGYDKRSASNAFMVCGVLYVLR SVYVDDDSEAAGNRVDYAFNTNANREEPVSLAFP NP  
YQFVSSVDYNPRDNQLVWNNYFVVRYSLEFGPPDPSAGPATSPPLSTTTTARPTPLTSTASPAATPLRRAP  
LTTHPVGAINQLGPDLPATAPAPSTRPPAPNLHVSPELFCEPREVRRVQWPATQQGMLVERPCPKGTRG IAS  
SFQCLPALGLWNPRGPDLSNCTSPWVNQVAQKIKSGENAANIASELARHTRGSIYAGDVSSSVKLMEQLL DIL  
DAQLQALRPIERESAGKNYNKMKRERTCKDYIKAVVETVDNLLRPEALESWKDMNATEQVHTATMLLDVLEE  
GAFLLADNVREPARFLAAKQNVVLEVTVLNTEGQVQELVFPQ EYPSSENSIQLSANTIKQNSRNGVVKVVFILY  
NNLGLFLSTENATVKLAGEAGTGGPGGASLVVNSQVIAASINKESSRVFLMDPVI FTVAHLEAKNHFNANC SF  
WNYSERMGLGYWSTQGCR LVESENKTHHTCACSHLTNF AVLMAHREIYQGRINELL SVITWVGIVISLVCLAI  
CISTF CFLRGLQTD RNTIHKNL CINFLAELLFLV GIDKTYEVACPIFAGLLHYFFLAAFSWLCLEGVHLYL  
LLVEVFESEYSRTKYYLGGYCFPALVVGIAAAIDYRSYGTEKACWLRVDNYFIWSFIGPVSFVI VVNLVFLM  
VTLHKMIRSSSVLKP DSSRLDNIKSWALGAIALLFLLGLT WAFGLLFINKESVVMAYLFTTFNAFQGVFI FV F  
HICALQKKVHKEYSKLRSHSYCCIRSPGGTHGSLKTSAMRSNTRYTGTQSRIRRMWNDTVRKQTES SFMAGD  
INSTPTLNRGTMGNHLLTNPVLQPRGGTSPYNTLIAESVGFNPSSPPVFNSPGSYREPKHPLGGREACGMDTL  
PLNGNFNNSYSLRSGDFPPGDGGPEPPRGRNLADAAAF EKMIISELVHNNLRGASGGAKGPPPEPPVPPVPGV  
SEDEAGGPGSADRAEIELLYKALEEPLLLPRAQSVLYQSDLDESE SCTAEDGATSRPLSSPPGRD SLYASGAN

LRDPSYPDSSPEGPNEALPPPPAPPGPPEIYYTSRPPALVARNPLQGYQVRRPSHEGYLAAPSLEGPGPD  
 GDGQMQLVTSL\*  
 >rs33291739\_ENSMUSP00000119100\_c.104:G>A\_p.M35I  
 ENSMUST00000132500.8|Adgr11-205|ENSMUSG0000013033|+|chr8:g.84645483:G>A  
 MARLAAALWLSLVCVTTVLVTSATQGLSRAGLPFGLIRRELACEGYPIELRCPGSDVIMVENANYGRD  
 DDKICDADPFQMVENVQCYLPDAFKIMSQRNNRTQCVVAVGSDAFDPDPCPGTYKYLEVQYDCV  
 PFI FVCPGTLQKVLEPTSTHESEHQSGAWCKDPLQAGDRIYVMPWIPYRTDTL  
 TEYASWEDYVAARHTTTYRLPNRVDGTGFVVYDGA  
 VFNKERTRNIVKYDLRTRIKSGETVINTANYHDTSPYRWGKTDIDLAVDENGLWVIYATEGNNGRLVVSQ  
 LNPYTLRFEGTWETGYDKRSASNAFMVCGVLYVLRVSVYVDDDSEAAGNRVDYAFNTNANREEPVSLAF  
 PNPYQFVSSVDYNPRDNQLYVWNNYFVVRYSLFEGPPDPSAGPATSPPLSTTTTARPTPLTSTASPAAT  
 TPLRRAPLTHPVGAINQLGPDLPATAPAPSTRPPAPNLHVSPELFCPEVRRVQWPATQQGMLVERPCPKG  
 TRGIA SFQCLPALGLWNPRGPDLSNCTSPWVNQVAQKIKSGENAANIASELARHTRGSIYAGDVSSSVK  
 LMEQLLDILDAQLQALRPIERESAGKNYNKMKRERTCKDYIKAVVETVDNLLRPEALESWKDMNATEQVHT  
 ATMLLDVLEEGAFLLADNVREPARFLAAKQNVVLEVTVLNTEGQVQELVFPQEYPSSENSIQLSANTIKQNS  
 RNVVVKVVFILYNLGLFLSTENATVKLAGEAGTGGPGGASLVVNSQVIAASINKESSRVFLMDPVI  
 FTVAHLEAKNHFNANCSFWNYSERMLGYWSTQGCRLVESNKTHHTCACSHLTNFAVLM  
 AHREIYQGRINELLSVITWVGIVISLVCLAICISTFCFLRGLQTD  
 RNTIHKNLCLNLAELFLVGDITQYEVACPIFAGLLHYFFLAAFSWL  
 CLEGVHLYLLVEVFESEYSRTKYLLGGYCFPALVVGIAAAIDYRSYGTEKACWLRVDNYFIWSFI  
 GPVSFVI VVNLVFLMVTLHKMIRSSSVLKPDSRLDNIKSWALGAIALLFLLGLT  
 WAFGLLFINKESVVMAYLFTTFNAFQGVFI FVHFCALQKKVHKEYSKCL  
 RHSYCCIRSPGGTHGSLKTSAMRSNTRYTGTQVPGQGRHIHQVSLGPRGRSTL  
 PESQKDPGGQSGPRDPLMFGLCPQSRIRRMWNTVVRKQTESSFMAGDINSTPTLN  
 RGTMGNHLLTNPVLQPRGGTSPYNTLIAESVGFNPSSPPVFN  
 SPGSYREPKHPLGGREACGMDTLP LNGNFNNSYSLRSGDFPPG  
 DGGPEPPRGRNLADAAAFEKMIISELVHNNLRGASGGAKGPPPEPPV  
 PVPVGVSEDEAGGPGSADRAEIELLYKALEEPLLLPRAQSVLYQSD  
 LDESECTAEDGATSRPLSSPPGRDSLYASGANLRDPSYPDSSPEGP  
 NEALPPPPAPPGPPEIYYTSRPPALVARNPLQGYQVRRPSHEGYLAAPS  
 LEGPGPDGDGQMQLVTSL\*  
 >rs33291739\_ENSMUSP00000115295\_c.104:G>A\_p.M35I  
 ENSMUST00000152978.8|Adgr11-210|ENSMUSG0000013033|+|chr8:g.84645483:G>A  
 MARLAAALWLSLVCVTTVLVTSATQGLSRAGLPFGLIRRELACEGYPIELRCPGSDVIMVENANYGRD  
 DDKICDADPFQMVENVQCYLPDAFKIMSQRNNRTQCVVAVGSDAFDPDPCPGTYKYLEVQYDCV  
 PFI FVCPGTLQKVLEPTSTHESEHQSGAWCKDPLQAGDRIYVMPWIPYRTDTL  
 TEYASWEDYVAARHTTTYRLPNRVDGTGFVVYDGA  
 VFNKERTRNIVKYDLRTRIKSGETVINTANYHDTSPYRWGKTDIDLAVDENGLWVIYATEGNNGRLV  
 VSQLNPNYTLRFEGTWETGYDKRSASNAFMVCGVLYVLRVSVYVDDDSEAAGNRVDYAFNTNANREEPV  
 SLAFPNPYQFVSSVDYNPRDNQLYVWNNYFVVRYSLFEGPPDPSAGPATSPPLSTTTTARPTPLTSTAS  
 PAATPLRRAPLTHPVGAINQLGPDLPATAPAPSTRPPAPNLHVSPELFCPEVRRVQWPATQQGMLVER  
 PCPKGTRGIA SFQCLPALGLWNPRGPDLSNCTSPWVNQVAQKIKSGENAANIASELARHTRGSIYAGDV  
 SSSVKLMEQLLDILDAQLQALRPIERESAGKNYNKMKRERTCKDYIKAVVETVDNLLRPEALESWKDM  
 NATEQVHTATMLLDVLEEGAFLLADNVREPARFLAAKQNVVLEVTVLNTEGQVQELVFPQEYPSSENSI  
 QLSANTIKQNSRNVVVKVVFILYNLGLFLSTENATVKLAGEAGTGGPGGASLVVNSQVIAASINKESSR  
 VFLMDPVI FTVAHLEAKNHFNANCSFWNYSERMLGYWSTQGCRLVESNKTHHTCACSHLTNFAVLM  
 AHREIYQGRINELLSVITWVGIVISLVCLAICISTFCFLRGLQTD  
 RNTIHKNLCLNLAELFLVGDITQYEVACPIFAGLLHYFFLAAFSWL  
 CLEGVHLYLLVEVFESEYSRTKYLLGGYCFPALVVGIAAAIDYRSYGTEKACWLRVDNYFIWSFI  
 GPVSFVI VVNLVFLMVTLHKMIRSSSVLKPDSRLDNIKSWALGAIALLFLLGLT  
 WAFGLLFINKESVVMAYLFTTFNAFQGVFI FVHFCALQKKVHKEYSKCL  
 RHSYCCIRSPGGTHGSLKTSAMRSNTRYTGTQVPGQGRHIHQVSLGPRGRSTL  
 PE S QKDPGGQSGPRDPLMFGLCPQSRIRRMWNTVVRKQTESSFMAGDINSTPTLN  
 RGTMGNHLLTNPVLQPRGGTSPYNTLIAESVGFNPSSPPVFN  
 SPGSYREPKHPLGGREACGMDTLP LNGNFNNSYSLRSGDFPPG  
 DGGPEPPRGRNLADAAAFEKMIISELVHNNLRGASGGAKGPPPEPPV  
 PVPVGVSEDEAGGPGSADRAEIELLYKALEEPLLLPRAQSVLYQSD  
 LDESECTAEDGATSRPLSSPPGRDSLYASGANLRDPSYPDSSPEGP  
 NEALPPPPAPPGPPEIYYTSRPPALVARNPLQGYQVRRPSHEGYLAAPS  
 LEGPGPDGDGQMQLVTSL\*  
 >rs32753131\_ENSMUSP00000118452\_c.1872:C>T\_p.P625S  
 ENSMUST00000141158.8|Adgr11-207|ENSMUSG0000013033|+|chr8:g.84659170:C>T  
 MARLAAALWLSLVCVTTVLVTSATQGLSRAGLPFGLMRRELACEGYPIELRCPGSDVIMVENANYGRD  
 DDKICDADPFQMVENVQCYLPDAFKIMSQRNNRTQCVVAVGSDAFDPDPCPGTYKYLEVQYDCV  
 PFI FVCPGTLQKVLEPTSTHESEHQSGAWCKDPLQAGDRIYVMPWIPYRTDTL  
 TEYASWEDYVAARHTTTYRLPNRVDGTGFVVYDGA  
 VFNKERTRNIVKYDLRTRIKSGETVINTANYHDTSPYRWGKTDIDLAVDENGLWVIYATEGNNGRLVVSQ  
 LNPYTLRFEGTWETGYDKRSASNAFMVCGVLYVLRVSVYVDDDSEAAGNRVDYAFNTNANREEPVSLAF  
 PNPYQFVSSVDYNPRDNQLYVWNNYFVVRYSLFEGPPDPSAGPATSPPLSTTTTARPTPLTSTASPAAT  
 TPLRRAPLTHPVGAINQLGPDLPATAPAPSTRPPAPNLHVSPELFCPEVRRVQWPATQQGMLVERPCPKG  
 TRGIA SFQCLPALGLWNPRGPDLSNCTSPWVNQVAQKIKSGENAANIASELARHTRGSIYAGDVSSSVK  
 LMEQLLDILDAQLQALRPIERESAGKNYNKMKRERTCKDYIKAVVETVDNLLRPEALESWKDMNATEQVHT  
 ATMLLDVLEEGAFLLADNVREPARFLAAKQNVVLEVTVLNTEGQVQELVFPQEYPSSENSIQLSANTIKQNS  
 RNVVVKVVFILYNLGLFLSTENATVKLAGEAGTGGPGGASLVVNSQVIAASINKESSRVFLMDPVI  
 FTVAHLEAKNHFNANCSFWNYSERMLGYWSTQGCRLVESNKTHHTCACSHLTNFAVLM  
 AHREIYQGRINELLSVITWVGIVISLVCLAICISTFCFLRGLQTD  
 RNTIHKNLCLNLAELFLVGDITQYEVACPIFAGLLHYFFLAAFSWL  
 CLEGVHLYLLVEVFESEYSRTKYLLGGYCFPALVVGIAAAIDYRSYGTEKACWLRVDNYFIWSFI  
 GPVSFVI VVNLVFLMVTLHKMIRSSSVLKPDSRLDNIKSWALGAIALLFLLGLT  
 WAFGLLFINKESVVMAYLFTTFNAFQGVFI FVHFCALQKKVHKEYSKCL  
 RHSYCCIRSPGGTHGSLKTSAMRSNTRYTGTQVPGQGRHIHQVSLGPRGRSTL  
 PE S QKDPGGQSGPRDPLMFGLCPQSRIRRMWNTVVRKQTESSFMAGDINSTPTLN  
 RGTMGNHLLTNPVLQPRGGTSPYNTLIAESVGFNPSSPPVFN  
 SPGSYREPKHPLGGREACGMDTLP LNGNFNNSYSLRSGDFPPG  
 DGGPEPPRGRNLADAAAFEKMIISELVHNNLRGASGGAKGPPPEPPV  
 PVPVGVSEDEAGGPGSADRAEIELLYKALEEPLLLPRAQSVLYQSD  
 LDESECTAEDGATSRPLSSPPGRDSLYASGANLRDPSYPDSSPEGP  
 NEALPPPPAPPGPPEIYYTSRPPALVARNPLQGYQVRRPSHEGYLAAPS  
 LEGPGPDGDGQMQLVTSL\*

ALRPIERESAGKYNKMKHRERTCKDYIKAVVETVDNLLRSEALESWKDMNATEQVHTATMLLDVLEEGAFLL  
ADNVREPARFLAAKQNVVLEVTVLNTEGQVQELVFPQEYPSSENSIQLSANTIKQNSRNGVVKVVFILYNNLGL  
FLSTENATVKLAGEAGTGGPGGASLVVNSQVIAASINKESSRVFLMDPVI FTVAHLEAKNHFNANCSFWNYSE  
RSMLGYWSTQGCRLVESNKHTTTCACSHLTNFVAVLMAHREIYQGRINELLLSVITWVGIVISLVCLAICISTF  
CFLRGLQTDNRNTHKNLNCINLFLAELLFLVGDIDKTQYEVACPIFAGLLHYFFLAAFSWLCLLEGVHLYLLLEVEV  
FESEYSRTKYYYYLGGYCFPALVVGIAAAIDYRSYGTEKACWLRVDNYFIWSFIGPVSFVIVVNLVFLMVTLHK  
MIRSSSVLKPDSRRLDNIKSWALGAIALLFLLGLTWFAGLLFINKESVVMAYLFTTFNAFQGVFI FVFHCALQ  
KKVHKEYSKCLRHSYCCIRSPPGGTHGSLKTSAMRSNTRYTGTQSRIRRMWNDTVRKQTESSEFMAGDINSTP  
TLNRGTMGNHLLTNPVLQPRGGTSPYNTLIAESVGFNPSSPPVFNPSPGSYREPKHPLGGREACGMDTLPLNGN  
FNNSYSLRSGDFPPGDGGPEPPRGRNLADAAAFEKMI I SELVHNNLRGASGGAKGPPPEPPVPPVPGVSEDEA  
GGPGSADRAEIELLYKALEEPLLLPRAQSVLYQSDLDESECTAEDGATSRLSSPPGRDSLYASGANLRDSP  
SYPDSSPEGPNEALPPPPAPPGPPEIYYTSRPPALVARNPLQGYQVRRPSHEGYLAAPSLEGPGPDGDGQM  
QLVTSL\*

>rs32753131\_ENSMUSP00000048422\_c.1887:C>T\_p.P630S

ENSMUST00000045393.15|Adgr11-201|ENSMUSG00000013033|+|chr8:g.84659170:C>T  
MARLAAALWLSLCVTTVLVTSATQGLSRAGLPFGLMRRELACEGYPIELRCPGSDVIMVENANYGRDDEKICDA  
DPFQMVENVQCYLPDAFKIMSQRNNRTQCVVAVGSDAFDPDPCPGTYKYLEVQYDCVPYIFVCPGTLQK  
VLEPTSTHSEHQSGAWCKDPLQAGDRIYVMPWI PYRTDTLTYASWEDYVAARHTTTYRPLNRVDGTGFVY  
DGAVFYNKERTRNIVKYDLRTRIKSGETVINTANYHDTSPYRWGGKTDIDLAVDENGLWVIYATEGNNGRLVV  
SQLNPHYTLRFEGTWETGYDKRSASNAFMVCGVLYVLRVSVYVDDDDSEAAGNRVDYAFNTNANREEPVSLAFP  
NPYQFVSSVDYNPRDNQLYVWNNYFVVRYSLEFGPPDPSAGPATSPPLSTTTTARPTPLTSTASPAATPLRRAP  
LTHPVGAINQLGPDLPATAPAPSTRPPAPNLHVSPELFCPEVRRVQWPATQQGMLVERPCPKGTRGIA  
SFQCLPALGLWNPGRDLSNCTSPWVNQVAQKIKSGENAANIASELARHTRGSIYAGDVSSSVKLMEQLLDIL  
DAQLQALRPIERESAGKYNKMKHRERTCKDYIKAVVETVDNLLRSEALESWKDMNATEQVHTATMLLDVLEE  
GAFLLADNVREPARFLAAKQNVVLEVTVLNTEGQVQELVFPQEYPSSENSIQLSANTIKQNSRNGVVKVVFILY  
NNLGLFLSTENATVKLAGEAGTGGPGGASLVVNSQVIAASINKESSRVFLMDPVI FTVAHLEAKNHFNANCS  
FWNYSEWNYSERMGLHLLTNPVLQPRGGTSPYNTLIAESVGFNPSSPPVFNPSPGSYREPKHPLGGREACGMDTL  
PLNGNFNNSYSLRSGDFPPGDGGPEPPRGRNLADAAAFEKMI I SELVHNNLRGASGGAKGPPPEPPVPPVPGV  
SEDEAGGPGSADRAEIELLYKALEEPLLLPRAQSVLYQSDLDESECTAEDGATSRLSSPPGRDSLYASGAN  
LRDSPSYPDSSPEGPNEALPPPPAPPGPPEIYYTSRPPALVARNPLQGYQVRRPSHEGYLAAPSLEGPGPD  
GDGQMQLVTSL\*

>rs32753131\_ENSMUSP00000119100\_c.1872:C>T\_p.P625S

ENSMUST00000132500.8|Adgr11-205|ENSMUSG00000013033|+|chr8:g.84659170:C>T  
MARLAAALWLSLCVTTVLVTSATQGLSRAGLPFGLMRRELACEGYPIELRCPGSDVIMVENANYGRDDEKICDA  
DPFQMVENVQCYLPDAFKIMSQRNNRTQCVVAVGSDAFDPDPCPGTYKYLEVQYDCVPYIFVCPGTLQK  
VLEPTSTHSEHQSGAWCKDPLQAGDRIYVMPWI PYRTDTLTYASWEDYVAARHTTTYRPLNRVDGTGFVY  
DGAVFYNKERTRNIVKYDLRTRIKSGETVINTANYHDTSPYRWGGKTDIDLAVDENGLWVIYATEGNNGRLVV  
SQLNPHYTLRFEGTWETGYDKRSASNAFMVCGVLYVLRVSVYVDDDDSEAAGNRVDYAFNTNANREEPVSLAFP  
NPYQFVSSVDYNPRDNQLYVWNNYFVVRYSLEFGPPDPSAGPATSPPLSTTTTARPTPLTSTASPAATPLRRAP  
LTHPVGAINQLGPDLPATAPAPSTRPPAPNLHVSPELFCPEVRRVQWPATQQGMLVERPCPKGTRGIA  
SFQCLPALGLWNPGRDLSNCTSPWVNQVAQKIKSGENAANIASELARHTRGSIYAGDVSSSVKLMEQLLDIL  
DAQLQALRPIERESAGKYNKMKHRERTCKDYIKAVVETVDNLLRSEALESWKDMNATEQVHTATMLLDVLEE  
GAFLLADNVREPARFLAAKQNVVLEVTVLNTEGQVQELVFPQEYPSSENSIQLSANTIKQNSRNGVVKVVFILY  
NNLGLFLSTENATVKLAGEAGTGGPGGASLVVNSQVIAASINKESSRVFLMDPVI FTVAHLEAKNHFNANCS  
FWNYSEWNYSERMGLHLLTNPVLQPRGGTSPYNTLIAESVGFNPSSPPVFNPSPGSYREPKHPLGGREACGMDTL  
PLNGNFNNSYSLRSGDFPPGDGGPEPPRGRNLADAAAFEKMI I SELVHNNLRGASGGAKGPPPEPPVPPVPGV  
SEDEAGGPGSADRAEIELLYKALEEPLLLPRAQSVLYQSDLDESECTAEDGATSRLSSPPGRDSLYASGAN  
LRDSPSYPDSSPEGPNEALPPPPAPPGPPEIYYTSRPPALVARNPLQGYQVRRPSHEGYLAAPSLEGPGPD  
GDGQMQLVTSL\*

SVLYQSDLDESECTAEDGATSRPLSSPPGRDSLYASGANLRDPSYPDSSPEGPNEALPPPPPPAPPGPPEIY  
YTSRPPALVARNPLQGYQVRRPSHEGYLAAPSLEGPGPDGDGQMLVTSL\*  
>rs32753131\_ENSMUSP00000115295\_c.1887:C>T\_p.P630S  
ENSMUST00000152978.8|Adgr11-210|ENSMUSG00000013033|+|chr8:g.84659170:C>T  
MARLAAALWLSLVCVTTVLVTSATQGLSRAGLPFGLMRRELACEGYPIELRCPGSDVIMVENANYGRDDKICDA  
DPFQMVENVQCYLPDAFKIMSQRNNRTQCVVVGASDAFPDPCPGTYKYLEVQYDCVPYKVEQKVFVCPGTLQK  
VLEPTSTHESEHQSGAWCKDPLQAGDRIYVMPWI PYRTDTLLEYASWEDYVAARHTTTYRLPNRVDGTGFVVY  
DGAVFYNKERTRNIVKYDLRTRIKSGETVINTANYHDTSPYRWGGKTDIDLAVDENGLWVIYATEGNNGRLVV  
SQLNPHYTLRFEGTWETGYDKRSASNAFMVCGVLYVLRVSVYVDDDDSEAAGNRVDYAFNTNANREEPVS LAFPNP  
YQFVSSVDYNPRDNQLYVWNNYFVVRYSLEFGPPDPSAGPATSPPLSTTTTARPTPLTSTASPAATTPLRRAP  
LTHPVGAINQLGPDLPATAPAPSTRPPAPNLHVSPELFCEPREVRRVQWPATQQGMLVERPCPKGTRGIA  
SFQCLPALGLWNPRGPDLSNCTSPWVNQVAQKIKSGENAANIASELARHTRGSIYAGDVSSSVKLMEQLLDIL  
DAQLQALRPIERESAGKNYNKMHKRERTCKDYIKAVVETVDNLLRSEALESWKDMNATEQVHTATMLLDVLEE  
GAFLLADNVREPARFLAAKQNVVLEVTVLNTEGQVQELVFPQEYPSSENSIQLSANTIKQNSRNGVVKVVFILY  
NNLGLFLSTENATVKLAGEAGTGGPGGASLVVNSQVIAASINKESSRVFLMDPVI FTVAHLEAKNHFNANCSF  
WNYSESRMLGYWSTQGCRLVESNKTHHTCACSHLTNFAVLMHREIYQGRINELLSSVITWVGIVISLVCLAI  
CISTFCFLRGLQTDNRNTHKNLCINLFLAEALLFLVGDIKTQYEVACPIFAGLLHYFFLAASFCLGEGVHLYL  
LLVEVFESEYSRTKYLLGGYCFPALVVGIAAAIDYRSYGTEKACWLRVDNYFIWSFIGPVSFVI VVNLVFLM  
VTLHKMIRSSSVLKPDSRDLNLIKSWALGAIALLFLGLTWFAGLLFINKESVVMAYLFTTFNAFQGVFIFVF  
HCALQKKVHKEYSKCLRHSYCCIRSPGGTHGSLKTSAMRSNTRYTGTVQVPGQGRHIHQVSLGPRGRSTLPE  
SQKDPGGQSGPRDPLMFLGCPQSRIRRMWNDTVRKQTESSFMAGDINSTPTLNRGTMGNHLLTNPVLPQPRGGT  
SPYNTLIAESVGFNPSSPPVFNSPGSYREPKHPLGGREACGMDTLPNGNFNNSYSLRSGDFPPGDGGPEPPR  
GRNLADAAAFEKMI ISELVHNNLRGASGGAKGPPPEPPVPPVPGVSEDEAGGPGSADRAEIELLYKALEEPLL  
LPRAQSVLYQSDLDESECTAEDGATSRPLSSPPGRDSLYASGANLRDPSYPDSSPEGPNEALPPPPPPAPP  
PPEIYYTSRPPALVARNPLQGYQVRRPSHEGYLAAPSLEGPGPDGDGQMLVTSL\*  
>rs32753131\_ENSMUSP00000118579\_c.1359:C>T\_p.P454S  
ENSMUST00000131717.2|Adgr11-204|ENSMUSG00000013033|+|chr8:g.84659170:C>T  
MPWI PYRTDTLLEYASWEDYVAARHTTTYRLPNRVDGTGFVVYDGAVFYNKERTRNIVKYDLRTRIKSGETVI  
NTANYHDTSPYRWGGKTDIDLAVDENGLWVIYATEGNNGRLVVSQVLYVLRVSVYVDDDDSEAAGNRVDYAFNTNANREEPVS LAFPNP  
YQFVSSVDYNPRDNQLYVWNNYFVVRYSLE  
FGPPDPSAGPATSPPLSTTTTARPTPLTSTASPAATTPLRRAPLTHPVGAINQLGPDLPATAPAPSTRPP  
APNLHVSPELFCEPREVRRVQWPATQQGMLVERPCPKGTRGIA SFQCLPALGLWNPRGPDLSNCTSPWVNQVA  
QKIKSGENAANIASELARHTRGSIYAGDVSSSVKLMEQLLDILDAQLQALRPIERESAGKNYNKMHKRERTCK  
DYIKAVVETVDNLLRSEALESWKDMNATEQVHTATMLLDVLEEGAFLLADNVREPARFLAAKQNVVLEVTVLN  
TEGQVQELVFPQEYPSSENSIQLSANTIKQNSRNGVVKVVFILYNNLGLFLSTENATVKLAGEAGTGGPGGASL  
VVNSQVIAASINKESSRVFLMDPVI FTVAHLEAKNHFNANCSFWNYSESRMLGYWSTQGCRLVESNKTHHTTCA  
CSHLTNFAVLMHREIYQGRINELLSSVITWVGIVISLVCLAI CISTFCFLRGLQTDNRNTHKNLCINLFLAE  
LLFLVGDIKTQYEVACPIFAGLLHYFFLAASFCLGEGVHLYLLVEVFESEYSRTKYLLGGYCFPALVVGI  
AAAIIDYRSYGTEKACWLRVDNYFIWSFIGPVSFVI VVNLVFLMVTLHKMIRSSSVLKPDSRDLNLIKSWALGA  
IALFLGLTWFAGLLFINKESVVMAYLFTTFNAFQGVFIFVHFCALQKKVHKEYSKCLRHSYCCIRSPGGT  
HGS LKTSAMRSNTRYTGTVQSRIRRMWNDTVRKQTESSFMAGDINSTPTLNRGTMGNHLLTNPVLPQPRGGTSP  
YNTLIAESVGFNPSSPPVFNSPGSYREPKHPLGGREACGMDTLPNGNFNNSYSLRSGDFPPGDGGPEPPRGR  
NLADAAAFEKMI ISELVHNNLRGASGGAKGPPPEPPVPPVPGVSEDEAGGPGSADRAEIELLYKALEEPLLLP  
RAQSVLYQSDLDESECTAEDGATSRPLSSPPGRDSLYASGANLRDPSYPDSSPEGPNEALPPPPPPAPP  
EIIYYTSRPPALVARNPLQGYQVRRPSHEGYLAAPSLEGPGPDGDGQMLVTSL\*  
>rs212477295\_ENSMUSP00000118452\_c.2568:A>G\_p.I857V  
ENSMUST00000141158.8|Adgr11-207|ENSMUSG00000013033|+|chr8:g.84661092:A>G  
MARLAAALWLSLVCVTTVLVTSATQGLSRAGLPFGLMRRELACEGYPIELRCPGSDVIMVENANYGRDDKICDA  
DPFQMVENVQCYLPDAFKIMSQRNNRTQCVVVGASDAFPDPCPGTYKYLEVQYDCVPYIFVCPGTLQK VLEPT  
STHESEHQSGAWCKDPLQAGDRIYVMPWI PYRTDTLLEYASWEDYVAARHTTTYRLPNRVDGTGFVVYDGAVF  
YNKERTRNIVKYDLRTRIKSGETVINTANYHDTSPYRWGGKTDIDLAVDENGLWVIYATEGNNGRLVVSQVLY  
YTLRFEGTWETGYDKRSASNAFMVCGVLYVLRVSVYVDDDDSEAAGNRVDYAFNTNANREEPVS LAFPNP  
YQFVSSVDYNPRDNQLYVWNNYFVVRYSLEFGPPDPSAGPATSPPLSTTTTARPTPLTSTASPAATTPLRRAPLTHP  
VGAINQLGPDLPATAPAPSTRPPAPNLHVSPELFCEPREVRRVQWPATQQGMLVERPCPKGTRGIA SFQCL  
PALGLWNPRGPDLSNCTSPWVNQVAQKIKSGENAANIASELARHTRGSIYAGDVSSSVKLMEQLLDILDAQLQ  
ALRPIERESAGKNYNKMHKRERTCKDYIKAVVETVDNLLRPEALESWKDMNATEQVHTATMLLDVLEEGAFLL  
ADNVREPARFLAAKQNVVLEVTVLNTEGQVQELVFPQEYPSSENSIQLSANTIKQNSRNGVVKVVFILYNNLGL  
FLSTENATVKLAGEAGTGGPGGASLVVNSQVIAASINKESSRVFLMDPVI FTVAHLEAKNHFNANCSFWNYSE

RSMGLGYWSTQGCR LVESNKTHHTTACSHLTNF AVLMAHREIYQGRINELLSSVVTWVGIVISLVCLAICISTF  
CFLRGLQTD RNTIHKNL CINFLAELLFLV GIDKTYEVACPIFAGLLHYFFLA AFSWLCLEGVHLYLLLVEV  
FESEYSRTKYYYYLGGYCF PALVVGIAAAIDYRSYGT EKACWLRVDNYFIWSFIGPVSFVI VVNLVFLMVT LHK  
MIRSSSVLKP DSSRLDNIKSWALGAIALLFLLGLT WAFGLLFINKESVVMAYLFTTTFNAFQGVFI FVFH CALQ  
KKVHKEYSKCLRH SYCCIRSP PGGTHGSLKTSAMRSNTRY YTGTSRIRRMWNDTVRKQTES SFMAGDINSTP  
TLNRGTMGNHLLTNPVLQPRGGTSPYNTLIAESVGFNPSSPPVFNSPGSYREPKHPLGGREACGMDTLPLNGN  
FNNSYSLRSGDFPPGDGGPEPPRGRNLADAAAF EKMIISELVHNNLRGASGGAKGPPPEPPVPPVPGVSEDEA  
GGPGSADRAEIELLYKALEEPLLLPRAQSVLYQSDLDESE SCTAEDGATSRPLSSPPGRD SLYASGANLRD SP  
SYPDSSPEGPNEALPPPPAPPGPPEIYYTSRPPALVARNPLQGY YQVRRPSHEGYLAAPSLEGPDPGDGQM  
QLVTSL\*

>rs212477295\_ENSMUSP00000048422\_c.2583:A>G\_p.1862V

ENSMUST00000045393.15|Adgr11-201|ENSMUSG00000013033|+|chr8:g.84661092:A>G  
MARLAAALWSLCVTTVLVTSATQGLSRAGLPFGLMRRELACEGYPIELRCPGSDVIMVENANYGR TDDKICDA  
DPFQ MENVCYLPDAFKIMSQR CNRTQC VVVGASDAFPDPCPGTYKYLEVQYDCVPYKVEQKVFVCPGTLQK  
VLEPTSTHESEHQSGAWCKDPLQAGDRIYVMPWI PYRTDTL TEYASWEDYVAARHTT TYR LPNRVDGTGFVVY  
DGAVFYNKERTRNIVKYDLRTRIKSGETVINTANYHDTSPYRWGGKTDIDLAVDENGLWVIYATEGNNGRLV V  
SQLNPYTLRFEGTWETGYDKRSASNAFMVCGVLYVLR SVYVDDDSEAAGNRVDYAFNTNANREEPVSLAFPNP  
YQFVSSVDYNPRDNQLYVWNNYFVVRYSLEFGPPDPSAGPATS PPLSTTTTARPTPLTSTASPAAT TPLRRAP  
LTTHPVGAINQLGPDLPATAPAPSTRRPPAPNLHVSPELFC EPREVRVQWPATQQGMLVERPCPKGTRGIA  
SFQCLPALGLWNPRGPDLSNCTSPWVNQVAQKIKSGENA ANIASELARHTRGSIYAGDVSSSVKLMEQLLDIL  
DAQLQALRPIERESAGKNYNKMHKRERTCKDYI KAVVETVDNLLRPEALESWKDMNATEQVHTATMLLDVLEE  
GAFLLADNVREPARFLAAKQNVVLEVTVLNTEGQVQELVFPQEYPSENS IQLSANTIKQNSRNGVVKVVFILY  
NNLGLFLSTENATVKLAGEAGTGGPGGASLVVNSQVIAAS INKESSRVFLMDPVI FTVAHLEAKNHFNANCSF  
WNYSESRMLGYWSTQGCR LVESNKTHHTTACSHLTNF AVLMAHREIYQGRINELLSSVVTWVGIVISLVCLAI  
CISTF CFLRGLQTD RNTIHKNL CINFLAELLFLV GIDKTYEVACPIFAGLLHYFFLA AFSWLCLEGVHLYL  
LLVEVFESEYSRTKYYYYLGGYCF PALVVGIAAAIDYRSYGT EKACWLRVDNYFIWSFIGPVSFVI VVNLVFLM  
VTLHKMIRSSSVLKP DSSRLDNIKSWALGAIALLFLLGLT WAFGLLFINKESVVMAYLFTTTFNAFQGVFI FVF  
H CALQKKVHKEYSKCLRH SYCCIRSP PGGTHGSLKTSAMRSNTRY YTGTSRIRRMWNDTVRKQTES SFMAGD  
INSTP TLNRGTMGNHLLTNPVLQPRGGTSPYNTLIAESVGFNPSSPPVFNSPGSYREPKHPLGGREACGMDTL  
PLNGNFNNSYSLRSGDFPPGDGGPEPPRGRNLADAAAF EKMIISELVHNNLRGASGGAKGPPPEPPVPPVPGV  
SEDEAGGPGSADRAEIELLYKALEEPLLLPRAQSVLYQSDLDESE SCTAEDGATSRPLSSPPGRD SLYASGAN  
LRDPSYPDSSPEGPNEALPPPPAPPGPPEIYYTSRPPALVARNPLQGY YQVRRPSHEGYLAAPSLEGPDP  
GDGQMQLVTSL\*

>rs212477295\_ENSMUSP00000119100\_c.2568:A>G\_p.1857V

ENSMUST00000132500.8|Adgr11-205|ENSMUSG00000013033|+|chr8:g.84661092:A>G  
MARLAAALWSLCVTTVLVTSATQGLSRAGLPFGLMRRELACEGYPIELRCPGSDVIMVENANYGR TDDKICDA  
DPFQ MENVCYLPDAFKIMSQR CNRTQC VVVGASDAFPDPCPGTYKYLEVQYDCVPYIFVCPGTLQKVLEPT  
STHESEHQSGAWCKDPLQAGDRIYVMPWI PYRTDTL TEYASWEDYVAARHTT TYR LPNRVDGTGFVVYDGAVF  
YNKERTRNIVKYDLRTRIKSGETVINTANYHDTSPYRWGGKTDIDLAVDENGLWVIYATEGNNGRLVVSQ LNP  
YTLRFEGTWETGYDKRSASNAFMVCGVLYVLR SVYVDDDSEAAGNRVDYAFNTNANREEPVSLAFPNPYQFVS  
SVDYNPRDNQLYVWNNYFVVRYSLEFGPPDPSAGPATS PPLSTTTTARPTPLTSTASPAAT TPLRRAPLTTHP  
VGAINQLGPDLPATAPAPSTRRPPAPNLHVSPELFC EPREVRVQWPATQQGMLVERPCPKGTRGIA SFQCL  
PALGLWNPRGPDLSNCTSPWVNQVAQKIKSGENA ANIASELARHTRGSIYAGDVSSSVKLMEQLLDILDAQLQ  
ALRPIERESAGKNYNKMHKRERTCKDYI KAVVETVDNLLRPEALESWKDMNATEQVHTATMLLDVLEEGAFLL  
ADNVREPARFLAAKQNVVLEVTVLNTEGQVQELVFPQEYPSENS IQLSANTIKQNSRNGVVKVVFILYNNLGL  
FLSTENATVKLAGEAGTGGPGGASLVVNSQVIAAS INKESSRVFLMDPVI FTVAHLEAKNHFNANCSFWNYSE  
RSMGLGYWSTQGCR LVESNKTHHTTACSHLTNF AVLMAHREIYQGRINELLSSVVTWVGIVISLVCLAICISTF  
CFLRGLQTD RNTIHKNL CINFLAELLFLV GIDKTYEVACPIFAGLLHYFFLA AFSWLCLEGVHLYLLLVEV  
FESEYSRTKYYYYLGGYCF PALVVGIAAAIDYRSYGT EKACWLRVDNYFIWSFIGPVSFVI VVNLVFLMVT LHK  
MIRSSSVLKP DSSRLDNIKSWALGAIALLFLLGLT WAFGLLFINKESVVMAYLFTTTFNAFQGVFI FVFH CALQ  
KKVHKEYSKCLRH SYCCIRSP PGGTHGSLKTSAMRSNTRY YTGTSRIRRMWNDTVRKQTES SFMAGDINSTP  
TLNRGTMGNHLLTNPVLQPRGGTSPYNTLIAESVGFNPSSPPVFNSPGSYREPKHPLGGREACGMDTLPLNGN  
FNNSYSLRSGDFPPGDGGPEPPRGRNLADAAAF EKMIISELVHNNLRGASGGAKGPPPEPPVPPVPGVSEDEA  
GGPGSADRAEIELLYKALEEPLLLPRAQSVLYQSDLDESE SCTAEDGATSRPLSSPPGRD SLYASGANLRD SP  
SYPDSSPEGPNEALPPPPAPPGPPEIYYTSRPPALVARNPLQGY YQVRRPSHEGYLAAPSLEGPDPGDGQM  
QLVTSL\*

>rs212477295\_ENSMUSP00000115295\_c.2583:A>G\_p.1862V

ENSMUST00000152978.8|Adgr11-210|ENSMUSG00000013033|+|chr8:g.84661092:A>G

MARLAAALWSLCVTTVLVTSATQGLSRAGLPFGLMRRELACEGYPIELRCPGSDVIMVENANYGRDDKICDA  
DPFQMENVCYLPDAFKIMSQRCCNRTQCVVVGSDAFDPDPCPGTYKYLEVQYDCVPYKVEQKVFVCPGTLQK  
VLEPTSTHESEHQSGAWCKDPLQAGDRIYVMPWIPIYRTDTLLEYASWEDYVAARHTTTYRLPNRVDGTGFVVY  
DGAVFYKERTRNIVKYDLRTRIKSGETVINTANYHDTSPYRWGGKTDIDLAVDENGLWVIYATEGNNGRLVV  
SQLNPYTLRFEGTWETGYDKRSASNAFMVCGVLYVLRVSVYVDDDEAAGNRVDYAFNTNANREEPVSLAFPNP  
YQFVSSVDYNPRDNQLYVWNNYFVVRYSLEFGPPDPSAGPATSPPLSTTTTARPTPLTSTASPAATPLRRAP  
LTHPVGAINQLGPDLPATAPAPSTRPPAPNLHVSPELFCPEVRRVQWPATQQGMLVERPCPKGTRGIA  
SFQCLPALGLWNPGRPDLSNCTSPWVNQVAQKIKSGENAANIASELARHTRGSIYAGDVSSSVKLMEQLLDIL  
DAQLQALRPIERESAGKNYNKMKRERTCKDYIKAVVETVDNLLRPEALESWKDMNATEQVHTATMLLDVLEE  
GAFLLADNVREPARFLAAKQNVVLEVTVLNTEGQVQELVFPQEYPSSENSIQLSANTIKQNSRNGVVKVVFILY  
NNLGLFLSTENATVKLAGEAGTGGPGGASLVVNSQVIAASINKESSRVFLMDPVI FTVAHLEAKNHFNANCSF  
WNYSERSMGLGWSTQGCRLESNKTHHTCACSHLTNFVAVLMAHREIYQGRINELLSVVTWVGIVISLVCLAIC  
ISTFCFLRGLQTDNRNTHKNLCLINFLAEELLFLVGDKTQYEVACPIFAGLLHYFFLAASFSLCLEGVHLYL  
LLVEVFSEYSRTKYYLGGYCFPALVVGIAAAIDYRSYGTEKACWLRVDNYFIWSFIGPVSFVI VVNLVFLM  
VTLHKMIRSSSVLKPDSRLDNIKSWALGAIALLFLLGLTWFAGLLFINKESVVMAYLFTTFNAFQGVFIFV  
HCALQKQVHKEYSKCLRHSYCCIRSPGGTHGSLKTSAMRSNTRYTGTQVPGQGRHIHQVSLGPRGRSTLPE  
SQKDPGGQSGPRDPLMFGCLPQSRIRRMWNTVTRKQTESSFMAGDINSTPTLNRGTMGNHLLTNPVLQPRGGT  
SPYNTLIAESVGFNPSSPPVFNSPGSYREPKHPLGGREACGMDTLP LNGNFNNSYSLRSGDFPPGDGPEPPR  
GRNLADAAFEKMIISELVHNNLRGASGGAKGPPPEPPVPPVPGVSEDEAGGPGSADRAEIELLYKALEEPLL  
LPRAQSVLYQSDLDESECTAEDGATSRPLSSPPGRDSLYASGANLRDPSYPDSSPEGPNEALPPPPAPP  
PPEIYYTSRPPALVARNPLQGYQVRRPSHEGYLAAPSLEGPGPDGDGQMLVTSL\*

>rs212477295\_ENSMUSP00000118579\_c.2055:A>G\_p.1686V  
ENSMUST00000131717.2|Adgr11-204|ENSMUSG0000013033|+|chr8:g.84661092:A>G  
MPWIPIYRTDTLLEYASWEDYVAARHTTTYRLPNRVDGTGFVVYDGAVFYKERTRNIVKYDLRTRIKSGETVI  
NTANYHDTSPYRWGGKTDIDLAVDENGLWVIYATEGNNGRLVVSQNLNPYTLRFEGTWETGYDKRSASNAFMVC  
GVLYVLRVSVYVDDDEAAGNRVDYAFNTNANREEPVSLAFPNPYQFVSSVDYNPRDNQLYVWNNYFVVRYSLE  
FGPPDPSAGPATSPPLSTTTTARPTPLTSTASPAATPLRRAPLTHPVGAINQLGPDLPATAPSTRPP  
APNLHVSPELFCPEVRRVQWPATQQGMLVERPCPKGTRGIA SFQCLPALGLWNPGRPDLSNCTSPWVNQVA  
QKIKSGENAANIASELARHTRGSIYAGDVSSSVKLMEQLLDILDAQLQALRPIERESAGKNYNKMKRERTCK  
DYIKAVVETVDNLLRPEALESWKDMNATEQVHTATMLLDVLEEGAFLLADNVREPARFLAAKQNVVLEVTVLN  
TEGQVQELVFPQEYPSSENSIQLSANTIKQNSRNGVVKVVFILYNNLGLFLSTENATVKLAGEAGTGGPGGASL  
VVNSQVIAASINKESSRVFLMDPVI FTVAHLEAKNHFNANCSFWNYSERSMGLGWSTQGCRLESNKTHHTCA  
CSHLTNFVAVLMAHREIYQGRINELLSVVTWVGIVISLVCLAICISTFCFLRGLQTDNRNTHKNLCLINFLAE  
LLFLVGDKTQYEVACPIFAGLLHYFFLAASFSLCLEGVHLYLLVEVFSEYSRTKYYLGGYCFPALVVGIA  
AAIDYRSYGTEKACWLRVDNYFIWSFIGPVSFVI VVNLVFLMVTLHKMIRSSSVLKPDSRLDNIKSWALGAI  
ALLFLLGLTWFAGLLFINKESVVMAYLFTTFNAFQGVFIFVHFCALQKQVHKEYSKCLRHSYCCIRSPGGT  
HGSGLKTSAMRSNTRYTGTQSRIRRMWNTVTRKQTESSFMAGDINSTPTLNRGTMGNHLLTNPVLQPRGGTSP  
YNTLIAESVGFNPSSPPVFNSPGSYREPKHPLGGREACGMDTLP LNGNFNNSYSLRSGDFPPGDGPEPPRGR  
NLADAAFEKMIISELVHNNLRGASGGAKGPPPEPPVPPVPGVSEDEAGGPGSADRAEIELLYKALEEPLLLP  
RAQSVLYQSDLDESECTAEDGATSRPLSSPPGRDSLYASGANLRDPSYPDSSPEGPNEALPPPPAPP  
EIIYYTSRPPALVARNPLQGYQVRRPSHEGYLAAPSLEGPGPDGDGQMLVTSL\*

>rs6405173\_ENSMUSP00000119100\_c.3540:G>A\_p.G1181R  
ENSMUST00000132500.8|Adgr11-205|ENSMUSG0000013033|+|chr8:g.84664075:G>A  
MARLAAALWSLCVTTVLVTSATQGLSRAGLPFGLMRRELACEGYPIELRCPGSDVIMVENANYGRDDKICDA  
DPFQMENVCYLPDAFKIMSQRCCNRTQCVVVGSDAFDPDPCPGTYKYLEVQYDCVPYIFVCPGTLQKVLPT  
STHESEHQSGAWCKDPLQAGDRIYVMPWIPIYRTDTLLEYASWEDYVAARHTTTYRLPNRVDGTGFVVYDGAVF  
YKERTRNIVKYDLRTRIKSGETVINTANYHDTSPYRWGGKTDIDLAVDENGLWVIYATEGNNGRLVVSQNLN  
YTLRFEGTWETGYDKRSASNAFMVCGVLYVLRVSVYVDDDEAAGNRVDYAFNTNANREEPVSLAFPNPYQFVS  
SVDYNPRDNQLYVWNNYFVVRYSLEFGPPDPSAGPATSPPLSTTTTARPTPLTSTASPAATPLRRAPLTHP  
VGAINQLGPDLPATAPAPSTRPPAPNLHVSPELFCPEVRRVQWPATQQGMLVERPCPKGTRGIA SFQCL  
PALGLWNPGRPDLSNCTSPWVNQVAQKIKSGENAANIASELARHTRGSIYAGDVSSSVKLMEQLLDILDAQLQ  
ALRPIERESAGKNYNKMKRERTCKDYIKAVVETVDNLLRPEALESWKDMNATEQVHTATMLLDVLEEGAFLL  
ADNVREPARFLAAKQNVVLEVTVLNTEGQVQELVFPQEYPSSENSIQLSANTIKQNSRNGVVKVVFILYNNLGL  
FLSTENATVKLAGEAGTGGPGGASLVVNSQVIAASINKESSRVFLMDPVI FTVAHLEAKNHFNANCSFWNYSE  
RSMGLGWSTQGCRLESNKTHHTCACSHLTNFVAVLMAHREIYQGRINELLSVITWVGIVISLVCLAICISTF  
CFLRGLQTDNRNTHKNLCLINFLAEELLFLVGDKTQYEVACPIFAGLLHYFFLAASFSLCLEGVHLYLLVEV  
FESEYSRTKYYLGGYCFPALVVGIAAAIDYRSYGTEKACWLRVDNYFIWSFIGPVSFVI VVNLVFLMVTLHK  
MIRSSSVLKPDSRLDNIKSWALGAIALLFLLGLTWFAGLLFINKESVVMAYLFTTFNAFQGVFIFVHFCALQ

KKVHKEYSKCLRHSYCCIRSPGGTHGSLKTSAMRSNTRYTGTQVPGQGRHIHQVSLGPRGRSTLPESSQKDP  
GGQSGPRDPLMFRLCPQSRIRRMWNDTVRKQTESSFMAGDINSTPTLNRTGMGNHLLTNPVLQPRGGTSPYNT  
LIAESVGFNPPSSPPVFNPSGYSYREPKHPLGGREACGMDTLPNGNFNNSYSLRSGDFPPGDDGGPEPPRGRNLA  
DAAAFEKMIISELVHNNLRGASGGAKGPPPEPPVPPVPGVSEDEAGGPGSADRAEIEELLYKALEEPLLLPRAQ  
SVLYQSDLDESECTAEDGATSRPLSSPPGRDLSYASGANLRDPSYDSSPEGPNEALPPPPAPPGPPEIY  
YTSRPPALVARNPLQGYQVRRPSHEGYLAAPSLEGGPDGDGQMLVTSL\*  
>rs6405173\_ENSMUSP00000115295\_c.3555:G>A\_p.G1186R  
ENSMUST00000152978.8|Adgr11-210|ENSMUSG00000013033|+|chr8:g.84664075:G>A  
MARLAAALWSLVCVTTVLVTSATQGLSRAGLPFGLMRRELACEGYPIELRCPGSDVIMVENANYGRDCKICDA  
DPFQEMENVQCYLPDAFKIMSQRCCNRTQCVVVGASDAFPDPCPGTYKYLEVQYDCVPYKVEQKVFVCPGTLQK  
VLEPTSTHESEHQSGAWCKDPLQAGDRIYVMPWIPIYRDTLLEYASWEDYVAARHTTYYRLPNRVDGTGFVVY  
DGAVFYKERTRNIVKYDLRTRIKSGETVINTANYHDTSPYRWGKTDIDLAVDENGLWVIYATEGNNGRLVV  
SQLNPYTLRFEGTWETGYDKRSASNAFMVCGVLYVLRVSVYVDDSEAGNRVDYAFNTNANREEPVSLAFPNP  
YQFVSSVDYNPRDNQLYVWNNYFVVRYSLEFGPPDPSAGPATSPPLSTTTTARPTPLTSTASPAATPLRRAP  
LTHPVGAINQLGPDLPAPAPSTRPPAPNLHVSPLEFCEPREVRRVQWPATQQGMLVERPCPKGTRGIA  
SFQCLPALGLWNPRGPDLSNCTSPWVNQVAQKIKSGENAANIASELARHTRGSIYAGDVSSSVKLMEQLLDIL  
DAQLQALRPIERESAGKNYKMKRERTCKDYIKAVVETVDNLLRPEALESWKDMNATEQVHTATMLLDVLEE  
GAFLLADNREPARFLAAKQNVVLEVTVLNTEGQVQELVFPQYEPSENSIQLSANTIKQNSRNGVVKVVFILY  
NNLGLFLSTENATVKLAGEAGTGGPGGASLVVNSQVIAASINKESSRVFLMDPVIIFTVAHLEAKNHFNANCSF  
WNYSERMGLYWSTQGCRLVESNKTHHTCACSHLTNFVLMHREIYQGRINELLSVITWVGIVISLVCLAI  
CISTFCLRGLQTDNRNTHKNCINLFLAELLFLVIGDKTQYEVACPIFAGLLHYFFLAAFSWLCLEGVHLYL  
LLVEVFSEYSRTKYYYLGGYCFPALVVGIAAAIDYRSYGTEKACWLRVDNYFIWSFIGPVSFVIVVNLVFLM  
VTLHKMIRSSSVLKPDSRLDNKISWALGAIALLFLLGLTWAFGLLFINKESVVMAYLFTTFNAFQGVFIFVF  
HCALQKKVHKEYSKCLRHSYCCIRSPGGTHGSLKTSAMRSNTRYTGTQVPGQGRHIHQVSLGPRGRSTLPE  
SQKDPGGQSGPRDPLMFRLCPQSRIRRMWNDTVRKQTESSFMAGDINSTPTLNRTGMGNHLLTNPVLQPRGGT  
SPYNTLIAESVGFNPPSSPPVFNPSGYSYREPKHPLGGREACGMDTLPNGNFNNSYSLRSGDFPPGDDGGPEPPR  
GRNLADAAAFEKMIISELVHNNLRGASGGAKGPPPEPPVPPVPGVSEDEAGGPGSADRAEIEELLYKALEEPLL  
LPRAQSVLYQSDLDESECTAEDGATSRPLSSPPGRDLSYASGANLRDPSYDSSPEGPNEALPPPPAPPG  
PPEIYYTSRPPALVARNPLQGYQVRRPSHEGYLAAPSLEGGPDGDGQMLVTSL\*  
>rs46894143\_ENSMUSP00000062468\_c.178:C>T\_p.P60L  
ENSMUST00000060357.15|1700067K01Rik-  
201|ENSMUSG00000046408|+|chr8:g.84728384:C>T  
MAAEPWFTGSLALGPGEAPPSEELGPGPPPYGDPSWSPAGRPE TSAEQEPQRAQPMMEALASTSSREPLAAEL  
GPAPARLPDMSFSPITDQLRYLLRKADDFQSYLLYRDRVQKEQLAKAMPTFLTMCEPYFLYLEAAARSVPP  
IYGALQELVRKGLLEISQQLTLRLEQLVLMYASFGFVDLEETNPLSISCFFCGRFSISPSHDVSI FRYCTPAA  
YTASHFPYLYKKMRWNLETTTEASSQGADSHVDYFVFLCYRDTWEDAGQGPANSCPQIQKLWSIGRWMP LGPA  
EDDLD SWILCPQPPGDYQQLLTIGFEESHVLTADLLVQIILLGQAGPARPPSAAGPAAWAAPAS\*  
>rs46894143\_ENSMUSP00000134486\_c.178:C>T\_p.P60L  
ENSMUST00000174570.9|1700067K01Rik-  
203|ENSMUSG00000046408|+|chr8:g.84728384:C>T  
MAAEPWFTGSLALGPGEAPPSEELGPGPPPYGDPSWSPAGRPE TSAEQEPQRAQPMMEALASTSSREPLAAEL  
GPAPARLPDMSFSPITDQLRYLLRKADDFQSYLLYRDRVQKEQLAKAMPTFLTMCEPYFLYLEAAARSVPP  
IYGALQELVRKGLLEISQQLTLRLEQLVLMYASFGFVDLEETNPLSISCFFCGRFSISPSHDVSI FRYCTPAA  
YTASHFPYLYKKMRWNLETTTEASSQGADSHVDYFVFLCYRDTWEDAGQGPANSCPQIQKLWSIGRWMP LGPAE  
DDLDSW\*  
>rs46894143\_ENSMUSP00000159263\_c.178:C>T\_p.P60L  
ENSMUST00000239176.2|1700067K01Rik-  
204|ENSMUSG00000046408|+|chr8:g.84728384:C>T  
MAAEPWFTGSLALGPGEAPPSEELGPGPPPYGDPSWSPAGRPE TSAEQEPQRAQPMMEALASTSSREPLAAEL  
GPAPARLPDMSFSPITDQLRYLLRKADDFQSYLLYRDRVQKEQLAKAMPTFLTMCEPYFLYLEAAARSVPP  
IYGALQELVRKGLLEISQQLTLRLEQLVLMYASFGFVDLEETNPLSISCFFCGRFSISPSHDVSI FRYCTPAA  
YTASHFPYLYKKMRWNLETTTEASSQGADSHVDYFVFLCYRDTWEDAGQGPANSCPQIQKLWSIGRWMP LGPAE  
DDLDSWILCPQPPGDYQQLLTIGFEESHVLTADLLVQIILLGQAGPARPPSAAGPAAWAAPAS\*  
>rs33228486\_ENSMUSP00000051396\_c.67:G>A\_p.R23Q  
ENSMUST00000055077.7|Pal3-201|ENSMUSG00000047986|+|chr8:g.84751007:G>A  
MALQTPVLSPATPTVMAESALYQQRLEVIAEKRRLEEEIGAARRELEEEKLRVERLKRKSLRERWLMDGAAEG  
PERPEEPASKDPQSPGQAQARIRNLEDSLFLSLSQLQLLQASASTGAQHRPAGRPAPWRREGPRPLSQSAAEAA  
PTAPTVDVKRTSLPDAPVGMSPESPDPREESIAVLPASRPSTEAI GTSSEANGPCPGHSPLPEQLSLGVSSV



TKAKGDGAVEVVWAGLRATENSATGPTDVELEAKVEEVVLEAIGARQGTSSPELPTWVKEGRGVVEVVWEGLG  
GRDL DVTGESGRDAEATHTSSRRLQEQFEAETCRKEEGASRDSLEGVGGGPGVEEGSFIWVERVALSEDWEE  
ILMEGLEAPQGAGSAGEPEALIGAQPRGGEASWEVEKREVEKVEGIEEKGRAEKLGAEREDGVAVLPDETQGR  
EENEAEKVERKDSEGGPFAEIAATDEEKWEVKTTEGEESSLEVEKGGAEAPVTTEKPLVTEKKPEGSLETERKGS  
EMPLDQEKDGEGLDRESKTTTEILLDGEIGDKSSLDDETKGSKLLDEKTTGGEGSLDEEAEGSKLLDREADGI  
EPFSEVDKTSKAKDDVSPEEQGKANEGAEFQAEDASPPGATVVCVQDEPRSEEQGGQEQPEKQEGLEVEGAASKPE  
PCTEREGPPGDATLLLAETPAPEQPVESQPLLHQEASSTNPGDHPAPTYAPAAQQLLELAEAKEASGPKQKTCQC  
CVM\*

>rs32670996\_ENSMUSP00000051396\_c.1578:A>G\_p.R527G  
ENSMUST00000055077.7|Pal3-201|ENSMUSG00000047986|+|chr8:g.84756068:A>G  
MALQTPVLS PATPTVMAESALYRQRLEVIAEKRRLOEEIGAARRELEEEKLRVERLKRKSLRERWLMDGAAEG  
PERPEEPASKDPQSPGQAQARIRNLEDSLFLSLSQLQLLQASASTGAQHRPAGRPAPWRREGPRPLSQSAAEAA  
PTAPTVDVKRTSLPDPAPVGMSPESPDPREESIAVLPASRPSTEAIIGTSSEANGPCPGHSPLPEQLSLGVSSV  
TKAKGDGAVEVVWAGLRATENSATGPTDVELEAKVEEVVLEAIGARQGTSSPELPTWVKEGRGVVEVVWEGLG  
GRDL DVTGESGRDAEATHTSSRRLQEQFEAETCRKEEGASRDSLEGVGGGPGVEEGSFIWVERVALSEDWEE  
ILMEGLEAPQGAGSAGEPEALIGAQPRGGEASWEVEKREVEKVEGIEEKGRAEKLGAEREDGVAVLPDETQGR  
EENEAEKVERKDSEGGPFAEIAATDEEKWEVKTTEGEESSLEVEKGGAEAPVTTEKPLVTEKKPEGSLETERKGS  
EMPLDQEKDGEGLDRESKTTTEILLDGEIGDKSSLDDETKGSKLLDEKTTGGEGSLDEEAEGSKLLDREADGI  
EPFSEVDKTSKAKDDVSPEEQGKANEGAEFQAEDASPPGATVVCVQDEPRSEEQGGQEQPEKQEGLEVEGAASKPE  
PCTEREGPPGDATLLLAETPAPEQPVESQPLLHQEASSTNPGDHPAPTYAPAAQQLLELAEAKEASGPKQKTCQC  
CVM\*

>rs33480646\_ENSMUSP00000051396\_c.1621:G>A\_p.G541E  
ENSMUST00000055077.7|Pal3-201|ENSMUSG00000047986|+|chr8:g.84756111:G>A  
MALQTPVLS PATPTVMAESALYRQRLEVIAEKRRLOEEIGAARRELEEEKLRVERLKRKSLRERWLMDGAAEG  
PERPEEPASKDPQSPGQAQARIRNLEDSLFLSLSQLQLLQASASTGAQHRPAGRPAPWRREGPRPLSQSAAEAA  
PTAPTVDVKRTSLPDPAPVGMSPESPDPREESIAVLPASRPSTEAIIGTSSEANGPCPGHSPLPEQLSLGVSSV  
TKAKGDGAVEVVWAGLRATENSATGPTDVELEAKVEEVVLEAIGARQGTSSPELPTWVKEGRGVVEVVWEGLG  
GRDL DVTGESGRDAEATHTSSRRLQEQFEAETCRKEEGASRDSLEGVGGGPGVEEGSFIWVERVALSEDWEE  
ILMEGLEAPQGAGSAGEPEALIGAQPRGGEASWEVEKREVEKVEGIEEKGRAEKLGAEREDGVAVLPDETQGR  
EENEAEKVERKDSEGGPFAEIAATDEEKWEVKTTEGEESSLEVEKGGAEAPVTTEKPLVTEKKPEGSLETERKGS  
EMPLDQEKDGEGLDRESKTTTEILLDGEIGDKSSLDDETKGSKLLDEKTTGGEGSLDEEAEGSKLLDREADGI  
EPFSEVDKTSKAKDDVSPEEQGKANEGAEFQAEDASPPGATVVCVQDEPRSEEQGGQEQPEKQEGLEVEGAASKPE  
PCTEREGPPGDATLLLAETPAPEQPVESQPLLHQEASSTNPGDHPAPTYAPAAQQLLELAEAKEASGPKQKTCQC  
CVM\*

>rs33092929\_ENSMUSP0000005601\_c.430:T>C\_p.V144A  
ENSMUST0000005601.9|I127ra-201|ENSMUSG0000005465|-|chr8:g.84767391:A>G  
MNRLRVARLTPLELLLSLMSLLLGTTRPHGSPGLQCYSVGGLGILNCSWEPLGDLETPPVLYHQSQKYHPNRV  
WEVKVPSKQSWVTIPREQFTMADKLLIWGTQKGRPLWSSVSVNLETQMKPDPQIFSQVDISEEATLEATAQW  
APPVWPPQKVLICQFRYKECQAEWTRLEPQLKTDGLTPVEMQNLPGTCYQVSGRCQVNGYVWGEWSSPLS  
FQTPFLDPEDVWVSGTVCETSGKRAALLVWVKDRPCVQVYTVVWFAGDITTTQEEVPCCKSPVPWMEWAVV  
SPGNSTSWVPPTNLSLVCLAPESAPCDVGVSSADGSPGIKVTWKQGTTRKPLEYVVDWAQDGDSDLKLNWTRLP  
PGNLSTLLPGEFKGGVYRITVTVAVYSGGLAAAPSVWGFREELVPLAGPAVWRLPDDPPGTPVVAWGEVPRHQ  
LRGQATHYTFICQSRGLSTVCRNVSSQTQTATLPNLHLGSLFVWVTVSTVAGQGGPPGNLSLHLPDNRIRWKA  
LPWFLSLWGLLLMGCGLSLASTRCLQARCLHWRHKLPLQWIERVDFPANSNSGQPYIKEVSLPQPPKDGPIIL  
EVEEVELQPVVESPKASAPIYSGYEKHFLEPTPEELGLLV\*

>rs50881156\_ENSMUSP00000147677\_c.780:C>A\_p.L261M  
ENSMUST00000211046.2|Rfx1-204|ENSMUSG00000031706|+|chr8:g.84810777:C>A  
MATQSYVTELOAAPQASQPPQAPPQALPQPPPPAAPQPPAAATPQPQYVTELOSPQPQTQPPGSQKQYVAELP  
AAPAPSPQATPAPSPVAQQYIVVTVSEGAMRASETVSEASPSSTASQTVPTQVVQVQVQGTQQRLLVQASVQA  
KPGHVSPQLTNIQVPPQAIPTQHLVVQSPAPGTSKQVSLTVHSAQQVHSAPERSPVQANNSTSKTAGTPAA  
TVQQQLQVHSVQVSPVPTQERSVQATPQTKAGPVQQLTVQGMQPVHVAQEVQQLPQVPVPHVYSSQVQYVEGG  
DASYTASAIRSSTYQYPETPIYTQTAGTSYEEASGTAQVSTPATSQTVASSGSVPMYVSGSPIVASSSSSEA  
GASNSVYAGGNGGGGGGGGGGGSGGSGGAGTYIVMGGYMLGNASQSYSHTRASPATVQWLLDNYETAEGVS  
LPRSTLYCHYLHCQEOKLEPVNAASFGLKIRSVFGLRTRRLGTRGNASKYHYGLRIKASSPLLRMLMEDQOH  
MAMRQPPFSQKQRLKPIQKMEGVANGVAVGQSTGLSDISAQVQYQVQFLDASRSLPFAELDLQKVLPEGV  
GPGDIKAFQVLYREHCEAIVDVMVNLQFTLVETLWKTFRWYNLSQPSEAPPLAVHDEAEKRLPRASLVLLSKF  
QPVLQWTKHCDNVLYQGLVEIILIPDVLRIIPALTAIRNFASLESWLTHAMVNIPEEMLRVKVAAAGAFQAQ  
TLRRYTSLNHLAQAARAVLQNTAQINQMLSDLN RVDFANVQEQASWVCRCEDRVVQRLEQDFKVTLQQNSLE

QWAAWLDGVVSVQVLKPYQGSSGFPKAAKLFLLKWSFYSSMVIRDLTLRSAASFGSFHLIRLLYDEYMYLIEH  
RVAQAKGETPIAVMGEFANLATSINPLDPDKVCR\*  
>rs50881156\_ENSMUSP0000005600\_c.780:C>A\_p.L261M  
ENSMUST0000005600.6|Rfx1-201|ENSMUSG00000031706|+|chr8:g.84810777:C>A  
MATQSYVTELQAAPQASQPPQAPQALPQPPPAAPQPPAAATPQPQYVTELQSPQPQTQPPGSQKQYVAELP  
AAPAPSPQATPAPSPVAQQYIVTVVSEAMRASETVSEASPSSTASQTGVPTQVVQQVQGTQQRLLVQASVQA  
KPGHVSPLQLTNIQVPPQAIPTQHLVQSPAPGKTKSGQVSLTVHSAQQVHSAPERSPVQANNSTSKTAGTPAA  
TVQQLQVHVSQVQSVPTQERSVVQATPQTKAGPVQQLTVQGMQPVHVAQEVQQLPQVVPVPHVYSSQVQYVEGG  
DASYTASAIRSSTYQY PETPIY TQTAGTSY YEASGTAAQVSTPATSQTVASSGSPVMYVSGSPIVASSSSSEA  
GASNSSVGAGNGGGSSGGSSGSSGAGTYVIQGGYMLGNASQSYSHTTTRASPATVQWLLDNYETAEGVS  
LPRSTLYCHYLLHCQEOKLEPVNAASFGKLIRSVFMGLRTRRLGTRGNSKYHYGLRIKASSPLRLMEDQQH  
MAMRGQFFSQKQRLKPIQKMEGVANGVAVGQQSTGLSDISAQVQQYQQLDASRSLPDFAEGLDQKVLPEGV  
GPGDIKAFQVLYREHCEAIVDMVNLQFTLVETLWKTFWRYNLSQPSEAPPLAVHDEAEKRLPRASLVLLSKF  
QPVLQWTKHCDNVLYQGLVEILIPDVLRIPI SALTQAIRNFAKLSWLTAMVNIPEEMLRVKVAAGAFQAQ  
TLRRYTSLNHLAQAARAVLQNTAQINQMLSDLN RVDFANVQEASWVCRCEDRVVQRLEQDFKVTLQQNSLE  
QWAAWLDGVVSVQVLKPYQGSSGFPKAAKLFLLKWSFYSSMVIRDLTLRSAASFGSFHLIRLLYDEYMYLIEH  
RVAQAKGETPIAVMGEFANLATSINPLDPDKDEEEEEEEEESEDELPQDISLAAGSESPALGPEALEPPAKLAR  
TDRGLFVQALPSS\*  
>rs32854560\_ENSMUSP00000112556\_c.2683:T>C\_p.L895P  
ENSMUST00000117424.9|Cc2d1a-202|ENSMUSG00000036686|-|chr8:g.84859876:A>G  
MHKRNGPQAPPGRGAVTARQLGLLVDFSPDGLMIPEDGINEEELEAEFLALVGGQPQALEKLGQGPLPMEAI  
EKMARLCMRDLDEDEEGTDEDDVEADEDLAELNEVLGEEQKAVEPLMPVAQTLENLLVS AKKGN I INEADIP  
PPVASGKGAAGHSHTQATSQLASVSPPAPESSTLEAPSTTTTPTSAPKQLPPDPCSPLARLQSLQHEYKLA  
LRAKHQDDTATATRHRLRIAKSFDPVLEALS R GELVDLSRLPPPPDQLSPEPLPAAQPLTSASTLTRPEVPQ  
PRNLLEALEQRMERYHVAAAQAKAKGDQRKARMHERIVKQYQDAIRAHKAGRAVDVAELPVPFGFPMPQGLS  
AEPQQSLVGVLETAMRLANHDEGSDDEEETPKKNTPAASTTQLKSSPSKAPPSGPAPAGKAAPKGTSNRAQ  
QQLAFLEGRKKQLLQAALRAKQKNDVEGAKMHLRQAKGLEPMLASRNGLPVDIAKVPPAPV NKDDFV LVQRP  
GPGLSQEAVRRY GELTKLLRQQHEMCLNHSTQFTHLGNIAETIKFEKLAEDCKRSM DTLKQAFARSLPTPAAR  
FEQRTFSVIKVFDPDLSNSDMLL FIVKGINLPTPTGLSPSDDLDAFVRFD FYPNV EEAQKDKTSVIKNTDSPEF  
KEQFKLCINRGRHGFRRAIQTKGIKFEVVHKGGLFKTDRVLGTAQLKLGTLTACEVHEILEVLDGRRPTGGR  
LEV MVR IREPLTAQQLETTTERWLVIDHI PAAMPTVTGPKAKAPLI PASSREAGNRSARPLHSLSVLAFDQER  
LERKILALRQARRPVPPEVAQQYQDVVQRSQWQRAQLEQGG AALRREYASHLERQLHFYTEAARRLGYDGSRE  
AAKEALYRRNLVESELQRRR\*  
>rs32854560\_ENSMUSP00000046449\_c.2821:T>C\_p.L941P  
ENSMUST00000040383.9|Cc2d1a-201|ENSMUSG00000036686|-|chr8:g.84859876:A>G  
MHKRNGPQAPPGRGAVTARQLGLLVDFSPDGLMIPEDGINEEELEAEFLALVGGQPQALEKLGQGPLPMEAI  
EKMARLCMRDLDEDEEGTDEDDVEADEDLAELNEVLGEEQKAVEPLMPVAQPKPSGPNPVEATLQERLTLY  
QSALESARQAGDSAKMRRYDRGLKTLLENLLVS AKKGN I INEADIPPPVASGKGAAGHSHTQATSQLASVSPP  
APESSTLEAPSTTTTPTSAPKQLPPDPCSPLARLQSLQHEYKLAALRAKHQDDTATATRHRLRIAKSFDPVLEA  
LSR GELVDLSRLPPPPDQLSPEPLPAAQPLTSASTLTRPEVPQPPRNLLEALEQRMERYHVAAAQAKAKGDQ  
RKARMHERIVKQYQDAIRAHKAGRAVDVAELPVPFGFPMPQGLSAEPQQSLVGVLETAMRLANHDEGSDDE  
EETPKKQNTPAASTTQLKSSPSKAPPSGPAPAGKAAPKGTSNRAQQQLAFLEGRKKQLLQAALRAKQKNDVE  
GAKMHLRQAKGLEPMLASRNGLPVDIAKVPPAPV NKDDFV LVQRP GPGLSQEAVRRY GELTKLLRQQHEMCL  
NHSTQFTHLGNIAETIKFEKLAEDCKRSM DTLKQAFARSLPTPAARFEQRTFSVIKVFDPDLSNSDMLL FIVK  
INLPTPTGLSPSDDLDAFVRFD FYPNV EEAQKDKTSVIKNTDSPEFKEQFKLCINRGRHGFRRAIQTKGIKFE  
VVHKGGLFKTDRVLGTAQLKLGTLTACEVHEILEVLDGRRPTGGRLEV MVR IREPLTAQQLETTTERWLVID  
HIPAAMPTVTGPKAKAPLI PASSREAGNRSARPLHSLSVLAFDQERLERKILALRQARRPVPPEVAQQYQDVV  
QRSQWQRAQLEQGG AALRREYASHLERQLHFYTEAARRLGYDGSREAAKEALYRRNLVESELQRRR\*  
>rs32547577\_ENSMUSP00000112556\_c.2005:A>C\_p.H669P  
ENSMUST00000117424.9|Cc2d1a-202|ENSMUSG00000036686|-|chr8:g.84861751:T>G  
MHKRNGPQAPPGRGAVTARQLGLLVDFSPDGLMIPEDGINEEELEAEFLALVGGQPQALEKLGQGPLPMEAI  
EKMARLCMRDLDEDEEGTDEDDVEADEDLAELNEVLGEEQKAVEPLMPVAQTLENLLVS AKKGN I INEADIP  
PPVASGKGAAGHSHTQATSQLASVSPPAPESSTLEAPSTTTTPTSAPKQLPPDPCSPLARLQSLQHEYKLA  
LRAKHQDDTATATRHRLRIAKSFDPVLEALS R GELVDLSRLPPPPDQLSPEPLPAAQPLTSASTLTRPEVPQ  
PRNLLEALEQRMERYHVAAAQAKAKGDQRKARMHERIVKQYQDAIRAHKAGRAVDVAELPVPFGFPMPQGLS  
AEPQQSLVGVLETAMRLANHDEGSDDEEETPKKNTPAASTTQLKSSPSKAPPSGPAPAGKAAPKGTSNRAQ  
QQLAFLEGRKKQLLQAALRAKQKNDVEGAKMHLRQAKGLEPMLASRNGLPVDIAKVPPAPV NKDDFV LVQRP  
GPGLSQEAVRRY GELTKLLRQQHEMCLNHSTQFTHLGNIAETIKFEKLAEDCKRSM DTLKQAFARSLPTPAAR

FEQRTFSVIKVFDPDLSNSDMLLFIVKGINLPTPTGLSPSDDLDAFVRFDFPYPNVEEAQKDKTSVIKNTDSPEF  
KEQFKLCINRGPRGFRRRAIQTKGIKFEVVHKGGLFKTDRVLGTAQLKLGTLTACEVHEILEVLGDGRRPTGGR  
LEVMVRIREPLTAQQLETTTTERWLVIDHI PAAMPTVTGPKAKAPLI PASSREAGNRSARPLHSLSVLAFDQER  
LERKILALRQARRPVPPEVAQQYQDVVQRSQWQRAQLEQGGAAALRREYASHLERQLHFYTEAARRLGYDGSRE  
AAKEALYRRNLVESELQRLRR\*

>rs32547577\_ENSMUSP00000046449\_c.2143:A>C\_p.H715P  
ENSMUST00000040383.9|Cc2d1a-201|ENSMUSG00000036686|-|chr8:g.84861751:T>G  
MHKRNGPQAPPGRGAVTARQLGLLVDFSPDGLMIPEDGINEEELEAEFLALVGGQPQALEKLGQGPLPMEAI  
EKMARLRCMRDLDEDEEGTDEDVDEADEDLLAELNEVLGEEQKAVEPLMPVAQPKPSGPNPVEATLQERLTLY  
QSALESARQAGDSAKMRRYDRGLKTLENLLVS AKKGNINEADI PPPV ASGKGAAAGHSHTQATSQLASVSPP  
APESSTLEAPSTTTPTS AKPQLPPDPCSPLARLQSLQHEYKLAALRAKHQDDTATATRHLRIAKSFDPVLEA  
LSRGELVDLSRLPPPPDQLSPEPPLPAAQPLTSASTLTRPEVPQPPRNLEALEQRMERYHVAAAQAKAKGDQ  
RKARMHERIVKQYQDAIRAHKAGRAVDVAELPVPPGFPMPQGLES AEPSQQSLVGVLETAMRLANHDEGS DDE  
EETPKKQNTPAASTTQLKSSPSKAPPSGPAPAGKAAPKGT SNRAQQQLAFLEGRKKQLLQAALRAKQKNDVE  
GAKMHLRQAKGLEPMLASRNL PVDIAKVP PAPVNKDDFVLRPQPGPGLSQA EAVRRY GELTKLLRQ QHEMCL  
NHSTQFTHLGNIAETIKFEKLAEDCKRSM DTLKQAFARSLPTPAARFEQRTFSVIKVFDPDLSNSDMLLFIVKGI  
NLPPTPTGLSPSDDLDAFVRFDFPYPNVEEAQKDKTSVIKNTDSPEFKEQFKLCINRGPRGFRRRAIQTKGIKFE  
VVHKGGLFKTDRVLGTAQLKLGTLTACEVHEILEVLGDGRRPTGGRLEVMVRIREPLTAQQLETTTTERWLVID  
HIPAAMPTVTGPKAKAPLI PASSREAGNRSARPLHSLSVLAFDQERLERKILALRQARRPVPPEVAQQYQDVV  
QRSQWQRAQLEQGGAAALRREYASHLERQLHFYTEAARRLGYDGSREAAKEALYRRNLVESELQRLRR\*

>rs33110810\_ENSMUSP00000112556\_c.1987:T>C\_p.L663P  
ENSMUST00000117424.9|Cc2d1a-202|ENSMUSG00000036686|-|chr8:g.84861769:A>G  
MHKRNGPQAPPGRGAVTARQLGLLVDFSPDGLMIPEDGINEEELEAEFLALVGGQPQALEKLGQGPLPMEAI  
EKMARLRCMRDLDEDEEGTDEDVDEADEDLLAELNEVLGEEQKAVEPLMPVAQTLENLLVS AKKGNINEADI P  
PPV ASGKGAAAGHSHTQATSQLASVSPPAPESSTLEAPSTTTPTS AKPQLPPDPCSPLARLQSLQHEYKLA  
LRAKHQDDTATATRHLRIAKSFDPVLEALS R GELVDLSRLPPPPDQLSPEPPLPAAQPLTSASTLTRPEVPQ  
PPRNLEALEQRMERYHVAAAQAKAKGDQRKARMHERIVKQYQDAIRAHKAGRAVDVAELPVPPGFPMPQGLS  
AEPSQQSLVGVLETAMRLANHDEGS DDEEEETPKKNT PAASTTQLKSSPSKAPPSGPAPAGKAAPKGT SNRAQ  
QQQLAFLEGRKKQLLQAALRAKQKNDVEGAKMHLRQAKGLEPMLASRNL PVDIAKVP PAPVNKDDFVLRP  
GPGLSQA EAVRRY GELTKLLRQ QHEMCLNHSTQFTHLGNIAETIKFEKLAEDCKRSM DTLKQAFARSLPTPAAR  
FEQRTFSVIKVFDPDLSNSDMLLFIVKGINLPTPTGLSPSDDLDAFVRFDFPYPNVEEAQKDKTSVIKNTDSPEF  
KEQFKPCINRGHRGFRRRAIQTKGIKFEVVHKGGLFKTDRVLGTAQLKLGTLTACEVHEILEVLGDGRRPTGGR  
LEVMVRIREPLTAQQLETTTTERWLVIDHI PAAMPTVTGPKAKAPLI PASSREAGNRSARPLHSLSVLAFDQER  
LERKILALRQARRPVPPEVAQQYQDVVQRSQWQRAQLEQGGAAALRREYASHLERQLHFYTEAARRLGYDGSRE  
AAKEALYRRNLVESELQRLRR\*

>rs33110810\_ENSMUSP00000046449\_c.2125:T>C\_p.L709P  
ENSMUST00000040383.9|Cc2d1a-201|ENSMUSG00000036686|-|chr8:g.84861769:A>G  
MHKRNGPQAPPGRGAVTARQLGLLVDFSPDGLMIPEDGINEEELEAEFLALVGGQPQALEKLGQGPLPMEAI  
EKMARLRCMRDLDEDEEGTDEDVDEADEDLLAELNEVLGEEQKAVEPLMPVAQPKPSGPNPVEATLQERLTLY  
QSALESARQAGDSAKMRRYDRGLKTLENLLVS AKKGNINEADI PPPV ASGKGAAAGHSHTQATSQLASVSPP  
APESSTLEAPSTTTPTS AKPQLPPDPCSPLARLQSLQHEYKLAALRAKHQDDTATATRHLRIAKSFDPVLEA  
LSRGELVDLSRLPPPPDQLSPEPPLPAAQPLTSASTLTRPEVPQPPRNLEALEQRMERYHVAAAQAKAKGDQ  
RKARMHERIVKQYQDAIRAHKAGRAVDVAELPVPPGFPMPQGLES AEPSQQSLVGVLETAMRLANHDEGS DDE  
EETPKKQNTPAASTTQLKSSPSKAPPSGPAPAGKAAPKGT SNRAQQQLAFLEGRKKQLLQAALRAKQKNDVE  
GAKMHLRQAKGLEPMLASRNL PVDIAKVP PAPVNKDDFVLRPQPGPGLSQA EAVRRY GELTKLLRQ QHEMCL  
NHSTQFTHLGNIAETIKFEKLAEDCKRSM DTLKQAFARSLPTPAARFEQRTFSVIKVFDPDLSNSDMLLFIVKGI  
NLPPTPTGLSPSDDLDAFVRFDFPYPNVEEAQKDKTSVIKNTDSPEFKEQFKPCINRGHRGFRRRAIQTKGIKFE  
VVHKGGLFKTDRVLGTAQLKLGTLTACEVHEILEVLGDGRRPTGGRLEVMVRIREPLTAQQLETTTTERWLVID  
HIPAAMPTVTGPKAKAPLI PASSREAGNRSARPLHSLSVLAFDQERLERKILALRQARRPVPPEVAQQYQDVV  
QRSQWQRAQLEQGGAAALRREYASHLERQLHFYTEAARRLGYDGSREAAKEALYRRNLVESELQRLRR\*

>rs46610077\_ENSMUSP00000112556\_c.1372:C>A\_p.A458D  
ENSMUST00000117424.9|Cc2d1a-202|ENSMUSG00000036686|-|chr8:g.84865199:G>T  
MHKRNGPQAPPGRGAVTARQLGLLVDFSPDGLMIPEDGINEEELEAEFLALVGGQPQALEKLGQGPLPMEAI  
EKMARLRCMRDLDEDEEGTDEDVDEADEDLLAELNEVLGEEQKAVEPLMPVAQTLENLLVS AKKGNINEADI P  
PPV ASGKGAAAGHSHTQATSQLASVSPPAPESSTLEAPSTTTPTS AKPQLPPDPCSPLARLQSLQHEYKLA  
LRAKHQDDTATATRHLRIAKSFDPVLEALS R GELVDLSRLPPPPDQLSPEPPLPAAQPLTSASTLTRPEVPQ  
PPRNLEALEQRMERYHVAAAQAKAKGDQRKARMHERIVKQYQDAIRAHKAGRAVDVAELPVPPGFPMPQGLS  
AEPSQQSLVGVLETAMRLANHDEGS DDEEEETPKKNT PAASTTQLKSSPSKAPPSGPAPAGKAAPKGT SNRAQ

QQLAFLEGRKKQLLQAALRDKQKNDVEGAKMHLRQAKGLEPMLEASRNLGPVDIAKVPVAPVKNDDFVLVQRP  
 GPGLSQEAVRRYGELTKLLRQHEMCLNHSTQFTHLGNIAETIKFEKLAEDCKRSMDTLKQAFARSLPTPAAR  
 FEQRTFSVIKVFDPDLSNSDMLLFIVKGINLPTPTGLSPSDDLDAFVRFDFPYPNVEEAQKDKTSVIKNTDSPEF  
 KEQFKLCINRGHRGFRRAIQTKGIKFEVVHKGGLFKTDRVLGTAQLKLGTLTETACEVHEILEVLDGRRPTGGR  
 LEVMVRIREPLTAQQLETTTERWLVIDHI PAAMPTVTGPKAKAPLI PASSREAGNRSARPLHSLSVLAFDQER  
 LERKILALRQARRPVPPEVAQQYQDVVQRSQWQRAQLEQGGGAALRREYASHLERQLHFYTEAARRLGYDGSRE  
 AAKEALYRRNLVESELQRLRR\*  
 >rs46610077\_ENSMUSP00000046449\_c.1510:C>A\_p.A504D  
 ENSMUST00000040383.9|Cc2d1a-201|ENSMUSG00000036686|-|chr8:g.84865199:G>T  
 MHKRNGPQAPPGRGAVTARQLGLLVDFSPDGLMIPEDGINEEELEAEFLALVGGQPQALEKLGQGPLPMEAI  
 EKMARLTCMRDLDEDEEGTDEDDVEADEDLAELNEVLGEEQKAVEPLMPVAQPKPSGPNPGVEATLQERLTLY  
 QSALESARQAGDSAKMRRYDRGLKTLENLLVSAKKNINEADI PPPVASGKGAAGHSHTQATSQLASVSPP  
 APESSTLEAPSTTTTPTSAPQLPPDPCSPLARLQSLQHEYKLAALRAKHQDDTATATRHLRIAKSFDVPLEA  
 LSRGELVDLSRLPPPPDQLSPEPPLPAAQPLTSASTLTRPEVPQPPRNLEALEQRMERYHVAAAQAKAKGDQ  
 RKARMHERIVKQYQDAIRAHKAGRAVDVAELPVPPGFPMPQGLESAEPSQQSLVGVLETAMRLANHDEGSDE  
 EETPKKQNTPAASTTQLKSSPSKAPPSGPAPAGKAAPKGTSNRAQQQLAFLEGRKKQLLQAALRDKQKNDVE  
 GAKMHLRQAKGLEPMLEASRNLGPVDIAKVPVAPVKNDDFVLVQRP GPGLSQEAVRRYGELTKLLRQHEMCL  
 NHSTQFTHLGNIAETIKFEKLAEDCKRSMDTLKQAFARSLPTPAARFEQRTFSVIKVFDPDLSNSDMLLFIVK  
 INLPTPTGLSPSDDLDAFVRFDFPYPNVEEAQKDKTSVIKNTDSPEFKEQFKLCINRGHRGFRRAIQTKGIKFE  
 VVHKGGLFKTDRVLGTAQLKLGTLTETACEVHEILEVLDGRRPTGGRLEVMVRIREPLTAQQLETTTERWLVID  
 HI PAAMPTVTGPKAKAPLI PASSREAGNRSARPLHSLSVLAFDQERLERKILALRQARRPVPPEVAQQYQDVV  
 QRSQWQRAQLEQGGGAALRREYASHLERQLHFYTEAARRLGYDGSREAAKEALYRRNLVESELQRLRR\*  
 >rs33365678\_ENSMUSP00000112556\_c.912:G>A\_p.E305K  
 ENSMUST00000117424.9|Cc2d1a-202|ENSMUSG00000036686|-|chr8:g.84867093:C>T  
 MHKRNGPQAPPGRGAVTARQLGLLVDFSPDGLMIPEDGINEEELEAEFLALVGGQPQALEKLGQGPLPMEAI  
 EKMARLTCMRDLDEDEEGTDEDDVEADEDLAELNEVLGEEQKAVEPLMPVAQTLENLLVSAKKNINEADI P  
 PVASGKGAAGHSHTQATSQLASVSPPAPESSTLEAPSTTTTPTSAPQLPPDPCSPLARLQSLQHEYKLAAL  
 LRAKHQDDTATATRHLRIAKSFDVPLEALSRGELVDLSRLPPPPDQLSPEPPLPAAQPLTSASTLTRPEVPQ  
 PRNLEALEQRMKRYHVAAAQAKAKGDQRKARMHERIVKQYQDAIRAHKAGRAVDVAELPVPPGFPMPQGLE  
 AEPSQQSLVGVLETAMRLANHDEGSDEEEETPKKQNTPAASTTQLKSSPSKAPPSGPAPAGKAAPKGTSNRAQ  
 QQLAFLEGRKKQLLQAALRAKQKNDVEGAKMHLRQAKGLEPMLEASRNLGPVDIAKVPVAPVKNDDFVLVQRP  
 GPGLSQEAVRRYGELTKLLRQHEMCLNHSTQFTHLGNIAETIKFEKLAEDCKRSMDTLKQAFARSLPTPAAR  
 FEQRTFSVIKVFDPDLSNSDMLLFIVKGINLPTPTGLSPSDDLDAFVRFDFPYPNVEEAQKDKTSVIKNTDSPEF  
 KEQFKLCINRGHRGFRRAIQTKGIKFEVVHKGGLFKTDRVLGTAQLKLGTLTETACEVHEILEVLDGRRPTGGR  
 LEVMVRIREPLTAQQLETTTERWLVIDHI PAAMPTVTGPKAKAPLI PASSREAGNRSARPLHSLSVLAFDQER  
 LERKILALRQARRPVPPEVAQQYQDVVQRSQWQRAQLEQGGGAALRREYASHLERQLHFYTEAARRLGYDGSRE  
 AAKEALYRRNLVESELQRLRR\*  
 >rs33365678\_ENSMUSP00000046449\_c.1047:G>A\_p.E350K  
 ENSMUST00000040383.9|Cc2d1a-201|ENSMUSG00000036686|-|chr8:g.84867093:C>T  
 MHKRNGPQAPPGRGAVTARQLGLLVDFSPDGLMIPEDGINEEELEAEFLALVGGQPQALEKLGQGPLPMEAI  
 EKMARLTCMRDLDEDEEGTDEDDVEADEDLAELNEVLGEEQKAVEPLMPVAQPKPSGPNPGVEATLQERLTLY  
 QSALESARQAGDSAKMRRYDRGLKTLENLLVSAKKNINEADI PPPVASGKGAAGHSHTQATSQLASVSPP  
 APESSTLEAPSTTTTPTSAPQLPPDPCSPLARLQSLQHEYKLAALRAKHQDDTATATRHLRIAKSFDVPLEA  
 LSRGELVDLSRLPPPPDQLSPEPPLPAAQPLTSASTLTRPEVPQPPRNLEALEQRMKRYHVAAAQAKAKGDQ  
 RKARMHERIVKQYQDAIRAHKAGRAVDVAELPVPPGFPMPQGLESAEPSQQSLVGVLETAMRLANHDEGSDE  
 EETPKKQNTPAASTTQLKSSPSKAPPSGPAPAGKAAPKGTSNRAQQQLAFLEGRKKQLLQAALRAKQKNDVE  
 GAKMHLRQAKGLEPMLEASRNLGPVDIAKVPVAPVKNDDFVLVQRP GPGLSQEAVRRYGELTKLLRQHEMCL  
 NHSTQFTHLGNIAETIKFEKLAEDCKRSMDTLKQAFARSLPTPAARFEQRTFSVIKVFDPDLSNSDMLLFIVK  
 INLPTPTGLSPSDDLDAFVRFDFPYPNVEEAQKDKTSVIKNTDSPEFKEQFKLCINRGHRGFRRAIQTKGIKFE  
 VVHKGGLFKTDRVLGTAQLKLGTLTETACEVHEILEVLDGRRPTGGRLEVMVRIREPLTAQQLETTTERWLVID  
 HI PAAMPTVTGPKAKAPLI PASSREAGNRSARPLHSLSVLAFDQERLERKILALRQARRPVPPEVAQQYQDVV  
 QRSQWQRAQLEQGGGAALRREYASHLERQLHFYTEAARRLGYDGSREAAKEALYRRNLVESELQRLRR\*  
 >rs33064505\_ENSMUSP00000112556\_c.835:C>T\_p.T279I  
 ENSMUST00000117424.9|Cc2d1a-202|ENSMUSG00000036686|-|chr8:g.84867261:G>A  
 MHKRNGPQAPPGRGAVTARQLGLLVDFSPDGLMIPEDGINEEELEAEFLALVGGQPQALEKLGQGPLPMEAI  
 EKMARLTCMRDLDEDEEGTDEDDVEADEDLAELNEVLGEEQKAVEPLMPVAQTLENLLVSAKKNINEADI P  
 PVASGKGAAGHSHTQATSQLASVSPPAPESSTLEAPSTTTTPTSAPQLPPDPCSPLARLQSLQHEYKLAAL  
 LRAKHQDDTATATRHLRIAKSFDVPLEALSRGELVDLSRLPPPPDQLSPEPPLPAAQPLISASTLTRPEVPQ

PRNLLEALEQRMERYHVAAAQAKAKGDQKARMHERIVKQYQDAIRAHKAGRAVDVAELPVPPGFPMPQGLES  
 AEPSQQSLVGVLETAMRLANHDEGSDDEEETPKKNTPAASTTQLKSSPSKAPPSGPAPAGKAAPKGTSNRAQ  
 QQLAFLEGRKKQLLQAALRAKQKNDVEGAKMHLRQAKGLEPMLASRNLGPVDIAKVPPAPVKNKDDFVLVQRP  
 GPGLSQEAVRRYGELTKLLRQHEMCLNHSTQFTHLGNIAETIKFEKLAEDCKRSMIDLKQAFARSLPTPAAR  
 FEQRTFSVIKVFDPDLSNSDMLLFIKGINLPTPTGLSPSDDLDAFVRFDFPYPNVEEAQKDKTSVIKNTDSPEF  
 KEQFKLCINRGRHGFRRAIQTKGIKFEVVHKGGLFKTDRVLGTAQLKLGTLTACEVHEILEVLDGRRPTGGR  
 LEVMVRIREPLTAQQLETTTERWLVIDHI PAAMPTVTGPKAKAPLI PASSREAGNRSARPLHLSVLAFDQER  
 LERKILALRQARRPVPPEVAQQYQDVVQRSQWQRAQLEQGGAAALRREYASHLERQLHFYTEAARRLGYDGSRE  
 AAKEALYRRNLVESELQRLRR\*

>rs33064505\_ENSMUSP00000046449\_c.970:C>T\_p.T324I  
 ENSMUST00000040383.9|Cc2d1a-201|ENSMUSG00000036686|-|chr8:g.84867261:G>A  
 MHKRNGPQAPPGRGAVTARQLGLLVDFSPDGLMIPEDGINEEELEAEFLALVGGQPQALEKLGQGPLPMEAI  
 EKMARLRCMRDLDEDEEGTDEDDVEADEDLAELNEVLGEEQKAVEPLMPVAQPKPSGPNPVEATLQERLTLY  
 QSALESARQAGDSAKMRRYDRGLKTLENLLVS AKKGNINEADI PPPVASGKGAAAGHSHTQATSQLASVSPP  
 APESSTLEAPSTTTPTSAPKQLPPDPCSPLARLQSLQHEYKLAALRAKHQDDTATATRHLRIAKSFDPVLEA  
 LSRGELVDLSRLLPPPPDQLSPEPPLPAAQPLISASTLTRPEVPQP  
 PRNLLEALEQRMERYHVAAAQAKAKGDQ  
 RKARMHERIVKQYQDAIRAHKAGRAVDVAELPVPPGFPMPQGLES  
 AEPSQQSLVGVLETAMRLANHDEGSDDE  
 EETPKKQNTPAASTTQLKSSPSKAPPSGPAPAGKAAPKGTSNRAQQQLAFLEGRKKQLLQAALRAKQKNDVE  
 GAKMHLRQAKGLEPMLASRNLGPVDIAKVPPAPVKNKDDFVLVQRP  
 GPGLSQEAVRRYGELTKLLRQHEMCL  
 NHSTQFTHLGNIAETIKFEKLAEDCKRSMIDLKQAFARSLPTPAARFEQRTFSVIKVFDPDLSNSDMLLFIKGI  
 NINLPTPTGLSPSDDLDAFVRFDFPYPNVEEAQKDKTSVIKNTDSPEFKEQFKLCINRGRHGFRRAIQTKGIKFE  
 VVHKGGLFKTDRVLGTAQLKLGTLTACEVHEILEVLDGRRPTGGRLEVMVRIREPLTAQQLETTTERWLVID  
 HI PAAMPTVTGPKAKAPLI PASSREAGNRSARPLHLSVLAFDQERLERKILALRQARRPVPPEVAQQYQDVV  
 QRSQWQRAQLEQGGAAALRREYASHLERQLHFYTEAARRLGYDGSREAAKEALYRRNLVESELQRLRR\*

>rs33598727\_ENSMUSP00000112556\_c.463:C>T\_p.A155V  
 ENSMUST000000117424.9|Cc2d1a-202|ENSMUSG00000036686|-|chr8:g.84870050:G>A  
 MHKRNGPQAPPGRGAVTARQLGLLVDFSPDGLMIPEDGINEEELEAEFLALVGGQPQALEKLGQGPLPMEAI  
 EKMARLRCMRDLDEDEEGTDEDDVEADEDLAELNEVLGEEQKAVEPLMPVAQTLENLLVS AKKGNINEADI  
 PPVASGKGVAAGHSHTQATSQLASVSPPAPESSTLEAPSTTTPTSAPKQLPPDPCSPLARLQSLQHEYKLA  
 LRAKHQDDTATATRHLRIAKSFDPVLEALSRGELVDLSRLLPPPPDQLSPEPPLPAAQPLTSASTLTRPEVPQP  
 PRNLLEALEQRMERYHVAAAQAKAKGDQKARMHERIVKQYQDAIRAHKAGRAVDVAELPVPPGFPMPQGLES  
 AEPSQQSLVGVLETAMRLANHDEGSDDEEETPKKNTPAASTTQLKSSPSKAPPSGPAPAGKAAPKGTSNRAQ  
 QQLAFLEGRKKQLLQAALRAKQKNDVEGAKMHLRQAKGLEPMLASRNLGPVDIAKVPPAPVKNKDDFVLVQRP  
 GPGLSQEAVRRYGELTKLLRQHEMCLNHSTQFTHLGNIAETIKFEKLAEDCKRSMIDLKQAFARSLPTPAAR  
 FEQRTFSVIKVFDPDLSNSDMLLFIKGINLPTPTGLSPSDDLDAFVRFDFPYPNVEEAQKDKTSVIKNTDSPEF  
 KEQFKLCINRGRHGFRRAIQTKGIKFEVVHKGGLFKTDRVLGTAQLKLGTLTACEVHEILEVLDGRRPTGGR  
 LEVMVRIREPLTAQQLETTTERWLVIDHI PAAMPTVTGPKAKAPLI PASSREAGNRSARPLHLSVLAFDQER  
 LERKILALRQARRPVPPEVAQQYQDVVQRSQWQRAQLEQGGAAALRREYASHLERQLHFYTEAARRLGYDGSRE  
 AAKEALYRRNLVESELQRLRR\*

>rs33598727\_ENSMUSP00000046449\_c.598:C>T\_p.A200V  
 ENSMUST00000040383.9|Cc2d1a-201|ENSMUSG00000036686|-|chr8:g.84870050:G>A  
 MHKRNGPQAPPGRGAVTARQLGLLVDFSPDGLMIPEDGINEEELEAEFLALVGGQPQALEKLGQGPLPMEAI  
 EKMARLRCMRDLDEDEEGTDEDDVEADEDLAELNEVLGEEQKAVEPLMPVAQPKPSGPNPVEATLQERLTLY  
 QSALESARQAGDSAKMRRYDRGLKTLENLLVS AKKGNINEADI PPPVASGKGVAAGHSHTQATSQLASVSPP  
 APESSTLEAPSTTTPTSAPKQLPPDPCSPLARLQSLQHEYKLAALRAKHQDDTATATRHLRIAKSFDPVLEA  
 LSRGELVDLSRLLPPPPDQLSPEPPLPAAQPLTSASTLTRPEVPQP  
 PRNLLEALEQRMERYHVAAAQAKAKGDQKARMHERIVKQYQDAIRAHKAGRAVDVAELPVPPGFPMPQGLES  
 AEPSQQSLVGVLETAMRLANHDEGSDDEEETPKKNTPAASTTQLKSSPSKAPPSGPAPAGKAAPKGTSNRAQ  
 QQLAFLEGRKKQLLQAALRAKQKNDVEGAKMHLRQAKGLEPMLASRNLGPVDIAKVPPAPVKNKDDFVLVQRP  
 GPGLSQEAVRRYGELTKLLRQHEMCLNHSTQFTHLGNIAETIKFEKLAEDCKRSMIDLKQAFARSLPTPAAR  
 FEQRTFSVIKVFDPDLSNSDMLLFIKGINLPTPTGLSPSDDLDAFVRFDFPYPNVEEAQKDKTSVIKNTDSPEF  
 KEQFKLCINRGRHGFRRAIQTKGIKFEVVHKGGLFKTDRVLGTAQLKLGTLTACEVHEILEVLDGRRPTGGR  
 LEVMVRIREPLTAQQLETTTERWLVIDHI PAAMPTVTGPKAKAPLI PASSREAGNRSARPLHLSVLAFDQER  
 LERKILALRQARRPVPPEVAQQYQDVVQRSQWQRAQLEQGGAAALRREYASHLERQLHFYTEAARRLGYDGSRE  
 AAKEALYRRNLVESELQRLRR\*

>rs254259087\_ENSMUSP00000113651\_c.405:GC>G\_p.A136del-fs  
 ENSMUST00000118856.8|Brme1-202|ENSMUSG00000008129|+|chr8:g.84893240:GC>G  
 MNKKKQRNSGVLHPSKSPKNPRLRDSQSSMMVHSHYSRESEDSSE PAPSVELGGEEPLHEAFSCPVEDTGAA  
 SDLAGSPKELVPLPPSQNSVGKVFVQFAKPRKTVTRKAKAWEEDELEGCSTTSQETRPEL GALKEPASHRESP

>rs254259087\_ENSMUSP00000091067\_c.300:GC>G\_p.A101del-fs  
ENSMUST00000093375.5|Brme1-201|ENSMUSG00000008129|+|chr8:g.84893240:GC>G  
MNKKKQRNSGVGLHPSKPSKNPRLRDSQSSMMVHSHYSRESEDSSEPA P SVELGGEEPLHEAFSCPVEDTGAA  
SDLAGSPKELVPLPPSQETRPELGALKEPASHRESP  
>rs32694707\_ENSMUSP00000113651\_c.663:C>T\_p.Q222\*  
ENSMUST00000118856.8|Brme1-202|ENSMUSG00000008129|+|chr8:g.84893498:C>T  
MNKKKQRNSGVGLHPSKPSKNPRLRDSQSSMMVHSHYSRESEDSSEPA P SVELGGEEPLHEAFSCPVEDTGAA  
SDLAGSPKELVPLPPSQNSVGKVFVQFAKPRKTVTRKAKAWEEDELEGCTTSQETRPELGALKAASQPQRESLR  
FPPHDIRPEVQTPDGTLSKERTISLDNRS LGNNGFEMATVQDSSSPLSDAAAEGREADSRDPQERDAQGGEA  
GA\*HSGEPQEGEDILYTSALAPASEPTWSVAQDLSVPTYTLLSSTAAAPSSTSPADASLMDTVITEVSLDPSVL  
QQSAPQVAKLLGSLDEQIPDGGCIGTLLSSTPLAEETTAGREEARWEERCHGDTLASFTETEPEKQEPVTEAG  
DSGHIAQEMDPVVKTKDGSDEQSPGDI GMLPLPAQSMNQMLVELRGLTCDQDLEGLSTPHTSSQLEHTCAAS  
DPPQSTKDKCHSSPGIPVHLAAPCPRDQA AWQESSAMELDFLPDSQIQDALDATNMEQGFPSPGMPDLGWVPVS  
SQSIGGSPKAVTKPQSRSHVETWAQET YRMQDATD TVRGLVVELSGLNRLIMSTHRDLEAFKRRKTKSLPYLT  
KGLGSLPRGDQSWRDL\*  
>rs32694707\_ENSMUSP00000091067\_c.558:C>T\_p.Q187\*  
ENSMUST00000093375.5|Brme1-201|ENSMUSG00000008129|+|chr8:g.84893498:C>T  
MNKKKQRNSGVGLHPSKPSKNPRLRDSQSSMMVHSHYSRESEDSSEPA P SVELGGEEPLHEAFSCPVEDTGAA  
SDLAGSPKELVPLPPSQETRPELGALKAASQPQRESLRFPPHDIRPEVQTPDGTLSKERTISLDNRS LGNNG  
FEMATVQDSSSPLSDAAAEGREADSRDPQERDAQGGEAGA\*HSGEPQEGEDILYTSALAPASEPTWSVAQDLS  
VPTYTLLSSTAAAPSSTSPADASLMDTVITEVSLDPSVLQQSAPQVAKLLGSLDEQIPDGGCIGTLLSSTPLAE  
ETTAGREEARWEERCHGDTLASFTETEPEKQEPVTEAGDSGHIAQEMDPVVKTKDGSDEQSPGDI GMLPLPA  
QSMNQMLVELRGLTCDQDLEGLSTPHTSSQLEHTCAASDPPQSTKDKCHSSPGIPVHLAAPCPRDQA AWQESSA  
MELDFLPDSQIQDALDATNMEQGFPSPGMPDLGWVPVSSQSIGGSPKAVTKPQSRSHVETWAQET YRMQDATD  
TVRGLVVELSGLNRLIMSTHRDLEAFKRRKTKSLPYLT KGLGSLPRGDQSWRDL\*  
>rs6355997\_ENSMUSP00000040078\_c.1231:A>G\_p.Q411R  
ENSMUST00000039480.7|Zswim4-201|ENSMUSG00000035671|-|chr8:g.84952729:T>C  
MEPPAAKRSRGC PAGDEPGTGARRSRPEPLLDLSAKRVAESWAFEQVEERFSRVPEPVQKRIVFWSFPRERE  
ICMYSSLGYPPEGEQDTRVPFTRGLHLLQSGAVDRVLQVGFHLSGNIREVGGPGEPEHLYHVSISFDRCKIT  
SVSCGCDNRDLFYCAHVVALS L YRIRHARQVELR LPISETLSQMNRDQLQKFVQYLISAHHTVLP TAQRLAD  
EILLGSEINLVHGAPDPTAGAGTEDANCWHLDEEQIQEQVKQLLSNGGHYGASQQLRSMF SKVREMLRARDS  
NGARMLIILMTEQFLQDPR LALWRQQGAGMTDKCRQLWDELGALWVCVILSPHCKPDERSGWLQLLGTWDKLDV  
CPLEEGNYSLDIPSLQPALTSRTGSEDEEEVTAASPRRTVFSRALRAGELHWNDSHLQRI L AS DSCGPTLTGS  
MGSDKPTFDPQGHPIWLGPEFP TACARVDTLRAHGYPHKALRLACAIINTLRLQRRHQLESYKQK KELLQKG  
ATGVTSTEGWVGHPLDPIGICL RALLEACRLEEEPHSLFPDSAPEKRKLAYQHVLVPGSPGESYLALALEVAL  
LGLGQQRALPEGLYAQDKVVRNEEQLLALLEVELEDERLVQVLRKQAGLLLEGGPFSGFGEVI FRESVPMHTC  
ARYLFTALLPHDPDLAFRLALRAMRLPVLETTFFPAGE SHPNPLDSIMSNRFPWFILGHLETRQCELASTMLT  
AAKGDTKWLHAVLGSVQQNIHSPALLFKLAQDACKTATPASAPPD TVLLGIALELGLQVMRMTLNTMTWRRRE  
MVRWLVSCATEIGPPALMSIMKNWYSLFTPVEAVTIVAVTGTTHATLLRLQLD TAGREELWACARTLALQCAM  
KDPQNCALPALTLCEKNHAAFEAAYQIVLDAAGGLGHAHLFTVARYMEHRGLPLRAYKLATLALALQLSIAFN  
QD SHPAVNDVLWACSLSHSLGRHEL SAIVPLIIRS IHCAPMLSDILRRWTL SAPGLGPLGARRATKPLGT DRA  
PLCQLLDAAVAAYITTSRSLTHISPRHYGDFIEFLGKARETFLLAPDGH LQFAQFLENLQTYKGGKKLMLL  
VREFRG\*  
>rs50242115\_ENSMUSP00000040078\_c.1018:T>C\_p.I340T  
ENSMUST00000039480.7|Zswim4-201|ENSMUSG00000035671|-|chr8:g.84953447:A>G  
MEPPAAKRSRGC PAGDEPGTGARRSRPEPLLDLSAKRVAESWAFEQVEERFSRVPEPVQKRIVFWSFPRERE  
ICMYSSLGYPPEGEQDTRVPFTRGLHLLQSGAVDRVLQVGFHLSGNIREVGGPGEPEHLYHVSISFDRCKIT  
SVSCGCDNRDLFYCAHVVALS L YRIRHARQVELR LPISETLSQMNRDQLQKFVQYLISAHHTVLP TAQRLAD  
EILLGSEINLVHGAPDPTAGAGTEDANCWHLDEEQIQEQVKQLLSNGGHYGASQQLRSMF SKVREMLRARDS  
NGARMLIILMTEQFLQDPR LALWRQQGAGMTDKCRQLWDELGALWVCVTLSPHCKPDERSGWLQLLGTWDKLDV  
CPLEEGNYSLDIPSLQPALTSRTGSEDEEEVTAASPRRTVFSRALQAGELHWNDSHLQRI L AS DSCGPTLTGS  
MGSDKPTFDPQGHPIWLGPEFP TACARVDTLRAHGYPHKALRLACAIINTLRLQRRHQLESYKQK KELLQKG  
ATGVTSTEGWVGHPLDPIGICL RALLEACRLEEEPHSLFPDSAPEKRKLAYQHVLVPGSPGESYLALALEVAL  
LGLGQQRALPEGLYAQDKVVRNEEQLLALLEVELEDERLVQVLRKQAGLLLEGGPFSGFGEVI FRESVPMHTC  
ARYLFTALLPHDPDLAFRLALRAMRLPVLETTFFPAGE SHPNPLDSIMSNRFPWFILGHLETRQCELASTMLT  
AAKGDTKWLHAVLGSVQQNIHSPALLFKLAQDACKTATPASAPPD TVLLGIALELGLQVMRMTLNTMTWRRRE  
MVRWLVSCATEIGPPALMSIMKNWYSLFTPVEAVTIVAVTGTTHATLLRLQLD TAGREELWACARTLALQCAM  
KDPQNCALPALTLCEKNHAAFEAAYQIVLDAAGGLGHAHLFTVARYMEHRGLPLRAYKLATLALALQLSIAFN

QDSHPAVNDVLWACSLSHSLGRHELSAIVPLIIRSIHCAPMLSDILRRWTL SAPGLGPLGARRATKPLGTDRA  
PLCQLLDAAVAAYITTSRSLTHISPRHYGDFIEFLGKARETFLLAPDGHQFAQFLENLKQTYKGKKLMLL  
VRERFG\*

>rs51157904\_ENSMUSP00000040078\_c.910:A>G\_p.Q304R

ENSMUST00000039480.7|Zswim4-201|ENSMUSG00000035671|-|chr8:g.84955507:T>C  
MEPPAAKRSRGCAPGDEPGTGARRSRPEPLDLSAKRVAESWAFEQVEERFSRVPEPVQKRIVFWSFPRSERE  
ICMYSSLGYQPPEGEQDTRVPFTRGLHLLQSGAVDRVLQVGFHLNIGNIREVGGPGEPEHLYHVSISFDRCKIT  
SVSCGCDNRDLFYCAHVVALSLYRIRHARQVELRLPISETLSQMNDRDQKQFVQYLISAHHTEVLPQAORLAD  
EILLGSEINLVHGAPDPTAGAGTEDANCWHLDEEQIQEQVKQLLSNGGHYGASQQLRSMFSKVREMLRARDS  
NGARMLILMTERFLQDPRRALWRQQGAGMTDKCRQLWDELGALWVCVILSPHCKPDERSGWLQLLGTWDKLDV  
CPLEEGNYSLDIPSLQPALTSRTGSEDEEEVTAASPRRTVFSRALQAGELHWNDSHLQORILASDCGPTLTGS  
MGSDKPTFDPOGHPIWLGEPPFTACARVDTLRAHGYPHKALRLACAIINTLRLQRRHQLESYKQKQKELLQKG  
ATGVTSTEGWVGHPLDPIGICLCRALLEACRLEEEPHSLFPD SAPEKRKRAYQHVLVPGSPGESYLALALEVAL  
LGLGQORALPEGLYAQDKVVRNEEQLLALLEEVELDERLVQVLRKQAGLLLEGGPFSGFGEVIFRESVPMHTC  
ARYLFTALLPHDPDLAFLRALRAMRLPVLETTFPAGESHPNPLDSIMSNRFPWFILGHLETRQCELASTMLT  
AAKGDTKWLHAVLGSVQNIHSPALLFKLAQDACKTATPASAPPDVTLLGIALELGLQVMRMTLNTMTWRRRE  
MVRWLVSCLATEIGPPALMSIMKNWYSLFTPVEAVTIVAVTGTTHATLLRLQLDQTAGREELWACARTLALQCAM  
KDPQNCALPALTLCEKNHAAFEAYQIVLDAAGGLGHAHLFTVARYMEHRGLPLRAYKLATLALAQLSIAFN  
QDSHPAVNDVLWACSLSHSLGRHELSAIVPLIIRSIHCAPMLSDILRRWTL SAPGLGPLGARRATKPLGTDRA  
PLCQLLDAAVAAYITTSRSLTHISPRHYGDFIEFLGKARETFLLAPDGHQFAQFLENLKQTYKGKKLMLL  
VRERFG\*

>rs48900740\_ENSMUSP00000040078\_c.352:G>A\_p.S118N

ENSMUST00000039480.7|Zswim4-201|ENSMUSG00000035671|-|chr8:g.84957714:C>T  
MEPPAAKRSRGCAPGDEPGTGARRSRPEPLDLSAKRVAESWAFEQVEERFSRVPEPVQKRIVFWSFPRSERE  
ICMYSSLGYQPPEGEQDTRVPFTRGLHLLQSGAVDRVLQVGFHLNIGNIREVGGPGEPEHLYHVSISFDRCKIT  
SVSCGCDNRDLFYCAHVVALSLYRIRHARQVELRLPISETLSQMNDRDQKQFVQYLISAHHTEVLPQAORLAD  
EILLGSEINLVHGAPDPTAGAGTEDANCWHLDEEQIQEQVKQLLSNGGHYGASQQLRSMFSKVREMLRARDS  
NGARMLILMTEQFLQDPRRALWRQQGAGMTDKCRQLWDELGALWVCVILSPHCKPDERSGWLQLLGTWDKLDV  
CPLEEGNYSLDIPSLQPALTSRTGSEDEEEVTAASPRRTVFSRALQAGELHWNDSHLQORILASDCGPTLTGS  
MGSDKPTFDPOGHPIWLGEPPFTACARVDTLRAHGYPHKALRLACAIINTLRLQRRHQLESYKQKQKELLQKG  
ATGVTSTEGWVGHPLDPIGICLCRALLEACRLEEEPHSLFPD SAPEKRKRAYQHVLVPGSPGESYLALALEVAL  
LGLGQORALPEGLYAQDKVVRNEEQLLALLEEVELDERLVQVLRKQAGLLLEGGPFSGFGEVIFRESVPMHTC  
ARYLFTALLPHDPDLAFLRALRAMRLPVLETTFPAGESHPNPLDSIMSNRFPWFILGHLETRQCELASTMLT  
AAKGDTKWLHAVLGSVQNIHSPALLFKLAQDACKTATPASAPPDVTLLGIALELGLQVMRMTLNTMTWRRRE  
MVRWLVSCLATEIGPPALMSIMKNWYSLFTPVEAVTIVAVTGTTHATLLRLQLDQTAGREELWACARTLALQCAM  
KDPQNCALPALTLCEKNHAAFEAYQIVLDAAGGLGHAHLFTVARYMEHRGLPLRAYKLATLALAQLSIAFN  
QDSHPAVNDVLWACSLSHSLGRHELSAIVPLIIRSIHCAPMLSDILRRWTL SAPGLGPLGARRATKPLGTDRA  
PLCQLLDAAVAAYITTSRSLTHISPRHYGDFIEFLGKARETFLLAPDGHQFAQFLENLKQTYKGKKLMLL  
VRERFG\*

>rs51323625\_ENSMUSP00000019506\_c.6:C>T\_p.Q3\*

ENSMUST00000019506.9|D8ErtD738e-201|ENSMUSG00000019362|-

|chr8:g.84976326:G>A

MA\*GQRKFQAQKPKSKAAAERSRGPGRKGRVIAPKKARVVQQKLLKKSLEVGIRKKIEHDVVMKASSSLPKR  
LALLKGASKKSEATIPGKTPS\*

>rs32623436\_ENSMUSP000000122623\_c.769:C>T\_p.A257V

ENSMUST000000126435.8|Mri1-203|ENSMUSG00000004996|-|chr8:g.84980671:G>A  
MTLEAIRYSPGSLQILDQLQLEPHCHYEALSSVQQAASEAIRAMKVRGAPAIALVGCLSLAVELRAGAGGPGLA  
ALVAFVRDQLRLLVAARPTAVNMARAARDLQVAAQEAEREGATEETVREVRIRFAEDMLEKDLKDNRSIGDL  
GARHLLQTNPRGGKVTVLTHCNTGALATAGYGTALGVIRSLHEMGRLEHTFCTETRPYNQGARLTAFELVYE  
QIPATLITDSMAAAAMAHRGVSAVVVGADRVVANGDVTNKGITTYQLAIVAKHHGVFPFYVAAPSSCDLHLETG  
KEIVIEERPSQELTDLNGVRIAAQGIRVWNPADFVTPHELITGGIITELGVFAPEELRGALSASVFSEGQTLT  
SPWV\*

>rs32623436\_ENSMUSP000000117115\_c.385:C>T\_p.A129V

ENSMUST000000125498.2|Mri1-202|ENSMUSG00000004996|-|chr8:g.84980671:G>A  
XRFADMLEKDLKDNRSIGDLGARHLLQTNPRGGKVTVLTHCNTGALATAGYGTALGVIRSLHEMGRLEHTF  
CTETRPYNQGARLTAFELVYEQIPATLITDSMAAAAMAHRAVVVGADRVVANGDVTNKGITTYQLAIVAKHHGV  
FPFYVAAPSSCDLHLETGKEIVIEERPSQELTDLNGVRIAAQDRIFLCLLGYPGTICRSGWLQTRSSCLCLP  
SAGIKCMHH

>rs33104670\_ENSMUSP00000096177\_c.139:G>A\_p.R47Q  
ENSMUST00000098578.10|Ccdc130-202|ENSMUSG0000004994|-  
|chr8:g.84990491:C>T  
MGERKQGONKYYPDFNPEKHGSLNRYHNSHPLRERARKLSQGILVIQFEMPYNIWCDGCKNHIGMVRVYNAEK  
KKVGNYYTTPYRFRMKCHLCVNYIEMQTD PANCDYVIVSGASRKEERWDMEDNEQVLTTEHEKKEKLET DAM  
FRLEHGADRSTLKKALPTLSHIQEAQNAWKDDFALNSMLRRHFREKKKAMQEEEEKDALQAKASLAIPLVP  
ESEDRLAALLRLHTLDSYEDKQRMKRTEI IHRSWFPSAQGPSASSSKASSVLKCLCQGRPPPSSTGTVDG  
LGI VRRKSRDVPESPQCAADNSLSEEQRPPGTTQGSKTLEEAEEASRTSKTSESKRNCSDQAFPLGSSQEDL  
LNPNTPNASLVADYSDSESE\*  
>rs33104670\_ENSMUSP00000005120\_c.139:G>A\_p.R47Q  
ENSMUST00000005120.12|Ccdc130-201|ENSMUSG0000004994|-  
|chr8:g.84990491:C>T  
MGERKQGONKYYPDFNPEKHGSLNRYHNSHPLRERARKLSQGILVIQFEMPYNIWCDGCKNHIGMVRVYNAEK  
KKVGNYYTTPYRFRMKCHLCVNYIEMQTD PANCDYVIVSGASRKEERWDMEDNEQVLTTEHEKKEKLET DAM  
FRLEHGADRSTLKKALPTLSHIQEAQNAWKDDFALNSMLRRHFRLMRTSSE\*  
>rs33104670\_ENSMUSP00000128605\_c.139:G>A\_p.R47Q  
ENSMUST00000172320.2|Ccdc130-207|ENSMUSG0000004994|-|chr8:g.84990491:C>T  
MGERKQGONKYYPDFNPEKHGSLNRYHNSHPLRERARKLSQGILVIQFEMPYNIWCDGCKNHIGMGERG\*  
>ENSMUSP00000158803\_c.1027:T>C\_p.F343S ENSMUST00000238701.2|Cacna1a-  
213|ENSMUSG00000034656|+|chr8:g.85245363:T>C  
MPRASWGS DPMLSPLSHELLHSPRYPGTDCTLAGSSRTLHPVWSQQMSGSLGPTLKRGGVVDHRDVI LAHQ  
AHKMHSTPQARRKEWEMARFGDEMPGRYGAGGGGSGPAAGVVGAAGGRGAGGSRQGGQPGAQRM YKQSMAQR  
ARTMALYNPI PVRQNC LTVNRS LFLFSEDNVVRKYAKKI TEWPPFEY MILATI IANCI VLAL EQHLPDDDKTP  
MSERLDDTEPYFIGIFCFEAGIKIVALGF AFHKGSYLNRNGWNVMD FVVVLTGILATVGTEFDLRTLRAVRVLR  
PLKLVSGIPSLQVVLKSIKAMIPLLQIGLLFFAILIFAIIGLEFYMGKSHTTCFEEGTDDIQGES P APCGT  
EEPARTCPNGTKCQFYWEGPNNGITQFDNILFAVLT V FQCITMEGWTDLLYNSNDASGNTWNWLYF I PLI IIG  
SFMLNLVLGVLSGEFAKERERVENRRAFLKLRQQQIERELNGYMEWISKAEEVILAEDETDVEQRHPFDGA  
LRRATLKKSKTDL LNPEEAEDQLADIASVGS PFARASIKS AKLENSTFFHKKERRMRFYIRRMVKTQAFYWTV  
LSLVALNTLCVAIVHYNQPEWLSDFLYAEFIFLGLFMSEMF IKMYGLTRPYFHSSFNCFDCGVIIGSIFEV  
IWAVIKPGTSFGISVLRALRLRIFKVTKY WASLRNLVSVLLNSMKS IISLLFLLFLFIVVFALLGMQLFGGQ  
FNFDEGTPPTNFDTFPAAIMTVFQILTGEDWNEVMYDGIKSQGGVQGMVFSIYFIVLTLFGNYTLLNVFLAI  
AVDNLANAQELTKDEQEEEEANQKLALQKAKEVAEVSPLSAANMSI AVKEQQKNQKPTKSVWEQRTSEMRKQ  
NLLASREALYGDAERWPTPYARPLRPDVKTHLDRPLVVDQENRNNNTNKSRAPEALRPTARPRESARDPDA  
RRAWPGSPERAPGREGPYGRESE PQQREHAPPREHAPWDADTERAKAGDAPRRHTRHPVAEGEP RRHRARRR  
GDEPDRRERRRPRDTRPARAADGEGDDGERKRRHRHGPPAHDDRERRRRRRKENQSGSVPSGPNLSTTR  
PIQQDLGRQDLPLAEDLDNMKNKLATGEPASPHDSLHSGLSGLPPSPAKIGNSTNPGPALATNPVNAASRRTPN  
NPGNPSNPGPKTPENSLIVTNPSSQPN SAKTARKPEHMAVEI PPACPLNHTVVQVNKNANPDP LPKKEEE  
KKEEEEADPGEDGPKMPYPYSSMFI LSTTNPLRRLCHYIILNRYFEMC ILMVIAMSSIALAAEDPVQPNAPRN  
NVLRYFDYVFTGVFTFEMVIK MIDLGLVLHQGAYFRDLWNILDFIVVSGALVAF AFTGNSKGDINTIKSLRV  
LRVLRPLKTIKRLPKLKA VFCVNSLKNVFNILIVYMLFMFI FAVVAVQLFKGKFFHCTDESKEFERDCRGK  
YLLYEKNEVKARDREWKKYEFHYDNVLWALLTLFTVSTGEGWPVQLKHSVDATFENQGPS PGYRMEMSIFYVV  
YFVVFPPFFVNI FVALI IITFQEQGDMMEEYSLEKNERACIDFAISAKPLTRHMPQNKQSFQYRMWQFV VSP  
PFEYTIMAMIALNTIVLMMKFY GASVAYENALRVFNIVFTSLFSL ECVLKVMAFGILNYFRDAWNIFDFVTVL  
GSITDILVTEFGNNFINLSFLRLFRAARLIKLLRQGYTIRILLWTFVQSFKALPYVCLLIAMLFFIYAIIGMQ  
VFGNIGIDGEDEDSDEDEFQITEHNNFR TFFQALMLLFRSATGEAWHNIMLSCLSGKPCDKNSGILTADCGNE  
FAYFYFVSFI FLCSFLMLNLFVAVIMDNFEYLTRDSSILGPHHLDEYVRVWAEYDPAACGRIHYKDMYSLLRV  
ISPPLGLGKCKPHRVACKRLLRMDLPVADDNTVHFNSTLMALIR TALDIKIAKGGADKQQMDAELRKEMMAIW  
PNLSQKTLDDLVT PHKSTDLTVGKIYAAMMIMEYYRQSKAKKLQAMREEQNRTPLMFQRMEPPSPTQEGGPSQ  
NALPSTQLDPGGGLMAHEGGMKESPSWVTQRAQEMFQKTGTWSPERGPPI DMPNSQPNSQS VEMREMGT DGYS  
DSEHYLPMEGQTRAASMPRLPAENQRRRGRPRGNDLSTISDTS PMKRSASVLGPKARRLDDYS LERV PPEENQ  
RYHQRRRDRGHRTSERSLGRYTDVDTGLGTDLSMTTQSGDLPSKDRDQDRGRPKDRKHRPHHHHHHHHHPPA  
PDRDRYAQERPDTGRARAREQRWSRSPSEGREHTTHRQSSSVSGSPAPSTSGTSTPRRGRRLPQTPTCTPRP  
LVSYSAPARRPAARRMAGPAAPP GGS PRGCRARPWAHAPEGPRPRGADYTEPDSPREPPGGAHDPA PRSPR  
TPRAAGCASPRHGRRPLNGY YAGHGAPRPR TARRGAHDAYSESEDDWC\*  
>ENSMUSP00000112436\_c.760:T>C\_p.F254S ENSMUST00000121390.8|Cacna1a-  
201|ENSMUSG00000034656|+|chr8:g.85245363:T>C  
MARFGDEMPGRYGAGGGGSGPAAGVVVGAAGGRGAGGSRQGGQPGAQRM YKQSMAQRARTMALYNPI PVRQNC  
LTVNRS LFLFSEDNVVRKYAKKI TEWPPFEY MILATI IANCI VLAL EQHLPDDDKTPMSERLDDTEPYFIGIF



CFEAGIKIVALGF AFHKGSYLRNGWNVMD FVVVLTGILATVGT EFDLRTLRAVRVLRPLKLVSGIPSLQVVLK  
SIMKAMIPLLQIGLLLFFAILIFAIIGLEFYMGKSHTTCFEEGTDDIQGESAPPCGTEEPARTCPNGTKCQPY  
WEGPNNGITQFDNILFAVLT V FQCITMEGWTDLLYNSNDASGNTWNWLYFIPLIIIGSFFMLNLVGLVLSGEF  
AKERERVENRRAFLKLRQQQIERELNGYMEWISKAEEVILA EDETDVEQRHPFDGALRRATLKKSKTDLLNP  
EEAEDQLADIASVGS PFARASIKSAKLENSTFFHKKERRMRFYIRRMVKTQAFYWTVLSLVALNTLCVAIVHY  
NQPEWLSDFLYYAEFIFLGLFMSEMF IKMYGLGTRPYFHSSFNCFDCGVIIGSIFEVIWAVIKPGTSFGISVL  
RALRLLRIFKVTKYWASLRNLVVSLLNSMKSIIISLLFLLFLFIVV FALLGMQLFGGQFNDFEGTPTNFDTFP  
AAIMTVFQILTGEDWNEVMYDGIKSQGGVQGGMVFSIYFIVLTLFGNYTLLNVFLAIAVDNLANAQELTKDEQ  
EEEEANQK LALQKAKEVAEVSPLSAANMSI AVKEQQKNQKPTKSVWEQRTSEMRKQNL LASREALYGDAAER  
WPTPYARPLRPDVKTHLDRPLVVD PQENRNNNTNKSRAPEALRPTARPRESARDPDARRAWPGSPERAPGREG  
PYGRESEPPQREHAPPREHAPWDADTERAKAGDAPRRHTRHPVAEAGEPRRHRARRRPGDEPDDRPERPRPRD  
ATRPARAADGEGDDGERKRRHRHGPPAHDDRERRRRRKENQSGVFPVSGPNLSTTRPIQQDLGRQDLPLAED  
LDNMKNNK LATGEPASPHDSLGHSGLPSPAKIGNSTNPGPALATNPQNAASRRTPNPNPNSNPGPKTPEN  
SLIVTNPSSTQPN SAKTARKPEHMAVEIPPACPLNHTVVQVNKNANPDPLPKKEEEEKKEEEEADPGEDGPKP  
MPPYSSMFI LSTTNPLRRLCHYILNLRYFEMC ILMVIAMSSIALAAEDPVQPNAPRNNVLR YFDYVFTGVFTF  
EMVIK MIDLGLVLHQGAYFRDLWNI LDFIVVSGALVAF AFTGNSKGDINTIKSLRVLRLRPLKTIKRLPKL  
KAVFDCVNSLKNVFNILIVYMLFMFIFAVVAVQLFKGKFFHCTDESKEFERDCRGKYLLYEKNEVKARDREW  
KKYEFHYDNVLWALLTLFTVSTGEGWPQVLKHSVDATFENQGPSGYRMEMSIFYVVYFVVFVNI FVAL  
IIITFQEQGDKMMEEYSLEKNERACIDFAISAKPLTRHMPQNKQSFQYRMWQFVVSPPFEYTIMAMIALNTIV  
LMMKFYGASVAYENALRVFNIVFTSLFSLECVLKVMAFGILNYFRDAWNI FDFVTVLGSITDILVTEFGNNFI  
NLSFLRLFRARLIKLLRQGYTIRILLWTFVQSFKALPYVCLLIAMLFFIYAIIGMQVFGNIGIDGEDSDSDE  
DEFQITEHNNFR TFFQALMLLFRSATGEAWHNIMLSCLSGKPCDKNSGILTADCGNEFAYFYFVSFIFLCSFL  
MLNLFVAVIMDNFEYLTRDSSILGPHHLD EYVRVWAEYDPAACGR IHYKMYSLLRVISPPGLGKCKPHRVA  
CKRLLRMDLPVADDNTVHFNSTLMALIRTALDIKIAKGGADKQQMDAELRKEEMAIWPNLSQKTLDLLVTPHK  
STDLTVGKIYAAMMIMEYYRQSKAKKLQAMREEQNRTPLMFQRM EPPSPTQEGGSPQNALPSTQLDPPGGGLMA  
HEGGMKESPSWVTQRAQEMFQKTGTWSPERGGPIDMPSQNSQSVEMREMGTGDYSDSEHYLPMEGQTRAAS  
MPRLPAENQRRRGRPRGNDLSTISDTSMPKRSASV LQGPARRLDYSLERVPEENQRYHQRRDRGHRTSER  
SLGRYTDVDTGLGTDLSMTTQSGDLP SKDRDQDRGRPKDRKHRPHHHHHHHHHHPPAPDRDRYAQERPDGRA  
RAREQRWSRSPSEGREHTTHRQGS SVSGSPAPSTSGTSTPRRGRQLPQTPCTPRPLVSYSPAPRRPAARM  
AGPAAPP GGS PRGCRRAPRWP AHAP EGP RP R GADY TE PDSPREPPGGAHDPAPRSRPTPRAAGCASPRHGRRL  
PNGYYAGHGAPRPTARRGAHDAYSESEDDWC\*

>ENSMUSP00000114055\_c.619:T>C\_p.F207S ENSMUST00000122053.2|Cacna1a-  
202|ENSMUSG00000034656|+|chr8:g.85245363:T>C

MARFGDEMPGRY GAGGGGSGPAGVVVGAAGGRGAGGSRQGGQPGAQRMYKQSMAQRARTMALYNPIPVQRNC  
LTVNRSFLFSEDNDDETEPYFIGIFCFEAGIKIVALGF AFHKGSYLRNGWNVMD FVVVLTGILATVGT EFDL  
RTLRAVRVLRPLKLVSGIPSLQVVLK SIMKAMIPLLQIGLLLFFAILIFAIIGLEFYMGKSHTTCFEEGTDDI  
QGESPAPCGTEEPARTCPNGTKCQPYWEGPNNGITQFDNILFAVLT V FQCITMEGWTDLLYNSNDASGNTWNW  
LYFIPLIIIGSFFMLNLVGLVLSGEFAKERERVENRRAFLKLRQQQIERELNGYMEWISKAEEVILA EDETD  
VEQRHPFDGALRRATLKKSKTDLLNPEEAEDQLADIASVGS PFARASIKSAKLENSTFFHKKERRMRFYIRRM  
VKTQAFYWTVLSLVALNTLCVAIVHYNQPEWLSDFLYYAEFIFLGLFMSEMF IKMYGLGTRPYFHSSFNCFDC  
GVIIGSIFEVIWAVIKPGTSFGISVLRALRLLRIFKVTKYWASLRNLVVSLLNSMKSIIISLLFLLFLFIVVFA  
LLGMQLFGGQFNDFEGTPTNFDTFPAAIMTVFQILTGEDWNEVMYDGIKSQGGVQGGMVFSIYFIVLTLFGN  
YTLNVLFLAIAVDNLANAQELTKDEQEEEEANQK LALQKAKEVAEVSPLSAANMSI AVKEQQKNQKPTKSVW  
EQRTSEMRKQNL LASREALYGDAAERWPTPYARPLRPDVKTHLDRPLVVD PQENRNNNTNKSRAPEALRPTAR  
PRESARDPDARRAWPGSPERAPGREGPYGRESEPPQREHAPPREHAPWDADTERAKAGDAPRRHTRHPVAEAGE  
PRRHRARRRPGDEPDDRPERPRPRDATRPARAADGEGDDGERKRRHRHGPPAHDDRERRRRRKENQSGVFP  
VSGPNLSTTRPIQQDLGRQDLPLAEDLDNMKNNK LATGEPASPHDSLGHSGLPSPAKIGNSTNPGPALATNP  
QNAASRRTPNPNPNSNPGPKTPENSLIVTNPSSTQPN SAKTARKPEHMAVEIPPACPLNHTVVQVNKNAN  
PDPLPKKEEEEKKEEEEADPGEDGPKMPPYSSMFI LSTTNPLRRLCHYILNLRYFEMC ILMVIAMSSIALAAE  
DPVQPNAPRNNVLR YFDYVFTGVFTFEMVIK MIDLGLVLHQGAYFRDLWNI LDFIVVSGALVAF AFTGNSKGD  
DINTIKSLRVLRLRPLKTIKRLPKL KAVFDCVNSLKNVFNILIVYMLFMFIFAVVAVQLFKGKFFHCTDES  
KEFERDCRGKYLLYEKNEVKARDREWKKYEFHYDNVLWALLTLFTVSTGEGWPQVLKHSVDATFENQGPSGY  
RMEMSIFYVVYFVVFVNI FVALIIITFQEQGDKMMEEYSLEKNERACIDFAISAKPLTRHMPQNKQSFQ  
YRMWQFVVSPPFEYTIMAMIALNTIVLMMKFYGASVAYENALRVFNIVFTSLFSLECVLKVMAFGILNYFRDA  
WNI FDFVTVLGSITDILVTEFGNNFINLSFLRLFRARLIKLLRQGYTIRILLWTFVQSFKALPYVCLLIAML  
FFIYAIIGMQVFGNIGIDGEDSDSDEDEFQITEHNNFR TFFQALMLLFRSATGEAWHNIMLSCLSGKPCDKNS  
GILTADCGNEFAYFYFVSFIFLCSFLMLNLFVAVIMDNFEYLTRDSSILGPHHLD EYVRVWAEYDPAACGR I  
HYKMYSLLRVISPPGLGKCKPHRVACKRLLRMDLPVADDNTVHFNSTLMALIRTALDIKIAKGGADKQQMDA

ELRKEMMAIWPNLSQKTLDDLVTPHKSTDLTVGKIYAAMMIMEYYRQSKAKKLQAMREEQNRTPLMFQRMPEPP  
SPTQEGGSPQNALPSTQLDPPGGGLMAHEGGMKESPSWVTQRAQEMFQKTGTWSPERGPPIDMPNSQPNSQSVE  
MREMGTGYSYDSEHYLPMEGQTRAASMPRLPAENQRRRGRPRGNDLSTISDTPMKRSASVLGPKARRLDDYS  
LERVPPEENQRYHQRRDRGHRTSERSLGRYTDVDTGLGTDLSMTTQSGDLPSKDRDQDRGRPKDRKHRPHHH  
HHHHHHHPAPDRDRYAQERPDTGRARAREQRWSRSPSEGREHTHTRQGS SSVSGSPAPSTSGTSTPRRGRQ  
LPQTPTPRPLVSYSPAPRRPAARRMAGPAAPPGGSPRGCRRAPRWPAPHAPEGPRPRGADYTEPDSPREPPGG  
AHDPA PRSPRT PRAAGCASPRHGRRLPNGYYAGHGAPRPRRTARRGAHDAYSESEDDWC\*  
>ENSMUSP00000149242\_c.622:T>C\_p.F208S ENSMUST00000215756.2|Cacnala-  
211|ENSMUSG00000034656|+|chr8:g.85245363:T>C  
XRMYKQSMARARTMALYNPIPVRQNCLTVNRSFLFSEDNVVRKYAKKITEWPPFEYMI LATI IANCIVLAL  
EQHLPDDDKTPMSERLDDTEPYFIGIFCFEAGIKIVALGF AFHKGSYLRNGWNVMD FVVVLTGILATVGTEFD  
LRTLRAVRVLRPLKLVSGIPSLQVVLKSIKAMIPLLQIGLLFFAILIFAIIGLEFYMGKSHHTTCFEEGTD  
IQGES PAPCGTEEPARTCPNGTKCQPYWEGPNNGITQFDNILFAVLTVFQCITMEGWTDL LYSNDASGNTWN  
WLYFIFLIIGSFFMLNLVGLVLSGEFAKERERVENRRAFLKLRQQQIERELNGYMEWISKAEEVILAEDET  
DVEQRHFPDALRRATLKKSKTDLNPEEAEDQLADIASVGSPPFARASIKSAKLENSTFFHKKERRMRFYIRRM  
VKTQAFYWTVLSLVALNTLCVAIVHYNQPEWLSDFLYAAEFIFLGLFMSEMF IKMYGLGTRPYFHSSFNCFCDC  
GVIIGSIFEVIWAVIKPGTSFGISVLRALRLLRIFKVTKYWASLRNLVVSLLNSMKSII SLLFLLFLFIVVFA  
LLGMQLFGGQFNFDGTPPTNFDTFPAAIMTVFQILTGEDWNEVMYDGIKSQGGVQGGMVFSIYFIVLTLFGN  
YTLNVLFLAIAVDNLANAQELTKDEQEEEEAAANQKLLALQKAKEVAEVSPLSAANMSI AVKEQQKNQKPTKSVW  
EQRTSEMRKQNLASREALYGDAERWPTPYARPLRPDVKTHLDRPLVVDPQENRNNNTNKSRAPEALRPTAR  
PRESARDPDARRAWPGSPERAPGREGPYGRESEPPQREHAPPREHAPWDADTERAKAGDAPRRHTRHPVAEGE  
PRRHRARRRRPGDEPDRPERRRPRDTRPARAADGEGDDGERKRRHRHGPPAHDDRERRRRRRKENQGSV  
VSGPNLSTTRPIQQDLGRQDLPLAEDLDNMKNNKLATGEPASPHDSLGHSGLPSPAKIGNSTNPGPALATNP  
QNAASRRTPNPNPNSNPGPKTPENSLIVTNPSSQPNSAKTARKPEHMAVEIPACPLNHTVVQVKNAN  
PDPLPKKEEKEEKEEADPGEDGPKMPYPSSMFI LSTTNPLRRLCHYILNLR YFEMCILMVIAMSSIALAAE  
DPVQPNAPRNNVLR YFDYVFTGVFTFEMVIKMDLGLVLHGAYFRDLWNILDFIVVSGALVAFVAFVGN  
DINTIKSLRVLRLPLKTIKRLPKLKA VDFDCVNSLKNVFNILLVYMLFMFIFAVVAVQLFKGKFFHCTDES  
KEFERDCRGKYLLEYEKNEVKARDREWKKYEFHYDNVLLWALLTLFTVSTGEGWPQVLKHSVDATFENQGPS  
PGYRMEMSIFYVVVYFVVPFFVNFVALIITFQEQGDKMMEEYSLEKNERACIDFAISAKPLTRHMPQNKQSFQ  
YRMWQFVVSPPFEYTIMAMIALNTIVLMMKFY GASVAYENALRVFNIVFTSLFSLECVLKVMAFGILNYFRDA  
WNIFDFVTVLGSITDILVTEFGNNFINLSFLRLFRAARLIKLLRQGYTIRILLWTFVQSFKALPYVCLLIAML  
FFIYAIIGMQVFGNIGIDGEDSDEDEFQITEHNNFRFFQALMLLFRSATGEAWHNIMLSCLSGKPCDKNS  
GILTADCGNEFAYFYFVSFIFLCSFLMLNLFVAVIMDNFEYLTRDSSILGPHHLDEYVVRVWAEYDPAACGR  
IHYKDMYSLLRVISPPGLGKCKPHRVACKRLLRMDLPVADDNTVHFNSTLMALIR TALDIKIAKGGADKQMDA  
ELRKEMMAIWPNLSQKTLDDLVTPHKSTDLTVGKIYAAMMIMEYYRQSKAKKLQAMREEQNRTPLMFQRMPEPP  
SPTQEGGSPQNALPSTQLDPPGGGLMAHEGGMKESPSWVTQRAQEMFQKTGTWSPERGPPIDMPNSQPNSQSVE  
MREMGTGYSYDSEHYLPMEGQTRAASMPRLPAENQRRRGRPRGNDLSTISDTPMKRSASVLGPKARRLDDYS  
LERVPPEENQRYHQRRDRGHRTSERSLGRYTDVDTGLGTDLSMTTQSGDLPSKDRDQDRGRPKDRKHRPHHH  
HHHHHHHPAPDRDRYAQERPDTGRARAREQRWSRSPSEGREHTHTRQGS SSVSGSPAPSTSGTSTPRRGRQ  
LPQTPTPRPLVSYSPAPRRPAARRMAGPAAPPGGSPRGCRRAPRWPAPHAPEGPRPRGADYTEPDSPREPPGG  
AHDPA PRSPRT PRAAGCASPRHGRRLPNGYYAGHGAPRPRRTARRGAHDAYSESEDDWC\*  
>rs38793291\_ENSMUSP00000158803\_c.3165:A>G\_p.K1056E  
ENSMUST00000238701.2|Cacnala-213|ENSMUSG00000034656|+|chr8:g.85286255:A>G  
MPRASWGS DPMLSPLSHELLHSPRYPGTDCTLAGSSRTLHVPWSQQMSGSLGPTLKRGGVVDHRDVI LAHQ  
AHKMHS TPQARRKEWEMARFGDEMPGRY GAGGGSGPAAGVVVGAAGGRGAGGSRQGGQPGAQRM YKQ SMAQR  
ARTMALYNPIPVRQNCLTVNRSFLFSEDNVVRKYAKKITEWPPFEYMI LATI IANCIVLAL EQHLPDDDKTP  
MSERLDDTEPYFIGIFCFEAGIKIVALGF AFHKGSYLRNGWNVMD FVVVLTGILATVGTEFDLRTLRAVRVLR  
PLKLVSGIPSLQVVLKSIKAMIPLLQIGLLFFAILIFAIIGLEFYMGKFHTTCFEEGTD DIQGES PAPCGT  
EEPARTCPNGTKCQPYWEGPNNGITQFDNILFAVLTVFQCITMEGWTDL LYSNDASGNTWNWLYFIFLIIG  
SFFMLNLVGLVLSGEFAKERERVENRRAFLKLRQQQIERELNGYMEWISKAEEVILAEDET DVEQRHFPDGA  
LRRATLKKSKTDLNPEEAEDQLADIASVGSPPFARASIKSAKLENSTFFHKKERRMRFYIRRMVKTQAFYWTV  
LSLVALNTLCVAIVHYNQPEWLSDFLYAAEFIFLGLFMSEMF IKMYGLGTRPYFHSSFNCFCDCGVIIGSIFEV  
IWAVIKPGTSFGISVLRALRLLRIFKVTKYWASLRNLVVSLLNSMKSII SLLFLLFLFIVV FALLGMQLFGGQ  
FNFDEGTPPTNFDTFPAAIMTVFQILTGEDWNEVMYDGIKSQGGVQGGMVFSIYFIVLTLFGNYTLNVLFLA  
AVDNLANAQELTKDEQEEEEAAANQKLLALQKAKEVAEVSPLSAANMSI AVKEQQKNQKPTKSVW EQRTSEMRKQ  
NLLASREALYGDAERWPTPYARPLRPDVKTHLDRPLVVDPQENRNNNTNKSRAPEALRPTARPRESARDPDA  
RRAWPGSPERAPGREGPYGRESEPPQREHAPPREHAPWDADTERAKAGDAPRRHTRHPVAEGEPRRHRARRR  
PGDEPDRPERRRPRDTRPARAADGEGDDGERERRRRHGPPAHDDRERRRRRRKENQGSV VSGPNLSTTR

PIQQDLGRQDLPLAEDLDNMKNKLATGEPASPHDSLGHSGLPPSPAKIGNSTNPGPALATNPQNAASRRTPN  
 NPGNPSNPGPKTPENSLIVTNPSSTQPNsAKTARKPEHMAVEIPPACPLNHTVVQVNKNANPDPLPKKEEE  
 KKEEEEDPAGEDGPKMPYPYSSMFI LSTTNPLRRLCHYI LNLRYFEMC ILMVIAMSSIALAAEDPVQPNAPRN  
 NVLRYFDYVFTGVFTFEMVIKMI DLGLVLHQGAYFRDLWNI LDFIVVSGALVAFaftGNSKGDINTIKSLRV  
 LRVLRPLKTIKRLPKLKAVFDCVVNSLKNVFNILIVYMLFMFI FAVVAVQLFKGKFFHCTDESKEFERDCRGK  
 YLLYEKNEVKARDREWKKYEFHYDNVLWALLTLFTVSTGEGWPQVLKHSVDATFENQGPS PGYRMEMSIFYV  
 YFVVFVFFVNI FVAL I I I T F Q E Q G D K M M E E Y S L E K N E R A C I D F A I S A K P L T R H M P Q N K Q S F Q Y R M W Q F V V S P  
 PFEYTIMAMIALNTIVLMMKFY G A S V A Y E N A L R V F N I V F T S L F S L E C V L K V M A F G I L N Y F R D A W N I F D F V T V L  
 G S I T D I L V T E F G N N F I N L S F L R L F R A A R L I K L L R Q G Y T I R I L L W T F V Q S F K A L P Y V C L L I A M L F F I Y A I I G M Q  
 V F G N I G I D G E D E D S D E D E F Q I T E H N N F R T F F Q A L M L L F R S A T G E A W H N I M L S C L S G K P C D K N S G I L T A D C G N E  
 F A Y F Y F V S F I F L C S F L M L N L F V A V I M D N F E Y L T R D S S I L G P H H L D E Y V R V W A E Y D P A A C G R I H Y K D M Y S L L R V  
 I S P P L G L G K K C P H R V A C K R L L R M D L P V A D D N T V H F N S T L M A L I R T A L D I K I A K G G A D K Q Q M D A E L R K E M M A I W  
 P N L S Q K T L D L L V T P H K S T D L T V G K I Y A A M M I M E Y Y R Q S K A K K L Q A M R E E Q N R T P L M F Q R M E P P S P T Q E G G P S Q  
 N A L P S T Q L D P G G G L M A H E G G M K E S P S W V T Q R A Q E M F Q K T G T W S P E R G P P I D M P N S Q P N S Q S V E M R E M G T D G Y S  
 D S E H Y L P M E G Q T R A A S M P R L P A E N Q R R R G R P R G N D L S T I S D T S P M K R S A S V L G P K A R R L D D Y S L E R V P P E E N Q  
 R Y H Q R R R D R G H R T S E R S L G R Y T D V D T G L G T D L S M T T Q S G D L P S K D R D Q D R G R P K D R K H R P H H H H H H H H H P P A  
 P D R D R Y A Q E R P D T G R A R A R E Q R W S R S P S E G R E H T T H R Q G S S V S G S P A P S T S G T S T P R R G R R Q L P Q T P C T P R P  
 L V S Y S P A P R R P A A R M A G P A A P P G G S P R G C R R A P R W P A H A P E G P R P R G A D Y T E P D S P R E P P G G A H D P A P R S P R  
 T P R A A G C A S P R H G R R L P N G Y Y A G H G A P R P R T A R R G A H D A Y S E S E D D W C \*

>rs38793291\_ENSMUSP00000112436\_c.2898:A>G\_p.K967E  
 ENSMUST000001121390.8|Cacna1a-201|ENSMUSG00000034656|+|chr8:g.85286255:A>G  
 M A R F G D E M P G R Y G A G G G G S G P A A G V V V G A A G G R G A G G S R Q G G Q P G A Q R M Y K Q S M A Q R A R T M A L Y N P I P V R Q N C  
 L T V N R S L F L F S E D N V V R K Y A K K I T E W P P F E Y M I L A T I I A N C I V L A L E Q H L P D D D K T P M S E R L D D T E P Y F I G I F  
 C F E A G I K I V A L G F A F H K G S Y L R N G W N V M D F V V V L T G I L A T V G T E F D L R T L R A V R V L R P L K L V S G I P S L Q V V L K  
 S I M K A M I P L L Q I G L L L F F A I L I F A I I G L E F Y M G K F H T T C F E E G T D D I Q G E S P A P C G T E E P A R T C P N G T K C Q P Y  
 W E G P N N G I T Q F D N I L F A V L T V F Q C I T M E G W T D L L Y N S N D A S G N T W N W L Y F I P L I I I G S F F M L N L V L G V L S G E F  
 A K E R E R V E N R R A F L K L R R Q Q I E R E L N G Y M E W I S K A E V I S A E D E T D V E Q R H P F D G A L R R A T L K K S K T D L L N P  
 E E A E D Q L A D I A S V G S P F A R A S I K S A K L E N S T F F H K K E R R M R F Y I R R M V K T Q A F Y W T V L S L V A L N T L C V A I V H Y  
 N Q P E W L S D F L Y A E F I F L G L F M S E M F I K M Y G L G T R P Y F H S S F N C F D C G V I I G S I F E V I W A V I K P G T S F G I S V L  
 R A L R L L R I F K V T K Y W A S L R N L V V S L L N S M K S I I S L L F L L F L F I V V F A L L G M Q L F G G Q F N F D E G T P P T N F D T F P  
 A A I M T V F Q I L T G E D W N E V M Y D G I K S Q G G V Q G G M V F S I Y F I V L T L F G N Y T L L N V F L A I A V D N L A N A Q E L T K D E Q  
 E E E E A A N Q K L A L Q K A K E V A E V S P L S A A N M S I A V K E Q Q K N Q K P T K S V W E Q R T S E M R K Q N L L A S R E A L Y G D A A E R  
 W P T P Y A R P L R P D V K T H L D R P L V V D P Q E N R N N N T N K S R A P E A L R P T A R P R E S A R D P D A R R A W P G S P E R A P G R E G  
 P Y G R E S E P Q Q R E H A P P R E H A P W D A D T E R A K A G D A P R R H T H R P V A E G E P R R H R A R R R P G D E P D D R P E R R P R P R D  
 A T R P A A A D G E G D D G E R E R R R H G P P A H D D R E R R R R R R K E N Q G S G V P V S G P N L S T T R P I Q Q D L G R Q D L P L A E D  
 L D N M K N N K L A T G E P A S P H D S L G H S G L P P S P A K I G N S T N P G P A L A T N P Q N A A S R R T P N N P G N S P N G P P K T P E N  
 S L I V T N P S S T Q P N S A K T A R K P E H M A V E I P P A C P L N H T V V Q V N K N A N P D P L P K K E E E K E E E E A D P G E D G P K P  
 M P P Y S S M F I L S T T N P L R R L C H Y I L N L R Y F E M C I L M V I A M S S I A L A A E D P V Q P N A P R N N V L R Y F D Y V F T G V F T F  
 E M V I K M I D L G L V L H Q G A Y F R D L W N I L D F I V V S G A L V A F A F T G N S K G D I N T I K S L R V L R V L R P L K T I K R L P K L  
 K A V F D C V V N S L K N V F N I L I V Y M L F M F I F A V V A V Q L F K G K F F H C T D E S K E F E R D C R G K Y L L Y E K N E V K A R D R E W  
 K K Y E F H Y D N V L W A L L T L F T V S T G E G W P Q V L K H S V D A T F E N Q G P S P G Y R M E M S I F Y V V Y F V V F P F F V N I F V A L  
 I I I T F Q E Q G D K M M E E Y S L E K N E R A C I D F A I S A K P L T R H M P Q N K Q S F Q Y R M W Q F V V S P P F E Y T I M A M I A L N T I V  
 L M M K F Y G A S V A Y E N A L R V F N I V F T S L F S L E C V L K V M A F G I L N Y F R D A W N I F D F V T V L G S I T D I L V T E F G N N F I  
 N L S F L R L F R A A R L I K L L R Q G Y T I R I L L W T F V Q S F K A L P Y V C L L I A M L F F I Y A I I G M Q V F G N I G I D G E D E D S D E  
 D E F Q I T E H N N F R T F F Q A L M L L F R S A T G E A W H N I M L S C L S G K P C D K N S G I L T A D C G N E F A Y F Y F V S F I F L C S F L  
 M L N L F V A V I M D N F E Y L T R D S S I L G P H H L D E Y V R V W A E Y D P A A C G R I H Y K D M Y S L L R V I S P P L G L G K K C P H R V A  
 C K R L L R M D L P V A D D N T V H F N S T L M A L I R T A L D I K I A K G G A D K Q Q M D A E L R K E M M A I W P N L S Q K T L D L L V T P H K  
 S T D L T V G K I Y A A M M I M E Y Y R Q S K A K K L Q A M R E E Q N R T P L M F Q R M E P P S P T Q E G G P S Q N A L P S T Q L D P G G G L M A  
 H E G G M K E S P S W V T Q R A Q E M F Q K T G T W S P E R G P P I D M P N S Q P N S Q S V E M R E M G T D G Y S D S E H Y L P M E G Q T R A A S  
 M P R L P A E N Q R R R G R P R G N D L S T I S D T S P M K R S A S V L G P K A R R L D D Y S L E R V P P E E N Q R Y H Q R R R D R G H R T S E R  
 S L G R Y T D V D T G L G T D L S M T T Q S G D L P S K D R D Q D R G R P K D R K H R P H H H H H H H H H P P A P D R D R Y A Q E R P D T G R A  
 R A R E Q R W S R S P S E G R E H T T H R Q G S S V S G S P A P S T S G T S T P R R G R R Q L P Q T P C T P R P L V S Y S P A P R R P A A R M  
 A G P A A P P G G S P R G C R R A P R W P A H A P E G P R P R G A D Y T E P D S P R E P P G G A H D P A P R S P R T P R A A G C A S P R H G R R L  
 P N G Y Y A G H G A P R P R T A R R G A H D A Y S E S E D D W C \*

>rs38793291\_ENSMUSP00000114055\_c.2757:A>G\_p.K920E  
 ENSMUST000001122053.2|Cacna1a-202|ENSMUSG00000034656|+|chr8:g.85286255:A>G  
 M A R F G D E M P G R Y G A G G G G S G P A A G V V V G A A G G R G A G G S R Q G G Q P G A Q R M Y K Q S M A Q R A R T M A L Y N P I P V R Q N C  
 L T V N R S L F L F S E D N V D D T E P Y F I G I F C F E A G I K I V A L G F A F H K G S Y L R N G W N V M D F V V V L T G I L A T V G T E F D L

RTLRVAVRVLRLKLVSGIPSLQVVLKSIKAMIPLLQIGLLFFAILIFAIIGLEFYMGKFHTTCFEEGTDDI  
 QGESAPPCGTEEPARTCPNGTKCQPYWEGPNNGITQFDNIFLAVLTVFQCITMEGWTDLLYNSNDASGNTWNW  
 LYFIFLIIGSFFMLNLVGLVLSGEFAKERERVENRRRAFLKLRQQQIERELNGYMEWISKAEEVILAEDET  
 VEQRHPFDGALRRATLKKSKTDLNPEEAEDQLADIASVGSPPFARASIKSAKLENSTFFHKKERRMRFYIRRM  
 VKTQAFYWTVLSLVALNTLCVAIVHYNQPEWLSDFLYYAEFIFLGLFMSEMFIKMYGLGTRPYFHSSFCFDC  
 GVIIGSIFEVIWAVIKPGTSFGISVLRALRLLRIFKVTKYWASLRNLVVSLLNSMKSIIISLLFLLFLFIVVFA  
 LLGMQLFGGQFNFDGTPPTNFDTFPAAIMTVFQILTGEDWNEVMYDGIKSQGGVQGGMVFSIYFIVLTLFGN  
 YTLNVLFLAIAVDNLANAQELTKDEQEEEEEAANQKALQKAKEVAEVSPLSAANMSIAVKEQQKNQKPTKSVW  
 EQRTSEMRKQNLASREALYGDAERWPTPYARPLRPDVKTHLDRPLVVDQPENRNNNTNKSRAPEALRPTAR  
 PRESARDPDARRAWPGSPERAPGREPGYGRESEPPQREHAPPREHAPWDADTERAKAGDAPRRHTRHPVAEGE  
 PRRHRARRRPGDEPDDRPERRPRPRDATRPARAADGEGDDGERERRHRHGPPAHDDRERRRRRRKENQSGV  
 VSGPNLSTTRPIQQDLGRQDLPLAEDLDNMKNNKLATGEPASPHDSLGHSGLPSPAKIGNSTNPGPALATNP  
 QNAASRRTPNPNPNSNPGPKTPENSLIVTNPSSQPNSAKTARKPEHMAVEIPPACPLNHTVVQVKNAN  
 PDPLPKKEEEKKEEEEADPGEDGPKPMPPYSSMFI LSTTNPLRRLCHYILNLRVYFEMCILMVIAMSSIALAAE  
 DPVQPNAPRNNVLRVYFDYVFTGVFTFEMVIKIMIDLGLVLHQGAYFRDLWNILDFIVVSGALVAFVFTGNSKKG  
 DINTIKSLRVLRLVLRPLKTIKRLPKLKAVFDCVNVNSLKNVFNILIVYMLFMFIFAVVAVQLFKGKFFHCTDES  
 KEFERDCRGKYLLEYKNEVKARDREWKKYEFHYDNVWALLTLFTVSTGEGWPQVLKHSVDATFENQGPSGY  
 RMEMSIFYVVYFVVFVFFVNIIFVALIITFQEQGDKMMEEYSLKNERACIDFAISAKPLTRHMPQNKQSFQ  
 YRMWQFVVSPPFEYTIMAMIALNTIVLMMKFYGASVAYENALRVFNIVFTSLFSLECVLKVMAFGILNYFRDA  
 WNI FDFVTVLGSITDILVTEFGNNFINLSFLRLFRAARLIKLLRQGYTIRILLWTFVQSFKALPYVCLLIAML  
 FFYAIIGMQVFGNIGIDGEDSDEDEFQITEHNNFRFFQALMLLFRSATGEAWHNIMLSCLSGKPCDKNS  
 GILTADCGNEFAYFYFVSFIFLCSFLMLNLFVAVIMDNFEYLTRDSSILGPHHLDEYVRVWAEYDPAACGRH  
 YKDMYSLLRVISPPLGLGKCKPHRVACKRLLRMDLPVADDNTVHFNSTLMALIRTALDIKIAKGGADKQMDA  
 ELRKEMMAIWPNLSQKTLDLLVTPHKSTDLTVGKIYAAMMIMEYRQSKAKKLQAMREEQNRTPLMFQRMEPP  
 SPTQEGGPNALPSTQLDPGGGLMAHEGGMKESPSWVTRAQEMFQKTGTWSPERGGPIDMPNSQPNQSVE  
 MREMGTDGYSDSEHYLPMEGQTRAASMPRLPAENQRRRGRPRGNDLSTISDTPMKRASVLPKARRLDDYS  
 LERVPEENQNLDRGHRTERSRLGRYTDVDTDLGTLDSMTTQSGDLP SKDRDQDRGRPKDRKRRPHHH  
 HHHHHHHPPAPDRDRAQERPDTRARAREQRWSRSPSEGREHTTHRQSSSVSGSPAPSTSGTSTPRRGRRO  
 LPQTPCTPRPLVSYSPAPRRPAARRMAGPAAPPGGSPRGCRRAPRWPAPAHAPEGPRPRGADYTEPDSPREPPGG  
 AHDPA PRSPRT PRAAGCASPRHGRRLPNGYYAGHGAPRPRRTARRGAHDAYSESEDDWC\*  
 >rs38793291\_ENSMUSP00000149242\_c.2757:A>G\_p.K920E  
 ENSMUST00000215756.2|Cacna1a-211|ENSMUSG00000034656|+|chr8:g.85286255:A>G  
 XRMKQKSMARARTMALYNPIVVRQNCITVNRSLFLFSEDNVVRKYAKKITEWPPFEYMI LATI IANCIVLAL  
 EQHLPDDDKTPMSERLDDTEPYFIFIGFCFEAGIKIVALGF AFHKGSYLRNGWNVMDV VVLTGILATVGTDFD  
 LRTLRAVRVLRLKLVSGIPSLQVVLKSIKAMIPLLQIGLLFFAILIFAIIGLEFYMGKFHTTCFEEGTDDI  
 IQGESAPPCGTEEPARTCPNGTKCQPYWEGPNNGITQFDNIFLAVLTVFQCITMEGWTDLLYNSNDASGNTWN  
 WLYFIFLIIGSFFMLNLVGLVLSGEFAKERERVENRRRAFLKLRQQQIERELNGYMEWISKAEEVILAEDET  
 DVEQRHPFDALRRATLKKSKTDLNPEEAEDQLADIASVGSPPFARASIKSAKLENSTFFHKKERRMRFYIRRM  
 VKTQAFYWTVLSLVALNTLCVAIVHYNQPEWLSDFLYYAEFIFLGLFMSEMFIKMYGLGTRPYFHSSFCFDC  
 GVIIGSIFEVIWAVIKPGTSFGISVLRALRLLRIFKVTKYWASLRNLVVSLLNSMKSIIISLLFLLFLFIVVFA  
 LLGMQLFGGQFNFDGTPPTNFDTFPAAIMTVFQILTGEDWNEVMYDGIKSQGGVQGGMVFSIYFIVLTLFGN  
 YTLNVLFLAIAVDNLANAQELTKDEQEEEEEAANQKALQKAKEVAEVSPLSAANMSIAVKEQQKNQKPTKSVW  
 EQRTSEMRKQNLASREALYGDAERWPTPYARPLRPDVKTHLDRPLVVDQPENRNNNTNKSRAPEALRPTAR  
 PRESARDPDARRAWPGSPERAPGREPGYGRESEPPQREHAPPREHAPWDADTERAKAGDAPRRHTRHPVAEGE  
 PRRHRARRRPGDEPDDRPERRPRPRDATRPARAADGEGDDGERERRHRHGPPAHDDRERRRRRRKENQSGV  
 VSGPNLSTTRPIQQDLGRQDLPLAEDLDNMKNNKLATGEPASPHDSLGHSGLPSPAKIGNSTNPGPALATNP  
 QNAASRRTPNPNPNSNPGPKTPENSLIVTNPSSQPNSAKTARKPEHMAVEIPPACPLNHTVVQVKNAN  
 PDPLPKKEEEKKEEEEADPGEDGPKPMPPYSSMFI LSTTNPLRRLCHYILNLRVYFEMCILMVIAMSSIALAAE  
 DPVQPNAPRNNVLRVYFDYVFTGVFTFEMVIKIMIDLGLVLHQGAYFRDLWNILDFIVVSGALVAFVFTGNSKKG  
 DINTIKSLRVLRLVLRPLKTIKRLPKLKAVFDCVNVNSLKNVFNILIVYMLFMFIFAVVAVQLFKGKFFHCTDES  
 KEFERDCRGKYLLEYKNEVKARDREWKKYEFHYDNVWALLTLFTVSTGEGWPQVLKHSVDATFENQGPSGY  
 RMEMSIFYVVYFVVFVFFVNIIFVALIITFQEQGDKMMEEYSLKNERACIDFAISAKPLTRHMPQNKQSFQ  
 YRMWQFVVSPPFEYTIMAMIALNTIVLMMKFYGASVAYENALRVFNIVFTSLFSLECVLKVMAFGILNYFRDA  
 WNI FDFVTVLGSITDILVTEFGNNFINLSFLRLFRAARLIKLLRQGYTIRILLWTFVQSFKALPYVCLLIAML  
 FFYAIIGMQVFGNIGIDGEDSDEDEFQITEHNNFRFFQALMLLFRSATGEAWHNIMLSCLSGKPCDKNS  
 GILTADCGNEFAYFYFVSFIFLCSFLMLNLFVAVIMDNFEYLTRDSSILGPHHLDEYVRVWAEYDPAACGRH  
 YKDMYSLLRVISPPLGLGKCKPHRVACKRLLRMDLPVADDNTVHFNSTLMALIRTALDIKIAKGGADKQMDA  
 ELRKEMMAIWPNLSQKTLDLLVTPHKSTDLTVGKIYAAMMIMEYRQSKAKKLQAMREEQNRTPLMFQRMEPP

SPTQEGGSPQNALPSTQLDPPGGGLMAHEGGMKESPSWVTQRAQEMFQKTGTWSPERGPPIDMPNSQPNSQSVE  
MREMGTGYS DSEHYLPMEGQTRAASMPRLPAENQRRRGRPRGNDLSTISDTPMKRSASVLGPKARRLDDYS  
LERVPPPEENQRYHQRRRDRGHRTSERSLGRYTDVDTGLGTDLSMTTQSGDLP SKDRDQDRGRPKDRKHRPHHH  
HHHHHHHPAPDRDRYAQERPDTGRARAREQRWSRSPSEGREHTTHRQSSSVSGSPAPSTSGTSTPRRGRRQ  
LPQTPTCTPRPLVSYSPAPRRPAARRMAGPAAPPGGSPRGCRRAPRWPAHAPEGPRPRGADYTEPDSPREPPGG  
AHDPA PRSPRT PRAAGCASPRHGRRLPNGYYAGHGAPRPRRTARRGAHDAYSESEDDWC\*  
>rs32648021\_ENSMUSP00000158803\_c.4146:A>G\_p.K1383E  
ENSMUST00000238701.2|Cacna1a-213|ENSMUSG00000034656|+|chr8:g.85306133:A>G  
MPRASWSDPMLSPLSHELLHSRYPGTDCITLAGSSRTLHVPWSQQMSGSLGPTLKRGGVVDHRDVI LAHQ  
AHKMHSTPQARRKEWEMARFGDEMPGRYGAGGGGSGPAAGVVVGAAGGRGAGGSRQGGQPGAQRMKYQSMAQR  
ARTMALYNPI PVRQNC LTVNRS LFLFSEDNVVRKYAKKITEWPPFEYMILATI IANCI VLAL EQHLPDDDKTP  
MSERLDDTEPYFIGIFCFEAGIKIVALGF AFHKGSYLRNGWNVMD FVVVLTGILATVGT EFDLRTLRAVRVLR  
PLKLVSGI PSLQVVLK SIMKAMI PLLQIGLLLFFAILIFAI IGLEFYMGKFHTTTCFEEGTDDIQGES P APCGT  
EEPARTCPNGTKCQPYWEGPNNGITQFDNILFAVLT V FQCITMEGWTDL LYSNDASGNTWNWLYFIPLIIIG  
SFFMLNLV LGLVLSGEFAKERERVENRRAFLKLRQQQIERELNGYMEWISKAEEVILAEDETDVEQRHPFDGA  
LRRATLKKSKTDL LNPEEAEDQLADIASVGS PFARASIKS AKLENSTFFHKKERRMRFY IRRMVKTQAFYWTV  
LSLVALNTLCVAIVHYNQPEWLSDFLYYAEFIFLGLFMSEMF IKMYGLGTRPYFHSSFNCFDCGVIIGSIFEV  
IWAIVIKPGTSFGISVLRALRLLRIFKVTKYWASLRNLVVSLLNSMKSII SLLFLLFLFIVVFALLGMQLFGGQ  
FNFDEGTPPTNFDTFPAAIMTVFQILTGEDWNEVMYDGIKSQGGVQGGMVFSIYFIVLTLFGNYTLLNVFLAI  
AVDNLANAQELTKDEQEEEEAAQK LALQKAKEVAEVSPLSAANMSI AVKEQQKNQKPTKSVWEQRTSEMRKQ  
NLLASREALYGDAAERWPTPYARPLRPDVKTHLDRPLVVDPQENRNNNTNKSRAPEALRPTARPRESARDPDA  
RRAWPGSPERAPGREGPYGRESEPPQREHAPPREHAPWDADTERAKAGDAPRRHTRHPVAEGERRRHRARRR  
GDEPDDRPERRPRPRDATRPARAADGEGDDGERKRRHRHGPPAHDDRERRHRRRKENQGS GVPVSGPNLSTTR  
PIQQDLGRQDLPLAEDLDNMKNKLATGEPASPHDSLGHSGLPPSPAKIGNSTNPGPALATNPQNAASRRTPN  
NPGNPSNPGPKTPENSLIVTNPSS TQPN SAKTARKPEHMAVEIPACPLNHTVVQVNKNANPDPLPKKEE  
KKEEEADPGEDGPKMPYPYSSMFI LSTTNPLRRLCHYI LNLRYFEMC ILMVIAMSSIALAEDPVQPNAPRN  
NVLRYFDYVFTGVFTFEMVIKIMIDLGLVLHQGAYFRDLWNILDFIVVSGALVAFAFTGNSKGDINTIESLRV  
LRVLRPLKTIKRLPKLKA VFDV VNSLKNVFNILIVYMLFMFIFAVVAVQLFKGKFFHCTDESKEFERDCRGK  
YLLYEKNEVKARDREWKKYEFHYDNVLWALLTLFTVSTGEGWPQVLKHSVDATFENQGPSPGYRMEMSIFYVV  
YFVVFVFFVNI FVALIIITFQEQGDKMMEEYSLEKNERACIDFAISAKPLTRHMPQNKQS FQYRMWQFVVS  
PFYTIMAMIALNTIVLMMKFGYASVAYENALRVFNIVFTSLFSLC VLVKVMAFGILNYFRDAWNIFDFVTVL  
GSTIDILVTEFGNNFINLSFLRLFRARLIKLLRQGYTIRILLWTFVQSFKALPYVCLLIAMLFFIYAIIGMQ  
VFGNIGIDGEDSDDEDEFQITEHNNFR TFFQALMLLFRSATGEAWHNIMLSCLSGKPCDKNSGILTADCGNE  
FAYFYFVSFI FLCSFLMLNL FVAVIMDNFEYLTRDSSILGPHHLDEYVRVWAEYDPAACGRIHYKDMYSLLRV  
ISPPLGLGKCKPHRVACKRLLRMDLPVADDNTVHFNSTLMALIR TALDIKIAKGGADKQMDAELRKEMMAIW  
PNLSQKTLDDLVT PHKSTD LTVGKIYAAMMIMEYRQSKAKKLQAMREEQNRTPLMFQRMEPPSP TQEGGSPQ  
NALPSTQLDPPGGGLMAHEGGMKESPSWVTQRAQEMFQKTGTWSPERGPPIDMPNSQPNSQSVE MREMGTGYS  
DSEHYLPMEGQTRAASMPRLPAENQRRRGRPRGNDLSTISDTPMKRSASVLGPKARRLDDYS LERVPPPEENQ  
RYHQRRRDRGHRTSERSLGRYTDVDTGLGTDLSMTTQSGDLP SKDRDQDRGRPKDRKHRPHHHHHHHHPA  
PDRDRYAQERPDTGRARAREQRWSRSPSEGREHTTHRQSSSVSGSPAPSTSGTSTPRRGRRQLPQTPTCTPRP  
LVSYSPAPRRPAARRMAGPAAPPGGSPRGCRRAPRWPAHAPEGPRPRGADYTEPDSPREPPGGAHDPA PRSP  
TPRAAGCASPRHGRRLPNGYYAGHGAPRPRRTARRGAHDAYSESEDDWC\*  
>rs32648021\_ENSMUSP00000112436\_c.3879:A>G\_p.K1294E  
ENSMUST00000121390.8|Cacna1a-201|ENSMUSG00000034656|+|chr8:g.85306133:A>G  
MARFGDEMPGRYGAGGGGSGPAAGVVVGAAGGRGAGGSRQGGQPGAQRMKYQSMAQRARTMALYNPI PVRQNC  
LTVNRS LFLFSEDNVVRKYAKKITEWPPFEYMILATI IANCI VLAL EQHLPDDDKTPMSERLDDTEPYFIGIF  
CFEAGIKIVALGF AFHKGSYLRNGWNVMD FVVVLTGILATVGT EFDLRTLRAVRVLRPLKLVSGI PSLQVVLK  
SIMKAMI PLLQIGLLLFFAILIFAI IGLEFYMGKFHTTTCFEEGTDDIQGES P APCGT EEPARTCPNGTKCQPY  
WEGPNNGITQFDNILFAVLT V FQCITMEGWTDL LYSNDASGNTWNWLYFIPLIIIGSFFMLNLV LGLVLSGEF  
AKERERVENRRAFLKLRQQQIERELNGYMEWISKAEEVILAEDETDVEQRHPFDGALRRATLKKSKTDL LNPE  
EEAEDQLADIASVGS PFARASIKS AKLENSTFFHKKERRMRFY IRRMVKTQAFYWTVLSLVALNTLCVAIVHY  
NQPEWLSDFLYYAEFIFLGLFMSEMF IKMYGLGTRPYFHSSFNCFDCGVIIGSIFEVIWAVIKPGTSFGISVL  
RALRLLRIFKVTKYWASLRNLVVSLLNSMKSII SLLFLLFLFIVVFALLGMQLFGGQFNFDEGTPPTNFDTFPA  
AAIMTVFQILTGEDWNEVMYDGIKSQGGVQGGMVFSIYFIVLTLFGNYTLLNVFLAI AVDNLANAQELTKDEQ  
EEEEAAQK LALQKAKEVAEVSPLSAANMSI AVKEQQKNQKPTKSVWEQRTSEMRKQ NLLASREALYGDAAER  
WPTPYARPLRPDVKTHLDRPLVVDPQENRNNNTNKSRAPEALRPTARPRESARDPDARRAWPGSPERAPGREG  
PYGRESEPPQREHAPPREHAPWDADTERAKAGDAPRRHTRHPVAEGERRRHRARRRPGDEPDDRPERRPRPRD  
ATRPARAADGEGDDGERKRRHRHGPPAHDDRERRHRRRKENQGS GVPVSGPNLSTTRPIQQDLGRQDLPLAED

LDNMKNKLATGEPASPHDSLGHSGLPPSPAKIGNSTNPGPALATNPQNAASRRTPNPNPGNPSNPGPPKTPEN
SLIVTNPSSTQPNSAKTARKPEHMAVEIPPACPLNHTVVQVNKNANPDPLPKKEEEEKKEEEEADPGEDGPKP
MPPYSSMFI LSTTNPLRRLCHYI LNLRYFEMCILMVIAMSSIALAAEDPVQPNAPRNNVLRVYFDYVFTGVFTF
EMVIK MIDLGLVLHQGAYFRDLWNLDFIVVSGALVAFaftGNSKGDINTIESLRVLRVLRPLKTIKRLPKL
KAVFDCVVNSLKNVFNILIVYMLFMFIFAVVAVQLFKGKFFHCTDESKEFERDCRGKYLLEYKNEVKARDREW
KKYEFHYDNVLWALLTLFTVSTGEGWPQVLKHSVDATFENQGPSGYRMEMSIFYVVYFVVFVFFVNI FVAL
IIITFQEQGDKMMEEYSLEKNERACIDFAISAKPLTRHMPQNKQSFQYRMWQFVVSPPFEYTIMAMIALNTIV
LMMKFYGASVAYENALRVFNIVFTSLFSLECVLKVMAFGILNYFRDAWNIFDFVTVLGSITDILVTEFGNNFI
NLSFLRFLRAARLIKLLRQGYTIRILLWTFVQSFKALPYVCLLIAMLFYIYAIIGMQVFGNIGIDGEDSDSE
DEFQITEHNNFRFTFFQALMLLFRSATGEAWHNIMLSCLSGKPCDKNSGILTADCGNEFAYFYFVSFIFLCSFL
MLNLFVAVIMDNFEYLTRDSSILGPHHLDEYVRVWAEYDPAACGRHYKMYSLLRVISPLGLGKCKPHRVA
CKRLLRMDLPVADDNTVHFNSTLMALIRTALDIKIAKGGADKQMDAELRKEMMAIWPNLSQKTLDLLVTPHK
STDLTVGKIYAAMMIMEYYRQSKAKKLQAMREEQNRTPLMFQRMPEPPSPTQEGGQSNALPSTQLDPPGGGLMA
HEGGMKESPSWVTQRAQEMFQKTGTWSPERGGPIDMPNSQPNSSQVEMREMGTGYSYDSEHYLPMEGQTRAAS
MPRLPAENQRRRGRPRGNDLSTISDTPMKRSASVLGPKARRLDDYSLERVPEENQRYHQRRDRGHRTSER
SLGRYTDVDTGLGTDLSMTTQSGDLPSKDRDQDRGRPKDRKHRPHHHHHHHHHHPPAPDRDRYAQERPDGRA
RAREQRWSRSPSEGREHTTHRQGSSSVSGSPAPSTSGTSTPRRGRRLPQTPCTPRPLVSYSPAPRRPAARRM
AGPAAPPGGSPRGCRRAPRWPAAHAPEGPRPRGADYTEPDSPREPPGGAHDPAPRSPTPRAAGCASPRHGRRLL
PNGYYAGHGAPRPRRTARRGAHDAYSESEDDWC\*

>rs32648021\_ENSMUSP00000114055\_c.3738:A>G\_p.K1247E
ENSMUST00000122053.2|Cacna1a-202|ENSMUSG00000034656|+|chr8:g.85306133:A>G
MARFGDEMPGRYGAGGGGSGPAAGVVVGAAGGRGAGGSRQGGQPGAQRMKQSMQAQRARTMALYNPIVVRQNC
LTVNRSFLFSEDNVDDTEPYFIGIFCFEAGIKIVALGFHKGSYLRNGWNVMDFFVVLGTGILATVGTDFDL
RTLRAVRVLRPLKLVSGIPSLQVVLKSIKAMIPLLQIGLLFFAILIFAIIGLEFYMGKFHTTCFEEGTDDI
QGESPAPCGTEEPARTCPNGTKCQPYWEGPNNGITQFDNIFLAVLTVFQCITMEGWTDLLYNSNDASGNTWNW
LYFIFLIIIGSFFMLNLVGLVLSGEFAKERERVENRRAFLKLRQQQIERELNGYMEWISKAEEVILAEDETD
VEQRHFPFDGALRRLIKLKSCTDLLNPEEAEDQLADIASVSGSPFARASIKSAKLENSTFFHKKERMRMYIRRM
VKTQAFYWTVLSLVALNTLCVAIVHYNQPEWLSDFLYAEFIFLGLFMSEMFIKMYGLGTRPYFHSSFCNCFDC
GVIIGSIFEVIWAVIKPGTSFGISVLRALRLRIFKVTKYWASLRNLVVSLLNSMKSIIISLLFLFLFIVVFA
LLGMQLFGGQFNDFEGTPTNFDTFPAAIMTVFQILTGEDWNEVMYDGIKSQGGVQGGMVFSIYFIVLTLFGN
YTLNLVFLAIAVDNLANAQELTKDEQEEEEANQKALQKAKEVAEVSPLSAANMSIAVKEQQKNQKPTKSVW
EQRTSEMRKQNLASREALYGDAERWPTPYARPLRPDVKTHLDRPLVVDPQENRNNNTNKSRAPEALRPTAR
PRESARDPDARRAWPGSPERAPGREGPYGRESEPOQREHAPPREHAPWDADTERAKAGDAPRRHTRHPVAEGE
PRRHRARRRPGDEPDRPRERRPRPRDATRPARAADGEGDDGERKRRHRHGPPAHDDRERRRRRKENQGSQV
VSGPNLSTTRPIQDLGRQDLPLAEDLDNMKNKLATGEPASPHDSLGHSGLPPSPAKIGNSTNPGPALATNP
QNAASRRTPNPNPGNPSNPGPPKTPENSLIVTNPSSTQPNSAKTARKPEHMAVEIPPACPLNHTVVQVNKNAN
PDPLPKKEEEEKKEEEEADPGEDGPKMPPYSSMFI LSTTNPLRRLCHYI LNLRYFEMCILMVIAMSSIALAAE
DPVQPNAPRNNVLRVYFDYVFTGVFTFEMVIK MIDLGLVLHQGAYFRDLWNLDFIVVSGALVAFaftGNSKGD
DINTIESLRVLRVLRPLKTIKRLPKLAVFDCVVNSLKNVFNILIVYMLFMFIFAVVAVQLFKGKFFHCTDES
KEFERDCRGKYLLEYKNEVKARDREWKKYEFHYDNVLWALLTLFTVSTGEGWPQVLKHSVDATFENQGPSGY
RMEMSIFYVVYFVVFVFFVNI FVALIIITFQEQGDKMMEEYSLEKNERACIDFAISAKPLTRHMPQNKQSFQ
YRMWQFVVSPPFEYTIMAMIALNTIVLMMKFYGASVAYENALRVFNIVFTSLFSLECVLKVMAFGILNYFRDA
WNIFDFVTVLGSITDILVTEFGNNFINLSFLRFLRAARLIKLLRQGYTIRILLWTFVQSFKALPYVCLLIAML
FFIYAIIGMQVFGNIGIDGEDSDSEDEFQITEHNNFRFTFFQALMLLFRSATGEAWHNIMLSCLSGKPCDKNS
GILTADCGNEFAYFYFVSFIFLCSFLMLNLFVAVIMDNFEYLTRDSSILGPHHLDEYVRVWAEYDPAACGRHY
YKMYSLLRVISPLGLGKCKPHRVACKRLLRMDLPVADDNTVHFNSTLMALIRTALDIKIAKGGADKQMDA
ELRKEMMAIWPNLSQKTLDLLVTPHKSTDLTVGKIYAAMMIMEYYRQSKAKKLQAMREEQNRTPLMFQRMPEPP
SPTQEGGQSNALPSTQLDPPGGGLMAHEGGMKESPSWVTQRAQEMFQKTGTWSPERGGPIDMPNSQPNSSQVE
MREMGTGYSYDSEHYLPMEGQTRAASMPRLPAENQRRRGRPRGNDLSTISDTPMKRSASVLGPKARRLDDYS
LERVPEENQRYHQRRDRGHRTSERSLGRYTDVDTGLGTDLSMTTQSGDLPSKDRDQDRGRPKDRKHRPHHH
HHHHHHHPPAPDRDRYAQERPDTRARAREQRWSRSPSEGREHTTHRQGSSSVSGSPAPSTSGTSTPRRGRRL
LPQTPCTPRPLVSYSPAPRRPAARRMAGPAAPPGGSPRGCRRAPRWPAAHAPEGPRPRGADYTEPDSPREPPGG
AHDPAAPRSPTPRAAGCASPRHGRRLLPNGYYAGHGAPRPRRTARRGAHDAYSESEDDWC\*

>rs32648021\_ENSMUSP00000149242\_c.3738:A>G\_p.K1247E
ENSMUST000001215756.2|Cacna1a-211|ENSMUSG00000034656|+|chr8:g.85306133:A>G
XRMKQSMQAQRARTMALYNPIVVRQNC LTVNRSFLFSEDNVVRKYAKKITEWPPFEYMILATI IANCIVLAL
EQHLPPDDDKTPMSERLDDTEPYFIGIFCFEAGIKIVALGFHKGSYLRNGWNVMDFFVVLGTGILATVGTDFD
LRTLRAVRVLRPLKLVSGIPSLQVVLKSIKAMIPLLQIGLLFFAILIFAIIGLEFYMGKFHTTCFEEGTDD

IQGESAPCGTEEPARTCPNGTKCQPYWEGPNNGITQFDNILFAVLTVFQCITMEGWTDLLYNSNDASGNTWN  
WLYFIPLIIIGSFFMLNLVGLVLSGEFAKERERVENRRRAFLKLRQQQIERELNGYMEWISKAEVILAEDET  
DVEQRHPPFDALRRATLKKSKTDLNPEEAEDQLADIASVGSPPFARASIKSAKLENSTFFHKKERRMRFYIRRM  
VKTQAFYWTVLSLVALNTLCVAIVHYNQPEWLSDFLYAAEFIFLGLFMSEMFIKMYGLGTRPYFHSSFNCFDC  
GVIIIGSIFEVIWAVIKPGTSFGISVLRALRLLRIFKVTKYWASLRNLVVSLLNSMKSIIISLLFLLFLFIVVFA  
LLGMQLFGGQFNFDGTPPTNFDTFPAAIMTVFQILTGEDWNEVMYDGIKSQGGVQGGMVFSIYFIVLTLFGN  
YTLNVLFLAIAVDNLANAQELTKDEQEEEEAAANQKLALQKAKEVAEVSPLSAANMSIAVKEQQKNQKPTKSVW  
EQTSEMRKQNLASREALYGDAAERWPTPYARPLRPDVKTHLDRPLVVDPOENRNNNTNKSRAPEALRPTAR  
PRESARDPDARRAWPGSPERAPGREGPYGRESEPPQREHAPPREHAPWDADTERAKAGDAPRRHTRHPVAEAGE  
PRRHRARRRPGDEPDDRPERRPRPRDATRPARAADGEGDDGERKRRHRHGPPAHDDRERRRRRKENQSGGVP  
VSGPNLSTTRPIQQDLGRQDLPLAEDLDNMKNNKLATGEPASPHDSLGHSGLPPSPAKIGNSTNPGPALATNP  
QNAASRRTPNPNPNSNPSPKTPENSLIVTNPSSTQPNSAKTARKPEHMAVEIPPACPLNHTVVQVNKNAN  
PDPLPKKEEEEKKEEEEADPGEDGPKMPPYSSMFI LSTTNPLRRLCHYI LNLR YFEMC ILMVIAMSSIALAAE  
DPVQPNAPRNNVLR YFDYVFTGVFTFEMVIK MIDLGLVLHQGAYFRDLWNILDFIVVSGALVAFVFTGNSK GK  
DINTIESLRVLRVLRPLKTIKRLPKLKAVFDCVVNSLKNVFNILIVYMLFMFIFAVVAVQLFKGKFFHCTDES  
KEFERDCRGKYLLEYEKNEVKARDREWKKYEFHYDNVLWALLTLFTVSTGEGWPQVLKHSVDATFENQGPSPGY  
RMEMSIFVYVYFVVFVFFVNI FVALIIITFQEQQDKMMEEYSLEKNERACIDFAISAKPLTRHMPQNKQSFQ  
YRMWQFVVSPPFEYTIMAMIALNTIVLMMKFYGASVAYENALRVFNIVFTSLFSLECVLKVMAFGILNYFRDA  
WNIFDFVTVLGSITDILVTEFGNFINLSFLRFLRAARLIKLLRQGYTIRILLWTFVQSFKALPYVCLLIAML  
FFIYAIIGMQVFGNIGIDGEDSDEDEFQITEHNNFRTFFQALMLLFRSATGEAWHNIMLSCLSGKPCDKNS  
GILTADCGNEFAYFYFVSFIFLCSFLMLNLFVAVIMDNFEYLTRDSSILGPHHLDEYVRVWAEYDPAACGRIH  
YKDMYSLLRVISPPGLGKCKPHRVACKRLLRMDLPVADDNTVHFNSTLMALIRTALDIKIAKGGADKQMDA  
ELRKEMMAIWPNLSQKTLDLLVTPHKSTDLTVGKIYAAMMIMEYRQSKAKKLQAMREEQNRTPLMFQRMEPP  
SPTQEGGSPQNALPSTQLDPGGGLMAHEGGMKESPSWVTQRAQEMFQKTGTWSPERGGPIDMPNSQPNSQSVE  
MREMGTDGYSDSEHYLPMEGQTRAASMPRLPAENQRRRGRPRGNDLSTISDTSMPKRSASVLGPKARRLDDYS  
LERVPPDENYHQRDRGRHRTSERSLGRYTDVSDTGLTDLSTTQSGDLP SKDRDQDRGRPKDRKHRPHHH  
HHHHHHHPAPDRDRAQERPDTRARAREQRWSRSPSEGEHRTTHRQGS SSVSPASTSGTSPRRGRRQ  
LPQTPCTPRPLVSYSPAPRRPAARRMAGPAAPPGGSPRGCRRAPRWPAAHAPEGPRPRGADYTEPDSPREPPGG  
AHDPA PRSPRT PRAAGCASPRHGRRLPNGYYAGHGAPRRTARRGAHDAYSESEDDWC\*  
>rs260693369\_ENSMUSP00000158803\_c.5967:G>GTAGTT\_p.D1990ins-fs  
ENSMUST00000238701.2|Cacnala-  
213|ENSMUSG00000034656|+|chr8:g.85356459:G>GTAGTT  
MPRASWGS DPMLSPLSHELLHS PRYPGTDCTLAGSSRTLHVPWSQQMSGSLGPTLKRGGVVDHRDVI LAHQ  
AHKMHSTPQARRKEWEMARFGDEMPGRYGAGGGGSGPAAGVVVGAAGGRGAGGSRQGGQPGAQRMYKQSMQR  
ARTMALYNPI PVRQCLTVNRS LFLFSEDNVVRKYAKKI TEWPPFEYMI LATII ANCI VLAL EQLHPDDDKTP  
MSERLDDTEPYFIFIGFCFEAGIKIVALGF AFHKGSYLRNGWNVMD FVVVLTGILATVGTDFLRTLRAVRVLR  
PLKLVSGIPSLQVVLKSIKAMI PLLQIGLLFFAILIFAIIGLEFYMGKFHTTTCFEEGTD DDIQGESAPCGT  
EEPARTCPNGTKCQPYWEGPNNGITQFDNILFAVLTVFQCITMEGWTDLLYNSNDASGNTWNWLYFIPLIIIG  
SFFMLNLVGLVLSGEFAKERERVENRRRAFLKLRQQQIERELNGYMEWISKAEVILAEDET DVEQRHPPFDGA  
LRRATLKKSKTDLNPEEAEDQLADIASVGSPPFARASIKSAKLENSTFFHKKERRMRFYIRRMVKTQAFYWTV  
LSLVALNTLCVAIVHYNQPEWLSDFLYAAEFIFLGLFMSEMFIKMYGLGTRPYFHSSFNCFDCGVIIIGSIFEV  
IWAVIKPGTSFGISVLRALRLLRIFKVTKYWASLRNLVVSLLNSMKSIIISLLFLLFLFIVV FALLGMQLFGGQ  
FNFDEGTPPTNFDTFPAAIMTVFQILTGEDWNEVMYDGIKSQGGVQGGMVFSIYFIVLTLFGNYTLLNVFLAI  
AVDNLANAQELTKDEQEEEEAAANQKLALQKAKEVAEVSPLSAANMSIAVKEQQKNQKPTKSVWEQRTSEMRKQ  
NLLASREALYGDAAERWPTPYARPLRPDVKTHLDRPLVVDPOENRNNNTNKSRAPEALRPTARPRESARDPDA  
RRAWPGSPERAPGREGPYGRESEPPQREHAPPREHAPWDADTERAKAGDAPRRHTRHPVAEAGEPRRHRARRR  
GDEPDDRPERRPRPRDATRPARAADGEGDDGERKRRHRHGPPAHDDRERRRRRKENQSGGVPVSGPNLSTTR  
PIQQDLGRQDLPLAEDLDNMKNNKLATGEPASPHDSLGHSGLPPSPAKIGNSTNPGPALATNPQNAASRRTPN  
NPNPNSNPSPKTPENSLIVTNPSSTQPNSAKTARKPEHMAVEIPPACPLNHTVVQVNKNANPDPLPKKEEEE  
KKEEEEADPGEDGPKMPPYSSMFI LSTTNPLRRLCHYI LNLR YFEMC ILMVIAMSSIALAAE DPVQPNAPRN  
NVLR YFDYVFTGVFTFEMVIK MIDLGLVLHQGAYFRDLWNILDFIVVSGALVAFVFTGNSK GKDINTIKSLRV  
LRVLRPLKTIKRLPKLKAVFDCVVNSLKNVFNILIVYMLFMFIFAVVAVQLFKGKFFHCTDESKEFERDCRGK  
YLLYEKNEVKARDREWKKYEFHYDNVLWALLTLFTVSTGEGWPQVLKHSVDATFENQGPSPGYRMEMSIFVYV  
YFVYVFFVVFVNI FVALIIITFQEQQDKMMEEYSLEKNERACIDFAISAKPLTRHMPQNKQSFQYRMWQFVVS  
PFEYTIMAMIALNTIVLMMKFYGASVAYENALRVFNIVFTSLFSLECVLKVMAFGILNYFRDAWNIFDFVTVL  
GSITDILVTEFGNFINLSFLRFLRAARLIKLLRQGYTIRILLWTFVQSFKALPYVCLLIAMLFFIYAIIGMQ  
VFGNIGIDGEDSDEDEFQITEHNNFRTFFQALMLLFRSATGEAWHNIMLSCLSGKPCDKNSGILTADCGNE  
FAYFYFVSFIFLCSFLMLNLFVAVIMDNFEYLTRDSSILGPHHLDEYVRVWAEYDPAACGRIHYKDMYSLLRV

ISPLLGLGKCKPHRVACKRLLRMDLPVADDNTVHFNSTLMALIRRTALDIKIAKGGADKQQMDAELRKEMMAIW  
PNLSQKTLDDLVTPHKSTVVT  
>rs260693369\_ENSMUSP00000112436\_c.5700:G>GTAGTT\_p.D1901ins-fs  
ENSMUST00000121390.8|Cacnala-  
201|ENSMUSG00000034656|+|chr8:g.85356459:G>GTAGTT  
MARFGDEMPGRYGAGGGGSGPAAAGVVVGAAGGRGAGGSRQGGQPGAQRMYKQSMAQRARTMALYNPIVPRQNC  
LTVNRSLFLFSEDNVVRKYAKKITEWPPFEYMI LATIIANCIVLALEQHL PDDDKTPMSERLDDTEPYFIGIF  
CFEAGIKIVALGFAFHKGSYLRNGWNVMDV FVVVLTGILATVGT EFDLRTLRAVRVLRPLKLVSGIPSLQVVLK  
SIMKAMIPLLQIGLLLLFFAILIFAIIGLEFYMGKFHTTCFEEGTD DIQGES P APCGTEEPARTCPNGTKCQPY  
WEGPNNGITQFDNILFAVLT V FQCITMEGWTDL L YNSNDASGNTWNWLYFIPLIIIGSFFMLNLVLGVL SGEF  
AKERERVENRRAFLKLRQQQIERELNGYMEWISKAEEVILA EDETDVEQRHPFDGALRRATLKKSKTDLLNP  
EEAEDQLADIASVGSPPFARASIKSAKLENSTFFHKKERRMRFYIRRMVKTQAFYWTVLSLVALNTLCVAIVHY  
NQPEWLSDFLYYAEFIFLGLFMSEMIKMYGLGTRPYFHSSFNCFCGVIIGSIFEVIWAVIKPGTSFGISVL  
RALRLLRIFKVTKYWASLRNLVVSLLNSMKSIIISLLFLLFLFIVV FALLGMLQFQFNFDEGTPPTNFDTFP  
AAIMTVFQILTGEDWNEVMYDGIKSQGGVQGGMVFSIYFIVLTLFGNYTLLNVFLAIAVDNLANAQELTKDEQ  
EEEEAANQKLALQKAKEVAEVSPLSAANMSIAVKEQQKNQKPTKSVWEQRTSEMRKQNLLASREALYGDAER  
WPTPYARPLRPDVKTHLDRPLVVDPQENRNNNTNKSRAPEALRPTARPRESARDPDARRAWPGSPERAPGREG  
PYGRESEPQQREHAPREHAPWDADTERAKAGDAPRRHTRHPVAEGERRRHRARRRPGDEPDRRPRRRPRD  
ATRPARAADGEGDDGERKRRHRHGPPAHDDRERRRRRKENQSGVVPVSGPNLSTTRPIQQDLGRQDLPLAED  
LDNMKNKLATGEPASPHDSLGHSLPSPAKIGNSTNPGPALATNPQNAASRRTPNPNPNPNPSPGPKTPEN  
SLIVTNPSSTQPN SAKTARKPEHMAVEIPPACPLNHTVVQVNKNANPDPLPKKEEEEKKEEEEADPGEDGPKP  
MPPYSSMFI LSTTNPLRRLCHYILNLR YFEMC ILMVIAMSSIALAAEDPVQPNAPRNNVLR YFDYVFTGVFTF  
EMVIK MIDLGLVLHQGAYFRDLWNILDFIVVSGALVAF AFTGNSKGDINTIKSLRVLRLRPLKTIKRLPKL  
KAVFDCVVNSLKNVFNILIVYMLFMFIFAVVAVQLFKGKFFHCTDESKEFERDCRGKYLLEYKNEVKARDREW  
KKYEFHYDNVWALLTLFTVSTGEGWPQVLKHSVDATFENQGPSGYRMEMSIFYVVFVVFVFFVNI FVAL  
IIITFQEQGDMMEEYSLEKNERACIDFAISAKPLTRHMPQNKQSFQYRMWQFVVSPPFEYTIMAMIALNTIV  
LMMKFY GASVAYENALRVFNIVFTSLFSLECVLKVMAFGILNYFRDAWNI FDFVTVLGSITDILVTEFGNNFI  
NLSFLRLFRAARLIKLLRQGYTIRILLWTFVQSFKALPYVCLLIAMLFYIYAIIGMQVFGNIGIDGEDSDE  
DEFQITEHNNFRFTFFQALMLLFRSATGEAWHNIMLSCLSGKPCDKNSGILTADCGNEFAYFYFVSFIFLCSFL  
MLNLFVAVIMDNFEYLTRDSSILGPHHLDEYVRVWAEYDPAACGRIHYKDMYSLLRVIS PPLGLGKCKPHRVA  
CKRLLRMDLPVADDNTVHFNSTLMALIRRTALDIKIAKGGADKQQMDAELRKEMMAIWPNLSQKTLDDLVTPHK  
STVVT  
>rs260693369\_ENSMUSP00000114055\_c.5559:G>GTAGTT\_p.D1854ins-fs  
ENSMUST00000122053.2|Cacnala-  
202|ENSMUSG00000034656|+|chr8:g.85356459:G>GTAGTT  
MARFGDEMPGRYGAGGGGSGPAAAGVVVGAAGGRGAGGSRQGGQPGAQRMYKQSMAQRARTMALYNPIVPRQNC  
LTVNRSLFLFSEDNVDDTEPYFIGIFCFEAGIKIVALGFAFHKGSYLRNGWNVMDV FVVVLTGILATVGT EFDL  
RTLRAVRVLRPLKLVSGIPSLQVVLKSIMKAMIPLLQIGLLLLFFAILIFAIIGLEFYMGKFHTTCFEEGTD DI  
QGES P APCGTEEPARTCPNGTKCQPYWEGPNNGITQFDNILFAVLT V FQCITMEGWTDL L YNSNDASGNTWNW  
LYFIPLIIIGSFFMLNLVLGVL SGEFAKERERVENRRAFLKLRQQQIERELNGYMEWISKAEEVILA EDETD  
VEQRHPFDGALRRATLKKSKTDLLNPEEAEDQLADIASVGSPPFARASIKSAKLENSTFFHKKERRMRFYIRRM  
VKTQAFYWTVLSLVALNTLCVAIVHYNQPEWLSDFLYYAEFIFLGLFMSEMIKMYGLGTRPYFHSSFNCFC  
GVIIGSIFEVIWAVIKPGTSFGISVLRALRLLRIFKVTKYWASLRNLVVSLLNSMKSIIISLLFLLFLFIVVFA  
LLGMLQFQFNFDEGTPPTNFDTFPAAIMTVFQILTGEDWNEVMYDGIKSQGGVQGGMVFSIYFIVLTLFGN  
YTLNLVFLAIAVDNLANAQELTKDEQEEEEAANQKLALQKAKEVAEVSPLSAANMSIAVKEQQKNQKPTKSVW  
EQRTSEMRKQNLLASREALYGDAERWPTPYARPLRPDVKTHLDRPLVVDPQENRNNNTNKSRAPEALRPTAR  
PRESARDPDARRAWPGSPERAPGREGPYGRESEPQQREHAPREHAPWDADTERAKAGDAPRRHTRHPVAEGER  
RRHRARRRPGDEPDRRPRRRPRDATRPARAADGEGDDGERKRRHRHGPPAHDDRERRRRRKENQSGVVP  
VSGPNLSTTRPIQQDLGRQDLPLAEDLDNMKNKLATGEPASPHDSLGHSLPSPAKIGNSTNPGPALATNP  
QNAASRRTPNPNPNPNPSPGPKTPENSLIVTNPSSTQPN SAKTARKPEHMAVEIPPACPLNHTVVQVNKNAN  
PDPLPKKEEEEKKEEEEADPGEDGPKMPPYSSMFI LSTTNPLRRLCHYILNLR YFEMC ILMVIAMSSIALAAE  
DPVQPNAPRNNVLR YFDYVFTGVFTFEMVIK MIDLGLVLHQGAYFRDLWNILDFIVVSGALVAF AFTGNSK  
GDINTIKSLRVLRLRPLKTIKRLPKL KAVFDCVVNSLKNVFNILIVYMLFMFIFAVVAVQLFKGKFFHCTDES  
KEFERDCRGKYLLEYKNEVKARDREWKKYEFHYDNVWALLTLFTVSTGEGWPQVLKHSVDATFENQGPSGY  
RMEMSIFYVVFVVFVFFVNI FVALIIITFQEQGDMMEEYSLEKNERACIDFAISAKPLTRHMPQNKQSFQ  
YRMWQFVVSPPFEYTIMAMIALNTIVLMMKFY GASVAYENALRVFNIVFTSLFSLECVLKVMAFGILNYFRDA  
WNI FDFVTVLGSITDILVTEFGNNFINLSFLRLFRAARLIKLLRQGYTIRILLWTFVQSFKALPYVCLLIAM  
LFYIYAIIGMQVFGNIGIDGEDSDEDEFQITEHNNFRFTFFQALMLLFRSATGEAWHNIMLSCLSGKPCDKNS



GILTADCGNEFAYFYFVSFIFLCSFLMLNLFVAVIMDNFEYLTRDSSILGPHHLDEYVRVWAEYDPAACGRIH  
YKDMYSLLRVISPPGLGKCKPHRVACKRLLRMDLPVADDNTVHFNSTLMALIRTALDIKIAKGGADKQQMDA  
ELRKEMMAIWPNLSQLTDLVTPHKSTVVT  
>rs260693369\_ENSMUSP00000149242\_c.5559:G>GTAGTT\_p.D1854ins-fs  
ENSMUST00000215756.2|Cacna1a-  
211|ENSMUSG00000034656|+|chr8:g.85356459:G>GTAGTT  
XRMYKQSMARARTMALYNPIPVRQNCCLTVNRSFLFSEDNVVRKYAKKITEWPPFEYMLATIIANCIVLAL  
EQHLPDDDKTPMSERLDDTEPYFIGIFCFEAGIKIVALGFHFHKSGLRNGWNVMDVVFVLTGILATVGTGTEFD  
LRTLRAVRVLRPLKLVSGIPSLQVVLKSIMKAMIPLLQIGLLFFAILIFAIIGLEFYMGKFHTTCFEEGTDD  
IQGESPAPCGTEEPARTCPNGTKCQPYWEGPNNGITQFDNILFAVLTVFQCITMEGWTDLLYNSNDASGNTWN  
WLYFIPLIIIGSFFMLNLVGLVSGEFAKERERVENRRRAFLKLRQQQIERELNGYMEWISKAEEVILAEDET  
DVEQRHPPFDALRRATLKKSKTDLNPEEAEDQLADIASVGSPPARASIKSAKLENSTFFHKKERRMRFYIRRM  
VKTQAFYWTVLSLVALNTLCVAIVHYNQPEWLSDFLYYAEFIFLGLFMSEMFIKMYGLGTRPYFHSSFNCFDC  
GVIIGSIFEVIWAVIKPGTSFGISVLRALRLLRIFKVTKYWASLRNLVVSLLNSMKSIIISLLFLLFLFIVVFA  
LLGMQLFGGQFNFDGTPPTNFDTFPAAIMTVFQILTGEDWNEVMYDGIKSQGGVQGGMVFSIYFIVLTLFGN  
YTLNVLFLAIAVDNLANAQELTKDEQEEEEANQKLALQKAKEVAEVSPLSAANMSIAVKEQQKNQKPTKSVW  
EQRTESEMRKQNLASREALYGDAERWPTPYARPLRPDVKTHLDRPLVVDPOENRNNNTNKSRAPEALRPTAR  
PRESARDPDARRAWPGSPERAPGREGPYGRESEPPQREHAPPREHAPWDADTERAKAGDAPRRHTRHPVAEAGE  
PRRHRARRRRPGDEPDDRPERRPRPRDATRPARAADGEGDDGERKRRHRHGPPAHDDRERRRRRRKENQSGV  
VSGPNLSTTRPIQQDLGRQDLPLAEDLDNMKNNKLATGEPASPHDSLGHSGLPPSPAKIGNSTNPGPALATNP  
QNAASRRTPNPNPNSPKNPKT PENSLIVTNPSSQPNSAKTARKPEHMAVEIPPACPLNHTVVQVNKNAN  
PDPLPKKEEKEEKEEADPGEDGPKPMPPYSSMFI LSTTNPLRRLCHYILNLRVYFEMCILMVIAMSSIALAAE  
DVPQPNAPRNNVLRVYFDYVFTGVFTFEMVIKMI DLGLVLHQGAYFRDLWNILDFIVVSGALVAFVAFNGSKGK  
DINTIKSLRVLRLRPLKTIKRLPKLKA VFCVNSLKNVFNILIVYMLFMFIFAVVAVQLFKGKFFHCTDES  
KEFERDCRGKYLLEYKNEVKARDREWKKYEFHYDNVLWALLTLFTVSTGEGWPQVLKHSVDATFENQGPSQY  
RMEMSIFVYVYFVYFVFFVNI FVALIIITFQEQGDMMEEYSLEKNERACIDFAISAKPLTRHPQNKQSFQ  
YRMWQFYYVSPPEFYTIMAMIALNTIVLMMKFYGASVAYENALRVFNIVFTSLFSLECVLKVMAFGILNLYFRDA  
WNIFDFVTVLGSITDILVTEFGNFINLSFLRLFRAARLIKLLRQGYTIRILLWTFVQSFKALPYVCLLIAML  
FFIYAIIGMQVFGNIGIDGEDSDEDEFQITEHNNFRFFFQALMLLFRSATGEAWHNIMLSCLSGKPCDKNS  
GILTADCGNEFAYFYFVSFIFLCSFLMLNLFVAVIMDNFEYLTRDSSILGPHHLDEYVRVWAEYDPAACGRIH  
YKDMYSLLRVISPPGLGKCKPHRVACKRLLRMDLPVADDNTVHFNSTLMALIRTALDIKIAKGGADKQQMDA  
ELRKEMMAIWPNLSQLTDLVTPHKSTVVT  
>rs260693369\_ENSMUSP00000158675\_c.924:G>GTAGTT\_p.D309ins-fs  
ENSMUST00000238337.2|Cacna1a-  
212|ENSMUSG00000034656|+|chr8:g.85356459:G>GTAGTT  
MHLLRLSGQRGLTLQPNSSPPLAKGNFINLSFLRLFRAARLIKLLRQGYTIRILLWTFVQSFKV  
GNIGIDGEDSDEDEFQITEHNNFRFFFQALMLLFRSATGEAWHNIMLSCLSGKPCDKNSGILTADCGNEFA  
YFYFVSFIFLCSFLMLNLFVAVIMDNFEYLTRDSSILGPHHLDEYVRVWAEYDPAACGRIHYKDMYSLLRVIS  
PPLGLGKCKPHRVACKRLLRMDLPVADDNTVHFNSTLMALIRTALDIKIAKGGADKQQMDAELRKEMMAIWP  
LSQKTLDDLVTTPHKSTVVT  
>rs39142910\_ENSMUSP00000158803\_c.6529:A>T\_p.D2177V  
ENSMUST00000238701.2|Cacna1a-213|ENSMUSG00000034656|+|chr8:g.85363208:A>T  
MPRASWGS DPMLSPLSHELLHSPRYPGTDCTLAGSSRTLHVPWSQQMSGSLGPTLKRGGVVDHRDVI LAHQ  
AHKMHSPTQARRKEWEMARFGDEMPGRYGAGGGGSGPAAGVVVGAAGGRGAGGSRQGGQPGAQRMKYQSMAR  
ARTMALYNPIPVRQNCCLTVNRSFLFSEDNVVRKYAKKITEWPPFEYMLATIIANCIVLALAEQHLPDDDKTP  
MSERLDDTEPYFIGIFCFEAGIKIVALGFHFHKSGLRNGWNVMDVVFVLTGILATVGTGTEFDLRTLRAVRVLR  
PLKLVSGIPSLQVVLKSIMKAMIPLLQIGLLFFAILIFAIIGLEFYMGKFHTTCFEEGTDDIQGESAPCGT  
EEPARTCPNGTKCQPYWEGPNNGITQFDNILFAVLTVFQCITMEGWTDLLYNSNDASGNTWNWLYFIPLIIIG  
SFFMLNLVGLVSGEFAKERERVENRRRAFLKLRQQQIERELNGYMEWISKAEEVILAEDET DVEQRHPPFDGA  
LRRATLKKSKTDLNPEEAEDQLADIASVGSPPARASIKSAKLENSTFFHKKERRMRFYIRRMVKTQAFYWTV  
LSLVALNTLCVAIVHYNQPEWLSDFLYYAEFIFLGLFMSEMFIKMYGLGTRPYFHSSFNCFDCGVIIGSIFEV  
IWAVIKPGTSFGISVLRALRLLRIFKVTKYWASLRNLVVSLLNSMKSIIISLLFLLFLFIVV FALLGMQLFGGQ  
FNFDEGTPPTNFDTFPAAIMTVFQILTGEDWNEVMYDGIKSQGGVQGGMVFSIYFIVLTLFGNYTLLNVFLAI  
AVDNLANAQELTKDEQEEEEANQKLALQKAKEVAEVSPLSAANMSIAVKEQQKNQKPTKSVWEQRTESEMRKQ  
NLLASREALYGDAERWPTPYARPLRPDVKTHLDRPLVVDPOENRNNNTNKSRAPEALRPTARPRESARDPDA  
RRAWPGSPERAPGREGPYGRESEPPQREHAPPREHAPWDADTERAKAGDAPRRHTRHPVAEAGEPRRHRARRRR  
GDEPDDRPERRPRPRDATRPARAADGEGDDGERKRRHRHGPPAHDDRERRRRRRKENQSGVPSVSGPNLSTTR  
PIQQDLGRQDLPLAEDLDNMKNNKLATGEPASPHDSLGHSGLPPSPAKIGNSTNPGPALATNPQNAASRRTPN

NPGNPSNPGPPKTPENSLIVTNPSSSTQPNSAKTARKPEHMAVEIPPACPLNHTVVQVKNANPDPLPKKEEE  
KKEEEADPGEDGPKMPPYSSMFI LSTTNPLRRLCHYI LNLRYFEMCILMVIAMSSIALAAEDPVQPNAPRN  
NVLRYFDYVFTGVFTFEMVIKIMIDLGLVLHQGAYFRDLWNI LDFIVVSGALVAFaftGNSKGDINTIKSLRV  
LRVLRPLKTIKRLPKLKA VFDVVNSLKNVFNILIVYMLFMFI FAVVAVQLFKGKFFHCTDESKEFERDCRGK  
YLLYEKNEVKARDREWKKYEFHYDNVLWALLTLFTVSTGEGWPQVLKHSVDATFENQGPS PGYRMEMSIFYVV  
YFVVFVFFVNI FVAL I I I T F Q E Q G D K M M E E Y S L E K N E R A C I D F A I S A K P L T R H M P Q N K Q S F Q Y R M W Q F V V S P  
PFEYTIMAMIALNTIVLMMKFY GASVAYENALRVFNIVFTSLFSLECVLKVMAFGILNYFRDAWNIFDFVTVL  
GSI TDILVTEFGNFI NLSFLRLFRAARLIKLLRQGYTIRILLWTFVQSFKALPYVCLLIAMLFFIYAIIGMQ  
VFNIGIDGEDSDEDEFQITEHNNFRTFFQALMLLFRSATGEAWHNIMLSCLSGKPCDKNSGILTADCGNE  
FAYFYFVSFI FLCSFLMLNLFVAVIMDNFEYLTRDSSILGPHHLDEYVRVWAEYDPAACGRIHYKDMYSLLRV  
ISPPLGLGKCKPHRVACKRLLRMDLPVADDNTVHFNSTLMALIRTALDIKIAKGGADKQMDAELRKEMMAIW  
PNLSQKTLDLLVTPHKSTDLTVGKIYAAMMIMEYYRQSKAKKLQAMREEQNRTPLMFQRMEPPSPTQEGGSPQ  
NALPSTQLDPPGGGLMAHEGGMKESPSWVTQRAQEMFQKTGTWSPERGPPIDMPNSQPNSSQSVEMREMGTGYS  
DSEHYLPMEGQTRAASMPRLPAENQRRRGRPRGNDLSTISDTS PMKRSASV LGPKARRLV DYSLERV PPEENQ  
RYHQRRDRGHRTSERSLGRYTDVDTGLGTDLSMTTQSGDLPSKDRDQDRGRPKDRKHRPHHHHHHHHHPPA  
PDRDRYAQERPDTGRARAREQRWSRSPSEGREHTTHRQSSSVSGSPAPSTSGTSTPRRGRRLPQTPTCTPRP  
LVSYSPAPRRPAARRMAGPAAPPGGSPRGCRRAPRWAHAPEGPRPRGADYTEPDSPREPPGGAHDPAPRSPR  
TPRAAGCASPRHGRRLPNGYYAGHGAPRPRRTARRGAHDAYSESEDDWC\*  
>rs39142910\_ENSMUSP00000112436\_c.6262:A>T\_p.D2088V  
ENSMUST00000121390.8|Cacna1a-201|ENSMUSG00000034656|+|chr8:g.85363208:A>T  
MARFGDEMPGRYGAGGGGSGPAAGVVVGAAGGRGAGGSRQGGQPGAQRMYKQSMARARTMALYNPI PVRQNC  
LTVNRSFLFLFSEDNVVRKYAKKI TEWPPFEYMI LATI IANCI VLAL EQHL PDDDKT PMSERLDDTEPYFIGIF  
CFEAGIKI VALGF AFHKGSYLRNGWNVMDFVVVLTGILATVGT EFDLRTLRAVRVLRPLKLVSGIPSLQVVLK  
SIMKAMIPLLQIGLLLFFAILIFAIIGLEFYMGKFHTTTCFEEGTDI QGES P APCGTEEPARTCPNGTKCQPY  
WEGPNNGITQFDNILFAVLTVFQCI TMEGWTDL LYSNDASGNTWNWLYFIPLI IIGSFFMLNLVLGVLSGEF  
AKERERVENRRAFLKLRQQQIERELNGYMEWISKAEEVILAEDET DVEQRHPFDGALRRATLKKSKTDLNLP  
EEAEDQLADIASVSGSPFARASIKSAKLENSTFFHKKERRMRFYIRRMVKTQAFYWTVLSLVALNLTCAIVHY  
NQPEWLSDFLYYAEFIFLGLFMSEMIKMYGLGTRPYFHSSFNCFDCGVIIGSIFEVIWAVIKPGTSFGISVL  
RALRLLRIFKVTKYWASLRNLVVSLLNSMKSII SLLFLLFLFIVVFALLGMQLFGGQFNDFEGTPTNFDTFP  
AAIMTVFQILTGEDWNEVMYDGIKSQGGVQGGMVFSIYFIVLTLFGNYTLNVLFLAIAVDNLANAQELTKDEQ  
EEEEANQKLALQKAKEVAEVSPLSAANMSIAVKEQQKNQKPTKSVWEQRTSEMRKQNLLASREALYGDAAER  
WPTPYARPLRPDVKTHLDRPLVVDPQENRNNNTNKSRAPEALRPTARPRE SARDPDARRAWPGSPERAPGREG  
PYGRESEPQOREHAPPREHAPWDADTERAKAGDAPRRHTRHPVAEGEPRRHRARRRRPGDEPDDRPERRPRPRD  
ATRPARAADGEGDDGERKRRHRHGPPAHDDRERRRRRKENQSGSVVSGPNLSTTRPIQQDLGRQDLPLAED  
LDNMKNKLATGEPASPHDSLHSGLPSPAKI GNSTNPGPALATNPQNAASRRTPNNGNPNP GPPKTPEN  
SLIVTNPSSSTQPNSAKTARKPEHMAVEIPPACPLNHTVVQVKNANPDPLPKKEEEKKEEEADPGEDGPKP  
MPPYSSMFI LSTTNPLRRLCHYI LNLRYFEMCILMVIAMSSIALAAEDPVQPNAPRN NVLRYFDYVFTGVFTF  
EMVIKIMIDLGLVLHQGAYFRDLWNI LDFIVVSGALVAFaftGNSKGDINTIKSLRVLRVLRPLKTIKRLPKL  
KAVFDVVNSLKNVFNILIVYMLFMFI FAVVAVQLFKGKFFHCTDESKEFERDCRGKYLLEYEKNEVKARDREW  
KKYEFHYDNVLWALLTLFTVSTGEGWPQVLKHSVDATFENQGPS PGYRMEMSIFYVVYFVVFVFFVNI FVAL  
I I I T F Q E Q G D K M M E E Y S L E K N E R A C I D F A I S A K P L T R H M P Q N K Q S F Q Y R M W Q F V V S P  
PFEYTIMAMIALNTIVLMMKFY GASVAYENALRVFNIVFTSLFSLECVLKVMAFGILNYFRDAWNIFDFVTVLGSITDILVTEFGNFI  
NLSFLRLFRAARLIKLLRQGYTIRILLWTFVQSFKALPYVCLLIAMLFFIYAIIGMQVFGNIGIDGEDSDE  
DEFQITEHNNFRTFFQALMLLFRSATGEAWHNIMLSCLSGKPCDKNSGILTADCGNEFAYFYFVSFI FLCSFL  
MLNLFVAVIMDNFEYLTRDSSILGPHHLDEYVRVWAEYDPAACGRIHYKDMYSLLRVISPPLGLGKCKPHRVA  
CKRLLRMDLPVADDNTVHFNSTLMALIRTALDIKIAKGGADKQMDAELRKEMMAIWPNLSTQLDLLVTPHK  
STDLTVGKIYAAMMIMEYYRQSKAKKLQAMREEQNRTPLMFQRMEPPSPTQEGGSPQNALPSTQLDPPGGGLMA  
HEGGMKESPSWVTQRAQEMFQKTGTWSPERGPPIDMPNSQPNSSQSVEMREMGTGYS DSEHYLPMEGQTRAAS  
MPRLPAENQRRRGRPRGNDLSTISDTS PMKRSASV LGPKARRLV DYSLERV PPEENQRYHQRRDRGHRTSER  
SLGRYTDVDTGLGTDLSMTTQSGDLPSKDRDQDRGRPKDRKHRPHHHHHHHHHPPAPDRDRYAQERPDTGRA  
RAREQRWSRSPSEGREHTTHRQSSSVSGSPAPSTSGTSTPRRGRRLPQTPTCTPRPLVSYSPAPRRPAARRM  
AGPAAPPGGSPRGCRRAPRWAHAPEGPRPRGADYTEPDSPREPPGGAHDPAPRSPRT PRAAGCASPRHGRRL  
PNGYYAGHGAPRPRRTARRGAHDAYSESEDDWC\*  
>rs39142910\_ENSMUSP00000114055\_c.6121:A>T\_p.D2041V  
ENSMUST00000122053.2|Cacna1a-202|ENSMUSG00000034656|+|chr8:g.85363208:A>T  
MARFGDEMPGRYGAGGGGSGPAAGVVVGAAGGRGAGGSRQGGQPGAQRMYKQSMARARTMALYNPI PVRQNC  
LTVNRSFLFLFSEDNVDDTEPYFIGIFCFEAGIKI VALGF AFHKGSYLRNGWNVMDFVVVLTGILATVGT EFDL  
RTLRAVRVLRPLKLVSGIPSLQVVLKSIKAMIPLLQIGLLLFFAILIFAIIGLEFYMGKFHTTTCFEEGTDI

QGESAPCGTEEPARTCPNGTKCQPYWEGPNNGITQFDNILFAVLTVFQCITMEGWTDLLYNSNDASGNTWNW  
 LYFIFPLIIIGSFFMLNLVLGVLGSEFAKERERVENRRAFLKLRQQQIERELNGYMEWISKAEVILAEDETD  
 VEQRHPPFDALRRATLKKSKTDLLNPEEAEDQLADIASVGSPPFARASIKSAKLENSTFFHKKERRRMFYIRRM  
 VKTQAFYWTVLSLVALNTLCVAIVHYNQPEWLSDFLYAAEFIFLGLFMSEMFIKMYGLGTRPYFHSSFNCFCDC  
 GVIIGSIFEVIWAVIKPGTSFGISVLRALRLLRIKFKVTKYWASLRNLVVSLLNSMKSIIISLLFLLFLFIVVFA  
 LLGMQLFGGQFNFDGTPPTNFDTFPAAIMTVFQILTGEDWNEVMYDGIKSQGGVQGGMVFSIYFIVLTLFGN  
 YTLNVLFLAIAVDNLANAQELTKDEQEEEEAAANQKLALQKAKEVAEVSPLSAANMSIAVKEQQKNQKPTKSVW  
 EQRTSEMRKQNLASREALYGDAERWPTPYARPLRPDVKTHLDRPLVVDQPENRNNNTNKSRAPEALRPTAR  
 PRESARDPDARRAWPGSPERAPGREGPYGRESEPPQREHAPPREHAPWDADTERAKAGDAPRRHTRHPVAEAGE  
 PRRHRARRRPGDEPDDRPERRPRPRDATRPARAADGEGDDGERKRRHRHGPPAHDDRERRRRRKENQGSQV  
 VSGPNLSTTRPIQQDLGRQDLPLAEDLDNMKNNKLATGEPASPHDSLGHSGLPPSPAKIGNSTNPGPALATNP  
 QNAASRRTPNPNPNSNPGPKTPENSLIVTNPSSTQPNSAKTARKPEHMAVEIPPACPLNHTVVQVNKNAN  
 PDPLPKKEEEEKKEEEEADPGEDGPKMPYPYSSMFI LSTTNPLRRLCHYILNLRVYFEMCILMVIAMSSIALAAE  
 DPVQPNAPRNNVLRVFDYVFTGVFTFEMVIKMI DLGLVLHQGAYFRDLWNILDFIVVSGALVAFVFTGNSK GK  
 DINTIKSLRVLRLRPLKTIKRLPKLKAVFDCVVNSLKNVFNILIVYMLFMFIFAVVAVQLFKGKFFHCTDES  
 KEFERDCRGKYLLEYEKNEVKARDREWKKYEFHYDNVLWALLTLFTVSTGEGWPQVLKHSVDATFENQGPSQY  
 RMEMSIFYVVYFVVFVFFVNI FVALIIITFQEQGDKMMEEYSLEKNERACIDFAISAKPLTRHMPQNKQSFQ  
 YRMWQFVVSPPFEYTIMAMIALNTIVLMMKFYGASVAYENALRVFNIVFTSLFSLECVLKVMAFGILNYFRDA  
 WNI FDFVTVLGSITDILVTEFGNNFINLSFLRFLFRAARLIKLLRQGYTIRILLWTFVQSFKALPYVCLLIAML  
 FFYIYAIIGMQVFGNIGIDGEDSDEDEFQITEHNNFRFFQALMLLFRSATGEAWHNIMLSCLSGKPCDKNS  
 GILTADCGNEFAYFYFVSFIFLCSFLMLNLFVAVIMDNFEYLTRDSSILGPHHLDEYVRVWAEYDPAACGR IH  
 YKDMYSLLRVISPPLGLGKCKPHRVACKRLLRMDLPVADDNTVHFNSTLMALIRTALDIKIAKGGADKQMDA  
 ELRKEMMAIWPNLSQKTLDLLVTPHKSTDLTVGKIYAAMMIMEYYRQSKAKKLQAMREEQNRTPLMFQRMEPP  
 SPTQEGGSPQNALPSTQLDPGGGLMAHEGGMKESPSWVTQRAQEMFQKTGTWSPERGGPIDMPNSQPNSSQVE  
 MREMGTDGYSDEHYLPMEGQTRAASMPRLPAENQRRRGRPRGNDLSTISDTSMPKRSASVLGPKARRLVDYS  
 LERVPPDENQRYHQRRDRGHRTSERSLGRYTDVSDTGLTDLSTMTQSGDLP SKDRDQDRGRKDRKHRPHHH  
 HHHHHHPAPDRDRYAQERPDTRARAREQRQWRSPEGHEHTHRQGSSSVSGSPAPSTSGTSPRRGRQ  
 LPQTPCTPRPLVSYSPAPRRPAARRMAGPAAPPGGSPRGCRRAPRWPAAHAPEGPRPRGADYTEPDSPREPPGG  
 AHDPA PRSPRT PRAAGCASPRHGRRLPNGYYAGHGAPRPRRTARRGAHDAYSESEDDWC\*  
 >rs39142910\_ENSMUSP00000149242\_c.6121:A>T\_p.D2041V  
 ENSMUST00000215756.2|Cacna1a-211|ENSMUSG0000034656|+|chr8:g.85363208:A>T  
 XRMXKQSMARARTMALYNPI PVRQNC LTVNRS LFLFSEDNVVRKYAKKI TEWPPFEYMI LATI IANCI VLAL  
 EQHLPDDDKTPMSERLDDTEPYFIFGIFCFEAGIKIVALGF AFHKGSYLRNGWNVMDFVVVLTGILATVGT EFD  
 LRTLRAVRVLRPLKLVSGIPSLQVVLKSIKAMIPLLQIGLLFFAILIFAIIGLEFYMGKFHTTCFEEGTDD  
 IQGESAPCGTEEPARTCPNGTKCQPYWEGPNNGITQFDNILFAVLTVFQCITMEGWTDLLYNSNDASGNTWN  
 WLYFIFPLIIIGSFFMLNLVLGVLGSEFAKERERVENRRAFLKLRQQQIERELNGYMEWISKAEVILAEDETD  
 DVEQRHPPFDALRRATLKKSKTDLLNPEEAEDQLADIASVGSPPFARASIKSAKLENSTFFHKKERRRMFYIRRM  
 VKTQAFYWTVLSLVALNTLCVAIVHYNQPEWLSDFLYAAEFIFLGLFMSEMFIKMYGLGTRPYFHSSFNCFCDC  
 GVIIGSIFEVIWAVIKPGTSFGISVLRALRLLRIKFKVTKYWASLRNLVVSLLNSMKSIIISLLFLLFLFIVVFA  
 LLGMQLFGGQFNFDGTPPTNFDTFPAAIMTVFQILTGEDWNEVMYDGIKSQGGVQGGMVFSIYFIVLTLFGN  
 YTLNVLFLAIAVDNLANAQELTKDEQEEEEAAANQKLALQKAKEVAEVSPLSAANMSIAVKEQQKNQKPTKSVW  
 EQRTSEMRKQNLASREALYGDAERWPTPYARPLRPDVKTHLDRPLVVDQPENRNNNTNKSRAPEALRPTAR  
 PRESARDPDARRAWPGSPERAPGREGPYGRESEPPQREHAPPREHAPWDADTERAKAGDAPRRHTRHPVAEAGE  
 PRRHRARRRPGDEPDDRPERRPRPRDATRPARAADGEGDDGERKRRHRHGPPAHDDRERRRRRKENQGSQV  
 VSGPNLSTTRPIQQDLGRQDLPLAEDLDNMKNNKLATGEPASPHDSLGHSGLPPSPAKIGNSTNPGPALATNP  
 QNAASRRTPNPNPNSNPGPKTPENSLIVTNPSSTQPNSAKTARKPEHMAVEIPPACPLNHTVVQVNKNAN  
 PDPLPKKEEEEKKEEEEADPGEDGPKMPYPYSSMFI LSTTNPLRRLCHYILNLRVYFEMCILMVIAMSSIALAAE  
 DPVQPNAPRNNVLRVFDYVFTGVFTFEMVIKMI DLGLVLHQGAYFRDLWNILDFIVVSGALVAFVFTGNSK GK  
 DINTIKSLRVLRLRPLKTIKRLPKLKAVFDCVVNSLKNVFNILIVYMLFMFIFAVVAVQLFKGKFFHCTDES  
 KEFERDCRGKYLLEYEKNEVKARDREWKKYEFHYDNVLWALLTLFTVSTGEGWPQVLKHSVDATFENQGPSQY  
 RMEMSIFYVVYFVVFVFFVNI FVALIIITFQEQGDKMMEEYSLEKNERACIDFAISAKPLTRHMPQNKQSFQ  
 YRMWQFVVSPPFEYTIMAMIALNTIVLMMKFYGASVAYENALRVFNIVFTSLFSLECVLKVMAFGILNYFRDA  
 WNI FDFVTVLGSITDILVTEFGNNFINLSFLRFLFRAARLIKLLRQGYTIRILLWTFVQSFKALPYVCLLIAML  
 FFYIYAIIGMQVFGNIGIDGEDSDEDEFQITEHNNFRFFQALMLLFRSATGEAWHNIMLSCLSGKPCDKNS  
 GILTADCGNEFAYFYFVSFIFLCSFLMLNLFVAVIMDNFEYLTRDSSILGPHHLDEYVRVWAEYDPAACGR IH  
 YKDMYSLLRVISPPLGLGKCKPHRVACKRLLRMDLPVADDNTVHFNSTLMALIRTALDIKIAKGGADKQMDA  
 ELRKEMMAIWPNLSQKTLDLLVTPHKSTDLTVGKIYAAMMIMEYYRQSKAKKLQAMREEQNRTPLMFQRMEPP  
 SPTQEGGSPQNALPSTQLDPGGGLMAHEGGMKESPSWVTQRAQEMFQKTGTWSPERGGPIDMPNSQPNSSQVE

MREMGTDGYS DSEHYLPMEGQTRAASMPRLPAENQRRRGRPRGNDLSTISDTSMPKRSASVLGPKARRLDVYS  
LERVPPEENQRYHQRRDRGRHRTSERSLGRYTDVDTGLGTDLSMTTQSGDLPSKDRDQDRGRPKDRKHRPHHH  
HHHHHHHPAPDRDRYAQERPDTRARAREQRWSRSPSEGREHTTHRQSSSVSGSPAPSTSGTSTPRRGRRQ  
LPQTPTPRPLVSYSPAPRRPAARRMAGPAAPPGGSPRGCRRAPRWPAHAPEGPRPRGADYTEPDSPREPPGG  
AHDPA PRSPRTPRAAGCASPRHGRRLPNGYYAGHGAPRPRRTARRGAHDAYSESEDDWC\*  
>rs39142910\_ENSMUSP00000158675\_c.1486:A>T\_p.D496V  
ENSMUST00000238337.2|Cacna1a-212|ENSMUSG00000034656|+|chr8:g.85363208:A>T  
MHLRLSLGQRGLTLQPNSSPLSSPFFPLAKGNFFINLSFLRFLRAARLIKLLRQGYTIRILLWTFVQSFKVF  
GNIGIDGEDSDSEDEFQITEHNNFRFFFQALMLLFRSATGEAWHNIMLSCLSGKPCDKNSGILTADCGNEFA  
YFYFVSFIFLCSFLMLNLFVAVIMDNFEYLTRDSSILGPHHLDEYVRVWAEYDPAACGRIHYKDMYSLLRVIS  
PPLGLGKCKPHRVACKRLLRMDLPVADDNTVHFNSTLMALIRTAIDIKIAKGGADKQMDAELRKEMMAIWP  
LSQKTLDDLVTPHKSTDLTVGKIYAAMMIMEYYRQSKAKKLQAMREEQNRTPLMFQRMPEPPSPTQEGGSPQNA  
LPSTQLDPPGGGLMAHEGGMKESPSWVTQRAQEMFQKTGTWSPERGPPIIDMPNSQPNSQSVMEMREMGTDGYS  
DSEHYLPMEGQTRAASMPRLPAENQRRRGRPRGNDLSTISDTSMPKRSASVLGPKARRLDVYSLERVPPEENQRY  
HQRRDRGRHRTSERSLGRYTDVDTGLGTDLSMTTQSGDLPSKDRDQDRGRPKDRKHRPHHHHHHHHPAPD  
RDRYAQERPDTRARAREQRWSRSPSEGREHTTHRQSSSVSGSPAPSTSGTSTPRRGRRQLPQTPTPRPLV  
SYSPAPRRPAARRMAGPAAPPGGSPRGCRRAPRWPAHAPEGPRPRGADYTEPDSPREPPGGGAHDPA PRSPRTP  
RAAGCASPRHGRRLPNGYYAGHGAPRPRRTARRGAHDAYSESEDDWC\*  
>ENSMUSP00000158803\_c.6586:GC>AA\_p.R2196Q\_ENSMUST00000238701.2|Cacna1a-  
213|ENSMUSG00000034656|+|chr8:g.85363265:GC>AA  
MPRASWGS DPMLSPLSHELLHSPRYPGTDCTLAGSSRTLHVPWSQQMSGSLGPTLKRGGVVDHRDVI LAHQ  
AHKMHSTPQARRKEWEMARFGDEMFGRYGAGGGGSGPAAGVVGAAGGRGAGGSRQGGQPGAQRMYKQSMQR  
ARTMALYNPI PVRQNC LTVNRS LFLFSEDNVVRKYAKKITEWPPFEYMI LATII ANCI VLAL EQHL PDDDKTP  
MSERLDDTEPYFIGIFCFEAGIKIVALGF AFHKGSYLRNGWNVMD FVVVLTGILATVGTEFDLRTLRAVRVLR  
PLKLVSGIPSLQVVLKSIKAMI PLLQIGLLFFAILIFAIIGLEFYMGKFHTTCFEEGTDDIQGESPA PCGT  
EEPARTCPNGTKCQFYWEGPNNGITQFDNIFLFAVTLVFQICITMEGWTDLLYNSNDASGNTWNWLYFIFLIIG  
SFMLNVLVLSGEFALAEEDLDNMKNK LATGEPASPHDSLGHSGLPPSPAKIGNSTNPGPALATNPQNAASRRTPN  
LRRATLKKSKTDLNPEEAEDQLADIASVGS PFARASIKS AKLENSTFFHKKERRMRFYIRRMVKTQAFYWTV  
LSLVALNTLCVAIVHYNQPEWLSDFLYAEFIFLGLFMSEMF IKMYGLTRPHYHSSFNCFDCGVIIGSIFEV  
IWAVIKPGTSFGISVLRALRLRIFKVTKYASLRNLVSVLLNSMKSISLLFLLFLFIVVFALLGMQLFGGQ  
FNFDEGTPPTNFDTFPAAIMTVFQILTGEDWNEVMYDGIKSQGGVQGMVFSIYFIVLTLFGNYTLLNVFLAI  
AVDNLANAQELTKDEQEEEEANQKLALQKAKEVAEVSPLSAANMSI AVKEQQKNQKPTKSVWEQRTSEMRKQ  
NLLASREALYGDAERWPTPYARPLRPDVKTHLDRPLVDPQENRNNNTNKSRAPEALRPTARPRESARDPDA  
RRAWPGSPERAPGREGPYGRESEPPQREHAPPREHAPWDADTERAKAGDAPRRHTRHPVAEGEP RRHRARRR  
GDEPDRRERRRPRDTRPARAADGEGDDGERKRRHRHGPPAHDDRERRRRRRKENQSGSVPSGPNLSTTR  
PIQDLGRQDLPLAEDLDNMKNK LATGEPASPHDSLGHSGLPPSPAKIGNSTNPGPALATNPQNAASRRTPN  
NPGNPSNPGPKTPENSLIVTNPSS TQPNSAKTARKPEHMAVEI PPACPLNHTVVQVNKNANPDP LPKKEEE  
KKEEEEADPGEDGPKMPYPYSSMFI LSTTNPLRRLCHYIILNRYFEMCILMVIAMSSIALAAEDPVQPNAPRN  
NVLRYFDYVFTGVFTFEMVIK MIDLGLVLHQGAYFRDLWNILDFIVVSGALVAF AFTGNSKGDINTIKSLRV  
LRVLRPLKTIKRLPKLKA VFCVNSLKNVFNILIVYMLFMFI FAVVAVQLFKGKFFHCTDESKEFERDCRGK  
YLLYEKNEVKARDREWKKYEFHYDNVLWALLTLFTVSTGEGWPQLKHSVDATFENQGPS PGYRMEMSIFYVV  
YFVVFPPFFVNI FVALIITFQE QGDKMMEEYSLEKNERACIDFAISAKPLTRHMPQNKQSFQYRMWQFVVS  
PFEYTIMAMIALNTIVLMMKFGASVAYENALRVFNIVFTSLFSL ECVLKVMAFGILNYFRDAWNIFDFVTVL  
GSITDILVTEFGNNFINLSFLRFLRAARLIKLLRQGYTIRILLWTFVQSFKALPYVCLLIAMLFFIYAIIGMQ  
VFGNIGIDGEDSDSEDEFQITEHNNFRFFFQALMLLFRSATGEAWHNIMLSCLSGKPCDKNSGILTADCGNE  
FAYFYFVSFIFLCSFLMLNLFVAVIMDNFEYLTRDSSILGPHHLDEYVRVWAEYDPAACGRIHYKDMYSLLRV  
ISPPLGLGKCKPHRVACKRLLRMDLPVADDNTVHFNSTLMALIRTAIDIKIAKGGADKQMDAELRKEMMAI  
PNLSQKTLDDLVTPHKSTDLTVGKIYAAMMIMEYYRQSKAKKLQAMREEQNRTPLMFQRMPEPPSPTQEGGSPQ  
NALPSTQLDPPGGGLMAHEGGMKESPSWVTQRAQEMFQKTGTWSPERGPPIIDMPNSQPNSQSVMEMREMGTDGYS  
DSEHYLPMEGQTRAASMPRLPAENQRRRGRPRGNDLSTISDTSMPKRSASVLGPKARRLDVYSLERVPPEENQ  
RYHQRPQPGPWWPHL\*ALSGPIH\*CGHRFGRDREHDPHIG\*PALQRSGPGPGPTQGP EASATPPPPPPSSSSPG  
PRPGLSRTGAAGHRPGAGPGAALVPLAQRSGAHDQTGQ\*FRQWKPSPLYVRHQHAAARPPAPDPLHPAA  
ACVLLARSQAACGAGGGSRSAPWRLAAGLPPCAALACACA\*GPAAARCLHRARQPARAARGRARSRAVAQ  
DSARRGLRVTA PRPQAQWLLRGARRAAAAHSPQGRARRVQREGRGLVL  
>ENSMUSP00000112436\_c.6319:GC>AA\_p.R2107Q\_ENSMUST00000121390.8|Cacna1a-  
201|ENSMUSG00000034656|+|chr8:g.85363265:GC>AA  
MARFGDEMFGRYGAGGGGSGPAAGVVGAAGGRGAGGSRQGGQPGAQRMYKQSMQRARTMALYNPI PVRQNC  
LTVNRS LFLFSEDNVVRKYAKKITEWPPFEYMI LATII ANCI VLAL EQHL PDDDKTPMSERLDDTEPYFIGIF

CFEAGIKIVALGF AFHKG SYLRNGWNVMD FVVVLTGILATVGT EFDLRTLRAVRVLRPLKLVSGIPSLQVVLK  
SIMKAMIPLLQIGLLFFAILIFAIIGLEFYMGKFHTTCFEEGTDDIQGESAPPCGTEEPARTCPNGTKCQPY  
WEGPNNGITQFDNILFAVLT V FQCITMEGWTDLLYNSNDASGNTWNWLYFIPLIIIGSFFMLNLVLGVLGSGEF  
AKERERVENRRAFLKLRQQQIERELNGYMEWISKAEEVILAEDETDVEQRHPPFDGALRRATLKKSKTDLLNP  
EEAEDQLADIASVGSPPFARASIKSAKLENSTFFHKKERRMRFYIRRMVKTQAFYWTVLSLVALNTLCVAIVHY  
NQPEWLSDFLYYAEFIFLGLFMSEMF IKMYGLGTRPYFHSSFNCFDCGVIIGSIFEVIWAVIKPGTSFGISVL  
RALRLLRIFKVTKYWASLRNLVVSLLNSMKSIIISLLFLLFLFIVV FALLGMLQFGGQFNDFEGTPTNFDTFP  
AAIMTVFQILTGEDWNEVMYDGIKSQGGVQGGMVFSIYFIVLTLFGNYTLLNVFLAIAVDNLANAQELTKDEQ  
EEEEANQKLLALQKAKEVAEVSPLSAANMSIAVKEQQKNQKPTKSVWEQRTSEMRKQNLASREALYGDAER  
WPTPYARPLRPDVKTHLDRPLVVD PQENRNNNTNKSRAPEALRPTARPRESARDPDARRAWPGSPERAPGREG  
PYGRESEPPQREHAPPREHAPWDADTERAKAGDAPRRHTRHPVAEAGEPRRHRARRRPGDEPDDRPERPRPRD  
ATRPARAADGEGDDGERKRRHRHGPPAHDDRERRHRRRKENQSGVFPVSGPNLSTTRPIQQDLGRQDLPLAED  
LDNMKNNKLATGEPASPHDSLGHSLPSPAKIGNSTNPGPALATNPQNAASRRTPNPNPNSNP GPPKTPEN  
SLIVTNPSSTQPN SAKTARKPEHMAVEIPPACPLNHTVVQVNKNANPDPLPKKEEEEKKEEEEADPGEDGPKP  
MPPYSSMFI LSTTNPLRRLCHYILNLRYFEMC ILMVIAMSSIALAAEDPVQPNAPRNNVLR YFDYVFTGVFTF  
EMVIK MIDLGLVLHQGAYFRDLWNI LDFIVVSGALVAF AFTGNSKGDINTIKSLRVLRLRPLKTIKRLPKL  
KAVFDCVVNSLKNVFNILIVYMLFMFIFAVVAVQLFKGKFFHCTDESKEFERDCRGKYLLYEKNEVKARDREW  
KKYEFHYDNVLWALLTLFTVSTGEGWPQVLKHSVDATFENQGPSGYRMEMSIFYVVYFVVPFFVFNIFVAL  
IITFQEQGDKMMEEYSLEKNERACIDFAISAKPLTRHMPQNKQSFQYRMWQFVVSPPFEYTIMAMIALNTIV  
LMMKFY GASVAYENALRVFNIVFTSLFSLECVLKVMAFGILNYFRDAWNI FDFVTVLGSITDILVTEFGNNFI  
NLSFLRLFRARLIKLLRQGYTIRILLWTFVQSFKALPYVCLLIAMLFFIYAIIGMQVFGNIGIDGEDSDSDE  
DEFQITEHNNFR TFFQALMLLFRSATGEAWHNIMLSCLSGKPCDKNSGILTADCGNEFAYFYFVSFIFLCSFL  
MLNLFVAVIMDNFEYLTRDSSILGPHHLD EYVRVWAEYDPAACGR IHYKMYSLLRVISPPGLGKCKPHRVA  
CKRLLRMDLPVADDNTVHFNSTLMALIRTALDIKIAKGGADKQQMDAELRKEEMAIWPNLSQKTLDLLVTPHK  
STDLTVGKIYAAMMIMEYYRQSKAKKLQAMREEQNRTPLMFQRM EPPSPTQEGGSPQNALPSTQLDPPGGGLMA  
HEGGMKESPSWVTQRAQEMFQKTGTWSPERGGPIDMPSNQPSQSVEMREMGTGDYSDSEHYLPMEGQTRAAS  
MPRLPAENQRRRGRPRGNDLSTISDTSMPKRSASVLGPKARRLDYSLERVPPEENQRYHQRPQGPWPHL\* A  
LSGPIH\*CGHRFGDRSEHDHPIG\*PALQSRSGPGPTQGPEASATPPPPPPSSSSPGPRPGSLRTGAAGHRPG  
AGPGAALVPLAQRRSGAHDQTGQ\*FRQWKPSPLYVRHQHAAARPPAPPDPLHPAAACVLLARSQAACGAQD  
GGSRSAPWRLAAGLPPCAALACACA\*GPAAARCRLHRARQPARAARGRARSRAAVAQDSARRGLRVTAPRPOA  
AQWLLRGARRAAAHS PQGRARRVQRERGRVLV  
>ENSMUSP00000114055\_c.6178:GC>AA\_p.R2060Q ENSMUST00000122053.2|Cacna1a-  
202|ENSMUSG00000034656|+|chr8:g.85363265:GC>AA  
MARFGDEMPGRY GAGGGGSGPAGVVVGAAGGRGAGGSRQGGQPGAQRMYKQSMARARTMALYNPIPVQRNC  
LTVNRSVLFSEDNVDDTEPYFIGIFCFEAGIKIVALGF AFHKG SYLRNGWNVMD FVVVLTGILATVGT EFDL  
RTLRAVRVLRPLKLVSGIPSLQVVLK SIMKAMIPLLQIGLLFFAILIFAIIGLEFYMGKFHTTCFEEGTDDI  
QGESPAPCGTEEPARTCPNGTKCQPYWEGPNNGITQFDNILFAVLT V FQCITMEGWTDLLYNSNDASGNTWNW  
LYFIPLIIIGSFFMLNLVLGVLGSGEFAKERERVENRRAFLKLRQQQIERELNGYMEWISKAEEVILAEDETD  
VEQRHPPFDGALRRATLKKSKTDLLNPEEAEDQLADIASVGSPPFARASIKSAKLENSTFFHKKERRMRFYIRRM  
VKTQAFYWTVLSLVALNTLCVAIVHYNQPEWLSDFLYYAEFIFLGLFMSEMF IKMYGLGTRPYFHSSFNCFDC  
GVIIGSIFEVIWAVIKPGTSFGISVLRALRLLRIFKVTKYWASLRNLVVSLLNSMKSIIISLLFLLFLFIVVFA  
LLGMLQFGGQFNDFEGTPTNFDTFPAAIMTVFQILTGEDWNEVMYDGIKSQGGVQGGMVFSIYFIVLTLFGN  
YTLNVLFLAIAVDNLANAQELTKDEQEEEEANQKLLALQKAKEVAEVSPLSAANMSIAVKEQQKNQKPTKSVW  
EQRTSEMRKQNLASREALYGDAERWPTPYARPLRPDVKTHLDRPLVVD PQENRNNNTNKSRAPEALRPTAR  
PRESARDPDARRAWPGSPERAPGREGPYGRESEPPQREHAPPREHAPWDADTERAKAGDAPRRHTRHPVAEAGE  
PRRHRARRRPGDEPDDRPERPRPRDATRPARAADGEGDDGERKRRHRHGPPAHDDRERRHRRRKENQSGVFP  
VSGPNLSTTRPIQQDLGRQDLPLAEDLDNMKNNKLATGEPASPHDSLGHSLPSPAKIGNSTNPGPALATNP  
QNAASRRTPNPNPNSNP GPPKTPENSLIVTNPSSTQPN SAKTARKPEHMAVEIPPACPLNHTVVQVNKNAN  
PDPLPKKEEEEKKEEEEADPGEDGPKMPPYSSMFI LSTTNPLRRLCHYILNLRYFEMC ILMVIAMSSIALAAE  
DPVQPNAPRNNVLR YFDYVFTGVFTFEMVIK MIDLGLVLHQGAYFRDLWNI LDFIVVSGALVAF AFTGNSKGD  
DINTIKSLRVLRLRPLKTIKRLPKL KAVFDCVVNSLKNVFNILIVYMLFMFIFAVVAVQLFKGKFFHCTDES  
KEFERDCRGKYLLYEKNEVKARDREWKKYEFHYDNVLWALLTLFTVSTGEGWPQVLKHSVDATFENQGPSGY  
RMEMSIFYVVYFVVPFFVFNIFVALIITFQEQGDKMMEEYSLEKNERACIDFAISAKPLTRHMPQNKQSFQ  
YRMWQFVVSPPFEYTIMAMIALNTIVLMMKFY GASVAYENALRVFNIVFTSLFSLECVLKVMAFGILNYFRDA  
WNI FDFVTVLGSITDILVTEFGNNFINLSFLRLFRARLIKLLRQGYTIRILLWTFVQSFKALPYVCLLIAML  
FFIYAIIGMQVFGNIGIDGEDSDSDEDEFQITEHNNFR TFFQALMLLFRSATGEAWHNIMLSCLSGKPCDKNS  
GILTADCGNEFAYFYFVSFIFLCSFLMLNLFVAVIMDNFEYLTRDSSILGPHHLD EYVRVWAEYDPAACGR IHY  
KMYSLLRVISPPGLGKCKPHRVACKRLLRMDLPVADDNTVHFNSTLMALIRTALDIKIAKGGADKQQMDA

ELRKEMMAIWPNLSQKTLDDLVTPHKSTDLTVGKIYAAMMIMEYYRQSKAKKLQAMREEQNRTPLMFQRMPEPP  
SPTQEGGSPQNALPSTQLDPPGGGLMAHEGGMKESPSWVTQRAQEMFQKTGTWSPERGPPIDMPNSQPNSQSVE  
MREMGTGYSYDSEHYLPMEGQTRAASMPRLPAENQRRRGRPRGNDLSTISDTSPMKRSASVLGPKARRLDDYS  
LERVPPEENQRYHQRPQGPWPPHL\*ALSGPIH\*CGHRFGDRSEHDHPIG\*PALQRSRSGPGPPTQGPEASATPP  
PPPPSSSSPGPRPGSLRTGAAGHRPGAGPGAALVPLAQRSGAHDQTGTG\*FRQWKPSPLYVRHQHAAARPPP  
APPDPLHPAAACVLLARSAQACGAQDGGRSAPWRLAAGLPPCAALACACA\*GPAAARCLHRARQPARAARG  
RARSRAAVAQDSARRGLRVTAPRPQAAQWLLRGARRAAAAHS PQGRARRVQREGRRLVL  
>ENSMUSP00000149242\_c.6178:GC>AA\_p.R2060Q ENSMUST00000215756.2|Cacna1a-  
211|ENSMUSG00000034656|+|chr8:g.85363265:GC>AA  
XRMYKQSMARARTMALYNPIVVRQNCCLTVNRSFLFSEDNVVRKYAKKITEWPPFEYMI LATI IANCIVLAL  
EQHLPDDDKTPMSERLDDTEPYFIGIFCFEAGIKIVALGFHFKGSYLRNGWNVMDFFVVLTGILATVGTDFD  
LRTLRAVRVLRPLKLVSGIPSLQVVLKSIKAMIPLLQIGLLFFAILIFAIIGLEFYMGKFHTTCFEEGTD  
IQGESAPCGTEEPARTCPNGTKCQPYWEGPNNGITQFDNILFAVLTVFQCITMEGWTDLLYNSNDASGNTWN  
WLYFIFLIIGSFFMLNLVGLVLSGEFAKERERVENRRAFLKLRQQQIERELNGYMEWISKAEVILAEDET  
DVEQRHPFDALRRATLKKSKTDLNPEEAEDQLADIASVGSPPFARASIKSAKLENSTFFHKKERRMRFYIRRM  
VKTQAFYWTVLSLVALNLTLCVAIVHYNQPEWLSDFLYAEFIFLGLFMSEMFIKMYGLGTRPYFHSSFNCFCDC  
GVIIGSIFEVIWAVIKPGTSFGISVLRALRLLRIFKVTKYWASLRNLVVSLLNSMKSIIISLLFLFLFIVVFA  
LLGMQLFGGQNFNDEGTPPTNFDTFPAAIMTVFQILTGEDWNEVMYDGIKSQGGVQGGMVFSIYFIVLTLFGN  
YTLNLFVLAIAVDNLANAQELTKDEQEEEEAAANQKALQKAKEVAEVSPLSAANMSIAVKEQQKNQKPTKSVW  
EQRTSEMRKQNLASREALYGDAERWPTPYARPLRPDVKTHLDRPLVVDPQENRNNNTNKSRAPEALRPTAR  
PRESARDPDARRAWPGSPERAPGREPGYGRESEPPQREHAPPREHAPWDADTERAKAGDAPRRHTRPVAEGE  
PRRHRARRRPGDEPDRPRERRPRPRDATRPARAADGEGDDGERKRRHRHGPPAHDDRERRRRRRKENQSGVP  
VSGPNLSTTRPIQDDLGRQDLPLAEDLDNMKNNKLATGEPASPHDSLGHSGLPSPAKIGNSTNPGPALATNP  
QNAASRRTPNPNPNSNPGPKTPENSLIVTNPSSQPNSAKTARKPEHMAVEIPPACPLNHTVVQVKNAN  
PDPLPKKEEKEEKEEADPGEDGPKMPPYSSMFI LSTTNPLRRLCHYILNLRVYFEMCILMVIAMSSIALAAE  
DPVQPNAPRNNVLRVYFDYVFTGVFTFEMVIKMDVNLGLVLHQGAYFRDLWNILDFIVVSGALVAFVFTGNSKKG  
DINTIKSLRVLRLPLKTIKRLPKLKAVIDCVNLSKNVFNILLVYMLFMFIFAVVAVQLFKGKFFHCTDES  
KEFERDCRGKYLLEYKNEVKARDREWKKYEFHYDNVLLWALLTLFTVSTGEGWPQVLKHSVDATFENQGPSPGY  
RMEMSIFYVVVYFVVFVFFVNFVALIITFQEQGDKMMEEYSLEKNERACIDFAISAKPLTRHMPQNKQSFQ  
YRMWQFVVSPPFEYTIMAMIALNTIVLMMKFY GASVAYENALRVFNIVFTSLFSLECVLKVMAFGILNYFRDA  
WNIFDFVTVLGSITDILVTEFGNNFINLSFLRLFRAARLIKLLRQGYTIRILLWTFVQSFKALPVVCLLIAML  
FFIYAIIGMQVFGNIGIDGEDSDEDEFQITEHNNFRTFFQALMLLFRSATGEAWHNIMLSCLSGKPCDKNS  
GILTADCGNEFAYFYFVSFIFLCSFLMLNLFVAVIMDNFEYLTRDSSILGPHHLDEYVRVWAEYDPAACGRIH  
YKDMYSLLRVISPPPLGLGKCKPHRVACKRLLRMDLPVADDNTVHFNSTLMALIRTALDIKIAKGGADKQMDA  
ELRKEMMAIWPNLSQKTLDDLVTPHKSTDLTVGKIYAAMMIMEYYRQSKAKKLQAMREEQNRTPLMFQRMPEPP  
SPTQEGGSPQNALPSTQLDPPGGGLMAHEGGMKESPSWVTQRAQEMFQKTGTWSPERGPPIDMPNSQPNSQSVE  
MREMGTGYSYDSEHYLPMEGQTRAASMPRLPAENQRRRGRPRGNDLSTISDTSPMKRSASVLGPKARRLDDYS  
LERVPPEENQRYHQRPQGPWPPHL\*ALSGPIH\*CGHRFGDRSEHDHPIG\*PALQRSRSGPGPPTQGPEASATPP  
PPPPSSSSPGPRPGSLRTGAAGHRPGAGPGAALVPLAQRSGAHDQTGTG\*FRQWKPSPLYVRHQHAAARPPP  
APPDPLHPAAACVLLARSAQACGAQDGGRSAPWRLAAGLPPCAALACACA\*GPAAARCLHRARQPARAARG  
RARSRAAVAQDSARRGLRVTAPRPQAAQWLLRGARRAAAAHS PQGRARRVQREGRRLVL  
>ENSMUSP00000158675\_c.1543:GC>AA\_p.R515Q ENSMUST00000238337.2|Cacna1a-  
212|ENSMUSG00000034656|+|chr8:g.85363265:GC>AA  
MHLRLSGQRGLTLQPNSSSLPSSPFLAKGNFNINLSFLRLFRAARLIKLLRQGYTIRILLWTFVQSFKVF  
GNIGIDGEDSDEDEFQITEHNNFRTFFQALMLLFRSATGEAWHNIMLSCLSGKPCDKNSGILTADCGNEFA  
YFYFVSFIFLCSFLMLNLFVAVIMDNFEYLTRDSSILGPHHLDEYVRVWAEYDPAACGRIHYKDMYSLLRVIS  
PPLGLGKCKPHRVACKRLLRMDLPVADDNTVHFNSTLMALIRTALDIKIAKGGADKQMDAELRKEMMAIWPN  
LSQKTLDDLVTPHKSTDLTVGKIYAAMMIMEYYRQSKAKKLQAMREEQNRTPLMFQRMPEPPSPTQEGGSPQNA  
LPSTQLDPPGGGLMAHEGGMKESPSWVTQRAQEMFQKTGTWSPERGPPIDMPNSQPNSQSVE  
MREMGTGYSYDSEHYLPMEGQTRAASMPRLPAENQRRRGRPRGNDLSTISDTSPMKRSASVLGPKARRLDDYS  
LERVPPEENQRYHQRPQGPWPPHL\*ALSGPIH\*CGHRFGDRSEHDHPIG\*PALQRSRSGPGPPTQGPEASATPP  
PPPPSSSSPGPRPGSLRTGAAGHRPGAGPGAALVPLAQRSGAHDQTGTG\*FRQWKPSPLYVRHQHAAARPPP  
APPDPLHPAAACVLLARSAQACGAQDGGRSAPWRLAAGLPPCAALACACA\*GPAAARCLHRARQPARAARG  
RARSRAAVAQDSARRGLRVTAPRPQAAQWLLRGARRAAAAHS PQGRARRVQREGRRLVL  
ARRGLRVTAPRPQAAQWLLRGARRAAAAHS PQGRARRVQREGRRLVL  
>rs240959951 ENSMUSP00000158803\_c.6595:G>C\_p.R2199P  
ENSMUST00000238701.2|Cacna1a-213|ENSMUSG00000034656|+|chr8:g.85363274:G>C  
MPRASWGS DPMLSPLSHELLHSPRYPGTDCTLAGSSRTLHVPWSQQMSGSLGPTLKRGGVVDHRDVI LAHQ  
AHKMHS TPQARRKEWEMARFGDEMPGRYGAGGGGSGPAAGVVVGAAGGRGAGGSRQGGQPGAQRMKYQSMAQR

ARTMALYNPIPVRQNCCLTVNRSFLFSEDNVVRKYAKKITEWPPFEYMI LATIIANCIVLAL EQHLPDDDKTP  
MSERLDDTEPYFIGIFCFEAGIKIVALGF AFHKGSYLRNGWNVMD FVVVLTGILATVGT EFDLRTLRAVRVLR  
PLKLVSGIPSLQVVLKSIMKAMIPLLQIGLLFFAILIFAIIGLEFYMGKFHTTTCFEEGTDDIQGES PAPCGT  
EEPARTCPNGTKCQPYWEGPNNGITQFDNILFAVLT VFCITMEGWTDL LYSNDASGNTWNWLYFIPLIIIG  
SFFMLNLVLGVLVSGEFAKERERVENRRAFLKLRQQQIERELNGYMEWISKAEEVILAEDET DVEQRHFPDGA  
LRRATLKKSKTDL LNPEEAEDQLADIASVGS PFARASIKS AKLENSTFFHKKERRMRFYIRRMVKTQAFYWTV  
LSLVALNTLCVAIVHYNQPEWLSDFLYYAEFI FLGLFMSEMF IKMYGLGTRPYFHSSFNCFDCGVIIGSIFEV  
IWAVIKPGTSFGISVLRALRLLRIFKVTKYWASLRNLVVSLLNSMKSII SLLFLLFLFIVVFALLGMQLFGGQ  
FNFDEGTPPTNFDTFPAAIMTVFQILTGEDWNEVMYDGIKSQGGVQGGMVFSIYFIVLTLFGNYTLLNVFLAI  
AVDNLANAQELTKDEQEEEEEAANQKLALQKAKEVAEVSPLSAANMSI AVKEQQKNQKPTKSVWEQRTSEMRKQ  
NLLASREALYGDAERWPTPYARPLRPDVKTHLDRPLVVD PQENRNNNTNKSRAPEALRPTARPRE SARDPDA  
RRAWPGSPERAPGREGPYGRESE PQQREHAPPREHAPWDADTERAKAGDAPRRHTRHPVAE GEP RRHRARRR  
GDEPDRPERRRPRDATRPARAADGEGDDGERKRRHRHGPPAHDDRERRRRRRKENQGS GVPVSGPNLSTTR  
PIQQDLGRQDLPLAEDLDNMKNK LATGEPASPHDSLGHSGLPSPAKIGNSTNPGPALATNPQNAASRRTPN  
NPGNPSNPGPKTPENSLIVTNPSSTQPNSAKTARKPEHMAVEIPPACPLNHTVVQVNKNANPDPLPKKEEE  
KKEEEEADPGEDGPKPMPPYSSMFI LSTTNPLRRLCHYI LNLR YFEMC ILMVIAMSSIALAAEDPVQPNAPRN  
NVLRYFDYVFTGVFTFEMVIK MIDLGLVLHQGAYFRDLWNI LDFIVVSGALVAF AFTGNSKGDINTIKSLRV  
LRVLRPLKTIKRLPKLKAVFDCVVNSLKNVFNILIVYMLFMFIFAVVAVQLFKGKFHCTDESKEFERDCRGK  
YLLYEKNEVKARDREWKKYEFHYDNVLWALLTLFTVSTGEGWPQVLKHSVDATFENQGPS PGYRMEMSIFYVV  
YFVVFVFFVNI FVALIIITFQE QGDKMMEEYSLEKNERACIDFAISAKPLTRHMPQNKQSFQYRMWQFVVS P  
PFEYTIMAMIALNTIVLMMKFYGASVAYENALRVFNIVFTSLSFLEC VLKVMAFGILNYFRDAWNIFDFVTVL  
GSITDILVTEFGNNFINLSFLRLFRAARLIKLLRQGYTIRILLWTFVQSFKALPYVCLLIAMLFFIYAIIGMQ  
VFGNIGIDGEDSDSDEDEFQITEHNNFRTFFQALMLLFRSATGEAWHNIMLSCLSGKPCDKNSGILTADCGNE  
FAYFYFVSFIFLCSFLMLNL FVAVIMDNFEYLTRDSSILGPHHLDEYVRVWAEYDPAACGRIHYKDMYSLLRV  
ISPPLGLGKCKPHRVACKRLLRMDLPVADDNTVHFNSTLMALIR TALDIKIAKGGADKQMDAELRKEMMAIW  
PNLSQKTLDDLVTPHKSTDLTVGKIYAAMMIEYRQSKAKKLQAMREEQNRTPLMFQRMEPPSPTEGEGGSQ  
NALPSTQLDPPGGLMAHEGGMKESPSWVTQRAEQMFKTGTWSPERGPPI DMPNSQPNSQVEMREMTDGY S  
DSEHYLPMEGQTRAASMPRLPAENQRRRGRPRGNDLSTISDTS PMKRSASVLGPKARRLDDYSLE RVPEENQ  
RYHQRRRDPGHRTSERSLGRYTDVDTGLGTDLSMTTQSGDLPSKDRDQDRGRPKDRKHRPHHHHHHHHHPPA  
PDRDRYAQERPDTGRARAREQRWSRSPSEGREHTTHRQSSSVSGSPAPSTSGTSTPRRGRRLPQTPTCTPRP  
LVSYS PARRRPAARRMAGPAAPP GGS PRGCRRAPRWP AHAP EGPRPRGADYTEPDSPREPPGGAHD PAPRSR  
TPRAAGCASPRHGRRPNGYYAGHAPRPR TARRGAHDAYSESEDDWC\*

>rs240959951\_ENSMUSP00000112436\_c.6328:G>C\_p.R2110P  
ENSMUST00000121390.8|Cacna1a-201|ENSMUSG00000034656|+|chr8:g.85363274:G>C  
MARFGDEMPGRYAGGGGSGPAAAGVVGAAGGRGAGGSRQGGQPGAQRMYKQSMARARTMALYNPIPVRQNC  
LTVNRSFLFSEDNVVRKYAKKITEWPPFEYMI LATIIANCIVLAL EQHLPDDDKTPMSERLDDTEPYFIGIF  
CFEAGIKIVALGF AFHKGSYLRNGWNVMD FVVVLTGILATVGT EFDLRTLRAVRVLRPLKLVSGIPSLQVVLK  
SIMKAMIPLLQIGLLFFAILIFAIIGLEFYMGKFHTTTCFEEGTDDIQGES PAPCGTEEPARTCPNGTKCQPY  
WEGPNNGITQFDNILFAVLT VFCITMEGWTDL LYSNDASGNTWNWLYFIPLIIIGSFFMLNLVLGVLVSGEF  
AKERERVENRRAFLKLRQQQIERELNGYMEWISKAEEVILAEDET DVEQRHFPDGA LRRATLKKSKTDL LN  
EEAEDQLADIASVGS PFARASIKS AKLENSTFFHKKERRMRFYIRRMVKTQAFYWTVLSLVALNTLCVAIVHY  
NQPEWLSDFLYYAEFI FLGLFMSEMF IKMYGLGTRPYFHSSFNCFDCGVIIGSIFEVIWAVIKPGTSFGISV  
RALRLLRIFKVTKYWASLRNLVVSLLNSMKSII SLLFLLFLFIVVFALLGMQLFGGQFNFDEGTPPTNFDTFP  
AAIMTVFQILTGEDWNEVMYDGIKSQGGVQGGMVFSIYFIVLTLFGNYTLLNVFLAI AVDNLANAQELTKDEQ  
EEEEEAANQKLALQKAKEVAEVSPLSAANMSI AVKEQQKNQKPTKSVWEQRTSEMRKQNLLASREALYGDAER  
WPTPYARPLRPDVKTHLDRPLVVD PQENRNNNTNKSRAPEALRPTARPRE SARDPDARRAWPGSPERAPGREG  
PYGRESE PQQREHAPPREHAPWDADTERAKAGDAPRRHTRHPVAE GEP RRHRARRRPGDEPDRPERRRPRD  
ATRPARAADGEGDDGERKRRHRHGPPAHDDRERRRRRRKENQGS GVPVSGPNLSTTRPIQQDLGRQDLPLAED  
LDNMKNK LATGEPASPHDSLGHSGLPSPAKIGNSTNPGPALATNPQNAASRRTPNNPGNPSNPGPKTPEN  
SLIVTNPSSTQPNSAKTARKPEHMAVEIPPACPLNHTVVQVNKNANPDPLPKKEEEKKEEEEADPGEDGPKP  
MPPYSSMFI LSTTNPLRRLCHYI LNLR YFEMC ILMVIAMSSIALAAEDPVQPNAPRN NVLRYFDYVFTGVFTF  
EMVIK MIDLGLVLHQGAYFRDLWNI LDFIVVSGALVAF AFTGNSKGDINTIKSLRVLRVLRPLKTIKRLPKL  
KAVFDCVVNSLKNVFNILIVYMLFMFIFAVVAVQLFKGKFHCTDESKEFERDCRGKYLLYEKNEVKARDREW  
KKYEFHYDNVLWALLTLFTVSTGEGWPQVLKHSVDATFENQGPS PGYRMEMSIFYVVVFVFFVNI FVAL  
IIITFQE QGDKMMEEYSLEKNERACIDFAISAKPLTRHMPQNKQSFQYRMWQFVVS PFEYTIMAMIALNTIV  
LMMKFYGASVAYENALRVFNIVFTSLSFLEC VLKVMAFGILNYFRDAWNIFDFVTVLGSITDILVTEFGNNFI  
NLSFLRLFRAARLIKLLRQGYTIRILLWTFVQSFKALPYVCLLIAMLFFIYAIIGMQVFGNIGIDGEDSDSDE  
DEFQITEHNNFRTFFQALMLLFRSATGEAWHNIMLSCLSGKPCDKNSGILTADCGNEFAYFYFVSFIFLCSFL

MLNLFVAVIMDNFEYLTRDSSILGPHHLDEYVRVWAEYDPAACGRIHYKDMYSLLRVISPLGLGKCKPHRVA  
 CKRLLRMDLPVADDNTVHFNSTLMALIRTALDIKIAKGGADKQQMDAELRKEMMAIWPNLSQKTLDDLVTPHK  
 STDLTVGKIYAAMMIMEYYRQSKAKKLQAMREEQNRTPLMFQRMPEPPSPTQEGGQPSQNALPSTQLDPPGGGLMA  
 HEGGMKESPSWVTQRAQEMFQKTGTWSPERGGPIDMPNSQPNSQSVEMREMGTGYSYDSEHYLPMEGQTRAAS  
 MPRLPAENQRRRGRPRGNDLSTISDTSMPKRSASVLGPKARRLDDYSLERVPPPEENQRYHQRRRDPGHRTSER  
 SLGRYTDVDTGLGTDLSMTTQSGDLPSKDRDQDRGRPKDRKHRPHHHHHHHHHPPAPDRDRYAQERPDGRA  
 RAREQRWSRSPSEGREHTTHRQSSSVSGSPAPSTSGTSTPRRGRRLPQTPCTPRPLVSYSPAPRRPAARRM  
 AGPAAPPGGSPRGCRRAPRWPAHAPEGPRPRGADYTEPDSPREPPGGAHDPAPRSRPTPRAAGCASPRHGRRLL  
 PNGYYAGHGAPRPRRTARRGAHDAYSESEDDWC\*

>rs240959951\_ENSMUSP00000114055\_c.6187:G>C\_p.R2063P  
 ENSMUST00000122053.2|Cacna1a-202|ENSMUSG00000034656|+|chr8:g.85363274:G>C  
 MARFGDEMPGRYGAGGGGSGPAAGVVGAAGGRGAGGSRQGGQPGAQRMYKQSMARARTMALYNPIVVRQNC  
 LTVNRSLSLFLFSEDNVDDTEPYFIGIFCFEAGIKIVALGFHFHKGSYLRNGWNVMDFFVVVLTGILATVGTDFDL  
 RTLRAVRVLRPLKLVSGIPSLQVVLKSIKAMIPLLQIGLLFFAILIFAIIGLEFYMGKFHTTCFEEGTDDI  
 QGESAPCGTEEPARTCPNGTKCQPYWEGPNNGITQFDNIFAVLTVFQCITMEGWTDLNNSNDASGNTWNW  
 LYFIPLIIIGSFFMLNLVLGVLGSEFAKERERVENRRRAFLKLRQQQIERELNGYMEWISKAEEVILAEDET  
 VEQRHFFDGLRRATLKKSKTDLLNPEEAEDQLADIASVGSPPFARASIKSAKLENSTFFHKKERRMRFYIRRM  
 VKTQAFYWTVLSLVALNTLCVAIVHYNQPEWLSDFLYAEFI FLGLFMSEMF IKMYGLGTRPYFHSSFCNCFDC  
 GVIIGSIFEVIWAVIKPGTSFGISVLRALRLLRIFKVTKYWASLRNLVVSLLNSMKSIIISLLFLFLFIVVFA  
 LLGMQLFGGQFNDFEGTPTNFDTFPAAIMTVFQILTGEDWNEVMYDGIKSQGGVQGGMVFSIYFIVLTLFGN  
 YTLNVLFLAIAVDNLANAQELTKDEQEEEEAAANQKLLALQKAKEVAEVSPLSAANMSIAVKEQQKNQKPTKSVW  
 EQRTSEMRKQNLASREALYGDAERWPTPYARPLRPDVKTHLDRPLVVDPOENRNNNTNKSRAPEALRPTAR  
 PRESARDPDARRAWPGSPERAPGREGPYGRESEPPQREHAPPREHAPWDADTERAKAGDAPRRHTRHPVAEAGE  
 PRRHRARRRPGDEPDRPERRPRPRDATRPARAADGEGDDGERKRRHRHGPPAHDDRERRRRRRKENQGGSGVP  
 VSGPNLSTTRPIQDDLGRQDLPLAEDLDNMKNKLATGEPASPHDSLHSGLPPSPAKIGNSTNPGPALATNP  
 QNAASRRTPNPNPNPNPNPNPKTPENSLIVTNPSTQNSAKTARKPEHMAVEIPPACPLNHTVVQVNKNAN  
 PDPLPKKEEKEEEDPGEDEGPKPMPYPYSMFI LSTTNPLRRLCHYILNLRVYFEMC ILMVIAMSIALAAE  
 DPVQPNAPRNNVLRVYFDYVFTGVFTFEMVIKMIIDLGLVLHQGAYFRDLWNILDFIVVSGALVAFVFTGNSKKG  
 DINTIKSLRVLRLRPLKTIKRLPKLKA VFCVNSLKNVFNILIVYMLFMFIFAVVAVQLFKGKFFHCTDES  
 KEFERDCRGKYLLEYKNEVKARDREWKKYEFHYDNVLWALLTLFTVSTGEGWPQVLKHSVDATFENQGPSPGY  
 RMEMSIFYVVYFVVFVFFVNI FVALIIITFQEQGDKMMEEYSLEKNERACIDFAISAKPLTRHMPQNKQSFQ  
 YRMWQFVVSPPEYTIMAMIALNTIVLMMKFY GASVAYENALRVFNIVFTSLFSLECVLKVMAFGIILNYFRDA  
 WNI FDFVTVLGSITDILVTEFGNNFINLSFLRLFRAARLIKLLRQGYTIRILLWTFVQSFKALPYVCLLIAML  
 FFIIYAIIGMQVFGNIGIDGEDSDEDEFOITEHNNFRFTFFQALMLLFRSATGEAWHNIMLSCLSGKPCDKNS  
 GILTADCGNEFAYFYVFSFIFLCSFLMLNLFVAVIMDNFEYLTRDSSILGPHHLDEYVRVWAEYDPAACGRIH  
 YKDMYSLLRVISPLGLGKCKPHRVACKRLLRMDLPVADDNTVHFNSTLMALIRTALDIKIAKGGADKQQMDA  
 ELRKEMMAIWPNLSQKTLDDLVTPHKSTDLTVGKIYAAMMIMEYYRQSKAKKLQAMREEQNRTPLMFQRMPEPP  
 SPTQEGGQPSQNALPSTQLDPPGGGLMAHEGGMKESPSWVTQRAQEMFQKTGTWSPERGGPIDMPNSQPNSQSV  
 MREMGTGYSYDSEHYLPMEGQTRAASMPRLPAENQRRRGRPRGNDLSTISDTSMPKRSASVLGPKARRLDDYS  
 LERVPPPEENQRYHQRRRDPGHRTSERSLGRYTDVDTGLGTDLSMTTQSGDLPSKDRDQDRGRPKDRKHRPHH  
 HHHHHHHPPAPDRDRYAQERPDGRARAREQRWSRSPSEGREHTTHRQSSSVSGSPAPSTSGTSTPRRGRRL  
 LPQTPCTPRPLVSYSPAPRRPAARRMAGPAAPPGGSPRGCRRAPRWPAHAPEGPRPRGADYTEPDSPREPPGG  
 AHDPAAPRSRPTPRAAGCASPRHGRRLLPNGYYAGHGAPRPRRTARRGAHDAYSESEDDWC\*

>rs240959951\_ENSMUSP00000149242\_c.6187:G>C\_p.R2063P  
 ENSMUST00000215756.2|Cacna1a-211|ENSMUSG00000034656|+|chr8:g.85363274:G>C  
 XRMKYKQSMARARTMALYNPIVVRQNC LTVNRSLSLFLFSEDNVVRKYAKKI TEWPPFEYMI LATI IANCI VLAL  
 EQHLPDDDKTPMSERLDDTEPYFIGIFCFEAGIKIVALGFHFHKGSYLRNGWNVMDFFVVVLTGILATVGTDFD  
 LRTLRAVRVLRPLKLVSGIPSLQVVLKSIKAMIPLLQIGLLFFAILIFAIIGLEFYMGKFHTTCFEEGTDD  
 IQGESAPCGTEEPARTCPNGTKCQPYWEGPNNGITQFDNIFAVLTVFQCITMEGWTDLNNSNDASGNTWN  
 WLYFIPLIIIGSFFMLNLVLGVLGSEFAKERERVENRRRAFLKLRQQQIERELNGYMEWISKAEEVILAEDET  
 DVEQRHFFDALRRATLKKSKTDLLNPEEAEDQLADIASVGSPPFARASIKSAKLENSTFFHKKERRMRFYIRRM  
 VKTQAFYWTVLSLVALNTLCVAIVHYNQPEWLSDFLYAEFI FLGLFMSEMF IKMYGLGTRPYFHSSFCNCFDC  
 GVIIGSIFEVIWAVIKPGTSFGISVLRALRLLRIFKVTKYWASLRNLVVSLLNSMKSIIISLLFLFLFIVVFA  
 LLGMQLFGGQFNDFEGTPTNFDTFPAAIMTVFQILTGEDWNEVMYDGIKSQGGVQGGMVFSIYFIVLTLFGN  
 YTLNVLFLAIAVDNLANAQELTKDEQEEEEAAANQKLLALQKAKEVAEVSPLSAANMSIAVKEQQKNQKPTKSVW  
 EQRTSEMRKQNLASREALYGDAERWPTPYARPLRPDVKTHLDRPLVVDPOENRNNNTNKSRAPEALRPTAR  
 PRESARDPDARRAWPGSPERAPGREGPYGRESEPPQREHAPPREHAPWDADTERAKAGDAPRRHTRHPVAEAGE  
 PRRHRARRRPGDEPDRPERRPRPRDATRPARAADGEGDDGERKRRHRHGPPAHDDRERRRRRRKENQGGSGVP



VSGPNLSTTRPIQQDLGRQDLPLAEDLDNMKNNKLATGEPASPHDSLGHSLPSPAKIGNSTNPGPALATNP  
QNAASRRTPNPNPNSNPGPPKTPENSLIVTNPSSQPNsAKTARKPEHMAVEIPPACPLNHTVVQVKNAN  
PDPLPKKEEEEKKEEEEADPGEDGPKMPPYSSMFILSTTNPLRRLCHYILNLRVYFEMCILMVIAMSSIALAAE  
DPVQPNAPRNNVLRVYFDYVFTGVFTFEMVIKIMIDLGLVLHQGAYFRDLWNILDFIVVSGALVAFVFTGNSKKG  
DINTIKSLRVLRLVLRPLKTIKRLPKLKAVFDCVNSLKNVFNILIVYMLFMFIFAVVAVQLFKGKFFHCTDES  
KEFERDCRGKYLLEYEKNEVKARDREWKKYEFHYDNVLWALLTLFTVSTGEGWPQVLKHSVDATFENQGPSGY  
RMEMSIFYVVVYFVVFVFFVNI FVALIIITFQEQGDKMMEEYSLEKNERACIDFAISAKPLTRHMPQNKQSFQ  
YRMWQFVVSPPFEYTIMAMIALNTIVLMMKFYGASVAYENALRVFNIVFTSLFSLCVCVKVMAFGILNYFRDA  
WNIFDFVTVLGSITDILVTEFGNFINLSFLRLFRAARLIKLLRQGYTIRILLWTFVQSFKALPYVCLLIAML  
FFIYAIIGMQVFGNIGIDGEDSDEDEFQITEHNNFRTFFQALMLLFRSATGEAWHNIMLSCLSGKPCDKNS  
GILTADCGNEFAYFYFVSFIFLCSFLMLNLFVAVIMDNFEYLTRDSSILGPHHLDEYVRVWAEYDPAACGRIH  
YKDMYSLLRVISPPGLGKCKPHRVACKRLLRMDLPVADDNTVHFNSTLMALIRTALDIKIAKGGADKQMDA  
ELRKEMMAIWPNSLQKTLDDLVTPHKSTDLTVGKIYAAMMIMEYRQSKAKKLQAMREEQNRTPLMFQRMPEPP  
SPTQEGGSPQNALPSTQLDPGGGLMAHEGGMKESPSWVTQRAQEMFQKTGTWSPERGPIDMPNSQPNsQSVE  
MREMGTDGYSDEHYLPMEGQTRAASMPRLPAENQRRRGRPRGNDLSTISDTSMPKRSASVLGPKARRLDDYS  
LERVPPEENQRYHQRRRDPGHRTSERSLGRYTDVDTGLGTDLSMTTQSGDLPSKDRDQDRGRPKDRKHRPHHH  
HHHHHHHPAPDRDRYAQERPDTRARAREQRWSRSPSEGREHTTHRQSSSVSGSPAPSTSGTSTPRRGRRQ  
LPQTPCTPRPLVSYSPAPRRPAARRMAGPAAPPGGSPRGCRRAPRWPAHAPEGPRPRGADYTEPDSPREPPGG  
AHDPA PRSPRT PRAAGCASPRHGRRLPNGYYAGHGAPRPRRTARRGAHDAYSESEDDWC\*  
>rs240959951\_ENSMUSP00000158675\_c.1552:G>C\_p.R518P  
ENSMUST00000238337.2|Cacna1a-212|ENSMUSG0000034656|+|chr8:g.85363274:G>C  
MHLRLSGQRGLTLQPNSSLPSSPFLAKGNFINLSFLRLFRAARLIKLLRQGYTIRILLWTFVQSFKVF  
GNIGIDGEDSDEDEFQITEHNNFRTFFQALMLLFRSATGEAWHNIMLSCLSGKPCDKNSGILTADCGNEFA  
YFYFVSFIFLCSFLMLNLFVAVIMDNFEYLTRDSSILGPHHLDEYVRVWAEYDPAACGRIHYKDMYSLLRVIS  
PPLGLGKCKPHRVACKRLLRMDLPVADDNTVHFNSTLMALIRTALDIKIAKGGADKQMDAELRKEMMAIWP  
LSQKTLDDLVTPHKSTDLTVGKIYAAMMIMEYRQSKAKKLQAMREEQNRTPLMFQRMPEPPSPTQEGGSPQNA  
LPSTQLDPPGGGLMAHEGGMKESPSWVTQRAQEMFQKTGTWSPERGPIDMPNSQPNsQPNsQPNsSDS  
EHYLPMEGQTRAASMPRLPAENQRRRGRPRGNDLSTISDTSMPKRSASVLGPKARRLDDYSLERVPPEENQRY  
HQRRRDPGHRTSERSLGRYTDVDTGLGTDLSMTTQSGDLPSKDRDQDRGRPKDRKHRPHHHHHHHHPAPD  
RDRYAQERPDTRARAREQRWSRSPSEGREHTTHRQSSSVSGSPAPSTSGTSTPRRGRRQLPQTPCTPRPLV  
SYSPAPRRPAARRMAGPAAPPGGSPRGCRRAPRWPAHAPEGPRPRGADYTEPDSPREPPGGAHDPAPRSRPT  
RAAGCASPRHGRRLPNGYYAGHGAPRPRRTARRGAHDAYSESEDDWC\*  
>rs230834853\_ENSMUSP00000158803\_c.6604:G>A\_p.R2202H  
ENSMUST00000238701.2|Cacna1a-213|ENSMUSG0000034656|+|chr8:g.85363283:G>A  
MPRASWGS DPMLSPLSHELLHSPRYPGTDCTLAGSSRTLHVPWSQQMSGLEGPTLKRGGVVDHRDVI LAHQ  
AHKMHSTPQARRKEWEMARFGDEMPGRYAGGGGSGPAAGVVVGAAGGRGAGGSRGGQPGAQRMYQSMAQR  
ARTMALYNPIPVQRNCLTVNRSLFLFSEDNVVRKYAKKITEWPPFEYMI LATIIANCIVLALQHLPPDDDKTP  
MSERLDDTEPYFIGIFCFEAGIKIVALGFHFHKSYLNRGWNVMDVFFVVLTGILATVGTDFDLRTRLAVRVLR  
PLKLVSGIPSLQVVLKSIKAMIPLLQIGLLFFAILIFAIIGLEFYMGKFHTTCFEEGTDDIQGESAPCGT  
EEPARTCPNGTKCQPYWEGPNNGITQFDNIFLAVLTVFQCITMEGWTDLLYNSNDASGNTWNWLYFIPLIIG  
SFFMLNLVLGVLSGEFAKERERVENRRAFLLKLRQQQIERELNGYMEWISKAEEVILAEDET DVEQRHPFDGA  
LRRATLKKSKTDLLNPEEAEDQLADIASVGSPPFARASIKSAKLENSTFFHKKERRMRFYIRRMVKTQAFYWTV  
LSLVALNTLCVAIVHYNQPEWLSDFLYAAEFIFLGLFMSEMFIKMYGLGTRPYFHSSFNCFDCGVIIGSIFEV  
IWAVIKPGTSFGISVLRALRLLRIFKVTKYWASLRNLVSLNSMKSIIISLLFLLFLFIVV FALLGMQLFGGQ  
FNFDEGTPPTNFDTFPAAIMTVFQILLTGEDWNEVMYDGIKSQGGVQGMVFSIYFIVLTLFGNYTLNVLAI  
AVDNLANAQELTKDEQEEEEAAQKLALQKAKEVAEVSPLSAANMSI AVKEQQKNQKPTKSVWEQRTSEMRKQ  
NLLASREALYGDAERWPTPYARPLRPDVKTHLDRPLVDPQENRNNNTNKSRAPEALRPTARPRESARDPDA  
RRAWPGSPERAPGREGPYGRESEPPQREHAPPREHAPWDADTERAKAGDAPRRHTRHPVAEGEP RRHRARRP  
GDEPDRPERRRPRDTRPARAADGEGDDGERKRRHRHGPPAHDDRERRRHRRRKENQGGSPVSGPNLSTTR  
PIQQDLGRQDLPLAEDLDNMKNNKLATGEPASPHDSLGHSLPSPAKIGNSTNPGPALATNPQNAASRRTPN  
NPNPNSNPGPPKTPENSLIVTNPSSQPNsAKTARKPEHMAVEIPPACPLNHTVVQVKNANPDPLPKKEEE  
KKEEEEADPGEDGPKMPPYSSMFILSTTNPLRRLCHYILNLRVYFEMCILMVIAMSSIALAAEDPVQPNAPRN  
NVLRVYFDYVFTGVFTFEMVIKIMIDLGLVLHQGAYFRDLWNILDFIVVSGALVAFVFTGNSKKGKDINTIKSLR  
LRLVRLPKTIKRLPKLKAVFDCVNSLKNVFNILIVYMLFMFIFAVVAVQLFKGKFFHCTDESKEFERDCRGK  
YLLYEKNEVKARDREWKKYEFHYDNVLWALLTLFTVSTGEGWPQVLKHSVDATFENQGPSGYRMEMSIFYVV  
YFVVFVFFVNI FVALIIITFQEQGDKMMEEYSLEKNERACIDFAISAKPLTRHMPQNKQSFQYRMWQFVVS  
PFEYTIMAMIALNTIVLMMKFYGASVAYENALRVFNIVFTSLFSLCVCVKVMAFGILNYFRDAWNIFDFVTVL  
GSITDILVTEFGNFINLSFLRLFRAARLIKLLRQGYTIRILLWTFVQSFKALPYVCLLIAMLFFIYAIIGMQ

VFGNIGIDGEDSDSEDEFQITEHNNFRTEFFQALMLLFRSATGEAWHNIMLSCLSGKPCDKNSGILTADCGNE  
FAYFYFVSFIFLCSFLMLNLFVAVIMDNFEYLTRDSSILGPHHLDEYVRVWAEYDPAACGRIHYKDMYSLLRV  
ISPPLGLGKCKPHRVACKRLLRMDLPVADDNTVHFNSTLMALIRTALDIKIAKGGADKQQMDAELRKEMMAIW  
PNLSQKTLDDLVTPHKSTDLTVGKIYAAMMIMEYYRQSKAKKLQAMREEQNRTPLMFQRMPEPPSPTQEGGSPQ  
NALPSTQLDPPGGGLMAHEGGMKESPSWVTQRAQEMFQKTGTWSPERGPPIDMPNSQPNSQSVEMREMGTDGYS  
DSEHYLPMEGQTRAASMPRLPAENQRRRGRPRGNDLSTISDTSMPKRSASVGLGPKARLLDDYSLERVPPEENQ  
RYHQRRDRRGHHTSERSLGRYTDVDTGLGTDLSMTTQSGDLPSKDRDQDRGRPKDRKHRPHHHHHHHHHPPA  
PDRDRYAQERPDGTGRARAREQRWSRSPSEGREHTTHRQSSSVSGSPAPSTSGTSTPRRGRRLPQTPCTPRP  
LVSYSPAPRRPAARRMAGPAAPPGGSPRGCRRAPRWPAAHAPEGPRPRGADYTEPDSPREPPGGAHDPAPRSR  
TPRAAGCASPRHGRRLPNGYYAGHGAPRPRRTARRGAHDAYSESEDDWC\*

>rs230834853\_ENSMUSP00000112436\_c.6337:G>A\_p.R2113H  
ENSMUST00000121390.8|Cacna1a-201|ENSMUSG00000034656|+|chr8:g.85363283:G>A  
MARFGDEMPGRYGAGGGGSGPAAGVVVGAAGGRGAGGSRQGGQPGAQRMKQSMARARTMALYNPIVVRQNC  
LTVNRSFLFLFSEDNVVRKYAKKITEWPPFEYMI LATI IANCI VLAL EQHL PDDDKTPM SERLDDTEPYFIGIF  
CFEAGIKIVALGF AFHKGSYLRNGWNVMDFVVVLTGILATVGT EFDLRTLRAVRVLRPLKLVSGIPSLQVVLK  
SIMKAMIPLLQIGLLLFFAILIFAIIGLEFYMGKFHTTCFEEGTDI QGES P APCGTEEPARTCPNGTKCQPY  
WEGPNNGITQFDNILFAVLT V FQCITMEGWTDL L YNSNDASGNTWNWLYFIPLIIIGSFFMLNLVLGVLSGEF  
AKERERVENRR AFLKLRQQQIERELNGYMEWISKAEEVILAEDETDVEQRHPFDGALRRATLKKSKTDLLNP  
EEAEDQLADIASVGSPPARASIKSAKLENSTFFHKKERRMRFYIRRMVKTQAFYWTVLSLVALNLTLCVAIVHY  
NQPEWLSDFLYAEFIFLGLFMSEMF IKMYGLGTRPYFHSSFNCFDCGVIIGSIFEVIWAVIKPGTSGFISVL  
RALRLLRIFKVTKYWASLRNLVVSLLNSMKSII SLLFLLFLFIVVFALLGMQLFGGQFNDFEGTPTNFDTFP  
AAIMTVFQILTGEDWNEVMYDGIKSQGGVQGGMVFSIYFIVLTLFGNYTLLNVFLAIAVDNLANAQELTKDEQ  
EEEEAAANQKLALQKAKEVAEVSPLSAANMSIAVKEQQKNQKPTKSVWEQRTSEMRKQNLLASREALYGDAER  
WPTPYARPLRPDVKTHLDRPLVVDPQENRNNNTNKSRAPEALRPTARPRESARDPDARRAWPGSPERAPGREG  
PYGRESEPOQREHAPPREHAPWDADTERAKAGDAPRRHTRHPVAEGEPRRHRARRRPGDEPDRPERRPRPRD  
ATRPARAADGEGDDGERKRRHRHGPFAHDDRERRRRRKNENQSGVFPVSGPNLSTTRPIQQDLGRQDLPLAED  
LDNMKNKALATGSLHGLPSPAKIGNSTNPGPALATNPQNAASRRTPNPNPNPNPNPNPNPNPNPNPNPNPNPN  
SLIVTNPSSTQPNSAKTARKPEHMAVEIPPACPLNHTVVQVKNANPDPLPKKEEEEKKEEEEADPGEDGPKP  
MPPYSSMFI LSTTNPLRRLCHYI LNLRYFEMC ILMVIAMSSIALAAEDPVQPNAPRNNVLRVFDYVFTGVFTF  
EMVIK MIDLGLVLHQGAYFRDLWNI LDFIVVSGALVAF AFTGNSKGDINTIKSLRVLRLVLRPLKTIKRLPKL  
KAVFDCVVNSLKNVFNILIVYMLFMFIFAVVAVQLFKGKFFHCTDESKEFERDCRGKYLLEYKNEVKARDREW  
KKEYEFHYDNVLWALLTLFTVSTGEGWPQVLKHSVDATFENQGPSGYRMEMSIFVYVYFVVFPPFFVNI FVAL  
I IITFQEQGDKMMEEYSLEKNERACIDFAISAKPLTRHMPQNKQSFQYRMWQFVVSPPFEYTIMAMIALNTIV  
LMMKFY GASVAYENALRVFNIVFTSLFSLECVLKVMAFGILNYFRDAWNIFDFVTVLGSITDILVTEFGNFI  
NLSFLRLFRARLRIKLLRQGYTIRILLWTFVQSFKALPYVCLLIAMLFFIYAIIGMQVFGNIGIDGEDSDSE  
DEFQITEHNNFRTEFFQALMLLFRSATGEAWHNIMLSCLSGKPCDKNSGILTADCGNEFAYFYFVSFIFLCSFL  
MLNLFVAVIMDNFEYLTRDSSILGPHHLDEYVRVWAEYDPAACGRIHYKDMYSLLRVISPPLGLGKCKPHRVA  
CKRLLRMDLPVADDNTVHFNSTLMALIRTALDIKIAKGGADKQQMDAELRKEMMAIWPNLSQKTLDDLVTPHK  
STDLTGKIYAAMMIMEYYRQSKAKKLQAMREEQNRTPLMFQRMPEPPSPTQEGGSPQNALPSTQLDPPGGGLMA  
HEGGMKESPSWVTQRAQEMFQKTGTWSPERGPPIDMPNSQPNSQSVEMREMGTDGYS DSEHYLPMEGQTRAAS  
MPRLPAENQRRRGRPRGNDLSTISDTSMPKRSASVGLGPKARLLDDYSLERVPPEENQRYHQRRDRRGHHTSER  
SLGRYTDVDTGLGTDLSMTTQSGDLPSKDRDQDRGRPKDRKHRPHHHHHHHHHPPAPDRDRYAQERPDGTGR  
RAREQRWSRSPSEGREHTTHRQSSSVSGSPAPSTSGTSTPRRGRRLPQTPCTPRPLVSYSPAPRRPAARRM  
AGPAAPPGGSPRGCRRAPRWPAAHAPEGPRPRGADYTEPDSPREPPGGAHDPAPRSRPTPRAAGCASPRHGRRL  
PNGYYAGHGAPRPRRTARRGAHDAYSESEDDWC\*

>rs230834853\_ENSMUSP00000114055\_c.6196:G>A\_p.R2066H  
ENSMUST00000122053.2|Cacna1a-202|ENSMUSG00000034656|+|chr8:g.85363283:G>A  
MARFGDEMPGRYGAGGGGSGPAAGVVVGAAGGRGAGGSRQGGQPGAQRMKQSMARARTMALYNPIVVRQNC  
LTVNRSFLFLFSEDNVDDTEPYFIGIFCFEAGIKIVALGF AFHKGSYLRNGWNVMDFVVVLTGILATVGT EFDL  
RTLRAVRVLRPLKLVSGIPSLQVVLKSIKAMIPLLQIGLLLFFAILIFAIIGLEFYMGKFHTTCFEEGTDI  
QGES P APCGTEEPARTCPNGTKCQPYWEGPNNGITQFDNILFAVLT V FQCITMEGWTDL L YNSNDASGNTWNW  
LYFIPLIIIGSFFMLNLVLGVLSGEFAKERERVENRR AFLKLRQQQIERELNGYMEWISKAEEVILAEDETD  
VEQRHPFDGALRRATLKKSKTDLLNPEEAEDQLADIASVGSPPARASIKSAKLENSTFFHKKERRMRFYIRRM  
VKTQAFYWTVLSLVALNLTLCVAIVHYNQPEWLSDFLYAEFIFLGLFMSEMF IKMYGLGTRPYFHSSFNCFDC  
GVIIGSIFEVIWAVIKPGTSGFISVLRALRLLRIFKVTKYWASLRNLVVSLLNSMKSII SLLFLLFLFIVVFA  
LLGMQLFGGQFNDFEGTPTNFDTFPAAIMTVFQILTGEDWNEVMYDGIKSQGGVQGGMVFSIYFIVLTLFGN  
YTLNVLFLAIAVDNLANAQELTKDEQEEEEAAANQKLALQKAKEVAEVSPLSAANMSIAVKEQQKNQKPTKSVW  
EQRTSEMRKQNLLASREALYGDAERWPTPYARPLRPDVKTHLDRPLVVDPQENRNNNTNKSRAPEALRPTAR

PRESARDPDARRAWPGSPERAPGREGPYGRESEPOQREHAPPREHAPWDADTERAKAGDAPRRHTHRVAEAGE  
 PRRHRARRRPGDEPDDRPERRRPRDTRPARAADGEGDDGERKRRHRHGPPAHDDRERRHRRRKENQGSQV  
 VSGPNLSTTRPIQQDLGRQDLPLAEDLDNMKNNKLATGEPASPHDSLGHSGLPSPAKIGNSTNPGPALATNP  
 QNAASRRTPNPNPNSNPGPPKTPENSLIVTNPSSTQPNsAKTARKPEHMAVEIPPACPLNHTVVQVKNAN  
 PDPLPKKEEEEKKEEEEADPGEDGPKMPYPSSMFI LSTTNPLRRLCHYILNLRVYFEMCILMVIAMSSIALAAE  
 DPVQPNAPRNNVLRVYFDYVFTGVFTFEMVIKIMIDLGLVLHQGAYFRDLWNILDFIVVSGALVAFVFTGNSKKG  
 DINTIKSLRVLRLVLRPLKTIKRLPKLKA VFD CVVNSLKNVFNILIVYMLFMFIFAVVAVQLFKGKFFHCTDES  
 KEFERDCRGKYLLEYKNEVKARDREWKKYEFHYDNVLWALLTLFTVSTGEGWPQVLKHSVDATFENQGPSQV  
 RMEMSIFYVVYFVVFVFFVNI FVALI I I TFQEQQDKMMEEYSLEKNERACIDFAISAKPLTRHMPQNKQSFQ  
 YRMWQFVVSPPFEYTIMAMIALNTIVLMMKFY GASVAYENALRVFNIVFTSLFSLECVLKVMAFGILNYFRDA  
 WNI FDFVTVLGSITDILVTEFGNNFINLSFLRLFRAARLIKLLRQGYTIRILLWTFVQSFKALPYVCLLIAML  
 FFYAIIGMQVFGNIGIDGEDSDDEDEFQITEHNNFRFTFFQALMLLFRSATGEAWHNIMLSCLSGKPCDKNS  
 GILTADCGNEFAYFYFVSFIFLCSFLMLNLFVAVIMDNFEYLTRDSSILGPHHLDEYVRVWAEYDPAACGRIH  
 YKDMYSLLRVISPPGLGKCKPHRVACKRLLRMDLPVADDNTVHFNSTLMALIRTALDIKIAKGGADKQMDA  
 ELRKEMMAIWPNLSQKTLDLLVTPHKSTDLTVGKIYAAMMIMEYYRQSKAKKLQAMREEQNRTPLMFQRMPEP  
 SPTQEGGQSNALPSTQLDPGGGLMAHEGGMKESPSWVTQRAQEMFQKTGTWSPERGGPIDMPNSQPNsQSVE  
 MREMGTGYS DSEHYLPMEGQTRAASMPRLPAENQRRRGRPRGNDLSTISDTPMKRSASVLPKARRLDDYS  
 LERVPEENQRYHQRRDRGHHTSERSLGRYTDVDTGLGTDLSMTTQSGDLP SKDRDQDRGRPKDRKHRPHHH  
 HHHHHHHPPAPDRDRYAQERPDTRARAREQRWSRSPSEGREHTTHRQGS SSVSGSPAPSTSGTSTPRRGRRO  
 LPQTPCTPRPLVSYSPAPRRPAARRMAGPAAPPGGSPRGCRRAPRWPAAHAPEGPRPRGADYTEPDSPREPPGG  
 AHDPA PRSPRT PRAAGCASPRHGRRLPNGYYAGHGAPRPRRTARRGAHDAYSESEDDWC\*  
 >rs230834853\_ENSMUSP00000149242\_c.6196:G>A\_p.R2066H  
 ENSMUST00000215756.2|Cacna1a-211|ENSMUSG00000034656|+|chr8:g.85363283:G>A  
 XRMKQKSMAQRARTMALYNPIVVRQNCCLTVNRSLFLFSEDNVVRKYAKKITEWPPFEYMILATIIANCIVLAL  
 EQHLPDDDKTPMSERLDDTEPYFIGIFCFEAGIKIVALGFHFKGSYLRNGWNVMDFFVVLTGILATVGTDFD  
 LRTLRAVRVLRPLKLVLSGIPSLQVVLKSIKAMKAPLLQIGLLFFAILIFAIIGLEFYMGKFHTTCFEEGTDD  
 IQGESPAPCVGTEEPARTCPNGTKCQPYWEGPNNGITQFDNILFVAVLTVFQCITMEGYMDLLYNSNDASGNTWN  
 WLYFIPLI I IGSFFMLNLVGLVLSGEFAKERERVENRRRAFLKLRQQQIERELNGYMEWISKAEVILAEDET  
 DVEQRHPFDALRRATLKKSKTDLLNPEEAEDQLADIASVGS PFARASIKSAKLENSTFFHKKERRMRFYIRRM  
 VKTQAFYWTVLSLVALNTLCVAIVHYNQPEWLSDFLYAEFIFLGLFMSEMIKMYGLGTRPYFHSSFNCFCDC  
 GVIIGSIFEVIWAVIKPGTSFGISVLRALRLLRIFKVTKYWASLRNLVVSLLNSMKSIIISLLFLLFLFIVVFA  
 LLGMQLFGGQFNDFDEGTPPTNFDTFPAAIMTVFQILTGEDWNEVMYDGIKSQGGVQGGMVFSIYFIVLTLFGN  
 YTLNVLFLAIAVDNLANAQELTKDEQEEEEANQKALQKAKEVAEVSPLSAANMSIAVKEQQKNQKPTKSVW  
 EQRTSEMRKQNLASREALYGDAERWPTPYARPLRPDVKTHLDRPLVVDPOENRNNNTNKSRAPEALRPTAR  
 PRESARDPDARRAWPGSPERAPGREGPYGRESEPOQREHAPPREHAPWDADTERAKAGDAPRRHTHRVAEAGE  
 PRRHRARRRPGDEPDDRPERRRPRDTRPARAADGEGDDGERKRRHRHGPPAHDDRERRHRRRKENQGSQV  
 VSGPNLSTTRPIQQDLGRQDLPLAEDLDNMKNNKLATGEPASPHDSLGHSGLPSPAKIGNSTNPGPALATNP  
 QNAASRRTPNPNPNSNPGPPKTPENSLIVTNPSSTQPNsAKTARKPEHMAVEIPPACPLNHTVVQVKNAN  
 PDPLPKKEEEEKKEEEEADPGEDGPKMPYPSSMFI LSTTNPLRRLCHYILNLRVYFEMCILMVIAMSSIALAAE  
 DPVQPNAPRNNVLRVYFDYVFTGVFTFEMVIKIMIDLGLVLHQGAYFRDLWNILDFIVVSGALVAFVFTGNSKKG  
 DINTIKSLRVLRLVLRPLKTIKRLPKLKA VFD CVVNSLKNVFNILIVYMLFMFIFAVVAVQLFKGKFFHCTDES  
 KEFERDCRGKYLLEYKNEVKARDREWKKYEFHYDNVLWALLTLFTVSTGEGWPQVLKHSVDATFENQGPSQV  
 RMEMSIFYVVYFVVFVFFVNI FVALI I I TFQEQQDKMMEEYSLEKNERACIDFAISAKPLTRHMPQNKQSFQ  
 YRMWQFVVSPPFEYTIMAMIALNTIVLMMKFY GASVAYENALRVFNIVFTSLFSLECVLKVMAFGILNYFRDA  
 WNI FDFVTVLGSITDILVTEFGNNFINLSFLRLFRAARLIKLLRQGYTIRILLWTFVQSFKALPYVCLLIAML  
 FFYAIIGMQVFGNIGIDGEDSDDEDEFQITEHNNFRFTFFQALMLLFRSATGEAWHNIMLSCLSGKPCDKNS  
 GILTADCGNEFAYFYFVSFIFLCSFLMLNLFVAVIMDNFEYLTRDSSILGPHHLDEYVRVWAEYDPAACGRIH  
 YKDMYSLLRVISPPGLGKCKPHRVACKRLLRMDLPVADDNTVHFNSTLMALIRTALDIKIAKGGADKQMDA  
 ELRKEMMAIWPNLSQKTLDLLVTPHKSTDLTVGKIYAAMMIMEYYRQSKAKKLQAMREEQNRTPLMFQRMPEP  
 SPTQEGGQSNALPSTQLDPGGGLMAHEGGMKESPSWVTQRAQEMFQKTGTWSPERGGPIDMPNSQPNsQSVE  
 MREMGTGYS DSEHYLPMEGQTRAASMPRLPAENQRRRGRPRGNDLSTISDTPMKRSASVLPKARRLDDYS  
 LERVPEENQRYHQRRDRGHHTSERSLGRYTDVDTGLGTDLSMTTQSGDLP SKDRDQDRGRPKDRKHRPHHH  
 HHHHHHHPPAPDRDRYAQERPDTRARAREQRWSRSPSEGREHTTHRQGS SSVSGSPAPSTSGTSTPRRGRRO  
 LPQTPCTPRPLVSYSPAPRRPAARRMAGPAAPPGGSPRGCRRAPRWPAAHAPEGPRPRGADYTEPDSPREPPGG  
 AHDPA PRSPRT PRAAGCASPRHGRRLPNGYYAGHGAPRPRRTARRGAHDAYSESEDDWC\*  
 >rs230834853\_ENSMUSP00000158675\_c.1561:G>A\_p.R521H  
 ENSMUST00000238337.2|Cacna1a-212|ENSMUSG00000034656|+|chr8:g.85363283:G>A

MHLLRLSGQRGLTLQPNSPSSLPSSPFPLAKGNFNLSFLRLFRAARLIKLLRQGYTIRILLWTFVQSFKVF  
GNIGIDGEDSDSDEDEFQITEHNNFRTFFQALMLLFRSATGEAWHNIMLSCLSGKPCDKNSGILTADCGNEFA  
YFYFVSFIIFLCSFLMLNLFVAVIMDNFEYLTRDSSILGPHHLEDEYVRVWAEYDPAACGRIHYKDMYSLLRVIS  
PPLGLGKCKPHRVACKRLLRMDLPVADDNTVHFNSTLMALIRTALDIKIAKGGADKQQMDAELRKEMMAIWP  
LSQKTLDDLVTPHKSTDLTVGKIYAAMMIMEYYRQSKAKKLQAMREEQNRTPLMFQRMPEPPSPTQEGGSPQNA  
LPSTQLDPPGGGLMAHEGGMKESPSWVTQRAQEMFQKTGTWSPERGPPIDMPNSQPNSQSVEMREMGTGYS  
EHLPMEGQTRAASMPRLPAENQRRRGRPRGNDLSTISDTSMPKRSASVLGPKARRLDDYSLERVPPPEENQRY  
HQRRDRGRHHTSERSLGRYTDVDTGLGTDLSMTTQSGDLPSKDRDQDRGRPKDRKRRPHHHHHHHHHHPAPD  
RDRYAQERPDTRARAREQRWSRSPSEGREHTTHRQSSSVSGSPAPSTSGTSTPRRGRRLPQTCTPRPLV  
SYSPAPRRPAARRMAGPAAPPGGSPRGCRRAPRWPAHAPEGPRPRGADYTEPDSPREPPGGAHDPAPRSRPTP  
RAAGCASPRHGRRLPNGYYAGHGAPRPTARRGAHDAYSESEDDWC\*  
>ENSMUSP00000158803\_c.6604:g>ATGAGGCAGTGGTCAGTCTGGGACTATAGTTCAAAGGCAGGCC  
ACCTGTCTTGTATACA\_p.R2202ins-fs ENSMUST00000238701.2|Cacna1a-  
213|ENSMUSG00000034656|+|chr8:g.85363283:g>ATGAGGCAGTGGTCAGTCTGGGACTATAG  
TTCAAAGGCAGGCCACCTGTCTTGTATACA  
MPRASWGS DPMLSPLSHELLHS PRYPGTDCTLAGSSRTLHVPWSQQMSGSLGPTLKRGGVVDHRDVI LAHQ  
AHKMHSTPQARRKEWEMARFGDEMPGRYGAGGGGSGPAAGVVGAAGGRGAGGSRQGGQPGAQRMYKQSMAQR  
ARTMALYNPIPVRQNC LTVNRS LFLFSEDNVVRKYAKKITEWPPFEYMI LATIIANCIVLAL EQHLPDDDKTP  
MSERLDDTEPYFIGIFCFEAGIKIVALGF AFHKGSYLRNGWNVMD FVVVLTGILATVGT EFDLRTLRAVRVLR  
PLKLVSGIPSLQVVLKSIMKAMIPLLQIGLLFFAILIFAIIGLEFYMKG FHTTCFEEGTD DDIQGESPA PCGT  
EEPARTCPNGTKCQPYWEGPNNGITQFDNILFAVLT V FQCITMEGWTDL LYSNDASGNTWNWLYFIPLIIIG  
SFFMLNLVLGVLSGEFAKERERVENRRAFLKLRQQQIERELNGYMEWISKAEEVILAEDET DVEQRHFPDGA  
LRRATLKKSKTDLLNPEEAEDQLADIASVGS PFARASIKSAKLENSTFFHKKERRMRFYIRRMVKTQAFYWT  
LSLVALNTLCVAIVHYNQPEWLSDFLYYAEFI FLGLFMSEMF IKMYGLGTRPYFHSSFNCFDCGVIIGSIFEV  
IWAVIKPGTSFGISVLRALRLLRIFKVTKYWASLRNLVSLNSMKSII SLLFLLFLFIVVFALLGMQLFGGQ  
FNFDEGTPPTNFDTFPAAIMTVFQILTGEDWNEVMEYDVISQGGVQGGMVFSIYFIVLTLFGNYTLLNVFLAI  
AVDNLANAQELTKDEQEEEEANQKLALQKAKEVAEVSPLSAANMSI AVKEQQKNQKPTKSVWEQRTSEMRKQ  
NLLASREALYGDAERWPTPYARPLRPDVKTHLDRPLVDPQENRNNNTNKSRAPEALRPTARPRESARDPDA  
RRAWPGSPERAPGREGPYGRESEPPQREHAPPREHAPWDADTERAKAGDAPRRHTRHPVAEGEPRRHRARRRP  
GDEPDRPERRPRPRDATRPARAADGEGDDGERKRRHRHGPPAHDDRERRHRRRKENQGGSPVSGPNLSTTR  
PIQQDLGRQDLPLAEDLDNMKNKLATGEPASPHDSLGHSGLPSPAKIGNSTNPGPALATNPQNAASRRTPN  
NPGNPSNP GP PKTPENSLIVTNPSS TQPN SAKTARKPEHMAVEI PPACPLNHTVVQVNKNANPDPLPKKEE  
KKEEEEDPGE DGPKMP PYS S MFI LSTTNPLRRLCHYI LNLRYFEMC ILMVIAMSSIALAAEDVPQPNAPRN  
NVLRYFDYVFTGVFTFEMVIK MIDLGLVLHQGAYFRDLWNILDFIVVSGALVAF AFTGNSKGDINTIKSLRV  
LRVLRPLKTIKRLPKLKA V FDCVVNSLKNVFNILIVYMLFMFIFAVVAVQLFKGKFFHCTDESKEFERDCRGK  
YLLYEKNEVKARDREWKKYEFHYDNVLWALLTLFTVSTEGEWQVQLKHSVDATFENQGGPSPGYRMEMSIFYVV  
YFVVFPPFFVNI FVALIIITFQE QGDKMEEYSLEKNERACIDFAISAKPLTRHMPQNKQSFQYRMWQFV VSP  
PFEYTIMAMIALNTIVLMMKFYGASVAYENALRVFNIVFTSLFSLECVLKVMAFGILNYFRDAWNIFDFVTVL  
GSITDILVTEFGNFINLSFLRLFRAARLIKLLRQGYTIRILLWTFVQSFKALPYVCLLIAMLFFIYAIIGMQ  
VFGNIGIDGEDSDSDEDEFQITEHNNFRTFFQALMLLFRSATGEAWHNIMLSCLSGKPCDKNSGILTADCGNE  
FAYFYFVSFIIFLCSFLMLNLFVAVIMDNFEYLTRDSSILGPHHLEDEYVRVWAEYDPAACGRIHYKDMYSLLRV  
ISPPLGLGKCKPHRVACKRLLRMDLPVADDNTVHFNSTLMALIRTALDIKIAKGGADKQQMDAELRKEMMAI  
PNLSQKTLDDLVTPHKSTDLTVGKIYAAMMIMEYYRQSKAKKLQAMREEQNRTPLMFQRMPEPPSPTQEGGSPQ  
NALPSTQLDPPGGGLMAHEGGMKESPSWVTQRAQEMFQKTGTWSPERGPPIDMPNSQPNSQSVEMREMGTGYS  
DSEHYLPMEGQTRAASMPRLPAENQRRRGRPRGNDLSTISDTSMPKRSASVLGPKARRLDDYSLERVPPPEENQ  
RYHQRRDRGRHHEAVVSAGTIVQRQATCLVYTPLSALWADTLMWTQVWGQI  
>ENSMUSP00000112436\_c.6337:g>ATGAGGCAGTGGTCAGTCTGGGACTATAGTTCAAAGGCAGGCC  
ACCTGTCTTGTATACA\_p.R2113ins-fs ENSMUST00000121390.8|Cacna1a-  
201|ENSMUSG00000034656|+|chr8:g.85363283:g>ATGAGGCAGTGGTCAGTCTGGGACTATAG  
TTCAAAGGCAGGCCACCTGTCTTGTATACA  
MARFGDEMPGRYGAGGGGSGPAAGVVVGAAGGRGAGGSRQGGQPGAQRMYKQSMAQRARTMALYNPIPVRQNC  
LTVNRS LFLFSEDNVVRKYAKKITEWPPFEYMI LATIIANCIVLAL EQHLPDDDKTPMSERLDDTEPYFIGIF  
CFEAGIKIVALGF AFHKGSYLRNGWNVMD FVVVLTGILATVGT EFDLRTLRAVRVLRPLKLVSGIPSLQVVLK  
SIMKAMIPLLQIGLLFFAILIFAIIGLEFYMKG FHTTCFEEGTD DDIQGESPA PCGT  
WEGPNNGITQFDNILFAVLT V FQCITMEGWTDL LYSNDASGNTWNWLYFIPLIIIGSFFMLNLVLGVLSGEF  
AKERERVENRRAFLKLRQQQIERELNGYMEWISKAEEVILAEDET DVEQRHFPDGA LRRATLKKSKTDLLN  
PEEAEDQLADIASVGS PFARASIKSAKLENSTFFHKKERRMRFYIRRMVKTQAFYWTVLSLVALNTLCVAIVHY  
NQPEWLSDFLYYAEFI FLGLFMSEMF IKMYGLGTRPYFHSSFNCFDCGVIIGSIFEV IWAVIKPGTSFGISVL

RALRLLRIFKVTKYWASLRNLVSVLLNSMKSIIISLLFLLFLFIVVVFALLGMQLFGGQFNFDGEGTPTNFDTFF  
AAIMTVFQILTGEDWNEVMYDGIKSQGGVQGGMVFSIYFIVLTLFNGYTLNVLFLAIAVDNLANAQELTKDEQ  
EEEEANQKLALQKAKEVAEVSPLSAANMSIAVKEQQKNQKPTKSVWEQRTSEMRKQNLLASREALYGDAEER  
WPTYARPLRPDVKTHLDRPLVVDPQENRNNNTNKSRAPEALRPTARPRESARDPDARRAWPGSPERAPGREG  
PYGRESEPPQREHAPPREHAPWDADTERAKAGDAPRRHTRHPVAEGEPRRHRARRRPGDEPDDRPERPRPRD  
ATRPARAADGEGDDGERKRRHRHGPPAHDDRERRRRRKENQSGSVPVSGPNLSTTRPIQQDLGRQDLPLAED  
LDNMKNNKLATGEPASPHDSLGHSLPSPAKIGNSTNPGPALATNPQNAASRRTPNPNPNSNPSPGPKTPEN  
SLIVTNPSSTQPNSAKTARKPEHMAVEIPPACPLNHTVVQVKNANPDPLPKKEEKKKEEEDPGEEDGPKP  
MPYSSMFI LSTTNPLRRLCHYILNLRVYFEMCILMVIAMSSIALAAEDVPQPNAPRNNVLRVYFDYVFTGVFTF  
EMVIKIMIDLGLVLHQGAYFRDLWNI LDFIVVSGALVAFVFTGNSKGDINTIKSLRVLRLVLRPLKTIKRLPKL  
KAVFDCVVNSLKNVFNILIVYMLFMFIFAVVAVQLFKGKFFHCTDESKEFERDCRGKYLLEYKNEVKARDREW  
KKYEFHYDNVLWALLTLFTVSTGEGWPQVLKHSVDATFENQGPSPGYRMEMSIFYVVYFVVFPPFFVNI FVAL  
IIITFQEQGDKMMEEYSLEKNERACIDFAISAKPLTRHMPQNKQSFQYRMWQFVVSPPFEYTIMAMIALNTIV  
LMMKFY GASVAYENALRVFNIVFTSLFSLECVLKVMAFGILNYFRDAWNIFDFVTVLGSITDILVTEFGNFI  
NLSFLRLFRAARLIKLLRQGYTIRILLWTFVQSFKALPYVCLLIAMLFFIYAIIGMQVFGNIGIDGEDSDSDE  
DEFQITEHNNFRFTFFQALMLLFRSATGEAWHNIMLSCLSGKPCDKNSGILTADCGNEFAYFYFVSFIFLCSFL  
MLNLFVAVIMDNFEYLTRDSSILGPHHLDEYVRVWAEYDPAACGRH HYKDMYSLLRVISPPLGLGKKCPHRVA  
CKRLLRMDLPVADDNTVHFNSTLMALIRTALDIKIAKGGADKQMDAELRKEMMAIWPNSQKTLDLLVTPHK  
STDLTVGKIYAAMMIMEYYRQSKAKKLQAMREEQNRTPLMFQRMPPSPTQEGGQSNALPSTQLDPPGGGLMA  
HEGGMKESPSWVTQRAQEMFQKTGTWSPERGPPIDMPNSQPNSSQSVEMREMGTGYSYDSEHYLPMEGQTRAAS  
MPRLPAENQRRRGRPRGNDLSTISDTSMPKRSASVLPKARRLDDYSLERVPPPEENQRYHQRRDRGHHEAVV  
SAGTIVQRQATCLVYTPLSALWADTLMWTQVWGQI  
>ENSMUSP00000114055\_c.6196:g>ATGAGGCAGTGGTCAGTGCTGGGACTATAGTTCAAAGGCAGGCC  
ACCTGTCTTGTATACA\_p.R2066ins-fs ENSMUST00000122053.2|Cacna1a-  
202|ENSMUSG00000034656|+|chr8:g.85363283:g>ATGAGGCAGTGGTCAGTGCTGGGACTATAG  
TTCAAAGGCAGGCCACCTGTCTTGTATACA  
MARFGDEMPGRYGAGGGSGPAAGVVVGAAGGRGAGGSRQGGQPGAQRMYKQSMARARTMALYNPIVVRQNC  
LTVNRSFLFSEDNVDDETEPYFIGIFCFEAGIKIVALGFHFKGSYLRNGWNVMDVFFVLTGILATVGTDFDL  
RTLRAVRVLRPLKLVSGIPSLQVVLKSIKAMIPLLQIGLLFFAILIFAIIGLEFYMGKFHTTCFEEGTDDI  
QGESPAPCGTEEPARTCPNGTKCQPYWEGPNNGITQFDNIFLAVLTVFQCITMEGWTDLLYNSNDASGNTWNW  
LYFIPLIIIGSFFMLNLVLGVLGSEFAKERERVENRRAFLKLRQQQIERELNGYMEWISKAEEVILAEDETD  
VEQRHPFDGALRRATLKKSKTDLNPEEAEDQLADIASVGSPPFARASIKSAKLENSTFFHKKERMRFYIRRM  
VKTQAFYWTVLSLVALNTLCVAIVHYNQPEWLSDFLYAEFIFLGLFMSEMIKMYGLGTRPYFHSSFCFCDC  
GVIIGSIFEVIWAVIKPGTSFGISVLRALRLLRIFKVTKYWASLRNLVSVLLNSMKSIIISLLFLLFLFIVVFA  
LLGMQLFGGQFNFDGEGTPTNFDTFFPAAIMTVFQILTGEDWNEVMYDGIKSQGGVQGGMVFSIYFIVLTLFNGY  
YTLNVLFLAIAVDNLANAQELTKDEQEEEEANQKLALQKAKEVAEVSPLSAANMSIAVKEQQKNQKPTKSVW  
EQRTSEMRKQNLLASREALYGDAEERWPTYARPLRPDVKTHLDRPLVVDPQENRNNNTNKSRAPEALRPTAR  
PRESARDPDARRAWPGSPERAPGREGPYGRESEPPQREHAPPREHAPWDADTERAKAGDAPRRHTRHPVAEGE  
PRRHRARRRPGDEPDDRPERPRPRDATRPARAADGEGDDGERKRRHRHGPPAHDDRERRRRRKENQSGSVP  
VSGPNLSTTRPIQQDLGRQDLPLAEDLDNMKNNKLATGEPASPHDSLGHSLPSPAKIGNSTNPGPALATNP  
QNAASRRTPNPNPNSNPSPGPKTPENSLIVTNPSSTQPNSAKTARKPEHMAVEIPPACPLNHTVVQVKNAN  
PDPLPKKEEKKKEEEDPGEEDGPKPMPPYSSMFI LSTTNPLRRLCHYILNLRVYFEMCILMVIAMSSIALAAE  
DPVQPNAPRNNVLRVYFDYVFTGVFTFEMVIKIMIDLGLVLHQGAYFRDLWNI LDFIVVSGALVAFVFTGNSKGD  
DINTIKSLRVLRLVLRPLKTIKRLPKLAVFDCVVNSLKNVFNILIVYMLFMFIFAVVAVQLFKGKFFHCTDES  
KEFERDCRGKYLLEYKNEVKARDREWKKYEFHYDNVLWALLTLFTVSTGEGWPQVLKHSVDATFENQGPSPGY  
RMEMSIFYVVYFVVFPPFFVNI FVALIIITFQEQGDKMMEEYSLEKNERACIDFAISAKPLTRHMPQNKQSFQ  
YRMWQFVVSPPFEYTIMAMIALNTIVLMMKFY GASVAYENALRVFNIVFTSLFSLECVLKVMAFGILNYFRDA  
WNIFDFVTVLGSITDILVTEFGNFI NLSFLRLFRAARLIKLLRQGYTIRILLWTFVQSFKALPYVCLLIAML  
FFIYAIIGMQVFGNIGIDGEDSDSDEDEFQITEHNNFRFTFFQALMLLFRSATGEAWHNIMLSCLSGKPCDKNS  
GILTADCGNEFAYFYFVSFIFLCSFLMLNLFVAVIMDNFEYLTRDSSILGPHHLDEYVRVWAEYDPAACGRH  
YKDMYSLLRVISPPLGLGKKCPHRVACKRLLRMDLPVADDNTVHFNSTLMALIRTALDIKIAKGGADKQMDA  
ELRKEMMAIWPNSQKTLDLLVTPHKSTDLTVGKIYAAMMIMEYYRQSKAKKLQAMREEQNRTPLMFQRMPP  
SPTQEGGQSNALPSTQLDPPGGGLMAHEGGMKESPSWVTQRAQEMFQKTGTWSPERGPPIDMPNSQPNSSQSV  
EMREMGTGYSYDSEHYLPMEGQTRAASMPRLPAENQRRRGRPRGNDLSTISDTSMPKRSASVLPKARRLDDYS  
LERVPPPEENQRYHQRRDRGHHEAVVSAGTIVQRQATCLVYTPLSALWADTLMWTQVWGQI  
>ENSMUSP00000149242\_c.6196:g>ATGAGGCAGTGGTCAGTGCTGGGACTATAGTTCAAAGGCAGGCC  
ACCTGTCTTGTATACA\_p.R2066ins-fs ENSMUST00000215756.2|Cacna1a-

211 | ENSMUSG00000034656 | + | chr8:g.85363283:G>ATGAGGCAGTGGTCAGTGCTGGGACTATAG  
TTCAAAGGCAGGCCACCTGTCTTGATACA  
XRMYKQSMARARTMALYNPI PVRQNCLTVNRSFLFSEDNVVRKYAKKITEWPPFEYMILATIIANCIVLAL  
EQHLPDDDKTPMSERLDDTEPYFIGIFCFEAGIKIVALGFHKGSYLRNGWNVMDVFFVVLGTGILATVGTGTEFD  
LRTLRAVRVLRPLKLVSGIPSLQVVLKSIKAMIPLLQIGLLFFAILIFAIIGLEFYMGKFHTTCFEEGTDD  
IQGESAPCGTEEPARTCPNGTKCQPYWEGPNNGITQFDNILFAVLTVFQCITMEGWTDLLYNSNDASGNTWN  
WLYFIPLIIIGSFFMLNLVGLVLSGEFAKERERVENRRAFLKLRQQQIERELNGYMEWISKAEEVILAEDET  
DVEQRHPPFDALRRATLKKSKTDLNPEEAEDQLADIASVGSPPARASIKSAKLENSTFFHKKERRMRFYIRRM  
VKTQAFYWTVLSLVALNTLCVAIVHYNQPEWLSDFLYYAEFIFLGLFMSEMF IKMYGLGTRPYFHSSFNCFDC  
GVIIGSIFEVIWAVIKPGTSFGISVLRALRLLRIFKVTKYASLRNLVVSLLNSMKSII SLLFLLFLFIVVFA  
LLGMQLFGGQFNDFEGTPTNFDTFPAAIMTVFQILTGEDWNEVMYDGIKSQGGVQGGMVFSIYFIVLTLFGN  
YTLNVLFLAIAVDNLANAQELTKDEQEEEEAAANQKLALQKAKEVAEVSPLSAANMSIAVKEQQKNQKPTKSVW  
EQRTSEMRKQNLASREALYGDAERWPTPYARPLRPDVKTHLDRPLVVDPQENRNNNTNKSRAPEALRPTAR  
PRESARDPDARRAWPGSPERAPGREPGYGRESEPPQREHAPPREHAPWDADTERAKAGDAPRRHTRHPVAEAGE  
PRRHRARRRPGDEPDDRPERRPRPRDATRPARAADGEGDDGERKRRHRHGPAAHDDRERRRRRKENQSGSVP  
VSGPNLSTTRPIQQDLGRQDLPLAEDLDNMKNKLATGEPASPHDSLGHSGLPPSPAKIGNSTNPGPALATNP  
QNAASRRTPNPNPGNPSNPGPKTPENSLIVTNPSSTQNSAKTARKPEHMAVEIPACPLNHTVVQVKNAN  
PDLPLPKKEEEKKEEEDPGEDEGPKPMPYPSSMFI LSTTNPLRRLCHYILNLRIFYEMCII LMVIAMSSIALAAE  
DPVQPNAPRNVLRYFDYVFTGVFTFEMVIK MIDLGLVLHQGAYFRDLWNILDFIVVSGALVAFATGNSK GK  
DINTIKSLRVLRLRPLKTIKRLPKLKA VFCVNSLKNVFNILIVYMLFMFIFAVVAVQLFKGKFFHCTDES  
KEFERDCRGKYLLEYKNEVKARDREWKKYEFHYDNVLWALLTLFTVSTGEGWPQVLKHSVDATFENQGPSGY  
RMEMSIFYVVYFVVFVFFVNI FVALIIITFQEQGDKMMEEYSLEKNERACIDFAISAKPLTRHMPQNKQSFQ  
YRMWQFVVSPPFEYTIMAMIALNTIVLMMKFYGASVAYENALRVFNIVFTSLFSLECVLKVMAFGI LNYFRDA  
WNIFDFVTVLGSITDILVTEFGNNFINLSFLRLFRAARLIKLLRQGYTIRILLWTFVQSFKALPYVCLLIAML  
FFIYAIIGMQVFGNIGIDGEDSDEDEFQITEHNNFRTFFQALMLLFRSATGEAWHNIMLSCLSGKPCDKNS  
GILTADCGNEFAYFYFVFSIFLCSFMLNLVAVIMDNFEYLTRDSSILGPHHLDEYVRVWAEYDPAACGR I H  
YKDMYSLLRVIS PPLGLGKKCPHRVACKRLLRMDLPVADDNTVHFNSTLMALIRTALDIKIAKGGADKQMDA  
ELRKEMMAIWPNL SQKTLDLLVTPHKSTDLTVGKIYAAMMIMEYYRQSKAKKLQAMREEQNRTPLMFQRM EPP  
SPTQEGGQSQNALPSTQLDPPGGGLMAHEGGMKESPSWVTQRAQEMFQKTGTWSPERGPPIDMPNSQPNSQSVE  
MREMGTGYS DSEHYLPMEGQTRAASMPRLPAENQRRRGRPRGNDLSTISDTSMPKRSASVLGPKARRLDDYS  
LERVPPEENQRYHQRRDRGHHEAVVSAGTIVQRQATCLVYTPLSALWADTLMWTQVWGQI  
>ENSMUSP00000158675\_c.1561:g>ATGAGGCAGTGGTCAGTGCTGGGACTATAGTTCAAAGGCAGGCC  
ACCTGTCTTGATACA\_p.R521ins-fs ENSMUST00000238337.2|Cacna1a-  
212 | ENSMUSG00000034656 | + | chr8:g.85363283:G>ATGAGGCAGTGGTCAGTGCTGGGACTATAG  
TTCAAAGGCAGGCCACCTGTCTTGATACA  
MHLRLSGQRGLTLQPNSPSSLPSPPFLAKGNF INLSFLRLFRAARLIKLLRQGYTIRILLWTFVQSFKVF  
GNIGIDGEDSDEDEFQITEHNNFRTFFQALMLLFRSATGEAWHNIMLSCLSGKPCDKNSGILTADCGNEFA  
YFYFVFSIFLCSFMLNLVAVIMDNFEYLTRDSSILGPHHLDEYVRVWAEYDPAACGR I HYKDMYSLLRVIS  
PPLGLGKKCPHRVACKRLLRMDLPVADDNTVHFNSTLMALIRTALDIKIAKGGADKQMDAELRKEMMAIWPN  
LSQKTLDLLVTPHKSTDLTVGKIYAAMMIMEYYRQSKAKKLQAMREEQNRTPLMFQRM EPPSPTQEGGQSQNA  
LPSTQLDPPGGGLMAHEGGMKESPSWVTQRAQEMFQKTGTWSPERGPPIDMPNSQPNSQSVE MREMGTGYS  
DSEHYLPMEGQTRAASMPRLPAENQRRRGRPRGNDLSTISDTSMPKRSASVLGPKARRLDDYS LERVPPEENQRY  
HQRRDRGHHEAVVSAGTIVQRQATCLVYTPLSALWADTLMWTQVWGQI  
>rs252377326\_ENSMUSP00000158803\_c.6615:C>T\_p.R2206C  
ENSMUST00000238701.2|Cacna1a-213|ENSMUSG00000034656|+|chr8:g.85363294:C>T  
MPRASWGS DPMLSPLSHELLHSPRYPGTDCTLAGSSRTLHVPWSQQMSGSLGPTLKRGGVVDHRDVI LAHQ  
AHKMHSTPQARRKEWEMARFGDEMPGRYGAGGGGSPAAGVVVGAAGGRGAGGSRQGGQPGAQRMYKQSMAR  
ARTMALYNPI PVRQNCLTVNRSFLFSEDNVVRKYAKKITEWPPFEYMILATIIANCIVLALAEQHL PDDDKTP  
MSERLDDTEPYFIGIFCFEAGIKIVALGFHKGSYLRNGWNVMDVFFVVLGTGILATVGTGTEFDLRTLRAVRVLR  
PLKLVSGIPSLQVVLKSIKAMIPLLQIGLLFFAILIFAIIGLEFYMGKFHTTCFEEGTDDIQGESAPCGT  
EEPARTCPNGTKCQPYWEGPNNGITQFDNILFAVLTVFQCITMEGWTDLLYNSNDASGNTWNWLYFIPLIIIG  
SFFMLNLVGLVLSGEFAKERERVENRRAFLKLRQQQIERELNGYMEWISKAEEVILAEDET DVEQRHPPFDGA  
LRRATLKKSKTDLNPEEAEDQLADIASVGSPPARASIKSAKLENSTFFHKKERRMRFYIRRMVKTQAFYWTV  
LSLVALNTLCVAIVHYNQPEWLSDFLYYAEFIFLGLFMSEMF IKMYGLGTRPYFHSSFNCFDCGVIIGSIFEV  
I WAVIKPGTSFGISVLRALRLLRIFKVTKYASLRNLVVSLLNSMKSII SLLFLLFLFIVV FALLGMQLFGGQ  
FNDFEGTPTNFDTFPAAIMTVFQILTGEDWNEVMYDGIKSQGGVQGGMVFSIYFIVLTLFGNYTLNVLFLAIA  
AVDNLANAQELTKDEQEEEEAAANQKLALQKAKEVAEVSPLSAANMSIAVKEQQKNQKPTKSVWEQRTSEMRKQ  
NLLASREALYGDAERWPTPYARPLRPDVKTHLDRPLVVDPQENRNNNTNKSRAPEALRPTARPRESARDPDA

RRAWPGSPERAPGREGPYGRESEPQQREHAPPREHAPWDADTERAKAGDAPRRHTRHPVAEGEPRRHRARRRP  
 GDEPDDRPERRRPRDTRPARAADGEGDDGERKRRHRHGPPAHDDRERRRHRRRKENQGSQVPSGPNLSTTR  
 PIQQDLGRQDLPLAEDLDNMKNKLATGEPASPHDSLGHSLGPPSPAKIGNSTNPGPALATNPQNAASRRTPN  
 NPGNPSNPGPPTPENSLIVTNPSSTQPNSAKTARKPEHMAVEIPPACPLNHTVVQVNKNANPDPLPKKEEE  
 KKEEEEADPGEDGPKMPPYSSMFI LSTTNPLRRLCHYI LNLRYFEMCILMVIAMSSIALAAEDPVQPNAPRN  
 NVLRYFDYVFTGVFTFEMVIK MIDLGLVLHQGAYFRDLWNILDFIVVSGALVAFVAFNGNSKGDINTIKSLRV  
 LRVLRPLKTIKRLPKLKAVFDCVVNSLKNVFNILIVYMLFMFIFAVVAVQLFKGKFFHCTDESKEFERDCRGK  
 YLLYEKNEVKARDREWKKYEFHYDNVLWALLTLFTVSTGEGWPQVLKHSVDATFENQGPSGYRMEMSIFYVV  
 YFVVFPFFVNI FVALIIITFQEQGDKMMEEYSLEKNERACIDFAISAKPLTRHMPQNKQSFQYRMWQFVVS  
 PFEYTIMAMIALNTIVLMMKFYGASVAYENALRVFNIVFTSLFSLKLVKMAFGILNYFRDAWNIFDFVTVL  
 GSITDILVTEFGNNFINLSFLRFLFRAARLIKLLRQGYTIRILLWTFVQSFKALPYVCLLIAMLFFIYAIIGMQ  
 VFGNIGIDGEDSDSDEFQITEHNNFRFTFFQALMLLFRSATGEAWHNIMLSCLSGKPCDKNSGILTADCGNE  
 FAYFYFVSFIFLCSFLMLNLFVAVIMDNFEYLTRDSSILGPHHLDEYVRVWAEYDPAACGRIHYKDMYSLLRV  
 ISPPLGLGKCKPHRVACKRLLRMDLPVADDNTVHFNSTLMALIRTALDIKIAKGGADKQQMDAELRKEMMAIW  
 PNLSQKTLDDLVTPHKSTDLTVGKIYAAMMIMEYYRQSKAKKLQAMREEQNRTPLMFQRMPEPSPQTQEGGPSQ  
 NALPSTQLDPPGGGLMAHEGGMKESPSWVTQRAQEMFQKTGTWSPERGPPIDMPSNQNSQSVEMREMGTDGYS  
 DSEHYLPMEGQTRAASMPRLPAENQRRRGRPRGNDLSTISDTSMPKRSASVGLPKARRLDDYSLERVPEENQ  
 RYHQRRDRGHRTSECSLGRYTDVDTGLGTDLSMTTQSGDLPSKDRDQDRGRPKDRKHPHHHHHHHHHPA  
 PDRDRYAQERPDTGRARAREQRWSRSPSEGREHTTHRQSSSVSGSPAPSTSGTSTPRRGRRLPQTPCTPRP  
 LVSYSAPRRPAARRMAGPAAPPGGSPRGCRRAPRWPAAHAPEGPRPRGADYTEPDSPREPPGGAHDPAPRSPR  
 TPRAAGCASPRHGRRLPNGYYAGHGAPRPRRTARRGAHDAYSESEDDWC\*  
 >rs252377326\_ENSMUSP00000112436\_c.6348:C>T\_p.R2117C  
 ENSMUST00000121390.8|Cacna1a-201|ENSMUSG00000034656|+|chr8:g.85363294:C>T  
 MARFGDEMPGRYAGGGGSGPAAGVVVGAAGGRGAGGSRQGGQPGAQRMYKQSMARARTMALYNPIVPRQNC  
 LTVNRSLFLVSEDNVVRKYAKKITEWPPFEYMI LATI IANCIVLALEQHL PDDDKTPMSERLDDTEPYFIGIF  
 CFEAGIKIVALGFAFHKGSYLRNGWNVMDFVVVLTGILATGTEFDLRTLRAVRVLRPLKLVSGIPSLQVVLK  
 SIMKAMIPLLQIGLFFAILIFAIIGLEFYMGKFHTTCFEEGTDDIQGESAPACVGTTEEPARTCNGTQCPY  
 WEGPNNGITQFDNILFAVLTVFQCI TMEGWTDLLYNSNDASGNTWNWLYFIPLIIIGSFFMLNLVLGVLSEGF  
 AKERERVENRRAFLKLRQQQIERELNGYMEWISKAEEVILAEDET DVEQRHPFDGALRRATLKKSKTDLLNP  
 EEAEDQLADIASVGSPPARASIKSAKLENSTFFHKKERRMRYIRRMVKTQAFYWTVLSLVALNTLCVAIVHY  
 NQPEWLSDFLYYAEFIFLGLFMSEMIKMYGLGTRPYFHSSFNCFDCGVIIGSIFEVIWAVIKPGTSGFISVL  
 RALRLLRIFKVTKYWASLRNLVVSLLNSMKSIIISLLFLFLFIVVVFALLGMQLFGGQFNDFEGTPTPTNFDTFP  
 AAIMTVFQILTGEDWNEVMYDGIKSQGGVQGGMVFSIYFIVLTLFGNYTLLNVFLAIAVDNLANAQELTKDEQ  
 EEEEEANQKLALQKAKEVAEVSPLSAANMSIAVKEQQKNQPKTSVWEQRTSEMRKQNLLASREALYGDAER  
 WPTPYARPLRPDVKTHLDRPLVVDPQENRNNNTNKSRAPEALRPTARPRESDARRAWPGSPERAPGREG  
 PYGRESEPPQREHAPPREHAPWDADTERAKAGDAPRRHTRHPVAEGEPRRHRARRRPGDEPDRPERRPRRD  
 ATRPARAADGEGDDGERKRRHRHGPPAHDDRERRRHRRRKENQGSQVPSGPNLSTTRPIQQDLGRQDLPLAED  
 LDNMKNKLATGEPASPHDSLGHSLGPPSPAKIGNSTNPGPALATNPQNAASRRTPNPNNPGNPSNPGPPTPEN  
 SLIVTNPSSTQPNSAKTARKPEHMAVEIPPACPLNHTVVQVNKNANPDPLPKKEEEKKEEEEADPGEDGPKP  
 MPPYSSMFI LSTTNPLRRLCHYI LNLRYFEMCILMVIAMSSIALAAEDPVQPNAPRN NVLRYFDYVFTGVFTF  
 EMVIK MIDLGLVLHQGAYFRDLWNILDFIVVSGALVAFVAFNGNSKGDINTIKSLRVLRVLRPLKTIKRLPKL  
 KAVFDCVVNSLKNVFNILIVYMLFMFIFAVVAVQLFKGKFFHCTDESKEFERDCRGKYLLEYEKNEVKARDREW  
 KKYEFHYDNVLWALLTLFTVSTGEGWPQVLKHSVDATFENQGPSGYRMEMSIFYVVYFVVFVFFVNI FVAL  
 I IITFQEQGDKMMEEYSLEKNERACIDFAISAKPLTRHMPQNKQSFQYRMWQFVVSPPFEYTIMAMIALNTIV  
 LMMKFYGASVAYENALRVFNIVFTSLFSLKLVKMAFGILNYFRDAWNIFDFVTVLGSITDILVTEFGNNFI  
 NLSFLRFLFRAARLIKLLRQGYTIRILLWTFVQSFKALPYVCLLIAMLFFIYAIIGMQVFGNIGIDGEDSDS  
 DEFQITEHNNFRFTFFQALMLLFRSATGEAWHNIMLSCLSGKPCDKNSGILTADCGNEFAYFYFVSFIFLCSFL  
 MLNLFVAVIMDNFEYLTRDSSILGPHHLDEYVRVWAEYDPAACGRIHYKDMYSLLRVISPPLGLGKCKPHRVA  
 CKRLLRMDLPVADDNTVHFNSTLMALIRTALDIKIAKGGADKQQMDAELRKEMMAIWPNLSQKTLDDLVTPHK  
 STDLTVGKIYAAMMIMEYYRQSKAKKLQAMREEQNRTPLMFQRMPEPSPQTQEGGPSQNALPSTQLDPPGGGLMA  
 HEGGMKESPSWVTQRAQEMFQKTGTWSPERGPPIDMPSNQNSQSVEMREMGTDGYS DSEHYLPMEGQTRAAS  
 MPRLPAENQRRRGRPRGNDLSTISDTSMPKRSASVGLPKARRLDDYSLERVPEENQRYHQRRDRGHRTSEC  
 SLGRYTDVDTGLGTDLSMTTQSGDLPSKDRDQDRGRPKDRKHPHHHHHHHHHPAPDRDRYAQERPDTGRA  
 RAREQRWSRSPSEGREHTTHRQSSSVSGSPAPSTSGTSTPRRGRRLPQTPCTPRPLVSYSPAPRRPAARRM  
 AGPAAPPGGSPRGCRRAPRWPAAHAPEGPRPRGADYTEPDSPREPPGGAHDPAPRSPRTPRAAGCASPRHGRRL  
 PNGYYAGHGAPRPRRTARRGAHDAYSESEDDWC\*  
 >rs252377326\_ENSMUSP00000114055\_c.6207:C>T\_p.R2070C  
 ENSMUST00000122053.2|Cacna1a-202|ENSMUSG00000034656|+|chr8:g.85363294:C>T

MARFGDEMPGRYGAGGGGSGPAAGVGVVGAAGGRGAGGSRQGGQPGAQRMYKQSMARARTMALYNPIPVRQNC  
 LTVNRSFLFSEDNVDDTEPYFIGIFCFEAGIKIVALGFHFKGSYLRNGWNVMDVFWVLTGILATVGTDFDL  
 RTLRAVRVLRPLKLVSGIPSLQVVLKSIMKAMIPLLQIGLLLFFAILIFAIIGLEFYMGKFHTTCFEEGTDDI  
 QGESAPCGTEEPARTCPNGTKCQPYWEGPNNGITQFDNILFAVLTVVFQITMEGWTDLLYNSNDASGNTWN  
 LYFIPLIIIGSFFMLNLVGLVLSGEFAKERERVENRRRAFLKLRQQQIERELNGYMEWISKAEVILAEDET  
 VEQRHPFDGALRRATLKKSKTDLLNPEEAEDQLADIASVGSPPARASIKSAKLENSTFFHKKERRMRFYIRRM  
 VKTQAFYWTVLSLVALNLCVAIVHYNQPEWLSDFLYAEFI FLGLFMSEMFIKMYGLGTRPYFHSFNCFCDC  
 GVIIGSIFEVIWAVIKPGTSGFISVLRALRLLRIKFKVTKYWASLRNLVVSLLSNMKSIISLLFLLFLFIVVFA  
 LLGMQLFGGQFNDFEGTPTNFDTFPAAIMTVFQILTGEDWNEVMYDGIKSQGGVQGGMVFSIYFIVLTLFGN  
 YTLNVLFLAIAVDNLANAQELTKDEQEEEEANQKLALQKAKEVAEVSPLSAANMSIAVKEQQKNQKPTKSVW  
 EQRTSEMRKQNLASREALYGDAERWPTPYARPLRPDVKTHLDRPLVVDQENRNNNTNKSRAPEALRP  
 PRESARDPDARRAWPGSPERAPGREGPYGRESEPQQREHAPPREHAPWDADTERAKAGDAPRRHTRPVAEGE  
 PRRHRARRRPGEDEPDRPRERRPRPRDATRPARAADGEGDDGERKRRHRHGPPAHDDRERRRRRRKENQGS  
 VSGPNLSTTRPIQQDLGRQDLPLAEDLDNMKNNKLATGEPASPHDSLGHSGLPSPAKIGNSTNPGPALATNP  
 QNAASRRTPNPNPNSNPGPKTPENSLIVTNPSSQPNSAKTARKPEHMAVEIPPACPLNHTVVQVKNAN  
 PDPLPKKEEKEEKEEADPGEDGPKMPPYSSMFI LSTTNPLRRLCHYILNLRIFEMCILMVIAMSSIALAAE  
 DPVQPNAPRNNVLRFYFDYVFTGVFTFEMVIK MIDLGLVLHQGAYFRDLWNILDFIVVSGALVAFVFTGNSK  
 DINTIKSLRVLRLVLRPLKTIKRLPKLKA VDCVNSLNKVFNI LIVYMLFMFI FAVVAVQLFKGKFFHCTDES  
 KEFERDCRGKYLLYEKNEVKARDREWKKYEFHYDNVLWALLTLFTVSTGEGWPQVLKHSVDATFENQGPSPGY  
 RMEMSIFYVVFVVFVFFVNI FVALI IITFQEQGDKMMEEYSLEKNERACIDFAISAKPLTRHMPQNKQSFQ  
 YRMWQFVVSPPFEYTIMAMIALNTIVLMMKFYGASVAYENALRVFNIVFTSLFSLECVLKVMAFGILNYFRDA  
 WNI FDFVTVLGSITDILVTEFGNNFINLSFLRLFRAARLIKLLRQGYTIRILLWTFVQSFKALPYVCLLIAM  
 FFYAIIGMQVFGNIGIDGEDSDDEDEFQITEHNNFRTFFQALMLLFRSATGEAWHNIMLSCLSGKPCDKNS  
 GILTADCGNEFAYFYFVSFI FLCSFLMLNLFVAVIMDNFEYLTRDSSILGPHHLDEYVRVWAEYDPAACGR  
 IHYKDMYSLLRVISPPGLGKCKPHRVACKRLLRMDLPVADDNTVHFNSTLMALIRTALDIKIAKGGADKQMDA  
 ELRKEMMAIWPNLSTQLDLDLVTPHKSTDLTVGKIYAAMMIMEYRQSKAKKLQAMREEQNRTPLMFQRMEPP  
 SPTQEGGSPSNLSTQLDLPGGGLMAHEGGMKESPSWVTQRAQEMFQKTGTWSPERGPIDMPNSQPNQSV  
 MREMGTDGYSDEHYLPMEGQTRAASMPRLPAENQRRRGRPRGNDLSTISDTPMKRSASVLGPKARRLDDYS  
 LERVPEENQRYHQRRDRGHRTECSLGRYTDVDTGLGTDLSMTTQSGDLPSKDRDQDRGRPKDRKHRPHHH  
 HHHHHHHPPAPDRDRIAQERPDTRARAREQRWSRSPSEGREHTTHRQSSSVSGSPAPSTSGTSTPRGRRQ  
 LPQTPTPRPLVSYSPAPRRPAARRMAGPAAPPGGSPRGCRAPRWPAHAPEGPRPRGADYTEPDSPREPPGG  
 AHDPA PRSPRT PRAAGCASPRHGRRLPNGYYAGHGAPRPRTARRGAHDAYSESEDDWC \*  
 >rs252377326\_ENSMUSP00000149242\_c.6207:C>T\_p.R2070C  
 ENSMUST00000215756.2|Cacna1a-211|ENSMUSG00000034656|+|chr8:g.85363294:C>T  
 XRMKYQSMARARTMALYNPIPVRQNC LTVNRSFLFSEDNVVVRKYAKKITEWPPFEYMILATIIANCIVLAL  
 EQHLPDDDKTPMSERLDDTEPYFIGIFCFEAGIKIVALGFHFKGSYLRNGWNVMDVFWVLTGILATVGTDFD  
 LRTLRAVRVLRPLKLVSGIPSLQVVLKSIMKAMIPLLQIGLLLFFAILIFAIIGLEFYMGKFHTTCFEEGTDD  
 IQGESAPCGTEEPARTCPNGTKCQPYWEGPNNGITQFDNILFAVLTVVFQITMEGWTDLLYNSNDASGNTWN  
 WLYFIPLIIIGSFFMLNLVGLVLSGEFAKERERVENRRRAFLKLRQQQIERELNGYMEWISKAEVILAEDET  
 DVEQRHPFDALRRATLKKSKTDLLNPEEAEDQLADIASVGSPPARASIKSAKLENSTFFHKKERRMRFYIRRM  
 VKTQAFYWTVLSLVALNLCVAIVHYNQPEWLSDFLYAEFI FLGLFMSEMFIKMYGLGTRPYFHSFNCFCDC  
 GVIIGSIFEVIWAVIKPGTSGFISVLRALRLLRIKFKVTKYWASLRNLVVSLLSNMKSIISLLFLLFLFIVVFA  
 LLGMQLFGGQFNDFEGTPTNFDTFPAAIMTVFQILTGEDWNEVMYDGIKSQGGVQGGMVFSIYFIVLTLFGN  
 YTLNVLFLAIAVDNLANAQELTKDEQEEEEANQKLALQKAKEVAEVSPLSAANMSIAVKEQQKNQKPTKSVW  
 EQRTSEMRKQNLASREALYGDAERWPTPYARPLRPDVKTHLDRPLVVDQENRNNNTNKSRAPEALRP  
 PRESARDPDARRAWPGSPERAPGREGPYGRESEPQQREHAPPREHAPWDADTERAKAGDAPRRHTRPVAEGE  
 PRRHRARRRPGEDEPDRPRERRPRPRDATRPARAADGEGDDGERKRRHRHGPPAHDDRERRRRRRKENQGS  
 VSGPNLSTTRPIQQDLGRQDLPLAEDLDNMKNNKLATGEPASPHDSLGHSGLPSPAKIGNSTNPGPALATNP  
 QNAASRRTPNPNPNSNPGPKTPENSLIVTNPSSQPNSAKTARKPEHMAVEIPPACPLNHTVVQVKNAN  
 PDPLPKKEEKEEKEEADPGEDGPKMPPYSSMFI LSTTNPLRRLCHYILNLRIFEMCILMVIAMSSIALAAE  
 DPVQPNAPRNNVLRFYFDYVFTGVFTFEMVIK MIDLGLVLHQGAYFRDLWNILDFIVVSGALVAFVFTGNSK  
 DINTIKSLRVLRLVLRPLKTIKRLPKLKA VDCVNSLNKVFNI LIVYMLFMFI FAVVAVQLFKGKFFHCTDES  
 KEFERDCRGKYLLYEKNEVKARDREWKKYEFHYDNVLWALLTLFTVSTGEGWPQVLKHSVDATFENQGPSPGY  
 RMEMSIFYVVFVVFVFFVNI FVALI IITFQEQGDKMMEEYSLEKNERACIDFAISAKPLTRHMPQNKQSFQ  
 YRMWQFVVSPPFEYTIMAMIALNTIVLMMKFYGASVAYENALRVFNIVFTSLFSLECVLKVMAFGILNYFRDA  
 WNI FDFVTVLGSITDILVTEFGNNFINLSFLRLFRAARLIKLLRQGYTIRILLWTFVQSFKALPYVCLLIAM  
 FFYAIIGMQVFGNIGIDGEDSDDEDEFQITEHNNFRTFFQALMLLFRSATGEAWHNIMLSCLSGKPCDKNS  
 GILTADCGNEFAYFYFVSFI FLCSFLMLNLFVAVIMDNFEYLTRDSSILGPHHLDEYVRVWAEYDPAACGR  
 IHYKDMYSLLRVISPPGLGKCKPHRVACKRLLRMDLPVADDNTVHFNSTLMALIRTALDIKIAKGGADKQMDA  
 ELRKEMMAIWPNLSTQLDLDLVTPHKSTDLTVGKIYAAMMIMEYRQSKAKKLQAMREEQNRTPLMFQRMEPP  
 SPTQEGGSPSNLSTQLDLPGGGLMAHEGGMKESPSWVTQRAQEMFQKTGTWSPERGPIDMPNSQPNQSV  
 MREMGTDGYSDEHYLPMEGQTRAASMPRLPAENQRRRGRPRGNDLSTISDTPMKRSASVLGPKARRLDDYS  
 LERVPEENQRYHQRRDRGHRTECSLGRYTDVDTGLGTDLSMTTQSGDLPSKDRDQDRGRPKDRKHRPHHH  
 HHHHHHHPPAPDRDRIAQERPDTRARAREQRWSRSPSEGREHTTHRQSSSVSGSPAPSTSGTSTPRGRRQ  
 LPQTPTPRPLVSYSPAPRRPAARRMAGPAAPPGGSPRGCRAPRWPAHAPEGPRPRGADYTEPDSPREPPGG  
 AHDPA PRSPRT PRAAGCASPRHGRRLPNGYYAGHGAPRPRTARRGAHDAYSESEDDWC \*



YKDMYSLLRVISPPGLGKCCPHRVACKRLLRMDLPVADDNTVHFNSTLMALIRTDALDIKIAKGGADKQOMDA  
ELRKEMMAIWPNSLQKTLDLLVTPHKSTDLTVGKIYAAMMIMEYYRQSKAKKLQAMREEQNRTPLMFQRMPEPP  
SPTQEGGSPQNALPSTQLDPPGGGLMAHEGGMKESPSWVTQRAQEMFQKTGTWSPERGGPIDMPNSQPNSSQSV  
MREMGTGYSDEHYLPMEGQTRAASMPRLPAENQRRRGRPRGNDLSTISDTPMKRSASVLPKARRLDDYS  
LERVPPPEENQRYHQRRDRGHRTSECSLGRYTDVDTGLGTDLSMTTQSGDLPSKDRDQDRGRPKDRKHPHHH  
HHHHHHHPAPDRDRYAQERPDTGRARAREQRWSRSPSEGREHTTHRQSSSVSGSPAPSTSGTSTPRRGRRQ  
LPQTPTPRPLVSYSPAPRRPAARRMAGPAAPPGGSPRGCRRAPRWPAAHAPEGPRPRGADYTEPDSPREPPGG  
AHDPAFRSPRTPRAAGCASPRHGRRLPNGYYAGHGAPRPRRTARRGAHDAYSESEDDWC\*

>rs252377326\_ENSMUSP00000158675\_c.1572:C>T\_p.R525C  
ENSMUST00000238337.2|Cacna1a-212|ENSMUSG00000034656|+|chr8:g.85363294:C>T  
MHLRLSLGQRLTLQPNSSLPSSPFLAKGNFINLSFLRLFRAARLIKLLRQGYTIRILLWTFVQSFQVF  
GNIGIDGEDSDSDEDEFQITEHNNFRFTFFQALMLLFRSATGEAWHNIMLSCLSGKPCDKNSGILTADCGNEFA  
YFYFVSFIFLCSFLMLNLFVAVIMDNFEYLTRDSSILGPHHLDEYVRVWAEYDPAACGRIHYKDMYSLLRVIS  
PPLGLGKCCPHRVACKRLLRMDLPVADDNTVHFNSTLMALIRTDALDIKIAKGGADKQOMDAELRKEMMAIWP  
LSQKTLDLLVTPHKSTDLTVGKIYAAMMIMEYYRQSKAKKLQAMREEQNRTPLMFQRMPEPPSPTQEGGSPQNA  
LPSTQLDPPGGGLMAHEGGMKESPSWVTQRAQEMFQKTGTWSPERGGPIDMPNSQPNSSQSVEMREMGTGYS  
EHYLPMEGQTRAASMPRLPAENQRRRGRPRGNDLSTISDTPMKRSASVLPKARRLDDYSLERVPPPEENQRY  
HQRRDRGHRTSECSLGRYTDVDTGLGTDLSMTTQSGDLPSKDRDQDRGRPKDRKHPHHHHHHHPAPDR  
DRYAQERPDTGRARAREQRWSRSPSEGREHTTHRQSSSVSGSPAPSTSGTSTPRRGRRQLPQTPTPRPLV  
SYSPAPRRPAARRMAGPAAPPGGSPRGCRRAPRWPAAHAPEGPRPRGADYTEPDSPREPPGGAHDPAPRSRTP  
RAAGCASPRHGRRLPNGYYAGHGAPRPRRTARRGAHDAYSESEDDWC\*

>rs37482583\_ENSMUSP00000158803\_c.7356:G>C\_p.E2453Q  
ENSMUST00000238701.2|Cacna1a-213|ENSMUSG00000034656|+|chr8:g.85366320:G>C  
MPRASWGS D P M L S P L S H E L L H S P R Y P G T D C T L A G S S R T L H V P W S Q Q M S G S L E G P T L K R R G G V D H R D V I L A H Q  
A H K M H S T P Q A R R K E W E M A R F G D E M P G R Y G A G G G S G P A A G V V G A A G G R G A G G S R Q G G Q P G A Q R M Y K Q S M A Q R  
A R T M A L Y N P I P V R Q N C L T V N R S L F L F S E D N V V R K Y A K K I T E W P P F E Y M I L A T I I A N C I V L A L E Q H L P D D D K T P  
M S E R L D D T E P Y F I G I F C F E A G I K I V A L G F A F H K G S Y L R N G W N V M D F V V V L T G I L A T V G T E F D L R T L R A V R V L R  
P L K L V S G I P S L Q V V L K S I M K A M I P L L Q I G L L L F F A I L I F A I I G L E F Y M G K F H T T C F E E G T D D I Q G E S P A P C G T  
E E P A R T C P N G T K C Q P Y W E G P N N G I T Q F D N I L F A V L T V F Q C I T M E G W T D L L Y N S N D A S G N T W N W L Y F I P L I I I G  
S F F M L N L V L G V L S G E F A K E R E R V E N R R A F L K L R R Q Q Q I E R E L N G Y M E W I S K A E E V I L A E D E T D V E Q R H P F D G A  
L R R A T L K K S K T D L L N P E E A E D Q L A D I A S V G S P F A R A S I K S A K L E N S T F F H K K E R R M R F Y I R R M V K T Q A F Y W T V  
L S I V A L N T L C V A I V H Y N Q P E W L S D F L Y A E F I F L G L F M S E M F I K M Y G L G T R P Y F H S S F N C F D C G V I I G S I F E V  
I W A V I K P G T S F G I S V L R A L R L L R I F K V T K Y W A S L R N L V V S L L N S M K S I I S L L F L L F L F I V V F A L L G M Q L F G G Q  
F N F D E G T P P T N F D T F P A A I M T V F Q I L T G E D W N E V M Y D G I K S Q G G V Q G G M V F S I Y F I V L T L F G N Y T L L N V F L A I  
A V D N L A N A Q E L T K D E Q E E E E A N Q K L A L Q K A K E V A E V S P L S A A N M S I A V K E Q Q K N Q K P T K S V W E Q R T S E M R K Q  
N L L A S R E A L Y G D A A E R W P T P Y A R P L R P D V K T H L D R P L V V D P Q E N R N N N T N K S R A P E A L R P T A R P R E S A R D P D A  
R R A W P G S P E R A P G R E G P Y G R E S E P Q Q R E H A P P R E H A P W D A D T E R A K A G D A P R R H T H R P V A E G E P R R H R A R R R P  
G D E P D D R P E R R P R P R D A T R P A R A A D G E G D D G E R K R R R H R G P P A H D D R E R R H R R R K E N Q G S G V P V S G P N L S T T R  
P I Q Q D L G R Q D L P L A E D L D N M K N K L A T G E P A S P H D S L G H S G L P P S P A K I G N S T N P G P A L A T N P Q N A A S R R T P N  
N P G N P S N P G P P K T P E N S L I V T N P S S T Q P N S A K T A R K P E H M A V E I P P A C P P L N H T V V Q V N K N A N P D P L P K K E E E  
K K E E E E A D P G E D G P K P M P P Y S M F I L S T T N P L R R L C H Y I L N L R Y F E M C I L M V I A M S S I A L A A E D P V Q P N A P R N  
N V L R Y F D Y V F T G V F T F E M V I K M I D L G L V L H Q G A Y F R D L W N I L D F I V V S G A L V A F A F T G N S K G K D I N T I K S L R V  
L R V L R P L K T I K R L P K L K A V F D C V V N S L K N V F N I L I V Y M L F M F I F A V V A V Q L F K G K F F H C T D E S K E F E R D C R G K  
Y L L Y E K N E V K A R D R E W K K Y E F H Y D N V L W A L L T L F T V S T G E G W P Q V L K H S V D A T F E N Q G P S P G Y R M E M S I F Y V V  
Y F V V F P F F F V N I F V A L I I I T F Q E Q G D K M M E E Y S L E K N E R A C I D F A I S A K P L T R H M P Q N K Q S F Q Y R M W Q F V V S P  
P F E Y T I M A M I A L N T I V L M M K F Y G A S V A Y E N A L R V F N I V F T S L F S L E C V L K V M A F G I L N Y F R D A W N I F D F V T V L  
G S I T D I L V T E F G N N F I N L S F L R L F R A A R L I K L L R Q G Y T I R I L L W T F V Q S F K A L P Y V C L L I A M L F F I Y A I I G M Q  
V F G N I G I D G E D E D S D E D E F Q I T E H N N F R T F F Q A L M L L F R S A T G E A W H N I M L S C L S G K P C D K N S G I L T A D C G N E  
F A Y F Y F V S F I F L C S F L M L N L F V A V I M D N F E Y L T R D S S I L G P H H L D E Y V R V W A E Y D P A A C G R I H Y K D M Y S L L R V  
I S P P L G L G K C C P H R V A C K R L L R M D L P V A D D N T V H F N S T L M A L I R T A L D I K I A K G G A D K Q O M D A E L R K E M M A I W  
P N L S Q K T L D L L V T P H K S T D L T V G K I Y A A M M I M E Y Y R Q S K A K K L Q A M R E E Q N R T P L M F Q R M E P P S P T Q E G G S P Q  
N A L P S T Q L D P P G G L M A H E G G M K E S P S W V T Q R A Q E M F Q K T G T W S P E R G P P I D M P N S Q P N S Q S V E M R E M G T D G Y S  
D S E H Y L P M E G Q T R A A S M P R L P A E N Q R R R G R P R G N D L S T I S D T S P M K R S A S V L G P K A R R L D D Y S L E R V P P E E N Q  
R Y H Q R R R D R G H R T S E R S L G R Y T D V D T G L G T D L S M T T Q S G D L P S K D R D Q D R G R P K D R K H R P H H H H H H H H P A P D  
P D R D R Y A Q E R P D T G R A R A R E Q R W S R S P S E G R E H T T H R Q S S S V S G S P A P S T S G T S T P R R G R R Q L P Q T P C T P R P  
L V S Y S P A P R R P A A R R M A G P A A P P G G S P R G C R R A P R W P A H A P E G P R P R G A D Y T E P D S P R E P P G G A H D P A P R S P R  
T P R A A G C A S P R H G R R L P N G Y Y A G H G A P R P R T A R R G A H D A Y S E S Q D D W C \*

>rs37482583\_ENSMUSP00000112436\_c.7089:G>C\_p.E2364Q  
 ENSMUST00000121390.8|Cacna1a-201|ENSMUSG00000034656|+|chr8:g.85366320:G>C  
 MARFGDEMPGRYGAGGGGSGPAAGVVVGAAGGRGAGGSRQGGQPGAQRMKQSMARARTMALYNPIVVRQNC  
 LTVNRSLFLFSEDNVVRKYAKKITEWPPFEYMILATI IANCIVLALAEQHL PDDDKTPMSERLDDTEPYFIGIF  
 CFEAGIKIVALGF AFHKGSYLRNGWNVMD FVVVLTGILATVGT EFDLRTLRAVRVLRPLKLVSGIPSLQVVLK  
 SIMKAMIPLLQIGLLFFAILIFAIIGLEFYMGKFHTTTCFEEGTD DDIQGESPAPCGTEEPARTCPNGTKCQPY  
 WEGPNNGITQFDNILFAVLT VFCITMEGWTDLLYNSNDASGNTWNWLYFIPLIIIGSFFMLNLVLGVLSGEF  
 AKERERVENRRAFLKLRQQQIERELNGYMEWISKAEEVILA EDETDVEQRHFPFDGALRRATLKKSKTDLNLP  
 EEAEADQLADIASVGSPPFARASIKSAKLENSTFFHKKERRMRFYIRRMVKTQAFYWTVLSLVALNLCVAIVHY  
 NQPEWLSDFLYYAEFIFLGLFMSEMF IKMYGLGTRPYFHSSFNCFDCGVIIGSIFEVIWAVIKPGTSFGISVL  
 RALRLLRIFKVTKYWASLRNLVVSLLNSMKSII SLLFLLFLFIVVFALLGMLFGGQFNFDGPTPTNFDTFP  
 AAIMTVFQILTGEDWNEVMYDGIKSQGGVQGGMVFSIYFIVLTLFGNYTLNVLFLAIAVDNLANAQELTKDEQ  
 EEEEEANQKLALQKAKEVAEVSPLSAANMSIAVKEQQKNQKPTKSVWEQRTSEMRKQNLLASREALYGDAAER  
 WPTPYARPLRPDVKTHLDRPLVVDPQENRNNNTNKSRAPEALRPTARPRESARDPDARRAWPGSPERAPGREG  
 PYGRESEPPQREHAPPREHAPWDADTERAKAGDAPRRHTRHPVAEAGEPRRHRARRRRPGDEPDDRPERPRPRD  
 ATRPARAADGEGDDGERKRRHRHGPPAHDDRERRRRRKENQGSVFPVSGPNLSTTRPIQQDLGRQDLPLAED  
 LDNMKNNKLATGEPASPHDSLGHSGLPSPAKIGNSTNPGPALATNPQNAASRRTPNPNPNSNPGPKTPEN  
 SLIVTNPSSTQPNSAKTARKPEHMAVEIPACPLNHTVQVKNANPDPLPKKEEKKKEEEDPGEDEGPKP  
 MPPYSSMFI LSTTNPLRRLCHYILNLR YFEMCILMVIAMSSIALAAEDPVQPNAPRNNVLR YFDYVFTGVFTF  
 EMVIK MIDLGLVLHQGAYFRDLWNI LDFIVVSGALVAF AFTGNSKGDINTIKSLRVLRLRPLKTIKRLPKL  
 KAVFDCVVNSLKNVFNILIVYMLFMFIFAVVAVQLFKGKFFHCTDESKEFERDCRGKYLLEYKNEVKARDREW  
 KKYEFHYDNVLWALLTLFTVSTGEGWPQVLKHSVDATFENQGPSPGYRMEMSIFYVVYFVVFPPFFVNI FVAL  
 I IITFQEQGDKMMEEYSLEKNERACIDFAISAKPLTRHMPQNKQSFQYRMWQFVVSPPFEYTIMAMIALNTIV  
 LMMKFY GASVAYENALRVFNIVFTSLFSLECVLKVMAFGILNYFRDAWNI FDFVTVLGSITDILVTEFGNFI  
 NLSFLRFLFRAARLIKLLRQGYTIRILLWTFVQSFKALPYVCLLIAMLFFIYAIIGMQVFGNIGIDGEDSDSDE  
 DEFQITEHNNDFEYLQALMLLFRSATGEAWHNIMLSCLSGKPCDKNSGILTADCGNEFAYFYFVSFIFLCSFL  
 MLNLFVAVIMDNFFYLTRDSSLGPHHLDEYVVRWAEYDPAACGR IHYKDMYSLLRVISPPLGLGKCPHRVA  
 CKRLLRMDLPVADDNTVHFNSTLMALIR TALDIKIAKGGADKQQMDAELR KEMMAIWPNL SQTLDDLVT PHK  
 STDLTVGKIYAAMMIMEYYRQSKAKKLQAMREEQNRTPLMFQRM EPPSPTQEGGSPQNALPSTQLDPPGGGLMA  
 HEGGMKESPSWVTQRAQEMFQKTGTWSPERGPPIDMPNSQPNQSQSVEMREMGT DGYSDSEHYLPMEGQTRAAS  
 MPRLPAENQRRRGRPRGNDLSTISDTSMPKRSASVLGPKARRLDYSLERVPPEENQRYHQRRDRGHRTSER  
 SLGRYTDVDTGLGTDLSMTTQSGDLPSKDRDQDRGRPKDRKHRPHHHHHHHHHHPAPDRDRYAQERPDTGRA  
 RAREQRWSRSPSEGREHTHRQGSSSVSGSPAPSTSGTSTPRRGRRLPQTPCTPRPLVSYSPAPRRPAARM  
 AGPAAPPGGSPRGCRRAPRWPAPHAPEGPRPRGADYTEPDSPREPPGGAHPAPRSPTPRAAGCASPRHGRL  
 PNGYYAGHGAPRPRTARRGAHDAYSSESQDDWC\*

>rs37482583\_ENSMUSP00000114055\_c.6948:G>C\_p.E2317Q  
 ENSMUST00000122053.2|Cacna1a-202|ENSMUSG00000034656|+|chr8:g.85366320:G>C  
 MARFGDEMPGRYGAGGGGSGPAAGVVVGAAGGRGAGGSRQGGQPGAQRMKQSMARARTMALYNPIVVRQNC  
 LTVNRSLFLFSEDNVDDTEPYFIGIFCFEAGIKIVALGF AFHKGSYLRNGWNVMD FVVVLTGILATVGT EFDL  
 RTLRAVRVLRPLKLVSGIPSLQVVLK SIMKAMIPLLQIGLLFFAILIFAIIGLEFYMGKFHTTTCFEEGTD DDI  
 QGESPAPCGTEEPARTCPNGTKCQPYWEGPNNGITQFDNILFAVLT VFCITMEGWTDLLYNSNDASGNTWNW  
 LYFIPLIIIGSFFMLNLVLGVLSGEFAKERERVENRRAFLKLRQQQIERELNGYMEWISKAEEVILA EDETD  
 VEQRHFPFDGALRRATLKKSKTDLNPEEAEDQLADIASVGSPPFARASIKSAKLENSTFFHKKERRMRFYIRRM  
 VKTQAFYWTVLSLVALNLCVAIVHYNQPEWLSDFLYYAEFIFLGLFMSEMF IKMYGLGTRPYFHSSFNCFDC  
 GVIIGSIFEVIWAVIKPGTSFGISVLRALRLLRIFKVTKYWASLRNLVVSLLNSMKSII SLLFLLFLFIVVFA  
 LLGMLFGGQFNFDGPTPTNFDTFPAAIMTVFQILTGEDWNEVMYDGIKSQGGVQGGMVFSIYFIVLTLFGN  
 YTLNVLFLAIAVDNLANAQELTKDEQEEEEANQKLALQKAKEVAEVSPLSAANMSIAVKEQQKNQKPTKSVW  
 EQRTSEMRKQNLLASREALYGDAAERWPTPYARPLRPDVKTHLDRPLVVDPQENRNNNTNKSRAPEALRPTAR  
 PRESARDPDARRAWPGSPERAPGREGPYGRESEPPQREHAPPREHAPWDADTERAKAGDAPRRHTRHPVAEAGE  
 PRRHRARRRRPGDEPDDRPERPRPRDATRPARAADGEGDDGERKRRHRHGPPAHDDRERRRRRKENQGSVFP  
 VSGPNLSTTRPIQQDLGRQDLPLAEDLDNMKNNKLATGEPASPHDSLGHSGLPSPAKIGNSTNPGPALATNP  
 QNAASRRTPNPNPNSNPGPKTPENSLIVTNPSSTQPNSAKTARKPEHMAVEIPACPLNHTVQVKNAN  
 PDPLPKKEEKKKEEEDPGEDEGPKMPPYSSMFI LSTTNPLRRLCHYILNLR YFEMCILMVIAMSSIALAAE  
 DPVQPNAPRNNVLR YFDYVFTGVFTFEMVIK MIDLGLVLHQGAYFRDLWNI LDFIVVSGALVAF AFTGNSKGD  
 DINTIKSLRVLRLRPLKTIKRLPKL KAVFDCVVNSLKNVFNILIVYMLFMFIFAVVAVQLFKGKFFHCTDES  
 KEFERDCRGKYLLEYKNEVKARDREWKKYEFHYDNVLWALLTLFTVSTGEGWPQVLKHSVDATFENQGPSPGY  
 RMEMSIFYVVYFVVFPPFFVNI FVALI IITFQEQGDKMMEEYSLEKNERACIDFAISAKPLTRHMPQNKQSFQ  
 YRMWQFVVSPPFEYTIMAMIALNTIVLMMKFY GASVAYENALRVFNIVFTSLFSLECVLKVMAFGILNYFRDA

WNIFDFVTVLGSITDILVTEFGNNFINLSFLRFLFRAARLIKLLRQGYTIRILLWTFVQSFKALPYVCLLIAML  
FFIYAIIGMQVFGNIGIDGEDSDEDEFQITEHNNFRFFFQALMLLFRSATGEAWHNIMLSCLSGKPCDKNS  
GILTADCGNEFAYFYFVSFIFLCSFLMLNLFVAVIMDNFEYLTRDSSILGPHHLDEYVRVWAEYDPAACGRIH  
YKDMYSLLRVISPPGLGKCKPHRVACKRLLRMDLPVADDNTVHFNSTLMALIRTALDIKIAKGGADKQQMDA  
ELRKEMMAIWPNLQKTLDDLVTPHKSTDLTVGKIYAAMMIMEYYRQSKAKKLQAMREEQNRTPLMFQRMPP  
SPTQEGGSPQNALPSTQLDPGGGLMAHEGGMKESPSWVTQRAQEMFQKTGTWSPERGPPIDMPNSQPNSQSVE  
MREMGTGYSDEHYLPMEGQTRAASMPRLPAENQRRRGRPRGNDLSTISDTPMKRSASVLPKARRLDDYS  
LERVPPPEENQRYHQRRDRGRHRTSERSLGRYTDVDTGLGTDLSMTTQSGDLPSKDRDQDRGRPKDRKHPHHH  
HHHHHHHPAPDRDRYAQERPDTGRARAREQRWSRSPSEGREHTHTRQGSSSVSGSPAPSTSGTSTPRRGRQ  
LPQTPCTPRPLVSYSPAPRRPAARRMAGPAAPPGGSPRGCRRAPRWPAAHAPEGPRPRGADYTEPDSPREPPGG  
AHDPA PRSPRT PRAAGCASPRHGRRLPNGYYAGHGAPRPTARRGAHDAYSSESQDDWC\*  
>rs37482583\_ENSMUSP00000149242\_c.6948:G>C\_p.E2317Q  
ENSMUST00000215756.2|Cacna1a-211|ENSMUSG00000034656|+|chr8:g.85366320:G>C  
XRMYKQSMARARTMALYNPIVVRQNCCLTVNRSLFLFSEDNVVRKYAKKITEWPPFEYMI LATI IANCIVLAL  
EQHLPDDDKTPMSERLDDTEPYFIFIGFCFEAGIKIVALGFHFHKSYLNRNGWVMDVFFVVLGTGILATVGTED  
LRTLRAVRVLRPLKLVSGIPSLQVVLKSIMKAMIPLLQIGLLFFAILIFAIIGLEFYMGKFHTTCFEEGTD  
IQGESPAPCGTEEPARTCPNGTKCQPYWEGPNNGITQFDNILFAVLTVFQCI TMEGWTDLLYNSNDASGNTWN  
WLYFIPLIIGSFFMLNLVGLVLSGEFAKERERVENRRRAFLKLRQQQIERELNGYMEWISKAEEVILAEDET  
DVEQRHPFDALRRATLKKSKTDLNPEEAEDQLADIASVGSPPFARASIKSAKLENSTFFHKKERRMRFYIRRM  
VKTQAFYWTVLSLVALNTLCVAIVHYNQPEWLSDFLYAAEFIFLGLFMSEMF IKMYGLGTRPYFHSSFCNFCDC  
GVIIGSIFEVIWAVIKPGTSFGISVLRALRLLRIFKVTKYWASLRNLVVSLLNSMKSIIISLLFLFLFIVVFA  
LLGMQLFGGQFNDFEGTPTNFDTFPAAIMTVFQILTGEDWNEVMYDGIKSQGGVQGGMVFSIYFIVLTLFGN  
YTLNVLFLAIAVDNLANAQELTKDEQEEEEAAANQKALQKAKEVAEVSPLSAANMSIAVKEQQKNQKPTKSVW  
EQRTSEMRKQNLASREALYGDAERWPTPYARPLRPDVKTHLDRPLVDPQENRNNNTNKSRAPEALRPTAR  
PRESARDPDARAWPGSPERAPGREGPGYGRESEPOQREHAPPREHAPWDADTERAKAGDAPRRHTRHPVAE  
PRRHRARRRPGDEPDRRERRRPRDATRPARAAGDEGGERKRRHRHGGPPAHDRERRRRRKENQGSQV  
VSGPNLSTTRPIQQDLGRQDLPLAEDLDNMKNKATLGDGPASPHDSLGHSGLPPSPAKIGNSTNPGPALATNP  
QNAASRRTPNNPGNPSNPGPKTPENSLIVTNPSSQPNSAKTARKPEHMAVEIPACPLNHTVVQVKNAN  
PDPLPKKEEKEEKEEADPGEDGPKMPPYSSMFI LSTTNPLRRLCHYILNLRVYFEMCILMVIAMSSIALAAE  
DPVQPNAPRNNVLRVYFDYVFTGVFTFEMVIK MIDLGLVLHQGAYFRDLWNILDFIVVSGALVAFVFTGNSK  
DINTIKSLRVLRLRPLKTIKRLPKLKA VFD CVVNSLKNVFNILIVYMLFMFIFAVVAVQLFKGKFFHCTDES  
KEFERDCRGKYLLEYKNEVKARDREWKKYEFHYDNVLWALLTLFTVSTGEGWPQVLKHSVDATFENQGPS  
RMEMSIFYVVVYFVVFVFFVFNIFVALI IITFQEQGDKMMEEYSLEKNERACIDFAISAKPLTRHMPQNKQSFQ  
YRMWQFVVSPPFEYTIMAMIALNTIVLMMKFY GASVAYENALRVFNIVFTSLFSLECVLKVMAFGILNYFRDA  
WNIFDFVTVLGSITDILVTEFGNNFINLSFLRFLFRAARLIKLLRQGYTIRILLWTFVQSFKALPYVCLLIAML  
FFIYAIIGMQVFGNIGIDGEDSDEDEFQITEHNNFRFFFQALMLLFRSATGEAWHNIMLSCLSGKPCDKNS  
GILTADCGNEFAYFYFVSFIFLCSFLMLNLFVAVIMDNFEYLTRDSSILGPHHLDEYVRVWAEYDPAACGRIH  
YKDMYSLLRVISPPGLGKCKPHRVACKRLLRMDLPVADDNTVHFNSTLMALIRTALDIKIAKGGADKQQMDA  
ELRKEMMAIWPNLQKTLDDLVTPHKSTDLTVGKIYAAMMIMEYYRQSKAKKLQAMREEQNRTPLMFQRMPP  
SPTQEGGSPQNALPSTQLDPGGGLMAHEGGMKESPSWVTQRAQEMFQKTGTWSPERGPPIDMPNSQPNSQSVE  
MREMGTGYSDEHYLPMEGQTRAASMPRLPAENQRRRGRPRGNDLSTISDTPMKRSASVLPKARRLDDYS  
LERVPPPEENQRYHQRRDRGRHRTSERSLGRYTDVDTGLGTDLSMTTQSGDLPSKDRDQDRGRPKDRKHPHHH  
HHHHHHHPAPDRDRYAQERPDTGRARAREQRWSRSPSEGREHTHTRQGSSSVSGSPAPSTSGTSTPRRGRQ  
LPQTPCTPRPLVSYSPAPRRPAARRMAGPAAPPGGSPRGCRRAPRWPAAHAPEGPRPRGADYTEPDSPREPPGG  
AHDPA PRSPRT PRAAGCASPRHGRRLPNGYYAGHGAPRPTARRGAHDAYSSESQDDWC\*  
>rs37482583\_ENSMUSP00000158675\_c.2313:G>C\_p.E772Q  
ENSMUST00000238337.2|Cacna1a-212|ENSMUSG00000034656|+|chr8:g.85366320:G>C  
MHLRLSGQRGLTLQPNPSSLPSSPFPLAKGNFINLSFLRFLFRAARLIKLLRQGYTIRILLWTFVQSFKVF  
GNIGIDGEDSDEDEFQITEHNNFRFFFQALMLLFRSATGEAWHNIMLSCLSGKPCDKNSGILTADCGNEFA  
YFYFVSFIFLCSFLMLNLFVAVIMDNFEYLTRDSSILGPHHLDEYVRVWAEYDPAACGRIHYKDMYSLLRVIS  
PPLGLGKCKPHRVACKRLLRMDLPVADDNTVHFNSTLMALIRTALDIKIAKGGADKQQMDAELRKEMMAIWP  
LSQKTLDDLVTPHKSTDLTVGKIYAAMMIMEYYRQSKAKKLQAMREEQNRTPLMFQRMPPSPTQEGGSPQNA  
LPSTQLDPGGGLMAHEGGMKESPSWVTQRAQEMFQKTGTWSPERGPPIDMPNSQPNSQVEMREMGTGYS  
EHYLPMEGQTRAASMPRLPAENQRRRGRPRGNDLSTISDTPMKRSASVLPKARRLDDYSLEHYLPMEGQRY  
HQRRDRGRHRTSERSLGRYTDVDTGLGTDLSMTTQSGDLPSKDRDQDRGRPKDRKHPHHHHHHHPAPD  
RDRYAQERPDTGRARAREQRWSRSPSEGREHTHTRQGSSSVSGSPAPSTSGTSTPRRGRQLPQTPCTPRPLV  
SYSPAPRRPAARRMAGPAAPPGGSPRGCRRAPRWPAAHAPEGPRPRGADYTEPDSPREPPGGAHDPAPRSPTP  
RAAGCASPRHGRRLPNGYYAGHGAPRPTARRGAHDAYSSESQDDWC\*

>rs220446334\_ENSMUSP00000060275\_c.654:G>A\_p.V219M  
ENSMUST00000060427.6|Ier2-201|ENSMUSG00000053560|-|chr8:g.85388726:C>T  
MEVQKEAQRIMTSLVWKMVYHSRMRQGGRLRLHRSLLQSLVMRSAREVYLSAKVEAHQPEFPSSRRALDPRHLHPP  
REAEVAVEVASPEAVQPPEPMDTQEVLRVQETPALCDPPPAPVSRKRRSSSDLSGDSDAGLVPSKKARLEEV  
EGEATSEVPDRLQLPPAQSEGAFPNLARVLQRRFSSLLNCGPAVPPPTPPTCEAKPACRPADNMLNVLVRAVM  
AF\*

>rs52044482\_ENSMUSP00000060275\_c.242:A>C\_p.E81D  
ENSMUST00000060427.6|Ier2-201|ENSMUSG00000053560|-|chr8:g.85389138:T>G  
MEVQKEAQRIMTSLVWKMVYHSRMRQGGRLRLHRSLLQSLVMRSAREVYLSAKVEAHQPEFPSSRRALDPRHLHPP  
REAEVAVDVASPEAVQPPEPMDTQEVLRVQETPALCDPPPAPVSRKRRSSSDLSGDSDAGLVPSKKARLEEV  
EGEATSEVPDRLQLPPAQSEGAFPNLARVLQRRFSSLLNCGPAVPPPTPPTCEAKPACRPADNMLNVLVRAVV  
AF\*

>rs32757845\_ENSMUSP0000001975\_c.688:T>C\_p.V230A  
ENSMUST0000001975.6|Nacc1-201|ENSMUSG0000001910|-|chr8:g.85403185:A>G  
MAQTLQMEIPNFGNSILECLNEQRLQGLYCDVSVVVKGHAFKAHRAVLAASSSYFRDLFNSSRSASVVELPAAV  
QPQSFQQILTFCYTGRLSMNMGDQFLLIYTAGFLQIQEIMEKGTEFFLKVSSPSCDSQGLHPEEAPSSEPPQSP  
VAQTLGWPAACSTPLPLVSRVKTEQELDSVQCTPMAKRLWDSSQKEAGSGGNNGSRKMAKFSTPDLALNRMPQ  
PLSMATATAAAAVVAVGGCVSGPMSERTSPGTSSAYTSDSPSSYHNEEDEEEDAEKVEALPEQVLESRSRIRVRQDLASL  
YMLNNGVQTAEKVEALPEQVLESRSRIRVRQDLASLPAELINQIGNRCHPKLYDEGDPSEKLELVGTNVYI  
TRAQLMNCHVSAGTRHKVLLRLLASFFDRNTLANSCGTGIRSSSTNDPRRKLDSRVLHAVKYQCQNFAPNFK  
ESEMNAIAADMCTNARRVVRKSWLPKTKPLHLVEGDNYSFISDTCKIEPDMMSMEHSFETASHDGEAGPSAE  
VLQ\*

>rs32757845\_ENSMUSP00000158606\_c.439:T>C\_p.V147A  
ENSMUST00000238434.2|Nacc1-203|ENSMUSG0000001910|-|chr8:g.85403185:A>G  
FCYTGRLSMNMGDQFLLIYTAGFLQIQEIMEKGTEFFLKVSSPSCDSQGLHPEEAPSSEPPQSPVAQTLGWPAAC  
STPLPLVSRVKTEQELDSVQCTPMAKRLWDSSQKEAGSGGNNGSRKMAKFSTPDLALNRMPQPLSMATATAA  
AAVVAVGGCVSGPMSERTSPGTSSAYTSDSPSSYHNEEDEEEDAEKVEALPEQVLESRSRIRVRQDLASL  
PAELINQIGNRCHPKLYDEGDPSEKLELVGTNVYI TRAQLMNCHVSAGTRHKVLLRLLASFFDRNTLANSC  
GTGIRSSSTNDPRRKLDSRVLHAVKYQCQNFAPNFK ESEMNAIAADMCTNARRVVRKSWLPKTKPLHLVEGDN  
YSSFISD

>rs36775818\_ENSMUSP0000001974\_c.1561:T>G\_p.I521S  
ENSMUST0000001974.11|Trmt1-201|ENSMUSG0000001909|+|chr8:g.85425080:T>G  
MSLARTILWLSRPLRPAHSLCRAQFMERKAQKPPSPAMENGRSWEERPPADPVATVTEGAAKIVFPSANEV  
FYNPVQEFNRDLTCAVITEFARIHLGAKGIQIKVPGEKDSEKIAVDLSDQEEETAGKNENLAPGDWPRTAAVG  
EICEEGLRVLEGLAASGLRSIRFALEVPGLQSVVANDASARAVELMHRNVELNGVAHLVQPNQADARMLMYQH  
QKAPERFDVIDLDPYGSPPAPFLDAAVQAVSDGGLLCVTCTDMAVLAGNSGETCYSKYGAMALKSRACHEMALR  
IVLHSLDLHANCYQRYIVPLLSISADFYIRVFRVFTGQAKVKSSASKQALVFQCVGCGAFYLRQLGKASGDP  
GGRIKFS AACGPPVTPECEHCGQRHQLGGPMWAEPIHDLDFVGRVLDVTTNPGRFHTSMRIQGVLSVVTEEL  
PDVPLYTTLDQLSSTIHCNTPRLLQLRSALLHAGFRVLSLHACKNAVKT DAPPEALWDIMRCWEKECPVKRER  
LSESSPAFRSLAVEPRLKANFNIRE DANPSSRQRGLKRFQANPEANWGPRPRARPGGAASEDLAGRRLQLN  
KRKEPAEDPAQRAARLKTFPCKRFKEGTCQLGDQCCYSHSPAAPVASGDIPIEECPETTTKISPGPKAAAGGI  
PGPGVD\*

>rs36775818\_ENSMUSP00000105389\_c.1561:T>G\_p.I521S  
ENSMUST00000109767.9|Trmt1-203|ENSMUSG0000001909|+|chr8:g.85425080:T>G  
MSLARTILWLSRPLRPAHSLCRAQFMERKAQKPPSPAMENGRSWEERPPADPVATVTEGAAKIVFPSANEV  
FYNPVQEFNRDLTCAVITEFARIHLGAKGIQIKVPGEKDSEKIAVDLSDQEEETAGKNENLAPGDWPRTAAVG  
EICEEGLRVLEGLAASGLRSIRFALEVPGLQSVVANDASARAVELMHRNVELNGVAHLVQPNQADARMLMYQH  
QKAPERFDVIDLDPYGSPPAPFLDAAVQAVSDGGLLCVTCTDMAVLAGNSGETCYSKYGAMALKSRACHEMALR  
IVLHSLDLHANCYQRYIVPLLSISADFYIRVFRVFTGQAKVKSSASKQALVFQCVGCGAFYLRQLGKASGDP  
GGRIKFS AACGPPVTPECEHCGQRHQLGGPMWAEPIHDLDFVGRVLDVTTNPGRFHTSMRIQGVLSVVTEEL  
PDVPLYTTLDQLSSTIHCNTPRLLQLRSALLHAGFRVLSLHACKNAVKT DAPPEALWDIMRCWEKECPVKRER  
LSESSPAFRSLAVEPRLKANFNIRE DANPSSRQRGLKRFQANPEANWGPRPRARPGGAASEDLAGRRLQLN  
KRKEPAEDPAQRAARLKTFPCKRFKEGTCQLGDQCCYSHSPAAPVASGDIPIEECPETTTKISPGPKAAAGGI  
PGPGVD\*

>rs36775818\_ENSMUSP00000105390\_c.1540:T>G\_p.I514S  
ENSMUST00000109768.9|Trmt1-204|ENSMUSG0000001909|+|chr8:g.85425080:T>G  
MREACTVTRWILLCRAQFMERKAQKPPSPAMENGRSWEERPPADPVATVTEGAAKIVFPSANEV FYNPVQEF  
NRDLTCAVITEFARIHLGAKGIQIKVPGEKDSEKIAVDLSDQEEETAGKNENLAPGDWPRTAAVGEICEEGL

RVLEGLAASGLRSIRFALEVPGLQSVVANDASARAVELMHRNVELNGVAHLVQPNQADARMLMYQHOKAPERF  
DVIDLDPYGSPAPFLDAAVQAVSDGGLLCVTCTDMAVLGNSGETCYSKYGAMALKSRACHEMALRIVLHSLD  
LHANCYQRYIVPLLSISADFYIRVFRVFTGQAKVKSSASKQALVFQCVGCGAFYLQRLGKASGDPGGRKIFS  
AACGPPVTPECEHCGQRHQLGGPMWAEPIHDLDFVGRVLDVTTNPGRFHTSMRIQGVLVSVVTEELPDVPLYY  
TLDQLSSTIHCNTPRLLQLRSALLHAGFRVLSLHACKNAVKTDAPEALWDIMRCWEKECPVKRERLSESSPA  
FRSLAVEPRLKANFNIREANPSSRQRGLKRFQANPEANWGPRPRARPGGKAASEDLAGRRLQLNKRKEPAE  
DPAQRAARLKTFFCKRFKEGTCQLGDQCCYSHSPAAPVASGDIPIEECPETTTKISPGPKAAAGGIPGPGVD\*  
>rs36775818\_ENSMUSP00000135510\_c.1474:T>G\_p.I492S  
ENSMUST00000125370.10|Trmt1-205|ENSMUSG00000001909|+|chr8:g.85425080:T>G  
MSLARTILWLSRPLRPAHSLCRAQFMERKAQKPPSPAMENGTRSWEEERPPADPVATVTEGAAKIVFPSANEV  
FYNPVQEFNRDLTCAVITEFARIHLGAKGIQIKVPGEKDSEKIAVDLSDQEEETAGKNENLAPGDWPRTAAVG  
EICEEGLRVLEGLAASGLRSIRFALEVPGLQSVVANDASARAVELMHRNVELNGVAHLVQPNQADARMLMYQH  
QKAPERFDVIDLDPYGSPAPFLDAAVQAVSDGGLLCVTCTDMAVLGNSGETCYSKYGAMALKSRACHEMALR  
IVLHSLDLHANCYQRYIVPLLSISADFYIRVFRVFTGQAKVKSARIKFS AACGPPVTPECEHCGQRHQLGG  
PMWAEPIHDLDFVGRVLDVTTNPGRFHTSMRIQGVLVSVVTEELPDVPLYYTLDQLSSTIHCNTPRLLQLRSA  
LLHAGFRVLSLHACKNAVKTDAPEALWDIMRCWEKECPVKRERLSESSPAFRSLAVEPRLKANFNIREANP  
SSRQRGLKRFQANPEANWGPRPRARPGGKAASEDLAGRRLQLNKRKEPAEDPAQRAARLKTFFCKRFKEGTC  
QLGDQCCYSHSPAAPVASGDIPIEECPETTTKISPGPKAAAGGIPGPGVD\*  
>rs36775818\_ENSMUSP00000134723\_c.55:T>G\_p.I19S  
ENSMUST00000136423.3|Trmt1-210|ENSMUSG00000001909|+|chr8:g.85425080:T>G  
XCEPVKRERLSESSPAFRSLAVEPRLKANFNIREANPSSRQRGLKRFQANPEANWGPRPRARPGGKAASEDL  
AGRRLQLNKRKEPAEDPAQRAARLKTFFCKRFKEVISPSTFHATGPRGLLWHSWGQRLRKETQLCAHSLGLH  
TLFSSHQGTQQLGDQCCYSHSPAAPVASGDIPIEECPETTTKISPGPKAAAGGIPGPGVD\*  
>rs32665800\_ENSMUSP00000001974\_c.1969:T>C\_p.I657T  
ENSMUST00000001974.11|Trmt1-201|ENSMUSG00000001909|+|chr8:g.85426371:T>C  
MSLARTILWLSRPLRPAHSLCRAQFMERKAQKPPSPAMENGTRSWEEERPPADPVATVTEGAAKIVFPSANEV  
FYNPVQEFNRDLTCAVITEFARIHLGAKGIQIKVPGEKDSEKIAVDLSDQEEETAGKNENLAPGDWPRTAAVG  
EICEEGLRVLEGLAASGLRSIRFALEVPGLQSVVANDASARAVELMHRNVELNGVAHLVQPNQADARMLMYQH  
QKAPERFDVIDLDPYGSPAPFLDAAVQAVSDGGLLCVTCTDMAVLGNSGETCYSKYGAMALKSRACHEMALR  
IVLHSLDLHANCYQRYIVPLLSISADFYIRVFRVFTGQAKVKSSASKQALVFQCVGCGAFYLQRLGKASGDP  
GGRIKFS AACGPPVTPECEHCGQRHQLGGPMWAEPIHDLDFVGRVLDVTTNPGRFHTSMRIQGVLVSVVTEEL  
PDVPLYYTLDQLSSTIHCNTPRLLQLRSALLHAGFRVLSLHACKNAVKTDAPEALWDIMRCWEKECPVKRER  
LSESSPAFRILAVEPRLKANFNIREANPSSRQRGLKRFQANPEANWGPRPRARPGGKAASEDLAGRRLQLN  
KRKEPAEDPAQRAARLKTFFCKRFKEGTCQLGDQCCYSHSPAAPVASGDIPIEECPETTTKISPGPKAAAGGT  
PGPGVD\*  
>rs32665800\_ENSMUSP00000105389\_c.1969:T>C\_p.I657T  
ENSMUST00000109767.9|Trmt1-203|ENSMUSG00000001909|+|chr8:g.85426371:T>C  
MSLARTILWLSRPLRPAHSLCRAQFMERKAQKPPSPAMENGTRSWEEERPPADPVATVTEGAAKIVFPSANEV  
FYNPVQEFNRDLTCAVITEFARIHLGAKGIQIKVPGEKDSEKIAVDLSDQEEETAGKNENLAPGDWPRTAAVG  
EICEEGLRVLEGLAASGLRSIRFALEVPGLQSVVANDASARAVELMHRNVELNGVAHLVQPNQADARMLMYQH  
QKAPERFDVIDLDPYGSPAPFLDAAVQAVSDGGLLCVTCTDMAVLGNSGETCYSKYGAMALKSRACHEMALR  
IVLHSLDLHANCYQRYIVPLLSISADFYIRVFRVFTGQAKVKSSASKQALVFQCVGCGAFYLQRLGKASGDP  
GGRIKFS AACGPPVTPECEHCGQRHQLGGPMWAEPIHDLDFVGRVLDVTTNPGRFHTSMRIQGVLVSVVTEEL  
PDVPLYYTLDQLSSTIHCNTPRLLQLRSALLHAGFRVLSLHACKNAVKTDAPEALWDIMRCWEKECPVKRER  
LSESSPAFRILAVEPRLKANFNIREANPSSRQRGLKRFQANPEANWGPRPRARPGGKAASEDLAGRRLQLN  
KRKEPAEDPAQRAARLKTFFCKRFKEGTCQLGDQCCYSHSPAAPVASGDIPIEECPETTTKISPGPKAAAGGT  
PGPGVD\*  
>rs32665800\_ENSMUSP00000105390\_c.1948:T>C\_p.I650T  
ENSMUST00000109768.9|Trmt1-204|ENSMUSG00000001909|+|chr8:g.85426371:T>C  
MREACTVTRWILLCRAQFMERKAQKPPSPAMENGTRSWEEERPPADPVATVTEGAAKIVFPSANEFYNPVQE  
FNRDLTCAVITEFARIHLGAKGIQIKVPGEKDSEKIAVDLSDQEEETAGKNENLAPGDWPRTAAVGEICEEGL  
RVLEGLAASGLRSIRFALEVPGLQSVVANDASARAVELMHRNVELNGVAHLVQPNQADARMLMYQHOKAPERF  
DVIDLDPYGSPAPFLDAAVQAVSDGGLLCVTCTDMAVLGNSGETCYSKYGAMALKSRACHEMALRIVLHSLD  
LHANCYQRYIVPLLSISADFYIRVFRVFTGQAKVKSSASKQALVFQCVGCGAFYLQRLGKASGDPGGRKIFS  
AACGPPVTPECEHCGQRHQLGGPMWAEPIHDLDFVGRVLDVTTNPGRFHTSMRIQGVLVSVVTEELPDVPLYY  
TLDQLSSTIHCNTPRLLQLRSALLHAGFRVLSLHACKNAVKTDAPEALWDIMRCWEKECPVKRERLSESSPA  
FRILAVEPRLKANFNIREANPSSRQRGLKRFQANPEANWGPRPRARPGGKAASEDLAGRRLQLNKRKEPAE  
DPAQRAARLKTFFCKRFKEGTCQLGDQCCYSHSPAAPVASGDIPIEECPETTTKISPGPKAAAGGTGPGPGVD\*

>rs32665800\_ENSMUSP00000135510\_c.1882:T>C\_p.I628T  
ENSMUST00000125370.10|Trmt1-205|ENSMUSG00000001909|+|chr8:g.85426371:T>C  
MSLARTILWLSRPLRPAHSLCRAQFMERKAQKPPSPAMENGTRSWEEERPPADPVATVTEGAAKIVFPSANEV  
FYNPVQEFNRDLTCAVITEFARIHLAGAKGIQIKVPGEKDSEKIAVDLSDQEEETAGKNENLAPGDWPRTAAVG  
EICEEGLRVLEGLAASGLRSIRFALEVPLQSVVANDASARAVELMHRNVELNGVAHLVQPNQADARMLMYQH  
QKAPERFDVIDLDPYGGSPAPFLDAAVQAVSDGGLLCVCTCTDMAVLAGNSGETCYSKYGAMALKSRACHEMALR  
IVLHSLDLHANCYQRYIVPLLSISADFYIRVVFVFTGQAKVKSSARIKFSAAACGPPVTPECEHCGQRHQLGG  
PMWAEPIHDLDFVGRVLDVAVTTNPGRFHTSMRIQGVLSVTEELPDVPLYTTLDQLSSTIHCNTPRLLQLRSA  
LLHAGFRVSLSHACKNAVKTDAPEALWDIMRCWEKECPVKRERLSESSPAFRILAVEPRLKANFNIREDANP  
SSRQRGLKRFQANPEANWGPRPRARPGGKAASEDLARRRLLQNKRKEPAEDPAQRAARLKTFFCKRFKEGTC  
QLGDQCCYSHSPAAPVASGDIPIEECPETTTKISPGPKAAAGGTPGPGVD\*

>rs32665800\_ENSMUSP00000134723\_c.595:T>C\_p.I199T  
ENSMUST00000136423.3|Trmt1-210|ENSMUSG00000001909|+|chr8:g.85426371:T>C  
XECPVKRELRSESSPAFRILAVEPRLKANFNIREDANPSSRQRGLKRFQANPEANWGPRPRARPGGKAASEDL  
ARRRLLQNKRKEPAEDPAQRAARLKTFFCKRFKEVISPTFHATGPRLLGLWHSWGQRLRKETQLCAHSLGLH  
TLFSHQGTQQLGDQCCYSHSPAAPVASGDIPIEECPETTTKISPGPKAAAGGTPGPGVD\*

>rs47830455\_ENSMUSP00000158636\_c.513:G>T\_p.A172S  
ENSMUST00000238562.2|Lyl1-204|ENSMUSG000000034041|+|chr8:g.85430832:G>T  
MPTTELSAFRPSLLQLTALGRAPPTLAVHYHHPHFLNSVYIGPAGPFSIFPNSRLKRRPSHSELDLADGHQPQ  
KVARRVFTNSRERWRQHVNGAFAELRKLTPHPDRKLSKNEVLR LAMKYIGFLVRLLRDQTAVLTSGPSAP  
GSRKPPARRGVEGSARFGAGHRVEASRSQPVLPGDCDGDPNGSVRPIKLEQTSLSPEVR\*

>rs47830455\_ENSMUSP00000046010\_c.732:G>T\_p.A245S  
ENSMUST00000037165.6|Lyl1-201|ENSMUSG000000034041|+|chr8:g.85430832:G>T  
MCPQARAEEVGSAMTEKTEMVCASSPAPAPPSKSPASPGPLSTEEVDHRNTCTPWLPPGVPVINLGHTRPIGAA  
MPTTELSAFRPSLLQLTALGRAPPTLAVHYHHPHFLNSVYIGPAGPFSIFPNSRLKRRPSHSELDLADGHQPQ  
KVARRVFTNSRERWRQHVNGAFAELRKLTPHPDRKLSKNEVLR LAMKYIGFLVRLLRDQTAVLTSGPSAP  
GSRKPPARRGVEGSARFGAGHRVEASRSQPVLPGDCDGDPNGSVRPIKLEQTSLSPEVR\*

>rs37437752\_ENSMUSP00000105386\_c.675:C>T\_p.P226S  
ENSMUST00000109764.8|Nfix-204|ENSMUSG00000001911|-|chr8:g.85453871:G>A  
MDEFHFPFIEALLPHVRAFSYTWFNLQARKRKYFKKHEKRMSKDEERAVKDELLGEKPEIKQKQWASRLAKLRK  
DIRPEFREDFVLTITGKKPPCCVLSNPDQKGIKIRRIDCLRQADKVVRLDLVMVILFKGIPLESTDGERLYKSP  
QCSNPGLCVQPHHIGVTIKELDLYLAYFVHTPESGQSDSSNQGDADIKPLPNGHLSFQDCFVTSGVWNVTEL  
VRVSVQTSVATASGPNFSLADLESYNNINQVTLGRRSITSPSTSSSTKRPKSIDDSEMESPVDVDFYPGTGR  
SPAAGSSQSSGWPNDVDAGPASLKKSGKLDLFCALSSQSSPRMAFTHHPLPVLAVRPGSPRATASALHFPS  
TSIIQQSSPYFTHPTIRYHHHGGQDSLKEFVQFVCSGQATGQPNGSGQKVPVPSFLLPPPPVAVRVPVPLP  
MPDSKTTSTAPDGAALTPPSPTTTGASSANRFVSIIGSRDGNFLNIPQSSQSWFL\*

>rs37437752\_ENSMUSP00000076005\_c.699:C>T\_p.P234S  
ENSMUST00000076715.13|Nfix-201|ENSMUSG00000001911|-|chr8:g.85453871:G>A  
MYSPLYCTQDEFHFPFIEALLPHVRAFSYTWFNLQARKRKYFKKHEKRMSKDEERAVKDELLGEKPEIKQKQWAS  
RLAKLRKDIRPEFREDFVLTITGKKPPCCVLSNPDQKGIKIRRIDCLRQADKVVRLDLVMVILFKGIPLESTD  
GERLYKSPQCSNPGLCVQPHHIGVTIKELDLYLAYFVHTPESGQSDSSNQGDADIKPLPNGHLSFQDCFVTS  
GVWNVTELVRSVQTSVATASGPNFSLADLESYNNINQVTLGRRSITSPSTSSSTKRPKSIDDSEMESPVDV  
VFYPGTGRSPAAGSSQSSGWPNDVDAGSPRATASALHFPSSTIIQQSSPYFTHPTIRYHHHGGQDSLKEFVQF  
VCSGSGQATGQHSQRQAPPLPTGLSASDPGTATF\*

>rs37437752\_ENSMUSP00000096669\_c.699:C>T\_p.P234S  
ENSMUST00000099070.10|Nfix-202|ENSMUSG00000001911|-|chr8:g.85453871:G>A  
MYSPLYCTQDEFHFPFIEALLPHVRAFSYTWFNLQARKRKYFKKHEKRMSKDEERAVKDELLGEKPEIKQKQWAS  
RLAKLRKDIRPEFREDFVLTITGKKPPCCVLSNPDQKGIKIRRIDCLRQADKVVRLDLVMVILFKGIPLESTD  
GERLYKSPQCSNPGLCVQPHHIGVTIKELDLYLAYFVHTPESGQSDSSNQGDADIKPLPNGHLSFQDCFVTS  
GVWNVTELVRSVQTSVATASGPNFSLADLESYNNINQVTLGRRSITSPSTSSSTKRPKSIDDSEMESPVDV  
VFYPGTGRSPAAGSSQSSGWPNDVDAGPASLKKSGKLDLFCALSSQSSPRMAFTHHPLPVLAVRPGSPRAT  
ASALHFPSSTIIQQSSPYFTHPTIRYHHHGGQDSLKEFVQFVCSGSGQATGQHSQRQAPPLPTGLSASDPGT  
ATF\*

>rs37437752\_ENSMUSP00000105384\_c.675:C>T\_p.P226S  
ENSMUST00000109762.8|Nfix-203|ENSMUSG00000001911|-|chr8:g.85453871:G>A  
MDEFHFPFIEALLPHVRAFSYTWFNLQARKRKYFKKHEKRMSKDEERAVKDELLGEKPEIKQKQWASRLAKLRK  
DIRPEFREDFVLTITGKKPPCCVLSNPDQKGIKIRRIDCLRQADKVVRLDLVMVILFKGIPLESTDGERLYKSP  
QCSNPGLCVQPHHIGVTIKELDLYLAYFVHTPESGQSDSSNQGDADIKPLPNGHLSFQDCFVTSGVWNVTEL

VRVSVQTSVATASGNFSLADLESFSPYNNINQVTLGRRSITSPSTSTKRPKSIDDSEMESPVDVDFYPGTGRS  
PAAGSSQSSGWPNDVDAGSPRATASALHFPSTSI IQQSSPYFTHPTIRYHHHHGQDSLKEFVQFVCSGSGQA  
TGQHSQRQAPPLPTGLSASDPGTATF\*

>rs37437752\_ENSMUSP00000115691\_c.699:C>T\_p.P234S  
ENSMUST00000126806.2|Nfix-205|ENSMUSG00000001911|-|chr8:g.85453871:G>A  
MYSPLYCTQDEFHFPFIEALLPHVRAFSYTWFNLQARKRKYFKKHEKRMKDEERAVKDELLGEKPEIKQKWA  
RLLAKLRKDIRPEFREDFVLTITGKKPPCCVLSNPDQKGIKRRIDCLRQADKVVRLDLVMVILFKGIPLESTD  
GERLYKSPQCSNPGLCVQPHHIGVTIKELDLYLAYFVHTPESEGQSDSSNQGDADIKPLPNGHLSFQDCFVTS  
GVWNVTELVRSQTSVATASGNFSLADLESFSPYNNINQVTLGRRSITSPSTSTKRPKSIDDSEMESPVDV  
VFYPGTGRSPAAGSSQSSGWPNDVDAGPASLKKSGKLDLFCALSSQSSPRMAFTHHPLPVLAVRPGSPRAT  
ASALHFPSTSI IQQSSPYFTHPTIRYHHHHGQDSLKEFVQFVCSGSGQATGQPNGSGQKVPVGSFLLPPPPP  
VARPVPLPMPDSTTTSTAPDGAALTTPSPSFTTTGASSANRFVSI GSRDG

>rs230210937\_ENSMUSP00000070057\_c.423:A>TTTTA\_p.N142ins-fs  
ENSMUST00000065539.6|Dand5-201|ENSMUSG00000053226|-  
|chr8:g.85543051:T>TAAAA  
MFRSQFTLLGLFSGAWLPTGSGRPGAPATPVQSGTAINQSWTLDPLVPI SALGSWEAFGLQNKQOGTGELO  
GGQRVAAGVPLPLAPQEVLETKALS FVQVISRPGCTSARVLNHLFCGRCSSFYIPSSDPTPVVFCF

>rs33207714\_ENSMUSP00000037783\_c.453:C>T\_p.R152W  
ENSMUST00000036734.6|Gadd45gip1-  
201|ENSMUSG00000033751|+|chr8:g.85560840:C>T  
MAALAMRSGYLLRLSVALGPRRSYRAPP PRRRPGPHSPDENLLTPRWQLTPRYVAKQFGRHGAISGVPPA  
SLWPTPEQLRELEAEQEWEYPSLATMQESLRLQQQALEARRQAREQRIAECKAMPQMIENWRKQKRERWEKI  
QADKEWRARLQAEAQERLGYHVDPRSARFQELLQDLKQQRKRLKEERQQRKKEARIAAMASAEAQDSA VSGE  
PSS\*

>rs46809451\_ENSMUSP0000003906\_c.25:T>C\_p.L9P  
ENSMUST0000003906.13|Farsa-201|ENSMUSG0000003808|+|chr8:g.85583689:T>C  
MADNPVLEPLLRLEVADGGLD SAE LATQLGVEHQAVVGAVKSLQALGEVIEAELRSTKWCWELTTEGEEIARE  
GSHEARVFRSIPLEGLVQSELMHLP SGKVGFSKAMSNKWI RVDKSAADGPRVFRVVD SIEDEVQKRLQLVQAG  
QAEKLAEKERNELRKRKLLTEVILKTYVWVSKGKAFSTSVSKQEAELSPEMIS SSGSWDRPFPKPYNFSARGVLP  
DSGHLHPLLKVR SQFRQIFLEMGFTEMP TDNFIESSFWNF DALFQPQQHPARDQHDTFFLRDPAEALQLPMGY  
VQRVKRTHSQGGYGSQGYKYTWKLEEARKNLLRTHTTAASARALYQLAQKPFPTPAKYFSIDRVFRNETLDAT  
HLAEFHQIEGVIADHGLTLGHLMGV LREFFTKLGITQLRFKPAYNPYTEPSMEVFSYHQGLKKWVEVGN SGVF  
RPEMLLPMGLPENVS VIAWGLSLERPTMIKYGINNIRELVGHKVNLMQVYD SPVCRLDIEPRSSKTQEAA\*

>rs46809451\_ENSMUSP00000105376\_c.25:T>C\_p.L9P ENSMUST00000109754.2|Farsa-  
202|ENSMUSG0000003808|+|chr8:g.85583689:T>C  
MADNPVLEPLLRLEVADGGLD SAE LATQLGVEHQAVVGAVKSLQALGEVIEAELRSTKWCWELTTEGEEIARE  
GSHEARVFRSIPLEGLVQSELMHLP SGKVGFSKAMSNKWI RVDKSAADGPRVFRVVD SIEDEVQKRLQLVQAG  
QAEKLAEKERNELRKRKLLTEVILKTYVWVSKGKAFSTSVSKQEAELSPEMIS SSGSWDRPFPKPYNFSARGVLP  
DSGHLHPLLKVR SQFRQIFLEMGFTEMP TDNFIESSFWNF DALFQPQQHPARDQHDTFFLRDPAEALQLPMGY  
VQRVKRTHSQGGYGSQGYKYTWKLEEARKNLLRTHTTAASARALYQLAQKPFPTPAKYFSIDRVFRNETLDATH  
LAEFHQIEGVIADHGLTLGHLMGV LREFFTKLGITQLRFKPAYNPYTEPSMEVFSYHQGLKKWVEVGN SGVF  
RPEMLLPMGLPENVS VIAWGLSLERPTMIKYGINNIRELVGHKVNLMQVYD SPVCRLDIEPRSSKTQEAA\*

>rs46809451\_ENSMUSP00000120609\_c.25:T>C\_p.L9P ENSMUST00000156970.8|Farsa-  
206|ENSMUSG0000003808|+|chr8:g.85583689:T>C  
MADNPVLEPLLRLEVADGGLD SAE LATQLGVEHQAVVGAVKSLQALGEVIEAELRSTKWCWELTTEAPAQRQG  
GLQQGHVQQVDPSGQECRRRAPGVPSGGQYRG\*

>rs32726273\_ENSMUSP0000003906\_c.1205:G>C\_p.Q402H  
ENSMUST0000003906.13|Farsa-201|ENSMUSG0000003808|+|chr8:g.85594648:G>C  
MADNPVLELLLRLEVADGGLD SAE LATQLGVEHQAVVGAVKSLQALGEVIEAELRSTKWCWELTTEGEEIARE  
GSHEARVFRSIPLEGLVQSELMHLP SGKVGFSKAMSNKWI RVDKSAADGPRVFRVVD SIEDEVQKRLQLVQAG  
QAEKLAEKERNELRKRKLLTEVILKTYVWVSKGKAFSTSVSKQEAELSPEMIS SSGSWDRPFPKPYNFSARGVLP  
DSGHLHPLLKVR SQFRQIFLEMGFTEMP TDNFIESSFWNF DALFQPQQHPARDQHDTFFLRDPAEALQLPMGY  
VQRVKRTHSQGGYGSQGYKYTWKLEEARKNLLRTHTTAASARALYQLAQKPFPTPAKYFSIDRVFRNETLDAT  
HLAEFHQIEGVIADHGLTLGHLMGV LREFFTKLGI THLRFKPAYNPYTEPSMEVFSYHQGLKKWVEVGN SGVF  
RPEMLLPMGLPENVS VIAWGLSLERPTMIKYGINNIRELVGHKVNLMQVYD SPVCRLDIEPRSSKTQEAA\*

>rs32726273\_ENSMUSP00000105376\_c.1202:G>C\_p.Q401H  
ENSMUST00000109754.2|Farsa-202|ENSMUSG0000003808|+|chr8:g.85594648:G>C

MADNPVLELLLRLEVADGGLDLSDAELATQLGVEHQAVVGAVKSLQALGEVIEAELRSTKCWELTTEGEEIARE  
GSHEARVFRSIPLEGLVQSELMHLPKSGKVGFSKAMSNKWIRVDKSAADGPRVFRVVDSDIEDEVQKRLQLVQAG  
QAEKLAEKERNELRKRKLLTEVILKTYWVSKGKAFSTSVSKQEAELSPEMISSGSRDRPFKPYNFSARGVLP  
DSGHLHPLLKVRQFRQIFLEMGFTEMPTDNFIESSFWNFDALFQPQQHPARDQHDTFFLRDPAEALQLPMGY  
VQRVKRTHSQGGYGSQGYKYTWKLEEARKNLLRTHTTAASARALYQLAQKPFPAKYFSIDRVFRNETLDATH  
LAEFHQIEGVIADHGLTLGHLMGVLRFFFTKLGITHLRFKPAYNPYTEPSMEVFSYHQGLKKWVEVNGSGVFR  
PEMLLPMGLPENVSIAWGLSLERPTMIKYGINNIRELVGHKVNLMVYDSDPVCRLDIEPRSSKTQEAA\*  
>ENSMUSP0000003906\_c.1222:C>CAAGA\_p.A408ins-fs  
ENSMUST0000003906.13|Farsa-  
201|ENSMUSG0000003808|+|chr8:g.85594665:C>CAAGA  
MADNPVLELLLRLEVADGGLDLSDAELATQLGVEHQAVVGAVKSLQALGEVIEAELRSTKCWELTTEGEEIARE  
GSHEARVFRSIPLEGLVQSELMHLPKSGKVGFSKAMSNKWIRVDKSAADGPRVFRVVDSDIEDEVQKRLQLVQAG  
QAEKLAEKERNELRKRKLLTEVILKTYWVSKGKAFSTSVSKQEAELSPEMISSGSRDRPFKPYNFSARGVLP  
DSGHLHPLLKVRQFRQIFLEMGFTEMPTDNFIESSFWNFDALFQPQQHPARDQHDTFFLRDPAEALQLPMGY  
VQRVKRTHSQGGYGSQGYKYTWKLEEARKNLLRTHTTAASARALYQLAQKPFPAKYFSIDRVFRNETLDATH  
HLAEFHQIEGVIADHGLTLGHLMGVLRFFFTKLGITQLRFKPARLQPLHRAQHGSVQLPPRSKEVG  
>ENSMUSP00000105376\_c.1219:C>CAAGA\_p.A407ins-fs  
ENSMUST00000109754.2|Farsa-  
202|ENSMUSG0000003808|+|chr8:g.85594665:C>CAAGA  
MADNPVLELLLRLEVADGGLDLSDAELATQLGVEHQAVVGAVKSLQALGEVIEAELRSTKCWELTTEGEEIARE  
GSHEARVFRSIPLEGLVQSELMHLPKSGKVGFSKAMSNKWIRVDKSAADGPRVFRVVDSDIEDEVQKRLQLVQAG  
QAEKLAEKERNELRKRKLLTEVILKTYWVSKGKAFSTSVSKQEAELSPEMISSGSRDRPFKPYNFSARGVLP  
DSGHLHPLLKVRQFRQIFLEMGFTEMPTDNFIESSFWNFDALFQPQQHPARDQHDTFFLRDPAEALQLPMGY  
VQRVKRTHSQGGYGSQGYKYTWKLEEARKNLLRTHTTAASARALYQLAQKPFPAKYFSIDRVFRNETLDATH  
LAEFHQIEGVIADHGLTLGHLMGVLRFFFTKLGITQLRFKPARLQPLHRAQHGSVQLPPRSKEVG  
>rs49360904\_ENSMUSP00000122159\_c.205:T>C\_p.L69P  
ENSMUST00000136026.8|Syce2-202|ENSMUSG00000003824|+|chr8:g.85610137:T>C  
MERHGVAAPPVELKDQEPPIAVESGEHRQSENHEETPGSVAPSASCQLPGPFSSLDSSIETLKKKAQEP IENI  
NESRQKDHALMTNFRDSLKMKVSDLTEKLEERMYQVYSHHSKI IQERLQEFTQKMAKINHLEMELKQVCQTVE  
TVYKDLQVQSEVPTCEEQNYKDGE\*  
>rs49360904\_ENSMUSP00000131438\_c.223:T>C\_p.L75P  
ENSMUST00000170296.2|Syce2-204|ENSMUSG00000003824|+|chr8:g.85610137:T>C  
MERHGWSLRSQVAAPPVELKDQEPPIAVESGEHRQSENHEETPGSVAPSASCQLPGPFSSLDSSIETLKKKAQ  
EPIENINESRQKDHALMTNFRDSLKMKVSDLTEKLEERMYQVYSHHSKI IQERLQEFTQKMAKINHLEMELKQ  
VCQTVETVYKDLQVQSEVPTCEEQNYKDGE\*  
>rs47589652\_ENSMUSP00000003907\_c.594:G>A\_p.G199S  
ENSMUST00000003907.14|Gcdh-201|ENSMUSG00000003809|-|chr8:g.85617709:C>T  
MVPAMLTGYMSLRGVSARLLSRRSGLRFRFRPTWSSAAAHEKTEKQIRPAKSSRPVFDWKDPLILEEQTLTAD  
KLIRDTFRNYCQERLMSRILLANRNEVFHRDIVYEMGELGVLGPTIKGYCAGVSSVAYGLLTRELERVDSGY  
RSMMSVQSSSLVMHPIIYTYGSEEQRQKYLPLGLAKGELLGCFGLTEPNHGS DPGSMETRARRHNPSNQSYTL  
SGTKTWITNSPVADLFIVWARCEDNCRGFIFILEKGMRLSAPRIEGKFSLRASATGMIIMDSVEVPEENVLP  
NVSSLAGPFGCLNTARYGITWGVLGAAEFCLHTARQYALDRIQFGVPLARNQLVQKKLADMLTEITLGLHAC  
LQLGRLKDQDKATPEMVSMLKRNCGKALDIARQARDILGGNGISDEYHVIRHAMNLEAVNTYEGTHDIIHAL  
ILGRAITGIQAF TVGK\*  
>rs47589652\_ENSMUSP00000105367\_c.567:G>A\_p.G190S  
ENSMUST00000109745.8|Gcdh-202|ENSMUSG00000003809|-|chr8:g.85617709:C>T  
MSLRGVSARLLSRRSGLRFRFRPTWSSAAAHEKTEKQIRPAKSSRPVFDWKDPLILEEQTLTAD  
EKLIRDTFRNYCQERLMSRILLANRNEVFHRDIVYEMGELGVLGPTIKGYCAGVSSVAYGLLTRELERV  
DSGYRSMMSVQSSSLVMHPIIYTYGSEEQRQKYLPLGLAKGELLGCFGLTEPNHGS DPGSMETRARRHN  
PSNQSYTL SGTKTWITNSPVALDFIVWARCEDNCRGFIFILEKGMRLSAPRIEGKFSLRASATGMIIMDS  
VEVPEENVLPNVSSLAGPFGCLNTARYGITWGVLGAAEFCLHTARQYALDRIQFGVPLARNQLVQKKLAD  
MLTEITLGLHACLQLGRLKDQDKATPEMVSMLKRNCGKALDIARQARDILGGNGISDEYHVIRHAMNLE  
AVNTYEGTHDIIHALILGRAITGIQAF TVGK\*  
>rs47393345\_ENSMUSP00000003907\_c.544:T>A\_p.L182H  
ENSMUST00000003907.14|Gcdh-201|ENSMUSG00000003809|-|chr8:g.85617759:A>T  
MVPAMLTGYMSLRGVSARLLSRRSGLRFRFRPTWSSAAAHEKTEKQIRPAKSSRPVFDWKDPLILEEQTL  
TAD EKLIRDTFRNYCQERLMSRILLANRNEVFHRDIVYEMGELGVLGPTIKGYCAGVSSVAYGLLTRE  
LERVDSGYRSMMSVQSSSLVMHPIIYTYGSEEQRQKYLPLGLAKGELLGCFGLTEPNHGS DPGSMET  
RARHNPSNQSYTL SGTKTWITNSPVALDFIVWARCEDNCRGFIFILEKGMRLSAPRIEGKFSLRASAT  
GMIIMDSVEVPEENVLPNVSSLAGPFGCLNTARYGITWGVLGAAEFCLHTARQYALDRIQFGVPLARNQL  
VQKKLADMLTEITLGLHACLQLGRLKDQDKATPEMVSMLKRNCGKALDIARQARDILGGNGISDEYHV  
IRHAMNLEAVNTYEGTHDIIHALILGRAITGIQAF TVGK\*



TWITNSPVADLFIVWARCEDNCIRGFILEKGMRGLSAPRIEGKFSLRASATGMIIMDSVEVPEENVLPNVSSL  
AGPFGCLNTARYGITWGVLGAAEFCLHTARQYALDRIQFGVPLARNQLVQKKLADMLTEITLGLHACLQLGRL  
KDQDKATPEMVSMLKRNCGKALDIARQARDILGGNGISDEYHVIRHAMNLEAVNTYEGTHDIIHALILGRAIT  
GIQAF TVGK\*

>rs47393345\_ENSMUSP00000105367\_c.517:T>A\_p.L173H  
ENSMUST00000109745.8|Gcdh-202|ENSMUSG0000003809|-|chr8:g.85617759:A>T  
MSLRGVSARLLSRRSGLRFRFRPTWSSAAAHEKTKQIRPAKSSRPVFDWKDPLILEEQLTADKLIRDTFRN  
YQERLMSRILLANRNEVFHRDIVYEMGELGVLGPTIKGYGCAGVSSVAYGLLRELERVSDGYRSMMSVQSS  
LVMHPIYTYGSEEQRQKYLPLGLAKGEHLGCFGLTEPNHGS DPGMETRARHNPNSQSYTSLSGTKWTITNSPVA  
DLFIVWARCEDNCIRGFILEKGMRGLSAPRIEGKFSLRASATGMIIMDSVEVPEENVLPNVSSLAGPFGCLNT  
ARYGITWGVLGAAEFCLHTARQYALDRIQFGVPLARNQLVQKKLADMLTEITLGLHACLQLGRLKDQDKATPE  
MVSMLKRNCGKALDIARQARDILGGNGISDEYHVIRHAMNLEAVNTYEGTHDIIHALILGRAITGIQAF TVGK  
\*

>rs4137992\_ENSMUSP00000105363\_c.2420:C>A\_p.S807R  
ENSMUST00000109741.9|Mast1-201|ENSMUSG00000053693|-|chr8:g.85644507:G>T  
MSDSLWTALS NFMSPFPGGSMFRRTKSCRTSNRKS LILTSTSP TLP RPHSPLPGHLGSSPLDSPRNFSPNT  
AHFSFASSRRADGRRWSLASLPSGSGYGTNTPSSTVSSSCSSQERLHQLPYQPTVDELHFLSKHFGSTESITDE  
DGRRSPAVRPRSRLSPGRSPSSYDNEIVMMNHVYKERFPKATAQMEEKLRDFARAYEPDSVLP LADGVLSF  
IHHQI IELARDCLTKSRDGLITTVYFYELQENLEKLLQDAYERSESLEVA FVTQLVKKLLIIISRPARLLECL  
EFNPEEFYHLLAAEGHAKGHLVKT D IPRYIIRQLGLTRDPFPD VVRLEEQDSGGSNTPEQDDTSEGRSSTS  
KAKKPPGESDFDTIKLISNGAYGAVYLVRHRDTRQRFAMKKINKQNLILRNQIQQAFVERDILTF AENPFVVG  
MFCSFETRRLCMVMEYVEGGDCATLLKNIGALPVEMARMYFAETVLALEYLHNYGIVHRDLKPDNLLITSMG  
HIKLTDFGLSKMGLMSLTNLYEGHIEKDAREFLDKQVCGTPEYI APEVILRQGYGKPVDDWWAMGIILYEFV  
GCVPPFGDTPPELFGQVISDDILWPEGDEALPTDAQLLISLLQTNPLVRLGAGGAFEVKQHSFFRDL DWTGL  
LRQKAEFI PHLESEDDTSYFDTRSDRYHHVNSYDEDDTTEEEPEVIRQFSSCS PRFSKVYSMEQLSQHEPKT  
PVSASGASKRDPESAKEEKVAGKREGLGGLTLREKTRWGGSP EIKRFSASEASFLEGEAS PPLGARRRRFSAL  
LEPRRFTAPQEDAEARLRPRRPSDDPSSLDTRVPKEAVQGEGETSTPGEPEATERSHPGDLGPPSKDGDPS  
GPRATNDLVLRRARHQQLSGDLAVEKRPSRTGGKVIKSASATALSVMIPAVDPHGGSP LASPMSRSLSSNPS  
SRDSSPSRDYSPAVSGLRSPITIQRS GKKYGFTLR AIRVYMGSDSVYSVHHIVVHVEEGGPAQEAGLCAGDLI  
THVNGEPVHGMVHPEVVELILKSGNKVAVTTTFFENTSIRIGPARRSSYKAKMARRNKRPSAKDGQESKKRSS  
LFRKIKTQSNLLHTSRSLSSLNRLSSSDSLPGSPTHGLPARSPTHSYRSTPDSAYLGASSQSSSPASSTPNS  
PASSASHHIRPSTLHGLSPKLRHQYRSARCKSAGNIPLSPLAHTPSPTQASPPPLPGHTVGS SHTTQSFPAKL  
HSSPPVVRPRPKSAEPPRSPLLRVQSAEKL GASLGADKKGALRKHSLEVGHPDFRKFDFHGE LALHLSLAESDG  
ETPPIEGPGATRQVAVRRLGRQESPLSLGADPLLPDGVQRPMAS SKEDSAGGTEACTPPRATTPGSRTLERDS  
GCTRHQSVQTEDGPGGVARALAKAALS PVQEHEHTRSSSGEAGTPVPVIVVEPARPGVK TQAPQLGTD SKG  
LKEPVAQMPLMPDAPRGRERWVLEVEERTT LSGLRSPASPKLSPDPQTPTLVPTKNVPRSAAPSVPPASLM  
VPGTKPEAGLNSRCPAEAVTPAGLTKTGAPSPASLGP\*

>rs46189481\_ENSMUSP00000064680\_c.169:G>A\_p.G57D  
ENSMUST00000064922.7|Junb-201|ENSMUSG00000052837|-|chr8:g.85704889:C>T  
MCTKMEQPFYHDDSYAAAGYGRSPGSLSLHDYKLLKPTLALNLADPYRGLKGP GARDPGPEGSGAGSYFSGQG  
SDTGASLKLASTELERLIVPNSNGVITTTPTPPGQYFYPRGGGSGGTGGGVTEE QEGFADGFVKALDDLHKM  
NHVTPPNVSLGASGGPQAGPGGVYAGPEPPPVYTNLSSYSPASAPSGSGTAVGTGSSYPTATISYLPHAPPF  
AGGHPAQLGLSRGASAFKEEPQTVPEARSRDATPPVSPINMEDQERIKVERKRLRNRLAATKCRKRKLERIAR  
LEDKVKTLKAENAGLSSAAGLLREQVAQLKQKVMTHVSNQCQLLLGVKGHAF\*

>ENSMUSP00000148237\_c.247:C>T\_p.S83L ENSMUST00000209764.2|Hook2-  
203|ENSMUSG00000052566|+|chr8:g.85719856:C>T  
MSVDKAELCGSLLTTLWLTQTFQVSPPCASPQDLSSGLAIAHVLNQIDPSWFNNEWLQGISSEDSSPSWRLKVRKLE  
KILQSLVEYLKKNVLGHPVSDQHLPDVSLIGEFNSPAELGKLLQLVLGCAISCEKKQEIYIQRIMTLEESVQHVV  
MEAIQELMTKDTPDLSPENYGNFDTQSRYYFLSEEVEEGDHLQHYLDLERQLLLLSEEKQNLAQENAAALR  
ERVGRSEVESAPGLTAKKLLLQSLEQLQEENFRLESSREDDRLRCLERELEREVAELQQRNQA L TSLSQEAQA  
LKDEMDELROSSERARQLEERNAGHAERTRQLEELRRAGSLRAQLEAQRQVQELQGGWQEEAMKA EKWLFE  
CRNLEEKCDLVTKEKERLLTERDSLREANEELRCAQLQPRGLAQADLSLDPTPSGLENLAAEILPAELRET LV  
RIQLENKRLCQEAADRERQEELQRHLEBANRARGHLEAQQRINQQQLSELRAQVEELQKALQE QGGKTEDPT  
LLKRKLEDHLQQLHEADLELQRKREYIEELEPPTDSSTARRIEELQDSLQKKDADLRAMEERYR RYVDKARTV  
IQTLEPKQRPTVVSPEFH TLRSQLWERNLRI RQMEMDYEKSRRRQEQEELKLLI SAWYSMGMALEHRAGEEHA  
PAHAQSFLAQORLATNARRGPLGRQALS LRPTDKH\*

>ENSMUSP00000067752\_c.247:C>T\_p.S83L ENSMUST00000064495.8|Hook2-  
201|ENSMUSG00000052566|+|chr8:g.85719856:C>T

MSVDKAEKCGSLLTTLWLTQTFQVSPPCASPQDLSSGLAIAHVLNQIDPSWFNNEWLQGISSEDSSPSWRLKVRKLE  
KILQSLVEYLNKLVGHPVSDQHLDPVSLIGEFNSPAELGKLLQLVVGCAISCEKKQEIYIQRIMTLEESVQHVV  
MEAIQELMTKDTDPDLSPENYGNFDTQSRYYFLSEEVVEEGDHLQHYLDLERQLLLLSEEKQNLAQENAAALR  
ERVGRSEVESAPGLTAKKLLLLQSLEQLQEENFRLESSREDDRLRCLLELREVAELQQRNQLTSLSQEAQA  
LKDEMDELQSSERARQLEATLNSCRRRLGELQELRRQVRQLEERNAGHAERTRQLEELRRAGSLRAQLEAQ  
RRQVQELQGGWQEEAMKAEKWLFECRNLEEKCDLVTKEKERLLTERDSLREANEELRCAQLQPRGLAQADLSL  
DPTPSGLENLAAEILPAELRETLVRLQLENKRLCQQAADRERQEELQRHLEENRARRHGLEAQQRNLNQQQLS  
ELRAQVEELQKALQEQQGKTEDPTLLKRRKLEDHLQKLHEADLELQKREYIEELEPPTDSSTARRIEELQDSL  
QKKDADLRAMEERYRRYVDKARTVIQTLEPKQRPTTVVSPHFHTLRSQWERNLRIQMEMDYEKSRRRQEQE  
EKLLISAWYSMGMALEHRAGEEHAHAQAQSFLAQORLATNARRGPLGRQALSRLPTDKH\*  
>ENSMUSP00000148078\_c.247:C>T\_p.S83L ENSMUST00000210326.2|Hook2-  
204|ENSMUSG00000052566|+|chr8:g.85719856:C>T  
MSVDKAEKCGSLLTTLWLTQTFQVSPPCASPQDLSSGLAIAHVLNQIDPSWFNNEWLQGISSEDSSPSWRLKVRKLE  
KILQSLVEYLNKLVGHPVSDQHLDPVSLIGEFNSPAELGKLLQLVVGCAISCEKKQEIYIQRIMTLEESVQHVV  
MEAIQELMTKDTDPDLSPENYGNFDTQSRYYFLSEEVVEEGDHLQHYLDLERQLLLLSEEKQNLAQENAAALR  
ERVGRSEVESAPGLTAKKLLLLQSLEQLQEENFRLESSREDDRLRCLLELREVAELQQRNQLTSLSQEAQA  
LKDEMDELQSSERARQLEATLNSCRRRLGELQELRRQVRQLEERNAGHAERTRQLEELRRAGSLRAQLEAQ  
RRQVQELQGGWQEEAMKAEKWLFECRNLEEKCDLVTKEKERLLTERDSLREANEELRCAQLQPRGLAQADLSL  
DPTPSGLENLAAEILPAELRETLVRLQLENKRLCQQAADRERQEELQRHLEENRARRHGLEAQQRNLNQQQLS  
ELRAQVEELQKALQEQQGKTEDVSAACLLPAWPSLVLPSPFPFSLPPCCPMPEEGHCEYHGSREAHHCYLHSFS  
DLVPVPSLPAASLPQPTLLKRRKLEDHL\*  
>rs254660594\_ENSMUSP00000148237\_c.345:C>T\_p.Q116\*  
ENSMUST00000209764.2|Hook2-203|ENSMUSG00000052566|+|chr8:g.85720043:C>T  
MSVDKAEKCGSLLTTLWLTQTFQVSPPCASPQDLSSGLAIAHVLNQIDPSWFNNEWLQGISSEDSSPSWRLKVRKLE  
KILQSLVEYLNKLVGHPVSDQHLDPVSLIGEFNSPAELGKLL\*LVVGCAISCEKKQEIYIQRIMTLEESVQHVV  
MEAIQELMTKDTDPDLSPENYGNFDTQSRYYFLSEEVVEEGDHLQHYLDLERQLLLLSEEKQNLAQENAAALR  
ERVGRSEVESAPGLTAKKLLLLQSLEQLQEENFRLESSREDDRLRCLLELREVAELQQRNQLTSLSQEAQA  
LKDEMDELQSSERARQLEATLNSCRRRLGELQELRRQVRQLEERNAGHAERTRQLEELRRAGSLRAQLEAQ  
RRQVQELQGGWQEEAMKAEKWLFECRNLEEKCDLVTKEKERLLTERDSLREANEELRCAQLQPRGLAQADLSL  
DPTPSGLENLAAEILPAELRETLVRLQLENKRLCQQAADRERQEELQRHLEENRARRHGLEAQQRNLNQQQLS  
ELRAQVEELQKALQEQQGKTEDVSAACLLPAWPSLVLPSPFPFSLPPCCPMPEEGHCEYHGSREAHHCYLHSFS  
DLVPVPSLPAASLPQPTLLKRRKLEDHL\*  
>rs254660594\_ENSMUSP00000067752\_c.345:C>T\_p.Q116\*  
ENSMUST00000064495.8|Hook2-201|ENSMUSG00000052566|+|chr8:g.85720043:C>T  
MSVDKAEKCGSLLTTLWLTQTFQVSPPCASPQDLSSGLAIAHVLNQIDPSWFNNEWLQGISSEDSSPSWRLKVRKLE  
KILQSLVEYLNKLVGHPVSDQHLDPVSLIGEFNSPAELGKLL\*LVVGCAISCEKKQEIYIQRIMTLEESVQHVV  
MEAIQELMTKDTDPDLSPENYGNFDTQSRYYFLSEEVVEEGDHLQHYLDLERQLLLLSEEKQNLAQENAAALR  
ERVGRSEVESAPGLTAKKLLLLQSLEQLQEENFRLESSREDDRLRCLLELREVAELQQRNQLTSLSQEAQA  
LKDEMDELQSSERARQLEATLNSCRRRLGELQELRRQVRQLEERNAGHAERTRQLEELRRAGSLRAQLEAQ  
RRQVQELQGGWQEEAMKAEKWLFECRNLEEKCDLVTKEKERLLTERDSLREANEELRCAQLQPRGLAQADLSL  
DPTPSGLENLAAEILPAELRETLVRLQLENKRLCQQAADRERQEELQRHLEENRARRHGLEAQQRNLNQQQLS  
ELRAQVEELQKALQEQQGKTEDPTLLKRRKLEDHLQKLHEADLELQKREYIEELEPPTDSSTARRIEELQDSL  
QKKDADLRAMEERYRRYVDKARTVIQTLEPKQRPTTVVSPHFHTLRSQWERNLRIQMEMDYEKSRRRQEQE  
EKLLISAWYSMGMALEHRAGEEHAHAQAQSFLAQORLATNARRGPLGRQALSRLPTDKH\*  
>rs254660594\_ENSMUSP00000148078\_c.345:C>T\_p.Q116\*  
ENSMUST00000210326.2|Hook2-204|ENSMUSG00000052566|+|chr8:g.85720043:C>T  
MSVDKAEKCGSLLTTLWLTQTFQVSPPCASPQDLSSGLAIAHVLNQIDPSWFNNEWLQGISSEDSSPSWRLKVRKLE  
KILQSLVEYLNKLVGHPVSDQHLDPVSLIGEFNSPAELGKLL\*LVVGCAISCEKKQEIYIQRIMTLEESVQHVV  
MEAIQELMTKDTDPDLSPENYGNFDTQSRYYFLSEEVVEEGDHLQHYLDLERQLLLLSEEKQNLAQENAAALR  
ERVGRSEVESAPGLTAKKLLLLQSLEQLQEENFRLESSREDDRLRCLLELREVAELQQRNQLTSLSQEAQA  
LKDEMDELQSSERARQLEATLNSCRRRLGELQELRRQVRQLEERNAGHAERTRQLEELRRAGSLRAQLEAQ  
RRQVQELQGGWQEEAMKAEKWLFECRNLEEKCDLVTKEKERLLTERDSLREANEELRCAQLQPRGLAQADLSL  
DPTPSGLENLAAEILPAELRETLVRLQLENKRLCQQAADRERQEELQRHLEENRARRHGLEAQQRNLNQQQLS  
ELRAQVEELQKALQEQQGKTEDPTLLKRRKLEDHLQKLHEADLELQKREYIEELEPPTDSSTARRIEELQDSL  
QKKDADLRAMEERYRRYVDKARTVIQTLEPKQRPTTVVSPHFHTLRSQWERNLRIQMEMDYEKSRRRQEQE  
EKLLISAWYSMGMALEHRAGEEHAHAQAQSFLAQORLATNARRGPLGRQALSRLPTDKH\*  
>rs32597233\_ENSMUSP00000147580\_c.693:A>G\_p.I232V  
ENSMUST00000209322.2|Best2-202|ENSMUSG00000052819|-|chr8:g.85737412:T>C

MTVTTYARVANARFGGFSQLLLLWRGSIYKLLWRELLCFLGLYMALSAAYRFLLAEEQKRYFEKLVICYDQYA  
SLIPVSVLGFYVTLVVRWNNQYLCMPLDALMCIVAGTVHGRDDRGRLYRRTLMRYAGLSAVLILRSVSTA  
VFKRFPTIDHVEAGFMTREERKKFENLNSSYNKYVWPCVWFSSLAAQARREGRIIRDNSALKLLEELNVFRS  
KCGMLFHYDWISVPLVYTQVVTIAVYSYFLACLIGRQFLDPAQGYKDHTLDLCVPIFTLLQFFFYAGWLKVAE  
QLINPFGEDDDDFETNFLIDRNFQVSMVADEMYDDLAMLEKDLWDAAEARAPYTAATAFLLQQPSFQGSTF  
DIALAKEDMQFQRLDGVGDPLGEVHGDFLQRLLPAGAGSVGPLGRRLSLLRRKNSCVSEASTAASCAGCAAD  
GGGVECGCGDPLDPSLREPELESPACPEPPAPIPGTPEPFTTVSIPGPRAPAPPWLPSPIGEEEEESPA\*  
>rs32597233\_ENSMUSP00000053408\_c.693:A>G\_p.I232V  
ENSMUST00000059072.6|Best2-201|ENSMUSG00000052819|-|chr8:g.85737412:T>C  
MTVTTYARVANARFGGFSQLLLLWRGSIYKLLWRELLCFLGLYMALSAAYRFLLAEEQKRYFEKLVICYDQYA  
SLIPVSVLGFYVTLVVRWNNQYLCMPLDALMCIVAGTVHGRDDRGRLYRRTLMRYAGLSAVLILRSVSTA  
VFKRFPTIDHVEAGFMTREERKKFENLNSSYNKYVWPCVWFSSLAAQARREGRIIRDNSALKLLEELNVFRS  
KCGMLFHYDWISVPLVYTQVVTIAVYSYFLACLIGRQFLDPAQGYKDHTLDLCVPIFTLLQFFFYAGWLKVAE  
QLINPFGEDDDDFETNFLIDRNFQVSMVADEMYDDLAMLEKDLWDAAEARAPYTAATAFLLQQPSFQGSTF  
DIALAKEDMQFQRLDGVGDPLGEVHGDFLQRLLPAGAGSVGPLGRRLSLLRRKNSCVSEASTAASCAGCAAD  
GGGVECGCGDPLDPSLREPELESPACPEPPAPIPGTPEPFTTVSIPGPRAPAPPWLPSPIGEEEEESPA\*  
>rs32597233\_ENSMUSP00000147837\_c.693:A>G\_p.I232V  
ENSMUST00000209421.2|Best2-203|ENSMUSG00000052819|-|chr8:g.85737412:T>C  
MTVTTYARVANARFGGFSQLLLLWRGSIYKLLWRELLCFLGLYMALSAAYRFLLAEEQKRYFEKLVICYDQYA  
SLIPVSVLGFYVTLVVRWNNQYLCMPLDALMCIVAGTVHGRDDRGRLYRRTLMRYAGLSAVLILRSVSTA  
VFKRFPTIDHVEAGFMTREERKKFENLNSSYNKYVWPCVWFSSLAAQARREGRIIRDNSALKLLEELNVFRS  
KCGMLFHYDWISVPLVYTQVVTIAVYSYFLACLIGRQFLDPAQGYKDHTLDLCVPIFTLLQFFFYAGWLKVAE  
QLINPFGEDDDDFETNFLIDRNFQVSMVADEMYDDLAMLEKDLWDAAEARAPYTAATAFLLQQPSFQGSTF  
DIALAKEDMQFQRLDGVGDPLGEVHGDFLQRLLPAGAGSVGPLGRRLSLLRRKNSCVSEASTAASCAGCAAD  
GGGVECGCGDPLDPSLREPELESPACPEPPAPIPGTPEPFTTVSIPGPRAPAPPWLPSPIGEEEEESPA\*  
>rs49088296\_ENSMUSP00000092845\_c.84:C>T\_p.Q29\*  
ENSMUST00000095220.4|Fbxw9-201|ENSMUSG00000008167|+|chr8:g.85786841:C>T  
MDLSSGRSGDPRSCEEEEDPEPDPDPDT\*AEAYVARVLT PPKLGLTPRRSSLQSMFSASLGVPERKAASKVPA  
VRLPGLLSLPELLEICAYLDARVVLQVLPVCVQALHDLVRDRVTWRLRAQRRVRAPYPVVEEENFDWPAAC  
IELEQHLARWAEDGQRTEYFCLADGHFASIDAVLLLQGGALCLSGSRDRNVNLWDLRHLGKDP SRVLVKALGT  
QGNSTHKGWVWSLAAQDHRVCSGSWDSTVKLWDMADGQQFGEIKGKA AVLCLSYQPDILVTGT YDKKVTIYD  
PRAGLALVKSRRLHSSAVLAVLADDRHVI SGSEHSLVVFDRRANSVLQRLQLDSYLLCMSYQEPQLWAGDNQ  
GLLHV FANRDGCFQLVRSFDVGHQSQITGIKHS LGTLYTTSTDKTIRVHVPTDPPRTICTRSHHNVLNGICAE  
GNVVVAASGGLSLEVWRLLA\*  
>rs50985175\_ENSMUSP00000077733\_c.63:T>C\_p.S22P  
ENSMUST00000078665.13|Dhps-201|ENSMUSG00000060038|+|chr8:g.85798539:T>C  
MEGTPPGAAPSSALAAVLKHS PALPPESAQVQGYDFNRGVDYHALLDAYRTTGFQATNFGRAVQQVNAMIEKK  
LEPLAVDEDDHADLTQSRRLTGCTIFLGYTSNLISSGIRETIRYLVQHNMDVLTVTAGGVEEDLIKCLAPT  
YLGEFSLRGKELRESGINRIGNLLVPNDNYCKFEDWLMPILDQMVLEQNTGKWT P SKMISRLGKEINNPDS  
VYYWAHKNH I PVLSPALTDGSLGDMIFFHSYKNPGLVLDIVEDLRLINTQAI FAKRSGMI I LGGGVVKHHIAN  
ANLMRNGADYAVYINTAQEFDGSDSGARPDEAVSWGKIRMDAQPVKVYADASLVFLLVAETFAQKADAFRAE  
KNED\*  
>rs50985175\_ENSMUSP00000120308\_c.114:T>C\_p.S39P  
ENSMUST00000152871.8|Dhps-207|ENSMUSG00000060038|+|chr8:g.85798539:T>C  
AGLRAPRLLRPESGREHMEGTPPGAAPSSALAAVLKHS PALPPESAQVQGYDFNRGVDYHALLDAYRTTGFQA  
TNFGRAVQQVNAMIEKKLEPLAVDEDDHADLTQSRRLTGCTIFLGYTSNLISSGIRETIRYLVQHNMDWKA  
GAE\*  
>rs49986977\_ENSMUSP00000147335\_c.693:T>G\_p.F232V  
ENSMUST00000211109.2|Zfp791-202|ENSMUSG00000074194|-|chr8:g.85837169:A>C  
MDSVTFEDVCVTFTQEEDLLRPVQKLYKDVMMETVRNLASVASELEDQDVSNQYRIQEENVRSYVIQRLYE  
SKEVIEHGESFSQIPNTGAAKITSGGKPYSCSVCGKGFMLCSSLTRHVRAHPGHELAGFKCGEKRFKCKECRA  
TFSYLKSFQRHERTHAGESPYRCKHCGKTFIYFPQFQTHERTHIGEQLYQCKHCGKGLSSPGSLRIHQRIHTG  
EKPYVCEKCGKAVCEPSSIQIHERTHTGKPKYCKGKGAFTSRTSVKTHMVTHSGDANKPHKCEHCCKAFLR  
PCFLRVHTRIHTGKPYVCKQCGKAFRCSTSMQIHKRHTHTGKPKYCKGKAFSAHSAFRVHRRVHTGKPY  
KCRDCGKAFICLTYCRAHERKHSGEKSYECDQCCKGKAFRTSHLENFRRHVKTHAEDTPYKCKEKGKAFVFLSALQA  
HERIHTGKPYECEQCCKTFRCSYVQVHRRHTHTGKPYECKEKGKTFIYSTSFRGHMRMHTGKPYKCKGCE  
KAFRLGSSLKRHERTHS\*

>rs49986977\_ENSMUSP00000096150\_c.693:T>G\_p.F232V  
ENSMUST00000098550.4|Zfp791-201|ENSMUSG00000074194|-|chr8:g.85837169:A>C  
MDSVTFEDVVCVTFTEQEEWDLRPVQKKLYKDVMMWETVRNLSVASELEDQDVSNQYRIQEENVRSYVIQRLYE  
SKEVIEHGESFSQIPNTGAAKITSGGKPYSCSVCGKGFMLCSSLTRHVRAHPGHELALAGFKCGEKRFKCKECRA  
TFSYLKSFQRHERTHAGESPYRCKHCGKTFIYFQPFQOTHERTHIGEQLYQCKHCGKGLSSPGSLRIHQRIHTG  
EKPYVCEKCGKAVSCPSSIQIHERHTHTGEKPYKCKEKGKAFISRTSVKTHMVTHSGDANKPHKCEHCCKAFLR  
PCFLRVHTRIHTGEKPYVCKQCGKAFRCSTSMQIHKRTHHTGEKPYKCKEKGKAFSAHSAFRVHRRVHTGEKPY  
KCRDCGKAFICLTYCRAHERKHSGEKSYECDQCGKAFVSLNFRRHVKTHAEDTPYKCKEKGKAFVFLSALQA  
HERIHTGEKPYECEQCGKTFRCSSYVQVHRRHTHTGEKPYECKEKGKTFIYSTSFRGHMRMHTGEKPYKCKGCE  
KAFRLGSSLKRHERTHS\*

>rs256780963\_ENSMUSP00000151714\_c.34:T>C\_p.F12S  
ENSMUST00000218663.2|Olfr371-202|ENSMUSG00000051952|+|chr8:g.85957160:T>C  
MEPENHTGIPESYLLGLSENPEIQSVLFGFLFLSLYLVTVFGNLLIILAIVSDPKLHTPMYLFSLNLSFSDICF  
TSTTVPKMLLGIQTQSKLITYAGCITQMYFFTFVGLLDNLLLTVMAYDRFVAICHPLHYTVLMNPKLCSQLLL  
LAWLISILGALPESLTALRLSFCAVVEIPHYFCELPEVLKLCSDTFINNVLVYIVTGIMGFFPLAGILFSYS  
QIVTSVLRISTVGGKYKAFSTCGSHLSVVSLFYGTCLGVYLSSIWTQASWAGVFASVLYTVVTPMMPFIYSL  
RNRDMKRALNTLLCSVPSSS\*

>rs256780963\_ENSMUSP00000077921\_c.34:T>C\_p.F12S  
ENSMUST00000070849.6|Olfr371-201|ENSMUSG00000051952|+|chr8:g.85957160:T>C  
MEPENHTGIPESYLLGLSENPEIQSVLFGFLFLSLYLVTVFGNLLIILAIVSDPKLHTPMYLFSLNLSFSDICF  
TSTTVPKMLLGIQTQSKLITYAGCITQMYFFTFVGLLDNLLLTVMAYDRFVAICHPLHYTVLMNPKLCSQLLL  
LAWLISILGALPESLTALRLSFCAVVEIPHYFCELPEVLKLCSDTFINNVLVYIVTGIMGFFPLAGILFSYS  
QIVTSVLRISTVGGKYKAFSTCGSHLSVVSLFYGTCLGVYLSSIWTQASWAGVFASVLYTVVTPMMPFIYSL  
RNRDMKRALNTLLCSVPSSS\*

>rs33534398\_ENSMUSP00000151714\_c.45:G>A\_p.G16R  
ENSMUST000000218663.2|Olfr371-202|ENSMUSG00000051952|+|chr8:g.85957171:G>A  
MEPENHTGIPEFYLLRLSENPEIQSVLFGFLFLSLYLVTVFGNLLIILAIVSDPKLHTPMYLFSLNLSFSDICF  
TSTTVPKMLLGIQTQSKLITYAGCITQMYFFTFVGLLDNLLLTVMAYDRFVAICHPLHYTVLMNPKLCSQLLL  
LAWLISILGALPESLTALRLSFCAVVEIPHYFCELPEVLKLCSDTFINNVLVYIVTGIMGFFPLAGILFSYS  
QIVTSVLRISTVGGKYKAFSTCGSHLSVVSLFYGTCLGVYLSSIWTQASWAGVFASVLYTVVTPMMPFIYSL  
RNRDMKRALNTLLCSVPSSS\*

>rs33534398\_ENSMUSP00000077921\_c.45:G>A\_p.G16R  
ENSMUST00000070849.6|Olfr371-201|ENSMUSG00000051952|+|chr8:g.85957171:G>A  
MEPENHTGIPEFYLLRLSENPEIQSVLFGFLFLSLYLVTVFGNLLIILAIVSDPKLHTPMYLFSLNLSFSDICF  
TSTTVPKMLLGIQTQSKLITYAGCITQMYFFTFVGLLDNLLLTVMAYDRFVAICHPLHYTVLMNPKLCSQLLL  
LAWLISILGALPESLTALRLSFCAVVEIPHYFCELPEVLKLCSDTFINNVLVYIVTGIMGFFPLAGILFSYS  
QIVTSVLRISTVGGKYKAFSTCGSHLSVVSLFYGTCLGVYLSSIWTQASWAGVFASVLYTVVTPMMPFIYSL  
RNRDMKRALNTLLCSVPSSS\*

>rs32548947\_ENSMUSP00000034131\_c.2217:A>G\_p.I740V  
ENSMUST00000034131.10|Vps35-201|ENSMUSG00000031696|-|chr8:g.85987932:T>C  
MPTTQQSPQDEQEKLLEDAIQAVKVQSFQMKRCLDKNKMLDALKHASNMLGELRTSMLSPKSYEELYMAISDE  
LHYLEVYLTDEFAGKRVADLYELVQYAGNIIPRLYLLITVGVVYVKSFPQSRKDILKDLVEMCRGVQHPLRG  
LFLRNYLLQCTRNLIPDEGEPTDEETTGDISDSMDFVLLNFAEMNKLWVRMQHQGHSRDREKREKREKRELRIL  
VGTNLVRLSQLEGVNVERYKQIVLTGILEQVNVNCRDALAQEYLMECIQVFPDEFHQLTLNPFRLACAEHLQON  
VNVKNIIALIDRLALFAHREDGPGIPAEIKLFDIFSQQVATVIQSRQDMPSEDVVSLLQVSLINLAMKCYPDR  
VDYVDKVLTEITVEIFNKLNLHEIATSSAVSKELTRLLKIIPVDTYNNILTVLKLKHFHPLFEYFDYESRKSMS  
YVLSNVLDYNTIIVSQDQVDSIMNLVSTLIQDQDPDQVEDPDPEDFADEQSLVGRFIHLLRSDDPDQYLIILN  
TARKHFAGGNQRIRFTLPLVFAAYQLAFRYKENSQMDKWEKKCQKIFSFAHQITISALIKAEALAEPLRLFL  
LQGALAAGEIGFENHETVAYEFMSQAFSLYEDEISDSKAQLAAITLIGTFERMKCFSEENHEPLRTQCALAA  
SKLLKPKDQGRAVSTCAHLFWSGRNTDKNGEELHGGKRVMECLKKALKIANQCMDPSLQVQLFIEILNRYIYF  
YEKENDAVTVQVLNQLIQKIREDLNLESSEETEQINKHFHNTLEHLRSRRESPESEGPYIEGLIIL\*

>rs32770262\_ENSMUSP00000034131\_c.1743:A>G\_p.R582G  
ENSMUST00000034131.10|Vps35-201|ENSMUSG00000031696|-|chr8:g.85990856:T>C  
MPTTQQSPQDEQEKLLEDAIQAVKVQSFQMKRCLDKNKMLDALKHASNMLGELRTSMLSPKSYEELYMAISDE  
LHYLEVYLTDEFAGKRVADLYELVQYAGNIIPRLYLLITVGVVYVKSFPQSRKDILKDLVEMCRGVQHPLRG  
LFLRNYLLQCTRNLIPDEGEPTDEETTGDISDSMDFVLLNFAEMNKLWVRMQHQGHSRDREKREKREKRELRIL  
VGTNLVRLSQLEGVNVERYKQIVLTGILEQVNVNCRDALAQEYLMECIQVFPDEFHQLTLNPFRLACAEHLQON  
VNVKNIIALIDRLALFAHREDGPGIPAEIKLFDIFSQQVATVIQSRQDMPSEDVVSLLQVSLINLAMKCYPDR

VDYVDKVLTTVEIFNKNLLEHIATSSAVSKELTRLLKIPVDTYNNILTVLKLKHFHPLFEYFDYESRKSMS  
 YVLSNVLDYNTTEIVSQDQVDSIMNLVSTLIQDQDPDQVEDPDPEDFADEQSLVGRFIHLLRSDDPDQYLI  
 LNTARKHFGAGGNQRIRFTLPPLVFAAYQLAFRYKENSQMDKWEKKCKIFSAHQITISALIKAEALPLGLF  
 LQGALAAGEIGFENHETVAYEFMSQAFSLYEDEISDSKAQLAAITLIIGTFERMKCFSEENHEPLRTQCALAA  
 SKLLKPKDQGRAVSTCAHLFWSGRNTDKNGEELHGGKRVMECLKKALKIANQCMDPSLQVQLFIEILNRYIYF  
 YEKENDAVTIQVLNQLIQKIREDLNLESSEETEQINKHFHNTLEHLRSRRESPESEGPPIYEGIL\*  
 >ENSMUSP00000040975\_c.441:A>G\_p.1148V ENSMUST00000047749.7|4921524J17Rik-  
 201|ENSMUSG00000036934|-|chr8:g.86136424:T>C  
 MSATRAKKVKMATKSCPECDQQIPVACKSCPCGYIFISRKLLNAKHSEKSPSTENKHEAKRRRTERVRREKI  
 NSTVNDLENRKRSRNSHSDHIRRGRGRPKSSSAKKHEEEREKQEKEIDIYANLSDEKAFVFSVALAEINRK  
 IVNQRLLIL\*  
 >rs52070708\_ENSMUSP00000040975\_c.384:T>A\_p.S129T  
 ENSMUST00000047749.7|4921524J17Rik-201|ENSMUSG00000036934|-  
 |chr8:g.86136481:A>T  
 MSATRAKKVKMATKSCPECDQQIPVACKSCPCGYIFISRKLLNAKHSEKSPSTENKHEAKRRRTERVRREKI  
 NSTVNDLENRKRSRNSHSDHIRRGRGRPKSSSAKKHEEEREKQEKEIDIYANLTDKAFVFSVALAEINRK  
 IINQRLLIL\*  
 >rs3709028\_ENSMUSP00000129724\_c.781:T>C\_p.V261A  
 ENSMUST00000165770.9|zfp423-203|ENSMUSG00000045333|-|chr8:g.88509186:A>G  
 MIGDGC DLGLGEEEGGTGLPYPCQFCDKSFIRLSYLKRHEQIHSKLPFKCTFCSRLFKHKRSRDRHIKLTG  
 DKKYHCHECEAAFSRSDHLKIHLKTHSSSKPFKCSVCKRGSSTSSLSQSHMQAHKKNKEHLAKSEKEAKKDDF  
 MCDYCEDTFSQTEELEKHVLT LHPQLSEKADLQCIHCPEVVFVDESTLLAHIHQAHANQKHKCPMCPQFSSVE  
 GYVCHLDSHRQPDSSNHSVSPDVLGVSASMSSATPDSSASAERGSTPDSTLKLPLRGQKMRDDGQSWPKVY  
 SCPYCSKRDFTS LAVLEIHLKTIHADKPQQSHTCQICLDSMPTLYNLNEHVRLKHSKSHAYPVMQFGNISAFHC  
 NYCPEMFADINSLQEHIRVSHCGPNANPPDGNAFFCNQCSMGFLTESLTHEIQAHCSVGSSTKLESFVQPTQ  
 SFMEVYSCPYCTNSPIFGSILKLTKHIKENHKNIPLAHSSKSKAEQSPVSSDVEVSSPKRQRLSGSANSIS  
 NGEYPCNQCDLKFNFESFQTHLKLHLELLLRKQACQCKEDFDSQESLLQHLTVHYMTTSTHYVCECDKQF  
 SSVDDLQKHLDMHTFVLYHCTLCQEVFDSKVS IQVHLAVKHSNEKKMYRCTACNWDNRKEADLQVHVKSHL  
 GNPAAKHKCFCGETFSTEVE LQCHITTHSKKYNCRFCSKAFHAVILLEKHLREKHCVFDAEAENG TANGVPP  
 TSTKKAEPADLQGMMLKNPEAPNSHEASEDDVDASEPMYGC DICGAAYTMEVLLQNHRLRDNIRPGE DDGSR  
 KKAEFIKGSHKCNVCSRTFFSENGLREHLQTHRGP AKHYMCPICGERFP SLLTLTEHKVTHSKSLDTGT CRIC  
 KMPLQSEEEFIEHCQMHPDLRNSLTGFRCVVMQTVTSTLELKIHGTFHMQLAGSSAASSPNGQLQKLYKC  
 ALCLKEFRSKQDLVRLDVNGLPYGLCAGCMARSANGQVGG LAPPEPADRPCAGLRCP ECNVKFESAEDLES  
 HMQVDHRDLTPETSGPRKGAQTSVPVRKTYQC IKCQMTFENEREQI IHVANHMIIEGINHECKLCNQMFDS  
 PAKLLCHLIEHSFEGMGGTFKCPVCFVQANKLQQHIFAVHGQEDKIYDCSQCPQKFFQTELQNHMTMSQHAQ\*  
 >rs3709028\_ENSMUSP00000105282\_c.1156:T>C\_p.V386A  
 ENSMUST00000109655.9|zfp423-202|ENSMUSG00000045333|-|chr8:g.88509186:A>G  
 MSRRKQAKPRSVKVEEGEASDFSLAWDSSVAAAGGLEGEPECDRKT SRALEDNRNSVTSQEERNEDEDEDES  
 IYTCDCQDFESLADLTDHRAHRC PGDGD DDPQLSWVASSPSSKDVASPTQMI GDGCDLGLGEEEGGTGLPY  
 PCQFCDKSFIRLSYLKRHEQIHSKLPFKCTFCSRLFKHKRSRDRHIKLTGDKKYHCHECEAAFSRSDHLKI  
 HLKTHSSSKPFKCSVCKRGSSTSSLSQSHMQAHKKNKEHLAKSEKEAKKDDFMCDYCEDTFSQTEELEKHVLT  
 LHPQLSEKADLQCIHCPEVVFVDESTLLAHIHQAHANQKHKCPMCPQFSSVEGVYCHLDSHRQPDSSNHSVSP  
 DPVLGVSASMSSATPDSSASAERGSTPDSTLKLPLRGQKMRDDGQSWPKVYSCPYPYCSKRDFTS LAVLEIHLK  
 TIHADKPQQSHTCQICLDSMPTLYNLNEHVRLKHSKSHAYPVMQFGNISAFHCNYCPEMFADINSLQEHIRVSH  
 CGPNANPPDGNAFFCNQCSMGFLTESLTHEIQAHCSVGSSTKLESFVQPTQSFMEVYSCPYCTNSPIFGS  
 ILKLTKHIKENHKNIPLAHSSKSKAEQSPVSSDVEVSSPKRQRLSGSANSISNGEYPCNQCDLKFNFESFQ  
 THLKLHLELLLRKQACQCKEDFDSQESLLQHLTVHYMTTSTHYVCECDKQFSSVDDLQKHLDMHTFVLYH  
 CTLCQEVFDSKVS IQVHLAVKHSNEKKMYRCTACNWDNRKEADLQVHVKSHLGNPAAKHKCFCGETFSTEVE  
 LQCHITTHSKKYNCRFCSKAFHAVILLEKHLREKHCVFDAEAENG TANGVPP TSTKKAEPADLQGMMLKNPEA  
 PNSHEASEDDVDASEPMYGC DICGAAYTMEVLLQNHRLRDNIRPGE DDGSRKKAEFIKGSHKCNVCSRTFFS  
 ENGLREHLQTHRGP AKHYMCPICGERFP SLLTLTEHKVTHSKSLDTGT CRICKMPLQSEEEFIEHCQMHPDLR  
 NSLTGFRCVVMQTVTSTLELKIHGTFHMQLAGSSAASSPNGQLQKLYKCALCLKEFRSKQDLVRLDVNGL  
 PYGLCAGCMARSANGQVGG LAPPEPADRPCAGLRCP ECNVKFESAEDLES HMQVDHRDLTPETSGPRKGAQTS  
 VPVRKTYQC IKCQMTFENEREQI IHVANHMIIEGINHECKLCNQMFDS PAKLLCHLIEHSFEGMGGTFKCPV  
 CFTVQANKLQQHIFAVHGQEDKIYDCSQCPQKFFQTELQNHMTMSQHAQ\*  
 >rs3709028\_ENSMUSP00000052379\_c.1093:T>C\_p.V365A  
 ENSMUST00000052250.15|zfp423-201|ENSMUSG00000045333|-|chr8:g.88509186:A>G

MTGAERGPLCYHGGLEGEPECDRKTSTRALEDNRNSVTSQEERNEDEDEDVEDES IYTCDHCCQDFESLADLTDHR  
AHRCPGDGDDDPQLSWVASSPSSKDVASPTQMIGDGC DLGLGEEEGGTGLPYPCQFCDKSFIRLSYLKRHEQI  
HSDKLFPKCTFCSRLFKHKRSRDRHIKLTGDKKYHCHECEAAFSRSDHLKIHLKTHSSSKPFCVCKRGFS  
STSSLQSHMQAHKKNEHLAKSEKEAKKDDFMCDYCEDTFSQTEELEKHVLT LHPQLSEKADLQCIHCPEVVFV  
DESTLLAHIHQAHANQKHKCPMCPEQFSSVEGVYCHLDSHRQPDSSNHSVSPDPVLGVSASMSSATPDSSASA  
ERGSTPDSTLKLPLRGQKKMRDDGQSWPKVVYSCPYCKRDFTS LAVLEIHLKTIHADKPQQSHTCQICLDSMP  
TLYNLNEHVRKLHKSHAYPVMQFGNISAFHCNYCPEMFADINSLQEHIRVSHCGPNANPPDGNAFFCNQCSM  
GFLTESSLTEHIQQAHC SVGSKLESFPVVQPTQSFMEVYSCPYCTNSPIFGSILKLTKH IKENHKNIPLAHSK  
KSKAEQSPVSSDVEVSSPKRQRLSGSANSISNGEYPCNQCDLKF SNFESFQTHLKLHLELLLRKQACPOCKED  
FDSQESLLQHLTVHYMTTSTHYVCE SCDKQFSSVDDLQKHLDMHTFVLYHCTLCQEVFDSKVS IQVHLAVKH  
SNEKKMYRCTACNWD FRKEADLQVHVKSHLGNPAKAHKC IFCGETFSTEVELQCHITTHSKY NCRFC SKAF  
HAVILLEKHLREKHC VFDA AENGTANGVPP TSTKKAEPADLQGM L LKNPEAPNSHEASEDDVDASEPMY GCD  
ICGAAYTMEVLLQNHRLRDNHNRPGEDDGSRKA EFKGSHKCNVCSRTFFSENGLREHLQTHRGP AKHYMCP  
ICGERFPSLLTLTEHKVTHSKSLDTGT CRICKMPLQSEEEFIEHCQMHPDLRNSLTGFRCVVMQTVTSTLEL  
KIHGTFHMQLAGSSAASSP NGQLQKLYKCALCLKEFRSKQDLVRLDVNGLPYGLCAGCMARSANGQVGG LA  
PPEPADRPCAGLRCP E CNVKFESAEDLES HMQVDHRDLTPETSGPRKGAQTS PVPRKKT YQC IKCQMTFENER  
EIQIHVANHMIEEGINHECKLCNQMFDSPAKLLCHLIEHSFEGMGGTFKCPVCFTV FVQANKLQQHI FAVHGO  
EDKIYDCSQCPQKFFFQTE LQNHMTMSQHAQ\*

>rs3710159\_ENSMUSP00000129724\_c.634:C>T\_p.P212L  
ENSMUST00000165770.9|Zfp423-203|ENSMUSG00000045333|-|chr8:g.88509333:G>A  
MIGDGC DLGLGEEEGGTGLPYPCQFCDKSFIRLSYLKRHEQI HSDKLFPKCTFCSRLFKHKRSRDRHIKLTG  
DKKYHCHECEAAFSRSDHLKIHLKTHSSSKPFCVCKRGFSSTSSLQSHMQAHKKNEHLAKSEKEAKKDDF  
MCDYCEDTFSQTEELEKHVLT LHPQLSEKADLQCIHCPEVVFVDESTLLAHIHQAHANQKHKCPMCLEQFSSVE  
GVYCHLDSHRQPDSSNHSVSPDPVLGVSASMSSATPDSSASVERGSTPDSTLKLPLRGQKKMRDDGQSWPKVVY  
SCPYCKRDFTS LAVLEIHLKTIHADKPQQSHTCQICLDSMPTLYNLNEHVRKLHKSHAYPVMQFGNISAFHC  
NYCPEMFADINSLQEHIRVSHCGPNANPPDGNAFFCNQCSMGFLTESSLTEHIQQAHC SVGSKLESFPVVQPT  
TQSFMEVYSCPYCTNSPIFGSILKLTKH IKENHKNIPLAHSKSKAEQSPVSSDVEVSSPKRQRLSGSANSIS  
NGEYPCNQCDLKF SNFESFQTHLKLHLELLLRKQACPOCKEDFDSQESLLQHLTVHYMTTSTHYVCE SCDKQF  
SSVDDLQKHLDMHTFVLYHCTLCQEVFDSKVS IQVHLAVKHSNEKKMYRCTACNWD FRKEADLQVHVKSHL  
GNPAKAHKC IFCGETFSTEVELQCHITTHSKY NCRFC SKAFHAVILLEKHLREKHC VFDA AENGTANGVPP  
TSTKKAEPADLQGM L LKNPEAPNSHEASEDDVDASEPMY GCDICGAAYTMEVLLQNHRLRDNHNRPGEDDGSR  
KKA EFKGSHKCNVCSRTFFSENGLREHLQTHRGP AKHYMCPICGERFPSLLTLTEHKVTHSKSLDTGT CRIC  
KMPLQSEEEFIEHCQMHPDLRNSLTGFRCVVMQTVTSTLELKIHGTFHMQLAGSSAASSP NGQLQKLYK  
ALCLKEFRSKQDLVRLDVNGLPYGLCAGCMARSANGQVGG LAPPEPADRPCAGLRCP E CNVKFESAEDLES HM  
QVDHRDLTPETSGPRKGAQTS PVPRKKT YQC IKCQMTFENEREIQIHVANHMIEEGINHECKLCNQMFDSPAK  
LLCHLIEHSFEGMGGTFKCPVCFTV FVQANKLQQHI FAVHGOEDKIYDCSQCPQKFFFQTE LQNHMTMSQHAQ\*

>rs3710159\_ENSMUSP00000105282\_c.1009:C>T\_p.P337L  
ENSMUST00000109655.9|Zfp423-202|ENSMUSG00000045333|-|chr8:g.88509333:G>A  
MSRRQAKPRSVKVEGEASDFSLAWDSSVAAAGGLEGEPECDRKTSTRALEDNRNSVTSQEERNEDEDEDVEDES  
IYTCDHCCQDFESLADLTDHRAHRC PGD GDDDPQLSWVASSPSSKDVASPTQMIGDGC DLGLGEEEGGTGLPY  
PCQFCDKSFIRLSYLKRHEQI HSDKLFPKCTFCSRLFKHKRSRDRHIKLTGDKKYHCHECEAAFSRSDHLKI  
HLKTHSSSKPFCVCKRGFSSTSSLQSHMQAHKKNEHLAKSEKEAKKDDFMCDYCEDTFSQTEELEKHVLT  
LHPQLSEKADLQCIHCPEVVFVDESTLLAHIHQAHANQKHKCPMCLEQFSSVEGVYCHLDSHRQPDSSNHSVSP  
DPVLGVSASMSSATPDSSASVERGSTPDSTLKLPLRGQKKMRDDGQSWPKVVYSCPYCKRDFTS LAVLEIHLK  
TIHADKPQQSHTCQICLDSMPTLYNLNEHVRKLHKSHAYPVMQFGNISAFHCNYCPEMFADINSLQEHIRVSH  
CGPNANPPDGNAFFCNQCSMGFLTESSLTEHIQQAHC SVGSKLESFPVVQPTQSFMEVYSCPYCTNSPIFGS  
ILKLTKH IKENHKNIPLAHSKSKAEQSPVSSDVEVSSPKRQRLSGSANSISNGEYPCNQCDLKF SNFESFQ  
HLKLHLELLLRKQACPOCKEDFDSQESLLQHLTVHYMTTSTHYVCE SCDKQFSSVDDLQKHLDMHTFVLYH  
CTLCQEVFDSKVS IQVHLAVKHSNEKKMYRCTACNWD FRKEADLQVHVKSHLGNPAKAHKC IFCGETFSTEVE  
LQCHITTHSKY NCRFC SKAFHAVILLEKHLREKHC VFDA AENGTANGVPP TSTKKAEPADLQGM L LKNPEA  
PNSHEASEDDVDASEPMY GCDICGAAYTMEVLLQNHRLRDNHNRPGEDDGSRKA EFKGSHKCNVCSRTFFS  
ENGLREHLQTHRGP AKHYMCPICGERFPSLLTLTEHKVTHSKSLDTGT CRICKMPLQSEEEFIEHCQMHPDLR  
NSLTGFRCVVMQTVTSTLELKIHGTFHMQLAGSSAASSP NGQLQKLYKCALCLKEFRSKQDLVRLDVNGL  
PYGLCAGCMARSANGQVGG LAPPEPADRPCAGLRCP E CNVKFESAEDLES HMQVDHRDLTPETSGPRKGAQTS  
PVPRKKT YQC IKCQMTFENEREIQIHVANHMIEEGINHECKLCNQMFDSPAKLLCHLIEHSFEGMGGTFKCPV  
CFTV FVQANKLQQHI FAVHGOEDKIYDCSQCPQKFFFQTE LQNHMTMSQHAQ\*

>rs3710159\_ENSMUSP00000052379\_c.946:C>T\_p.P316L  
ENSMUST00000052250.15|Zfp423-201|ENSMUSG00000045333|-|chr8:g.88509333:G>A

MTGAERGPLCYHGGLEGEPECDRKTSTRALEDNRNSVTSQEERNEDEDEDVEDES IYTCDHCCQDFESLADLTDHR  
 AHRCPGDGGDDDPQLSWVASSPSSKDVASPTQMIGDGC DLGLGEEEGGTGLPYPCQFCDKSFIRLSYLKRHEQI  
 HSDKLPFKCTFCSRLFKHKRSRDRHIKLTGDKKYHCHECEAAFSRSDHLKIHLKTHSSSKPFKCSVCKRGFS  
 STSSLQSHMQAHKKNKEHLAKSEKEAKKDDFMC DYCEDTFSQTEELEKHVLT LHPQLSEKADLQCIHCPEV FV  
 DESTLLAHIHQAHANQKHKCPMCLEQFSSVEGVYCHLDSHRQPDSSNHSVSPDPV LGSVASMSSATPDSSASV  
 ERGSTPDSTLKLPLRGQKKMRDDGQSWPKVVYSCPYCKSRDFTSLAVLEIHLKTIHADKPQQSHTCQICLDSMP  
 TLYNLNEHVRLKHKSHAYPVMQFGNISAFHCNYCPEMFADINSIQEHIRVSHCGPNANPPDGNAFFCNQCSM  
 GFLTESSLTEHIQQAHCSVGSTKLESPVVQPTQSFMEVYSCPYCTNSPIFGSILKLTKH IKENHKNIPLAHSK  
 KSKAEQSPVSSDVEVSSPKRQRLSGSANSISNGEYPCNQCDLKF SNFESFQTHLKLHLELLLRLKQACPOCKED  
 FDSQESLLQHLTVHYMTTSTHYVCE SCDKQFSSVDDLQKHLDMHTFVLYHCTLCQEVFDSKVS IQVHLAVKH  
 SNEKKMYRCTACNWD FRKEADLQVHVKSHLGNPAKAHKC IFCGETFSTEVELQCHITTHSKY NCRFC SKAF  
 HAVILLEKHLREKHCVFDA AENGTANGVPPTSTKKAEPADLQGM L LKNPEAPNSHEASEDDVDASEPMY GCD  
 ICGAAYTMEVLLQNHRLRDNHIRPGEDDGSRKA EFKGSHKCNVCSRTFFSENGLREHLQTHRGP AKHYMCP  
 ICGERFPSLLTLTEHKVTHSKSLDTGT CRICKMPLQSEEEFIEHCQMHPDLRNSLTGFR CVVMQTVTSTLEL  
 KIHGTFHMQLAGSSAASSPNGQLQKLYKCALCLKEFRSKQDLVRLDVNGLPYGLCAGCMARSANGQVGG LA  
 PPEPADRPCAGLRCP ECNVKFESAEDLES HMQVDHRDLTPETSGPRKGAQTS PVPRKKT YQC IKCQMTFENER  
 EIQIHVANHMIEEGINHECKLCNQMFDS PAKLLCHLIEHSFEGMGGTFKCPVCFTV FVQANKLQQHI FAVHGQ  
 EDKIYDCSQCPQKFFFQTE LQNHTMSQHAQ\*

>rs50410189\_ENSMUSP00000105282\_c.181:A>T\_p.E61V  
 ENSMUST00000109655.9|Zfp423-202|ENSMUSG00000045333|-|chr8:g.88586031:T>A  
 MSRRKQAKPRSVKVEEGEASDFSLAWDSSVAAAGGLEGEPECDRKTSTRALEDNRNSVTSQEVRNEDEDEDVEDES  
 IYTCDHCCQDFESLADLTDHRAHRCPGDGGDDDPQLSWVASSPSSKDVASPTQMIGDGC DLGLGEEEGGTGLPY  
 PCQFCDKSFIRLSYLKRHEQIHSDKLPFKCTFCSRLFKHKRSRDRHIKLTGDKKYHCHECEAAFSRSDHLKI  
 HLKTHSSSKPFKCSVCKRGFSSTSSLQSHMQAHKKNKEHLAKSEKEAKKDDFMC DYCEDTFSQTEELEKHVLT  
 LHPQLSEKADLQCIHCPEV FVDESTLLAHIHQAHANQKHKCPMCPEQFSSVEGVYCHLDSHRQPDSSNHSVSP  
 DPV LGSVASMSSATPDSSASVERGSTPDSTLKLPLRGQKKMRDDGQSWPKVVYSCPYCKSRDFTSLAVLEIHLK  
 TIHADKPQQSHTCQICLDSMP TLYNLNEHVRLKHKSHAYPVMQFGNISAFHCNYCPEMFADINSIQEHIRVSH  
 CGPNANPPDGNAFFCNQCSMGFLTESSLTEHIQQAHCSVGSTKLESPVVQPTQSFMEVYSCPYCTNSPIFGS  
 I LKLTKH IKENHKNIPLAHSKSKAEQSPVSSDVEVSSPKRQRLSGSANSISNGEYPCNQCDLKF SNFESFQTHL  
 HLKLHLELLLRLKQACPOCKEDFDSQESLLQHLTVHYMTTSTHYVCE SCDKQFSSVDDLQKHLDMHTFVLYHC  
 TLCQEVFDSKVS IQVHLAVKHSNEKKMYRCTACNWD FRKEADLQVHVKSHLGNPAKAHKC IFCGETFSTEVE  
 LQCHITTHSKY NCRFC SKAFHAVILLEKHLREKHCVFDA AENGTANGVPPTSTKKAEPADLQGM L LKNPEA  
 PNSHEASEDDVDASEPMY GCDICGAAYTMEVLLQNHRLRDNHIRPGEDDGSRKA EFKGSHKCNVCSRTFFS  
 ENGLREHLQTHRGP AKHYMCPICGERFPSLLTLTEHKVTHSKSLDTGT CRICKMPLQSEEEFIEHCQMHPDLR  
 NSLTGFR CVVMQTVTSTLELKIHGTFHMQLAGSSAASSPNGQLQKLYKCALCLKEFRSKQDLVRLDVNGL  
 PYGLCAGCMARSANGVGG LAPPEPADRPCAGLRCP ECNVKFESAEDLES HMQVDHRDLTPETSGPRKGAQTS  
 PVPRKKT YQC IKCQMTFENEREIQIHVANHMIEEGINHECKLCNQMFDS PAKLLCHLIEHSFEGMGGTFKCPV  
 CFTV FVQANKLQQHIFAVHGQEDKIYDCSQCPQKFFFQTE LQNHTMSQHAQ\*

>rs50410189\_ENSMUSP00000052379\_c.118:A>T\_p.E40V  
 ENSMUST00000052250.15|Zfp423-201|ENSMUSG00000045333|-|chr8:g.88586031:T>A  
 MTGAERGPLCYHGGLEGEPECDRKTSTRALEDNRNSVTSQEVRNEDEDEDVEDES IYTCDHCCQDFESLADLTDHR  
 AHRCPGDGGDDDPQLSWVASSPSSKDVASPTQMIGDGC DLGLGEEEGGTGLPYPCQFCDKSFIRLSYLKRHEQI  
 HSDKLPFKCTFCSRLFKHKRSRDRHIKLTGDKKYHCHECEAAFSRSDHLKIHLKTHSSSKPFKCSVCKRGFS  
 STSSLQSHMQAHKKNKEHLAKSEKEAKKDDFMC DYCEDTFSQTEELEKHVLT LHPQLSEKADLQCIHCPEV FV  
 DESTLLAHIHQAHANQKHKCPMCPEQFSSVEGVYCHLDSHRQPDSSNHSVSPDPV LGSVASMSSATPDSSASV  
 ERGSTPDSTLKLPLRGQKKMRDDGQSWPKVVYSCPYCKSRDFTSLAVLEIHLKTIHADKPQQSHTCQICLDSMP  
 TLYNLNEHVRLKHKSHAYPVMQFGNISAFHCNYCPEMFADINSIQEHIRVSHCGPNANPPDGNAFFCNQCSM  
 GFLTESSLTEHIQQAHCSVGSTKLESPVVQPTQSFMEVYSCPYCTNSPIFGSILKLTKH IKENHKNIPLAHSK  
 KSKAEQSPVSSDVEVSSPKRQRLSGSANSISNGEYPCNQCDLKF SNFESFQTHLKLHLELLLRLKQACPOCKED  
 FDSQESLLQHLTVHYMTTSTHYVCE SCDKQFSSVDDLQKHLDMHTFVLYHCTLCQEVFDSKVS IQVHLAVKH  
 SNEKKMYRCTACNWD FRKEADLQVHVKSHLGNPAKAHKC IFCGETFSTEVELQCHITTHSKY NCRFC SKAF  
 HAVILLEKHLREKHCVFDA AENGTANGVPPTSTKKAEPADLQGM L LKNPEAPNSHEASEDDVDASEPMY GCD  
 ICGAAYTMEVLLQNHRLRDNHIRPGEDDGSRKA EFKGSHKCNVCSRTFFSENGLREHLQTHRGP AKHYMCP  
 ICGERFPSLLTLTEHKVTHSKSLDTGT CRICKMPLQSEEEFIEHCQMHPDLRNSLTGFR CVVMQTVTSTLEL  
 KIHGTFHMQLAGSSAASSPNGQLQKLYKCALCLKEFRSKQDLVRLDVNGLPYGLCAGCMARSANGQVGG LA  
 PPEPADRPCAGLRCP ECNVKFESAEDLES HMQVDHRDLTPETSGPRKGAQTS PVPRKKT YQC IKCQMTFENER  
 EIQIHVANHMIEEGINHECKLCNQMFDS PAKLLCHLIEHSFEGMGGTFKCPVCFTV FVQANKLQQHI FAVHGQ  
 EDKIYDCSQCPQKFFFQTE LQNHTMSQHAQ\*

>rs50410189\_ENSMUSP00000134575\_c.190:A>T\_p.E64V  
ENSMUST00000174764.2|zfp423-207|ENSMUSG00000045333|-|chr8:g.88586031:T>A  
MAVFKESGGLPIFISYKVEEGEASDFSLAWDSSVAAAGGLEGEPECDRKTSTRALEDNRNSVTIQEERNEDEDEDVE  
DESIYTCDHCCQDFESLADLTDHRAHRCPCGDGDDDPQLSWVASSPSSKDVASPTQMIGDGC DLGLGEEEGGTG  
LPYPCQFCDKSFIRLSYLKRHEQIHSDKLPFKCTFCSRLFKHKRSRDRHIKLHTGDKKYHCHECEAAFSRSDH  
LKIHLKTHSSSKPFKCSVCKRGFSS  
>rs45696557\_ENSMUSP00000105282\_c.172:G>T\_p.S58I  
ENSMUST00000109655.9|zfp423-202|ENSMUSG00000045333|-|chr8:g.88586040:C>A  
MSRRKQAKPRSVKVEEGEASDFSLAWDSSVAAAGGLEGEPECDRKTSTRALEDNRNSVTIQEERNEDEDEDVEDES  
IYTCDHCCQDFESLADLTDHRAHRCPCGDGDDDPQLSWVASSPSSKDVASPTQMIGDGC DLGLGEEEGGTGLPY  
PCQFCDKSFIRLSYLKRHEQIHSDKLPFKCTFCSRLFKHKRSRDRHIKLHTGDKKYHCHECEAAFSRSDHLKI  
HLKTHSSSKPFKCSVCKRGFSSSTSLQSHMQAHKKNKEHLAKSEKEAKKDDFMC DYCEDTFSQTEELEKHVLT  
LHPQLSEKADLQCIHCPEV FVDESTLLAHIHQAHANQKHKCPMCP EQFSSVEGVYCHLDSHRQPDSSNH SVSP  
DPVLG SVASMS SATPDSSASVERGSTPDSTLKLPLRGQKKMRDDGQSWPKVVYSCPYCKRDFTS LAVLEIHLK  
TIHADKPPQSHTCQICLDSMPTLYNLNEHVRLKHSKSHAYPVMQFGNISAFHCNYCPEMFADINSLQEHIRVSH  
CGPNANPPDGNAFFCNQCSMGFLTESSLTEHIQQAHC SVGSKLES PVVQPTQSFMEVYSCPYCTNSPIFGS  
ILKLTKH IKENHKNIPLAHSKSKAEQSPVSDVEVSSPKRQRLSGSANSISNGEYPCNQCDLKF SNFESFQT  
HLKLHLELLLRKQAC PQCKEDFDSQESLLQHLTVHYMTTSTHYVCE SCDKQFSSVDDLQKHLDMHTFVLYHC  
TLCQEVFDSKVS IQVHLAVKHSNEKKMYRCTACNWD FRKEADLQVHVKSHLGNPAKAHKC IFCGETFSTEVE  
LQCHITTHSKYNCRFCSKAFHAVILLEKHLREKHC VFDA AENGTANGVPPTSTKKAEPADLQGM LKNPEA  
PNSHEASEDDVDASEPMYGC DICGAAYTMEVLLQNHRLRDHNIRPGEDDGSRKKAEFIKGS HKCNVCSRTFFS  
ENGLREHLQTHRGP AKHYMCPICGERFPSLLTLTEHKVTHSKSLDTGT CRICKMPLQSEEEFIEHCQMHPDLR  
NSLTGFRVCMQTVTSTLELKIHGTFHMQLAGSSAASSPNGQLKLYKCALCLKEFRSKQDLVRLDVNGL  
PYGLCAGCMARSANGQVGG LAPPEPADRPCAGLRCP ECNVKFESAEDLES HMQVDHRDLTPETSGPRKGAQTS  
PVP RKKTYQC IKCQMTFENEREIQIHVANHMIEEGINHECKLCNQMFDS PAKLLCHLIEHSFEGMGGTFKCPV  
CFTV FVQANKLQQHI FAVHGOEDKIYDCSQCPQKFFFQTE LQNHTMSQHAQ\*  
>rs45696557\_ENSMUSP00000052379\_c.109:G>T\_p.S37I  
ENSMUST00000052250.15|zfp423-201|ENSMUSG00000045333|-|chr8:g.88586040:C>A  
MTGAERGPLCYHGGLEGEPECDRKTSTRALEDNRNSVTIQEERNEDEDEDVEDES IYTCDHCCQDFESLADLTDHR  
AHRCPCGDGDDDPQLSWVASSPSSKDVASPTQMIGDGC DLGLGEEEGGTGLPYPCQFCDKSFIRLSYLKRHEQI  
HSDKLPFKCTFCSRLFKHKRSRDRHIKLHTGDKKYHCHECEAAFSRSDHLKIHLKTHSSSKPFKCSVCKRGFS  
STSLQSHMQAHKKNKEHLAKSEKEAKKDDFMC DYCEDTFSQTEELEKHVLT LHPQLSEKADLQCIHCPEV FV  
DESTLLAHIHQAHANQKHKCPMCP EQFSSVEGVYCHLDSHRQPDSSNH SVSPDPVLG SVASMS SATPDSSASV  
ERGSTPDSTLKLPLRGQKKMRDDGQSWPKVVYSCPYCKRDFTS LAVLEIHLKTIHADKPPQSHTCQICLDSM  
TLYNLNEHVRLKHSKSHAYPVMQFGNISAFHCNYCPEMFADINSLQEHIRVSHCGPNANPPDGNAFFCNQCSM  
GFLTESSLTEHIQQAHC SVGSKLES PVVQPTQSFMEVYSCPYCTNSPIFGS ILKLTKH IKENHKNIPLAHSK  
KSKAEQSPVSDVEVSSPKRQRLSGSANSISNGEYPCNQCDLKF SNFESFQTHLKLHLELLLRKQAC PQCKED  
FDSQESLLQHLTVHYMTTSTHYVCE SCDKQFSSVDDLQKHLDMHTFVLYHCTLCQEVFDSKVS IQVHLAVKH  
SNEKKMYRCTACNWD FRKEADLQVHVKSHLGNPAKAHKC IFCGETFSTEVE LQCHITTHSKYNCRFCSKAF  
HAVILLEKHLREKHC VFDA AENGTANGVPPTSTKKAEPADLQGM LKNPEA P NSHEASEDDVDASEPMYGC  
ICGAAYTMEVLLQNHRLRDHNIRPGEDDGSRKKAEFIKGS HKCNVCSRTFFSENGLREHLQTHRGP AKHYMCP  
ICGERFPSLLTLTEHKVTHSKSLDTGT CRICKMPLQSEEEFIEHCQMHPDLRNSLTGFRVCMQTVTSTLEL  
KIHGTFHMQLAGSSAASSPNGQLKLYKCALCLKEFRSKQDLVRLDVNGLPYGLCAGCMARSANGQVGG LA  
PPEPADRPCAGLRCP ECNVKFESAEDLES HMQVDHRDLTPETSGPRKGAQTS PVP RKKTYQC IKCQMTFENER  
EIQIHVANHMIEEGINHECKLCNQMFDS PAKLLCHLIEHSFEGMGGTFKCPV CFTV FVQANKLQQHI FAVHGO  
EDKIYDCSQCPQKFFFQTE LQNHTMSQHAQ\*  
>rs45696557\_ENSMUSP00000134575\_c.181:G>T\_p.S61I  
ENSMUST00000174764.2|zfp423-207|ENSMUSG00000045333|-|chr8:g.88586040:C>A  
MAVFKESGGLPIFISYKVEEGEASDFSLAWDSSVAAAGGLEGEPECDRKTSTRALEDNRNSVTIQEERNEDEDEDVE  
DESIYTCDHCCQDFESLADLTDHRAHRCPCGDGDDDPQLSWVASSPSSKDVASPTQMIGDGC DLGLGEEEGGTG  
LPYPCQFCDKSFIRLSYLKRHEQIHSDKLPFKCTFCSRLFKHKRSRDRHIKLHTGDKKYHCHECEAAFSRSDH  
LKIHLKTHSSSKPFKCSVCKRGFSS  
>rs260982584\_ENSMUSP00000105282\_c.135:A>CAAATACCATCTCTAGTA\_p.T46ins-fs  
ENSMUST00000109655.9|zfp423-202|ENSMUSG00000045333|-  
|chr8:g.88586077:T>TACTAGAGATGGTATTTG  
MSRRKQAKPRSVKVEEGEASDFSLAWDSSVAAAGGLEGEPECDRQIPSLVPAVRWKTGTA



>rs260982584\_ENSMUSP00000052379\_c.72:A>CAAATACCATCTCTAGTA\_p.T25ins-fs  
 ENSMUST00000052250.15|Zfp423-201|ENSMUSG00000045333|-  
 |chr8:g.88586077:T>TACTAGAGATGGTATTTG  
 MTGAERGPLYHGGLEGEPECDRKQIPSLVPAVRWKTGTA  
 >rs260982584\_ENSMUSP00000134575\_c.144:A>CAAATACCATCTCTAGTA\_p.T49ins-fs  
 ENSMUST00000174764.2|Zfp423-207|ENSMUSG00000045333|-  
 |chr8:g.88586077:T>TACTAGAGATGGTATTTG  
 MAVFKESGPLPIFSYKVEEGEASDFSLAWDSSVAAAGGLEGEPECDRKQIPSLVPAVRWKTGTA  
 >rs45714081\_ENSMUSP00000092839\_c.7:C>T\_p.S3L  
 ENSMUST00000095214.10|Cnep1r1-  
 201|ENSMUSG00000036810|+|chr8:g.88845480:C>T  
 MNLLEQAEDLKAFERRLT EYIHCLQPATGRWRMLLIVVSVCTATGAWNWLIDPETQKVSFFTSLWNHPFFTTIS  
 CITLIGLFFAGIHKRVVAPSI IAARCRTVLA EYNMSCDDTGKLLKPRPHVQ\*  
 >rs45714081\_ENSMUSP00000120121\_c.7:C>T\_p.S3L  
 ENSMUST00000127490.8|Cnep1r1-204|ENSMUSG00000036810|+|chr8:g.88845480:C>T  
 MNLLEQAEDLKAFERRLT EYIHCLQPATGRWRSVLLHVIMEPSVFHY\*  
 >rs45714081\_ENSMUSP00000113435\_c.7:C>T\_p.S3L  
 ENSMUST00000121097.8|Cnep1r1-203|ENSMUSG00000036810|+|chr8:g.88845480:C>T  
 MNLLEQAEDLKAFERRLT EYIHCLQPATGRWRMLLIVVSVCTATGAWNWLIDPETQKVSFFTSLWNHPFFTTIS  
 CITLIGLFFAGIHKRVVAPSMYPLPRVEFCYHN\*  
 >rs45714081\_ENSMUSP00000113207\_c.7:C>T\_p.S3L  
 ENSMUST00000117775.2|Cnep1r1-202|ENSMUSG00000036810|+|chr8:g.88845480:C>T  
 MNLLEQAEDLKAFERRLT EYIHCLQPATGRWRMLLIVVSVCTATGAWNWLIDPETQKVSFFTSLWNHPFFTTIS  
 CITLIGLFFAGIHKRVVAPSI IAARCRTVLA EYNMSCDDP\*  
 >rs49014380\_ENSMUSP00000034079\_c.1122:A>G\_p.S375G  
 ENSMUST00000034079.14|Heatr3-201|ENSMUSG00000031657|+|chr8:g.88883174:A>G  
 MGKSRTKRFRKRPQFSP IESCQAEAAAASNGTGDEEDDGPAEELLEKLQHP SAEVRECACAGLARLVQQRPALP  
 DLARRDAVRR LGPLLLDSSLAVRETAAGALRNLSACGGFDVCDMVAKD IMTPLVALLRECLSGLD SNEMSPQ  
 EKADKRN PVE SIANEAVNVLWNVCECSGRAVSI FNKEGCLEIVLQYLRRFP T SIDLAVSVAYCLQTVTEDNPE  
 LLKSF DGTALRVLESALLCPV ASMEY ILLKTLVAGTIWN LKDI I PSKSQAEI INAILGALSEVLGMNTGNMVI  
 QMKEAETQRLKTA AESEDI LANANGDDLVEDDEMEE I PHKRKLR RKT F ISDLLPPTDKELREAMALLTAQQT A  
 LEVIVNMCCGEDPSDDEWEELSSSDESEAFMENS FSECSGHLMS PLCLSHEIHSALTNCLI PEKVFEKTSSPN  
 SVAVDIC SKNPTWKPLIRKMNTIQCRALMCLQSLVSLLDIDH LGGAPALQTLAQHLSQILFSQPDFAKHDDDFL  
 EAISSALRALLQTMASKNIPQCMTPEQLMTLCREGIHSSSIGVRVNVVSI LGITGSVLAKDDGTLDLTKTIGC  
 FLLEVATKDP SLVVTGEALDALFDVFADGEAAEKASVQIKLLAALKEFQPVFKMKIRKEGRGKYS PDQLCVLD  
 NVKMNLRRFIAYQETVEKRLTS\*  
 >rs49014380\_ENSMUSP00000112812\_c.771:A>G\_p.S258G  
 ENSMUST00000121949.2|Heatr3-202|ENSMUSG00000031657|+|chr8:g.88883174:A>G  
 MVAKD IMTPLVALLRECLSGLD SNEMSPQEKADKRN PVE SIANEAVNVLWNVCECSGRAVSI FNKEGCLEIVL  
 QYLRRFP T SIDLAVSVAYCLQTVTEDNPELLKSF DGTALRVLESALLCPV ASMEY ILLKTLVAGTIWN LKDI I  
 PSKSQAEI INAILGALSEVLGMNTGNMVI QMKEAETQRLKTA AESEDI LANANGDDLVEDDEMEE I PHKRKLR  
 RKT F ISDLLPPTDKELREAMALLTAQQT ALEVIVNMCCGEDPSDDEWEELSSSDESEAFMENS FSECSGHLMS  
 PLCLSHEIHSALTNCLI PEKVFEKTSSPN SVAVDIC SKNPTWKPLIRKMNTIQCRALMCLQSLVSLLDIDH LG  
 GAPALQTLAQHLSQILFSQPDFAKHDDDFLEA ISSALRALLQTMASKNIPQCMTPEQLMTLCREGIHSSSIGVR  
 VNVVSI LGITGSVLAKDDGTLDLTKTIGCFLLEVATKDP SLVVTGEALDALFDVFADGEAAEKASVQIKLLAA  
 LKEFQPVFKMKIRKEGRGKYS PDQLCVLDNVKMNLRRFIAYQETVEKRLTS\*  
 >rs48401410\_ENSMUSP00000034079\_c.1617:A>G\_p.M540V  
 ENSMUST00000034079.14|Heatr3-201|ENSMUSG00000031657|+|chr8:g.88891537:A>G  
 MGKSRTKRFRKRPQFSP IESCQAEAAAASNGTGDEEDDGPAEELLEKLQHP SAEVRECACAGLARLVQQRPALP  
 DLARRDAVRR LGPLLLDSSLAVRETAAGALRNLSACGGFDVCDMVAKD IMTPLVALLRECLSGLD SNEMSPQ  
 EKADKRN PVE SIANEAVNVLWNVCECSGRAVSI FNKEGCLEIVLQYLRRFP T SIDLAVSVAYCLQTVTEDNPE  
 LLKSF DGTALRVLESALLCPV ASMEY ILLKTLVAGTIWN LKDI I PSKSQAEI INAILGALSEVLGMNTGNMVI  
 QMKEAETQRLKTA AESEDI LANANGDDLVEDDEMEE I PHKRKLR RKT F ISDLLPPTDKELREAMALLTAQQT A  
 LEVIVNMCCGEDPSDDEWEELSSSDESEAFMENS FSECSGHLMS PLCLSHEIHSALTNCLI PEKVFEKTSSPN  
 SVAVDIC SKNPTWKPLIRKMNTIQCRALMCLQSLVSLLDIDH LGGAPALQTLAQHLSQILFSQPDFAKHDDDFL  
 EAISSALRALLQTMASKNIPQCMTPEQLVTL CREGIHSSSIGVRVNVVSI LGITGSVLAKDDGTLDLTKTIGC  
 FLLEVATKDP SLVVTGEALDALFDVFADGEAAEKASVQIKLLAALKEFQPVFKMKIRKEGRGKYS PDQLCVLD  
 NVKMNLRRFIAYQETVEKRLTS\*

>rs48401410\_ENSMUSP00000112812\_c.1266:A>G\_p.M423V  
ENSMUST00000121949.2|Heatr3-202|ENSMUSG00000031657|+|chr8:g.88891537:A>G  
MVAKDIMTPLVALLRECLSGLDSEVLEKADKRNPFVSIANEAVNLWNVCECSGRAVSI FNKEGCLEIVL  
QYLRFPPTSIDLAVSVAYCLQTVTEDNPELLKSFDTALRVLESALLCPVASMEYILLKTLVAGTIWNLKDI I  
PSKSQAEI INAILGALSEVLGMNTGNMVI QMKEAETQRLKTAASEDILANANGDDLVEDDEMEEIPHKRKL  
RKT F ISDLLPPTDKELREAMALLTAQQTAL EIVIVNMCCSEDP S DDEWEELSSSDESEAFMENSFSECSGHLMS  
PLCLSHEIHSALTNCLIPEKVF EKTSSPNSVAVDICSKNPTWKPLIRKMNTIQCRALMCLQSLVSLDDIDHLG  
GAPALQTLAQHLSQILFSQPDFAKHDDFLEAISSALRALLQTMASKNIPQCMTPEQLVTLCREGIHSSSIGVR  
VNVVSI LGITG SVLAKDDGTLDTLKTIGCFLLLEVATKDP SLVVTGEALDALFDV FADGEAAEKASVQIKLLAA  
LKEFQPVFKMKIRKEGRGKYS PDQLCVLDNVKMNLRRIAYQETVEKRLTS\*  
>rs238749623\_ENSMUSP00000034079\_c.1848:G>GAATAA\_p.E617ins-fs  
ENSMUST00000034079.14|Heatr3-  
201|ENSMUSG00000031657|+|chr8:g.88893732:G>GAATAA  
MGKSRTKRFKRPQFSPIESCQAEAAAASNGTGDEEDDGPAAELLEKLQHPSAEVREACAGLARLVQQRPALP  
DLARRDAVRRGLPLLLDSSSLAVRETAAGALRNLSACGGFDVCCDMVAKDIMTPLVALLRECLSGLDSEVLEK  
EKADKRNPFVSIANEAVNLWNVCECSGRAVSI FNKEGCLEIVLQYLRFPPTSIDLAVSVAYCLQTVTEDNPE  
LLKSFDTALRVLESALLCPVASMEYILLKTLVAGTIWNLKDI I PSKSQAEI INAILGALSEVLGMNTGNMVI  
QMKEAETQRLKTAASEDILANANGDDLVEDDEMEEIPHKRKL RKT F ISDLLPPTDKELREAMALLTAQQTAL  
EIVIVNMCCSEDP S DDEWEELSSSDESEAFMENSFSECSGHLMSPLCLSHEIHSALTNCLIPEKVF EKTSSP  
NSVAVDICSKNPTWKPLIRKMNTIQCRALMCLQSLVSLDDIDHLGGAPALQTLAQHLSQILFSQPDFAKHDDF  
LEAISSALRALLQTMASKNIPQCMTPEQLM TL CREGIHSSSIGVRVNVVSI LGITG SVLAKDDGTLDTLKTIG  
CFLLLEVATKDP SLVVTGEALDALFDV FADGEAAE  
>rs238749623\_ENSMUSP00000112812\_c.1497:G>GAATAA\_p.E500ins-fs  
ENSMUST00000121949.2|Heatr3-  
202|ENSMUSG00000031657|+|chr8:g.88893732:G>GAATAA  
MVAKDIMTPLVALLRECLSGLDSEVLEKADKRNPFVSIANEAVNLWNVCECSGRAVSI FNKEGCLEIVL  
QYLRFPPTSIDLAVSVAYCLQTVTEDNPELLKSFDTALRVLESALLCPVASMEYILLKTLVAGTIWNLKDI I  
PSKSQAEI INAILGALSEVLGMNTGNMVI QMKEAETQRLKTAASEDILANANGDDLVEDDEMEEIPHKRKL  
RKT F ISDLLPPTDKELREAMALLTAQQTAL EIVIVNMCCSEDP S DDEWEELSSSDESEAFMENSFSECSGHLMS  
PLCLSHEIHSALTNCLIPEKVF EKTSSPNSVAVDICSKNPTWKPLIRKMNTIQCRALMCLQSLVSLDDIDHLG  
GAPALQTLAQHLSQILFSQPDFAKHDDFLEAISSALRALLQTMASKNIPQCMTPEQLM TL CREGIHSSSIGVR  
VNVVSI LGITG SVLAKDDGTLDTLKTIGCFLLLEVATKDP SLVVTGEALDALFDV FADGEAAE  
>rs50253664\_ENSMUSP00000112766\_c.157:A>C\_p.E53A  
ENSMUST00000119033.8|Tent4b-203|ENSMUSG00000036779|+|chr8:g.88926749:A>C  
MQIWETTQGLRNLYFNHCHSSGASSASGGSGSGPGGTAPAPAGMFRSGARPLGGLAVPAEQRDFLPLET  
TNNNNNHQPAAWARRASAGPSASPVPSAPSSPRPAAALPASESTD PASGSSNKRKRDNKASTYGLNYSLLQP  
SGGRAAGGGRADGGGGVYSGTPWKRRNYNQGVVGLHEEISDFY EYMSRPEEEKMRMEVVSRIESVIKELWPS  
ADVQIFG SFKTGLYLPTS DIDL VVFGK WENLPLWTL EEALRKHKVADEDSVKVLDKATVPI I KLTDSFTEVKV  
DISFNVQNGVRAADLIKDFTKKYPVLPYLVLV LKQFLLQ RDLNEVF TGGIGSYSLFLMAVSFLQLHPREDACI  
PNTNYGVLLIEFFELYGRHFNYLKTGIRIKDGGSYVAKDEVQKNMLDGYRPSMLYIEDPLQPGNDVGRSSYGA  
MQVKQAFDYAYVVL SHAVSPIAKYYPNNETESILGRI IRVTDEVATYRDWISKQWGLQNRPEPSCNGNGVTLI  
VDTQQLDKCNLSEEKEALGKCRSNASEPLSKHSSNSSSGPVSSSSATQSSSSDVDS DATPCKTPKQLL CRP  
PTVTRVGSQDVSLEVSQAVGKMQSTQTTNTPNNANKSQHGSARLFRSSSKGFQGT AQTSHGALMTSKQHOGKS  
NTQYYHGKRRRHRKRDAPLSEL CR\*  
>rs50253664\_ENSMUSP00000112608\_c.157:A>C\_p.E53A  
ENSMUST00000118952.8|Tent4b-202|ENSMUSG00000036779|+|chr8:g.88926749:A>C  
MQIWETTQGLRNLYFNHCHSSGASSASGGSGSGPGGTAPAPAGMFRSGARPLGGLAVPAEQRDFLPLET  
TNNNNNHQPAAWARRASAGPSASPVPSAPSSPRPAAALPASESTD PASGSSNKRKRDNKASTYGLNYSLLQP  
SGGRAAGGGRADGGGGVYSGTPWKRRNYNQGVVGLHEEISDFY EYMSRPEEEKMRMEVVSRIESVIKELWPS  
ADVQIFG SFKTGLYLPTS DIDL VVFGK WENLPLWTL EEALRKHKVADEDSVKVLDKATVPI I KLTDSFTEVKV  
DISFNVQNGVRAADLIKDFTKKYPVLPYLVLV LKQFLLQ RDLNEVF TGGIGSYSLFLMAVSFLQLHPREDACI  
PNTNYGVLLIEFFELYGRHFNYLKTGIRIKDGGSYVAKDEVQKNMLDGYRPSMLYIEDPLQPGNDVGRSSYGA  
MQVKQAFDYAYVVL SHAVSPIAKYYPNNETESILGRI IRVTDEVATYRDWISKQWGLQNRPEPSCNGNGVTLI  
VDTQQLDKCNLSEEKEALGKCRSNASEPLSKHSSNSSSGPVSSSSATQSSSSDVDS DATPCKTPKQLL CRP  
PTVTRVGSQDVSLEVSQAVGKMQSTQTTNTPNNANKSQHGSARLFRSSSKGFQGT AQTSHGALMTSKQHOGKS  
NTQYYHGKRRRHRKRDAPLSEL CR\*  
>rs50253664\_ENSMUSP00000067971\_c.157:A>C\_p.E53A  
ENSMUST00000066748.10|Tent4b-201|ENSMUSG00000036779|+|chr8:g.88926749:A>C

MQIWETTQGLRNLYFNHCHSSGASSASGGSGSGPGSPGGTAPAPAGMFRSGARPLGGLAVPAEQRDFLPLET  
TNNNNHHQPAAWARRASAGPSASPVPSPAPSSPRPAAALPASESTDPASGSSNKRKRDNKASTYGLNYSLLQP  
SGGRAAGGGRADGGGGVYSGTPWKRRNYNQGVVGLHEEISDFYEYMSRPEEEKMRMEVVSRIESVIKELWPS  
ADVQIFGSFKTGLYLPTSDIDLVVFGKWENLPLWTLLEEALRKHKVADEDSVKVLDKATVPIIKLTDSTFEVKV  
DISFNVQNGVRAADLIKDFTKLHPREDACIPNTNYGVLLIEFFELYGRHFNYLKTGIRIKDGGSYVAKDEVQK  
NMLDGYRPSMLYIEDPLQPGNDVGRSSYGAMQVKQAFDYAYVVLHAVSPIAKYYPNNETESILGRIIRVTDE  
VATYRDWISKQWGLQNRPEPSCNGNGVTIIVDTQQLDKCNNNLSEEKEALGKCRSNASEPLSKHSSNSSSGPV  
SSSSATQSSSSDVSDATPCKTPKQLLRCRPTVTRVGSQDVSLEVSQAVGKMOSTQTTNTPNNANKSQHGSAR  
LFRSSSKGFQGTQTSHGALMTSKQHOGKSNTQYYHGKRRRHKRDAPLSELCR\*

>rs50420322\_ENSMUSP00000112766\_c.174:C>T\_p.L59F  
ENSMUST00000119033.8|Tent4b-203|ENSMUSG00000036779|+|chr8:g.88926766:C>T  
MQIWETTQGLRNLYFNHCHSSGASSASGGSGSGPGSPGGTAPAPAGMFRSGERPLGGFAVPAEQRDFLPLET  
TNNNNHHQPAAWARRASAGPSASPVPSPAPSSPRPAAALPASESTDPASGSSNKRKRDNKASTYGLNYSLLQP  
SGGRAAGGGRADGGGGVYSGTPWKRRNYNQGVVGLHEEISDFYEYMSRPEEEKMRMEVVSRIESVIKELWPS  
ADVQIFGSFKTGLYLPTSDIDLVVFGKWENLPLWTLLEEALRKHKVADEDSVKVLDKATVPIIKLTDSTFEVKV  
DISFNVQNGVRAADLIKDFTKKYPVLPYLVLVQLKQFLLQRLDNEVFTGGIGSYSLFLMAVSLQLHPREDACI  
PNTNYGVLLIEFFELYGRHFNYLKTGIRIKDGGSYVAKDEVQKNMLDGYRPSMLYIEDPLQPGNDVGRSSYGA  
MQVKQAFDYAYVVLHAVSPIAKYYPNNETESILGRIIRVTDEVATYRDWISKQWGLQNRPEPSCNGNGVTI  
VDTQQLDKCNNNLSEEKEALGKCRSNASEPLSKHSSNSSSGPVSSSSATQSSSSDVSDATPCKTPKQLLRCR  
PTVTRVGSQDVSLEVSQAVGKMOSTQTTNTPNNANKSQHGSARLFRSSSKGFQGTQTSHGALMTSKQHOGKS  
NTQYYHGKRRRHKRDAPLSELCR\*

>rs50420322\_ENSMUSP00000112608\_c.174:C>T\_p.L59F  
ENSMUST00000118952.8|Tent4b-202|ENSMUSG00000036779|+|chr8:g.88926766:C>T  
MQIWETTQGLRNLYFNHCHSSGASSASGGSGSGPGSPGGTAPAPAGMFRSGERPLGGFAVPAEQRDFLPLET  
TNNNNHHQPAAWARRASAGPSASPVPSPAPSSPRPAAALPASESTDPASGSSNKRKRDNKASTYGLNYSLLQP  
SGGRAAGGGRADGGGGVYSGTPWKRRNYNQGVVGLHEEISDFYEYMSRPEEEKMRMEVVSRIESVIKELWPS  
ADVQIFGSFKTGLYLPTSDIDLVVFGKWENLPLWTLLEEALRKHKVADEDSVKVLDKATVPIIKLTDSTFEVKV  
DISFNVQNGVRAADLIKDFTKKYPVLPYLVLVQLKQFLLQRLDNEVFTGGIGSYSLFLMAVSLQLHPREDACI  
PNTNYGVLLIEFFELYGRHFNYLKTGIRIKDGGSYVAKDEVQKNMLDGYRPSMLYIEDPLQPGNDVGRSSYGA  
MQVKQAFDYAYVVLHAVSPIAKYYPNNETESILGRIIRVTDEVATYRDWISKQWGLQNRPEPSCNGNGVTI  
VDTQQLDKCNNNLSEEKEALGKCRSNASEPLSKHSSNSSSGPVSSSSATQSSSSDVSDATPCKTPKQLLRCR  
PTVTRVGSQDVSLEVSQAVGKMOSTQTTNTPNNANKSQHGSARLFRSSSKGFQGTQTSHGALMTSKQHOGKS  
NTQYYHGKRRRHKRDAPLSELCR\*

>rs50420322\_ENSMUSP00000067971\_c.174:C>T\_p.L59F  
ENSMUST00000066748.10|Tent4b-201|ENSMUSG00000036779|+|chr8:g.88926766:C>T  
MQIWETTQGLRNLYFNHCHSSGASSASGGSGSGPGSPGGTAPAPAGMFRSGERPLGGFAVPAEQRDFLPLET  
TNNNNHHQPAAWARRASAGPSASPVPSPAPSSPRPAAALPASESTDPASGSSNKRKRDNKASTYGLNYSLLQP  
SGGRAAGGGRADGGGGVYSGTPWKRRNYNQGVVGLHEEISDFYEYMSRPEEEKMRMEVVSRIESVIKELWPS  
ADVQIFGSFKTGLYLPTSDIDLVVFGKWENLPLWTLLEEALRKHKVADEDSVKVLDKATVPIIKLTDSTFEVKV  
DISFNVQNGVRAADLIKDFTKKYPVLPYLVLVQLKQFLLQRLDNEVFTGGIGSYSLFLMAVSLQLHPREDACI  
PNTNYGVLLIEFFELYGRHFNYLKTGIRIKDGGSYVAKDEVQKNMLDGYRPSMLYIEDPLQPGNDVGRSSYGA  
MQVKQAFDYAYVVLHAVSPIAKYYPNNETESILGRIIRVTDEVATYRDWISKQWGLQNRPEPSCNGNGVTI  
VDTQQLDKCNNNLSEEKEALGKCRSNASEPLSKHSSNSSSGPVSSSSATQSSSSDVSDATPCKTPKQLLRCR  
PTVTRVGSQDVSLEVSQAVGKMOSTQTTNTPNNANKSQHGSARLFRSSSKGFQGTQTSHGALMTSKQHOGKS  
NTQYYHGKRRRHKRDAPLSELCR\*

>rs48197139\_ENSMUSP00000112766\_c.295:T>A\_p.V99D  
ENSMUST00000119033.8|Tent4b-203|ENSMUSG00000036779|+|chr8:g.88926887:T>A  
MQIWETTQGLRNLYFNHCHSSGASSASGGSGSGPGSPGGTAPAPAGMFRSGERPLGGLAVPAEQRDFLPLET  
TNNNNHHQPAAWARRASAGPSASPDPSPAPSSPRPAAALPASESTDPASGSSNKRKRDNKASTYGLNYSLLQP  
SGGRAAGGGRADGGGGVYSGTPWKRRNYNQGVVGLHEEISDFYEYMSRPEEEKMRMEVVSRIESVIKELWPS  
ADVQIFGSFKTGLYLPTSDIDLVVFGKWENLPLWTLLEEALRKHKVADEDSVKVLDKATVPIIKLTDSTFEVKV  
DISFNVQNGVRAADLIKDFTKKYPVLPYLVLVQLKQFLLQRLDNEVFTGGIGSYSLFLMAVSLQLHPREDACI  
PNTNYGVLLIEFFELYGRHFNYLKTGIRIKDGGSYVAKDEVQKNMLDGYRPSMLYIEDPLQPGNDVGRSSYGA  
MQVKQAFDYAYVVLHAVSPIAKYYPNNETESILGRIIRVTDEVATYRDWISKQWGLQNRPEPSCNGNGVTI  
VDTQQLDKCNNNLSEEKEALGKCRSNASEPLSKHSSNSSSGPVSSSSATQSSSSDVSDATPCKTPKQLLRCR  
PTVTRVGSQDVSLEVSQAVGKMOSTQTTNTPNNANKSQHGSARLFRSSSKGFQGTQTSHGALMTSKQHOGKS  
NTQYYHGKRRRHKRDAPLSELCR\*

>rs48197139\_ENSMUSP00000112608\_c.295:T>A\_p.V99D  
ENSMUST00000118952.8|Tent4b-202|ENSMUSG00000036779|+|chr8:g.88926887:T>A

MQIWETTQGLRNLYFNHCHSSGASSASGGSGSGPGSPGGTAPAPAGMFRSGERPLGGLAVPAEQRDFLPLET  
 TNNNNHHQPAAWARRASAGPSASPDPSPAPSSPRPAAALPASESTDPASGSSNKRKRDNKASTYGLNYSLLQP  
 SGGRAAGGGRADGGGGVYSGTPWKRRNYNQGVVGLHEEISDFYEYMSRPEEEKMRMEVVSRIESVIKELWPS  
 ADVQIFGSFKTGLYLPTSDIDLVVFGKWENLPLWTLLEALRKHKVADEDSVKVLDKATVPIIKLTDSTFEVKV  
 DISFNVQNGVRAADLIKDFTKKYVPLPYLVLVKQFLLQRDLENEVFTGGIGSYSLFLMAVSFLQLHPREDACI  
 PNTNYGVLLIEFFELYGRHFNYLKTGIRIKDGGSYVAKDEVQKNMLDGYRPSMLYIEDPLQPGNDVGRSSYGA  
 MQVKQAFDYAYVVLSHAVSPIAKYYPNNETESILGRIIRVTDEVATYRDWISKQWGLQNRPEPSCNGNGVTLI  
 VDTQQLDKCNLSEEKEALGKCRSNASEPLSKHSSNSSSGPVSSSSATQSSSSDVDSDATPCKTPKQLLCP  
 PTVTRVGSQDVSLEVSQAVGKMOSTQTTNTPNNANKSQHGSARLFRSSSKGFQGTQTSHGALMTSKQHOGKS  
 NTQYYHGKRRHRKRDAPLSELCR\*  
 >rs48197139\_ENSMUSP00000067971\_c.295:T>A\_p.V99D  
 ENSMUST00000066748.10|Tent4b-201|ENSMUSG00000036779|+|chr8:g.88926887:T>A  
 MQIWETTQGLRNLYFNHCHSSGASSASGGSGSGPGSPGGTAPAPAGMFRSGERPLGGLAVPAEQRDFLPLET  
 TNNNNHHQPAAWARRASAGPSASPDPSPAPSSPRPAAALPASESTDPASGSSNKRKRDNKASTYGLNYSLLQP  
 SGGRAAGGGRADGGGGVYSGTPWKRRNYNQGVVGLHEEISDFYEYMSRPEEEKMRMEVVSRIESVIKELWPS  
 ADVQIFGSFKTGLYLPTSDIDLVVFGKWENLPLWTLLEALRKHKVADEDSVKVLDKATVPIIKLTDSTFEVKV  
 DISFNVQNGVRAADLIKDFTKLHPREDACIPNTNYGVLLIEFFELYGRHFNYLKTGIRIKDGGSYVAKDEVQK  
 NMLDGYRPSMLYIEDPLQPGNDVGRSSYGAMQVKQAFDYAYVVLSHAVSPIAKYYPNNETESILGRIIRVTDE  
 VATYRDWISKQWGLQNRPEPSCNGNGVTLIVDTQQLDKCNLSEEKEALGKCRSNASEPLSKHSSNSSSGPV  
 SSSSATQSSSSDVDSDATPCKTPKQLLCPPTVTRVGSQDVSLEVSQAVGKMOSTQTTNTPNNANKSQHGSAR  
 LFRSSSKGFQGTQTSHGALMTSKQHOGKSNTQYYHGKRRHRKRDAPLSELCR\*  
 >rs46128864\_ENSMUSP00000112766\_c.496:G>A\_p.G166E  
 ENSMUST00000119033.8|Tent4b-203|ENSMUSG00000036779|+|chr8:g.88927088:G>A  
 MQIWETTQGLRNLYFNHCHSSGASSASGGSGSGPGSPGGTAPAPAGMFRSGERPLGGLAVPAEQRDFLPLET  
 TNNNNHHQPAAWARRASAGPSASPVPSPAPSSPRPAAALPASESTDPASGSSNKRKRDNKASTYGLNYSLLQP  
 SGGRAAGGGRADGGGGVYSETPWKRRNYNQGVVGLHEEISDFYEYMSRPEEEKMRMEVVSRIESVIKELWPS  
 ADVQIFGSFKTGLYLPTSDIDLVVFGKWENLPLWTLLEALRKHKVADEDSVKVLDKATVPIIKLTDSTFEVKV  
 DISFNVQNGVRAADLIKDFTKKYVPLPYLVLVKQFLLQRDLENEVFTGGIGSYSLFLMAVSFLQLHPREDACI  
 PNTNYGVLLIEFFELYGRHFNYLKTGIRIKDGGSYVAKDEVQKNMLDGYRPSMLYIEDPLQPGNDVGRSSYGA  
 MQVKQAFDYAYVVLSHAVSPIAKYYPNNETESILGRIIRVTDEVATYRDWISKQWGLQNRPEPSCNGNGVTLI  
 VDTQQLDKCNLSEEKEALGKCRSNASEPLSKHSSNSSSGPVSSSSATQSSSSDVDSDATPCKTPKQLLCP  
 PTVTRVGSQDVSLEVSQAVGKMOSTQTTNTPNNANKSQHGSARLFRSSSKGFQGTQTSHGALMTSKQHOGKS  
 NTQYYHGKRRHRKRDAPLSELCR\*  
 >rs46128864\_ENSMUSP00000112608\_c.496:G>A\_p.G166E  
 ENSMUST00000118952.8|Tent4b-202|ENSMUSG00000036779|+|chr8:g.88927088:G>A  
 MQIWETTQGLRNLYFNHCHSSGASSASGGSGSGPGSPGGTAPAPAGMFRSGERPLGGLAVPAEQRDFLPLET  
 TNNNNHHQPAAWARRASAGPSASPVPSPAPSSPRPAAALPASESTDPASGSSNKRKRDNKASTYGLNYSLLQP  
 SGGRAAGGGRADGGGGVYSETPWKRRNYNQGVVGLHEEISDFYEYMSRPEEEKMRMEVVSRIESVIKELWPS  
 ADVQIFGSFKTGLYLPTSDIDLVVFGKWENLPLWTLLEALRKHKVADEDSVKVLDKATVPIIKLTDSTFEVKV  
 DISFNVQNGVRAADLIKDFTKKYVPLPYLVLVKQFLLQRDLENEVFTGGIGSYSLFLMAVSFLQLHPREDACI  
 PNTNYGVLLIEFFELYGRHFNYLKTGIRIKDGGSYVAKDEVQKNMLDGYRPSMLYIEDPLQPGNDVGRSSYGA  
 MQVKQAFDYAYVVLSHAVSPIAKYYPNNETESILGRIIRVTDEVATYRDWISKQWGLQNRPEPSCNGNGVTLI  
 VDTQQLDKCNLSEEKEALGKCRSNASEPLSKHSSNSSSGPVSSSSATQSSSSDVDSDATPCKTPKQLLCP  
 PTVTRVGSQDVSLEVSQAVGKMOSTQTTNTPNNANKSQHGSARLFRSSSKGFQGTQTSHGALMTSKQHOGKS  
 NTQYYHGKRRHRKRDAPLSELCR\*  
 >rs46128864\_ENSMUSP00000067971\_c.496:G>A\_p.G166E  
 ENSMUST00000066748.10|Tent4b-201|ENSMUSG00000036779|+|chr8:g.88927088:G>A  
 MQIWETTQGLRNLYFNHCHSSGASSASGGSGSGPGSPGGTAPAPAGMFRSGERPLGGLAVPAEQRDFLPLET  
 TNNNNHHQPAAWARRASAGPSASPVPSPAPSSPRPAAALPASESTDPASGSSNKRKRDNKASTYGLNYSLLQP  
 SGGRAAGGGRADGGGGVYSETPWKRRNYNQGVVGLHEEISDFYEYMSRPEEEKMRMEVVSRIESVIKELWPS  
 ADVQIFGSFKTGLYLPTSDIDLVVFGKWENLPLWTLLEALRKHKVADEDSVKVLDKATVPIIKLTDSTFEVKV  
 DISFNVQNGVRAADLIKDFTKLHPREDACIPNTNYGVLLIEFFELYGRHFNYLKTGIRIKDGGSYVAKDEVQK  
 NMLDGYRPSMLYIEDPLQPGNDVGRSSYGAMQVKQAFDYAYVVLSHAVSPIAKYYPNNETESILGRIIRVTDE  
 VATYRDWISKQWGLQNRPEPSCNGNGVTLIVDTQQLDKCNLSEEKEALGKCRSNASEPLSKHSSNSSSGPV  
 SSSATQSSSSDVDSDATPCKTPKQLLCPPTVTRVGSQDVSLEVSQAVGKMOSTQTTNTPNNANKSQHGSAR  
 LFRSSSKGFQGTQTSHGALMTSKQHOGKSNTQYYHGKRRHRKRDAPLSELCR\*  
 >rs50051979\_ENSMUSP00000112766\_c.876:G>A\_p.D293N  
 ENSMUST00000119033.8|Tent4b-203|ENSMUSG00000036779|+|chr8:g.88974182:G>A

MQIWETTQGLRNLYFNHCHSSGASSASGGSGSGPGSPGGTAPAPAGMFRSGERPLGGLAVPAEQRDFLPLET  
TNNNNHHQPAAWARRASAGPSASPVPSPAPSSPRPAAALPASESTDPASGSSNKRKRDNKASTYGLNYSLLQP  
SGGRAAGGGRADGGGGVYSGTPWKRRNYNQGVVGLHEEISDFYEMYSPRPEEEKMRMEVVSRIESVIKELWPS  
ADVQIFGSFKTGLYLPTSDIDLVVFGKVENLPLWTLLEALRKHKVADEDSVKVLDKATVPIIKLTDSFTEVKV  
NISFNVQNGVRAADLIKDFTKKYVPLPYLVVLKQFLLQRDLENEVFTGGIGSYSLFLMAVSFLQLHPREDACI  
PNTNYGVLLIEFFELYGRHFNYLKTGIRIKDGGSYVAKDEVQKNMLDGYRPSMLYIEDPLQPGNDVGRSSYGA  
MQVKQAFDYAYVVLHAVSPIAKYYPNNETESILGRIIRVTDEVATYRDWISKQWGLQNRPEPSCNGNGVTLI  
VDTQQLDKCNLSEEKEALGKCRSNASEPLSKHSSNSSSGPVSSSSATQSSSSDVS DATPCKTPKQLLCP  
PTVTRVGSQDVSLEVSQAVGKMSTQTTNTPNANKSQHGSARLFRSSSKGFQGTQTSHGALMTSKQHOGKS  
NTQYYHGKRRRHRDAPLSELCR\*

>rs50051979\_ENSMUSP00000112608\_c.876:G>A\_p.D293N

ENSMUST00000118952.8|Tent4b-202|ENSMUSG00000036779|+|chr8:g.88974182:G>A  
MQIWETTQGLRNLYFNHCHSSGASSASGGSGSGPGSPGGTAPAPAGMFRSGERPLGGLAVPAEQRDFLPLET  
TNNNNHHQPAAWARRASAGPSASPVPSPAPSSPRPAAALPASESTDPASGSSNKRKRDNKASTYGLNYSLLQP  
SGGRAAGGGRADGGGGVYSGTPWKRRNYNQGVVGLHEEISDFYEMYSPRPEEEKMRMEVVSRIESVIKELWPS  
ADVQIFGSFKTGLYLPTSDIDLVVFGKVENLPLWTLLEALRKHKVADEDSVKVLDKATVPIIKLTDSFTEVKV  
NISFNVQNGVRAADLIKDFTKKYVPLPYLVVLKQFLLQRDLENEVFTGGIGSYSLFLMAVSFLQLHPREDACI  
PNTNYGVLLIEFFELYGRHFNYLKTGIRIKDGGSYVAKDEVQKNMLDGYRPSMLYIEDPLQPGNDVGRSSYGA  
MQVKQAFDYAYVVLHAVSPIAKYYPNNETESILGRIIRVTDEVATYRDWISKQWGLQNRPEPSCNGNGVTLI  
VDTQQLDKCNLSEEKEALGKCRSNASEPLSKHSSNSSSGPVSSSSATQSSSSDVS DATPCKTPKQLLCP  
PTVTRVGSQDVSLEVSQAVGKMSTQTTNTPNANKSQHGSARLFRSSSKGFQGTQTSHGALMTSKQHOGKS  
NTQYYHGKRRRHRDAPLSELCR\*

>rs50051979\_ENSMUSP00000067971\_c.876:G>A\_p.D293N

ENSMUST00000066748.10|Tent4b-201|ENSMUSG00000036779|+|chr8:g.88974182:G>A  
MQIWETTQGLRNLYFNHCHSSGASSASGGSGSGPGSPGGTAPAPAGMFRSGERPLGGLAVPAEQRDFLPLET  
TNNNNHHQPAAWARRASAGPSASPVPSPAPSSPRPAAALPASESTDPASGSSNKRKRDNKASTYGLNYSLLQP  
SGGRAAGGGRADGGGGVYSGTPWKRRNYNQGVVGLHEEISDFYEMYSPRPEEEKMRMEVVSRIESVIKELWPS  
ADVQIFGSFKTGLYLPTSDIDLVVFGKVENLPLWTLLEALRKHKVADEDSVKVLDKATVPIIKLTDSFTEVKV  
NISFNVQNGVRAADLIKDFTKLHPREDACIPNTNYGVLLIEFFELYGRHFNYLKTGIRIKDGGSYVAKDEVQK  
NMLDGYRPSMLYIEDPLQPGNDVGRSSYGAMQVKQAFDYAYVVLHAVSPIAKYYPNNETESILGRIIRVTDE  
VATYRDWISKQWGLQNRPEPSCNGNGVTLIVDTQQLDKCNLSEEKEALGKCRSNASEPLSKHSSNSSSGPV  
SSSSATQSSSSDVS DATPCKTPKQLLCPPTVTRVGSQDVSLEVSQAVGKMSTQTTNTPNANKSQHGSAR  
LFRSSSKGFQGTQTSHGALMTSKQHOGKSNTQYYHGKRRRHRDAPLSELCR\*

>rs49186190\_ENSMUSP00000112766\_c.1335:G>A\_p.D446N

ENSMUST00000119033.8|Tent4b-203|ENSMUSG00000036779|+|chr8:g.88978636:G>A  
MQIWETTQGLRNLYFNHCHSSGASSASGGSGSGPGSPGGTAPAPAGMFRSGERPLGGLAVPAEQRDFLPLET  
TNNNNHHQPAAWARRASAGPSASPVPSPAPSSPRPAAALPASESTDPASGSSNKRKRDNKASTYGLNYSLLQP  
SGGRAAGGGRADGGGGVYSGTPWKRRNYNQGVVGLHEEISDFYEMYSPRPEEEKMRMEVVSRIESVIKELWPS  
ADVQIFGSFKTGLYLPTSDIDLVVFGKVENLPLWTLLEALRKHKVADEDSVKVLDKATVPIIKLTDSFTEVKV  
DISFNVQNGVRAADLIKDFTKKYVPLPYLVVLKQFLLQRDLENEVFTGGIGSYSLFLMAVSFLQLHPREDACI  
PNTNYGVLLIEFFELYGRHFNYLKTGIRIKDGGSYVAKDEVQKNMLDGYRPSMLYIEDPLQPGNDVGRSSYGA  
MQVKQAFNYAYVVLHAVSPIAKYYPNNETESILGRIIRVTDEVATYRDWISKQWGLQNRPEPSCNGNGVTLI  
VDTQQLDKCNLSEEKEALGKCRSNASEPLSKHSSNSSSGPVSSSSATQSSSSDVS DATPCKTPKQLLCP  
PTVTRVGSQDVSLEVSQAVGKMSTQTTNTPNANKSQHGSARLFRSSSKGFQGTQTSHGALMTSKQHOGKS  
NTQYYHGKRRRHRDAPLSELCR\*

>rs49186190\_ENSMUSP00000112608\_c.1335:G>A\_p.D446N

ENSMUST00000118952.8|Tent4b-202|ENSMUSG00000036779|+|chr8:g.88978636:G>A  
MQIWETTQGLRNLYFNHCHSSGASSASGGSGSGPGSPGGTAPAPAGMFRSGERPLGGLAVPAEQRDFLPLET  
TNNNNHHQPAAWARRASAGPSASPVPSPAPSSPRPAAALPASESTDPASGSSNKRKRDNKASTYGLNYSLLQP  
SGGRAAGGGRADGGGGVYSGTPWKRRNYNQGVVGLHEEISDFYEMYSPRPEEEKMRMEVVSRIESVIKELWPS  
ADVQIFGSFKTGLYLPTSDIDLVVFGKVENLPLWTLLEALRKHKVADEDSVKVLDKATVPIIKLTDSFTEVKV  
DISFNVQNGVRAADLIKDFTKKYVPLPYLVVLKQFLLQRDLENEVFTGGIGSYSLFLMAVSFLQLHPREDACI  
PNTNYGVLLIEFFELYGRHFNYLKTGIRIKDGGSYVAKDEVQKNMLDGYRPSMLYIEDPLQPGNDVGRSSYGA  
MQVKQAFNYAYVVLHAVSPIAKYYPNNETESILGRIIRVTDEVATYRDWISKQWGLQNRPEPSCNGNGVTLI  
VDTQQLDKCNLSEEKEALGKCRSNASEPLSKHSSNSSSGPVSSSSATQSSSSDVS DATPCKTPKQLLCP  
PTVTRVGSQDVSLEVSQAVGKMSTQTTNTPNANKSQHGSARLFRSSSKGFQGTQTSHGALMTSKQHOGKS  
NTQYYHGKRRRHRDAPLSELCR\*

>rs49186190\_ENSMUSP00000120503\_c.36:G>A\_p.D13N  
ENSMUST00000154115.2|Tent4b-205|ENSMUSG00000036779|+|chr8:g.88978636:G>A  
SSYGAMQVQKQAFNYAYVVLSHAVSPIAKYYPNNETESILGRIIRVTDEVATYRDWISKQWGLQNRPEPSCNGP  
VSSSSATQSSSSDVS DATPCKTPKQLLCRPPTVTRVGSQDVSLEVSQAVGKMOSTQTNTNPNANKSQHGSA  
RLFRSSSKGFQGT AQTSHGALMTSKQHOGKSNTQYYHGKRRRHRKRDAPLSELCR\*  
>rs49186190\_ENSMUSP00000067971\_c.1206:G>A\_p.D403N  
ENSMUST00000066748.10|Tent4b-201|ENSMUSG00000036779|+|chr8:g.88978636:G>A  
MQIWETTQGLRNLYFNHCHSSGASSASGSGSGPGSPGGTAPAPAGMFRSGERPLGGLAVPAEQRDFLPLET  
TNNNNHHQPAAWARRASAGPSASPVPSAPSSPRPAAALPASESTDPASGSSNKRRKRDNKASTYGLNYSLLQP  
SGGRAAGGGRADGGGGVYSGTPWKRRNYNQGVVGLHEEISDFYEYMSRPEEEKMRMEVVSRIESVIKELWPS  
ADVQIFGSKTGLYLPTSDIDL VVFGKVENLPLWTLLEALRKHKVADEDSVKVLDKATVPIIKLTD SFTEVKV  
DISFNVQNGVRAADLIKDFTKLHPREDACIPNTNYGVLLIEFFELYGRHFNYLKTGIRIKDGGSYVAKDEVQK  
NMLDGYRPSMLYIEDPLQPGNDVGRSSYGAMQVQKQAFNYAYVVLSHAVSPIAKYYPNNETESILGRIIRVTDE  
VATYRDWISKQWGLQNRPEPSCNGVTLIVDTQQLDKCINNLSSEEKEALGKCRSNASEPLSKHSSNSSSGPV  
SSSSATQSSSSDVS DATPCKTPKQLLCRPPTVTRVGSQDVSLEVSQAVGKMOSTQTNTNPNANKSQHGSA  
LFRSSSKGFQGT AQTSHGALMTSKQHOGKSNTQYYHGKRRRHRKRDAPLSELCR\*  
>ENSMUSP00000112766\_c.1415:AG>TA\_p.L472F ENSMUST00000119033.8|Tent4b-  
203|ENSMUSG00000036779|+|chr8:g.88978816:AG>TA  
MQIWETTQGLRNLYFNHCHSSGASSASGSGSGPGSPGGTAPAPAGMFRSGERPLGGLAVPAEQRDFLPLET  
TNNNNHHQPAAWARRASAGPSASPVPSAPSSPRPAAALPASESTDPASGSSNKRRKRDNKASTYGLNYSLLQP  
SGGRAAGGGRADGGGGVYSGTPWKRRNYNQGVVGLHEEISDFYEYMSRPEEEKMRMEVVSRIESVIKELWPS  
ADVQIFGSKTGLYLPTSDIDL VVFGKVENLPLWTLLEALRKHKVADEDSVKVLDKATVPIIKLTD SFTEVKV  
DISFNVQNGVRAADLIKDFTKKYPVLPYLVLVLKQFLLQRD LNEVFTGGIGSYSLFLMAVSFLQLHPREDACI  
PNTNYGVLLIEFFELYGRHFNYLKTGIRIKDGGSYVAKDEVQKNMLDGYRPSMLYIEDPLQPGNDVGRSSYGA  
MQVKQAFDYAYVVLSHAVSPIAKYYPNNETESIFR\*NN\*SDG\*SCHV\*RLDIKTVGLAE\*ARAIMQRKWCYLD  
SRYS AVR\*V\*\*\*SV\*RKGS PWKM\*K\*RLGTS\*\*TLFKL FIRSSVLL LCHAVQL\*\*RRF\*CNAMQNPQTAALPS  
THCHPGRLTGCLLGGLSGSWENAEHSNH\*HTQORQQITAWISKALPFFQORLPRYSSNQPWGLDDKQTASRQI  
QYSVLPWQKEETQEGRAPLRAL\*I  
>ENSMUSP00000112608\_c.1415:AG>TA\_p.L472F ENSMUST00000118952.8|Tent4b-  
202|ENSMUSG00000036779|+|chr8:g.88978816:AG>TA  
MQIWETTQGLRNLYFNHCHSSGASSASGSGSGPGSPGGTAPAPAGMFRSGERPLGGLAVPAEQRDFLPLET  
TNNNNHHQPAAWARRASAGPSASPVPSAPSSPRPAAALPASESTDPASGSSNKRRKRDNKASTYGLNYSLLQP  
SGGRAAGGGRADGGGGVYSGTPWKRRNYNQGVVGLHEEISDFYEYMSRPEEEKMRMEVVSRIESVIKELWPS  
ADVQIFGSKTGLYLPTSDIDL VVFGKVENLPLWTLLEALRKHKVADEDSVKVLDKATVPIIKLTD SFTEVKV  
DISFNVQNGVRAADLIKDFTKKYPVLPYLVLVLKQFLLQRD LNEVFTGGIGSYSLFLMAVSFLQLHPREDACI  
PNTNYGVLLIEFFELYGRHFNYLKTGIRIKDGGSYVAKDEVQKNMLDGYRPSMLYIEDPLQPGNDVGRSSYGA  
MQVKQAFDYAYVVLSHAVSPIAKYYPNNETESIFR\*NN\*SDG\*SCHV\*RLDIKTVGLAE\*ARAIMQRKWCYLD  
SRYS AVR\*V\*\*\*SV\*RKGS PWKM\*K\*RLGTS\*\*TLFKL FIRSSVLL LCHAVQL\*\*RRF\*CNAMQNPQTAALPS  
THCHPGRLTGCLLGGLSGSWENAEHSNH\*HTQORQQITAWISKALPFFQORLPRYSSNQPWGLDDKQTASRQI  
QYSVLPWQKEETQEGRAPLRAL\*I  
>ENSMUSP00000120503\_c.116:AG>TA\_p.L39F ENSMUST00000154115.2|Tent4b-  
205|ENSMUSG00000036779|+|chr8:g.88978816:AG>TA  
SSYGAMQVQKQAFDYAYVVLSHAVSPIAKYYPNNETESIFR\*NN\*SDG\*SCHV\*RLDIKTVGLAE\*ARAIMQRS  
SVLLLCHAVQL\*\*RRF\*CNAMQNPQTAALPSTHCHPGRLTGCLLGGLSGSWENAEHSNH\*HTQORQQITAWIS  
KALPFFQORLPRYSSNQPWGLDDKQTASRQIQYSVLPWQKEETQEGRAPLRAL\*I  
>ENSMUSP00000067971\_c.1286:AG>TA\_p.L429F ENSMUST00000066748.10|Tent4b-  
201|ENSMUSG00000036779|+|chr8:g.88978816:AG>TA  
MQIWETTQGLRNLYFNHCHSSGASSASGSGSGPGSPGGTAPAPAGMFRSGERPLGGLAVPAEQRDFLPLET  
TNNNNHHQPAAWARRASAGPSASPVPSAPSSPRPAAALPASESTDPASGSSNKRRKRDNKASTYGLNYSLLQP  
SGGRAAGGGRADGGGGVYSGTPWKRRNYNQGVVGLHEEISDFYEYMSRPEEEKMRMEVVSRIESVIKELWPS  
ADVQIFGSKTGLYLPTSDIDL VVFGKVENLPLWTLLEALRKHKVADEDSVKVLDKATVPIIKLTD SFTEVKV  
DISFNVQNGVRAADLIKDFTKLHPREDACIPNTNYGVLLIEFFELYGRHFNYLKTGIRIKDGGSYVAKDEVQK  
NMLDGYRPSMLYIEDPLQPGNDVGRSSYGAMQVQKQAFDYAYVVLSHAVSPIAKYYPNNETESIFR\*NN\*SDG\*  
SCHV\*RLDIKTVGLAE\*ARAIMQRKWCYLD\*SRYS AVR\*V\*\*\*SV\*RKGS PWKM\*K\*RLGTS\*\*TLFKL FIRSS  
VLLLCHAVQL\*\*RRF\*CNAMQNPQTAALPSTHCHPGRLTGCLLGGLSGSWENAEHSNH\*HTQORQQITAWISK  
ALPFFQORLPRYSSNQPWGLDDKQTASRQIQYSVLPWQKEETQEGRAPLRAL\*I  
>rs47266984\_ENSMUSP00000112766\_c.1806:G>A\_p.V603I  
ENSMUST00000119033.8|Tent4b-203|ENSMUSG00000036779|+|chr8:g.88981842:G>A

MQIWETTQGLRNLYFNHCHSSGASSASGGSGSGPGSPGGTAPAPAGMFRSGERPLGGLAVPAEQRDFLPLET  
 TNNNNHHQPAAWARRASAGPSASPVPSPAPSSPRPAAALPASESTDPASGSSNKRKRDNKASTYGLNYSLLQP  
 SGGRAAGGGRADGGGGVYSGTPWKRRNYNQGVVGLHEEISDFYEYMSRPEEEKMRMEVVSRIESVIKELWPS  
 ADVQIFGSFKTGLYLPTSDIDLVVFGKWENLPLWTLLEALRKHKVADEDSVKVLDKATVPIIKLTDSTFEVKV  
 DISFNVQNGVRAADLIKDFTKKYVPLPYLVVLVKQFLLQRDLNEVFTGGIGSYSLFLMAVSFLQLHPREDACI  
 PNTNYGVLLIEFFELYGRHFNYLKTGIRIKDGGSYVAKDEVQKNMLDGYRPSMLYIEDPLQPGNDVGRSSYGA  
 MQVKQAFDYAYVVLHAVSPIAKYYPNNETESILGRIIRVTDEVATYRDWISKQWGLQNRPEPSCNGNGVTLI  
 VDTQQLDKCNLSEEKEALGKCRSNASEPLSKHSSNSSSGPVSSSSATQSSSSDVSDATPCKTPKQLLCP  
 PTVTRVGSQDVSLEVSQAIGKMOSTQTTNTPNANKSQHGSARLFRSSSKGFQGTQTSHGALMTSKQHOGKS  
 NTQYYHGKRRRHRDAPLSELCR\*  
 >rs47266984\_ENSMUSP00000112608\_c.1806:G>A\_p.V603I  
 ENSMUST00000118952.8|Tent4b-202|ENSMUSG00000036779|+|chr8:g.88981842:G>A  
 MQIWETTQGLRNLYFNHCHSSGASSASGGSGSGPGSPGGTAPAPAGMFRSGERPLGGLAVPAEQRDFLPLET  
 TNNNNHHQPAAWARRASAGPSASPVPSPAPSSPRPAAALPASESTDPASGSSNKRKRDNKASTYGLNYSLLQP  
 SGGRAAGGGRADGGGGVYSGTPWKRRNYNQGVVGLHEEISDFYEYMSRPEEEKMRMEVVSRIESVIKELWPS  
 ADVQIFGSFKTGLYLPTSDIDLVVFGKWENLPLWTLLEALRKHKVADEDSVKVLDKATVPIIKLTDSTFEVKV  
 DISFNVQNGVRAADLIKDFTKKYVPLPYLVVLVKQFLLQRDLNEVFTGGIGSYSLFLMAVSFLQLHPREDACI  
 PNTNYGVLLIEFFELYGRHFNYLKTGIRIKDGGSYVAKDEVQKNMLDGYRPSMLYIEDPLQPGNDVGRSSYGA  
 MQVKQAFDYAYVVLHAVSPIAKYYPNNETESILGRIIRVTDEVATYRDWISKQWGLQNRPEPSCNGNGVTLI  
 VDTQQLDKCNLSEEKEALGKCRSNASEPLSKHSSNSSSGPVSSSSATQSSSSDVSDATPCKTPKQLLCP  
 PTVTRVGSQDVSLEVSQAIGKMOSTQTTNTPNANKSQHGSARLFRSSSKGFQGTQTSHGALMTSKQHOGKS  
 NTQYYHGKRRRHRDAPLSELCR\*  
 >rs47266984\_ENSMUSP00000120503\_c.366:G>A\_p.V123I  
 ENSMUST00000154115.2|Tent4b-205|ENSMUSG00000036779|+|chr8:g.88981842:G>A  
 SSYGAMQVKQAFDYAYVVLHAVSPIAKYYPNNETESILGRIIRVTDEVATYRDWISKQWGLQNRPEPSCNGP  
 VSSSSATQSSSSDVSDATPCKTPKQLLCPPTVTRVGSQDVSLEVSQAIGKMOSTQTTNTPNANKSQHGSAR  
 LFRSSSKGFQGTQTSHGALMTSKQHOGKSNTQYYHGKRRRHRDAPLSELCR\*  
 >rs47266984\_ENSMUSP00000067971\_c.1677:G>A\_p.V560I  
 ENSMUST00000066748.10|Tent4b-201|ENSMUSG00000036779|+|chr8:g.88981842:G>A  
 MQIWETTQGLRNLYFNHCHSSGASSASGGSGSGPGSPGGTAPAPAGMFRSGERPLGGLAVPAEQRDFLPLET  
 TNNNNHHQPAAWARRASAGPSASPVPSPAPSSPRPAAALPASESTDPASGSSNKRKRDNKASTYGLNYSLLQP  
 SGGRAAGGGRADGGGGVYSGTPWKRRNYNQGVVGLHEEISDFYEYMSRPEEEKMRMEVVSRIESVIKELWPS  
 ADVQIFGSFKTGLYLPTSDIDLVVFGKWENLPLWTLLEALRKHKVADEDSVKVLDKATVPIIKLTDSTFEVKV  
 DISFNVQNGVRAADLIKDFTKLHPREDACIPNTNYGVLLIEFFELYGRHFNYLKTGIRIKDGGSYVAKDEVQK  
 NMLDGYRPSMLYIEDPLQPGNDVGRSSYGAMQVKQAFDYAYVVLHAVSPIAKYYPNNETESILGRIIRVTDE  
 VATYRDWISKQWGLQNRPEPSCNGNGVTLIVDTQQLDKCNLSEEKEALGKCRSNASEPLSKHSSNSSSGPV  
 SSSSATQSSSDVSDATPCKTPKQLLCPPTVTRVGSQDVSLEVSQAIGKMOSTQTTNTPNANKSQHGSAR  
 LFRSSSKGFQGTQTSHGALMTSKQHOGKSNTQYYHGKRRRHRDAPLSELCR\*  
 >rs52496465\_ENSMUSP00000112766\_c.1989:G>A\_p.G664S  
 ENSMUST00000119033.8|Tent4b-203|ENSMUSG00000036779|+|chr8:g.88983850:G>A  
 MQIWETTQGLRNLYFNHCHSSGASSASGGSGSGPGSPGGTAPAPAGMFRSGERPLGGLAVPAEQRDFLPLET  
 TNNNNHHQPAAWARRASAGPSASPVPSPAPSSPRPAAALPASESTDPASGSSNKRKRDNKASTYGLNYSLLQP  
 SGGRAAGGGRADGGGGVYSGTPWKRRNYNQGVVGLHEEISDFYEYMSRPEEEKMRMEVVSRIESVIKELWPS  
 ADVQIFGSFKTGLYLPTSDIDLVVFGKWENLPLWTLLEALRKHKVADEDSVKVLDKATVPIIKLTDSTFEVKV  
 DISFNVQNGVRAADLIKDFTKKYVPLPYLVVLVKQFLLQRDLNEVFTGGIGSYSLFLMAVSFLQLHPREDACI  
 PNTNYGVLLIEFFELYGRHFNYLKTGIRIKDGGSYVAKDEVQKNMLDGYRPSMLYIEDPLQPGNDVGRSSYGA  
 MQVKQAFDYAYVVLHAVSPIAKYYPNNETESILGRIIRVTDEVATYRDWISKQWGLQNRPEPSCNGNGVTLI  
 VDTQQLDKCNLSEEKEALGKCRSNASEPLSKHSSNSSSGPVSSSSATQSSSDVSDATPCKTPKQLLCP  
 PTVTRVGSQDVSLEVSQAVGKMOSTQTTNTPNANKSQHGSARLFRSSSKGFQGTQTSHGALMTSKQHOGKS  
 NTQYYHSHKRRRHRDAPLSELCR\*  
 >rs52496465\_ENSMUSP00000112608\_c.1989:G>A\_p.G664S  
 ENSMUST00000118952.8|Tent4b-202|ENSMUSG00000036779|+|chr8:g.88983850:G>A  
 MQIWETTQGLRNLYFNHCHSSGASSASGGSGSGPGSPGGTAPAPAGMFRSGERPLGGLAVPAEQRDFLPLET  
 TNNNNHHQPAAWARRASAGPSASPVPSPAPSSPRPAAALPASESTDPASGSSNKRKRDNKASTYGLNYSLLQP  
 SGGRAAGGGRADGGGGVYSGTPWKRRNYNQGVVGLHEEISDFYEYMSRPEEEKMRMEVVSRIESVIKELWPS  
 ADVQIFGSFKTGLYLPTSDIDLVVFGKWENLPLWTLLEALRKHKVADEDSVKVLDKATVPIIKLTDSTFEVKV  
 DISFNVQNGVRAADLIKDFTKKYVPLPYLVVLVKQFLLQRDLNEVFTGGIGSYSLFLMAVSFLQLHPREDACI  
 PNTNYGVLLIEFFELYGRHFNYLKTGIRIKDGGSYVAKDEVQKNMLDGYRPSMLYIEDPLQPGNDVGRSSYGA

MQVQKQAFDYAYVVLSSHAVSPIAKYYPNNETESILGRIIRVTDEVATYRDWISKQWGLQNRPEPSCNGNGVTLI  
VDTQQLDKCNNNLSEEKEALGKCRSNASEPLSKHSSNSSSGPVSSSSATQSSSSDVS DATPCKT PKQLL CRP  
PTVTRVGSQDVSLEVSQAVGKMQSTQTTNTPNANKSQHGSARLFRSSSKGFQGT AQTS HGALMTSKQHOGKS  
NTQYYHSKRRHRKRDAPLSELCR\*

>rs52496465\_ENSMUSP00000120503\_c.549:G>A\_p.G184S  
ENSMUST00000154115.2|Tent4b-205|ENSMUSG00000036779|+|chr8:g.88983850:G>A  
SSYGAMQVQKQAFDYAYVVLSSHAVSPIAKYYPNNETESILGRIIRVTDEVATYRDWISKQWGLQNRPEPSCNGP  
VSSSSATQSSSSDVS DATPCKT PKQLL CRPPTVTRVGSQDVSLEVSQAVGKMQSTQTTNTPNANKSQHGSAR  
LFRSSSKGFQGT AQTS HGALMTSKQHOGKSNTQYYHSKRRHRKRDAPLSELCR\*

>rs52496465\_ENSMUSP00000067971\_c.1860:G>A\_p.G621S  
ENSMUST00000066748.10|Tent4b-201|ENSMUSG00000036779|+|chr8:g.88983850:G>A  
MQIWETTQGLRNLYFNHCHSSGASSASGGSGSGPGSGGTAPAPAGMFRSGERPLGGLAVPAEQRDFLPLET  
TNNNNHHQPAAWARRASAGPSASVPSPAPSSPRPAAALPASESTDPASGSSNKRKRDNKASTYGLNYSLLOP  
SGGRAAGGGRADGGGGVSGT PWKRRNYNQGVVGLHEEISDFYEMSPRPEEEKMRMEVVSRIESVIKELWPS  
ADVQIFGSFKTGLYLPTSDIDL VVFGK WENLPLWTLLEALRKHKVADEDSVKVLDKATVPIIKLTD SFTEVKV  
DISFNVQNGVRAADLIKDFTKLHPREDACIPNTNYGVLLIEFFELYGRHFNYLKTGIRIKDGGSYVAKDEVQK  
NMLDGYRPSMLYIEDPLQPGNDVGRSSYGAMQVQKQAFDYAYVVLSSHAVSPIAKYYPNNETESILGRIIRVTDE  
VATYRDWISKQWGLQNRPEPSCNGNGVTLI VDTQQLDKCNNNLSEEKEALGKCRSNASEPLSKHSSNSSSGPV  
SSSSATQSSSSDVS DATPCKT PKQLL CRPPTVTRVGSQDVSLEVSQAVGKMQSTQTTNTPNANKSQHGSAR  
LFRSSSKGFQGT AQTS HGALMTSKQHOGKSNTQYYHSKRRHRKRDAPLSELCR\*

>rs33615446\_ENSMUSP00000130594\_c.46:C>T\_p.P16L  
ENSMUST00000169037.9|Adcy7-203|ENSMUSG00000031659|+|chr8:g.89033274:C>T  
MPAKGRYFLNEGDEGLDQAALYKYRLTSLHGPLLLLLLLLLVAAATCIALISIAF SHEDLRRHQVVLGTAFLML  
TLFVALYVLVYVECLVQRWLRALALLTWACLMVLGSLVMWDSLENEAHAWEQVPFFLFVVFVYVYALLPLSRRA  
AIVAGVTSTVSHLLVFGAVTRAFQTSMSSTQLGLQLLANAVILLGGNFTGAFHKKQLQDASRDLFIYTVKCIQ  
IRKLRVEKRRQENLLLLSVLPAHISMGMKLAIIERLKEGGDRHYMPDNNFHSLYVKKRHNQVNSILYADIVGFTR  
LASDCSPKELVVVLNELFGKFDQIAKANECMRKIKILGDCYCVSGLPVSLPTHARNVCVMGLDICEAIKQVRE  
ATGVDISMRVGIHSGNVLCGVI GLRKWQYDVWSDVSLANRMEAGVPGRVHITEATLNHLDKAYEVEDGHGE  
QRDPYLKEMNIRTYLVIDPRSQQPPPPSHHLSKPKGDATLKMRA SVRVTRYLESWGAARPF AHLNHRESVSSS  
ETPISNGRRQKAIPLRRHRAPDRSASPGRLEDDCDEMLSAIEGLSSTRPCCSKSDDFHTFGPIFLEKGFER  
EYRLVPIPRARYDFACASLVFVCILLVHLLVMPMATLGVSFGLVACLGLVLSFCFATEFSRCFPSRSTLQA  
ISESVETQPLVRLVLVVLTVGSLLTVAIINMPLTLNPGPEQPGDNKTSPLAAQNRVGT PCELLPYTTCSCILG  
FIACSVFLRMSLELKAMLLTVALVAYLLL FNLSPCWHVSGNSTETNGTQRTRLLLSDAQSMPSHTLAPGARET  
APSPSYLERDLKIMVNFYLLIFYATLILLSRQIDYYCRLDCLWKKKFKKEHEEFETMENVNRLLENVLP AHV  
AAHFIDGKAAEDWYHQSYDCVCMFASVPDFKVIFYTECDVNKEGLECLRLNEIIADFD ELLLPKPFSGVEKI  
KTIGSTYMAAAGLSAPSGHENQDLERKHHVIGVLVEFSMALMSKLDGINRHSFN SFRLRVGINHGVPV IAGVIG  
ARKPQYDIWGN TVNVASRMESTGELGKIQVTEETCTILQGLGYSC ECRGLINVKGKGELRTYFVCTDTAKFQG  
LGLN\*

>rs33615446\_ENSMUSP00000132528\_c.46:C>T\_p.P16L  
ENSMUST00000171456.9|Adcy7-204|ENSMUSG00000031659|+|chr8:g.89033274:C>T  
MPAKGRYFLNEGDEGLDQAALYKYRLTSLHGPLLLLLLLLLVAAATCIALISIAF SHEDLRRHQVVLGTAFLML  
TLFVALYVLVYVECLVQRWLRALALLTWACLMVLGSLVMWDSLENEAHAWEQVPFFLFVVFVYVYALLPLSRRA  
AIVAGVTSTVSHLLVFGAVTRAFQTSMSSTQLGLQLLANAVILLGGNFTGAFHKKQLQDASRDLFIYTVKCIQ  
IRKLRVEKRRQENLLLLSVLPAHISMGMKLAIIERLKEGGDRHYMPDNNFHSLYVKKRHNQVNSILYADIVGFTR  
LASDCSPKELVVVLNELFGKFDQIAKANECMRKIKILGDCYCVSGLPVSLPTHARNVCVMGLDICEAIKQVRE  
ATGVDISMRVGIHSGNVLCGVI GLRKWQYDVWSDVSLANRMEAGVPGRVHITEATLNHLDKAYEVEDGHGE  
QRDPYLKEMNIRTYLVIDPRSQQPPPPSHHLSKPKGDATLKMRA SVRVTRYLESWGAARPF AHLNHRESVSSS  
ETPISNGRRQKAIPLRRHRAPDRSASPGRLEDDCDEMLSAIEGLSSTRPCCSKSDDFHTFGPIFLEKGFER  
EYRLVPIPRARYDFACASLVFVCILLVHLLVMPMATLGVSFGLVACLGLVLSFCFATEFSRCFPSRSTLQA  
ISESVETQPLVRLVLVVLTVGSLLTVAIINMPLTLNPGPEQPGDNKTSPLAAQNRVGT PCELLPYTTCSCILG  
FIACSVFLRMSLELKAMLLTVALVAYLLL FNLSPCWHVSGNSTETNGTQRTRLLLSDAQSMPSHTLAPGARET  
APSPSYLERDLKIMVNFYLLIFYATLILLSRQIDYYCRLDCLWKKKFKKEHEEFETMENVNRLLENVLP AHV  
AAHFIDGKAAEDWYHQSYDCVCMFASVPDFKVIFYTECDVNKEGLECLRLNEIIADFD ELLLPKPFSGVEKI  
KTIGSTYMAAAGLSAPSGHENQDLERKHHVIGVLVEFSMALMSKLDGINRHSFN SFRLRVGINHGVPV IAGVIG  
ARKPQYDIWGN TVNVASRMESTGELGKIQVTEETCTILQGLGYSC ECRGLINVKGKGELRTYFVCTDTAKFQG  
LGLN\*

>rs33615446\_ENSMUSP00000096122\_c.46:C>T\_p.P16L  
ENSMUST00000098521.4|Adcy7-201|ENSMUSG00000031659|+|chr8:g.89033274:C>T



MPAKGRYFLNEGDEGLDQAALYEKYRLTSLHGPLLLLLLLLLVAAATCIALISIAFSHEDLRRHQVVLGTAFLML  
TLFVALYVLVVVECLVQRWLRALALLTWACLMVLSVLMWDSLENEAHAWEQVPPFFLVVVFVYALLPLSRRA  
AIVAGVSTVSHLLVFGAVTRAFQTSMSSTQLGLQLLANAVILLGNGFTGAFHKKQLQDASRDLFIYTVKCIQ  
IRKLRVEKRRQENLLLSVLPAAHISMGMKLAIIERLKEGGDRHYMPDNNFHSLYVKKRQNVSIYADIVGFTR  
LASDCSPKELVVVLNELFGKFDQIAKANECMRIKILGDCYCVSGLPVSLPTHARNVCVMGLDICEAIKQVRE  
ATGVDISMRVGIHSGNVLCGVI GLRWQYDVWSDVSLANRMEAGVPGRVHITTEATLNHLDKAYEVEDGHGE  
QRDPYLKEMNIRTYLVIDPRSQQPPPPSHHLSKPKGDATLKMRAVSVTRYLESWGAARPPFAHLNHRESVSSS  
ETPISNGRRQKAIPLRRHRAPDRSASPCKGRLEDDCDEMLSAIEGLSSTRPCCSKSDDFHTFGPIFLEKGFER  
EYRLVPIPRARYDFACASLVFVCILLVHLLVMPRMATLGVSFGLVACLGLGLVLSFCFATEFSRCFSPRSTLQA  
ISESVETQPLVRLVVLTVGSLTVAIINMPLTLNPGPEQPGDNKTSPLAAQNRVGTPECELLPYTCSILG  
FIACSVFLRMSLELKAMLLTVALVAYLLLNLSPCWHVSGNSTETNGTQRTRLLLSDAQSMPSHTLAPGARET  
APSPSYLERDLKIMVNFYLIIFYATLILLSRQIDYYCRDLCLWKKKFKKEHEEFETMENVNRLLENVLPAAHV  
AAHFIGDKAAEDWYHQSYDCVCMFASVPDFKVFYTECDVNKEGLECLRLLEI IADDFELLLKPKFSGVEKI  
KTIGSTYMAAAGLSAPSGHENQDLERKXVHI GVLVEFSMALMSKLDGINRHSFNSFRLRVGINHGPVIAVIG  
ARKPQYDIWGNVTNVASRMESTGELGKIQVTEETCTILQGLGYSCECRGLINVKKGELRITYFVCTDTAKFQG  
LGLN\*

>rs33615446\_ENSMUSP00000129252\_c.46:C>T\_p.P16L

ENSMUST00000168545.8|Adcy7-202|ENSMUSG00000031659|+|chr8:g.89033274:C>T  
MPAKGRYFLNEGDEGLDQAALYEKYRLTSLHGPLLLLLLLLLVAAATCIALISIAFSHEDLRRHQVVLGTAFLML  
TLFVALYVLVVVECLVQRWLRALALLTWACLMVLSVLMWDSLENEAHAWEQVPPFFLVVVFVYALLPLSRRA  
AIVAGVSTVSHLLVFGAVTRAFQTSMSSTQLGLQLLANAVILLGNGFTGAFHKKQLQDASRDLFIYTVKCIQ  
IRKLRVEKRRQENLLLSVLPAAHISMGMKLAIIERLKEGGDRHYMPDNNFHSLYVKKRQNVSIYADIVGFTR  
LASDCSPKELVVVLNELFGKFDQIAKANECMRIKILGDCYCVSGLPVSLPTHARNVCVMGLDICEAIKQVRE  
ATGVDISMRVGIHSGNVLCGVI GLRWQYDVWSDVSLANRMEAGVPGRVHITTEATLNHLDKAYEVEDGHGE  
QRDPYLKEMNIRTYLVIDPRSQQPPPPSHHLSKPKGDATLKMRAVSVTRYLESWGAARPPFAHLNHRESVSSS  
ETPISNGRRQKAIPLRRHRAPDRSASPCKGRLEDDCDEMLSAIEGLSSTRPCCSKSDDFHTFGPIFLEKGFER  
EYRLVPIPRARYDFACASLVFVCILLVHLLVMPRMATLGVSFGLVACLGLGLVLSFCFATEFSRCFSPRSTLQA  
ISESVETQPLVRLVVLTVGSLTVAIINMPLTLNPGPEQPGDNKTSPLAAQNRVGTPECELLPYTCSILG  
FIACSVFLRMSLELKAMLLTVALVAYLLLNLSPCWHVSGNSTETNGTQRTRLLLSDAQSMPSHTLAPGARET  
APSPSYLERDLKIMVNFYLIIFYATLILLSRQIDYYCRDLCLWKKKFKKEHEEFETMENVNRLLENVLPAAHV  
AAHFIGDKAAEDWYHQSYDCVCMFASVPDFKVFYTECDVNKEGLECLRLLEI IADDFELLLKPKFSGVEKI  
KTIGSTYMAAAGLSAPSGHENQDLERKXVHI GVLVEFSMALMSKLDGINRHSFNSFRLRVGINHGPVIAVIG  
ARKPQYDIWGNVTNVASRMESTGELGKIQVTEETCTILQGLGYSCECRGLINVKKGELRITYFVCTDTAKFQG  
LGLN\*

>rs51766230\_ENSMUSP00000034085\_c.1525:G>T\_p.R509L

ENSMUST00000034085.8|Brd7-201|ENSMUSG00000031660|-|chr8:g.89060819:C>A  
MGKHKHKKHSDRHFYEEYVEKPLKLVLVKGGSEVTELTSGSSGHDSLFEEDRSDHDKHKDRKRKRKKEKQA  
PGEKGRKRRRVKEDKKRDRDRAENEVDRDLQCHVPIRLDLPPEKPLTSSLAKQEEVEQTPLQEALNQLMRQ  
LQRKDP SAFFSFPVTD FIA PGYSMI IKHPMDFSTMKEKIKNNDYQSIEELKDNFKLMCTNAMIYKPKETIYYK  
AAKLLHSGMKILSQERIQSLKQSIDFMSDLQKTRKQKERTDACQSGEDSGCQWREREDSGDAETQAFRSPAK  
DNKRKDKDVLLEDKWRSSNSEREHEQIERVVQESGGKLTRRLANSQCEFERRKPDGTTTTLGLLHPVDPVIVGEPG  
YCPVRLGMTTGRLOSGVNTLQGFKEDKRN RVTPVLYLNYGPYSSYAPHYDSTFANISKDSDLIYSTYGEDSD  
LPNNFSISEFLATCQDYPYVMADSLLDVLTGGHRSRLQDLDMSSPEDEGQTRALDTAKEAEITQIEPTGLE  
SSSQDRLTALQAVTTFGAPAEVFDSEEA EVFQRKLD ETT RLLRELQEAQNERLSTRPPNMI C LLG P SYREMY  
LAEQVTNNLKELTQQVTPGDVVS IHGVRKAMGISVPSPIVGN SFV DLTGECEEPKETSTAECGP DAS\*

>rs47501089\_ENSMUSP00000034085\_c.1444:C>T\_p.S482L

ENSMUST00000034085.8|Brd7-201|ENSMUSG00000031660|-|chr8:g.89063764:G>A  
MGKHKHKKHSDRHFYEEYVEKPLKLVLVKGGSEVTELTSGSSGHDSLFEEDRSDHDKHKDRKRKRKKEKQA  
PGEKGRKRRRVKEDKKRDRDRAENEVDRDLQCHVPIRLDLPPEKPLTSSLAKQEEVEQTPLQEALNQLMRQ  
LQRKDP SAFFSFPVTD FIA PGYSMI IKHPMDFSTMKEKIKNNDYQSIEELKDNFKLMCTNAMIYKPKETIYYK  
AAKLLHSGMKILSQERIQSLKQSIDFMSDLQKTRKQKERTDACQSGEDSGCQWREREDSGDAETQAFRSPAK  
DNKRKDKDVLLEDKWRSSNSEREHEQIERVVQESGGKLTRRLANSQCEFERRKPDGTTTTLGLLHPVDPVIVGEPG  
YCPVRLGMTTGRLOSGVNTLQGFKEDKRN RVTPVLYLNYGPYSSYAPHYDSTFANISKDSDLIYSTYGEDSD  
LPNNFSISEFLATCQDYPYVMADSLLDVLTGGHRSRLQDLDMSSPEDEGQTRALDTAKEAEITQIEPTGLE  
SSSQDRLTALQAVTTFGAPAEVFDSEEA EVFQRKLD ETT RLLRELQEAQNERLSTRPPNMI C LLG P SYREMY  
LAEQVTNNLKELTQQVTPGDVVS IHGVRKAMGISVPSPIVGN SFV DLTGECEEPKETSTAECGP DAS\*

>rs250965619\_ENSMUSP00000034085\_c.1219:A>G\_p.Y407C

ENSMUST00000034085.8|Brd7-201|ENSMUSG00000031660|-|chr8:g.89069474:T>C

MGKHKHKKHSDRHFYEEYVEKPLKLVKLVGGSEVTELTSTGSSGHDSLFFEDRSDDHDKHKDRKRKRKRKGEKQA  
 PGEEKGRKRRRVKEDDKKRRDRRAENEVDRDLQCHVPIRLDLPPEKPLTSSLAKQEEVEQTPLQEALNQLMRQ  
 LQRKDPSAFFSFPVTDFAIAPGYSMI IKHPMDFSTMKEKIKNNDYQSI EELKDNFKLMCTNAMI YNKPETIYYK  
 AAKLLHSGMKILSQRISLQSLKQSIDFMSDLQKTRKQKERTDACQSGEDSGCWQREREDSGDAETQAFRSPAK  
 DNKRKDKDVLLEDKWRSSNSEREHEQIERVVQESGGKLTTRRLANSQCEFEERRKPDGTTTTLGLLHPVDP IVGEPG  
 YCPVRLGMTTGRQLQSGVNTLQGFKEDKRN RVTPVLYLNYGPCSSYAPHYDSTFANISKDDSDLIYSTYGEDSD  
 LPNNFSISEFLATCQDYPYVMADSLLDVLTGGHRSRSLQDLDMSSPEDEGQTRALDTAKEAEITQIEPTGRLE  
 SSSQDRLTALQAVTTFGAPAEVFDSEEA EVFQKRLDETRLLRELQEAQNERLSTRPPPNMICLLGPSYREMY  
 LAEQVTNNLKELTQQVTPGDVVS IHGVRKAMGISVPSPIVGN SFVDLTGECEEPKETSTAECGP DAS\*  
 >rs48313211\_ENSMUSP00000034085\_c.700:A>T\_p.Q234L  
 ENSMUST00000034085.8|Brd7-201|ENSMUSG00000031660|-|chr8:g.89078429:T>A  
 MGKHKHKKHSDRHFYEEYVEKPLKLVKLVGGSEVTELTSTGSSGHDSLFFEDRSDDHDKHKDRKRKRKRKGEKQA  
 PGEEKGRKRRRVKEDDKKRRDRRAENEVDRDLQCHVPIRLDLPPEKPLTSSLAKQEEVEQTPLQEALNQLMRQ  
 LQRKDPSAFFSFPVTDFAIAPGYSMI IKHPMDFSTMKEKIKNNDYQSI EELKDNFKLMCTNAMI YNKPETIYYK  
 AAKLLHSGMKILSLERISLQSLKQSIDFMSDLQKTRKQKERTDACQSGEDSGCWQREREDSGDAETQAFRSPAK  
 DNKRKDKDVLLEDKWRSSNSEREHEQIERVVQESGGKLTTRRLANSQCEFEERRKPDGTTTTLGLLHPVDP IVGEPG  
 YCPVRLGMTTGRQLQSGVNTLQGFKEDKRN RVTPVLYLNYGPYSSYAPHYDSTFANISKDDSDLIYSTYGEDSD  
 LPNNFSISEFLATCQDYPYVMADSLLDVLTGGHRSRSLQDLDMSSPEDEGQTRALDTAKEAEITQIEPTGRLE  
 SSSQDRLTALQAVTTFGAPAEVFDSEEA EVFQKRLDETRLLRELQEAQNERLSTRPPPNMICLLGPSYREMY  
 LAEQVTNNLKELTQQVTPGDVVS IHGVRKAMGISVPSPIVGN SFVDLTGECEEPKETSTAECGP DAS\*  
 >rs263208908\_ENSMUSP00000034085\_c.408:C>T\_p.Q137\*  
 ENSMUST00000034085.8|Brd7-201|ENSMUSG00000031660|-|chr8:g.89084202:G>A  
 MGKHKHKKHSDRHFYEEYVEKPLKLVKLVGGSEVTELTSTGSSGHDSLFFEDRSDDHDKHKDRKRKRKRKGEKQA  
 PGEEKGRKRRRVKEDDKKRRDRRAENEVDRDLQCHVPIRLDLPPEKPLTSSLAKQEEVEQTPL\*EALNQLMRQ  
 LQRKDPSAFFSFPVTDFAIAPGYSMI IKHPMDFSTMKEKIKNNDYQSI EELKDNFKLMCTNAMI YNKPETIYYK  
 AAKLLHSGMKILSQRISLQSLKQSIDFMSDLQKTRKQKERTDACQSGEDSGCWQREREDSGDAETQAFRSPAK  
 DNKRKDKDVLLEDKWRSSNSEREHEQIERVVQESGGKLTTRRLANSQCEFEERRKPDGTTTTLGLLHPVDP IVGEPG  
 YCPVRLGMTTGRQLQSGVNTLQGFKEDKRN RVTPVLYLNYGPYSSYAPHYDSTFANISKDDSDLIYSTYGEDSD  
 LPNNFSISEFLATCQDYPYVMADSLLDVLTGGHRSRSLQDLDMSSPEDEGQTRALDTAKEAEITQIEPTGRLE  
 SSSQDRLTALQAVTTFGAPAEVFDSEEA EVFQKRLDETRLLRELQEAQNERLSTRPPPNMICLLGPSYREMY  
 LAEQVTNNLKELTQQVTPGDVVS IHGVRKAMGISVPSPIVGN SFVDLTGECEEPKETSTAECGP DAS\*  
 >rs49846526\_ENSMUSP00000034086\_c.220:C>T\_p.A74V  
 ENSMUST00000034086.13|Nkd1-201|ENSMUSG00000031661|+|chr8:g.89300854:C>T  
 MGKLSKPAAVCKRRESPEGDSFAVSAAWARKGIEEWIGRQRCPGSVSGPRQLRLAGTVGRGTRELVGDTSR  
 VLGEEDDDDFPLEVALPPEKIDSLGSGDEKRMERLSEPGQASKQLKFEELQCDVSVEDSRQEWTF TLYDFD  
 NNGKVTREDITSLLHTIYEVVDSVNHSP TSSKTLRVKLT VAPDGSQSKRSVLFNHTDLQTRPADTKPAEE  
 LRGEWKKQRAPLRFQGD SHLEQPCYHHCVDENIERNHYLDLAGIENYTSQFGPGSPSVAQKSELPPRISNP  
 TRSR SHEPEAAH I PHRRPQGVDPGSFHLLDTPFAKASELQQLRGTQDGSKH FVRSPKAQGNMGMHGARGA  
 RSKPPLVPTTHTVSPSAHLATSPALLPTLAPLGHKHKHHRAKESQASCRGLQGPLAAGGSTVMGREQVRELPA  
 VVVYESQAGQAVQRHEHHHHHHHHHHYHFFYQP\*  
 >rs45974600\_ENSMUSP00000113773\_c.1839:G>A\_p.G614R  
 ENSMUST00000118370.8|Nod2-203|ENSMUSG00000055994|+|chr8:g.89391600:G>A  
 MCSQEEFQAQRSQVALLISGSLEGFESILDWLLSWDVLRSREDEGLSLPGQPLSHSARRLLDTVWNKGVWGC  
 QKLEAVQEAQANSHTFELYGSWDTHSLHPTRDLQSHRPAIVRRLYNHVEAMLELAREGGFLSQYECIEIRLP  
 IFTSSQRARRLLDLA AVKANGLA A FLLQH VRELPA PLPLPYEAAECQKFI SKLR TMVLTQSRFLSTYDGENL  
 CLEDIY TENILELQTEVGTAGALQKSPA I LGLEDLFDTHGHLNRDADTILVVGEAGSGKSTLLQRLHLLWATG  
 RSFQEF LFI FPFSCRQLQCVAKPLSLR TLLFEHCCWPDVAQDDVVFQFLLDHPDRVLLTFDGLDEFKFRFTDRE  
 RHCSPI DPTSVQ TLLFNLLQGNLLKNACKVLT SRPDAVSALLRKFVRTELQLKGFSEEGIQLYLRKHHREPGV  
 ADRLIQ LIQATSALHGLCHLPVFSWVSRCHRELLLN RGFPTTSTDMYLLILQH FLLHASPPDSSPLGLGPG  
 LLQSRLSTLLHLGHLALRGLAMSCYVFS AQQLQAAQVDSDDI SLGFLVRAQSSVPGSKAPLEFLHITFCQFFA  
 AFYLAVSADTSVASLKH L FSCGR LGSLLRRLLPNLCIQGSRVKKGSEAALLQKAEPHNLQITAAFLAGLLSQ  
 QHRDLLAACQVSERVLLQRQARARSLAHS LREHFHSIPPAVGETKSMHAMPGF IWLIRSLYEMQEEQLAQE  
 AVRRLDIGHLKLTFCRVGPAECAALAFV LQH LQRPVALQLDYN SVGDVGVQEQLRPAAGVETALYLRDNNISDR  
 GARTLVECALRCEQLKALFNKLT DACACSMAKLLAHKQNF LSRVGN NHITAAQEA VTLAQGLKSN TSLKF  
 LGFWGNSVGDKGTQALAEVVADHQNLKWL SLVGN NIGSMGAEALALMLEKNKSLEELCLEENHICDEGVYSLA  
 EGLKRNSTL KFLKLSNNGITYRGAEALLQALS RNAI LEVWLRGNTFSLEEIQTLSSRDARLLL\*  
 >rs45974600\_ENSMUSP00000105262\_c.1860:G>A\_p.G621R  
 ENSMUST00000109634.3|Nod2-202|ENSMUSG00000055994|+|chr8:g.89391600:G>A

MRSSCCDMCSQEEFQAQRSQLVALLISGSLEGFESILDWLLSWDVLRSREYEGLSLPGQPLSHSARRLLDVTW  
 NKGWGCQKLEAVQEAQANSHTFELYGSWDTHSLHPTDRDLQSHRPAIVRRLYNHVEAMLELAREGGFLSQYE  
 CEEIRLPIFTSSQRARRLLDLAAVKANGLAAFLQHVRELPAPLPLPYEAAECQKFISKLRTMVLTSRFLST  
 YDGSENLCLEDIYTENILELQTEVGTAGALQKSPAILGLEDLFDTHGHLNRDADTILVVGEAGSGKSTLLQRL  
 HLLWATGRSFQEFLLFIFFPSCRQLQCVAKPLSLRLLFEHCCWPDVAQDDVFQFLLDHPDRVLLTFDGLDEFK  
 FRFTDRERHCSPIDPTSVQTLFNLLQGNLLKNACKVLTSRPDAVSALLRKFVTELQKGFSEEGIQLYLRK  
 HHREPGVADRLIQLIQATSALHGLCHLPVFSWVSRCHRELLQNRGFPTTSTDMYLLILQHFLHASPDPSS  
 PLGLGPGLLQSRLLSTLLHLGHLALRGLAMSCYVFSQQQLQAAQVSDDISLGFLVRAQSSVPGSKAPLEFLHI  
 TFQCFFAAFYLAVSADTSVASLKHLLFSCGRLGSSLLRLLPNLCIQGSRVKKGSEAALLQKAEPHNLQITAAF  
 LAGLLSQQHRDLAACQVSERVLLQRQARARSCLAHSREHFHSIPPAVPGETKSMHAMPGFIVLIRSLYEMQ  
 EEQLAQEAVRRLDIGHLKLTFCRVGPAECAALAFVLQHLQRPVALQLDYNSVGDVGVQELRPCLGVCTALYLR  
 DNNSDRGARTLVECALRCEQLQKALFNNKLTDACACSMAKLLAHKQNFSLRVGNNHITAAGAEVLAQGLK  
 SNTSLKFLGFWGNVSGDKGTQALAEVVADHQNLKWLVLVGNIGSMGAEALALMLEKNKSLEELCLEENHICD  
 EGVYSLAEGLRNSTLKFLLKLSNNGITYRGAEALLQALSNSAILEVWLRGNTFSLEEIQTLSSRDARLLL\*  
 >rs45974600\_ENSMUSP00000050538\_c.1905:G>A\_p.G636R  
 ENSMUST00000054324.15|Nod2-201|ENSMUSG00000055994|+|chr8:g.89391600:G>A  
 MCSQEEFQAQRSQLVALLISGSLEGFESILDWLLSWDVLRSREYEGLSLPGQPLSHSARRLLDVTWVWGC  
 QKLEAVQEAQANSHTFELYGSWDTHSLHPTDRDLQSHRPAIVRRLYNHVEAMLELAREGGFLSQYECIEIRLP  
 IFTSSQRARRLLDLAAVKANGLAAFLQHVRELPAPLPLPYEGYSLCRSRCDRGFTLICLFCILAECQKFIS  
 KLRTMVLTSRFLSTYDGSENLCLEDIYTENILELQTEVGTAGALQKSPAILGLEDLFDTHGHLNRDADTILV  
 VGEAGSGKSTLLQRLHLLWATGRSFQEFLLFIFFPSCRQLQCVAKPLSLRLLFEHCCWPDVAQDDVFQFLLDH  
 PDRVLLTFDGLDEFKFRFTDRERHCSPIDPTSVQTLFNLLQGNLLKNACKVLTSRPDAVSALLRKFVTELQ  
 LKGFSEEGIQLYLRKHHREPGVADRLIQLIQATSALHGLCHLPVFSWVSRCHRELLQNRGFPTTSTDMYLL  
 ILQHFLHASPDPSSPLGLGPGLLQSRLLSTLLHLGHLALRGLAMSCYVFSQQQLQAAQVSDDISLGFLVRAQ  
 SSVPGSKAPLEFLHITFQCFFAAFYLAVSADTSVASLKHLLFSCGRLGSSLLRLLPNLCIQGSRVKKGSEAAL  
 LQKAEPHNLQITAAFLAGLLSQQHRDLAACQVSERVLLQRQARARSCLAHSREHFHSIPPAVPGETKSMHA  
 MPGFIVLIRSLYEMQEEQLAQEAVRRLDIGHLKLTFCRVGPAECAALAFVLQHLQRPVALQLDYNSVGDVGV  
 QLRPCLGVCTALYLRDNNSDRGARTLVECALRCEQLQKALFNNKLTDACACSMAKLLAHKQNFSLRVGNN  
 HITAAGAEVLAQGLKSNTSLKFLGFWGNVSGDKGTQALAEVVADHQNLKWLVLVGNIGSMGAEALALMLEKN  
 KSLEELCLEENHICDEGVYSLAEGLRNSTLKFLLKLSNNGITYRGAEALLQALSNSAILEVWLRGNTFSLEE  
 IQTLSSRDARLLL\*  
 >rs52365090\_ENSMUSP00000113773\_c.2427:G>A\_p.E810K  
 ENSMUST00000118370.8|Nod2-203|ENSMUSG00000055994|+|chr8:g.89397085:G>A  
 MCSQEEFQAQRSQLVALLISGSLEGFESILDWLLSWDVLRSREYEGLSLPGQPLSHSARRLLDVTWVWGC  
 QKLEAVQEAQANSHTFELYGSWDTHSLHPTDRDLQSHRPAIVRRLYNHVEAMLELAREGGFLSQYECIEIRLP  
 IFTSSQRARRLLDLAAVKANGLAAFLQHVRELPAPLPLPYEAAECQKFISKLRTMVLTSRFLSTYDGSENL  
 CLEDIYTENILELQTEVGTAGALQKSPAILGLEDLFDTHGHLNRDADTILVVGEAGSGKSTLLQRLHLLWATG  
 RSFQEFLLFIFFPSCRQLQCVAKPLSLRLLFEHCCWPDVAQDDVFQFLLDHPDRVLLTFDGLDEFKFRFTDRE  
 RHCSPIDPTSVQTLFNLLQGNLLKNACKVLTSRPDAVSALLRKFVTELQKGFSEEGIQLYLRKHHREPGV  
 ADRLIQLIQATSALHGLCHLPVFSWVSRCHRELLQNRGFPTTSTDMYLLILQHFLHASPDPSSPLGLGPG  
 LLQSRLLSTLLHLGHLALRGLAMSCYVFSQQQLQAAQVSDDISLGFLVRAQSSVPGSKAPLEFLHITFQCFFA  
 AFYLAVSADTSVASLKHLLFSCGRLGSSLLRLLPNLCIQGSRVKKGSEAALLQKAEPHNLQITAAFLAGLLSQ  
 QHRDLAACQVSERVLLQRQARARSCLAHSREHFHSIPPAVPGETKSMHAMPGFIVLIRSLYEMQEEQLAQE  
 AVRRLDIGHLKLTFCRVGPAECAALAFVLQHLQRPVALQLDYNSVGDVGVQELRPCLGVCTALYLRDNNSDR  
 GARTLVKCALRCEQLQKALFNNKLTDACACSMAKLLAHKQNFSLRVGNNHITAAGAEVLAQGLKSNTSLKF  
 LGFWGNVSGDKGTQALAEVVADHQNLKWLVLVGNIGSMGAEALALMLEKNKSLEELCLEENHICDEGVYSLA  
 EGLKRNSTLKFLLKLSNNGITYRGAEALLQALSNSAILEVWLRGNTFSLEEIQTLSSRDARLLL\*  
 >rs52365090\_ENSMUSP00000105262\_c.2448:G>A\_p.E817K  
 ENSMUST00000109634.3|Nod2-202|ENSMUSG00000055994|+|chr8:g.89397085:G>A  
 MRSSCCDMCSQEEFQAQRSQLVALLISGSLEGFESILDWLLSWDVLRSREYEGLSLPGQPLSHSARRLLDVTW  
 NKGWGCQKLEAVQEAQANSHTFELYGSWDTHSLHPTDRDLQSHRPAIVRRLYNHVEAMLELAREGGFLSQYE  
 CEEIRLPIFTSSQRARRLLDLAAVKANGLAAFLQHVRELPAPLPLPYEAAECQKFISKLRTMVLTSRFLST  
 YDGSENLCLEDIYTENILELQTEVGTAGALQKSPAILGLEDLFDTHGHLNRDADTILVVGEAGSGKSTLLQRL  
 HLLWATGRSFQEFLLFIFFPSCRQLQCVAKPLSLRLLFEHCCWPDVAQDDVFQFLLDHPDRVLLTFDGLDEFK  
 FRFTDRERHCSPIDPTSVQTLFNLLQGNLLKNACKVLTSRPDAVSALLRKFVTELQKGFSEEGIQLYLRK  
 HHREPGVADRLIQLIQATSALHGLCHLPVFSWVSRCHRELLQNRGFPTTSTDMYLLILQHFLHASPDPSS  
 PLGLGPGLLQSRLLSTLLHLGHLALRGLAMSCYVFSQQQLQAAQVSDDISLGFLVRAQSSVPGSKAPLEFLHI  
 TFQCFFAAFYLAVSADTSVASLKHLLFSCGRLGSSLLRLLPNLCIQGSRVKKGSEAALLQKAEPHNLQITAAF

LAGLLSQHRDLAACQVSEVLLQRQARARSCLAHSREHFHSIPPAVPGETKSMHAMPGFIWLIIRSLYEMQ  
EEQLAQEA VRRLDIGHLKLTF CRVGP AECAALAFVLQHLQRPVALQLDYNSVGDVGVQEQLRPCLGVCTALYLR  
DNNISDRGARTLVKCALRCEQLQKALFNNKLT DACACSMAKLLAHKQNFSLRVGNNHITAAGAEVLAQGLK  
SNTSLKFLGFWGNSVGDGKTQALAEVVADHQNLKWL SVLGN NIGSMGAEALALMLEKNKSLEELCLEENHICD  
EGVYSLAEG LKRNSTL KFLKLSNNGITYRGAEALLQALS RNAI LEVWLRGNTFSLEEIQTLSSRDARLLL\*  
>rs52365090\_ENSMUSP00000050538\_c.2493:G>A\_p.E832K  
ENSMUST00000054324.15|Nod2-201|ENSMUSG00000055994|+|chr8:g.89397085:G>A  
MCSQEEFQAQRSQVLVALLISGSLEGFESILDWLLSWDVL SREDYEGLSLPGQPLSHSARRLLD TVWNGVWGC  
QKLEAVQEAQANSHTFELYGSWDTHSLHPT RD LQSHRPAIVRRLYNHVEAMLELAREGGFLSQYEC EIRLP  
IFTSSQRARRLLDLAAVKANGLAAFL LQH VRELPA PLPLPYEGYSLCRSRCDRGFTLICLFCILAAECQKFIS  
KLRTMVL TQSRFLSTYD GSENL CLEDIY TENILELQTEVGTAGALQKSPAILGLEDLFDTHGHLNRDADTILV  
VGEAGSGKSTLLQRLHLLWATGRSFQEF LFI FPFSCRQLQCVAKPLSLR TLLFEHCCWPDVAQDDV FQFLLDH  
PDRVLLTFDGLDEFKFRFTDRERHCSPI DPTSVQ TLLFNLLQGNLLKNACKVLT SRPDAVSALLRKFV RTELQ  
LKG FSEEGIQLYLRKHHREP G VADRLIQ LIQATSALHGLCHLPVFSW MVSRCHRELL LQNRGFPTTSTDMYLL  
ILQHFL LHASPPDSSPLGLGPGLLQSRLSTLLHLGHLALRGLAMSCYV FSAQQLQAAQVDSDDISLGFLVRAQ  
SSVPGSKAPLEFLHITFQCFFA AFYLAVSADTSVASLKH L FSCGRLGSSLLGRLLPNLCIQGSRVKKGSEAA  
LQKAEPHNLQITAAFLAGLLSQHRDLAACQVSEVLLQRQARARSCLAHSREHFHSIPPAVPGETKSMHA  
MPGFIWLIIRSLYEMQEEQLAQEA VRRLDIGHLKLTF CRVGP AECAALAFVLQHLQRPVALQLDYNSVGDVGVQE  
QLRPCLGVCTALYLRDNNISDRGARTLVKCALRCEQLQKALFNNKLT DACACSMAKLLAHKQNFSLRVGNN  
HITAAGAEVLAQGLKSN TSLKFLGFWGNSVGDGKTQALAEVVADHQNLKWL SVLGN NIGSMGAEALALMLEKN  
KSLEELCLEENHICDEGVYSLAEG LKRNSTL KFLKLSNNGITYRGAEALLQALS RNAI LEVWLRGNTFSLEE  
IQTLSSRDARLLL\*  
>rs46944186\_ENSMUSP00000113773\_c.2544:C>A\_p.L849M  
ENSMUST00000118370.8|Nod2-203|ENSMUSG00000055994|+|chr8:g.89397370:C>A  
MCSQEEFQAQRSQVLVALLISGSLEGFESILDWLLSWDVL SREDYEGLSLPGQPLSHSARRLLD TVWNGVWGC  
QKLEAVQEAQANSHTFELYGSWDTHSLHPT RD LQSHRPAIVRRLYNHVEAMLELAREGGFLSQYEC EIRLP  
IFTSSQRARRLLDLAAVKANGLAAFL LQH VRELPA PLPLPYEAAECQKFISKLRTMVL TQSRFLSTYD GSENL  
CLEDIY TENILELQTEVGTAGALQKSPAILGLEDLFDTHGHLNRDADTILV VGEAGSGKSTLLQRLHLLWATG  
RSFQEF LFI FPFSCRQLQCVAKPLSLR TLLFEHCCWPDVAQDDV FQFLLDHPDRVLLTFDGLDEFKFRFTDRE  
RHCSPI DPTSVQ TLLFNLLQGNLLKNACKVLT SRPDAVSALLRKFV RTELQ LKGFSEEGIQLYLRKHHREP G V  
ADRLIQ LIQATSALHGLCHLPVFSW MVSRCHRELL LQNRGFPTTSTDMYLLILQHFL LHASPPDSSPLGLGPG  
LLQSRLSTLLHLGHLALRGLAMSCYV FSAQQLQAAQVDSDDISLGFLVRAQSSVPGSKAPLEFLHITFQCFFA  
AFYLAVSADTSVASLKH L FSCGRLGSSLLGRLLPNLCIQGSRVKKGSEAA LLQKAEPHNLQITAAFLAGLLSQ  
QHRDLAACQVSEVLLQRQARARSCLAHSREHFHSIPPAVPGETKSMHAMPGFIWLIIRSLYEMQEEQLAQEA  
AVRRLDIGHLKLTF CRVGP AECAALAFVLQHLQRPVALQLDYNSVGDVGVQEQLRPCLGVCTALYLRDNNISDR  
GARTLVECALRCEQLQKALFNNKLT DACACSMAKLLAHKQNFSLMRVGN NHITAAGAEVLAQGLKSN TSLKF  
LGFWGNSVGDGKTQALAEVVADHQNLKWL SVLGN NIGSMGAEALALMLEKNKSLEELCLEENHICDEGVYSLA  
EGLKRNSTL KFLKLSNNGITYRGAEALLQALS RNAI LEVWLRGNTFSLEEIQTLSSRDARLLL\*  
>rs46944186\_ENSMUSP00000105262\_c.2565:C>A\_p.L856M  
ENSMUST00000109634.3|Nod2-202|ENSMUSG00000055994|+|chr8:g.89397370:C>A  
MRS SCCDMCSQEEFQAQRSQVLVALLISGSLEGFESILDWLLSWDVL SREDYEGLSLPGQPLSHSARRLLD TVW  
NKGVWGCQKLEAVQEAQANSHTFELYGSWDTHSLHPT RD LQSHRPAIVRRLYNHVEAMLELAREGGFLSQYE  
CEEIRLP IFTSSQRARRLLDLAAVKANGLAAFL LQH VRELPA PLPLPYEAAECQKFISKLRTMVL TQSRFLST  
YD GSENL CLEDIY TENILELQTEVGTAGALQKSPAILGLEDLFDTHGHLNRDADTILV VGEAGSGKSTLLQRL  
HLLWATGRSFQEF LFI FPFSCRQLQCVAKPLSLR TLLFEHCCWPDVAQDDV FQFLLDHPDRVLLTFDGLDEFK  
FRFTDRERHCSPI DPTSVQ TLLFNLLQGNLLKNACKVLT SRPDAVSALLRKFV RTELQ LKGFSEEGIQLYLRK  
HHREP G VADRLIQ LIQATSALHGLCHLPVFSW MVSRCHRELL LQNRGFPTTSTDMYLLILQHFL LHASPPDSS  
PLGLGPGLLQSRLSTLLHLGHLALRGLAMSCYV FSAQQLQAAQVDSDDISLGFLVRAQSSVPGSKAPLEFLHI  
TFQCFFA AFYLAVSADTSVASLKH L FSCGRLGSSLLGRLLPNLCIQGSRVKKGSEAA LLQKAEPHNLQITAAFL  
LAGLLSQHRDLAACQVSEVLLQRQARARSCLAHSREHFHSIPPAVPGETKSMHAMPGFIWLIIRSLYEMQ  
EEQLAQEA VRRLDIGHLKLTF CRVGP AECAALAFVLQHLQRPVALQLDYNSVGDVGVQEQLRPCLGVCTALYLR  
DNNISDRGARTLVECALRCEQLQKALFNNKLT DACACSMAKLLAHKQNFSLMRVGN NHITAAGAEVLAQGLK  
SNTSLKFLGFWGNSVGDGKTQALAEVVADHQNLKWL SVLGN NIGSMGAEALALMLEKNKSLEELCLEENHICD  
EGVYSLAEG LKRNSTL KFLKLSNNGITYRGAEALLQALS RNAI LEVWLRGNTFSLEEIQTLSSRDARLLL\*  
>rs46944186\_ENSMUSP00000050538\_c.2610:C>A\_p.L871M  
ENSMUST00000054324.15|Nod2-201|ENSMUSG00000055994|+|chr8:g.89397370:C>A  
MCSQEEFQAQRSQVLVALLISGSLEGFESILDWLLSWDVL SREDYEGLSLPGQPLSHSARRLLD TVWNGVWGC  
QKLEAVQEAQANSHTFELYGSWDTHSLHPT RD LQSHRPAIVRRLYNHVEAMLELAREGGFLSQYEC EIRLP

I FTSSQRARRLLDLAAVKANGLAAFLQHVRELPAPLPLPYEGYSLCRSRCDRGFTLICLFCILAECQKFIS  
KLRTMVLTSRFLSTYDGSENLCLEDIYTENILELQTEVGTAGALQKSPAILGLEDLFDTHGHLNRDADTILV  
VGEAGSGKSTLLQRLHLLWATGRSFQEFLLFIFFPSCRQLQCVAKPLSLRLLFEHCCWPDVAQDDVFQFLLDH  
PDRVLLTFDGLDEFKFRFTDRERHCSPIDPTSVQTLLENLQGNLLKNACKVLTSRPDAVSALLRKFVTELQ  
LKGFSSEEGIQLYLRKHHREPGVADRILQIQATSALHGLCHLPVFSWVSRCHRELLLQNRGFPTTSTDMYLL  
ILQHFLHASPPDSSPLGLGPGLLQSRLLTLLHLGHLALRGLAMSCYVFSQQQLQAAQVDSDDISLGFLVRAQ  
SSVPGSKAPLEFLHITFQCFFAAFYLAVSADTSVASLKHFLFSCGRLGSSLLGRLLPNLCIQGSRVKKGSEAAL  
LQKAEPHNLQITAAFLAGLLSQQHRDLAACQVSEVLLQRQARARSCLAHSREHFHSIPPAVPGETKSMHA  
MPGFIWLIIRSLYEMQEEQLAQEAVRRLDIGHLKLTFCRVGPAECAALAFVLQHLQRPVALQLDYNVSGDVGVE  
QLRPCLGVCTALYLRDNNISDRGARTLVECALRCEQLQKALFNKLTADACACSMAKLLAHKQNFLSMRVGN  
HITAAGAEVLAQGLKSNLTKFLGFWGNSVGDGKTQALAEVVADHQNKLWLSLVGNNGISMGAEALALMLEKN  
KSLEELCLEENHICDEGVYSLAEGLRNSTLTKFLKLSNNGITYRGAEALLQALSNSAILEVWLRGNTFSLEE  
IQTLSRRDARLLL\*

>rs50374660\_ENSMUSP00000113773\_c.2563:A>T\_p.H855L

ENSMUST00000118370.8|Nod2-203|ENSMUSG00000055994|+|chr8:g.89399317:A>T  
MCSQEEFQAQRSQVALLISGSLEGFESILDWLLSWDVLSDREYEGLSLPGQPLSHSARRLLDTVWNGVWGC  
QKLEAVQEAQANSHTFELYGSWDTHSLHPTRDLSHRPAIVRRLYNHVEAMLELAREGGFLSQYECIEIRLP  
I FTSSQRARRLLDLAAVKANGLAAFLQHVRELPAPLPLPYEAAECQKFISKLRTMVLTSRFLSTYDGSENL  
CLEDIYTENILELQTEVGTAGALQKSPAILGLEDLFDTHGHLNRDADTILVVGEAGSGKSTLLQRLHLLWATG  
RSFQEFLLFIFFPSCRQLQCVAKPLSLRLLFEHCCWPDVAQDDVFQFLLDHPDRVLLTFDGLDEFKFRFTDR  
RHCSPIIDPTSVQTLLENLQGNLLKNACKVLTSRPDAVSALLRKFVTELQKGFSEEGIQLYLRKHHREPGV  
ADRILQIQATSALHGLCHLPVFSWVSRCHRELLLQNRGFPTTSTDMYLLILQHFLHASPPDSSPLGLGPG  
LLQSRLLTLLHLGHLALRGLAMSCYVFSQQQLQAAQVDSDDISLGFLVRAQSSVPGSKAPLEFLHITFQCFFA  
AFYLAVSADTSVASLKHFLFSCGRLGSSLLGRLLPNLCIQGSRVKKGSEAALLQKAEPHNLQITAAFLAGLLSQ  
QHRDLAACQVSEVLLQRQARARSCLAHSREHFHSIPPAVPGETKSMHAMPGFIWLIIRSLYEMQEEQLAQEA  
AVRRLDIGHLKLTFCRVGPAECAALAFVLQHLQRPVALQLDYNVSGDVGVEQLRPCLGVCTALYLRDNNISDR  
GARTLVECALRCEQLQKALFNKLTADACACSMAKLLAHKQNFLSLRVGNLITAAGAEVLAQGLKSNLTKF  
LGFWGNSVGDGKTQALAEVVADHQNKLWLSLVGNNGISMGAEALALMLEKNKSLEELCLEENHICDEGVYSLA  
EGLKRNSTLTKFLKLSNNGITYRGAEALLQALSNSAILEVWLRGNTFSLEEIQTLSRRDARLLL\*

>rs50374660\_ENSMUSP00000105262\_c.2584:A>T\_p.H862L

ENSMUST00000109634.3|Nod2-202|ENSMUSG00000055994|+|chr8:g.89399317:A>T  
MRSSCDMCSQEEFQAQRSQVALLISGSLEGFESILDWLLSWDVLSDREYEGLSLPGQPLSHSARRLLDTVW  
NKGVWGCQKLEAVQEAQANSHTFELYGSWDTHSLHPTRDLSHRPAIVRRLYNHVEAMLELAREGGFLSQYE  
CEEIRLP I FTSSQRARRLLDLAAVKANGLAAFLQHVRELPAPLPLPYEAAECQKFISKLRTMVLTSRFLST  
YDGSENLCLEDIYTENILELQTEVGTAGALQKSPAILGLEDLFDTHGHLNRDADTILVVGEAGSGKSTLLQRL  
HLLWATGRSFQEFLLFIFFPSCRQLQCVAKPLSLRLLFEHCCWPDVAQDDVFQFLLDHPDRVLLTFDGLDEFK  
FRFTDRERHCSPIDPTSVQTLLENLQGNLLKNACKVLTSRPDAVSALLRKFVTELQKGFSEEGIQLYLRK  
HHREPGVADRILQIQATSALHGLCHLPVFSWVSRCHRELLLQNRGFPTTSTDMYLLILQHFLHASPPDSS  
PLGLGPGLLQSRLLTLLHLGHLALRGLAMSCYVFSQQQLQAAQVDSDDISLGFLVRAQSSVPGSKAPLEFLHI  
TFQCFFAAFYLAVSADTSVASLKHFLFSCGRLGSSLLGRLLPNLCIQGSRVKKGSEAALLQKAEPHNLQITAA  
LAGLLSQQHRDLAACQVSEVLLQRQARARSCLAHSREHFHSIPPAVPGETKSMHAMPGFIWLIIRSLYEMQ  
EEQLAQEAVRRLDIGHLKLTFCRVGPAECAALAFVLQHLQRPVALQLDYNVSGDVGVEQLRPCLGVCTALYLR  
DNNISDRGARTLVECALRCEQLQKALFNKLTADACACSMAKLLAHKQNFLSLRVGNLITAAGAEVLAQGLK  
SNTSLKFLGFWGNSVGDGKTQALAEVVADHQNKLWLSLVGNNGISMGAEALALMLEKNKSLEELCLEENHICD  
EGVYSLAEGLRNSTLTKFLKLSNNGITYRGAEALLQALSNSAILEVWLRGNTFSLEEIQTLSRRDARLLL\*

>rs50374660\_ENSMUSP00000050538\_c.2629:A>T\_p.H877L

ENSMUST00000054324.15|Nod2-201|ENSMUSG00000055994|+|chr8:g.89399317:A>T  
MCSQEEFQAQRSQVALLISGSLEGFESILDWLLSWDVLSDREYEGLSLPGQPLSHSARRLLDTVWNGVWGC  
QKLEAVQEAQANSHTFELYGSWDTHSLHPTRDLSHRPAIVRRLYNHVEAMLELAREGGFLSQYECIEIRLP  
I FTSSQRARRLLDLAAVKANGLAAFLQHVRELPAPLPLPYEGYSLCRSRCDRGFTLICLFCILAECQKFIS  
KLRTMVLTSRFLSTYDGSENLCLEDIYTENILELQTEVGTAGALQKSPAILGLEDLFDTHGHLNRDADTILV  
VGEAGSGKSTLLQRLHLLWATGRSFQEFLLFIFFPSCRQLQCVAKPLSLRLLFEHCCWPDVAQDDVFQFLLDH  
PDRVLLTFDGLDEFKFRFTDRERHCSPIDPTSVQTLLENLQGNLLKNACKVLTSRPDAVSALLRKFVTELQ  
LKGFSSEEGIQLYLRKHHREPGVADRILQIQATSALHGLCHLPVFSWVSRCHRELLLQNRGFPTTSTDMYLL  
ILQHFLHASPPDSSPLGLGPGLLQSRLLTLLHLGHLALRGLAMSCYVFSQQQLQAAQVDSDDISLGFLVRAQ  
SSVPGSKAPLEFLHITFQCFFAAFYLAVSADTSVASLKHFLFSCGRLGSSLLGRLLPNLCIQGSRVKKGSEAAL  
LQKAEPHNLQITAAFLAGLLSQQHRDLAACQVSEVLLQRQARARSCLAHSREHFHSIPPAVPGETKSMHA  
MPGFIWLIIRSLYEMQEEQLAQEAVRRLDIGHLKLTFCRVGPAECAALAFVLQHLQRPVALQLDYNVSGDVGVE

QLRPCLGVCTALYLRDNNISDRGARTLVECALRCEQLQKALFNKLTDACACSMAKLLAHKQNFSLRVGNN  
LITAAGAEVLAQGLKSNTSLKFLGFWGNSVGDGKTQALAEVVADHQNLKWLVLVGNNGISMGAEALALMLEKN  
KSLEELCLEENHICDEGVYSLAEGLRNSTLKFLLKLSNNGITYRGAEALLQALSNSAILEVWLRGNTFSLEE  
IQTLSRRDARLLL\*

>rs33277582\_ENSMUSP00000113773\_c.2770:T>C\_p.L924P  
ENSMUST00000118370.8|Nod2-203|ENSMUSG00000055994|+|chr8:g.89402128:T>C  
MCSQEEFQAQRSQVALLISGSLEGFESILDWLLSWDVLRSREDEGLSLPGQPLSHSARRLLDVTWVWGC  
QKLEAVQEAQANSHTFELYGSWDTHSLHPTRDLSHRPAIVRRLYNHVEAMLELAREGGFLSQYECIEIRLP  
IFTSSQRARRLLDLAAVKANGLAAFLQHVRELPAPLPLPYEAAECQKFI SKLRMTVLTQSRFLSTYDGENL  
CLEDIYTENILELQTEVGTAGALQKSPAILGLEDLFDTHGHLNRDADTILVVGEAGSGKSTLLQRLHLLWATG  
RSFQEFLLIFPFSCRQLQCVAKPLSLRLLFEHCCWPDVAQDDVFQFLLDHPDRVLLTFDGLDEFKFRFTDRE  
RHCSPIIDPTSVQTLFNLQGNLLKNACKVLTSRPDVAVALLRKFVTELQKGFSEEGIQLYLRKHHREPGV  
ADRLIQLIQATSALHGLCHLPVFSWVSRCHRELLQNRGFPPTSTDMYLLILQHFLHASPDDSSPLGLGPG  
LLQSRLSTLLHLGHLALRGLAMSCYVFSAQQLQAAQVSDDISLGFLVRAQSSVPGSKAPLEFLHITFQCFFA  
AFYLAVSADTSVASLKHFLSCGRLGSSLLGRLLPNLCIQGSRVKKGSEAALLQKAEPHNLQITAAFLAGLLSQ  
QHRDLAACQVSEVLLQRQARARSCLAHSREHFHSIPPAVPGETKSMHAMPGFIWLIIRSLYEMQEEQLAQE  
AVRRLDIGHLKLTFCRVGPAECAALAFVLQHLQRPVALQLDYNVSGDVGVEQLRCLGVCTALYLRDNNISDR  
GARTLVECALRCEQLQKALFNKLTDACACSMAKLLAHKQNFSLRVGNNHITAAGAEVLAQGLKSNTSLKF  
LGFWGNVSGDKGTQALAEVVADHQNLKWLVLVGNNGISMGAEALALMPEKNKSLEELCLEENHICDEGVYSLA  
EGLKRNSTLKFLLKLSNNGITYRGAEALLQALSNSAILEVWLRGNTFSLEEIQTLSSRDARLLL\*

>rs33277582\_ENSMUSP00000105262\_c.2791:T>C\_p.L931P  
ENSMUST00000109634.3|Nod2-202|ENSMUSG00000055994|+|chr8:g.89402128:T>C  
MRSSCDMCSQEEFQAQRSQVALLISGSLEGFESILDWLLSWDVLRSREDEGLSLPGQPLSHSARRLLDVTW  
NKGWGCQKLEAVQEAQANSHTFELYGSWDTHSLHPTRDLSHRPAIVRRLYNHVEAMLELAREGGFLSQYE  
CEEIRLPIFTSSQRARRLLDLAAVKANGLAAFLQHVRELPAPLPLPYEAAECQKFI SKLRMTVLTQSRFLST  
YDGENLCLEDIYTENILELQTEVGTAGALQKSPAILGLEDLFDTHGHLNRDADTILVVGEAGSGKSTLLQRL  
HLLWATGRSFEFLFI PFPCRQLQCVAKPLSLRLLFEHCCWPDVAQDDVFQFLLDHPDRVLLTFDGLDEFK  
FRFTDRERHCSPIIDPTSVQTLFNLQGNLLKNACKVLTSRPDVAVALLRKFVTELQKGFSEEGIQLYLRK  
HHREPGVADRLIQLIQATSALHGLCHLPVFSWVSRCHRELLQNRGFPPTSTDMYLLILQHFLHASPDDSS  
PLGLGPGLLQSRLSTLLHLGHLALRGLAMSCYVFSAQQLQAAQVSDDISLGFLVRAQSSVPGSKAPLEFLHI  
TFQCFFAAFYLAVSADTSVASLKHFLSCGRLGSSLLGRLLPNLCIQGSRVKKGSEAALLQKAEPHNLQITAAFL  
LAGLLSQQHRDLAACQVSEVLLQRQARARSCLAHSREHFHSIPPAVPGETKSMHAMPGFIWLIIRSLYEMQ  
EEQLAQEA VRRLDIGHLKLTFCRVGPAECAALAFVLQHLQRPVALQLDYNVSGDVGVEQLRCLGVCTALYLR  
DNNISDRGARTLVECALRCEQLQKALFNKLTDACACSMAKLLAHKQNFSLRVGNNHITAAGAEVLAQGLK  
SNTSLKFLGFWGNSVGDGKTQALAEVVADHQNLKWLVLVGNNGISMGAEALALMPEKNKSLEELCLEENHICD  
EGYSLAEGLRNSTLKFLLKLSNNGITYRGAEALLQALSNSAILEVWLRGNTFSLEEIQTLSSRDARLLL\*

>rs33277582\_ENSMUSP00000050538\_c.2836:T>C\_p.L946P  
ENSMUST00000054324.15|Nod2-201|ENSMUSG00000055994|+|chr8:g.89402128:T>C  
MCSQEEFQAQRSQVALLISGSLEGFESILDWLLSWDVLRSREDEGLSLPGQPLSHSARRLLDVTWVWGC  
QKLEAVQEAQANSHTFELYGSWDTHSLHPTRDLSHRPAIVRRLYNHVEAMLELAREGGFLSQYECIEIRLP  
IFTSSQRARRLLDLAAVKANGLAAFLQHVRELPAPLPLPYEGYSLCRS RCDRGFTLICFLCILAECQKFI S  
KLRTMVLTQSRFLSTYDGENLCLEDIYTENILELQTEVGTAGALQKSPAILGLEDLFDTHGHLNRDADTILV  
VGEAGSGKSTLLQRLHLLWATGRSFEFLFI PFPCRQLQCVAKPLSLRLLFEHCCWPDVAQDDVFQFLLDH  
PDRVLLTFDGLDEFKFRFTDRERHCSPIIDPTSVQTLFNLQGNLLKNACKVLTSRPDVAVALLRKFVTELQ  
LKGFESEGIQLYLRKHHREPGVADRLIQLIQATSALHGLCHLPVFSWVSRCHRELLQNRGFPPTSTDMYLL  
ILQHFLHASPDDSSPLGLGPGLLQSRLSTLLHLGHLALRGLAMSCYVFSAQQLQAAQVSDDISLGFLVRAQ  
SSVPGSKAPLEFLHITFQCFFAAFYLAVSADTSVASLKHFLSCGRLGSSLLGRLLPNLCIQGSRVKKGSEAAL  
LQKAEPHNLQITAAFLAGLLSQQHRDLAACQVSEVLLQRQARARSCLAHSREHFHSIPPAVPGETKSMHA  
MPGFIWLIIRSLYEMQEEQLAQEA VRRLDIGHLKLTFCRVGPAECAALAFVLQHLQRPVALQLDYNVSGDVGVE  
QLRPCLGVCTALYLRDNNISDRGARTLVECALRCEQLQKALFNKLTDACACSMAKLLAHKQNFSLRVGNN  
HITAAGAEVLAQGLKSNTSLKFLGFWGNSVGDGKTQALAEVVADHQNLKWLVLVGNNGISMGAEALALMPEKN  
KSLEELCLEENHICDEGVYSLAEGLRNSTLKFLLKLSNNGITYRGAEALLQALSNSAILEVWLRGNTFSLEE  
IQTLSRRDARLLL\*

>rs229254609\_ENSMUSP00000148037\_c.1710:ACT>A\_p.T571del-fs  
ENSMUST00000211554.2|CylD-210|ENSMUSG00000036712|+|chr8:g.89458341:ACT>A  
MSSGLWSQEKVTSPLYWEERIFYLLQECVTDKQTKLLKVPKGSIGQYIQDRSVGHSRVPSTKGGKNQIGLK  
ILEQPFAVLVFDKDVVEINEKFTELLAITNCEERLSLFRNRLRLSKGLQVDVGSVPKVQLRSGEKFPVGVV  
RFRGPLLAERTVSGIFFGVELLEEGRGQFTDGVYQKQLFQCDEDCGVFVALDKLELIEDDDNGLESDFAGP

GDTMQVEPPPLEINSRVSLKVGESTESGTVIFCDVLPKGESLGYFVGVDMDNPIGNWDGRFDGVQLCSFASVE  
STILLHINDIIPDSVTQERRPPKLAFMSRGGVGDGKSSSHNPKPKVTGSTSDPGSRNRSELYFTLNGSSVDSQQS  
KSKNPWYIDEVAEDPAKSLTESSDFGHSSPPPQPPSMNSLSENRFHSLPFSLTKMPNTNGSMAHSPLSLSV  
QSVMGELNSTPVQESPLPISSGNAHGLEVGSLAEVKENPPFYGVIRWIGQPPGLSDVLAGLELEDEDECAGCTD  
GTFRGTRYFTCALKKALFVKLKSCRPDSTRFASLQPVSNQIERCNSLAFGGYLSEVVEENTT  
>rs229254609\_ENSMUSP00000147654\_c.1719:ACT>A\_p.T574del-fs  
ENSMUST00000209532.2|CylD-205|ENSMUSG00000036712|+|chr8:g.89458341:ACT>A  
MSSGLWSQEKVTSPLYWEERIFYLLQLQECVTDKQTKLLKVPKGSIGQYIQDRSVGHSRVPSTKGKKNQIGLK  
ILEQPHAVLFDVDEKDVVEINEKFTELLLAITNCEERLSLFRNRLRLSKGLQVDVGVSPVKVQLRSGEKFPFPGVV  
RFRGPLLAERTVSGIFFGVELLEEGRGQGFTDGVYQKQLFQCDEDCGVFVALDKLELIEDDDNGLESDFAGP  
GDTMQVEPPPLEINSRVSLKVGESTESGTVIFCDVLPKGESLGYFVGVDMDNPIGNWDGRFDGVQLCSFASVE  
STILLHINDIIPALSDSVTQERRPPKLAFMSRGGVGDGKSSSHNPKPKVTGSTSDPGSRNRSELYFTLNGSSVDS  
QQSKSKNPWYIDEVAEDPAKSLTESSDFGHSSPPPQPPSMNSLSENRFHSLPFSLTKMPNTNGSMAHSPLS  
LSVQSVMGELNSTPVQESPLPISSGNAHGLEVGSLAEVKENPPFYGVIRWIGQPPGLSDVLAGLELEDEDECAG  
CTDGTFRGTRYFTCALKKALFVKLKSCRPDSTRFASLQPVSNQIERCNSLAFGGYLSEVVEENTT  
>rs229254609\_ENSMUSP00000147426\_c.1710:ACT>A\_p.T571del-fs  
ENSMUST00000209559.2|CylD-206|ENSMUSG00000036712|+|chr8:g.89458341:ACT>A  
MSSGLWSQEKVTSPLYWEERIFYLLQLQECVTDKQTKLLKVPKGSIGQYIQDRSVGHSRVPSTKGKKNQIGLK  
ILEQPHAVLFDVDEKDVVEINEKFTELLLAITNCEERLSLFRNRLRLSKGLQVDVGVSPVKVQLRSGEKFPFPGVV  
RFRGPLLAERTVSGIFFGVELLEEGRGQGFTDGVYQKQLFQCDEDCGVFVALDKLELIEDDDNGLESDFAGP  
GDTMQVEPPPLEINSRVSLKVGESTESGTVIFCDVLPKGESLGYFVGVDMDNPIGNWDGRFDGVQLCSFASVE  
STILLHINDIIPDSVTQERRPPKLAFMSRGGVGDGKSSSHNPKPKVTGSTSDPGSRNRSELYFTLNGSSVDS  
QQSKSKNPWYIDEVAEDPAKSLTESSDFGHSSPPPQPPSMNSLSENRFHSLPFSLTKMPNTNGSMAHSPLS  
QSVMGELNSTPVQESPLPISSGNAHGLEVGSLAEVKENPPFYGVIRWIGQPPGLSDVLAGLELEDEDECAGCTD  
GTFRGTRYFTCALKKALFVKLKSCRPDSTRFASLQPVSNQIERCNSLAFGGYLSEVVEENTT  
>rs229254609\_ENSMUSP00000147904\_c.1164:ACT>A\_p.T389del-fs  
ENSMUST00000209206.2|CylD-204|ENSMUSG00000036712|+|chr8:g.89458341:ACT>A  
MSSGLWSQEKVTSPLYWEERIFYLLQLQECVTDKQTKLLKVPKGSIGQYIQDRSVGHSRVPSTKGKKNQIGLK  
ILEQPHAVLFDVDEKDVVEINEKFTELLLAITNCEERLSLFRNRLRLSKGLQVDVGVSPVKVQLRSGEKFPFPGVV  
RFRGPLLAERTVSGIFFGVELLEEGRGQGFTDGVYQKQLFQCDEDCGVFVALDKLELIEDDDNGLESDFAGP  
GDTMQVEPPPLEINSRVSLKVGESTESGTVIFCDVLPKGESLGYFVGVDMDNPIGNWDGRFDGVQLCSFASVE  
STILLHINDIIPDSVTQERRPPKLAFMSRGGVGDGKSSSHNPKPKVTGSTSDPGSRNRSELYFTLNGSSVDS  
QQSKSKNPWYIDEVAEDPAKSLTESSDFGHSSPPPQPPSMNSLSENRFHSLPFSLTKMPNTNGSMAHSPLS  
QSVMGELNSTPVQESPLPISSGNAHGLEVGSLAEVKENPPFYGVIRWIGQPPGLSDVLAGLELEDEDECAGCTD  
GTFRGTRYFTCALKKALFVKLKSCRPDSTRFASLQPVSNQIERCNSLAFGGYLSEVVEENTT  
>rs229254609\_ENSMUSP00000105254\_c.1710:ACT>A\_p.T571del-fs  
ENSMUST00000109626.4|CylD-203|ENSMUSG00000036712|+|chr8:g.89458341:ACT>A  
MSSGLWSQEKVTSPLYWEERIFYLLQLQECVTDKQTKLLKVPKGSIGQYIQDRSVGHSRVPSTKGKKNQIGLK  
ILEQPHAVLFDVDEKDVVEINEKFTELLLAITNCEERLSLFRNRLRLSKGLQVDVGVSPVKVQLRSGEKFPFPGVV  
RFRGPLLAERTVSGIFFGVELLEEGRGQGFTDGVYQKQLFQCDEDCGVFVALDKLELIEDDDNGLESDFAGP  
GDTMQVEPPPLEINSRVSLKVGESTESGTVIFCDVLPKGESLGYFVGVDMDNPIGNWDGRFDGVQLCSFASVE  
STILLHINDIIPDSVTQERRPPKLAFMSRGGVGDGKSSSHNPKPKVTGSTSDPGSRNRSELYFTLNGSSVDS  
QQSKSKNPWYIDEVAEDPAKSLTESSDFGHSSPPPQPPSMNSLSENRFHSLPFSLTKMPNTNGSMAHSPLS  
QSVMGELNSTPVQESPLPISSGNAHGLEVGSLAEVKENPPFYGVIRWIGQPPGLSDVLAGLELEDEDECAGCTD  
GTFRGTRYFTCALKKALFVKLKSCRPDSTRFASLQPVSNQIERCNSLAFGGYLSEVVEENTT  
>rs229254609\_ENSMUSP00000096119\_c.1719:ACT>A\_p.T574del-fs  
ENSMUST00000098519.11|CylD-202|ENSMUSG00000036712|+|chr8:g.89458341:ACT>A  
MSSGLWSQEKVTSPLYWEERIFYLLQLQECVTDKQTKLLKVPKGSIGQYIQDRSVGHSRVPSTKGKKNQIGLK  
ILEQPHAVLFDVDEKDVVEINEKFTELLLAITNCEERLSLFRNRLRLSKGLQVDVGVSPVKVQLRSGEKFPFPGVV  
RFRGPLLAERTVSGIFFGVELLEEGRGQGFTDGVYQKQLFQCDEDCGVFVALDKLELIEDDDNGLESDFAGP  
GDTMQVEPPPLEINSRVSLKVGESTESGTVIFCDVLPKGESLGYFVGVDMDNPIGNWDGRFDGVQLCSFASVE  
STILLHINDIIPALSDSVTQERRPPKLAFMSRGGVGDGKSSSHNPKPKVTGSTSDPGSRNRSELYFTLNGSSVDS  
QQSKSKNPWYIDEVAEDPAKSLTESSDFGHSSPPPQPPSMNSLSENRFHSLPFSLTKMPNTNGSMAHSPLS  
LSVQSVMGELNSTPVQESPLPISSGNAHGLEVGSLAEVKENPPFYGVIRWIGQPPGLSDVLAGLELEDEDECAG  
CTDGTFRGTRYFTCALKKALFVKLKSCRPDSTRFASLQPVSNQIERCNSLAFGGYLSEVVEENTT  
>rs229254609\_ENSMUSP00000039834\_c.1719:ACT>A\_p.T574del-fs  
ENSMUST00000043526.15|CylD-201|ENSMUSG00000036712|+|chr8:g.89458341:ACT>A  
MSSGLWSQEKVTSPLYWEERIFYLLQLQECVTDKQTKLLKVPKGSIGQYIQDRSVGHSRVPSTKGKKNQIGLK  
ILEQPHAVLFDVDEKDVVEINEKFTELLLAITNCEERLSLFRNRLRLSKGLQVDVGVSPVKVQLRSGEKFPFPGVV  
RFRGPLLAERTVSGIFFGVELLEEGRGQGFTDGVYQKQLFQCDEDCGVFVALDKLELIEDDDNGLESDFAGP

GDTMQVEPPPLEINSRVSLKVGESTESGTVIFCDVLPKGESLGYFVGVMDNPIGNWDGRFDGVQLCSFASVE  
STILLHINDIIPAVSDSVTQERRPPKLAFM SRGVGDKGSSSHNKPKVTGSTSDPGSRNRSELFYTLNGSSVDS  
QQSKSKNPWYIDEVAEDPAKSLTEMSSDFGHSSPPPQPPSMNSLSENRFHSLPFSLTKMPNTNGSMAHSPLS  
LSVQSVMGELNSTPVQESPLPISSGNAHGLEVGLAEVKENPPFYGVIRWIGQPPGLSDVLAGLELEDECAG  
CTDGTFRGTRYFTCALKKALFVKLSCRPD SRFASLQPVSNQIERCNSLAFGGYLSEVVEENTT  
>rs32562371\_ENSMUSP00000148037\_c.2737:A>G\_p.K913R  
ENSMUST00000211554.2|Cyl d-210|ENSMUSG00000036712|+|chr8:g.89473520:A>G  
MSSGLWSQEKVTSPLYWEERIFYLLQLQEC SVTDKQTKLLKVPKGSIGQYIQDRSVGHSRVPSTKGKKNQIGLK  
ILEQPHAVL FVDEKDVVE INEKFT ELLLAITNCEERLSLFRNRLRLSKGLQVDVGSVPKVQLRSGE EKFP  
RFRGP LLAERTVSGIFFGVELLEEGRGQGF TDGVYQ GKQLFQCDEDCGVFVALDKLELIEDDDNGLESDFAGP  
GDTMQVEPPPLEINSRVSLKVGESTESGTVIFCDVLPKGESLGYFVGVMDNPIGNWDGRFDGVQLCSFASVE  
STILLHINDIIPDSVTQERRPPKLAFM SRGVGDKGSSSHNKPKVTGSTSDPGSRNRSELFYTLNGSSVDSQQS  
KSKNPWYIDEVAEDPAKSLTEMSSDFGHSSPPPQPPSMNSLSENRFHSLPFSLTKMPNTNGSMAHSPLSLSV  
QSVMGELNSTPVQESPLPISSGNAHGLEVGLAEVKENPPFYGVIRWIGQPPGLSDVLAGLELEDECAGCTD  
GTFRGRTRYFTCALKKALFVKLSCRPD SRFASLQPVSNQIERCNSLAFGGYLSEVVEENTPPKMEKEGLEIMI  
GKKKGIQGHYNSCYLDSTLFC LFAFSSALD TVLLRPKEKNDIEYYSETQELLRTEIVNPLRIYGYVCATKIMK  
LRKILEKVEAASGFTSEEKDP EEFNLILFHDILRVEPLLKIRSAGQKVQDCNFYQIFMEKNEKVGVP TIQQLL  
EWSFINSNLKFAEAPSCLIIQMPRFGKDFKLFKKI FPSLELNI TDLEDTPRQCRI CGGLAMYECRECYDDPD  
ISAGKIKQFCKTCSTQVHLHPRRLNHSYHPVSLPKDLPDWDWRHGCIPCQKMELFAVLCIETSHYVAFVKYK  
DDSAWLF FDSMADRGGQNGFNIPQVTPCPEVGEYLRMSLEDLHSLDSRRIQGCARRLLCDA YMCMYQSPTMS  
LYK\*

>rs32562371\_ENSMUSP00000147654\_c.2746:A>G\_p.K916R  
ENSMUST00000209532.2|Cyl d-205|ENSMUSG00000036712|+|chr8:g.89473520:A>G  
MSSGLWSQEKVTSPLYWEERIFYLLQLQEC SVTDKQTKLLKVPKGSIGQYIQDRSVGHSRVPSTKGKKNQIGLK  
ILEQPHAVL FVDEKDVVE INEKFT ELLLAITNCEERLSLFRNRLRLSKGLQVDVGSVPKVQLRSGE EKFP  
RFRGP LLAERTVSGIFFGVELLEEGRGQGF TDGVYQ GKQLFQCDEDCGVFVALDKLELIEDDDNGLESDFAGP  
GDTMQVEPPPLEINSRVSLKVGESTESGTVIFCDVLPKGESLGYFVGVMDNPIGNWDGRFDGVQLCSFASVE  
STILLHINDIIPALSDSVTQERRPPKLAFM SRGVGDKGSSSHNKPKVTGSTSDPGSRNRSELFYTLNGSSVDS  
QQSKSKNPWYIDEVAEDPAKSLTEMSSDFGHSSPPPQPPSMNSLSENRFHSLPFSLTKMPNTNGSMAHSPLS  
LSVQSVMGELNSTPVQESPLPISSGNAHGLEVGLAEVKENPPFYGVIRWIGQPPGLSDVLAGLELEDECAG  
CTDGTFRGTRYFTCALKKALFVKLSCRPD SRFASLQPVSNQIERCNSLAFGGYLSEVVEENTPPKMEKEGLE  
IMIGKKKGIQGHYNSCYLDSTLFC LFAFSSALD TVLLRPKEKNDIEYYSETQELLRTEIVNPLRIYGYVCATK  
IMKLRKILEKVEAASGFTSEEKDP EEFNLILFHDILRVEPLLKIRSAGQKVQDCNFYQIFMEKNEKVGVP TIQ  
QLEWSFINSNLKFAEAPSCLIIQMPRFGKDFKLFKKI FPSLELNI TDLEDTPRQCRI CGGLAMYECRECYD  
DPDI SAGKIKQFCKTCSTQVHLHPRRLNHSYHPVSLPKDLPDWDWRHGCIPCQKMELFAVLCIETSHYVAFVK  
YKDDSAWLF FDSMADRGGQNGFNIPQVTPCPEVGEYLRMSLEDLHSLDSRRIQGCARRLLCDA YMCMYQSP  
TMSLYK\*

>rs32562371\_ENSMUSP00000147426\_c.2737:A>G\_p.K913R  
ENSMUST00000209559.2|Cyl d-206|ENSMUSG00000036712|+|chr8:g.89473520:A>G  
MSSGLWSQEKVTSPLYWEERIFYLLQLQEC SVTDKQTKLLKVPKGSIGQYIQDRSVGHSRVPSTKGKKNQIGLK  
ILEQPHAVL FVDEKDVVE INEKFT ELLLAITNCEERLSLFRNRLRLSKGLQVDVGSVPKVQLRSGE EKFP  
RFRGP LLAERTVSGIFFGVELLEEGRGQGF TDGVYQ GKQLFQCDEDCGVFVALDKLELIEDDDNGLESDFAGP  
GDTMQVEPPPLEINSRVSLKVGESTESGTVIFCDVLPKGESLGYFVGVMDNPIGNWDGRFDGVQLCSFASVE  
STILLHINDIIPDSVTQERRPPKLAFM SRGVGDKGSSSHNKPKVTGSTSDPGSRNRSELFYTLNGSSVDSQQS  
KSKNPWYIDEVAEDPAKSLTEMSSDFGHSSPPPQPPSMNSLSENRFHSLPFSLTKMPNTNGSMAHSPLSLSV  
QSVMGELNSTPVQESPLPISSGNAHGLEVGLAEVKENPPFYGVIRWIGQPPGLSDVLAGLELEDECAGCTD  
GTFRGRTRYFTCALKKALFVKLSCRPD SRFASLQPVSNQIERCNSLAFGGYLSEVVEENTPPKMEKEGLEIMI  
GKKKGIQGHYNSCYLDSTLFC LFAFSSALD TVLLRPKEKNDIEYYSETQELLRTEIVNPLRIYGYVCATKIMK  
LRKILEKVEAASGFTSEEKDP EEFNLILFHDILRVEPLLKIRSAGQKVQDCNFYQIFMEKNEKVGVP TIQQLL  
EWSFINSNLKFAEAPSCLIIQMPRFGKDFKLFKKI FPSLELNI TDLEDTPRQCRI CGGLAMYECRECYDDPD  
ISAGKIKQFCKTCSTQVHLHPRRLNHSYHPVSLPKDLPDWDWRHGCIPCQKMELFAVLCIETSHYVAFVKYK  
DDSAWLF FDSMADRGGQNGFNIPQVTPCPEVGEYLRMSLEDLHSLDSRRIQGCARRLLCDA YMCMYQSPTMS  
LYK\*

>rs32562371\_ENSMUSP00000147904\_c.2191:A>G\_p.K731R  
ENSMUST00000209206.2|Cyl d-204|ENSMUSG00000036712|+|chr8:g.89473520:A>G  
MSSGLWSQEKVTSPLYWEERIFYLLQLQEC SVTDKQTKLLKVPKGSIGQYIQDRSVGHSRVPSTKGKKNQIGLK  
ILEQPHAVL FVDEKDVVE INEKFT ELLLAITNCEERLSLFRNRLRLSKGLQVDVGSVPKVQLRSGE EKFP  
RFRGP LLAERTVSGIFFGVELLEEGRGQGF TDGVYQ GKQLFQCDEDCGVFVALDKLELIEDDDNGLESDFAGP



GDTMQVEPPPLEINSRVSLKVGESTESGTVIFCDVLPKGESLGYFVGVDMDNPIGNWDGRFDGVQLCSFASVE  
STILLHINDIIPDSVTQERRPPKLAFMSRGGVGDGKSSSHNKPKVTGSTDGSRNRSELYFTLNGSSVDSQQS  
KSKNPWYIDEAFGGYLSEVVEENTPPKMEKEGLEIMIGKKKGIQGHYNSCYLDSTLFLCLFAFSSALDVTLLRP  
KEKNDIEYYSETQELLRTEIVNPLRIYGYVCATKIMKLRKILEKVEAASGFTSEEKDPPEEFLNILFHDILRVE  
PLLKIRSAGQKVQDCNFYQIFMEKNEKVGVP TIQQLLEWSFINSNLKFAEAPSCLIIQMFRFGKDFKLFKKIF  
PSLELNI TDLEDTPRQCRICGGLAMYECRECYDDPDISAGKIKQFCKTCSTQVHLHPRRLNHSYHPVSLPKD  
LPDWDWRHGCIPCQKMEFVAVLCIETSHYVAVFKYKGDSDAWLFFDSMADRGGQNGFNIPQVTPCEVGEYLR  
MSLEDLHSLDSRRIQGCARRLLCDAYMCMYQSPTMSLYK\*

>rs32562371\_ENSMUSP00000105254\_c.2737:A>G\_p.K913R

ENSMUST00000109626.4|Cyl d-203|ENSMUSG00000036712|+|chr8:g.89473520:A>G  
MSSGLWSQEKVTSPLYWEERIFYLLLQECVTDKQTQKLLKVPKGSIGQYIQDRSVGHSRVPSTKGKKNQIGLK  
ILEQPHAVLFLVDEKDVVEINEKFTELL LAITNCEERLSLFRNRLRLSKGLQVDVGSVPKVQLRSGEKFPFVGV  
RFRGPLLAERTVSGIFFGVELLEEGRGQGFTDGVYQKQLFQCDEDCGVFVALDKLELIEDDDNGLESDFAGP  
GDTMQVEPPPLEINSRVSLKVGESTESGTVIFCDVLPKGESLGYFVGVDMDNPIGNWDGRFDGVQLCSFASVE  
STILLHINDIIPDSVTQERRPPKLAFMSRGGVGDGKSSSHNKPKVTGSTDGSRNRSELYFTLNGSSVDSQQS  
KSKNPWYIDEVAEDPAKSLTEMSSDFGHSSPPPQPPSMNSLSSENRFHSLPFLTKMPNTNGSMAHSPLSLSV  
QSVMGELNSTPVQESPLPISSGNAHGLEVGSLAEVKNPPFYGVIRWIGQPPGLSDVLAGLELEDECAGCTD  
GTFRGTRYFTCALKKALFVKLSCRPDSTRFASLQPVSNQIERCNSLAFGGYLSEVVEENTPPKMEKEGLEIMI  
GKKKGIQGHYNSCYLDSTLFLCLFAFSSALDVTLLRPKEKNDIEYYSETQELLRTEIVNPLRIYGYVCATKIMK  
LRKILEKVEAASGFTSEEKDPPEEFLNILFHDILRVEPLLKIRSAGQKVQDCNFYQIFMEKNEKVGVP TIQQLL  
EWSFINSNLKFAEAPSCLIIQMFRFGKDFKLFKKIFPSLELNI TDLEDTPRQCRICGGLAMYECRECYDDPD  
ISAGKIKQFCKTCSTQVHLHPRRLNHSYHPVSLPKDLPDWDWRHGCIPCQKMEFVAVLCIETSHYVAVFKYK  
GDDSAWLFFDSMADRGGQNGFNIPQVTPCEVGEYLRMSLEDLHSLDSRRIQGCARRLLCDAYMCMYQSPTMS  
LYK\*

>rs32562371\_ENSMUSP00000096119\_c.2746:A>G\_p.K916R

ENSMUST00000098519.11|Cyl d-202|ENSMUSG00000036712|+|chr8:g.89473520:A>G  
MSSGLWSQEKVTSPLYWEERIFYLLLQECVTDKQTQKLLKVPKGSIGQYIQDRSVGHSRVPSTKGKKNQIGLK  
ILEQPHAVLFLVDEKDVVEINEKFTELL LAITNCEERLSLFRNRLRLSKGLQVDVGSVPKVQLRSGEKFPFVGV  
RFRGPLLAERTVSGIFFGVELLEEGRGQGFTDGVYQKQLFQCDEDCGVFVALDKLELIEDDDNGLESDFAGP  
GDTMQVEPPPLEINSRVSLKVGESTESGTVIFCDVLPKGESLGYFVGVDMDNPIGNWDGRFDGVQLCSFASVE  
STILLHINDIIPALSDSVTQERRPPKLAFMSRGGVGDGKSSSHNKPKVTGSTDGSRNRSELYFTLNGSSVDS  
QQSKSKNPWYIDEVAEDPAKSLTEMSSDFGHSSPPPQPPSMNSLSSENRFHSLPFLTKMPNTNGSMAHSPLS  
LSVQSVMGELNSTPVQESPLPISSGNAHGLEVGSLAEVKNPPFYGVIRWIGQPPGLSDVLAGLELEDECAG  
CTDGTFRGTRYFTCALKKALFVKLSCRPDSTRFASLQPVSNQIERCNSLAFGGYLSEVVEENTPPKMEKEGLE  
IMIGKKKGIQGHYNSCYLDSTLFLCLFAFSSALDVTLLRPKEKNDIEYYSETQELLRTEIVNPLRIYGYVCATK  
IMKLRKILEKVEAASGFTSEEKDPPEEFLNILFHDILRVEPLLKIRSAGQKVQDCNFYQIFMEKNEKVGVP TIQ  
QLEWSFINSNLKFAEAPSCLIIQMFRFGKDFKLFKKIFPSLELNI TDLEDTPRQCRICGGLAMYECRECYD  
DPDISAGKIKQFCKTCSTQVHLHPRRLNHSYHPVSLPKDLPDWDWRHGCIPCQKMEFVAVLCIETSHYVAVFK  
YKDDSAWLFFDSMADRGGQNGFNIPQVTPCEVGEYLRMSLEDLHSLDSRRIQGCARRLLCDAYMCMYQSP  
TMSLYK\*

>rs32562371\_ENSMUSP00000039834\_c.2746:A>G\_p.K916R

ENSMUST00000043526.15|Cyl d-201|ENSMUSG00000036712|+|chr8:g.89473520:A>G  
MSSGLWSQEKVTSPLYWEERIFYLLLQECVTDKQTQKLLKVPKGSIGQYIQDRSVGHSRVPSTKGKKNQIGLK  
ILEQPHAVLFLVDEKDVVEINEKFTELL LAITNCEERLSLFRNRLRLSKGLQVDVGSVPKVQLRSGEKFPFVGV  
RFRGPLLAERTVSGIFFGVELLEEGRGQGFTDGVYQKQLFQCDEDCGVFVALDKLELIEDDDNGLESDFAGP  
GDTMQVEPPPLEINSRVSLKVGESTESGTVIFCDVLPKGESLGYFVGVDMDNPIGNWDGRFDGVQLCSFASVE  
STILLHINDIIPAVSDSVTQERRPPKLAFMSRGGVGDGKSSSHNKPKVTGSTDGSRNRSELYFTLNGSSVDS  
QQSKSKNPWYIDEVAEDPAKSLTEMSSDFGHSSPPPQPPSMNSLSSENRFHSLPFLTKMPNTNGSMAHSPLS  
LSVQSVMGELNSTPVQESPLPISSGNAHGLEVGSLAEVKNPPFYGVIRWIGQPPGLSDVLAGLELEDECAG  
CTDGTFRGTRYFTCALKKALFVKLSCRPDSTRFASLQPVSNQIERCNSLAFGGYLSEVVEENTPPKMEKEGLE  
IMIGKKKGIQGHYNSCYLDSTLFLCLFAFSSALDVTLLRPKEKNDIEYYSETQELLRTEIVNPLRIYGYVCATK  
IMKLRKILEKVEAASGFTSEEKDPPEEFLNILFHDILRVEPLLKIRSAGQKVQDCNFYQIFMEKNEKVGVP TIQ  
QLEWSFINSNLKFAEAPSCLIIQMFRFGKDFKLFKKIFPSLELNI TDLEDTPRQCRICGGLAMYECRECYD  
DPDISAGKIKQFCKTCSTQVHLHPRRLNHSYHPVSLPKDLPDWDWRHGCIPCQKMEFVAVLCIETSHYVAVFK  
YKDDSAWLFFDSMADRGGQNGFNIPQVTPCEVGEYLRMSLEDLHSLDSRRIQGCARRLLCDAYMCMYQSP  
TMSLYK\*

>rs33035272\_ENSMUSP00000034090\_c.2794:A>G\_p.N932S

ENSMUST00000034090.8|Sal11-201|ENSMUSG00000031665|-|chr8:g.89757308:T>C

MSRRKQAKPQHFQSDPEVASLPRRDGDTEKGQPSRPTKSKDAHVCGRCCAEFFELSDLLLLHKKSCTKNQVLVI  
 VNESPASPAPAKAFPPGSLNDPDDQMKDAANKADQEDCSLSEPKGLDREESMEVEVPVATTTTTTTGGSGGSG  
 GSTLSGVTNITTPSCHSGSSTGTSAITTSLPQLGDLTTLGNFVINSNVI IENLQSTKVAVAQFSQEARCGGA  
 SGGKLLISTLMEQLLALQQQIHLQLIEQIRHQILLASQSADLPAAPSIPSQGLTRTSANPLTTLSSHLSQ  
 QLAVAAGLAQSLASQSANISGVKQLPHVQLPQSSSGTSIVPPSGGTSFNMSIVTAAVPTPSSEKVASNAGASH  
 VSSPAVSASSSPAFAISSLLSPASNPLLPQPTPANAVFPTPLPNIATTAEDLNLSLALAQQQRKSKPPNVTAFE  
 AKSTSDEAFFKHKCRFCAKVFSGDSALQIHLRSHTGERPFKCNICGNRFSTKGNLKVHFQRHKEKYPHIQMNP  
 YPVPEHLDNVPTSTGIPYGMSIPPEKPVTSWLDTKPVLPTLTTSVGLPLPPTLPSLTPFIKTEEPAPIPI SHS  
 AASPQGSVKSDSGAPDLATRNP SGVPEEVEGSAVPPFGGKGEESNMASAVPTAGNSTLNSPVADGGPGGTTT  
 TNPLPLMSEQFKAKFPFGGLLDSAQASETSKQLQVLNIDKKATDPNECII CHRVLSCQSALKMHYRTHTGE  
 RPFKCKICGRAFTTKGNLKTHTSVHRAMPPLRVQHSCPICQKFTNAVVLQQHIRMHMGGOIPNTVPDNYPE  
 SMESDTGSFDEKNFDDLDNFDENMEECPEGSIPTPKSADASQDSLSSSPLPLEMSSIAALENQMKMINAGL  
 AEQLQASLKSVENGSMEGDVLTNDSSSVGGDMESQSAGSPAISESTSSMQALSPSSSTQEFHKSPGMEEKPQR  
 VGPGEFANGLSPTPVNGGALDLTSSHAEKIKEDSLGILFPFRDRGKFKNTACDICGKTFACQSALDIHYRSH  
 TKERPFICTVCNRFSTKGNLQHMRLTHQMRDLPSQLFEPSSNLGPNQNSAVIPANLSSSLIKTEVNGFVHVS  
 PQDSKDAPTSHVPQGPLSSSATS PVLLPALPRRTPKQHYCNTCGKTFSSSSALQIHERHTHTGEKPFAC TICGR  
 AFTTKGNLKVHMGTHMWNSTPARRGRRLSVDGPMFTLGGNPVKFPEMFQKDLAARSGSGDPSSFWNQYTAALS  
 NGLAMKANEISVIQNGGIPPIPGSLGSGSSSPI SGLTGNVEKLGNSEPSAPLAGLEKMASSENGTNFRFTRFV  
 EDSKEIVTS\*

>rs52511487\_ENSMUSP00000034090\_c.2497:A>G\_p.E833G

ENSMUST00000034090.8|Sal11-201|ENSMUSG00000031665|-|chr8:g.89757605:T>C

MSRRKQAKPQHFQSDPEVASLPRRDGDTEKGQPSRPTKSKDAHVCGRCCAEFFELSDLLLLHKKSCTKNQVLVI  
 VNESPASPAPAKAFPPGSLNDPDDQMKDAANKADQEDCSLSEPKGLDREESMEVEVPVATTTTTTTGGSGGSG  
 GSTLSGVTNITTPSCHSGSSTGTSAITTSLPQLGDLTTLGNFVINSNVI IENLQSTKVAVAQFSQEARCGGA  
 SGGKLLISTLMEQLLALQQQIHLQLIEQIRHQILLASQSADLPAAPSIPSQGLTRTSANPLTTLSSHLSQ  
 QLAVAAGLAQSLASQSANISGVKQLPHVQLPQSSSGTSIVPPSGGTSFNMSIVTAAVPTPSSEKVASNAGASH  
 VSSPAVSASSSPAFAISSLLSPASNPLLPQPTPANAVFPTPLPNIATTAEDLNLSLALAQQQRKSKPPNVTAFE  
 AKSTSDEAFFKHKCRFCAKVFSGDSALQIHLRSHTGERPFKCNICGNRFSTKGNLKVHFQRHKEKYPHIQMNP  
 YPVPEHLDNVPTSTGIPYGMSIPPEKPVTSWLDTKPVLPTLTTSVGLPLPPTLPSLTPFIKTEEPAPIPI SHS  
 AASPQGSVKSDSGAPDLATRNP SGVPEEVEGSAVPPFGGKGEESNMASAVPTAGNSTLNSPVADGGPGGTTT  
 TNPLPLMSEQFKAKFPFGGLLDSAQASETSKQLQVLNIDKKATDPNECII CHRVLSCQSALKMHYRTHTGE  
 RPFKCKICGRAFTTKGNLKTHTSVHRAMPPLRVQHSCPICQKFTNAVVLQQHIRMHMGGOIPNTVPDNYPE  
 SMESDTGSFDEKNFDDLDNFDENMEECPEGSIPTPKSADASQDSLSSSPLPLEMSSIAALENQMKMINAGL  
 AEQLQASLKSVENGSMEGDVLTNDSSSVGGDMESQSAGSPAISESTSSMQALSPSNSTQEFHKSPGMEEKPQR  
 VGPGEFANGLSPTPVNGGALDLTSSHAEKIKEDSLGILFPFRDRGKFKNTACDICGKTFACQSALDIHYRSH  
 TKERPFICTVCNRFSTKGNLQHMRLTHQMRDLPSQLFEPSSNLGPNQNSAVIPANLSSSLIKTEVNGFVHVS  
 PQDSKDAPTSHVPQGPLSSSATS PVLLPALPRRTPKQHYCNTCGKTFSSSSALQIHERHTHTGEKPFAC TICGR  
 AFTTKGNLKVHMGTHMWNSTPARRGRRLSVDGPMFTLGGNPVKFPEMFQKDLAARSGSGDPSSFWNQYTAALS  
 NGLAMKANEISVIQNGGIPPIPGSLGSGSSSPI SGLTGNVEKLGNSEPSAPLAGLEKMASSENGTNFRFTRFV  
 EDSKEIVTS\*

>rs214238730\_ENSMUSP00000034090\_c.2360:C>A\_p.H787Q

ENSMUST00000034090.8|Sal11-201|ENSMUSG00000031665|-|chr8:g.89757742:G>T

MSRRKQAKPQHFQSDPEVASLPRRDGDTEKGQPSRPTKSKDAHVCGRCCAEFFELSDLLLLHKKSCTKNQVLVI  
 VNESPASPAPAKAFPPGSLNDPDDQMKDAANKADQEDCSLSEPKGLDREESMEVEVPVATTTTTTTGGSGGSG  
 GSTLSGVTNITTPSCHSGSSTGTSAITTSLPQLGDLTTLGNFVINSNVI IENLQSTKVAVAQFSQEARCGGA  
 SGGKLLISTLMEQLLALQQQIHLQLIEQIRHQILLASQSADLPAAPSIPSQGLTRTSANPLTTLSSHLSQ  
 QLAVAAGLAQSLASQSANISGVKQLPHVQLPQSSSGTSIVPPSGGTSFNMSIVTAAVPTPSSEKVASNAGASH  
 VSSPAVSASSSPAFAISSLLSPASNPLLPQPTPANAVFPTPLPNIATTAEDLNLSLALAQQQRKSKPPNVTAFE  
 AKSTSDEAFFKHKCRFCAKVFSGDSALQIHLRSHTGERPFKCNICGNRFSTKGNLKVHFQRHKEKYPHIQMNP  
 YPVPEHLDNVPTSTGIPYGMSIPPEKPVTSWLDTKPVLPTLTTSVGLPLPPTLPSLTPFIKTEEPAPIPI SHS  
 AASPQGSVKSDSGAPDLATRNP SGVPEEVEGSAVPPFGGKGEESNMASAVPTAGNSTLNSPVADGGPGGTTT  
 TNPLPLMSEQFKAKFPFGGLLDSAQASETSKQLQVLNIDKKATDPNECII CHRVLSCQSALKMHYRTHTGE  
 RPFKCKICGRAFTTKGNLKTHTSVHRAMPPLRVQHSCPICQKFTNAVVLQQHIRMHMGGOIPNTVPDNYPE  
 SMESDTGSFDEKNFDDLDNFDENMEECPEGSIPTPKSADASQDSLSSSPLPLEMSSIAALENQMKMINAGL  
 AEQLQASLKSVENGSMEGDVLTNDSSSVGGDMESQSAGSPAISESTSSMQALSPSNSTQEFHKSPGMEEKPQR  
 VGPGEFANGLSPTPVNGGALDLTSSHAEKIKEDSLGILFPFRDRGKFKNTACDICGKTFACQSALDIHYRSH  
 TKERPFICTVCNRFSTKGNLQHMRLTHQMRDLPSQLFEPSSNLGPNQNSAVIPANLSSSLIKTEVNGFVHVS  
 PQDSKDAPTSHVPQGPLSSSATS PVLLPALPRRTPKQHYCNTCGKTFSSSSALQIHERHTHTGEKPFAC TICGR

AFTTKGNLKVHMGTHMWNSTPARRGRRLSVDGPMFTLGGNPVKFPPEMFQKDLAARSGSGDPSSFWNQYTAALS  
NGLAMKANEISVIQNGGIPPIPGSLGSGSSSPI SGLTGNVEKLGNSEPSAPLAGLEKMASSENGTNFRFTRFV  
EDSKEIVTS\*

>rs50405873\_ENSMUSP00000034090\_c.2273:G>A\_p.M758I

ENSMUST00000034090.8|Sal11-201|ENSMUSG00000031665|-|chr8:g.89757829:C>T  
MSRRKQAKPQHFQSDPEVASLPRRDGDEKQPSRPTKSKDAHVCGRCCAEFFELSDLLLHKKSTKNQLVLI  
VNESPASPAKAFPPGSLNDPDDQMKDAANKADQEDCSDLSEPKGLDREESMEVEVPVATTTTTTTGGSGGSG  
GSTLSGVTNITTPSCHSGSSTGTSAITTSLPQLGDLTTLGNFVINSNVI IENLQSTKVAVAQFSQEARC  
GGASGGKLLISTLMEQLLALQQQIHLQQLIEQIRHQILLASQSADLPAAPSI PSQGLRRTSANPLTTLSSHLSQ  
QLAVAAGLAQSLASQSANISGVKQLPHVQLPQSSSGTSIVPPSGGTSNMSIVTAAVPTPSSEKVASNAGASH  
VSSPAVSASSPFAFAISSLLSPASNPLLPQPTPANAVFPTPLPNIATTAEDLNLSLALAQQQRKSKPPNVTA  
FAEAKSTSDEAFFKHKCRFCAKVFSGDSALQIHLRSHTGERPFKCNICGNRFSTKGNLKVHFQRHKEYPHIQMNP  
YPVPEHLDNVPTSTGIPYGM SIPPEKPVTSWLDTKPVLPTLTTSVGLPLPPTLPSLTPFIKTEEPAPIPI  
SHSAASPQGSVKSDSGAPDLATRNPSGVPEEVEGSAVPPFGGKGEESNMASAVPTAGNSTLNSPVADGGPGG  
TFTNPLPLMSEQFKAKFPFGGLLDSAQASETSKLQQLVENIDKKATDPNECIICHRVLSCQSALKMHYR  
THTGERPFKCKICGRAFTTKGNLKVHMGTHMWNSTPARRGRRLSVDGPMFTLGGNPVKFPPEMFQKDLA  
ARSGSGDPSSFWNQYTAALS  
NGLAMKANEISVIQNGGIPPIPGSLGSGSSSPI SGLTGNVEKLGNSEPSAPLAGLEKMASSENGTNFRF  
TRFVEDSKEIVTS\*

>rs24769596\_ENSMUSP00000034090\_c.2169:CT>T\_p.Y724del-fs

ENSMUST00000034090.8|Sal11-201|ENSMUSG00000031665|-|chr8:g.89757933:AG>A  
MSRRKQAKPQHFQSDPEVASLPRRDGDEKQPSRPTKSKDAHVCGRCCAEFFELSDLLLHKKSTKNQLVLI  
VNESPASPAKAFPPGSLNDPDDQMKDAANKADQEDCSDLSEPKGLDREESMEVEVPVATTTTTTTGGSGGSG  
GSTLSGVTNITTPSCHSGSSTGTSAITTSLPQLGDLTTLGNFVINSNVI IENLQSTKVAVAQFSQEARC  
GGASGGKLLISTLMEQLLALQQQIHLQQLIEQIRHQILLASQSADLPAAPSI PSQGLRRTSANPLTTLSSHLSQ  
QLAVAAGLAQSLASQSANISGVKQLPHVQLPQSSSGTSIVPPSGGTSNMSIVTAAVPTPSSEKVASNAGASH  
VSSPAVSASSPFAFAISSLLSPASNPLLPQPTPANAVFPTPLPNIATTAEDLNLSLALAQQQRKSKPPNVTA  
FAEAKSTSDEAFFKHKCRFCAKVFSGDSALQIHLRSHTGERPFKCNICGNRFSTKGNLKVHFQRHKEYPHIQMNP  
YPVPEHLDNVPTSTGIPYGM SIPPEKPVTSWLDTKPVLPTLTTSVGLPLPPTLPSLTPFIKTEEPAPIPI  
SHSAASPQGSVKSDSGAPDLATRNPSGVPEEVEGSAVPPFGGKGEESNMASAVPTAGNSTLNSPVADGGPGG  
TFTNPLPLMSEQFKAKFPFGGLLDSAQASETSKLQQLVENIDKKATDPNECIICHRVLSCQSALKMHYR  
THTGERPFKCKICGRAFTTKGNLKVHMGTHMWNSTPARRGRRLSVDGPMFTLGGNPVKFPPEMFQKDLA  
ARSGSGDPSSFWNQYTAALS  
NGLAMKANEISVIQNGGIPPIPGSLGSGSSSPI SGLTGNVEKLGNSEPSAPLAGLEKMASSENGTNFRF  
TRFVEDSKEIVTS\*

>rs224820615\_ENSMUSP00000034090\_c.1871:G>TG\_p.K624ins-fs

ENSMUST00000034090.8|Sal11-201|ENSMUSG00000031665|-|chr8:g.89758231:C>CA  
MSRRKQAKPQHFQSDPEVASLPRRDGDEKQPSRPTKSKDAHVCGRCCAEFFELSDLLLHKKSTKNQLVLI  
VNESPASPAKAFPPGSLNDPDDQMKDAANKADQEDCSDLSEPKGLDREESMEVEVPVATTTTTTTGGSGGSG  
GSTLSGVTNITTPSCHSGSSTGTSAITTSLPQLGDLTTLGNFVINSNVI IENLQSTKVAVAQFSQEARC  
GGASGGKLLISTLMEQLLALQQQIHLQQLIEQIRHQILLASQSADLPAAPSI PSQGLRRTSANPLTTLSSHLSQ  
QLAVAAGLAQSLASQSANISGVKQLPHVQLPQSSSGTSIVPPSGGTSNMSIVTAAVPTPSSEKVASNAGASH  
VSSPAVSASSPFAFAISSLLSPASNPLLPQPTPANAVFPTPLPNIATTAEDLNLSLALAQQQRKSKPPNVTA  
FAEAKSTSDEAFFKHKCRFCAKVFSGDSALQIHLRSHTGERPFKCNICGNRFSTKGNLKVHFQRHKEYPHIQMNP  
YPVPEHLDNVPTSTGIPYGM SIPPEKPVTSWLDTKPVLPTLTTSVGLPLPPTLPSLTPFIKTEEPAPIPI  
SHSAASPQGSVKSDSGAPDLATRNPSGVPEEVEGSAVPPFGGNG

>rs51089854\_ENSMUSP00000034090\_c.1852:T>C\_p.V618A

ENSMUST00000034090.8|Sal11-201|ENSMUSG00000031665|-|chr8:g.89758250:A>G  
MSRRKQAKPQHFQSDPEVASLPRRDGDEKQPSRPTKSKDAHVCGRCCAEFFELSDLLLHKKSTKNQLVLI  
VNESPASPAKAFPPGSLNDPDDQMKDAANKADQEDCSDLSEPKGLDREESMEVEVPVATTTTTTTGGSGGSG  
GSTLSGVTNITTPSCHSGSSTGTSAITTSLPQLGDLTTLGNFVINSNVI IENLQSTKVAVAQFSQEARC  
GGASGGKLLISTLMEQLLALQQQIHLQQLIEQIRHQILLASQSADLPAAPSI PSQGLRRTSANPLTTLSSHLSQ  
QLAVAAGLAQSLASQSANISGVKQLPHVQLPQSSSGTSIVPPSGGTSNMSIVTAAVPTPSSEKVASNAGASH  
VSSPAVSASSPFAFAISSLLSPASNPLLPQPTPANAVFPTPLPNIATTAEDLNLSLALAQQQRKSKPPNVTA  
FAEAKSTSDEAFFKHKCRFCAKVFSGDSALQIHLRSHTGERPFKCNICGNRFSTKGNLKVHFQRHKEYPHIQMNP

YPVPEHLDNVPTSTGIPYGM SIPPEKPVTSWLDTKPVLPTLTTSVGLPLPPTLPSLTPFIKTEEPAPIPI SHS  
AASPQGSVKSDSGAPDLATRNPSGVPEEVEGSAAPPFGGKGEESNMASAVPTAGNSTLNSPVADGGPGGTTT  
TNPLLLPLMSEQFKAKFPFGGLLDSAQASETSKLQQLVENIDKKATDPNECII CHRVLSCQSALKMHYRTHTGE  
RPFKCKICGRAFTTKGNLKT HYSVHRAMPPLRVQHSCPICQKFTNAVVLQQHIRMHMGGOIPNTVPDNYPE  
SMESDTGSFDEKNFDDLDNFDENMEECPEGSI PDTPKSADASQDSLSSSPLPLEMSSIAALENQMKMINAGL  
AEQLQASLKSVENGSMEGDVLTNDSSSVGGDMESQSAGSPAISESTSSMQALSPSNSTQEFHKSPGMEEKPQR  
VGPGEFANGLSPTPVNGGALDLTSSHAEKI IKEDSLGILFPFRDRGKFKNTACDICGKTFACQSALDIHYRSH  
TKERPFICTVCNRFSTKGNLQHM LTHQMRDLPSQLFEPSSNLGPNQNSAVIPANLSSSLIKTEVNGFVHVS  
PQDSKDAPTSHPVQGPLSSSATS PVLLPALPRRTPKQHYCNTCGKTFSSSSALQIHERHTHGEKPFAC TICGR  
AFTTKGNLKVHMGTHMWNSTPARRGRRLSVDGPM TFLGGNPVKFPPEMFQKDLAARSGSGDPSSFWNQYTAALS  
NGLAMKANEISVIQNGGIPPIPGSLGSGSSSPI SGLTGNVEKLGNSEPSAPLAGLEKMASSENGTNFRFTRFV  
EDSKEIVTS\*

>rs45920869\_ENSMUSP00000034090\_c.1533:T>C\_p.Y512H

ENSMUST00000034090.8|Sal11-201|ENSMUSG00000031665|-|chr8:g.89758569:A>G  
MSRRKQAKPQHFQSDPEVASLPRRDGDETEKGQPSRPTKSKDAHVCGRCCAEFFELSDLLLHKKSTKNQLVLI  
VNESPASPAKAFPPGSLNDPDDQMKDAANKADQEDCSDLSEPKGLDREESMEVEVPVATTTTTTTGGSGGSG  
GSTLSGVTNITTPSCHSGSSTGTSAITTSLPQLGDLTTLGNF SVINSNVI IENLQSTKVAVAFSQAERCGGA  
SGGKLLISTLMEQLLALQQQQI HQQLIEQIRHQILLASQSADLPAAPSIP SQGLRRTSANPLTTLSSHLSQ  
QLAVAAGLAQSLASQSANISGVKQLPHVQLPQSSSGTSIVPPSGGTSNMSIVTAAVPTPSSEKVASNAGASH  
VSSPAVSASSPFAFAISSLLSPASNPLLPQPTPANAVFPTPLPNIAATTAEDLNSLSALAQQRKS KPPNVTAFE  
AKSTSDEAFFKHKCRFCAKVFSGDSALQIHLRSHTGERPFKCNICGNRFSTKGNLKVHFQRHKEYPHIQMNP  
HPVPEHLDNVPTSTGIPYGM SIPPEKPVTSWLDTKPVLPTLTTSVGLPLPPTLPSLTPFIKTEEPAPIPI SHS  
AASPQGSVKSDSGAPDLATRNPSGVPEEVEGSAVPPFGGKGEESNMASAVPTAGNSTLNSPVADGGPGGTTT  
TNPLLLPLMSEQFKAKFPFGGLLDSAQASETSKLQQLVENIDKKATDPNECII CHRVLSCQSALKMHYRTHTGE  
RPFKCKICGRAFTTKGNLKT HYSVHRAMPPLRVQHSCPICQKFTNAVVLQQHIRMHMGGOIPNTVPDNYPE  
SMESDTGSFDEKNFDDLDNFDENMEECPEGSI PDTPKSADASQDSLSSSPLPLEMSSIAALENQMKMINAGL  
AEQLQASLKSVENGSMEGDVLTNDSSSVGGDMESQSAGSPAISESTSSMQALSPSNSTQEFHKSPGMEEKPQR  
VGPGEFANGLSPTPVNGGALDLTSSHAEKI IKEDSLGILFPFRDRGKFKNTACDICGKTFACQSALDIHYRSH  
TKERPFICTVCNRFSTKGNLQHM LTHQMRDLPSQLFEPSSNLGPNQNSAVIPANLSSSLIKTEVNGFVHVS  
PQDSKDAPTSHPVQGPLSSSATS PVLLPALPRRTPKQHYCNTCGKTFSSSSALQIHERHTHGEKPFAC TICGR  
AFTTKGNLKVHMGTHMWNSTPARRGRRLSVDGPM TFLGGNPVKFPPEMFQKDLAARSGSGDPSSFWNQYTAALS  
NGLAMKANEISVIQNGGIPPIPGSLGSGSSSPI SGLTGNVEKLGNSEPSAPLAGLEKMASSENGTNFRFTRFV  
EDSKEIVTS\*

>rs46996426\_ENSMUSP00000034090\_c.1465:C>T\_p.T489I

ENSMUST00000034090.8|Sal11-201|ENSMUSG00000031665|-|chr8:g.89758637:G>A  
MSRRKQAKPQHFQSDPEVASLPRRDGDETEKGQPSRPTKSKDAHVCGRCCAEFFELSDLLLHKKSTKNQLVLI  
VNESPASPAKAFPPGSLNDPDDQMKDAANKADQEDCSDLSEPKGLDREESMEVEVPVATTTTTTTGGSGGSG  
GSTLSGVTNITTPSCHSGSSTGTSAITTSLPQLGDLTTLGNF SVINSNVI IENLQSTKVAVAFSQAERCGGA  
SGGKLLISTLMEQLLALQQQQI HQQLIEQIRHQILLASQSADLPAAPSIP SQGLRRTSANPLTTLSSHLSQ  
QLAVAAGLAQSLASQSANISGVKQLPHVQLPQSSSGTSIVPPSGGTSNMSIVTAAVPTPSSEKVASNAGASH  
VSSPAVSASSPFAFAISSLLSPASNPLLPQPTPANAVFPTPLPNIAATTAEDLNSLSALAQQRKS KPPNVTAFE  
AKSTSDEAFFKHKCRFCAKVFSGDSALQIHLRSHTGERPFKCNICGNRFSTKGNLKVHFQRHKEYPHIQMNP  
YPVPEHLDNVPTSTGIPYGM SIPPEKPVTSWLDTKPVLPTLTTSVGLPLPPTLPSLTPFIKTEEPAPIPI SHS  
AASPQGSVKSDSGAPDLATRNPSGVPEEVEGSAVPPFGGKGEESNMASAVPTAGNSTLNSPVADGGPGGTTT  
TNPLLLPLMSEQFKAKFPFGGLLDSAQASETSKLQQLVENIDKKATDPNECII CHRVLSCQSALKMHYRTHTGE  
RPFKCKICGRAFTTKGNLKT HYSVHRAMPPLRVQHSCPICQKFTNAVVLQQHIRMHMGGOIPNTVPDNYPE  
SMESDTGSFDEKNFDDLDNFDENMEECPEGSI PDTPKSADASQDSLSSSPLPLEMSSIAALENQMKMINAGL  
AEQLQASLKSVENGSMEGDVLTNDSSSVGGDMESQSAGSPAISESTSSMQALSPSNSTQEFHKSPGMEEKPQR  
VGPGEFANGLSPTPVNGGALDLTSSHAEKI IKEDSLGILFPFRDRGKFKNTACDICGKTFACQSALDIHYRSH  
TKERPFICTVCNRFSTKGNLQHM LTHQMRDLPSQLFEPSSNLGPNQNSAVIPANLSSSLIKTEVNGFVHVS  
PQDSKDAPTSHPVQGPLSSSATS PVLLPALPRRTPKQHYCNTCGKTFSSSSALQIHERHTHGEKPFAC TICGR  
AFTTKGNLKVHMGTHMWNSTPARRGRRLSVDGPM TFLGGNPVKFPPEMFQKDLAARSGSGDPSSFWNQYTAALS  
NGLAMKANEISVIQNGGIPPIPGSLGSGSSSPI SGLTGNVEKLGNSEPSAPLAGLEKMASSENGTNFRFTRFV  
EDSKEIVTS\*

>rs46840751\_ENSMUSP00000034090\_c.1407:C>A\_p.R470S

ENSMUST00000034090.8|Sal11-201|ENSMUSG00000031665|-|chr8:g.89758695:G>T  
MSRRKQAKPQHFQSDPEVASLPRRDGDETEKGQPSRPTKSKDAHVCGRCCAEFFELSDLLLHKKSTKNQLVLI  
VNESPASPAKAFPPGSLNDPDDQMKDAANKADQEDCSDLSEPKGLDREESMEVEVPVATTTTTTTGGSGGSG

GSTLSGVTNITTPSCHSGSSTGTSAITTSLPQLGDLTTLGNFVSVINSNVI IENLQSTKVAVAQFSQEARCGGA  
 SGGKLLISTLMEQLLALQQQQIHQLQLIEQIRHQILLASQSADLPAAPSIPSQGLRTSANPLTTLSSHLSQ  
 QLAVAAGLAQSLASQSANISGVKQLPHVQLPQSSSGTSIVPPSGGTSFNMSIVTAAVPTPSSEKVASNAGASH  
 VSSPAVSASSSPAFAISSLLSPASNPLLPQPTPANAVFPTPLPNIATTAEDLNLSLALAQQQRKSKPPNVTAFE  
 AKSTSDEAFFKHKCRFCAKVFGSDSALQIHLSSHTGERPFKCNICGNRFSTKGNLKVHFQRHKEYPHIQMNP  
 YPVPEHLDNVPTSTGIPYGMSSIPPEKPVTSWLDTKPVLPTLTTSSVGLPLPPTLPSLTPFIKTEEPAPIPI SHS  
 AASPQGSVKSDSGAPDLATRNPSPGVPEEVEGSAVPPFGGKGEESNMASAVPTAGNSTLNSPVADGGPGGTTT  
 TNPLPLMSEQFKAKFPFGGLLDSAQASETSKLQQLVENIDKKATDPNECII CHRVLSCQSALKMHYRTHTGE  
 RPFKCKICGRAFTTKGNLKTHTSVHRAMPPLRVQHSCPICQKFTNAVVLQQHIRMHMGGOIPNTVPVDNYPE  
 SMESDTGSFDEKNFDDLDNFDENMEECPEGSIPTPKSADASQDSLSSSPLPLEMSSIAALENQMKMINAGL  
 AEQLQASLKSVENGSMEGDVLTNDSSSVGGDMESQSAGSPAISESTSSMQALSPSNSTQEFHKS PGMEKPKQR  
 VGPGEFANGLSPTPVNGGALDLTSSHAEKI IKEDSLGILFPFRDRGKFKNTACDICGKTFACQSALDIHYRSH  
 TKERPFICTVCNRGFSTKGNLKHMLTHQMRDLPSQLFEPSSNLGPNQNSAVIPANLSSSLIKTEVNGFVHVS  
 PQDSKDAPTSHPVQGPLSSSATS PVLLPALPRRTPKQHYCNTCGKTFSSSSALQIHERHTHTGEKPFAC TICGR  
 AFTTKGNLKVHMGTHMWNSTPARRGRRLSVDGPMTFLGGNPVKFPPEMFQKDLAARSGSGDPSSFWNQYTAALS  
 NGLAMKANEISVIQNGGIPPIPGSLGSGSSSPISGLTGNVEKLGNSEPSAPLAGLEKMASSENGTNFRFRTRFV  
 EDSKEIVTS\*

>rs49037112\_ENSMUSP00000034090\_c.325:A>T\_p.D109V

ENSMUST00000034090.8|Sal11-201|ENSMUSG00000031665|-|chr8:g.89759777:T>A  
 MSRRKQAKPQHFQSDPEVASLPRRDGDETEKQPSRPTKSKDAHVCGRCCAEFFELSDLLLHKKSKTKNQLVLI  
 VNESPASPAKAFPPGSLNDPDDQMKDAANKADQEVCSLDSEPKGLDREESMEVEVPVATTTTTTTGGSGGSG  
 GSTLSGVTNITTPSCHSGSSTGTSAITTSLPQLGDLTTLGNFVSVINSNVI IENLQSTKVAVAQFSQEARCGGA  
 SGGKLLISTLMEQLLALQQQQIHQLQLIEQIRHQILLASQSADLPAAPSIPSQGLRTSANPLTTLSSHLSQ  
 QLAVAAGLAQSLASQSANISGVKQLPHVQLPQSSSGTSIVPPSGGTSFNMSIVTAAVPTPSSEKVASNAGASH  
 VSSPAVSASSSPAFAISSLLSPASNPLLPQPTPANAVFPTPLPNIATTAEDLNLSLALAQQQRKSKPPNVTAFE  
 AKSTSDEAFFKHKCRFCAKVFGSDSALQIHLRSHTGERPFKCNICGNRFSTKGNLKVHFQRHKEYPHIQMNP  
 YPVPEHLDNVPTSTGIPYGMSSIPPEKPVTSWLDTKPVLPTLTTSSVGLPLPPTLPSLTPFIKTEEPAPIPI SHS  
 AASPQGSVKSDSGAPDLATRNPSPGVPEEVEGSAVPPFGGKGEESNMASAVPTAGNSTLNSPVADGGPGGTTT  
 TNPLPLMSEQFKAKFPFGGLLDSAQASETSKLQQLVENIDKKATDPNECII CHRVLSCQSALKMHYRTHTGE  
 RPFKCKICGRAFTTKGNLKTHTSVHRAMPPLRVQHSCPICQKFTNAVVLQQHIRMHMGGOIPNTVPVDNYPE  
 SMESDTGSFDEKNFDDLDNFDENMEECPEGSIPTPKSADASQDSLSSSPLPLEMSSIAALENQMKMINAGL  
 AEQLQASLKSVENGSMEGDVLTNDSSSVGGDMESQSAGSPAISESTSSMQALSPSNSTQEFHKS PGMEKPKQR  
 VGPGEFANGLSPTPVNGGALDLTSSHAEKI IKEDSLGILFPFRDRGKFKNTACDICGKTFACQSALDIHYRSH  
 TKERPFICTVCNRGFSTKGNLKHMLTHQMRDLPSQLFEPSSNLGPNQNSAVIPANLSSSLIKTEVNGFVHVS  
 PQDSKDAPTSHPVQGPLSSSATS PVLLPALPRRTPKQHYCNTCGKTFSSSSALQIHERHTHTGEKPFAC TICGR  
 AFTTKGNLKVHMGTHMWNSTPARRGRRLSVDGPMTFLGGNPVKFPPEMFQKDLAARSGSGDPSSFWNQYTAALS  
 NGLAMKANEISVIQNGGIPPIPGSLGSGSSSPISGLTGNVEKLGNSEPSAPLAGLEKMASSENGTNFRFRTRFV  
 EDSKEIVTS\*

>rs48147872\_ENSMUSP00000034090\_c.211:T>C\_p.V71A

ENSMUST00000034090.8|Sal11-201|ENSMUSG00000031665|-|chr8:g.89759891:A>G  
 MSRRKQAKPQHFQSDPEVASLPRRDGDETEKQPSRPTKSKDAHVCGRCCAEFFELSDLLLHKKSKTKNQLALI  
 VNESPASPAKAFPPGSLNDPDDQMKDAANKADQEDCSLDSEPKGLDREESMEVEVPVATTTTTTTGGSGGSG  
 GSTLSGVTNITTPSCHSGSSTGTSAITTSLPQLGDLTTLGNFVSVINSNVI IENLQSTKVAVAQFSQEARCGGA  
 SGGKLLISTLMEQLLALQQQQIHQLQLIEQIRHQILLASQSADLPAAPSIPSQGLRTSANPLTTLSSHLSQ  
 QLAVAAGLAQSLASQSANISGVKQLPHVQLPQSSSGTSIVPPSGGTSFNMSIVTAAVPTPSSEKVASNAGASH  
 VSSPAVSASSSPAFAISSLLSPASNPLLPQPTPANAVFPTPLPNIATTAEDLNLSLALAQQQRKSKPPNVTAFE  
 AKSTSDEAFFKHKCRFCAKVFGSDSALQIHLRSHTGERPFKCNICGNRFSTKGNLKVHFQRHKEYPHIQMNP  
 YPVPEHLDNVPTSTGIPYGMSSIPPEKPVTSWLDTKPVLPTLTTSSVGLPLPPTLPSLTPFIKTEEPAPIPI SHS  
 AASPQGSVKSDSGAPDLATRNPSPGVPEEVEGSAVPPFGGKGEESNMASAVPTAGNSTLNSPVADGGPGGTTT  
 TNPLPLMSEQFKAKFPFGGLLDSAQASETSKLQQLVENIDKKATDPNECII CHRVLSCQSALKMHYRTHTGE  
 RPFKCKICGRAFTTKGNLKTHTSVHRAMPPLRVQHSCPICQKFTNAVVLQQHIRMHMGGOIPNTVPVDNYPE  
 SMESDTGSFDEKNFDDLDNFDENMEECPEGSIPTPKSADASQDSLSSSPLPLEMSSIAALENQMKMINAGL  
 AEQLQASLKSVENGSMEGDVLTNDSSSVGGDMESQSAGSPAISESTSSMQALSPSNSTQEFHKS PGMEKPKQR  
 VGPGEFANGLSPTPVNGGALDLTSSHAEKI IKEDSLGILFPFRDRGKFKNTACDICGKTFACQSALDIHYRSH  
 TKERPFICTVCNRGFSTKGNLKHMLTHQMRDLPSQLFEPSSNLGPNQNSAVIPANLSSSLIKTEVNGFVHVS  
 PQDSKDAPTSHPVQGPLSSSATS PVLLPALPRRTPKQHYCNTCGKTFSSSSALQIHERHTHTGEKPFAC TICGR  
 AFTTKGNLKVHMGTHMWNSTPARRGRRLSVDGPMTFLGGNPVKFPPEMFQKDLAARSGSGDPSSFWNQYTAALS

NGLAMKANEISVIQNGGIPPIPGSLGSGSSSPISGLTGNVEKLGNSEPSAPLAGLEKMASSENGTNFRFTRFV  
EDSKEIVTS\*  
>rs247287166\_ENSMUSP00000105250\_c.1105:C>TTTGC\_p.A369ins-fs  
ENSMUST00000109621.10|Tox3-201|ENSMUSG00000043668|-  
|chr8:g.90975524:G>GCAA  
MDVRFYPAAAGDPAGLDFAQCLGYGYGSKLGNNNYMNMAEANNAFFAASEQTFHTPSLGDEEFEI P P I T P P P E  
SDPTLGMPDALLPFQTLSDPLPSQGTEFTFPQFPQQSLDLPSITISRNLVEQDGVLHNSGLHMDQSHTQVVSQYR  
QDPSLVMRSIVHMTDGARSGIMPQAQLTTINQSQLSAQLGGLNLGGANVSHTSPSPPPASKSATPSPSSSINEED  
ADDANRAIGEKRTAPDSGKKPKTPKKKKKKDPNEPQKPVSAAYALFFRDTQAAIKGQNP NAT FGEVSKIVASMW  
DSLGEEQKQVYKRKTEAAKKEYLKALAAAYRASLVSKAAAEAEQ T I R S V Q Q T L A S T N L T S S L L L N T S L S Q H G  
TVPVCLTSDSSTVTP  
>rs49748472\_ENSMUSP00000105250\_c.577:A>G\_p.N193S  
ENSMUST00000109621.10|Tox3-201|ENSMUSG00000043668|-|chr8:g.90984600:T>C  
MDVRFYPAAAGDPAGLDFAQCLGYGYGSKLGNNNYMNMAEANNAFFAASEQTFHTPSLGDEEFEI P P I T P P P E  
SDPTLGMPDALLPFQTLSDPLPSQGTEFTFPQFPQQSLDLPSITISRNLVEQDGVLHNSGLHMDQSHTQVVSQYR  
QDPSLVMRSIVHMTDGARSGIMPQAQLTTINQSQLSAQLGGLNLGGASVSHTSPSPPPASKSATPSPSSSINEED  
ADDANRAIGEKRTAPDSGKKPKTPKKKKKKDPNEPQKPVSAAYALFFRDTQAAIKGQNP NAT FGEVSKIVASMW  
DSLGEEQKQVYKRKTEAAKKEYLKALAAAYRASLVSKAAAEAEQ T I R S V Q Q T L A S T N L T S S L L L N T S L S Q H G  
TVPASPQTLPSLPRSIAPKPLTMRPMSQIVTSVTIAANMPNIGAPLISSMGTTMVGSATSTQVSPSVQTQ  
QHQMQLQQQQQQQQQQMQQMQQQQQLQQHQMHOQIQQQMQQQHFOHMQHQLQQQQQQHLQQQLSQQQLQQQLQQ  
HLQLQQLQHMQHQSQSPRQHSPVTSQITSPIPAIGSPQSPASQQHQPIQSQTQTQVLPQVSI F \*  
>rs49748472\_ENSMUSP00000135697\_c.574:A>G\_p.N192S  
ENSMUST00000176616.8|Tox3-203|ENSMUSG00000043668|-|chr8:g.90984600:T>C  
MDVRFYPAAAGDPAGLDFAQCLGYGYGSKLGNNNYMNMAEANNAFFAASETFHTPSLGDEEFEI P P I T P P P E S  
DPTLGMPDALLPFQTLSDPLPSQGTEFTFPQFPQQSLDLPSITISRNLVEQDGVLHNSGLHMDQSHTQVVSQYRQ  
DPSLVMRSIVHMTDGARSGIMPQAQLTTINQSQLSAQLGGLNLGGASVSHTSPSPPPASKSATPSPSSSINEEDA  
DDANRAIGEKRTAPDSGKKPKTPKKKKKKDPNEPQKPVSAAYALFFRDTQAAIKGQNP NAT FGEVSKIVASMW  
SLGEEQKQVYKRKTEAA  
>rs49748472\_ENSMUSP00000134931\_c.511:A>G\_p.N171S  
ENSMUST00000176034.2|Tox3-202|ENSMUSG00000043668|-|chr8:g.90984600:T>C  
MDVRFYPAAAGDPAGLDFAQCLGYGYGSKTFHTPSLGDEEFEI P P I T P P P E S D P T L G M P D A L L P F Q T L S D P L P  
SQGTEFTFPQFPQQSLDLPSITISRNLVEQDGVLHNSGLHMDQSHTQVVSQYRQDPSLVMRSIVHMTDGARSGIM  
PPAQLTTINQSQLSAQLGGLNLGGASVSHTSPSP  
>rs46153803\_ENSMUSP00000105250\_c.441:G>T\_p.D148Y  
ENSMUST00000109621.10|Tox3-201|ENSMUSG00000043668|-|chr8:g.90984736:C>A  
MDVRFYPAAAGDPAGLDFAQCLGYGYGSKLGNNNYMNMAEANNAFFAASEQTFHTPSLGDEEFEI P P I T P P P E  
SDPTLGMPDALLPFQTLSDPLPSQGTEFTFPQFPQQSLDLPSITISRNLVEQDGVLHNSGLHMDQSHTQVVSQYR  
QYPSLVMRSIVHMTDGARSGIMPQAQLTTINQSQLSAQLGGLNLGGANVSHTSPSPPPASKSATPSPSSSINEED  
ADDANRAIGEKRTAPDSGKKPKTPKKKKKKDPNEPQKPVSAAYALFFRDTQAAIKGQNP NAT FGEVSKIVASMW  
DSLGEEQKQVYKRKTEAAKKEYLKALAAAYRASLVSKAAAEAEQ T I R S V Q Q T L A S T N L T S S L L L N T S L S Q H G  
TVPASPQTLPSLPRSIAPKPLTMRPMSQIVTSVTIAANMPNIGAPLISSMGTTMVGSATSTQVSPSVQTQ  
QHQMQLQQQQQQQQQQMQQMQQQQQLQQHQMHOQIQQQMQQQHFOHMQHQLQQQQQQHLQQQLSQQQLQQQLQQ  
HLQLQQLQHMQHQSQSPRQHSPVTSQITSPIPAIGSPQSPASQQHQPIQSQTQTQVLPQVSI F \*  
>rs46153803\_ENSMUSP00000135697\_c.438:G>T\_p.D147Y  
ENSMUST00000176616.8|Tox3-203|ENSMUSG00000043668|-|chr8:g.90984736:C>A  
MDVRFYPAAAGDPAGLDFAQCLGYGYGSKLGNNNYMNMAEANNAFFAASETFHTPSLGDEEFEI P P I T P P P E S  
DPTLGMPDALLPFQTLSDPLPSQGTEFTFPQFPQQSLDLPSITISRNLVEQDGVLHNSGLHMDQSHTQVVSQYRQ  
YPSLVMRSIVHMTDGARSGIMPQAQLTTINQSQLSAQLGGLNLGGANVSHTSPSPPPASKSATPSPSSSINEEDA  
DDANRAIGEKRTAPDSGKKPKTPKKKKKKDPNEPQKPVSAAYALFFRDTQAAIKGQNP NAT FGEVSKIVASMW  
SLGEEQKQVYKRKTEAA  
>rs46153803\_ENSMUSP00000134931\_c.375:G>T\_p.D126Y  
ENSMUST00000176034.2|Tox3-202|ENSMUSG00000043668|-|chr8:g.90984736:C>A  
MDVRFYPAAAGDPAGLDFAQCLGYGYGSKTFHTPSLGDEEFEI P P I T P P P E S D P T L G M P D A L L P F Q T L S D P L P  
SQGTEFTFPQFPQQSLDLPSITISRNLVEQDGVLHNSGLHMDQSHTQVVSQYRQYPSLVMRSIVHMTDGARSGIM  
PPAQLTTINQSQLSAQLGGLNLGGANVSHTSPSP  
>rs33399640\_ENSMUSP00000046356\_c.382:A>G\_p.Q128R  
ENSMUST00000048665.8|Chd9-201|ENSMUSG00000056608|+|chr8:g.91659424:A>G

MTDPMDDFFDDANLFGETLEGLSDDTFVQPGPVSLVDELNLGAEFEPLHIDSLNHVQGTPTHQKMADFEQLSQ  
 FDSMKFHPVNVQSFSGSPVEHVLSPHSQFNCSPIHPPNQPNGLFQDVADGSPMWGHRTATGLANQNGSPFHQPGH  
 SHSLHQNKSFVAHPDFALFQASEHQTCSSLSHQSRSNLNPQNSLGQAKNFLDANVSGAHRVNVNHLATAP  
 SSQQTLPVQFSPTANPPAHFLKCSSHQEGNYNRPSMTSCSVNSQQFSPSHYSFSSGHVSPSSLLQSSAGLA  
 PGHTNQALSDFAGSNFSFPHRGMKQEPTQHLLNPTPSLNSNNFQILHSSHPQGNYSNSKLSPVHMNFPDPVDA  
 GPPVGHFNDHAETNGFSSLEENLLHHVDSHAEPFAGLDPEDLLQEGLLPQFDESFPFGQDNSNHVLDHDLDRQF  
 TSHLVSRSQDMAQTQLQYQARGWPSPLSTNHQHLHSRNLHCLQRQPSSKKSQDGSQTYTKLQNTQVRVMSEKK  
 PRKRVESESKQEKANRIISEAIAKAKERGERNIPRVMSPENFPASVEGKKEKRGRMKSPKDRDNKKPKTY  
 SKLKEKTKIGKLIITLGGKHKRRNESSELSDAEQRSQHTFKEQHSQKRRSNRQIKRKKYAEDEAGQSEEEV  
 KGSRLVKRNSAPPPGEQPLQLFVENPSEEDAAIVDKILACRTVKKEVSPGVMLDIEEFFVKYKNYSYLHCEWA  
 TEQQLLKDKRIQQKIKRFLRQAQRAHFLADMEEPFNPDYVEVDRILEVSCFCEKDTGESVIYLVKWCSLP  
 YEDSTWELKEDVDLAKIEEFEQLQASRPDTRHLDRPPSNIWKKIEQSREYKNGNQLREYQLEGLNWLFFNWN  
 RRNCILADEMGLGKTIQSITFLYEILLTGIRGPFLLIAPLSTIANWEREFRTWTNDINVVVYHGSLSRQMIQQ  
 YEMYFRDSQGRIRGAYRFQAIITTFEMILGGCGELNAIDWRCVIIDEAHRLKNKNCKLLEGLKLMNLEHKVL  
 LTGTPLQNTVEELFSLHLFLEPLRFPESETFMQEFGDLKTEEQVQKLQAILKPMMLRRLKEDVEKKLAPKEET  
 IIEVELTNIQKKYRAILEKNFSFLSKGAGQTNVNLVNTMELRKCCHNPHYLIKGAEEKILGEFRDTPNPSA  
 SDFHLQAMIQSAGLVLIDKLLPKMKAGGHKVLIFSQMVRCLDILEDYLIHKRYLYERIDGRVGRNLRQAID  
 RFSKPDSDRFVLLCTRAGGLINLTAADTCIIFDSDWNPQNDLQAQARCHRIGQNKAVKYYRVLVTRNSYERE  
 MFDRASLKLGLDKAVLQSMSGRSDNSVSGIQQLSKKEIEDLLRRGAYGAIMEEEDGSKFCEEDIDQILLRRTK  
 TITIESEGRGSTFAKASFVAGNRTDISLDDPNFWQKAKKAELDIDTISGRNSLVIDTPRIRKQTRPFSATK  
 DELAELSEAESEGEKPKLRPCDRSGGYGRTECFRVEKNLLVYGWRWREILSHGRFKRQLNEHDEVEICRA  
 LLAYCLIHRYGDEKIKGFIWDLITPTEDGQTRQLNHLGLSAPVPRGRKGGKVKQTQTSFQIAEAWLRKYNP  
 EQLLQDEGYKHKVHKHCNKVLLRVRMLYLLKQEVIGNESQKVFQDASDIDVWVPEPDHSEVPAAWWDFDAD  
 KSLGIVGFKHGYEKYNTIRADPALCFLEVRGKPDQKAVAAEQRANDYMDGDVEDPEYKPAIAFKDDIEDDVS  
 SPGLDVIADGEGQLMEGDKVYWPSPALTTLRRLITAYQRTNKNRHIQQMQPTFSLPANAMQPLYEEATLNP  
 KMAAKIERQWRNREEADFYRVVSTFGVVFDPDRGQFDWTKFRALARLHKKTDNSLEKILCAFMSMCRRCR  
 LPSKEELVDPNIFIQPIITEERASRTLYRIELLRKVRQALRHPQLFERLKLCHPNPDLPIWWECEGSHDRDLI  
 GAAKHGVSRTDYHILRDPELSFMQAQRNYNQSKAAHSRTSAPLLQQYQVALSASPLTSLPRLGKGTLLLEDM  
 KVKSESLTEEPQSSEEEESMSSMETRTRVKSEPVSPKNGVLSQATGDQKSGGKSETDRRMVAARTEPLTPNPAS  
 KKPRVHKRGSQSSSDSDSARSSSSSSSSSSSSSSSSSSSSSSSSSSSSSSSSSSSSSSSSSSSSSSSSSSSSS  
 SSSEESDSEEDVQKREGTPHRKAYDEESVASLSTTQDETQDSFQANNGTPESAYLLQGGYMLAASYWPKDRVM  
 INRLDSICQTVLKGKWPARRHYDANTVASFYTTKLLDSPGAATERGEPVPTPPAVAVREEHEQSAQMSKEG  
 GLKLTQKQGLAQKRPFDGEDGALGQQYLRRLRELQSTSETSLVNLKPAVPASGTSIQPTLGANGAILDSQP  
 IVKRRGRNRNVEGADILFLNRNKPPNIPTGMNPALSYQPQRIPTESVPPVNLKDGTRLAGDDAPKRKD  
 LDRWLKEHPYVEDLGAFIQVQLHEGRPKQKRHRCRNPNKLDINSLTGEERVQLINRRNARKVGGAFAPPLK  
 DLCRFLKENSEYGVAPWGDVVKQSGFLPESMFERILITGPVVREEVSRGRPKSGIAKATTAATAAVPAGSVPG  
 NPLLANGLLPGVDLTAALQALQQLNQLNQLQSLQVTAGLMGPAGLSSGGETKNMAAMFPMLFSGMAGLPLNLLGMG  
 GLLSKTAESGAEKRGNDKESLEGKERTESQSPENGGERCVPSPSTSSSTAALSSAAAAPIALNPLLLSNI  
 LYPGMLLTPGLNLHLPTLSQSNAFDVQKNKSDLLDSSKSVEIKEENSRVRDQEEKGGTEPSPLNENSTDEGSE  
 RASSGSDSSSSSESDSSSNED\*

>rs33399640\_ENSMUSP00000147839\_c.382:A>G\_p.Q128R  
 ENSMUST00000211403.2|Chd9-213|ENSMUSG00000056608|+|chr8:g.91659424:A>G  
 MTDPMDDFFDDANLFGETLEGLSDDTFVQPGPVSLVDELNLGAEFEPLHIDSLNHVQGTPTHQKMADFEQLSQ  
 FDSMKFHPVNVQSFSGSPVEHVLSPHSQFNCSPIHPPNQPNGLFQDVADGSPMWGHRTATGLANQNGSPFHQPGH  
 SHSLHQNKSFVAHPDFALFQASEHQTCSSLSHQSRSNLNPQNSLGQAKNFLDANVSGAHRVNVNHLATAP  
 SSQQTLPVQFSPTANPPAHFLKCSSHQEGNYNRPSMTSCSVNSQQFSPSHYSFSSGHVSPSSLLQSSAGLA  
 PGHTNQALSDFAGSNFSFPHRGMKQEPTQHLLNPTPSLNSNNFQILHSSHPQGNYSNSKLSPVHMNFPDPVDA  
 GPPVGHFNDHAETNGFSSLEENLLHHVDSHAEPFAGLDPEDLLQEGLLPQFDESFPFGQDNSNHVLDHDLDRQF  
 TSHLVSRSQDMAQTQLQYQARGWPSPLSTNHQHLHSRNLHCLQRQPSSKKSQDGSQTYTKLQNTQVRVMSEKK  
 PRKRVESESKQEKANRIISEAIAKAKERGERNIPRVMSPENFPASVEGKKEKRGRMKSPKDRDNKKPKTY  
 SKLKEKTKIGKLIITLGGKHKRRNESSELSDAEQRSQHTFKEQHSQKRRSNRQIKR

>rs33399640\_ENSMUSP00000147407\_c.382:A>G\_p.Q128R  
 ENSMUST00000209203.2|Chd9-203|ENSMUSG00000056608|+|chr8:g.91659424:A>G  
 MTDPMDDFFDDANLFGETLEGLSDDTFVQPGPVSLVDELNLGAEFEPLHIDSLNHVQGTPTHQKMADFEQLSQ  
 FDSMKFHPVNVQSFSGSPVEHVLSPHSQFNCSPIHPPNQPNGLFQDVADGSPMWGHRTATGLANQNGSPFHQPGH  
 SHSLHQNKSFVAHPDFALFQASEHQTCSSLSHQSRSNLNPQNSLGQAKNFLDANVSGAHRVNVNHLATAP  
 SSQQTLPVQFSPTANPPAHFLKCSSHQEGNYNRPSMTSCSVNSQQFSPSHYSFSSGHVSPSSLLQSSAGLA  
 PGHTNQALSDFAGSNFSFPHRGMKQEPTQHLLNPTPSLNSNNFQILHSSHPQGNYSNSKLSPVHMNFPDPVDA

GPPVGHFNDHAETNGFSSLEENLLHHVDSHAEPFAGLDPEDLLQEGLLPQFDES PFGQDNSNHVLDHDLDRQF  
TSHLVSRPSDMAQTQLQYQARGWPSPLSTNHQHLHSRNLHLCLQRQPPSSSKKSDGSGTYTKLQNTQVRVMSEKK  
PRKRVESESKQEKANRIISEAIARAKERGERNIPRVMSPENFPASVEGKEEKRGRMMKSKPKDRDNKKPKTY  
SKLKEKTKIGKLIITLGGKHKRRNESSELSDAEQRSQHTFKEQHSQKRRSNRQIKRKKYAEAEAGKQSEEEV  
KGSRLVVRNSAPPPGEQPLQLFVENPSEEDAAIVDKILACRTVKKEVSPGVMLDIEEFFVKYKNYSYLHCEWA  
TEQQLLKDKRIQQKIKRFLRQAQRAHFLADMEEEEFPNPDYVEVDRILEVSFCEDEKDTGESVIYYLVKWCSLP  
YEDSTWELKEDVDLAKIEEFEQLQASRPDTRHLDRPPSNIWKKIEQSREYKNGNQLREYQLEGLNWLWNWYN  
RRNCILADEMGLGKTIQSITFLYEILLTGIRGPFLLIAPLSTIANWEREFRTWTDINVVVYHGSLISRQMIQQ  
YEMYFRDSQGRIRGAYRFQAIITTFEMILGGCGELNAIDWRCVIIDEAHRLKKNCKLLEGLKLMNLEHKVL  
LTGTPLQNTVEELFSLHLFLEPLRFPSESTFMQEFGLDTEEQVQKLQAILKPMMLRRLKEDVEKKLAPKEET  
IIEVELTNIQKYYRAILEKNFSFLSKGAGQTNVNLVNTMELRKCCHPYLIKGAEEKILGEFRDYNPSA  
SDFHLQAMIQSAGKLVLDKLLPKMKAGGKVLIFSQMVRCLEDYLIHKRYLYERIDGRVGRNLRQAID  
RFSKPDSRDFVLLCTRAGGLGINLTAADTCIIFDSDWNPQNDLQAQARCHRIGQNKAVKRYRNLVTRNSYERE  
MFDRA SLKLGDKAVLQSMGRDSNVSGIQQLSKKEIEDLLRRGAYGAIMEEEEDEGSKFCEEDIQILLRRTK  
TITIESEGRGSTFAKASFVAGNRDTSISLDDPNFWQKAKKAELDIDTISGRNSLVIDTIPRIRKQTRPFSATK  
DELAELSEAESEGEKPKLRPCDRSGGYGRTECFRVEKNLLVYGWRWREILSHGRFKRQLNEHDVEVICRA  
LLAYCLIHRYGDEKIKGFIWDLITPTEDGQTRELQNLHGLSAPVPRGRKGKVKVTQTSFQIAEAWLRKYNP  
EQLLQDEGYKKHVKHHCNKVLLRVRMLYLLKQEVIGNESQKVFQVGDASDIDVWVPEPDHSEVPAAWWDFDAD  
KSLLLIGVFKHGYEKYNTIRADPALCFLEVRGKPDKAVAAEQRANDYMDGDVEDPEYKPAPAIKDDIEDDVS  
SPGDLVIADGEGQLMEGDKVYWPSPSALTTRLRRLITAYQRTNKNRHIQQMQPTFSLPANAMQPLYEEATLNP  
KMAAKIERQQRIGRSKYFYSTNHRGTCF\*

>rs33399640\_ENSMUSP00000148088\_c.382:A>G\_p.Q128R  
ENSMUST00000209423.2|Chd9-205|ENSMUSG00000056608|+|chr8:g.91659424:A>G  
MTDPMDFDDANLFGETLEGLSDDTFVQPGVSLVDELNLGAEEFPLHIDSLNHVQGTPTHQKMADFEQLSQ  
FDSMKFHPVNQSFVGFSPVEHVLSPHSQFNCSPIHPNPQNGLFQDVADGSPMWGHRTATGLANQNGSPFHQPGH  
SSSLHLQNKSFVAFALFQASEHQTCSSLSHQSRSNLNPGQNSLGQAKNFLDANVSGAHRVNVNHLATAP  
SQQTLVPVQFSPTANPAHFLKCSHQEGNYNRPSMTSCSVNSQFPSPSHYSFSSGHVSPSSLLQSSAGLA  
PGHTNQALSDFAAGNSFSPHRGMKQEQHTQHLNPTPSLNSNMFQILHSSHPQGNYSNSKLSPVHMNFPDPVDA  
GPPVGHFNDHAETNGFSSLEENLLHHVDSHAEPFAGLDPEDLLQEGLLPQFDES PFGQDNSNHVLDHDLDRQF  
TSHLVSRPSDMAQTQLQYQARGWPSPLSTNHQHLHSRNLHLCLQRQPPSSSKKSDGSGTYTKLQNTQVRVMSEKK  
PRKRVESESKQEKANRIISEAIARAKERGERNIPRVMSPENFPASVEGKEEKRGRMMKSKPKDRDNKKPKTY  
SKLKEKTKIGKLIITLGGKHKRRNESSELSDAEQRSQHTFKEQHSQKRRSNRQIKRKKYAEAEAGKQSEEEV  
KGSRLVVRNSAPPPGEQPLQLFVENPSEEDAAIVDKILACRTVKKEVSPGVMLDIEEFFVKYKNYSYLHCEWA  
TEQQLLKDKRIQQKIKRFLRQAQRAHFLADMEEEEFPNPDYVEVDRILEVSFCEDEKDTGESVIYYLVKWCSLP  
YEDSTWELKEDVDLAKIEEFEQLQASRPDTRHLDRPPSNIWKKIEQSREYKNGNQLREYQLEGLNWLWNWYN  
RRNCILADEMGLGKTIQSITFLYEILLTGIRGPFLLIAPLSTIANWEREFRTWTDINVVVYHGSLISRQMIQQ  
YEMYFRDSQGRIRGAYRFQAIITTFEMILGGCGELNAIDWRCVIIDEAHRLKKNCKLLEGLKLMNLEHKVL  
LTGTPLQNTVEELFSLHLFLEPLRFPSESTFMQEFGLDTEEQVQKLQAILKPMMLRRLKEDVEKKLAPKEET  
IIEVELTNIQKYYRAILEKNFSFLSKGAGQTNVNLVNTMELRKCCHPYLIKGAEEKILGEFRDYNPSA  
SDFHLQAMIQSAGKLVLDKLLPKMKAGGKVLIFSQMVRCLEDYLIHKRYLYERIDGRVGRNLRQAID  
RFSKPDSRDFVLLCTRAGGLGINLTAADTCIIFDSDWNPQNDLQAQARCHRIGQNKAVKRYRNLVTRNSYERE  
MFDRA SLKLGDKAVLQSMGRDSNVSGIQQLSKKEIEDLLRRGAYGAIMEEEEDEGSKFCEEDIQILLRRTK  
TITIESEGRGSTFAKASFVAGNRDTSISLDDPNFWQKAKKAELDIDTISGRNSLVIDTIPRIRKQTRPFSATK  
DELAELSEAESEGEKPKLRPCDRSGGYGRTECFRVEKNLLVYGWRWREILSHGRFKRQLNEHDVEVICRA  
LLAYCLIHRYGDEKIKGFIWDLITPTEDGQTRELQNLHGLSAPVPRGRKGKVKVTQTSFQIAEAWLRKYNP  
EQLLQDEGYKKHVKHHCNKVLLRVRMLYLLKQEVIGNESQKVFQVGDASDIDVWVPEPDHSEVPAAWWDFDAD  
KSLLLIGVFKHGYEKYNTIRADPALCFLEVRGKPDKAVAAEQRANDYMDGDVEDPEYKPAPAIKDDIEDDVS  
SPGDLVIADGEGQLMEGDKVYWPSPSALTTRLRRLITAYQRTNKNRHIQQMQPTFSLPANAMQPLYEEATLNP  
KMAAKIERQQRWTRREEADFYRVVSTFGVVDFDPRGQFDWTKFRALARLHKKTDNSLEKYLCAFMSMCRVCR  
LPskeELVDPNIFIQPIITEERASRTLYRIELLRKVREQALRHPQLFERLKLCHPNPDLPIWWECSHHRDILLI  
GAAKHGVSRTDYHILRDPELSFMQAQRNYNQSKAAHSRTSAPLLQQYQVALSASPLTSLPRLLAGKGTLL EDM  
KVKSESLTEEPQSSEESMSMETRTRVKSEPVSPKNGVLSQATGDQKSGGKSETDRRMVAARTEPLTPNPAS  
KKPRVHKRGSQSSSDSARS SCSRSSSSSSSSSSSSS SCSRS GSSSSSSSSSSSSSSSSSSSSSSSSSSSSSSSS  
SSSEEDSSEDVQKREGTPHRKAYDEESVASTTQDETQDSFQANNGTPEPAYLLAGGYMLAASYWPKDRVM  
INRLDSICQTVLKGKWP SARRHYDANTVASFYTTKLLDS PGAATERGEPVPTPPAVAVREEHEQSAQMSKVK  
KHVREKEFTVVIKDEGGKLLTFQKQGLAQKRPFDGEDGALGQQQYLRTRRELQSTSETSLVNLPKAVPASGTS  
IQPTLGANGAILDSQPIVKKRRGRRRNVGADILFLNRNKPNIPTGMNPALSYPPQRIPTDESVPVIVNL  
KDGTLAGDDAPKRKDLDRWLKEHPGYVEDLGAFIPRVQLHEGRPKQRHRCRNPNKLDINSLTGEERVQLIN



RRNARKVGGAFAPPLKDLRCRFLKENSEYGVAPWEGDVVKQSGFLPESMFERILTGPPVREEVSRGRPKSGI  
AKATTAAAVPAGSVPGNPLLANGLLPGVDLTALQALQONLQNLQSLQVTAGLMGMPAGLSSGGGETKNMAAMFP  
MLFSGMAGLPNLLGMGGLLSKTAESGAEEKRGNDSKELEGKKERTESQSPENGGERCVPGPSSTSSSTAALSSA  
AAAKPIALNPLLLSNILYPGMLLTPGLNLHLPTLSQSNADFVQKNKSDDLDSKKSVEIKEENSRVRDQEEKGG  
TEPSPLNENSTDEGSERASSGSDSSSSSESDSDSSNED\*  
>rs33399640\_ENSMUSP00000105243\_c.382:A>G\_p.Q128R  
ENSMUST00000109614.9|Chd9-202|ENSMUSG00000056608|+|chr8:g.91659424:A>G  
MTDPMDFDDANLFGETLEGLSDDTFVQPGPVSVDLNLGAEFEPLHIDSLNHVQGTPTHQKMADFEQLSQ  
FDSMKFHPVNVQSFQSPVEHVLSPHSQFNCSPIHPPNQPNGLFQDVADGSPMWHGRTATGLANQNGSPFHQPGH  
SHSLHQNKSFVAHPDFALFQASEHQTCSSLSHSQQSRNLNPGQNSLGQAKNFLDANVSGAHRVNVNHLATAP  
SSQQTLPVQFSPTANPPAHFLKCSSHQEGNYNRPSMTSCSVNSQQFSPSHYSFSSGHVSPSSLLQSSAGLA  
PGHTNQALSDFAGSNSFSPHRGMKQEPHQHLLNPTPSLNSNPFQILHSSHPQGNYSNSKLSPVHMFDPVDA  
GPPVGHFNDHAETNGFSSLEENLLHHVDSHAEPFAGLDPEDDLQEGLLPQFDESFPFGQDNSNHVLDHDLDRQF  
TSHLVSRRPSDMAQTQLQYQARGWPSPLSTNHQHLHSRNLCLQRQPPSSKKS DGSGTYTKLQNTQVRVMSEKK  
PRKRVESESKQEKANRIISEAIARAKERGERNIPRVMSPENFPASVEGKKEKRGRMRMKS PKDRDNKKPKTY  
SKLKEKTKIGKLIITLGGKHKRRNESSELSDAEQRSQHTFKEQHSQKRRSNRQIKRKKYAEDAEGKQSEEEV  
KGLSRVKNRSAPPPGEQPLQLFVENPSEEDAAIVDKILACRTVKKEVSPGVMLDIEEFFVKYKNYSYLHCEWA  
TEQQLLKDRIQKIKRFLKRAHFLADMEEPFNPDYVEVDRILEVFCEDKDTGESVIYYLVKWCSLP  
YEDSTWELKEDVDLAKIEEFEQLQASRPDTRHLDRPPSNIWKKIEQSREYKNGNQLREYQLEGLNWLFFNWN  
RRNCILADEMGLGKTIQSITFLYEILLTGIRGPFLLIAPLSTIANWEREFRTWTDINVVVYHGSLSRQMIQQ  
YEMYFRDSQGRIRGAYRFQAIITTFEMILGGCGELNAIDWRCVIIDEAHRLKKNCKLLEGLKLMNLEHKVL  
LTGTPLQNTVEELFSLHLFLEPLRFPSESTFMQEFGLDTEEQVQKLAAILKPMMLRRLKEDVEKKLAPKEET  
IIEVELTNIQKYYRAILEKNFSFLSKGAGQTNVNLVNTMMELRKCNCNHPYLIKGAEEKILGEFRDTPNSA  
SDFHLQAMIQSAGKLVLDKLLPKMKAGGHKVLIFSQMVRCLDILEDYLIHKRYLYERIDGRVGRNLRQAAID  
RFSKPDSDRFVLLCTRAGGLGINLTAADTCIIFDSWNPQNDLQAQARCHRIGQNKAVKVRVLRVTRNSYERE  
MFDRA SLKGLD KAVLQSMGRDSNVSGIQQLSKKEIEDLLRRGAYGAIMEEEDGSKFCEEDIDQILLRRTK  
TITIESEGRVSTFAKASFVAGNRDITSLDDPNFQWAKKAELDITISGRNSLVIDTPRIRKQTRFPFSAK  
DELAELSEAESEGEKPKLRRPCDRSGGYGRTECFRVEKNLLVYGWRWREILSHGRFQRQLNEHDVEVICRA  
LLAYCLIHRYGDEKIKGFIWDLITPTEDGQTRQLNHLGLSAPVPRGRKGGKVKQTSSFDIQKAEWLRKYNP  
EQLLQDEGYKHHVHHCNKVLLRVRMLYLLKQEVIGNESQKVFVDGVDASDIDVWVPEPDHSEVPAAWWDFDAD  
KSLLIGVFKHGYEKYNTIRADPALCFLERVGKPDKAVAAEQRANDYMDGDVEDPEYKPAFAIKDDIEDDVS  
SPGDLVIADGEGQLMEGDKVYWPSPALTRRLRLITAYQRTNKNRHIQQMQPTFSLPANAMQPLYEATLNP  
KMAAKIERQQRWTRREEADFYRVVSTFGVVFDPDRGQFDWTKFRALARLHKKTDNSLEKYLCAFMSCRRVCR  
LPSKEELVDPNIFIQPI TEERASRTLYRIELLRKVREQALRHPQLFERLKLCHPNPDLPIWCEGSHDRDLI  
GAAKHGVSRTDYHILRDPESLMAAQRNYNQSKAAHSRTSAPLLQYQVALSASPLTSLPRLGAKGTLLEDM  
KVKSESLTEEPQSEEEESMSMETRTRVKSEPVSPKNVLSQATGDQKSGGKSETDRRMVAARTEPLTPNPAS  
KKPRVHKRGSQSSSDSDSDSARSSCSSRSSSSSSSSSSSSSHSRSGSSSSSSSSSSSASSSSSSSSSSSSSSSS  
SSSEESDSEEDVQKREGTPHRKAYDEESVASLSTTQDETQDSFQANNGTPESAYLLQGGYMLAASYPKDRVM  
INRLDSICQTVLKGKWPARRHYDANTVASFYTTKLLDSPAATERGEPVPTPPAVAVREEHEQSAQMSKVK  
KHVREKEFTVKIKDEGGLKLTQKQGLAQKRPFDGEDGALGQQYLRRLRELQSTSETSLVNLPAKVPASGTS  
IQPTLGANGAILDSQPIVKKRRGRRRNVEGADILFLNRNKPNNHIPGMPNALSYPQPQRI PDTESVPVINL  
KDGTRLAGDDAPKRKDLDRWLKEHPGYVEDLGAFIPRVQLHEGRPKQKRHRCRNPNKLDINSLTGEERVQLIN  
RRNARKVGGAFAPPLKDLRCRFLKENSEYGVAPWEGDVVKQSGFLPESMFERILTGPPVREEVSRGRPKSGI  
AKATTAAAVPAGSVPGNPLLANGLLPGVDLTALQALQONLQNLQSLQVTAGLMGMPAGLSSGGGETKNMAAMFP  
MLFSGMAGLPNLLGMGGLLSKTAESGAEEKRGNDSKELEGKKERTESQSPENGGERCVPGPSSTSSSTAALSSA  
AAAKPIALNPLLLSNILYPGMLLTPGLNLHLPTLSQSNADFVQKNKSDDLDSKKSVEIKEENSRVRDQEEKGG  
TEPSPLNENSTDEGSERASSGSDSSSSSESDSDSSNED\*  
>rs48347616\_ENSMUSP00000046356\_c.2422:C>T\_p.T808I  
ENSMUST00000048665.8|Chd9-201|ENSMUSG00000056608|+|chr8:g.91710948:C>T  
MTDPMDFDDANLFGETLEGLSDDTFVQPGPVSVDLNLGAEFEPLHIDSLNHVQGTPTHQKMADFEQLSQ  
FDSMKFHPVNVQSFQSPVEHVLSPHSQFNCSPIHPPNQPNGLFQDVADGSPMWHGRTATGLANQNGSPFHQPGH  
SHSLHQNKSFVAHPDFALFQASEHQTCSSLSHSQQSRNLNPGQNSLGQAKNFLDANVSGAHRVNVNHLATAP  
SSQQTLPVQFSPTANPPAHFLKCSSHQEGNYNRPSMTSCSVNSQQFSPSHYSFSSGHVSPSSLLQSSAGLA  
PGHTNQALSDFAGSNSFSPHRGMKQEPHQHLLNPTPSLNSNPFQILHSSHPQGNYSNSKLSPVHMFDPVDA  
GPPVGHFNDHAETNGFSSLEENLLHHVDSHAEPFAGLDPEDDLQEGLLPQFDESFPFGQDNSNHVLDHDLDRQF  
TSHLVSRRPSDMAQTQLQYQARGWPSPLSTNHQHLHSRNLCLQRQPPSSKKS DGSGTYTKLQNTQVRVMSEKK  
PRKRVESESKQEKANRIISEAIARAKERGERNIPRVMSPENFPASVEGKKEKRGRMRMKS PKDRDNKKPKTY  
SKLKEKTKIGKLIITLGGKHKRRNESSELSDAEQRSQHTFKEQHSQKRRSNRQIKRKKYAEDAEGKQSEEEV

KGSRLVRKNSAPPPGEQPLQLFVENPSEEDAAIVDKILACRTVKKEVSPGVMLDIEEFFVKYKNYSYLHCEWA  
 TEQQLLKDKRIQQKIKRFLRQAQRAHFLADMEEEFPNDYVEVDRILEVSFCEDKDTGESVIYYLVKWCSLP  
 YEDSIWELKEDVDLAKIEEFEQLQASRPDTRHLDRPPSNIWKKIEQSREYKNGNQLREYQLEGLNWLLENFNWYN  
 RRNCILADEMGLGKTIQSITFLYEILLTGIRGPFLLIAPLSTIANWEREFRTWTDINVVVYHGSLISRQMIQQ  
 YEMYFRDSQGRIIRGAYRFQAIITTFEMILGGCGELNAIDWRCVIIDEAHRLKKNCKLLEGLKLMNLEHKVL  
 LTGTPLQNTVEELFSLHFLFLEPLRFPSESTFMQEFGLDTEEQVQKLQAILKPMMLRRLKEDVEKKLAPKEET  
 IIEVELTNIQKKYYRAILEKNFSFLSKGAGQTNVPLNVTMMELRKCENHPYLIKGAEEKILGEFRDYNPSA  
 SDFHLQAMIQSAGKLVLDKLLPKMKAGGHKVLIFSQMVRCLELDYLIHKRYLYERIDGRVVRGNLRQAAID  
 RFSKPDSDRFVLLCTRAGGLGINLTAADTCIIFDSDWNPQNDLQAQARCHRIGQNKAVKVYRLVTRNSYERE  
 MFDRASLKLGLDKAVLQSMSGRDSNVSGIQQLSKKEIEDLLRRGAYGAIMEEEDEGSKFCEEDIDQILLRRTK  
 TITIESEGRGSTFAKASFVAGNRTDISLDDPNFWQKAKKAELDIDTISGRNSLVIDTPRIRKQTRPFSATK  
 DELAELSEAESEGEKPKLRRPCDRSGGYGRTECFRVEKNLLVYGWRWREILSHGRFKRQLNEHDVEVICRA  
 LLAYCLIHRYGDEKIKGFIWDLITPTEDGQTRQLNHLGLSAPVPRGRKGGKVKQTQTSSFDIQKAEWLKYNP  
 EQLLQDEGYKHKVHHCNKVLLRVRMLYLLKQEVIGNESQKVFQDGDASDIDVWVPEPDHSEVPAAWWDFDAD  
 KSLLLIGVFKHGYEKYNTIRADPALCFLEVRGKPDKAVAAEQRANDYMDGDVEDPEYKPAIAFKDDIEDDVS  
 SPGDLVIADGEGQLMEGDKVYWPSPALTRRLRLITAYQRTNKNRHIQQMQPTFSLPANAMQPLYEATLNP  
 KMAAKIERQQRWTRREEDFYRVVSTFGVVFDPDRGQFDWTKFRALARLHKKTDNSLKLCAFMSCRRVCR  
 LPSKEELVDPNIFIQPIITEERASRTLYRIELLRKVRQALRHPQLFERLKLCHPNPDLPIWWEFGSHDRDLII  
 GAAKHGVSRTDYHILRDPELSFMQAQRNYNQSKAAHSRTSAPLLQQYQVALSASPLTSLPRLLAGKGTLLLEDM  
 KVKSESLTEEPQSSEEESSMETRTRVKSEPVSPKNGVLSQATGDQKSGGKSETDRRMVAARTEPLTPNPAS  
 KKPRVHKRGSQSSSDSDSARSSSSSSSSSSSSSSSSSSSSSSSSSSSSSSSSSSSSSSSSSSSSSSSSSSSSS  
 SSSEESDSEEDVQKREGTPHRKAYDEESVASLSTTQDETQDSFQANNGTPESAYLLQGGYMLAASYWPKDRVM  
 INRLDSICQTVLKGKWPARRHYDANTVASFYTTKLLDSPGAATERGEPVPTPPAVAVREEHEQSAQMSKEG  
 GLKLTQKQGLAQKRPFDGEDGALGQQYLTRLRELQSTSETSLVNLKPAVPASGTSIQPTLGGANGAILDSQP  
 IVKRRGRNRNVEGADILFLNRNKPNIPTGMNPAISYPQQRIPDTESPVPVNLKDGTRLAGDDAPKRKD  
 LDRLKFHEHPYEDVLAFAIIRVQLHEGRPKQKRHRICRNLKIDINSLTGEERVQLINRRNARKVGGAFAPPLK  
 DLCRFLKENSEYGVAFPEWGDVVKQSGFLPESMFRILNTPGVVREEVSRGRPKSGIAKATAAAVPAGSVPG  
 NPLLANGLLPGVDLTAALQALQNLQNLQSLQVTAGLMGPAGLSSGGETKNMAAMFPMFLSGMAGLPLNLLGMG  
 GLLSKTAESGAEKRGNDKELEGGKERTESQSPENGGERCVPSPSTSSSTAALSSAAAAPIALNPLLLSNI  
 LYPGMLLTPGLNLHLPTLSQSNAFDVQKNKSDLLDSSKSVEIKEENSRVRDQEEKGGTEPSPLNENSTDEGSE  
 RASSGSDSSSSSSSESDSSSNED\*  
 >rs48347616\_ENSMUSP00000147407\_c.2422:C>T\_p.T808I  
 ENSMUST00000209203.2|Chd9-203|ENSMUSG00000056608|+|chr8:g.91710948:C>T  
 MTDPMDFDANLFGETLEGLSDDTFVQPGPVSLVDELNLGAEFEPLHIDSLNHVQGTPTHQKMADFEQLSQ  
 FDSMKFHPVNSFGSPVEHVLSPHSQFNCSPIHPPNQPNGLFQDQVADGSPMWHQATATGLANQNGSPFHQPGH  
 SHSLHQNSFVAHPDFALFQASEHQTCSSSLHSQSRSNLNPQNSLQAKNFDANVSGAHRVNVNHLATAP  
 SSQQTLPVQFSPTANPPAHFLKCSHQEGNYNRPSMTSCSVNSQGFPSHYFSSSGHVSPSSLLQSSAGLA  
 PGHTNQALSDFAGSNSFSPHRGMKQEPQHLNPTPSLNSNFFQILHSSHPQGNYSNSKLSPVHMFDPVDA  
 GPPVGHFNDHAETNGFSSLEENLLHHVDSHAEPFAGLDPEDLLEGLLPQFDESFPQDQNSNHVLDHDLDRQF  
 TSHLVSRSQDMAQTQLQYQARGWPSPLSTNHQHLHSRNLCLQRQPPSSKKSQDGSQTYTKLQNTQVRVMSEKK  
 PRKRVESESKQEKANRIISEAIAARAKERGERNIPRVMSPENFPASVEGKEEKRRMRKSKPKDRDNKPKPTY  
 SKLKEKTKIGKLIITLGGKHKRRNESSELSDAEQRSQHTFKEQHSQKRRSNRQIKRKKYAEDEAGKQSEEEV  
 KGSRLVRKNSAPPPGEQPLQLFVENPSEEDAAIVDKILACRTVKKEVSPGVMLDIEEFFVKYKNYSYLHCEWA  
 TEQQLLKDKRIQQKIKRFLRQAQRAHFLADMEEEFPNDYVEVDRILEVSFCEDKDTGESVIYYLVKWCSLP  
 YEDSIWELKEDVDLAKIEEFEQLQASRPDTRHLDRPPSNIWKKIEQSREYKNGNQLREYQLEGLNWLLENFNWYN  
 RRNCILADEMGLGKTIQSITFLYEILLTGIRGPFLLIAPLSTIANWEREFRTWTDINVVVYHGSLISRQMIQQ  
 YEMYFRDSQGRIIRGAYRFQAIITTFEMILGGCGELNAIDWRCVIIDEAHRLKKNCKLLEGLKLMNLEHKVL  
 LTGTPLQNTVEELFSLHFLFLEPLRFPSESTFMQEFGLDTEEQVQKLQAILKPMMLRRLKEDVEKKLAPKEET  
 IIEVELTNIQKKYYRAILEKNFSFLSKGAGQTNVPLNVTMMELRKCENHPYLIKGAEEKILGEFRDYNPSA  
 SDFHLQAMIQSAGKLVLDKLLPKMKAGGHKVLIFSQMVRCLELDYLIHKRYLYERIDGRVVRGNLRQAAID  
 RFSKPDSDRFVLLCTRAGGLGINLTAADTCIIFDSDWNPQNDLQAQARCHRIGQNKAVKVYRLVTRNSYERE  
 MFDRASLKLGLDKAVLQSMSGRDSNVSGIQQLSKKEIEDLLRRGAYGAIMEEEDEGSKFCEEDIDQILLRRTK  
 TITIESEGRGSTFAKASFVAGNRTDISLDDPNFWQKAKKAELDIDTISGRNSLVIDTPRIRKQTRPFSATK  
 DELAELSEAESEGEKPKLRRPCDRSGGYGRTECFRVEKNLLVYGWRWREILSHGRFKRQLNEHDVEVICRA  
 LLAYCLIHRYGDEKIKGFIWDLITPTEDGQTRQLNHLGLSAPVPRGRKGGKVKQTQTSSFDIQKAEWLKYNP  
 EQLLQDEGYKHKVHHCNKVLLRVRMLYLLKQEVIGNESQKVFQDGDASDIDVWVPEPDHSEVPAAWWDFDAD  
 KSLLLIGVFKHGYEKYNTIRADPALCFLEVRGKPDKAVAAEQRANDYMDGDVEDPEYKPAIAFKDDIEDDVS

SPGDLVIADGEGQLMEGDKVYWPTPSALTTRLRRLITAYQRTNKNRHIQQMQPTFSLPANAMQPLYEEATLNP  
KMAAKIERQORIGRSKYFYSTNHRGTCF\*  
>rs48347616\_ENSMUSP00000148088\_c.2422:C>T\_p.T808I  
ENSMUST00000209423.2|Chd9-205|ENSMUSG00000056608|+|chr8:g.91710948:C>T  
MTDPMDFFDANLFGETLEGLSDDTFVQPGVSLVDELNLGAEFEPFLHIDSLNHVQGTPTHQKMADFEQLSQ  
FDSMKFHPVNVQSFQSPVEHVLSPHSQFNCSPIHPPNPNGLFQDVADGSPMWHGQTATGLANQNGSPFHQPGH  
SHSLHQNKSFVAHPDFALFQASEHQTCSSLSHSQQSRSNLNPQNSLGQAKNFLDANVSGAHRVNVNHLATAP  
SSQQLPVQFSPPTANPPAHFLKCSSHQEGNYNRPSPSMTSCSVNSQQFSPSHYSFSSGHVSPSSLLQSSAGLA  
PGHTNQALSDFAGSNSFSPHRGMKQEPHQHLLNPTPSLNSNNFQILHSSHPQGNYSNSKLSPVHMNFDPVDA  
GPPVGHFNDAETNGFSSLEENLLHHVDSHAEPFAGLDPEDLLQEGLLPQFDESPFGQDNSNHVLDHDLDRQF  
TSHLVS RPSDMAQTQLQYQARGWPSPLSTNHQHLHSRNLCLQRQPPSSKKS DSGSGTYTKLQNTQVRVMSEKK  
PRKRVESESKQEKANRIISEAIARAKERGERNI PRVMS PENFP SASVEGKKEKRGRMRMKS KPKDRDNKKPKTY  
SKLKEKTKIGKLIITLGGKHKRRNESSDELSDAEQRSQHTFKEQHSQKRRSNRQIKRKKYAEAEAGKQSEEEV  
KGS LRVKRN SAPP PGEQPLQLFVENPSEEDAAIVDKILACRTVKKEVSPGVMLDIEEFFVKYKNYSYLHCEWA  
TEQQLLKDKRIQQKIKRFLRQAQRAHFLADMEEEFPNPDYVEVDRILEV SFCEDKDTGESVIYYLVKWC SLP  
YEDSIWELKEDVDLAKIEEFEQLQASRPDTRHLDRPPSNIWKKIEQSREYKNGNQLREYQLEGLNWLLFNWYN  
RRNCILADEMGLGKTIQSITFLYEILLTGIRGPFLIAPLSTIANWEREFRTWTDINVVVYHGSLISRQMIQQ  
YEMYFRDSQGRIRGAYRFQAIITTFEMILGGCGELNAIDWRCVIIDEAHRLKNKNCKLLEGLKLMNLEHKVL  
LTGTPLQNTVEELFSLHLFLEPLRFPSESTFMQEFGLDTEEQVQKLQAILKPMMLRRLKEDVEKKLAPKEET  
IEVELTNIQKKYYRAILEKNFSFLSKGAGQTNVNLVNTMMELRKC CNHPYLIKGAEEKILGEFRDYNPSA  
SDFHLQAMIQSAGKLVLDKLLPKMKAGGHKVLIFSQMVRCLDILEDYLIHKRYLYERIDGRV RGNLRQA AID  
RFSKPDSDRFVLLCTRAGGLGINLTAADTCIIFDSDWNPQNDLQAQARCHRIGQNKAVKVYRLVTRNSYERE  
MFD RASLKLGLDKAVLQSMSGRDSNVSGIQQLSKKEIEDLLRRGAYGAIMEEDEGSKFCEEDIDQILLRRTK  
TITIESEGRGSTFAKASFVAGNRDTSISLDDPNFWQKWAELDIDTISGRNSLVIDTPRIRKQTRPFSATK  
DELAELSEAESEGEKPKLRPCDRSGGYGRTECFRVEKNLLVYGWRWREILSHGRFKRQLNEHDVEVICRA  
LLAYCLIHRYGDEKIKGFIWDLITPTEDGQTRQLNHLGSLAPVPRGRKGGKVKQTSSFDIQKAEWLKRYNP  
EQLLQDEGYKHKHHCNKVLLRVRMLYLLKQEVIGNESQKVFVDGVDASDIDVWVPEPDHSEVPAAWDFDAD  
KSL LIGVFKHGYEKYNTIRADPALCFLEVRGKPD DKAVAAEQRANDYMDGDVEDPEYKPA PAIFKDDIEDDVS  
SPGDLVIADGEGQLMEGDKVYWPTPSALTTRLRRLITAYQRTNKNRHIQQMQPTFSLPANAMQPLYEEATLNP  
KMAAKIERQORWTRREEADFYRVVSTFGVVFDPDRGQFDWTKFRALARLHKKTDNSLEKYLCAFMSCRRVCR  
LPSKEELVDPNIFIQPI TEERASRTLYRIELLRKVREQALRHPQLFERLKLCHPNPDLPIWWECSHHRDILLI  
GAAKHGVSRTDYHILRDP ELSFMAAQRNYNQSKAAHSRTSAPLLQQYQVALSASPLTSLPRLLGAKGTLLEDM  
KVKSESLTEEPQSSEEESSMSMETRTRVKSEPVSPKNGVLSQATGDQKSGGKSETDRRMVAARTEPLTPNPAS  
KKPRVHKRGSQSSSDSDSARS SCSSSSSSSSSSSSSSSHSRSGSSSSSSSSSSSSSASSSSSSSSSSSSSSSS  
SSSESDSEEDVQKREGTPHRKAYDEESVASLSTTQDETQDSFQANNGTPESAYLLGGYMLAASYPWKDRVM  
INRLDSICQTVLKGKWP SARHRYDANTVASFYTTKLLD SPGAATERGEPVPTPPAVAVREEHESQSAQMSKVK  
KHVREKEFTV KIKDEGGLKLT FQKQGLAQKRPFDGEDGALGQQQYLTRLRELQSTSETSLVNLPKAVPASGTS  
IQPTLGANGA I L DSQPIVKKRRRGRRNVEGADILFLNRNKPNNHIPTGMNPALSYPPQRI PDTESPVPVNL  
KDGT RLAGDDAPKRKDLDRWLKEHPGYVEDLGAFIPRVQLHEGRPKQRHRCRNPNKLDINSLTGEERVQLIN  
RRNARKVGGAFAPPLKDLCRFLKENSEYGVAP EWGDVVKQSGFLPESMFERILTGPVVREEVSRGRPKSGI  
AKAT TAAAVPAGSVPGNPLLANGLLPGVDLTALQALQNLQNLQSLQV TAGLMGMPAGLSSGGETKNMAAMFP  
MLFSGMAGLPNLLGMGGLLSKTAESGAEEKRGNDSKELEGKKERTESQSPENGGERCVPGPSPTSSTAALSSA  
AAAKPIALNPLLLSNILYPGMLLTPGLNLHLPTLSQSNAFDVQKNKSDDLDSKKSVEIKEENSRVRDQEEKGG  
TEPSPLNENSTDEGSE RASSGSDSSSSSESDSSSNED\*  
>rs48347616\_ENSMUSP00000147741\_c.1003:C>T\_p.T335I  
ENSMUST00000210947.2|Chd9-210|ENSMUSG00000056608|+|chr8:g.91710948:C>T  
MSSVKRPRGRPPSSKKS DSGSGTYTKLQNTQVRVMSEKKPRKRVESESKQEKANRIISEAIARAKERGERNI PR  
VMS PENFP SASVEGKKEKRGRMRMKS KPKDRDNKKPKTY SKLKEKTKIGKLIITLGGKHKRRNESSDELSDAEQ  
RSQHTFKEQHSQKRRSNRQIKRKKYAEAEAGKQSEEEVKGSLRVKRN SAPP PGEQPLQLFVENPSEEDAAIVD  
KILACRTVKKEVSPGVMLDIEEFFVKYKNYSYLHCEWATEQQLLKDKRIQQKIKRFLRQAQRAHFLADMEEE  
FPNPDYVEVDRILEV SFCEDKDTGESVIYYLVKWC SLPYEDSIWELKEDVDLAKIEEFEQLQASRPDTRHLDR  
PPSNIWKKIEQSREYKNGNQLREYQLEGLNWLLFNWYNRRNCILADEMGLGKTIQSITFLYEILLTGIRGPFL  
IAPLSTIANWEREFRTWTDINVVVYHGSLISRQMIQQYEMYFRDSQGRIRGAYRFQAIITTFEMILGGCGE  
LNAIDWRCVIIDEAHRLKNKNCKLLEGLKLMNLEHKVLLTGTPLQNTVEELFSLHLFLEPLRFPSESTFMQEF  
GDLKTEEQVQKLQAILKPMMLRRLKEDVEKKLAPKEETIEVELTNIQKKYYRAILEKNFSFLSKGAGQTNV  
NLVNTMMELRKC CNHPYLIKGAEEKILGEFRDYNPSASDFHLQAMIQSAGKLVLDKLLPKMKAGGHKVLIFS  
SQMVRCLDILEDYLIHKRYLYERIDGRV RGNLRQA AIDRFSKPDSDRFVLLCTRAGGLGINLTAADTCIIFD  
SDWNPQNDLQAQARCHRIGQNKAVKVYRLVTRNSYEREMFD RASLKLGLDKAVLQSMSGRDSNVSGIQQLS

>rs48347616\_ENSMUSP00000105243\_c.2422:C>T\_p.T808I  
 ENSMUST00000109614.9|Chd9-202|ENSMUSG00000056608|+|chr8:g.91710948:C>T  
 MTDPMDDFFDDANLFGETLEGLSDDTFVQPGPVSLSVDELNLGAEFEPLHIDSLNHVQGTPTHQKMAADFEQLSQ  
 FDSMKFHPVNVQSFSGSPVEHVLSPHSQFNCSPIHPPNQPNGLFQDQVADGSPMWHGQTATGLANQNGSPFHQP  
 SHSLHQNKSFVAHPDFALFQASEHQTCSSLSHSQQSRNLNPGQNSLGQAKNFLDANVSGAHRVNVNHLATAP  
 SSQQTLPVQFSPTANPPAHFLKCSSHQEGNYNRPSMTSCSVNSQQFP SHYSFSSGHVSPSSLLQSSAGLA  
 PGHTNQALSDFAGSNFSFPHRGMKQEPHQHLLNPTPSLNSNNFQILHSSHPQGNYSNSKLSPVHMNFDPVDA  
 GPPVGHFNDHAETNGFSSLEENLLHHVDSHAEPFAGLDPEDLLQEGLLPQFDES PFGQDNSNHVLDHDLDRQF  
 TSHLVS RPSDMAQTQLQYQARGWPSPLSTNHQHLHSRNHLC LQRQPPSSKKS DSGS TYTKLQNTQVRVMSEKK  
 PRKRVESESKQEKANRI I SEAIARAKERGERNI PRVMS PENFSPASVEGKEEKRGRMRMKS PKDRDNKKPKTY  
 SKLKEKTKIGKLIITL GKHKRRNESSELSDAEQRSQHTFKEQHSQKRRSNRQIKRKKYAEDAEGKQSEEEV  
 KGSLRVKRN SAPPPGEQPLQLFVENPSEEDAAIVDKILACRTVKKEVSPGVMLDIEEFFVKYKNYSYLHCEWA  
 TEQQLLKD KRIQQKIKRFLRQAQRAHFLADMEEPFNPDYVEVDRI LEVSFCEDKDTGESVIYYLVKWC SLP  
 YEDSIWELKEDVDLAKIEEFELQASRPDTRHLDRPPSNIWKKIEQSREYKNGNQLREYQLEGLNWLLFNWYN  
 RRNCILADEMGLGKTIQSITFLYEILLTGIRGPFLLIAPLSTIANWEREFRTWT DINVVVYHGSLSRQMIQQ  
 YEMYFRDSQGRIIRGAYRFQAIITTFEMILGGCGELNAIDWRCV IIDEAHLRKNKNCKLLEGLKLMNLEHKVL  
 LTGTPLQNTVEELFSLHLFLEPLRFSESTFMQEFGLDKEEQVQLQAILKPMMLRRLKEDVEKKLAPKEET  
 IIEVELTNIQKKYRAILEKNFSLSKGAGQTNVNLVNTMMELRKC CNHPYLIKGAEEKILGEFRDTPNSA  
 SDFHLQAMIQSAGKLVLDIKLLPKMKAGGHKVLIFSQMVRCLDILEDYLIHKRYLYERIDGRVGRNLRQAAID  
 RFSKPDSDR FVLLCTRAGGLGINLTAADTCIIFDS DWNPNQNDLQAQARCHRIGQNKAVKVRVLRVTRNSYERE  
 MFDRASLKLGLDKAVLQSMGRDSNVSGIQQLSKKEIEDLLRRGAYGAIMEEDEGSKFCEEDIDQILLRRTK  
 TITIESEGRGSTFAKASFVAGNRDITSLDDPNFWQKAKKAELDITISGRNSLVIDTPRIRKQTRPFSATK  
 DELAELSEAESEGEKPKLRPCDRSGGYGRTECFRVEKNLLVYGWRWREILSHGRFKRQLNEHDEVEICRA  
 LLAYCLIHRYGDEKIKGFIWDLITPTEDGQTRRELQNHGLSAPVPRGRKGGKVKQTQSSFDIQKAEWLKYNP  
 EQLLQDEGYKHKHVHHCNKVLLRVRMLYLLKQEVIGNESQKVFQDGDVADSIDVWVPEPDHSEVPAAWWDFDAD  
 KSLLIGVFKHGEYKNTIRADPALCFLERVGKPRDKAVAAEQRANDYMDGDVEDPEYKPAPAI FKDDIEDDVS  
 SPGDLVIADGEGYLMEGDKVYWPSPALTTRLRLITAYQRTNKNRHIQQMQPTFSLPANAMQPLYEEATLNP  
 KMAAKIERQQRWTRREEADFYRVVSTFGVVFDPDRGQFDWTKFRALARLHKKT DNSLEKYLCAFMSCRRVCR  
 LPSKEELVDPNIFIQPI TEERASRTLYRIELLRKVREQALRHPQLFERLKLCHPNPDLPIWWECEGSHDRDLI  
 GAAKHGVSRTDYHILRDP ELSFMAAQRNYNQSKAAHSRTSAPLLQQYVALSASPLTSLPRLLGAKGTLLEDM  
 KVKSESLTEEPQSSEEEESMSMETRTRVKSEPVSPKNGVLSQATGDQKSGGKSETDRRMVAARTEPLTPNPAS  
 KKPRVHKRGSQSSSDSDSDARS SCSSRSSSSSSSSSSSSSHSRSGSSSSSSSSSSSSSSSSSSSSSSSSSSSS  
 SSSEESDSEEDVQKREGTPHRKAYDEESVASLSTTQDETQDSFQANNGTPESAYLLQGGYMLAASYWPKDRVM  
 INRLDSICQTVLKGKWP SARRHYDANTVASFYTTKLLDSPGAATERGEPSVPTPPAVAVREEHEQSAQMSKVK  
 KHVREKEFTVVIKDEGGLKLT FQKQGLAQKRPFDGEDGALGQQYLTRLRELQSTSETSLVNLKAVPASGTS  
 IQPTL GANAILDSQPIVKKRRGRRRNVEGADILFLNRNKPNNH IPTGMN PALSYPPQPRI PDTESEVPVINL  
 KDGTRLAGDDAPKRKDLDRWLKEHPGYVEDLGAFIPRVQLHEGRPKQKRHR CRNPNKLDINSLTGEERVQLIN  
 RRNARKVGGAFAPPLKDL CRFLKENSEYGVAP EWGDVVKQSGFLPESMFERILTGPV VREEVSRGRPKSGI  
 AKATTA AVPAGSVPGNPLLANGLLPGVDLTALQALQNLQNLQSLQV TAGLMGMPAGLSSGGETKNMAAMFP  
 MLFSGMAGLPNLLGMGGLLSKTAESGAEEKRGNDSKELEGKKERTESQSPENGGERCVPGPSSTSSSTAALSSA  
 AAAPIALNPLLLSNILYPGMLLTPGLNLHLPTLSQSNADFVQKNKSDDLDSKKSVEIKEENSRVRDQEEKGG  
 TEPSPLENSTDEGSERASSGSDSSSSSESDSDSSNED\*  
 >rs261610524\_ENSMUSP00000046356\_c.3375:C>CG\_p.Q1126ins-fs  
 ENSMUST00000048665.8|Chd9-201|ENSMUSG00000056608|+|chr8:g.91723885:C>CG  
 MTDPMDDFFDDANLFGETLEGLSDDTFVQPGPVSLSVDELNLGAEFEPLHIDSLNHVQGTPTHQKMAADFEQLSQ  
 FDSMKFHPVNVQSFSGSPVEHVLSPHSQFNCSPIHPPNQPNGLFQDQVADGSPMWHGQTATGLANQNGSPFHQP  
 SHSLHQNKSFVAHPDFALFQASEHQTCSSLSHSQQSRNLNPGQNSLGQAKNFLDANVSGAHRVNVNHLATAP  
 SSQQTLPVQFSPTANPPAHFLKCSSHQEGNYNRPSMTSCSVNSQQFP SHYSFSSGHVSPSSLLQSSAGLA  
 PGHTNQALSDFAGSNFSFPHRGMKQEPHQHLLNPTPSLNSNNFQILHSSHPQGNYSNSKLSPVHMNFDPVDA  
 GPPVGHFNDHAETNGFSSLEENLLHHVDSHAEPFAGLDPEDLLQEGLLPQFDES PFGQDNSNHVLDHDLDRQF  
 TSHLVS RPSDMAQTQLQYQARGWPSPLSTNHQHLHSRNHLC LQRQPPSSKKS DSGS TYTKLQNTQVRVMSEKK  
 PRKRVESESKQEKANRI I SEAIARAKERGERNI PRVMS PENFSPASVEGKEEKRGRMRMKS PKDRDNKKPKTY  
 SKLKEKTKIGKLIITL GKHKRRNESSELSDAEQRSQHTFKEQHSQKRRSNRQIKRKKYAEDAEGKQSEEEV  
 KGSLRVKRN SAPPPGEQPLQLFVENPSEEDAAIVDKILACRTVKKEVSPGVMLDIEEFFVKYKNYSYLHCEWA  
 TEQQLLKD KRIQQKIKRFLRQAQRAHFLADMEEPFNPDYVEVDRI LEVSFCEDKDTGESVIYYLVKWC SLP  
 YEDSTWELKEDVDLAKIEEFELQASRPDTRHLDRPPSNIWKKIEQSREYKNGNQLREYQLEGLNWLLFNWYN  
 RRNCILADEMGLGKTIQSITFLYEILLTGIRGPFLLIAPLSTIANWEREFRTWT DINVVVYHGSLSRQMIQQ  
 YEMYFRDSQGRIIRGAYRFQAIITTFEMILGGCGELNAIDWRCV IIDEAHLRKNKNCKLLEGLKLMNLEHKVL

LTGTPLQNTVEELFSLHFLEPLRFPSESTFMQEFGLDKTTEEQVQKQLQAILKPMMLRRLKEDVEKKLAPKEET  
 IIEVELTNIQKKYYRAILEKNFSFLSKGAGRNKCT  
 >rs261610524\_ENSMUSP00000147407\_c.3375:C>CG\_p.Q1126ins-fs  
 ENSMUST00000209203.2|Chd9-203|ENSMUSG00000056608|+|chr8:g.91723885:C>CG  
 MTDPMDDFFDDANLFGGETLEGLSDDTFVQPGPVSLVDELNLGAEFEPLHIDSLNHVQGTPTHQKMADFEQLSQ  
 FDSMKFHPVNVQSFSGSPVEHVLSPHSQFNCSPIHPPNQPNGLFQDVADGSPMWGHQTATGLANQNGSPFHQPFGH  
 SHSLHQNKSFVAHPDFALFQASEHQTCSSLSHSQQSRSNLNPQNSLGQAKNFLDANVSGAHRVNVNHLATAP  
 SSQQTLPVQFSPTANPPAHFLKCSSHQEGNYNRPSPSMTSCSVNSQQFSPSHYSFSSGHVSPSSLLQSSAGLA  
 PGHTNQALSDFAGSNSFSPHRGMKQEPHQHLLNPTPSLNSNNFQILHSSHPQGNYSNSKLSPVHMNFPDPVDA  
 GPPVGHFNDHAETNGFSSLEENLLHHVDSHAEPFAGLDPEDLLQEGLLPQFDESFPFGQDNSNHVLDHDLDRQF  
 TSHLVS RPSDMAQTQLQYQARGWPSPLSTNHQHLHSRNLCLQRQPSSKKS DSGSGTYTKLQNTQVRVMSEKK  
 PRKRVESESKQEKANRIISEAIARAKERGERNI PRVMSPENFPASVEGKEEKRGRMRMKS KPKDRDNKKPKTY  
 SKLKEKTKIGKLIITLGGKHKRRNESSELSDAEQRSQHTFKEQHSQKRRSNRQIKRKKYAEDAEGKQSEEEV  
 KGS LRVKRNSAPPPGEQPLQLFVENPSEEDAAIVDKILACRTVKKEVSPGVMLDIEEFFVKYKNYSYLHCEWA  
 TEQQLLKDKRIQQKIKRFLRQAQRAHFLADMEEEFPNPDYVEVDRI LEVSFCEDKDTGESVIYYLVKWC SLP  
 YEDSTWELKEDVDLAKIEEFEQLQASRPDTRHLDRPPSNIWKKIEQSREYKNGNQLREYQLEGLNWLLFNWYN  
 RRNCILADEMGLGKTIQSITFLYEILLTGIRGPFLIIAPLSTIANWEREFRTWTDINVVVYHGSLISRQMIQQ  
 YEMYFRDSQGRIIRGAYRFQAIITTFEMILGGCGELNAIDWRCVIIDEAHRLKNKNCKLLEGLKLMNLEHKV L  
 LTGTPLQNTVEELFSLHFLEPLRFPSESTFMQEFGLDKTTEEQVQKQLQAILKPMMLRRLKEDVEKKLAPKEET  
 IIEVELTNIQKKYYRAILEKNFSFLSKGAGRNKCT  
 >rs261610524\_ENSMUSP00000148088\_c.3375:C>CG\_p.Q1126ins-fs  
 ENSMUST00000209423.2|Chd9-205|ENSMUSG00000056608|+|chr8:g.91723885:C>CG  
 MTDPMDDFFDDANLFGGETLEGLSDDTFVQPGPVSLVDELNLGAEFEPLHIDSLNHVQGTPTHQKMADFEQLSQ  
 FDSMKFHPVNVQSFSGSPVEHVLSPHSQFNCSPIHPPNQPNGLFQDVADGSPMWGHQTATGLANQNGSPFHQPFGH  
 SHSLHQNKSFVAHPDFALFQASEHQTCSSLSHSQQSRSNLNPQNSLGQAKNFLDANVSGAHRVNVNHLATAP  
 SSQQTLPVQFSPTANPPAHFLKCSSHQEGNYNRPSPSMTSCSVNSQQFSPSHYSFSSGHVSPSSLLQSSAGLA  
 PGHTNQALSDFAGSNSFSPHRGMKQEPHQHLLNPTPSLNSNNFQILHSSHPQGNYSNSKLSPVHMNFPDPVDA  
 GPPVGHFNDHAETNGFSSLEENLLHHVDSHAEPFAGLDPEDLLQEGLLPQFDESFPFGQDNSNHVLDHDLDRQF  
 TSHLVS RPSDMAQTQLQYQARGWPSPLSTNHQHLHSRNLCLQRQPSSKKS DSGSGTYTKLQNTQVRVMSEKK  
 PRKRVESESKQEKANRIISEAIARAKERGERNI PRVMSPENFPASVEGKEEKRGRMRMKS KPKDRDNKKPKTY  
 SKLKEKTKIGKLIITLGGKHKRRNESSELSDAEQRSQHTFKEQHSQKRRSNRQIKRKKYAEDAEGKQSEEEV  
 KGS LRVKRNSAPPPGEQPLQLFVENPSEEDAAIVDKILACRTVKKEVSPGVMLDIEEFFVKYKNYSYLHCEWA  
 TEQQLLKDKRIQQKIKRFLRQAQRAHFLADMEEEFPNPDYVEVDRI LEVSFCEDKDTGESVIYYLVKWC SLP  
 YEDSTWELKEDVDLAKIEEFEQLQASRPDTRHLDRPPSNIWKKIEQSREYKNGNQLREYQLEGLNWLLFNWYN  
 RRNCILADEMGLGKTIQSITFLYEILLTGIRGPFLIIAPLSTIANWEREFRTWTDINVVVYHGSLISRQMIQQ  
 YEMYFRDSQGRIIRGAYRFQAIITTFEMILGGCGELNAIDWRCVIIDEAHRLKNKNCKLLEGLKLMNLEHKV L  
 LTGTPLQNTVEELFSLHFLEPLRFPSESTFMQEFGLDKTTEEQVQKQLQAILKPMMLRRLKEDVEKKLAPKEET  
 IIEVELTNIQKKYYRAILEKNFSFLSKGAGRNKCT  
 >rs261610524\_ENSMUSP00000147741\_c.1956:C>CG\_p.Q653ins-fs  
 ENSMUST00000210947.2|Chd9-210|ENSMUSG00000056608|+|chr8:g.91723885:C>CG  
 MSSVKRPRGRPPSSKKS DSGSGTYTKLQNTQVRVMSEKKPRKRVESESKQEKANRIISEAIARAKERGERNI PR  
 VMSPENFPASVEGKEEKRGRMRMKS KPKDRDNKKPKTYSKLKEKTKIGKLIITLGGKHKRRNESSELSDAEQ  
 RSQHTFKEQHSQKRRSNRQIKRKKYAEDAEGKQSEEEVKGS LRVKRNSAPPPGEQPLQLFVENPSEEDAAIVD  
 KILACRTVKKEVSPGVMLDIEEFFVKYKNYSYLHCEWATEQQLLKDKRIQQKIKRFLRQAQRAHFLADMEEE  
 PFNPDYVEVDRI LEVSFCEDKDTGESVIYYLVKWC SLPYEDSTWELKEDVDLAKIEEFEQLQASRPDTRHLDR  
 PPSNIWKKIEQSREYKNGNQLREYQLEGLNWLLFNWYNRRNCILADEMGLGKTIQSITFLYEILLTGIRGPFL  
 IIAPLSTIANWEREFRTWTDINVVVYHGSLISRQMIQQYEMYFRDSQGRIIRGAYRFQAIITTFEMILGGCGE  
 LNAIDWRCVIIDEAHRLKNKNCKLLEGLKLMNLEHKVLLTGTPLQNTVEELFSLHFLEPLRFPSESTFMQEF  
 GDLKTEEQVQKQLQAILKPMMLRRLKEDVEKKLAPKEETIIEVELTNIQKKYYRAILEKNFSFLSKGAGRNKCT  
 >rs261610524\_ENSMUSP00000105243\_c.3375:C>CG\_p.Q1126ins-fs  
 ENSMUST00000109614.9|Chd9-202|ENSMUSG00000056608|+|chr8:g.91723885:C>CG  
 MTDPMDDFFDDANLFGGETLEGLSDDTFVQPGPVSLVDELNLGAEFEPLHIDSLNHVQGTPTHQKMADFEQLSQ  
 FDSMKFHPVNVQSFSGSPVEHVLSPHSQFNCSPIHPPNQPNGLFQDVADGSPMWGHQTATGLANQNGSPFHQPFGH  
 SHSLHQNKSFVAHPDFALFQASEHQTCSSLSHSQQSRSNLNPQNSLGQAKNFLDANVSGAHRVNVNHLATAP  
 SSQQTLPVQFSPTANPPAHFLKCSSHQEGNYNRPSPSMTSCSVNSQQFSPSHYSFSSGHVSPSSLLQSSAGLA  
 PGHTNQALSDFAGSNSFSPHRGMKQEPHQHLLNPTPSLNSNNFQILHSSHPQGNYSNSKLSPVHMNFPDPVDA  
 GPPVGHFNDHAETNGFSSLEENLLHHVDSHAEPFAGLDPEDLLQEGLLPQFDESFPFGQDNSNHVLDHDLDRQF  
 TSHLVS RPSDMAQTQLQYQARGWPSPLSTNHQHLHSRNLCLQRQPSSKKS DSGSGTYTKLQNTQVRVMSEKK

PRKRVESESKQEKANRI I SEAIARAKERGERNI PRVMSPENFSPASVEGKKEKRGRMRMKS PKDRDNKPKPTY  
SKLKEKTKIGKLIITLTKKKHRRNESSELSDAEQRSQHTFKEQHSQKRRSNRQIKRKKYAEDAEGKQSEEEV  
KGLSRVKRNSAPPPGEPQLQLFVENPSEEDAAIVDKILACRTVKKEVSPGVMLDIEEFFVKYKNYSYLHCEWA  
TEQQLLKDKRIQQKIKRFLRQAQRAHFLADMEEEFPNPDYVEVDRIEVSFCEDKDTGESVIYYLVKWCSLP  
YEDSTWELKEDVDLAKIEEFELQASRPDTRHLDRPPSNIWKKIEQSREYKNGNQLREYQLEGLNWLFFNWN  
RRNCILADEMGLGKTIQSITFLYEILLTGIRGPFLLIAPLSTIANWEREFRTWTDINVVVYHGSLISRQMIQQ  
YEMYFRDSQGRIIRGAYRFQAIITTFEMILGGCGELNAIDWRCVIIDEAHLKKNCKLLEGLKLMNLEHKVL  
LTGTPLQNTVEELFSLHFLPLRFPSESTFMQEFGLDTEEQVKLQAILKPMMLRRLKEDVEKKLAPKEET  
IEVELTNIQKKYYRAILEKNFSFLSKGAGRNKCT  
>rs33410738\_ENSMUSP00000046356\_c.3379:C>A\_p.T1127K  
ENSMUST00000048665.8|Chd9-201|ENSMUSG00000056608|+|chr8:g.91723889:C>A  
MTDPMDDFFDDANLFGETLEGLSDDTFVQPGVSLVDELNLGAEFEPLHIDSLNHVQGTPTHQKMADFEQLSQ  
FDSMKFHPVNQSFSGSPVEHVLSPHSQFNCSPIHPPNQPNGLFQDVADGSPMWHGQTATGLANQNGSPFHQPGH  
SHSLHQNKSFVAHPDFALFQASEHQTCSSLSHSQQSRNLNPGQNSLGQAKNFLDANVSGAHRVNVNHLATAP  
SSQQTLPVQFSPTANPPAHFLKCSSHQEGNYNRPSMSTSCSVSNSQQFSPSHYSFSSGHVSPSSLLQSSAGLA  
PGHTNQALSDFAGSNSFSPHRGMKQEPHQHLLNPTPSLNSNFFQILHSSHPQGNYSNSKLSPVHMFDPVDA  
GPPVGHFNDHAETNGFSSLEENLLHHVDSHAEPFAGLDPEDLLQEGLLPQFDESPPFGQDNSNHVLDHDLDRQF  
TSHLVSRPDMAQTLQYQARGWPSPLSTNHQHLHSRNLCLQRQPPSSKSDGSGTYTKLQNTQVRVMSEKK  
PRKRVESESKQEKANRI I SEAIARAKERGERNI PRVMSPENFSPASVEGKKEKRGRMRMKS PKDRDNKPKPTY  
SKLKEKTKIGKLIITLTKKKHRRNESSELSDAEQRSQHTFKEQHSQKRRSNRQIKRKKYAEDAEGKQSEEEV  
KGLSRVKRNSAPPPGEPQLQLFVENPSEEDAAIVDKILACRTVKKEVSPGVMLDIEEFFVKYKNYSYLHCEWA  
TEQQLLKDKRIQQKIKRFLRQAQRAHFLADMEEEFPNPDYVEVDRIEVSFCEDKDTGESVIYYLVKWCSLP  
YEDSTWELKEDVDLAKIEEFELQASRPDTRHLDRPPSNIWKKIEQSREYKNGNQLREYQLEGLNWLFFNWN  
RRNCILADEMGLGKTIQSITFLYEILLTGIRGPFLLIAPLSTIANWEREFRTWTDINVVVYHGSLISRQMIQQ  
YEMYFRDSQGRIIRGAYRFQAIITTFEMILGGCGELNAIDWRCVIIDEAHLKKNCKLLEGLKLMNLEHKVL  
LTGTPLQNTVEELFSLHFLPLRFPSESTFMQEFGLDTEEQVKLQAILKPMMLRRLKEDVEKKLAPKEET  
IEVELTNIQKKYYRAILEKNFSFLSKGAGQKNVNLVNTMMELRKCENHPYLIKGAEEKILGEFRDTYNPSA  
SDFHLQAMIQSAGKLVLDKLLPKMKAGGHKVLIFSQMVRCLDILEDYLIHKRYLYERIDGRVRGNLRQAAID  
RFSKPDSDRFVLLCTRAGGLGINLTAADTCIIFDSDWNPQNDLQAQARCHRIGQNKAVKVYRLVTRNSYERE  
MFDRASLKLGLDKAVLQSMSGRDSNVSGIQQLSKKEIEDLLRRGAYGAIMEEEDEGSKFCEEDIDQILLRRTK  
TITIESEGRGSTFAKASFVAGNRDIDSLDDPNFWQWAKKAELDIDTISGRNSLVIDTPRIRKQTRPFSATK  
DELAELSEAESEGEKPKLRPCDRSGGYGRTECFRVEKNLLVYGWRWREILSHGRFKRQLNEHDEVEICRA  
LLAYCLIHRYGDEKIKGFIWDLITPTEDGQTRELQNHGLSAPVPRGRKGKVKVTQTSSFDIQKAEWLRKYNP  
EQLLQDEGYKHKVHHCNKVLLRVRMLYLLKQEVIGNESQKVFQDGDVADSIDVWVPEPDHSEVPAAWDFDAD  
KSLLIQVFKHGYEKYNTIRADPALCFLEVRGKPDKAVAAEQRANDYMDGDVEDPEYKPAPIFKDDIEDDVS  
SPGDLVIADGEGQLMEGDKVYWPSPALTRLRRLITAYQRTNKNRHIQQMQPTFSLPANAMQPLYEEATLNP  
KMAAKIERQQRWTRREEDFYRVVSTFGVVFDPDRGQFDWTKFRALARLHKKTDNSLEKYLCAFMSMCRVR  
LPSKEELVDPNIFIQPIITEERASRTLYRIELLRKVREQALRHPQLFERLKLCHPNPDLPIWWECSHHRDILLI  
GAAKHGVSRTDYHILRDPFLSMAAQRYNYSKAHSRTSAPLLQQYVALSASPLTSLPRLLGAKGTLLEDM  
KVKSESLTEEPQSSEEEESMSMETRTRVKSEPVSPKNGVLSQATGDQKSGGKSETDRRMVAARTEPLTPNPAS  
KKPRVHKRGSQSSSDSDSARSSCSRSSSSSSSSSSSSSHSRSGSSSSSSSSSSSSSSSSSSSSSSSSSSSS  
SSSEEDSDEEDVQKREGTPHRKAYDEESVASLSTTQDETQDSFQANNGTPESAYLLQGGYMLAASYWPKDRVM  
INRLDSICQTVLKGKWPARRHYDANTVASFYTTKLLDSPAATERGEPVPTPPAVAVREEHEQSAQMSKEG  
GLKLTFOKQGLAQKRPFDGEDGALGQQYLTRLRELQSTSETSIVNLKAVPASGTSIQPTLGANGAILDSQP  
IVKRRRGRRRNVEGADILFLNRNKPNIPTGMNPALSYPPQQRIPDTESPVPVINLKDGTRELQDAPKRKD  
LDRWLKEHPGYVEDLGAFI PRVQLHEGRPKQKRHRCRNPNKLDINSLTGEERVQLINRRNARKVGGAFAPPLK  
DLCRFLKENSEYGAPEWGDVVKQSGFLPESMFERILTGPVVREEVSRGRPKSGIAKATTAAVPAGSVPG  
NPLLANGLPGVDLTAALQALQONLQNLQSLQVTAGLMGPAGLSSGGETKNMAAMFPMFLSGMAGLPNLLGMG  
GLLSKTAESGAEKRGNDKELEGGKERTESQSPENGGERCVPSPSTSSSTAALSSAAAKPIALNPLLSNI  
LYPGMLLTPLNLHLPTLSQSNFVQKNSDDLSSKSVEIKEENSRVRDQEEKGGTEPSPLNENSTDEGSE  
RASSGSDSSSSSEDSDSNED\*  
>rs33410738\_ENSMUSP00000147407\_c.3379:C>A\_p.T1127K  
ENSMUST000000209203.2|Chd9-203|ENSMUSG00000056608|+|chr8:g.91723889:C>A  
MTDPMDDFFDDANLFGETLEGLSDDTFVQPGVSLVDELNLGAEFEPLHIDSLNHVQGTPTHQKMADFEQLSQ  
FDSMKFHPVNQSFSGSPVEHVLSPHSQFNCSPIHPPNQPNGLFQDVADGSPMWHGQTATGLANQNGSPFHQPGH  
SHSLHQNKSFVAHPDFALFQASEHQTCSSLSHSQQSRNLNPGQNSLGQAKNFLDANVSGAHRVNVNHLATAP  
SSQQTLPVQFSPTANPPAHFLKCSSHQEGNYNRPSMSTSCSVSNSQQFSPSHYSFSSGHVSPSSLLQSSAGLA  
PGHTNQALSDFAGSNSFSPHRGMKQEPHQHLLNPTPSLNSNFFQILHSSHPQGNYSNSKLSPVHMFDPVDA

GPPVGHFNDHAETNGFSSLEENLLHHVDSHAEPFAGLDPEDLLQEGLLPQFDESPFGQDNSNHVLDHDLDRQF  
TSHLVSRPSDMAQTQLQYQARGWPSPLSTNHQHLSRNLHCLQRQPSSSKKSDGSGTYTKLQNTQVRVMSEKK  
PRKRVESESKQEKANRI I SEAIARAKERGERNI PRVMS PENFP SASVEGKKEKRGRMRMKS KPKDRDNKKPKTY  
SKLKEKTKIGKLIITLGGKHKRRNESSELSDAEQRSQHTFKEQHSQKRRSNRQIKRKKYAEDAEGKQSEEEV  
KGSRLVKRNSAPPPGEQPLQLFVENPSEEDAAIVDKILACRTVKKEVSPGVMLDIEEFFVYKKNYSYLHCEWA  
TEQQLLKDKRIQQKIKRFLRQAQRAHFLADMEEEFPNPDYVEVDRI LEV SFCEDKDTGESVIYYLVKWC SLP  
YEDSTWELKEDVDLAKIEEFEQLQASRPDTRHLDRPPSNIWKKIEQSREYKNGNQLREYQLEGLNWL LFNWYN  
RRNCILADEMGLGKTIQSITFLYEILLTGIRGPFLLIAPLSTIANWEREFRTWTDINVVVYHGSLISRQMIQQ  
YEMYFRDSQGRIRGAYRFQAIITTFEMILGGCGELNAIDWRCV IIDEAHLRKNKNCKLLEGLKLMNLEHKVL  
LTGTPLQNTVEELFSLHLFLEPLRFPSESTFMQEFGLDKTEEQVQKLQAILKPMMLRRLKEDVEKKLAPKEET  
IEVELTNIQKYYRAILEKNFSFLSKGAGQKNVNLVNTMMELRKC CNHPYLIKGAEEKILGEFRDTYNPSA  
SDFHLQAMIQSAGKLVLDKLLPKMKAGGHKVLIFSQMVRCLDILEDYLIHKRYLYERIDGRVGRNLRQA AID  
RFSKPDSDRFVLLCTRAGGLGINLTAADTCIIFDSDWNPQNDLQAQARCHRIGQNKAVKVYRLVTRNSYERE  
MFDRASLKLGLDKAVLQSMSGRDSNVSGIQQLSKKEIEDLLRRGAYGAIMEEDEGSKFCEEDIDQILLRRTK  
TITIESEGRGSTFAKASFVAGNRD TDISLDDPNFWQKWA KKAELDIDTISGRNSLVIDTPRIRKQTRPFSATK  
DELAELSEAESEGEKPKLRPCDRSGGYGRTECFRVEKNLLVYGWRWREILSHGRFKRQLNEHDVEVICRA  
LLAYCLIHRYGDEKIKGFIWDLITPTEDGQTRRELQNHGLSAPVPRGRKGGKVKVTQTSSFDIQKAEWLKRYNP  
EQLLQDEGYKHKHHCNKVLLRVRMLYLLKQEVIGNESQKVF DGDVADSIDVWVPEPDHSEVPAAWWDFDAD  
KSLLLIGVFKHGYEKYNTIRADPALCFLEVRGKPD KAVAAEQRANDYMDGDVEDPEYKPAPAIKDDIEDDVS  
SPGDLVIADGEGQLMEGDKVYWP TSPALTTLRRLITAYQRTNKNRHIQQMQPTFSLPANAMQPLYEEATLNP  
KMAAKIERQQRIGRSKYFYSTNHRGTCF\*

>rs33410738\_ENSMUSP00000148088\_c.3379:C>A\_p.T1127K  
ENSMUST00000209423.2|Chd9-205|ENSMUSG00000056608|+|chr8:g.91723889:C>A  
MTDPMDFDDANLFGETLEGLSDDTFVQPGVSLVDELNLGAEFEPLHIDSLNHVQGTPTHQKMADFEQLSQ  
FDSMKFHPVNSQFSGSPVEHVLSPHSQFNCSPIHPPNQPNGLFQDVADGSPMWHQTATGLANQNGSPFHQPGH  
SSSHLQNKSFVAFNDPFAHQASEHQTCSSLSHSQPSRNLNPGQNSLGQAKNFLDANVSGAHRVNVNHLATAP  
SQQTLFVQFSPANTPAHFLKCSSHQEGNYNRPSSTSCSVNSQFPSPSHYSFSSGHVSPSSLQSSAGLA  
PGHTNQALSDFAGSNSFSPHRGMKQEPTQHLLNPTPSLNSNNFQILHSSHPQGNYSNSKLSPVHMFDPVDA  
GPPVGHFNDHAETNGFSSLEENLLHHVDSHAEPFAGLDPEDLLQEGLLPQFDESPFGQDNSNHVLDHDLDRQF  
TSHLVSRPSDMAQTQLQYQARGWPSPLSTNHQHLSRNLHCLQRQPSSSKKSDGSGTYTKLQNTQVRVMSEKK  
PRKRVESESKQEKANRI I SEAIARAKERGERNI PRVMS PENFP SASVEGKKEKRGRMRMKS KPKDRDNKKPKTY  
SKLKEKTKIGKLIITLGGKHKRRNESSELSDAEQRSQHTFKEQHSQKRRSNRQIKRKKYAEDAEGKQSEEEV  
KGSRLVKRNSAPPPGEQPLQLFVENPSEEDAAIVDKILACRTVKKEVSPGVMLDIEEFFVYKKNYSYLHCEWA  
TEQQLLKDKRIQQKIKRFLRQAQRAHFLADMEEEFPNPDYVEVDRI LEV SFCEDKDTGESVIYYLVKWC SLP  
YEDSTWELKEDVDLAKIEEFEQLQASRPDTRHLDRPPSNIWKKIEQSREYKNGNQLREYQLEGLNWL LFNWYN  
RRNCILADEMGLGKTIQSITFLYEILLTGIRGPFLLIAPLSTIANWEREFRTWTDINVVVYHGSLISRQMIQQ  
YEMYFRDSQGRIRGAYRFQAIITTFEMILGGCGELNAIDWRCV IIDEAHLRKNKNCKLLEGLKLMNLEHKVL  
LTGTPLQNTVEELFSLHLFLEPLRFPSESTFMQEFGLDKTEEQVQKLQAILKPMMLRRLKEDVEKKLAPKEET  
IEVELTNIQKYYRAILEKNFSFLSKGAGQKNVNLVNTMMELRKC CNHPYLIKGAEEKILGEFRDTYNPSA  
SDFHLQAMIQSAGKLVLDKLLPKMKAGGHKVLIFSQMVRCLDILEDYLIHKRYLYERIDGRVGRNLRQA AID  
RFSKPDSDRFVLLCTRAGGLGINLTAADTCIIFDSDWNPQNDLQAQARCHRIGQNKAVKVYRLVTRNSYERE  
MFDRASLKLGLDKAVLQSMSGRDSNVSGIQQLSKKEIEDLLRRGAYGAIMEEDEGSKFCEEDIDQILLRRTK  
TITIESEGRGSTFAKASFVAGNRD TDISLDDPNFWQKWA KKAELDIDTISGRNSLVIDTPRIRKQTRPFSATK  
DELAELSEAESEGEKPKLRPCDRSGGYGRTECFRVEKNLLVYGWRWREILSHGRFKRQLNEHDVEVICRA  
LLAYCLIHRYGDEKIKGFIWDLITPTEDGQTRRELQNHGLSAPVPRGRKGGKVKVTQTSSFDIQKAEWLKRYNP  
EQLLQDEGYKHKHHCNKVLLRVRMLYLLKQEVIGNESQKVF DGDVADSIDVWVPEPDHSEVPAAWWDFDAD  
KSLLLIGVFKHGYEKYNTIRADPALCFLEVRGKPD KAVAAEQRANDYMDGDVEDPEYKPAPAIKDDIEDDVS  
SPGDLVIADGEGQLMEGDKVYWP TSPALTTLRRLITAYQRTNKNRHIQQMQPTFSLPANAMQPLYEEATLNP  
KMAAKIERQQRWTRREADFYRVVSTFGVVDFDRGQFDWTKFRALARLHKKT DNSLEKYLCAFMSCRRVCR  
LPSKEELVDPNIFIQPI TEERASRTLYRIELLRKVREQALRHPQLFERLKLCHPNPDLPIWWECSGSHDRDLI  
GAAKHGVSRTDYHILRDP ELSFMAAQRYNQSKAAHSRTSAPLLQQYQVALSASPLTSLPRLLGAKGTLLEDM  
KVKSESLTEEPQSSEEE SMSSMETRTRVKSEPVSPKNGVLSQATGDQKSGGKSETDRRMVAARTEPLTPNPAS  
KKPRVHKRSDQSSSDSDSARS SCSSSSSSSSSSSSSSS SCSHSRS GSSSSSSSSSSSSSSSSSSSSSSSSSS  
SSSEESDSEEDVQKREGTPHRKAYDEESVASLSTTQDETQDSFQANNGTPE SAYLLQGGYMLAASYWPKDRVM  
INRLDSICQTVLKGKWP SARRHYDANTVASFYTTKLLDS PGAATERGEP SVPTPPAVAVREEHEQSAQMSKVK  
KHVREKEFTVKIKDEGGLKLTQKQGLAQKRPFDGEDGALGQQQY LTRLRELQSTSETSLVNLPKAVPASGTS  
IQPTLGANGA ILDSQPIVKKRRGRRRNVGADILFLNRNKPNIPTGMNPALSYPQPPRI PDTESVPVIVNL  
KDGTLAGDDAPKRKDLDRWLKEHPGYVEDLGAFI PRVQLHEGRPKQRHRCRNPNKLDINS LTGEERVQLIN

RRNARKVGGAFAPPLKDLRCFLKENSEYGVAPWGDVVKQSGFLPESMFERILTGPVVREEVSRGRPKSGI  
AKATTA AV PAVG SV PGN PLL ANGL L PGVD L TAL QAL QQN L QNL QSL QV TAG L MGMPAG L SSGGETKNMAAMFP  
MLFSGMAGLPNLLGMGGLLSKTAESGAEEKRGNDSKELEGKKERTESQSPENGGERCVPGPSSTSSSTAALSSA  
AAAKPIALNPLLLSNILYPGMLLTPGLNLHLPTLSQSNAFDVQKNKSDDLSSKSVEIKEENSRVRDQEEKGG  
TEPSPLENSTDEGSEERASSGSDSSSSSESDSSSNED\*  
>rs33410738\_ENSMUSP00000147741\_c.1960:C>A\_p.T654K  
ENSMUST00000210947.2|Chd9-210|ENSMUSG00000056608|+|chr8:g.91723889:C>A  
MSSVKRPRGRPPSSKSDGSGTYTKLQNTQVRVMSEKKPRKRVESESKQEKANRIISEAIARAKERGERNIPR  
VMSPENFPASASVEGKEEKRRMRMKS PKDRDNKKPKTY SKLKEKTKIGKLIITLGKHKRRNESDELSDAEQ  
RSQHTFKEQHSQKRRSNRQIKRKKYAEDAEGKQSEEEVKGSLRVKRN SAPP PGEQPLQLFVENPSEEDAAIVD  
KILACRTVKKEVSPGVMLDIEEFFVKYKNYSYLHCEWATEQQLLKDKRIQQKIKRFLRQAQRAHF LADMEEE  
PFNPDYVEVDRILEV SFCEDKDTGESVIYYLVKWC SLPYEDSTWELKEDVDLAKIEEFEQLQASRPDTRHLDR  
PPSNIWKKIEQSREYKNGNQLREYQLEGLNWLLFNWYNRRNCILADEMGLGKTIQSITFLYEI LLTGIRGPFL  
IIAPLSTIANWEREFRTWTDINVVVYHGSLISRQMIQQYEMYFRDSQGRIRGAYRFQAIITTFEMILGGCGE  
LNAIDWRCVIIDEAHRLKNKNCKLLEGLKLMNLEHKVLLTGTPLQNTVEELFSLHLHFLEPLRFPSESTFMQEF  
GDLKTEEQVQKLQAILKPMMLRRLKEDVEKKLAPKEETIEVELTNIQKYYRAILEKNFSFLSKGAGQKNVP  
NLVNTMMELRKCCNHPYLIKGAEEKILGEFRDYNPSASDFHLQAMIQSAGKLV LIDKLLPKMKAGGHKVLIF  
SQMVRCLDILEDYLIHKRYLYERIDGRVRGNLRQAAIDRFSPKPSDRFVFLLC TRAGGLINLTAADTCIIFD  
SDWNPQNDLQAQARCHRIGQNKAVKVYRLVTRNSYEREMFDRASLKLGLDKAVLQSMSGRDSNVSGIQQLS  
>rs33410738\_ENSMUSP00000105243\_c.3379:C>A\_p.T1127K  
ENSMUST00000109614.9|Chd9-202|ENSMUSG00000056608|+|chr8:g.91723889:C>A  
MTDPMDDFFDDANLFGETLEGLSDDTFVQPGVSLVDELNLGAEFEPLHIDSLNHVQGTPTHQKMADFEQLSQ  
FDSMKFHPVNQSFSGPVEHVLSPHSQFNCSPIHPPNQPNGLFQDVADGSPMWHGQTATGLANQNGSPFHPQPGH  
SHSLHQNKSFVAHPDFALFQASEHQTCSSLSHSQQSRSNLNPQNSLQAKNFLDANVSGAHRVNVNHLATAP  
SSQQTLPVQFSPTANPPAHFLKCSSHQEGNYNRPSMSTSCSVNSQFP SHYSFSSGHVSPSSLLQSSAGLA  
PGHTQALSDFAGNSFSPHRGMKQEP TQHLLNPTSLNSNFI LHS SHPQGNYSNKLSVHMNFDPVDVA  
GPPVGHFNDHAETNGFSSLEENLHHVDSHAEPFAGLDPEDLLQEGLLPQFDES PFGQDNSNHVLDHDLDRQF  
TSHLVSRPSDMAQTQLQYQARGWPSPLSTNHQHLHSRNLCLQRQPSSKSDGSGTYTKLQNTQVRVMSEKK  
PRKRVESESKQEKANRIISEAIARAKERGERNIPRVMSPENFPASASVEGKEEKRRMRMKS PKDRDNKKPKTY  
SKLKEKTKIGKLIITLGKHKRRNESDELSDAEQRSQHTFKEQHSQKRRSNRQIKRKKYAEDAEGKQSEEEV  
KGLRVKRN SAPP PGEQPLQLFVENPSEEDAAIVDKILACRTVKKEVSPGVMLDIEEFFVKYKNYSYLHCEWA  
TEQQLLKDKRIQQKIKRFLRQAQRAHF LADMEEEPFNPDYVEVDRILEV SFCEDKDTGESVIYYLVKWC SLP  
YEDSTWELKEDVDLAKIEEFEQLQASRPDTRHLDRPPSNIWKKIEQSREYKNGNQLREYQLEGLNWLLFNWYN  
RRNCILADEMGLGKTIQSITFLYEI LLTGIRGPFLIIAPLSTIANWEREFRTWTDINVVVYHGSLISRQMIQQ  
YEMYFRDSQGRIRGAYRFQAIITTFEMILGGCGELNAIDWRCVIIDEAHRLKNKNCKLLEGLKLMNLEHKV  
LTGTPLQNTVEELFSLHLHFLEPLRFPSESTFMQEFGLDKEEQVQKLQAILKPMMLRRLKEDVEKKLAPKEE  
TIEVELTNIQKYYRAILEKNFSFLSKGAGQKNVNLVNTMMELRKCCNHPYLIKGAEEKILGEFRDYNPSA  
SDFHLQAMIQSAGKLV LIDKLLPKMKAGGHKVLIFSQMVRCLDILEDYLIHKRYLYERIDGRVRGNLRQAAID  
RFSPKPSDRFVFLLC TRAGGLINLTAADTCIIFDSDWNPQNDLQAQARCHRIGQNKAVKVYRLVTRNSYERE  
MFDRASLKLGLDKAVLQSMSGRDSNVSGIQQLSKKEIEDLLRRGAYGAIMEEEDGSKFCEEDIDQILLRRTK  
TITIESEGRGSTFAKASFVAGNRTDISLDDPNFWQWAKKAELDIDTISGRNSLVIDTPRIRKQTRPFSATK  
DELAELSEAESEGEKPKLRPCDRSGGYGRTECFRVEKNLLVYGWRWREILSHGRFKRQLNEHDVEVICRA  
LLAYCLIHRYGDEKIKGFIWDLITPTEDGQTRQLNHLGLSAPVPRGRKGGKVKQTSSFDIQKAEWLKRYNP  
EQLLQDEGYKHKHVKCNKVLRLVRMLYYLQKEVIGNESQKVFQVDFGDASDIDVWVPEPDHSEVPAAWWDFDAD  
KSLLIQVFKHGYEKYNTIRADPALCFLERVGKPDKAVAAEQRANDYMDGDVEDPEYKPAPAIFKDDIEDDVS  
SPGDLVIADGEGQLMEGDKVYWP TFSALTTRLRRLITAYQRTNKNRHIQQMQPTFSLPANAMQPLYEATLNP  
KMAAKIERQQRWTRREEADFYRVVSTFGVVFDPDRGQFDWTKFRALARLHKKT DNSLEKYLCAFMSCRRVCR  
LPSKEELVDPNIFIQPI TEERASRTLYRIELLRKVREQALRHPQLFERLKLCHPNPDLPIWECGSHDRDLI  
GAAKHGVSRTDYHILRDP ELSFMAAQRNYNQSKAAHSRTSAPLLQQYQVALSASPLTSLPRLLGAKGTLLEDM  
KVKSESLTEEPQSSEEE SMSMETRTRVKSEPVSPKNGVLSQATGDQKSGGKSETDRRMVAARTEPLTPNPAS  
KKPRVHKRGSQSSSDSDSDSARSSCSSRSSSSSSSSSSSSSSSHSRSGSSSSSSSSSSSSSSSSSSSSSSSSSSSS  
SSSEEDSEEDVQKREGTPHRKAYDEESVASLSTTQDETQDSFQANNGTPESAYLLQGGYMLAASYWPKDRVM  
INRLDISCQTVLKKGKWP SARRHYDANTVASFYTTKLLDSPGAATERGEP SVPTPPAVAVREEHEQSAQMSKVK  
KHVREKEFTVLIKDEGGKLT FQKQGLAQKRPFDDGEDGALGQQQY LTRLRELQSTSETSVLNLPKAVPASGTS  
IQPTLIGANAILDSQPIVKKRRGRRRNVEGADILFLNRKPPNHIP TGMNPALSYPQPQRI PDTESVPVINL  
KDGTRLAGDDAPKRKDLDRWLKEHPGYVEDLGAFIPRVQLHEGRPKQKRHRRCRNPKNKLDINSLTGEERVQLIN  
RRNARKVGGAFAPPLKDLRCFLKENSEYGVAPWGDVVKQSGFLPESMFERILTGPVVREEVSRGRPKSGI  
AKATTA AV PAVG SV PGN PLL ANGL L PGVD L TAL QAL QQN L QNL QSL QV TAG L MGMPAG L SSGGETKNMAAMFP



MLFSGMAGLPNLLGMGGLLSKTAESGAEEKRGNDSSKELEGKKERTESQSPENGGERCVPGSPSTSSSTAALSSA  
AAAKPIALNPLLLSNILYPGMLLTPGLNLHLPTLSQSNADFVQKNKSDDLSSKSVEIKEENSRVRDQEEKGG  
TEPSPLENSTDEGSEERASSGSDSSSSSESDSSSNED\*

>rs48480191\_ENSMUSP00000046356\_c.4351:A>G\_p.K1451R

ENSMUST00000048665.8|Chd9-201|ENSMUSG00000056608|+|chr8:g.91737274:A>G  
MTDPMDDFFDDANLFGETLEGLSDDTFVQPGPVSLVDELNLGAEFEPLHIDSLNHVQGTPTHQKMADFEQLSQ  
FDSMKFHPVNQSFSGSPVEHVLSPHSQFNCSPIHPPNPNGLFQDQVADGSPMWHQATATGLANQNGSPFHQPGH  
SHSLHQNKSFVAHPDFALFQASEHQTCSSSLHSQQSRSNLNPQGNSLGQAKNFLDANVSGAHRVNVNHLATAP  
SSQQTLPVQFSPTANPPAHFLKCSSHQEGNYNRPSMSTSCSVNSQQFP SHYSFSSGHVSPSSLLQSSAGLA  
PGHTNQALSDFAGSNSFSPHRGMKQEPTQHLLNPTPSLNSNNFQILHSSHPQGNYSNSKLSPVHMFNFPD  
GPPVGHFNDHAETNGFSSLEENLLHHVDSHAEPFAGLDPEDLLQEGLLPQFDESFPGQDNSNHVLDHDLDRQF  
TSHLVSRPSDMAQTQLQYQARGWPSPLSTNHQHLHSRNLCLQRQPSSKKS DSGSGTYTKLQNTQVRVMSEKK  
PRKRVESESKQEKANRIISEAIARAKERGERNIPRVMS PENFSPASVEGKKEKRGRMRMKS PKDRDNKKPKTY  
SKLKEKTKIGKLIITLGGKHKRRNESSELSDAEQRSQHTFKEQHSQKRRSNRQIKRKKYAEAEAGKQSEEEV  
KGLSRVKNRSAPPPGEQPLQLFVENPSEEDAAIVDKILACRTVKKEVSPGVMLDIEEFFVKYKNYSYLHCEWA  
TEQQLLKDKRIQQKIKRFLRQAQRAHFLADMEEEFPNP DYVEVDRILEV SFCEDEKDTGESVIYYLVKWC SLP  
YEDSTWELKEDVLDLAKIEEFELQASRPDTRHLDRPPSNIWKIEQSREYKNGNQLREYQLEGLNWLNFNWN  
RRNCILADEMGLGKTIQSITFLYEILLTGIRGPFLLIAPLSTIANWEREFRTWTDINVVYHGSLISRQMIQQ  
YEMYFRDSQGRIRGAYRFQAIITTFEMILGGCGELNAIDWRCV IIDEAHLRKNKNCKLLEGLKLMNLEHKVL  
LTGTPLQNTVEELFSLHLFLEPLRFPSESTFMQEFGLDTEEQVQKLQAILKPMMLRRLKEDVEKKLAPKEET  
IEVELTNIQKKYRAILEKNFSLSKGAGQTNVNLVNTMELRKC CNHPYLIKGAEEKILGEFRDYNP  
SDFHLQAMIQSAGKLVLDKLLPKMKAGGHKVLIFSQMVRCLDILEDYLIHKRYLYERIDGRVGRNLRQA  
AIDRFKPSDRFVFLCTRAGGLGINLTAADTCIIFDSDWNPQNDLQAQARCHRIGQNKAVKYRLVTRNSYERE  
MFDRASLKLGLDKAVLQSMSGRDSNVSGIQQLSKKEIEDLLRRGAYGAIMEEEDGSKFCEEDIDQILLRRTK  
TITIESEGRSESTFAKASFVAGNRDIDSLDDPNFWQKWA KKAELDITISGRNSLVIDTPRIRRQTRPFSATK  
DELAELSEAESEGEKPKLRRPCDRSGGYGRTECFRVEKNLLVYGWGRWREILSHGRFRRKILNEHDVEVICRA  
LLAYCLIHRYGDEKIKGFIWDLITPTEDGQTRRELQNLHGLSAPVPRGRKGGKVKVTQTS SFDIQKAEWLKRYNP  
EQLLQDEGYKHKHHCNKVLLRVRMLYLLKQEVIGNESQKVFDGVDASDIDVWVPEPDHSEVPAAWWDFDAD  
KSLLIGVFKHGYEKYNTIRADPALCFLEVRGKPD DKAVAAEQRANDYMDGDVEDPEYKPAPAIKDDIEDDVS  
SPGDLVIADGEGQLMEGDKVYWPSPALTTLRRLITAYQRTNKNRHIQQMQPTFSLPANAMQPLYEEATLNP  
KMAAKIERQQRWTRREEADFYRVVSTFGVVFDPDRGQFDWTKFRALARLHKKTDNSLEKYLCAFMSCRRVCR  
LPSKEELVDPNIFIQPIITEERASRTLYRIELLRKVREQALRHPQLFERLKLCHPNPDLPIWWECSHHRDILLI  
GAAKHGVSRTDYHILRDPELS FMAAQRNYNQSKAAHSRTSAPLLQQYQVALSASPLTSLPRLGAKGTLLED  
MVKKSESLTEEPQSSEEE SMSSMETRTRVKSEPVSPKNGVLSQATGDQKSGGKSETDRRMVAARTEPLTPNPAS  
KKPRVHKRGSQSSSDSDSARS SCSRSSSSSSSSSSSSS SCSHSRSGSSSSSSSSSSSSSSSSSSSSSSSSSS  
SSSEESDSEEDVQKREGTPHRKAYDEESVASLSTTQDETQDSFQANNGTPE SAYLLQGGYMLAASYWPKDRVM  
INRLDSICQTVLKGKWP SARRHYDANTVASFYTTKLLDSPGAATERGEP SVPTPPAVAVREEHEQSAQMSKEG  
GLKLTQKQGLAQKRPFDGEDGALGQQYLTRLRELQSTSETSLVNLPKAVPASGTSIQPTL GANGAILDSQP  
IVKRRRGRNRNVEGADILFLNRNKP PNHIP TGMNPALSYQPQRI PDTESPVPV INLKDGT RLAGDDAPKRKD  
LDRWLKEHPGYVEDLGAFI PRVQLHEGRPKQKRHR CRNPNKLDINSLTGEERVQLINRRNARKVGGAFAPPLK  
DLCRFLKENSEYGVAP EWGDVVKQSGFLPESMFERILTGPVVREEVSRRGRRPKSGIAKATTA AAVPAGSVPG  
NPLLANGLLPVLDLTAALQALQQLNLQSLQV TAGLMGPAGLSSGGETKNMAAMFPMLFSGMAGLPNLLGMG  
GLLSKTAESGAEEKRGNDSSKELEGKKERTESQSPENGGERCVPGSPSTSSSTAALSSAAA KPIALNPLLLSNI  
LYPGMLLTPGLNLHLPTLSQSNADFVQKNKSDDLSSKSVEIKEENSRVRDQEEKGGTEPSPLENSTDEGSE  
RASSGSDSSSSSESDSSSNED\*

>rs48480191\_ENSMUSP00000147407\_c.4351:A>G\_p.K1451R

ENSMUST000000209203.2|Chd9-203|ENSMUSG00000056608|+|chr8:g.91737274:A>G  
MTDPMDDFFDDANLFGETLEGLSDDTFVQPGPVSLVDELNLGAEFEPLHIDSLNHVQGTPTHQKMADFEQLSQ  
FDSMKFHPVNQSFSGSPVEHVLSPHSQFNCSPIHPPNPNGLFQDQVADGSPMWHQATATGLANQNGSPFHQPGH  
SHSLHQNKSFVAHPDFALFQASEHQTCSSSLHSQQSRSNLNPQGNSLGQAKNFLDANVSGAHRVNVNHLATAP  
SSQQTLPVQFSPTANPPAHFLKCSSHQEGNYNRPSMSTSCSVNSQQFP SHYSFSSGHVSPSSLLQSSAGLA  
PGHTNQALSDFAGSNSFSPHRGMKQEPTQHLLNPTPSLNSNNFQILHSSHPQGNYSNSKLSPVHMFNFPD  
GPPVGHFNDHAETNGFSSLEENLLHHVDSHAEPFAGLDPEDLLQEGLLPQFDESFPGQDNSNHVLDHDLDRQF  
TSHLVSRPSDMAQTQLQYQARGWPSPLSTNHQHLHSRNLCLQRQPSSKKS DSGSGTYTKLQNTQVRVMSEKK  
PRKRVESESKQEKANRIISEAIARAKERGERNIPRVMS PENFSPASVEGKKEKRGRMRMKS PKDRDNKKPKTY  
SKLKEKTKIGKLIITLGGKHKRRNESSELSDAEQRSQHTFKEQHSQKRRSNRQIKRKKYAEAEAGKQSEEEV  
KGLSRVKNRSAPPPGEQPLQLFVENPSEEDAAIVDKILACRTVKKEVSPGVMLDIEEFFVKYKNYSYLHCEWA  
TEQQLLKDKRIQQKIKRFLRQAQRAHFLADMEEEFPNP DYVEVDRILEV SFCEDEKDTGESVIYYLVKWC SLP

YEDSTWELKEDVDLAKIEEFELQASRPDTRHLDRPPSNIWKKIEQSREYKNGNQLREYQLEGLNWLLFNWYN  
RRNCILADEMGLGKTIQSITFLYEILLTGIRGPFLLIAPLSTIANWEREFRTWTDINVVVYHGSLSISRQMIQQ  
YEMYFRDSQGRIIRGAYRFQAIITTFEMILGGCGELNAIDWRCVIIDEAHRLKKNCKLLEGLKLMNLEHKVL  
LTGTPLQNTVEELFSLHFLFLEPLRFPSESTFMQEFGLDKTEEQVQKLQAILKPMMLRRLKEDVEKKLAPKEET  
IIEVELTNIQKKYYRAILEKNFSLSKGAGQTNVPLVNTMMELRKCNCNHPYLIKGAEEKILGEFRDTPNPSA  
SDFHLQAMIQSAGKLVLDKLLPKMKAGGHKVLIFSQMVRCLDILEDYLIHKRYLYERIDGRVGRNLRQAAID  
RFSKPDSDRFVLLCTRAGGLGINLTAADTCIIFDSDWNPQNDLQAQARCHRIGONKAVKVYRLVTRNSYERE  
MFDRA SLKGLDKAVLQSMSGRDSNVSGIQQLSKKEIEDLLRRGAYGAIMEEEDGSKFCEEDIDQILLRRTK  
TITIESEGRGSTFAKASFVAGNRTDISLDDPNFWQKAKKAELDIDTISGRNSLVIDTPRIRRQTRPFSATK  
DELAELSEAESEGEKPKLRRPCDRSGGYGRTECFRVEKNLLVYGWRWREILSHGRFKRQLNEHDVEVICRA  
LLAYCLIHRYGDEKIKGFIWDLITPTEDGQTRQLNHLGLSAPVPRGRKGGKVKQTSSFDIQAELWRKYNP  
EQLLQDEGYKHHVHHCNKVLLRVRMLYYLKQEVIGNESQKVFQVGDASDIDVWVPEPDHSEVPAAWWDFDAD  
KSLLLIGVFKHGYEKYNTIRADPALCFLEVRGKPDKAVAAEQRANDYMDGDVEDPEYKPAIAIFKDDIEDDVS  
SPGDLVIADGEGQLMEGDKVYWPPTSALTTRLRLITAYQRTNKNRHIQQMQPTFSLPANAMQPLYEEATLNP  
KMAAKIERQQRIGRSKYFYSTNHRGTCF\*

>rs48480191\_ENSMUSP00000148088\_c.4351:A>G\_p.K1451R  
ENSMUST00000209423.2|Chd9-205|ENSMUSG00000056608|+|chr8:g.91737274:A>G  
MTDPMDDFFDDANLFGETLEGLSDDTFVQPGPVSLVDELNLGAEFEPHIDSLNHVQGTPTHQKMADFEQLSQ  
FDSMKFHPVNVQSFQSPVEHVLSPHSQFNCSPHPPNPNGLFQDQVADGSPMWHQATATGLANQNGSPFHQP  
SHSLHQNSFVAHPDFALFQASEHQTCSSLSHSQSRSNLNPQNSLGQAKNFLDANVSGAHRVNVNHLATAP  
SSQQTLPVQFSPTANPPAHFLKCSHQEGNYNRPSMTSCSVNSQFPSSHYSFSSGHVSPSSLLQSSAGLA  
PGHTNQALSDFAGSNSFSPHRGMKQEPHQHLLNPTPSLNSNNFQILHSSHPQGNYSNSKLSPVHMNFPDPVDA  
GPPVGHFNDAETNGFSSLEENLLHHVDSHAEPFAGLDPELLEGLLQFQDESFPFGQDNSNHVLDHDLDRQF  
TSHLVSRPSDMAQTQLQYQARGWPSPLSTNHQHLHSRNLCLQRQPSSSKSDGSGTYTKLQNTQVRVMSEKK  
PRKRVESESKQEKANRIISEAIARAKERGERNIPRVMSPENFPASVEGKEEKRRMRMKSPPKDRDNKKPKTY  
SKLKEKTIKGLIITLGGKHKRRNESSELSDAEQSHTFKEQHSQKRRSNRQIKRKKYAEADAEQKQSEEEV  
KGSRLRVKRSAPPPGEPQLQFVENPSEEDAAIVDKILACRTVKKEVSPGVMLDIEEFFVKYKNYSYLHCEWA  
TEQQLLKDKRIQKIKRFLRQAQRAHFLADMEEPFNPDYVEVDRIEVSFCEDKDTGESVIYYLVKWCSLP  
YEDSTWELKEDVDLAKIEEFELQASRPDTRHLDRPPSNIWKKIEQSREYKNGNQLREYQLEGLNWLLFNWYN  
RRNCILADEMGLGKTIQSITFLYEILLTGIRGPFLLIAPLSTIANWEREFRTWTDINVVVYHGSLSISRQMIQQ  
YEMYFRDSQGRIIRGAYRFQAIITTFEMILGGCGELNAIDWRCVIIDEAHRLKKNCKLLEGLKLMNLEHKVL  
LTGTPLQNTVEELFSLHFLFLEPLRFPSESTFMQEFGLDKTEEQVQKLQAILKPMMLRRLKEDVEKKLAPKEET  
IIEVELTNIQKKYYRAILEKNFSLSKGAGQTNVPLVNTMMELRKCNCNHPYLIKGAEEKILGEFRDTPNPSA  
SDFHLQAMIQSAGKLVLDKLLPKMKAGGHKVLIFSQMVRCLDILEDYLIHKRYLYERIDGRVGRNLRQAAID  
RFSKPDSDRFVLLCTRAGGLGINLTAADTCIIFDSDWNPQNDLQAQARCHRIGONKAVKVYRLVTRNSYERE  
MFDRA SLKGLDKAVLQSMSGRDSNVSGIQQLSKKEIEDLLRRGAYGAIMEEEDGSKFCEEDIDQILLRRTK  
TITIESEGRGSTFAKASFVAGNRTDISLDDPNFWQKAKKAELDIDTISGRNSLVIDTPRIRRQTRPFSATK  
DELAELSEAESEGEKPKLRRPCDRSGGYGRTECFRVEKNLLVYGWRWREILSHGRFKRQLNEHDVEVICRA  
LLAYCLIHRYGDEKIKGFIWDLITPTEDGQTRQLNHLGLSAPVPRGRKGGKVKQTSSFDIQAELWRKYNP  
EQLLQDEGYKHHVHHCNKVLLRVRMLYYLKQEVIGNESQKVFQVGDASDIDVWVPEPDHSEVPAAWWDFDAD  
KSLLLIGVFKHGYEKYNTIRADPALCFLEVRGKPDKAVAAEQRANDYMDGDVEDPEYKPAIAIFKDDIEDDVS  
SPGDLVIADGEGQLMEGDKVYWPPTSALTTRLRLITAYQRTNKNRHIQQMQPTFSLPANAMQPLYEEATLNP  
KMAAKIERQQRWTRREADFYRVVSTFGVVFDPDRGQFDWTKFRALARLHKKTDNSLEKYLCAFMSCRRVCR  
LPSKEELVDPNIFIQPIITEERASRTLYRIELLRKVREQALRHPQLFERLKLCHPNPDLPIWCEGSHDRDLI  
GAAKHGVSRTDYHILRDPELSFMAAQRNYNSKAHSRTSAPLLQYQVALSASPLTSLPRLLGAKGTLLEDM  
KVKSESLTEEPQSSEESMSMETRTRVKSEPVSPKNGVLSQATGDQKSGGKSETDRRMVAARTEPLTPNPAS  
KKPRVHKRGSQSSSDSDSDSARSSCSSRSSSSSSSSSSSSSHSRSGSSSSSSSSSCSSASSSSSSSSSSSSSS  
SSSEESDSEEDVQKREGTPHRKAYDEESVASLSTTQDETQDSFQANNGTPESAYLLQGGYMLAASYWPKDRVM  
INRLDSICQTVLKGKWPARRHYDANTVASFYTTKLLDSPAATERGEPVPTPPAVAVREEHEQSAQMSKVK  
KHVREKEFTVVIKDEGGLKLTQKQGLAQKRPFDGEDGALGQQYLTRLRELQSTSETSLVNLPKAVPASGTS  
IQPTLGANGAILDSQPIVKKRRRRRNVGADILFLNRNKPNNHIPTGMNPALSYPQPQRIPTDESPVPVNL  
KDGTRLGADDAPKRKDLRDLRKEHPGYVEDLGAFI PRVQLHEGRPKQKRHRCRNPNKLDINSLTGEERVQLIN  
RRNARKVGGAFAPVPLKDLRFLKENSEYGVAPWGDVVKQSGFLPEMFERILTGVPVREEVSRGRRPKSGI  
AKATTAAVAPAGSVPGNPLLANGLLPGVDLTLALQALQNLQNLQSLQVVTAGLMGMPAGLVSSGGETKNMAAMFP  
MLFSGMAGLNNLLGMGGLLSKTAESGAEKRGALDNLQALQNLQNLQSLQVVTAGLMGMPAGLVSSGGETKNMAAMFP  
AAAAPIALNPLLLSNILYPGMLLTPGLNLHLPTLSQSNADFVQKNKSDDLDSKSVIKEENSVRDQEEKGG  
TEPSPLNENSTDEGSERASSGSDSSSSSESDSSSNED\*

```

>rs48480191_ENSMUSP00000105243_c.4351:A>G_p.K1451R
ENSMUST00000109614.9|Chd9-202|ENSMUSG00000056608|+|chr8:g.91737274:A>G
MTDPMDDFFDDANLFGETLEGLSDDTFVQPGPVSLVDELNLGAEFEPLHIDSLNHVQGTPTHQKMADFEQLSQ
FDSMKFHPVNVQSFSGSPVEHVLSPHSQFNCSPIHPPNQPNGLFQDQVADGSPMWHGQTATGLANQNGSPFHQPFGH
SHSLHQNKSFVAHPDFALFQASEHQTCSSLSHSQQSRNLNPGQNSLGQAKNFLDANVSGAHRVNVNHLATAP
SSQQTLPVQFSPTANPPAHFLKCSSHQEGNYNRPSPSMTSCSVSNSQQFSPSHYSFSSGHVSPSSLLQSSAGLA
PGHTNQALSDFAGSNSFSPHRGMKQEPHQHLLNPTPSLNSNNFQILHSSHPQGNYSNSKLSPVHMFNFPDQVDA
GPPVGHFNDHAETNGFSSLEENLLHHVDSHAEPFAGLDPEDDLQEGLLPQFDES PFGQDNSNHVLDHDLDRQF
TSHLVS RPSDMAQTQLQYQARGWPSPLSTNHQHLHSRNHLC LQRQPPSSKKS DSGSGTYTKLQNTQVRVMSEKK
PRKRVESESKQEKANRI I SEAIARAKERGERNI PRVMS PENFPSASVEGKEEKRGRMRMKS PKDRDNKPKPTY
SKLKEKTKIGKLIITLGGKHKRRNESSEDELSDAEQRSQHTFKEQHSQKRRSNRQIKRKKYAEADAEKGQSEEEV
KGLSRVKNRSAPPPGEQPLQLFVENPSEEDAAIVDKILACRTVKKEVSPGVMLDIEEFFVKYKNYSYLHCEWA
TEQQLLKDKRIQQKIKRFLRQAQRAHFLADMEEEFNPDPYVEVDRIEVSFCEDKDTGESVIYYLVKWC SLP
YEDSTWELKEDVDLAKIEEFELQASRPDTRHLDRPPSNIWKKIEQSREYKNGNQLREYQLEGLNWLLFNWYN
RRNCILADEMGLGKTIQSITFLYEILLTGIRGPFLLIAPLSTIANWEREFRTWT DINVVVYHGSLSRQMIQQ
YEMYFRDSQGRIRGAYRFQAIITTFEMILGGCGELNAIDWRCV IIDEAHLRKNKNCKLLEGLKLMNLEHKVL
LTGTPLQNTVEELFSLHLHLEPLRFPSESTFMQEFGLDKTEEQVQLQAILKPMMLRRLKEDVEKKLAPKEET
IEVELTNIQKKYYRAILEKNFSLSKGAGQTNVPLNVTMMELRKC CNHPYLIKGAEEKILGEFRDTPNPSA
SDFHLQAMIQSAGKLVLDKLLPKMKAGGHKVLIFSQMVRCLDILEDYLIHKRYLYERIDGRVRGNLRQAAID
RFSKPDSDRFVLLCTRAGGLGINLTAADTCIIFDSDWNPQNDLQAQARCHRIGQNKAVKVVYRLVTRNSYERE
MFDRA SLKLGDKAVLQSMSGRDSNVSGIQQLSKKEIEDLLRRGAYGAIMEEDEGSKFCEEDIDQILLRRTK
TITIESEGRGSTFAKASFVAGNRTDISLDDPNFWQKWKAKAELDIDTISGRNSLVIDTPRIRRTQTRPFSATK
DELAELSEAESEGEKPKLRPCDRSGGYGRTECFRVEKNLLVYGWRWREILSHGRFKRQLNEHDEVEICRA
LLAYCLIHRYGDEKIKGFIWDLITPTEDGQTRQLNHLGLSAPVPRGRKGGKVKQTQSSFDIQKAEWLKRYNP
EQLLQDEGYKHKHVHHCNKVLLRVRMLYLLKQEVIGNESQKVFQDGDVADSIDVWVPEPDHSEVPAAWWDFDAD
KSLLIQVFKHGEYKNTIRADPALCFLERVGKPPDDKAVAAEQRANDYMDGDVEDPEYKPAIAPFKDDIEDDVS
SPGDLVIADGEGYKQPIVKKRRGRRRNVEGADILFLNRNKPPNHIP TGMNPALSYPQPQRI PDTESVPVINL
KMAAKIERQQRWTRREEADFYRVVSTFGVVFDPDRGQFDWTKFRALARLHKKTDNSLEKYLCAFMSCRRVCR
LPSKEELVDPNIFIQPI TEERASRTLYRIELLRKVREQALRHPQLFERLKLCHPNPDLPIWWECEGSHDRDLI
GAAKHGVSRTDYHILRDPELS FMAAQRNYNQSKAAHSRTSAPLLQQYVALSASPLTSLPRLLGAKGTLLEDM
KVKSESLTEEPQSSEEEESMSMETRTRVKSEPVSPKNGVLSQATGDQKSGGKSETDRRMVAARTEPLTPNPAS
KKPRVHKRGSQSSSDSDSARS SCSSRSSSSSSSSSSSSSSSHSRSGSSSSSSSSSSSSSSSSSSSSSSSSSSSS
SSSEESDSEEDVQKREGTPHRKAYDEESVASLSTTQDETQDSFQANNGTPESAYLLQGGYMLAASYPKDRVM
INRLDSICQTVLKGKWP SARRHYDANTVASFYTTKLLDSPGAATERGEP SVPTPPAVAVREEHEQSAQMSKVK
KHVREKEFTVVIKDEGGLKLT FQKQGLAQKRPFDGEDGALGQQYLTRLRELQSTSETSLVNLKAVPASGTS
IQPTLGANGA ILDSQPIVKKRRGRRRNVEGADILFLNRNKPPNHIP TGMNPALSYPQPQRI PDTESVPVINL
KDGTRLAGDDAPKRKDLDRWLKEHPGYVEDLGAFI PRVQLHEGRPKQKRHRCRNPNKLDINSLTGEERVQLIN
RRNARKVGGAFAPPLKDLCRFLKENSEYGVAPWGDVVKQSGFLPESMFERILTGPVVREEVSRGRPKSGI
AKATTA AVPAGSVPGNPLLANGLLPGVDLTALQALQNLQNLQSLQV TAGLMGMPAGLSSGGETKNMAAMFP
MLFSGMAGLPNLLGMGGLLSKTAESGAEKRGND SKELEGKERTESQSPENGGERCVPGPSPTSSTAALSSA
AAAKPIALNPLLLSNILYPGMLLTPGLNLHLPTLSQSNADFVQKNKSDDLDSKKSVEIKEENSRVRDQEEKGG
TEPSPLNENSTDEGSE RASSGSDSSSSSSSEDS DSSNED*

```

```

>rs32839533_ENSMUSP00000046356_c.4569:G>A_p.E1524K
ENSMUST00000048665.8|Chd9-201|ENSMUSG00000056608|+|chr8:g.91737939:G>A
MTDPMDDFFDDANLFGETLEGLSDDTFVQPGPVSLVDELNLGAEFEPLHIDSLNHVQGTPTHQKMADFEQLSQ
FDSMKFHPVNVQSFSGSPVEHVLSPHSQFNCSPIHPPNQPNGLFQDQVADGSPMWHGQTATGLANQNGSPFHQPFGH
SHSLHQNKSFVAHPDFALFQASEHQTCSSLSHSQQSRNLNPGQNSLGQAKNFLDANVSGAHRVNVNHLATAP
SSQQTLPVQFSPTANPPAHFLKCSSHQEGNYNRPSPSMTSCSVSNSQQFSPSHYSFSSGHVSPSSLLQSSAGLA
PGHTNQALSDFAGSNSFSPHRGMKQEPHQHLLNPTPSLNSNNFQILHSSHPQGNYSNSKLSPVHMFNFPDQVDA
GPPVGHFNDHAETNGFSSLEENLLHHVDSHAEPFAGLDPEDDLQEGLLPQFDES PFGQDNSNHVLDHDLDRQF
TSHLVS RPSDMAQTQLQYQARGWPSPLSTNHQHLHSRNHLC LQRQPPSSKKS DSGSGTYTKLQNTQVRVMSEKK
PRKRVESESKQEKANRI I SEAIARAKERGERNI PRVMS PENFPSASVEGKEEKRGRMRMKS PKDRDNKPKPTY
SKLKEKTKIGKLIITLGGKHKRRNESSEDELSDAEQRSQHTFKEQHSQKRRSNRQIKRKKYAEADAEKGQSEEEV
KGLSRVKNRSAPPPGEQPLQLFVENPSEEDAAIVDKILACRTVKKEVSPGVMLDIEEFFVKYKNYSYLHCEWA
TEQQLLKDKRIQQKIKRFLRQAQRAHFLADMEEEFNPDPYVEVDRIEVSFCEDKDTGESVIYYLVKWC SLP
YEDSTWELKEDVDLAKIEEFELQASRPDTRHLDRPPSNIWKKIEQSREYKNGNQLREYQLEGLNWLLFNWYN
RRNCILADEMGLGKTIQSITFLYEILLTGIRGPFLLIAPLSTIANWEREFRTWT DINVVVYHGSLSRQMIQQ
YEMYFRDSQGRIRGAYRFQAIITTFEMILGGCGELNAIDWRCV IIDEAHLRKNKNCKLLEGLKLMNLEHKVL

```

LTGTPLQNTVEELFSLHFLFLEPLRFPSESTFMQEFGLDKTEEQVQKLQAILKPMMLRRLKEDVEKKLAPKEET  
 IIEVELTNIQKKYYRAILEKNFSLSKGAGQTNVNLVNTMMELRKCCHPYLIKGAEEKILGEFRDYNPSA  
 SDFHLQAMIQSAGKLVLDKLLPKMKAGGHKVLIFSQMVRCLDILEDYLIHKRYLYERIDGRVVRGNLRQA  
 RFSKPDSDRFVLLCTRAGGLGINLTAADTCIIFDSDWNPQNDLQAQARCHRIGQNKAVKVYRLVTRNSYERE  
 MFDRAKSLKGLDKAVLQSMGRDSNVSGIQQLSKKEIEDLLRRGAYGAIMEEEDGSKFCEEDIDQILLRRTK  
 TITIESEGRGSTFAKASFVAGNRDITSLDDPNFWQKAKKAELDIDTISGRNSLVIDTPRIRKQTRPFSATK  
 DELAELSEAESEGEKPKLRRPCDRSGGYGRTECFRVEKNLLVYGWRWREILSHGRFKRQLNKHDVEVICRA  
 LLAYCLIHRYGDEKIKGFIWDLITPTEDGQTRELQNHGLSAPVPRGRKGGKVKVTQTSSFDIQKAEWLKRYNP  
 EQLLQDEGYKKHVHHCNKVLLRVRMLYLLKQEVIGNESQKVFDGVDASDIDVWVPEPDHSEVPAAWWDFDAD  
 KSLDIGVFKHGYEKYNTIRADPALCFLEVRGKPDKAVAAEQRANDYMDGDVEDPEYKPAFAIKDDIEDDVS  
 SPGDLVIADGEGQLMEGDKVYWPPTSALTTRLRRLITAYQRTNKNRHIQQMQPTFSLPANAMQPLYEATLNP  
 KMAAKIERQQRWTRREEADFYRVVSTFGVVFDPDRGQFDWTKFRALARLHKKTDNSLEKYLCAFMSCRRVCR  
 LPSKEELVDPNIFIQPIITEERASRTLYRIELLRKVREQALRHPQLFERLKLCHPNPDLPIWWECSHHRDILLI  
 GAAKHGVSRTDYHILRDELSFMAAQRYNQSKAAHSRTSAPLLQYQVALSASPLTSLPRLGAKGTLLLEDM  
 KVKSESLTEEPQSSEESMSMETRTRVKSEPVSPKNGVLSQATGDQKSGGKSETDRRMVAARTEPLTPNPAS  
 KKPRVHKRGSQSSSDSDSARSSSSSSSSSSSSSSSSSSSSSSSSSSSSSSSSSSSSSSSSSSSSSSSSSSSSS  
 SSSESDSEEDVQKREGTPHRKAYDEESVASLSTTQDETQDSFQANNGTPESAYLLQGGYMLAASQWPKDRVM  
 INRLDSICQTVLKGKWPARRHYDANTVASFYTTKLLDSPGAATERGEPVPTPPAVAVREHEQSAQMSKEG  
 GLKLTQKQGLAQKRPFDGEDGALGQQYLLRLRELQSTSETSLVNLPKAVPASGTSIQPTLGGANGAILDSQP  
 IVKRRRRRRNVEGADILFLNRNKPNIPTGMNPALSYPPQRIPTDESVPVNLKDGTRLAGDDAPKRKD  
 LDRWLKEHPGYVEDLGAIFPRVQLHEGRPKQKRHRCRNPNKLDINSLTGEERVQLINRRNARKVGGAFAPPLK  
 DLCRFLKENSEYGVAPWGDVVKQSGFLPESMFERILTGPVVREEVSRRRRPPKSGIAKATTAAVPAGSVPG  
 NPLLANGLLPGVDLTAQALQQLQNLQSLQVTAAGLMGPAGLSGGETTKNMAAMFPMLFSGMAGLPNLLGMG  
 GLLSKTAESGAEKRGNDKELEGGKERTESQSPENGGERCVPSPSTSSSTAALSSAAAAPIALNPLLLSNI  
 LYPGMLLTPLNLHLPTLSQSNAFDVQKNKSDLLDSSKSVEIKEENSRVRDQEEKGGTEPSPLNENSTDEGSE  
 RASSGSDSSSSSESDSSSNED\*

>rs32839533\_ENSMUSP00000147407\_c.4569:G>A\_p.E1524K  
 ENSMUST00000209203.2|Chd9-203|ENSMUSG00000056608|+|chr8:g.91737939:G>A  
 MTDPMDDFFDDANLFGETLEGLSDDTFVQPGPVSLVDELNLGAEFEPLHIDSLNHVQGTPTHQKMADFEQLSQ  
 FDSMKFHPVNQSFSGSPVEHVLSPHSQFNCSPIHPPNPNGLFQDVADGSPMWHQTATGLANQNGSPFHQPGH  
 SHSLHQKNSFVAHPDFALFQASEHQTCSSLSHQSSRSNLNPGQNSLGQAKNFLDANVSGAHRVNVNHLATAP  
 SSQQLPVQFSPTANPPAHFLKCSHQEGNYNRPSMSTCSVSNQQFPSSHYSFSSGHVSPSSLQSSAGLA  
 PGHTNQALSDFAGSNFSFPHRGMKQEPTQHLLNPTPSLNSNFFQILHSSHPQGNYSNSKLSPVHMNFPDPVDA  
 GPPVGHFNDHAETNGFSSLEENLLHHVDSHAEPFAGLDPELLEGLLQFDESPFGQDNSNHVLDHDLDRQF  
 TSHLVSRSQMAQTQLQYQARGWPSPLSTNHQHLHRSNHLCLQRQPPSSKKSQDGSQTYTKLQNTQVRVMSEKK  
 PRKRVESESKQEKANRIISEAIAKAKERGERNIPRVMSPENFPASVEGKEEKRRMKSPPKDRNKKPKTY  
 SKLKEKTKIGKLIITLGGKHKRRNESSELSDAEQRSQHTFKEQHSQKRRSNRQIKRKKYAEDAEGKQSEEEV  
 KGLSRVKNRSAPPPGEQLQLFVENPSEEDAAIVDKILACRTVKKEVSPGVMLDIEEFFVKYKNYSYLHCEWA  
 TEQQLLKDKRIQQKIKRFLRQAQRAHFLADMEEPFNPDYVEVDRILEVSFCECDKDTGESVIYYLVKWCSLP  
 YEDSTWELKEDVDLAKIEEFEQLQASRPDTRHLDRPPSNIWKKIEQSREYKNGNQLREYQLEGLNWLFFNWN  
 RRNCILADEMGLGKTIQSITFLYEILLTGIRGPFLLIAPLSTIANWEREFRTWTDINVVVYHGSLISRQMIQQ  
 YEMYFRDSQGRIRGAYRFQAIITTFEMILGGCGELNAIDWRCVIIDEAHRLKNKNCKLLEGLKLMNLEHKVL  
 LTGTPLQNTVEELFSLHFLFLEPLRFPSESTFMQEFGLDKTEEQVQKLQAILKPMMLRRLKEDVEKKLAPKEET  
 IIEVELTNIQKKYYRAILEKNFSLSKGAGQTNVNLVNTMMELRKCCHPYLIKGAEEKILGEFRDYNPSA  
 SDFHLQAMIQSAGKLVLDKLLPKMKAGGHKVLIFSQMVRCLDILEDYLIHKRYLYERIDGRVVRGNLRQA  
 RFSKPDSDRFVLLCTRAGGLGINLTAADTCIIFDSDWNPQNDLQAQARCHRIGQNKAVKVYRLVTRNSYERE  
 MFDRAKSLKGLDKAVLQSMGRDSNVSGIQQLSKKEIEDLLRRGAYGAIMEEEDGSKFCEEDIDQILLRRTK  
 TITIESEGRGSTFAKASFVAGNRDITSLDDPNFWQKAKKAELDIDTISGRNSLVIDTPRIRKQTRPFSATK  
 DELAELSEAESEGEKPKLRRPCDRSGGYGRTECFRVEKNLLVYGWRWREILSHGRFKRQLNKHDVEVICRA  
 LLAYCLIHRYGDEKIKGFIWDLITPTEDGQTRELQNHGLSAPVPRGRKGGKVKVTQTSSFDIQKAEWLKRYNP  
 EQLLQDEGYKKHVHHCNKVLLRVRMLYLLKQEVIGNESQKVFDGVDASDIDVWVPEPDHSEVPAAWWDFDAD  
 KSLDIGVFKHGYEKYNTIRADPALCFLEVRGKPDKAVAAEQRANDYMDGDVEDPEYKPAFAIKDDIEDDVS  
 SPGDLVIADGEGQLMEGDKVYWPPTSALTTRLRRLITAYQRTNKNRHIQQMQPTFSLPANAMQPLYEATLNP  
 KMAAKIERQQRIGRSKYFYSTNHRGTCF\*

>rs32839533\_ENSMUSP00000148088\_c.4569:G>A\_p.E1524K  
 ENSMUST00000209423.2|Chd9-205|ENSMUSG00000056608|+|chr8:g.91737939:G>A  
 MTDPMDDFFDDANLFGETLEGLSDDTFVQPGPVSLVDELNLGAEFEPLHIDSLNHVQGTPTHQKMADFEQLSQ  
 FDSMKFHPVNQSFSGSPVEHVLSPHSQFNCSPIHPPNPNGLFQDVADGSPMWHQTATGLANQNGSPFHQPGH

SHSLHQKNSFVAHPDFALFQASEHQTCSSLSHSQQSRSNLNPQGNSLGQAKNFLDANVSGAHRVNVNHLATAP  
SSQQTLPVQFSPTANPPAHFLKCSSHQEGNYNRPSMTSCSVNSQFP SHYSFSSGHVSPSSLLQSSAGLA  
PGHTNQALSDFAGSNSFSPHRGMKQEPHQHLLNPTPSLNSNNFQILHSSHPQGNYSNSKLSPVHMFDPVDA  
GPPVGHFNDAETNGFSSLEENLLHHVDSHAEPFAGLDPEDLLQEGLLPQFDESFPFGQDNSNHVLDHDLDRQF  
TSHLVSRPSDMAQTQLQYQARGWPSPLSTNHQHLHSRNLCLQRQPPSSKKS DSGSGTYTKLQNTQVRVMSEKK  
PRKRVESESKQEKANRIISEAIARAKERGERNI PRVMS PENFP SASVEGKEEKRGRMRMKS PKDRDNKKPKTY  
SKLKEKTKIGKLIITLTKKHKRRNESSELSDAEQRSQHTFKEQHSQKRRSNRQIKRKKYAEDAEGKQSEEEV  
KGSRLVKRNSAPPPGEQPLQLFVENPSEEDAAIVDKILACRTVKKEVSPGVMLDIEEFFVKYKNSYLVHCEWA  
TEQQLLKDKRIQQKIKRFLRQAQRAHFLADMEEEPFNPDYVEVDRILEV SFCEDKDTGESVIYYLVKWC SLP  
YEDSTWELKEDVDLAKIEEFEQLQASRPDTRHLDRPPSNIWKKIEQSREYKNGNQLREYQLEGLNWLLFNWYN  
RRNCILADEMGLGKTIQSITFLYEILLTGIRGPFLIIAPLSTIANWEREFRTWTDINVVVYHGSLSISRQMIQQ  
YEMYFRDSQGRIRGAYRFQAIITTFEMILGGCGELNAIDWRCVIIDEAHRLKNKNCKLLEGLKLMNLEHKVL  
LTGTPLQNTVEELFSLHFLEPLRFPSESTFMQEFGLDTEEQVQKQLQAILKPMMLRRLKEDVEKKLAPKEET  
IIEVELTNIQKKYYRAILEKNFSFLSKGAGQTNVPLVNTMMELRKC CNHPYLIKGAEEKILGEFRD TYNPSA  
SDFHLQAMIQSAGKLVLDKLLPKMKAGGHKVLIFSQMVRCLDILEDYLIHKRYLYERIDGRV RGNLRQAAID  
RFSKPDSDRFVLLCTRAGGLGINLTAADTCIIFDS DWNPNQNDLQAQARCHRIGQNKAVKVYRLVTRNSYERE  
MFDRA SLKGLDKAVLSMSGRDSNVSGIQQLSKKEIEDLLRRGAYGAIMEEEDGSKFCEEDIDQILLRRTK  
TITIESEGRGSTFAKASFVAGNRDTISLDDPNFVQKWAKKAELDIDTISGRNSLVIDTPRIRKQTRFP SATK  
DELAELSEAESEGEKPKLRPCDRSGGYGRTECFRVEKNLLVYGWRWREILSHGRFKRQLNKHDVEVICRA  
LLAYCLIHRYGDEKIKGFIWDLITPTEDGQTR ELQNHGLSAPVPRGRKGKVKQTSSFDIQKAEWLKRYNP  
EQLLQDEGYKHKVHKHCNKVLLRVRMLYYLKQEVIGNESQKVF DGDVADSIDVWVPEPDHSEVPAAWWDFDAD  
KSL LIGVFKHGYEKYNTIRADPALCFLE RVGKPD DKAVAAEQRANDYMDGDVEDPEYKPAPAI FKDDIEDDVS  
SPGDLVIADGEGQLMEGDKVYWP TPSALTTRLRRLITAYQRTNKNRHIQQMQPTFSLPANAMQPLYEEATLNP  
KMAAKIERQQRWTRREEADFYRVVSTFGVVFDPDRGQFDWTKFRALARLHKKTDNSLEKYLCAFMSCRRVCR  
LPSKEELVDPNIFIQPI TEERASRTLYRIELLRKVREQALRHPQLFERLKLCHPNPDLPIWWECEGSHDRDLI  
GAAKHGVSRTDYHILRDP ELSFMAAQ RNYNQSKAAHSRTSAPLLQQYQVALSASPLTSLPRLLAGAKTLEEDM  
KVKSESLTEEPQSEESMSMETRTRVKSEPVSNKGVLSQATGDQKSGGKSETDRRMVAARTEPLTNPAS  
KKPRVHKRGSQSSSDSDSDSARSSCSSRSSSSSSSSSSSSSHSRSGSSSSSSSSSSSSASSSSSSSSSSSSSSSS  
SSSEESDSEEDVQKREGTPHRKAYDEESVASLSTTQDETQDSFQANNGTPESAYLLQGGYMLAASYPWKDRVM  
INRLDSICQTVLKGKWP SARRHYDANTVASFYTTKLLDSPGAATERGEP SVPTPPAVAVREEHEQSAQMSKVK  
KHVREKEFTVKIKDEGGLKLT FQKQGLAQKRPFDGEDGALGQQQYLTRLRELQSTSETSLVNLPKAVPASGTS  
IQPTLGANGAILDSQPIVKKRRGRRRNVEGADILFLNRNKP PNHIP TGMNPALSYPQPQRI PDTESVPVINL  
KDGTRLAGDDAPKRKDLDRWLKEHPGYVEDLGAFI PRVQLHEGRPKQKRHRCRNPNKLDINSLTGEERVQLIN  
RRNARKVGGAFAPPLKDLCRFLKENSEYGVAP EWGDVVKQSGFLPE SMFERILTGPVVREEVSRGRPKSGI  
AKATTA AVPAGSVPGNPLLANGLLPGVDLTALQALQNLQNLQSLQV TAGLMGMPAGLSSGGETKNMAAMFP  
MLFSGMAGLPNLLGMGGLLSKTAESGAEEKRGNDSKELEGGKERTESQSPENGGERCVPGPSSTSTAALSSA  
AAAKPIALNPLLLSNILYPGMLLTPGLNLHLPTLSQSNADFVQKNKSDDLDSKSV EIKEENSVRDQE EKKG  
TEPSPLNENSTDEGSERASSGSDSSSSSEDS DSSNED\*

>rs32839533\_ENSMUSP00000105243\_c.4569:G>A\_p.E1524K  
ENSMUST00000109614.9|Chd9-202|ENSMUSG00000056608|+|chr8:g.91737939:G>A  
MTDPMDFDDANLFGETLEGLSDDTFVQPGVSLVDELNLGAEFEPLHIDSLNHVQGTPTHQKMA DFEQLSQ  
FDSMKFHPVNSQFSGSPVEHVLSPHSQFNCSPIHPPNPNGLFQDVADGSPMWHQATATGLANQNGSPFHQPGH  
SHSLHQKNSFVAHPDFALFQASEHQTCSSLSHSQQSRSNLNPQGNSLGQAKNFLDANVSGAHRVNVNHLATAP  
SSQQTLPVQFSPTANPPAHFLKCSSHQEGNYNRPSMTSCSVNSQFP SHYSFSSGHVSPSSLLQSSAGLA  
PGHTNQALSDFAGSNSFSPHRGMKQEPHQHLLNPTPSLNSNNFQILHSSHPQGNYSNSKLSPVHMFDPVDA  
GPPVGHFNDAETNGFSSLEENLLHHVDSHAEPFAGLDPEDLLQEGLLPQFDESFPFGQDNSNHVLDHDLDRQF  
TSHLVSRPSDMAQTQLQYQARGWPSPLSTNHQHLHSRNLCLQRQPPSSKKS DSGSGTYTKLQNTQVRVMSEKK  
PRKRVESESKQEKANRIISEAIARAKERGERNI PRVMS PENFP SASVEGKEEKRGRMRMKS PKDRDNKKPKTY  
SKLKEKTKIGKLIITLTKKHKRRNESSELSDAEQRSQHTFKEQHSQKRRSNRQIKRKKYAEDAEGKQSEEEV  
KGSRLVKRNSAPPPGEQPLQLFVENPSEEDAAIVDKILACRTVKKEVSPGVMLDIEEFFVKYKNSYLVHCEWA  
TEQQLLKDKRIQQKIKRFLRQAQRAHFLADMEEEPFNPDYVEVDRILEV SFCEDKDTGESVIYYLVKWC SLP  
YEDSTWELKEDVDLAKIEEFEQLQASRPDTRHLDRPPSNIWKKIEQSREYKNGNQLREYQLEGLNWLLFNWYN  
RRNCILADEMGLGKTIQSITFLYEILLTGIRGPFLIIAPLSTIANWEREFRTWTDINVVVYHGSLSISRQMIQQ  
YEMYFRDSQGRIRGAYRFQAIITTFEMILGGCGELNAIDWRCVIIDEAHRLKNKNCKLLEGLKLMNLEHKVL  
LTGTPLQNTVEELFSLHFLEPLRFPSESTFMQEFGLDTEEQVQKQLQAILKPMMLRRLKEDVEKKLAPKEET  
IIEVELTNIQKKYYRAILEKNFSFLSKGAGQTNVPLVNTMMELRKC CNHPYLIKGAEEKILGEFRD TYNPSA  
SDFHLQAMIQSAGKLVLDKLLPKMKAGGHKVLIFSQMVRCLDILEDYLIHKRYLYERIDGRV RGNLRQAAID  
RFSKPDSDRFVLLCTRAGGLGINLTAADTCIIFDS DWNPNQNDLQAQARCHRIGQNKAVKVYRLVTRNSYERE

MFDRASLKLGLDKAVLQSMSGRDSNVSGIQQLSKKEIEDLLRRGAYGAIMEEEDGSKFCEEDIDQILLRRTK  
TITIESEGRGSTFAKASFVAGNRTDISLDDPNFWQKAKKAELDIDTISGRNSLVIDTPRIRKQTRPFSATK  
DELAELSEAESEGEKPKLRRPCDRSGGYGRTECFRVEKNLLVYGWRWREILSHGRFKRQLNKHDEVEVICRA  
LLAYCLIHRYGDEKIKGFIWDLITPTEDGQTRELQNLHGLSAPVPRGRKGGKVKQTQTSSFDIQKAEWLRKYNP  
EQLLQDEGYKXKHKHCNKVLLRVRMLYLLKQEVIGNESQKVFQDGDASDIDVWVPEPDHSEVPAAWWDFDAD  
KSLLIQVFKHGYEKYNTIRADPALCFLEVRGKPDKAVAAEQRANDYMDGDVEDPEYKPAIAIFKDDIEDDVS  
SPGDLVIADGEGQLMEGDKVYWPSPALTTTLRRLITAYQRTNKNRHIQQMQPTFSLPANAMQPLYEATLNP  
KMAAKIERQQRWTRREADFYRVVSTFGVVFDPDRGQFDWTKFRALARLHKKTDNSLEKYLCAFMSCRRVCR  
LPSKEELVDPNIFIQPIITEERASRTLYRIELLRKVREQALRHPQLFERLKLCHPNPDLPIWWECSHHRDILLI  
GAAKHGVSRTDYHILRDPELSFMQAQRNYNQSKAAHSRTSAPLLQQYQVALSASPLTSLPRLLAGKGTLL EDM  
KVKSESLTEEPQSSEESMSMETRTRVKSEPVSPKNGVLSQATGDQKSGGKSETDRRMVAARTEPLTPNPAS  
KKPRVHKRGSQSSSDSDSARSSCSSRSSSSSSSSSSSSSHSRSGSSSSSSSSSSSSASSSSSSSSSSSSSSSS  
SSSEESDSEEDVQKREGTPHRKAYDEESVASLSTTQDETQDSFQANNGTPESAYLLQGGYMLAASYWPKDRVM  
INRLDSICQTVLKGKWPARRHYDANTVASFYTTKLLDSPGAATERGEPVPTPPAVAVREEHEQSAQMSKVK  
KHVREKEFTVVKIKDEGGLKLTQKQGLAQKRPFDGEDGALGQQQYLTRLRELQSTSETSLVNLPAKVPASGTS  
IQPTLGANGAILDSQPIVKKRRRRRNVEGADILFLNRNKPNIPTGMNPALSYQPQRIPTDESVPVIVNL  
KDGTRLAGDDAPKRKDLDRWLKEHPGYVEDLGAFIPRVQLHEGRPKQKRHRRCRNPKLDINSLTGEERVQLIN  
RRNARKVGGAFAPPLKDLCRFLKENSEYGVAPWGDVVKQSGFLPESMFERILTGPVVREEVSRGRPKSGI  
AKATTAAVPAGSVPGNPLLANGLLPGVDLTALQALQNLQNLQSLQVTAGLMGMPAGLSSGGETKNMAAMFP  
MLFSGMAGLPNLLGMGGLSKTAESGAEEKRGNDSKELEGKERTESQSPENGGERCVPGPSSTSSSTAALSSA  
AAKPIALNPLLLSNILYPGMLLTPGLNLHLPTLSQSNADFVQKNKSDDLSSKSVEIKEENSVRDQEEKGG  
TEPSPLNENSTDEGSERASSGSDSSSSSESDSDSSNED\*  
>ENSMUSP00000046356\_c.4874:A>T\_p.K1625N ENSMUST00000048665.8|Chd9-  
201|ENSMUSG00000056608|+|chr8:g.91742463:A>T  
MTDPMDDFFDDANLFGETLEGLSDDTFVQPGPVSLVDELNLGAEFEPLHIDSLNHVQGTPTHQKMADFEQLSQ  
FDSMKHFHPVNFVSGFVVEHVLSPHSQFNCSPHPPNQPNGLFQDQVADGSPMWHQATATGLANQNGSPFHQPGH  
SHSLHQNKSFVAHPDFALQASEHQTCSSSLHSQCSRSNLNPGQNSLQQAQKFLDANVSGAHRVNVNHLATAP  
SSQQTLPVQFSPTANPPAHFLKCSHQEGNYNRPSPSMTSCSVNSQGFPSHYFSSSGHVSPSSLLQSSAGLA  
PGHTNQALSDFAGSNSFSPHRGMKQEPHQHLLNPTPSLNSNPFQILHSSHPQGNYSNSKLSPVHMFDPVDA  
GPPVGHFNDHAETNGFSSLEENLLHHVDSHAEPFAGLDPEDLLQEGLLPQFDESFPFGQDNSNHVLDHDLDRQF  
TSHLVSRPSDMAQTQLQYQARGWPSPLSTNHQHLHSRNLHCLQRQPSSKKSQDGSQTYTKLQNTQVRVMSEKK  
PRKRVESESKQEKANRIISEAIAKAKERGERNIPRVMSPENFPASVEGKEEKRRMRKSKPKDRDNKPKPTY  
SKLKEKTKIGKLIITLGGKHKRRNESSELSDAEQRSQHTFKEQHSQKRRSNRQIKRKKYAEDEAGKQSEEEV  
KGLSRVKNRSAPPPGEQPLQFLVENPSEEDAAIVDKILACRTVKKEVSPGMVLDIEEFFVKYKNYSYLHCEWA  
TEQQLLKDRIQKIKRFLRQAQRAHFLADMEEPFNPNDYVEVDRILEVSFCEQDKDTGESVIYLVKWCSLP  
YEDSTWELKEDVDLAKIEEFEQLQASRPDTRHLDRPPSNWIKKIEQSREYKNGNQLREYQLEGLNLLFNWYN  
RRNCILADEMGLGKTIQSITFLYEILLTGIRGPFLLIAPLSTIANWEREFRTWTDINVVVYHGSLSISRQMIQQ  
YEMYFRDSQGRIRGAYRFQAIITTFEMILGGCGELNAIDWRCVIIDEAHRLKNKNCKLLEGLKLMNLEHKVL  
LTGTPLQNTVEELFSLHFLPLRFPSESTFMQEFGLDTEEQVQLQAILKPMMLRRLKEDVEKKLAPKEET  
IEVELTNIQKYYRAILEKNFSFLSKGAGQTNVNLVNTMMELRKCENHPYLIKGAEEKILGEFRDTPNPSA  
SDFHLQAMIQSAGKLVLDKLLPKMKAGGHKVLIFSQMVRCLDILEDYLIHKRYLYERIDGRVRGNLQAAID  
RFSKPDSDRFVLLCTRAGGLGINLTAADTCIIFDSWNPQNDLQAQARCHRIGQNKAVKVVRLVTRNSYERE  
MFDRASLKLGLDKAVLQSMSGRDSNVSGIQQLSKKEIEDLLRRGAYGAIMEEEDGSKFCEEDIDQILLRRTK  
TITIESEGRGSTFAKASFVAGNRTDISLDDPNFWQKAKKAELDIDTISGRNSLVIDTPRIRKQTRPFSATK  
DELAELSEAESEGEKPKLRRPCDRSGGYGRTECFRVEKNLLVYGWRWREILSHGRFKRQLNKHDEVEVICRA  
LLAYCLIHRYGDEKIKGFIWDLITPTEDGQTRELQNLHGLSAPVPRGRKGGKVKQTQTSSFDIQKAEWLRKYNP  
EQLLQDEGYKXKHKHCNKVLLRVRMLYLLKQEVIGNESQKVFQDGDASDIDVWVPEPDHSEVPAAWWDFDAD  
KSLLIQVFKHGYEKYNTIRADPALCFLEVRGKPDKAVAAEQRANDYMDGDVEDPEYKPAIAIFKDDIEDDVS  
SPGDLVIADGEGQLMEGDKVYWPSPALTTTLRRLITAYQRTNKNRHIQQMQPTFSLPANAMQPLYEATLNP  
KMAAKIERQQRWTRREADFYRVVSTFGVVFDPDRGQFDWTKFRALARLHKKTDNSLEKYLCAFMSCRRVCR  
LPSKEELVDPNIFIQPIITEERASRTLYRIELLRKVREQALRHPQLFERLKLCHPNPDLPIWWECSHHRDILLI  
GAAKHGVSRTDYHILRDPELSFMQAQRNYNQSKAAHSRTSAPLLQQYQVALSASPLTSLPRLLAGKGTLL EDM  
KVKSESLTEEPQSSEESMSMETRTRVKSEPVSPKNGVLSQATGDQKSGGKSETDRRMVAARTEPLTPNPAS  
KKPRVHKRGSQSSSDSDSARSSCSSRSSSSSSSSSSSSSHSRSGSSSSSSSSSSSSASSSSSSSSSSSSSSSS  
SSSEESDSEEDVQKREGTPHRKAYDEESVASLSTTQDETQDSFQANNGTPESAYLLQGGYMLAASYWPKDRVM  
INRLDSICQTVLKGKWPARRHYDANTVASFYTTKLLDSPGAATERGEPVPTPPAVAVREEHEQSAQMSKEG  
GLKLTQKQGLAQKRPFDGEDGALGQQQYLTRLRELQSTSETSLVNLPAKVPASGTSIQPTLGANGAILDSQP  
IVKRRRRRRRNVEGADILFLNRNKPNIPTGMNPALSYQPQRIPTDESVPVIVNLKDGTRLAGDDAPKRKD

LDRWLKEHPGYVEDLGAFIPRVQLHEGRPKQKRHRRCRNPKNKLDINSLTGEERVQLINRRNARKVGGAFAPPLK  
DLCRFLKENSEYGVAPWGDVVKQSGFLPESMFERILTGPVVREEVSRGRPKSGIAKATTAAVPAGSVPG  
NPLLANGLLPGVDLTAQALQONLQNLQSLQVOTAGLMGMPAGLSSGGETKNMAAMFPMLFSGMAGLPNLLGMG  
GLLSKTAESGAEKRGNDSSKELEGGKERTESQSPENGGERCVPSPSTSSSTAALSSAAAAPKIALNPLLLSNI  
LYPGMLLTPLNLHLPTLSQSNADFVQKNKSDLLDSSKSVEIKEENSRVRDQEEKGGTEPSPLENENSTDEGSE  
RASSGSDSSSSSSSESDSSSNED\*

>ENSMUSP00000147407\_c.4874:A>T\_p.K1625N ENSMUST00000209203.2|Chd9-  
203|ENSMUSG00000056608|+|chr8:g.91742463:A>T

MTDPMDDFFDDANLFGETLEGLSDDTFVQPGPVSLVDELNLGAEFEPLHIDSLNHVQGTPTHQKMADFEQLSQ  
FDSMKFHPVNVQSFSGSPVEHVLSPHSQFNCSPIHPPNPNGLFQDQVADGSPMWHQTATGLANQNGSPFHQPGH  
SHSLHQNKSFVAHPDFALFQASEHQTCSSLSHSQQRSNLPNGQNSLGQAKNFLDANVSGAHRVNVNHLATAP  
SSQQTLPVQFSPTANPPAHFLKCSHQEGNYNRPSMTSCSVNSQQFSPSHYSFSSGHVSPSSLLQSSAGLA  
PGHTNQALSDFAGSNSFSPHRGMKQEPHQHLLNPTPSLNSNNFQILHSSHPQGNYSNSKLSPVHMFDPVDA  
GPPVGHFNDHAETNGFSSLEENLLHHVDSHAEPFAGLDPEDLLQEGLLPQFDESFPFGQDNSNHVLDHDLDRQF  
TSHLVSRRPSDMAQTQLQYQARGWPSPLSTNHQHLHSRNLHCLQRQPPSSKKS DGSGTYTKLQNTQVRVMSEKK  
PRKRVESESKQEKANRIISEAIARAKERGERNIPRVMSPENFPASVEGKKEKRGRMRMKS PKDRDNKKPKTY  
SKLKEKTKIGKLIITLGGKHKRRNESSELSDAEQRSQHTFKEQHSQKRRSNRQIKRKKYAEAEAGKQSEEEV  
KGSRLRVKRNASAPPPGEQPLQLFVENPSEEDAAIVDKILACRTVKKEVSPGVMLDIEEFFVKYKNSYLHCEWA  
TEQQLLKDKRIQQKIKRFLRQAQRAHFLADMEEEFPNDPYVEVDRIEVSFCEDKDTGESVIYYLVKWCSLP  
YEDSTWELKEDVDLAKIEEFEQLQASRPDTRHLDRPPSNIWKKIEQSREYKNGNQLREYQLEGLNWLFFNWN  
RRNCILADEMGLGKTIQSITFLYEILLTGIRGPFLLIAPLSTIANWEREFRTWTDINVVVYHGSLSRQMIQQ  
YEMYFRDSQGRIRGAYRFQAIITTFEMILGGCGELNAIDWRCVIIDEAHRLKNKNCKLLEGLKLMNLEHKVL  
LTGTPLQNTVEELFSLHFLFLEPLRFPESESTFMQEFGDLKTEEQVQKLQAILKPMMLRRLKEDVEKKLAPKEET  
IEVELTNIQKKYYRAILEKNFSFLSKGAGQTNVPLNVTMMELRKCCHNHPYLIKGAEEKILGEFRDTPNPSA  
SDFHLQAMIQSAGKLVLDKLLPKMKAGGHKVLIFSQMVRCLELDYLIHKRYLYERIDGRVGRNLRQAAD  
RFSKPDSDRFVLLCTRAGGLINLTAADTCIIFDSDWNPQNDLQAQARCHRIGONKAVKYRVLVTRNSYERE  
MFDRA SLKGLGLDKAVLQSMGRDSDNVSGIQQLSKKEIEDLLRRGAYGAIMEEDEGSKFCEEDIDQILLRRTK  
TITIESEGRGSTFAKASFVAGNRDIDSLDDPNFWQKAKKAELDIDTISGRNSLVIDTPRIRKQTRPFSATK  
DELAELSEAESEGEKPKLRPCDRSGGYGRTECFRVEKNLLVYGWRWREILSHGRFKRQLNEHDVEVICRA  
LLAYCLIHRYGDEKIKGFIWDLITPTEDGQTRQLNHLGLSAPVPRGRKGGKVKVTQTSSFDIQAELWRKYNP  
EQLLQDEGYKHKVHHCNNVLLRVRMLYYLQEVIGNESQKVFQDGDASDIDVWVPEPDHSEVPAAWWDFDAD  
KSLLIIGVFKHGYEKYNTIRADPALCFLERVGKPDKAVAAEQRANDYMDGDVEDPEYKPAFAIKDDIEDDVS  
SPGDLVIADGEGQLMEGDKVYWPPTSALTTRRLRLITAYQRTNKNRHIQQMQPTFSLPANAMQPLYEEATLNP  
KMAAKIERQQRIGRSKYFYSTNHRGTCF\*

>ENSMUSP00000148088\_c.4874:A>T\_p.K1625N ENSMUST00000209423.2|Chd9-  
205|ENSMUSG00000056608|+|chr8:g.91742463:A>T

MTDPMDDFFDDANLFGETLEGLSDDTFVQPGPVSLVDELNLGAEFEPLHIDSLNHVQGTPTHQKMADFEQLSQ  
FDSMKFHPVNVQSFSGSPVEHVLSPHSQFNCSPIHPPNPNGLFQDQVADGSPMWHQTATGLANQNGSPFHQPGH  
SHSLHQNKSFVAHPDFALFQASEHQTCSSLSHSQQRSNLPNGQNSLGQAKNFLDANVSGAHRVNVNHLATAP  
SSQQTLPVQFSPTANPPAHFLKCSHQEGNYNRPSMTSCSVNSQQFSPSHYSFSSGHVSPSSLLQSSAGLA  
PGHTNQALSDFAGSNSFSPHRGMKQEPHQHLLNPTPSLNSNNFQILHSSHPQGNYSNSKLSPVHMFDPVDA  
GPPVGHFNDHAETNGFSSLEENLLHHVDSHAEPFAGLDPEDLLQEGLLPQFDESFPFGQDNSNHVLDHDLDRQF  
TSHLVSRRPSDMAQTQLQYQARGWPSPLSTNHQHLHSRNLHCLQRQPPSSKKS DGSGTYTKLQNTQVRVMSEKK  
PRKRVESESKQEKANRIISEAIARAKERGERNIPRVMSPENFPASVEGKKEKRGRMRMKS PKDRDNKKPKTY  
SKLKEKTKIGKLIITLGGKHKRRNESSELSDAEQRSQHTFKEQHSQKRRSNRQIKRKKYAEAEAGKQSEEEV  
KGSRLRVKRNASAPPPGEQPLQLFVENPSEEDAAIVDKILACRTVKKEVSPGVMLDIEEFFVKYKNSYLHCEWA  
TEQQLLKDKRIQQKIKRFLRQAQRAHFLADMEEEFPNDPYVEVDRIEVSFCEDKDTGESVIYYLVKWCSLP  
YEDSTWELKEDVDLAKIEEFEQLQASRPDTRHLDRPPSNIWKKIEQSREYKNGNQLREYQLEGLNWLFFNWN  
RRNCILADEMGLGKTIQSITFLYEILLTGIRGPFLLIAPLSTIANWEREFRTWTDINVVVYHGSLSRQMIQQ  
YEMYFRDSQGRIRGAYRFQAIITTFEMILGGCGELNAIDWRCVIIDEAHRLKNKNCKLLEGLKLMNLEHKVL  
LTGTPLQNTVEELFSLHFLFLEPLRFPESESTFMQEFGDLKTEEQVQKLQAILKPMMLRRLKEDVEKKLAPKEET  
IEVELTNIQKKYYRAILEKNFSFLSKGAGQTNVPLNVTMMELRKCCHNHPYLIKGAEEKILGEFRDTPNPSA  
SDFHLQAMIQSAGKLVLDKLLPKMKAGGHKVLIFSQMVRCLELDYLIHKRYLYERIDGRVGRNLRQAAD  
RFSKPDSDRFVLLCTRAGGLINLTAADTCIIFDSDWNPQNDLQAQARCHRIGONKAVKYRVLVTRNSYERE  
MFDRA SLKGLGLDKAVLQSMGRDSDNVSGIQQLSKKEIEDLLRRGAYGAIMEEDEGSKFCEEDIDQILLRRTK  
TITIESEGRGSTFAKASFVAGNRDIDSLDDPNFWQKAKKAELDIDTISGRNSLVIDTPRIRKQTRPFSATK  
DELAELSEAESEGEKPKLRPCDRSGGYGRTECFRVEKNLLVYGWRWREILSHGRFKRQLNEHDVEVICRA  
LLAYCLIHRYGDEKIKGFIWDLITPTEDGQTRQLNHLGLSAPVPRGRKGGKVKVTQTSSFDIQAELWRKYNP

EQLLQDEGYKHKHHCNNVLLRVRMLYYLKQEVIGNESQKVFDGVDASDIDVWVPEPDHSEVPAAWWDFDAD  
KSLLIIGVFKHGYEKYNTIRADPALCFLEVRGKPDCKAVAAEQRANDYMDGDVEDPEYKPAPAI FKDDIEDDVS  
SPGDLVIADGEGQLMEGDKVYWP TSPALTTTLRRLITAYQRTNKNRHIQQMQPTFSLPANAMQPLYEATLNP  
KMAAKIERQQRWTRREEADFYRVVSTFGVVFDPDRGQFDWTKFRALARLHKKTDNSLEKYLCAFMSMCRVCR  
LPSKEELVDPNIFIQPIITEERASRTLYRIELLRKVREQALRHPQLFERLKLCHPNPDLPIWWECEGSHDRDLI  
GAAKHGVSRTDYHILRDPELS FMAAQRNYNQSKAAHSRTSAPLLQQYQVALSASPLTSLPRLGAKGTLL EDM  
KVKSESLTEEPQSSEEEESMSMETRTRVKSEPVSPKNGVLSQATGDQKSGGKSETDRRMVAARTEPLTPNPAS  
KKPRVHKRGSQSSSDSDSDSARSSCSSRSSSSSSSSSSSSSSSHSRSGSSSSSSSSSSSSSSSSSSSSSSSSSSSS  
SSSEESDSEEDVQKREGTPHRKAYDEESVASLSTTQDETQDSFQANNGTPESAYLLQGGYMLAASYWPKDRVM  
INRLDSICQTVLKGKWPSARRHYDANTVASFYTTKLLDSPAATERGEPVPTPPAVAVREEHEQSAQMSKVK  
KHVREKEFTVKIKDEGGKLTFFQKQGLAQKRPFDGEDGALGQQQYLTRLRELQSTSETSLVNLPKAVPASGTS  
IQPTLGANGAILDSQPIVKKRRRGRNRVEGADILFLNRNKPNNHIPTGMNPALSYPPQPRI PDTESPVPVINL  
KDGTRLAGDDAPKRKDLDRWLKEHPGYVEDLGAFIPRVQLHEGRPKQKRHRRCRNPKNLDINSLTGEERVQLIN  
RRNARKVGGAFAPPLKDLCRFLKENSEYGVAPWGDVVKQSGFLPESMFERILTGPPVREEVSRGRPKSGI  
AKATTAAVPAGSVPGNPLLANGLLPGVDLTALQALQONLQNLQSLQVTAGLMGMPAGLSSGGETKNMAAMFP  
MLFSGMAGLPNLLGMGGLLSKTAESGAEEKRGNDSKELEGKERTESQSPENGGERCVPGPSSTSSSTAALSSA  
AAAKPIALNPLLLSNILYPGMLLTPGLNLHLPTLSQSNAFDVQKNKSDDLDSKKSVEIKEENSRVRDQEEKGG  
TEPSPLNENSTDEGSEERASSGSDSSSSSEDSNED\*  
>ENSMUSP00000105243\_c.4874:A>T\_p.K1625N ENSMUST00000109614.9|Chd9-  
202|ENSMUSG00000056608|+|chr8:g.91742463:A>T  
MTDPMDDFFDDANLFGETLEGLSDDTFVQPGVSLVDELNLGAEFEPLHIDSLNHVQGTPTHQKMADFEQLSQ  
FDSMKFHPVNSQSFSGSPVEHVLSPHSQFNCSPIHPPNPNGLFQDVAADGSPMWHGQTATGLANQNGSPFHQPGH  
SHSLHQNKSFVAHPDFALFQASEHQTCSSLSHSQQSRNLNPGQNSLGQAKNFLDANVSGAHRVNVNHLATAP  
SSQQTLPVQFSPTANPPAHFLKCSSHQEGNYNRPSMSTCSVSNQQFP SHYSFSSGHVSPSSLLQSSAGLA  
PGHTNQALSDFAGSNSFSPHRGMKQEPHQHLLNPTPSLNSNFFQILHSSHPQGNYSNSKLSPVHMNFPDPVDA  
GPPVGHFNDHAETNGFSSLEENLLHHVDSHAEPFAGLDPEDLLQEGLLPQFDESPPFGQDNSNHVLDHDLDRQF  
TSHLVSRPDSMAETQQLQYQARGWPSPLSTNHQHLHSRNHLCLQRQPPSSKKSQSDGSGTYTKLQNTQVRVMSEKK  
PRKRVESESKQEKANRIISEA IARAKERGERNI PRVMS PENFSPASVEGKKEKRGRMKSKPKDRDNKKPKTY  
SKLKEKTKIGKLIITLKGKHKRRNESSDELSDAEQRSQHTFKEQHSQKRRSNRQIKRKKYAEAEKGQSEEEV  
KGSRLVRKNSAPPPGEQPLQLFVENPSEEDAAIVDKILACRTVKKEVSPGVMLDIEEFFVKYKNYSYLHCEWA  
TEQQLLKDRIQQIKRFLKRAHFLADMEEPFNPDYVEVDRILEVFCEDKDTGESVIYLVKWCSLP  
YEDSTWELKEDVDLAKIEEFELQASRPDTRHLDRPPSNIWKKIEQSREYKNGNQLREYQLEGLNWLLENWYN  
RRNCILADEMGLGKTIQSITFLYEILLTGIRGPFLLIAPLSTIANWEREFRTWTDINVVVYHGSLSRQMIQQ  
YEMYFRDSQGRIRGAYRFQAIITTFEMILGGCGELNAIDWRCVIIDEAHRLKKNCKLLEGLKLMNLEHKVL  
LTGTPLQNTVEELFSLHFLFLEPLRFPSESTFMQEFGLKTEEQQKLAAILKPMMLRRLKEDVEKKLAPKEET  
IIEVELTNIQKKYRAILEKNFSFLSKGAGQTNVNLVNTMMELRKCENHPYLIKGAEEKILGEFRTYNSA  
SDFHLQAMIQSAGKLVLDKLLPKMKAGGHKVLIFSQMVRCLEIDEDYLIHKRYLYERIDGRVRGNLRQAAID  
RFSKPDSDRFVLLCTRAGGLGINLTAADTCIIFDSDWNPQNDLQAQARCHRIGQNKAVKVVYRLVTRNSYERE  
MFDRA SLKLGDKAVLQSMSGRDSNVSGIQQLSKKEIEDLLRRGAYGAIMEEEDGSKFCEEDIDQILLRRTK  
TITIESEGRGSTFAKASFVAGNRTDISLDDPNFWQWAKKAELDIDTISGRNSLVIDTPRIRKQTRPFSATK  
DELAELSEAESEGEKPKLRRPCDRSGGYGRTECFRVEKNLLVYGWRWREILSHGRFKRQLNEHDEVEICRA  
LLAYCLIHRYGDEKIKGFIWDLITPTEDEGQTRRELQNHGLSAPVPRGRKGGKVKQTSSFDIQAELWRKYNP  
EQLLQDEGYKHKHHCNNVLLRVRMLYYLKQEVIGNESQKVFDGVDASDIDVWVPEPDHSEVPAAWWDFDAD  
KSLLIIGVFKHGYEKYNTIRADPALCFLEVRGKPDCKAVAAEQRANDYMDGDVEDPEYKPAPAI FKDDIEDDVS  
SPGDLVIADGEGQLMEGDKVYWP TSPALTTTLRRLITAYQRTNKNRHIQQMQPTFSLPANAMQPLYEATLNP  
KMAAKIERQQRWTRREEADFYRVVSTFGVVFDPDRGQFDWTKFRALARLHKKTDNSLEKYLCAFMSMCRVCR  
LPSKEELVDPNIFIQPIITEERASRTLYRIELLRKVREQALRHPQLFERLKLCHPNPDLPIWWECEGSHDRDLI  
GAAKHGVSRTDYHILRDPELS FMAAQRNYNQSKAAHSRTSAPLLQQYQVALSASPLTSLPRLGAKGTLL EDM  
KVKSESLTEEPQSSEEEESMSMETRTRVKSEPVSPKNGVLSQATGDQKSGGKSETDRRMVAARTEPLTPNPAS  
KKPRVHKRGSQSSSDSDSDSARSSCSSRSSSSSSSSSSSSSHSRSGSSSSSSSSSSSSSSSSSSSSSSSSSSSS  
SSSEESDSEEDVQKREGTPHRKAYDEESVASLSTTQDETQDSFQANNGTPESAYLLQGGYMLAASYWPKDRVM  
INRLDSICQTVLKGKWPSARRHYDANTVASFYTTKLLDSPAATERGEPVPTPPAVAVREEHEQSAQMSKVK  
KHVREKEFTVKIKDEGGKLTFFQKQGLAQKRPFDGEDGALGQQQYLTRLRELQSTSETSLVNLPKAVPASGTS  
IQPTLGANGAILDSQPIVKKRRRGRNRVEGADILFLNRNKPNNHIPTGMNPALSYPPQPRI PDTESPVPVINL  
KDGTRLAGDDAPKRKDLDRWLKEHPGYVEDLGAFIPRVQLHEGRPKQKRHRRCRNPKNLDINSLTGEERVQLIN  
RRNARKVGGAFAPPLKDLCRFLKENSEYGVAPWGDVVKQSGFLPESMFERILTGPPVREEVSRGRPKSGI  
AKATTAAVPAGSVPGNPLLANGLLPGVDLTALQALQONLQNLQSLQVTAGLMGMPAGLSSGGETKNMAAMFP  
MLFSGMAGLPNLLGMGGLLSKTAESGAEEKRGNDSKELEGKERTESQSPENGGERCVPGPSSTSSSTAALSSA



AAAKPIALNPLLLSNILYPGMLLTPGLNLHLPTLSQSNADFVQKNKSDDLDSKKSVEIKEENSRVRDQEEKGG  
TEPSPLNENSTDEGSEERASSGSDSSSSSESDSSSNED\*  
>rs49334146\_ENSMUSP00000046356\_c.5248:A>G\_p.D1750G  
ENSMUST00000048665.8|Chd9-201|ENSMUSG00000056608|+|chr8:g.91752012:A>G  
MTDPMDFDANLFGGETLEGLSDDTFVQPGPVSVDLNLGAEFEPLHIDSLNHVQGTPTHQKMADFEQLSQ  
FDSMKFHPVNSFGSPVEHVLSPHSQFNCSPIHPPNPNGLFQDVADGSPMWHQTATGLANQNGSPFHQPGH  
SHSLHQNKSFVAHPDFALFQASEHQTCSSLSHSQQSRSNLNPQNLSLQAKNFDANVSGAHRVNVNHLATAP  
SSQQTLPVQFSPTANPPAHFLKCSHQEGNYNRPSPSMTSCSVNSQQFSPSHYSFSSGHVSPSSLLQSSAGLA  
PGHTNQALSDFAGSNFSFPHRGMKQEPHQHLLNPTPSLNSNNFQILHSSHPQGNYSNSKLSPVHMNFPDPVDA  
GPPVGHFNDHAETNGFSSLEENLLHHVDSHAEPFAGLDPEDLLQEGLLPQFDESPFGQDNSNHVLDHDLDRQF  
TSHLVS RPSDMAQTQLQYQARGWPSPLSTNHQHLHSRNLCLQRQPSSKKS DSGSGTYTKLQNTQVRVMSEKK  
PRKRVESESKQEKANRIISEAIARAKERGERNIPRVMS PENFPASVEGKEEKRGRMRMKS PKDRDNKKPKTY  
SKLKEKTKIGKLIITLGGKHKRNESSDELSDAEQRSQHTFKEQHSQKRRSNRQIKRKKYAEAEAGKQSEEEV  
KGSRLVRKNSAPPPGEQPLQLFVENPSEEDAAIVDKILACRTVKKEVSPGVMLDIEEFFVKYKNYSYLHCEWA  
TEQQLLKDKRIQQKIKRFLRQAQRAHFLADMEEPFNPDYVEVDRILEV SFCEDEKDTGESVIYYLVKWC SLP  
YEDSTWELKEDVDLAKIEEFEQLQASRPDTRHLDRPPSNIWKKIEQSREYKNGNQLREYQLEGLNWL LFNWYN  
RRNCILADEMGLKGTIQSITFLYEILLTGIRGPFLLIAPLSTIANWEREFRTWTDINVVVYHGSLSIRQMIQQ  
YEMYFRDSQGRIRGAYRFQAIITTFEMILGGCGELNAIDWRCV IIDEAHLRKNKNCKLLEGLKLMNLEHKVL  
LTGTPLQNTVEELFSLHLFLEPLRFPESESTFMQEFGLDTEEQVQKLA IILKPMMLRRLKEDVEKKLAPKEET  
IEVELTNIQKKYRAILEKNFSFLSKGAGQTNVNLVNTMMELRKC CNHPYLIKGAEEKILGEFRDYNPSA  
SDFHLQAMIQSAGKLVLDKLLPKMKAGGHKVLIFSQMVRCLDILEDYLIHKRYLYERIDGRVGRNLRQA AID  
RFSKPDSDRFVLLCTRAGGLGINLTAADTCIIFDSDWNPQNDLQAQARCHRIGQNKAVKYRLVTRNSYERE  
MFDRASLKLGLDKAVLQSMSGRDSNVSGIQQLSKKEIEDLLRRGAYGAIMEEDEGSKFCEEDIDQILLRRTK  
TITIESEGRGSTFAKASFVAGNRD TDISLDDPNFWQKWA KKAELDIDTISGRNSLVIDTPRIRKQTRPFSATK  
DELAELSEAESEGEKPKLRRCDRSGGYGRTECFRVEKNLLVYWGWRWEILSHGRFKRQLNEHDVEVICRA  
LLAYCLIHRYGDEKIKGFIWDLITPTEDGQTRQLNHLGSLAPVPRGRKGGKVKQTQTSDFIQKAEWLRYKNP  
EQLLQDEGYSDFAGSNFSFPHRGMKQEPHQHLLNPTPSLNSNNFQILHSSHPQGNYSNSKLSPVHMNFPDPVDA  
KSL LIGVFKHGYEKYNTIRADPALCFLEVRGKPD DKAVAAEQRANDYMDGDVEDPEYKPAPAIKDDIEDGVS  
SPGDLVIADGEGQLMEGDKVYWP TSPALTRRLRLITAYQRTNKNRHIQQMQPTFSLPANAMQPLYEEATLNP  
KMAAKIERQQRWTRREADFYRVVSTFGVVFDPDRGQFDWTKFRALARLHKKTDNSLEKYLCAFMSCRRVCR  
LPSKEELVDPNIFIQPI TEERASRTLYRIELLRKVREQALRHPQLFERLKLCHPNPDLPIWWECSHHRDILLI  
GAAKHGVSRTDYHILRDP ELSFMAAQRNYNQSKAAHSRTSAPLLQQYQVALSASPLTSLPRLLGAKGTLLEDM  
KVKSESLTEEPQSSEEESSMSMETRTRVKSEPVSPKNGVLSQATGDQKSGGKSETDRRMVAARTEPLTPNPAS  
KKPRVHKRGSQSSSDSDSARS SCSSRSSSSSSSSSSSSCSHSRSGSSSSSSSSSSSCSSASSSSSSSSSSSSSSSS  
SSSESDSEEDVQKREGTPHRKAYDEESVASLSTTKLQDQSFQANNGTPESAYLLQGGYMLAASYPWKDRVM  
INRLDSICQTVLKGKWP SARHYDANTVASFYTTKLLD SPGAATERGEPSPVTPPAVAVREEHQESAQMSKEG  
GLKLTQKQGLAQKRPFDGEDGALGQQYLTRLRELQSTSETSLVNLPKAVPASGTSIQPTLGGANGA IILDSQP  
IVKRRRGRNRNVEGADILFLNRNKP PNHIP TGMNPALSYPPQRI PDTESPVV INLKDGTLAGDDAPKRKD  
LDRWLKEHPGYVEDLGA FIPRVQLHEGRPKQKRHRCRNPNKLDINSLTGEERVQLINRRNARKVGGAFAPPLK  
DLCRFLKENSEYGVAP EWGDVVKQSGFLPESMFERILTGPVVREEVSRGRPKSGIAKATTA AAVPAGSVPG  
NPELLANGLLPGVDLTALQALQQLQNLQSLQV TAGLMGMPAGLSSGGETKNMAAMFPMLFSGMAGLPNLLGMG  
GLLSKTAESGAEKRGND SKELEGGKERTESQSPENGGERCVPSPSTSS TAALSSAAAAPIALNPLLLSNI  
LYPGMLLTPGLNLHLPTLSQSNADFVQKNKSDDLDSKKSVEIKEENSRVRDQEEKGGTEPSPLNENSTDEGSE  
RASSGSDSSSSSESDSSSNED\*

>rs49334146\_ENSMUSP00000147407\_c.5248:A>G\_p.D1750G  
ENSMUST00000209203.2|Chd9-203|ENSMUSG00000056608|+|chr8:g.91752012:A>G  
MTDPMDFDANLFGGETLEGLSDDTFVQPGPVSVDLNLGAEFEPLHIDSLNHVQGTPTHQKMADFEQLSQ  
FDSMKFHPVNSFGSPVEHVLSPHSQFNCSPIHPPNPNGLFQDVADGSPMWHQTATGLANQNGSPFHQPGH  
SHSLHQNKSFVAHPDFALFQASEHQTCSSLSHSQQSRSNLNPQNLSLQAKNFDANVSGAHRVNVNHLATAP  
SSQQTLPVQFSPTANPPAHFLKCSHQEGNYNRPSPSMTSCSVNSQQFSPSHYSFSSGHVSPSSLLQSSAGLA  
PGHTNQALSDFAGSNFSFPHRGMKQEPHQHLLNPTPSLNSNNFQILHSSHPQGNYSNSKLSPVHMNFPDPVDA  
GPPVGHFNDHAETNGFSSLEENLLHHVDSHAEPFAGLDPEDLLQEGLLPQFDESPFGQDNSNHVLDHDLDRQF  
TSHLVS RPSDMAQTQLQYQARGWPSPLSTNHQHLHSRNLCLQRQPSSKKS DSGSGTYTKLQNTQVRVMSEKK  
PRKRVESESKQEKANRIISEAIARAKERGERNIPRVMS PENFPASVEGKEEKRGRMRMKS PKDRDNKKPKTY  
SKLKEKTKIGKLIITLGGKHKRNESSDELSDAEQRSQHTFKEQHSQKRRSNRQIKRKKYAEAEAGKQSEEEV  
KGSRLVRKNSAPPPGEQPLQLFVENPSEEDAAIVDKILACRTVKKEVSPGVMLDIEEFFVKYKNYSYLHCEWA  
TEQQLLKDKRIQQKIKRFLRQAQRAHFLADMEEPFNPDYVEVDRILEV SFCEDEKDTGESVIYYLVKWC SLP  
YEDSTWELKEDVDLAKIEEFEQLQASRPDTRHLDRPPSNIWKKIEQSREYKNGNQLREYQLEGLNWL LFNWYN

RRNCILADEMGLGKTIQSITFLYEILLTGIRGPFLIIAPLSTIANWEREFRTWTDINVVVYHGSLSRQMIQQ  
YEMYFRDSQGRIIRGAYRFQAIITTFEMILGGCGELNAIDWRCVIIDEAHRLKKNCKLLEGLKLMNLEHKVL  
LTGTPLQNTVEELFSLHFLFLEPLRFPSESTFMQEFGLDKEEQVQKLAAILKPMMLRRLKEDVEKKLAPKEET  
IEVELTNIQKKYYRAILEKNFSLSKGAGQTNVPLVNTMMELRKCENHPYLIKGAEEKILGEFRDTPYNSA  
SDFHLQAMIQSAGKLVLDKLLPKMKAGGHKVLIFSQMVRCLDILEDYLIHKRYLYERIDGRVVRGNLRQAAID  
RFSKPDSDRFVLLCTRAGGLGINLTAADTCIIFDSDWNPQNDLQAQARCHRIGQNKAVKVYRLVTRNSYERE  
MFDRAKSLKGLDKAVLQSMGRSDSNVSGIQQLSKKEIEDLLRRGAYGAIMEEEDGSKFCEEDIDQILLRRTK  
TITIESEGRGSTFAKASFVAGNRDIDSLDDPNFWQKWAKKAELDIDTISGRNSLVIDTPRIRKQTRPFSATK  
DELAELSEAESEGEKPKLRRPCDRSGGYGRTECFRVEKNLLVYGWRWREILSHGRFQRQLNEHDEVICRA  
LLAYCLIHRYGDEKIKGFIWDLITPTEDGQTRRELQNHGLSAPVPRGRKGGKVKQTSSFDIQKAEWLKRYNP  
EQLLQDEGYKHKHHCNKVLLRVRMLYLLKQEVIGNESQKVFQDGDVADSIDVWVPEPDHSEVPAAWDFDAD  
KSLLIQVFKHGYEKYNTIRADPALCFLEVRGKPDKAVAAEQRANDYMDGDVEDPEYKPAFAIKDDIEDGVS  
SPGDLVIADGEGQLMEGDKVYWPSPALTTTLRRLITAYQRTNKNRHIQQMQPTFSLPANAMQPLYEATLNP  
KMAAKIERQQRIGRSKYFYSTNHRGTCF\*

>rs49334146\_ENSMUSP00000148088\_c.5248:A>G\_p.D1750G

ENSMUST00000209423.2|Chd9-205|ENSMUSG00000056608|+|chr8:g.91752012:A>G  
MTDPMMDFDDANLFGETLEGLSDDTFVQPGVSLVDELNLGAEFEPLHIDSLNHVQGTPTHQKMADFEQLSQ  
FDSMKFHPVNQSFSGSPVEHVLSPHSQFNCSPIHPPNQPNGLFQDQVADGSPMWHGQTATGLANQNGSPFHQPGH  
SHSLHQNKSFVAHPDFALFQASEHQTCSSLSHSQQRSRNLNPGQNSLGQAKNFLDANVSGAHRVNVNHLATAP  
SSQQTLPVQFSPTANPPAHFLKCSSHQEGNYNRPSMTSCSVSNSQQFSPSHYSFSSGHVSPSSLLQSSAGLA  
PGHTNQALSDFAGSNSFSPHRGMKQEPHQHLLNPTPSLNSNFIHLHSSHQGNYSNSKLSPVHMFDPVDA  
GPPVGHFNDHAETNGFSSLEENLHHVDSHAEPFAGLDPEDLLQEGLLPQFDESFPFGQDNSNHVLDHDLDRQF  
TSHLVSRPSDMAQTQLQYQARGWSPPLSTNHQHLHSRNLCLQRQPPSSKKS DGSGTYTKLQNTQVRVMSEKK  
PRKRVESESKQEKANRIISEAIARAKERGERNI PRVMS PENFSPASVEGKEEKRGRMKSKPKDRDNKKPKTY  
SKLKEKTKIGKLIITLKGKHKRRNESSELSDAEQRSQHTFKEQHSQKRRSNRQIKRKKYAEADAEKGQSEEEV  
KGLRVLKRN SAPPEQQLQFLVENPSEEDAAIVDKIACHRTVKKEVSPGVMLDIEEFFVYKKNYSYLHCEWA  
TEQQLLKDRIKRIKRFKLRQAQRAHFLADMEEEPFPNDYVEVDRILEVSFCEDKDGTGESVIYYLVKWCSLP  
YEDQSTWELKEDVDLAKIEEFELQASRPDTRHLDRPPSNIWKKIEQSREYKNGNQLREYQLEGLNWLFFNWN  
RRNCILADEMGLGKTIQSITFLYEILLTGIRGPFLIIAPLSTIANWEREFRTWTDINVVVYHGSLSRQMIQQ  
YEMYFRDSQGRIIRGAYRFQAIITTFEMILGGCGELNAIDWRCVIIDEAHRLKKNCKLLEGLKLMNLEHKVL  
LTGTPLQNTVEELFSLHFLFLEPLRFPSESTFMQEFGLDKEEQVQKLAAILKPMMLRRLKEDVEKKLAPKEET  
IEVELTNIQKKYYRAILEKNFSLSKGAGQTNVPLVNTMMELRKCENHPYLIKGAEEKILGEFRDTPYNSA  
SDFHLQAMIQSAGKLVLDKLLPKMKAGGHKVLIFSQMVRCLDILEDYLIHKRYLYERIDGRVVRGNLRQAAID  
RFSKPDSDRFVLLCTRAGGLGINLTAADTCIIFDSDWNPQNDLQAQARCHRIGQNKAVKVYRLVTRNSYERE  
MFDRAKSLKGLDKAVLQSMGRSDSNVSGIQQLSKKEIEDLLRRGAYGAIMEEEDGSKFCEEDIDQILLRRTK  
TITIESEGRGSTFAKASFVAGNRDIDSLDDPNFWQKWAKKAELDIDTISGRNSLVIDTPRIRKQTRPFSATK  
DELAELSEAESEGEKPKLRRPCDRSGGYGRTECFRVEKNLLVYGWRWREILSHGRFQRQLNEHDEVICRA  
LLAYCLIHRYGDEKIKGFIWDLITPTEDGQTRRELQNHGLSAPVPRGRKGGKVKQTSSFDIQKAEWLKRYNP  
EQLLQDEGYKHKHHCNKVLLRVRMLYLLKQEVIGNESQKVFQDGDVADSIDVWVPEPDHSEVPAAWDFDAD  
KSLLIQVFKHGYEKYNTIRADPALCFLEVRGKPDKAVAAEQRANDYMDGDVEDPEYKPAFAIKDDIEDGVS  
SPGDLVIADGEGQLMEGDKVYWPSPALTTTLRRLITAYQRTNKNRHIQQMQPTFSLPANAMQPLYEATLNP  
KMAAKIERQQRWTRREADFYRVVSTFGVVFDPDRGQFDWTKFRALARLHKKTDNSLEKYLCAFMSCRRVCR  
LPSKEELVDPNIFIQPI TEERASRTLYRIELLRKVREQALRHPQLFERLKLCHPNPDLPIWWECEGSHDRDLI  
GAAKHGVSRTDYHILRDPELSFMQAQRNYNQSKAAHSRTSAPLLQYQVALSASPLTSLPRLLAGKGTLL EDM  
KVKSESLTEEPQSSSEESMSMETRTRVKSEPVSPKNGVLSQATGDQKSGGKSETDRRMVAARTEPLTPNPAS  
KKPRVHKRGSQSSSDSDSDSARSSCSSRSSSSSSSSSSSSSSSHSRSGSSSSSSSSSSSSSSSSSSSSSSSSSSSS  
SSSEESDSEEDVQKREGTPHRKAYDEESVASLSTTQDETQDSFQANNGTPESAYLLQGGYMLAASYPKDRVM  
INRLDSICQTVLKGKWPARRHYDANTVASFYTTKLLDSPAATERGEPVPTPPAVAVREEHEQSAQMSKVK  
KHVREKEFTVKIKDEGGLKLTQKQGLAQKRPFDGEDGALGQQQYLTRLRELQSTSETSLVNLPKAVPASGTS  
IQPTLGANGAILDSQPIVKKRRGRRRNVEGADILFLNRNKPNIHPTGMNPALSYPQPQRI PDTESEVPVNL  
KDGTRLAGDDAPKRKDLDRWLKEHPGYVEDLGAFI PRVQLHEGRPKQKRHRCRNPNKLDINSLTGEERVQLIN  
RRNARKVGGAFAPPLKDLCRFLKENSEYGVAPWGDVVKQSGFLPESMFERILTGVPVREEVSRGRPKSGI  
AKATTA AVPAGSVPGNPLLANGLLPGVDLTALQALQNLQNLQSLQVTAGLMGMPAGLSSGGETKNMAAMFP  
MLFSGMAGLPNLLGMGGLL SKTAESGAEEKRGNDSKELEGNKERTESQSPENGGERCVPGPSPTSSTAALSSA  
AAKPIALNPLLLSNILYPGMLLTPGLNLHLPTLSQSNAFADVQKNKSDDLDSKKSVEIKEENSRVDRDQEEKGG  
TEPSPLNENSTDEGSEERASSGSDSSSSSESDSSSNE\*

>rs49334146\_ENSMUSP00000105243\_c.5248:A>G\_p.D1750G

ENSMUST00000109614.9|Chd9-202|ENSMUSG00000056608|+|chr8:g.91752012:A>G

MTDPMDDFFDDANLFGETLEGLSDDTFVQPGPVSLVDELNLGAEFEPLHIDSLNHVQGTPTHQKMADFEQLSQ  
 FDSMKFHPVNSQFSGSPVEHVLSPHSQFNCSPIHPPNQPNGLFQDVADGSPMWHQTATGLANQNGSPFHQPGH  
 SHSLHQNSKSFVAHPDFALFQASEHQTCSSLSHSQQSRNLNPGQNSLGQAKNFLDANVSGAHRVNVNHLATAP  
 SSQQTLPVQFSPTANPPAHFLKCSSHQEGNYNRPSPSMTSCSVNSQQFSPSHYSFSSGHVSPSSLLQSSAGLA  
 PGHTNQALSDFAGSNFSFPHRGMKQEPHQHLLNPTPSLNSNNFQILHSSHPQGNYSNSKLSPVHMFNFPD  
 GPPVGHFNDHAETNGFSSLEENLLHHVDSHAEPFAGLDPEDLLQEGLLPQFDES PFGQDNSNHVLDHDLDRQF  
 TSHLVS RPSDMAQTQLQYQARGWPSPLSTNHQHLHSRNLHCLQRQPSSSKKSDGSGTYTKLQNTQVRVMSEKK  
 PRKRVESESKQEKANRI I SEAIARAKERGERNI PRVMS PENFP SASVEGKKEKRGRMRKSKPKDRDNKKPKTY  
 SKLKEKTKIGKLIITLGGKHKRRNESSELSDAEQRSQHTFKEQHSQKRRSNRQIKRKKYAEDEAGKQSEEEV  
 KGSRLVKRNSAPPPGEQPLQLFVENPSEEDAAIVDKILACRTVKKEVSPGVMLDIEEFFVKYKNYSYLHCEWA  
 TEQQLLKDKRIQQKIKRFLRQAQRAHFLADMEEPFNPDYVEVDRI LEVSFCEDKDTGESVIYYLVKWCSLP  
 YEDSTWELKEDVDLAKIEEFEQLQASRPDTRHLDRPPSNIWKKIEQSREYKNGNQLREYQLEGLNWLFFNWN  
 RRNCILADEMGLGKTIQSITFLYEILLTGIRGPFLLI IAPLSTIANWEREFRTWTNDINVVVYHGSLSRQMIQQ  
 YEMYFRDSQGRIIRGAYRFQAIITTFEMILGGCGELNAIDWRCVIIDEAHRLKKNCKLLEGLKLMNLEHKVL  
 LTGTPLQNTVEELFSLHFLFLEPLRFPESETFMQEFGDLKTEEQVQKLQAILKPMMLRRLKEDVEKKLAPKEET  
 IIEVELTNIQKKYYRAILEKNFSFLSKGAGQTNVPLNVTMMELRKCCHNHPYLIKGAEEKILGEFRDYNP  
 SDFHLQAMIQSAGKLVLIDKLLPKMKAGGHKVLIFSQMVRCLDILEDYLIHKRYLYERIDGRVGRNLRQA  
 IDRFKPDSDRDFVLLCTRAGGLINLTAADTCIIFDSDWNPQNDLQAQARCHRIGQNKAVKVEYRLVTRNSYERE  
 MFDRASLKLGLDKAVLQSMSGRSDNSVSGIQQLSKKEIEDLLRRGAYGAIMEEEDGSKFCEEDIDQILLRRTK  
 TITIESEGRGSTFAKASFVAGNRTDISLDDPNFWQKAKKAELDIDTISGRNSLVIDTTPRIRKQTRPFSATK  
 DELAELSEAESEGEKPKLRPCDRSGGYGRTECFRVEKNLLVYGWRWREILSHGRFKRQLNEHDEVEICRA  
 LLAYCLIHRYGDEKIKGFIWDLITPTEDGQTRQLNHLGLSAPVPRGRKGGKVKQTQSSFDIQKAEWLRKYNP  
 EQLLQDEGYKHKVHHCNKVLLRVRMLYYLQEVIGNESQKVFQDASDIDVWVPEPDHSEVPAAWWDFDAD  
 KSLDIGVFKHGYEKYNTIRADPALCFLEVRGKPDKAVAAEQRANDYMDGDVEDPEYKPAIAIFKDDIEDGVS  
 SPGLDVIADGEGQLMEGDKVYWPSPALTRRLRLITAYQRTNKNRHIQQMQPTFSLPANAMQPLYEEATLNP  
 KMAAKIERQWRNTRREEDFYRVVSTFGVVFDPDRGQFDWTKFRALARLHKKTDNSLEKILCAFMSMCRRCR  
 LPSKEELVDPNIFIQPIITEERASRTLYRIELLRKVRQALRHPQLFERLKLCHPNPDLPIWWECEGSHDRDLI  
 GAAKHGVSRTDYHILRDPELSFMAAQRYNQSKAAHSRTSAPLLQQYQVALSASPLTSLPRLGAGTLLLED  
 KVKSESLTEEPQSSEESMSMETRTRVKSEPVSPKNGVLSQATGDQKSGGKSETDRRMVAARTEPLTPNPAS  
 KKPRVHKRGSQSSSDSDSARSSSSSSSSSSSSSSSSSSSSSSSSSSSSSSSSSSSSSSSSSSSSSSSSSSS  
 SSSEESDSEEDVQKREGTPHRKAYDEESVASLSTTQDETQDSFQANNGTPESAYLLQGGYMLAASYWPKDRVM  
 INRLDSICQTVLKGKWPARRHYDANTVASFYTTKLLDSPGAATERGEPVPTPPAVAVREEHEQSAQMSKVK  
 KHVREKEFTVVIKIDEGGLKLTQKQGLAQKRPFDGEDGALGQQQYLTRLRELQSTSETSLVNLPAKVPASGTS  
 IQPTLGANGAILDSQPIVKKRRRGRNVEGADILFLNRNKPNNHIPGMNPALSYPQPQRIPTDESVPVIVNL  
 KDGTLAGDDAPKRKDLDRWLKEHPGYVEDLGAFIPRVQLHEGRPKQKRHRCRNPNKLDINSLTGEERVQLIN  
 RRNARKVGGAFAPPLKDLRFLKENSEYGVAPWGDVVKQSGFLPEMSFERILTGPPVREVEVSRGRPKSGI  
 AKATTAAVPAGSVPGNPLLANGLLPGVDLTAALQALQNLQNLQSLQVTAGLMGMPAGLSSGGETKNMAAMFP  
 MLFSGMAGLPNLLGMGGLLSKTAESGAEEKRGNDSKELEGKKERTESQSPENGGERCVPGPSSTSSSTAALSSA  
 AAAKPIALNPLLLSNILYPGMLLTPGLNLHLPTLSQSNADFVQKNKSDDLSSKKSVEIKEENSRVRDQEEKGG  
 TEPSPLENSTDEGSERASSGSDSSSSSESDSDSSNED\*

>rs3345121\_ENSMUSP00000046356\_c.5305:G>A\_p.G1769E  
 ENSMUST00000048665.8|Chd9-201|ENSMUSG00000056608|+|chr8:g.91753314:G>A  
 MTDPMDDFFDDANLFGETLEGLSDDTFVQPGPVSLVDELNLGAEFEPLHIDSLNHVQGTPTHQKMADFEQLSQ  
 FDSMKFHPVNSQFSGSPVEHVLSPHSQFNCSPIHPPNQPNGLFQDVADGSPMWHQTATGLANQNGSPFHQPGH  
 SHSLHQNSKSFVAHPDFALFQASEHQTCSSLSHSQQSRNLNPGQNSLGQAKNFLDANVSGAHRVNVNHLATAP  
 SSQQTLPVQFSPTANPPAHFLKCSSHQEGNYNRPSPSMTSCSVNSQQFSPSHYSFSSGHVSPSSLLQSSAGLA  
 PGHTNQALSDFAGSNFSFPHRGMKQEPHQHLLNPTPSLNSNNFQILHSSHPQGNYSNSKLSPVHMFNFPD  
 GPPVGHFNDHAETNGFSSLEENLLHHVDSHAEPFAGLDPEDLLQEGLLPQFDES PFGQDNSNHVLDHDLDRQF  
 TSHLVS RPSDMAQTQLQYQARGWPSPLSTNHQHLHSRNLHCLQRQPSSSKKSDGSGTYTKLQNTQVRVMSEKK  
 PRKRVESESKQEKANRI I SEAIARAKERGERNI PRVMS PENFP SASVEGKKEKRGRMRKSKPKDRDNKKPKTY  
 SKLKEKTKIGKLIITLGGKHKRRNESSELSDAEQRSQHTFKEQHSQKRRSNRQIKRKKYAEDEAGKQSEEEV  
 KGSRLVKRNSAPPPGEQPLQLFVENPSEEDAAIVDKILACRTVKKEVSPGVMLDIEEFFVKYKNYSYLHCEWA  
 TEQQLLKDKRIQQKIKRFLRQAQRAHFLADMEEPFNPDYVEVDRI LEVSFCEDKDTGESVIYYLVKWCSLP  
 YEDSTWELKEDVDLAKIEEFEQLQASRPDTRHLDRPPSNIWKKIEQSREYKNGNQLREYQLEGLNWLFFNWN  
 RRNCILADEMGLGKTIQSITFLYEILLTGIRGPFLLI IAPLSTIANWEREFRTWTNDINVVVYHGSLSRQMIQQ  
 YEMYFRDSQGRIIRGAYRFQAIITTFEMILGGCGELNAIDWRCVIIDEAHRLKKNCKLLEGLKLMNLEHKVL  
 LTGTPLQNTVEELFSLHFLFLEPLRFPESETFMQEFGDLKTEEQVQKLQAILKPMMLRRLKEDVEKKLAPKEET  
 IIEVELTNIQKKYYRAILEKNFSFLSKGAGQTNVPLNVTMMELRKCCHNHPYLIKGAEEKILGEFRDYNP  
 SDFHLQAMIQSAGKLVLIDKLLPKMKAGGHKVLIFSQMVRCLDILEDYLIHKRYLYERIDGRVGRNLRQA  
 IDRFKPDSDRDFVLLCTRAGGLINLTAADTCIIFDSDWNPQNDLQAQARCHRIGQNKAVKVEYRLVTRNSYERE  
 MFDRASLKLGLDKAVLQSMSGRSDNSVSGIQQLSKKEIEDLLRRGAYGAIMEEEDGSKFCEEDIDQILLRRTK  
 TITIESEGRGSTFAKASFVAGNRTDISLDDPNFWQKAKKAELDIDTISGRNSLVIDTTPRIRKQTRPFSATK  
 DELAELSEAESEGEKPKLRPCDRSGGYGRTECFRVEKNLLVYGWRWREILSHGRFKRQLNEHDEVEICRA  
 LLAYCLIHRYGDEKIKGFIWDLITPTEDGQTRQLNHLGLSAPVPRGRKGGKVKQTQSSFDIQKAEWLRKYNP  
 EQLLQDEGYKHKVHHCNKVLLRVRMLYYLQEVIGNESQKVFQDASDIDVWVPEPDHSEVPAAWWDFDAD  
 KSLDIGVFKHGYEKYNTIRADPALCFLEVRGKPDKAVAAEQRANDYMDGDVEDPEYKPAIAIFKDDIEDGVS  
 SPGLDVIADGEGQLMEGDKVYWPSPALTRRLRLITAYQRTNKNRHIQQMQPTFSLPANAMQPLYEEATLNP  
 KMAAKIERQWRNTRREEDFYRVVSTFGVVFDPDRGQFDWTKFRALARLHKKTDNSLEKILCAFMSMCRRCR  
 LPSKEELVDPNIFIQPIITEERASRTLYRIELLRKVRQALRHPQLFERLKLCHPNPDLPIWWECEGSHDRDLI  
 GAAKHGVSRTDYHILRDPELSFMAAQRYNQSKAAHSRTSAPLLQQYQVALSASPLTSLPRLGAGTLLLED  
 KVKSESLTEEPQSSEESMSMETRTRVKSEPVSPKNGVLSQATGDQKSGGKSETDRRMVAARTEPLTPNPAS  
 KKPRVHKRGSQSSSDSDSARSSSSSSSSSSSSSSSSSSSSSSSSSSSSSSSSSSSSSSSSSSSSSSSSSSS  
 SSSEESDSEEDVQKREGTPHRKAYDEESVASLSTTQDETQDSFQANNGTPESAYLLQGGYMLAASYWPKDRVM  
 INRLDSICQTVLKGKWPARRHYDANTVASFYTTKLLDSPGAATERGEPVPTPPAVAVREEHEQSAQMSKVK  
 KHVREKEFTVVIKIDEGGLKLTQKQGLAQKRPFDGEDGALGQQQYLTRLRELQSTSETSLVNLPAKVPASGTS  
 IQPTLGANGAILDSQPIVKKRRRGRNVEGADILFLNRNKPNNHIPGMNPALSYPQPQRIPTDESVPVIVNL  
 KDGTLAGDDAPKRKDLDRWLKEHPGYVEDLGAFIPRVQLHEGRPKQKRHRCRNPNKLDINSLTGEERVQLIN  
 RRNARKVGGAFAPPLKDLRFLKENSEYGVAPWGDVVKQSGFLPEMSFERILTGPPVREVEVSRGRPKSGI  
 AKATTAAVPAGSVPGNPLLANGLLPGVDLTAALQALQNLQNLQSLQVTAGLMGMPAGLSSGGETKNMAAMFP  
 MLFSGMAGLPNLLGMGGLLSKTAESGAEEKRGNDSKELEGKKERTESQSPENGGERCVPGPSSTSSSTAALSSA  
 AAAKPIALNPLLLSNILYPGMLLTPGLNLHLPTLSQSNADFVQKNKSDDLSSKKSVEIKEENSRVRDQEEKGG  
 TEPSPLENSTDEGSERASSGSDSSSSSESDSDSSNED\*

SDFHLQAMIQSAGKLVLDKLLPKMKAGGHKVLIFSQMVRCLDILEDYLIHKRYLYERIDGRVRGNLRQAAID  
RFSKPDSDRFVLLCTRAGGLGINLTAADTCIIFDSWNPQNDLQAQARCHRIGQNKAVKVYRLVTRNSYERE  
MFDASLKLGLDKAVLQSMSGRDSNVSGIQQLSKKEIEDLLRRGAYGAIMEEEDGSKFCEEDIDQILLRRTK  
TITIESEGRGSTFAKASFVAGNRTDISLDDPNFWQKAKKAELDIDTISGRNSLVIDTPRIRKQTRPFSATK  
DELAELSEAESEGEKPKLRRPCDRSGGYGRTECFRVEKNLLVYGWRWREILSHGRFKRQLNEHDVEVICRA  
LLAYCLIHRYGDEKIKGFIWDLITPTEDGQTRQLNHLGLSAPVPRGRKGKVKQTSSFDIQKAEWLRYKYNP  
EQLLQDEGYKHKHHCNKVLLRVRMLYYLKQEVIGNESQKVFVDGVDASDIDVWVPEPDHSEVPAAWWDFDAD  
KSLLIQVFKHGYEKYNTIRADPALCFLEVRGKPDVKAVAAEQRANDYMDGDVEDPEYKPAIAFKDDIEDDVS  
SPGDLVIADGEGQLMEEDKVYWPSPALTTTLRRLITAYQRTNKNRHIQQMQPTFSLPANAMQPLYEEATLNP  
KMAAKIERQQRWTRREEADFYRVVSTFGVVFDPDRGQFDWTKFRALARLHKKTDNSLEKYLCAFMSCRRVCR  
LPSKEELVDPNIFIQPIITEERASRTLYRIELLRKVREQALRHPQLFERLKLCHPNPDLPIWWECSHHRDLI  
GAAKHGVSRTDYHILRDPELSFMARQNYNQSKAAHSRTSAPLLQQYVALSASPLTSLPRLLAGKGTLLDEM  
KVKSESLTEEPQSSEEEESMSSMETRTRVKSEPVSPKNGVLSQATGDQKSGGKSETDRRMVAARTEPLTPNPAS  
KKPRVHKRGSQSSSDSDSARSSCSSRSSSSSSSSSSSSSSSHSRSGSSSSSSSSSSSSSSSSSSSSSSSSSSSS  
SSSEESDSEEDVQKREGTPHRKAYDEESVASLSTTQDETQDSFQANNGTPESAYLLQGGYMLAASYPKDRVM  
INRLDSICQTVLKGKWPARRHYDANTVASFYTTKLLDSPAATERGEPVPTPPAVAVREEHEQSAQMSKEG  
GLKLTQKQGLAQKRPFDGEDGALGQQYLTRLRELQSTSETSLVNLPKAVPASGTSIQPTLGGANGAIIQSQP  
IVKRRRGRNRNVEGADILFLNRNKPENHIPTGMNPALSYQPQRIPDTESPVPVINLKDGTLAGDDAPKRKD  
LDRWLKEHPGYVEDLGAFIQVQLHEGRPKQKRHRCRNPNKLDINSLTGEERVQLINRRNARKVGGAFAPPLK  
DLCRFLKENSEYGVAPWGDVVKQSGFLPESMFERILTGPVREEVSRGRPKSGIAKATTAAVPAGSVPG  
NPLLANGLLPGVDLTAQALQQLQNLQSLQVQTAGLMGPAGLSSGGETKNMAAMPMLFSGMAGLPNLLGMG  
GLLSKTAESGAEKRGNDKESLEGGKERTESQSPENGGERCVPSPSTSSSTAALSSAAAAPIALNPLLLSNI  
LYPGMLLTPLNLHLPTLSQSNAFDVQKNKSDLLDSSKSVEIKEENSRVRDQEEKGGTEPSPLNENSTDEGSE  
RASSGSDSSSSSESDSSSNED\*

>rs33455121\_ENSMUSP00000147407\_c.5305:G>A\_p.G1769E  
ENSMUST00000209203.2|Chd9-203|ENSMUSG00000056608|+|chr8:g.91753314:G>A  
MTDPMDDFFDDANLFGETLEGLSDDTFVQPGVSLVDELNLGAEFEPLHIDSLNHVQGTPTHQKMADFEQLSQ  
FDSMKFHPVNVQSFQSPVEHVLSPHSQFNCSPIHPPNPNGLFQDVADGSPMWHQTATGLANQNGSPFHQPGH  
SHSLHQNKSFVAHPDFALFQASEHQTCSSLSHQSRNSLNPGQNSLGQAKNFLDANVSGAHRVNVNHLATAP  
SSQQTLPVQFSPTANPPAHFLKCSHQEGNYNRPSMSTSCSVNSQFPSSHYSFSSGHVSPSSLLQSSAGLA  
PGHTNQALSDFAGSNSFSPHRGMKQEPQTHLLNPTPSLNSNFIQILHSSHPQGNYSNSKLSPVHMFDPVDA  
GPPVGHFNDAETNGFSSLEENLLHHVDSHAEPFAGLDPEDLLEGLLPQFDESFPQDQNSNHVLDHDLDRQF  
TSHLVSRPSDMAQTQLQYQARGWPSPLSTNHQHLHSRNLCLQRQPPSSKKSDBGSTYTKLQNTQVRVMSEKK  
PRKRVESESKQEKANRIISEAIARAKERGERNIPRVMSPENFPASVEGKEEKGRMRMKSPPKDRDNKPKTY  
SKLKEKTKIKGLIITLGGKHKRRNESSEDELSDAEQRSQHTFKEQHSQKRRSNRQIKRKKYAEADAEKGQSEEEV  
KGSRLVRKRNAPPGEQPLQLFVENPSEEDAAIVDKILACRTVKKEVSPGVMLDIEEFFVKYKNSYLHCEWA  
TEQQLLKDKRIQKIKRFLRQAQRAHFLADMEEPFNPDYVEVDRIEVSFCEDKDTGESVIYYLVKWCSLP  
YEDSTWELKEDVDLAKIEEFEQLQASRPDTRHLDRPPSNIWKKIEQSREYKNGNQLREYQLEGLNWLFFNWN  
RRNCILADEMGLGKTIQSITFLYEILLTGIRGFLLIAPLSTIANWEREFRTWTDINVVVYHGSLSIRQMIQQ  
YEMYFRDSQGRIRGAYRFQAIITTFEMILGGCGELNAIDWRCVIIDEAHRLKNKNCKLLEGLKLMNLEHKVL  
LTGTPLQNTVEELFSLHFLPLRFPSESTFMQEFGLKTEEQVQKLQAILKPMMLRRLKEDVEKKLAPKEET  
IEVELTNIQKKYYRAILEKNFSFLSKGAGQTNVPLNVTMMELRKCCHNPHYLIKGAEEKILGEFRDTPNPSA  
SDFHLQAMIQSAGKLVLDKLLPKMKAGGHKVLIFSQMVRCLDILEDYLIHKRYLYERIDGRVRGNLRQAAID  
RFSKPDSDRFVLLCTRAGGLGINLTAADTCIIFDSWNPQNDLQAQARCHRIGQNKAVKVYRLVTRNSYERE  
MFDASLKLGLDKAVLQSMSGRDSNVSGIQQLSKKEIEDLLRRGAYGAIMEEEDGSKFCEEDIDQILLRRTK  
TITIESEGRGSTFAKASFVAGNRTDISLDDPNFWQKAKKAELDIDTISGRNSLVIDTPRIRKQTRPFSATK  
DELAELSEAESEGEKPKLRRPCDRSGGYGRTECFRVEKNLLVYGWRWREILSHGRFKRQLNEHDVEVICRA  
LLAYCLIHRYGDEKIKGFIWDLITPTEDGQTRQLNHLGLSAPVPRGRKGKVKQTSSFDIQKAEWLRYKYNP  
EQLLQDEGYKHKHHCNKVLLRVRMLYYLKQEVIGNESQKVFVDGVDASDIDVWVPEPDHSEVPAAWWDFDAD  
KSLLIQVFKHGYEKYNTIRADPALCFLEVRGKPDVKAVAAEQRANDYMDGDVEDPEYKPAIAFKDDIEDDVS  
SPGDLVIADGEGQLMEEDKVYWPSPALTTTLRRLITAYQRTNKNRHIQQMQPTFSLPANAMQPLYEEATLNP  
KMAAKIERQQRIGRSKYFYSTNHRGTCF\*

>rs33455121\_ENSMUSP00000148088\_c.5305:G>A\_p.G1769E  
ENSMUST00000209423.2|Chd9-205|ENSMUSG00000056608|+|chr8:g.91753314:G>A  
MTDPMDDFFDDANLFGETLEGLSDDTFVQPGVSLVDELNLGAEFEPLHIDSLNHVQGTPTHQKMADFEQLSQ  
FDSMKFHPVNVQSFQSPVEHVLSPHSQFNCSPIHPPNPNGLFQDVADGSPMWHQTATGLANQNGSPFHQPGH  
SHSLHQNKSFVAHPDFALFQASEHQTCSSLSHQSRNSLNPGQNSLGQAKNFLDANVSGAHRVNVNHLATAP  
SSQQTLPVQFSPTANPPAHFLKCSHQEGNYNRPSMSTSCSVNSQFPSSHYSFSSGHVSPSSLLQSSAGLA

PGHTNQALSDFAGSNSFSPHRGMKQEPTQHLLNPTPSLNSNNFQILHSSHPQGNYSNSKLSPVHMNFPDPVDA  
 GPPVGHFNDHAETNGFSSLEENLLHHVDSHAEPFAGLDPEDLLQEGLLPQFDES PFGQDNSNHVLDHDLDRQF  
 TSHLVS RPSDMAQTQLQYQARGWPSPLSTNHQHLSRNLHCLQRQPSSSKSDGSGTYTKLQNTQVRVMSEKK  
 PRKRVESESKQEKANRIISEAIARAKERGERNIPRVMSPENFSPASVEGKKEKRGRMRMKS KPKDRDNKKPKTY  
 SKLKEKTKIGKLIITLGGKHKRRNESSELSDAEQRSQHTFKEQHSQKRRSNRQIKRKKYAEDAEGKQSEEEV  
 KGSLRVKRN SAPPPEQPLQLFVENPSEEDAAIVDKILACRTVKKEVSPGVMLDIEEFFVKYKNYSYLHCEWA  
 TEQQLLKDKRIQQKIKRFLRQAQRAHFLADMEEEFPNDYVEVDRILEV SFCEDKDTGESVIYLVKWC SLP  
 YEDSTWELKEDVDLAKIEEFELQASRPDTRHLDRPPSNIWKKIEQSREYKNGNQLREYQLEGLNWL LFNWYN  
 RRNCILADEMGLGKTIQSITFLYEILLTGIRGPFLLIAPLSTIANWEREFRTWTDINVVVYHGSLSRQMIQQ  
 YEMYFRDSQGRIRGAYRFQAIITTFEMILGGCGELNAIDWRCVIIDEAHRLKNKNCKLLEGLKLMNLEHKVL  
 LTGTPLQNTVEELFSLHFLPLRFPSESTFMQEFGLDTEEQVQLQAILKPMMLRRLKEDVEKKLAPKEET  
 IEVELTNIQKYYRAILEKNFSLSKGAGQTNVPLNVTMMELRKC CNHPYLIKGAEEKILGEFRD TYNPSA  
 SDFHLQAMIQSAGKLVLDKLLPKMKAGGHKVLIFSQMVRCLDILEDYLIHKRYLYERIDGRVRGNLRQA AID  
 RFSKPDSDRFVLLCTRAGGLGINLTAADTCIIFDSDWNPQNDLQAQARCHRIGQNKAVKVYRLVTRNSYERE  
 MFDRASLKLGLDKAVLQSMSGRDSNVSGIQQLSKKEIEDLLRRGAYGAIMEEEDGSKFCEEDIDQILLRRTK  
 TITIESEGRGSTFAKASFVAGNRTDISLDDPNFWQKAKKAELDIDTISGRNSLVIDTPRIRKQTRPFSATK  
 DELAELSEASEGEKPKLRRPCDRSGGYGRTECFRVEKNLLVYWGWRWEILSHGRFKRQLNEHDVEVICRA  
 LLAYCLIHRYGDEKIKGFIWDLITPTEDGQTRRELQNHGLSAPVPRGRKGGKVKTKTSSFDIQKAEWLRKYNP  
 EQLLQDEGYKHKHHCNKVLLRVRMLYLLKQEVIGNESQKVFVDGVDASDIDVWVPEPDHSEVPAAWDFDAD  
 KSLLIGVFKHGYEKYNTIRADPALCFLEVRGKPD DKAVAAEQRANDYMDGDVEDPEYKPAPIFKDDIEDDVS  
 SPGLDVIADGEGQLMEEDKVYWP T PSALTTRLRRLITAYQRTNKNRHIQQMQPTFSLPANAMQPLYEATLNP  
 KMAAKIERQQRWTRREEADFYRVVSTFGVVFDPDRGQFDWTKFRALARLHKKTDNSLEKYLCAFMSCRRVCR  
 LPSKEELVDPNIFIQPI TEERASRTLYRIELLRKVREQALRHPQLFERLKLCHPNPDLPIWWECSHHRDILLI  
 GAAKHGVSRTDYHILRDPELS FMAAQRNYNQSKAAHSRTSAPLLQQYQVALSASPLTSLPRLLGAKGTLLEDM  
 KVKSESLTEEPQSSEESMSMETRTRVKSEPVSPKNGVLSQATGDQKSGGKSETDRRMVAARTEPLTPNPAS  
 KKPRVHKRDSQSSSDSDSARS SCSSSSSSSSSSSSSSSSSSSSSSSSSSSSSSSSSSSSSSSSSSSSSSSSSS  
 SSSEESDSEEDVQREGTPHRKAYDEESVASLSTTQDETQDSFQANNGTPE SAYLLQGGYMLAASYWPKDRVM  
 INRLDSICQTVLKGKWP SARRHYDANTVASFYTTKLLDSPAATERGEPVPTPPAVAVREEHEQSAQMSKVK  
 KHVREKEFTVKIKDEGGLKLT FQKQGLAQKRPFDGEDGALGQQQYLTRLRELQSTSETSLVNLPKAVPASGTS  
 IQPTLGANGA ILDSQPIVKKRRRRRNVGADILFLNRNKPNNHIPTGMNPALSYPPQRI PDTESPVPVINL  
 KDGTRLAGDDAPKRKDLDRWLKEHPGYVEDLGAFIPRVQLHEGRPKQRHRRCRNPKNLDINSLTGEERVQLIN  
 RRNARKVGGAFAPPLKDLCRFLKENSEYGVAPWGDVVKQSGFLPE SMFERILTGPVVREEVSRGRPKSGI  
 AKATTA AAVPAGSVPGNPLL ANGLLPVLDLALQALQNLQNLQSLQV TAGL MGMPAGLSSGGETKNMAAMFP  
 MLFSGMAGLPNLLGMGGLLSKTAESGAEEKRGNDSKELEGKERTESQSPENGGERCVPGPSPTSSTAALSSA  
 AAAKPIALNPLLLSNILYPGMLLTPGLNLHLPTLSQSNADFVQKNKSDDLDSKKSVEIKEENS RVRDQEEKGG  
 TEPSPLNENSTDEGSERASSGSDSSSSSESDSSNED\*  
 >rs33455121\_ENSMUSP00000105243\_c.5305:G>A\_p.G1769E  
 ENSMUST00000109614.9|Chd9-202|ENSMUSG00000056608|+|chr8:g.91753314:G>A  
 MTDPMDDFFDDANLFGETLEGLSDDTFVQPGPVSLVDELNLGAEFEPLHIDSLNHVQGTPTHQKMA DFEQLSQ  
 FDSMKFHPVNQSFSGSPVEHVLSPHSQFNCSPIHPPNPNGLFQDVA DGS PMWGHQTATGLANQNGSPFHQPGH  
 SHSLHQNKSFVAHPDFALFQASEHQTQCSLHSQQSRNLNPGQNSLGQAKNFLDANVSGAHRVNVNHLATAP  
 SSQQTLPVQFSPTANPPAHFLKCSSHQEGNYNRPSMSTCSVSN SQFP SHYSFSSGHVSPSSLLQSSAGLA  
 PGHTNQALSDFAGSNSFSPHRGMKQEPTQHLLNPTPSLNSNNFQILHSSHPQGNYSNSKLSPVHMNFPDPVDA  
 GPPVGHFNDHAETNGFSSLEENLLHHVDSHAEPFAGLDPEDLLQEGLLPQFDES PFGQDNSNHVLDHDLDRQF  
 TSHLVS RPSDMAQTQLQYQARGWPSPLSTNHQHLSRNLHCLQRQPSSSKSDGSGTYTKLQNTQVRVMSEKK  
 PRKRVESESKQEKANRIISEAIARAKERGERNIPRVMSPENFSPASVEGKKEKRGRMRMKS KPKDRDNKKPKTY  
 SKLKEKTKIGKLIITLGGKHKRRNESSELSDAEQRSQHTFKEQHSQKRRSNRQIKRKKYAEDAEGKQSEEEV  
 KGSLRVKRN SAPPPEQPLQLFVENPSEEDAAIVDKILACRTVKKEVSPGVMLDIEEFFVKYKNYSYLHCEWA  
 TEQQLLKDKRIQQKIKRFLRQAQRAHFLADMEEEFPNDYVEVDRILEV SFCEDKDTGESVIYLVKWC SLP  
 YEDSTWELKEDVDLAKIEEFELQASRPDTRHLDRPPSNIWKKIEQSREYKNGNQLREYQLEGLNWL LFNWYN  
 RRNCILADEMGLGKTIQSITFLYEILLTGIRGPFLLIAPLSTIANWEREFRTWTDINVVVYHGSLSRQMIQQ  
 YEMYFRDSQGRIRGAYRFQAIITTFEMILGGCGELNAIDWRCVIIDEAHRLKNKNCKLLEGLKLMNLEHKVL  
 LTGTPLQNTVEELFSLHFLPLRFPSESTFMQEFGLDTEEQVQLQAILKPMMLRRLKEDVEKKLAPKEET  
 IEVELTNIQKYYRAILEKNFSLSKGAGQTNVPLNVTMMELRKC CNHPYLIKGAEEKILGEFRD TYNPSA  
 SDFHLQAMIQSAGKLVLDKLLPKMKAGGHKVLIFSQMVRCLDILEDYLIHKRYLYERIDGRVRGNLRQA AID  
 RFSKPDSDRFVLLCTRAGGLGINLTAADTCIIFDSDWNPQNDLQAQARCHRIGQNKAVKVYRLVTRNSYERE  
 MFDRASLKLGLDKAVLQSMSGRDSNVSGIQQLSKKEIEDLLRRGAYGAIMEEEDGSKFCEEDIDQILLRRTK  
 TITIESEGRGSTFAKASFVAGNRTDISLDDPNFWQKAKKAELDIDTISGRNSLVIDTPRIRKQTRPFSATK

DELAELSEAESEGEKPKLRRPCDRSGGYGRTECFRVEKNLLVYGWGRWREILSHGRFKRQLNEHDVEVICRA
LLAYCLIHRYGDEKIKGFIWDLITPTEDGQTRELQNHGLSAPVPRGRKGKKVKTQTSSFDIQKAEWLRKYNP
EQLLQDEGYKHKVHKHNCNKKVLLRVRMLYYLQKQEVIGNESQKVFQDGDASDIDVWVPEPDHSEVPAAWWDFDAD
KSLLIQVFKHGYEKYNTIRADPALCFLEVRVKGKPPDDKAVAAEQRANDYMDGDVEDPEYKPAPAIKDDIEDDVS
SPGDLVIADGEGQLMEEDKVYWPPTPSALTTTRLRLITAYQRTNKNRHIQMQPTFSLPANAMQPLYEEATLNP
KMAAKIERQQRWTRREEADFYRVVSTFGVVDFDPRGQFDWTKFRALARLHKKTDNSLEKYLCAFMSCRRVCR
LPSKEELVDPNIFIQPITEERASRTLYRIELLRKQVREQRALRHPQLFERLKLCHPNPDLPIWECGSHDRDLI
GAAKHGVSRTDYHILRDELSFMAAQRYNYNSKAAHSRTSAPLLQYQVALSASPLTSLPRLDAGKTLLEDM
KVKSESLTEEPQSSEESMSMETRTRVKSEPVSPKNGVLSQATGDQKSGGKSETDRRMVAARTEPLTPNPAS
KKPRVHKRGQSSESDSDSARSSSCSSRSSSSSSSSSSSSSSSHRSRSGSSSSSSSSSSSSSSSSSSSSSSSS
SSSEESDSEEDVQKREGTPHRKAYDEESVASLSTTQDETQDSFQANNGTPESAYLLQGGYMLAASYWPKDRVM
INRLDSICQTVLKGWKPSARRHYDANTVASFYTTKLLDSPGAATERGEPVPTPPAVAVREEHEQSAQMSKVK
KHVREKEFTVVIKIDEGGLKLTQKQLAQKRPFDGEDGALGQQQYLTRLRELQSTSETSLVNLPKAVPASGTS
IQPTLGANGAILDSQPIVKKRRGRRRNVEGADILFLNRNKPNNHPTGMNPALSYPQQRIPDTESVFPVINL
KDGTRLGDDAPKRKDLRDLRDLRDLRDLRDLRDLRDLRDLRDLRDLRDLRDLRDLRDLRDLRDLRDLRDLR
RRNARKVGGAFAPPLKDLCRFLKENSEYGVAPWGDVVKQSGFLPESMFERILTGPPVREEVSRGRPKSGI
AKATTAAVPAGSVPGNPLLANGLLPGVDLTAALQALQNLQNLQSLQVQTAGLMGMPAGLSSGGETKNMAAMFP
MLFSGMAGLPNLLMGGLLSKTAESGAEKRGNDKELEGKERTESQSPENGGERCVPSPSTSTAALSSA
AAAKPIALNPLLLSNILYPGMLLTPGLNLHLPPLTSSNSAFDVQKNSDDLDSKSKVEIKEENSVRDQEEKGG
TEPSPLNENSTDEGSERASSGSDSSSSSESDSDSSNE\*

>rs47052211\_ENSMUSP00000046356\_c.6103:G>A\_p.G2035D

ENSMUST00000048665.8|Chd9-201|ENSMUSG00000056608|+|chr8:g.91760360:G>A

MTDPMDFFDANLFGETLEGLSDDTFVQGPVSLVDELNLGAEFEPLHIDSLNHVQGTPTHQKMAFFEQLSQ
FDSMKFHFPVNSQFSGSPVEHVLSPHSQFNCSPHPPNQPNGLFQDVADGSPMWHGQATATGLANQNGSPFHQPGH
SHSLHQNKSFVAHPDFALFQASEHQTCSSLHSQPSRNLNPGQNSLGQAKNFDANVSGAHRVNVNHLATAP
SSQQLPVQFSPANTPPAHFLKCSHSHQEGNYNRPSSMTSCSVNSQQFSPSHYSFSSGHVSSPSSLQSSAGLA
PGHTNQALSDFPASSSEESMSMETRTRVKSEPVSPKNGVLSQATGDQKSGGKSETDRRMVAARTEPLTPNPAS
GPPVGHFNDAETNGFSSLEENLLHHVDSHAEPFAGLDPEDLLQEGLLPQFDDESFPQGDNNSHVLHDHDLDRQF
TSHLVSRPSDMAQTQLQYQARGWPSPLSTNHQHLHSRNLCLQRPSSKKSQSGTYTKLQNTQVRVMSEKK
PRKRVESESKQEKANRIIESEIARAKERGERNIPRVMSPENFPASVEGKEEKRGRMMSKPKDRDNKKPKTY
SKLKEKTKIKGLIITLGGKHKRRNESSELSDAEQRSQHTFKEQHSQKRNSNRQIKRKYAEDAEGKQSEEEV
KGSILRVKRNSAPPPEQPLQLFVENPSEEDAAIVDKILACRTVKKEVSPGVMLDIEEFFVKYKNYSYLHCEWA
TEQQLLKDKRIQKKIKRFLKRAQRAHFLADMEEEFPNPDYVEVDRILEVSFCEDKDTGESVIYLVKWSLP
YEDSTWELKEDVDLAKIEEFELQASRPDRHLDRPPSNIWKKIEQSREYKNGNQLEQYQLLEGLNWLFLNWN
RRNCILADEMGLKTIQSIITFLYEILLTGIRGPFLLIAPLSTIANWEREFRTWTDINVVVYHGSLISRQMIQQ
YEMIFRDSQGRILRGAYRFAQIITTFEMILGGCGELNAIDWRCVIIDEAHRLKKNCKLLEGLKMLNLEHKVL
LTGTPLQNTVEELFSLHFLEPLRFPSESTFMQEFGLDTEEQVKLQAILKPMMLRRLKEDVEKLLAPKEET
IEVELTNIQKKYRRAILEKNFSFLSKGAGQTNVNLVNTMMELRKCCHPYLIKGAEEKILGEFRDYNPSA
SDFHLQAMIQSAGKLVLDKLLPKMKAGGHKVLIFSQMVRLDILEDYLIHKRYLYERIDGRVGRNLRQAAID
RFSKPDSDRFVLLCTRAGGLGINLTAADTCIIFDSWDNPNQNDLQAQARCHRIGQNKAVKYLTVTRNSYERE
MFDRASLKLGLDKAVLQSMGRDSNVSGIQQLSKKEIEDLLRGGAYGAIMEEEDGSKFCEEDIDQILLRRTK
TITIESEGRGSTFAKASFVAGNRDIDISLDDPNFWQKAKKAELDIDTISGRNSLVIDTPIRIRKQTRPFSATK
DELAELSEAESEGEKPKLRRPCDRSGGYGRTECFRVEKNLLVYGWGRWREILSHGRFKRQLNEHDVEVICRA
LLAYCLIHRYGDEKIKGFIWDLITPTEDGQTRELQNHGLSAPVPRGRKGKKVKTQTSSFDIQKAEWLRKYNP
EQLLQDEGYKHKVHKHNCNKKVLLRVRMLYYLQKQEVIGNESQKVFQDGDASDIDVWVPEPDHSEVPAAWWDFDAD
KSLLIQVFKHGYEKYNTIRADPALCFLEVRVKGKPPDDKAVAAEQRANDYMDGDVEDPEYKPAPAIKDDIEDDVS
SPGDLVIADGEGQLMEEDKVYWPPTPSALTTTRLRLITAYQRTNKNRHIQMQPTFSLPANAMQPLYEEATLNP
KMAAKIERQQRWTRREEADFYRVVSTFGVVDFDPRGQFDWTKFRALARLHKKTDNSLEKYLCAFMSCRRVCR
LPSKEELVDPNIFIQPITEERASRTLYRIELLRKQVREQRALRHPQLFERLKLCHPNPDLPIWECGSHDRDLI
GAAKHGVSRTDYHILRDELSFMAAQRYNYNSKAAHSRTSAPLLQYQVALSASPLTSLPRLDAGKTLLEDM
KVKSESLTEEPQSSEESMSMETRTRVKSEPVSPKNGVLSQATGDQKSGGKSETDRRMVAARTEPLTPNPAS
KKPRVHKRGQSSESDSDSARSSSCSSRSSSSSSSSSSSSSHRSRSGSSSSSSSSSSSSSSSSSSSSSSSS
SSSEESDSEEDVQKREGTPHRKAYDEESVASLSTTQDETQDSFQANNGTPESAYLLQGGYMLAASYWPKDRVM
INRLDSICQTVLKGWKPSARRHYDANTVASFYTTKLLDSPGAATERGEPVPTPPAVAVREEHEQSAQMSKVK
GLKLTFFQKQLAQKRPFDGEDGALGQQQYLTRLRELQSTSETSLVNLPKAVPASGTSIQPTLGANGAILDSQP
IVKKRRGRRRNVEGADILFLNRNKPNNHPTGMNPALSYPQQRIPDTESVFPVINLKDGTLAGDDAPKRK
DLRDLRDLRDLRDLRDLRDLRDLRDLRDLRDLRDLRDLRDLRDLRDLRDLRDLRDLRDLRDLRDLRDLR
DLRDLRDLRDLRDLRDLRDLRDLRDLRDLRDLRDLRDLRDLRDLRDLRDLRDLRDLRDLRDLRDLRDLR
DLRDLRDLRDLRDLRDLRDLRDLRDLRDLRDLRDLRDLRDLRDLRDLRDLRDLRDLRDLRDLRDLRDLR

NPLLANGLLPGVDLTALQALQQNLQNLQSLQVDTAGLMGMPAGLSSGGGETKNMAAMFPMLFSGMAGLPNLLGMG  
GLLSKTAESGAEKRGNDSSKELEGKKERTESQSPENGGERCVPGPSSTSSSTAALSSAAAAPIALNPLLLSNI  
LYPGMLLTPGLNLHLPTLSQSNAFDVQKNKSDDLSSKSVEIKEENSRVRDQEEKGGTEPSPLENENSTDEGSE  
RASSGSDSSSSSSSEDSDSSNED\*

>rs47052211\_ENSMUSP00000148088\_c.6103:G>A\_p.G2035D

ENSMUST00000209423.2|Chd9-205|ENSMUSG00000056608|+|chr8:g.91760360:G>A  
MTDPMDDFFDDANLFGETLEGLSDDTFVQPGPVSLVDELNLGAEEFELHIDSLNHVQGTPTHQKMADFEQLSQ  
FDSMKFHPVNVQSFVGHVLSPHSQFNCSPIHPPNQPNGLFQDVADGSPMVGHTATGLANQNGSPFHQP  
SHSLHQNKSFVAHPDFALFQASEHQTCCSSLHSQQSRNLNPGQNSLGQAKNFLDANVSGAHRVNVNHLATAP  
SSQQLTPVQFSPTANPPAHFLKCSHQEGNYNRPSMTSCSVNSQQFP SHYFSSGHVSPSSLLQSSAGLA  
PGHTNQALSDFAGSNSFSPHRGMKQEPHQHLLNPTPSLNSNFIQLHSSHPQGNYSNSKLSPVHMFNFPD  
GPPVGHFNDHAETNGFSSLEENLLHHVDSHAEPFAGLDPEDLLQEGLLPQFDESPPFGQDNSNHVLDHDLDRQF  
TSHLVSRPSDMAQTQLQYQARGWPSPLSTNHQHLHSRNLCLQRQPSSSKKSDGSGTYTKLQNTQVRVMSEKK  
PRKRVESESKQEKANRIISEAIARAKERGERNIPRVMSPENFPASVEGKKEKRGRMRKSKPKDRDNKKPKTY  
SKLKEKTKIGKLIITLGGKHKRRNESSELSDAEQRSQHTFKEQHSQKRRSNRQIKRKKYAEDAEGKQSEEEV  
KGLSRVKNRSAPPPGEQPLQLFVENPSEEDAAIVDKILACRTVKKEVSPGVMLDIEEFFVKYKNYSYLHCEWA  
TEQQLLKDRIQKIKRFLRQAQRAHFLADMEEPFNPDYVEVDRILEVDFCEDKDTGESVIYLVKWCSLP  
YEDSTWELKEDVDLAKIEEFELQASRPDRHLDRPPSNLWKKIEQSREYKNGNQLREYQLEGLNLLFNWYN  
RRNCILADEMGLGKTIQSITFLYEILLTGIRGPFLLIAPLSTIANWEREFRTWTDINVVVYHGSLSRQMIQQ  
YEMYFRDSQGRIRGAYRFQAIITTFEMILGGCGELNAIDWRCVIIDEAHRLKKNCKLLEGLKLMNLEHKVL  
LTGTPLQNTVEELFSLHFLRPFSESTFMQEFGLDTEEQVQKQAI LKPMMLRRLKEDVEKKLAPKEET  
IEVELTNIQKKYRAILEKNFSFLSKGAGQTNVPLNVTMMELRKCENHPYLIKGAEEKILGEFRDTPNPSA  
SDFHLQAMIQSAGKLVLDKLLPKMKAGGHKVLIFSQMVRCLDILEDYLIHKRYLYERIDGRVGNLRQAAID  
RFSKPDSDRFVLLCTRAGGLGINLTAADTCIIFDSDWNPQNDLQAQARCHRIGQNKAVKVRVLRVTRNSYERE  
MFDRAKLGKLDKAVLQSMGRDSNVSGIQQLSKKEIEDLLRRGAYGAIMEEDEGSKFCEEDIDQILLRRTK  
TITIESEGRGSTFAKASVFASGNRTDISLDPNFQWAKKAELDITISGRNSLVIDTPRIRKQTRPFSATK  
DELAELSEAESEGEKPKLRRPCDRSGGYRTRHLDRECFRVEKNLLVYGWRWREILSHGRFKRQLNEHDVEVICRA  
LLAYCLIHRYGDEKIKGFIWDLITPTEDGQTRRELQNLHGLSAPVPRGRKGGKVKQTSSFDIQKAEWLRYNP  
EQLLQDEGYKHHVHHCNKVLLRVRMLYLLKQEVIGNESQKVFQVGDASDIDVWVPEPDHSEVPAAWDFDAD  
KSLLIIGVFKHGYEKYNTIRADPALCFLERVGKPDKAVAAEQRANDYMDGDVEDPEYKPAPAIKDDIEDDVS  
SPGLDVIADGEGQLMEGDKVYWPSPALTTLRRLITAYQRTNKNRHIQQMQPTFSLPANAMQPLYEATLNP  
KMAAKIERQQRWTRREADFYRVVSTFGVVFDPDRGQFDWTKFRALARLHKKTDNSLEKYLCAFMSCRRVCR  
LPSKEELVDPNIFIQPI TEERASRTLYRIELLRKVREQALRHPQLFERLKLCHPNPDLPIWWECSHHRDILLI  
GAAKHGVSRTDYHILRDPELSFMAAQRNYNQSKAAHSRTSAPLLQQYQVALSASPLTSLPRLLDAKGTLLDEM  
KVKSESLTEEPQSSEESMSMETRTRVKSEPVSPKNGVLSQATGDQKSGGKSETDRRMVAARTEPLTPNPAS  
KKPRVHKRGSDDSDSARSSCSSRSSSSSSSSSSSSSSSHRSRGSSSSSSSSSSSSSSSSSSSSSSSSSSS  
SSSEESDSEEDVQKREGTPHRKAYDEESVASLSTTQDETQDSFQANNGTPESAYLLQGGYMLAASYWPKDRVM  
INRLDSICQTVLKGKWPSARRHYDANTVASFYTTKLLDSPAATERGEPVPTPPAVAVREEHEQSAQMSKVK  
KHVREKEFTVKIKDEGGLKLTQKQGLAQKRPFDGEDGALGQQQYLRRLRELQSTSETSLVNLPAKVPASGTS  
IQPTLGANGAILDSQPIVKKRRRNRNVEGADILFLNRNKPNNHIPTGMNPALSYPQPQRI PDTESVPVIVNL  
KDGTRLAGDDAPKRKDLDRWLKEHPGYVEDLGAFIPRVQLHEGRPKQRHRCRNPKNLDINSLTGEERVQLIN  
RRNARKVGGAFAPPLKDLRCFLKENSEYGVAPWGDVVKQSGFLPESMFERILTGPVVREEVSRGRPKSGI  
AKATTAAVPAGSVPGNPLLANGLLPGVDLTALQALQQNLQNLQSLQVDTAGLMGMPAGLSSGGGETKNMAAMFP  
MLFSGMAGLPNLLGMGGLLSKTAESGAEKRGNDSSKELEGKKERTESQSPENGGERCVPGPSSTSSSTAALSSA  
AAKPIALNPLLLSNIILYPGMLLTPGLNLHLPTLSQSNAFDVQKNKSDDLSSKSVEIKEENSRVRDQEEKGG  
TEPSPLENENSTDEGSERASSGSDSSSSSSSEDSDSSNED\*

>rs47052211\_ENSMUSP00000105243\_c.6103:G>A\_p.G2035D

ENSMUST00000109614.9|Chd9-202|ENSMUSG00000056608|+|chr8:g.91760360:G>A  
MTDPMDDFFDDANLFGETLEGLSDDTFVQPGPVSLVDELNLGAEEFELHIDSLNHVQGTPTHQKMADFEQLSQ  
FDSMKFHPVNVQSFVGHVLSPHSQFNCSPIHPPNQPNGLFQDVADGSPMVGHTATGLANQNGSPFHQP  
SHSLHQNKSFVAHPDFALFQASEHQTCCSSLHSQQSRNLNPGQNSLGQAKNFLDANVSGAHRVNVNHLATAP  
SSQQLTPVQFSPTANPPAHFLKCSHQEGNYNRPSMTSCSVNSQQFP SHYFSSGHVSPSSLLQSSAGLA  
PGHTNQALSDFAGSNSFSPHRGMKQEPHQHLLNPTPSLNSNFIQLHSSHPQGNYSNSKLSPVHMFNFPD  
GPPVGHFNDHAETNGFSSLEENLLHHVDSHAEPFAGLDPEDLLQEGLLPQFDESPPFGQDNSNHVLDHDLDRQF  
TSHLVSRPSDMAQTQLQYQARGWPSPLSTNHQHLHSRNLCLQRQPSSSKKSDGSGTYTKLQNTQVRVMSEKK  
PRKRVESESKQEKANRIISEAIARAKERGERNIPRVMSPENFPASVEGKKEKRGRMRKSKPKDRDNKKPKTY  
SKLKEKTKIGKLIITLGGKHKRRNESSELSDAEQRSQHTFKEQHSQKRRSNRQIKRKKYAEDAEGKQSEEEV  
KGLSRVKNRSAPPPGEQPLQLFVENPSEEDAAIVDKILACRTVKKEVSPGVMLDIEEFFVKYKNYSYLHCEWA

TEQQLLKDKRIQQKIKRFLRQAQRAHFLADMEEEFPNPDYVEVDRI LEVSFCEDKDTGESVIYYLVKWCSLP  
YEDSTWELKEDVDLAKIEEFEQLQASRPDTRHLDRPPSNIWKKIEQSREYKNGNQLREYQLEGLNWLLFNWYN  
RRNCILADEMGLGKTIQSITFLYEILLTGIRGPFLLIAPLSTIANWEREFRTWTDINVVVYHGSLISRQMIQQ  
YEMYFRDSQGRIIRGAYRFQAIITTFEMILGGCGELNAIDWRCVIIDEAHRLKKNCKLLEGLKLMNLEHKVL  
LTGTPLQNTVEELFSLHFLFLEPLRFPESESTFMQEFGLDKTEEQVQKLQAILKPMMLRRLKEDVEKKLAPKEET  
IEVELTNIQKKYYRAILEKNFSFLSKGAGQTNVPLNVTMMELRKCCHNHPYLIKGAEEKILGEFRDYNPSA  
SDFHLQAMIQSAGKLVLDKLLPKMKAGGHKVLIFSQMVRCLDILEDYLIHKRYLYERIDGRVGRNLRQAID  
RFSKPDSDRFVFLCTRAGGLGINLTAADTCIIFDSDWNPQNDLQAQARCHRIGQNKAVKYRLVTRNSYERE  
MFDRASLKLGLDKAVLQSMSGRDSNVSGIQQLSKKEIEDLLRRGAYGAIMEEDEGSKFCEEDIDQILLRRTK  
TITIESEGRGSTFAKASFVAGNRTDISLDDPNFWQKAKKAELDIDTISGRNSLVIDTPRIRKQTRPFSATK  
DELAELSEAESEGEKPKLRRPCDRSGGYGRTECFRVEKNLLVYGWRWREILSHGRFKRQLNEHDVEVICRA  
LLAYCLIHRYGDEKIKGFIWDLITPTEDGQTRRELQNLHGLSAPVPRGRKGGKVKVTQTSSFDIQKAEWLRKYNP  
EQLLQDEGYKHKHHCNKVLLRVRMLYYLQEVIGNESQKVFVDGVDASDIDVWVPEPDHSEVPAAWWDFDAD  
KSLLLIGVFKHGYEKYNTIRADPALCFLERVGKPDKAVAAEQRANDYMDGDVEDPEYKPAPAI FKDDIEDDVS  
SPGDLVIADGEGQLMEGDKVYWP TSPALTTTLRRLITAYQRTNKNRHIQQMQPTFSLPANAMQPLYEEATLNP  
KMAAKIERQQRWTRREADFYRVVSTFGVVFDPDRGQFDWTKFRALARLHKKTDNSLEKYLCAFMSCRRVCR  
LPSKEELVDPNIFIQPI TEERASRTLYRIE LLRKVRQALRHPQLFERLKLCHPNPDLPIWCEGSHDRDLII  
GAAKHGVSRTDYHILRDPFLSMAAQRNYNQSKAAHSRTSAPLLQQYQVALSASPLTSLPRLLDAGTLLDEM  
KVKSESLTEEPQSSEEESSMSMETRTRVKSEPVSPKNGVLSQATGDQKSGGKSETDRRMVAARTEPLTPNPAS  
KKPRVHKRGSQSSSDSDSARSSSSSSSSSSSSSSSSSSSSSSSSSSSSSSSSSSSSSSSSSSSSSSSSSSSSS  
SSSEEDSEEDVQKREGTPHRKAYDEESVASLSTTQDETQDSFQANNGTPESAYLLGGYMLAASYPKDRVM  
INRLDSICQTVLKGKWPARRHYDANTVASFYTTKLLDSPGAATERGEPVPTPPAVAVREEHEQSAQMSKVK  
KHVREKEFTVVIKIDEGGLKLTQKQGLAQKRPFDGEDGALGQQYLTRLRELQSTSETSLVNLKAVPASGTS  
IQPTLGANGAILDSQPIVKKRRRGRNVEGADILFLNRNKPNNHIPTGMNPALSYPQQRIPDTESPVPVNL  
KDGTRLAGDDAPKRKDLDRWLKEHPGYVEDLGAFI PRVQLHEGRPKQKRHRCRNPNKLDINSLTGEERVQLIN  
RRNARKVGGAFAPPLKDLCRFLKENSEYGVAPALQWQDVVQSGFLPEMFERILTGPVREEVSRGRPKSGI  
AKATTAAVPAGSVPGNPLLANGLLPGVDLTAQWALQONLQNLQSLQVTAGLMGMPAGLVSSGGETKNMAAMFP  
MLFSGMAGLPNLLGMGGLLSKTAESGAEEKRGNDSKELEGGKERTESQSPENGGERCVPGPSSTSSSTAALSSA  
AAAKPIALNPLLLSNILYPGMLLTPGLNLHLPTLSQSNADFVQKNKSDDLDSKKSVEIKEENSVRDQEEKGG  
TEPSPLENSTDEGSEERASSGSDSSSSSESDSDSSNED\*  
>rs51312005\_ENSMUSP00000046356\_c.6787:T>C\_p.M2263T  
ENSMUST00000048665.8|Chd9-201|ENSMUSG00000056608|+|chr8:g.91762964:T>C  
MTDPMDFDDANLFGETLEGLSDDTFVQPGPVSLVDELNLGAEFEPLHIDSLNHVQGTPTHQKMADFEQLSQ  
FDSMKFHPVNQSFSGSPVEHVLSPHSQFNCSPIHPPNPNGLFQDQVADGSPMWHQATATGLANQNGSPFHQPGH  
SSSLHQNKSFFVAHPDFALFQASEHQTCSSLSHQSSRSNLNPGQNSLGQAKNFDANVSGAHRVNVNHLATAP  
SSQQTLPVQFSPYANPPAHFLKCSSHQEGNYNRPSPSMTSCSVNSQQFPSSHYSFSSGHVSPSSLLQSLAGLA  
PGHTNQALSDFAGSNSFSPHRGMKQEPQHLNPTPSLNSNNFQILHSSHPQGNYSNSKLSPVHMMNFPDPVDA  
GPPVGHFNDHAETNGFSSLEENLLHHVDSHAEPFAGLDPEDLLQEGLLPQFDESPFGQDNSNHVLDHDLDRQF  
TSHLVSRPSDMAQTQLQYQARGWPSPLSTNHQHLHSRNLCLQRQPSSKKS DSGSYTKLQNTQVRVMSEKK  
PRKRVESESKQEKANRIISEA IARAKERGERNI PRVMS PENFP SASVEGKEEKRRMRMKS KPKDRDNKKPKTY  
SKLKEKTKIGKLIITLGGKHKRRNESSELSDAEQRSQHTFKEQHSQKRRSNRQIKRKKYAEAEAGKQSEEEV  
KGSRLVRKNSAPPPGEQPLQLFVENPSEEDAAIVDKILACRTVKKEVSPGVMLDIEEFFVKYKNYSYLHCEWA  
TEQQLLKDKRIQQKIKRFLRQAQRAHFLADMEEEFPNPDYVEVDRI LEVSFCEDKDTGESVIYYLVKWCSLP  
YEDSTWELKEDVDLAKIEEFEQLQASRPDTRHLDRPPSNIWKKIEQSREYKNGNQLREYQLEGLNWLLFNWYN  
RRNCILADEMGLGKTIQSITFLYEILLTGIRGPFLLIAPLSTIANWEREFRTWTDINVVVYHGSLISRQMIQQ  
YEMYFRDSQGRIIRGAYRFQAIITTFEMILGGCGELNAIDWRCVIIDEAHRLKKNCKLLEGLKLMNLEHKVL  
LTGTPLQNTVEELFSLHFLFLEPLRFPESESTFMQEFGLDKTEEQVQKLQAILKPMMLRRLKEDVEKKLAPKEET  
IEVELTNIQKKYYRAILEKNFSFLSKGAGQTNVPLNVTMMELRKCCHNHPYLIKGAEEKILGEFRDYNPSA  
SDFHLQAMIQSAGKLVLDKLLPKMKAGGHKVLIFSQMVRCLDILEDYLIHKRYLYERIDGRVGRNLRQAID  
RFSKPDSDRFVFLCTRAGGLGINLTAADTCIIFDSDWNPQNDLQAQARCHRIGQNKAVKYRLVTRNSYERE  
MFDRASLKLGLDKAVLQSMSGRDSNVSGIQQLSKKEIEDLLRRGAYGAIMEEDEGSKFCEEDIDQILLRRTK  
TITIESEGRGSTFAKASFVAGNRTDISLDDPNFWQKAKKAELDIDTISGRNSLVIDTPRIRKQTRPFSATK  
DELAELSEAESEGEKPKLRRPCDRSGGYGRTECFRVEKNLLVYGWRWREILSHGRFKRQLNEHDVEVICRA  
LLAYCLIHRYGDEKIKGFIWDLITPTEDGQTRRELQNLHGLSAPVPRGRKGGKVKVTQTSSFDIQKAEWLRKYNP  
EQLLQDEGYKHKHHCNKVLLRVRMLYYLQEVIGNESQKVFVDGVDASDIDVWVPEPDHSEVPAAWWDFDAD  
KSLLLIGVFKHGYEKYNTIRADPALCFLERVGKPDKAVAAEQRANDYMDGDVEDPEYKPAPAI FKDDIEDDVS  
SPGDLVIADGEGQLMEGDKVYWP TSPALTTTLRRLITAYQRTNKNRHIQQMQPTFSLPANAMQPLYEEATLNP  
KMAAKIERQQRWTRREADFYRVVSTFGVVFDPDRGQFDWTKFRALARLHKKTDNSLEKYLCAFMSCRRVCR



LPSKEELVDPNIFIQIPITEERASRTLYRIELLRKRVREQALRHPQLFERLKLCHPNPDLPIWWECEGSHDRDLI  
GAAKHGVSRTDYHILRDPELSFMAAQRNYNQSKAAHSRTSAPLLQQYQVALSASPLTSLPRLGAKGTLLEDM  
KVKSESLTEEPQSSEEEESMSSMETRTRVKSEPVSPKNGVLSQATGDQKSGGKSETDRRMVAARTEPLTPNPAS  
KKPRVHKRGSQSSSDSDSDSARSSCSSRSSSSSSSSSSSSSSSCSHSRSGSSSSSSSSSSSCSSASSSSSSSSSSSSSSSSSSSS  
SSSEESDSEEDVQKREGTPHRKAYDEESVASLSTTQDETQDSFQANNGTPESAYLLQGGYMLAASYWPKDRVT  
INRLDSICQTVLKGKWPSARRHYDANTVASFYTTKLLDSPAATERGEPVPTPPAVAVREEHEQSAQMSKEG  
GLKLTFOKQGLAQKRPFDDGEDGALGQQYLRRLRELQSTSETSLVNLPKAVPASGTSIQPTLGANGAILDSQP  
IVKRRRGRRRNVEGADILFLNRNKPNNHIPGMPNALSYPQPQRIPDTESPVPVNLKDGTRLGDDAPKRKD  
LDRWLKEHPGYVEDLGAFIPRVQLHEGRPKQKRHRCRNPNKLDINSLTGEERVQLINRRNARKVGAFAPPLK  
DLCRFLKENSEYGVAPWGDVVKQSGFLPESMFERILTGPVVREEVSRGRPKSGIAKATTAAVPAGSVPG  
NPLLANGLLPGVDLTALQALQNLQNLQSLQVQTAGLMGMPAGLSSGGETKNMAAMFPMFLSGMAGLPLNLLGMG  
GLLSKTAESGAEKRGNDKELEGKERTESQSPENGGERCVPSPSTSSSTAALSSAAAAPIALNPLLLSNI  
LYPGMLLTPGLNLHLPTLSQSNAFDVQKNKSDDLSDSSKSVEIKEENSRVRDQEEKGGTEPSPLENSTDEGSE  
RASSGSDSSSSSSESDSDSSNED\*

>rs51312005\_ENSMUSP00000148088\_c.6787:T>C\_p.M2263T

ENSMUST00000209423.2|Chd9-205|ENSMUSG00000056608|+|chr8:g.91762964:T>C  
MTDFPMMDFDDANLFGETLEGLSDDTFVQPGPVSLVDELNLGAEEFELHIDSLNHVQGTPTHQKMADEFQLSQ  
FDSMKFHPVNQSFSGSPVEHVLSPHSQFNCSPIHPPNQPNGLFQDQVADGSPMWHQATATGLANQNGSPFHQPGH  
SHSLHQKNSFVAHPDFALFQASEHQTCSSSLHSQQRSNLNPGQNSLGQAKNFLDANVSGAHRVNVNHLATAP  
SSQQTLPVQFSPTANPPAHLKCSHQEGNYNRPSMTSCSVNSQQFSPHYFSSGHVSPSSLLQSSAGLA  
PGHTNQALSDFAGSNSFSPHRGMKQEPHQHLLNPTPSLNSNFIQHSSHPQGNYSNSKLSPVHMFDPFVDA  
GPPVGHFNDHAETNGFSSLEENLHHVDSHAEPFAGLDPEDLLQEGLLPQFDESPFGQDNSNHVLDHDLDRQF  
TSHLVSRSQDMAQTQLQYQARGWSPPLSTNHQHLHSRNHLCLQRQPPSSKKS DGSGTYTKLQNTQVRVMSEKK  
PRKRVESESKQEKANRIISEAIARAKERGERNIPRVMSPENFPASVEGKEEKRRRMKSKPKDRDNKKPKTY  
SKLKEKTKIGKLIITLGGKHKRRNESSELSDAEQRSQHTFKEQHSQKRRSNRQIKRKKYAEADAEKQSEEEV  
KGLRVKRNAPPPGEQPLQLFVENPSEEDAAIVDKILACRTVKKEVSPGVMLDIEEFFVYKNSYLSHCEWA  
TEQQLLKDKRIQKIKRFLKRAHFLADMEEEPFPNDYVEVDRILEVDFCEDKDTGESVIYYLVKWCPSLP  
YEDSTWELKEDVDLAKIEEFEQLQASRPDTRHLDRPPSNIWKKIEQSREYKNGNQLREYQLEGLNWLFFNWN  
RRNCILADEMGLGKTIQSITFLYEILLTGIRGPFLLIAPLSTIANWEREFRTWTNDINVVVYHGSLISRQMIQQ  
YEMYFRDSQGRIRGAYRFQAIITTFEMILGGCGELNAIDWRCVIDEAHLRKNKNCKLLEGLKLMNLEHKVL  
LTGTPLQNTVEELFSLHFLPLRFSESTFMQEFGLKTEEQVQLQAILKPMMLRRLKEDVEKKLAPKEET  
IEVELTNIQKYYRAILEKNFSLSKGAGQTNVNLVNTMMELRCCNHPYLIKGAEEKILGFRDFTYNPSA  
SDFHLQAMIQSAGKLVLDKLLPKMKAGGHKVLIFSQMVRCLDILEDYLIHKRYLYERIDGRVGRNLQAAID  
RFSPKPSDRFVLLCTRAGGLGINLTAADTCIIFDSDWNPQNDLQAQARCHRIGQNKAVKRYLVRTRNSYERE  
MFDRAKLGKLDKAVLQSMGRDSNVSGIQQLSKKIEIDLRRGAYGAIMEEEDGSKFCEEDIDQILLRRTK  
TITIESEGRGSTFAKASVAGNRDTSLDDPNFVQKWAKKAELDIDTISGRNSLVIDTPRIRKQTRPFSAK  
DELAELSEAESEGEKPKLRPCDRSGGYGRTECFRVEKNLLVYGWRWREILSHGRFKRQLNEHDEVVICRA  
LLAYCLIHRYGDEKIKGFIWDLITPTEDGQTRQLNHLGLSAPVPRGRKGKVKQTSSFDIQAELRKYNP  
EQLLQDEGYKHHKHCNKVLLRVRMLYLLKQEVIGNESQKVFQDGDASDIDVVVPEPDHSEVPAAWDFDAD  
KSLLIQVFKHGYEKYNTIRADPALCFLELVGKPDKAVAAEQRANDYMDGDVEDPEYKPAFAIKDDIEDDVS  
SPGDLVIADGEGQLMEGDKVYWPSPALTRRLRLITAYQRTNKNRHIQQMQPTFSLPANAMQPLYEATLNP  
KMAAKIERQQRWTRREEADFYRVVSTFGVVFDPDRGQFDWTKFRALARLHKKTDNSLEKYLCAFMSCRRVCR  
LPSKEELVDPNIFIQIPITEERASRTLYRIELLRKRVREQALRHPQLFERLKLCHPNPDLPIWWECEGSHDRDLI  
GAAKHGVSRTDYHILRDPELSFMAAQRNYNQSKAAHSRTSAPLLQQYQVALSASPLTSLPRLGAKGTLLEDM  
KVKSESLTEEPQSSEEEESMSSMETRTRVKSEPVSPKNGVLSQATGDQKSGGKSETDRRMVAARTEPLTPNPAS  
KKPRVHKRGSQSSSDSDSDSARSSCSSRSSSSSSSSSSSSSCSHSRSGSSSSSSSSSSSCSSASSSSSSSSSSSSSSSSSSSS  
SSSEESDSEEDVQKREGTPHRKAYDEESVASLSTTQDETQDSFQANNGTPESAYLLQGGYMLAASYWPKDRVT  
INRLDSICQTVLKGKWPSARRHYDANTVASFYTTKLLDSPAATERGEPVPTPPAVAVREEHEQSAQMSKVK  
KHVREKEFTVKIKDEGLKLTFOKQGLAQKRPFDDGEDGALGQQYLRRLRELQSTSETSLVNLPKAVPASGTS  
IQPTLGANGAILDSQPIVKKRRGRRRNVEGADILFLNRNKPNNHIPGMPNALSYPQPQRIPDTESPVPVNL  
KDGTRLGDDAPKRKDLDRWLKEHPGYVEDLGAFIPRVQLHEGRPKQKRHRCRNPNKLDINSLTGEERVQLIN  
RRNARKVGGAFAAPPLKDLCRFLKENSEYGVAPWGDVVKQSGFLPESMFERILTGPVVREEVSRGRPKSGI  
AKATTAAVPAGSVPGNPLLANGLLPGVDLTALQALQNLQNLQSLQVQTAGLMGMPAGLSSGGETKNMAAMF  
MLFSGMAGLPLNLLGMGGLLSKTAESGAEKRGNDKELEGKERTESQSPENGGERCVPSPSTSSSTAALSSA  
AAKPIALNPLLLSNIILYPGMLLTPGLNLHLPTLSQSNAFDVQKNKSDDLSDSSKSVEIKEENSRVRDQEEKGG  
TEPSPLENSTDEGSEERASSGSDSSSSSSESDSDSSNED\*

>rs51312005\_ENSMUSP00000105243\_c.6787:T>C\_p.M2263T

ENSMUST00000109614.9|Chd9-202|ENSMUSG00000056608|+|chr8:g.91762964:T>C

MTDPMDDFFDDANLFGGETLEGLSDDTFVQPGPVSLVDELNLGAEFEPLHIDSLNHVQGTPTHQKMADFEQLSQ  
FDSMKFHPVNVQSFQSPVEHVLSPHSQFNCSPIHPPNQPNGLFQDVADGSPMWHQATATGLANQNGSPFHQPGH  
SHSLHQNKSFVAHPDFALFQASEHQTCSSLSHSQQSRNLNPGQNSLGQAKNFLDANVSGAHRVNVNHLATAP  
SSQQTLPVQFSPTANPPAHFLKCSSHQEGNYNRPSPSMTSCSVNSQQFSPSHYSFSSGHVSPSSLLQSSAGLA  
PGHTNQALSDFAGSNFSFPHRGMKQEPHQHLLNPTPSLNSNNFQILHSSHPQGNYSNSKLSPVHMFNFPDQVDA  
GPPVGHFNDHAETNGFSSLEENLLHHVDSHAEPFAGLDPEDLLQEGLLPQFDESFPFGQDNSNHVLDHDLDRQF  
TSHLVSRPSDMAQTQLQYQARGWPSPLSTNHQHLHSRNLHCLQRQPSSSKKSDGSGTYTKLQNTQVRVMSEKK  
PRKRVESESKQEKANRIISEAIAKAKERGERNIPRVMSPENFPASVEGKKEKRGRMRKSKPKDRDNKKPKTY  
SKLKEKTKIGKLIITLGGKHKRRNESSELSDAEQRSQHTFKEQHSQKRRSNRQIKRKKYAEDEAGKQSEEEV  
KGSRLVKRNSAPPPGEQPLQLFVENPSEEDAAIVDKILACRTVKKEVSPGVMLDIEEFFVKYKNYSYLHCEWA  
TEQQLLKDKRIQQKIKRFLRQAQRAHFLADMEEPFNPDYVEVDRILEVSFCEDKDTGESVIYYLVKWCSLP  
YEDSTWELKEDVDLAKIEEFEQLQASRPDTRHLDRPPSNIWKKIEQSREYKNGNQLREYQLEGLNWLFLFNWYN  
RRNCILADEMGLGKTIQSITFLYEILLTGIRGPFLLIAPLSTIANWEREFRTWTNDINVVVYHGSLSRQMIQQ  
YEMYFRDSQGRIIRGAYRFQAIITTFEMILGGCGELNAIDWRCVIIDEAHRLKKNCKLLEGLKLMNLEHKVL  
LTGTPLQNTVEELFSLHFLFLEPLRFPESESTFMQEFGLDKTEEQVQKLQAILKPMMLRRLKEDVEKKLAPKEET  
IEVELTNIQKYYRAILEKNFSLSKGAGQTNVPLNVTMMELRKCCHNHPYLIKGAEEKILGEFRDTPNPSA  
DFDHLQAMIQSAGKLVLIDKLLPKMKAGGHKVLIFSQMVRCLDILEDYLIHKRYLYERIDGRVGRNLRQA  
RFSKPDSDRDFVLLCTRAGGLINLTAADTCIIFDSDWNPQNDLQAQARCHRIGQNKAVKVEYRLVTRNSYERE  
MFDRASLKLGLDKAVLQSMSGRSDNSVSGIQQLSKKEIEDLLRRGAYGAIMEEEDGSKFCEEDIDQILLRRTK  
TITIESEGRGSTFAKASFVAGNRTDISLDDPNFWQKAKKAELDIDTISGRNSLVIDTTPRIRKQTRPFSATK  
DELAELSEAESEGEKPKLRPCDRSGGYGRTECFRVEKNLLVYGWRWREILSHGRFKRQLNEHDEVEICRA  
LLAYCLIHRYGDEKIKGFIWDLITPTEDGQTRQLNHLGLSAPVPRGRKGGKVKQTQSSFDIQKAEWLKYNP  
EQLLQDEGYKHKVHKHCNKVLLRVRMLYYLQKQEVIGNESQKVFQDGDASDIDVWVPEPDHSEVPAAWWDFDAD  
KSLIGVFKHGYEKYNTIRADPALCFLEVRGKPDKAVAAEQRANDYMDGDVEDPEYKPAIAFKDDIEDDVS  
SPGDLVIADGEGQLMEGDKVYWPSPALTRRLRLITAYQRTNKNRHIQQMQPTFSLPANAMQPLYEATLNP  
KMAAKIERQWRNTRREEDFYRVVSTFGVVFDPDRGQFQDWTFRALARLHKKTDNSLEKLCAFMSMCRRCR  
LPSKEELVDPNIFIQPITEERASRTLYRIELLRKVRQALRHPQLFERLKLCHPNPDLPIWWECEGSHDRDLI  
GAAKHGVSRTDYHILRDPPELSFMAAQRNYNQSKAAHSRTSAPLLQQYQVALSASPLTSLPRLGAGTLLLED  
KVKSESLTEEPQSSEESMSMETRTRVKSEPVSPKNGVLSQATGDQKSGGKSETDRRMVAARTEPLTPNPAS  
KKPRVHKRGSQSSSDSDSARSSSSSSSSSSSSSSSSSSSSSSSSSSSSSSSSSSSSSSSSSSSSSSSSSSSSS  
SSSEESDSEEDVQKREGTPHRKAYDEESVASLSTTQDETQDSFQANNGTPESAYLLQGGYMLAASYWPKDRVT  
INRLDSICQTVLKGKWPARRHYDANTVASFYTTKLLDSPGAATERGEPVPTPPAVAVREEHEQSAQMSKVK  
KHVREKEFTVVIKIDEGGLKLTQKQGLAQKRPFDGEDGALGQQQYLTRLRELQSTSETSLVNLKAVPASGTS  
IQPTLGANGAILDSQPIVKKRRRGRNVEGADILFLNRNKPNNHIPGMNPALSYPQQRIPDTESPVPVNL  
KDGTRLAGDDAPKRLDLRDLKEHPGYVEDLGAFIPRVQLHEGRPKQKRHRCRNPNKLDINSLTGEERVQLIN  
RRNARKVGGAFAPPLKDLRFLKENSEYGVAPWGDVVKQSGFLPESMFERILTGPVVREYVSRGRPKSGI  
AKATTAAVPAGSVPGNPLLANGLLPGVDLTAALQALQNLQNLQSLQVTAGLMGMPAGLSSGGETKNMAAMFP  
MLFSGMAGLPNLLGMGGLLSKTAESGAEEKRGNDSKELEGKKERTESQSPENGGERCVPGPSSTSSSTAALSSA  
AAAKPIALNPLLLSNILYPMMLTPGLNLHLPTLSQSNADFVQKNKSDDLSSKKSVEIKEENSRVRDQEEKGG  
TEPSPLNENSTDEGSEERASSGSDSSSSSESDSSSNED\*

>rs32816175\_ENSMUSP00000046356\_c.8340:C>A\_p.L2781I  
ENSMUST00000048665.8|Chd9-201|ENSMUSG00000056608|+|chr8:g.91778331:C>A  
MTDPMDDFFDDANLFGGETLEGLSDDTFVQPGPVSLVDELNLGAEFEPLHIDSLNHVQGTPTHQKMADFEQLSQ  
FDSMKFHPVNVQSFQSPVEHVLSPHSQFNCSPIHPPNQPNGLFQDVADGSPMWHQATATGLANQNGSPFHQPGH  
SHSLHQNKSFVAHPDFALFQASEHQTCSSLSHSQQSRNLNPGQNSLGQAKNFLDANVSGAHRVNVNHLATAP  
SSQQTLPVQFSPTANPPAHFLKCSSHQEGNYNRPSPSMTSCSVNSQQFSPSHYSFSSGHVSPSSLLQSSAGLA  
PGHTNQALSDFAGSNFSFPHRGMKQEPHQHLLNPTPSLNSNNFQILHSSHPQGNYSNSKLSPVHMFNFPDQVDA  
GPPVGHFNDHAETNGFSSLEENLLHHVDSHAEPFAGLDPEDLLQEGLLPQFDESFPFGQDNSNHVLDHDLDRQF  
TSHLVSRPSDMAQTQLQYQARGWPSPLSTNHQHLHSRNLHCLQRQPSSSKKSDGSGTYTKLQNTQVRVMSEKK  
PRKRVESESKQEKANRIISEAIAKAKERGERNIPRVMSPENFPASVEGKKEKRGRMRKSKPKDRDNKKPKTY  
SKLKEKTKIGKLIITLGGKHKRRNESSELSDAEQRSQHTFKEQHSQKRRSNRQIKRKKYAEDEAGKQSEEEV  
KGSRLVKRNSAPPPGEQPLQLFVENPSEEDAAIVDKILACRTVKKEVSPGVMLDIEEFFVKYKNYSYLHCEWA  
TEQQLLKDKRIQQKIKRFLRQAQRAHFLADMEEPFNPDYVEVDRILEVSFCEDKDTGESVIYYLVKWCSLP  
YEDSTWELKEDVDLAKIEEFEQLQASRPDTRHLDRPPSNIWKKIEQSREYKNGNQLREYQLEGLNWLFLFNWYN  
RRNCILADEMGLGKTIQSITFLYEILLTGIRGPFLLIAPLSTIANWEREFRTWTNDINVVVYHGSLSRQMIQQ  
YEMYFRDSQGRIIRGAYRFQAIITTFEMILGGCGELNAIDWRCVIIDEAHRLKKNCKLLEGLKLMNLEHKVL  
LTGTPLQNTVEELFSLHFLFLEPLRFPESESTFMQEFGLDKTEEQVQKLQAILKPMMLRRLKEDVEKKLAPKEET  
IEVELTNIQKYYRAILEKNFSLSKGAGQTNVPLNVTMMELRKCCHNHPYLIKGAEEKILGEFRDTPNPSA

SDFHLQAMIQSAGKLVLDKLLPKMKAGGHKVLIFSQMVRCLDILEDYLIHKRYLYERIDGRVRGNLRQAAID  
RFSKPDSDRFVFLLCRAGGLGINLTAADTCIIIFSDSDWNPNQDLQAQARCHRIGQNKAVKVYRLVTRNSYERE  
MFDRAISLKLGLDKAVLQSMSGRDSNVSGIQQLSKKEIEDLLRRGAYGAIMEEEDSGSKFCEEDIDQILLRRTK  
TITIESEGRGSTFAKASFVAGNRTDISLDDPNFWQWAKKAELEIDTISGRNSLVIDTPIRIRKQTRPFSATK  
DELAELSEAESEGEKPKLRPCDRSGGYGRTECFRVEKNLLVYGWRWREILSHGRFKRQLNEHDEVEICRA  
LLAYCLHYRGDEKIKGFIWDLITPTEDGQTRELQNLHLSAPVPRGRKGKVKQTOTSSFDIQKAEWLRKYNP  
EQLLQDEGYKKHVHHKCNKVVLLRVMLYLLKQEVIGNESQKVFVDGVDASDIDVWVPEPDHSEVPAAWWDFDAD  
KSLLIQGVFKHGYEKYNTIRADPALCFLEVRGKPDCKAVAAEQRANDYMDGDVEDPEYKPAIWKDDIEDDVS  
SPGDLVIADGEGQLMEGDKVYWPSPALTRRLRLITAYQRTNKNRHIQQMQPTFSLPANAMQPLYEATLNP  
KMAAKIERQQRWTRREEADFYRVVSTFGVVFDPRDQGFWDWTKFRALARLHKKTDNSLEKYLCAFMSCRRVCR  
LPSKEELVDPNIFIQPITEERASRTLYRIELLRKVREQRALRHPQLFERLKLCHPNPDLPIWWECEGSHDRDLI  
GAAKHGVSRTDYHILRDPELSFMAAQARNYNQSKAAHSRTSAPLLQQYQVALSASPLTSLPRLLAGKGTLLDEM  
KVKSESLTEEPQSSEESMSMETRTRVKSEPVSPKNGVLSQATGDKSGGKSETDRRMVAAARTEPLTPNPAS  
KKPRVHKRGSQSSSDSDSDARS SCSSRSSSSSSSSSSSSSS SSSSSSSSSSSSSSSSSSSSSSSSSSSSS  
SSSEESDSEEDVQKREGTPHRKAYDEESVASLSTTQDETQDSFQANNGTPESAYLLQGGMMLAASYPKDRVM  
INRLDISICQTVLKGKWPSARRHYDANTVASFYTTKLLDSPGAATERGEPSVPTPPAVAVREEHEQSAQMSKEG  
GLKLTFOKQLAQKRPFDEGALGQQYLTRLRELQSTSETSLVNLPKAVPASGTSIQPTLGANGAILDSQP  
IVKKRRGRRRNVEGADILFLNRNKPNNHIPTGMNPAISYPOPQRIPDTESPVPVINLKDGTRELADGDPKRRK  
LDRWLKEHPGYVEDLGAFI PRVQLHEGRPKQKRHRCRNPKLDINSLTGEERVQLINRRNARKVGGAFAPPLK  
DLCRFLKENSEYGAPEWGDVVKQSGFLPESMFERILTGPVVREEVSRGRPKSGIAKATTAAVPAGSVPG  
NPLLANGLPGVDLTALQALQQLQNLQSLQVTAGLMGPAGLSSGGETKNMAAMPMLFSGMAGLPNLLGMG  
GLLSKTAESGAEKRGNDKKELEGGKERTESQSPENGGERCVPSPSTSSSTAALSSAAAAPKIALNPPLLSNI  
LYPGMLITPGLNHLPTLSQSNADFVQKNKSDLLDSSKSVEIKEENSRVRDQEEKGGTEPSPLNENSTDEGSE  
RASSGSDSSSSSSSESDSSSNED\*  
>rs32816175\_ENSMUSP00000148088\_c.8388:C>A\_p.L2797I  
ENSMUST00000209423.2|Chd9-205|ENSMUSG00000056608|+|chr8:g.91778331:C>A  
MTDPMMDFFDANLFGETLEGLSDDTFVQPQGPVSLVDELNLGAEFELPHIDSLNHVQGTPTHQKMADEFQLSQ  
FDSMKFHPVNSQSFQSPVEHVLSPHSQFNCSPIHPPNPNGLFQDVADGSPMWGHQTATGLANQNGSPFHQPGH  
SHSLHQNSFVAHPDFALFQASEHQTCSSSLHSQQRSRNLNPGQNSLGQAKNFLDANVSGAHRVNVNHLATAP  
SSQQLPVQFSPTANPPAFLKCSSHQEGNYNRPSPSMTSCSVNSQFSPSHYSFSSGHVSPSSLLQSSAGLA  
PGHTNQALSDFAGSNFSFPHRGKQEPQTQHLLNPTPSLNSNFIQHSSHPQGNYSNSKLSPVHMNFPDPVDA  
GPPVGHFNDAETNGFSSLEENLLHHVDSHAEPFAGLDPEDLLEGLLPQFDDESFPFGQDNSHVLDHDLDRQF  
TSHLVSRLPDMAQTQLQYQARGWPSPLSTNHQHLHSRNLCLQRQPPSSKKS DSGSGTYTKLQNTQVRVMSEKK  
PRKRVESESKQEKANRI ISEA IARAKERGERNI PRVMS PENFP SASVEGKEEKRGRRMKS PKDRDNKPKTY  
SKLKEKTKIKGLIITLGKHKHRNESSEDELSDAEQRSTFKEQHSQKRNSNRQIKRKKYAEADAEKGQSEEEV  
KGSRLVKNRSAPPPGEQPLQFVENPSEEDAAIVDKILACRTVKKEVSPGVMLDIEEFFVKYKNYSYLHCEWA  
TEQQLLKDKRIQQIKRFLRQAQRAHFADMEEFNPNDYVEVDRIEVSFCEDKDTGESVIYYLVKWCSLP  
YEDSTWELKEDVDLAKIEEFELQASRPDTRHLDRPPSNIIWKIEQSREYKNGNQLEQYQLEGLNWLLFNWYN  
RRNCILADEMGLGKTIQSITFLYEILLTGIRGFPIIIAPLSTIANWEREFRTWTDINVVVYHGSLSISRQMIQQ  
YEMYFRDSQGRIRGAYRFQAIITTFEMILGGCGELNAIDWRCVIEDEAHLKKNCKLLEGLKLMNLEHKVL  
LGTGPTLQNTVEELFSLHFLEPLRFSESTFMQEFGLKTEEQVQLQAILKPMMLRLKEDVEKKLAPKEET  
IEVELTNIQKYYRAILEKNFSFLSKGAGQTNVPLNVTMMELRKCCHNPHYLIKGAEEKILGEFRDTPYNSA  
SDFHLQAMIQSAGKLVLDKLLPKMKAGGHKVLIFSQMVRCLDILEDYLIHKRYLYERIDGRVRGNLRQAAID  
RFSKPDSDRFVFLLCRAGGLGINLTAADTCIIIFSDSDWNPNQDLQAQARCHRIGQNKAVKVYRLVTRNSYERE  
MFDRAISLKLGLDKAVLQSMSGRDSNVSGIQQLSKKEIEDLLRRGAYGAIMEEEDSGSKFCEEDIDQILLRRTK  
TITIESEGRGSTFAKASFVAGNRTDISLDDPNFWQWAKKAELEIDTISGRNSLVIDTPIRIRKQTRPFSATK  
DELAELSEAESEGEKPKLRPCDRSGGYGRTECFRVEKNLLVYGWRWREILSHGRFKRQLNEHDEVEICRA  
LLAYCLHYRGDEKIKGFIWDLITPTEDGQTRELQNLHLSAPVPRGRKGKVKQTOTSSFDIQKAEWLRKYNP  
EQLLQDEGYKKHVHHKCNKVVLLRVMLYLLKQEVIGNESQKVFVDGVDASDIDVWVPEPDHSEVPAAWWDFDAD  
KSLLIQGVFKHGYEKYNTIRADPALCFLEVRGKPDCKAVAAEQRANDYMDGDVEDPEYKPAIWKDDIEDDVS  
SPGDLVIADGEGQLMEGDKVYWPSPALTRRLRLITAYQRTNKNRHIQQMQPTFSLPANAMQPLYEATLNP  
KMAAKIERQQRWTRREEADFYRVVSTFGVVFDPRDQGFWDWTKFRALARLHKKTDNSLEKYLCAFMSCRRVCR  
LPSKEELVDPNIFIQPITEERASRTLYRIELLRKVREQRALRHPQLFERLKLCHPNPDLPIWWECEGSHDRDLI  
GAAKHGVSRTDYHILRDPELSFMAAQARNYNQSKAAHSRTSAPLLQQYQVALSASPLTSLPRLLAGKGTLLDEM  
KVKSESLTEEPQSSEESMSMETRTRVKSEPVSPKNGVLSQATGDKSGGKSETDRRMVAAARTEPLTPNPAS  
KKPRVHKRGSQSSSDSDSDARS SCSSRSSSSSSSSSSSSSS SSSSSSSSSSSSSSSSSSSSSSSSSSSSS  
SSSEESDSEEDVQKREGTPHRKAYDEESVASLSTTQDETQDSFQANNGTPESAYLLQGGMMLAASYPKDRVM  
INRLDISICQTVLKGKWPSARRHYDANTVASFYTTKLLDSPGAATERGEPSVPTPPAVAVREEHEQSAQMSKVK

KHVREKEFTVVKIKDEGGLKLTfQKQGLAQKRPFDGEDGALGQQQYLTRLRELQSTSETSLVNLPKAVPASGTS  
IQPTLGANGAILDSQPIVKKRRGRRRNVEGADILFLNRNKPPNHIPTGMNPALSYPQPQRI PDTESPVPVINL  
KDGTRLAGDDAPKRKDLDRWLKEHPGYVEDLGAFI PRVQLHEGRPKQKRHRCRNPKNLDINSLTGEERVQLIN  
RRNARKVGGAFAPPLKDLRCFLKENSEYGVAPWGDVVKQSGFLPESMFERILTGPVVREEVSRGRPKSGI  
AKATTAAAVPAGSVPGNPLLANGLLPGVDLTALQALQQNLQNLQSLQVTAGLMGMPAGLSSGGETKNMAAMFP  
MLFSGMAGLPNLLGMGGLLSKTAESGAEEKRGNDSKELEGKKERTESQSPENGGERCVPGPSPTSSTAALSSA  
AAAKPIALNPLLLSNILYPGMLITPGLNLHLPTLSQSNADFVQKNKSDDLSSKSVEIKEENSRVRDQEEKGG  
TEPSPLNENSTDEGSERASSGSDSSSSSESDSSSNED\*

>rs32816175\_ENSMUSP00000105243\_c.8388:C>A\_p.L2797I  
ENSMUST00000109614.9|Chd9-202|ENSMUSG00000056608|+|chr8:g.91778331:C>A  
MTDPMDDFFDDANLFGETLEGLSDDTFVQPGVSLVDELNLGAEFEPLHIDSLNHVQGTPTHQKMADFEQLSQ  
FDSMKFHPVNSQSFSGSPVEHVLSPHSQFNCSPIHPPNQPNGLFQDVADGSPMWHGTATGLANQNGSPFHQPGH  
SHSLHQNKSFVAHPDFALFQASEHQTCSSLSHSQQSRSNLNPNGQNSLGQAKNFLDANVSGAHRVNVNHLATAP  
SSQQTLPVQFSPTANPPAHFLKCSSHQEGNYNRSPSMTSCSVNSQQFSPSHYSFSSGHVSPSSLLQSSAGLA  
PGHTNQALSDFAGSNSFSPHRGMKQEPTQHLLNPTPSLNSNNFQILHSSHPQGNYSNSKLSPVHMFNFPDVA  
GPPVGHFNDHAETNGFSSLEENLLHHVDSHAEPFAGLDPEDLLQEGLLPQFDES PFGQDNSNHVLDHDLDRQF  
TSHLVSRSQDMQATQYQARGWPSPLSTNHQHLHSRNLCLQRQPPSSKKS DGS GSYTKLQNTQVRVMSEKK  
PRKRVESESKQEKANRI ISEAIARAKERGERNI PRVMSPENFPASVEGKEEKRGRMKSPKDRDNKKPKTY  
SKLKEKTKIGKLIITLGGKHKRRNESSELSDAEQRSQHTFKEQHSQKRRSNRQIKRKKYAEDAEGKQSEEEV  
KGLSRVKNRSAPPPGEQPLQLFVENPSEEDAAIVDKILACRTVKKEVSPGVMLDIEEFFVKYKNYSYLHCEWA  
TEQQLLKDKRIQKIKRFLRQAQRAHFLADMEEPFNPDYVEVDRI LEVSFCEDKDTGESVIYYLVKWCSLP  
YEDSTWELKEDVDLAKIEEFEQLQASRPDTRHLDRPPSNIWKKIEQSREYKNGNQLREYQLEGLNWLFFNWN  
RRNCILADEMGLGKTIQSITFLYEILLTGIRGPFLLIAPLSTIANWEREFRTWTDINVVVYHGSLISRQMIQQ  
YEMYFRDSQGRIRGAYRFQAIITTFEMILGGCGELNAIDWRCVIIDEAHRLKNKNCKLLEGLKLMNLEHKVL  
LTGTPLQNTVEELFSLHFLFLEPLRFPESETFMQEFGDLKTEEQVQKLAAILKPMMLRRLKEDVEKKLAPKEET  
IEVELTNIQKKYYRAILEKNFSFLSKGAGQTNVNLVNTMELRKCCHNHPYLIKGAEEKILGEFRDTYNPSA  
SDFHLQAMIQSAGKLVLIDKLLPKMKAGGHKVLIFSQMVRCLDILEDYLIHKRYLYERIDGRVRGNLQAAID  
RFSKPDSDRFVLLCTRAGGLGINLTAADTCIIFDSWNPQNDLQAQARCHRIGQNKAVKVYRLVTRNSYERE  
MFDRASLKLGLDKAVLQSMSGRDSNVSGIQQLSKKEIEDLLRRGAYGAIMEEEDEGSKFCEEDIDQILLRRTK  
TITIESEGRGSTFAKASFVASGNRTDISLDDPNFWQKAKKAELDIDTISGRNSLVIDTTPRIRKQTRPFSATK  
DELAELSEAESEGEKPKLRRPCDRSGGYGRTECFRVEKNLLVYGWRWREILSHGRFKRQLNEHDVEVICRA  
LLAYCLIHYRGDEKIKGFIWDLITPTEDGQTRQLNHLGLSAPVPRGRKGGKVKQTSSFDIQKAEWLRKYNP  
EQLLQDEGYKKHVHHCNKVLLRVRMLYLLKQEVIGNESQKVFDFGDVADSIDVWVPEPDHSEVPAAWDFDAD  
KSLLIIGVFKHGYEKYNTIRADPALCFLERVKGPKDDKAVAAEQRANDYMDGDVEDPEYKPAFAFKDDIEDDVS  
SPGDLVIADGEGQLMEGDKVYWP TPSALTTRLRLRITAYQRTNKNRHIQQMQPTFSLPANAMQPLYEATLNP  
KMAAKIERQQRWTRREEADFYRVVSTFGVDFDPRGQFDWTKFRALARLHKKTDNSLEKYLCAFMCMCRVCR  
LPSKEELVDPNIFIQPIITEERASRTLYRIELLRKVREQALRHPQLFERLKLCHPNPDLPIWWECEGSHDRDLI  
GAAKHGVSRTDYHILRDPELSFMQAQRNYNQSKAAHSRTSAPLLQQYQVALSASPLTSLPRLLAGKGTLL EDM  
KVKSESLTEEPQSSEEESSMETRTRVKSEPVSPKNGVLSQATGDQKSGGKSETDRRMVAARTEPLTPNPAS  
KKPRVHKRGSQSSSDSDSDSARSSCSSSSSSSSSSSSSSSHSRSGSSSSSSSSSSSSASSSSSSSSSSSSSSSS  
SSSEESDSEEDVQKREGTPHRKAYDEESVASLSTTQDETQDSFQANNGTPESAYLLQGGYMLAASYWPKDRVM  
INRLDSICQTVLKGKWPSARRHYDANTVASFYTTKLLDSPGAATERGEPVPTPPAVAVREEHEQSAQMSKVK  
KHVREKEFTVVKIKDEGGLKLTfQKQGLAQKRPFDGEDGALGQQQYLTRLRELQSTSETSLVNLPKAVPASGTS  
IQPTLGANGAILDSQPIVKKRRGRRRNVEGADILFLNRNKPPNHIPTGMNPALSYPQPQRI PDTESPVPVINL  
KDGTRLAGDDAPKRKDLDRWLKEHPGYVEDLGAFI PRVQLHEGRPKQKRHRCRNPKNLDINSLTGEERVQLIN  
RRNARKVGGAFAPPLKDLRCFLKENSEYGVAPWGDVVKQSGFLPESMFERILTGPVVREEVSRGRPKSGI  
AKATTAAAVPAGSVPGNPLLANGLLPGVDLTALQALQQNLQNLQSLQVTAGLMGMPAGLSSGGETKNMAAMFP  
MLFSGMAGLPNLLGMGGLLSKTAESGAEEKRGNDSKELEGKKERTESQSPENGGERCVPGPSPTSSTAALSSA  
AAAKPIALNPLLLSNILYPGMLITPGLNLHLPTLSQSNADFVQKNKSDDLSSKSVEIKEENSRVRDQEEKGG  
TEPSPLNENSTDEGSERASSGSDSSSSSESDSSSNED\*

>rs254579959\_ENSMUSP00000034091\_c.1201:C>G\_p.T401S  
ENSMUST00000034091.8|Rb12-201|ENSMUSG00000031666|+|chr8:g.91816714:C>G  
MASGGNDLHPPLAAAASSEEEEDGDAADRAQAGSPSHQIQRFEELECSRLNMDEAARAEAWSSYRSMSES  
YTLEGNDLHWLACALYVACRKSVPVTSKGTAEAGNYSVSLTRILRCSEQSLIEFFNKMKKWEDMANLPPHFRETR  
ERLERNFTVSAVIFKKEYEPIFQDIFKYPOEEQPRQQRGRKQRQPCTTSEIFHFCWVLFYIYAKGNFPMISDDL  
VNSYHLLLALDLVYGNALQCSNRKELVNPNFKGLSEDCPKSKASSDPPCVIEKLCSLHDGLVLEAKGIKE  
HFWKPYIRKLFKELLKKEENLTGFLEPGNFGESFKAVNKAYEYVLAAGNLDERVFLGEDAEVEEVGTL SRC  
LSAASGTE SAERTQMRDILQQHLDKSKALRVCTPLSGVRYVQENSFCVTPVSTAASHLSRLHTMLSGLRNAPS

EKLERILRSCSRDPTQAIADRLKEMYEIIYSQHFQPDENFNSNCAKEIANKHFRFAEMLYYKVLESVIEQEQQKRL  
 GDMDLSGVLEHDAFHRSLACCLEVVAFSHKPPGNFPFIAEIFDVPHYHFYKVIIEVFIRAEDGLCREVVKHLN  
 QIEEQILDHLAWKTKSPLWDRIRDNENRVPTCEEVMPQNLERDEIYIAGSPLTPRRVGEVRADAGGLGRS  
 TSPTTLYDRYSSPTVSTTRRRRLFENDSPSEGSTSGRI PPQPLVNAVVPQNVPGETVSVTPVPGQTLVMTATAT  
 VTANNGQTVTIPVQGIANENGGITFFFPVQVNVGGQAQAVAGSIQPLSAQALAGSLSSQQVTGTTLQVPGPVAI  
 QQISPGGQQQNPQPLTSSSIRPRKTSSLALFFRKVYLAGVRLRDLCKIKLDISDELKKIWTCFEFSIIQCT  
 ELMMDRHLDQLLMCAIYVMAKVTKEDRSFQNIIMRCYRTQPQARSQVYRSVLIKGKRRNSGSSSESRSHQNSPTE  
 LNTDRASRDSSPVMRSNSTLPVPQPSSAPPTPTRLTGASSDVEEEEERGDLIQFYNNIYRKQIQAFAMKYSQAN  
 AQTDTPPLSPYFPVRTGSPRRVQLSQSHPIYISPHNNEAMPSPREKIFYFYSNSPSKRLREINSMIRTGETPT  
 KKRGIILLDDGSESPAKRICPENHSALLRRLQDVANDRGSQ\*  
 >rs254579959\_ENSMUSP00000147579\_c.1072:C>G\_p.T358S  
 ENSMUST00000211136.2|Rb12-210|ENSMUSG00000031666|+|chr8:g.91816714:C>G  
 MASGGNQSPPPPPAAAASSEEEEEEDGDAADRAQPAGSPSHQIQORFEELCSRLNMDEAARAEAWSSYRSMSES  
 YTLEGNDLHLWALACALYVACRKSVPVTVSKGTAEAGNYVSLTRILRCSEQSLIEFFNKMKKWEDMANLPPHFRERT  
 ERLERNFTVSAVIFKKYEPIFQDIFKYPQEEQPRQQRGRKQRRQPCTTSEIFHFCWVLFYIYAKGLSEDCPKD  
 SKASSDPPCVIEKLCSLHDGLVLEAKGIKEHFWKPYIRKLFKLLKGKEENLTGFLEPGNFGESFKAVNKAY  
 EEPVLAAGNLDERVFLGEDAEVEVGTLSRCLSAASGTEAERTQMRDILQOHLDKSKALRVCTPLSGVRYVQE  
 NSPCVTPVSTAAHSLRSLHTMLSGLRNAPSEKLERILRSCSRDPTQAIADRLKEMYEIIYSQHFQPDENFNSNCA  
 KEIANKHFRFAEMLYYKVLESVIEQEQQKRLGDMDLSGVLEHDAFHRSLACCLEVVAFSHKPPGNFPFIAEIF  
 DVPHYHFYKVIIEVFIRAEDGLCREVVKHLNQIEEQILDHLAWKTKSPLWDRIRDNENRVPTCEEVMPQNLER  
 TDEIYIAGSPLTPRRVGEVRADAGGLGRSITSPTTLYDRYSSPTVSTTRRRRLFENDSPSEGSTSGRI PPQPLV  
 NAVVPQNVPGETVSVTPVPGQTLVMTATATVTANNGQTVTIPVQGIANENGGITFFFPVQVNVGGQAQAVAGSI  
 QPLSAQALAGSLSSQQVTGTTLQVPGPVAIQQISPGGQQQNPQPLTSSSIRPRKTSSLALFFRKVYLAGVRL  
 RDLCKIKLDISDELKKIWTCFEFSIIQCTELMMDRHLDQLLMCAIYVMAKVTKEDRSFQNIIMRCYRTQPQAR  
 SQVYRSVLIKGKRRNSGSSSESRSHQNSPTELNTDRASRDSSPVMRSNSTLPVPQPSSAPPTPTRLTGASSDVE  
 EEEERGDLIQFYNNIYRKQIQAFAMKYSQANAQTDTPPLSPYFPVRTGSPRRVQLSQSHPIYISPHNNEAMPSP  
 REKIFYFYSNSPSKRLREINSMIRTGETPTKKRGILLDDGSESPAKRICPENHSALLRRLQDVANDRGSQ\*  
 >rs254579959\_ENSMUSP00000147327\_c.1201:C>G\_p.T401S  
 ENSMUST00000209518.2|Rb12-208|ENSMUSG00000031666|+|chr8:g.91816714:C>G  
 MASGGNQSPPPPPAAAASSEEEEEEDGDAADRAQPAGSPSHQIQORFEELCSRLNMDEAARAEAWSSYRSMSES  
 YTLEGNDLHLWALACALYVACRKSVPVTVSKGTAEAGNYVSLTRILRCSEQSLIEFFNKMKKWEDMANLPPHFRERT  
 ERLERNFTVSAVIFKKYEPIFQDIFKYPQEEQPRQQRGRKQRRQPCTTSEIFHFCWVLFYIYAKGNFPMISDDL  
 VNSYHLLLALDLVYGALQCSNRKELVNPVNFKGLSEDCPKDSSKASSDPPCVIEKLCSLHDGLVLEAKGIKE  
 HFWKPYIRKLFKLLKGKEENLTGFLEPGNFGESFKAVNKAYEYVLAAGNLDERVFLGEDAEVEVGTLSRCL  
 LSAASGTEAERTQMRDILQOHLDKSKALRVCTPLSGVRYVQENSPCVTPVSTAAHSLRSLHTMLSGLRNAPS  
 EKLERILRSCSRDPTQAIADRLKEMYEIIYSQHFQPDENFNSNCAKEMLYYKVLESVIEQEQQKRLGDMDLSGVLE  
 HDAFHRSLACCLEVVAFSHKPPGNFPFIAEIFDVPHYHFYKVIIEVFIRAEDGLCREVVKHLNQIEEQILDHL  
 AWKTKSPLWDRIRDNENRVPTCEEVMPQNLERDEIYIAGSPLTPRRVGEVRADAGGLGRSITSPTTLYDRY  
 SSPTVSTTRRRRLFENDSPSEGSTSGRI PPQPLVNAVVPQNVPGETVSVTPVPGQTLVMTATATVTANNGQTVT  
 IPVQGIANENGGITFFFPVQVNVGGQAQAVAGSIQPLSAQALAGSLSSQQVTGTTLQVPGPVAIQQISPGGQQQ  
 NPQPLTSSSIRPRKTSSLALFFRKVYLAGVRLRDLCKIKLDISDELKKIWTCFEFSIIQCTELMMDRHLDQ  
 LLMCAIYVMAKVTKEDRSFQNIIMRCYRTQPQARSQVYRSVLIKGKRRNSGSSSESRSHQNSPTELNTDRASRD  
 SPVMRSNSTLPVPQPSSAPPTPTRLTGASSDVEEEEERGDLIQFYNNIYRKQIQAFAMKYSQANAQTDTPPLSP  
 YFPVRTGSPRRVQLSQSHPIYISPHNNEAMPSPREKIFYFYSNSPSKRLREINSMIRTGETPTKKRGILLDDG  
 SESPAKRICPENHSALLRRLQDVANDRGSQ\*  
 >rs33292293\_ENSMUSP00000034091\_c.1753:A>G\_p.Q585R  
 ENSMUST00000034091.8|Rb12-201|ENSMUSG00000031666|+|chr8:g.91828040:A>G  
 MASGGNQSPPPPPAAAASSEEEEEEDGDAADRAQPAGSPSHQIQORFEELCSRLNMDEAARAEAWSSYRSMSES  
 YTLEGNDLHLWALACALYVACRKSVPVTVSKGTAEAGNYVSLTRILRCSEQSLIEFFNKMKKWEDMANLPPHFRERT  
 ERLERNFTVSAVIFKKYEPIFQDIFKYPQEEQPRQQRGRKQRRQPCTTSEIFHFCWVLFYIYAKGNFPMISDDL  
 VNSYHLLLALDLVYGALQCSNRKELVNPVNFKGLSEDCPKDSSKASSDPPCVIEKLCSLHDGLVLEAKGIKE  
 HFWKPYIRKLFKLLKGKEENLTGFLEPGNFGESFKAVNKAYEYVLAAGNLDERVFLGEDAEVEVGTLSRCL  
 LSAASGTEAERTQMRDILQOHLDKSKALRVCTPLTGVRVYQENSPCVTPVSTAAHSLRSLHTMLSGLRNAPS  
 EKLERILRSCSRDPTQAIADRLKEMYEIIYSQHFQPDENFNSNCAKEIANKHFRFAEMLYYKVLESVIEQEQQKRL  
 GDMDLSGVLEHDAFHRSLACCLEVVAFSHKPPGNFPFIAEIFDVPHYHFYKVIIEVFIRAEDGLCREVVKHLN  
 RIEEQILDHLAWKTKSPLWDRIRDNENRVPTCEEVMPQNLERDEIYIAGSPLTPRRVGEVRADAGGLGRS  
 TSPTTLYDRYSSPTVSTTRRRRLFENDSPSEGSTSGRI PPQPLVNAVVPQNVPGETVSVTPVPGQTLVMTATAT  
 VTANNGQTVTIPVQGIANENGGITFFFPVQVNVGGQAQAVAGSIQPLSAQALAGSLSSQQVTGTTLQVPGPVAI

QQISPGGQQNPGQPLTSSSIRPRKTSSLALFFRKVYYLAGVRLRDLCLDKLIDISDELRRKIWTCTFEFSIIQCT  
ELMMDRHLDQLLMCAIYVMAKVTKEDRSFQNIIMRCYRTQPQARSQVYRSVLIKGRNRSGSSESRSHQNSPTE  
LNTDRASRDSSPVMRSNSTLPVPQPSSAPPTPTRLTGASSDVEEEERGDLIQFYNNIYRKQIQAFAMKYSQAN  
AQTDTPPLSPYFPVVRTGSPRRVQLSQSHPIYISPHNNEAMPSPREKIFYFYSNSPSKRLREINSMIRTGETPT  
KKRGILLDDGSESPAKRICPENHSALLRRLQDVANDRGSQ\*  
>rs33292293\_ENSMUSP00000147579\_c.1624:A>G\_p.Q542R  
ENSMUST00000211136.2|Rb12-210|ENSMUSG00000031666|+|chr8:g.91828040:A>G  
MASGGNQSPPPPPAAAASSEEEEEEDGDAADRAQPAGSPSHQIQRFEEELCSRLNMDEAARAEAWSSYRSMSES  
YTLGNLHHLACALYVACRKSVPVTVSKGTAEAGNYVSLTRILRCSEQSLIEFFNKMKKWEDMANLPPHFRERT  
ERLERNFTVSAVIFKKYEPIFQDIFKYPQEEQPRQQRGRKQRRQPCTTSEIFHFCWVLFYIYAKGLSEDCPKD  
SKASSDPPCVIEKLCSLHDGLVLEAKGIKEHFWKPYIRKLFKLLKKEENLTGFLEPGNFGESFKAVNKAY  
EYVLAAGNLDERVFLGEDAEVEVGTLSRCLSAASGTESAERTQMRDILQQHLDKSKALRVCTPLTGVRVYQ  
NSPCVTPVSTAAHLSRLHTMLSGLRNAPSEKLERILRSCSRDPTQAIADRLKEMYEIIYSQHFQPDENFSNCA  
KEIANKHFRFAEMLYYKLVLESVIEQEQKRLGDMDLGVLHDAFHRSLACCLEVVAFSHKPPGNFPFIAEIF  
DVPYHYFYKVIIEVIRAEDGLCREVVKHLNRIEEQILDHLAWKTKSPLWDRIRDNENRVPTCEEVMPQNLER  
TDEIYIAGSPLTPRRVGEVRADAGGLGRSITSPTTLYDRYSSPTVSTTRRRLFENDSPSEGSTSGRIPPQPLV  
NAVVPQNVPGETVSVTPVPGQTLVTMATATVTANNGQTVTIPVQGIANENGGITFFPVQNVVGGQAQAVAGSI  
QPLSAQALAGSLSSQVGTGTTLQVPGPVAIQQISPGGQQNPGQPLTSSSIRPRKTSSLALFFRKVYYLAGV  
LRDLCLDKLIDISDELRRKIWTCTFEFSIIQCTELMMDRHLDQLLMCAIYVMAKVTKEDRSFQNIIMRCYRTQPQAR  
SQVYRSVLIKGRNRSGSSESRSHQNSPTELNTDRASRDSSPVMRSNSTLPVPQPSSAPPTPTRLTGASSDVE  
EEERGDLIQFYNNIYRKQIQAFAMKYSQANAQTDTPPLSPYFPVVRTGSPRRVQLSQSHPIYISPHNNEAMPSP  
REKIFYFYSNSPSKRLREINSMIRTGETPTKKRGILLDDGSESPAKRICPENHSALLRRLQDVANDRGSQ\*  
>rs33292293\_ENSMUSP00000147327\_c.1723:A>G\_p.Q575R  
ENSMUST00000209518.2|Rb12-208|ENSMUSG00000031666|+|chr8:g.91828040:A>G  
MASGGNQSPPPPPAAAASSEEEEEEDGDAADRAQPAGSPSHQIQRFEEELCSRLNMDEAARAEAWSSYRSMSES  
YTLGNLHHLACALYVACRKSVPVTVSKGTAEAGNYVSLTRILRCSEQSLIEFFNKMKKWEDMANLPPHFRERT  
ERLERNFTVSAVIFKKYEPIFQDIFKYPQEEQPRQQRGRKQRRQPCTTSEIFHFCWVLFYIYAKGNFPMISDDL  
VNSYHLLLCALDLVYGNALQCSNRKELVNPVFKGLSEDCPKDSKASSDPPCVIEKLCSLHDGLVLEAKGIKE  
HFWKPYIRKLFKLLKKEENLTGFLEPGNFGESFKAVNKAYEYVLAAGNLDERVFLGEDAEVEVGTLSRC  
LSAASGTESAERTQMRDILQQHLDKSKALRVCTPLTGVRVYQENSPCVTPVSTAAHLSRLHTMLSGLRNAPS  
EKLERILRSCSRDPTQAIADRLKEMYEIIYSQHFQPDENFSNCAKEMLYYKLVLESVIEQEQKRLGDMDLGVL  
HDAFHRSLACCLEVVAFSHKPPGNFPFIAEIFDVPYHYFYKVIIEVIRAEDGLCREVVKHLNRIEEQILDHL  
AWKTKSPLWDRIRDNENRVPTCEEVMPQNLERTDEIYIAGSPLTPRRVGEVRADAGGLGRSITSPTTLYDRY  
SSPTVSTTRRRLFENDSPSEGSTSGRIPPQPLVNAVVPQNVPGETVSVTPVPGQTLVTMATATVTANNGQTVT  
IPVQGIANENGGITFFPVQNVVGGQAQAVAGSIQPLSAQALAGSLSSQVGTGTTLQVPGPVAIQQISPGGQQ  
NPGQPLTSSSIRPRKTSSLALFFRKVYYLAGVRLRDLCLDKLIDISDELRRKIWTCTFEFSIIQCTELMMDRHLDQ  
LLMCAIYVMAKVTKEDRSFQNIIMRCYRTQPQARSQVYRSVLIKGRNRSGSSESRSHQNSPTELNTDRASRDS  
SPVMRSNSTLPVPQPSSAPPTPTRLTGASSDVEEEERGDLIQFYNNIYRKQIQAFAMKYSQANAQTDTPPLSP  
YFPVVRTGSPRRVQLSQSHPIYISPHNNEAMPSPREKIFYFYSNSPSKRLREINSMIRTGETPTKKRGILLDDG  
SESPAKRICPENHSALLRRLQDVANDRGSQ\*  
>rs49005983\_ENSMUSP00000034091\_c.2462:C>G\_p.S821R  
ENSMUST00000034091.8|Rb12-201|ENSMUSG00000031666|+|chr8:g.91833560:C>G  
MASGGNQSPPPPPAAAASSEEEEEEDGDAADRAQPAGSPSHQIQRFEEELCSRLNMDEAARAEAWSSYRSMSES  
YTLGNLHHLACALYVACRKSVPVTVSKGTAEAGNYVSLTRILRCSEQSLIEFFNKMKKWEDMANLPPHFRERT  
ERLERNFTVSAVIFKKYEPIFQDIFKYPQEEQPRQQRGRKQRRQPCTTSEIFHFCWVLFYIYAKGNFPMISDDL  
VNSYHLLLCALDLVYGNALQCSNRKELVNPVFKGLSEDCPKDSKASSDPPCVIEKLCSLHDGLVLEAKGIKE  
HFWKPYIRKLFKLLKKEENLTGFLEPGNFGESFKAVNKAYEYVLAAGNLDERVFLGEDAEVEVGTLSRC  
LSAASGTESAERTQMRDILQQHLDKSKALRVCTPLTGVRVYQENSPCVTPVSTAAHLSRLHTMLSGLRNAPS  
EKLERILRSCSRDPTQAIADRLKEMYEIIYSQHFQPDENFSNCAKEIANKHFRFAEMLYYKLVLESVIEQEQKRL  
GDMDLGVLHDAFHRSLACCLEVVAFSHKPPGNFPFIAEIFDVPYHYFYKVIIEVIRAEDGLCREVVKHLN  
QIEEQILDHLAWKTKSPLWDRIRDNENRVPTCEEVMPQNLERTDEIYIAGSPLTPRRVGEVRADAGGLGRS  
TSPTTLYDRYSSPTVSTTRRRLFENDSPSEGSTSGRIPPQPLVNAVVPQNVPGETVSVTPVPGQTLVTMATAT  
VTANNGQTVTIPVQGIANENGGITFFPVQNVVGGQAQAVAGSIQPLSAQALAGSLSSQVGTGTTLQVPGPVAI  
QQISPGGQQNPGQPLTRSSIRPRKTSSLALFFRKVYYLAGVRLRDLCLDKLIDISDELRRKIWTCTFEFSIIQCT  
ELMMDRHLDQLLMCAIYVMAKVTKEDRSFQNIIMRCYRTQPQARSQVYRSVLIKGRNRSGSSESRSHQNSPTE  
LNTDRASRDSSPVMRSNSTLPVPQPSSAPPTPTRLTGASSDVEEEERGDLIQFYNNIYRKQIQAFAMKYSQAN  
AQTDTPPLSPYFPVVRTGSPRRVQLSQSHPIYISPHNNEAMPSPREKIFYFYSNSPSKRLREINSMIRTGETPT  
KKRGILLDDGSESPAKRICPENHSALLRRLQDVANDRGSQ\*

>rs49005983\_ENSMUSP00000147579\_c.2333:C>G\_p.S778R  
ENSMUST00000211136.2|Rb12-210|ENSMUSG00000031666|+|chr8:g.91833560:C>G  
MASGGNQSPPPPPAAAASSEEEEEEDGDAADRAQPAGSPHQIQQRFEELCSRLNMDEAARAEAWSSYRSMSES  
YTLEGNDLHWLACALYVACRKSVPVTVSKGTAEGNYVSLTRILRCSEQSLIEFFNKMKKWEDMANLPPHFRERT  
ERLERNFVSAVIFKKYEPIFQDIFKYPOEEQPRQQRGRKQRRQPCTTSEIFHFCWVLFYIYAKGLSEDCHPKD  
SKASSDPPCVIEKLCSLHDGLVLEAKGIKEHFWKPYIRKLFKLLKGKEENLTGFLEPGNFGESFKAVNKAY  
EYVLAAGNLDERVFLGEDAEVEVGTLSRCLSAASGTESAERTQMRDILQOHLDKSKALRVCTPLTGVRVYQ  
NSPCVTPVSTAAHSLRSLHTMLSGLRNAPSEKLERILRSCSRDPTQAIADRLKEMYEIIYSQHFQPDENFNSCA  
KEIANKHFRFAEMLYYKLVESVIEQEQKRLGDMDSLGVLEHDAFHRSLACCLEVAVFVSHKPPGNFFIAEIF  
DVPHYHFYKVIIEVFIRAEDGLCREVVKHLNQIEEQILDHLAWKTKSPLWDRIRDNENRVPTCEEVMPQNLER  
TDEIYIAGSPLTPRRVGEVRADAGGLGRSITSPTTLYDRYSSPTVSTTRRRLFENDSPSEGSTSGRIPPQPLV  
NAVVPQVNPGETVSVTPVPGQTLVTMATATVTANNGQTVTIPVQGIANENGGITFFPVQVNVGGQAQAVAGSI  
QPLSAQALAGSLSSQVGTGTTLQVPGPVAIQQISPGGQQQNPQPLTRSSIRPRKTSSLALFFRKVYYLAGVR  
LRDLCKIKLDISDELKKIWTCFEFSIIQCTELMMDRHLDQLLMCAIYVMAKVTKEDRSFQNIIMRCYRTQPQAR  
SQVYRSVLIKGRNRSGSSESRSHQNSPTELNTDRASRDSPPVMRSNSTLVPVQPSSAPPTPTRLTGASSDVE  
EEERGDLIQFYNNIYRKQIQAFAMKYSQANAQTDTPPLSPYFPVVRTGSPRRVQLSQSHPIYISPHNNEAMPSP  
REKIFYYFSNSPSKRLREINSMIRTGETPTKKRGILLDDGSESPAKRICPENHSALLRRLQDVANDRGSQ\*  
>rs49005983\_ENSMUSP00000147327\_c.2432:C>G\_p.S811R  
ENSMUST00000209518.2|Rb12-208|ENSMUSG00000031666|+|chr8:g.91833560:C>G  
MASGGNQSPPPPPAAAASSEEEEEEDGDAADRAQPAGSPHQIQQRFEELCSRLNMDEAARAEAWSSYRSMSES  
YTLEGNDLHWLACALYVACRKSVPVTVSKGTAEGNYVSLTRILRCSEQSLIEFFNKMKKWEDMANLPPHFRERT  
ERLERNFVSAVIFKKYEPIFQDIFKYPOEEQPRQQRGRKQRRQPCTTSEIFHFCWVLFYIYAKGNFPMISDDL  
VNSYHLLLCALDLVYGNAQCENRKLVPNPNFKGLSEDCHPKDSSKASSDPPCVIEKLCSLHDGLVLEAKGIKE  
HFWKPYIRKLFKLLKGKEENLTGFLEPGNFGESFKAVNKAYEYVLAAGNLDERVFLGEDAEVEVGTLSRC  
LSAASGTESAERTQMRDILQOHLDKSKALRVCTPLTGVRVYQENSPCVTPVSTAAHSLRSLHTMLSGLRNAPS  
EKLERILRSCSRDPTQAIADRLKEMYEIIYSQHFQPDENFNSCAKEMLYYKLVESVIEQEQKRLGDMDSLGVLE  
HDAFHRSLACCLEVAVFVSHKPPGNFFIAEIFDVPHYHFYKVIIEVFIRAEDGLCREVVKHLNQIEEQILDHL  
AWKTKSPLWDRIRDNENRVPTCEEVMPQNLERLERTDEIYIAGSPLTPRRVGEVRADAGGLGRSITSPTTLYDRY  
SSPTVSTTRRRLFENDSPSEGSTSGRIPPQPLVNAVVPQVNPGETVSVTPVPGQTLVTMATATVTANNGQTVT  
IPVQGIANENGGITFFPVQVNVGGQAQAVAGSIQPLSAQALAGSLSSQVGTGTTLQVPGPVAIQQISPGGQQ  
NPQPLTRSSIRPRKTSSLALFFRKVYYLAGVRLRDLCKIKLDISDELKKIWTCFEFSIIQCTELMMDRHLDQ  
LLMCAIYVMAKVTKEDRSFQNIIMRCYRTQPQARSQVYRSVLIKGRNRSGSSESRSHQNSPTELNTDRASRDS  
SPVMRSNSTLVPVQPSSAPPTPTRLTGASSDVEEEERGDLIQFYNNIYRKQIQAFAMKYSQANAQTDTPPLSP  
YFPVVRTGSPRRVQLSQSHPIYISPHNNEAMPSPREKIFYYFSNSPSKRLREINSMIRTGETPTKKRGILLDDG  
SESPAKRICPENHSALLRRLQDVANDRGSQ\*  
>rs51619191\_ENSMUSP00000034091\_c.2646:C>T\_p.H883Y  
ENSMUST00000034091.8|Rb12-201|ENSMUSG00000031666|+|chr8:g.91833818:C>T  
MASGGNQSPPPPPAAAASSEEEEEEDGDAADRAQPAGSPHQIQQRFEELCSRLNMDEAARAEAWSSYRSMSES  
YTLEGNDLHWLACALYVACRKSVPVTVSKGTAEGNYVSLTRILRCSEQSLIEFFNKMKKWEDMANLPPHFRERT  
ERLERNFVSAVIFKKYEPIFQDIFKYPOEEQPRQQRGRKQRRQPCTTSEIFHFCWVLFYIYAKGNFPMISDDL  
VNSYHLLLCALDLVYGNAQCENRKLVPNPNFKGLSEDCHPKDSSKASSDPPCVIEKLCSLHDGLVLEAKGIKE  
HFWKPYIRKLFKLLKGKEENLTGFLEPGNFGESFKAVNKAYEYVLAAGNLDERVFLGEDAEVEVGTLSRC  
LSAASGTESAERTQMRDILQOHLDKSKALRVCTPLTGVRVYQENSPCVTPVSTAAHSLRSLHTMLSGLRNAPS  
EKLERILRSCSRDPTQAIADRLKEMYEIIYSQHFQPDENFNSCAKEIANKHFRFAEMLYYKLVESVIEQEQKRL  
GDMDSLGVLEHDAFHRSLACCLEVAVFVSHKPPGNFFIAEIFDVPHYHFYKVIIEVFIRAEDGLCREVVKHLN  
QIEEQILDHLAWKTKSPLWDRIRDNENRVPTCEEVMPQNLERLERTDEIYIAGSPLTPRRVGEVRADAGGLGRS  
TSPPTTLYDRYSSPTVSTTRRRLFENDSPSEGSTSGRIPPQPLVNAVVPQVNPGETVSVTPVPGQTLVTMATAT  
VTANNGQTVTIPVQGIANENGGITFFPVQVNVGGQAQAVAGSIQPLSAQALAGSLSSQVGTGTTLQVPGPVAI  
QQISPGGQQQNPQPLTSSSIRPRKTSSLALFFRKVYYLAGVRLRDLCKIKLDISDELKKIWTCFEFSIIQCT  
ELMMDRYLDQLLMCAIYVMAKVTKEDRSFQNIIMRCYRTQPQARSQVYRSVLIKGRNRSGSSESRSHQNSPTE  
LNTDRASRDSPPVMRSNSTLVPVQPSSAPPTPTRLTGASSDVEEEERGDLIQFYNNIYRKQIQAFAMKYSQAN  
AQTDTPPLSPYFPVVRTGSPRRVQLSQSHPIYISPHNNEAMPSPREKIFYYFSNSPSKRLREINSMIRTGETPT  
KKRGILLDDGSESPAKRICPENHSALLRRLQDVANDRGSQ\*  
>rs51619191\_ENSMUSP00000147579\_c.2517:C>T\_p.H840Y  
ENSMUST00000211136.2|Rb12-210|ENSMUSG00000031666|+|chr8:g.91833818:C>T  
MASGGNQSPPPPPAAAASSEEEEEEDGDAADRAQPAGSPHQIQQRFEELCSRLNMDEAARAEAWSSYRSMSES  
YTLEGNDLHWLACALYVACRKSVPVTVSKGTAEGNYVSLTRILRCSEQSLIEFFNKMKKWEDMANLPPHFRERT  
ERLERNFVSAVIFKKYEPIFQDIFKYPOEEQPRQQRGRKQRRQPCTTSEIFHFCWVLFYIYAKGLSEDCHPKD

SKASSDPPCVIEKLCSLHDGLVLEAKGIKEHFWKPYIRKLFKLLKGKEENLTGFLEPGNFGESFKAVNKAY  
 EYVLAAGNLDERVLGEDAEVEVGTLSRCLSAASGTESAERTQMRDILQQHLDKSKALRVCTPLTGVRVYQ  
 NSPCVTPVSTAAHLSRLHTMLSGLRNAPSEKLERILRSCSRDPTQAIADRLKEMYEIYSQHFPDENFNSCA  
 KEIANKHFRFAEMLYYKLVESVIEQEQKRLGDMDLGVLHDAFHRSLLACCLEVVAFSHKPPGNFPFIAEIF  
 DVPHYHFYKVEVFIIRAEDGLCREVVKHLNQIEEQILDHLAWKTKSPLWDRIIRDNENRVPTCEEVMPQNLER  
 TDEIYIAGSPLTPRRVGEVRADAGGLGRSITSPTTLYDRYSSPTVSTTRRRLFENDSPSEGSTSGRIPPQPLV  
 NAVPVQNVPGETVSVTPVPGQTLVTMATATVTANNGQTVTIPVQGIANENGGITFFPVQVNVGGQAQAVAGSI  
 QPLSAQALAGSLSSQVGTGTTLQVPGPVAIQQISPGGQQQNPQGQPLTSSSIRPRKTSSALFFRKVYYLAGVR  
 LRDLCKIKLDISDELRKKIWTCTFEFSIIQCTELMMDRYLDQLLMCAIYVMAKVTKEDRSFQNMRCYRTQPQAR  
 SQVYRSVLIKGKRNSGSSSRSHQNSPTELNTDRASRDS SPVMRSNSTLVPVQPSSAPPTPTRLTGASSDVE  
 EEERGLIQFYNNIYRKQIQAFAMKYSQANAQTDTPPLSPYFVRTGSPRRVQLSQSHPIYISPHNNEAMPSP  
 REKIFYFYSNSPSKRLREINSMIRTGETPTKKRGILLDDGSESPAKRICPENHSALLRRLQDVANDRGSQ\*  
 >rs51619191\_ENSMUSP00000147327\_c.2616:C>T\_p.H873Y  
 ENSMUST00000209518.2|Rb12-208|ENSMUSG00000031666|+|chr8:g.91833818:C>T  
 MASGGNQSPPPPPAAAASSEEEEDGDAADRAQPAGSPSHQIQQRFEELCSRLNMDEAARAEAWSSYRSMSES  
 YTLEGNLHHLACALYVACRKSVPVTSKGTAEAGNYVSLTRILRCSEQSLIEFFNKMKKWEDMANLPPHFRE  
 ERLERNFTVSAVIFKKYEPIFQDIFKYPQEEQPRQQRGRKQRRPCTTSEIFHFCWVLFYIYAKGNFPMISDDL  
 VNSYHLLCALDLVYGNALQCSNRKELVNPNFKGLSEDCHPKDKSKASSDPPCVIEKLCSLHDGLVLEAKGIKE  
 HFWKPYIRKLFKLLKGKEENLTGFLEPGNFGESFKAVNKAYEYVLAAGNLDERVLGEDAEVEVGTLSRCL  
 SAASGTESAERTQMRDILQQHLDKSKALRVCTPLTGVRVYQENSPCVTPVSTAAHLSRLHTMLSGLRNAPS  
 EKLERILRSCSRDPTQAIADRLKEMYEIYSQHFPDENFNSCAKEMLYYKLVESVIEQEQKRLGDMDLGVLH  
 DAFHRSLLACCLEVVAFSHKPPGNFPFIAEIFDVPHYHFYKVEVFIIRAEDGLCREVVKHLNQIEEQILDHL  
 AWKTKSPLWDRIIRDNENRVPTCEEVMPQNLERTDEIYIAGSPLTPRRVGEVRADAGGLGRSITSPTTLYDRY  
 SSPTVSTTRRRLFENDSPSEGSTSGRIPPQPLVNAVVPVQNVPGETVSVTPVPGQTLVTMATATVTANNGQTVT  
 IPVQGIANENGGITFFPVQVNVGGQAQAVAGSIQPLSAQALAGSLSSQVGTGTTLQVPGPVAIQQISPGGQQ  
 NPGQPLTSSSIRPRKTSSALFFRKVYYLAGVRLRDLCKIKLDISDELRKKIWTCTFEFSIIQCTELMMDRYLDQ  
 LLMCAIYVMAKVTKEDRSFQNMRCYRTQPQARSVRSVLIKGKRNSGSSSRSHQNSPTELNTDRASRDS  
 SPVMRSNSTLVPVQPSSAPPTPTRLTGASSDVEEEERGLIQFYNNIYRKQIQAFAMKYSQANAQTDTPPLSP  
 YPFVRTGSPRRVQLSQSHPIYISPHNNEAMPSPREKIFYFYSNSPSKRLREINSMIRTGETPTKKRGILLDDG  
 SESPAKRICPENHSALLRRLQDVANDRGSQ\*  
 >rs226649924\_ENSMUSP00000034091\_c.2653:ACC>A\_p.D885del-fs  
 ENSMUST00000034091.8|Rb12-201|ENSMUSG00000031666|+|chr8:g.91833825:ACC>A  
 MASGGNQSPPPPPAAAASSEEEEDGDAADRAQPAGSPSHQIQQRFEELCSRLNMDEAARAEAWSSYRSMSES  
 YTLEGNLHHLACALYVACRKSVPVTSKGTAEAGNYVSLTRILRCSEQSLIEFFNKMKKWEDMANLPPHFRE  
 ERLERNFTVSAVIFKKYEPIFQDIFKYPQEEQPRQQRGRKQRRPCTTSEIFHFCWVLFYIYAKGNFPMISDDL  
 VNSYHLLCALDLVYGNALQCSNRKELVNPNFKGLSEDCHPKDKSKASSDPPCVIEKLCSLHDGLVLEAKGIKE  
 HFWKPYIRKLFKLLKGKEENLTGFLEPGNFGESFKAVNKAYEYVLAAGNLDERVLGEDAEVEVGTLSRCL  
 SAASGTESAERTQMRDILQQHLDKSKALRVCTPLTGVRVYQENSPCVTPVSTAAHLSRLHTMLSGLRNAPS  
 EKLERILRSCSRDPTQAIADRLKEMYEIYSQHFPDENFNSCAKEIANKHFRFAEMLYYKLVESVIEQEQKRL  
 GDMDLGVLHDAFHRSLLACCLEVVAFSHKPPGNFPFIAEIFDVPHYHFYKVEVFIIRAEDGLCREVVKHLN  
 QIEEQILDHLAWKTKSPLWDRIIRDNENRVPTCEEVMPQNLERTDEIYIAGSPLTPRRVGEVRADAGGLGRS  
 ITSPTTLYDRYSSPTVSTTRRRLFENDSPSEGSTSGRIPPQPLVNAVVPVQNVPGETVSVTPVPGQTLVTMATAT  
 VTANNGQTVTIPVQGIANENGGITFFPVQVNVGGQAQAVAGSIQPLSAQALAGSLSSQVGTGTTLQVPGPVAI  
 QQISPGGQQQNPQGQPLTSSSIRPRKTSSALFFRKVYYLAGVRLRDLCKIKLDISDELRKKIWTCTFEFSIIQCT  
 ELMMDRHLEAVDVCHLCDGKGHRRQVLEPHHALLQNSATGPEPGVQKCLDKREKKLWQQ  
 >rs226649924\_ENSMUSP00000147579\_c.2524:ACC>A\_p.D842del-fs  
 ENSMUST00000211136.2|Rb12-210|ENSMUSG00000031666|+|chr8:g.91833825:ACC>A  
 MASGGNQSPPPPPAAAASSEEEEDGDAADRAQPAGSPSHQIQQRFEELCSRLNMDEAARAEAWSSYRSMSES  
 YTLEGNLHHLACALYVACRKSVPVTSKGTAEAGNYVSLTRILRCSEQSLIEFFNKMKKWEDMANLPPHFRE  
 ERLERNFTVSAVIFKKYEPIFQDIFKYPQEEQPRQQRGRKQRRPCTTSEIFHFCWVLFYIYAKGLEDCHPKD  
 SKASSDPPCVIEKLCSLHDGLVLEAKGIKEHFWKPYIRKLFKLLKGKEENLTGFLEPGNFGESFKAVNKAY  
 EYVLAAGNLDERVLGEDAEVEVGTLSRCLSAASGTESAERTQMRDILQQHLDKSKALRVCTPLTGVRVYQ  
 NSPCVTPVSTAAHLSRLHTMLSGLRNAPSEKLERILRSCSRDPTQAIADRLKEMYEIYSQHFPDENFNSCA  
 KEIANKHFRFAEMLYYKLVESVIEQEQKRLGDMDLGVLHDAFHRSLLACCLEVVAFSHKPPGNFPFIAEIF  
 DVPHYHFYKVEVFIIRAEDGLCREVVKHLNQIEEQILDHLAWKTKSPLWDRIIRDNENRVPTCEEVMPQNLER  
 TDEIYIAGSPLTPRRVGEVRADAGGLGRSITSPTTLYDRYSSPTVSTTRRRLFENDSPSEGSTSGRIPPQPLV  
 NAVPVQNVPGETVSVTPVPGQTLVTMATATVTANNGQTVTIPVQGIANENGGITFFPVQVNVGGQAQAVAGSI  
 QPLSAQALAGSLSSQVGTGTTLQVPGPVAIQQISPGGQQQNPQGQPLTSSSIRPRKTSSALFFRKVYYLAGVR



LRDLCIKLDISDELRRKIWTCFEFSIIQCTELMMDRHLEAVDVCHLCDGKGHKRRQVLPEHHALLQNSATGPE  
 PGVQKCLDKREKKKLWQQ  
 >rs226649924\_ENSMUSP00000147327\_c.2623:ACC>A\_p.D875del-fs  
 ENSMUST00000209518.2|Rb12-208|ENSMUSG00000031666|+|chr8:g.91833825:ACC>A  
 MASGGNQSPPPPPAAAASSEEEEEEDGDAADRAQPAGSPHQIQQRFEELCSRLNMDEAARAEAWSSYRSMSES  
 YTLEGNDLHWLACALYVACRKSVPVTVSKGTAEGNYVSLTRILRCSEQSLIEFFNKMKKWEDMANLPPHFRERT  
 ERLERNFTVSAVIFKKYEPIFQDIFKYPQEEQPRQQRGRKQRRPCTTSEIFHFCWVLFYIYAKGNFPMISDDL  
 VNSYHLLLALDLDVYGALQCSNRKELVNPVNFKGLSEDCPKDSKASSDPPCVIEKLCSLHDGLVLEAKGIKE  
 HFWKPYIRKLFKFKLLKGKEENLTGFLEPGNFGESFKAVNKAYEEYVLAAGNLDERVFLGEDAEEVGTLSRC  
 LSAASGTEAERTQMRDILQQHLDKSKALRVCTPLTGVRVYQENSPCVTPVSTAAHSLSRHLTMSGLRNAPS  
 EKLERILRSCSRDPTQAIADRLKEMYEIYSQHFQPDENFNSCAKEMLYYKLVESVIEQEQKRLGDMDLGVLVLE  
 HDAFHRSLLACCLEVVAFVSHKPPGNFPFIAEIFDVPHYHFYKVIIEVFIRAEDGLCREVVKHLNQIEEQILDHL  
 AWKTKSPLWDRIRDNENRVPTCEEVMPQNLERDEIYIAGSPLTPRRVGEVRADAGGLGRSITSPTTLYDRY  
 SSPTVSTTRRRLFENDSPSEGSTSGRIPPQPLVNAVVPVQNPGETVSVTPVPGQTLVTMATATVTANNGQTVT  
 IPVQGIANENGGITFFPVQVNVGGQAQAVAGSIQPLSAQALAGSLSSQQVVTGTTLQVPGPVAIQQISPGGQQQ  
 NPGQPLTSSSIRPRKTSSLALFFRKVYYLAGVRLDLCIKLDISDELRRKIWTCFEFSIIQCTELMMDRHLEA  
 VDVCHLCDGKGHKRRQVLPEHHALLQNSATGPEPGVQKCLDKREKKKLWQQ  
 >rs51979111\_ENSMUSP00000034091\_c.2671:C>T\_p.A891V  
 ENSMUST00000034091.8|Rb12-201|ENSMUSG00000031666|+|chr8:g.91833843:C>T  
 MASGGNQSPPPPPAAAASSEEEEEEDGDAADRAQPAGSPHQIQQRFEELCSRLNMDEAARAEAWSSYRSMSES  
 YTLEGNDLHWLACALYVACRKSVPVTVSKGTAEGNYVSLTRILRCSEQSLIEFFNKMKKWEDMANLPPHFRERT  
 ERLERNFTVSAVIFKKYEPIFQDIFKYPQEEQPRQQRGRKQRRPCTTSEIFHFCWVLFYIYAKGNFPMISDDL  
 VNSYHLLLALDLDVYGALQCSNRKELVNPVNFKGLSEDCPKDSKASSDPPCVIEKLCSLHDGLVLEAKGIKE  
 HFWKPYIRKLFKFKLLKGKEENLTGFLEPGNFGESFKAVNKAYEEYVLAAGNLDERVFLGEDAEEVGTLSRC  
 LSAASGTEAERTQMRDILQQHLDKSKALRVCTPLTGVRVYQENSPCVTPVSTAAHSLSRHLTMSGLRNAPS  
 EKLERILRSCSRDPTQAIADRLKEMYEIYSQHFQPDENFNSCAKEIANKHFRFAEMLYYKLVESVIEQEQKRL  
 GDMDLGVLVLEHDAFHRSLLACCLEVVAFVSHKPPGNFPFIAEIFDVPHYHFYKVIIEVFIRAEDGLCREVVKHLN  
 QIEEQILDHLAWKTKSPLWDRIRDNENRVPTCEEVMPQNLERDEIYIAGSPLTPRRVGEVRADAGGLGRSIT  
 TSPTTLYDRYSSPTVSTTRRRLFENDSPSEGSTSGRIPPQPLVNAVVPVQNPGETVSVTPVPGQTLVTMATAT  
 VTANNGQTVTIPVQGIANENGGITFFPVQVNVGGQAQAVAGSIQPLSAQALAGSLSSQQVVTGTTLQVPGPVAI  
 QQISPGGQQQNPGQPLTSSSIRPRKTSSLALFFRKVYYLAGVRLDLCIKLDISDELRRKIWTCFEFSIIQCT  
 ELMMDRHLDQLLMCVIYVMAKVTKEDRSFQNMRCYRTPQARSQVYRSVLIKGRNRSGSSESRSQNSPTE  
 LNTDRASRDSSPVMRSNSTLPVPQPSSAPPTPTRLTGASSDVEEEERGDLIQFYNNIYRKQIQAFAMKYSQAN  
 AQTDTPLSPYPFVRTGSPRRVQLSQSHPIYISPHNNEAMPSPREKIFYFYSNSPSKRLREINSMIRTGETPT  
 KKRGIILLDDGSESPAKRICPENHSALLRRLQDVANDRGSQ\*  
 >rs51979111\_ENSMUSP00000147579\_c.2542:C>T\_p.A848V  
 ENSMUST00000211136.2|Rb12-210|ENSMUSG00000031666|+|chr8:g.91833843:C>T  
 MASGGNQSPPPPPAAAASSEEEEEEDGDAADRAQPAGSPHQIQQRFEELCSRLNMDEAARAEAWSSYRSMSES  
 YTLEGNDLHWLACALYVACRKSVPVTVSKGTAEGNYVSLTRILRCSEQSLIEFFNKMKKWEDMANLPPHFRERT  
 ERLERNFTVSAVIFKKYEPIFQDIFKYPQEEQPRQQRGRKQRRPCTTSEIFHFCWVLFYIYAKGLSEDCPKD  
 SKASSDPPCVIEKLCSLHDGLVLEAKGIKEHFWKPYIRKLFKFKLLKGKEENLTGFLEPGNFGESFKAVNKAY  
 EEYVLAAGNLDERVFLGEDAEEVGTLSRCLSAASGTEAERTQMRDILQQHLDKSKALRVCTPLTGVRVYQ  
 NSPCVTPVSTAAHSLSRHLTMSGLRNAPSEKLERILRSCSRDPTQAIADRLKEMYEIYSQHFQPDENFNSCA  
 KEIANKHFRFAEMLYYKLVESVIEQEQKRLGDMDLGVLVLEHDAFHRSLLACCLEVVAFVSHKPPGNFPFIAEIF  
 DVPHYHFYKVIIEVFIRAEDGLCREVVKHLNQIEEQILDHLAWKTKSPLWDRIRDNENRVPTCEEVMPQNLER  
 TDEIYIAGSPLTPRRVGEVRADAGGLGRSITSPTTLYDRYSSPTVSTTRRRLFENDSPSEGSTSGRIPPQPLV  
 NAVVPVQNPGETVSVTPVPGQTLVTMATATVTANNGQTVTIPVQGIANENGGITFFPVQVNVGGQAQAVAGSI  
 QPLSAQALAGSLSSQQVVTGTTLQVPGPVAIQQISPGGQQQNPGQPLTSSSIRPRKTSSLALFFRKVYYLAGV  
 RLRDLCIKLDISDELRRKIWTCFEFSIIQCTELMMDRHLDQLLMCVIYVMAKVTKEDRSFQNMRCYRTPQAR  
 SQVYRSVLIKGRNRSGSSESRSQNSPTELNTDRASRDSSPVMRSNSTLPVPQPSSAPPTPTRLTGASSDVE  
 EEERGDLIQFYNNIYRKQIQAFAMKYSQANAQTDTPLSPYPFVRTGSPRRVQLSQSHPIYISPHNNEAMPSP  
 REKIFYFYSNSPSKRLREINSMIRTGETPTKKRGIILLDDGSESPAKRICPENHSALLRRLQDVANDRGSQ\*  
 >rs15979111\_ENSMUSP00000147327\_c.2641:C>T\_p.A881V  
 ENSMUST00000209518.2|Rb12-208|ENSMUSG00000031666|+|chr8:g.91833843:C>T  
 MASGGNQSPPPPPAAAASSEEEEEEDGDAADRAQPAGSPHQIQQRFEELCSRLNMDEAARAEAWSSYRSMSES  
 YTLEGNDLHWLACALYVACRKSVPVTVSKGTAEGNYVSLTRILRCSEQSLIEFFNKMKKWEDMANLPPHFRERT  
 ERLERNFTVSAVIFKKYEPIFQDIFKYPQEEQPRQQRGRKQRRPCTTSEIFHFCWVLFYIYAKGNFPMISDDL  
 VNSYHLLLALDLDVYGALQCSNRKELVNPVNFKGLSEDCPKDSKASSDPPCVIEKLCSLHDGLVLEAKGIKE

HFWKPYIRKLFKFKLLKGKEENLTGFLEPGNFGESFKAVNKAYEEYVLAAGNLDERVFLGEDAEEEVGTLSRC  
LSAASGTEAERTQMRDILQQHLDKSKALRVCTPLTGVRVQENSPCVTPVSTAAHSLRSLHTMLSGLRNAPS  
EKLERILRSCSRDPTQAIADRLKEMYE IYSQHFPDENFNSCAKEMLYYKLVESVIEQEQRKLGMDLDSGVLE  
HDAFHRSLLACCLEVVAFSHKPPGNFPFIAE IFDVPHYHYFYKVI EVFIRAEDGLCREVVKHLNQIEEQILDHL  
AWKTKSPLWDRIRDNENRVPTCEEVMPQNLERTDEIYIAGSPLTPRRVGEVRADAGGLGRSITSPTTLYDRY  
SSPTVSTTRRRLFENDSPSEGSTSGRI PPQPLVNAVVPVQNVPGETVSVTPVPGQTLVTMATATVTANNGQTVT  
IPVQGIANENGGITFFPVQVNVGGQAQAVAGSIQPLSAQALAGSLSSQQVTGTTLQVPGPVAIQQISPGGQQQ  
NPGQPLTSSSIRPRKTSSALFFRKVYYLAGVRLRDLCKLDISDELRRKIWTCEFEFSIQCTELMMDRHLDDQ  
LLMCVIYVMAKVTKEDRSFQNMRCYRTQPQARSQVYRSVLIKGKRRNSGSSSRSHQNSPTELNTDRASRDS  
SPVMRSNSTLPVPQSSAPPTPTRLTGASSDVEEEERGDLIQFYNNIYRKQIQAFAMKYSQANAQTDTPLSP  
YFPVRTGSPRRVQLSQSHPIYISPHNNEAMPSPREKIFYFNSNSPSKRLREINSMIRTGETPTTKRGILLDDG  
SESPAKRICPENHSALLRRLQDVANDRGSQ\*

>rs32595399\_ENSMUSP00000034091\_c.2813:T>A\_p.S938R

ENSMUST00000034091.8|Rb12-201|ENSMUSG00000031666|+|chr8:g.91840663:T>A  
MASGGNQSPPPPPAAAASSEEEEDGDAADRAQPAGSPSHQIQQRFEELCSRLNMDEAARAEAWSSYRSMSES  
YTLEGNDLHWLACALYVACRKSVPVTVSKGTAEGNYVSLTRILRCSEQSLIEFFNKMKKWEDMANLPPHFRETR  
ERLERNFTVSAVIFKKYEPIFQDIFKYPQEEQPRQQRGRKQRRPCTTSEIFHFVCWVLF IYAKGNFPMISDDL  
VNSYHLLLCALDLVYGNALQCSNRKELVNPFNKGLSEDCHPKDSKASSDPPCVIEKLCSLHDGLVLEAKGIKE  
HFWKPYIRKLFKFKLLKGKEENLTGFLEPGNFGESFKAVNKAYEEYVLAAGNLDERVFLGEDAEEEVGTLSRC  
LSAASGTEAERTQMRDILQQHLDKSKALRVCTPLTGVRVQENSPCVTPVSTAAHSLRSLHTMLSGLRNAPS  
EKLERILRSCSRDPTQAIADRLKEMYE IYSQHFPDENFNSCAKEIANKHFRFAEMLYYKLVESVIEQEQRK  
GMDLDSGVLEHDAFHRSLLACCLEVVAFSHKPPGNFPFIAE IFDVPHYHYFYKVI EVFIRAEDGLCREVVKHLN  
QIEEQILDHLAWKTKSPLWDRIRDNENRVPTCEEVMPQNLERTDEIYIAGSPLTPRRVGEVRADAGGLGRS  
TSPTTLYDRYSSPTVSTTRRRLFENDSPSEGSTSGRI PPQPLVNAVVPVQNVPGETVSVTPVPGQTLVTMATAT  
VTANNGQTVTIPVQGIANENGGITFFPVQVNVGGQAQAVAGSIQPLSAQALAGSLSSQQVTGTTLQVPGPVAI  
QQISPGGQQQNPGQPLTSSSIRPRKTSSALFFRKVYYLAGVRLRDLCKLDISDELRRKIWTCEFEFSIQCT  
ELMMDRHLDDQLLMCAIYVMAKVTKEDRSFQNMRCYRTQPQARSQVYRSVLIKGKRRNSGSSSRSHQNSPTE  
LNTDRASRDS SPVMRSNSTLPVPQSSAPPTPTRLTGASSDVEEEERGDLIQFYNNIYRKQIQAFAMKYSQAN  
AQTDTPLSPYFPVRTGSPRRVQLSQSHPIYISPHNNEAMPSPREKIFYFNSNSPSKRLREINSMIRTGETPT  
TKRGILLDDGSESPAKRICPENHSALLRRLQDVANDRGSQ\*

>rs32595399\_ENSMUSP00000147579\_c.2684:T>A\_p.S895R

ENSMUST00000211136.2|Rb12-210|ENSMUSG00000031666|+|chr8:g.91840663:T>A  
MASGGNQSPPPPPAAAASSEEEEDGDAADRAQPAGSPSHQIQQRFEELCSRLNMDEAARAEAWSSYRSMSES  
YTLEGNDLHWLACALYVACRKSVPVTVSKGTAEGNYVSLTRILRCSEQSLIEFFNKMKKWEDMANLPPHFRETR  
ERLERNFTVSAVIFKKYEPIFQDIFKYPQEEQPRQQRGRKQRRPCTTSEIFHFVCWVLF IYAKGLSEDCHPK  
SKASSDPPCVIEKLCSLHDGLVLEAKGIKEHFWKPYIRKLFKFKLLKGKEENLTGFLEPGNFGESFKAVNKAY  
EEYVLAAGNLDERVFLGEDAEEEVGTLSRCLSAASGTEAERTQMRDILQQHLDKSKALRVCTPLTGVRVQ  
NSPCVTPVSTAAHSLRSLHTMLSGLRNAPSEKLERILRSCSRDPTQAIADRLKEMYE IYSQHFPDENFNSCA  
KEIANKHFRFAEMLYYKLVESVIEQEQRKLGMDLDSGVLEHDAFHRSLLACCLEVVAFSHKPPGNFPFIAE I  
FDVPHYHYFYKVI EVFIRAEDGLCREVVKHLNQIEEQILDHLAWKTKSPLWDRIRDNENRVPTCEEVMPQNL  
ERTDEIYIAGSPLTPRRVGEVRADAGGLGRSITSPTTLYDRYSSPTVSTTRRRLFENDSPSEGSTSGRI PPQPLV  
NAVVPVQNVPGETVSVTPVPGQTLVTMATATVTANNGQTVTIPVQGIANENGGITFFPVQVNVGGQAQAVAGSI  
QPLSAQALAGSLSSQQVTGTTLQVPGPVAIQQISPGGQQQNPGQPLTSSSIRPRKTSSALFFRKVYYLAGV  
RLDLCKLDISDELRRKIWTCEFEFSIQCTELMMDRHLDDQLLMCAIYVMAKVTKEDRSFQNMRCYRTQPQAR  
SQVYRSVLIKGKRRNSGSSSRSHQNSPTELNTDRASRDS SPVMRSNSTLPVPQSSAPPTPTRLTGASSDVE  
EEERGDLIQFYNNIYRKQIQAFAMKYSQANAQTDTPLSPYFPVRTGSPRRVQLSQSHPIYISPHNNEAMPSP  
REKIFYFNSNSPSKRLREINSMIRTGETPTTKRGILLDDGSESPAKRICPENHSALLRRLQDVANDRGSQ\*

>rs32595399\_ENSMUSP00000147327\_c.2783:T>A\_p.S928R

ENSMUST00000209518.2|Rb12-208|ENSMUSG00000031666|+|chr8:g.91840663:T>A  
MASGGNQSPPPPPAAAASSEEEEDGDAADRAQPAGSPSHQIQQRFEELCSRLNMDEAARAEAWSSYRSMSES  
YTLEGNDLHWLACALYVACRKSVPVTVSKGTAEGNYVSLTRILRCSEQSLIEFFNKMKKWEDMANLPPHFRETR  
ERLERNFTVSAVIFKKYEPIFQDIFKYPQEEQPRQQRGRKQRRPCTTSEIFHFVCWVLF IYAKGNFPMISDDL  
VNSYHLLLCALDLVYGNALQCSNRKELVNPFNKGLSEDCHPKDSKASSDPPCVIEKLCSLHDGLVLEAKGIKE  
HFWKPYIRKLFKFKLLKGKEENLTGFLEPGNFGESFKAVNKAYEEYVLAAGNLDERVFLGEDAEEEVGTLSRC  
LSAASGTEAERTQMRDILQQHLDKSKALRVCTPLTGVRVQENSPCVTPVSTAAHSLRSLHTMLSGLRNAPS  
EKLERILRSCSRDPTQAIADRLKEMYE IYSQHFPDENFNSCAKEMLYYKLVESVIEQEQRKLGMDLDSGVLE  
HDAFHRSLLACCLEVVAFSHKPPGNFPFIAE IFDVPHYHYFYKVI EVFIRAEDGLCREVVKHLNQIEEQILDHL  
AWKTKSPLWDRIRDNENRVPTCEEVMPQNLERTDEIYIAGSPLTPRRVGEVRADAGGLGRSITSPTTLYDRY

SSPTVSTTRRRLFENDSPSEGSTSGRIPPQPLVNAVVPQVNPGETVSVTPVPGQTLVTMATATVTANNGQTVT  
IPVQGIANENGGITFFPVQVNVGGQAQAVAGSIQPLSAQALAGSLSSQVVTGTTLQVPGPVAIQQISPGGQQQ  
NPGQPLTSSSIRPRKTSLLALFFRKVYYLAGVRLRDLCKLDISDELRRKKIWTCEFFSIIQCTELMMDRHLDQ  
LLMCAIYVMAKVTKEDRSFQNIIMRCYRTQPQARSQVYRSVLIKGRNRNSGSRRESRSHQNSPTELNTDRASRDS  
SPVMRSNSTLVPVQPSSAPPTPTRLTGASSDVEEEERGDLIQFYNNIYRKQIQAFAMKYSQANAQTDTPLSP  
YFPVVRTGSPRRVQLSQSHPIYISPHNNEAMPSPREKIFYFYFNSPSKRLREINSMIRTGETPTKKRGILLDDG  
SESPAKRICPENHSALLRRLQDVANDRGSQ\*

>rs48045978\_ENSMUSP00000042702\_c.3409:T>C\_p.M1137T

ENSMUST00000047783.14|Rpgrip11-201|ENSMUSG00000033282|-  
|chr8:g.91959489:A>G

MSGPSETAGDLPVKDTGLNLFVGGGLQETSTARTVKTRQAVSRVSREELEDRFLRLHDENILLKQHARKQED  
KIKRMA TKLIRLVNDKKRYERVGGGPKRLGRDVEMEEMIEQLQEKVHELERQNEVLKNRLISAKQQLQVQGHR  
QTSYSRVQARVNTGRRRASASAGSQECPGKGLRFQNVDEAETVQPTLTKEYSNSLLEEARGEIRNLENVIQSQR  
GQIEELEHLAEILKTQLKRKENEIELSLLQLREQQATDQRSNIRDNVETIKLHKQLVEKSNALSVIEGKFIQL  
QEKQRTLRI SHDALMANGDELNKQLKEQRLKCCSLEKQLHSVRFSEERRVEELQDRINDLEKERELLENYDKL  
YNSAFSAAHEEQWKLKEQQMKVQIAQLETALKSDLTDKTEVLDKDKTERDQNEKLVQENRDLQLQCLQQKQRL  
HELQSRLLFFNQESDINADDLSEALLLIKAQKEQKNGDLSFLEKVDKINKDLDRSMKELQATHAETVQELEK  
TRNMLIMQHKINKDYQMEVETVTQKMNELQDYELKVEQYVHLLDIRAARIQKLEAQLKDIAGTKQYKFKPE  
IMPDDSVDEFDETIHLERGENLFEIHINKVTFSSSEVLRASGDKELVTFCTYAFYDFELQTTPIVRGLYPEYNF  
TSQYLVHVNDLFLQYIQKNTVTLELHQAHSSTDYETIAACQLRFHEILEKSGRIFCTTSLVGTGKDI PNFGTVE  
YWFRLRVPMDQAIRLYRERAKALGYITSNFKKPEKMQLSQQAATTAQISPAESTDGNLNLHVTVKCCTGLQ  
SRASYLQPHAYVYKFFDFPDHDTAIVPSSNDPQFDDHMCFPVPMNMDLDRYLKSESLSFYVFDSDTQENIY  
MGKVNVPPLISLAHDKCISGIFELMDKEKHAAGTIQVILKWKFTYLPSPSGSITTEDLGKFCVREEPEAVQRLPP  
KSSDVTSVVAPKPKPRQRLTFVDKKSFAADTISHPSPETSPPPKDIKDSSEVGPKEPENGLSAVAYPSKESGV  
AKVEENVGEMQQKEDDISFLSEGQLASGVSASSEDETEITEELEPEDEDRSASDSDDCIIPSSVSTNTKQPS  
EERIEI IALNLNDSQITREDTIQRLFIECRFYSLPAEETPMSLPKQSGQWVYNYNSNVIYLDKENNPAVRD  
ILKAILQRRELPHRSVRFTTVSDPPEDEQDLECEDIGVAHVLDLADLFQKGRDIEQDIDVLDARTDGGTIGKL  
KVTVEALHALRSVYEQNRKDLEA\*

>rs51575997\_ENSMUSP00000042702\_c.3292:T>G\_p.I1098S

ENSMUST00000047783.14|Rpgrip11-201|ENSMUSG00000033282|-  
|chr8:g.91959606:A>C

MSGPSETAGDLPVKDTGLNLFVGGGLQETSTARTVKTRQAVSRVSREELEDRFLRLHDENILLKQHARKQED  
KIKRMA TKLIRLVNDKKRYERVGGGPKRLGRDVEMEEMIEQLQEKVHELERQNEVLKNRLISAKQQLQVQGHR  
QTSYSRVQARVNTGRRRASASAGSQECPGKGLRFQNVDEAETVQPTLTKEYSNSLLEEARGEIRNLENVIQSQR  
GQIEELEHLAEILKTQLKRKENEIELSLLQLREQQATDQRSNIRDNVETIKLHKQLVEKSNALSVIEGKFIQL  
QEKQRTLRI SHDALMANGDELNKQLKEQRLKCCSLEKQLHSVRFSEERRVEELQDRINDLEKERELLENYDKL  
YNSAFSAAHEEQWKLKEQQMKVQIAQLETALKSDLTDKTEVLDKDKTERDQNEKLVQENRDLQLQCLQQKQRL  
HELQSRLLFFNQESDINADDLSEALLLIKAQKEQKNGDLSFLEKVDKINKDLDRSMKELQATHAETVQELEK  
TRNMLIMQHKINKDYQMEVETVTQKMNELQDYELKVEQYVHLLDIRAARIQKLEAQLKDIAGTKQYKFKPE  
IMPDDSVDEFDETIHLERGENLFEIHINKVTFSSSEVLRASGDKELVTFCTYAFYDFELQTTPIVRGLYPEYNF  
TSQYLVHVNDLFLQYIQKNTVTLELHQAHSSTDYETIAACQLRFHEILEKSGRIFCTTSLVGTGKDI PNFGTVE  
YWFRLRVPMDQAIRLYRERAKALGYITSNFKKPEKMQLSQQAATTAQISPAESTDGNLNLHVTVKCCTGLQ  
SRASYLQPHAYVYKFFDFPDHDTAIVPSSNDPQFDDHMCFPVPMNMDLDRYLKSESLSFYVFDSDTQENIY  
MGKVNVPPLISLAHDKCISGIFELMDKEKHAAGTIQVILKWKFTYLPSPSGSITTEDLGKFCVREEPEAVQRLPP  
KSSDVTSVVAPKPKPRQRLTFVDKKSFAADTISHPSPETSPPPKDIKDSSEVGPKEPENGLSAVAYPSKESGV  
AKVEENVGEMQQKEDDISFLSEGQLASGVSASSEDETEITEELEPEDEDRSASDSDDCIIPSSVSTNTKQPS  
EESRIE I IALNLNDSQITREDTIQRLFIECRFYSLPAEETPMSLPKQSGQWVYNYNSNVIYLDKENNPAVRD  
ILKAILQRRELPHRSVRFTTVSDPPEDEQDLECEDIGVAHVLDLADLFQKGRDIEQDIDVLDARTDGGTIGKL  
KVTVEALHALRSVYEQNRKDLEA\*

>rs248295175\_ENSMUSP00000042702\_c.2974:C>T\_p.P992L

ENSMUST00000047783.14|Rpgrip11-201|ENSMUSG00000033282|-  
|chr8:g.91979189:G>A

MSGPSETAGDLPVKDTGLNLFVGGGLQETSTARTVKTRQAVSRVSREELEDRFLRLHDENILLKQHARKQED  
KIKRMA TKLIRLVNDKKRYERVGGGPKRLGRDVEMEEMIEQLQEKVHELERQNEVLKNRLISAKQQLQVQGHR  
QTSYSRVQARVNTGRRRASASAGSQECPGKGLRFQNVDEAETVQPTLTKEYSNSLLEEARGEIRNLENVIQSQR  
GQIEELEHLAEILKTQLKRKENEIELSLLQLREQQATDQRSNIRDNVETIKLHKQLVEKSNALSVIEGKFIQL  
QEKQRTLRI SHDALMANGDELNKQLKEQRLKCCSLEKQLHSVRFSEERRVEELQDRINDLEKERELLENYDKL  
YNSAFSAAHEEQWKLKEQQMKVQIAQLETALKSDLTDKTEVLDKDKTERDQNEKLVQENRDLQLQCLQQKQRL

HELQSRLLKFFNQESDINADDLSEALLLIKAQKEQKNGDLSFLEKVDISKINKDLDRSMKELQATHAETVQELEK  
 TRNMLIMQHKINKDYQMEVETVTQKMENLQDDYELKVEQYVHLLDIRAARIQKLEAQLKDIAYGTKQYKFKPE  
 IMPDDSVDEFDETIHLERGENLFEIHINKVTFSSSEVLRASGDKELVTFCTYAFYDFELQTTPIVRGLYPEYNF  
 TSQYLVHVNDLFLQYIQKNTVTLELHQAHSTDYETIAACQLRFHEILEKSGRIFCTTSLVGTGKDI PNFGTVE  
 YWFRLRVPMDQAIRLYRERAKALGYITSNFKKPEKMQLSSQQAATTAQISPAESTDGNLNLHVTVCCTGLQ  
 SRASYLQPHAYVVYKFFDFPDHDTAIVPSSNDPQFDDHMCFFVPMNMDLDRYLKSELSFYVFDSDTQENIY  
 MGKVVNPLISLAHDKCISGIFELMDKEKHAAGTIQVILKWKFTYLPSPSGITTEDLGKFCVCREEPEAVQRLPP  
 KSSDVTSVVAPKPKPRQRLTFVDKKSFAADTISHPSPETSPPPKDIKDSSEVGPKEPENGLSAVAYPSKESGV  
 AKVEENVGEMQGGKEDDISFLSEGQLASGSVASSEDETEITEELEPEDEDRSASDSDDCIIPSSVSTNTKQPS  
 EEIRIEIIALNLNDSQITREDTIQRLFIIECRFYSLPAEETPMSLKPQSGQWVYNYNSNVIYLDKENNPAVRD  
 ILKAILQRRELPHRSVRFTVSDPPEDEQDLECEDIGVAHVLDLADLFQKGRDIEQDIDVLDARTDGGTIGKL  
 KVTVEALHALRSVYEQNRKDLEA\*

>rs248295175\_ENSMUSP00000147300\_c.637:C>T\_p.P213L  
 ENSMUST00000209616.2|Rpgrip11-206|ENSMUSG00000033282|-  
 |chr8:g.91979189:G>A

GENLFEIHINKVTFSSSEVLRASGDKELVTFCTYAFYDFELQTTPIVRGLYPEYNFTSQYLVHVNDLFLQYIQK  
 NVTLELHQAHSTDYETIAACQLRFHEILEKSGRIFCTTSLVGI FELMDKEKHAAGTIQVILKWKFTYLPSPSG  
 SITTEDLGKFCVCREEPEAVQRLPPKSSDVTSVVAPKPKPRQRLTFVDKKSFAADTISHPSPETSPPPKDIKDS  
 SPEVGPKEPENGLSAVAYPSKESGVAKVEENVGEM

>rs33211992\_ENSMUSP00000042702\_c.2043:C>T\_p.L682F  
 ENSMUST00000047783.14|Rpgrip11-201|ENSMUSG00000033282|-  
 |chr8:g.91996835:G>A

MSGPSDETAGDLPVKDTGLNLFVGGLOQETSTARTVKTRQAVSRVSREELEDRFLRLHDENILLKQHARKQED  
 KIKRMATKLIIRLVNDKKRYERVGGGPKRLGRDVEMEEMIEQLQEKVHELERQNEVLKNRLISAKQQQLQVQGHR  
 QTSYSRVQARVNTGRRRASASAGSQECPGKGLRFQNVDEAETVQPTLTQYNSNLLLEARGEIRNLENVIQSQR  
 GQIEELEHLAEIILKTLQKRENEIELSLLQLRECCQATDQRSNIRDNVETIKLHKQLVDEKSNALSVIEGKFIQRL  
 QEKQRTLRISHDALMANGDELNKQLKEQRLKCSLEKQLHSHVRFSEERRVEELQDRINDLEKERELLKENYDKL  
 YNSAFSAAHQEWKLEQKQMVQIAQLETTALKSDLTDKTEVLDKLDKTERDQNEKLVQENRDLQLQCLQKQRL  
 HELQSRLLKFFNQESDINADDLSEALLLIKAQKEQKNGDLSFLEKVDISKINKDLDRSMKELQATHAETVQELEK  
 TRNMLIMQHKINKDYQMEVETVTQKMENLQDDYELKVEQYVHLLDIRAARIQKLEAQLKDIAYGTKQYKFKPE  
 IMPDDSVDEFDETIHLERGENLFEIHINKVTFSSSEVLRASGDKELVTFCTYAFYDFELQTTPIVRGLYPEYNF  
 TSQYLVHVNDLFLQYIQKNTVTLEFHQAHSSTDYETIAACQLRFHEILEKSGRIFCTTSLVGTGKDI PNFGTVE  
 YWFRLRVPMDQAIRLYRERAKALGYITSNFKKPEKMQLSSQQAATTAQISPAESTDGNLNLHVTVCCTGLQ  
 SRASYLQPHAYVVYKFFDFPDHDTAIVPSSNDPQFDDHMCFFVPMNMDLDRYLKSELSFYVFDSDTQENIY  
 MGKVVNPLISLAHDKCISGIFELMDKEKHAAGTIQVILKWKFTYLPSPSGITTEDLGKFCVCREEPEAVQRLPP  
 KSSDVTSVVAPKPKPRQRLTFVDKKSFAADTISHPSPETSPPPKDIKDSSEVGPKEPENGLSAVAYPSKESGV  
 AKVEENVGEMQGGKEDDISFLSEGQLASGSVASSEDETEITEELEPEDEDRSASDSDDCIIPSSVSTNTKQPS  
 EEIRIEIIALNLNDSQITREDTIQRLFIIECRFYSLPAEETPMSLKPQSGQWVYNYNSNVIYLDKENNPAVRD  
 ILKAILQRRELPHRSVRFTVSDPPEDEQDLECEDIGVAHVLDLADLFQKGRDIEQDIDVLDARTDGGTIGKL  
 KVTVEALHALRSVYEQNRKDLEA\*

>rs33211992\_ENSMUSP00000147300\_c.237:C>T\_p.L80F  
 ENSMUST00000209616.2|Rpgrip11-206|ENSMUSG00000033282|-  
 |chr8:g.91996835:G>A

GENLFEIHINKVTFSSSEVLRASGDKELVTFCTYAFYDFELQTTPIVRGLYPEYNFTSQYLVHVNDLFLQYIQK  
 NVTLEFHQAHSSTDYETIAACQLRFHEILEKSGRIFCTTSLVGI FELMDKEKHAAGTIQVILKWKFTYLPSPSG  
 SITTEDLGKFCVCREEPEAVQRLPPKSSDVTSVVAPKPKPRQRLTFVDKKSFAADTISHPSPETSPPPKDIKDS  
 SPEVGPKEPENGLSAVAYPSKESGVAKVEENVGEM

>rs47127351\_ENSMUSP00000068380\_c.411:A>C\_p.T138P  
 ENSMUST00000069718.15|Fto-201|ENSMUSG00000055932|+|chr8:g.92136139:A>C

MKRVQTAEEEREREAKKRLRLEELDTWLPYLTPKDDEFYQQWQLKYPKLVFREAGSIPEELHKEVPEAFLLTLH  
 KHGCLFRDVVRIQGGKDLVTPVSRILIGDPGCTYKYLNTRLFVWPVKGCTVKYTEAEIAAACQPFLKLNLDYL  
 QVETIQALEELAVREKANEDAVPLCMAEFPRAGVGPSCDDEVDLKSRAAYNVTLNFMMDPQKMPYLKEEYFG  
 MGKMAVSWHHDENLVDRAVAVYSYSCGESEDESEFEGRDPDTWHVGFKISWDIETPGLTIPLHQGDCY  
 FMLDDLNATHQHCVLQAGSQPRFSSTRVACSTGTLDYILERCQLALQNVNLNDSDDGDVSLKSFDPVAVLKQGE  
 EIHNEVEFEWLRQFVQGNRYKLCCTDWWCEPMTHTLEGLWKKMESMTNAVLREVKREGLPVEQRSEILSAILVP  
 LTVRQNLKKEWHARCQSRVVRTLPVQQKPDRCRPYWEKDDPSMPLPFDLTDVVSELRGQLLEARS\*

>rs47127351\_ENSMUSP00000147563\_c.411:A>C\_p.T138P  
 ENSMUST00000125471.8|Fto-202|ENSMUSG00000055932|+|chr8:g.92136139:A>C

MKRVTAEEREREAKKRLRLEEELEDTWLPYLTPKDDEFYQQWQLKYPKLVFREAGSIPEELHKEVPEAFRTLH  
KHGCLFRDVRVRIQGGKDVLTVPVSRILIGDPGCTYKYLNTRLFVTPWPVKGCTVKYTEAEIAAACQPFLKLNLYL  
QVETIQALEELAVREKANEDAVPLCMAEFPRAGVGPSCDDEVDLKSRAAYNVTLNFMNDPQKMPYLKEEYPYFG  
MGKMAVSWHHDENLVDRSAVAVYSYSCGSEDESEDESSFEGRDPDTWHVGFKISWDIETPGLTIPLHQGDCY  
FMLGNVGSRLRVGHLWGFEIHFWIL\*

>rs47127351\_ENSMUSP00000147548\_c.411:A>C\_p.T138P  
ENSMUST00000128081.8|Fto-203|ENSMUSG00000055932|+|chr8:g.92136139:A>C  
MKRVQTAEEEREREAKKRLRLEEELEDTWLPYLTPKDDEFYQQWQLKYPKLVFREAGSIPEELHKEVPEAFRTLH  
KHGCLFRDVRVRIQGGKDVLTVPVSRILIGDPGCTYKYLNTRLFVTPWPVKGCTVKYTEAEIAAACQPFLKLNLYL  
QVETIQALEELAVREKANEDAVPLCMAEFPRAGVGPSCDDEVDLKSRAAYNVTLNFMNDPQKMPYLKEEYPYFG  
MGKMAVSWHHDENLVDRSAVAVYSYSCGSEDESEDESSFEGRDPDTWHVGFKISWDIETPGLTIPLHQGDCY  
FMLDDLNATHQHCVLAGSQPRFSSTHRVAECSTGTLDIYILERCQLALQNVLNDSDDGDVSLKSFDPAVLKQGE  
EIHNEVEFEWLRQFWFQGNRYKLC TDWWCEPMTHEGLWKKMESMTNAVLREVKREGLPVEQRSEILSAILVP  
LTVRQNLKREWHARFVLLRGGVWCPCSSARPAQRTKVEDILS\*

>rs47127351\_ENSMUSP00000147603\_c.411:A>C\_p.T138P  
ENSMUST00000136802.8|Fto-204|ENSMUSG00000055932|+|chr8:g.92136139:A>C  
MKRVQTAEEEREREAKKRLRLEEELEDTWLPYLTPKDDEFYQQWQLKYPKLVFREAGSIPEELHKEVPEAFRTLH  
KHGCLFRDVRVRIQGGKDVLTVPVSRILIGDPGCTYKYLNTRLFVTPWPVKGCTVKYTEAEIAAACQPFLKLNLYL  
QVETIQALEELAVREKANEDAVPLCMAEFPRAGVGPSCDDEVDLKSRAAYNVTLNFMNDPQKMPYLKEEYPYFG  
MGKMAVSWHHDENLVDRSAVAVYSYSCGSEDESEDESSFEGRDPDTWHVGFKISWDIETPGLTIPLHQGDCY  
FMLDDLNATHQHCVLAGSQPRFSSTHRVAECSTGTLDIYILERCQLALQNVLNDSDDGDVSLKSFDPAVLKQGE  
EIHNEVEFEWLRQFWFQGNRYKLC TDWWCEPMTHEGLWKKMESMVA\*

>rs47127351\_ENSMUSP00000127680\_c.405:A>C\_p.T136P  
ENSMUST00000166548.9|Fto-207|ENSMUSG00000055932|+|chr8:g.92136139:A>C  
MCSVKPYRRTLAQKRLRLEEELEDTWLPYLTPKDDEFYQQWQLKYPKLVFREAGSIPEELHKEVPEAFRTLHKKH  
GCLFRDVRVRIQGGKDVLTVPVSRILIGDPGCTYKYLNTRLFVTPWPVKGCTVKYTEAEIAAACQPFLKLNLYLQV  
ETIQALEELAVREKANEDAVPLCMAEFPRAGVGPSCDDEVDLKSRAAYNVTLNFMNDPQKMPYLKEEYPYFGMG  
KMAVSWHHDENLVDRSAVAVYSYSCEDDLNATHQHCVLAGSQPRFSSTHRV

>rs47850182\_ENSMUSP00000091002\_c.1252:T>A\_p.F418Y  
ENSMUST00000093312.6|Irx3-201|ENSMUSG00000031734|-|chr8:g.92526450:A>T  
MSFPQLGYQYIRPLYPPERPGAAGGGGGSSAGGRSGPGAGASELAASGSLSNVLSVYVYAPYAAAAAAAAAAAA  
QGYGAFLPYATELPIFPQLGAQYELKDS PGVQHPATAA AFPHHPAFYYPYQYQFGDPSRPNATRESTSTLK  
AWLNEHRKNPYPTKGEKIMLAIITKMTLTQVSTWTFANARRRLKKNKMTWAPRSRTDEEGNAYGSEREEEED  
EDEEESKRELEMEMEEELAGEEEDTGGEGLADDEDEEIDLENLDSAAAGSELTLAGAAHRNGDFGLGPI SDCK  
TSDSDSSEGLEDRPLSVLSLAPPPPPVARAPASPPSPSSLDPCAPAPAPSSALQKPKIWSLAETATSPDNP  
RRSPPGAGGSPPGA AVAPPTLQLSPAAAAAAAAAAHRLVSA PLGKFFPAWTNRYPYPPGPPAGPRPHPLSMLGSA PQ  
HLLGLPGAAGHPAAAAAAYARPAEPESGTGDKKNIAVVPWKWRKSYSRQLSSRCQGGHRTIWTLLWSYQLSPR  
LNFSTIFKSLY\*

>rs47850182\_ENSMUSP00000135488\_c.1252:T>A\_p.F418Y  
ENSMUST00000175795.4|Irx3-202|ENSMUSG00000031734|-|chr8:g.92526450:A>T  
MSFPQLGYQYIRPLYPPERPGAAGGGGGSSAGGRSGPGAGASELAASGSLSNVLSVYVYAPYAAAAAAAAAAAA  
QGYGAFLPYATELPIFPQLGAQYELKDS PGVQHPATAA AFPHHPAFYYPYQYQFGDPSRPNATRESTSTLK  
AWLNEHRKNPYPTKGEKIMLAIITKMTLTQVSTWTFANARRRLKKNKMTWAPRSRTDEEGNAYGSEREEEED  
EDEEESKRELEMEMEEELAGEEEDTGGEGLADDEDEEIDLENLDSAAAGSELTLAGAAHRNGDFGLGPI SDCK  
TSDSDSSEGLEDRPLSVLSLAPPPPPVARAPASPPSPSSLDPCAPAPAPSSALQKPKIWSLAETATSPDNP  
RRSPPGAGGSPPGA AVAPPTLQLSPAAAAAAAAAAHRLVSA PLGKFFPAWTNRYPYPPGPPAGPRPHPLSMLGSA PQ  
HLLGLPGAAGHPAAAAAAYARPAEPESGTDRC SALEVEKLLKTA FQVPRRPNHLDAALVLSALSSS\*

>rs50127074\_ENSMUSP00000091002\_c.916:G>A\_p.R306Q  
ENSMUST00000093312.6|Irx3-201|ENSMUSG00000031734|-|chr8:g.92526786:C>T  
MSFPQLGYQYIRPLYPPERPGAAGGGGGSSAGGRSGPGAGASELAASGSLSNVLSVYVYAPYAAAAAAAAAAAA  
QGYGAFLPYATELPIFPQLGAQYELKDS PGVQHPATAA AFPHHPAFYYPYQYQFGDPSRPNATRESTSTLK  
AWLNEHRKNPYPTKGEKIMLAIITKMTLTQVSTWTFANARRRLKKNKMTWAPRSRTDEEGNAYGSEREEEED  
EDEEESKRELEMEMEEELAGEEEDTGGEGLADDEDEEIDLENLDSAAAGSELTLAGAAHRNGDFGLGPI SDCK  
TSDSDSSEGLEDRPLSVLSLAPPPPPVARAPASPPSPSSLDPCAPAPAPSSALQKPKIWSLAETATSPDNP  
RRSPPGAGGSPPGA AVAPPTLQLSPAAAAAAAAAAHRLVSA PLGKFFPAWTNRYPYPPGPPAGPRPHPLSMLGSA PQ  
HLLGLPGAAGHPAAAAAAYARPAEPESGTGDKKNIAVVPWKWRKSYSRQLSSRCQGGHRTIWTLLWSYQLSPR  
LNFSTIFKSLY\*

```

>rs50127074_ENSMUSP00000135488_c.916:G>A_p.R306Q
ENSMUST00000175795.4|Irx3-202|ENSMUSG00000031734|-|chr8:g.92526786:C>T
MSFPQLGYQYIRPLYPPERPGAAGGGGGSSAGGRSGPGAGASELAASGSLSNVLSVYGAPYAAAAAAAAAAAA
QGYGAFLPYATELPIFPQLGAQYELKDSPGVQHPATAAAFPHPHAFYYPYQYQFGDPSRPNKATRESTSTLK
AWLNEHRKNPYPTKGEKIMLAIITKMTLTQVSTWTFANARRRLKKNKMTWAPRSRTDEEGNAYGSEREEEDDEE
EDEEESKRELEMEMEEELAGEEEDTGGEGLADDEDEEIDLNLDSAAAAGSELTLAGAAHRNGDFGLGPI SDCK
TSDSDSSEGLEDRPLSVLSLAPPPPPVARAPASPPSPSSLDPCAPAPAPSSALQKPKIWSLAETATSPDNP
RRSPPGAGGSPPGA AVAPPTLQLSPAAAAAAAHRVLSAPLGKFFAWTNRPFPPGPPAGPRPHPLSMLGSAPQ
HLLGLPGAAGHPAAAAAAYARPAEPESGTDRCSALEVEKLLKTAQFQVPRRPNHLDAALVLSALSSS*
>rs249655209_ENSMUSP00000091002_c.754:A>G_p.D252G
ENSMUST00000093312.6|Irx3-201|ENSMUSG00000031734|-|chr8:g.92526948:T>C
MSFPQLGYQYIRPLYPPERPGAAGGGGGSSAGGRSGPGAGASELAASGSLSNVLSVYGAPYAAAAAAAAAAAA
QGYGAFLPYATELPIFPQLGAQYELKDSPGVQHPATAAAFPHPHAFYYPYQYQFGDPSRPNKATRESTSTLK
AWLNEHRKNPYPTKGEKIMLAIITKMTLTQVSTWTFANARRRLKKNKMTWAPRSRTDEEGNAYGSEREEEDDEE
EDEEESKRELEMEMEEELAGEEEDTGGEGLADDEDEEIDLNLDSAAAAGSELTLAGAAHRNGDFGLGPI SDCK
TSDSDSSEGLEDRPLSVLSLAPPPPPVARAPASPPSPSSLDPCAPAPAPSSALQKPKIWSLAETATSPDNP
RRSPPGAGGSPPGA AVAPPTLQLSPAAAAAAAHRVLSAPLGKFFAWTNRPFPPGPPAGPRPHPLSMLGSAPQ
HLLGLPGAAGHPAAAAAAYARPAEPESGTDKKNIAVVPWKWRKYSRQLSSRCQGGHRTIWTLLWSYQLSPR
LNFSTIFKSLY*
>rs249655209_ENSMUSP00000135488_c.754:A>G_p.D252G
ENSMUST00000175795.4|Irx3-202|ENSMUSG00000031734|-|chr8:g.92526948:T>C
MSFPQLGYQYIRPLYPPERPGAAGGGGGSSAGGRSGPGAGASELAASGSLSNVLSVYGAPYAAAAAAAAAAAA
QGYGAFLPYATELPIFPQLGAQYELKDSPGVQHPATAAAFPHPHAFYYPYQYQFGDPSRPNKATRESTSTLK
AWLNEHRKNPYPTKGEKIMLAIITKMTLTQVSTWTFANARRRLKKNKMTWAPRSRTDEEGNAYGSEREEEDDEE
EDEEESKRELEMEMEEELAGEEEDTGGEGLADDEDEEIDLNLDSAAAAGSELTLAGAAHRNGDFGLGPI SDCK
TSDSDSSEGLEDRPLSVLSLAPPPPPVARAPASPPSPSSLDPCAPAPAPSSALQKPKIWSLAETATSPDNP
RRSPPGAGGSPPGA AVAPPTLQLSPAAAAAAAHRVLSAPLGKFFAWTNRPFPPGPPAGPRPHPLSMLGSAPQ
HLLGLPGAAGHPAAAAAAYARPAEPESGTDKKNIAVVPWKWRKYSRQLSSRCQGGHRTIWTLLWSYQLSPR
LNFSTIFKSLY*
>rs49504271_ENSMUSP00000091002_c.526:A>G_p.Q176R
ENSMUST00000093312.6|Irx3-201|ENSMUSG00000031734|-|chr8:g.92527176:T>C
MSFPQLGYQYIRPLYPPERPGAAGGGGGSSAGGRSGPGAGASELAASGSLSNVLSVYGAPYAAAAAAAAAAAA
QGYGAFLPYATELPIFPQLGAQYELKDSPGVQHPATAAAFPHPHAFYYPYQYQFGDPSRPNKATRESTSTLK
AWLNEHRKNPYPTKGEKIMLAIITKMTLTRVSTWTFANARRRLKKNKMTWAPRSRTDEEGNAYGSEREEEDDEE
EDEEESKRELEMEMEEELAGEEEDTGGEGLADDEDEEIDLNLDSAAAAGSELTLAGAAHRNGDFGLGPI SDCK
TSDSDSSEGLEDRPLSVLSLAPPPPPVARAPASPPSPSSLDPCAPAPAPSSALQKPKIWSLAETATSPDNP
RRSPPGAGGSPPGA AVAPPTLQLSPAAAAAAAHRVLSAPLGKFFAWTNRPFPPGPPAGPRPHPLSMLGSAPQ
HLLGLPGAAGHPAAAAAAYARPAEPESGTDKKNIAVVPWKWRKYSRQLSSRCQGGHRTIWTLLWSYQLSPR
LNFSTIFKSLY*
>rs49504271_ENSMUSP00000135488_c.526:A>G_p.Q176R
ENSMUST00000175795.4|Irx3-202|ENSMUSG00000031734|-|chr8:g.92527176:T>C
MSFPQLGYQYIRPLYPPERPGAAGGGGGSSAGGRSGPGAGASELAASGSLSNVLSVYGAPYAAAAAAAAAAAA
QGYGAFLPYATELPIFPQLGAQYELKDSPGVQHPATAAAFPHPHAFYYPYQYQFGDPSRPNKATRESTSTLK
AWLNEHRKNPYPTKGEKIMLAIITKMTLTRVSTWTFANARRRLKKNKMTWAPRSRTDEEGNAYGSEREEEDDEE
EDEEESKRELEMEMEEELAGEEEDTGGEGLADDEDEEIDLNLDSAAAAGSELTLAGAAHRNGDFGLGPI SDCK
TSDSDSSEGLEDRPLSVLSLAPPPPPVARAPASPPSPSSLDPCAPAPAPSSALQKPKIWSLAETATSPDNP
RRSPPGAGGSPPGA AVAPPTLQLSPAAAAAAAHRVLSAPLGKFFAWTNRPFPPGPPAGPRPHPLSMLGSAPQ
HLLGLPGAAGHPAAAAAAYARPAEPESGTDRCSALEVEKLLKTAQFQVPRRPNHLDAALVLSALSSS*
>rs231460599_ENSMUSP00000147339_c.423:A>AG_p.K142ins-fs
ENSMUST00000210246.2|Irx5-202|ENSMUSG00000031737|+|chr8:g.93086342:A>AG
MSYPQGYLYQPSASLALYSCPAYSTSVISGPRTDELGRSSSGSAFSPYAGSTAFTAPSPGYNSHLQYADPAA
AAAAAFSYVGSYPDHTPGMAGSLGYHPYAAPLGSYPYGDPAAYRKNATRDATAATLKAWLNEHRKNPYPTRGRED
HAGHYHQDDPHPGVHLVLCQAPAPQEREQDDVDATEDPQRGRGGGGGEHRSGEERRGRATEARGQGRPRGRPIRR
SRAEGDCGLRTAAGAAQPRRQDRRQPQLGF
>rs231460599_ENSMUSP00000034184_c.423:A>AG_p.K142ins-fs
ENSMUST00000034184.12|Irx5-201|ENSMUSG00000031737|+|chr8:g.93086342:A>AG
MSYPQGYLYQPSASLALYSCPAYSTSVISGPRTDELGRSSSGSAFSPYAGSTAFTAPSPGYNSHLQYADPAA
AAAAAFSYVGSYPDHTPGMAGSLGYHPYAAPLGSYPYGDPAAYRKNATRDATAATLKAWLNEHRKNPYPTRGRED

```

HAGHYHQDDPHPGVHLVCQRAPAPQEREQDDVDATEPQRGRGGGGEHRSGEERRGRATEARGQGRPRGPRIRR  
SRAEGDCGLRRTAAGAAQPRRQGDRRQPQRLGF  
>rs243647518\_ENSMUSP00000147339\_c.556:A>AATATAGTGAG\_p.D186ins-fs  
ENSMUST00000210246.2|Irx5-  
202|ENSMUSG00000031737|+|chr8:g.93086475:A>AATATAGTGAG  
MSYPQGYLYQPSASLALYSCPAYSTSVISGPRTDELGRSSSGSAFSPYAGSTAFTAPSPGYNSHLQYGADPAA  
AAAAAFSYVGSYPDHTPGMAGSLGYHPYAAPLGSYPYGPDPAYRKNATRDATAATLKAWLNEHRKNPYPTKGEKI  
MLAIITKMTLTQVSTWFANARRRLKKNKMTWTPRNRSEEYSEYERGGGGEHRSGEERRGRATEARGQGRPRGPR  
IRRSRAEGDCGLRRTAAGAAQPRRQGDRRQPQRLGF  
>rs243647518\_ENSMUSP00000034184\_c.556:A>AATATAGTGAG\_p.D186ins-fs  
ENSMUST00000034184.12|Irx5-  
201|ENSMUSG00000031737|+|chr8:g.93086475:A>AATATAGTGAG  
MSYPQGYLYQPSASLALYSCPAYSTSVISGPRTDELGRSSSGSAFSPYAGSTAFTAPSPGYNSHLQYGADPAA  
AAAAAFSYVGSYPDHTPGMAGSLGYHPYAAPLGSYPYGPDPAYRKNATRDATAATLKAWLNEHRKNPYPTKGEKI  
MLAIITKMTLTQVSTWFANARRRLKKNKMTWTPRNRSEEYSEYERGGGGEHRSGEERRGRATEARGQGRPRGPR  
IRRSRAEGDCGLRRTAAGAAQPRRQGDRRQPQRLGF  
>rs33039720\_ENSMUSP00000052258\_c.919:G>A\_p.R307Q  
ENSMUST00000053766.14|Amfr-201|ENSMUSG00000031751|-|chr8:g.94712009:C>T  
MPLLFLEFRFPWPSLRTYTGLSGLALLGTIVSAYRALSQPEDGSGEPEPLTAPLQPEARLTAGGPRARDVAQYL  
LSDSLFVWLVNTACCVLMLVAKLIQCIVFGPLRVSERQHLKDKFWNFIYKFIIFIGVLNVQTVVEEVMWCL  
WFAGLVFLHLMVQLCKDRFEYLSFSPTPMSSHGRVLSLLIAMLLSCGLAVVCCVTGYTHGMHTLAFMAAES  
LLVTVRTAHVILRYVIHLWDLNHEGTWEGKGTYYVYTDVFVMEALALLSLDLMHHIHMLLFGNIWLSMASLVI  
QLRYLFHEVQRRIRQHKNYLRVVGNMPEARFAVATPEELAVNNDCAICWDSMQAARKLPCGHLFHNSCLRSWL  
EQDTSCTCRMSLNADGSRAREDHQGENLDENLVPVAAAEGRPRLNQHNFHFDGSRIASWLPFSFVEVMH  
TTNILGITQASNSQLNAMAHQIQEMFPQVPHLVLDLQDMTRSEVITTDNILEGRIQVFPPTQSRSDSLRPALN  
SPVERPSPDLDEEGEASVQTERVPLDLSRLEETLDFSEVELEPIEVEDFEARGSRFSKADERQRMVLVQRKDD  
LLQQARKRFLNKSSSEDDGASERLLPSEGTSSDPVTLRRRMLAAAERRLQRQRTT\*  
>rs33591144\_ENSMUSP00000105183\_c.1090:A>G\_p.K364R  
ENSMUST00000109556.9|Ogfod1-203|ENSMUSG00000033009|+|chr8:g.94784788:A>G  
MNGKRPADPGPARPMKKGKKQVSAEFSDAVTEEILRKQVAEAWSCRTPFSSHEAIALDMDPFLHCVIPNFIQSQ  
DFLEGLHKELLSLDFHEKYNDLYKFQQSDDLKNRKEPHISALRKLMEFDFRAWLSKVSIGIDLEPTIDMSCAKY  
EFTDALLCHDDELEGRRIAFILYLVP SWDRDLGGTLDLYDTDEHLQPKQIVKSLIPSWNKLVFFEVSPVFSFHQ  
VSEVLSEETSRLSISGWFGYPSLTRPPTYFEPPIPRNPHIQDHEILYEWINPAYLEMDYQMQIQEEFEERSE  
ILLKEFLKPEKFAEVCEALEKGDVEWKSHGPPNKRIFYEKAENNLPDVLKECMGLFRSEALFLLLSNLTGLRL  
HFLAPSEDDTEEEKGETASAAAAGTEEGTSRRPSGPENNQVAAGSHSQENGEQADPEAQEEEEAKKESVPMC  
QGELRRWKTGHYTLVHDNTKTEFALDLFLYCGCEGWEPEYGGFTSYIAKGEDEELLIVNPENNSLALVYRDRE  
TLRFVKHINHRSLQSKAFPSRSGFWDFAFIYYE\*  
>rs33591144\_ENSMUSP00000090991\_c.961:A>G\_p.K321R  
ENSMUST00000093301.9|Ogfod1-202|ENSMUSG00000033009|+|chr8:g.94784788:A>G  
MNGKRPADPGPARPMKKGKKQVSAEFSDAVTEEILRKQVAEAWSCRTPFSSHEAIALDMDPFLHCVIPNFIQSQ  
DFLEGLHKELLSLDFHEKYNDLYKFQQSDDLKNRKEPHISALRKLMEFDFRAWLSKVSIGIDLEPTIDMSCAKY  
EFTDALLCHDDELEGRRIAFILYLVP SWDRDLGGTLDLYDTDEHLQPKQIVKSLIPSWNKLVFFEVSPVFSFHQ  
HEILYEWINPAYLEMDYQMQIQEEFEERSEILLKEFLKPEKFAEVCEALEKGDVEWKSHGPPNKRIFYEKAEN  
NLPDVLKECMGLFRSEALFLLLSNLTGLRLHFLAPSEDDTEEEKGETASAAAAGTEEGTSRRPSGPENNQVA  
AGSHSQENGEQADPEAQEEEEAKKESVPMCQGELRRWKTGHYTLVHDNTKTEFALDLFLYCGCEGWEPEYGGF  
TSYIAKGEDEELLIVNPENNSLALVYRDRETLRFVKHINHRSLQSKAFPSRSGFWDFAFIYYE\*  
>rs33591144\_ENSMUSP00000051430\_c.1045:A>G\_p.K349R  
ENSMUST00000060632.8|Ogfod1-201|ENSMUSG00000033009|+|chr8:g.94784788:A>G  
MKGKQVSAEFSDAVTEEILRKQVAEAWSCRTPFSSHAIALDMDPFLHCVIPNFIQSQDFLEGLHKELLSLDF  
HEKYNDLYKFQQSDDLKNRKEPHISALRKLMEFDFRAWLSKVSIGIDLEPTIDMSCAKYEFTDALLCHDDELE  
GRRIAFILYLVP SWDRDLGGTLDLYDTDEHLQPKQIVKSLIPSWNKLVFFEVSPVFSFHQVSEVLSEETSRLSIS  
GWFGYPSLTRPPTYFEPPIPRNPHIQDHEILYEWINPAYLEMDYQMQIQEEFEERSEILLKEFLKPEKFAEV  
CEALEKGDVEWKSHGPPNKRIFYEKAENNLPDVLKECMGLFRSEALFLLLSNLTGLRLHFLAPSEDDTEEEK  
GETASAAAAGTEEGTSRRPSGPENNQVAAGSHSQENGEQADPEAQEEEEAKKESVPMCQGELRRWKTGHYTLV  
HDNTKTEFALDLFLYCGCEGWEPEYGGFTSYIAKGEDEELLIVNPENNSLALVYRDRETLRFVKHINHRSLQ  
SKAFPSRSGFWDFAFIYYE\*  
>rs236243673\_ENSMUSP00000034206\_c.2061:G>A\_p.G688R  
ENSMUST00000034206.6|Bbs2-201|ENSMUSG00000031755|-|chr8:g.94795008:C>T

MLLPVFTLKL RHKISPRMVAIGRYDGHPCLA AATQAGKVF IHNPHTRSQHFSASRVFQSPLES DVSL LNINQ  
TVSCLGSGV LNPELGYDTLLVGTQTSL LAYDIYNN SDFYREVSDGANAIVLGT LGDIAPPLAI IGGNCALQG  
FDHEGNDLFWT VTDGNVHSLALCDFDGDGKTELLVGS EDFDIRVFK EDEIVAEMTETEIVTSLCPMYGSRFGY  
ALSNGTVGVYDKTARYWRIKSKNHAMSIHAFDINS DGVC ELITGWSNGKVDARS DR TGEVIFKDNFSSAVAGV  
VEGDYRMDGHVQLICCSVDGEIRGYLPGTAEMKGNLLDTSVEQDLIRELSQKKQNLLLELRNYEESTK AELSS  
PLNEADGQKGIIPANTRLHTALSVMNGNDLQDAHAELGISTSNDTIIRAVLI FAEGIFV GESHVHPSIHNLS  
SSLRVPITPPKDV PVDLHLKTFVGYRSSTQFHVFELTRQLPRFTMYALTSPDAASEPVSYVNFVSAERTQRMV  
TWLNQNFLLPEDSNVQNSPFHVCFTSLRNGGQLYIKMKQSGEITVNTDDIDL AGDIIQSIASF FAI EDLQVEA  
DFPVYFEELRKVLVKVDEYHSVHQKLSADMADNSNLIRSLLVRAEDARLMRDMKTMKSRYMELYDLNKDLLNG  
YKIRCNNHTELLGNLKA VNQAIQRAGRLRVRKPKNQVISACRDAIRSNNINTLFRIMRVGTAPS\*  
>rs254620580\_ENSMUSP00000034206\_c.1899:A>G\_p.M634V  
ENSMUST00000034206.6|Bbs2-201|ENSMUSG00000031755|-|chr8:g.94800930:T>C  
MLLPVFTLKL RHKISPRMVAIGRYDGHPCLA AATQAGKVF IHNPHTRSQHFSASRVFQSPLES DVSL LNINQ  
TVSCLGSGV LNPELGYDTLLVGTQTSL LAYDIYNN SDFYREVSDGANAIVLGT LGDIAPPLAI IGGNCALQG  
FDHEGNDLFWT VTDGNVHSLALCDFDGDGKTELLVGS EDFDIRVFK EDEIVAEMTETEIVTSLCPMYGSRFGY  
ALSNGTVGVYDKTARYWRIKSKNHAMSIHAFDINS DGVC ELITGWSNGKVDARS DR TGEVIFKDNFSSAVAGV  
VEGDYRMDGHVQLICCSVDGEIRGYLPGTAEMKGNLLDTSVEQDLIRELSQKKQNLLLELRNYEESTK AELSS  
PLNEADGQKGIIPANTRLHTALSVMNGNDLQDAHAELGISTSNDTIIRAVLI FAEGIFV GESHVHPSIHNLS  
SSLRVPITPPKDV PVDLHLKTFVGYRSSTQFHVFELTRQLPRFTMYALTSPDAASEPVSYVNFVSAERTQRMV  
TWLNQNFLLPEDSNVQNSPFHVCFTSLRNGGQLYIKMKQSGEITVNTDDIDL AGDIIQSIASF FAI EDLQVEA  
DFPVYFEELRKVLVKVDEYHSVHQKLSADMADNSNLIRSLLVRAEDARLMRDMKTMKSRYMELYDLNKDLLNG  
YKIRCNNHTELLGNLKA VNQAIQRAGRLRVRGKPKNQVISACRDAIRSNNINTLFRIMRVGTAPS\*  
>rs33036013\_ENSMUSP00000034206\_c.943:G>A\_p.R315Q  
ENSMUST00000034206.6|Bbs2-201|ENSMUSG00000031755|-|chr8:g.94808762:C>T  
MLLPVFTLKL RHKISPRMVAIGRYDGHPCLA AATQAGKVF IHNPHTRSQHFSASRVFQSPLES DVSL LNINQ  
TVSCLGSGV LNPELGYDTLLVGTQTSL LAYDIYNN SDFYREVSDGANAIVLGT LGDIAPPLAI IGGNCALQG  
FDHEGNDLFWT VTDGNVHSLALCDFDGDGKTELLVGS EDFDIRVFK EDEIVAEMTETEIVTSLCPMYGSRFGY  
ALSNGTVGVYDKTARYWRIKSKNHAMSIHAFDINS DGVC ELITGWSNGKVDARS DR TGEVIFKDNFSSAVAGV  
VEGDYRMDGHVQLICCSVDGEIQGYLPGTAEMKGNLLDTSVEQDLIRELSQKKQNLLLELRNYEESTK AELSS  
PLNEADGQKGIIPANTRLHTALSVMNGNDLQDAHAELGISTSNDTIIRAVLI FAEGIFV GESHVHPSIHNLS  
SSLRVPITPPKDV PVDLHLKTFVGYRSSTQFHVFELTRQLPRFTMYALTSPDAASEPVSYVNFVSAERTQRMV  
TWLNQNFLLPEDSNVQNSPFHVCFTSLRNGGQLYIKMKQSGEITVNTDDIDL AGDIIQSIASF FAI EDLQVEA  
DFPVYFEELRKVLVKVDEYHSVHQKLSADMADNSNLIRSLLVRAEDARLMRDMKTMKSRYMELYDLNKDLLNG  
YKIRCNNHTELLGNLKA VNQAIQRAGRLRVRGKPKNQVISACRDAIRSNNINTLFRIMRVGTAPS\*  
>rs32128886\_ENSMUSP00000078878\_c.18:G>A\_p.G7S  
ENSMUST00000079961.14|Nup93-201|ENSMUSG00000032939|+|chr8:g.94954323:G>A  
MDTEGFSELLQQAELAAETEGISELPHVERN LQEIQQAGERLRSRTLTRTSQETADV KASVLLGSRGLDISH  
ISQRLESLSAATTFE PLEPVKDTDIQGFLKNEKDNALLSAIEESRKRTFGMAE EYHRESMLV EWEQVKQRILH  
TLLASGEDALDFTQESEPSYIGD VNPGRSSLDSIEMAYARQIYIYNEKIVSGHLQPNLV DLCASVAELDDKS  
ISDMWAMVKQMTDVVLT PATDALKSRSSVEVRMDFVKALGYLEQSYKNTLVTVFGNLHQ AQLGGVPGTYQL  
VRSFLNIKLPAPSPGLQDGEVEGHPVWALIYYCMRCGDLAASQVVSRAQHQLGEFKTWFQ EYMNSKDRRLSP  
ATENKLR LHYRRALRNNTDPYKRAVYCIIGRCDITDNQSEVADKTEDYLWLKLNQVCFDDDDGTSSPQDR LTL S  
QFQQLLEDY GESHFTVNQQPFLYFQVLF LTAQFEAAIAFLFRMERLRCHAVHVALVLFELK LLLKSSGQSAQ  
LLSHEPGDPPCMRRLNFVRLMLYTRKFESTDPREALQYFYFLRDEKDSQGENMFLRCVSELVIESREFDMIL  
GKLENDGSRKPGVIDKFTSDTKPIINKVASVAENKGLFEEAAKLYDLAKNADK VLELMNKL LSPVVPQISAPQ  
SNKERLKNMALSIAERYRAQG ISANKFVDSTFYLLDLITFFDEYHSGHIDRAFDIIDRLKLVPLNQESVEER  
VAAFRRNFSDEIRHNLSEVLLATMNI LFTQFKRLKGTSPSSATRPQRVIEDRDSQLRSQARALITFAGMIPYRT  
SGDTNARLVQMEVLMN\*  
>rs32128886\_ENSMUSP00000148700\_c.18:G>A\_p.G7S ENSMUST00000212824.2|Nup93-  
207|ENSMUSG00000032939|+|chr8:g.94954323:G>A  
MDTEGFSELLQQAELAAETEGISELPHVERN LQEIQQAGERLRSRTLTRTSQETADV KASVLLGSRGLDISH  
ISQRLESLSAATTFE PLEPVKDTDIQGFLKNEKDNALLSAIEESRKRTFGMAE EYHRESMLV EWEQVKQRILH  
TLLASGEDALDFTQESEPSYIGD VNPGRSSLDSIEMAYARQIYIYNEKIVSGHLQPNLV DLCASVAELDDKS  
ISDMWAMVKQMTDVVLT PATDALKSRSSVEVRMDFVKALGYLEQSYKNTLVTVFGNLHQ AQLGGVPGTYQL  
VRSFLNIKLPAPSPGLQDGEVEGHPVWALIYYCMRCGDLAASQVVSRAQHQLGEFKTWFQ EYMNSKDRRLSP  
ATENKLR LHYRRALRNNTDPYKRAVYCIIGRCDITDNQSEVADKTEDYLWLKLNQVCFDDDDGTSSPQDR LTL S  
QFQQLLEDY GESHFTVNQQPFLYFQVLF LTAQFEAAIAFLFRMERLRCHAVHVALVLFELK LLLKSSGQSAQ  
LLSHEPGDPPCMRRLNFVRLMLYTRKFESTDPREALQYFYFLRDEKDSQGENMFLRCVSELVIESREFDMIL



GKLENDGSRKPGVIDKFTSDTKPI INKVASVAENKGLFEEAAKLYDLAKNADKVLELMNKLLSPVVPQISAPQ  
SNKERLKNMALSIAERYRAQGISANKFVDSTFYLLDLITFFDEYHSGHIDRAFDI IDRLKLVPLNQESVEER  
VAAFRNFSDEIRHNLSEVLLATMNI LFTQFKRLKGTSPSSATRPQRVIEDRDSQLRSQARALITFAGMIPYRT  
SGDTNARLVQMEVLMN\*

>rs32128886\_ENSMUSP00000105174\_c.18:G>A\_p.G7S ENSMUST00000109547.2|Nup93-  
202|ENSMUSG00000032939|+|chr8:g.94954323:G>A  
MDTEGFSELLOQAEQLAAETEGISELPHVERNLOEIQQAGERLRSRTLRTSQTADV KASVLLGSRGLDISH  
ISQRLESLSAATTFEPELEPVKDTDIQGFLKNEKDNALLSAIEESRKRFTFGMAEYHRESMLVEWEQVKQRILH  
TLLASGEDALDFTQESEPSYIGDVNPPGRSSLDSIEMAYARQIYIYNEKIVSGHLQPNLVDLCASVAELDDKS  
ISDMWAMVKQMTDVLTPATDALKSRSSVEVRMDFVKQALGYLEQSYKNTLVTVFGNLHQALQGGVPGTYQL  
VRSFLNIKLPAPSPGLQDGEVEGHPVWALIYYCMRCGDLLAASQVVSRAQHQLGFEFKTWFQYEMNSKDRRLSP  
ATENKLRHLHYRRALRNNTDPYKRAVYCIIGRCDITDNQSEVADKTEDYLWLKLNQVCFDDGTSSPQDRLTLS  
QFQKQLLEDYGESHTVNQQPFLYFQVLFLLTAQFEAAIAFLFRMERLRCHAVHVALVLFELKLLKSSGQSAQ  
LLSHEPGDPPCMRRLNFVRLMLYTRKFESTDPREALQYFYFLRDEKDSQGENMFLRCVSELVIESREFDMIL  
GKLENDGSRKPGVIDKFTSDTKPI INKVASVAENKGLFEEAAKLYDLAKNADKVLELMNKLLSPVVPQISAPQ  
SNKERLKNMALSIAERYRAQGISANKFVDSTFYLLDLITFFDEYHSGHIDRAFDI IDRLKLVPLNQESVEER  
VAAFRNFSDEIRHNLSEVLLATMNI LFTQFKRLKGTSPSSATRPQRVIEDRDSQLRSQARALITFAGMIPYRT  
SGDTNARLVQMEVLMN\*

>rs48226225\_ENSMUSP00000124201\_c.1029:A>T\_p.M344L  
ENSMUST00000161576.8|Herpud1-205|ENSMUSG00000031770|+|chr8:g.95121237:A>T  
MEPEPQPEPVTLVKS PNQRHRDLELSGDRSWSVSRLKAHLRSVYPERPRPEDQRLIYSGKLLLDHQCQLDILL  
PKQEKRHVHLHVCNVKNPSKMPETSTKGAESTE QPDNSNQTQHPGDS SSGDLRQREVLRNLSPSGWENISRPE  
AVQQTFFQGLGPGFSGYTTYGWLQLSWFQQIYARQYYMQYLAATAASGTFVPTPSAQEI PVVSTPAPAPIHNQF  
PAENQPANQNAQAQAVVNPGANQNLRMNAQGGPLVEEDDE INRDWLDWTYSAATFSVFLSILYFYSSLSRFLM  
VMGATVVMYLHHVWGWFPRQRPVQNF PDDGGPRDAANQDPNNNLQGGMDPELEDPNRLLPPDREVLDPHEHTSPS  
FMSTAWLVFKTFFASLLPEGPPALAN\*

>rs48226225\_ENSMUSP00000034220\_c.1026:A>T\_p.M343L  
ENSMUST00000034220.8|Herpud1-201|ENSMUSG00000031770|+|chr8:g.95121237:A>T  
MEPEPQPEPVTLVKS PNQRHRDLELSGDRSWSVSRLKAHLRSVYPERPRPEDQRLIYSGKLLLDHQCQLDILL  
PKEKRHLVHLHVCNVKNPSKMPETSTKGAESTE QPDNSNQTQHPGDS SSGDLRQREVLRNLSPSGWENISRPEA  
VQQTFFQGLGPGFSGYTTYGWLQLSWFQQIYARQYYMQYLAATAASGTFVPTPSAQEI PVVSTPAPAPIHNQFP  
AENQPANQNAQAQAVVNPGANQNLRMNAQGGPLVEEDDE INRDWLDWTYSAATFSVFLSILYFYSSLSRFLMV  
MGATVVMYLHHVWGWFPRQRPVQNF PDDGGPRDAANQDPNNNLQGGMDPELEDPNRLLPPDREVLDPHEHTSPSF  
MSTAWLVFKTFFASLLPEGPPALAN\*

>rs33320749\_ENSMUSP00000045755\_c.1317:C>T\_p.L440F  
ENSMUST00000048653.10|Cpne2-201|ENSMUSG00000034361|+|chr8:g.95295234:C>T  
MAYIPDGGAPTAGAIPLGSQCCVCKVELSVSGQNLLDRDVTSKSDPFCVLFIEDNGRWMEFDRTE TAVNNLNP  
AFSCKKFLVDYHFEEVQKLFALFDQDKSSAQLDEHDFLGQFSCSLGTIVSSKKITRPLLLMNDKPKAGKGVITI  
AAQELSDNRVITLTLAAGRKLKDLFGKSDPFLEFYKPGDDGWMLVHRTEVIKYTLDPVWPKPFTVPLVSLCD  
GDLEKPIQVMCYDYDSNGGHDFIGEFQTSVLQMSSEARDGVPLEIECINPKKQRKKKSYKNSGIIILRCKIHR  
NYSFLDYILGGCQLMFTVGDFTASNGNPLDPSSLHYINPMGTNEYLSAIWAVGQIIQDYDSDKMFALGFGA  
QLPPDWKVSHEFAINFNPTNPFCSGVDGIAQAYSACLPHIRFYGPTNFSPIVNHVARFAAATQQQTATQYFI  
LFIITDGVISDMEETRHAHVQASKLPMSIIIVGVGNADFAAMEFLDGDNRRLRSHTGEEAARDIVQFVPFREF  
RNAAKETLAKAVLAELPQQVVQYFKHKNLPPTNSEPA\*

>rs33320749\_ENSMUSP00000105163\_c.1314:C>T\_p.L439F  
ENSMUST00000109537.2|Cpne2-202|ENSMUSG00000034361|+|chr8:g.95295234:C>T  
MAYIPDGGAPTAGAIPLGSQCCVCKVELSVSGQNLLDRDVTSKSDPFCVLFIEDNGRWMEFDRTE TAVNNLNP  
AFSCKKFLVDYHFEEVQKLFALFDQDKSSAQLDEHDFLGQFSCSLGTIVSSKKITRPLLLMNDKPKAGKGVITI  
AAQELSDNRVITLTLAAGRKLKDLFGKSDPFLEFYKPGDDGWMLVHRTEVIKYTLDPVWPKPFTVPLVSLCD  
GDLEKPIQVMCYDYDSNGGHDFIGEFQTSVLQMSSEARDGVPLEIECINPKKQRKKKSYKNSGIIILRCKIHR  
NYSFLDYILGGCQLMFTVGDFTASNGNPLDPSSLHYINPMGTNEYLSAIWAVGQIIQDYDSDKMFALGFGA  
QLPPDWKVSHEFAINFNPTNPFCSGVDGIAQAYSACLPHIRFYGPTNFSPIVNHVARFAAATQQQTATYFIL  
FIITDGVISDMEETRHAHVQASKLPMSIIIVGVGNADFAAMEFLDGDNRRLRSHTGEEAARDIVQFVPFREFR  
NAAKETLAKAVLAELPQQVVQYFKHKNLPPTNSEPA\*

>ENSMUSP00000034226\_c.732:T>G\_p.F245V ENSMUST00000034226.8|Psm3ip1-  
201|ENSMUSG00000031774|-|chr8:g.95302297:A>C  
MDGEDDSNLVIKKRFVSEAE LDERRRRQEEWEKVRKPEDPKCEPEEAYDPRSLYERLQEQKDRKQQEYEEQF  
KFKNMVRLGDEDETNFLDEVSRQQLIEKQRREEELEELEKEYRNLNKVGISAEENKEVEKKLAVKPIETKNKF

SQAKLLAGAVKHKSSSESGNSVKRLKPD PDPDDKAQEAPSCMSLGS SSSLSGPPSIHCPSAAVCIGILPGLGAYS  
GSSDSESSSDSEGTINATGKIVSSIVRTNTFLEAP\*  
>rs49000192\_ENSMUSP00000034226\_c.185:A>C\_p.K62N  
ENSMUST00000034226.8|Psm3ip1-201|ENSMUSG00000031774|-  
|chr8:g.95314671:T>G  
MDGEDDSNLVIKKRFVSEAE LDERRRRQEEWEKVRKPEDPKECPEEAYDPRSLYERLQEQNDRKQQEYEEQF  
KFKNMVRLDEDETNFLDEVSRQQELIEKQRREEEELEELKEYRSNLNKV GISAENKEVEKKLAVKPIETKNKF  
SQAKLLAGAVKHKSSSESGNSVKRLKPD PDPDDKAQEAPSCMSLGS SSSLSGPPSIHCPSAAVCIGILPGLGAYS  
GSSDSESSSDSEGTINATGKIVSSIVRTNTFLEAP\*  
>rs49000192\_ENSMUSP000000148506\_c.185:A>C\_p.K62N  
ENSMUST000000212791.2|Psm3ip1-214|ENSMUSG00000031774|-  
|chr8:g.95314671:T>G  
MDGEDDSNLVIKKRFVSEAE LDERRRRQEEWEKVRKPEDPKECPEEAYDPRSLYERLQEQNDRKQQEYEEQF  
KFKNMVRLDEDETNFLDEVSRQQELIEKQRREEEELEELKEYRSNLNKV GISAENKEVEKKLAVKPIETKNKF  
SQAKLLAGAVKHKSSSESGNSVKRLKPD PDPDDKAQEAPSCMSLGS SSSLSGPPSIHCPSAAVCIGILPGLGAYS  
>rs49000192\_ENSMUSP000000148524\_c.185:A>C\_p.K62N  
ENSMUST000000212507.2|Psm3ip1-209|ENSMUSG00000031774|-  
|chr8:g.95314671:T>G  
MDGEDDSNLVIKKRFVSEAE LDERRRRQEEWEKVRKPEDPKECPEEAYDPRSLYERLQEQNDRKQQEYEEQF  
KFKNMVRLDEDETNFLDEVSRQQELIEKQRREEEELEELKEYRSNLNKV GISAENKEVEKKLAVKPIETKNKF  
SQAKLLAGAVKHKSSSESGNSVKRLKPD  
>rs49000192\_ENSMUSP000000148543\_c.185:A>C\_p.K62N  
ENSMUST000000213022.2|Psm3ip1-216|ENSMUSG00000031774|-  
|chr8:g.95314671:T>G  
MDGEDDSNLVIKKRFVSEAE LDERRRRQEEWEKVRKPEDPKECPEEAYDPRSLYERLQEQNDRKQQEYEEQF  
KFKNMVRLDEDETNFLDEVSRQQELIEKQRREEEELEELKEYRSNLNKV GISAENKEVEKKLAVKPIETK  
>rs49000192\_ENSMUSP000000148547\_c.185:A>C\_p.K62N  
ENSMUST000000212083.2|Psm3ip1-203|ENSMUSG00000031774|-  
|chr8:g.95314671:T>G  
MDGEDDSNLVIKKRFVSEAE LDERRRRQEEWEKVRKPEDPKECPEEAYDPRSLYERLQEQNDRKQQEYEEQF  
KFKNMVRLDEDETNFLDEVSRQQELIEKQRREEEELEELKEYRSNLNKV GISAENK  
>rs49000192\_ENSMUSP000000148379\_c.185:A>C\_p.K62N  
ENSMUST000000213008.2|Psm3ip1-215|ENSMUSG00000031774|-  
|chr8:g.95314671:T>G  
MDGEDDSNLVIKKRFVSEAE LDERRRRQEEWEKVRKPEDPKECPEEAYDPRSLYERLQEQNDRKQQEYEEQF  
KFKNMVRLDEDETNFLDEVSRQQELIEKQRREEEELEELKEYRSNLNKV GISAENK  
>rs49000192\_ENSMUSP000000148342\_c.185:A>C\_p.K62N  
ENSMUST000000212159.2|Psm3ip1-204|ENSMUSG00000031774|-  
|chr8:g.95314671:T>G  
MDGEDDSNLVIKKRFVSEAE LDERRRRQEEWEKVRKPEDPKECPEEAYDPRSLYERLQEQNDRKQQEYEEQF  
KFKNMVRLDEDETNFLDEVSRQQELIEKQRREEEELEELKEYRSNLNKV GISAENK  
>rs49000192\_ENSMUSP000000148392\_c.185:A>C\_p.K62N  
ENSMUST000000212258.2|Psm3ip1-205|ENSMUSG00000031774|-  
|chr8:g.95314671:T>G  
MDGEDDSNLVIKKRFVSEAE LDERRRRQEEWEKVRKPEDPKECPEEAYDPRSLYERLQEQNDRKQQEYEEQF  
KFKNMVRLDEDETNFL  
>rs49000192\_ENSMUSP000000148497\_c.185:A>C\_p.K62N  
ENSMUST000000212765.2|Psm3ip1-212|ENSMUSG00000031774|-  
|chr8:g.95314671:T>G  
MDGEDDSNLVIKKRFVSEAE LDERRRRQEEWEKVRKPEDPKECPEEAYDPRSLYERLQEQNDRKQQEYEEQF  
KFKNMVRLDEDE  
>rs49000192\_ENSMUSP000000148325\_c.185:A>C\_p.K62N  
ENSMUST000000212788.2|Psm3ip1-213|ENSMUSG00000031774|-  
|chr8:g.95314671:T>G  
MDGEDDSNLVIKKRFVSEAE LDERRRRQEEWEKVRKPEDPKECPEEAYDPRSLYERLQEQNDRKQQEYEEQF  
KFKNMVRLD  
>ENSMUSP00000057275\_c.1204:A>C\_p.D402A ENSMUST00000060389.10|Rspry1-  
201|ENSMUSG00000050079|+|chr8:g.95373255:A>C

MIVFGWAVFLASRSLGQGLLLTLEEHIHLLGTTGATATMGNSCICRDDSGAEDNVDTHQQQAENSTVPTADS  
RSQPRDPVRRPRRRGRGPHEPRRKKQNVLDGLVLDLAVIRTLVDNDQEPYPYSMITLHEMAETDEGWLDVQSLI  
RVIPLEDPGLPAVITLLLLDECPLPTKDALQKLTEILNLNGEVACQDSGHPAKHRNTSAVLGCLAELKLAGPASI  
GLLSPGILEYLLQCLKQSHPTVMLFALIALEKFAQTSENKLTISESSISDRLVTLELWADDPDYLRQVGFCA  
AQWSLDNLFLKEGRQLTYEKVDLNNIRAMLNSNDVSEYLYKISPHGLEARCDASSFESVRCTFCVDTGVWYYEV  
TVVTSGVMQIGWATRDSKFLNHEGYGIGDDEYSCAYAGCRQLIWIYNARSKPHVHPCWKEGDTVGFLLDLNEKQ  
MIFFLNGNQLPPEKQVFSSTVSGFFAAASFMSYQQCEFNFGARPFKYPPSMKFSTFNDYAFLLTAEKIIILPRH  
RRLLALLKQVSIRENCCSLCCDEVADTQLKPCGHSDLCDLQLETCPLCRKEIVSRIRQISHIS\*

>ENSMUSP00000148724\_c.832:A>C\_p.D278A ENSMUST00000212729.2|Rspryl-  
207|ENSMUSG00000050079|+|chr8:g.95373255:A>C

MITLHEMAETDEGWLDVQSLIRVIPLEDPGLPAVITLLLLDECPLPTKDALQKLTEILNLNGEVACQDSGHPA  
KHRNTSAVLGCLAELKLAGPASIIGLLSPGILEYLLQCLKQSHPTVMLFALIALEKFAQTSENKLTISESSISD  
RLVTLELWADDPDYLRQVGFCAQWSLDNLFLKEGRQLTYEKVDLNNIRAMLNSNDVSEYLYKISPHGLEARCD  
ASSFESVRCTFCVDTGVWYYEVTVVTSGVMQIGWATRDSKFLNHEGYGIGDDEYSCAYAGCRQLIWIYNARSKP  
HVHPCWKEGDTVGFLLDLNEKQMIFFLNGNQLPPEKQVFSSTVSGFFAAASFMSYQQCEFNFGARPFKYPPSM  
KFSTFNDYAFLLTAEKIIILPRHRRLLALLKQVSIRENCCSLCCDEVADTQLKPCGHSDLCDLQLETCPLCR  
KEIVSRIRQISHIS\*

>ENSMUSP00000148737\_c.1204:A>C\_p.D402A ENSMUST00000211983.2|Rspryl-  
205|ENSMUSG00000050079|+|chr8:g.95373255:A>C

MIVFGWAVFLASRSLGQGLLLTLEEHIHLLGTTGATATMGNSCICRDDSGAEDNVDTHQQQAENSTVPTADS  
RSQPRDPVRRPRRRGRGPHEPRRKKQNVLDGLVLDLAVIRTLVDNDQEPYPYSMITLHEMAETDEGWLDVQSLI  
RVIPLEDPGLPAVITLLLLDECPLPTKDALQKLTEILNLNGEVACQDSGHPAKHRNTSAVLGCLAELKLAGPASI  
GLLSPGILEYLLQCLKQSHPTVMLFALIALEKFAQTSENKLTISESSISDRLVTLELWADDPDYLRQVGFCA  
AQWSLDNLFLKEGRQLTYEKVDLNNIRAMLNSNDVSEYLYKISPHGLEARCDASSFESVRCTFCVDTGVWYYEV  
TVVTSGVMQIGWATRDSKFLNHEGYGIGDDEYSCAYAGCRQLIWIYNARSKPHVHPCWKEGDTVGFLLDLNEKQ  
MIFFLNGNQLPPEKQVFSSTVSGFFAAASFMSYQQCEFNFGARPFKYPPSMKFSTFNDYAFLLTAEKIIILPRH  
RRLLALLKQVSIRENCCSLCCDEVADTQLKPCGHSDLCDLQLETCPLCRKEIVSRIRQISHIS\*

>ENSMUSP00000034228\_c.49:CT>AG\_p.S17\* ENSMUST00000034228.16|Arl2bp-  
201|ENSMUSG00000031776|+|chr8:g.95394236:CT>AG

MDALEEESFALSFSFA\*\*CRI\*CCGWMFRGHYYG\*\*VPVIAEKLHGQVLPGI\*RHRRE\*THLYTHF\*\*IYLP  
REYH\*RAVAGAYPRLQHGGHLNHAAPQR\*GGWRHL\*HAAHIHGFSGFGQDVPGLQSRKGRPRTGLKQRLGCD  
FSV\*VIFYASFPEQPAAL

>ENSMUSP00000105153\_c.16:CT>AG\_p.S6\* ENSMUST00000109527.6|Arl2bp-  
202|ENSMUSG00000031776|+|chr8:g.95394236:CT>AG

MRSA\*\*CRI\*CCGWMFRGHYYG\*\*VPVIAEKLHGQVLPGI\*RHRRE\*THLYTHF\*\*IYLPGREYH\*RAVAGA  
YPRLQHGGHLNHAAPQR\*GGWRHL\*HAAHIHGFSGFGQDVPGLQSRKGRPRTGLKQRLGCDFSV\*VIFYASF  
PEQPAAL

>ENSMUSP00000148695\_c.49:CT>AG\_p.S17\* ENSMUST00000211858.2|Arl2bp-  
203|ENSMUSG00000031776|+|chr8:g.95394236:CT>AG

MDALEEESFALSFSFA\*\*CRI\*CCGWMFRGHYYG\*\*VPVIAEKLHGQVLPGI\*RHRRE\*THLYTHF\*\*IYLP  
REYH\*RAVAGAFPEQPAAL

>rs51191315\_ENSMUSP00000132628\_c.837:C>T\_p.H280Y  
ENSMUST00000166802.9|Adgrg5-205|ENSMUSG00000061577|+|chr8:g.95664229:C>T  
MDPHGALFFYLCLLAAQVVLVETLSDDLVLVLMKRLEQPVGRGLSSRARHIHSLEQKLLNASFGGHNLTLQTNSI  
QSLVFKLSCDFPGLSLSSSTTLTNVQVRAPHAMQFPAELTKGACVTSRPAELRLICIFYFFTAHLFQDDRNSSL  
LNNYVLGAQLDHRPVNNLQKPVNISFWHNRSLEGYTVSCVFWKEGASKSSWGAWSPEGCYTEQPSATQVLC  
NHLTYFAVLMQLSGDPVPAELQVPLEYISFVGCISISIVASLLTILLYAQSRKQSDSTTRIYMNLNGSVLLLN  
VTFLLSSQMTLPTMPRPVCKVLA AVLHYALLSSLTWM AIEGFNLYLFLGRVYNAYIRRYLLKLCMLGWGF  
PALLVLLLMIKSSVYGPCVTSLSKSEQENGTGFQNVSMCWIRSPMVHSILVMGYGGFTSLFNLVLAWALWIL  
CRLRAREKALSPWAYRDTAMVGLTIVLLGTTWTLAFFSFGVFLPQLFLFTIFNSLYGFFLFLWFCSQKRYSD  
AEAKAEMEAVSSSQMTH\*

>rs51191315\_ENSMUSP00000074155\_c.834:C>T\_p.H279Y  
ENSMUST00000074570.10|Adgrg5-201|ENSMUSG00000061577|+|chr8:g.95664229:C>T  
MDPHGALFFYLCLLAAQVVLVETLSDDLVLVLMKRLEQPVGRGLSSRARHIHSLEQKLLNASFGGHNLTLQTNSI  
QSLVFKLSCDFPGLSLSSSTTLTNVQVRAPHAMQFPAELTKGACVTSRPAELRLICIFYFFTAHLFQDDRNSSL  
LNNYVLGAQLDHRPVNNLQKPVNISFWHNRSLEGYTVSCVFWKEGASKSSWGAWSPEGCYTEQPSATQVLC  
NHLTYFAVLMQLSGDPVPAELQVPLEYISFVGCISISIVASLLTILLYAQSRKQSDSTTRIYMNLNGSVLLLN  
VTFLLSSQMTLPTMPRPVCKVLA AVLHYALLSSLTWM AIEGFNLYLFLGRVYNAYIRRYLLKLCMLGWGF  
PALLV

LLLLMIKSSVYGPCVTSLSKSEQENGTGFQNVSMCWIRSPMVHSILVMGYGGFTSLFNLVVLAWALWILCRLRA  
REKALSPWAYRDTAMVLLGLTVLLGTWTWTLAFFSFGVFLLPQLFLFTIFNSLYGFFLFLWFCSQKRYSDAEAKA  
EMEAVSSSQMTH\*

>ENSMUSP00000127427\_c.271:A>T\_p.K91I ENSMUST00000169353.3|Kifc3-

202|ENSMUSG00000031788|-|chr8:g.95836554:T>A

MPPLGPGSPQGGTDAEKHRDRMLVENEQLRQELRRCEVELQELRAQPVVPCGCEHSQESSQLRDKLSQLQLE  
VAENKGMSELNLEVVQITDRLAEVELRLKDCLAEKAQEEERLSRRLRDSHETIASLRAQSPVKYVIKTVEV  
ESSKTKQALSESQTRNQHLQEQVAMQORQVLKEMEQQLQNSHQTLTVQLRAQIAMYEAELEAHERAHGQMLEEMQSLE  
EDKNRAIEEAFARAQVEMKAVHENLAGVRTNLLTLQPALRRTLNDYNGLKRQVRGFPLLLQEQALRSVKAEIGQ  
AIEEVNSNNQELLRKYRRELQLRKKCHNELVRLKGNIRVIARVRPVTKEGEGPEATNAVTFDPDDDSIHL  
HKGKPVSFELDKVFPSPWASQQDVFQEVQALITSCIDGFNVCI FAYGQTGAGKTYTMEGTPENPGINQALQLL  
FSEVQEKASDWQYNITVSAE IYNEVLRDLLGKEPQEKLEIRLCPDGSQQLYVPGLTEFQVQSVDDINKVFEF  
GYNNRTTEFTNLNEHSSRSHALLIVTVRGVDCSTGLRTTGKLNLDLAGSERVKGSGAEGNRLREAQHINRSL  
SALGDVIAALRSRQGHVFPFRNSKLTLYLLQDLSGDSKTLMVVQVSPVEKNTSETLYSLRFAERVRVSVELGPGS  
RRETELGSWSSQEHLEWEPACQTPQPTARAH SAPGSGTSSRPGSIRRKLQPSA\*

>ENSMUSP00000034240\_c.616:A>T\_p.K206I ENSMUST00000034240.15|Kifc3-

201|ENSMUSG00000031788|-|chr8:g.95836554:T>A

MVPSRRTWNLGATPSLRGLWRVGRVQEPKPGMARPA PASPAARPFPHQTGQRLRTGRGKDI LPSGEEDSTSR  
AARPSLAQCRALSVDWPGPRSPHRLYLTQVENLKEKLI SQAQEVSRRLRSELGGTDAEKHRDRMLVENEQLRQ  
ELRRCEVELQELRAQPVVPCGCEHSQESSQLRDKLSQLQLEVAENKGMSELNLEVVQITDRLAEVELRLKDC  
CLAEKAQEEERLSRRLRDSHETIASLRAQSPVKYVIKTVEVESKTKQALSESQTRNQHLQEQVAMQORQVLK  
EMEQQLQNSHQTLTVQLRAQIAMYEAELEAHERAHGQMLEEMQSLEEDKNRAIEEAFARAQVEMKAVHENLAGVRTN  
LLTLQPALRRTLNDYNGLKRQVRGFPLLLQEQALRSVKAEIGQAIIEEVNSNNQELLRKYRRELQLRKKCHNELV  
RLKGNIRVIARVRPVTKEGEGPEATNAVTFDPDDDSIHLHKGKPVSFELDKVFPSPWASQQDVFQEVQALI  
TSCIDGFNVCI FAYGQTGAGKTYTMEGTPENPGINQALQLLFSEVQEKASDWQYNITVSAE IYNEVLRDLL  
GKEPQEKLEIRLCPDGSQQLYVPGLTEFQVQSVDDINKVFEFGYNNRTTEFTNLNEHSSRSHALLIVTVRGV  
DCSTGLRRTTGKLNLDLAGSERVKGSGAEGNRLREAQHINRSLSALGDVIAALRSRQGHVFPFRNSKLTLYLLQD  
LSGDSKTLMVVQVSPVEKNTSETLYSLRFAERVRVSVELGPGSSRRETELGSWSSQEHLEWEPACQTPQPTARAH  
SAPGSGTSSRPGSIRRKLQPSA\*

>ENSMUSP00000126784\_c.508:A>T\_p.K170I ENSMUST00000169748.9|Kifc3-

203|ENSMUSG00000031788|-|chr8:g.95836554:T>A

MNVENTGGRLFGIGRCSSLSGAPGDPVHRTVEAMSQLEELVVLRRERLALHSDRQATTTQLQNQVENLKE  
KLISQAQEVSRRLRSELGGTDAEKHRDRMLVENEQLRQELRRCEVELQELRAQPVVPCGCEHSQESSQLRDKL  
SQLQLEVAENKGMSELNLEVVQITDRLAEVELRLKDCLAEKAQEEERLSRRLRDSHETIASLRAQSPVKYV  
IKTVEVESKTKQALSESQTRNQHLQEQVAMQORQVLKEMEQQLQNSHQTLTVQLRAQIAMYEAELEAHERAHGQML  
EMQSLEEDKNRAIEEAFARAQVEMKAVHENLAGVRTNLLTLQPALRRTLNDYNGLKRQVRGFPLLLQEQALRSV  
KAEIGQAIIEEVNSNNQELLRKYRRELQLRKKCHNELVRLKGNIRVIARVRPVTKEGEGPEATNAVTFDPDD  
SIIHLHKGKPVSFELDKVFPSPWASQQDVFQEVQALITSCIDGFNVCI FAYGQTGAGKTYTMEGTPENPGINQALQLL  
FSEVQEKASDWQYNITVSAE IYNEVLRDLLGKEPQEKLEIRLCPDGSQQLYVPGLTEFQVQSVDDINKVFEFGYNN  
RTTEFTNLNEHSSRSHALLIVTVRGVDCSTGLRRTTGKLNLDLAGSERVKGSGAEGNRLREAQHINRSLSALG  
DVIAALRSRQGHVFPFRNSKLTLYLLQDLSGDSKTLMVVQVSPVEKNTSETLYSLRFAERVRVSVELGPGSSRTE  
LGSWSSQEHLEWEPACQTPQPTARAH SAPGSGTSSRPGSIRRKLQPSA\*

>ENSMUSP00000148425\_c.205:A>T\_p.K69I ENSMUST00000213004.2|Kifc3-

212|ENSMUSG00000031788|-|chr8:g.95836554:T>A

MVENEQLRQELRRCEVELQELRAQPVVPCGCEHSQESSQLRDKLSQLQLEVAENKGMSELNLEVVQITDRL  
AEVELRLKDCLAEKAQEEERLSRRLRDSHETIASLRAQSPVKYVIKTVEVESKTKQALSESQTRNQHLQEQ  
VAMQORQVLKEMEQQLQNSHQTLTVQLRAQIAMYEAELEAHERAHGQMLEEMQSLEEDKNRAIEEAFARAQVEMKAVH  
ENLAGVRTNLLTLQPALRRTLNDYNGLKRQVRGFPLLLQEQALRSVKAEIGQAIIEEVNSNNQELLRKYRRELQ  
RKKCHNELVRLKGNIRVIARVRPVTKEGEGPEATNAVTFDPDDDSIHLHKGKPVSFELDKVFPSPWASQQD  
VFQEVQALITSCIDGFNVCI FAYGQTGAGKTYTMEGTPENPGINQALQLLFSEVQEKASDWQYNITVSAE I  
YNEVLRDLLGKEPQEKLEIRLCPDGSQQLYVPGLTEFQVQSVDDINKVFEFGYNNRTTEFTNLNEHSSRSHAL  
LIVTVRGVDCSTGLRRTTGKLNLDLAGSERVKGSGAEGNRLREAQHINRSLSALGDVIAALRSRQGHVFPFRNS  
KLTLYLLQDLSGDSKTLMVVQVSPVEKNTSETLYSLRFAERVRVSVELGPGSSRRETELGSWSSQEHLEWEPACQ  
TPQPTARAH SAPGSGTSSRPGSIRRKLQPSA\*

>ENSMUSP00000148754\_c.205:A>T\_p.K69I ENSMUST00000212787.2|Kifc3-

210|ENSMUSG00000031788|-|chr8:g.95836554:T>A



ALPQPVLHGKAAEQEPGCGMCDVQTISILPVEQVEHDVLVLEGVDSWEDAQQEDGASQPQTEVAPAHEESEE  
 AIVEIPRELTKIQEEREDEQEEDDEEEKKEEKKKEEKEKEKEKEKEKEKEKEKEKEKEKEKEKEKEKEKEKEKEKEKE  
 EKEEEKKEEKEKEKEEKEKEEKEEKEKEEKEEKEEKEKEEKEEKEEKEKEKEEKEEKEEKEKEEKEKEEKEEKEE  
 EEEKEKEEVEKKEEGETNSTVVPATKEHPELQVEDTDADSGPLIPEETLPPPERPPPSPVKSDTLTVPAAAA  
 AGHRKRLPSQDDEAEELKALSPAESPVVAWSDPTTPEADGQDRAASTASQNSAI INDRLELQELVKMFKERTEK  
 VKEKLIDPDPVTSDEESPKPSPAKKAPEPDPAPQKPAEAEEVAEEHYCDMLCCKFKRRLPLKMYRFPQSIDPLTNL  
 MYILWLFFVVLAWNWCWLI PVRWAFPYQADNIHFWLLMDYLCDFIYLLDITVFMRLQFVKGGDIITDKKE  
 MRNNYKSRFRKMDLCLLPDLFLYLKLGINLLRPLRCLKYMAFFEFNNRLEAILSKAYVYRVIRTAYLLY  
 SLHLNSCLYYWASAFQGIGSTHWVYDGVGNSYIRCYWAVKTLITIGGLPDPQTLFEIVFQLLNYFTGVFAFS  
 VMIGQMRDVGGAATAGQTYRSCMDSTVKYMNFKYIPRSVQNRVKTWYETWHSQGMLESELVQLPDKMRL  
 DLAI DVNYSIVSKVALFQGCQRQMI FDMKLKRLRSVVYLPNDYVCKKGEIGREMYIIQAGQVQVLGGPDGKAVL  
 VTLKAGSVFGEISLLAVGGNRRTANVVAHGFTNLFI LDKKDLNEILVHYPESQKLLRKKARRMLRNNKPKKE  
 EKSVLILPPRAGTPKLFNAALAAAGKMGRGAKGGKLAHLRLARLKELAALAAARQQQLLEQAKSSQEAGGEE  
 GSGATDQAPAPPEPKPDKPPKPPGPEPSAQSSPPASAKPEESTGEEAGPPEPSVIRVSPGPDPEQTL SV  
 EVLEEKKEGAE\*

>rs32151123\_ENSMUSP00000125362\_c.562:A>G\_p.Q188R  
 ENSMUST00000161029.9|Tepp-204|ENSMUSG00000090206|+|chr8:g.96047318:A>G  
 MAQIIDLVPWDECSAHLASPAVLLPLERVRHPLAGVKHQLYHPALPSLRMDMDTVKGLSDEHQCSTYFS  
 KDDFNKAHFTLLGVPNKPLQCLDFATGQKLCHKYRGGKMIPIAPGINRVDWPCFTRAIEDWSKFSRSEEFK  
 LPCANKRVEGFSGYAVRYLKEPVTQNWRYCLNQNSLDYGRKPLPFDLSLNAFRRFGSHYSRINYLTDPWH\*

>rs32151123\_ENSMUSP00000096080\_c.226:A>G\_p.Q76R  
 ENSMUST00000098480.9|Tepp-201|ENSMUSG00000090206|+|chr8:g.96047318:A>G  
 MIP IAPGINRVDWPCFTRAIEDWSKFSRSEEFK LPCANKRVEGFSGYAVRYLKEPVTQNWRYCLNQNSLDR  
 YGRKPLPFDLSLNAFRRFGSHYSRINYLTDPWH\*

>rs32151123\_ENSMUSP00000148526\_c.355:A>G\_p.Q119R  
 ENSMUST00000212056.2|Tepp-207|ENSMUSG00000090206|+|chr8:g.96047318:A>G  
 MAQIIDLVPWDECSAHLASPAVLLPLERVRHPLLCHKYRGGKMIPIAPGINRVDWPCFTRAIEDWSKFSRS  
 EEFFK LPCANKRVEGFSGYAVRYLKEPVTQNWRYCLNQNSLDYGRKPLPFDLSLNAFRRFGSHYSRINYLTDP  
 H\*

>rs32151123\_ENSMUSP00000148558\_c.148:A>G\_p.Q50R  
 ENSMUST00000153991.2|Tepp-203|ENSMUSG00000090206|+|chr8:g.96047318:A>G  
 XGLFRSFRPKVALSTVEGFSGYAVRYLKEPVTQNWRYCLNQNSLDYGRKPLPFDLSLTRSPWLVLSSPTLAF  
 GKWRLVSCS\*

>rs32151123\_ENSMUSP00000124913\_c.88:A>G\_p.Q30R  
 ENSMUST00000162294.2|Tepp-  
 205|ENSMUSG00000090206|+|chr8:g.96047318:A>G  
 GYAVRYLKEPVTQNWRYCLNQNSLDYGRKPLPFDLSLNAFRRFGSHYRTRSPWLVLSSPTLAFGKWRLVSCS  
 \*

>rs33399487\_ENSMUSP00000034243\_c.570:G>T\_p.A191S  
 ENSMUST00000034243.7|Mmp15-201|ENSMUSG00000031790|+|chr8:g.96094698:G>T  
 MGSDRSALGRPGCTGSCLSRASLLPLLLVLLDCLGHGTASKDAEVYAAENWLRLYGYLPQPSRHMSTMRSQAQ  
 ILASALAEMQSFYGI PVTGVLDEETKTWPKRPRCGVDPQFVGHVKANLRRRRKRYP TLTGKAWNNYHLTFSIQN  
 YTEKLGWYNSMEAVRRAFQVWEQVTPLVFQEVSYDDIRLRRRAESDIMVLFASGFHGDSSPFDPVGGFLAHAY  
 FPGPLGGDTHFDADEPWFSSDHLHGISLFLVAVHELGHALGLEHSSNP SAIMAPPYQWMDTDNFQLPEDDL  
 RGIQQLYGSPDGKPQPTPLP LTVRPRRPGRPHDQPPRPQPPHPGGKPERPPKPGPPPQPRATERPDQYGPNI  
 CDGNFDTVAVLRGEMFVFKGRWFWRVRRHNRVLDNYMPPIGHFWRGLPGNISAAYERQDGHFVFFKNRYWLFER  
 EANLEPGYPQPLSSYGTDI PYDRIDTAIWWEPTGHTFFQADRYWRFNEETQHGDPGYPKPI SVWQGIPTSPK  
 GAFLSNDAAYTYFYKGTKYWKFNNERLRMEPGHPKSILRDFMGCQEHVEPRSRWPDVARPPFPNPGGAPEAD  
 GDSKEENAGDKDEGSRVVVQMEVVRTVNVVVLVPLLLLLC IILGLAFALVQMQRKGAPRMLLYCKRSLQEWV  
 \*

>rs228352088\_ENSMUSP00000034249\_c.260:T>G\_p.F87L  
 ENSMUST00000034249.8|Cfap20-201|ENSMUSG00000031796|-|chr8:g.96149426:A>C  
 MFKNTFQSGFLSILYSIGSKPLQIWDKVRNGHIKRITDNDIQSLVLEIEGTVNSTTYITCPADPKKTLGIKL  
 PFLVMI IKNLKYLTFEVQVLDKVNRRFRFRASNYSKSTTRVCKPFICTMPMRLDDGWNQIQFNLSDFTRRAYGT  
 NYIETLRVQIHANCRIRRVYFSDRLYSEDELP AEFKLYLFPVQNKAKQ\*

>rs228352088\_ENSMUSP00000148651\_c.260:T>G\_p.F87L  
 ENSMUST00000213086.2|Cfap20-208|ENSMUSG00000031796|-|chr8:g.96149426:A>C

MFKNTFQSGFLSILYSIGSKPLQIWDKVRNGHIKRITDNDIQSLVLEIEGTVNSTTYITCPADPKKTLGKIKL  
PFLVMI IKNLKKYLTTFEVQVLDKVNRRRFRASNYQSTTRVKPFICTMPMRLDDGWNQIQFNLSDFTRRAYGT  
NYIETLRVQVLLHLPRESHTGGFRTLWLANWLAYGPPWSRTM\*  
>rs228352088\_ENSMUSP00000148527\_c.180:T>G\_p.Y61D  
ENSMUST00000212684.2|Cfap20-205|ENSMUSG00000031796|-|chr8:g.96149426:A>C  
MFKNTFQSGFLSILYSIGSKPLQIWDKKYHIHVVSCGPQEDTGDQTAFFCHDHQKLEEIFDL\*  
>rs228352088\_ENSMUSP00000148668\_c.260:T>G\_p.F87L  
ENSMUST00000211908.2|Cfap20-202|ENSMUSG00000031796|-|chr8:g.96149426:A>C  
MFKNTFQSGFLSILYSIGSKPLQIWDKVRNGHIKRITDNDIQSLVLEIEGTVNSTTYITCPADPKKTLGKIKL  
PFLVMI IKNLKKYLTTFEVQVLDKVNRRRF  
>rs32172376\_ENSMUSP00000148608\_c.912:C>T\_p.Q305\*  
ENSMUST00000213096.2|Prss54-205|ENSMUSG00000048400|-|chr8:g.96286159:G>A  
MAEMRGMLLMLLYISHSSAICGIQKATIADKLENLVSSTFEFPWVSIQDKQYTHLAFGCILSEFWILSTAS  
ALQHRPEVIAVVGISNMDPRKTDHREYSVNTIIPHENFDNVSMGNNIALLKTESAMHFNDLVQAICFLGKKLH  
KPPALKNCWVAGWNPTSATGNHMTMSILRRI SVKDIEVCPLRRHQKTECASHTKEPNNVCLGEPGSPMCMQAK  
KLDLWILRGLLAYGGDSCPGFLYTSVADYSWITAKTRKAGPSLSSLHLWEKLVFELPFHESNIALTTNSFS  
IHTYAEWPHSYS\*GQRMSTKSNKQKDAGQNFVRNRQPETSGPSKVAIQPMYYDYGGEAGEGGAVAGQNRHLHW  
SQERILMSFVLVFLGSGV\*  
>rs32172376\_ENSMUSP00000058859\_c.912:C>T\_p.Q305\*  
ENSMUST00000052690.13|Prss54-201|ENSMUSG00000048400|-|chr8:g.96286159:G>A  
MAEMRGMLLMLLYISHSSAICGIQKATIADKLENLVSSTFEFPWVSIQDKQYTHLAFGCILSEFWILSTAS  
ALQHRPEVIAVVGISNMDPRKTDHREYSVNTIIPHENFDNVSMGNNIALLKTESAMHFNDLVQAICFLGKKLH  
KPPALKNCWVAGWNPTSATGNHMTMSILRRI SVKDIEVCPLRRHQKTECASHTKEPNNVCLGEPGSPMCMQAK  
KLDLWILRGLLAYGGDSCPGFLYTSVADYSWITAKTRKAGPSLSSLHLWEKLVFELPFHESNIALTTNSFS  
IHTYAEWPHSYS\*GQRMSTKSNKQKDAGQNFVRNRQPETSGPSKVAIQPMYYDYGGEAGEGGAVAGQNRHLHW  
SQERILMSFVLVFLGSGV\*  
>rs32172376\_ENSMUSP00000137577\_c.912:C>T\_p.Q305\*  
ENSMUST00000180075.2|Prss54-202|ENSMUSG00000048400|-|chr8:g.96286159:G>A  
MAEMRGMLLMLLYISHSSAICGIQKATIADKLENLVSSTFEFPWVSIQDKQYTHLAFGCILSEFWILSTAS  
ALQHRPEVIAVVGISNMDPRKTDHREYSVNTIIPHENFDNVSMGNNIALLKTESAMHFNDLVQAICFLGKKLH  
KPPALKNCWVAGWNPTSATGNHMTMSILRRI SVKDIEVCPLRRHQKTECASHTKEPNNVCLGEPGSPMCMQAK  
KLDLWILRGLLAYGGDSCPGFLYTSVADYSWITAKTRKAGPSLSSLHLWEKLVFELPFHESNIALTTNSFS  
IHTYAEWPHSYS\*GQRMSTKSNKQKDAGQNFVRNRQPETSGPSKVAIQPMYYDYGGEAGEGGAVAGQNRHLHW  
SQERILMSFVLVFLGSGV\*  
>rs236239334\_ENSMUSP00000034096\_c.135:G>A\_p.V46M  
ENSMUST00000034096.6|Setd6-201|ENSMUSG00000031671|+|chr8:g.96442700:G>A  
MAAPAKRARVSGSPLVAPCPSPRAARAPLPLPAGSSGGEPEGDAMAGFLRWCRVGLLELSPKVTVSRQGTVA  
GYGMVARESVRAGELLFAVPRSALLSPHTCSISGLLERERGAQSLSGWVPLLLALLHELQAPASPWSPYFAL  
WPELGRLEHMPMFPEEERLRLKGTGVPEAVEKDLVNIRSEYYSIVLPMFMEAHSDLFSPSVRSLELYQQLVAL  
VMAYSFQEPLEEDDDEKEPNPLMVPAADILNHIANHNANLEYSADYLRMVATQPILEGHEIFNTYGMANWQ  
LIHMYGFAEPYPNNTDDTADIQMTVTRDAALQGTGKDETEKLLVCERWDFLCKQEMVGEAGAFVIGCEEVLTEE  
ELATTLKVLCPAEFRDYKERAGWGEETEDDSLAITDIPKLQESWKRLLRNSVLLTLQTYTTDLKTDQDLL  
SNKEAYATLSWREQQALQVRYGQKMLHRVLELNTN\*  
>rs262614519\_ENSMUSP00000034096\_c.451:G>C\_p.G151A  
ENSMUST00000034096.6|Setd6-201|ENSMUSG00000031671|+|chr8:g.96443098:G>C  
MAAPAKRARVSGSPLVAPCPSPRAARAPLPLPAGSSGGEPEGDAVAGFLRWCRVGLLELSPKVTVSRQGTVA  
GYGMVARESVRAGELLFAVPRSALLSPHTCSISGLLERERGAQSLSGWVPLLLALLHELQAPASPWSPYFAL  
WPELARLEHMPMFPEEERLRLKGTGVPEAVEKDLVNIRSEYYSIVLPMFMEAHSDLFSPSVRSLELYQQLVAL  
VMAYSFQEPLEEDDDEKEPNPLMVPAADILNHIANHNANLEYSADYLRMVATQPILEGHEIFNTYGMANWQ  
LIHMYGFAEPYPNNTDDTADIQMTVTRDAALQGTGKDETEKLLVCERWDFLCKQEMVGEAGAFVIGCEEVLTEE  
ELATTLKVLCPAEFRDYKERAGWGEETEDDSLAITDIPKLQESWKRLLRNSVLLTLQTYTTDLKTDQDLL  
SNKEAYATLSWREQQALQVRYGQKMLHRVLELNTN\*  
>rs215389823\_ENSMUSP00000034096\_c.555:A>G\_p.S186G  
ENSMUST00000034096.6|Setd6-201|ENSMUSG00000031671|+|chr8:g.96443314:A>G  
MAAPAKRARVSGSPLVAPCPSPRAARAPLPLPAGSSGGEPEGDAVAGFLRWCRVGLLELSPKVTVSRQGTVA  
GYGMVARESVRAGELLFAVPRSALLSPHTCSISGLLERERGAQSLSGWVPLLLALLHELQAPASPWSPYFAL  
WPELGRLEHMPMFPEEERLRLKGTGVPEAVEKDLVNIRGEYYSIVLPMFMEAHSDLFSPSVRSLELYQQLVAL  
VMAYSFQEPLEEDDDEKEPNPLMVPAADILNHIANHNANLEYSADYLRMVATQPILEGHEIFNTYGMANWQ

LIHMYGFAEYPYNNNTDDTADIQMVTVRDAALQGTQKDETEKLLVCERWDFLCKQEMVGEEGAFVIGCEEVLTEE  
ELATTLKVLKMPAAEFDRDYKERAGWGEETEDDSLAIITDIPKLQESWKRLLRNSVLLTLQTYTTDLKTDQDLL  
SNKEAYATLSWREQQALQVRYGQKMLHRVLELNTN\*

>rs215389823\_ENSMUSP00000148466\_c.75:A>G\_p.S26G  
ENSMUST00000141900.8|Setd6-203|ENSMUSG00000031671|+|chr8:g.96443314:A>G  
EEERLRLKGTGVPEAVEKDLVNIRGEYYSIVLPFMEAHSDLFSPSVRSLELYQQQLVALVMAYRNKG\*

>rs215389823\_ENSMUSP00000148785\_c.66:A>G\_p.S23G  
ENSMUST00000148727.3|Setd6-204|ENSMUSG00000031671|+|chr8:g.96443314:A>G  
RLRLLKGTGVPEAVEKDLVNIRGEYYSIVLPFMEAHSDLFSPSVRSLELYQQQLVALVMAYSFQEPLEEDDDEK  
EPNSPLMDYLRMVATQPILEGHEIFNTYGMANWQLIHMYGFAEYPYNNNTDDTAD

>rs213219203\_ENSMUSP00000034096\_c.625:C>T\_p.S209F  
ENSMUST00000034096.6|Setd6-201|ENSMUSG00000031671|+|chr8:g.96443384:C>T  
MAAPAKRARVSGSPLVAPCPSPRAARAPLPLPAGSSGGEPEGDAVAGFLRWCRRVGLELSPKVTVSRQGTVA  
GYGMVARESVRAGELLFAVPRSALLSPHTCSISGLLERERGAQLQSLSGWVPLLLALLHELQAPASPWSPYFAL  
WPELGRLEHPMFWPEEERLRLKGTGVPEAVEKDLVNIRSEYYSIVLPFMEAHSDLFSPSVRFLELYQQQLVAL  
VMAYSFQEPLEEDDDEKEPNSPLMVPAADILNHIANHNANLEYSADYLRMVATQPILEGHEIFNTYGMANWQ  
LIHMYGFAEYPYNNNTDDTADIQMVTVRDAALQGTQKDETEKLLVCERWDFLCKQEMVGEEGAFVIGCEEVLTEE  
ELATTLKVLKMPAAEFDRDYKERAGWGEETEDDSLAIITDIPKLQESWKRLLRNSVLLTLQTYTTDLKTDQDLL  
SNKEAYATLSWREQQALQVRYGQKMLHRVLELNTN\*

>rs213219203\_ENSMUSP00000148466\_c.145:C>T\_p.S49F  
ENSMUST00000141900.8|Setd6-203|ENSMUSG00000031671|+|chr8:g.96443384:C>T  
EEERLRLKGTGVPEAVEKDLVNIRSEYYSIVLPFMEAHSDLFSPSVRFLELYQQQLVALVMAYRNKG\*

>rs213219203\_ENSMUSP00000148785\_c.136:C>T\_p.S46F  
ENSMUST00000148727.3|Setd6-204|ENSMUSG00000031671|+|chr8:g.96443384:C>T  
RLRLLKGTGVPEAVEKDLVNIRSEYYSIVLPFMEAHSDLFSPSVRFLELYQQQLVALVMAYSFQEPLEEDDDEK  
EPNSPLMDYLRMVATQPILEGHEIFNTYGMANWQLIHMYGFAEYPYNNNTDDTAD

>rs387317066\_ENSMUSP00000063565\_c.6872:C>A\_p.N2291K  
ENSMUST00000068452.10|Cnot1-201|ENSMUSG00000036550|-|chr8:g.96448163:G>T  
MNLDSLALSQISYLVNLTKKNYRASQQEIQHIVNRHGPEADRHLRCLFHVDFSGDGKSSGKDFHQTF  
LIQECASLITKPNFISTLSYAIIDNPLHYQKSLKPAPHLFAQLSKVLKLSKVQEVIFGLALLNSSSPDLRGFAA  
QFIKQKLPDLLRSYIDADVSGNQEGGFQDIAIEVLHLLLSHLLFGQKGAFGVQEQIDAFKTLRRDFPQERC  
PVLAPLLYPEKRDILMDRILPDSGGVAKTMMESSLADFMQEVGYGFCASIEECRNIIMQFGVREVTAAQVAR  
VLGMMARTHSGLTGDIPLQSIAPGSGIWSGDKDKSEGAQHTWNVVLIIDVLKELNPSLNFKEVYELDHPG  
FQIRDSKGLHNVVYGIQRGLGMEVFPVDFIYRPWKHAEGQLSFIQHSLINPEVFCFADYPCHTVATDILKAPP  
EDDNREIATWKSLLDIESLLRLAEVGGQYEQVQKLFSPFIKHCPLMLVLLQINTSWHTLRHELISTLMPFI  
GNHPNSAILHYAWHGQGSPSIRQLIMHAMAWEYMRGEQYDQAKLSRILDVAQDLKALSMLLNGTFFAFVID  
LAALASRREYLKLDKWLTDKIREHGEFFIQACMTFLKRRCPSSLGGLAPEKDKPKSAQLPAETLATMLACLQA  
CAGSVSQELSETILTMVANCNVMNKARQPPPGVMPKGRPPSASSLDAISPVQIDPLAGMASLIGGSAAPHT  
QSMQGFPPNLGSAFSTPQSPAKAFPPPLSTPNQTTAFSGIGGLSSQLPVGGLGTGSLTGIGTGALGLPAVNNDF  
FVQRKLGTSGLNQPTFQQTDLQVWPEANQHFSKEIDDEANSYFQRIYNHPPHTMSVDEVLEMLQRFKSTI  
KREREVFNCLRNLFEEYRFFPQYDPKELHITACLFGGIEKGLVTYMALGLALRYVLEALRKPFGSKMYFYF  
IAALDRFKNRLKDYPPQYQHLASISHFMQFPHHLQEYIEYGGQSRDPPVKMQGSITTPGSIALAAQAQAQV  
AKAPLAGQVNTMVTSTTTTVAKTVTVTKPTGVSFKKDVPPSINTNIDTLLVATDQTERIVEPPENIQEKIA  
FIFNNLSQSNMTQKVEELKETVKEEFMPWVSQYLVMKRVSIEPNFHSLSYNFLDTLKNPEFNKMLVNETYRNI  
KVLTLTSDKAAANFSDRSLLKNLGHWLGMITLAKNKPIIHTDLVKSLLLEAYVKGQELLYVVPFAKVLESS  
IRSLVFRPPNPWTMAIMNVLAELHQEHDLKLNLFKFEIEVLCKNLALDINELKPGNLLKDKDRKLNLEQLSAP  
KKDKVQPEELPAITTTTTSTTPATSTTCTATVPPQPQYSYHDINVYSLAGLAPHITLNPTIPLFQAHPQLKQC  
VRQAIERAVQELVHPVVDRSIKIAMTTCQIVRKDFALDSEESRMRIAAHHMMRNLTAGMAMITCREPLMSI  
STNLKNSFASALRTASPPQREMMDQAAAQLAQDNCELACCFIQKTAVEKAGPEMDKRLATEFELRKHARQEGR  
RYCDPVVLTYYAERMPEQIRLKVGGVDPKQLAVYEEFARNVPGFLPTNDLSQPTGFLAQPMQAWATDDVAQI  
YDKCITELEQHLHAIPPTLAMNPQAALRSLEVVVLSRNSRDAIAALGLLQKAVEGLLDATSGADADLLRY  
RECHLLVLKALQDGRAYGSPWCNKQITRCLIECRDEYKYNVEAVEELLIRNHLVNMQQYDLHLAQSMEGLNYM  
AVAFAMQSLVAKIILLVDPRSVAHITEADLFHTIETLMRINAHSRGNAPGLPQLMEVVRNSYNEAMIDRAHGGPNF  
MMHSGISQASEYVDDPPGLREKAEYLLREWVNLHSAAGRDSKAFSAFVGMHQQGIKTDLLITRFFRLCT  
EMCVEISYRAQAEQQHNPAANPTMIRAKYHNLDFAVRLIALLVKHSGEATNTVTKINLLNKVLGIVVGVLLQ  
DHDVRQSEFQQLPYHRIFIMLLELNAPEHVLETINFQTLTAFQNTFHILRPTKAPGFVYAWLELISHRIFIA  
RMLAHTPQQKGWPMYAQLLIDLFKYLAPFLRNVELTKPMQILYKGLTRVLLVLLHDFPEFLCDYHYGFCDVIP  
PNCIQLRNLILSAFPRNMRLPDPFTPNLKVDMLEINIAPRIITNFTGVMPPQFKKDLDSYLKTRSPVTFSLD



LRSNLQVSNPEGNRYNLQLINALVLYVGTQAIARIAHINKGSTPSMSTITHSAHMDIFQNLAVDLDETEGRYLFLN  
AIANQLRYPNSHHTYFSCMTLYLFAEAKTEAIEQEQITRFLQSVQCCMGQKQAQQVMEGTGAS\*  
>rs387317066\_ENSMUSP00000148807\_c.6866:C>A\_p.N2289K  
ENSMUST00000211887.2|Cnot1-203|ENSMUSG00000036550|-|chr8:g.96448163:G>T  
MNLDSLALSQISYLVNDLTKKNYRASQQEIQHIVNRHGPEADRHLRLCLFVDFSGDGKSSGKDFHQFLI  
QECASLITKPNFISTLSYAI DNPLHYQKSLKPAPHLFAQLSKVLKLSKVQEVIFGLALLNSSSPDLRGFAAQF  
IKQKLPDLLRSYIDADVSGNQEGGFQDIAIEVLHLLLSHLLFGQKGAFGVQEQIDAFKTLRRDFPQERC  
VLAFLLYPEKRDILMDRILPDSGGVAKTMMESSLADFMQEVGYGFCASIEECRNIIMQFGVREVTAAQVARV  
GMMARTHSGLTDGIPLQSIAPGSGIWSGDKDKSEGAQAHTWNVEVLIDVLKELNPSLNFKEVTEYELDHPGFQ  
IRDSKGLHNVVYGIQRGLGMEVFPVDFIYRPWKHAEGQLSFIQHSLINPEVFCFADYPCHTVATDILKAPPED  
DNREIATWKSLLDIESLLRLAEVQYEQVKQLFSFPIKHCPLMLVALLQINTSWHTLRHELISTLMPIFLGN  
HPNSAILHYAWHGQGSPIRQLIMHAMAEWYMRGEQYDQAKLSRILDVAQDLKALSMLLNGTFFAFVIDLA  
ALASRREYLKLDKWLTDKIREHGEPFIQACMTFLKRRCP SILGGLAPEKDPKSAQLPAETLATMLACLQACA  
GSVQSQELSETILTMVANCNSVMNKARQPPPGVMPKGRPPSASSLDAISPVQIDPLAGMASLSIGGSAAPHTQS  
MQGFPPNLGSAFSTPQSPAKAFPPPLSTPNQTTAFSGIGGLSSQLPVGGLGTGSLTGIGTGALGLPAVNNDFV  
QRKLGTSGLNQPTFQQTDLQVWPEANQHFSKEIDDEANSYFQRIYNHPPHPTMSVDEVLEMLQRFKDKSTIKR  
EREVFNMLRNLFEYRFFPQYQPKELHITACLFEGGIIEKGLVTYMALGLALRYVLEALRKPFGSKMYFYGIA  
ALDRFKNRLKDYPCQHLASISHEFMQFPHHLQEYIEYGQQRSDPPVKMQGSIITPGSIALAQQAQVPAK  
APLAGQVNTMVTSTTTTVAKTVTVTKPTGVSFKKDVPPSINTTNIIDTLLVATDQTERIVEPPENIQEKIAFI  
FNNLSQSNMTQKVEELKETVKEEFMPWVSQYLVMKRVSIEPNFHSLSYNSFLDTLKNPEFNKMLVNETYRNKIV  
LLTSDKAAANFSDRSLLKLNGLHWLGMITLAKNKPI LHTDLDVKSLLLEAYVKGQOQELLYVVPFVAKVLESSIR  
SLVFRPPNPWTMAIMNVLAELHQEHDLKLNKFEIEVLCKNLALDINELKPGNLLKDKDRKLNKLNDEQLSAPKK  
DVKQPEELPAITTTTTSTTPATSTTCTATVPPQPQYSYHDINVYSLAGLAPHITLNPTIPLFQAHPQLKQCVR  
QAIERAVQELVHPVVDRSIKIAMTTCEQIVRKDFALDSEESRMRIAAHMMRNLTAGMAMITCREPLLSIST  
NLKNSFASALRTASPPQREMDQAAAQLAQDNCELACCFIQKTAVEKAGPEMDKRLATEFELRKHARQEGRRY  
CDPVVLYTQAERMPEQIRLKVGGVDPKQLAVYEEFARNVPGFLPTNDLSQPTGFLAQPMKQAWATDDVAQIYD  
KCITELQHLHAIPTPLAMNPQAQALRSLLLEVVLSRNSRDAIAALGLLQKAVEGLLDTKSGADADLLLRYSRE  
CHLLVLKALQDGRAYGSPWCNKQITRCLIECRDEYKYNVEAVELLIRNHLVNMQYDLHLAQSMENGLNYMAV  
AFAMQLVKILLVDSERSVAHI TEADLFHTIETLMRINAHSRGNAPGLPQLMEVRSNYEAMIDRAHGPNFMM  
HSGISQASEYDDPPGLREKAEYLLREWVNLHSAAGRDSTKAFSAFVGMHQOQGI LKTDLLITRFFRLCTEM  
CVEISYRAQAEQQHNPANPTMIRAKCYHNLDAFVRLIALLVKHSGEATNTVTKINLLNKVLGIVVGVLLQDH  
DVRQSEFQQLPYHRIFIMLLLELNAPEHVLETINFQTLTAFNCNFHILRPTKAPGFVYAWLELISHRIFIARM  
LAHTPQQKGWPMYAQLLIDLFKYLAPFLRNVELTKPMQILYKGLTRVLLVLLHDFPEFLCDYHYGFCDVIPP  
CIQLRNLILSAFPRNMRLPDPFTPNLKVDMLEINIAPRILTNFTGMPPQFKKDLDSYLKTRSPVTFLSDLR  
SNLQVSNPEGNRYNLQLINALVLYVGTQAIARIAHINKGSTPSMSTITHSAHMDIFQNLAVDLDETEGRYLFLNAI  
ANQLRYPNSHHTYFSCMTLYLFAEAKTEAIEQEQITRVLRLERLIVNRPHPWGLLITFIELIKNPAFKFWNHEFV  
HCAPEIEKLFQSVQCCMGQKQAQQVMEGTGAS\*  
>rs387317066\_ENSMUSP00000096073\_c.6887:C>A\_p.N2296K  
ENSMUST00000098473.11|Cnot1-202|ENSMUSG00000036550|-|chr8:g.96448163:G>T  
MNLDSLALSQISYLVNDLTKKNYRASQQEIQHIVNRHGPEADRHLRLCLFVDFSGDGKSSGKDFHQFQF  
LIQECASLITKPNFISTLSYAI DNPLHYQKSLKPAPHLFAQLSKVLKLSKVQEVIFGLALLNSSSPDLRGFAA  
QFIKQKLPDLLRSYIDADVSGNQEGGFQDIAIEVLHLLLSHLLFGQKGAFGVQEQIDAFKTLRRDFPQERC  
PVVLAFLLYPEKRDILMDRILPDSGGVAKTMMESSLADFMQEVGYGFCASIEECRNIIMQFGVREVTAAQVAR  
VLGMMARTHSGLTDGIPLQSIAPGSGIWSGDKDKSEGAQAHTWNVEVLIDVLKELNPSLNFKEVTEYELDHPG  
FQIRDSKGLHNVVYGIQRGLGMEVFPVDFIYRPWKHAEGQLSFIQHSLINPEVFCFADYPCHTVATDILKAPP  
EDDNREIATWKSLLDIESLLRLAEVQYEQVKQLFSFPIKHCPLMLVALLQINTSWHTLRHELISTLMPIFL  
GNHPNSAILHYAWHGQGSPIRQLIMHAMAEWYMRGEQYDQAKLSRILDVAQDLKALSMLLNGTFFAFVID  
LAALASRREYLKLDKWLTDKIREHGEPFIQACMTFLKRRCP SILGGLAPEKDPKSAQLPAETLATMLACLQACA  
CAGSVQSQELSETILTMVANCNSVMNKARQPPPGVMPKGRPPSASSLDAISPVQIDPLAGMASLSIGGSAAPHT  
QSMQGFPPNLGSAFSTPQSPAKAFPPPLSTPNQTTAFSGIGGLSSQLPVGGLGTGSLTGIGTGALGLPAVNNDF  
FVQRKLGTSGLNQPTFQQSKMKPSDLSQVWPEANQHFSKEIDDEANSYFQRIYNHPPHPTMSVDEVLEMLQRF  
KDKSTIKREVEFNMLRNLFEYRFFPQYQPKELHITACLFEGGIIEKGLVTYMALGLALRYVLEALRKPFGSK  
MYFYGIAALDRFKNRLKDYPCQHLASISHEFMQFPHHLQEYIEYGQQRSDPPVKMQGSIITPGSIALAQQA  
QAQVPAKAPLAGQVNTMVTSTTTTVAKTVTVTKPTGVSFKKDVPPSINTTNIIDTLLVATDQTERIVEPPENI  
QEKIAFI FNNLSQSNMTQKVEELKETVKEEFMPWVSQYLVMKRVSIEPNFHSLSYNSFLDTLKNPEFNKMLVNE  
TYRNKIVLLTSDKAAANFSDRSLLKLNGLHWLGMITLAKNKPI LHTDLDVKSLLLEAYVKGQOQELLYVVPFVAK  
VLESSIRSLVFRPPNPWTMAIMNVLAELHQEHDLKLNKFEIEVLCKNLALDINELKPGNLLKDKDRKLNKLNDE  
QLSAPKKDVKQPEELPAITTTTTSTTPATSTTCTATVPPQPQYSYHDINVYSLAGLAPHITLNPTIPLFQAHP

QLKQCVRQAIERAVQELVHPVVDRSIKIAMTTCSEQIVRKDFALDSEESRMRIAHHMMRNLTAGMAMITCREP  
LLMSISTNLKNSFASALRTASPQQREMMDQAAAQLAQDNCELACCFIQKTAVEKAGPEMDKRLATEFELRKHA  
RQEGRRYCDPVVLTYYAERMPEQIRLKVGGVDPKQLAVYEEFARNVPGFLPTNDLSQPTGFLAQPMKQAWATD  
DVAQIYDKCITELEQHLHAI PPTLAMNPQAQALRSLLLEVVLRSNSRDAIAALGLLQKAVEGLLDATSGADAD  
LLLRYRECHLLVLKALQDGRAYGSPWCNKQITRCLIECRDEYKYNVEAVELLIRNHLVNMQQYDLHLAQSMEN  
GLNYMAVAFAMQLVKILLVDERSVAHI TEADLFHTIETLMRINAHSRGNAPGLPQLMEVVRSNYEAMIDRAH  
GGPNFMMHSGISQASEYDDPPGLREKAEYLLREWVNLYHSAAAGRDSTKAFSAFVGMHQQGILKTDLLITRF  
FRLCTEMCVEISYRAQAEQQHNPAANPTMIRAKCYHNLD AFVRLIALLVKHSGEATNTVTKINLLNKVLGIVV  
GVLLQDHDVRSQSEFQQLPYHRIFIMLLELNAPEHVLETINFQTLTAFNCNTFHILRPTKAPGFVYAWLELISH  
RIFFIARMLAHTPQQKGWPMYAQLLIDLFKYLAPFLRNVELTKPMQILYKGLTRVLLVLLHDFPEFLCDYHYGF  
CDVIPPNCIQLRNLI LSAFPRNMRLPDPFTPNLKVDMLSEINIAPRILTNFTGVMPPQFKKDLDSYLKTRSPV  
TFLSDLRSNLQVSNPNRYNLQLINALVLYVGTQAI AIAHINKGSTPSMSTITHSAHMDIFQNLAVDLDTTEGR  
YLFNLAIANQLRYPNSHHTYFSC TMLYLFAEAKTEAIQEQITRVLRLERLIVNRPHPWGLLITFIELIKNPAFK  
FWNHEFVHCAPEIEKLFQSVACCMGQKQAQQVMEGTGAS\*

>rs107850230\_ENSMUSP00000063565\_c.6243:C>T\_p.P2082S

ENSMUST00000068452.10|Cnot1-201|ENSMUSG00000036550|-|chr8:g.96454231:G>A  
MNLDSLALSLSQISYLVNDLTKKNYRASQQEIQHIVNRHGPEADRHLRLCLFVSHVDFSGDGKSSGKDFHQTF  
LIQECASLITKPNFISTLSY AIDNPLHYQKSLKPAPHLFAQLSKVLKLSKVQEVIFGLALLNSSSPDLRGFAA  
QFIKQKLPDLLRSYIDADVSGNQEGGFQDIAIEVLHLLLSHLLFGQKGAFGVQEQIDAFKTLRRDFPQERC  
PVVLAPELLYPEKRDILMDRILPDSGGVAKTMMESSLADFMQEVGYGFCASIEECRNIIMQFGVREVTAAQVAR  
VLGMMARTHSGLTDGIPLOSISAPGSGIWSDGKDKSEGAQAHTWNVEVLIDVLKELNPSLNFKEVTEYLDHDPG  
FQIRDSKGLHNVVYGIQRGLGMEVFPVDFIYRPWKHAEGQLSFIQHSLINPEVFCFADYPCHTVAATDILKAPP  
EDDREIATWKSLLDIESLLRLAEVQYEQVKQLFSFPIKHC PDMLVLALLQINTSWHTLRHELISTLMPIFL  
GNHPNSAILHYAWHGQGSPSIRQLIMHAMAEWYMRGEQYDQAKLSRILDVAQDLKALSMLLNGTFFAFVID  
LAALASRREYLKLDKWLTDKIREHGEPFIOACMTFLKRRCP SILGGLAPEKDPKSAQLPAETLATMLACLQA  
CAGSVSQELSETILTMVANCNSVMNKARQPPPGVMPKGRPPSASSLDAISPQIDPLAGMASLIGGSAAPHT  
QSMQGFPPNPSETSALFSTPQSPAKAFPPPLSTPNQTTAFSGIIGGLSSQLPVGGGLGTGSLTGIGTGALGLPAVNNDP  
FVQRKLGTSGLNQPTFQQTDLDSQVWPEANQHFSKEIDDEANSYFQRIYNHPPHPTMSVDEVLEMLQRFKSTI  
KREREVFNCLMRNLFEYRFFPQYDPKELHITACLFGGIEKGLVTYMALGLALRYVLEALRKPFGSKMYFYFG  
IAALDRFKNRLKDYPOCYQLASISHFMQFPHHLQYIEYEQQSRDPPVKMGSITTPGSIALAQAQAQVQV  
AKAPLAGQVNTMVTSTTTTVAKTVTVTKPTGVSFKKDVPPSINTNIDTLLVATDQTERIVEPPENIQEKIA  
FIFNNLSQSNMTQKVEELKETVKEEFMPWVSQYLVMKRVSIEPNFHSLSYSNFLDTLKNPEFNKMLVNETYRNI  
KVLITSDKAAANFSDRSLLKNLGHWLGMITLAKNKPI LHDTLDVKSLLLEAYVKGQOQELLYVVPFAKVLESS  
IRSLVFRPPNPWTMAIMNVLAELHQEHDLKLNLFKFEIEVLCKNLALDINELKPGNLLKDKDRKLNLDQLSAP  
KKDVKQPEELPAITTTTTSTPATSTTCTATVPPQPYSYHYDINVYSLAGLAPHITLNPITPLFQAHQKQKQ  
VRQAIERAVQELVHPVVDRSIKIAMTTCSEQIVRKDFALDSEESRMRIAHHMMRNLTAGMAMITCREP  
STNLKNSFASALRTASPQQREMMDQAAAQLAQDNCELACCFIQKTAVEKAGPEMDKRLATEFELRKHARQEGR  
RYCDPVVLTYYAERMPEQIRLKVGGVDPKQLAVYEEFARNVPGFLPTNDLSQPTGFLAQPMKQAWATDDVAQI  
YDKCITELEQHLHAI PPTLAMNPQAQALRSLLLEVVLRSNSRDAIAALGLLQKAVEGLLDATSGADADLLLRY  
RECHLLVLKALQDGRAYGSPWCNKQITRCLIECRDEYKYNVEAVELLIRNHLVNMQQYDLHLAQSMENGLNYM  
AVAFAMQLVKILLVDERSVAHI TEADLFHTIETLMRINAHSRGNAPGLPQLMEVVRSNYEAMIDRAHGGPNF  
MMHSGISQASEYDDPPGLREKAEYLLREWVNLYHSAAAGRDSTKAFSAFVGMHQQGILKTDLLITRF  
FRLCTEMCVEISYRAQAEQQHNPAANPTMIRAKCYHNLD AFVRLIALLVKHSGEATNTVTKINLLNKVLGIVV  
GVLLQDHDVRSQSEFQQLPYHRIFIMLLELNAPEHVLETINFQTLTAFNCNTFHILRPTKAPGFVYAWLELISH  
RIFFIARMLAHTPQQKGWPMYAQLLIDLFKYLAPFLRNVELTKSMQILYKGLTRVLLVLLHDFPEFLCDYHYGF  
CDVIPPNCIQLRNLI LSAFPRNMRLPDPFTPNLKVDMLSEINIAPRILTNFTGVMPPQFKKDLDSYLKTRSPV  
TFLSDLRSNLQVSNPNRYNLQLINALVLYVGTQAI AIAHINKGSTPSMSTITHSAHMDIFQNLAVDLDTTEGR  
YLFNLAIANQLRYPNSHHTYFSC TMLYLFAEANTEAIQEQITRVLRLERLIVNRPHPWGLLITFIELIKNPAFK  
FWNHEFVHCAPEIEKLFQSVACCMGQKQAQQVMEGTGAS\*

>rs107850230\_ENSMUSP00000148807\_c.6237:C>T\_p.P2080S

ENSMUST00000211887.2|Cnot1-203|ENSMUSG00000036550|-|chr8:g.96454231:G>A  
MNLDSLALSLSQISYLVNDLTKKNYRASQQEIQHIVNRHGPEADRHLRLCLFVSHVDFSGDGKSSGKDFHQTF  
LIQECASLITKPNFISTLSY AIDNPLHYQKSLKPAPHLFAQLSKVLKLSKVQEVIFGLALLNSSSPDLRGFAA  
QFIKQKLPDLLRSYIDADVSGNQEGGFQDIAIEVLHLLLSHLLFGQKGAFGVQEQIDAFKTLRRDFPQERC  
PVVLAPELLYPEKRDILMDRILPDSGGVAKTMMESSLADFMQEVGYGFCASIEECRNIIMQFGVREVTAAQVAR  
VLGMMARTHSGLTDGIPLOSISAPGSGIWSDGKDKSEGAQAHTWNVEVLIDVLKELNPSLNFKEVTEYLDHDPG  
FQIRDSKGLHNVVYGIQRGLGMEVFPVDFIYRPWKHAEGQLSFIQHSLINPEVFCFADYPCHTVAATDILKAPP  
EDDREIATWKSLLDIESLLRLAEVQYEQVKQLFSFPIKHC PDMLVLALLQINTSWHTLRHELISTLMPIFL  
GNHPNSAILHYAWHGQGSPSIRQLIMHAMAEWYMRGEQYDQAKLSRILDVAQDLKALSMLLNGTFFAFVID  
LAALASRREYLKLDKWLTDKIREHGEPFIOACMTFLKRRCP SILGGLAPEKDPKSAQLPAETLATMLACLQA  
CAGSVSQELSETILTMVANCNSVMNKARQPPPGVMPKGRPPSASSLDAISPQIDPLAGMASLIGGSAAPHT  
QSMQGFPPNPSETSALFSTPQSPAKAFPPPLSTPNQTTAFSGIIGGLSSQLPVGGGLGTGSLTGIGTGALGLPAVNNDP  
FVQRKLGTSGLNQPTFQQTDLDSQVWPEANQHFSKEIDDEANSYFQRIYNHPPHPTMSVDEVLEMLQRFKSTI  
KREREVFNCLMRNLFEYRFFPQYDPKELHITACLFGGIEKGLVTYMALGLALRYVLEALRKPFGSKMYFYFG  
IAALDRFKNRLKDYPOCYQLASISHFMQFPHHLQYIEYEQQSRDPPVKMGSITTPGSIALAQAQAQVQV  
AKAPLAGQVNTMVTSTTTTVAKTVTVTKPTGVSFKKDVPPSINTNIDTLLVATDQTERIVEPPENIQEKIA  
FIFNNLSQSNMTQKVEELKETVKEEFMPWVSQYLVMKRVSIEPNFHSLSYSNFLDTLKNPEFNKMLVNETYRNI  
KVLITSDKAAANFSDRSLLKNLGHWLGMITLAKNKPI LHDTLDVKSLLLEAYVKGQOQELLYVVPFAKVLESS  
IRSLVFRPPNPWTMAIMNVLAELHQEHDLKLNLFKFEIEVLCKNLALDINELKPGNLLKDKDRKLNLDQLSAP  
KKDVKQPEELPAITTTTTSTPATSTTCTATVPPQPYSYHYDINVYSLAGLAPHITLNPITPLFQAHQKQKQ  
VRQAIERAVQELVHPVVDRSIKIAMTTCSEQIVRKDFALDSEESRMRIAHHMMRNLTAGMAMITCREP  
STNLKNSFASALRTASPQQREMMDQAAAQLAQDNCELACCFIQKTAVEKAGPEMDKRLATEFELRKHARQEGR  
RYCDPVVLTYYAERMPEQIRLKVGGVDPKQLAVYEEFARNVPGFLPTNDLSQPTGFLAQPMKQAWATDDVAQI  
YDKCITELEQHLHAI PPTLAMNPQAQALRSLLLEVVLRSNSRDAIAALGLLQKAVEGLLDATSGADADLLLRY  
RECHLLVLKALQDGRAYGSPWCNKQITRCLIECRDEYKYNVEAVELLIRNHLVNMQQYDLHLAQSMENGLNYM  
AVAFAMQLVKILLVDERSVAHI TEADLFHTIETLMRINAHSRGNAPGLPQLMEVVRSNYEAMIDRAHGGPNF  
MMHSGISQASEYDDPPGLREKAEYLLREWVNLYHSAAAGRDSTKAFSAFVGMHQQGILKTDLLITRF  
FRLCTEMCVEISYRAQAEQQHNPAANPTMIRAKCYHNLD AFVRLIALLVKHSGEATNTVTKINLLNKVLGIVV  
GVLLQDHDVRSQSEFQQLPYHRIFIMLLELNAPEHVLETINFQTLTAFNCNTFHILRPTKAPGFVYAWLELISH  
RIFFIARMLAHTPQQKGWPMYAQLLIDLFKYLAPFLRNVELTKSMQILYKGLTRVLLVLLHDFPEFLCDYHYGF  
CDVIPPNCIQLRNLI LSAFPRNMRLPDPFTPNLKVDMLSEINIAPRILTNFTGVMPPQFKKDLDSYLKTRSPV  
TFLSDLRSNLQVSNPNRYNLQLINALVLYVGTQAI AIAHINKGSTPSMSTITHSAHMDIFQNLAVDLDTTEGR  
YLFNLAIANQLRYPNSHHTYFSC TMLYLFAEANTEAIQEQITRVLRLERLIVNRPHPWGLLITFIELIKNPAFK  
FWNHEFVHCAPEIEKLFQSVACCMGQKQAQQVMEGTGAS\*

ALASRREYLKLDKWLTDKIREHGEPFIQACMTFLKRRCP SILGGLAPEKDPKSAQLPAETLATMLACLQACA  
GSVSQELSETILTMVANCNSVMNKARQPPPGVMPKGRPPSASSLDAISPVQIDPLAGMASLSIGGSAAPHTQS  
MQGFPPNLGSAFSTPQSPAKAFPPPLSTPNQTTAFSGIGGLSSQLPVGGLGTGSLTGIGTGALGLPAVNNDFV  
QRKLGTSGLNQPTFQQTDL SQVWPEANQHFSKEIDDEANSYFQRIYNHPPHTMSVDEVLEMLQRFKDKSTIKR  
EREVFNCLMRNLFEYRFFPQYDPKELHITACLFGGIIEKGLVTYMALGLALRYVLEALRKPFGSKMYFYFGIA  
ALDRFKNRLKDYPOYCQHLASISHFMQFPHHLQEYIEYGGQSRDPPVKMQGSITTPGSIALAQAQAQVPAK  
APLAGQVNTMVTSTTTTVAKTVTVTKPTGVSFKKDVPPSINTTNIIDTLVATDQTERIVEPPENIQEKIAFI  
FNNLSQSNMTQKVEELKETVKEEFMPWVSQYLVMKRVSIEPNFHSLSYNSFLDITLKNPEFNKMLVNETYRNIKV  
LLTSDKAAANFSDRSLLKNLGHWLGMITLAKNKPI LHDTLDVKSLLLEAYVKGQQEQLLYVVPFVAKVLESSIR  
SLVFRPPNPWTMAIMNVLAELHQEHDLKLNKFEIEVLCKNLALDINELKPGNLLKDKDRKLNLDLDEQLSAPKK  
DVQPEELPAITTTTTSTTPATSTTCTATVPPQPQYSYHDINVYSLAGLAPHITLNPTIPLFQAHPQLKQCVR  
QAIERAVQELVHPVVDRSIKIAMTTCQIVRKDFALDSEESRMRIAHHMMRNLTAGMAMITCREP LLMSIST  
NLKNSFASALRTASPQQREMMDQAAAQLAQDNCELACCFIQKTAVEKAGPEMDKRLATEFELRKHARQEGRRY  
CDPVVLTQYQAERMPEQIRLKVGGVDPKQLAVYEEFARNVPGFLPTNDLSQPTGFLAQPMKQAWATDDVAQIYD  
KCITELEQHLHAI PPTLAMNPQAQALRSLLLEVVL SRNSRDAIAALGLLQKAVEGLLDATSGADADLLRYRE  
CHLLVLKALQDGRAYGSPWCNKQITRCLIECRDEYKYNEAVEELLIRNHLVNMQQYDLHLAQSMENGLNYMAV  
AFAMQLVKILLVDERSVAHI TEADLFHTIETLMRINAHSRGNAPGLPQLMEVVRSNYEAMIDRAHGGPNFMM  
HSGISQASEYDDPPGLREKAEYLLREWVNLYHSAAAGRDSTKAFSAFVGQMHQQGILKTDLLITRFELRSTEM  
CVEISYRAQAEQQHNPAANPTMIRAKCYHNLDAFVRLIALLVKHSGEATNTVTKINLLNKVLGIVVGVLLQDH  
DVRQSEFQQLPYHRIFIMLLLELNAPEHVLETINFQTLTAFNCNTFHILRPTKAPGFVYAWLELISHRIF IARM  
LAHTPQQKGWPMYAQLLIDLFKYLAPFLRNVELTKSMQILYKGTLRVLLVLLHDFPEFLCDYHYGFCDVIPP  
CIQLRNLILSAFPRNMLPDPFTPNLKVDMLEINIAPRILTNFTGVMPPQFKKDLDSYLKTRSPVTFLSDLR  
SNLQVSNPEGNRYNLQLINALVLYVGTQAI AIAHINHGSTPSMSTITHSAHMDIFQNLAVDLDTTEGRYLF LNAI  
ANQLRYPNSHSHYFSC TMLYLFAEANTEA IQEQITRVLLERLIVNRPHPWGLLITFIELIKNPAFKFWNHEFV  
HCAPEIEKLFQSV AQCCMGQKQAQQVMEGTGAS\*  
>rs107850230\_ENSMUSP0000096073\_c.6258:C>T\_p.P2087S  
ENSMUST0000098473.11|Cnot1-202|ENSMUSG00000036550|-|chr8:g.96454231:G>A  
MNLDSLALSQISYLVNDLTKKNYRASQQEIQHIVNRHGPEADRHLLRCLFHVDFSGDGKSSGKDFHQTF  
LIQECASLITKPNFISTLSYAI DNPLHYQKSLKPAPHLFAQLSKVLKLSKVQEVIFGLALLNSSSPDLRGFAA  
QFIKQKLPDLLRSYIDADVSGNQEGGFQDIAIEVLHLLLSHLLFGQKGAFGVQEQIDAFKTLRRDFPQERC  
PVLAPLLYPEKRDILMDRI LPDSGGVAKTMMESSLADFMQEVGYGFCASIEECRNIIMQFGVREVTAAQVAR  
VLGMMARTHSGLTDGIP LQSI SAPGSGIWSDGKDKSEGAQAHWNVEVLI DVLKELNPSLNFKEVTEYELDHPG  
FQIRDSKGLHNVVYGIQRGLGMEVFPVDFIYRPWKHAEGQLSFIQHSLINPEVFCFADYPCHTVA TDILKAPP  
EDDREIATWKSLLDIESLLRLAEVQYEQVKQLFSFPIKHC PDMLVLALLQINTSWHTLRHELISTLMPIFL  
GNHNSAIILHYAWHGQGSPSIRQLIMHAMAEWYMRGEYDQAKLSRILDVAQDLKALSMLLNGTFFAFVID  
LAALASRREYLKLDKWLTDKIREHGEPFIQACMTFLKRRCP SILGGLAPEKDPKSAQLPAETLATMLACLQACA  
CAGSVS QELSETILTMVANCNSVMNKARQPPPGVMPKGRPPSASSLDAISPVQIDPLAGMASLSIGGSAAPHT  
QSMQGFPPNLGSAFSTPQSPAKAFPPPLSTPNQTTAFSGIGGLSSQLPVGGLGTGSLTGIGTGALGLPAVNNDF  
FVQRKLGTSGLNQPTFQQSKMKPSDLSQVWPEANQHFSKEIDDEANSYFQRIYNHPPHTMSVDEVLEMLQRF  
KDKSTIKREEVFNCLMRNLFEYRFFPQYDPKELHITACLFGGIIEKGLVTYMALGLALRYVLEALRKPFGSK  
MYFYFGIAALDRFKNRLKDYPOYCQHLASISHFMQFPHHLQEYIEYGGQSRDPPVKMQGSITTPGSIALAQAQA  
QAQVPAKAPLAGQVNTMVTSTTTTVAKTVTVTKPTGVSFKKDVPPSINTTNIIDTLVATDQTERIVEPPENI  
QEKIAFI FNNLSQSNMTQKVEELKETVKEEFMPWVSQYLVMKRVSIEPNFHSLSYNSFLDITLKNPEFNKMLVNE  
TYRNIKVL L TSDKAAANFSDRSLLKNLGHWLGMITLAKNKPI LHDTLDVKSLLLEAYVKGQQEQLLYVVPFVAK  
VLESSIRSLVFRPPNPWTMAIMNVLAELHQEHDLKLNKFEIEVLCKNLALDINELKPGNLLKDKDRKLNLDL  
QLSAPKKDVQPEELPAITTTTTSTTPATSTTCTATVPPQPQYSYHDINVYSLAGLAPHITLNPTIPLFQAHP  
QLKQCVRQAIERAVQELVHPVVDRSIKIAMTTCQIVRKDFALDSEESRMRIAHHMMRNLTAGMAMITCREP  
LLMSISTNLKNSFASALRTASPQQREMMDQAAAQLAQDNCELACCFIQKTAVEKAGPEMDKRLATEFELRKHA  
RQEGRRYCDPVVLTQYQAERMPEQIRLKVGGVDPKQLAVYEEFARNVPGFLPTNDLSQPTGFLAQPMKQAWATD  
DVAQIYDKCITELEQHLHAI PPTLAMNPQAQALRSLLLEVVL SRNSRDAIAALGLLQKAVEGLLDATSGADAD  
LLRYRECHLLVLKALQDGRAYGSPWCNKQITRCLIECRDEYKYNEAVEELLIRNHLVNMQQYDLHLAQSMEN  
GLNYMAVAFAMQLVKILLVDERSVAHI TEADLFHTIETLMRINAHSRGNAPGLPQLMEVVRSNYEAMIDRAH  
GGPNFMMHSGISQASEYDDPPGLREKAEYLLREWVNLYHSAAAGRDSTKAFSAFVGQMHQQGILKTDLLITRF  
FRLCTEMDCVEISYRAQAEQQHNPAANPTMIRAKCYHNLDAFVRLIALLVKHSGEATNTVTKINLLNKVLGIVV  
GVLLQDHDVQRSEFQQLPYHRIFIMLLLELNAPEHVLETINFQTLTAFNCNTFHILRPTKAPGFVYAWLELISH  
RIF IARMLAHTPQQKGWPMYAQLLIDLFKYLAPFLRNVELTKSMQILYKGTLRVLLVLLHDFPEFLCDYHYGFC  
CDVIPPNCIQLRNLILSAFPRNMLPDPFTPNLKVDMLEINIAPRILTNFTGVMPPQFKKDLDSYLKTRSPV  
TFLSDLRSNLQVSNPEGNRYNLQLINALVLYVGTQAI AIAHINHGSTPSMSTITHSAHMDIFQNLAVDLDTTEGR

YLFNLAIANQLRYPNSHSHYFSCMTMLYLFAEANTEAIEQEQITRVLLERLIVNRPHPWGLLITFIELIKNPFAFK  
FWNHEFVHCAPEIEKLFQSVQCCMGQKQAQQVMEGTGAS\*  
>rs46179737\_ENSMUSP00000063565\_c.6205:A>G\_p.Y2069C  
ENSMUST00000068452.10|Cnot1-201|ENSMUSG00000036550|-|chr8:g.96454269:T>C  
MNLDSLALSLSQISYLVNDLTKKNYRASQQEIQHIVNRHGPEADRHLRLCLFVSHVDFSGDGKSSGKDFHQTF  
LIQECASLITKPNFISTLSYAIIDNPLHYQKSLKPAPHLFAQLSKVLKLSKVQEVIFGLALLNSSSPDLRGFAA  
QFIKQKLPDLLRSYIDADVSGNQEGGFQDIAIEVLHLLLSHLLFGQKGAFGVQEQIDAFKTLRRDFPQERC  
PVLAPLLYPEKRDILMDRILPDSGGVAKTMMESSLADFMQEVGYGFCASIEECRNIIMQFGVREVTAAQVAR  
VLGMMARTHSGLTDGIPLQSIAPGSGIWSGDKKSEGAQAHTWNVEVLIDVLKELNPSLNFKEVTEYELDHPG  
FQIRDSKGLHNVVYGIQRGLGMEVFPVDFIYRPWKHAEGQLSFIQHSLINPEVFCFADYPCHTVATDILKAPP  
EDDREIATWKSLLDIESLLRLAEVQYEQVKQLFSFPIKHC PDMLVLALLQINTSWHTLRHELISLTMPIFL  
GNHPNSAII LHAWHGQGS PSIRQLIMHAMA EWYMRGEQYDQAKLSRILDVAQDLKALSMLLNGT PFAFVID  
LAALASRREYLKLDKWLTDKIREHGEPFIQACMTFLKRRCP SILGGLAPEKDPKSAQLPAETLATMLACLQA  
CAGSVSQELSETILTMVANC SNVMNKARQPPPGVMPKGRPPSASSLDAISPVQIDPLAGMASLSIGGSAAPHT  
QSMQGFPPNLGSAFSTPQSPAKAF PPLSTPNQTTAFSGIGGLSSQLPVGGLGTGSLTGIGTGALGLPAVNNDP  
FVQRKLGTSGLNQPTFQQTDL SQVWPEANQHFSKEIDDEANSYFQRIYNHPPHTMSVDEVLEMLQRFKDS TI  
KREREFNCLRNLFEEYRFFPQY PDKELHITACLFGGIIEKGLVTYMALGLALRYVLEALRKPFGSKMYFFG  
IAALDRFKNRLKDY PQY CQHLS ISHFMQFP HHLQEYIEY GQQRDP PVKMQGSITTPGSI ALAQAQAQVPAK  
AKAPLAGQVNTMVTSTTTTVAKT VTVTKPTGV SFKKDVPPSINTTNIDTLLVATDQTERIVEPPENIQEKIA  
FIFNNLSQSNMTQKVEELKETVKEEFMPWVSQYLV MKRVSIEPNFHSLSYNFLD TLKNPEFNKMLVNETYRNI  
KVL L TSDKAAANFSDRSLLKNLGHWLGMITLAKNKPI LH TDLDVKSLLLEAYVKGQOQELLYVVPFVAKVLESS  
IRSLVFRPPNPWTMAIMNVLAELHQEHDLKLNLFKFEIEVLCKNLALDINELKPGNLLKDKDRKLNLDQELSAP  
KKDVKQPEELPAITTTTTSTT PATSTTCTATVPPQPQYSYHDINVYSLAGLAPHITLNPTIPLFQAHPQLKQC  
VRQAIERAVQELVHPVVDRS IKIAMTTCEQIVRKDFALDSEESRMR IAAHHMMRNLTAGMAMITCREPLLSI  
STNLKNSFASALRTAS PQQREMDQAAAQLA QDNCELACCFIQKTAVEKAGPEMDKRLATEFELRKHARQEGR  
RYCDPVVLYQALRAMEPQIRLKVGGVDPKQLAVYEEFARNVPGFLPTNDLSQPTGFLAQPMKQAWATDDVAQI  
YDKCITELHQHLHAI PPTLAMNPQAQALRSLLLEVVL SRNSRDAIAALGLLQKAVEGLLDATSGADADLLRY  
RECHLLVLKALQDGRAYGSPWCNQITRCLIECRDEYKYNVEAVELLIRNHLVNMQQYDLHLAQSMENGLNYM  
AVAFAMQLVKIILLV DERSVAHIT EADLFHTIETLMRINAHSRGNAP EGLPQLMEVVRSNYEAMIDRAHGGPNF  
MMHSGISQASEYDDPPGLREKAEYLLREWVNLYHSAAAGRDS TKAFSAFVGMHQGGILKTDLLITRFR LCT  
EMCVEISYRAQAEQQHNPAANPTMIRAKCYHNLDAFVRLIALLVKHSGEATNTVTKINLLNKVLGIVVGVLLQ  
DHDVQRSEFQQLPYHRIFIMLLELNAPEHVLETINFQTLTAFCNTFHILRPTKAPGFVYAWLELISHRIFIA  
RMLAHTPQQKGWPMYAQLLIDLFKCLAPFLRNVELTKPMQILYKGTLRVLLVLLHDFPEFLCDYHYGFCDVIP  
PNCIQLRNLI LSAPFRNMRLPDPFTPNLKV DMLSEINIAPRI LTNFTGVMPPQFKKDLDSYLKTRSPVTF LSD  
LRSNLQVSNPEGNRYNLQLINALVLYVGTQAI AIAIHKNKGS TSPMSTITHSAHMDIFQNLAVDLDTEGRYLFNL  
AIANQLRYPNSHSHYFSCMTMLYLFAEANTEAIEQEQITRFLFQSVQCCMGQKQAQQVMEGTGAS\*  
>rs46179737\_ENSMUSP00000148807\_c.6199:A>G\_p.Y2067C  
ENSMUST00000211887.2|Cnot1-203|ENSMUSG00000036550|-|chr8:g.96454269:T>C  
MNLDSLALSLSQISYLVNDLTKKNYRASQQEIQHIVNRHGPEADRHLRLCLFVSHVDFSGDGKSSGKDFHQFLI  
QECASLITKPNFISTLSYAIIDNPLHYQKSLKPAPHLFAQLSKVLKLSKVQEVIFGLALLNSSSPDLRGFAAQF  
IKQKLPDLLRSYIDADVSGNQEGGFQDIAIEVLHLLLSHLLFGQKGAFGVQEQIDAFKTLRRDFPQERC PV  
VLAPLLYPEKRDILMDRILPDSGGVAKTMMESSLADFMQEVGYGFCASIEECRNIIMQFGVREVTAAQVARVL  
GMMARTHSGLTDGIPLQSIAPGSGIWSGDKKSEGAQAHTWNVEVLIDVLKELNPSLNFKEVTEYELDHPGFQ  
IRDSKGLHNVVYGIQRGLGMEVFPVDFIYRPWKHAEGQLSFIQHSLINPEVFCFADYPCHTVATDILKAPPED  
DNREIATWKSLLDIESLLRLAEVQYEQVKQLFSFPIKHC PDMLVLALLQINTSWHTLRHELISLTMPIFLGN  
HPNSAII LHAWHGQGS PSIRQLIMHAMA EWYMRGEQYDQAKLSRILDVAQDLKALSMLLNGT PFAFVIDLA  
ALASRREYLKLDKWLTDKIREHGEPFIQACMTFLKRRCP SILGGLAPEKDPKSAQLPAETLATMLACLQACA  
GSV SQELSETILTMVANC SNVMNKARQPPPGVMPKGRPPSASSLDAISPVQIDPLAGMASLSIGGSAAPHTQS  
MQGFPPNLGSAFSTPQSPAKAF PPLSTPNQTTAFSGIGGLSSQLPVGGLGTGSLTGIGTGALGLPAVNNDPFV  
QRKLGTSGLNQPTFQQTDL SQVWPEANQHFSKEIDDEANSYFQRIYNHPPHTMSVDEVLEMLQRFKDS TI  
EREVFNCLRNLFEEYRFFPQY PDKELHITACLFGGIIEKGLVTYMALGLALRYVLEALRKPFGSKMYFFGIA  
ALDRFKNRLKDY PQY CQHLS ISHFMQFP HHLQEYIEY GQQRDP PVKMQGSITTPGSI ALAQAQAQVPAK  
APLAGQVNTMVTSTTTTVAKT VTVTKPTGV SFKKDVPPSINTTNIDTLLVATDQTERIVEPPENIQEKIAFI  
FNNLSQSNMTQKVEELKETVKEEFMPWVSQYLV MKRVSIEPNFHSLSYNFLD TLKNPEFNKMLVNETYRNIKV  
LLTSDKAAANFSDRSLLKNLGHWLGMITLAKNKPI LH TDLDVKSLLLEAYVKGQOQELLYVVPFVAKVLESSIR  
SLVFRPPNPWTMAIMNVLAELHQEHDLKLNLFKFEIEVLCKNLALDINELKPGNLLKDKDRKLNLDQELSAPKK  
DVKQPEELPAITTTTTSTT PATSTTCTATVPPQPQYSYHDINVYSLAGLAPHITLNPTIPLFQAHPQLKQCVR  
QAIERAVQELVHPVVDRS IKIAMTTCEQIVRKDFALDSEESRMR IAAHHMMRNLTAGMAMITCREPLLSIST

NLKN SFASALRTAS PQQREMMDQAAAQLAQDNCELACCFIQKTAVEKAGPEMDKRLATEFELRKHARQEGRRY  
CDPVVLT YQAERMPEQIRLKVGGVDPKQLAVYEEFARNVPGFLPTNDLSQPTGFLAQPMKQAWATDDVAQIYD  
KCITTELEQHLHAI PPTLAMNPQAQALRSLLLEVVLRSNRDAIAALGLLQKAVEGLLDATSGADADLLRYRE  
CHLLVLKALQDGRAYGSPWCNKQITRCLIECRDEYKYNVEAVE LLIRNHLVNMQQYDLHLAQSMENGLNYMAV  
AFAMQLVKIILLVDERSVAHITEADLFHTIETLMRINAHSRGNAPGLPQLMEVVRSNYEAMI DRAHGGPNFMM  
HSGISQASEYDDPPGLREKAEYLLREWVNLYHSAAAGRDSTKAFSAFVGMHQGGILKTDLLITRFFRLCTEM  
CVEISYRAQAEQQHNPAANPTMIRAKCYHNLDADFVRLIALLVKHSGEATNTVTKINLLNKVLGIVVGVLLQDH  
DVRQSEFQQLPYHRIFIMLLELNAPEHVLETINFQTLTAFNCNTFHILRPTKAPGFVYAWLELISHRIFIARM  
LAHTPQQKGWPMYAQLLIDLKCLAPFLRNVELTKPMQILYKGTLRVLLVLLHDFPEFLCDYHYGFCDVIPPN  
CIQLRNLILSAFPRNMRLPDPFPTNLKVDMLSEINIAPRILTNFTGVMPPQFKKDLDSYLKTRSPVTFSLDLR  
SNLQVSNPEGNRYNLQLINALVLYVGTQAI AIAHINHGSTPSMSTITHSAHMDIFQNLAVDLDTTEGRYLFNAI  
ANQLRYPNSH THYFSC TMLYLFAEANTEA IQEQITRVLLERLIVNRPHPWGLLITFIELIKNPAFKFVNHEFV  
HCAPEIEKLFQSV AQCCMGQKQAQQVMEGTGAS\*

>rs46179737\_ENSMUSP00000096073\_c.6220:A>G\_p.Y2074C

ENSMUST00000098473.11|Cnot1-202|ENSMUSG00000036550|-|chr8:g.96454269:T>C  
MNLDSLALSLSQISYLVNDLTKKNYRASQQEIQHIVNRHGPEADRHLRLCLFVSHVDFSGDGKSSGKDFHQTF  
LIQECASLITKPNFISTLSYAI DNPLHYQKSLKPAPHLFAQLSKVLKLSKVQEVIFGLALLNSSPDLRGFAA  
QFIKQKLPDLLRSYIDADVSGNQEGGFQDIAIEVLHLLLSHLLFGQKGAFGVGVQEQIDAFKTLRRDFPQERC  
PVVLAPELLYPEKRDILMDRILPDSGGVAKTMMESSLADFMQEVGYGFCASIEECRNIIMQFGVREVTAAQVAR  
VLGMMARTHSGLTDGIPLQSIAPGSGIWSDGKDKSEGAQAHTWNVEVLIDVLKELNPSLNFKEVTEYELDHG  
FQIRDSKGLHN VVYGIQRGLGMEVFPVDFIYRPWKHAEGQLSFIQHS LINPEVFCFADYPCHTVA TDILKAPP  
EDDNREIATWKS LDLESLLRLAEVGOYEQVKQLFSFPIKHC PDMLV LALLQINTSWHTLRHELISTLMPIFL  
GNHPNSAILHYAWHGQGSPSIRQLIMHAMA EWYMRGEQYDQAKLSRILDVAQDLKALSMLNGTFFAFVID  
LAALASREY LKLDKWLTDKIREHGEPFIQACMTFLKRRCP SILGGLAPEKDPKSAQLPAETLATMLACLQA  
CAGSVSQELSETILTMVANCSNVMNKARQPPPGVMPKGRPPSASSLDAISPVQIDPLAGMASLSIGGSAAPHT  
QSMQGFPPNLGSAFSTPQSPAKAFPLSTPNQTTAFSGIIGLSSQLPVGGLGTGSLTGIGTGALGPLAVNNDP  
FVQRKLGTSGLNSFASALRTAS PQQREMMDQAAAQLAQDNCELACCFIQKTAVEKAGPEMDKRLATEFELRKH  
KDSTIKREREVFNCLRNLFEEYRFFPQYPKELHITACLFGGIIEKGLVTYMALGLALRYVLEALRKPFGSK  
MYYFGIAALDRFKNRLKDYQYQCQHLASISHFMQFPHHLQEYIEYGOQSRDPPVKMQGSITTPGSIALAQAQA  
QAQVPKAPLAGQVNTMVTSTTTTVAKTVTVTKPTGVSFKKDVPPSINTTNIDTLLVATDQTERIVEPPENI  
QEKIAFIFNNLSQSNMTQKVEELKETVKEEFMPVWSQYLVMKRVSIEPNFHSLSYSNFLDTLKNPEFNKMLNE  
TYRNKVL LSTDKAAANFSDRSLLKNLGHWLGMITLAKNKPI LH TDLDVKSL LLEAYVKGQOELLYVVPFAK  
VLESSIRSLVFRPPNPWTMAIMNVLAELHQEHDLKLNLFKFEIEVLCKNLALDINELKPGNLLKDKDRKLNDE  
QLSAPKKDVKQPEELPAITTTTSTTTPATSTTCTATVPPQPYSYHDINVYSLAGLAPHITLNPTIPLFQAHP  
QLKQCVRQAIERAVQELVHPVVDRSIKIAMTTCEQIVRKDFALDSEESRMRIA AHMMRNLTAGMAMITCREP  
LLMSISTNLKNSFASALRTAS PQQREMMDQAAAQLAQDNCELACCFIQKTAVEKAGPEMDKRLATEFELRKH  
RQEGRRYCDPVVLT YQAERMPEQIRLKVGGVDPKQLAVYEEFARNVPGFLPTNDLSQPTGFLAQPMKQAWATD  
DVAQIYDKCITTELEQHLHAI PPTLAMNPQAQALRSLLLEVVLRSNRDAIAALGLLQKAVEGLLDATSGADAD  
LLRYRECHLLVLKALQDGRAYGSPWCNKQITRCLIECRDEYKYNVEAVE LLIRNHLVNMQQYDLHLAQSMEN  
GLNYMAVAFAMQLVKIILLVDERSVAHITEADLFHTIETLMRINAHSRGNAPGLPQLMEVVRSNYEAMI DRAH  
GGPNFMMHSGISQASEYDDPPGLREKAEYLLREWVNLYHSAAAGRDSTKAFSAFVGMHQGGILKTDLLITR  
FRLCTEMCVEISYRAQAEQQHNPAANPTMIRAKCYHNLDADFVRLIALLVKHSGEATNTVTKINLLNKVLGIVV  
GVLLQDHDVVRQSEFQQLPYHRIFIMLLELNAPEHVLETINFQTLTAFNCNTFHILRPTKAPGFVYAWLELISH  
RIFIARM LAHTPQQKGWPMYAQLLIDLKCLAPFLRNVELTKPMQILYKGTLRVLLVLLHDFPEFLCDYHYGF  
CDVIPPNCIQLRNLILSAFPRNMRLPDPFPTNLKVDMLSEINIAPRILTNFTGVMPPQFKKDLDSYLKTRSPV  
TFSLDLRSNLQVSNPEGNRYNLQLINALVLYVGTQAI AIAHINHGSTPSMSTITHSAHMDIFQNLAVDLDTTEGR  
YLFNAIANQLRYPNSH THYFSC TMLYLFAEANTEA IQEQITRVLLERLIVNRPHPWGLLITFIELIKNPAFK  
FVNHEFVHCAPEIEKLFQSV AQCCMGQKQAQQVMEGTGAS\*

>rs264083360\_ENSMUSP00000063565\_c.6049:C>TTC\_p.T2017ins-fs

ENSMUST00000068452.10|Cnot1-201|ENSMUSG00000036550|-  
|chr8:g.96455355:G>GAA  
MNLDSLALSLSQISYLVNDLTKKNYRASQQEIQHIVNRHGPEADRHLRLCLFVSHVDFSGDGKSSGKDFHQTF  
LIQECASLITKPNFISTLSYAI DNPLHYQKSLKPAPHLFAQLSKVLKLSKVQEVIFGLALLNSSPDLRGFAA  
QFIKQKLPDLLRSYIDADVSGNQEGGFQDIAIEVLHLLLSHLLFGQKGAFGVGVQEQIDAFKTLRRDFPQERC  
PVVLAPELLYPEKRDILMDRILPDSGGVAKTMMESSLADFMQEVGYGFCASIEECRNIIMQFGVREVTAAQVAR  
VLGMMARTHSGLTDGIPLQSIAPGSGIWSDGKDKSEGAQAHTWNVEVLIDVLKELNPSLNFKEVTEYELDHG  
FQIRDSKGLHN VVYGIQRGLGMEVFPVDFIYRPWKHAEGQLSFIQHS LINPEVFCFADYPCHTVA TDILKAPP  
EDDNREIATWKS LDLESLLRLAEVGOYEQVKQLFSFPIKHC PDMLV LALLQINTSWHTLRHELISTLMPIFL

GNHPNSAIILHYAWHGQSQSPSIRQLIMHAMAWEYMRGEQYDQAKLSRILDVAQDLKALSMLLNGTFFAFVID  
LAALASRREYLKLDKWLTDKIREHGEPFIQACMTFLKRRCP SILGGLAPEKDPKSAQLPAETLATMLACLQA  
CAGSVSQELSETILTMVANCNSVMNKARQPPPGVMPKGRPPSASSLDAISPVQIDPLAGMASLSIGGSAAPHT  
QSMQGFPPNLGSAFSTPQSPAKAFPLSTPNQTTAFSGIGGLSSQLPVGGLGTGSLTGIGTGALGLPAVNNDP  
FVQRKLGTSGLNQPTFQQTDLSQVWPEANQHFSKEIDDEANSYFQRIYNHPPHTMSVDEVLEMLQRFKDSI  
KREREVFNCLRNLFEEYRFFPQYDPKELHITACLFGGIIEKGLVTYMALGLALRYVLEALRKPFGSKMYFYG  
IAALDRFKNRLKDYPPQYCHLASISHFMQFPHHLQEYIEYQQSRDPPVKMQGSITTPGSIALAQAQAQVPAK  
AKAPLAGQVNTMVTSTTTTVAKTVTVTKPTGVSFKKDVPPSINTTNIDTLLVATDQTERIVEPPENIQEKIAFI  
FNNLSQSNMTQKVEELKETVKEEFMPWVSQYLVMKRVSIEPNFHSLSYSNFLDTLKNPEFNKMLNETYRNI  
KVLTLSDKAAANFSDRSLLKLNGLHWLGMITLAKNKPI LHDTLDVKSLLLEAYVKGQQEELLYVVPFVAKVLESS  
IRSLVFRPPNPWTMAIMNVLAELHQEHDLKLNKFEIEVLCKNLALDINELKPGNLLKDKDRLKNLDEQLSAP  
KKDVKQPEELPAITTTTTSTPATSTTCTATVPPQPQYSYHDINVYSLAGLAPHITLNPTIPLFQAHPQLKQCV  
RQAIERAVQELVHPVVDRSIIKIAMTTCEQIVRKDFALDSEESRMRIAAHHMMRNLTAGMAMITCREPLLSI  
STNLKNSFASALRTASPPQREMMDQAAAQLAQDNCELACCFIQKTAVEKAGPEMDKRLATEFELRKHARQEGR  
RYCDPVVLTYPQAERMPEQIRLKVGGVDPKQLAVYEEFARNVPGFLPTNDLSQPTGFLAQPMKQAWATDDVAQI  
YDKCITELEQHLHAIPPTLAMNPQAALRSLLLEVVLRSNSRDAIAALGLLQKAVEGLLDATSGADADLLRY  
RECHLLVLKALQDGRAYGSPWCNKQITRCLIECRDEYKYNVEAVELLIRNHLVNMQQYDLHLAQSMENGLNYM  
AVAFAMQLVKILLVDERSVAHI TEADLFHTIETLMRINAHSRGNAPGLPQLMEVVRSNYEAMIDRAHGGPNF  
MMHSGISQASEYDDPPGLREKAEYLLREWVNLYHSAAAGRDSTKAFSAFVGMHQQGILKTDLLITRFFRLCT  
EMCVEISYRAQAEQQHNPAANPTMIRAKCYHNLDAFVRLIALLVKHSGEATNTVTKINLLNKVLGIVVGVLLQ  
DHDVRQSEFQQLPYHRIFIMLLELNAPEHVLETINFQTLTAFACNIHSTS  
>rs264083360\_ENSMUSP00000148807\_c.6043:C>TTC\_p.T2015ins-fs  
ENSMUST00000211887.2|Cnot1-203|ENSMUSG00000036550|-|chr8:g.96455355:G>GAA  
MNLDSLALSQISYLVNDLTKKNYRASQQEIQHIVNRHGPEADRHLRLCLFSHVDFSGDGKSSGKDFHQFLI  
QECASLITKPNFISTLSYAI DNPLHYQKSLKPAPHLFAQLSKVLKLSKVQEVIFGLALLNSSSPDLRGFAAQF  
IKQKLPDLLRSYIDADVSGNQEGGFQDIAIEVLHLLLSHLLFGQKGAFAVGVGQEQIDAFLLKTLRRDFPQERC  
VLAPELLYPEKRDILMDRIIPDSGGVAKTMMESSLADFMQEVGVYGFACASIEECRNIIMQFGVREVTAAQVAR  
GMMARTHSGLTLDGIPLQSIAPSGSIWSDGDKDSEGAQAHTWNVEVLIDVLKELNPSLNFKEVITYELDHGPFQ  
IRDSKGLHNVVYGIQRGLGMEVFPVDFIYRPWKHAEGQLSFIQHSLINPEVFCFADYPCHTVATDILKAPPED  
DNREIATWKSLDLIESLLRLAEVQYEQVKQLFSFPIKHCMDMLVALLQINTSWHTLRHELISTLMPIFLGN  
HPNSAIILHYAWHGQSQSPSIRQLIMHAMAWEYMRGEQYDQAKLSRILDVAQDLKALSMLLNGTFFAFVIDLA  
ALASRREYLKLDKWLTDKIREHGEPFIQACMTFLKRRCP SILGGLAPEKDPKSAQLPAETLATMLACLQACA  
GSVSVQELSETILTMVANCNSVMNKARQPPPGVMPKGRPPSASSLDAISPVQIDPLAGMASLSIGGSAAPHTQS  
MQGFPPNLGSAFSTPQSPAKAFPLSTPNQTTAFSGIGGLSSQLPVGGLGTGSLTGIGTGALGLPAVNNDPFV  
QRKLGTSGLNQPTFQQTDLSQVWPEANQHFSKEIDDEANSYFQRIYNHPPHTMSVDEVLEMLQRFKDSI  
KREVEVFNCLRNLFEEYRFFPQYDPKELHITACLFGGIIEKGLVTYMALGLALRYVLEALRKPFGSKMYFYGIA  
ALDRFKNRLKDYPPQYCHLASISHFMQFPHHLQEYIEYQQSRDPPVKMQGSITTPGSIALAQAQAQVPAK  
APLAGQVNTMVTSTTTTVAKTVTVTKPTGVSFKKDVPPSINTTNIDTLLVATDQTERIVEPPENIQEKIAFI  
FNNLSQSNMTQKVEELKETVKEEFMPWVSQYLVMKRVSIEPNFHSLSYSNFLDTLKNPEFNKMLNETYRNI  
KVLTLSDKAAANFSDRSLLKLNGLHWLGMITLAKNKPI LHDTLDVKSLLLEAYVKGQQEELLYVVPFVAKVLESS  
IRSLVFRPPNPWTMAIMNVLAELHQEHDLKLNKFEIEVLCKNLALDINELKPGNLLKDKDRLKNLDEQLSAP  
KKDVKQPEELPAITTTTTSTPATSTTCTATVPPQPQYSYHDINVYSLAGLAPHITLNPTIPLFQAHPQLKQCV  
RQAIERAVQELVHPVVDRSIIKIAMTTCEQIVRKDFALDSEESRMRIAAHHMMRNLTAGMAMITCREPLLSI  
STNLKNSFASALRTASPPQREMMDQAAAQLAQDNCELACCFIQKTAVEKAGPEMDKRLATEFELRKHARQEGR  
RYCDPVVLTYPQAERMPEQIRLKVGGVDPKQLAVYEEFARNVPGFLPTNDLSQPTGFLAQPMKQAWATDDVAQI  
YDKCITELEQHLHAIPPTLAMNPQAALRSLLLEVVLRSNSRDAIAALGLLQKAVEGLLDATSGADADLLRY  
RECHLLVLKALQDGRAYGSPWCNKQITRCLIECRDEYKYNVEAVELLIRNHLVNMQQYDLHLAQSMENGLNYM  
AVAFAMQLVKILLVDERSVAHI TEADLFHTIETLMRINAHSRGNAPGLPQLMEVVRSNYEAMIDRAHGGPNFMM  
HSGISQASEYDDPPGLREKAEYLLREWVNLYHSAAAGRDSTKAFSAFVGMHQQGILKTDLLITRFFRLCTEM  
CVEISYRAQAEQQHNPAANPTMIRAKCYHNLDAFVRLIALLVKHSGEATNTVTKINLLNKVLGIVVGVLLQDH  
DVRQSEFQQLPYHRIFIMLLELNAPEHVLETINFQTLTAFACNIHSTS  
>rs264083360\_ENSMUSP00000096073\_c.6064:C>TTC\_p.T2022ins-fs  
ENSMUST00000098473.11|Cnot1-202|ENSMUSG00000036550|-  
|chr8:g.96455355:G>GAA  
MNLDSLALSQISYLVNDLTKKNYRASQQEIQHIVNRHGPEADRHLRLCLFSHVDFSGDGKSSGKDFHQFQF  
LIQECASLITKPNFISTLSYAI DNPLHYQKSLKPAPHLFAQLSKVLKLSKVQEVIFGLALLNSSSPDLRGFAA  
QFIKQKLPDLLRSYIDADVSGNQEGGFQDIAIEVLHLLLSHLLFGQKGAFAVGVGQEQIDAFLLKTLRRDFPQERC  
PVVLAPELLYPEKRDILMDRIIPDSGGVAKTMMESSLADFMQEVGVYGFACASIEECRNIIMQFGVREVTAAQVAR

VLGMMARTHSGSLTDGIPLQSIAPGSGIWSGDGKDKSEGAQAHTWNVEVLIDVLKELNPSLNFKEVITYELDHPG  
FQIRDSKGLHNVVYGIQRGLGMEVFPVDFIYRPWKHAEGQLSFIQHSLINPEVFCFADYPCHTVATDILKAPP  
EDDNREIATWKSLLDIESLLRLAEVGGQYEQVKQLFSFPIKHC PDMLVLALLQINTSWHTLRHELISTLMPIFL  
GNHPNSAILHYAWHGQGSQPSIRQLIMHAMAWEYMRGEQYDQAKLSRILDVAQDLKALSMLLNGTFFAFVID  
LAALASRREYLKLDKWLTDKIREHGEPFIQACMTFLKRRCP SILGGLAPEKDPKSAQLPAETLATMLACLQA  
CAGSVSQELSETILTMVANCSNMVNKARQPPPGVMPKGRPPSASSLDAISPVQIDPLAGMASLSIGGSAAPHT  
QSMQGFPPNLGSAFSTPQSPAKAFPPPLSTPNQTTAFSGIGGLSSQLPVGGLGTGSLTGIGTGALGLPAVNNDF  
FVQRKLGTSGLNQPTFQQSKMKPSDLSQVWPEANQHFSKEIDDEANSYFQRIYNHPPHPTMSVDEVLEMLQRFK  
KDSTIKREREVFNCLRNLFEEYRFFPQYDPKELHITACLFGGIIEKGLVTYMALGLALRYVLEALRKPFGSK  
MYYFGIAALDRFKNRLKDYPOYCQHLASISHFMQFPHHLQEYIEYGQQRDPPVKMQGSITTPGSIALAQAQA  
QAQVPAKAPLAGQVNTMVTSTTTTVAKTVTVTKPTGVSFKKDVPPSINTTNIDTLLVATDQTERIVEPPENI  
QEKIAFIFNNLSQSNMTQKVEELKETVKEEFMPWVSQYLVMKRVSIEPNFHSLSYNSFLDTLKNPEFNKMLVNE  
TYRNIVLLTSDKAAANFSDRSLLKNLGHWLGMITLAKNKPI LHDTLDVKSLLLEAYVKGQOELLYVVPFVAK  
VLESSIRSLVFRPPNPWTMAIMNVLAELHQEHDLKLNLFKFEIEVLCKNLALDINELKPGNLLKDKDRKLNLDE  
QLSAPKKDVKQPEELPAITTTTSTTTPATSTTCTATVPPQPYSYHDINVYSLAGLAPHITLNPITPLFQAHP  
QLKQCVRQAIERAVQELVHPVDRSIIKIAMTTCEQIVRKDFALDSEESRMRIAAHHMMRNLTAGMAMITCREP  
LLMSISTNLKNSFASALRTASPPQREMMDQAAAQLAQDNCELACCFIQKTAVEKAGPEMDKRLATEFELRKHAR  
RQEGRRYCDPVVLTYYAERMPEQIRLKVGGVDPKQLAVYEEFARNVPGFLPTNDLSQPTGFLAQPMKQAWATD  
DVAQIYDKCITELEQHLHAIPTTAMNPPQAQALRSLLLEVVLRSNSRDAIAALGLLQKAVEGLLDATSGADAD  
LLRYRECHLLVLKALQDGRAYGSPWCNKQITRCLIECRDEYKYNVEAVELLIRNHLVNMQQYDLHLAQSMEN  
GLNYMAVAFAMQLVKILLVDERSVAHITEADLFHTIETLMRINAHSRGAPEGLPQLMEVVRSNYEAMIDRAH  
GGPNFMMHSGISQASEYDDPPGLREKAEYLLREWVNLYHSAAAGRDSTKAFSAFVGMHQGGILKTDLLITRF  
FRLCTEMCVEISYRAQAEQQHNPAANPTMIRAKCYHNLDAFVRLIALLVKHSGEATNTVTKINLLNKVLGIVV  
GVLLQDHDVQRQSEFQQLPYHRIFIMLLELNAPEHVLETINFQTLTAFNCNIHSTS  
>rs240993791\_ENSMUSP00000063565\_c.4114:A>G\_p.N1372S  
ENSMUST00000068452.10|Cnot1-201|ENSMUSG00000036550|-|chr8:g.96469739:T>C  
MNLDSLALSLSQISYLVNDLTKKNYRASQQEIQHIVNRHGPEADRHLRLCLFSHVDFSGDGKSSGKDFHQTF  
LIQECASLITKPNFISTLSYAIIDNPLHYQKSLKPAPHLFAQLSKVLKLSKVQEVIFGLALLNSSSPDLRGFAA  
QFIKQKLPDLLRSYIDADVSGNQEGGFQDIAIEVLHLLLSHLLFGQKGAFGVGGQEQIDAFKTLRRDFPQERC  
PVVLAPELLYPEKRDILMDRILPDSGGVAKTMMESSLADFMQEVGYGFCASIEECRNIIMQFGVREVTAAQVAR  
VLGMMARTHSGSLTDGIPLQSIAPGSGIWSGDGKDKSEGAQAHTWNVEVLIDVLKELNPSLNFKEVITYELDHPG  
FQIRDSKGLHNVVYGIQRGLGMEVFPVDFIYRPWKHAEGQLSFIQHSLINPEVFCFADYPCHTVATDILKAPP  
EDDNREIATWKSLLDIESLLRLAEVGGQYEQVKQLFSFPIKHC PDMLVLALLQINTSWHTLRHELISTLMPIFL  
GNHPNSAILHYAWHGQGSQPSIRQLIMHAMAWEYMRGEQYDQAKLSRILDVAQDLKALSMLLNGTFFAFVID  
LAALASRREYLKLDKWLTDKIREHGEPFIQACMTFLKRRCP SILGGLAPEKDPKSAQLPAETLATMLACLQA  
CAGSVSQELSETILTMVANCSNMVNKARQPPPGVMPKGRPPSASSLDAISPVQIDPLAGMASLSIGGSAAPHT  
QSMQGFPPNLGSAFSTPQSPAKAFPPPLSTPNQTTAFSGIGGLSSQLPVGGLGTGSLTGIGTGALGLPAVNNDF  
FVQRKLGTSGLNQPTFQQTDLQVWPEANQHFSKEIDDEANSYFQRIYNHPPHPTMSVDEVLEMLQRFKDS  
TIKREREVFNCLRNLFEEYRFFPQYDPKELHITACLFGGIIEKGLVTYMALGLALRYVLEALRKPFGSKMYYFG  
IAALDRFKNRLKDYPOYCQHLASISHFMQFPHHLQEYIEYGQQRDPPVKMQGSITTPGSIALAQAQAQAQV  
AKAPLAGQVNTMVTSTTTTVAKTVTVTKPTGVSFKKDVPPSINTTNIDTLLVATDQTERIVEPPENIQEKIA  
FIFNNLSQSNMTQKVEELKETVKEEFMPWVSQYLVMKRVSIEPNFHSLSYNSFLDTLKNPEFNKMLVNETYRNI  
KVLLTSDKAAANFSDRSLLKNLGHWLGMITLAKNKPI LHDTLDVKSLLLEAYVKGQOELLYVVPFVAKVLESS  
IRSLVFRPPNPWTMAIMNVLAELHQEHDLKLNLFKFEIEVLCKNLALDINELKPGNLLKDKDRKLNLDEQLSAP  
KKDVKQPEELPAITTTTSTTTPATSTTCTATVPPQPYSYHDINVYSLAGLAPHITLSPITPLFQAHPQLKQC  
VRQAIERAVQELVHPVDRSIIKIAMTTCEQIVRKDFALDSEESRMRIAAHHMMRNLTAGMAMITCREP  
LLMSISTNLKNSFASALRTASPPQREMMDQAAAQLAQDNCELACCFIQKTAVEKAGPEMDKRLATEFELRKHAR  
RQEGRRYCDPVVLTYYAERMPEQIRLKVGGVDPKQLAVYEEFARNVPGFLPTNDLSQPTGFLAQPMKQAWATD  
DVAQIYDKCITELEQHLHAIPTTAMNPPQAQALRSLLLEVVLRSNSRDAIAALGLLQKAVEGLLDATSGADAD  
LLRYRECHLLVLKALQDGRAYGSPWCNKQITRCLIECRDEYKYNVEAVELLIRNHLVNMQQYDLHLAQSMEN  
GLNYMAVAFAMQLVKILLVDERSVAHITEADLFHTIETLMRINAHSRGAPEGLPQLMEVVRSNYEAMIDRAH  
GGPNFMMHSGISQASEYDDPPGLREKAEYLLREWVNLYHSAAAGRDSTKAFSAFVGMHQGGILKTDLLITRF  
FRLCTEMCVEISYRAQAEQQHNPAANPTMIRAKCYHNLDAFVRLIALLVKHSGEATNTVTKINLLNKVLGIVV  
GVLLQDHDVQRQSEFQQLPYHRIFIMLLELNAPEHVLETINFQTLTAFNCNIHSTS  
RMLAHTPPQQKQWPMYAQLLIDLFKYLAPFLRNVELTKPMQILYKGLTRVLLVLLHDFEFLCDYHYGFCDVIP  
PNCIQLRNLILSAFPRNMRLPDPFTPNLKVDMLEINIAPRI LTNFTGVMPPQFKKDLDSYLKTRSPVTF  
LSDLRSLNQSNEPGRNRYNLQ LINALVLYVGTQAI AIAHINKGSTPSMSTITHSAHMDIFQNLAVDLDEGRYLF  
FLN AIANQLRYPNSHTHYFSC TMLYLF AEANTEAIEQEQITRLFQSV AQCCMGQKQAQQVMEGTGAS\*

```
>rs240993791_ENSMUSP00000148807_c.4108:A>G_p.N1370S
ENSMUST00000211887.2|Cnot1-203|ENSMUSG00000036550|-|chr8:g.96469739:T>C
MNLDSLALSQISYLVNDLTKKNYRASQQEIQHIVNRHGPEADRHLRCLFVDFSGDGKSSGKDFHQFLI
QECASLITKPNFISTLSYAIDNPLHYQKSLKPAPHLFAQLSKVLKLSKVQEVIIFGLALLNSSSPDLRGFAAQF
IKQKLPDLLRSYIDADVSGNQEGGFQDIAIEVLHLLLSHLLFGQKGAFGVQEQIDAFLKTLRRDFPQERC
VLAFLLYPEKRDILMDRILPDSGGVAKTMMESSLADFMQEVGYGFCASIEECRNIIMQFGVREVTAAQVARV
LGMARTHSGSLTDGIPLOSIAPGSGIWSGDKDKSEGAQAHTWNVVLEVDLVLKELNPSLNFKEVYELDHGPFQ
IRDSKGLHNVVYGIQRGLGMEVFPVDFIYRPWKHAEGQLSFIQHSLINPEVFCFADYPCHTVATDILKAPPED
DNREIATWKSLLDIESLLRLAEVGYEQVKQLFSFPIKHCPSDMLVALLQINTSWHTLRHELISTLMPIFLGN
HPNSAILHYAWHGGQSPSIRQLIMHAMAEWYMRGEQYDQAKLSRILDVAQDLKALSMLLNGTPFAFVIDLA
ALASRREYLKLDKWLTDKIREHGEFFIQACMTFLKRRCPSSILGGLAPEKDQPKSAQLPAETLATMLACLQACA
GSVSVQELSETILTMVANCNVMNKAQPPPGVMPKGRPPSASSLDAISPVQIDPLAGMASLSIGGSAAPHTQS
MQGFPPNLGSAFSTPQSPAKAFPPPLSTPNQTTAFSGIGGLSSQLPVGGLGTGSLTGIGTGALGLPAVNNDFV
QRKLGTSGLNQPFTQTDLSQVWPEANQHFSKEIDDEANSYFQRIYNHPPHTMSVDEVLEMLQRFKDKSTIKR
EREVFNCLMRNLFEEYRFFPQYQPKELHITACLFGGIIEKGLVTYMALGLALRYVLEALRKPFGSKMYFVGI
ALDRFKNRLKDYQYQCHLASISHFMQFPFHLLQYIEYEQQSRDPPVKMQGSITTPGSIALAQAAQAQVPAK
APLAGQVNTMTVTTSTTTTVAKTVTVTKPTGVSFKKDVPSSINTTNIDTLLVATDQTERIVEPPENIQEKIAFI
FNNLSQSNMTQKVEELKETVKEEFMPVWSQYLVKRVSIENPFHSLYSNFDLTLKNPEFNKMLVNETYRNIKV
LLTSDKAAANFSDRSLLKNLGHWLGMITLAKNKPIIHTDLVDKSLLEAYVKQQEQLLYVVPFAKVVLESSIR
SLVFRPPNPWTMAIMNVLAELHQEHDLKLNKFEIEVLCKNLALDINELKPGNLLKDKDRKLNLDLQSLAPKK
DVKQPEELPAITTTTTSTPATSTTCTATVPPQYQSYHDINVYSLAGLAPHITLSPTIPLFQAHPQLKQCVR
QAIERAVQELVHPVVDRIKIAMTTCQIVRKDFALDSEESRMRIAHHMMRNLTAGMAMITCREPLLMSIST
NLKNSFASALRTASPPQREMMDQAAAQLAQDNCELACCFIQKTAVEKAGPEMDKRLATEFELRKHARQEGRRY
CDPVVLTQYQAEQIRLKVGGVDPKQLAVYEEFARNVPGFLPTNDLSQPTGFLAQPMKQAWATDDVAQIYD
KCITELEQHLHAIPTTLAMNPQAALRSLLEVVLSRNSRDAIAALGLLQKAVEGLLDATSGADADLLRYRE
CHLLVLKALQDGRAYSPPWCNKQITRCLIECRDEYKYNVEAVEILLRNHLVNMQQYDLHQAQSMENGLNMYAV
AFAMQVVKILLVDERSVAHITAEADLFTIETLMRINAHSRGNAPGEGLPQLMEVVRNSYEMIIDRAHGPNFMM
HSGISQASEYDDPPGLREKAEYLLREWVNLHSAAGRDSTKAFSAFVGMHQGGILKTDLLITRFFRLCTEM
CVEISYRAQAEQQHNPAANPTMIRAKCYHNLDAFVRLIALLVKHSGEATNTVTKINLLNKVLGIVVGVLLQDH
DVRQSEFQQLPYHRIFIMLLLELNAPEHVLETINFQTLTAFNCNTFHILRPTKAPGFVYAWLELISHRIFIARM
LAHTPQQKQWPMYAQLLIDLFKYLAFLRNVELTKPMQIYKGTLRVLLVLLHDFPEFLCDYHYGFCDVIPP
CIQLRNLIILSAFPRNMRPDPFTPNLKVDMSEINIAPRILTNTFTGMPPQFKKDLDSYKTRSPTFFLSDLR
SNLQVSNEPGRNRYNLQLINALVLYVGTQAIHAHNKGGSTPSMSTITHSAHMDIFQNLAVDLDTTEGRYLFNAI
ANQLRYPNSHTHYFSCMTMLYLFAEANTEAIEQEQITRVLLERLIVNRPHPWGLLITFIELIKNPAFKFWNHEFV
HCAPEIEKLFQSVACCMGQKQAQVMEGTGAS*
>rs240993791_ENSMUSP00000148735_c.4129:A>G_p.N1377S
ENSMUST00000213006.2|Cnot1-216|ENSMUSG00000036550|-|chr8:g.96469739:T>C
MNLDSLALSQISYLVNDLTKKNYRASQQEIQHIVNRHGPEADRHLRCLFVDFSGDGKSSGKDFHQFQF
LIQECASLITKPNFISTLSYAIDNPLHYQKSLKPAPHLFAQLSKVLKLSKVQEVIIFGLALLNSSSPDLRGF
AAQFIKQKLPDLLRSYIDADVSGNQEGGFQDIAIEVLHLLLSHLLFGQKGAFGVQEQIDAFLKTLRRDFPQ
ERC PVVLAFLLYPEKRDILMDRILPDSGGVAKTMMESSLADFMQEVGYGFCASIEECRNIIMQFGVREVT
AAQVARVLGMARTHSGSLTDGIPLOSIAPGSGIWSGDKDKSEGAQAHTWNVVLEVDLVLKELNPSLNFKEV
YELDHGPFQIRDSKGLHNVVYGIQRGLGMEVFPVDFIYRPWKHAEGQLSFIQHSLINPEVFCFADYPCHTV
ATDILKAPPEDDNREIATWKSLLDIESLLRLAEVGYEQVKQLFSFPIKHCPSDMLVALLQINTSWHTLRHE
LISTLMPIFLGNHHPNSAILHYAWHGGQSPSIRQLIMHAMAEWYMRGEQYDQAKLSRILDVAQDLKALSML
LNGTPFAFVIDLAALASRREYLKLDKWLTDKIREHGEFFIQACMTFLKRRCPSSILGGLAPEKDQPKSAQL
PAETLATMLACLQACAGSVSVQELSETILTMVANCNVMNKAQPPPGVMPKGRPPSASSLDAISPVQIDPL
AGMASLSIGGSAAPHTQSQMQGFPPNLGSAFSTPQSPAKAFPPPLSTPNQTTAFSGIGGLSSQLPVGGLG
TGSLTGIGTGALGLPAVNNDFVQRKLGTSGLNQPFTQSKMKPSDLSQVWPEANQHFSKEIDDEANSYFQ
RIYNHPPHTMSVDEVLEMLQRFKDKSTIKREREVFNCLMRNLFEEYRFFPQYQPKELHITACLFGGIIEK
GLVTYMALGLALRYVLEALRKPFGSKMYFVGI AALDRFKNRLKDYQYQCHLASISHFMQFPFHLLQYIEY
EQQSRDPPVKMQGSITTPGSIALAQAAQAQVPAKAPLAGQVNTMTVTTSTTTTVAKTVTVTKPTGVSFK
KDVPSSINTTNIDTLLVATDQTERIVEPPENIQEKIAFI FNNLSQSNMTQKVEELKETVKEEFMPVWSQ
YLVKRVSIENPFHSLYSNFDLTLKNPEFNKMLVNETYRNIKVLLTSDKAAANFSDRSLLKNLGHWLGMI
TLAKNKPIIHTDLVDKSLLEAYVKQQEQLLYVVPFAKVVLESSIRSLVFRPPNPWTMAIMNVLAELHQE
HDLKLNKFEIEVLCKNLALDINELKPGNLLKDKDRKLNLDLQSLAPKKDVKQPEELPAITTTTTSTPAT
STTCTATVPPQYQSYHDINVYSLAGLAPHITLSPTIPLFQAHPQLKQCVRQAIAERAVQELVHPVVDRI
KIAMTTCQIVRKDFALDSEESRMRIAHHMMRNLTAGMAMITCREPLLMSISTNLKNSFASALRTASPPQ
REMMDQAAAQLAQDNCELACCFIQKTAVEKAGPEMDKRLATEFELRKHARQEGRRYCDPVVLTQYQAEQ
IRLKVGGVDPKQLAVYEEFARNVPGFLPTNDLSQPTGFLAQPMKQAWATDDVAQIYD KCITELEQHLHAI
PTTLAMNPQAALRSLLEVVLSRNSRDAIAALGLLQKAVEGLLDATSGADADLLRYRECHLLVLKALQD
GRAYSPPWCNKQITRCLIECRDEYKYNVEAVEILLRNHLVNMQQYDLHQAQSMENGLNMYAVAFAMQV
VKILLVDERSVAHITAEADLFTIETLMRINAHSRGNAPGEGLPQLMEVVRNSYEMIIDRAHGPNFMMHSG
ISQASEYDDPPGLREKAEYLLREWVNLHSAAGRDSTKAFSAFVGMHQGGILKTDLLITRFFRLCTEMC
VEISYRAQAEQQHNPAANPTMIRAKCYHNLDAFVRLIALLVKHSGEATNTVTKINLLNKVLGIVVGVLL
QDHDVRQSEFQQLPYHRIFIMLLLELNAPEHVLETINFQTLTAFNCNTFHILRPTKAPGFVYAWLELISH
RIFIARMLAHTPQQKQWPMYAQLLIDLFKYLAFLRNVELTKPMQIYKGTLRVLLVLLHDFPEFLCDYHY
GFCDVIPPNCIQLRNLIILSAFPRNMRPDPFTPNLKVDMSEINIAPRILTNTFTGMPPQFKKDLDSYKTR
SPTFFLSDLRSNLQVSNEPGRNRYNLQLINALVLYVGTQAIHAHNKGGSTPSMSTITHSAHMDIFQNLAV
DLDTTEGRYLFNAIANQLRYPNSHTHYFSCMTMLYLFAEANTEAIEQEQITRVLLERLIVNRPHPWGLL
ITFIELIKNPAFKFWNHEFVHCAPEIEKLFQSVACCMGQKQAQVMEGTGAS*
```



RQEGRRYCDPVVLTQYAERMPEQIRLKVGGVDPKQLAVYEEFARNVPGFLPTNDLSQPTGFLAQPMKNWSSTY  
 TPFHPLWP\*  
 >rs240993791\_ENSMUSP00000096073\_c.4129:A>G\_p.N1377S  
 ENSMUST00000098473.11|Cnot1-202|ENSMUSG00000036550|-|chr8:g.96469739:T>C  
 MNLDSLALSQISYLVNDLTKKNYRASQQEIQHIVNRHGPEADRHLRCLFVDFSGDGKSSGKDFHQTQF  
 LIQECASLITKPNFISTLSYIDNPLHYQKSLKPAPHLFAQLSKVLKLSKVQEVIFGLALLNSSSPDLRGFAA  
 QFIKQKLPDLLRSYIDADVSGNQEGGFQDIAIEVLHLLLSHLLFGQKGAFGVQEQIDAFKTLRRDFPQERC  
 PVLAPLLYPEKRDILMDRILPDSGGVAKTMMESSLADFMQEVGYGFCASIEECRNIIMQFGVREVTAAQVAR  
 VLGMMARTHSGLTDGIPLQSIAPGSGIWSDGKDKSEGAQAHTWNVEVLIDVLKELNPSLNFKEVTYELDHPG  
 FQIRDSKGLHNVVYGIQRGLGMEVFPVDFIYRPWKHAEGQLSFIQHSLINPEVFCFADYPCHTVATDILKAPP  
 EDDNREIATWKSLLDIESLLRLAEVQYEQVKQLFSFPIKHCPCDMLVLALLQINTSWHTLRHELISTLMPIFL  
 GNHPNSAII LHAWHGQGSPIRQLIMHAMAEWYMRGEQYDQAKLSRILDVAQDLKALSMLLNGTFFAFVID  
 LAALASRREYLKLDKWLTDKIREHGEPFIQACMTFLKRRCP SILGGLAPEKDQPKSAQLPAETLATMLACLQA  
 CAGSVSQELSETILTMVANCNSVMNKARQPPPGVMPKGRPPSASSLDAISPVQIDPLAGMASLIGGSAAPHT  
 QSMQGFPPNLGSAFSTPQSPAKAFPPPLSTPNQTTAFSGIGGLSSQLPVGGLGTGSLTGIGTGALGLPAVNNDP  
 FVQRKLGTSGLNQPTFQQSKMKPSDLSQVWPEANQHFSSKEIDDEANSYFQRIYNHPPHPTMSVDEVLEMLQRF  
 KDSTIKRREVFNCMLRNLFEYRFFPQYDPKELHITACLFGGIEKGLVTYMALGLALRYVLEALRKPFGSK  
 MYFYGIAALDRFKNRLKDYPCYQHLASISHFMQFPHHLQEYIEYGQSRDPPVKMQGSIITTPGSIALAQAQA  
 QAQVPAKAPLAGQVNTMVTSTTTTVAKTVTVTKPTGVSFKKDVPPSINTTNIDTLLVATDQTERIVEPPENI  
 QEKIAFIFNNLSQSNMTQKVEELKETVKEEFMPWVSQYLVMKRVSIEPNFHSLSYNSFLDTLKNPEFNKMLVNE  
 TYRNIKVLLTSDKAAANFSDRSLLKNLGHWLGMITLAKNKPI LHTDLVDKSLLEAYVKGQOELLYVVPFVAK  
 VLESSIRSLVFRPPNPWTMAIMNVLAELHQEHDLKLNLFKFEIEVLCKNLALDINELKPGNLLKDKDRKLNLE  
 QLSAPKKDVQPEELPAITTTTTSTTPATSTTCTATVPPQPYSYHDINVYSLAGLAPHITLPTIPLFQAHP  
 QLKQCVRQAIERAVQELVHPVDRSIIKIAMTTCEQIVRKDFALDSEESRMRIAAHMMRNLTAGMAMITCREP  
 LLMSISTNLKNSFASALRTASPQQREMMDQAAAQLADNCELACCFIQKTAVEKAGPEMDKRLATEFELRKHA  
 RQEGRRYCDPVVLTQYAERMPEQIRLKVGGVDPKQLAVYEEFARNVPGFLPTNDLSQPTGFLAQPMKQAWATD  
 DVAQIYDKCITELYEQLHAI PPTLAMNPQAALRSLEVVVLSRNSRDAIAALGLLQKAVEGLLDATSGADAD  
 LLLRYRECHLLVLKALQDGRAYGSPWCNKQITRCLIECRDEYKYNVEAVELLIRNHLVNMQQYDLHLAQSMEN  
 GLNYMAVAFAMQLVKILLVDERSVAHIT EADLFHTIETLMRINAHSRGNAPGLPQLMEVVRNRYEAMIDRAH  
 GGNPFMMHSGISQASEYDDPPGLREKAEYLLREWVNLHYSAAAGRDSTKAFSAFVGMHQGGIILKTDLITRF  
 FRLCTEMCVEISYRAQAEQQHNPAANPTMIRAKCYHNLDFAVRLIALLVKHSGEATNTVTKINLLNKVLGIVV  
 GVLLQDHDVQRSEFQQLPYHRIFIMLLLELNAPEHVLETINFQTLTAFCNTFHILRPTKAPGFVYAWLELISH  
 RIFFIARMLAHTPQQKGWPMYAQLLIDLKYLAPFLRNVELTKPMQIILYKGTLRVLLVLLHDFPEFLCDYHYGF  
 CDVI PPNCIQLRNLILSAFPRNMLPDPFTPNLKVDMLEINIAPIRLTNFTGMVPPQFKKDLDSYLKTRSPV  
 TFLSDLRSNLQVSNPEGNRYNLQ LINALVLYVGTQAI AHIHNKGSTPSMSTITHSAHMDIFQNLAVDLDTTEGR  
 YLFLNAIANQLRYPNSHTHYFSC TMLYLFAEANTEAIEQEQITRVLLERLIVNRPHPWGLLITFIELIKNPAFK  
 FWNHEFVHCAPEIEKLFQSV AQCCMGKQAQQVMEGTGAS\*  
 >rs32184217\_ENSMUSP00000063565\_c.1554:A>T\_p.I519F  
 ENSMUST00000068452.10|Cnot1-201|ENSMUSG00000036550|-|chr8:g.96489647:T>A  
 MNLDSLALSQISYLVNDLTKKNYRASQQEIQHIVNRHGPEADRHLRCLFVDFSGDGKSSGKDFHQTQF  
 LIQECASLITKPNFISTLSYIDNPLHYQKSLKPAPHLFAQLSKVLKLSKVQEVIFGLALLNSSSPDLRGFAA  
 QFIKQKLPDLLRSYIDADVSGNQEGGFQDIAIEVLHLLLSHLLFGQKGAFGVQEQIDAFKTLRRDFPQERC  
 PVLAPLLYPEKRDILMDRILPDSGGVAKTMMESSLADFMQEVGYGFCASIEECRNIIMQFGVREVTAAQVAR  
 VLGMMARTHSGLTDGIPLQSIAPGSGIWSDGKDKSEGAQAHTWNVEVLIDVLKELNPSLNFKEVTYELDHPG  
 FQIRDSKGLHNVVYGIQRGLGMEVFPVDFIYRPWKHAEGQLSFIQHSLINPEVFCFADYPCHTVATDILKAPP  
 EDDNREIATWKSLLDIESLLRLAEVQYEQVKQLFSFPIKHCPCDMLVLALLQINTSWHTLRHELISTLMPIFL  
 GNHPNSAFILHYAWHGQGSPIRQLIMHAMAEWYMRGEQYDQAKLSRILDVAQDLKALSMLLNGTFFAFVID  
 LAALASRREYLKLDKWLTDKIREHGEPFIQACMTFLKRRCP SILGGLAPEKDQPKSAQLPAETLATMLACLQA  
 CAGSVSQELSETILTMVANCNSVMNKARQPPPGVMPKGRPPSASSLDAISPVQIDPLAGMASLIGGSAAPHT  
 QSMQGFPPNLGSAFSTPQSPAKAFPPPLSTPNQTTAFSGIGGLSSQLPVGGLGTGSLTGIGTGALGLPAVNNDP  
 FVQRKLGTSGLNQPTFQQTDLQVWPEANQHFSSKEIDDEANSYFQRIYNHPPHPTMSVDEVLEMLQRFKDS  
 TIKRREVFNCMLRNLFEYRFFPQYDPKELHITACLFGGIEKGLVTYMALGLALRYVLEALRKPFGSKMYFYG  
 IAALDRFKNRLKDYPCYQHLASISHFMQFPHHLQEYIEYGQSRDPPVKMQGSIITTPGSIALAQAQAQAQV  
 AKAPLAGQVNTMVTSTTTTVAKTVTVTKPTGVSFKKDVPPSINTTNIDTLLVATDQTERIVEPPENIQEKIA  
 FIFNNLSQSNMTQKVEELKETVKEEFMPWVSQYLVMKRVSIEPNFHSLSYNSFLDTLKNPEFNKMLVNETYRNI  
 KVLLTSDKAAANFSDRSLLKNLGHWLGMITLAKNKPI LHTDLVDKSLLEAYVKGQOELLYVVPFVAKVLESS  
 IRSLVFRPPNPWTMAIMNVLAELHQEHDLKLNLFKFEIEVLCKNLALDINELKPGNLLKDKDRKLNLEQLSAP  
 KKDVKQPEELPAITTTTTSTTPATSTTCTATVPPQPYSYHDINVYSLAGLAPHITLNPITPLFQAHPQLKQC

VRQAIERAVQELVHPVVDRS IKIAMTTCEQIVRKDFALDSEESRMRIA AHMMRNLTAGMAMITCREP LLMSI  
STNLKNSFASALRTAS PQQREMMDQAAAQLAQDNCELACCFIQKTAVEKAGPEMDKRLATEFELRKHARQEGR  
RYCDPVVLTYYQAERMPEQIRLKVGGVDPKQLAVYEEFARNVPGFLPTNDLSQPTGFLAQPMKQAWATDDVAQI  
YDKCITELEQHLHAI PPTLAMNPPQAALRSLLLEVVLVSRNSRDAIAALGGLQKAVEGLLDATSGADADLLRY  
RECHLLVLKALQDGRAYGSPWCNKQITRCLIECRDEYKYNVEAVE LLIRNHLVNMQQYDLHLAQSMENGLNYM  
AVAFAMQLVKILLVDRSVAHIT EADLFHTIETLMRINAHSRGNAP EGLPQLMEVVRSNYEAMI DRAHGGPNF  
MMHSGISQASEYDDPPGLREKAEYLLREWVNLYHSAAAGRDSTKAFSAFVGMHQQGILKTDLLITRFFRLCT  
EMCVEISYRAQAEQQHNPAANPTMIRAKCYHNLDAFVRLIALLVKHSGEATNTVTKINLLNKVLGIVVGVLLQ  
DHDVRQSEFQQLPYHRIFIMLLLELNAPEHVLETINFQTLTAFNCNTFHILRPTKAPGFVYAWLELISHRIFIA  
RMLAHTPQQKGWPMYAQLLIDLFKYLAPFLRNVELTKPMQILYKGLTRVLLVLLHDFPEFLCDYHYGFCDVIP  
PNCIQLRNILSAFPRNMRLPDPFTPNLKVDMLEINIAPRILTNFTGVMPPQFKKDLDSYLKTRSPVTFSLD  
LRSNLQVSNPEGNRYNLQLINALVLYVGTQAI AIAHINKGSTPSMSTITHSAHMDIFQNLAVDLDTEGRYLF LN  
AIANQLRYPNSH THYFSC TMLYLFAEANTEA IQEQITRFLQSV AQCCMGQKQAQQVMEGTGAS\*

>rs32184217\_ENSMUSP00000148807\_c.1548:A>T\_p.1517F

ENSMUST00000211887.2|Cnot1-203|ENSMUSG00000036550|-|chr8:g.96489647:T>A  
MNLDSLALSLSQISYLVNDLTKKNYRASQQEIQHIVNRHGPEADRHLRLCLF SHVDFSGDGKSSGKDFHQFLI  
QECASLITKPNFISTLSY AIDNPLHYQKSLKPAPHLFAQLSKVLKLSKVQEVIFGLALLNSSSPDLRGFAAQF  
IKQKLPDLLRSYIDADVSGNQEGGFQDIAIEVLHLLSHLLFGQKGAFGVQEQIDAFKTLRRDFPQERC  
VLAPLLYPEKRDILMDRILPDSGGVAKTMMESSLADFMQEVGYGFCASIEECRNIIMQFGVREVTAAQVARVL  
GMMARTHSGLT DGIPLQSI SAPGSGIWS DGDKSEGAQAHTWNVEVLIDVLKELNPSLNFKEVTYELDHGPFQ  
IRDSKGLHNVVYGIQRGLGMEVFPVDFIYRPWKHAEGQLSFIQHS LINPEVFCFADYPCHTVATDILKAPPED  
DNREIATWKS LDLES LLRLAEVGYEQVKQLFSFPIKHC PDMLVLALLQINTSWHTLRHELISTLMPIFLGN  
HPNSAFILHYAWHGQGS PSIRQLIMHAMA EWYMRGEQYDQAKLSRILDVAQDLKALSMLNGT PFAFVIDLA  
ALASREY LKLDKWLTDKIREHGEFFIQACMTFLKRRCP SILGGLAPEKDQPKSAQLPAETLATMLACLQACA  
GSVSQELSETILTMVANC SNVMNKARQPPPGVMPKGRPPSASSLDAISPVQIDPLAGMASLSIGGSAAPHTQS  
MQGFPPNLGSAFSTPQSPAKAFPPPLSTPNQTTAFSGIIGLSSQLPVGGLGTGSLTGIGTGA LGLPAVNNDPFV  
QRKLGTSGNLGSAFSTPQSPAKAFPPPLSTPNQTTAFSGIIGLSSQLPVGGLGTGSLTGIGTGA LGLPAVNNDPFV  
EREVFNCLMRNLFE EYRFFPQY PDKELHITACLFGGIIEKGLVYTMALGLALRYVLEALRKPFGSKMYFFGIA  
ALDRFKNR LKDY PQY CQHLASISHFMQFPHHLQ EYIEYQQSRDPPVKMQGSITTPGSIALAQAQAQVPAK  
APLAGQVNTMVT TSTTTTVAKT VTKPTGVSFKKDVPPSINTTNI DTLVATDQTERIVEPPENIQEKIAFI  
FNNLSQSNMTQKVEELKETVKEEFMPWVSQYLVMKRVSIEPNFHSLSY SNFLDTLKNPEFNKMLVNETYRN IKV  
LLTSDKAAANFSDRSLLKNLGHWLGMITLAKNKPI LH TDLDVKSLLLEAYVKQQE LLYVVPFVAKVLESSIR  
SLVFRPPNPWTMAIMNVLAELHQEHDLKLNLFKFEIEVLCKNLALDINELKPGNLLKDKDR LKNLDEQLSAPKK  
DVKQPEELPAITTTTSTTPATSTTCTATVPPQPQYSYHDIN VYSLAGLAPHITLNPTIPLFQAHPQLKQCVR  
QAIERAVQELVHPVVDRS IKIAMTTCEQIVRKDFALDSEESRMRIA AHMMRNLTAGMAMITCREP LLMSI  
STNLKNSFASALRTAS PQQREMMDQAAAQLAQDNCELACCFIQKTAVEKAGPEMDKRLATEFELRKHARQEGR  
RYCDPVVLTYYQAERMPEQIRLKVGGVDPKQLAVYEEFARNVPGFLPTNDLSQPTGFLAQPMKQAWATDDVAQI  
YDKCITELEQHLHAI PPTLAMNPPQAALRSLLLEVVLVSRNSRDAIAALGGLQKAVEGLLDATSGADADLLRY  
RECHLLVLKALQDGRAYGSPWCNKQITRCLIECRDEYKYNVEAVE LLIRNHLVNMQQYDLHLAQSMENGLNYM  
AVAFAMQLVKILLVDRSVAHIT EADLFHTIETLMRINAHSRGNAP EGLPQLMEVVRSNYEAMI DRAHGGPNF  
MMHSGISQASEYDDPPGLREKAEYLLREWVNLYHSAAAGRDSTKAFSAFVGMHQQGILKTDLLITRFFRLCT  
EMCVEISYRAQAEQQHNPAANPTMIRAKCYHNLDAFVRLIALLVKHSGEATNTVTKINLLNKVLGIVVGVLLQ  
DHDVRQSEFQQLPYHRIFIMLLLELNAPEHVLETINFQTLTAFNCNTFHILRPTKAPGFVYAWLELISHRIFIA  
RMLAHTPQQKGWPMYAQLLIDLFKYLAPFLRNVELTKPMQILYKGLTRVLLVLLHDFPEFLCDYHYGFCDVIP  
PNCIQLRNILSAFPRNMRLPDPFTPNLKVDMLEINIAPRILTNFTGVMPPQFKKDLDSYLKTRSPVTFSLD  
LRSNLQVSNPEGNRYNLQLINALVLYVGTQAI AIAHINKGSTPSMSTITHSAHMDIFQNLAVDLDTEGRYLF LN  
AIANQLRYPNSH THYFSC TMLYLFAEANTEA IQEQITRFLQSV AQCCMGQKQAQQVMEGTGAS\*

>rs32184217\_ENSMUSP00000148735\_c.1554:A>T\_p.1519F

ENSMUST00000213006.2|Cnot1-216|ENSMUSG00000036550|-|chr8:g.96489647:T>A  
MNLDSLALSLSQISYLVNDLTKKNYRASQQEIQHIVNRHGPEADRHLRLCLF SHVDFSGDGKSSGKDFHQFQF  
LIQECASLITKPNFISTLSY AIDNPLHYQKSLKPAPHLFAQLSKVLKLSKVQEVIFGLALLNSSSPDLRGFAA  
QFIKQKLPDLLRSYIDADVSGNQEGGFQDIAIEVLHLLSHLLFGQKGAFGVQEQIDAFKTLRRDFPQERC  
VLAPLLYPEKRDILMDRILPDSGGVAKTMMESSLADFMQEVGYGFCASIEECRNIIMQFGVREVTAAQVAR  
VLGMMARTHSGLT DGIPLQSI SAPGSGIWS DGDKSEGAQAHTWNVEVLIDVLKELNPSLNFKEVTYELDHGPF  
FQIRDSKGLHNVVYGIQRGLGMEVFPVDFIYRPWKHAEGQLSFIQHS LINPEVFCFADYPCHTVATDILKAPP  
EDDNREIATWKS LDLES LLRLAEVGYEQVKQLFSFPIKHC PDMLVLALLQINTSWHTLRHELISTLMPIFL  
GNHPNSAFILHYAWHGQGS PSIRQLIMHAMA EWYMRGEQYDQAKLSRILDVAQDLKALSMLNGT PFAFVID

LAALASRREYLKLDKWLTDKIREHGEPFIQACMTFLKRRCP SILGGLAPEKDQPKSAQLPAETLATMLACLQA  
CAGSVSQELSETILTMVANCNSVMNKARQPPPGVMPKGRPPSASSLDAISPVDIPLAGMASLSIGGSAAPHT  
QSMQGFPPNLGSAFSTPQSPAKAF PPLSTPNQTTAFSGIGGLSSQLPVGGLGTGSLTGIGTGALGLPAVNNNDP  
FVQRKLGTSGLNQPTFQOSKMKPSDLSQVWPEANQHFSKEIDDEANSYFQRIYNHPPHPTMSVDEVLEMLQRF  
KDSTIKREREVFNCLRNLFEEYRFFPQYDPKELHITACLFGGIIEKGLVTYMALGLALRYVLEALRKPFGSK  
MYFYGIAALDRFKNRLKDYQYCQHLASISHFMQFPHHLQEYIEYQQSRDPPVKMQGSITTPGSI ALAQAQA  
QAQVPAKAPLAGQVNTMVTSTTTTVAKTVTVTKPTGVSFKKDVPPSINTTNIDTLLVATDQTERIVEPPENI  
QEKIAFIFNNLSQSNMTQKVEELKETVKEEFMPWVSQYLVMKRVSIEPNFHSLYSNFDLTLKNPEFNKMLVNE  
TYRNIKVLLTSDKAAANFSDRSLLKNLGHWLGMITLAKNKPI LHTDLDVKSLLLEAYVKGQOELLYVVPFVAK  
VLESSIRSLVFRPPNPWTMAIMNVLAELHQEHDLKLNLFKFEIEVLCKNLALDINELKPGNLLKDKDRLKNLDE  
QLSAPKKDVKQPEELPAITTTTTSTTPATSTTCTATVPPQPQYSYHDINVYSLAGLAPHITLNPTIPLFQAHP  
QLKQCVRQAIERAVQELVHPVVDRSIKIAMTTCEQIVRKDFALDSEESRMRIA AHHMMRNLTAGMAMITCREP  
LLMSISTNLKNSFASALRTAS PQQREMMDQAAAQLAQDNCELACCFIQKTAVEKAGPEMDKRLATEFELRKHA  
RQEGRRYCDPVVLTQYQERMPEQIRLKVGGVDPKQLAVYEEFARNVPGFLPTNDLSQPTGFLAQPMKNWSSTY  
TPFHPLWP\*

>rs32184217\_ENSMUSP00000096073\_c.1554:A>T\_p.I519F

ENSMUST00000098473.11|Cnot1-202|ENSMUSG00000036550|-|chr8:g.96489647:T>A  
MNLDSLALSQISYLVNLTCKNYRASQQEIQHIVNRHGPEADRHLRCLF SHVDFSGDGKSSGKDFHQTF  
LIQECASLITKPNFISTLSY AIDNPLHYQKSLKPAPHLFAQLSKVLKLSKVQEVIFGLALLNSSSPDLRGFAA  
QFIKQKLPDLLRSYIDADVSGNQEGGFQDIAIEVLHLLLSHLLFGQKGAFGVQEQIDAFKTLRRDFPQERC  
PVLAPLLYPEKRDILMDRI LPDSGGVAKTMMESSLADFMQEVGYGFCASIEECRNIIMQFGVREVTAAQVAR  
VLGMMARTHSGGLTDGIPLQSI SAPGSGIWSDGDKSEGAQAHTWNVEVLIDVLKELNPSLNFKEVTEYELDHG  
FQIRDSKGLHNVVYGIQRGLGMEVFPVDFIYRPWKHAEGQLSFIQHSLINPEVFCFADYPCHTVATDILKAPP  
EDDREIATWKSLLDIESLLRLAEVQYEQVKQLFSFPIKHC PDMLVLALLQINTSWHTLRHELISLTPMIFL  
GNHPNSAFILHYAWHGQGSPIRQLIMHAMAWEYMRGEQYDQAKLSRILDVAQDLKALSMLNGT PFAFVID  
LAALASRREYLKLDKWLTDKIREHGEPFIQACMTFLKRRCP SILGGLAPEKDQPKSAQLPAETLATMLACLQA  
CAGSVSQELSETILTMVANCNSVMNKARQPPPGVMPKGRPPSASSLDAISPVDIPLAGMASLSIGGSAAPHT  
QSMQGFPPNLGSAFSTPQSPAKAF PPLSTPNQTTAFSGIGGLSSQLPVGGLGTGSLTGIGTGALGLPAVNNNDP  
FVQRKLGTSGLNQPTFQOSKMKPSDLSQVWPEANQHFSKEIDDEANSYFQRIYNHPPHPTMSVDEVLEMLQRF  
KDSTIKREREVFNCLRNLFEEYRFFPQYDPKELHITACLFGGIIEKGLVTYMALGLALRYVLEALRKPFGSK  
MYFYGIAALDRFKNRLKDYQYCQHLASISHFMQFPHHLQEYIEYQQSRDPPVKMQGSITTPGSI ALAQAQA  
QAQVPAKAPLAGQVNTMVTSTTTTVAKTVTVTKPTGVSFKKDVPPSINTTNIDTLLVATDQTERIVEPPENI  
QEKIAFIFNNLSQSNMTQKVEELKETVKEEFMPWVSQYLVMKRVSIEPNFHSLYSNFDLTLKNPEFNKMLVNE  
TYRNIKVLLTSDKAAANFSDRSLLKNLGHWLGMITLAKNKPI LHTDLDVKSLLLEAYVKGQOELLYVVPFVAK  
VLESSIRSLVFRPPNPWTMAIMNVLAELHQEHDLKLNLFKFEIEVLCKNLALDINELKPGNLLKDKDRLKNLDE  
QLSAPKKDVKQPEELPAITTTTTSTTPATSTTCTATVPPQPQYSYHDINVYSLAGLAPHITLNPTIPLFQAHP  
QLKQCVRQAIERAVQELVHPVVDRSIKIAMTTCEQIVRKDFALDSEESRMRIA AHHMMRNLTAGMAMITCREP  
LLMSISTNLKNSFASALRTAS PQQREMMDQAAAQLAQDNCELACCFIQKTAVEKAGPEMDKRLATEFELRKHA  
RQEGRRYCDPVVLTQYQERMPEQIRLKVGGVDPKQLAVYEEFARNVPGFLPTNDLSQPTGFLAQPMKQAWATD  
DVAQIYDKCITELEQHLHAI PPTLAMNPQAQALRSLLLEVVLRSNRSDAIAALGLLQKAVEGLLDATSGADAD  
LLRYRECHLLVLKALQDGRAYGSPWCNKQITRCLIECRDEYKYNVEAVE LLIRNHLVNMQQYDLHLAQSMEN  
GLNYMAVAFAMQLVKILLVDERSVAHI TEADLFHTIETLMRINAHSRGAPEGLPQLMEVVRSNYEAMIDRAH  
GGPNFMMHSGISQASEYDDPPGLREKAEYLLREWVNLHYSAAAGRDSTKAFSAFVGMHQGGILKTDDLITRF  
FRLCTEMCVEISYRAQAEQQHNPAANPTMIRAKCYHNLDFAVRLIALLVKHSGEATNTVTKINLLNKVLGIVV  
GVLLQDHDVQRQSEFQQLPYHRIFIMLLELNAPEHVEITINFQTLTAFCNTHILRPTKAPGFVYAWLELISH  
RIFIAQRLAHTPQKQGWPMYAQLLIDLKYLAPFLRNVELTKPMQILYKGLTRVLLVLLHDFPEFLCDYHYGF  
CDVIPPNCIQLRNLILSAFPRNMRPLDPFTPNLKVDMLEINIAPRILTNFTGVMPPQFKKDLDSYKTRSPV  
TFLSDLRSNLQVSNPNRYNLQILINALVLYVGTQAI AHIHNGKSTPSMSTITHSAHMDIFQNLAVDLDTTEGR  
YFLFLNAIANQLRYPNSHTHYFSC TMLYLFAEANTEAIEQEQITRVLLERLIVNRPHPWGLLITFIELIKNPAFK  
FWNHEFVHCAPEIEKLFQSV AQCCMGQKQAQQVMEGTGAS\*

>rs33010259\_ENSMUSP00000063565\_c.1197:A>T\_p.K400\*

ENSMUST00000068452.10|Cnot1-201|ENSMUSG00000036550|-|chr8:g.96491625:T>A  
MNLDSLALSQISYLVNLTCKNYRASQQEIQHIVNRHGPEADRHLRCLF SHVDFSGDGKSSGKDFHQTF  
LIQECASLITKPNFISTLSY AIDNPLHYQKSLKPAPHLFAQLSKVLKLSKVQEVIFGLALLNSSSPDLRGFAA  
QFIKQKLPDLLRSYIDADVSGNQEGGFQDIAIEVLHLLLSHLLFGQKGAFGVQEQIDAFKTLRRDFPQERC  
PVLAPLLYPEKRDILMDRI LPDSGGVAKTMMESSLADFMQEVGYGFCASIEECRNIIMQFGVREVTAAQVAR  
VLGMMARTHSGGLTDGIPLQSI SAPGSGIWSDGDKSEGAQAHTWNVEVLIDVLKELNPSLNFKEVTEYELDHG  
FQIRDSKGLHNVVYGIQRGLGMEVFPVDFIYRPWKHAEGQLSFIQHSLINPEVFCFADYPCHTVATDILKAPP

EDDNREIATWKSLLDLIESLLRLAEVGGQYEQVKQLFSFPIKHC PDMLVLALLQINTSWHTLRHELISTLMPIFL  
GNHPNSAIILHYAWHGQGSIRQLIMHAMAWEYMRGEQYDQAKLSRILDVAQDLKALSMLLNGTFFAFVID  
LAALASRREYLKLDKWLTDKIREHGEPFIQACMTFLKRRCP SILGGLAPEKDPKSAQLPAETLATMLACLQA  
CAGSVSQELSETILTMVANCNSVMNKARQPPPGVMPKGRPPSASSLDAISPVQIDPLAGMASLSIGGSAAPHT  
QSMQGFPPNLGSAFSTPQSPAKAFPLSTPNQTTAFSGIGGLSSQLPVGGLGTGSLTGIGTGALGLPAVNNDP  
FVQRKLGTSGLNQPTFQQTDL SQVWPEANQHFSKEIDDEANSYFQRIYNHPPHTMSVDEVLEMLQRFKDS  
TIREVEVFNCLRNLFEEYRFFPQY PDKELHITACLFGGIIEKGLVTYALGLALRYVLEALRKPFGSKMYYFG  
IAALDRFKNRLKDY PQYQCQLASISHFMQFPHHLQEYIEYGGQSRDPPVKMQGSITTPGSIALAQAQAQV  
AKAPLAGQVNTMVTSTTTTVAKTVTVTKPTGVSFKKDVPPSINTNIDTLLVATDQTERIVEPPENIQEKIA  
FIFNNLSQSNMTQKVEELKETVKEEFMPWVSQYLVMKRVSIEPNFHSLSYSNFLDTLKNPEFNKMVLNETYRNI  
KVLTLSDKAAANFSDRSLKLNGLHGLGMITLAKNKPI LHTDL DVKSLLEAYVKGQOQLLYVVPFAKVLESS  
IRSLVFRPPNPWTMAIMNVLAELHQEHDLKLNLFKFEIEVLCKNLALDINELKPGNLLKDKDRKLNLEQLSAP  
KKDVQPEELPAITTTTTSTTPATSTTCTATVPPQPQYSYHDINVYSLAGLAPHITLNPTIPLFQAHPLKQC  
VRQAIERAVQELVHPVVDRS IKIAMTTCEQIVRKDFALDSEESRMRIAHHMMRNLTAGMAMITCREP LLSI  
STNLKNSFASALRTASPPQREMMDQAAAQLAQDNCELACCFIQKTAVEKAGPEMDKRLATEFELRKHARQEGR  
RYCDPVVLTYYAERMPEQIRLKVGGVDPKQLAVYEEFARNVPGFLPTNDLSQPTGFLAQPMKQAWATDDVAQI  
YDKCITELQHLHAI PPTLAMNPQAALRSLLLEVVL SRNSRDAIAALGGLQKAVEGLLDATSGADADLLRY  
RECHLLVLKALQDGRAYGSPWCNKQITRCLIECRDEYKYNVEAVE LLIRNHLVNMQQYDLHLAQSMENGLNYM  
AVAFAMQLVKILLVDRSVAHIT EADLFHTIETLMRINAHSRGAPEGLPQLMEVVRSNYEAMIDRAHGGPNF  
MMHSGISQASEYDDPPGLREKAEYLLREWVNLYHSAAAGRDSTKAFSAFVGQMHQQGILKTDDLI TRFFRLCT  
EMCVEISYRAQAEQQHNPAANPTMIRAKCYHNLDAFVRLIALLVKHSGEATNTVTKINLLNKVLGIVVGVLLQ  
DHDVRQSEFQQLPYHRIFIMLLELNAPHEVLETINFQTLTAFNCNTFHILRPTKAPGFVYAWLELISHRIFIA  
RMLAHTPQQKGWPMYAQLLIDLFKYLAPFLRNVELTKPMQILYKGLTRVLLVLLHDFPEFLCDYHYGFCDVIP  
PNCIQLRNLILSAFPRNMRLPDPFTPNLKVDMLEINIAPRI LTNFTGVMPPQFKKDLDSYLKTRSPVTF LSD  
LRSNLQVSNPGRNRYNLQ LINALVLYVGTQAI AHINHGKSTPSMSTITTHSAHMDIFQNLAVDLDETEGRYLF LN  
AIANQLRYPNSSHYFSC TMLYLFAEANTEAIEQEITRFLQSV AQCCMGQQAQQVMEGTGAS\*  
>rs33010259\_ENSMUSP00000148807\_c.1191:A>T\_p.K398\*  
ENSMUST00000211887.2|Cnot1-203|ENSMUSG00000036550|-|chr8:g.96491625:T>A  
MNLDSLALSQISYLVNDLTKKNYRASQQEIQHIVNRHGPEADRHLRCLF SHVDFSGDGKSSGKDFHQFLI  
QECASLITKPNFISTLSY AIDNPLHYQKSLKPAPHLFAQLSKVLKLSKVQEVIFGLALLNSSSPDLRGFAAQF  
IKQKLPDLLRSYIDADVSGNQEGGFQDIAIEVLHLLLSHLLFGQKGAFGVQEQIDAF LKTLRRDFPQERCPV  
VLAPLLYPEKRDILMDRI LPDSGGVAKTMMESSLADFMQEVGYGFCASIEECRNIIMQFGVREVTAQVARVL  
GMMARTHSGLTDGIP LQSI SAPSGIWSDGKDKSEGAQAHTWNVEVLIDVLKELNPSLNFKEVTYELDHGPFQ  
IRDSKGLHNVVYGIQRGLGMEVFPVDFIYRPW\*HAEGQLSFIQHS LINPEVFCFADYPCHTVATDILKAPPED  
DNREIATWKSLLDLIESLLRLAEVGGQYEQVKQLFSFPIKHC PDMLVLALLQINTSWHTLRHELISTLMPIFLGN  
HPNSAIILHYAWHGQGSIRQLIMHAMAWEYMRGEQYDQAKLSRILDVAQDLKALSMLLNGTFFAFVIDLA  
ALASRREYLKLDKWLTDKIREHGEPFIQACMTFLKRRCP SILGGLAPEKDPKSAQLPAETLATMLACLQACA  
GSVSVQELSETILTMVANCNSVMNKARQPPPGVMPKGRPPSASSLDAISPVQIDPLAGMASLSIGGSAAPHTQS  
MQGFPPNLGSAFSTPQSPAKAFPLSTPNQTTAFSGIGGLSSQLPVGGLGTGSLTGIGTGALGLPAVNNDP  
FVQRKLGTSGLNQPTFQQTDL SQVWPEANQHFSKEIDDEANSYFQRIYNHPPHTMSVDEVLEMLQRFKDS  
TIREVEVFNCLRNLFEEYRFFPQY PDKELHITACLFGGIIEKGLVTYALGLALRYVLEALRKPFGSKMYYFG  
IAALDRFKNRLKDY PQYQCQLASISHFMQFPHHLQEYIEYGGQSRDPPVKMQGSITTPGSIALAQAQAQV  
AKAPLAGQVNTMVTSTTTTVAKTVTVTKPTGVSFKKDVPPSINTNIDTLLVATDQTERIVEPPENIQEKIA  
FIFNNLSQSNMTQKVEELKETVKEEFMPWVSQYLVMKRVSIEPNFHSLSYSNFLDTLKNPEFNKMVLNETYRNI  
KVLTLSDKAAANFSDRSLKLNGLHGLGMITLAKNKPI LHTDL DVKSLLEAYVKGQOQLLYVVPFAKVLESS  
IRSLVFRPPNPWTMAIMNVLAELHQEHDLKLNLFKFEIEVLCKNLALDINELKPGNLLKDKDRKLNLEQLSAP  
KKDVQPEELPAITTTTTSTTPATSTTCTATVPPQPQYSYHDINVYSLAGLAPHITLNPTIPLFQAHPLKQC  
VRQAIERAVQELVHPVVDRS IKIAMTTCEQIVRKDFALDSEESRMRIAHHMMRNLTAGMAMITCREP LLSI  
STNLKNSFASALRTASPPQREMMDQAAAQLAQDNCELACCFIQKTAVEKAGPEMDKRLATEFELRKHARQEGR  
RYCDPVVLTYYAERMPEQIRLKVGGVDPKQLAVYEEFARNVPGFLPTNDLSQPTGFLAQPMKQAWATDDVAQI  
YDKCITELQHLHAI PPTLAMNPQAALRSLLLEVVL SRNSRDAIAALGGLQKAVEGLLDATSGADADLLRY  
RECHLLVLKALQDGRAYGSPWCNKQITRCLIECRDEYKYNVEAVE LLIRNHLVNMQQYDLHLAQSMENGLNYM  
AVAFAMQLVKILLVDRSVAHIT EADLFHTIETLMRINAHSRGAPEGLPQLMEVVRSNYEAMIDRAHGGPNF  
MMHSGISQASEYDDPPGLREKAEYLLREWVNLYHSAAAGRDSTKAFSAFVGQMHQQGILKTDDLI TRFFRLCT  
EMCVEISYRAQAEQQHNPAANPTMIRAKCYHNLDAFVRLIALLVKHSGEATNTVTKINLLNKVLGIVVGVLLQ  
DHDVRQSEFQQLPYHRIFIMLLELNAPHEVLETINFQTLTAFNCNTFHILRPTKAPGFVYAWLELISHRIFIA  
RMLAHTPQQKGWPMYAQLLIDLFKYLAPFLRNVELTKPMQILYKGLTRVLLVLLHDFPEFLCDYHYGFCDVIP  
PNCIQLRNLILSAFPRNMRLPDPFTPNLKVDMLEINIAPRI LTNFTGVMPPQFKKDLDSYLKTRSPVTF LSD  
LRSNLQVSNPGRNRYNLQ LINALVLYVGTQAI AHINHGKSTPSMSTITTHSAHMDIFQNLAVDLDETEGRYLF LN  
AIANQLRYPNSSHYFSC TMLYLFAEANTEAIEQEITRFLQSV AQCCMGQQAQQVMEGTGAS\*  
>rs33010259\_ENSMUSP00000148807\_c.1191:A>T\_p.K398\*  
ENSMUST00000211887.2|Cnot1-203|ENSMUSG00000036550|-|chr8:g.96491625:T>A  
MNLDSLALSQISYLVNDLTKKNYRASQQEIQHIVNRHGPEADRHLRCLF SHVDFSGDGKSSGKDFHQFLI  
QECASLITKPNFISTLSY AIDNPLHYQKSLKPAPHLFAQLSKVLKLSKVQEVIFGLALLNSSSPDLRGFAAQF  
IKQKLPDLLRSYIDADVSGNQEGGFQDIAIEVLHLLLSHLLFGQKGAFGVQEQIDAF LKTLRRDFPQERCPV  
VLAPLLYPEKRDILMDRI LPDSGGVAKTMMESSLADFMQEVGYGFCASIEECRNIIMQFGVREVTAQVARVL  
GMMARTHSGLTDGIP LQSI SAPSGIWSDGKDKSEGAQAHTWNVEVLIDVLKELNPSLNFKEVTYELDHGPFQ  
IRDSKGLHNVVYGIQRGLGMEVFPVDFIYRPW\*HAEGQLSFIQHS LINPEVFCFADYPCHTVATDILKAPPED  
DNREIATWKSLLDLIESLLRLAEVGGQYEQVKQLFSFPIKHC PDMLVLALLQINTSWHTLRHELISTLMPIFLGN  
HPNSAIILHYAWHGQGSIRQLIMHAMAWEYMRGEQYDQAKLSRILDVAQDLKALSMLLNGTFFAFVIDLA  
ALASRREYLKLDKWLTDKIREHGEPFIQACMTFLKRRCP SILGGLAPEKDPKSAQLPAETLATMLACLQACA  
GSVSVQELSETILTMVANCNSVMNKARQPPPGVMPKGRPPSASSLDAISPVQIDPLAGMASLSIGGSAAPHTQS  
MQGFPPNLGSAFSTPQSPAKAFPLSTPNQTTAFSGIGGLSSQLPVGGLGTGSLTGIGTGALGLPAVNNDP  
FVQRKLGTSGLNQPTFQQTDL SQVWPEANQHFSKEIDDEANSYFQRIYNHPPHTMSVDEVLEMLQRFKDS  
TIREVEVFNCLRNLFEEYRFFPQY PDKELHITACLFGGIIEKGLVTYALGLALRYVLEALRKPFGSKMYYFG  
IAALDRFKNRLKDY PQYQCQLASISHFMQFPHHLQEYIEYGGQSRDPPVKMQGSITTPGSIALAQAQAQV  
AKAPLAGQVNTMVTSTTTTVAKTVTVTKPTGVSFKKDVPPSINTNIDTLLVATDQTERIVEPPENIQEKIA  
FIFNNLSQSNMTQKVEELKETVKEEFMPWVSQYLVMKRVSIEPNFHSLSYSNFLDTLKNPEFNKMVLNETYRNI  
KVLTLSDKAAANFSDRSLKLNGLHGLGMITLAKNKPI LHTDL DVKSLLEAYVKGQOQLLYVVPFAKVLESS  
IRSLVFRPPNPWTMAIMNVLAELHQEHDLKLNLFKFEIEVLCKNLALDINELKPGNLLKDKDRKLNLEQLSAP  
KKDVQPEELPAITTTTTSTTPATSTTCTATVPPQPQYSYHDINVYSLAGLAPHITLNPTIPLFQAHPLKQC  
VRQAIERAVQELVHPVVDRS IKIAMTTCEQIVRKDFALDSEESRMRIAHHMMRNLTAGMAMITCREP LLSI  
STNLKNSFASALRTASPPQREMMDQAAAQLAQDNCELACCFIQKTAVEKAGPEMDKRLATEFELRKHARQEGR  
RYCDPVVLTYYAERMPEQIRLKVGGVDPKQLAVYEEFARNVPGFLPTNDLSQPTGFLAQPMKQAWATDDVAQI  
YDKCITELQHLHAI PPTLAMNPQAALRSLLLEVVL SRNSRDAIAALGGLQKAVEGLLDATSGADADLLRY  
RECHLLVLKALQDGRAYGSPWCNKQITRCLIECRDEYKYNVEAVE LLIRNHLVNMQQYDLHLAQSMENGLNYM  
AVAFAMQLVKILLVDRSVAHIT EADLFHTIETLMRINAHSRGAPEGLPQLMEVVRSNYEAMIDRAHGGPNF  
MMHSGISQASEYDDPPGLREKAEYLLREWVNLYHSAAAGRDSTKAFSAFVGQMHQQGILKTDDLI TRFFRLCT  
EMCVEISYRAQAEQQHNPAANPTMIRAKCYHNLDAFVRLIALLVKHSGEATNTVTKINLLNKVLGIVVGVLLQ  
DHDVRQSEFQQLPYHRIFIMLLELNAPHEVLETINFQTLTAFNCNTFHILRPTKAPGFVYAWLELISHRIFIA  
RMLAHTPQQKGWPMYAQLLIDLFKYLAPFLRNVELTKPMQILYKGLTRVLLVLLHDFPEFLCDYHYGFCDVIP  
PNCIQLRNLILSAFPRNMRLPDPFTPNLKVDMLEINIAPRI LTNFTGVMPPQFKKDLDSYLKTRSPVTF LSD  
LRSNLQVSNPGRNRYNLQ LINALVLYVGTQAI AHINHGKSTPSMSTITTHSAHMDIFQNLAVDLDETEGRYLF LN  
AIANQLRYPNSSHYFSC TMLYLFAEANTEAIEQEITRFLQSV AQCCMGQQAQQVMEGTGAS\*

SNLQVSNPEGNRYNLQNLINALVLYVGTQAIHAIHNKGSTPMSMTITHSAHMDIFQNLAVDLDTEGRYLFNNAI  
ANQLRYPNSHSHYFSCMTLYLFAEANTEAIOEQITRVLLERLIVNRPHPWGLLITFIELIKNPAFKFVNHEFV  
HCAPEIEKLFQSVAQCCMGQKQAQQVMEGTGAS\*

>rs33010259\_ENSMUSP00000148735\_c.1197:A>T\_p.K400\*

ENSMUST00000213006.2|Cnot1-216|ENSMUSG00000036550|-|chr8:g.96491625:T>A  
MNLDSLALSQISYLVNDLTKKNYRASQQEIQHIVNRHGPEADRHLRLCLFSHVDFSGDGKSSGKDFHQTF  
LIQECASLITKPNFISTLSYAI DNPLHYQKSLKPAPHLFAQLSKVLKLSKVQEVIFGLALLNSSSPDLRGFAA  
QFIKQKLPDLLRSYIDADVSGNQE GGFQDIAIEVLHLLLSHLLFGQKGAFGVQEQIDAFKTLRRDFPQERC  
PVVLAPLLYPEKRDILMDRILPDSGGVAKTMMESSLADFMQEVGYGFCASIEECRNIIMQFGVREVTAAQVAR  
VLGMMARTHSGSLTDGIPLQSIAPGSGIWSGDGKDKSEGAQAHTWNVEVLIDVLKELNPSLNFKEVITYELDHG  
FQIRDSKGLHNVVYGIQRGLGMEVFPVDFIYRPW\*HAEGQLSFIQHSLINPEVFCFADYPCHTVATDILKAPP  
EDDNREIATWKSLLDIESLLRLAEVQYEQVKQLFSFPIKHCPCDMLVLALLQINTSWHTLRHELISLTMPIFL  
GNHPNSAILHYAWHGQGSPIRQLIMHAMA EWYMRGEQYDQAKLSRILDVAQDLKALSMLLNGTFFAFVID  
LAALASRREYLKLDKWLTDKIREHGEPFIQACMTFLKRRCP SILGGLAPEKDQPKSAQLPAETLATMLACLQA  
CAGSVSQELSETILTMVANCNSVMNKARQPPPGVMPKGRPPSASSLDAISPVQIDPLAGMASLIGGSAAPHT  
QSMQGFPPNLGSAFSTPQSPAKAF PPLSTPNQTTAFSGIGGLSSQLPVGGLGTGSLTGIGTGALGLPAVNNDP  
FVQRKLGTSGLNQPTFQQSKMKPSDLSQVWPEANQHFSKEIDDEANSYFQRIYNHPPHPTMSVDEVLEMLQRF  
KDSTIKRREVFNCMLRNLFEERYRFFPQYDPKELHITACLFGGIIEKGLVTYMALGLALRYVLEALRKPFGSK  
MYYFGIAALDRFKNRLKDYQYCQHLASISHFMQFPHHLQEYIEYGGQSRDPPVKMQGSIITPGSIALAQAQA  
QAQVPAKAPLAGQVNTMVTSTTTTVAKTVTVTKPTGVSFKKDVPPSINTTNIDTLLVATDQTERIVEPPENI  
QEKIAFIFNNLSQSNMTQKVEELKETVKEEFMPWVSQYLVMKRVSIEPNFHSLSYSNFLDTLKNPEFNKMLVNE  
TYRNIVLLTSDKAAANFSDRSLLKNLGHWLGMITLAKNKPI LHTDLDVKSLLEAYVKGQOQELLYVVPFVAK  
VLESSIRSLVFRPPNPWTMAIMNVLAELHQEHDLKLNLFKFEIEVLCKNLALDINELKPGNLLKDKDRLKNLDE  
QLSAPKKDVKQPEELPAITTTTTSTTPATSTTCTATVPPQPQYSYHDINVYSLAGLAPHITLNPITPLFQAHP  
QLKQCVRAIERAVQELVHPVVDRSIKIAMTTCEQIVRKDFALDSEESRMRIAAHMMRNLTAGMAMITCREP  
LLMSISTNLKNSFASALRTASPPQREMMDQAAAQLAQDNCELACCFIQKTAVEKAGPEMDKRLATEFELRKHA  
RQEGRRYCDPVVLTQYAEERMEQIRLKVGGVDPKQLAVYEEFARNVPGFLPTNDLSQPTGFLAQPMKNWSSTY  
TPFHPLWP\*

>rs33010259\_ENSMUSP00000096073\_c.1197:A>T\_p.K400\*

ENSMUST00000098473.11|Cnot1-202|ENSMUSG00000036550|-|chr8:g.96491625:T>A  
MNLDSLALSQISYLVNDLTKKNYRASQQEIQHIVNRHGPEADRHLRLCLFSHVDFSGDGKSSGKDFHQTF  
LIQECASLITKPNFISTLSYAI DNPLHYQKSLKPAPHLFAQLSKVLKLSKVQEVIFGLALLNSSSPDLRGFAA  
QFIKQKLPDLLRSYIDADVSGNQE GGFQDIAIEVLHLLLSHLLFGQKGAFGVQEQIDAFKTLRRDFPQERC  
PVVLAPLLYPEKRDILMDRILPDSGGVAKTMMESSLADFMQEVGYGFCASIEECRNIIMQFGVREVTAAQVAR  
VLGMMARTHSGSLTDGIPLQSIAPGSGIWSGDGKDKSEGAQAHTWNVEVLIDVLKELNPSLNFKEVITYELDHG  
FQIRDSKGLHNVVYGIQRGLGMEVFPVDFIYRPW\*HAEGQLSFIQHSLINPEVFCFADYPCHTVATDILKAPP  
EDDNREIATWKSLLDIESLLRLAEVQYEQVKQLFSFPIKHCPCDMLVLALLQINTSWHTLRHELISLTMPIFL  
GNHPNSAILHYAWHGQGSPIRQLIMHAMA EWYMRGEQYDQAKLSRILDVAQDLKALSMLLNGTFFAFVID  
LAALASRREYLKLDKWLTDKIREHGEPFIQACMTFLKRRCP SILGGLAPEKDQPKSAQLPAETLATMLACLQA  
CAGSVSQELSETILTMVANCNSVMNKARQPPPGVMPKGRPPSASSLDAISPVQIDPLAGMASLIGGSAAPHT  
QSMQGFPPNLGSAFSTPQSPAKAF PPLSTPNQTTAFSGIGGLSSQLPVGGLGTGSLTGIGTGALGLPAVNNDP  
FVQRKLGTSGLNQPTFQQSKMKPSDLSQVWPEANQHFSKEIDDEANSYFQRIYNHPPHPTMSVDEVLEMLQRF  
KDSTIKRREVFNCMLRNLFEERYRFFPQYDPKELHITACLFGGIIEKGLVTYMALGLALRYVLEALRKPFGSK  
MYYFGIAALDRFKNRLKDYQYCQHLASISHFMQFPHHLQEYIEYGGQSRDPPVKMQGSIITPGSIALAQAQA  
QAQVPAKAPLAGQVNTMVTSTTTTVAKTVTVTKPTGVSFKKDVPPSINTTNIDTLLVATDQTERIVEPPENI  
QEKIAFIFNNLSQSNMTQKVEELKETVKEEFMPWVSQYLVMKRVSIEPNFHSLSYSNFLDTLKNPEFNKMLVNE  
TYRNIVLLTSDKAAANFSDRSLLKNLGHWLGMITLAKNKPI LHTDLDVKSLLEAYVKGQOQELLYVVPFVAK  
VLESSIRSLVFRPPNPWTMAIMNVLAELHQEHDLKLNLFKFEIEVLCKNLALDINELKPGNLLKDKDRLKNLDE  
QLSAPKKDVKQPEELPAITTTTTSTTPATSTTCTATVPPQPQYSYHDINVYSLAGLAPHITLNPITPLFQAHP  
QLKQCVRAIERAVQELVHPVVDRSIKIAMTTCEQIVRKDFALDSEESRMRIAAHMMRNLTAGMAMITCREP  
LLMSISTNLKNSFASALRTASPPQREMMDQAAAQLAQDNCELACCFIQKTAVEKAGPEMDKRLATEFELRKHA  
RQEGRRYCDPVVLTQYAEERMEQIRLKVGGVDPKQLAVYEEFARNVPGFLPTNDLSQPTGFLAQPMKQAWATD  
DVAQIYDKCITLEQLHLHAIPPTLAMNPQAQALRSLEVVLSRNSRDAIAALGLLQKAVEGLLDATSGADAD  
LLRYRECHLLVLKALQDGRAYGSPWCNKQITRCLIECRDEYKYNVEAVELLIRNHLVNMQQYDLHLAQSMEN  
GLNYMAVAFAMQLVKILLVDEERSVAHIT EADLFHTIETLMRINAHSRGNAPGLPQLMEVVRSNYEAMIDRAH  
GGPNFMMHSGISQASEYDDPPGLREKAEYLLREWVNLHYSAAAGRDSTKAFSAFVGMHQGGI LKTDLITRF  
FRLCTEMCVEISYRAQAEQQHNPAANPTMIRAKCYHNLD AFVRLIALLVKHSGEATNTVTKINLLNKVLGIVV  
GVLLQDHDVRRQSEFQQLPYHRIFIMLLELNAPEHVLETINFQTLTAF CNTFHILRPTKAGFVYAWLELISH

RIFIARMLAHTPQQKGWPMYAQLLIDLKYLAPFLRNVELTKPMQILYKGLTRVLLVLLHDFPEFLCDYHYGF  
CDVIPPNCIQLRNLILSAFPRNMRLPDPFTPNLKVDMLSEINIAPRILTNFTGVMPPQFKKDLDSYLKTRSPV  
TFLSDLRSNLQVSNPEGNRYNLQLINALVLYVGTQAIHAIHNKGSTPSMSTITHSAHMDIFQNLAVDLDTTEGR  
YLFNLAIANQLRYPNSHSHYFSCMTMLYLFAEANTEAIEQEQITRVLLERLIVNRPHPWGLLITFIELIKNPAFK  
FWNHEFVHCAPEIEKLFQSVQCCMGQKQAQQVMEGTGAS\*  
>rs6249151\_ENSMUSP00000063565\_c.547:T>A\_p.L183H  
ENSMUST00000068452.10|Cnot1-201|ENSMUSG00000036550|-|chr8:g.96498688:A>T  
MNLDSLALSQISYLVNDLTKKNYRASQQEIQHIVNRHGPEADRHLRCLFVSHVDFSGDGKSSGKDFHQTF  
LIQECASLITKPNFISTLSYAI DNPLHYQKSLKPAPHLFAQLSKVLKLSKVQEVIFGLALLNSSSPDLRGFAA  
QFIKQKLPDLLRSYIDADVSGNQEQQGQDIAIEVLHLLSHLLFGQKGAFGVQEQIDAFKTLRRDFPQERC  
PVVLAPELLYPEKRDILMDRILPDSGGVAKTMMESSLADFMQEVGYGFCASIEECRNIIMQFGVREVTAAQVAR  
VLGMMARTHSGGLTDGIPLQSIAPGSGIWSDGKDKSEGAQAHTWNVEVLIDVLKELNPSLNFKEVTEYLDHPG  
FQIRDSKGLHNVVYGIQIRGLGMEVFPVDFIYRPWKHAEGQLSFIQHSLINPEVFCFADYPCHTVATDILKAPP  
EDDNREIATWKSLLDIESLLRLAEVQYEQVKQLFSFPIKHC PDMLVLALLQINTSWHTLRHELISTLMPIFL  
GNHPNSAILHYAWHGQGSPIRQLIMHAMAEWYMRGEQYDQAKLSRILDVAQDLKALSMLLNGTFFAFVID  
LAALASREYLKLDKWLTDKIREHGEPFIQACMTFLKRRCP SILGGLAPEKDPKSAQLPAETLATMLACLQA  
CAGSVQELSETILTMVANCNSVMNKARQPPPGVMPKGRPPSASSLDAISPVQIDPLAGMASLIGSSAAPHT  
QSMQGFPPNLGSAFSTPQSPAKAFPPPLSTPNQTTAFSGIGGLSSQLPVGGLGTGSLTGIGTGALGLPAVNDP  
FVQRKLGTSGLNQPTFQQTDLQVWPEANQHFSKEIDDEANSYFQRIYNHPPHPTMSVDEVLEMLQRFKSTI  
KREREFVNCMLRNLFEYRFFPQYDPKELHITACLFGGIEKGLVTYMALGLALRYVLEALRPFKSKMYFYFG  
IAALDRFKNRLKDY PQYQCQLASISHFMQFPHHLQEYIEYGQSRDPVVKMGSITTPGSI ALAQQAQAQV  
AKAPLAGQVNTMVTSTTTTVAKTVTVTKPTGVSFKKDVPPSINTTNIDTLLVATDQTERIVEPPENIQEKIA  
FIFNNLSQSNMTQKVEELKETVKEEFMPWVSQYLVMKRVSIEPNFHSLSYNSFLDTLKNPEFNKMLNETYRNI  
KVLLTSDKAAANFSDRSLLKNLGHWLGMITLAKNKPI LHDTLDVKSLLLEAYVKGQOQELLYVVPFVAKVLESS  
IRSLVFRPPNPWTMAIMNVLAELHQEHDLKLNLFKFEIEVLCKNLALDINELKPGNLLKDKDRKLNLDQLSAP  
KKDVKQPEELPAITTTTTSTPATSTTCTATVPPQFQYSYHDINVYSLAGLAPHITLNPTIPLFQAHQQLKQC  
VRQAIERAVQELVHPVVDRSIKIAMTTCETQIVRKQALYSDSESRMIAAHHMMRNLTAGMAMITCREPLLSMI  
STNLKNSFASALRTASPPQREMMDQAAAQLAQDNCELACCFIQKTAVEKAGPEMDKRLATEFELRKHARQEGR  
RYCDPVVLTQYQAERMPEQIRLKVGGVDPKQLAVYEEFARNVPGFLPTNDLSQPTGFLAQPMKQAWATDDVAQI  
YDKCITELEQHLHAIPPTLAMNPQAQALRSLLVVVLSRNSRDAIAALGLLQKAVEGLLDATSGADADLLRY  
RECHLLVLKALQDGRAYGSPWCNKQITRCLIECRDEYKYNVEAVELLIRNHLVNMQQYDLHLAQSMENGLNYM  
AVAFAMQLVKILLVDESVVAHIT EADLFHTIETLMRINAHSRGNAP EGLPQLMEVVRSNYEAMI DRAHGGPNF  
MMHSGISQASEYDDPPGLREKAEYLLREWVNLHSAAGRDSTKAFSAFVGMHQQGI LKTDLLITRFFRLCT  
EMCVEISYRAQAEQQHNPAANPTMIRAKCYHNLDAFVRLIALLVKHSGEATNTVTKINLLNKVLGIVVGVLLQ  
DHDVQRSEFQQLPYHRIFIMLLELNAPEHVLETINFQTLTAFACNTFHILRPTKAPGFVYAWLELISHRIFIA  
RMLAHTPQQKGWPMYAQLLIDLKYLAPFLRNVELTKPMQILYKGLTRVLLVLLHDFPEFLCDYHYGFCDVIP  
PNCIQLRNLILSAFPRNMRLPDPFTPNLKVDMLSEINIAPRILTNFTGVMPPQFKKDLDSYLKTRSPVTF  
LSDLRSNLQVSNPEGNRYNLQLINALVLYVGTQAIHAIHNKGSTPSMSTITHSAHMDIFQNLAVDLDTTEGR  
YLFNLAIANQLRYPNSHSHYFSCMTMLYLFAEANTEAIEQEQITRFLFQSVQCCMGQKQAQQVMEGTGAS\*  
>rs6249151\_ENSMUSP00000148807\_c.541:T>A\_p.L181H  
ENSMUST00000211887.2|Cnot1-203|ENSMUSG00000036550|-|chr8:g.96498688:A>T  
MNLDSLALSQISYLVNDLTKKNYRASQQEIQHIVNRHGPEADRHLRCLFVSHVDFSGDGKSSGKDFHQFLI  
QECASLITKPNFISTLSYAI DNPLHYQKSLKPAPHLFAQLSKVLKLSKVQEVIFGLALLNSSSPDLRGFAAQF  
IKQKLPDLLRSYIDADVSGNQEQQGQDIAIEVLHLLSHLLFGQKGAFGVQEQIDAFKTLRRDFPQERC  
PVVLAPELLYPEKRDILMDRILPDSGGVAKTMMESSLADFMQEVGYGFCASIEECRNIIMQFGVREVTAAQVAR  
VLGMMARTHSGGLTDGIPLQSIAPGSGIWSDGKDKSEGAQAHTWNVEVLIDVLKELNPSLNFKEVTEYLDHPGFQ  
IRDSKGLHNVVYGIQIRGLGMEVFPVDFIYRPWKHAEGQLSFIQHSLINPEVFCFADYPCHTVATDILKAPP  
EDDNREIATWKSLLDIESLLRLAEVQYEQVKQLFSFPIKHC PDMLVLALLQINTSWHTLRHELISTLMPIFL  
GNHPNSAILHYAWHGQGSPIRQLIMHAMAEWYMRGEQYDQAKLSRILDVAQDLKALSMLLNGTFFAFVID  
LAALASREYLKLDKWLTDKIREHGEPFIQACMTFLKRRCP SILGGLAPEKDPKSAQLPAETLATMLACLQACA  
GSVSQELSETILTMVANCNSVMNKARQPPPGVMPKGRPPSASSLDAISPVQIDPLAGMASLIGSSAAPHTQS  
MQGFPPNLGSAFSTPQSPAKAFPPPLSTPNQTTAFSGIGGLSSQLPVGGLGTGSLTGIGTGALGLPAVNDP  
FVQRKLGTSGLNQPTFQQTDLQVWPEANQHFSKEIDDEANSYFQRIYNHPPHPTMSVDEVLEMLQRFKSTI  
KREREFVNCMLRNLFEYRFFPQYDPKELHITACLFGGIEKGLVTYMALGLALRYVLEALRPFKSKMYFYGIA  
ALDRFKNRLKDY PQYQCQLASISHFMQFPHHLQEYIEYGQSRDPVVKMGSITTPGSI ALAQQAQAQVPAK  
APLAGQVNTMVTSTTTTVAKTVTVTKPTGVSFKKDVPPSINTTNIDTLLVATDQTERIVEPPENIQEKIAFI  
FNNLSQSNMTQKVEELKETVKEEFMPWVSQYLVMKRVSIEPNFHSLSYNSFLDTLKNPEFNKMLNETYRNI  
KVLLTSDKAAANFSDRSLLKNLGHWLGMITLAKNKPI LHDTLDVKSLLLEAYVKGQOQELLYVVPFVAKVLESSIR

SLVFRPPNPWTMAIMNVLAELHQEHDLKLNKFEIEVLCKNLALDINELKPGNLLKDKDRLKLNLDLDEQLSAPKK  
 DVKQPEELPAITTTTTSTTPATSTTCTATVPPQPQYSYHDINVYSLAGLAPHITLNPTIPLFQAHPQLKQCVR  
 QAIERAVQELVHPVVDRSIKIAMTTCEQIVRKDFALDSEESRMRIAHHMMRNLTAGMAMITCREP LLMSIST  
 NLKNSFASALRTASPQQREMMDQAAAQLAQDNCELACCFIQKTAVEKAGPEMDKRLATEFELRKHARQEGRRY  
 CDPVVLTYQAERMPEQIRLKVGGVDPKQLAVYEEFARNVPGFLPTNDLSQPTGFLAQPMKQAWATDDVAQIYD  
 KCITELEQHLHAIPPTLAMNPQAQALRSLLLEVVLRSNRDAIAALGLLQKAVEGLLDATSGADADLLRYRE  
 CHLLVLKALQDGRAYGSPWCNKQITRCLIECRDEYKYNVEAVELLIRNHLVNMQQYDLHLAQSMENGLNYMAV  
 AFAMQLVKILLVDERSVAHITEADLFHTIETLMRINAHSRGNAPGLPQLMEVVRSNYEAMIDRAHGGPNFMM  
 HSGISQASEYDDPPGLREKAEYLLREWVNLHSAAGRDSTKAFSAFVGMHQQGILKTDLLITRFRCLTEM  
 CVEISYRAQAEQQHNPAANPTMIRAKCYHNLDAFVRLIALLVKHSGEATNTVTKINLLNKVLGIVVGVLLQDH  
 DVRQSEFQQLPYHRIFIMLLLELNAPEHVLETINFQTLTAFNCNTHILRPTKAPGFVYAWLELISHRIFIAMR  
 LAHTPQQKGWPMYAQLLIDLFKYLAPFLRNVELTKPMQILYKGLRVLLVLLHDFPEFLCDYHYGFCDVIPP  
 CIQLRNLIILSAFPRNMRPDPFTPNLKVDMLEINIAPRILTNFTGVMPPQFKKDLDSYLKTRSPVTFLSDLR  
 SNLQVSNPEGNRYNLQLINALVLYVGTQAIHAIHNKGSTPSMSTITHSAHMDIFQNLAVDLDTTEGRYLFNLAI  
 ANQLRYPNSHSHYFSCMTMLYLFAEANTEAIEQEQITRVLLERLIVNRPHPWGLLITFIELIKNPAFKFWNHEFV  
 HCAPEIEKLFQSVQCCMGQKQAQQVMEGTGAS\*

>rs6249151\_ENSMUSP00000148735\_c.547:T>A\_p.L183H

ENSMUST00000213006.2|Cnot1-216|ENSMUSG00000036550|-|chr8:g.96498688:A>T  
 MNLDLSLALSQISYLVNDLTKKNYRASQQEIQHIVNRHGPEADRHLRLCLFSHVDFSGDGKSSGKDFHQTF  
 LIQECASLITKPNFISTLSYAI DNPLHYQKSLKPAPHLFAQLSKVLKLSKVQEVIFGLALLNSSSPDLRGFAA  
 QFIKQKLPDLLRSYIDADVSGNQE GGFQDIAIEVLHLLSHLLFGQKGAFGVQEQIDAF LKTLRRDFPQERC  
 PVLAPLLYPEKRDILMDRILPDSGGVAKTMMESSLADFMQEVGYGFCASIEECRNIIMQFGVREVTAAQVAR  
 VLGMMARTHSGLTDGIPLQSIAPGSGIWSDGKDKSEGAQAHTWNVEVLIDVLKELNPSLNFKEVTEYLDHPG  
 FQIRDSKGLHNVVYGIQIRGLGMEVFPVDFIYRPWKHAEGQLSFIQHSLINPEVFCFADYPCHTVAATDILKAPP  
 EDDNREIATWKSLLDIESLLRLAEVQYEQVKQLFSFPIKHC PDMVLVALLQINTSWHTRHELISTLMPIFL  
 GNHPNSAILHYAWHGQGGQSPSIRQLIMHAMAEWYMRGEYDQAKLSRILDVAQDLKALSMLLNGTFFAFVID  
 LAALASRREYLKLDKWLTDKIREHGEPFIQACMTFLKRRCP SILGGLAPEKDKPKSAQLPAETLATMLACLQA  
 CAGSVSQELSETILTMVANCNVMNKARQPPPGVMPKGRPPSASSLDAISPVQIDPLAGMASLIGGSAAPHT  
 QSMQGFPPNLGSAFSTPQSPAKAFPLSTPNQTTAFSGIGGLSSQLPVGGLGTGSLTGIGTGALGLPAVNNDF  
 FVQRKLGTSGLNQPTFQOSKMKPSDLSQVWPEANQHSKEIDDEANSYFQRIYNHPPHTMSVDEVLEMLQRF  
 KDSTIKREREVFNCMLRNLFEEYRFFPQY PDKELHITACFLGGIEKGLVTYMALGLALRYVLEALRKPFGSK  
 MYFYGIAALDRFKNRLKDY PQCQHLASISHFMQFP HHLQEYIEYGGQSRDPPVKMQGSIITPGSIALAQAQA  
 QAQVPAKAPLAGQVNTMVTSTTTTVAKTVTVTKPTGVSFKKDVPPSINTTNIIDTLLVATDQTERIVEPPENI  
 QEKIAFIFNNLSQSNMTQKVEELKETVKEEFMPVWSQYLVMKRVSIEPNFHSLSYSNFLD TLKNPEFNKMLVNE  
 TYRNIKVLSTSDKAAANFSDRSLLKNLGHWLGMITLAKNKPI LH TDLDVKSLLLEAYVKGQEQELLYVVPFVAK  
 VLESSIRSLVFRPPNPWTMAIMNVLAELHQEHDLKLNKFEIEVLCKNLALDINELKPGNLLKDKDRLKLNLDL  
 QLSAPKKDVKQPEELPAITTTTTSTTPATSTTCTATVPPQPQYSYHDINVYSLAGLAPHITLNPTIPLFQAHP  
 QLKQCVRQAIERAVQELVHPVVDRSIKIAMTTCEQIVRKDFALDSEESRMRIAHHMMRNLTAGMAMITCREP  
 LLMSISTNLKNSFASALRTASPQQREMMDQAAAQLAQDNCELACCFIQKTAVEKAGPEMDKRLATEFELRKHA  
 RQEGRRYCDPVVLTYQAERMPEQIRLKVGGVDPKQLAVYEEFARNVPGFLPTNDLSQPTGFLAQPMKNWSSSTY  
 TPFHPLWP\*

>rs6249151\_ENSMUSP00000096073\_c.547:T>A\_p.L183H

ENSMUST00000098473.11|Cnot1-202|ENSMUSG00000036550|-|chr8:g.96498688:A>T  
 MNLDLSLALSQISYLVNDLTKKNYRASQQEIQHIVNRHGPEADRHLRLCLFSHVDFSGDGKSSGKDFHQTF  
 LIQECASLITKPNFISTLSYAI DNPLHYQKSLKPAPHLFAQLSKVLKLSKVQEVIFGLALLNSSSPDLRGFAA  
 QFIKQKLPDLLRSYIDADVSGNQE GGFQDIAIEVLHLLSHLLFGQKGAFGVQEQIDAF LKTLRRDFPQERC  
 PVLAPLLYPEKRDILMDRILPDSGGVAKTMMESSLADFMQEVGYGFCASIEECRNIIMQFGVREVTAAQVAR  
 VLGMMARTHSGLTDGIPLQSIAPGSGIWSDGKDKSEGAQAHTWNVEVLIDVLKELNPSLNFKEVTEYLDHPG  
 FQIRDSKGLHNVVYGIQIRGLGMEVFPVDFIYRPWKHAEGQLSFIQHSLINPEVFCFADYPCHTVAATDILKAPP  
 EDDNREIATWKSLLDIESLLRLAEVQYEQVKQLFSFPIKHC PDMVLVALLQINTSWHTRHELISTLMPIFL  
 GNHPNSAILHYAWHGQGGQSPSIRQLIMHAMAEWYMRGEYDQAKLSRILDVAQDLKALSMLLNGTFFAFVID  
 LAALASRREYLKLDKWLTDKIREHGEPFIQACMTFLKRRCP SILGGLAPEKDKPKSAQLPAETLATMLACLQA  
 CAGSVSQELSETILTMVANCNVMNKARQPPPGVMPKGRPPSASSLDAISPVQIDPLAGMASLIGGSAAPHT  
 QSMQGFPPNLGSAFSTPQSPAKAFPLSTPNQTTAFSGIGGLSSQLPVGGLGTGSLTGIGTGALGLPAVNNDF  
 FVQRKLGTSGLNQPTFQOSKMKPSDLSQVWPEANQHSKEIDDEANSYFQRIYNHPPHTMSVDEVLEMLQRF  
 KDSTIKREREVFNCMLRNLFEEYRFFPQY PDKELHITACFLGGIEKGLVTYMALGLALRYVLEALRKPFGSK  
 MYFYGIAALDRFKNRLKDY PQCQHLASISHFMQFP HHLQEYIEYGGQSRDPPVKMQGSIITPGSIALAQAQA  
 QAQVPAKAPLAGQVNTMVTSTTTTVAKTVTVTKPTGVSFKKDVPPSINTTNIIDTLLVATDQTERIVEPPENI

QEKIAFIFNNLSQSNMTQKVEELKETVKEEFMPWVSQYLVMKRVSIEPNFHSLSYNSFLDRTLKNPEFNKMLVNE  
 TYRNIKVLLTSDKAAANFSDRSLLKNLGHWLGMITLAKNKPI LHTDLVDKSLLEAYVKGQOQELLYVVPFVAK  
 VLESSIRSLVFRPPNPWTMAIMNVLAELHQEHDLKLNLFKFEIEVLCKNLALDINELKPGNLLKDKDRKLNLE  
 QLSAPKKDVKQPEELPAITTTTTSTPATSTTCTATVPPQPQYSYHDINVYSLAGLAPHITLNPTIPLFQAH  
 QLKQCVRQAIERAVQELVHPVVDRSIKIAMTTCEQIVRKDFALDSEESRMRIA AHHMMRNLTAGMAMITCREP  
 LLMSISTNLKNSFASALRTASPQQREMMDQAAAQLAQDNCELACCFIQKTAVEKAGPEMDKRLATEFELRKHA  
 RQEGRRYCDPVVLTQYAERMEQIRLKVGGVDPKQLAVYEEFARNVPGFLPTNDLSQPTGFLAQPMKQAWATD  
 DVAQIYDKCITELEQHLHAI PPTLAMNPQAQALRSLLEVVVLSRNSRDAIAALGLLQKAVEGLLDATSGADAD  
 LLLRYRECHLLVLKALQDGRAYGSPWCNKQITRCLIECRDEYKYNVEAVELLIRNHLVNMQQYDLHLAQSMEN  
 GLNYMAVAFAMQLVKILLVDERSVAHI TEADLFHTIETLMRINAHSRGNAPPEGLPQLMEVVRSNYEAMIDRAH  
 GGNPFMMHSGISQASEYDDPPGLREKAEYLLREWVNLYHSAAAGRDSTKAFSAFVGMHQGGILKTDLLITRF  
 FRLCTEMCVEISYRAQAEQQHNPAANPTMIRAKCYHNLD AFVRLIALLVKHSGEATNTVTKINLLNKVLGIVV  
 GVLLQDHDVRSQEFQQLPYHRIFIMLLELNAPEHVLETINFQTLTAFNCNTFHILRPTKAPGFVYAWLELISH  
 RIFIA RMLAHTPQQKGWPMYAQLLIDLFKYLAPFLRNVELTKPMQILYKGTLRVLLVLLHDFPEFLCDYHYGF  
 CDVIPPNCIQLRNLI LSAFPRNMRLPDPFTPNLKVDMLSEINIAPRILTNFTGVMPPQFKKDLDSYLKTRSPV  
 TFLSDLRSNLQVSNPEGNRYNLQLINALVLYVGTQAI AHIHNKGSTPSMSTITHSAHMDIFQNLAVDLDTTEGR  
 YLFLNAIANQLRYPNSHTHYFSC TMLYLFAEANTEAIEQEQITRVLRLIVNRPHPWGLLITFIELIKNPAFK  
 FWNHEFVHCAPEIEKLFQSV AQCCMGQKQAQQVMEGTGAS\*  
 >rs32188968\_ENSMUSP00000063565\_c.220:T>C\_p.L74P  
 ENSMUST00000068452.10|Cnot1-201|ENSMUSG00000036550|-|chr8:g.96501346:A>G  
 MNLDSLALSLSQISYLVNDLTKKNYRASQQEIQHIVNRHGPEADRHLRCLF SHVDFSGDGKSSGKDFHQTF  
 PIQECASLITKPNFISTLSY AIDNPLHYQKSLKPAPHLFAQLSKVLKLSKVQEVIFGLALLNSSSPDLRGFAA  
 QFIKQKLPDLLRSYIDADVSGNQEGGFQDIAIEVLHLLLSHLLFGQKGAFGVQEQIDAFLKTLRRDFPQERC  
 PVLAPLLYPEKRDILMDRILPDSGGVAKTMMESSLADFMQEVGYGFCASIEECRNIIMQFGVREVTAAQVAR  
 VLGMMARTHSGLTDGIPLOSI SAPGSGIWSDGKDKSEGAQAHTWNVEVLIDVLKELNPSLNFKEVTEYELDHPG  
 FQIRDSKGLHNVVYGIQERGLGMEVFVDFIYRPWKHAEGQLSFIQHSLINPEVFCFADYRCHTVA TDI LKAPP  
 EDDNREIATWLLDI ESLLRLAEVGYEQVQVLFSPFIKHC PDMVLVALLQINTSWHTLRHELISTLMPIFL  
 GNHPNSAIILHYAWHGQGS PSIRQLIMHAMA EWYMRGEQYDQAKLSRILDVAQDLKALSMLLNGT PFAFVID  
 LAALASRREYLKLDKWLTDKIREHGEPFIQACMTFLKRRCP SILGGLAPEKDQPKSAQLPAETLATMLACLQA  
 CAGSVSQELSETILTMVANC SNVMNKARQPPPGVMPKGRPPSASSLDAISPVQIDPLAGMASLISGSSAAPHT  
 QSMQGFPPNLGSAFSTPQSPAKAF PPLSTPNQTTAFSGIGGLSSQLPVGGLGTGSLTGIGTGALGLPAVNNDP  
 FVQRKLGTSGLNQPTFQQTDL SQVWPEANQHFSKEIDDEANSYFQRIYNHPPHPTMSVDEVLEM LQRFKDS TI  
 KREREVFNCLMRNLFE EYRFFPQYDPKELHITACLFGGIIEKGLVTYMALGLALRYVLEALRKPFGSKMYYFG  
 IAALDRFKNRLKDY PQYCYHLASISHFMQFP HHLQEYIEYGGQSRDPPVKM QGSITTPGSI ALAQAQAQAVP  
 AKAPLAGQVNTMVTSTTTTVAKT VTVTKPTGVSFKKDVPPSINTNIDTLLVATDQTERIVEPPENIQEKIA  
 FIFNNLSQSNMTQKVEELKETVKEEFMPWVSQYLVMKRVSIEPNFHSLSYNSFLDRTLKNPEFNKMLVNETYRNI  
 KVLLTSDKAAANFSDRSLLKNLGHWLGMITLAKNKPI LHTDLVDKSLLEAYVKGQOQELLYVVPFVAKVLESS  
 IRSLVFRPPNPWTMAIMNVLAELHQEHDLKLNLFKFEIEVLCKNLALDINELKPGNLLKDKDRKLNLEQLSAP  
 KKDVKQPEELPAITTTTTSTPATSTTCTATVPPQPQYSYHDINVYSLAGLAPHITLNPTIPLFQAHQPKQC  
 VRQAIERAVQELVHPVVDRSIKIAMTTCEQIVRKDFALDSEESRMRIA AHHMMRNLTAGMAMITCREP LLMSI  
 STNLKNSFASALRTASPQQREMMDQAAAQLAQDNCELACCFIQKTAVEKAGPEMDKRLATEFELRKHARQEGR  
 RYCDPVVLTQYAERMEQIRLKVGGVDPKQLAVYEEFARNVPGFLPTNDLSQPTGFLAQPMKQAWATDDVAQI  
 YDKCITELEQHLHAI PPTLAMNPQAQALRSLLEVVVLSRNSRDAIAALGLLQKAVEGLLDATSGADAD LLLRY  
 RECHLLVLKALQDGRAYGSPWCNKQITRCLIECRDEYKYNVEAVELLIRNHLVNMQQYDLHLAQSMENGLNYM  
 AVAFAMQLVKILLVDERSVAHI TEADLFHTIETLMRINAHSRGNAPPEGLPQLMEVVRSNYEAMIDRAHGGPNF  
 MMHSGISQASEYDDPPGLREKAEYLLREWVNLYHSAAAGRDSTKAFSAFVGMHQGGILKTDLLITRFFRLCT  
 EMCVEISYRAQAEQQHNPAANPTMIRAKCYHNLD AFVRLIALLVKHSGEATNTVTKINLLNKVLGIVVGVLLQ  
 DHDVRSQEFQQLPYHRIFIMLLELNAPEHVLETINFQTLTAFNCNTFHILRPTKAPGFVYAWLELISHRIFIA  
 RMLAHTPQQKGWPMYAQLLIDLFKYLAPFLRNVELTKPMQILYKGTLRVLLVLLHDFPEFLCDYHYGFCDVIP  
 PNCIQLRNLI LSAFPRNMRLPDPFTPNLKVDMLSEINIAPRILTNFTGVMPPQFKKDLDSYLKTRSPVTFLSD  
 LRSNLQVSNPEGNRYNLQLINALVLYVGTQAI AHIHNKGSTPSMSTITHSAHMDIFQNLAVDLDTTEGR YLFLN  
 AIANQLRYPNSHTHYFSC TMLYLFAEANTEAIEQEQITRVLRLIVNRPHPWGLLITFIELIKNPAFK  
 FWNHEFVHCAPEIEKLFQSV AQCCMGQKQAQQVMEGTGAS\*  
 >rs32188968\_ENSMUSP00000148807\_c.214:T>C\_p.L72P  
 ENSMUST000000211887.2|Cnot1-203|ENSMUSG00000036550|-|chr8:g.96501346:A>G  
 MNLDSLALSLSQISYLVNDLTKKNYRASQQEIQHIVNRHGPEADRHLRCLF SHVDFSGDGKSSGKDFHQFP  
 IQECASLITKPNFISTLSY AIDNPLHYQKSLKPAPHLFAQLSKVLKLSKVQEVIFGLALLNSSSPDLRGFAAQF  
 IKQKLPDLLRSYIDADVSGNQEGGFQDIAIEVLHLLLSHLLFGQKGAFGVQEQIDAFLKTLRRDFPQERC  
 PV LAPLLYPEKRDILMDRILPDSGGVAKTMMESSLADFMQEVGYGFCASIEECRNIIMQFGVREVTAAQVARVL



GMMARTHSGSLTDGIPLQSI SAPGSGIWSGDGKDKSEGAQAHTWNVEVLIDVLKELNPSLNFKVEVTYELDHPGFQ  
IRDSKGLHNVVYGIQRGLGMEVFPVDFIYRPWKHAEGQLSFIQHSLINPEVFCFADYPCHTVATDILKAPPED  
DNREIATWKSLLDIESLLRLAEVQYEQVKQLFSFPIKHCPCDMLVLALLQINTSWHTLRHELISLMPIFLGN  
HPNSAILHYAWHGQGSPSIRQLIMHAMAEWYMRGEQYDQAKLSRILDVAQDLKALSMLLNGTPFAFVIDLA  
ALASRREYLKLDKWLTDKIREHGEPFIQACMTFLKRRCP SILGGLAPEKDPKSAQLPAETLATMLACLQACA  
GSVSVQELSETILTMVANCNSVMNKARQPPPGVMPKGRPPSASSLDAISPVQIDPLAGMASLSIGGSAAPHTQS  
MQGFPPNLGSAFSTPQSPAKAFPPPLSTPNQTTAFSGIGGLSSQLPVGGLGTGSLTGIGTGALGLPAVNNDFV  
QRKLGTSGLNQPTFQQTDL SQVWPEANQHFSKEIDDEANSYFQRIYNHPPHPTMSVDEVLEMLQRFKSTIKR  
EREVFNCLRNLFEEYRFFPQYDPKELHITACLFGGIIEKGLVTYMALGLALRYVLEALRKPFGSKMYFYGIA  
ALDRFKNRLKDYPOYCQHLASISHFMQFPHHLQEYIEYGQSRDPPVKMQGSITTPGSIALAQAQAQVPAK  
APLAGQVNTMVTSTTTTVAKTVTVTKPTGVSFKKDVPPSINTTNIDTLLVATDQTERIVEPPENIQEKIAFI  
FNNLSQSNMTQKVEELKETVKEEFMPWVSQYLVMKRVSIEPNFHSLSYSNFLDTLKNPEFNKMLVNETYRNKIV  
LLTSDKAAANFSDRSLLKNLGHWLGMITLAKNKPI LHDTLDVKSLLLEAYVKGQQEELLYVVPFVAKVLESSIR  
SLVFRPPNPWTMAIMNVLAELHQEHDLKLNKFEIEVLCKNLALDINELKPGNLLKDKDRKLNKDEQLSAPKK  
DVKQPEELPAITTTTTSTPATSTTCTATVPPQPQYSYHDINVYSLAGLAPHITLNPITPLFQAHPQLKQCVR  
QAIERAVQELVHPVVDRS IKIAMTTCEQIVRKDFALDSEESRMRIAHHMMRNLTAGMAMITCREP LLMSIST  
NLKNSFASALRTASPPQREMMDQAAAQLAQDNCELACCFIQKTAVEKAGPEMDKRLATEFELRKHARQEGRRY  
CDPVVLTYYQAERMPEQIRLKVGGVDPKQLAVYEEFARNVPGFLPTNDLSQPTGFLAQPMKQAWATDDVAQIYD  
KCITELEQHLHAIPPTLAMNPQAQALRSLLLEVVLRSNRDAIAALGLLQKAVEGLLDATSGADADLLLRYRE  
CHLLVLKALQDGRAYGSPWCNKQITRCLIECRDEYKYNVEAVE LLIRNHLVNMQQYDLHLAQSMENGLNYMAV  
AFAMQLVKILLVDERSVAHIT EADLFHTIETLMRINAHSRGNAP EGLPQLMEVVRSNYEAMI DRAHGGPNFMM  
HSGISQASEYDDPPGLREKAEYLLREWVNLVYHSAAAGRSTKAFSAFVGMHQGGILKTDDLITRFRCTEM  
CVEISYRAQAEQQHNPAANPTMIRAKCYHNLD AFVRLIALLVKHSGEATNTVTKINLLNKVLGIVVGVLLQDH  
DVRQSEFQQLPYHRIFIMLLLELNAPEHVLETINFQTLTAFCNTPHILRPTKAPGFVYAWLELISHRIFIARM  
LAHTPQQKGWPMYAQLLIDLFKYLAPFLRNVELTKPMQILYKGLTRVLLVLLHDFPEFLCDYHYGFCDVIPPN  
CIQLRNLILSAPFRNMLRDPFPTPNLKVMDLSEINIAPRILNTFTGMPPQFKKDLSDYSLKTRSPVTFLSDLR  
SNLQVSNCEPGRNQLINALVLYVGTQAI AIAHIHNKSGTSPSMTITSHAHMDFQNLAVLDTEGRYLFNLAI  
ANQLRYPNSHSTHYFSC TMLYLF AEANTEA IQEQITRVLLERLIVNRPHPWGLLITFIELIKNPAFKFWNHEFV  
HCAPEIEKLFQSV AQCCMGQKQAQQVMEGTGAS\*

>rs32188968\_ENSMUSP00000148735\_c.220:T>C\_p.L74P

ENSMUST00000213006.2|Cnot1-216|ENSMUSG00000036550|-|chr8:g.96501346:A>G  
MNLDSLALSQISYLVNDLTKKNYRASQQEIQHIVNRHGPEADRHLRLCLFSHVDFSGDGKSSGKDFHQTF  
PIQECASLITKPNFISTLSY AIDNPLHYQKSLKPAPHLFAQLSKVLKLSKVQEVIFGLALLNSSSPDLRGFAA  
QFIKQKLPDLLRSYIDADVSGNQEGGFQDIAIEVLHLLLSHLLFGQKGAFGVQEQIDAFKTLRRDFPQERC  
PVLAPLLYPEKRDILMDRILPDSGGVAKTMMESSLADFMQEVGYGFCASIEECRNIIMQFGVREVTAAQVAR  
VLMARTHSGSLTDGIPLQSI SAPGSGIWSGDGKDKSEGAQAHTWNVEVLIDVLKELNPSLNFKVEVTYELDHPG  
FQIRDSKGLHNVVYGIQRGLGMEVFPVDFIYRPWKHAEGQLSFIQHSLINPEVFCFADYPCHTVATDILKAPP  
EDDNREIATWKSLLDIESLLRLAEVQYEQVKQLFSFPIKHCPCDMLVLALLQINTSWHTLRHELISLMPIFL  
GNHPNSAILHYAWHGQGSPSIRQLIMHAMAEWYMRGEQYDQAKLSRILDVAQDLKALSMLLNGTPFAFVID  
LAALASRREYLKLDKWLTDKIREHGEPFIQACMTFLKRRCP SILGGLAPEKDPKSAQLPAETLATMLACLQA  
CAGSVSVQELSETILTMVANCNSVMNKARQPPPGVMPKGRPPSASSLDAISPVQIDPLAGMASLSIGGSAAPHT  
QSMQGFPPNLGSAFSTPQSPAKAFPPPLSTPNQTTAFSGIGGLSSQLPVGGLGTGSLTGIGTGALGLPAVNNDF  
FVQRKLGTSGLNQPTFQQSKMKPSDLSQVWPEANQHFSKEIDDEANSYFQRIYNHPPHPTMSVDEVLEMLQRF  
KDSTIKREVEVFNCLRNLFEEYRFFPQYDPKELHITACLFGGIIEKGLVTYMALGLALRYVLEALRKPFGSK  
MYFYGIAALDRFKNRLKDYPOYCQHLASISHFMQFPHHLQEYIEYGQSRDPPVKMQGSITTPGSIALAQAQA  
QAQVPAKAPLAGQVNTMVTSTTTTVAKTVTVTKPTGVSFKKDVPPSINTTNIDTLLVATDQTERIVEPPENI  
QEKIAFIFNNLSQSNMTQKVEELKETVKEEFMPWVSQYLVMKRVSIEPNFHSLSYSNFLDTLKNPEFNKMLVNE  
TYRNKIVLLTSDKAAANFSDRSLLKNLGHWLGMITLAKNKPI LHDTLDVKSLLLEAYVKGQQEELLYVVPFVAK  
VLESSIRSLVFRPPNPWTMAIMNVLAELHQEHDLKLNKFEIEVLCKNLALDINELKPGNLLKDKDRKLNKDE  
QLSAPKKDVKQPEELPAITTTTTSTPATSTTCTATVPPQPQYSYHDINVYSLAGLAPHITLNPITPLFQAHP  
QLKQCVRQAIERAVQELVHPVVDRS IKIAMTTCEQIVRKDFALDSEESRMRIAHHMMRNLTAGMAMITCREP  
LLMSISTNLKNSFASALRTASPPQREMMDQAAAQLAQDNCELACCFIQKTAVEKAGPEMDKRLATEFELRKHA  
RQEGRRYCDPVVLTYYQAERMPEQIRLKVGGVDPKQLAVYEEFARNVPGFLPTNDLSQPTGFLAQPMKNWSSTY  
TPFHPLWP\*

>rs32188968\_ENSMUSP00000148574\_c.220:T>C\_p.L74P

ENSMUST00000212323.2|Cnot1-209|ENSMUSG00000036550|-|chr8:g.96501346:A>G

MNLDLSLALSQISYLVNDLTKKNYRASQQEIQHIVNRHGPEADRHLRLCLFSHVDFSGDGKSSGKDFHQTF  
PIQECASLITKPNFISTLSYAIDNPLHYQKSLKPAPHLFAQLSKVLKLSKVQEVIFGLALLNSSSPDLRGGFK  
SLYPEYKTLPTPPSPFRLPSFLPPFLSFFSLSLSTPHPPFFIFVVLGIKSRALDKLYKQGLYL\*

>rs32188968\_ENSMUSP00000096073\_c.220:T>C\_p.L74P  
ENSMUST00000098473.11|Cnot1-202|ENSMUSG00000036550|-|chr8:g.96501346:A>G  
MNLDLSLALSQISYLVNDLTKKNYRASQQEIQHIVNRHGPEADRHLRLCLFSHVDFSGDGKSSGKDFHQTF  
PIQECASLITKPNFISTLSYAIDNPLHYQKSLKPAPHLFAQLSKVLKLSKVQEVIFGLALLNSSSPDLRGGFAA  
QFIKQKLPDLLRSYIDADVSGNQEGGFQDIAIEVLHLLSHLLFGQKGAFGVQEQIDAFKTLRRDFPQERC  
PVVLAPELLYPEKRDILMDRILPDSGGVAKTMMESSLADFMQEVGYGFCASIEECRNIIMQFGVREVTAAQVAR  
VLGMMARTHSGLTGDIPLQSIAPGSGIWSGDGKDKSEGAQAHTWNVVLIIDVLKELNPSLNFKEVITYELDHGPG  
FQIRDSKGLHNVVYGIQRGLGMEVFPVDFIYRPWKHAEGQLSFIQHSLINPEVFCFADYPCHTVAVDILKAPP  
EDDNREIATWKSLLDIESLLRLAEVQYEQVKQLFSFPIKHCPCDMLVALLQINTSWHTLRHELISLTMPIFL  
GNHPNSAILHYAWHGQGSPIRQLIMHAMAEWYMRGEQYDQAKLSRILDVAQDLKALSMLNGTFFAFVID  
LAALASRREYLKLDKWLTDKIREHGEPFIQACMTFLKRRCP SILGGLAPEKQPKSAQLPAETLATMLACLQA  
CAGSVSQELSETILTMVANCSNMVNKARQPPPGVMPKGRPPSASSLDAISPVQIDPLAGMASLIGGSAAPHT  
QSMQGFPPNLGSAFSTPQSPAKAFPPPLSTPNQTTAFSGIGGLSSQLPVGGGTGSLTGIGTGALGLPAVNNDF  
FVQRKLGTSGLNQPTFQQSKMKPSDLSQVWPEANQHF SKEIDDEANSYFQRIYNHPPHPTMSVDEVLEMLQRF  
KVDSTIKRREVEFNCLMRNLFEYRFPPQYDPKELHITACLFGGIEKGLVTYMALGLALRYLEALRKPFGSK  
MYYFGIAALDRFKNRLKDYQYQCQHLASISHFMQFPHHLQEYIEYQQSRDPPVKMQGSITTPGSIALAQAQA  
QAQVPAKAPLAGQVNTMVTSTTTTVAKTVTVTKPTGVSFKKDVPPSINTTNIDTLLVATDQTERIVEPPENI  
QEKIAFIFNNLSQSNMTQKVEELKETVKEEFMPWVSQYLVMKRVSIEPNFHSLSYNSFLDTLKNPEFNKMLVNE  
TYRNKIVLLTSDKAAANFSDRSLLKNLGHWLGMITLAKNKPI LHTDLVKSLLLEAYVKGQOELLVVPFVAK  
VLESSIRSLVFRPPNPWTMAIMNVLAELHQEHDLKLNLFKFEIEVLCKNLALDINELKPGNLLKDKDLKLNDE  
QLSAPKKDVKQPEELPAITTTTSTTPATSTTCTATVPPQPYSYHDINVYSLAGLAPHITLNPITPLFQAHP  
QLKQCVRAIERAVQELVHPVVDRSIKIAMTTCQIVRKDFALDSEESRMRIAAHMMRNLTAGMAMITCREP  
LLMSISTNLKDNFSALYARTASPPQREMMDQAAAQQLADNCELACCFIQKTAVEKAGPEMDKRLATEFELRKAHA  
RQEGRRYCDPVVLTYSALQERMPEQIRLKVGGVDPKQLAQVYEEFARNVPGFLPTNDLSQPTGFLAQPMMQAWATD  
DVAQIYDKCITELEQHLHAIPTPLAMNPQAQALRSLEVVVLSRNSRDAIAALGLLQKAVEGLLDATSGADAD  
LLRYRECHLLVLKALQDGRAYGSPWCNKQITRCLIECRDEYKYNVEAVELLIRNHLVNMQQYDLHLAQSMEN  
GLNYMAVAFAMQLVKILLVDERSVAHITEADLFHTIETLMRINAHSRGNAPGLPQLMEVVRSNYEAMIDRAH  
GGPNFMMHSGISQASEYDDPPGLREKAEYLLREWVNLHSAAGRDSTKAFSAFVGMHQQGIKLTDDLITRF  
FRLCTEMCVEISYRAQAEQQHNPAANTMIRAKCYHNLDADFVRLIALLVKHSGEATNTVTKINLLNKVGLIVV  
GVLLQDHDVQRSEFQQLPYHRIFIMLLELNAPEHVLETINFQTLTAFCNTFHILRPTKAPGFVYAWLELISH  
RIFIARMLAHTPQKQGWPMYAQLLIDLFKYLAPFLRNVELTKPMQILYKGTLRVLLVLLHDFPEFLCDYHYGF  
CDVIPNCIQLRNLILSAFPRNMRPLDPFPTNLKVDMLSEINIAPRILTNFTGMVPPQFKKDLDSYLKTRSPV  
TFLSDDLRSNLQVSNPEGNRYNLQLINALVLYVGTQAIHAIHNKGSTPSMSTITHSAHMDIFQNLAVDLDTGR  
YLFNLAIANQLRYPNSHthyfscTmlyLFAEANTEAIQEQITRVLLERLIVNRPHPWGLLITFIELIKNPAFK  
FWNHFEVHCAPEIEKLFQSVQCCMGQKQAQQVMEGTGAS\*

>rs46345668\_ENSMUSP00000037023\_c.975:C>T\_p.R326\*  
ENSMUST00000040481.4|Slc38a7-201|ENSMUSG00000036534|-|chr8:g.96568862:G>A  
MAQVSINSDYSEWASSTDAGERARLLQSPCVDVVPKSEGEASPGDPDSGTTSTLGAVFIVVNAACLGAGLLNFP  
AAFSTAGGVAAGIALQMGMLVFIISGLVILAYCSQASNERTYQEVVWAVCGKLTGVLCEVAIAVYTFGTCTIAF  
LIIIGDQDQKIIAVMSKEPDGASGSPWYTDKFTISLTAFLFILPLSIPKEIGFQKYASFLSVVGTWYVTAII  
IIKYIWPDKEMRPGDILTRPASWMAVFNAMPTICFGFQCHVSSVPVFNMSMRQPEVKTWGGVVTAMVIALAVY  
MGTGICGFLTFGAAVDPDLRSYSESDVAVAVA\*AFIILSVLTSYPIILHFCGRAVVEGLWLRKGMPEVEDVG  
RERRRRVLQTLVWFLLTLLLALFIPDYGKVISVIGGLAACFIFIFPGLCLIQAKLSEMEEVKPAWVALVSYG  
VLLVTLGAFIFGQTTANAI FVDLLA\*

>rs46345668\_ENSMUSP00000148659\_c.975:C>T\_p.R326\*  
ENSMUST00000212270.2|Slc38a7-204|ENSMUSG00000036534|-|chr8:g.96568862:G>A  
MAQVSINSDYSEWASSTDAGERARLLQSPCVDVVPKSEGEASPGDPDSGTTSTLGAVFIVVNAACLGAGLLNFP  
AAFSTAGGVAAGIALQMGMLVFIISGLVILAYCSQASNERTYQEVVWAVCGKLTGVLCEVAIAVYTFGTCTIAF  
LIIIGDQDQKIIAVMSKEPDGASGSPWYTDKFTISLTAFLFILPLSIPKEIGFQKYASFLSVVGTWYVTAII  
IIKYIWPDKEMRPGDILTRPASWMAVFNAMPTICFGFQCHVSSVPVFNMSMRQPEVKTWGGVVTAMVIALAVY  
MGTGICGFLTFGAAVDPDLRSYSESDVAVAVA\*AFIILSVLTSYPIILHFCGRAVVEGLWLRKGMPEVEDVG  
RERRRRVLQTLVWFLLTLLLALFIPDYGKVISVIGGLAACFIFIFPGLCLIQAKLSEMEEVKPAWVALVSYG  
VLLVTLGAFIFGQTTANAI FVDLLA\*

>rs46345668\_ENSMUSP00000148545\_c.975:C>T\_p.R326\*  
ENSMUST00000212628.2|Slc38a7-205|ENSMUSG00000036534|-|chr8:g.96568862:G>A

MAQVSINSDYSEWASSTDAGERARLLQSPCVDVVPKSEGEASPGDPDSGTTSTLGAVFIVVNAACLGLLNFP  
AAFSTAGGVAAGIALQMGMLVFIISGLVILAYCSQASNERTYQEVVWAVCGKLTGVLCEVAIAVYTFGTICIAF  
LIIIGDQDKIIAVMSKEPDGASGSPWYTDKFTIISLTAFLFILPLSIPKEIGFQKYASFLSVGTWVYVTAII  
IIKYIWPDKEMRPGDILTRPASWMAVFNAMPTICFGFQCHVSSVPVFNMSRQPEVKTWGGVVTAAMVIALAVY  
MGTGICGFLTFGAAVDPDVLRSYPSEDVAVAVA\*AFIILSVLTSYPILHFCGRAVVEGLWLRKGMPEEDVG  
RERRRRVLQTLVWFLLLTLLALFIPDIGKVISVIGGLAACFIFI  
>ENSMUSP00000017622\_c.334:C>T\_p.A112V ENSMUST00000017622.12|Zc3h18-  
201|ENSMUSG00000017478|+|chr8:g.123110487:C>T  
MDVAESPELDHPSPEDDEEQPALSDDILRESGSEQDLGAGERASDLEEEENATRVQSQEETRSDEEDRASEP  
KSQDQDSEAHELSRGPAGSPCEEEDDVEEDGTSDLRDEVSSVTRELDEHELDYDEEVPEEPAPAAQEEEA  
GAEHEEEKGEKGEAPGEEGKPDVQSVGEQEPTEAAKEKKKEDDDGEIDDGEIDDDDLLEEVEKDP  
CRFFMKDVVTPPLSTLLPPIPNISIPLRGQVKGNCWTGMSCRFIHPGVNDKGNYSLITKAEFP  
LMPANPWGGPVVDEILPPPPPEPPTESAWERGLRHAKEVLKATIRKEQEPDFEKKRFTVTIGEDDRE  
EVFRDWSRVPRDVRDRTTLEPYADPYDYEIERFWRGGQYENFRVQYTEAEPYHNYRERERERENRQ  
RERERDRERERRQRERERERERERERDKERQRRKEEWERERAKRDEKDRQHRDRDRDKDREKDK  
SRQAEPKKESTSVGPQVKRADEWKDPWRRSKSPKKKLGVSVPSPRARRRRKTSASSASANSR  
SGSGSSRSRSHSSYSSSRSHSSFSGSRSRSRSFSSSPSPPTPSPHRPPVRTKGEPA  
KKPAPPPAPPQATKTTAPGPEPAKPGDLREARRKERQTRTPRRRTLSGSGSGSSYSGSSRSR  
SSVSSATSSSSSVHSDVSDDDMYADLASPVSSASSRSPTPAQTKKERGKSKKEDGVREKRRR  
APAGGKASQQAAPQPAVPGQPQQGSFVAHKEIKLTLNKAADKGSRKRYEPSDKDRQSP  
RDRKSGGRMGSPKPERQRGQNAKAPAAPADKRPLSPQSKGSSKVTVPKGATDTATAGTKSGK  
LLKQLKAVEDAIARKRAKIPGKV\*  
>ENSMUSP00000090761\_c.334:C>T\_p.A112V ENSMUST00000093073.12|Zc3h18-  
202|ENSMUSG00000017478|+|chr8:g.123110487:C>T  
MDVAESPELDHPSPEDDEEQPALSDDILRESGSEQDLGAGERASDLEEEENATRVQSQEETRSDEEDRASEP  
KSQDQDSEAHELSRGPAGSPCEEEDDVEEDGTSDLRDEVSSVTRELDEHELDYDEEVPEEPAPAAQ  
GAEHEEEKGEKGEAPGEEGKPDVQSVGEQEPTEAAKEKKKEDDDGEIDDGEIDDDDLLEEVEKDP  
CRFFMKGNCTWGMSCRFIHPGVNDKGNYSLITKAEFP  
TESAWERGLRHAKEVLKATIRKEQEPDFEKKRFTVTIGEDDREFDKENEVFRDWSRVPRDVRD  
PYDYEIERFWRGGQYENFRVQYTEAEPYHNYRERERERERENRQ  
DKERQRRKEEWERERAKRDEKDRQHRDRDRDKDREKDKKPKRSPQPPSRQAEPKKESTSVGPQ  
KDPWRRSKSPKKKLGVSVPSPRARRRRKTSASSASANSR  
HSSFSGSRSRSRSFSSSPSPPTPSPHRPPVRTKGEPA  
PGDLREARRKERQTRTPRRRTLSGSGSGSSYSGSSRSRSLVSSVSSVSSATSSSSSVHSDVSD  
LASPVSSASSRSPTPAQTKKERGKSKKEDGVREKRRRDP  
GSFVAHKEIKLTLNKAADKGSRKRYEPSDKDRQSP  
PAAPADKRPLSPQSKGSSKVTVPKGATDTATAGTKSGKASTLSRREELLKQLKAVEDAIARKRAKIPGKV\*  
>ENSMUSP00000134743\_c.334:C>T\_p.A112V ENSMUST00000176629.8|Zc3h18-  
205|ENSMUSG00000017478|+|chr8:g.123110487:C>T  
MDVAESPELDHPSPEDDEEQPALSDDILRESGSEQDLGAGERASDLEEEENATRVQSQEETRSDEEDRASEP  
KSQDQDSEAHELSRGPAGSPCEEEDDVEEDGTSDLRDEVSSVTRELDEHELDYDEEVPEEPAPAAQ  
GAEHEEEKGEKGEAPGEEGKPDVQSVGEQEPTEAAKEKKKEDDDGEIDDGEIDDDDLLEEVEKDP  
CRFFMKDVVTPPLSTLLPPIPNISIPLRGQVKGNCWTGMSCRFIHPGVNDKGNYSLITKAEFP  
LMPANPWGGPVVDEILPPPPPEPPTESAWERGLRHAKEVLKATIRKEQEPDFEKKRFTVTIGEDDRE  
EVFRDWSRVPRDVRDRTTLEPYADPYDYEIERFWRGGQYENFRVQYTEAEPYHNYRERERERENRQ  
RERERDRERERRQRERERERERERERDKERQRRKEEWERERAKRDEKDRQHRDRDRDKDREKDK  
SRQAEPKKESTSVGPQVKRADEWKDPWRRSKSPKKKLGVSVPSPRARRRRKTSASSASANSR  
SGSGSSRSRSHSSYSSSRSHSSFSGSRSRSRSFSSSPSPPTPSPHRPPVRTKGEPA  
KKPAPPPAPPQATKTTAPGPEPAKPGDLREARRKERQTRTPRRRTL  
ADLASPVSSASSRSPTPAQTKKERGKSKKEDGVREKRRRDP  
QQGSFVAHKEIKLTLNKAADKGSRKRYEPSDKDRQSP  
KAPAAPADKRPLSPQSKGSSKVTVPKGATDTATAGTKSGKASTLSRREELLKQLKAVEDAIARKRAKIPGK  
V\*  
>ENSMUSP00000095939\_c.4756:A>GGAGGGGAGA\_p.E1586GRGE-ins  
ENSMUST00000098334.13|Ankrd11-202|ENSMUSG00000035569|-  
|chr8:g.123619031:T>TCTCCCTCC  
MPKGGCSKTPQOEDFALSNDMVEKQTGKKDKDKVSLTKTPKLDKSDGGKEVREERATKRKLPFTV  
DTEKQGPERRKRIKKEPVARKSGLLFGMGLSGIRAGYPLSERQQVALLMQMTAEESANS  
PVDTTPKHPSQSTVC

QKGTTPNSASKTKDKVNKRNERGETRLHRAAIRGDARRIKELISEGADVNVKDFAGWTALHEACNRGYDDIAKQ  
 LLAAGAEVNTKGLDDDDTPLHDAANNNGHYKVVKLLRLRYGGNPQQSNRKGETPLKVANSPTMVNLLLKGKTYTSS  
 EESSTESSEEEEDAPSFAPSSSVGNNNTDSEFEKGLKLLKAKNPEPQKTVTPVKDEYEFDEDEQDRVPPVDDKH  
 LLKKDYRKEAKANSFISIPKMEVKSYSKNNTLAPKKAHRILSDTSDEEDVSVSIGAGEKLRLSAHTMLPGSK  
 ARESSSSRQQKEKNKLLKKRKKETKGEVRFVGRSDKFCSSGSESESESEEDDGDSDVSSGCLKGSPLVLKD  
 PSLFSSLSASSTSSHGSAVAQKHGSGHTDQHTKHWRTDNWKAISSPAWSEVSSLSDSSRTGLTSESDCSSEGS  
 SVESLKPTRRKQEHRRKRGVLQSAPESEKRSFHPCTDGAVPKLDKEGKVVKKHKTKKHKKHKEKGQCSVSVQELK  
 LKSFTYEDSKQKSDKAILLESDLSTENKLVKLDREHLKEDKLGMRKPEDKDWLFKDEKVLKRIKDANK  
 DMSRAFREDKDRASKAERERATKDKSPKEEKLRLYKEERKKKSKDRASRLERKNDMKEDKLSKEKEKAFKEDK  
 EKLKKEKLYREDAAFDDYCNKSQFLDHEDTKFSLSDDQQRWFSDLSDSSSFDFKGEDSWDSVTDYRDIKNDV  
 AKLILETVKEDSKEKKRDNKIREKRDFKDSFFRKRDRDCLDNSEKRRDQTEKHKSIPSYLSEKDKKRRESAE  
 GGRDRRDGRIRSEEVHREDLKECGFESSFKDKSDCDFPKNLEPWERPHAAREKEKDDALEKERKEKGRADKYK  
 EKSSERERSDKSTLDKQCQKDEFEKCFKEKKDGKEKHDIHSDRKAASFDQLREKKEKVFSSIISEDFSERKD  
 DRKGKEKSWYIADIFTDESEDEKDDCVAGSFKATEASDTQRVDGLPEKEEGREHPSDRHRKSSSDRQHTTEKPR  
 DKEPKEKKKDRGASEGGKDKKEKMEKIFEKHKEKKDKECAERYKDRKERASADSAPEKKNKQKLEPEKVEKKHF  
 AEDKVKSKHKEKPEKEHSRERERKPSRGPDVEKSLLEKLEEEALHDYREDSNDKISEVSSDSFADHGQEP  
 SLSTLLEVSFSEPPAEDKARDSACLSEKLEKERHRHSSSSSKSHERERAKKEKAEKKESEDYKDISSVRKDA  
 SQFEKDFLDAETYGVSYPTKADVEEELDKAIELFSSEKKDRSDPEREPAKRIEKELKPYGSSAISILKEKKR  
 EKHRERWREEKERHRDKHVDGFLRHHKDEPKPAAKDKDNPPNSFKEKSREESLKLSETKLKEKFKENTEREK  
 GDSIKMSNGNDKLVPSRDSGKKDRPREKLLGDGDLMMTSFERMLSQKDLIEGRGERHKKRHKRMKQMEKMRH  
 RSGDPKLEKKPTDGRKKSDFPSKALGLDKVKEPAPTLTGESKPHSGPGTESKDWLSGQPLKEVLPAS  
 PRTEQSRPTGVPTPTS SVVSCPSYEEVMHTPRTSPSCSADDPDLVFDCTDSQHSMPVSTASTSACSPFFDRFS  
 VASSVVSENAAGQTPTRPISTNLYRSISVDIRRTPEEEFSAGDKLFRQQSVAPSSFDSPVQHLLLEEKAPLPP  
 VPAEKFACLSPGYSPDYGIPSPKVDLHCPPTAVVSATPPPDSVFSNLPPKSSPSPRGELLSPAIEGTLPPD  
 LGLPLDATEDQQATAAILPQEPSYLEPLDEGPFPTTIVITEEPVEWHTAAEQGLSSSSSLIASASENPVSWPVGS  
 ELMLKSPQFAESPKHFCPGESLHSTTPGPYSAEPTVPSPGSYPLPAPEPALEEVKGGTGAI PVAISAAE  
 GAAPYAAPARLESFFSNCKSHDPALDTPAEPTEGVTAVAQVEALGPLESSFLDNSPSISITLSQVEPVSWHEAF  
 TSPEDDLDLGPFSLPELPLQAKDASDVEAEAAKASPVPPAESPPGPTGVLGGDVPAPAAEPPAPPQEA  
 SPQLSTEPEPSEEPKLDVLEATVETEVLADDSAPEASISNSVPAPSPPPQQPPGGGDEEAETEDPSATPCCAPD  
 GPTTDGLAQAHNSAEASCVAAAEGPPGNVQAEATDPEPKPTSEVPKAPKVEEVPQRMTRNRAQMLASQSKQ  
 IPAAEKDPMPTPASRAKGRASEEEDAQAQHPRKRRFRQSSQQLQQQLNTSTQQTREVIQQTAAI VDAIKLDA  
 IEPYHSDRSNPFYELQIRKKIEEKRIKILCCITPQAPQCYAEVYTYTGSYLLDGKPLSKLHIVLAPPPSLAE  
 PLKELFKQQAVERGKLRQLQHSIEREKLIVSCEQEILRVHCRAARTIANQAVPFSACTMLLDSEVYNMPLESQ  
 DENKSVRDRFNARQFISWLQDVDDKYDRMKTCLLMRQQHEAAALNAVQRMWQLKAQELDPAGHKSICVNEVP  
 SFYVPMVDVNDDFVLLPA\*

>ENSMUSP00000095938 c.4819:A>GGAGGGGAGA\_p.E1607GRGE-ins  
 ENSMUST00000098333.5|Ankrd11-201|ENSMUSG00000035569|-  
 |chr8:g.123619031:T>TCTCCCTCC

MPKGGCSKTPQOEDFALSNDMVEKQGTGKKDKDKVSLTKTPKLDKRSDDGGKEVREERATKRKLPFTVANGEQKDS  
 DTDSFGHRTFNWGSPLPFLSFTCHTEKQGPERRKRIKKEPVARKSGLLFGMGLSGIRAGYPLSERQQVALLMQMT  
 AEESSANSPTTPKHPSQSTVCQKGTTPNSASKTKDKVNKRNERGETRLHRAAIRGDARRIKELISEGADVNVKDF  
 FAGWTALHEACNRGYDDIAKQLLAAGAEVNTKGLDDDDTPLHDAANNNGHYKVVKLLRLRYGGNPQQSNRKGETPL  
 KVANSPTMVNLLLKGKTYTSSSEESSTESSEEEEDAPSFAPSSSVGNNNTDSEFEKGLKLLKAKNPEPQKTVTPVK  
 DEYEFDEDEQDRVPPVDDKHLKKDYRKEAKANSFISIPKMEVKSYSKNNTLAPKKAHRILSDTSDEEDVSV  
 SIGAGEKLRLSAHTMLPGSKARESSSSRQQKEKNKLLKKRKKETKGEVRFVGRSDKFCSSGSESESESESE  
 DDGDSDVSSGCLKGSPLVLKDPFLFSSLSASSTSSHGSAVAQKHGSGHTDQHTKHWRTDNWKAISSPAWSEV  
 SLSDSRTGLTSESDCSSEGSVSVESLKPTRRKQEHRRKRGVLQSAPESEKRSFHPCTDGAVPKLDKEGKVVKKH  
 KTKHKKHKKHKEKGQCSVSVQELKLSFTYEDSKQKSDKAILLESDLSTENKLVKLDREHLKEDKLGMRKPE  
 DKDWLFKDEKVLKRIKDANKDMSRAFREDKDRASKAERERATKDKSPKEEKLRLYKEERKKKSKDRASRLER  
 KNDMKEDKLSKEKEKAFKEDKEKLLKKEKLYREDAAFDDYCNKSQFLDHEDTKFSLSDDQQRWFSDLSDSSSF  
 FKGEDSWDSVTDYRDIKNDVAKLILETVKEDSKEKKRDNKIREKRDFKDSFFRKRDRDCLDNSEKRRDQTE  
 KHKSIPSYLSEKDKKRRESAEGGRDRRDGRIRSEEVHREDLKECGFESSFKDKSDCDFPKNLEPWERPHAARE  
 KEKDDALEKERKEKGRADKYKKEKSSERERSDKSTLDKQCQKDEFEKCFKEKKDGKEKHDIHSDRKAASFDQL  
 REKKEKVFSSIISEDFSERKDDRKGEKSWYIADIFTDESEDEKDDCVAGSFKATEASDTQRVDGLPEKEEGRE  
 EHPSDRHRKSSSDRQHTTEKPRDKEPKEKKKDRGASEGGKDKKEKMEKIFEKHKEKKDKECAERYKDRKERAS  
 ADAPEKKNKQKLEPEKVEKKHFAEDKVKSKHKEKPEKEHSRERERKPSRGPDVEKSLLEKLEEEALHDYREDSN  
 DKISEVSSDSFADHGQEP  
 SLSTLLEVSFSEPPAEDKARDSACLSEKLEKERHRHSSSSSKSHERERAKKEK  
 AEKKEKSEDYKDISSVRKDASQFEKDFLDAETYGVSYPTKADVEEELDKAIELFSSEKKDRSDPEREPAKRI

EKELKPYGSSAISILKEKKKKREKHRERWREEKERHRDKHVDGFLRHHKDEPKPAKDKDNPPNSFKEKSREES  
LKLSETKLKEKFKENTEREKGDS IKMSNGNDKLVPSRDSGKKDSRPREKLLGDGDLMMTSFERMLSQKDLIE  
GRGERHHRKRMKQMEKMRHRSGDPKLKEKKPTEDGRKKS LDFPSKKALGLDKKVKEPAPTLTTGESKPHSG  
PGTESKDWLSGQPLKEVLPASPRTEQSRPTGVPTPTS SVVSCPSYEEVMHTPRTTPSCSADDYPDLVFDCTDSQH  
SMPVSTASTSACSPPFFDRFSVASSVVSENAAGQTPTRPISTNLYSRISVDIRRTPEEEFSAGDKLFRQQSVP  
APSSFDSPVQHLLLEEKAPLPPVPAEKFACLSPGYSPDYGIPSPKVDLTHCPPTAVVSATPPPDSVFSNLPPK  
SSPSPRGELLSPAIEGTLPPDLGLPLDATEDQQATAAILPQEPSYLEPLDEGPF TTVITEEPVEWHTHAAEQG  
LSSSSLIASASENPVSWPVGSELMKSPQRFAESPKHFPCGESLHSTTPGPYSAAEPTYVSPGSPYLPAPPEP  
ALEEVKDGGTGAIPVAISAAEGAAPYAAPARLESFFSNCKSHPDAPLDTAPEPTGVTAVAQVEALGPLESSFL  
DSNPSISTLSQVEPVSWEAFTSPEDDLGLGPFSLPELPLQAKDASDVEAEAAKASPVPPAESPPGPTGVLGG  
GDVPAPAAEPPAPPPQEASQLS TEPEPSEEPKLDVVLEATVETEVLADDSAPEASISNSVPAPSPQQQPP  
GGGDEEAETEDPSATPCCAPDGPTTDGLAQAHNSAEASCVAAAEGPPGNVQAEATDPEPKPTSEVPKAPKVE  
EVPQRMTRNRAQMLASQSKQGI PAEKDPMPTPASRAKGRASEEEDAQAQHPRKRRFQRSSQQLQQQLNTSTQ  
QTREVIQQTAAIVDAIKLDAIEPYHSDRSNPFYFYLQIRKKIEEKRI LCCITPQAPQCYAEYVYTGSYLL  
DGKPLSKLHIPVIAPPPSLAEPLKELFKQQA VRGKLRQLHSIEREKLIVSCEQEILRVHCRAARTIANQAVP  
FSACTMLLDSEVYNMPLESQGDENKSVRDRFNARQFISWLQDVDDKYDRMKTCLLMRQQHEAAAALNAVQRMW  
QLKAQELDPAGHKS LCVNEVPSFYVPMVDVNDDFVLLPA\*  
>ENSMUSP00000095939\_c.4605:A>G\_p.I1536V ENSMUST00000098334.13|Ankrd11-  
202|ENSMUSG00000035569|-|chr8:g.123619182:T>C  
MPKGGCSKTPQQEDFALSNDMVEKQTGKKDKDKVSLTKTPKLD RSDGGKEVREERATKRKLPFTV GANGEQKDS  
DTEKQGP ERKRIKKEPVARKSGLLFGMGLSGIRAGYPLSERQQVALLMQMTAEESANS PVDTTPKHPSQSTVC  
QKGT PNASAKTKDKVNKRNERGETRLHRAAIRGDARRIKELISEGADVNVKDFAGWTALHEACNRGYDIAKQ  
LLAAGAEVNTKGLDDDTPLHDAANNNGHYKVVKLLLR YGGNPQQSNRKGETPLKVANSPTMVNLLLKGTYTSS  
EESSTESSEEEEDAPSFAPSSSDGNNTDSEFEKGLK LKAKNPEPQKT VTPVKDEYEFDEDEQDRVPVDDKH  
LLKKDYRKEAKANSFISIPKMEVKSYSKNNTLAPKKAHRILSDTSDEEDVSVSIGAGEKLRLSAHTMLPGSK  
ARES SSSRQQEKKNLKKRKKETKGKEVRFGRKSDKFCSSGSESESESEEDDGDSDVSSGCLKGSPLVLKD  
PSLFS SLSASSTSHGSAVAQKHGSGHTDQHTKHWRTDNWKAISSPAWSEVSSLSDSSRTGLTSESDCSSEGS  
SVESLKPTRRKQEHRRKRGVLQSAPESEKRS SFHPCTDGA VPKLDEKGVVKKHKT KKKHKKHKEKGQCSVSQELK  
LKSFTY EYEDSKQKSDKAILLES DLSTENKLVKLDHREHLKEDKLG RMPEDKDWLFKDEKVLKRIKDANK  
DMSRAFREDKDRASKAERERATKDKSPKEEKLRLYKEERKSKDRASRLERKNDMKEDKLSKEKEKAFKEDK  
EKLKKELKYREDAAFDDYCNKSQFLDHEDTKFSLSDDQ QERWFS DLSDSSFDKGEDSWDSVTDYRDIKND SV  
AKLILLETVKEDSKEKKRDNKIREKRDFKDSFFRKRDRDCLDKNSEKRRDQTEKHKSI PSYLSEKDKKRRSAE  
GGRRDRDGRIRSEEVHREDLKECGFESSFKDKSDCDFPKNLEPWERPHAAREKEKKDALEKERKEKGRADKYK  
EKSSERERSDKSTLDKCKQKDEFEKCFKEKKDGKEKHKDIH SKDRKASFDQLREKKEKVFSSIISEDFSERKD  
DRKGKEKSWYIADIFTDESEDEKDDCVAGSFKATEASDTQRVDGLPEKEEGREHPSDRHRKSSSDRQHT EKPR  
DKEPKEKKKDRGASEGGKDKKEKMEKIFEKHKEKKDKECAERYKDRKERASADSAPEKKNKQLPEKVEKKHF  
AEDKVKSKHKEKPEKEHSRERERKPSRGP DVEKSLLEKLEEEALHDYREDSNDKISEVSSDSFADHGQEPSLS  
TLLEVSFSEPPAEDKARDSACLSEKLRERHRHSSSSSKSHERERAKKEKA EKKEKSEDYKDIS SVRKA  
SQFEKDFLDAETYGVSYPTKADVEEELDKAIELFSSEKDRSDPEREPAKRIEKELKPYGSSAISILKEKKKR  
EKHRERWREEKERHRDKHVDGFLRHHKDEPKPAKDKDNPPNSFKEKSREESLKLSETKLKEKFKENTEREKG  
DSVKMSNGNDKLVPSRDSGKKDSRPREKLLGDGDLMMTSFERMLSQKDLIEERHHRKRMKQMEKMRHRSG  
DPKLKEKKPTEDGRKKS LDFPSKKALGLDKKVKEPAPTLTTGESKPHSGPGTESKDWLSGQPLKEVLPASPR  
EQSRPTGVPTPTS SVVSCPSYEEVMHTPRTTPSCSADDYPDLVFDCTDSQHSMPVSTASTSACSPPFFDRFSV  
SVVSENAAGQTPTRPISTNLYSRISVDIRRTPEEEFSAGDKLFRQQSVPAPSSFDSPVQHLLLEEKAPLPPVPA  
EKFACLSPGYSPDYGIPSPKVDLTHCPPTAVVSATPPPDSVFSNLPPKSSPSPRGELLSPAIEGTLPPDLGL  
PLDATEDQQATAAILPQEPSYLEPLDEGPF TTVITEEPVEWHTHAAEQGLSSSSLIASASENPVSWPVGSELM  
LKSPQRFAESPKHFPCGESLHSTTPGPYSAAEPTYVSPGSPYLPAPPEPALEEVKDGGTGAIPVAISAAEGAA  
PYAAPARLESFFSNCKSHPDAPLDTAPEPTGVTAVAQVEALGPLESSFLDSNPSISTLSQVEPVSWEAFTSP  
EDDLGLGPFSLPELPLQAKDASDVEAEAAKASPVPPAESPPGPTGVLGGGDVPAPAAEPPAPPPQEASQLS  
TEPEPSEEPKLDVVLEATVETEVLADDSAPEASISNSVPAPSPQQQPPGGGDEEAETEDPSATPCCAPDGPT  
TDGLAQAHNSAEASCVAAAEGPPGNVQAEATDPEPKPTSEVPKAPKVEEVPQRMTRNRAQMLASQSKQGI PA  
AEK DPMPTPASRAKGRASEEEDAQAQHPRKRRFQRSSQQLQQQLNTSTQQTREVIQQTAAIVDAIKLDAIEP  
YHSDRSNPFYFYLQIRKKIEEKRI LCCITPQAPQCYAEYVYTGSYLLDGKPLSKLHIPVIAPPPSLAEPLK  
ELFKQQA VRGKLRQLHSIEREKLIVSCEQEILRVHCRAARTIANQAVPFSACTMLLDSEVYNMPLESQGDEN  
KSVRDRFNARQFISWLQDVDDKYDRMKTCLLMRQQHEAAAALNAVQRMWQLKAQELDPAGHKS LCVNEVPSFY  
VPMVDVNDDFVLLPA\*  
>ENSMUSP00000095938\_c.4668:A>G\_p.I1557V ENSMUST00000098333.5|Ankrd11-  
201|ENSMUSG00000035569|-|chr8:g.123619182:T>C

MPKGGCSKTPQQEDFALSNDMVEKQTGKKDKDKVSLTKTPKLDKSDGGKEVRERATKRKLPFTVVGANGEQKDS  
DTDSFGHRTFNWGSPLPFLTCHTEKQGPERRKRIKKEPVARKSGLLFGMGLSGIRAGYPLSERQQVALLMQMT  
AEESANSPTDTPKHPSQSTVCQKGT PNSASKTKDKVNKRNERGETRLHRAAIRGDARRIKELISEGADVNVKD  
FAGWTALHEACNRGYDIAKQLLAAGAEVNTKGLDDDTPLHDAANNNGHYKVVKLLRLRYGGNPQQSNRKGETPL  
KVANSPTMVNLLLKGKTYTSSEESSTESSEEDAPSFAPSSV DGNNTDSEFEKGLKLLKAKNPEPQKTVTPVK  
DEYEFDEDEQDRVPPVDDKHLKLDYRKEAKANSFISIPKMEVKSYSKNNTLAPKKAHRI LSDTSDEEDVS  
VSIGAGEKLRLSAHTMLPGSKARESSSSRQOKEKNLKKRKKETKGEVRFGRSDKFCSSGSESESESEE  
DGDSDSRTGLTSESDCSSEGS SVESLKPTRRKQEHRRKRGVLQSAPSEKRS SFHPCTDGAVPKLDEKGVVKKH  
KTKHKKHKKHEKGCQSVSQELKLSFTY EYEDSKQKSDKAILLES DLSTENKLVKLDREHLKEDKLGMRKP  
EDKDWLFKDEKVLKRIKDANKMSRAFREDKDRASKAERERATKDKSPKEEKLRLYKEERKKKSKDRASRLER  
KNDMKEDKLSKEKEKAFKEDKELKKEKLYREDAAFDDYCNKSQFLDHEDTKFSLSDDQQRWFS DLSDSSFD  
FKGEDSWDSVTDYRDIKNDVAKLILETVKEDSKEKRDNKIREKRDFKDSFFRKRDRDCLDKNSEKRRDQTE  
KHKSIPSYLSEKDKKRRESAEGGRDRRDGRI RSEEVHREDLKECGFESSFKDKSDCDFPKNLEPWERPHAARE  
KEKKDALEKERKEKGRADKYKEKSSERERSDKSTL DCKQKDEFEKCFKEKKDGKEKHKDIH SKDRKASFDQL  
REKKEKVFSSIISEDFSERKDDRKGKEKSWYIADIF TDESEDEKDDCVAGSFKATEASDTQRVDGLPEKEEGR  
EHPSDRHRKSSSDRQHTTEKPRDKEPKKEKKDRGASEGGKDKKEKMEKIFEKHKEKKDKECAERYKDRKERASA  
DSAPEKKNKQKLPKVEKHKHFAEDKVKSKHKEKPEKHSRERERKPSRGPDVEKSLLEKLEEEALHDYREDSN  
DKISEVSSDSFADHGQEP SLSLLELVSFSEPPAEDKARDSACLSEKLEKERHRHSSSSSKSHERERAKKEK  
AEKKEKSEDYKDISSVRKDASQFEKDFLDAETYGVSYP TKADVEEELDKAIELFSSEKDRSDPEREPAKRI  
EKELKPYGSSAISILKEKKKREKHRERWREEKERHRDKHVDGFLRHHKDEPKPAKDKDNPNSFKEKSRRES  
LKLSETKLKEKFKENTEREKGDSVKMSNGNDKLVPSRDSGKKDSRPREKLLGDGDLMMT SFERMLSQKDLIE  
ERHHRHKERMKQMEKMRHRS GPKLKEKPTEDGRKSLDFPSKALGLDKKVKEPAPTLTTGESKPHSGPGT  
ESKDWLSGQPLKEVLPASPRTEQSRPTGVPTPTSVVSCPSYEEVMHTPRT PSCSADDY PDLVFDCTDSQHSMF  
VSTASTSACSPFFDFRFSVASSVSENAAGQTPTRPISTNL YRSISVDIRRTPEE EFSAGDKLFRQQSV PAPS  
SFDSPVQHLLEEKAPLPVPAEKFACLSPGYSPDYIGIPSPKVDTLHCPPTAVVSATPPPDVSFVNLPPKSSP  
SRGELLSPAIEGTLPPDLGLPLDATEDQQATAAAILPQEPSYLEPLDEGPFTTVITEEPVEWHTAAEQGLSS  
SSLIASASENPVSWPVGSELMLKSPQRFAESPKHFCPGESLHSTTPGPYSAAEPTYPVSPG SYPLPAPEPALE  
EVKDGGTGAI PVAISAAEGAAPYAAPARLESFFSNCKSHPDAPLDTAPEPTGVTAVAQVEALGPLESSFLDSN  
PSISTLSQVEPVSWEAFTSPEDDLGLGPFSLPELPLQAKDASDVEAEAAKASPVPPAESPPGP TGVLGGGDV  
PAPAAEPPAPPPQEASQ LSTEPEPSEEPKLDVVLEATVETEVLADDSAPEASISNSVPAPSPPPQQPPGGG  
DEEAETEDPSATPCCAPDGP TTDGLAQAHNSAEASC VAAAE GPGNVQAEATDPEPKPTSEVPKAPKVEEVP  
QRMTRNRAQMLASQSKQGI PAAEKDPMPTPASRAKGRASEEEDAQAQHPRKRRFQRSSQQLQQQLNTSTQQTR  
EVIQQT LAAI VDAIKLDAIEPYHSDRSNPYFEYLQIRKKIEEKRI LCCITPQAPQCYAEYVYTYG SYLLDGK  
PLSKLHIPVIAPPPSLAEPLKELFKQAEAVRGKRLQLHSIEREKLIVSCEQEILRVHCRAARTIANQAVPFS A  
CTMLLDSEVYNMPLS QGDNKSVRDRFNARQFISWLQDVDDKYDRMKTCLLMRQQHEAAAALNAVQRMEWQLK  
AQELDPAGHKS LCVNEVPSFYVPMVDVNDDFVLLPA\*  
>ENSMUSP00000095939\_c.4552:C>G\_p.T15188 ENSMUST00000098334.13|Ankrd11-  
202|ENSMUSG00000035569|-|chr8:g.123619235:G>C  
MPKGGCSKTPQQEDFALSNDMVEKQTGKKDKDKVSLTKTPKLDKSDGGKEVRERATKRKLPFTVVGANGEQKDS  
DTEKQGPERRKRIKKEPVARKSGLLFGMGLSGIRAGYPLSERQQVALLMQMTAEESANS PVDTPKHPSQSTVC  
QKGT PNSASKTKDKVNKRNERGETRLHRAAIRGDARRIKELISEGADVNVKDFAGWTALHEACNRGYDIAKQ  
LLAAGAEVNTKGLDDDTPLHDAANNNGHYKVVKLLRLRYGGNPQQSNRKGETPLKVANSPTMVNLLLKGKTYTSS  
EESSTESSEEDAPSFAPSSV DGNNTDSEFEKGLKLLKAKNPEPQKTVTPVKDEYEFDEDEQDRVPPVDDKH  
LLKLDYRKEAKANSFISIPKMEVKSYSKNNTLAPKKAHRI LSDTSDEEDVSVSIGAGEKLRLSAHTMLPGSK  
ARESSSSRQOKEKNLKKRKKETKGEVRFGRSDKFCSSGSESESESEEDDGDSDVSGSGLKGSPLVLKD  
PSLFSLSASSTSSHGSAVAQKHGSGHTDQHTKHWRTDNWKAISSPAWSEVSSLSDSRTGLTSESDCSSEGS  
SVESLKPTRRKQEHRRKRGVLQSAPSEKRS SFHPCTDGAVPKLDEKGVVKKHKT KKKHKKHEKGCQSVSQELK  
LKSFTY EYEDSKQKSDKAILLES DLSTENKLVKLDREHLKEDKLGMRKPEDKDWLFKDEKVLKRIKDANK  
DMSRAFREDKDRASKAERERATKDKSPKEEKLRLYKEERKKKSKDRASRLERKNDMKEDKLSKEKEKAFKEDK  
EKLKKEKLYREDAAFDDYCNKSQFLDHEDTKFSLSDDQQRWFS DLSDSSFDKGEDSWDSVTDYRDIKNDV  
AKLILETVKEDSKEKRDNKIREKRDFKDSFFRKRDRDCLDKNSEKRRDQTEKHKSIPSYLSEKDKKRRESAE  
GGRDRDRGRI RSEEVHREDLKECGFESSFKDKSDCDFPKNLEPWERPHAAREKEKKDALEKERKEKGRADKY  
EKSSERERSDKSTL DCKQKDEFEKCFKEKKDGKEKHKDIH SKDRKASFDQLREKKEKVFSSIISEDFSERK  
DRKGKESWYIADIF TDESEDEKDDCVAGSFKATEASDTQRVDGLPEKEE GREHPSDRHRKSSSDRQHTTEKPR  
DKEPKKEKKDRGASEGGKDKKEKMEKIFEKHKEKKDKECAERYKDRKERASADSAP EKKNKQKLPKVEKHKH  
AEDKVKSKHKEKPEKHSRERERKPSRGPDVEKSLLEKLEEEALHDYREDSNDKISEVSSDSFADHGQEP SLS  
TLLELVSFSEPPAEDKARDSACLSEKLEKERHRHSSSSSKSHERERAKKEKA EKKEKSEDYKDISSVRKDA

SQFEKDFLDAETYGVSYPTKADVEEELDKAIELFSSEKKDRSDPEREPAKRIEKELKPYGSSAISILKEKKKR  
EKHRERWREEKERHRDKHVDGFLRHHKDEPKPAKDKDNPPNSFKEKSREESLKLSESKLKEKFKENTEREKG  
DSIKMSNGNDKLVPSRDSGKKDSRPREKLLGDGDLMMTSFERMLSQKDLIEERHHRHKERMKQMEKMRHRS  
DPKLKEKKPTEDGRKSLDFPSKKALGLDKKVKEPAPTLTTGESKPHSGPGTESKDWLSGQPLKEVLPASPRT  
EQSRPTGVPTPTS SVVSCPSYEEVMHTPRT PSCSADDY PDLVFDCTDSQHSMVSTASTSACSPPFFDRFSVAS  
SVVSENAAGQTPTRPISTNLYRSISVDIRRTPPEEFSAGDKLFRQQSV PAPS SFDSVPVQHLLLEEKAPLPPVPA  
EKFACLSPGYSPDYGIPSPKVDTLHCPPTAVVSATPPPDSVFNLPKSSSPRGE LLSPAIEGTLPPDLGL  
PLDATEDQQATAAILPQEPSYLEPLDEGPFTTVITEEPVEWHTAAEQGLSSSSLIASASENPVSWPVGSELM  
LKSQRFAPESPKHFCPGESLHSTTPGPYSAAEPTYVSPG SYPLPAPEPALEEVKDGGTGAI PVAISAAEGAA  
PYAAPARLESFFSNCKSHPDAPLDTAPEPTGVTAVAQVEALGPLESSFLDSNPSISTLSQVEPVSWEAFTSP  
EDDLDLGPFSLPELPLQAKDASDVEAEAAKASPVPPAESPPGPTGVLGGGDVPAPAAEPPAPPPQEASQLS  
TEPEPSEEPKLDVVLEATVETEVLADDSAPEASISNSVPAPSPQQQPPGGGDEEAETEDPSATPCCAPDGPT  
TDGLAQAHNSAEASCVAAGP PGNVQAEATDPEPKPTSEVPKAPKVEEVPQRMTRNRAQMLASQSKQGI PA  
AEKDPMPPTPASRAKGRASEEEDAQAQHPRKRRFQRSSQQLQQQLNTSTQQTREVIQQT LAIVDAIKLDAIEP  
YHSDRSNPYFEYLQIRKKIEEKRI LCCITPQAPQCYAEYVYTG SYLLDGKPLSKLHIPVIAPPPSLAEPLK  
ELFKQOEAVRGKLRQLQHSIEREKLIVSCEQEILRVHCRAARTIANQAVPFSACTMLLDSEVYNMPLESQGDEN  
KSVRDRFNARQFISWLQDVDDKYDRMKTCLLMRQQHEAAAALNAVQRM EWQLKAQELDPAGHKS LCVNEVPSFY  
VPMVDVNDDFVLLPA\*  
>ENSMUSP00000095938\_c.4615:C>G\_p.T1539S ENSMUST00000098333.5|Ankrd11-  
201|ENSMUSG00000035569|-|chr8:g.123619235:G>C  
MPKGGC SKTPQOEDFALSNDMVEKQTGKKDKDKVSLTKTPKLD RSDGGKEVRERATKRKLPFTV GANGEQKDS  
DTDSFGHRTFNWGSPLPFSLTCHTEKQGP ERKRIKKEPVARKSGLLFGMGLSGIRAGYPLSERQQVALLMQMT  
AEE SANS P D T T P K H P S Q S T V C Q K G T P N S A S K T K D K V N K R N E R G E T R L H R A A I R G D A R R I K E L I S E G A D V N V K D  
FAGWTALHEACNRGYDIAKQLLAAGAEVNTKGLDDDTPLHDAANN GHYKVVKLLRLRYGGNPQQSNRKGETPL  
KVANSPTMVNLLLGKGTYSSEESSTESSEEEEDAPSFAPSSVDGNNTDSEFEKGLK LKAKNPEPQKTVTPVK  
DEYEFDEDDQRVPPVDDKHLKLDYRKEAKANSFISI PKMEVKSYSKNNTLAPKKAHRILSDTSDEEDVS  
VSI GAGEKLRLSAHTMLPGSKARESSSRQQKEKNLKKRKKETKKGKEVRFGRKSDKFCSSGSESESESEE  
DDGDSVGSGLKGSPLVLKDP SLFSSLSASSTSSHGSAVAQKHGSGHTDQHTKHWRTDNWKAISSPAWSEVS  
SLSDSSRTGLTSESDCSSEGSSVESLKPTRRKQEHRRKRGVLQSAPESEKRSFHPCTDGAVPKLDKEGKVVKKH  
KTKHKKHKKKEKGQCSV SQELKLSFTY EYEDSKQKSDKAILLES DLSTENKLVKLDHREHLKKEKDKLGRMKP  
EDKDWLFKDEKVLKRIKDANKDMSRAFREDKDRASKAERERATKDKSPKEEKLRLYKEERKKSKDRASRLER  
KNDMKEDKLSKEKEKAFKEDKEK LKKEKLYREDAAFDDYCNK SQFLDHEDTKFSLSDDQQRWFSDLS DSSFD  
FKGEDSWDSVTDYRDIKNDSVAKLILETVKEDSKEKKRDNKIREKRDFKDSFFRKRDRDCLDNSEKRRDQTE  
KHKSIPSYLSEKDKKRRESAEGGRDRDRGRI RSEEVHREDLKECGFESSFKDKSDCDFPKNLEPWERPHAARE  
KEKKDALEKKEKGRADKYKEKSSERERSDKSTLDKQCQKDEFEKCFKEKKDGKEKHKDIHSKDRKASFQDL  
REKKEKVFSSII SEDF SERKDDRKGKEKSWYIADIFTDESEDEKDDCVAGSFKATEASDTQRVDGLPEKEEGR  
EHPSDRHRKSSDRQHTKEPRDKEPKKEKKDRGASEGGKDKKEKMEKIFEKHKEKKDKECAERYKDRKERASA  
DSAPEKKNQKLPEKVEKKHFAEDKVSKHKEKPEKEHSRERERKPSRGPDVEKSLLEKLEEEALHDYREDSN  
DKISEVSSDSFADHGQEPSLSTLLEVSFSEPPAEDKARDSACLSEK LREKERHRHSSSSSKSHERERAKKEK  
AEKKEKSEDYKDISSVRKDASQFEKDFLDAETYGVSYPTKADVEEELDKAIELFSSEKKDRSDPEREPAKRI  
EKELKPYGSSAISILKEKKKREKHRERWREEKERHRDKHVDGFLRHHKDEPKPAKDKDNPPNSFKEKSREES  
LKLSESKLKEKFKENTEREKGDSIKMSNGNDKLVPSRDSGKKDSRPREKLLGDGDLMMTSFERMLSQKDLIE  
ERHHRHKERMKQMEKMRHRS GPKLKEKKPTEDGRKSLDFPSKKALGLDKKVKEPAPTLTTGESKPHSGPGT  
ESKDWLSGQPLKEVLPASPRTEQSRPTGVPTPTS SVVSCPSYEEVMHTPRT PSCSADDY PDLVFDCTDSQHSMV  
VSTASTSACSPPFFDRFSVASSVSENAAGQTPTRPISTNLYRSISVDIRRTPPEEFSAGDKLFRQQSV PAPS  
SFDSVPVQHLLLEEKAPLPPVPAEKFACLSPGYSPDYGIPSPKVDTLHCPPTAVVSATPPPDSVFNLPKSSP  
SPRGELLSPAIEGTLPPDLGLPLDATEDQQATAAILPQEPSYLEPLDEGPFTTVITEEPVEWHTAAEQGLSS  
SSLIASASENPVSWPVGSELM LKSQRFAPESPKHFCPGESLHSTTPGPYSAAEPTYVSPG SYPLPAPEPALE  
EVKDGGTGAI PVAISAAEGAAPYAAPARLESFFSNCKSHPDAPLDTAPEPTGVTAVAQVEALGPLESSFLDSN  
PSISTLSQVEPVSWEAFTSPEDDLDLGPFSLPELPLQAKDASDVEAEAAKASPVPPAESPPGPTGVLGGGDV  
PAPAAEPPAPPPQEASQLS TEPEPSEEPKLDVVLEATVETEVLADDSAPEASISNSVPAPSPQQQPPGGG  
DEEAETEDPSATPCCAPDGPTTDGLAQAHNSAEASCVAAGP PGNVQAEATDPEPKPTSEVPKAPKVEEVP  
QRMTRNRAQMLASQSKQGI PAAEKDPMPPTPASRAKGRASEEEDAQAQHPRKRRFQRSSQQLQQQLNTSTQQT  
REVIQQT LAIVDAIKLDAIEPYHSDRSNPYFEYLQIRKKIEEKRI LCCITPQAPQCYAEYVYTG SYLLDGK  
PLSKLHIPVIAPPPSLAEPLKELFKQOEAVRGKLRQLQHSIEREKLIVSCEQEILRVHCRAARTIANQAVPFS  
ACTMLLDSEVYNMPLESQGDENKSVRDRFNARQFISWLQDVDDKYDRMKTCLLMRQQHEAAAALNAVQRM EWQLK  
AQELDPAGHKS LCVNEVPSFYVPMVDVNDDFVLLPA\*

>ENSMUSP00000095939\_c.3858:G>T\_p.D1287Y ENSMUST00000098334.13|Ankrd11-202|ENSMUSG00000035569|-|chr8:g.123619929:C>A  
 MPKGGCCKTPQQEDFALSNDMVEKQTGKKDKDKVSLTKTPKLDKSDGGKEVREERATKRKLPFTVVGANGEQKDS  
 DTEKQGPERRKRIKKEPVARSGLLFGMGLSGIRAGYPLSERQQVALLMQMTAEESANSVPDTPKHPSQSTVC  
 QKGT PNSASKTKDKVNKRNERGETRLHRAAIRGDARRIKELISEGADVNVKDFAGWTALHEACNRGYDIAKQ  
 LLAAGAENVTKGLDDDTPLHDAANNNGHYKVVKLLRLRYGGNPQQSNRKGETPLKVANSPTMVNLLLKGKTYTSS  
 EESSTESSEEDAPSFAPSSVDGNNTDSEFEKGLKLLKAKNPEPQKTVTPVKDEYEFDEDEQDRVPPVDDKH  
 LLKKDYRKEAKANSFISIPKMEVKSYSKNNTLAPKKAHRILSDTSDEEDVSVSIGAGEKLRLSAHTMLPGSK  
 ARESSSRQQKEKNKLLKKRKKETKGEVRFGRSDKFCSSGSESESESEEDDGDSDVSSGCLKGSPLVLKD  
 PSLFSSLSASSTSSHGSAVAQKHGSGHTDQHTKHWRTDNWKAISSPAWSEVSSLSDSSRTGLTSESDCSSEGS  
 SVESLKPTRRKQEHRRKRGVLQSAPEKRSFHPCTDGAVPKLDEKGVVKKHKT KHKHKKHKEKGQCSVSOELK  
 LKSFTY EYEDSKQKSDKAILLESDLSTENKLVKLDHREHLKEDKLGMRKPEDKDWLFKDEKVLKRIKDANK  
 DMSRAFREDKDRASKAERERATKDKSPKEEKLRLYKEERKSKDRASRLERKNDMKEDKLSKEKEKAFKEDK  
 EKLLKKEKLYREDAAFDDYCNKSQFLDHEDTKFSLSDDQQRWFSDLSDSSFDKGEDSWDSVTDYRDIKNDV  
 AKLILETVKEDSKEKRDNKIREKRDFKDSFFRKRDRDCLDNSEKRRDQTEKHKSIPSYLSEKDKKRRESAE  
 GGRDRDRGRIRSEEVHREDLKECGFESSFKDKSDCDFPNLEPWERPHAAREKEKDDALEKERKEKGRADKYK  
 EKSSERERSDKSTLTKCQKDKFEKCFKEKKGKEKHKDIHSDRKA SFDQLREKKEKVFSSIISEDFSERKD  
 DRKGEKESWYIADIFTDESEDEKDDCVAGSFKATEASDTQRVDGLPEKEEGREHPSDRHRKSSDRQHTTEKPR  
 DKEPKEKDKDRGASEGGKDKKEKMEKIFEKHKEKDKCEAERYKDRKERASADSAPKKNKQKLPKVEKHHF  
 AEDKVKSKHKEKPEKEHSRERERKPSRGPDVEKSLLEKLEEEALHYREDSNDKISEVSSDSFADHGQEPSLS  
 TLLEVSFSEPPAEDKARDSACLSEKLEKERHRHSSSSSSKSHERERAKKEKA EKKEKSEYKDSISSVRKDA  
 SQFEKDFLDAETYGVSYPTKADVEEELDKAIELFSSEKDRSDPEREPAKRIEKELKPYGSSAISILKEKRR  
 EKHRERWREEKERHRDKHVDGFLRHHKDEPKPAKDKDNPNSFKESREESLKLSETKLEKFKENTEREK  
 DSIKMSNGNDKLVPSRDSGKDSRPREKLLGDGLMMSFERMLSQKDLIEERHHRKERMKQMEKMRHRSG  
 DPKLKEKKTEDGRKSLDFPSSKALGLDKKVKPEAPTLTGESKPHSGPGTESKDWLSDGQPLKEVLPASPRT  
 EQSRPTGVPTPTSVVSCPSYEEVMHTPRTSPCSADDPDLVDFDCTDSQHSMPVSTASTSACSPFFDFRFSVAS  
 SVVSENAAGQTPTRPISTNLYRSISVDIRRTPEEEFASAGDKLFRQQSVVAPASSFDSVQHLLLEKAPLPPVA  
 EKFACLSPGYSPDYGI PPKVDLHCPPTAVVSATPPPDSVFNLPKSSPSPRGELLSPAIEGTLPPDLGL  
 PLDATEDQQATAAILPQEPSYLEPLDEGPFTTVITEEPVEWHTHAAEQGLSSSSLIASASENPVSWPVGSELM  
 LKSPQRFAESPKHFCPGESLHSTTPGPYSAAEPTYVSPGYSYPLPAPEPALEEVKDGGTGAI PVAISAAEGAA  
 PYAAPARLESFFSNCKSHDPALDTAPEPTGVTAVAQVEALGPLLESSFLDSNPSISTLSQVEPVSWHEAFTSP  
 EDDL DLGPFSLPELPLQAKDASDVEAEAAKASPVPPAESPPGPTGVLGGGDVPAPAAEPPAPPQEQEASQLS  
 TEPEPSEEPKLDVVLEATVETEVLADDSAPEASISNSVPAPSPQQQPPGGGDEEAETEDPSATPCCAPDGPT  
 TDGLAQAHNSAEASCVVAAGPPGNVQAEATDPEPKPTSEVPKAPKVEEVPQRMTRNRAQMLASQSKQGI PA  
 AEKDPMPPTPASRAKGRASEEDAQAQHPRKRFRQRSSQQLQQQLNTSTQQTREVIQQT LAIVDAIKLDAIEP  
 YHSDRSNPYFEYLQIRKKIEEKRI LCCI TPQAPQCYAEYVTYTGSYLLDGGKPLSKLHI PVIAPPSLAEPK  
 ELFKQQEAVRGLRLQHSIEREKLI VSCQEILRVHCRAARTIANQAVPFSACTMLLDSEVYNMPLESQGDEN  
 KSVRDRFNARQFISWLQDVDDKYDRMKTCLLMRQQHEAAALNAVQRMEWQLKAQELDPAGHKS LCVNEVPSFY  
 VPMVDVNDDFVLLPA\*

>ENSMUSP00000095938\_c.3921:G>T\_p.D1308Y ENSMUST00000098333.5|Ankrd11-201|ENSMUSG00000035569|-|chr8:g.123619929:C>A  
 MPKGGCCKTPQQEDFALSNDMVEKQTGKKDKDKVSLTKTPKLDKSDGGKEVREERATKRKLPFTVVGANGEQKDS  
 DTDSFGHRTFNWGSPLPFLTCHTEKQGPERRKRIKKEPVARSGLLFGMGLSGIRAGYPLSERQQVALLMQMT  
 AEESANSPTTPKHPSQSTVCQKGT PNSASKTKDKVNKRNERGETRLHRAAIRGDARRIKELISEGADVNVKDF  
 FAGWTALHEACNRGYDIAKQLLAAGAENVTKGLDDDTPLHDAANNNGHYKVVKLLRLRYGGNPQQSNRKGETPL  
 KVANSPTMVNLLLKGKTYTSSSEESSTESSEEDAPSFAPSSVDGNNTDSEFEKGLKLLKAKNPEPQKTVTPVK  
 DEYEFDEDEQDRVPPVDDKHLLKKDYRKEAKANSFISIPKMEVKSYSKNNTLAPKKAHRILSDTSDEEDVSV  
 VSIGAGEKLRLSAHTMLPGSKARESSSRQKEKNKLLKKRKKETKGEVRFGRSDKFCSSGSESESESESE  
 DDGDSDVSSGCLKGSPLVLKDP SLFSSLSASSTSSHGSAVAQKHGSGHTDQHTKHWRTDNWKAISSPAWSEV  
 SLDSSRTGLTSESDCSSEGS SVESLKPTRRKQEHRRKRGVLQSAPEKRSFHPCTDGAVPKLDEKGVVKKH  
 KTKHKHKKHKEKGQCSVSOELKLSFTY EYEDSKQKSDKAILLESDLSTENKLVKLDHREHLKEDKLGMRK  
 EDKDWLFKDEKVLKRIKDANKDMSRAFREDKDRASKAERERATKDKSPKEEKLRLYKEERKSKDRASRLER  
 KNDMKEDKLSKEKEKAFKEDKEKLLKKEKLYREDAAFDDYCNKSQFLDHEDTKFSLSDDQQRWFSDLSDSSFD  
 FKGEDSWDSVTDYRDIKNDVAKLILETVKEDSKEKRDNKIREKRDFKDSFFRKRDRDCLDNSEKRRDQTE  
 KHKSIPSYLSEKDKKRRESAEGGRDRDRGRIRSEEVHREDLKECGFESSFKDKSDCDFPNLEPWERPHAARE  
 KEKDDALEKERKEKGRADKYKESSEERERSDKSTLTKCQKDKFEKCFKEKKGKEKHKDIHSDRKA SFDQL  
 REKKEKVFSSIISEDFSERKDRKGEKESWYIADIFTDESEDEKDDCVAGSFKATEASDTQRVDGLPEKEEGR  
 EHPDRHRKSSSDRQHTTEKPRDKEPKEKDKDRGASEGGKDKKEKMEKIFEKHKEKDKCEAERYKDRKERASA



DSAPEKKNKQKLPEKVEKKHFAEDKVKSKHKEKPEKEHSRERERKPSRGPDVEKSLLEKLEEEALHYREDSN  
 DKISEVSSDSFADHGQEPSTLLELVSFSEPPAEDKARDSACLSEKLEKERHRHSSSSSKSHERERAKKEK  
 AEKKEKSEYKDSISSVRKDAQFEKDFLDAETYGVSYPTKADVEEELDKAIELFSSEKKDRSDPEREPAKRI  
 EKELKPYGSSAISILKEKKKREKHRERWREEKERHRDKHVDGFLRHHKDEPKPAAKDKDNPPNSFKEKSREES  
 LKLETKLKEKFKENTEREKGDSIKMSNGNDKLVPSRDSGKKDSRPREKLLGDGDLMMTSFERMLSQKDLIE  
 ERHHRKERMKQMEKMRHRSRSDPKLKEKPTEDGRKSLDFPSKALGLDCKVKEPAPTLTTGESKPHSGPGT  
 ESKDWLSGQPLKEVLPASPRTEQSRPTGVPTPTS SVVSCPSYEEVMHTPRTTPSCSADDY PDLVFDCTDSQHSMP  
 VSTASTSACSPFFDRFSVASVSENAAGQTPTRPISTNLYRSISVDIRRTPPEEFSAGDKLFRQQSV PAPS  
 SFDSPVQHLLLEEKAPLPPVPAEKFACLSPGYSPDYGI PPKVDTLHCPPTAVVSATPPPDSVFNLPKSSP  
 SPRGELLSPAIEGTLPPDLGLPLDATEDDQQAATAAILPQEPSYLEPLDEGPFTTVITEEPVEWHTHAAEQGLSS  
 SSLIASASENPNVSWPVGSELMLKSPQRFAESPKHFCPGESLHSTTPGPYSAAEPTYPVSPGSLPAPPALE  
 EVKDGGTGAI PVAISAAEGAAPYAAPARLESFFSNCKSHDPAPLDTAPEPTGVTAVAQVEALGPLSSFLDSN  
 PSISTLSQVEPVSWHEAFTSPEDDLGLGPFSLPELPLQAKDASDVEAEAAKASPVPPAESPPGPTGVLGGGDV  
 PAPAEEPPAPPQEASQLSSTEPSEPKLDVLEATVETEVLADDSAPEASISNSVPAPSPQQQPPGGG  
 DEEAETEDPSATPCCAPDGP TTDGLAQAHNSAEASCVVAAAEPPGNVQAEATDPEPKPTSEVPKAPKVEEVP  
 QRMTRNRAQMLASQSKQGI PAEKDPMPTPASRAKGRASEEEDAQAQHPRKRRFQRSSQQLQQQLNTSTQOTR  
 EVIQOTLAAIVDAIKLDAIEPYHSDRSNPFYEYLQIRKKIEEKRI LCCITPQAPQCYAEYVYTGSYLLDGK  
 PLSKHLPI PVIAPPPSLAEPLKELFKQOEAVRGKLRQLQHSIEREKLIVSCEQEILRVHCRAARTIANQAVPFS  
 CTMLLDSEVYNMPLESQGDENKSVRDRFNARQFISWLQDVDDKYDRMKTCLLMRQQHEAAALNAVQRMEWQLK  
 AQELDPAGHKS LCVNEVPSFYVPMVDVNDDFVLLPA\*  
 >ENSMUSP00000095939\_c.1203:G>A\_p.A402T ENSMUST00000098334.13|Ankrdl1-  
 202|ENSMUSG00000035569|-|chr8:g.123622584:C>T  
 MPKGGCSKTPQQEDFALSNDMVEKQGTGKKDKDKVSLTKTKPLDRSDGGKEVRERATKRKLPFTV GANGEQKDS  
 DTEKQGP ERKRIKKEPVARKSGLLFGMGLSGIRAGYPLSERQQVALLMQMTAEESANS PVDTTPKHPSQSTVC  
 QKGT PNASKTKDKVNKRNERGETRLHRAAIRGDARRIKELI SEGADVNVKDFAGWTALHEACNRGYDIAKQ  
 LLAAGAEVNTKGLDDDTPLHDAANNHGYKVVKLLLRYGNNPQQSNRKGETPLKVANSPTMVNLLLGGKGYDTS  
 EESSTESSEEDFAPSSVDGNNTDSEFEKGLKAKNPEPQKTVTPVKDEYEFDEDDQDRVNPVDTDKH  
 LLKKDYRKEAKANSFISIPKMEVKSYSKNNTLAPKTAHRILSDTSDEEDVSVSIGAGEKLRLSAHTMLPGSK  
 ARESSSRQKKEKNLKKRKKETKGEKVRFGKRSDFKFCSSGSESESESEEDDGDSDVSGGCLKGSPLVLKD  
 PSLFSSLSASSTSSHGSAVAQKHGSGHTDQHTKHWRTDNWKAISSPAWSEVSSLSDSRTGLTSESDCSSEGS  
 SVESLKPTRRKQEHRRKGVLSAPSEKRS SFHPCTDGAVPKLDEKGVVKKHKT KKKHKKHKEKGQCSVSOELK  
 LKSFTYEDSKQKSDKAILLES DLSTENKLVKLDREHLKKEKDKLGRMKPEDKDWLFKDEKVLKRIKDANK  
 DMSRAFREDKDRASKAERERATKDKSPKEEKLRLYKEERKKSKDRASRLERKNDMKEDKLSKEKEKAFKEDK  
 EKLKKEKLYREDAAFDDYCNKSQFLDHEDTKFSLSDDQQRWFS DLSDSSDFDKGEDSWDSVTDYRDIKNDV  
 AKLILETVKEDSKEKRDNKIREKRDFKDSFFRKRDRDCLDNSEKRRDQTEKHKSI PSYLSEKDKKRRESAE  
 GGRDRRDGRI RSEEVHREDLKECFESSFKDKSDCDFPNLEPWERPHAAREKEKDDALEKERKEKGRADKYK  
 EKSSERERSDKSTL DKCQKDEFEKCFEKKDGKEKHKDI HSKDRKASFDQLREKKEKVFSSII SEDF SERKD  
 DRKGKEKSWYIADIFTDESEDEKDDCVAGSFKATEASDTQRVDGLPEKEEGREHPSDRHRKSSSDRQHTEKPR  
 DKEPKK KDRGASEGGKDKKEKMEKIFEKHKEKDKCEAERYKDRKERASADSAPEKKNKQKLPEKVEKKHF  
 AEDKVKSKHKEKPEKEHSRERERKPSRGPDVEKSLLEKLEEEALHYREDSNDKISEVSSDSFADHGQEPSTL  
 TLELVSFSEPPAEDKARDSACLSEKLEKERHRHSSSSSKSHERERAKKEKA EKKEKSEYKDSISSVRKDA  
 SQFEKDFLDAETYGVSYPTKADVEEELDKAIELFSSEKKDRSDPEREPAKRIEKELKPYGSSAISILKEKKR  
 EKHRERWREEKERHRDKHVDGFLRHHKDEPKPAAKDKDNPPNSFKEKSREESLKLSETKLEKFKENTEREK  
 DSIKMSNGNDKLVPSRDSGKKDSRPREKLLGDGDLMMTSFERMLSQKDLIEERHHRKERMKQMEKMRHRSR  
 DPKLKEKPTEDGRKSLDFPSKALGLDCKVKEPAPTLTTGESKPHSGPGTESKDWLSGQPLKEVLPASPRTE  
 EQSRPTGVPTPTS SVVSCPSYEEVMHTPRTTPSCSADDY PDLVFDCTDSQHSMPVSTASTSACSPFFDRFSVAS  
 SVVSENAAGQTPTRPISTNLYRSISVDIRRTPPEEFSAGDKLFRQQSV PAPSFDSPVQHLLLEEKAPLPPVPA  
 EKFACLSPGYSPDYGI PPKVDTLHCPPTAVVSATPPPDSVFNLPKSSPSPRGELLSPAIEGTLPPDLGL  
 PLDATEDDQQAATAAILPQEPSYLEPLDEGPFTTVITEEPVEWHTHAAEQGLSSSSSLIASASENPNVSWPVGSEL  
 LKSPQRFAESPKHFCPGESLHSTTPGPYSAAEPTYPVSPGSLPAPPALEEVKDGGTGAI PVAISAAEGAA  
 PYAAPARLESFFSNCKSHDPAPLDTAPEPTGVTAVAQVEALGPLSSFLDSNPSISTLSQVEPVSWHEAFTSP  
 EDDLGLGPFSLPELPLQAKDASDVEAEAAKASPVPPAESPPGPTGVLGGGDV PAPAEEPPAPPQEASQLS  
 TEPEPSEEPKLDVLEATVETEVLADDSAPEASISNSVPAPSPQQQPPGGGDEEAETEDPSATPCCAPDGP  
 TTDGLAQAHNSAEASCVVAAAEPPGNVQAEATDPEPKPTSEVPKAPKVEEVPQRMTRNRAQMLASQSKQGI PA  
 AEKDPMPPTPASRAKGRASEEEDAQAQHPRKRRFQRSSQQLQQQLNTSTQOTREVIQOTLAAIVDAIKLDAIEP  
 YHSDRSNPFYEYLQIRKKIEEKRI LCCITPQAPQCYAEYVYTGSYLLDGKPLSKHLPI PVIAPPPSLAEPLK  
 ELFKQOEAVRGKLRQLQHSIEREKLIVSCEQEILRVHCRAARTIANQAVPFSACTMLLDSEVYNMPLESQGDEN

KSVRDRFNARQFISWLQDVDDKYDRMKTCLLMRQQHEAAALNAVQRMEWQLKAQELDPAGHKS LCVNEVPSFY  
VPMVDVNDDFVLLPA\*  
>ENSMUSP00000095938\_c.1266:G>A\_p.A423T ENSMUST00000098333.5|Ankrdl1-  
201|ENSMUSG00000035569|-|chr8:g.123622584:C>T  
MPKGGCSKTPQQEDFALSNDMVEKQTGKKDKDKVSLTKTPKLDKSDGGKEVRERATKRKLPFTVVGANGEQKDS  
DTDSFGHRTFNWGSPLPFLSFTCHTEKQGPERRKRIKKEPVARKSGLLFGMGLSGIRAGYPLSERQQVALLMQMT  
AEESANSPTDTPKHPQSQTVCQKGT PNSASKTKDKVNKRNERGETRLHRAAIRGDARRIKELISEGADVNVKD  
FAGWTALHEACNRGYDIAKQLLAAGAEVNTKGLDDDTPLHDAANNHGYKVVKLLRLRYGGNPQQSNRKGETPL  
KVANSPTMVNLLLGKGTYSSEESSTESSEEDAPSFAPSSSDVGNNTDSEFEKGLKLLKAKNPEPQKTVTPVK  
DEYEFDEDEQDRVPPVDDKHLKLDYRKEAKANSFISIPKMEVKSYSKNNTLAPKTAHRILSDTSDEEDVS  
VSI GAGEKLRLSAHTMLPGSKARESSSSRQOKEKNKLLKRRKKEKTKGKEVRFGRSDKFCSSGSESESESEE  
DDGDSVGSGLKGSPLVLKDP SLFSSLSASSTSSHGSAVAQKHGSGHTDQHTKHWRTDNWKAISSPAWSEVS  
SLSDSSRTGLTSESDCSSEGSVESLKPTRRKQEHRRKRGVLQSAPEKRS SFHPCTDGAVPKLDEKGVVKKH  
KTKHKKHKKHEKQCSVSQELKLSFTYEDSKQKSDKAILLES DLSTENKLVKLDREHLKKEKDKLGRMKP  
EDKDWLFKDEKVLKRIKDANKDMSRAFREDKDRASKAERERATKDKSPKEEKLRLYKEERKKSKDRASRLER  
KNDMKEDKLSKEKEKAFKEDKEKLLKKEKLYREDAADFDDYCNKSQFLDHEDTKFSLSDDQQRWFDLSDS SFD  
FKGEDSWDSVTDYRDIKNDVAKLILETVKEDSKEKRDNKIREKRDFKDSFFRKRDRDCLDKNSEKRRDQTE  
KHKSIPSYLSEKDKRRRESAEGGRDRRDGRI RSEEVHREDLKECGFESSFKDKSDCDFPKNLEPWERPHAARE  
KEKKDALEKERKEKGRADKYKEKSSERERSDKSTLDCQKDKFEKCFKEKKDGKEKHKDIHSDRKRASFDQL  
REKKEKVFSSIISEDFSERKDDRGKEKSWYIADIFTDESEDEKDDCVAGSFKATEASDTQRVDGLPEKEEGR  
EHPDRHRKSSSDRQHTKEPRDKEPKKKKDRGASEGGKDKKEKMEKIFEKHKEKKDKCAERYKDRKERASA  
DSAPEKKNKQKLPEKVEKHFADKVKSKHKEKPEKEHSRERERKPSRGPDVEKSLLEKLEEEALHDYREDSN  
DKISEVSSDSFADHGQEP SLSTLLEVFSFEPPEADKARDSACLSEKLEKERHRHSSSSSKSHERERAKKEK  
AEKKEKSEDKSISVVRKDSQFEKDFLDAETYGVSYPTKADVEEELDKAIELFSSEKDRSDPEREPAKRI  
EKELKPYGSSAISILKEKKKREKHRERWREEKERHRDKHVDGFLRHHKDEPKPAKDKDNPNPNSFKEKSREES  
LKLSETKLKEKFKENTEREKGD SIKMSNGNDKLVSRSDSGKKDRPREKLLGDGDLMTSFERMLSQKDLIE  
ERHKKRHKERMKMRHRSRGPDLKLEKKPTEDGRKSLDFPSPKALGLDKKVEKAPMLTTGESKPHSGPGT  
ESKDWLSGQPLKEVLPASPRTEQSRPTGVPTPTS SVVSCPSYEEVMHTPRT PSCSADDY PDLVFDCTDSQHSMP  
VSTASTSACSPFFDFRFSVASSVSENAAGQTPTRPISTNLYRSISVDIRRTPEEEFSAGDKLFRQQSV PAPS  
SFDSPVQHLLEEKAPLPPVPAEKFACLSPGYSPDYGIPSPKVDTLHCPPTAVVSATPPPDSVFNLPKSSP  
SPRGELLSPAIEGLTLPDGLPLDATEDQQATAAILPQEPSYLEPLDEGPFTTVITEEPVEWHTAAEQGLSS  
SSLIASASENPVSWPVGSELMLKSPQRFAESPKHFCPGESLHSTTPGPYSAAEPTYPVSPGSPYPLPAPEPALE  
EVKDDGGTGAI PVAISAAEGAAPYAAPARLESFFSNCKSHPDAPLDTAPEPTGVTAVAQVEALGPLESSFLDSN  
PSISTLSQVEPVSWHEAFTSPEDDLDLGPFSLPELPLQAKDASDVEAEAAKASPVPPAESPPGPTGVLGGGDV  
PAPAAEPPAPPPQEA SPQLEPEPSEPKLDVVLEATVETEVLADDSAPEASISNSVPAPSPPPQQPPGGG  
DEEAETEDPSATPCCAPDGT TDGLAQAHNSAEASCVAAAEGPPGNVQAEATDPEPKPTSEVPKAPKVEEVP  
QRMRNRAQMLASQSKQGI PAAEKDPMPTPASRAKGRASEEEDAQAQHPRKRRFQRSSQQLQQQLNTSTQQTR  
EVIQQT LAIIVDAIKLDAIEPHYSDRSNPYFEYLQIRKKIEEKRI LCCITPQAPQCYAEYVYTYG SYLLDGK  
PLSKLHIPVIA PPPSLAEPLKELFKQEA VRGKLRQLQHSIEREKLIVSCEQEILRVHCRAARTIANQAVPFS  
CTMLLDSEVYNMPLESQGDENKSVRDRFNARQFISWLQDVDDKYDRMKTCLLMRQQHEAAALNAVQRMEWQLK  
AQELDPAGHKS LCVNEVPSFYVPMVDVNDDFVLLPA\*  
>ENSMUSP00000114043\_c.876:ATG>TTA\_p.D293L ENSMUST00000117624.9|Ttc13-  
202|ENSMUSG00000037300|-|chr8:g.125415327:CAT>TAA  
MAPAGCGCGCSGSLGAAVVRPLLLLLGALACARATEHYSPLSLLKQELQHRQQEAPAGGGCPQSGDWADQYP  
ECESFFLNHFESDCELRSAPCDSLLSLNTEKILSQA SIAEQKRFPFATDNDSTNEELAIAYVLVGSGLYDE  
AIRHFSTMLQEEPDLSAIYGRGIAYGKGLHEAIEAFKEALQKQVDFIDAYKSLGQAYRELGNFDAATESFQ  
KALLLNQNHVQTLQLRGMMLYHHGSLQEALKNFKRCLQLEPYNEVCQYMKGLSHVAMGQFYEGIKAQTKVMLN  
LTLFQARRPAQST\*GSSTYESILDICTHTS IPL\*RNITLTRIYRAASRTTGPRTCLSS\*TAMKSSPACSLTLE  
MCYIRISRATSLKRS\*SV\*LTAWAR\*CSMKHRGSCPTRGYTEPWAWQHWKSCRPIVPGPTQRFA\*MEKQGC  
CSGGTCSTLL\*SGEGLIRTSLSGWI RQLQVSAEGSITTTST\*SGVK\*SI\*DIWNILRKYFILLKIEFLFIT  
EQI IQRAYWKSEKLWKRYTKWTSFQL\*SSLIPKQRTGSP\*TPKSPASKIKGRNMTASPSQETRS AISYFL  
WKLKPKQRGHSCITLK\*MHFIKT\*QRRAKY\*PSRQNSGRMLMSAT\*SY\*P\*CITFII\*CPCLEDLVSLRIQSLW  
ER\*WPVAKKWLGRSPKGS\*STLKP\*QPLAQRPSAK\*QKAG\*T\*RVFPLPTRPCHQYQRRSRL\*GP\*SRCSTRI  
PPHGV\*RNS  
>ENSMUSP00000156040\_c.810:ATG>TTA\_p.D271L ENSMUST00000231984.2|Ttc13-  
212|ENSMUSG00000037300|-|chr8:g.125415327:CAT>TAA  
MAPAGCGCGCSGSLGAAVVRPLLLLLGALACARATEHYSPLSLLKQELQHRQQEAPAGGGCPQSGDWADQYP  
ECESFFLNHFESDCELRSAPCDSLLSLNTEKILSQA SIAEQKRFPFATDNDSTNEELAIAYVLVGSGLYDE

AIRHFSTMLQEAIEAFKEALKQKVDIFIDAYKSLGQAYRELGNFDDAATESFQKALLLNQNHVQTLQLRGMMLYH  
HGSLQEALKNFKRCLQLEPYNEVCQYMKGLSHVAMGQFYEGIKAQTKVMLNLTFLQARRPAQST\*GSSTYESI  
LDICTHTSIPL\*RNITLTRIYRAASRTTGPRTCLSS\*TAMKSSPACSLTLEMCIYIRISRATSLSKRS\*SV\*LT  
AWAR\*CSMKHRGSCPTRGYTEPWAWQHWKSCRPIVPGPTQRFA\*MEKQGCCSGGTCSTLL\*SGEGLIRTSL  
SCGWIRCQLQVSAEGSITTTST\*SGVK\*SI\*DIWNILRKYFILLKIEFLFITEQIIQRAYWKSEKLWKRYTKWK  
TSFQL\*SLIPKQRTGSP\*TPKSPASKIKGRNMTASPPSQETRS AISYFLWKLKPKQKRGHSCITLK\*MHFIKT  
\*QRRAKY\*PSRQNSGRMLMSAT\*SYP\*CITFII\*CPCLEDLVSLRIQSLWER\*WPVAKKWLGRSPKGS\*STLK  
P\*QPLAQRPSAK\*QKAG\*T\*RVFPLPTRPCHQYQRRSRL\*GP\*SRCSTRIPPHGV\*RNS  
>ENSMUSP00000149848\_c.1197:ATG>TTA\_p.D400L ENSMUST00000214828.2|Ttc13-  
210|ENSMUSG00000037300|-|chr8:g.125415327:CAT>TAA  
MAPAGCGCGCSGSLGAAVVRPLLLLLGALACARATEHYSPLSLLKQELQHRQQQEAAPAGGGCPQSGDWADQYP  
ECESFFLNHFESDCELRSAPCDSLLSLNTEKILSQAKSIAEQKRFPFATDNDSTNEELAIAYVLVGSGLYDE  
AIRHFSTMLQEEPDLSVAIYGRGIAYGKGLHDIKNAELALFELSRVIALEPDRPEVFQRAEILSPLGRINE  
AVNDLTKAIQLQPSARLYRHRGTYLFI SEDYATAHEDFQOSLELNRNQPTAMLYKGLTFFHRGLLKEAIEAFK  
EALKQKVDIFIDAYKSLGQAYRELGNFDDAATESFQKALLLNQNHVQTLQLRGMMLYHHGSLQEALKNFKRCLQ  
EPYNEVCQYMKGLSHVAMGQFYEGIKAQTKVMLNLTFLQARRPAQST\*GSSTYESILDICTHTSIPL\*RNITL  
TRIYRAASRTTGPRTCLSS\*TAMKSSPACSLTLEMCIYIRISRATSLSKRS\*SV\*LTAWAR\*CSMKHRGSCPTR  
GYTEPWAWQHWKSCRPIVPGPTQRFA\*MEKQGCCSGGTCSTLL\*SGEGLIRTSLSCGWIRCQLQVSAEGSI  
TTST\*SGVK\*SI\*DIWNILRKYFILLKIEFLFITEQIIQRAYWKSEKLWKRYTKWKTSFQL\*SLIPKQRTGSP  
\*TPKSPASKIKGRNMTASPPSQETRS AISYFLWKLKPKQKRGHSCITLK\*MHFIKT\*QRRAKY\*PSRQNSGR  
MLMSAT\*SYP\*CITFII\*CPCLEDLVSLRIQSLWER\*WPVAKKWLGRSPKGS\*STLKP\*QPLAQRPSAK\*QKAG  
\*T\*RVFPLPTRPCHQYQRRSRL\*GP\*SRCSTRIPPHGV\*RNS  
>ENSMUSP00000038484\_c.810:ATG>TTA\_p.D271L ENSMUST00000041614.15|Ttc13-  
201|ENSMUSG00000037300|-|chr8:g.125415327:CAT>TAA  
MAPAGCGCGCSGSLGAAVVRPLLLLLGALACARATEHYSPLSLLKQELQHRQQQEAAPAGGGCPQSGDWADQYP  
ECESFFLNHFESDCELRSAPCDSLLSLNTEKILSQAKSIAEQKRFPFATDNDSTNEELAIAYVLVGSGLYDE  
AIRHFSTMLQEAIEAFKEALKQKVDIFIDAYKSLGQAYRELGNFDDAATESFQKALLLNQNHVQTLQLRGMMLYH  
HGSLQEALKNFKRCLQLEPYNEVCQYMKGLSHVAMGQFYEGIKAQTKVMLNLTFLQARRPAQST\*GSSTYESI  
LDICTHTSIPL\*RNITLTRIYRAASRTTGPRTCLSS\*TAMKSSPACSLTLEMCIYIRISRATSLSKRS\*SV\*LT  
AWAR\*CSMKHRGSCPTRGYTEPWAWQHWKSCRPIVPGPTQRFA\*MEKQGCCSGGTCSTLL\*SGEGLIRTSL  
SCGWIRCQLQVSAEGSITTTST\*SGVK\*SI\*DIWNILRKYFILLKIEFLFITEQIIQRAYWKSEKLWKRYTKWK  
TSFQL\*SSLIPKQRTGSP\*TPKSPASKIKGRNMTASPPSQETRS AISYFLWKLKPKQKRGHSCITLK\*MHFIK  
T\*QRRAKY\*PSRQNSGRMLMSAT\*SYP\*CITFII\*CPCLEDLVSLRIQSLWER\*WPVAKKWLGRSPKGRYAGL  
AEAQAHLHLAGFWLWTACELDPTFPFSFYHVLRLLFSS\*STLKP\*QPLAQRPSAK\*QKAG\*T\*RVFPLPTRP  
CHQYQRRSRL\*GP\*SRCSTRIPPHGV\*RNS  
>ENSMUSP00000113383\_c.1038:ATG>TTA\_p.D347L ENSMUST00000118134.3|Ttc13-  
203|ENSMUSG00000037300|-|chr8:g.125415327:CAT>TAA  
MAPAGCGCGCSGSLGAAVVRPLLLLLGALACARATEHYSPLSLLKQELQHRQQQEAAPAGGGCPQSGDWADQYP  
ECESFFLNHFESDCELRSAPCDSLLSLNTEKILSQAKSIAEQKRFPFATDNDSTNEELAIAYVLVGSGLYDE  
AIRHFSTMLQILSPLGRINEAVNDLTKAIQLQPSARLYRHRGTYLFI SEDYATAHEDFQOSLELNRNQPTAML  
YKGLTFFHRGLLKEAIEAFKEALKQKVDIFIDAYKSLGQAYRELGNFDDAATESFQKALLLNQNHVQTLQLRGM  
LYHHGSLQEALKNFKRCLQLEPYNEVCQYMKGLSHVAMGQFYEGIKAQTKVMLNLTFLQARRPAQST\*GSSTY  
ESILDICTHTSIPL\*RNITLTRIYRAASRTTGPRTCLSS\*TAMKSSPACSLTLEMCIYIRISRATSLSKRS\*SV  
\*LTAWAR\*CSMKHRGSCPTRGYTEPWAWQHWKSCRPIVPGPTQRFA\*MEKQGCCSGGTCSTLL\*SGEGLIR  
TSLSCGWIRCQLQVSAEGSITTTST\*SGVK\*SI\*DIWNILRKYFILLKIEFLFITEQIIQRAYWKSEKLWKRYT  
KWKTSFQL\*SSLIPKQRTGSP\*TPKSPASKIKGRNMTASPPSQETRS AISYFLWKLKPKQKRGHSCITLK\*MH  
FIKT\*QRRAKY\*PSRQNSGRMLMSAT\*SYP\*CITFII\*CPCLEDLVSLRIQSLWER\*WPVAKKWLGRSPKGS\*  
STLKP\*QPLAQRPSAK\*QKAG\*T\*RVFPLPTRPCHQYQRRSRL\*GP\*SRCSTRIPPHGV\*RNS  
>ENSMUSP00000132394\_c.15:T>C\_p.C6R ENSMUST00000151376.3|Gm10722-  
201|ENSMUSG00000091028|+|chr9:g.3000937:T>C  
SCHIPRPTVDISFPFVFLAIFHVLKCVFLIFRDFQFYRQIPGPTVCIFHISRFSVILSFFKLSTACFSFSM  
IFSFLAIFHVLQWTFNLNFPFVFLAIFHVLKCVFLIFSDFLSRHIPGPTVCISHFSRFSVILSFFKLSSGC  
FSFSMIFSFLAIFHVLQWTFNLNFPFSSSIFSPYSRSYSVHFSFVIFQVVKWMFLIFHDFQFSC  
>ENSMUSP00000132394\_c.42:C>A\_p.P15T ENSMUST00000151376.3|Gm10722-  
201|ENSMUSG00000091028|+|chr9:g.3000968:C>A  
SCHIPCPTVDISFPFVFLAIFHVLKCVFLIFRDFQFYRQIPGPTVCIFHISRFSVILSFFKLSTACFSFSM  
IFSFLAIFHVLQWTFNLNFPFVFLAIFHVLKCVFLIFSDFLSRHIPGPTVCISHFSRFSVILSFFKLSSGC  
FSFSMIFSFLAIFHVLQWTFNLNFPFSSSIFSPYSRSYSVHFSFVIFQVVKWMFLIFHDFQFSC

>ENSMUSP00000132394\_c.99:C>T\_p.R34C ENSMUST00000151376.3|Gm10722-201|ENSMUSG00000091028|+|chr9:g.3001025:C>T  
SCHIPCPTVDISFPPFSVFLAIFHVLKCVFLIFRDFQFYRQIPGPTVCIFHISRFSVILSFFKLSTACFSFSM  
IFSFLAIFHVLQWTFNLNPPFSSVFLAIFHVLKCVFLIFSDFLFSRHIPGPTVCISHFSRFSVSSFFKLSSGC  
FSFSMIFSFLAIFHVLQWTFNLNPPFSSSIFSPYSRSYSVHFSFFTFSSDFVIFQVVKWMFLIFHDFQFSC  
>ENSMUSP00000132394\_c.115:A>C\_p.Y39S ENSMUST00000151376.3|Gm10722-201|ENSMUSG00000091028|+|chr9:g.3001041:A>C  
SCHIPCPTVDISFPPFSVFLAIFHVLKCVFLIFRDFQFYRQIPGPTVCIFHISRFSVILSFFKLSTACFSFSM  
IFSFLAIFHVLQWTFNLNPPFSSVFLAIFHVLKCVFLIFSDFLFSRHIPGPTVCISHFSRFSVSSFFKLSSGC  
FSFSMIFSFLAIFHVLQWTFNLNPPFSSSIFSPYSRSYSVHFSFFTFSSDFVIFQVVKWMFLIFHDFQFSC  
>ENSMUSP00000132394\_c.122:G>C\_p.Q41H ENSMUST00000151376.3|Gm10722-201|ENSMUSG00000091028|+|chr9:g.3001048:G>C  
SCHIPCPTVDISFPPFSVFLAIFHVLKCVFLIFRDFQFYRHIPGPTVCIFHISRFSVILSFFKLSTACFSFSM  
IFSFLAIFHVLQWTFNLNPPFSSVFLAIFHVLKCVFLIFSDFLFSRHIPGPTVCISHFSRFSVSSFFKLSSGC  
FSFSMIFSFLAIFHVLQWTFNLNPPFSSSIFSPYSRSYSVHFSFFTFSSDFVIFQVVKWMFLIFHDFQFSC  
>rs221766350\_ENSMUSP00000132394\_c.122:G>T\_p.Q41H  
ENSMUST00000151376.3|Gm10722-201|ENSMUSG00000091028|+|chr9:g.3001048:G>T  
SCHIPCPTVDISFPPFSVFLAIFHVLKCVFLIFRDFQFYRHIPGPTVCIFHISRFSVILSFFKLSTACFSFSM  
IFSFLAIFHVLQWTFNLNPPFSSVFLAIFHVLKCVFLIFSDFLFSRHIPGPTVCISHFSRFSVSSFFKLSSGC  
FSFSMIFSFLAIFHVLQWTFNLNPPFSSSIFSPYSRSYSVHFSFFTFSSDFVIFQVVKWMFLIFHDFQFSC  
>ENSMUSP00000132394\_c.135:ACG>TCA\_p.T46S ENSMUST00000151376.3|Gm10722-201|ENSMUSG00000091028|+|chr9:g.3001061:ACG>TCA  
SCHIPCPTVDISFPPFSVFLAIFHVLKCVFLIFRDFQFYRQIPGPTVCIFHISRFSVILSFFKLSTACFSFSM  
\*FSVFLPYSMSYSYGHF\*IFHLFQFSSPYFMS\*SVYFSFSVIFCFLAIFQVQLQCAFLIFHVQ\*FRHFSSCQVD  
VSHFP\*FSVFLPYSMSYNGHF\*IFHLFHRQFSRHIPGPTVCISHFSRFSVSSFFKLSSGCFSFFMIFSFL  
>ENSMUSP00000132394\_c.148:T>A\_p.F50Y ENSMUST00000151376.3|Gm10722-201|ENSMUSG00000091028|+|chr9:g.3001074:T>A  
SCHIPCPTVDISFPPFSVFLAIFHVLKCVFLIFRDFQFYRQIPGPTVCIFHISRFSVILSFFKLSTACFSFSM  
IFSFLAIFHVLQWTFNLNPPFSSVFLAIFHVLKCVFLIFSDFLFSRHIPGPTVCISHFSRFSVSSFFKLSSGC  
FSFSMIFSFLAIFHVLQWTFNLNPPFSSSIFSPYSRSYSVHFSFFTFSSDFVIFQVVKWMFLIFHDFQFSC  
>ENSMUSP00000132394\_c.148:T>C\_p.F50S ENSMUST00000151376.3|Gm10722-201|ENSMUSG00000091028|+|chr9:g.3001074:T>C  
SCHIPCPTVDISFPPFSVFLAIFHVLKCVFLIFRDFQFYRQIPGPTVCISHISRFSVILSFFKLSTACFSFSM  
IFSFLAIFHVLQWTFNLNPPFSSVFLAIFHVLKCVFLIFSDFLFSRHIPGPTVCISHFSRFSVSSFFKLSSGC  
FSFSMIFSFLAIFHVLQWTFNLNPPFSSSIFSPYSRSYSVHFSFFTFSSDFVIFQVVKWMFLIFHDFQFSC  
>ENSMUSP00000132394\_c.152:TA>T\_p.H51del-fs ENSMUST00000151376.3|Gm10722-201|ENSMUSG00000091028|+|chr9:g.3001078:TA>T  
SCHIPCPTVDISFPPFSVFLAIFHVLKCVFLIFRDFQFYRQIPGPTVCIFHIFHVQ  
>ENSMUSP00000132394\_c.153:A>T\_p.I52F ENSMUST00000151376.3|Gm10722-201|ENSMUSG00000091028|+|chr9:g.3001079:A>T  
SCHIPCPTVDISFPPFSVFLAIFHVLKCVFLIFRDFQFYRQIPGPTVCIFHISRFSVILSFFKLSTACFSFSM  
IFSFLAIFHVLQWTFNLNPPFSSVFLAIFHVLKCVFLIFSDFLFSRHIPGPTVCISHFSRFSVSSFFKLSSGC  
FSFSMIFSFLAIFHVLQWTFNLNPPFSSSIFSPYSRSYSVHFSFFTFSSDFVIFQVVKWMFLIFHDFQFSC  
>ENSMUSP00000132394\_c.159:C>T\_p.R54C ENSMUST00000151376.3|Gm10722-201|ENSMUSG00000091028|+|chr9:g.3001085:C>T  
SCHIPCPTVDISFPPFSVFLAIFHVLKCVFLIFRDFQFYRQIPGPTVCIFHISCFVSVILSFFKLSTACFSFSM  
IFSFLAIFHVLQWTFNLNPPFSSVFLAIFHVLKCVFLIFSDFLFSRHIPGPTVCISHFSRFSVSSFFKLSSGC  
FSFSMIFSFLAIFHVLQWTFNLNPPFSSSIFSPYSRSYSVHFSFFTFSSDFVIFQVVKWMFLIFHDFQFSC  
>ENSMUSP00000132394\_c.166:C>T\_p.S56L ENSMUST00000151376.3|Gm10722-201|ENSMUSG00000091028|+|chr9:g.3001092:C>T  
SCHIPCPTVDISFPPFSVFLAIFHVLKCVFLIFRDFQFYRQIPGPTVCIFHISRFLVILSFFKLSTACFSFSM  
IFSFLAIFHVLQWTFNLNPPFSSVFLAIFHVLKCVFLIFSDFLFSRHIPGPTVCISHFSRFSVSSFFKLSSGC  
FSFSMIFSFLAIFHVLQWTFNLNPPFSSSIFSPYSRSYSVHFSFFTFSSDFVIFQVVKWMFLIFHDFQFSC  
>ENSMUSP00000132394\_c.175:T>C\_p.L59S ENSMUST00000151376.3|Gm10722-201|ENSMUSG00000091028|+|chr9:g.3001101:T>C  
SCHIPCPTVDISFPPFSVFLAIFHVLKCVFLIFRDFQFYRQIPGPTVCIFHISRFSVSSFFKLSTACFSFSM  
IFSFLAIFHVLQWTFNLNPPFSSVFLAIFHVLKCVFLIFSDFLFSRHIPGPTVCISHFSRFSVSSFFKLSSGC  
FSFSMIFSFLAIFHVLQWTFNLNPPFSSSIFSPYSRSYSVHFSFFTFSSDFVIFQVVKWMFLIFHDFQFSC

>ENSMUSP00000132394\_c.190:T>G\_p.L64W ENSMUST00000151376.3|Gm10722-201|ENSMUSG00000091028|+|chr9:g.3001116:T>G  
SCHIPCPTVDISFPPFSVFLAIFHVLKCVFLIFRDFQFYRQIPGPTVCIFHISRFSVILSFFKWSTACFSFSM  
IFSFLAIFHVLQWTFNLNPPFSSVFLAIFHVLKCVFLIFSDFLFSRHIPGPTVCISHFSRFSVISSFFKLSSGC  
FSFSMIFSFLAIFHVLQWTFNLNPPFSSSIFSPYSRSYSVHFSFFTFSSDFVIFQVVKWMFLIFHDFQFSC  
>rs236908461\_ENSMUSP00000132394\_c.190:T>C\_p.L64S  
ENSMUST00000151376.3|Gm10722-201|ENSMUSG00000091028|+|chr9:g.3001116:T>C  
SCHIPCPTVDISFPPFSVFLAIFHVLKCVFLIFRDFQFYRQIPGPTVCIFHISRFSVILSFFKSSTACFSFSM  
IFSFLAIFHVLQWTFNLNPPFSSVFLAIFHVLKCVFLIFSDFLFSRHIPGPTVCISHFSRFSVISSFFKLSSGC  
FSFSMIFSFLAIFHVLQWTFNLNPPFSSSIFSPYSRSYSVHFSFFTFSSDFVIFQVVKWMFLIFHDFQFSC  
>ENSMUSP00000132394\_c.196:C>G\_p.T66S ENSMUST00000151376.3|Gm10722-201|ENSMUSG00000091028|+|chr9:g.3001122:C>G  
SCHIPCPTVDISFPPFSVFLAIFHVLKCVFLIFRDFQFYRQIPGPTVCIFHISRFSVILSFFKLSSACFSFSM  
IFSFLAIFHVLQWTFNLNPPFSSVFLAIFHVLKCVFLIFSDFLFSRHIPGPTVCISHFSRFSVISSFFKLSSGC  
FSFSMIFSFLAIFHVLQWTFNLNPPFSSSIFSPYSRSYSVHFSFFTFSSDFVIFQVVKWMFLIFHDFQFSC  
>ENSMUSP00000132394\_c.196:CTGC>GTGT\_p.T66S ENSMUST00000151376.3|Gm10722-201|ENSMUSG00000091028|+|chr9:g.3001122:CTGC>GTGT  
SCHIPCPTVDISFPPFSVFLAIFHVLKCVFLIFRDFQFYRQIPGPTVCIFHISRFSVILSFFKLSSVACFSFS  
MIFSFLAIFHVLQWTFNLNPPFSSVFLAIFHVLKCVFLIFSDFLFSRHIPGPTVCISHFSRFSVISSFFKLSSG  
CFSFSMIFSFLAIFHVLQWTFNLNPPFSSSIFSPYSRSYSVHFSFFTFSSDFVIFQVVKWMFLIFHDFQFSC  
>ENSMUSP00000132394\_c.196:CTGC>GTGG\_p.T66S ENSMUST00000151376.3|Gm10722-201|ENSMUSG00000091028|+|chr9:g.3001122:CTGC>GTGG  
SCHIPCPTVDISFPPFSVFLAIFHVLKCVFLIFRDFQFYRQIPGPTVCIFHISRFSVILSFFKLSSGACFSFS  
MIFSFLAIFHVLQWTFNLNPPFSSVFLAIFHVLKCVFLIFSDFLFSRHIPGPTVCISHFSRFSVISSFFKLSSG  
CFSFSMIFSFLAIFHVLQWTFNLNPPFSSSIFSPYSRSYSVHFSFFTFSSDFVIFQVVKWMFLIFHDFQFSC  
>ENSMUSP00000132394\_c.199:C>G\_p.A67G ENSMUST00000151376.3|Gm10722-201|ENSMUSG00000091028|+|chr9:g.3001125:C>G  
SCHIPCPTVDISFPPFSVFLAIFHVLKCVFLIFRDFQFYRQIPGPTVCIFHISRFSVILSFFKLSTGCFFSM  
IFSFLAIFHVLQWTFNLNPPFSSVFLAIFHVLKCVFLIFSDFLFSRHIPGPTVCISHFSRFSVISSFFKLSSGC  
FSFSMIFSFLAIFHVLQWTFNLNPPFSSSIFSPYSRSYSVHFSFFTFSSDFVIFQVVKWMFLIFHDFQFSC  
>ENSMUSP00000132394\_c.216:A>G\_p.M73V ENSMUST00000151376.3|Gm10722-201|ENSMUSG00000091028|+|chr9:g.3001142:A>G  
SCHIPCPTVDISFPPFSVFLAIFHVLKCVFLIFRDFQFYRQIPGPTVCIFHISRFSVILSFFKLSTACFSFSV  
IFSFLAIFHVLQWTFNLNPPFSSVFLAIFHVLKCVFLIFSDFLFSRHIPGPTVCISHFSRFSVISSFFKLSSGC  
FSFSMIFSFLAIFHVLQWTFNLNPPFSSSIFSPYSRSYSVHFSFFTFSSDFVIFQVVKWMFLIFHDFQFSC  
>ENSMUSP00000132394\_c.305:T>A\_p.H102Q ENSMUST00000151376.3|Gm10722-201|ENSMUSG00000091028|+|chr9:g.3001231:T>A  
SCHIPCPTVDISFPPFSVFLAIFHVLKCVFLIFRDFQFYRQIPGPTVCIFHISRFSVILSFFKLSTACFSFSM  
IFSFLAIFHVLQWTFNLNPPFSSVFLAIFQVLKCVFLIFSDFLFSRHIPGPTVCISHFSRFSVISSFFKLSSGC  
FSFSMIFSFLAIFHVLQWTFNLNPPFSSSIFSPYSRSYSVHFSFFTFSSDFVIFQVVKWMFLIFHDFQFSC  
>rs255289761\_ENSMUSP00000132394\_c.333:A>C\_p.S112R  
ENSMUST00000151376.3|Gm10722-201|ENSMUSG00000091028|+|chr9:g.3001259:A>C  
SCHIPCPTVDISFPPFSVFLAIFHVLKCVFLIFRDFQFYRQIPGPTVCIFHISRFSVILSFFKLSTACFSFSM  
IFSFLAIFHVLQWTFNLNPPFSSVFLAIFHVLKCVFLIFRDFLFSRHIPGPTVCISHFSRFSVISSFFKLSSGC  
FSFSMIFSFLAIFHVLQWTFNLNPPFSSSIFSPYSRSYSVHFSFFTFSSDFVIFQVVKWMFLIFHDFQFSC  
>ENSMUSP00000132394\_c.333:A>T\_p.S112C ENSMUST00000151376.3|Gm10722-201|ENSMUSG00000091028|+|chr9:g.3001259:A>T  
SCHIPCPTVDISFPPFSVFLAIFHVLKCVFLIFRDFQFYRQIPGPTVCIFHISRFSVILSFFKLSTACFSFSM  
IFSFLAIFHVLQWTFNLNPPFSSVFLAIFHVLKCVFLIFCDFLFSRHIPGPTVCISHFSRFSVISSFFKLSSGC  
FSFSMIFSFLAIFHVLQWTFNLNPPFSSSIFSPYSRSYSVHFSFFTFSSDFVIFQVVKWMFLIFHDFQFSC  
>ENSMUSP00000132394\_c.343:T>A\_p.L115Q ENSMUST00000151376.3|Gm10722-201|ENSMUSG00000091028|+|chr9:g.3001269:T>A  
SCHIPCPTVDISFPPFSVFLAIFHVLKCVFLIFRDFQFYRQIPGPTVCIFHISRFSVILSFFKLSTACFSFSM  
IFSFLAIFHVLQWTFNLNPPFSSVFLAIFHVLKCVFLIFSDFLFSRHIPGPTVCISHFSRFSVISSFFKLSSGC  
FSFSMIFSFLAIFHVLQWTFNLNPPFSSSIFSPYSRSYSVHFSFFTFSSDFVIFQVVKWMFLIFHDFQFSC  
>ENSMUSP00000132394\_c.369:A>T\_p.T124S ENSMUST00000151376.3|Gm10722-201|ENSMUSG00000091028|+|chr9:g.3001295:A>T

SCHIPCPTVDISFPPFSVFLAIFHVLKCVFLIFRDFQFYRQIPGPTVCIFHISRFSVILSFFKLSTACFSFSM  
IFSFLAIFHVLQWTFNLNPPFSVFLAIFHVLKCVFLIFSDFLFSRHIPGPTVCISHFSRFSVILSFFKLSSGC  
FSSMIFSLAIFHVLQWTFNLNPPFSSSIFSPYSRSYSVHFSFFTFSSDFVIFQVVKWMFLIFHDFQFSC  
>ENSMUSP00000132394\_c.400:C>T\_p.S134L ENSMUST00000151376.3|Gm10722-  
201|ENSMUSG00000091028|+|chr9:g.3001326:C>T  
SCHIPCPTVDISFPPFSVFLAIFHVLKCVFLIFRDFQFYRQIPGPTVCIFHISRFSVILSFFKLSTACFSFSM  
IFSFLAIFHVLQWTFNLNPPFSVFLAIFHVLKCVFLIFSDFLFSRHIPGPTVCISHFSRFLVILSFFKLSSGC  
FSSMIFSLAIFHVLQWTFNLNPPFSSSIFSPYSRSYSVHFSFFTFSSDFVIFQVVKWMFLIFHDFQFSC  
>ENSMUSP00000132394\_c.424:T>C\_p.L142S ENSMUST00000151376.3|Gm10722-  
201|ENSMUSG00000091028|+|chr9:g.3001350:T>C  
SCHIPCPTVDISFPPFSVFLAIFHVLKCVFLIFRDFQFYRQIPGPTVCIFHISRFSVILSFFKLSTACFSFSM  
IFSFLAIFHVLQWTFNLNPPFSVFLAIFHVLKCVFLIFSDFLFSRHIPGPTVCISHFSRFSVILSFFKSSSGC  
FSSMIFSLAIFHVLQWTFNLNPPFSSSIFSPYSRSYSVHFSFFTFSSDFVIFQVVKWMFLIFHDFQFSC  
>ENSMUSP00000132394\_c.424:T>G\_p.L142W ENSMUST00000151376.3|Gm10722-  
201|ENSMUSG00000091028|+|chr9:g.3001350:T>G  
SCHIPCPTVDISFPPFSVFLAIFHVLKCVFLIFRDFQFYRQIPGPTVCIFHISRFSVILSFFKLSTACFSFSM  
IFSFLAIFHVLQWTFNLNPPFSVFLAIFHVLKCVFLIFSDFLFSRHIPGPTVCISHFSRFSVILSFFKWSSGC  
FSSMIFSLAIFHVLQWTFNLNPPFSSSIFSPYSRSYSVHFSFFTFSSDFVIFQVVKWMFLIFHDFQFSC  
>ENSMUSP00000132394\_c.488:A>T\_p.Q163H ENSMUST00000151376.3|Gm10722-  
201|ENSMUSG00000091028|+|chr9:g.3001414:A>T  
SCHIPCPTVDISFPPFSVFLAIFHVLKCVFLIFRDFQFYRQIPGPTVCIFHISRFSVILSFFKLSTACFSFSM  
IFSFLAIFHVLQWTFNLNPPFSVFLAIFHVLKCVFLIFSDFLFSRHIPGPTVCISHFSRFSVILSFFKLSSGC  
FSSMIFSLAIFHVLQWTFNLNPPFSSSIFSPYSRSYSVHFSFFTFSSDFVIFQVVKWMFLIFHDFQFSC  
>ENSMUSP00000132394\_c.520:C>G\_p.S174W ENSMUST00000151376.3|Gm10722-  
201|ENSMUSG00000091028|+|chr9:g.3002051:C>G  
SCHIPCPTVDISFPPFSVFLAIFHVLKCVFLIFRDFQFYRQIPGPTVCIFHISRFSVILSFFKLSTACFSFSM  
IFSFLAIFHVLQWTFNLNPPFSVFLAIFHVLKCVFLIFSDFLFSRHIPGPTVCISHFSRFSVILSFFKLSSGC  
FSSMIFSLAIFHVLQWTFNLNPPFSSSIFSPYSRSYSVHFSFFTFSSDFVIFQVVKWMFLIFHDFQFSC  
>ENSMUSP00000132394\_c.550:A>T\_p.Y184F ENSMUST00000151376.3|Gm10722-  
201|ENSMUSG00000091028|+|chr9:g.3002230:A>T  
SCHIPCPTVDISFPPFSVFLAIFHVLKCVFLIFRDFQFYRQIPGPTVCIFHISRFSVILSFFKLSTACFSFSM  
IFSFLAIFHVLQWTFNLNPPFSVFLAIFHVLKCVFLIFSDFLFSRHIPGPTVCISHFSRFSVILSFFKLSSGC  
FSSMIFSLAIFHVLQWTFNLNPPFSSSIFSPYSRSYSVHFSFFTFSSDFVIFQVVKWMFLIFHDFQFSC  
>ENSMUSP00000132394\_c.580:T>G\_p.F194C ENSMUST00000151376.3|Gm10722-  
201|ENSMUSG00000091028|+|chr9:g.3002260:T>G  
SCHIPCPTVDISFPPFSVFLAIFHVLKCVFLIFRDFQFYRQIPGPTVCIFHISRFSVILSFFKLSTACFSFSM  
IFSFLAIFHVLQWTFNLNPPFSVFLAIFHVLKCVFLIFSDFLFSRHIPGPTVCISHFSRFSVILSFFKLSSGC  
FSSMIFSLAIFHVLQWTFNLNPPFSSSIFSPYSRSYSVHFSFFTFSSDFVIFQVVKWMFLIFHDFQFSC  
>ENSMUSP00000132394\_c.615:A>T\_p.M206L ENSMUST00000151376.3|Gm10722-  
201|ENSMUSG00000091028|+|chr9:g.3002295:A>T  
SCHIPCPTVDISFPPFSVFLAIFHVLKCVFLIFRDFQFYRQIPGPTVCIFHISRFSVILSFFKLSTACFSFSM  
IFSFLAIFHVLQWTFNLNPPFSVFLAIFHVLKCVFLIFSDFLFSRHIPGPTVCISHFSRFSVILSFFKLSSGC  
FSSMIFSLAIFHVLQWTFNLNPPFSSSIFSPYSRSYSVHFSFFTFSSDFVIFQVVKWFLIFHDFQFSC  
>ENSMUSP00000132394\_c.617:G>T\_p.M206I ENSMUST00000151376.3|Gm10722-  
201|ENSMUSG00000091028|+|chr9:g.3002297:G>T  
SCHIPCPTVDISFPPFSVFLAIFHVLKCVFLIFRDFQFYRQIPGPTVCIFHISRFSVILSFFKLSTACFSFSM  
IFSFLAIFHVLQWTFNLNPPFSVFLAIFHVLKCVFLIFSDFLFSRHIPGPTVCISHFSRFSVILSFFKLSSGC  
FSSMIFSLAIFHVLQWTFNLNPPFSSSIFSPYSRSYSVHFSFFTFSSDFVIFQVVKWIFLIFHDFQFSC  
>ENSMUSP00000132394\_c.630:C>T\_p.H211Y ENSMUST00000151376.3|Gm10722-  
201|ENSMUSG00000091028|+|chr9:g.3002310:C>T  
SCHIPCPTVDISFPPFSVFLAIFHVLKCVFLIFRDFQFYRQIPGPTVCIFHISRFSVILSFFKLSTACFSFSM  
IFSFLAIFHVLQWTFNLNPPFSVFLAIFHVLKCVFLIFSDFLFSRHIPGPTVCISHFSRFSVILSFFKLSSGC  
FSSMIFSLAIFHVLQWTFNLNPPFSSSIFSPYSRSYSVHFSFFTFSSDFVIFQVVKWMFLIFYDFQFSC  
>ENSMUSP00000136598\_c.45:T>C\_p.C16R ENSMUST00000177722.8|Gm11168-  
201|ENSMUSG00000096385|+|chr9:g.3003391:T>C  
MFLIFHDFQFSCHIPRPTVDISFPPFSVFLAIFHVLKCVFLIFSDQFSRHIPGPTVCISHFSRFSVILSFFK  
LSSGCFSLIFSLAIFHVLQWTFNLNPPFSVFLAIFHVLKCVFLIFRDFQFPRHIPGPTVCISHFSRFSV

ISSFFKSSSGCFSFSMIFSLAIFHVLQWTFNFPFSSYSFSPYSRSYSVHFSFSTFFSDFVIFQVVKWMFL  
IFLDFQFSC  
>ENSMUSP00000136598\_c.72:C>A\_p.P25T ENSMUST00000177722.8|Gm11168-  
201|ENSMUSG00000096385|+|chr9:g.3003422:C>A  
MFLIFHDFQFSCHIPCPTVDISFPFVSFLAIFHVLKCVFLIFSDQFSRHIPGPTVCISHFSRFSVILSFFK  
LSSGCFSSFLIFSFLAIFHVLQWTFNFPFSSVFLAIFHVLKCCVFLIFRDFQFPRHIPGPTVCISHFSRFSV  
ISSFFKSSSGCFSFSMIFSLAIFHVLQWTFNFPFSSYSFSPYSRSYSVHFSFSTFFSDFVIFQVVKWMFL  
IFLDFQFSC  
>ENSMUSP00000136598\_c.101:T>A\_p.H34Q ENSMUST00000177722.8|Gm11168-  
201|ENSMUSG00000096385|+|chr9:g.3003451:T>A  
MFLIFHDFQFSCHIPCPTVDISFPFVSFLAIFQVLKCVFLIFSDQFSRHIPGPTVCISHFSRFSVILSFFK  
LSSGCFSSFLIFSFLAIFHVLQWTFNFPFSSVFLAIFHVLKCCVFLIFRDFQFPRHIPGPTVCISHFSRFSV  
ISSFFKSSSGCFSFSMIFSLAIFHVLQWTFNFPFSSYSFSPYSRSYSVHFSFSTFFSDFVIFQVVKWMFL  
IFLDFQFSC  
>rs228881908\_ENSMUSP00000136598\_c.129:A>T\_p.S44C  
ENSMUST00000177722.8|Gm11168-201|ENSMUSG00000096385|+|chr9:g.3003479:A>T  
MFLIFHDFQFSCHIPCPTVDISFPFVSFLAIFHVLKCVFLIFCDFQFSRHIPGPTVCISHFSRFSVILSFFK  
LSSGCFSSFLIFSFLAIFHVLQWTFNFPFSSVFLAIFHVLKCCVFLIFRDFQFPRHIPGPTVCISHFSRFSV  
ISSFFKSSSGCFSFSMIFSLAIFHVLQWTFNFPFSSYSFSPYSRSYSVHFSFSTFFSDFVIFQVVKWMFL  
IFLDFQFSC  
>ENSMUSP00000136598\_c.129:A>C\_p.S44R ENSMUST00000177722.8|Gm11168-  
201|ENSMUSG00000096385|+|chr9:g.3003479:A>C  
MFLIFHDFQFSCHIPCPTVDISFPFVSFLAIFHVLKCVFLIFRDFQFSRHIPGPTVCISHFSRFSVILSFFK  
LSSGCFSSFLIFSFLAIFHVLQWTFNFPFSSVFLAIFHVLKCCVFLIFRDFQFPRHIPGPTVCISHFSRFSV  
ISSFFKSSSGCFSFSMIFSLAIFHVLQWTFNFPFSSYSFSPYSRSYSVHFSFSTFFSDFVIFQVVKWMFL  
IFLDFQFSC  
>ENSMUSP00000136598\_c.165:A>T\_p.T56S ENSMUST00000177722.8|Gm11168-  
201|ENSMUSG00000096385|+|chr9:g.3003515:A>T  
MFLIFHDFQFSCHIPCPTVDISFPFVSFLAIFHVLKCVFLIFSDQFSRHIPGPSVCISHFSRFSVILSFFK  
LSSGCFSSFLIFSFLAIFHVLQWTFNFPFSSVFLAIFHVLKCCVFLIFRDFQFPRHIPGPTVCISHFSRFSV  
ISSFFKSSSGCFSFSMIFSLAIFHVLQWTFNFPFSSYSFSPYSRSYSVHFSFSTFFSDFVIFQVVKWMFL  
IFLDFQFSC  
>ENSMUSP00000136598\_c.186:T>C\_p.S63P ENSMUST00000177722.8|Gm11168-  
201|ENSMUSG00000096385|+|chr9:g.3003536:T>C  
MFLIFHDFQFSCHIPCPTVDISFPFVSFLAIFHVLKCVFLIFSDQFSRHIPGPTVCISHFPFRFSVILSFFK  
LSSGCFSSFLIFSFLAIFHVLQWTFNFPFSSVFLAIFHVLKCCVFLIFRDFQFPRHIPGPTVCISHFSRFSV  
ISSFFKSSSGCFSFSMIFSLAIFHVLQWTFNFPFSSYSFSPYSRSYSVHFSFSTFFSDFVIFQVVKWMFL  
IFLDFQFSC  
>ENSMUSP00000136598\_c.195:T>G\_p.S66A ENSMUST00000177722.8|Gm11168-  
201|ENSMUSG00000096385|+|chr9:g.3003545:T>G  
MFLIFHDFQFSCHIPCPTVDISFPFVSFLAIFHVLKCVFLIFSDQFSRHIPGPTVCISHFSRFAVILSFFK  
LSSGCFSSFLIFSFLAIFHVLQWTFNFPFSSVFLAIFHVLKCCVFLIFRDFQFPRHIPGPTVCISHFSRFSV  
ISSFFKSSSGCFSFSMIFSLAIFHVLQWTFNFPFSSYSFSPYSRSYSVHFSFSTFFSDFVIFQVVKWMFL  
IFLDFQFSC  
>ENSMUSP00000136598\_c.196:C>T\_p.S66L ENSMUST00000177722.8|Gm11168-  
201|ENSMUSG00000096385|+|chr9:g.3003546:C>T  
MFLIFHDFQFSCHIPCPTVDISFPFVSFLAIFHVLKCVFLIFSDQFSRHIPGPTVCISHFSRFLVILSFFK  
LSSGCFSSFLIFSFLAIFHVLQWTFNFPFSSVFLAIFHVLKCCVFLIFRDFQFPRHIPGPTVCISHFSRFSV  
ISSFFKSSSGCFSFSMIFSLAIFHVLQWTFNFPFSSYSFSPYSRSYSVHFSFSTFFSDFVIFQVVKWMFL  
IFLDFQFSC  
>ENSMUSP00000136598\_c.199:T>G\_p.V67G ENSMUST00000177722.8|Gm11168-  
201|ENSMUSG00000096385|+|chr9:g.3003549:T>G  
MFLIFHDFQFSCHIPCPTVDISFPFVSFLAIFHVLKCVFLIFSDQFSRHIPGPTVCISHFSRFSGILSFFK  
LSSGCFSSFLIFSFLAIFHVLQWTFNFPFSSVFLAIFHVLKCCVFLIFRDFQFPRHIPGPTVCISHFSRFSV  
ISSFFKSSSGCFSFSMIFSLAIFHVLQWTFNFPFSSYSFSPYSRSYSVHFSFSTFFSDFVIFQVVKWMFL  
IFLDFQFSC  
>ENSMUSP00000136598\_c.205:T>C\_p.L69S ENSMUST00000177722.8|Gm11168-  
201|ENSMUSG00000096385|+|chr9:g.3003555:T>C

MFLIFHDFQFSCHIPCPTVDISFPPFSVFLAIFHVLKCVFLIFSDQFSRHIPGPTVCISHFSRFSVILSFFK  
LSSGCFSSFLIFSLAIFHVLQWTFNLNPPFSVFLAIFHVLKCCVFLIFRDFQFPRHIPGPTVCISHFSRFSV  
ISSFFKSSSGCFSSMIFSLAIFHVLQWTFNLNPPFSSYSFSPYSRSYSVHFSFSTFFSDFVIFQVVKWMFL  
IFLDFQFSC  
>rs252934463\_ENSMUSP00000136598\_c.220:T>G\_p.L74W  
ENSMUST00000177722.8|Gm11168-201|ENSMUSG00000096385|+|chr9:g.3003570:T>G  
MFLIFHDFQFSCHIPCPTVDISFPPFSVFLAIFHVLKCVFLIFSDQFSRHIPGPTVCISHFSRFSVILSFFK  
WSSGCFSSFLIFSLAIFHVLQWTFNLNPPFSVFLAIFHVLKCCVFLIFRDFQFPRHIPGPTVCISHFSRFSV  
ISSFFKSSSGCFSSMIFSLAIFHVLQWTFNLNPPFSSYSFSPYSRSYSVHFSFSTFFSDFVIFQVVKWMFL  
IFLDFQFSC  
>ENSMUSP00000136598\_c.220:T>C\_p.L74S ENSMUST00000177722.8|Gm11168-  
201|ENSMUSG00000096385|+|chr9:g.3003570:T>C  
MFLIFHDFQFSCHIPCPTVDISFPPFSVFLAIFHVLKCVFLIFSDQFSRHIPGPTVCISHFSRFSVILSFFK  
SSSGCFSSFLIFSLAIFHVLQWTFNLNPPFSVFLAIFHVLKCCVFLIFRDFQFPRHIPGPTVCISHFSRFSV  
ISSFFKSSSGCFSSMIFSLAIFHVLQWTFNLNPPFSSYSFSPYSRSYSVHFSFSTFFSDFVIFQVVKWMFL  
IFLDFQFSC  
>ENSMUSP00000136598\_c.232:G>T\_p.C78F ENSMUST00000177722.8|Gm11168-  
201|ENSMUSG00000096385|+|chr9:g.3003582:G>T  
MFLIFHDFQFSCHIPCPTVDISFPPFSVFLAIFHVLKCVFLIFSDQFSRHIPGPTVCISHFSRFSVILSFFK  
LSSGFFSFLIFSLAIFHVLQWTFNLNPPFSVFLAIFHVLKCCVFLIFRDFQFPRHIPGPTVCISHFSRFSV  
ISSFFKSSSGCFSSMIFSLAIFHVLQWTFNLNPPFSSYSFSPYSRSYSVHFSFSTFFSDFVIFQVVKWMFL  
IFLDFQFSC  
>ENSMUSP00000136761\_c.2:G>T\_p.M1I ENSMUST00000178077.2|Gm11168-  
202|ENSMUSG00000096385|+|chr9:g.3003582:G>T  
IFLIFLDFQFSCHIPCPTVDISFPPFSVFLAIFHVLKCVFLIFSDQFSRHIPGPTVCISHFFRFFMISSTFF  
LSSGCFSSSIIFTFLAIFHVLQWTFNLNPPFSVFLAIFHILKCCVFLIFRDFQFPRHIPGPTVCISHFSRFSV  
ISSFFKSSSGCFSSMIFSLAIFHVLQWTFNLNPPFSSYSFSPYSRSYSVHFSFSTFFSDFVIFQVVKWMFL  
IFLDFQFSC  
>ENSMUSP00000136598\_c.246:T>G\_p.L83V ENSMUST00000177722.8|Gm11168-  
201|ENSMUSG00000096385|+|chr9:g.3003596:T>G  
MFLIFHDFQFSCHIPCPTVDISFPPFSVFLAIFHVLKCVFLIFSDQFSRHIPGPTVCISHFSRFSVILSFFK  
LSSGCFSSSVIFSLAIFHVLQWTFNLNPPFSVFLAIFHVLKCCVFLIFRDFQFPRHIPGPTVCISHFSRFSV  
ISSFFKSSSGCFSSMIFSLAIFHVLQWTFNLNPPFSSYSFSPYSRSYSVHFSFSTFFSDFVIFQVVKWMFL  
IFLDFQFSC  
>ENSMUSP00000136761\_c.16:T>G\_p.L6R ENSMUST00000178077.2|Gm11168-  
202|ENSMUSG00000096385|+|chr9:g.3003596:T>G  
MFLIFRDFQFSCHIPCPTVDISFPPFSVFLAIFHVLKCVFLIFSDQFSRHIPGPTVCISHFFRFFMISSTFF  
LSSGCFSSSIIFTFLAIFHVLQWTFNLNPPFSVFLAIFHILKCCVFLIFRDFQFPRHIPGPTVCISHFSRFSV  
ISSFFKSSSGCFSSMIFSLAIFHVLQWTFNLNPPFSSYSFSPYSRSYSVHFSFSTFFSDFVIFQVVKWMFL  
IFLDFQFSC  
>ENSMUSP00000136598\_c.246:T>A\_p.L83M ENSMUST00000177722.8|Gm11168-  
201|ENSMUSG00000096385|+|chr9:g.3003596:T>A  
MFLIFHDFQFSCHIPCPTVDISFPPFSVFLAIFHVLKCVFLIFSDQFSRHIPGPTVCISHFSRFSVILSFFK  
LSSGCFSSMIFSLAIFHVLQWTFNLNPPFSVFLAIFHVLKCCVFLIFRDFQFPRHIPGPTVCISHFSRFSV  
ISSFFKSSSGCFSSMIFSLAIFHVLQWTFNLNPPFSSYSFSPYSRSYSVHFSFSTFFSDFVIFQVVKWMFL  
IFLDFQFSC  
>ENSMUSP00000136761\_c.16:T>A\_p.L6H ENSMUST00000178077.2|Gm11168-  
202|ENSMUSG00000096385|+|chr9:g.3003596:T>A  
MFLIFHDFQFSCHIPCPTVDISFPPFSVFLAIFHVLKCVFLIFSDQFSRHIPGPTVCISHFFRFFMISSTFF  
LSSGCFSSSIIFTFLAIFHVLQWTFNLNPPFSVFLAIFHILKCCVFLIFRDFQFPRHIPGPTVCISHFSRFSV  
ISSFFKSSSGCFSSMIFSLAIFHVLQWTFNLNPPFSSYSFSPYSRSYSVHFSFSTFFSDFVIFQVVKWMFL  
IFLDFQFSC  
>ENSMUSP00000136598\_c.257:T>A\_p.S86R ENSMUST00000177722.8|Gm11168-  
201|ENSMUSG00000096385|+|chr9:g.3003607:T>A  
MFLIFHDFQFSCHIPCPTVDISFPPFSVFLAIFHVLKCVFLIFSDQFSRHIPGPTVCISHFSRFSVILSFFK  
LSSGCFSSFLIFRFLAIFHVLQWTFNLNPPFSVFLAIFHVLKCCVFLIFRDFQFPRHIPGPTVCISHFSRFSV  
ISSFFKSSSGCFSSMIFSLAIFHVLQWTFNLNPPFSSYSFSPYSRSYSVHFSFSTFFSDFVIFQVVKWMFL  
IFLDFQFSC



>ENSMUSP00000136761\_c.27:T>A\_p.F10I ENSMUST00000178077.2|Gm11168-  
202|ENSMUSG00000096385|+|chr9:g.3003607:T>A  
MFLIFLDFQFSCHIPCPTVDISFPPFSVFLAIFHVLKCVFLIFSDQFSRHIPGPTVCISHFFRFFMISFFFT  
LSSGCFSSFSIIFTFLAIFHVLQWTFNLNPPFSVFLAIFHILKCCVFLIFRDFQFPRHIPGPTVCISHFSRFSV  
ISSFFKSSSGCFSSMIFSLAIFHVLQWTFNLNPPFSSYSFSPYRSYSVHFSFFTTFFSDFVIFQVVKWMFL  
IFLDFQFSC  
>ENSMUSP00000136761\_c.45:T>C\_p.C16R ENSMUST00000178077.2|Gm11168-  
202|ENSMUSG00000096385|+|chr9:g.3003625:T>C  
MFLIFLDFQFSCHIPRPTVDISFPPFSVFLAIFHVLKCVFLIFSDQFSRHIPGPTVCISHFFRFFMISFFFT  
LSSGCFSSFSIIFTFLAIFHVLQWTFNLNPPFSVFLAIFHILKCCVFLIFRDFQFPRHIPGPTVCISHFSRFSV  
ISSFFKSSSGCFSSMIFSLAIFHVLQWTFNLNPPFSSYSFSPYRSYSVHFSFFTTFFSDFVIFQVVKWMFL  
IFLDFQFSC  
>ENSMUSP00000136598\_c.275:T>G\_p.H92Q ENSMUST00000177722.8|Gm11168-  
201|ENSMUSG00000096385|+|chr9:g.3003625:T>G  
MFLIFHDFQFSCHIPCPTVDISFPPFSVFLAIFHVLKCVFLIFSDQFSRHIPGPTVCISHFSRFSVILSFFK  
LSSGCFSSFLIFSFLAIFQVLQWTFNLNPPFSVFLAIFHVLKCCVFLIFRDFQFPRHIPGPTVCISHFSRFSV  
ISSFFKSSSGCFSSMIFSLAIFHVLQWTFNLNPPFSSYSFSPYRSYSVHFSFFTTFFSDFVIFQVVKWMFL  
IFLDFQFSC  
>ENSMUSP00000136761\_c.45:T>G\_p.C16G ENSMUST00000178077.2|Gm11168-  
202|ENSMUSG00000096385|+|chr9:g.3003625:T>G  
MFLIFLDFQFSCHIPGPTVDISFPPFSVFLAIFHVLKCVFLIFSDQFSRHIPGPTVCISHFFRFFMISFFFT  
LSSGCFSSFSIIFTFLAIFHVLQWTFNLNPPFSVFLAIFHILKCCVFLIFRDFQFPRHIPGPTVCISHFSRFSV  
ISSFFKSSSGCFSSMIFSLAIFHVLQWTFNLNPPFSSYSFSPYRSYSVHFSFFTTFFSDFVIFQVVKWMFL  
IFLDFQFSC  
>ENSMUSP00000136598\_c.306:C>A\_p.P103T ENSMUST00000177722.8|Gm11168-  
201|ENSMUSG00000096385|+|chr9:g.3003656:C>A  
MFLIFHDFQFSCHIPCPTVDISFPPFSVFLAIFHVLKCVFLIFSDQFSRHIPGPTVCISHFSRFSVILSFFK  
LSSGCFSSFLIFSFLAIFHVLQWTFNLNPTFSVFLAIFHVLKCCVFLIFRDFQFPRHIPGPTVCISHFSRFSV  
ISSFFKSSSGCFSSMIFSLAIFHVLQWTFNLNPPFSSYSFSPYRSYSVHFSFFTTFFSDFVIFQVVKWMFL  
IFLDFQFSC  
>ENSMUSP00000136761\_c.72:C>A\_p.P25T ENSMUST00000178077.2|Gm11168-  
202|ENSMUSG00000096385|+|chr9:g.3003656:C>A  
MFLIFLDFQFSCHIPCPTVDISFPTFSVFLAIFHVLKCVFLIFSDQFSRHIPGPTVCISHFFRFFMISFFFT  
LSSGCFSSFSIIFTFLAIFHVLQWTFNLNPPFSVFLAIFHILKCCVFLIFRDFQFPRHIPGPTVCISHFSRFSV  
ISSFFKSSSGCFSSMIFSLAIFHVLQWTFNLNPPFSSYSFSPYRSYSVHFSFFTTFFSDFVIFQVVKWMFL  
IFLDFQFSC  
>ENSMUSP00000136598\_c.335:T>A\_p.H112Q ENSMUST00000177722.8|Gm11168-  
201|ENSMUSG00000096385|+|chr9:g.3003685:T>A  
MFLIFHDFQFSCHIPCPTVDISFPPFSVFLAIFHVLKCVFLIFSDQFSRHIPGPTVCISHFSRFSVILSFFK  
LSSGCFSSFLIFSFLAIFHVLQWTFNLNPPFSVFLAIFQVLKCCVFLIFRDFQFPRHIPGPTVCISHFSRFSV  
ISSFFKSSSGCFSSMIFSLAIFHVLQWTFNLNPPFSSYSFSPYRSYSVHFSFFTTFFSDFVIFQVVKWMFL  
IFLDFQFSC  
>ENSMUSP00000136761\_c.101:T>A\_p.H34Q ENSMUST00000178077.2|Gm11168-  
202|ENSMUSG00000096385|+|chr9:g.3003685:T>A  
MFLIFLDFQFSCHIPCPTVDISFPPFSVFLAIFQVLKCVFLIFSDQFSRHIPGPTVCISHFFRFFMISFFFT  
LSSGCFSSFSIIFTFLAIFHVLQWTFNLNPPFSVFLAIFHILKCCVFLIFRDFQFPRHIPGPTVCISHFSRFSV  
ISSFFKSSSGCFSSMIFSLAIFHVLQWTFNLNPPFSSYSFSPYRSYSVHFSFFTTFFSDFVIFQVVKWMFL  
IFLDFQFSC  
>ENSMUSP00000136761\_c.129:A>C\_p.S44R ENSMUST00000178077.2|Gm11168-  
202|ENSMUSG00000096385|+|chr9:g.3003713:A>C  
MFLIFLDFQFSCHIPCPTVDISFPPFSVFLAIFHVLKCVFLIFRDFQFSRHIPGPTVCISHFFRFFMISFFFT  
LSSGCFSSFSIIFTFLAIFHVLQWTFNLNPPFSVFLAIFHILKCCVFLIFRDFQFPRHIPGPTVCISHFSRFSV  
ISSFFKSSSGCFSSMIFSLAIFHVLQWTFNLNPPFSSYSFSPYRSYSVHFSFFTTFFSDFVIFQVVKWMFL  
IFLDFQFSC  
>ENSMUSP00000136761\_c.129:A>T\_p.S44C ENSMUST00000178077.2|Gm11168-  
202|ENSMUSG00000096385|+|chr9:g.3003713:A>T  
MFLIFLDFQFSCHIPCPTVDISFPPFSVFLAIFHVLKCVFLIFCDFQFSRHIPGPTVCISHFFRFFMISFFFT  
LSSGCFSSFSIIFTFLAIFHVLQWTFNLNPPFSVFLAIFHILKCCVFLIFRDFQFPRHIPGPTVCISHFSRFSV

ISSFFKSSSGCFSFSMIFSLAIFHVLQWTFNLNPPFSSYSFSPYRSYSVHFSFSTFFSDFVIFQVVKWMFL  
IFLDFQFSC  
>ENSMUSP00000136761\_c.165:A>T\_p.T56S ENSMUST00000178077.2|Gm11168-  
202|ENSMUSG00000096385|+|chr9:g.3003749:A>T  
MFLIFLDFQFSCCHIPCPTVDISFPPFSVFLAIFHVLKCVFLIFSDQFQSRHIPGPSVCISHFFRFFMISFFFT  
LSSGCFSSFSIIIFTFLAIFHVLQWTFNLNPPFSSVFLAIFHILKCCVFLIFRDFQFPRHIPGPTVCISHFSRFSV  
ISSFFKSSSGCFSFSMIFSLAIFHVLQWTFNLNPPFSSYSFSPYRSYSVHFSFSTFFSDFVIFQVVKWMFL  
IFLDFQFSC  
>ENSMUSP00000136761\_c.171:T>G\_p.C58G ENSMUST00000178077.2|Gm11168-  
202|ENSMUSG00000096385|+|chr9:g.3003755:T>G  
MFLIFLDFQFSCCHIPCPTVDISFPPFSVFLAIFHVLKCVFLIFSDQFQSRHIPGPTVGISHFFRFFMISFFFT  
LSSGCFSSFSIIIFTFLAIFHVLQWTFNLNPPFSSVFLAIFHILKCCVFLIFRDFQFPRHIPGPTVCISHFSRFSV  
ISSFFKSSSGCFSFSMIFSLAIFHVLQWTFNLNPPFSSYSFSPYRSYSVHFSFSTFFSDFVIFQVVKWMFL  
IFLDFQFSC  
>ENSMUSP00000136761\_c.181:AT>A\_p.H61del-fs ENSMUST00000178077.2|Gm11168-  
202|ENSMUSG00000096385|+|chr9:g.3003765:AT>A  
MFLIFLDFQFSCCHIPCPTVDISFPPFSVFLAIFHVLKCVFLIFSDQFQSRHIPGPTVCISHFSGFS  
>ENSMUSP00000136761\_c.181:ATT>A\_p.H61del-fs ENSMUST00000178077.2|Gm11168-  
202|ENSMUSG00000096385|+|chr9:g.3003765:ATT>A  
MFLIFLDFQFSCCHIPCPTVDISFPPFSVFLAIFHVLKCVFLIFSDQFQSRHIPGPTVCISHFQVFHDFVIFHV  
VKWMFLIFHYFHFSCHISCPTVDISKFSTFFCFPRHISHPKVLCISHFP  
>ENSMUSP00000136761\_c.190:G>C\_p.R64T ENSMUST00000178077.2|Gm11168-  
202|ENSMUSG00000096385|+|chr9:g.3003774:G>C  
MFLIFLDFQFSCCHIPCPTVDISFPPFSVFLAIFHVLKCVFLIFSDQFQSRHIPGPTVCISHFFTFMISFFFT  
LSSGCFSSFSIIIFTFLAIFHVLQWTFNLNPPFSSVFLAIFHILKCCVFLIFRDFQFPRHIPGPTVCISHFSRFSV  
ISSFFKSSSGCFSFSMIFSLAIFHVLQWTFNLNPPFSSYSFSPYRSYSVHFSFSTFFSDFVIFQVVKWMFL  
IFLDFQFSC  
>ENSMUSP00000136761\_c.214:TCAC>CCAA\_p.F72S ENSMUST00000178077.2|Gm11168-  
202|ENSMUSG00000096385|+|chr9:g.3003974:TCAC>CCAA  
MFLIFLDFQFSCCHIPCPTVDISFPPFSVFLAIFHVLKCVFLIFSDQFQSRHIPGPTVCISHFFRFFMISFFSN  
TLSSGCFSSFSIIIFTFLAIFHVLQWTFNLNPPFSSVFLAIFHILKCCVFLIFRDFQFPRHIPGPTVCISHFSRFS  
VSSFFKSSSGCFSFSMIFSLAIFHVLQWTFNLNPPFSSYSFSPYRSYSVHFSFSTFFSDFVIFQVVKWMFL  
LIFLDFQFSC  
>ENSMUSP00000136761\_c.217:C>A\_p.T73K ENSMUST00000178077.2|Gm11168-  
202|ENSMUSG00000096385|+|chr9:g.3003977:C>A  
MFLIFLDFQFSCCHIPCPTVDISFPPFSVFLAIFHVLKCVFLIFSDQFQSRHIPGPTVCISHFFRFFMISFFFK  
LSSGCFSSFSIIIFTFLAIFHVLQWTFNLNPPFSSVFLAIFHILKCCVFLIFRDFQFPRHIPGPTVCISHFSRFSV  
ISSFFKSSSGCFSFSMIFSLAIFHVLQWTFNLNPPFSSYSFSPYRSYSVHFSFSTFFSDFVIFQVVKWMFL  
IFLDFQFSC  
>ENSMUSP00000136761\_c.217:CGTT>AGTC\_p.T73K ENSMUST00000178077.2|Gm11168-  
202|ENSMUSG00000096385|+|chr9:g.3003977:CGTT>AGTC  
MFLIFLDFQFSCCHIPCPTVDISFPPFSVFLAIFHVLKCVFLIFSDQFQSRHIPGPTVCISHFFRFFMISFFFK  
SLSSGCFSSFSIIIFTFLAIFHVLQWTFNLNPPFSSVFLAIFHILKCCVFLIFRDFQFPRHIPGPTVCISHFSRFS  
VSSFFKSSSGCFSFSMIFSLAIFHVLQWTFNLNPPFSSYSFSPYRSYSVHFSFSTFFSDFVIFQVVKWMFL  
LIFLDFQFSC  
>ENSMUSP00000136761\_c.221:G>T\_p.L74F ENSMUST00000178077.2|Gm11168-  
202|ENSMUSG00000096385|+|chr9:g.3003981:G>T  
MFLIFLDFQFSCCHIPCPTVDISFPPFSVFLAIFHVLKCVFLIFSDQFQSRHIPGPTVCISHFFRFFMISFFFT  
FSSGCFSSFSIIIFTFLAIFHVLQWTFNLNPPFSSVFLAIFHILKCCVFLIFRDFQFPRHIPGPTVCISHFSRFSV  
ISSFFKSSSGCFSFSMIFSLAIFHVLQWTFNLNPPFSSYSFSPYRSYSVHFSFSTFFSDFVIFQVVKWMFL  
IFLDFQFSC  
>ENSMUSP00000136761\_c.256:C>G\_p.T86S ENSMUST00000178077.2|Gm11168-  
202|ENSMUSG00000096385|+|chr9:g.3004016:C>G  
MFLIFLDFQFSCCHIPCPTVDISFPPFSVFLAIFHVLKCVFLIFSDQFQSRHIPGPTVCISHFFRFFMISFFFT  
LSSGCFSSFSIIIFSFLAIFHVLQWTFNLNPPFSSVFLAIFHILKCCVFLIFRDFQFPRHIPGPTVCISHFSRFSV  
ISSFFKSSSGCFSFSMIFSLAIFHVLQWTFNLNPPFSSYSFSPYRSYSVHFSFSTFFSDFVIFQVVKWMFL  
IFLDFQFSC

>ENSMUSP00000136761\_c.307:C>T\_p.P103L ENSMUST00000178077.2|Gm11168-202|ENSMUSG00000096385|+|chr9:g.3004067:C>T  
MFLIFLDFQFSCHIPCPTVDISFPPFSVFLAIFHVLKCVFLIFSDQFSRHIIPGPTVCISHFFRFFMISFFFT  
LSSGCFSSFSIIFTFLAIFHVLQWTFNLFPFVFLAIFHILKCCVFLIFRDFQFPRHIIPGPTVCISHFSRFSV  
ISSFFKSSSGCFSSMIFSLAIFHVLQWTFNLFPFSSYSFSPYSRSYSVHFSFFTFSSDFVIFQVVKWMFL  
IFLDFQFSC  
>ENSMUSP00000136761\_c.336:A>G\_p.I113V ENSMUST00000178077.2|Gm11168-202|ENSMUSG00000096385|+|chr9:g.3004096:A>G  
MFLIFLDFQFSCHIPCPTVDISFPPFSVFLAIFHVLKCVFLIFSDQFSRHIIPGPTVCISHFFRFFMISFFFT  
LSSGCFSSFSIIFTFLAIFHVLQWTFNLFPFVFLAIFHVLKCCVFLIFRDFQFPRHIIPGPTVCISHFSRFSV  
ISSFFKSSSGCFSSMIFSLAIFHVLQWTFNLFPFSSYSFSPYSRSYSVHFSFFTFSSDFVIFQVVKWMFL  
IFLDFQFSC  
>rs253463892\_ENSMUSP00000137273\_c.15:A>C\_p.N6H  
ENSMUST00000178348.2|Gm11168-203|ENSMUSG00000096385|+|chr9:g.3004472:A>C  
MFLIFHDFHFSCHIPRPIVDISFPPFSVFFAIFHVPKCVFLIFRDFQFPRHIIPGPTVCISHFSRFSVISSFFK  
SSSGCFSSMIFSLAIFHVLQWTFNLFPFVFLAIFHVLKCVFLIYRDFQFSCYIPSPPTVCISHFSRFSLI  
LSLFLKSTACFSFSMIFSLAIFHVLQWKFLYFPTFSVSPYSRSYSVHFSFFTFSSDFVIFQVVKWMFLIFLD  
FQFSC  
>rs215471772\_ENSMUSP00000137273\_c.26:T>G\_p.H9Q  
ENSMUST00000178348.2|Gm11168-203|ENSMUSG00000096385|+|chr9:g.3004483:T>G  
MFLIFNDFQFSCHIPRPIVDISFPPFSVFFAIFHVPKCVFLIFRDFQFPRHIIPGPTVCISHFSRFSVISSFFK  
SSSGCFSSMIFSLAIFHVLQWTFNLFPFVFLAIFHVLKCVFLIYRDFQFSCYIPSPPTVCISHFSRFSLI  
LSLFLKSTACFSFSMIFSLAIFHVLQWKFLYFPTFSVSPYSRSYSVHFSFFTFSSDFVIFQVVKWMFLIFLD  
FQFSC  
>rs235490158\_ENSMUSP00000137273\_c.52:T>C\_p.I18T  
ENSMUST00000178348.2|Gm11168-203|ENSMUSG00000096385|+|chr9:g.3004509:T>C  
MFLIFNDFHFSCHIPRPTVDISFPPFSVFFAIFHVPKCVFLIFRDFQFPRHIIPGPTVCISHFSRFSVISSFFK  
SSSGCFSSMIFSLAIFHVLQWTFNLFPFVFLAIFHVLKCVFLIYRDFQFSCYIPSPPTVCISHFSRFSLI  
LSLFLKSTACFSFSMIFSLAIFHVLQWKFLYFPTFSVSPYSRSYSVHFSFFTFSSDFVIFQVVKWMFLIFLD  
FQFSC  
>ENSMUSP00000137273\_c.87:T>C\_p.F30L ENSMUST00000178348.2|Gm11168-203|ENSMUSG00000096385|+|chr9:g.3004548:T>C  
MFLIFNDFHFSCHIPRPIVDISFPPFSVFLAIFHVPKCVFLIFRDFQFPRHIIPGPTVCISHFSRFSVISSFFK  
SSSGCFSSMIFSLAIFHVLQWTFNLFPFVFLAIFHVLKCVFLIYRDFQFSCYIPSPPTVCISHFSRFSLI  
LSLFLKSTACFSFSMIFSLAIFHVLQWKFLYFPTFSVSPYSRSYSVHFSFFTFSSDFVIFQVVKWMFLIFLD  
FQFSC  
>ENSMUSP00000137273\_c.87:TTCGC>CTTGT\_p.F30L ENSMUST00000178348.2|Gm11168-203|ENSMUSG00000096385|+|chr9:g.3004548:TTCGC>CTTGT  
MFLIFNDFHFSCHIPRPIVDISFPPFSVFLVRHISRPKVCISHFP\*FSVSSPYSRSYSVHFSFFTFSSDFVFF  
QVVKWMFLIFHDFQFSCHIPCPTVDISKSTFFCFPRHISRPKVCISHLP\*FSVFLLYSKSYSVHFSFFTFFT  
DFVIVQVNCMFLIFHDFQFSCHIPCPTVEISIFSNFFSFAIFQVLQCAFLIFHVFQ\*FCNFSSCQVDVSHFP  
\*FSVFL  
>ENSMUSP00000137273\_c.106:C>T\_p.P36L ENSMUST00000178348.2|Gm11168-203|ENSMUSG00000096385|+|chr9:g.3004567:C>T  
MFLIFNDFHFSCHIPRPIVDISFPPFSVFFAIFHVLKCVFLIFRDFQFPRHIIPGPTVCISHFSRFSVISSFFK  
SSSGCFSSMIFSLAIFHVLQWTFNLFPFVFLAIFHVLKCVFLIYRDFQFSCYIPSPPTVCISHFSRFSLI  
LSLFLKSTACFSFSMIFSLAIFHVLQWKFLYFPTFSVSPYSRSYSVHFSFFTFSSDFVIFQVVKWMFLIFLD  
FQFSC  
>ENSMUSP00000137273\_c.106:CAA>TAT\_p.P36L ENSMUST00000178348.2|Gm11168-203|ENSMUSG00000096385|+|chr9:g.3004567:CAA>TAT  
MFLIFNDFHFSCHIPRPIVDISFPPFSVFFAIFHVL\*SVYFSFSVIFSLAIFQVLQCAFLIFHVFQ\*FRLFS  
SRQVDVSHFP\*FSVFLPYMSYSGHF\*IFHLFLFSSPYFTS\*SVYFSFTVIFSLAIFQVLQCAFLIFHVFH\*  
FCHCSSLQHVSHFP\*FSVFLPYMSYSGNFYIFQLFQRHIIPGPTVCISHFSRFSVIL\*FFKLSSGCFSSFL  
IFSL  
>ENSMUSP00000136598\_c.351:G>A\_p.V118I ENSMUST00000177722.8|Gm11168-201|ENSMUSG00000096385|+|chr9:g.3004575:G>A  
MFLIFHDFQFSCHIPCPTVDISFPPFSVFLAIFHVLKCVFLIFSDQFSRHIIPGPTVCISHFSRFSVILSFFK  
LSSGCFSSFLIFSLAIFHVLQWTFNLFPFVFLAIFHVLKCCIFLIFRDFQFPRHIIPGPTVCISHFSRFSV

ISSFFKSSSGCFSFSMIFSLAIFHVLQWTFNFPFSSYSFSPYSRSYSVHFSFSTFFSDFVIFQVVKWMFL  
IFLDFQFSC  
>ENSMUSP00000136761\_c.351:G>A\_p.V118I ENSMUST00000178077.2|Gm11168-  
202|ENSMUSG00000096385|+|chr9:g.3004575:G>A  
MFLIFLDFQFSCCHIPCPTVDISFPFVFLAIFHVLKCVFLIFSDQFQSRHIPGPTVCISHFFRFFMISSTFF  
LSSGCFSSSIIIFTFLAIFHVLQWTFNFPFSSVFLAIFHILKCCIFLIFRDFQFPRHIPGPTVCISHFSRFSV  
ISSFFKSSSGCFSFSMIFSLAIFHVLQWTFNFPFSSYSFSPYSRSYSVHFSFSTFFSDFVIFQVVKWMFL  
IFLDFQFSC  
>ENSMUSP00000137273\_c.114:G>A\_p.V39I ENSMUST00000178348.2|Gm11168-  
203|ENSMUSG00000096385|+|chr9:g.3004575:G>A  
MFLIFNDFHFSCHIPRPIVDISFPFVFFAIFHVPKCVFLIFRDFQFPRHIPGPTVCISHFSRFSVVISSTFFK  
SSSGCFSSMIFSLAIFHVLQWTFNFPFSSVFLAIFHVLKCVFLIYRDFQFSCYIPSPPTVCISHFSRFSLI  
LSLFLKSTACFSFSMIFSLAIFHVLQWKFLYFPTFSVSPYSRSYSVHFSFSTFFSDFVIFQVVKWMFLIFLD  
FQFSC  
>ENSMUSP00000136598\_c.356:T>A\_p.F119L ENSMUST00000177722.8|Gm11168-  
201|ENSMUSG00000096385|+|chr9:g.3004580:T>A  
MFLIFHDFQFSCCHIPCPTVDISFPFVFLAIFHVLKCVFLIFSDQFQSRHIPGPTVCISHFSRFSVILSSTFFK  
LSSGCFSSSIIIFTFLAIFHVLQWTFNFPFSSVFLAIFHVLKCVLLIFRDFQFPRHIPGPTVCISHFSRFSV  
ISSFFKSSSGCFSFSMIFSLAIFHVLQWTFNFPFSSYSFSPYSRSYSVHFSFSTFFSDFVIFQVVKWMFL  
IFLDFQFSC  
>ENSMUSP00000136761\_c.356:T>A\_p.F119L ENSMUST00000178077.2|Gm11168-  
202|ENSMUSG00000096385|+|chr9:g.3004580:T>A  
MFLIFLDFQFSCCHIPCPTVDISFPFVFLAIFHVLKCVFLIFSDQFQSRHIPGPTVCISHFFRFFMISSTFF  
LSSGCFSSSIIIFTFLAIFHVLQWTFNFPFSSVFLAIFHILKCCVLLIFRDFQFPRHIPGPTVCISHFSRFSV  
ISSFFKSSSGCFSFSMIFSLAIFHVLQWTFNFPFSSYSFSPYSRSYSVHFSFSTFFSDFVIFQVVKWMFL  
IFLDFQFSC  
>ENSMUSP00000137273\_c.119:T>A\_p.F40L ENSMUST00000178348.2|Gm11168-  
203|ENSMUSG00000096385|+|chr9:g.3004580:T>A  
MFLIFNDFHFSCHIPRPIVDISFPFVFFAIFHVPKCVLLIFRDFQFPRHIPGPTVCISHFSRFSVVISSTFFK  
SSSGCFSSMIFSLAIFHVLQWTFNFPFSSVFLAIFHVLKCVFLIYRDFQFSCYIPSPPTVCISHFSRFSLI  
LSLFLKSTACFSFSMIFSLAIFHVLQWKFLYFPTFSVSPYSRSYSVHFSFSTFFSDFVIFQVVKWMFLIFLD  
FQFSC  
>ENSMUSP00000136598\_c.366:C>T\_p.R123C ENSMUST00000177722.8|Gm11168-  
201|ENSMUSG00000096385|+|chr9:g.3004590:C>T  
MFLIFHDFQFSCCHIPCPTVDISFPFVFLAIFHVLKCVFLIFSDQFQSRHIPGPTVCISHFSRFSVILSSTFFK  
LSSGCFSSSIIIFTFLAIFHVLQWTFNFPFSSVFLAIFHVLKCVLLIFCDFQFPRHIPGPTVCISHFSRFSV  
ISSFFKSSSGCFSFSMIFSLAIFHVLQWTFNFPFSSYSFSPYSRSYSVHFSFSTFFSDFVIFQVVKWMFL  
IFLDFQFSC  
>ENSMUSP00000136761\_c.366:C>T\_p.R123C ENSMUST00000178077.2|Gm11168-  
202|ENSMUSG00000096385|+|chr9:g.3004590:C>T  
MFLIFLDFQFSCCHIPCPTVDISFPFVFLAIFHVLKCVFLIFSDQFQSRHIPGPTVCISHFFRFFMISSTFF  
LSSGCFSSSIIIFTFLAIFHVLQWTFNFPFSSVFLAIFHILKCCVLLIFCDFQFPRHIPGPTVCISHFSRFSV  
ISSFFKSSSGCFSFSMIFSLAIFHVLQWTFNFPFSSYSFSPYSRSYSVHFSFSTFFSDFVIFQVVKWMFL  
IFLDFQFSC  
>ENSMUSP00000137273\_c.129:C>T\_p.R44C ENSMUST00000178348.2|Gm11168-  
203|ENSMUSG00000096385|+|chr9:g.3004590:C>T  
MFLIFNDFHFSCHIPRPIVDISFPFVFFAIFHVPKCVLLIFCDFQFPRHIPGPTVCISHFSRFSVVISSTFFK  
SSSGCFSSMIFSLAIFHVLQWTFNFPFSSVFLAIFHVLKCVFLIYRDFQFSCYIPSPPTVCISHFSRFSLI  
LSLFLKSTACFSFSMIFSLAIFHVLQWKFLYFPTFSVSPYSRSYSVHFSFSTFFSDFVIFQVVKWMFLIFLD  
FQFSC  
>ENSMUSP00000136598\_c.381:C>T\_p.P128S ENSMUST00000177722.8|Gm11168-  
201|ENSMUSG00000096385|+|chr9:g.3004605:C>T  
MFLIFHDFQFSCCHIPCPTVDISFPFVFLAIFHVLKCVFLIFSDQFQSRHIPGPTVCISHFSRFSVILSSTFFK  
LSSGCFSSSIIIFTFLAIFHVLQWTFNFPFSSVFLAIFHVLKCVLLIFRDFQFQSRHIPGPTVCISHFSRFSV  
ISSFFKSSSGCFSFSMIFSLAIFHVLQWTFNFPFSSYSFSPYSRSYSVHFSFSTFFSDFVIFQVVKWMFL  
IFLDFQFSC  
>ENSMUSP00000136761\_c.381:C>T\_p.P128S ENSMUST00000178077.2|Gm11168-  
202|ENSMUSG00000096385|+|chr9:g.3004605:C>T

MFLIFLDFQFSCHIPCPTVDISFPPFSVFLAIFHVLKCVFLIFSDQFSRHPGPTVCISHFFRFMISFFFT  
LSSGCFSSFSIIIFTFLAIFHVLQWTFNLNPPFSVFLAIFHILKCCVFLIFRDFQFSRHPGPTVCISHFSRFSV  
ISSFFKSSSGCFSSMIFSLAIFHVLQWTFNLNPPFSSYSFSPYRSYSVHFSFFTFSSDFVIFQVVKWMFL  
IFLDFQFSC  
>ENSMUSP00000137273\_c.144:C>T\_p.P49S ENSMUST00000178348.2|Gm11168-  
203|ENSMUSG00000096385|+|chr9:g.3004605:C>T  
MFLIFNDFHFSCHIPRPIVDISFPPFSVFFAIFHVPKCVFLIFRDFQFSRHPGPTVCISHFSRFSV  
SSSGCFSSMIFSLAIFHVLQWTFNLNPPFSVFLAIFHVLKCVFLIYRDFQFSCYIPSPPTVCISHFSRFSLI  
LSLFKLSTACFSFSMIFSLAIFHVLQWKFLYFPTFSVSPYRSYSVHFSFFTFSSDFVIFQVVKWMFLIFLD  
FQFSC  
>ENSMUSP00000136598\_c.402:A>T\_p.T135S ENSMUST00000177722.8|Gm11168-  
201|ENSMUSG00000096385|+|chr9:g.3004626:A>T  
MFLIFHDFQFSCHIPCPTVDISFPPFSVFLAIFHVLKCVFLIFSDQFSRHPGPTVCISHFSRFSVILSFFK  
LSSGCFSSSLIFSLAIFHVLQWTFNLNPPFSVFLAIFHVLKCCVFLIFRDFQFPRHPGPTVCISHFSRFSV  
ISSFFKSSSGCFSSMIFSLAIFHVLQWTFNLNPPFSSYSFSPYRSYSVHFSFFTFSSDFVIFQVVKWMFL  
IFLDFQFSC  
>ENSMUSP00000136761\_c.402:A>T\_p.T135S ENSMUST00000178077.2|Gm11168-  
202|ENSMUSG00000096385|+|chr9:g.3004626:A>T  
MFLIFLDFQFSCHIPCPTVDISFPPFSVFLAIFHVLKCVFLIFSDQFSRHPGPTVCISHFFRFMISFFFT  
LSSGCFSSFSIIIFTFLAIFHVLQWTFNLNPPFSVFLAIFHILKCCVFLIFRDFQFPRHPGPTVCISHFSRFSV  
ISSFFKSSSGCFSSMIFSLAIFHVLQWTFNLNPPFSSYSFSPYRSYSVHFSFFTFSSDFVIFQVVKWMFL  
IFLDFQFSC  
>ENSMUSP00000137273\_c.165:A>T\_p.T56S ENSMUST00000178348.2|Gm11168-  
203|ENSMUSG00000096385|+|chr9:g.3004626:A>T  
MFLIFNDFHFSCHIPRPIVDISFPPFSVFFAIFHVPKCVFLIFRDFQFPRHPGPTVCISHFSRFSVILSFFK  
SSSGCFSSMIFSLAIFHVLQWTFNLNPPFSVFLAIFHVLKCVFLIYRDFQFSCYIPSPPTVCISHFSRFSLI  
LSLFKLSTACFSFSMIFSLAIFHVLQWKFLYFPTFSVSPYRSYSVHFSFFTFSSDFVIFQVVKWMFLIFLD  
FQFSC  
>rs33899290\_ENSMUSP00000136598\_c.427:G>A\_p.R143H  
ENSMUST00000177722.8|Gm11168-201|ENSMUSG00000096385|+|chr9:g.3004651:G>A  
MFLIFHDFQFSCHIPCPTVDISFPPFSVFLAIFHVLKCVFLIFSDQFSRHPGPTVCISHFSRFSVILSFFK  
LSSGCFSSSLIFSLAIFHVLQWTFNLNPPFSVFLAIFHVLKCCVFLIFRDFQFPRHPGPTVCISHFSRFSV  
ISSFFKSSSGCFSSMIFSLAIFHVLQWTFNLNPPFSSYSFSPYRSYSVHFSFFTFSSDFVIFQVVKWMFL  
IFLDFQFSC  
>rs33899290\_ENSMUSP00000136761\_c.427:G>A\_p.R143H  
ENSMUST00000178077.2|Gm11168-202|ENSMUSG00000096385|+|chr9:g.3004651:G>A  
MFLIFLDFQFSCHIPCPTVDISFPPFSVFLAIFHVLKCVFLIFSDQFSRHPGPTVCISHFFRFMISFFFT  
LSSGCFSSFSIIIFTFLAIFHVLQWTFNLNPPFSVFLAIFHILKCCVFLIFRDFQFPRHPGPTVCISHFSRFSV  
ISSFFKSSSGCFSSMIFSLAIFHVLQWTFNLNPPFSSYSFSPYRSYSVHFSFFTFSSDFVIFQVVKWMFL  
IFLDFQFSC  
>rs33899290\_ENSMUSP00000137273\_c.190:G>A\_p.R64H  
ENSMUST00000178348.2|Gm11168-203|ENSMUSG00000096385|+|chr9:g.3004651:G>A  
MFLIFNDFHFSCHIPRPIVDISFPPFSVFFAIFHVPKCVFLIFRDFQFPRHPGPTVCISHFSRFSVILSFFK  
SSSGCFSSMIFSLAIFHVLQWTFNLNPPFSVFLAIFHVLKCVFLIYRDFQFSCYIPSPPTVCISHFSRFSLI  
LSLFKLSTACFSFSMIFSLAIFHVLQWKFLYFPTFSVSPYRSYSVHFSFFTFSSDFVIFQVVKWMFLIFLD  
FQFSC  
>rs30685709\_ENSMUSP00000136598\_c.433:C>T\_p.S145L  
ENSMUST00000177722.8|Gm11168-201|ENSMUSG00000096385|+|chr9:g.3004657:C>T  
MFLIFHDFQFSCHIPCPTVDISFPPFSVFLAIFHVLKCVFLIFSDQFSRHPGPTVCISHFSRFSVILSFFK  
LSSGCFSSSLIFSLAIFHVLQWTFNLNPPFSVFLAIFHVLKCCVFLIFRDFQFPRHPGPTVCISHFSRFLV  
ISSFFKSSSGCFSSMIFSLAIFHVLQWTFNLNPPFSSYSFSPYRSYSVHFSFFTFSSDFVIFQVVKWMFL  
IFLDFQFSC  
>rs30685709\_ENSMUSP00000136761\_c.433:C>T\_p.S145L  
ENSMUST00000178077.2|Gm11168-202|ENSMUSG00000096385|+|chr9:g.3004657:C>T  
MFLIFLDFQFSCHIPCPTVDISFPPFSVFLAIFHVLKCVFLIFSDQFSRHPGPTVCISHFFRFMISFFFT  
LSSGCFSSFSIIIFTFLAIFHVLQWTFNLNPPFSVFLAIFHILKCCVFLIFRDFQFPRHPGPTVCISHFSRFLV  
ISSFFKSSSGCFSSMIFSLAIFHVLQWTFNLNPPFSSYSFSPYRSYSVHFSFFTFSSDFVIFQVVKWMFL  
IFLDFQFSC

>rs30685709\_ENSMUSP00000137273\_c.196:C>T\_p.S66L  
ENSMUST00000178348.2|Gm11168-203|ENSMUSG00000096385|+|chr9:g.3004657:C>T  
MFLIFHDFQFSCHIPPCPTVDISFPPFSVFFAIFHVPKCVFLIFRDFQFPRHIPGPTVCISHFSRFLVISSFFK  
SSSGCFSFSMIFSFLAIFHVLQWTFNLNFPFVSFLAIFHVLKCVFLIYRDFQFSCYIPSPPTVCISHFSRFSLI  
LSLFKLSTACFSFSMIFSFLAIFHVLQWKFLYFPTFSVSPYSRSYSVHFSFSTFFSDFVIFQVVKWMFLIFLD  
FQFSC  
>ENSMUSP00000136598\_c.442:C>T\_p.S148L ENSMUST00000177722.8|Gm11168-  
201|ENSMUSG00000096385|+|chr9:g.3004666:C>T  
MFLIFHDFQFSCHIPPCPTVDISFPPFSVFLAIFHVLKCVFLIFSDQFQSRHIPGPTVCISHFSRFSVILSFFK  
LSSGCFSFSLIFSFLAIFHVLQWTFNLNFPFVSFLAIFHVLKCCVFLIFRDFQFPRHIPGPTVCISHFSRFSV  
ILSFFKSSSGCFSFSMIFSFLAIFHVLQWTFNLNFPFSSYSFSPYSRSYSVHFSFSTFFSDFVIFQVVKWMFL  
IFLDFQFSC  
>ENSMUSP00000136761\_c.442:C>T\_p.S148L ENSMUST00000178077.2|Gm11168-  
202|ENSMUSG00000096385|+|chr9:g.3004666:C>T  
MFLIFLDFQFSCHIPPCPTVDISFPPFSVFLAIFHVLKCVFLIFSDQFQSRHIPGPTVCISHFFRFFMISFFFT  
LSSGCFSFSIIFTFLAIFHVLQWTFNLNFPFVSFLAIFHILKCCVFLIFRDFQFPRHIPGPTVCISHFSRFSV  
ILSFFKSSSGCFSFSMIFSFLAIFHVLQWTFNLNFPFSSYSFSPYSRSYSVHFSFSTFFSDFVIFQVVKWMFL  
IFLDFQFSC  
>ENSMUSP00000137273\_c.205:C>T\_p.S69L ENSMUST00000178348.2|Gm11168-  
203|ENSMUSG00000096385|+|chr9:g.3004666:C>T  
MFLIFHDFQFSCHIPPCPTVDISFPPFSVFFAIFHVPKCVFLIFRDFQFPRHIPGPTVCISHFSRFSVILSFFK  
SSSGCFSFSMIFSFLAIFHVLQWTFNLNFPFVSFLAIFHVLKCVFLIYRDFQFSCYIPSPPTVCISHFSRFSLI  
LSLFKLSTACFSFSMIFSFLAIFHVLQWKFLYFPTFSVSPYSRSYSVHFSFSTFFSDFVIFQVVKWMFLIFLD  
FQFSC  
>ENSMUSP00000136598\_c.445:C>G\_p.S149C ENSMUST00000177722.8|Gm11168-  
201|ENSMUSG00000096385|+|chr9:g.3004669:C>G  
MFLIFHDFQFSCHIPPCPTVDISFPPFSVFLAIFHVLKCVFLIFSDQFQSRHIPGPTVCISHFSRFSVILSFFK  
LSSGCFSFSLIFSFLAIFHVLQWTFNLNFPFVSFLAIFHVLKCCVFLIFRDFQFPRHIPGPTVCISHFSRFSV  
ISCFFKSSSGCFSFSMIFSFLAIFHVLQWTFNLNFPFSSYSFSPYSRSYSVHFSFSTFFSDFVIFQVVKWMFL  
IFLDFQFSC  
>ENSMUSP00000136761\_c.445:C>G\_p.S149C ENSMUST00000178077.2|Gm11168-  
202|ENSMUSG00000096385|+|chr9:g.3004669:C>G  
MFLIFLDFQFSCHIPPCPTVDISFPPFSVFLAIFHVLKCVFLIFSDQFQSRHIPGPTVCISHFFRFFMISFFFT  
LSSGCFSFSIIFTFLAIFHVLQWTFNLNFPFVSFLAIFHILKCCVFLIFRDFQFPRHIPGPTVCISHFSRFSV  
ISCFFKSSSGCFSFSMIFSFLAIFHVLQWTFNLNFPFSSYSFSPYSRSYSVHFSFSTFFSDFVIFQVVKWMFL  
IFLDFQFSC  
>ENSMUSP00000137273\_c.208:C>G\_p.S70C ENSMUST00000178348.2|Gm11168-  
203|ENSMUSG00000096385|+|chr9:g.3004669:C>G  
MFLIFHDFQFSCHIPPCPTVDISFPPFSVFFAIFHVPKCVFLIFRDFQFPRHIPGPTVCISHFSRFSVISCFFK  
SSSGCFSFSMIFSFLAIFHVLQWTFNLNFPFVSFLAIFHVLKCVFLIYRDFQFSCYIPSPPTVCISHFSRFSLI  
LSLFKLSTACFSFSMIFSFLAIFHVLQWKFLYFPTFSVSPYSRSYSVHFSFSTFFSDFVIFQVVKWMFLIFLD  
FQFSC  
>ENSMUSP00000136598\_c.543:C>A\_p.P182T ENSMUST00000177722.8|Gm11168-  
201|ENSMUSG00000096385|+|chr9:g.3004767:C>A  
MFLIFHDFQFSCHIPPCPTVDISFPPFSVFLAIFHVLKCVFLIFSDQFQSRHIPGPTVCISHFSRFSVILSFFK  
LSSGCFSFSLIFSFLAIFHVLQWTFNLNFPFVSFLAIFHVLKCCVFLIFRDFQFPRHIPGPTVCISHFSRFSV  
ISSFFKSSSGCFSFSMIFSFLAIFHVLQWTFNLNFPFSSYSFSPYSRSYSVHFSFSTFFSDFVIFQVVKWMFL  
IFLDFQFSC  
>ENSMUSP00000136761\_c.543:C>A\_p.P182T ENSMUST00000178077.2|Gm11168-  
202|ENSMUSG00000096385|+|chr9:g.3004767:C>A  
MFLIFLDFQFSCHIPPCPTVDISFPPFSVFLAIFHVLKCVFLIFSDQFQSRHIPGPTVCISHFFRFFMISFFFT  
LSSGCFSFSIIFTFLAIFHVLQWTFNLNFPFVSFLAIFHILKCCVFLIFRDFQFPRHIPGPTVCISHFSRFSV  
ISSFFKSSSGCFSFSMIFSFLAIFHVLQWTFNLNFPFSSYSFSPYSRSYSVHFSFSTFFSDFVIFQVVKWMFL  
IFLDFQFSC  
>ENSMUSP00000137273\_c.306:C>A\_p.P103T ENSMUST00000178348.2|Gm11168-  
203|ENSMUSG00000096385|+|chr9:g.3004767:C>A  
MFLIFHDFQFSCHIPPCPTVDISFPPFSVFFAIFHVPKCVFLIFRDFQFPRHIPGPTVCISHFSRFSVILSFFK  
SSSGCFSFSMIFSFLAIFHVLQWTFNLNFPFVSFLAIFHVLKCVFLIYRDFQFSCYIPSPPTVCISHFSRFSLI

LSLFKLSTACFSFSMIFSFLAIFHVLQWKFLYFPTFSVSPYSRSYSVHFSFSTFFSDFVIFQVVKWMFLIFLD  
FQFSC  
>ENSMUSP00000136598\_c.544:C>T\_p.P182L ENSMUST00000177722.8|Gm11168-  
201|ENSMUSG00000096385|+|chr9:g.3004768:C>T  
MFLIFHDFQFSCHIPCPTVDISFPPFSVFLAIFHVLKCVFLIFSDQFSRHIPGPTVCISHFSRFSVILSFFK  
LSSGCFSSFLIFSLAIFHVLQWTFNLNFPFVSFLAIFHVLKCCVFLIFRDFQFPRHIPGPTVCISHFSRFSV  
ISSFFKSSSGCFSSMIFSFLAIFHVLQWTFNLNPLFSSYSFSPYSRSYSVHFSFSTFFSDFVIFQVVKWMFL  
IFLDFQFSC  
>ENSMUSP00000136761\_c.544:C>T\_p.P182L ENSMUST00000178077.2|Gm11168-  
202|ENSMUSG00000096385|+|chr9:g.3004768:C>T  
MFLIFLDFQFSCHIPCPTVDISFPPFSVFLAIFHVLKCVFLIFSDQFSRHIPGPTVCISHFFRFFMISSFFT  
LSSGCFSSSIIFTFLAIFHVLQWTFNLNFPFVSFLAIFHILKCCVFLIFRDFQFPRHIPGPTVCISHFSRFSV  
ISSFFKSSSGCFSSMIFSFLAIFHVLQWTFNLNPLFSSYSFSPYSRSYSVHFSFSTFFSDFVIFQVVKWMFL  
IFLDFQFSC  
>ENSMUSP00000137273\_c.307:C>T\_p.P103L ENSMUST00000178348.2|Gm11168-  
203|ENSMUSG00000096385|+|chr9:g.3004768:C>T  
MFLIFNDFHFSCHIPRPIVDISFPPFSVFFAIFHVPKCVFLIFRDFQFPRHIPGPTVCISHFSRFSVISSFFK  
SSSGCFSSMIFSFLAIFHVLQWTFNLNPLFVSFLAIFHVLKCVFLIYRDFQFSCYIPSPPTVCISHFSRFSLI  
LSLFKLSTACFSFSMIFSFLAIFHVLQWKFLYFPTFSVSPYSRSYSVHFSFSTFFSDFVIFQVVKWMFLIFLD  
FQFSC  
>ENSMUSP00000137273\_c.361:A>T\_p.Y121F ENSMUST00000178348.2|Gm11168-  
203|ENSMUSG00000096385|+|chr9:g.3004822:A>T  
MFLIFNDFHFSCHIPRPIVDISFPPFSVFFAIFHVPKCVFLIFRDFQFPRHIPGPTVCISHFSRFSVISSFFK  
SSSGCFSSMIFSFLAIFHVLQWTFNLNFPFVSFLAIFHVLKCVFLIFRDFQFSCYIPSPPTVCISHFSRFSLI  
LSLFKLSTACFSFSMIFSFLAIFHVLQWKFLYFPTFSVSPYSRSYSVHFSFSTFFSDFVIFQVVKWMFLIFLD  
FQFSC  
>ENSMUSP00000137273\_c.364:G>A\_p.R122H ENSMUST00000178348.2|Gm11168-  
203|ENSMUSG00000096385|+|chr9:g.3004825:G>A  
MFLIFNDFHFSCHIPRPIVDISFPPFSVFFAIFHVPKCVFLIFRDFQFPRHIPGPTVCISHFSRFSVISSFFK  
SSSGCFSSMIFSFLAIFHVLQWTFNLNFPFVSFLAIFHVLKCVFLIYHDFQFSCYIPSPPTVCISHFSRFSLI  
LSLFKLSTACFSFSMIFSFLAIFHVLQWKFLYFPTFSVSPYSRSYSVHFSFSTFFSDFVIFQVVKWMFLIFLD  
FQFSC  
>ENSMUSP00000137273\_c.373:A>T\_p.Q125L ENSMUST00000178348.2|Gm11168-  
203|ENSMUSG00000096385|+|chr9:g.3004834:A>T  
MFLIFNDFHFSCHIPRPIVDISFPPFSVFFAIFHVPKCVFLIFRDFQFPRHIPGPTVCISHFSRFSVISSFFK  
SSSGCFSSMIFSFLAIFHVLQWTFNLNFPFVSFLAIFHVLKCVFLIYRDFLQFSCYIPSPPTVCISHFSRFSLI  
LSLFKLSTACFSFSMIFSFLAIFHVLQWKFLYFPTFSVSPYSRSYSVHFSFSTFFSDFVIFQVVKWMFLIFLD  
FQFSC  
>ENSMUSP00000137273\_c.374:G>T\_p.Q125H ENSMUST00000178348.2|Gm11168-  
203|ENSMUSG00000096385|+|chr9:g.3004835:G>T  
MFLIFNDFHFSCHIPRPIVDISFPPFSVFFAIFHVPKCVFLIFRDFQFPRHIPGPTVCISHFSRFSVISSFFK  
SSSGCFSSMIFSFLAIFHVLQWTFNLNFPFVSFLAIFHVLKCVFLIYRDFHFSYIPSPPTVCISHFSRFSLI  
LSLFKLSTACFSFSMIFSFLAIFHVLQWKFLYFPTFSVSPYSRSYSVHFSFSTFFSDFVIFQVVKWMFLIFLD  
FQFSC  
>ENSMUSP00000137273\_c.381:TGCT>CGCC\_p.C128R ENSMUST00000178348.2|Gm11168-  
203|ENSMUSG00000096385|+|chr9:g.3004842:TGCT>CGCC  
MFLIFNDFHFSCHIPRPIVDISFPPFSVFFAIFHVPKCVFLIFRDFQFPRHIPGPTVCISHFSRFSVISSFFK  
SSSGCFSSMIFSFLAIFHVLQWTFNLNFPFVSFLAIFHVLKCVFLIYRDFQFSRRYIPSPPTVCISHFSRFSLI  
LSLFKLSTACFSFSMIFSFLAIFHVLQWKFLYFPTFSVSPYSRSYSVHFSFSTFFSDFVIFQVVKWMFLIFLD  
DFQFSC  
>ENSMUSP00000137273\_c.384:T>C\_p.Y129H ENSMUST00000178348.2|Gm11168-  
203|ENSMUSG00000096385|+|chr9:g.3004845:T>C  
MFLIFNDFHFSCHIPRPIVDISFPPFSVFFAIFHVPKCVFLIFRDFQFPRHIPGPTVCISHFSRFSVISSFFK  
SSSGCFSSMIFSFLAIFHVLQWTFNLNFPFVSFLAIFHVLKCVFLIYRDFQFSCHIPSPPTVCISHFSRFSLI  
LSLFKLSTACFSFSMIFSFLAIFHVLQWKFLYFPTFSVSPYSRSYSVHFSFSTFFSDFVIFQVVKWMFLIFLD  
FQFSC  
>ENSMUSP00000137273\_c.390:CAA>TCAC\_p.P131S ENSMUST00000178348.2|Gm11168-  
203|ENSMUSG00000096385|+|chr9:g.3004851:CAA>TCAC

MFLIFNDFHFSCHIPRPIVDISFPPFSVFFAIFHVPKCVFLIFRDFQFPRHIPGPTVCISHFSRFSVISSFFK  
SSSGCFSFSMIFSLAIFHVLQWTFLNFPFVSFLAIFHVLKCVFLIYRDFQFSCYIPSPPTVCISHFSRFSL  
ILSLFKLSTACFSFSMIFSLAIFHVLQWKFLYFPTFSVSPYSRSYSVHFSFSTFFSDFVIFQVVKWMFLIFL  
DFQFSC  
>ENSMUSP00000137273\_c.393:A>G\_p.S132G ENSMUST00000178348.2|Gm11168-  
203|ENSMUSG00000096385|+|chr9:g.3004854:A>G  
MFLIFNDFHFSCHIPRPIVDISFPPFSVFFAIFHVPKCVFLIFRDFQFPRHIPGPTVCISHFSRFSVISSFFK  
SSSGCFSFSMIFSLAIFHVLQWTFLNFPFVSFLAIFHVLKCVFLIYRDFQFSCYIPGPTVCISHFSRFSLI  
LSLFLKSTACFSFSMIFSLAIFHVLQWKFLYFPTFSVSPYSRSYSVHFSFSTFFSDFVIFQVVKWMFLIFLD  
FQFSC  
>ENSMUSP00000137273\_c.393:A>T\_p.S132C ENSMUST00000178348.2|Gm11168-  
203|ENSMUSG00000096385|+|chr9:g.3004854:A>T  
MFLIFNDFHFSCHIPRPIVDISFPPFSVFFAIFHVPKCVFLIFRDFQFPRHIPGPTVCISHFSRFSVISSFFK  
SSSGCFSFSMIFSLAIFHVLQWTFLNFPFVSFLAIFHVLKCVFLIYRDFQFSCYIPGPTVCISHFSRFSLI  
LSLFLKSTACFSFSMIFSLAIFHVLQWKFLYFPTFSVSPYSRSYSVHFSFSTFFSDFVIFQVVKWMFLIFLD  
FQFSC  
>ENSMUSP00000137273\_c.394:G>T\_p.S132I ENSMUST00000178348.2|Gm11168-  
203|ENSMUSG00000096385|+|chr9:g.3004855:G>T  
MFLIFNDFHFSCHIPRPIVDISFPPFSVFFAIFHVPKCVFLIFRDFQFPRHIPGPTVCISHFSRFSVISSFFK  
SSSGCFSFSMIFSLAIFHVLQWTFLNFPFVSFLAIFHVLKCVFLIYRDFQFSCYIPIPTVCISHFSRFSLI  
LSLFLKSTACFSFSMIFSLAIFHVLQWKFLYFPTFSVSPYSRSYSVHFSFSTFFSDFVIFQVVKWMFLIFLD  
FQFSC  
>ENSMUSP00000136598\_c.556:A>T\_p.Y186F ENSMUST00000177722.8|Gm11168-  
201|ENSMUSG00000096385|+|chr9:g.3004860:A>T  
MFLIFHDFQFSCHIPCPTVDISFPPFSVFLAIFHVLKCVFLIFSDQFSRHIPGPTVCISHFSRFSVILSFFK  
LSSGCFSFSLIIFSFLAIFHVLQWTFLNFPFVSFLAIFHVLKCCVFLIFRDFQFPRHIPGPTVCISHFSRFSV  
ISSFFKSSSGCFSFSMIFSLAIFHVLQWTFLNFPFSSFSFSPYSRSYSVHFSFSTFFSDFVIFQVVKWMFL  
IFLDFQFSC  
>ENSMUSP00000136761\_c.556:A>T\_p.Y186F ENSMUST00000178077.2|Gm11168-  
202|ENSMUSG00000096385|+|chr9:g.3004860:A>T  
MFLIFLDFQFSCHIPCPTVDISFPPFSVFLAIFHVLKCVFLIFSDQFSRHIPGPTVCISHFFRFFMISFFFT  
LSSGCFSFSIIIFTFLAIFHVLQWTFLNFPFVSFLAIFHILKCCVFLIFRDFQFPRHIPGPTVCISHFSRFSV  
ISSFFKSSSGCFSFSMIFSLAIFHVLQWTFLNFPFSSFSFSPYSRSYSVHFSFSTFFSDFVIFQVVKWMFL  
IFLDFQFSC  
>ENSMUSP00000137273\_c.399:A>T\_p.T134S ENSMUST00000178348.2|Gm11168-  
203|ENSMUSG00000096385|+|chr9:g.3004860:A>T  
MFLIFNDFHFSCHIPRPIVDISFPPFSVFFAIFHVPKCVFLIFRDFQFPRHIPGPTVCISHFSRFSVISSFFK  
SSSGCFSFSMIFSLAIFHVLQWTFLNFPFVSFLAIFHVLKCVFLIYRDFQFSCYIPSPSVCISHFSRFSLI  
LSLFLKSTACFSFSMIFSLAIFHVLQWKFLYFPTFSVSPYSRSYSVHFSFSTFFSDFVIFQVVKWMFLIFLD  
FQFSC  
>ENSMUSP00000136598\_c.558:A>C\_p.S187R ENSMUST00000177722.8|Gm11168-  
201|ENSMUSG00000096385|+|chr9:g.3004862:A>C  
MFLIFHDFQFSCHIPCPTVDISFPPFSVFLAIFHVLKCVFLIFSDQFSRHIPGPTVCISHFSRFSVILSFFK  
LSSGCFSFSLIIFSFLAIFHVLQWTFLNFPFVSFLAIFHVLKCCVFLIFRDFQFPRHIPGPTVCISHFSRFSV  
ISSFFKSSSGCFSFSMIFSLAIFHVLQWTFLNFPFSSYRFSFSPYSRSYSVHFSFSTFFSDFVIFQVVKWMFL  
IFLDFQFSC  
>ENSMUSP00000136761\_c.558:A>C\_p.S187R ENSMUST00000178077.2|Gm11168-  
202|ENSMUSG00000096385|+|chr9:g.3004862:A>C  
MFLIFLDFQFSCHIPCPTVDISFPPFSVFLAIFHVLKCVFLIFSDQFSRHIPGPTVCISHFFRFFMISFFFT  
LSSGCFSFSIIIFTFLAIFHVLQWTFLNFPFVSFLAIFHILKCCVFLIFRDFQFPRHIPGPTVCISHFSRFSV  
ISSFFKSSSGCFSFSMIFSLAIFHVLQWTFLNFPFSSYRFSFSPYSRSYSVHFSFSTFFSDFVIFQVVKWMFL  
IFLDFQFSC  
>ENSMUSP00000136598\_c.558:AG>CA\_p.S187Q ENSMUST00000177722.8|Gm11168-  
201|ENSMUSG00000096385|+|chr9:g.3004862:AG>CA  
MFLIFHDFQFSCHIPCPTVDISFPPFSVFLAIFHVLKCVFLIFSDQFSRHIPGPTVCISHFSRFSVILSFFK  
LSSGCFSFSLIIFSFLAIFHVLQWTFLNFPFVSFLAIFHVLKCCVFLIFRDFQFPRHIPGPTVCISHFSRFSV  
ISSFFKSSSGCFSFSMIFSLAIFHVLQWTFLNFPFSSYQFLAIFQVLQCAFLIFHVQ\*FCNFSQCQVDVS  
HFP\*FSVFL



>ENSMUSP00000136761\_c.558:AG>CA\_p.S187Q ENSMUST00000178077.2|Gm11168-202|ENSMUSG00000096385|+|chr9:g.3004862:AG>CA  
MFLIFLDFQFSCHIPCPTVDISFPPFSVFLAIFHVLKCVFLIFSDQFSRHIPGPTVCISHFFRFFMISFFFT  
LSSGCFSSFSIIFTFLAIFHVLQWTFLNFPFSSVFLAIFHILKCCVFLIFRDFQFPRHIPGPTVCISHFSRFSV  
ISSFFKSSSGCFSSMIFSFSLAIFHVLQWTFLNFPFSSYQFLAIFQVLQCAFLIFHVFQ\*FCNFSSCQVDVS  
HFP\*FSVFL  
>ENSMUSP00000137273\_c.414:C>T\_p.H139Y ENSMUST00000178348.2|Gm11168-203|ENSMUSG00000096385|+|chr9:g.3004875:C>T  
MFLIFLDFHFSCHIPRPIVDISFPPFSVFFAIFHVPKCVFLIFRDFQFPRHIPGPTVCISHFSRFSVISSFFK  
SSSGCFSSMIFSFSLAIFHVLQWTFLNFPFSSVFLAIFHVLKCVFLIYRDFQFSCYIPSPPTVCISYFSRFSLI  
LSLFLKSTACFSFSMIFSFSLAIFHVLQWKFLYFPTFSVSPYSRSYSVHFSFFTFSSDFVIFQVVKWMFLIFLD  
FQFSC  
>ENSMUSP00000137273\_c.415:A>T\_p.H139L ENSMUST00000178348.2|Gm11168-203|ENSMUSG00000096385|+|chr9:g.3004876:A>T  
MFLIFLDFHFSCHIPRPIVDISFPPFSVFFAIFHVPKCVFLIFRDFQFPRHIPGPTVCISHFSRFSVISSFFK  
SSSGCFSSMIFSFSLAIFHVLQWTFLNFPFSSVFLAIFHVLKCVFLIYRDFQFSCYIPSPPTVCISLFSRFSLI  
LSLFLKSTACFSFSMIFSFSLAIFHVLQWKFLYFPTFSVSPYSRSYSVHFSFFTFSSDFVIFQVVKWMFLIFLD  
FQFSC  
>ENSMUSP00000137273\_c.420:T>C\_p.S141P ENSMUST00000178348.2|Gm11168-203|ENSMUSG00000096385|+|chr9:g.3004881:T>C  
MFLIFLDFHFSCHIPRPIVDISFPPFSVFFAIFHVPKCVFLIFRDFQFPRHIPGPTVCISHFSRFSVISSFFK  
SSSGCFSSMIFSFSLAIFHVLQWTFLNFPFSSVFLAIFHVLKCVFLIYRDFQFSCYIPSPPTVCISHFPRFSLI  
LSLFLKSTACFSFSMIFSFSLAIFHVLQWKFLYFPTFSVSPYSRSYSVHFSFFTFSSDFVIFQVVKWMFLIFLD  
FQFSC  
>ENSMUSP00000137273\_c.423:C>T\_p.R142C ENSMUST00000178348.2|Gm11168-203|ENSMUSG00000096385|+|chr9:g.3004884:C>T  
MFLIFLDFHFSCHIPRPIVDISFPPFSVFFAIFHVPKCVFLIFRDFQFPRHIPGPTVCISHFSRFSVISSFFK  
SSSGCFSSMIFSFSLAIFHVLQWTFLNFPFSSVFLAIFHVLKCVFLIYRDFQFSCYIPSPPTVCISHFSCFSLI  
LSLFLKSTACFSFSMIFSFSLAIFHVLQWKFLYFPTFSVSPYSRSYSVHFSFFTFSSDFVIFQVVKWMFLIFLD  
FQFSC  
>ENSMUSP00000137273\_c.432:C>G\_p.L145V ENSMUST00000178348.2|Gm11168-203|ENSMUSG00000096385|+|chr9:g.3004893:C>G  
MFLIFLDFHFSCHIPRPIVDISFPPFSVFFAIFHVPKCVFLIFRDFQFPRHIPGPTVCISHFSRFSVISSFFK  
SSSGCFSSMIFSFSLAIFHVLQWTFLNFPFSSVFLAIFHVLKCVFLIYRDFQFSCYIPSPPTVCISHFSRFSVI  
LSLFLKSTACFSFSMIFSFSLAIFHVLQWKFLYFPTFSVSPYSRSYSVHFSFFTFSSDFVIFQVVKWMFLIFLD  
FQFSC  
>ENSMUSP00000137273\_c.440:G>C\_p.L147F ENSMUST00000178348.2|Gm11168-203|ENSMUSG00000096385|+|chr9:g.3004901:G>C  
MFLIFLDFHFSCHIPRPIVDISFPPFSVFFAIFHVPKCVFLIFRDFQFPRHIPGPTVCISHFSRFSVISSFFK  
SSSGCFSSMIFSFSLAIFHVLQWTFLNFPFSSVFLAIFHVLKCVFLIYRDFQFSCYIPSPPTVCISHFSRFSLI  
FSLFLKSTACFSFSMIFSFSLAIFHVLQWKFLYFPTFSVSPYSRSYSVHFSFFTFSSDFVIFQVVKWMFLIFLD  
FQFSC  
>ENSMUSP00000137273\_c.446:G>T\_p.L149F ENSMUST00000178348.2|Gm11168-203|ENSMUSG00000096385|+|chr9:g.3004907:G>T  
MFLIFLDFHFSCHIPRPIVDISFPPFSVFFAIFHVPKCVFLIFRDFQFPRHIPGPTVCISHFSRFSVISSFFK  
SSSGCFSSMIFSFSLAIFHVLQWTFLNFPFSSVFLAIFHVLKCVFLIYRDFQFSCYIPSPPTVCISHFSRFSLI  
LSFFKLSTACFSFSMIFSFSLAIFHVLQWKFLYFPTFSVSPYSRSYSVHFSFFTFSSDFVIFQVVKWMFLIFLD  
FQFSC  
>ENSMUSP00000137273\_c.454:T>A\_p.L152\* ENSMUST00000178348.2|Gm11168-203|ENSMUSG00000096385|+|chr9:g.3004915:T>A  
MFLIFLDFHFSCHIPRPIVDISFPPFSVFFAIFHVPKCVFLIFRDFQFPRHIPGPTVCISHFSRFSVISSFFK  
SSSGCFSSMIFSFSLAIFHVLQWTFLNFPFSSVFLAIFHVLKCVFLIYRDFQFSCYIPSPPTVCISHFSRFSLI  
LSLFLK\*STACFSFSMIFSFSLAIFHVLQWKFLYFPTFSVSPYSRSYSVHFSFFTFSSDFVIFQVVKWMFLIFLD  
FQFSC  
>rs247048029\_ENSMUSP00000137273\_c.523:A>C\_p.K175T  
ENSMUST00000178348.2|Gm11168-203|ENSMUSG00000096385|+|chr9:g.3004984:A>C  
MFLIFLDFHFSCHIPRPIVDISFPPFSVFFAIFHVPKCVFLIFRDFQFPRHIPGPTVCISHFSRFSVISSFFK  
SSSGCFSSMIFSFSLAIFHVLQWTFLNFPFSSVFLAIFHVLKCVFLIYRDFQFSCYIPSPPTVCISHFSRFSLI

LSLFLKSTACFSFSMIFSLAIFHVLQWTFLYFPTFSVSPYSRSYSVHFSFSTFFSDFVIFQVVKWMFLIFLD  
FQFSC  
>ENSMUSP00000137273\_c.531:T>A\_p.Y178N ENSMUST00000178348.2|Gm11168-  
203|ENSMUSG00000096385|+|chr9:g.3004992:T>A  
MFLIFNDFHFSCHIPRPIVDISFPPFSVFFAIFHVPKCVFLIFRDFQFPRHIPGPTVCISHFSRFSVISSFFK  
SSSGCFSFSMIFSLAIFHVLQWTFNLNFPFVSFLAIFHVLKCVFLIYRDFQFSCYIPSPPTVCISHFSRFSLI  
LSLFLKSTACFSFSMIFSLAIFHVLQWKFLNFPPTFSVSPYSRSYSVHFSFSTFFSDFVIFQVVKWMFLIFLD  
FQFSC  
>ENSMUSP00000137273\_c.535:T>C\_p.F179S ENSMUST00000178348.2|Gm11168-  
203|ENSMUSG00000096385|+|chr9:g.3004996:T>C  
MFLIFNDFHFSCHIPRPIVDISFPPFSVFFAIFHVPKCVFLIFRDFQFPRHIPGPTVCISHFSRFSVISSFFK  
SSSGCFSFSMIFSLAIFHVLQWTFNLNFPFVSFLAIFHVLKCVFLIYRDFQFSCYIPSPPTVCISHFSRFSLI  
LSLFLKSTACFSFSMIFSLAIFHVLQWKFLYSPTFSVSPYSRSYSVHFSFSTFFSDFVIFQVVKWMFLIFLD  
FQFSC  
>ENSMUSP00000137273\_c.541:CT>C\_p.T181del-fs ENSMUST00000178348.2|Gm11168-  
203|ENSMUSG00000096385|+|chr9:g.3005002:CT>C  
MFLIFNDFHFSCHIPRPIVDISFPPFSVFFAIFHVPKCVFLIFRDFQFPRHIPGPTVCISHFSRFSVISSFFK  
SSSGCFSFSMIFSLAIFHVLQWTFNLNFPFVSFLAIFHVLKCVFLIYRDFQFSCYIPSPPTVCISHFSRFSLI  
LSLFLKSTACFSFSMIFSLAIFHVLQWKFLYFPTFQFRHIPGPTVCISHFSRFSVIL  
>ENSMUSP00000136598\_c.559:G>T\_p.S187I ENSMUST00000177722.8|Gm11168-  
201|ENSMUSG00000096385|+|chr9:g.3005070:G>T  
MFLIFHDFQFSCHIPCPTVDISFPPFSVFLAIFHVLKCVFLIFSDQFQSRHIPGPTVCISHFSRFSVILSFFK  
LSSGCFSSLIIFSFLAIFHVLQWTFNLNFPFVSFLAIFHVLKCCVFLIFRDFQFPRHIPGPTVCISHFSRFSV  
ISSFFKSSSGCFSFSMIFSLAIFHVLQWTFNLNFPFSSYIFSPYSRSYSVHFSFSTFFSDFVIFQVVKWMFL  
IFLDFQFSC  
>ENSMUSP00000136761\_c.559:G>T\_p.S187I ENSMUST00000178077.2|Gm11168-  
202|ENSMUSG00000096385|+|chr9:g.3005070:G>T  
MFLIFLDFQFSCHIPCPTVDISFPPFSVFLAIFHVLKCVFLIFSDQFQSRHIPGPTVCISHFFRFFMISSTFF  
LSSGCFSSIIIFTFLAIFHVLQWTFNLNFPFVSFLAIFHILKCCVFLIFRDFQFPRHIPGPTVCISHFSRFSV  
ISSFFKSSSGCFSFSMIFSLAIFHVLQWTFNLNFPFSSYIFSPYSRSYSVHFSFSTFFSDFVIFQVVKWMFL  
IFLDFQFSC  
>ENSMUSP00000137273\_c.549:G>T\_p.V184F ENSMUST00000178348.2|Gm11168-  
203|ENSMUSG00000096385|+|chr9:g.3005070:G>T  
MFLIFNDFHFSCHIPRPIVDISFPPFSVFFAIFHVPKCVFLIFRDFQFPRHIPGPTVCISHFSRFSVISSFFK  
SSSGCFSFSMIFSLAIFHVLQWTFNLNFPFVSFLAIFHVLKCVFLIYRDFQFSCYIPSPPTVCISHFSRFSLI  
LSLFLKSTACFSFSMIFSLAIFHVLQWKFLYFPTFSFSPYSRSYSVHFSFSTFFSDFVIFQVVKWMFLIFLD  
FQFSC  
>ENSMUSP00000136598\_c.617:T>G\_p.S206R ENSMUST00000177722.8|Gm11168-  
201|ENSMUSG00000096385|+|chr9:g.3005128:T>G  
MFLIFHDFQFSCHIPCPTVDISFPPFSVFLAIFHVLKCVFLIFSDQFQSRHIPGPTVCISHFSRFSVILSFFK  
LSSGCFSSLIIFSFLAIFHVLQWTFNLNFPFVSFLAIFHVLKCCVFLIFRDFQFPRHIPGPTVCISHFSRFSV  
ISSFFKSSSGCFSFSMIFSLAIFHVLQWTFNLNFPFSSYSFSPYSRSYSVHFSFSTFFRDFVIFQVVKWMFL  
IFLDFQFSC  
>ENSMUSP00000136761\_c.617:T>G\_p.S206R ENSMUST00000178077.2|Gm11168-  
202|ENSMUSG00000096385|+|chr9:g.3005128:T>G  
MFLIFLDFQFSCHIPCPTVDISFPPFSVFLAIFHVLKCVFLIFSDQFQSRHIPGPTVCISHFFRFFMISSTFF  
LSSGCFSSIIIFTFLAIFHVLQWTFNLNFPFVSFLAIFHILKCCVFLIFRDFQFPRHIPGPTVCISHFSRFSV  
ISSFFKSSSGCFSFSMIFSLAIFHVLQWTFNLNFPFSSYSFSPYSRSYSVHFSFSTFFRDFVIFQVVKWMFL  
IFLDFQFSC  
>ENSMUSP00000137273\_c.605:T>G\_p.S202R ENSMUST00000178348.2|Gm11168-  
203|ENSMUSG00000096385|+|chr9:g.3005128:T>G  
MFLIFNDFHFSCHIPRPIVDISFPPFSVFFAIFHVPKCVFLIFRDFQFPRHIPGPTVCISHFSRFSVISSFFK  
SSSGCFSFSMIFSLAIFHVLQWTFNLNFPFVSFLAIFHVLKCVFLIYRDFQFSCYIPSPPTVCISHFSRFSLI  
LSLFLKSTACFSFSMIFSLAIFHVLQWKFLYFPTFSVSPYSRSYSVHFSFSTFFRDFVIFQVVKWMFLIFLD  
FQFSC  
>rs223163006\_ENSMUSP00000136598\_c.664:T>A\_p.L222H  
ENSMUST00000177722.8|Gm11168-201|ENSMUSG00000096385|+|chr9:g.3005175:T>A

MFLIFHDFQFSCHIPCPTVDISFPPFSVFLAIFHVLKCVFLIFSDQFSRSHIPGPTVCISHFSRFSVILSFFK  
LSSGCFSSFLIFSLAIFHVLQWTFNLNPPFSVFLAIFHVLKCCVFLIFRDFQFPRHIPGPTVCISHFSRFSV  
ISSFFKSSSGCFSSMIFSLAIFHVLQWTFNLNPPFSSYSFSPYSRSYSVHFSFSTFFSDFVIFQVVKWMFL  
IFHDFQFSC  
>rs223163006\_ENSMUSP00000136761\_c.664:T>A\_p.L222H  
ENSMUST00000178077.2|Gm11168-202|ENSMUSG00000096385|+|chr9:g.3005175:T>A  
MFLIFLDFQFSCHIPCPTVDISFPPFSVFLAIFHVLKCVFLIFSDQFSRSHIPGPTVCISHFFRFFMILSFFK  
LSSGCFSSSIIFTFLAIFHVLQWTFNLNPPFSVFLAIFHILKCCVFLIFRDFQFPRHIPGPTVCISHFSRFSV  
ISSFFKSSSGCFSSMIFSLAIFHVLQWTFNLNPPFSSYSFSPYSRSYSVHFSFSTFFSDFVIFQVVKWMFL  
IFHDFQFSC  
>rs223163006\_ENSMUSP00000137273\_c.652:T>A\_p.L218H  
ENSMUST00000178348.2|Gm11168-203|ENSMUSG00000096385|+|chr9:g.3005175:T>A  
MFLIFNDFHFSCHIPRPIVDISFPPFSVFFAIFHVPKCVFLIFRDFQFPRHIPGPTVCISHFSRFSVILSFFK  
SSSGCFSSMIFSLAIFHVLQWTFNLNPPFSVFLAIFHVLKCVFLIYRDFQFSCYIPSPPTVCISHFSRFSLI  
LSLFLKSTACFSFSMIFSLAIFHVLQWKFLYFPTFSVSPYSRSYSVHFSFSTFFSDFVIFQVVKWMFLIFHD  
FQFSC  
>rs223163006\_ENSMUSP00000136541\_c.16:T>A\_p.L6H  
ENSMUST00000179881.2|Gm11168-204|ENSMUSG00000096385|+|chr9:g.3005175:T>A  
MFLIFHDFQFSCHIPCPTVDISFPPFSVFLAIFHVLKCVFLIFSDQFSRNIPGPTVCISHFFRFFMILSFFK  
LSTACFSFSMIFSLAIFHVLQWTFNLNPTFSVFLAIFHVLKCVFLIFSDFLFSRHIPGPTVCISNFSRFSVI  
SSFFKLSSGCFSSMIFSLAIFHVLQWTFNLNPTFSIFPYFTSYSVHFSFSTFFSDFVIFQVVNCMFLIFHD  
FQFSC  
>ENSMUSP00000136541\_c.45:T>C\_p.C16R ENSMUST00000179881.2|Gm11168-  
204|ENSMUSG00000096385|+|chr9:g.3005204:T>C  
MFLIFLDFQFSCHIPRPTVDISFPPFSVFLAIFHVLKCVFLIFSDQFSRNIPGPTVCISHFFRFFMILSFFK  
LSTACFSFSMIFSLAIFHVLQWTFNLNPTFSVFLAIFHVLKCVFLIFSDFLFSRHIPGPTVCISNFSRFSVI  
SSFFKLSSGCFSSMIFSLAIFHVLQWTFNLNPTFSIFPYFTSYSVHFSFSTFFSDFVIFQVVNCMFLIFHD  
FQFSC  
>ENSMUSP00000136541\_c.52:C>T\_p.T18I ENSMUST00000179881.2|Gm11168-  
204|ENSMUSG00000096385|+|chr9:g.3005211:C>T  
MFLIFLDFQFSCHIPCPIVDISFPPFSVFLAIFHVLKCVFLIFSDQFSRNIPGPTVCISHFFRFFMILSFFK  
LSTACFSFSMIFSLAIFHVLQWTFNLNPTFSVFLAIFHVLKCVFLIFSDFLFSRHIPGPTVCISNFSRFSVI  
SSFFKLSSGCFSSMIFSLAIFHVLQWTFNLNPTFSIFPYFTSYSVHFSFSTFFSDFVIFQVVNCMFLIFHD  
FQFSC  
>ENSMUSP00000136541\_c.124:T>A\_p.I42N ENSMUST00000179881.2|Gm11168-  
204|ENSMUSG00000096385|+|chr9:g.3005287:T>A  
MFLIFLDFQFSCHIPCPTVDISFPPFSVFLAIFHVLKCVFLNFSDFQFSRNIPGPTVCISHFFRFFMILSFFK  
LSTACFSFSMIFSLAIFHVLQWTFNLNPTFSVFLAIFHVLKCVFLIFSDFLFSRHIPGPTVCISNFSRFSVI  
SSFFKLSSGCFSSMIFSLAIFHVLQWTFNLNPTFSIFPYFTSYSVHFSFSTFFSDFVIFQVVNCMFLIFHD  
FQFSC  
>rs253464051\_ENSMUSP00000136541\_c.129:A>C\_p.S44R  
ENSMUST00000179881.2|Gm11168-204|ENSMUSG00000096385|+|chr9:g.3005292:A>C  
MFLIFLDFQFSCHIPCPTVDISFPPFSVFLAIFHVLKCVFLIFRDFQFSRNIPGPTVCISHFFRFFMILSFFK  
LSTACFSFSMIFSLAIFHVLQWTFNLNPTFSVFLAIFHVLKCVFLIFSDFLFSRHIPGPTVCISNFSRFSVI  
SSFFKLSSGCFSSMIFSLAIFHVLQWTFNLNPTFSIFPYFTSYSVHFSFSTFFSDFVIFQVVNCMFLIFHD  
FQFSC  
>ENSMUSP00000136541\_c.129:A>T\_p.S44C ENSMUST00000179881.2|Gm11168-  
204|ENSMUSG00000096385|+|chr9:g.3005292:A>T  
MFLIFLDFQFSCHIPCPTVDISFPPFSVFLAIFHVLKCVFLIFCDFQFSRNIPGPTVCISHFFRFFMILSFFK  
LSTACFSFSMIFSLAIFHVLQWTFNLNPTFSVFLAIFHVLKCVFLIFSDFLFSRHIPGPTVCISNFSRFSVI  
SSFFKLSSGCFSSMIFSLAIFHVLQWTFNLNPTFSIFPYFTSYSVHFSFSTFFSDFVIFQVVNCMFLIFHD  
FQFSC  
>ENSMUSP00000136541\_c.140:GT>A\_p.Q47del-fs ENSMUST00000179881.2|Gm11168-  
204|ENSMUSG00000096385|+|chr9:g.3005303:GT>A  
MFLIFLDFQFSCHIPCPTVDISFPPFSVFLAIFHVLKCVFLIFSDQFLAIFQVLQCAFLIFSGFS  
>ENSMUSP00000136541\_c.150:A>C\_p.N51H ENSMUST00000179881.2|Gm11168-  
204|ENSMUSG00000096385|+|chr9:g.3005313:A>C

MFLIFLDFQFSCHIPCPTVDISFPPFSVFLAIFHVLKCVFLIFSDQFSRSHIPGPTVCISHFFRFFMILSFFK  
LSTACFSFSMIFSLAIFHVLLWTFNLNPTFSVFLAIFHVLKCVFLIFSDFLFSRHIPGPTVCISNFSRFSVI  
SSFFKLSSGCFSFSMIFSLAIFHVLQWTFNLNPTFSIFPYFTSYSVHFSFFTFSSDFVIFQVNCMFLIFHD  
FQFSC  
>ENSMUSP00000136541\_c.165:A>T\_p.T56S ENSMUST00000179881.2|Gm11168-  
204|ENSMUSG00000096385|+|chr9:g.3005328:A>T  
MFLIFLDFQFSCHIPCPTVDISFPPFSVFLAIFHVLKCVFLIFSDQFSRSHIPGPTVCISHFFRFFMILSFFK  
LSTACFSFSMIFSLAIFHVLLWTFNLNPTFSVFLAIFHVLKCVFLIFSDFLFSRHIPGPTVCISNFSRFSVI  
SSFFKLSSGCFSFSMIFSLAIFHVLQWTFNLNPTFSIFPYFTSYSVHFSFFTFSSDFVIFQVNCMFLIFHD  
FQFSC  
>ENSMUSP00000136541\_c.181:AT>A\_p.H61del-fs ENSMUST00000179881.2|Gm11168-  
204|ENSMUSG00000096385|+|chr9:g.3005344:AT>A  
MFLIFLDFQFSCHIPCPTVDISFPPFSVFLAIFHVLKCVFLIFSDQFSRSHIPGPTVCISHFSGFS  
>ENSMUSP00000136541\_c.190:G>C\_p.R64T ENSMUST00000179881.2|Gm11168-  
204|ENSMUSG00000096385|+|chr9:g.3005353:G>C  
MFLIFLDFQFSCHIPCPTVDISFPPFSVFLAIFHVLKCVFLIFSDQFSRSHIPGPTVCISHFFRFFMILSFFK  
LSTACFSFSMIFSLAIFHVLLWTFNLNPTFSVFLAIFHVLKCVFLIFSDFLFSRHIPGPTVCISNFSRFSVI  
SSFFKLSSGCFSFSMIFSLAIFHVLQWTFNLNPTFSIFPYFTSYSVHFSFFTFSSDFVIFQVNCMFLIFHD  
FQFSC  
>ENSMUSP00000136541\_c.205:T>C\_p.L69S ENSMUST00000179881.2|Gm11168-  
204|ENSMUSG00000096385|+|chr9:g.3006187:T>C  
MFLIFLDFQFSCHIPCPTVDISFPPFSVFLAIFHVLKCVFLIFSDQFSRSHIPGPTVCISHFFRFFMILSFFK  
LSTACFSFSMIFSLAIFHVLLWTFNLNPTFSVFLAIFHVLKCVFLIFSDFLFSRHIPGPTVCISNFSRFSVI  
SSFFKLSSGCFSFSMIFSLAIFHVLQWTFNLNPTFSIFPYFTSYSVHFSFFTFSSDFVIFQVNCMFLIFHD  
FQFSC  
>ENSMUSP00000136541\_c.220:T>A\_p.L74\* ENSMUST00000179881.2|Gm11168-  
204|ENSMUSG00000096385|+|chr9:g.3006202:T>A  
MFLIFLDFQFSCHIPCPTVDISFPPFSVFLAIFHVLKCVFLIFSDQFSRSHIPGPTVCISHFFRFFMILSFFK  
\*STACFSFSMIFSLAIFHVLLWTFNLNPTFSVFLAIFHVLKCVFLIFSDFLFSRHIPGPTVCISNFSRFSVI  
SSFFKLSSGCFSFSMIFSLAIFHVLQWTFNLNPTFSIFPYFTSYSVHFSFFTFSSDFVIFQVNCMFLIFHD  
FQFSC  
>ENSMUSP00000136541\_c.220:T>G\_p.L74W ENSMUST00000179881.2|Gm11168-  
204|ENSMUSG00000096385|+|chr9:g.3006202:T>G  
MFLIFLDFQFSCHIPCPTVDISFPPFSVFLAIFHVLKCVFLIFSDQFSRSHIPGPTVCISHFFRFFMILSFFK  
WSTACFSFSMIFSLAIFHVLLWTFNLNPTFSVFLAIFHVLKCVFLIFSDFLFSRHIPGPTVCISNFSRFSVI  
SSFFKLSSGCFSFSMIFSLAIFHVLQWTFNLNPTFSIFPYFTSYSVHFSFFTFSSDFVIFQVNCMFLIFHD  
FQFSC  
>ENSMUSP00000136541\_c.226:CTGC>ATGG\_p.T76N ENSMUST00000179881.2|Gm11168-  
204|ENSMUSG00000096385|+|chr9:g.3006208:CTGC>ATGG  
MFLIFLDFQFSCHIPCPTVDISFPPFSVFLAIFHVLKCVFLIFSDQFSRSHIPGPTVCISHFFRFFMILSFFK  
LSNGACFSFSMIFSLAIFHVLLWTFNLNPTFSVFLAIFHVLKCVFLIFSDFLFSRHIPGPTVCISNFSRFSV  
ISSFFKLSSGCFSFSMIFSLAIFHVLQWTFNLNPTFSIFPYFTSYSVHFSFFTFSSDFVIFQVNCMFLIFH  
DFQFSC  
>ENSMUSP00000136541\_c.226:CTGC>GTGG\_p.T76S ENSMUST00000179881.2|Gm11168-  
204|ENSMUSG00000096385|+|chr9:g.3006208:CTGC>GTGG  
MFLIFLDFQFSCHIPCPTVDISFPPFSVFLAIFHVLKCVFLIFSDQFSRSHIPGPTVCISHFFRFFMILSFFK  
LSSGACFSFSMIFSLAIFHVLLWTFNLNPTFSVFLAIFHVLKCVFLIFSDFLFSRHIPGPTVCISNFSRFSV  
ISSFFKLSSGCFSFSMIFSLAIFHVLQWTFNLNPTFSIFPYFTSYSVHFSFFTFSSDFVIFQVNCMFLIFH  
DFQFSC  
>ENSMUSP00000136541\_c.226:CTGCATG>GTGGATT\_p.T76S  
ENSMUST00000179881.2|Gm11168-  
204|ENSMUSG00000096385|+|chr9:g.3006208:CTGCATG>GTGGATT  
MFLIFLDFQFSCHIPCPTVDISFPPFSVFLAIFHVLKCVFLIFSDQFSRSHIPGPTVCISHFFRFFMILSFFK  
LSSGFACFSFSMIFSLAIFHVLLWTFNLNPTFSVFLAIFHVLKCVFLIFSDFLFSRHIPGPTVCISNFSRFS  
VSSFFKLSSGCFSFSMIFSLAIFHVLQWTFNLNPTFSIFPYFTSYSVHFSFFTFSSDFVIFQVNCMFLIF  
HDFQFSC  
>ENSMUSP00000136541\_c.246:A>G\_p.M83V ENSMUST00000179881.2|Gm11168-  
204|ENSMUSG00000096385|+|chr9:g.3006228:A>G

MFLIFLDFQFSCHIPCPTVDISFPPFSVFLAIFHVLKCVFLIFSDQFSRNIPGPTVCISHFFRFFMILSFFK  
LSTACFSFSVIFSFSLAIFHVLLWTFLNFPPTFSVFLAIFHVLKCVFLIFSDFLFSRHIPGPTVCISNFSRFSVI  
SSFFKLSSGCFSFSMIFSFLAIFHVLQWTFLNFPPTFSIFPYFTSYSVHFSFSTFFSDFVIFQVNCMFLIFHD  
FQFSC  
>ENSMUSP00000136541\_c.283:T>C\_p.L95P ENSMUST00000179881.2|Gm11168-  
204|ENSMUSG00000096385|+|chr9:g.3006265:T>C  
MFLIFLDFQFSCHIPCPTVDISFPPFSVFLAIFHVLKCVFLIFSDQFSRNIPGPTVCISHFFRFFMILSFFK  
LSTACFSFSMIFSFLAIFHVLPWTFLNFPPTFSVFLAIFHVLKCVFLIFSDFLFSRHIPGPTVCISNFSRFSVI  
SSFFKLSSGCFSFSMIFSFLAIFHVLQWTFLNFPPTFSIFPYFTSYSVHFSFSTFFSDFVIFQVNCMFLIFHD  
FQFSC  
>ENSMUSP00000136541\_c.283:T>A\_p.L95Q ENSMUST00000179881.2|Gm11168-  
204|ENSMUSG00000096385|+|chr9:g.3006265:T>A  
MFLIFLDFQFSCHIPCPTVDISFPPFSVFLAIFHVLKCVFLIFSDQFSRNIPGPTVCISHFFRFFMILSFFK  
LSTACFSFSMIFSFLAIFHVLQWTFLNFPPTFSVFLAIFHVLKCVFLIFSDFLFSRHIPGPTVCISNFSRFSVI  
SSFFKLSSGCFSFSMIFSFLAIFHVLQWTFLNFPPTFSIFPYFTSYSVHFSFSTFFSDFVIFQVNCMFLIFHD  
FQFSC  
>ENSMUSP00000136541\_c.301:T>A\_p.F101Y ENSMUST00000179881.2|Gm11168-  
204|ENSMUSG00000096385|+|chr9:g.3006283:T>A  
MFLIFLDFQFSCHIPCPTVDISFPPFSVFLAIFHVLKCVFLIFSDQFSRNIPGPTVCISHFFRFFMILSFFK  
LSTACFSFSMIFSFLAIFHVLLWTFLNFPPTFSVFLAIFHVLKCVFLIFSDFLFSRHIPGPTVCISNFSRFSVI  
SSFFKLSSGCFSFSMIFSFLAIFHVLQWTFLNFPPTFSIFPYFTSYSVHFSFSTFFSDFVIFQVNCMFLIFHD  
FQFSC  
>ENSMUSP00000136541\_c.306:A>C\_p.T103P ENSMUST00000179881.2|Gm11168-  
204|ENSMUSG00000096385|+|chr9:g.3006288:A>C  
MFLIFLDFQFSCHIPCPTVDISFPPFSVFLAIFHVLKCVFLIFSDQFSRNIPGPTVCISHFFRFFMILSFFK  
LSTACFSFSMIFSFLAIFHVLLWTFLNFPPTFSVFLAIFHVLKCVFLIFSDFLFSRHIPGPTVCISNFSRFSVI  
SSFFKLSSGCFSFSMIFSFLAIFHVLQWTFLNFPPTFSIFPYFTSYSVHFSFSTFFSDFVIFQVNCMFLIFHD  
FQFSC  
>ENSMUSP00000136541\_c.324:G>T\_p.A109S ENSMUST00000179881.2|Gm11168-  
204|ENSMUSG00000096385|+|chr9:g.3006306:G>T  
MFLIFLDFQFSCHIPCPTVDISFPPFSVFLAIFHVLKCVFLIFSDQFSRNIPGPTVCISHFFRFFMILSFFK  
LSTACFSFSMIFSFLAIFHVLLWTFLNFPPTFSVFLSIFHVLKCVFLIFSDFLFSRHIPGPTVCISNFSRFSVI  
SSFFKLSSGCFSFSMIFSFLAIFHVLQWTFLNFPPTFSIFPYFTSYSVHFSFSTFFSDFVIFQVNCMFLIFHD  
FQFSC  
>ENSMUSP00000136541\_c.335:T>A\_p.H112Q ENSMUST00000179881.2|Gm11168-  
204|ENSMUSG00000096385|+|chr9:g.3006317:T>A  
MFLIFLDFQFSCHIPCPTVDISFPPFSVFLAIFHVLKCVFLIFSDQFSRNIPGPTVCISHFFRFFMILSFFK  
LSTACFSFSMIFSFLAIFHVLLWTFLNFPPTFSVFLAIFQVLKCVFLIFSDFLFSRHIPGPTVCISNFSRFSVI  
SSFFKLSSGCFSFSMIFSFLAIFHVLQWTFLNFPPTFSIFPYFTSYSVHFSFSTFFSDFVIFQVNCMFLIFHD  
FQFSC  
>ENSMUSP00000136541\_c.343:A>T\_p.K115M ENSMUST00000179881.2|Gm11168-  
204|ENSMUSG00000096385|+|chr9:g.3006325:A>T  
MFLIFLDFQFSCHIPCPTVDISFPPFSVFLAIFHVLKCVFLIFSDQFSRNIPGPTVCISHFFRFFMILSFFK  
LSTACFSFSMIFSFLAIFHVLLWTFLNFPPTFSVFLAIFHVLKCVFLIFSDFLFSRHIPGPTVCISNFSRFSVI  
SSFFKLSSGCFSFSMIFSFLAIFHVLQWTFLNFPPTFSIFPYFTSYSVHFSFSTFFSDFVIFQVNCMFLIFHD  
FQFSC  
>ENSMUSP00000136541\_c.346:G>A\_p.C116Y ENSMUST00000179881.2|Gm11168-  
204|ENSMUSG00000096385|+|chr9:g.3006328:G>A  
MFLIFLDFQFSCHIPCPTVDISFPPFSVFLAIFHVLKCVFLIFSDQFSRNIPGPTVCISHFFRFFMILSFFK  
LSTACFSFSMIFSFLAIFHVLLWTFLNFPPTFSVFLAIFHVLKYVFLIFSDFLFSRHIPGPTVCISNFSRFSVI  
SSFFKLSSGCFSFSMIFSFLAIFHVLQWTFLNFPPTFSIFPYFTSYSVHFSFSTFFSDFVIFQVNCMFLIFHD  
FQFSC  
>ENSMUSP00000136541\_c.348:G>A\_p.V117I ENSMUST00000179881.2|Gm11168-  
204|ENSMUSG00000096385|+|chr9:g.3006330:G>A  
MFLIFLDFQFSCHIPCPTVDISFPPFSVFLAIFHVLKCVFLIFSDQFSRNIPGPTVCISHFFRFFMILSFFK  
LSTACFSFSMIFSFLAIFHVLLWTFLNFPPTFSVFLAIFHVLKCVFLIFSDFLFSRHIPGPTVCISNFSRFSVI  
SSFFKLSSGCFSFSMIFSFLAIFHVLQWTFLNFPPTFSIFPYFTSYSVHFSFSTFFSDFVIFQVNCMFLIFHD  
FQFSC

>ENSMUSP00000136541\_c.363:A>T\_p.S122C ENSMUST00000179881.2|Gm11168-204|ENSMUSG00000096385|+|chr9:g.3006345:A>T  
MFLIFLDFQFSCHIPCPTVDISFPPFSVFLAIFHVLKCVFLIFSDQFSRNI PGPTVCISHFFRFFMILSFFK  
LSTACFSFSMIFSFLAIFHVLLWTFNLNPTFSVFLAIFHVLKCVFLIFCDFLFSRHIPGPTVCISNFSRFSVI  
SSFFKLSSGCFSFSMIFSFLAIFHVLQWTFNLNPTFSIFPYFTSYSVHFSFSTFFSDVFIFQVNCMFLIFHD  
FQFSC  
>ENSMUSP00000136541\_c.363:A>C\_p.S122R ENSMUST00000179881.2|Gm11168-204|ENSMUSG00000096385|+|chr9:g.3006345:A>C  
MFLIFLDFQFSCHIPCPTVDISFPPFSVFLAIFHVLKCVFLIFSDQFSRNI PGPTVCISHFFRFFMILSFFK  
LSTACFSFSMIFSFLAIFHVLLWTFNLNPTFSVFLAIFHVLKCVFLIFRDFLFSRHIPGPTVCISNFSRFSVI  
SSFFKLSSGCFSFSMIFSFLAIFHVLQWTFNLNPTFSIFPYFTSYSVHFSFSTFFSDVFIFQVNCMFLIFHD  
FQFSC  
>ENSMUSP00000136541\_c.373:T>A\_p.L125Q ENSMUST00000179881.2|Gm11168-204|ENSMUSG00000096385|+|chr9:g.3006355:T>A  
MFLIFLDFQFSCHIPCPTVDISFPPFSVFLAIFHVLKCVFLIFSDQFSRNI PGPTVCISHFFRFFMILSFFK  
LSTACFSFSMIFSFLAIFHVLLWTFNLNPTFSVFLAIFHVLKCVFLIFSDQFSRHIPGPTVCISNFSRFSVI  
SSFFKLSSGCFSFSMIFSFLAIFHVLQWTFNLNPTFSIFPYFTSYSVHFSFSTFFSDVFIFQVNCMFLIFHD  
FQFSC  
>ENSMUSP00000136541\_c.399:A>T\_p.T134S ENSMUST00000179881.2|Gm11168-204|ENSMUSG00000096385|+|chr9:g.3006381:A>T  
MFLIFLDFQFSCHIPCPTVDISFPPFSVFLAIFHVLKCVFLIFSDQFSRNI PGPTVCISHFFRFFMILSFFK  
LSTACFSFSMIFSFLAIFHVLLWTFNLNPTFSVFLAIFHVLKCVFLIFSDFLFSRHIPGPTVCISNFSRFSVI  
SSFFKLSSGCFSFSMIFSFLAIFHVLQWTFNLNPTFSIFPYFTSYSVHFSFSTFFSDVFIFQVNCMFLIFHD  
FQFSC  
>ENSMUSP00000136541\_c.414:A>T\_p.N139Y ENSMUST00000179881.2|Gm11168-204|ENSMUSG00000096385|+|chr9:g.3006396:A>T  
MFLIFLDFQFSCHIPCPTVDISFPPFSVFLAIFHVLKCVFLIFSDQFSRNI PGPTVCISHFFRFFMILSFFK  
LSTACFSFSMIFSFLAIFHVLLWTFNLNPTFSVFLAIFHVLKCVFLIFSDFLFSRHIPGPTVCISYFSRFSVI  
SSFFKLSSGCFSFSMIFSFLAIFHVLQWTFNLNPTFSIFPYFTSYSVHFSFSTFFSDVFIFQVNCMFLIFHD  
FQFSC  
>ENSMUSP00000136541\_c.414:A>C\_p.N139H ENSMUST00000179881.2|Gm11168-204|ENSMUSG00000096385|+|chr9:g.3006396:A>C  
MFLIFLDFQFSCHIPCPTVDISFPPFSVFLAIFHVLKCVFLIFSDQFSRNI PGPTVCISHFFRFFMILSFFK  
LSTACFSFSMIFSFLAIFHVLLWTFNLNPTFSVFLAIFHVLKCVFLIFSDFLFSRHIPGPTVCISHFSRFSVI  
SSFFKLSSGCFSFSMIFSFLAIFHVLQWTFNLNPTFSIFPYFTSYSVHFSFSTFFSDVFIFQVNCMFLIFHD  
FQFSC  
>ENSMUSP00000136541\_c.416:T>A\_p.N139K ENSMUST00000179881.2|Gm11168-204|ENSMUSG00000096385|+|chr9:g.3006398:T>A  
MFLIFLDFQFSCHIPCPTVDISFPPFSVFLAIFHVLKCVFLIFSDQFSRNI PGPTVCISHFFRFFMILSFFK  
LSTACFSFSMIFSFLAIFHVLLWTFNLNPTFSVFLAIFHVLKCVFLIFSDFLFSRHIPGPTVCISKFSRFSVI  
SSFFKLSSGCFSFSMIFSFLAIFHVLQWTFNLNPTFSIFPYFTSYSVHFSFSTFFSDVFIFQVNCMFLIFHD  
FQFSC  
>ENSMUSP00000136541\_c.429:T>G\_p.S144A ENSMUST00000179881.2|Gm11168-204|ENSMUSG00000096385|+|chr9:g.3006411:T>G  
MFLIFLDFQFSCHIPCPTVDISFPPFSVFLAIFHVLKCVFLIFSDQFSRNI PGPTVCISHFFRFFMILSFFK  
LSTACFSFSMIFSFLAIFHVLLWTFNLNPTFSVFLAIFHVLKCVFLIFSDFLFSRHIPGPTVCISNFSRFAVI  
SSFFKLSSGCFSFSMIFSFLAIFHVLQWTFNLNPTFSIFPYFTSYSVHFSFSTFFSDVFIFQVNCMFLIFHD  
FQFSC  
>ENSMUSP00000136541\_c.430:C>T\_p.S144L ENSMUST00000179881.2|Gm11168-204|ENSMUSG00000096385|+|chr9:g.3006412:C>T  
MFLIFLDFQFSCHIPCPTVDISFPPFSVFLAIFHVLKCVFLIFSDQFSRNI PGPTVCISHFFRFFMILSFFK  
LSTACFSFSMIFSFLAIFHVLLWTFNLNPTFSVFLAIFHVLKCVFLIFSDFLFSRHIPGPTVCISNFSRFLVI  
SSFFKLSSGCFSFSMIFSFLAIFHVLQWTFNLNPTFSIFPYFTSYSVHFSFSTFFSDVFIFQVNCMFLIFHD  
FQFSC  
>ENSMUSP00000136541\_c.439:C>T\_p.S147L ENSMUST00000179881.2|Gm11168-204|ENSMUSG00000096385|+|chr9:g.3006421:C>T  
MFLIFLDFQFSCHIPCPTVDISFPPFSVFLAIFHVLKCVFLIFSDQFSRNI PGPTVCISHFFRFFMILSFFK  
LSTACFSFSMIFSFLAIFHVLLWTFNLNPTFSVFLAIFHVLKCVFLIFSDFLFSRHIPGPTVCISNFSRFSVI

LSFFKLSSGCFSSMIFSLAIFHVLQWTFNLNPTFSIFPYFTSYSVHFSFSTFFSDFVIFQVNCMFLIFHD  
FQFSC  
>ENSMUSP00000136541\_c.454:T>C\_p.L152S ENSMUST00000179881.2|Gm11168-  
204|ENSMUSG00000096385|+|chr9:g.3006436:T>C  
MFLIFLDFQFSCHIPCPTVDISFPPFSVFLAIFHVLKCVFLIFSDQFSRNIPGPTVCISHFFRFFMILSFFK  
LSTACFSFSMIFSLAIFHVLLWTFNLNPTFSVFLAIFHVLKCVFLIFSDQFSRNIPGPTVCISNFSRFSVI  
SSFFKLSSGCFSSMIFSLAIFHVLQWTFNLNPTFSIFPYFTSYSVHFSFSTFFSDFVIFQVNCMFLIFHD  
FQFSC  
>ENSMUSP00000136541\_c.454:T>G\_p.L152W ENSMUST00000179881.2|Gm11168-  
204|ENSMUSG00000096385|+|chr9:g.3006436:T>G  
MFLIFLDFQFSCHIPCPTVDISFPPFSVFLAIFHVLKCVFLIFSDQFSRNIPGPTVCISHFFRFFMILSFFK  
LSTACFSFSMIFSLAIFHVLLWTFNLNPTFSVFLAIFHVLKCVFLIFSDQFSRNIPGPTVCISNFSRFSVI  
SSFFKWSSGCFSSMIFSLAIFHVLQWTFNLNPTFSIFPYFTSYSVHFSFSTFFSDFVIFQVNCMFLIFHD  
FQFSC  
>ENSMUSP00000136541\_c.516:C>T\_p.Q173\* ENSMUST00000179881.2|Gm11168-  
204|ENSMUSG00000096385|+|chr9:g.3006498:C>T  
MFLIFLDFQFSCHIPCPTVDISFPPFSVFLAIFHVLKCVFLIFSDQFSRNIPGPTVCISHFFRFFMILSFFK  
LSTACFSFSMIFSLAIFHVLLWTFNLNPTFSVFLAIFHVLKCVFLIFSDQFSRNIPGPTVCISNFSRFSVI  
SSFFKLSSGCFSSMIFSLAIFHVL\*WTFNLNPTFSIFPYFTSYSVHFSFSTFFSDFVIFQVNCMFLIFHD  
FQFSC  
>ENSMUSP00000136541\_c.535:T>A\_p.F179Y ENSMUST00000179881.2|Gm11168-  
204|ENSMUSG00000096385|+|chr9:g.3006517:T>A  
MFLIFLDFQFSCHIPCPTVDISFPPFSVFLAIFHVLKCVFLIFSDQFSRNIPGPTVCISHFFRFFMILSFFK  
LSTACFSFSMIFSLAIFHVLLWTFNLNPTFSVFLAIFHVLKCVFLIFSDQFSRNIPGPTVCISNFSRFSVI  
SSFFKLSSGCFSSMIFSLAIFHVLQWTFNLNPTFSIFPYFTSYSVHFSFSTFFSDFVIFQVNCMFLIFHD  
FQFSC  
>ENSMUSP00000136541\_c.540:A>C\_p.T181P ENSMUST00000179881.2|Gm11168-  
204|ENSMUSG00000096385|+|chr9:g.3006522:A>C  
MFLIFLDFQFSCHIPCPTVDISFPPFSVFLAIFHVLKCVFLIFSDQFSRNIPGPTVCISHFFRFFMILSFFK  
LSTACFSFSMIFSLAIFHVLLWTFNLNPTFSVFLAIFHVLKCVFLIFSDQFSRNIPGPTVCISNFSRFSVI  
SSFFKLSSGCFSSMIFSLAIFHVLQWTFNLNPTFSIFPYFTSYSVHFSFSTFFSDFVIFQVNCMFLIFHD  
FQFSC  
>ENSMUSP00000136541\_c.571:A>T\_p.Y191F ENSMUST00000179881.2|Gm11168-  
204|ENSMUSG00000096385|+|chr9:g.3006848:A>T  
MFLIFLDFQFSCHIPCPTVDISFPPFSVFLAIFHVLKCVFLIFSDQFSRNIPGPTVCISHFFRFFMILSFFK  
LSTACFSFSMIFSLAIFHVLLWTFNLNPTFSVFLAIFHVLKCVFLIFSDQFSRNIPGPTVCISNFSRFSVI  
SSFFKLSSGCFSSMIFSLAIFHVLQWTFNLNPTFSIFPYFTSYSVHFSFSTFFSDFVIFQVNCMFLIFHD  
FQFSC  
>ENSMUSP00000136541\_c.601:T>G\_p.F201C ENSMUST00000179881.2|Gm11168-  
204|ENSMUSG00000096385|+|chr9:g.3006878:T>G  
MFLIFLDFQFSCHIPCPTVDISFPPFSVFLAIFHVLKCVFLIFSDQFSRNIPGPTVCISHFFRFFMILSFFK  
LSTACFSFSMIFSLAIFHVLLWTFNLNPTFSVFLAIFHVLKCVFLIFSDQFSRNIPGPTVCISNFSRFSVI  
SSFFKLSSGCFSSMIFSLAIFHVLQWTFNLNPTFSIFPYFTSYSVHFSFSTFFSDFVIFQVNCMFLIFHD  
FQFSC  
>ENSMUSP00000136541\_c.632:C>A\_p.N211K ENSMUST00000179881.2|Gm11168-  
204|ENSMUSG00000096385|+|chr9:g.3006909:C>A  
MFLIFLDFQFSCHIPCPTVDISFPPFSVFLAIFHVLKCVFLIFSDQFSRNIPGPTVCISHFFRFFMILSFFK  
LSTACFSFSMIFSLAIFHVLLWTFNLNPTFSVFLAIFHVLKCVFLIFSDQFSRNIPGPTVCISNFSRFSVI  
SSFFKLSSGCFSSMIFSLAIFHVLQWTFNLNPTFSIFPYFTSYSVHFSFSTFFSDFVIFQVNCMFLIFHD  
FQFSC  
>ENSMUSP00000136541\_c.632:C>G\_p.N211K ENSMUST00000179881.2|Gm11168-  
204|ENSMUSG00000096385|+|chr9:g.3006909:C>G  
MFLIFLDFQFSCHIPCPTVDISFPPFSVFLAIFHVLKCVFLIFSDQFSRNIPGPTVCISHFFRFFMILSFFK  
LSTACFSFSMIFSLAIFHVLLWTFNLNPTFSVFLAIFHVLKCVFLIFSDQFSRNIPGPTVCISNFSRFSVI  
SSFFKLSSGCFSSMIFSLAIFHVLQWTFNLNPTFSIFPYFTSYSVHFSFSTFFSDFVIFQVNCMFLIFHD  
FQFSC  
>ENSMUSP00000136541\_c.632:CTGC>GTGG\_p.N211K ENSMUST00000179881.2|Gm11168-  
204|ENSMUSG00000096385|+|chr9:g.3006909:CTGC>GTGG

MFLIFLDFQFSCHIPCPTVDISFPPFSVFLAIFHVLKCVFLIFSDQFSRNIPGPTVCISHFFRFFMILSFFK  
LSTACFSFSMIFSLAIFHVLWTFLNFPFVSFLAIFHVLKCVFLIFSDFLFSRHIPGPTVCISNFSRFSVI  
SSFFKLSSGCFSSMIFSLAIFHVLQWTFLNFPFVSIFPYFTSYSVHFSFFTFSSDFVIFQVVKWCMFLIFH  
DFQFSC  
>ENSMUSP00000136541\_c.635:C>G\_p.C212W ENSMUST00000179881.2|Gm11168-  
204|ENSMUSG00000096385|+|chr9:g.3006912:C>G  
MFLIFLDFQFSCHIPCPTVDISFPPFSVFLAIFHVLKCVFLIFSDQFSRNIPGPTVCISHFFRFFMILSFFK  
LSTACFSFSMIFSLAIFHVLWTFLNFPFVSFLAIFHVLKCVFLIFSDFLFSRHIPGPTVCISNFSRFSVI  
SSFFKLSSGCFSSMIFSLAIFHVLQWTFLNFPFVSIFPYFTSYSVHFSFFTFSSDFVIFQVVKWCMFLIFH  
DFQFSC  
>ENSMUSP00000136541\_c.636:A>C\_p.M213L ENSMUST00000179881.2|Gm11168-  
204|ENSMUSG00000096385|+|chr9:g.3006913:A>C  
MFLIFLDFQFSCHIPCPTVDISFPPFSVFLAIFHVLKCVFLIFSDQFSRNIPGPTVCISHFFRFFMILSFFK  
LSTACFSFSMIFSLAIFHVLWTFLNFPFVSFLAIFHVLKCVFLIFSDFLFSRHIPGPTVCISNFSRFSVI  
SSFFKLSSGCFSSMIFSLAIFHVLQWTFLNFPFVSIFPYFTSYSVHFSFFTFSSDFVIFQVVKWCMFLIFH  
DFQFSC  
>ENSMUSP00000136541\_c.639:T>A\_p.F214I ENSMUST00000179881.2|Gm11168-  
204|ENSMUSG00000096385|+|chr9:g.3006916:T>A  
MFLIFLDFQFSCHIPCPTVDISFPPFSVFLAIFHVLKCVFLIFSDQFSRNIPGPTVCISHFFRFFMILSFFK  
LSTACFSFSMIFSLAIFHVLWTFLNFPFVSFLAIFHVLKCVFLIFSDFLFSRHIPGPTVCISNFSRFSVI  
SSFFKLSSGCFSSMIFSLAIFHVLQWTFLNFPFVSIFPYFTSYSVHFSFFTFSSDFVIFQVVKWCMFLIFH  
DFQFSC  
>ENSMUSP00000136541\_c.660:C>A\_p.Q221K ENSMUST00000179881.2|Gm11168-  
204|ENSMUSG00000096385|+|chr9:g.3006937:C>A  
MFLIFLDFQFSCHIPCPTVDISFPPFSVFLAIFHVLKCVFLIFSDQFSRNIPGPTVCISHFFRFFMILSFFK  
LSTACFSFSMIFSLAIFHVLWTFLNFPFVSFLAIFHVLKCVFLIFSDFLFSRHIPGPTVCISNFSRFSVI  
SSFFKLSSGCFSSMIFSLAIFHVLQWTFLNFPFVSIFPYFTSYSVHFSFFTFSSDFVIFQVVKWCMFLIFH  
DFKFSC  
>ENSMUSP00000137330\_c.14:C>A\_p.F5L ENSMUST00000143083.3|Gm10721-  
201|ENSMUSG00000096519|+|chr9:g.3013154:C>A  
LFLILHDFQFSCHIPCPTLDISFPPFSVFLAIFHVLKCVFLIFRDFQFSCHIPGPTVCISHFSRFSVILSFFK  
LSTACFSFSMIFSLAIFHVLQWKFLNFPFVSFLAIFHVLKCVFLIFRDFQFSRHIPGPTVCISHFSRFSVI  
SSFFKSSSGCFSSMIFSLAIFHVLQWTFLNFPFVSIFPYFTSYSVHFSFFTFSSDFVIFQVVKWCMFLIFHDF  
QFSC  
>ENSMUSP00000137330\_c.15:C>T\_p.H6Y ENSMUST00000143083.3|Gm10721-  
201|ENSMUSG00000096519|+|chr9:g.3013155:C>T  
LFLIFYDFQFSCHIPCPTLDISFPPFSVFLAIFHVLKCVFLIFRDFQFSCHIPGPTVCISHFSRFSVILSFFK  
LSTACFSFSMIFSLAIFHVLQWKFLNFPFVSFLAIFHVLKCVFLIFRDFQFSRHIPGPTVCISHFSRFSVI  
SSFFKSSSGCFSSMIFSLAIFHVLQWTFLNFPFVSIFPYFTSYSVHFSFFTFSSDFVIFQVVKWCMFLIFHDF  
QFSC  
>ENSMUSP00000137330\_c.26:G>T\_p.Q9H ENSMUST00000143083.3|Gm10721-  
201|ENSMUSG00000096519|+|chr9:g.3013166:G>T  
LFLIFHDFHFSCHIPCPTLDISFPPFSVFLAIFHVLKCVFLIFRDFQFSCHIPGPTVCISHFSRFSVILSFFK  
LSTACFSFSMIFSLAIFHVLQWKFLNFPFVSFLAIFHVLKCVFLIFRDFQFSRHIPGPTVCISHFSRFSVI  
SSFFKSSSGCFSSMIFSLAIFHVLQWTFLNFPFVSIFPYFTSYSVHFSFFTFSSDFVIFQVVKWCMFLIFHDF  
QFSC  
>ENSMUSP00000137330\_c.33:T>C\_p.C12R ENSMUST00000143083.3|Gm10721-  
201|ENSMUSG00000096519|+|chr9:g.3013173:T>C  
LFLIFHDFQFSRHIPCPTLDISFPPFSVFLAIFHVLKCVFLIFRDFQFSCHIPGPTVCISHFSRFSVILSFFK  
LSTACFSFSMIFSLAIFHVLQWKFLNFPFVSFLAIFHVLKCVFLIFRDFQFSRHIPGPTVCISHFSRFSVI  
SSFFKSSSGCFSSMIFSLAIFHVLQWTFLNFPFVSIFPYFTSYSVHFSFFTFSSDFVIFQVVKWCMFLIFHDF  
QFSC  
>ENSMUSP00000137330\_c.36:C>A\_p.H13N ENSMUST00000143083.3|Gm10721-  
201|ENSMUSG00000096519|+|chr9:g.3013176:C>A  
LFLIFHDFQFSCNIPCPTLDISFPPFSVFLAIFHVLKCVFLIFRDFQFSCHIPGPTVCISHFSRFSVILSFFK  
LSTACFSFSMIFSLAIFHVLQWKFLNFPFVSFLAIFHVLKCVFLIFRDFQFSRHIPGPTVCISHFSRFSVI  
SSFFKSSSGCFSSMIFSLAIFHVLQWTFLNFPFVSIFPYFTSYSVHFSFFTFSSDFVIFQVVKWCMFLIFHDF  
QFSC



>ENSMUSP00000137330\_c.45:T>A\_p.C16S ENSMUST00000143083.3|Gm10721-  
201|ENSMUSG00000096519|+|chr9:g.3013185:T>A  
LFLIFHDFQFSCHIPSPPTLDISFPFVFLAIFHVLKCVFLIFRDFQFSCHIPGPTVCISHFSRFSVILSFFK  
LSTACFSFSMIFSLAIFHVLQWKFLNFPFVFLAIFHVLKCVFLIFRDFQFSRHIPGPTVCISHFSGFSVI  
SSFFKSSSGCFSFSMIFSLAIFHVLQWTFLNFPFVFLAIFHVLKCVFLIFRDFQFSRHIPGPTVCISHFSGFSVI  
QFSC  
>ENSMUSP00000137330\_c.45:T>C\_p.C16R ENSMUST00000143083.3|Gm10721-  
201|ENSMUSG00000096519|+|chr9:g.3013185:T>C  
LFLIFHDFQFSCHIPRPTLDISFPFVFLAIFHVLKCVFLIFRDFQFSCHIPGPTVCISHFSRFSVILSFFK  
LSTACFSFSMIFSLAIFHVLQWKFLNFPFVFLAIFHVLKCVFLIFRDFQFSRHIPGPTVCISHFSGFSVI  
SSFFKSSSGCFSFSMIFSLAIFHVLQWTFLNFPFVFLAIFHVLKCVFLIFRDFQFSRHIPGPTVCISHFSGFSVI  
QFSC  
>ENSMUSP00000137330\_c.45:T>G\_p.C16G ENSMUST00000143083.3|Gm10721-  
201|ENSMUSG00000096519|+|chr9:g.3013185:T>G  
LFLIFHDFQFSCHIPGPTLDISFPFVFLAIFHVLKCVFLIFRDFQFSCHIPGPTVCISHFSRFSVILSFFK  
LSTACFSFSMIFSLAIFHVLQWKFLNFPFVFLAIFHVLKCVFLIFRDFQFSRHIPGPTVCISHFSGFSVI  
SSFFKSSSGCFSFSMIFSLAIFHVLQWTFLNFPFVFLAIFHVLKCVFLIFRDFQFSRHIPGPTVCISHFSGFSVI  
QFSC  
>ENSMUSP00000137330\_c.54:C>G\_p.L19V ENSMUST00000143083.3|Gm10721-  
201|ENSMUSG00000096519|+|chr9:g.3013194:C>G  
LFLIFHDFQFSCHIPCPTVDISFPFVFLAIFHVLKCVFLIFRDFQFSCHIPGPTVCISHFSRFSVILSFFK  
LSTACFSFSMIFSLAIFHVLQWKFLNFPFVFLAIFHVLKCVFLIFRDFQFSRHIPGPTVCISHFSGFSVI  
SSFFKSSSGCFSFSMIFSLAIFHVLQWTFLNFPFVFLAIFHVLKCVFLIFRDFQFSRHIPGPTVCISHFSGFSVI  
QFSC  
>ENSMUSP00000137330\_c.129:C>T\_p.R44C ENSMUST00000143083.3|Gm10721-  
201|ENSMUSG00000096519|+|chr9:g.3013273:C>T  
LFLIFHDFQFSCHIPCPTLDISFPFVFLAIFHVLKCVFLIFRDFQFSCHIPGPTVCISHFSRFSVILSFFK  
LSTACFSFSMIFSLAIFHVLQWKFLNFPFVFLAIFHVLKCVFLIFRDFQFSRHIPGPTVCISHFSGFSVI  
SSFFKSSSGCFSFSMIFSLAIFHVLQWTFLNFPFVFLAIFHVLKCVFLIFRDFQFSRHIPGPTVCISHFSGFSVI  
QFSC  
>ENSMUSP00000137330\_c.147:T>C\_p.C50R ENSMUST00000143083.3|Gm10721-  
201|ENSMUSG00000096519|+|chr9:g.3013291:T>C  
LFLIFHDFQFSCHIPCPTLDISFPFVFLAIFHVLKCVFLIFRDFQFSRHIPGPTVCISHFSRFSVILSFFK  
LSTACFSFSMIFSLAIFHVLQWKFLNFPFVFLAIFHVLKCVFLIFRDFQFSRHIPGPTVCISHFSGFSVI  
SSFFKSSSGCFSFSMIFSLAIFHVLQWTFLNFPFVFLAIFHVLKCVFLIFRDFQFSRHIPGPTVCISHFSGFSVI  
QFSC  
>ENSMUSP00000137330\_c.165:A>T\_p.T56S ENSMUST00000143083.3|Gm10721-  
201|ENSMUSG00000096519|+|chr9:g.3013309:A>T  
LFLIFHDFQFSCHIPCPTLDISFPFVFLAIFHVLKCVFLIFRDFQFSCHIPGPTVCISHFSRFSVILSFFK  
LSTACFSFSMIFSLAIFHVLQWKFLNFPFVFLAIFHVLKCVFLIFRDFQFSRHIPGPTVCISHFSGFSVI  
SSFFKSSSGCFSFSMIFSLAIFHVLQWTFLNFPFVFLAIFHVLKCVFLIFRDFQFSRHIPGPTVCISHFSGFSVI  
QFSC  
>ENSMUSP00000137330\_c.178:C>T\_p.S60F ENSMUST00000143083.3|Gm10721-  
201|ENSMUSG00000096519|+|chr9:g.3013322:C>T  
LFLIFHDFQFSCHIPCPTLDISFPFVFLAIFHVLKCVFLIFRDFQFSCHIPGPTVCIFHFSRFSVILSFFK  
LSTACFSFSMIFSLAIFHVLQWKFLNFPFVFLAIFHVLKCVFLIFRDFQFSRHIPGPTVCISHFSGFSVI  
SSFFKSSSGCFSFSMIFSLAIFHVLQWTFLNFPFVFLAIFHVLKCVFLIFRDFQFSRHIPGPTVCISHFSGFSVI  
QFSC  
>ENSMUSP00000137330\_c.186:T>C\_p.S63P ENSMUST00000143083.3|Gm10721-  
201|ENSMUSG00000096519|+|chr9:g.3013330:T>C  
LFLIFHDFQFSCHIPCPTLDISFPFVFLAIFHVLKCVFLIFRDFQFSCHIPGPTVCISHFPFVILSFFK  
LSTACFSFSMIFSLAIFHVLQWKFLNFPFVFLAIFHVLKCVFLIFRDFQFSRHIPGPTVCISHFSGFSVI  
SSFFKSSSGCFSFSMIFSLAIFHVLQWTFLNFPFVFLAIFHVLKCVFLIFRDFQFSRHIPGPTVCISHFSGFSVI  
QFSC  
>ENSMUSP00000137330\_c.199:T>G\_p.V67G ENSMUST00000143083.3|Gm10721-  
201|ENSMUSG00000096519|+|chr9:g.3013343:T>G  
LFLIFHDFQFSCHIPCPTLDISFPFVFLAIFHVLKCVFLIFRDFQFSCHIPGPTVCISHFSRFSGILSFFK  
LSTACFSFSMIFSLAIFHVLQWKFLNFPFVFLAIFHVLKCVFLIFRDFQFSRHIPGPTVCISHFSGFSVI

SSFFKSSSGCFSFSMIFSLAIFHVLQWTFNLNPPFFSPYSRSYSVHFSFFTTFFSDFVIFQVVKWMFLIFHDF  
QFSC  
>ENSMUSP00000137330\_c.205:T>C\_p.L69S ENSMUST00000143083.3|Gm10721-  
201|ENSMUSG00000096519|+|chr9:g.3013349:T>C  
LFLIFHDFQFSCHIPCPTLDISFPPFSVFLAIFHVLKCVFLIFRDFQFSCHIPGPTVCISHFSRFSVILSFFK  
LSTACFSFSMIFSLAIFHVLQWKFLNFPFVSFLAIFHVLKCVFLIFRDFQFSRHIPGPTVCISHFSGFSVI  
SSFFKSSSGCFSFSMIFSLAIFHVLQWTFNLNPPFFSPYSRSYSVHFSFFTTFFSDFVIFQVVKWMFLIFHDF  
QFSC  
>ENSMUSP00000137330\_c.220:T>G\_p.L74W ENSMUST00000143083.3|Gm10721-  
201|ENSMUSG00000096519|+|chr9:g.3013364:T>G  
LFLIFHDFQFSCHIPCPTLDISFPPFSVFLAIFHVLKCVFLIFRDFQFSCHIPGPTVCISHFSRFSVILSFFK  
WSTACFSFSMIFSLAIFHVLQWKFLNFPFVSFLAIFHVLKCVFLIFRDFQFSRHIPGPTVCISHFSGFSVI  
SSFFKSSSGCFSFSMIFSLAIFHVLQWTFNLNPPFFSPYSRSYSVHFSFFTTFFSDFVIFQVVKWMFLIFHDF  
QFSC  
>ENSMUSP00000137330\_c.220:T>C\_p.L74S ENSMUST00000143083.3|Gm10721-  
201|ENSMUSG00000096519|+|chr9:g.3013364:T>C  
LFLIFHDFQFSCHIPCPTLDISFPPFSVFLAIFHVLKCVFLIFRDFQFSCHIPGPTVCISHFSRFSVILSFFK  
SSTACFSFSMIFSLAIFHVLQWKFLNFPFVSFLAIFHVLKCVFLIFRDFQFSRHIPGPTVCISHFSGFSVI  
SSFFKSSSGCFSFSMIFSLAIFHVLQWTFNLNPPFFSPYSRSYSVHFSFFTTFFSDFVIFQVVKWMFLIFHDF  
QFSC  
>ENSMUSP00000137330\_c.226:C>G\_p.T76S ENSMUST00000143083.3|Gm10721-  
201|ENSMUSG00000096519|+|chr9:g.3013370:C>G  
LFLIFHDFQFSCHIPCPTLDISFPPFSVFLAIFHVLKCVFLIFRDFQFSCHIPGPTVCISHFSRFSVILSFFK  
LSSACFSFSMIFSLAIFHVLQWKFLNFPFVSFLAIFHVLKCVFLIFRDFQFSRHIPGPTVCISHFSGFSVI  
SSFFKSSSGCFSFSMIFSLAIFHVLQWTFNLNPPFFSPYSRSYSVHFSFFTTFFSDFVIFQVVKWMFLIFHDF  
QFSC  
>ENSMUSP00000137330\_c.226:CTGC>GTGT\_p.T76S ENSMUST00000143083.3|Gm10721-  
201|ENSMUSG00000096519|+|chr9:g.3013370:CTGC>GTGT  
LFLIFHDFQFSCHIPCPTLDISFPPFSVFLAIFHVLKCVFLIFRDFQFSCHIPGPTVCISHFSRFSVILSFFK  
LSSVACFSFSMIFSLAIFHVLQWKFLNFPFVSFLAIFHVLKCVFLIFRDFQFSRHIPGPTVCISHFSGFSV  
ISSFFKSSSGCFSFSMIFSLAIFHVLQWTFNLNPPFFSPYSRSYSVHFSFFTTFFSDFVIFQVVKWMFLIFHD  
FQFSC  
>ENSMUSP00000137330\_c.226:CTGC>GTGG\_p.T76S ENSMUST00000143083.3|Gm10721-  
201|ENSMUSG00000096519|+|chr9:g.3013370:CTGC>GTGG  
LFLIFHDFQFSCHIPCPTLDISFPPFSVFLAIFHVLKCVFLIFRDFQFSCHIPGPTVCISHFSRFSVILSFFK  
LSSGACFSFSMIFSLAIFHVLQWKFLNFPFVSFLAIFHVLKCVFLIFRDFQFSRHIPGPTVCISHFSGFSV  
ISSFFKSSSGCFSFSMIFSLAIFHVLQWTFNLNPPFFSPYSRSYSVHFSFFTTFFSDFVIFQVVKWMFLIFHD  
FQFSC  
>ENSMUSP00000137330\_c.289:A>C\_p.K97T ENSMUST00000143083.3|Gm10721-  
201|ENSMUSG00000096519|+|chr9:g.3013433:A>C  
LFLIFHDFQFSCHIPCPTLDISFPPFSVFLAIFHVLKCVFLIFRDFQFSCHIPGPTVCISHFSRFSVILSFFK  
LSTACFSFSMIFSLAIFHVLQWTFNLNFPFVSFLAIFHVLKCVFLIFRDFQFSRHIPGPTVCISHFSGFSVI  
SSFFKSSSGCFSFSMIFSLAIFHVLQWTFNLNPPFFSPYSRSYSVHFSFFTTFFSDFVIFQVVKWMFLIFHDF  
QFSC  
>ENSMUSP00000137330\_c.289:A>T\_p.K97I ENSMUST00000143083.3|Gm10721-  
201|ENSMUSG00000096519|+|chr9:g.3013433:A>T  
LFLIFHDFQFSCHIPCPTLDISFPPFSVFLAIFHVLKCVFLIFRDFQFSCHIPGPTVCISHFSRFSVILSFFK  
LSTACFSFSMIFSLAIFHVLQWTFNLNFPFVSFLAIFHVLKCVFLIFRDFQFSRHIPGPTVCISHFSGFSVI  
SSFFKSSSGCFSFSMIFSLAIFHVLQWTFNLNPPFFSPYSRSYSVHFSFFTTFFSDFVIFQVVKWMFLIFHDF  
QFSC  
>ENSMUSP00000137330\_c.336:G>A\_p.V113I ENSMUST00000143083.3|Gm10721-  
201|ENSMUSG00000096519|+|chr9:g.3013480:G>A  
LFLIFHDFQFSCHIPCPTLDISFPPFSVFLAIFHVLKCVFLIFRDFQFSCHIPGPTVCISHFSRFSVILSFFK  
LSTACFSFSMIFSLAIFHVLQWKFLNFPFVSFLAIFHILKCVFLIFRDFQFSRHIPGPTVCISHFSGFSVI  
SSFFKSSSGCFSFSMIFSLAIFHVLQWTFNLNPPFFSPYSRSYSVHFSFFTTFFSDFVIFQVVKWMFLIFHDF  
QFSC  
>ENSMUSP00000137330\_c.344:G>T\_p.K115N ENSMUST00000143083.3|Gm10721-  
201|ENSMUSG00000096519|+|chr9:g.3013488:G>T

LFLIFHDFQFSCHIPCPTLDISFPPFSVFLAIFHVLKCVFLIFRDFQFSCHIPGPTVCISHFSRFSVILSFFK  
LSTACFSFSMIFSLAIFHVLQWKFLNFPFVSFLAIFHVLKCVFLIFRDFQFSRHIPGPTVCISHFSGFSVI  
SSFFKSSSGCFSFSMIFSLAIFHVLQWTFLNFPFVSFYSRSYSVHFSFFTFSSDFVIFQVVKWMFLIFHDF  
QFSC  
>ENSMUSP00000137330\_c.393:G>T\_p.G132C ENSMUST00000143083.3|Gm10721-  
201|ENSMUSG00000096519|+|chr9:g.3013537:G>T  
LFLIFHDFQFSCHIPCPTLDISFPPFSVFLAIFHVLKCVFLIFRDFQFSCHIPGPTVCISHFSRFSVILSFFK  
LSTACFSFSMIFSLAIFHVLQWKFLNFPFVSFLAIFHVLKCVFLIFRDFQFSRHIPGPTVCISHFSGFSVI  
SSFFKSSSGCFSFSMIFSLAIFHVLQWTFLNFPFVSFYSRSYSVHFSFFTFSSDFVIFQVVKWMFLIFHDF  
QFSC  
>ENSMUSP00000137330\_c.399:A>T\_p.T134S ENSMUST00000143083.3|Gm10721-  
201|ENSMUSG00000096519|+|chr9:g.3014010:A>T  
LFLIFHDFQFSCHIPCPTLDISFPPFSVFLAIFHVLKCVFLIFRDFQFSCHIPGPTVCISHFSRFSVILSFFK  
LSTACFSFSMIFSLAIFHVLQWKFLNFPFVSFLAIFHVLKCVFLIFRDFQFSRHIPGPTVCISHFSGFSVI  
SSFFKSSSGCFSFSMIFSLAIFHVLQWTFLNFPFVSFYSRSYSVHFSFFTFSSDFVIFQVVKWMFLIFHDF  
QFSC  
>ENSMUSP00000137330\_c.400:C>G\_p.T134R ENSMUST00000143083.3|Gm10721-  
201|ENSMUSG00000096519|+|chr9:g.3014011:C>G  
LFLIFHDFQFSCHIPCPTLDISFPPFSVFLAIFHVLKCVFLIFRDFQFSCHIPGPTVCISHFSRFSVILSFFK  
LSTACFSFSMIFSLAIFHVLQWKFLNFPFVSFLAIFHVLKCVFLIFRDFQFSRHIPGPTVCISHFSGFSVI  
SSFFKSSSGCFSFSMIFSLAIFHVLQWTFLNFPFVSFYSRSYSVHFSFFTFSSDFVIFQVVKWMFLIFHDF  
QFSC  
>ENSMUSP00000137330\_c.423:G>T\_p.G142C ENSMUST00000143083.3|Gm10721-  
201|ENSMUSG00000096519|+|chr9:g.3014034:G>T  
LFLIFHDFQFSCHIPCPTLDISFPPFSVFLAIFHVLKCVFLIFRDFQFSCHIPGPTVCISHFSRFSVILSFFK  
LSTACFSFSMIFSLAIFHVLQWKFLNFPFVSFLAIFHVLKCVFLIFRDFQFSRHIPGPTVCISHFSCFSVI  
SSFFKSSSGCFSFSMIFSLAIFHVLQWTFLNFPFVSFYSRSYSVHFSFFTFSSDFVIFQVVKWMFLIFHDF  
QFSC  
>ENSMUSP00000137330\_c.423:G>C\_p.G142R ENSMUST00000143083.3|Gm10721-  
201|ENSMUSG00000096519|+|chr9:g.3014034:G>C  
LFLIFHDFQFSCHIPCPTLDISFPPFSVFLAIFHVLKCVFLIFRDFQFSCHIPGPTVCISHFSRFSVILSFFK  
LSTACFSFSMIFSLAIFHVLQWKFLNFPFVSFLAIFHVLKCVFLIFRDFQFSRHIPGPTVCISHFSRFSVI  
SSFFKSSSGCFSFSMIFSLAIFHVLQWTFLNFPFVSFYSRSYSVHFSFFTFSSDFVIFQVVKWMFLIFHDF  
QFSC  
>ENSMUSP00000137330\_c.430:C>T\_p.S144L ENSMUST00000143083.3|Gm10721-  
201|ENSMUSG00000096519|+|chr9:g.3014041:C>T  
LFLIFHDFQFSCHIPCPTLDISFPPFSVFLAIFHVLKCVFLIFRDFQFSCHIPGPTVCISHFSRFSVILSFFK  
LSTACFSFSMIFSLAIFHVLQWKFLNFPFVSFLAIFHVLKCVFLIFRDFQFSRHIPGPTVCISHFSGFLVI  
SSFFKSSSGCFSFSMIFSLAIFHVLQWTFLNFPFVSFYSRSYSVHFSFFTFSSDFVIFQVVKWMFLIFHDF  
QFSC  
>ENSMUSP00000137330\_c.454:C>G\_p.S152W ENSMUST00000143083.3|Gm10721-  
201|ENSMUSG00000096519|+|chr9:g.3014065:C>G  
LFLIFHDFQFSCHIPCPTLDISFPPFSVFLAIFHVLKCVFLIFRDFQFSCHIPGPTVCISHFSRFSVILSFFK  
LSTACFSFSMIFSLAIFHVLQWKFLNFPFVSFLAIFHVLKCVFLIFRDFQFSRHIPGPTVCISHFSGFSVI  
SSFFKSSSGCFSFSMIFSLAIFHVLQWTFLNFPFVSFYSRSYSVHFSFFTFSSDFVIFQVVKWMFLIFHDF  
QFSC  
>ENSMUSP00000137330\_c.491:T>A\_p.S164R ENSMUST00000143083.3|Gm10721-  
201|ENSMUSG00000096519|+|chr9:g.3014102:T>A  
LFLIFHDFQFSCHIPCPTLDISFPPFSVFLAIFHVLKCVFLIFRDFQFSCHIPGPTVCISHFSRFSVILSFFK  
LSTACFSFSMIFSLAIFHVLQWKFLNFPFVSFLAIFHVLKCVFLIFRDFQFSRHIPGPTVCISHFSGFSVI  
SSFFKSSSGCFSFSMIFSLAIFHVLQWTFLNFPFVSFYSRSYSVHFSFFTFSSDFVIFQVVKWMFLIFHDF  
QFSC  
>ENSMUSP00000137330\_c.540:C>A\_p.P181T ENSMUST00000143083.3|Gm10721-  
201|ENSMUSG00000096519|+|chr9:g.3014151:C>A  
LFLIFHDFQFSCHIPCPTLDISFPPFSVFLAIFHVLKCVFLIFRDFQFSCHIPGPTVCISHFSRFSVILSFFK  
LSTACFSFSMIFSLAIFHVLQWKFLNFPFVSFLAIFHVLKCVFLIFRDFQFSRHIPGPTVCISHFSGFSVI  
SSFFKSSSGCFSFSMIFSLAIFHVLQWTFLNFPFVSFYSRSYSVHFSFFTFSSDFVIFQVVKWMFLIFHDF  
QFSC

>ENSMUSP00000137330\_c.541:C>T\_p.P181L ENSMUST00000143083.3|Gm10721-201|ENSMUSG00000096519|+|chr9:g.3014152:C>T  
LFLIFHDFQFSCHIPCPTLDISFPFVFLAIFHVLKCVFLIFRDFQFSCHIPGPTVCISHFSRFSVILSFFK  
LSTACFSFSMIFSFLAIFHVLQWKFLNFPFVFLAIFHVLKCVFLIFRDFQFSRHIPGPTVCISHFSGFSVI  
SSFFKSSSGCFSFSMIFSFLAIFHVLQWTFNLNFPFSPYSRSYSVHFSFSTFFSDFVIFQVVKWMFLIFHDF  
QFSC  
>ENSMUSP00000137330\_c.563:G>T\_p.R188S ENSMUST00000143083.3|Gm10721-201|ENSMUSG00000096519|+|chr9:g.3014239:G>T  
LFLIFHDFQFSCHIPCPTLDISFPFVFLAIFHVLKCVFLIFRDFQFSCHIPGPTVCISHFSRFSVILSFFK  
LSTACFSFSMIFSFLAIFHVLQWKFLNFPFVFLAIFHVLKCVFLIFRDFQFSRHIPGPTVCISHFSGFSVI  
SSFFKSSSGCFSFSMIFSFLAIFHVLQWTFNLNFPFSPYSSYSVHFSFSTFFSDFVIFQVVKWMFLIFHDF  
QFSC  
>ENSMUSP00000137330\_c.568:A>T\_p.Y190F ENSMUST00000143083.3|Gm10721-201|ENSMUSG00000096519|+|chr9:g.3014244:A>T  
LFLIFHDFQFSCHIPCPTLDISFPFVFLAIFHVLKCVFLIFRDFQFSCHIPGPTVCISHFSRFSVILSFFK  
LSTACFSFSMIFSFLAIFHVLQWKFLNFPFVFLAIFHVLKCVFLIFRDFQFSRHIPGPTVCISHFSGFSVI  
SSFFKSSSGCFSFSMIFSFLAIFHVLQWTFNLNFPFSPYSRSYSVHFSFSTFFSDFVIFQVVKWMFLIFHDF  
QFSC  
>ENSMUSP00000137330\_c.642:A>T\_p.I215F ENSMUST00000143083.3|Gm10721-201|ENSMUSG00000096519|+|chr9:g.3014318:A>T  
LFLIFHDFQFSCHIPCPTLDISFPFVFLAIFHVLKCVFLIFRDFQFSCHIPGPTVCISHFSRFSVILSFFK  
LSTACFSFSMIFSFLAIFHVLQWKFLNFPFVFLAIFHVLKCVFLIFRDFQFSRHIPGPTVCISHFSGFSVI  
SSFFKSSSGCFSFSMIFSFLAIFHVLQWTFNLNFPFSPYSRSYSVHFSFSTFFSDFVIFQVVKWMFLIFHDF  
QFSC  
>ENSMUSP00000096649\_c.15:A>C\_p.N6H ENSMUST00000099050.4|Gm10720-201|ENSMUSG00000074564|+|chr9:g.3015669:A>C  
MFLIFHDFHFSCHIPCPTVDISKFPFVFLAIFHVLKCVFLIFSDQFSRHIPGPTVCISHFSRFSVILSFFK  
LSSGCFSLIFSFLAIFHVLQWTFNLNFPFVFLAIFHVLKCVFLIFSDQFSRHIPGPTVCISHFFRFFMI  
SSFFTLSSGCFSFSMIFFFLAIFHVLQWTFNLNFPFPLPYSRSYSVHFSFSTFFSDFVIFQVVKWMFLIFHDF  
QFSR  
>ENSMUSP00000096649\_c.15:A>T\_p.N6Y ENSMUST00000099050.4|Gm10720-201|ENSMUSG00000074564|+|chr9:g.3015669:A>T  
MFLIFYDFHFSCHIPCPTVDISKFPFVFLAIFHVLKCVFLIFSDQFSRHIPGPTVCISHFSRFSVILSFFK  
LSSGCFSLIFSFLAIFHVLQWTFNLNFPFVFLAIFHVLKCVFLIFSDQFSRHIPGPTVCISHFFRFFMI  
SSFFTLSSGCFSFSMIFFFLAIFHVLQWTFNLNFPFPLPYSRSYSVHFSFSTFFSDFVIFQVVKWMFLIFHDF  
QFSR  
>rs212664173\_ENSMUSP00000096649\_c.26:T>G\_p.H9Q  
ENSMUST00000099050.4|Gm10720-201|ENSMUSG00000074564|+|chr9:g.3015680:T>G  
MFLIFNDFQFSCHIPCPTVDISKFPFVFLAIFHVLKCVFLIFSDQFSRHIPGPTVCISHFSRFSVILSFFK  
LSSGCFSLIFSFLAIFHVLQWTFNLNFPFVFLAIFHVLKCVFLIFSDQFSRHIPGPTVCISHFFRFFMI  
SSFFTLSSGCFSFSMIFFFLAIFHVLQWTFNLNFPFPLPYSRSYSVHFSFSTFFSDFVIFQVVKWMFLIFHDF  
QFSR  
>ENSMUSP00000096649\_c.26:TTTT>GTTA\_p.H9Q ENSMUST00000099050.4|Gm10720-201|ENSMUSG00000074564|+|chr9:g.3015680:TTTT>GTTA  
MFLIFNDFQLFSCHIPCPTVDISKFPFVFLAIFHVLKCVFLIFSDQFSRHIPGPTVCISHFSRFSVILSFF  
KLSSGCFSLIFSFLAIFHVLQWTFNLNFPFVFLAIFHVLKCVFLIFSDQFSRHIPGPTVCISHFFRFFMI  
ISSFFTLSSGCFSFSMIFFFLAIFHVLQWTFNLNFPFPLPYSRSYSVHFSFSTFFSDFVIFQVVKWMFLIFHD  
FQFSR  
>ENSMUSP00000096649\_c.45:T>C\_p.C16R ENSMUST00000099050.4|Gm10720-201|ENSMUSG00000074564|+|chr9:g.3015699:T>C  
MFLIFNDFHFSCHIPRPTVDISKFPFVFLAIFHVLKCVFLIFSDQFSRHIPGPTVCISHFSRFSVILSFFK  
LSSGCFSLIFSFLAIFHVLQWTFNLNFPFVFLAIFHVLKCVFLIFSDQFSRHIPGPTVCISHFFRFFMI  
SSFFTLSSGCFSFSMIFFFLAIFHVLQWTFNLNFPFPLPYSRSYSVHFSFSTFFSDFVIFQVVKWMFLIFHDF  
QFSR  
>ENSMUSP00000096649\_c.90:G>T\_p.A31S ENSMUST00000099050.4|Gm10720-201|ENSMUSG00000074564|+|chr9:g.3015748:G>T  
MFLIFNDFHFSCHIPCPTVDISKFPFVFLSIFHVLKCVFLIFSDQFSRHIPGPTVCISHFSRFSVILSFFK  
LSSGCFSLIFSFLAIFHVLQWTFNLNFPFVFLAIFHVLKCVFLIFSDQFSRHIPGPTVCISHFFRFFMI

SSFFTLSSGCFSSFSMIFFTLAIFHVLQWTFNLNPPFFLPYSRSYSVHFSFFTTFFSDFVIFQVVKWMFLIFHDF  
QFSR  
>ENSMUSP00000096649\_c.101:T>A\_p.H34Q ENSMUST00000099050.4|Gm10720-  
201|ENSMUSG00000074564|+|chr9:g.3015759:T>A  
MFLIFNDFHFSCHIPCPTVDISKFPFSVFLAIFHVLKCVFLIFSDQFSRHIPGPTVCISHFSRFSVILSFFK  
LSSGCFSSFLIFSFLAIFHVLQWTFNLNPPFSVFLAIFHVLKCVFLIFSDQFSRHIPGPTVCISHFFRFFMI  
SSFFTLSSGCFSSFSMIFFTLAIFHVLQWTFNLNPPFFLPYSRSYSVHFSFFTTFFSDFVIFQVVKWMFLIFHDF  
QFSR  
>rs236115139\_ENSMUSP00000096649\_c.129:A>C\_p.S44R  
ENSMUST00000099050.4|Gm10720-201|ENSMUSG00000074564|+|chr9:g.3015787:A>C  
MFLIFNDFHFSCHIPCPTVDISKFPFSVFLAIFHVLKCVFLIFRDFQFSRHIPGPTVCISHFSRFSVILSFFK  
LSSGCFSSFLIFSFLAIFHVLQWTFNLNPPFSVFLAIFHVLKCVFLIFSDQFSRHIPGPTVCISHFFRFFMI  
SSFFTLSSGCFSSFSMIFFTLAIFHVLQWTFNLNPPFFLPYSRSYSVHFSFFTTFFSDFVIFQVVKWMFLIFHDF  
QFSR  
>ENSMUSP00000096649\_c.129:A>T\_p.S44C ENSMUST00000099050.4|Gm10720-  
201|ENSMUSG00000074564|+|chr9:g.3015787:A>T  
MFLIFNDFHFSCHIPCPTVDISKFPFSVFLAIFHVLKCVFLIFCDFQFSRHIPGPTVCISHFSRFSVILSFFK  
LSSGCFSSFLIFSFLAIFHVLQWTFNLNPPFSVFLAIFHVLKCVFLIFSDQFSRHIPGPTVCISHFFRFFMI  
SSFFTLSSGCFSSFSMIFFTLAIFHVLQWTFNLNPPFFLPYSRSYSVHFSFFTTFFSDFVIFQVVKWMFLIFHDF  
QFSR  
>ENSMUSP00000096649\_c.165:A>T\_p.T56S ENSMUST00000099050.4|Gm10720-  
201|ENSMUSG00000074564|+|chr9:g.3016466:A>T  
MFLIFNDFHFSCHIPCPTVDISKFPFSVFLAIFHVLKCVFLIFSDQFSRHIPGPSVCISHFSRFSVILSFFK  
LSSGCFSSFLIFSFLAIFHVLQWTFNLNPPFSVFLAIFHVLKCVFLIFSDQFSRHIPGPTVCISHFFRFFMI  
SSFFTLSSGCFSSFSMIFFTLAIFHVLQWTFNLNPPFFLPYSRSYSVHFSFFTTFFSDFVIFQVVKWMFLIFHDF  
QFSR  
>ENSMUSP00000096649\_c.186:T>C\_p.S63P ENSMUST00000099050.4|Gm10720-  
201|ENSMUSG00000074564|+|chr9:g.3016487:T>C  
MFLIFNDFHFSCHIPCPTVDISKFPFSVFLAIFHVLKCVFLIFSDQFSRHIPGPTVCISHFPFSVILSFFK  
LSSGCFSSFLIFSFLAIFHVLQWTFNLNPPFSVFLAIFHVLKCVFLIFSDQFSRHIPGPTVCISHFFRFFMI  
SSFFTLSSGCFSSFSMIFFTLAIFHVLQWTFNLNPPFFLPYSRSYSVHFSFFTTFFSDFVIFQVVKWMFLIFHDF  
QFSR  
>ENSMUSP00000096649\_c.195:T>G\_p.S66A ENSMUST00000099050.4|Gm10720-  
201|ENSMUSG00000074564|+|chr9:g.3016496:T>G  
MFLIFNDFHFSCHIPCPTVDISKFPFSVFLAIFHVLKCVFLIFSDQFSRHIPGPTVCISHFSRFAVILSFFK  
LSSGCFSSFLIFSFLAIFHVLQWTFNLNPPFSVFLAIFHVLKCVFLIFSDQFSRHIPGPTVCISHFFRFFMI  
SSFFTLSSGCFSSFSMIFFTLAIFHVLQWTFNLNPPFFLPYSRSYSVHFSFFTTFFSDFVIFQVVKWMFLIFHDF  
QFSR  
>ENSMUSP00000096649\_c.196:C>T\_p.S66L ENSMUST00000099050.4|Gm10720-  
201|ENSMUSG00000074564|+|chr9:g.3016497:C>T  
MFLIFNDFHFSCHIPCPTVDISKFPFSVFLAIFHVLKCVFLIFSDQFSRHIPGPTVCISHFSRFLVILSFFK  
LSSGCFSSFLIFSFLAIFHVLQWTFNLNPPFSVFLAIFHVLKCVFLIFSDQFSRHIPGPTVCISHFFRFFMI  
SSFFTLSSGCFSSFSMIFFTLAIFHVLQWTFNLNPPFFLPYSRSYSVHFSFFTTFFSDFVIFQVVKWMFLIFHDF  
QFSR  
>ENSMUSP00000096649\_c.205:T>C\_p.L69S ENSMUST00000099050.4|Gm10720-  
201|ENSMUSG00000074564|+|chr9:g.3016506:T>C  
MFLIFNDFHFSCHIPCPTVDISKFPFSVFLAIFHVLKCVFLIFSDQFSRHIPGPTVCISHFSRFSVILSFFK  
LSSGCFSSFLIFSFLAIFHVLQWTFNLNPPFSVFLAIFHVLKCVFLIFSDQFSRHIPGPTVCISHFFRFFMI  
SSFFTLSSGCFSSFSMIFFTLAIFHVLQWTFNLNPPFFLPYSRSYSVHFSFFTTFFSDFVIFQVVKWMFLIFHDF  
QFSR  
>ENSMUSP00000096649\_c.220:T>C\_p.L74S ENSMUST00000099050.4|Gm10720-  
201|ENSMUSG00000074564|+|chr9:g.3016521:T>C  
MFLIFNDFHFSCHIPCPTVDISKFPFSVFLAIFHVLKCVFLIFSDQFSRHIPGPTVCISHFSRFSVILSFFK  
SSGCFSSFLIFSFLAIFHVLQWTFNLNPPFSVFLAIFHVLKCVFLIFSDQFSRHIPGPTVCISHFFRFFMI  
SSFFTLSSGCFSSFSMIFFTLAIFHVLQWTFNLNPPFFLPYSRSYSVHFSFFTTFFSDFVIFQVVKWMFLIFHDF  
QFSR  
>rs234484759\_ENSMUSP00000096649\_c.220:T>G\_p.L74W  
ENSMUST00000099050.4|Gm10720-201|ENSMUSG00000074564|+|chr9:g.3016521:T>G

MFLIFNDFHFSCHIPCPTVDISKFPFSVFLAIFHVLKCVFLIFSDFQFSRHIPGPTVCISHFSRFSVILSFFK  
WSSGCFSFSLIFSLAIFHVLQWTFLNFPFVSFLAIFHVLKCVFLIFSDFQFSRHIPGPTVCISHFRFFMI  
SSFFTLSSGCFSFSMIFTFLAIFHVLQWTFLNFPFVFLPYSRSYSVHFSFFTFSSDFVIFQVVKWMFLIFHDF  
QFSR  
>ENSMUSP00000096649\_c.246:T>A\_p.L83M ENSMUST00000099050.4|Gm10720-  
201|ENSMUSG00000074564|+|chr9:g.3016547:T>A  
MFLIFNDFHFSCHIPCPTVDISKFPFSVFLAIFHVLKCVFLIFSDFQFSRHIPGPTVCISHFSRFSVILSFFK  
LSSGCFSFSLIFSLAIFHVLQWTFLNFPFVSFLAIFHVLKCVFLIFSDFQFSRHIPGPTVCISHFRFFMI  
SSFFTLSSGCFSFSMIFTFLAIFHVLQWTFLNFPFVFLPYSRSYSVHFSFFTFSSDFVIFQVVKWMFLIFHDF  
QFSR  
>ENSMUSP00000096649\_c.257:T>A\_p.S86R ENSMUST00000099050.4|Gm10720-  
201|ENSMUSG00000074564|+|chr9:g.3016558:T>A  
MFLIFNDFHFSCHIPCPTVDISKFPFSVFLAIFHVLKCVFLIFSDFQFSRHIPGPTVCISHFSRFSVILSFFK  
LSSGCFSFSLIFRFLAIFHVLQWTFLNFPFVSFLAIFHVLKCVFLIFSDFQFSRHIPGPTVCISHFRFFMI  
SSFFTLSSGCFSFSMIFTFLAIFHVLQWTFLNFPFVFLPYSRSYSVHFSFFTFSSDFVIFQVVKWMFLIFHDF  
QFSR  
>ENSMUSP00000096649\_c.275:T>G\_p.H92Q ENSMUST00000099050.4|Gm10720-  
201|ENSMUSG00000074564|+|chr9:g.3016576:T>G  
MFLIFNDFHFSCHIPCPTVDISKFPFSVFLAIFHVLKCVFLIFSDFQFSRHIPGPTVCISHFSRFSVILSFFK  
LSSGCFSFSLIFSLAIFQVLQWTFLNFPFVSFLAIFHVLKCVFLIFSDFQFSRHIPGPTVCISHFRFFMI  
SSFFTLSSGCFSFSMIFTFLAIFHVLQWTFLNFPFVFLPYSRSYSVHFSFFTFSSDFVIFQVVKWMFLIFHDF  
QFSR  
>ENSMUSP00000096649\_c.286:G>T\_p.W96L ENSMUST00000099050.4|Gm10720-  
201|ENSMUSG00000074564|+|chr9:g.3016587:G>T  
MFLIFNDFHFSCHIPCPTVDISKFPFSVFLAIFHVLKCVFLIFSDFQFSRHIPGPTVCISHFSRFSVILSFFK  
LSSGCFSFSLIFSLAIFHVLQWTFLNFPFVSFLAIFHVLKCVFLIFSDFQFSRHIPGPTVCISHFRFFMI  
SSFFTLSSGCFSFSMIFTFLAIFHVLQWTFLNFPFVFLPYSRSYSVHFSFFTFSSDFVIFQVVKWMFLIFHDF  
QFSR  
>ENSMUSP00000096649\_c.301:T>A\_p.F101Y ENSMUST00000099050.4|Gm10720-  
201|ENSMUSG00000074564|+|chr9:g.3016602:T>A  
MFLIFNDFHFSCHIPCPTVDISKFPFSVFLAIFHVLKCVFLIFSDFQFSRHIPGPTVCISHFSRFSVILSFFK  
LSSGCFSFSLIFSLAIFHVLQWTFLNYPFVSFLAIFHVLKCVFLIFSDFQFSRHIPGPTVCISHFRFFMI  
SSFFTLSSGCFSFSMIFTFLAIFHVLQWTFLNFPFVFLPYSRSYSVHFSFFTFSSDFVIFQVVKWMFLIFHDF  
QFSR  
>ENSMUSP00000096649\_c.306:C>A\_p.P103T ENSMUST00000099050.4|Gm10720-  
201|ENSMUSG00000074564|+|chr9:g.3016607:C>A  
MFLIFNDFHFSCHIPCPTVDISKFPFSVFLAIFHVLKCVFLIFSDFQFSRHIPGPTVCISHFSRFSVILSFFK  
LSSGCFSFSLIFSLAIFHVLQWTFLNFPFVSFLAIFHVLKCVFLIFSDFQFSRHIPGPTVCISHFRFFMI  
SSFFTLSSGCFSFSMIFTFLAIFHVLQWTFLNFPFVFLPYSRSYSVHFSFFTFSSDFVIFQVVKWMFLIFHDF  
QFSR  
>ENSMUSP00000096649\_c.335:T>A\_p.H112Q ENSMUST00000099050.4|Gm10720-  
201|ENSMUSG00000074564|+|chr9:g.3016636:T>A  
MFLIFNDFHFSCHIPCPTVDISKFPFSVFLAIFHVLKCVFLIFSDFQFSRHIPGPTVCISHFSRFSVILSFFK  
LSSGCFSFSLIFSLAIFHVLQWTFLNFPFVSFLAIFQVLKCVFLIFSDFQFSRHIPGPTVCISHFRFFMI  
SSFFTLSSGCFSFSMIFTFLAIFHVLQWTFLNFPFVFLPYSRSYSVHFSFFTFSSDFVIFQVVKWMFLIFHDF  
QFSR  
>ENSMUSP00000096649\_c.340:T>C\_p.L114P ENSMUST00000099050.4|Gm10720-  
201|ENSMUSG00000074564|+|chr9:g.3016641:T>C  
MFLIFNDFHFSCHIPCPTVDISKFPFSVFLAIFHVLKCVFLIFSDFQFSRHIPGPTVCISHFSRFSVILSFFK  
LSSGCFSFSLIFSLAIFHVLQWTFLNFPFVSFLAIFHVPKCVFLIFSDFQFSRHIPGPTVCISHFRFFMI  
SSFFTLSSGCFSFSMIFTFLAIFHVLQWTFLNFPFVFLPYSRSYSVHFSFFTFSSDFVIFQVVKWMFLIFHDF  
QFSR  
>ENSMUSP00000096649\_c.363:A>C\_p.S122R ENSMUST00000099050.4|Gm10720-  
201|ENSMUSG00000074564|+|chr9:g.3016664:A>C  
MFLIFNDFHFSCHIPCPTVDISKFPFSVFLAIFHVLKCVFLIFSDFQFSRHIPGPTVCISHFSRFSVILSFFK  
LSSGCFSFSLIFSLAIFHVLQWTFLNFPFVSFLAIFHVLKCVFLIFRDFQFSRHIPGPTVCISHFRFFMI  
SSFFTLSSGCFSFSMIFTFLAIFHVLQWTFLNFPFVFLPYSRSYSVHFSFFTFSSDFVIFQVVKWMFLIFHDF  
QFSR

>rs261664597\_ENSMUSP00000096649\_c.363:A>T\_p.S122C  
ENSMUST00000099050.4|Gm10720-201|ENSMUSG00000074564|+|chr9:g.3016664:A>T  
MFLIFNDFHFSCHIPCPTVDISKFPFSVFLAIFHVLKCVFLIFSDQFSRHIPGPTVCISHFSRFSVILSFFK  
LSSGCFSLIFSLIFSLAIFHVLQWTFNLFPFVFLAIFHVLKCVFLIFSDQFSRHIPGPTVCISHFFRFFMI  
SSFFTLSSGCFSSMIFTFLAIFHVLQWTFNLFPFVFLAIFHVLKCVFLIFSDQFSRHIPGPTVCISHFFRFFMI  
QFSR  
>ENSMUSP00000096649\_c.399:A>T\_p.T134S ENSMUST00000099050.4|Gm10720-  
201|ENSMUSG00000074564|+|chr9:g.3016700:A>T  
MFLIFNDFHFSCHIPCPTVDISKFPFSVFLAIFHVLKCVFLIFSDQFSRHIPGPTVCISHFSRFSVILSFFK  
LSSGCFSLIFSLIFSLAIFHVLQWTFNLFPFVFLAIFHVLKCVFLIFSDQFSRHIPGPTVCISHFFRFFMI  
SSFFTLSSGCFSSMIFTFLAIFHVLQWTFNLFPFVFLAIFHVLKCVFLIFSDQFSRHIPGPTVCISHFFRFFMI  
QFSR  
>ENSMUSP00000096649\_c.400:C>T\_p.T134I ENSMUST00000099050.4|Gm10720-  
201|ENSMUSG00000074564|+|chr9:g.3016701:C>T  
MFLIFNDFHFSCHIPCPTVDISKFPFSVFLAIFHVLKCVFLIFSDQFSRHIPGPTVCISHFSRFSVILSFFK  
LSSGCFSLIFSLIFSLAIFHVLQWTFNLFPFVFLAIFHVLKCVFLIFSDQFSRHIPGPTVCISHFFRFFMI  
SSFFTLSSGCFSSMIFTFLAIFHVLQWTFNLFPFVFLAIFHVLKCVFLIFSDQFSRHIPGPTVCISHFFRFFMI  
QFSR  
>ENSMUSP00000096649\_c.415:ATT>A\_p.H139del-fs  
ENSMUST00000099050.4|Gm10720-  
201|ENSMUSG00000074564|+|chr9:g.3016716:ATT>A  
MFLIFNDFHFSCHIPCPTVDISKFPFSVFLAIFHVLKCVFLIFSDQFSRHIPGPTVCISHFSRFSVILSFFK  
LSSGCFSLIFSLIFSLAIFHVLQWTFNLFPFVFLAIFHVLKCVFLIFSDQFSRHIPGPTVCISHFFRFFMI  
VIFHVVKWMFLIFHDFHFSCHISCPDVIDSKFSTFFLAIFQVLQCAFLIFHVQ  
>ENSMUSP00000096649\_c.424:G>C\_p.R142T ENSMUST00000099050.4|Gm10720-  
201|ENSMUSG00000074564|+|chr9:g.3016725:G>C  
MFLIFNDFHFSCHIPCPTVDISKFPFSVFLAIFHVLKCVFLIFSDQFSRHIPGPTVCISHFSRFSVILSFFK  
LSSGCFSLIFSLIFSLAIFHVLQWTFNLFPFVFLAIFHVLKCVFLIFSDQFSRHIPGPTVCISHFFRFFMI  
SSFFTLSSGCFSSMIFTFLAIFHVLQWTFNLFPFVFLAIFHVLKCVFLIFSDQFSRHIPGPTVCISHFFRFFMI  
QFSR  
>ENSMUSP00000096649\_c.439:C>T\_p.S147L ENSMUST00000099050.4|Gm10720-  
201|ENSMUSG00000074564|+|chr9:g.3016916:C>T  
MFLIFNDFHFSCHIPCPTVDISKFPFSVFLAIFHVLKCVFLIFSDQFSRHIPGPTVCISHFSRFSVILSFFK  
LSSGCFSLIFSLIFSLAIFHVLQWTFNLFPFVFLAIFHVLKCVFLIFSDQFSRHIPGPTVCISHFFRFFMI  
LSFFTLSSGCFSSMIFTFLAIFHVLQWTFNLFPFVFLAIFHVLKCVFLIFSDQFSRHIPGPTVCISHFFRFFMI  
QFSR  
>ENSMUSP00000096649\_c.451:CGTT>AGTC\_p.T151K ENSMUST00000099050.4|Gm10720-  
201|ENSMUSG00000074564|+|chr9:g.3016928:CGTT>AGTC  
MFLIFNDFHFSCHIPCPTVDISKFPFSVFLAIFHVLKCVFLIFSDQFSRHIPGPTVCISHFSRFSVILSFFK  
LSSGCFSLIFSLIFSLAIFHVLQWTFNLFPFVFLAIFHVLKCVFLIFSDQFSRHIPGPTVCISHFFRFFMI  
SSFFKSLSSGCFSSMIFTFLAIFHVLQWTFNLFPFVFLAIFHVLKCVFLIFSDQFSRHIPGPTVCISHFFRFFMI  
FQFSR  
>ENSMUSP00000096649\_c.451:CGTT>AGTG\_p.T151K ENSMUST00000099050.4|Gm10720-  
201|ENSMUSG00000074564|+|chr9:g.3016928:CGTT>AGTG  
MFLIFNDFHFSCHIPCPTVDISKFPFSVFLAIFHVLKCVFLIFSDQFSRHIPGPTVCISHFSRFSVILSFFK  
LSSGCFSLIFSLIFSLAIFHVLQWTFNLFPFVFLAIFHVLKCVFLIFSDQFSRHIPGPTVCISHFFRFFMI  
SSFFKWLSSGCFSSMIFTFLAIFHVLQWTFNLFPFVFLAIFHVLKCVFLIFSDQFSRHIPGPTVCISHFFRFFMI  
FQFSR  
>ENSMUSP00000096649\_c.451:CGTTG>TGTA\_p.T151M  
ENSMUST00000099050.4|Gm10720-  
201|ENSMUSG00000074564|+|chr9:g.3016928:CGTTG>TGTA  
MFLIFNDFHFSCHIPCPTVDISKFPFSVFLAIFHVLKCVFLIFSDQFSRHIPGPTVCISHFSRFSVILSFFK  
LSSGCFSLIFSLIFSLAIFHVLQWTFNLFPFVFLAIFHVLKCVFLIFSDQFSRHIPGPTVCISHFFRFFMI  
SSFFM\*VVKWMFLIFHDFHFSCHISCPDVIDSKFSTFFLAIFQVLQCAFLIFHVQ\*FRHFSRQVDVSHFP\*  
FSVFS  
>ENSMUSP00000096649\_c.490:C>G\_p.T164S ENSMUST00000099050.4|Gm10720-  
201|ENSMUSG00000074564|+|chr9:g.3016967:C>G

MFLIFNDFHFSCHIPCPTVDISKFPFSVFLAIFHVLKCVFLIFSDQFSRHIPGPTVCISHFSRFSVILSFFK  
LSSGCFSSFLIFSLAIFHVLQWTFLNFPFVSFLAIFHVLKCVFLIFSDQFSRHIPGPTVCISHFFRFFMI  
SSFFTLSSGCFSSMIFSLAIFHVLQWTFLNFPFVFLAIFHVLKCVFLIFSDQFSRHIPGPTVCISHFFRFFMI  
QFSR  
>ENSMUSP00000096649\_c.499:C>T\_p.A167V ENSMUST00000099050.4|Gm10720-  
201|ENSMUSG00000074564|+|chr9:g.3016976:C>T  
MFLIFNDFHFSCHIPCPTVDISKFPFSVFLAIFHVLKCVFLIFSDQFSRHIPGPTVCISHFSRFSVILSFFK  
LSSGCFSSFLIFSLAIFHVLQWTFLNFPFVSFLAIFHVLKCVFLIFSDQFSRHIPGPTVCISHFFRFFMI  
SSFFTLSSGCFSSMIFTLVIFHVLQWTFLNFPFVFLAIFHVLKCVFLIFSDQFSRHIPGPTVCISHFFRFFMI  
QFSR  
>ENSMUSP00000096649\_c.550:T>C\_p.L184S ENSMUST00000099050.4|Gm10720-  
201|ENSMUSG00000074564|+|chr9:g.3017092:T>C  
MFLIFNDFHFSCHIPCPTVDISKFPFSVFLAIFHVLKCVFLIFSDQFSRHIPGPTVCISHFSRFSVILSFFK  
LSSGCFSSFLIFSLAIFHVLQWTFLNFPFVSFLAIFHVLKCVFLIFSDQFSRHIPGPTVCISHFFRFFMI  
SSFFTLSSGCFSSMIFTLAIFHVLQWTFLNFPFVFLAIFHVLKCVFLIFSDQFSRHIPGPTVCISHFFRFFMI  
QFSR  
>ENSMUSP00000096649\_c.568:A>T\_p.Y190F ENSMUST00000099050.4|Gm10720-  
201|ENSMUSG00000074564|+|chr9:g.3017110:A>T  
MFLIFNDFHFSCHIPCPTVDISKFPFSVFLAIFHVLKCVFLIFSDQFSRHIPGPTVCISHFSRFSVILSFFK  
LSSGCFSSFLIFSLAIFHVLQWTFLNFPFVSFLAIFHVLKCVFLIFSDQFSRHIPGPTVCISHFFRFFMI  
SSFFTLSSGCFSSMIFTLAIFHVLQWTFLNFPFVFLAIFHVLKCVFLIFSDQFSRHIPGPTVCISHFFRFFMI  
QFSR  
>ENSMUSP00000096649\_c.666:C>T\_p.R223C ENSMUST00000099050.4|Gm10720-  
201|ENSMUSG00000074564|+|chr9:g.3017208:C>T  
MFLIFNDFHFSCHIPCPTVDISKFPFSVFLAIFHVLKCVFLIFSDQFSRHIPGPTVCISHFSRFSVILSFFK  
LSSGCFSSFLIFSLAIFHVLQWTFLNFPFVSFLAIFHVLKCVFLIFSDQFSRHIPGPTVCISHFFRFFMI  
SSFFTLSSGCFSSMIFTLAIFHVLQWTFLNFPFVFLAIFHVLKCVFLIFSDQFSRHIPGPTVCISHFFRFFMI  
QFSC  
>rs262556314\_ENSMUSP00000096648\_c.15:A>C\_p.N6H  
ENSMUST00000099049.4|Gm10719-202|ENSMUSG00000095547|+|chr9:g.3017423:A>C  
MFLIFHDFHFSCHIPCPTVDISFPFVSFLAIFHVLKCVFLIFRDFQFSRHIPGPTVCISHFFRFFMISFFFT  
LSSGCFSSMIFTLAIFHVLQWTFLNFPFVSFLAIFHILKCVFLIFRDFQFSCHIPGPTVCISHFSRFSVI  
SSFFKSSSGCFSSMIFSLAIFQVLQTLTFLNFPFLSFSFYRSYSVHFSFFFTFFSDFVIFQVVKWLFILFL  
DFQFSC  
>ENSMUSP00000096648\_c.16:A>G\_p.N6S ENSMUST00000099049.4|Gm10719-  
202|ENSMUSG00000095547|+|chr9:g.3017424:A>G  
MFLIFSDHFHFSCHIPCPTVDISFPFVSFLAIFHVLKCVFLIFRDFQFSRHIPGPTVCISHFFRFFMISFFFT  
LSSGCFSSMIFTLAIFHVLQWTFLNFPFVSFLAIFHILKCVFLIFRDFQFSCHIPGPTVCISHFSRFSVI  
SSFFKSSSGCFSSMIFSLAIFQVLQTLTFLNFPFLSFSFYRSYSVHFSFFFTFFSDFVIFQVVKWLFILFL  
DFQFSC  
>ENSMUSP00000096648\_c.26:T>G\_p.H9Q ENSMUST00000099049.4|Gm10719-  
202|ENSMUSG00000095547|+|chr9:g.3017434:T>G  
MFLIFNDFQFSCHIPCPTVDISFPFVSFLAIFHVLKCVFLIFRDFQFSRHIPGPTVCISHFFRFFMISFFFT  
LSSGCFSSMIFTLAIFHVLQWTFLNFPFVSFLAIFHILKCVFLIFRDFQFSCHIPGPTVCISHFSRFSVI  
SSFFKSSSGCFSSMIFSLAIFQVLQTLTFLNFPFLSFSFYRSYSVHFSFFFTFFSDFVIFQVVKWLFILFL  
DFQFSC  
>ENSMUSP00000096648\_c.45:T>C\_p.C16R ENSMUST00000099049.4|Gm10719-  
202|ENSMUSG00000095547|+|chr9:g.3017453:T>C  
MFLIFNDFHFSCHIPRPTVDISFPFVSFLAIFHVLKCVFLIFRDFQFSRHIPGPTVCISHFFRFFMISFFFT  
LSSGCFSSMIFTLAIFHVLQWTFLNFPFVSFLAIFHILKCVFLIFRDFQFSCHIPGPTVCISHFSRFSVI  
SSFFKSSSGCFSSMIFSLAIFQVLQTLTFLNFPFLSFSFYRSYSVHFSFFFTFFSDFVIFQVVKWLFILFL  
DFQFSC  
>ENSMUSP00000096648\_c.72:C>A\_p.P25T ENSMUST00000099049.4|Gm10719-  
202|ENSMUSG00000095547|+|chr9:g.3017484:C>A  
MFLIFNDFHFSCHIPCPTVDISFPFVSFLAIFHVLKCVFLIFRDFQFSRHIPGPTVCISHFFRFFMISFFFT  
LSSGCFSSMIFTLAIFHVLQWTFLNFPFVSFLAIFHILKCVFLIFRDFQFSCHIPGPTVCISHFSRFSVI  
SSFFKSSSGCFSSMIFSLAIFQVLQTLTFLNFPFLSFSFYRSYSVHFSFFFTFFSDFVIFQVVKWLFILFL  
DFQFSC



>ENSMUSP00000096648\_c.113:T>G\_p.C38W ENSMUST00000099049.4|Gm10719-  
202|ENSMUSG00000095547|+|chr9:g.3017525:T>G  
MFLIFNDFHFSCHIPCPTVDISFPPFSVFLAIFHVLKQWFLIFRDFQFSRHIPGPTVCISHFFRFFMISFFFT  
LSSGCFSSMIFTFLAIFHVLQWTFNLNPPFSVFLAIFHILKCVFLIFRDFQFSCHIPGPTVCISHFSRFSVI  
SSFFKSSSGCFSFSMIFSLAIFQVLQTLTFLNFPFLSFSPPYRSYSVHFSFFFTFFSDFVIFQVVKWLFILFL  
DFQFSC  
>ENSMUSP00000096648\_c.119:T>A\_p.F40L ENSMUST00000099049.4|Gm10719-  
202|ENSMUSG00000095547|+|chr9:g.3017531:T>A  
MFLIFNDFHFSCHIPCPTVDISFPPFSVFLAIFHVLKCVLLIFRDFQFSRHIPGPTVCISHFFRFFMISFFFT  
LSSGCFSSMIFTFLAIFHVLQWTFNLNPPFSVFLAIFHILKCVFLIFRDFQFSCHIPGPTVCISHFSRFSVI  
SSFFKSSSGCFSFSMIFSLAIFQVLQTLTFLNFPFLSFSPPYRSYSVHFSFFFTFFSDFVIFQVVKWLFILFL  
DFQFSC  
>ENSMUSP00000096648\_c.129:A>T\_p.R44W ENSMUST00000099049.4|Gm10719-  
202|ENSMUSG00000095547|+|chr9:g.3017541:A>T  
MFLIFNDFHFSCHIPCPTVDISFPPFSVFLAIFHVLKCVFLIFWDFQFSRHIPGPTVCISHFFRFFMISFFFT  
LSSGCFSSMIFTFLAIFHVLQWTFNLNPPFSVFLAIFHILKCVFLIFRDFQFSCHIPGPTVCISHFSRFSVI  
SSFFKSSSGCFSFSMIFSLAIFQVLQTLTFLNFPFLSFSPPYRSYSVHFSFFFTFFSDFVIFQVVKWLFILFL  
DFQFSC  
>ENSMUSP00000096648\_c.165:A>T\_p.T56S ENSMUST00000099049.4|Gm10719-  
202|ENSMUSG00000095547|+|chr9:g.3017577:A>T  
MFLIFNDFHFSCHIPCPTVDISFPPFSVFLAIFHVLKCVFLIFRDFQFSRHIPGPSVCISHFFRFFMISFFFT  
LSSGCFSSMIFTFLAIFHVLQWTFNLNPPFSVFLAIFHILKCVFLIFRDFQFSCHIPGPTVCISHFSRFSVI  
SSFFKSSSGCFSFSMIFSLAIFQVLQTLTFLNFPFLSFSPPYRSYSVHFSFFFTFFSDFVIFQVVKWLFILFL  
DFQFSC  
>ENSMUSP00000096648\_c.181:AT>A\_p.H61del-fs ENSMUST00000099049.4|Gm10719-  
202|ENSMUSG00000095547|+|chr9:g.3017593:AT>A  
MFLIFNDFHFSCHIPCPTVDISFPPFSVFLAIFHVLKCVFLIFRDFQFSRHIPGPTVCISHFSGFS  
>ENSMUSP00000096648\_c.190:G>C\_p.R64T ENSMUST00000099049.4|Gm10719-  
202|ENSMUSG00000095547|+|chr9:g.3017602:G>C  
MFLIFNDFHFSCHIPCPTVDISFPPFSVFLAIFHVLKCVFLIFRDFQFSRHIPGPTVCISHFFFTFFMISFFFT  
LSSGCFSSMIFTFLAIFHVLQWTFNLNPPFSVFLAIFHILKCVFLIFRDFQFSCHIPGPTVCISHFSRFSVI  
SSFFKSSSGCFSFSMIFSLAIFQVLQTLTFLNFPFLSFSPPYRSYSVHFSFFFTFFSDFVIFQVVKWLFILFL  
DFQFSC  
>ENSMUSP00000096648\_c.190:G>A\_p.R64K ENSMUST00000099049.4|Gm10719-  
202|ENSMUSG00000095547|+|chr9:g.3017602:G>A  
MFLIFNDFHFSCHIPCPTVDISFPPFSVFLAIFHVLKCVFLIFRDFQFSRHIPGPTVCISHFFKFFMISFFFT  
LSSGCFSSMIFTFLAIFHVLQWTFNLNPPFSVFLAIFHILKCVFLIFRDFQFSCHIPGPTVCISHFSRFSVI  
SSFFKSSSGCFSFSMIFSLAIFQVLQTLTFLNFPFLSFSPPYRSYSVHFSFFFTFFSDFVIFQVVKWLFILFL  
DFQFSC  
>ENSMUSP00000096648\_c.217:C>A\_p.T73K ENSMUST00000099049.4|Gm10719-  
202|ENSMUSG00000095547|+|chr9:g.3017805:C>A  
MFLIFNDFHFSCHIPCPTVDISFPPFSVFLAIFHVLKCVFLIFRDFQFSRHIPGPTVCISHFFRFFMISFFFK  
LSSGCFSSMIFTFLAIFHVLQWTFNLNPPFSVFLAIFHILKCVFLIFRDFQFSCHIPGPTVCISHFSRFSVI  
SSFFKSSSGCFSFSMIFSLAIFQVLQTLTFLNFPFLSFSPPYRSYSVHFSFFFTFFSDFVIFQVVKWLFILFL  
DFQFSC  
>ENSMUSP00000096648\_c.217:CGTT>A\_p.TL73del ENSMUST00000099049.4|Gm10719-  
202|ENSMUSG00000095547|+|chr9:g.3017805:CGTT>A  
MFLIFNDFHFSCHIPCPTVDISFPPFSVFLAIFHVLKCVFLIFRDFQFSRHIPGPTVCISHFFRFFMISFFFK  
SSGCFSSMIFTFLAIFHVLQWTFNLNPPFSVFLAIFHILKCVFLIFRDFQFSCHIPGPTVCISHFSRFSVIS  
SFFKSSSGCFSFSMIFSLAIFQVLQTLTFLNFPFLSFSPPYRSYSVHFSFFFTFFSDFVIFQVVKWLFILFLD  
FQFSC  
>ENSMUSP00000096648\_c.217:CGTT>AGTC\_p.T73K ENSMUST00000099049.4|Gm10719-  
202|ENSMUSG00000095547|+|chr9:g.3017805:CGTT>AGTC  
MFLIFNDFHFSCHIPCPTVDISFPPFSVFLAIFHVLKCVFLIFRDFQFSRHIPGPTVCISHFFRFFMISFFFK  
SLSSGCFSSMIFTFLAIFHVLQWTFNLNPPFSVFLAIFHILKCVFLIFRDFQFSCHIPGPTVCISHFSRFSV  
ISSFFKSSSGCFSFSMIFSLAIFQVLQTLTFLNFPFLSFSPPYRSYSVHFSFFFTFFSDFVIFQVVKWLFILFL  
LDFQFSC

>ENSMUSP00000096648\_c.217:CGTT>AGTG\_p.T73K ENSMUST00000099049.4|Gm10719-202|ENSMUSG00000095547|+|chr9:g.3017805:CGTT>AGTG  
MFLIFNDFHFSCHIPCPTVDISFPPFSVFLAIFHVLKCVFLIFRDFQFSRHIPGPTVCISHFFRFFMISFFK  
WLSSGCFSSMIFTFLAIFHVLQWTFLNFPFVSFLAIFHILKCVFLIFRDFQFSCHIPGPTVCISHFSRFSV  
ISSFFKSSSGCFSSMIFSLAIFQVLQTLFLNFPFLSFSPPYSRSYSVHFSFFTFSSDFVIFQVVKWFLIFL  
LDFQFSC  
>ENSMUSP00000096648\_c.256:C>G\_p.T86S ENSMUST00000099049.4|Gm10719-202|ENSMUSG00000095547|+|chr9:g.3017844:C>G  
MFLIFNDFHFSCHIPCPTVDISFPPFSVFLAIFHVLKCVFLIFRDFQFSRHIPGPTVCISHFFRFFMISFFFT  
LSSGCFSSMIFSLAIFHVLQWTFLNFPFVSFLAIFHILKCVFLIFRDFQFSCHIPGPTVCISHFSRFSVI  
SSFFKSSSGCFSSMIFSLAIFQVLQTLFLNFPFLSFSPPYSRSYSVHFSFFTFSSDFVIFQVVKWFLIFL  
DFQFSC  
>ENSMUSP00000096648\_c.256:CT>TA\_p.T86I ENSMUST00000099049.4|Gm10719-202|ENSMUSG00000095547|+|chr9:g.3017844:CT>TA  
MFLIFNDFHFSCHIPCPTVDISFPPFSVFLAIFHVLKCVFLIFRDFQFSRHIPGPTVCISHFFRFFMISFFFT  
LSSGCFSSMIFIFSCHISCPDVDISKFSTFFCFPRHISHPKVCISHFP\*FVFLPYSRSYSVHFSFFTFSSD  
FVIFQVVKWMFLIFHDFQFSRHIPGPTVDISKFSTFFKFLAIFQVLQCAFLIFHVFQ\*FCHFSSCQVVSHP  
\*FSVFL  
>ENSMUSP00000096648\_c.265:C>T\_p.A89V ENSMUST00000099049.4|Gm10719-202|ENSMUSG00000095547|+|chr9:g.3017853:C>T  
MFLIFNDFHFSCHIPCPTVDISFPPFSVFLAIFHVLKCVFLIFRDFQFSRHIPGPTVCISHFFRFFMISFFFT  
LSSGCFSSMIFTFLVIFHVLQWTFLNFPFVSFLAIFHILKCVFLIFRDFQFSCHIPGPTVCISHFSRFSVI  
SSFFKSSSGCFSSMIFSLAIFQVLQTLFLNFPFLSFSPPYSRSYSVHFSFFTFSSDFVIFQVVKWFLIFL  
DFQFSC  
>ENSMUSP00000096648\_c.307:C>T\_p.P103L ENSMUST00000099049.4|Gm10719-202|ENSMUSG00000095547|+|chr9:g.3017895:C>T  
MFLIFNDFHFSCHIPCPTVDISFPPFSVFLAIFHVLKCVFLIFRDFQFSRHIPGPTVCISHFFRFFMISFFFT  
LSSGCFSSMIFTFLAIFHVLQWTFLNFPFVSFLAIFHILKCVFLIFRDFQFSCHIPGPTVCISHFSRFSVI  
SSFFKSSSGCFSSMIFSLAIFQVLQTLFLNFPFLSFSPPYSRSYSVHFSFFTFSSDFVIFQVVKWFLIFL  
DFQFSC  
>ENSMUSP00000096648\_c.336:A>G\_p.I113V ENSMUST00000099049.4|Gm10719-202|ENSMUSG00000095547|+|chr9:g.3017924:A>G  
MFLIFNDFHFSCHIPCPTVDISFPPFSVFLAIFHVLKCVFLIFRDFQFSRHIPGPTVCISHFFRFFMISFFFT  
LSSGCFSSMIFTFLAIFHVLQWTFLNFPFVSFLAIFHVLKCVFLIFRDFQFSCHIPGPTVCISHFSRFSVI  
SSFFKSSSGCFSSMIFSLAIFQVLQTLFLNFPFLSFSPPYSRSYSVHFSFFTFSSDFVIFQVVKWFLIFL  
DFQFSC  
>ENSMUSP00000096648\_c.344:G>T\_p.K115N ENSMUST00000099049.4|Gm10719-202|ENSMUSG00000095547|+|chr9:g.3017932:G>T  
MFLIFNDFHFSCHIPCPTVDISFPPFSVFLAIFHVLKCVFLIFRDFQFSRHIPGPTVCISHFFRFFMISFFFT  
LSSGCFSSMIFTFLAIFHVLQWTFLNFPFVSFLAIFHILNVCVFLIFRDFQFSCHIPGPTVCISHFSRFSVI  
SSFFKSSSGCFSSMIFSLAIFQVLQTLFLNFPFLSFSPPYSRSYSVHFSFFTFSSDFVIFQVVKWFLIFL  
DFQFSC  
>ENSMUSP00000096648\_c.363:C>T\_p.R122C ENSMUST00000099049.4|Gm10719-202|ENSMUSG00000095547|+|chr9:g.3017951:C>T  
MFLIFNDFHFSCHIPCPTVDISFPPFSVFLAIFHVLKCVFLIFRDFQFSRHIPGPTVCISHFFRFFMISFFFT  
LSSGCFSSMIFTFLAIFHVLQWTFLNFPFVSFLAIFHILKCVFLIFCDFQFSCHIPGPTVCISHFSRFSVI  
SSFFKSSSGCFSSMIFSLAIFQVLQTLFLNFPFLSFSPPYSRSYSVHFSFFTFSSDFVIFQVVKWFLIFL  
DFQFSC  
>ENSMUSP00000096648\_c.364:G>A\_p.R122H ENSMUST00000099049.4|Gm10719-202|ENSMUSG00000095547|+|chr9:g.3017952:G>A  
MFLIFNDFHFSCHIPCPTVDISFPPFSVFLAIFHVLKCVFLIFRDFQFSRHIPGPTVCISHFFRFFMISFFFT  
LSSGCFSSMIFTFLAIFHVLQWTFLNFPFVSFLAIFHILKCVFLIFHDFQFSCHIPGPTVCISHFSRFSVI  
SSFFKSSSGCFSSMIFSLAIFQVLQTLFLNFPFLSFSPPYSRSYSVHFSFFTFSSDFVIFQVVKWFLIFL  
DFQFSC  
>ENSMUSP00000096648\_c.381:T>C\_p.C128R ENSMUST00000099049.4|Gm10719-202|ENSMUSG00000095547|+|chr9:g.3017969:T>C  
MFLIFNDFHFSCHIPCPTVDISFPPFSVFLAIFHVLKCVFLIFRDFQFSRHIPGPTVCISHFFRFFMISFFFT  
LSSGCFSSMIFTFLAIFHVLQWTFLNFPFVSFLAIFHILKCVFLIFRDFQFSRHIPGPTVCISHFSRFSVI

SSFFKSSSGCFSFSMIFSLAIFQVLQLTFLNFPFLSFSPPYSRSYSVHFSFFTFSSDFVIFQVVKWLFLLIFL  
DFQFSC  
>ENSMUSP00000096648\_c.399:A>T\_p.T134S ENSMUST00000099049.4|Gm10719-  
202|ENSMUSG00000095547|+|chr9:g.3017987:A>T  
MFLIFNDFHFSCHIPCPTVDISFPPFSVFLAIFHVLKCVFLIFRDFQFSRHIPGPTVCISHFFRFFMISFFFT  
LSSGCFSSMIFTFLAIFHVLQWTFLNFPFVSFLAIFHILKCVFLIFRDFQFSCHIPGPSVCISHFSRFSVI  
SSFFKSSSGCFSFSMIFSLAIFQVLQLTFLNFPFLSFSPPYSRSYSVHFSFFTFSSDFVIFQVVKWLFLLIFL  
DFQFSC  
>ENSMUSP00000096648\_c.420:T>C\_p.S141P ENSMUST00000099049.4|Gm10719-  
202|ENSMUSG00000095547|+|chr9:g.3018008:T>C  
MFLIFNDFHFSCHIPCPTVDISFPPFSVFLAIFHVLKCVFLIFRDFQFSRHIPGPTVCISHFFRFFMISFFFT  
LSSGCFSSMIFTFLAIFHVLQWTFLNFPFVSFLAIFHILKCVFLIFRDFQFSCHIPGPTVCISHFPRFSVI  
SSFFKSSSGCFSFSMIFSLAIFQVLQLTFLNFPFLSFSPPYSRSYSVHFSFFTFSSDFVIFQVVKWLFLLIFL  
DFQFSC  
>ENSMUSP00000096648\_c.430:C>T\_p.S144L ENSMUST00000099049.4|Gm10719-  
202|ENSMUSG00000095547|+|chr9:g.3018018:C>T  
MFLIFNDFHFSCHIPCPTVDISFPPFSVFLAIFHVLKCVFLIFRDFQFSRHIPGPTVCISHFFRFFMISFFFT  
LSSGCFSSMIFTFLAIFHVLQWTFLNFPFVSFLAIFHILKCVFLIFRDFQFSCHIPGPTVCISHFSRFLVI  
SSFFKSSSGCFSFSMIFSLAIFQVLQLTFLNFPFLSFSPPYSRSYSVHFSFFTFSSDFVIFQVVKWLFLLIFL  
DFQFSC  
>ENSMUSP00000096648\_c.439:C>T\_p.S147L ENSMUST00000099049.4|Gm10719-  
202|ENSMUSG00000095547|+|chr9:g.3018027:C>T  
MFLIFNDFHFSCHIPCPTVDISFPPFSVFLAIFHVLKCVFLIFRDFQFSRHIPGPTVCISHFFRFFMISFFFT  
LSSGCFSSMIFTFLAIFHVLQWTFLNFPFVSFLAIFHILKCVFLIFRDFQFSCHIPGPTVCISHFSRFSVI  
LSFFKSSSGCFSFSMIFSLAIFQVLQLTFLNFPFLSFSPPYSRSYSVHFSFFTFSSDFVIFQVVKWLFLLIFL  
DFQFSC  
>ENSMUSP00000096648\_c.509:G>C\_p.Q170H ENSMUST00000099049.4|Gm10719-  
202|ENSMUSG00000095547|+|chr9:g.3018097:G>C  
MFLIFNDFHFSCHIPCPTVDISFPPFSVFLAIFHVLKCVFLIFRDFQFSRHIPGPTVCISHFFRFFMISFFFT  
LSSGCFSSMIFTFLAIFHVLQWTFLNFPFVSFLAIFHILKCVFLIFRDFQFSCHIPGPTVCISHFSRFSVI  
SSFFKSSSGCFSFSMIFSLAIFHVLQWTFLNFPFLSFSPPYSRSYSVHFSFFTFSSDFVIFQVVKWLFLLIFL  
DFQFSC  
>ENSMUSP00000096648\_c.520:T>G\_p.L174W ENSMUST00000099049.4|Gm10719-  
202|ENSMUSG00000095547|+|chr9:g.3018108:T>G  
MFLIFNDFHFSCHIPCPTVDISFPPFSVFLAIFHVLKCVFLIFRDFQFSRHIPGPTVCISHFFRFFMISFFFT  
LSSGCFSSMIFTFLAIFHVLQWTFLNFPFVSFLAIFHILKCVFLIFRDFQFSCHIPGPTVCISHFSRFSVI  
SSFFKSSSGCFSFSMIFSLAIFQVLQWTFLNFPFLSFSPPYSRSYSVHFSFFTFSSDFVIFQVVKWLFLLIFL  
DFQFSC  
>ENSMUSP00000096648\_c.533:T>A\_p.N178K ENSMUST00000099049.4|Gm10719-  
202|ENSMUSG00000095547|+|chr9:g.3018121:T>A  
MFLIFNDFHFSCHIPCPTVDISFPPFSVFLAIFHVLKCVFLIFRDFQFSRHIPGPTVCISHFFRFFMISFFFT  
LSSGCFSSMIFTFLAIFHVLQWTFLNFPFVSFLAIFHILKCVFLIFRDFQFSCHIPGPTVCISHFSRFSVI  
SSFFKSSSGCFSFSMIFSLAIFQVLQLTFLKFPFLSFSPPYSRSYSVHFSFFTFSSDFVIFQVVKWLFLLIFL  
DFQFSC  
>ENSMUSP00000136170\_c.45:T>C\_p.C16R ENSMUST00000179272.2|Gm10719-  
203|ENSMUSG00000095547|+|chr9:g.3018798:T>C  
MFLIFHDFQFSCHIPRPTVEISFPTFSVFLAIFHVLKCVFLIFRVFQVSRHIPGPTVCISHFSRFSVILSFFK  
LSSGCFSSLIFSFLAIFHVLWTFLNFPFVSFLAIFHVLKCCVFLIFRDFQFSRHIPSPTVCISHFSRFSV  
ISSFFKLSSGCFSSMIFSLAIFKVLQWTFLNFRPLSFSPPYSRSYSVHFSFFRFFSDFVFFQVVKWMFLIFH  
DFQFSC  
>ENSMUSP00000136170\_c.59:A>C\_p.E20D ENSMUST00000179272.2|Gm10719-  
203|ENSMUSG00000095547|+|chr9:g.3018812:A>C  
MFLIFHDFQFSCHIPCPTVDISFPTFSVFLAIFHVLKCVFLIFRVFQVSRHIPGPTVCISHFSRFSVILSFFK  
LSSGCFSSLIFSFLAIFHVLWTFLNFPFVSFLAIFHVLKCCVFLIFRDFQFSRHIPSPTVCISHFSRFSV  
ISSFFKLSSGCFSSMIFSLAIFKVLQWTFLNFRPLSFSPPYSRSYSVHFSFFRFFSDFVFFQVVKWMFLIFH  
DFQFSC  
>ENSMUSP00000136170\_c.67:T>A\_p.F23Y ENSMUST00000179272.2|Gm10719-  
203|ENSMUSG00000095547|+|chr9:g.3018824:T>A

MFLIFHDFQFSCHIPCPTVEISYPTFSVFLAIFHVLKCVFLIFRVFQVSRHIPGPTVCISHFSRFSVILSFFK  
LSSGCFSLIFSLIFSLAIFHVLWTFNLNFPFVSFLAIFHVLKCCVFLIFRDFQFSRHIPSPPTVCISHFSRFSV  
ISSFFKLSSGCFSSMIFSLAIFKVLQWTFNLNFRPLSFSPYSRSYSVHFSFFRFFSDFVFFQVVKWMFLIFH  
DFQFSC  
>ENSMUSP00000136170\_c.133:T>A\_p.V45D ENSMUST00000179272.2|Gm10719-  
203|ENSMUSG00000095547|+|chr9:g.3018890:T>A  
MFLIFHDFQFSCHIPCPTVEISFPTFSVFLAIFHVLKCVFLIFRDFQVSRHIPGPTVCISHFSRFSVILSFFK  
LSSGCFSLIFSLIFSLAIFHVLWTFNLNFPFVSFLAIFHVLKCCVFLIFRDFQFSRHIPSPPTVCISHFSRFSV  
ISSFFKLSSGCFSSMIFSLAIFKVLQWTFNLNFRPLSFSPYSRSYSVHFSFFRFFSDFVFFQVVKWMFLIFH  
DFQFSC  
>ENSMUSP00000096648\_c.550:G>T\_p.S184I ENSMUST00000099049.4|Gm10719-  
202|ENSMUSG00000095547|+|chr9:g.3018898:G>T  
MFLIFNDFHFSCHIPCPTVDISFPFVSFLAIFHVLKCVFLIFRDFQFSRHIPGPTVCISHFFRFFMISFFFT  
LSSGCFSSMIFTFLAIFHVLQWTFNLNFPFVSFLAIFHILKCVFLIFRDFQFSCHIPGPTVCISHFSRFSVI  
SSFFKSSSGCFSSMIFSLAIFQVLQTLTFLNFPFLIFSPYSRSYSVHFSFFFTFFSDFVIFQVVKWLFLIFL  
DFQFSC  
>ENSMUSP00000136170\_c.141:G>T\_p.V48F ENSMUST00000179272.2|Gm10719-  
203|ENSMUSG00000095547|+|chr9:g.3018898:G>T  
MFLIFHDFQFSCHIPCPTVEISFPTFSVFLAIFHVLKCVFLIFRVFQVSRHIPGPTVCISHFSRFSVILSFFK  
LSSGCFSLIFSLIFSLAIFHVLWTFNLNFPFVSFLAIFHVLKCCVFLIFRDFQFSRHIPSPPTVCISHFSRFSV  
ISSFFKLSSGCFSSMIFSLAIFKVLQWTFNLNFRPLSFSPYSRSYSVHFSFFRFFSDFVFFQVVKWMFLIFH  
DFQFSC  
>ENSMUSP00000096648\_c.574:A>T\_p.Y192F ENSMUST00000099049.4|Gm10719-  
202|ENSMUSG00000095547|+|chr9:g.3018922:A>T  
MFLIFNDFHFSCHIPCPTVDISFPFVSFLAIFHVLKCVFLIFRDFQFSRHIPGPTVCISHFFRFFMISFFFT  
LSSGCFSSMIFTFLAIFHVLQWTFNLNFPFVSFLAIFHILKCVFLIFRDFQFSCHIPGPTVCISHFSRFSVI  
SSFFKSSSGCFSSMIFSLAIFQVLQTLTFLNFPFLIFSPYSRSYSVHFSFFFTFFSDFVIFQVVKWLFLIFL  
DFQFSC  
>ENSMUSP00000136170\_c.165:A>T\_p.T56S ENSMUST00000179272.2|Gm10719-  
203|ENSMUSG00000095547|+|chr9:g.3018922:A>T  
MFLIFHDFQFSCHIPCPTVEISFPTFSVFLAIFHVLKCVFLIFRVFQVSRHIPGPSVCISHFSRFSVILSFFK  
LSSGCFSLIFSLIFSLAIFHVLWTFNLNFPFVSFLAIFHVLKCCVFLIFRDFQFSRHIPSPPTVCISHFSRFSV  
ISSFFKLSSGCFSSMIFSLAIFKVLQWTFNLNFRPLSFSPYSRSYSVHFSFFRFFSDFVFFQVVKWMFLIFH  
DFQFSC  
>ENSMUSP00000096648\_c.576:A>C\_p.S193R ENSMUST00000099049.4|Gm10719-  
202|ENSMUSG00000095547|+|chr9:g.3018924:A>C  
MFLIFNDFHFSCHIPCPTVDISFPFVSFLAIFHVLKCVFLIFRDFQFSRHIPGPTVCISHFFRFFMISFFFT  
LSSGCFSSMIFTFLAIFHVLQWTFNLNFPFVSFLAIFHILKCVFLIFRDFQFSCHIPGPTVCISHFSRFSVI  
SSFFKSSSGCFSSMIFSLAIFQVLQTLTFLNFPFLIFSPYSRSYSRVHFSFFFTFFSDFVIFQVVKWLFLIFL  
DFQFSC  
>ENSMUSP00000096648\_c.595:T>C\_p.F199S ENSMUST00000099049.4|Gm10719-  
202|ENSMUSG00000095547|+|chr9:g.3018943:T>C  
MFLIFNDFHFSCHIPCPTVDISFPFVSFLAIFHVLKCVFLIFRDFQFSRHIPGPTVCISHFFRFFMISFFFT  
LSSGCFSSMIFTFLAIFHVLQWTFNLNFPFVSFLAIFHILKCVFLIFRDFQFSCHIPGPTVCISHFSRFSVI  
SSFFKSSSGCFSSMIFSLAIFQVLQTLTFLNFPFLIFSPYSRSYSVHFSFFSTFFSDFVIFQVVKWLFLIFL  
DFQFSC  
>ENSMUSP00000136170\_c.186:T>C\_p.S63P ENSMUST00000179272.2|Gm10719-  
203|ENSMUSG00000095547|+|chr9:g.3018943:T>C  
MFLIFHDFQFSCHIPCPTVEISFPTFSVFLAIFHVLKCVFLIFRVFQVSRHIPGPTVCISHFPFRFSVILSFFK  
LSSGCFSLIFSLIFSLAIFHVLWTFNLNFPFVSFLAIFHVLKCCVFLIFRDFQFSRHIPSPPTVCISHFSRFSV  
ISSFFKLSSGCFSSMIFSLAIFKVLQWTFNLNFRPLSFSPYSRSYSVHFSFFRFFSDFVFFQVVKWMFLIFH  
DFQFSC  
>ENSMUSP00000096648\_c.595:TCAC>CCAA\_p.F199S ENSMUST00000099049.4|Gm10719-  
202|ENSMUSG00000095547|+|chr9:g.3018943:TCAC>CCAA  
MFLIFNDFHFSCHIPCPTVDISFPFVSFLAIFHVLKCVFLIFRDFQFSRHIPGPTVCISHFFRFFMISFFFT  
LSSGCFSSMIFTFLAIFHVLQWTFNLNFPFVSFLAIFHILKCVFLIFRDFQFSCHIPGPTVCISHFSRFSVI  
SSFFKSSSGCFSSMIFSLAIFQVLQTLTFLNFPFLIFSPYSRSYSVHFSFSNTFFSDFVIFQVVKWLFLIF  
LDFQFSC

>ENSMUSP00000136170\_c.186:TCAC>CCAA\_p.S63P ENSMUST00000179272.2|Gm10719-203|ENSMUSG00000095547|+|chr9:g.3018943:TCAC>CCAA  
MFLIFHDFQFSCHIPCPTVEISFPTFSVFLAIFHVLKCVFLIFRVFQVSRHIPGPTVCISHFPTRFSVILSFF  
KLSSGCFSSFLIFSFLAIFHVLWTFLNFPFVSFLAIFHVLKCCVFLIFRDFQFSRHIPSPPTVCISHFSRFS  
VISSFFKLSSGCFSSMIFSFLAIFKVLQWTFLNFRPLSFSPYSRSYSVHFSFFRFFSDFVFFQVVKWMFLIF  
HDFQFSC  
>ENSMUSP00000136170\_c.196:C>T\_p.S66L ENSMUST00000179272.2|Gm10719-203|ENSMUSG00000095547|+|chr9:g.3018953:C>T  
MFLIFHDFQFSCHIPCPTVEISFPTFSVFLAIFHVLKCVFLIFRVFQVSRHIPGPTVCISHFSRFLVILSFFK  
LSSGCFSSFLIFSFLAIFHVLWTFLNFPFVSFLAIFHVLKCCVFLIFRDFQFSRHIPSPPTVCISHFSRFSV  
ISSFFKLSSGCFSSMIFSFLAIFKVLQWTFLNFRPLSFSPYSRSYSVHFSFFRFFSDFVFFQVVKWMFLIFH  
DFQFSC  
>ENSMUSP00000136170\_c.205:T>C\_p.L69S ENSMUST00000179272.2|Gm10719-203|ENSMUSG00000095547|+|chr9:g.3018962:T>C  
MFLIFHDFQFSCHIPCPTVEISFPTFSVFLAIFHVLKCVFLIFRVFQVSRHIPGPTVCISHFSRFSVISSFFK  
LSSGCFSSFLIFSFLAIFHVLWTFLNFPFVSFLAIFHVLKCCVFLIFRDFQFSRHIPSPPTVCISHFSRFSV  
ISSFFKLSSGCFSSMIFSFLAIFKVLQWTFLNFRPLSFSPYSRSYSVHFSFFRFFSDFVFFQVVKWMFLIFH  
DFQFSC  
>ENSMUSP00000136170\_c.220:T>C\_p.L74S ENSMUST00000179272.2|Gm10719-203|ENSMUSG00000095547|+|chr9:g.3018977:T>C  
MFLIFHDFQFSCHIPCPTVEISFPTFSVFLAIFHVLKCVFLIFRVFQVSRHIPGPTVCISHFSRFSVILSFFK  
SSSGCFSSFLIFSFLAIFHVLWTFLNFPFVSFLAIFHVLKCCVFLIFRDFQFSRHIPSPPTVCISHFSRFSV  
ISSFFKLSSGCFSSMIFSFLAIFKVLQWTFLNFRPLSFSPYSRSYSVHFSFFRFFSDFVFFQVVKWMFLIFH  
DFQFSC  
>ENSMUSP00000136170\_c.220:T>G\_p.L74W ENSMUST00000179272.2|Gm10719-203|ENSMUSG00000095547|+|chr9:g.3018977:T>G  
MFLIFHDFQFSCHIPCPTVEISFPTFSVFLAIFHVLKCVFLIFRVFQVSRHIPGPTVCISHFSRFSVILSFFK  
WSSGCFSSFLIFSFLAIFHVLWTFLNFPFVSFLAIFHVLKCCVFLIFRDFQFSRHIPSPPTVCISHFSRFSV  
ISSFFKLSSGCFSSMIFSFLAIFKVLQWTFLNFRPLSFSPYSRSYSVHFSFFRFFSDFVFFQVVKWMFLIFH  
DFQFSC  
>ENSMUSP00000136170\_c.220:TG>GA\_p.L74\* ENSMUST00000179272.2|Gm10719-203|ENSMUSG00000095547|+|chr9:g.3018977:TG>GA  
MFLIFHDFQFSCHIPCPTVEISFPTFSVFLAIFHVLKCVFLIFRVFQVSRHIPGPTVCISHFSRFSVILSFFK  
\*VKWLFLIFLDFQFSCHIPCPTVDISKSTFFSFPCCHISCPKVLCSHF\*FSVFSPPYSKSYSVHFSFFTFSS  
DFVIFQVVKWMFLIFHDFQLSCHIQSPTVDISKSTFIIFAIF\*VLQCAFLIFQVFQ\*FRLFSSRQVDVSHFP  
\*FSVFL  
>ENSMUSP00000096648\_c.639:T>A\_p.L214M ENSMUST00000099049.4|Gm10719-202|ENSMUSG00000095547|+|chr9:g.3018987:T>A  
MFLIFNDFHFSCHIPCPTVDISFPFVSFLAIFHVLKCVFLIFRDFQFSRHIPGPTVCISHFFRFFMISFFFT  
LSSGCFSSMIFTFLAIFHVLQWTFLNFPFVSFLAIFHILKCVFLIFRDFQFSCHIPGPTVCISHFSRFSVI  
SSFFKSSSGCFSSMIFSFLAIFQVLQTLTFLNFPFLSFSPPYSRSYSVHFSFFTFSSDFVIFQVVKWMFLIFL  
DFQFSC  
>ENSMUSP00000096648\_c.655:T>C\_p.L219P ENSMUST00000099049.4|Gm10719-202|ENSMUSG00000095547|+|chr9:g.3019003:T>C  
MFLIFNDFHFSCHIPCPTVDISFPFVSFLAIFHVLKCVFLIFRDFQFSRHIPGPTVCISHFFRFFMISFFFT  
LSSGCFSSMIFTFLAIFHVLQWTFLNFPFVSFLAIFHILKCVFLIFRDFQFSCHIPGPTVCISHFSRFSVI  
SSFFKSSSGCFSSMIFSFLAIFQVLQTLTFLNFPFLSFSPPYSRSYSVHFSFFTFSSDFVIFQVVKWLFLIFP  
DFQFSC  
>rs227483733\_ENSMUSP00000096648\_c.655:T>A\_p.L219H  
ENSMUST00000099049.4|Gm10719-202|ENSMUSG00000095547|+|chr9:g.3019003:T>A  
MFLIFNDFHFSCHIPCPTVDISFPFVSFLAIFHVLKCVFLIFRDFQFSRHIPGPTVCISHFFRFFMISFFFT  
LSSGCFSSMIFTFLAIFHVLQWTFLNFPFVSFLAIFHILKCVFLIFRDFQFSCHIPGPTVCISHFSRFSVI  
SSFFKSSSGCFSSMIFSFLAIFQVLQTLTFLNFPFLSFSPPYSRSYSVHFSFFTFSSDFVIFQVVKWLFLIFH  
DFQFSC  
>rs227483733\_ENSMUSP00000136170\_c.246:T>A\_p.L83M  
ENSMUST00000179272.2|Gm10719-203|ENSMUSG00000095547|+|chr9:g.3019003:T>A  
MFLIFHDFQFSCHIPCPTVEISFPTFSVFLAIFHVLKCVFLIFRVFQVSRHIPGPTVCISHFSRFSVILSFFK  
LSSGCFSSMIFSFLAIFHVLWTFLNFPFVSFLAIFHVLKCCVFLIFRDFQFSRHIPSPPTVCISHFSRFSV

ISSFFKLSSGCFSSMIFSLAIFKVLQWTFNLNFRPLSFSPYSRSYSVHFSFFRFFSDFVFFQVVKWMFLIFH  
DFQFSC  
>ENSMUSP00000136170\_c.283:T>A\_p.L95Q ENSMUST00000179272.2|Gm10719-  
203|ENSMUSG00000095547|+|chr9:g.3019040:T>A  
MFLIFHDFQFSCHIPCPTVEISFPTFSVFLAIFHVLKCVFLIFRVFQVSRHIPGPTVCISHFSRFSVILSFFK  
LSSGCFSSFLIFSLAIFHVLQWTFNLNFPFVSFLAIFHVLKCCVFLIFRDFQFSRHIPSPPTVCISHFSRFSV  
ISSFFKLSSGCFSSMIFSLAIFKVLQWTFNLNFRPLSFSPYSRSYSVHFSFFRFFSDFVFFQVVKWMFLIFH  
DFQFSC  
>ENSMUSP00000136170\_c.286:G>T\_p.W96L ENSMUST00000179272.2|Gm10719-  
203|ENSMUSG00000095547|+|chr9:g.3019043:G>T  
MFLIFHDFQFSCHIPCPTVEISFPTFSVFLAIFHVLKCVFLIFRVFQVSRHIPGPTVCISHFSRFSVILSFFK  
LSSGCFSSFLIFSLAIFHVLQWTFNLNFPFVSFLAIFHVLKCCVFLIFRDFQFSRHIPSPPTVCISHFSRFSV  
ISSFFKLSSGCFSSMIFSLAIFKVLQWTFNLNFRPLSFSPYSRSYSVHFSFFRFFSDFVFFQVVKWMFLIFH  
DFQFSC  
>ENSMUSP00000136170\_c.306:C>A\_p.P103T ENSMUST00000179272.2|Gm10719-  
203|ENSMUSG00000095547|+|chr9:g.3019063:C>A  
MFLIFHDFQFSCHIPCPTVEISFPTFSVFLAIFHVLKCVFLIFRVFQVSRHIPGPTVCISHFSRFSVILSFFK  
LSSGCFSSFLIFSLAIFHVLQWTFNLNFPFVSFLAIFHVLKCCVFLIFRDFQFSRHIPSPPTVCISHFSRFSV  
ISSFFKLSSGCFSSMIFSLAIFKVLQWTFNLNFRPLSFSPYSRSYSVHFSFFRFFSDFVFFQVVKWMFLIFH  
DFQFSC  
>ENSMUSP00000096646\_c.45:T>C\_p.C16R ENSMUST00000099047.4|Gm10719-  
201|ENSMUSG00000095547|+|chr9:g.3020200:T>C  
MFLIFHDFQFSCHIPRPTMDISFPTFSVFLAIFHVLKCVFLIFRDFQFSRHIPGPTVCISHFSGFSVILSFFK  
SSSGCFSSMIFSLAIFHVLQWTFNLNFPFVSFLAIFHVLKCVFLIFSDQFSRHIPGPTVCISHFSRFSVI  
SSFFKLSSGCFSSMIFSLAIFHVPQWTFNLNFPFSSYSFSPYSRSYSVHFSFFRFFSDFVIFQVVKWMFLI  
FLDFQFSC  
>ENSMUSP00000096646\_c.54:A>T\_p.M19L ENSMUST00000099047.4|Gm10719-  
201|ENSMUSG00000095547|+|chr9:g.3020209:A>T  
MFLIFHDFQFSCHIPCPTLDISFPTFSVFLAIFHVLKCVFLIFRDFQFSRHIPGPTVCISHFSGFSVILSFFK  
SSSGCFSSMIFSLAIFHVLQWTFNLNFPFVSFLAIFHVLKCVFLIFSDQFSRHIPGPTVCISHFSRFSVI  
SSFFKLSSGCFSSMIFSLAIFHVPQWTFNLNFPFSSYSFSPYSRSYSVHFSFFRFFSDFVIFQVVKWMFLI  
FLDFQFSC  
>ENSMUSP00000096646\_c.54:A>C\_p.M19L ENSMUST00000099047.4|Gm10719-  
201|ENSMUSG00000095547|+|chr9:g.3020209:A>C  
MFLIFHDFQFSCHIPCPTLDISFPTFSVFLAIFHVLKCVFLIFRDFQFSRHIPGPTVCISHFSGFSVILSFFK  
SSSGCFSSMIFSLAIFHVLQWTFNLNFPFVSFLAIFHVLKCVFLIFSDQFSRHIPGPTVCISHFSRFSVI  
SSFFKLSSGCFSSMIFSLAIFHVPQWTFNLNFPFSSYSFSPYSRSYSVHFSFFRFFSDFVIFQVVKWMFLI  
FLDFQFSC  
>ENSMUSP00000096646\_c.54:A>G\_p.M19V ENSMUST00000099047.4|Gm10719-  
201|ENSMUSG00000095547|+|chr9:g.3020209:A>G  
MFLIFHDFQFSCHIPCPTVDISFPTFSVFLAIFHVLKCVFLIFRDFQFSRHIPGPTVCISHFSGFSVILSFFK  
SSSGCFSSMIFSLAIFHVLQWTFNLNFPFVSFLAIFHVLKCVFLIFSDQFSRHIPGPTVCISHFSRFSVI  
SSFFKLSSGCFSSMIFSLAIFHVPQWTFNLNFPFSSYSFSPYSRSYSVHFSFFRFFSDFVIFQVVKWMFLI  
FLDFQFSC  
>ENSMUSP00000096646\_c.67:T>A\_p.F23Y ENSMUST00000099047.4|Gm10719-  
201|ENSMUSG00000095547|+|chr9:g.3020226:T>A  
MFLIFHDFQFSCHIPCPTMDISYPTFSVFLAIFHVLKCVFLIFRDFQFSRHIPGPTVCISHFSGFSVILSFFK  
SSSGCFSSMIFSLAIFHVLQWTFNLNFPFVSFLAIFHVLKCVFLIFSDQFSRHIPGPTVCISHFSRFSVI  
SSFFKLSSGCFSSMIFSLAIFHVPQWTFNLNFPFSSYSFSPYSRSYSVHFSFFRFFSDFVIFQVVKWMFLI  
FLDFQFSC  
>ENSMUSP00000096646\_c.72:A>C\_p.T25P ENSMUST00000099047.4|Gm10719-  
201|ENSMUSG00000095547|+|chr9:g.3020231:A>C  
MFLIFHDFQFSCHIPCPTMDISFPFVSFLAIFHVLKCVFLIFRDFQFSRHIPGPTVCISHFSGFSVILSFFK  
SSSGCFSSMIFSLAIFHVLQWTFNLNFPFVSFLAIFHVLKCVFLIFSDQFSRHIPGPTVCISHFSRFSVI  
SSFFKLSSGCFSSMIFSLAIFHVPQWTFNLNFPFSSYSFSPYSRSYSVHFSFFRFFSDFVIFQVVKWMFLI  
FLDFQFSC  
>ENSMUSP00000096646\_c.112:G>A\_p.C38Y ENSMUST00000099047.4|Gm10719-  
201|ENSMUSG00000095547|+|chr9:g.3020271:G>A

MFLIFHDFQFSCHIPCPTMDISFPTFSVFLAIFHVLKYVFLIFRDFQFSRHIPGPTVCISHFSGFSVISSFFK  
SSSGCFSFSMIFSLAIFHVLQWTFLNFPFVSFLAIFHVLKCVFLIFSDQFSRHIPGPTVCISHFSRFSVI  
SSFFKLSSGCFSFSMIFSLAIFHVPQWTFLNFPFSSYSFSPYSRSYSVHFSFFTFSDFVIFQVVKWMFLI  
FLDFQFSC  
>ENSMUSP0000096646\_c.129:C>T\_p.R44C ENSMUST0000099047.4|Gm10719-  
201|ENSMUSG0000095547|+|chr9:g.3020288:C>T  
MFLIFHDFQFSCHIPCPTMDISFPTFSVFLAIFHVLKCVFLIFCDFQFSRHIPGPTVCISHFSGFSVISSFFK  
SSSGCFSFSMIFSLAIFHVLQWTFLNFPFVSFLAIFHVLKCVFLIFSDQFSRHIPGPTVCISHFSRFSVI  
SSFFKLSSGCFSFSMIFSLAIFHVPQWTFLNFPFSSYSFSPYSRSYSVHFSFFTFSDFVIFQVVKWMFLI  
FLDFQFSC  
>ENSMUSP00000136170\_c.366:C>T\_p.R123C ENSMUST00000179272.2|Gm10719-  
203|ENSMUSG0000095547|+|chr9:g.3020521:C>T  
MFLIFHDFQFSCHIPCPTVEISFPTFSVFLAIFHVLKCVFLIFRVFQVSRHIPGPTVCISHFSRFSVILSFFK  
LSSGCFSFSLIFSFLAIFHVLLWTFLNFPFVSFLAIFHVLKCCVFLIFCDFQFSRHIPSPPTVCISHFSRFSV  
ISSFFKLSSGCFSFSMIFSLAIFKVLQWTFLNFRPLSFSPYSRSYSVHFSFFRFFSDFVFFQVVKWMFLIFH  
DFQFSC  
>ENSMUSP00000136170\_c.367:G>A\_p.R123H ENSMUST00000179272.2|Gm10719-  
203|ENSMUSG0000095547|+|chr9:g.3020522:G>A  
MFLIFHDFQFSCHIPCPTVEISFPTFSVFLAIFHVLKCVFLIFRVFQVSRHIPGPTVCISHFSRFSVILSFFK  
LSSGCFSFSLIFSFLAIFHVLLWTFLNFPFVSFLAIFHVLKCCVFLIFHDFQFSRHIPSPPTVCISHFSRFSV  
ISSFFKLSSGCFSFSMIFSLAIFKVLQWTFLNFRPLSFSPYSRSYSVHFSFFRFFSDFVFFQVVKWMFLIFH  
DFQFSC  
>ENSMUSP00000136170\_c.384:C>T\_p.R129C ENSMUST00000179272.2|Gm10719-  
203|ENSMUSG0000095547|+|chr9:g.3020539:C>T  
MFLIFHDFQFSCHIPCPTVEISFPTFSVFLAIFHVLKCVFLIFRVFQVSRHIPGPTVCISHFSRFSVILSFFK  
LSSGCFSFSLIFSFLAIFHVLLWTFLNFPFVSFLAIFHVLKCCVFLIFRDFQFSCHIPSPPTVCISHFSRFSV  
ISSFFKLSSGCFSFSMIFSLAIFKVLQWTFLNFRPLSFSPYSRSYSVHFSFFRFFSDFVFFQVVKWMFLIFH  
DFQFSC  
>ENSMUSP00000136170\_c.396:A>G\_p.S133G ENSMUST00000179272.2|Gm10719-  
203|ENSMUSG0000095547|+|chr9:g.3020551:A>G  
MFLIFHDFQFSCHIPCPTVEISFPTFSVFLAIFHVLKCVFLIFRVFQVSRHIPGPTVCISHFSRFSVILSFFK  
LSSGCFSFSLIFSFLAIFHVLLWTFLNFPFVSFLAIFHVLKCCVFLIFRDFQFSRHIPGPTVCISHFSRFSV  
ISSFFKLSSGCFSFSMIFSLAIFKVLQWTFLNFRPLSFSPYSRSYSVHFSFFRFFSDFVFFQVVKWMFLIFH  
DFQFSC  
>ENSMUSP00000136170\_c.396:A>T\_p.S133C ENSMUST00000179272.2|Gm10719-  
203|ENSMUSG0000095547|+|chr9:g.3020551:A>T  
MFLIFHDFQFSCHIPCPTVEISFPTFSVFLAIFHVLKCVFLIFRVFQVSRHIPGPTVCISHFSRFSVILSFFK  
LSSGCFSFSLIFSFLAIFHVLLWTFLNFPFVSFLAIFHVLKCCVFLIFRDFQFSRHIPSPPTVCISHFSRFSV  
ISSFFKLSSGCFSFSMIFSLAIFKVLQWTFLNFRPLSFSPYSRSYSVHFSFFRFFSDFVFFQVVKWMFLIFH  
DFQFSC  
>ENSMUSP00000136170\_c.402:A>T\_p.T135S ENSMUST00000179272.2|Gm10719-  
203|ENSMUSG0000095547|+|chr9:g.3020557:A>T  
MFLIFHDFQFSCHIPCPTVEISFPTFSVFLAIFHVLKCVFLIFRVFQVSRHIPGPTVCISHFSRFSVILSFFK  
LSSGCFSFSLIFSFLAIFHVLLWTFLNFPFVSFLAIFHVLKCCVFLIFRDFQFSRHIPSPVCISHFSRFSV  
ISSFFKLSSGCFSFSMIFSLAIFKVLQWTFLNFRPLSFSPYSRSYSVHFSFFRFFSDFVFFQVVKWMFLIFH  
DFQFSC  
>ENSMUSP00000136170\_c.433:C>T\_p.S145L ENSMUST00000179272.2|Gm10719-  
203|ENSMUSG0000095547|+|chr9:g.3020588:C>T  
MFLIFHDFQFSCHIPCPTVEISFPTFSVFLAIFHVLKCVFLIFRVFQVSRHIPGPTVCISHFSRFSVILSFFK  
LSSGCFSFSLIFSFLAIFHVLLWTFLNFPFVSFLAIFHVLKCCVFLIFRDFQFSRHIPSPPTVCISHFSRFLV  
ISSFFKLSSGCFSFSMIFSLAIFKVLQWTFLNFRPLSFSPYSRSYSVHFSFFRFFSDFVFFQVVKWMFLIFH  
DFQFSC  
>ENSMUSP00000136170\_c.442:C>T\_p.S148L ENSMUST00000179272.2|Gm10719-  
203|ENSMUSG0000095547|+|chr9:g.3020597:C>T  
MFLIFHDFQFSCHIPCPTVEISFPTFSVFLAIFHVLKCVFLIFRVFQVSRHIPGPTVCISHFSRFSVILSFFK  
LSSGCFSFSLIFSFLAIFHVLLWTFLNFPFVSFLAIFHVLKCCVFLIFRDFQFSRHIPSPPTVCISHFSRFSV  
ILSFFKLSSGCFSFSMIFSLAIFKVLQWTFLNFRPLSFSPYSRSYSVHFSFFRFFSDFVFFQVVKWMFLIFH  
DFQFSC

>ENSMUSP00000136170\_c.457:T>G\_p.L153W ENSMUST00000179272.2|Gm10719-203|ENSMUSG00000095547|+|chr9:g.3020612:T>G  
MFLIFHDFQFSCHIPCPTVEISFPTFSVFLAIFHVLKCVFLIFRVFQVSRHIPGPTVCISHFSRFSVILSFFK  
LSSGCFSSFLIFSFLAIFHVLLWTFNLNFPFVSFLAIFHVLKCCVFLIFRDFQFSRHIPSPPTVCISHFSRFSV  
ISSFFKWSSGCFSSMIFSFLAIFKVLQWTFNLNFRPLSFSPYSRSYSVHFSFFRFFSDFVFFQVVKWMFLIFH  
DFQFSC  
>ENSMUSP00000136170\_c.457:T>C\_p.L153S ENSMUST00000179272.2|Gm10719-203|ENSMUSG00000095547|+|chr9:g.3020612:T>C  
MFLIFHDFQFSCHIPCPTVEISFPTFSVFLAIFHVLKCVFLIFRVFQVSRHIPGPTVCISHFSRFSVILSFFK  
LSSGCFSSFLIFSFLAIFHVLLWTFNLNFPFVSFLAIFHVLKCCVFLIFRDFQFSRHIPSPPTVCISHFSRFSV  
ISSFFKSSGCFSSMIFSFLAIFKVLQWTFNLNFRPLSFSPYSRSYSVHFSFFRFFSDFVFFQVVKWMFLIFH  
DFQFSC  
>ENSMUSP00000136170\_c.494:C>A\_p.S165R ENSMUST00000179272.2|Gm10719-203|ENSMUSG00000095547|+|chr9:g.3020649:C>A  
MFLIFHDFQFSCHIPCPTVEISFPTFSVFLAIFHVLKCVFLIFRVFQVSRHIPGPTVCISHFSRFSVILSFFK  
LSSGCFSSFLIFSFLAIFHVLLWTFNLNFPFVSFLAIFHVLKCCVFLIFRDFQFSRHIPSPPTVCISHFSRFSV  
ISSFFKLSSGCFSSMIFRFLAIFKVLQWTFNLNFRPLSFSPYSRSYSVHFSFFRFFSDFVFFQVVKWMFLIFH  
DFQFSC  
>ENSMUSP00000136170\_c.510:A>C\_p.K171Q ENSMUST00000179272.2|Gm10719-203|ENSMUSG00000095547|+|chr9:g.3020665:A>C  
MFLIFHDFQFSCHIPCPTVEISFPTFSVFLAIFHVLKCVFLIFRVFQVSRHIPGPTVCISHFSRFSVILSFFK  
LSSGCFSSFLIFSFLAIFHVLLWTFNLNFPFVSFLAIFHVLKCCVFLIFRDFQFSRHIPSPPTVCISHFSRFSV  
ISSFFKLSSGCFSSMIFSFLAIFQVLQWTFNLNFRPLSFSPYSRSYSVHFSFFRFFSDFVFFQVVKWMFLIFH  
DFQFSC  
>ENSMUSP00000136170\_c.510:AAA>CAC\_p.K171H ENSMUST00000179272.2|Gm10719-203|ENSMUSG00000095547|+|chr9:g.3020665:AAA>CAC  
MFLIFHDFQFSCHIPCPTVEISFPTFSVFLAIFHVLKCVFLIFRVFQVSRHIPGPTVCISHFSRFSVILSFFK  
LSSGCFSSFLIFSFLAIFHVLLWTFNLNFPFVSFLAIFHVLKCCVFLIFRDFQFSRHIPSPPTVCISHFSRFSV  
ISSFFKLSSGCFSSMIFSFLAIFHKSYSGHF\*IFDLYHFRHILGPTVCISHFSGFSVISSFFKSSGCFSS  
MIFSFL  
>ENSMUSP00000136170\_c.526:C>A\_p.T176K ENSMUST00000179272.2|Gm10719-203|ENSMUSG00000095547|+|chr9:g.3020681:C>A  
MFLIFHDFQFSCHIPCPTVEISFPTFSVFLAIFHVLKCVFLIFRVFQVSRHIPGPTVCISHFSRFSVILSFFK  
LSSGCFSSFLIFSFLAIFHVLLWTFNLNFPFVSFLAIFHVLKCCVFLIFRDFQFSRHIPSPPTVCISHFSRFSV  
ISSFFKLSSGCFSSMIFSFLAIFKVLQWKFLNFRPLSFSPYSRSYSVHFSFFRFFSDFVFFQVVKWMFLIFH  
DFQFSC  
>ENSMUSP00000136170\_c.541:G>A\_p.R181Q ENSMUST00000179272.2|Gm10719-203|ENSMUSG00000095547|+|chr9:g.3020696:G>A  
MFLIFHDFQFSCHIPCPTVEISFPTFSVFLAIFHVLKCVFLIFRVFQVSRHIPGPTVCISHFSRFSVILSFFK  
LSSGCFSSFLIFSFLAIFHVLLWTFNLNFPFVSFLAIFHVLKCCVFLIFRDFQFSRHIPSPPTVCISHFSRFSV  
ISSFFKLSSGCFSSMIFSFLAIFKVLQWTFNLNFRPLSFSPYSRSYSVHFSFFRFFSDFVFFQVVKWMFLIFH  
DFQFSC  
>ENSMUSP00000136170\_c.548:A>T\_p.L183F ENSMUST00000179272.2|Gm10719-203|ENSMUSG00000095547|+|chr9:g.3020703:A>T  
MFLIFHDFQFSCHIPCPTVEISFPTFSVFLAIFHVLKCVFLIFRVFQVSRHIPGPTVCISHFSRFSVILSFFK  
LSSGCFSSFLIFSFLAIFHVLLWTFNLNFPFVSFLAIFHVLKCCVFLIFRDFQFSRHIPSPPTVCISHFSRFSV  
ISSFFKLSSGCFSSMIFSFLAIFKVLQWTFNLNFRPFSFSPYSRSYSVHFSFFRFFSDFVFFQVVKWMFLIFH  
DFQFSC  
>ENSMUSP00000136170\_c.574:A>T\_p.Y192F ENSMUST00000179272.2|Gm10719-203|ENSMUSG00000095547|+|chr9:g.3020791:A>T  
MFLIFHDFQFSCHIPCPTVEISFPTFSVFLAIFHVLKCVFLIFRVFQVSRHIPGPTVCISHFSRFSVILSFFK  
LSSGCFSSFLIFSFLAIFHVLLWTFNLNFPFVSFLAIFHVLKCCVFLIFRDFQFSRHIPSPPTVCISHFSRFSV  
ISSFFKLSSGCFSSMIFSFLAIFKVLQWTFNLNFRPLSFSPYSRSYSVHFSFFRFFSDFVFFQVVKWMFLIFH  
DFQFSC  
>ENSMUSP00000096646\_c.165:A>T\_p.T56S ENSMUST00000099047.4|Gm10719-201|ENSMUSG00000095547|+|chr9:g.3020791:A>T  
MFLIFHDFQFSCHIPCPTMDSIFPTFSVFLAIFHVLKCVFLIFRDFQFSRHIPGPSVCISHFSGFSVISSFFK  
SSSGCFSSMIFSFLAIFHVLLQWTFNLNFPFVSFLAIFHVLKCVFLIFSDQFSRHIPGPTVCISHFSRFSVI



SSFFKLSSGCFSFSMIFSLAIFHVPQWTFNLNPPFSSYSFSPYSRSYSVHFSFFTFSSDFVIFQVVKWMFLI  
FLDFQFSC  
>ENSMUSP00000136170\_c.598:G>T\_p.R200M ENSMUST00000179272.2|Gm10719-  
203|ENSMUSG00000095547|+|chr9:g.3020815:G>T  
MFLIFHDFQFSCHIPCPTVEISFPTFSVFLAIFHVLKCVFLIFRVFQVSRHIPGPTVCISHFSRFSVILSFFK  
LSSGCFSSFLIFSLAIFHVLQWTFNLNPPFSSVFLAIFHVLKCCVFLIFRDFQFSRHIPSPPTVCISHFSRFSV  
ISSFFKLSSGCFSFSMIFSLAIFKVLQWTFNLNFRPLSFSPPYSRSYSVHFSFFMFFSDFVFFQVVKWMFLIFH  
DFQFSC  
>ENSMUSP00000096646\_c.189:G>T\_p.G64C ENSMUST00000099047.4|Gm10719-  
201|ENSMUSG00000095547|+|chr9:g.3020815:G>T  
MFLIFHDFQFSCHIPCPTMDISFPTFSVFLAIFHVLKCVFLIFRDFQFSRHIPGPTVCISHFSRFSVILSFFK  
SSSGCFSSMIFSLAIFHVLQWTFNLNPPFSSVFLAIFHVLKCVFLIFSDQFSRHIPGPTVCISHFSRFSVI  
SSFFKLSSGCFSFSMIFSLAIFHVPQWTFNLNPPFSSYSFSPYSRSYSVHFSFFTFSSDFVIFQVVKWMFLI  
FLDFQFSC  
>ENSMUSP00000136170\_c.598:G>C\_p.R200T ENSMUST00000179272.2|Gm10719-  
203|ENSMUSG00000095547|+|chr9:g.3020815:G>C  
MFLIFHDFQFSCHIPCPTVEISFPTFSVFLAIFHVLKCVFLIFRVFQVSRHIPGPTVCISHFSRFSVILSFFK  
LSSGCFSSFLIFSLAIFHVLQWTFNLNPPFSSVFLAIFHVLKCCVFLIFRDFQFSRHIPSPPTVCISHFSRFSV  
ISSFFKLSSGCFSFSMIFSLAIFKVLQWTFNLNFRPLSFSPPYSRSYSVHFSFFTFSSDFVIFQVVKWMFLIFH  
DFQFSC  
>ENSMUSP00000096646\_c.189:G>C\_p.G64R ENSMUST00000099047.4|Gm10719-  
201|ENSMUSG00000095547|+|chr9:g.3020815:G>C  
MFLIFHDFQFSCHIPCPTMDISFPTFSVFLAIFHVLKCVFLIFRDFQFSRHIPGPTVCISHFSRFSVILSFFK  
SSSGCFSSMIFSLAIFHVLQWTFNLNPPFSSVFLAIFHVLKCVFLIFSDQFSRHIPGPTVCISHFSRFSVI  
SSFFKLSSGCFSFSMIFSLAIFHVPQWTFNLNPPFSSYSFSPYSRSYSVHFSFFTFSSDFVIFQVVKWMFLI  
FLDFQFSC  
>ENSMUSP00000096646\_c.196:C>T\_p.S66L ENSMUST00000099047.4|Gm10719-  
201|ENSMUSG00000095547|+|chr9:g.3020822:C>T  
MFLIFHDFQFSCHIPCPTMDISFPTFSVFLAIFHVLKCVFLIFRDFQFSRHIPGPTVCISHFSRFSVILSFFK  
SSSGCFSSMIFSLAIFHVLQWTFNLNPPFSSVFLAIFHVLKCVFLIFSDQFSRHIPGPTVCISHFSRFSVI  
SSFFKLSSGCFSFSMIFSLAIFHVPQWTFNLNPPFSSYSFSPYSRSYSVHFSFFTFSSDFVIFQVVKWMFLI  
FLDFQFSC  
>ENSMUSP00000136170\_c.618:T>A\_p.F207I ENSMUST00000179272.2|Gm10719-  
203|ENSMUSG00000095547|+|chr9:g.3020835:T>A  
MFLIFHDFQFSCHIPCPTVEISFPTFSVFLAIFHVLKCVFLIFRVFQVSRHIPGPTVCISHFSRFSVILSFFK  
LSSGCFSSFLIFSLAIFHVLQWTFNLNPPFSSVFLAIFHVLKCCVFLIFRDFQFSRHIPSPPTVCISHFSRFSV  
ISSFFKLSSGCFSFSMIFSLAIFKVLQWTFNLNFRPLSFSPPYSRSYSVHFSFFRFFSDFVIFQVVKWMFLIFH  
DFQFSC  
>ENSMUSP00000096646\_c.285:T>C\_p.W96R ENSMUST00000099047.4|Gm10719-  
201|ENSMUSG00000095547|+|chr9:g.3020911:T>C  
MFLIFHDFQFSCHIPCPTMDISFPTFSVFLAIFHVLKCVFLIFRDFQFSRHIPGPTVCISHFSRFSVILSFFK  
SSSGCFSSMIFSLAIFHVLQWTFNLNPPFSSVFLAIFHVLKCVFLIFSDQFSRHIPGPTVCISHFSRFSVI  
SSFFKLSSGCFSFSMIFSLAIFHVPQWTFNLNPPFSSYSFSPYSRSYSVHFSFFTFSSDFVIFQVVKWMFLI  
FLDFQFSC  
>ENSMUSP00000096646\_c.335:T>A\_p.H112Q ENSMUST00000099047.4|Gm10719-  
201|ENSMUSG00000095547|+|chr9:g.3020961:T>A  
MFLIFHDFQFSCHIPCPTMDISFPTFSVFLAIFHVLKCVFLIFRDFQFSRHIPGPTVCISHFSRFSVILSFFK  
SSSGCFSSMIFSLAIFHVLQWTFNLNPPFSSVFLAIFQVLKCVFLIFSDQFSRHIPGPTVCISHFSRFSVI  
SSFFKLSSGCFSFSMIFSLAIFHVPQWTFNLNPPFSSYSFSPYSRSYSVHFSFFTFSSDFVIFQVVKWMFLI  
FLDFQFSC  
>ENSMUSP00000096646\_c.363:A>T\_p.S122C ENSMUST00000099047.4|Gm10719-  
201|ENSMUSG00000095547|+|chr9:g.3020989:A>T  
MFLIFHDFQFSCHIPCPTMDISFPTFSVFLAIFHVLKCVFLIFRDFQFSRHIPGPTVCISHFSRFSVILSFFK  
SSSGCFSSMIFSLAIFHVLQWTFNLNPPFSSVFLAIFHVLKCVFLIFCDFQFSRHIPGPTVCISHFSRFSVI  
SSFFKLSSGCFSFSMIFSLAIFHVPQWTFNLNPPFSSYSFSPYSRSYSVHFSFFTFSSDFVIFQVVKWMFLI  
FLDFQFSC  
>ENSMUSP00000096646\_c.363:A>C\_p.S122R ENSMUST00000099047.4|Gm10719-  
201|ENSMUSG00000095547|+|chr9:g.3020989:A>C

MFLIFHDFQFSCHIPCPTMDISFPTFSVFLAIFHVLKCVFLIFRDFQFSRHIPGPTVCISHFSGFSVISSFFK  
SSSGCFSFSMIFSLAIFHVLQWTFLNFPFSSVFLAIFHVLKCVFLIFRDFQFSRHIPGPTVCISHFSRFSVI  
SSFFKLSSGCFSFSMIFSLAIFHVPQWTFLNFPFSSYSFSPYRSYSVHFSFFTFFSDFVIFQVVKWMFLI  
FLDFQFSC  
>ENSMUSP00000096646\_c.399:A>T\_p.T134S ENSMUST00000099047.4|Gm10719-  
201|ENSMUSG00000095547|+|chr9:g.3021025:A>T  
MFLIFHDFQFSCHIPCPTMDISFPTFSVFLAIFHVLKCVFLIFRDFQFSRHIPGPTVCISHFSGFSVISSFFK  
SSSGCFSFSMIFSLAIFHVLQWTFLNFPFSSVFLAIFHVLKCVFLIFSDQFSRHIPGPTVCISHFSRFSVI  
SSFFKLSSGCFSFSMIFSLAIFHVPQWTFLNFPFSSYSFSPYRSYSVHFSFFTFFSDFVIFQVVKWMFLI  
FLDFQFSC  
>ENSMUSP00000096646\_c.430:C>T\_p.S144L ENSMUST00000099047.4|Gm10719-  
201|ENSMUSG00000095547|+|chr9:g.3021056:C>T  
MFLIFHDFQFSCHIPCPTMDISFPTFSVFLAIFHVLKCVFLIFRDFQFSRHIPGPTVCISHFSGFSVISSFFK  
SSSGCFSFSMIFSLAIFHVLQWTFLNFPFSSVFLAIFHVLKCVFLIFSDQFSRHIPGPTVCISHFSRFLVI  
SSFFKLSSGCFSFSMIFSLAIFHVPQWTFLNFPFSSYSFSPYRSYSVHFSFFTFFSDFVIFQVVKWMFLI  
FLDFQFSC  
>ENSMUSP00000096646\_c.454:T>C\_p.L152S ENSMUST00000099047.4|Gm10719-  
201|ENSMUSG00000095547|+|chr9:g.3021080:T>C  
MFLIFHDFQFSCHIPCPTMDISFPTFSVFLAIFHVLKCVFLIFRDFQFSRHIPGPTVCISHFSGFSVISSFFK  
SSSGCFSFSMIFSLAIFHVLQWTFLNFPFSSVFLAIFHVLKCVFLIFSDQFSRHIPGPTVCISHFSRFSVI  
SSFFKLSSGCFSFSMIFSLAIFHVPQWTFLNFPFSSYSFSPYRSYSVHFSFFTFFSDFVIFQVVKWMFLI  
FLDFQFSC  
>ENSMUSP00000096646\_c.454:T>G\_p.L152W ENSMUST00000099047.4|Gm10719-  
201|ENSMUSG00000095547|+|chr9:g.3021080:T>G  
MFLIFHDFQFSCHIPCPTMDISFPTFSVFLAIFHVLKCVFLIFRDFQFSRHIPGPTVCISHFSGFSVISSFFK  
SSSGCFSFSMIFSLAIFHVLQWTFLNFPFSSVFLAIFHVLKCVFLIFSDQFSRHIPGPTVCISHFSRFSVI  
SSFFKLSSGCFSFSMIFSLAIFHVPQWTFLNFPFSSYSFSPYRSYSVHFSFFTFFSDFVIFQVVKWMFLI  
FLDFQFSC  
>ENSMUSP00000096646\_c.490:G>T\_p.S164I ENSMUST00000099047.4|Gm10719-  
201|ENSMUSG00000095547|+|chr9:g.3021116:G>T  
MFLIFHDFQFSCHIPCPTMDISFPTFSVFLAIFHVLKCVFLIFRDFQFSRHIPGPTVCISHFSGFSVISSFFK  
SSSGCFSFSMIFSLAIFHVLQWTFLNFPFSSVFLAIFHVLKCVFLIFSDQFSRHIPGPTVCISHFSRFSVI  
SSFFKLSSGCFSFSMIFSLAIFHVPQWTFLNFPFSSYSFSPYRSYSVHFSFFTFFSDFVIFQVVKWMFLI  
FLDFQFSC  
>ENSMUSP00000096646\_c.514:C>T\_p.P172L ENSMUST00000099047.4|Gm10719-  
201|ENSMUSG00000095547|+|chr9:g.3021140:C>T  
MFLIFHDFQFSCHIPCPTMDISFPTFSVFLAIFHVLKCVFLIFRDFQFSRHIPGPTVCISHFSGFSVISSFFK  
SSSGCFSFSMIFSLAIFHVLQWTFLNFPFSSVFLAIFHVLKCVFLIFSDQFSRHIPGPTVCISHFSRFSVI  
SSFFKLSSGCFSFSMIFSLAIFHVLQWTFLNFPFSSYSFSPYRSYSVHFSFFTFFSDFVIFQVVKWMFLI  
FLDFQFSC  
>ENSMUSP00000096646\_c.535:T>A\_p.F179Y ENSMUST00000099047.4|Gm10719-  
201|ENSMUSG00000095547|+|chr9:g.3021161:T>A  
MFLIFHDFQFSCHIPCPTMDISFPTFSVFLAIFHVLKCVFLIFRDFQFSRHIPGPTVCISHFSGFSVISSFFK  
SSSGCFSFSMIFSLAIFHVLQWTFLNFPFSSVFLAIFHVLKCVFLIFSDQFSRHIPGPTVCISHFSRFSVI  
SSFFKLSSGCFSFSMIFSLAIFHVPQWTFLNFPFSSYSFSPYRSYSVHFSFFTFFSDFVIFQVVKWMFLI  
FLDFQFSC  
>ENSMUSP00000096646\_c.540:C>A\_p.P181T ENSMUST00000099047.4|Gm10719-  
201|ENSMUSG00000095547|+|chr9:g.3021166:C>A  
MFLIFHDFQFSCHIPCPTMDISFPTFSVFLAIFHVLKCVFLIFRDFQFSRHIPGPTVCISHFSGFSVISSFFK  
SSSGCFSFSMIFSLAIFHVLQWTFLNFPFSSVFLAIFHVLKCVFLIFSDQFSRHIPGPTVCISHFSRFSVI  
SSFFKLSSGCFSFSMIFSLAIFHVPQWTFLNFPFSSYSFSPYRSYSVHFSFFTFFSDFVIFQVVKWMFLI  
FLDFQFSC  
>ENSMUSP00000096646\_c.553:A>T\_p.Y185F ENSMUST00000099047.4|Gm10719-  
201|ENSMUSG00000095547|+|chr9:g.3021259:A>T  
MFLIFHDFQFSCHIPCPTMDISFPTFSVFLAIFHVLKCVFLIFRDFQFSRHIPGPTVCISHFSGFSVISSFFK  
SSSGCFSFSMIFSLAIFHVLQWTFLNFPFSSVFLAIFHVLKCVFLIFSDQFSRHIPGPTVCISHFSRFSVI  
SSFFKLSSGCFSFSMIFSLAIFHVPQWTFLNFPFSSYSFSPYRSYSVHFSFFTFFSDFVIFQVVKWMFLI  
FLDFQFSC

>ENSMUSP00000096646\_c.571:C>T\_p.S191F ENSMUST00000099047.4|Gm10719-201|ENSMUSG00000095547|+|chr9:g.3021484:C>T  
MFLIFHDFQFSCHIPCPTMDISFPTFSVFLAIFHVLKCVFLIFRDFQFSRHIPGPTVCISHFSGFSVISSFFK  
SSSGCFSFSMIFSFLAIFHVLQWTFLNFPFVSFLAIFHVLKCVFLIFSDQFSRHIPGPTVCISHFSRFSVI  
SSFFKLSSGCFSFSMIFSFLAIFHVPQWTFLNFPFSSYSFSPYFRSYSVHFSFSTFFSDFVIFQVVKWMFLI  
FLDFQFSC  
>ENSMUSP00000096646\_c.580:A>T\_p.Y194F ENSMUST00000099047.4|Gm10719-201|ENSMUSG00000095547|+|chr9:g.3021493:A>T  
MFLIFHDFQFSCHIPCPTMDISFPTFSVFLAIFHVLKCVFLIFRDFQFSRHIPGPTVCISHFSGFSVISSFFK  
SSSGCFSFSMIFSFLAIFHVLQWTFLNFPFVSFLAIFHVLKCVFLIFSDQFSRHIPGPTVCISHFSRFSVI  
SSFFKLSSGCFSFSMIFSFLAIFHVPQWTFLNFPFSSYSFSPYRSRFSVHFSFSTFFSDFVIFQVVKWMFLI  
FLDFQFSC  
>ENSMUSP00000096646\_c.582:A>C\_p.S195R ENSMUST00000099047.4|Gm10719-201|ENSMUSG00000095547|+|chr9:g.3021495:A>C  
MFLIFHDFQFSCHIPCPTMDISFPTFSVFLAIFHVLKCVFLIFRDFQFSRHIPGPTVCISHFSGFSVISSFFK  
SSSGCFSFSMIFSFLAIFHVLQWTFLNFPFVSFLAIFHVLKCVFLIFSDQFSRHIPGPTVCISHFSRFSVI  
SSFFKLSSGCFSFSMIFSFLAIFHVPQWTFLNFPFSSYSFSPYRSRYSRVHFSFSTFFSDFVIFQVVKWMFLI  
FLDFQFSC  
>ENSMUSP00000096646\_c.585:G>T\_p.V196L ENSMUST00000099047.4|Gm10719-201|ENSMUSG00000095547|+|chr9:g.3021498:G>T  
MFLIFHDFQFSCHIPCPTMDISFPTFSVFLAIFHVLKCVFLIFRDFQFSRHIPGPTVCISHFSGFSVISSFFK  
SSSGCFSFSMIFSFLAIFHVLQWTFLNFPFVSFLAIFHVLKCVFLIFSDQFSRHIPGPTVCISHFSRFSVI  
SSFFKLSSGCFSFSMIFSFLAIFHVPQWTFLNFPFSSYSFSPYRSRYSVHFSFSTFFSDFVIFQVVKWMFLI  
FLDFQFSC  
>ENSMUSP00000096646\_c.601:T>C\_p.F201S ENSMUST00000099047.4|Gm10719-201|ENSMUSG00000095547|+|chr9:g.3021514:T>C  
MFLIFHDFQFSCHIPCPTMDISFPTFSVFLAIFHVLKCVFLIFRDFQFSRHIPGPTVCISHFSGFSVISSFFK  
SSSGCFSFSMIFSFLAIFHVLQWTFLNFPFVSFLAIFHVLKCVFLIFSDQFSRHIPGPTVCISHFSRFSVI  
SSFFKLSSGCFSFSMIFSFLAIFHVPQWTFLNFPFSSYSFSPYRSRYSVHFSFSTFFSDFVIFQVVKWMFLI  
FLDFQFSC  
>ENSMUSP00000096646\_c.661:T>A\_p.L221H ENSMUST00000099047.4|Gm10719-201|ENSMUSG00000095547|+|chr9:g.3021574:T>A  
MFLIFHDFQFSCHIPCPTMDISFPTFSVFLAIFHVLKCVFLIFRDFQFSRHIPGPTVCISHFSGFSVISSFFK  
SSSGCFSFSMIFSFLAIFHVLQWTFLNFPFVSFLAIFHVLKCVFLIFSDQFSRHIPGPTVCISHFSRFSVI  
SSFFKLSSGCFSFSMIFSFLAIFHVPQWTFLNFPFSSYSFSPYRSRYSVHFSFSTFFSDFVIFQVVKWMFLI  
FHDFQFSC  
>ENSMUSP00000096646\_c.672:T>A\_p.F225I ENSMUST00000099047.4|Gm10719-201|ENSMUSG00000095547|+|chr9:g.3021585:T>A  
MFLIFHDFQFSCHIPCPTMDISFPTFSVFLAIFHVLKCVFLIFRDFQFSRHIPGPTVCISHFSGFSVISSFFK  
SSSGCFSFSMIFSFLAIFHVLQWTFLNFPFVSFLAIFHVLKCVFLIFSDQFSRHIPGPTVCISHFSRFSVI  
SSFFKLSSGCFSFSMIFSFLAIFHVPQWTFLNFPFSSYSFSPYRSRYSVHFSFSTFFSDFVIFQVVKWMFLI  
FLDFQISC  
>ENSMUSP00000096645\_c.45:T>C\_p.C16R ENSMUST00000099046.4|Gm10718-201|ENSMUSG00000095186|+|chr9:g.3023592:T>C  
MFLIFHDFQFSCHIPRPTVDISFPFVSFLAIFHVLKCVFLIFRDFQFSCHIPGPTVCISHFSRFSLILSFFK  
LSTACFSFSMIFSFLAIFHVLQWKFLNFPFVSFLAIFHVLKCVFLIFRDFQFSRHIPGPTVCISHFSRFSVI  
SSFFKLSSGCFSFSMIFSFLAIFHVLQWTFLNFPFVSFLVFFSPYRSRYSVHFSFSTFFSDFDIFQVVKWMFLI  
FHDFQLSC  
>ENSMUSP00000096645\_c.72:C>A\_p.P25T ENSMUST00000099046.4|Gm10718-201|ENSMUSG00000095186|+|chr9:g.3023623:C>A  
MFLIFHDFQFSCHIPCPTVDISFPTFSVFLAIFHVLKCVFLIFRDFQFSCHIPGPTVCISHFSRFSLILSFFK  
LSTACFSFSMIFSFLAIFHVLQWKFLNFPFVSFLAIFHVLKCVFLIFRDFQFSRHIPGPTVCISHFSRFSVI  
SSFFKLSSGCFSFSMIFSFLAIFHVLQWTFLNFPFVSFLVFFSPYRSRYSVHFSFSTFFSDFDIFQVVKWMFLI  
FHDFQLSC  
>ENSMUSP00000096645\_c.129:C>T\_p.R44C ENSMUST00000099046.4|Gm10718-201|ENSMUSG00000095186|+|chr9:g.3023680:C>T  
MFLIFHDFQFSCHIPCPTVDISFPFVSFLAIFHVLKCVFLIFCDFQFSCHIPGPTVCISHFSRFSLILSFFK  
LSTACFSFSMIFSFLAIFHVLQWKFLNFPFVSFLAIFHVLKCVFLIFRDFQFSRHIPGPTVCISHFSRFSVI

SSFFKSSSGCFSFSMIFSLAIFHVLQWTFLNFPFVSFLFFSPYSRSYSVHFSFSTFFSDFDIFQVVKWMFLI  
FHDFQLSC  
>ENSMUSP00000096645\_c.147:T>C\_p.C50R ENSMUST00000099046.4|Gm10718-  
201|ENSMUSG00000095186|+|chr9:g.3023698:T>C  
MFLIFHDFQFSCHIPCPTVDISFPFVSFLAIFHVLKCVFLIFRDFQFSRHIPGPTVCISHFSRFSLILSFFK  
LSTACFSFSMIFSLAIFHVLQWKFLNFPFVSFLAIFHVLKCVFLIFRDFQFSRHIPGPTVCISHFSRFSVI  
SSFFKSSSGCFSFSMIFSLAIFHVLQWTFLNFPFVSFLFFSPYSRSYSVHFSFSTFFSDFDIFQVVKWMFLI  
FHDFQLSC  
>ENSMUSP00000096645\_c.159:G>C\_p.G54R ENSMUST00000099046.4|Gm10718-  
201|ENSMUSG00000095186|+|chr9:g.3023710:G>C  
MFLIFHDFQFSCHIPCPTVDISFPFVSFLAIFHVLKCVFLIFRDFQFSCHIPRPTVCISHFSRFSLILSFFK  
LSTACFSFSMIFSLAIFHVLQWKFLNFPFVSFLAIFHVLKCVFLIFRDFQFSRHIPGPTVCISHFSRFSVI  
SSFFKSSSGCFSFSMIFSLAIFHVLQWTFLNFPFVSFLFFSPYSRSYSVHFSFSTFFSDFDIFQVVKWMFLI  
FHDFQLSC  
>ENSMUSP00000096645\_c.165:A>T\_p.T56S ENSMUST00000099046.4|Gm10718-  
201|ENSMUSG00000095186|+|chr9:g.3023716:A>T  
MFLIFHDFQFSCHIPCPTVDISFPFVSFLAIFHVLKCVFLIFRDFQFSCHIPGPSVCISHFSRFSLILSFFK  
LSTACFSFSMIFSLAIFHVLQWKFLNFPFVSFLAIFHVLKCVFLIFRDFQFSRHIPGPTVCISHFSRFSVI  
SSFFKSSSGCFSFSMIFSLAIFHVLQWTFLNFPFVSFLFFSPYSRSYSVHFSFSTFFSDFDIFQVVKWMFLI  
FHDFQLSC  
>ENSMUSP00000096645\_c.186:T>C\_p.S63P ENSMUST00000099046.4|Gm10718-  
201|ENSMUSG00000095186|+|chr9:g.3023737:T>C  
MFLIFHDFQFSCHIPCPTVDISFPFVSFLAIFHVLKCVFLIFRDFQFSCHIPGPTVCISHFPRFSLILSFFK  
LSTACFSFSMIFSLAIFHVLQWKFLNFPFVSFLAIFHVLKCVFLIFRDFQFSRHIPGPTVCISHFSRFSVI  
SSFFKSSSGCFSFSMIFSLAIFHVLQWTFLNFPFVSFLFFSPYSRSYSVHFSFSTFFSDFDIFQVVKWMFLI  
FHDFQLSC  
>ENSMUSP00000096645\_c.189:C>T\_p.R64C ENSMUST00000099046.4|Gm10718-  
201|ENSMUSG00000095186|+|chr9:g.3023740:C>T  
MFLIFHDFQFSCHIPCPTVDISFPFVSFLAIFHVLKCVFLIFRDFQFSCHIPGPTVCISHFSCFSLILSFFK  
LSTACFSFSMIFSLAIFHVLQWKFLNFPFVSFLAIFHVLKCVFLIFRDFQFSRHIPGPTVCISHFSRFSVI  
SSFFKSSSGCFSFSMIFSLAIFHVLQWTFLNFPFVSFLFFSPYSRSYSVHFSFSTFFSDFDIFQVVKWMFLI  
FHDFQLSC  
>ENSMUSP00000096645\_c.198:C>G\_p.L67V ENSMUST00000099046.4|Gm10718-  
201|ENSMUSG00000095186|+|chr9:g.3023749:C>G  
MFLIFHDFQFSCHIPCPTVDISFPFVSFLAIFHVLKCVFLIFRDFQFSCHIPGPTVCISHFSRFSVILSFFK  
LSTACFSFSMIFSLAIFHVLQWKFLNFPFVSFLAIFHVLKCVFLIFRDFQFSRHIPGPTVCISHFSRFSVI  
SSFFKSSSGCFSFSMIFSLAIFHVLQWTFLNFPFVSFLFFSPYSRSYSVHFSFSTFFSDFDIFQVVKWMFLI  
FHDFQLSC  
>ENSMUSP00000096645\_c.198:C>A\_p.L67M ENSMUST00000099046.4|Gm10718-  
201|ENSMUSG00000095186|+|chr9:g.3023749:C>A  
MFLIFHDFQFSCHIPCPTVDISFPFVSFLAIFHVLKCVFLIFRDFQFSCHIPGPTVCISHFSRFSMILSFFK  
LSTACFSFSMIFSLAIFHVLQWKFLNFPFVSFLAIFHVLKCVFLIFRDFQFSRHIPGPTVCISHFSRFSVI  
SSFFKSSSGCFSFSMIFSLAIFHVLQWTFLNFPFVSFLFFSPYSRSYSVHFSFSTFFSDFDIFQVVKWMFLI  
FHDFQLSC  
>ENSMUSP00000096645\_c.205:T>C\_p.L69S ENSMUST00000099046.4|Gm10718-  
201|ENSMUSG00000095186|+|chr9:g.3023756:T>C  
MFLIFHDFQFSCHIPCPTVDISFPFVSFLAIFHVLKCVFLIFRDFQFSCHIPGPTVCISHFSRFSLILSFFK  
LSTACFSFSMIFSLAIFHVLQWKFLNFPFVSFLAIFHVLKCVFLIFRDFQFSRHIPGPTVCISHFSRFSVI  
SSFFKSSSGCFSFSMIFSLAIFHVLQWTFLNFPFVSFLFFSPYSRSYSVHFSFSTFFSDFDIFQVVKWMFLI  
FHDFQLSC  
>ENSMUSP00000096645\_c.220:T>G\_p.L74W ENSMUST00000099046.4|Gm10718-  
201|ENSMUSG00000095186|+|chr9:g.3023771:T>G  
MFLIFHDFQFSCHIPCPTVDISFPFVSFLAIFHVLKCVFLIFRDFQFSCHIPGPTVCISHFSRFSLILSFFK  
WSTACFSFSMIFSLAIFHVLQWKFLNFPFVSFLAIFHVLKCVFLIFRDFQFSRHIPGPTVCISHFSRFSVI  
SSFFKSSSGCFSFSMIFSLAIFHVLQWTFLNFPFVSFLFFSPYSRSYSVHFSFSTFFSDFDIFQVVKWMFLI  
FHDFQLSC  
>ENSMUSP00000096645\_c.220:T>C\_p.L74S ENSMUST00000099046.4|Gm10718-  
201|ENSMUSG00000095186|+|chr9:g.3023771:T>C

MFLIFHDFQFSCHIPCPTVDISFPPFSVFLAIFHVLKCVFLIFRDFQFSCHIPGPTVCISHFSRFSLILSFFK  
SSTACFSFSMIFSLAIFHVLQWKFLNFPFVSFLAIFHVLKCVFLIFRDFQFSRHIPGPTVCISHFSRFSVI  
SSFFKSSSGCFSFSMIFSLAIFHVLQWTFLNFPFVSFLFFSPYSRSYSVHFSFSTFFSDFDIFQVVKWMFLI  
FHDFQLSC  
>ENSMUSP00000096645\_c.226:CTGC>GTGG\_p.T76S ENSMUST00000099046.4|Gm10718-  
201|ENSMUSG00000095186|+|chr9:g.3023777:CTGC>GTGG  
MFLIFHDFQFSCHIPCPTVDISFPPFSVFLAIFHVLKCVFLIFRDFQFSCHIPGPTVCISHFSRFSLILSFFK  
LSSGACFSFSMIFSLAIFHVLQWKFLNFPFVSFLAIFHVLKCVFLIFRDFQFSRHIPGPTVCISHFSRFSV  
ISSFFKSSSGCFSFSMIFSLAIFHVLQWTFLNFPFVSFLFFSPYSRSYSVHFSFSTFFSDFDIFQVVKWMFLI  
IFHDFQLSC  
>ENSMUSP00000096645\_c.226:CTGC>GTGT\_p.T76S ENSMUST00000099046.4|Gm10718-  
201|ENSMUSG00000095186|+|chr9:g.3023777:CTGC>GTGT  
MFLIFHDFQFSCHIPCPTVDISFPPFSVFLAIFHVLKCVFLIFRDFQFSCHIPGPTVCISHFSRFSLILSFFK  
LSSVACFSFSMIFSLAIFHVLQWKFLNFPFVSFLAIFHVLKCVFLIFRDFQFSRHIPGPTVCISHFSRFSV  
ISSFFKSSSGCFSFSMIFSLAIFHVLQWTFLNFPFVSFLFFSPYSRSYSVHFSFSTFFSDFDIFQVVKWMFLI  
IFHDFQLSC  
>ENSMUSP00000096645\_c.275:T>A\_p.H92Q ENSMUST00000099046.4|Gm10718-  
201|ENSMUSG00000095186|+|chr9:g.3023826:T>A  
MFLIFHDFQFSCHIPCPTVDISFPPFSVFLAIFHVLKCVFLIFRDFQFSCHIPGPTVCISHFSRFSLILSFFK  
LSTACFSFSMIFSLAIFHVLQWKFLNFPFVSFLAIFHVLKCVFLIFRDFQFSRHIPGPTVCISHFSRFSVI  
SSFFKSSSGCFSFSMIFSLAIFHVLQWTFLNFPFVSFLFFSPYSRSYSVHFSFSTFFSDFDIFQVVKWMFLI  
FHDFQLSC  
>ENSMUSP00000096645\_c.289:A>C\_p.K97T ENSMUST00000099046.4|Gm10718-  
201|ENSMUSG00000095186|+|chr9:g.3023840:A>C  
MFLIFHDFQFSCHIPCPTVDISFPPFSVFLAIFHVLKCVFLIFRDFQFSCHIPGPTVCISHFSRFSLILSFFK  
LSTACFSFSMIFSLAIFHVLQWTFLNFPFVSFLAIFHVLKCVFLIFRDFQFSRHIPGPTVCISHFSRFSVI  
SSFFKSSSGCFSFSMIFSLAIFHVLQWTFLNFPFVSFLFFSPYSRSYSVHFSFSTFFSDFDIFQVVKWMFLI  
FHDFQLSC  
>ENSMUSP00000096645\_c.289:A>T\_p.K97I ENSMUST00000099046.4|Gm10718-  
201|ENSMUSG00000095186|+|chr9:g.3023840:A>T  
MFLIFHDFQFSCHIPCPTVDISFPPFSVFLAIFHVLKCVFLIFRDFQFSCHIPGPTVCISHFSRFSLILSFFK  
LSTACFSFSMIFSLAIFHVLQWTFLNFPFVSFLAIFHVLKCVFLIFRDFQFSRHIPGPTVCISHFSRFSVI  
SSFFKSSSGCFSFSMIFSLAIFHVLQWTFLNFPFVSFLFFSPYSRSYSVHFSFSTFFSDFDIFQVVKWMFLI  
FHDFQLSC  
>ENSMUSP00000096645\_c.306:C>A\_p.P103T ENSMUST00000099046.4|Gm10718-  
201|ENSMUSG00000095186|+|chr9:g.3023857:C>A  
MFLIFHDFQFSCHIPCPTVDISFPPFSVFLAIFHVLKCVFLIFRDFQFSCHIPGPTVCISHFSRFSLILSFFK  
LSTACFSFSMIFSLAIFHVLQWKFLNFPFVSFLAIFHVLKCVFLIFRDFQFSRHIPGPTVCISHFSRFSVI  
SSFFKSSSGCFSFSMIFSLAIFHVLQWTFLNFPFVSFLFFSPYSRSYSVHFSFSTFFSDFDIFQVVKWMFLI  
FHDFQLSC  
>ENSMUSP00000096645\_c.325:C>A\_p.A109D ENSMUST00000099046.4|Gm10718-  
201|ENSMUSG00000095186|+|chr9:g.3023876:C>A  
MFLIFHDFQFSCHIPCPTVDISFPPFSVFLAIFHVLKCVFLIFRDFQFSCHIPGPTVCISHFSRFSLILSFFK  
LSTACFSFSMIFSLAIFHVLQWKFLNFPFVSFLDIFHVLKCVFLIFRDFQFSRHIPGPTVCISHFSRFSVI  
SSFFKSSSGCFSFSMIFSLAIFHVLQWTFLNFPFVSFLFFSPYSRSYSVHFSFSTFFSDFDIFQVVKWMFLI  
FHDFQLSC  
>ENSMUSP00000096645\_c.339:C>A\_p.L114M ENSMUST00000099046.4|Gm10718-  
201|ENSMUSG00000095186|+|chr9:g.3023890:C>A  
MFLIFHDFQFSCHIPCPTVDISFPPFSVFLAIFHVLKCVFLIFRDFQFSCHIPGPTVCISHFSRFSLILSFFK  
LSTACFSFSMIFSLAIFHVLQWKFLNFPFVSFLAIFHVMKCVFLIFRDFQFSRHIPGPTVCISHFSRFSVI  
SSFFKSSSGCFSFSMIFSLAIFHVLQWTFLNFPFVSFLFFSPYSRSYSVHFSFSTFFSDFDIFQVVKWMFLI  
FHDFQLSC  
>ENSMUSP00000096645\_c.363:C>T\_p.R122C ENSMUST00000099046.4|Gm10718-  
201|ENSMUSG00000095186|+|chr9:g.3023914:C>T  
MFLIFHDFQFSCHIPCPTVDISFPPFSVFLAIFHVLKCVFLIFRDFQFSCHIPGPTVCISHFSRFSLILSFFK  
LSTACFSFSMIFSLAIFHVLQWKFLNFPFVSFLAIFHVLKCVFLIFRDFQFSRHIPGPTVCISHFSRFSVI  
SSFFKSSSGCFSFSMIFSLAIFHVLQWTFLNFPFVSFLFFSPYSRSYSVHFSFSTFFSDFDIFQVVKWMFLI  
FHDFQLSC

>ENSMUSP00000096645\_c.399:A>T\_p.T134S ENSMUST00000099046.4|Gm10718-201|ENSMUSG00000095186|+|chr9:g.3024417:A>T  
MFLIFHDFQFSCHIPCPTVDISFPPFSVFLAIFHVLKCVFLIFRDFQFSCHIPGPTVCISHFSRFSLILSFFK  
LSTACFSFSMIFSFLAIFHVLQWKFLNFPFVSFLAIFHVLKCVFLIFRDFQFSRHIPGPSVCISHFSRFSVI  
SSFFKSSSGCFSFSMIFSFLAIFHVLQWTFLNFPFVSFLFFSPYSRSYSVHFSFFTFFSDFDIFQVVKWMFLI  
FHDFQLSC  
>ENSMUSP00000096645\_c.405:T>G\_p.C136G ENSMUST00000099046.4|Gm10718-201|ENSMUSG00000095186|+|chr9:g.3024423:T>G  
MFLIFHDFQFSCHIPCPTVDISFPPFSVFLAIFHVLKCVFLIFRDFQFSCHIPGPTVCISHFSRFSLILSFFK  
LSTACFSFSMIFSFLAIFHVLQWKFLNFPFVSFLAIFHVLKCVFLIFRDFQFSRHIPGPTVGIHFSRFSVI  
SSFFKSSSGCFSFSMIFSFLAIFHVLQWTFLNFPFVSFLFFSPYSRSYSVHFSFFTFFSDFDIFQVVKWMFLI  
FHDFQLSC  
>ENSMUSP00000096645\_c.430:C>T\_p.S144L ENSMUST00000099046.4|Gm10718-201|ENSMUSG00000095186|+|chr9:g.3024448:C>T  
MFLIFHDFQFSCHIPCPTVDISFPPFSVFLAIFHVLKCVFLIFRDFQFSCHIPGPTVCISHFSRFSLILSFFK  
LSTACFSFSMIFSFLAIFHVLQWKFLNFPFVSFLAIFHVLKCVFLIFRDFQFSRHIPGPTVCISHFSRFLVI  
SSFFKSSSGCFSFSMIFSFLAIFHVLQWTFLNFPFVSFLFFSPYSRSYSVHFSFFTFFSDFDIFQVVKWMFLI  
FHDFQLSC  
>ENSMUSP00000096645\_c.540:C>A\_p.P181T ENSMUST00000099046.4|Gm10718-201|ENSMUSG00000095186|+|chr9:g.3024558:C>A  
MFLIFHDFQFSCHIPCPTVDISFPPFSVFLAIFHVLKCVFLIFRDFQFSCHIPGPTVCISHFSRFSLILSFFK  
LSTACFSFSMIFSFLAIFHVLQWKFLNFPFVSFLAIFHVLKCVFLIFRDFQFSRHIPGPTVCISHFSRFSVI  
SSFFKSSSGCFSFSMIFSFLAIFHVLQWTFLNFPFVSFLFFSPYSRSYSVHFSFFTFFSDFDIFQVVKWMFLI  
FHDFQLSC  
>ENSMUSP00000096645\_c.553:T>TAC\_p.L185ins-fs ENSMUST00000099046.4|Gm10718-201|ENSMUSG00000095186|+|chr9:g.3024884:T>TAC  
MFLIFHDFQFSCHIPCPTVDISFPPFSVFLAIFHVLKCVFLIFRDFQFSCHIPGPTVCISHFSRFSLILSFFK  
LSTACFSFSMIFSFLAIFHVLQWKFLNFPFVSFLAIFHVLKCVFLIFRDFQFSRHIPGPTVCISHFSRFSVI  
SSFFKSSSGCFSFSMIFSFLAIFHVLQWTFLNFPFVSFLHFSRHIPGPTVCISHFSRFSVISTFFKLSSGCFS  
FSMIFSFL  
>ENSMUSP00000096645\_c.554:AT>A\_p.L185del-fs ENSMUST00000099046.4|Gm10718-201|ENSMUSG00000095186|+|chr9:g.3024885:AT>A  
MFLIFHDFQFSCHIPCPTVDISFPPFSVFLAIFHVLKCVFLIFRDFQFSCHIPGPTVCISHFSRFSLILSFFK  
LSTACFSFSMIFSFLAIFHVLQWKFLNFPFVSFLAIFHVLKCVFLIFRDFQFSRHIPGPTVCISHFSRFSVI  
SSFFKSSSGCFSFSMIFSFLAIFHVLQWTFLNFPFVSFLFSRHIPGPTVCISHFSRFSVISTFFKLSSGCFS  
SMIFSFL  
>ENSMUSP00000096645\_c.555:T>TA\_p.F186ins-fs ENSMUST00000099046.4|Gm10718-201|ENSMUSG00000095186|+|chr9:g.3024886:T>TA  
MFLIFHDFQFSCHIPCPTVDISFPPFSVFLAIFHVLKCVFLIFRDFQFSCHIPGPTVCISHFSRFSLILSFFK  
LSTACFSFSMIFSFLAIFHVLQWKFLNFPFVSFLAIFHVLKCVFLIFRDFQFSRHIPGPTVCISHFSRFSVI  
SSFFKSSSGCFSFSMIFSFLAIFHVLQWTFLNFPFVSFLYFLAIFQVLQCAFLIFHVQ  
>ENSMUSP00000096645\_c.580:A>T\_p.Y194F ENSMUST00000099046.4|Gm10718-201|ENSMUSG00000095186|+|chr9:g.3025118:A>T  
MFLIFHDFQFSCHIPCPTVDISFPPFSVFLAIFHVLKCVFLIFRDFQFSCHIPGPTVCISHFSRFSLILSFFK  
LSTACFSFSMIFSFLAIFHVLQWKFLNFPFVSFLAIFHVLKCVFLIFRDFQFSRHIPGPTVCISHFSRFSVI  
SSFFKSSSGCFSFSMIFSFLAIFHVLQWTFLNFPFVSFLFFSPYSRSYSVHFSFFTFFSDFDIFQVVKWMFLI  
FHDFQLSC  
>ENSMUSP00000096645\_c.622:A>C\_p.D208A ENSMUST00000099046.4|Gm10718-201|ENSMUSG00000095186|+|chr9:g.3025160:A>C  
MFLIFHDFQFSCHIPCPTVDISFPPFSVFLAIFHVLKCVFLIFRDFQFSCHIPGPTVCISHFSRFSLILSFFK  
LSTACFSFSMIFSFLAIFHVLQWKFLNFPFVSFLAIFHVLKCVFLIFRDFQFSRHIPGPTVCISHFSRFSVI  
SSFFKSSSGCFSFSMIFSFLAIFHVLQWTFLNFPFVSFLFFSPYSRSYSVHFSFFTFFSDFAIQVVKWMFLI  
FHDFQLSC  
>ENSMUSP00000096645\_c.622:A>T\_p.D208V ENSMUST00000099046.4|Gm10718-201|ENSMUSG00000095186|+|chr9:g.3025160:A>T  
MFLIFHDFQFSCHIPCPTVDISFPPFSVFLAIFHVLKCVFLIFRDFQFSCHIPGPTVCISHFSRFSLILSFFK  
LSTACFSFSMIFSFLAIFHVLQWKFLNFPFVSFLAIFHVLKCVFLIFRDFQFSRHIPGPTVCISHFSRFSVI

SSFFKSSSGCFSFSMIFSFLAIFHVLQWTFNLNPPFSVLFSPYSRSYSVHFSFSTFFSDFVIFQVVKWMFLI  
FHDFQLSC  
>ENSMUSP00000096645\_c.654:A>G\_p.I219V ENSMUST00000099046.4|Gm10718-  
201|ENSMUSG00000095186|+|chr9:g.3025192:A>G  
MFLIFHDFQFSCHIPCPTVDISFPPFSVFLAIFHVLKCVFLIFRDFQFSCHIPGPTVCISHFSRFSLILSFFK  
LSTACFSFSMIFSFLAIFHVLQWKFLNFPFVSFLAIFHVLKCVFLIFRDFQFSRHIPGPTVCISHFSRFSVI  
SSFFKSSSGCFSFSMIFSFLAIFHVLQWTFNLNPPFSVLFSPYSRSYSVHFSFSTFFSDFDIFQVVKWMFLV  
FHDFQLSC  
>ENSMUSP00000096645\_c.654:A>T\_p.I219F ENSMUST00000099046.4|Gm10718-  
201|ENSMUSG00000095186|+|chr9:g.3025192:A>T  
MFLIFHDFQFSCHIPCPTVDISFPPFSVFLAIFHVLKCVFLIFRDFQFSCHIPGPTVCISHFSRFSLILSFFK  
LSTACFSFSMIFSFLAIFHVLQWKFLNFPFVSFLAIFHVLKCVFLIFRDFQFSRHIPGPTVCISHFSRFSVI  
SSFFKSSSGCFSFSMIFSFLAIFHVLQWTFNLNPPFSVLFSPYSRSYSVHFSFSTFFSDFDIFQVVKWMFLF  
FHDFQLSC  
>ENSMUSP00000096645\_c.672:C>T\_p.L225F ENSMUST00000099046.4|Gm10718-  
201|ENSMUSG00000095186|+|chr9:g.3025210:C>T  
MFLIFHDFQFSCHIPCPTVDISFPPFSVFLAIFHVLKCVFLIFRDFQFSCHIPGPTVCISHFSRFSLILSFFK  
LSTACFSFSMIFSFLAIFHVLQWKFLNFPFVSFLAIFHVLKCVFLIFRDFQFSRHIPGPTVCISHFSRFSVI  
SSFFKSSSGCFSFSMIFSFLAIFHVLQWTFNLNPPFSVLFSPYSRSYSVHFSFSTFFSDFDIFQVVKWMFLI  
FHDFQFSC  
>ENSMUSP00000096645\_c.672:C>A\_p.L225I ENSMUST00000099046.4|Gm10718-  
201|ENSMUSG00000095186|+|chr9:g.3025210:C>A  
MFLIFHDFQFSCHIPCPTVDISFPPFSVFLAIFHVLKCVFLIFRDFQFSCHIPGPTVCISHFSRFSLILSFFK  
LSTACFSFSMIFSFLAIFHVLQWKFLNFPFVSFLAIFHVLKCVFLIFRDFQFSRHIPGPTVCISHFSRFSVI  
SSFFKSSSGCFSFSMIFSFLAIFHVLQWTFNLNPPFSVLFSPYSRSYSVHFSFSTFFSDFDIFQVVKWMFLI  
FHDFQISC  
>ENSMUSP00000096644\_c.0:A>C\_p.M1L ENSMUST00000075573.7|Gm10717-  
201|ENSMUSG00000095891|+|chr9:g.3025417:A>C  
LFLIFHDFQFSCHIPCPTVEICKFPFVSFLAIFHVLKYVFLIFRDFQFSRHIPGPTVCISHFSRFSVILSFF  
KFSSGCFSFSLIFSFLAIFHVLQWTFNLNPPFSVFLAIFHVLKCVFLIFSDQFSRHIPGPTVCISHFSRFSV  
ISSFFKVSSGCFSFSMIFSFLAIFHVLQWTFNLNPPFSSYSFSPYSRSYSVHFSFSTFFSDFVIFQVVKWMFL  
IFLDFQFSC  
>ENSMUSP00000096644\_c.3:T>A\_p.F2I ENSMUST00000075573.7|Gm10717-  
201|ENSMUSG00000095891|+|chr9:g.3025420:T>A  
MILIFHDFQFSCHIPCPTVEICKFPFVSFLAIFHVLKYVFLIFRDFQFSRHIPGPTVCISHFSRFSVILSFF  
KFSSGCFSFSLIFSFLAIFHVLQWTFNLNPPFSVFLAIFHVLKCVFLIFSDQFSRHIPGPTVCISHFSRFSV  
ISSFFKVSSGCFSFSMIFSFLAIFHVLQWTFNLNPPFSSYSFSPYSRSYSVHFSFSTFFSDFVIFQVVKWMFL  
IFLDFQFSC  
>ENSMUSP00000096644\_c.9:A>T\_p.I4F ENSMUST00000075573.7|Gm10717-  
201|ENSMUSG00000095891|+|chr9:g.3025426:A>T  
MFLFFHDFQFSCHIPCPTVEICKFPFVSFLAIFHVLKYVFLIFRDFQFSRHIPGPTVCISHFSRFSVILSFF  
KFSSGCFSFSLIFSFLAIFHVLQWTFNLNPPFSVFLAIFHVLKCVFLIFSDQFSRHIPGPTVCISHFSRFSV  
ISSFFKVSSGCFSFSMIFSFLAIFHVLQWTFNLNPPFSSYSFSPYSRSYSVHFSFSTFFSDFVIFQVVKWMFL  
IFLDFQFSC  
>ENSMUSP00000096644\_c.45:T>A\_p.C16S ENSMUST00000075573.7|Gm10717-  
201|ENSMUSG00000095891|+|chr9:g.3025462:T>A  
MFLIFHDFQFSCHIPSPPTVEICKFPFVSFLAIFHVLKYVFLIFRDFQFSRHIPGPTVCISHFSRFSVILSFF  
KFSSGCFSFSLIFSFLAIFHVLQWTFNLNPPFSVFLAIFHVLKCVFLIFSDQFSRHIPGPTVCISHFSRFSV  
ISSFFKVSSGCFSFSMIFSFLAIFHVLQWTFNLNPPFSSYSFSPYSRSYSVHFSFSTFFSDFVIFQVVKWMFL  
IFLDFQFSC  
>ENSMUSP00000096644\_c.45:T>C\_p.C16R ENSMUST00000075573.7|Gm10717-  
201|ENSMUSG00000095891|+|chr9:g.3025462:T>C  
MFLIFHDFQFSCHIPRPTVEICKFPFVSFLAIFHVLKYVFLIFRDFQFSRHIPGPTVCISHFSRFSVILSFF  
KFSSGCFSFSLIFSFLAIFHVLQWTFNLNPPFSVFLAIFHVLKCVFLIFSDQFSRHIPGPTVCISHFSRFSV  
ISSFFKVSSGCFSFSMIFSFLAIFHVLQWTFNLNPPFSSYSFSPYSRSYSVHFSFSTFFSDFVIFQVVKWMFL  
IFLDFQFSC  
>ENSMUSP00000096644\_c.59:A>T\_p.E20D ENSMUST00000075573.7|Gm10717-  
201|ENSMUSG00000095891|+|chr9:g.3025476:A>T

MFLIFHDFQFSCHIPCPTVDICKFPPFSVFLAIFHVLKYVFLIFRDFQFSRHIPGPTVCISHFSRFSVILSFF  
KFSSGCFSSFLIFSFLAIFHVLQWTFNLNPPFSVFLAIFHVLKCVFLIFSDQFSRHIPGPTVCISHFSRFSV  
ISSFFKVSSGCFSSMIFSFLAIFHVLQWTFNLNPPFSSYSFSPYRSYSVHFSFSTFFSDFVIFQVFKWMFL  
IFLDFQFSC  
>ENSMUSP00000096644\_c.59:A>C\_p.E20D ENSMUST00000075573.7|Gm10717-  
201|ENSMUSG00000095891|+|chr9:g.3025476:A>C  
MFLIFHDFQFSCHIPCPTVDICKFPPFSVFLAIFHVLKYVFLIFRDFQFSRHIPGPTVCISHFSRFSVILSFF  
KFSSGCFSSFLIFSFLAIFHVLQWTFNLNPPFSVFLAIFHVLKCVFLIFSDQFSRHIPGPTVCISHFSRFSV  
ISSFFKVSSGCFSSMIFSFLAIFHVLQWTFNLNPPFSSYSFSPYRSYSVHFSFSTFFSDFVIFQVFKWMFL  
IFLDFQFSC  
>ENSMUSP00000096644\_c.64:G>C\_p.C22S ENSMUST00000075573.7|Gm10717-  
201|ENSMUSG00000095891|+|chr9:g.3025481:G>C  
MFLIFHDFQFSCHIPCPTVEISKFPFVFLAIFHVLKYVFLIFRDFQFSRHIPGPTVCISHFSRFSVILSFF  
KFSSGCFSSFLIFSFLAIFHVLQWTFNLNPPFSVFLAIFHVLKCVFLIFSDQFSRHIPGPTVCISHFSRFSV  
ISSFFKVSSGCFSSMIFSFLAIFHVLQWTFNLNPPFSSYSFSPYRSYSVHFSFSTFFSDFVIFQVFKWMFL  
IFLDFQFSC  
>ENSMUSP00000096644\_c.64:G>A\_p.C22Y ENSMUST00000075573.7|Gm10717-  
201|ENSMUSG00000095891|+|chr9:g.3025481:G>A  
MFLIFHDFQFSCHIPCPTVEIYKFPFVFLAIFHVLKYVFLIFRDFQFSRHIPGPTVCISHFSRFSVILSFF  
KFSSGCFSSFLIFSFLAIFHVLQWTFNLNPPFSVFLAIFHVLKCVFLIFSDQFSRHIPGPTVCISHFSRFSV  
ISSFFKVSSGCFSSMIFSFLAIFHVLQWTFNLNPPFSSYSFSPYRSYSVHFSFSTFFSDFVIFQVFKWMFL  
IFLDFQFSC  
>ENSMUSP00000096644\_c.68:A>AT\_p.K23ins-fs ENSMUST00000075573.7|Gm10717-  
201|ENSMUSG00000095891|+|chr9:g.3025485:A>AT  
MFLIFHDFQFSCHIPCPTVEICKFSTFFSFPRHISRPKVCISHFP  
>ENSMUSP00000096644\_c.70:T>TA\_p.F24ins-fs ENSMUST00000075573.7|Gm10717-  
201|ENSMUSG00000095891|+|chr9:g.3025487:T>TA  
MFLIFHDFQFSCHIPCPTVEICKLSTFFSFPRHISRPKVCISHFP  
>ENSMUSP00000096644\_c.75:C>A\_p.P26T ENSMUST00000075573.7|Gm10717-  
201|ENSMUSG00000095891|+|chr9:g.3025492:C>A  
MFLIFHDFQFSCHIPCPTVEICKFPTFSVFLAIFHVLKYVFLIFRDFQFSRHIPGPTVCISHFSRFSVILSFF  
KFSSGCFSSFLIFSFLAIFHVLQWTFNLNPPFSVFLAIFHVLKCVFLIFSDQFSRHIPGPTVCISHFSRFSV  
ISSFFKVSSGCFSSMIFSFLAIFHVLQWTFNLNPPFSSYSFSPYRSYSVHFSFSTFFSDFVIFQVFKWMFL  
IFLDFQFSC  
>ENSMUSP00000096644\_c.89:C>A\_p.F30L ENSMUST00000075573.7|Gm10717-  
201|ENSMUSG00000095891|+|chr9:g.3025506:C>A  
MFLIFHDFQFSCHIPCPTVEICKFPPFSVLLAIFHVLKYVFLIFRDFQFSRHIPGPTVCISHFSRFSVILSFF  
KFSSGCFSSFLIFSFLAIFHVLQWTFNLNPPFSVFLAIFHVLKCVFLIFSDQFSRHIPGPTVCISHFSRFSV  
ISSFFKVSSGCFSSMIFSFLAIFHVLQWTFNLNPPFSSYSFSPYRSYSVHFSFSTFFSDFVIFQVFKWMFL  
IFLDFQFSC  
>ENSMUSP00000096644\_c.94:C>A\_p.A32D ENSMUST00000075573.7|Gm10717-  
201|ENSMUSG00000095891|+|chr9:g.3025511:C>A  
MFLIFHDFQFSCHIPCPTVEICKFPPFSVFLDIFHVLKYVFLIFRDFQFSRHIPGPTVCISHFSRFSVILSFF  
KFSSGCFSSFLIFSFLAIFHVLQWTFNLNPPFSVFLAIFHVLKCVFLIFSDQFSRHIPGPTVCISHFSRFSV  
ISSFFKVSSGCFSSMIFSFLAIFHVLQWTFNLNPPFSSYSFSPYRSYSVHFSFSTFFSDFVIFQVFKWMFL  
IFLDFQFSC  
>ENSMUSP00000096644\_c.115:A>G\_p.Y39C ENSMUST00000075573.7|Gm10717-  
201|ENSMUSG00000095891|+|chr9:g.3025532:A>G  
MFLIFHDFQFSCHIPCPTVEICKFPPFSVFLAIFHVLKCVFLIFRDFQFSRHIPGPTVCISHFSRFSVILSFF  
KFSSGCFSSFLIFSFLAIFHVLQWTFNLNPPFSVFLAIFHVLKCVFLIFSDQFSRHIPGPTVCISHFSRFSV  
ISSFFKVSSGCFSSMIFSFLAIFHVLQWTFNLNPPFSSYSFSPYRSYSVHFSFSTFFSDFVIFQVFKWMFL  
IFLDFQFSC  
>ENSMUSP00000096644\_c.143:G>C\_p.Q48H ENSMUST00000075573.7|Gm10717-  
201|ENSMUSG00000095891|+|chr9:g.3025560:G>C  
MFLIFHDFQFSCHIPCPTVEICKFPPFSVFLAIFHVLKYVFLIFRDFHFSRHIPGPTVCISHFSRFSVILSFF  
KFSSGCFSSFLIFSFLAIFHVLQWTFNLNPPFSVFLAIFHVLKCVFLIFSDQFSRHIPGPTVCISHFSRFSV  
ISSFFKVSSGCFSSMIFSFLAIFHVLQWTFNLNPPFSSYSFSPYRSYSVHFSFSTFFSDFVIFQVFKWMFL  
IFLDFQFSC



>ENSMUSP00000096644\_c.163:G>T\_p.G55V ENSMUST00000075573.7|Gm10717-  
201|ENSMUSG00000095891|+|chr9:g.3025580:G>T  
MFLIFHDFQFSCHIPCPTVEICKFPPFSVFLAIFHVLKYVFLIFRDFQFSRHIPVPTVCISHFSRFSVILSFF  
KFSSGCFSSFLIFSFLAIFHVLQWTFNLNPPFSVFLAIFHVLKCVFLIFSDFQFSRHIPGPTVCISHFSRFSV  
ISSFFKVSSGCFSSMIFSFLAIFHVLQWTFNLNPPFSSYSFSPYRSYSVHFSFSTFFSDFVIFQVFKWMFL  
IFLDFQFSC  
>ENSMUSP00000096644\_c.168:A>T\_p.T57S ENSMUST00000075573.7|Gm10717-  
201|ENSMUSG00000095891|+|chr9:g.3025585:A>T  
MFLIFHDFQFSCHIPCPTVEICKFPPFSVFLAIFHVLKYVFLIFRDFQFSRHIPGSPVCISHFSRFSVILSFF  
KFSSGCFSSFLIFSFLAIFHVLQWTFNLNPPFSVFLAIFHVLKCVFLIFSDFQFSRHIPGPTVCISHFSRFSV  
ISSFFKVSSGCFSSMIFSFLAIFHVLQWTFNLNPPFSSYSFSPYRSYSVHFSFSTFFSDFVIFQVFKWMFL  
IFLDFQFSC  
>ENSMUSP00000096644\_c.183:C>A\_p.H62N ENSMUST00000075573.7|Gm10717-  
201|ENSMUSG00000095891|+|chr9:g.3025600:C>A  
MFLIFHDFQFSCHIPCPTVEICKFPPFSVFLAIFHVLKYVFLIFRDFQFSRHIPGPTVCISNFSRFSVILSFF  
KFSSGCFSSFLIFSFLAIFHVLQWTFNLNPPFSVFLAIFHVLKCVFLIFSDFQFSRHIPGPTVCISHFSRFSV  
ISSFFKVSSGCFSSMIFSFLAIFHVLQWTFNLNPPFSSYSFSPYRSYSVHFSFSTFFSDFVIFQVFKWMFL  
IFLDFQFSC  
>ENSMUSP00000096644\_c.198:T>G\_p.S67A ENSMUST00000075573.7|Gm10717-  
201|ENSMUSG00000095891|+|chr9:g.3025615:T>G  
MFLIFHDFQFSCHIPCPTVEICKFPPFSVFLAIFHVLKYVFLIFRDFQFSRHIPGPTVCISHFSRFAVILSFF  
KFSSGCFSSFLIFSFLAIFHVLQWTFNLNPPFSVFLAIFHVLKCVFLIFSDFQFSRHIPGPTVCISHFSRFSV  
ISSFFKVSSGCFSSMIFSFLAIFHVLQWTFNLNPPFSSYSFSPYRSYSVHFSFSTFFSDFVIFQVFKWMFL  
IFLDFQFSC  
>ENSMUSP00000096644\_c.199:C>T\_p.S67L ENSMUST00000075573.7|Gm10717-  
201|ENSMUSG00000095891|+|chr9:g.3025616:C>T  
MFLIFHDFQFSCHIPCPTVEICKFPPFSVFLAIFHVLKYVFLIFRDFQFSRHIPGPTVCISHFSRFLVILSFF  
KFSSGCFSSFLIFSFLAIFHVLQWTFNLNPPFSVFLAIFHVLKCVFLIFSDFQFSRHIPGPTVCISHFSRFSV  
ISSFFKVSSGCFSSMIFSFLAIFHVLQWTFNLNPPFSSYSFSPYRSYSVHFSFSTFFSDFVIFQVFKWMFL  
IFLDFQFSC  
>ENSMUSP00000096644\_c.202:T>G\_p.V68G ENSMUST00000075573.7|Gm10717-  
201|ENSMUSG00000095891|+|chr9:g.3025619:T>G  
MFLIFHDFQFSCHIPCPTVEICKFPPFSVFLAIFHVLKYVFLIFRDFQFSRHIPGPTVCISHFSRFSGILSFF  
KFSSGCFSSFLIFSFLAIFHVLQWTFNLNPPFSVFLAIFHVLKCVFLIFSDFQFSRHIPGPTVCISHFSRFSV  
ISSFFKVSSGCFSSMIFSFLAIFHVLQWTFNLNPPFSSYSFSPYRSYSVHFSFSTFFSDFVIFQVFKWMFL  
IFLDFQFSC  
>ENSMUSP00000096644\_c.208:T>C\_p.L70S ENSMUST00000075573.7|Gm10717-  
201|ENSMUSG00000095891|+|chr9:g.3025625:T>C  
MFLIFHDFQFSCHIPCPTVEICKFPPFSVFLAIFHVLKYVFLIFRDFQFSRHIPGPTVCISHFSRFSVILSFF  
KFSSGCFSSFLIFSFLAIFHVLQWTFNLNPPFSVFLAIFHVLKCVFLIFSDFQFSRHIPGPTVCISHFSRFSV  
ISSFFKVSSGCFSSMIFSFLAIFHVLQWTFNLNPPFSSYSFSPYRSYSVHFSFSTFFSDFVIFQVFKWMFL  
IFLDFQFSC  
>ENSMUSP00000096644\_c.209:G>T\_p.L70F ENSMUST00000075573.7|Gm10717-  
201|ENSMUSG00000095891|+|chr9:g.3025626:G>T  
MFLIFHDFQFSCHIPCPTVEICKFPPFSVFLAIFHVLKYVFLIFRDFQFSRHIPGPTVCISHFSRFSVILSFF  
KFSSGCFSSFLIFSFLAIFHVLQWTFNLNPPFSVFLAIFHVLKCVFLIFSDFQFSRHIPGPTVCISHFSRFSV  
ISSFFKVSSGCFSSMIFSFLAIFHVLQWTFNLNPPFSSYSFSPYRSYSVHFSFSTFFSDFVIFQVFKWMFL  
IFLDFQFSC  
>ENSMUSP00000096644\_c.223:T>C\_p.F75S ENSMUST00000075573.7|Gm10717-  
201|ENSMUSG00000095891|+|chr9:g.3025640:T>C  
MFLIFHDFQFSCHIPCPTVEICKFPPFSVFLAIFHVLKYVFLIFRDFQFSRHIPGPTVCISHFSRFSVILSFF  
KSSSGCFSSFLIFSFLAIFHVLQWTFNLNPPFSVFLAIFHVLKCVFLIFSDFQFSRHIPGPTVCISHFSRFSV  
ISSFFKVSSGCFSSMIFSFLAIFHVLQWTFNLNPPFSSYSFSPYRSYSVHFSFSTFFSDFVIFQVFKWMFL  
IFLDFQFSC  
>ENSMUSP00000096644\_c.223:T>G\_p.F75C ENSMUST00000075573.7|Gm10717-  
201|ENSMUSG00000095891|+|chr9:g.3025640:T>G  
MFLIFHDFQFSCHIPCPTVEICKFPPFSVFLAIFHVLKYVFLIFRDFQFSRHIPGPTVCISHFSRFSVILSFF  
KCSSGCFSSFLIFSFLAIFHVLQWTFNLNPPFSVFLAIFHVLKCVFLIFSDFQFSRHIPGPTVCISHFSRFSV

ISSFFKVSSGCFSSMIFSLAIFHVLQWTFNFPFSSYSFSPYSRSYSVHFSFFTFSSDFVIFQVFKWMFL  
IFLDFQFSC  
>ENSMUSP00000096644\_c.223:TT>CA\_p.F75S ENSMUST00000075573.7|Gm10717-  
201|ENSMUSG00000095891|+|chr9:g.3025640:TT>CA  
MFLIFHDFQFSCHIPCPTVEICKFPPFSVFLAIFHVLKYVFLIFRDFQFSRHIPGPTVCISHFSRFSVILSFF  
KSFKWMFLIFLDFQFSCHIPCPTVDISKFSTFFSFPRHISC PKVCISHFQ\*FSVFSPPYSRSYSVHFSFFTFSS  
DFVIFQGVKWMFLIFHDFQFSCHIPCPTVDISKFSTFFFLQFLAIFQVLQCAFLIFHV FQ\*FCHFSSFQVDVS  
HFP\*FSVFL  
>ENSMUSP00000096644\_c.223:TT>CG\_p.F75S ENSMUST00000075573.7|Gm10717-  
201|ENSMUSG00000095891|+|chr9:g.3025640:TT>CG  
MFLIFHDFQFSCHIPCPTVEICKFPPFSVFLAIFHVLKYVFLIFRDFQFSRHIPGPTVCISHFSRFSVILSFF  
KSFKWMFLIFLDFQFSCHIPCPTVDISKFSTFFSFPRHISC PKVCISHFQ\*FSVFSPPYSRSYSVHFSFFTFSS  
DFVIFQGVKWMFLIFHDFQFSCHIPCPTVDISKFSTFFFLQFLAIFQVLQCAFLIFHV FQ\*FCHFSSFQVDVS  
HFP\*FSVFL  
>ENSMUSP00000096644\_c.235:G>T\_p.C79F ENSMUST00000075573.7|Gm10717-  
201|ENSMUSG00000095891|+|chr9:g.3025652:G>T  
MFLIFHDFQFSCHIPCPTVEICKFPPFSVFLAIFHVLKYVFLIFRDFQFSRHIPGPTVCISHFSRFSVILSFF  
KFSSGFFSFLIFSFLAIFHVLQWTFNFPFSSVFLAIFHVLKCVFLIFSDFQFSRHIPGPTVCISHFSRFSV  
ISSFFKVSSGCFSSMIFSLAIFHVLQWTFNFPFSSYSFSPYSRSYSVHFSFFTFSSDFVIFQVFKWMFL  
IFLDFQFSC  
>ENSMUSP00000096644\_c.237:T>A\_p.F80I ENSMUST00000075573.7|Gm10717-  
201|ENSMUSG00000095891|+|chr9:g.3025654:T>A  
MFLIFHDFQFSCHIPCPTVEICKFPPFSVFLAIFHVLKYVFLIFRDFQFSRHIPGPTVCISHFSRFSVILSFF  
KFSSGCISFSLIFSFLAIFHVLQWTFNFPFSSVFLAIFHVLKCVFLIFSDFQFSRHIPGPTVCISHFSRFSV  
ISSFFKVSSGCFSSMIFSLAIFHVLQWTFNFPFSSYSFSPYSRSYSVHFSFFTFSSDFVIFQVFKWMFL  
IFLDFQFSC  
>ENSMUSP00000096644\_c.249:T>A\_p.L84M ENSMUST00000075573.7|Gm10717-  
201|ENSMUSG00000095891|+|chr9:g.3025666:T>A  
MFLIFHDFQFSCHIPCPTVEICKFPPFSVFLAIFHVLKYVFLIFRDFQFSRHIPGPTVCISHFSRFSVILSFF  
KFSSGCFSSMIFSLAIFHVLQWTFNFPFSSVFLAIFHVLKCVFLIFSDFQFSRHIPGPTVCISHFSRFSV  
ISSFFKVSSGCFSSMIFSLAIFHVLQWTFNFPFSSYSFSPYSRSYSVHFSFFTFSSDFVIFQVFKWMFL  
IFLDFQFSC  
>ENSMUSP00000096644\_c.249:T>G\_p.L84V ENSMUST00000075573.7|Gm10717-  
201|ENSMUSG00000095891|+|chr9:g.3025666:T>G  
MFLIFHDFQFSCHIPCPTVEICKFPPFSVFLAIFHVLKYVFLIFRDFQFSRHIPGPTVCISHFSRFSVILSFF  
KFSSGCFSSVIFSFLAIFHVLQWTFNFPFSSVFLAIFHVLKCVFLIFSDFQFSRHIPGPTVCISHFSRFSV  
ISSFFKVSSGCFSSMIFSLAIFHVLQWTFNFPFSSYSFSPYSRSYSVHFSFFTFSSDFVIFQVFKWMFL  
IFLDFQFSC  
>ENSMUSP00000096644\_c.260:T>A\_p.S87R ENSMUST00000075573.7|Gm10717-  
201|ENSMUSG00000095891|+|chr9:g.3025677:T>A  
MFLIFHDFQFSCHIPCPTVEICKFPPFSVFLAIFHVLKYVFLIFRDFQFSRHIPGPTVCISHFSRFSVILSFF  
KFSSGCFSSFLIFRFLAIFHVLQWTFNFPFSSVFLAIFHVLKCVFLIFSDFQFSRHIPGPTVCISHFSRFSV  
ISSFFKVSSGCFSSMIFSLAIFHVLQWTFNFPFSSYSFSPYSRSYSVHFSFFTFSSDFVIFQVFKWMFL  
IFLDFQFSC  
>ENSMUSP00000096644\_c.278:T>G\_p.H93Q ENSMUST00000075573.7|Gm10717-  
201|ENSMUSG00000095891|+|chr9:g.3025695:T>G  
MFLIFHDFQFSCHIPCPTVEICKFPPFSVFLAIFHVLKYVFLIFRDFQFSRHIPGPTVCISHFSRFSVILSFF  
KFSSGCFSSFLIFSFLAIFQVLQWTFNFPFSSVFLAIFHVLKCVFLIFSDFQFSRHIPGPTVCISHFSRFSV  
ISSFFKVSSGCFSSMIFSLAIFHVLQWTFNFPFSSYSFSPYSRSYSVHFSFFTFSSDFVIFQVFKWMFL  
IFLDFQFSC  
>ENSMUSP00000096644\_c.289:G>T\_p.W97L ENSMUST00000075573.7|Gm10717-  
201|ENSMUSG00000095891|+|chr9:g.3025706:G>T  
MFLIFHDFQFSCHIPCPTVEICKFPPFSVFLAIFHVLKYVFLIFRDFQFSRHIPGPTVCISHFSRFSVILSFF  
KFSSGCFSSFLIFSFLAIFHVLQLTFLNFPFSSVFLAIFHVLKCVFLIFSDFQFSRHIPGPTVCISHFSRFSV  
ISSFFKVSSGCFSSMIFSLAIFHVLQWTFNFPFSSYSFSPYSRSYSVHFSFFTFSSDFVIFQVFKWMFL  
IFLDFQFSC  
>ENSMUSP00000096644\_c.309:C>A\_p.P104T ENSMUST00000075573.7|Gm10717-  
201|ENSMUSG00000095891|+|chr9:g.3025726:C>A

MFLIFHDFQFSCHIPCPTVEICKFPPFSVFLAIFHVLKYVFLIFRDFQFSRHIPGPTVCISHFSRFSVILSFF  
KFSSGCFSSFLIFSFLAIFHVLQWTFNLNPPFSVFLAIFHVLKCVFLIFSDQFSRHIPGPTVCISHFSRFSV  
ISSFFKVSSGCFSSMIFSFLAIFHVLQWTFNLNPPFSSYSFSPYRSYSVHFSFSTFFSDFVIFQVFKWMFL  
IFLDFQFSC  
>ENSMUSP00000096644\_c.330:A>T\_p.I111L ENSMUST00000075573.7|Gm10717-  
201|ENSMUSG00000095891|+|chr9:g.3025747:A>T  
MFLIFHDFQFSCHIPCPTVEICKFPPFSVFLAIFHVLKYVFLIFRDFQFSRHIPGPTVCISHFSRFSVILSFF  
KFSSGCFSSFLIFSFLAIFHVLQWTFNLNPPFSVFLAIFHVLKCVFLIFSDQFSRHIPGPTVCISHFSRFSV  
ISSFFKVSSGCFSSMIFSFLAIFHVLQWTFNLNPPFSSYSFSPYRSYSVHFSFSTFFSDFVIFQVFKWMFL  
IFLDFQFSC  
>ENSMUSP00000096644\_c.338:T>A\_p.H113Q ENSMUST00000075573.7|Gm10717-  
201|ENSMUSG00000095891|+|chr9:g.3025755:T>A  
MFLIFHDFQFSCHIPCPTVEICKFPPFSVFLAIFHVLKYVFLIFRDFQFSRHIPGPTVCISHFSRFSVILSFF  
KFSSGCFSSFLIFSFLAIFHVLQWTFNLNPPFSVFLAIFHVLKCVFLIFSDQFSRHIPGPTVCISHFSRFSV  
ISSFFKVSSGCFSSMIFSFLAIFHVLQWTFNLNPPFSSYSFSPYRSYSVHFSFSTFFSDFVIFQVFKWMFL  
IFLDFQFSC  
>ENSMUSP00000096644\_c.356:T>A\_p.F119L ENSMUST00000075573.7|Gm10717-  
201|ENSMUSG00000095891|+|chr9:g.3025773:T>A  
MFLIFHDFQFSCHIPCPTVEICKFPPFSVFLAIFHVLKYVFLIFRDFQFSRHIPGPTVCISHFSRFSVILSFF  
KFSSGCFSSFLIFSFLAIFHVLQWTFNLNPPFSVFLAIFHVLKCVLLIFSDQFSRHIPGPTVCISHFSRFSV  
ISSFFKVSSGCFSSMIFSFLAIFHVLQWTFNLNPPFSSYSFSPYRSYSVHFSFSTFFSDFVIFQVFKWMFL  
IFLDFQFSC  
>ENSMUSP00000096644\_c.366:A>T\_p.S123C ENSMUST00000075573.7|Gm10717-  
201|ENSMUSG00000095891|+|chr9:g.3025783:A>T  
MFLIFHDFQFSCHIPCPTVEICKFPPFSVFLAIFHVLKYVFLIFRDFQFSRHIPGPTVCISHFSRFSVILSFF  
KFSSGCFSSFLIFSFLAIFHVLQWTFNLNPPFSVFLAIFHVLKCVFLIFCDFQFSRHIPGPTVCISHFSRFSV  
ISSFFKVSSGCFSSMIFSFLAIFHVLQWTFNLNPPFSSYSFSPYRSYSVHFSFSTFFSDFVIFQVFKWMFL  
IFLDFQFSC  
>ENSMUSP00000096644\_c.366:A>C\_p.S123R ENSMUST00000075573.7|Gm10717-  
201|ENSMUSG00000095891|+|chr9:g.3025783:A>C  
MFLIFHDFQFSCHIPCPTVEICKFPPFSVFLAIFHVLKYVFLIFRDFQFSRHIPGPTVCISHFSRFSVILSFF  
KFSSGCFSSFLIFSFLAIFHVLQWTFNLNPPFSVFLAIFHVLKCVFLIFRDFQFSRHIPGPTVCISHFSRFSV  
ISSFFKVSSGCFSSMIFSFLAIFHVLQWTFNLNPPFSSYSFSPYRSYSVHFSFSTFFSDFVIFQVFKWMFL  
IFLDFQFSC  
>ENSMUSP00000096644\_c.397:G>T\_p.G133V ENSMUST00000075573.7|Gm10717-  
201|ENSMUSG00000095891|+|chr9:g.3025814:G>T  
MFLIFHDFQFSCHIPCPTVEICKFPPFSVFLAIFHVLKYVFLIFRDFQFSRHIPGPTVCISHFSRFSVILSFF  
KFSSGCFSSFLIFSFLAIFHVLQWTFNLNPPFSVFLAIFHVLKCVFLIFSDQFSRHIPVPTVCISHFSRFSV  
ISSFFKVSSGCFSSMIFSFLAIFHVLQWTFNLNPPFSSYSFSPYRSYSVHFSFSTFFSDFVIFQVFKWMFL  
IFLDFQFSC  
>ENSMUSP00000096644\_c.402:A>T\_p.T135S ENSMUST00000075573.7|Gm10717-  
201|ENSMUSG00000095891|+|chr9:g.3025819:A>T  
MFLIFHDFQFSCHIPCPTVEICKFPPFSVFLAIFHVLKYVFLIFRDFQFSRHIPGPTVCISHFSRFSVILSFF  
KFSSGCFSSFLIFSFLAIFHVLQWTFNLNPPFSVFLAIFHVLKCVFLIFSDQFSRHIPGPTVCISHFSRFSV  
ISSFFKVSSGCFSSMIFSFLAIFHVLQWTFNLNPPFSSYSFSPYRSYSVHFSFSTFFSDFVIFQVFKWMFL  
IFLDFQFSC  
>ENSMUSP00000096644\_c.433:C>T\_p.S145L ENSMUST00000075573.7|Gm10717-  
201|ENSMUSG00000095891|+|chr9:g.3025850:C>T  
MFLIFHDFQFSCHIPCPTVEICKFPPFSVFLAIFHVLKYVFLIFRDFQFSRHIPGPTVCISHFSRFSVILSFF  
KFSSGCFSSFLIFSFLAIFHVLQWTFNLNPPFSVFLAIFHVLKCVFLIFSDQFSRHIPGPTVCISHFSRFLV  
ISSFFKVSSGCFSSMIFSFLAIFHVLQWTFNLNPPFSSYSFSPYRSYSVHFSFSTFFSDFVIFQVFKWMFL  
IFLDFQFSC  
>ENSMUSP00000096644\_c.456:G>T\_p.V153L ENSMUST00000075573.7|Gm10717-  
201|ENSMUSG00000095891|+|chr9:g.3025873:G>T  
MFLIFHDFQFSCHIPCPTVEICKFPPFSVFLAIFHVLKYVFLIFRDFQFSRHIPGPTVCISHFSRFSVILSFF  
KFSSGCFSSFLIFSFLAIFHVLQWTFNLNPPFSVFLAIFHVLKCVFLIFSDQFSRHIPGPTVCISHFSRFSV  
ISSFFKLSSGCFSSMIFSFLAIFHVLQWTFNLNPPFSSYSFSPYRSYSVHFSFSTFFSDFVIFQVFKWMFL  
IFLDFQFSC

>ENSMUSP00000096644\_c.457:T>G\_p.V153G ENSMUST00000075573.7|Gm10717-201|ENSMUSG00000095891|+|chr9:g.3025874:T>G  
MFLIFHDFQFSCHIPCPTVEICKFPPFSVFLAIFHVLKYVFLIFRDFQFSRHIPGPTVCISHFSRFSVILSFF  
KFSSGCFSSFLIFSFLAIFHVLQWTFNLNPPFSVFLAIFHVLKCVFLIFSDFQFSRHIPGPTVCISHFSRFSV  
ISSFFKVGSSGCFSSMIFSFLAIFHVLQWTFNLNPPFSSYSFSPYSRSYSVHFSFSTFFSDFVIFQVFKWMFL  
IFLDFQFSC  
>ENSMUSP00000096644\_c.519:C>T\_p.Q174\* ENSMUST00000075573.7|Gm10717-201|ENSMUSG00000095891|+|chr9:g.3025936:C>T  
MFLIFHDFQFSCHIPCPTVEICKFPPFSVFLAIFHVLKYVFLIFRDFQFSRHIPGPTVCISHFSRFSVILSFF  
KFSSGCFSSFLIFSFLAIFHVLQWTFNLNPPFSVFLAIFHVLKCVFLIFSDFQFSRHIPGPTVCISHFSRFSV  
ISSFFKVSSGCFSSMIFSFLAIFHVL\*WTFNLNPPFSSYSFSPYSRSYSVHFSFSTFFSDFVIFQVFKWMFL  
IFLDFQFSC  
>ENSMUSP00000096644\_c.522:T>C\_p.W175R ENSMUST00000075573.7|Gm10717-201|ENSMUSG00000095891|+|chr9:g.3025939:T>C  
MFLIFHDFQFSCHIPCPTVEICKFPPFSVFLAIFHVLKYVFLIFRDFQFSRHIPGPTVCISHFSRFSVILSFF  
KFSSGCFSSFLIFSFLAIFHVLQWTFNLNPPFSVFLAIFHVLKCVFLIFSDFQFSRHIPGPTVCISHFSRFSV  
ISSFFKVSSGCFSSMIFSFLAIFHVLQRTFLNPPFSSYSFSPYSRSYSVHFSFSTFFSDFVIFQVFKWMFL  
IFLDFQFSC  
>ENSMUSP00000096644\_c.543:C>A\_p.P182T ENSMUST00000075573.7|Gm10717-201|ENSMUSG00000095891|+|chr9:g.3025960:C>A  
MFLIFHDFQFSCHIPCPTVEICKFPPFSVFLAIFHVLKYVFLIFRDFQFSRHIPGPTVCISHFSRFSVILSFF  
KFSSGCFSSFLIFSFLAIFHVLQWTFNLNPPFSVFLAIFHVLKCVFLIFSDFQFSRHIPGPTVCISHFSRFSV  
ISSFFKVSSGCFSSMIFSFLAIFHVLQWTFNLNPTFSSYSFSPYSRSYSVHFSFSTFFSDFVIFQVFKWMFL  
IFLDFQFSC  
>ENSMUSP00000096644\_c.558:A>C\_p.S187R ENSMUST00000075573.7|Gm10717-201|ENSMUSG00000095891|+|chr9:g.3026055:A>C  
MFLIFHDFQFSCHIPCPTVEICKFPPFSVFLAIFHVLKYVFLIFRDFQFSRHIPGPTVCISHFSRFSVILSFF  
KFSSGCFSSFLIFSFLAIFHVLQWTFNLNPPFSVFLAIFHVLKCVFLIFSDFQFSRHIPGPTVCISHFSRFSV  
ISSFFKVSSGCFSSMIFSFLAIFHVLQWTFNLNPPFSSYSFSPYSRSYSVHFSFSTFFSDFVIFQVFKWMFL  
IFLDFQFSC  
>ENSMUSP00000136755\_c.1:G>A\_p.C1Y ENSMUST00000177601.2|Gm10717-205|ENSMUSG00000095891|+|chr9:g.3026152:G>A  
YHIPCPTVEISFPPFSVFLAIFHVLKCVFLIFRVFQVSRHIPGPTVCISHFSRFSVILSFFKFSSGCFSSFLI  
FSFLAIFHVLQWTFNLNPPFSVFLAIFHVLKCCVFLIFRDFQFSCHIPGPTVCISHFSRFSVILSFFNLSTAC  
FSFSIIFSFLAIFHVLQWTFNLNPPFSSYSFSPYSRSYRHMHSFSTFFSDFIIFQVVKCMFLIFNDFHFSC  
>ENSMUSP00000136755\_c.19:C>A\_p.T7N ENSMUST00000177601.2|Gm10717-205|ENSMUSG00000095891|+|chr9:g.3026170:C>A  
CHIPCPNVEISFPPFSVFLAIFHVLKCVFLIFRVFQVSRHIPGPTVCISHFSRFSVILSFFKFSSGCFSSFLI  
FSFLAIFHVLQWTFNLNPPFSVFLAIFHVLKCCVFLIFRDFQFSCHIPGPTVCISHFSRFSVILSFFNLSTAC  
FSFSIIFSFLAIFHVLQWTFNLNPPFSSYSFSPYSRSYRHMHSFSTFFSDFIIFQVVKCMFLIFNDFHFSC  
>ENSMUSP00000136755\_c.26:A>C\_p.E9D ENSMUST00000177601.2|Gm10717-205|ENSMUSG00000095891|+|chr9:g.3026177:A>C  
CHIPCPTVDISFPPFSVFLAIFHVLKCVFLIFRVFQVSRHIPGPTVCISHFSRFSVILSFFKFSSGCFSSFLI  
FSFLAIFHVLQWTFNLNPPFSVFLAIFHVLKCCVFLIFRDFQFSCHIPGPTVCISHFSRFSVILSFFNLSTAC  
FSFSIIFSFLAIFHVLQWTFNLNPPFSSYSFSPYSRSYRHMHSFSTFFSDFIIFQVVKCMFLIFNDFHFSC  
>ENSMUSP00000136755\_c.88:T>A\_p.L30H ENSMUST00000177601.2|Gm10717-205|ENSMUSG00000095891|+|chr9:g.3026243:T>A  
CHIPCPTVEISFPPFSVFLAIFHVLKCVFHFIFRVFQVSRHIPGPTVCISHFSRFSVILSFFKFSSGCFSSFLI  
FSFLAIFHVLQWTFNLNPPFSVFLAIFHVLKCCVFLIFRDFQFSCHIPGPTVCISHFSRFSVILSFFNLSTAC  
FSFSIIFSFLAIFHVLQWTFNLNPPFSSYSFSPYSRSYRHMHSFSTFFSDFIIFQVVKCMFLIFNDFHFSC  
>ENSMUSP00000136755\_c.95:TC>T\_p.F32del-fs ENSMUST00000177601.2|Gm10717-205|ENSMUSG00000095891|+|chr9:g.3026250:TC>T  
CHIPCPTVEISFPPFSVFLAIFHVLKCVFLIFVFFRFLAIFQVLQCAFLIFHVFQ  
>ENSMUSP00000136755\_c.100:T>A\_p.V34D ENSMUST00000177601.2|Gm10717-205|ENSMUSG00000095891|+|chr9:g.3026255:T>A  
CHIPCPTVEISFPPFSVFLAIFHVLKCVFLIFRDFQVSRHIPGPTVCISHFSRFSVILSFFKFSSGCFSSFLI  
FSFLAIFHVLQWTFNLNPPFSVFLAIFHVLKCCVFLIFRDFQFSCHIPGPTVCISHFSRFSVILSFFNLSTAC  
FSFSIIFSFLAIFHVLQWTFNLNPPFSSYSFSPYSRSYRHMHSFSTFFSDFIIFQVVKCMFLIFNDFHFSC

>ENSMUSP00000096644\_c.559:G>T\_p.S187I ENSMUST00000075573.7|Gm10717-201|ENSMUSG00000095891|+|chr9:g.3026263:G>T  
MFLIFHDFQFSCHIPCPTVEICKFPPFSVFLAIFHVLKYVFLIFRDFQFSRHIPGPTVCISHFSRFSVILSFF  
KFSSGCFSSFLIFSFLAIFHVLQWTFNLNPPFSVFLAIFHVLKCVFLIFSDQFSRHIPGPTVCISHFSRFSV  
ISSFFKVSSGCFSSMIFSFLAIFHVLQWTFNLNPPFSSYIFSPYSRSYSVHFSFSTFFSDFVIFQVFKWMFL  
IFLDFQFSC  
>ENSMUSP000000136755\_c.108:G>T\_p.V37F ENSMUST00000177601.2|Gm10717-205|ENSMUSG00000095891|+|chr9:g.3026263:G>T  
CHIPCPTVEISFPPFSVFLAIFHVLKCVFLIFRVFQFSRHIPGPTVCISHFSRFSVILSFFKFSSGCFSSFLI  
FSFLAIFHVLQWTFNLNPPFSVFLAIFHVLKCCVFLIFRDFQFSCHIPGPTVCISHFSRFSVILSFFNLSTAC  
FSFSIIFSFLAIFHVLQWTFNLNPPFSSYSPYSRSYRMHFSFSTFFSDFIIFQVVKCMFLIFNDFHFSC  
>ENSMUSP00000096644\_c.565:CGCC>TGTT\_p.S189L ENSMUST00000075573.7|Gm10717-201|ENSMUSG00000095891|+|chr9:g.3026269:CGCC>TGTT  
MFLIFHDFQFSCHIPCPTVEICKFPPFSVFLAIFHVLKYVFLIFRDFQFSRHIPGPTVCISHFSRFSVILSFF  
KFSSGCFSSFLIFSFLAIFHVLQWTFNLNPPFSVFLAIFHVLKCVFLIFSDQFSRHIPGPTVCISHFSRFSV  
ISSFFKVSSGCFSSMIFSFLAIFHVLQWTFNLNPPFSSYSFLLPYSRSYSVHFSFSTFFSDFVIFQVFKWMFL  
LIFLDFQFSC  
>ENSMUSP000000136755\_c.114:CGCC>TGTT\_p.R39C ENSMUST00000177601.2|Gm10717-205|ENSMUSG00000095891|+|chr9:g.3026269:CGCC>TGTT  
CHIPCPTVEISFPPFSVFLAIFHVLKCVFLIFRVFQVSCCHIPGPTVCISHFSRFSVILSFFKFSSGCFSSFLI  
IFSFLAIFHVLQWTFNLNPPFSVFLAIFHVLKCCVFLIFRDFQFSCHIPGPTVCISHFSRFSVILSFFNLSTA  
CFSFSIIFSFLAIFHVLQWTFNLNPPFSSYSPYSRSYRMHFSFSTFFSDFIIFQVVKCMFLIFNDFHFSC  
>ENSMUSP00000096644\_c.583:A>T\_p.Y195F ENSMUST00000075573.7|Gm10717-201|ENSMUSG00000095891|+|chr9:g.3026287:A>T  
MFLIFHDFQFSCHIPCPTVEICKFPPFSVFLAIFHVLKYVFLIFRDFQFSRHIPGPTVCISHFSRFSVILSFF  
KFSSGCFSSFLIFSFLAIFHVLQWTFNLNPPFSVFLAIFHVLKCVFLIFSDQFSRHIPGPTVCISHFSRFSV  
ISSFFKVSSGCFSSMIFSFLAIFHVLQWTFNLNPPFSSYSFSPYSRSYSVHFSFSTFFSDFVIFQVFKWMFL  
IFLDFQFSC  
>ENSMUSP000000136755\_c.132:A>T\_p.T45S ENSMUST00000177601.2|Gm10717-205|ENSMUSG00000095891|+|chr9:g.3026287:A>T  
CHIPCPTVEISFPPFSVFLAIFHVLKCVFLIFRVFQVSRHIPGPSVCISHFSRFSVILSFFKFSSGCFSSFLI  
FSFLAIFHVLQWTFNLNPPFSVFLAIFHVLKCCVFLIFRDFQFSCHIPGPTVCISHFSRFSVILSFFNLSTA  
CFSFSIIFSFLAIFHVLQWTFNLNPPFSSYSPYSRSYRMHFSFSTFFSDFIIFQVVKCMFLIFNDFHFSC  
>ENSMUSP00000096644\_c.604:T>C\_p.F202S ENSMUST00000075573.7|Gm10717-201|ENSMUSG00000095891|+|chr9:g.3026308:T>C  
MFLIFHDFQFSCHIPCPTVEICKFPPFSVFLAIFHVLKYVFLIFRDFQFSRHIPGPTVCISHFSRFSVILSFF  
KFSSGCFSSFLIFSFLAIFHVLQWTFNLNPPFSVFLAIFHVLKCVFLIFSDQFSRHIPGPTVCISHFSRFSV  
ISSFFKVSSGCFSSMIFSFLAIFHVLQWTFNLNPPFSSYSFSPYSRSYSVHFSFSTFFSDFVIFQVFKWMFL  
IFLDFQFSC  
>ENSMUSP000000136755\_c.153:T>C\_p.S52P ENSMUST00000177601.2|Gm10717-205|ENSMUSG00000095891|+|chr9:g.3026308:T>C  
CHIPCPTVEISFPPFSVFLAIFHVLKCVFLIFRVFQVSRHIPGPTVCISHFPRFSVILSFFKFSSGCFSSFLI  
FSFLAIFHVLQWTFNLNPPFSVFLAIFHVLKCCVFLIFRDFQFSCHIPGPTVCISHFSRFSVILSFFNLSTA  
CFSFSIIFSFLAIFHVLQWTFNLNPPFSSYSPYSRSYRMHFSFSTFFSDFIIFQVVKCMFLIFNDFHFSC  
>ENSMUSP00000096644\_c.613:T>G\_p.F205C ENSMUST00000075573.7|Gm10717-201|ENSMUSG00000095891|+|chr9:g.3026317:T>G  
MFLIFHDFQFSCHIPCPTVEICKFPPFSVFLAIFHVLKYVFLIFRDFQFSRHIPGPTVCISHFSRFSVILSFF  
KFSSGCFSSFLIFSFLAIFHVLQWTFNLNPPFSVFLAIFHVLKCVFLIFSDQFSRHIPGPTVCISHFSRFSV  
ISSFFKVSSGCFSSMIFSFLAIFHVLQWTFNLNPPFSSYSFSPYSRSYSVHFSFSTFFSDFVIFQVFKWMFL  
IFLDFQFSC  
>ENSMUSP000000136755\_c.162:T>G\_p.S55A ENSMUST00000177601.2|Gm10717-205|ENSMUSG00000095891|+|chr9:g.3026317:T>G  
CHIPCPTVEISFPPFSVFLAIFHVLKCVFLIFRVFQVSRHIPGPTVCISHFSRFAVILSFFKFSSGCFSSFLI  
FSFLAIFHVLQWTFNLNPPFSVFLAIFHVLKCCVFLIFRDFQFSCHIPGPTVCISHFSRFSVILSFFNLSTA  
CFSFSIIFSFLAIFHVLQWTFNLNPPFSSYSPYSRSYRMHFSFSTFFSDFIIFQVVKCMFLIFNDFHFSC  
>ENSMUSP000000136755\_c.163:C>T\_p.S55L ENSMUST00000177601.2|Gm10717-205|ENSMUSG00000095891|+|chr9:g.3026318:C>T

CHIPCPTVEISFPPFSVFLAIFHVLKCVFLIFRVFQVSRHIPGPTVCISHFSRFLVILSFFKFSSGCFSSFLI  
FSFLAIFHVLQWTFNLNPPFSVFLAIFHVLKCCVFLIFRDFQFSCHIPGPTVCISHFSRFSVILSFFNLSTAC  
FSFSIIFSFLAIFHVLQWTFNLNPPFSYSPYSRYSRHMHSFFTFSSDFIIFQVVKCMFLIFNDFHFSC  
>ENSMUSP00000136755\_c.172:T>C\_p.L58S ENSMUST00000177601.2|Gm10717-  
205|ENSMUSG00000095891|+|chr9:g.3026327:T>C  
CHIPCPTVEISFPPFSVFLAIFHVLKCVFLIFRVFQVSRHIPGPTVCISHFSRFSVILSFFKFSSGCFSSFLI  
FSFLAIFHVLQWTFNLNPPFSVFLAIFHVLKCCVFLIFRDFQFSCHIPGPTVCISHFSRFSVILSFFNLSTAC  
FSFSIIFSFLAIFHVLQWTFNLNPPFSYSPYSRYSRHMHSFFTFSSDFIIFQVVKCMFLIFNDFHFSC  
>ENSMUSP00000136755\_c.187:T>G\_p.F63C ENSMUST00000177601.2|Gm10717-  
205|ENSMUSG00000095891|+|chr9:g.3026342:T>G  
CHIPCPTVEISFPPFSVFLAIFHVLKCVFLIFRVFQVSRHIPGPTVCISHFSRFSVILSFFKSSGCFSSFLI  
FSFLAIFHVLQWTFNLNPPFSVFLAIFHVLKCCVFLIFRDFQFSCHIPGPTVCISHFSRFSVILSFFNLSTAC  
FSFSIIFSFLAIFHVLQWTFNLNPPFSYSPYSRYSRHMHSFFTFSSDFIIFQVVKCMFLIFNDFHFSC  
>ENSMUSP00000136755\_c.187:T>C\_p.F63S ENSMUST00000177601.2|Gm10717-  
205|ENSMUSG00000095891|+|chr9:g.3026342:T>C  
CHIPCPTVEISFPPFSVFLAIFHVLKCVFLIFRVFQVSRHIPGPTVCISHFSRFSVILSFFKSSGCFSSFLI  
FSFLAIFHVLQWTFNLNPPFSVFLAIFHVLKCCVFLIFRDFQFSCHIPGPTVCISHFSRFSVILSFFNLSTAC  
FSFSIIFSFLAIFHVLQWTFNLNPPFSYSPYSRYSRHMHSFFTFSSDFIIFQVVKCMFLIFNDFHFSC  
>ENSMUSP00000096644\_c.650:G>T\_p.M217I ENSMUST00000075573.7|Gm10717-  
201|ENSMUSG00000095891|+|chr9:g.3026354:G>T  
MFLIFHDFQFSCHIPCPTVEICKFPPFSVFLAIFHVLKYVFLIFRDFQFSRHIPGPTVCISHFSRFSVILSFF  
KFSSGCFSSFLIIFSFLAIFHVLQWTFNLNPPFSVFLAIFHVLKCVFLIFSDFQFSRHIPGPTVCISHFSRFSV  
ISSFFKVSSGCFSSMIFSFLAIFHVLQWTFNLNPPFSYSPYSRYSRVHHSFFTFSSDFVIFQVFKWIFL  
IFLDFQFSC  
>ENSMUSP00000136755\_c.199:G>T\_p.C67F ENSMUST00000177601.2|Gm10717-  
205|ENSMUSG00000095891|+|chr9:g.3026354:G>T  
CHIPCPTVEISFPPFSVFLAIFHVLKCVFLIFRVFQVSRHIPGPTVCISHFSRFSVILSFFKFSSGCFSSFLI  
FSFLAIFHVLQWTFNLNPPFSVFLAIFHVLKCCVFLIFRDFQFSCHIPGPTVCISHFSRFSVILSFFNLSTAC  
FSFSIIFSFLAIFHVLQWTFNLNPPFSYSPYSRYSRHMHSFFTFSSDFIIFQVVKCMFLIFNDFHFSC  
>ENSMUSP00000096644\_c.657:A>G\_p.I220V ENSMUST00000075573.7|Gm10717-  
201|ENSMUSG00000095891|+|chr9:g.3026361:A>G  
MFLIFHDFQFSCHIPCPTVEICKFPPFSVFLAIFHVLKYVFLIFRDFQFSRHIPGPTVCISHFSRFSVILSFF  
KFSSGCFSSFLIIFSFLAIFHVLQWTFNLNPPFSVFLAIFHVLKCVFLIFSDFQFSRHIPGPTVCISHFSRFSV  
ISSFFKVSSGCFSSMIFSFLAIFHVLQWTFNLNPPFSYSPYSRYSRVHHSFFTFSSDFVIFQVFKWIFL  
VFLDFQFSC  
>ENSMUSP00000096644\_c.664:T>A\_p.L222H ENSMUST00000075573.7|Gm10717-  
201|ENSMUSG00000095891|+|chr9:g.3026368:T>A  
MFLIFHDFQFSCHIPCPTVEICKFPPFSVFLAIFHVLKYVFLIFRDFQFSRHIPGPTVCISHFSRFSVILSFF  
KFSSGCFSSFLIIFSFLAIFHVLQWTFNLNPPFSVFLAIFHVLKCVFLIFSDFQFSRHIPGPTVCISHFSRFSV  
ISSFFKVSSGCFSSMIFSFLAIFHVLQWTFNLNPPFSYSPYSRYSRVHHSFFTFSSDFVIFQVFKWIFL  
IFHDFQFSC  
>ENSMUSP00000136755\_c.213:T>A\_p.L72M ENSMUST00000177601.2|Gm10717-  
205|ENSMUSG00000095891|+|chr9:g.3026368:T>A  
CHIPCPTVEISFPPFSVFLAIFHVLKCVFLIFRVFQVSRHIPGPTVCISHFSRFSVILSFFKFSSGCFSSMI  
FSFLAIFHVLQWTFNLNPPFSVFLAIFHVLKCCVFLIFRDFQFSCHIPGPTVCISHFSRFSVILSFFNLSTAC  
FSFSIIFSFLAIFHVLQWTFNLNPPFSYSPYSRYSRHMHSFFTFSSDFIIFQVVKCMFLIFNDFHFSC  
>ENSMUSP00000096644\_c.664:T>G\_p.L222R ENSMUST00000075573.7|Gm10717-  
201|ENSMUSG00000095891|+|chr9:g.3026368:T>G  
MFLIFHDFQFSCHIPCPTVEICKFPPFSVFLAIFHVLKYVFLIFRDFQFSRHIPGPTVCISHFSRFSVILSFF  
KFSSGCFSSFLIIFSFLAIFHVLQWTFNLNPPFSVFLAIFHVLKCVFLIFSDFQFSRHIPGPTVCISHFSRFSV  
ISSFFKVSSGCFSSMIFSFLAIFHVLQWTFNLNPPFSYSPYSRYSRVHHSFFTFSSDFVIFQVFKWIFL  
IFRDFQFSC  
>ENSMUSP00000136755\_c.213:T>G\_p.L72V ENSMUST00000177601.2|Gm10717-  
205|ENSMUSG00000095891|+|chr9:g.3026368:T>G  
CHIPCPTVEISFPPFSVFLAIFHVLKCVFLIFRVFQVSRHIPGPTVCISHFSRFSVILSFFKFSSGCFSSVI  
FSFLAIFHVLQWTFNLNPPFSVFLAIFHVLKCCVFLIFRDFQFSCHIPGPTVCISHFSRFSVILSFFNLSTAC  
FSFSIIFSFLAIFHVLQWTFNLNPPFSYSPYSRYSRHMHSFFTFSSDFIIFQVVKCMFLIFNDFHFSC

>ENSMUSP00000096644\_c.675:T>A\_p.F226I ENSMUST00000075573.7|Gm10717-201|ENSMUSG00000095891|+|chr9:g.3026379:T>A  
MFLIFHDFQFSCHIPCPTVEICKFPPFSVFLAIFHVLKYVFLIFRDFQFSRHIPGPTVCISHFSRFSVILSFF  
KFSSGCFSSFLIFSFLAIFHVLQWTFNLNPPFSVFLAIFHVLKCVFLIFSDQFSRHIPGPTVCISHFSRFSV  
ISSFFKVSSGCFSSMIFSFLAIFHVLQWTFNLNPPFSSYSFSPYSRSYSVHFSFFTFSSDFVIFQVVKWMFL  
IFLDFQISC  
>ENSMUSP000000136755\_c.224:T>A\_p.S75R ENSMUST00000177601.2|Gm10717-205|ENSMUSG00000095891|+|chr9:g.3026379:T>A  
CHIPCPTVEISFPPFSVFLAIFHVLKCVFLIFRVFQVSRHIPGPTVCISHFSRFSVILSFFKFSSGCFSSFLI  
FRFLAIFHVLQWTFNLNPPFSVFLAIFHVLKCCVFLIFRDFQFSCHIPGPTVCISHFSRFSVILSFFNLSTAC  
FSFSIIFSFLAIFHVLQWTFNLNPPFSSYSPYSRSYRHMHSFFTFSSDFIIFQVVKCMFLIFNDFHFSC  
>ENSMUSP000000136755\_c.242:T>G\_p.H81Q ENSMUST00000177601.2|Gm10717-205|ENSMUSG00000095891|+|chr9:g.3026397:T>G  
CHIPCPTVEISFPPFSVFLAIFHVLKCVFLIFRVFQVSRHIPGPTVCISHFSRFSVILSFFKFSSGCFSSFLI  
FSFLAIFHVLQWTFNLNPPFSVFLAIFHVLKCCVFLIFRDFQFSCHIPGPTVCISHFSRFSVILSFFNLSTAC  
FSFSIIFSFLAIFHVLQWTFNLNPPFSSYSPYSRSYRHMHSFFTFSSDFIIFQVVKCMFLIFNDFHFSC  
>ENSMUSP000000136755\_c.292:C>T\_p.A98V ENSMUST00000177601.2|Gm10717-205|ENSMUSG00000095891|+|chr9:g.3026447:C>T  
CHIPCPTVEISFPPFSVFLAIFHVLKCVFLIFRVFQVSRHIPGPTVCISHFSRFSVILSFFKFSSGCFSSFLI  
FSFLAIFHVLQWTFNLNPPFSVFLVIFHVLKCCVFLIFRDFQFSCHIPGPTVCISHFSRFSVILSFFNLSTAC  
FSFSIIFSFLAIFHVLQWTFNLNPPFSSYSPYSRSYRHMHSFFTFSSDFIIFQVVKCMFLIFNDFHFSC  
>ENSMUSP000000136755\_c.302:T>A\_p.H101Q ENSMUST00000177601.2|Gm10717-205|ENSMUSG00000095891|+|chr9:g.3026457:T>A  
CHIPCPTVEISFPPFSVFLAIFHVLKCVFLIFRVFQVSRHIPGPTVCISHFSRFSVILSFFKFSSGCFSSFLI  
FSFLAIFHVLQWTFNLNPPFSVFLAIFQVLKCCVFLIFRDFQFSCHIPGPTVCISHFSRFSVILSFFNLSTAC  
FSFSIIFSFLAIFHVLQWTFNLNPPFSSYSPYSRSYRHMHSFFTFSSDFIIFQVVKCMFLIFNDFHFSC  
>ENSMUSP000000136755\_c.309:A>T\_p.K104\* ENSMUST00000177601.2|Gm10717-205|ENSMUSG00000095891|+|chr9:g.3026464:A>T  
CHIPCPTVEISFPPFSVFLAIFHVLKCVFLIFRVFQVSRHIPGPTVCISHFSRFSVILSFFKFSSGCFSSFLI  
FSFLAIFHVLQWTFNLNPPFSVFLAIFHVL\*CCVFLIFRDFQFSCHIPGPTVCISHFSRFSVILSFFNLSTAC  
FSFSIIFSFLAIFHVLQWTFNLNPPFSSYSPYSRSYRHMHSFFTFSSDFIIFQVVKCMFLIFNDFHFSC  
>ENSMUSP000000137419\_c.2:G>T\_p.M1I ENSMUST00000177875.8|Gm10717-206|ENSMUSG00000095891|+|chr9:g.3027525:G>T  
IFLIFHDFQFSCHIPCPTVDISFPPFSVFLAIFHVLKCVFLIFRDFQFSCHIPGPTVCISHFSRFSVILSFFN  
LSTACFSFSIIFSFLAIFHVLQWTFNLNPPFSVFLAIFHVLKCCVFLIFRDFQFSCHIPGPTVCISHFSRFSV  
ILSFFNLSTACFSFSMIFSFLAIFHVLQWKFLNPPFSVSPYSRSYSVHFSFFTFSSDFVIFQVVKWMFPFI  
DFQFSY  
>ENSMUSP000000136365\_c.2:G>T\_p.M1I ENSMUST00000179982.2|Gm10717-209|ENSMUSG00000095891|+|chr9:g.3027525:G>T  
IFLIFHDFQFSCHIPCPTVDISFPPFSVFLAIFHVLKCVFLIFRDFQFSCHIPGPTVCISHFSRFSVILSFFN  
LSTACFSFSIIFSFLAIFHVLQWTFNLNPPFSVFLAIFHVLKCVFLIFRDFQFSCHIPGPTVCISHFSRFSV  
LSFFNLSTACFSFSMIFSFFAIFHVLQWKFLYFPPFSSSIFSPYSRSYSVHFSFFTFSSDFVIFQVVKWKFLI  
FHDFQLSS  
>ENSMUSP000000137419\_c.45:T>C\_p.C16R ENSMUST00000177875.8|Gm10717-206|ENSMUSG00000095891|+|chr9:g.3027568:T>C  
MFLIFHDFQFSCHIPRPTVDISFPPFSVFLAIFHVLKCVFLIFRDFQFSCHIPGPTVCISHFSRFSVILSFFN  
LSTACFSFSIIFSFLAIFHVLQWTFNLNPPFSVFLAIFHVLKCCVFLIFRDFQFSCHIPGPTVCISHFSRFSV  
ILSFFNLSTACFSFSMIFSFLAIFHVLQWKFLNPPFSVSPYSRSYSVHFSFFTFSSDFVIFQVVKWMFPFI  
DFQFSY  
>ENSMUSP000000136365\_c.45:T>C\_p.C16R ENSMUST00000179982.2|Gm10717-209|ENSMUSG00000095891|+|chr9:g.3027568:T>C  
MFLIFHDFQFSCHIPRPTVDISFPPFSVFLAIFHVLKCVFLIFRDFQFSCHIPGPTVCISHFSRFSVILSFFN  
LSTACFSFSIIFSFLAIFHVLQWTFNLNPPFSVFLAIFHVLKCVFLIFRDFQFSCHIPGPTVCISHFSRFSV  
LSFFNLSTACFSFSMIFSFFAIFHVLQWKFLYFPPFSSSIFSPYSRSYSVHFSFFTFSSDFVIFQVVKWKFLI  
FHDFQLSS  
>ENSMUSP000000136755\_c.333:C>T\_p.R112C ENSMUST00000177601.2|Gm10717-205|ENSMUSG00000095891|+|chr9:g.3027656:C>T

CHIPCPTVEISFPPFSVFLAIFHVLKCVFLIFRVFQVSRHIPGPTVCISHFSRFSVILSFFKFSSGCFSSFLI  
FSFLAIFHVLQWTFNLNPPFSVFLAIFHVLKCCVFLIFCDFQFSCHIPGPTVCISHFSRFSVILSFFNLSTAC  
FSFSIIFSFLAIFHVLQWTFNLNPPFSYSPYSRYSRMHFSFFTFSSDFIIFQVVKCMFLIFNDFHFSC  
>ENSMUSP00000137419\_c.129:C>T\_p.R44C ENSMUST00000177875.8|Gm10717-  
206|ENSMUSG00000095891|+|chr9:g.3027656:C>T  
MFLIFHDFQFSCHIPCPTVDISFPPFSVFLAIFHVLKCVFLIFCDFQFSCHIPGPTVCISHFSRFSVILSFFN  
LSTACFSFSIIFSFLAIFHVLQWTFNLNPPFSVFLAIFHVLKCCVFLIFRDFQFSCHIPGPTVCISHFSRFSV  
ILSFFNLSTACFSFSMIFSFLAIFHVLQWKFLNPPFSVSPYSRYSVHFSFFTFSSDFVIFQVVKWMFPIFL  
DFQFSY  
>ENSMUSP00000136365\_c.129:C>T\_p.R44C ENSMUST00000179982.2|Gm10717-  
209|ENSMUSG00000095891|+|chr9:g.3027656:C>T  
MFLIFHDFQFSCHIPCPTVDISFPPFSVFLAIFHVLKCVFLIFCDFQFSCHIPGPTVCISHFSRFSVILSFFN  
LSTACFSFSIIFSFLAIFHVLQWTFNLNPPFSVFLAIFHVLKCCVFLIFRDFQFSCHIPGPTVCISHFSRFSV  
ILSFFNLSTACFSFSMIFSFLAIFHVLQWKFLNPPFSVSPYSRYSVHFSFFTFSSDFVIFQVVKWMFPIFL  
FHDFQLSS  
>ENSMUSP00000136755\_c.334:G>A\_p.R112H ENSMUST00000177601.2|Gm10717-  
205|ENSMUSG00000095891|+|chr9:g.3027657:G>A  
CHIPCPTVEISFPPFSVFLAIFHVLKCVFLIFRVFQVSRHIPGPTVCISHFSRFSVILSFFKFSSGCFSSFLI  
FSFLAIFHVLQWTFNLNPPFSVFLAIFHVLKCCVFLIFHDFQFSCHIPGPTVCISHFSRFSVILSFFNLSTAC  
FSFSIIFSFLAIFHVLQWTFNLNPPFSYSPYSRYSRMHFSFFTFSSDFIIFQVVKCMFLIFNDFHFSC  
>ENSMUSP00000137419\_c.130:G>A\_p.R44H ENSMUST00000177875.8|Gm10717-  
206|ENSMUSG00000095891|+|chr9:g.3027657:G>A  
MFLIFHDFQFSCHIPCPTVDISFPPFSVFLAIFHVLKCVFLIFHDFQFSCHIPGPTVCISHFSRFSVILSFFN  
LSTACFSFSIIFSFLAIFHVLQWTFNLNPPFSVFLAIFHVLKCCVFLIFRDFQFSCHIPGPTVCISHFSRFSV  
ILSFFNLSTACFSFSMIFSFLAIFHVLQWKFLNPPFSVSPYSRYSVHFSFFTFSSDFVIFQVVKWMFPIFL  
DFQFSY  
>ENSMUSP00000136365\_c.130:G>A\_p.R44H ENSMUST00000179982.2|Gm10717-  
209|ENSMUSG00000095891|+|chr9:g.3027657:G>A  
MFLIFHDFQFSCHIPCPTVDISFPPFSVFLAIFHVLKCVFLIFHDFQFSCHIPGPTVCISHFSRFSVILSFFN  
LSTACFSFSIIFSFLAIFHVLQWTFNLNPPFSVFLAIFHVLKCCVFLIFRDFQFSCHIPGPTVCISHFSRFSV  
ILSFFNLSTACFSFSMIFSFLAIFHVLQWKFLNPPFSVSPYSRYSVHFSFFTFSSDFVIFQVVKWMFPIFL  
FHDFQLSS  
>ENSMUSP00000136755\_c.351:T>C\_p.C118R ENSMUST00000177601.2|Gm10717-  
205|ENSMUSG00000095891|+|chr9:g.3027674:T>C  
CHIPCPTVEISFPPFSVFLAIFHVLKCVFLIFRVFQVSRHIPGPTVCISHFSRFSVILSFFKFSSGCFSSFLI  
FSFLAIFHVLQWTFNLNPPFSVFLAIFHVLKCCVFLIFRDFQFSRSHIPGPTVCISHFSRFSVILSFFNLSTAC  
FSFSIIFSFLAIFHVLQWTFNLNPPFSYSPYSRYSRMHFSFFTFSSDFIIFQVVKCMFLIFNDFHFSC  
>ENSMUSP00000137419\_c.147:T>C\_p.C50R ENSMUST00000177875.8|Gm10717-  
206|ENSMUSG00000095891|+|chr9:g.3027674:T>C  
MFLIFHDFQFSCHIPCPTVDISFPPFSVFLAIFHVLKCVFLIFRDFQFSRSHIPGPTVCISHFSRFSVILSFFN  
LSTACFSFSIIFSFLAIFHVLQWTFNLNPPFSVFLAIFHVLKCCVFLIFRDFQFSCHIPGPTVCISHFSRFSV  
ILSFFNLSTACFSFSMIFSFLAIFHVLQWKFLNPPFSVSPYSRYSVHFSFFTFSSDFVIFQVVKWMFPIFL  
DFQFSY  
>ENSMUSP00000136365\_c.147:T>C\_p.C50R ENSMUST00000179982.2|Gm10717-  
209|ENSMUSG00000095891|+|chr9:g.3027674:T>C  
MFLIFHDFQFSCHIPCPTVDISFPPFSVFLAIFHVLKCVFLIFRDFQFSRSHIPGPTVCISHFSRFSVILSFFN  
LSTACFSFSIIFSFLAIFHVLQWTFNLNPPFSVFLAIFHVLKCCVFLIFRDFQFSCHIPGPTVCISHFSRFSV  
ILSFFNLSTACFSFSMIFSFLAIFHVLQWKFLNPPFSVSPYSRYSVHFSFFTFSSDFVIFQVVKWMFPIFL  
FHDFQLSS  
>ENSMUSP00000136755\_c.369:A>T\_p.T124S ENSMUST00000177601.2|Gm10717-  
205|ENSMUSG00000095891|+|chr9:g.3027692:A>T  
CHIPCPTVEISFPPFSVFLAIFHVLKCVFLIFRVFQVSRHIPGPTVCISHFSRFSVILSFFKFSSGCFSSFLI  
FSFLAIFHVLQWTFNLNPPFSVFLAIFHVLKCCVFLIFRDFQFSCHIPGPSVCISHFSRFSVILSFFNLSTAC  
FSFSIIFSFLAIFHVLQWTFNLNPPFSYSPYSRYSRMHFSFFTFSSDFIIFQVVKCMFLIFNDFHFSC  
>ENSMUSP00000137419\_c.165:A>T\_p.T56S ENSMUST00000177875.8|Gm10717-  
206|ENSMUSG00000095891|+|chr9:g.3027692:A>T  
MFLIFHDFQFSCHIPCPTVDISFPPFSVFLAIFHVLKCVFLIFRDFQFSCHIPGPSVCISHFSRFSVILSFFN  
LSTACFSFSIIFSFLAIFHVLQWTFNLNPPFSVFLAIFHVLKCCVFLIFRDFQFSCHIPGPTVCISHFSRFSV



ILSFFNLSTACFSFSMIFSFSLAIFHVLQWKFLNFPPFSVSPYSRSYSVHFSFFTFSSDFVIFQVVKWMFPIFL  
DFQFSY  
>ENSMUSP00000136365\_c.165:A>T\_p.T56S ENSMUST00000179982.2|Gm10717-  
209|ENSMUSG00000095891|+|chr9:g.3027692:A>T  
MFLIFHDFQFSCHIPCPTVDISFPPFSVFLAIFHVLKCVFLIFRDFQFSCHIPGPSVCISHFSRFSVILSFFN  
LSTACFSFSIIIFSFLAIFHVLQWTFNLNPPFSVFLAIFHVLKCVFLIFRDFQFSCYIPSPPTVCISHFSRFSVI  
LSFFNLSTACFSFSMIFSFFAIFHVLQWKFLYFPPFSSSIFSPYSRSYSVHFSFFTFSSDFVIFQVVKWKFLI  
FHDFQLSS  
>ENSMUSP00000136755\_c.409:T>C\_p.L137S ENSMUST00000177601.2|Gm10717-  
205|ENSMUSG00000095891|+|chr9:g.3027732:T>C  
CHIPCPTVEISFPPFSVFLAIFHVLKCVFLIFRVFQVSRHIPGPTVCISHFSRFSVILSFFKFSSGCFSSFLI  
FSFLAIFHVLQWTFNLNPPFSVFLAIFHVLKCCVFLIFRDFQFSCHIPGPTVCISHFSRFSVISSFFNLSTAC  
FSFSIIFSFLAIFHVLQWTFNLNPPFSSYSPYSRSYRHMHSFFTFSSDFIIFQVVKCMFLIFNDFHFSC  
>ENSMUSP00000137419\_c.205:T>C\_p.L69S ENSMUST00000177875.8|Gm10717-  
206|ENSMUSG00000095891|+|chr9:g.3027732:T>C  
MFLIFHDFQFSCHIPCPTVDISFPPFSVFLAIFHVLKCVFLIFRDFQFSCHIPGPTVCISHFSRFSVISSFFN  
LSTACFSFSIIIFSFLAIFHVLQWTFNLNPPFSVFLAIFHVLKCCVFLIFRDFQFSCHIPGPTVCISHFSRFSV  
ILSFFNLSTACFSFSMIFSFFAIFHVLQWKFLYFPPFSSSIFSPYSRSYSVHFSFFTFSSDFVIFQVVKWMFPIFL  
DFQFSY  
>ENSMUSP00000136365\_c.205:T>C\_p.L69S ENSMUST00000179982.2|Gm10717-  
209|ENSMUSG00000095891|+|chr9:g.3027732:T>C  
MFLIFHDFQFSCHIPCPTVDISFPPFSVFLAIFHVLKCVFLIFRDFQFSCHIPGPTVCISHFSRFSVISSFFN  
LSTACFSFSIIIFSFLAIFHVLQWTFNLNPPFSVFLAIFHVLKCVFLIFRDFQFSCYIPSPPTVCISHFSRFSVI  
LSFFNLSTACFSFSMIFSFFAIFHVLQWKFLYFPPFSSSIFSPYSRSYSVHFSFFTFSSDFVIFQVVKWKFLI  
FHDFQLSS  
>ENSMUSP00000136755\_c.422:T>G\_p.N141K ENSMUST00000177601.2|Gm10717-  
205|ENSMUSG00000095891|+|chr9:g.3027745:T>G  
CHIPCPTVEISFPPFSVFLAIFHVLKCVFLIFRVFQVSRHIPGPTVCISHFSRFSVILSFFKFSSGCFSSFLI  
FSFLAIFHVLQWTFNLNPPFSVFLAIFHVLKCCVFLIFRDFQFSCHIPGPTVCISHFSRFSVILSFFKLSTAC  
FSFSIIFSFLAIFHVLQWTFNLNPPFSSYSPYSRSYRHMHSFFTFSSDFIIFQVVKCMFLIFNDFHFSC  
>ENSMUSP00000137419\_c.218:T>G\_p.N73K ENSMUST00000177875.8|Gm10717-  
206|ENSMUSG00000095891|+|chr9:g.3027745:T>G  
MFLIFHDFQFSCHIPCPTVDISFPPFSVFLAIFHVLKCVFLIFRDFQFSCHIPGPTVCISHFSRFSVILSFFK  
LSTACFSFSIIIFSFLAIFHVLQWTFNLNPPFSVFLAIFHVLKCCVFLIFRDFQFSCHIPGPTVCISHFSRFSV  
ILSFFNLSTACFSFSMIFSFFAIFHVLQWKFLYFPPFSSSIFSPYSRSYSVHFSFFTFSSDFVIFQVVKWMFPIFL  
DFQFSY  
>ENSMUSP00000136365\_c.218:T>G\_p.N73K ENSMUST00000179982.2|Gm10717-  
209|ENSMUSG00000095891|+|chr9:g.3027745:T>G  
MFLIFHDFQFSCHIPCPTVDISFPPFSVFLAIFHVLKCVFLIFRDFQFSCHIPGPTVCISHFSRFSVILSFFK  
LSTACFSFSIIIFSFLAIFHVLQWTFNLNPPFSVFLAIFHVLKCVFLIFRDFQFSCYIPSPPTVCISHFSRFSVI  
LSFFNLSTACFSFSMIFSFFAIFHVLQWKFLYFPPFSSSIFSPYSRSYSVHFSFFTFSSDFVIFQVVKWKFLI  
FHDFQLSS  
>ENSMUSP00000136755\_c.430:C>G\_p.T144S ENSMUST00000177601.2|Gm10717-  
205|ENSMUSG00000095891|+|chr9:g.3027753:C>G  
CHIPCPTVEISFPPFSVFLAIFHVLKCVFLIFRVFQVSRHIPGPTVCISHFSRFSVILSFFKFSSGCFSSFLI  
FSFLAIFHVLQWTFNLNPPFSVFLAIFHVLKCCVFLIFRDFQFSCHIPGPTVCISHFSRFSVILSFFNLSSAC  
FSFSIIFSFLAIFHVLQWTFNLNPPFSSYSPYSRSYRHMHSFFTFSSDFIIFQVVKCMFLIFNDFHFSC  
>ENSMUSP00000137419\_c.226:C>G\_p.T76S ENSMUST00000177875.8|Gm10717-  
206|ENSMUSG00000095891|+|chr9:g.3027753:C>G  
MFLIFHDFQFSCHIPCPTVDISFPPFSVFLAIFHVLKCVFLIFRDFQFSCHIPGPTVCISHFSRFSVILSFFN  
LSSACFSFSIIIFSFLAIFHVLQWTFNLNPPFSVFLAIFHVLKCCVFLIFRDFQFSCHIPGPTVCISHFSRFSV  
ILSFFNLSTACFSFSMIFSFFAIFHVLQWKFLNFPFSSVSPYSRSYSVHFSFFTFSSDFVIFQVVKWMFPIFL  
DFQFSY  
>ENSMUSP00000136365\_c.226:C>G\_p.T76S ENSMUST00000179982.2|Gm10717-  
209|ENSMUSG00000095891|+|chr9:g.3027753:C>G  
MFLIFHDFQFSCHIPCPTVDISFPPFSVFLAIFHVLKCVFLIFRDFQFSCHIPGPTVCISHFSRFSVILSFFN  
LSSACFSFSIIIFSFLAIFHVLQWTFNLNPPFSVFLAIFHVLKCVFLIFRDFQFSCYIPSPPTVCISHFSRFSVI

LSFFNLSTACFSFSMIFSFFAIFHVLQGKFLYFPPFSSSIFSPYSRSYSVHFSFSTFFSDFVIFQVVKWKFLI  
FHDFQLSS  
>ENSMUSP00000136755\_c.430:CTGC>GTGG\_p.T144S ENSMUST00000177601.2|Gm10717-  
205|ENSMUSG00000095891|+|chr9:g.3027753:CTGC>GTGG  
CHIPCPTVEISFPPFSVFLAIFHVLKCVFLIFRVFQVSRHIPGPTVCISHFSRFSVILSFFKFSSGCFSSFLI  
FSFLAIFHVLQWTFNLNPPFSVFLAIFHVLKCCVFLIFRDFQFSCHIPGPTVCISHFSRFSVILSFFNLSSGA  
CFSFSIIFSFLAIFHVLQWTFNLNPPFSSYSYSPYSRSYRMHFSFSTFFSDFIIFQVVKCMFLIFNDFHFSC  
>ENSMUSP00000137419\_c.226:CTGC>GTGG\_p.T76S ENSMUST00000177875.8|Gm10717-  
206|ENSMUSG00000095891|+|chr9:g.3027753:CTGC>GTGG  
MFLIFHDFQFSCHIPCPTVDISFPPFSVFLAIFHVLKCVFLIFRDFQFSCHIPGPTVCISHFSRFSVILSFFN  
LSSGACFSFSIIFSFLAIFHVLQWTFNLNPPFSVFLAIFHVLKCCVFLIFRDFQFSCHIPGPTVCISHFSRFS  
VILSFFNLSTACFSFSMIFSFLAIFHVLQWKFLNPPFSSVSPYSRSYSVHFSFSTFFSDFVIFQVVKWMPPIF  
LDFQFSY  
>ENSMUSP00000136365\_c.226:CTGC>GTGG\_p.T76S ENSMUST00000179982.2|Gm10717-  
209|ENSMUSG00000095891|+|chr9:g.3027753:CTGC>GTGG  
MFLIFHDFQFSCHIPCPTVDISFPPFSVFLAIFHVLKCVFLIFRDFQFSCHIPGPTVCISHFSRFSVILSFFN  
LSSGACFSFSIIFSFLAIFHVLQWTFNLNPPFSVFLAIFHVLKCVFLIFRDFQFSCHIPGPTVCISHFSRFSV  
ILSFFNLSTACFSFSMIFSFFAIFHVLQGKFLYFPPFSSSIFSPYSRSYSVHFSFSTFFSDFVIFQVVKWKFL  
IFHDFQLSS  
>ENSMUSP00000136755\_c.430:CTGC>GTGT\_p.T144S ENSMUST00000177601.2|Gm10717-  
205|ENSMUSG00000095891|+|chr9:g.3027753:CTGC>GTGT  
CHIPCPTVEISFPPFSVFLAIFHVLKCVFLIFRVFQVSRHIPGPTVCISHFSRFSVILSFFKFSSGCFSSFLI  
FSFLAIFHVLQWTFNLNPPFSVFLAIFHVLKCCVFLIFRDFQFSCHIPGPTVCISHFSRFSVILSFFNLSSVA  
CFSFSIIFSFLAIFHVLQWTFNLNPPFSSYSYSPYSRSYRMHFSFSTFFSDFIIFQVVKCMFLIFNDFHFSC  
>ENSMUSP00000137419\_c.226:CTGC>GTGT\_p.T76S ENSMUST00000177875.8|Gm10717-  
206|ENSMUSG00000095891|+|chr9:g.3027753:CTGC>GTGT  
MFLIFHDFQFSCHIPCPTVDISFPPFSVFLAIFHVLKCVFLIFRDFQFSCHIPGPTVCISHFSRFSVILSFFN  
LSSVACFSFSIIFSFLAIFHVLQWTFNLNPPFSVFLAIFHVLKCCVFLIFRDFQFSCHIPGPTVCISHFSRFS  
VILSFFNLSTACFSFSMIFSFLAIFHVLQWKFLNPPFSSVSPYSRSYSVHFSFSTFFSDFVIFQVVKWMPPIF  
LDFQFSY  
>ENSMUSP00000136365\_c.226:CTGC>GTGT\_p.T76S ENSMUST00000179982.2|Gm10717-  
209|ENSMUSG00000095891|+|chr9:g.3027753:CTGC>GTGT  
MFLIFHDFQFSCHIPCPTVDISFPPFSVFLAIFHVLKCVFLIFRDFQFSCHIPGPTVCISHFSRFSVILSFFN  
LSSVACFSFSIIFSFLAIFHVLQWTFNLNPPFSVFLAIFHVLKCVFLIFRDFQFSCHIPGPTVCISHFSRFSV  
ILSFFNLSTACFSFSMIFSFFAIFHVLQGKFLYFPPFSSSIFSPYSRSYSVHFSFSTFFSDFVIFQVVKWKFL  
IFHDFQLSS  
>ENSMUSP00000136755\_c.452:T>G\_p.I151M ENSMUST00000177601.2|Gm10717-  
205|ENSMUSG00000095891|+|chr9:g.3027775:T>G  
CHIPCPTVEISFPPFSVFLAIFHVLKCVFLIFRVFQVSRHIPGPTVCISHFSRFSVILSFFKFSSGCFSSFLI  
FSFLAIFHVLQWTFNLNPPFSVFLAIFHVLKCCVFLIFRDFQFSCHIPGPTVCISHFSRFSVILSFFNLSTAC  
FSFSMIFSFLAIFHVLQWTFNLNPPFSSYSYSPYSRSYRMHFSFSTFFSDFIIFQVVKCMFLIFNDFHFSC  
>ENSMUSP00000137419\_c.248:T>G\_p.I83M ENSMUST00000177875.8|Gm10717-  
206|ENSMUSG00000095891|+|chr9:g.3027775:T>G  
MFLIFHDFQFSCHIPCPTVDISFPPFSVFLAIFHVLKCVFLIFRDFQFSCHIPGPTVCISHFSRFSVILSFFN  
LSTACFSFSMIFSFLAIFHVLQWTFNLNPPFSVFLAIFHVLKCCVFLIFRDFQFSCHIPGPTVCISHFSRFSV  
ILSFFNLSTACFSFSMIFSFLAIFHVLQWKFLNPPFSSVSPYSRSYSVHFSFSTFFSDFVIFQVVKWMPPIFL  
DFQFSY  
>ENSMUSP00000136365\_c.248:T>G\_p.I83M ENSMUST00000179982.2|Gm10717-  
209|ENSMUSG00000095891|+|chr9:g.3027775:T>G  
MFLIFHDFQFSCHIPCPTVDISFPPFSVFLAIFHVLKCVFLIFRDFQFSCHIPGPTVCISHFSRFSVILSFFN  
LSTACFSFSMIFSFLAIFHVLQWTFNLNPPFSVFLAIFHVLKCVFLIFRDFQFSCHIPGPTVCISHFSRFSV  
ILSFFNLSTACFSFSMIFSFFAIFHVLQGKFLYFPPFSSSIFSPYSRSYSVHFSFSTFFSDFVIFQVVKWKFLI  
FHDFQLSS  
>ENSMUSP00000136755\_c.511:C>T\_p.P171L ENSMUST00000177601.2|Gm10717-  
205|ENSMUSG00000095891|+|chr9:g.3027834:C>T  
CHIPCPTVEISFPPFSVFLAIFHVLKCVFLIFRVFQVSRHIPGPTVCISHFSRFSVILSFFKFSSGCFSSFLI  
FSFLAIFHVLQWTFNLNPPFSVFLAIFHVLKCCVFLIFRDFQFSCHIPGPTVCISHFSRFSVILSFFNLSTAC  
FSFSIIFSFLAIFHVLQWTFNLNPPFSSYSYSPYSRSYRMHFSFSTFFSDFIIFQVVKCMFLIFNDFHFSC

>ENSMUSP00000137419\_c.307:C>T\_p.P103L ENSMUST00000177875.8|Gm10717-206|ENSMUSG00000095891|+|chr9:g.3027834:C>T  
MFLIFHDFQFSCHIPCPTVDISFPPFSVFLAIFHVLKCVFLIFRDFQFSCHIPGPTVCISHFSRFSVILSFFN  
LSTACFSFSIIIFSFLAIFHVLQWTFNLNFPPLFSVFLAIFHVLKCCVFLIFRDFQFSCHIPGPTVCISHFSRFSV  
ILSFFNLSTACFSFSMIFSFLAIFHVLQWKFLNFPFVSVPYRSYSVHFSFFTFFSDFVIFQVVKWMPFIPL  
DFQFSY  
>ENSMUSP00000136365\_c.307:C>T\_p.P103L ENSMUST00000179982.2|Gm10717-209|ENSMUSG00000095891|+|chr9:g.3027834:C>T  
MFLIFHDFQFSCHIPCPTVDISFPPFSVFLAIFHVLKCVFLIFRDFQFSCHIPGPTVCISHFSRFSVILSFFN  
LSTACFSFSIIIFSFLAIFHVLQWTFNLNFPPLFSVFLAIFHVLKCVFLIFRDFQFSCYIPSPPTVCISHFSRFSVI  
LSFFNLSTACFSFSMIFSFFAIFHVLQKFLYFPPFSSSIFSPYRSYSVHFSFFTFFSDFVIFQVVKWKFLI  
FHDFQLSS  
>ENSMUSP00000136365\_c.348:G>A\_p.V117I ENSMUST00000179982.2|Gm10717-209|ENSMUSG00000095891|+|chr9:g.3027875:G>A  
MFLIFHDFQFSCHIPCPTVDISFPPFSVFLAIFHVLKCVFLIFRDFQFSCHIPGPTVCISHFSRFSVILSFFN  
LSTACFSFSIIIFSFLAIFHVLQWTFNLNFPFVSFLAIFHVLKCVFLIFRDFQFSCYIPSPPTVCISHFSRFSVI  
LSFFNLSTACFSFSMIFSFFAIFHVLQKFLYFPPFSSSIFSPYRSYSVHFSFFTFFSDFVIFQVVKWKFLI  
FHDFQLSS  
>ENSMUSP00000136365\_c.364:G>T\_p.R122L ENSMUST00000179982.2|Gm10717-209|ENSMUSG00000095891|+|chr9:g.3027891:G>T  
MFLIFHDFQFSCHIPCPTVDISFPPFSVFLAIFHVLKCVFLIFRDFQFSCHIPGPTVCISHFSRFSVILSFFN  
LSTACFSFSIIIFSFLAIFHVLQWTFNLNFPFVSFLAIFHVLKCVFLIFLDFQFSCYIPSPPTVCISHFSRFSVI  
LSFFNLSTACFSFSMIFSFFAIFHVLQKFLYFPPFSSSIFSPYRSYSVHFSFFTFFSDFVIFQVVKWKFLI  
FHDFQLSS  
>ENSMUSP00000136365\_c.384:T>C\_p.Y129H ENSMUST00000179982.2|Gm10717-209|ENSMUSG00000095891|+|chr9:g.3027911:T>C  
MFLIFHDFQFSCHIPCPTVDISFPPFSVFLAIFHVLKCVFLIFRDFQFSCHIPGPTVCISHFSRFSVILSFFN  
LSTACFSFSIIIFSFLAIFHVLQWTFNLNFPFVSFLAIFHVLKCVFLIFRDFQFSCHIPSPPTVCISHFSRFSVI  
LSFFNLSTACFSFSMIFSFFAIFHVLQKFLYFPPFSSSIFSPYRSYSVHFSFFTFFSDFVIFQVVKWKFLI  
FHDFQLSS  
>rs237508806\_ENSMUSP00000136365\_c.393:A>G\_p.S132G  
ENSMUST00000179982.2|Gm10717-209|ENSMUSG00000095891|+|chr9:g.3027920:A>G  
MFLIFHDFQFSCHIPCPTVDISFPPFSVFLAIFHVLKCVFLIFRDFQFSCHIPGPTVCISHFSRFSVILSFFN  
LSTACFSFSIIIFSFLAIFHVLQWTFNLNFPFVSFLAIFHVLKCVFLIFRDFQFSCYIPGPTVCISHFSRFSVI  
LSFFNLSTACFSFSMIFSFFAIFHVLQKFLYFPPFSSSIFSPYRSYSVHFSFFTFFSDFVIFQVVKWKFLI  
FHDFQLSS  
>ENSMUSP00000136365\_c.393:A>T\_p.S132C ENSMUST00000179982.2|Gm10717-209|ENSMUSG00000095891|+|chr9:g.3027920:A>T  
MFLIFHDFQFSCHIPCPTVDISFPPFSVFLAIFHVLKCVFLIFRDFQFSCHIPGPTVCISHFSRFSVILSFFN  
LSTACFSFSIIIFSFLAIFHVLQWTFNLNFPFVSFLAIFHVLKCVFLIFRDFQFSCYIPSPPTVCISHFSRFSVI  
LSFFNLSTACFSFSMIFSFFAIFHVLQKFLYFPPFSSSIFSPYRSYSVHFSFFTFFSDFVIFQVVKWKFLI  
FHDFQLSS  
>ENSMUSP00000136755\_c.525:A>C\_p.S176R ENSMUST00000177601.2|Gm10717-205|ENSMUSG00000095891|+|chr9:g.3027928:A>C  
CHIPCPTVEISFPPFSVFLAIFHVLKCVFLIFRVFQVSRHIPGPTVCISHFSRFSVILSFFKFSGCFSSFLI  
FSFLAIFHVLQWTFNLNFPFVSFLAIFHVLKCCVFLIFRDFQFSCHIPGPTVCISHFSRFSVILSFFNLSTAC  
FSFSIIIFSFLAIFHVLQWTFNLNFPFSSYRYPYRSYRMHFSFFTFFSDFIIFQVVKCMFLIFNDFHFSC  
>ENSMUSP00000136755\_c.525:AG>CA\_p.S176Q ENSMUST00000177601.2|Gm10717-205|ENSMUSG00000095891|+|chr9:g.3027928:AG>CA  
CHIPCPTVEISFPPFSVFLAIFHVLKCVFLIFRVFQVSRHIPGPTVCISHFSRFSVILSFFKFSGCFSSFLI  
FSFLAIFHVLQWTFNLNFPFVSFLAIFHVLKCCVFLIFRDFQFSCHIPGPTVCISHFSRFSVILSFFNLSTAC  
FSFSIIIFSFLAIFHVLQWTFNLNFPFSSYQSIFQVLQDAFLIFHVQ\*FHHFSSRQVYVSHFQ\*FSFFL  
>ENSMUSP00000136365\_c.420:T>C\_p.S141P ENSMUST00000179982.2|Gm10717-209|ENSMUSG00000095891|+|chr9:g.3027947:T>C  
MFLIFHDFQFSCHIPCPTVDISFPPFSVFLAIFHVLKCVFLIFRDFQFSCHIPGPTVCISHFSRFSVILSFFN  
LSTACFSFSIIIFSFLAIFHVLQWTFNLNFPFVSFLAIFHVLKCVFLIFRDFQFSCYIPSPPTVCISHFPRFSVI  
LSFFNLSTACFSFSMIFSFFAIFHVLQKFLYFPPFSSSIFSPYRSYSVHFSFFTFFSDFVIFQVVKWKFLI  
FHDFQLSS

>ENSMUSP00000136365\_c.490:GT>G\_p.S164del-fs ENSMUST00000179982.2|Gm10717-209|ENSMUSG00000095891|+|chr9:g.3028017:GT>G  
MFLIFHDFQFSCHIPCPTVDISFPPFSVFLAIFHVLKCVFLIFRDFQFSCHIPGPTVCISHFSRFSVILSFFN  
LSTACFSFSIIIFSFLAIFHVLQWTFNLNFPFVFLAIFHVLKCVFLIFRDFQFSCYIPSPPTVCISHFSRFSVI  
LSFFNLSTACFSFSMIFSFPLPYSMSYRGNFYIFHLFHRQFSHHIPGPTVCISHFSRFSVLISSFFKLSSGFSFSF  
SMIFSFL  
>ENSMUSP00000136365\_c.495:T>C\_p.F166L ENSMUST00000179982.2|Gm10717-209|ENSMUSG00000095891|+|chr9:g.3028022:T>C  
MFLIFHDFQFSCHIPCPTVDISFPPFSVFLAIFHVLKCVFLIFRDFQFSCHIPGPTVCISHFSRFSVILSFFN  
LSTACFSFSIIIFSFLAIFHVLQWTFNLNFPFVFLAIFHVLKCVFLIFRDFQFSCYIPSPPTVCISHFSRFSVI  
LSFFNLSTACFSFSMIFSFLLAIFHVLQKFLYFPFSSSIFSPYSRSYSVHFSFFTFSSDFVIFQVVKWKFLI  
FHDFQLSS  
>ENSMUSP00000136365\_c.519:G>T\_p.G174W ENSMUST00000179982.2|Gm10717-209|ENSMUSG00000095891|+|chr9:g.3028046:G>T  
MFLIFHDFQFSCHIPCPTVDISFPPFSVFLAIFHVLKCVFLIFRDFQFSCHIPGPTVCISHFSRFSVILSFFN  
LSTACFSFSIIIFSFLAIFHVLQWTFNLNFPFVFLAIFHVLKCVFLIFRDFQFSCYIPSPPTVCISHFSRFSVI  
LSFFNLSTACFSFSMIFSFLLAIFHVLQWTFNLNFPFSSSIFSPYSRSYSVHFSFFTFSSDFVIFQVVKWKFLI  
FHDFQLSS  
>rs231884288\_ENSMUSP00000136365\_c.523:A>C\_p.K175T  
ENSMUST00000179982.2|Gm10717-209|ENSMUSG00000095891|+|chr9:g.3028050:A>C  
MFLIFHDFQFSCHIPCPTVDISFPPFSVFLAIFHVLKCVFLIFRDFQFSCHIPGPTVCISHFSRFSVILSFFN  
LSTACFSFSIIIFSFLAIFHVLQWTFNLNFPFVFLAIFHVLKCVFLIFRDFQFSCYIPSPPTVCISHFSRFSVI  
LSFFNLSTACFSFSMIFSFLLAIFHVLQWTFNLNFPFSSSIFSPYSRSYSVHFSFFTFSSDFVIFQVVKWKFLI  
FHDFQLSS  
>ENSMUSP00000136365\_c.531:T>A\_p.Y178N ENSMUST00000179982.2|Gm10717-209|ENSMUSG00000095891|+|chr9:g.3028058:T>A  
MFLIFHDFQFSCHIPCPTVDISFPPFSVFLAIFHVLKCVFLIFRDFQFSCHIPGPTVCISHFSRFSVILSFFN  
LSTACFSFSIIIFSFLAIFHVLQWTFNLNFPFVFLAIFHVLKCVFLIFRDFQFSCYIPSPPTVCISHFSRFSVI  
LSFFNLSTACFSFSMIFSFLLAIFHVLQWTFNLNFPFSSSIFSPYSRSYSVHFSFFTFSSDFVIFQVVKWKFLI  
FHDFQLSS  
>ENSMUSP00000136755\_c.532:A>C\_p.Y178S ENSMUST00000177601.2|Gm10717-205|ENSMUSG00000095891|+|chr9:g.3028382:A>C  
CHIPCPTVEISFPPFSVFLAIFHVLKCVFLIFRVFQVSRHIPGPTVCISHFSRFSVILSFFKFSSGCFSSFLI  
FSFLAIFHVLQWTFNLNFPFVFLAIFHVLKCCVFLIFRDFQFSCHIPGPTVCISHFSRFSVILSFFNLSTAC  
FSFSIIIFSFLAIFHVLQWTFNLNFPFSSSYSPSSRSYRHMFSFFTFSSDFIIFQVVKCMFLIFNDFHFSC  
>ENSMUSP00000136755\_c.548:G>T\_p.R183S ENSMUST00000177601.2|Gm10717-205|ENSMUSG00000095891|+|chr9:g.3028398:G>T  
CHIPCPTVEISFPPFSVFLAIFHVLKCVFLIFRVFQVSRHIPGPTVCISHFSRFSVILSFFKFSSGCFSSFLI  
FSFLAIFHVLQWTFNLNFPFVFLAIFHVLKCCVFLIFRDFQFSCHIPGPTVCISHFSRFSVILSFFNLSTAC  
FSFSIIIFSFLAIFHVLQWTFNLNFPFSSSYSPYSRSYSRHMFSFFTFSSDFIIFQVVKCMFLIFNDFHFSC  
>ENSMUSP00000136755\_c.548:GA>TG\_p.R183S ENSMUST00000177601.2|Gm10717-205|ENSMUSG00000095891|+|chr9:g.3028398:GA>TG  
CHIPCPTVEISFPPFSVFLAIFHVLKCVFLIFRVFQVSRHIPGPTVCISHFSRFSVILSFFKFSSGCFSSFLI  
FSFLAIFHVLQWTFNLNFPFVFLAIFHVLKCCVFLIFRDFQFSCHIPGPTVCISHFSRFSVILSFFNLSTAC  
FSFSIIIFSFLAIFHVLQWTFNLNFPFSSSYSPYSRSYSRHMFSFFTFSSDFIIFQVVKCMFLIFNDFHFSC  
>ENSMUSP00000136755\_c.585:A>G\_p.I196V ENSMUST00000177601.2|Gm10717-205|ENSMUSG00000095891|+|chr9:g.3028435:A>G  
CHIPCPTVEISFPPFSVFLAIFHVLKCVFLIFRVFQVSRHIPGPTVCISHFSRFSVILSFFKFSSGCFSSFLI  
FSFLAIFHVLQWTFNLNFPFVFLAIFHVLKCCVFLIFRDFQFSCHIPGPTVCISHFSRFSVILSFFNLSTAC  
FSFSIIIFSFLAIFHVLQWTFNLNFPFSSSYSPYSRSYSRHMFSFFTFSSDFIIFQVVKCMFLIFNDFHFSC  
>ENSMUSP00000136755\_c.607:G>T\_p.C203F ENSMUST00000177601.2|Gm10717-205|ENSMUSG00000095891|+|chr9:g.3028457:G>T  
CHIPCPTVEISFPPFSVFLAIFHVLKCVFLIFRVFQVSRHIPGPTVCISHFSRFSVILSFFKFSSGCFSSFLI  
FSFLAIFHVLQWTFNLNFPFVFLAIFHVLKCCVFLIFRDFQFSCHIPGPTVCISHFSRFSVILSFFNLSTAC  
FSFSIIIFSFLAIFHVLQWTFNLNFPFSSSYSPYSRSYSRHMFSFFTFSSDFIIFQVVKCMFLIFNDFHFSC  
>rs221236237\_ENSMUSP00000136755\_c.624:A>C\_p.N209H  
ENSMUST00000177601.2|Gm10717-205|ENSMUSG00000095891|+|chr9:g.3028474:A>C

CHIPCPTVEISFPPFSVFLAIFHVLKCVFLIFRVFQVSRHIPGPTVCISHFSRFSVILSFFKFSSGCFSSFLI  
FSFLAIFHVLQWTFNLNPPFSVFLAIFHVLKCCVFLIFRDFQFSCHIPGPTVCISHFSRFSVILSFFNLSTAC  
FSFSIIFSFLAIFHVLQWTFNLNPPFSYSPYSRYSRHMHSFFTFSSDFIIFQVVKCMFLIFHDFHFS  
>ENSMUSP00000136755\_c.624:AATG>CATA\_p.N209H ENSMUST00000177601.2|Gm10717-  
205|ENSMUSG00000095891|+|chr9:g.3028474:AATG>CATA  
CHIPCPTVEISFPPFSVFLAIFHVLKCVFLIFRVFQVSRHIPGPTVCISHFSRFSVILSFFKFSSGCFSSFLI  
FSFLAIFHVLQWTFNLNPPFSVFLAIFHVLKCCVFLIFRDFQFSCHIPGPTVCISHFSRFSVILSFFNLSTAC  
FSFSIIFSFLAIFHVLQWTFNLNPPFSYSPYSRYSRHMHSFFTFSSDFIIFQVVKCMFLIFHNDHFHFS  
>ENSMUSP00000136755\_c.632:T>A\_p.F211L ENSMUST00000177601.2|Gm10717-  
205|ENSMUSG00000095891|+|chr9:g.3028482:T>A  
CHIPCPTVEISFPPFSVFLAIFHVLKCVFLIFRVFQVSRHIPGPTVCISHFSRFSVILSFFKFSSGCFSSFLI  
FSFLAIFHVLQWTFNLNPPFSVFLAIFHVLKCCVFLIFRDFQFSCHIPGPTVCISHFSRFSVILSFFNLSTAC  
FSFSIIFSFLAIFHVLQWTFNLNPPFSYSPYSRYSRHMHSFFTFSSDFIIFQVVKCMFLIFNDLHFS  
>ENSMUSP00000136755\_c.635:T>G\_p.H212Q ENSMUST00000177601.2|Gm10717-  
205|ENSMUSG00000095891|+|chr9:g.3028485:T>G  
CHIPCPTVEISFPPFSVFLAIFHVLKCVFLIFRVFQVSRHIPGPTVCISHFSRFSVILSFFKFSSGCFSSFLI  
FSFLAIFHVLQWTFNLNPPFSVFLAIFHVLKCCVFLIFRDFQFSCHIPGPTVCISHFSRFSVILSFFNLSTAC  
FSFSIIFSFLAIFHVLQWTFNLNPPFSYSPYSRYSRHMHSFFTFSSDFIIFQVVKCMFLIFNDHFHFS  
>ENSMUSP00000136755\_c.639:TC>T\_p.S214del-fs ENSMUST00000177601.2|Gm10717-  
205|ENSMUSG00000095891|+|chr9:g.3028489:TC>T  
CHIPCPTVEISFPPFSVFLAIFHVLKCVFLIFRVFQVSRHIPGPTVCISHFSRFSVILSFFKFSSGCFSSFLI  
FSFLAIFHVLQWTFNLNPPFSVFLAIFHVLKCCVFLIFRDFQFSCHIPGPTVCISHFSRFSVILSFFNLSTAC  
FSFSIIFSFLAIFHVLQWTFNLNPPFSYSPYSRYSRHMHSFFTFSSDFIIFQVVKCMFLIFNDHFHFS  
>ENSMUSP00000136365\_c.646:A>T\_p.K216M ENSMUST00000179982.2|Gm10717-  
209|ENSMUSG00000095891|+|chr9:g.3028694:A>T  
MFLIFHDFQFSCHIPCPTVDISFPPFSVFLAIFHVLKCVFLIFRDFQFSCHIPGPTVCISHFSRFSVILSFFN  
LSTACFSFSIIFSFLAIFHVLQWTFNLNPPFSVFLAIFHVLKCVFLIFRDFQFSFYIPSPPTVCISHFSRFSVI  
LSFFNLSTACFSFSMIFSFFAIFHVLQKFLYFPPFSSSIFSPYSRYSVHFSFFTFSSDFVIFQVVKWMFLI  
FHDFQLSS  
>ENSMUSP00000136365\_c.654:A>T\_p.I219F ENSMUST00000179982.2|Gm10717-  
209|ENSMUSG00000095891|+|chr9:g.3028702:A>T  
MFLIFHDFQFSCHIPCPTVDISFPPFSVFLAIFHVLKCVFLIFRDFQFSCHIPGPTVCISHFSRFSVILSFFN  
LSTACFSFSIIFSFLAIFHVLQWTFNLNPPFSVFLAIFHVLKCVFLIFRDFQFSFYIPSPPTVCISHFSRFSVI  
LSFFNLSTACFSFSMIFSFFAIFHVLQKFLYFPPFSSSIFSPYSRYSVHFSFFTFSSDFVIFQVVKWKFLE  
FHDFQLSS  
>ENSMUSP00000136365\_c.678:A>T\_p.S227C ENSMUST00000179982.2|Gm10717-  
209|ENSMUSG00000095891|+|chr9:g.3028726:A>T  
MFLIFHDFQFSCHIPCPTVDISFPPFSVFLAIFHVLKCVFLIFRDFQFSCHIPGPTVCISHFSRFSVILSFFN  
LSTACFSFSIIFSFLAIFHVLQWTFNLNPPFSVFLAIFHVLKCVFLIFRDFQFSFYIPSPPTVCISHFSRFSVI  
LSFFNLSTACFSFSMIFSFFAIFHVLQKFLYFPPFSSSIFSPYSRYSVHFSFFTFSSDFVIFQVVKWKFLE  
FHDFQLSC  
>ENSMUSP00000137419\_c.366:C>T\_p.R123C ENSMUST00000177875.8|Gm10717-  
206|ENSMUSG00000095891|+|chr9:g.3028826:C>T  
MFLIFHDFQFSCHIPCPTVDISFPPFSVFLAIFHVLKCVFLIFRDFQFSCHIPGPTVCISHFSRFSVILSFFN  
LSTACFSFSIIFSFLAIFHVLQWTFNLNPPFSVFLAIFHVLKCCVFLIFCDEFQFSCHIPGPTVCISHFSRFSV  
ILSFFNLSTACFSFSMIFSFFLAIFHVLQWKFNLNPPFSVSPYSRYSVHFSFFTFSSDFVIFQVVKWMPFI  
DFQFSY  
>ENSMUSP00000137419\_c.367:G>A\_p.R123H ENSMUST00000177875.8|Gm10717-  
206|ENSMUSG00000095891|+|chr9:g.3028827:G>A  
MFLIFHDFQFSCHIPCPTVDISFPPFSVFLAIFHVLKCVFLIFRDFQFSCHIPGPTVCISHFSRFSVILSFFN  
LSTACFSFSIIFSFLAIFHVLQWTFNLNPPFSVFLAIFHVLKCCVFLIFHDFQFSCHIPGPTVCISHFSRFSV  
ILSFFNLSTACFSFSMIFSFFLAIFHVLQWKFNLNPPFSVSPYSRYSVHFSFFTFSSDFVIFQVVKWMPFI  
DFQFSY  
>ENSMUSP00000137419\_c.384:T>C\_p.C129R ENSMUST00000177875.8|Gm10717-  
206|ENSMUSG00000095891|+|chr9:g.3028844:T>C  
MFLIFHDFQFSCHIPCPTVDISFPPFSVFLAIFHVLKCVFLIFRDFQFSCHIPGPTVCISHFSRFSVILSFFN  
LSTACFSFSIIFSFLAIFHVLQWTFNLNPPFSVFLAIFHVLKCCVFLIFRDFQFSRHIPGPTVCISHFSRFSV

ILSFFNLSTACFSFSMIFSLAIFHVLQWKFLNFPPFSVSPYSRSYSVHFSFSTFFSDFVIFQVVKWMFPFIPL  
DFQFSY  
>ENSMUSP00000137419\_c.396:G>C\_p.G133R ENSMUST00000177875.8|Gm10717-  
206|ENSMUSG00000095891|+|chr9:g.3028856:G>C  
MFLIFHDFQFSCHIPCPTVDISFPPFSVFLAIFHVLKCVFLIFRDFQFSCHIPGPTVCISHFSRFSVILSFFN  
LSTACFSFSIIIFSFLAIFHVLQWTFLNFPFVSFLAIFHVLKCCVFLIFRDFQFSCHIPRPTVCISHFSRFSV  
ILSFFNLSTACFSFSMIFSLAIFHVLQWKFLNFPPFSVSPYSRSYSVHFSFSTFFSDFVIFQVVKWMFPFIPL  
DFQFSY  
>ENSMUSP00000137419\_c.402:A>T\_p.T135S ENSMUST00000177875.8|Gm10717-  
206|ENSMUSG00000095891|+|chr9:g.3028862:A>T  
MFLIFHDFQFSCHIPCPTVDISFPPFSVFLAIFHVLKCVFLIFRDFQFSCHIPGPTVCISHFSRFSVILSFFN  
LSTACFSFSIIIFSFLAIFHVLQWTFLNFPFVSFLAIFHVLKCCVFLIFRDFQFSCHIPGPSVCISHFSRFSV  
ILSFFNLSTACFSFSMIFSLAIFHVLQWKFLNFPPFSVSPYSRSYSVHFSFSTFFSDFVIFQVVKWMFPFIPL  
DFQFSY  
>ENSMUSP00000137419\_c.423:T>C\_p.S142P ENSMUST00000177875.8|Gm10717-  
206|ENSMUSG00000095891|+|chr9:g.3028883:T>C  
MFLIFHDFQFSCHIPCPTVDISFPPFSVFLAIFHVLKCVFLIFRDFQFSCHIPGPTVCISHFSRFSVILSFFN  
LSTACFSFSIIIFSFLAIFHVLQWTFLNFPFVSFLAIFHVLKCCVFLIFRDFQFSCHIPGPTVCISHFRFSV  
ILSFFNLSTACFSFSMIFSLAIFHVLQWKFLNFPPFSVSPYSRSYSVHFSFSTFFSDFVIFQVVKWMFPFIPL  
DFQFSY  
>ENSMUSP00000137419\_c.426:C>T\_p.R143C ENSMUST00000177875.8|Gm10717-  
206|ENSMUSG00000095891|+|chr9:g.3028886:C>T  
MFLIFHDFQFSCHIPCPTVDISFPPFSVFLAIFHVLKCVFLIFRDFQFSCHIPGPTVCISHFSRFSVILSFFN  
LSTACFSFSIIIFSFLAIFHVLQWTFLNFPFVSFLAIFHVLKCCVFLIFRDFQFSCHIPGPTVCISHFSCFSV  
ILSFFNLSTACFSFSMIFSLAIFHVLQWKFLNFPPFSVSPYSRSYSVHFSFSTFFSDFVIFQVVKWMFPFIPL  
DFQFSY  
>ENSMUSP00000137419\_c.436:T>G\_p.V146G ENSMUST00000177875.8|Gm10717-  
206|ENSMUSG00000095891|+|chr9:g.3028896:T>G  
MFLIFHDFQFSCHIPCPTVDISFPPFSVFLAIFHVLKCVFLIFRDFQFSCHIPGPTVCISHFSRFSVILSFFN  
LSTACFSFSIIIFSFLAIFHVLQWTFLNFPFVSFLAIFHVLKCCVFLIFRDFQFSCHIPGPTVCISHFSRFSG  
ILSFFNLSTACFSFSMIFSLAIFHVLQWKFLNFPPFSVSPYSRSYSVHFSFSTFFSDFVIFQVVKWMFPFIPL  
DFQFSY  
>ENSMUSP00000137419\_c.442:T>C\_p.L148S ENSMUST00000177875.8|Gm10717-  
206|ENSMUSG00000095891|+|chr9:g.3028902:T>C  
MFLIFHDFQFSCHIPCPTVDISFPPFSVFLAIFHVLKCVFLIFRDFQFSCHIPGPTVCISHFSRFSVILSFFN  
LSTACFSFSIIIFSFLAIFHVLQWTFLNFPFVSFLAIFHVLKCCVFLIFRDFQFSCHIPGPTVCISHFSRFSV  
ISSFFNLSTACFSFSMIFSLAIFHVLQWKFLNFPPFSVSPYSRSYSVHFSFSTFFSDFVIFQVVKWMFPFIPL  
DFQFSY  
>ENSMUSP00000137419\_c.455:TTT>GTC\_p.N152K ENSMUST00000177875.8|Gm10717-  
206|ENSMUSG00000095891|+|chr9:g.3028915:TTT>GTC  
MFLIFHDFQFSCHIPCPTVDISFPPFSVFLAIFHVLKCVFLIFRDFQFSCHIPGPTVCISHFSRFSVILSFFN  
LSTACFSFSIIIFSFLAIFHVLQWTFLNFPFVSFLAIFHVLKCCVFLIFRDFQFSCHIPGPTVCISHFSRFSV  
ILSFFKSCQLHVSHFP\*FLVFLLYSMSYSGNF\*IFHLQFRHIPGPTVCISHFSRFSVILSFFKLSSGCFPFS  
LIFSFL  
>ENSMUSP00000137419\_c.455:TTT>GTG\_p.N152K ENSMUST00000177875.8|Gm10717-  
206|ENSMUSG00000095891|+|chr9:g.3028915:TTT>GTG  
MFLIFHDFQFSCHIPCPTVDISFPPFSVFLAIFHVLKCVFLIFRDFQFSCHIPGPTVCISHFSRFSVILSFFN  
LSTACFSFSIIIFSFLAIFHVLQWTFLNFPFVSFLAIFHVLKCCVFLIFRDFQFSCHIPGPTVCISHFSRFSV  
ILSFFKCCQLHVSHFP\*FLVFLLYSMSYSGNF\*IFHLQFRHIPGPTVCISHFSRFSVILSFFKLSSGCFPFS  
LIFSFL  
>ENSMUSP00000137419\_c.463:CTGC>GTGA\_p.T155S ENSMUST00000177875.8|Gm10717-  
206|ENSMUSG00000095891|+|chr9:g.3028923:CTGC>GTGA  
MFLIFHDFQFSCHIPCPTVDISFPPFSVFLAIFHVLKCVFLIFRDFQFSCHIPGPTVCISHFSRFSVILSFFN  
LSTACFSFSIIIFSFLAIFHVLQWTFLNFPFVSFLAIFHVLKCCVFLIFRDFQFSCHIPGPTVCISHFSRFSV  
ILSFFNLSSDACFSFSMIFSLAIFHVLQWKFLNFPPFSVSPYSRSYSVHFSFSTFFSDFVIFQVVKWMFPFIPL  
LDFQFSY  
>ENSMUSP00000137419\_c.463:CTGC>GTGG\_p.T155S ENSMUST00000177875.8|Gm10717-  
206|ENSMUSG00000095891|+|chr9:g.3028923:CTGC>GTGG

MFLIFHDFQFSCHIPCPTVDISFPPFSVFLAIFHVLKCVFLIFRDFQFSCHIPGPTVCISHFSRFSVILSFFN  
LSTACFSFSIIFSFLAIFHVLQWTFNLNPPFSVFLAIFHVLKCCVFLIFRDFQFSCHIPGPTVCISHFSRFSV  
ILSFFNLSSGACFSFSMIFSFLAIFHVLQWKFLNPPFSVSPYSRSYSVHFSFSTFFSDFVIFQVVKWMPPIFL  
LDFQFSY  
>ENSMUSP00000137419\_c.463:CTGC>GTTT\_p.T155S ENSMUST00000177875.8|Gm10717-  
206|ENSMUSG00000095891|+|chr9:g.3028923:CTGC>GTTT  
MFLIFHDFQFSCHIPCPTVDISFPPFSVFLAIFHVLKCVFLIFRDFQFSCHIPGPTVCISHFSRFSVILSFFN  
LSTACFSFSIIFSFLAIFHVLQWTFNLNPPFSVFLAIFHVLKCCVFLIFRDFQFSCHIPGPTVCISHFSRFSV  
ILSFFNLSSFACFSFSMIFSFLAIFHVLQWKFLNPPFSVSPYSRSYSVHFSFSTFFSDFVIFQVVKWMPPIFL  
LDFQFSY  
>ENSMUSP00000137419\_c.475:C>A\_p.S159\* ENSMUST00000177875.8|Gm10717-  
206|ENSMUSG00000095891|+|chr9:g.3028935:C>A  
MFLIFHDFQFSCHIPCPTVDISFPPFSVFLAIFHVLKCVFLIFRDFQFSCHIPGPTVCISHFSRFSVILSFFN  
LSTACFSFSIIFSFLAIFHVLQWTFNLNPPFSVFLAIFHVLKCCVFLIFRDFQFSCHIPGPTVCISHFSRFSV  
ILSFFNLSTACF\*FSMIFSFLAIFHVLQWKFLNPPFSVSPYSRSYSVHFSFSTFFSDFVIFQVVKWMPPIFL  
DFQFSY  
>ENSMUSP00000137419\_c.483:A>G\_p.M162V ENSMUST00000177875.8|Gm10717-  
206|ENSMUSG00000095891|+|chr9:g.3028943:A>G  
MFLIFHDFQFSCHIPCPTVDISFPPFSVFLAIFHVLKCVFLIFRDFQFSCHIPGPTVCISHFSRFSVILSFFN  
LSTACFSFSIIFSFLAIFHVLQWTFNLNPPFSVFLAIFHVLKCCVFLIFRDFQFSCHIPGPTVCISHFSRFSV  
ILSFFNLSTACFSFSVIFSFLAIFHVLQWKFLNPPFSVSPYSRSYSVHFSFSTFFSDFVIFQVVKWMPPIFL  
DFQFSY  
>ENSMUSP00000137419\_c.526:A>C\_p.K176T ENSMUST00000177875.8|Gm10717-  
206|ENSMUSG00000095891|+|chr9:g.3028986:A>C  
MFLIFHDFQFSCHIPCPTVDISFPPFSVFLAIFHVLKCVFLIFRDFQFSCHIPGPTVCISHFSRFSVILSFFN  
LSTACFSFSIIFSFLAIFHVLQWTFNLNPPFSVFLAIFHVLKCCVFLIFRDFQFSCHIPGPTVCISHFSRFSV  
ILSFFNLSTACFSFSMIFSFLAIFHVLQWTFNLNPPFSVSPYSRSYSVHFSFSTFFSDFVIFQVVKWMPPIFL  
DFQFSY  
>ENSMUSP00000137419\_c.544:C>T\_p.P182L ENSMUST00000177875.8|Gm10717-  
206|ENSMUSG00000095891|+|chr9:g.3029004:C>T  
MFLIFHDFQFSCHIPCPTVDISFPPFSVFLAIFHVLKCVFLIFRDFQFSCHIPGPTVCISHFSRFSVILSFFN  
LSTACFSFSIIFSFLAIFHVLQWTFNLNPPFSVFLAIFHVLKCCVFLIFRDFQFSCHIPGPTVCISHFSRFSV  
ILSFFNLSTACFSFSMIFSFLAIFHVLQWKFLNPPFSVSPYSRSYSVHFSFSTFFSDFVIFQVVKWMPPIFL  
DFQFSY  
>rs245098628\_ENSMUSP00000096650\_c.100:T>A\_p.V34D  
ENSMUST00000099051.11|Gm10717-203|ENSMUSG00000095891|+|chr9:g.3029299:T>A  
CHIPCPTVEISFPPFSVFLAIFHVLKCVFLIFRDFQVSRHIPGPTVCISHFSRFSVILSFFKLSGCFPPSLI  
FSFLTIFHVLQWTFNLNPPFSVFLAIFHVLKCVFLIFSDQFPRHIPGPTVCISHFSRFSVSISSFFKTSSGCF  
SFFMIFSFLAIFHVLQWTFNLNPPFSVSPYSRSYSVHFSFSTFFSDFVIFQVVKWMPPIFLDFHFSC  
>ENSMUSP00000096650\_c.100:TTT>ATA\_p.V34D ENSMUST00000099051.11|Gm10717-  
203|ENSMUSG00000095891|+|chr9:g.3029299:TTT>ATA  
CHIPCPTVEISFPPFSVFLAIFHVLKCVFLIFRDFRFLAIFQVLQCAFLIFHVQ\*FCHFSSCQVDVSHFP\*  
FSVFLPYSMSYSGHF\*IFHLFQFSLPYFMS\*SVYFSFSVIFSFLAIFQVLQCAFLIFHVQ\*FRLEFRRQVDV  
SHFS\*FSVFLPYSMSYSGHF\*IFHLFLFRHIPGPTVCISHFSRFSVILSFFKLSGCFPSFLIFTFL  
>ENSMUSP00000137419\_c.552:G>T\_p.V185F ENSMUST00000177875.8|Gm10717-  
206|ENSMUSG00000095891|+|chr9:g.3029307:G>T  
MFLIFHDFQFSCHIPCPTVDISFPPFSVFLAIFHVLKCVFLIFRDFQFSCHIPGPTVCISHFSRFSVILSFFN  
LSTACFSFSIIFSFLAIFHVLQWTFNLNPPFSVFLAIFHVLKCCVFLIFRDFQFSCHIPGPTVCISHFSRFSV  
ILSFFNLSTACFSFSMIFSFLAIFHVLQWKFLNPPFSVSPYSRSYSVHFSFSTFFSDFVIFQVVKWMPPIFL  
DFQFSY  
>ENSMUSP00000096650\_c.108:G>T\_p.V37F ENSMUST00000099051.11|Gm10717-  
203|ENSMUSG00000095891|+|chr9:g.3029307:G>T  
CHIPCPTVEISFPPFSVFLAIFHVLKCVFLIFRDFRFLAIFRVLQVSRHIPGPTVCISHFSRFSVILSFFKLSGCFPPSLI  
FSFLTIFHVLQWTFNLNPPFSVFLAIFHVLKCVFLIFSDQFPRHIPGPTVCISHFSRFSVSISSFFKTSSGCF  
SFFMIFSFLAIFHVLQWTFNLNPPFSVSPYSRSYSVHFSFSTFFSDFVIFQVVKWMPPIFLDFHFSC  
>ENSMUSP00000137419\_c.576:A>C\_p.S193R ENSMUST00000177875.8|Gm10717-  
206|ENSMUSG00000095891|+|chr9:g.3029333:A>C

MFLIFHDFQFSCHIPCPTVDISFPPFSVFLAIFHVLKCVFLIFRDFQFSCHIPGPTVCISHFSRFSVILSFFN  
LSTACFSFSIIFSFLAIFHVLQWTFNLNFPFVSFLAIFHVLKCCVFLIFRDFQFSCHIPGPTVCISHFSRFSV  
ILSFFNLSTACFSFSMIFSFLAIFHVLQWKFLNFPFVSVPYSRSYRVHFSFFTFSSDFVIFQVVKWMPFIPL  
DFQFSY  
>ENSMUSP00000137419\_c.595:T>C\_p.F199S ENSMUST00000177875.8|Gm10717-  
206|ENSMUSG00000095891|+|chr9:g.3029352:T>C  
MFLIFHDFQFSCHIPCPTVDISFPPFSVFLAIFHVLKCVFLIFRDFQFSCHIPGPTVCISHFSRFSVILSFFN  
LSTACFSFSIIFSFLAIFHVLQWTFNLNFPFVSFLAIFHVLKCCVFLIFRDFQFSCHIPGPTVCISHFSRFSV  
ILSFFNLSTACFSFSMIFSFLAIFHVLQWKFLNFPFVSVPYSRSYSVHFSFSTFFSDFVIFQVVKWMPFIPL  
DFQFSY  
>ENSMUSP00000096650\_c.153:T>C\_p.S52P ENSMUST00000099051.11|Gm10717-  
203|ENSMUSG00000095891|+|chr9:g.3029352:T>C  
CHIPCPTVEISFPPFSVFLAIFHVLKCVFLIFRVFQVSRHIPGPTVCISHFPRFSVILSFFKLSSGCFPFSLI  
FSFLTIFHVLQWTFNLNFPFVSFLAIFHVLKCVFLIFSDQFPRHIPGPTVCISHFSRFSVILSFFKTS  
SFFMIFSFLAIFHVLQWTFNLNFPFVSVPYSRSYSVHFSFFTFSSDFVIFQVVKWMPFIPLDFHFSC  
>ENSMUSP00000096650\_c.163:C>T\_p.S55L ENSMUST00000099051.11|Gm10717-  
203|ENSMUSG00000095891|+|chr9:g.3029362:C>T  
CHIPCPTVEISFPPFSVFLAIFHVLKCVFLIFRVFQVSRHIPGPTVCISHFSRFLVILSFFKLSSGCFPFSLI  
FSFLTIFHVLQWTFNLNFPFVSFLAIFHVLKCVFLIFSDQFPRHIPGPTVCISHFSRFSVILSFFKTS  
SFFMIFSFLAIFHVLQWTFNLNFPFVSVPYSRSYSVHFSFFTFSSDFVIFQVVKWMPFIPLDFHFSC  
>ENSMUSP00000096650\_c.172:T>C\_p.L58S ENSMUST00000099051.11|Gm10717-  
203|ENSMUSG00000095891|+|chr9:g.3029371:T>C  
CHIPCPTVEISFPPFSVFLAIFHVLKCVFLIFRVFQVSRHIPGPTVCISHFSRFSVILSFFKLSSGCFPFSLI  
FSFLTIFHVLQWTFNLNFPFVSFLAIFHVLKCVFLIFSDQFPRHIPGPTVCISHFSRFSVILSFFKTS  
SFFMIFSFLAIFHVLQWTFNLNFPFVSVPYSRSYSVHFSFFTFSSDFVIFQVVKWMPFIPLDFHFSC  
>rs260015946\_ENSMUSP00000096650\_c.187:T>C\_p.L63S  
ENSMUST00000099051.11|Gm10717-203|ENSMUSG00000095891|+|chr9:g.3029386:T>C  
CHIPCPTVEISFPPFSVFLAIFHVLKCVFLIFRVFQVSRHIPGPTVCISHFSRFSVILSFFKLSSGCFPFSLI  
FSFLTIFHVLQWTFNLNFPFVSFLAIFHVLKCVFLIFSDQFPRHIPGPTVCISHFSRFSVILSFFKTS  
SFFMIFSFLAIFHVLQWTFNLNFPFVSVPYSRSYSVHFSFFTFSSDFVIFQVVKWMPFIPLDFHFSC  
>ENSMUSP00000137419\_c.646:C>T\_p.P216L ENSMUST00000177875.8|Gm10717-  
206|ENSMUSG00000095891|+|chr9:g.3029403:C>T  
MFLIFHDFQFSCHIPCPTVDISFPPFSVFLAIFHVLKCVFLIFRDFQFSCHIPGPTVCISHFSRFSVILSFFN  
LSTACFSFSIIFSFLAIFHVLQWTFNLNFPFVSFLAIFHVLKCCVFLIFRDFQFSCHIPGPTVCISHFSRFSV  
ILSFFNLSTACFSFSMIFSFLAIFHVLQWKFLNFPFVSVPYSRSYSVHFSFFTFSSDFVIFQVVKWMPFIPL  
DFQFSY  
>ENSMUSP00000096650\_c.204:C>T\_p.P69S ENSMUST00000099051.11|Gm10717-  
203|ENSMUSG00000095891|+|chr9:g.3029403:C>T  
CHIPCPTVEISFPPFSVFLAIFHVLKCVFLIFRVFQVSRHIPGPTVCISHFSRFSVILSFFKLSSGCFPFSLI  
FSFLTIFHVLQWTFNLNFPFVSFLAIFHVLKCVFLIFSDQFPRHIPGPTVCISHFSRFSVILSFFKTS  
SFFMIFSFLAIFHVLQWTFNLNFPFVSVPYSRSYSVHFSFFTFSSDFVIFQVVKWMPFIPLDFHFSC  
>rs227499457\_ENSMUSP00000137419\_c.655:T>A\_p.L219H  
ENSMUST00000177875.8|Gm10717-206|ENSMUSG00000095891|+|chr9:g.3029412:T>A  
MFLIFHDFQFSCHIPCPTVDISFPPFSVFLAIFHVLKCVFLIFRDFQFSCHIPGPTVCISHFSRFSVILSFFN  
LSTACFSFSIIFSFLAIFHVLQWTFNLNFPFVSFLAIFHVLKCCVFLIFRDFQFSCHIPGPTVCISHFSRFSV  
ILSFFNLSTACFSFSMIFSFLAIFHVLQWKFLNFPFVSVPYSRSYSVHFSFFTFSSDFVIFQVVKWMPFIH  
DFQFSY  
>rs227499457\_ENSMUSP00000096650\_c.213:T>A\_p.L72M  
ENSMUST00000099051.11|Gm10717-203|ENSMUSG00000095891|+|chr9:g.3029412:T>A  
CHIPCPTVEISFPPFSVFLAIFHVLKCVFLIFRVFQVSRHIPGPTVCISHFSRFSVILSFFKLSSGCFPFSMI  
FSFLTIFHVLQWTFNLNFPFVSFLAIFHVLKCVFLIFSDQFPRHIPGPTVCISHFSRFSVILSFFKTS  
SFFMIFSFLAIFHVLQWTFNLNFPFVSVPYSRSYSVHFSFFTFSSDFVIFQVVKWMPFIPLDFHFSC  
>ENSMUSP00000137419\_c.666:T>A\_p.F223I ENSMUST00000177875.8|Gm10717-  
206|ENSMUSG00000095891|+|chr9:g.3029423:T>A  
MFLIFHDFQFSCHIPCPTVDISFPPFSVFLAIFHVLKCVFLIFRDFQFSCHIPGPTVCISHFSRFSVILSFFN  
LSTACFSFSIIFSFLAIFHVLQWTFNLNFPFVSFLAIFHVLKCCVFLIFRDFQFSCHIPGPTVCISHFSRFSV  
ILSFFNLSTACFSFSMIFSFLAIFHVLQWKFLNFPFVSVPYSRSYSVHFSFFTFSSDFVIFQVVKWMPFIPL  
DFQISY



>ENSMUSP00000096650\_c.224:T>A\_p.S75R ENSMUST00000099051.11|Gm10717-203|ENSMUSG00000095891|+|chr9:g.3029423:T>A  
CHIPCPTVEISFPPFSVFLAIFHVLKCVFLIFRVFQVSRHIPGPTVCISHFSRFSVILSFFKLSSGCFPPFSLI  
FRFLTIFHVLQWTFNLNFPFVSFLAIFHVLKCVFLIFSDQFPRHIPGPTVCISHFSRFSVILSFFKTS  
SFFMIFSFLAIFHVLQWTFNLNFPFVSFLAIFHVLKCVFLIFSDQFPRHIPGPTVCISHFSRFSVILS  
>ENSMUSP00000137419\_c.673:A>G\_p.Y225C ENSMUST00000177875.8|Gm10717-206|ENSMUSG00000095891|+|chr9:g.3029430:A>G  
MFLIFHDFQFSCHIPCPTVDISFPPFSVFLAIFHVLKCVFLIFRDFQFSCHIPGPTVCISHFSRFSVILS  
LSTACFSFSIIFSFLAIFHVLQWTFNLNFPFVSFLAIFHVLKCVFLIFRDFQFSCHIPGPTVCISHFSRFSV  
ILSFFNLSTACFSFSMIFSFLAIFHVLQWTFNLNFPFVSFLAIFHVLKCVFLIFRDFQFSCHIPGPTVCISHFSRFSV  
DFQFSC  
>ENSMUSP00000096650\_c.231:A>G\_p.T78A ENSMUST00000099051.11|Gm10717-203|ENSMUSG00000095891|+|chr9:g.3029430:A>G  
CHIPCPTVEISFPPFSVFLAIFHVLKCVFLIFRVFQVSRHIPGPTVCISHFSRFSVILSFFKLSSGCFPPFSLI  
FSFLAIFHVLQWTFNLNFPFVSFLAIFHVLKCVFLIFSDQFPRHIPGPTVCISHFSRFSVILSFFKTS  
SFFMIFSFLAIFHVLQWTFNLNFPFVSFLAIFHVLKCVFLIFSDQFPRHIPGPTVCISHFSRFSVILS  
>ENSMUSP00000096650\_c.268:T>A\_p.F90Y ENSMUST00000099051.11|Gm10717-203|ENSMUSG00000095891|+|chr9:g.3029467:T>A  
CHIPCPTVEISFPPFSVFLAIFHVLKCVFLIFRVFQVSRHIPGPTVCISHFSRFSVILSFFKLSSGCFPPFSLI  
FSFLTIFHVLQWTFNLNFPFVSFLAIFHVLKCVFLIFSDQFPRHIPGPTVCISHFSRFSVILSFFKTS  
SFFMIFSFLAIFHVLQWTFNLNFPFVSFLAIFHVLKCVFLIFSDQFPRHIPGPTVCISHFSRFSVILS  
>ENSMUSP00000096650\_c.273:C>T\_p.P92S ENSMUST00000099051.11|Gm10717-203|ENSMUSG00000095891|+|chr9:g.3029472:C>T  
CHIPCPTVEISFPPFSVFLAIFHVLKCVFLIFRVFQVSRHIPGPTVCISHFSRFSVILSFFKLSSGCFPPFSLI  
FSFLTIFHVLQWTFNLNFPFVSFLAIFHVLKCVFLIFSDQFPRHIPGPTVCISHFSRFSVILSFFKTS  
SFFMIFSFLAIFHVLQWTFNLNFPFVSFLAIFHVLKCVFLIFSDQFPRHIPGPTVCISHFSRFSVILS  
>ENSMUSP00000096650\_c.292:C>T\_p.A98V ENSMUST00000099051.11|Gm10717-203|ENSMUSG00000095891|+|chr9:g.3029491:C>T  
CHIPCPTVEISFPPFSVFLAIFHVLKCVFLIFRVFQVSRHIPGPTVCISHFSRFSVILSFFKLSSGCFPPFSLI  
FSFLTIFHVLQWTFNLNFPFVSFLAIFHVLKCVFLIFSDQFPRHIPGPTVCISHFSRFSVILSFFKTS  
SFFMIFSFLAIFHVLQWTFNLNFPFVSFLAIFHVLKCVFLIFSDQFPRHIPGPTVCISHFSRFSVILS  
>ENSMUSP00000096650\_c.309:A>T\_p.K104\* ENSMUST00000099051.11|Gm10717-203|ENSMUSG00000095891|+|chr9:g.3029508:A>T  
CHIPCPTVEISFPPFSVFLAIFHVLKCVFLIFRVFQVSRHIPGPTVCISHFSRFSVILSFFKLSSGCFPPFSLI  
FSFLTIFHVLQWTFNLNFPFVSFLAIFHVL\*CVFLIFSDQFPRHIPGPTVCISHFSRFSVILSFFKTS  
SFFMIFSFLAIFHVLQWTFNLNFPFVSFLAIFHVLKCVFLIFSDQFPRHIPGPTVCISHFSRFSVILS  
>ENSMUSP00000096650\_c.315:G>A\_p.V106I ENSMUST00000099051.11|Gm10717-203|ENSMUSG00000095891|+|chr9:g.3029514:G>A  
CHIPCPTVEISFPPFSVFLAIFHVLKCVFLIFRVFQVSRHIPGPTVCISHFSRFSVILSFFKLSSGCFPPFSLI  
FSFLTIFHVLQWTFNLNFPFVSFLAIFHVLKCVFLIFSDQFPRHIPGPTVCISHFSRFSVILSFFKTS  
SFFMIFSFLAIFHVLQWTFNLNFPFVSFLAIFHVLKCVFLIFSDQFPRHIPGPTVCISHFSRFSVILS  
>ENSMUSP00000096650\_c.330:A>C\_p.S111R ENSMUST00000099051.11|Gm10717-203|ENSMUSG00000095891|+|chr9:g.3029529:A>C  
CHIPCPTVEISFPPFSVFLAIFHVLKCVFLIFRVFQVSRHIPGPTVCISHFSRFSVILSFFKLSSGCFPPFSLI  
FSFLTIFHVLQWTFNLNFPFVSFLAIFHVLKCVFLIFRDFQFPRHIPGPTVCISHFSRFSVILSFFKTS  
SFFMIFSFLAIFHVLQWTFNLNFPFVSFLAIFHVLKCVFLIFRDFQFPRHIPGPTVCISHFSRFSVILS  
>ENSMUSP00000096650\_c.330:A>T\_p.S111C ENSMUST00000099051.11|Gm10717-203|ENSMUSG00000095891|+|chr9:g.3029529:A>T  
CHIPCPTVEISFPPFSVFLAIFHVLKCVFLIFRVFQVSRHIPGPTVCISHFSRFSVILSFFKLSSGCFPPFSLI  
FSFLTIFHVLQWTFNLNFPFVSFLAIFHVLKCVFLIFCDQFPRHIPGPTVCISHFSRFSVILSFFKTS  
SFFMIFSFLAIFHVLQWTFNLNFPFVSFLAIFHVLKCVFLIFCDQFPRHIPGPTVCISHFSRFSVILS  
>ENSMUSP00000096640\_c.6:A>T\_p.I3F ENSMUST00000099042.4|Gm10717-202|ENSMUSG00000095891|+|chr9:g.3030343:A>T  
FLFFHDFQSSHIPGPTVDISFRPLSVFLAIFHVPKCVFLIFHDFQFPRHIPGPTVCISHFSRFSVILSFFKTS  
SSGCFSSFFMIFSFLAIFHVLQWTFNLNFPFVSFLAIFHVLKCVFLIFRDFQFSCHIPGPTVCISHFSRFSVIL  
SFFNLSTACFSFSMIFSFLAIFHVLQWTFNLNFPFVSFLAIFHVLKCVFLIFRDFQFSCHIPGPTVCISHFSRFSVIL  
HFSC

>ENSMUSP00000096640\_c.24:C>T\_p.L9F ENSMUST00000099042.4|Gm10717-  
202|ENSMUSG00000095891|+|chr9:g.3030361:C>T  
FLIFHDFQFSSHIPGPTVDISFRPLSVFLAIFHVPKCVFLIFHDFQFPRHIPGPTVCISHFSRFSVSISSFFKT  
SSGCFSSFFMIFSFLAIFHVLQWTFNLNPPFSVFLAIFHVLKCVFLIFRDFQFSCHIPGPTVCISHFSRFSVIL  
SFFNLSTACFSFSMIFSFLAIFHVLQWTFNLNPPFSVSPYSRSYSVHFSFFTFSSDFVIFQVVKWMFLIFLDF  
HFSC  
>ENSMUSP00000096640\_c.30:A>C\_p.S11R ENSMUST00000099042.4|Gm10717-  
202|ENSMUSG00000095891|+|chr9:g.3030367:A>C  
FLIFHDFQLSRHIPGPTVDISFRPLSVFLAIFHVPKCVFLIFHDFQFPRHIPGPTVCISHFSRFSVSISSFFKT  
SSGCFSSFFMIFSFLAIFHVLQWTFNLNPPFSVFLAIFHVLKCVFLIFRDFQFSCHIPGPTVCISHFSRFSVIL  
SFFNLSTACFSFSMIFSFLAIFHVLQWTFNLNPPFSVSPYSRSYSVHFSFFTFSSDFVIFQVVKWMFLIFLDF  
HFSC  
>ENSMUSP00000096640\_c.30:A>T\_p.S11C ENSMUST00000099042.4|Gm10717-  
202|ENSMUSG00000095891|+|chr9:g.3030367:A>T  
FLIFHDFQLSCHIPGPTVDISFRPLSVFLAIFHVPKCVFLIFHDFQFPRHIPGPTVCISHFSRFSVSISSFFKT  
SSGCFSSFFMIFSFLAIFHVLQWTFNLNPPFSVFLAIFHVLKCVFLIFRDFQFSCHIPGPTVCISHFSRFSVIL  
SFFNLSTACFSFSMIFSFLAIFHVLQWTFNLNPPFSVSPYSRSYSVHFSFFTFSSDFVIFQVVKWMFLIFLDF  
HFSC  
>rs260741822\_ENSMUSP00000096640\_c.42:G>C\_p.G15R  
ENSMUST00000099042.4|Gm10717-202|ENSMUSG00000095891|+|chr9:g.3030379:G>C  
FLIFHDFQLSSHIPRPTVDISFRPLSVFLAIFHVPKCVFLIFHDFQFPRHIPGPTVCISHFSRFSVSISSFFKT  
SSGCFSSFFMIFSFLAIFHVLQWTFNLNPPFSVFLAIFHVLKCVFLIFRDFQFSCHIPGPTVCISHFSRFSVIL  
SFFNLSTACFSFSMIFSFLAIFHVLQWTFNLNPPFSVSPYSRSYSVHFSFFTFSSDFVIFQVVKWMFLIFLDF  
HFSC  
>ENSMUSP00000096640\_c.67:G>C\_p.R23P ENSMUST00000099042.4|Gm10717-  
202|ENSMUSG00000095891|+|chr9:g.3030408:G>C  
FLIFHDFQLSSHIPGPTVDISFPPLSVFLAIFHVPKCVFLIFHDFQFPRHIPGPTVCISHFSRFSVSISSFFKT  
SSGCFSSFFMIFSFLAIFHVLQWTFNLNPPFSVFLAIFHVLKCVFLIFRDFQFSCHIPGPTVCISHFSRFSVIL  
SFFNLSTACFSFSMIFSFLAIFHVLQWTFNLNPPFSVSPYSRSYSVHFSFFTFSSDFVIFQVVKWMFLIFLDF  
HFSC  
>ENSMUSP00000096640\_c.141:C>T\_p.P48S ENSMUST00000099042.4|Gm10717-  
202|ENSMUSG00000095891|+|chr9:g.3030482:C>T  
FLIFHDFQLSSHIPGPTVDISFRPLSVFLAIFHVPKCVFLIFHDFQFSRHIPGPTVCISHFSRFSVSISSFFKT  
SSGCFSSFFMIFSFLAIFHVLQWTFNLNPPFSVFLAIFHVLKCVFLIFRDFQFSCHIPGPTVCISHFSRFSVIL  
SFFNLSTACFSFSMIFSFLAIFHVLQWTFNLNPPFSVSPYSRSYSVHFSFFTFSSDFVIFQVVKWMFLIFLDF  
HFSC  
>ENSMUSP00000096650\_c.390:C>T\_p.R131C ENSMUST00000099051.11|Gm10717-  
203|ENSMUSG00000095891|+|chr9:g.3030527:C>T  
CHIPCPTVEISFPPFSVFLAIFHVLKCVFLIFRVFQVSRHIPGPTVCISHFSRFSVILSFFKLSSGCFPPSLI  
FSFLTIFHVLQWTFNLNPPFSVFLAIFHVLKCVFLIFSDQFPRHIPGPTVCISHFSRFSVSISSFFKTSSGCF  
SFFMIFSFLAIFHVLQWTFNLNPPFSVSPYSRSYSVHFSFFTFSSDFVIFQVVKWMFLIFLDFHFSC  
>ENSMUSP00000096640\_c.186:C>T\_p.R63C ENSMUST00000099042.4|Gm10717-  
202|ENSMUSG00000095891|+|chr9:g.3030527:C>T  
FLIFHDFQLSSHIPGPTVDISFRPLSVFLAIFHVPKCVFLIFHDFQFPRHIPGPTVCISHFSRFSVSISSFFKT  
SSGCFSSFFMIFSFLAIFHVLQWTFNLNPPFSVFLAIFHVLKCVFLIFRDFQFSCHIPGPTVCISHFSRFSVIL  
SFFNLSTACFSFSMIFSFLAIFHVLQWTFNLNPPFSVSPYSRSYSVHFSFFTFSSDFVIFQVVKWMFLIFLDF  
HFSC  
>ENSMUSP00000096650\_c.390:C>A\_p.R131S ENSMUST00000099051.11|Gm10717-  
203|ENSMUSG00000095891|+|chr9:g.3030527:C>A  
CHIPCPTVEISFPPFSVFLAIFHVLKCVFLIFRVFQVSRHIPGPTVCISHFSRFSVILSFFKLSSGCFPPSLI  
FSFLTIFHVLQWTFNLNPPFSVFLAIFHVLKCVFLIFSDQFPRHIPGPTVCISHFSRFSVSISSFFKTSSGCF  
SFFMIFSFLAIFHVLQWTFNLNPPFSVSPYSRSYSVHFSFFTFSSDFVIFQVVKWMFLIFLDFHFSC  
>ENSMUSP00000096640\_c.186:C>A\_p.R63S ENSMUST00000099042.4|Gm10717-  
202|ENSMUSG00000095891|+|chr9:g.3030527:C>A  
FLIFHDFQLSSHIPGPTVDISFRPLSVFLAIFHVPKCVFLIFHDFQFPRHIPGPTVCISHFSRFSVSISSFFKT  
SSGCFSSFFMIFSFLAIFHVLQWTFNLNPPFSVFLAIFHVLKCVFLIFRDFQFSCHIPGPTVCISHFSRFSVIL  
SFFNLSTACFSFSMIFSFLAIFHVLQWTFNLNPPFSVSPYSRSYSVHFSFFTFSSDFVIFQVVKWMFLIFLDF  
HFSC

>ENSMUSP00000096650\_c.397:C>T\_p.S133L ENSMUST00000099051.11|Gm10717-203|ENSMUSG00000095891|+|chr9:g.3030534:C>T  
CHIPCPTVEISFPPFSVFLAIFHVLKCVFLIFRVFQVSRHIPGPTVCISHFSRFSVILSFFKLSSGCFPPFSLI  
FSFLTIFHVLQWTFNLNFPFVSFLAIFHVLKCVFLIFSDQFPRHIPGPTVCISHFSRFLVISSFFKTSSGCF  
SFFMIFSFLAIFHVLQWTFNLNFPFVSVPYSRYSVHFSFFTFSDVIFQVVKWMFLIFLDFHFSC  
>ENSMUSP00000096640\_c.193:C>T\_p.S65L ENSMUST00000099042.4|Gm10717-202|ENSMUSG00000095891|+|chr9:g.3030534:C>T  
FLIFHDFQLSSHIPGPTVDISFRPLSVFLAIFHVPKCVFLIFHDFQFPRHIPGPTVCISHFSRFLVISSFFKT  
SSGCF SFFMIFSFLAIFHVLQWTFNLNFPFVSFLAIFHVLKCVFLIFRDFQFSCHIPGPTVCISHFSRFSVIL  
SFFNLSTACFSFSMIFSFLAIFHVLQWTFNLNFPFVSVPYSRYSVHFSFFTFSDVIFQVVKWMFLIFLDF  
HFSC  
>rs226036698\_ENSMUSP00000096650\_c.420:A>T\_p.T141S  
ENSMUST00000099051.11|Gm10717-203|ENSMUSG00000095891|+|chr9:g.3030557:A>T  
CHIPCPTVEISFPPFSVFLAIFHVLKCVFLIFRVFQVSRHIPGPTVCISHFSRFSVILSFFKLSSGCFPPFSLI  
FSFLTIFHVLQWTFNLNFPFVSFLAIFHVLKCVFLIFSDQFPRHIPGPTVCISHFSRFSVILSFFKSSGCF  
SFFMIFSFLAIFHVLQWTFNLNFPFVSVPYSRYSVHFSFFTFSDVIFQVVKWMFLIFLDFHFSC  
>rs226036698\_ENSMUSP00000096640\_c.216:A>T\_p.T73S  
ENSMUST00000099042.4|Gm10717-202|ENSMUSG00000095891|+|chr9:g.3030557:A>T  
FLIFHDFQLSSHIPGPTVDISFRPLSVFLAIFHVPKCVFLIFHDFQFPRHIPGPTVCISHFSRFSVILSFFKS  
SSGCF SFFMIFSFLAIFHVLQWTFNLNFPFVSFLAIFHVLKCVFLIFRDFQFSCHIPGPTVCISHFSRFSVIL  
SFFNLSTACFSFSMIFSFLAIFHVLQWTFNLNFPFVSVPYSRYSVHFSFFTFSDVIFQVVKWMFLIFLDF  
HFSC  
>ENSMUSP00000137451\_c.12:TTTC>CTTT\_p.F5L ENSMUST00000179264.2|Gm10717-207|ENSMUSG00000095891|+|chr9:g.3030580:TTTC>CTTT  
MFLILFHDQFQFSCHIPCPTVDISFPFVSFLAIFHVLKCVFLIFRDFQFSCHIPGPTVCISHFSRFSVILSFF  
NLSTACFSFSMIFSFLAIFHVLQWTFNLNFPFVSFLAIFHVLKCVFLIFRVFQFPRHIPGPTVCICYHFSRFSV  
ISSFFKTSSGCF SFFMIFSFLAIFHVLQWTFNLNFPFVSVPYSRYSVHFSFFTFSDVIFQVVKWMFLIFLDF  
DFHFSC  
>ENSMUSP00000096650\_c.445:T>C\_p.F149S ENSMUST00000099051.11|Gm10717-203|ENSMUSG00000095891|+|chr9:g.3030582:T>C  
CHIPCPTVEISFPPFSVFLAIFHVLKCVFLIFRVFQVSRHIPGPTVCISHFSRFSVILSFFKLSSGCFPPFSLI  
FSFLTIFHVLQWTFNLNFPFVSFLAIFHVLKCVFLIFSDQFPRHIPGPTVCISHFSRFSVILSFFKTSSGCF  
SFSMIFSFLAIFHVLQWTFNLNFPFVSVPYSRYSVHFSFFTFSDVIFQVVKWMFLIFLDFHFSC  
>ENSMUSP00000096640\_c.241:T>C\_p.F81S ENSMUST00000099042.4|Gm10717-202|ENSMUSG00000095891|+|chr9:g.3030582:T>C  
FLIFHDFQLSSHIPGPTVDISFRPLSVFLAIFHVPKCVFLIFHDFQFPRHIPGPTVCISHFSRFSVILSFFKT  
SSGCF SFSMIFSFLAIFHVLQWTFNLNFPFVSFLAIFHVLKCVFLIFRDFQFSCHIPGPTVCISHFSRFSVIL  
SFFNLSTACFSFSMIFSFLAIFHVLQWTFNLNFPFVSVPYSRYSVHFSFFTFSDVIFQVVKWMFLIFLDF  
HFSC  
>ENSMUSP00000096650\_c.445:TC>CT\_p.F149S ENSMUST00000099051.11|Gm10717-203|ENSMUSG00000095891|+|chr9:g.3030582:TC>CT  
CHIPCPTVEISFPPFSVFLAIFHVLKCVFLIFRVFQVSRHIPGPTVCISHFSRFSVILSFFKLSSGCFPPFSLI  
FSFLTIFHVLQWTFNLNFPFVSFLAIFHVLKCVFLIFSDQFPRHIPGPTVCISHFSRFSVILSFFKTSSGCF  
SFSHDFQFSCHIPCPTVDISKFSTFFCFQVFLQCAFLIFHVFQ\*FCHFSSCQVDVSHFP\*FSLFL  
>ENSMUSP00000096640\_c.241:TC>CT\_p.F81S ENSMUST00000099042.4|Gm10717-202|ENSMUSG00000095891|+|chr9:g.3030582:TC>CT  
FLIFHDFQLSSHIPGPTVDISFRPLSVFLAIFHVPKCVFLIFHDFQFPRHIPGPTVCISHFSRFSVILSFFKT  
SSGCF SFSHDFQFSCHIPCPTVDISKFSTFFCFPRHISRPKVCISHFP\*FSVFLPYSWSYSVHFSFFTFSDV  
VIFQFVNCMFLIFHDFQFSCHIPCPTVDISKFSTFFSFAIFQVFLQCAFLIFHVFQ\*FCHFSSCQVDVSHFP\*F  
SLFL  
>ENSMUSP00000096650\_c.468:A>C\_p.I157L ENSMUST00000099051.11|Gm10717-203|ENSMUSG00000095891|+|chr9:g.3030605:A>C  
CHIPCPTVEISFPPFSVFLAIFHVLKCVFLIFRVFQVSRHIPGPTVCISHFSRFSVILSFFKLSSGCFPPFSLI  
FSFLTIFHVLQWTFNLNFPFVSFLAIFHVLKCVFLIFSDQFPRHIPGPTVCISHFSRFSVILSFFKTSSGCF  
SFFMIFSFLAIFHVLQWTFNLNFPFVSVPYSRYSVHFSFFTFSDVIFQVVKWMFLIFLDFHFSC  
>ENSMUSP00000096640\_c.264:A>C\_p.I89L ENSMUST00000099042.4|Gm10717-202|ENSMUSG00000095891|+|chr9:g.3030605:A>C

FLIFHDFQLSSHIPGPTVDISFRPLSVFLAIFHVPKCVFLIFHDFQFPRHIPGPTVCISHFSRFSVILSFFFKT  
SSGCFSEFFMIFSLALFHVLTQWTFNLNPPFSVFLAIFHVLKCVFLIFRDFQFSCHIPGPTVCISHFSRFSVIL  
SFFNLSTACFSFSMIFSLAIFHVLQWTFNLNPPFSVSPYSRYSVHFSFFTFSSDFVIFQVVKWMFLIFLDF  
HFSC  
>ENSMUSP00000137451\_c.37:A>C\_p.H13P ENSMUST00000179264.2|Gm10717-  
207|ENSMUSG00000095891|+|chr9:g.3030605:A>C  
MFLIFHDFQFSCPIPCPTVDISFPPFSVFLAIFHVLKCVFLIFRDFQFSCHIPGPTVCISHFSRFSVILSFFN  
LSTACFSFSMIFSLAIFHVLQWTFNLNPPFSVFLAIFHVLKCVFLIFRVFQFPRHIPGPTVCISHFSRFSVI  
SFFFKTSSGCFSEFFMIFSLAIFHVLQWTFNLNPPFSVSPYSRYSVHFSFFTFSSDFVIFQVVKWMFLIFLD  
HFSC  
>ENSMUSP00000096650\_c.474:CAT>AAA\_p.H159K ENSMUST00000099051.11|Gm10717-  
203|ENSMUSG00000095891|+|chr9:g.3030611:CAT>AAA  
CHIPCPTVEISFPPFSVFLAIFHVLKCVFLIFRVFQVSRHIPGPTVCISHFSRFSVILSFFKLSSGCFPPSLI  
FSFLTIFHVLQWTFNLNPPFSVFLAIFHVLKCVFLIFSDQFPRHIPGPTVCISHFSRFSVILSFFFKTSSGCF  
SFFMIFSLAIFKMSYSGHF\*IFHLFLFRHIPGPTVCISHFSRFSVILSFFKLSSGCFSEFLIFTF  
>ENSMUSP00000096640\_c.270:CAT>AAA\_p.H91K ENSMUST00000099042.4|Gm10717-  
202|ENSMUSG00000095891|+|chr9:g.3030611:CAT>AAA  
FLIFHDFQLSSHIPGPTVDISFRPLSVFLAIFHVPKCVFLIFHDFQFPRHIPGPTVCISHFSRFSVILSFFFKT  
SSGCFSEFFMIFSLAIFKMSYSGHF\*IFHLFLFSSPYFTS\*SVYFSFSVIFSLAIFLVLQCAFLIFHVQ\*F  
CHFISICQLHVSHFP\*FSVFLPYSMSYSGHF\*IFHLQFRHIPGPTVCISHFSRFSVILSFFKLSSGCFSESLI  
FTFL  
>ENSMUSP00000137451\_c.43:CAT>AAA\_p.P15Q ENSMUST00000179264.2|Gm10717-  
207|ENSMUSG00000095891|+|chr9:g.3030611:CAT>AAA  
MFLIFHDFQFSCHIQLVLTQWTFHLFLFSSPYFTS\*SVYFSFSVIFSLAIFLVLQCAFLIFHVQ\*FCHFS  
ICQLHVSHFP\*FSVFLPYSMSYSGHF\*IFHLQFSSPYFTC\*SVYFSFFVFFSFLAIFQVLTQCAFIFHVQ\*  
FRLFSRRQVDVSHFS\*FSVFLPYSMSYSGHF\*IFHLFLFRHIPGPTVCISHFSRFSVILSFFKLSSGCFSESLI  
FTFL  
>ENSMUSP00000137451\_c.45:T>C\_p.C16R ENSMUST00000179264.2|Gm10717-  
207|ENSMUSG00000095891|+|chr9:g.3030613:T>C  
MFLIFHDFQFSCHIPRPTVDISFPPFSVFLAIFHVLKCVFLIFRDFQFSCHIPGPTVCISHFSRFSVILSFFN  
LSTACFSFSMIFSLAIFHVLQWTFNLNPPFSVFLAIFHVLKCVFLIFRVFQFPRHIPGPTVCISHFSRFSVI  
SFFFKTSSGCFSEFFMIFSLAIFHVLQWTFNLNPPFSVSPYSRYSVHFSFFTFSSDFVIFQVVKWMFLIFLD  
HFSC  
>ENSMUSP00000096650\_c.508:C>A\_p.P170H ENSMUST00000099051.11|Gm10717-  
203|ENSMUSG00000095891|+|chr9:g.3030645:C>A  
CHIPCPTVEISFPPFSVFLAIFHVLKCVFLIFRVFQVSRHIPGPTVCISHFSRFSVILSFFKLSSGCFPPSLI  
FSFLTIFHVLQWTFNLNPPFSVFLAIFHVLKCVFLIFSDQFPRHIPGPTVCISHFSRFSVILSFFFKTSSGCF  
SFFMIFSLAIFHVLQWTFNLNPPHFSVSPYSRYSVHFSFFTFSSDFVIFQVVKWMFLIFLDFHFSC  
>ENSMUSP00000096640\_c.304:C>A\_p.P102H ENSMUST00000099042.4|Gm10717-  
202|ENSMUSG00000095891|+|chr9:g.3030645:C>A  
FLIFHDFQLSSHIPGPTVDISFRPLSVFLAIFHVPKCVFLIFHDFQFPRHIPGPTVCISHFSRFSVILSFFFKT  
SSGCFSEFFMIFSLAIFHVLQWTFNLNPPHFSVFLAIFHVLKCVFLIFRDFQFSCHIPGPTVCISHFSRFSVIL  
SFFNLSTACFSFSMIFSLAIFHVLQWTFNLNPPFSVSPYSRYSVHFSFFTFSSDFVIFQVVKWMFLIFLDF  
HFSC  
>ENSMUSP00000137451\_c.73:C>A\_p.P25H ENSMUST00000179264.2|Gm10717-  
207|ENSMUSG00000095891|+|chr9:g.3030645:C>A  
MFLIFHDFQFSCHIPCPTVDISFPHFSVFLAIFHVLKCVFLIFRDFQFSCHIPGPTVCISHFSRFSVILSFFN  
LSTACFSFSMIFSLAIFHVLQWTFNLNPPFSVFLAIFHVLKCVFLIFRVFQFPRHIPGPTVCISHFSRFSVI  
SFFFKTSSGCFSEFFMIFSLAIFHVLQWTFNLNPPFSVSPYSRYSVHFSFFTFSSDFVIFQVVKWMFLIFLD  
HFSC  
>ENSMUSP00000096640\_c.333:G>A\_p.V112I ENSMUST00000099042.4|Gm10717-  
202|ENSMUSG00000095891|+|chr9:g.3030674:G>A  
FLIFHDFQLSSHIPGPTVDISFRPLSVFLAIFHVPKCVFLIFHDFQFPRHIPGPTVCISHFSRFSVILSFFFKT  
SSGCFSEFFMIFSLAIFHVLQWTFNLNPPFSVFLAIFHILKCVFLIFRDFQFSCHIPGPTVCISHFSRFSVIL  
SFFNLSTACFSFSMIFSLAIFHVLQWTFNLNPPFSVSPYSRYSVHFSFFTFSSDFVIFQVVKWMFLIFLDF  
HFSC  
>ENSMUSP00000137451\_c.102:G>A\_p.V35I ENSMUST00000179264.2|Gm10717-  
207|ENSMUSG00000095891|+|chr9:g.3030674:G>A

MFLIFHDFQFSCHIPCPTVDISFPPFSVFLAIFHILKCVFLIFRDFQFSCHIPGPTVCISHFSRFSVILSFFN  
LSTACFSFSMIFSLAIFHVLQWTFLNFPFVSFLAIFHVLKCVFLIFRVFQFPRHIPGPTVCIYHFSRFSVI  
SSFFKTSSGCFSFFMIFSLAIFHVLQWTFLNFPFVSVPYSRSYSVHFSFSTFFSDFVIFQVVKWMFLIFLD  
HFSC  
>ENSMUSP00000096640\_c.360:C>T\_p.R121C ENSMUST00000099042.4|Gm10717-  
202|ENSMUSG00000095891|+|chr9:g.3030701:C>T  
FLIFHDFQLSSHIPGPTVDISFRPLSVFLAIFHVPKCVFLIFHDFQFPRHIPGPTVCISHFSRFSVILSFFN  
SSGCFSFFMIFSLAIFHVLQWTFLNFPFVSFLAIFHVLKCVFLIFCDFQFSCHIPGPTVCISHFSRFSVIL  
SFFNLSTACFSFSMIFSLAIFHVLQWTFLNFPFVSVPYSRSYSVHFSFSTFFSDFVIFQVVKWMFLIFLDF  
HFSC  
>ENSMUSP00000137451\_c.129:C>T\_p.R44C ENSMUST00000179264.2|Gm10717-  
207|ENSMUSG00000095891|+|chr9:g.3030701:C>T  
MFLIFHDFQFSCHIPCPTVDISFPPFSVFLAIFHVLKCVFLIFCDFQFSCHIPGPTVCISHFSRFSVILSFFN  
LSTACFSFSMIFSLAIFHVLQWTFLNFPFVSFLAIFHVLKCVFLIFRVFQFPRHIPGPTVCIYHFSRFSVI  
SSFFKTSSGCFSFFMIFSLAIFHVLQWTFLNFPFVSVPYSRSYSVHFSFSTFFSDFVIFQVVKWMFLIFLD  
HFSC  
>ENSMUSP00000096640\_c.361:G>A\_p.R121H ENSMUST00000099042.4|Gm10717-  
202|ENSMUSG00000095891|+|chr9:g.3030702:G>A  
FLIFHDFQLSSHIPGPTVDISFRPLSVFLAIFHVPKCVFLIFHDFQFPRHIPGPTVCISHFSRFSVILSFFN  
SSGCFSFFMIFSLAIFHVLQWTFLNFPFVSFLAIFHVLKCVFLIFHDFQFSCHIPGPTVCISHFSRFSVIL  
SFFNLSTACFSFSMIFSLAIFHVLQWTFLNFPFVSVPYSRSYSVHFSFSTFFSDFVIFQVVKWMFLIFLDF  
HFSC  
>ENSMUSP00000137451\_c.130:G>A\_p.R44H ENSMUST00000179264.2|Gm10717-  
207|ENSMUSG00000095891|+|chr9:g.3030702:G>A  
MFLIFHDFQFSCHIPCPTVDISFPPFSVFLAIFHVLKCVFLIFHDFQFSCHIPGPTVCISHFSRFSVILSFFN  
LSTACFSFSMIFSLAIFHVLQWTFLNFPFVSFLAIFHVLKCVFLIFRVFQFPRHIPGPTVCIYHFSRFSVI  
SSFFKTSSGCFSFFMIFSLAIFHVLQWTFLNFPFVSVPYSRSYSVHFSFSTFFSDFVIFQVVKWMFLIFLD  
HFSC  
>ENSMUSP00000096640\_c.378:T>C\_p.C127R ENSMUST00000099042.4|Gm10717-  
202|ENSMUSG00000095891|+|chr9:g.3030719:T>C  
FLIFHDFQLSSHIPGPTVDISFRPLSVFLAIFHVPKCVFLIFHDFQFPRHIPGPTVCISHFSRFSVILSFFN  
SSGCFSFFMIFSLAIFHVLQWTFLNFPFVSFLAIFHVLKCVFLIFRDFQFSRHIPGPTVCISHFSRFSVIL  
SFFNLSTACFSFSMIFSLAIFHVLQWTFLNFPFVSVPYSRSYSVHFSFSTFFSDFVIFQVVKWMFLIFLDF  
HFSC  
>ENSMUSP00000137451\_c.147:T>C\_p.C50R ENSMUST00000179264.2|Gm10717-  
207|ENSMUSG00000095891|+|chr9:g.3030719:T>C  
MFLIFHDFQFSCHIPCPTVDISFPPFSVFLAIFHVLKCVFLIFRDFQFSRHIPGPTVCISHFSRFSVILSFFN  
LSTACFSFSMIFSLAIFHVLQWTFLNFPFVSFLAIFHVLKCVFLIFRVFQFPRHIPGPTVCIYHFSRFSVI  
SSFFKTSSGCFSFFMIFSLAIFHVLQWTFLNFPFVSVPYSRSYSVHFSFSTFFSDFVIFQVVKWMFLIFLD  
HFSC  
>ENSMUSP00000096640\_c.396:A>T\_p.T133S ENSMUST00000099042.4|Gm10717-  
202|ENSMUSG00000095891|+|chr9:g.3030737:A>T  
FLIFHDFQLSSHIPGPTVDISFRPLSVFLAIFHVPKCVFLIFHDFQFPRHIPGPTVCISHFSRFSVILSFFN  
SSGCFSFFMIFSLAIFHVLQWTFLNFPFVSFLAIFHVLKCVFLIFRDFQFSCHIPGPTVCISHFSRFSVIL  
SFFNLSTACFSFSMIFSLAIFHVLQWTFLNFPFVSVPYSRSYSVHFSFSTFFSDFVIFQVVKWMFLIFLDF  
HFSC  
>ENSMUSP00000137451\_c.165:A>T\_p.T56S ENSMUST00000179264.2|Gm10717-  
207|ENSMUSG00000095891|+|chr9:g.3030737:A>T  
MFLIFHDFQFSCHIPCPTVDISFPPFSVFLAIFHVLKCVFLIFRDFQFSCHIPGPTVCISHFSRFSVILSFFN  
LSTACFSFSMIFSLAIFHVLQWTFLNFPFVSFLAIFHVLKCVFLIFRVFQFPRHIPGPTVCIYHFSRFSVI  
SSFFKTSSGCFSFFMIFSLAIFHVLQWTFLNFPFVSVPYSRSYSVHFSFSTFFSDFVIFQVVKWMFLIFLD  
HFSC  
>ENSMUSP00000096640\_c.411:C>T\_p.H138Y ENSMUST00000099042.4|Gm10717-  
202|ENSMUSG00000095891|+|chr9:g.3030752:C>T  
FLIFHDFQLSSHIPGPTVDISFRPLSVFLAIFHVPKCVFLIFHDFQFPRHIPGPTVCISHFSRFSVILSFFN  
SSGCFSFFMIFSLAIFHVLQWTFLNFPFVSFLAIFHVLKCVFLIFRDFQFSCHIPGPTVCISYFSRFSVIL  
SFFNLSTACFSFSMIFSLAIFHVLQWTFLNFPFVSVPYSRSYSVHFSFSTFFSDFVIFQVVKWMFLIFLDF  
HFSC

>ENSMUSP00000137451\_c.180:C>T\_p.H61Y ENSMUST00000179264.2|Gm10717-  
207|ENSMUSG00000095891|+|chr9:g.3030752:C>T  
MFLIFHDFQFSCHIPCPTVDISFPFVSFLAIFHVLKCVFLIFRDFQFSCHIPGPTVCISYFSRFSVILSFFN  
LSTACFSFSMIFSFLAIFHVLQWTFNLNFPFVSFLAIFHVLKCVFLIFRVFQFPRHIPGPTVCYHFSRFSVI  
SSFFKTSSGCFSFFMIFSFLAIFHVLQWTFNLNFPFVSVPYSRSYSVHFSFSTFFSDFVIFQVVKWMFLIFLD  
HFSC  
>ENSMUSP00000096640\_c.427:C>T\_p.S143L ENSMUST00000099042.4|Gm10717-  
202|ENSMUSG00000095891|+|chr9:g.3030768:C>T  
FLIFHDFQLSSSHIPGPTVDISFRPLSVFLAIFHVPKCVFLIFHDFQFPRHIPGPTVCISHFSRFSVILSFFKT  
SSGCFSFFMIFSFLAIFHVLQWTFNLNFPFVSFLAIFHVLKCVFLIFRDFQFSCHIPGPTVCISHFSRFLVIL  
SFFNLSTACFSFSMIFSFLAIFHVLQWTFNLNFPFVSVPYSRSYSVHFSFSTFFSDFVIFQVVKWMFLIFLDF  
HFSC  
>ENSMUSP00000137451\_c.196:C>T\_p.S66L ENSMUST00000179264.2|Gm10717-  
207|ENSMUSG00000095891|+|chr9:g.3030768:C>T  
MFLIFHDFQFSCHIPCPTVDISFPFVSFLAIFHVLKCVFLIFRDFQFSCHIPGPTVCISHFSRFLVILSFFN  
LSTACFSFSMIFSFLAIFHVLQWTFNLNFPFVSFLAIFHVLKCVFLIFRVFQFPRHIPGPTVCYHFSRFSVI  
SSFFKTSSGCFSFFMIFSFLAIFHVLQWTFNLNFPFVSVPYSRSYSVHFSFSTFFSDFVIFQVVKWMFLIFLD  
HFSC  
>ENSMUSP00000096640\_c.429:G>T\_p.V144L ENSMUST00000099042.4|Gm10717-  
202|ENSMUSG00000095891|+|chr9:g.3030770:G>T  
FLIFHDFQLSSSHIPGPTVDISFRPLSVFLAIFHVPKCVFLIFHDFQFPRHIPGPTVCISHFSRFSVILSFFKT  
SSGCFSFFMIFSFLAIFHVLQWTFNLNFPFVSFLAIFHVLKCVFLIFRDFQFSCHIPGPTVCISHFSRFLVIL  
SFFNLSTACFSFSMIFSFLAIFHVLQWTFNLNFPFVSVPYSRSYSVHFSFSTFFSDFVIFQVVKWMFLIFLDF  
HFSC  
>ENSMUSP00000137451\_c.198:G>T\_p.V67L ENSMUST00000179264.2|Gm10717-  
207|ENSMUSG00000095891|+|chr9:g.3030770:G>T  
MFLIFHDFQFSCHIPCPTVDISFPFVSFLAIFHVLKCVFLIFRDFQFSCHIPGPTVCISHFSRFLVILSFFN  
LSTACFSFSMIFSFLAIFHVLQWTFNLNFPFVSFLAIFHVLKCVFLIFRVFQFPRHIPGPTVCYHFSRFSVI  
SSFFKTSSGCFSFFMIFSFLAIFHVLQWTFNLNFPFVSVPYSRSYSVHFSFSTFFSDFVIFQVVKWMFLIFLD  
HFSC  
>ENSMUSP00000096640\_c.445:TC>AA\_p.F149\* ENSMUST00000099042.4|Gm10717-  
202|ENSMUSG00000095891|+|chr9:g.3030786:TC>AA  
FLIFHDFQLSSSHIPGPTVDISFRPLSVFLAIFHVPKCVFLIFHDFQFPRHIPGPTVCISHFSRFSVILSFFKT  
SSGCFSFFMIFSFLAIFHVLQWTFNLNFPFVSFLAIFHVLKCVFLIFRDFQFSCHIPGPTVCISHFSRFSVIL  
SF\*QFVNCMFLIFHDFQFSCHIPCPTVDISKFSTFFSFAIFQVLQCAFLIFHVFQ\*FCHFSSCQVDVSHFP\*F  
SLFL  
>ENSMUSP00000137451\_c.214:TC>AA\_p.F72\* ENSMUST00000179264.2|Gm10717-  
207|ENSMUSG00000095891|+|chr9:g.3030786:TC>AA  
MFLIFHDFQFSCHIPCPTVDISFPFVSFLAIFHVLKCVFLIFRDFQFSCHIPGPTVCISHFSRFSVILSFF\*Q  
FVNCMFLIFHDFQFSCHIPCPTVDISKFSTFFSFPRHISRKVCISHFSCFSVSSPYSRSYSVHLSFFSTFFSD  
FVFFQDVKWMFLIFHDFQFSCHIPCPTVDISKFSTFFCFIAIFQVLQCAFLIFHVFQ\*FCHFSSCQVDVSHFP\*  
FSLFL  
>ENSMUSP00000096640\_c.449:T>G\_p.N150K ENSMUST00000099042.4|Gm10717-  
202|ENSMUSG00000095891|+|chr9:g.3030790:T>G  
FLIFHDFQLSSSHIPGPTVDISFRPLSVFLAIFHVPKCVFLIFHDFQFPRHIPGPTVCISHFSRFSVILSFFKT  
SSGCFSFFMIFSFLAIFHVLQWTFNLNFPFVSFLAIFHVLKCVFLIFRDFQFSCHIPGPTVCISHFSRFSVIL  
SFFKLSTACFSFSMIFSFLAIFHVLQWTFNLNFPFVSVPYSRSYSVHFSFSTFFSDFVIFQVVKWMFLIFLDF  
HFSC  
>ENSMUSP00000137451\_c.218:T>G\_p.N73K ENSMUST00000179264.2|Gm10717-  
207|ENSMUSG00000095891|+|chr9:g.3030790:T>G  
MFLIFHDFQFSCHIPCPTVDISFPFVSFLAIFHVLKCVFLIFRDFQFSCHIPGPTVCISHFSRFSVILSFFK  
LSTACFSFSMIFSFLAIFHVLQWTFNLNFPFVSFLAIFHVLKCVFLIFRVFQFPRHIPGPTVCYHFSRFSVI  
SSFFKTSSGCFSFFMIFSFLAIFHVLQWTFNLNFPFVSVPYSRSYSVHFSFSTFFSDFVIFQVVKWMFLIFLD  
HFSC  
>ENSMUSP00000096640\_c.449:TTT>GTC\_p.N150K ENSMUST00000099042.4|Gm10717-  
202|ENSMUSG00000095891|+|chr9:g.3030790:TTT>GTC  
FLIFHDFQLSSSHIPGPTVDISFRPLSVFLAIFHVPKCVFLIFHDFQFPRHIPGPTVCISHFSRFSVILSFFKT  
SSGCFSFFMIFSFLAIFHVLQWTFNLNFPFVSFLAIFHVLKCVFLIFRDFQFSCHIPGPTVCISHFSRFSVIL

SFFKSCQLHVSHFP\*FSVFLPYSMSYSGHF\*IFHLFQFRHIPGPTVCISHFSRFSVILSFFKLSSGCFSFSLI  
FTFL  
>ENSMUSP00000137451\_c.218:TTT>GTC\_p.N73K ENSMUST00000179264.2|Gm10717-  
207|ENSMUSG00000095891|+|chr9:g.3030790:TTT>GTC  
MFLIFHDFQFSCHIPCPTVDISFPPFSVFLAIFHVLKCVFLIFRDFQFSCHIPGPTVCISHFSRFSVILSFFK  
SCQLHVSHFP\*FSVFLPYSMSYSGHF\*IFHLFQFSPPYFTC\*SVYFSFFVFFSFLAIFQVLQCAFIIHFVFO\*  
FRLFSRRQVDVSHFS\*FSVFLPYSMSYSGHF\*IFHLFLFRHIPGPTVCISHFSRFSVILSFFKLSSGCFSFSL  
IFTFL  
>rs242073667\_ENSMUSP00000096640\_c.451:T>C\_p.L151S  
ENSMUST00000099042.4|Gm10717-202|ENSMUSG00000095891|+|chr9:g.3030792:T>C  
FLIFHDFQLSSHIPGPTVDISFRPLSVFLAIFHVPKCVFLIFHDFQFPRHIPGPTVCISHFSRFSVILSFFKT  
SSGCFSSFFMIFSFSLAIFHVLQWTFLNFPFVSFLAIFHVLKCVFLIFRDFQFSCHIPGPTVCISHFSRFSVIL  
SFFNSSTACFSFSMIFSFSLAIFHVLQWTFLNFPFVSVPYSRYSVHFSFFTFSSDFVIFQVVKWMFLIFLDF  
HFSC  
>rs242073667\_ENSMUSP00000137451\_c.220:T>C\_p.L74S  
ENSMUST00000179264.2|Gm10717-207|ENSMUSG00000095891|+|chr9:g.3030792:T>C  
MFLIFHDFQFSCHIPCPTVDISFPPFSVFLAIFHVLKCVFLIFRDFQFSCHIPGPTVCISHFSRFSVILSFFN  
SSTACFSFSMIFSFSLAIFHVLQWTFLNFPFVSFLAIFHVLKCVFLIFRVFQFPRHIPGPTVCIIYHFSRFSVI  
SSFFKTSSGCFSSFFMIFSFSLAIFHVLQWTFLNFPFVSVPYSRYSVHFSFFTFSSDFVIFQVVKWMFLIFLD  
FHFSC  
>ENSMUSP00000096640\_c.456:A>C\_p.T153P ENSMUST00000099042.4|Gm10717-  
202|ENSMUSG00000095891|+|chr9:g.3030797:A>C  
FLIFHDFQLSSHIPGPTVDISFRPLSVFLAIFHVPKCVFLIFHDFQFPRHIPGPTVCISHFSRFSVILSFFKT  
SSGCFSSFFMIFSFSLAIFHVLQWTFLNFPFVSFLAIFHVLKCVFLIFRDFQFSCHIPGPTVCISHFSRFSVIL  
SFFNLSPACFSFSMIFSFSLAIFHVLQWTFLNFPFVSVPYSRYSVHFSFFTFSSDFVIFQVVKWMFLIFLDF  
HFSC  
>ENSMUSP00000137451\_c.225:A>C\_p.T76P ENSMUST00000179264.2|Gm10717-  
207|ENSMUSG00000095891|+|chr9:g.3030797:A>C  
MFLIFHDFQFSCHIPCPTVDISFPPFSVFLAIFHVLKCVFLIFRDFQFSCHIPGPTVCISHFSRFSVILSFFN  
LSPACFSFSMIFSFSLAIFHVLQWTFLNFPFVSFLAIFHVLKCVFLIFRVFQFPRHIPGPTVCIIYHFSRFSVI  
SSFFKTSSGCFSSFFMIFSFSLAIFHVLQWTFLNFPFVSVPYSRYSVHFSFFTFSSDFVIFQVVKWMFLIFLD  
FHFSC  
>rs264641761\_ENSMUSP00000096640\_c.457:C>G\_p.T153S  
ENSMUST00000099042.4|Gm10717-202|ENSMUSG00000095891|+|chr9:g.3030798:C>G  
FLIFHDFQLSSHIPGPTVDISFRPLSVFLAIFHVPKCVFLIFHDFQFPRHIPGPTVCISHFSRFSVILSFFKT  
SSGCFSSFFMIFSFSLAIFHVLQWTFLNFPFVSFLAIFHVLKCVFLIFRDFQFSCHIPGPTVCISHFSRFSVIL  
SFFNLSSACFSFSMIFSFSLAIFHVLQWTFLNFPFVSVPYSRYSVHFSFFTFSSDFVIFQVVKWMFLIFLDF  
HFSC  
>rs264641761\_ENSMUSP00000137451\_c.226:C>G\_p.T76S  
ENSMUST00000179264.2|Gm10717-207|ENSMUSG00000095891|+|chr9:g.3030798:C>G  
MFLIFHDFQFSCHIPCPTVDISFPPFSVFLAIFHVLKCVFLIFRDFQFSCHIPGPTVCISHFSRFSVILSFFN  
LSSACFSFSMIFSFSLAIFHVLQWTFLNFPFVSFLAIFHVLKCVFLIFRVFQFPRHIPGPTVCIIYHFSRFSVI  
SSFFKTSSGCFSSFFMIFSFSLAIFHVLQWTFLNFPFVSVPYSRYSVHFSFFTFSSDFVIFQVVKWMFLIFLD  
FHFSC  
>ENSMUSP00000096640\_c.457:CTGC>GTGT\_p.T153S ENSMUST00000099042.4|Gm10717-  
202|ENSMUSG00000095891|+|chr9:g.3030798:CTGC>GTGT  
FLIFHDFQLSSHIPGPTVDISFRPLSVFLAIFHVPKCVFLIFHDFQFPRHIPGPTVCISHFSRFSVILSFFKT  
SSGCFSSFFMIFSFSLAIFHVLQWTFLNFPFVSFLAIFHVLKCVFLIFRDFQFSCHIPGPTVCISHFSRFSVIL  
SFFNLSSVACFSFSMIFSFSLAIFHVLQWTFLNFPFVSVPYSRYSVHFSFFTFSSDFVIFQVVKWMFLIFLD  
FHFSC  
>ENSMUSP00000137451\_c.226:CTGC>GTGT\_p.T76S ENSMUST00000179264.2|Gm10717-  
207|ENSMUSG00000095891|+|chr9:g.3030798:CTGC>GTGT  
MFLIFHDFQFSCHIPCPTVDISFPPFSVFLAIFHVLKCVFLIFRDFQFSCHIPGPTVCISHFSRFSVILSFFN  
LSSVACFSFSMIFSFSLAIFHVLQWTFLNFPFVSFLAIFHVLKCVFLIFRVFQFPRHIPGPTVCIIYHFSRFSV  
ISSFFKTSSGCFSSFFMIFSFSLAIFHVLQWTFLNFPFVSVPYSRYSVHFSFFTFSSDFVIFQVVKWMFLIFL  
DFHFSC  
>ENSMUSP00000096640\_c.457:CTGC>GTGG\_p.T153S ENSMUST00000099042.4|Gm10717-  
202|ENSMUSG00000095891|+|chr9:g.3030798:CTGC>GTGG

FLIFHDFQLSSHIPGPTVDISFRPLSVFLAIFHVPKCVFLIFHDFQFPRHIPGPTVCISHFSRFSVISSFFKT  
SSGCFSEFFMIFSLAIFHVLQWTFNLNPPFSVFLAIFHVLKCVFLIFRDFQFSCHIPGPTVCISHFSRFSVIL  
SFFNLSSGACFSFSMIFSLAIFHVLQWTFNLNPPFSVSPYSRSYSVHFSFFTFSSDFVIFQVVKWMFLIFLD  
FHFSC  
>ENSMUSP00000137451\_c.226:CTGC>GTGG\_p.T76S ENSMUST00000179264.2|Gm10717-  
207|ENSMUSG00000095891|+|chr9:g.3030798:CTGC>GTGG  
MFLIFHDFQFSCHIPCPTVDISFPPFSVFLAIFHVLKCVFLIFRDFQFSCHIPGPTVCISHFSRFSVILSFFN  
LSSGACFSFSMIFSLAIFHVLQWTFNLNPPFSVFLAIFHVLKCVFLIFRVFQFPRHIPGPTVCYHFSRFSV  
ISSFFKTSSGCFSEFFMIFSLAIFHVLQWTFNLNPPFSVSPYSRSYSVHFSFFTFSSDFVIFQVVKWMFLIFL  
DFHFSC  
>rs220228475\_ENSMUSP00000096640\_c.460:C>G\_p.A154G  
ENSMUST00000099042.4|Gm10717-202|ENSMUSG00000095891|+|chr9:g.3030801:C>G  
FLIFHDFQLSSHIPGPTVDISFRPLSVFLAIFHVPKCVFLIFHDFQFPRHIPGPTVCISHFSRFSVISSFFKT  
SSGCFSEFFMIFSLAIFHVLQWTFNLNPPFSVFLAIFHVLKCVFLIFRDFQFSCHIPGPTVCISHFSRFSVIL  
SFFNLSTGCFSEFFMIFSLAIFHVLQWTFNLNPPFSVSPYSRSYSVHFSFFTFSSDFVIFQVVKWMFLIFLDF  
HFSC  
>rs220228475\_ENSMUSP00000137451\_c.229:C>G\_p.A77G  
ENSMUST00000179264.2|Gm10717-207|ENSMUSG00000095891|+|chr9:g.3030801:C>G  
MFLIFHDFQFSCHIPCPTVDISFPPFSVFLAIFHVLKCVFLIFRDFQFSCHIPGPTVCISHFSRFSVILSFFN  
LSTGCFSEFFMIFSLAIFHVLQWTFNLNPPFSVFLAIFHVLKCVFLIFRVFQFPRHIPGPTVCYHFSRFSVI  
SSFFKTSSGCFSEFFMIFSLAIFHVLQWTFNLNPPFSVSPYSRSYSVHFSFFTFSSDFVIFQVVKWMFLIFLD  
FHFSC  
>ENSMUSP00000096640\_c.537:C>A\_p.P180T ENSMUST00000099042.4|Gm10717-  
202|ENSMUSG00000095891|+|chr9:g.3030878:C>A  
FLIFHDFQLSSHIPGPTVDISFRPLSVFLAIFHVPKCVFLIFHDFQFPRHIPGPTVCISHFSRFSVISSFFKT  
SSGCFSEFFMIFSLAIFHVLQWTFNLNPPFSVFLAIFHVLKCVFLIFRDFQFSCHIPGPTVCISHFSRFSVIL  
SFFNLSTACFSFSMIFSLAIFHVLQWTFNLNPTFSVSPYSRSYSVHFSFFTFSSDFVIFQVVKWMFLIFLDF  
HFSC  
>ENSMUSP00000137451\_c.306:C>A\_p.P103T ENSMUST00000179264.2|Gm10717-  
207|ENSMUSG00000095891|+|chr9:g.3030878:C>A  
MFLIFHDFQFSCHIPCPTVDISFPPFSVFLAIFHVLKCVFLIFRDFQFSCHIPGPTVCISHFSRFSVILSFFN  
LSTACFSFSMIFSLAIFHVLQWTFNLNPTFSVFLAIFHVLKCVFLIFRVFQFPRHIPGPTVCYHFSRFSVI  
SSFFKTSSGCFSEFFMIFSLAIFHVLQWTFNLNPPFSVSPYSRSYSVHFSFFTFSSDFVIFQVVKWMFLIFLD  
FHFSC  
>ENSMUSP00000137451\_c.344:G>T\_p.K115N ENSMUST00000179264.2|Gm10717-  
207|ENSMUSG00000095891|+|chr9:g.3030916:G>T  
MFLIFHDFQFSCHIPCPTVDISFPPFSVFLAIFHVLKCVFLIFRDFQFSCHIPGPTVCISHFSRFSVILSFFN  
LSTACFSFSMIFSLAIFHVLQWTFNLNPPFSVFLAIFHVLKCVFLIFRVFQFPRHIPGPTVCYHFSRFSVI  
SSFFKTSSGCFSEFFMIFSLAIFHVLQWTFNLNPPFSVSPYSRSYSVHFSFFTFSSDFVIFQVVKWMFLIFLD  
FHFSC  
>ENSMUSP00000137451\_c.362:TC>T\_p.F121del-fs ENSMUST00000179264.2|Gm10717-  
207|ENSMUSG00000095891|+|chr9:g.3030934:TC>T  
MFLIFHDFQFSCHIPCPTVDISFPPFSVFLAIFHVLKCVFLIFRDFQFSCHIPGPTVCISHFSRFSVILSFFN  
LSTACFSFSMIFSLAIFHVLQWTFNLNPPFSVFLAIFHVLKCVFLIFVFFSFLAIFQVLQCAFIIFHVQ  
>rs238860127\_ENSMUSP00000137451\_c.367:T>A\_p.V123D  
ENSMUST00000179264.2|Gm10717-207|ENSMUSG00000095891|+|chr9:g.3030939:T>A  
MFLIFHDFQFSCHIPCPTVDISFPPFSVFLAIFHVLKCVFLIFRDFQFSCHIPGPTVCISHFSRFSVILSFFN  
LSTACFSFSMIFSLAIFHVLQWTFNLNPPFSVFLAIFHVLKCVFLIFRDFQFPRHIPGPTVCYHFSRFSVI  
SSFFKTSSGCFSEFFMIFSLAIFHVLQWTFNLNPPFSVSPYSRSYSVHFSFFTFSSDFVIFQVVKWMFLIFLD  
FHFSC  
>ENSMUSP00000096650\_c.516:G>C\_p.V173L ENSMUST00000099051.11|Gm10717-  
203|ENSMUSG00000095891|+|chr9:g.3030947:G>C  
CHIPCPTVEISFPPFSVFLAIFHVLKCVFLIFRVFQVSRHIPGPTVCISHFSRFSVILSFFKLSSGCFPPSLI  
FSFLTIFHVLQWTFNLNPPFSVFLAIFHVLKCVFLIFSDQFPRHIPGPTVCISHFSRFSVISSFFKTSSGCF  
SFFMIFSLAIFHVLQWTFNLNPPFSVSPYSRSYSVHFSFFTFSSDFVIFQVVKWMFLIFLDFHFSC  
>ENSMUSP00000096640\_c.546:G>C\_p.V183L ENSMUST00000099042.4|Gm10717-  
202|ENSMUSG00000095891|+|chr9:g.3030947:G>C



FLIFHDFQLSSSHIPGPTVDISFRPLSVFLAIFHVPKCVFLIFHDFQFPRHIPGPTVCISHFSRFSVISSFFKT  
SSGCFSEFFMIFSFSLAIFHVLQWTFNLNPPFVSFLAIFHVLKCVFLIFRDFQFSCHIPGPTVCISHFSRFSVIL  
SFFNLSTACFSFSMIFSFSLAIFHVLQWTFNLNPPFVSFLAIFHVLKCVFLIFRDFQFSCHIPGPTVCISHFSRFSVIL  
HFSC

>rs259953757\_ENSMUSP00000096650\_c.516:G>T\_p.V173F  
ENSMUST00000099051.11|Gm10717-203|ENSMUSG00000095891||+|chr9:g.3030947:G>T  
CHIPCPTVEISFPPFVSFLAIFHVLKCVFLIFRVFQVSRHIPGPTVCISHFSRFSVILSFFKLSSGCFPPFLI  
FSFLTIFHVLQWTFNLNPPFVSFLAIFHVLKCVFLIFSDQFPRHIPGPTVCISHFSRFSVISSFFKTSSGCF  
SFFMIFSFSLAIFHVLQWTFNLNPPFVSFLAIFHVLKCVFLIFSDQFPRHIPGPTVCISHFSRFSVISSFFKTSSGCF  
>rs259953757\_ENSMUSP00000096640\_c.546:G>T\_p.V183F  
ENSMUST00000099042.4|Gm10717-202|ENSMUSG00000095891||+|chr9:g.3030947:G>T  
FLIFHDFQLSSSHIPGPTVDISFRPLSVFLAIFHVPKCVFLIFHDFQFPRHIPGPTVCISHFSRFSVISSFFKT  
SSGCFSEFFMIFSFSLAIFHVLQWTFNLNPPFVSFLAIFHVLKCVFLIFRDFQFSCHIPGPTVCISHFSRFSVIL  
SFFNLSTACFSFSMIFSFSLAIFHVLQWTFNLNPPFVSFLAIFHVLKCVFLIFRDFQFSCHIPGPTVCISHFSRFSVIL  
HFSC

>ENSMUSP00000096650\_c.527:T>A\_p.Y176\* ENSMUST00000099051.11|Gm10717-  
203|ENSMUSG00000095891||+|chr9:g.3030960:T>A  
CHIPCPTVEISFPPFVSFLAIFHVLKCVFLIFRVFQVSRHIPGPTVCISHFSRFSVILSFFKLSSGCFPPFLI  
FSFLTIFHVLQWTFNLNPPFVSFLAIFHVLKCVFLIFSDQFPRHIPGPTVCISHFSRFSVISSFFKTSSGCF  
SFFMIFSFSLAIFHVLQWTFNLNPPFVSFLAIFHVLKCVFLIFSDQFPRHIPGPTVCISHFSRFSVISSFFKTSSGCF  
>ENSMUSP00000096640\_c.557:T>A\_p.Y186\* ENSMUST00000099042.4|Gm10717-  
202|ENSMUSG00000095891||+|chr9:g.3030960:T>A  
FLIFHDFQLSSSHIPGPTVDISFRPLSVFLAIFHVPKCVFLIFHDFQFPRHIPGPTVCISHFSRFSVISSFFKT  
SSGCFSEFFMIFSFSLAIFHVLQWTFNLNPPFVSFLAIFHVLKCVFLIFRDFQFSCHIPGPTVCISHFSRFSVIL  
SFFNLSTACFSFSMIFSFSLAIFHVLQWTFNLNPPFVSFLAIFHVLKCVFLIFRDFQFSCHIPGPTVCISHFSRFSVIL  
HFSC

>ENSMUSP00000096650\_c.531:A>T\_p.R178W ENSMUST00000099051.11|Gm10717-  
203|ENSMUSG00000095891||+|chr9:g.3030964:A>T  
CHIPCPTVEISFPPFVSFLAIFHVLKCVFLIFRVFQVSRHIPGPTVCISHFSRFSVILSFFKLSSGCFPPFLI  
FSFLTIFHVLQWTFNLNPPFVSFLAIFHVLKCVFLIFSDQFPRHIPGPTVCISHFSRFSVISSFFKTSSGCF  
SFFMIFSFSLAIFHVLQWTFNLNPPFVSFLAIFHVLKCVFLIFSDQFPRHIPGPTVCISHFSRFSVISSFFKTSSGCF  
>ENSMUSP00000096640\_c.561:A>T\_p.R188W ENSMUST00000099042.4|Gm10717-  
202|ENSMUSG00000095891||+|chr9:g.3030964:A>T  
FLIFHDFQLSSSHIPGPTVDISFRPLSVFLAIFHVPKCVFLIFHDFQFPRHIPGPTVCISHFSRFSVISSFFKT  
SSGCFSEFFMIFSFSLAIFHVLQWTFNLNPPFVSFLAIFHVLKCVFLIFRDFQFSCHIPGPTVCISHFSRFSVIL  
SFFNLSTACFSFSMIFSFSLAIFHVLQWTFNLNPPFVSFLAIFHVLKCVFLIFRDFQFSCHIPGPTVCISHFSRFSVIL  
HFSC

>ENSMUSP00000096650\_c.559:T>C\_p.F187S ENSMUST00000099051.11|Gm10717-  
203|ENSMUSG00000095891||+|chr9:g.3030992:T>C  
CHIPCPTVEISFPPFVSFLAIFHVLKCVFLIFRVFQVSRHIPGPTVCISHFSRFSVILSFFKLSSGCFPPFLI  
FSFLTIFHVLQWTFNLNPPFVSFLAIFHVLKCVFLIFSDQFPRHIPGPTVCISHFSRFSVISSFFKTSSGCF  
SFFMIFSFSLAIFHVLQWTFNLNPPFVSFLAIFHVLKCVFLIFSDQFPRHIPGPTVCISHFSRFSVISSFFKTSSGCF  
>ENSMUSP00000096640\_c.589:T>C\_p.F197S ENSMUST00000099042.4|Gm10717-  
202|ENSMUSG00000095891||+|chr9:g.3030992:T>C  
FLIFHDFQLSSSHIPGPTVDISFRPLSVFLAIFHVPKCVFLIFHDFQFPRHIPGPTVCISHFSRFSVISSFFKT  
SSGCFSEFFMIFSFSLAIFHVLQWTFNLNPPFVSFLAIFHVLKCVFLIFRDFQFSCHIPGPTVCISHFSRFSVIL  
SFFNLSTACFSFSMIFSFSLAIFHVLQWTFNLNPPFVSFLAIFHVLKCVFLIFRDFQFSCHIPGPTVCISHFSRFSVIL  
HFSC

>ENSMUSP00000096650\_c.629:C>G\_p.H210Q ENSMUST00000099051.11|Gm10717-  
203|ENSMUSG00000095891||+|chr9:g.3031062:C>G  
CHIPCPTVEISFPPFVSFLAIFHVLKCVFLIFRVFQVSRHIPGPTVCISHFSRFSVILSFFKLSSGCFPPFLI  
FSFLTIFHVLQWTFNLNPPFVSFLAIFHVLKCVFLIFSDQFPRHIPGPTVCISHFSRFSVISSFFKTSSGCF  
SFFMIFSFSLAIFHVLQWTFNLNPPFVSFLAIFHVLKCVFLIFSDQFPRHIPGPTVCISHFSRFSVISSFFKTSSGCF  
>ENSMUSP00000096640\_c.659:C>G\_p.H220Q ENSMUST00000099042.4|Gm10717-  
202|ENSMUSG00000095891||+|chr9:g.3031062:C>G  
FLIFHDFQLSSSHIPGPTVDISFRPLSVFLAIFHVPKCVFLIFHDFQFPRHIPGPTVCISHFSRFSVISSFFKT  
SSGCFSEFFMIFSFSLAIFHVLQWTFNLNPPFVSFLAIFHVLKCVFLIFRDFQFSCHIPGPTVCISHFSRFSVIL  
SFFNLSTACFSFSMIFSFSLAIFHVLQWTFNLNPPFVSFLAIFHVLKCVFLIFRDFQFSCHIPGPTVCISHFSRFSVIL  
HFSC

SFFNLSTACFSFSMIFSLAIFHVLQWTFNLNPPFSVSPYSRSYSVHFSFSTFFSDFVIFQVVKWMFLIFLDF  
QFSC  
>ENSMUSP00000137451\_c.378:C>T\_p.P127S ENSMUST00000179264.2|Gm10717-  
207|ENSMUSG00000095891|+|chr9:g.3031999:C>T  
MFLIFHDFQFSCHIPCPTVDISFPPFSVFLAIFHVLKCVFLIFRDFQFSCHIPGPTVCISHFSRFSVILSFFN  
LSTACFSFSMIFSLAIFHVLQWTFNLNPPFSVFLAIFHVLKCVFLIFRVFQFSRHIPGPTVCIYHFSRFSVI  
SSFFKTSSGCFSFFMIFSLAIFHVLQWTFNLNPPFSVSPYSRSYSVHFSFSTFFSDFVIFQVVKWMFLIFLD  
FHFSC  
>ENSMUSP00000137451\_c.389:T>G\_p.I130M ENSMUST00000179264.2|Gm10717-  
207|ENSMUSG00000095891|+|chr9:g.3032010:T>G  
MFLIFHDFQFSCHIPCPTVDISFPPFSVFLAIFHVLKCVFLIFRDFQFSCHIPGPTVCISHFSRFSVILSFFN  
LSTACFSFSMIFSLAIFHVLQWTFNLNPPFSVFLAIFHVLKCVFLIFRVFQFPRHMPGPTVCIYHFSRFSVI  
SSFFKTSSGCFSFFMIFSLAIFHVLQWTFNLNPPFSVSPYSRSYSVHFSFSTFFSDFVIFQVVKWMFLIFLD  
FHFSC  
>ENSMUSP00000137451\_c.399:A>T\_p.T134S ENSMUST00000179264.2|Gm10717-  
207|ENSMUSG00000095891|+|chr9:g.3032020:A>T  
MFLIFHDFQFSCHIPCPTVDISFPPFSVFLAIFHVLKCVFLIFRDFQFSCHIPGPTVCISHFSRFSVILSFFN  
LSTACFSFSMIFSLAIFHVLQWTFNLNPPFSVFLAIFHVLKCVFLIFRVFQFPRHIPGPSVCIYHFSRFSVI  
SSFFKTSSGCFSFFMIFSLAIFHVLQWTFNLNPPFSVSPYSRSYSVHFSFSTFFSDFVIFQVVKWMFLIFLD  
FHFSC  
>ENSMUSP00000137451\_c.406:G>A\_p.C136Y ENSMUST00000179264.2|Gm10717-  
207|ENSMUSG00000095891|+|chr9:g.3032027:G>A  
MFLIFHDFQFSCHIPCPTVDISFPPFSVFLAIFHVLKCVFLIFRDFQFSCHIPGPTVCISHFSRFSVILSFFN  
LSTACFSFSMIFSLAIFHVLQWTFNLNPPFSVFLAIFHVLKCVFLIFRVFQFPRHIPGPTVYIYHFSRFSVI  
SSFFKTSSGCFSFFMIFSLAIFHVLQWTFNLNPPFSVSPYSRSYSVHFSFSTFFSDFVIFQVVKWMFLIFLD  
FHFSC  
>ENSMUSP00000137451\_c.423:C>T\_p.R142C ENSMUST00000179264.2|Gm10717-  
207|ENSMUSG00000095891|+|chr9:g.3032044:C>T  
MFLIFHDFQFSCHIPCPTVDISFPPFSVFLAIFHVLKCVFLIFRDFQFSCHIPGPTVCISHFSRFSVILSFFN  
LSTACFSFSMIFSLAIFHVLQWTFNLNPPFSVFLAIFHVLKCVFLIFRVFQFPRHIPGPTVCIYHFSRFSVI  
SSFFKTSSGCFSFFMIFSLAIFHVLQWTFNLNPPFSVSPYSRSYSVHFSFSTFFSDFVIFQVVKWMFLIFLD  
FHFSC  
>ENSMUSP00000137451\_c.430:C>T\_p.S144L ENSMUST00000179264.2|Gm10717-  
207|ENSMUSG00000095891|+|chr9:g.3032051:C>T  
MFLIFHDFQFSCHIPCPTVDISFPPFSVFLAIFHVLKCVFLIFRDFQFSCHIPGPTVCISHFSRFSVILSFFN  
LSTACFSFSMIFSLAIFHVLQWTFNLNPPFSVFLAIFHVLKCVFLIFRVFQFPRHIPGPTVCIYHFSRFLVI  
SSFFKTSSGCFSFFMIFSLAIFHVLQWTFNLNPPFSVSPYSRSYSVHFSFSTFFSDFVIFQVVKWMFLIFLD  
FHFSC  
>rs246324318\_ENSMUSP00000137451\_c.453:A>T\_p.T152S  
ENSMUST00000179264.2|Gm10717-207|ENSMUSG00000095891|+|chr9:g.3032074:A>T  
MFLIFHDFQFSCHIPCPTVDISFPPFSVFLAIFHVLKCVFLIFRDFQFSCHIPGPTVCISHFSRFSVILSFFN  
LSTACFSFSMIFSLAIFHVLQWTFNLNPPFSVFLAIFHVLKCVFLIFRVFQFPRHIPGPTVCIYHFSRFSVI  
SSFFKSSSGCFSFFMIFSLAIFHVLQWTFNLNPPFSVSPYSRSYSVHFSFSTFFSDFVIFQVVKWMFLIFLD  
FHFSC  
>ENSMUSP00000137451\_c.478:T>C\_p.F160S ENSMUST00000179264.2|Gm10717-  
207|ENSMUSG00000095891|+|chr9:g.3032099:T>C  
MFLIFHDFQFSCHIPCPTVDISFPPFSVFLAIFHVLKCVFLIFRDFQFSCHIPGPTVCISHFSRFSVILSFFN  
LSTACFSFSMIFSLAIFHVLQWTFNLNPPFSVFLAIFHVLKCVFLIFRVFQFPRHIPGPTVCIYHFSRFSVI  
SSFFKTSSGCFSFSMIFSLAIFHVLQWTFNLNPPFSVSPYSRSYSVHFSFSTFFSDFVIFQVVKWMFLIFLD  
FHFSC  
>ENSMUSP00000136837\_c.45:T>C\_p.C16R ENSMUST00000179839.8|Gm10717-  
208|ENSMUSG00000095891|+|chr9:g.3032130:T>C  
MFLIFHDFQFSCHIPRPTVDISFPPFSVFLAIFHVLKCVFLIFRDFQFSCHIPGPTVCISHFSRFSVILSFFK  
LSSGCFSSSLIFTFLAIFHVLQWTFLYFPFSSVFLAIFHVLKCVFLIFRDFQVSRHIPGPTVCISHFSRFSVI  
LSFFKLSSGCFSSSLIFTFLAIFHVLQWTFNLNPPFSVLYFSPYSKSYSVHFSFSTFFSDFVIFQVVKWMFLI  
FHDFQLSC  
>ENSMUSP00000096655\_c.45:T>C\_p.C16R ENSMUST00000099056.4|Gm10717-  
204|ENSMUSG00000095891|+|chr9:g.3032130:T>C

MFLIFHDFQFSCHIPRPTVDISFPPFSVFLAIFHVLKCVFLIFRDFQFSCHIPGPTVCISHFSRFSVILSFFK  
LSSGCFSSFLIFTFLAIFHVLQWTFLYFPPFSVFLAIFHVLKCVFLIFRDFQVSRHIPGPTVCISHFSRFSVI  
LSFFKLSSGCFSSFLIFTFLAIFHVLQWTFNLNFPFFFLPYRSYSVHFSFFTFSSDFVIFQVVNCMFLIFYDF  
QFSC  
>ENSMUSP00000137451\_c.541:C>T\_p.P181L ENSMUST00000179264.2|Gm10717-  
207|ENSMUSG00000095891|+|chr9:g.3032162:C>T  
MFLIFHDFQFSCHIPCPTVDISFPPFSVFLAIFHVLKCVFLIFRDFQFSCHIPGPTVCISHFSRFSVILSFFN  
LSTACFSFSMIFSLAIFHVLQWTFNLNFPFFSVFLAIFHVLKCVFLIFRVFQFPRHIPGPTVCISHFSRFSVI  
SSFFKLSSGCFSSFMIFSLAIFHVLQWTFNLNFPFLFSVSPYSRSYSVHFSFFTFSSDFVIFQVVKWMFLIFLD  
FHFSC  
>ENSMUSP00000136837\_c.73:C>T\_p.P25L ENSMUST00000179839.8|Gm10717-  
208|ENSMUSG00000095891|+|chr9:g.3032162:C>T  
MFLIFHDFQFSCHIPCPTVDISFPLFSVFLAIFHVLKCVFLIFRDFQFSCHIPGPTVCISHFSRFSVILSFFK  
LSSGCFSSFLIFTFLAIFHVLQWTFLYFPPFSVFLAIFHVLKCVFLIFRDFQVSRHIPGPTVCISHFSRFSVI  
LSFFKLSSGCFSSFLIFTFLAIFHVLQWTFNLNFPFFSVLYFSPYSKSYSVHFSFFTFSSDFVIFQVVKWMFLI  
FHDFQLSC  
>ENSMUSP00000096655\_c.73:C>T\_p.P25L ENSMUST00000099056.4|Gm10717-  
204|ENSMUSG00000095891|+|chr9:g.3032162:C>T  
MFLIFHDFQFSCHIPCPTVDISFPLFSVFLAIFHVLKCVFLIFRDFQFSCHIPGPTVCISHFSRFSVILSFFK  
LSSGCFSSFLIFTFLAIFHVLQWTFLYFPPFSVFLAIFHVLKCVFLIFRDFQVSRHIPGPTVCISHFSRFSVI  
LSFFKLSSGCFSSFLIFTFLAIFHVLQWTFNLNFPFFSVLYFSPYSKSYSVHFSFFTFSSDFVIFQVVKWMFLI  
FHDFQLSC  
>ENSMUSP00000136837\_c.130:G>A\_p.R44H ENSMUST00000179839.8|Gm10717-  
208|ENSMUSG00000095891|+|chr9:g.3032219:G>A  
MFLIFHDFQFSCHIPCPTVDISFPPFSVFLAIFHVLKCVFLIFHDFQFSCHIPGPTVCISHFSRFSVILSFFK  
LSSGCFSSFLIFTFLAIFHVLQWTFLYFPPFSVFLAIFHVLKCVFLIFRDFQVSRHIPGPTVCISHFSRFSVI  
LSFFKLSSGCFSSFLIFTFLAIFHVLQWTFNLNFPFFSVLYFSPYSKSYSVHFSFFTFSSDFVIFQVVKWMFLI  
FHDFQLSC  
>ENSMUSP00000096655\_c.130:G>A\_p.R44H ENSMUST00000099056.4|Gm10717-  
204|ENSMUSG00000095891|+|chr9:g.3032219:G>A  
MFLIFHDFQFSCHIPCPTVDISFPPFSVFLAIFHVLKCVFLIFHDFQFSCHIPGPTVCISHFSRFSVILSFFK  
LSSGCFSSFLIFTFLAIFHVLQWTFLYFPPFSVFLAIFHVLKCVFLIFRDFQVSRHIPGPTVCISHFSRFSVI  
LSFFKLSSGCFSSFLIFTFLAIFHVLQWTFNLNFPFFSVLYFSPYSKSYSVHFSFFTFSSDFVIFQVVNCMFLIFYDF  
QFSC  
>ENSMUSP00000136837\_c.147:T>C\_p.C50R ENSMUST00000179839.8|Gm10717-  
208|ENSMUSG00000095891|+|chr9:g.3032236:T>C  
MFLIFHDFQFSCHIPCPTVDISFPPFSVFLAIFHVLKCVFLIFRDFQFSRHIPGPTVCISHFSRFSVILSFFK  
LSSGCFSSFLIFTFLAIFHVLQWTFLYFPPFSVFLAIFHVLKCVFLIFRDFQVSRHIPGPTVCISHFSRFSVI  
LSFFKLSSGCFSSFLIFTFLAIFHVLQWTFNLNFPFFSVLYFSPYSKSYSVHFSFFTFSSDFVIFQVVKWMFLI  
FHDFQLSC  
>ENSMUSP00000096655\_c.147:T>C\_p.C50R ENSMUST00000099056.4|Gm10717-  
204|ENSMUSG00000095891|+|chr9:g.3032236:T>C  
MFLIFHDFQFSCHIPCPTVDISFPPFSVFLAIFHVLKCVFLIFRDFQFSRHIPGPTVCISHFSRFSVILSFFK  
LSSGCFSSFLIFTFLAIFHVLQWTFLYFPPFSVFLAIFHVLKCVFLIFRDFQVSRHIPGPTVCISHFSRFSVI  
LSFFKLSSGCFSSFLIFTFLAIFHVLQWTFNLNFPFFSVLYFSPYSKSYSVHFSFFTFSSDFVIFQVVNCMFLIFYDF  
QFSC  
>ENSMUSP00000136837\_c.165:A>T\_p.T56S ENSMUST00000179839.8|Gm10717-  
208|ENSMUSG00000095891|+|chr9:g.3032254:A>T  
MFLIFHDFQFSCHIPCPTVDISFPPFSVFLAIFHVLKCVFLIFRDFQFSCHIPGPSVCISHFSRFSVILSFFK  
LSSGCFSSFLIFTFLAIFHVLQWTFLYFPPFSVFLAIFHVLKCVFLIFRDFQVSRHIPGPTVCISHFSRFSVI  
LSFFKLSSGCFSSFLIFTFLAIFHVLQWTFNLNFPFFSVLYFSPYSKSYSVHFSFFTFSSDFVIFQVVKWMFLI  
FHDFQLSC  
>ENSMUSP00000096655\_c.165:A>T\_p.T56S ENSMUST00000099056.4|Gm10717-  
204|ENSMUSG00000095891|+|chr9:g.3032254:A>T  
MFLIFHDFQFSCHIPCPTVDISFPPFSVFLAIFHVLKCVFLIFRDFQFSCHIPGPSVCISHFSRFSVILSFFK  
LSSGCFSSFLIFTFLAIFHVLQWTFLYFPPFSVFLAIFHVLKCVFLIFRDFQVSRHIPGPTVCISHFSRFSVI  
LSFFKLSSGCFSSFLIFTFLAIFHVLQWTFNLNFPFFSVLYFSPYSKSYSVHFSFFTFSSDFVIFQVVNCMFLIFYDF  
QFSC

>ENSMUSP00000136837\_c.178:C>T\_p.S60F ENSMUST00000179839.8|Gm10717-208|ENSMUSG00000095891|+|chr9:g.3032267:C>T  
MFLIFHDFQFSCHIPCPTVDISFPPFSVFLAIFHVLKCVFLIFRDFQFSCHIPGPTVCISHFSRFSVILSFFK  
LSSGCFSSLIIFTFLAIFHVLQWTFLYFPPFSVFLAIFHVLKCVFLIFRDFQVSRHIPGPTVCISHFSRFSVI  
LSFFKLSSGCFSSLIIFTFLAIFHVLQWTFNLNFPFVSFLYFSPYSKSYSVHFSFSTFFSDFVIFQVVKWMFLI  
FHDFQLSC  
>ENSMUSP00000096655\_c.178:C>T\_p.S60F ENSMUST00000099056.4|Gm10717-204|ENSMUSG00000095891|+|chr9:g.3032267:C>T  
MFLIFHDFQFSCHIPCPTVDISFPPFSVFLAIFHVLKCVFLIFRDFQFSCHIPGPTVCISHFSRFSVILSFFK  
LSSGCFSSLIIFTFLAIFHVLQWTFLYFPPFSVFLAIFHVLKCVFLIFRDFQVSRHIPGPTVCISHFSRFSVI  
LSFFKLSSGCFSSLIIFTFLAIFHVLQWTFNLNFPFVSFLYFSPYSKSYSVHFSFSTFFSDFVIFQVNCMFLIFYDF  
QFSC  
>ENSMUSP00000136837\_c.186:T>C\_p.S63P ENSMUST00000179839.8|Gm10717-208|ENSMUSG00000095891|+|chr9:g.3032275:T>C  
MFLIFHDFQFSCHIPCPTVDISFPPFSVFLAIFHVLKCVFLIFRDFQFSCHIPGPTVCISHFPRFSVILSFFK  
LSSGCFSSLIIFTFLAIFHVLQWTFLYFPPFSVFLAIFHVLKCVFLIFRDFQVSRHIPGPTVCISHFSRFSVI  
LSFFKLSSGCFSSLIIFTFLAIFHVLQWTFNLNFPFVSFLYFSPYSKSYSVHFSFSTFFSDFVIFQVVKWMFLI  
FHDFQLSC  
>ENSMUSP00000096655\_c.186:T>C\_p.S63P ENSMUST00000099056.4|Gm10717-204|ENSMUSG00000095891|+|chr9:g.3032275:T>C  
MFLIFHDFQFSCHIPCPTVDISFPPFSVFLAIFHVLKCVFLIFRDFQFSCHIPGPTVCISHFPRFSVILSFFK  
LSSGCFSSLIIFTFLAIFHVLQWTFLYFPPFSVFLAIFHVLKCVFLIFRDFQVSRHIPGPTVCISHFSRFSVI  
LSFFKLSSGCFSSLIIFTFLAIFHVLQWTFNLNFPFVSFLYFSPYSKSYSVHFSFSTFFSDFVIFQVNCMFLIFYDF  
QFSC  
>ENSMUSP00000136837\_c.205:T>C\_p.L69S ENSMUST00000179839.8|Gm10717-208|ENSMUSG00000095891|+|chr9:g.3032294:T>C  
MFLIFHDFQFSCHIPCPTVDISFPPFSVFLAIFHVLKCVFLIFRDFQFSCHIPGPTVCISHFSRFSVILSFFK  
LSSGCFSSLIIFTFLAIFHVLQWTFLYFPPFSVFLAIFHVLKCVFLIFRDFQVSRHIPGPTVCISHFSRFSVI  
LSFFKLSSGCFSSLIIFTFLAIFHVLQWTFNLNFPFVSFLYFSPYSKSYSVHFSFSTFFSDFVIFQVVKWMFLI  
FHDFQLSC  
>ENSMUSP00000096655\_c.205:T>C\_p.L69S ENSMUST00000099056.4|Gm10717-204|ENSMUSG00000095891|+|chr9:g.3032294:T>C  
MFLIFHDFQFSCHIPCPTVDISFPPFSVFLAIFHVLKCVFLIFRDFQFSCHIPGPTVCISHFSRFSVILSFFK  
LSSGCFSSLIIFTFLAIFHVLQWTFLYFPPFSVFLAIFHVLKCVFLIFRDFQVSRHIPGPTVCISHFSRFSVI  
LSFFKLSSGCFSSLIIFTFLAIFHVLQWTFNLNFPFVSFLYFSPYSKSYSVHFSFSTFFSDFVIFQVNCMFLIFYDF  
QFSC  
>ENSMUSP00000136837\_c.220:T>C\_p.L74S ENSMUST00000179839.8|Gm10717-208|ENSMUSG00000095891|+|chr9:g.3032309:T>C  
MFLIFHDFQFSCHIPCPTVDISFPPFSVFLAIFHVLKCVFLIFRDFQFSCHIPGPTVCISHFSRFSVILSFFK  
SSSGCFSSLIIFTFLAIFHVLQWTFLYFPPFSVFLAIFHVLKCVFLIFRDFQVSRHIPGPTVCISHFSRFSVI  
LSFFKLSSGCFSSLIIFTFLAIFHVLQWTFNLNFPFVSFLYFSPYSKSYSVHFSFSTFFSDFVIFQVVKWMFLI  
FHDFQLSC  
>ENSMUSP00000096655\_c.220:T>C\_p.L74S ENSMUST00000099056.4|Gm10717-204|ENSMUSG00000095891|+|chr9:g.3032309:T>C  
MFLIFHDFQFSCHIPCPTVDISFPPFSVFLAIFHVLKCVFLIFRDFQFSCHIPGPTVCISHFSRFSVILSFFK  
SSSGCFSSLIIFTFLAIFHVLQWTFLYFPPFSVFLAIFHVLKCVFLIFRDFQVSRHIPGPTVCISHFSRFSVI  
LSFFKLSSGCFSSLIIFTFLAIFHVLQWTFNLNFPFVSFLYFSPYSKSYSVHFSFSTFFSDFVIFQVNCMFLIFYDF  
QFSC  
>ENSMUSP00000136837\_c.220:T>G\_p.L74W ENSMUST00000179839.8|Gm10717-208|ENSMUSG00000095891|+|chr9:g.3032309:T>G  
MFLIFHDFQFSCHIPCPTVDISFPPFSVFLAIFHVLKCVFLIFRDFQFSCHIPGPTVCISHFSRFSVILSFFK  
WSSGCFSSLIIFTFLAIFHVLQWTFLYFPPFSVFLAIFHVLKCVFLIFRDFQVSRHIPGPTVCISHFSRFSVI  
LSFFKLSSGCFSSLIIFTFLAIFHVLQWTFNLNFPFVSFLYFSPYSKSYSVHFSFSTFFSDFVIFQVVKWMFLI  
FHDFQLSC  
>ENSMUSP00000096655\_c.220:T>G\_p.L74W ENSMUST00000099056.4|Gm10717-204|ENSMUSG00000095891|+|chr9:g.3032309:T>G  
MFLIFHDFQFSCHIPCPTVDISFPPFSVFLAIFHVLKCVFLIFRDFQFSCHIPGPTVCISHFSRFSVILSFFK  
WSSGCFSSLIIFTFLAIFHVLQWTFLYFPPFSVFLAIFHVLKCVFLIFRDFQVSRHIPGPTVCISHFSRFSVI

LSFFKLSSGCFSSFLIFTFLAIFHVLQWTFNLNPPFFLPYSRSYSVHFSFFTTFFSDFVIFQVNCMFLIFYDF  
QFSC  
>ENSMUSP00000136837\_c.246:T>A\_p.L83M ENSMUST00000179839.8|Gm10717-  
208|ENSMUSG00000095891|+|chr9:g.3032335:T>A  
MFLIFHDFQFSCHIPCPTVDISFPPFSVFLAIFHVLKCVFLIFRDFQFSCHIPGPTVCISHFSRFSVILSFFK  
LSSGCFSSFLIFTFLAIFHVLQWTFLYFPPFSVFLAIFHVLKCVFLIFRDFQVSRHIPGPTVCISHFSRFSVI  
LSFFKLSSGCFSSFLIFTFLAIFHVLQWTFNLNPPFFSVLYFSPYSKSYSVHFSFFTTFFSDFVIFQVVKWMFLI  
FHDFQLSC  
>ENSMUSP00000096655\_c.246:T>A\_p.L83M ENSMUST00000099056.4|Gm10717-  
204|ENSMUSG00000095891|+|chr9:g.3032335:T>A  
MFLIFHDFQFSCHIPCPTVDISFPPFSVFLAIFHVLKCVFLIFRDFQFSCHIPGPTVCISHFSRFSVILSFFK  
LSSGCFSSFLIFTFLAIFHVLQWTFLYFPPFSVFLAIFHVLKCVFLIFRDFQVSRHIPGPTVCISHFSRFSVI  
LSFFKLSSGCFSSFLIFTFLAIFHVLQWTFNLNPPFFLPYSRSYSVHFSFFTTFFSDFVIFQVNCMFLIFYDF  
QFSC  
>ENSMUSP00000136837\_c.256:C>G\_p.T86S ENSMUST00000179839.8|Gm10717-  
208|ENSMUSG00000095891|+|chr9:g.3032345:C>G  
MFLIFHDFQFSCHIPCPTVDISFPPFSVFLAIFHVLKCVFLIFRDFQFSCHIPGPTVCISHFSRFSVILSFFK  
LSSGCFSSFLIFSLAIFHVLQWTFLYFPPFSVFLAIFHVLKCVFLIFRDFQVSRHIPGPTVCISHFSRFSVI  
LSFFKLSSGCFSSFLIFTFLAIFHVLQWTFNLNPPFFSVLYFSPYSKSYSVHFSFFTTFFSDFVIFQVVKWMFLI  
FHDFQLSC  
>ENSMUSP00000096655\_c.256:C>G\_p.T86S ENSMUST00000099056.4|Gm10717-  
204|ENSMUSG00000095891|+|chr9:g.3032345:C>G  
MFLIFHDFQFSCHIPCPTVDISFPPFSVFLAIFHVLKCVFLIFRDFQFSCHIPGPTVCISHFSRFSVILSFFK  
LSSGCFSSFLIFSLAIFHVLQWTFLYFPPFSVFLAIFHVLKCVFLIFRDFQVSRHIPGPTVCISHFSRFSVI  
LSFFKLSSGCFSSFLIFTFLAIFHVLQWTFNLNPPFFLPYSRSYSVHFSFFTTFFSDFVIFQVNCMFLIFYDF  
QFSC  
>ENSMUSP00000136837\_c.256:CT>GA\_p.T86R ENSMUST00000179839.8|Gm10717-  
208|ENSMUSG00000095891|+|chr9:g.3032345:CT>GA  
MFLIFHDFQFSCHIPCPTVDISFPPFSVFLAIFHVLKCVFLIFRDFQFSCHIPGPTVCISHFSRFSVILSFFK  
LSSGCFSSFLIFRFSCHIPCPTVDISIFSTFFRFPCHISRPKVCISHFP\*FSGFSPYSRSYSVHFSFFTTFFSD  
FVIFQVVKWMFLIFLDFHFSCHIPCPTVDISKFSTFFFLAIFQVLQCAFLIFHVQ\*FRHFSSCQVDVSH  
FP\*FSAFL  
>ENSMUSP00000096655\_c.256:CT>GA\_p.T86R ENSMUST00000099056.4|Gm10717-  
204|ENSMUSG00000095891|+|chr9:g.3032345:CT>GA  
MFLIFHDFQFSCHIPCPTVDISFPPFSVFLAIFHVLKCVFLIFRDFQFSCHIPGPTVCISHFSRFSVILSFFK  
LSSGCFSSFLIFRFSCHIPCPTVDISIFSTFFRFPCHISRPKVCISHFP\*FSGFSPYSRSYSVHFSFFTTFFSD  
FVIFQVVKWMFLIFLDFHFSCHIPCPTVDISKFSTFFFLAIFQVLQCAFLIFHVQ\*FCHFSSCQLHVSHFL\*F  
SVFL  
>ENSMUSP00000136837\_c.265:C>T\_p.A89V ENSMUST00000179839.8|Gm10717-  
208|ENSMUSG00000095891|+|chr9:g.3032354:C>T  
MFLIFHDFQFSCHIPCPTVDISFPPFSVFLAIFHVLKCVFLIFRDFQFSCHIPGPTVCISHFSRFSVILSFFK  
LSSGCFSSFLIFTFLVIFHVLQWTFLYFPPFSVFLAIFHVLKCVFLIFRDFQVSRHIPGPTVCISHFSRFSVI  
LSFFKLSSGCFSSFLIFTFLAIFHVLQWTFNLNPPFFSVLYFSPYSKSYSVHFSFFTTFFSDFVIFQVVKWMFLI  
FHDFQLSC  
>ENSMUSP00000096655\_c.265:C>T\_p.A89V ENSMUST00000099056.4|Gm10717-  
204|ENSMUSG00000095891|+|chr9:g.3032354:C>T  
MFLIFHDFQFSCHIPCPTVDISFPPFSVFLAIFHVLKCVFLIFRDFQFSCHIPGPTVCISHFSRFSVILSFFK  
LSSGCFSSFLIFTFLVIFHVLQWTFLYFPPFSVFLAIFHVLKCVFLIFRDFQVSRHIPGPTVCISHFSRFSVI  
LSFFKLSSGCFSSFLIFTFLAIFHVLQWTFNLNPPFFLPYSRSYSVHFSFFTTFFSDFVIFQVNCMFLIFYDF  
QFSC  
>ENSMUSP00000136837\_c.297:T>A\_p.Y100N ENSMUST00000179839.8|Gm10717-  
208|ENSMUSG00000095891|+|chr9:g.3032386:T>A  
MFLIFHDFQFSCHIPCPTVDISFPPFSVFLAIFHVLKCVFLIFRDFQFSCHIPGPTVCISHFSRFSVILSFFK  
LSSGCFSSFLIFTFLAIFHVLQWTFNLNPPFSVFLAIFHVLKCVFLIFRDFQVSRHIPGPTVCISHFSRFSVI  
LSFFKLSSGCFSSFLIFTFLAIFHVLQWTFNLNPPFFSVLYFSPYSKSYSVHFSFFTTFFSDFVIFQVVKWMFLI  
FHDFQLSC  
>ENSMUSP00000096655\_c.297:T>A\_p.Y100N ENSMUST00000099056.4|Gm10717-  
204|ENSMUSG00000095891|+|chr9:g.3032386:T>A

MFLIFHDFQFSCHIPCPTVDISFPPFSVFLAIFHVLKCVFLIFRDFQFSCHIPGPTVCISHFSRFSVILSFFK  
LSSGCFSSFLIFTFLAIFHVLQWTFLNFPFVSFLAIFHVLKCVFLIFRDFQVSRHIPGPTVCISHFSRFSVI  
LSFFKLSSGCFSSFLIFTFLAIFHVLQWTFLNFPFVFLPYSRSYSVHFSFFTFSSDFVIFQVNCMFLIFYDF  
QFSC  
>ENSMUSP00000136837\_c.325:C>T\_p.A109V ENSMUST00000179839.8|Gm10717-  
208|ENSMUSG00000095891|+|chr9:g.3032414:C>T  
MFLIFHDFQFSCHIPCPTVDISFPPFSVFLAIFHVLKCVFLIFRDFQFSCHIPGPTVCISHFSRFSVILSFFK  
LSSGCFSSFLIFTFLAIFHVLQWTFLYFPFVSFLVIFHVLKCVFLIFRDFQVSRHIPGPTVCISHFSRFSVI  
LSFFKLSSGCFSSFLIFTFLAIFHVLQWTFLNFPFVSFLYFSPYSKSYSVHFSFFTFSSDFVIFQVVKWMFLI  
FHDFQLSC  
>ENSMUSP00000096655\_c.325:C>T\_p.A109V ENSMUST00000099056.4|Gm10717-  
204|ENSMUSG00000095891|+|chr9:g.3032414:C>T  
MFLIFHDFQFSCHIPCPTVDISFPPFSVFLAIFHVLKCVFLIFRDFQFSCHIPGPTVCISHFSRFSVILSFFK  
LSSGCFSSFLIFTFLAIFHVLQWTFLYFPFVSFLVIFHVLKCVFLIFRDFQVSRHIPGPTVCISHFSRFSVI  
LSFFKLSSGCFSSFLIFTFLAIFHVLQWTFLNFPFVFLPYSRSYSVHFSFFTFSSDFVIFQVNCMFLIFYDF  
QFSC  
>ENSMUSP00000136837\_c.342:A>T\_p.K115\* ENSMUST00000179839.8|Gm10717-  
208|ENSMUSG00000095891|+|chr9:g.3032431:A>T  
MFLIFHDFQFSCHIPCPTVDISFPPFSVFLAIFHVLKCVFLIFRDFQFSCHIPGPTVCISHFSRFSVILSFFK  
LSSGCFSSFLIFTFLAIFHVLQWTFLYFPFVSFLAIFHVL\*CVFLIFRDFQVSRHIPGPTVCISHFSRFSVI  
LSFFKLSSGCFSSFLIFTFLAIFHVLQWTFLNFPFVSFLYFSPYSKSYSVHFSFFTFSSDFVIFQVVKWMFLI  
FHDFQLSC  
>ENSMUSP00000096655\_c.342:A>T\_p.K115\* ENSMUST00000099056.4|Gm10717-  
204|ENSMUSG00000095891|+|chr9:g.3032431:A>T  
MFLIFHDFQFSCHIPCPTVDISFPPFSVFLAIFHVLKCVFLIFRDFQFSCHIPGPTVCISHFSRFSVILSFFK  
LSSGCFSSFLIFTFLAIFHVLQWTFLYFPFVSFLAIFHVL\*CVFLIFRDFQVSRHIPGPTVCISHFSRFSVI  
LSFFKLSSGCFSSFLIFTFLAIFHVLQWTFLNFPFVFLPYSRSYSVHFSFFTFSSDFVIFQVNCMFLIFYDF  
QFSC  
>ENSMUSP00000136837\_c.344:G>T\_p.K115N ENSMUST00000179839.8|Gm10717-  
208|ENSMUSG00000095891|+|chr9:g.3032433:G>T  
MFLIFHDFQFSCHIPCPTVDISFPPFSVFLAIFHVLKCVFLIFRDFQFSCHIPGPTVCISHFSRFSVILSFFK  
LSSGCFSSFLIFTFLAIFHVLQWTFLYFPFVSFLAIFHVLNCFVFLIFRDFQVSRHIPGPTVCISHFSRFSVI  
LSFFKLSSGCFSSFLIFTFLAIFHVLQWTFLNFPFVSFLYFSPYSKSYSVHFSFFTFSSDFVIFQVVKWMFLI  
FHDFQLSC  
>ENSMUSP00000096655\_c.344:G>T\_p.K115N ENSMUST00000099056.4|Gm10717-  
204|ENSMUSG00000095891|+|chr9:g.3032433:G>T  
MFLIFHDFQFSCHIPCPTVDISFPPFSVFLAIFHVLKCVFLIFRDFQFSCHIPGPTVCISHFSRFSVILSFFK  
LSSGCFSSFLIFTFLAIFHVLQWTFLYFPFVSFLAIFHVLNCFVFLIFRDFQVSRHIPGPTVCISHFSRFSVI  
LSFFKLSSGCFSSFLIFTFLAIFHVLQWTFLNFPFVFLPYSRSYSVHFSFFTFSSDFVIFQVNCMFLIFYDF  
QFSC  
>ENSMUSP00000136837\_c.363:C>T\_p.R122C ENSMUST00000179839.8|Gm10717-  
208|ENSMUSG00000095891|+|chr9:g.3032452:C>T  
MFLIFHDFQFSCHIPCPTVDISFPPFSVFLAIFHVLKCVFLIFRDFQFSCHIPGPTVCISHFSRFSVILSFFK  
LSSGCFSSFLIFTFLAIFHVLQWTFLYFPFVSFLAIFHVLKCVFLIFCDFQVSRHIPGPTVCISHFSRFSVI  
LSFFKLSSGCFSSFLIFTFLAIFHVLQWTFLNFPFVSFLYFSPYSKSYSVHFSFFTFSSDFVIFQVVKWMFLI  
FHDFQLSC  
>ENSMUSP00000096655\_c.363:C>T\_p.R122C ENSMUST00000099056.4|Gm10717-  
204|ENSMUSG00000095891|+|chr9:g.3032452:C>T  
MFLIFHDFQFSCHIPCPTVDISFPPFSVFLAIFHVLKCVFLIFRDFQFSCHIPGPTVCISHFSRFSVILSFFK  
LSSGCFSSFLIFTFLAIFHVLQWTFLYFPFVSFLAIFHVLKCVFLIFCDFQVSRHIPGPTVCISHFSRFSVI  
LSFFKLSSGCFSSFLIFTFLAIFHVLQWTFLNFPFVFLPYSRSYSVHFSFFTFSSDFVIFQVNCMFLIFYDF  
QFSC  
>ENSMUSP00000137451\_c.549:G>T\_p.V184F ENSMUST00000179264.2|Gm10717-  
207|ENSMUSG00000095891|+|chr9:g.3032464:G>T  
MFLIFHDFQFSCHIPCPTVDISFPPFSVFLAIFHVLKCVFLIFRDFQFSCHIPGPTVCISHFSRFSVILSFFN  
LSTACFSFSMIFSLAIFHVLQWTFLNFPFVSFLAIFHVLKCVFLIFRVFQFPRHIPGPTVCYHFSRFSVI  
SSFFKTSSGCFSSMIFSLAIFHVLQWTFLNFPFVSFLPYSRSYSVHFSFFTFSSDFVIFQVVKWMFLIFLD  
FHFS

>ENSMUSP00000136837\_c.375:G>T\_p.V126F ENSMUST00000179839.8|Gm10717-208|ENSMUSG00000095891|+|chr9:g.3032464:G>T  
MFLIFHDFQFSCHIPCPTVDISFPPFSVFLAIFHVLKCVFLIFRDFQFSCHIPGPTVCISHFSRFSVILSFFK  
LSSGCFSSLIIFTFLAIFHVLQWTFLYFPPFSVFLAIFHVLKCVFLIFRDFQFSRHIPGPTVCISHFSRFSVI  
LSFFKLSSGCFSSLIIFTFLAIFHVLQWTFNLNFPFVSFLYFSPYSKSYSVHFSFSTFFSDFVIFQVVKWMFLI  
FHDFQLSC  
>ENSMUSP00000096655\_c.375:G>T\_p.V126F ENSMUST00000099056.4|Gm10717-204|ENSMUSG00000095891|+|chr9:g.3032464:G>T  
MFLIFHDFQFSCHIPCPTVDISFPPFSVFLAIFHVLKCVFLIFRDFQFSCHIPGPTVCISHFSRFSVILSFFK  
LSSGCFSSLIIFTFLAIFHVLQWTFLYFPPFSVFLAIFHVLKCVFLIFRDFQFSRHIPGPTVCISHFSRFSVI  
LSFFKLSSGCFSSLIIFTFLAIFHVLQWTFNLNFPFVFLPYRSYSVHFSFSTFFSDFVIFQVNCMFLIFYDF  
QFSC  
>ENSMUSP00000137451\_c.571:A>T\_p.Y191F ENSMUST00000179264.2|Gm10717-207|ENSMUSG00000095891|+|chr9:g.3032488:A>T  
MFLIFHDFQFSCHIPCPTVDISFPPFSVFLAIFHVLKCVFLIFRDFQFSCHIPGPTVCISHFSRFSVILSFFN  
LSTACFSFSMIFSFSLAIFHVLQWTFNLNFPFVSFLAIFHVLKCVFLIFRVFQFPRHIPGPTVCYHFSRFSVI  
SSFFKTSSGCFSSFMIFSFSLAIFHVLQWTFNLNFPFVSFLYFSPYSRFSVHFSFSTFFSDFVIFQVVKWMFLIFLD  
FHFS  
>ENSMUSP00000136837\_c.399:A>T\_p.T134S ENSMUST00000179839.8|Gm10717-208|ENSMUSG00000095891|+|chr9:g.3032488:A>T  
MFLIFHDFQFSCHIPCPTVDISFPPFSVFLAIFHVLKCVFLIFRDFQFSCHIPGPTVCISHFSRFSVILSFFK  
LSSGCFSSLIIFTFLAIFHVLQWTFLYFPPFSVFLAIFHVLKCVFLIFRDFQVSRHIPGPSVCISHFSRFSVI  
LSFFKLSSGCFSSLIIFTFLAIFHVLQWTFNLNFPFVSFLYFSPYSKSYSVHFSFSTFFSDFVIFQVVKWMFLI  
FHDFQLSC  
>ENSMUSP00000096655\_c.399:A>T\_p.T134S ENSMUST00000099056.4|Gm10717-204|ENSMUSG00000095891|+|chr9:g.3032488:A>T  
MFLIFHDFQFSCHIPCPTVDISFPPFSVFLAIFHVLKCVFLIFRDFQFSCHIPGPTVCISHFSRFSVILSFFK  
LSSGCFSSLIIFTFLAIFHVLQWTFLYFPPFSVFLAIFHVLKCVFLIFRDFQVSRHIPGPSVCISHFSRFSVI  
LSFFKLSSGCFSSLIIFTFLAIFHVLQWTFNLNFPFVFLPYRSYSVHFSFSTFFSDFVIFQVNCMFLIFYDF  
QFSC  
>ENSMUSP00000136837\_c.400:C>T\_p.T134I ENSMUST00000179839.8|Gm10717-208|ENSMUSG00000095891|+|chr9:g.3032489:C>T  
MFLIFHDFQFSCHIPCPTVDISFPPFSVFLAIFHVLKCVFLIFRDFQFSCHIPGPTVCISHFSRFSVILSFFK  
LSSGCFSSLIIFTFLAIFHVLQWTFLYFPPFSVFLAIFHVLKCVFLIFRDFQVSRHIPGPVIVCISHFSRFSVI  
LSFFKLSSGCFSSLIIFTFLAIFHVLQWTFNLNFPFVSFLYFSPYSKSYSVHFSFSTFFSDFVIFQVVKWMFLI  
FHDFQLSC  
>ENSMUSP00000096655\_c.400:C>T\_p.T134I ENSMUST00000099056.4|Gm10717-204|ENSMUSG00000095891|+|chr9:g.3032489:C>T  
MFLIFHDFQFSCHIPCPTVDISFPPFSVFLAIFHVLKCVFLIFRDFQFSCHIPGPTVCISHFSRFSVILSFFK  
LSSGCFSSLIIFTFLAIFHVLQWTFLYFPPFSVFLAIFHVLKCVFLIFRDFQVSRHIPGPVIVCISHFSRFSVI  
LSFFKLSSGCFSSLIIFTFLAIFHVLQWTFNLNFPFVFLPYRSYSVHFSFSTFFSDFVIFQVNCMFLIFYDF  
QFSC  
>ENSMUSP00000137451\_c.577:T>G\_p.V193G ENSMUST00000179264.2|Gm10717-207|ENSMUSG00000095891|+|chr9:g.3032494:T>G  
MFLIFHDFQFSCHIPCPTVDISFPPFSVFLAIFHVLKCVFLIFRDFQFSCHIPGPTVCISHFSRFSVILSFFN  
LSTACFSFSMIFSFSLAIFHVLQWTFNLNFPFVSFLAIFHVLKCVFLIFRVFQFPRHIPGPTVCYHFSRFSVI  
SSFFKTSSGCFSSFMIFSFSLAIFHVLQWTFNLNFPFVSFLYFSPYSRFSYSGHFSFSTFFSDFVIFQVVKWMFLIFLD  
FHFS  
>ENSMUSP00000136837\_c.405:T>G\_p.C136G ENSMUST00000179839.8|Gm10717-208|ENSMUSG00000095891|+|chr9:g.3032494:T>G  
MFLIFHDFQFSCHIPCPTVDISFPPFSVFLAIFHVLKCVFLIFRDFQFSCHIPGPTVCISHFSRFSVILSFFK  
LSSGCFSSLIIFTFLAIFHVLQWTFLYFPPFSVFLAIFHVLKCVFLIFRDFQVSRHIPGPTVIGISHFSRFSVI  
LSFFKLSSGCFSSLIIFTFLAIFHVLQWTFNLNFPFVSFLYFSPYSKSYSVHFSFSTFFSDFVIFQVVKWMFLI  
FHDFQLSC  
>ENSMUSP00000096655\_c.405:T>G\_p.C136G ENSMUST00000099056.4|Gm10717-204|ENSMUSG00000095891|+|chr9:g.3032494:T>G  
MFLIFHDFQFSCHIPCPTVDISFPPFSVFLAIFHVLKCVFLIFRDFQFSCHIPGPTVCISHFSRFSVILSFFK  
LSSGCFSSLIIFTFLAIFHVLQWTFLYFPPFSVFLAIFHVLKCVFLIFRDFQVSRHIPGPTVIGISHFSRFSVI

LSFFKLSSGCFSFSLIFTFLAIFHVLQWTFNLNPPFFLPYSRSYSVHFSFSTFFSDFVIFQVNCMFLIFYDF  
QFSC  
>ENSMUSP00000137451\_c.592:T>C\_p.F198S ENSMUST00000179264.2|Gm10717-  
207|ENSMUSG00000095891|+|chr9:g.3032509:T>C  
MFLIFHDFQFSCHIPCPTVDISFPPFSVFLAIFHVLKCVFLIFRDFQFSCHIPGPTVCISHFSRFSVILSFFN  
LSTACFSFSMIFSFSLAIFHVLQWTFNLNPPFSVFLAIFHVLKCVFLIFRVFQFPRHIPGPTVCIYHFSRFSVI  
SSFFKTSSGCFSFFMIFSFSLAIFHVLQWTFNLNPPFSVSPYSRSYSVHFSFSTFFSDFVIFQVVKWMFLIFLD  
FHFS  
>ENSMUSP00000136837\_c.420:T>C\_p.S141P ENSMUST00000179839.8|Gm10717-  
208|ENSMUSG00000095891|+|chr9:g.3032509:T>C  
MFLIFHDFQFSCHIPCPTVDISFPPFSVFLAIFHVLKCVFLIFRDFQFSCHIPGPTVCISHFSRFSVILSFFK  
LSSGCFSSLSLIFTFLAIFHVLQWTFLYFPPFSVFLAIFHVLKCVFLIFRDFQVSRHIPGPTVCISHFPRFSVI  
LSFFKLSSGCFSFSLIFTFLAIFHVLQWTFNLNPPFSVLYFSPYSKSYSVHFSFSTFFSDFVIFQVVKWMFLI  
FHDFQLSC  
>ENSMUSP00000096655\_c.420:T>C\_p.S141P ENSMUST00000099056.4|Gm10717-  
204|ENSMUSG00000095891|+|chr9:g.3032509:T>C  
MFLIFHDFQFSCHIPCPTVDISFPPFSVFLAIFHVLKCVFLIFRDFQFSCHIPGPTVCISHFSRFSVILSFFK  
LSSGCFSSLSLIFTFLAIFHVLQWTFLYFPPFSVFLAIFHVLKCVFLIFRDFQVSRHIPGPTVCISHFPRFSVI  
LSFFKLSSGCFSFSLIFTFLAIFHVLQWTFNLNPPFSVLYFSPYSKSYSVHFSFSTFFSDFVIFQVVKWMFLI  
FHDFQLSC  
>ENSMUSP00000137451\_c.597:T>G\_p.F200V ENSMUST00000179264.2|Gm10717-  
207|ENSMUSG00000095891|+|chr9:g.3032514:T>G  
MFLIFHDFQFSCHIPCPTVDISFPPFSVFLAIFHVLKCVFLIFRDFQFSCHIPGPTVCISHFSRFSVILSFFN  
LSTACFSFSMIFSFSLAIFHVLQWTFNLNPPFSVFLAIFHVLKCVFLIFRVFQFPRHIPGPTVCIYHFSRFSVI  
SSFFKTSSGCFSFFMIFSFSLAIFHVLQWTFNLNPPFSVSPYSRSYSVHFSFSTVFSDFVIFQVVKWMFLIFLD  
FHFS  
>ENSMUSP00000137451\_c.605:T>G\_p.S202R ENSMUST00000179264.2|Gm10717-  
207|ENSMUSG00000095891|+|chr9:g.3032522:T>G  
MFLIFHDFQFSCHIPCPTVDISFPPFSVFLAIFHVLKCVFLIFRDFQFSCHIPGPTVCISHFSRFSVILSFFN  
LSTACFSFSMIFSFSLAIFHVLQWTFNLNPPFSVFLAIFHVLKCVFLIFRVFQFPRHIPGPTVCIYHFSRFSVI  
SSFFKTSSGCFSFFMIFSFSLAIFHVLQWTFNLNPPFSVSPYSRSYSVHFSFSTFFRDFVIFQVVKWMFLIFLD  
FHFS  
>ENSMUSP00000136837\_c.433:T>G\_p.V145G ENSMUST00000179839.8|Gm10717-  
208|ENSMUSG00000095891|+|chr9:g.3032522:T>G  
MFLIFHDFQFSCHIPCPTVDISFPPFSVFLAIFHVLKCVFLIFRDFQFSCHIPGPTVCISHFSRFSVILSFFK  
LSSGCFSSLSLIFTFLAIFHVLQWTFLYFPPFSVFLAIFHVLKCVFLIFRDFQVSRHIPGPTVCISHFSRFSGI  
LSFFKLSSGCFSFSLIFTFLAIFHVLQWTFNLNPPFSVLYFSPYSKSYSVHFSFSTFFSDFVIFQVVKWMFLI  
FHDFQLSC  
>ENSMUSP00000096655\_c.433:T>G\_p.V145G ENSMUST00000099056.4|Gm10717-  
204|ENSMUSG00000095891|+|chr9:g.3032522:T>G  
MFLIFHDFQFSCHIPCPTVDISFPPFSVFLAIFHVLKCVFLIFRDFQFSCHIPGPTVCISHFSRFSVILSFFK  
LSSGCFSSLSLIFTFLAIFHVLQWTFLYFPPFSVFLAIFHVLKCVFLIFRDFQVSRHIPGPTVCISHFSRFSGI  
LSFFKLSSGCFSFSLIFTFLAIFHVLQWTFNLNPPFFLPYSRSYSVHFSFSTFFSDFVIFQVNCMFLIFYDF  
QFSC  
>ENSMUSP00000136837\_c.439:T>C\_p.L147S ENSMUST00000179839.8|Gm10717-  
208|ENSMUSG00000095891|+|chr9:g.3032528:T>C  
MFLIFHDFQFSCHIPCPTVDISFPPFSVFLAIFHVLKCVFLIFRDFQFSCHIPGPTVCISHFSRFSVILSFFK  
LSSGCFSSLSLIFTFLAIFHVLQWTFLYFPPFSVFLAIFHVLKCVFLIFRDFQVSRHIPGPTVCISHFSRFSVI  
SSFFKLSSGCFSFSLIFTFLAIFHVLQWTFNLNPPFSVLYFSPYSKSYSVHFSFSTFFSDFVIFQVVKWMFLI  
FHDFQLSC  
>ENSMUSP00000096655\_c.439:T>C\_p.L147S ENSMUST00000099056.4|Gm10717-  
204|ENSMUSG00000095891|+|chr9:g.3032528:T>C  
MFLIFHDFQFSCHIPCPTVDISFPPFSVFLAIFHVLKCVFLIFRDFQFSCHIPGPTVCISHFSRFSVILSFFK  
LSSGCFSSLSLIFTFLAIFHVLQWTFLYFPPFSVFLAIFHVLKCVFLIFRDFQVSRHIPGPTVCISHFSRFSVI  
SSFFKLSSGCFSFSLIFTFLAIFHVLQWTFNLNPPFFLPYSRSYSVHFSFSTFFSDFVIFQVNCMFLIFYDF  
QFSC  
>ENSMUSP00000136837\_c.454:T>G\_p.L152W ENSMUST00000179839.8|Gm10717-  
208|ENSMUSG00000095891|+|chr9:g.3032543:T>G



MFLIFHDFQFSCHIPCPTVDISFPPFSVFLAIFHVLKCVFLIFRDFQFSCHIPGPTVCISHFSRFSVILSFFK  
LSSGCFSSFLIFTFLAIFHVLQWTFLYFPPFSVFLAIFHVLKCVFLIFRDFQVSRHIPGPTVCISHFSRFSVI  
LSFFKWSSGCFSSFLIFTFLAIFHVLQWTFNLNPPFSVLYFSPYSKSYSVHFSFFTFSSDFVIFQVVKWMFLI  
FHDFQLSC  
>ENSMUSP00000096655\_c.454:T>G\_p.L152W ENSMUST00000099056.4|Gm10717-  
204|ENSMUSG00000095891|+|chr9:g.3032543:T>G  
MFLIFHDFQFSCHIPCPTVDISFPPFSVFLAIFHVLKCVFLIFRDFQFSCHIPGPTVCISHFSRFSVILSFFK  
LSSGCFSSFLIFTFLAIFHVLQWTFLYFPPFSVFLAIFHVLKCVFLIFRDFQVSRHIPGPTVCISHFSRFSVI  
LSFFKWSSGCFSSFLIFTFLAIFHVLQWTFNLNPPFSVLYFSPYSKSYSVHFSFFTFSSDFVIFQVVKWMFLI  
QFSC  
>ENSMUSP00000136837\_c.454:T>C\_p.L152S ENSMUST00000179839.8|Gm10717-  
208|ENSMUSG00000095891|+|chr9:g.3032543:T>C  
MFLIFHDFQFSCHIPCPTVDISFPPFSVFLAIFHVLKCVFLIFRDFQFSCHIPGPTVCISHFSRFSVILSFFK  
LSSGCFSSFLIFTFLAIFHVLQWTFLYFPPFSVFLAIFHVLKCVFLIFRDFQVSRHIPGPTVCISHFSRFSVI  
LSFFKSSSGCFSSFLIFTFLAIFHVLQWTFNLNPPFSVLYFSPYSKSYSVHFSFFTFSSDFVIFQVVKWMFLI  
FHDFQLSC  
>ENSMUSP00000096655\_c.454:T>C\_p.L152S ENSMUST00000099056.4|Gm10717-  
204|ENSMUSG00000095891|+|chr9:g.3032543:T>C  
MFLIFHDFQFSCHIPCPTVDISFPPFSVFLAIFHVLKCVFLIFRDFQFSCHIPGPTVCISHFSRFSVILSFFK  
LSSGCFSSFLIFTFLAIFHVLQWTFLYFPPFSVFLAIFHVLKCVFLIFRDFQVSRHIPGPTVCISHFSRFSVI  
LSFFKSSSGCFSSFLIFTFLAIFHVLQWTFNLNPPFSVLYFSPYSKSYSVHFSFFTFSSDFVIFQVVKWMFLI  
QFSC  
>ENSMUSP00000137451\_c.652:T>A\_p.L218H ENSMUST00000179264.2|Gm10717-  
207|ENSMUSG00000095891|+|chr9:g.3032569:T>A  
MFLIFHDFQFSCHIPCPTVDISFPPFSVFLAIFHVLKCVFLIFRDFQFSCHIPGPTVCISHFSRFSVILSFFN  
LSTACFSFSMIFSLAIFHVLQWTFNLNPPFSVFLAIFHVLKCVFLIFRVFQFPRHIPGPTVCYHFSRFSVI  
SSFFKTSSGCFSSFMIFSLAIFHVLQWTFNLNPPFSVSPYSRYSVHFSFFTFSSDFVIFQVVKWMFLIFHD  
FHFC  
>ENSMUSP00000136837\_c.480:T>A\_p.L161M ENSMUST00000179839.8|Gm10717-  
208|ENSMUSG00000095891|+|chr9:g.3032569:T>A  
MFLIFHDFQFSCHIPCPTVDISFPPFSVFLAIFHVLKCVFLIFRDFQFSCHIPGPTVCISHFSRFSVILSFFK  
LSSGCFSSFLIFTFLAIFHVLQWTFLYFPPFSVFLAIFHVLKCVFLIFRDFQVSRHIPGPTVCISHFSRFSVI  
LSFFKLSSGCFSSFMIFSLAIFHVLQWTFNLNPPFSVLYFSPYSKSYSVHFSFFTFSSDFVIFQVVKWMFLI  
FHDFQLSC  
>ENSMUSP00000096655\_c.480:T>A\_p.L161M ENSMUST00000099056.4|Gm10717-  
204|ENSMUSG00000095891|+|chr9:g.3032569:T>A  
MFLIFHDFQFSCHIPCPTVDISFPPFSVFLAIFHVLKCVFLIFRDFQFSCHIPGPTVCISHFSRFSVILSFFK  
LSSGCFSSFLIFTFLAIFHVLQWTFLYFPPFSVFLAIFHVLKCVFLIFRDFQVSRHIPGPTVCISHFSRFSVI  
LSFFKLSSGCFSSFMIFSLAIFHVLQWTFNLNPPFSVLYFSPYSKSYSVHFSFFTFSSDFVIFQVVKWMFLI  
QFSC  
>ENSMUSP00000137451\_c.662:C>G\_p.H221Q ENSMUST00000179264.2|Gm10717-  
207|ENSMUSG00000095891|+|chr9:g.3032579:C>G  
MFLIFHDFQFSCHIPCPTVDISFPPFSVFLAIFHVLKCVFLIFRDFQFSCHIPGPTVCISHFSRFSVILSFFN  
LSTACFSFSMIFSLAIFHVLQWTFNLNPPFSVFLAIFHVLKCVFLIFRVFQFPRHIPGPTVCYHFSRFSVI  
SSFFKTSSGCFSSFMIFSLAIFHVLQWTFNLNPPFSVSPYSRYSVHFSFFTFSSDFVIFQVVKWMFLIFLD  
FQFSC  
>ENSMUSP00000136837\_c.490:C>G\_p.T164S ENSMUST00000179839.8|Gm10717-  
208|ENSMUSG00000095891|+|chr9:g.3032579:C>G  
MFLIFHDFQFSCHIPCPTVDISFPPFSVFLAIFHVLKCVFLIFRDFQFSCHIPGPTVCISHFSRFSVILSFFK  
LSSGCFSSFLIFTFLAIFHVLQWTFLYFPPFSVFLAIFHVLKCVFLIFRDFQVSRHIPGPTVCISHFSRFSVI  
LSFFKLSSGCFSSFLIFSFLAIFHVLQWTFNLNPPFSVLYFSPYSKSYSVHFSFFTFSSDFVIFQVVKWMFLI  
FHDFQLSC  
>ENSMUSP00000096655\_c.490:C>G\_p.T164S ENSMUST00000099056.4|Gm10717-  
204|ENSMUSG00000095891|+|chr9:g.3032579:C>G  
MFLIFHDFQFSCHIPCPTVDISFPPFSVFLAIFHVLKCVFLIFRDFQFSCHIPGPTVCISHFSRFSVILSFFK  
LSSGCFSSFLIFTFLAIFHVLQWTFLYFPPFSVFLAIFHVLKCVFLIFRDFQVSRHIPGPTVCISHFSRFSVI  
LSFFKLSSGCFSSFLIFSFLAIFHVLQWTFNLNPPFSVLYFSPYSKSYSVHFSFFTFSSDFVIFQVVKWMFLI  
QFSC

>ENSMUSP00000137451\_c.662:CT>GA\_p.H221Q ENSMUST00000179264.2|Gm10717-207|ENSMUSG00000095891|+|chr9:g.3032579:CT>GA  
MFLIFHDFQFSCHIPCPTVDISFPPFSVFLAIFHVLKCVFLIFRDFQFSCHIPGPTVCISHFSRFSVILSFFN  
LSTACFSFSMIFSFLAIFHVLQWTFNLNFPFVSFLAIFHVLKCVFLIFRVFQFPRHIPGPTVCYHFSRFSVI  
SSFFKTSSGCFSFFMIFSFLAIFHVLQWTFNLNFPFVSVPYSRSYSVHFSFSTFFSDFVIFQVVKWMFLIFLD  
FQIFL  
>ENSMUSP00000136837\_c.490:CT>GA\_p.T164R ENSMUST00000179839.8|Gm10717-208|ENSMUSG00000095891|+|chr9:g.3032579:CT>GA  
MFLIFHDFQFSCHIPCPTVDISFPPFSVFLAIFHVLKCVFLIFRDFQFSCHIPGPTVCISHFSRFSVILSFFK  
LSSGCFSSFLIFTFLAIFHVLQWTFLYFPFVSFLAIFHVLKCVFLIFRDFQVSRHIPGPTVCISHFSRFSVI  
LSFFKLSSGCFSFSLIFRFSCHIPCPTVDISKFSTFFSPIFLAIFQVLQCAFLIFHVQ\*FRHFSSCQVDVSH  
FP\*FSAFL  
>ENSMUSP00000096655\_c.490:CT>GA\_p.T164R ENSMUST00000099056.4|Gm10717-204|ENSMUSG00000095891|+|chr9:g.3032579:CT>GA  
MFLIFHDFQFSCHIPCPTVDISFPPFSVFLAIFHVLKCVFLIFRDFQFSCHIPGPTVCISHFSRFSVILSFFK  
LSSGCFSSFLIFTFLAIFHVLQWTFLYFPFVSFLAIFHVLKCVFLIFRDFQVSRHIPGPTVCISHFSRFSVI  
LSFFKLSSGCFSFSLIFRFSCHIPCPTVDISKFSTFFLAIQVLQCAFLIFHVQ\*FCHFSSCQLHVSHFL\*F  
SVFL  
>ENSMUSP00000136837\_c.499:C>T\_p.A167V ENSMUST00000179839.8|Gm10717-208|ENSMUSG00000095891|+|chr9:g.3032588:C>T  
MFLIFHDFQFSCHIPCPTVDISFPPFSVFLAIFHVLKCVFLIFRDFQFSCHIPGPTVCISHFSRFSVILSFFK  
LSSGCFSSFLIFTFLAIFHVLQWTFLYFPFVSFLAIFHVLKCVFLIFRDFQVSRHIPGPTVCISHFSRFSVI  
LSFFKLSSGCFSFSLIFTFLVIFHVLQWTFNLNFPFVSFLYFSPYSKSYSVHFSFSTFFSDFVIFQVVKWMFLI  
FHDFQLSC  
>ENSMUSP00000096655\_c.499:C>T\_p.A167V ENSMUST00000099056.4|Gm10717-204|ENSMUSG00000095891|+|chr9:g.3032588:C>T  
MFLIFHDFQFSCHIPCPTVDISFPPFSVFLAIFHVLKCVFLIFRDFQFSCHIPGPTVCISHFSRFSVILSFFK  
LSSGCFSSFLIFTFLAIFHVLQWTFLYFPFVSFLAIFHVLKCVFLIFRDFQVSRHIPGPTVCISHFSRFSVI  
LSFFKLSSGCFSFSLIFTFLVIFHVLQWTFNLNFPFVFLPYSRSYSVHFSFSTFFSDFVIFQVNCMFLIFYDF  
QFSC  
>ENSMUSP00000136837\_c.509:T>G\_p.H170Q ENSMUST00000179839.8|Gm10717-208|ENSMUSG00000095891|+|chr9:g.3032598:T>G  
MFLIFHDFQFSCHIPCPTVDISFPPFSVFLAIFHVLKCVFLIFRDFQFSCHIPGPTVCISHFSRFSVILSFFK  
LSSGCFSSFLIFTFLAIFHVLQWTFLYFPFVSFLAIFHVLKCVFLIFRDFQVSRHIPGPTVCISHFSRFSVI  
LSFFKLSSGCFSFSLIFTFLAIFQVLQWTFNLNFPFVSFLYFSPYSKSYSVHFSFSTFFSDFVIFQVVKWMFLI  
FHDFQLSC  
>ENSMUSP00000096655\_c.509:T>G\_p.H170Q ENSMUST00000099056.4|Gm10717-204|ENSMUSG00000095891|+|chr9:g.3032598:T>G  
MFLIFHDFQFSCHIPCPTVDISFPPFSVFLAIFHVLKCVFLIFRDFQFSCHIPGPTVCISHFSRFSVILSFFK  
LSSGCFSSFLIFTFLAIFHVLQWTFLYFPFVSFLAIFHVLKCVFLIFRDFQVSRHIPGPTVCISHFSRFSVI  
LSFFKLSSGCFSFSLIFTFLAIFQVLQWTFNLNFPFVFLPYSRSYSVHFSFSTFFSDFVIFQVNCMFLIFYDF  
QFSC  
>ENSMUSP00000136837\_c.541:C>T\_p.P181L ENSMUST00000179839.8|Gm10717-208|ENSMUSG00000095891|+|chr9:g.3032630:C>T  
MFLIFHDFQFSCHIPCPTVDISFPPFSVFLAIFHVLKCVFLIFRDFQFSCHIPGPTVCISHFSRFSVILSFFK  
LSSGCFSSFLIFTFLAIFHVLQWTFLYFPFVSFLAIFHVLKCVFLIFRDFQVSRHIPGPTVCISHFSRFSVI  
LSFFKLSSGCFSFSLIFTFLAIFHVLQWTFNLNPLFVSFLYFSPYSKSYSVHFSFSTFFSDFVIFQVVKWMFLI  
FHDFQLSC  
>ENSMUSP00000096655\_c.541:C>T\_p.P181L ENSMUST00000099056.4|Gm10717-204|ENSMUSG00000095891|+|chr9:g.3032630:C>T  
MFLIFHDFQFSCHIPCPTVDISFPPFSVFLAIFHVLKCVFLIFRDFQFSCHIPGPTVCISHFSRFSVILSFFK  
LSSGCFSSFLIFTFLAIFHVLQWTFLYFPFVSFLAIFHVLKCVFLIFRDFQVSRHIPGPTVCISHFSRFSVI  
LSFFKLSSGCFSFSLIFTFLAIFHVLQWTFNLNPLFVFLPYSRSYSVHFSFSTFFSDFVIFQVNCMFLIFYDF  
QFSC  
>ENSMUSP00000096655\_c.550:T>C\_p.L184S ENSMUST00000099056.4|Gm10717-204|ENSMUSG00000095891|+|chr9:g.3032704:T>C  
MFLIFHDFQFSCHIPCPTVDISFPPFSVFLAIFHVLKCVFLIFRDFQFSCHIPGPTVCISHFSRFSVILSFFK  
LSSGCFSSFLIFTFLAIFHVLQWTFLYFPFVSFLAIFHVLKCVFLIFRDFQVSRHIPGPTVCISHFSRFSVI

LSFFKLSSGCFSSFLIFTFLAIFHVLQWTFNLNFPFFSPYSRSYSVHFSFSTFFSDFVIFQVNCMFLIFYDF  
QFSC  
>ENSMUSP00000096655\_c.552:CC>TT\_p.P185F ENSMUST00000099056.4|Gm10717-  
204|ENSMUSG00000095891|+|chr9:g.3032706:CC>TT  
MFLIFHDFQFSCHIPCPTVDISFPPFSVFLAIFHVLKCVFLIFRDFQFSCHIPGPTVCISHFSRFSVILSFFK  
LSSGCFSSFLIFTFLAIFHVLQWTFLYFPPFSVFLAIFHVLKCVFLIFRDFQVSRHIPGPTVCISHFSRFSVI  
LSFFKLSSGCFSSFLIFTFLAIFHVLQWTFNLNFPFFFLFIFQVLQCAFLIFHVFQ\*FCHFSSCQLHVSHFL\*F  
SVFL  
>ENSMUSP00000096655\_c.562:G>T\_p.R188M ENSMUST00000099056.4|Gm10717-  
204|ENSMUSG00000095891|+|chr9:g.3032716:G>T  
MFLIFHDFQFSCHIPCPTVDISFPPFSVFLAIFHVLKCVFLIFRDFQFSCHIPGPTVCISHFSRFSVILSFFK  
LSSGCFSSFLIFTFLAIFHVLQWTFLYFPPFSVFLAIFHVLKCVFLIFRDFQVSRHIPGPTVCISHFSRFSVI  
LSFFKLSSGCFSSFLIFTFLAIFHVLQWTFNLNFPFFFLPYSMSYSVHFSFSTFFSDFVIFQVNCMFLIFYDF  
QFSC  
>ENSMUSP00000096655\_c.562:G>C\_p.R188T ENSMUST00000099056.4|Gm10717-  
204|ENSMUSG00000095891|+|chr9:g.3032716:G>C  
MFLIFHDFQFSCHIPCPTVDISFPPFSVFLAIFHVLKCVFLIFRDFQFSCHIPGPTVCISHFSRFSVILSFFK  
LSSGCFSSFLIFTFLAIFHVLQWTFLYFPPFSVFLAIFHVLKCVFLIFRDFQVSRHIPGPTVCISHFSRFSVI  
LSFFKLSSGCFSSFLIFTFLAIFHVLQWTFNLNFPFFFLPYSTYSVHFSFSTFFSDFVIFQVNCMFLIFYDF  
QFSC  
>ENSMUSP00000096655\_c.568:A>T\_p.Y190F ENSMUST00000099056.4|Gm10717-  
204|ENSMUSG00000095891|+|chr9:g.3032722:A>T  
MFLIFHDFQFSCHIPCPTVDISFPPFSVFLAIFHVLKCVFLIFRDFQFSCHIPGPTVCISHFSRFSVILSFFK  
LSSGCFSSFLIFTFLAIFHVLQWTFLYFPPFSVFLAIFHVLKCVFLIFRDFQVSRHIPGPTVCISHFSRFSVI  
LSFFKLSSGCFSSFLIFTFLAIFHVLQWTFNLNFPFFFLPYRSYSVHFSFSTFFSDFVIFQVNCMFLIFYDF  
QFSC  
>ENSMUSP00000096655\_c.589:T>C\_p.F197S ENSMUST00000099056.4|Gm10717-  
204|ENSMUSG00000095891|+|chr9:g.3032743:T>C  
MFLIFHDFQFSCHIPCPTVDISFPPFSVFLAIFHVLKCVFLIFRDFQFSCHIPGPTVCISHFSRFSVILSFFK  
LSSGCFSSFLIFTFLAIFHVLQWTFLYFPPFSVFLAIFHVLKCVFLIFRDFQVSRHIPGPTVCISHFSRFSVI  
LSFFKLSSGCFSSFLIFTFLAIFHVLQWTFNLNFPFFFLPYRSYSVHFSFSTFFSDFVIFQVNCMFLIFYDF  
QFSC  
>ENSMUSP00000096655\_c.602:T>G\_p.S201R ENSMUST00000099056.4|Gm10717-  
204|ENSMUSG00000095891|+|chr9:g.3032756:T>G  
MFLIFHDFQFSCHIPCPTVDISFPPFSVFLAIFHVLKCVFLIFRDFQFSCHIPGPTVCISHFSRFSVILSFFK  
LSSGCFSSFLIFTFLAIFHVLQWTFLYFPPFSVFLAIFHVLKCVFLIFRDFQVSRHIPGPTVCISHFSRFSVI  
LSFFKLSSGCFSSFLIFTFLAIFHVLQWTFNLNFPFFFLPYRSYSVHFSFSTFFRDFVIFQVNCMFLIFYDF  
QFSC  
>ENSMUSP00000096655\_c.629:CTGC>GTGT\_p.N210K ENSMUST00000099056.4|Gm10717-  
204|ENSMUSG00000095891|+|chr9:g.3032783:CTGC>GTGT  
MFLIFHDFQFSCHIPCPTVDISFPPFSVFLAIFHVLKCVFLIFRDFQFSCHIPGPTVCISHFSRFSVILSFFK  
LSSGCFSSFLIFTFLAIFHVLQWTFLYFPPFSVFLAIFHVLKCVFLIFRDFQVSRHIPGPTVCISHFSRFSVI  
LSFFKLSSGCFSSFLIFTFLAIFHVLQWTFNLNFPFFFLPYRSYSVHFSFSTFFSDFVIFQVVKCCMFLIFYD  
FQFSC  
>ENSMUSP00000096655\_c.629:CTGC>GTGG\_p.N210K ENSMUST00000099056.4|Gm10717-  
204|ENSMUSG00000095891|+|chr9:g.3032783:CTGC>GTGG  
MFLIFHDFQFSCHIPCPTVDISFPPFSVFLAIFHVLKCVFLIFRDFQFSCHIPGPTVCISHFSRFSVILSFFK  
LSSGCFSSFLIFTFLAIFHVLQWTFLYFPPFSVFLAIFHVLKCVFLIFRDFQVSRHIPGPTVCISHFSRFSVI  
LSFFKLSSGCFSSFLIFTFLAIFHVLQWTFNLNFPFFFLPYRSYSVHFSFSTFFSDFVIFQVVKCMFLIFYD  
FQFSC  
>ENSMUSP00000096655\_c.632:C>A\_p.C211\* ENSMUST00000099056.4|Gm10717-  
204|ENSMUSG00000095891|+|chr9:g.3032786:C>A  
MFLIFHDFQFSCHIPCPTVDISFPPFSVFLAIFHVLKCVFLIFRDFQFSCHIPGPTVCISHFSRFSVILSFFK  
LSSGCFSSFLIFTFLAIFHVLQWTFLYFPPFSVFLAIFHVLKCVFLIFRDFQVSRHIPGPTVCISHFSRFSVI  
LSFFKLSSGCFSSFLIFTFLAIFHVLQWTFNLNFPFFFLPYRSYSVHFSFSTFFSDFVIFQVNCMFLIFYDF  
QFSC  
>ENSMUSP00000096655\_c.633:A>C\_p.M212L ENSMUST00000099056.4|Gm10717-  
204|ENSMUSG00000095891|+|chr9:g.3032787:A>C

MFLIFHDFQFSCHIPCPTVDISFPPFSVFLAIFHVLKCVFLIFRDFQFSCHIPGPTVCISHFSRFSVILSFFK  
LSSGCFSSFLIFTFLAIFHVLQWTFLYFPPFSVFLAIFHVLKCVFLIFRDFQVSRHIPGPTVCISHFSRFSVI  
LSFFKLSSGCFSSFLIFTFLAIFHVLQWTFNLNPPFFLPYSRSYSVHFSFFTFSSDFVIFQVNVNCLFLIFYDF  
QFSC  
>ENSMUSP00000096655\_c.648:T>C\_p.Y217H ENSMUST00000099056.4|Gm10717-  
204|ENSMUSG00000095891|+|chr9:g.3032802:T>C  
MFLIFHDFQFSCHIPCPTVDISFPPFSVFLAIFHVLKCVFLIFRDFQFSCHIPGPTVCISHFSRFSVILSFFK  
LSSGCFSSFLIFTFLAIFHVLQWTFLYFPPFSVFLAIFHVLKCVFLIFRDFQVSRHIPGPTVCISHFSRFSVI  
LSFFKLSSGCFSSFLIFTFLAIFHVLQWTFNLNPPFFLPYSRSYSVHFSFFTFSSDFVIFQVNVNCLFLIFHDF  
QFSC  
>ENSMUSP00000096655\_c.648:T>G\_p.Y217D ENSMUST00000099056.4|Gm10717-  
204|ENSMUSG00000095891|+|chr9:g.3032802:T>G  
MFLIFHDFQFSCHIPCPTVDISFPPFSVFLAIFHVLKCVFLIFRDFQFSCHIPGPTVCISHFSRFSVILSFFK  
LSSGCFSSFLIFTFLAIFHVLQWTFLYFPPFSVFLAIFHVLKCVFLIFRDFQVSRHIPGPTVCISHFSRFSVI  
LSFFKLSSGCFSSFLIFTFLAIFHVLQWTFNLNPPFFLPYSRSYSVHFSFFTFSSDFVIFQVNVNCLFLIFDDF  
QFSC  
>ENSMUSP00000136837\_c.555:T>TA\_p.Y186ins-fs ENSMUST00000179839.8|Gm10717-  
208|ENSMUSG00000095891|+|chr9:g.3032957:T>TA  
MFLIFHDFQFSCHIPCPTVDISFPPFSVFLAIFHVLKCVFLIFRDFQFSCHIPGPTVCISHFSRFSVILSFFK  
LSSGCFSSFLIFTFLAIFHVLQWTFLYFPPFSVFLAIFHVLKCVFLIFRDFQVSRHIPGPTVCISHFSRFSVI  
LSFFKLSSGCFSSFLIFTFLAIFHVLQWTFNLNPPFFSVL  
>ENSMUSP00000136837\_c.556:A>T\_p.Y186F ENSMUST00000179839.8|Gm10717-  
208|ENSMUSG00000095891|+|chr9:g.3033165:A>T  
MFLIFHDFQFSCHIPCPTVDISFPPFSVFLAIFHVLKCVFLIFRDFQFSCHIPGPTVCISHFSRFSVILSFFK  
LSSGCFSSFLIFTFLAIFHVLQWTFLYFPPFSVFLAIFHVLKCVFLIFRDFQVSRHIPGPTVCISHFSRFSVI  
LSFFKLSSGCFSSFLIFTFLAIFHVLQWTFNLNPPFSVLFSPYSKSYSVHFSFFTFSSDFVIFQVVKWMFLI  
FHDFQLSC  
>ENSMUSP00000136837\_c.574:A>G\_p.K192R ENSMUST00000179839.8|Gm10717-  
208|ENSMUSG00000095891|+|chr9:g.3033183:A>G  
MFLIFHDFQFSCHIPCPTVDISFPPFSVFLAIFHVLKCVFLIFRDFQFSCHIPGPTVCISHFSRFSVILSFFK  
LSSGCFSSFLIFTFLAIFHVLQWTFLYFPPFSVFLAIFHVLKCVFLIFRDFQVSRHIPGPTVCISHFSRFSVI  
LSFFKLSSGCFSSFLIFTFLAIFHVLQWTFNLNPPFSVLYFSPYSKSYSVHFSFFTFSSDFVIFQVVKWMFLI  
FHDFQLSC  
>ENSMUSP00000136837\_c.574:A>T\_p.K192M ENSMUST00000179839.8|Gm10717-  
208|ENSMUSG00000095891|+|chr9:g.3033183:A>T  
MFLIFHDFQFSCHIPCPTVDISFPPFSVFLAIFHVLKCVFLIFRDFQFSCHIPGPTVCISHFSRFSVILSFFK  
LSSGCFSSFLIFTFLAIFHVLQWTFLYFPPFSVFLAIFHVLKCVFLIFRDFQVSRHIPGPTVCISHFSRFSVI  
LSFFKLSSGCFSSFLIFTFLAIFHVLQWTFNLNPPFSVLYFSPYSMSYSVHFSFFTFSSDFVIFQVVKWMFLI  
FHDFQLSC  
>ENSMUSP00000136837\_c.580:A>T\_p.Y194F ENSMUST00000179839.8|Gm10717-  
208|ENSMUSG00000095891|+|chr9:g.3033189:A>T  
MFLIFHDFQFSCHIPCPTVDISFPPFSVFLAIFHVLKCVFLIFRDFQFSCHIPGPTVCISHFSRFSVILSFFK  
LSSGCFSSFLIFTFLAIFHVLQWTFLYFPPFSVFLAIFHVLKCVFLIFRDFQVSRHIPGPTVCISHFSRFSVI  
LSFFKLSSGCFSSFLIFTFLAIFHVLQWTFNLNPPFSVLYFSPYSKSYSVHFSFFTFSSDFVIFQVVKWMFLI  
FHDFQLSC  
>ENSMUSP00000136837\_c.604:C>T\_p.T202M ENSMUST00000179839.8|Gm10717-  
208|ENSMUSG00000095891|+|chr9:g.3033213:C>T  
MFLIFHDFQFSCHIPCPTVDISFPPFSVFLAIFHVLKCVFLIFRDFQFSCHIPGPTVCISHFSRFSVILSFFK  
LSSGCFSSFLIFTFLAIFHVLQWTFLYFPPFSVFLAIFHVLKCVFLIFRDFQVSRHIPGPTVCISHFSRFSVI  
LSFFKLSSGCFSSFLIFTFLAIFHVLQWTFNLNPPFSVLYFSPYSKSYSVHFSFFMFFSDFVIFQVVKWMFLI  
FHDFQLSC  
>ENSMUSP00000136837\_c.672:C>T\_p.L225F ENSMUST00000179839.8|Gm10717-  
208|ENSMUSG00000095891|+|chr9:g.3033281:C>T  
MFLIFHDFQFSCHIPCPTVDISFPPFSVFLAIFHVLKCVFLIFRDFQFSCHIPGPTVCISHFSRFSVILSFFK  
LSSGCFSSFLIFTFLAIFHVLQWTFLYFPPFSVFLAIFHVLKCVFLIFRDFQVSRHIPGPTVCISHFSRFSVI  
LSFFKLSSGCFSSFLIFTFLAIFHVLQWTFNLNPPFSVLYFSPYSKSYSVHFSFFTFSSDFVIFQVVKWMFLI  
FHDFQFSC

>ENSMUSP00000135988\_c.16:A>G\_p.H6R ENSMUST00000178641.2|Gm17535-201|ENSMUSG00000096736|+|chr9:g.3034615:A>G  
MFLIFRDFQFSCHIPCPTVDISFPPFSVFLAIFHVLKCVFLIFRVFQVSRHIPGPTVCISHFSRFSVILSFFK  
LSSGCFSSLSLIFTFLAIFHVLQWTFNLNFPFVSFLAIFHVLKCVFLIFSDQFSRHIPGPTVCISHFSRFSVI  
SSFFKTSSGCFSSMIFSLAIFHVLQWTFNLNFPFVSVPYSRSYSVHFSFSTFFCDFVIFQVVKWMFLIFLD  
FQFSY  
>ENSMUSP00000135988\_c.45:T>C\_p.C16R ENSMUST00000178641.2|Gm17535-201|ENSMUSG00000096736|+|chr9:g.3034644:T>C  
MFLIFHDFQFSCHIPRPTVDISFPPFSVFLAIFHVLKCVFLIFRVFQVSRHIPGPTVCISHFSRFSVILSFFK  
LSSGCFSSLSLIFTFLAIFHVLQWTFNLNFPFVSFLAIFHVLKCVFLIFSDQFSRHIPGPTVCISHFSRFSVI  
SSFFKTSSGCFSSMIFSLAIFHVLQWTFNLNFPFVSVPYSRSYSVHFSFSTFFCDFVIFQVVKWMFLIFLD  
FQFSY  
>ENSMUSP00000135988\_c.128:TC>T\_p.F43del-fs ENSMUST00000178641.2|Gm17535-201|ENSMUSG00000096736|+|chr9:g.3034731:TC>T  
MFLIFHDFQFSCHIPCPTVDISFPPFSVFLAIFHVLKCVFLIFVFRFLAIFQVLQCAFLIFHVFQ  
>ENSMUSP00000135988\_c.133:T>A\_p.V45D ENSMUST00000178641.2|Gm17535-201|ENSMUSG00000096736|+|chr9:g.3034736:T>A  
MFLIFHDFQFSCHIPCPTVDISFPPFSVFLAIFHVLKCVFLIFRDFQVSRHIPGPTVCISHFSRFSVILSFFK  
LSSGCFSSLSLIFTFLAIFHVLQWTFNLNFPFVSFLAIFHVLKCVFLIFSDQFSRHIPGPTVCISHFSRFSVI  
SSFFKTSSGCFSSMIFSLAIFHVLQWTFNLNFPFVSVPYSRSYSVHFSFSTFFCDFVIFQVVKWMFLIFLD  
FQFSY  
>ENSMUSP00000135988\_c.141:G>T\_p.V48F ENSMUST00000178641.2|Gm17535-201|ENSMUSG00000096736|+|chr9:g.3034744:G>T  
MFLIFHDFQFSCHIPCPTVDISFPPFSVFLAIFHVLKCVFLIFRVFQVSRHIPGPTVCISHFSRFSVILSFFK  
LSSGCFSSLSLIFTFLAIFHVLQWTFNLNFPFVSFLAIFHVLKCVFLIFSDQFSRHIPGPTVCISHFSRFSVI  
SSFFKTSSGCFSSMIFSLAIFHVLQWTFNLNFPFVSVPYSRSYSVHFSFSTFFCDFVIFQVVKWMFLIFLD  
FQFSY  
>ENSMUSP00000135988\_c.154:T>A\_p.I52N ENSMUST00000178641.2|Gm17535-201|ENSMUSG00000096736|+|chr9:g.3034757:T>A  
MFLIFHDFQFSCHIPCPTVDISFPPFSVFLAIFHVLKCVFLIFRVFQVSRHNPPTVCISHFSRFSVILSFFK  
LSSGCFSSLSLIFTFLAIFHVLQWTFNLNFPFVSFLAIFHVLKCVFLIFSDQFSRHIPGPTVCISHFSRFSVI  
SSFFKTSSGCFSSMIFSLAIFHVLQWTFNLNFPFVSVPYSRSYSVHFSFSTFFCDFVIFQVVKWMFLIFLD  
FQFSY  
>rs254349492\_ENSMUSP00000135988\_c.165:A>T\_p.T56S  
ENSMUST00000178641.2|Gm17535-201|ENSMUSG00000096736|+|chr9:g.3034768:A>T  
MFLIFHDFQFSCHIPCPTVDISFPPFSVFLAIFHVLKCVFLIFRVFQVSRHIPGPSVCISHFSRFSVILSFFK  
LSSGCFSSLSLIFTFLAIFHVLQWTFNLNFPFVSFLAIFHVLKCVFLIFSDQFSRHIPGPTVCISHFSRFSVI  
SSFFKTSSGCFSSMIFSLAIFHVLQWTFNLNFPFVSVPYSRSYSVHFSFSTFFCDFVIFQVVKWMFLIFLD  
FQFSY  
>ENSMUSP00000135988\_c.186:T>C\_p.S63P ENSMUST00000178641.2|Gm17535-201|ENSMUSG00000096736|+|chr9:g.3034789:T>C  
MFLIFHDFQFSCHIPCPTVDISFPPFSVFLAIFHVLKCVFLIFRVFQVSRHIPGPTVCISHFPFSVILSFFK  
LSSGCFSSLSLIFTFLAIFHVLQWTFNLNFPFVSFLAIFHVLKCVFLIFSDQFSRHIPGPTVCISHFSRFSVI  
SSFFKTSSGCFSSMIFSLAIFHVLQWTFNLNFPFVSVPYSRSYSVHFSFSTFFCDFVIFQVVKWMFLIFLD  
FQFSY  
>ENSMUSP00000135988\_c.196:C>T\_p.S66L ENSMUST00000178641.2|Gm17535-201|ENSMUSG00000096736|+|chr9:g.3034799:C>T  
MFLIFHDFQFSCHIPCPTVDISFPPFSVFLAIFHVLKCVFLIFRVFQVSRHIPGPTVCISHFSRFLVILSFFK  
LSSGCFSSLSLIFTFLAIFHVLQWTFNLNFPFVSFLAIFHVLKCVFLIFSDQFSRHIPGPTVCISHFSRFSVI  
SSFFKTSSGCFSSMIFSLAIFHVLQWTFNLNFPFVSVPYSRSYSVHFSFSTFFCDFVIFQVVKWMFLIFLD  
FQFSY  
>ENSMUSP00000135988\_c.205:T>C\_p.L69S ENSMUST00000178641.2|Gm17535-201|ENSMUSG00000096736|+|chr9:g.3034808:T>C  
MFLIFHDFQFSCHIPCPTVDISFPPFSVFLAIFHVLKCVFLIFRVFQVSRHIPGPTVCISHFSRFSVILSFFK  
LSSGCFSSLSLIFTFLAIFHVLQWTFNLNFPFVSFLAIFHVLKCVFLIFSDQFSRHIPGPTVCISHFSRFSVI  
SSFFKTSSGCFSSMIFSLAIFHVLQWTFNLNFPFVSVPYSRSYSVHFSFSTFFCDFVIFQVVKWMFLIFLD  
FQFSY

>rs217741387\_ENSMUSP00000135988\_c.220:T>C\_p.L74S  
ENSMUST00000178641.2|Gm17535-201|ENSMUSG00000096736|+|chr9:g.3034823:T>C  
MFLIFHDFQFSCHIPCPTVDISFPPFSVFLAIFHVLKCVFLIFRVFQVSRHIPGPTVCISHFSRFSVILSFFK  
SSSGCFSFSLIFTFLAIFHVLQWTFLNFPFVSFLAIFHVLKCVFLIFSDQFSRHIPGPTVCISHFSRFSVI  
SSFFKTSSGCFSFSMIFSFLAIFHVLQWTFLNFPFVSVPYSRSYSVHFSFFTFCCDFVIFQVVKWMFLIFLD  
FQFSY  
>ENSMUSP00000135988\_c.220:T>G\_p.L74W ENSMUST00000178641.2|Gm17535-  
201|ENSMUSG00000096736|+|chr9:g.3034823:T>G  
MFLIFHDFQFSCHIPCPTVDISFPPFSVFLAIFHVLKCVFLIFRVFQVSRHIPGPTVCISHFSRFSVILSFFK  
WSSGCFSFSLIFTFLAIFHVLQWTFLNFPFVSFLAIFHVLKCVFLIFSDQFSRHIPGPTVCISHFSRFSVI  
SSFFKTSSGCFSFSMIFSFLAIFHVLQWTFLNFPFVSVPYSRSYSVHFSFFTFCCDFVIFQVVKWMFLIFLD  
FQFSY  
>ENSMUSP00000135988\_c.246:T>G\_p.L83V ENSMUST00000178641.2|Gm17535-  
201|ENSMUSG00000096736|+|chr9:g.3034849:T>G  
MFLIFHDFQFSCHIPCPTVDISFPPFSVFLAIFHVLKCVFLIFRVFQVSRHIPGPTVCISHFSRFSVILSFFK  
LSSGCFSFSLIFTFLAIFHVLQWTFLNFPFVSFLAIFHVLKCVFLIFSDQFSRHIPGPTVCISHFSRFSVI  
SSFFKTSSGCFSFSMIFSFLAIFHVLQWTFLNFPFVSVPYSRSYSVHFSFFTFCCDFVIFQVVKWMFLIFLD  
FQFSY  
>ENSMUSP00000135988\_c.246:T>A\_p.L83M ENSMUST00000178641.2|Gm17535-  
201|ENSMUSG00000096736|+|chr9:g.3034849:T>A  
MFLIFHDFQFSCHIPCPTVDISFPPFSVFLAIFHVLKCVFLIFRVFQVSRHIPGPTVCISHFSRFSVILSFFK  
LSSGCFSFSLIFTFLAIFHVLQWTFLNFPFVSFLAIFHVLKCVFLIFSDQFSRHIPGPTVCISHFSRFSVI  
SSFFKTSSGCFSFSMIFSFLAIFHVLQWTFLNFPFVSVPYSRSYSVHFSFFTFCCDFVIFQVVKWMFLIFLD  
FQFSY  
>ENSMUSP00000135988\_c.256:C>G\_p.T86S ENSMUST00000178641.2|Gm17535-  
201|ENSMUSG00000096736|+|chr9:g.3034859:C>G  
MFLIFHDFQFSCHIPCPTVDISFPPFSVFLAIFHVLKCVFLIFRVFQVSRHIPGPTVCISHFSRFSVILSFFK  
LSSGCFSFSLIFSLAIFHVLQWTFLNFPFVSFLAIFHVLKCVFLIFSDQFSRHIPGPTVCISHFSRFSVI  
SSFFKTSSGCFSFSMIFSFLAIFHVLQWTFLNFPFVSVPYSRSYSVHFSFFTFCCDFVIFQVVKWMFLIFLD  
FQFSY  
>ENSMUSP00000135988\_c.256:CT>GA\_p.T86R ENSMUST00000178641.2|Gm17535-  
201|ENSMUSG00000096736|+|chr9:g.3034859:CT>GA  
MFLIFHDFQFSCHIPCPTVDISFPPFSVFLAIFHVLKCVFLIFRVFQVSRHIPGPTVCISHFSRFSVILSFFK  
LSSGCFSFSLIFRFSCHIPCPTVDISKFSTFFSFPRHISC PKVCISHFQ\*F SVFSPYSRSYSVHFSFFTFSD  
FVFFQDVKWMFLIFHDFQFSCHIPCPTVDISKFSTFFCF AIFQVLQCAFLIFHVFL\*FCHFSSCQVDVSHFP\*  
F SVFL  
>ENSMUSP00000135988\_c.265:C>T\_p.A89V ENSMUST00000178641.2|Gm17535-  
201|ENSMUSG00000096736|+|chr9:g.3034868:C>T  
MFLIFHDFQFSCHIPCPTVDISFPPFSVFLAIFHVLKCVFLIFRVFQVSRHIPGPTVCISHFSRFSVILSFFK  
LSSGCFSFSLIFTFLVIFHVLQWTFLNFPFVSFLAIFHVLKCVFLIFSDQFSRHIPGPTVCISHFSRFSVI  
SSFFKTSSGCFSFSMIFSFLAIFHVLQWTFLNFPFVSVPYSRSYSVHFSFFTFCCDFVIFQVVKWMFLIFLD  
FQFSY  
>ENSMUSP00000135988\_c.275:T>G\_p.H92Q ENSMUST00000178641.2|Gm17535-  
201|ENSMUSG00000096736|+|chr9:g.3034878:T>G  
MFLIFHDFQFSCHIPCPTVDISFPPFSVFLAIFHVLKCVFLIFRVFQVSRHIPGPTVCISHFSRFSVILSFFK  
LSSGCFSFSLIFTFLAIFQVLQWTFLNFPFVSFLAIFHVLKCVFLIFSDQFSRHIPGPTVCISHFSRFSVI  
SSFFKTSSGCFSFSMIFSFLAIFHVLQWTFLNFPFVSVPYSRSYSVHFSFFTFCCDFVIFQVVKWMFLIFLD  
FQFSY  
>ENSMUSP00000135988\_c.286:G>T\_p.W96L ENSMUST00000178641.2|Gm17535-  
201|ENSMUSG00000096736|+|chr9:g.3034889:G>T  
MFLIFHDFQFSCHIPCPTVDISFPPFSVFLAIFHVLKCVFLIFRVFQVSRHIPGPTVCISHFSRFSVILSFFK  
LSSGCFSFSLIFTFLAIFHVLQWTFLNFPFVSFLAIFHVLKCVFLIFSDQFSRHIPGPTVCISHFSRFSVI  
SSFFKTSSGCFSFSMIFSFLAIFHVLQWTFLNFPFVSVPYSRSYSVHFSFFTFCCDFVIFQVVKWMFLIFLD  
FQFSY  
>ENSMUSP00000135988\_c.307:C>T\_p.P103L ENSMUST00000178641.2|Gm17535-  
201|ENSMUSG00000096736|+|chr9:g.3034910:C>T  
MFLIFHDFQFSCHIPCPTVDISFPPFSVFLAIFHVLKCVFLIFRVFQVSRHIPGPTVCISHFSRFSVILSFFK  
LSSGCFSFSLIFTFLAIFHVLQWTFLNFPFVSFLAIFHVLKCVFLIFSDQFSRHIPGPTVCISHFSRFSVI

SSFFKTSSGCFSFSMIFSLAIFHVLQWTFNLNPPFSVSPYSRSYSVHFSFSTFFCDFVIFQVVKWMFLIFLD  
FQFSY  
>ENSMUSP00000135988\_c.335:T>A\_p.H112Q ENSMUST00000178641.2|Gm17535-  
201|ENSMUSG00000096736|+|chr9:g.3034938:T>A  
MFLIFHDFQFSCHIPCPTVDISFPPFSVFLAIFHVLKCVFLIFRVFQVSRHIPGPTVCISHFSRFSVILSFFK  
LSSGCFSSSLIFTFLAIFHVLQWTFNLNPPFSVFLAIFHVLKCVFLIFSDQFSRHIPGPTVCISHFSRFSVI  
SSFFKTSSGCFSFSMIFSLAIFHVLQWTFNLNPPFSVSPYSRSYSVHFSFSTFFCDFVIFQVVKWMFLIFLD  
FQFSY  
>ENSMUSP00000135988\_c.344:G>T\_p.K115N ENSMUST00000178641.2|Gm17535-  
201|ENSMUSG00000096736|+|chr9:g.3034947:G>T  
MFLIFHDFQFSCHIPCPTVDISFPPFSVFLAIFHVLKCVFLIFRVFQVSRHIPGPTVCISHFSRFSVILSFFK  
LSSGCFSSSLIFTFLAIFHVLQWTFNLNPPFSVFLAIFHVLKCVFLIFSDQFSRHIPGPTVCISHFSRFSVI  
SSFFKTSSGCFSFSMIFSLAIFHVLQWTFNLNPPFSVSPYSRSYSVHFSFSTFFCDFVIFQVVKWMFLIFLD  
FQFSY  
>ENSMUSP00000135988\_c.347:T>G\_p.C116W ENSMUST00000178641.2|Gm17535-  
201|ENSMUSG00000096736|+|chr9:g.3034950:T>G  
MFLIFHDFQFSCHIPCPTVDISFPPFSVFLAIFHVLKCVFLIFRVFQVSRHIPGPTVCISHFSRFSVILSFFK  
LSSGCFSSSLIFTFLAIFHVLQWTFNLNPPFSVFLAIFHVLKCVFLIFSDQFSRHIPGPTVCISHFSRFSVI  
SSFFKTSSGCFSFSMIFSLAIFHVLQWTFNLNPPFSVSPYSRSYSVHFSFSTFFCDFVIFQVVKWMFLIFLD  
FQFSY  
>ENSMUSP00000135988\_c.353:T>A\_p.F118L ENSMUST00000178641.2|Gm17535-  
201|ENSMUSG00000096736|+|chr9:g.3034956:T>A  
MFLIFHDFQFSCHIPCPTVDISFPPFSVFLAIFHVLKCVFLIFRVFQVSRHIPGPTVCISHFSRFSVILSFFK  
LSSGCFSSSLIFTFLAIFHVLQWTFNLNPPFSVFLAIFHVLKCVLLIFSDQFSRHIPGPTVCISHFSRFSVI  
SSFFKTSSGCFSFSMIFSLAIFHVLQWTFNLNPPFSVSPYSRSYSVHFSFSTFFCDFVIFQVVKWMFLIFLD  
FQFSY  
>ENSMUSP00000135988\_c.363:A>C\_p.S122R ENSMUST00000178641.2|Gm17535-  
201|ENSMUSG00000096736|+|chr9:g.3034966:A>C  
MFLIFHDFQFSCHIPCPTVDISFPPFSVFLAIFHVLKCVFLIFRVFQVSRHIPGPTVCISHFSRFSVILSFFK  
LSSGCFSSSLIFTFLAIFHVLQWTFNLNPPFSVFLAIFHVLKCVFLIFRDFQFSRHIPGPTVCISHFSRFSVI  
SSFFKTSSGCFSFSMIFSLAIFHVLQWTFNLNPPFSVSPYSRSYSVHFSFSTFFCDFVIFQVVKWMFLIFLD  
FQFSY  
>ENSMUSP00000135988\_c.363:A>T\_p.S122C ENSMUST00000178641.2|Gm17535-  
201|ENSMUSG00000096736|+|chr9:g.3034966:A>T  
MFLIFHDFQFSCHIPCPTVDISFPPFSVFLAIFHVLKCVFLIFRVFQVSRHIPGPTVCISHFSRFSVILSFFK  
LSSGCFSSSLIFTFLAIFHVLQWTFNLNPPFSVFLAIFHVLKCVFLIFCDFQFSRHIPGPTVCISHFSRFSVI  
SSFFKTSSGCFSFSMIFSLAIFHVLQWTFNLNPPFSVSPYSRSYSVHFSFSTFFCDFVIFQVVKWMFLIFLD  
FQFSY  
>ENSMUSP00000135988\_c.363:A>G\_p.S122G ENSMUST00000178641.2|Gm17535-  
201|ENSMUSG00000096736|+|chr9:g.3034966:A>G  
MFLIFHDFQFSCHIPCPTVDISFPPFSVFLAIFHVLKCVFLIFRVFQVSRHIPGPTVCISHFSRFSVILSFFK  
LSSGCFSSSLIFTFLAIFHVLQWTFNLNPPFSVFLAIFHVLKCVFLIFGDFQFSRHIPGPTVCISHFSRFSVI  
SSFFKTSSGCFSFSMIFSLAIFHVLQWTFNLNPPFSVSPYSRSYSVHFSFSTFFCDFVIFQVVKWMFLIFLD  
FQFSY  
>ENSMUSP00000135988\_c.399:A>T\_p.T134S ENSMUST00000178641.2|Gm17535-  
201|ENSMUSG00000096736|+|chr9:g.3035002:A>T  
MFLIFHDFQFSCHIPCPTVDISFPPFSVFLAIFHVLKCVFLIFRVFQVSRHIPGPTVCISHFSRFSVILSFFK  
LSSGCFSSSLIFTFLAIFHVLQWTFNLNPPFSVFLAIFHVLKCVFLIFSDQFSRHIPGPTVCISHFSRFSVI  
SSFFKTSSGCFSFSMIFSLAIFHVLQWTFNLNPPFSVSPYSRSYSVHFSFSTFFCDFVIFQVVKWMFLIFLD  
FQFSY  
>ENSMUSP00000135988\_c.424:G>A\_p.R142H ENSMUST00000178641.2|Gm17535-  
201|ENSMUSG00000096736|+|chr9:g.3035027:G>A  
MFLIFHDFQFSCHIPCPTVDISFPPFSVFLAIFHVLKCVFLIFRVFQVSRHIPGPTVCISHFSRFSVILSFFK  
LSSGCFSSSLIFTFLAIFHVLQWTFNLNPPFSVFLAIFHVLKCVFLIFSDQFSRHIPGPTVCISHFSRFSVI  
SSFFKTSSGCFSFSMIFSLAIFHVLQWTFNLNPPFSVSPYSRSYSVHFSFSTFFCDFVIFQVVKWMFLIFLD  
FQFSY  
>ENSMUSP00000135988\_c.430:C>T\_p.S144L ENSMUST00000178641.2|Gm17535-  
201|ENSMUSG00000096736|+|chr9:g.3035033:C>T

MFLIFHDFQFSCHIPCPTVDISFPPFSVFLAIFHVLKCVFLIFRVFQVSRHIPGPTVCISHFSRFSVILSFFK  
LSSGCFSSFLIFTFLAIFHVLQWTFLNFPFVSFLAIFHVLKCVFLIFSDQFSRHIPGPTVCISHFSRFLVI  
SSFFKTSSGCFSSMIFSLAIFHVLQWTFLNFPFVSVPYSRSYSVHFSFSTFFCDFVIFQVVKWMFLIFLD  
FQFSY  
>ENSMUSP00000135988\_c.439:C>T\_p.S147L ENSMUST00000178641.2|Gm17535-  
201|ENSMUSG00000096736|+|chr9:g.3035042:C>T  
MFLIFHDFQFSCHIPCPTVDISFPPFSVFLAIFHVLKCVFLIFRVFQVSRHIPGPTVCISHFSRFSVILSFFK  
LSSGCFSSFLIFTFLAIFHVLQWTFLNFPFVSFLAIFHVLKCVFLIFSDQFSRHIPGPTVCISHFSRFSVI  
LSSFFKTSSGCFSSMIFSLAIFHVLQWTFLNFPFVSVPYSRSYSVHFSFSTFFCDFVIFQVVKWMFLIFLD  
FQFSY  
>rs235217004\_ENSMUSP00000135988\_c.453:A>T\_p.T152S  
ENSMUST00000178641.2|Gm17535-201|ENSMUSG00000096736|+|chr9:g.3035056:A>T  
MFLIFHDFQFSCHIPCPTVDISFPPFSVFLAIFHVLKCVFLIFRVFQVSRHIPGPTVCISHFSRFSVILSFFK  
LSSGCFSSFLIFTFLAIFHVLQWTFLNFPFVSFLAIFHVLKCVFLIFSDQFSRHIPGPTVCISHFSRFSVI  
SSFFKSSSGCFSSMIFSLAIFHVLQWTFLNFPFVSVPYSRSYSVHFSFSTFFCDFVIFQVVKWMFLIFLD  
FQFSY  
>ENSMUSP00000135988\_c.490:G>C\_p.S164T ENSMUST00000178641.2|Gm17535-  
201|ENSMUSG00000096736|+|chr9:g.3035093:G>C  
MFLIFHDFQFSCHIPCPTVDISFPPFSVFLAIFHVLKCVFLIFRVFQVSRHIPGPTVCISHFSRFSVILSFFK  
LSSGCFSSFLIFTFLAIFHVLQWTFLNFPFVSFLAIFHVLKCVFLIFSDQFSRHIPGPTVCISHFSRFSVI  
SSFFKTSSGCFSSMIFSLAIFHVLQWTFLNFPFVSVPYSRSYSVHFSFSTFFCDFVIFQVVKWMFLIFLD  
FQFSY  
>ENSMUSP00000135988\_c.540:C>A\_p.P181T ENSMUST00000178641.2|Gm17535-  
201|ENSMUSG00000096736|+|chr9:g.3035143:C>A  
MFLIFHDFQFSCHIPCPTVDISFPPFSVFLAIFHVLKCVFLIFRVFQVSRHIPGPTVCISHFSRFSVILSFFK  
LSSGCFSSFLIFTFLAIFHVLQWTFLNFPFVSFLAIFHVLKCVFLIFSDQFSRHIPGPTVCISHFSRFSVI  
SSFFKTSSGCFSSMIFSLAIFHVLQWTFLNFPFVSVPYSRSYSVHFSFSTFFCDFVIFQVVKWMFLIFLD  
FQFSY  
>ENSMUSP00000135988\_c.541:C>T\_p.P181L ENSMUST00000178641.2|Gm17535-  
201|ENSMUSG00000096736|+|chr9:g.3035144:C>T  
MFLIFHDFQFSCHIPCPTVDISFPPFSVFLAIFHVLKCVFLIFRVFQVSRHIPGPTVCISHFSRFSVILSFFK  
LSSGCFSSFLIFTFLAIFHVLQWTFLNFPFVSFLAIFHVLKCVFLIFSDQFSRHIPGPTVCISHFSRFSVI  
SSFFKTSSGCFSSMIFSLAIFHVLQWTFLNFPFVSVPYSRSYSVHFSFSTFFCDFVIFQVVKWMFLIFLD  
FQFSY  
>ENSMUSP00000135988\_c.549:G>T\_p.V184F ENSMUST00000178641.2|Gm17535-  
201|ENSMUSG00000096736|+|chr9:g.3035681:G>T  
MFLIFHDFQFSCHIPCPTVDISFPPFSVFLAIFHVLKCVFLIFRVFQVSRHIPGPTVCISHFSRFSVILSFFK  
LSSGCFSSFLIFTFLAIFHVLQWTFLNFPFVSFLAIFHVLKCVFLIFSDQFSRHIPGPTVCISHFSRFSVI  
SSFFKTSSGCFSSMIFSLAIFHVLQWTFLNFPFVSVPYSRSYSVHFSFSTFFCDFVIFQVVKWMFLIFLD  
FQFSY  
>ENSMUSP00000135988\_c.566:G>T\_p.R189S ENSMUST00000178641.2|Gm17535-  
201|ENSMUSG00000096736|+|chr9:g.3035700:G>T  
MFLIFHDFQFSCHIPCPTVDISFPPFSVFLAIFHVLKCVFLIFRVFQVSRHIPGPTVCISHFSRFSVILSFFK  
LSSGCFSSFLIFTFLAIFHVLQWTFLNFPFVSFLAIFHVLKCVFLIFSDQFSRHIPGPTVCISHFSRFSVI  
SSFFKTSSGCFSSMIFSLAIFHVLQWTFLNFPFVSVPYSSYSVHFSFSTFFCDFVIFQVVKWMFLIFLD  
FQFSY  
>ENSMUSP00000135988\_c.573:A>C\_p.S192R ENSMUST00000178641.2|Gm17535-  
201|ENSMUSG00000096736|+|chr9:g.3035707:A>C  
MFLIFHDFQFSCHIPCPTVDISFPPFSVFLAIFHVLKCVFLIFRVFQVSRHIPGPTVCISHFSRFSVILSFFK  
LSSGCFSSFLIFTFLAIFHVLQWTFLNFPFVSFLAIFHVLKCVFLIFSDQFSRHIPGPTVCISHFSRFSVI  
SSFFKTSSGCFSSMIFSLAIFHVLQWTFLNFPFVSVPYSRSYSRVHFSFSTFFCDFVIFQVVKWMFLIFLD  
FQFSY  
>ENSMUSP00000135988\_c.592:T>C\_p.F198S ENSMUST00000178641.2|Gm17535-  
201|ENSMUSG00000096736|+|chr9:g.3035726:T>C  
MFLIFHDFQFSCHIPCPTVDISFPPFSVFLAIFHVLKCVFLIFRVFQVSRHIPGPTVCISHFSRFSVILSFFK  
LSSGCFSSFLIFTFLAIFHVLQWTFLNFPFVSFLAIFHVLKCVFLIFSDQFSRHIPGPTVCISHFSRFSVI  
SSFFKTSSGCFSSMIFSLAIFHVLQWTFLNFPFVSVPYSRSYSVHFSFSTFFCDFVIFQVVKWMFLIFLD  
FQFSY



>ENSMUSP00000135988\_c.601:T>A\_p.F201Y ENSMUST00000178641.2|Gm17535-201|ENSMUSG00000096736|+|chr9:g.3035735:T>A  
MFLIFHDFQFSCHIPCPTVDISFPPFSVFLAIFHVLKCVFLIFRVFQVSRHIPGPTVCISHFSRFSVILSFFK  
LSSGCFSSFLIFTFLAIFHVLQWTFNLNPPFSVFLAIFHVLKCVFLIFSDQFSRHIPGPTVCISHFSRFSVI  
SSFFKTSSGCFSSMIFSFSLAIFHVLQWTFNLNPPFSVSPYSRSYSVHFSFFTFYCDFVIFQVVKWMFLIFLD  
FQFSY  
>ENSMUSP00000135988\_c.601:T>G\_p.F201C ENSMUST00000178641.2|Gm17535-201|ENSMUSG00000096736|+|chr9:g.3035735:T>G  
MFLIFHDFQFSCHIPCPTVDISFPPFSVFLAIFHVLKCVFLIFRVFQVSRHIPGPTVCISHFSRFSVILSFFK  
LSSGCFSSFLIFTFLAIFHVLQWTFNLNPPFSVFLAIFHVLKCVFLIFSDQFSRHIPGPTVCISHFSRFSVI  
SSFFKTSSGCFSSMIFSFSLAIFHVLQWTFNLNPPFSVSPYSRSYSVHFSFFTFCCDFVIFQVVKWMFLIFLD  
FQFSY  
>ENSMUSP00000135988\_c.638:G>T\_p.M213I ENSMUST00000178641.2|Gm17535-201|ENSMUSG00000096736|+|chr9:g.3035772:G>T  
MFLIFHDFQFSCHIPCPTVDISFPPFSVFLAIFHVLKCVFLIFRVFQVSRHIPGPTVCISHFSRFSVILSFFK  
LSSGCFSSFLIFTFLAIFHVLQWTFNLNPPFSVFLAIFHVLKCVFLIFSDQFSRHIPGPTVCISHFSRFSVI  
SSFFKTSSGCFSSMIFSFSLAIFHVLQWTFNLNPPFSVSPYSRSYSVHFSFFTFCCDFVIFQVVKWIFLIFLD  
FQFSY  
>ENSMUSP00000135988\_c.652:T>A\_p.L218H ENSMUST00000178641.2|Gm17535-201|ENSMUSG00000096736|+|chr9:g.3035786:T>A  
MFLIFHDFQFSCHIPCPTVDISFPPFSVFLAIFHVLKCVFLIFRVFQVSRHIPGPTVCISHFSRFSVILSFFK  
LSSGCFSSFLIFTFLAIFHVLQWTFNLNPPFSVFLAIFHVLKCVFLIFSDQFSRHIPGPTVCISHFSRFSVI  
SSFFKTSSGCFSSMIFSFSLAIFHVLQWTFNLNPPFSVSPYSRSYSVHFSFFTFCCDFVIFQVVKWMFLIFHD  
FQFSY  
>ENSMUSP00000135988\_c.661:A>T\_p.Q221L ENSMUST00000178641.2|Gm17535-201|ENSMUSG00000096736|+|chr9:g.3035795:A>T  
MFLIFHDFQFSCHIPCPTVDISFPPFSVFLAIFHVLKCVFLIFRVFQVSRHIPGPTVCISHFSRFSVILSFFK  
LSSGCFSSFLIFTFLAIFHVLQWTFNLNPPFSVFLAIFHVLKCVFLIFSDQFSRHIPGPTVCISHFSRFSVI  
SSFFKTSSGCFSSMIFSFSLAIFHVLQWTFNLNPPFSVSPYSRSYSVHFSFFTFCCDFVIFQVVKWMFLIFLD  
FLFSY  
>ENSMUSP00000135988\_c.670:A>G\_p.Y224C ENSMUST00000178641.2|Gm17535-201|ENSMUSG00000096736|+|chr9:g.3035804:A>G  
MFLIFHDFQFSCHIPCPTVDISFPPFSVFLAIFHVLKCVFLIFRVFQVSRHIPGPTVCISHFSRFSVILSFFK  
LSSGCFSSFLIFTFLAIFHVLQWTFNLNPPFSVFLAIFHVLKCVFLIFSDQFSRHIPGPTVCISHFSRFSVI  
SSFFKTSSGCFSSMIFSFSLAIFHVLQWTFNLNPPFSVSPYSRSYSVHFSFFTFCCDFVIFQVVKWMFLIFLD  
FQFSC  
>rs257554234\_ENSMUSP00000136448\_c.15:A>C\_p.N6H  
ENSMUST00000155807.3|Gm10715-201|ENSMUSG00000096201|+|chr9:g.3036892:A>C  
MFLIFHDFHFSCLIPRPIVDISFPPFSVFLAIFHVPKCVFLIFHDFQFPRHIPGPTVCISHFSRFSVILSFFK  
TSSGCFSSFFMIFSFSLAIFPVLQWTFNLNPPFSVFLAIFHVLKCVFLIFRDFQFSRQIPGPTVCISHFSRFSVI  
LSFFNLSTACFSLSMIFSFSLAIFHVLQWTFNLNPPFSFFSPYFTSYSVHFSFFTFSDVFFQDVVKWMFLIFH  
DFQFSC  
>rs234203612\_ENSMUSP00000136448\_c.26:T>G\_p.H9Q  
ENSMUST00000155807.3|Gm10715-201|ENSMUSG00000096201|+|chr9:g.3036903:T>G  
MFLIFNDFHFSCLIPRPIVDISFPPFSVFLAIFHVPKCVFLIFHDFQFPRHIPGPTVCISHFSRFSVILSFFK  
TSSGCFSSFFMIFSFSLAIFPVLQWTFNLNPPFSVFLAIFHVLKCVFLIFRDFQFSRQIPGPTVCISHFSRFSVI  
LSFFNLSTACFSLSMIFSFSLAIFHVLQWTFNLNPPFSFFSPYFTSYSVHFSFFTFSDVFFQDVVKWMFLIFH  
DFQFSC  
>ENSMUSP00000136448\_c.37:T>A\_p.L13H ENSMUST00000155807.3|Gm10715-201|ENSMUSG00000096201|+|chr9:g.3036914:T>A  
MFLIFNDFHFSCHIPRPIVDISFPPFSVFLAIFHVPKCVFLIFHDFQFPRHIPGPTVCISHFSRFSVILSFFK  
TSSGCFSSFFMIFSFSLAIFPVLQWTFNLNPPFSVFLAIFHVLKCVFLIFRDFQFSRQIPGPTVCISHFSRFSVI  
LSFFNLSTACFSLSMIFSFSLAIFHVLQWTFNLNPPFSFFSPYFTSYSVHFSFFTFSDVFFQDVVKWMFLIFH  
DFQFSC  
>ENSMUSP00000136448\_c.46:G>T\_p.R16L ENSMUST00000155807.3|Gm10715-201|ENSMUSG00000096201|+|chr9:g.3036923:G>T  
MFLIFNDFHFSCLIPRPIVDISFPPFSVFLAIFHVPKCVFLIFHDFQFPRHIPGPTVCISHFSRFSVILSFFK  
TSSGCFSSFFMIFSFSLAIFPVLQWTFNLNPPFSVFLAIFHVLKCVFLIFRDFQFSRQIPGPTVCISHFSRFSVI

LSFFNLSTACFSLSMIFSFLAIFHVLQWTFLNFPFSPYFTSYSVHFSFSTFFSDFVFFQDVKWMFLIFH  
DFQFSC  
>ENSMUSP00000136448\_c.52:T>C\_p.I18T ENSMUST00000155807.3|Gm10715-  
201|ENSMUSG00000096201|+|chr9:g.3036929:T>C  
MFLIFNDFHFSCLI PRPTVDISFPFVSFLAIFHVPKCVFLIFHDFQFPRHIPGPTVCISHFSRFSVISSFFK  
TSSGCFSSFFMIFSFLAIFPVLQWTFLNFPFVSFLAIFHVLKCVFLIFRDFQFSRQIPGPTVCISHFSRFSVI  
LSFFNLSTACFSLSMIFSFLAIFHVLQWTFLNFPFSPYFTSYSVHFSFSTFFSDFVFFQDVKWMFLIFH  
DFQFSC  
>ENSMUSP00000136448\_c.57:G>A\_p.D20N ENSMUST00000155807.3|Gm10715-  
201|ENSMUSG00000096201|+|chr9:g.3036934:G>A  
MFLIFNDFHFSCLI PRPIVNISFPFVSFLAIFHVPKCVFLIFHDFQFPRHIPGPTVCISHFSRFSVISSFFK  
TSSGCFSSFFMIFSFLAIFPVLQWTFLNFPFVSFLAIFHVLKCVFLIFRDFQFSRQIPGPTVCISHFSRFSVI  
LSFFNLSTACFSLSMIFSFLAIFHVLQWTFLNFPFSPYFTSYSVHFSFSTFFSDFVFFQDVKWMFLIFH  
DFQFSC  
>ENSMUSP00000136448\_c.58:A>G\_p.D20G ENSMUST00000155807.3|Gm10715-  
201|ENSMUSG00000096201|+|chr9:g.3036935:A>G  
MFLIFNDFHFSCLI PRPIVIGISFPFVSFLAIFHVPKCVFLIFHDFQFPRHIPGPTVCISHFSRFSVISSFFK  
TSSGCFSSFFMIFSFLAIFPVLQWTFLNFPFVSFLAIFHVLKCVFLIFRDFQFSRQIPGPTVCISHFSRFSVI  
LSFFNLSTACFSLSMIFSFLAIFHVLQWTFLNFPFSPYFTSYSVHFSFSTFFSDFVFFQDVKWMFLIFH  
DFQFSC  
>ENSMUSP00000136448\_c.143:TC>T\_p.F48del-fs ENSMUST00000155807.3|Gm10715-  
201|ENSMUSG00000096201|+|chr9:g.3037024:TC>T  
MFLIFNDFHFSCLI PRPIVDISFPFVSFLAIFHVPKCVFLIFHDFQFLAIFQVLQCAFLIFHVQ  
>ENSMUSP00000136448\_c.146:TC>T\_p.P49del-fs ENSMUST00000155807.3|Gm10715-  
201|ENSMUSG00000096201|+|chr9:g.3037027:TC>T  
MFLIFNDFHFSCLI PRPIVDISFPFVSFLAIFHVPKCVFLIFHDFQFPAIFQVLQCAFLIFHVQ  
>ENSMUSP00000136448\_c.159:GGTC>TGTG\_p.G54C ENSMUST00000155807.3|Gm10715-  
201|ENSMUSG00000096201|+|chr9:g.3037040:GGTC>TGTG  
MFLIFNDFHFSCLI PRPIVDISFPFVSFLAIFHVPKCVFLIFHDFQFPRHIPGPTVCISHFSRFSVISSFF  
KTSSGCFSSFFMIFSFLAIFPVLQWTFLNFPFVSFLAIFHVLKCVFLIFRDFQFSRQIPGPTVCISHFSRFSV  
ILSFFNLSTACFSLSMIFSFLAIFHVLQWTFLNFPFSPYFTSYSVHFSFSTFFSDFVFFQDVKWMFLIF  
HDFQFSC  
>ENSMUSP00000136448\_c.165:A>T\_p.T56S ENSMUST00000155807.3|Gm10715-  
201|ENSMUSG00000096201|+|chr9:g.3037046:A>T  
MFLIFNDFHFSCLI PRPIVDISFPFVSFLAIFHVPKCVFLIFHDFQFPRHIPGPSVCISHFSRFSVISSFFK  
TSSGCFSSFFMIFSFLAIFPVLQWTFLNFPFVSFLAIFHVLKCVFLIFRDFQFSRQIPGPTVCISHFSRFSVI  
LSFFNLSTACFSLSMIFSFLAIFHVLQWTFLNFPFSPYFTSYSVHFSFSTFFSDFVFFQDVKWMFLIFH  
DFQFSC  
>ENSMUSP00000136448\_c.166:C>A\_p.T56K ENSMUST00000155807.3|Gm10715-  
201|ENSMUSG00000096201|+|chr9:g.3037047:C>A  
MFLIFNDFHFSCLI PRPIVDISFPFVSFLAIFHVPKCVFLIFHDFQFPRHIPGPKVCISHFSRFSVISSFFK  
TSSGCFSSFFMIFSFLAIFPVLQWTFLNFPFVSFLAIFHVLKCVFLIFRDFQFSRQIPGPTVCISHFSRFSVI  
LSFFNLSTACFSLSMIFSFLAIFHVLQWTFLNFPFSPYFTSYSVHFSFSTFFSDFVFFQDVKWMFLIFH  
DFQFSC  
>ENSMUSP00000136448\_c.171:T>G\_p.C58G ENSMUST00000155807.3|Gm10715-  
201|ENSMUSG00000096201|+|chr9:g.3037052:T>G  
MFLIFNDFHFSCLI PRPIVDISFPFVSFLAIFHVPKCVFLIFHDFQFPRHIPGPTVGIHSHFSRFSVISSFFK  
TSSGCFSSFFMIFSFLAIFPVLQWTFLNFPFVSFLAIFHVLKCVFLIFRDFQFSRQIPGPTVCISHFSRFSVI  
LSFFNLSTACFSLSMIFSFLAIFHVLQWTFLNFPFSPYFTSYSVHFSFSTFFSDFVFFQDVKWMFLIFH  
DFQFSC  
>ENSMUSP00000136448\_c.171:TG>GA\_p.C58E ENSMUST00000155807.3|Gm10715-  
201|ENSMUSG00000096201|+|chr9:g.3037052:TG>GA  
MFLIFNDFHFSCLI PRPIVDISFPFVSFLAIFHVPKCVFLIFHDFQFPRHIPGPTVEHFSFSTFFSDFVFFQ  
DVKWMFLIFHDFQFSCHIPCPTVDISKFSTFFCFPRHISRPKVCISHFP\*FVSFSPDSRSYSVHFSFSTFFSD  
FVIFQFVNCMFLSFHDFQFSCHIPCPTVDISKFSTFFIFLAIHVLQCAFLIFHVQ\*FRLFSRRQVDVSHFS  
\*FSVFL  
>ENSMUSP00000136448\_c.196:C>T\_p.S66L ENSMUST00000155807.3|Gm10715-  
201|ENSMUSG00000096201|+|chr9:g.3037077:C>T

MFLIFNDFHFSCLIPRPIVDISFPPFSVFLAIFHVPKCVFLIFHDFQFPRHIPGPTVCISHFSRFLVISSFFK  
TSSGCFSSFFMIFSFLAIFPVLQWTFLNFPFVSFLAIFHVLKCVFLIFRDFQFSRQIPGPTVCISHFSRFSVI  
LSFFNLSTACFSLSMIFSFLAIFHVLQWTFLNFPFVSFFSPYFTSYSVHFSFFTFSSDFVFFQDVKWMFLIFH  
DFQFSC  
>rs217447675\_ENSMUSP00000136448\_c.219:A>T\_p.T74S  
ENSMUST00000155807.3|Gm10715-201|ENSMUSG00000096201|+|chr9:g.3037100:A>T  
MFLIFNDFHFSCLIPRPIVDISFPPFSVFLAIFHVPKCVFLIFHDFQFPRHIPGPTVCISHFSRFSVISSFFK  
SSSGCFSSFFMIFSFLAIFPVLQWTFLNFPFVSFLAIFHVLKCVFLIFRDFQFSRQIPGPTVCISHFSRFSVI  
LSFFNLSTACFSLSMIFSFLAIFHVLQWTFLNFPFVSFFSPYFTSYSVHFSFFTFSSDFVFFQDVKWMFLIFH  
DFQFSC  
>ENSMUSP00000136448\_c.239:AT>A\_p.S80del-fs\_ENSMUST00000155807.3|Gm10715-  
201|ENSMUSG00000096201|+|chr9:g.3037120:AT>A  
MFLIFNDFHFSCLIPRPIVDISFPPFSVFLAIFHVPKCVFLIFHDFQFPRHIPGPTVCISHFSRFSVISSFFK  
TSSGCFSSFS  
>ENSMUSP00000137129\_c.9:AT>A\_p.I4del-fs\_ENSMUST00000177969.2|Gm10715-  
202|ENSMUSG00000096201|+|chr9:g.3037120:AT>A  
MFLIFMIFSFLAIFPVLQWTFLHFLFSSPYFTS  
>ENSMUSP00000136448\_c.244:T>C\_p.F82S\_ENSMUST00000155807.3|Gm10715-  
201|ENSMUSG00000096201|+|chr9:g.3037125:T>C  
MFLIFNDFHFSCLIPRPIVDISFPPFSVFLAIFHVPKCVFLIFHDFQFPRHIPGPTVCISHFSRFSVISSFFK  
TSSGCFSSMIFSFLAIFPVLQWTFLNFPFVSFLAIFHVLKCVFLIFRDFQFSRQIPGPTVCISHFSRFSVI  
LSFFNLSTACFSLSMIFSFLAIFHVLQWTFLNFPFVSFFSPYFTSYSVHFSFFTFSSDFVFFQDVKWMFLIFH  
DFQFSC  
>ENSMUSP00000136448\_c.274:C>A\_p.P92H\_ENSMUST00000155807.3|Gm10715-  
201|ENSMUSG00000096201|+|chr9:g.3037155:C>A  
MFLIFNDFHFSCLIPRPIVDISFPPFSVFLAIFHVPKCVFLIFHDFQFPRHIPGPTVCISHFSRFSVISSFFK  
TSSGCFSSFFMIFSFLAIFHVLQWTFLNFPFVSFLAIFHVLKCVFLIFRDFQFSRQIPGPTVCISHFSRFSVI  
LSFFNLSTACFSLSMIFSFLAIFHVLQWTFLNFPFVSFFSPYFTSYSVHFSFFTFSSDFVFFQDVKWMFLIFH  
DFQFSC  
>ENSMUSP00000136448\_c.274:CT>AC\_p.P92H\_ENSMUST00000155807.3|Gm10715-  
201|ENSMUSG00000096201|+|chr9:g.3037155:CT>AC  
MFLIFNDFHFSCLIPRPIVDISFPPFSVFLAIFHVPKCVFLIFHDFQFPRHIPGPTVCISHFSRFSVISSFFK  
TSSGCFSSFFMIFSFLAIFHCPTVDISKFSTFFCFPRHISRPKVCISHFP\*FSVFSPPDRSRSYVHFSFFTFSSD  
FVIFQFVNCMFLSFHDFQFSCHIPCPTVDISKFSTFFIFLAIHVLQCAFLIFHVQ\*FRLFSRRQVDVSHFS  
\*FSVFL  
>rs228898590\_ENSMUSP00000137129\_c.45:T>C\_p.C16R  
ENSMUST00000177969.2|Gm10715-202|ENSMUSG00000096201|+|chr9:g.3037156:T>C  
MFLIFHDFQFSCHIPRPTVDISFPPFSVFLAIFHVLKCVFLIFRDFQFSRQIPGPTVCISHFSRFSVILSFFN  
LSTACFSLSMIFSFLAIFHVLQWTFLNFPFVSFLAIFHVLKCVFLIFRVFQFPRHIPGPTVCISHFSRFSVI  
SSFFKTSSGCFSSFFMIFSFLAIFPVLQWTFLNFPFSSSIFLPYSRSYSVHFSFFTFSSDFVIFQVVKWFLI  
FHDFQLSS  
>ENSMUSP00000136448\_c.363:C>T\_p.R122C\_ENSMUST00000155807.3|Gm10715-  
201|ENSMUSG00000096201|+|chr9:g.3037244:C>T  
MFLIFNDFHFSCLIPRPIVDISFPPFSVFLAIFHVPKCVFLIFHDFQFPRHIPGPTVCISHFSRFSVISSFFK  
TSSGCFSSFFMIFSFLAIFPVLQWTFLNFPFVSFLAIFHVLKCVFLIFCDFQFSRQIPGPTVCISHFSRFSVI  
LSFFNLSTACFSLSMIFSFLAIFHVLQWTFLNFPFVSFFSPYFTSYSVHFSFFTFSSDFVFFQDVKWMFLIFH  
DFQFSC  
>ENSMUSP00000137129\_c.129:C>T\_p.R44C\_ENSMUST00000177969.2|Gm10715-  
202|ENSMUSG00000096201|+|chr9:g.3037244:C>T  
MFLIFHDFQFSCHIPCPTVDISFPPFSVFLAIFHVLKCVFLIFCDFQFSRQIPGPTVCISHFSRFSVILSFFN  
LSTACFSLSMIFSFLAIFHVLQWTFLNFPFVSFLAIFHVLKCVFLIFRVFQFPRHIPGPTVCISHFSRFSVI  
SSFFKTSSGCFSSFFMIFSFLAIFPVLQWTFLNFPFSSSIFLPYSRSYSVHFSFFTFSSDFVIFQVVKWFLI  
FHDFQLSS  
>ENSMUSP00000136448\_c.386:G>T\_p.Q129H\_ENSMUST00000155807.3|Gm10715-  
201|ENSMUSG00000096201|+|chr9:g.3037267:G>T  
MFLIFNDFHFSCLIPRPIVDISFPPFSVFLAIFHVPKCVFLIFHDFQFPRHIPGPTVCISHFSRFSVISSFFK  
TSSGCFSSFFMIFSFLAIFPVLQWTFLNFPFVSFLAIFHVLKCVFLIFRDFQFSRHIPGPTVCISHFSRFSVI

LSFFNLSTACFSLSMIFSFLAIFHVLQWTFLNFPFSSFFSPYFTSYSVHFSFSTFFSDFVFFQDVKWMFLIFH  
DFQFSC  
>ENSMUSP00000137129\_c.152:G>T\_p.Q51H ENSMUST00000177969.2|Gm10715-  
202|ENSMUSG00000096201|+|chr9:g.3037267:G>T  
MFLIFHDFQFSCHIPCPTVDISFPFVSFLAIFHVLKCVFLIFRDFQFSRHIPGPTVCISHFSRFSVILSFFN  
LSTACFSLSMIFSFLAIFHVLQWTFLNFPFVSFLAIFHVLKCVFLIFRVFQFPRHIPGPTVCISHFSRFSVI  
SSFFKTSSGCFSSFMIFSFLAIFPVLQWTFLNFPFSSSIFLPYSRSYSVHFSFSTFFSDFVIFQVVKWKFLI  
FHDFQLSS  
>ENSMUSP00000136448\_c.386:G>C\_p.Q129H ENSMUST00000155807.3|Gm10715-  
201|ENSMUSG00000096201|+|chr9:g.3037267:G>C  
MFLIFNDFHFSCLIPRPIVDISFPFVSFLAIFHVPKCVFLIFHDFQFPRHIPGPTVCISHFSRFSVISSFFK  
TSSGCFSSFMIFSFLAIFPVLQWTFLNFPFVSFLAIFHVLKCVFLIFRDFQFSRHIPGPTVCISHFSRFSVI  
LSFFNLSTACFSLSMIFSFLAIFHVLQWTFLNFPFSSFFSPYFTSYSVHFSFSTFFSDFVIFQVVKWKFLI  
FHDFQLSS  
>ENSMUSP00000137129\_c.152:G>C\_p.Q51H ENSMUST00000177969.2|Gm10715-  
202|ENSMUSG00000096201|+|chr9:g.3037267:G>C  
MFLIFHDFQFSCHIPCPTVDISFPFVSFLAIFHVLKCVFLIFRDFQFSRHIPGPTVCISHFSRFSVILSFFN  
LSTACFSLSMIFSFLAIFHVLQWTFLNFPFVSFLAIFHVLKCVFLIFRVFQFPRHIPGPTVCISHFSRFSVI  
SSFFKTSSGCFSSFMIFSFLAIFPVLQWTFLNFPFSSSIFLPYSRSYSVHFSFSTFFSDFVIFQVVKWKFLI  
FHDFQLSS  
>ENSMUSP00000136448\_c.394:G>T\_p.G132V ENSMUST00000155807.3|Gm10715-  
201|ENSMUSG00000096201|+|chr9:g.3037275:G>T  
MFLIFNDFHFSCLIPRPIVDISFPFVSFLAIFHVPKCVFLIFHDFQFPRHIPGPTVCISHFSRFSVISSFFK  
TSSGCFSSFMIFSFLAIFPVLQWTFLNFPFVSFLAIFHVLKCVFLIFRDFQFSRQIPVPTVCISHFSRFSVI  
LSFFNLSTACFSLSMIFSFLAIFHVLQWTFLNFPFSSFFSPYFTSYSVHFSFSTFFSDFVIFQVVKWKFLI  
FHDFQLSS  
>ENSMUSP00000137129\_c.160:G>T\_p.G54V ENSMUST00000177969.2|Gm10715-  
202|ENSMUSG00000096201|+|chr9:g.3037275:G>T  
MFLIFHDFQFSCHIPCPTVDISFPFVSFLAIFHVLKCVFLIFRDFQFSRQIPVPTVCISHFSRFSVILSFFN  
LSTACFSLSMIFSFLAIFHVLQWTFLNFPFVSFLAIFHVLKCVFLIFRVFQFPRHIPGPTVCISHFSRFSVI  
SSFFKTSSGCFSSFMIFSFLAIFPVLQWTFLNFPFSSSIFLPYSRSYSVHFSFSTFFSDFVIFQVVKWKFLI  
FHDFQLSS  
>ENSMUSP00000136448\_c.399:A>T\_p.T134S ENSMUST00000155807.3|Gm10715-  
201|ENSMUSG00000096201|+|chr9:g.3037280:A>T  
MFLIFNDFHFSCLIPRPIVDISFPFVSFLAIFHVPKCVFLIFHDFQFPRHIPGPTVCISHFSRFSVISSFFK  
TSSGCFSSFMIFSFLAIFPVLQWTFLNFPFVSFLAIFHVLKCVFLIFRDFQFSRQIPGTVCSHFSRFSVI  
LSFFNLSTACFSLSMIFSFLAIFHVLQWTFLNFPFSSFFSPYFTSYSVHFSFSTFFSDFVIFQVVKWKFLI  
FHDFQLSS  
>ENSMUSP00000137129\_c.165:A>T\_p.T56S ENSMUST00000177969.2|Gm10715-  
202|ENSMUSG00000096201|+|chr9:g.3037280:A>T  
MFLIFHDFQFSCHIPCPTVDISFPFVSFLAIFHVLKCVFLIFRDFQFSRQIPGPSVCISHFSRFSVILSFFN  
LSTACFSLSMIFSFLAIFHVLQWTFLNFPFVSFLAIFHVLKCVFLIFRVFQFPRHIPGPTVCISHFSRFSVI  
SSFFKTSSGCFSSFMIFSFLAIFPVLQWTFLNFPFSSSIFLPYSRSYSVHFSFSTFFSDFVIFQVVKWKFLI  
FHDFQLSS  
>ENSMUSP00000136448\_c.433:T>G\_p.V145G ENSMUST00000155807.3|Gm10715-  
201|ENSMUSG00000096201|+|chr9:g.3037314:T>G  
MFLIFNDFHFSCLIPRPIVDISFPFVSFLAIFHVPKCVFLIFHDFQFPRHIPGPTVCISHFSRFSVISSFFK  
TSSGCFSSFMIFSFLAIFPVLQWTFLNFPFVSFLAIFHVLKCVFLIFRDFQFSRQIPGPTVCISHFSRFSGI  
LSFFNLSTACFSLSMIFSFLAIFHVLQWTFLNFPFSSFFSPYFTSYSVHFSFSTFFSDFVIFQVVKWKFLI  
FHDFQLSS  
>ENSMUSP00000137129\_c.199:T>G\_p.V67G ENSMUST00000177969.2|Gm10715-  
202|ENSMUSG00000096201|+|chr9:g.3037314:T>G  
MFLIFHDFQFSCHIPCPTVDISFPFVSFLAIFHVLKCVFLIFRDFQFSRQIPGPTVCISHFSRFSVILSFFN  
LSTACFSLSMIFSFLAIFHVLQWTFLNFPFVSFLAIFHVLKCVFLIFRVFQFPRHIPGPTVCISHFSRFSVI  
SSFFKTSSGCFSSFMIFSFLAIFPVLQWTFLNFPFSSSIFLPYSRSYSVHFSFSTFFSDFVIFQVVKWKFLI  
FHDFQLSS  
>ENSMUSP00000136448\_c.439:T>C\_p.L147S ENSMUST00000155807.3|Gm10715-  
201|ENSMUSG00000096201|+|chr9:g.3037320:T>C

MFLIFNDFHFSCLIIPRPIVDISFPPFSVFLAIFHVPKCVFLIFHDFQFPRHIPGPTVCISHFSRFSVISSFFK  
TSSGCFSSFFMIFSFLAIFPVLQWTFLNFPFVSFLAIFHVLKCVFLIFRDFQFSRQIPGPTVCISHFSRFSVI  
SSFFNLSTACFSLSMIFSFLAIFHVLQWTFLNFPFVSFFSPYFTSYSVHFSFFTFSSDFVFFQDVKWMFLIFH  
DFQFSC  
>ENSMUSP00000137129\_c.205:T>C\_p.L69S ENSMUST00000177969.2|Gm10715-  
202|ENSMUSG00000096201|+|chr9:g.3037320:T>C  
MFLIFHDFQFSCHIPCPTVDISFPPFSVFLAIFHVLKCVFLIFRDFQFSRQIPGPTVCISHFSRFSVISSFFN  
LSTACFSLSMIFSFLAIFHVLQWTFLNFPFVSFLAIFHVLKCVFLIFRVFQFPRHIPGPTVCISHFSRFSVI  
SSFFKTSSGCFSSFFMIFSFLAIFPVLQWTFLNFPFSSSIFLPYSRSYSVHFSFFTFSSDFVIFQVVKWKFLI  
FHDFQLSS  
>ENSMUSP00000136448\_c.452:T>G\_p.N151K ENSMUST00000155807.3|Gm10715-  
201|ENSMUSG00000096201|+|chr9:g.3037333:T>G  
MFLIFNDFHFSCLIIPRPIVDISFPPFSVFLAIFHVPKCVFLIFHDFQFPRHIPGPTVCISHFSRFSVISSFFK  
TSSGCFSSFFMIFSFLAIFPVLQWTFLNFPFVSFLAIFHVLKCVFLIFRDFQFSRQIPGPTVCISHFSRFSVI  
LSFFKLSTACFSLSMIFSFLAIFHVLQWTFLNFPFVSFFSPYFTSYSVHFSFFTFSSDFVFFQDVKWMFLIFH  
DFQFSC  
>ENSMUSP00000137129\_c.218:T>G\_p.N73K ENSMUST00000177969.2|Gm10715-  
202|ENSMUSG00000096201|+|chr9:g.3037333:T>G  
MFLIFHDFQFSCHIPCPTVDISFPPFSVFLAIFHVLKCVFLIFRDFQFSRQIPGPTVCISHFSRFSVILSFFK  
LSTACFSLSMIFSFLAIFHVLQWTFLNFPFVSFLAIFHVLKCVFLIFRVFQFPRHIPGPTVCISHFSRFSVI  
SSFFKTSSGCFSSFFMIFSFLAIFPVLQWTFLNFPFSSSIFLPYSRSYSVHFSFFTFSSDFVIFQVVKWKFLI  
FHDFQLSS  
>ENSMUSP00000136448\_c.454:T>C\_p.L152S ENSMUST00000155807.3|Gm10715-  
201|ENSMUSG00000096201|+|chr9:g.3037335:T>C  
MFLIFNDFHFSCLIIPRPIVDISFPPFSVFLAIFHVPKCVFLIFHDFQFPRHIPGPTVCISHFSRFSVISSFFK  
TSSGCFSSFFMIFSFLAIFPVLQWTFLNFPFVSFLAIFHVLKCVFLIFRDFQFSRQIPGPTVCISHFSRFSVI  
LSFFNSTACFSLSMIFSFLAIFHVLQWTFLNFPFVSFFSPYFTSYSVHFSFFTFSSDFVFFQDVKWMFLIFH  
DFQFSC  
>ENSMUSP00000137129\_c.220:T>C\_p.L74S ENSMUST00000177969.2|Gm10715-  
202|ENSMUSG00000096201|+|chr9:g.3037335:T>C  
MFLIFHDFQFSCHIPCPTVDISFPPFSVFLAIFHVLKCVFLIFRDFQFSRQIPGPTVCISHFSRFSVILSFFN  
SSTACFSLSMIFSFLAIFHVLQWTFLNFPFVSFLAIFHVLKCVFLIFRVFQFPRHIPGPTVCISHFSRFSVI  
SSFFKTSSGCFSSFFMIFSFLAIFPVLQWTFLNFPFSSSIFLPYSRSYSVHFSFFTFSSDFVIFQVVKWKFLI  
FHDFQLSS  
>ENSMUSP00000136448\_c.460:CT>GG\_p.T154R ENSMUST00000155807.3|Gm10715-  
201|ENSMUSG00000096201|+|chr9:g.3037341:CT>GG  
MFLIFNDFHFSCLIIPRPIVDISFPPFSVFLAIFHVPKCVFLIFHDFQFPRHIPGPTVCISHFSRFSVISSFFK  
TSSGCFSSFFMIFSFLAIFPVLQWTFLNFPFVSFLAIFHVLKCVFLIFRDFQFSRQIPGPTVCISHFSRFSVI  
LSFFNLSRCMFLSFHDFQFSCHIPCPTVDISKSTFFIFLAIHVLQCAFLIFHVQ\*FRLFSRRQVDVSHFS  
\*FSVFL  
>ENSMUSP00000137129\_c.226:CT>GG\_p.T76R ENSMUST00000177969.2|Gm10715-  
202|ENSMUSG00000096201|+|chr9:g.3037341:CT>GG  
MFLIFHDFQFSCHIPCPTVDISFPPFSVFLAIFHVLKCVFLIFRDFQFSRQIPGPTVCISHFSRFSVILSFFN  
LSRCMFLSFHDFQFSCHIPCPTVDISKSTFFSPPRHISRAKVCISHFSCFSVSSPYSRSYSVHFSFFTFSSD  
FVFFQDVKWMFLIFHDFQFSCHIPCPTVDISKSTFFFNFLTIFQVLQCAFLIFHVQ\*FRHFSSCQVEVSH  
FP\*FSAF\*  
>ENSMUSP00000136448\_c.460:CTGC>GTGT\_p.T154S ENSMUST00000155807.3|Gm10715-  
201|ENSMUSG00000096201|+|chr9:g.3037341:CTGC>GTGT  
MFLIFNDFHFSCLIIPRPIVDISFPPFSVFLAIFHVPKCVFLIFHDFQFPRHIPGPTVCISHFSRFSVISSFFK  
TSSGCFSSFFMIFSFLAIFPVLQWTFLNFPFVSFLAIFHVLKCVFLIFRDFQFSRQIPGPTVCISHFSRFSVI  
LSFFNLSSVACFSLSMIFSFLAIFHVLQWTFLNFPFVSFFSPYFTSYSVHFSFFTFSSDFVFFQDVKWMFLIF  
HDFQFSC  
>ENSMUSP00000137129\_c.226:CTGC>GTGT\_p.T76S ENSMUST00000177969.2|Gm10715-  
202|ENSMUSG00000096201|+|chr9:g.3037341:CTGC>GTGT  
MFLIFHDFQFSCHIPCPTVDISFPPFSVFLAIFHVLKCVFLIFRDFQFSRQIPGPTVCISHFSRFSVILSFFN  
LSSVACFSLSMIFSFLAIFHVLQWTFLNFPFVSFLAIFHVLKCVFLIFRVFQFPRHIPGPTVCISHFSRFSV  
ISSFFKTSSGCFSSFFMIFSFLAIFPVLQWTFLNFPFSSSIFLPYSRSYSVHFSFFTFSSDFVIFQVVKWKFL  
IFHDFQLSS

>ENSMUSP00000136448\_c.460:CTGC>GTGG\_p.T154S ENSMUST00000155807.3|Gm10715-201|ENSMUSG00000096201|+|chr9:g.3037341:CTGC>GTGG  
MFLIFHDFHFSCLIPIPRIVDISFPPFSVFLAIFHVPKCVFLIFHDFQFPRHIPGPTVCISHFSRFSVISSFFK  
TSSGCFSSFFMIFSFLAIFPVLQWTFNLNFPFVSFLAIFHVLKCVFLIFRDFQFSRQIPGPTVCISHFSRFSVI  
LSFFNLSSGACFSLSMIFSFLAIFHVLQWTFNLNFPFSSFFSPYFTSYSVHFSFFTFFSDFVFFQDVKWMFLIF  
HDFQFSC  
>ENSMUSP00000137129\_c.226:CTGC>GTGG\_p.T76S ENSMUST00000177969.2|Gm10715-202|ENSMUSG00000096201|+|chr9:g.3037341:CTGC>GTGG  
MFLIFHDFQFSCHIPCPTVDISFPPFSVFLAIFHVLKCVFLIFRDFQFSRQIPGPTVCISHFSRFSVILSFFN  
LSSGACFSLSMIFSFLAIFHVLQWTFNLNFPFVSFLAIFHVLKCVFLIFRVFQFPRHIPGPTVCISHFSRFSV  
ISSFFKTSSGCFSSFFMIFSFLAIFPVLQWTFNLNFPFSSSIFLPYSRSYSVHFSFFTFFSDFVIFQVVKWFLI  
IFHDFQLSS  
>ENSMUSP00000136448\_c.474:C>T\_p.L159F ENSMUST00000155807.3|Gm10715-201|ENSMUSG00000096201|+|chr9:g.3037355:C>T  
MFLIFHDFHFSCLIPIPRIVDISFPPFSVFLAIFHVPKCVFLIFHDFQFPRHIPGPTVCISHFSRFSVISSFFK  
TSSGCFSSFFMIFSFLAIFPVLQWTFNLNFPFVSFLAIFHVLKCVFLIFRDFQFSRQIPGPTVCISHFSRFSVI  
LSFFNLSTACFSFSMIFSFLAIFHVLQWTFNLNFPFSSFFSPYFTSYSVHFSFFTFFSDFVFFQDVKWMFLIFH  
DFQFSC  
>ENSMUSP00000137129\_c.240:C>T\_p.L81F ENSMUST00000177969.2|Gm10715-202|ENSMUSG00000096201|+|chr9:g.3037355:C>T  
MFLIFHDFQFSCHIPCPTVDISFPPFSVFLAIFHVLKCVFLIFRDFQFSRQIPGPTVCISHFSRFSVILSFFN  
LSTACFSFSMIFSFLAIFHVLQWTFNLNFPFVSFLAIFHVLKCVFLIFRVFQFPRHIPGPTVCISHFSRFSVI  
SSFFKTSSGCFSSFFMIFSFLAIFPVLQWTFNLNFPFSSSIFLPYSRSYSVHFSFFTFFSDFVIFQVVKWFLI  
FHDFQLSS  
>ENSMUSP00000137129\_c.362:TC>T\_p.F121del-fs ENSMUST00000177969.2|Gm10715-201|ENSMUSG00000096201|+|chr9:g.3037477:TC>T  
MFLIFHDFQFSCHIPCPTVDISFPPFSVFLAIFHVLKCVFLIFRDFQFSRQIPGPTVCISHFSRFSVILSFFN  
LSTACFSLSMIFSFLAIFHVLQWTFNLNFPFVSFLAIFHVLKCVFLIFVFFSFLAIFQVLQCAFLIFHVQ  
>ENSMUSP00000137129\_c.367:T>A\_p.V123D ENSMUST00000177969.2|Gm10715-202|ENSMUSG00000096201|+|chr9:g.3037482:T>A  
MFLIFHDFQFSCHIPCPTVDISFPPFSVFLAIFHVLKCVFLIFRDFQFSRQIPGPTVCISHFSRFSVILSFFN  
LSTACFSLSMIFSFLAIFHVLQWTFNLNFPFVSFLAIFHVLKCVFLIFRDFQFPRHIPGPTVCISHFSRFSVI  
SSFFKTSSGCFSSFFMIFSFLAIFPVLQWTFNLNFPFSSSIFLPYSRSYSVHFSFFTFFSDFVIFQVVKWFLI  
FHDFQLSS  
>ENSMUSP00000136448\_c.553:T>C\_p.F185S ENSMUST00000155807.3|Gm10715-201|ENSMUSG00000096201|+|chr9:g.3037669:T>C  
MFLIFHDFHFSCLIPIPRIVDISFPPFSVFLAIFHVPKCVFLIFHDFQFPRHIPGPTVCISHFSRFSVISSFFK  
TSSGCFSSFFMIFSFLAIFPVLQWTFNLNFPFVSFLAIFHVLKCVFLIFRDFQFSRQIPGPTVCISHFSRFSVI  
LSFFNLSTACFSLSMIFSFLAIFHVLQWTFNLNFPFSSSPYFTSYSVHFSFFTFFSDFVFFQDVKWMFLIFH  
DFQFSC  
>ENSMUSP00000137129\_c.378:C>T\_p.P127S ENSMUST00000177969.2|Gm10715-202|ENSMUSG00000096201|+|chr9:g.3037727:C>T  
MFLIFHDFQFSCHIPCPTVDISFPPFSVFLAIFHVLKCVFLIFRDFQFSRQIPGPTVCISHFSRFSVILSFFN  
LSTACFSLSMIFSFLAIFHVLQWTFNLNFPFVSFLAIFHVLKCVFLIFRVFQFSRHIPGPTVCISHFSRFSVI  
SSFFKTSSGCFSSFFMIFSFLAIFPVLQWTFNLNFPFSSSIFLPYSRSYSVHFSFFTFFSDFVIFQVVKWFLI  
FHDFQLSS  
>ENSMUSP00000136448\_c.574:A>T\_p.Y192F ENSMUST00000155807.3|Gm10715-201|ENSMUSG00000096201|+|chr9:g.3037748:A>T  
MFLIFHDFHFSCLIPIPRIVDISFPPFSVFLAIFHVPKCVFLIFHDFQFPRHIPGPTVCISHFSRFSVISSFFK  
TSSGCFSSFFMIFSFLAIFPVLQWTFNLNFPFVSFLAIFHVLKCVFLIFRDFQFSRQIPGPTVCISHFSRFSVI  
LSFFNLSTACFSLSMIFSFLAIFHVLQWTFNLNFPFSSFFSPYFTSFSVHFSFFTFFSDFVFFQDVKWMFLIFH  
DFQFSC  
>ENSMUSP00000137129\_c.399:A>T\_p.T134S ENSMUST00000177969.2|Gm10715-202|ENSMUSG00000096201|+|chr9:g.3037748:A>T  
MFLIFHDFQFSCHIPCPTVDISFPPFSVFLAIFHVLKCVFLIFRDFQFSRQIPGPTVCISHFSRFSVILSFFN  
LSTACFSLSMIFSFLAIFHVLQWTFNLNFPFVSFLAIFHVLKCVFLIFRVFQFPRHIPGPTVCISHFSRFSVI  
SSFFKTSSGCFSSFFMIFSFLAIFPVLQWTFNLNFPFSSSIFLPYSRSYSVHFSFFTFFSDFVIFQVVKWFLI  
FHDFQLSS

>ENSMUSP00000137129\_c.430:C>T\_p.S144L ENSMUST00000177969.2|Gm10715-202|ENSMUSG00000096201|+|chr9:g.3037779:C>T  
MFLIFHDFQFSCHIPCPTVDISFPPFSVFLAIFHVLKCVFLIFRDFQFSRQIPGPTVCISHFSRFSVILSFFN  
LSTACFSLSMIFSFLAIFHVLQWTFLNFPFVSFLAIFHVLKCVFLIFRVFQFPRHIPGPTVCISHFSRFLVI  
SSFFKTSSGCFSSFFMIFSFLAIFPVLQWTFLNFPFSSSIFLPYSRSYSVHFSFSTFFSDFVIFQVVKWKFLI  
FHDFQLSS  
>rs215064382\_ENSMUSP00000136448\_c.618:T>A\_p.F207I  
ENSMUST00000155807.3|Gm10715-201|ENSMUSG00000096201|+|chr9:g.3037792:T>A  
MFLIFNDFHFSLIPRPIVDISFPPFSVFLAIFHVPKCVFLIFHDFQFPRHIPGPTVCISHFSRFSVILSFFK  
TSSGCFSSFFMIFSFLAIFPVLQWTFLNFPFVSFLAIFHVLKCVFLIFRDFQFSRQIPGPTVCISHFSRFSVI  
LSFFNLSTACFSLSMIFSFLAIFHVLQWTFLNFPFSSFFSPYFTSYSVHFSFSTFFSDFVIFQVVKWMFLIFH  
DFQFSC  
>ENSMUSP00000136448\_c.624:C>T\_p.Q209\* ENSMUST00000155807.3|Gm10715-201|ENSMUSG00000096201|+|chr9:g.3037798:C>T  
MFLIFNDFHFSLIPRPIVDISFPPFSVFLAIFHVPKCVFLIFHDFQFPRHIPGPTVCISHFSRFSVILSFFK  
TSSGCFSSFFMIFSFLAIFPVLQWTFLNFPFVSFLAIFHVLKCVFLIFRDFQFSRQIPGPTVCISHFSRFSVI  
LSFFNLSTACFSLSMIFSFLAIFHVLQWTFLNFPFSSFFSPYFTSYSVHFSFSTFFSDFVFF\*DVKWMFLIFH  
DFQFSC  
>rs240247081\_ENSMUSP00000136448\_c.628:A>T\_p.D210V  
ENSMUST00000155807.3|Gm10715-201|ENSMUSG00000096201|+|chr9:g.3037802:A>T  
MFLIFNDFHFSLIPRPIVDISFPPFSVFLAIFHVPKCVFLIFHDFQFPRHIPGPTVCISHFSRFSVILSFFK  
TSSGCFSSFFMIFSFLAIFPVLQWTFLNFPFVSFLAIFHVLKCVFLIFRDFQFSRQIPGPTVCISHFSRFSVI  
LSFFNLSTACFSLSMIFSFLAIFHVLQWTFLNFPFSSFFSPYFTSYSVHFSFSTFFSDFVFFQVVKWMFLIFH  
DFQFSC  
>rs240247081\_ENSMUSP00000137129\_c.453:A>T\_p.T152S  
ENSMUST00000177969.2|Gm10715-202|ENSMUSG00000096201|+|chr9:g.3037802:A>T  
MFLIFHDFQFSCHIPCPTVDISFPPFSVFLAIFHVLKCVFLIFRDFQFSRQIPGPTVCISHFSRFSVILSFFN  
LSTACFSLSMIFSFLAIFHVLQWTFLNFPFVSFLAIFHVLKCVFLIFRVFQFPRHIPGPTVCISHFSRFSVI  
SSFFKSSGCFSSFFMIFSFLAIFPVLQWTFLNFPFSSSIFLPYSRSYSVHFSFSTFFSDFVIFQVVKWKFLI  
FHDFQLSS  
>ENSMUSP00000136448\_c.628:AC>TG\_p.D210V ENSMUST00000155807.3|Gm10715-201|ENSMUSG00000096201|+|chr9:g.3037802:AC>TG  
MFLIFNDFHFSLIPRPIVDISFPPFSVFLAIFHVPKCVFLIFHDFQFPRHIPGPTVCISHFSRFSVILSFFK  
TSSGCFSSFFMIFSFLAIFPVLQWTFLNFPFVSFLAIFHVLKCVFLIFRDFQFSRQIPGPTVCISHFSRFSVI  
LSFFNLSTACFSLSMIFSFLAIFHVLQWTFLNFPFSSFFSPYFTSYSVHFSFSTFFSDFVFFQVQVQDVSHFS  
\*FSVFL  
>ENSMUSP00000137129\_c.453:AC>TG\_p.T152C ENSMUST00000177969.2|Gm10715-202|ENSMUSG00000096201|+|chr9:g.3037802:AC>TG  
MFLIFHDFQFSCHIPCPTVDISFPPFSVFLAIFHVLKCVFLIFRDFQFSRQIPGPTVCISHFSRFSVILSFFN  
LSTACFSLSMIFSFLAIFHVLQWTFLNFPFVSFLAIFHVLKCVFLIFRVFQFPRHIPGPTVCISHFSRFSVI  
SSFFKCVKWMFLIFHDFQFSCHIPCPTVDISKSTFFFFNFLTIFQVLQCAFLIFHVQF\*FRHFSQCQVEVSH  
FP\*FSAF\*  
>ENSMUSP00000136448\_c.641:G>T\_p.M214I ENSMUST00000155807.3|Gm10715-201|ENSMUSG00000096201|+|chr9:g.3037815:G>T  
MFLIFNDFHFSLIPRPIVDISFPPFSVFLAIFHVPKCVFLIFHDFQFPRHIPGPTVCISHFSRFSVILSFFK  
TSSGCFSSFFMIFSFLAIFPVLQWTFLNFPFVSFLAIFHVLKCVFLIFRDFQFSRQIPGPTVCISHFSRFSVI  
LSFFNLSTACFSLSMIFSFLAIFHVLQWTFLNFPFSSFFSPYFTSYSVHFSFSTFFSDFVFFQVQVQVWIFLIFH  
DFQFSC  
>ENSMUSP00000137129\_c.466:G>T\_p.C156F ENSMUST00000177969.2|Gm10715-202|ENSMUSG00000096201|+|chr9:g.3037815:G>T  
MFLIFHDFQFSCHIPCPTVDISFPPFSVFLAIFHVLKCVFLIFRDFQFSRQIPGPTVCISHFSRFSVILSFFN  
LSTACFSLSMIFSFLAIFHVLQWTFLNFPFVSFLAIFHVLKCVFLIFRVFQFPRHIPGPTVCISHFSRFSVI  
SSFFKTSSGFFSFFMIFSFLAIFPVLQWTFLNFPFSSSIFLPYSRSYSVHFSFSTFFSDFVIFQVVKWKFLI  
FHDFQLSS  
>ENSMUSP00000137129\_c.478:T>C\_p.F160S ENSMUST00000177969.2|Gm10715-202|ENSMUSG00000096201|+|chr9:g.3037827:T>C  
MFLIFHDFQFSCHIPCPTVDISFPPFSVFLAIFHVLKCVFLIFRDFQFSRQIPGPTVCISHFSRFSVILSFFN  
LSTACFSLSMIFSFLAIFHVLQWTFLNFPFVSFLAIFHVLKCVFLIFRVFQFPRHIPGPTVCISHFSRFSVI

SSFFKTSSGCFSFSMIFSLAIFPVLQWTFNLNPPFSSSIFLPYSRSYSVHFSFFFTFFSDFVIFQVVKWKFLLI  
FHDFQLSS  
>ENSMUSP00000137129\_c.508:C>A\_p.P170H ENSMUST00000177969.2|Gm10715-  
202|ENSMUSG00000096201|+|chr9:g.3037857:C>A  
MFLIFHDFQFSCHIPCPTVDISFPPFSVFLAIFHVLKCVFLIFRDFQFSRQIPGPTVCISHFSRFSVILSFFN  
LSTACFSLSMIFSFLAIFHVLQWTFNLNPPFSVFLAIFHVLKCVFLIFRVFQFP RHIPGPTVCISHFSRFSVI  
SSFFKTSSGCFSFFMIFSLAIFHVLQWTFNLNPPFSSSIFLPYSRSYSVHFSFFFTFFSDFVIFQVVKWKFLLI  
FHDFQLSS  
>ENSMUSP00000137129\_c.508:CT>AC\_p.P170H ENSMUST00000177969.2|Gm10715-  
202|ENSMUSG00000096201|+|chr9:g.3037857:CT>AC  
MFLIFHDFQFSCHIPCPTVDISFPPFSVFLAIFHVLKCVFLIFRDFQFSRQIPGPTVCISHFSRFSVILSFFN  
LSTACFSLSMIFSFLAIFHVLQWTFNLNPPFSVFLAIFHVLKCVFLIFRVFQFP RHIPGPTVCISHFSRFSVI  
SSFFKTSSGCFSFFMIFSLAIFHCPTVDISKSTFFFFNFLTIFQVLQCAFLIFHVQ\*FRHFSSCQVEVSH  
FP\*FSAF\*  
>ENSMUSP00000137129\_c.580:A>T\_p.Y194F ENSMUST00000177969.2|Gm10715-  
202|ENSMUSG00000096201|+|chr9:g.3038216:A>T  
MFLIFHDFQFSCHIPCPTVDISFPPFSVFLAIFHVLKCVFLIFRDFQFSRQIPGPTVCISHFSRFSVILSFFN  
LSTACFSLSMIFSFLAIFHVLQWTFNLNPPFSVFLAIFHVLKCVFLIFRVFQFP RHIPGPTVCISHFSRFSVI  
SSFFKTSSGCFSFFMIFSLAIFPVLQWTFNLNPPFSSSIFLPYSRSYSVHFSFFFTFFSDFVIFQVVKWKFLLI  
FHDFQLSS  
>ENSMUSP00000137129\_c.581:C>A\_p.Y194\* ENSMUST00000177969.2|Gm10715-  
202|ENSMUSG00000096201|+|chr9:g.3038217:C>A  
MFLIFHDFQFSCHIPCPTVDISFPPFSVFLAIFHVLKCVFLIFRDFQFSRQIPGPTVCISHFSRFSVILSFFN  
LSTACFSLSMIFSFLAIFHVLQWTFNLNPPFSVFLAIFHVLKCVFLIFRVFQFP RHIPGPTVCISHFSRFSVI  
SSFFKTSSGCFSFFMIFSLAIFPVLQWTFNLNPPFSSSIFLPYSRS\*SVHFSFFFTFFSDFVIFQVVKWKFLLI  
FHDFQLSS  
>ENSMUSP00000137129\_c.588:C>T\_p.H197Y ENSMUST00000177969.2|Gm10715-  
202|ENSMUSG00000096201|+|chr9:g.3038224:C>T  
MFLIFHDFQFSCHIPCPTVDISFPPFSVFLAIFHVLKCVFLIFRDFQFSRQIPGPTVCISHFSRFSVILSFFN  
LSTACFSLSMIFSFLAIFHVLQWTFNLNPPFSVFLAIFHVLKCVFLIFRVFQFP RHIPGPTVCISHFSRFSVI  
SSFFKTSSGCFSFFMIFSLAIFPVLQWTFNLNPPFSSSIFLPYSRSYSVYFSFFFTFFSDFVIFQVVKWKFLLI  
FHDFQLSS  
>ENSMUSP00000137129\_c.604:C>A\_p.T202K ENSMUST00000177969.2|Gm10715-  
202|ENSMUSG00000096201|+|chr9:g.3038240:C>A  
MFLIFHDFQFSCHIPCPTVDISFPPFSVFLAIFHVLKCVFLIFRDFQFSRQIPGPTVCISHFSRFSVILSFFN  
LSTACFSLSMIFSFLAIFHVLQWTFNLNPPFSVFLAIFHVLKCVFLIFRVFQFP RHIPGPTVCISHFSRFSVI  
SSFFKTSSGCFSFFMIFSLAIFPVLQWTFNLNPPFSSSIFLPYSRSYSVHFSFFKFFSDFVIFQVVKWKFLLI  
FHDFQLSS  
>ENSMUSP00000137129\_c.621:G>A\_p.V208I ENSMUST00000177969.2|Gm10715-  
202|ENSMUSG00000096201|+|chr9:g.3038257:G>A  
MFLIFHDFQFSCHIPCPTVDISFPPFSVFLAIFHVLKCVFLIFRDFQFSRQIPGPTVCISHFSRFSVILSFFN  
LSTACFSLSMIFSFLAIFHVLQWTFNLNPPFSVFLAIFHVLKCVFLIFRVFQFP RHIPGPTVCISHFSRFSVI  
SSFFKTSSGCFSFFMIFSLAIFPVLQWTFNLNPPFSSSIFLPYSRSYSVHFSFFFTFFSDFVIFQVVKWKFLLI  
FHDFQLSS  
>ENSMUSP00000137129\_c.646:A>T\_p.K216M ENSMUST00000177969.2|Gm10715-  
202|ENSMUSG00000096201|+|chr9:g.3038282:A>T  
MFLIFHDFQFSCHIPCPTVDISFPPFSVFLAIFHVLKCVFLIFRDFQFSRQIPGPTVCISHFSRFSVILSFFN  
LSTACFSLSMIFSFLAIFHVLQWTFNLNPPFSVFLAIFHVLKCVFLIFRVFQFP RHIPGPTVCISHFSRFSVI  
SSFFKTSSGCFSFFMIFSLAIFPVLQWTFNLNPPFSSSIFLPYSRSYSVHFSFFFTFFSDFVIFQVVKWKFLLI  
FHDFQLSS  
>ENSMUSP00000137129\_c.654:A>G\_p.I219V ENSMUST00000177969.2|Gm10715-  
202|ENSMUSG00000096201|+|chr9:g.3038290:A>G  
MFLIFHDFQFSCHIPCPTVDISFPPFSVFLAIFHVLKCVFLIFRDFQFSRQIPGPTVCISHFSRFSVILSFFN  
LSTACFSLSMIFSFLAIFHVLQWTFNLNPPFSVFLAIFHVLKCVFLIFRVFQFP RHIPGPTVCISHFSRFSVI  
SSFFKTSSGCFSFFMIFSLAIFPVLQWTFNLNPPFSSSIFLPYSRSYSVHFSFFFTFFSDFVIFQVVKWKFLLV  
FHDFQLSS  
>ENSMUSP00000137129\_c.672:C>T\_p.L225F ENSMUST00000177969.2|Gm10715-  
202|ENSMUSG00000096201|+|chr9:g.3038308:C>T



MFLIFHDFQFSCHIPCPTVDISFPFVSFLAIFHVLKCVFLIFRDFQFSRQIPGPTVCISHFSRFSVILSFFN  
LSTACFSLSMIFSFLAIFHVLQWTFLNFPFVSFLAIFHVLKCVFLIFRVFQFPRHIPGPTVCISHFSRFSVI  
SSFFKTSSGCFSSFMIFSFLAIFPVLQWTFLNFPFSSSIFLPYSRSYSVHFSFFTFFSDFVIFQVVKWKFLLI  
FHDFQFSS  
>rs244572871\_ENSMUSP00000151193\_c.315:T>TG\_p.W106ins-fs  
ENSMUST00000217651.3|Mmp1a-201|ENSMUSG00000043089|+|chr9:g.7465083:T>TG  
MPSLPLLLLLLWAASSYSFPVFNHNGDRQNVETVWKYLENYNLGKNMQAKNVNGKEMMAEKLQMQQLFGLKVT  
GNSDPETLRAMKKPRCGVPDVAPYAITHNNPRWDQNTSDIQHFKLHTIFAKSSCGRCHRESL  
>ENSMUSP00000083459\_c.1139:T>A\_p.C380\* ENSMUST00000086278.7|Zfp810-  
201|ENSMUSG00000066829|-|chr9:g.22189767:A>T  
MVLVSFEDVAVDFTTWEWQALDAAQRTLYRDVMLETYSSLSVLGHCMAKPELIFNLEQGLGPRSTAGASVWNL  
SGVNVSSSLVDTIQENDSRHFWQIEINSHTANEELVEAELEKIHHEEIHGAKSYECEVCEAFYLPQYSTKQS  
YHTCENPCDCKKCREAFYPKSTLSQYQRLERGERKPHACLECGKSFYCKSHLTVHQRTHTGKPYDCKEKRKAF  
YSKSQLNVHLRIHTGKPYECKDCRKAFYRNSDLTVHQRTHTGKPYECKVCRKAFCNSQLTVHHRHTHTGK  
PYECQVCNKAFCYCKSQLAVHHRHTHTGKPYQCKEKRKAFQCRSDLTRHQRTHTGERPYECPECKRKAFCYRKS  
DLTVHQRTHTGKPYE\*KECKRKAFCNSQLTVHQRTHTGKPYECKDCGKAFQCKYELTRHQRTHTGKPYGCRE  
CKKAFYTKSDLTRHLKTHAGDKP\*  
>ENSMUSP00000083459\_c.1114:A>G\_p.H372R ENSMUST00000086278.7|Zfp810-  
201|ENSMUSG00000066829|-|chr9:g.22189792:T>C  
MVLVSFEDVAVDFTTWEWQALDAAQRTLYRDVMLETYSSLSVLGHCMAKPELIFNLEQGLGPRSTAGASVWNL  
SGVNVSSSLVDTIQENDSRHFWQIEINSHTANEELVEAELEKIHHEEIHGAKSYECEVCEAFYLPQYSTKQS  
YHTCENPCDCKKCREAFYPKSTLSQYQRLERGERKPHACLECGKSFYCKSHLTVHQRTHTGKPYDCKEKRKAF  
YSKSQLNVHLRIHTGKPYECKDCRKAFYRNSDLTVHQRTHTGKPYECKVCRKAFCNSQLTVHHRHTHTGK  
PYECQVCNKAFCYCKSQLAVHHRHTHTGKPYQCKEKRKAFQCRSDLTRHQRTHTGERPYECPECKRKAFCYRKS  
DLTVHQRTHTGKPYE\*KECKRKAFCNSQLTVHQRTHTGKPYECKDCGKAFQCKYELTRHQRTHTGKPYGCRE  
CKKAFYTKSDLTRHLKTHAGDKP\*  
>ENSMUSP00000150938\_c.160:C>A\_p.T54K ENSMUST00000216677.2|Ncapd3-  
205|ENSMUSG00000035024|+|chr9:g.26948380:C>A  
MALQDLGENLQPWCPGLGSLVWVKTVDLDFTEIEPLDPSIVGEILETGRDAFKKLYGSLFPFATDESGLSLES  
IWTFFTENDISSNTLVALFCHFVQEAHKKKSASAQYREYGLHAAGLYFLLEIIPGSVVNQVFPVPMFDKCIQIL  
KRSWPQESNLTQKRKDHKSSKSDNYRKRKRGRKPPRKEDYQVDELSREEEEEEEEEIYFSGRDLCQIRDAIFN  
LLKNFLRLLPKFSLKEKPSIQTCIEVFVALTSFEPIPHKFLISQARNLNEVKHISELAYYGLYLLCSPVHGE  
ENKVIIGSIFHQMLNVILMLEVGEGRSAPLAITSQVINCRNQAQVQFVSSSLVDELQASVYPVLGTLQHCACAV  
VDKAEYRTYAAQSLVQLLTKLPSEYATFIAWLYKYSRSSKIIPHRVFTLDVALALLTLPERELDDTVSLEHQK  
FLKHKFFVQEIIFDRCLDKAPTVRSKALSSFAHCLELSSNTSESIIEIFINSNLVPGIQNLSNTVNLNPSVPL  
TSRNGYSAQSRTHNNDEQTLPGERCFTMLRKRKIKDEKINVRKSALQVLMNILKHCIDILSMEQDLILQDHCR  
DPAISVRKQALQSLTELVAQPTCVPVQKAWLMGVIIPVMDCESTVQEKALECLDQLLQNLKHHKHFHSADR  
SQVLAWSLALLTIENQDLRRYLKAFHIWSKKDKFSSTFINSVISHTDTERSAPAWMLLSKITCSSPKLDYT  
KIIIESWERLSREQSPNSNTLGYMLCVIGHIAKHLPGKTRDKITGVIKAKLNGFQWSPELISSVDALQKLCRA  
SAKTVLEEQGLLKQVCGDVLATCEQHLNILLKEDGTGNMDEGLVVKCIFTGLGDIQALCPAIVEKRVFLLIQS  
ILASSAHSDDLPSQGTTDALDSQPPFQPRSSAMPVIRAHAIITLGLKCLQHEDLAKKSIIPALVRELEVSED  
VAVRNNVIVICDLIRYTMVDNYIPNISVCLKSDPPIRQKTLVLLTNLLQEEYVVKWGSLLFFRFVSTLVD  
SHPDIASLGEFCLAHLLLRNPTMFFQHFIECFHFNSYKHEGQYNKFSQSERGKQLFLLKGTNKEKRMRIY  
KFLLEHFTDEQRFNVTSKICLNILACFTDGLPMDMEASELLSDTFDILNSKEIKLLAMRAQTSKDLLEEDDV  
ALANVVMQEAQMKIISQVQKRNFIENIPIIISLKTVLEKNKIIPALRELMNYLREVMQDYRDEINDFFAVDKQ  
LASELEYDMKKYNEQLAQEQALTEHANATKGPEDSDRVPQAQVAPDLEAVPALAAAPMAAAAAAPMAAAAA  
AGQDNADVPTQSRPSAPRSNFTPTLPPISENGPLKIMSSTRPMSLSTIAILNSVKKAVASKNRTRSLGALPF  
NVETGSPENPSSHESSLSLEKESDRTVNHVTKRAISTPENSISDVTFAAGVSYIGTPATFFTEKHEAQEQGS  
DILCLSLLDKRPQSPQWNVKSPARSHGSTRSSRRSLRKAPLKTAN\*  
>ENSMUSP00000072871\_c.160:C>A\_p.T54K ENSMUST00000073127.14|Ncapd3-  
201|ENSMUSG00000035024|+|chr9:g.26948380:C>A  
MALQDLGENLQPWCPGLGSLVWVKTVDLDFTEIEPLDPSIVGEILETGRDAFKKLYGSLFPFATDESGLSLES  
IWTFFTENDISSNTLVALFCHFVQEAHKKKSASAQYREYGLHAAGLYFLLEIIPGSVVNQVFPVPMFDKCIQIL  
KRSWPQESNLTQKRKDHKSSKSDNYRKRKRGRKPPRKEDYQVDELSREEEEEEEEEIYFSGRDLCQIRDAIFN  
LLKNFLRLLPKFSLKEKPSIQTCIEVFVALTSFEPIPHKFLISQARNLNEVKHISELAYYGLYLLCSPVHGE  
ENKVIIGSIFHQMLNVILMLEVGEGRSAPLAITSQVINCRNQAQVQFVSSSLVDELQASVYPVLGTLQHCACAV  
VDKAEYRTYAAQSLVQLLTKLPSEYATFIAWLYKYSRSSKIIPHRVFTLDVALALLTLPERELDDTVSLEHQK  
FLKHKFFVQEIIFDRCLDKAPTVRSKALSSFAHCLELSSNTSESIIEIFINSNLVPGIQNLSNTVNLNPSVPL

TSRNGYSAQSRTHNNDEQTLPGERCFTMLRKRKIKDEKINVRKSALQVLMSSILKHCDSLMEQDLLILQDHCR  
DPAISVRKQALQSLTELVAQPTCVPVQKAWLMGVI PVVMDCESTVQEKALECLDQLLLQNIKHHKKFHSADR  
SQVLAWSLALLTIENQDLRRYLKAFHIWSKKDKFSSTFINSVISHTDTERSAPAWMLLSKITCSSPKLDYT  
KIIESWERLSREQSPNSNTLGYMLCVIGHIAKHLPGKTRDKITGVIKAKLNGFQWSPELISSVDALQKLCRA  
SAKTVLEEQGLLKQVCGDVLATCEQHLSNILLKEDGTGNMDEGLVVKCIFTLGDIQALCPAIVEKRVFLLIQS  
ILASSAHSDDLPSQGTDDALDSQPPFQPRSSAMP SVIRAHAIITLGLKCLQHEDLAKKSI PALVRELEVSED  
VAVRNNVIVICDL CIRYTMVDNYIPNISVCLKDSDPFIRKQTLVLLTNLLQEEYVKKWGS LFFRFVSTLVD  
SHPDIASLGEFCLAHLLLKRNPMTFFQHFIEC I FHFNSYEK HGQYNKFSQSERGKQLFLLKGTNKEKRMRIY  
KFLLEHFTDEQRFNVT SKICLNILACFTDGILPMDMEASELLSDTFDI LNSKEIKLLAMRAQTSKDLLEEDDV  
ALANVVMQEAQMKIISQVQKRNF IENIPII IISLKT VLEKNKIPALRELMNYLREVMQDYRDEINDFFAVDKQ  
LASELEYDMKKYNEQLAQEQALTEHANATKGPEDSDRVPSAQVAPDLEAVPALAAAPMAAAAAAPMAAAAA  
AGQDNADVPPQTQSRPSAPRSNFTPTLPPISENGPLKIMSTRPMSLSTIAILNSVKKAVASKNRTRSLGALPF  
NVETGSPENPSSHESSLSLEKESDRTVNHVTKRAISTPENSISDVTFAAGVSYIGTPATFFTEKHEAQEQGS  
DILCLSLLDKRPPQSPQWNVKSPARSHGSTRSSRRSLRKAPLKTAN\*

>ENSMUSP00000083374\_c.160:C>A\_p.T54K ENSMUST00000086198.5|Ncapd3-  
202|ENSMUSG00000035024|+|chr9:g.26948380:C>A  
MALQDLGENLQPWCPGLSLEWVKTVDLDFTEIEPLDPSIVGEILETGRDAFKKLYGSLFPFATDESGSLES  
IWTFFTENDISSNTLVALFCHFVQEAHKKSSASAQYREYGLHAAGLYFLLLEIPGSVNVQVFPVPMFDKCIQIL  
KRSWPQESNLTQKRKKDHSKSSKDNRYRKSRRKRGKPPRKEDYQVDELSREEEEEEEEEIYFSGRDLQCIRDAIFN  
LLKNFLRLLPKFSLKEKQSIQTCIEVFVALTSFEPIPHKFLISQARNLNEVKHISELAYYGLYLLCSPVHGE  
ENKVI GSI F HQMLNVI L MLEVGEGRCAPLAITSQVINCRNQAQVQVSSSLVDELQASVYPVLTLLQHI CAKV  
VDKAEYRTYAAQSLVQLLTKLPSEYATFIAWLYKYSRSSKI PHRVFTLDVALALLTLPERELDDTVSLEHQK  
FLKHKFFVQE I I FDRCLDKAPT VRSKALSSFAHCLELSSSNTSESI LEIFINSNLVPGIQNLSNTV LNPSV L  
TSRNGYSAQSRTHNNDEQTLPGERCFTMLRKRKIKDEKINVRKSALQVLMSSILKHCDSLMEQDLLILQDHCR  
DPAISVRKQALQSLTELVAQPTCVPVQKAWLMGVI PVVMDCESTVQEKALECLDQLLLQNIKHHKKFHSADR  
SQVLAWSLALLTIENQDLRRYLKAFHIWSKKDKFSSTFINSVISHTDTERSAPAWMLLSKITCSSPKLDYT  
KIIESWERLSREQSPNSNTLGYMLCVIGHIAKHLPGKTRDKITGVIKAKLNGFQWSPELISSVDALQKLCRA  
SAKTVLEEQGLLKQVCGDVLATCEQHLSNILLKEDGTGNMDEGLVVKCIFTLGDIQALCPAIVEKRVFLLIQS  
ILASSAHSDDLPSQGTDDALDSQPPFQPRSSAMP SVIRAHAIITLGLKCLQHEDLAKKSI PALVRELEVSED  
VAVRNNVIVICDL CIRYTMVDNYIPNISVCLKDSDPFIRKQTLVLLTNLLQEEYVKKWGS LFFRFVSTLVD  
SHPDIASLGEFCLAHLLLKRNPMTFFQHFIEC I FHFNSYEK HGQYNKFSQSERGKQLFLLKGTNKEKRMRIY  
KFLLEHFTDEQRFNVT SKICLNILACFTDGILPMDMEASELLSDTFDI LNSKEIKLLAMRAQTSKDLLEEDDV  
ALANVVMQEAQMKIISQVQKRNF IENIPII IISTVERKVP SQESRQH KIQPEVPS\*

>ENSMUSP00000150938\_c.4489:T>G\_p.L1497R ENSMUST00000216677.2|Ncapd3-  
205|ENSMUSG00000035024|+|chr9:g.27006070:T>G  
MALQDLGENLQPWCPGLSLEWVKTVDLDFTEIEPLDPSIVGEILETGRDAFTKLYGSLFPFATDESGSLES  
IWTFFTENDISSNTLVALFCHFVQEAHKKSSASAQYREYGLHAAGLYFLLLEIPGSVNVQVFPVPMFDKCIQIL  
KRSWPQESNLTQKRKKDHSKSSKDNRYRKSRRKRGKPPRKEDYQVDELSREEEEEEEEEIYFSGRDLQCIRDAIFN  
LLKNFLRLLPKFSLKEKQSIQTCIEVFVALTSFEPIPHKFLISQARNLNEVKHISELAYYGLYLLCSPVHGE  
ENKVI GSI F HQMLNVI L MLEVGEGRCAPLAITSQVINCRNQAQVQVSSSLVDELQASVYPVLTLLQHI CAKV  
VDKAEYRTYAAQSLVQLLTKLPSEYATFIAWLYKYSRSSKI PHRVFTLDVALALLTLPERELDDTVSLEHQK  
FLKHKFFVQE I I FDRCLDKAPT VRSKALSSFAHCLELSSSNTSESI LEIFINSNLVPGIQNLSNTV LNPSV L  
TSRNGYSAQSRTHNNDEQTLPGERCFTMLRKRKIKDEKINVRKSALQVLMSSILKHCDSLMEQDLLILQDHCR  
DPAISVRKQALQSLTELVAQPTCVPVQKAWLMGVI PVVMDCESTVQEKALECLDQLLLQNIKHHKKFHSADR  
SQVLAWSLALLTIENQDLRRYLKAFHIWSKKDKFSSTFINSVISHTDTERSAPAWMLLSKITCSSPKLDYT  
KIIESWERLSREQSPNSNTLGYMLCVIGHIAKHLPGKTRDKITGVIKAKLNGFQWSPELISSVDALQKLCRA  
SAKTVLEEQGLLKQVCGDVLATCEQHLSNILLKEDGTGNMDEGLVVKCIFTLGDIQALCPAIVEKRVFLLIQS  
ILASSAHSDDLPSQGTDDALDSQPPFQPRSSAMP SVIRAHAIITLGLKCLQHEDLAKKSI PALVRELEVSED  
VAVRNNVIVICDL CIRYTMVDNYIPNISVCLKDSDPFIRKQTLVLLTNLLQEEYVKKWGS LFFRFVSTLVD  
SHPDIASLGEFCLAHLLLKRNPMTFFQHFIEC I FHFNSYEK HGQYNKFSQSERGKQLFLLKGTNKEKRMRIY  
KFLLEHFTDEQRFNVT SKICLNILACFTDGILPMDMEASELLSDTFDI LNSKEIKLLAMRAQTSKDLLEEDDV  
ALANVVMQEAQMKIISQVQKRNF IENIPII IISLKT VLEKNKIPALRELMNYLREVMQDYRDEINDFFAVDKQ  
LASELEYDMKKYNEQLAQEQALTEHANATKGPEDSDRVPSAQVAPDLEAVPALAAAPMAAAAAAPMAAAAA  
AGQDNADVPPQTQSRPSAPRSNFTPTLPPISENGPLKIMSTRPMSLSTIAILNSVKKAVASKNRTRSLGALPF  
NVETGSPENPSSHESSLSLEKESDRTVNHVTKRAISTPENSISDVTFAAGVSYIGTPATFFTEKHEAQEQGS  
DILCLSLLDKRPPQSPQWNVKSPARSHGSTRSSRRSRKAPLKTAN\*

>ENSMUSP00000072871\_c.4489:T>G\_p.L1497R ENSMUST00000073127.14|Ncapd3-  
201|ENSMUSG00000035024|+|chr9:g.27006070:T>G

MALQDLGENLQPWCPGLSLEWVKTVDLDFTEIEPLDPSIVGEILETGRDAFTKLYGSLFPFATDESGLSES  
IWTFFFTENDISSNTLVALFCHFVQEAHKKSSASAQYREYGLHAAGLYFLLEIIPGSVVNQVHFHVMFDKCIQIL  
KRSWPQESNLTQKRKKDHSSKSKDNRYKRSRKRKGPFRKEDYQVDELSREEEEEEEEEIEYFSGRDLCQIRDAIFN  
LLKNFLRLLPKFSLKEKQPQSIQTCIEVFVALTSFEPIPHKFLISQARNLNEVKHISELAYYGLYLLCSPVHGE  
ENKVIIGSIFHQMLNVLMLLEVGEGRSAPLAITSQVINCRNQAQVQFVSSSLVDELQASVYPVLGTLQHCICAKV  
VDKAEYRTYAAQSLVQLLTKLPSEYATFIAWLYKYRSRSSKI PHRVFTLDVALALLTLPERELDDTVSLEHQK  
FLKHKFFVQEIIFDRCLDKAPTVRSKALSSFAHCLELSSSNTSESI LEIFINSNLVPGIQNLSNTVNLNPSVPL  
TSRNGYSAQSRTHNNDEQTLPGERCFTMLRKRRIKDEKINVRKSALQVLMSSILKHCIDILSMEQDLLILQDHCR  
DPAISVRKQALQSLTELVMAQPTCVVPQKAWLMGVI PVVMDCESTVQEKALECLDQLLLQNIKHHKFFHSADR  
SQVLAWSLALLTIENQDLRRYLKAFHIWSKKDKFSSTFINSVISHTDTERSAPAWMLLSKITCSPKLDYT  
KIIESWERLSREQSPNSNTLGYMLCVIGHIAKHLPGKTRDKITGVIKAKLNGFQWSPELISSVDALQKLCRA  
SAKTVLEEQLLQVCGDVLATCEQHLSNILLKEDGTGNMDEGLVVKCIFTGLDIAQLCPAIVEKRVFLLIQS  
ILASSAHSDDLPSQGTDDALDSQPPFQPRSSAMPVIRAHAIITLGLKCLQHEDLAKKSI PALVRELEVSED  
VAVRNNVIVICDLIRYTMVDNYIPNISVCLKSDSPFIRKQTLVLLTNLLQEEYVKKWKSLLFFRFVSTLVD  
SHPDIASLGEFCLAHLLLRNPTMFFQHFIECFHFNSYKHEGQYKNSQSSEGRKQLFLLLKGTNKEKRMRIY  
KFLLEHFTDEQRFNVTSKICLNILACFTDGLIPMDMEASELLSDTFDILNSKEIKLLAMRAQTSKDLLEEDDV  
ALANVVMQEAQMKIISQVQKRNFIENIPIIISLKTVLEKNKI PALRELMNYLREVMQDYRDEINDFAVDKQ  
LASELEYDMKKYNEQLAQEQALTEHANATKGPEDSDRVPSAQVAPDLEAVPALAAAPMAAAAAA  
AGQDNADVPTQSRPSAPRSNFTPTLPPISENGPLKIMSSTRPMSLSTIAILNSVKKAVASKNRTRSLGALPF  
NVETGSPENPSSHESSLSLEKESDRTVNHVTKRAISTPENSISDVTFAAGVSYIGTPATFFTEKHEAQEQGS  
DILCLSLLDKRPQSPQWNVKSPARSHGSTRSSRRSRKAPLKTAN\*

>rs45708828\_ENSMUSP00000011262\_c.52:C>A\_p.P18H  
ENSMUST00000011262.4|Pax3-201|ENSMUSG00000011118|-|chr9:g.37580299:G>T  
MSLAHTAAEYMLSDALLHRRGRSRLKGLRLELPLDKMVKFITVGFPLLLMSLAFQAQEFSSGSPISCFSPSNFS  
VRQAAAYVDSSCWDSLAHTQDKAGQYKVKSLWPHKALPYSLALAVAMYLPVLLWQYVAVPSSDLLFIIE  
LDKSYNRSIRLVQHMQLIRQSSSDPHVFWDEKARKERYFEFPLLERYLECKQRSHWLVAATYLLRNALLLLF  
TSATYLYLQFHLDFVFFQDEFNCFIKTGLLHDETHPELITCRLTSLSVFQIVSVSSAAIYITLVPVLIYNLT  
RLCRWDKGLLSIYEMLPADFLLSRKMLGCPINDLNVILLFLRANISELISFSWLSVLSVLKDTTTQKHNIDTV  
VDFMTFVAGLEPSKPKHLTQHTYDEHA\*

>rs45708828\_ENSMUSP000000114539\_c.52:C>A\_p.P18H  
ENSMUST000000142228.2|Pax3-202|ENSMUSG00000011118|-|chr9:g.37580299:G>T  
MSLAHTAAEYMLSDALLHRRGRSRLKGLRLELPLDKMVKFITVGFPLLLMSLAFQAQEFSSIEQSLVLCALQNK  
RAFFQSGYGSHTICNRSIPEPEAEG\*

>ENSMUSP000000150357\_c.715:G>C\_p.S239T ENSMUST000000214377.2|Olf905-  
202|ENSMUSG000000096794|+|chr9:g.38384760:G>C  
MGFENGSSVTEFILVGLTKESDLQCPLFILFLMMYVVTVLGNQGLISLIGLNSHLHTPMYFFLNLFSVDLWY  
SSVFTPKMLESFISEKNTISYRGCMAQLFFFCFFSISECYILTSMAIDRYVAICNPLLYNIVMSPKQCLILMF  
SSYMAFSGAMAHTGCMLRLTFCDANTINHYFCDILPLLQLSCTSTYVNELEVFFVVGINIIIVPTITIFISYG  
FIIASIFRISSEKEDRSKAFTTCSHIIAVSLFFGSGAFMYLKPSSAESMNEGKISSIFYTNTVPLLNPLIYSL  
RNKDVKDALIKTLSKRKR\*

>ENSMUSP000000057998\_c.715:G>C\_p.S239T ENSMUST000000051111.3|Olf905-  
201|ENSMUSG000000096794|+|chr9:g.38384760:G>C  
MGFENGSSVTEFILVGLTKESDLQCPLFILFLMMYVVTVLGNQGLISLIGLNSHLHTPMYFFLNLFSVDLWY  
SSVFTPKMLESFISEKNTISYRGCMAQLFFFCFFSISECYILTSMAIDRYVAICNPLLYNIVMSPKQCLILMF  
SSYMAFSGAMAHTGCMLRLTFCDANTINHYFCDILPLLQLSCTSTYVNELEVFFVVGINIIIVPTITIFISYG  
FIIASIFRISSEKEDRSKAFTTCSHIIAVSLFFGSGAFMYLKPSSAESMNEGKISSIFYTNTVPLLNPLIYSL  
RNKDVKDALIKTLSKRKR\*

>ENSMUSP00000001544\_c.1083:G>A\_p.A362T ENSMUST00000001544.12|Vwa5a-  
201|ENSMUSG000000023186|+|chr9:g.38639354:G>A  
MEHHCGLITSNKETVPLKNI SVTLSINEFVAAVVATLNYENEEKVPLEATFVFPMEDESAVYSFEALVDGKKI  
VAELQDKMKAHSEYEEALSQGHQAYLLEEDDYSRDVFSNVGNLQPGAKVAVTLYRVQELPLETDGALRYLLP  
AILNPRYQLSEQSANSCLNIQKPTVPLEDLPYTLNMTATITISQHGIERVQSNCSLSPIQYLTDDKTSAQVSLT  
EGHKFDRDVELLIYYNEVHSPSAVAVEMGLMDKMPDLSLGMGSSAMVSYFPIPEVEASKACEGFVFLMDRSGSM  
DSPMSTENNSQYKRIEAAKETLRLKSLPMGCFYNIYGFSSYEFKFPESVKYTQDTMEDAVKRVKALKTNLGL  
GTEILTPLCNIIYKASSIPGHPLQLFVFTDGEVSDTFVIREVKLNSKKHRCFSFGIGQGASTSLIKNIARVSG  
GTAVFITGKDRMQTKALGSLKFALQCAVDNISLSWDLPPGLSVKMLSPEQLTIFRQRLIIYAQLTGLMPQVE  
STGAVCLKHILQGRSLENRVTFSLQPKANDNFTIHRLAAKSLIQTKDFGSGEASKEEKEDVMNISLQSGVLSS  
FTAFIAINKELNKPVQGPLAHRVIRPVMAGSSSMRFYSSFSGGFKGFPQPRSLRVPAYDLCSAESANLVLKKS

ACSAIQKKTNSSTNKSNLKKEHKAFGENAVVQLISLQKANGSWELDEDLTKILGTSKSDIKAANPAKHEDPS  
 AWSTVLAVVWLHANGTDLKCEWELLERKAVAWLHDHAGSSIPMLVQAANSLKLSVNPVAVFGV\*  
 >ENSMUSP00000113596\_c.1083:G>A\_p.A362T ENSMUST00000118144.8|Vwa5a-  
 202|ENSMUSG00000023186|+|chr9:g.38639354:G>A  
 MEHHCGLITSNKETVPLKNISVTLSSINEFVAAVVATLNYENEEKVPLEATFVFPMEDEDSAVYSFEALVDGKKI  
 VAELQDKMKAHSEYEEALSQGHQAYLLEEDDYSRDVFCNVGNLQPGAKVAVTLRYVQELPLETDGALRYLLP  
 AILNPRYQLSEQSANSCLNIQKPTVPLEDLPYTLNMTATITTSQHGIERVQSNCSLSPIQYLTDKTSQVSLT  
 EGHKFRDRDVELLIYYNEVHSPSVAVEMGMLDMKPDLSLGMGAPSAMVSFYDPDIPEVEASKACGEFVFLMDRSGSM  
 DSPMSTENNSQLRIEAAKETLLLLLKLSPMGCFNYIYGFSSYEKFFPESVKYTDQTMEDAVKRVKALKTNLG  
 GTEILTPLCNIYKASSIPGHPLQVLFVFTDGEVSDTFSVIREVKLNSKKHRCFSFGIGQGASTSLIKNIARVSG  
 GTAVFITGKDRMQTKALGSLKFAVQCAVDNISLSWDLPPGLSVKMLSPEQLTIFRGQRLIIYAQLTGLMPQVE  
 STGAVCLKHILQGRSLENRVTFSLQPKANDNFTIHRLAASKLIQTKDFGSQEASKEEKEDVMNISLQSGVLSS  
 FTAFIAINKELNKPVQGPLAHRVIRPVMAGSSSMRFYSSFSGGFKGPQPRSLRVPAYDLCSAESANLVLKKS  
 ACSAIQKKTNSSTNKSNLKKEHKAFGENAVVQLISLQKANGSWELDEDLTKILGTSKSDIKAANPAKHEDPS  
 AWSTVLAVVWLHANGTDLKCEWELLERKAVAWLHDHAGSSIPMLVQAANSLKLSVNPVAVFGV\*  
 >rs215248989\_ENSMUSP00000042582\_c.1925:G>A\_p.W642\*  
 ENSMUST00000042485.11|AW551984-201|ENSMUSG00000038112|-  
 |chr9:g.39502745:C>T  
 MVRSGLLTSIRDVVALKSIIVTSLINDFVAGVSATLNYENEEKSPLEAFFVFPMEDEDSAVYSFEAFVVDGKKI  
 VAELQDKYQAHKRYEEALSGGYQAYLLEEDKCSRDFCCNVGNLQPGSKVSLTLRYVQELPLEDDGALRYVLP  
 AILNPRYHLSDGREDSNLDKMTPIVPLEELPYTLMSVATISSQLGISTIQSNCPNPIEYTGDNKTSQVSLA  
 EGHKFRDRDVELLIIFYRKVHSPSVAVEMGMSGRPSDSLGMGAPSAMVSFYDPDIPEVETTTKCGEFVFLMDRSTRSM  
 NSPMSSKDKSQLRIEAAKETLILLLKSLPMGCFNYIYGFATHEEFFPDSVMYNQETMQIAVKKVKRLLADLG  
 GTELLTPLRKIFRKPPIPGHPLQVLFVFTDGEVVETFSVIREVMFQSKKHRCFSFGIGEGASTSLIKNLARVSG  
 GTAEFITGNDRMQSKALRSLRSLQSVVEDVLSWNLPPKMFAPMLSPEQTSIFRGQRLIIYSLIGKIPKEE  
 ATGEVCLSYKHLHGKSYEEKVTFSLQPKPDDNLTIHRLAASKMIQSKDFGFKETSMLYKRDVLDISLESGVMSS  
 FTAFVAINKELNEPIQGPLVHRDIPRPILLGAGPNRPSDGGYPKTLFCASAPVTLPP\*LKGSVKCVATILMPN  
 GTPQQRQNSQKKKCVVHTDTRPELPHLAKYDSYPQGSKEHSIAQLIYLQADGSDWMNEDLAKILSTSLEDIT  
 AACPTVEVLEPSAWATMLAVIWLHANGKELKDEWELLERKAVVWLHNNSVRGFNKLIRTANKLLKTSLSPSIFK  
 L\*  
 >rs215248989\_ENSMUSP00000113212\_c.1925:G>A\_p.W642\*  
 ENSMUST00000119722.8|AW551984-202|ENSMUSG00000038112|-  
 |chr9:g.39502745:C>T  
 MVRSGLLTSIRDVVALKSIIVTSLINDFVAGVSATLNYENEEKSPLEAFFVFPMEDEDSAVYSFEAFVVDGKKI  
 VAELQDKYQAHKRYEEALSGGYQAYLLEEDKCSRDFCCNVGNLQPGSKVSLTLRYVQELPLEDDGALRYVLP  
 AILNPRYHLSDGREDSNLDKMTPIVPLEELPYTLMSVATISSQLGISTIQSNCPNPIEYTGDNKTSQVSLA  
 EGHKFRDRDVELLIIFYRKVHSPSVAVEMGMSGRPSDSLGMGAPSAMVSFYDPDIPEVETTTKCGEFVFLMDRSTRSM  
 NSPMSSKDKSQLRIEAAKETLILLLKSLPMGCFNYIYGFATHEEFFPDSVMYNQETMQIAVKKVKRLLADLG  
 GTELLTPLRKIFRKPPIPGHPLQVLFVFTDGEVVETFSVIREVMFQSKKHRCFSFGIGEGASTSLIKNLARVSG  
 GTAEFITGNDRMQSKALRSLRSLQSVVEDVLSWNLPPKMFAPMLSPEQTSIFRGQRLIIYSLIGKIPKEE  
 ATGEVCLSYKHLHGKSYEEKVTFSLQPKPDDNLTIHRLAASKMIQSKDFGFKETSMLYKRDVLDISLESGVMSS  
 FTAFVAINKELNEPIQGPLVHRDIPRPILLGAGPNRPSDGGYPKTLFCASAPVTLPP\*LKGSVKCVATILMPN  
 GTPQQRQNSQKKKCVVHTDTRPELPHLAKYDSYPQGSKEHSIAQLIYLQADGSDWMNEDLAKILSTSLEDIT  
 AACPTVEVLEPSAWATMLAVIWLHANGKELKDEWELLERKAVVWLHNNSVRGFNKLIRTANKLLKTSLSPSIFK  
 L\*  
 >ENSMUSP00000034621\_c.1093:C>A\_p.A365D ENSMUST00000034621.16|Nlrx1-  
 201|ENSMUSG00000032109|-|chr9:g.44174106:G>T  
 MRWGCHLPRTSWGSGLRTPQLPDEHISFLIQSWPFGVHPLRPPRAFIRYHGNSADSAPPPGRHGQLFRSI  
 SATEAIQRHRRNLTEWFSRPREERQFGPTFALDVTVHVPVIRESTPDELLRPSTELATGHQQTQAGLPPLAL  
 SQLFDPDSCGRRVQTVVLYGTGKSTLVRKMLVDWCYGRLPFAPELLIPFSCEDLSSLGSTPASLQVLTQR  
 YTPLKEVPLPLMTAAGSRLFLVHGLERLNLDFRLAGTGLCSDPEEPGPPAAIIVNLLRKYMLPEASILVTTTRP  
 STISRIPSKYVGRYGEICGFSDTNLQKLYFQLRLNQPDGCGYAGGASVSVTPAQRDNLIQMLSRNLEGHQID  
 AACFLPSYCWLVCATLHFLHAPTAPAGQTLTSIYTSFLRNLFSGETLDSHTSNLSLMSYAARTMGKLAYEGVS  
 SRKTYFSEEDVVRGCELEAGIKTEEEFQLLQIFRRDARLFFLAPCEVPHGLGTFVFTVPAMQEYLAALYIVLGLR  
 KTALQRVGKEVEFVGRVGEDVSLVLGIVAKLLPLRILPLLFNLLKVVPRVFGRMVSKSREAVAQAMVLEMFR  
 EEDYNDVDVLDQMGASILGVEGPRRHPDEPSEDEVFELFPMFMGGLLSAHNRAVLAQLGCPKIKNLDALENAQA  
 IKKKLGLKGRQVLPPELDDHLFFHYEFQNRQFSAEVLGSLRQLNLAGVRMTPLKCTVVASVLSGSRHPLDEV  
 NLASCQLDPAGLHTLMPVLLRARKLGLQLNLLGPEACRDLRDLLLHDQCQITTLRLSNNPLTAAGVGLLMDGL

AGNTSVTHLSLLHTDLGDEGLELLAAQLDRNKQLQELNVAYNGAGDTVALALAKAAREHPSLELLHLHYFNELS  
 SEGRQVLRDLGGSGEGGARVVASLTEGTAVSEYWSVILSEVQRNVHSDWPLRVQRHLKLLLRDLEDSRGATLN  
 PWRKAQLLRVEGEVKTLLLEQLGGSGH\*

>ENSMUSP00000126555\_c.1093:C>A\_p.A365D ENSMUST00000169651.3|Nlrx1-  
 203|ENSMUSG00000032109|-|chr9:g.44174106:G>T  
 MRWGCHLPRTSWGSGGLGRTPQLPDEHISFLIQSWPFGVHPLRPPRAFIRYHGNSADSAPPPGRHGQLFRSI  
 SATEAIQRHRRNLTEWFSRLPREERQFGPTFALDVTVHVDPVIRESTPDELLRPSTELATGHQQTQAGLPPLAL  
 SQLFDPDSCGRRVQTVVLYGTGTGKSTLVRKMLVDWCYGRLPAPFELLIPFSCEDLSSLGSTPASLCQLVTQR  
 YTPLKEVLPMLTAAGSRLFLVHLGLERLNLDFRLAGTGLCSDEEPGPPAAIIVNLLRKYMLPEASILVTTTRP  
 STISRIPSKYVGRYGEICGFSDTNLQKLYFQLRLNQPDCGYGAGGASVSVTPAQRDNLIQMLSRNLEGHQID  
 AACFLPSYCWLVCATLHFLHAPTPAGQTLTSIYTSFLRLNFSGETLDSTHTSNLSLMSYAARTMGKLAYEGVS  
 SRKTYFSEEDVRCLEAGIKTEEEFQLLQIFRRDALRFFLAPCVEPGHLGTFVFTVPAMQEYLAALYIVLGLR  
 KTALQRVGKEVVEFVGRVGEDVSLVLGIVAKLLPLRILPLLFNLLKVVPRVFGRMVSKSREAVAQAMVLEMFR  
 EEDYNDVDVLDQMGASILGVEGPRRHPDEPSEDEVFELFPMFMGGLLSAHNRAVLAQLGCPKKNLDALENAQA  
 IKKKLGLGRQVLPPESELLDHLFFHYEFQNRFSAEVLGSLRQLNLAGVRMTPLKCTVVASVLGSGRHPLEDEV  
 NLASCQLDPAGLHTLMPVLLRARKLGLQLNNLGPEACRDLRDLHLDQCQITTLRLSNNPLTAAGVGLLMDGL  
 AGNTSVTHLSLLHTDLGDEGLELLAAQLDRNKQLQELNVAYNGAGDTVALALAKAAREHPSLELLHLHYFNELS  
 SEGRQVLRDLGGSGEGGARVVASLTEGTAVSEYWSVILSEVQRNVHSDWPLRVQRHLKLLLRDLEDSRGATLN  
 PWRKAQLLRVEGEVKTLLLEQLGGSGH\*

>ENSMUSP00000127531\_c.1093:C>A\_p.A365D ENSMUST00000168499.9|Nlrx1-  
 202|ENSMUSG00000032109|-|chr9:g.44174106:G>T  
 MRWGCHLPRTSWGSGGLGRTPQLPDEHISFLIQSWPFGVHPLRPPRAFIRYHGNSADSAPPPGRHGQLFRSI  
 SATEAIQRHRRNLTEWFSRLPREERQFGPTFALDVTVHVDPVIRESTPDELLRPSTELATGHQQTQAGLPPLAL  
 SQLFDPDSCGRRVQTVVLYGTGTGKSTLVRKMLVDWCYGRLPAPFELLIPFSCEDLSSLGSTPASLCQLVTQR  
 YTPLKEVLPMLTAAGSRLFLVHLGLERLNLDFRLAGTGLCSDEEPGPPAAIIVNLLRKYMLPEASILVTTTRP  
 STISRIPSKYVGRYGEICGFSDTNLQKLYFQLRLNQPDCGYGAGGASVSVTPAQRDNLIQMLSRNLEGHQID  
 AACFLPSYCWLVCATLHFLHAPTPAGQTLTSIYTSFLRLNFSGETLDSTHTSNLSLMSYAARTMGKLAYEGVS  
 SRKTYFSEEDVRCLEAGIKTEEEFQLLQIFRRDALRFFLAPCVEPGHLGTFVFTVPAMQEYLAALYIVLGLR  
 KTALQRVGKEVVEFVGRVGEDVSLVLGIVAKLLPLRILPLLFNLLKVVPRVFGRMVSKSREAVAQAMVLEMFR  
 EEDYNDVDVLDQMGASILGVEGPRRHPDEPSEDEVFELFPMFMGGLLSAHNRAVLAQLGCPKKNLDALENAQA  
 IKKKLGLGRQVLPPESELLDHLFFHYEFQNRFSAEVLGSLRQLNLAGVRMTPLKCTVVASVLGSGRHPLEDEV  
 NLASCQLDPAGLHTLMPVLLRARKLGLQLNNLGPEACRDLRDLHLDQCQITTLRLSNNPLTAAGVGLLMDGL  
 AGNTSVTHLSLLHTDLGDEGLELLAAQLDRNKQLQELNVAYNGAGDTVALALAKAAREHPSLELLHLHYFNELS  
 SEGRQVLRDLGGSGEGGARVVASLTEGTAVSEYWSVILSEVQRNVHSDWPLRVQRHLKLLLRDLEDSRGATLN  
 PWRKAQLLRVEGEVKTLLLEQLGGSGH\*

>ENSMUSP00000110337\_c.5083:T>C\_p.V1695A ENSMUST00000114689.8|Kmt2a-  
 202|ENSMUSG00000002028|-|chr9:g.44742612:A>G  
 MAHSCRWRFPARPGTTGGGGGGRRGLGGAPRQVPAALLLPPGPQAGGGGPGAPPSPPAVAAAAAGSSGAGVP  
 GGAAAAASAASSSSASSSSSSSSASSSGPALLRVGPGFDAALQVSAAIIGNLRRFRAVFGESGGGGGSGEDEQF  
 LGFGSDEEVVRVSRPSPSVKASPRKPRGRPRSGSDRNPAILSDPSVFSPLNKSETKSADKIKKKDKSISIEKK  
 RGRPPTFPGVKIKITHGKDIAELTQGSKEDSLKVKRTPSAMFQQATKIKKLRAGKLSPLKSKFKTGKLGQIGR  
 KGVQIVRRRGRPPSTERIKTPSGLLINSELEKPKQVVRKDEKTPPLTKEDKTVVRQSPRRIKPVRIIPSCKRT  
 DATIAKQLLQRAKKAQKKEEAAQLQGRKVKTKVKNIRQFIMPVVAISSRIIKTPRRFIEDEYDPPMKI  
 ARLESTPNSRFSATSCGSSEKSSAASQHSQMSDSSRSSSPSIDTSDSQASEEIQALPEERSNTPEVHTPL  
 PISQSPENESNDRRSRRYSMSERSFGSRATKLLPTLQSAQQQTSSSPPPLLTTPPPLQPASGIDHTPWLM  
 PPTIPLASPLPASAPMKGKRSILREPTFRWTSLKHSRSEPQYFSSAKYAKEGLIRKPIFDNFRPPLTPE  
 DVGFASGFSASGTAASARLFSPLHSGTRFDIHKRSPILRAPRFTPSEAHSRIFESVTLPSNRTSSGASSGVS  
 NRKRKRKVFSPIRSEPRSPSHMRTRSGRLSTSELSPLTPPSSVSSLSIPVSPLAASALNPTFTFPShSLTQ  
 SGESTTEKNQRARKQTSALAEFSSNSPALFPWFTPGSQTEKGRKDTAPEELSKDRDADKSVEKDKSRERDRE  
 REKENKRESRKEKRKKSIDIQSSSALYPVGRVSKEKVAGEDVGTSSSAKKATGRKSSSLDSDGADVAVPTLGD  
 TTAVKAKILIKKGRNLEKNNLDLGAAPSLEKERTPCLSAPSSSTVKHSTSSIGSMLAQADKLPMTDKRVAS  
 LLKAKAQLCKIEKSKSLKQTDQPKAQGESDSSSETSVRGPRIKHVCRRAAVALGRKRAVFPDDMPTLSALPW  
 EEREKILSSMGNDKSSVAGSEDAEPLAPPKIPKIPVTRNKAPQEPVKKGRRSRRCGQCPCGQVPEDCGICT  
 NCLDKPKFGGRNIKKQCKMRKCQNLQWMPKSKASLQKQTKAVKKEKESKTEKESKESTAVKSPLEPAQKA  
 APPEEPAPKSSSEPPRPVVEEKSEEGGAPAPAPAPEPKQVSAPASRKSQVSSQPAAVVPPQPPSTAPQ  
 KKEAPKAVPSEPKKKQPPPEPGPEQSKQKQVAPRPSIPVKQKPKDKEKPPVSKQENAGTLNINLPLSNGIS  
 SKQKIPADGVHRIKRVDFKEDCEAENWEMGGLGILTSVPIPTPRVVCFLCASSGHVEFVYCQCCEPFHKFCLE  
 ENERPLEDQLENWCCRRCKFCHVCGRQHQAQTKQLLECNKCRNSYHPECLGPNYPTKPTKKKVVICTKCVRCK

SCGSTTPGKGWDAQWSDHDFSLCHDCAKLFAGNFCPLCDKCYDDDDYESKMMQCGKCDRWVHSHKCESLSGTEDEMYEILSNLPEVAYTCVNCTERHPAEWRLALEKELQASLKQVLTALLNSRRTTSHLLRYRQAAKPPDLNPETEESIPSRSSPEGPDPALTEVSKQDEQQPLDLEGVKKRMDQGSYVSVLEFSDDIVKIIQAAINSDGGQPEIKKANSMVKSFFIRQMERVFPWFVSVKSRFWEPNKVSNNSGMLPNAVLPPSLDHNYAQWQEREESHTEQPPLMKKIIPAPKPKGPGEPDPTPLHPPTPIILSTDRSREDSPELNPPGIDDRQCALCLMYGDDSSANDAGRLLYIGQNEWTHVNCALWSAEVFEDEDDGSLKNVHMAVIRGKQLRCEFCQKPGATVGCCLTSTCTSNYHFMCRAKNCVFLDDKVVYQQRHRDLIKGEVVPENGFEVFRVFDVDFEGISLRKFLNGLPENIHMMIGSMTIDCLGILNLDLSDCEDKLFPIGYQCSRVIWSTTDARKRCVYTCIMECRPPVVEPDINSTVEHDDNRTIAHSPSSFIIDASCKDSQSTAAILLSPSPDRPHSQTSGSCYYHVISKVPRIRTPLSYSPTRQSPGCRPLPSAGSPTPTTHEIVTVGDPDLLSSGLRSIGSRRHSTSSLSPLRSKLRIMSPVRTGSAYSRSVSSVPSLGTATDPEASAKASDRGGLLSSSANLGHSAAPPSSSSQRTVGGSKTSHLDGSSPSEVKRCSASDLVPGKSLVKGEKNRTSSSKSTDGSAHSTAYPGIPKLTPOVHNA TPGELNISKIGSFAEPSTVPFSSKDTVSYPLHLRQGRSDRDQHMDPSQSVKPSPNEDGEIKTLKLPGMGHRP SILHEHIGSSSRDRRQKGGKSSKETCKEKHSSKSYLEPGQVTTGEEGNLKPFADEVLTGFLGQRPCNNVSS EKIGDKVPLPSGVKQSTQVEGSSKELQAPRKCSVKVTPKMEGENQSKNTQKESGPGSPAHEISVCPAEPV SASRSPGAGPGVQPSNNLTSQDPQSNNYQNLPEQDRNLMI PDGPKPQEDGSKRRYPRRSARARSNMFFGLT PLYGVRSYGEEDI PFYNSSTGKRGKRSAGQVDGADDLSTSEDDLYYFNTRTVISSGGEERLASHNLFRE EEQCCLKPKISQLDGVDDGTESDTSVTATSRKSSQIPKRNGKENGTEENLKI DRPEDAGEKEHVIKSAVGHKNEP KLDNCHSVSRVKAQGGQDSLEAQLSSESSRRVHTSTPSDKNLLDTYNAELLKSDSDNNSDDCGNLLPSPDIMD FVLKNTPSMQALGESPESSSELTLGEGGLDSDNREKDIGLFEVFSQQLPATEPVDSSVSSSISAEEQFELP LELPSDLVLTTRSPVPSQNPRLAVISDSGEKRVITITEKSVASSEGDPAALLSPGVDPAPEGHMTPDHFIOG HMDADHISPPCGSVEQGHGNSQDLTRNSGTPGLQVPVSPVQVQKQYVPSSTDSPGPSQISNAAVQTTPPH LKPAATEKLIVVNQNMPLYVLTLPNGVTQKIQLTSPVSSTPSVMETNTSVLGPMGSGGLTLTGLNPLSPSP SLFPPASKGLLSVPHHQLHSFPAAQSSFPNISSPPSGLLIGVQPPDPQLLGSEANQRTDLTTTAVATPSS GLKKRPI SRLHTRKNKKLAPSSAPSNIAPSDVVSMMTLINFTPSQLSNHPSLLDLGSLNPSSSHRTVPNI IKRS KSGIMYFEQAPLLPQSVGGTAATAAGSSTISQDTSHTLSTGVPVSALASGSSVNLVSMQTTAAPTSSTSVPGH VTLANQRLGTPDIGSISHLLIKASHQSLGIQDQVALPSSGMFQGLTSTQTPSAAAMTAASSICVLPSSQT AGMTAASPGEAEHYKLRGNQLLAGKTGLTSTQDRDRDPSAPGTQPSNFTQTAEAPNGVRLEQNKTLPSAK PASSASPGSSPSSGQQSGSSVPGPTPKPKAKRIQLPLDKGSGKHKVSHLRTSSEAHIPHRDTPAPQPSV TRTPRANREQQDAAGVEQPSQKECGQPAGPVAALPEVQATQNPANEQENAEPKAMEEEEESGFSSPLMLWQQE QKRKESITERKPKKGLVFEISSDDGFQICAESIEDAWKSLTDKVVQEARSNARLKQLSFAGVNLRLMLGILHDA VVFLIEQLAGAKHCRNYKFRFHKPEEANEPLNPHGSARAETHLRQSAFDMFNFLASKHRQPPEYNPNDEEEE EVQLKSARRATSMDLPMRFRHLKKTSEAVGVYRSP IHGRGLFCKRNI DAGEMVIEYAGNVIRSIQTDKRE KYYSKIGICYMFRIDDSEVVDATMHGNAARFINHSCEPCNYSRVINIDGQKHIVIFAMRKIYRGEELTYDYK FPIEDASNKLPNCNGAKKCRKFLN\*

>ENSMUSP0000002095\_c.5074:T>C\_p.V1692A ENSMUST0000002095.11|Kmt2a-201|ENSMUSG0000002028|-|chr9:g.44742612:A>G

MAHSCRWRFPARPGTTGGGGGGRRGLGGAPRQVPAALLPPGPQAGGGGPGAPPSPPAVAAAAAGSSGAGVPGGAAAAASAASSSSASSSSSSSSASSSGPALLRVGPGFDAALQVSAAI GTNLRRFRAVFGESGGGGGSGEDEQFLGFGSDEEVVRVRSPTSPSVKASPRKPRGRPRSGSDRNPAILSDPSVFSPLNKSETKSADKIKKDKSIEKKRGRPPTFPGVKIKITHGKDIAELTQGSKEDSLKVKRTPSAMFQQATKIKKLRAGKLSPLKSKFKTKLQIGRKGVQIVRRRRGRPPSTERIKTPSGLLINSELEKPKQVRKDKEGTPELTKEDKTVVVRQSPRRIKPVRIIPSCKRTDATIAKQLLQRAKKAQKKEEAAQLQGRKVKTVQVKNIRQFIMPVVSASSRIIKTPRRFIEDEYDPPMKIARLESTPNSRFSATSCGSSEKSSAASQHSQMSDSSRSSPSIDTSDSQASEEIQALPEERSNTPEVHTPLPISQSPENESNDRRSRRYSMSERSFGSRATKKLPTLQSAQQQTSSSPPPPLTPPPPLQPASGISDHTPWLMPPTIPLASPFPLPASAAPMQGRKSI LREPTFRWTSLKHSRSEPQYFSSAKYAKEGLIRKPIFDNFRPPLTPE DVGFASGFSASGTAASARLFSPLHSGTRFDIHKRSPI LRAPRFTPSEAHSRIFESVTLPSNRTSSGASSGVS NRKRKRKVFSPIRSEPRSPSHSMRTRSGRLSTSELSPLTPPSSVSSLSIPVSPLAASALNPTFTFPSSHSLTQSGESTEKNQRARKQTSALAEFFSSNSPALFPWFPTPGSQTEKGRKDTAPEELSKDRDADKSVEKDKSRERDRE REKENKRESRKEKRRKGSIDIQSSALYPVGRVSKEKVAGEDVGTSSAKKATGRKSSSSLDGADVAVPTLGD TTAVKAKILIKKGRNLEKNNLDLGPAAAPSLEKERTPCLSA PSSSTVKHSTSSIGSMLAQADKLPMTDKRVAL LKKAQAQLCKIEKSKSLKQTDQPKAQGQESDSSSETSVRGPRIKHVCRRAAVALGRKRAVFPDDMPTLSALPWEEREKILSSMGNDDKSSVAGSEDAEPLAPPKIPKIPVTRNKAPQEPVVKGRRSRRCGQCPGCQVPEDCGICTNCLDKPKFGRNIIKQCKMRKCQNLQWMPKSKASLQKQTKAVKKEKSKTTEKESKESSTAVKSPLEPAQKAPPPREAPAPKPKSSSEPPRKPVEEKSEEGGAPAPAPEPKQVSAPASRKSQKQVPAAVPPQPPSTAPQKKEAPKAVPSEPKKKQPPPEPGPEQSKQKQVAPRPSIPVKQPKDKKPPVSKQENAGTLNINLPLSNGISSKQKIPADGVHRI RVD FKEDCEAENVWEMGGLGILTSVPI TRVVCFLCASSGHVEFVYCQVCEPFHKFCLE ENERPLEDQLENWCCRCKFCHVCGRQHQA TKQLLECNKCRNSYHPECLGPNYPTKPTKKKVVICTKVRCK SCGSTTPGKGWDAQWSDHDFSLCHDCAKLFAGNFCPLCDKCYDDDDYESKMMQCGKCDRWVHSHKCESLSDEMY

EILSNLPESVAYTCVNCTERHPAEWRLALEKELQASLKQVLTALLNSRTTSHLLRQRQAAPKPPDLNPETEESI  
PSRSSPEGPDPALTEVSKQDEQQPLDLEGVKKRMDQGSYVSVLEFSDDIVKIIQAAINSDDGGQPEIKKANSM  
VKSFFIRQMERVFPWFVSVKSRFEWPNKVSNNSGMLPNAVLPPLSLDHNQAQWQEREESSTHEQPPLMKKIIIPA  
PKPKGPGEPDSPTPLHPPTPPIILSTDRSREDSPELNPPPGIDDNRQCALCLMYGDDSDANDAGRLLYIGQNEWT  
HVNICALWSAEVFEDEDDGSLKNVHMAVIRGKQLRCEFCQKPGATVGCCLTSCTSNIYHFMCSRAKNCVFLDDKKV  
YQQRHRDLIKGEVVPENGFEVFRVFDVFEGLSLRRKFLNGLPENIHMMIGSMTIDCLGILNDLSDCEDKLF  
PIGYQCSRUYWSTTDARKRCVYTCIMECRPPVVEPDINSTVEHDDNRTIAHSPSSFIDASCKDSQSTAAIILS  
PPSPDRPHSQTSKSCYHYHVISKVPRIIRTPSYSPTRQSRPGCRPLPSAGSPTPTTHEIVTVGDPLLSGLRSIGS  
RRHSTSSLSPLRSKLRIMSPVRTGSAYSRSVSVPSVSLGTATDPEASAKASDRGGLSSANLGHSAAPPSSSS  
QRTVGGSKTSHLDGSSPSEVKRCSASDLVPGKSLVKEKNRTSSSKSTDGSAHSTAYPGI PKLTPQVHNATPG  
ELNISKIGSFAEPSTVPPFSSKDTVSYVQLHLRGQRSDRDQHMDSQSVKPSPNEDGEIKTLKLPGMGHRPSIL  
HEHIGSSSRDRRQKGGKSSKETCKEKHSSKSYLEPGQVTTGEEGNLKEPEFADEVLTGFLGQRPCNNVSSEKI  
GDKVPLSGVPGKQSTQVEGSSKELQAPRKCSVKVTPMKMEGENQSKNTQKESGPGSPAHI ESVCFAEPVSAS  
RSPGAGPGVQPSNNLTSQDPQSNNYQNLPEQDRNLMI PDGPKPQEDGSFKRRYPRRSARARSNMFFGLTPLY  
GVRSYGEEDI PFYSNSTGKKRGRSAEQVDGADDLSTSEDDLYYNFTRTVISSGGEERLASHNLFREEEQ  
CDLPKISQLDGVDDGTESDTSVTATSRKSSQIPKRNGKENGENTENLKIDRPEDAGEKEHVIKSAVGHKNEPKLD  
NCHSVSRVKAQGDSSLEAQLSSLESRRVHTSTPSDKNLLDTYNAELLKSDSDNNNSDDCGNII LPSQDIMDFVL  
KNTPSMQALGESPESSSELTLGEGGLDLSNREKDIGLFEVFSQQLPATEPVDSSVSSSISAEQFELPLEL  
PSDLSVLTTRSPVPSQNPRLAVISDSGEKRVITITEKSVASSEGDPALLSPGVDPAPEGHMTPDHF IQGHMD  
ADHISSPPCGSVEQGHGNSQDLTRNSGTPGLQVPVSPVQVQNKYVPSSTDSPGPSQISNAAVQTPPHLKP  
ATEKLI VVNQNMQPLYVLQTL PNGVTQKIQLTSPVSSSTPSVME TNTSVLGPMGSGTLTTLTGLNPSLPPSPSLF  
PPASKGLLSVPHHQLHLSFPAAAQSSFPNIISSPPSGLLIGVQPPDPQLLGSEANQRTDLTTT VATPSSGLK  
KRPI SRLHTRKNKKLAPSSAPSN IAPSDVVSNMTLINFTPSQLSNHPSLLDLGSLNPS SHRTVPI I KRKSKG  
IMYFEQAPLLPPQSVGGTAATAAGSSTISQDTSHLTSGPVSALASGSSVNLNVSMQTTAAPTSSSTVPGHVTL  
ANQRL LGTPDIGSISHLLIKASHQSLGIQDQPVALPPSSGMFPQLGTSQTPSAAAMTAASSICVLPSSQTAGM  
TAASFPGEAEHEHYKLRGNQLLAGKTGTLTSQRDRDPDSAPGTQPSNFTQTAEAPNGVRLEQNKTLPSAKPAS  
SASPGSSPSSGSSSSVPGPTKPKPKAKRIQLPLDKGSGKKHKVSHLRTSSEAHIPHRDTPAPQPSVTRT  
PRANREQQDAAGVEQPSQKECGQPAGPVAALPEVQATQNPANEQENAEPKAMEEEEEESGFSSPLMLWLQQEQKR  
KESITERKPKKGLVFEISSDDGFQICAESIEDAWKSLTDKVQEARSNARLKQLSFAGVNGLRMLGILHDAVVF  
LIEQLAGAKHCRNYKFRFHKPEEANEPPLNPHGSARA EVHLRQSAFDMFNFLASKHRQPPEYNPNDEEEEEVQ  
LKSARRATSMDLPMRFRHLKKT SKEAVGVYRSPIHGRGLFCKRNIDAGEMVIEYAGNVIRSIQTDKREKYY  
DSKIGICYMFRIDDSEVVDATMHGNAARFINHSCEPNCYSRVINIDGQKHIVIFAMRKIYRGEELTYDYKFP  
EDASNKLPNCGAKKCRKFLN\*

>ENSMUSP00000047508\_c.1188:T>G\_p.C397G ENSMUST00000039059.8|Pcsk7-  
201|ENSMUSG00000035382|+|chr9:g.45830096:T>G

MPKGRQKVPHLDAHLGLPICLWLELAIFFLVVPQVMGLSEAGGLDILGTGGLSWAVHLDLSLEGERKEESLTQQA  
DAVAQAAGLVNAGRIGELQGHYLFVQPTGHRQAMEVEAMRQQA EAVLARHEAVRWSEQTLLKRAKRSIHFN  
PKYPQQWHLNRRSPGRDINVTGVWERNVTGRGVTVVVDDGVEHTVQDIAPNYSPEGSYDLNSNDPDPMPHP  
DEENGNHHGTRCAGEIAAVPNSFCVAVGVA YGSRIAGIRVLDGPLTDSMEAVAFNKHYQINDIYSCSWGPD  
GKTVDPHQLGKAALQHGVMAGRQGFSGIFVVASGNGGQHNDNCNYDGYANSIYTVTIGAVDEEGRMPFYAEE  
CASMLAVTFSSGDKMLRSIVTTDWDLQKGTGGTEGHTGTSAAAPLAAGMIALMLQVRPCLTWRDVQHIIVFTA  
IQYEDHHDWLTNEAGFSSHQHGFGLLNAWRLVNAAKIWTSPYLASVYVSPMLKENKAVPRSPHSLEVLWNV  
SRTDLEMSGLKTL EHVAVTVSITHPRRGSLELKLFCPSGMMSLIGAPRSMDSDPNGFNAWTFSTVRCWGERAR  
GVYRLVIRDVGD EPLQMGILQQWQLTLYGSMWSPVDIKDRQSLESAMSGKYLHDGFTLPCPPGLKIPEEDGY  
TITPNTLKTLLVLVGCFSVFWTIYMLEVCLSRNKASTHGRKCGCPWAPRRQNSKDGTALESMP LCSSSKDL  
DGV DSEHGDC TTASSFLAPELDCPPHPD L LQKSGQIC\*

>ENSMUSP00000150500\_c.1188:T>G\_p.C397G ENSMUST00000215189.2|Pcsk7-  
204|ENSMUSG00000035382|+|chr9:g.45830096:T>G

MPKGRQKVPHLDAHLGLPICLWLELAIFFLVVPQVMGLSEAGGLDILGTGGLSWAVHLDLSLEGERKEESLTQQA  
DAVAQAAGLVNAGRIGELQGHYLFVQPTGHRQAMEVEAMRQQA EAVLARHEAVRWSEQTLLKRAKRSIHFN  
PKYPQQWHLNRRSPGRDINVTGVWERNVTGRGVTVVVDDGVEHTVQDIAPNYSPEGSYDLNSNDPDPMPHP  
DEENGNHHGTRCAGEIAAVPNSFCVAVGVA YGSRIAGIRVLDGPLTDSMEAVAFNKHYQINDIYSCSWGPD  
GKTVDPHQLGKAALQHGVMAGRQGFSGIFVVASGNGGQHNDNCNYDGYANSIYTVTIGAVDEEGRMPFYAEE  
CASMLAVTFSSGDKMLRSIVTTDWDLQKGTGGTEGHTGTSAAAPLAAGMIALMLQVRPCLTWRDVQHIIVFTA  
IQYEDHHDWLTNEAGFSSHQHGFGLLNAWRLVNAAKIWTSPYLASVYVSPMLKENKAVPRSPHSLEVLWNG  
RTWRCRG\*

>ENSMUSP00000150393\_c.1188:T>G\_p.C397G ENSMUST00000216672.2|Pcsk7-  
209|ENSMUSG00000035382|+|chr9:g.45830096:T>G

MPKGRQKVPHLDAHLGLPICLWLELAIFFLVLPQVMGLSEAGGLDILGTGGLSWAVHLDLSLEGERKEESLTQQA  
 DAVAQAAGLVNAGRIGELQGHYLFVQPTGHRQAMEVEAMRQQAEEAVLARHEAVRWHEQTLKRAKRSIHFND  
 PKYPQQWHLNNRRSPGRDINVTGVWERNVTGRGVTVVVVDDGVEHTVQDIAPNYSPEGSYDLNSNDPDMPPH  
 DEENGNHHGTRCAGEIAAVPNNNSFCAVGVAYGSRIAGIRVLDGPLTDSMEAVAFNKHYQINDIYSCSWGPD  
 GKTVDGPHQLGKAALQHGVMAGRQGFSGIFVVASGNGGQHNDNCNYDGYANSIYTVTIGAVDEEGRMPFYAEE  
 CASMLAVTFSGGDKMLRSIVTTDWDLQKGTGGTEGHTGTSAAAPLAAGMIALMLQVRPCLTWRDVBQHIIVFTA  
 IQYEDHHADWLTNEAGFSSHQHGFGLLNAWRLVNAAKIWTSPYLAASYVSPMLKENKAVPRSPHSLEVLWNV  
 SRTDLEMSGLKTLKLEHVAVTVSITHPRRGSLELKLFCPSGMMSLIGAPRSMDSDPNGFNAWTFSTVRCWGERAR  
 GYRLVIRDVQDEPLQMGILQQWQLTYGSMWSPVDIKDRQSLESAMSGKYLHDGFTLPCPPGLKIPPEEDGY  
 TITPNTLTKTLVLVGCFSVFWTIYYMLEVCLSQRNKASTHGCRKGCCPWAPRRQNSKDAGTALESMPCLCSSKDL  
 DGVDSEHGDC TTASSFLAPELDCPPHQPDDLQKSGQIC\*  
 >ENSMUSP00000037915\_c.2318:G>A\_p.W773\* ENSMUST00000038890.6|Dennd4a-  
 201|ENSMUSG00000053641|+|chr9:g.64796294:G>A  
 MIEDKGRVADYFVAVGLTDISKPLEEEIHFNDACHKVAKPKEITDVSVIKSLGEEVPRDYVICIDVTPTGL  
 SADLNNGLSVGPQIYLCYKGRGRDKPPLTDLGVLYDWKERLKGQCEIIQSTPYGRPANISGSTSSQRIYITYRR  
 ASENTTQNTLAVTDICIIIPSKGESPPHTFCVKVDKNLSNSMWSAVYLCYKKSVAKTNTISYKAGLICRYPQE  
 DYESFSLPESVPLFCLPMGATIECWPPDSKYPLPVFSTFVLTGASAEKVYGAAIQFYEPYEEENLTKQRLL  
 GLTSLVDGKSDSTRITHTNKICLLSHWPFDAFRKFLTFLYRYSISGPHALPIEKHISHFMHKVPFSPQRP  
 RILVQLSPHDNLILSQPVSSPLPLSGGKFSTLLQNLGPNNAVTLVFAVTEHKILIHSLRPSVLTSTVTEALVS  
 MIFPFHWPCPYVPLCPLALADVLSAPCPFIVGIDSRYFDLYDPPDVSCVDLDTNTISQTDGKKNVAVKILPK  
 KPCKNLMNTLNNLHQQLAKLQQRPRDDGLMDLAMNDYDFNSGKRLHMDLEIQEAFLLFMASILKGYRSYLRP  
 ITQAPSETATDATSLFALQAFRLSRDRSHQKFFYNMKTQMFIRFIEECSFVSDKDASLAFDCCVDKVDTDK  
 SGEVRLIELDASFKEHTVFVTPPEIPLHPNGEPPQLQSYNGFVFLRNNLFRPEGFQARKNKLPSKPS  
 GSPSPMFRRTKQEIKAHAKIARYSSIPQMWSRCLLRHCYGL\*FICLPAYVKVCHSKVRALKTAYDVLKMQ  
 KMDPPDEVCYRILMQLCGQYDQVLAVRVLFEMQKAGIDPNAITYGYNKAVLESTWPSRSRSGYFLWTKVR  
 NVVLGVAQFKRALKHPHPQTALS GGRSDLGYNSLKDNRREGPSTEDIQGEKEKRGSDSSLSSENESTKG  
 SAECPLTSLSYQRASTIVRLNGAHNDSAGKTSGEESTPELLLMPSEDTNEAQTPSRCFRKRHSDDGSHL  
 QQQMPWGSRRNLSGGVLMGFMLNRTNQETS PGEMVEKLGADAKILSNVISKSTRPNSLDIGKPPARSKRDSL  
 EKESSDDDTPFHGSNCLDKVESPVIFDLEDLDTETDGSKVGVAQNPKRLQRRNSSFSVKPSEKTDVVTGFD  
 PLSLLVAETEQQQKVEEEDEDDNKS SVSTPSARRNLAAEIEMYMNMMSPLTSRTPSIDLQRACDDKLTNKS  
 PTLVKACRRSSLPPNSPRPVRLTKSKSYTKSEERPRDLWSSPAFSPTCPFREGSQETLAHSSPSFNLDTLV  
 PKLDVLRHSVFTAGKGVAEKASKWYSRFTMYTTSSKDQSSDRSLSVGAQDSESTSLTDEDVCHLEGATSS  
 QESSAASGTKGIDVSRASLGSSASLEGLSKFALPGKSETASSLNTSNANIFQNYAMEVLISSCSR CRTCDCL  
 VHDEEIMAGWTADDSNLNTTCPCGNLFLPFLNVEIRD LRRPGRYFLKSSSSTETMHFASRTRQSCISASAG  
 LDTSSLSVQGNFDLNNKSLQENPCARSIQIPAHRSKTVVSKCLPFMARSISTCGPLDKDDPGGQKLIPTGS  
 LPATLQGH TDSLGLWHLPSDPVTVPYLSPLVWKELESLENEGDHAITVADFVDHHPVIVFVNLVWYFRRL  
 DLPSNLPGLILSSEHCNKYSKIPRCHMSSEDSKYVLIQMLWDNMKHLHQDPGQPLYILWNAHSQNRLLFETQKY  
 PMVHLLQKGDSDFNQELLSMVKS IKMNDVYGPMSQILETLNKC PHFKRQRSLYREILFLSLVALGRENIDID  
 AFDKEYKMAYDRLTPSQVKSTHNCDRPPSTGVMECRKTFGEPYL\*  
 >rs33746359\_ENSMUSP00000077040\_c.8893:A>G\_p.Y2965C  
 ENSMUST00000077879.7|Vps13c-201|ENSMUSG00000035284|+|chr9:g.67862278:A>G  
 MVLESVVADLLNRFGLDYVENLNKSQLKLGWGNVALDNLQIKENALSELVDPFKVAKAGQIDKLTLPWKN  
 LYGEAVVATLEGLYLLVPGASIKYDAEKEEKSLQDIKQKELCRIEEALQKAAEKGAHSGEFMYGLENLLYKD  
 VKPGRKRKHKHKKHFKFRKGLDRSKDKPKEAKKDTFLEKLATQVIKNVQVKITDIHIKIEDDITDPERPLSFG  
 VTLREFSLTTNEHWTPCILNEAEKILYKLVKLDLSAYWNVGCMSYRGSREHILEQLKREILTSTNIIPDH  
 QYIFQPISASAKLYMNGAESELKTPKLDGNVEVQNI AIELTKPQYLSMIDFLES LDYMVNAPYRKYKPCLP  
 LHTNCRQWKKY AIDSVLEVHIRRYTQPWSWSNIKNHRQLLSYKMAKTKLTQAKVSEEIQKQIQDLEKSLDV  
 FNIILVRQQAQVEVIHSGQLRKRKSAEAGEKRGWFSGFWGKESKRDEESSVPETIDDLMTPEEKDKLFTAI  
 GYSENAYNLALPKQYVAHILTLKLVSTSI IIRENRNVEILRVQIIGLGTQVSQRPGAQALKIEAKLEHWYVT  
 GLRQQDIVPSLVASIGD TTSSLLKIEFETNPENSPADQTLIVQSQPVEVIYDAKTINAVVEFFQSNKGLDLEQ  
 ITSATLMKLEEI KERTATGLTHI IETRKVLDLRINLKPSYLIIPQTGFHHEKSNLLILDGFTQLNSKDQGAQ  
 KTANASLEEIIDKAYDKFDVEIRSVQLLFAKAEENWKKCRFQHPSTMHILQPMDIHVELAKAMVEKDVRMAKF  
 KVS GGLPLMHVRI SDQKIKDALCLINSIPLPQKSSLLTSPFERQVASIPVLSGGTKALLGTSLLLDGVESESD  
 EEFDAEDGMSQAARTVKASELKKAAEV PNEELVSLLEKFEIKEVLELTKQQKEEETILVFNVTQLGTEATMRT  
 FDLTAVSYLRKISTDYHDIKGSRKKPIHLISSDRPGLDLLKVEYIKVDRNGPSFQTTEKTEQTVKVAFSSL  
 NLLLQ TQALLSSLNLT TTVI P SDSQNTGVAKVQAMPEKQKNSPLQKVMVPSRSDSVIGFRLFAKLNACVTV  
 CDEKSNIAEIKIQGLDSSLSLQSKKQSLFARLENIIVTDVDPKTIHKKAVSIVGNEVFRFNLDLYPDATEGDS  
 YTDMSTVDGVVALHVGC IQIVYLHKFLMSLLSFLNNFQVAKEALSAATAQAAEKAATS VKDLAQR SFRVSVDI



DLKAPVIVIPQSSSLSTNAVVDLGLIRVHNRFSLSVSGEDTANPPVIDKMEVQLTKLKLRSRTAIQPGTSHPDIO  
 LLHPINLEFFVSRNLANWYHKVPVVEIKGRLD SMNVSLNQEDLNLLFRILAENLGEATEDLDK GKPRIQERG  
 ETKACREVSTPQDVHTTQGVPAARVEETRPVDI INVLLNFEIKEVVVTLMKKAERKGS PFHELKI LHLGMEAK  
 VKAHDMTAAAYLRNISMRCFHFDPDSKGEPLRIVNTSDVSDGILLKLLFIKADSDGPDFKTIHDNTKQKLKVSF  
 SSLDLVLHLEALLSLMDFLSSAIPSSDSSSSEKEPELKPLVGESRSLAIRAVPSSYEGDAFDLKI TAE LNAFN  
 IFICDQKSNIAEIKIHGM DASISVKPKQTDV FARLKNII VMNVDSLSIHKKAVSILGDEVFRFQMSLYPDATE  
 GENYGDMSKVDGRLSLKVGCIQIVYVHKFFMSLLSFLNNFQAAKEALSTATVQAAERAASSVKDLAQKSFRL  
 MDIDLKAPVITIPQSSVSPNVVIADLGLIRVENKFSLSVVEQLALPVADEM SIQLTQLKLARTVLAQADSPQH  
 DVEILKPVNMLLCIQRNLSAAWY TQIPGMEIKGELKPMQVALSQDDLTVLMKILLENLGEASSQPSPTQYAE  
 AARVKRDRTRSGPDYLKEQELADPKPPGDQTVTLQDFDFHDSLSI ILYNSDSSQEPRLSFHND SFRLGELTLHL  
 MASAGKMFKDGSMNVSLKLTCTLDDLREGIERATSRMIDKKNQDNNSSMIDI SYSQDKNGSQVDAVLDKLY  
 VCASVEFLMTVADFFIKAMPQSPENIAKEIQIPSRQTAAGRVKMEKDDSVRPNMTLKAMITDPEVVVAVSLTK  
 ADAPALTASFQCNLSLSTSKLEQMM EASVRDLKVLACPFLRERRGKSITTVLQPCSLFMEKCTWASGKQNINI  
 VVKEFVIKISPIILNTVMTIMAAMS PKTKEDEWKDTPKETDNLWAVKSITDYN SWFLGVDMATEVTENFRDSE  
 HPSIEENCVVAVESVQVTLECGLGHRTVPLLLAESKFSGNIKNWTS LMAAAADMTLEVHYYNETHAVWEPLIE  
 RVEGNKPSWKLKLVKKNPIQDKSLMPGDDFIPEPQTAVHISSGATMNI TISKCLNVFSLNLAGFSEGAESTF  
 DYSLKDRAPFTVKNALGVPMKVQPNRNLKVMGSP EKSIDIYDVGAGQHLELDYASLEPSRQKGLSILSRQASSL  
 FTLTFVPGYTYEASVPVARPGRRLYNVRNPSASHSDSVLVQIDATEGNKVVTLR SPLQIKNHFSIAFIYKF  
 VKNVKLLERIGIARPEEEFHVPLDSYRCQLYVQPAGGLEQQYTHSSTYISWKEELHRSREVR CMLQCPAVEVS  
 FLPLIVNTVALPDELSYIGAHGEDWDPAYVIHLYPPLTLRNL LPPYSLRYLLEGTAE THELAEGSSADVLHSRI  
 SGEI IELVLVKYLGKNWNGHFRICDTLPEFFLVCFSSDTAEVMTVDLSVHVRRI GCRMELSVFSPYWLINKTS  
 RVLQYRSEEIHVKHPADFRDIILFSFKKNI FSKNKVQLKISTSAWSNGFSLDTVGSYGCVKCPATNMEYLVG  
 VSIKMSSENL SRVVTLPFCTVANKSSLDLEVEIASDGS IPTNKWHYVASSECI PFWPENLSGKLCVRVVG  
 EGSSKPFYFNQRDNGTLLSLEDLNGGILVDINTAEHSTVITFSDCHEGSAPALIMNHTQWDVLT YKQSGSQEE  
 LVLLPGETRLFAWADPTGIRKLTWN YANFGEHDLKDECGQFPYDANIQIHVVSFLDGRQVRLLFTDDVALV  
 SKALQAEEME QADHEVALS LHSGLSLVNNENKQEVSYVGI TSSGVVWEMKPKQKWKPF SQKQIMSLEQAYS  
 RLASQDRGWVKLDSNFVFDKVP MEMRLPIRCPIKRDFLSGIQVEFKQSPHQRS LRARLYWLQVDNQLPGTM  
 FVVFVHPVAPPKSIALDSEPKPFIDVSVITRFNEYSKVLQFKYFMVLIQEMALKVDQGF LGAVISLFTPTTDP  
 EAERKRTKLIQQDIDALNTELMESSMTDMSILSFFEFHHSIPVKLHLSLSLGSGGEESDKEKQEMIAIHSVNL  
 LLKSIGATLTDVDDLI FKLAYYEIRYQFYKRDQLMWSVVRHYSEQFLKQMYVLVGLDVLGNPFGLIRGLSEG  
 VEALFYEPFQAGVQGP EFAEGLVIGVRSLVGHTVGGAGVVSRI TGSVKGGLAAITMDKEYQQKRREEMGRQ  
 PKDFGDSLARGGKGF LRGVVGGVTGIIITKPV EGAKEGAAGFFKGI GKGLVGAVARPTGGI IDMASSTFQGIQ  
 RVAESTE EVSSLRPPRLIHEDGIIRPYDRQESEGS DLLENHIK KLEGEAYQFHCAVPGNKRAVLMITNRRALF  
 IKEVEILGHMSVDWQCLFEDFVCPPEVSENLLKISVKEQGLFHKKDSANIGHLRKIY LKDPITAKRAFDAIES  
 AQSARQQQKLMRQSSV KLLRPQGPS\*

>r33746359\_ENSMUSP00000149778\_c.295:A>G\_p.Y99C  
 ENSMUST00000213168.2|Vps13c-202|ENSMUSG00000035284|+|chr9:g.67862278:A>G  
 XTVANKSSLDLEVEIASDGS IPTNKWHYVASSECI PFWPENLSGKLCVRVVG YEGSSKPFYFNQRDNGTLLS  
 LEDLNGGILVDINTAEHSTVITFSDCHEGSAPALIMNHTQWDVLT YKQSGSQEELVLLPGETRLFAWADPTGI  
 RKLTWN YANFGEHDLKDECGQFPYDANIQIHVVSFLDGRQVRLLFTDDVALVSKALQAEEME QADHEVALS  
 LHSGLSLVNNENKQEVSYVGI TSSGVVWEMKPKQKWKPF SQKQIMSLEQAYS RLASQDRGWVKLDSNFVFN  
 FDKVP MEMRLPIRCPIKRDFLSGIQVEFKQSPHQRS LRARLYWLQVDNQLPGTMFVVFVHPVAPPKSIALDSE  
 PKPFIDVSVITRFNEYSKVLQFKYFMVLIQEMALKVDQGF LGAVISLFTPTTDP EAERKRTKLIQQDIDALNT  
 ELMESSMTDMSILSFFEFHHSIPVKLHLSLSLGSGGEESDKEKQEMIAIHSVNL LLSIGATLTDVDDLI FKL  
 AYYEIRYQFYKRDQLMWSVVRHYSEQFLKQMYVLVGLDVLGNPFGLIRGLSEGVEALFYEPFQAGVQGP EEF  
 AEGLVIGVRSLVGHTVGGAGVVSRI TGSVKGGLAAITMDKEYQQKRREEMGRQPKDFGDSLARGGKGF LRGV  
 VGGVTGIIITKPV EGAKEGAAGFFKGI GKGLVGAVARPTGGI IDMASSTFQGIQ RVAESTE EVSSLRPPRLIH  
 EDGIIRPYDRQESEGS DLLEQEMGTQE\*

>ENSMUSP00000046111\_c.2377:T>A\_p.V793E ENSMUST00000044491.13|Minar1-  
 201|ENSMUSG00000039313|-|chr9:g.89478667:A>T  
 MEANQEASLFLVKILEELDSKQNTVSYQDLCKSLCAQFDLSQLAKLRSVLFYTA CLDPNFPATLFKDKMKCSV  
 NNQOSKKIMVAADIVTIFNLIQMNNGGTAK EKLPMSCHKVRKKEASFESCRSDTEVCSP TVCEPLNCELSERPF  
 SRGYPTROSSKRCMLDCKECPQFVPASEPNFLLGVSKEVKNRAASLDRLQALS PYSVASPQCEMQRTYFPMN  
 IENEPMSDQDLSLPISQIKETFISSEEPFVVQSCVQKRNIFKEDFHNLMTVSPSLVGT TNKAEEGHGEPQSOK  
 ELHKPFFFNHSEMPYHNQYLN PVYSP I PDKRRAKHESLDDLQASTYFGPTPVMGTQDTRRCPGRSSKQTPWP  
 AKSWSLNT EEPDFERSFFNRNPSE EKLRYPNSGSQT PNFSGPDRHPVYLV PKDQKVL PAVYAVKPNGLKSK  
 EISSPVDLEKHEAVKKFKDKSISCTSGQHSSDTSSVGTQTEQHVLDP PKCKDLCTSGQAKYGRHAMQSDDD  
 SEIVSDDISDIFRFLDDMSISGSTGVIQSSCYNSTGSLSQLHKSDCDSSPEHHLAKITNGVSSGKDKCNRPE

NVHHSEELKSSVCKLVLRIEIERKLESLSGVREEISQVLGKLNKLDQKIQQPEKVNQIDLNSLTSEAPSD  
DSASPRVFRAHSGSHGPKLENSPDWCCSDASGSNSESLRVKALKKSLFTRPSSRSLTEENSATESKIASISNS  
PRDWRITITYTNRMSLNEEEIKDAGPANNKDWHRKSKEADRQYDIPPOHRLPKQPKDGFVLEQEFSPHPYPTSL  
KGHMKSNNPLYTDMRLTELAEVKRGQPSWTIEEYARNSGDKGKLTALDLQEQESLNPNNLEYWMEIYTPGYDS  
LLKRKEAEFRRAKVCKIAALITAACTVILVIVVPICTMKS\*  
>ENSMUSP00000140942\_c.2377:T>A\_p.V793E ENSMUST00000191465.2|Minar1-  
202|ENSMUSG00000039313|-|chr9:g.89478667:A>T  
MEANQEASLFLVKILEELDSKQNTVSYQDLCKSLCAQFDLSQLAKLRSVLFYTAACLDPNFPATLFDKMKCSV  
NNQQSKKIMVAADIVTIFNLIQMNNGGTAKKLPMSCHKVRKKEASFESCRSDTEVCSPVCEPLNCELSEKPF  
SRGYPTRQSSKCRKMDCKECPQFVPASEPNFLLGVSKEVKNRAASLDRLQALSPYSVASPQPCEMQRTYFPMN  
IENEPMSDQDSLPIISQGIKETFISSEEPFVQSCVQKRNIFKEDFHNLMTVSPSLVGTNNKAEHGHEPQSOK  
ELHKPPFFNHSFEMPYHNQYLNVPVYSPIPKRRRAKHESLDDLOASTYFGPTPVMGTQDTRRCPGRSSKQTPWP  
AKSWSLNTEEVPDFERSFFNRPSEKLRYPNSGSQTPNFSGPDRHPVYLVPKDQKQVLPAGYAVKPNGLKSK  
EISSPVDLEKHEAVKFKDKSISCTSGQHSSDTSVGTQTEQHVLDPPKCKDLCTSGQAKYGRHAKMSQSDDD  
SEIVSDDISDIFRFLDDMSISGSTGVIQSSCYNSTGSLSQLHKSDCDSPEHHLAKITNGVSSGKGDKNRPE  
NVHHSEELKSSVCKLVLRIEIERKLESLSGVREEISQVLGKLNKLDQKIQQPEKVNQIDLNSLTSEAPSD  
DSASPRVFRAHSGSHGPKLENSPDWCCSDASGSNSESLRVKALKKSLFTRPSSRSLTEENSATESKIASISNS  
PRDWRITITYTNRMSLNEEEIKDAGPANNKDWHRKSKEADRQYDIPPOHRLPKQPKDGFVLEQEFSPHPYPTSL  
KGHMKSNNPLYTDMRLTELAEVKRGQPSWTIEEYARNSGDKGKLTALDLQHV\*  
>ENSMUSP00000108264\_c.1110:A>G\_p.T371A ENSMUST00000112645.8|Trf-  
203|ENSMUSG00000032554|-|chr9:g.103098181:T>C  
MRLTVGALLACAALGLCLAVPDKTVKWCVAUSEHENTKCSIFRDHMKTVLPPDGPRLACVKKTSYPDCIKAIISA  
SEADAMTLDDGGWVYDAGLTPNNLKPVAAEFYGSVEHPQTYYYAVAVVKKGTDFQLNQLEGGKKSCHTGLGRSAG  
WVPIPIGLLFCKLSEPRSPLEKAVSSFFSGSCVPCADPVAFPKLCQLCPGCGCSSTQPFPGYVGAFAKCLKDGGG  
DVAFVKHTTIFEVLPEKADRDQYELLCLDNTRKPVQYEDCYLARIPSHAVVARKNNGKEDLIWEILKVAQEH  
FGKGSKDFQLFSSPLGKDLLFKDSAFGLLRVPPRMDYRLYLGHNYVTAIRNQOEGVCPEGSIDNSPVKWCAL  
SHLERAKCDEWSIIISEGKIECESAETTEDCIEKIVNGEADAMTLDDGGHAYIAGQCGLVPVMAEYESSNCAIP  
SQQGIFPKGYAVAVVKASDTSITWNNLKGKKSCHTGVDRTAGWNI PMGMLYNRINHCKFDEFFSQGCAPGYE  
KNSTLCDLDCIGPLKCAPNNKEEYNGYTGAFRCLVEKGDVAFVKHQTVLDNTEGKNPAEWAKNLKQEDFELLCP  
DGTRKPVKDFASCHLAQAPNHVVSRKEKAARVKAVLTSQETLFGGSDCTGNFCLFKSTTKDLLFRDDTKCFV  
KLPEGTTPEKYLGAEYMQSVGNMRKCSTSRLLLEACTFHKH\*  
>ENSMUSP00000035158\_c.1110:A>G\_p.T371A ENSMUST00000035158.16|Trf-  
201|ENSMUSG00000032554|-|chr9:g.103098181:T>C  
MRLTVGALLACAALGLCLAVPDKTVKWCVAUSEHENTKCSIFRDHMKTVLPPDGPRLACVKKTSYPDCIKAIISA  
SEADAMTLDDGGWVYDAGLTPNNLKPVAAEFYGSVEHPQTYYYAVAVVKKGTDFQLNQLEGGKKSCHTGLGRSAG  
WVPIPIGLLFCKLSEPRSPLEKAVSSFFSGSCVPCADPVAFPKLCQLCPGCGCSSTQPFPGYVGAFAKCLKDGGG  
DVAFVKHTTIFEVLPEKADRDQYELLCLDNTRKPVQYEDCYLARIPSHAVVARKNNGKEDLIWEILKVAQEH  
FGKGSKDFQLFSSPLGKDLLFKDSAFGLLRVPPRMDYRLYLGHNYVTAIRNQOEGVCPEGSIDNSPVKWCAL  
SHLERAKCDEWSIIISEGKIECESAETTEDCIEKIVNGEADAMTLDDGGHAYIAGQCGLVPVMAEYESSNCAIP  
SQQGIFPKGYAVAVVKASDTSITWNNLKGKKSCHTGVDRTAGWNI PMGMLYNRINHCKFDEFFSQGCAPGYE  
KNSTLCDLDCIGPLKCAPNNKEEYNGYTGAFRCLVEKGDVAFVKHQTVLDNTEGKNPAEWAKNLKQEDFELLCP  
DGTRKPVKDFASCHLAQAPNHVVSRKEKAARVKAVLTSQETLFGGSDCTGNFCLFKSTTKDLLFRDDTKCFV  
KLPEGTTPEKYLGAEYMQSVGNMRKCSTSRLLLEACTFHKH\*  
>ENSMUSP00000128390\_c.75:A>G\_p.T26A ENSMUST00000170904.2|Trf-  
208|ENSMUSG00000032554|-|chr9:g.103098181:T>C  
QEGVCPEGSIDNSPVKWCALSHLERAKCDEWSIIISEGKIECESAETTEDCIEKIVNGEADAMTLDDGGHAYIAG  
QCGLVPVMAEYGYAVAVVKASDTSITWNNLKGKKSCHTGVDRTAGWNI PMGMLYNRINHCKFDEFFSQGCA  
PGYEKNSTLCDLDCIGPLKCAPNNKEEYNGYTGAFRCLVEKGDVAFVKHQTVLDNTEGKNPAEWAKNLKQEDFE  
LLCPDGTRKPVKDFASCHLAQAPNHVVSRKEKAARVKAVLTSQETLFGGSDCTGNFCL  
>ENSMUSP00000071966\_c.5656:G>A\_p.S1886N ENSMUST00000072093.13|Plxnb1-  
201|ENSMUSG00000053646|+|chr9:g.108943415:G>A  
MSVLGVPVLLQVFWAGCVVTLRSLPAAFTANGTHLQHLARDPTTGTLYVGATNFLFQLSPGLQLEAVVSTGPV  
NDSRDCLPPVIPDECPQAQPTNPNQLLLVSPEALVCGSVHQICELRSLGQIRQLLLRPERPGDTQYVAAN  
DPAVSTGLVAQGLVGEPLLFVGRGYTSRGGVGGIPPIITRALRPPDPQAQAFSIEETAKLAVGRLESEYSHHFV  
SAFVRGASAYFLFLRRDLKAPSRARAYVSRVCLQDQHYYSYVELPLACQGGRYGLIQAAAVATSKEVARGDV  
LFAAFSSVAPPTVDWPLSASTGASGTSVLCAFPLEVDQLANYTRDACYTREGRAENGTKVADIAYDVLSDCA  
QLPVDTPDAFPCGSDHTPSPMVSCVPLEATPILELPGVQLTAVAVTMEDGHTIAFLGDSQGLHRVYLGPGRS  
AAPYSKQSIQPGSPVNRDLTFDGTFEHLYVATQTTLVKVPVAPCAQHLDCDSCLAHRDPYCGWCVLLGRCRR

SECSRDQGPEQWLWSFQPELGLCRVAVSPANISREERREVFLSVPGPLSLWPGESYFCYFGDQQSPALLTSS  
 GVMCPSDPSEAPVLQRGADHISVNVLELRFAGAVVIASSTLSFYDCVAVTASSPSAPCRACVSSRWGCNWCWVWQ  
 QLCTHKASCADAGPMVASQQSPLLPLIPPARDELTPFPPTVPQTTVTPTPNSFPPIEPRAPSTASDVLPGAKPSR  
 LSLWGPWAGPGPILSPTSTESPLHEKPLPPDPPTIPGTTVPAPTGLGPSTTPEDLLASYPFPSDAAAVSPAEP  
 GPEALPSMVALDQPPGTVPDPTTFPGAPGSMKPVLDWLTGGGELPEADEWMGGDTPAFSTSTLLSGDGSAAEH  
 EGPPAPLILLSSLDYQYDTPGLWELGEVNRVSSCPCVETVQGSLLIPVHVEREVQLRGRNLWLFQDGRSSE  
 CVLELGSREVAVEAQVECAPPPDVWCHIKCQQHQFSYEALKEPELQVGLFLRWAGGLRVDSADGLHVVLVYDCSV  
 GHGDCSRCQTAMPQYDCVWCEGERPRCVAREACNEAETVATQCPAPLIHSVDPLTGPIDGGTRVTIRGSNLGQ  
 HVQDVLDMVRVAGVPCAVDAGEYDVSSSLVCITGASGEEVTGTVAVEVPGRGHGVSEFSFAYQDPKVHSIFPA  
 RGPRAGGTRLTLHGSKLLTGRLEDIRVVVGDQPCHLLLEQQSEQLHCETGYPVPAPLPTVTLFGATERRLQH  
 GQFKYTSDPNVT SVGPKSFFSFGGREIWWRGQDLDDVQRPRIRVTVVPRQHGQGLAQKQHVVEKFEFEEPCLVN  
 SSHLLMCRTPALPGPPWDSGVQVEFILDNMVDFDAALSPTPFSYEADPTLRSLNPEDPSTPFRHKPGSVFVSVE  
 GENLDLAMSKEEVVAMIGDGPCVVKTLTRNHLYCEPPVEQPLPHPHALREAPDALPEFTVQMGNLRFSGLGHVQ  
 YDGESVPAFPVAAQVGLGVGTSLLALGVIIVLVIYRRKSKQALRDYKVKVQIQLENLESSVRDRCKKEFTDLMT  
 EMTDLTSDLLGSGIPFLDYKVAERVFFPGYRESPLHRDLGVPSRRPTVEQGLGQLSNLLNSKFLTKFIHT  
 LESQRTFSARDRAYVASLLTVALHGKLEYFTDILRLLS DLVAQYVAKNPKMLLRRTETVVEKLLTNWMSICL  
 YTFVRDSVGEPLYMLFRGIKHQVDKGFVDSVTGKAKYTLNDNRLLREDVEYRPLTLNALLAVGPGAGEAQCVP  
 VKVLDLDCDTISQAKEKMLDQLYKGVPLAQRPDSCITLDVEWRSVAGHLILSDEDVTSELQGLWRRRLNTLQHYKV  
 PDGATVALVPCLTKHILRENQDYVPGERTPMLEDVDEGGIRPWHLVKPSDEPEPPRRRGRNLGGGERERAKAI  
 PEIYLTRLLSMKGT LQKFVDDLFQVILSTSRPVPLAVKYFFDLDLDEQAQQHGISDQDTIHIWKTNLSLPLRFWI  
 NI IKNPQVFVFDVQTSNDMDAVLLVIAQTFMDACTLADHKLGRDSPINKLLYARDIPRYKQMVVERYADIRQTV  
 PASDQEMNSVLAELSRNCSADL GARVALHELYKYINKYYDQIITALEEDGTAQKMQLGYRLQQIAAAVENKVT  
 DL\*

>ENSMUSP00000071966\_c.5748:G>A\_p.V1917M ENSMUST00000072093.13|Plxnb1-  
 201|ENSMUSG00000053646|+|chr9:g.108943663:G>A

MSVLGPFVLLQVFWAGCVTLRSLPAAFTANGTHLQHLARDPTTGTLYVGATNFLFQLSPGLQLEAVVSTGPV  
 NDSRDLCLPPVIPDECPQAQPTNNPNQLLLVSPREALVCGSVHQIGICELRSLGQIRQLLLRPERPGDTQYVAAN  
 DPAVSTVGLVAQGLVGEPLLVFVGRGYTSRGGVGGIPIITRALRPPDPQAAFSYEETAKLAVGRLSEYSHHFV  
 SAFVRGASAYFLFLRRDLKAPSRAFRAVSRVCLQDQHYYSYVELPLACQGGRYGLIQAAAVATSKEVARGDV  
 LFAAFSSVAPPTVDWPLSASTGASGTSVLCAFPLEVDQLANYTRDACYTREGRAENGTKVADIAYDVLSDCA  
 QLPVDTPDAFPDGSHTPSPMVSCVPLEATPILELPGVQLTAVAVTMEDGHTIAFLGDSQGLHRVYLGPGRS  
 AAPYSKQSIQPGSPVNRDLTDFDGTFEHLYVATQTTLVKVPVAPCAQHLDLDCDSL AHRDPYCGWCVLLGRCRR  
 SECSRDQGPEQWLWSFQPELGLCRVAVSPANISREERREVFLSVPGPLSLWPGESYFCYFGDQQSPALLTSS  
 GVMCPSDPSEAPVLQRGADHISVNVLELRFAGAVVIASSTLSFYDCVAVTASSPSAPCRACVSSRWGCNWCWVWQ  
 QLCTHKASCADAGPMVASQQSPLLPLIPPARDELTPFPPTVPQTTVTPTPNSFPPIEPRAPSTASDVLPGAKPSR  
 LSLWGPWAGPGPILSPTSTESPLHEKPLPPDPPTIPGTTVPAPTGLGPSTTPEDLLASYPFPSDAAAVSPAEP  
 GPEALPSMVALDQPPGTVPDPTTFPGAPGSMKPVLDWLTGGGELPEADEWMGGDTPAFSTSTLLSGDGSAAEH  
 EGPPAPLILLSSLDYQYDTPGLWELGEVNRVSSCPCVETVQGSLLIPVHVEREVQLRGRNLWLFQDGRSSE  
 CVLELGSREVAVEAQVECAPPPDVWCHIKCQQHQFSYEALKEPELQVGLFLRWAGGLRVDSADGLHVVLVYDCSV  
 GHGDCSRCQTAMPQYDCVWCEGERPRCVAREACNEAETVATQCPAPLIHSVDPLTGPIDGGTRVTIRGSNLGQ  
 HVQDVLDMVRVAGVPCAVDAGEYDVSSSLVCITGASGEEVTGTVAVEVPGRGHGVSEFSFAYQDPKVHSIFPA  
 RGPRAGGTRLTLHGSKLLTGRLEDIRVVVGDQPCHLLLEQQSEQLHCETGYPVPAPLPTVTLFGATERRLQH  
 GQFKYTSDPNVT SVGPKSFFSFGGREIWWRGQDLDDVQRPRIRVTVVPRQHGQGLAQKQHVVEKFEFEEPCLVN  
 SSHLLMCRTPALPGPPWDSGVQVEFILDNMVDFDAALSPTPFSYEADPTLRSLNPEDPSTPFRHKPGSVFVSVE  
 GENLDLAMSKEEVVAMIGDGPCVVKTLTRNHLYCEPPVEQPLPHPHALREAPDALPEFTVQMGNLRFSGLGHVQ  
 YDGESVPAFPVAAQVGLGVGTSLLALGVIIVLVIYRRKSKQALRDYKVKVQIQLENLESSVRDRCKKEFTDLMT  
 EMTDLTSDLLGSGIPFLDYKVAERVFFPGYRESPLHRDLGVPSRRPTVEQGLGQLSNLLNSKFLTKFIHT  
 LESQRTFSARDRAYVASLLTVALHGKLEYFTDILRLLS DLVAQYVAKNPKMLLRRTETVVEKLLTNWMSICL  
 YTFVRDSVGEPLYMLFRGIKHQVDKGFVDSVTGKAKYTLNDNRLLREDVEYRPLTLNALLAVGPGAGEAQCVP  
 VKVLDLDCDTISQAKEKMLDQLYKGVPLAQRPDSCITLDVEWRSVAGHLILSDEDVTSELQGLWRRRLNTLQHYKV  
 PDGATVALVPCLTKHILRENQDYVPGERTPMLEDVDEGGIRPWHLVKPSDEPEPPRRRGRSLGGGERERAKAI  
 PEIYLTRLLSMKGT LQKFMDLDFQVILSTSRPVPLAVKYFFDLDLDEQAQQHGISDQDTIHIWKTNLSLPLRFWI  
 NI IKNPQVFVFDVQTSNDMDAVLLVIAQTFMDACTLADHKLGRDSPINKLLYARDIPRYKQMVVERYADIRQTV  
 PASDQEMNSVLAELSRNCSADL GARVALHELYKYINKYYDQIITALEEDGTAQKMQLGYRLQQIAAAVENKVT  
 DL\*

>ENSMUSP00000055803\_c.454:A>C\_p.D152A ENSMUST00000063042.11|G1b1-  
 201|ENSMUSG00000045594|+|chr9:g.114250812:A>C

MLRVPLCTPLPLALLQLLGAHGIYNVTQRTFKLDYSRDRFLKDGQPFYRISGSIHYFRIPRFYWEDRLLKM  
KMAGLNAIQMYPVWNFHEPQPGQYEFSGDRDVEHFIQLAHELGLLVILRPGPYICAEDWDMGGLPAWLLKQSI  
VLRSSAPDYLVAVDKWLAVLLPKMKPLLYQNGGPIITVQVENEYGSYFACDYDYLRLVHRFRYHLGNDVILF  
TTDGASEKMLKCGTLQDLYATVDFGTGNNITQAFVLVQRKFEPKGPLINSEFYTGWLDHWGKPHSTVKTKLAT  
SLYNLLARGANVNLYMFIGGTNFAYWNGANTPYEPQPTS YDYDAPLSEAGDLTKKYFALREVIQMFKEVPEGP  
IPPSTPKFAYGKVALRKFKTVAEALGILCPNGPVKSLYPLTFTQVKQYFGYVLYRRTLPQDCSNPKPIFSSPF  
NGVRDRAYVSVDGVPQGILDRNLTALNIRGKAGATLDILVENMGRVNYGRFINDFKGLISNMTINSTVLTNW  
INGFNLGRYWPTMGPKTLFVPRNILTTSAPNNITVLELEFAPCSEGTPPELCTVEFVDTTPVIS\*  
>ENSMUSP00000149937\_c.208:A>C\_p.D70A ENSMUST00000217583.2|Glb1-  
202|ENSMUSG00000045594|+|chr9:g.114250812:A>C  
MYVFPWNFHEPQPGQYEFSGDRDVEHFIQLAHELGLLVILRPGPYICAEDWDMGGLPAWLLKQSI  
LVAVDKWLAVLLPKMKPLLYQNGGPIITVQVENEYGSYFACDYDYLRLVHRFRYHLGNDVILF  
TTDGASEKMLKCGTLQDLYATVDFGTGNNITQAFVLVQRKFEPKGPLINSEFYTGWLDHWGKPHSTVKTKLAT  
SLYNLLARGANVNLYMFIGGTNFAYWNGANTPYEPQPTS YDYDAPLSEAGDLTKKYFALREVIQMVGPSNSQ  
RAGLLGGLL\*  
>ENSMUSP00000107069\_c.97:A>T\_p.Q33L ENSMUST00000111442.3|Ccr5-  
202|ENSMUSG00000079227|+|chr9:g.123924496:A>T  
MDFQGSVPTYSYDIDYGMSAPCQKINVKQIAALLLPPLYSLVFI FGFVGNMMVFLILISCKKLSVTDIYLLN  
LAISDLLFLLTLPFWAHYAANEWVFGNIMCKVFTGLYHIGYFGGIFFIILLTIDRYLAIHVAVFALKVRTVNF  
GVITSVVTWAVAVFASLPEIIFTRSQKEGFHYTCSPHFPHTQYHFWSFQTLKMVILSLILPLLVMVICYSGI  
LHTLFRRCRNEKRRHRAVRLIFAIMIVYFLFWTPYINIVLLLTTFQEFFGLNNC SSSNRLDQAMQATETLGMTHC  
CLNPVIYAFVGEKFRSYLSVFFRKHMVKRFRCKRCSIFQDNPDRASSVYTRSTGEHEVSTGL\*  
>ENSMUSP00000127328\_c.97:A>T\_p.Q33L ENSMUST00000171499.3|Ccr5-  
205|ENSMUSG00000079227|+|chr9:g.123924496:A>T  
MDFQGSVPTYSYDIDYGMSAPCQKINVKQIAALLLPPLYSLVFI FGFVGNMMVFLILISCKKLSVTDIYLLN  
LAISDLLFLLTLPFWAHYAANEWVFGNIMCKVFTGLYHIGYFGGIFFIILLTIDRYLAIHVAVFALKVRTVNF  
GVITSVVTWAVAVFASLPEIIFTRSQKEGFHYTCSPHFPHTQYHFWSFQTLKMVILSLILPLLVMVICYSGI  
LHTLFRRCRNEKRRHRAVRLIFAIMIVYFLFWTPYINIVLLLTTFQEFFGLNNC SSSNRLDQAMQATETLGMTHC  
CLNPVIYAFVGEKFRSYLSVFFRKHMVKRFRCKRCSIFQDNPDRASSVYTRSTGEHEVSTGL\*  
>ENSMUSP00000107069\_c.728:G>A\_p.M243I ENSMUST00000111442.3|Ccr5-  
202|ENSMUSG00000079227|+|chr9:g.123925127:G>A  
MDFQGSVPTYSYDIDYGMSAPCQKINVKQIAAQLLPPLYSLVFI FGFVGNMMVFLILISCKKLSVTDIYLLN  
LAISDLLFLLTLPFWAHYAANEWVFGNIMCKVFTGLYHIGYFGGIFFIILLTIDRYLAIHVAVFALKVRTVNF  
GVITSVVTWAVAVFASLPEIIFTRSQKEGFHYTCSPHFPHTQYHFWSFQTLKMVILSLILPLLVMVICYSGI  
LHTLFRRCRNEKRRHRAVRLIFAIMIVYFLFWTTYNIVLLLTTFQEFFGLNNC SSSNRLDQAMQATETLGMTHC  
CLNPVIYAFVGEKFRSYLSVFFRKHMVKRFRCKRCSIFQDNPDRASSVYTRSTGEHEVSTGL\*  
>ENSMUSP00000107069\_c.753:C>A\_p.P252T ENSMUST00000111442.3|Ccr5-  
202|ENSMUSG00000079227|+|chr9:g.123925152:C>A  
MDFQGSVPTYSYDIDYGMSAPCQKINVKQIAAQLLPPLYSLVFI FGFVGNMMVFLILISCKKLSVTDIYLLN  
LAISDLLFLLTLPFWAHYAANEWVFGNIMCKVFTGLYHIGYFGGIFFIILLTIDRYLAIHVAVFALKVRTVNF  
GVITSVVTWAVAVFASLPEIIFTRSQKEGFHYTCSPHFPHTQYHFWSFQTLKMVILSLILPLLVMVICYSGI  
LHTLFRRCRNEKRRHRAVRLIFAIMIVYFLFWTTYNIVLLLTTFQEFFGLNNC SSSNRLDQAMQATETLGMTHC  
CLNPVIYAFVGEKFRSYLSVFFRKHMVKRFRCKRCSIFQDNPDRASSVYTRSTGEHEVSTGL\*  
>ENSMUSP00000152718\_c.860:T>G\_p.I287M ENSMUST00000223295.2|Sult3a2-  
202|ENSMUSG00000090298|-|chr10:g.33642441:A>C  
MDNKDEDIFKFKGYNFLRALVSM DIVKNMEDYEIRDDDI FIVTYPKSGTTWTQQILCLICFESH  
RNGTENIATIDRIPSEFYNIHKLDYAKMPSPRIFTSHIPYLLVPKGLKDKKAKIIYVYRNP  
KDVLI SFFHFSNLMVVLKASDTLENFMQRFLNGLVGS LWFHDHIRGWYEHRRDFNIMFMSFEDM  
KDLRSSLVKICSFLEKELSEEDMDAVVRQATFEKMKADPRANNEHIKDELGTRNNTGAFLR  
KGI VGDWKHYLTVDQSERFDKIFHMNMKNIPLKFMWNINEK\*  
>ENSMUSP00000127159\_c.860:T>G\_p.I287M ENSMUST00000165904.2|Sult3a2-  
201|ENSMUSG00000090298|-|chr10:g.33642441:A>C  
MDNKDEDIFKFKGYNFLRALVSM DIVKNMEDYEIRDDDI FIVTYPKSGTTWTQQILCLICFESH  
RNGTENIATIDRIPSEFYNIHKLDYAKMPSPRIFTSHIPYLLVPKGLKDKKAKIIYVYRNP  
KDVLI SFFHFSNLMVVLKASDTLENFMQRFLNGLVGS LWFHDHIRGWYEHRRDFNIMFMSFEDM  
KDLRSSLVKICSFLEKELSEEDMDAVVRQATFEKMKADPRANNEHIKDELGTRNNTGAFLR  
KGI VGDWKHYLTVDQSERFDKIFHMNMKNIPLKFMWNINEK\*  
>ENSMUSP00000143429\_c.1624:G>T\_p.R542M ENSMUST00000200401.2|Crybg1-  
202|ENSMUSG00000019866|-|chr10:g.43879562:C>A  
MPLSPSPSQDPREASPSKAPKKHPTFHIWRSKKKQSPSSSCGVFI PHPPGAFGETRAFLV  
PDGSGQGEPELTLHG GELQLSDTPSEVPGPSSTESAMLKKSRAQPPEDTRKPVLEKLGTLFTAGRRR  
NTRNGLESPTNSNSKSAS

AKVPKTGSEKTKAQDNQLKATDAGEAGPRQEAEGQPVESCVQATPCDAEQSPCSSINVGVVQQCHSNDSAQLE  
 PLQAEGETFPDATTAAKELLHSSPGNRSRQESAETPARSPGEEALPGAGLQPETARGVSGSPPEEHLVGGVGE  
 APDGAPGVGAEAGSLGAPGDVPPGEPQAQDAETSRTAGSVDRAPHTKVLTLTDIYLSKTEVAQVDEPASIAPG  
 TDDCEDSDMEKRSSGRRSGRRRKSQKSTDSPGADAVAPESAADKDEAVFDDEVAPDAAAENCLAERKVKSVQA  
 VPDGGAAPVACPEPKASSCPRGQPRGEPDRSKPLSPTKRKGRSRVPEAVPSSPGSGSRAPAKESPPKRAPAAA  
 DSGEAAGRVPRELTVKSSSLLPEIKPEHKMGPLPHHFDSDRGDGGRRSGTGASDADGLKPRNQFGVGRSTVTT  
 KVTLPARPKEHVELNLKTPKNPDSLNEHNSFSQPVHKGNTANKISLFENKRANSSPRHPDVRNTRNPPSSKT  
 FVGRAKLNLAKKAKEMEQQPEKKAVSTSHQNGLVVKEPSAEGKGTAVPVPREEIRPATRGGEGESTKDQVLRPE  
 PEQSDKLDVQTDAYPSHPGPTALVPVKDSELSGEGQPEAADS KGPVLNNTSDVAQDIAAICDAREAPPKPQD  
 AFSDSQPASAAESAESSLPSPAPISVDAPQDGCQVQVPCISVPCTALEVSENHNGCVSPVSPHTEKTPISKPG  
 VGEASPPSTPEHSPETMGKDCPSKVLVQVRSFVLPVENPQDVSSQVISESSEVREAQLPSCHSNEPEVSVVTT  
 CVPQHEDAPDTPSKDIHHREGHVAQSRPHITQSGPEKAPPIQSSSGMPQTAEFILTHSPSSRSHAEGPQRPGQ  
 DATSPLTPTRLLNISAGSDNSVLDSSSDMEKFTEI IKKMSAVCVPQKKKARVPNSPAPHFAMPPIHEDSLE  
 KVFDPNVFTIIGLKKKESLAEVSPALHLLQNHDPISKLRAKRASTEQSI VFKSLHTNSNGKSEPQTTSEASDK  
 ENRDINSGGVKRSLENSTLFSSMLSSLPQDKVFSVSVTSMSTSFSTSQNSSVSVQSSVVQPRKEGGLPCG  
 SDKEQPHLAPHNSLKVFNFNSSNTSRLGSSHMEKYPQKEGSKEDVNSQGNLQLPENNLSDLPKLNKSDGVEGI  
 LKSNLPNVGSVDADFLGLFKASRYDPGHSFSGMSLSDSMTLRGSMHSKLNPRPGKVVI FSEPVDVSEECIEVFG  
 DIQDCSSWRSLSPVIVKVVVRCWILYEKANFEGHSLALEEGELELSSIWGTEEMLDEEAESDKPVVIGSIRHV  
 VQDYRISQIDLTFTEPEGLGLLNSYFDDTEEMQGFVPMQKTCISKVHWGTWLIYEEPGFQGVPFILPEGEYDPL  
 SFDWTEEAYIGSMRPLKMGGRKVEFPTDPKVVIYEKPSFEGRCMELETEMSSFIMEGGETEETTGNNNLPFTS  
 VGSMLKVLRGVWVAYEKCGFTGHQYLLEEGEYRDWNAWGGYNGELQSLRPILSDFSNAHMIMYSEKNFGSKGSS  
 IDVLGIVANLKETGYGVKTQSINVLSGVWVAYENPDTGEOYVLDKGFYTSFEDWGGKNCISSVQPICLDSF  
 TGPRRRNQIHLFSEPFQGGQSQSFEETIDQIDDSFQTKSCRVLGGSWVAYDGENFSGNQYVLEEGHYPCLSAM  
 GCLPGATLKLRFIDFEFSEPTIILFERENFKGKIELNAETVNLRS LGFNTQIRSVRVVGGIIVWVTEYEGNYR  
 GRQFLLSPAEPVNWYEFSAQRQIGSLRPFQAQKRIYFRLRNKATGLFMSTNGNLEDLKLRLVQVMEVGDADDQI  
 WIYQEGCIKRIAEDCCLTIVGSLVTS GSKLGLALDQNVDSQFWCMKSDGRIYSKMKPNLVLDVKGAQYDQN  
 HIILNTVSTEKLTQVWEAMVL\*

>ENSMUSP00000020017\_c.502:G>T\_p.R168M ENSMUST00000020017.14|Crybg1-  
 201|ENSMUSG00000019866|-|chr10:g.43879562:C>A  
 MEKRSSGRRSGRRRKSQKSTDSPGADAVAPESAADKDEAVFDDEVAPDAAAENCLAERKVKSVQAVPDGGAAPV  
 ACPEPKASSCPRGQPRGEPDRSKPLSPTKRKGRSRVPEAVPSSPGSGSRAPAKESPPKRAPAAAADSGEEAGR  
 VRELTVKSSSLLPEIKPEHKMGPLPHHFDSDRGDGGRRSGTGASDADGLKPRNQFGVGRSTVTTKVTLPARP  
 HVELNLKTPKNPDSLNEHNSFSQPVHKGNTANKISLFENKRANSSPRHPDVRNTRNPPSSKTFVGRAKLN  
 AKKAKEMEQQPEKKAVSTSHQNGLVVKEPSAEGKGTAVPVPREEIRPATRGGEGESTKDQVLRPEPEQSDKLDV  
 QTDAYPSHPGPTALVPVKDSELSGEGQPEAADS KGPVLNNTSDVAQDIAAICDAREAPPKPQDAFSDSQPAS  
 AAESAESSLPSPAPISVDAPQDGCQVQVPCISVPCTALEVSENHNGCVSPVSPHTEKTPISKPGVGEASPPST  
 PEHSPETMGKDCPSKVLVQVRSFVLPVENPQDVSSQVISESSEVREAQLPSCHSNEPEVSVVTT CVPQHEDAP  
 DTS PKDIHHREGHVAQSRPHITQSGPEKAPPIQSSSGMPQTAEFILTHSPSSRSHAEGPQRPGQDATSPLTP  
 RLLNISAGSDNSVLDSSSDMEKFTEI IKKMSAVCVPQKKKARVPNSPAPHFAMPPIHEDSLEKVFDPNVFT  
 IIGLKKKESLAEVSPALHLLQNHDPISKLRAKRASTEQSI VFKSLHTNSNGKSEPQTTSEASDKENRDINSGG  
 VKRSLENSTLFSSMLSSLPQDKVFSVSVTSMSTSFSTSQNSSVSVQSSVVQPRKEGGLPCGSDKEQPHLA  
 PHNSLKVFNFNSSNTSRLGSSHMEKYPQKEGSKEDVNSQGNLQLPENNLSDLPKLNKSDGVEGI LKSNL  
 PNVGSVDADFLGLFKASRYDPGHSFSGMSLSDSMTLRGSMHSKLNPRPGKVVI FSEPVDVSEECIEVFGDI  
 QDCSSWRSLSPVIVKVVVRCWILYEKANFEGHSLALEEGELELSSIWGTEEMLDEEAESDKPVVIGSIRHV  
 VQDYRISQIDLTFTEPEGLGLLNSYFDDTEEMQGFVPMQKTCISKVHWGTWLIYEEPGFQGVPFILPEGEYDPL  
 SFDWTEEAYIGSMRPLKMGGRKVEFPTDPKVVIYEKPSFEGRCMELETEMSSFIMEGGETEETTGNNNLPFTS  
 VGSMLKVLRGVWVAYEKCGFTGHQYLLEEGEYRDWNAWGGYNGELQSLRPILSDFSNAHMIMYSEKNFGSKGSS  
 IDVLGIVANLKETGYGVKTQSINVLSGVWVAYENPDTGEOYVLDKGFYTSFEDWGGKNCISSVQPICLDSF  
 TGPRRRNQIHLFSEPFQGGQSQSFEETIDQIDDSFQTKSCRVLGGSWVAYDGENFSGNQYVLEEGHYPCLSAM  
 GCLPGATLKLRFIDFEFSEPTIILFERENFKGKIELNAETVNLRS LGFNTQIRSVRVVGGIIVWVTEYEGNYR  
 GRQFLLSPAEPVNWYEFSAQRQIGSLRPFQAQKRIYFRLRNKATGLFMSTNGNLEDLKLRLVQVMEVGDADDQI  
 WIYQEGCIKRIAEDCCLTIVGSLVTS GSKLGLALDQNVDSQFWCMKSDGRIYSKMKPNLVLDVKGAQYDQN  
 HIILNTVSTEKLTQVWEAMVL\*

>ENSMUSP00000122041\_c.256:A>T\_p.E86V ENSMUST00000151623.8|Smpd13a-  
 203|ENSMUSG00000019872|+|chr10:g.57678545:A>T  
 MALSGQFWHVTDLHLDPTYHI TDDR TKVCASSKGANASNPGPF GDVLCDSPYQLILSAFDFIKNSGQEASFMI  
 WTGDSPPHVPVPLSTGTVIKVI TNMTMTVQ

>ENSMUSP00000020022\_c.346:A>T\_p.E116V ENSMUST00000020022.8|Smpd13a-201|ENSMUSG00000019872|+|chr10:g.57678545:A>T  
MALLGNFLCCLLVAWLCGPGGLVPLAPADRAPAVGQFWHVTDLHLDPTYHITDDRTKVCASSKGANASNP GPF  
GDVLCDSPLYQLILSAFDFIKNSGQEASFMiWTGDSPPHVVPVVLSTGTVIKVIITNMTMTVQNLFNQLQVFPAL  
GNHDYWPQDQLPIVTSKVYSAVADLWKPWLGEAAISTLKKGGFYSQKVASNPGLRIISLNTNLYYGNIMTLN  
KTDPANQFEWLENTLNSSLWNKEKVYIIAHVPVGYLPYATDTPAIRQYNEKLLDIFRRYSSVIAGQFYGHTH  
RDSLMLVSDKNGNPLNSVFVAVPTPVKGVLOKETNPNPGVRLFQYKPGDYTLDMVQYYLNLTEANLKGESNW  
TLEYVLTQAYSVADLQPKSLYALVQQFATKDSKQFLKYYHYFVSYDSSATCDQHCKTLQVCAIMNLDMSYD  
DCLKQHL\*

>ENSMUSP00000020258\_c.2373:G>A\_p.V792I ENSMUST00000020258.10|Herc4-201|ENSMUSG00000020064|+|chr10:g.63147282:G>A  
MLCWGNASYGQLGLGGIDEIIVLEPRRSDFVFNKKVRDVGCGLRHTVFVLDGTVYTCGCNDLGLGHEKSRK  
KPEQVVALDAQNIVAVACGEAHTLALNDKGQVYAWGLDSDGQLGLQGSEECIRVPRNIKSLSDIQIVQVACGY  
YHSLALSKASEVFCWGQNKYQGLGLGIDCQKQTSPLIKSLLGIPFMQVAAGGAHSFVLTLSGAI FGWGRNKF  
GQLGLNDENDRYVPNLLKSLRSQKIVYICCGEDHTAALTKEGGVFTFGAGGYGQLGHNSTSHENPRKVFELM  
GSIVTQVACGRQHTSAFVPSSGRIYSFGLGGNGQLGTGSTSNRKSFPFTVKGNWFSYNGQCPQDIGSEDFCVK  
RIFSGGDQSFSSHYSPPQNGPDDFRCSDPKQIWTVNEALIQKWSYPSGRFPVEIANEIDGTFSSSGCLNG  
SFLAISNDHDYRTGTRFSGVDMNAARLLFHKLIIQPDHPQISQQVAASLEKNLIPKLTSSLDPVEALRFYLTLP  
ECPLMSDCNNFTTIAIPFGTALVNLEKAPLKVLENWWSVLEPPLFLKIVELFKEVHVHLLKLYKIGIPPSERR  
IFNSFLHTALKVLEILHRVNEKTGQLIQYDKFYIHEVQELIDIRNDYINWVQQQAYGVLDIPIVICTYPFV  
DAQAKTTLTQTDVAVLQMQMAIDQAHQNVSSSLFPLVIESVNPCLILVVRRENIVGDAMEVLRKTKNIDYKPKL  
KVI FVGEDAVDAGGVRKEFFLLIMRELLDPKYGMFRYYEDSRLIWFSDKTFEDSDLFHLIGIICGLAIYNFTI  
VDLHFPALYKLLKRP SLDDLKELMPAVGRSMQQLLDYPEDDIEETFCLNFTITVENFGATEVKELVNLGA  
DTAVNRQNRQEFVDAYVDYIFNKSVASLFDFAFHAGFHKVCGGKVL L LFQPNELQAMVIGNTNYDWKELEKNT  
YKGEYWADHPTIKIFWEV FHELPLEK KQFLLFLTGS DRIPILGMKSLKLV IQSTGGGESYLPVSHTCFNLLD  
LPKYTEKETLRCKLIQAIDHNEGFSLI\*

>ENSMUSP00000151886\_c.2397:G>A\_p.V800I ENSMUST00000219577.2|Herc4-208|ENSMUSG00000020064|+|chr10:g.63147282:G>A  
MLCWGNASYGQLGLGGIDEIIVLEPRRSDFVFNKKVRDVGCGLRHTVFVLDGTVYTCGCNDLGLGHEKSRK  
KPEQVVALDAQNIVAVACGEAHTLALNDKGQVYAWGLDSDGQLGLQGSEECIRVPRNIKSLSDIQIVQVACGY  
YHSLALSKASEVFCWGQNKYQGLGLGIDCQKQTSPLIKSLLGIPFMQVAAGGAHSFVLTLSGAI FGWGRNKF  
GQLGLNDENDRYVPNLLKSLRSQKIVYICCGEDHTAALTKEGGVFTFGAGGYGQLGHNSTSHENPRKVFELM  
GSIVTQVACGRQHTSAFVPSSGRIYSFGLGGNGQLGTGSTSNRKSFPFTVKGNWFSYNGQCPQDIGSEDFCVK  
RIFSGGDQSFSSHYSPPQNGPDDFRCSDPKQIWTVNEALIQKWSYPSGRFPVEIANEIDGTFSSSGCLNG  
SFLAISNDHDYRTGTRFSGVDMNAARLLFHKLIIQPDHPQISQQVAASLEKNLIPKLTSSLDPVEALRFYLTLP  
ECPLMSDCNNFTTIAIPFGTALVNLEKAPLKVLENWWSVLEPPLFLKIVELFKEVHVHLLKLYKIGIPPSERR  
IFNSFLHTALKVLEILHRVNEKTGQLIQYDKFYIHEVQELIDIRNDYINWVQQQAYGVDVSHGVTELDIPIV  
ICTYPFVFD AQAKTTLTQTDVAVLQMQMAIDQAHQNVSSSLFPLVIESVNPCLILVVRRENIVGDAMEVLRKTK  
NIDYKPKLKVI FVGEDAVDAGGVRKEFFLLIMRELLDPKYGMFRYYEDSRLIWFSDKTFEDSDLFHLIGIICG  
LAIYNFTIVDLHFPALYKLLKRP SLDDLKELMPAVGRSMQQLLDYPEDDIEETFCLNFTITVENFGATEV  
KELVNLGADTAVNRQNRQEFVDAYVDYIFNKSVASLFDFAFHAGFHKVCGGKVL L LFQPNELQAMVIGNTNYDW  
KELEKNTYKGEYWADHPTIKIFWEV FHELPLEK KQFLLFLTGS DRIPILGMKSLKLV IQSTGGGESYLPV  
HTCFNLLDLPKYTEKETLRCKLIQAIDHNEGFSLI\*

>ENSMUSP00000020258\_c.2955:A>C\_p.S986R ENSMUST00000020258.10|Herc4-201|ENSMUSG00000020064|+|chr10:g.63153073:A>C  
MLCWGNASYGQLGLGGIDEIIVLEPRRSDFVFNKKVRDVGCGLRHTVFVLDGTVYTCGCNDLGLGHEKSRK  
KPEQVVALDAQNIVAVACGEAHTLALNDKGQVYAWGLDSDGQLGLQGSEECIRVPRNIKSLSDIQIVQVACGY  
YHSLALSKASEVFCWGQNKYQGLGLGIDCQKQTSPLIKSLLGIPFMQVAAGGAHSFVLTLSGAI FGWGRNKF  
GQLGLNDENDRYVPNLLKSLRSQKIVYICCGEDHTAALTKEGGVFTFGAGGYGQLGHNSTSHENPRKVFELM  
GSIVTQVACGRQHTSAFVPSSGRIYSFGLGGNGQLGTGSTSNRKSFPFTVKGNWFSYNGQCPQDIGSEDFCVK  
RIFSGGDQSFSSHYSPPQNGPDDFRCSDPKQIWTVNEALIQKWSYPSGRFPVEIANEIDGTFSSSGCLNG  
SFLAISNDHDYRTGTRFSGVDMNAARLLFHKLIIQPDHPQISQQVAASLEKNLIPKLTSSLDPVEALRFYLTLP  
ECPLMSDCNNFTTIAIPFGTALVNLEKAPLKVLENWWSVLEPPLFLKIVELFKEVHVHLLKLYKIGIPPSERR  
IFNSFLHTALKVLEILHRVNEKTGQLIQYDKFYIHEVQELIDIRNDYINWVQQQAYGVLDIPIVICTYPFV  
DAQAKTTLTQTDVAVLQMQMAIDQAHQNVSSSLFPLVIESVNPCLILVVRRENIVGDAMEVLRKTKNIDYKPKL  
KVI FVGEDAVDAGGVRKEFFLLIMRELLDPKYGMFRYYEDSRLIWFSDKTFEDSDLFHLIGVICGLAIYNFTI  
VDLHFPALYKLLKRP SLDDLKELMPAVGRSMQQLLDYPEDDIEETFCLNFTITVENFGATEVKELVNLGA  
DTAVNRQNRQEFVDAYVDYIFNKSVASLFDFAFHAGFHKVCGGKVL L LFQPNELQAMVIGNTNYDWKELEKNT

YKGEYWADHPTIKIFWEVVFHELPLEKKKQFLLFLTGRDRIPILGMKSLKLVIQSTGGGESYLPVSHTCFNLLD  
 LPKYTEKETLRCKLIQAIDHNEGFSLI\*  
 >ENSMUSP00000151886\_c.2979:A>C\_p.S994R ENSMUST00000219577.2|Herc4-  
 208|ENSMUSG00000020064|+|chr10:g.63153073:A>C  
 MLCWGNASYGQLGLGGIDEIIVLEPRRSDFVFNKKVRDVGCGLRHTVFLDDGTVYTCGCNDLGGQLGHEKSRK  
 KPEQVVALDAQNIVAVACGEAHTLALNDKGQVYAWGLDSDGQLGLQGSEECIRVPRNIKSLSDIQIVQVACGY  
 YHSLALS KASEVFCWGQNKYQQLGLGIDCQKQTSPLIKSLLGIPFMQVAAGGAHSFVLTLSGAI FGWGRNKF  
 GQLGLNDENDRYVPNLLKSLRSQKIVYICCGEDHTAALTKEGGVFTFGAGGYQLGHNSTSHENPRKVFELM  
 GSIVTQVACGRQHTSAFVPSGRIYSFGLGGNGQLGTGSTS NRKSPFTVKGNWFSYNGQCPQDIGSEDFCVK  
 RIFSGGDQSF SHYSSPQNCGPPDDFRCS DSPKQIWTVNEALIQKWLSPSGRFPVEIANEIDGTFSSSGCLNG  
 SFLAISNDHYRTGTRFSGVDMNAARLLFHKL IQPDHPQISQQVAASLEKNLIPKLTSSLPDVEALRFYLTLP  
 ECPLMSDCNNFTTIAIPFGTALVNLEKAPLKVLENWWSVLEPPLFLKIVELFKEVVVHLLKLYKIGIPPSERR  
 IFNSFLHTALKVLEILHRVNEKTGQLIQYDKFYIHEVQELIDIRNDYINWVQQQAYGVDVSHGVTELDIPVT  
 ICTYPFVFDQAQKTTLLQTDVAVLQMQMAIDQAHQNVSSFLFVIESVNPCLILVVRRENI VGDAMEVLRKTK  
 NIDYKKPLKVI FVGEDAVDAGGRKEFFLLIMRELLDPKYGMFRYYEDSRLIWFSDKTFEDSDFHLIGVICG  
 LAIYNFTIVDLHFPLALYKLLKRRKPSLDDLKELMPAVGRSMQQLLDYPEDDIEETFCLNFTITVENFGATEV  
 KELVLNGADTAVNRQRQEFVDAVYDI FNKSVASLFD AFHAGFHKVC GGKVL LLLFQPNE LQAMVIGNTYNDW  
 KELEKNTEYKGEYWADHPTIKIFWEVVFHELPLEKKKQFLLFLTGRDRIPILGMKSLKLVIQSTGGGESYLPVS  
 HTCFNLLDLPKYTEKETLRCKLIQAIDHNEGFSLI\*  
 >ENSMUSP00000041298\_c.142:A>C\_p.E48A ENSMUST00000043317.7|Dnajc12-  
 201|ENSMUSG00000036764|+|chr10:g.63231628:A>C  
 MDAIILNYRPEGSEDYIALLGCDELSSVEQILAEFKIRALECHPDKHPANSKAVETFOQLQKAKEILCNAESRA  
 RYDHWRRSQMSMPFEQWEALADSVKTSMHWA VRSK KDLML EGSQFTTSSVPNKERSEQRET KKGDPDSNPEK  
 MKQKEPKFPPEEGISPQNPDSPLSDLNCGHLRFRWSGDAPSELLRKRFRNYEI\*  
 >ENSMUSP00000079789\_c.301:A>G\_p.Q101R ENSMUST00000080995.8|Tmem26-  
 201|ENSMUSG000000060044|+|chr10:g.68584237:A>G  
 MEGLVLLKALVTRLLFLLHSLVAVWRVTWVKEEHRYWLLALLNLLLVLETVLT LKFKRGRGYKWLSPAIFVYL  
 VNIMP SLW LLEMHHGNQY CSTQSERMARNFSRRGDVNQTLSSHRATNGMGNILELARGFVDNLSMVCEPVWTL  
 GLHQ TLLL LIL IIGRWLLPIGGTITRDQLSEL LLMFVGTAA DILEFTTETLKENNVRTNPTLVSGILVVTWWSM  
 LQFPDLDAVQLKLVCPASVKARGFLRVFLCQYSADLWAI GLSFFIQDGPFLVVRVLVMIYFKVINHMLVFFAV  
 KNSLVMALHFYRLVALIMATRDFMRDHPESP KPEHSGPDQPS ESGPSEWEDASPEALPLRTSPVTSEESYPTT  
 P\*  
 >rs254345418\_ENSMUSP00000151917\_c.184:A>C\_p.D62A  
 ENSMUST00000219981.2|Fgf22-203|ENSMUSG00000020327|+|chr10:g.79591137:A>C  
 MRSRLWLGLAWLLLARAPGAPGGYPHLEGDVRRWRRLFSSTHFFLRVDLGGRVQGTWRWRHGQASIVEIRSVRVG  
 TVVIKAVYSGFYVAMNRRGRLYGSVPGAHRRERLQHIRLATLEAPRPTHVPGT\*  
 >rs254345418\_ENSMUSP00000151743\_c.184:A>C\_p.D62A  
 ENSMUST00000219228.2|Fgf22-202|ENSMUSG00000020327|+|chr10:g.79591137:A>C  
 MRSRLWLGLAWLLLARAPGAPGGYPHLEGDVRRWRRLFSSTHFFLRVDLGGRVQGTWRWRHGQASIVEIRSVRVG  
 TVVIKAVYSGFYVAMNRRGRLYGSRVYSVDCRFRE RIEENGYNTYASRRWRHRGRPMFLALDSQGI PRQGRRT  
 RRHQLSTHFLPVLVSS\*  
 >rs254345418\_ENSMUSP00000020577\_c.166:A>C\_p.D56A  
 ENSMUST00000020577.4|Fgf22-201|ENSMUSG00000020327|+|chr10:g.79591137:A>C  
 LGLAWLLLARAPGAPGGYPHLEGDVRRWRRLFSSTHFFLRVDLGGRVQGTWRWRHGQASIVEIRSVRVGT VVIKA  
 VYSGFYVAMNRRGRLYGSVSDWRWAATGWQWSVVQTASLTHPPCSG STLWTVGSGSASRRTATHTPRDVG GT  
 AADPCS WHLTAKAFPGKADGHDG TNC PHTSCQSWSRLEGPANGSGMGGTQGLEDP ELNNQGPQRPWANTSL  
 YV  
 >rs242503166\_ENSMUSP00000005069\_c.244:C>T\_p.A82V  
 ENSMUST00000005069.8|Nmrk2-201|ENSMUSG00000004939|-|chr10:g.81036204:G>A  
 MKL IIGIGV TNGGKTTL TNSLLKALPNCCVIHQDDFFKPDQI AVGEDGFQW DVLES LDMETMLSTVQAWV  
 KDPHKFARVHGVSLQSGASDTHVLLLEGFLLYSYRPLVDLYSQRYFLTVPYEECKRRRRSRTYMVPDPPGLFD  
 GHVWPMYQKYRREMEQD GVEVVYLDGMKSP EGLFHQVLEDIQNRLNLS\*  
 >rs108207416\_ENSMUSP000000059533\_c.1078:T>C\_p.V360A  
 ENSMUST000000050867.8|Cactin-201|ENSMUSG000000034889|+|chr10:g.81159581:T>C  
 MRGAGRQMGDRSRSRSVGRGRKQRSRSRGRSRSRSRSRSRSRSRSRSRSHGRSSRRRREHERRRERKR  
 RSRGRSDSEGEQRQKSRRRS QSLRPPRWHSQNQSSCSDS GEERAQGSWARKGHRRSWSPGSSASSLDS PRRS  
 RSPGTATLALSQQQSLQERLRLREERKQOEELLKAFETPEEKRRARLAKKEAKERKKREKMGWGEEMGYTNT  
 DNPFGDNNLLGTFIWNKALEKKGISHLEEKELKERNKRIQEDNRLELQKVKQLRLEREREKAMREQELELLQR

EKEAEHFKTWEEQEDSFHLRQAKLRSKIRIRDGRAKPIDLLAKYISAEDDDLAVEMHEPYTFNLGLTAADMED  
LLEDIQVYMELEQGKNVDFWRDMMTTITETEDEIAKLRKLEASGKGPGERREGVNASVSSDVQSVFKGKTYNQLQV  
IFQIEGKIRAGGNPLDMGYWESLLQQLRAHMARARLRERHQDVLRLQKLFKFKQEQGVESEPLFPILKSEPSA  
AHSPEPEERPPSPGTSVDPVEPVEPEEATAPGEAEGEAEGEAVLMEEDLIQQSLADYDAGRYSRLLTAHELPL  
LDAHVLEPHEDLQRLQLSRQQLQATGDASESAEDIFFRRAREGMQDEAQFSVEMPLGGGRAYLWADKYRPRKP  
RFFNRVHTGFWEWNKYNQTHYDFDNPFPKIVQGYKFNIFYPDLIRKRATPEYFLEACADNRDFAILRFHAGPPY  
EDIAFKIVSREWEYSHRHGFRCQFANGIFQLWFHFKRYRYYR\*

>rs108207416\_ENSMUSP00000151248\_c.136:T>C\_p.V46A  
ENSMUST00000218120.2|Cactin-202|ENSMUSG00000034889|+|chr10:g.81159581:T>C  
QTCSKIRIRDGRAKPIDLLAKYISAEDDDLAVEMHEPYTFNLGLTAADMEDLLEDIQVYMELEQGKNVDFWRD  
MTTITETEDEIAKLRKLEASGKGPGERREGVNASVSSDVQSVFKGKTYNQLQVIFQIEGKIRAGGNPLDMGYWE  
SLLQQLRAHMARARLRERHQDVLRLQKLFKFKQEQGVESEPLFPILKSEPSAAHSPEPEERPPSPGTSVDPVEP  
VEP

>ENSMUSP00000036690\_c.681:G>C\_p.D228H ENSMUST00000039956.6|Slc41a2-  
201|ENSMUSG00000034591|-|chr10:g.83140221:C>G  
MTHSKGRPVTYKTSASPESGGGFVDWTLNLTIQSDKFLNLLSMVPIYQKNQEDRHKKVNIGWQDGLSGAA  
QTFSKRSEPHLDYHEFSEQAFHSSSSGHTPASCSPKYDDYAGYNYCDGREASETTAMLQDEDLSEGGDDVIVE  
TSQRIPKESSGVMAQLILVFPFLLAGFGTVSAGMVLDIVQHWVEFKNVTEVFILVPALLGLKGNLEMTLASRLS  
TAVNVGKMHSPIEKWNLIIGNLALKQVQATVVGFLAAVAIIILGWIPGKYYLSHSILLCSSSVATAFIASLL  
QGIIMVGVIVGSKKTGINPDNVATPIAASFGDLITLAILAWISQGLYSCLETYYYISPLVCAFFLALTPWI  
IAAKHPATRTVLHSGWEPVITAMVISSIGGLILDTTVSDPNLVGIVVYTPVINGIGGNLVAIQASRISTYLHL  
HSIPGELPEEPKGCSPFRFTFFGSGVNNKSAQVLLLFVIPGHLIFLYTIHLMKSGHTSLTVVFFVVVYLFAAVL  
QVFTLLWIADWMVHRFWRKGDPSFSIPYLTALGDLLGTALLALSFFHLWLIGDRDGDVGD\*

>ENSMUSP00000076418\_c.1824:A>C\_p.K609Q ENSMUST00000077175.7|Polr3b-  
201|ENSMUSG00000034453|+|chr10:g.84515653:A>C  
MDVLAEEFGSLTPEQLTAPIPTVEEKWRLLPALFKVKGLVKQHIDSFNYFINVEIKKIMKANEKVTSDADPMW  
YLKYLNIYVGLPDVEESFNVRPVPHECRLRDMTYSAPITVDIEYTRGSQRIIRNALPIGRMPIMLRSSNCV  
LTGKTPAEFAKLNECPLDPGGYFIVKGVKVLILIQEQLSKNRIIVEADRKGAVGASVTSSTHEKKSRTNMAVK  
QGRFYLRHNTLSEDIPIVIFKAMGVESDQEIQVMIGTEEHVMAAFGPSLEECQKAQIFTQMQUALYIGNKVR  
RQRMWGGGPKKTKIEEARELLASTILTHVPVKEFNFRACIYTAVMVRRVILAQQDNKVDDRDYGNKRL  
GQLSLLFEDLFFKFNSEMKKIADQVIPKQRAAQFDVVKHMRQDQITNGMVNAISTGNWSLKRKFMDRQGV  
TQVLSRLSYISALGMMTRISSQFEKTRKVSQPRSLQPSQWMLCPSDTPGEACGLVKNLALMTHITDMDGPI  
IKLAGNLGVEDVNLCCGEELSPNVFLVFLNGNIGLVIRDHKKLVSTFRLMRRAGYINEFVSI  
STNLTDRCVYISSDGGRLCRPYIIVKKQKPAVTNQHMEELAQGYRNFEDFLHESLVEYLDVNEENDCNIALY  
EHTINKDTHLEIEPFTLLGVCAGLIPYPHNQSPRNTYQCAMGKQAMGTIGYNQRNIDTLMYLLAYPQKPMVKT  
KTIELIDFEKLPAGQNATVAVMSYSGYDIEDALVLNKAASLDRGFRCLVYKNAKCTLKRYTNQTFDKVMGP  
MLDAATRKPWRHEILDADGICSPGKVENKQVLVNSMPTVTQIPLGNSVPPQPYKDVPIYTKGATDSYIEK  
VMISSNAEDAFLIKMLLRQTRRPEIGDKFSSRHGQKGVCGLIVPQEDMPFCDSGICPDIIMNPHGFPSR  
MTVGKLIPELLAGKAGVLDGRFHYGTAFGGSKVKDVCEDLVRHGYNYLGDYVTSGITGEPL  
EAYIYFGPVYYQKPKHMVLDKMHARARGPRAVLTRQPTGRSRDGLRLGEMERDCLIGYGASMLL  
LERLMISSDAFEVDVCGQCGLLGYSGWCHYCKSSCHVSSLRIPYACKLLFQELQSMNII  
PRLKLAKYNE\*

>ENSMUSP00000020094\_c.9:C>A\_p.L4I ENSMUST00000020094.8|Epyc-  
201|ENSMUSG00000019936|+|chr10:g.97485571:C>A  
MGMIARVALGLIIIDAVLAAPTTELFNYDSEVYDAILEDGTFTFYNYEHI  
PDNHVENEKVSERLSGNRELLTPGPQLGDNQDEDKDEESTPR  
LIDGSSPQEPFPGLLGPHNTNEFPPTCLLCTCISTTVY  
CDDHELDAIPLPKKTTYFYSRFNRIKKINKNDFASLNDLKR  
IDLTSNLISEIDEDAFRKLPHLQELVLRDNKIKQLPEL  
PNTLTFIDISNNRLGRKGIKQEA  
FKDMYDLHLLYITDNSLDHIPLPLPESL  
RALHLQNNDIEMHEDTFCNVKNTYVRKALEDIRLDG  
NPINLSRTPQAYMCLPRLPIGSFI\*

>ENSMUSP00000100922\_c.9:C>A\_p.L4I ENSMUST00000105285.4|Epyc-  
202|ENSMUSG00000019936|+|chr10:g.97485571:C>A  
MGMIARVALGLIIIDAVLAAPTTELFNYDSEVYDAILEDGTFTFYNYEHI  
PDNHVENEKVSERLSGNRELLTPGPQLGDNQDEDKDEESTPR  
LIDGSSPQEPFPGLLGPHNTNEFPPTCLLCTCISTTVY  
CDDHELDAIPLPKKTTYFYSRFNRIKKINKNDFASLNDLKR  
IDLTSNLISEIDEDAFRKLPHLQELVLRDNKIKQLPEL  
PNTLTFIDISNNRLGRKGIKQEA  
FKDMYDLHLLYITDNSLDHIPLPLPESL  
RALHLQNNDIEMHEDTFCNVKNTYVRKALEDIRLDG  
NPINLSRTPQAYMCLPRLPIGSFI\*

>ENSMUSP00000151842\_c.2284:A>G\_p.E762G ENSMUST00000219263.2|Ppp1r12a-  
205|ENSMUSG00000019907|+|chr10:g.108096896:A>G



MKMADAKQKRNEQLKRWIGSETDLEPPVVKRQKTKVKFDDGAVFLAACSSGDTDEVKLLHRGADINYANVDG  
LTALHQACIDDNVDMVKFLVENGANINQPDNEGWIPLHAAASCGYLDIAEFLIGQGAHVAVNSEGDTPLDIA  
EEEAMEELLQNEVNRQGV DIEAARKEEERVMLRDARQWLNNGHISDVRHAKSGGTALHVAAGKYTEVLKLLI  
QAGYDVNIKDYDGWTPHAAAHWGKEEACRILVDNLCDMETVNVKVGQTAFDVADEDILGYLEELQKKQTL LHS  
EKRDKKSPLIESTANMENNQPQKAFKNKETLIEPEKNASRIESLEHEKADEEEEGKKDESSCSSEDEEDDS  
ESEAEETDKTKPMASVSNHTSSTQAAPAAVTAPTSSNQGTPTS PVKFFPISTTKISPKEEERKDESPASWRL  
GLRKTGSYGALAEISASKEAQKEKDTAGVMRSASSPRLSSSLDNKEKEKDNKGTRLAYVTPTIPRRLASTSDI  
EKENRESSSLRTSSSYTRRKWEDDLKKNSSINEGSTYHRSCSFGRQDDLI SCVSPSTTSTPTVTSAAGLQR  
SLPSSSTAAKTPPGSSSAGTQSSTSNRLWAEDSTEKEKDSAPTAVTIPVAPT VVNAAAPSTTTTLTTTAGTV  
SEVRERRRSYLT PVRDEESESQRKARSRQARQSRSTQGVTLTDLQEA EKTIGRSRSTRTREQENEEKEKEEK  
EKQDKEKQEEKKESEASREDEYKQKYSRTYDGYTRYRVPVSTSSSSAPSSSSLSTLGSTLYASSQLNRPNLSLV  
GITSAYSRGLAKENEREGEKKEEKEGEDKSKQPKSIRERRRPREKRRSTGVSFWTQDSDENEQERQSDTEDGS  
SKRETQTDVSRYDSSSTSSSDRYDSSLGRSASYSYLEDKPYSSRLEKDDSTDFKKLYEQILAENEKLAQL  
HDTNMELTDLKLQLEKATQRQERFADRSQLEMEKRERRALERRISEMEEELKMLPDLKADNQR LKDENGALIR  
VISKLSK\*

>ENSMUSP00000069257\_c.2284:A>G\_p.E762G ENSMUST00000070663.6|Ppplr12a-  
201|ENSMUSG00000019907|+|chr10:g.108096896:A>G

MKMADAKQKRNEQLKRWIGSETDLEPPVVKRQKTKVKFDDGAVFLAACSSGDTDEVKLLHRGADINYANVDG  
LTALHQACIDDNVDMVKFLVENGANINQPDNEGWIPLHAAASCGYLDIAEFLIGQGAHVAVNSEGDTPLDIA  
EEEAMEELLQNEVNRQGV DIEAARKEEERVMLRDARQWLNNGHISDVRHAKSGGTALHVAAGKYTEVLKLLI  
QAGYDVNIKDYDGWTPHAAAHWGKEEACRILVDNLCDMETVNVKVGQTAFDVADEDILGYLEELQKKQTL LHS  
EKRDKKSPLIESTANMENNQPQKAFKNKETLIEPEKNASRIESLEHEKADEEEEGKKDESSCSSEDEEDDS  
ESEAEETDKTKPMASVSNHTSSTQAAPAAVTAPTSSNQGTPTS PVKFFPISTTKISPKEEERKDESPASWRL  
GLRKTGSYGALAEISASKEAQKEKDTAGVMRSASSPRLSSSLDNKEKEKDNKGTRLAYVTPTIPRRLASTSDI  
EKENRESSSLRTSSSYTRRKWEDDLKKNSSINEGSTYHRSCSFGRQDDLI SCVSPSTTSTPTVTSAAGLQR  
SLPSSSTAAKTPPGSSSAGTQSSTSNRLWAEDSTEKEKDSAPTAVTIPVAPT VVNAAAPSTTTTLTTTAGTV  
SEVRERRRSYLT PVRDEESESQRKARSRQARQSRSTQGVTLTDLQEA EKTIGRSRSTRTREQENEEKEKEEK  
EKQDKEKQEEKKESEASREDEYKQKYSRTYDGYTRYRVPVSTSSSSAPSSSSLSTLGSTLYASSQLNRPNLSLV  
GITSAYSRGLAKENEREGEKKEEKEGEDKSKQPKSIRERRRPREKRRSTGVSFWTQDSDENEQERQSDTEDGS  
SKRETQTDVSRYDSSSTSSSDRYDSSLGRSASYSYLEDKPYSSRLEKDDSTDFKKLYEQILAENEKLAQL  
HDTNMELTDLKLQLEKATQRQERFADRSQLEMEKRVAGKSYLLGGTKSSRKKNI\*

>ENSMUSP00000151478\_c.715:A>G\_p.E239G ENSMUST00000219759.2|Ppplr12a-  
208|ENSMUSG00000019907|+|chr10:g.108096896:A>G

VMRSASSPRLSSSLDNKEKEKDNKGTRLAYVTPTIPRRLASTSDIEEKENRESSSLRTSSSYTRRKWEDDLK  
NSSINEGSTYHRSCSFGRQDDLI SCVSPSTTSTPTVTSAAGLQRSLPSSSTAAKTPPGSSSAGTQSRSYLT  
PVRDEESESQRKARSRQARQSRSTQGVTLTDLQEA EKTIGRSRSTRTREQENEEKEKEEKEKQDKEKQEEK  
ESEASREDEYKQKYSRTYDGYTRYRVPVSTSSSSAPSSSSLSTLGSTLYASSQLNRPNLSLVGITSAYSRGLAK  
ENEREGEKKEEKEGEDKSKQPKSIRERRRPREKRRSTGVSFWTQDSDENEQERQSDTEDGSSKRETQTDVSR  
YDSSSTSSSDRYDSSLGRSASYSYLEDKPYSSRLEKDDSTDFKKLYEQILAENEKLAQLHDTNMELTDLKL  
QLEKATQRQERFADRSQLEMEKRERRALERRISEMEEELKMLPDLKADNQR LKDENGALIRVISKLSK\*

>ENSMUSP00000020315\_c.3421:G>T\_p.R1141M ENSMUST00000020315.13|Cand1-  
201|ENSMUSG00000020114|-|chr10:g.119042667:C>A

MASASYHISNLEKMTSSDKDFRDMATNDLMTLQKDSIKLDDDSERKVVKMILRLLLEDKNGEVQNLAVKCLG  
PLVSKVKEYQVETIVDTLCTNMLSDKEQLRDISSIGLKTIVIGELPPASSGSALANVCKKITGR L TSAIAKQE  
DVSVQLEALDIMADMLSRQGGLLVNFHPSILTCLLPQLTSPRLAVRKRTI IALGHLVMSCGNI VFVDLIEHLL  
SELSKNDMSMTTRTYIQCIAAISRQAGHRIGEYLEKI I PLVVKFCNVDDDELREYCIQAFESFVRRCPKEVYP  
HVSTI INICLKYLTYDPNINYDDEDEDENAMDADGGDDDDQGSDDDEYSDDDDMSWKVRRRAAKCLDAVVSTRH  
EMLPEFYKTVSPALIARFKEREENVKADV FHAYLSLLKQTRPVQSWLCPDAMEQGDPTLTM LQSQV PNIVKA  
LHKQMKESVKTRQCCFNMLTELNVNLPGALTQHIPVLVPGIIFSLNDKSSSSNLKIDALSCLYVILCNHSPQ  
VFHPHVQALVPPVACVGDPFYKITSEALLVTQQLVKVIRPLDQPSFDPATPYIKDLFTCTIKR LKAADIDQE  
VKERAI SCMQIICNLGDNLGPDLSENTLQIFLERLKN EITRLT TVKALT IAGSPLKIDLRPVLGEGVPI LAS  
FLRKNQRALKLGTL SLDILIKNYSDSLTAAMIDAVLDELPLI SE SDMHVSQMAISFLT TLAKVY PSSLSKI  
SGSILNELIGLVRPPLQGGALSAMLDFFQALVLTGTNNLGYMDLLRMLTGPVYSQSTAL THKQSYYSIAKCV  
AALTRACPEKGPVAVVQFIQDVKNRSRSTDSIRLLVALLSLGVEGHHIDL SGQLELKS VILEAFSSPSEEVKSA  
SYALGSI SVGNLPEYLPFVLQEI TSQPKRQYLLHSLKEI ISSASVAGLKPVENI WALLKHCECAEEGTRN  
VVAECLGKLTLDIPETLLPRLKGYLISGSSYARSSVVTAVKFTISDHPQPIDPLLKN CIGDFLKTLED PDLNV  
RRVALVTFNSAAHNKPSLIRDLLDSVLP HLYNETKVRKELIREVEMGPFKHTVDDGLDIRKAAFECMYTLLDS

CLDRLDIFEFLNHVEDGLKDHYDIKMLTFLMLVRLSTLCPSAVLQMLDRLVEPLRATCTTKVKANSVKQEFEEK  
QDELKRSAMRAVAALLTIPEAEKSPMLSEFQSQISSNPELAAIFESIQKSSSTNLESMDTS\*  
>ENSMUSP00000122669\_c.89:G>A\_p.W30\* ENSMUST00000152054.8|Tsfm-  
207|ENSMUSG00000040521|-|chr10:g.126866470:C>T  
MSLLRSLRFFPVACTGRSARAVLLQPSQP\*LTfHAGPSLSSAASSKELLMKLRRTGYSFVNCKKALETCCGGD  
LKQAEDWLHKQAQKEGWSKAAKHLGRKTK EGLIGLLQEGNTAVLVEVVLCLSPQQKDVVGVGERGSRGRDLHCF  
GVGFVVPVDLEEPYWRVRLVSLPGSPALKSRVQTFRVLRELAAMNVRWTVYHLCPSGSP\*  
>ENSMUSP00000042134\_c.89:G>A\_p.W30\* ENSMUST00000040560.11|Tsfm-  
201|ENSMUSG00000040521|-|chr10:g.126866470:C>T  
MSLLRSLRFFPVACTGRSARAVLLQPSQP\*LTfHAGPSLSSAASSKELLMKLRRTGYSFVNCKKALETCCGGD  
LKQAEDWLHKQAQKEGWSKAAKHLGRKTK EGLIGLLQEGNTAVLVEVNCETDFVSRNLKFQQLVQQVALGTMA  
HCQNLTDRLSTYSGFLNSSELSLAAGPDREGSLKDQLALAIKGLGENMILKRAAWVKVPSGFYVGSYVHGV  
TQSPSLQNLVLGKYGALVICETPEQIANLEEVGRRLGQHVVMAPLSVGSLDDEPGGETETRMLPQPYPYLLDPS  
ITLGQYVQPQGVTVVDFVRFECGEDEQVAEAE\*  
>ENSMUSP00000113446\_c.89:G>A\_p.W30\* ENSMUST00000120547.2|Tsfm-  
202|ENSMUSG00000040521|-|chr10:g.126866470:C>T  
MSLLRSLRFFPVACTGRSARAVLLQPSQP\*LTfHAGPSLSSAASSKELLMKLRRTGYSFVNCKKALETCCGGD  
LKQAEDWLHKQAQKEGWSKAAKHLGRKTK EGLIGLLQEGNTAVLVEVNCETDFVSRNLKFQQLVQQVALGTMA  
HCQNLTDRLSTYSGFLNSSELSLAAGPDREGSLKDQLALAI GEY L\*  
>ENSMUSP00000050300\_c.772:C>A\_p.T258N ENSMUST00000050901.5|Apof-  
201|ENSMUSG00000047631|+|chr10:g.128105653:C>A  
MHSRLILMSIQLLCYLLLCVPDATSHGEATSVSTVLPSPKLG YQM Q TSDKPLSCQMLLPKSLPGFTYMPVVS  
KFLVGLALRNALEAAGCQAEVWALQLQLYRLGGVEATQALIHHLQELQKSGHTDREVSVDALSSALQLLAWEQ  
PGPKRAKRSISNTDCDNDQE QSVHNVDLLPAVGTYYNLGTALYYAIKNCSDKAKERGRDGAIDLGYDMLMAM  
VGASGGPAGAVITAALKPAMKAGVQRLIQY Y Y Y DEKEVTNPQPEVTT HQPETGKDATTDIGVVEEIAMSNFVSE  
VESTTSNWEWPLLKNYGVLAYKR\*  
>ENSMUSP00000158988\_c.805:C>A\_p.T269N ENSMUST00000238970.2|Apof-  
202|ENSMUSG00000047631|+|chr10:g.128105653:C>A  
MAGLYGCSAPDMHSRLILMSIQLLCYLLLCVPDATSHGEATSVSTVLPSPKLG YQM Q TSDKPLSCQMLLPKSL  
LPGFTYMPVVS KFLVGLALRNALEAAGCQAEVWALQLQLYRLGGVEATQALIHHLQELQKSGHTDREVSVDAL  
SSALQLLAWEQPGPKRAKRSISNTDCDNDQE QSVHNVDLLPAVGTYYNLGTALYYAIKNCSDKAKERGRDGA  
IDLGYDMLMAMVGASGGPAGAVITAALKPAMKAGVQRLIQY Y Y Y DEKEVTNPQPEVTT HQPETGKDATTDIGV  
VEEIAMSNFVSEVESTTSNWEWPLLKNYGVLAYKR\*  
>ENSMUSP0000005825\_c.3072:G>T\_p.D1025Y ENSMUST0000005825.8|Pan2-  
201|ENSMUSG00000005682|+|chr10:g.128153876:G>T  
MNFEGLDPLAEFSPAMHSTLDPVLD AHLNPSLLQNVELDPEGVALEALPVQESVHIMEGVYSELH SVVAE V G  
VPVSVSHFDLHEEMLWVGSHGHATSFFGPALERYSSFQVNGGDDIRQIQSLENGILFLT KNNLKYMARGGLI  
IFDYLLDENEDMHSVLLTDNSTLLVGG LQNHVLEIDLNTVQETQKYAVETPGVTIMRQTNRFFFCGHTSGKVS  
LRDLRSFKVEHEFD AFSGSLSDFDVHGNLLAACGFSSRLTGLACDRFLK VYDLRMMRAITPLQVHVDPAFLRF  
IPTYTSRLAIISQSGQCQFCEPTGLANPADIFHVNVPVPLMTFDVSASKQALAFGDSEGCVHLWTDSPSPS  
NPYSRETEFALPCLVDSLPLDWSQDLLPLSLIPVPLTTDALLSDWPAANSAPAPRRAPPVDAEILRTMKKVG  
FIGYAPNPRTRLRNQIPYRLKESDHEFDNFSQVTE SPTGREEEPLHTVSKKYRKVTIKYSKLGLDFDFKHYN  
KTLFAGLEPHIPNAYCNCMIQVLYFLEPVRLIQNHLCQKEFC LACELGFLFHMLDLSRGDPCQGSNFLRAFR  
TIPEASALGLILADSDEASGKGLARLIQRWNRFILTLQHDMQELEVPQAYRGAGGSFCSSGDSIIGQLFSC  
EMENCSLRCGSETVRASSTLLFTLSYPEDKTKGN YDFAQVLKRSICLEQNTQAWCDNCEKYQPTIQTRNIRH  
LPDILVINCEVNSSKEADFWRLQAEVAFKIAVKKYGGEMKSEFALADRKELRSP EGFLCSSIEELKNVWLPF  
SIRMKMTKNKGLDVCNWADEHELSL GAPSQWGPAREEEELGVYVYDLMATVVHILDSRTGGSLVAHIKVGET  
YHQKKEGVTHQQWYLFNDFLIEPIDKYEAVQFDMNWKVPAI LYVVKRNLSRYNLNKNPIEASVLLAEASLA  
RKQRKTHTTFIPLMLNEMPQVGD LVGLDAEFVTLNEEEAE LRS DGT KSTIKPSQMSVARITCVRGQGPNEGIP  
FIYDYISTQE QVVDYLTQYSGIKPGDLDAKISSKHLTTL KSTY LKLRFLIDIGVKFVGHGLQKDFRVINLMVP  
KDQVLDTVYLFHMPRKRMI SLRFLAWYF LDKIQGETHDSIEDARTALQLYRKYLELSKNGTEPE SFHKVLKG  
LYEKGRKMDWKVPEPE SQTSPKNAAVFSVLAL\*  
>ENSMUSP00000151216\_c.3045:G>T\_p.D1016Y ENSMUST00000218315.2|Pan2-  
203|ENSMUSG00000005682|+|chr10:g.128153876:G>T  
MNFEGLDPLAEFSPAMHSTLDPVLD AHLNPSLLQNVELDPEGVALEALPVQESVHIMEGVYSELH SVVAE V G  
VPVSVSHFDLHEEMLWVGSHGHATSFFGPALERYSSFQVNGGDDIRQIQSLENGILFLT KNNLKYMARGGLI  
IFDYLLDENEDMHSVLLTDNSTLLVGG LQNHVLEIDLNTVQETQKYAVETPGVTIMRQTNRFFFCGHTSGKVS  
LRDLRSFKVEHEFD AFSGSLSDFDVHGNLLAACGFSSRLTGLACDRFLK VYDLRMMRAITPLQVHVDPAFLRF

IPTYTSRLAIISQSGQCQFCEPTGLANPADIFHVNVPVGPLLMTFDVVSASKQALAFGDSEGCVHLWTDSPSPFN  
 NPYSRETEFALPCLVDSLPLDWSQDLLPLSLIPVPLTTDALLSDWPAANSAPAPRRAPPVDAEILRTMKKVG  
 FIGYAPNPRTRLRNQIPYRLKESDHEFDNFSQVTEPTGREEEPLHTVSKKYRKVTIKYSKLGLDFDFKHYN  
 KTLFAGLEPHIPNAYCNCMIQVLYFLEPVRCLIQNHLCQKEFCLACELGFLFHMLDLSRGDPCQGSNFLRAFRT  
 TIPEASALGLILADSDEASGKGLARLIQRWNRFILTLQHQMDELEVPQAYRGAGGSFCSSGDSIIGQLFSC  
 EMENCSLCRCGSETVSRASSTLLFTLSYPEDKTGKNYDFAQVLRKRSICLEQNTQAWCDNCEKYQPTIQTRNIRH  
 LPDILVINCEVNSSKEADFWRLQAEVAFKIAVKKYGGEMKSKEFALADRKELRSPEGFLCSSIEELKNVWLPF  
 SIRMKMTKNKGLDVCNWADEHEWGPAREEELGVYVYDLMATVVHILDSRTGGSLVAHIKVGETYHQKKEGVT  
 HQQWYLFNDFLIEPIDKYEAVQFDMNWKVPAILLYVKNRNLNSRYNLNKNPIEASVLLAEASLARKQRKTHTT  
 FIPLMLNEMPQVGDVGLDAEFVTLNEEEAELRSDGKSTIKPSQMSVARITCVRGQGPNEGIPFIYDYISTQ  
 EQVVDYLTQYSGIKPGDLDAKISSKHLTTLKSTYLKLRFLIDIGVKFVGHGLQKDFRVINLMVPKQVLDTVY  
 LFHMPRKRMSLRFLAWYFLDLKIQGETHDSIEDARTALQLYRKYLELSKNGTEPESFHKVLKGLYEKGRKMD  
 WKVPEPESQTSPKNAAVFVSVLAL\*

>ENSMUSP00000151874\_c.2991:G>T\_p.D998Y ENSMUST00000219721.2|Pan2-

206|ENSMUSG00000005682|+|chr10:g.128153876:G>T

MNFEGLDPLAEFSPAMHSTLDPVLD AHLNPSLLQNVELDPEGVALEALPVQESVHIMEGVYSELHVSVAEVEG  
 VPVSVSHFDLHEEMLWVSGHVGDDIRQIQSLENGILFLTKNNLKYMARGGLIIFDYLLDENEDMHSVLLT  
 DNSTLLVGGQLQNHVLEIDLNTVQETQKYAVETPGVTIMRQTNRFFFCGHTSGKVSRLDLRSFKVEHEFDASG  
 SLSDFDVHGNLLAACGFSSRLTGLACDRFLKVDLMMRAITPLQVHVDPAFLRFIPTYTSRLAIISQSGQCQ  
 FCEPTGLANPADIFHVNVPVGPLLMTFDVVSASKQALAFGDSEGCVHLWTDSPSPFNPNYSRETEFALPCLVDSL  
 PPLDWSQDLLPLSLIPVPLTTDALLSDWPAANSAPAPRRAPPVDAEILRTMKKVGFIGYAPNPRTRLRNQIPY  
 RLKESDHEFDNFSQVTEPTGREEEPLHTVSKKYRKVTIKYSKLGLDFDFKHYNKTLFAGLEPHIPNAYCNC  
 MIQVLYFLEPVRCLIQNHLCQKEFCLACELGFLFHMLDLSRGDPCQGSNFLRAFRTIPEASALGLILADSDEA  
 SGKGLARLIQRWNRFILTLQHQMDELEVPQAYRGAGGSFCSSGDSIIGQLFSCMEMENCSLCRCGSETVSRAS  
 STLLFTLSYPEDKTGKNYDFAQVLRKRSICLEQNTQAWCDNCEKYQPTIQTRNIRHLPDILVINCEVNSSKEAD  
 FWRLQAEVAFKIAVKKYGGEMKSKEFALADRKELRSPEGFLCSSIEELKNVWLPFSIRMKMTKNKGLDVCNWA  
 DEHEWGPAREEELGVYVYDLMATVVHILDSRTGGSLVAHIKVGETYHQKKEGVT HQWYLFNDFLIEPIDKY  
 EAVQFDMNWKVPAILLYVKNRNLNSRYNLNKNPIEASVLLAEASLARKQRKTHTTFIPLMLNEMPQVGDVGL  
 DAEFVTLNEEEAELRSDGKSTIKPSQMSVARITCVRGQGPNEGIPFIYDYISTQEQVVDYLTQYSGIKPGDL  
 DAKISSKHLTTLKSTYLKLRFLIDIGVKFVGHGLQKDFRVINLMVPKQVLDTVYLFHMPRKRMSLRFLAWY  
 FLDLKIQGETHDSIEDARTALQLYRKYLELSKNGTEPESFHKVLKGLYEKGRKMDWKVPEPESQTSPKNAAVF  
 SVLAL\*

>ENSMUSP00000149391\_c.880:A>G\_p.Q294R ENSMUST00000213329.2|Olfr787-

202|ENSMUSG00000096497|+|chr10:g.129299427:A>G

MKNHNSVITEFVLLGISDDPEVQVVFILLFIAYILSVTGNLTIIILTLDDSQLKTPMYFFLQNFSLFLEIIFTS  
 VSIPRFLESIIITKVKTISYNNCLAQLYFFISMGVSEFFLLTAMS YDRYVAICKPLHYTLIMNQVCTLLVLAS  
 WLAGFLTIFPPLMLVLKLDFCASNVIDHFS CDYFPILQLSCSDTRSLEMIGFYFAFITLLFTLALVILSYISI  
 ISTILRFPSASQRKKAFASTCSSHMIVISISYGSCIFMYVKPSANERASLTKGVAVLNTSIAPMLNPFYISLRN  
 ERVKQAFKDLINKVVLYRSK\*

>ENSMUSP00000077005\_c.880:A>G\_p.Q294R ENSMUST00000077836.3|Olfr787-

201|ENSMUSG00000096497|+|chr10:g.129299427:A>G

MKNHNSVITEFVLLGISDDPEVQVVFILLFIAYILSVTGNLTIIILTLDDSQLKTPMYFFLQNFSLFLEIIFTS  
 VSIPRFLESIIITKVKTISYNNCLAQLYFFISMGVSEFFLLTAMS YDRYVAICKPLHYTLIMNQVCTLLVLAS  
 WLAGFLTIFPPLMLVLKLDFCASNVIDHFS CDYFPILQLSCSDTRSLEMIGFYFAFITLLFTLALVILSYISI  
 ISTILRFPSASQRKKAFASTCSSHMIVISISYGSCIFMYVKPSANERASLTKGVAVLNTSIAPMLNPFYISLRN  
 ERVKQAFKDLINKVVLYRSK\*

>ENSMUSP00000099178\_c.832:T>C\_p.V278A ENSMUST00000101655.10|Sfi1-

203|ENSMUSG00000023764|-|chr11:g.3114574:A>G

MEKKIGRSFRDGVVKKPCSPKTLPLKKSSAFSGIQREPSRSCHSIYYHASQNWTRYRLQELRIRC VARKFLY  
 LWIRVTFGRVTPSRARIFHEQKILLQKVFGEWREEWVVSQREWKL CVRADCHYRYLYNLIFQNWKTFVHQRE  
 MRKRFRIAEHHTDKQKMCQAWKSWLIYVMSRRTKLHMKTTALEFRRQSVLCFVWWSKWRWRLGQAHAHALHAV  
 AVKHRALS LQLQGWLWRQEQLLISQRDRRKEATAVQHYQHWWKQQRSLKAWLKYLQICRAKRWQNEMAVQFHRA  
 TVLQIHFCDWQAWAEWRQSLSAHQALVVKLAGRMVLRRAFTHWKHYMLLQAEAAQREAAAEHRQHYLLYSCF  
 RAFKDNVQTARLQQRKLAQQQLRDTLLHRFVNWLQSRIEQREERVQTPSLHAALSHYRVTVLHKCVRVWLR  
 YVHKRQWQQLLRARADGHFQQRALPAAFYTWYRGLWHQQRRILHTKAVRFHRGTLEKQVFALWRQKMSQHRE  
 NCLAERMAILQAEQQLLRRFVFWVHQQAAVCQLERQQQAMAIAHHHSGLLRRAFCIWKESTQGFRIERMGRAQ  
 AAHFHSAQLLSRAWMSMRECLALRLEEQQKLC AALHSQCILLRRALQKWL VYQNRVRSVLRVAVARERQHNR  
 QLLWWALHLWRENTMARLDGAKKTSQARVHYSRTLCSKVLVQWREVTSVQIYYRQKEAAALREARKALDRGRL

QNWFFQHWRFCSQRAAQRFQQLGQAAQHWWQLLMEAMARWKAHHLGCIIRKKFLQRQAAQLLAQRLSRACFCQW  
RKQLAVRKQEQWGATARALWLWAFSLQAKVWTAWLGFVLERRRKKARLERAMQAYQQQLLQEGATRLRLRFTAGT  
KAFRQQLQAQQQVQAAHSLHCAVRHCAELWKKKVLGPGKTSQPPAPTTFSKRVTFKDSFSLGHAAEAGDATQE  
TKKLRAPPSQGVVGLSLAGAAGEPCHLDLNAARSSRKQPRRPSFLLERLGSQRLEKPPPEESTALLGGSSLTRP  
FLPGVLPNVPGPPLPPTASPGLELLPSSIMPHAAGGTARVSAKPSIPGPQPWGCPSLPRDLDPQLLPGDSIS  
TRTEPVYGSEATGHTELEAELEGIQQQLQHYQTTKQNLWSCQRQANSLRRWLELSQEPEKSEDLHLEEQVKTE  
LEEVELQVQQLAKELEAQRQPVGTTCIARVRALRRALC\*

>ENSMUSP0000080066\_c.832:T>C\_p.V278A ENSMUST0000081318.13|Sfi1-  
202|ENSMUSG00000023764|-|chr11:g.3114574:A>G  
MEKKIGSRFRDGVVKKPCSPKTLPLKKSSAFSGIQREPSRSCHSIYYHASQNWTRYRLQELRIRCVARCKFLY  
LWIRVTFGRVTPSRARIFHEQKILQKVFGEWREEWVVSQREWKLVCVRADCHYRYLYNLIFQNWKTFFVHQRE  
MRKRFRIAEHHTDKQKMCQAWKSWLIYMVSRRTKLHMKTTALEFRQSVLCFVWWSKWRWRLGQAHAEHALHAV  
AVKHRALSLLQGLWLRWQEQLLISQRDRRKEATAVQHYQHWQKQKRSKAWLKYLQICRAKRWQNEMAVQFHRA  
TVLQIHFCDWQAWEWQRSLSAHQALVVKLAGRMVLRRAFTHWKHYMLLQAEAAAQREAAAHRQHYLLYSCF  
RAFKNVNTQARLQOQTRKLAQQLRDTTLLHRFWNLWQSRIEQREERVQTPSLHAALSHYRVTVLHKCVRVWLR  
YVHKRWQQLLRARADGHFQQRALPAAFYTWYRGWLWHQQRRIILHTKAVRFHRGTLEKQVFALWRQKMSQHRE  
NCLAERMAILQAEQQLLRRFVFWVWQQAAVCQLERQQQAMAIHHSGLLRRAFCIWKESTQGFRIERMGRAQ  
AAHFHSAQLLSRAWSMWRECLALRLEEQQKLCALHSQCILLRRALQKWLQVYQNRVRSVLRVAARERQHNR  
QLLWWALHLWRENTMARLDGAKKTSQARVHYSRTLCSKVLVQWREVTSVQIYYRQKEAAAALREARKALDRGRL  
QNWFFQHWRFCSQRAAQRFQQLGQAAQHWWQLLMEAMARWKAHHLGCIIRKKFLQRQAAQLLAQRLSRACFCQW  
RKQLAVRKQEQWGATARALWLWAFSLQAKVWTAWLGFVLERRRKKARLERAMQAYQQQLLQEGATRLRLRFTAGT  
KAFRQQLQAQQQVQAAHSLHCAVRHCAELWKKKVLGPGKTSQPPAPTTFSKRVTFKDSFSLGHAAEAGDATQE  
TKKLRAPPSQGVVGLSLAGAAGEPCHLDLNAARSSRKQPRRPSFLLERLGSQRSPEWYSLGEQQLEKPPPEEST  
ALLGGSSLTRPFLPGVLPNVPGPPLPPTASPGLELLPSSIMPHAAGGTARVSAKPSIPGPQPWGCPSLPRDL  
DPQLLPGDSISTRTEPVYGSEATGHTELEAELEGIQQQLQHYQTTKQNLWSCQRQANSLRRWLELSQEPEKSE  
DLHLEEQVKTELEEVELQVQQLAKELEAQRQPVGTTCIARVRALRRALC\*

>ENSMUSP0000067261\_c.832:T>C\_p.V278A ENSMUST0000066391.14|Sfi1-  
201|ENSMUSG00000023764|-|chr11:g.3114574:A>G  
MEKKIGSRFRDGVVKKPCSPKTLPLKKSSAFSGIQREPSRSCHSIYYHASQNWTRYRLQELRIRCVARCKFLY  
LWIRVTFGRVTPSRARIFHEQKILQKVFGEWREEWVVSQREWKLVCVRADCHYRYLYNLIFQNWKTFFVHQRE  
MRKRFRIAEHHTDKQKMCQAWKSWLIYMVSRRTKLHMKTTALEFRQSVLCFVWWSKWRWRLGQAHAEHALHAV  
AVKHRALSLLQGLWLRWQEQLLISQRDRRKEATAVQHYQHWQKQKRSKAWLKYLQICRAKRWQNEMAVQFHRA  
TVLQIHFCDWQAWEWQRSLSAHQALVVKLAGRMVLRRAFTHWKHYMLLQAEAAAQREAAAHRQHYLLYSCF  
RAFKNVNTQARLQOQTRKLAQQLRDTTLLHRFWNLWQSRIEQREERVQTPSLHAALSHYRVTVLHKCVRVWLR  
YVHKRWQQLLRARADGHFQQRALPAAFYTWYRGWLWHQQRRIILHTKAVRFHRGTLEKQVFALWRQKMSQHRE  
NCLAERMAILQAEQQLLRRFVFWVWQQAAVCQLERQQQAMAIHHSGLLRRAFCIWKESTQGFRIERMGRAQ  
AAHFHSAQLLSRAWSMWREVYQNRVRSVLRVAARERQHNRQLLWWALHLWRENTMARLDGAKKTSQARVHYS  
RTLCSKVLVQWREVTSVQIYYRQKEAAAALREARKALDRGRLQNWFFQHWRFCSQRAAQRFQQLGQAAQHWWQL  
LMEAMARWKAHHLGCIIRKKFLQRQAAQLLAQRLSRACFCQWRKQLAVRKQEQWGATARALWLWAFSLQAKVWTA  
WLGFLVLERRRKKARLERAMQAYQQQLLQEGATRLRLRFTAGTKAFRQQLQAQQQVQAAHSLHCAVRHCAELWKK  
KVLGPGKTSQPPAPTTFSKRVTFKDSFSLGHAAEAGDATQETKKLRAPPSQGVVGLSLAGAAGEPCHLDLNAAR  
SSRKQPRRPSFLLERLGSQRSPEWYSLGEQQLEKPPPEESTALLGGSSLTRPFLPGVLPNVPGPPLPPTASPG  
LELLPSSIMPHAAGGTARVSAKPSIPGPQPWGCPSLPRDLDPQLLPGDSISTRTEPVYGSEATGHTELEAELE  
EGIQQLQHYQTTKQNLWSCQRQANSLRRWLELSQEPEKSEDLHLEEQVKTELEEVELQVQQLAKELEAQRQPV  
GTTCIARVRALRRALC\*

>ENSMUSP00000121719\_c.832:T>C\_p.V278A ENSMUST00000153425.9|Sfi1-  
218|ENSMUSG00000023764|-|chr11:g.3114574:A>G  
MEKKIGSRFRDGVVKKPCSPKTLPLKKSSAFSGIQREPSRSCHSIYYHASQNWTRYRLQELRIRCVARCKFLY  
LWIRVTFGRVTPSRARIFHEQKILQKVFGEWREEWVVSQREWKLVCVRADCHYRYLYNLIFQNWKTFFVHQRE  
MRKRFRIAEHHTDKQKMCQAWKSWLIYMVSRRTKLHMKTTALEFRQSVLCFVWWSKWRWRLGQAHAEHALHAV  
AVKHRALSLLQGLWLRWQEQLLISQRDRRKEATAVQHYQHWQKQKRSKAWLKYLQICRAKRWQNEMAVQFHRA  
TVLQIHFCDWQAWEWQRSLSAHQALVVKLAGRMVLRRAFTHWKHYMLLQAEAAAQREAAAHRQHYLLLLHR  
FWNLWQSRIEQREERVQTPSLHAALSHYRVTVLHKCVRVWLRVYVHKRWQQLLRARADGHFQQRALPAAFYTW  
YRGWLWHQQRRIILHTKAVRFHRGTLEKQVFALWRQKMSQHRENLAEERMAILQAEQQLLRRFVFWVWQQA  
AVCQLERQQQAMAIHHSGLLRRAFCIWKESTQGFRIERMGRAQAAHFHSAQLLSRAWSMWRECLALRLEEQQK  
KCAALHSQCILLRRALQKWLQVYQNRVRSVLRVAARERQHNRQLLWWALHLWRENTMARLDGAKKTSQARVHYS  
RTLCSKVLVQWREVTSVQIYYRQKEAAAALREARKALDRGRLQNWFFQHWRFCSQRAAQRFQQLGQAAQHWWQL  
LMEAMARWKAHHLGCIIRKKFLQRQAAQLLAQRLSRACFCQWRKQLAVRKQEQWGATARALWLWAFSLQAKVWTA

AWLGFVLERRRKKARLERAMQAYQQQLLEQEGATRLRRFTAGTKAFRQQLQAQQQVQAAHSLHC AVRHCAELWK  
KKVLGPGKTSQPPAPTTF SKRVTFKDSFLSGHAAEAGDATQETKKLRAPPSQGVVLSLAGAAGEPCHLDLNA  
RSSRQPRRPSFLLERLGSQRLEKPEEEESTALLGSSSLTRPFLPGVLPNVPGPKLPPTASPGLELLPSSIM  
PHAAGGTARVSAKPSIPGPQWGPCSLPRDLDPQLLPGDSISTRTEPVYGSEATGHTELEAELEGIQQQLQHY  
QTTKQNLWSCQRQANSLRRWLELSQEPEKSEDLHLEEQVKTELEEEVELQVQQLAKELEAQRQPVGT CIARVRA  
LRRALC\*

>ENSMUSP00000119905\_c.589:T>C\_p.V197A ENSMUST00000140846.9|sfi1-  
210|ENSMUSG00000023764|-|chr11:g.3114574:A>G

MEKKIGSRIFHEQKILQKVFGEWREWWVSQREWKLCVRADCHYRYLYNLI FQNWKTFVHQREMRKRFRIA  
EHHDTKQKMCQAWKSWLI YMVSRRTKLHMKTTALEFRQSVLCFWSKWRWRLGQAHAHALHAVAVKHRALS  
LQIQGWLWRWQEQLLISQRDRRKEATAVQHYQHWQKQKRSWKAWLKYLQICRAKRWQNEMAVQFHRA TVLQIHFC  
DWQWAWEWQSLSAHQALVVKLAGRMVLRRAFTHWKHYMLLQAEAAAQREAAA EHRQHYLLYSCFRAFKNVNT  
QARLQOQTRKKLAQQLRDTTLLHRFWNLWQSRIEQREERVQTPSLHAALSHYRVTVLHKCVRVWLVYVHKRQWQ  
QLLRARADGHFQQRALPAAFYTWYRGWLWHQQRRI LHTKAVRFHRTLEKQVFALWRQKMSQHRENC LAERMA  
ILQAEQQLLRRFVFWVHQQAAVCQLERQQQAMAIAHHHSGLLRRAFCIWKESTQGFRIERMGRAQAAHFHSAQ  
LLSRAWSMWRECLALRLEEQQKLKCAALHSQCILLRRALQKWL VYQNRVRSVLREVAARERQHNRLWVWALH  
LWRENTMARLDGAKKTSQARVHYSRTLCSKVLVQWREVTSVQIYRQKEAAAALREARKALDRGLQNWFOHWR  
FCQRAAQQRFLQAGQAQHWWQLLMEAMARWKAHHLGCIRKKFLQRQAQQLLAQRLSRACFCQWRKQLAVRK  
QEQWGTARALWLWAFSLQAKVWTAWLGFVLERRRKKARLERAMQAYQQQLLEQEGATRLRRFTAGTKAFRQQLQ  
AQQQVQAAHSLHC AVRHCAELWKKKVLGPGKTSQPPAPTTF SKRVTFKDSFLSGHAAEAGDATQETKKLRAPP  
SQGVVLSLAGAAGEPCHLDLNAARSSRQPRRPSFLLERLGSQRLEKPEEEESTALLGSSSLTRPFLPGVLPN  
VPGPKLPPTASPGLELLPSSIMPHAAGGTARVSAKPSIPGPQWGPCSLPRDLDPQLLPGDSISTRTEPVYG  
SEATGHTELEAELEGIQQQLQHYQTTKQNLWSCQRQANSLRRWLELSQEPEKSEDLHLEEQVKTELEEEVELQV  
QQLAKELEAQRQPVGT CIARVRLRRALC\*

>ENSMUSP00000122002\_c.25:T>C\_p.V9A ENSMUST00000126746.9|sfi1-  
205|ENSMUSG00000023764|-|chr11:g.3114574:A>G

XKYLQICRAKRWQNEMAVQFHRA TVLQIHFCDWQWAWEWQSLSAHQALVVKLAGRMVLRRAFTHWKHYMLLQ  
AEAAAQREAAA EHRQHYLLYSCFRAFKNVNTQARLQOQTRKKLAQQLRDTTLLHRFWNLWQSRIEQREERVQTP  
SLHAALSHYRVTVLHKCVRVWLVYVHKRQWQQLLRARADGHFQQRALPAAFYTWYRGWLWHQQRRI LHTKAVR  
FHRGTLEKQVFALWRQKMSQHRENC LAERMAILQAEQQLLRRFVFWVHQQAAVCQLERQQQAMAIAHHHSGLL  
RRAFCIWKESTQGFRIESSSSGERLLQCRYITDKRRQLPSGRPGKHWTGVVSRGTGFSTGDSAARGQPSRDS  
DRRLSITTGSC\*

>ENSMUSP00000118419\_c.832:T>C\_p.V278A ENSMUST00000132893.8|sfi1-  
206|ENSMUSG00000023764|-|chr11:g.3114574:A>G

MEKKIGSRIFHEQKILQKVFGEWREWWVSQREWKLCVRADCHYRYLYNLI FQNWKTFVHQRE  
LWIRVTFGRVTPSRARIFHEQKILQKVFGEWREWWVSQREWKLCVRADCHYRYLYNLI FQNWKTFVHQRE  
MRKRFRIAEHHDTKQKMCQAWKSWLI YMVSRRTKLHMKTTALEFRQSVLCFWSKWRWRLGQAHAHALHAV  
AVKHRALS LQIQGWLWRWQEQLLISQRDRRKEATAVQHYQHWQKQKRSWKAWLKYLQICRAKRWQNVIAQQRWS  
FPAASTACCLLHVQRLAMAPAE TPAHKSSAFFQORDIREASICSLEAEDVSASRKL LGRENGYTAGRAAFA  
\*

>rs227559416\_ENSMUSP00000020734\_c.505:A>T\_p.H169L  
ENSMUST00000020734.11|Eif4enif1-

201|ENSMUSG00000020454|+|chr11:g.3170454:A>T

MEKSV AETENGDAFLELKKLP TSKSPHRYTKEELLDIKERPYSKQRPSC LSEKYDSDGVWDPEKWHASLYPAS  
GRSSPVESLKKESSEDRPSLVRIADPRERVKEDDL DVVLS PQRRSFGGGCHVTA AVSSRRSGS PLEKDS DGL  
RLLGRRIGSGRIISARAFEKDLRLSDKDLRDLRDRDRERDYKDKRFRREFGDSKRVFGERRRND SYTEEEPE  
WFSAGPTSQSETIELTGFDDKILEEDHKGRKRTRRRRTASVKEGIVECNGGVAEEDEVEVILAQEPSADQEVPR  
DVILPEQSPGFEFDNEFFNL DKVPC LASMIEDVLGEGSVSASRFSRWF SNPSRSGSRSSSLG STPHEELERLA  
GLEQAVLSPGQNSGNYFAPI PSEDHAENKVDILEMLQKAKVDL KPLLSLSANKEK LKESHSGV VLSVEEVE  
AGLKGKLV DQOMKNSTPFMAEHLEETLSAAS SNRQLKKGDMTAFNKLVNTMKASGTLPTQPKVSELLGQPVQ  
RPASSNLLSGLMGSLEATASLLSQRAPSP PMSQVFR TQAASADYLHPRIPSPIGFPSPGQQLLGD PFGMRKP  
MSPVSAQMSQLELQQA ALEGLALPHDLAVQTAPFYQPGFSKPVDRTRDGLRNRQQRMSKSPAMHGGNSSSP  
APAASIT SMLS SCSFTPTSVIRKMYESREKTKEMAPGMVVPDGKEDTQKTSEENLLSSNP I PNTDQDSSTTN  
PKLSTLQRSSSTPLSQT SRYTKEQDYRPKTAGRKTPTLASVPVGT PFLRPTHQVPLVPHVPIVRPAHQ LHPG  
LVQRLIAQGVHPQHLP SLLQAGVLP PGIDMAPLQGLSGPLLGQPLYPLVSAASHPLLNPRPGT PLHLAVMQQQ  
LQRSVLHPPGSSSQA AAISVQTPQNVP SRSGMPHMHSQLEHRTSQRSSSPVGLAKWFGSDV LQQPLPSMPTKV  
ISVDELEYRQ\*

>rs227559416\_ENSMUSP00000105676\_c.505:A>T\_p.H169L  
ENSMUST00000110049.8|Eif4enif1-  
203|ENSMUSG00000020454|+|chr11:g.3170454:A>T  
MEKSV AETENGDAFLELKKLP TSKSPHRYTKEELLDIKERPYSKQRP SCLSEKYDSDGVWDPEKWHASLYPAS  
GRSSPVESLKKESESDRPSLVRR IADPRERVKEDDL DVVLS PQRRSF GGGCHVTA AVSSRRSGS PLEKDS DGL  
RL LGRRIGSGRII SARAFEKDLRLSDKDLRDLRDRDRERDYKDKRFRREFGDSKR VFGERRRND SYTEEEPE  
WFSAGPTSQSE TIELTGFDDK ILEEDHKGRKRTRRRRTASVKEGIVECNGGVAEEDEVEVILA QEPSADQEVPR  
DVILPEQSPGEFDFNEFFNLDKVPCLASMI EDV LGE GSVSASRFSRWF SNPSRSGSRSSSLG STPHEELERLA  
GLEQAVLSPGQNSGNYFAPI PSEDHAENKVD ILEMLQKAKVDL KPLLSSLSANKEK LKESHSGV VLSVEEVE  
AGLKG LKVDQ QMKNSTPFMAEHLEETLSAASN RQLKKGDMTAFNKL VNTMKASGTLPTQPKVSRN VESHLL  
APAEIPGQPVSKN ILQELLGQPVQRPASSNLLSGLMGSLEATASLLSQRAPSP PMSQVFRTQAASADYLHPRI  
PSPIGFPSPG PQQLLGD PFGMRKPMSPVSAQMSQLELQQA ALEGLALPHDLAVQTAPFYQPGF SKPQVDRTRD  
GLRNRQQRMSKSPAPMHGGNSSS PAPAASITSM LSPSFTPTSVIRKMYESREKTKEEMAPGMVVP GDGKEDTQ  
KTSEENLLSSNPI PNTDQDSSTNPKLSTLQRSSCSTPLSQT SRYTKEQDYRPKTAGRKTPTLASPVPGT PFL  
RPTHQVPLVPHVPIVRPAHQ LHPGLVQR LIAQGVHPQHLP SLLQAGVLP PPGIDMAPLQGLSGPLL GQPLYPLV  
SAASHPLL NRP RPTPLHLAVMQQQLQRSVLHPPGSSSQAAAISVQTPQNVP SRSGMPHMHSQLEHRTSQRSSS  
PVGLAKWFGSDV LQQPLPSMPTKVISVDELEYRQ\*

>rs227559416\_ENSMUSP00000118527\_c.505:A>T\_p.H169L  
ENSMUST00000125637.8|Eif4enif1-  
206|ENSMUSG00000020454|+|chr11:g.3170454:A>T  
MEKSV AETENGDAFLELKKLP TSKSPHRYTKEELLDIKERPYSKQRP SCLSEKYDSDGVWDPEKWHASLYPAS  
GRSSPVESLKKESESDRPSLVRR IADPRERVKEDDL DVVLS PQRRSF GGGCHVTA AVSSRRSGS PLEKDS DGL  
RL LGRRIGSGRII SARAFEKDLRLSDKDLRDLRDRDRERDYKDKRFR  
>rs227559416\_ENSMUSP00000105675\_c.505:A>T\_p.H169L  
ENSMUST00000110048.8|Eif4enif1-  
202|ENSMUSG00000020454|+|chr11:g.3170454:A>T  
MEKSV AETENGDAFLELKKLP TSKSPHRYTKEELLDIKERPYSKQRP SCLSEKYDSDGVWDPEKWHASLYPAS  
GRSSPVESLKKESESDRPSLVRR IADPRERVKEDDL DVVLS PQRRSF GGGCHVTA AVSSRRSGS PLEKDS DGL  
RL LGRRIGSGRII SARAFEKDLRLSDKDLRDLRDRDRERDYKDKRFRREFGDSKR VFGERRRND SYTEEEPE  
WFSAGPTSQSE TIELTGFDDK ILEEDHKGRKRTRRRRTASVKEGIVECNGGVAEEDEVEVILA QEPSADQEVPR  
DVILPEQSPGEFDFNEFFNLDKVPCLASMI EDV LGE GSVSASRFSRWF SNPSRSGSRSSSLG STPHEELERLA  
GLEQAVLSPGQNSGNYFAPI PSEDHAENKVD ILEMLQKAKVDL KPLLSSLSANKEK LKESHSGV VLSVEEVE  
AGLKG LKVDQ QMKNSTPFMAEHLEETLSAASN RQLKKGDMTAFNKL VNTMKASGTLPTQPKVSELLGQPVQ  
RPASSNLLSGLMGSLEATASLLSQRAPSP PMSQVFRTQAASADYLHPRI PSPIGFPSPG PQQLLGD PFGMRK  
MSPVSAQMSQLELQQA ALEGLALPHDLAVQTAPFYQPGF SKPQVDRTRDGLRNRQQRMSKSPAPMHGGNSSS  
PAPAASITSM LSPSFTPTSVIRKMYESREKTKEEMAPGMVVP GDGKEDTQKTSEENLLSSNPI PNTDQDSSTN  
PKLSTLQRSSCSTPLSQT SRYTKEQDYRPKTAGRKTPTLASPVPGT PFLRPTHQVPLVPHVPIVRPAHQ LHPG  
LVQR LIAQGVHPQHLP SLLQAGVLP PPGIDMAPLQGLSGPLL GQPLYPLVSAASHPLL NRP RPTPLHLAVMQQQ  
LQRSVLHPPGSSSQAAAISVQTPQNVP SRSGMPHMHSQLEHRTSQRSSSPVGLAKWFGSDV LQQPLPSMPTK  
VISVDELEYRQ\*

>rs227559416\_ENSMUSP00000136768\_c.505:A>T\_p.H169L  
ENSMUST00000179770.8|Eif4enif1-  
213|ENSMUSG00000020454|+|chr11:g.3170454:A>T  
MEKSV AETENGDAFLELKKLP TSKSPHRYTKEELLDIKERPYSKQRP SCLSEKYDSDGVWDPEKWHASLYPAS  
GRSSPVESLKKESESDRPSLVRR IADPRERVKEDDL DVVLS PQRRSF GGGCHVTA AVSSRRSGS PLEKDS DGL  
RL LGRRIGSGRII SARAFEKDLRLSDKDLRDLRDRDRERDYKDKRFRREFGDSKR VFGERRRND SYTEEEPE  
WFSAGPTSQSE TIELTGFDDK ILEEDHKGRKRTRRRRTASVKEGIVECNGGVAEEDEVEVILA QEPSADQEVPR  
DVILPEQSPGEFDFNEFFNLDKVPCLASMI EDV LGE GSVSASRFSRWF SNPSRSGSRSSSLG STPHEELERLA  
GLEQAVLSPGQNSGNYFAPI PSEDHAENKVD ILEMLQKAKVDL KPLLSSLSANKEK LKESHSGV VLSVEEVE  
AGLKG LKVDQ QMKNSTPFMAEHLEETLSAASN RQLKKGDMTAFNKL VNTMKASGTLPTQPKVSRN VESHLL  
APAEIPGQPVSKN ILQELLGQPVQRPASSNLLSGLMGSLEATASLLSQRAPSP PMSQVFRTQAASADYLHPRI  
PSPIGFPSPG PQQLLGD PFGMRKPMSPVSAQMSQLELQQA ALEGLALPHDLAVQTAPFYQPGF SKPQVDRTRD  
GLRNRQQRMSKSPAPMHGGNSSS PAPAASITSM LSPSFTPTSVIRKMYESREKTKEEMAPGMVVP GDGKEDTQ  
KTSEENLLSSNPI PNTDQDSSTNPKLSTLQRSSCSTPLSQT SRYTKEQDYRPKTAGRKTPTLASPVPGT PFL  
RPTHQVPLVPHVPIVRPAHQ LHPGLVQR LIAQGVHPQHLP SLLQAGVLP PPGIDMAPLQGLSGPLL GQPLYPLV  
SAASHPLL NRP RPTPLHLAVMQQQLQRSVLHPPGSSSQAAAISVQTPQNVP SRSGMPHMHSQLEHRTSQRSSS  
PVGLAKWFGSDV LQQPLPSMPTKVISVDELEYRQ\*

>rs239307747\_ENSMUSP00000020734\_c.1423:A>G\_p.K475R  
 ENSMUST00000020734.11|Eif4enif1-  
 201|ENSMUSG00000020454|+|chr11:g.3180016:A>G  
 MEKSV AETENGDAFLELKKLPTSKSPHRYTKEELLDIKERPYSKQRPSC LSEKYDSDGVWDPEKWHASLYPAS  
 GRSSPVESLKKESSEDRPSLVRR IADPRERVKEDDL DVVLS PQRRSFGGGCHVTA AVSSRRSGSPLEKDS DGL  
 RLLGGRRIGSGRIISARAFEKDHRLSDKDLRDLRDRDRERDYKDKRFRREFGDSKR VFGERRRND SYTEEEPE  
 WFSAGPTSQSETIELTGFDDKILEEDHKGRKRTRRRRTASVKEGIVECNGGVAEEDEVEVILAQEPSADQEVPR  
 DVILPEQSPGEFDFNEFFNL DKVPCLASMI EDV LGE GSVSASRFSRWF SNPSRSGSRSSSLG STPHEELERLA  
 GLEQAVLSPGQNSGNYFAPI PSEDHAENKVDILEMLQKAKVDLKP LLSL SANKEKLKESHSGV VLSVEEVE  
 AGLKGLKVDQ QMKNSTPFMAEHLEETLSAASSNRQLRKGDMTAFNKL VNTMKASGTLPTQPKVSELLGQP VQ  
 RPASSNLLSGLMGSLEATASLLSQRAPSP PMSQVFRTQAASADYLHPRI P SPIGFPSGPQQLLGD PPFQGM RKP  
 MSPVSAQMSQLELQQA ALEGLALPHDLAVQTAPFYQPGFSKPVDRTRDGLRNRQQRMSKSPAPMHGNS SSP  
 APAASITSM LSPSFTPTS VIRKMYESREKTKEEMAPGMVVPDGKEDTQKTSEENLLSSNPI PNTDQDSSTTN  
 PKLSTLQRSSCSTPLSQT SRYTKEQDYRPKTAGRKTPTLASPVPGT PFLRPTHQVPLVPHVPIVRPAHQLHPG  
 LVQRLIAQGVHPQHLP SLLQAGVLP PGIDMAPLQGLSGPLL GQPLYPLVSAASHPLLNPRPGT PLHLAVMQQQ  
 LQRSVLHPPGSSSQAAAI SVQTPQNVP SRSGMPHMHSQLEHRTSQRSSSPVGLAKWFGSDVLQQPLPSMPTKV  
 ISVDELEYRQ\*

>rs239307747\_ENSMUSP00000105676\_c.1423:A>G\_p.K475R  
 ENSMUST00000110049.8|Eif4enif1-  
 203|ENSMUSG00000020454|+|chr11:g.3180016:A>G  
 MEKSV AETENGDAFLELKKLPTSKSPHRYTKEELLDIKERPYSKQRPSC LSEKYDSDGVWDPEKWHASLYPAS  
 GRSSPVESLKKESSEDRPSLVRR IADPRERVKEDDL DVVLS PQRRSFGGGCHVTA AVSSRRSGSPLEKDS DGL  
 RLLGGRRIGSGRIISARAFEKDHRLSDKDLRDLRDRDRERDYKDKRFRREFGDSKR VFGERRRND SYTEEEPE  
 WFSAGPTSQSETIELTGFDDKILEEDHKGRKRTRRRRTASVKEGIVECNGGVAEEDEVEVILAQEPSADQEVPR  
 DVILPEQSPGEFDFNEFFNL DKVPCLASMI EDV LGE GSVSASRFSRWF SNPSRSGSRSSSLG STPHEELERLA  
 GLEQAVLSPGQNSGNYFAPI PSEDHAENKVDILEMLQKAKVDLKP LLSL SANKEKLKESHSGV VLSVEEVE  
 AGLKGLKVDQ QMKNSTPFMAEHLEETLSAASSNRQLRKGDMTAFNKL VNTMKASGTLPTQPKVSRNVE SHLL  
 APAEIPGQPVSKNILQELLGQPVQRPASSNLLSGLMGSLEATASLLSQRAPSP PMSQVFRTQAASADYLHPRI  
 P SPIGFPSGPQQLLGD PPFQGM RKPMSPVSAQMSQLELQQA ALEGLALPHDLAVQTAPFYQPGFSKPVDRTRD  
 GLRNRQQRMSKSPAPMHGNS SSPAPAASITSM LSPSFTPTS VIRKMYESREKTKEEMAPGMVVPDGKEDTQ  
 KTSEENLLSSNPI PNTDQDSSTTNPKLSTLQRSSCSTPLSQT SRYTKEQDYRPKTAGRKTPTLASPVPGT PFL  
 RPTHQVPLVPHVPIVRPAHQLHPGLVQRLIAQGVHPQHLP SLLQAGVLP PGIDMAPLQGLSGPLL GQPLYPLV  
 SAASHPLLNPRPGT PLHLAVMQQQ LQRSVLHPPGSSSQAAAI SVQTPQNVP SRSGMPHMHSQLEHRTSQRSSS  
 PVGLAKWFGSDVLQQPLPSMPTKVISVDELEYRQ\*

>rs239307747\_ENSMUSP00000105675\_c.1423:A>G\_p.K475R  
 ENSMUST00000110048.8|Eif4enif1-  
 202|ENSMUSG00000020454|+|chr11:g.3180016:A>G  
 MEKSV AETENGDAFLELKKLPTSKSPHRYTKEELLDIKERPYSKQRPSC LSEKYDSDGVWDPEKWHASLYPAS  
 GRSSPVESLKKESSEDRPSLVRR IADPRERVKEDDL DVVLS PQRRSFGGGCHVTA AVSSRRSGSPLEKDS DGL  
 RLLGGRRIGSGRIISARAFEKDHRLSDKDLRDLRDRDRERDYKDKRFRREFGDSKR VFGERRRND SYTEEEPE  
 WFSAGPTSQSETIELTGFDDKILEEDHKGRKRTRRRRTASVKEGIVECNGGVAEEDEVEVILAQEPSADQEVPR  
 DVILPEQSPGEFDFNEFFNL DKVPCLASMI EDV LGE GSVSASRFSRWF SNPSRSGSRSSSLG STPHEELERLA  
 GLEQAVLSPGQNSGNYFAPI PSEDHAENKVDILEMLQKAKVDLKP LLSL SANKEKLKESHSGV VLSVEEVE  
 AGLKGLKVDQ QMKNSTPFMAEHLEETLSAASSNRQLRKGDMTAFNKL VNTMKASGTLPTQPKVSELLGQP VQ  
 RPASSNLLSGLMGSLEATASLLSQRAPSP PMSQVFRTQAASADYLHPRI P SPIGFPSGPQQLLGD PPFQGM RKP  
 MSPVSAQMSQLELQQA ALEGLALPHDLAVQTAPFYQPGFSKPVDRTRDGLRNRQQRMSKSPAPMHGNS SSP  
 APAASITSM LSPSFTPTS VIRKMYESREKTKEEMAPGMVVPDGKEDTQKTSEENLLSSNPI PNTDQDSSTTN  
 PKLSTLQRSSCSTPLSQT SRYTKEQDYRPKTAGRKTPTLASPVPGT PFLRPTHQVPLVPHVPIVRPAHQLHPG  
 LVQRLIAQGVHPQHLP SLLQAGVLP PGIDMAPLQGLSGPLL GQPLYPLVSAASHPLLNPRPGT PLHLAVMQQQ  
 LQRSVLHPPGSSSQAAAI SVQTPQNVP SRSGMPHMHSQLEHRTSQRSSSPVGLAKWFGSDVLQQPLPSMPTKV  
 ISVDELEYRQ\*

>rs239307747\_ENSMUSP00000112550\_c.934:A>G\_p.K312R  
 ENSMUST00000120721.9|Eif4enif1-  
 204|ENSMUSG00000020454|+|chr11:g.3180016:A>G  
 MEKSV AETENGDAFLELKKLPTSKSPHRYTKEELLDIKERPYSKQRPSC LSEKYDSDGVWDPEKWHASLYPAS  
 GRSSPVESLKKESSEDRPSLVRR IAGIVECNGGVAEEDEVEVILAQEPSADQEVPRDVILPEQSPGEFDFNEF  
 FNLDKVPCLASMI EDV LGE GSVSASRFSRWF SNPSRSGSRSSSLG STPHEELERLAGLEQAVLSPGQNSGNYF  
 API PSEDHAENKVDILEMLQKAKVDLKP LLSL SANKEKLKESHSGV VLSVEEVEAGL KGLKVDQ QMKNSTP

FMAEHLEETLSAASSNRQLRKDGDMTAFNKLVTMKNRVESHLLAPAEIPGQPVSKNILQELLGQPVQRPASS  
 NLLSGLMGSLEATASLLSQRAPSPPMQVFRTOAASADYLHPRI P S P I G F P S G P Q Q L L G D P F Q G M R K P M S P V S  
 AQMSQLELQQAALGLALPHDLAVQTAPFYQPGFQSKPQVDRTRDGLRNRQQRMSKSPAPMHGGNSSSPAPAAS  
 ITSMLSPSFTPTSVIRKMYESREKTKEEMAPGMVVPDGDGKEDTQKTSEENLLSSNPI P N T D Q D S S T T N P K L S T  
 LQRSSCSTPLSQTSTRYTKEDYRPKTAGRKTPTLASPVPGTFFLRPTHQVPLVPHVPIVRPAHQHLHPGLVQRL  
 IAQGVHPQHLPSLLQAGVLPPIGIDMAPLQGLSGPLLGQPLYPLVSAASHPLLNRPGTPLHLAVMQQQLQRSV  
 LHPPGSSSQAAAISVQTPQNVPSRSRGMPHMSQLEHRTSQRSSSPVGLAKWFGSDVLQQLPLPSMPTKVISVDE  
 LEYRQ\*

>rs239307747\_ENSMUSP00000122912\_c.220:A>G\_p.K74R  
 ENSMUST00000135223.2|Eif4enif1-  
 210|ENSMUSG00000020454|+|chr11:g.3180016:A>G  
 QKAKVDLKPILLSANKEKLEKESHSGVLSVEEVEAGLGLKVDQMKNSTPFMAEHLEETLSAASSNRQL  
 RKDGDMTAFNKLVTMKNRVESHLLAPAEIPGQPVSKNILQVFRTOAASADYLHPRI P S P I  
 G F P S G P Q Q L L G D P F Q G M R K P M S P V S A Q M S Q L E L Q Q A A L G L A L P H D L A V Q T A P F Y Q P G F S K P Q V D R T R D G L R N  
 R Q Q R M S K S P A P M H G G N S S S P

>rs239307747\_ENSMUSP00000136768\_c.1423:A>G\_p.K475R  
 ENSMUST00000179770.8|Eif4enif1-  
 213|ENSMUSG00000020454|+|chr11:g.3180016:A>G  
 MEKSVAEETENGDAFLELKKLPTSKSPHRYTKEELLDIKERPYSKQRPSCLESEKYDSDGVWDPEKWHASLYPAS  
 GRSSPVESLKKESSEDRPSLVRRADPRERVKEDDLVLSVQRRSFGGGCHVTAAVSSRRSGSPLEKSDSGL  
 RLLGGRRIGSGRIISARAFEKDHRLSDKDLRDLRDRDRERDYKDKRFRREFGDSKRVRFGERRRNDSTEEPE  
 WFSAGPTSQSETIETLGFDDKILEEDHKGRKRTRRRRTASVKEGIVECNGGVAEEDEVEVILAQEPSADQEVPR  
 DVILPEQSPGEFDFNEFFNLKVPCLASMIEDVLGEGSVSASRFRWFSNPSRSGSRSSSLGSTPHEELERLA  
 GLEQAVLSPGQNSGNYFAPI P S E D H A E N K V D I L E M L Q K A K V D L K P L L S S L S A N K E K L E K E S H S G V L S V E E V E  
 AGLKGLKVDQMKNSTPFMAEHLEETLSAASSNRQLRKDGDMTAFNKLVTMKNRVESHLL  
 APAEIPGQPVSKNILQELLGQPVQRPASSNLLSGLMGSLEATASLLSQRAPSPPMQVFRTOAASADYLHPRI  
 P S P I G F P S G P Q Q L L G D P F Q G M R K P M S P V S A Q M S Q L E L Q Q A A L G L A L P H D L A V Q T A P F Y Q P G F S K P Q V D R T R D  
 G L R N R Q Q R M S K S P A P M H G G N S S S P A P A A S I T S M L S P S F T P T S V I R K M Y E S R E K T K E E M A P G M V V P D G D K E D T Q  
 K T S E E N L L S S N P I P N T D Q D S S T T N P K L S T L Q R S S C S T P L S Q T S R Y T K E Q D Y R P K T A G R K T P T L A S P V P G T P F L  
 R P T H Q V P L V P H V P I V R P A H Q L H P G L V Q R L I A Q G V H P Q H L P S L L Q A G V L P P G I D M A P L Q G L S G P L L G Q P L Y P L V  
 S A A S H P L L N R P R G T P L H L A V M Q Q Q L Q R S V L H P P G S S S Q A A A I S V Q T P Q N V P S R S R G M P H M S Q L E H R T S Q R S S S  
 P V G L A K W F G S D V L Q Q L P L S M P T K V I S V D E L E Y R Q \*

>rs228382181\_ENSMUSP00000105676\_c.1520:A>C\_p.E507D  
 ENSMUST00000110049.8|Eif4enif1-  
 203|ENSMUSG00000020454|+|chr11:g.3183999:A>C  
 MEKSVAEETENGDAFLELKKLPTSKSPHRYTKEELLDIKERPYSKQRPSCLESEKYDSDGVWDPEKWHASLYPAS  
 GRSSPVESLKKESSEDRPSLVRRADPRERVKEDDLVLSVQRRSFGGGCHVTAAVSSRRSGSPLEKSDSGL  
 RLLGGRRIGSGRIISARAFEKDHRLSDKDLRDLRDRDRERDYKDKRFRREFGDSKRVRFGERRRNDSTEEPE  
 WFSAGPTSQSETIETLGFDDKILEEDHKGRKRTRRRRTASVKEGIVECNGGVAEEDEVEVILAQEPSADQEVPR  
 DVILPEQSPGEFDFNEFFNLKVPCLASMIEDVLGEGSVSASRFRWFSNPSRSGSRSSSLGSTPHEELERLA  
 GLEQAVLSPGQNSGNYFAPI P S E D H A E N K V D I L E M L Q K A K V D L K P L L S S L S A N K E K L E K E S H S G V L S V E E V E  
 AGLKGLKVDQMKNSTPFMAEHLEETLSAASSNRQLKKGDMTAFNKLVTMKNRVESHLL  
 APAEIPGQPVSKNILQELLGQPVQRPASSNLLSGLMGSLEATASLLSQRAPSPPMQVFRTOAASADYLHPRI  
 P S P I G F P S G P Q Q L L G D P F Q G M R K P M S P V S A Q M S Q L E L Q Q A A L G L A L P H D L A V Q T A P F Y Q P G F S K P Q V D R T R D  
 G L R N R Q Q R M S K S P A P M H G G N S S S P A P A A S I T S M L S P S F T P T S V I R K M Y E S R E K T K E E M A P G M V V P D G D K E D T Q  
 K T S E E N L L S S N P I P N T D Q D S S T T N P K L S T L Q R S S C S T P L S Q T S R Y T K E Q D Y R P K T A G R K T P T L A S P V P G T P F L  
 R P T H Q V P L V P H V P I V R P A H Q L H P G L V Q R L I A Q G V H P Q H L P S L L Q A G V L P P G I D M A P L Q G L S G P L L G Q P L Y P L V  
 S A A S H P L L N R P R G T P L H L A V M Q Q Q L Q R S V L H P P G S S S Q A A A I S V Q T P Q N V P S R S R G M P H M S Q L E H R T S Q R S S S  
 P V G L A K W F G S D V L Q Q L P L S M P T K V I S V D E L E Y R Q \*

>rs228382181\_ENSMUSP00000112550\_c.995:A>C\_p.E332D  
 ENSMUST00000120721.9|Eif4enif1-  
 204|ENSMUSG00000020454|+|chr11:g.3183999:A>C  
 MEKSVAEETENGDAFLELKKLPTSKSPHRYTKEELLDIKERPYSKQRPSCLESEKYDSDGVWDPEKWHASLYPAS  
 GRSSPVESLKKESSEDRPSLVRRADPRERVKEDDLVLSVQRRSFGGGCHVTAAVSSRRSGSPLEKSDSGL  
 RLLGGRRIGSGRIISARAFEKDHRLSDKDLRDLRDRDRERDYKDKRFRREFGDSKRVRFGERRRNDSTEEPE  
 FNLKVPCLASMIEDVLGEGSVSASRFRWFSNPSRSGSRSSSLGSTPHEELERLAGLEQAVLSPGQNSGNYF  
 A P I P S E D H A E N K V D I L E M L Q K A K V D L K P L L S S L S A N K E K L E K E S H S G V L S V E E V E A G L K G L K V D Q M K N S T P  
 F M A E H L E E T L S A A S S N R Q L K K G D M T A F N K L V T M K N R V D S H L L A P A E I P G Q P V S K N I L Q E L L G Q P V Q R P A S S  
 N L L S G L M G S L E A T A S L L S Q R A P S P P M S Q V F R T O A A S A D Y L H P R I P S P I G F P S G P Q Q L L G D P F Q G M R K P M S P V S



AQMSQLELQQAALGLALPHDLAVQTAPFYQPGFSKPQVDRTRDGLRNRQQRMSKSPAPMHGGNSSSPAPAAS  
 ITSMSPSFTPTSVIRKMYESREKTKEEMAPGMVVPDGDGKEDTQKTSEENLLSSNPIPNTDQDSSTTNPKLST  
 LQRSSCSTPLSQTSRYTKEQDYRPKTAGRKTPTLASPVPGTFFLRPTHQVPLVPHVPIVRPAHQHPLGLVQRL  
 IAQGVHPQHLPSSLQAGVLPPIGDMAPLQGLSGPLLGQPLYPLVSAASHPLLNPRPGTPLHLAVMQQQLQRSV  
 LHPPGSSSQAAAISVQTPQNVPSRSGMPMHMSQLEHRTSQRSSSPVGLAKWFGSDVLQQPLPSMPTKVISVDE  
 LEYRQ\*

>rs228382181\_ENSMUSP00000122912\_c.317:A>C\_p.E106D  
 ENSMUST00000135223.2|Eif4enif1-  
 210|ENSMUSG00000020454|+|chr11:g.3183999:A>C  
 QKAKVDLKLPLSSLSANKEKLKESHSGVVLVVEEVEAGLKLKVDQMKNSTPFMAEHLEETLSAASSNRQL  
 KKDGMTAFNKLNTMKASGTLPTQPKVSRNVDSHLLAPAEIPGQPVSKNILQVFRTOAASADYLHPRI  
 GPFSPGQQLLGDPPFQGMKRPMSPVSAQMSQLELQQAALGLALPHDLAVQTAPFYQPGFSKPQVDRTRDGLRNR  
 RQQRMSKSPAPMHGGNSSSP

>rs228382181\_ENSMUSP00000136768\_c.1520:A>C\_p.E507D  
 ENSMUST00000179770.8|Eif4enif1-  
 213|ENSMUSG00000020454|+|chr11:g.3183999:A>C  
 MEKVAETENGDAFLELKLKLPSTKSPHRYTKEELLDIKERPYSKQRPSCLEKYDSDGVWDPEKWHASLYPAS  
 GRSSPVESLKKESSEDRPSLVRRADPRERVKEDDLVVLSPQRRSFGGGCHVTAAVSSRRSGSPLEKDS  
 RLLGGRRIGSGRIISARAFEKDHRLSDKDLRDLRDRDRERDYKDKRFRREFGDSKRVFGERRRNDST  
 WFSAGPTSQSETIELTGFDDKILEEDHKGRKRTRRRRTASVKEGIVECNGGVAEEDEVEVILAQEPSADQEVPR  
 DVILPEQSPGFEFDFNEFFNLDKVPCLASMIEDVLGEGSVSASRFRWFSNPSRSGSRSSSLGSPHEELERLA  
 GLEQAVLSPGQNSGNYFAPIPSEDHAENKVDILEMLQKAKVDLKLPLSSLSANKEKLKESHSGVVLVVEEVE  
 AGLKGLKVDQMKNSTPFMAEHLEETLSAASSNRQLKDGDMTAFNKLNTMKASGTLPTQPKVSRNVDSHLL  
 APAEIPGQPVSKNILQELLGQPVQRPASSNLLSGLMGSLEATASLLSQRAPSPPMQVFRTOAASADYLHPRI  
 PSPIGFSPGQQLLGDPPFQGMKRPMSPVSAQMSQLELQQAALGLALPHDLAVQTAPFYQPGFSKPQVDRTRD  
 GLRNRQQRMSKSPAPMHGGNSSSPAPAASITSMSPSFTPTSVIRKMYESREKTKEEMAPGMVVPDGDGKEDTQ  
 KTSEENLLSSNPIPNTDQDSSTTNPKLSTLQRSSCSTPLSQTSRYTKEQDYRPKTAGRKTPTLASPVPGTFFL  
 RPTHQVPLVPHVPIVRPAHQHPLGLVQRLIAQGVHPQHLPSSLQAGVLPPIGDMAPLQGLSGPLLGQPLYPLV  
 SAASHPLLNPRPGTPLHLAVMQQQLQRSV LHPPGSSSQAAAISVQTPQNVPSRSGMPMHMSQLEHRTSQRSSSP  
 PVGLAKWFGSDVLQQPLPSMPTKVISVDELEYRQ\*

>rs240891555\_ENSMUSP00000020734\_c.1836:G>A\_p.V613I  
 ENSMUST00000020734.11|Eif4enif1-  
 201|ENSMUSG00000020454|+|chr11:g.3186277:G>A  
 MEKVAETENGDAFLELKLKLPSTKSPHRYTKEELLDIKERPYSKQRPSCLEKYDSDGVWDPEKWHASLYPAS  
 GRSSPVESLKKESSEDRPSLVRRADPRERVKEDDLVVLSPQRRSFGGGCHVTAAVSSRRSGSPLEKDS  
 RLLGGRRIGSGRIISARAFEKDHRLSDKDLRDLRDRDRERDYKDKRFRREFGDSKRVFGERRRNDST  
 WFSAGPTSQSETIELTGFDDKILEEDHKGRKRTRRRRTASVKEGIVECNGGVAEEDEVEVILAQEPSADQEVPR  
 DVILPEQSPGFEFDFNEFFNLDKVPCLASMIEDVLGEGSVSASRFRWFSNPSRSGSRSSSLGSPHEELERLA  
 GLEQAVLSPGQNSGNYFAPIPSEDHAENKVDILEMLQKAKVDLKLPLSSLSANKEKLKESHSGVVLVVEEVE  
 AGLKGLKVDQMKNSTPFMAEHLEETLSAASSNRQLKDGDMTAFNKLNTMKASGTLPTQPKVSELLGQPVQ  
 RPASSNLLSGLMGSLEATASLLSQRAPSPPMQVFRTOAASADYLHPRI  
 PSPIGFSPGQQLLGDPPFQGMKRPMSPVSAQMSQLELQQAALGLALPHDLAIQTAPFYQPGFSKPQVDRTRDGLRNRQQRMSKSPAPMHGGNSSSP  
 APAASITSMSPSFTPTSVIRKMYESREKTKEEMAPGMVVPDGDGKEDTQKTSEENLLSSNPIPNTDQDSSTT  
 NPKLSTLQRSSCSTPLSQTSRYTKEQDYRPKTAGRKTPTLASPVPGTFFLRPTHQVPLVPHVPIVRPAHQHPLG  
 LVQRLIAQGVHPQHLPSSLQAGVLPPIGDMAPLQGLSGPLLGQPLYPLVSAASHPLLNPRPGTPLHLAVMQQQL  
 LQRSV LHPPGSSSQAAAISVQTPQNVPSRSGMPMHMSQLEHRTSQRSSSPVGLAKWFGSDVLQQPLPSMPTKV  
 ISVDELEYRQ\*

>rs240891555\_ENSMUSP00000105676\_c.1908:G>A\_p.V637I  
 ENSMUST00000110049.8|Eif4enif1-  
 203|ENSMUSG00000020454|+|chr11:g.3186277:G>A  
 MEKVAETENGDAFLELKLKLPSTKSPHRYTKEELLDIKERPYSKQRPSCLEKYDSDGVWDPEKWHASLYPAS  
 GRSSPVESLKKESSEDRPSLVRRADPRERVKEDDLVVLSPQRRSFGGGCHVTAAVSSRRSGSPLEKDS  
 RLLGGRRIGSGRIISARAFEKDHRLSDKDLRDLRDRDRERDYKDKRFRREFGDSKRVFGERRRNDST  
 WFSAGPTSQSETIELTGFDDKILEEDHKGRKRTRRRRTASVKEGIVECNGGVAEEDEVEVILAQEPSADQEVPR  
 DVILPEQSPGFEFDFNEFFNLDKVPCLASMIEDVLGEGSVSASRFRWFSNPSRSGSRSSSLGSPHEELERLA  
 GLEQAVLSPGQNSGNYFAPIPSEDHAENKVDILEMLQKAKVDLKLPLSSLSANKEKLKESHSGVVLVVEEVE  
 AGLKGLKVDQMKNSTPFMAEHLEETLSAASSNRQLKDGDMTAFNKLNTMKASGTLPTQPKVSRNVESHLL  
 APAEIPGQPVSKNILQELLGQPVQRPASSNLLSGLMGSLEATASLLSQRAPSPPMQVFRTOAASADYLHPRI

PSPIGFPSGPQQLLGDPPFQGMKPKMSPVSAQMSQLELQQAALGLALPHDLAIQTAPFYQPGFSPKQVDRTRD  
GLRNRQQRMSKSPAPMHGGNSSSPAPAASITSMSPSFTPTPTSVIRKMYESREKTKEEMAPGMVVPDGDGKEDTQ  
KTSEENLLSSNPIPNTDQDSSTTNPKLSTLQRSSCSTPLSQTSTRYKQDYRPKTAGRKTPTLASVPVPGTFFL  
RPTHQVPLVPHVPIVRPAHQHPLGLVQRLIAQGVHPQHLPSSLQAGVLPFGIDMAPLQGLSGPLLGQPLYPLV  
SAASHPLLNRPGTPLHLAVMQQLQRSVLHPPGSSSQAAAI SVQTPQNVPSRSGMPMHMSQLEHRTSQRSSS  
PVGLAKWFGSDVLQQLPLSMPTKVISVDELEYRQ\*

>rs240891555\_ENSMUSP00000105675\_c.1836:G>A\_p.V613I  
ENSMUST00000110048.8|Eif4enif1-  
202|ENSMUSG00000020454|+|chr11:g.3186277:G>A  
MEKVAETENGDAFLELKKLPTSKSPHRYTKEELLDIKERPYSKQRPSCLESEKYDSDGVWDPEKWHASLYPAS  
GRSSPVESLKKESESDRPSLVRRADPRERVKEDDLVVLSPQRRSFGGGCHVTAAVSSRRSGSPLEKSDGL  
RLLGRRIGSGRIISARAFEKDHRLSDKDLRDLRDRDRERDYKDKRFRREFGDSKRVPFGERRRNDSTYEEEEPE  
WFSAGPTSQSETIELTGFDDKILEEDHKGRKRTRRRRTASVKEGIVECNGGVAEEDEVEVILAQEPSADQEVPR  
DVILPEQSPGFEFDFNEFFNLDKVPCLASMIEDVLGEGSVSASRFRWFSNPSRSGSRSSSLGSTPHEELERLA  
GLEQAVLSPGQNSGNYFAPIPSEDHAENKVDILEMLQKAKVDLKPILLSLSANKEKLKESHSGVVLVSVVEEVE  
AGLGLKVDQQMKNSTPFMAEHLEETLSAASSNRQLKKGDMTAFNKLVTMKNVESHLLAPAEIPGQPVSKNIIQV  
RTPASSNLLSGLMGSLEATASLLSQRAPSPMMSQVFRTOAASADYLHPRI PSPIGFPSGPQQLLGDPPFQGMKPK  
MSPVSAQMSQLELQQAALGLALPHDLAIQTAPFYQPGFSPKQVDRTRDGLRNRQQRMSKSPAPMHGGNSSSP  
APAASITSMSPSFTPTPTSVIRKMYESREKTKEEMAPGMVVPDGDGKEDTQKTSEENLLSSNPIPNTDQDSSTTN  
PKLSTLQRSSCSTPLSQTSTRYKQDYRPKTAGRKTPTLASVPVPGTFFLRPTHQVPLVPHVPIVRPAHQHPLG  
LVQRLIAQGVHPQHLPSSLQAGVLPFGIDMAPLQGLSGPLLGQPLYPLVSAASHPLLNRPGTPLHLAVMQQL  
QRSVLHPPGSSSQAAAI SVQTPQNVPSRSGMPMHMSQLEHRTSQRSSSPVGLAKWFGSDVLQQLPLSMPTKVI  
SVDELEYRQ\*

>rs240891555\_ENSMUSP00000112550\_c.1383:G>A\_p.V462I  
ENSMUST00000120721.9|Eif4enif1-  
204|ENSMUSG00000020454|+|chr11:g.3186277:G>A  
MEKVAETENGDAFLELKKLPTSKSPHRYTKEELLDIKERPYSKQRPSCLESEKYDSDGVWDPEKWHASLYPAS  
GRSSPVESLKKESESDRPSLVRRADPRERVKEDDLVVLSPQRRSFGGGCHVTAAVSSRRSGSPLEKSDGL  
FNLKVPCLASMIEDVLGEGSVSASRFRWFSNPSRSGSRSSSLGSTPHEELERLAGLEQAVLSPGQNSGNYF  
APIPSEDHAENKVDILEMLQKAKVDLKPILLSLSANKEKLKESHSGVVLVSVVEEVEAGLGLKVDQQMKNSTP  
FMAEHLEETLSAASSNRQLKKGDMTAFNKLVTMKNVESHLLAPAEIPGQPVSKNIIQV RTPASSNLLSGLMGS  
LEATASLLSQRAPSPMMSQVFRTOAASADYLHPRI PSPIGFPSGPQQLLGDPPFQGMKPKMSPVSAQMSQ  
LELQQAALGLALPHDLAIQTAPFYQPGFSPKQVDRTRDGLRNRQQRMSKSPAPMHGGNSSSPAPAASITSM  
SPSFTPTPTSVIRKMYESREKTKEEMAPGMVVPDGDGKEDTQKTSEENLLSSNPIPNTDQDSSTTNPKLST  
LQRSSCSTPLSQTSTRYKQDYRPKTAGRKTPTLASVPVPGTFFLRPTHQVPLVPHVPIVRPAHQHPLGLVQRL  
IAQGVHPQHLPSSLQAGVLPFGIDMAPLQGLSGPLLGQPLYPLVSAASHPLLNRPGTPLHLAVMQQLQRSV  
LHPPGSSSQAAAI SVQTPQNVPSRSGMPMHMSQLEHRTSQRSSSPVGLAKWFGSDVLQQLPLSMPTKVISVDE  
LEYRQ\*

>rs240891555\_ENSMUSP00000122912\_c.582:G>A\_p.V195I  
ENSMUST00000135223.2|Eif4enif1-  
210|ENSMUSG00000020454|+|chr11:g.3186277:G>A  
QKAKVDLKPILLSLSANKEKLKESHSGVVLVSVVEEVEAGLGLKVDQQMKNSTPFMAEHLEETLSAASSNRQL  
KKGDMTAFNKLVTMKNVESHLLAPAEIPGQPVSKNIIQV RTPASSNLLSGLMGSLEATASLLSQRAPSPMMSQ  
VFRTOAASADYLHPRI PSPIGFPSGPQQLLGDPPFQGMKPKMSPVSAQMSQLELQQAALGLALPHDLAIQTAP  
FYQPGFSPKQVDRTRDGLRNRQQRMSKSPAPMHGGNSSSPAPAASITSMSPSFTPTPTSVIRKMYESREKTKE  
EMAPGMVVPDGDGKEDTQKTSEENLLSSNPIPNTDQDSSTTNPKLSTLQRSSCSTPLSQTSTRYKQDYRPKT  
AGRKTPTLASVPVPGTFFLRPTHQVPLVPHVPIVRPAHQHPLGLVQRLIAQGVHPQHLPSSLQAGVLPFGIDMA  
PLQGLSGPLLGQPLYPLVSAASHPLLNRPGTPLHLAVMQQLQRSVLHPPGSSSQAAAI SVQTPQNVPSRSGMP  
MHMSQLEHRTSQRSSSPVGLAKWFGSDVLQQLPLSMPTKVISVDELEYRQ\*

>rs240891555\_ENSMUSP00000136768\_c.1908:G>A\_p.V637I  
ENSMUST00000179770.8|Eif4enif1-  
213|ENSMUSG00000020454|+|chr11:g.3186277:G>A  
MEKVAETENGDAFLELKKLPTSKSPHRYTKEELLDIKERPYSKQRPSCLESEKYDSDGVWDPEKWHASLYPAS  
GRSSPVESLKKESESDRPSLVRRADPRERVKEDDLVVLSPQRRSFGGGCHVTAAVSSRRSGSPLEKSDGL  
RLLGRRIGSGRIISARAFEKDHRLSDKDLRDLRDRDRERDYKDKRFRREFGDSKRVPFGERRRNDSTYEEEEPE  
WFSAGPTSQSETIELTGFDDKILEEDHKGRKRTRRRRTASVKEGIVECNGGVAEEDEVEVILAQEPSADQEVPR  
DVILPEQSPGFEFDFNEFFNLDKVPCLASMIEDVLGEGSVSASRFRWFSNPSRSGSRSSSLGSTPHEELERLA  
GLEQAVLSPGQNSGNYFAPIPSEDHAENKVDILEMLQKAKVDLKPILLSLSANKEKLKESHSGVVLVSVVEEVE  
AGLGLKVDQQMKNSTPFMAEHLEETLSAASSNRQLKKGDMTAFNKLVTMKNVESHLLAPAEIPGQPVSKNIIQV  
RTPASSNLLSGLMGSLEATASLLSQRAPSPMMSQVFRTOAASADYLHPRI PSPIGFPSGPQQLLGDPPFQGMKPK  
MSPVSAQMSQLELQQAALGLALPHDLAIQTAPFYQPGFSPKQVDRTRDGLRNRQQRMSKSPAPMHGGNSSSP  
APAASITSMSPSFTPTPTPTSVIRKMYESREKTKEEMAPGMVVPDGDGKEDTQKTSEENLLSSNPIPNTDQDS  
STTNPKLSTLQRSSCSTPLSQTSTRYKQDYRPKTAGRKTPTLASVPVPGTFFLRPTHQVPLVPHVPIVRPAHQH  
PLGLVQRLIAQGVHPQHLPSSLQAGVLPFGIDMAPLQGLSGPLLGQPLYPLVSAASHPLLNRPGTPLHLAVMQQL  
QRSVLHPPGSSSQAAAI SVQTPQNVPSRSGMPMHMSQLEHRTSQRSSSPVGLAKWFGSDVLQQLPLSMPTKVI  
SVDELEYRQ\*

KTSEENLLSSNPIPN TDQDSSTNPKLSTLQRSSCSTPLSQTSTRYTKEQDYRPKTAGRKTPTLASVPVPGTFFL  
RPTHQVPLVPHVPIVRPAHQHPLVQRLIAQGVHPQHLP SLLQAGVLP PPGIDMAPLQGLSGP L L G Q P L Y P L V  
SAASHPLLNPRPGTPLHLAVMQQQLQRSVLHPPGSSSQAAAISVQTPQNVPSRS GMPHMHSQLEHRTSQRSSS  
PVGLAKWFGSDV LQQPLPSMPTKVISVDELEYRQ\*

>ENSMUSP00000020734\_c.2694:C>T\_p.P899S ENSMUST00000020734.11|Eif4enif1-  
201|ENSMUSG00000020454|+|chr11:g.3193904:C>T  
MEKSV AETENGDAFLELKKLPTS KSPHRYTKEELLDIKERPYSKQRP SCLSEKYDSDGVWDPEKWHASLYPAS  
GRSSPVESLKKESSEDRPSLVRR IADPRERVKEDDL DVVLS PQRRSFGGGCHVTA AVSSRRSGS PLEKDS DGL  
RLLGGRRIGSGRIISARAFEKDHRLSDKDLRDLRDRDRERDYKDKRFRREFGDSKR VFGERRRND SYTEEEPE  
WFSAGPTSQSETIELTGFDDKILEEDHKGRKRTRRRRTASVKEGIVECNGGVAEEDEVEVILAQEPSADQEVPR  
DVILPEQSPGEFDFNEFFNL DKVPC LASMIEDV LGE GSVSASRFSRWF SNPSRSGSRSSSLG STPHEELERLA  
GLEQAVLSPGQNSGNYFAPI PSEDHAENKVDILEMLQKAKVDLKP LLSL SANKEKLKESHSGV VLSVEEVE  
AGLKG LKVDQ QMKNSTPFMAEHLEETLSAASSNRQLKKGDMTAFNKL VNTMKASGTLPTQPKVSELLGQP VQ  
RPASSNLLSGLMGSLEATASLLSQRAPSP PMSQVFRTQAASADYLHPRI P SPIGFPSGPQQLLGD PFGMRKP  
MSPVSAQMSQLELQQA ALEGLALPHDLAVQTAPFYQPGFSK PQVDRTRDGLRNRQQRMSKSPAPMHGNSSSP  
APAASITSM LSPSFTPTSVIRKMYESREKTKEEMAPGMVVP GDGKEDTQKTSEENLLSSNPIPN TDQDSSTN  
PKLSTLQRSSCSTPLSQTSTRYTKEQDYRPKTAGRKTPTLASVPVPGTFFLRPTHQVPLVPHVPIVRPAHQHPLG  
LVQRLIAQGVHPQHLP SLLQAGVLP PPGIDMAPLQGLSGP L L G Q P L Y P L V S A A S H P L L N P R P G T P L H L A V M Q Q Q  
LQRSVLHPPGSSSQAAAISVQTSQNVPSRS GMPHMHSQLEHRTSQRSSS PVGLAKWFGSDV LQQPLPSMPTKVISVDELEYRQ\*

>ENSMUSP00000105676\_c.2766:C>T\_p.P923S ENSMUST00000110049.8|Eif4enif1-  
203|ENSMUSG00000020454|+|chr11:g.3193904:C>T  
MEKSV AETENGDAFLELKKLPTS KSPHRYTKEELLDIKERPYSKQRP SCLSEKYDSDGVWDPEKWHASLYPAS  
GRSSPVESLKKESSEDRPSLVRR IADPRERVKEDDL DVVLS PQRRSFGGGCHVTA AVSSRRSGS PLEKDS DGL  
RLLGGRRIGSGRIISARAFEKDHRLSDKDLRDLRDRDRERDYKDKRFRREFGDSKR VFGERRRND SYTEEEPE  
WFSAGPTSQSETIELTGFDDKILEEDHKGRKRTRRRRTASVKEGIVECNGGVAEEDEVEVILAQEPSADQEVPR  
DVILPEQSPGEFDFNEFFNL DKVPC LASMIEDV LGE GSVSASRFSRWF SNPSRSGSRSSSLG STPHEELERLA  
GLEQAVLSPGQNSGNYFAPI PSEDHAENKVDILEMLQKAKVDLKP LLSL SANKEKLKESHSGV VLSVEEVE  
AGLKG LKVDQ QMKNSTPFMAEHLEETLSAASSNRQLKKGDMTAFNKL VNTMKASGTLPTQPKVSRNVESHLL  
APAEIPGPVSKNILQELLGQPVQRPASSNLLSGLMGSLEATASLLSQRAPSP PMSQVFRTQAASADYLHPRI  
P SPIGFPSGPQQLLGD PFGMRK PMSPVSAQMSQLELQQA ALEGLALPHDLAVQTAPFYQPGFSK PQVDRTRD  
GLRNRQQRMSKSPAPMHGNSSSPAPAASITSM LSPSFTPTSVIRKMYESREKTKEEMAPGMVVP GDGKEDTQ  
KTSEENLLSSNPIPN TDQDSSTNPKLSTLQRSSCSTPLSQTSTRYTKEQDYRPKTAGRKTPTLASVPVPGTFFL  
RPTHQVPLVPHVPIVRPAHQHPLVQRLIAQGVHPQHLP SLLQAGVLP PPGIDMAPLQGLSGP L L G Q P L Y P L V  
SAASHPLLNPRPGTPLHLAVMQQQLQRSVLHPPGSSSQAAAISVQTSQNVPSRS GMPHMHSQLEHRTSQRSSS  
PVGLAKWFGSDV LQQPLPSMPTKVISVDELEYRQ\*

>ENSMUSP00000105675\_c.2694:C>T\_p.P899S ENSMUST00000110048.8|Eif4enif1-  
202|ENSMUSG00000020454|+|chr11:g.3193904:C>T  
MEKSV AETENGDAFLELKKLPTS KSPHRYTKEELLDIKERPYSKQRP SCLSEKYDSDGVWDPEKWHASLYPAS  
GRSSPVESLKKESSEDRPSLVRR IADPRERVKEDDL DVVLS PQRRSFGGGCHVTA AVSSRRSGS PLEKDS DGL  
RLLGGRRIGSGRIISARAFEKDHRLSDKDLRDLRDRDRERDYKDKRFRREFGDSKR VFGERRRND SYTEEEPE  
WFSAGPTSQSETIELTGFDDKILEEDHKGRKRTRRRRTASVKEGIVECNGGVAEEDEVEVILAQEPSADQEVPR  
DVILPEQSPGEFDFNEFFNL DKVPC LASMIEDV LGE GSVSASRFSRWF SNPSRSGSRSSSLG STPHEELERLA  
GLEQAVLSPGQNSGNYFAPI PSEDHAENKVDILEMLQKAKVDLKP LLSL SANKEKLKESHSGV VLSVEEVE  
AGLKG LKVDQ QMKNSTPFMAEHLEETLSAASSNRQLKKGDMTAFNKL VNTMKASGTLPTQPKVSELLGQP VQ  
RPASSNLLSGLMGSLEATASLLSQRAPSP PMSQVFRTQAASADYLHPRI P SPIGFPSGPQQLLGD PFGMRKP  
MSPVSAQMSQLELQQA ALEGLALPHDLAVQTAPFYQPGFSK PQVDRTRDGLRNRQQRMSKSPAPMHGNSSSP  
APAASITSM LSPSFTPTSVIRKMYESREKTKEEMAPGMVVP GDGKEDTQKTSEENLLSSNPIPN TDQDSSTN  
PKLSTLQRSSCSTPLSQTSTRYTKEQDYRPKTAGRKTPTLASVPVPGTFFLRPTHQVPLVPHVPIVRPAHQHPLG  
LVQRLIAQGVHPQHLP SLLQAGVLP PPGIDMAPLQGLSGP L L G Q P L Y P L V S A A S H P L L N P R P G T P L H L A V M Q Q Q  
LQRSVLHPPGSSSQAAAISVQTSQNVPSRS GMPHMHSQLEHRTSQRSSS PVGLAKWFGSDV LQQPLPSMPTKVISVDELEYRQ\*

>ENSMUSP00000112550\_c.2241:C>T\_p.P748S ENSMUST00000120721.9|Eif4enif1-  
204|ENSMUSG00000020454|+|chr11:g.3193904:C>T  
MEKSV AETENGDAFLELKKLPTS KSPHRYTKEELLDIKERPYSKQRP SCLSEKYDSDGVWDPEKWHASLYPAS  
GRSSPVESLKKESSEDRPSLVRR IAGIVECNGGVAEEDEVEVILAQEPSADQEVPRDVILPEQSPGEFDFNEF  
FNLDKVPC LASMIEDV LGE GSVSASRFSRWF SNPSRSGSRSSSLG STPHEELERLAGLEQAVLSPGQNSGNYF  
API PSEDHAENKVDILEMLQKAKVDLKP LLSL SANKEKLKESHSGV VLSVEEVEAGLKG LKVDQ QMKNSTP

FMAEHLEETLSAASSNRQLKKDGMTAFNKLVTMKNRVESHLLAPAEIPGQPVSKNILQELLGQPQVQRPASS  
 NLLSGLMGSLEATASLLSQRAPSPPMQVFRTOAASADYLHPRI P SPIGFPSGPQQLLGDPPFQGMKPMSPVS  
 AQMSQLELQQAALGLALPHDLAVQTAPFYQPGFSKPQVDRTRDGLRNRQQRMSKSPAPMHGGNSSS PAPAAS  
 ITSMSPSFTPTSVIRKMYESREKTKEEMAPGMVVPDGDGKEDTQKTSEENLLSSNPI PNTDQDSSTNPKLST  
 LQRSSCSTPLSQTSTRYTKEDYRPKTAGRKTPTLASPVPGTFFLRPTHQVPLVPHVPIVRPAHQHLPGLVQRL  
 IAQGVHPQHLPSSLQAGVLPPIGIDMAPLQGLSGPLLGQPLYPLVSAASHPLLNRPGTPLHLAVMQQLQRSV  
 LHPPGSSSQAAAISVQTSQNVPSRSGMPMHMSQLEHRTSQRSSSPVGLAKWFGSDVLQQLPLSMP TKVISVDE  
 LEYRQ\*

>ENSMUSP00000136768\_c.2766:C>T\_p.P923S ENSMUST00000179770.8|Eif4enif1-  
 213|ENSMUSG00000020454|+|chr11:g.3193904:C>T  
 MEKSVAEETENGDAFLELKKLPTSKSPHRYTKEELLDIKERPYSKQRPSCLESEKYDSDGVWDPEKWHASLYPAS  
 GRSSPVESLKKESSEDRPSLVRRIADPRERVKEDDLVDVLSQRRSFGGGCHVTAAVSSRRSGSPLEKDS DGL  
 RLLGGRRIGSGRIISARAFEKDHRLSDKDLRDLRDRDRERDYKDKRFRREFGDSKR VFGERRRNDSYTEEEPE  
 WFSAGPTSQSETIELTGFDDKILEEDHKGRKRTRRRRTASVKEGIVECNGGVAEEDEVEVILAQEPSADQEVPR  
 DVILPEQSPGEFDFNEFFNLKDVPCCLASMIEDVLGEGSVSASRFSRWFNSPNSRSGSRSSSLGSPHEELERLA  
 GLEQAVLSPGQNSGNYFAPIPSEDHAENKVDILEMLQKAKVDLKP LLSLSANKEKLEKESHSGVVLVSVEEVE  
 AGLKGLKVDQMKNSTPFMAEHLEETLSAASSNRQLKKDGMTAFNKLVTMKNRVESHLLAPAEIPGQPVSKNILQELLGQPQVQRPASS  
 NLLSGLMGSLEATASLLSQRAPSPPMQVFRTOAASADYLHPRI P SPIGFPSGPQQLLGDPPFQGMKPMSPVS  
 AQMSQLELQQAALGLALPHDLAVQTAPFYQPGFSKPQVDRTRDGLRNRQQRMSKSPAPMHGGNSSS PAPAAS  
 ITSMSPSFTPTSVIRKMYESREKTKEEMAPGMVVPDGDGKEDTQKTSEENLLSSNPI PNTDQDSSTNPKLST  
 LQRSSCSTPLSQTSTRYTKEDYRPKTAGRKTPTLASPVPGTFFLRPTHQVPLVPHVPIVRPAHQHLPGLVQRL  
 IAQGVHPQHLPSSLQAGVLPPIGIDMAPLQGLSGPLLGQPLYPLVSAASHPLLNRPGTPLHLAVMQQLQRSV  
 LHPPGSSSQAAAISVQTSQNVPSRSGMPMHMSQLEHRTSQRSSSPVGLAKWFGSDVLQQLPLSMP TKVISVDE  
 LEYRQ\*

>rs46909618\_ENSMUSP00000099865\_c.416:G>T\_p.R139S  
 ENSMUST00000102801.8|Tenm2-202|ENSMUSG00000049336|-|chr11:g.36755580:C>A  
 MDVKDRRHRSLTRGRCGKECRYTSSSLDSEDCRVPTQKSYSSSETL KAYDHDSRMHYGNRVTDLVHRESDEFS  
 RQGTNFTLAEELGICEPSPHRSGYCSMDGILHQGYSLSSTGSDADSDTEGGMSPEHAIRLWGRGIKSSRSSGLSS  
 RENSAITLTDSDNENKSDDDNGRPI PPTSSSSLLPSAQLPSSHNPPVSCQMPLLDSENTSHQIMDTNPDEEFS  
 PNSYLLRACSGPQQASSGPPNHHSQSTLRPPLPPPHNHTLSHHHSSANS LNRSNLTNRRSQIHAPAPAPNDL  
 ATTPESVQLQDSWVLSNVPLETRHFLFKTSSGSTPLFSSSSPGYPLTSGTVYTPPPRLLPRNTF SRKAFKFK  
 KPSKYCSWKCAALSAIAAALLLAILLAYFIAMHLLGLNWQLQPADGHTFNNGVRTGLPGNDDVATVP SGGKVP  
 WSLKNSSIDSGEAEVGRVVTQEVPPGVFVRSQIHIHQPFKFNISL GKDALFGVYIRRG LPPSHAQYDFMER  
 LDGKEKSVVSESPRERSIQTTLVQNEAVFVQYLDVGLWHLAFYNDGKDKEMVSFNTVVLDVSDQCP RNC HNG  
 ECVSGLCHCFPGFLGADCAKACPVLC SGNQYKSGTKCQCYSGWKGAEC DVP MNQCIDPSCGGHGSCIDGNVC  
 CAAGYKGEHCEEVDLPTCS SHGVCVNGECLCSPGWGLNCELARVQCPDQC SGHGT YLPDSGLCSDCNWM  
 GPDCSVVCSVDCGTHGVCIGGACRCEEGWTGAACDQRVCHPRCIEHGTCKDGKCECREGWNGEHCTIDGCPDL  
 CNGNGRCTLGQNSWQCVCQTGWGRGPCNVAMETSCADNKDNEGDGLVDCLDPDCCLQSACQNSLLCRGSRDPL  
 DIIQQGQTDWPAVKSFYDRIKLLAGKDSHTIIPGDNPFNSSLVSLIRGQVVTMDGTPLVGVNVSFVKYPKYGY  
 TITRQDGTFDLIANGGSALT LHFERAPFMSQERTVWLPWNSFYAMDTLVMKTEENSIPSCDLSGFVRPDPII  
 SSPLSTFFSASPASNPIVPEQTQLHEEIELPGTNVKKR YLSSRTAGYKSLKITMTQSTVPLNLRVHLMVAV  
 EGHFLQKSFQASPNLAYTFIWDKTDAYGQRVYGLSDAVVSVGFYETCP SILLWEKRTALLQGFELDP SNLGG  
 WSLDKHHTLNVKSGILHKGTGENQFLTQQPAIITSIMGNRRRSISCPSCNGLAEGNKLLAPVALAVGIDGSL  
 FVGDFNYIRRI FPSRNVTSILELRNKEFKHSNSPGHKYLLAVDPVTGSLYVSDTNSRRIYRVKSLSGAKDLA  
 NSEVVAGTGEQCLPFDEARCGDGGKAVDATLMSPRGIAVDKNGLMYFVDATMIRKVDQNGIISTLLGSNDLTA  
 VRPLSCDSSMDVAQVRLEWPTDLAVNPMDNSLYVLENNVILRITENHQVSI IAGRPMHCQVPGIDYSLSKLAI  
 HSALESASAIASHTGVLYITETDEKKINRLRQVTTNGEICLLAGAASDCCKNDVNCICYSGD DAYATDAI  
 NSPSSLAVAPDGTIYIADLGNIRIRAVSKNKPVLNAFNQYEAASPEQE LYVFNADGIHQYTVSLVTGEYLYN  
 FTYSADNDVTELDNNGNSLKIIRDSSGMPRHLLMPDNQIITLTVGTNGGLKAVSTQNLELGLMTYDGN TGLL  
 ATKSDETGWTTFYDYDHEGRLTNVTRPTGVVTS LHREMEKSITIDIENSNRDDDVTVITNLSVVEASYTVVQD  
 QVRNSYQLCNGGTLRVMYANGMAVSVFHSPEPHVLAGTITPTIGRCNISLPMENGLNSIEWRLRKEQIKGKVTIF  
 GRKLRVHGRNLLSIDYDRNIRTEKIYDDHRKFTLR IYDQVGRPFLLWLPSSGLAAVNVSYFFNGRLAGLQ RGA  
 MSERTDIDKQGRIVSRMFADGK VWSYSYLDKSMGVLQYQRYI FEYDSSDR LHAVT MFSVARHMSMSTHTSIG  
 YIRNIYNPPESNASVIFDYSDDGRILKTSFLGTGRQVFTYKGLSKLSEIYVDSTAVTFYDET TGVLMKMN  
 QSGGFSCTIRYRKVGLVDKQIYRFSEEGMINARQYTYHDNSFR IASIKPVISETPLPVDLYRYDEISGKVE  
 HFGKFGVIYYDINQIITAVMTLSKHFDTHGRIKEVQYEMFRSLMYWMTVQYDSMGRVIKRELKLG PYANTTK  
 YTYDYDGDGQLQSVAVNDRPTWRYSYDLNGLNHLNPGNSARLMP LRYDLRDRITRLGDVQYKIDDDGYLCQR  
 GSDIFEYNSKGLL TRAYNKASGWSVQYRYDGVGRRASYKTNLGHHLQYFYSDLHNPTRITHVYNHSNSEITSL

YYDLQGHLFAMESSSGEEYYVASDNTGTPLAVFSINGLMIKQLQYTAYGEIYYDSNPDFQMVIGFHGGLYDPL  
TKLVHFTQRDYDVLAGRWTSPDYTMWRNVGKEPAPFNLYMFKNNNPLSNELDLKKNYVTDVKSWSLVMFGFQLSN  
IIPGFPRAKMYFVPPPYELSEQASENGQLITGVQQTTERHNQAF LALEGQVITKKLHASIREKAGHWFATTT  
PIIGKIMFAIKEGRVTTGVSSIASEDSRKVASVLNNAYYLDKMHYSIEGKDTHYFVKIGAADGDLVTLGTTI  
GRKVLSEGVNVTVSQPTLLVNGRTRRFTNIEFQYSTLLLSIRYGLTPDTLDEEKARVLDQARQALGTAWAKE  
QQKARDGREGSRLWTEGEKQQLLSTGRVQGYEGYVLPVEQYPELADSSSNIQFLRQNEMGKR\*

>rs46909618\_ENSMUSP0000052014\_c.416:g>T\_p.R139S  
ENSMUST00000057207.6|Tenm2-201|ENSMUSG00000049336|-|chr11:g.36755580:C>A  
MDVKDRRHRSLTRGRCGKECRYTSSSLDSEDCRVPTQKSYSSSETLKAYDHDSRMHYGNRVTDLVHRESDEFS  
RQGTNFTLAEELGICEPSPHRSGYCSMDGILHQYSLSTGSDADSDTEGGMSPEHAIRLWGRGKIKSRSSGLSS  
RENSALTLTSDNENKSDDDNGRPIPTSSSSLLPSAQLPSSHNPVSCQMPLLDSENTSHQIMDTPDEEFS  
PNSYLLRACSGPQQASSSGPPNHHSQSTLRPPLPPPHNHTLSHHSSANS LNRSNLNRRSQIHAPAPAPNDL  
ATTPESVQLQDSWVLNSNVPLETRHFLFKTSSGSTPLFSSSSPGYPLTSGTVYTPPPRLLPRNTFSRKAFLK  
KPSKYCSWKCAALSAAIAALLLAILLAYFIAMHLLGLNWQLQPADGHTFNNGVRTGLPGNDDVATVPSSGKVP  
WSLKNSSIDSGEAEVGRVTVQEVPPGVFVRSQIHISQPPQFLKFNISLGKDALFGVYIRRGLPPSHAQYDFMER  
LDGKEKWSVVEsprerrsIQTLVQNEAVFVQYLDVGLWHLAFYNDGKDKEMVSFNTVVLDVSVQDCPRNCHGNG  
ECVSGLCHCFPGFLGADCAKAACPVLCSGNGQYSGKTCQCYSGWKAECVPMNQCIDPSCGGHGSCIDGNVCV  
CAAGYKGEHCEEVDCLDPTCSSHGVCVNGECLCSPGWGGLNCELARVQCPDQCSGHGTYLPDSGLCSDPNWM  
GPDCSVEVCSVDCGTHGVCIGGACRCEEGWTGAACDQRVCHPRCIEHGTCCKDGKCECREGWNGEHCITDGC  
PCDLCNNGRCTLGQNSWQVCQGTGWRGPGCNVAMETSCADNKDNEGDGLVDCLDPDCCLQSACQNSLLCRGSRDP  
LDIIQQGQTDWPAVKSFYDRIKLLAGKDSSTHII PGDNPFNSLVSLIRGQVVTMDGTPLVGVNVSFVKYPKYG  
YTI TRQDGTDFLIANGGSALT LHFERAPFMSQERTVWLPWNSFYAMD TLVMKTEENSIPSCDLSGFVRPDI I  
ISSPLSTFFSASPASNPIVPETQVLHEEIELPGTNVKLRYLSRTAGYKSLKITMTQSTVPLNLIRVHLMVA  
VEGHLFQKSFQASPNLAYTFIWDKTDAYGQRVYGLSDAVVSVGFYETCPSLILWEKRTALLQGFELDPNGLG  
GWSLDKHHHTLVNKGSGILHKGTEGENQFLTQQPAIITSIMGNRRRSISCPSCNGLAEGNKLLAPVALAVGIDGS  
LFVGFDFNYIRRIFFSRNVTSILELRNKEFKHLSNSPGHKIYLAVDVPTGSLYVSDTNSRRIYRVKSLSGAKDLA  
GNSEVAVAGTEGQCLPFDEARCGDGGKAVDATLMSPRGIYAVDNKGLMYFVDATMIRKVDQNGIISTLLGSNDLT  
AVRPLSCDSSMDVAQVRLEWPTDLAVNPMDNSLYVLENNVILRITENHQVSI IAGRPMHCQVPGIDYSLSKLA  
IHSALASASAIASHTGVLYITETDEKKINRLRQVTTNGEICLLAGAASDCDCKNDVNCICYSGDDAYATDAI  
LNSPSSLAVAPDGTIYIADLGNIRIRAVSKNKPVLNAFNQYEAASPGEQELYVFNADGIHQYTVSLVTGEYLY  
NFTYSADNDVTELDNNGNSLKIIRDSSGMPRHLLMPDNQIITLTVGTNGGLKAVSTQNLGLMTYDGNTGL  
LATKSDETGWTTFYDYDHEGRLTNVTRPTGVVTSLHREMEKSIITIDIENSRDDDVTVITNLSVVEASYTVVQ  
DQVRNSYQLCNGTLRVMYANGMAVSFHSSEPHVLAGTITPTIGRCNISLPMENGLNSIEWRLRKEQIKGKVTI  
FGRKLRVHGRNLLSIDYDRNIRTEKIYDDHRKFTLRIYDQVGRPFLWLPSSGLAANVNSYFFNGRLAGLQRG  
AMSERTDIDKQGRIVSRMFADGKVVWSYSLDKSMVLLQLQSQRYIFEYDSSDRHLHAVTMPVARHSMSTHTSI  
GYIRNIYNPPESNASVIFDYSDGRILKTSFLGTGRQVYFYKGLSKLSEIYVDSTAVTFYDETTGVLMNVN  
LQSGGFSCITIRYKVGPLVDKQIYRFSEEGMINARFDYTYHDNSFR IASIKPVISETPLPVDLYRYDEISGKV  
EHFGKFGVIYYDINQIITTAVMTSLKHFDTHGRIKEVQYEMFRSLMYWMTVQYDSMGRVIKRELKLPYANTT  
KYTYDYDGDGQLQSVAVNDRPTWRYSYDLNGLHLLNPGNSARLMPRLRYDLRDRITRLGDVQYKIDDDGYLCQ  
RGSDFEYNSKGLLTRAYNKASGWSVQYRYDGVGRRASYKTNLGHHLQYFYSDLHNPTRITHVYNHNSNEITS  
LYYDLQGHLFAMESSSGEEYYVASDNTGTPLAVFSINGLMIKQLQYTAYGEIYYDSNPDFQMVIGFHGGLYDPL  
TKLVHFTQRDYDVLAGRWTSPDYTMWRNVGKEPAPFNLYMFKNNNPLSNELDLKKNYVTDVKSWSLVMFGFQLS  
NIIPGFPRAKMYFVPPPYELSEQASENGQLITGVQQTTERHNQAF LALEGQVITKKLHASIREKAGHWFATT  
TPIIGKIMFAIKEGRVTTGVSSIASEDSRKVASVLNNAYYLDKMHYSIEGKDTHYFVKIGAADGDLVTLGTTI  
GRKVLSEGVNVTVSQPTLLVNGRTRRFTNIEFQYSTLLLSIRYGLTPDTLDEEKARVLDQARQALGTAWAK  
EQKARDGREGSRLWTEGEKQQLLSTGRVQGYEGYVLPVEQYPELADSSSNIQFLRQNEMGKR\*

>rs46909618\_ENSMUSP00000129951\_c.416:g>T\_p.R139S  
ENSMUST00000163524.8|Tenm2-208|ENSMUSG00000049336|-|chr11:g.36755580:C>A  
MDVKDRRHRSLTRGRCGKECRYTSSSLDSEDCRVPTQKSYSSSETLKAYDHDSRMHYGNRVTDLVHRESDEFS  
RQGTNFTLAEELGICEPSPHRSGYCSMDGILHQYSLSTGSDADSDTEGGMSPEHAIRLWGRGKIKSRSSGLSS  
RENSALTLTSDNENKSDDDNGRPIPTSSSSLLPSAQLPSSHNPVSCQMPLLDSENTSHQIMDTPDEEFS  
PNSYLLRACSGPQQASSSGPPNHHSQSTLRPPLPPPHNHTLSHHSSANS LNRSNLNRRSQIHAPAPAPNDL  
ATTPESVQLQDSWVLNSNVPLETRHFLFKTSSGSTPLFSSSSPGYPLTSGTVYTPPPRLLPRNTFSRKAFLK  
KPSKYCSWKCAALSAAIAALLLAILLAYFIAMHLLGLNWQLQPADGHTFNNGVRTGLPGNDDVATVPSSGKVP  
WSLKNSSIDSGEAEVGRVTVQEVPPGVFVRSQIHISQPPQFLKFNISLGKDALFGVYIRRGLPPSHAQYDFMER  
LDGKEKWSVVEsprerrsIQTLVQNEAVFVQYLDVGLWHLAFYNDGKDKEMVSFNTVVLDVSVQDCPRNCHGNG  
ECVSGLCHCFPGFLGADCAKAACPVLCSGNGQYSGKTCQCYSGWKAECVPMNQCIDPSCGGHGSCIDGNVCV  
CAAGYKGEHCEEVDCLDPTCSSHGVCVNGECLCSPGWGGLNCELARVQCPDQCSGHGTYLPDSGLCSDPNWM

GPDCSVVCSVDCGTHGVCIGGACRCEEGWGTGAACDQRVCHPRCIEHGTCKDGKCECREGWNGEHCTIDGCPDL  
 CNGNGRCTLGQNSWQCVCQTGWGRGPCNVAMETSCADNKDNEGDGLVDCLDPDCCLQSACQNSLLCRGRSDPL  
 DI IQQGQTDWPAVKSFYDRIKLLAGKDSHTIIPGDNPFNSSLVSLIRGQVVTMDGTPLVGVNVSVFKYPKYGY  
 TITRQDGTFDLIANGGSALTLLHFERAPFMSQERTVWLPWNSFYAMDTLVMKTEENSI PSCDLSGFVRPDPII  
 SSPLSTFFFASASPASNPVIVPETQVLHEEIELPGTINVKRLYLSSRTAGYKSLKITMTQSTVPLNLI RVHLMVAV  
 EGHFLQKSFQASPNLAYTFIWDKTDAYGQRVYGLSDAVVSVGFYETCPSLILWEKRTALLQGFELDPNSLGG  
 WSLDKHHTLNVKSGILHKGTGENQFLTQQPAIITSIMGNRRRSISCPSCNGLAEGNKLLAPVALAVGIDGSL  
 FVGDFNYIRRIFFPSRNVTSILELRNKEFKHSNSPGHKYYLAVDPVTGSLYVSDTNSRRIYRVKSLSGAKDLA  
 NSEVVAGTGEQCLPFDEARCGDGGKAVDATLMSPRGIAVDKNGLMYFVDATMIRKVDQNGIISTLLGSNDLTA  
 VRPLSCDSSMDVAQVRLEWPTDLAVNPMDNSLYVLENNVILRITENHQVSI IAGRPMHCQVPGIDYSLSKLAI  
 HSALESASAI AISHTGVLYITETDEKKINRLRQVTTNGEICLLAGAASDCCKNDVNCICYSGDDAYATDAI  
 NSPSSLAVAPDGTIYIADLGNIRIRAVSKNKPVLNAFNQYEAASPEQEYLVFNADGIHQYTVSLVTGEYLYN  
 FTYSADNDVTELDNNGNSLKIIRDSSGMPRHLLMPDNQIITLTVGTNGGLKAVSTQNLELGLMTYDNGTGLL  
 ATKSDETGWTTFYDYDHEGRLTNVTRPTGVVTS LHREMEKSIITIDIENSRDDDDVTVITNLSSEASYTVVQD  
 QVRNSYQLCNGTLRVMYANGMAVSVFHFSEPHVLAGTITPTIGRCNISLPMENGLNSIEWRLRKEQIKGKVTIF  
 GRKLRVHGRNLLSIDYDRNIRTEKIYDDHRKFTLR IYDQVGRPFVLPSSGLAAVNVSYFFNGRLAGLQORGA  
 MSERTDIDKQGRIVSRMEFADGKVVWSYSLDKSMVLLLSQRQYIFEYDSSDRLHAVTMPVSVARHSMSTHTSIG  
 YIRNIYNPPESNASVIFDYSDGRIKTSFLGTGRQVYKYGKLSKLSEIVYDSTAVTFYDETTGVLMKMN  
 QSGGFSC TIRYRKVGPLVDKQIYRFSEEGMINARFDYTYHDNSFRIASIKPVISETPLPVDLYRYDEISGKVE  
 HFGKFGVIYYDINQIITTAVMTLSKHFDTHGRIKEVQYEMFRSLMYWMTVQYDSMGRVIKRELKLGPIYANTTK  
 YTYDYDGDGQLQSVAVNDRPTWRYSYDLNGLNHLNPNGSARLMPRLYDLRDRITRLGDVQYKIDDDGYLCQR  
 GSDIFEYNSKGLLTRAYNKASGWSVQYRYDGVGRRASYKTNLGHHLQYFYSDLHNPTRITHVYNHSNSEITSL  
 YYDLQGHLFAMESSSGEEYVVDNTGTPLAVFVSINGLMIKQLQYTAYGEIYYDSNPDFQMVIGFHGGLYDPL  
 TKLVHFTQRDYDVLAGRWTSPDYTMWRNVGKEPAPFNLYMFKNNPLSNELDLKNYVTDVKS WLVMFGFQLSN  
 IIPGFPRAKMYFVPPPYELSEQASENGQLITGVQOTTERHNQAF LALEGQVITKKLHASIREKAGHWFATTT  
 PIGKIMFAIKESRVTGVSSIASEDSRKVASVNLNAYLDKMHSYIEGKDTHYFVKIGAADGLVTLGTTI  
 GRKVLSESGVNTVTSQPTLLVNGRTRRFTNIEFQYSTLLLSIRYGLTPDPTLDEEKARVLDQARQALGTAWAKE  
 QQKARDGREGSRLWTEGEKQQLLSTGRVQGYEGYVLPVEQYPELADSSSNIQFLRQNE MGKR\*  
 >rs29434588\_ENSMUSP00000146133\_c.598:A>T\_p.E200V  
 ENSMUST00000205546.2|Gabra1-205|ENSMUSG00000010803|-|chr11:g.42038018:T>A  
 MKKSRGLSDYLWAWTLILSTLSGRSYGQPSQDELKDNTTVFTRILDRLLDGYDNRLRPGLGERVTEVKTDIFV  
 TSFGPVSDDHMEYTI DVFFRQSWKDERLKFKGPM TVLRLNLMASKI WTPDPTFFHNGKKSVAHNMTMPNKLLR  
 ITEDGTLTYMRLTVRAECPMHLEDFPMDAHACPLKFGSYAYTRAEVVYEWTRV PARSVVVAEDGSRLNQYDL  
 LGQTVDSGIVQSSTGEYVVMTHFHLKRKIGYFVIQTYLPCIMTVILSQVSFWLNRESVPARTVFGVTVLTM  
 TTLSISARNSLPKVAYATAMDWFIAVCYAFVFSALIEFATVNYFTKRGYAWDGKSVVPEKPKKVKDPLIKKNN  
 TYAPTATSYPNLRGDPGLATI AKSATIEPKEVKPETKPEPKKTFNSVSKIDRLSRIAFPLLFGI FNLVYW  
 ATYLNREPQLKAPTPHQ\*  
 >rs29434588\_ENSMUSP00000020707\_c.598:A>T\_p.E200V  
 ENSMUST00000020707.12|Gabra1-201|ENSMUSG00000010803|-  
 |chr11:g.42038018:T>A  
 MKKSRGLSDYLWAWTLILSTLSGRSYGQPSQDELKDNTTVFTRILDRLLDGYDNRLRPGLGERVTEVKTDIFV  
 TSFGPVSDDHMEYTI DVFFRQSWKDERLKFKGPM TVLRLNLMASKI WTPDPTFFHNGKKSVAHNMTMPNKLLR  
 ITEDGTLTYMRLTVRAECPMHLEDFPMDAHACPLKFGSYAYTRAEVVYEWTRV PARSVVVAEDGSRLNQYDL  
 LGQTVDSGIVQSSTGEYVVMTHFHLKRKIGYFVIQTYLPCIMTVILSQVSFWLNRESVPARTVFGVTVLTM  
 TTLSISARNSLPKVAYATAMDWFIAVCYAFVFSALIEFATVNYFTKRGYAWDGKSVVPEKPKKVKDPLIKKNN  
 TYAPTATSYPNLRGDPGLATI AKSATIEPKEVKPETKPEPKKTFNSVSKIDRLSRIAFPLLFGI FNLVYW  
 ATYLNREPQLKAPTPHQ\*  
 >rs29434588\_ENSMUSP00000145949\_c.598:A>T\_p.E200V  
 ENSMUST00000206105.2|Gabra1-207|ENSMUSG00000010803|-|chr11:g.42038018:T>A  
 MKKSRGLSDYLWAWTLILSTLSGRSYGQPSQDELKDNTTVFTRILDRLLDGYDNRLRPGLGERVTEVKTDIFV  
 TSFGPVSDDHMEYTI DVFFRQSWKDERLKFKGPM TVLRLNLMASKI WTPDPTFFHNGKKSVAHNMTMPNKLLR  
 ITEDGTLTYMRLTVRAECPMHLEDFPMDAHACPLKFGSYAYTRAEVVYEWTRV PARSVVVAEDGSRLNQYDL  
 LGQTVDSGIVQSSTGEYVVMTHFHLKRKIGYFVIQTYLPCIMTVILSQVSFWLNRESVPARTVFGVTVLTM  
 TTLSISARNS  
 >rs29466007\_ENSMUSP00000146133\_c.556:A>G\_p.Y186C  
 ENSMUST00000205546.2|Gabra1-205|ENSMUSG00000010803|-|chr11:g.42038060:T>C  
 MKKSRGLSDYLWAWTLILSTLSGRSYGQPSQDELKDNTTVFTRILDRLLDGYDNRLRPGLGERVTEVKTDIFV  
 TSFGPVSDDHMEYTI DVFFRQSWKDERLKFKGPM TVLRLNLMASKI WTPDPTFFHNGKKSVAHNMTMPNKLLR

ITEDGTLTYMRLTVRAECPMHLEDFPMDAHACPLKFGSCAYTRAEVVYEWTPREPARSVVVAEDGSRNLNQYDL  
 LGQTVDSGIVQSSTGEYVVMTHFHLKRKIGYFVIQTYLPCIMTVILSQVSWFNLNRESVPARTVFGVTTVLTM  
 TTLSISARNSLPKVAYATAMDWFIAVCYAFVFSALIEFATVNYFTKRGYAWDGKSVVPEKPKKVKDPLIKKNN  
 TYAPTATSYPNLARGDPGLATIAKSATIEPKEVKPETKPEPKKTFNSVSKIDRLSRIAPLLFGIFNLVYW  
 ATYLNREPQLKAPTPHQ\*  
 >rs29466007\_ENSMUSP00000020707\_c.556:A>G\_p.Y186C  
 ENSMUST00000020707.12|Gabra1-201|ENSMUSG00000010803|-  
 |chr11:g.42038060:T>C  
 MKKSRGLSDYLWAWTLILSTLSGRSYGQPSQDELKDNTTVFTRILDRLLDGYDNRLRPGLGERVTEVKTDIFV  
 TSFGPVSDDHMEYTTIDVFFRQSWKDERLKFKGPMTVLRLNLMASKIWTPTDFFHNGKKSVAHNMTMPNKLLR  
 ITEDGTLTYMRLTVRAECPMHLEDFPMDAHACPLKFGSCAYTRAEVVYEWTPREPARSVVVAEDGSRNLNQYDL  
 LGQTVDSGIVQSSTGEYVVMTHFHLKRKIGYFVIQTYLPCIMTVILSQVSWFNLNRESVPARTVFGVTTVLTM  
 TTLSISARNSLPKVAYATAMDWFIAVCYAFVFSALIEFATVNYFTKRGYAWDGKSVVPEKPKKVKDPLIKKNN  
 TYAPTATSYPNLARGDPGLATIAKSATIEPKEVKPETKPEPKKTFNSVSKIDRLSRIAPLLFGIFNLVYW  
 ATYLNREPQLKAPTPHQ\*  
 >rs29466007\_ENSMUSP00000145949\_c.556:A>G\_p.Y186C  
 ENSMUST000000206105.2|Gabra1-207|ENSMUSG00000010803|-|chr11:g.42038060:T>C  
 MKKSRGLSDYLWAWTLILSTLSGRSYGQPSQDELKDNTTVFTRILDRLLDGYDNRLRPGLGERVTEVKTDIFV  
 TSFGPVSDDHMEYTTIDVFFRQSWKDERLKFKGPMTVLRLNLMASKIWTPTDFFHNGKKSVAHNMTMPNKLLR  
 ITEDGTLTYMRLTVRAECPMHLEDFPMDAHACPLKFGSCAYTRAEVVYEWTPREPARSVVVAEDGSRNLNQYDL  
 LGQTVDSGIVQSSTGEYVVMTHFHLKRKIGYFVIQTYLPCIMTVILSQVSWFNLNRESVPARTVFGVTTVLTM  
 TTLSISARNSLPKVAYATAMDWFIAVCYAFVFSALIEFATVNYFTKRGYAWDGKSVVPEKPKKVKDPLIKKNN  
 TYAPTATSYPNLARGDPGLATIAKSATIEPKEVKPETKPEPKKTFNSVSKIDRLSRIAPLLFGIFNLVYW  
 ATYLNREPQLKAPTPHQ\*  
 >rs264326470\_ENSMUSP00000146133\_c.537:C>T\_p.P180S  
 ENSMUST000000205546.2|Gabra1-205|ENSMUSG00000010803|-|chr11:g.42044179:G>A  
 MKKSRGLSDYLWAWTLILSTLSGRSYGQPSQDELKDNTTVFTRILDRLLDGYDNRLRPGLGERVTEVKTDIFV  
 TSFGPVSDDHMEYTTIDVFFRQSWKDERLKFKGPMTVLRLNLMASKIWTPTDFFHNGKKSVAHNMTMPNKLLR  
 ITEDGTLTYMRLTVRAECPMHLEDFPMDAHACPLKFGSYAYTRAEVVYEWTPREPARSVVVAEDGSRNLNQYDL  
 LGQTVDSGIVQSSTGEYVVMTHFHLKRKIGYFVIQTYLPCIMTVILSQVSWFNLNRESVPARTVFGVTTVLTM  
 TTLSISARNSLPKVAYATAMDWFIAVCYAFVFSALIEFATVNYFTKRGYAWDGKSVVPEKPKKVKDPLIKKNN  
 TYAPTATSYPNLARGDPGLATIAKSATIEPKEVKPETKPEPKKTFNSVSKIDRLSRIAPLLFGIFNLVYW  
 ATYLNREPQLKAPTPHQ\*  
 >rs264326470\_ENSMUSP00000020707\_c.537:C>T\_p.P180S  
 ENSMUST00000020707.12|Gabra1-201|ENSMUSG00000010803|-  
 |chr11:g.42044179:G>A  
 MKKSRGLSDYLWAWTLILSTLSGRSYGQPSQDELKDNTTVFTRILDRLLDGYDNRLRPGLGERVTEVKTDIFV  
 TSFGPVSDDHMEYTTIDVFFRQSWKDERLKFKGPMTVLRLNLMASKIWTPTDFFHNGKKSVAHNMTMPNKLLR  
 ITEDGTLTYMRLTVRAECPMHLEDFPMDAHACPLKFGSYAYTRAEVVYEWTPREPARSVVVAEDGSRNLNQYDL  
 LGQTVDSGIVQSSTGEYVVMTHFHLKRKIGYFVIQTYLPCIMTVILSQVSWFNLNRESVPARTVFGVTTVLTM  
 TTLSISARNSLPKVAYATAMDWFIAVCYAFVFSALIEFATVNYFTKRGYAWDGKSVVPEKPKKVKDPLIKKNN  
 TYAPTATSYPNLARGDPGLATIAKSATIEPKEVKPETKPEPKKTFNSVSKIDRLSRIAPLLFGIFNLVYW  
 ATYLNREPQLKAPTPHQ\*  
 >rs264326470\_ENSMUSP00000145949\_c.537:C>T\_p.P180S  
 ENSMUST000000206105.2|Gabra1-207|ENSMUSG00000010803|-|chr11:g.42044179:G>A  
 MKKSRGLSDYLWAWTLILSTLSGRSYGQPSQDELKDNTTVFTRILDRLLDGYDNRLRPGLGERVTEVKTDIFV  
 TSFGPVSDDHMEYTTIDVFFRQSWKDERLKFKGPMTVLRLNLMASKIWTPTDFFHNGKKSVAHNMTMPNKLLR  
 ITEDGTLTYMRLTVRAECPMHLEDFPMDAHACPLKFGSYAYTRAEVVYEWTPREPARSVVVAEDGSRNLNQYDL  
 LGQTVDSGIVQSSTGEYVVMTHFHLKRKIGYFVIQTYLPCIMTVILSQVSWFNLNRESVPARTVFGVTTVLTM  
 TTLSISARNSLPKVAYATAMDWFIAVCYAFVFSALIEFATVNYFTKRGYAWDGKSVVPEKPKKVKDPLIKKNN  
 TYAPTATSYPNLARGDPGLATIAKSATIEPKEVKPETKPEPKKTFNSVSKIDRLSRIAPLLFGIFNLVYW  
 ATYLNREPQLKAPTPHQ\*  
 >rs47442249\_ENSMUSP00000158770\_c.378:T>C\_p.Y127H  
 ENSMUST000000238415.2|Atp10b-203|ENSMUSG00000055415|+|chr11:g.43047100:T>C  
 MRKEGRKRKKKEDKKRVVSNLPEFEGWPYKPNRHRGNQVTKSKYTVLSFIPKNLFEQLHRFANLYFVGI  
 VILNFI PVVNAFQPGVSMVPVCAILTVTAIKDAWEDFRYKSDKVINNRESLVHSRKEQRYMLKRWQDVRVGD  
 FVQMOCNEIVPADILLFSSDPGSGVCHLETANLDEGTNLKQRRVVKGFSQPEVQFQPEHFHSTIVCEKPNHNL  
 SKFKGYMEHPDQTRTGFGSESLLRGCTIRNTEVAAGIYIYAGHETKAMLNNSGPRYKRSKIERINTDIFFC  
 IGLLFMLCLIGAVGHSLWNGTFKEHPFDPDADGNFLSLALGGFYMFLTMIILLQVLIPIISLYVSIELVKLG  
 QVFLHNDLDLYDEETDLSIQCRALNITEDLGGIQIYIFSDKGTGLTENKMFRRCTIVGSEYCHQENAKRLEM  
 PKELDSDGEEWTQYQCLSFPFRWAQGSTTMRSSQGAQPLRRCHSARVPIQSHCRQRSVGRWETSQPPVAFSSS  
 IEKDVTPDKNLLSKVRDAALWLETSDTRPAKPSHSTTASIAIDFFLAL TICNSVMVSTTTEPRKRVTPPANKA

LGTSLEKIQQLFQRLKLLSLSQSFSSSTAPSDTDLGESLGNLPTIDSDEKDDTSVCSGDCSTDGGYRSSTWEQ  
 GDILGSESGTSLEEGLEAPTLSQDEPELCEYAEASPDEAALVHAARAYSFTLVSRTPPEQVTVRLPQGICLTFDL  
 LFTLGFDSVRKRMSVVVRHPLTDEIIVYTKGADSVIMDLLED PACESNIDVEKCLKRIRARTQKHLDLIYARDG  
 LRTLCAIAKKVVDEEDFQRWASFRREAEASLDNREELLMETAQHLENHLLTLLGATGIEDRLQEGVPDTIAALRE  
 AGIQLWVLTGDKQETAVNIAYSCKLLDQDTVYSINTENQETCESILNCTLEDIKRFHEPQQPARKLCGHRIP  
 PKMPSVNSGAMAPEIGLVIDGKTLNAIFQGKLENKFLELTQYCRSVLCCRSTPLQKSMIVKLVRDKLSVMTLS  
 IGDGANDVSMIQAADIGIGISGQEGMQAVMSSDFAIARFSLKLLLVHGHWCYSRLARMVVYFYKNCYVNL  
 LFWYQFFCGFSGSTMIDYWQMIFFNLFFTSPLPIIFGVLDKDVSAETLLALPELYKSGQNSECYNLPTFWVS  
 MADAFYQSLICFFIPLYTYRGSIDVFTFGTPIINTISLTTILLHQAMEMKTWTVLHGLVLLGSFLMYFVVS  
 YNATCVTCNSPTNPYWVMERQLSDPTFYLICLLTPVVALLPYFLLSLQGTYGKSLISKAQKIDKLPIDKRNLE  
 IQNWRSKQRPAPASASASAPATGTVHTRPPCHPVPPEAQQNFGASTSKSSGPPRQKHVEDRVLQDPRCSR  
 EHSRDDTCTVDTLAKLSSGECLLDPNRTVAPTAYSRGQKDVSRHSSKSGSHRRSQSSLTII\*  
 >rs250039360\_ENSMUSP00000076844\_c.4078:C>CTTAAT\_p.A1360ins-fs  
 ENSMUST00000077659.6|Atp10b-  
 201|ENSMUSG00000055415|+|chr11:g.43150382:C>CTTAAT  
 MTCSLDFSWLRWKWRTQDGFSSQSPSETTPLLSPETDRQSHNTAEQRVVYPNNSMCHQDWWKVCRRYPGNSICT  
 TKYTLTFLPQNLFEQFHRWANLYFLFLVILNWMPSMEVPHREITIFPLATVLLIIMVKDGIEDFKRYCFDRE  
 MNSASIQIYERKEQRYMLKRWDVVRVGDVFMQMCNEIIVPADILLFSSDPGCVCHLETANLDGETNLKQRRVV  
 KGFSQPEVQFQPEHFHSTIVCEKPNHLSKFKGYMEHPDQTRTGFSGESLLLRGCTIRNTEVAAGIVIYAGHE  
 TKAMLNNSGPRYKRSKIERRINTDIFFCIGLLFLMCLIGAVGHSWNGTFKEHPPFDVPDADGNFLSLALGGF  
 YMFLTMIILLQVLIPIISLYVSELVKLGQVFLHNDLDLYDEETDLSIQCRALNITEDLGQIQYIFSDKTGTL  
 TENKMFRRCTIVGSEYCHQENAKRLEMPKELSDSDEEWTQYQCLSFPPRWAQGSTTMRSQGGAPLRRCHSA  
 RVPIQSHCRQRSVGRWETSQPPVAFSSSIEKDVTDPKNLLSKVRDAALWLETSDTRPAKPSHSTASIAFFL  
 ALTICNSVMVSTTTEPRKRVTPPANKALGTSLEKIQQLFQRLKLLSLSQSFSSSTAPSDTDLGESLGNLPTI  
 DSDEKDDTSVCSGDCSTDGGYRSSTWEQGDILGSESGTSLEEGLEAPTLSQDEPELCEYAEASPDEAALVHAAR  
 AYSFTLVSRTPPEQVTVRLPQGICLTFDLFTLGFDSVRKRMSVVVRHPLTDEIIVYTKGADSVIMDLLED PAC  
 ESNIDVEKCLKRIRARTQKHLDLIYARDGLRTLCAIAKKVVDEEDFQRWASFRREAEASLDNREELLMETAQHLE  
 NHLTLLGATGIEDRLQEGVPDTIAALREAGIQLWVLTGDKQETAVNIAYSCKLLDQDTVYSINTENQETCES  
 ILNCTLEDIKRFHEPQQPARKLCGHRIPPKMPSVNSGAMAPEIGLVIDGKTLNAIFQGKLENKFLELTQYCRS  
 VLCCRSTPLQKSMIVKLVRDKLSVMTLSIGDGANDVSMIQAADIGIGISGQEGMQAVMSSDFAIARFSLKLL  
 LLVHGHWCYSRLARMVVYFYKNCYVNLFWYQFFCGFSGSTMIDYWQMIFFNLFFTSPLPIIFGVLDKDVSA  
 ETLLALPELYKSGQNSECYNLPTFWVSMADAFYQSLICFFIPLYTYRGSIDVFTFGTPIINTISLTTILLHQ  
 AMEMKTWTVLHGLVLLGSFLMYFVVSIIYNATCVTCNSPTNPYWVMERQLSDPTFYLICLLTPVVALLPYFLL  
 SLQGTYGKSLISKAQKIDKLPIDKRNLEIQNWRSKQRPAPASASA  
 >rs250039360\_ENSMUSP00000158770\_c.3994:C>CTTAAT\_p.A1332ins-fs  
 ENSMUST00000238415.2|Atp10b-  
 203|ENSMUSG00000055415|+|chr11:g.43150382:C>CTTAAT  
 MRKEGRKRRKKKEDKKRVVSNLPEFEGWPYKENPNRHYRGNQVKTSKYTVLSFIPKNLFEQLHRFANLYFVGI  
 VILNFI PVVNAFQPGVSMVPVCAILTVTAIKDAWEDFRYKSDKVINNRESLVYSRKEQRYMLKRWDVVRVGD  
 FVQMOCNEIIVPADILLFSSDPGCVCHLETANLDGETNLKQRRVVKGFSQPEVQFQPEHFHSTIVCEKPNHLS  
 SKFKGYMEHPDQTRTGFSGESLLLRGCTIRNTEVAAGIVIYAGHETKAMLNNSGPRYKRSKIERRINTDIFFC  
 IGLLFLMCLIGAVGHSWNGTFKEHPPFDVPDADGNFLSLALGGFYMFLTMIILLQVLIPIISLYVSELVKLG  
 QVFLHNDLDLYDEETDLSIQCRALNITEDLGQIQYIFSDKTGTLTENKMFRRCTIVGSEYCHQENAKRLEM  
 PKELSDSDEEWTQYQCLSFPPRWAQGSTTMRSQGGAPLRRCHSARVPIQSHCRQRSVGRWETSQPPVAFSSS  
 IEKDVTDPKNLLSKVRDAALWLETSDTRPAKPSHSTASIAFFLALTICNSVMVSTTTEPRKRVTPPANKA  
 LGTSLEKIQQLFQRLKLLSLSQSFSSSTAPSDTDLGESLGNLPTIDSDEKDDTSVCSGDCSTDGGYRSSTWEQ  
 GDILGSESGTSLEEGLEAPTLSQDEPELCEYAEASPDEAALVHAARAYSFTLVSRTPPEQVTVRLPQGICLTFDL  
 LFTLGFDSVRKRMSVVVRHPLTDEIIVYTKGADSVIMDLLED PACESNIDVEKCLKRIRARTQKHLDLIYARDG  
 LRTLCAIAKKVVDEEDFQRWASFRREAEASLDNREELLMETAQHLENHLLTLLGATGIEDRLQEGVPDTIAALRE  
 AGIQLWVLTGDKQETAVNIAYSCKLLDQDTVYSINTENQETCESILNCTLEDIKRFHEPQQPARKLCGHRIP  
 PKMPSVNSGAMAPEIGLVIDGKTLNAIFQGKLENKFLELTQYCRSVLCCRSTPLQKSMIVKLVRDKLSVMTLS  
 IGDGANDVSMIQAADIGIGISGQEGMQAVMSSDFAIARFSLKLLLVHGHWCYSRLARMVVYFYKNCYVNL  
 LFWYQFFCGFSGSTMIDYWQMIFFNLFFTSPLPIIFGVLDKDVSAETLLALPELYKSGQNSECYNLPTFWVS  
 MADAFYQSLICFFIPLYTYRGSIDVFTFGTPIINTISLTTILLHQAMEMKTWTVLHGLVLLGSFLMYFVVS  
 YNATCVTCNSPTNPYWVMERQLSDPTFYLICLLTPVVALLPYFLLSLQGTYGKSLISKAQKIDKLPIDKRNLE  
 IQNWRSKQRPAPASASA  
 >rs49165270\_ENSMUSP00000020672\_c.376:G>A\_p.R126K  
 ENSMUST00000020672.5|Fabp6-201|ENSMUSG00000020405|-|chr11:g.43486949:C>T



MAFSGKYEFESEKNYDEFMKRLGLPGDVIERGRNFKIIITEVQQDGDFTWSQSYSGGNIMSNKFTIGKECEMQ  
 TMGGKFKFATVKMEGGKVVAEFPNYHOTSEVVGDKLVEISTIGDVTYERVSKKLA\*  
 >ENSMUSP00000104901\_c.609:A>G\_p.K204E ENSMUST00000109278.8|Ttc1-  
 202|ENSMUSG00000041278|-|chr11:g.43628774:T>C  
 MEEKSEDCKVPEDLFLNGLKVADPQEGESASPMVSDPKGQHCQSKLPKAAEAHPQDDHVEEECFHDCSASFEEE  
 QPGAHVAGSKASDDSSSELDEEYLIIELEKNMPEEEKQKRREESAKLKEEGNERFKRGDYMEAESSYSQALQMC  
 PACFQKDRSVLFSNRRAARMKQDKKETAITDCSKAIQLNPTYIRAILRRAELYEKTDELDEALEDYKSVLEKD  
 PSVHQAREACMRLPKQIEERNERLKEEMLGK\*  
 >ENSMUSP00000040779\_c.609:A>G\_p.K204E ENSMUST00000048578.3|Ttc1-  
 201|ENSMUSG00000041278|-|chr11:g.43628774:T>C  
 MEEKSEDCKVPEDLFLNGLKVADPQEGESASPMVSDPKGQHCQSKLPKAAEAHPQDDHVEEECFHDCSASFEEE  
 QPGAHVAGSKASDDSSSELDEEYLIIELEKNMPEEEKQKRREESAKLKEEGNERFKRGDYMEAESSYSQALQMC  
 PACFQKDRSVLFSNRRAARMKQDKKETAITDCSKAIQLNPTYIRAILRRAELYEKTDELDEALEDYKSVLEKD  
 PSVHQAREACMRLPKQIEERNERLKEEMLGKLDLGNLVLRLPFLSTENFQIKQDSSTGSYSINFVQNPNNNR  
 \*  
 >rs264767124\_ENSMUSP00000104901\_c.366:G>TGAGCG\_p.G123ins-fs  
 ENSMUST00000109278.8|Ttc1-202|ENSMUSG00000041278|-  
 |chr11:g.43632612:C>CGCTCA  
 MEEKSEDCKVPEDLFLNGLKVADPQEGESASPMVSDPKGQHCQSKLPKAAEAHPQDDHVEEECFHDCSASFEEE  
 QPGAHVAGSKASDDSSSELDEEYLIIELEKNMPEEEKQKRREESAKLKEE  
 >rs264767124\_ENSMUSP00000040779\_c.366:G>TGAGCG\_p.G123ins-fs  
 ENSMUST00000048578.3|Ttc1-201|ENSMUSG00000041278|-  
 |chr11:g.43632612:C>CGCTCA  
 MEEKSEDCKVPEDLFLNGLKVADPQEGESASPMVSDPKGQHCQSKLPKAAEAHPQDDHVEEECFHDCSASFEEE  
 QPGAHVAGSKASDDSSSELDEEYLIIELEKNMPEEEKQKRREESAKLKEE  
 >rs51355143\_ENSMUSP00000098881\_c.447:T>G\_p.S150A  
 ENSMUST000000101327.3|Rnf145-202|ENSMUSG00000019189|+|chr11:g.44439653:T>G  
 MAAKEKLEAVLNVALRVPSIMLLDVLYRWDVSSFFQQIQRSSLNNNPLFQYKYLALNMHYVGYILSVVLLTLP  
 RQHLVQLYLYFVTALLLYAGHQISRDRYVRSELESAYEGPMYLEPLSMNRFTTALIGQLVVCTLCSCVMKTKQI  
 WLFSAHMLPLQARLCLVPLETIVIINKFAMIFTGLEVLYFLGSLNLLVPYNLAKSAYRELVQVVEVYGLLALGM  
 SLWNQLVVPVLFMVFWLVLFALQIYSYFSTRDQPASRERLLFLFLTR\*  
 >rs51355143\_ENSMUSP00000019333\_c.447:T>G\_p.S150A  
 ENSMUST00000019333.10|Rnf145-  
 201|ENSMUSG00000019189|+|chr11:g.44439653:T>G  
 MAAKEKLEAVLNVALRVPSIMLLDVLYRWDVSSFFQQIQRSSLNNNPLFQYKYLALNMHYVGYILSVVLLTLP  
 RQHLVQLYLYFVTALLLYAGHQISRDRYVRSELESAYEGPMYLEPLSMNRFTTALIGQLVVCTLCSCVMKTKQI  
 WLFSAHMLPLQARLCLVPLETIVIINKFAMIFTGLEVLYFLGSLNLLVPYNLAKSAYRELVQVVEVYGLLALGM  
 SLWNQLVVPVLFMVFWLVLFALQIYSYFSTRDQPASRERLLFLFLTSIAECCSTPYSLGLVFTVSFVALGVL  
 TLCKFYLQGYRAFMDNPAMNRGMTEGVTLILAVQTGLIELQVHRAFLLSIILFIVVASILQSMLEIADPIV  
 LALGASRDKSLWKHFRAVSLCLFLLVFPAYMAYMICQFFHMDFWLLIISSSILTSLQVLGTLFIYVLFMVEE  
 FRKEPVENMDDVIYYVNGTYRLLLEFVVALCVVAYGVSETIFGEWTVMGSMIIFIHSYYNVWLRALQGWKSFLL  
 RRDAVNKIKSLPVATQEQLEKHNDICAICYQDMKSAVITPCSHFFHAGCLKKWLYVQDTCPLCHCHLKNSSQL  
 PGLGTEAAPQPPAGAEQNIIVLQEGPEPPDHESPPGTGTQEGSGDSSEHINRGASQEGAADAGEGPQIPEGEV  
 CPVESA\*  
 >rs47986688\_ENSMUSP00000098881\_c.469:T>A\_p.L157Q  
 ENSMUST00000101327.3|Rnf145-202|ENSMUSG00000019189|+|chr11:g.44439675:T>A  
 MAAKEKLEAVLNVALRVPSIMLLDVLYRWDVSSFFQQIQRSSLNNNPLFQYKYLALNMHYVGYILSVVLLTLP  
 RQHLVQLYLYFVTALLLYAGHQISRDRYVRSELESAYEGPMYLEPLSMNRFTTALIGQLVVCTLCSCVMKTKQI  
 WLFSAHMLPLQARLCLVPLETIVIINKFAMIFTGLEVLYFLGSLNLLVPYNLAKSAYRELVQVVEVYGLLALGM  
 SLWNQLVVPVLFMVFWLVLFALQIYSYFSTRDQPASRERLLFLFLTSIAECCSTPYSLGLVFTVSFVALGVL  
 TLCKFYLQGYRAFMDNPAMNRGMTEGVTLILAVQTGLIELQVHRAFLLSIILFIVVASILQSMLEIADPIV

LALGASRDKSLWKHFRAVSLCLFLLVFPAYMAYMICQFFHMDFWLLIISSSILTSLQVLGTLFIYVLFMVEE  
FRKEPVENMDDVIYYVNGTYRLLLEFVVALCVVAYGVSETIFGEWTVMGSMIIFIHSYYNVWLRALQGWKSFL  
RRDAVNKIKSLPVATQEQLEKHNDICAICYQDMKSAVITPCSHFFHAGCLKKWLYVQDTCPLCHCHLKNSSQL  
PGLGTEAAPQPPAGAEQNIIVLQEGPEPPDHESSPPGTGTQEGSGDSSEHINRGSSASQEGAADAGEGPQIPEGEV  
CPVESA\*

>rs249860048\_ENSMUSP00000098881\_c.557:C>CAAAAAAAAA\_p.F186ins-fs  
ENSMUST00000101327.3|Rnf145-  
202|ENSMUSG00000019189|+|chr11:g.44439763:C>CAAAAAAAAA  
MAAKEKLEAVLNVALRVPSIMLLDVLYRWDVSSFFQIQRSSLNNNPLFQYKYLALNMHYVGYILSVVLLTLP  
RQHLVQLYLYFVTALLLYAGHQISRDYVRSELESAYEGPMYLEPLSMNRFTTALIGQLVVCTLCSCVMKTKQI  
WLFSAHMLPLLARLCLVPLETIVIINKFAMI FTGLEVLVYFKKN  
>rs249860048\_ENSMUSP00000019333\_c.557:C>CAAAAAAAAA\_p.F186ins-fs  
ENSMUST00000019333.10|Rnf145-  
201|ENSMUSG00000019189|+|chr11:g.44439763:C>CAAAAAAAAA  
MAAKEKLEAVLNVALRVPSIMLLDVLYRWDVSSFFQIQRSSLNNNPLFQYKYLALNMHYVGYILSVVLLTLP  
RQHLVQLYLYFVTALLLYAGHQISRDYVRSELESAYEGPMYLEPLSMNRFTTALIGQLVVCTLCSCVMKTKQI  
WLFSAHMLPLLARLCLVPLETIVIINKFAMI FTGLEVLVYFKKN  
>rs52337589\_ENSMUSP00000019333\_c.1179:G>T\_p.A394S  
ENSMUST00000019333.10|Rnf145-  
201|ENSMUSG00000019189|+|chr11:g.44450857:G>T  
MAAKEKLEAVLNVALRVPSIMLLDVLYRWDVSSFFQIQRSSLNNNPLFQYKYLALNMHYVGYILSVVLLTLP  
RQHLVQLYLYFVTALLLYAGHQISRDYVRSELESAYEGPMYLEPLSMNRFTTALIGQLVVCTLCSCVMKTKQI  
WLFSAHMLPLLARLCLVPLETIVIINKFAMI FTGLEVLVYFLGSLNLLVPYNLAKSAYRELVQVVEVYGLLALGM  
SLWNQLVVPVLFMVFVWLVLFALQIYSYFSTRDQPASRERLLFLFLTSIAECCSTPYSLGLVFTVSFVALGVL  
TLCKFYLQGYRAFNMNDPAMNRGMTEGVTLILAVQTGLIELQVVHRAFLLSIILFIVVASILQSMLEIADPIV  
LALGASRDKSLWKHFRAVSLCLFLLVFPAYMAYMICQFFHMDFWLLIISSSILTSLQVLGTLFIYVLFMVEE  
FRKEPVENMDDVIYYVNGTYRLLLEFVVALCVVAYGVSETIFGEWTVMGSMIIFIHSYYNVWLRALQGWKSFL  
RRDAVNKIKSLPVATQEQLEKHNDICAICYQDMKSAVITPCSHFFHAGCLKKWLYVQDTCPLCHCHLKNSSQL  
PGLGTEAAPQPPAGAEQNIIVLQEGPEPPDHESSPPGTGTQEGSGDSSEHINRGSSASQEGAADAGEGPQIPEGEV  
CPVESA\*

>ENSMUSP00000019333\_c.1367:CA>C\_p.G456del-fs  
ENSMUST00000019333.10|Rnf145-  
201|ENSMUSG00000019189|+|chr11:g.44452390:CA>C  
MAAKEKLEAVLNVALRVPSIMLLDVLYRWDVSSFFQIQRSSLNNNPLFQYKYLALNMHYVGYILSVVLLTLP  
RQHLVQLYLYFVTALLLYAGHQISRDYVRSELESAYEGPMYLEPLSMNRFTTALIGQLVVCTLCSCVMKTKQI  
WLFSAHMLPLLARLCLVPLETIVIINKFAMI FTGLEVLVYFLGSLNLLVPYNLAKSAYRELVQVVEVYGLLALGM  
SLWNQLVVPVLFMVFVWLVLFALQIYSYFSTRDQPASRERLLFLFLTSIAECCSTPYSLGLVFTVSFVALGVL  
TLCKFYLQGYRAFNMNDPAMNRGMTEGVTLILAVQTGLIELQVVHRAFLLSIILFIVVASILQSMLEIADPIV  
LALGASRDKSLWKHFRAVSLCLFLLVFPAYMAYMICQFFHMDFWLLIISSSILTSLQVLGTLFIYVLFMVEE  
FRKEPVENMDDVIYYVNGLIVCWSLLWPSVWVWPTASQRPSLESGL  
>rs250621053\_ENSMUSP00000080020\_c.215:G>GT\_p.L72ins-fs  
ENSMUST00000081265.12|Ebf1-201|ENSMUSG00000057098|+|chr11:g.44511322:G>GT  
MFGIQESIQRSGSSMKEEPLGSGMNAVRTWMQAGVLDANTAAQSGVGLARAHFEKQPPSNLRKSNFFHFVLC  
PLRQTGPARGD  
>rs250621053\_ENSMUSP00000099857\_c.215:G>GT\_p.L72ins-fs  
ENSMUST00000101326.10|Ebf1-202|ENSMUSG00000057098|+|chr11:g.44511322:G>GT  
MFGIQESIQRSGSSMKEEPLGSGMNAVRTWMQAGVLDANTAAQSGVGLARAHFEKQPPSNLRKSNFFHFVLC  
PLRQTGPARGD  
>rs250621053\_ENSMUSP00000104891\_c.215:G>GT\_p.L72ins-fs  
ENSMUST00000109268.2|Ebf1-203|ENSMUSG00000057098|+|chr11:g.44511322:G>GT  
MFGIQESIQRSGSSMKEEPLGSGMNAVRTWMQAGVLDANTAAQSGVGLARAHFEKQPPSNLRKSNFFHFVLC  
PLRQTGPARGD  
>ENSMUSP00000080020\_c.219:C>T\_p.L74F ENSMUST00000081265.12|Ebf1-  
201|ENSMUSG00000057098|+|chr11:g.44511326:C>T  
MFGIQESIQRSGSSMKEEPLGSGMNAVRTWMQAGVLDANTAAQSGVGLARAHFEKQPPSNLRKSNFFHFVLA  
FYDRQGPVEIERTAFVGFVEKEKEANSEKTNNGIHYRLQLLYSNGIRTEQDFYVRLIDSMTKQAIYVEGQDK  
NPEMCRVLLTHEIMCSRCCDKKSCGNRNETPSPVPIIDRFFLKFLLKCNQCNCLKNAGNPRDMRRFQVVVSTTV  
NVDGHVLAVSDNMFVHNSKHGRRARRLDPSEGTPSYLEHATPCIKAI SPSEGWTTGGATVIIIGDNFFDGLQ

VIFGTMLVWSELITPHAIRVQTTPRHIPGVVEVTLSEYKSKQFCKGTPGRFIYTALNEPTIDYGFQRLQKVI PR  
HPGDPERLPKEVILKRAADLVEALYGMPHNNQEIIILKRAADIAEALYSVPRNHNQLPALANTSVHAGMMGVNS  
FSGQLAVNVSEASQATNQGFTRNSSSVSPHGYVPSTTPQQTNYNSVTTSMNGYGSAAMSNLGGSPFLNGSAA  
NSPYAIVPSSPTMASSTSLPNSCSSSSGIFSFSPANMVS AVKQKSAFAPVVRPQTSPPPTCTSTNGNSLQAI  
GMIVPPM\*

>ENSMUSP00000099857\_c.219:C>T\_p.L74F ENSMUST00000101326.10|Ebf1-  
202|ENSMUSG00000057098|+|chr11:g.44511326:C>T  
MFGIQESIQRSGSSMKEEPLGSGMNAVRTWMQGAGVLDANTAAQSGVGLARAHFEKQPPSNLRKSNFFHFVLA  
FYDRQGQPVEIERTAFVGFVEKEKEANSEKTNNGIHYRLQLLYSNGIRTEQDFYVRLIDSMTKQAI VYEGQDK  
NPEMCRVLLTHEIMCSRCCDKKSCGNRNETPSDPVIIDRFFLKFFLKCQNCLKNAGNPRDMRRFQVVVSTTV  
NVDGHVLAVSDNMFVHNNKSHGRRARRLDPSEGTPSYLEHAATPCIKAI SPSEGWTTGGATVIIIGDNFFDGL  
QVIFGTMLVWSELITPHAIRVQTTPRHIPGVVEVTLSEYKSKQFCKGTPGRFIYTALNEPTIDYGFQRLQKVI P  
RHPGDPERLPKEVILKRAADLVEALYGMPHNNQEIIILKRAADIAEALYSVPRNHNQLPALANTSVHAGMMGVN  
FSGQLAVNVSEASQATNQGFTRNSSSVSPHGYVPSTTPQQTNYNSVTTSMNGYGSAAMSNLGGSPFLNGSA  
ANSPYAIVPSSPTMASSTSLPNSCSSSSGIFSFSPANMVS AVKQKSAFAPVVRPQTSPPPTCTSTNGNSLQAI  
SGMIVPPM\*

>ENSMUSP00000104891\_c.219:C>T\_p.L74F ENSMUST00000109268.2|Ebf1-  
203|ENSMUSG00000057098|+|chr11:g.44511326:C>T  
MFGIQESIQRSGSSMKEEPLGSGMNAVRTWMQGAGVLDANTAAQSGVGLARAHFEKQPPSNLRKSNFFHFVLA  
FYDRQGQPVEIERTAFVGFVEKEKEANSEKTNNGIHYRLQLLYSNGIRTEQDFYVRLIDSMTKQAI VYEGQDK  
NPEMCRVLLTHEIMCSRCCDKKSCGNRNETPSDPVIIDRFFLKFFLKCQNCLKNAGNPRDMRRFQVVVSTTV  
NVDGHVLAVSDNMFVHNNKSHGRRARRLDPSEAATPCIKAI SPSEGWTTGGATVIIIGDNFFDGLQVIFGTML  
VWSELITPHAIRVQTTPRHIPGVVEVTLSEYKSKQFCKGTPGRFIYTALNEPTIDYGFQRLQKVI PRHPGDPER  
LPKEVILKRAADLVEALYGMPHNNQEIIILKRAADIAEALYSVPRNHNQLPALANTSVHAGMMGVNSFSGQLAV  
NVSEASQATNQGFTRNSSSVSPHGYVPSTTPQQTNYNSVTTSMNGYGSAAMSNLGGSPFLNGSAA NSPYAIV  
PSSPTMASSTSLPNSCSSSSGIFSFSPANMVS AVKQKSAFAPVVRPQTSPPPTCTSTNGNSLQAI SGMIVPPM  
\*

>rs48661756\_ENSMUSP00000080020\_c.250:T>C\_p.I84T  
ENSMUST00000081265.12|Ebf1-201|ENSMUSG00000057098|+|chr11:g.44511357:T>C  
MFGIQESIQRSGSSMKEEPLGSGMNAVRTWMQGAGVLDANTAAQSGVGLARAHFEKQPPSNLRKSNFFHFVLA  
LYDRQGQPVEIERTAFVGFVEKEKEANSEKTNNGIHYRLQLLYSNGIRTEQDFYVRLIDSMTKQAI VYEGQDK  
NPEMCRVLLTHEIMCSRCCDKKSCGNRNETPSDPVIIDRFFLKFFLKCQNCLKNAGNPRDMRRFQVVVSTTV  
NVDGHVLAVSDNMFVHNNKSHGRRARRLDPSEGTPSYLEHATPCIKAI SPSEGWTTGGATVIIIGDNFFDGLQ  
VIFGTMLVWSELITPHAIRVQTTPRHIPGVVEVTLSEYKSKQFCKGTPGRFIYTALNEPTIDYGFQRLQKVI PR  
HPGDPERLPKEVILKRAADLVEALYGMPHNNQEIIILKRAADIAEALYSVPRNHNQLPALANTSVHAGMMGVNS  
FSGQLAVNVSEASQATNQGFTRNSSSVSPHGYVPSTTPQQTNYNSVTTSMNGYGSAAMSNLGGSPFLNGSAA  
NSPYAIVPSSPTMASSTSLPNSCSSSSGIFSFSPANMVS AVKQKSAFAPVVRPQTSPPPTCTSTNGNSLQAI  
GMIVPPM\*

>rs48661756\_ENSMUSP00000099857\_c.250:T>C\_p.I84T  
ENSMUST00000101326.10|Ebf1-202|ENSMUSG00000057098|+|chr11:g.44511357:T>C  
MFGIQESIQRSGSSMKEEPLGSGMNAVRTWMQGAGVLDANTAAQSGVGLARAHFEKQPPSNLRKSNFFHFVLA  
LYDRQGQPVEIERTAFVGFVEKEKEANSEKTNNGIHYRLQLLYSNGIRTEQDFYVRLIDSMTKQAI VYEGQDK  
NPEMCRVLLTHEIMCSRCCDKKSCGNRNETPSDPVIIDRFFLKFFLKCQNCLKNAGNPRDMRRFQVVVSTTV  
NVDGHVLAVSDNMFVHNNKSHGRRARRLDPSEGTPSYLEHAATPCIKAI SPSEGWTTGGATVIIIGDNFFDGL  
QVIFGTMLVWSELITPHAIRVQTTPRHIPGVVEVTLSEYKSKQFCKGTPGRFIYTALNEPTIDYGFQRLQKVI P  
RHPGDPERLPKEVILKRAADLVEALYGMPHNNQEIIILKRAADIAEALYSVPRNHNQLPALANTSVHAGMMGVN  
FSGQLAVNVSEASQATNQGFTRNSSSVSPHGYVPSTTPQQTNYNSVTTSMNGYGSAAMSNLGGSPFLNGSA  
ANSPYAIVPSSPTMASSTSLPNSCSSSSGIFSFSPANMVS AVKQKSAFAPVVRPQTSPPPTCTSTNGNSLQAI  
SGMIVPPM\*

>rs48661756\_ENSMUSP00000104891\_c.250:T>C\_p.I84T  
ENSMUST00000109268.2|Ebf1-203|ENSMUSG00000057098|+|chr11:g.44511357:T>C  
MFGIQESIQRSGSSMKEEPLGSGMNAVRTWMQGAGVLDANTAAQSGVGLARAHFEKQPPSNLRKSNFFHFVLA  
LYDRQGQPVEIERTAFVGFVEKEKEANSEKTNNGIHYRLQLLYSNGIRTEQDFYVRLIDSMTKQAI VYEGQDK  
NPEMCRVLLTHEIMCSRCCDKKSCGNRNETPSDPVIIDRFFLKFFLKCQNCLKNAGNPRDMRRFQVVVSTTV  
NVDGHVLAVSDNMFVHNNKSHGRRARRLDPSEAATPCIKAI SPSEGWTTGGATVIIIGDNFFDGLQVIFGTML  
VWSELITPHAIRVQTTPRHIPGVVEVTLSEYKSKQFCKGTPGRFIYTALNEPTIDYGFQRLQKVI PRHPGDPER  
LPKEVILKRAADLVEALYGMPHNNQEIIILKRAADIAEALYSVPRNHNQLPALANTSVHAGMMGVNSFSGQLAV  
NVSEASQATNQGFTRNSSSVSPHGYVPSTTPQQTNYNSVTTSMNGYGSAAMSNLGGSPFLNGSAA NSPYAIV

PSSPTMASSTSLPSNCSSSSSGIFSFSPANMVSAVKQKSAFAPVVRPQTSPPPTCTSTNGNSLQAI SGMIVPPM  
 \*  
 >ENSMUSP00000104884\_c.698:C>G\_p.D233E ENSMUST00000109261.11|Clint1-  
 202|ENSMUSG00000006169|+|chr11:g.45784701:C>G  
 MLNMWVRELVDKATNVVMNYSEIESKVREATNDPWPGPSQQLMGEIAKATFMYEQFPELMNMLWSRMLKDNK  
 KNWRRVYKSLLLLAYLIRNGSERVVTSAHEHIYDLRSLENYHFVDEHGKDQGINIRQVKVELVEFAQDDDRLR  
 EERKKAKKNKDKYVGVSSDSVGGFRYNERYDPEPKSKWDEEWDKNKSAFPFSDKLGELSDKIGSTIDDTISKF  
 RRDREDSPERCSESDEEKKARRGRSPKGEFKDEEETVTTKHIHITQATETTTTRHKRTANPSKTIDLGAAAH  
 YTGDKASPDQNASTHTPQSSAKPSVPSSKSSGDLVDLFDGSSQSAGGSADLFGGFADFGSAAASGNFP SQATS  
 GNGDFGDWSAFNQAPSGPVASGGELFGSAPQSAVELISASQPALGPPPAASNSADLFDLMGSSQATMTSSQSM  
 NFSLMSTNTVGLGLPMSRSQPLQNVSAVLQKPNPLYHQNTDMVQKSASKTLPSTWSDPSVNI SLDNLLPGMQP  
 SKPQQPSLNTMIQQQNMQQPLNVMTQSF GAVNLSSPSNMLPVRPQTNPLLGGMPPMMPGVMTGTMGMAPLGN  
 SAGMSQGMVGMNMMNGMSASGMGLSGTMGMGMPMAMPSTVQPKQDAFANFANFSK\*  
 >ENSMUSP00000104883\_c.698:C>G\_p.D233E ENSMUST00000109260.3|Clint1-  
 201|ENSMUSG00000006169|+|chr11:g.45784701:C>G  
 MLNMWVRELVDKATNVVMNYSEIESKVREATNDPWPGPSQQLMGEIAKATFMYEQFPELMNMLWSRMLKDNK  
 KNWRRVYKSLLLLAYLIRNGSERVVTSAHEHIYDLRSLENYHFVDEHGKDQGINIRQVKVELVEFAQDDDRLR  
 EERKKAKKNKDKYVGVSSDSVGGFRYNERYDPEPKSKWDEEWDKNKSAFPFSDKLGELSDKIGSTIDDTISKF  
 RRDREDSPERCSESDEEKKARRGRSPKGEFKDEEETVTTKHIHITQATETTTTRHKRTANPSKTIDLGAAAH  
 YTGDKASPDQNASTHTPQSSAKPSVPSSKSSGDLVDLFDGSSQSAGGSADLFGGFADFGSAAASGNFP SQATS  
 GNGDFGDWSAFNQAPSGPVASGGELFGSAPQSAVELISASQPALGPPPAASNSADLFDLMGSSQATMTSSQSM  
 NFSLMSTNTVGLGLPMSRSQNTDMVQKSASKTLPSTWSDPSVNI SLDNLLPGMQPSPKQQPSLNTMIQQQNMQ  
 QPLNVMTQSF GAVNLSSPSNMLPVRPQTNPLLGGMPPMMPGVMTGTMGMAPLGN SAGMSQGMVGMNMMNGMS  
 ASGMGLSGTMGMGMPMAMPSTVQPKQDAFANFANFSK\*  
 >rs29395502\_ENSMUSP00000037519\_c.517:G>A\_p.G173D  
 ENSMUST00000049038.4|Sox30-201|ENSMUSG00000040489|+|chr11:g.45871664:G>A  
 MERARPEPPPPPPPPRQPPRPTPPRPLRPAPPAQVEAATFRAAAAERSQSPSAQATAAMA AVASSCGEAAA  
 AGAQAAAGRLLQVKPEQVLLLPPGGPGVPPAPDEGAAAAAAAAAAAAASSAQARLLQLRPELLLLPPQSAADG  
 GPCRPELHPMQPRTLLVKAEQELGADLDLSVGSRRTEAGPRASRAAKLDGTGKALDGRSDEKKALEAE  
 APRDALKGGEGKSLLAIGEGVIKTEEPDRPRDDCRLGTEATSNGLVHSSKEA ILAQPPSAFGPHQDLRFPLT  
 LHTVPPGARIQFQGGPPSELIRLSKVPLTPVPIKMQSLLPEPSVKIETKDVPLTVLPSDAGIPDTPFSKDRNGH  
 VKREPMNAFMVWARIHRPALAKANPAANNAEISVQLGLEWNKLSSEEQKPPYDEAQKI KEKHREEFPGWVYQPR  
 PGKRKRFP LSVSNVFSGTTQNIISTNPTTIYPYRSPTYSVVI PGLQNTITHPVGEAPP AIQLPTPAVQRPSPI  
 TLFQPSVSSTGPVAVPPP SLTPRPSLPPQRFSGPSQTDIHRPLSGSSRSVKRSTPGSLESTTRIPAGASTAHA  
 RFATSPIQPPKEYASVSTCPRSTPIPPATPIPHSHVYQPPPLGHPATLFGTTPRFSFHHPYFLPGPHYFPSST  
 CYSRPPFGYGNFPSSMEPECLGYEDRYQKHEAIF SALNRDYPFRDYPDEHTHSEDSRSCESMDGPPYSSHG  
 HGGEYLNAMPTLDIGALENVFTAPASAPSGVQQVNVTDSD EEEEEKVLRLNL\*  
 >rs49996694\_ENSMUSP00000011400\_c.2665:C>T\_p.S889F  
 ENSMUST00000011400.8|Adam19-201|ENSMUSG00000011256|+|chr11:g.46033855:C>T  
 MPGRAGVARFCLLALALQLHWPLAACEPGWTTTRGSQEGSPPLQHELIIPQWRTSESPGRGKHPLRAELRMAE  
 GRELILDLKNEHLFAPAYTETCYTASGNPQTSTLKSEDFYHGTVRDVDESSVTLSTCRGIRGLIIVRSNL  
 SYIIEPVPNSDSQHRIYRSEHLTLPNGCFEHSPTSKDWALQFTHQTKQPRRMKREDLHSMKYVELYLVA  
 DYAEFQKNRHDQDATKRKLMEIANYVDKFYRSLNIRIALVGLVWTHGDKCEVSENPYSTLWSF LSWRRKLLA  
 QKSHDNAQLITGRSFQGTITIGLAPLMAMCSVYQSGGVSMDSHSENAIGVASTVAHEIGHNFGMSHSDAHCCSAS  
 AADGGCIMAAATGHPFPKVFVSWCNRKELDRYLQTGGMCLSNMPDTRTYGGRRCGNGYLEDGEECDGEEEEE  
 CKNPCCNASNCTLKEGAECAHGSCHQCKLVAPGTQCREQVRQCDLPEFCTGKSPHCPTNYQMDGTPCEGGQ  
 AYCYNMCLTYQECCQLWGP GARPALDLCFERVNAAGD TYGNCCKGLNGQYRKCSPRDAKCGKIQCCSTQAR  
 PLESNAVSIDTTITLNGRIHCRGTHVYRGPEEEEEEGEDMLDPGLVMTGTKCGHNHICFEGQCRNTSFFETEG  
 CGKKNCGHGVCCNNKNCHCFPGWSPFCNTPGDGGSVDSGPLPKSVGPVIAGVFSALFVLAVLVLVLLCHCYRQ  
 SHKLGKPSALPFKLRHQFSCPFVRSQSGGTGHANPTFKLQTPQGRKVTNTPESLRKPSHPPRPPPDYLRVE  
 SPPAPLPAHLNRAAGSSPEAGARIERKESARRPPPSRPMPPAPNCLLSQDFSRPRPPQKALPANVPVPGQRTGP  
 RSGGTSLLQPPTFGPQPPRPPAVVPKLEPYRSQRVGAIISSKI\*  
 >rs49693271\_ENSMUSP00000011400\_c.2727:C>G\_p.Q910E  
 ENSMUST00000011400.8|Adam19-201|ENSMUSG00000011256|+|chr11:g.46034637:C>G  
 MPGRAGVARFCLLALALQLHWPLAACEPGWTTTRGSQEGSPPLQHELIIPQWRTSESPGRGKHPLRAELRMAE  
 GRELILDLKNEHLFAPAYTETCYTASGNPQTSTLKSEDFYHGTVRDVDESSVTLSTCRGIRGLIIVRSNL  
 SYIIEPVPNSDSQHRIYRSEHLTLPNGCFEHSPTSKDWALQFTHQTKQPRRMKREDLHSMKYVELYLVA  
 DYAEFQKNRHDQDATKRKLMEIANYVDKFYRSLNIRIALVGLVWTHGDKCEVSENPYSTLWSF LSWRRKLLA

QKSHDNAQLITGRSFQGTITIGLAPLMAMCSVYQSGGVSMDSHSENAIGVASTVAHEIGHNFGMSHSDSAHCCSAS  
AADGGCIMAATGHPFPKVSWCNRKELDRYLQTTGGMCLSNMPDTRTLYGGRRCGNGYLEEDGEEDCGEEEE  
CKNPCCNASNCTLKEGAECAHSCCHQCKLVAPGTQCREQVRQCDLPEFCTGKSPHCPTNYYQMDGTPCEGGGQ  
AYCYNGMCLTYQECCQQLWGPARGPALDLCFERVNAAGDTYGNCGKGLNGQYRKCSPRDAKCGKIQCQSTQAR  
PLESNAVSIDTTITLNGRRIHCRGTHVYRGPEEEEEGEDMLDPLVMTGTCKGHNHICFEGQCRNTSFFETEG  
CGKKCNHGVCNNNKNCHCFPGWSPFCNTPGDGGSVDSGPLPKSVGPVIAAGVFSALFVLAFLVLLCHCYRQ  
SHKLGKPSALPFKLRHQFSCPFVRSQSGGTGHANPTFKLQTPQGKRKVTNTPESLRKPSHPPRPPDYLRVE  
SPPAPLPAHLNRAAGSSPEAGARIERKESARRPPSRPMPAPNCLLSQDFSRPRPPQKALPANVPVPGORTGP  
RSGGTSLLQPPPTSGPQPPRPPAVVPKLEPYSRSEVGAIISSKI\*  
>rs33850578\_ENSMUSP00000020679\_c.301:A>G\_p.Y101C  
ENSMUST00000020679.3|Nipal4-201|ENSMUSG00000020411|-|chr11:g.46047631:T>C  
MELRVANANGSCENGSIIVSLYCSSQEVLCQIVRGISPEEPYNATLITWQERVRKKYGFYIGVGLAFLSCFLIG  
TSVILKKKGLIRLVATGATRAVNGGYGCLKDPMMWAGMATMSAGEVANFGAYAFAPATVVTPLGALSVLISAI  
FSSYCLGESLNLGKLGCVICMAGSTVMVIHAPKEEKVTTVAEMASKMKDGTGFIVFAVLLVVSCLILIFIVAP  
RYGQRNIIYIIICSVIGSFSVTAVKGLGVTIRNFFQGLPVVRHPLPYILSLILGLSIIIIQVNFNLRALDIFN  
TSLVFPFIYVFFTTVVVASSIVLFKEWYTMASVDIVGTLGSGFVTIILGVFMLHAFKDLIDINQISLPHTHKNPT  
PAPAPEPTVIKLEDKNVLDNIELASTPSPQKPKVFMFMTDS\*  
>rs29482402\_ENSMUSP00000090854\_c.748:A>T\_p.E250V  
ENSMUST00000093166.11|Cyfip2-202|ENSMUSG00000020340|-  
|chr11:g.46167652:T>A  
MTHTVTLLEDALSNDLLEELPLDPQQPCIEPPSSIMYQANFDTNFEDRNAFVTGIARYIEQATVHSSMNEML  
EEGHYAVMLYTWRSRRAIPQVKCNEQPNRVEIYEKTVLEVLEPEVTKLMKFMYFQRKAIERFCSEVKRLCHA  
ERRKDFVSEAYLLTLGKFINMFAVLDELKMNKCSVKNDHSAYKRAAQFLRKMADPQSIQESQNLMSFLANHNR  
ITQCLHQQLEVIIPGYEELLADIVNICVDYVYVNMKMYLTPSEKHMLLKVGMGFLYLMMDGNVSNIIYKLDKAKRINL  
SKIDKFFKQLQVPLFGDMQIELARYIKTSAHYEENKSKWCTQSSISPQYNICEQMVQIRDDHIRFISELAR  
YSNSEVVTGSGLDSQKSDEEYRELFDLALRGLQLLSKWSAHVMEVYSWKLVHPTDKFCNKDPCPTAEYERAT  
RYNYTSEEKFAFVEVIAMIKGLQVLMGRMESVFNQAIRNTIYAALQDFAQVTLREPLRQAVRKKKNVLSVLQ  
AIRKTCIDWEGGREPPNDPCLRGEKDPKGGFDIKVPRRAVGPSSSTQLYMVRTMLES LIADKSGSKKTLRSSLD  
GPIVLAIEDFHKQSFFFTHLLNISEALQQCCDLSQLWFREFFLELTMGRRIQFPIEMSMPWILTDHILETKEP  
SMMEYVLYPLDLYNDSAYYALTKFKKQFLYDEIEAEVNLCFDQFVYKLADQIFAYYKAMAGSVLLDKRFRAEC  
KNYGVIIIPYPPSNRYETLLKQRHVQLLGRSIDLNRITQORISAAAMYKSLDQAISRFESEDLTSSIVELEWLEI  
NRLTHRLLCKHMTLDSFDAMFREANHNVSAPYGRITLHVFWELNFDLFPNYCYNGSTNRFVRTAIPFTQEPQR  
DKPANVQPYLYGSKPLNIAYSHIYSSYRNFVGPFFHFKTICRLLGYQGIADVMEELLKIVKSLQGTILQYVK  
TLIEVMPKICRLPRHEYGSPGILEFFHHQLKDIIEYAEKTDVQSLREVGNAILFCLLIEQALSQEEVCDLL  
HAAPFQNILPRVYIKEGERLEVRMKRLEAKYAPLHLVPLIERLGTQQIAIAREGDLTKERLCCGLSMFEVI  
LTRIRSYLQDPIWRGPPPTNGVMHVDECFVHRLWSAMQFVYCI PVGTNEFTAECFGDGLNWAGCSIIIVLLG  
QQRFRDLDFCYHLLKQVQDQDGKDEI IKNVPLKKMADRIRKYQILNNEVFALNKYMKSVETDSSSTVEHVRCF  
QPPIHQSLATTC\*  
>rs29482402\_ENSMUSP00000127586\_c.748:A>T\_p.E250V  
ENSMUST00000165599.9|Cyfip2-205|ENSMUSG00000020340|-|chr11:g.46167652:T>A  
MTHTVTLLEDALSNDLLEELPLDPQQPCIEPPSSIMYQANFDTNFEDRNAFVTGIARYIEQATVHSSMNEML  
EEGHYAVMLYTWRSRRAIPQVKCNEQPNRVEIYEKTVLEVLEPEVTKLMKFMYFQRKAIERFCSEVKRLCHA  
ERRKDFVSEAYLLTLGKFINMFAVLDELKMNKCSVKNDHSAYKRAAQFLRKMADPQSIQESQNLMSFLANHNR  
ITQCLHQQLEVIIPGYEELLADIVNICVDYVYVNMKMYLTPSEKHMLLKVGMGFLYLMMDGNVSNIIYKLDKAKRINL  
SKIDKFFKQLQVPLFGDMQIELARYIKTSAHYEENKSKWCTQSSISPQYNICEQMVQIRDDHIRFISELAR  
YSNSEVVTGSGLDSQKSDEEYRELFDLALRGLQLLSKWSAHVMEVYSWKLVHPTDKFCNKDPCPTAEYERAT  
RYNYTSEEKFAFVEVIAMIKGLQVLMGRMESVFNQAIRNTIYAALQDFAQVTLREPLRQAVRKKKNVLSVLQ  
AIRKTCIDWEGGREPPNDPCLRGEKDPKGGFDIKVPRRAVGPSSSTQLYMVRTMLES LIADKSGSKKTLRSSLD  
GPIVLAIEDFHKQSFFFTHLLNISEALQQCCDLSQLWFREFFLELTMGRRIQFPIEMSMPWILTDHILETKEP  
SMMEYVLYPLDLYNDSAYYALTKFKKQFLYDEIEAEVNLCFDQFVYKLADQIFAYYKAMAGSVLLDKRFRAEC  
KNYGVIIIPYPPSNRYETLLKQRHVQLLGRSIDLNRITQORISAAAMYKSLDQAISRFESEDLTSSIVELEWLEI  
NRLTHRLLCKHMTLDSFDAMFREANHNVSAPYGRITLHVFWELNFDLFPNYCYNGSTNRFVRTAIPFTQEPQR  
DKPANVQPYLYGSKPLNIAYSHIYSSYRNFVGPFFHFKTICRLLGYQGIADVMEELLKIVKSLQGTILQYVK  
TLIEVMPKICRLPRHEYGSPGILEFFHHQLKDIIEYAEKTDVQSLREVGNAILFCLLIEQALSQEEVCDLL  
HAAPFQNILPRVYIKEGERLEVRMKRLEAKYAPLHLVPLIERLGTQQIAIAREGDLTKERLCCGLSMFEVI  
LTRIRSYLQDPIWRGPPPTNGVMHVDECFVHRLWSAMQFVYCI PVGTNEFTAECFGDGLNWAGCSIIIVLLG  
QQRFRDLDFCYHLLKQVQDQDGKDEI IKNVPLKKMADRIRKYQILNNEVFALNKYMKSVETDSSSTVEHVRCF  
QPPIHQSLATTC\*

>rs29482402\_ENSMUSP00000090853\_c.748:A>T\_p.E250V  
 ENSMUST00000093165.12|Cyfip2-201|ENSMUSG00000020340|-  
 |chr11:g.46167652:T>A  
 MTHVTLEDALSNVDLLEELPLPDQQPCIEPPSSIMYQANFDTNFEDRNAFVTGIARYIEQATVHSSMNEML  
 EEGHDYAVMLYTWRSRRAIPQVKCNEQPNRVEIYEKTVLEVLEPEVTKLMKFMFYQRKAIERFCSEVKRLCHA  
 ERRKDFVSEAYLLTLGKFINMFAVLDELKNMKCSVKNDHSAYKRAAQFLRKMADPQSIQESQNLMSFLANHNR  
 ITQCLHQQLLEVI PGYEELLADIVNICVDYVYVNMKMYLTPSEKHMLLKVMGFGLYLMDGNVSNIKYLDKAKRINL  
 SKIDKFFKQLQVVPLFGDMQIELARYIKTSAHYEENKSKWTCTQSSISPQYNICEQMVQIRDDHIRFISELAR  
 YSNSEVVTGSGGLDSQKSDEEYRELFDLALRGLQLLSKWSAHVMEVYSWKLVHPTDKFCNKDCPGTAEYERAT  
 RYNYTSEEKFAFVEVIAMIKGLQVLMGRMESVFNQAIRNTIYAALQDFAQVTLREPLRQAVRKKKNVLI SVLQ  
 AIRKTI CDWEGGREPPNDPCLRGEKDPKGGFDIKVPRRAVGPSSQLYMVRTMLES LIADKSGSKKTLRSSL  
 GPIVLAIEDFHKQSF FFFTHLLNISEALQQCCDLSQLWFREFFLELTMGRRIQFP IEMSPWILTDHILETKEP  
 SMMEYVLYPLDLYNDSAYYALTKFKKQFLYDEIEAEVNLCFDQFVYK LADQIFAYYKAMAGSVLLDKRFRAEC  
 KNYGVIIPYPPSNRYETLLKQRHVQLLGRSIDLNRLITQRISAAMYKSLDQAISRFESEDLT SIVELEWLEI  
 NRLTHRLLCKHMTLDSFDAMFREANHNVSAPYGRITLHVFWELNFDLFPNYCYNGSTNRFVRTAIPFTQEPQR  
 DKPANVQPYLYGSKPLNIAYSHIYSSYRNFVGGPPHFKTICRLLGYQGI AVVMEELLKIVKSLQGTILQYVK  
 TLI EVMPKICRLPRHEYGSPGILEFFHHQLKDI IEYAELKTDV FQSLREVGNAILFCLLIEQALSQEVECDLL  
 HAAPFQNILPRVYIKEGERLEVRMKRLEAKYAPLHLVPLIERLGT PQQIAIAREGDL LTKERLCCGLSMFEVI  
 LTRIRSYLQDPIWRGPPPTNGVMHVDECVEFHRLWSAMQFVYCI PVGTNEFTAEQC FGDGLNWAGCSIIVLLG  
 QQRFDLDFCYHLLKVRQDQKDEI IKNVPLKMMADRIRKYQILNNEVFAILNKYMKSVETDSS TVEHVRCF  
 QPPIHQSLATTC\*

>rs29383724\_ENSMUSP00000090854\_c.670:T>C\_p.L224P  
 ENSMUST00000093166.11|Cyfip2-202|ENSMUSG00000020340|-  
 |chr11:g.46167730:A>G  
 MTHVTLEDALSNVDLLEELPLPDQQPCIEPPSSIMYQANFDTNFEDRNAFVTGIARYIEQATVHSSMNEML  
 EEGHDYAVMLYTWRSRRAIPQVKCNEQPNRVEIYEKTVLEVLEPEVTKLMKFMFYQRKAIERFCSEVKRLCHA  
 ERRKDFVSEAYLLTLGKFINMFAVLDELKNMKCSVKNDHSAYKRAAQFLRKMADPQSIQESQNLMSFLANHNR  
 ITQCPHQQLLEVI PGYEELLADIVNICVDYENKMYLTPSEKHMLLKVMGFGLYLMDGNVSNIKYLDKAKRINL  
 SKIDKFFKQLQVVPLFGDMQIELARYIKTSAHYEENKSKWTCTQSSISPQYNICEQMVQIRDDHIRFISELAR  
 YSNSEVVTGSGGLDSQKSDEEYRELFDLALRGLQLLSKWSAHVMEVYSWKLVHPTDKFCNKDCPGTAEYERAT  
 RYNYTSEEKFAFVEVIAMIKGLQVLMGRMESVFNQAIRNTIYAALQDFAQVTLREPLRQAVRKKKNVLI SVLQ  
 AIRKTI CDWEGGREPPNDPCLRGEKDPKGGFDIKVPRRAVGPSSQLYMVRTMLES LIADKSGSKKTLRSSL  
 GPIVLAIEDFHKQSF FFFTHLLNISEALQQCCDLSQLWFREFFLELTMGRRIQFP IEMSPWILTDHILETKEP  
 SMMEYVLYPLDLYNDSAYYALTKFKKQFLYDEIEAEVNLCFDQFVYK LADQIFAYYKAMAGSVLLDKRFRAEC  
 KNYGVIIPYPPSNRYETLLKQRHVQLLGRSIDLNRLITQRISAAMYKSLDQAISRFESEDLT SIVELEWLEI  
 NRLTHRLLCKHMTLDSFDAMFREANHNVSAPYGRITLHVFWELNFDLFPNYCYNGSTNRFVRTAIPFTQEPQR  
 DKPANVQPYLYGSKPLNIAYSHIYSSYRNFVGGPPHFKTICRLLGYQGI AVVMEELLKIVKSLQGTILQYVK  
 TLI EVMPKICRLPRHEYGSPGILEFFHHQLKDI IEYAELKTDV FQSLREVGNAILFCLLIEQALSQEVECDLL  
 HAAPFQNILPRVYIKEGERLEVRMKRLEAKYAPLHLVPLIERLGT PQQIAIAREGDL LTKERLCCGLSMFEVI  
 LTRIRSYLQDPIWRGPPPTNGVMHVDECVEFHRLWSAMQFVYCI PVGTNEFTAEQC FGDGLNWAGCSIIVLLG  
 QQRFDLDFCYHLLKVRQDQKDEI IKNVPLKMMADRIRKYQILNNEVFAILNKYMKSVETDSS TVEHVRCF  
 QPPIHQSLATTC\*

>rs29383724\_ENSMUSP00000127586\_c.670:T>C\_p.L224P  
 ENSMUST00000165599.9|Cyfip2-205|ENSMUSG00000020340|-|chr11:g.46167730:A>G  
 MTHVTLEDALSNVDLLEELPLPDQQPCIEPPSSIMYQANFDTNFEDRNAFVTGIARYIEQATVHSSMNEML  
 EEGHDYAVMLYTWRSRRAIPQVKCNEQPNRVEIYEKTVLEVLEPEVTKLMKFMFYQRKAIERFCSEVKRLCHA  
 ERRKDFVSEAYLLTLGKFINMFAVLDELKNMKCSVKNDHSAYKRAAQFLRKMADPQSIQESQNLMSFLANHNR  
 ITQCPHQQLLEVI PGYEELLADIVNICVDYENKMYLTPSEKHMLLKVMGFGLYLMDGNVSNIKYLDKAKRINL  
 SKIDKFFKQLQVVPLFGDMQIELARYIKTSAHYEENKSKWTCTQSSISPQYNICEQMVQIRDDHIRFISELAR  
 YSNSEVVTGSGGLDSQKSDEEYRELFDLALRGLQLLSKWSAHVMEVYSWKLVHPTDKFCNKDCPGTAEYERAT  
 RYNYTSEEKFAFVEVIAMIKGLQVLMGRMESVFNQAIRNTIYAALQDFAQVTLREPLRQAVRKKKNVLI SVLQ  
 AIRKTI CDWEGGREPPNDPCLRGEKDPKGGFDIKVPRRAVGPSSQLYMVRTMLES LIADKSGSKKTLRSSL  
 GPIVLAIEDFHKQSF FFFTHLLNISEALQQCCDLSQLWFREFFLELTMGRRIQFP IEMSPWILTDHILETKEP  
 SMMEYVLYPLDLYNDSAYYALTKFKKQFLYDEIEAEVNLCFDQFVYK LADQIFAYYKAMAGSVLLDKRFRAEC  
 KNYGVIIPYPPSNRYETLLKQRHVQLLGRSIDLNRLITQRISAAMYKSLDQAISRFESEDLT SIVELEWLEI  
 NRLTHRLLCKHMTLDSFDAMFREANHNVSAPYGRITLHVFWELNFDLFPNYCYNGSTNRFVRTAIPFTQEPQR  
 DKPANVQPYLYGSKPLNIAYSHIYSSYRNFVGGPPHFKTICRLLGYQGI AVVMEELLKIVKSLQGTILQYVK  
 TLI EVMPKICRLPRHEYGSPGILEFFHHQLKDI IEYAELKTDV FQSLREVGNAILFCLLIEQALSQEVECDLL

HAAPFQNILPRVYIKEGERLEVRMKRLEAKYAPLHLVPLIERLGTTPQQIAIAREGDLTKERLCCGLSMFEVI  
LTRIRSYLQDPIWRGPPPTNGVMHVDECVEFHRLWSAMQFVYCI PVGTNEFTAEOCFDGLNWAGCSII VLLG  
QQRFDLDFDFCYHLLKQVQDQKDEI IKNVPLKKMADRIRKYQILNNEVFALNKYMKSVETDSSSTVEHVRCF  
QPPIHQSLATTC\*

>rs29383724\_ENSMUSP00000090853\_c.670:T>C\_p.L224P  
ENSMUST00000093165.12|Cyfip2-201|ENSMUSG00000020340|-  
|chr11:g.46167730:A>G  
MTTHVTLEDALSNDLLEELPLPDQQPCIEPPSSIMYQANFDTNFEDRNAFVTGIARYIEQATVHSSMNEML  
EEGHYAVMLYTWRSRRAIPQVKCNEQPNRVEIYEKTVEVLEPEVTKLMKFMFQRKAIERFCSEVKRLCHA  
ERRKDFVSEAYLLTLGKFINMFAVLDELKMKCSVKNDHSAYKRAAQFLRKMADPQSIQESQNLMSFLANHNR  
ITQCPHQLEVI PGYEELLADIVNICVDYENKMYLTPSEKHMMLKVMGFGLYLMGDNVSNYKLDKAKRINL  
SKIDKFFKQLQVPLFGDMQIELARYIKTSAHYEENKSKWCTQSSISPQYNICEQMVQIRDDHIRFISELAR  
YSNSEVVTGSGLDQSDEEYRELFDLALRGLQLLSKWSAHVMEVYSWKLVHPTDKFCNKDCPGTAEYERAT  
RYNYTSEEKFAFVEVIAMIKGLQVLMGRMESVFNQAIRNTIYAALQDFAQVTLREPLRQAVRKKKNVLSVLQ  
AIRKTI CDWEGGREPPNDPCLRGEKDPKGGFDIKVPRRAVGPSS TQLYMVRTMLES LIADKSGSKKTLRSSLD  
GPIVLAIEDFHKQSF FFFTHLLNI SEALQQCCDLSQLWFREFFLELTMRRIQFP IEMSPWILTDHI LETKEP  
SMMEYVLYPLDLYNDSAYYALTKFKKQFLYDEIEAEVNLCFDQFVYKLDQIFAYYKAMAGSVLLDKRFRAC  
KNYGVLIIPYPPSNRYETLLKQRHVQLLGRSIDLNRLITQRISAAMYKSLDQAI SRFESEDLTSI VELEWLL E I  
NRLTHRLLCKHMTLDSFDAMFREANHNVSAPYGRITLHVFWELNFDLFPNYCYNGSTNRFVRTAIPFTQEPQR  
DKPANVQPYLYGSKPLNIAYSHIYSSYRNFGPPHFKTICRLLGYQGI AVVMEELLKIVKSLQGTILQYVK  
TLIEVMPKICRLPRHEYGSPGILEFFHHQLKDI IEYAEKTDV FQSLREVGNAILFCLLIEQALSQEVC DLL  
HAAPFQNILPRVYIKEGERLEVRMKRLEAKYAPLHLVPLIERLGTTPQQIAIAREGDLTKERLCCGLSMFEVI  
LTRIRSYLQDPIWRGPPPTNGVMHVDECVEFHRLWSAMQFVYCI PVGTNEFTAEOCFDGLNWAGCSII VLLG  
QQRFDLDFDFCYHLLKQVQDQKDEI IKNVPLKKMADRIRKYQILNNEVFALNKYMKSVETDSSSTVEHVRCF  
QPPIHQSLATTC\*

>rs245339491\_ENSMUSP00000090854\_c.604:A>TA\_p.Q202ins-fs  
ENSMUST00000093166.11|Cyfip2-202|ENSMUSG00000020340|-  
|chr11:g.46168947:T>TA  
MTTHVTLEDALSNDLLEELPLPDQQPCIEPPSSIMYQANFDTNFEDRNAFVTGIARYIEQATVHSSMNEML  
EEGHYAVMLYTWRSRRAIPQVKCNEQPNRVEIYEKTVEVLEPEVTKLMKFMFQRKAIERFCSEVKRLCHA  
ERRKDFVSEAYLLTLGKFINMFAVLDELKMKCSVKNDHSAYKRAAQFLRKMADPLVHPGISEPVHVPGSQSQ  
DHPVSSPATGSDPGL

>rs245339491\_ENSMUSP00000127586\_c.604:A>TA\_p.Q202ins-fs  
ENSMUST00000165599.9|Cyfip2-205|ENSMUSG00000020340|-  
|chr11:g.46168947:T>TA  
MTTHVTLEDALSNDLLEELPLPDQQPCIEPPSSIMYQANFDTNFEDRNAFVTGIARYIEQATVHSSMNEML  
EEGHYAVMLYTWRSRRAIPQVKCNEQPNRVEIYEKTVEVLEPEVTKLMKFMFQRKAIERFCSEVKRLCHA  
ERRKDFVSEAYLLTLGKFINMFAVLDELKMKCSVKNDHSAYKRAAQFLRKMADPLVHPGISEPVHVPGSQSQ  
DHPVSSPATGSDPGL

>rs245339491\_ENSMUSP00000090853\_c.604:A>TA\_p.Q202ins-fs  
ENSMUST00000093165.12|Cyfip2-201|ENSMUSG00000020340|-  
|chr11:g.46168947:T>TA  
MTTHVTLEDALSNDLLEELPLPDQQPCIEPPSSIMYQANFDTNFEDRNAFVTGIARYIEQATVHSSMNEML  
EEGHYAVMLYTWRSRRAIPQVKCNEQPNRVEIYEKTVEVLEPEVTKLMKFMFQRKAIERFCSEVKRLCHA  
ERRKDFVSEAYLLTLGKFINMFAVLDELKMKCSVKNDHSAYKRAAQFLRKMADPLVHPGISEPVHVPGSQSQ  
DHPVSSPATGSDPGL

>rs213016101\_ENSMUSP00000090854\_c.82:TG>G\_p.C28del-fs  
ENSMUST00000093166.11|Cyfip2-202|ENSMUSG00000020340|-  
|chr11:g.46182374:CA>C  
MTTHVTLEDALSNDLLEELPLPDQQPVSSPRHPPSCTRLTLTRTSRTGMHLSRALQGTLSRQRSTPA

>rs213016101\_ENSMUSP00000127586\_c.82:TG>G\_p.C28del-fs  
ENSMUST00000165599.9|Cyfip2-205|ENSMUSG00000020340|-  
|chr11:g.46182374:CA>C  
MTTHVTLEDALSNDLLEELPLPDQQPVSSPRHPPSCTRLTLTRTSRTGMHLSRALQGTLSRQRSTPA

>rs213016101\_ENSMUSP00000090853\_c.82:TG>G\_p.C28del-fs  
ENSMUST00000093165.12|Cyfip2-201|ENSMUSG00000020340|-  
|chr11:g.46182374:CA>C  
MTTHVTLEDALSNDLLEELPLPDQQPVSSPRHPPSCTRLTLTRTSRTGMHLSRALQGTLSRQRSTPA

>rs46650668\_ENSMUSP00000020664\_c.1218:G>A\_p.E407K  
ENSMUST00000020664.13|Itk-201|ENSMUSG00000020395|-|chr11:g.46228942:C>T  
MNNFILLLEEQLIKKSQQKRRTSPSNFKVRFVLTAKSLAYFEDRHGKKRTLKGSIELSRIKCVIIVKSDISIP  
CHYKYPFQVVDHNYLLYVFAPDCESRQRWVLTKEETRNNSLVSKYHPNFWMDGRWRCCSQLEKPAVGCAPY  
DPSKNASKKPLPPTPEDNRRSFQEP EETLVIALYDYQTNDPQELALRCDEEYLLDSSEIHWWRVQDKNGHEG  
YAPSSYLVEKSPNNLETYEWYNKSI SRDKAEKLLDGTGKEGAFMVRDSRTPGTYT VSVFTKAI ISENPCIKHY  
HIKETNDSPKRYVVAEKYVFDSPILLIQYHQYNGGGLVTRLRYPVCSWRQKAPVTTAGLRYGKWWIQPSELTFV  
QEIGSGQFGLVHLGYWLNKDKVAIKTIQEGAMSEEDFIEEAKVMMKLSHPKLVQLYGVCLEQAPICLVFEFME  
HGCLSDYLRQRGLFAAETLLGMCLDVCEGMAYLEKACVIHRDLAARNCLVGENQVIKVSDFGMTRFVLDQY  
TSSTGTKFPVKWASPEVFSFSRYSSKSDVWSFGVLMWEVVFSEGKIPYENRSNSEVVEDISTGFRLYKPRLAS  
HVYQIMNHCWKEKPEDRPPFSQLLSQAELAEIAGL\*  
>rs46650668\_ENSMUSP00000104860\_c.1236:G>A\_p.E413K  
ENSMUST00000109237.9|Itk-203|ENSMUSG00000020395|-|chr11:g.46228942:C>T  
MNNFILLLEEQLIKKSQQKRRTSPSNFKVRFVLTAKSLAYFEDRHGKKRTLKGSIELSRIKCVIIVKSDISIP  
CHYKYPFQTLVYLQVVDHNYLLYVFAPDCESRQRWVLTKEETRNNSLVSKYHPNFWMDGRWRCCSQLEKPA  
VGCAPYDPSKNASKKPLPPTPEDNRRSFQEP EETLVIALYDYQTNDPQELALRCDEEYLLDSSEIHWWRVQD  
KNGHEGYAPSSYLVEKSPNNLETYEWYNKSI SRDKAEKLLDGTGKEGAFMVRDSRTPGTYT VSVFTKAI ISEN  
PCIKHYHIKETNDSPKRYVVAEKYVFDSPILLIQYHQYNGGGLVTRLRYPVCSWRQKAPVTTAGLRYGKWWIQP  
SELTFVQEIGSGQFGLVHLGYWLNKDKVAIKTIQEGAMSEEDFIEEAKVMMKLSHPKLVQLYGVCLEQAPICL  
VFEFMEHGCLSDYLRQRGLFAAETLLGMCLDVCEGMAYLEKACVIHRDLAARNCLVGENQVIKVSDFGMTRF  
VLDQYTSSTGTKFPVKWASPEVFSFSRYSSKSDVWSFGVLMWEVVFSEGKIPYENRSNSEVVEDISTGFRLYK  
PRLASCHVYQIMNHCWKEKPEDRPPFSQLLSQAELAEIAGL\*  
>ENSMUSP00000116997\_c.175:T>TAAA\_p.L59LK-ins ENSMUST00000128940.2|Med7-  
204|ENSMUSG00000020397|+|chr11:g.46331582:T>TAAA  
MGEPPQVSALPPPPMQYIKEYTDENIQEGLAPKPPPIKDSYMMFGNQFQCDDLIIIRPLKESQGIERLHPMQF  
DHKKELRKLNMSILINFLDLDLILIRSPGSIKREEKLEDLKLFLVHVHHLINYEYRPHQARETLRVMMEVQKRQ  
RLETAERFQKHL  
>ENSMUSP00000104854\_c.175:T>TAAA\_p.L59LK-ins ENSMUST00000109231.2|Med7-  
202|ENSMUSG00000020397|+|chr11:g.46331582:T>TAAA  
MGEPPQVSALPPPPMQYIKEYTDENIQEGLAPKPPPIKDSYMMFGNQFQCDDLIIIRPLKESQGIERLHPMQF  
DHKKELRKLNMSILINFLDLDLILIRSPGSIKREEKLEDLKLFLVHVHHLINYEYRPHQARETLRVMMEVQKRQ  
RLETAERFQKHLERVIEMIQNCLASLPD  
>ENSMUSP00000104855\_c.175:T>TAAA\_p.L59LK-ins ENSMUST00000109232.4|Med7-  
203|ENSMUSG00000020397|+|chr11:g.46331582:T>TAAA  
MGEPPQVSALPPPPMQYIKEYTDENIQEGLAPKPPPIKDSYMMFGNQFQCDDLIIIRPLKESQGIERLHPMQF  
DHKKELRKLNMSILINFLDLDLILIRSPGSIKREEKLEDLKLFLVHVHHLINYEYRPHQARETLRVMMEVQKRQ  
RLETAERFQKHLERVIEMIQNCLASLPDDLP HSEAGMRVKAEPMDTDDNSNCPGQNEQQRESSGHRDQIEK  
DAALCVLIDEMNERP\*  
>ENSMUSP00000020665\_c.175:T>TAAA\_p.L59LK-ins ENSMUST00000020665.13|Med7-  
201|ENSMUSG00000020397|+|chr11:g.46331582:T>TAAA  
MGEPPQVSALPPPPMQYIKEYTDENIQEGLAPKPPPIKDSYMMFGNQFQCDDLIIIRPLKESQGIERLHPMQF  
DHKKELRKLNMSILINFLDLDLILIRSPGSIKREEKLEDLKLFLVHVHHLINYEYRPHQARETLRVMMEVQKRQ  
RLETAERFQKHLERVIEMIQNCLASLPDDLP HSEAGMRVKAEPMDTDDNSNCPGQNEQQRESSGHRDQIEK  
DAALCVLIDEMNERP\*  
>ENSMUSP00000122182\_c.175:T>TAAA\_p.L59LK-ins ENSMUST00000152119.2|Med7-  
207|ENSMUSG00000020397|+|chr11:g.46331582:T>TAAA  
MGEPPQVSALPPPPMQYIKEYTDENIQEGLAPKPPPIKDSYMMFGNQFQCDDLIIIRPLKESQGIERLHPMQF  
DHKKELRKLNMSILINFLDLDLILIRSPGSIKREEKLEDLKLFLVHVHHLINYEYRPHQARETLRVMMEVQKRQ  
>ENSMUSP00000120077\_c.175:T>TAAA\_p.L59LK-ins ENSMUST00000140027.8|Med7-  
206|ENSMUSG00000020397|+|chr11:g.46331582:T>TAAA  
MGEPPQVSALPPPPMQYIKEYTDENIQEGLAPKPPPIKDSYMMFGNQFQCDDLIIIRPLKES  
>ENSMUSP00000120617\_c.175:T>TAAA\_p.L59LK-ins ENSMUST00000133635.2|Med7-  
205|ENSMUSG00000020397|+|chr11:g.46331582:T>TAAA  
MGEPPQVSALPPPPMQYIKEYTDENIQEGLAPKPPPIKDSYMMFGNQFQCDDLIIIRPLKESQGIERLHPMQF  
DHKKELRKLNMSILINFLDLDLILIRSPGSIKREEKLEDLKLFLVHVHHLINYEYRPHQARE  
>ENSMUSP00000131852\_c.175:T>TAAA\_p.L59LK-ins ENSMUST00000170928.8|Med7-  
209|ENSMUSG00000020397|+|chr11:g.46331582:T>TAAA



MGEPPQVSALPPPPMQYIKEYTDENIQEGLAPKPPPIKDSYMMFGNQFQCDDLIIIRPLKESQGIERLHPMQF  
DHKKELRKLNMSILINFLDLDLILIRSPGSIKREEKLEDLKLFFVHVHHLINYEYRPHQARETLRVMMEVQKRQ  
RLETAERFQKHLERVIEMIQNCLASLPDDLPHSEAGMRVKAEPMDTDDNSNCPGQNEQQRESSGHRDQIIEK  
DAALCVLIDEMNERP\*

>rs227019036\_ENSMUSP00000069456\_c.18:C>A\_p.L7I  
ENSMUST00000068877.7|Timd4-201|ENSMUSG00000055546|+|chr11:g.46701657:C>A  
MSKGLLILWLVTTELWVLYLTPAASEDTIIGFLGQPVTLPCHYLSWSQSRNSMCWKGKSCPNKCNAEELLRTDG  
TRII SRKSTKYTLLGKVQFGEVSLTISNTNRGDSGVYCCRIEVPWFNDVKKNRLELRRATTTKKPTTTTTRP  
TTTTPVTTTTPELLPTTVMTTSVLPTTTPPQTLATTAFASTAVTTCPSTTPGSFQSQETTKGSAFTTESETLPAS  
NHSQRSMMTISTDIAVLRPTGSNPGILPSTSQLTTQKTTLLTTSSESLQKTTKSHQINSRQTILIIACCVGFVLM  
VLLFLAFLLRGKVTGANCLQRHKRPDNTEDSDSVLNDMSHGRDDEDGIFTL\*

>rs50666259\_ENSMUSP00000069456\_c.144:C>T\_p.R49C  
ENSMUST00000068877.7|Timd4-201|ENSMUSG00000055546|+|chr11:g.46706344:C>T  
MSKGLLLLWLVTTELWVLYLTPAASEDTIIGFLGQPVTLPCHYLSWSQSCNSMCWKGKSCPNKCNAEELLRTDG  
TRII SRKSTKYTLLGKVQFGEVSLTISNTNRGDSGVYCCRIEVPWFNDVKKNRLELRRATTTKKPTTTTTRP  
TTTTPVTTTTPELLPTTVMTTSVLPTTTPPQTLATTAFASTAVTTCPSTTPGSFQSQETTKGSAFTTESETLPAS  
NHSQRSMMTISTDIAVLRPTGSNPGILPSTSQLTTQKTTLLTTSSESLQKTTKSHQINSRQTILIIACCVGFVLM  
VLLFLAFLLRGKVTGANCLQRHKRPDNTEDSDSVLNDMSHGRDDEDGIFTL\*

>rs52482656\_ENSMUSP00000069456\_c.356:G>A\_p.W119\*  
ENSMUST00000068877.7|Timd4-201|ENSMUSG00000055546|+|chr11:g.46706556:G>A  
MSKGLLLLWLVTTELWVLYLTPAASEDTIIGFLGQPVTLPCHYLSWSQSRNSMCWKGKSCPNKCNAEELLRTDG  
TRII SRKSTKYTLLGKVQFGEVSLTISNTNRGDSGVYCCRIEVPWFNDVKKNRLELRRATTTKKPTTTTTRP  
TTTTPVTTTTPELLPTTVMTTSVLPTTTPPQTLATTAFASTAVTTCPSTTPGSFQSQETTKGSAFTTESETLPAS  
NHSQRSMMTISTDIAVLRPTGSNPGILPSTSQLTTQKTTLLTTSSESLQKTTKSHQINSRQTILIIACCVGFVLM  
VLLFLAFLLRGKVTGANCLQRHKRPDNTEDSDSVLNDMSHGRDDEDGIFTL\*

>ENSMUSP00000019060\_c.154:A>G\_p.E52G ENSMUST00000019060.6|Csf2-  
201|ENSMUSG00000018916|-|chr11:g.54140185:T>C  
MWLQNLFLGIVVYLSAPTRSPITVTRPWKHVEAIKEALNLLDDMPVTLNGEVEVVSNEFSFKKLTVCVQTRL  
KIFEQGLRGNFTKLGALNMTASYYQTYCPPTPETDCETQVTTYADFDISLKTFLTDIIPFECKKPGQK\*

>rs48718255\_ENSMUSP00000049026\_c.34:A>G\_p.K12R  
ENSMUST00000046835.14|Fnip1-201|ENSMUSG00000035992|+|chr11:g.54329157:A>G  
MAPTLFQKLFRRSGLGAPGRDARDPDCAFWSWLPPEFDPSQIRLIVYQDCERRGRNVLFDSSVKKRKNEDTSVS  
KLCNDAQVKVFGKCCQLKPGGDSSSSLDSSITLSSDGKDQC PKYQGSRCSSDANMLGEMMFGSVAMSYKGSTL  
KIHQIRSPPLMLSKVFTARTGSSICGSLNLTQDSLEFINQDSNTLKAADSSTVSNGLLGNIGLSQFCSPPRAF  
SEQGPLRLIRASFFFAVHSNPMMDMPGRELNEDRDSGIARSASLSSLFITPFPSPNSLTRSCASSYQRRWRRS  
QTTSLENGVPFRWSVEESFNLSDESCGNPGIVRKKKIAIGVIFSLSKDEDENNKFNFFFSHFPLFESHMKN  
LKSAIEQAMKMSRRSADASQRSLAYNRILDALTEFRTTICNLYTMPRI GEPVWLTMMSGTPEKNQLCHRFMKE  
FTFLMENASKNQFLPALITAVLNTNHLAWVPTVMPNGQPPIKIFLEKHSSQSVGMLAKTHPYNPLWAQLGDLYG  
AIGSPVRLARTVVVGRQDLVQRLLYFLTYFIRCSELQETHLLENGEDEAIVMPGTVITTTLEKGEIEESEYV  
LITMHRNKSSLLFKESEETRTPCNCKYCSHPVLGQNTENVSQPEREDTQDNSKELLGISDECQKISPPDCQE  
ENAVDVQQYRDKLRCTCLDTKLETVVCTGSAPADKCVLSETCLEPREESWQNKELLSDSNHTGTAMRPTGIVVE  
KKPPDKNVPSAFSCEVTQTKVTFIIGDSMSPDSDELRSQAVVDQINRHHSEPLKEDRGVADKHQESKITKDQ  
SESDTQNIIVSGESCELPWVSHSDPESMSLFDEYFNDDSIETRTIDDPVVKTSTDSKEYCCMLEYPKRLYTKT  
NKQKSELCKCIETVHQDSCNACFPQQDQRNSLSILVPHGDKESDKNNAVGTEWDIPRNESSDSALGDSESED  
TGPDIRRQAGGYCGGDQEDWTEDEIPFPGSKLIEVSAVQPNIANFGRSLLGGYCSSYVPDFVLQIGNDRERL  
RQCLVSDLSHAVQHPVLDEPIAEAVCI IADMDKWTQVASSQRRVTDNKLKGEVLVSSLSVNLHSTLQLYKH  
NLSPNFCVMHLEDRLQELYFKSKMLSEYLRGQMRVHVKELGVVGLGIESDLPLLAAVASTHSPYVAQILL\*

>rs26974040\_ENSMUSP00000104511\_c.1249:T>C\_p.L417P  
ENSMUST00000108883.10|Anxa6-202|ENSMUSG00000018340|-|chr11:g.54885390:A>G  
MAKIAQGAMYRGSVHDFPEFDANQDAEALYTAMKGFSGDKESILELITSRSNKQRQEICQNYKSLYGKDLIED  
LKYELTGKFERLIVNLMRPLAYCDAKEIKDAISGVGTDEKCLIEILASRTNEQMHLVAAYKDAYERDLES  
IGDTSGHFQKMLVLLQGTRENDVVSSEDLVQQDVQDLYEAGELKWTDEAQFIYILGNRSKQHLRLVDFEYL  
KTTGKPIEASIRGELSGDFEKLMLAVVKCIRSTPEYFAERLFKAMKGLGTRDNTLIRIMVSRSELMDLDIREI  
FRTKYEKSLYSMIKNDTSGEYKALLKLCGGDDAAGQFFPEAAQVAYQMWELSAVSRVELKGTVCAANDFNP  
DADAKALRKAMKIGTDEATI IDIVTHRSNAQRQQIRQTFKSHFGRDLMDADPKSEISGDLARLILGLMMPAH  
YDAKQLKAMEGAGTDEKTLIEILATRTRNAEIRAINAEYKEDYHKSLEDALSSDTSGHFRRLISLATGNREE  
GGENRDQAQEDAQVAEEILEIADTPSGDKTSLETRFMTVLCSTRYPHLRRVQEFIKKTNYDIEHVIKKEMSG

DVKDAFVAIVQSVKNKPLFFADKLYKSMKGAGTDEKTLTRVMVSRSEIDLNLNIRREFIEKYDKSLHQAIEGDT  
 SGDFMKALLALCGGED\*

>rs26974040\_ENSMUSP00000099788\_c.1249:T>C\_p.L417P  
 ENSMUST00000102727.3|Anxa6-201|ENSMUSG00000018340|-|chr11:g.54885390:A>G  
 MAKIAQGAMYRGSVHDFPEFDANQDAEALYTAMKGFSGDKESILELITSRSNKQRQEICQNYKSLYGKDLIED  
 LKYEELTGKFERLIVNLMRPLAYCDAKEIKDAISGVGTDEKCLIEILASRTNEQMHQLVAAYKDAYERDLES  
 IGDTSGHFQKMLVLLQGTRENDVSEDLVQQDVQDLYEAGELKWTDEAQFIYILGNRSKQHLRLVDFEYL  
 KTTGKPIEASIRGELSGDFEKLMLAVVKCIRSTPEYFAERLFFKAMKGLGTRDNTLIRIMVSRSELMDLIREI  
 FRTKYEKSLYSMIKNDTSGEYKALLKLCGGDDAAGQFFPEAAQVAYQMWELSAVSRVELKGTVCAANDFNP  
 DADAKALRKAMKIGTDEATIIDIVTHRSNAQRQQIRQTFKSHFGRDLMDPKSEISGDLARLILGLMPPAH  
 YDAKQLKAMEGAGTDEKTLIEILATRTRNAEIRAINAYKEDYHKSLEDALSSDTSGHFRIRILISLATGNREE  
 GGENRDQAQEDAQEIADTPSGDKTSLTRFMTVLCSTRYPHLRRVQEFIKKTNIDIEHVIKKEMSGDVKDAF  
 VAIVQSVKNKPLFFADKLYKSMKGAGTDEKTLTRVMVSRSEIDLNLNIRREFIEKYDKSLHQAIEGDTSGDFMK  
 ALLALCGGED\*

>rs251828522\_ENSMUSP00000064960\_c.205:A>C\_p.E69A  
 ENSMUST00000069816.6|Slc36a3-202|ENSMUSG00000049491|-  
 |chr11:g.55040726:T>G  
 MGNVPLLREVGKQRNMFGRSTASSKGSNSRSSSTSPKKGPRREADALMEALWQQRGSPDPAWHSSAASSR  
 NPIFPAGRGAATRLIQPLLAPPRKFGSNP\*

>rs32973454\_ENSMUSP00000018727\_c.892:A>G\_p.D298G  
 ENSMUST00000018727.4|G3bp1-201|ENSMUSG00000018583|+|chr11:g.55388532:A>G  
 MVMEKPSPLLVGREFVRQYYTLLNQAPDMLHRFYGKNSSYAHGGLDSNGKPADAVYGQKEIHRKVMSONFTNC  
 HTKIRHVDAHATLNDGVVQVMGLLSNNQALRRFMQTFVLAPEGSVANKFYVHNDIFRYQDEVFGGFVTEPQ  
 EESEEEVEEPEERQQTPEVVPDDSGTFYDQTVSNDLEEHLEEPVVEPEPEPEPEPEPEVSDIQEDKPEAALE  
 EAAPDDVQKSTSPAPADVAPAQEDLRTFSWASVTSKNLPPSGAVPVGTGTPPHVVKVPASQPRPESKPDQIPP  
 QRPQRGQVREQRINIPQQRGPRPIREAGEPGDVEPRMVRHPDSHQLFIGNLPHEVDKSELKDFQNFQNVV  
 ELRINSGGKLPNFGFVVVDDSEPVQKVLNRPIMFRGAVRLNVEEKKTRAAREGDRDRNRLRPGGPRGGPSG  
 GMRGPPRGGMVQKPGFVGRGITTPRQ\*

>rs26959816\_ENSMUSP000000104481\_c.1057:T>C\_p.I353T  
 ENSMUST00000108853.8|G1ra1-203|ENSMUSG00000000263|-|chr11:g.55405682:A>G  
 MDYRVNIFLRQQWNPRLAYNEYPDDSLDLDPMSLDSIWKPDLFFANEKGAHFHEITTDNKLLRISRNGNVLY  
 SIRITLTLACPMDLKNFPMQVQTCIMQLESFGYTMNDLIFEWQEQGAVQVADGLTLPQFILKEEKDLRYCTKH  
 YNTGKFTCIEARFHLERQMGYYLIQMYIPSLILVILSWISFWINMDAAPARVGLGITTVLTMTTQSSGSRASL  
 PKVSYVKAIDIWMAVCLLFVFSALLEYAANFVSRQHKELLRFRKRHRHKKDDEGGEGFRNFSAAYGMGPACLO  
 AKDGISVKGANNNTTNPPAPSKSPEEMRKLFIQRAKKIDKISRIGFPM AFLIFNMFYWTIYKIVRREDVHN  
 K\*

>rs26959816\_ENSMUSP00000099777\_c.1306:T>C\_p.I436T  
 ENSMUST00000102716.10|G1ra1-202|ENSMUSG00000000263|-|chr11:g.55405682:A>G  
 MYSFNTRFYLWETIVFFSLAASKEAEAARSAPKPMSPDFLDKLMGRTSGYDARIRPNFKGPPVNVSCNIFI  
 NSFGSIAETTMDYRVNIFLRQQWNPRLAYNEYPDDSLDLDPMSLDSIWKPDLFFANEKGAHFHEITTDNKLL  
 RISRNGNVLYSIRITLTLACPMDLKNFPMQVQTCIMQLESFGYTMNDLIFEWQEQGAVQVADGLTLPQFILKE  
 EKDLRYCTKHNTGKFTCIEARFHLERQMGYYLIQMYIPSLILVILSWISFWINMDAAPARVGLGITTVLTMT  
 TQSSGSRASLPAKVDISVKGANNNTTNPPAPSKSPEEMRKLFIQRAKKIDKISRIGFPM AFLIFNMFYWTIY  
 KIVRREDVHNK\*

>rs26959816\_ENSMUSP00000075032\_c.1330:T>C\_p.I444T  
 ENSMUST00000075603.5|G1ra1-201|ENSMUSG00000000263|-|chr11:g.55405682:A>G  
 MYSFNTRFYLWETIVFFSLAASKEAEAARSAPKPMSPDFLDKLMGRTSGYDARIRPNFKGPPVNVSCNIFI  
 NSFGSIAETTMDYRVNIFLRQQWNPRLAYNEYPDDSLDLDPMSLDSIWKPDLFFANEKGAHFHEITTDNKLL  
 RISRNGNVLYSIRITLTLACPMDLKNFPMQVQTCIMQLESFGYTMNDLIFEWQEQGAVQVADGLTLPQFILKE  
 EKDLRYCTKHNTGKFTCIEARFHLERQMGYYLIQMYIPSLILVILSWISFWINMDAAPARVGLGITTVLTMT  
 TQSSGSRASLPAKVDISVKGANNNTTNPPAPSKSPEEMRKLFIQRAKKIDKISRIGFPM AFLIFNMFYWTIY  
 NMFYWTIYKIVRREDVHNK\*

>rs47776591\_ENSMUSP000000104481\_c.880:A>G\_p.K294R  
 ENSMUST00000108853.8|G1ra1-203|ENSMUSG00000000263|-|chr11:g.55405859:T>C  
 MDYRVNIFLRQQWNPRLAYNEYPDDSLDLDPMSLDSIWKPDLFFANEKGAHFHEITTDNKLLRISRNGNVLY  
 SIRITLTLACPMDLKNFPMQVQTCIMQLESFGYTMNDLIFEWQEQGAVQVADGLTLPQFILKEEKDLRYCTKH

YNTGKFTCIEARFHLERQMGYYLIQMYIPSLILVILSWISFWINMDAAPARVGLGITTVLTMTTQSSGSRASL  
PKVSYVKAIDIWMAVCLLFVFSALLEYAANFVSRQHKELLRFRKRHRHKKDDEGGEGRFNFSAYGMGPACLO  
ARDGISVKGANNNTTNPAPSKSPEEMRKLFIQRAKKIDKISRIGFPMFLIFNMFYWIIYKIVRREDVHN  
K\*

>rs47776591\_ENSMUSP00000099777\_c.1129:A>G\_p.K377R  
ENSMUST00000102716.10|G1ra1-202|ENSMUSG0000000263|-|chr11:g.55405859:T>C  
MYSFNTRFYLWETIVFFSLAASKEAEAARSAPKPMSPSDFLDKLMGRTSGYDARIRPNFKGPPVNVSCNIFI  
NSFGSIAETTMDYRVNIFLRQQWNPRLAYNEYPPDSDLDPMSLDSIWKPDFFANKEGAHFHEITTDNKLL  
RISRNGNVLYSIRITLTLACPMDLKNFPMQVQTCIMQLESFGYTMNDLIFEWQEQGAVQVADGLTLPQFILKE  
EKDLRYCTKHYNTGKFTCIEARFHLERQMGYYLIQMYIPSLILVILSWISFWINMDAAPARVGLGITTVLTM  
TQSSGSRASLPKVSYVKAIDIWMAVCLLFVFSALLEYAANFVSRQHKELLRFRKRHRHKKDDEGGEGRFNFS  
AYGMGPACLOARDGISVKGANNNTTNPAPSKSPEEMRKLFIQRAKKIDKISRIGFPMFLIFNMFYWIIY  
KIVRREDVHNK\*

>rs47776591\_ENSMUSP00000075032\_c.1153:A>G\_p.K385R  
ENSMUST00000075603.5|G1ra1-201|ENSMUSG0000000263|-|chr11:g.55405859:T>C  
MYSFNTRFYLWETIVFFSLAASKEAEAARSAPKPMSPSDFLDKLMGRTSGYDARIRPNFKGPPVNVSCNIFI  
NSFGSIAETTMDYRVNIFLRQQWNPRLAYNEYPPDSDLDPMSLDSIWKPDFFANKEGAHFHEITTDNKLL  
RISRNGNVLYSIRITLTLACPMDLKNFPMQVQTCIMQLESFGYTMNDLIFEWQEQGAVQVADGLTLPQFILKE  
EKDLRYCTKHYNTGKFTCIEARFHLERQMGYYLIQMYIPSLILVILSWISFWINMDAAPARVGLGITTVLTM  
TQSSGSRASLPKVSYVKAIDIWMAVCLLFVFSALLEYAANFVSRQHKELLRFRKRHRHKKSPMLNLFQDDEG  
GEGRFNFSAYGMGPACLOARDGISVKGANNNTTNPAPSKSPEEMRKLFIQRAKKIDKISRIGFPMFLIF  
NMFYWIIYKIVRREDVHNK\*

>rs45667969\_ENSMUSP00000044718\_c.1137:A>G\_p.I380V  
ENSMUST00000037682.3|Nmur2-201|ENSMUSG00000037393|-|chr11:g.55917850:T>C  
MGKLENASWIHDSLMLKYNLSTEEYLAYLCGPKRSDLSLPVSVVYALIFVVGVIIGNLLVCLVIARHQTLKTP  
TYLFLSLAVSDDLVLVLLGMPLEVEYELWHNYPFLLFGPVGCFKATLFFETVCFASILSVTTVSIERYVAIVHP  
FRAKLESTRRRALRILSLVVSFVFLPNTSIHGKIFQCFNGSSVPGSATCTVTKPIWVYNFIIQATSFLFYIL  
PMTLISVLYLMLGLRLKRDESLEADKVTVNIHRPSRKS SVTKMLFVLVLFVFAICWTPFHVDRLFESFVDEW  
TESLAAVFNLIHVVGVSFFYLSSAVNPIIYNLLSRRFRAAFRNVVSPSCKWCHPQHRPQGPAPQKVI  
FLTECHLVE LTEDAGPQFPQSSVHNTQLTTVPCVEEVP\*

>ENSMUSP00000044494\_c.1497:G>GTTTCCTGTAGC\_p.E500ins-fs  
ENSMUST00000036315.16|G1ra1-  
201|ENSMUSG00000020524|+|chr11:g.57133620:G>GTTTCCTGTAGC  
MPYIFAFFCTGFLGAVVGANFPNNIQIGGLFPNQSQEHAAFRALSQLEPPKLLPQIDIVNISDSFEMTYR  
FCSQFSKGVYAIFFGYERRTVNMLTSFCGALHVCFITPSFPVDTSNQFVLQRLPELQEALISIIDHYKWQTFV  
YIYDADRGLSVLQRVLDTAAEKNWQVTAVNILTTEEGYRMLFQDLEKKKERLVVVDCESERLNAILGQIVKL  
EKNIGYHYILANLGFMDIDLNKFESGANVTGFQLVNYTDTIPARIMQQWRTSDARDHTRVDWKRPKYTSAL  
TYDGVKVMAEAFQSLRRQRIDISRRGNAGDCLANPAVPWGQGIDIQRALQQVRFEGTLGNVQFNEKGRRTNYT  
LHVIEMKHDGIRKIGYWNEDDKFVPAATDAQAGDNSSVQNRITYIVTTILEDPYVMLKKNANQFEGNDRYEGY  
CVELAAEIAKHVGYSYRLEIVSDGKYGARDPDTKAWNGMVGELVYGRADVAVAPLTITLVRVSCSRKSSTSPS  
HS

>ENSMUSP00000091731\_c.1497:G>GTTTCCTGTAGC\_p.E500ins-fs  
ENSMUST00000094179.11|G1ra1-  
202|ENSMUSG00000020524|+|chr11:g.57133620:G>GTTTCCTGTAGC  
MPYIFAFFCTGFLGAVVGANFPNNIQIGGLFPNQSQEHAAFRALSQLEPPKLLPQIDIVNISDSFEMTYR  
FCSQFSKGVYAIFFGYERRTVNMLTSFCGALHVCFITPSFPVDTSNQFVLQRLPELQEALISIIDHYKWQTFV  
YIYDADRGLSVLQRVLDTAAEKNWQVTAVNILTTEEGYRMLFQDLEKKKERLVVVDCESERLNAILGQIVKL  
EKNIGYHYILANLGFMDIDLNKFESGANVTGFQLVNYTDTIPARIMQQWRTSDARDHTRVDWKRPKYTSAL  
TYDGVKVMAEAFQSLRRQRIDISRRGNAGDCLANPAVPWGQGIDIQRALQQVRFEGTLGNVQFNEKGRRTNYT  
LHVIEMKHDGIRKIGYWNEDDKFVPAATDAQAGDNSSVQNRITYIVTTILEDPYVMLKKNANQFEGNDRYEGY  
CVELAAEIAKHVGYSYRLEIVSDGKYGARDPDTKAWNGMVGELVYGRADVAVAPLTITLVRVSCSRKSSTSPS  
HS

>ENSMUSP00000117746\_c.1290:G>GTTTCCTGTAGC\_p.E431ins-fs  
ENSMUST00000151045.3|G1ra1-  
204|ENSMUSG00000020524|+|chr11:g.57133620:G>GTTTCCTGTAGC  
MTYRFSQFSKGVYAIFFGYERRTVNMLTSFCGALHVCFITPSFPVDTSNQFVLQRLPELQEALISIIDHYKW  
QTFVYIYDADRGLSVLQRVLDTAAEKNWQVTAVNILTTEEGYRMLFQDLEKKKERLVVVDCESERLNAILGQ  
IVKLEKNGIGYHYILANLGFMDIDLNKFESGANVTGFQLVNYTDTIPARIMQQWRTSDARDHTRVDWKRPKY

TSALTYDGVKVMMAEFQSLRRQRIDISRRGNAGDCLANPAVPWVGQGIDIQRALQQVRFEGTLGNVQFNEKGRR  
 TNYTLHVIEMKHDGIRKIGYWNEDDKFVPAATDAQAGDNSSVQNRITYIVTTILEDPYVMLKKNANQFEGNDR  
 YEGYCVELAAEIAKHVGYSYRLEIVSDGKYGARDPDTKAWNGMVGELVYGRADVAVAPLTTITLVREEVDFSKPFMS  
 TSPSHS  
 >rs33881482\_ENSMUSP00000044494\_c.1929:G>A\_p.V644M  
 ENSMUST00000036315.16|Gria1-201|ENSMUSG00000020524|+|chr11:g.57174442:G>A  
 MPYIFAFFCTGFLGAVVGANFPNNIQIGGLFPNQSQEHAAFRALSQLEPPKLLPQIDIVNISDSFEMTYR  
 FCSQFSKGVYAI FGFYERRTVNMLTSFCGALHVCFITPSPFVDTSNQFVLQLRPELQEALISIIDHYKWQTFV  
 YIYDADRGLSVLQRLVDTAAEKNWQVTAVNILTTEEGYRMLFQDLEKKKERLVVVDCESERLNAILGQIVKL  
 EKNIGYHYILANLGFMDIDLNKFKESGANVTGFQLVNYTDTIPARIMQWRTSDARDHTRVDWKRPKYTSAL  
 TYDGVKVMMAEFQSLRRQRIDISRRGNAGDCLANPAVPWVGQGIDIQRALQQVRFEGTLGNVQFNEKGRR  
 LHVIEMKHDGIRKIGYWNEDDKFVPAATDAQAGDNSSVQNRITYIVTTILEDPYVMLKKNANQFEGNDRYEGY  
 CVELAAEIAKHVGYSYRLEIVSDGKYGARDPDTKAWNGMVGELVYGRADVAVAPLTTITLVREEVDFSKPFMS  
 LGISIMIKKPQKSKPGVFSFLDPLAYE IWMCI VFAYIGVSVVFLVSRFSPYEWHSSEEFEEGRDQTTSDQSNE  
 FGIFNSLWFSLGAFMQGCDISPRSLSGRIVGGVWVFFTLIIISSYTANLAAFLTVERMMSPIESAEDLAKQT  
 EIAYGTLEAGSTKEFFRRSKIAVFEKMWTYMKSAEPSVVRTTEEGMIRVRKSKGKYAYLLESTMNEYIEQRK  
 PCDTMKVGGNLDSKGYGIATPKGSALRGPVNLA VLKLEQGVLDKLSKWWYDKGECGSKDSGSKDKTSALS  
 SNVAGVFYILIGGLGLAMLVALIEFCYKRSRSESKRMKGFC LI PQQS INEAIRTSTLPRNSGAGASGGSGSGEN  
 GRVVSQDFPKSMQSI PCMSHSSGMPLGATGL\*

>rs33881482\_ENSMUSP00000091731\_c.1929:G>A\_p.V644M  
 ENSMUST00000094179.11|Gria1-202|ENSMUSG00000020524|+|chr11:g.57174442:G>A  
 MPYIFAFFCTGFLGAVVGANFPNNIQIGGLFPNQSQEHAAFRALSQLEPPKLLPQIDIVNISDSFEMTYR  
 FCSQFSKGVYAI FGFYERRTVNMLTSFCGALHVCFITPSPFVDTSNQFVLQLRPELQEALISIIDHYKWQTFV  
 YIYDADRGLSVLQRLVDTAAEKNWQVTAVNILTTEEGYRMLFQDLEKKKERLVVVDCESERLNAILGQIVKL  
 EKNIGYHYILANLGFMDIDLNKFKESGANVTGFQLVNYTDTIPARIMQWRTSDARDHTRVDWKRPKYTSAL  
 TYDGVKVMMAEFQSLRRQRIDISRRGNAGDCLANPAVPWVGQGIDIQRALQQVRFEGTLGNVQFNEKGRR  
 LHVIEMKHDGIRKIGYWNEDDKFVPAATDAQAGDNSSVQNRITYIVTTILEDPYVMLKKNANQFEGNDRYEGY  
 CVELAAEIAKHVGYSYRLEIVSDGKYGARDPDTKAWNGMVGELVYGRADVAVAPLTTITLVREEVDFSKPFMS  
 LGISIMIKKPQKSKPGVFSFLDPLAYE IWMCI VFAYIGVSVVFLVSRFSPYEWHSSEEFEEGRDQTTSDQSNE  
 FGIFNSLWFSLGAFMQGCDISPRSLSGRIVGGVWVFFTLIIISSYTANLAAFLTVERMMSPIESAEDLAKQT  
 EIAYGTLEAGSTKEFFRRSKIAVFEKMWTYMKSAEPSVVRTTEEGMIRVRKSKGKYAYLLESTMNEYIEQRK  
 PCDTMKVGGNLDSKGYGIATPKGSALRNPVNLA VLKLEQGLLDKLNKWWYDKGECGSGGSDSKDKTSALS  
 SNVAGVFYILIGGLGLAMLVALIEFCYKRSRSESKRMKGFC LI PQQS INEAIRTSTLPRNSGAGASGGSGSGEN  
 GRVVSQDFPKSMQSI PCMSHSSGMPLGATGL\*

>rs33881482\_ENSMUSP00000117746\_c.1722:G>A\_p.V575M  
 ENSMUST00000151045.3|Gria1-204|ENSMUSG00000020524|+|chr11:g.57174442:G>A  
 MTYR FCSQFSKGVYAI FGFYERRTVNMLTSFCGALHVCFITPSPFVDTSNQFVLQLRPELQEALISIIDHYKW  
 QTFVYIYDADRGLSVLQRLVDTAAEKNWQVTAVNILTTEEGYRMLFQDLEKKKERLVVVDCESERLNAILGQ  
 IVKLEKNGIGYHYILANLGFMDIDLNKFKESGANVTGFQLVNYTDTIPARIMQWRTSDARDHTRVDWKRPKY  
 TSALTYDGVKVMMAEFQSLRRQRIDISRRGNAGDCLANPAVPWVGQGIDIQRALQQVRFEGTLGNVQFNEKGRR  
 TNYTLHVIEMKHDGIRKIGYWNEDDKFVPAATDAQAGDNSSVQNRITYIVTTILEDPYVMLKKNANQFEGNDR  
 YEGYCVELAAEIAKHVGYSYRLEIVSDGKYGARDPDTKAWNGMVGELVYGRADVAVAPLTTITLVREEVDFSK  
 PFMSLGISIMIKKPQKSKPGVFSFLDPLAYE IWMCI VFAYIGVSVVFLVSRFSPYEWHSSEEFEEGRDQTTSD  
 QSNFEGIFNSLWFSLGAFMQGCDISPRSLSGRIVGGVWVFFTLIIISSYTANLAAFLTVERMMSPIESAEDL  
 AKQTEIAYGTLEAGSTKEFFRRSKIAVFEKMWTYMKSAEPSVVRTTEEGMIRVRKSKGKYAYLLESTMNEYI  
 EQRKPCDTMKVGGNLDSKGYGIATPKGSALRGPVNLA VLKLEQGVLDKLSKWWYDKGECGSKDSGSKDKTS  
 ALSLSNVAGVFYILIGGLGLAMLVALIEFCYKRSRSESKRMKGFC LI PQQS INEAIRTSTLPRNSGAGASGGSG  
 SGENRVSQDFPKSMQSI PCMSHSSGMPLGATGL\*

>rs51805917\_ENSMUSP00000020831\_c.999:G>A\_p.A334T  
 ENSMUST00000020831.13|Fam114a2-201|ENSMUSG00000020523|-  
 |chr11:g.57383913:C>T  
 MSDKDPPEPVVTVGASTLKDENCEPVEKPEDKSPVSTRKRPETKPSDLEASALPAQETASKDVPQTGWG  
 YWGSWGKSLSSASATVATVGGISNVIEKAETSLGIPSPTEISA EVKQAAGEKNAGENGSLVAAPFGMLST  
 ISTAVQSTGLSSVISGGLDALEFIGKKTMDVIAEGDPGFKRTKGLMNRTSTLSQVLRKAKDKEEQRPSNEVTME  
 TDKKTHYGLLDFEFQGLSHLEALEMLSRESEIKVKSILSSLSGEELOTTTRLELEQLKEVFSLAEFCEEEEEER  
 QGDDNFTKEITDLFAQLHVSSRPEKLARARNTAYKWI RTSLTRPVAEKEEKESEAGNTEEAQKHSIEDIHA  
 FAIRSLAELTACSIELFHKTAALVLHGQKQEV TALERSQTL SQTMLCKDLASLSKEFTTCLTTAGVREKAD  
 VLNVPVITAVFLEASNSASYIQDAFQLLLPVLQISLIESKTESSTCEPQSRDL\*

>rs51805917\_ENSMUSP00000104478\_c.1020:G>A\_p.A341T  
ENSMUST00000108850.2|Fam114a2-202|ENSMUSG00000020523|-  
|chr11:g.57383913:C>T  
MSDKDPPESPVVTGVASTLKDENCEPVEKPEDKSPVAVSTRKRPEKPKSSDLEASALPAQVSLAVAKETASKD  
VPQTGWGYWGSWGSLLSSASATVATVGGQGISNVIEKAETSLGIPSPTEISAEVKQAAGEKNAGENGSLVAA  
PFGMLSTISTAVQSTGKSVISGGLEDALEFIGKKTMDVIAEGDPGFKRKTGLMNRSTSTLSQVLEAKDKEEQRP  
SNEVTMETDKKTHYGLLFDEFQGLSHLEALEMLSRESEIKVKSILSSLSGEELEQTTRELEQLKEVFSLAEFC  
EEEEERQGGDNFTKEITDLFAQLHVSSRPEKLARARNTAYKWIWRTSLTRPVAEKEEKEESEAGNTEEAQKH  
SIEDIHAFAIRSLAELTACSIELFHKTAALVLHGQKQEVTALETSQTLTSMQTMVLMCKDLASLSKEFTTCLTTA  
GVREKADVLPVITAVFLEASNSASYIQDAFQQLLPVLQISLIESKTESSTCEPQSRDL\*  
>ENSMUSP00000104477\_c.167:T>TAAA\_p.I56K-ins ENSMUST00000108849.8|Mfap3-  
203|ENSMUSG00000020522|+|chr11:g.57419009:T>TAAA  
MKLHHCLSILLVVTLVPAALGLEDVAPLGNQSSYNASFLPSFELSAGSYSGDDVIKIVKEGTNVSLECLLTV  
DQYGEVHWYNSKGQQLHSRGGKWLVDNFLNITSVAFDDRGLYTCIITSPARASYSVTLRVIFTSGDMSVYYM  
VVCLIAFTITLILNVTRCLMSTHLRKTAKAINEFFRTEGAEKLQKAFEIAKRIPIIITSAKTLELAKVTQFKT  
MEFARYIEELARSVPLPPLIILNCRAFVEEMFEAVRVDDPDDMGERIKERPALDAQSGIYVINPELGRSNSPGG  
DSDGSLSEQGGQEIIVQVSVHLQSETKSIQDSSSHFSPSPDPASAEGSIHHRVSI\*  
>ENSMUSP00000020830\_c.167:T>TAAA\_p.I56K-ins ENSMUST00000020830.14|Mfap3-  
201|ENSMUSG00000020522|+|chr11:g.57419009:T>TAAA  
MKLHHCLSILLVVTLVPAALGLEDVAPLGNQSSYNASFLPSFELSAGSYSGDDVIKIVKEGTNVSLECLLTV  
DQYGEVHWYNSKGQQLHSRGGKWLVDNFLNITSVAFDDRGLYTCIITSPARASYSVTLRVIFTSGDMSVYYM  
VVCLIAFTITLILNVTRCLMSTHLRKTAKAINEFFRTEGAEKLQKAFEIAKRIPIIITSAKTLELAKVTQFKT  
MEFARYIEELARSVPLPPLIILNCRAFVEEMFEAVRVDDPDDMGERIKERPALDAQSGIYVINPELGRSNSPGG  
DSDGSLSEQGGQEIIVQVSVHLQSETKSIQDSSSHFSPSPDPASAEGSIHHRVSI\*  
>ENSMUSP00000104476\_c.167:T>TAAA\_p.I56K-ins ENSMUST00000108848.2|Mfap3-  
202|ENSMUSG00000020522|+|chr11:g.57419009:T>TAAA  
MKLHHCLSILLVVTLVPAALGLEDVAPLGNQSSYNASFLPSFELSAGSYSGDDVIKIVKEGTNVSLECLLTV  
DQYGEVHWYNSKGQQLHSRGGKWLVDNFLNITSVAFD  
>rs49424190\_ENSMUSP00000104477\_c.523:A>G\_p.K175R  
ENSMUST00000108849.8|Mfap3-203|ENSMUSG00000020522|+|chr11:g.57420544:A>G  
MKLHHCLSILLVVTLVPAALGLEDVAPLGNQSSYNASFLPSFELSAGSYSGDDVIVKEGTNVSLECLLTV  
DQYGEVHWYNSKGQQLHSRGGKWLVDNFLNITSVAFDDRGLYTCIITSPARASYSVTLRVIFTSGDMSVYYMV  
VCLIAFTITLILNVTRCLMSTHLRKTAKAINEFFRTEGAEKLQKAFEIAKRIPIIITSAKTLELAKVTQFKTM  
EFARYIEELARSVPLPPLIILNCRAFVEEMFEAVRVDDPDDMGERIKERPALDAQSGIYVINPELGRSNSPGG  
DSDGSLSEQGGQEIIVQVSVHLQSETKSIQDSSSHFSPSPDPASAEGSIHHRVSI\*  
>rs49424190\_ENSMUSP00000020830\_c.523:A>G\_p.K175R  
ENSMUST00000020830.14|Mfap3-201|ENSMUSG00000020522|+|chr11:g.57420544:A>G  
MKLHHCLSILLVVTLVPAALGLEDVAPLGNQSSYNASFLPSFELSAGSYSGDDVIVKEGTNVSLECLLTV  
DQYGEVHWYNSKGQQLHSRGGKWLVDNFLNITSVAFDDRGLYTCIITSPARASYSVTLRVIFTSGDMSVYYMV  
VCLIAFTITLILNVTRCLMSTHLRKTAKAINEFFRTEGAEKLQKAFEIAKRIPIIITSAKTLELAKVTQFKTM  
EFARYIEELARSVPLPPLIILNCRAFVEEMFEAVRVDDPDDMGERIKERPALDAQSGIYVINPELGRSNSPGG  
DSDGSLSEQGGQEIIVQVSVHLQSETKSIQDSSSHFSPSPDPASAEGSIHHRVSI\*  
>rs49450509\_ENSMUSP00000104477\_c.673:T>C\_p.I225T  
ENSMUST00000108849.8|Mfap3-203|ENSMUSG00000020522|+|chr11:g.57420694:T>C  
MKLHHCLSILLVVTLVPAALGLEDVAPLGNQSSYNASFLPSFELSAGSYSGDDVIVKEGTNVSLECLLTV  
DQYGEVHWYNSKGQQLHSRGGKWLVDNFLNITSVAFDDRGLYTCIITSPARASYSVTLRVIFTSGDMSVYYMV  
VCLIAFTITLILNVTRCLMSTHLRKTAKAINEFFRTEGAEKLQKAFEIAKRIPIIITSAKTLELAKVTQFKTM  
EFARYTEELARSVPLPPLIILNCRAFVEEMFEAVRVDDPDDMGERIKERPALDAQSGIYVINPELGRSNSPGG  
DSDGSLSEQGGQEIIVQVSVHLQSETKSIQDSSSHFSPSPDPASAEGSIHHRVSI\*  
>rs49450509\_ENSMUSP00000020830\_c.673:T>C\_p.I225T  
ENSMUST00000020830.14|Mfap3-201|ENSMUSG00000020522|+|chr11:g.57420694:T>C  
MKLHHCLSILLVVTLVPAALGLEDVAPLGNQSSYNASFLPSFELSAGSYSGDDVIVKEGTNVSLECLLTV  
DQYGEVHWYNSKGQQLHSRGGKWLVDNFLNITSVAFDDRGLYTCIITSPARASYSVTLRVIFTSGDMSVYYMV  
VCLIAFTITLILNVTRCLMSTHLRKTAKAINEFFRTEGAEKLQKAFEIAKRIPIIITSAKTLELAKVTQFKTM  
EFARYTEELARSVPLPPLIILNCRAFVEEMFEAVRVDDPDDMGERIKERPALDAQSGIYVINPELGRSNSPGG  
DSDGSLSEQGGQEIIVQVSVHLQSETKSIQDSSSHFSPSPDPASAEGSIHHRVSI\*  
>rs3712502\_ENSMUSP00000104477\_c.858:A>C\_p.N287H  
ENSMUST00000108849.8|Mfap3-203|ENSMUSG00000020522|+|chr11:g.57420879:A>C

MKLHHCLSILLVVTLPVPAALGLEDVAPLPGANQSSYNASFLPSFELSAGSYSGDDVIVKEGTNVSLECLLTVD  
 QYGEVHWYNSKGGQQLHSRGGKWLVDNFLNITSVAFDDRGLYTCIITSPARASYSVTLRVIFTSGDMSVYYMV  
 VCLIAFTITLILNVTRCLMSTHLRKTAKAINEFFRTEGAEKLQKAFEIAKRIPIITSAKTLELAKVTQFKTM  
 EFARYIEELARSVPLPPLILNCRAFVEEMFEAVRVDDPDDMGERIKERPALDAQSGIYVINPELGRSHSPGGD  
 SDDGSLSEQQQEIAVQVSVHLQSETKISIGTDSQDSSHFSPPSDPASAEGSIHHRVSI\*  
 >rs3712502\_ENSMUSP00000020830\_c.858:A>C\_p.N287H  
 ENSMUST00000020830.14|Mfap3-201|ENSMUSG00000020522|+|chr11:g.57420879:A>C  
 MKLHHCLSILLVVTLPVPAALGLEDVAPLPGANQSSYNASFLPSFELSAGSYSGDDVIVKEGTNVSLECLLTVD  
 QYGEVHWYNSKGGQQLHSRGGKWLVDNFLNITSVAFDDRGLYTCIITSPARASYSVTLRVIFTSGDMSVYYMV  
 VCLIAFTITLILNVTRCLMSTHLRKTAKAINEFFRTEGAEKLQKAFEIAKRIPIITSAKTLELAKVTQFKTM  
 EFARYIEELARSVPLPPLILNCRAFVEEMFEAVRVDDPDDMGERIKERPALDAQSGIYVINPELGRSHSPGGD  
 SDDGSLSEQQQEIAVQVSVHLQSETKISIGTDSQDSSHFSPPSDPASAEGSIHHRVSI\*  
 >rs264395791\_ENSMUSP00000065096\_c.118:C>CA\_p.P40ins-fs  
 ENSMUST00000066987.14|Galnt10-  
 201|ENSMUSG00000020520|+|chr11:g.57536503:C>CA  
 MRRKEKRLQAVALLAALVLLPNVGLWALYRERQPDGSPWGIGGGGGPRGGSGITQSTKKDIFLGS  
 >rs264395791\_ENSMUSP00000104474\_c.118:C>CA\_p.P40ins-fs  
 ENSMUST00000108846.2|Galnt10-  
 202|ENSMUSG00000020520|+|chr11:g.57536503:C>CA  
 MRRKEKRLQAVALLAALVLLPNVGLWALYRERQPDGSPWGIGGGGGPRGGSGITQSTKKDIFLGS  
 >rs46886604\_ENSMUSP00000065096\_c.183:A>T\_p.T62S  
 ENSMUST00000066987.14|Galnt10-  
 201|ENSMUSG00000020520|+|chr11:g.57612145:A>T  
 MRRKEKRLQAVALLAALVLLPNVGLWALYRERQPDGSPGGLGAAVAPAAVQELHSRQKKSFFLGAEQRLKD  
 WHNKEAIRRDAQRVGYGEQKPYPMTDAERVDQAYRENGFNIVSDKISLNRSLPDIRHPNCNSKLYLETLPN  
 TSIIPFHNEGWSSLLRTHSVLNRSPPELVAEIVLVDDFSDREHLKPKPLEDYMALFPVSRILRTRKKREGLIR  
 TRMLGASAATGDVVTFLDSDHCEANVNWLPPLLDRIARNRKTIVCPMIDVIDHDFFRYETQAGDAMRGAFDWEM  
 YYKRIPPELQKADPSPDFESPVMAGGLFAVDRKWFELGGYDPGLEIWGGEQYEISFKVWMCGRMEDIPC  
 SRVGHYIRKYVPYKVPAGVSLARNLKRVAEVMDEYAEYIYQRRPEYRHLRHSAGDVVAQKKLRVSLNCKSFKWF  
 MTKIAWDLPKFYPPVEPPAAWGEIRNVGTGLCTDTKLGTLGSPRLRLETCIRGRGEAAWNSMQVFTFTWREDI  
 RPDGPQHTKKKCFDAVSHSTPVTLYDCHSMKGNQLWKYRKDKTLYHPVSGSCMDCSESDHRVFMNTCNPSSLT  
 QQWLFHTNSTVLENFNKN\*  
 >rs46886604\_ENSMUSP00000104474\_c.183:A>T\_p.T62S  
 ENSMUST00000108846.2|Galnt10-  
 202|ENSMUSG00000020520|+|chr11:g.57612145:A>T  
 MRRKEKRLQAVALLAALVLLPNVGLWALYRERQPDGSPGGLGAAVAPAAVQELHSRQKKSFFLGAEQRLKD  
 WHNKEAIRRDAQRVGYGEQKPYPMTDAERVDQAYRENGFNIVSDKISLNRSLPDIRHPK\*  
 >rs47128972\_ENSMUSP00000065096\_c.603:C>T\_p.L202F  
 ENSMUST00000066987.14|Galnt10-  
 201|ENSMUSG00000020520|+|chr11:g.57656421:C>T  
 MRRKEKRLQAVALLAALVLLPNVGLWALYRERQPDGSPGGLGAAVAPAAVQELHSRQKKTFFLGAEQRLKD  
 WHNKEAIRRDAQRVGYGEQKPYPMTDAERVDQAYRENGFNIVSDKISLNRSLPDIRHPNCNSKLYLETLPN  
 TSIIPFHNEGWSSLLRTHSVLNRSPPELVAEIVLVDDFSDREHLKPKPLEDYMAFFPVSRI LRTRKKREGLIR  
 TRMLGASAATGDVVTFLDSDHCEANVNWLPPLLDRIARNRKTIVCPMIDVIDHDFFRYETQAGDAMRGAFDWEM  
 YYKRIPPELQKADPSPDFESPVMAGGLFAVDRKWFELGGYDPGLEIWGGEQYEISFKVWMCGRMEDIPC  
 SRVGHYIRKYVPYKVPAGVSLARNLKRVAEVMDEYAEYIYQRRPEYRHLRHSAGDVVAQKKLRVSLNCKSFKWF  
 MTKIAWDLPKFYPPVEPPAAWGEIRNVGTGLCTDTKLGTLGSPRLRLETCIRGRGEAAWNSMQVFTFTWREDI  
 RPDGPQHTKKKCFDAVSHSTPVTLYDCHSMKGNQLWKYRKDKTLYHPVSGSCMDCSESDHRVFMNTCNPSSLT  
 QQWLFHTNSTVLENFNKN\*  
 >rs29437286\_ENSMUSP00000020826\_c.171:A>G\_p.K58E  
 ENSMUST00000020826.6|Sap301-201|ENSMUSG00000020519|+|chr11:g.57693089:A>G  
 MNGFSTEEDESREGPPAAPAAAPGYGQSCCLLADGERCVRPAGNASFSKRVQKSIISQKELKLDIDKSVRHLIYIC  
 DFHKNFIQSVRNKRKRKASDDGGDSPEHDADIPEVDLFLQLQVNTLRRYKRHYKLQTRPGFNKAQLAETVSRHF  
 RNIPVNEKETLAYFIYMVKSNRSLDQKSEGSQLE\*  
 >rs29434411\_ENSMUSP00000020826\_c.252:A>G\_p.N85D  
 ENSMUST00000020826.6|Sap301-201|ENSMUSG00000020519|+|chr11:g.57696924:A>G

MNGFSTEEEDSREGPPAAPAAAPGYGQSCCLIADGERCVRPAGNASFSKRQKSISSQKKLKLDDIKSVRHLIYIC  
DFHKNFIQSVRDKRKRKASDDGGDSPEHDADIPEVDLFLQVNTLRRYKRHYKLQTRPGFNKAQLAETVSRHF  
RNIIPVNEKETLAYFIYMVKSNSRSLDQKSEGSKQLE\*

>rs29431791\_ENSMUSP00000046999\_c.147:G>T\_p.A50S  
ENSMUST00000036917.3|Hand1-201|ENSMUSG00000037335|-|chr11:g.57722465:C>A  
MNLVGSYAHHHHHHSHPPHMLHEPFLFGPASRCHQERPYFQSWLLSPSDAAPDFPAGGPPPTTAVAAAAAYG  
PDARPSQSPGRLEALGSRLLPKRKGSGPKKERRRTEINSFAELRECIPNVPADTKLSKIKTLLRLATSYIAYL  
MDVLAKDAQAGDPEAFKAELKKTDDGGRESKRKRELPPQPESEFPPASGPGGPKRIKGRGTGWPQQVWALELNQ\*

>rs29431791\_ENSMUSP00000124951\_c.147:G>T\_p.A50S  
ENSMUST00000160392.9|Hand1-203|ENSMUSG00000037335|-|chr11:g.57722465:C>A  
MNLVGSYAHHHHHHSHPPHMLHEPFLFGPASRCHQERPYFQSWLLSPSDAAPDFPAGGPPPTTAVAAAAAYG  
PDARPSQSPGRLEALGSRLLPKRKGSGPKKERRRTEINSFAELRECIPNVPADTKLSKIKTLLRLATSYIAYL  
MDVLAKDAQAGDPEAFKAELKKTDDGGRESKRKRELPPQPESEFPPASGPGGPKRIKGRGTGWPQQVWALELNQ\*

>rs49487294\_ENSMUSP00000071421\_c.1896:C>T\_p.H633Y  
ENSMUST00000071487.13|Larp1-201|ENSMUSG00000037331|+|chr11:g.57940772:C>T  
MATQVEPLLPAAGAPLLQAEHGLARKKPAPDAQAESGPGDGGGEPDGGVRRRPRACARPGRDGAERESPRPPA  
AAEAPAGSDGEDGGRRDFVEAPPKVNPNWTKHAPPAAVNGQPPPEPSAPAKVVRAAAPKPRKGSKVGFDA  
VNWPTEPGEIAHKSVPQSHKPPARKLPPKDMKEQEKDGSDESKEPKTKSDESSEKNGDEDCQRRGGQKKK  
GNKHKWVPLQIDMKPEVPREKLASRPTRPQEPRTPAVRGEMKGSEPATYMPVSVAPPTPAWQPETKVEPAWH  
DQDETSSVKSDBGAGGARASFRGRGRGRGRGRGRGGTRTHFDYQFGYRKFDDGTEGPRTHKYMNNITYYFDNV  
SSNEIYSMDQELLKDYIKRQIEYYFSVDNLERDFFLRKMDADGFLPITLIASFHRVQALTTDISLI FAALKD  
SKVVEMVEEKVRRREEPEKWPLPGPPIVDYSQTDDFSQLLNCEPFPVPRQHYQKTESAPGSPRAVTPVPTKTEE  
VSNLKTLPKGLSASLPDLSESWIEVKKRPRPSPARPKKPEEPRFSHTALPQQLPSQQLMSKDQDEQEELDF  
LFDEEMEQMDGRKNTFTAWSEEDSDYEIDDRDVNKILIVTQTTPPYMRRYPGGDRTGNHTSRAKMSAELAKVIN  
DGLFYEQDLWTEKFEPEYSQIKQEVENFKKVNMI SREQFDTLTPEPPVDPNQEVPPGPPRFQVPTDALANK  
LFGAPEPSTIARSLPTTVPESPNYRNARTPRTPRTPQLKSSQTPRFYPVVKEGRTLDAKMPRKRKTRHSSNP  
PLESHVGVWVMSREHRPRTASISSPSEGTAVGSGYCTPQSLPKFQHPHELLKENGFTQHVYHKYRRRCLN  
ERKRLGIGQSQEMNTLFRFWSFFLRDHFNKKMYEEFKQLALEDAKEGYRYGLECLFRYYSYGLEKKFRDLIFK  
DFQEETVKDYEAGQLYGLEKFWAFLKYSKAKNLDIDPKLQEYLGKFRRLDFRVDPPMGEEGNHHRHPVVAGG  
SGEGRKRCPSQSSSRPATGISQPPTTPTGQATREDAKWTSSQHSDTLTLRK\*

>rs49487294\_ENSMUSP00000136673\_c.1896:C>T\_p.H633Y  
ENSMUST00000178636.2|Larp1-203|ENSMUSG00000037331|+|chr11:g.57940772:C>T  
MATQVEPLLPAAGAPLLQAEHGLARKKPAPDAQAESGPGDGGGEPDGGVRRRPRACARPGRDGAERESPRPPA  
AAEAPAGSDGEDGGRRDFVEAPPKVNPNWTKHAPPAAVNGQPPPEPSAPAKVVRAAAPKPRKGSKVGFDA  
VNWPTEPGEIAHKSVPQSHKPPARKLPPKDMKEQEKDGSDESKEPKTKSDESSEKNGDEDCQRRGGQKKK  
GSKHKWVPLQIDMKPEVPREKLASRPTRPQEPRTPAVRGEMKGSEPATYMPVSVAPPTPAWQPETKVEPAWH  
DQDETSSVKSDBGAGGARASFRGRGRGRGRGRGRGGTRTHFDYQFGYRKFDDGTEGPRTHKYMNNITYYFDNV  
SSNEIYSMDQELLKDYIKRQIEYYFSVDNLERDFFLRKMDADGFLPITLIASFHRVQALTTDISLI FAALKD  
SKVVEMVEEKVRRREEPEKWPLPGPPIVDYSQTDDFSQLLNCEPFPVPRQHYQKTESAPGSPRAVTPVPTKTEE  
VSNLKTLPKGLSASLPDLSESWIEVKKRPRPSPARPKKPEEPRFSHTALPQQLPSQQLMSKDQDEQEELDF  
LFDEEMEQMDGRKNTFTAWSEEDSDYEIDDRDVNKILIVTQTTPPYMRRYPGGDRTGNHTSRAKMSAELAKVIN  
DGLFYEQDLWTEKFEPEYSQIKQEVENFKKVNMI SREQFDTLTPEPPVDPNQEVPPGPPRFQVPTDALANK  
LFGAPEPSTIARSLPTTVPESPNYRNARTPRTPRTPQLKSSQTPRFYPVVKEGRTLDAKMPRKRKTRHSSNP  
PLESHVGVWVMSREHRPRTASISSPSEGTAVGSGYCTPQSLPKFQHPHELLKENGFTQHVYHKYRRRCLN  
ERKRLGIGQSQEMNTLFRFWSFFLRDHFNKKMYEEFKQLALEDAKEGYRYGLECLFRYYSYGLEKKFRDLIFK  
DFQEETVKDYEAGQLYGLEKFWAFLKYSKAKNLDIDPKLQEYLGKFRRLDFRVDPPMGEEGNHHRHPVVAGG  
SGEGRKRCPSQSSSRPATGISQPPTTPTGQATREDAKWTSSQHSDTLTLRK\*

>rs47101486\_ENSMUSP00000071421\_c.2512:G>A\_p.S838N  
ENSMUST00000071487.13|Larp1-201|ENSMUSG00000037331|+|chr11:g.57943441:G>A  
MATQVEPLLPAAGAPLLQAEHGLARKKPAPDAQAESGPGDGGGEPDGGVRRRPRACARPGRDGAERESPRPPA  
AAEAPAGSDGEDGGRRDFVEAPPKVNPNWTKHAPPAAVNGQPPPEPSAPAKVVRAAAPKPRKGSKVGFDA  
VNWPTEPGEIAHKSVPQSHKPPARKLPPKDMKEQEKDGSDESKEPKTKSDESSEKNGDEDCQRRGGQKKK  
GNKHKWVPLQIDMKPEVPREKLASRPTRPQEPRTPAVRGEMKGSEPATYMPVSVAPPTPAWQPETKVEPAWH  
DQDETSSVKSDBGAGGARASFRGRGRGRGRGRGRGGTRTHFDYQFGYRKFDDGTEGPRTHKYMNNITYYFDNV  
SSNEIYSMDQELLKDYIKRQIEYYFSVDNLERDFFLRKMDADGFLPITLIASFHRVQALTTDISLI FAALKD  
SKVVEMVEEKVRRREEPEKWPLPGPPIVDYSQTDDFSQLLNCEPFPVPRQHYQKTESAPGSPRAVTPVPTKTEE  
VSNLKTLPKGLSASLPDLSESWIEVKKRPRPSPARPKKPEEPRFSHTALPQQLPSQQLMSKDQDEQEELDF  
LFDEEMEQMDGRKNTFTAWSEEDSDYEIDDRDVNKILIVTQTTPPYMRRHPGGDRTGNHTSRAKMSAELAKVIN

DGLFYEQDLWTEKFEPEYSQIKQEVENFKKVNMI SREQFDTLTPEPPVDPNQEVPPGPPRFQVPTDALANK  
 LFGAPEPSTIARSLPTTVPE SPNYRNARTPRTPTPQLKDSSTPRFYPVVKEGRTLDAKMPKRKRTRHSSNP  
 PLESHVGVWVMSREHRPRTASISSPSEGTPAVGNYGCTPQSLPKFQHP SHELLKENGFTQHVYHKYRRRCLN  
 ERKRLGIGQSQEMNTLFRFWSFFLRDHFNKKMYEEFKQLALEDAKEGYRYGLECLFRYYSYGLEKKFRLDIFK  
 DFQEETVKDYEAGQLYGLEKFWAFLKYSAKAKNLIDPKLQEYLGKFRRLEDFRVDPPMGEEGNHKKRHPVVAGG  
 SGEGRKRCPSQSSSRPATGISQPPTTPTGQATREDAKWT SQHSDTLTLRK\*

>rs47101486\_ENSMUSP00000136673\_c.2512:G>A\_p.S838N  
 ENSMUST00000178636.2|Larp1-203|ENSMUSG00000037331|+|chr11:g.57943441:G>A  
 MATQVEPLL PAGAPLLQAEHGLARKKPAPDAQAESGPGDGGGEPDGGVRRPRPACARPGRDGAERESPRPPA  
 AAEPAGSDGEDGRRDFVEAPPKVNPTWKHAPPAVNGQPPPEPSAPAKVVRAAPKPRKGSKVGDFGDA  
 VNWPPTGEIAHKSVPQSHKQPARKLPPKMDKEQEKDGSDESKEPKTKSDESGEEKNGDEDCQRRGQKKK  
 GSKHKWVPLQIDMKPEVPREKLASRPTRPQEP RHTPAVRGEMKGSEPATYMPVSVAPPTPAWQPETKVEPAWH  
 DQDETSVKS SDGAGGARASFRGRGRGRGRGRGRGGTRTHFDYQFGRKFDGTEGPRTHKYMNIITYYFDNV  
 SSNEIYSMDQELLKDYIKRQIEYYSVDNLERDFFLRKMDADGFLPITLIASFHRVQALTTDISLIFAALKD  
 SKVVEMVEEKVRRREEPEKWPLPGPIVDYSQTD FSQLLNCEP FVPRQHYQKETESAPGSRAVTPVPTKTEE  
 VSNLKTLPKGLSASLPDL DSESWIEVKKRPRPSPARPKKPEEPFRSHPTALPQQLPSQQLMSKDQDEQEELDF  
 LFDEEMEQMDGRKNFTTAWSEEDSDYEIDDRDVNKILIVTQTPPYMRRHHPGGDRGTGNHTSRAKMSAELAKVIN  
 DGLFYEQDLWTEKFEPEYSQIKQEVENFKKVNMI SREQFDTLTPEPPVDPNQEVPPGPPRFQVPTDALANK  
 LFGAPEPSTIARSLPTTVPE SPNYRNARTPRTPTPQLKDSSTPRFYPVVKEGRTLDAKMPKRKRTRHSSNP  
 PLESHVGVWVMSREHRPRTASISSPSEGTPAVGNYGCTPQSLPKFQHP SHELLKENGFTQHVYHKYRRRCLN  
 ERKRLGIGQSQEMNTLFRFWSFFLRDHFNKKMYEEFKQLALEDAKEGYRYGLECLFRYYSYGLEKKFRLDIFK  
 DFQEETVKDYEAGQLYGLEKFWAFLKYSAKAKNLIDPKLQEYLGKFRRLEDFRVDPPMGEEGNHKKRHPVVAGG  
 SGEGRKRCPSQSSSRPATGISQPPTTPTGQATREDAKWT SQHSDTLTLRK\*

>rs49332894\_ENSMUSP00000151952\_c.420:C>A\_p.Q141K  
 ENSMUST00000218429.2|Gm12248-202|ENSMUSG00000086962|-  
 |chr11:g.57957410:G>T  
 MIFLPRHLQRFDASGYFCQTQWEKLLSTFEGYEWILYYIGVILVPLGFCFWGLSGLLLLLVDTTEKPTFISRYR  
 IQRGKNEPVPVVKLRQAVLTVL FNQNFISIPMLVIYYPFLKWRDPCSRELPTFHWFVLEMAFFTLLEILFY  
 YAHRLFHHPMLYKKS HKKHHEWTAPIGVVS IYADPPEHVANMLPVLVGLAMGSHLSSITVWLSMVLIVSII  
 NHTGYHLPFLPSPEFH DYHHLKSNQCYGVLGLMDHLHGTDTLFKQTKAYERHVILLGFTPLSESI PDSPKKTR  
 SAL\*

>rs49332894\_ENSMUSP00000151997\_c.474:C>A\_p.Q159K  
 ENSMUST00000219877.2|Gm12248-203|ENSMUSG00000086962|-  
 |chr11:g.57957410:G>T  
 MRNTTLIQSGLLLLLVFWNSVTWHLQRFDASGYFCQTQWEKLLSTFEGYEWILYYIGVILVPLGFCFWGLS  
 LLLLVDVTTEKPTFISRYRIQRGKNEPVPVVKLRQAVLTVL FNQNFISIPMLVIYYPFLKWRDPCSRELPTFH  
 WFLVLEMAFFTLLEILFYAHRLFHHPMLYKKS HKKHHEWTAPIGVVS IYADPPEHVANMLPVLVGLAMG  
 HLSSITVWLSMVLIVSII NHTGYHLPFLPSPEFH DYHHLKSNQCYGVLGLMDHLHGTDTLFKQTKAYERHVIL  
 LGFTPLSESI PDSPKKTR SAL\*

>rs49332894\_ENSMUSP00000151429\_c.477:C>A\_p.Q160K  
 ENSMUST00000137124.3|Gm12248-201|ENSMUSG00000086962|-  
 |chr11:g.57957410:G>T  
 SMRNTTLIQSGLLLLLVFWNSVTWHLQRFDASGYFCQTQWEKLLSTFEGYEWILYYIGVILVPLGFCFWGLS  
 GLLLLVDVTTEKPTFISRYRIQRGKNEPVPVVKLRQAVLTVL FNQNFISIPMLVIYYPFLKWRDPCSRELPTFH  
 HWFLVLEMAFFTLLEILFYAHRLFHHPMLYKKS HKKHHEWTAPIGVVS IYADPPEHVANMLPVLVGLAMG  
 SHLSSITVWLSMVLIVSII NHTGYHLPFLPSPEFH DYHHLKSNQCYGVLGLMDHLHGTDTLFKQTKAYERHVI  
 LLGFTPLSESI PDSPKKTR

>rs212675617\_ENSMUSP0000020822\_c.717:A>G\_p.R240G  
 ENSMUST0000020822.12|Cnot8-201|ENSMUSG0000020515|+|chr11:g.58006190:A>G  
 MPAALVENSQVICEVWASNLEEMRKIREIVLSYSYIAMDTEFPGVVVRPIGEFRSSIDYQYQLLR CNVDLLK  
 IIQLGLTFTNEKGEYPSGINTWQFNFKFNLTEDMYSQDSIDLLANSGLQFQKHEEEGIDTLHF AELLMTSGVV  
 LCDNVKWSLFSHSGYDFGYMVKLLTDSRLPEEEHEFFHILNLFPSIYDVKYLKMSCKNLKGGLEQEVADQLDQ  
 RIGRQHQA GSDSLLTGMAFFGMKELFFEDSIDDAKYCGRLYGLGTGVAQKQNEVDVCAQEKMSILAMINNMQQ  
 \*

>rs212675617\_ENSMUSP00000104471\_c.717:A>G\_p.R240G  
 ENSMUST00000108843.8|Cnot8-202|ENSMUSG0000020515|+|chr11:g.58006190:A>G  
 MPAALVENSQVICEVWASNLEEMRKIREIVLSYSYIAMDTEFPGVVVRPIGEFRSSIDYQYQLLR CNVDLLK  
 IIQLGLTFTNEKGEYPSGINTWQFNFKFNLTEDMYSQDSIDLLANSGLQFQKHEEEGIDTLHF AELLMTSGVV



LCDNVKWSLFHSGYDFGYMVKLLTDSRLPEEEHEFFHILNLFPSIYDVKYLKMKCKNLKGGQLQEVADQLDLQ  
RIGRQHQAGSDSLLTGMAFFGMKELFFEDSIDDAKYCGRLYGLGTGVAQKQNEVDVCAQEKMSILAMINMQQ  
\*

>rs29483150\_ENSMUSP00000036603\_c.3618:G>A\_p.D1207N  
ENSMUST00000035604.13|Gemin5-201|ENSMUSG00000037275|-  
|chr11:g.58017399:C>T

MKPEPRTLPPSPNWCYSRCSDAAPGGIFGFAARTSVFLVRVGPAGASPGAPPFRVVGELVGHTEVRSVGFSTFS  
HHPGQYNLCATSSDDGTVKVVDVETKTVVTEHTLHQHTISALHWSPTVKDLIVSGDEKGVVFCYWLNRNDSQH  
LFTPEPTIFCLTCSPHHENLVAIGYKDGIVVIIDISKKGEVIHRLRGHDDEIHSIAWCPLSGEDCLISIQEEN  
SEEPDIPNGKLI AETPITKGCYLATGSKDQTIIRIWSCSRGRGVMVLKLPFLKRRSGVDPTVKERLWLT LHWP  
KNQPTQLVSSCFGGELLWDLTQSWRRKYTLFSTSAEGHNHSRIVFNLC SLKTEDGKQLLLSTSMRDRVKCWD  
MATLECCWTLPSLGGFAYSLAFSPVDVGS LAIGVGDGMIRVWNTLS IKNNYDVKNFWQGVKSKVTALCWHPNK  
EGCLAFGTDDGKVG LYDTC SNKPPQISSTYHKKTVYRLAWGPPVPPMSLGEGEDRPSLTLYSCGEGEVVLQHN  
PWKLSGEAFDINKLVRD TNSIRYKLPVHTEISWKGDGKVLALGNEDGSIEIFQVPNLRLLLCTIQQHHKLVNAI  
VWHHEHGSRP ELSCLLASGSNNAVIYVHNLKAVLESNPESPIITITEPYRTLSGHTAKITSLAWSPHHDGRLVS  
ACYDGT AQVWDALREEP LFNFRGHRGRLLCVAWSPVDPECIYSGADDFCVYRWL TSMQDHSRPPQGGKCI ELE  
KKRLSQFKPKLKKKKKPTLRLPVKQDSSVGNEDSVKENS GPAENGLSDQDGE EEAQEPELPPSPVVCVEPVS  
CTDICS GF EKS KVTVSSKATSLKKEPAKEKPEALLKKRKARSMLPLSTSLDHR SKEELHRDCLVLATATHAKA  
ELNEDVSADLEERFHLGLFTDRATLYRMMETEGKGHLES GHPEL FHLQMLLWKGD LKGV LQAAAER GELTDSL V  
AVAPVAGYSVWLWAVEAF AKQLCFQDQYVKAASYLLSIHKVYEAV ELLKSNHLYREAI AVAKARLRPEDPVLK  
ELYLSWGSILERDGHYAI AAKCYLGATSAYDAAKVLARKGDAASLR TAAELAAIAGEHELAASLALRCAQELL  
LMKNWVGAQEALGLHESLQGQRLVFCLELLCRHLEEKQPLEVRGPSSIYHQWATGSEGLTVQRVTGVWRS AF  
SVDTPEQCQAALQKLQDVKYPSATSNTPF RQLLLHVCHNLTLAML SQQAAAWEEAVPALLQAVVRSYTSGNFT  
LMQEIYSAFLPGGCDHLRDKLGDLS PAMAAYKSLEAF CIYGGQLYEVWWSLCGPGPESSVWVLSAESTVSDKQS  
KPEDSASAEDMEQPPGPGPRLSAESERLLSACKELF SERHASLQTSQRTVAEVQETLAEMIRQH QKSQ LCKAT  
TNGPSRDEPSRDEPSQEAERAPSQPPSPTEERNAPVSLPEL TRRLTEANERIAEFPE SVKAWPFPDVLECCLV  
LHIGSQCPDAVDPEMQQAQELLH KYGHTRAYRRHCQSRHT\*

>rs29483150\_ENSMUSP00000099772\_c.3615:G>A\_p.D1206N  
ENSMUST00000102711.9|Gemin5-202|ENSMUSG00000037275|-|chr11:g.58017399:C>T

MKPEPRTLPPSPNWCYSRCSDAAPGGIFGFAARTSVFLVRVGPAGASPGAPPFRVVGELVGHTEVRSVGFSTFS  
HHPGQYNLCATSSDDGTVKVVDVETKTVVTEHTLHQHTISALHWSPTVKDLIVSGDEKGVVFCYWLNRNDSQH  
LFTPEPTIFCLTCSPHHENLVAIGYKDGIVVIIDISKKGEVIHRLRGHDDEIHSIAWCPLSGEDCLISIQEEN  
SEEPDIPNGKLI AETPITKGCYLATGSKDQTIIRIWSCSRGRGVMVLKLPFLKRRSGVDPTVKERLWLT LHWP  
KNQPTQLVSSCFGGELLWDLTQSWRRKYTLFSTSAEGHNHSRIVFNLC SLKTEDGKQLLLSTSMRDRVKCWD  
MATLECCWTLPSLGGFAYSLAFSPVDVGS LAIGVGDGMIRVWNTLS IKNNYDVKNFWQGVKSKVTALCWHPNK  
EGCLAFGTDDGKVG LYDTC SNKPPQISSTYHKKTVYRLAWGPPVPPMSLGEGEDRPSLTLYSCGEGEVVLQHN  
PWKLSGEAFDINKLVRD TNSIRYKLPVHTEISWKGDGKVLALGNEDGSIEIFQVPNLRLLLCTIQQHHKLVNAI  
VWHHEHGSRP ELSCLLASGSNNAVIYVHNLKAVLESNPESPIITITEPYRTLSGHTAKITSLAWSPHHDGRLVS  
ACYDGT AQVWDALREEP LFNFRGHRGRLLCVAWSPVDPECIYSGADDFCVYRWL TSMQDHSRPPQGGKCI ELE  
KKRLSQFKPKLKKKKKPTLRLPVKQDSSVGNEDSVKENS GPAENGLSDQDGE EEAQEPELPPSPVVCVEPVS  
CTDICS GF EKS KVTVSSKATSLKKEPAKEKPEALLKKRKARSMLPLSTSLDHR SKEELHRDCLVLATATHAKE  
LNEDVSADLEERFHLGLFTDRATLYRMMETEGKGHLES GHPEL FHLQMLLWKGD LKGV LQAAAER GELTDSLVA  
VAPVAGYSVWLWAVEAF AKQLCFQDQYVKAASYLLSIHKVYEAV ELLKSNHLYREAI AVAKARLRPEDPVLKE  
LYLSWGSILERDGHYAI AAKCYLGATSAYDAAKVLARKGDAASLR TAAELAAIAGEHELAASLALRCAQELL  
MKNWVGAQEALGLHESLQGQRLVFCLELLCRHLEEKQPLEVRGPSSIYHQWATGSEGLTVQRVTGVWRS AF  
VDTP EQCQAALQKLQDVKYPSATSNTPF RQLLLHVCHNLTLAML SQQAAAWEEAVPALLQAVVRSYTSGNFTL  
MQEIYSAFLPGGCDHLRDKLGDLS PAMAAYKSLEAF CIYGGQLYEVWWSLCGPGPESSVWVLSAESTVSDKQSK  
PEDSASAEDMEQPPGPGPRLSAESERLLSACKELF SERHASLQTSQRTVAEVQETLAEMIRQH QKSQ LCKATT  
NGPSRDEPSRDEPSQEAERAPSQPPSPTEERNAPVSLPEL TRRLTEANERIAEFPE SVKAWPFPDVLECCLV  
LHIGSQCPDAVDPEMQQAQELLH KYGHTRAYRRHCQSRHT\*

>rs29483150\_ENSMUSP00000131842\_c.3618:G>A\_p.D1207N  
ENSMUST00000172035.8|Gemin5-205|ENSMUSG00000037275|-|chr11:g.58017399:C>T

MKPEPRTLPPSPNWCYSRCSDAAPGGIFGFAARTSVFLVRVGPAGASPGAPPFRVVGELVGHTEVRSVGFSTFS  
HHPGQYNLCATSSDDGTVKVVDVETKTVVTEHTLHQHTISALHWSPTVKDLIVSGDEKGVVFCYWLNRNDSQH  
LFTPEPTIFCLTCSPHHENLVAIGYKDGIVVIIDISKKGEVIHRLRGHDDEIHSIAWCPLSGEDCLISIQEEN  
SEEPDIPNGKLI AETPITKGCYLATGSKDQTIIRIWSCSRGRGVMVLKLPFLKRRSGVDPTVKERLWLT LHWP  
KNQPTQLVSSCFGGELLWDLTQSWRRKYTLFSTSAEGHNHSRIVFNLC SLKTEDGKQLLLSTSMRDRVKCWD  
MATLECCWTLPSLGGFAYSLAFSPVDVGS LAIGVGDGMIRVWNTLS IKNNYDVKNFWQGVKSKVTALCWHPNK

EGCLAFGTDDGKVGlyDTCsNKPPQISSTYHKKTVYRLAWGPPVPPMSLGGEgDRPSLTlySCGGEGVVLQHN  
 PWKLSGEAFDINKLVRDTNSIRYKLPVHTEISWKGdGKVLALGNEDGSIEIFQVpNLrLLCTIQqHhKLVNAI  
 VWHHEHGSRPELSCLLASGSNNAVIYVHNLKAVLESNPESPIITITEPYRTLSGHTAKITSLAWSPHHDGRLVS  
 ACYDGTaqVWDALREEPLFNFRGHRGRLLCVAWSPVDPECIYSGADDFCVYRWLTSMQDHSRPPQgKkCIELE  
 KKRLSQfKPKLKKKKKPTLRLPVKQDSSVGNEDSVKENSgPAENGLSDQDGEEEAQEPELPPSPVVCVEPVS  
 CTDICSGFEKSKVTVSSKATSLKKEPAKEKPEALLKKRkARSMLPLSTSLDHRsKEELHRDCLVLATATHAKA  
 ELNEDVSADLEERFHLGLFTDRATLYRMMETEGKGHLESghPELFHQMLLWKGDlKGVLQAAAERGELTDSL  
 AVAPVAGYsvWLWAVEAFakQLCFQDQYVKAAsYLLSIHKVYEAVELLKSNHLYREAIaVAKARLRPEdPVLK  
 ELYLSWGSILERDGHYAIAAKCYLGATSAYDAAKVLARKGDAASLRtAAELAAIAGEHELAASLALRCAQELL  
 LMKNWVGAQeALGLHESLQgQRLVfCLELLCRHLEEKQPLEVRGPSSIYHQWATGSEGTLVQRVTGVWRSaf  
 SVDTPEQCQAALQKLQDVKYPSATSNTPFrQLLLHVCHNLTLAMLSQQAaWEEAVPALLQAVVRSYtSGNFT  
 LMQEIYSAfLPGGCDHLRDKLGDLSpAMAAYKSLEAFCIYgQLYEVWWSLcGPGPESSVWVLSAEStVSDKQs  
 KPEDSAsAEDMEQPPGPGPRLSAESERLLSACKELfSERHASLQTSQRtVAEVQETLAEMIRQHqKsQLCKAT  
 TNGPSRDEPSRDEPSQEAERAPSQPPSPtREERNAPVSLPELTrRLTEANERIAEFPEsVKAWPFpDVLecCL  
 VLLHIGSQCPDAVDPEMQQQAQELLHkyGHTRAYRRHCQSRHT\*

>rs51771045\_ENSMUSP00000036603\_c.3498:G>C\_p.A1167P  
 ENSMUST00000035604.13|Gemin5-201|ENSMUSG00000037275|-  
 |chr11:g.58019569:C>G  
 MKPEPRTLPPSPNWYCSRCSDAAPGGIFGFAARTSVFLVRVGPgAGASPGAPPFRVVGELVGHTErVSGFTfS  
 HHPGQYNLCATSSDDGTVKVWDVETKTVVTEHTLHQHTISALHWSPTVKDLIVSGDEKGVVfCYWLNrNDSQH  
 LFTEPRTIFCLTCSPHENLVAIGYKDGIVVIIDISKKGEVIHRLRGHDDEIHSIAWCPLSGEDCLSI SQEEN  
 SEEPDIPNGKLIaETPITKGCYLaTGSKDQTIrIWScSRGRGVMVLKLPfLKRRSGGVDPTVkerLWLTLHWP  
 KNQPTQLVSSCFGGELLWDLTQSWRRKYTLfSTSAEGHNHSrIVFNLCsLkTEDGKQLLLSTSMDRDVKCWD  
 MATLECCWTLPSLGGFAYSLAFSPVDVGSlaIGVGDGMIRVWNTLSIKNNYDVKNFwQgVksKVTALCWhPNK  
 EGCLAFGTDDGKVGlyDTCsNKPPQISSTYHKKTVYRLAWGPPVPPMSLGGEgDRPSLTlySCGGEGVVLQHN  
 PWKLSGEAFDINKLVRDTNSIRYKLPVHTEISWKGdGKVLALGNEDGSIEIFQVpNLrLLCTIQqHhKLVNAI  
 VWHHEHGSRPELSCLLASGSNNAVIYVHNLKAVLESNPESPIITITEPYRTLSGHTAKITSLAWSPHHDGRLVS  
 ACYDGTaqVWDALREEPLFNFRGHRGRLLCVAWSPVDPECIYSGADDFCVYRWLTSMQDHSRPPQgKkCIELE  
 KKRLSQfKPKLKKKKKPTLRLPVKQDSSVGNEDSVKENSgPAENGLSDQDGEEEAQEPELPPSPVVCVEPVS  
 CTDICSGFEKSKVTVSSKATSLKKEPAKEKPEALLKKRkARSMLPLSTSLDHRsKEELHRDCLVLATATHAKA  
 ELNEDVSADLEERFHLGLFTDRATLYRMMETEGKGHLESghPELFHQMLLWKGDlKGVLQAAAERGELTDSL  
 AVAPVAGYsvWLWAVEAFakQLCFQDQYVKAAsYLLSIHKVYEAVELLKSNHLYREAIaVAKARLRPEdPVLK  
 ELYLSWGSILERDGHYAIAAKCYLGATSAYDAAKVLARKGDAASLRtAAELAAIAGEHELAASLALRCAQELL  
 LMKNWVGAQeALGLHESLQgQRLVfCLELLCRHLEEKQPLEVRGPSSIYHQWATGSEGTLVQRVTGVWRSpf  
 SVDTPEQCQAALQKLQDVKYPSATSNTPFrQLLLHVCHDLTLAMLSQQAaWEEAVPALLQAVVRSYtSGNFT  
 LMQEIYSAfLPGGCDHLRDKLGDLSpAMAAYKSLEAFCIYgQLYEVWWSLcGPGPESSVWVLSAEStVSDKQs  
 KPEDSAsAEDMEQPPGPGPRLSAESERLLSACKELfSERHASLQTSQRtVAEVQETLAEMIRQHqKsQLCKAT  
 TNGPSRDEPSRDEPSQEAERAPSQPPSPtREERNAPVSLPELTrRLTEANERIAEFPEsVKAWPFpDVLecCLV  
 LLHIGSQCPDAVDPEMQQQAQELLHkyGHTRAYRRHCQSRHT\*

>rs51771045\_ENSMUSP00000099772\_c.3495:G>C\_p.A1166P  
 ENSMUST00000102711.9|Gemin5-202|ENSMUSG00000037275|-|chr11:g.58019569:C>G  
 MKPEPRTLPPSPNWYCSRCSDAAPGGIFGFAARTSVFLVRVGPgAGASPGAPPFRVVGELVGHTErVSGFTfS  
 HHPGQYNLCATSSDDGTVKVWDVETKTVVTEHTLHQHTISALHWSPTVKDLIVSGDEKGVVfCYWLNrNDSQH  
 LFTEPRTIFCLTCSPHENLVAIGYKDGIVVIIDISKKGEVIHRLRGHDDEIHSIAWCPLSGEDCLSI SQEEN  
 SEEPDIPNGKLIaETPITKGCYLaTGSKDQTIrIWScSRGRGVMVLKLPfLKRRSGGVDPTVkerLWLTLHWP  
 KNQPTQLVSSCFGGELLWDLTQSWRRKYTLfSTSAEGHNHSrIVFNLCsLkTEDGKQLLLSTSMDRDVKCWD  
 MATLECCWTLPSLGGFAYSLAFSPVDVGSlaIGVGDGMIRVWNTLSIKNNYDVKNFwQgVksKVTALCWhPNK  
 EGCLAFGTDDGKVGlyDTCsNKPPQISSTYHKKTVYRLAWGPPVPPMSLGGEgDRPSLTlySCGGEGVVLQHN  
 PWKLSGEAFDINKLVRDTNSIRYKLPVHTEISWKGdGKVLALGNEDGSIEIFQVpNLrLLCTIQqHhKLVNAI  
 VWHHEHGSRPELSCLLASGSNNAVIYVHNLKAVLESNPESPIITITEPYRTLSGHTAKITSLAWSPHHDGRLVS  
 ACYDGTaqVWDALREEPLFNFRGHRGRLLCVAWSPVDPECIYSGADDFCVYRWLTSMQDHSRPPQgKkCIELE  
 KKRLSQfKPKLKKKKKPTLRLPVKQDSSVGNEDSVKENSgPAENGLSDQDGEEEAQEPELPPSPVVCVEPVS  
 CTDICSGFEKSKVTVSSKATSLKKEPAKEKPEALLKKRkARSMLPLSTSLDHRsKEELHRDCLVLATATHAKE  
 LNEDVSADLEERFHLGLFTDRATLYRMMETEGKGHLESghPELFHQMLLWKGDlKGVLQAAAERGELTDSL  
 AVAPVAGYsvWLWAVEAFakQLCFQDQYVKAAsYLLSIHKVYEAVELLKSNHLYREAIaVAKARLRPEdPVLKE  
 LYLSWGSILERDGHYAIAAKCYLGATSAYDAAKVLARKGDAASLRtAAELAAIAGEHELAASLALRCAQELL  
 MKNWVGAQeALGLHESLQgQRLVfCLELLCRHLEEKQPLEVRGPSSIYHQWATGSEGTLVQRVTGVWRSpfS  
 VDTPEQCQAALQKLQDVKYPSATSNTPFrQLLLHVCHDLTLAMLSQQAaWEEAVPALLQAVVRSYtSGNFTL

MQEIYSAFLPGGCDHLRDKLGDLSPAMAAKYSLAFCIYGQLYEVVWWSLCGPGPESSVWVLSAESTVSDKQSK  
PEDSASAEDMEQPPGPGPRLSAESERLLSACKELFSEERHASLQTSQRTVAEVQETLAEMIRQHQSOLCKATT  
NGPSRDEPSRDEPSQEAERAPSQPPSPTEERNAPVSLPELTRRLTEANERIAEFPEPESVKAWPFPDVLECCCLVL  
LHIGSQCPDAVDPEMQQQAQELLLHXYGHTRAYRRHCQSRHT\*

>rs51771045\_ENSMUSP00000131842\_c.3498:G>C\_p.A1167P  
ENSMUST00000172035.8|Gemin5-205|ENSMUSG00000037275|-|chr11:g.58019569:C>G  
MKPEPRTLPPSPNWCYSRCSDAAPGGIFGFAARTSVFLVRVGPAGASPGAPPFRVVGELVGHTEVSGFTFS  
HHPGQYNLCATSSDDGTVKVWDVETKTVVTEHTLHQHTISALHWSPTVKDLIVSGDEKGVVFCYWLNRNDSQH  
LFTPEPTIFCLTCSPHHENLVAIGYKDGIVVVIDISKKGEVIHRLRGHDDEIHSIAWCPLSGEDCLISQEN  
SEEPDIPNGKLI AETPITKGCYLATGSKDQTIIRIWSCSRGRGVMVLKLPFLKRRSGVDPTVKERLWLT LHWP  
KNQPTQLVSSCFGGELLLWDLTQSWRRKYTLFSTSAEGHNHSRIVFNLC SLKTEDGKQLLLSTSMRDRVKCWD  
MATLECCWTLPSLGGFAYSLAFSPVDVGS LAIGVGDGMIRVWNTLS IKNNYDVKNFWQGVKSKVTALCWHPNK  
EGCLAFGTDDGKVG LYDTC SNKPPQISSTYHKKTVYRLAWGPPVPPMSLGGEGDRPSLTLYSCGEGVVLQHN  
PWKLSGEAFDINKLVRD TNSIRYKLPVHTEISWKG DGKVLALGNEDGSIEIFQV PNLRLLLCTIQQHHKLVNAI  
VWHHEHGSRP ELSCLLASGSNNAVIYVHNLKAVLESNPESPIITITEPYRTLSGHTAKITSLAWSPHHDGRLVS  
ACYDGT AQVWDALREEP LFNFRGHRGRLLCVAWSPVDPECIYSGADDFCVYRWL TSMQDHSRPPQ GKKCI ELE  
KKRLSQFKPKLKKKKKPTLR LPVKQDSSVGNEDSVKENS GPAENGLSDQDGE EEAQEP LPPSPVVCVEPVS  
CTDICS GF EKSKVTVSSKATSLKKEPAKEKPEALLKKRKARSMLPLSTSLDHR SKEELHRDCLVLA TATHAKA  
ELNEDVSADLEERFHLGLFTDRATLYRMMETEGKGHLES GHPEL FHLQMLLWKGD LKGV LQAAAERGELTDSL V  
AVAPVAGYSVWLWAVEAF AKQLCFQDQYVKAASYLLSIHKVYEAV ELLKSNHLYREAI AVAKARLPEDPVLK  
ELYLSWGSILERDGHYAI AAKCYLGATSAYDAAKVLARKGDAASLR TAAELAAIAGEHELAASLALRCAQELL  
LMKNWVGAQEALGLHESLQGR L VFCLLELLCRHLEEKQPLEVR GPSSIYHQWATGSEGLTVQRVTGVWRSPF  
SVDTPEQCQAALQKLQDV KYPSATSNT PFRQLLLHVCHDLT LAML SQAAAWE EAVPALLQAVVRSYTSGNFT  
LMQEIYSAFLPGGCDHLRDKLGDLSPAMAAKYSLAFCIYGQLYEVVWWSLCGPGPESSVWVLSAESTVSDKQS  
KPEDSASAEDMEQPPGPGPRLSAESERLLSACKELFSEERHASLQTSQRTVAEVQETLAEMIRQHQSOLCKAT  
TNGPSRDEPSRDEPSQEAERAPSQPPSPTEERNAPVSLPELTRRLTEANERIAEFPEPESVKAWPFPDVLECCCL  
VLLHIGSQCPDAVDPEMQQQAQELLLHXYGHTRAYRRHCQSRHT\*

>rs246725396\_ENSMUSP00000036603\_c.1996:T>ATAAATAAT\_p.V666ins-fs  
ENSMUST00000035604.13|Gemin5-201|ENSMUSG00000037275|-  
|chr11:g.58036345:A>ATTATTTAT  
MKPEPRTLPPSPNWCYSRCSDAAPGGIFGFAARTSVFLVRVGPAGASPGAPPFRVVGELVGHTEVSGFTFS  
HHPGQYNLCATSSDDGTVKVWDVETKTVVTEHTLHQHTISALHWSPTVKDLIVSGDEKGVVFCYWLNRNDSQH  
LFTPEPTIFCLTCSPHHENLVAIGYKDGIVVVIDISKKGEVIHRLRGHDDEIHSIAWCPLSGEDCLISQEN  
SEEPDIPNGKLI AETPITKGCYLATGSKDQTIIRIWSCSRGRGVMVLKLPFLKRRSGVDPTVKERLWLT LHWP  
KNQPTQLVSSCFGGELLLWDLTQSWRRKYTLFSTSAEGHNHSRIVFNLC SLKTEDGKQLLLSTSMRDRVKCWD  
MATLECCWTLPSLGGFAYSLAFSPVDVGS LAIGVGDGMIRVWNTLS IKNNYDVKNFWQGVKSKVTALCWHPNK  
EGCLAFGTDDGKVG LYDTC SNKPPQISSTYHKKTVYRLAWGPPVPPMSLGGEGDRPSLTLYSCGEGVVLQHN  
PWKLSGEAFDINKLVRD TNSIRYKLPVHTEISWKG DGKVLALGNEDGSIEIFQV PNLRLLLCTIQQHHKLVNAI  
VWHHEHGSRP ELSCLLASGSNNAVIYVHNLKAVLESNPESPIITITEPYRTLSGHTAKITSLAWSPHHDGRLVS  
ACYDGT AQDK

>rs246725396\_ENSMUSP00000099772\_c.1996:T>ATAAATAAT\_p.V666ins-fs  
ENSMUST00000102711.9|Gemin5-202|ENSMUSG00000037275|-  
|chr11:g.58036345:A>ATTATTTAT  
MKPEPRTLPPSPNWCYSRCSDAAPGGIFGFAARTSVFLVRVGPAGASPGAPPFRVVGELVGHTEVSGFTFS  
HHPGQYNLCATSSDDGTVKVWDVETKTVVTEHTLHQHTISALHWSPTVKDLIVSGDEKGVVFCYWLNRNDSQH  
LFTPEPTIFCLTCSPHHENLVAIGYKDGIVVVIDISKKGEVIHRLRGHDDEIHSIAWCPLSGEDCLISQEN  
SEEPDIPNGKLI AETPITKGCYLATGSKDQTIIRIWSCSRGRGVMVLKLPFLKRRSGVDPTVKERLWLT LHWP  
KNQPTQLVSSCFGGELLLWDLTQSWRRKYTLFSTSAEGHNHSRIVFNLC SLKTEDGKQLLLSTSMRDRVKCWD  
MATLECCWTLPSLGGFAYSLAFSPVDVGS LAIGVGDGMIRVWNTLS IKNNYDVKNFWQGVKSKVTALCWHPNK  
EGCLAFGTDDGKVG LYDTC SNKPPQISSTYHKKTVYRLAWGPPVPPMSLGGEGDRPSLTLYSCGEGVVLQHN  
PWKLSGEAFDINKLVRD TNSIRYKLPVHTEISWKG DGKVLALGNEDGSIEIFQV PNLRLLLCTIQQHHKLVNAI  
VWHHEHGSRP ELSCLLASGSNNAVIYVHNLKAVLESNPESPIITITEPYRTLSGHTAKITSLAWSPHHDGRLVS  
ACYDGT AQDK

>rs246725396\_ENSMUSP00000131842\_c.1996:T>ATAAATAAT\_p.V666ins-fs  
ENSMUST00000172035.8|Gemin5-205|ENSMUSG00000037275|-  
|chr11:g.58036345:A>ATTATTTAT  
MKPEPRTLPPSPNWCYSRCSDAAPGGIFGFAARTSVFLVRVGPAGASPGAPPFRVVGELVGHTEVSGFTFS  
HHPGQYNLCATSSDDGTVKVWDVETKTVVTEHTLHQHTISALHWSPTVKDLIVSGDEKGVVFCYWLNRNDSQH

LFTEPRTIFCLTCSPHHENLVAIGYKDGIVVIIDISKKGEVIHRLRGHDDEIHSIAWCPLSGEDCLISISQEEN  
SEEPDIPNGKLI AETPITKGCYLATGSKDQTI RIWSCSRGRGVMVLKLPFLKRRSGVDPTVKERLWLT LHW P  
KNQPTQLVSSCFGGELLWDLTQSWRRKYTLFSTSAEGHNHSRIVFNLC SLKTEDGKQLLLSTSM DRDVK CWD  
MATLECCWTLPSLGGFAYSLAFSPVDVGS LAIGVGDGMIRVWNTLS IKNNYDVKNFWQGVKSKVTALCWHPNK  
EGCLAFGTDDGKVGLYDTC SNKPPQISSTYHKKT VYRLAWGPPVPPMSLGEGEDRPSLTLYSCGGEVVLQHN  
PWKLSGEAFDINKLVRD TNSIRYKLPVHTEISWKG DGKVLALGNEDGSIEIFQV PNLRLLLCTIQQHHKLVNAI  
VWHHEHGSRP ELSCLLASGSNNAVIYVHNLKAVLESNPESPIITITEPYRTLSGHTAKITSLAWS PHHDGRLVS  
ACYDGT AQDK

>rs29470941\_ENSMUSP00000036603\_c.1132:T>C\_p.L378P

ENSMUST00000035604.13|Gemin5-201|ENSMUSG00000037275|-  
|chr11:g.58046618:A>G

MKPEPRTLPPSPNWYCSRCSDAAPGGIFGFAARTSVFLVRVGPAGASPGAPPFRVVGELVGHTE RVSGFTFS  
HHPGQYNLCATSSDDGT VKVVDVETKTVVTEHTLHQHTISALHWSPTVKDLIVSGDEKGVVFCYWLNRNDSQH  
LFTEPRTIFCLTCSPHHENLVAIGYKDGIVVIIDISKKGEVIHRLRGHDDEIHSIAWCPLSGEDCLISISQEEN  
SEEPDIPNGKLI AETPITKGCYLATGSKDQTI RIWSCSRGRGVMVLKLPFLKRRSGVDPTVKERLWLT LHW P  
KNQPTQLVSSCFGGELLWDLTQSWRRKYTLFSTSAEGHNHSRIVFNLC SLKTEDGKQLLLSTSM DRDVK CWD  
MATLECCWTLPSLGGFAYSLAFSPVDVGS LAIGVGDGMIRVWNTLS IKNNYDVKNFWQGVKSKVTALCWHPNK  
EGCLAFGTDDGKVGLYDTC SNKPPQISSTYHKKT VYRLAWGPPVPPMSLGEGEDRPSLTLYSCGGEVVLQHN  
PWKLSGEAFDINKLVRD TNSIRYKLPVHTEISWKG DGKVLALGNEDGSIEIFQV PNLRLLLCTIQQHHKLVNAI  
VWHHEHGSRP ELSCLLASGSNNAVIYVHNLKAVLESNPESPIITITEPYRTLSGHTAKITSLAWS PHHDGRLVS  
ACYDGT AQVWDALREEPLFNFRGHRGRLLCVAWSPVDPECIYSGADDFCVYRWLTSMQDHSRPPQKKCIELE  
KKRLSQFKPKLKKKKKPTLRLPVKQDSSVGNEDSVKENS GPAENGLSDQDGE EEAQEP ELPSPVVCVEPVS  
CTDICS GF ESKVTVSSKATSLKKEPAKEKPEALLKKRKARSMLPLSTSLDHR SKEELHRDCLVLATATHAKA  
ELNEDVSADLEERFHLGLFTDRATLYRMMETEGKGHLES GHPEL FHQLMLWKGD LKGVLQAAAER GELTDSL V  
AVAPVAGYSVWLWAVEAFAKQLCFQDQYVKAASYLLSIHKVYEAV ELLKSNHLYREAI AVAKARLRPEDPVLK  
ELYLSWGSIL ERDGHYAI AAKCYLGATSAYDAAKVLARKGDAASLR TAAELAAIAGEHELAASLALRCAQELL  
LMKNWVGAQEAALGLHESLQGQRLVFCLELLLCRHLEEKQPLEVRGPSSIYHQWATGSEGTLVQRVTGVWRS AF  
SVDTP EQCQAALQKLQDVKYPSATSNTPF RQLLLHVCHDLTLAMLSQQAAAWE EAVPALLQAVVRSYTSGNFT  
LMQEIYSAFLPGGCDHLRDLKGLDLSPAMAAYKSLEAF CIYQGLYEVWWSLCGPGPESSVWVLSAESTVSDKQS  
KPEDSASAEDMEQPPGPGPRLSAESERLLSACKELF SERHASLQTSQRTVAEVQETLAEMIRQHQS QLCKAT  
TNGPSRDEPSRDEPSQEAERAPSQPPSPTEERNAPVSLPELTRRLTEANERIAEFPE SVKAWPFPDVL ECLLV  
LLHIGSQCPDAVDPEMQQAQELLHKYGHTRAYRRHCQSRHT\*

>rs29470941\_ENSMUSP00000099772\_c.1132:T>C\_p.L378P

ENSMUST00000102711.9|Gemin5-202|ENSMUSG00000037275|-|chr11:g.58046618:A>G  
MKPEPRTLPPSPNWYCSRCSDAAPGGIFGFAARTSVFLVRVGPAGASPGAPPFRVVGELVGHTE RVSGFTFS  
HHPGQYNLCATSSDDGT VKVVDVETKTVVTEHTLHQHTISALHWSPTVKDLIVSGDEKGVVFCYWLNRNDSQH  
LFTEPRTIFCLTCSPHHENLVAIGYKDGIVVIIDISKKGEVIHRLRGHDDEIHSIAWCPLSGEDCLISISQEEN  
SEEPDIPNGKLI AETPITKGCYLATGSKDQTI RIWSCSRGRGVMVLKLPFLKRRSGVDPTVKERLWLT LHW P  
KNQPTQLVSSCFGGELLWDLTQSWRRKYTLFSTSAEGHNHSRIVFNLC SLKTEDGKQLLLSTSM DRDVK CWD  
MATLECCWTLPSLGGFAYSLAFSPVDVGS LAIGVGDGMIRVWNTLS IKNNYDVKNFWQGVKSKVTALCWHPNK  
EGCLAFGTDDGKVGLYDTC SNKPPQISSTYHKKT VYRLAWGPPVPPMSLGEGEDRPSLTLYSCGGEVVLQHN  
PWKLSGEAFDINKLVRD TNSIRYKLPVHTEISWKG DGKVLALGNEDGSIEIFQV PNLRLLLCTIQQHHKLVNAI  
VWHHEHGSRP ELSCLLASGSNNAVIYVHNLKAVLESNPESPIITITEPYRTLSGHTAKITSLAWS PHHDGRLVS  
ACYDGT AQVWDALREEPLFNFRGHRGRLLCVAWSPVDPECIYSGADDFCVYRWLTSMQDHSRPPQKKCIELE  
KKRLSQFKPKLKKKKKPTLRLPVKQDSSVGNEDSVKENS GPAENGLSDQDGE EEAQEP ELPSPVVCVEPVS  
CTDICS GF ESKVTVSSKATSLKKEPAKEKPEALLKKRKARSMLPLSTSLDHR SKEELHRDCLVLATATHAKE  
LNEDVSADLEERFHLGLFTDRATLYRMMETEGKGHLES GHPEL FHQLMLWKGD LKGVLQAAAER GELTDSLVA  
VAPVAGYSVWLWAVEAFAKQLCFQDQYVKAASYLLSIHKVYEAV ELLKSNHLYREAI AVAKARLRPEDPVLKE  
LYLSWGSIL ERDGHYAI AAKCYLGATSAYDAAKVLARKGDAASLR TAAELAAIAGEHELAASLALRCAQELL  
MKNWVGAQEAALGLHESLQGQRLVFCLELLLCRHLEEKQPLEVRGPSSIYHQWATGSEGTLVQRVTGVWRS AF  
SVDTP EQCQAALQKLQDVKYPSATSNTPF RQLLLHVCHDLTLAMLSQQAAAWE EAVPALLQAVVRSYTSGNFTL  
MQEIYSAFLPGGCDHLRDLKGLDLSPAMAAYKSLEAF CIYQGLYEVWWSLCGPGPESSVWVLSAESTVSDKQSK  
PEDSASAEDMEQPPGPGPRLSAESERLLSACKELF SERHASLQTSQRTVAEVQETLAEMIRQHQS QLCKAT  
TNGPSRDEPSRDEPSQEAERAPSQPPSPTEERNAPVSLPELTRRLTEANERIAEFPE SVKAWPFPDVL ECLLV  
LHIGSQCPDAVDPEMQQAQELLHKYGHTRAYRRHCQSRHT\*

>rs29470941\_ENSMUSP00000116600\_c.283:T>C\_p.L95P

ENSMUST00000134953.2|Gemin5-204|ENSMUSG00000037275|-|chr11:g.58046618:A>G

XLWLTlHWPKNQPTQLVSSCFGGELLlWDLTQSWRRKYTLFSTSAEGHNHSRlVFNLCSLKTEDGKQLLLSTS  
MDRDVKCWDMATLECCWTLPSGGFAYSLAFSPVDVGSAlGVGDGMlRVWNTLSlKNNYDVKNFWQGVKSKV  
TALCWHPNKEGCLAFGTDDGKVGLYDTCsNK\*

>rs29470941\_ENSMUSP00000131842\_c.1132:T>C\_p.L378P  
ENSMUST00000172035.8|Gemin5-205|ENSMUSG00000037275|-|chr11:g.58046618:A>G  
MKPEPRTLPPSPNWYCSRCSDAAPGGlFGFAARTSVFLVRVGPAGASPGAPPFRVVGELVGHTERVSGFTFS  
HHPGQYNLCATSSDDGTVKVWDVETKTVVTEHTLHQHTlSAlHWSPTVKDLlVSGDEKGVVFCYWLNRNDSQH  
LFTEPRTlFCLTCSPHHENLVAlGYKDGlVVIIDlSKKGEVlHRLRGHDDElHSIAWCPLSGEDCLSlSQEEN  
SEEPDlPNGKlIAETPlTKGCYlATGSKDQTlRlWSCSRGRGVMVLKlPFLKRRSGGVDPTVKERLWLTlHWP  
KNQPTQLVSSCFGGELLlWDLTQSWRRKYTLFSTSAEGHNHSRlVFNLCSLKTEDGKQLLLSTSMDRDVKCWD  
MATLECCWTLPSGGFAYSLAFSPVDVGSAlGVGDGMlRVWNTLSlKNNYDVKNFWQGVKSKVTALCWHPNK  
EGCLAFGTDDGKVGLYDTCsNKPPQlSSTYHKKTVYRLAWGPPVPPMSlGGEGDRPSLTlYSCGEGGVVLQHN  
PWKLSGEAFDlNKlVRDTNSlRYKlPVHTElSWKGDGKVLAlGNEDGSIElFQVPNlRLLCTlQQHhKLVNAI  
VWHHEHGSRPELSCLLASGSNNAVlYVHNLKAVLESNPESPlTlTEPYRTlSGHTAKlTSlAWSPHHDGRLVS  
ACyDGTAQVWDAlREEPFNFRGHRGRLLCVAWSPVDPEClYSGADDFCVYRWLTSMQDHSRPPQGGKClELE  
KKRLSQQFKPKLKKKKKPTLRLPVKQDSSVGNEDESVKENSGPAENGLSDQDGEEEAQEPeLPPSPVVCVEPVS  
CTDlCSGFEEKSVTVSSKATSlKKEPAKEKPEALLKRRKARSMLPlSTSlDHRSKEELHRDCLVlATATHAKA  
ELNEDVSADLEERFHLGLFTDRATLYRMMETEGKGHLESghPELFHQlMLWKGDLKGVlQAAAERGELTDSlV  
AVAPVAGYSVWLWAVEAFAKQlCFQDQYVKAASylLSlHKVYEAVeLLKSNHLYREAlAVAKARLRPEDPVLK  
ELYLSWGSILERDGHYAlAAKCYlGATSAYDAAKVLARKGDAASlRTAAELAAIAGEHELAASlALRCAQELL  
LMKNWVGAEALGLHESlQGQRlVFCLELLCRHLEEKQPlEVGRPSSlYHQWATGSEGLTVQRVTGVWRSAlF  
SVDTPEQCQAALQKlQDVKYPSATSNTPFRQlLLHVCHDLTlLAMLSSQAAAWEEAVPALLQAVVRSYTSGNFT  
lMQEiYSAFlPGGCDHLRDKlGDLSPAMAAYKSLEAFClYGlQLYEVWWSlCGPGPESSVWVLSAESTVSDKQS  
KPEDSASAEDMEQPPGPGPRLSAESERLLSACKELFSERHASlQTSQRTVAEVQETLAEMlRQHQKSQlCKAT  
TNGPSRDEPSRDEPSQEAERAPSQPPSPTEERNAPVSlPELTrRLTEANERAlAEFPESVKAWPFDPVLECClV  
LLHlGSQCPDAVDPEMQQAQELlLHKYGHTRAYRRHCQRSHt\*

>rs29461142\_ENSMUSP00000036603\_c.853:T>G\_p.L285R  
ENSMUST00000035604.13|Gemin5-201|ENSMUSG00000037275|-  
|chr11:g.58051592:A>C  
MKPEPRTLPPSPNWYCSRCSDAAPGGlFGFAARTSVFLVRVGPAGASPGAPPFRVVGELVGHTERVSGFTFS  
HHPGQYNLCATSSDDGTVKVWDVETKTVVTEHTLHQHTlSAlHWSPTVKDLlVSGDEKGVVFCYWLNRNDSQH  
LFTEPRTlFCLTCSPHHENLVAlGYKDGlVVIIDlSKKGEVlHRLRGHDDElHSIAWCPLSGEDCLSlSQEEN  
SEEPDlPNGKlIAETPlTKGCYlATGSKDQTlRlWSCSRGRGVMVLKlPFLKRRSGGVDPTVKERRWLTlHWP  
KNQPTQLVSSCFGGELLlWDLTQSWRRKYTLFSTSAEGHNHSRlVFNLCSLKTEDGKQLLLSTSMDRDVKCWD  
MATLECCWTLPSLGGFAYSLAFSPVDVGSAlGVGDGMlRVWNTLSlKNNYDVKNFWQGVKSKVTALCWHPNK  
EGCLAFGTDDGKVGLYDTCsNKPPQlSSTYHKKTVYRLAWGPPVPPMSlGGEGDRPSLTlYSCGEGGVVLQHN  
PWKLSGEAFDlNKlVRDTNSlRYKlPVHTElSWKGDGKVLAlGNEDGSIElFQVPNlRLLCTlQQHhKLVNAI  
VWHHEHGSRPELSCLLASGSNNAVlYVHNLKAVLESNPESPlTlTEPYRTlSGHTAKlTSlAWSPHHDGRLVS  
ACyDGTAQVWDAlREEPFNFRGHRGRLLCVAWSPVDPEClYSGADDFCVYRWLTSMQDHSRPPQGGKClELE  
KKRLSQQFKPKLKKKKKPTLRLPVKQDSSVGNEDESVKENSGPAENGLSDQDGEEEAQEPeLPPSPVVCVEPVS  
CTDlCSGFEEKSVTVSSKATSlKKEPAKEKPEALLKRRKARSMLPlSTSlDHRSKEELHRDCLVlATATHAKA  
ELNEDVSADLEERFHLGLFTDRATLYRMMETEGKGHLESghPELFHQlMLWKGDLKGVlQAAAERGELTDSlV  
AVAPVAGYSVWLWAVEAFAKQlCFQDQYVKAASylLSlHKVYEAVeLLKSNHLYREAlAVAKARLRPEDPVLK  
ELYLSWGSILERDGHYAlAAKCYlGATSAYDAAKVLARKGDAASlRTAAELAAIAGEHELAASlALRCAQELL  
LMKNWVGAEALGLHESlQGQRlVFCLELLCRHLEEKQPlEVGRPSSlYHQWATGSEGLTVQRVTGVWRSAlF  
SVDTPEQCQAALQKlQDVKYPSATSNTPFRQlLLHVCHDLTlLAMLSSQAAAWEEAVPALLQAVVRSYTSGNFT  
lMQEiYSAFlPGGCDHLRDKlGDLSPAMAAYKSLEAFClYGlQLYEVWWSlCGPGPESSVWVLSAESTVSDKQS  
KPEDSASAEDMEQPPGPGPRLSAESERLLSACKELFSERHASlQTSQRTVAEVQETLAEMlRQHQKSQlCKAT  
TNGPSRDEPSRDEPSQEAERAPSQPPSPTEERNAPVSlPELTrRLTEANERAlAEFPESVKAWPFDPVLECClV  
LLHlGSQCPDAVDPEMQQAQELlLHKYGHTRAYRRHCQRSHt\*

>rs29461142\_ENSMUSP00000099772\_c.853:T>G\_p.L285R  
ENSMUST00000102711.9|Gemin5-202|ENSMUSG00000037275|-|chr11:g.58051592:A>C  
MKPEPRTLPPSPNWYCSRCSDAAPGGlFGFAARTSVFLVRVGPAGASPGAPPFRVVGELVGHTERVSGFTFS  
HHPGQYNLCATSSDDGTVKVWDVETKTVVTEHTLHQHTlSAlHWSPTVKDLlVSGDEKGVVFCYWLNRNDSQH  
LFTEPRTlFCLTCSPHHENLVAlGYKDGlVVIIDlSKKGEVlHRLRGHDDElHSIAWCPLSGEDCLSlSQEEN  
SEEPDlPNGKlIAETPlTKGCYlATGSKDQTlRlWSCSRGRGVMVLKlPFLKRRSGGVDPTVKERRWLTlHWP  
KNQPTQLVSSCFGGELLlWDLTQSWRRKYTLFSTSAEGHNHSRlVFNLCSLKTEDGKQLLLSTSMDRDVKCWD  
MATLECCWTLPSLGGFAYSLAFSPVDVGSAlGVGDGMlRVWNTLSlKNNYDVKNFWQGVKSKVTALCWHPNK

EGCLAFGTDDGKVGLYDTC SNKPPQISSTYHKKTVYRLAWGPPVPPMSLGGEGDRPSLTLYSCGEGGVVLQHN  
PWKLSGEAFDINKLVRDNTSIRYKLPVHTEISWKGDKVLA LGNEDGSIEIFQVPNLRLLLCTIQQHHKLVNAI  
VWHHEHGSRP ELSCLLASGSNNAVIYVHNLKAVLESNPESPIITITEPYRTL SGHTAKITSLAWSPHHDGRLVS  
ACYDGT AQVWDALREEPLFNFRGHRGRLLCVAWSPVDPECIYSGADDFCVYRWLTSMQDHSRPPQGGK CIELE  
KKRLSQFKPKLKKKKKPTLRLPVKQDSSVGNEDSVKENS GPAENGLSDQDGE EEAQEPELPPSPVVCVEPVS  
CTDICS GF EKS KVTVSSKATS LKKEPAKEKPEALLKKR KARSMPLSTSLDHR SKEELHRDCLVLATATHAKE  
LNEDVSADLEERFHLGLFTDRATLYRMMETEGKGHLES GHPELFHQMLLWKGD LKGVLQAAAER GELTDSLVA  
VAPVAGYSVWLWAVEAF AKQLCFQDQYVKAASYLLSIHKVYEAV ELLKSNHLYREAI AVAKARLRPEDPVLKE  
LYLSWGSILERDGHYAI AAKCYLGATSAYDAAKV LARKGDAASLR TAAELAAIAGEHELAASLALRCAQ ELLL  
MKNWVGAQEALGLHESLQ GQRLVFCLELLCRHLEEKQPLEVRGPSSIYHQWATGSEGLTVQRVTGVWRS AF S  
VDTP EQQAALQKLQDVKYPSATSNTPF RQLLLHVCHDLTLAMLSQQA AWE EAVPALLQAVVRSY TSGNFTL  
MQE IYSAFLPGGCDHLRDKLGDLS PAMAAYKSLEAF CIYQLYEVWWSLCGPGPESSVWVLSAESTVSDKQSK  
PEDSASAEDMEQPPGPGPRLSAESERLLSACKELF SERHASLQTSQRTVAEVQETLAEMIRQH QKSQ LCKATT  
NGPSRDEPSRDEPSQEAERAPSQPPSPT EERNAPVSLPELTRRLTEANERIAEF PESSVKAWPF PDVLECC LVL  
LHIGSQCPDAVDPEMQQQAQ ELLHKYGHTRAYRRHCQSRHT\*

>rs29461142\_ENSMUSP00000116600\_c.4:T>G\_p.L2R ENSMUST00000134953.2|Gemin5-  
204|ENSMUSG00000037275|-|chr11:g.58051592:A>C  
XRWLT LHWPKNQPTQLVSSCFGG ELLLWDLTQSWRRKYTLFSTSAEGHNHSRIVFNLC SLKTEDGKQLLLSTS  
MDRDVKCWD MATLECCWTLPSLGGFAYS LAFSPVDVGS LAIGVGDGMIRVWNTLSIKNNYDVKNFWQGVKSKV  
TALCWHPNKEGCLAFGTDDGKVGLYDTC SNK\*

>rs29461142\_ENSMUSP00000131842\_c.853:T>G\_p.L285R  
ENSMUST00000172035.8|Gemin5-205|ENSMUSG00000037275|-|chr11:g.58051592:A>C  
MKPEPRTLPPSPNWYCSRCSDAAPGGIFGFAARTSVFLVRVGP GAGASPGAPPFRVVGELVGHTE RVSGFTFS  
HHPGQYNLCATSSDDGTVKVWDVETKT VVTEHTLHQHTI SALHWSPTVKDLIVSGDEKGVVFCYWLNRNDSQH  
LFTEPRTIFCLTCS PHHENLVAIGYKDGIVV I IDISKKGEVIHRLRGHDDEIHSIAWCPLSGEDCLSI SQEEN  
SEEPDIPNGKLI AETPITKGCYLATGSKDQTIRIWSCSRGRGVMVLKLPFLKRRSGGVDPTVKERRWLT LHWP  
KNQPTQLVSSCFGG ELLLWDLTQSWRRKYTLFSTSAEGHNHSRIVFNLC SLKTEDGKQLLLSTSMDRDVKCWD  
MATLECCWTLPSLGGFAYS LAFSPVDVGS LAIGVGDGMIRVWNTLSIKNNYDVKNFWQGVKSKVTALCWHPNK  
EGCLAFGTDDGKVGLYDTC SNKPPQISSTYHKKTVYRLAWGPPVPPMSLGGEGDRPSLTLYSCGEGGVVLQHN  
PWKLSGEAFDINKLVRDNTSIRYKLPVHTEISWKGDKVLA LGNEDGSIEIFQVPNLRLLLCTIQQHHKLVNAI  
VWHHEHGSRP ELSCLLASGSNNAVIYVHNLKAVLESNPESPIITITEPYRTL SGHTAKITSLAWSPHHDGRLVS  
ACYDGT AQVWDALREEPLFNFRGHRGRLLCVAWSPVDPECIYSGADDFCVYRWLTSMQDHSRPPQGGK CIELE  
KKRLSQFKPKLKKKKKPTLRLPVKQDSSVGNEDSVKENS GPAENGLSDQDGE EEAQEPELPPSPVVCVEPVS  
CTDICS GF EKS KVTVSSKATS LKKEPAKEKPEALLKKR KARSMPLSTSLDHR SKEELHRDCLVLATATHAKA  
ELNEDVSADLEERFHLGLFTDRATLYRMMETEGKGHLES GHPELFHQMLLWKGD LKGVLQAAAER GELTDSLVA  
AVAPVAGYSVWLWAVEAF AKQLCFQDQYVKAASYLLSIHKVYEAV ELLKSNHLYREAI AVAKARLRPEDPVLK  
ELYLSWGSILERDGHYAI AAKCYLGATSAYDAAKV LARKGDAASLR TAAELAAIAGEHELAASLALRCAQ ELL  
LMKNWVGAQEALGLHESLQ GQRLVFCLELLCRHLEEKQPLEVRGPSSIYHQWATGSEGLTVQRVTGVWRS AF S  
SVDTPEQQAALQKLQDVKYPSATSNTPF RQLLLHVCHDLTLAMLSQQA AWE EAVPALLQAVVRSY TSGNFTL  
LMQEIYSAFLPGGCDHLRDKLGDLS PAMAAYKSLEAF CIYQLYEVWWSLCGPGPESSVWVLSAESTVSDKQS  
KPEDSASAEDMEQPPGPGPRLSAESERLLSACKELF SERHASLQTSQRTVAEVQETLAEMIRQH QKSQ LCKAT  
TNGPSRDEPSRDEPSQEAERAPSQPPSPTREERNAPVSLPELTRRLTEANERIAEF PESSVKAWPF PDVLECC LVL  
VLLHIGSQCPDAVDPEMQQQAQ ELLHKYGHTRAYRRHCQSRHT\*

>rs218507294\_ENSMUSP00000036603\_c.682:G>AAG\_p.G228ins-fs  
ENSMUST00000035604.13|Gemin5-201|ENSMUSG00000037275|-  
|chr11:g.58054718:C>CTT  
MKPEPRTLPPSPNWYCSRCSDAAPGGIFGFAARTSVFLVRVGP GAGASPGAPPFRVVGELVGHTE RVSGFTFS  
HHPGQYNLCATSSDDGTVKVWDVETKT VVTEHTLHQHTI SALHWSPTVKDLIVSGDEKGVVFCYWLNRNDSQH  
LFTEPRTIFCLTCS PHHENLVAIGYKDGIVV I IDISKKGEVIHRLRGHDDEIHSIAWCPLSGEDCLSI SQEEN  
SEEPDIPNEGSL

>rs218507294\_ENSMUSP00000099772\_c.682:G>AAG\_p.G228ins-fs  
ENSMUST00000102711.9|Gemin5-202|ENSMUSG00000037275|-  
|chr11:g.58054718:C>CTT  
MKPEPRTLPPSPNWYCSRCSDAAPGGIFGFAARTSVFLVRVGP GAGASPGAPPFRVVGELVGHTE RVSGFTFS  
HHPGQYNLCATSSDDGTVKVWDVETKT VVTEHTLHQHTI SALHWSPTVKDLIVSGDEKGVVFCYWLNRNDSQH  
LFTEPRTIFCLTCS PHHENLVAIGYKDGIVV I IDISKKGEVIHRLRGHDDEIHSIAWCPLSGEDCLSI SQEEN  
SEEPDIPNEGSL

>rs218507294\_ENSMUSP00000131842\_c.682:G>AAG\_p.G228ins-fs  
ENSMUST00000172035.8|Gemin5-205|ENSMUSG00000037275|-  
|chr11:g.58054718:C>CTT  
MKPEPRTLPPSPNWYCSRCSDAAPGGIFGFAARTSVFLVRVGPAGASPGAPPFRVVGELVGHTERVSGFTFS  
HHPGQYNLCATSSDDGTVKVVDVETKTVVTEHTLHQHTISALHWSPTVKDLIVSGDEKGVVFCYWLNRNDSQH  
LFTEPRTIFCLTCSPPHENLVAIGYKDGIVVVIDISKKEVIHRLRGRHDEIHSIAWCPLSGEDCLISISQEEN  
SEEPDIPNEGSL  
>rs50868671\_ENSMUSP00000020820\_c.489:G>A\_p.V164I  
ENSMUST00000020820.2|Mrp122-201|ENSMUSG00000020514|+|chr11:g.58070184:G>A  
MAAALLRELGALRVPNLRIWATQTLRVLPSCIHTSASLDISRKWEKKNKIVYPPQLPGEPRRPAEIIYHCRRQ  
IKYSKDKMWWYLAKMIRGMSIDQALAQLEFNDKKGAI I KEVLLAQDMAVRDHNVEFRSNLHIAESTSGRGQC  
LKRIRYHGRGRFGIMEKIYCHYFVKLVGEGPPPPPEVPKTAVDHAKDYIQQLRSRTIIHTL\*  
>rs46633950\_ENSMUSP00000020820\_c.576:T>C\_p.Y193H  
ENSMUST00000020820.2|Mrp122-201|ENSMUSG00000020514|+|chr11:g.58070271:T>C  
MAAALLRELGALRVPNLRIWATQTLRVLPSCIHTSASLDISRKWEKKNKIVYPPQLPGEPRRPAEIIYHCRRQ  
IKYSKDKMWWYLAKMIRGMSIDQALAQLEFNDKKGAI I KEVLLAQDMAVRDHNVEFRSNLHIAESTSGRGQC  
LKRIRYHGRGRFGIMEKVYCHYFVKLVGEGPPPPPEVPKTAVDHAKDHIQQLRSRTIIHTL\*  
>rs26966377\_ENSMUSP00000146805\_c.552:T>A\_p.F185I  
ENSMUST00000209079.2|Irgm2-203|ENSMUSG00000069874|+|chr11:g.58110827:T>A  
MPTSRVAPLLDNMEEAVESPEVKEFEYFSDAVFIPKDGNTLSVGVKRIETAVKEGEVVKVVSIVKEIIQNVS  
RNKIKIAVTGDSNGMSSFINALRLIGHEEKDSAPTGVVVRTTQKPTCYFSSHFYVELWDLPLGLGATAQSVES  
YLEEMQISIIYDLIIIVASEQFSLNHVKLAITMQRMRKRIYVWVTKLDRDLSTSTFPPEPQLLQSIQRNIRDLSLQ  
KEKVKEHPMFLVSVFKPESHDFPKLRETLQKDLVVIKYHGLVETLYQVCEKTVNERVESIKKSIDEDNLHTEF  
GISDPGNAIEIRKAFQKTFGLDDISLHLVALEMKNKHFNTSMESQETQRYQQDDWVLARLYRTGTRVGSIGFD  
YMKCCFTSHHSRCKQQKDILDETAAKAKEVLLKILRLSIPHP\*  
>rs26966377\_ENSMUSP00000104464\_c.516:T>A\_p.F173I  
ENSMUST00000108836.2|Irgm2-202|ENSMUSG00000069874|+|chr11:g.58110827:T>A  
MEEAVESPEVKEFEYFSDAVFIPKDGNTLSVGVKRIETAVKEGEVVKVVSIVKEIIQNVS RNKIKIAVTGDS  
GNGMSSFINALRLIGHEEKDSAPTGVVVRTTQKPTCYFSSHFYVELWDLPLGLGATAQSVESYLEEMQISIIYDL  
IIIVASEQFSLNHVKLAITMQRMRKRIYVWVTKLDRDLSTSTFPPEPQLLQSIQRNIRDLSLQKEKVKEHPMFLV  
SVFKPESHDFPKLRETLQKDLVVIKYHGLVETLYQVCEKTVNERVESIKKSIDEDNLHTEFGISDPGNAIEIR  
KAFQKTFGLDDISLHLVALEMKNKHFNTSMESQETQRYQQDDWVLARLYRTGTRVGSIGFDYMKCCFTSHHSR  
CKQQKDILDETAAKAKEVLLKILRLSIPHP\*  
>rs26966377\_ENSMUSP00000056001\_c.516:T>A\_p.F173I  
ENSMUST00000058704.9|Irgm2-201|ENSMUSG00000069874|+|chr11:g.58110827:T>A  
MEEAVESPEVKEFEYFSDAVFIPKDGNTLSVGVKRIETAVKEGEVVKVVSIVKEIIQNVS RNKIKIAVTGDS  
GNGMSSFINALRLIGHEEKDSAPTGVVVRTTQKPTCYFSSHFYVELWDLPLGLGATAQSVESYLEEMQISIIYDL  
IIIVASEQFSLNHVKLAITMQRMRKRIYVWVTKLDRDLSTSTFPPEPQLLQSIQRNIRDLSLQKEKVKEHPMFLV  
SVFKPESHDFPKLRETLQKDLVVIKYHGLVETLYQVCEKTVNERVESIKKSIDEDNLHTEFGISDPGNAIEIR  
KAFQKTFGLDDISLHLVALEMKNKHFNTSMESQETQRYQQDDWVLARLYRTGTRVGSIGFDYMKCCFTSHHSR  
CKQQKDILDETAAKAKEVLLKILRLSIPHP\*  
>rs49881478\_ENSMUSP00000146805\_c.1116:T>C\_p.S373P  
ENSMUST00000209079.2|Irgm2-203|ENSMUSG00000069874|+|chr11:g.58111391:T>C  
MPTSRVAPLLDNMEEAVESPEVKEFEYFSDAVFIPKDGNTLSVGVKRIETAVKEGEVVKVVSIVKEIIQNVS  
RNKIKIAVTGDSNGMSSFINALRLIGHEEKDSAPTGVVVRTTQKPTCYFSSHFYVELWDLPLGLGATAQSVES  
YLEEMQISIIYDLIIIVASEQFSLNHVKLAITMQRMRKRFYVWVTKLDRDLSTSTFPPEPQLLQSIQRNIRDLSLQ  
KEKVKEHPMFLVSVFKPESHDFPKLRETLQKDLVVIKYHGLVETLYQVCEKTVNERVESIKKSIDEDNLHTEF  
GISDPGNAIEIRKAFQKTFGLDDISLHLVALEMKNKHFNTSMESQETQRYQQDDWVLARLYRTGTRVGSIGFD  
YMKCCFTPHHSRCKQQKDILDETAAKAKEVLLKILRLSIPHP\*  
>rs49881478\_ENSMUSP00000104464\_c.1080:T>C\_p.S361P  
ENSMUST00000108836.2|Irgm2-202|ENSMUSG00000069874|+|chr11:g.58111391:T>C  
MEEAVESPEVKEFEYFSDAVFIPKDGNTLSVGVKRIETAVKEGEVVKVVSIVKEIIQNVS RNKIKIAVTGDS  
GNGMSSFINALRLIGHEEKDSAPTGVVVRTTQKPTCYFSSHFYVELWDLPLGLGATAQSVESYLEEMQISIIYDL  
IIIVASEQFSLNHVKLAITMQRMRKRFYVWVTKLDRDLSTSTFPPEPQLLQSIQRNIRDLSLQKEKVKEHPMFLV  
SVFKPESHDFPKLRETLQKDLVVIKYHGLVETLYQVCEKTVNERVESIKKSIDEDNLHTEFGISDPGNAIEIR  
KAFQKTFGLDDISLHLVALEMKNKHFNTSMESQETQRYQQDDWVLARLYRTGTRVGSIGFDYMKCCFTPHHSR  
CKQQKDILDETAAKAKEVLLKILRLSIPHP\*

>rs49881478\_ENSMUSP00000056001\_c.1080:T>C\_p.S361P  
 ENSMUST00000058704.9|Irgm2-201|ENSMUSG00000069874|+|chr11:g.58111391:T>C  
 MEEAVESPEVKEFEYFSDAVFIPKDGNTLSVGVKRIETAVKEGEVVKVVSIVKEIIQNVSRNKIKIAVTGDS  
 GNGMSSFINALRLIGHEEKDSAPTGVVVRTTQKPTCYFSSHFYVELWDLPLGLGATAQSVESYLEEMQISYDL  
 IIVASEQFSLNHVKLAITMQRMRKRFYVWTKLDRDLSTSTFPPEQLLQSIQRNIRDSLQKEKVEHPMFLV  
 SVFKPESHDFPKLRETLQKDLPIKHYHGLVETLYQVCEKTVNERVESIKKSIDEDNLHTEFGISDPGNAIEIR  
 KAFQKTFGLDDISLHLVALEMKNKHFNTSMESQETQRYQQDDWVLARLYRTGTRVGSIGFDYMKCCFTPHHSR  
 CKQQKDILDETAAKAKEVLLKILRLSIPHP\*

>ENSMUSP00000104462\_c.811:T>G\_p.L271R ENSMUST00000108834.3|4930438A08Rik-  
 201|ENSMUSG00000069873|+|chr11:g.58184095:T>G  
 MLPAPGRLLAMFPGWLALIFLSVLSLDTQAFNRKLVKCFEDPQYEELLQLARNGLGQTAERKQVVVIGAGMAG  
 LTAAKILQDAGHQVTVLEASGRVGGRIETHRVPGAHWYIELGAMRIPINHRLSHELKIKFGLMLKEFCPCNNQ  
 TWVLVNGVRQRSAGVQADPGLLGYSVRADEVGKTAEQLFASLRKIVEELKNSSCQEVLEKYDSFSTKEYLIK  
 VGNLSRGAVQMIGDMLNTDSGYEAFETETLRGIISFFQDPRFDEIVGGFDQRPQALHNSLLPGTVWFYSPAEE  
 VEMSGDCVHVTYRTPDPLLRARLTADFVVVATTAKAARLLRFQPPSLNKQDALRSVHYNSATKVI LACTQR  
 FWERDGI FSGKSSTDRPSRFIYYPNHIFPNGAGVILASYTELDDSDVFFTDALDHTQVVDIVLDDLAALHSRAKE  
 ELRALCPYSAIKNWSQDPYSMGGFAFFTPYQYVDYAQELSQPEGLVFFAGEHTDLPHGWIDTAIKSGLRVAKN  
 IQESVDLALTRNPRNTKEYFSKSEL\*

>ENSMUSP00000147249\_c.780:T>G\_p.S261A ENSMUST00000208022.2|4930438A08Rik-  
 202|ENSMUSG00000069873|+|chr11:g.58184095:T>G  
 MLPAPGRLLAMFPGWLALIFLSVLSLDTQAFNRKLVKCFEDPQYEELLQLARNGLGQTAERKQVVVIGAGMAG  
 LTAAKILQDAGHQVTVLEASGRVGGRIETHRVPGAHWYIELGAMRIPINHRLSHELKIKFGLMLKEFCPCNNQ  
 TWVLVNGVRQRSAGVQADPGLLGYSVRADEVGKTAEQLFASLRKIVEELKNSSCQEVLEKYDSFSTKEYLIK  
 VGNLSRGAVQMIGDMLNTDSGYEAFETETLRSMKSLEALTNAPRLCTILSSQGLFGSTHQQRKWKCLETVFTS  
 PTGHLTLCCPGRG\*

>ENSMUSP00000131896\_c.584:G>T\_p.E195D ENSMUST00000049353.9|Zfp692-  
 201|ENSMUSG00000037243|+|chr11:g.58200417:G>T  
 MASPVDASRRRREKRRQLDARRSKCRIRLGGHMEQWCLLKERLGFSLHSQLAKFLLDRYTSSGCVLCAAPEP  
 GPRKGLQYLVLLSHTHSRECGLVPLRGPGGGEGELVWECSAGHTFSWEPSLI PAPSVDVPKQAPLTHTTTERAW  
 CSEARRKQEAQGLECEQERRETQETRLSRRVDSPLEIDPPLGEDQDVEEDEEEEEEEEEELSDASPWTYSSSPD  
 DSEPDPVPRPPSPVTHTPKEGEVSPVPATLPTPCAVLASVGS PDALTSDEVRLELSRTPQVPAELHMTESLE  
 SPGSQAQSAPNPTWDEDTAQIGLRRIRKAAKRELMPCDFPGCGRIFSNRQYLNHHKKYQHIHQKSFCCPEPAC  
 GKSFNFKHLKEHVKLHSDTRDYICEFCARSFRTSSNLVIHRRIHTEGKPLQCEICGFTCRQKASLNWHRRKH  
 AETAALRFPCEFCGRFEKPDSSVVAHCSKSHPLLPAQEPGSLVSSPSISAPESLQSPEGASISTTSDSNP  
 ASSTSISSPGVDPDRNREKS\*

>ENSMUSP00000126674\_c.584:G>T\_p.E195D ENSMUST00000153510.9|Zfp692-  
 202|ENSMUSG00000037243|+|chr11:g.58200417:G>T  
 MASPVDASRRRREKRRQLDARRSKCRIRLGGHMEQWCLLKERLGFSLHSQLAKFLLDRYTSSGCVLCAAPEP  
 GPRKGLQYLVLLSHTHSRECGLVPLRGPGGGEGELVWECSAGHTFSWEPSLI PAPSVDVPKQAPLTHTTTERAW  
 CSEARRKQEAQGLECEQERRETQETRLSRRVDSPLEIDPPLGEDQDVEEDEEEEEEEEEELSDASPWTYSSSPD  
 DSEPDPVPRPPSPVTHTPKEGEVSPVPATLPTPCAVLASVGS PDALTSDEVRLELSRTPQVPAELHMTESLE  
 SPGSQAQSAPNPTWDEDTAQIGLRRIRKAAKRELMPCDFPGCGRIFSNRQYLNHHKKYQHIHQKSFCCPEPAC  
 GKSFNFKHLKEHVKLHSDTRDYICEFCARSFRTSSNLVIHRRIHTEGKPLQCEICGFTCRQKASLNWHRRKH  
 AETAALRFPCEFCGRFEKPDSSVVAHCSKSHPLLPAQEPGSLVSSPSISAPESLQSPEGASISTTSDSNP  
 ASSTSISSPGVDPDRNREKS\*

>ENSMUSP00000070680\_c.185:C>A\_p.Y62\* ENSMUST00000065533.3|Zfp672-  
 203|ENSMUSG00000049755|-|chr11:g.58220412:G>T  
 MRMEEDGVPOSEVKGIPVLPVVRVQESPHKPOEYQSQSDRDSVLNAHPTVGRHSLDSGTEC\*YHELRFVRSLY  
 RQKPI MNSQAIAGRACRVIGLFPSCVCLNNDITVQVDFYLA\*

>ENSMUSP00000013787\_c.108:G>T\_p.A37S ENSMUST00000013787.11|Lypd8-  
 201|ENSMUSG00000013643|+|chr11:g.58273631:G>T  
 MRGVFIAGVIAAFAITVVDSLNCTQCYTYNSTCDGQSTECNEQSFSCVSESSINSTLGGFLHVYQNKFCASNC  
 TENSTEVAFVTHLFDQRYHFASQCCQGESCNATHSESGTQNVTDMQCMSCYGHNKTLCEEKPKQCYEGEQCV  
 FIIAEMVNGSRVELKGCSDISNSTCQFLSPGNTHVGEFVFKSVECTQPTTEYTNSTTTTIPITNTSLTSVTRP  
 GIKTSPASVTPQASMGTKASFTSSIFGSLLLKLLF\*

>ENSMUSP00000104454\_c.108:G>T\_p.A37S ENSMUST00000108826.3|Lypd8-  
 202|ENSMUSG00000013643|+|chr11:g.58273631:G>T



MRGVFIAGVIAAFAITVVDSLNCCTQCYTYNSTCDGQSTECNEQSFSCVSESSINSTLGGFLHVYQNKFCASANC  
TENSTEVAFTVHLFDDQRYHFASQCCQGESCNATHSESGTQNVTDQMCMSCYGHNKTLCEEKPKQCYEGEQCV  
FIIAEMVNGSGRVELKGCSDISNSTCQFLSPGNNTTVGEFVFKSVECTQPTEYTNSTTTTIPITNTSLTSVTRP  
GIKTSPASVTPQASMGTKASFTSSIFGSLLLLKLLF\*  
>ENSMUSP00000013787\_c.232:C>T\_p.T78M ENSMUST00000013787.11|Lypd8-  
201|ENSMUSG00000013643|+|chr11:g.58275499:C>T  
MRGVFIAGVIAAFAITVVDSLNCCTQCYTYNSTCDGQATECNEQSFSCVSESSINSTLGGFLHVYQNKFCASANC  
TENSMVAFTVHLFDDQRYHFASQCCQGESCNATHSESGTQNVTDQMCMSCYGHNKTLCEEKPKQCYEGEQCV  
FIIAEMVNGSGRVELKGCSDISNSTCQFLSPGNNTTVGEFVFKSVECTQPTEYTNSTTTTIPITNTSLTSVTRP  
GIKTSPASVTPQASMGTKASFTSSIFGSLLLLKLLF\*  
>ENSMUSP000000104454\_c.232:C>T\_p.T78M ENSMUST000000108826.3|Lypd8-  
202|ENSMUSG00000013643|+|chr11:g.58275499:C>T  
MRGVFIAGVIAAFAITVVDSLNCCTQCYTYNSTCDGQATECNEQSFSCVSESSINSTLGGFLHVYQNKFCASANC  
TENSMVAFTVHLFDDQRYHFASQCCQGESCNATHSESGTQNVTDQMCMSCYGHNKTLCEEKPKQCYEGEQCV  
FIIAEMVNGSGRVELKGCSDISNSTCQFLSPGNNTTVGEFVFKSVECTQPTEYTNSTTTTIPITNTSLTSVTRP  
GIKTSPASVTPQASMGTKASFTSSIFGSLLLLKLLF\*  
>ENSMUSP00000013787\_c.586:C>A\_p.T196N ENSMUST00000013787.11|Lypd8-  
201|ENSMUSG00000013643|+|chr11:g.58281026:C>A  
MRGVFIAGVIAAFAITVVDSLNCCTQCYTYNSTCDGQATECNEQSFSCVSESSINSTLGGFLHVYQNKFCASANC  
TENSTEVAFTVHLFDDQRYHFASQCCQGESCNATHSESGTQNVTDQMCMSCYGHNKTLCEEKPKQCYEGEQCV  
FIIAEMVNGSGRVELKGCSDISNSTCQFLSPGNNTTVGEFVFKSVECTQPNEYTNSTTTTIPITNTSLTSVTRP  
GIKTSPASVTPQASMGTKASFTSSIFGSLLLLKLLF\*  
>ENSMUSP000000104454\_c.586:C>A\_p.T196N ENSMUST000000108826.3|Lypd8-  
202|ENSMUSG00000013643|+|chr11:g.58281026:C>A  
MRGVFIAGVIAAFAITVVDSLNCCTQCYTYNSTCDGQATECNEQSFSCVSESSINSTLGGFLHVYQNKFCASANC  
TENSTEVAFTVHLFDDQRYHFASQCCQGESCNATHSESGTQNVTDQMCMSCYGHNKTLCEEKPKQCYEGEQCV  
FIIAEMVNGSGRVELKGCSDISNSTCQFLSPGNNTTVGEFVFKSVECTQPNEYTNSTTTTIPITNTSLTSVTRP  
GIKTSPASVTPQASMGTKASFTSSIFGSLLLLKLLF\*  
>ENSMUSP00000013787\_c.741:C>T\_p.L248F ENSMUST00000013787.11|Lypd8-  
201|ENSMUSG00000013643|+|chr11:g.58281181:C>T  
MRGVFIAGVIAAFAITVVDSLNCCTQCYTYNSTCDGQATECNEQSFSCVSESSINSTLGGFLHVYQNKFCASANC  
TENSTEVAFTVHLFDDQRYHFASQCCQGESCNATHSESGTQNVTDQMCMSCYGHNKTLCEEKPKQCYEGEQCV  
FIIAEMVNGSGRVELKGCSDISNSTCQFLSPGNNTTVGEFVFKSVECTQPTEYTNSTTTTIPITNTSLTSVTRP  
GIKTSPASVTPQASMGTKASFTSSIFGSLLLLKLLF\*  
>ENSMUSP000000104454\_c.741:C>T\_p.L248F ENSMUST000000108826.3|Lypd8-  
202|ENSMUSG00000013643|+|chr11:g.58281181:C>T  
MRGVFIAGVIAAFAITVVDSLNCCTQCYTYNSTCDGQATECNEQSFSCVSESSINSTLGGFLHVYQNKFCASANC  
TENSTEVAFTVHLFDDQRYHFASQCCQGESCNATHSESGTQNVTDQMCMSCYGHNKTLCEEKPKQCYEGEQCV  
FIIAEMVNGSGRVELKGCSDISNSTCQFLSPGNNTTVGEFVFKSVECTQPTEYTNSTTTTIPITNTSLTSVTRP  
GIKTSPASVTPQASMGTKASFTSSIFGSLLLLKLLF\*  
>rs29446775\_ENSMUSP000000104453\_c.538:C>T\_p.T180M  
ENSMUST000000108825.2|Gm12253-  
201|ENSMUSG00000058287|+|chr11:g.58330781:C>T  
MEVTMSWFLVLLKSLAVCIISHLSVSSVESYACIQEPPFNKECYPNSSTCESSKGCFLWLELGAHQTYVQK  
GCSEDSCTGLEFSVTVERHLALSVDHRCCYTEHCSKEPIKVPALSSEPNGVECPACFSECGTCRPVLLKCTGE  
ETMCIKATARDI IKLQAMGCATKTACNLKNVTIMDNLKFDTSCVNGSPLLSSRLLLQHHACLPAATLPAMTVM  
ELSSGTVSPQ\*  
>rs29395894\_ENSMUSP00000063665\_c.114:G>A\_p.E39K  
ENSMUST00000064614.4|Lypd9-201|ENSMUSG00000052642|-|chr11:g.58338276:C>T  
MHPATPSRLLLVCSLAFMPFSTDPWEITMNEIEEKEVDKFNSSGLKCPCTFTVKGRECSPELKWCTDKIKCV  
ELSGIINTGVNNVPIQLMKCITIEQCKDTATAYMGFTISNKSEICKSAIRNGARVRPPTPIFFVFLFKLLH\*  
>rs47817785\_ENSMUSP000000136008\_c.659:A>G\_p.I220M  
ENSMUST000000180165.3|O1fr332-201|ENSMUSG00000050813|-  
|chr11:g.58380920:T>C  
MDLKNKTTSSFILLGLFPSCRYPNLLISFILLIYTLASAGNSLLILLIWLDPRLHTPMYFLLSLSVIDLAYI  
SCTVPKAAINYFTGRQNI SFFACATQMF SFLTGLAECILLTLMAYDRYVAVCNPLRYTILMSPKVCIMMAAS  
TWIGAVAAALVHTVYPMNFPICGSREINHYFCEMPAILRMSCVDTSVYEMVKFVSTIIFLLTPFTLILTSYTL

MFLTVMRNSPKGRNKALATCSSHLTVVSLYFGQAIIFYMTPTSSHTPDQDQVGAVLGTIVTPMLNPLIYSLR  
NKEVIGALQKCTGRCCSRDRVGSRLRCCCTQKCPILHLKSEFKSKEIQIGNRAL\*  
>rs47370459\_ENSMUSP00000136008\_c.496:C>G\_p.P166R  
ENSMUST00000180165.3|Olfr332-201|ENSMUSG00000050813|-  
|chr11:g.58381083:G>C  
MDLKNKTTSSFILLGLFPSCRYPNLLISFILLIYTLASAGNSLLILLIWLDPRLHTPMYFLLSQLSVIDLAYI  
SCTVPKAAINYFTGRQNI SFFACATQMF SFLTGLAECILLTLMAYDRYVAVCNPLRYTILMSPKVCMMMAAS  
TWIGAVAAALVHTVYPMNFRICGSREINHYFCEMPAILRMSCVDTSVYEMVKFVSTIIIFLLTPFTLILTSYTL  
IFLTVLRMNSPKGRNKALATCSSHLTVVSLYFGQAIIFYMTPTSSHTPDQDQVGAVLGTIVTPMLNPLIYSLR  
NKEVIGALQKCTGRCCSRDRVGSRLRCCCTQKCPILHLKSEFKSKEIQIGNRAL\*  
>rs46574752\_ENSMUSP00000136008\_c.385:T>C\_p.L129P  
ENSMUST00000180165.3|Olfr332-201|ENSMUSG00000050813|-  
|chr11:g.58381194:A>G  
MDLKNKTTSSFILLGLFPSCRYPNLLISFILLIYTLASAGNSLLILLIWLDPRLHTPMYFLLSQLSVIDLAYI  
SCTVPKAAINYFTGRQNI SFFACATQMF SFLTGLAECILLTLMAYDRYVAVCNPPRYTILMSPKVCMMMAAS  
TWIGAVAAALVHTVYPMNFPICGSREINHYFCEMPAILRMSCVDTSVYEMVKFVSTIIIFLLTPFTLILTSYTL  
IFLTVLRMNSPKGRNKALATCSSHLTVVSLYFGQAIIFYMTPTSSHTPDQDQVGAVLGTIVTPMLNPLIYSLR  
NKEVIGALQKCTGRCCSRDRVGSRLRCCCTQKCPILHLKSEFKSKEIQIGNRAL\*  
>rs46574752\_ENSMUSP00000144797\_c.88:T>C\_p.L30P  
ENSMUST00000203744.2|Olfr332-202|ENSMUSG00000050813|-  
|chr11:g.58381194:A>G  
MFSFLTGLAECILLTLMAYDRYVAVCNPPRYT  
>ENSMUSP00000080440\_c.721:G>AG\_p.G241ins-fs ENSMUST00000081743.3|Olfr331-  
201|ENSMUSG00000058807|-|chr11:g.58392677:C>CT  
MDLTTWMNNTTQSDFTLVGFFS QSKHPALLAVVIFVVFLMALSGNALLILLILSDIHIPIHLHIPMYFFISQ  
LSLMDMMYISVTVPKMLMDQVLGSHKISAAACGMQMF LYLTLAGSEYFLLAAMS YDHYVAICHPLQYPVLMNH  
RVCLLLMSVCWILGSLDGMFTPVMTMFPFCGSREIHHFFCEVPAVTKLSCSDTWLYETLMYVCCVLMLLIPV  
TVISGSYTSILLTVLRMNSAEEQEEG PCHLLLP HDCGHP LLWCCYLYLHFPCLSPHP  
>ENSMUSP00000132693\_c.703:G>AG\_p.G235ins-fs ENSMUST00000170501.3|Olfr331-  
202|ENSMUSG00000058807|-|chr11:g.58392677:C>CT  
MNNYTTQSDFTLVGFFS QSKHPALLAVVIFVVFLMALSGNALLILLILSDIHIPIHLHIPMYFFISQLSLMDM  
MYISVTVPKMLMDQVLGSHKISAAACGMQMF LYLTLAGSEYFLLAAMS YDHYVAICHPLQYPVLMNHRVCLLL  
MSVCWILGSLDGMFTPVMTMFPFCGSREIHHFFCEVPAVTKLSCSDTWLYETLMYVCCVLMLLIPVTVISGS  
YTSILLTVLRMNSAEEQEEG PCHLLLP HDCGHP LLWCCYLYLHFPCLSPHP  
>rs261360536\_ENSMUSP00000149073\_c.286:T>CT\_p.I96ins-fs  
ENSMUST00000213188.3|Olfr330-202|ENSMUSG00000050818|-  
|chr11:g.58420524:A>AG  
MDLTTWMNNTTQSDFTLVGFFS QSKHSALLAVVIFVVFLMALSGNALLILLVLSDTHLHTPMYFFISQLSLM  
DDMYISVTVPKMLMDQVLGSHKTLSCCLWDADVPLCDTSRFRIFPSGCHVLRPLCGHLPSTPVSCPHELQGLS  
PPDVCLLDPGIFGWLHVHPCHHDL P ILWIPGDPSLLL  
>rs261360536\_ENSMUSP00000145126\_c.286:T>CT\_p.I96ins-fs  
ENSMUST00000134055.3|Olfr330-201|ENSMUSG00000050818|-  
|chr11:g.58420524:A>AG  
MDLTTWMNNTTQSDFTLVGFFS QSKHSALLAVVIFVVFLMALSGNALLILLVLSDTHLHTPMYFFISQLSLM  
DDMYISVTVPKMLMDQVLGSHKTLSCCLWDADVPLCDTSRFRIFPSGCHVLRPLCGHLPSTPVSCPHELQGLS  
PPDVCLLDPGIFGWLHVHPCHHDL P ILWIPGDPSLLL  
>rs51951760\_ENSMUSP00000150086\_c.511:G>T\_p.R171L  
ENSMUST00000216725.2|Olfr328-204|ENSMUSG00000057654|-  
|chr11:g.58442552:C>A  
MSNYTGQFSDFTLVGFFS QSKHPALLAVVIFVVFLMALSGNALLILLILSDTHLHTPMYFFISQLSLMDMMYI  
SVTVPKMLMDQVLGSHKISAAACGMQMF LYLSIGGSEFLLAAMS YDRYVAICHPLRYPVLMNHRICLLLSV  
CWLLGSLDGMFTPVMTMFPICGSLEIHHFFCEVPAVTKLSCSDTWLYETLMYVCCVLMILIPVTVISGSYSS  
ILLTVLKMNSAEGRKKALATCSSHMTVVTLFYGAAYTYMLPASLHTPEKDMVVS VFYTI VTPLLNPLIYSFR  
NKNVTEAMKLLGV SIPH\*  
>rs51951760\_ENSMUSP00000149506\_c.511:G>T\_p.R171L  
ENSMUST00000215717.2|Olfr328-203|ENSMUSG00000057654|-  
|chr11:g.58442552:C>A

MSNYTGQFSDFTLVGFFSQQSKHPALLAVVIFVVFLMALSGNALLILLILSDTHLHTPMYFFISQLSLMDDMMYI  
SVTVPKMLMDQVLGSHKISAAACGMQMFYLYLSIGGSEFLLLAAMSYDRYVAICHPLRYPVLMNHRICLLLLSV  
CWLLGSLDGFMLTPVTMTFPICGSLEIHFFCEVPAVTKLSCSDTWLYETLMYVCCVLMILIPVTVISGSYSS  
ILLTVLKMNSAEGRKKALATCSSHMTVVTLFYGAAVTYMLPASLHTPEKDMVVSVFYTIPTPLNPLIYSFR  
NKNVTEAMKLLGVSIPIH\*

>rs51951760\_ENSMUSP00000104452\_c.511:G>T\_p.R171L  
ENSMUST00000108824.3|Olfr328-202|ENSMUSG00000057654|-  
|chr11:g.58442552:C>A

MSNYTGQFSDFTLVGFFSQQSKHPALLAVVIFVVFLMALSGNALLILLILSDTHLHTPMYFFISQLSLMDDMMYI  
SVTVPKMLMDQVLGSHKISAAACGMQMFYLYLSIGGSEFLLLAAMSYDRYVAICHPLRYPVLMNHRICLLLLSV  
CWLLGSLDGFMLTPVTMTFPICGSLEIHFFCEVPAVTKLSCSDTWLYETLMYVCCVLMILIPVTVISGSYSS  
ILLTVLKMNSAEGRKKALATCSSHMTVVTLFYGAAVTYMLPASLHTPEKDMVVSVFYTIPTPLNPLIYSFR  
NKNVTEAMKLLGVSIPIH\*

>rs51951760\_ENSMUSP00000073588\_c.511:G>T\_p.R171L  
ENSMUST00000073933.2|Olfr328-201|ENSMUSG00000057654|-  
|chr11:g.58442552:C>A

MSNYTGQFSDFTLVGFFSQQSKHPALLAVVIFVVFLMALSGNALLILLILSDTHLHTPMYFFISQLSLMDDMMYI  
SVTVPKMLMDQVLGSHKISAAACGMQMFYLYLSIGGSEFLLLAAMSYDRYVAICHPLRYPVLMNHRICLLLLSV  
CWLLGSLDGFMLTPVTMTFPICGSLEIHFFCEVPAVTKLSCSDTWLYETLMYVCCVLMILIPVTVISGSYSS  
ILLTVLKMNSAEGRKKALATCSSHMTVVTLFYGAAVTYMLPASLHTPEKDMVVSVFYTIPTPLNPLIYSFR  
NKNVTEAMKLLGVSIPIH\*

>rs49802583\_ENSMUSP00000150086\_c.393:C>A\_p.P132T  
ENSMUST00000216725.2|Olfr328-204|ENSMUSG00000057654|-  
|chr11:g.58442670:G>T

MSNYTGQFSDFTLVGFFSQQSKHPALLAVVIFVVFLMALSGNALLILLILSDTHLHTPMYFFISQLSLMDDMMYI  
SVTVPKMLMDQVLGSHKISAAACGMQMFYLYLSIGGSEFLLLAAMSYDRYVAICHPLRYTVLMNHRICLLLLSV  
CWLLGSLDGFMLTPVTMTFPICGSREIHFFCEVPAVTKLSCSDTWLYETLMYVCCVLMILIPVTVISGSYSS  
ILLTVLKMNSAEGRKKALATCSSHMTVVTLFYGAAVTYMLPASLHTPEKDMVVSVFYTIPTPLNPLIYSFR  
NKNVTEAMKLLGVSIPIH\*

>rs49802583\_ENSMUSP00000149506\_c.393:C>A\_p.P132T  
ENSMUST00000215717.2|Olfr328-203|ENSMUSG00000057654|-  
|chr11:g.58442670:G>T

MSNYTGQFSDFTLVGFFSQQSKHPALLAVVIFVVFLMALSGNALLILLILSDTHLHTPMYFFISQLSLMDDMMYI  
SVTVPKMLMDQVLGSHKISAAACGMQMFYLYLSIGGSEFLLLAAMSYDRYVAICHPLRYTVLMNHRICLLLLSV  
CWLLGSLDGFMLTPVTMTFPICGSREIHFFCEVPAVTKLSCSDTWLYETLMYVCCVLMILIPVTVISGSYSS  
ILLTVLKMNSAEGRKKALATCSSHMTVVTLFYGAAVTYMLPASLHTPEKDMVVSVFYTIPTPLNPLIYSFR  
NKNVTEAMKLLGVSIPIH\*

>rs49802583\_ENSMUSP00000104452\_c.393:C>A\_p.P132T  
ENSMUST00000108824.3|Olfr328-202|ENSMUSG00000057654|-  
|chr11:g.58442670:G>T

MSNYTGQFSDFTLVGFFSQQSKHPALLAVVIFVVFLMALSGNALLILLILSDTHLHTPMYFFISQLSLMDDMMYI  
SVTVPKMLMDQVLGSHKISAAACGMQMFYLYLSIGGSEFLLLAAMSYDRYVAICHPLRYTVLMNHRICLLLLSV  
CWLLGSLDGFMLTPVTMTFPICGSREIHFFCEVPAVTKLSCSDTWLYETLMYVCCVLMILIPVTVISGSYSS  
ILLTVLKMNSAEGRKKALATCSSHMTVVTLFYGAAVTYMLPASLHTPEKDMVVSVFYTIPTPLNPLIYSFR  
NKNVTEAMKLLGVSIPIH\*

>rs49802583\_ENSMUSP00000073588\_c.393:C>A\_p.P132T  
ENSMUST00000073933.2|Olfr328-201|ENSMUSG00000057654|-  
|chr11:g.58442670:G>T

MSNYTGQFSDFTLVGFFSQQSKHPALLAVVIFVVFLMALSGNALLILLILSDTHLHTPMYFFISQLSLMDDMMYI  
SVTVPKMLMDQVLGSHKISAAACGMQMFYLYLSIGGSEFLLLAAMSYDRYVAICHPLRYTVLMNHRICLLLLSV  
CWLLGSLDGFMLTPVTMTFPICGSREIHFFCEVPAVTKLSCSDTWLYETLMYVCCVLMILIPVTVISGSYSS  
ILLTVLKMNSAEGRKKALATCSSHMTVVTLFYGAAVTYMLPASLHTPEKDMVVSVFYTIPTPLNPLIYSFR  
NKNVTEAMKLLGVSIPIH\*

>rs29402353\_ENSMUSP00000150140\_c.675:A>C\_p.M226L  
ENSMUST00000216758.2|Olfr224-203|ENSMUSG00000059279|-  
|chr11:g.58457494:T>G

MSNYTGQSYFTLVGLFSQSKHPALLAVVIFVVFLMSLSGNALLILLILSDTHLHTPMYFFISQLSLMDDMMYIS  
VTVPKMLMDRVLGNHKISAAACGMQMFYLYMSLGSEFLLLAAMSYDRYVAICHPLRYPVLMNHRVCLLLIISTC

WILGSLDGMFTPVMTMFPFCGSREIHHFFCEAPAVTKLSCSDTWLYETLMYVCCVLMILIPVTVISGSYSSI  
LLTVLRLNSAEGRKKALATCSSHMTVVTLFYGAAIYTYIFPASLHSPEKDMVVSVFYITILTPLLNPLIYSLRN  
KNVTEAMKLLGIRLHFPEVTK\*

>rs29402353\_ENSMUSP00000150268\_c.675:A>C\_p.M226L  
ENSMUST00000217009.2|Olfr224-204|ENSMUSG00000059279|-  
|chr11:g.58457494:T>G  
MSNYTGQSYFTLVGLFSQSKHPALLAVVIFVVFLMSLSGNALLILLILSDTHLHTPMYFFISQLSLMDDMMYIS  
VTVPKMLMDRVLGNHKKISAAACGMQMFLYMSLGGSEFLLLAAMS YDRYVAICHPLRYPVLMNHRVCLLLISTC  
WILGSLDGMFTPVMTMFPFCGSREIHHFFCEAPAVTKLSCSDTWLYETLMYVCCVLMILIPVTVISGSYSSI  
LLTVLRLNSAEGRKKALATCSSHMTVVTLFYGAAIYTYIFPASLHSPEKDMVVSVFYITILTPLLNPLIYSLRN  
KNVTEAMKLLGIRLHFPEVTK\*

>rs29402353\_ENSMUSP00000150143\_c.675:A>C\_p.M226L  
ENSMUST00000215322.2|Olfr224-202|ENSMUSG00000059279|-  
|chr11:g.58457494:T>G  
MSNYTGQSYFTLVGLFSQSKHPALLAVVIFVVFLMSLSGNALLILLILSDTHLHTPMYFFISQLSLMDDMMYIS  
VTVPKMLMDRVLGNHKKISAAACGMQMFLYMSLGGSEFLLLAAMS YDRYVAICHPLRYPVLMNHRVCLLLISTC  
WILGSLDGMFTPVMTMFPFCGSREIHHFFCEAPAVTKLSCSDTWLYETLMYVCCVLMILIPVTVISGSYSSI  
LLTVLRLNSAEGRKKALATCSSHMTVVTLFYGAAIYTYIFPASLHSPEKDMVVSVFYITILTPLLNPLIYSLRN  
KNVTEAMKLLGIRLHFPEVTK\*

>rs29402353\_ENSMUSP00000079881\_c.675:A>C\_p.M226L  
ENSMUST00000081102.5|Olfr224-201|ENSMUSG00000059279|-  
|chr11:g.58457494:T>G  
MSNYTGQSYFTLVGLFSQSKHPALLAVVIFVVFLMSLSGNALLILLILSDTHLHTPMYFFISQLSLMDDMMYIS  
VTVPKMLMDRVLGNHKKISAAACGMQMFLYMSLGGSEFLLLAAMS YDRYVAICHPLRYPVLMNHRVCLLLISTC  
WILGSLDGMFTPVMTMFPFCGSREIHHFFCEAPAVTKLSCSDTWLYETLMYVCCVLMILIPVTVISGSYSSI  
LLTVLRLNSAEGRKKALATCSSHMTVVTLFYGAAIYTYIFPASLHSPEKDMVVSVFYITILTPLLNPLIYSLRN  
KNVTEAMKLLGIRLHFPEVTK\*

>rs46544151\_ENSMUSP00000154189\_c.237:A>C\_p.N80H  
ENSMUST00000214990.2|Olfr324-  
202|ENSMUSG00000056564|+|chr11:g.58488479:A>C  
MEPRYGAAGLSPENSSTITELVLVGFSDQPQTEIPLFIFFSLVYLASCLGNTAVVILVALDVSLQTPMYFFL  
CHLAFLHGFFSTVVT PKMLFNFLASRKVISYPFCLAQTYLTLFLESTECFLLAVMAIDRYVAICYPLRYLLIM  
SWAVCIALAVAVVWTGFCASVPLCFMILPLCSPYVVDYLFCELPILLHLFCADTSLQEAMMAVGGAGTVLVP  
FLLIALSYLRILVTVIRIDSAEGRKKAFASTCASHLAVVTIYYGTGLIRYLRPKSLYSAEGDKLISVFYAVIGP  
ALNPFYISLRNKEVQGAVRRVVERYRKS PRIAF\*

>rs46544151\_ENSMUSP00000154149\_c.255:A>C\_p.N86H  
ENSMUST00000216965.2|Olfr324-  
203|ENSMUSG00000056564|+|chr11:g.58488479:A>C  
MLPHIRTLGRYGAAGLSPENSSTITELVLVGFSDQPQTEIPLFIFFSLVYLASCLGNTAVVILVALDVSLQTP  
MYFFLCHLAFLHGFFSTVVT PKMLFNFLASRKVISYPFCLAQTYLTLFLESTECFLLAVMAIDRYVAICYPL  
RYLLIMSWAVCIALAVAVVWTGFCASVPLCFMILPLCSPYVVDYLFCELPILLHLFCADTSLQEAMMAVGG  
GAGTVLVPFLLIALSYLRILVTVIRIDSAEGRKKAFASTCASHLAVVTIYYGTGLIRYLRPKSLYSAEGDKLIS  
VFYAVIGPALNPFYISLRNKEVQGAVRRVVERYRKS PRIAF\*

>rs46544151\_ENSMUSP00000056457\_c.261:A>C\_p.N88H  
ENSMUST000000054683.8|Olfr324-  
201|ENSMUSG00000056564|+|chr11:g.58488479:A>C  
MWGPSISSRLDRYGAAGLSPENSSTITELVLVGFSDQPQTEIPLFIFFSLVYLASCLGNTAVVILVALDVSL  
QTPMYFFLCHLAFLHGFFSTVVT PKMLFNFLASRKVISYPFCLAQTYLTLFLESTECFLLAVMAIDRYVAICY  
PLRYLLIMSWAVCIALAVAVVWTGFCASVPLCFMILPLCSPYVVDYLFCELPILLHLFCADTSLQEAMMAV  
GAGTVLVPFLLIALSYLRILVTVIRIDSAEGRKKAFASTCASHLAVVTIYYGTGLIRYLRPKSLYSAEGDKLIS  
VFYAVIGPALNPFYISLRNKEVQGAVRRVVERYRKS PRIAF\*

>rs49647928\_ENSMUSP00000154189\_c.343:T>C\_p.L115P  
ENSMUST00000214990.2|Olfr324-  
202|ENSMUSG00000056564|+|chr11:g.58488585:T>C  
MEPRYGAAGLSPENSSTITELVLVGFSDQPQTEIPLFIFFSLVYLASCLGNTAVVILVALDVSLQTPMYFFL  
CHLAFLNGFFSTVVT PKMLFNFLASRKVISYPFCLAQTYLTLFLESTECFLLAVMAIDRYVAICYPLRYLLIM  
SWAVCIALAVAVVWTGFCASVPLCFMILPLCSPYVVDYLFCELPILLHLFCADTSLQEAMMAVGGAGTVLVP

FLLIALSYLRILVTVIRIDSAEGRKKAFASTCASHLAVVTIYYGTGLIRYLRPKSLYSAEGDKLISVFYAVIGP  
 ALNPFIIYSLRNKEVQGAVRRVVERYRKS PRIAF\*  
 >rs49647928\_ENSMUSP00000154149\_c.361:T>C\_p.L121P  
 ENSMUST00000216965.2|Olfr324-  
 203|ENSMUSG00000056564|+|chr11:g.58488585:T>C  
 MLPHIRTGLGRYGSAAGLSPENSSTITELVLVGFSDQPQTEIPLFIFFSLVYLASCLGNTAVVILVALDVSLQT  
 PMYFFLCHLAFLNGFFSTVVT PKMLFNFLASRKVISYPFCLAQTYLTPFLESTECFLLAVMAIDRYVAICYPL  
 RYLLIMSWAVCIALAVAVVWTGFCASVLPFCMILPLCSPYVVDYLFCELPILLHLFCADTSLQEAMMAVGGA  
 GTVLVPFLLIALSYLRILVTVIRIDSAEGRKKAFASTCASHLAVVTIYYGTGLIRYLRPKSLYSAEGDKLISVF  
 YAVIGPALNPFIIYSLRNKEVQGAVRRVVERYRKS PRIAF\*  
 >rs49647928\_ENSMUSP00000056457\_c.367:T>C\_p.L123P  
 ENSMUST00000054683.8|Olfr324-  
 201|ENSMUSG00000056564|+|chr11:g.58488585:T>C  
 MWGPSISSRLDRYGSAAGLSPENSSTITELVLVGFSDQPQTEIPLFIFFSLVYLASCLGNTAVVILVALDVSL  
 QTPMYFFLCHLAFLNGFFSTVVT PKMLFNFLASRKVISYPFCLAQTYLTPFLESTECFLLAVMAIDRYVAICY  
 PLRYLLIMSWAVCIALAVAVVWTGFCASVLPFCMILPLCSPYVVDYLFCELPILLHLFCADTSLQEAMMAVG  
 GAGTVLVPFLLIALSYLRILVTVIRIDSAEGRKKAFASTCASHLAVVTIYYGTGLIRYLRPKSLYSAEGDKLIS  
 VFYAVIGPALNPFIIYSLRNKEVQGAVRRVVERYRKS PRIAF\*  
 >rs50958699\_ENSMUSP00000154189\_c.772:C>G\_p.T258S  
 ENSMUST00000214990.2|Olfr324-  
 202|ENSMUSG00000056564|+|chr11:g.58489014:C>G  
 MEPRYGSAAGLSPENSSTITELVLVGFSDQPQTEIPLFIFFSLVYLASCLGNTAVVILVALDVSLQT  
 CHLAFLNGFFSTVVT PKMLFNFLASRKVISYPFCLAQTYLTPFLESTECFLLAVMAIDRYVAICYPLRYLLIM  
 SWAVCIALAVAVVWTGFCASVLPFCMILPLCSPYVVDYLFCELPILLHLFCADTSLQEAMMAVG  
 GAGTVLVPFLLIALSYLRILVTVIRIDSAEGRKKAFASTCASHLAVVSIYYGTGLIRYLRPKSLYSAEGDKLISVF  
 YAVIGPALNPFIIYSLRNKEVQGAVRRVVERYRKS PRIAF\*  
 >rs50958699\_ENSMUSP00000154149\_c.790:C>G\_p.T264S  
 ENSMUST00000216965.2|Olfr324-  
 203|ENSMUSG00000056564|+|chr11:g.58489014:C>G  
 MLPHIRTGLGRYGSAAGLSPENSSTITELVLVGFSDQPQTEIPLFIFFSLVYLASCLGNTAVVILVALDVSLQT  
 PMYFFLCHLAFLNGFFSTVVT PKMLFNFLASRKVISYPFCLAQTYLTPFLESTECFLLAVMAIDRYVAICYPL  
 RYLLIMSWAVCIALAVAVVWTGFCASVLPFCMILPLCSPYVVDYLFCELPILLHLFCADTSLQEAMMAVGGA  
 GTVLVPFLLIALSYLRILVTVIRIDSAEGRKKAFASTCASHLAVVSIYYGTGLIRYLRPKSLYSAEGDKLISVF  
 YAVIGPALNPFIIYSLRNKEVQGAVRRVVERYRKS PRIAF\*  
 >rs50958699\_ENSMUSP00000056457\_c.796:C>G\_p.T266S  
 ENSMUST00000054683.8|Olfr324-  
 201|ENSMUSG00000056564|+|chr11:g.58489014:C>G  
 MWGPSISSRLDRYGSAAGLSPENSSTITELVLVGFSDQPQTEIPLFIFFSLVYLASCLGNTAVVILVALDVSL  
 QTPMYFFLCHLAFLNGFFSTVVT PKMLFNFLASRKVISYPFCLAQTYLTPFLESTECFLLAVMAIDRYVAICY  
 PLRYLLIMSWAVCIALAVAVVWTGFCASVLPFCMILPLCSPYVVDYLFCELPILLHLFCADTSLQEAMMAVG  
 GAGTVLVPFLLIALSYLRILVTVIRIDSAEGRKKAFASTCASHLAVVSIYYGTGLIRYLRPKSLYSAEGDKLIS  
 VFYAVIGPALNPFIIYSLRNKEVQGAVRRVVERYRKS PRIAF\*  
 >rs259189485\_ENSMUSP00000151137\_c.805:A>G\_p.E269G  
 ENSMUST00000214132.2|Olfr323-203|ENSMUSG00000043880|-  
 |chr11:g.58516065:T>C  
 MEPQNL SKVTEFQLLGFQNLLEWQSLLF AIFLCFYLLTITGNMVIICVVS EDPRLRAPMYTFLQHLSFLEIWIY  
 TSTTVPLLLSKLASWGHMLSFPACMAQLYFFVFFGATECFLLAAMAYDRYLAICHPLHYSLMSPDNCAALVT  
 VSWVTGVTGFLPSLLISKLDFCGPNRINHFFCDLPLLIQLSCSSVYVTEMAIFVLSIAVLCICFLLTLVSYV  
 FIVSSILRIPSTSGRMKTFSTCGSHLAVVTIYYGTMI SMYVRPNAHLS PGLNKVISVFYTVVTPLLNPVIYSL  
 RNKDFKEAVRKIVRTKCGVYRARKVGSALTT\*  
 >rs259189485\_ENSMUSP00000068147\_c.805:A>G\_p.E269G  
 ENSMUST00000070804.3|Olfr323-201|ENSMUSG00000043880|-  
 |chr11:g.58516065:T>C  
 MEPQNL SKVTEFQLLGFQNLLEWQSLLF AIFLCFYLLTITGNMVIICVVS EDPRLRAPMYTFLQHLSFLEIWIY  
 TSTTVPLLLSKLASWGHMLSFPACMAQLYFFVFFGATECFLLAAMAYDRYLAICHPLHYSLMSPDNCAALVT  
 VSWVTGVTGFLPSLLISKLDFCGPNRINHFFCDLPLLIQLSCSSVYVTEMAIFVLSIAVLCICFLLTLVSYV  
 FIVSSILRIPSTSGRMKTFSTCGSHLAVVTIYYGTMI SMYVRPNAHLS PGLNKVISVFYTVVTPLLNPVIYSL  
 RNKDFKEAVRKIVRTKCGVYRARKVGSALTT\*

>rs46530477\_ENSMUSP00000151137\_c.795:C>G\_p.L266V  
ENSMUST00000214132.2|Olfr323-203|ENSMUSG00000043880|-  
|chr11:g.58516075:G>C  
MEPQNLSKVTEFQLLGFQNLLEWQSLLF AIFLCFYLLTITGNMVIICVVS EDPRLRAPMYTFLQHLSFLEIYW  
TSTTVPLLLSKLASWGHMLSFPACMAQLYFFVFFGATECFLLAAMAYDRYLAICHPLHYSLMSPDNCAALVT  
VSWVTGVTGFLPSELLISKLDFCGPNRINHFFCDLPLLIQLSCSSVYVTEMAIFVLSIAVLCICFLLTLVSYV  
FIVSSILRIPSTSGRMKTFSTCGSHLAVVTIYYGTMISMVYRPNNAHVSPELNKVISVFYTVVTPLLNPVIYSL  
RNKDFKEAVRKIVRTKCGVYRVRVKGSA LTT\*

>rs46530477\_ENSMUSP00000145459\_c.235:C>G\_p.S79C  
ENSMUST00000203173.2|Olfr323-202|ENSMUSG00000043880|-  
|chr11:g.58516075:G>C  
EPQNLSKVTEFQLLGFQNLLEWQSLLF AIFLCFYLLTITGNMVIICVDE DVFYMWFPFGCGHLLRDHDLHVC  
APKCTCVTGTQQGHFCLLRHGHSTAEP SYLQPEEQRLQRSCEKNRENQVWGLQSQSERKCPHYV

>rs46530477\_ENSMUSP00000068147\_c.795:C>G\_p.L266V  
ENSMUST00000070804.3|Olfr323-201|ENSMUSG00000043880|-  
|chr11:g.58516075:G>C  
MEPQNLSKVTEFQLLGFQNLLEWQSLLF AIFLCFYLLTITGNMVIICVVS EDPRLRAPMYTFLQHLSFLEIYW  
TSTTVPLLLSKLASWGHMLSFPACMAQLYFFVFFGATECFLLAAMAYDRYLAICHPLHYSLMSPDNCAALVT  
VSWVTGVTGFLPSELLISKLDFCGPNRINHFFCDLPLLIQLSCSSVYVTEMAIFVLSIAVLCICFLLTLVSYV  
FIVSSILRIPSTSGRMKTFSTCGSHLAVVTIYYGTMISMVYRPNNAHVSPELNKVISVFYTVVTPLLNPVIYSL  
RNKDFKEAVRKIVRTKCGVYRVRVKGSA LTT\*

>rs29481153\_ENSMUSP00000150916\_c.529:T>C\_p.F177S  
ENSMUST00000214400.2|Olfr322-  
205|ENSMUSG00000063549|+|chr11:g.58556916:T>C  
MGATNDSTFSSHFILIGFSDRPELERVLF AII LPAYLLTLLGNSIIILVSR LDPHLHTPMYFFLTHLSFLDLSF  
TSSSIPQLLYNLSGPDKTISYVGCALQLV LFLGLGGVECLLLAVMAYDRFVAVCKPLHYMVIMSPRLCVGLVS  
VAWSCGVANSLAMSPVTLSPRCGHRRVDHSLCEMPALIRTACVN TAAVEGTVFVLAIGIVLSPLVFI LVSYG  
YIVRAVLQIRSAAGRQKAFNTCGSHLTVVSLFYGNIIYMYMQPGNSSSQDQ GKFLTFLFYNIIVTPLLNPLIYTL  
RNKEVKGALRRLLLGSRETGKVRAGSIRTRGKLSW\*

>rs29481153\_ENSMUSP00000150410\_c.529:T>C\_p.F177S  
ENSMUST00000216442.2|Olfr322-  
206|ENSMUSG00000063549|+|chr11:g.58556916:T>C  
MGATNDSTFSSHFILIGFSDRPELERVLF AII LPAYLLTLLGNSIIILVSR LDPHLHTPMYFFLTHLSFLDLSF  
TSSSIPQLLYNLSGPDKTISYVGCALQLV LFLGLGGVECLLLAVMAYDRFVAVCKPLHYMVIMSPRLCVGLVS  
VAWSCGVANSLAMSPVTLSPRCGHRRVDHSLCEMPALIRTACVN TAAVEGTVFVLAIGIVLSPLVFI LVSYG  
YIVRAVLQIRSAAGRQKAFNTCGSHLTVVSLFYGNIIYMYMQPGNSSSQDQ GKFLTFLFYNIIVTPLLNPLIYTL  
RNKEVKGALRRLLLGSRETGKVRAGSIRTRGKLSW\*

>rs29481153\_ENSMUSP00000149062\_c.529:T>C\_p.F177S  
ENSMUST00000217399.2|Olfr322-  
207|ENSMUSG00000063549|+|chr11:g.58556916:T>C  
MGATNDSTFSSHFILIGFSDRPELERVLF AII LPAYLLTLLGNSIIILVSR LDPHLHTPMYFFLTHLSFLDLSF  
TSSSIPQLLYNLSGPDKTISYVGCALQLV LFLGLGGVECLLLAVMAYDRFVAVCKPLHYMVIMSPRLCVGLVS  
VAWSCGVANSLAMSPVTLSPRCGHRRVDHSLCEMPALIRTACVN TAAVEGTVFVLAIGIVLSPLVFI LVSYG  
YIVRAVLQIRSAAGRQKAFNTCGSHLTVVSLFYGNIIYMYMQPGNSSSQDQ GKFLTFLFYNIIVTPLLNPLIYTL  
RNKEVKGALRRLLLGSRETGKVRAGSIRTRGKLSW\*

>rs29481153\_ENSMUSP00000150990\_c.529:T>C\_p.F177S  
ENSMUST00000214392.2|Olfr322-  
204|ENSMUSG00000063549|+|chr11:g.58556916:T>C  
MGATNDSTFSSHFILIGFSDRPELERVLF AII LPAYLLTLLGNSIIILVSR LDPHLHTPMYFFLTHLSFLDLSF  
TSSSIPQLLYNLSGPDKTISYVGCALQLV LFLGLGGVECLLLAVMAYDRFVAVCKPLHYMVIMSPRLCVGLVS  
VAWSCGVANSLAMSPVTLSPRCGHRRVDHSLCEMPALIRTACVN TAAVEGTVFVLAIGIVLSPLVFI LVSYG  
YIVRAVLQIRSAAGRQKAFNTCGSHLTVVSLFYGNIIYMYMQPGNSSSQDQ GKFLTFLFYNIIVTPLLNPLIYTL  
RNKEVKGALRRLLLGSRETGKVRAGSIRTRGKLSW\*

>rs29481153\_ENSMUSP00000150004\_c.529:T>C\_p.F177S  
ENSMUST00000213793.2|Olfr322-  
203|ENSMUSG00000063549|+|chr11:g.58556916:T>C  
MGATNDSTFSSHFILIGFSDRPELERVLF AII LPAYLLTLLGNSIIILVSR LDPHLHTPMYFFLTHLSFLDLSF  
TSSSIPQLLYNLSGPDKTISYVGCALQLV LFLGLGGVECLLLAVMAYDRFVAVCKPLHYMVIMSPRLCVGLVS

VAWSCGVANSLAMSPVTLTSLPRCGHRRVDHSLCEMPALIRTACVNTAAVEGTVFVLAIGIVLSPLVFIIVSYG  
YIVRAVLQIRSAAGRQKAFNTCGSHLTVVSLFYGNIIYMYMQPGNSSSQDQGKFLTLFYNIIVTPLLNPLIYTL  
RNKEVKGALRRLLLGSRETGKVRAGSIRTRGKLSW\*  
>rs29481153\_ENSMUSP00000150953\_c.529:T>C\_p.F177S  
ENSMUST00000213232.2|Olfr322-  
202|ENSMUSG00000063549|+|chr11:g.58556916:T>C  
MGATNDSTFSSHFILIGFSDRPELERVLFAIILPAYLLTLLGNSIIILVSRDPLHHTPMYFFLTHLSFLDLSF  
TSSSIPQLLYNLGSPDKTISYVGCALQLVLFGLGGVECLLLAVMAYDRFVAVCKPLHYMVIMSPRLCVGLVS  
VAWSCGVANSLAMSPVTLTSLPRCGHRRVDHSLCEMPALIRTACVNTAAVEGTVFVLAIGIVLSPLVFIIVSYG  
YIVRAVLQIRSAAGRQKAFNTCGSHLTVVSLFYGNIIYMYMQPGNSSSQDQGKFLTLFYNIIVTPLLNPLIYTL  
RNKEVKGALRRLLLGSRETGKVRAGSIRTRGKLSW\*  
>rs29481153\_ENSMUSP00000071913\_c.529:T>C\_p.F177S  
ENSMUST00000072030.4|Olfr322-  
201|ENSMUSG00000063549|+|chr11:g.58556916:T>C  
MGATNDSTFSSHFILIGFSDRPELERVLFAIILPAYLLTLLGNSIIILVSRDPLHHTPMYFFLTHLSFLDLSF  
TSSSIPQLLYNLGSPDKTISYVGCALQLVLFGLGGVECLLLAVMAYDRFVAVCKPLHYMVIMSPRLCVGLVS  
VAWSCGVANSLAMSPVTLTSLPRCGHRRVDHSLCEMPALIRTACVNTAAVEGTVFVLAIGIVLSPLVFIIVSYG  
YIVRAVLQIRSAAGRQKAFNTCGSHLTVVSLFYGNIIYMYMQPGNSSSQDQGKFLTLFYNIIVTPLLNPLIYTL  
RNKEVKGALRRLLLGSRETGKVRAGSIRTRGKLSW\*  
>rs29484354\_ENSMUSP00000150916\_c.624:T>A\_p.S209T  
ENSMUST00000214400.2|Olfr322-  
205|ENSMUSG00000063549|+|chr11:g.58557011:T>A  
MGATNDSTFSSHFILIGFSDRPELERVLFAIILPAYLLTLLGNSIIILVSRDPLHHTPMYFFLTHLSFLDLSF  
TSSSIPQLLYNLGSPDKTISYVGCALQLVLFGLGGVECLLLAVMAYDRFVAVCKPLHYMVIMSPRLCVGLVS  
VAWSCGVANSLAMSPVTLTSLPRCGHRRVDHFLCEMPALIRTACVNTAAVEGTVFVLAIGIVLTPLVFIIVSYG  
YIVRAVLQIRSAAGRQKAFNTCGSHLTVVSLFYGNIIYMYMQPGNSSSQDQGKFLTLFYNIIVTPLLNPLIYTL  
RNKEVKGALRRLLLGSRETGKVRAGSIRTRGKLSW\*  
>rs29484354\_ENSMUSP00000150410\_c.624:T>A\_p.S209T  
ENSMUST00000216442.2|Olfr322-  
206|ENSMUSG00000063549|+|chr11:g.58557011:T>A  
MGATNDSTFSSHFILIGFSDRPELERVLFAIILPAYLLTLLGNSIIILVSRDPLHHTPMYFFLTHLSFLDLSF  
TSSSIPQLLYNLGSPDKTISYVGCALQLVLFGLGGVECLLLAVMAYDRFVAVCKPLHYMVIMSPRLCVGLVS  
VAWSCGVANSLAMSPVTLTSLPRCGHRRVDHFLCEMPALIRTACVNTAAVEGTVFVLAIGIVLTPLVFIIVSYG  
YIVRAVLQIRSAAGRQKAFNTCGSHLTVVSLFYGNIIYMYMQPGNSSSQDQGKFLTLFYNIIVTPLLNPLIYTL  
RNKEVKGALRRLLLGSRETGKVRAGSIRTRGKLSW\*  
>rs29484354\_ENSMUSP00000149062\_c.624:T>A\_p.S209T  
ENSMUST00000217399.2|Olfr322-  
207|ENSMUSG00000063549|+|chr11:g.58557011:T>A  
MGATNDSTFSSHFILIGFSDRPELERVLFAIILPAYLLTLLGNSIIILVSRDPLHHTPMYFFLTHLSFLDLSF  
TSSSIPQLLYNLGSPDKTISYVGCALQLVLFGLGGVECLLLAVMAYDRFVAVCKPLHYMVIMSPRLCVGLVS  
VAWSCGVANSLAMSPVTLTSLPRCGHRRVDHFLCEMPALIRTACVNTAAVEGTVFVLAIGIVLTPLVFIIVSYG  
YIVRAVLQIRSAAGRQKAFNTCGSHLTVVSLFYGNIIYMYMQPGNSSSQDQGKFLTLFYNIIVTPLLNPLIYTL  
RNKEVKGALRRLLLGSRETGKVRAGSIRTRGKLSW\*  
>rs29484354\_ENSMUSP00000150990\_c.624:T>A\_p.S209T  
ENSMUST00000214392.2|Olfr322-  
204|ENSMUSG00000063549|+|chr11:g.58557011:T>A  
MGATNDSTFSSHFILIGFSDRPELERVLFAIILPAYLLTLLGNSIIILVSRDPLHHTPMYFFLTHLSFLDLSF  
TSSSIPQLLYNLGSPDKTISYVGCALQLVLFGLGGVECLLLAVMAYDRFVAVCKPLHYMVIMSPRLCVGLVS  
VAWSCGVANSLAMSPVTLTSLPRCGHRRVDHFLCEMPALIRTACVNTAAVEGTVFVLAIGIVLTPLVFIIVSYG  
YIVRAVLQIRSAAGRQKAFNTCGSHLTVVSLFYGNIIYMYMQPGNSSSQDQGKFLTLFYNIIVTPLLNPLIYTL  
RNKEVKGALRRLLLGSRETGKVRAGSIRTRGKLSW\*  
>rs29484354\_ENSMUSP00000150004\_c.624:T>A\_p.S209T  
ENSMUST00000213793.2|Olfr322-  
203|ENSMUSG00000063549|+|chr11:g.58557011:T>A  
MGATNDSTFSSHFILIGFSDRPELERVLFAIILPAYLLTLLGNSIIILVSRDPLHHTPMYFFLTHLSFLDLSF  
TSSSIPQLLYNLGSPDKTISYVGCALQLVLFGLGGVECLLLAVMAYDRFVAVCKPLHYMVIMSPRLCVGLVS  
VAWSCGVANSLAMSPVTLTSLPRCGHRRVDHFLCEMPALIRTACVNTAAVEGTVFVLAIGIVLTPLVFIIVSYG

YIVRAVLQIRSAAGRQKAFNTCGSHLTVVSLFYGNIIYMYMQPGNSSSSQDQGKFLTLFYNIIVTPLLNPLIYTL  
RNKEVKGALRRLLLGSRETGKVRAGSIRTRGKLSW\*  
>rs29484354\_ENSMUSP00000150953\_c.624:T>A\_p.S209T  
ENSMUST00000213232.2|Olfr322-  
202|ENSMUSG00000063549|+|chr11:g.58557011:T>A  
MGATNDSTFHSFILIGFSDRPELERVLFAIILPAYLLTLLGNSIIILVSRLDPLHPTMYFFLTHLSFLDLSF  
TSSSIPQLLYNLGSPDKTISYVGCALQLVFLGLGGVECLLLAVMAYDRFVAVCKPLHYMVIMSPRLCVGLVS  
VAWSCGVANSLAMSPVTLSPRCGHRRVDHFLCEMPALIRTACVNTAAVEGTVFVLAIGIVLTPLVFILVSYG  
YIVRAVLQIRSAAGRQKAFNTCGSHLTVVSLFYGNIIYMYMQPGNSSSSQDQGKFLTLFYNIIVTPLLNPLIYTL  
RNKEVKGALRRLLLGSRETGKVRAGSIRTRGKLSW\*  
>rs29484354\_ENSMUSP00000071913\_c.624:T>A\_p.S209T  
ENSMUST00000072030.4|Olfr322-  
201|ENSMUSG00000063549|+|chr11:g.58557011:T>A  
MGATNDSTFHSFILIGFSDRPELERVLFAIILPAYLLTLLGNSIIILVSRLDPLHPTMYFFLTHLSFLDLSF  
TSSSIPQLLYNLGSPDKTISYVGCALQLVFLGLGGVECLLLAVMAYDRFVAVCKPLHYMVIMSPRLCVGLVS  
VAWSCGVANSLAMSPVTLSPRCGHRRVDHFLCEMPALIRTACVNTAAVEGTVFVLAIGIVLTPLVFILVSYG  
YIVRAVLQIRSAAGRQKAFNTCGSHLTVVSLFYGNIIYMYMQPGNSSSSQDQGKFLTLFYNIIVTPLLNPLIYTL  
RNKEVKGALRRLLLGSRETGKVRAGSIRTRGKLSW\*  
>rs29405718\_ENSMUSP00000150916\_c.934:G>A\_p.G312E  
ENSMUST00000214400.2|Olfr322-  
205|ENSMUSG00000063549|+|chr11:g.58557321:G>A  
MGATNDSTFHSFILIGFSDRPELERVLFAIILPAYLLTLLGNSIIILVSRLDPLHPTMYFFLTHLSFLDLSF  
TSSSIPQLLYNLGSPDKTISYVGCALQLVFLGLGGVECLLLAVMAYDRFVAVCKPLHYMVIMSPRLCVGLVS  
VAWSCGVANSLAMSPVTLSPRCGHRRVDHFLCEMPALIRTACVNTAAVEGTVFVLAIGIVLSPLVFILVSYG  
YIVRAVLQIRSAAGRQKAFNTCGSHLTVVSLFYGNIIYMYMQPGNSSSSQDQGKFLTLFYNIIVTPLLNPLIYTL  
RNKEVKGALRRLLLGSRETEKVRAGSIRTRGKLSW\*  
>rs29405718\_ENSMUSP00000150410\_c.934:G>A\_p.G312E  
ENSMUST00000216442.2|Olfr322-  
206|ENSMUSG00000063549|+|chr11:g.58557321:G>A  
MGATNDSTFHSFILIGFSDRPELERVLFAIILPAYLLTLLGNSIIILVSRLDPLHPTMYFFLTHLSFLDLSF  
TSSSIPQLLYNLGSPDKTISYVGCALQLVFLGLGGVECLLLAVMAYDRFVAVCKPLHYMVIMSPRLCVGLVS  
VAWSCGVANSLAMSPVTLSPRCGHRRVDHFLCEMPALIRTACVNTAAVEGTVFVLAIGIVLSPLVFILVSYG  
YIVRAVLQIRSAAGRQKAFNTCGSHLTVVSLFYGNIIYMYMQPGNSSSSQDQGKFLTLFYNIIVTPLLNPLIYTL  
RNKEVKGALRRLLLGSRETEKVRAGSIRTRGKLSW\*  
>rs29405718\_ENSMUSP00000149062\_c.934:G>A\_p.G312E  
ENSMUST00000217399.2|Olfr322-  
207|ENSMUSG00000063549|+|chr11:g.58557321:G>A  
MGATNDSTFHSFILIGFSDRPELERVLFAIILPAYLLTLLGNSIIILVSRLDPLHPTMYFFLTHLSFLDLSF  
TSSSIPQLLYNLGSPDKTISYVGCALQLVFLGLGGVECLLLAVMAYDRFVAVCKPLHYMVIMSPRLCVGLVS  
VAWSCGVANSLAMSPVTLSPRCGHRRVDHFLCEMPALIRTACVNTAAVEGTVFVLAIGIVLSPLVFILVSYG  
YIVRAVLQIRSAAGRQKAFNTCGSHLTVVSLFYGNIIYMYMQPGNSSSSQDQGKFLTLFYNIIVTPLLNPLIYTL  
RNKEVKGALRRLLLGSRETEKVRAGSIRTRGKLSW\*  
>rs29405718\_ENSMUSP00000150990\_c.934:G>A\_p.G312E  
ENSMUST00000214392.2|Olfr322-  
204|ENSMUSG00000063549|+|chr11:g.58557321:G>A  
MGATNDSTFHSFILIGFSDRPELERVLFAIILPAYLLTLLGNSIIILVSRLDPLHPTMYFFLTHLSFLDLSF  
TSSSIPQLLYNLGSPDKTISYVGCALQLVFLGLGGVECLLLAVMAYDRFVAVCKPLHYMVIMSPRLCVGLVS  
VAWSCGVANSLAMSPVTLSPRCGHRRVDHFLCEMPALIRTACVNTAAVEGTVFVLAIGIVLSPLVFILVSYG  
YIVRAVLQIRSAAGRQKAFNTCGSHLTVVSLFYGNIIYMYMQPGNSSSSQDQGKFLTLFYNIIVTPLLNPLIYTL  
RNKEVKGALRRLLLGSRETEKVRAGSIRTRGKLSW\*  
>rs29405718\_ENSMUSP00000150004\_c.934:G>A\_p.G312E  
ENSMUST00000213793.2|Olfr322-  
203|ENSMUSG00000063549|+|chr11:g.58557321:G>A  
MGATNDSTFHSFILIGFSDRPELERVLFAIILPAYLLTLLGNSIIILVSRLDPLHPTMYFFLTHLSFLDLSF  
TSSSIPQLLYNLGSPDKTISYVGCALQLVFLGLGGVECLLLAVMAYDRFVAVCKPLHYMVIMSPRLCVGLVS  
VAWSCGVANSLAMSPVTLSPRCGHRRVDHFLCEMPALIRTACVNTAAVEGTVFVLAIGIVLSPLVFILVSYG  
YIVRAVLQIRSAAGRQKAFNTCGSHLTVVSLFYGNIIYMYMQPGNSSSSQDQGKFLTLFYNIIVTPLLNPLIYTL  
RNKEVKGALRRLLLGSRETEKVRAGSIRTRGKLSW\*



>rs29405718\_ENSMUSP00000150953\_c.934:G>A\_p.G312E  
ENSMUST00000213232.2|Olfr322-  
202|ENSMUSG00000063549|+|chr11:g.58557321:G>A  
MGATNDSTFSSHFILIGFSDRPELERVLFMAILPAYLLTLLGNSIIILVSRDLPHLHTPMYFFLTHLSFLDLSF  
TSSSIPQLLYNLSPDKTISYVGCALQLVFLGLGGVECLLLAVMAYDRFVAVCKPLHYMVIMSRLCVGLVS  
VAWSCGVANSLAMSPVTLSPRCGHRRVDHFLCEMPALIRTACVNTAAVEGTVFVLAIGIVLSPLVFIIVSYG  
YIVRAVLQIRSAAGRQKAFNTEGSHLTVVSLFYGNIIYMYMQPGNSSSQDQGKFLTLFYNIIVTPLLNPLIYTL  
RNKEVKGALRRLLLGSRETEKVRAGSIRTRGKLSW\*  
>rs29405718\_ENSMUSP00000071913\_c.934:G>A\_p.G312E  
ENSMUST00000072030.4|Olfr322-  
201|ENSMUSG00000063549|+|chr11:g.58557321:G>A  
MGATNDSTFSSHFILIGFSDRPELERVLFMAILPAYLLTLLGNSIIILVSRDLPHLHTPMYFFLTHLSFLDLSF  
TSSSIPQLLYNLSPDKTISYVGCALQLVFLGLGGVECLLLAVMAYDRFVAVCKPLHYMVIMSRLCVGLVS  
VAWSCGVANSLAMSPVTLSPRCGHRRVDHFLCEMPALIRTACVNTAAVEGTVFVLAIGIVLSPLVFIIVSYG  
YIVRAVLQIRSAAGRQKAFNTEGSHLTVVSLFYGNIIYMYMQPGNSSSQDQGKFLTLFYNIIVTPLLNPLIYTL  
RNKEVKGALRRLLLGSRETEKVRAGSIRTRGKLSW\*  
>rs26962585\_ENSMUSP00000150051\_c.42:G>A\_p.V15I  
ENSMUST00000214662.2|Olfr320-  
202|ENSMUSG00000107711|+|chr11:g.58574743:G>A  
METGNRSCGTDFSLIGLGFQDGHMDTFLFTLIAILFAVAFIGNITLVLLIRLDCRLHTPMYFLLSQLSIIDMMY  
ISTTVPKVAANFLSDTKAISFLGCAVQAFVFLTLGGSEALLGFMSYDRYIAICRPLHYPVLMRSRKCICSMVA  
GAWSSSSINAFMHTVYVVFQLPFCGSRMVNHHFFCEVPSLLPLVCEDTSQYEHTVLVSGLVILLPLFLAILASYA  
RVLVVVLQMGSGKGQSRVAVSTCSSHLTVASLFYVTGLSTYTPHSLHSPGRDKVVAVLYSIVTLVLPFIYSL  
RNKEVMGALRRQMG\*  
>rs26962585\_ENSMUSP00000145531\_c.42:G>A\_p.V15I  
ENSMUST00000204718.3|Olfr320-  
201|ENSMUSG00000107711|+|chr11:g.58574743:G>A  
METGNRSCGTDFSLIGLGFQDGHMDTFLFTLIAILFAVAFIGNITLVLLIRLDCRLHTPMYFLLSQLSIIDMMY  
ISTTVPKVAANFLSDTKAISFLGCAVQAFVFLTLGGSEALLGFMSYDRYIAICRPLHYPVLMRSRKCICSMVA  
GAWSSSSINAFMHTVYVVFQLPFCGSRMVNHHFFCEVPSLLPLVCEDTSQYEHTVLVSGLVILLPLFLAILASYA  
RVLVVVLQMGSGKGQSRVAVSTCSSHLTVASLFYVTGLSTYTPHSLHSPGRDKVVAVLYSIVTLVLPFIYSL  
RNKEVMGALRRQMG\*  
>rs26962582\_ENSMUSP00000150051\_c.228:A>C\_p.T77P  
ENSMUST00000214662.2|Olfr320-  
202|ENSMUSG00000107711|+|chr11:g.58574929:A>C  
METGNRSCGTDFSLVGLGFQDGHMDTFLFTLIAILFAVAFIGNITLVLLIRLDCRLHTPMYFLLSQLSIIDMMY  
ISTPVPKVAANFLSDTKAISFLGCAVQAFVFLTLGGSEALLGFMSYDRYIAICRPLHYPVLMRSRKCICSMVA  
GAWSSSSINAFMHTVYVVFQLPFCGSRMVNHHFFCEVPSLLPLVCEDTSQYEHTVLVSGLVILLPLFLAILASYA  
RVLVVVLQMGSGKGQSRVAVSTCSSHLTVASLFYVTGLSTYTPHSLHSPGRDKVVAVLYSIVTLVLPFIYSL  
RNKEVMGALRRQMG\*  
>rs26962582\_ENSMUSP00000145531\_c.228:A>C\_p.T77P  
ENSMUST00000204718.3|Olfr320-  
201|ENSMUSG00000107711|+|chr11:g.58574929:A>C  
METGNRSCGTDFSLVGLGFQDGHMDTFLFTLIAILFAVAFIGNITLVLLIRLDCRLHTPMYFLLSQLSIIDMMY  
ISTPVPKVAANFLSDTKAISFLGCAVQAFVFLTLGGSEALLGFMSYDRYIAICRPLHYPVLMRSRKCICSMVA  
GAWSSSSINAFMHTVYVVFQLPFCGSRMVNHHFFCEVPSLLPLVCEDTSQYEHTVLVSGLVILLPLFLAILASYA  
RVLVVVLQMGSGKGQSRVAVSTCSSHLTVASLFYVTGLSTYTPHSLHSPGRDKVVAVLYSIVTLVLPFIYSL  
RNKEVMGALRRQMG\*  
>rs46167475\_ENSMUSP00000150051\_c.576:T>C\_p.S193P  
ENSMUST00000214662.2|Olfr320-  
202|ENSMUSG00000107711|+|chr11:g.58575277:T>C  
METGNRSCGTDFSLVGLGFQDGHMDTFLFTLIAILFAVAFIGNITLVLLIRLDCRLHTPMYFLLSQLSIIDMMY  
ISTTVPKVAANFLSDTKAISFLGCAVQAFVFLTLGGSEALLGFMSYDRYIAICRPLHYPVLMRSRKCICSMVA  
GAWSSSSINAFMHTVYVVFQLPFCGSRMVNHHFFCEVPSLLPLVCEDTPOYEHTVLVSGLVILLPLFLAILASYA  
RVLVVVLQMGSGKGQSRVAVSTCSSHLTVASLFYVTGLSTYTPHSLHSPGRDKVVAVLYSIVTLVLPFIYSL  
RNKEVMGALRRQMG\*

>rs46167475\_ENSMUSP00000145531\_c.576:T>C\_p.S193P  
ENSMUST00000204718.3|Olfr320-  
201|ENSMUSG00000107711|+|chr11:g.58575277:T>C  
METGNRSCGTDFTLVGLFQDGHMDTFLFTLIAILFAVAFIGNITLVLLIIRLDCRLHTPMYFLLSOLSIIIDMMY  
ISTTVPKVAANFLSDTKAISFLGCAVQAFVFLTLGGSEALLLGFMYSYDRYIAICRPLHYPVLMRSKICCSMVA  
GAWSSSSINAFMHTVYVVFQLPFCGSRMVNHHFFCEVPSLLPLVCEDTPQYEHTVLVSGLVILLPLFLAILASYA  
RVLVVVLFQMGSGQGQSRVAVSTCSSHLTVASLFYVTGLSTYTPHSLHSPGRDKVVAVLYSIVTIVLNPFIYSL  
RNKEVMGALRRQMG\*

>rs26962562\_ENSMUSP00000150883\_c.120:G>T\_p.G41C  
ENSMUST00000215962.2|Olfr319-  
203|ENSMUSG00000064044|+|chr11:g.58592649:G>T  
METGNHSCGTDFTLVGLFQYGHMDTFLFTVISILFAVALICNITLVLLIIRLDRRLHTPMYFFLSOLSIIIDMMC  
ISTTVPKMGANFISDTKAISVLGCEIQVFMFMSLAGCEALLLGFMYSYDRYIAICQPLHYPVLMRSKICCSMVA  
SAWSSSSINALAHTVYVVFQLPFCGSRMVNHHFFCEVPSLLPLVCEDTSQYEHMIVMSVLVLLPLFLAILASYA  
RVLVVVLFQMGSGQGQSRVAVSTCSSHLTVASLFYVTGLCTYTPHSLHSPGRDKVVAVLYSIVTIVLNPFIYSL  
RNKEVIGALRRQMG\*

>rs26962562\_ENSMUSP00000076232\_c.120:G>T\_p.G41C  
ENSMUST00000076965.2|Olfr319-  
201|ENSMUSG00000064044|+|chr11:g.58592649:G>T  
METGNHSCGTDFTLVGLFQYGHMDTFLFTVISILFAVALICNITLVLLIIRLDRRLHTPMYFFLSOLSIIIDMMC  
ISTTVPKMGANFISDTKAISVLGCEIQVFMFMSLAGCEALLLGFMYSYDRYIAICQPLHYPVLMRSKICCSMVA  
SAWSSSSINALAHTVYVVFQLPFCGSRMVNHHFFCEVPSLLPLVCEDTSQYEHMIVMSVLVLLPLFLAILASYA  
RVLVVVLFQMGSGQGQSRVAVSTCSSHLTVASLFYVTGLCTYTPHSLHSPGRDKVVAVLYSIVTIVLNPFIYSL  
RNKEVIGALRRQMG\*

>rs29425081\_ENSMUSP00000150883\_c.160:G>T\_p.R54I  
ENSMUST00000215962.2|Olfr319-  
203|ENSMUSG00000064044|+|chr11:g.58592689:G>T  
METGNHSCGTDFTLVGLFQYGHMDTFLFTVISILFAVALIGNITLVLLIIRLDRILHTPMYFFLSOLSIIIDMMC  
ISTTVPKMGANFISDTKAISVLGCEIQVFMFMSLAGCEALLLGFMYSYDRYIAICQPLHYPVLMRSKICCSMVA  
SAWSSSSINALAHTVYVVFQLPFCGSRMVNHHFFCEVPSLLPLVCEDTSQYEHMIVMSVLVLLPLFLAILASYA  
RVLVVVLFQMGSGQGQSRVAVSTCSSHLTVASLFYVTGLCTYTPHSLHSPGRDKVVAVLYSIVTIVLNPFIYSL  
RNKEVIGALRRQMG\*

>rs29425081\_ENSMUSP00000076232\_c.160:G>T\_p.R54I  
ENSMUST00000076965.2|Olfr319-  
201|ENSMUSG00000064044|+|chr11:g.58592689:G>T  
METGNHSCGTDFTLVGLFQYGHMDTFLFTVISILFAVALIGNITLVLLIIRLDRILHTPMYFFLSOLSIIIDMMC  
ISTTVPKMGANFISDTKAISVLGCEIQVFMFMSLAGCEALLLGFMYSYDRYIAICQPLHYPVLMRSKICCSMVA  
SAWSSSSINALAHTVYVVFQLPFCGSRMVNHHFFCEVPSLLPLVCEDTSQYEHMIVMSVLVLLPLFLAILASYA  
RVLVVVLFQMGSGQGQSRVAVSTCSSHLTVASLFYVTGLCTYTPHSLHSPGRDKVVAVLYSIVTIVLNPFIYSL  
RNKEVIGALRRQMG\*

>rs48879405\_ENSMUSP00000150883\_c.175:T>C\_p.M59T  
ENSMUST00000215962.2|Olfr319-  
203|ENSMUSG00000064044|+|chr11:g.58592704:T>C  
METGNHSCGTDFTLVGLFQYGHMDTFLFTVISILFAVALIGNITLVLLIIRLDRRLHTPTYFFLSOLSIIIDMMC  
ISTTVPKMGANFISDTKAISVLGCEIQVFMFMSLAGCEALLLGFMYSYDRYIAICQPLHYPVLMRSKICCSMVA  
SAWSSSSINALAHTVYVVFQLPFCGSRMVNHHFFCEVPSLLPLVCEDTSQYEHMIVMSVLVLLPLFLAILASYA  
RVLVVVLFQMGSGQGQSRVAVSTCSSHLTVASLFYVTGLCTYTPHSLHSPGRDKVVAVLYSIVTIVLNPFIYSL  
RNKEVIGALRRQMG\*

>rs48879405\_ENSMUSP00000076232\_c.175:T>C\_p.M59T  
ENSMUST00000076965.2|Olfr319-  
201|ENSMUSG00000064044|+|chr11:g.58592704:T>C  
METGNHSCGTDFTLVGLFQYGHMDTFLFTVISILFAVALIGNITLVLLIIRLDRRLHTPTYFFLSOLSIIIDMMC  
ISTTVPKMGANFISDTKAISVLGCEIQVFMFMSLAGCEALLLGFMYSYDRYIAICQPLHYPVLMRSKICCSMVA  
SAWSSSSINALAHTVYVVFQLPFCGSRMVNHHFFCEVPSLLPLVCEDTSQYEHMIVMSVLVLLPLFLAILASYA  
RVLVVVLFQMGSGQGQSRVAVSTCSSHLTVASLFYVTGLCTYTPHSLHSPGRDKVVAVLYSIVTIVLNPFIYSL  
RNKEVIGALRRQMG\*

>rs29394878\_ENSMUSP00000150883\_c.530:T>A\_p.F177L  
ENSMUST00000215962.2|Olfr319-  
203|ENSMUSG00000064044|+|chr11:g.58593059:T>A  
METGNHSCGTDFTLVGLFQYGHMDTFLFTVISILFAVALIGNITLVLLIIRLDRLHTPMYFFLSQLSIIDMMC  
ISTTVPKMGANFISDTKAI SVL GCEIQVFMFMSLAGCEALLGFMSYDRYIAICQPLHYPVLMRSKICCSMVA  
SAWSSSSINALAHTVYVVFQLPFCGSRMVNHLFCEVPSLLPLVCEDTSQYEHMIVMSVLVLLVLLPFLAILASYA  
RVLVVVFQMGSGQGQSRVAVSTCSSHLTVASLFYVTGLCTYTPHSLHSPGRDKVAVLYSIVTPVLNPFIIYSL  
RNKEVIGALRRQMG\*

>rs29394878\_ENSMUSP00000076232\_c.530:T>A\_p.F177L  
ENSMUST00000076965.2|Olfr319-  
201|ENSMUSG00000064044|+|chr11:g.58593059:T>A  
METGNHSCGTDFTLVGLFQYGHMDTFLFTVISILFAVALIGNITLVLLIIRLDRLHTPMYFFLSQLSIIDMMC  
ISTTVPKMGANFISDTKAI SVL GCEIQVFMFMSLAGCEALLGFMSYDRYIAICQPLHYPVLMRSKICCSMVA  
SAWSSSSINALAHTVYVVFQLPFCGSRMVNHLFCEVPSLLPLVCEDTSQYEHMIVMSVLVLLVLLPFLAILASYA  
RVLVVVFQMGSGQGQSRVAVSTCSSHLTVASLFYVTGLCTYTPHSLHSPGRDKVAVLYSIVTPVLNPFIIYSL  
RNKEVIGALRRQMG\*

>rs48062366\_ENSMUSP00000150883\_c.906:A>G\_p.R303G  
ENSMUST00000215962.2|Olfr319-  
203|ENSMUSG00000064044|+|chr11:g.58593435:A>G  
METGNHSCGTDFTLVGLFQYGHMDTFLFTVISILFAVALIGNITLVLLIIRLDRLHTPMYFFLSQLSIIDMMC  
ISTTVPKMGANFISDTKAI SVL GCEIQVFMFMSLAGCEALLGFMSYDRYIAICQPLHYPVLMRSKICCSMVA  
SAWSSSSINALAHTVYVVFQLPFCGSRMVNHLFCEVPSLLPLVCEDTSQYEHMIVMSVLVLLVLLPFLAILASYA  
RVLVVVFQMGSGQGQSRVAVSTCSSHLTVASLFYVTGLCTYTPHSLHSPGRDKVAVLYSIVTPVLNPFIIYSL  
RNKEVIGALRRQMG\*

>rs48062366\_ENSMUSP00000076232\_c.906:A>G\_p.R303G  
ENSMUST00000076965.2|Olfr319-  
201|ENSMUSG00000064044|+|chr11:g.58593435:A>G  
METGNHSCGTDFTLVGLFQYGHMDTFLFTVISILFAVALIGNITLVLLIIRLDRLHTPMYFFLSQLSIIDMMC  
ISTTVPKMGANFISDTKAI SVL GCEIQVFMFMSLAGCEALLGFMSYDRYIAICQPLHYPVLMRSKICCSMVA  
SAWSSSSINALAHTVYVVFQLPFCGSRMVNHLFCEVPSLLPLVCEDTSQYEHMIVMSVLVLLVLLPFLAILASYA  
RVLVVVFQMGSGQGQSRVAVSTCSSHLTVASLFYVTGLCTYTPHSLHSPGRDKVAVLYSIVTPVLNPFIIYSL  
RNKEVIGALRRQMG\*

>ENSMUSP00000150575\_c.655:G>A\_p.G219D ENSMUST00000215513.2|Olfr317-  
202|ENSMUSG00000060030|-|chr11:g.58623334:C>T  
MGATNDSTFHSFILTGFSDRPELERVLFAILLPAYLLTLLGNSTIILVSRDPLHHTPMYFFLTHLSFLDLSF  
TSSSIPQLLYNLGSPDKTISYVGCALQLVFLGLGGVECLLLAVMAYDRFVAICKPLHYMVIMSRLCVGLVS  
VAWSCGVANSLAMSPATLSLPRCGHHRVDHFLCEMPALIRMACVNTAVVEGIAFILAI GIVLSPLVFI LVS YD  
YIVRAVLRIS SAAGRQKAFNTCGSHLTVVSLFYGNIIYMYMQPGNSSSQDQGKFLTLFYNI VTP LLNPLIYTL  
RNKEVKGALRRLLLGSRETGKVRASSRWTRGKLSW\*

>ENSMUSP00000150027\_c.655:G>A\_p.G219D ENSMUST00000216196.2|Olfr317-  
203|ENSMUSG00000060030|-|chr11:g.58623334:C>T  
MGATNDSTFHSFILTGFSDRPELERVLFAILLPAYLLTLLGNSTIILVSRDPLHHTPMYFFLTHLSFLDLSF  
TSSSIPQLLYNLGSPDKTISYVGCALQLVFLGLGGVECLLLAVMAYDRFVAICKPLHYMVIMSRLCVGLVS  
VAWSCGVANSLAMSPATLSLPRCGHHRVDHFLCEMPALIRMACVNTAVVEGIAFILAI GIVLSPLVFI LVS YD  
YIVRAVLRIS SAAGRQKAFNTCGSHLTVVSLFYGNIIYMYMQPGNSSSQDQGKFLTLFYNI VTP LLNPLIYTL  
RNKEVKGALRRLLLGSRETGKVRASSRWTRGKLSW\*

>ENSMUSP00000075034\_c.655:G>A\_p.G219D ENSMUST00000075607.5|Olfr317-  
201|ENSMUSG00000060030|-|chr11:g.58623334:C>T  
MGATNDSTFHSFILTGFSDRPELERVLFAILLPAYLLTLLGNSTIILVSRDPLHHTPMYFFLTHLSFLDLSF  
TSSSIPQLLYNLGSPDKTISYVGCALQLVFLGLGGVECLLLAVMAYDRFVAICKPLHYMVIMSRLCVGLVS  
VAWSCGVANSLAMSPATLSLPRCGHHRVDHFLCEMPALIRMACVNTAVVEGIAFILAI GIVLSPLVFI LVS YD  
YIVRAVLRIS SAAGRQKAFNTCGSHLTVVSLFYGNIIYMYMQPGNSSSQDQGKFLTLFYNI VTP LLNPLIYTL  
RNKEVKGALRRLLLGSRETGKVRASSRWTRGKLSW\*

>ENSMUSP00000150575\_c.34:T>C\_p.F12S ENSMUST00000215513.2|Olfr317-  
202|ENSMUSG00000060030|-|chr11:g.58623955:A>G  
MGATNDSTFHSILTGFSDRPELERVLFAILLPAYLLTLLGNSTIILVSRDPLHHTPMYFFLTHLSFLDLSF  
TSSSIPQLLYNLGSPDKTISYVGCALQLVFLGLGGVECLLLAVMAYDRFVAICKPLHYMVIMSRLCVGLVS  
VAWSCGVANSLAMSPATLSLPRCGHHRVDHFLCEMPALIRMACVNTAVVEGIAFILAI GIVLSPLVFI LVS YG

YIVRAVLRISAAAGRQKAFNTCGSHLTVVSLFYGNIIYMYMQPGNSSSQDQGKFLTLFYNIIVTPLLNPLIYTL  
RNKEVKGALRRLLLGSRETGKVRASSRWTRGKLSW\*  
>ENSMUSP00000150027\_c.34:T>C\_p.F12S ENSMUST00000216196.2|Olfr317-  
203|ENSMUSG00000060030|-|chr11:g.58623955:A>G  
MGATNDSTFSSHILTGFSDRPELERVLFALLPAYLLTLLGNSTIILVSRLDPLHPTMYFFLTHLSFLDLSF  
TSSSIPQLLYNLGSPDKTISYVGCALQLVLFGLGGVECLLLAVMAYDRFVAICKPLHYMVIMSPRLCVGLVS  
VAWSCGVANSLAMSPATLSLPRCGHHRVDHFLCEMPALIRMACVNTAVVEGIAFILAIIGIVLSPLVFIILVSYG  
YIVRAVLRISAAAGRQKAFNTCGSHLTVVSLFYGNIIYMYMQPGNSSSQDQGKFLTLFYNIIVTPLLNPLIYTL  
RNKEVKGALRRLLLGSRETGKVRASSRWTRGKLSW\*  
>ENSMUSP00000075034\_c.34:T>C\_p.F12S ENSMUST00000075607.5|Olfr317-  
201|ENSMUSG00000060030|-|chr11:g.58623955:A>G  
MGATNDSTFSSHILTGFSDRPELERVLFALLPAYLLTLLGNSTIILVSRLDPLHPTMYFFLTHLSFLDLSF  
TSSSIPQLLYNLGSPDKTISYVGCALQLVLFGLGGVECLLLAVMAYDRFVAICKPLHYMVIMSPRLCVGLVS  
VAWSCGVANSLAMSPATLSLPRCGHHRVDHFLCEMPALIRMACVNTAVVEGIAFILAIIGIVLSPLVFIILVSYG  
YIVRAVLRISAAAGRQKAFNTCGSHLTVVSLFYGNIIYMYMQPGNSSSQDQGKFLTLFYNIIVTPLLNPLIYTL  
RNKEVKGALRRLLLGSRETGKVRASSRWTRGKLSW\*  
>ENSMUSP00000150575\_c.7:C>T\_p.A3V ENSMUST00000215513.2|Olfr317-  
202|ENSMUSG00000060030|-|chr11:g.58623982:G>A  
MGVTNDSTFSHFILTGFSDRPELERVLFALLPAYLLTLLGNSTIILVSRLDPLHPTMYFFLTHLSFLDLSF  
TSSSIPQLLYNLGSPDKTISYVGCALQLVLFGLGGVECLLLAVMAYDRFVAICKPLHYMVIMSPRLCVGLVS  
VAWSCGVANSLAMSPATLSLPRCGHHRVDHFLCEMPALIRMACVNTAVVEGIAFILAIIGIVLSPLVFIILVSYG  
YIVRAVLRISAAAGRQKAFNTCGSHLTVVSLFYGNIIYMYMQPGNSSSQDQGKFLTLFYNIIVTPLLNPLIYTL  
RNKEVKGALRRLLLGSRETGKVRASSRWTRGKLSW\*  
>ENSMUSP00000150027\_c.7:C>T\_p.A3V ENSMUST00000216196.2|Olfr317-  
203|ENSMUSG00000060030|-|chr11:g.58623982:G>A  
MGVTNDSTFSHFILTGFSDRPELERVLFALLPAYLLTLLGNSTIILVSRLDPLHPTMYFFLTHLSFLDLSF  
TSSSIPQLLYNLGSPDKTISYVGCALQLVLFGLGGVECLLLAVMAYDRFVAICKPLHYMVIMSPRLCVGLVS  
VAWSCGVANSLAMSPATLSLPRCGHHRVDHFLCEMPALIRMACVNTAVVEGIAFILAIIGIVLSPLVFIILVSYG  
YIVRAVLRISAAAGRQKAFNTCGSHLTVVSLFYGNIIYMYMQPGNSSSQDQGKFLTLFYNIIVTPLLNPLIYTL  
RNKEVKGALRRLLLGSRETGKVRASSRWTRGKLSW\*  
>ENSMUSP00000075034\_c.7:C>T\_p.A3V ENSMUST00000075607.5|Olfr317-  
201|ENSMUSG00000060030|-|chr11:g.58623982:G>A  
MGVTNDSTFSHFILTGFSDRPELERVLFALLPAYLLTLLGNSTIILVSRLDPLHPTMYFFLTHLSFLDLSF  
TSSSIPQLLYNLGSPDKTISYVGCALQLVLFGLGGVECLLLAVMAYDRFVAICKPLHYMVIMSPRLCVGLVS  
VAWSCGVANSLAMSPATLSLPRCGHHRVDHFLCEMPALIRMACVNTAVVEGIAFILAIIGIVLSPLVFIILVSYG  
YIVRAVLRISAAAGRQKAFNTCGSHLTVVSLFYGNIIYMYMQPGNSSSQDQGKFLTLFYNIIVTPLLNPLIYTL  
RNKEVKGALRRLLLGSRETGKVRASSRWTRGKLSW\*  
>ENSMUSP00000151136\_c.413:G>T\_p.R138S ENSMUST00000215071.2|Olfr316-  
202|ENSMUSG00000107677|+|chr11:g.58648906:G>T  
MESGNRSCGTDFTLVGLFQDGHMDTFLFTVISILFAVALIGNITLVILIRLDQRLHPTMYFLLSOLSIMDDMY  
ISTTVPKMAANFLSDTKAISFLGCVIQAFVFLTLGGSEALLGFMSYDRYIAICRPLHYPVLMSSKICCSMVA  
SAWSSSSITASVHTVYVVFQLPFCGSRMVNHHFFCEVPSLLPLVCEDETSQYEHTVLVSGLVILLPLFLAILASYA  
RVLVVVIQMGSGKGQSRVAVSTCSSHLTVASLFFVTTTLSTYTPHTLHSPGRDKVVAVLYSIVTPVLNPFYISL  
RNKEVMGALRRQMK\*  
>ENSMUSP00000145187\_c.413:G>T\_p.R138S ENSMUST00000203731.2|Olfr316-  
201|ENSMUSG00000107677|+|chr11:g.58648906:G>T  
MESGNRSCGTDFTLVGLFQDGHMDTFLFTVISILFAVALIGNITLVILIRLDQRLHPTMYFLLSOLSIMDDMY  
ISTTVPKMAANFLSDTKAISFLGCVIQAFVFLTLGGSEALLGFMSYDRYIAICRPLHYPVLMSSKICCSMVA  
SAWSSSSITASVHTVYVVFQLPFCGSRMVNHHFFCEVPSLLPLVCEDETSQYEHTVLVSGLVILLPLFLAILASYA  
RVLVVVIQMGSGKGQSRVAVSTCSSHLTVASLFFVTTTLSTYTPHTLHSPGRDKVVAVLYSIVTPVLNPFYISL  
RNKEVMGALRRQMK\*  
>ENSMUSP00000151136\_c.438:A>G\_p.S147G ENSMUST00000215071.2|Olfr316-  
202|ENSMUSG00000107677|+|chr11:g.58648931:A>G  
MESGNRSCGTDFTLVGLFQDGHMDTFLFTVISILFAVALIGNITLVILIRLDQRLHPTMYFLLSOLSIMDDMY  
ISTTVPKMAANFLSDTKAISFLGCVIQAFVFLTLGGSEALLGFMSYDRYIAICRPLHYPVLMSSKICCSMVA  
GAWSSSSITASVHTVYVVFQLPFCGSRMVNHHFFCEVPSLLPLVCEDETSQYEHTVLVSGLVILLPLFLAILASYA  
RVLVVVIQMGSGKGQSRVAVSTCSSHLTVASLFFVTTTLSTYTPHTLHSPGRDKVVAVLYSIVTPVLNPFYISL  
RNKEVMGALRRQMK\*

>ENSMUSP00000145187\_c.438:A>G\_p.S147G ENSMUST00000203731.2|Olfr316-201|ENSMUSG00000107677|+|chr11:g.58648931:A>G  
MESGNRSCGTDFTLVGLFQDGHMDTFLFTVISILFAVALIGNITLVILIRLDQRLHTPMYFLLSOLSIMDDMMY  
ISTTVPKMAANFLSDTKAISFLGCVIQAFVFLTLGGSEALLLGFMSYDRYIAICRPLHYPVLMRSRKICCSMVA  
GAWSSSSITASVHTVYVVFQLPFCGSRMVNHHFFCEVPSLLPLVCEDTSQYEHTVLVSGLVILLPLFLAILASYA  
RVLVVVIQMGSGKGQSRVAVSTCSSHLTVASLFYVTTLSTYTPHPTLHSPGRDKVVAVLYSIVTPVLNPFIIYSL  
RNKEVMGALRRQMK\*  
>ENSMUSP00000151136\_c.887:GG>A\_p.E296del-fs ENSMUST00000215071.2|Olfr316-202|ENSMUSG00000107677|+|chr11:g.58649380:GG>A  
MESGNRSCGTDFTLVGLFQDGHMDTFLFTVISILFAVALIGNITLVILIRLDQRLHTPMYFLLSOLSIMDDMMY  
ISTTVPKMAANFLSDTKAISFLGCVIQAFVFLTLGGSEALLLGFMSYDRYIAICRPLHYPVLMRSRKICCSMVA  
SAWSSSSITASVHTVYVVFQLPFCGSRMVNHHFFCEVPSLLPLVCEDTSQYEHTVLVSGLVILLPLFLAILASYA  
RVLVVVIQMGSGKGQSRVAVSTCSSHLTVASLFYVTTLSTYTPHPTLHSPGRDKVVAVLYSIVTPVLNPFIIYSL  
RNKESWGP  
>ENSMUSP00000145187\_c.887:GG>A\_p.E296del-fs ENSMUST00000203731.2|Olfr316-201|ENSMUSG00000107677|+|chr11:g.58649380:GG>A  
MESGNRSCGTDFTLVGLFQDGHMDTFLFTVISILFAVALIGNITLVILIRLDQRLHTPMYFLLSOLSIMDDMMY  
ISTTVPKMAANFLSDTKAISFLGCVIQAFVFLTLGGSEALLLGFMSYDRYIAICRPLHYPVLMRSRKICCSMVA  
SAWSSSSITASVHTVYVVFQLPFCGSRMVNHHFFCEVPSLLPLVCEDTSQYEHTVLVSGLVILLPLFLAILASYA  
RVLVVVIQMGSGKGQSRVAVSTCSSHLTVASLFYVTTLSTYTPHPTLHSPGRDKVVAVLYSIVTPVLNPFIIYSL  
RNKESWGP  
>ENSMUSP00000144944\_c.176:G>A\_p.M59I ENSMUST00000203256.4|Olfr315-202|ENSMUSG00000056959|+|chr11:g.58669131:G>A  
MKTSPNSTEADFILLGLFSHTHAHSLLSVVLVIFTASLMGNTLMILLICRDPRLHTPIYFLLSOLSIMDDMMML  
VSTIVPKMAANYLTSTRSISPAGCGSQIFLFLTLAGGECFLLAAMSYDRYVAICFPLRYHVLNPNKLCAYLTV  
GSWLLGAADGLMQAGTILSFPPFCHSRTINHHFFCEAPSLVRLACADTKVFEFFMYICILMLLIPLSLVLASYS  
LILATVLRMRSSAARKKAFTTCCSHLAVVGLFYGAIIFIYMRPKSHQPGKSDKVVSAFYTIPTPVLNPLIYSV  
RNKEVKGALRKWLQKTV\*  
>ENSMUSP00000080248\_c.176:G>A\_p.M59I ENSMUST00000081533.5|Olfr315-201|ENSMUSG00000056959|+|chr11:g.58669131:G>A  
MKTSPNSTEADFILLGLFSHTHAHSLLSVVLVIFTASLMGNTLMILLICRDPRLHTPIYFLLSOLSIMDDMMML  
VSTIVPKMAANYLTSTRSISPAGCGSQIFLFLTLAGGECFLLAAMSYDRYVAICFPLRYHVLNPNKLCAYLTV  
GSWLLGAADGLMQAGTILSFPPFCHSRTINHHFFCEAPSLVRLACADTKVFEFFMYICILMLLIPLSLVLASYS  
LILATVLRMRSSAARKKAFTTCCSHLAVVGLFYGAIIFIYMRPKSHQPGKSDKVVSAFYTIPTPVLNPLIYSV  
RNKEVKGALRKWLQKTV\*  
>ENSMUSP00000144944\_c.633:T>C\_p.S212P ENSMUST00000203256.4|Olfr315-202|ENSMUSG00000056959|+|chr11:g.58669588:T>C  
MKTSPNSTEADFILLGLFSHTHAHSLLSVVLVIFTASLMGNTLMILLICRDPRLHTPMYFLLSOLSIMDDMMML  
VSTIVPKMAANYLTSTRSISPAGCGSQIFLFLTLAGGECFLLAAMSYDRYVAICFPLRYHVLNPNKLCAYLTV  
GSWLLGAADGLMQAGTILSFPPFCHSRTINHHFFCEAPSLVRLACADTKVFEFFMYICILMLLIPLPLVLASYS  
LILATVLRMRSSAARKKAFTTCCSHLAVVGLFYGAIIFIYMRPKSHQPGKSDKVVSAFYTIPTPVLNPLIYSV  
RNKEVKGALRKWLQKTV\*  
>ENSMUSP00000080248\_c.633:T>C\_p.S212P ENSMUST00000081533.5|Olfr315-201|ENSMUSG00000056959|+|chr11:g.58669588:T>C  
MKTSPNSTEADFILLGLFSHTHAHSLLSVVLVIFTASLMGNTLMILLICRDPRLHTPMYFLLSOLSIMDDMMML  
VSTIVPKMAANYLTSTRSISPAGCGSQIFLFLTLAGGECFLLAAMSYDRYVAICFPLRYHVLNPNKLCAYLTV  
GSWLLGAADGLMQAGTILSFPPFCHSRTINHHFFCEAPSLVRLACADTKVFEFFMYICILMLLIPLPLVLASYS  
LILATVLRMRSSAARKKAFTTCCSHLAVVGLFYGAIIFIYMRPKSHQPGKSDKVVSAFYTIPTPVLNPLIYSV  
RNKEVKGALRKWLQKTV\*  
>ENSMUSP00000144944\_c.781:G>T\_p.R261I ENSMUST00000203256.4|Olfr315-202|ENSMUSG00000056959|+|chr11:g.58669736:G>T  
MKTSPNSTEADFILLGLFSHTHAHSLLSVVLVIFTASLMGNTLMILLICRDPRLHTPMYFLLSOLSIMDDMMML  
VSTIVPKMAANYLTSTRSISPAGCGSQIFLFLTLAGGECFLLAAMSYDRYVAICFPLRYHVLNPNKLCAYLTV  
GSWLLGAADGLMQAGTILSFPPFCHSRTINHHFFCEAPSLVRLACADTKVFEFFMYICILMLLIPLSLVLASYS  
LILATVLRMRSSAARKKAFTTCCSHLAVVGLFYGAIIFIYMRPKSHQPGKSDKVVSAFYTIPTPVLNPLIYSV  
RNKEVKGALRKWLQKTV\*  
>ENSMUSP00000080248\_c.781:G>T\_p.R261I ENSMUST00000081533.5|Olfr315-201|ENSMUSG00000056959|+|chr11:g.58669736:G>T

MKTPSNSTEADFILLGLFSHTHAHSLLSVVLVIFTASLMGNTLMILLICRDPRLHTPMYFLLSQLSLMDMML  
VSTIVPKMAANYLTSTRSISPAGCGSQIFLFLTLGAGCEFLLAAMSYDRYVAICFPLRYHVMNPKLCAYLTV  
GSWLLGAADGLMQAGTILSFPPFCHSRTINHHFFCEAPSLVRLACADTKVFEFFMYICILMLLIPLSLVLASYS  
LILATVLRMRSSAARKKAFTTCSHSLAVVGLFYGAIIFIYMI PKSHQPGKSDKVVSFAFYTIFT PVLNPLIYSV  
RNKEVKGALRKWLQKTV\*

>ENSMUSP00000091708\_c.366:G>A\_p.A123T ENSMUST00000094156.12|Fam183b-  
202|ENSMUSG00000049154|-|chr11:g.58683756:C>T  
MAGRVGQMKNQDEVHQNQILRELFKELRAQKLYTQYHVNPLRKVHTITRKPMShWDNLEEPEDAKFLNLIHH  
AAQGPKKKYSETQTEAQEIGWDPNPLINPDRQDHRLNHFRVYHDITLYKTKLWSLGEDDHQK\*

>ENSMUSP00000051960\_c.306:G>A\_p.A103T ENSMUST00000060581.5|Fam183b-  
201|ENSMUSG00000049154|-|chr11:g.58683756:C>T  
MAGRVGQMKNQDEVHQNQILRELFKELRAQKLYTQYHVNPLRKAKFLNLIHHAAGPKKKYSETQTEAQEIG  
WDPNPLINPDRQDHRLNHFRVYHDITLYKTKLWSLGEDDHQK\*

>ENSMUSP00000159142\_c.372:G>A\_p.A125T ENSMUST00000239007.2|Fam183b-  
204|ENSMUSG00000049154|-|chr11:g.58683756:C>T  
MAMAGRVGQMKNQDEVHQNQILRELFKELRAQKLYTQYHVNPLRKVHTITRKPMShWDNLEEPEDAKFLNLI  
HHAAGPKKKYSETQTEAQEIGWDPNPLINPDRQDHRLNHFRVYHDITLYKTKLWSLGEDDHQK\*

>ENSMUSP00000159184\_c.312:G>A\_p.A105T ENSMUST00000238886.2|Fam183b-  
203|ENSMUSG00000049154|-|chr11:g.58683756:C>T  
MAMAGRVGQMKNQDEVHQNQILRELFKELRAQKLYTQYHVNPLRKAKFLNLIHHAAGPKKKYSETQTEAQE  
IGWDPNPLINPDRQDHRLNHFRVYHDITLYKTKLWSLGEDDHQK\*

>ENSMUSP00000091708\_c.327:A>C\_p.N110H ENSMUST00000094156.12|Fam183b-  
202|ENSMUSG00000049154|-|chr11:g.58683795:T>G  
MAGRVGQMKNQDEVHQNQILRELFKELRAQKLYTQYHVNPLRKVHTITRKPMShWDNLEEPEDAKFLNLIHH  
AAQGPKKKYSETQTEAQEIGWDPNPLINPDRQDHRLHFRVYHDITLYKAKLWSLGEDDHQK\*

>ENSMUSP00000051960\_c.267:A>C\_p.N90H ENSMUST00000060581.5|Fam183b-  
201|ENSMUSG00000049154|-|chr11:g.58683795:T>G  
MAGRVGQMKNQDEVHQNQILRELFKELRAQKLYTQYHVNPLRKAKFLNLIHHAAGPKKKYSETQTEAQEIG  
WDPNPLINPDRQDHRLHFRVYHDITLYKAKLWSLGEDDHQK\*

>ENSMUSP00000159142\_c.333:A>C\_p.N112H ENSMUST00000239007.2|Fam183b-  
204|ENSMUSG00000049154|-|chr11:g.58683795:T>G  
MAMAGRVGQMKNQDEVHQNQILRELFKELRAQKLYTQYHVNPLRKVHTITRKPMShWDNLEEPEDAKFLNLI  
HHAAGPKKKYSETQTEAQEIGWDPNPLINPDRQDHRLHFRVYHDITLYKAKLWSLGEDDHQK\*

>ENSMUSP00000159184\_c.273:A>C\_p.N92H ENSMUST00000238886.2|Fam183b-  
203|ENSMUSG00000049154|-|chr11:g.58683795:T>G  
MAMAGRVGQMKNQDEVHQNQILRELFKELRAQKLYTQYHVNPLRKAKFLNLIHHAAGPKKKYSETQTEAQE  
IGWDPNPLINPDRQDHRLHFRVYHDITLYKAKLWSLGEDDHQK\*

>rs265601560\_ENSMUSP00000091708\_c.4:C>AC\_p.A2ins-fs  
ENSMUST00000094156.12|Fam183b-202|ENSMUSG00000049154|-  
|chr11:g.58692715:G>GT  
MDRTCGADEESG

>rs265601560\_ENSMUSP00000051960\_c.4:C>AC\_p.A2ins-fs  
ENSMUST00000060581.5|Fam183b-201|ENSMUSG00000049154|-  
|chr11:g.58692715:G>GT  
MDRTCGADEESG

>rs265601560\_ENSMUSP00000159142\_c.10:C>AC\_p.A4ins-fs  
ENSMUST00000239007.2|Fam183b-204|ENSMUSG00000049154|-  
|chr11:g.58692715:G>GT  
MAMDRTCGADEESG

>rs265601560\_ENSMUSP00000159184\_c.10:C>AC\_p.A4ins-fs  
ENSMUST00000238886.2|Fam183b-203|ENSMUSG00000049154|-  
|chr11:g.58692715:G>GT  
MAMDRTCGADEESG

>rs232871506\_ENSMUSP00000150529\_c.24:C>T\_p.H9Y  
ENSMUST00000217506.2|olfr313-  
202|ENSMUSG00000070438|+|chr11:g.58707860:C>T  
MSNHTRVTYFILRGFSDIPQLRLMAIPVFLLIYTFGLLGNLSIITAVTRDSRLHSPMYFFLKNLSFLDICYTS  
ATIPKAVVISLTGSGVISYQECVAQLYIFLTFSSSECFLLTAMAYDRCLAAILRPLIYGTIMSHKYCSALVVTA

WVGGAIYSAFHTFNTFSLPYCGPNVIDHFFCDIPPMRLSCTDYHLSEEVGFVAVSSCIVMSSFALTVVSYIGI  
VATVLCIPSVEGRWKAFSTCSSHLTTVILFYGTGSFVYLRPASQYSPTLGPLASIFYSVVTPSLNPVYCLRN  
KDMKFALQKLYCGRKY\*

>rs232871506\_ENSMUSP00000080852\_c.24:C>T\_p.H9Y  
ENSMUST00000082220.5|Olfr313-  
201|ENSMUSG00000070438|+|chr11:g.58707860:C>T  
MSNHTRVTFILRGFSDIPQLRLMAIPVFLLIYTFGLLGNLSIITAVTRDSRLHSPMYFFLKNLSFLDICYTS  
ATIPKAVVISLTGSGVISYQECVAQLYIFLTFSSSECFLLTAMAYDRCLAAILRPLIYGTIMSHKYCSALVVTA  
WVGGAIYSAFHTFNTFSLPYCGPNVIDHFFCDIPPMRLSCTDYHLSEEVGFVAVSSCIVMSSFALTVVSYIGI  
VATVLCIPSVEGRWKAFSTCSSHLTTVILFYGTGSFVYLRPASQYSPTLGPLASIFYSVVTPSLNPVYCLRN  
KDMKFALQKLYCGRKY\*

>rs252040486\_ENSMUSP00000150529\_c.34:T>C\_p.L12P  
ENSMUST00000217506.2|Olfr313-  
202|ENSMUSG00000070438|+|chr11:g.58707870:T>C  
MSNHTRVTHFIPRGFSDIPQLRLMAIPVFLLIYTFGLLGNLSIITAVTRDSRLHSPMYFFLKNLSFLDICYTS  
ATIPKAVVISLTGSGVISYQECVAQLYIFLTFSSSECFLLTAMAYDRCLAAILRPLIYGTIMSHKYCSALVVTA  
WVGGAIYSAFHTFNTFSLPYCGPNVIDHFFCDIPPMRLSCTDYHLSEEVGFVAVSSCIVMSSFALTVVSYIGI  
VATVLCIPSVEGRWKAFSTCSSHLTTVILFYGTGSFVYLRPASQYSPTLGPLASIFYSVVTPSLNPVYCLRN  
KDMKFALQKLYCGRKY\*

>rs252040486\_ENSMUSP00000080852\_c.34:T>C\_p.L12P  
ENSMUST00000082220.5|Olfr313-  
201|ENSMUSG00000070438|+|chr11:g.58707870:T>C  
MSNHTRVTHFIPRGFSDIPQLRLMAIPVFLLIYTFGLLGNLSIITAVTRDSRLHSPMYFFLKNLSFLDICYTS  
ATIPKAVVISLTGSGVISYQECVAQLYIFLTFSSSECFLLTAMAYDRCLAAILRPLIYGTIMSHKYCSALVVTA  
WVGGAIYSAFHTFNTFSLPYCGPNVIDHFFCDIPPMRLSCTDYHLSEEVGFVAVSSCIVMSSFALTVVSYIGI  
VATVLCIPSVEGRWKAFSTCSSHLTTVILFYGTGSFVYLRPASQYSPTLGPLASIFYSVVTPSLNPVYCLRN  
KDMKFALQKLYCGRKY\*

>ENSMUSP00000150529\_c.49:A>AAATAATAATAATAATAAT\_p.D17EIIIIII-ins  
ENSMUST00000217506.2|Olfr313-  
202|ENSMUSG00000070438|+|chr11:g.58707885:A>AAATAATAATAATAATAAT  
MSNHTRVTHFIPRGFSEIIIIIIIPQLRLMAIPVFLLIYTFGLLGNLSIITAVTRDSRLHSPMYFFLKNLSFL  
DICYTSATIPKAVVISLTGSGVISYQECVAQLYIFLTFSSSECFLLTAMAYDRCLAAILRPLIYGTIMSHKYCS  
ALVVTAWVGGAIYSAFHTFNTFSLPYCGPNVIDHFFCDIPPMRLSCTDYHLSEEVGFVAVSSCIVMSSFALTV  
VSYIGIVATVLCIPSVEGRWKAFSTCSSHLTTVILFYGTGSFVYLRPASQYSPTLGPLASIFYSVVTPSLNPV  
VYCLRNKDMKFALQKLYCGRKY\*

>ENSMUSP00000080852\_c.49:A>AAATAATAATAATAATAAT\_p.D17EIIIIII-ins  
ENSMUST00000082220.5|Olfr313-  
201|ENSMUSG00000070438|+|chr11:g.58707885:A>AAATAATAATAATAATAAT  
MSNHTRVTHFIPRGFSEIIIIIIIPQLRLMAIPVFLLIYTFGLLGNLSIITAVTRDSRLHSPMYFFLKNLSFL  
DICYTSATIPKAVVISLTGSGVISYQECVAQLYIFLTFSSSECFLLTAMAYDRCLAAILRPLIYGTIMSHKYCS  
ALVVTAWVGGAIYSAFHTFNTFSLPYCGPNVIDHFFCDIPPMRLSCTDYHLSEEVGFVAVSSCIVMSSFALTV  
VSYIGIVATVLCIPSVEGRWKAFSTCSSHLTTVILFYGTGSFVYLRPASQYSPTLGPLASIFYSVVTPSLNPV  
VYCLRNKDMKFALQKLYCGRKY\*

>rs249513274\_ENSMUSP00000150529\_c.103:T>G\_p.F35C  
ENSMUST00000217506.2|Olfr313-  
202|ENSMUSG00000070438|+|chr11:g.58707939:T>G  
MSNHTRVTHFIPRGFSDIPQLRLMAIPVFLLIYTCGLLGNLSIITAVTRDSRLHSPMYFFLKNLSFLDICYTS  
ATIPKAVVISLTGSGVISYQECVAQLYIFLTFSSSECFLLTAMAYDRCLAAILRPLIYGTIMSHKYCSALVVTA  
WVGGAIYSAFHTFNTFSLPYCGPNVIDHFFCDIPPMRLSCTDYHLSEEVGFVAVSSCIVMSSFALTVVSYIGI  
VATVLCIPSVEGRWKAFSTCSSHLTTVILFYGTGSFVYLRPASQYSPTLGPLASIFYSVVTPSLNPVYCLRN  
KDMKFALQKLYCGRKY\*

>rs249513274\_ENSMUSP00000080852\_c.103:T>G\_p.F35C  
ENSMUST00000082220.5|Olfr313-  
201|ENSMUSG00000070438|+|chr11:g.58707939:T>G  
MSNHTRVTHFIPRGFSDIPQLRLMAIPVFLLIYTCGLLGNLSIITAVTRDSRLHSPMYFFLKNLSFLDICYTS  
ATIPKAVVISLTGSGVISYQECVAQLYIFLTFSSSECFLLTAMAYDRCLAAILRPLIYGTIMSHKYCSALVVTA  
WVGGAIYSAFHTFNTFSLPYCGPNVIDHFFCDIPPMRLSCTDYHLSEEVGFVAVSSCIVMSSFALTVVSYIGI

VATVLCIPSVTEGRWKAFSTCSSHLTTVILFYGTGSFVYLRPASQYSPTLGPLASIFYSVVTPSLNPVVYCLRN  
KDMKFALQKLYCGRKY\*

>rs258477531\_ENSMUSP00000150529\_c.279:G>A\_p.E94K  
ENSMUST00000217506.2|Olfr313-  
202|ENSMUSG00000070438|+|chr11:g.58708115:G>A  
MSNHTRVTHFILRGFSDIPQLRLMAIPVFLLIYTFGLLGNLSIITAVTRDSRLHSPMYFFLNLSFLDICYTS  
ATIPKAVVISLTGSGVISYQKCAVQLYIFLTFSSSECFLLTAMAYDRCLAAILRPLIYGTIMSHKYCSALVVTA  
WVGGAIFYSAFHTFNTFSLPYCGPNVIDHFFCDIPPMRLSCTDYHLSEEVGFVAVSSCIVMSSFALTVVSYIGI  
VATVLCIPSVTEGRWKAFSTCSSHLTTVILFYGTGSFVYLRPASQYSPTLGPLASIFYSVVTPSLNPVVYCLRN  
KDMKFALQKLYCGRKY\*

>rs258477531\_ENSMUSP00000080852\_c.279:G>A\_p.E94K  
ENSMUST00000082220.5|Olfr313-  
201|ENSMUSG00000070438|+|chr11:g.58708115:G>A  
MSNHTRVTHFILRGFSDIPQLRLMAIPVFLLIYTFGLLGNLSIITAVTRDSRLHSPMYFFLNLSFLDICYTS  
ATIPKAVVISLTGSGVISYQKCAVQLYIFLTFSSSECFLLTAMAYDRCLAAILRPLIYGTIMSHKYCSALVVTA  
WVGGAIFYSAFHTFNTFSLPYCGPNVIDHFFCDIPPMRLSCTDYHLSEEVGFVAVSSCIVMSSFALTVVSYIGI  
VATVLCIPSVTEGRWKAFSTCSSHLTTVILFYGTGSFVYLRPASQYSPTLGPLASIFYSVVTPSLNPVVYCLRN  
KDMKFALQKLYCGRKY\*

>rs245110369\_ENSMUSP00000150529\_c.306:C>G\_p.L103V  
ENSMUST00000217506.2|Olfr313-  
202|ENSMUSG00000070438|+|chr11:g.58708142:C>G  
MSNHTRVTHFILRGFSDIPQLRLMAIPVFLLIYTFGLLGNLSIITAVTRDSRLHSPMYFFLNLSFLDICYTS  
ATIPKAVVISLTGSGVISYQECVAQLYIFVTFSSSECFLLTAMAYDRCLAAILRPLIYGTIMSHKYCSALVVTA  
WVGGAIFYSAFHTFNTFSLPYCGPNVIDHFFCDIPPMRLSCTDYHLSEEVGFVAVSSCIVMSSFALTVVSYIGI  
VATVLCIPSVTEGRWKAFSTCSSHLTTVILFYGTGSFVYLRPASQYSPTLGPLASIFYSVVTPSLNPVVYCLRN  
KDMKFALQKLYCGRKY\*

>rs245110369\_ENSMUSP00000080852\_c.306:C>G\_p.L103V  
ENSMUST00000082220.5|Olfr313-  
201|ENSMUSG00000070438|+|chr11:g.58708142:C>G  
MSNHTRVTHFILRGFSDIPQLRLMAIPVFLLIYTFGLLGNLSIITAVTRDSRLHSPMYFFLNLSFLDICYTS  
ATIPKAVVISLTGSGVISYQECVAQLYIFVTFSSSECFLLTAMAYDRCLAAILRPLIYGTIMSHKYCSALVVTA  
WVGGAIFYSAFHTFNTFSLPYCGPNVIDHFFCDIPPMRLSCTDYHLSEEVGFVAVSSCIVMSSFALTVVSYIGI  
VATVLCIPSVTEGRWKAFSTCSSHLTTVILFYGTGSFVYLRPASQYSPTLGPLASIFYSVVTPSLNPVVYCLRN  
KDMKFALQKLYCGRKY\*

>rs259366413\_ENSMUSP00000150529\_c.609:A>C\_p.I204L  
ENSMUST00000217506.2|Olfr313-  
202|ENSMUSG00000070438|+|chr11:g.58708445:A>C  
MSNHTRVTHFILRGFSDIPQLRLMAIPVFLLIYTFGLLGNLSIITAVTRDSRLHSPMYFFLNLSFLDICYTS  
ATIPKAVVISLTGSGVISYQECVAQLYIFLTFSSSECFLLTAMAYDRCLAAILRPLIYGTIMSHKYCSALVVTA  
WVGGAIFYSAFHTFNTFSLPYCGPNVIDHFFCDIPPMRLSCTDYHLSEEVGFVAVSSCLVMSSFALTVVSYIGI  
VATVLCIPSVTEGRWKAFSTCSSHLTTVILFYGTGSFVYLRPASQYSPTLGPLASIFYSVVTPSLNPVVYCLRN  
KDMKFALQKLYCGRKY\*

>rs259366413\_ENSMUSP00000080852\_c.609:A>C\_p.I204L  
ENSMUST00000082220.5|Olfr313-  
201|ENSMUSG00000070438|+|chr11:g.58708445:A>C  
MSNHTRVTHFILRGFSDIPQLRLMAIPVFLLIYTFGLLGNLSIITAVTRDSRLHSPMYFFLNLSFLDICYTS  
ATIPKAVVISLTGSGVISYQECVAQLYIFLTFSSSECFLLTAMAYDRCLAAILRPLIYGTIMSHKYCSALVVTA  
WVGGAIFYSAFHTFNTFSLPYCGPNVIDHFFCDIPPMRLSCTDYHLSEEVGFVAVSSCLVMSSFALTVVSYIGI  
VATVLCIPSVTEGRWKAFSTCSSHLTTVILFYGTGSFVYLRPASQYSPTLGPLASIFYSVVTPSLNPVVYCLRN  
KDMKFALQKLYCGRKY\*

>ENSMUSP00000150529\_c.878:A>CTCAGACAG\_p.K293ins-fs  
ENSMUST00000217506.2|Olfr313-  
202|ENSMUSG00000070438|+|chr11:g.58708714:A>CTCAGACAG  
MSNHTRVTHFILRGFSDIPQLRLMAIPVFLLIYTFGLLGNLSIITAVTRDSRLHSPMYFFLNLSFLDICYTS  
ATIPKAVVISLTGSGVISYQECVAQLYIFLTFSSSECFLLTAMAYDRCLAAILRPLIYGTIMSHKYCSALVVTA  
WVGGAIFYSAFHTFNTFSLPYCGPNVIDHFFCDIPPMRLSCTDYHLSEEVGFVAVSSCIVMSSFALTVVSYIGI  
VATVLCIPSVTEGRWKAFSTCSSHLTTVILFYGTGSFVYLRPASQYSPTLGPLASIFYSVVTPSLNPVVYCLRN  
NSDRI



>ENSMUSP00000080852\_c.878:A>CTCAGACAG\_p.K293ins-fs  
ENSMUST00000082220.5|Olfr313-  
201|ENSMUSG00000070438|+|chr11:g.58708714:A>CTCAGACAG  
MSNHTRVTHFILRGFSDIPQLRLMAIPVFLLIYTFGLLGNLSIITAVTRDSRLHSPMYFFLKNLSFLDICYTS  
ATIPKAVVISLTGSGVISYQECVAQLYIIFLTFSSSECFLLTAMAYDRCLAAILRPLIYGTIMSHKYCSALVVTA  
WVGAIYSAFHTFNTFSLPYCGPNVIDHFFCDIPPMRLSCTDYHLSEEVGFVAVSSCIVMSSFALTVVSYIGI  
VATVLCIPSVVEGRWKAFSTCSSHLTTVILFYGTGSFVYLRPASQYSPTLGPLASIFYSVVTPLSNPVPVYCLRN  
NSDRI  
>ENSMUSP00000149697\_c.524:C>G\_p.F175L ENSMUST00000216407.2|Olfr312-  
202|ENSMUSG00000096806|+|chr11:g.58722506:C>G  
MSNHTRVTHFILRGFSDVPQLRLVLI PFFLFFYTFGILGNFSIITAVTRDSRLHSPMYFFLKNLSFLDICYTS  
ATIPKAVVISLTGSGVISYQECAAQLYIIFTFACTECFLLTAMAYDRCLAAILRPLIYGTIMSQKYCSALVVTA  
WVGAIYSAFHTFNTFSLPYCGPNVIDHFLFCMPVRLSCTDYHLTEEVGFVAVSSCIVMSSFVLTVVSYIGI  
VATVLRIPSVEGRWKAFSTCSSHLTTVILFYGTGSFVYLRPASQYSPTLGRLASIFYSVVTPLSNPVPVYCLRN  
KDMKFALQKLYCGRKY\*  
>ENSMUSP00000077344\_c.524:C>G\_p.F175L ENSMUST00000078217.2|Olfr312-  
201|ENSMUSG00000096806|+|chr11:g.58722506:C>G  
MSNHTRVTHFILRGFSDVPQLRLVLI PFFLFFYTFGILGNFSIITAVTRDSRLHSPMYFFLKNLSFLDICYTS  
ATIPKAVVISLTGSGVISYQECAAQLYIIFTFACTECFLLTAMAYDRCLAAILRPLIYGTIMSQKYCSALVVTA  
WVGAIYSAFHTFNTFSLPYCGPNVIDHFLFCMPVRLSCTDYHLTEEVGFVAVSSCIVMSSFVLTVVSYIGI  
VATVLRIPSVEGRWKAFSTCSSHLTTVILFYGTGSFVYLRPASQYSPTLGRLASIFYSVVTPLSNPVPVYCLRN  
KDMKFALQKLYCGRKY\*  
>ENSMUSP00000149697\_c.679:C>T\_p.P227L ENSMUST00000216407.2|Olfr312-  
202|ENSMUSG00000096806|+|chr11:g.58722661:C>T  
MSNHTRVTHFILRGFSDVPQLRLVLI PFFLFFYTFGILGNFSIITAVTRDSRLHSPMYFFLKNLSFLDICYTS  
ATIPKAVVISLTGSGVISYQECAAQLYIIFTFACTECFLLTAMAYDRCLAAILRPLIYGTIMSQKYCSALVVTA  
WVGAIYSAFHTFNTFSLPYCGPNVIDHFFCDIPPMRLSCTDYHLTEEVGFVAVSSCIVMSSFVLTVVSYIGI  
VATVLRILSVVEGRWKAFSTCSSHLTTVILFYGTGSFVYLRPASQYSPTLGRLASIFYSVVTPLSNPVPVYCLRN  
KDMKFALQKLYCGRKY\*  
>ENSMUSP00000077344\_c.679:C>T\_p.P227L ENSMUST00000078217.2|Olfr312-  
201|ENSMUSG00000096806|+|chr11:g.58722661:C>T  
MSNHTRVTHFILRGFSDVPQLRLVLI PFFLFFYTFGILGNFSIITAVTRDSRLHSPMYFFLKNLSFLDICYTS  
ATIPKAVVISLTGSGVISYQECAAQLYIIFTFACTECFLLTAMAYDRCLAAILRPLIYGTIMSQKYCSALVVTA  
WVGAIYSAFHTFNTFSLPYCGPNVIDHFFCDIPPMRLSCTDYHLTEEVGFVAVSSCIVMSSFVLTVVSYIGI  
VATVLRILSVVEGRWKAFSTCSSHLTTVILFYGTGSFVYLRPASQYSPTLGRLASIFYSVVTPLSNPVPVYCLRN  
KDMKFALQKLYCGRKY\*  
>ENSMUSP00000149697\_c.689:A>AT\_p.E230ins-fs ENSMUST00000216407.2|Olfr312-  
202|ENSMUSG00000096806|+|chr11:g.58722671:A>AT  
MSNHTRVTHFILRGFSDVPQLRLVLI PFFLFFYTFGILGNFSIITAVTRDSRLHSPMYFFLKNLSFLDICYTS  
ATIPKAVVISLTGSGVISYQECAAQLYIIFTFACTECFLLTAMAYDRCLAAILRPLIYGTIMSQKYCSALVVTA  
WVGAIYSAFHTFNTFSLPYCGPNVIDHFFCDIPPMRLSCTDYHLTEEVGFVAVSSCIVMSSFVLTVVSYIGI  
VATVLRIPSVEWQVESLFYLLSPDHSHLVLWLNWKLVCSEARLSVLPDPGSPGIYFLLCSHTISESSCLLSEE  
QRYEVCSTETLLWEKVL  
>ENSMUSP00000077344\_c.689:A>AT\_p.E230ins-fs ENSMUST00000078217.2|Olfr312-  
201|ENSMUSG00000096806|+|chr11:g.58722671:A>AT  
MSNHTRVTHFILRGFSDVPQLRLVLI PFFLFFYTFGILGNFSIITAVTRDSRLHSPMYFFLKNLSFLDICYTS  
ATIPKAVVISLTGSGVISYQECAAQLYIIFTFACTECFLLTAMAYDRCLAAILRPLIYGTIMSQKYCSALVVTA  
WVGAIYSAFHTFNTFSLPYCGPNVIDHFFCDIPPMRLSCTDYHLTEEVGFVAVSSCIVMSSFVLTVVSYIGI  
VATVLRIPSVEWQVESLFYLLSPDHSHLVLWLNWKLVCSEARLSVLPDPGSPGIYFLLCSHTISESSCLLSEE  
QRYEVCSTETLLWEKVL  
>ENSMUSP00000149697\_c.900:A>G\_p.K301E ENSMUST00000216407.2|Olfr312-  
202|ENSMUSG00000096806|+|chr11:g.58722882:A>G  
MSNHTRVTHFILRGFSDVPQLRLVLI PFFLFFYTFGILGNFSIITAVTRDSRLHSPMYFFLKNLSFLDICYTS  
ATIPKAVVISLTGSGVISYQECAAQLYIIFTFACTECFLLTAMAYDRCLAAILRPLIYGTIMSQKYCSALVVTA  
WVGAIYSAFHTFNTFSLPYCGPNVIDHFFCDIPPMRLSCTDYHLTEEVGFVAVSSCIVMSSFVLTVVSYIGI  
VATVLRIPSVEGRWKAFSTCSSHLTTVILFYGTGSFVYLRPASQYSPTLGRLASIFYSVVTPLSNPVPVYCLRN  
KDMKFALQELYCGRKY\*

```

>ENSMUSP00000077344_c.900:A>G_p.K301E ENSMUST00000078217.2|Olfr312-
201|ENSMUSG00000096806|+|chr11:g.58722882:A>G
MSNHTRVTHFILRGFSDVPQLRLVLI PFFLLFYTFGILGNFSIITAVTRDSRLHSPMYFFLKNLSFLDICYTS
ATIPKAVVISLGTSGVISYQECQAQLYIIFTFACTECFLLTAMAYDRCLAAILRPLIYGTIMSQKYCSALVVTA
WVGGAIIYSAFHFTNTFSLPYCGPNVIDHFFCDMPPVMRLSCTDYHLTEEVGFAVSSCIVMSSFVLTVVSYIGI
VATVLRIPSVEGRWKAFSTCSSHLLTTVILFYGTGSFVYLRPASQYSPTLGRLASIFYSVVTPLSNPVIYCLRN
KDMKFALQELYCGRKY*
>ENSMUSP00000150870_c.173:C>A_p.Y58* ENSMUST00000216473.2|Olfr311-
203|ENSMUSG00000094805|+|chr11:g.58732115:C>A
MANHTRVTHFILRGFSDVPQLRLVLI PFFLLFYTFGILGNFSIITAVIRDSRLHSPM*FFLKNLSFLDICYTS
ATIPKAVVISLGTSGVISYQECVAQLYMFITLCGTECFLLTAMAYDRCLAAILRPLIYGTIMSHKYCSALVVTA
WVGGAIIYSAFHFTNTFSLPYCGPNVDHFFCDMPPVMRLSCTDYHLNEEVGFAVIGCIIMSSFALTVVSYIGI
VATVLRIPSVEGRWKAFSTCSSHLLTTVILFYGTGSFVYLRPASQYSPTLDPLASIFYSVVTPLSNPVIYCLRN
KDMKFALQKLYCGRKY*
>ENSMUSP00000071553_c.173:C>A_p.Y58* ENSMUST00000071625.2|Olfr311-
201|ENSMUSG00000094805|+|chr11:g.58732115:C>A
MANHTRVTHFILRGFSDVPQLRLVLI PFFLLFYTFGILGNFSIITAVIRDSRLHSPM*FFLKNLSFLDICYTS
ATIPKAVVISLGTSGVISYQECVAQLYMFITLCGTECFLLTAMAYDRCLAAILRPLIYGTIMSHKYCSALVVTA
WVGGAIIYSAFHFTNTFSLPYCGPNVDHFFCDMPPVMRLSCTDYHLNEEVGFAVIGCIIMSSFALTVVSYIGI
VATVLRIPSVEGRWKAFSTCSSHLLTTVILFYGTGSFVYLRPASQYSPTLDPLASIFYSVVTPLSNPVIYCLRN
KDMKFALQKLYCGRKY*
>ENSMUSP00000150870_c.273:T>C_p.Y92H ENSMUST00000216473.2|Olfr311-
203|ENSMUSG00000094805|+|chr11:g.58732215:T>C
MANHTRVTHFILRGFSDVPQLRLVLI PFFLLFYTFGILGNFSIITAVIRDSRLHSPMYFFLKNLSFLDICYTS
ATIPKAVVISLGTSGVISYHQECVAQLYMFITLCGTECFLLTAMAYDRCLAAILRPLIYGTIMSHKYCSALVVTA
WVGGAIIYSAFHFTNTFSLPYCGPNVDHFFCDMPPVMRLSCTDYHLNEEVGFAVIGCIIMSSFALTVVSYIGI
VATVLRIPSVEGRWKAFSTCSSHLLTTVILFYGTGSFVYLRPASQYSPTLDPLASIFYSVVTPLSNPVIYCLRN
KDMKFALQKLYCGRKY*
>ENSMUSP00000071553_c.273:T>C_p.Y92H ENSMUST00000071625.2|Olfr311-
201|ENSMUSG00000094805|+|chr11:g.58732215:T>C
MANHTRVTHFILRGFSDVPQLRLVLI PFFLLFYTFGILGNFSIITAVIRDSRLHSPMYFFLKNLSFLDICYTS
ATIPKAVVISLGTSGVISYHQECVAQLYMFITLCGTECFLLTAMAYDRCLAAILRPLIYGTIMSHKYCSALVVTA
WVGGAIIYSAFHFTNTFSLPYCGPNVDHFFCDMPPVMRLSCTDYHLNEEVGFAVIGCIIMSSFALTVVSYIGI
VATVLRIPSVEGRWKAFSTCSSHLLTTVILFYGTGSFVYLRPASQYSPTLDPLASIFYSVVTPLSNPVIYCLRN
KDMKFALQKLYCGRKY*
>ENSMUSP00000150870_c.436:C>G_p.A146G ENSMUST00000216473.2|Olfr311-
203|ENSMUSG00000094805|+|chr11:g.58732378:C>G
MANHTRVTHFILRGFSDVPQLRLVLI PFFLLFYTFGILGNFSIITAVIRDSRLHSPMYFFLKNLSFLDICYTS
ATIPKAVVISLGTSGVISYQECVAQLYMFITLCGTECFLLTAMAYDRCLAAILRPLIYGTIMSHKYCSALVVTA
WVGGAIIYSAFHFTNTFSLPYCGPNVDHFFCDMPPVMRLSCTDYHLNEEVGFAVIGCIIMSSFALTVVSYIGI
VATVLRIPSVEGRWKAFSTCSSHLLTTVILFYGTGSFVYLRPASQYSPTLDPLASIFYSVVTPLSNPVIYCLRN
KDMKFALQKLYCGRKY*
>ENSMUSP00000071553_c.436:C>G_p.A146G ENSMUST00000071625.2|Olfr311-
201|ENSMUSG00000094805|+|chr11:g.58732378:C>G
MANHTRVTHFILRGFSDVPQLRLVLI PFFLLFYTFGILGNFSIITAVIRDSRLHSPMYFFLKNLSFLDICYTS
ATIPKAVVISLGTSGVISYQECVAQLYMFITLCGTECFLLTAMAYDRCLAAILRPLIYGTIMSHKYCSALVVTA
WVGGAIIYSAFHFTNTFSLPYCGPNVDHFFCDMPPVMRLSCTDYHLNEEVGFAVIGCIIMSSFALTVVSYIGI
VATVLRIPSVEGRWKAFSTCSSHLLTTVILFYGTGSFVYLRPASQYSPTLDPLASIFYSVVTPLSNPVIYCLRN
KDMKFALQKLYCGRKY*
>ENSMUSP00000150870_c.511:T>C_p.V171A ENSMUST00000216473.2|Olfr311-
203|ENSMUSG00000094805|+|chr11:g.58732453:T>C
MANHTRVTHFILRGFSDVPQLRLVLI PFFLLFYTFGILGNFSIITAVIRDSRLHSPMYFFLKNLSFLDICYTS
ATIPKAVVISLGTSGVISYQECVAQLYMFITLCGTECFLLTAMAYDRCLAAILRPLIYGTIMSHKYCSALVVTA
WVGGAIIYSAFHFTNTFSLPYCGPNAVDHFFCDMPPVMRLSCTDYHLNEEVGFAVIGCIIMSSFALTVVSYIGI
VATVLRIPSVEGRWKAFSTCSSHLLTTVILFYGTGSFVYLRPASQYSPTLDPLASIFYSVVTPLSNPVIYCLRN
KDMKFALQKLYCGRKY*
>ENSMUSP00000071553_c.511:T>C_p.V171A ENSMUST00000071625.2|Olfr311-
201|ENSMUSG00000094805|+|chr11:g.58732453:T>C

```

MANHTRVTHFILRGFSDVPQLRLVLIPFFLLFYTFGILGNFSIITAVIRDSRLHSPMYFFLKNLSFLDICYTS  
 ATIPKAVVISLTGSGVISYQECVAQLYMFITLCGTECFLLTAMAYDRCLAILRPLIYGTIMSHKYCSALVVTA  
 WVGGAIIYSAFHTFNFTSLPYCGPNAVDHFFCDMPVPMRLSCTDYHLNNEEVGFAVIGCIIMSSFALTVVSYIGI  
 VATVLHIPSVEGRWKAFASTCSSHLTTVILFYGTGSFVYLRPASQYSPTLDPLASIFYSVVTPSLNPVIYCLRN  
 KDMKFALQKLYCGRKY\*

>ENSMUSP00000117644\_c.352:C>T\_p.A118V ENSMUST00000139337.3|Gm12258-  
 202|ENSMUSG00000072915|+|chr11:g.58749179:C>T  
 MDTSEGLVSVFEDVSVDFTWDEWQDLDDSQRKLYRDVMLETYSSLLSLNQCDAPKELILKLEKEAEPWKEDDAP  
 DQSLPDMQNVDDRNEVSQDSQKIRRCSLVIAKSSVSAERAPAGKVLSSSHRVLDLAIKNSTSSGMSPGPLNMR  
 DRMLLPREPSEMQARKEGLPDVTRVSPRLPEPLSLYRSTEECEQHVQYCGPSEAFHVKPVWLQKAFPMNSPS  
 SKLRDYRKELEKLALPAKGETRAQVQTFECKVCGKLFCKNSHLTQHLKMHKEKRCYKGSNCEPILNIQPKLPK  
 HQSLRAGEELYTCNGDEKYIRPKSGKSVQQKIIGDGRIVCGKTECSKLNCSVEQNPLKHEETHEFSLAGKTVR  
 KSDLHQLETPHRYERYECSACGKTFSSHYPHVSPPSGAEKPYECEDCQQSKLVVSPAPTQEKRYVCNVCGKA  
 FYKRAHLHAHQRTHTGKPYDCQECGKSFRLKSFVHVHQRHTGKPFACDTCGKSFQRTSLYTHIRIHTGE  
 KPYECKEKRKSFILKSYLTVHQRTSHGKPYECDVCGKSFQNSHLHAHKRHTHTSEKPYECIVCGKSYKQSPS  
 LYTHKKIHTSEKPYECKQCRKSFSLKFHLTRHQRTSHGKHYQ\*

>ENSMUSP00000117644\_c.687:G>A\_p.E230K ENSMUST00000139337.3|Gm12258-  
 202|ENSMUSG00000072915|+|chr11:g.58749514:G>A  
 MDTSEGLVSVFEDVSVDFTWDEWQDLDDSQRKLYRDVMLETYSSLLSLNQCDAPKELILKLEKEAEPWKEDDAP  
 DQSLPDMQNVDDRNEVSQDSQKIRRCSLVIAKSSVSAERAPAGKALSSSHRVLDLAIKNSTSSGMSPGPLNMR  
 DRMLLPREPSEMQARKEGLPDVTRVSPRLPEPLSLYRSTEECEQHVQYCGPSEAFHVKPVWLQKAFPMNSPS  
 SKLRDYRKELEKLALPAKGETRAQVQTFECKVCGKLFCKNSHLTQHLKMHKEKRCYKGSNCEPILNIQPKLPK  
 HQSLRAGEELYTCNGDEKYIRPKSGKSVQQKIIGDGRIVCGKTECSKLNCSVEQNPLKHEETHEFSLAGKTVR  
 KSDLHQLETPHRYERYECSACGKTFSSHYPHVSPPSGAEKPYECEDCQQSKLVVSPAPTQEKRYVCNVCGKA  
 FYKRAHLHAHQRTHTGKPYDCQECGKSFRLKSFVHVHQRHTGKPFACDTCGKSFQRTSLYTHIRIHTGE  
 KPYECKEKRKSFILKSYLTVHQRTSHGKPYECDVCGKSFQNSHLHAHKRHTHTSEKPYECIVCGKSYKQSPS  
 LYTHKKIHTSEKPYECKQCRKSFSLKFHLTRHQRTSHGKHYQ\*

>ENSMUSP00000117644\_c.1351:C>A\_p.T451N ENSMUST00000139337.3|Gm12258-  
 202|ENSMUSG00000072915|+|chr11:g.58750178:C>A  
 MDTSEGLVSVFEDVSVDFTWDEWQDLDDSQRKLYRDVMLETYSSLLSLNQCDAPKELILKLEKEAEPWKEDDAP  
 DQSLPDMQNVDDRNEVSQDSQKIRRCSLVIAKSSVSAERAPAGKALSSSHRVLDLAIKNSTSSGMSPGPLNMR  
 DRMLLPREPSEMQARKEGLPDVTRVSPRLPEPLSLYRSTEECEQHVQYCGPSEAFHVKPVWLQKAFPMNSPS  
 SKLRDYRKELEKLALPAKGETRAQVQTFECKVCGKLFCKNSHLTQHLKMHKEKRCYKGSNCEPILNIQPKLPK  
 HQSLRAGEELYTCNGDEKYIRPKSGKSVQQKIIGDGRIVCGKTECSKLNCSVEQNPLKHEETHEFSLAGKTVR  
 KSDLHQLETPHRYERYECSACGKTFSSHYPHVSPPSGAEKPYECEDCQQSKLVVSPAPTQEKRYVCNVCGKA  
 FYKRAHLHAHQRTHTGKPYDCQECGKSFRLKSFVHVHQRHTGKPFACDTCGKSFQRTSLYTHIRIHTGE  
 KPYECKEKRKSFILKSYLTVHQRTSHGKPYECDVCGKSFQNSHLHAHKRHTHTSEKPYECIVCGKSYKQSPS  
 LYTHKKIHTSEKPYECKQCRKSFSLKFHLTRHQRTSHGKHYQ\*

>ENSMUSP00000117644\_c.1740:C>T\_p.Q581\* ENSMUST00000139337.3|Gm12258-  
 202|ENSMUSG00000072915|+|chr11:g.58750567:C>T  
 MDTSEGLVSVFEDVSVDFTWDEWQDLDDSQRKLYRDVMLETYSSLLSLNQCDAPKELILKLEKEAEPWKEDDAP  
 DQSLPDMQNVDDRNEVSQDSQKIRRCSLVIAKSSVSAERAPAGKALSSSHRVLDLAIKNSTSSGMSPGPLNMR  
 DRMLLPREPSEMQARKEGLPDVTRVSPRLPEPLSLYRSTEECEQHVQYCGPSEAFHVKPVWLQKAFPMNSPS  
 SKLRDYRKELEKLALPAKGETRAQVQTFECKVCGKLFCKNSHLTQHLKMHKEKRCYKGSNCEPILNIQPKLPK  
 HQSLRAGEELYTCNGDEKYIRPKSGKSVQQKIIGDGRIVCGKTECSKLNCSVEQNPLKHEETHEFSLAGKTVR  
 KSDLHQLETPHRYERYECSACGKTFSSHYPHVSPPSGAEKPYECEDCQQSKLVVSPAPTQEKRYVCNVCGKA  
 FYKRAHLHAHQRTHTGKPYDCQECGKSFRLKSFVHVHQRHTGKPFACDTCGKSFQRTSLYTHIRIHTGE  
 KPYECKEKRKSFILKSYLTVHQRTSHGKPYECDVCGKSFQNSHLHAHKRHTHTSEKPYECIVCGKSYK\*SPS  
 LYTHKKIHTSEKPYECKQCRKSFSLKFHLTRHQRTSHGKHYQ\*

>ENSMUSP00000091282\_c.306:C>T\_p.Q103\* ENSMUST00000093768.4|Gm12258-  
 201|ENSMUSG00000072915|+|chr11:g.58750567:C>T  
 IHTGKPFACDTCGKSFQRTSLYTHIRIHTGKPYECKEKRKSFILKSYLTVHQRTSHGKPYECDVCGKSF  
 QNSHLHAHKRHTHTSEKPYECIVCGKSYK\*SPSLYTHKKIHTSEKPYECKQCRKSFSLKFHLTRHQRTSHGK  
 HYQ\*

>ENSMUSP00000120692\_c.181:A>G\_p.D61G ENSMUST00000132570.2|2810021J22Rik-  
 202|ENSMUSG00000020491|+|chr11:g.58768808:A>G  
 MSSIVGLVSVFEDVSVDFTWDEWQDLDDSQRKLYRDVMLETYSSLLSLSAGQASTVSKFLTGFCSHGLW

>ENSMUSP00000073579\_c.579:G>A\_p.G194S  
ENSMUST00000073924.10|2810021J22Rik-  
201|ENSMUSG00000020491|+|chr11:g.58771099:G>A  
MSSIVGLVSFEDVSVDFTWDEWQDLDDSQRKLYRDVMLETYSSLLSLNQCDAPKPELILKLEQGAGPWKEDNAP  
DQSLPALQPMKSLKEARRDTGKKHLSHLLVTSASAEERGLGEILSMNSNHVLHLALKTRSTSRMRSEVLDLDT  
WGDVYLPGGPIEMQATEELDHLNPSKMLPRPPAPLSLDFSAERGPQHSQCAQHGEAFDVRTVWTRTVFPLGDS  
STNAFDKLALTAQEGTHIREETFDCNMCKKPFSDTCNHRHLKPHLKKQCGKCPDGEPAFRAKAGLQHTLHWSW  
GKPRGCNDNKKCVHQMPKPRSNQSVFSSKESNCVKTFPCDSTLSVQQRPHGTGKKPQESSTPVKINSQPRRRHR  
CGRTYQCKVCGKAFKHTONLYLHHRHTHTGEKPYECKECKKLFSAKSNLSVHQKTHTGEKPYECNICGNAFKRR  
CDLTIHQRVHTGEKPYECKECKRTFSIKSGLIVHQRIHTGEKPYECSVCGKRFNQKSNLSTHEKIHTGEKPF  
CKECSKAFSVKSYLTIHQKTHVGEKPHS\*  
>ENSMUSP00000073579\_c.1225:T>C\_p.V409A  
ENSMUST00000073924.10|2810021J22Rik-  
201|ENSMUSG00000020491|+|chr11:g.58771745:T>C  
MSSIVGLVSFEDVSVDFTWDEWQDLDDSQRKLYRDVMLETYSSLLSLNQCDAPKPELILKLEQGAGPWKEDNAP  
DQSLPALQPMKSLKEARRDTGKKHLSHLLVTSASAEERGLGEILSMNSNHVLHLALKTRSTSRMRSEVLDLDT  
WGDVYLPGGPIEMQATEELDHLNPSKMLPRPPAPLSLDFSAERGPQHGQCAQHGEAFDVRTVWTRTVFPLGDS  
STNAFDKLALTAQEGTHIREETFDCNMCKKPFSDTCNHRHLKPHLKKQCGKCPDGEPAFRAKAGLQHTLHWSW  
GKPRGCNDNKKCVHQMPKPRSNQSVFSSKESNCVKTFPCDSTLSVQQRPHGTGKKPQESSTPVKINSQPRRRHR  
CGRTYQCKVCGKAFKHTONLYLHHRHTHTGEKPYECKECKKLFSAKSNLSVHQKTHTGEKPYECNICGNAFKRR  
CDLTIHQRVHTGEKPYECKECKRTFSIKSGLIVHQRIHTGEKPYECSVCGKRFNQKSNLSTHEKIHTGEKPF  
CKECSKAFSVKSYLTIHQKTHVGEKPHS\*  
>ENSMUSP00000099764\_c.2092:T>A\_p.F698Y ENSMUST00000102703.2|zfp39-  
201|ENSMUSG00000037001|-|chr11:g.58780668:A>T  
MRNLQPDSVENSLSQLPSRCLERTRKRKRSYKKRPVITYSYWRRTRQRNRARKHKAPVKGLVSFEDVSVDFTWDEW  
QDLDDSQRKLYRDVMLETYSSLES LGHCITKPEVIFKLEQGAEPWRAEDVPKQSRADVQKITELNETSQDNEE  
RHLWHHAITYSNKSTEEKVKLGNIVNVSSNCVSNLTVKNGNSGMRPVALTVWQSVLPPNKPDDTRIGEELDA  
SLTSEPPPIHAEHPGLYSRAPGTGQQFQCCMQEVT CNTKALWTKRFHIAHGSSKFGSEKVPDEVALHAQDVSW  
VRAETFEC SICKKTFCTKCELMKHKKIHKGQQYYTCRDCEKTFIKESYHTDQRVHAGVGS HRCKQCEKCFHQK  
NQQNVHERVPREARLWEVYQSENSFGEKPNLRRYQRTRAGYKPYGCNLCGKAFYRKSHLGRHQKIHTGEKPYG  
CEECKKTFYHKSSSLTIHQRTHTGEKPYECKKCRKTFYCKSDLNVHHRHTHTGEKPYECECRKTFYKSHLVIH  
QKVHTGDKPYECEECQKAFSRKSNLTVHQKTHTGEKPYECNVCCKTFHRQSHLNMHQGTHTGQKPYQCEECGK  
AFYQKSSLRHRHQRNHTGSRPYACEEKRKTF LHKSSSLTVHQRSHTGYKPYSCEECRKTFYKSHLTVHQRTHTG  
EKPYECKLCKKAFHQKSYLNRHQVTHGSEKRFECQECRKYHYKSSSLTVHQRIHLRELLCV\*  
>ENSMUSP00000099764\_c.1947:G>A\_p.V650I ENSMUST00000102703.2|zfp39-  
201|ENSMUSG00000037001|-|chr11:g.58780813:C>T  
MRNLQPDSVENSLSQLPSRCLERTRKRKRSYKKRPVITYSYWRRTRQRNRARKHKAPVKGLVSFEDVSVDFTWDEW  
QDLDDSQRKLYRDVMLETYSSLES LGHCITKPEVIFKLEQGAEPWRAEDVPKQSRADVQKITELNETSQDNEE  
RHLWHHAITYSNKSTEEKVKLGNIVNVSSNCVSNLTVKNGNSGMRPVALTVWQSVLPPNKPDDTRIGEELDA  
SLTSEPPPIHAEHPGLYSRAPGTGQQFQCCMQEVT CNTKALWTKRFHIAHGSSKFGSEKVPDEVALHAQDVSW  
VRAETFEC SICKKTFCTKCELMKHKKIHKGQQYYTCRDCEKTFIKESYHTDQRVHAGVGS HRCKQCEKCFHQK  
NQQNVHERVPREARLWEVYQSENSFGEKPNLRRYQRTRAGYKPYGCNLCGKAFYRKSHLGRHQKIHTGEKPYG  
CEECKKTFYHKSSSLTIHQRTHTGEKPYECKKCRKTFYCKSDLNVHHRHTHTGEKPYECECRKTFYKSHLVIH  
QKVHTGDKPYECEECQKAFSRKSNLTVHQKTHTGEKPYECNVCCKTFHRQSHLNMHQGTHTGQKPYQCEECGK  
AFYQKSSLRHRHQRNHTGSRPYACEEKRKTF LHKSSSLTVHQRSHTGYKPYSCEECRKTFYKSHLTIHQRTHTG  
EKPYECKLCKKAFHQKSYLNRHQVTHGSEKRFECQECRKYHYKSSSLTVHQRIHLRELLCV\*  
>ENSMUSP00000099764\_c.1196:T>G\_p.Y399\* ENSMUST00000102703.2|zfp39-  
201|ENSMUSG00000037001|-|chr11:g.58781564:A>C  
MRNLQPDSVENSLSQLPSRCLERTRKRKRSYKKRPVITYSYWRRTRQRNRARKHKAPVKGLVSFEDVSVDFTWDEW  
QDLDDSQRKLYRDVMLETYSSLES LGHCITKPEVIFKLEQGAEPWRAEDVPKQSRADVQKITELNETSQDNEE  
RHLWHHAITYSNKSTEEKVKLGNIVNVSSNCVSNLTVKNGNSGMRPVALTVWQSVLPPNKPDDTRIGEELDA  
SLTSEPPPIHAEHPGLYSRAPGTGQQFQCCMQEVT CNTKALWTKRFHIAHGSSKFGSEKVPDEVALHAQDVSW  
VRAETFEC SICKKTFCTKCELMKHKKIHKGQQYYTCRDCEKTFIKESYHTDQRVHAGVGS HRCKQCEKCFHQK  
NQQNVHERVPREARLWEVYQSENSFGEKPNLRRYQRTRAGYKPYGCNLCGKAFYRKSHLGRHQKIHTGEKPYG  
CEECKKTFYHKSSSLTIHQRTHTGEKPYECKKCRKTFYCKSDLNVHHRHTHTGEKPYECECRKTFYKSHLVIH  
QKVHTGDKPYECEECQKAFSRKSNLTVHQKTHTGEKPYECNVCCKTFHRQSHLNMHQGTHTGQKPYQCEECGK  
AFYQKSSLRHRHQRNHTGSRPYACEEKRKTF LHKSSSLTVHQRSHTGYKPYSCEECRKTFYKSHLTVHQRTHTG  
EKPYECKLCKKAFHQKSYLNRHQVTHGSEKRFECQECRKYHYKSSSLTVHQRIHLRELLCV\*

>ENSMUSP00000099764\_c.1174:A>C\_p.E392A ENSMUST00000102703.2|zfp39-201|ENSMUSG00000037001|-|chr11:g.58781586:T>G  
MRNLQPDSVENSLSQLPSRCLSTRKRKRSYKKRPVITYSYWRRRTQRNRARKHKAPVKGLVSFEDVSVDFTWDEW  
QDLDDSQRKLYRDVMLETYSSLES LGHCITKPEVIFKLEQGAEPWRAEDVPKQSRADVQKITELNETSQDNEE  
RHLWHHAITYSNKSTEEKVKLGNIVNVSSNCVSNLTVKNGNSSGMRPVALTVMQSVLPPNKPDDTRIGEELDA  
SLTSEPPPIHAEHPGLYSRAPGTGQQFQCCMQEVT CNTKALWTKRFHIAHGSSKFGSESEKVPDEVALHAQDVSW  
VRAETFECISICKKTFCTKCELMKHKKIHKGQQYYTCRDCEKTFIKESYHTDQRVHAGVGS HRCKQCEKCFHQK  
NQQNVHERVPREARLWEVYQSENSFGEKPNLRRYQRTRAGYKPYGCNLCGKAFYRKSHLGRHQKIHTGEKPYG  
CEECKKTFYHKSSSLTIHQRTHTGEKPYECKKCRKTFYCKSDLNVHHRHTHTGEKPYECDECRKTFYKSHLVIH  
QKVHTGDKPYECEECQKAFSRKSNLTVHQKTHTGEKPYECNVCCKTFHRQSHLNMHQGTHTGQKPYQCEECGK  
AFYQKSSLRHRQRNHTGSRPYACEECCRKTF LHKSSLTVHQRSHHTGYKPYSCCEEKRTFYKSHLTVHQRTHTG  
EKPYECKLCKKAFHQKSYLNRHQVTHGSEKRFECQECRKTFFYHKSSLTVHQRIHLRELLCV\*  
>ENSMUSP00000099764\_c.1137:C>T\_p.L380F ENSMUST00000102703.2|zfp39-201|ENSMUSG00000037001|-|chr11:g.58781623:G>A  
MRNLQPDSVENSLSQLPSRCLSTRKRKRSYKKRPVITYSYWRRRTQRNRARKHKAPVKGLVSFEDVSVDFTWDEW  
QDLDDSQRKLYRDVMLETYSSLES LGHCITKPEVIFKLEQGAEPWRAEDVPKQSRADVQKITELNETSQDNEE  
RHLWHHAITYSNKSTEEKVKLGNIVNVSSNCVSNLTVKNGNSSGMRPVALTVMQSVLPPNKPDDTRIGEELDA  
SLTSEPPPIHAEHPGLYSRAPGTGQQFQCCMQEVT CNTKALWTKRFHIAHGSSKFGSESEKVPDEVALHAQDVSW  
VRAETFECISICKKTFCTKCELMKHKKIHKGQQYYTCRDCEKTFIKESYHTDQRVHAGVGS HRCKQCEKCFHQK  
NQQNVHERVPREARLWEVYQSENSFGEKPNLRRYQRTRAGYKPYGCNLCGKAFYRKSHLGRHQKIHTGEKPYG  
CEECKKTFYHKSSSLTIHQRTHTGEKPYECKKCRKTFYCKSDLNVHHRHTHTGEKPYECDECRKTFYKSHLVIH  
QKVHTGDKPYECEECQKAFSRKSNLTVHQKTHTGEKPYECNVCCKTFHRQSHLNMHQGTHTGQKPYQCEECGK  
AFYQKSSLRHRQRNHTGSRPYACEECCRKTF LHKSSLTVHQRSHHTGYKPYSCCEEKRTFYKSHLTVHQRTHTG  
EKPYECKLCKKAFHQKSYLNRHQVTHGSEKRFECQECRKTFFYHKSSLTVHQRIHLRELLCV\*  
>ENSMUSP00000099764\_c.925:C>G\_p.T309R ENSMUST00000102703.2|zfp39-201|ENSMUSG00000037001|-|chr11:g.58781835:G>C  
MRNLQPDSVENSLSQLPSRCLSTRKRKRSYKKRPVITYSYWRRRTQRNRARKHKAPVKGLVSFEDVSVDFTWDEW  
QDLDDSQRKLYRDVMLETYSSLES LGHCITKPEVIFKLEQGAEPWRAEDVPKQSRADVQKITELNETSQDNEE  
RHLWHHAITYSNKSTEEKVKLGNIVNVSSNCVSNLTVKNGNSSGMRPVALTVMQSVLPPNKPDDTRIGEELDA  
SLTSEPPPIHAEHPGLYSRAPGTGQQFQCCMQEVT CNTKALWTKRFHIAHGSSKFGSESEKVPDEVALHAQDVSW  
VRAETFECISICKKTFCTKCELMKHKKIHKGQQYYTCRDCEKTFIKESYHTDQRVHAGVGS HRCKQCEKCFHQK  
NQQNVHERVPREARLWEVYQSENSFGEKPNLRRYQRTRAGYKPYGCNLCGKAFYRKSHLGRHQKIHTGEKPYG  
CEECKKTFYHKSSSLTIHQRTHTGEKPYECKKCRKTFYCKSDLNVHHRHTHTGEKPYECDECRKTFYKSHLVIH  
QKVHTGDKPYECEECQKAFSRKSNLTVHQKTHTGEKPYECNVCCKTFHRQSHLNMHQGTHTGQKPYQCEECGK  
AFYQKSSLRHRQRNHTGSRPYACEECCRKTF LHKSSLTVHQRSHHTGYKPYSCCEEKRTFYKSHLTVHQRTHTG  
EKPYECKLCKKAFHQKSYLNRHQVTHGSEKRFECQECRKTFFYHKSSLTVHQRIHLRELLCV\*  
>rs49084133\_ENSMUSP00000099764\_c.186:G>A\_p.D63N  
ENSMUST00000102703.2|zfp39-201|ENSMUSG00000037001|-|chr11:g.58791499:C>T  
MRNLQPDSVENSLSQLPSRCLSTRKRKRSYKKRPVITYSYWRRRTQRNRARKHKAPVKGLVSFENVSVDFTWDEW  
QDLDDSQRKLYRDVMLETYSSLES LGHCITKPEVIFKLEQGAEPWRAEDVPKQSRADVQKITELNETSQDNEE  
RHLWHHAITYSNKSTEEKVKLGNIVNVSSNCVSNLTVKNGNSSGMRPVALTVMQSVLPPNKPDDTRIGEELDA  
SLTSEPPPIHAEHPGLYSRAPGTGQQFQCCMQEVT CNTKALWTKRFHIAHGSSKFGSESEKVPDEVALHAQDVSW  
VRAETFECISICKKTFCTKCELMKHKKIHKGQQYYTCRDCEKTFIKESYHTDQRVHAGVGS HRCKQCEKCFHQK  
NQQNVHERVPREARLWEVYQSENSFGEKPNLRRYQRTRAGYKPYGCNLCGKAFYRKSHLGRHQKIHTGEKPYG  
CEECKKTFYHKSSSLTIHQRTHTGEKPYECKKCRKTFYCKSDLNVHHRHTHTGEKPYECDECRKTFYKSHLVIH  
QKVHTGDKPYECEECQKAFSRKSNLTVHQKTHTGEKPYECNVCCKTFHRQSHLNMHQGTHTGQKPYQCEECGK  
AFYQKSSLRHRQRNHTGSRPYACEECCRKTF LHKSSLTVHQRSHHTGYKPYSCCEEKRTFYKSHLTVHQRTHTG  
EKPYECKLCKKAFHQKSYLNRHQVTHGSEKRFECQECRKTFFYHKSSLTVHQRIHLRELLCV\*  
>rs29406722\_ENSMUSP00000063279\_c.882:G>A\_p.E295K  
ENSMUST00000069941.13|Btln110-202|ENSMUSG00000020490|+|chr11:g.58813255:G>A  
MARAHPGDATLPSILVFSIFLQLLTSNGKSDFLVLGPPHPLLAIVGQDKELPCKLSLNI SAEGMELRWYRDK  
PSSVVHVYKNGEDVYDEQMV EYKGRTSFNGSHVAGEAAKVIHNVTVFDNGTYHCVFKEYTSHSQATLWLKVA  
GRGSSPRIRKVTDTQDKGIRAECT SAGWYPEPKVARELDLKGQPVSAESHFVSASTGLVALLSIVTPQDTAVGG  
LTCISISNPLLPEKVTETYLLASLSRRPLSTESGPALPLI L TALGLVSAAIACAFGKCHKEEHKTNQEEEDPGA  
RDKAGLFHVLSLDPETASPKLMVSEDQKSVKRLFLDQDVFPSSRRFNQDPCILAQERFEAGRHYWEVEVGDR  
RAWILGVCLESLVREGRIKPSQPQHGLWALEFYKKKQLQALSYPRTCLSPPEPLRRVGILLDFEAGQISFYNSTN  
GSLIYVFSGFSFSGPLQPFCLWTHDRPLTICSVVTETKDTESSGDPGLPGDS\*

>rs29406722\_ENSMUSP00000124234\_c.882:G>A\_p.E295K  
ENSMUST00000142499.8|Btln110-204|ENSMUSG00000020490|+|chr11:g.58813255:G>A  
MARAHPGDATLPSILVSFIFLQLLTSGNGKSDFLVLGPPHPLLAIVGQDKELPCKLSLNISAEGMELRWYRDK  
PSSVVHVYKNGEDVYDEQMVVEYKGRTSFNNGSHVARGEAAVKIHNVTVFDNGTYHCVFKEYTSHSQATLWLKVA  
GRGSSPRIVRTDTQDKGIRAECSAGWYEPKVEWLDLKGQPVSAESHFSVSASTGLVALLSIVTPQDQDTAVGG  
LTCSISNPLLPEKVTETETYLASLSRRPLSTESGPALPLILITLGLVSAAIACAFGKCHKEEHKTNQEEEDPGA  
RDKAGLFHVLSLSDPETASPKLMVSEDQKSVKRLFLDQDVFPSRRRFNQDPCILAQERFEAGRHYWEVEVGD  
RAWILGVCSLVSREGRIKSPQHGLWALEFYKKKLQALSYPRTCLSPPEPLRRVGIILLDFEAGQISFYNSTN  
GSLIYVFSGFSFSGPLQPFCLWTHDPRPLTICSVVTETKDTESGDPGLPGDS\*  
>rs46049392\_ENSMUSP00000063279\_c.1237:C>T\_p.P413L  
ENSMUST00000069941.13|Btln110-  
202|ENSMUSG00000020490|+|chr11:g.58814559:C>T  
MARAHPGDATLPSILVSFIFLQLLTSGNGKSDFLVLGPPHPLLAIVGQDKELPCKLSLNISAEGMELRWYRDK  
PSSVVHVYKNGEDVYDEQMVVEYKGRTSFNNGSHVARGEAAVKIHNVTVFDNGTYHCVFKEYTSHSQATLWLKVA  
GRGSSPRIVRTDTQDKGIRAECSAGWYEPKVEWLDLKGQPVSAESHFSVSASTGLVALLSIVTPQDQDTAVGG  
LTCSISNPLLPEKVTETETYLASLSRRPLSTESGPALPLILITLGLVSAAIACAFGKCHKEEHKTNQEEEDPGA  
RDEAGLFHVLSLSDPETASPKLMVSEDQKSVKRLFLDQDVFPSRRRFNQDPCILAQERFEAGRHYWEVEVGD  
RAWILGVCSLVSREGRIKSPQHGLWALEFYKKKLQALSYPRTCLSLPEPLRRVGIILLDFEAGQISFYNSTN  
GSLIYVFSGFSFSGPLQPFCLWTHDPRPLTICSVVTETKDTESGDPGLPGDS\*  
>rs46049392\_ENSMUSP00000124234\_c.1237:C>T\_p.P413L  
ENSMUST00000142499.8|Btln110-204|ENSMUSG00000020490|+|chr11:g.58814559:C>T  
MARAHPGDATLPSILVSFIFLQLLTSGNGKSDFLVLGPPHPLLAIVGQDKELPCKLSLNISAEGMELRWYRDK  
PSSVVHVYKNGEDVYDEQMVVEYKGRTSFNNGSHVARGEAAVKIHNVTVFDNGTYHCVFKEYTSHSQATLWLKVA  
GRGSSPRIVRTDTQDKGIRAECSAGWYEPKVEWLDLKGQPVSAESHFSVSASTGLVALLSIVTPQDQDTAVGG  
LTCSISNPLLPEKVTETETYLASLSRRPLSTESGPALPLILITLGLVSAAIACAFGKCHKEEHKTNQEEEDPGA  
RDEAGLFHVLSLSDPETASPKLMVSEDQKSVKRLFLDQDVFPSRRRFNQDPCILAQERFEAGRHYWEVEVGD  
RAWILGVCSLVSREGRIKSPQHGLWALEFYKKKLQALSYPRTCLSLPEPLRRVGIILLDFEAGQISFYNSTN  
GSLIYVFSGFSFSGPLQPFCLWTHDPRPLTICSVVTETKDTESGDPGLPGDS\*  
>rs26987335\_ENSMUSP00000091703\_c.356:G>A\_p.W119\*  
ENSMUST00000094151.6|Rnf187-201|ENSMUSG00000020496|-|chr11:g.58829254:C>T  
LALPAGPADAICALCQRAPREPVADCGHRFCRACVVRFWAEEEDGPFPCPECADDCQRAVEPSRPLSRLL  
ALEEAAAAPARDGPASEAALQLLRCRADGDPLCSACRMAAGPEPE\*EPRWRKALRGKENKGSVEIMRKDLNDA  
RDLHGQAESAAAVWKGHVMDRRKALTDYKKLRAFFVEEEHFLEAEKDEGASEDDELADPADRFRSLLQAV  
SELEKKHRLGLSMLLQ\*  
>ENSMUSP00000091703\_c.243:C>TT\_p.P82ins-fs ENSMUST00000094151.6|Rnf187-  
201|ENSMUSG00000020496|-|chr11:g.58829367:G>AA  
LALPAGPADAICALCQRAPREPVADCGHRFCRACVVRFWAEEEDGPFPCPECADDCQRAVEPSRPLSRLL  
ALEEAAAAPGARWPCQRGAAAAALSRRRGSVAVLRLPHGRWPGAAGVGTALEEGPARQGEQGLCGNHEEGLK  
>rs244794510\_ENSMUSP00000076397\_c.94:G>A\_p.R32Q  
ENSMUST00000078267.5|H2bu2-201|ENSMUSG00000056895|+|chr11:g.58839860:G>A  
MPEPSRSTPAPKKGSKKAITKAQKKGKRRKGRKESYSIYVYKVLKQVHPDTGISSKAMGIMNSFVNDIFER  
IASEASRLAHYNKRSTITSREVTAVRLLLPGLAKHAVSEGTKAVTKYTSSK\*  
>rs260573336\_ENSMUSP00000076397\_c.321:G>C\_p.A108P  
ENSMUST00000078267.5|H2bu2-201|ENSMUSG00000056895|+|chr11:g.58840087:G>C  
MPEPSRSTPAPKKGSKKAITKAQKKGKRRKGRKESYSIYVYKVLKQVHPDTGISSKAMGIMNSFVNDIFER  
IASEASRLAHYNKRSTITSREVTAVRLLLPGLPKHAVSEGTKAVTKYTSSK\*  
>rs108669903\_ENSMUSP00000037248\_c.811:C>T\_p.S271F  
ENSMUST00000047697.12|Trim17-  
201|ENSMUSG00000036964|+|chr11:g.58861404:C>T  
MDAVELARRLQEEATCSICLDYFTDPVMTACGHNFCRECIQMSWEKGVKKGKQKGSFPCPECREMSPQRN  
LRPNRLLTKVAEMARQHPGLQKRDLCQAHQEPLKLFQDQDQSPICVVCREAQEHMHRVLPLEAAREYKLLK  
EEDIKYLREEMMKTETLQAKEEQTLTEWQERVKERRERILEEFQKVVFLVVEEERRILQVLKKEEEDTLGKLQ  
DSKASLDHQSRSLDLILLQLEERSQQEPLQMLQDVKDTLNRASACSTQRWFSRPLSRPCAIEFQDR\*  
>rs227763149\_ENSMUSP00000074639\_c.861:G>A\_p.E288K  
ENSMUST00000075141.7|Trim17-202|ENSMUSG00000036964|+|chr11:g.58861450:G>A  
MDAVELARRLQEEATCSICLDYFTDPVMTACGHNFCRECIQMSWEKGVKKGKQKGSFPCPECREMSPQRN  
LRPNRLLTKVAEMARQHPGLQKRDLCQAHQEPLKLFQDQDQSPICVVCREAQEHMHRVLPLEAAREYKLLK  
EEDIKYLREEMMKTETLQAKEEQTLTEWQERVKERRERILEEFQKVVFLVVEEERRILQVLKKEEEDTLGKLQ

DSKASLDHQSRSLDLILLQLEERSQQEPLQMLQDVKDTLNRKESFSVQYPEVVLPAAIKTLCRVPGQIKVLKS  
 FQEDVMPDPSSAYPYLLLLYESRQRRYLSPPPEGSAPYSKDRFVAYPCAVGQKSFSSGRHYWEVGMNLTDALW  
 ALGVCARDNVSRKDRVLKSPENGFVWVQLSKGKKQLSLLPNSTLVTLEPPSHMGIFLDFQAGEVSVFYSVNDGS  
 HLHSFSQAAPPGPLLPFFCLGAPKSGQMVISTVTMVKG\*  
 >ENSMUSP00000074639\_c.1225:T>AAA\_p.V409ins-fs  
 ENSMUST00000075141.7|Trim17-  
 202|ENSMUSG00000036964|+|chr11:g.58862195:T>AAA  
 MDAVELARRLQEEATCSICLDYFTDPVMTACGHNFCRECIQMSWEKGVKKGKKKQKGSFPCPECREMSPQRN  
 LRPNRLLTKVAEMARQHPGLQKRDLCAHQEPLKLFQDDQSPICVVCREAQEHRMHRVLPDEAAREYKLLK  
 EEDIKYLREEMMKTETLQAKEEQTLTEWQERVKERRERILEEFQKVVFLVVEEERRILQVLKKEEDTLGKLO  
 DSKASLDHQSRSLDLILLQLEERSQQEPLQMLQDVKDTLNRKESFSVQYPEVVLPAAIKTLCRVPGQIEVLKS  
 FQEDVMPDPSSAYPYLLLLYESRQRRYLSPPPEGSAPYSKDRFVAYPCAVGQKSFSSGRHYWEVGMNLTDALW  
 ALGVCARDNVSRKDRVLKSPENGFVWVQLSKGKKQLSLLPNSTLVTLSQSLPATWGSSTSRLEPCPSTA  
 >rs29437620\_ENSMUSP00000074639\_c.1416:A>G\_p.M473V  
 ENSMUST00000075141.7|Trim17-202|ENSMUSG00000036964|+|chr11:g.58862386:A>G  
 MDAVELARRLQEEATCSICLDYFTDPVMTACGHNFCRECIQMSWEKGVKKGKKKQKGSFPCPECREMSPQRN  
 LRPNRLLTKVAEMARQHPGLQKRDLCAHQEPLKLFQDDQSPICVVCREAQEHRMHRVLPDEAAREYKLLK  
 EEDIKYLREEMMKTETLQAKEEQTLTEWQERVKERRERILEEFQKVVFLVVEEERRILQVLKKEEDTLGKLO  
 DSKASLDHQSRSLDLILLQLEERSQQEPLQMLQDVKDTLNRKESFSVQYPEVVLPAAIKTLCRVPGQIEVLKS  
 FQEDVMPDPSSAYPYLLLLYESRQRRYLSPPPEGSAPYSKDRFVAYPCAVGQKSFSSGRHYWEVGMNLTDALW  
 ALGVCARDNVSRKDRVLKSPENGFVWVQLSKGKKQLSLLPNSTLVTLEPPSHMGIFLDFQAGEVSVFYSVNDGS  
 HLHSFSQAAPPGPLLPFFCLGAPKSGQMVISTVTMVKG\*  
 >rs107962877\_ENSMUSP00000104437\_c.586:T>C\_p.L196P  
 ENSMUST00000108809.8|Trim11-202|ENSMUSG00000020455|+|chr11:g.58872904:T>C  
 MAAPDLSTNLQEEATCAICLDYFTDPVMTDCGHNFCRECIRRCWGQPEGYPYACPECRELSAQNRNLRPNRPLAK  
 MAEMARRLHPPSPVPPQGVCAAHREPLTTFCGDLSLLCPICERSEHWTHRVRPLQEAADDLKGRLKLSLEHLR  
 KQMEDAMLFOQAEEETCALWQKMOVESQRQNVLGEFERLRRLLAEEEEQQLPQKLEEEEELEVLPRLREGAARLGO  
 QSTQLAALISELESRCQLPALGLLQDIKDALCRM\*  
 >rs107962877\_ENSMUSP00000104438\_c.586:T>C\_p.L196P  
 ENSMUST00000108810.10|Trim11-  
 203|ENSMUSG00000020455|+|chr11:g.58872904:T>C  
 MAAPDLSTNLQEEATCAICLDYFTDPVMTDCGHNFCRECIRRCWGQPEGYPYACPECRELSAQNRNLRPNRPLAK  
 MAEMARRLHPPSPVPPQGVCAAHREPLTTFCGDLSLLCPICERSEHWTHRVRPLQEAADDLKGRLKLSLEHLR  
 KQMEDAMLFOQAEEETCALWQKMOVESQRQNVLGEFERLRRLLAEEEEQQLPQKLEEEEELEVLPRLREGAARLGO  
 QSTQLAALISELESRCQLPALGLLQDIKDALCRVQDVKLQPPAVVPMELRTVCRVPG  
 LVETLRRFRGDITLDPDTANPELVLSEDRRSVQRGEQRQALPDNPERFDPGPCVLGQERITSGRHYWEVEVGD  
 QTSWALGVCKETANRKEKGELESAGNGFWILVFLGSFYNSNEPAFSPLRDPPKRVGIFLDYEAGHLSFYSATDG  
 SLLFIFPETLFSGLTRPLFSPLSSSPTMTICRLIGVSGDTLGPQ\*  
 >rs107962877\_ENSMUSP00000090749\_c.586:T>C\_p.L196P  
 ENSMUST00000093061.7|Trim11-201|ENSMUSG00000020455|+|chr11:g.58872904:T>C  
 MAAPDLSTNLQEEATCAICLDYFTDPVMTDCGHNFCRECIRRCWGQPEGYPYACPECRELSAQNRNLRPNRPLAK  
 MAEMARRLHPPSPVPPQGVCAAHREPLTTFCGDLSLLCPICERSEHWTHRVRPLQEAADDLKGRLKLSLEHLR  
 KQMEDAMLFOQAEEETCALWQKMOVESQRQNVLGEFERLRRLLAEEEEQQLPQKLEEEEELEVLPRLREGAARLGO  
 QSTQLAALISELESRCQLPALGLLQDIKDALCRVQDVKLQPPAVVPMELRTVCRVPGVETLRRFRGDITLDP  
 DTANPELVLSEDRRSVQRGEQRQALPDNPERFDPGPCVLGQERITSGRHYWEVEVGDQTSWALGVCKETANR  
 EKGELESAGNGFWILVFLGSFYNSNEPAFSPLRDPPKRVGIFLDYEAGHLSFYSATDGSLLFIFPETLFSGLTR  
 PLFSPLSSSPTMTICRLIGVSGDTLGPQ\*  
 >rs51849424\_ENSMUSP00000121092\_c.1479:A>G\_p.N494D  
 ENSMUST00000138587.9|Obscn-206|ENSMUSG00000061462|-|chr11:g.58888846:T>C  
 KQEGSSQDSCRGKPASSCHSELGSGSQEGCGPPSSQSLGSLPPQSLKKESTSCGPLFSEQPQAAPFPTQVSP  
 LLGSEKEPQDGLSEGPVPPVSSSPGSASQVDASLDTEGLSEAGDTCDFTPPPQRPQEQATTRKFSLESRGGY  
 AGVAGYGTFAFGGDAGGMLGQGPLWARMAWAVSQSSEEQDEAATESPQPLESLGPIAEASGVPLRTSPSLTPW  
 EEVEQVSLVQIRDLSGDAEAADTISLDISEVDPAYLNLSLDYDIKYLPEFEMIFRRVVKPIEQPESPGSETEA  
 GQGLADFLEEAAWPWPGEGLRAGLEITEEPEEPGLDEALLGEAAVGRKRKWSPSRGLFQFPGRCLSGEEPVE  
 LGLRQRVKASMAHISRIKGRPEGPEREGPPRKKAGLASFRLSGLKGRDQAPSFLRELSDEAVVLGQSVTLAC  
 QVLAQPTAQATWSKDGVLLESSEGHLLISSTLKNFQLLTILVVKEDLGTYTCCVSDPLGTAVTTGVLRAERP  
 SSSPRPEVGEELYKDAVLLVWKPVESCGPVTYIVQCCIEGGSWTTLASDISDCCYLTGKLSRGGMYIFRTACVS  
 KAGMGFYSSPSEQVLLGGPNHLASEEESRRGRPAQLLPSTKTFMQQIRRRGRFSVVRQCREKASGRALAAKI

VPYQPEDKTAVLREYEALKRLHHPHLAQLHAAAYLSPRHLVLI LELCSGPELLPPLAERESYSESDVKDYLWQM  
 LSATQYLHAQHILHLDLRSENMMVTEYNLLKVIDLGNQSLDQEKVPAPENFKDYLETMAPELLEGQAVPQT  
 DIWAIGVTAIFIMLSGEYPESEGETRDLQKGLRKLIRLSRCYAGLSGGAVAFLOSSLCAQPWGRPCASTCLOQC  
 GWLTEEGPTGSRPTPVTFPTVRLRAFVREKRRALLYKKNLAQVR\*  
 >rs51849424\_ENSMUSP00000158795\_c.25368:A>G\_p.N8457D  
 ENSMUST00000238536.2|Obscn-210|ENSMUSG00000061462|-|chr11:g.58888846:T>C  
 MDHSFSGAPRFLTRPKAFVSVGKDATLSCQIVGNPTPHVSWEKDRQFVEAGARFRLAQDGDVYRLTILDLAL  
 GDSGQYVCRARNAIGEFAAVGLRVDSEGTCAEQAPHFLLRPTSIRVREGADATFRCRVGGSPQPAVSWSKDG  
 RRLGPPDAPHVRVEEHGESSALRIRSARPRDGGTYEVRAENPLGSASAAAALVVDSDAEVAGPPGTSTATLLA  
 HLQORREAMRAEGIPPSPPGAGTRTCTVTEGKHARLSCFVTGEPKPEVWKKDGQLVTEGRRHVVEDEQENF  
 VLKILFCKQSDRGLYTCTASNLVGQTYSSVLVVVREPTVPFKKRLQDLEVREKESATFQCEVAQPAEAAWFK  
 EETRLWASAKYDIEEGTERRLTVRNVSADDDAVYICETTEGSRVVAELSVQGNLTKLPRKTAVRTGDTAIF  
 WVVELAVPEGPVRWLRNQEEMVAGGRVAITAEGTCHTLTI FQCTLEDMGEVAFVSGGCRTTTQFCVSAAPRRPPL  
 YPADPVVKAKTESVTLWSAPPHGDRPVTIDGYVLEKRLGAYAWSRCHEAGWLATTEFTITGVAAEEDGFQ  
 FRVSAINHFGQGPYLEFPGTMHLVPLAVKTPKAVEAVEGGEVTFVSDLTVASSGEWFLDGEALKASSIYVI  
 RCDRTRHMLTIREVPARLHGAQLKVFANGIETSIQMVVRAALGLPSSKLPAAAAREVLAQLHHEEAQLLAE LSD  
 QAAAATWLKDGRELSLGPKYEMQVSAGRRALLVRDVAQDDAGLYECVSRGSRRTAYQLLVQDITDGYRWDWGPAG  
 PQKHMCKCAGAKIARYLGSSCYRFLQYDKGVVHWEAALDTRQKGTSSCSLHEKPKLVFAKQQAHSEVKA  
 AGNSATLSCEVTQAQTEVTWFKDGKLLSSSSKVRMEASGCSRRLVVQQAGKADAGEYSCEAGGQKLSFRLDVA  
 EPKLVFAKQQAHSEVKAEGASATLSCEVAQAQTEVTWFKDGKLLSSSSKVRMEASGCSRRLVVQQAGKADA  
 GEYSCEAGGQKLSFRLDVAEPKMFVFAKEQQARSEVKAEGASATLSCEVAQAQTEVTWFKDGKLLSSSSKVRM  
 EASGCSRRLVVQQAGKADAGEYSCEAGGQKLSFRLDVTEPKLVFAKEQQARSEVKAEGVNSATLSCEVAQAQ  
 ETVWFKDGKLLSSSSKVRMEASGCSRRLVVQQAGKADAGEYSCEAGGQKLSFRLDVAEPKLVFAKEQQARSEV  
 KAEAGNSATLSCEVAQAQTEVTWFKDGKLLSSSSKVRMEASGCSRRLVVQQAGKADAGEYSCEAGGQKLSFHL  
 DVTEPKLVFAKEQQAHSEVKAEGASATLSCEVAQAQTEVTWFKDGKLLSSSSKVRMEASGCSRRLVVQQAGK  
 ADAGEYSCEAGGQKLSFRLDVAEPKLVFAKEQQARSEVKAEGASATLSCEVAQAQTEVTWFKDGKLLSSSSK  
 VRVEASGCSRRLVVQQAGKADAGEYSCEAGGQKLSFRLDVAEPKLVFAKEQQANSEVKAEGASATLSCEVAQ  
 AQTEVTWFKDGKLLSSSSKVRVEASGCSRRLVVQQAGKADAGEYSCEAGGQKLSFRLDVAEPKLAFAKEQQAH  
 SEVKAEGASATLSCEVAQAQTEVTWFKDGKLLSSSSKVRVEASGCSRRLVVQQAGKADAGEYSCEAGGQKLS  
 FRLDVAEPKLAFAKEQQAHSEVKAEGASATLSCEVAQAQTEVTWFKDGKLLSSSSKVRVEASGCSRRLVVQQ  
 AGKADAGEYSCEAGGQKLSFRLDVAEPKLAFAKEQQAHSEVKAEGASATLSCEVAQAQTEVTWFKDGKLLSS  
 SSKVRVEASGCSRRLVVQQAGKADAGEYSCEAGGQKLFRLDVAEPKLMFAKEQQAHSEVKAEGASATLSCE  
 VAQAQTEVTWFKDGKLLSSSSKVRVEASGCSRRLVVQQAGKADAGEYSCEAGGQKLSFRLDVAEPKLVFAKEQ  
 QAHSEVKAEGASATLSCEVAQAQTEVTWFKDGKLLSSSSKVRVEASGCSRRLVVQQVQKADAGEYSCEARGQ  
 KLSFRLDVADTRLMFAKEQQARTEVKAEGNSATLSCEVAQAQTEVTWFKDGKLLSSSSKVRVEASGCSRRLV  
 VQQAGKADAGEYSCEAGGQKLSFRLDVAEAEASQIIPERPRREPLVVKHEHETIILTATIAAPSVAAVTWLKDG  
 EIRRSKRHEATSLGDTHTLTVRGAQVLDLSAIYSCRVGKEGQDFPVQVEEVAAKFSKPLEPVEGELGGTVMLVC  
 ELSPEQAEVWRCGNTQLRPGKRFQMTSEGPRRTLTVSGLREDDAEYVCESRDDRTSARLTVKVPVVKFTS  
 GLSAMVAEEGQEQATFQCVVSPSDAGVTWYKDGMLQPSKFKVMVESGASRSLTILGLTLEDAGQVTEAEGAS  
 SSAALRVREAPVFLFKKLEPQTEVEERTSVTLEVELTRPWPEVKWTRNAAVLTPSENVEIRAEGARHCLVLRV  
 GFADRGFFGCETPDDKTQAKLNVEMRQVRLVRLGLQEVEAKEQGTASMDVELSHAEEVGSWTRDGLRLQPGPKC  
 HLAVQGPVHILTLALSALQPQDSGLVAFRAEGVHTSARLIVTELPSVSTRVLQDVVATQKEKVTLECELSRPVDV  
 RWLKDGVLELRAGKAIIGIVAQGTCSRSLVIYRCETGDQGVYVCDALDAQTSASLRVQGRTYTLIFRRVLAEDAGE  
 VKFVAENAESRAHLRVKELPVTLLRPLRDKIAMEKHRGVLECCQVSRASAQVRWFKGGVELQSGPKYEVVSDGL  
 YRKLVINVDVQPEDEDTYTCDAGNVKTSAQFFVEEQSITIVRGLKDMTVMPEPAPAWFECETSIPSVRPPKLLG  
 KTVLQAGGNVLEQDGTVHRLTLHKTCSTMTGPVHFTIGKSRSSAQLVVSDIPVVLTRPLEPKAGRELQSVVL  
 SCDFRPAPKAVQWYKDDTPLSPSEKFKMALEGQMAELRILRLTPADAGVYRCQAGSAQSSAEVTEAREVTVI  
 QPLQDAEAMEEGRVCFSCELSHKDEDEIWSLNGTPLYNDSFHEISHEGCLHTLVLSVRQADTGTVCATSPKV  
 SVSARLVVKGKPVVFLKALDDVSAEERGTLLTQCEVSDPEARVVWRKDGVELGSPDKYDFLHKAGARGLTVHD  
 LSHEDAGLYTCQVGSKETQSKVSVHDLHVGITKRLKTVLEVLEGECSFECVLSHESPSDPAVWTVGGKTVGGS  
 GHFHAVRQGRKYTLTVKDAALSDAGEVVSFVGLTSSKASLIIRERPVDITKPLEDQRTTLGEDVMLSCELSRA  
 GTSVRWLKDGKAIRKSQKYDLLSEGTRAVLVVRKASLKDSGEYTCETEASKSTAKLCVEEKANRFTEELADLQ  
 VEEKGRAVFTCKTEHPASVVTWRKGLLELRASGKHVPVSEGLTLKLTINALERTDSDTYTCDIGQARTQARLL  
 VHGGQKVRVIEDLEDTASVQEGSSAKFCCRIAPADYGVPHWFLDKTPLHSNELNEITVQPGGYHVLTLRQLAKD  
 SGTVYFEAGDQRTSAALRVTEKPSIFSRPLTDVTVTEGEDTLVCETTTTVDSVSRWTKDGKTLRPSARCQLSH  
 EGCQAQLLITATTPQDGGRYKCEIGGASSSSIVRVHALPVRFRRESLKDVEVPEGKAATLRCVLSVVAAPVEWR  
 HGDDVLKSSNKYSLRQEGAVLELVIRDLQPDQSGQYSCSFGDQTTSATLTVKTSQAQFVGLRNKEATEGTTV  
 TLRCELTKAPVEWKKGTETLRNGDKYSLKQDGA VCELQICSLLVADAGEYSCVCGQEKTSATLTVKALLVHF



VRRLRSKEATEGDTTTLQCELSKAAPVEWRKGTETLRDGDYSLKQDQAVCELQIRSLTIADAGEYLCTCGQE  
KTSATLTVRALPAKFKDSLKNEEATEGTTATLSCELSKAAPVTWKKGPKTLQSGDKYVLRQDQAVCGLQIHGL  
TMADAGEYSCVCGQEKTSATLTVRGLPAKFIEDLRSQEATEGATAILRCELSKAAPVEWRKGSSETLKDGDYR  
LRQDQAVCELQIRGLAVVDGTYSLSLPTKFTTEGLRNEEATEGTMATLRCQMSKAAPVEWRKGSSETLRDGDYR  
LRQDQAVCELQIRGLTIEDSGEYTCVCGQEKTSATLSVKALPSRFIEDLRSQEATEGTMATLRCQMSKTAPVE  
WKKGSETLRDGGYSLRQDGPVCELQICDLAVEDAGEYSCVCGQEKTSATLSIKALPPRFIEDLRSQEATEG  
MATLRCQMSKAAPVEWRKGSSETLGDGGYSLRQNGAVCELQIHDLAVEDTGEYSCVCGQEKTSATLNVKALPP  
RFIEDLRSQEATEGTMATLRCQMSKAAPVEWRKGSSETLRDGGYSLRQDQAVCELQIHDLVEDAGQYSCVCG  
QEKTSAVLTVDALPPKFTTEGLKKEEATEGTMVTLRCQMSKEATVEWRKGAKTSLDGGYSLRQDQAVCELQIC  
GLAVEDAGEYSCVCGQEKTSATLSVKALPPRFIEDLRSQEATEGTMATLRCQMSKAAPVEWRKGSSETLRDGD  
YSLRQDQAVCELQIRDLAVEDAGEYLCVCGQEKTSATLSVKALPPRFIEDLRSQEATEGTMATLRCQMSKAAP  
VEWRKGSKTALRDGDYSLRQDQAVCELQICDLAVEDTGDYSCVCGQEKTSATLSVKALPPRFIEDLRSQEARE  
GTVATLRCRMSKAAPVEWRKGSSETLKDGDYSLRQEGNLCELQIRDLAVEDTEEYSCVCGQEKTSATLSVKAL  
PAKFIEDLRSQEAPESSTVTLRCKLSKKASVVWKKGSETLRNGARYSLRQDQAVCELEIRDLTVEDTGEYSCT  
CGQERTSATLSIMAPQVVFQQLQNLQAEEGSMASLRCELSVPNAAMVWSKGGLELQGDTRREARQQGCVAEL  
LLRDLRREDAGEYSCVCGQEKTSATLMVTAAPVRFLELQAQDVDEGATARLRCELSREAVSVEWRKGSQQLF  
PCAKYQMVQEGTTAELLVHGVEQEDAGEYTCDAHTQSIARLSVRAPKPKFKTDLQSTEQEAGGTARLCCQLS  
EABPGTVPQWLKEGVELHVGSKYEMRRQGAVERCELLIHGLEAKDTGEYACLVGQKTLASLRVKEPEVTVIRGL  
VDMEVQADEDEFTCKVSAQATDVQWHLQGLPLQSNVTEVAVLADGCTHVLQKGVTLLEDAGTVSFHVGGL  
SSSAQLTVRVPEVTVLEPLKDVQVLESEGQDAHFRCLRSRAGQEARWALGGVPLQCNEMNDITVEQGTLYLLTL  
HKVTVLEDAGITTLQVGSSEEAQLKVTAKNTVLRGLENVDALEGGEALFECQLSQPEVAHAHTWLLDDEPVHTS  
EKVEVVYFENGLRHLLLLKLNKPKQDSCRVTFLAGDVVTSFAFLTVRGWRLEVLEPPHDASVKAGMQVRFCTILS  
EAVPVGEATWYINGAAIQPDDTWTVTDDGSHHALTLSNAQPQHAGEVTFFAARDAVASARLSVLALPDPEDA  
EVVGRSDHSVTLVSWVAPMSDGGGGLCGYRVMKEASTGQWQLCHDLVPGPECVVDDLVPGKTYRFRVAAVGPA  
GAGEPVHLPQMVKIAPAPAPAPAPAPAPAPETRAQAVVGEDICILELEVAADGGEVVWHKGTERRIQPGGHFEVLS  
RGQRQMLVIKGFRTEDQGEYRCGPIQGLPSSGAATFNVMVTSVSGSDEVPAQPSLPPPEAAQEDLHLLWEALAR  
KRMSREPLTDSISELPEEDSRVQHLRQEAETAPDLSEGYSTADELARTGEADLSHTSSDDESAGTPELVT  
YLKKAAGGPGISPLASKHEAQVTTSVKPKQKQEPVPTCPGGDLAADLMDPSLDKAAVKIQAAFKGYKVRKE  
MKQQEGPVFSRTFGDTEAQVGDVLRLECVLATKTDMRACWLKDGIELTDGRHYHIDQLKDGTCSSLVTVGLAPT  
DSGRYTCQVSTKSGRVSHSACVVVSGTESEAESSSGGELDDAFRRAARRLHRLFRTKSPAELSEELFLSADE  
GPGEPEEPADWQTYREDENFVCIRFESLAEARQAVTCFRNMFMATMGIGVEISLGEQGPGRVEMRIGKVAPT  
PAVPLAKTPGLQTSDAAPVFLTELQNDVQDGYPMSFDCVVTGQVPSVRWFKDGKLEEDDHVMINEDQQGG  
HQLIITAVVPADMGVYRCLAENSMGVSSTKAELRVELTSTDYDTAADATETSSYFSAQGYLSSREQEGTESDE  
GQLPQVLEELKDLQVAPGTRLAKFQLKVKGYPAKLYWFKDGGQPLTSDHIRMTDKKTLHLEIVSVTREDSG  
QYAAYSNAVGAAYSSARLLVRGPSEPEEKPASDVHERLVRPPILEKFTPKKVKRGSSTIFSVKVEGHPAPSV  
HWLKEEAEGVWLWIGPDTPGYTMASSSKQHSVLVLDVGRQHGTQTYTCIATNPAGQALCASLHISGLAKEEEEQ  
ERVKEALISSFLQGTSAQVSAQMSSEAGFADLVGQSKGESLVAAEAHSHLSLAEVGTEEFQKLTSSQITEMVS  
AKISQAKLQVPGGDSDEETKTPSASPRHGRSRPSSSVQESSSESEDGDSRGEIFDIYVVTADYLPPLGAEQDAI  
ILREGQYVEVLDSAHPLRWLVRTKPTKSSPSRQGWVSPAYLDRKRLKLSPEWGPTEAPEFPGEAVSEDEYRTRL  
SSVIQELLSSEQAFVQELQFLESHHMKHLERSPRVPAAVASQKTVIFRNVQDISHFHSSFLKELQCGTDDDDV  
AMCFIKNQEAFAEKYLEFLVGRVQAESVVVSTPVQEFYKKYAEETLSAKDPTQPPPPPLQHYLEQPVVERVQKYQ  
ALLKELIRNKARNRQNCALLEQAYAVVSALPQRAENKLVSLMENYPGTLEALGEPHQGHFIVWEGAPGARM  
PWKGHNHRVFLFRNYLVICKPRRDSRTDFTSYVFRNMMKLSSIDLNDQVEGDDRAFEVWHEREDSVRKYLLQA  
RTVVIKNSWVKEICIGIQORLAQPVWRPPEFEEELADCTAELGETVKLACRVTGTPKPIVSWYKDGKPEVVDPH  
HILIEDPDGSCTLILDNLGTIDSGYMCFAASAAGNASTLGKILVQVPPRFVNVKVRATPFVEGEDAQITCTVE  
GAPYPQIRWYKDGTLTLLAPGNRYRMLNEPRSGVLVVIQAASKEDLGHYECELVNRLGSTRGGGELYMQSPALR  
ARDQHHREQIVAAVEDTSVEGSAHSAQDQADQQAASVLWRLGSEALGPSGDLPNTRQSEPPAFEEAASQIP  
GAASGTPEVSPQPGTHKLEQETTSSGSQGWTPVIRVEGTAWPGAGTGQLLQVHVSQVIMETTQRTYVCQAPDT  
GVTRAPSMQVTIEDVQVQVGDMAQFDAVIEGHPPPIVTVWYKGSTQLTSSARLSQRQDGTYSVLVTDVAPHDA  
GVYTCVANNAGGQVLCKAELLVHGDKLDAENQVYRRKLHSFYDVQEEIGRGVFGFVKRVQHKGNMFCAAKF  
IPLRSKTRAQAYQERDILATLGHPLVTGLLDQFETRKTLLILILELCSSEELLDRFLKKGVTAEAEVKVYIQQ  
VEGLHYLHSHGILHLDIKPPNILMVHPAREDIKICDFGFAQKITPSEPQYSKYGSPEFVSPEIIEQNPVSEGS  
DIWAMGVISYLSLTCSSPFAGESDRATLLNVLEGRVSWSSPTAAHLSSEDAKDFIKATLQRTPRARPSTSQCLA  
HPWFLKSMPEAAEAFINTKQLKFLARSRWQRSLMSYKSIIVMRSIPELLQGPDPSPSLGVARHRLRGEASGAS  
SSSSSDNELAPFARAKSLPPSPVTHSPLLHPRGFLRPSASLPEETEASMPADAADVSPASQAGPPASPGCV  
PRHSVSISSLFYQQAGEGAERGNKTSGAKRHPARRRHLLKGGYIARALPGLREPLMEYSLLEEEAAREEQASLM  
TKTSPFETALRLPSSSVREVPGRSHSLDNPPVTTGPSPEACKEQLLFPSTGLTHETTAKDRGHKEGFLQESV  
PFPMSGDSRPGKQEGSSQDSCRGKPASSCHSELGSGSQEGCGPPSSQSLGSLPPQSLKELSTSCGFLFSEQ

PQAAPFPTQVSPLLGSEKEPQDGSLSSEGPVVPVSSSPGSASQVDASLDTEGLSEAGDTCDFTPPPQRPQEQAT  
TRKFSLESRGGYAGVAGYGTFAFGGDAGGMLGQGPLWARMAWAVSQSSEEQDEAATESPQPLESIGPIAEASG  
VPLRTSPSLTPWEEVEQVSLVQIRDLSDGDAEAADTISLDISEVDPAYLNLSLDYDIKYLPEFEMI FRRVVKPI  
EQPESPGSETEAGQGLADFLLEAAWPWPGEGLGLRAGLEITEEPEEPGDLEALLGEEAAVGRKRKWSPSRGLFQF  
PGRCLSGEEPVELGLRQRVKASMAHISRILKGRPEGPEREGPPRKKAGLASFRLSGLKGRDQELSDEAVVLGQ  
SVTLACQVLAQPTAQTATWSKDGVLLESSGHLISSTLKNFQLLTILVVKEEDLGTYTCCVSDPLGTAVTTGVL  
RKAERPSSSPRPEVGELEKYDAVLLVWKPVESECGPVYIVQCCIEGGSWTTLASDISDCCYLTKLSRGGMYIF  
RTACVSKAGMGPIYSSPSEQVLLGGPNHLASEEESSRGRPAQLLPSTKTFQMQIRRRGRFVSVRQCREKASGR  
ALAAKIVPYQPEDKTAVLREYEALKRLLHHPHLAQLHAAYLSRHLVLIILELCSGPELLPSLAERESYSESDVK  
DYLWQMLSATQYLHAQHILHLDLRSENMMVTEYNLLKVIDLGNQSLDQEKVPAPENFKDYLETMAPELLEGGQ  
GAVPQTDIWAIGVTAIFIMLSGEYPESESETRDLQKGLRKLIRLSRCYAGLSGGAVAFLOSSLCAQPWGRPCA  
STCLQCGLWTEEGPTGSRPTPVTFTVRLRAFVREKRRALLYKKNLAQVR\*  
>rs51849424\_ENSMUSP00000038264\_c.22806:A>G\_p.N7603D  
ENSMUST00000047441.14|Obscn-202|ENSMUSG00000061462|-|chr11:g.58888846:T>C  
MDHSFSGAPRFLTRPKAFVSVGKDATLSCQIVGNPTPHVSWEKDRQPVVEAGARFRLAQDGDVYRLTILDLAL  
GDSGQYVCRARNAIGEFAAVGLRVDSEGTCAEQAPHFLLRPTSIRVREGADATFRCRVGGSPPAVSWSKDG  
RRLGPPDAPHVRVEEHGESSALRIR SARPRDGGTYEVR AENPLGSASAAAALVVDSDAEVAGPPGTSTATLLA  
HLQQRREAMRAEGI PPSPPGAGTRTCTVTEGKHARLSCFVTGEPKPETVWKKDGLVTEGRRHVVEDEQENF  
VLKILFCKQSDRGLYTCTASNLVGQTYSSVLVVVREPTVPFKKRLQDLEVREKESATFQCEVAQPAEEAAWFK  
EETRLWASAKYDIEEEGTERRLTVRNVSADDDAVYICETTEGSRVAELSVQGNLTKLPRKTAVRTGDTAIF  
WVELAVPEGPVWRWRNQEEMVAGGRVAITAEGTCHTLTI FQCTLEDMGEVAFVSGGCRTTTQFCVSAPRRPPL  
YPPADPVVKAKTESSVTL SWSAPPHGDRPVTIDGYVLEKRKLGAYAWSRCHEAGWLATTEFTITGVAEEDGFQ  
FRVSAINHFGQGPYLEFPGMTMLVPLAVKTPKAVEAVEGGEVTFVSDLTVASSGEWFLDGEALKASSIYVI  
RCDRTRHMLTIREV PARLHGAQLKFVANGIETS IQMVVRAALGLPSSSKLPAAAAREVLAQLHEEAQLLAELSD  
QAAA VTWLKDGRELSLGPKEYMQVSAGRALLVVRDVAQDDAGLYECVSRGSR TAYQLLVQDITDGYRDWGPAG  
PQKHMCKCAEKIARYLGS SCYRFLQYDKGVWHWLEAALDTRQKGTSSCSLHEKPKLVFAKQQAHSEVKAE  
AGASATLSCEVAQAQTEVTWFKDGKLLSSSSKVRMEASGCSRRLVVQQAGKADAGEYSCEAGGQKLSFRLDVA  
EPKMFVFAKEQQARSEVKAEGASATLSCEVAQAQTEVTWFKDGKLLSSSSKVRMEASGCSRRLVVQQAGKADA  
GEYSCEAGGQKLSFRLDVTEPKLVFAKEQQARSEVKAEGNSATLSCEVAQAQTEVTWFKDGKLLSSSSKVRM  
EASGCSRRLVVQQAGKADAGEYSCEAGGQKLSFRLDVAEPKLVFAKEQQARSEVKAEGNSATLSCEVAQAQ  
EVTWFKDGKLLSSSSKVRMEASGCSRRLVVQQAGKADAGEYSCEAGGQKLSFHLDVTEPKLVFAKEQQAHSEV  
KAEAGASATLSCEVAQAQTEVTWFKDGKLLSSSSKVRMEASGCSRRLVVQQAGKADAGEYSCEAEQKLSFRL  
DVAEPKLVFAKEQQARSEVKAEGASATLSCEVAQAQTEVTWFKDGKLLSSSSKVRVEASGCSRRLVVQQAGK  
ADAGEYSCEAGGQKLSFRLDVAEPKLVFAKEQQANSEVKAEGASATLSCEVAQAQTEVTWFKDGKLLSSSSK  
VRVEASGCSRRLVVQQAGKADAGEYSCEAGGQKLSFRLDVAEPKLVFAKEQQAHSEVKAEGASATLSCEVAQA  
AQTEVTWFKDGKLLSSSSKVRVEASGCSRRLVVQQAGKADAGEYSCEAGGQKLSFRLDVAEPKLVFAKEQQAH  
SEVKAEGASATLSCEVAQAQTEVTWFKDGKLLSSSSKVRVEASGCSRRLVVQQAGKADAGEYSCEAGGQKLS  
FRLDVAEPKLVFAKEQQAHSEVKAEGASATLSCEVAQAQTEVTWFKDGKLLSSSSKVRVEASGCSRRLVVQQ  
AGKADAGEYSCEAGGQKLFRLDVAEPKLVFAKEQQAHSEVKAEGASATLSCEVAQAQTEVTWFKDGKLLSS  
SSKVRVEASGCSRRLVVQQVQKADAGEYSCEARGQKLSFRLDVAEAEBSQI PERPSRREPLVVEKHETIILTAT  
IAAPSVAAVTWLKDGV EIRRSKRHEATSLGDTHLTVRGAQVLD SAIYSCRVGKEGQDFPVQVEEVAAKFSKP  
LEPVEGELGGTVMLVCELSPEQA EVVWRCNGNTQLRPGKRFQMTSEGPRRTLTVSGLREDDAE EYVCE SRDDRT  
SARLTVKVPVVKFTSGLSAMVAEEGQEATFQCVVSPSDAGVTWYKDGMLQLPSEKFMVMEVSGASRSLTILGL  
TLEDAGQVTVEAEGASSAALRVREAPVLFKKKLEPQTVEERTSVTLEVELTRPWPEVKWTRNAAVLTPSENV  
EIRAEGARHCLVLRVSGFADRGGFFGCETPDDKTQAKLNVMRQVRLVRLGLQEVEAKEQGTASMDVELSHAEVE  
GSWTRDGLRLQPGPKCHLAVQGPVHILTL SALQPQDSGLVAFRAEGVHTSARLIVTEL PVSFTRVLQDVVATQ  
KEKVTLECELSRPVDVRWLKDGVELRAGKAI GIVAQGTCSLVIYRCETGDQGVVCDALDAQTSASLRVQGR  
TYTLIFRRVLAEDAGEVKFVAENAESRAHLRVKELPVTLLRPLRDKIAMEKHRGVLECVSRASAVRWFKGG  
VELQSGPKYEVVSDGLYRKLVIN DVQPEDEDTYTCDAGNVKTS AQFFVEEQSITIVRGLKDMTVMEPAPAWFE  
CETSI PSVRPPKWL LGKTVLQAGNVGLEQDGTVHRLTLHKTCSTMTGPVHFTIGKSRSSAQLVVS DIPVVL T  
RPLEPKAGRELQSVVLSCDFRPAPKAVQWYKDDTPLSPSEKFKMALEGQMAELRILRLTPADAGVYRCQAGSA  
QSSAEVTVAEAREVTVIQPLQDAEAMEEGRVCFSCELSHKDEDI EWSLNGTPLYNDSFHEISHEGLHTLVLKS  
VRQADTGTVCATLSPVSVSARLVVKGPVVFLKALDDVSAEERGTTLQCEVSDPEARVWVRKDGVELGSPDK  
YDFLHKAGARGLTVHDLSHEDAGLYTCQVGSKETQKSVSVHDLHVGITKRLKTVLEVLEGESCFECLVSHES  
SDPAVWTVGGKTVGGSGHFHAVRQGRKYTLTKVDAALSDAGEVVVFSVLGLTSKASLIRERPVDI TKPLEDQR  
TTLGEDVMLSCELSRAGTSVRWLKDGKAI RKSQKYDLLSEGTRAVLVVRKASLKDSGEYTCETEASKSTAKLC  
VEEKANRFTEELADLQVEEKGRAVFTCKTEHPASVVTWRKGLLELRASGKHVPSQEGTLTKLTINALERTDSD  
TYTCDIGQARTQARLLVHGQKVRVIEDLED TAVQEGSSAKFCCR IAPADYGPVHWF LDKTPLHSNELNEITVQ

PGGYHVLTLRQLALKDSGTVYFEAGDQRTSAALRVTEKPSIFSRPLTDVTVTEGEDLTLVCETTTVDSSVRWT
KDGKTLRPSARCQLSHEGCQAQLLI TATTPQDGGRYKCEIGGASSSSIVRVHALPVRFRESLKDVEVPEGKAA
TLRCVLSVAAPVEWRHGDDVLKSSNKYSLRQEGAVLELVIRDLQPDQSGQYSCSFGDQTTSATLTVKTSQAQ
FVGKLRNKEATEGTTVTLRCELTKAPVEWKKGTETLRNGDKYSLKQDGAVCELQICSLLVADAGEYSCVCGQ
EKT SATLTVKALLVHFVRLRSKEATEGDTTTLQCELSKAAPVEWRKGTETLRDGDYSLKQDGAVCELQIRS
LTIADAGEYLCTCGQEKT SATLTVRALPAKFKDSLKNEEATEGTTATLSCELSKAAPVTWKKGPKTLQSGDKY
VLRQDGAVCGLQIHGLTMADAGEYSCVCGQEKT SATLTVRGLPAKFIEDLRSQEATEGATAILRCELSKAAPV
EWRKGSSETLRDGDYSLRQDGAVCELQIRGLAVVDTGTYSLLPTKFTTEGLRNEEATEGTMATLRCQMSKAAPV
EWRKGSSETLRDGDYSLRQDGAMCELQIRGLTIEDSGEYTCVCGQEKT SATLSVKALPPRFIEDLRSQEATEG
TMATLRCQMSKAAPVEWRKGSSETLRDGGYSLRQNGAVCELQIHDLAVEDTGEYSCVCGQEKT SATLNVKALP
PRFIEDLRSQEATEGTMATLRCQMSKAAPVEWRKGSSETLRDGGYSLRQDGAVCELQIHDLVDEDAGQYSCVC
GQEKTSAVLTVDALPPKFTTEGLKKEEATEGTMVTLRCQMSKEATVEWRKGAKTSLDGGYSLRQDGAMCELQI
CGLAVEDAGEYSCVCGQEKT SATLSVKALPPRFIEDLRSQEATEGTMATLRCQMSKAAPVEWRKGSKTLRDGD
RYSLRQDGAMCELQICDLAVEDTGDYSCVCGQEKT SATLSVKAPQVVFQQPLQNLQAEEGSMASLRCELSVFN
AAMVWSKGGLELQGDTRREARQQGCVAELELLRDLRREDAGEYSCCTCGSQTTSATLMVTAAPVRFRLRLQAQDV
DEGATARLRCELSREAVSVEWRKGSLLQFPKAKYQMVQEGTTAEELLVHGVQEEDAGEYTC DAGHTQS IARLSV
RAPKPKFKTDLQSTEQEAGGTARLCCQLSEAEPTVQWLKEGVELHVGSKYEMRRQAGVCELLIHGLEAKDT
GEYACLVGGQKTLASLRVKEPEVTIVRGLVDMEVQADEDEVEFTCKVSOAGATDVQWHLQVGLPLQSNVEVAV
LADGCTHVLQKGVTLLEDAGTVSFHVGGSSSAQLTVRVPEVTVLEPLKDVQLSEGQDAHFRCLSRASGQEA
RWALGGVPLQCNEMNDITVEQGTLYLLTLHKVTLLEDAGTITLQVGCSSAEQLKVTAKNVTLRGLNVDALLEG
GEALFECQLSQPEVAHAHTWLLDDEPVHTSEKVEVVYFENGLRHLLLLKLNKPKQDSCRVTFLAGDVVTS AFLTV
RALPDPPEDAEVVGRSDHSVTLVSWVAPMSDGGGGLCGYRVMKEASTGQWQLCHDLVPGPECVDDLVPGKTY
RFRVAAVGPAGAGEPVHLPQMVKIAPAPAPAPAPAPAPAPETRAVVGEDI CLELEVAADGGEVVWHKGTERRI
QPGGHFEVLSRQQRQMLVIKGFRTEDQGEYRCGPIQGLPSSGAATFNVMVTS GSGDEVPAQPSLPPEAAQEGD
LHLLWEALARKRRMSREPTLDSISELPEEDSRVQHLRQEAEETAPDLSEGYSTADELARTGEADLSHTSSDDE
SRAGTPSLVTYLKKAGGPGISPLASKHEAQVTTSVKQJQPEVVPVTCPPPGLD SAADLMSPDSLDKAAVKIQA
AFKGYKVRKEMKQEGPVFSRTFGDTEAQVGDVLRLECVLATKTD MRACWLKDGIELTDGRHYHIDQLKDGTC
SLLVVTGLAPTDSGRYTCQVSTKSGRVSHSACVVVSGTSEAESSSGGELDDAFRRAARRLHRLFRTRKSPAELS
EEELFLSADEGPGEPEEPADWQTYREDENFVCIRFESLAEARQAVTCFRNMFMATMGIGVEISLGEQGPGRVEM
RIGKVAPTPTPAVPLAKTPGLQTS DAAPVFLTELQNDVQDGYPMSFDCVVTGQPVPSVRWFKDGKLLLEDDH
YMINEDQQGGHQLIITAVVPADMGVYRCLAENSMGVSSTKAE LRVELTSTDYDTAADATETSSYFSAQGYLSS
REQEGTESDEGQLPQVLEELKDLQVAPGTRLAKFQLKVKGYPAKLYWFKDGQPLTSDHIRMTRDKKTLHTLE
IVSVTREDSGQYAAIYI SNAVGAAYSSARLLVRGPSEPEEK PASDVHERLVPPRILEKFTPKKVKRGSSITFSV
KVEGHPAPSVHWLKEEAKEGVLWIGPDTPGYTMASSSKQHSLVLLDVGRQHOGTYTCIATNPAGQALCSASLH
ISGLAKEEEEQERVKEALISSFLQGT SQAVSAQMSSESAGFADLVGQSKGESLVAAEEAHSHLSLAEVGTTEFLQK
LTSQITEMVSAKISQAKLQVPGGDSDEETKTPSASPRHGRSRPSSSVQJESSESESDGDSRGEIFDIYVVVTADY
LPLGAEQDAIILREGQYVEVLDSAHPLRWLVRTKPTKSSPSRQGWVSPAYLDKRLKLSPEWGPTEAPEFPGEA
VSEDEYRTRLSSVIQELLSSEQAFV GELQFLESHHMKHLERSPRVPAAVASQKTVIFRNVQDISHFHSSFLKE
LQCGCTDDDVAMCFIKNQEA FEKYLEFLVGRVQAE SVVSTPVQEFYKKYAEETLSAKDPTQPPPPLOHYLE
QPVERVQKYQALLKELIRNKARNRQNCALLEQAYAVVSALPQRAENKLVSLMENYPGTLEALGEP IROGHFI
VWEGAPGAMPWKGNHRHVFLFRNYLVICKPRRDSRTDTFSYVFRNMMKLSSIDLNDQVEGDDRAFEVWHERE
DSVRKYLLQARTVIKNSWVKEICGIQORLAQPVWRPPEFEEELADCTAELGETVKLACRVTGTPKPIVSWYK
DGKPEVEVDPHHILIEDPDGSC TLLDNLGTGIDSGQYMCFAASAAGNASTLGKILVQVPPRFVNKVRATPFVEG
EDAQITCTVEGAPYPQIRWYKDGTTLLAPGNRYRMLNEPRSGVLVLIQAASKEDLGHYECELVNR LGSTRGGG
ELYMQSPALRARDQHREQIVAAVEGAPSMQVTDIEDVQVQVGDMAQF DAVIEGHPPPIV TWYKGSTQLTSSAR
LSQRQDGTYSLVLT DVAPHDAGVYTCVANNAGQVLC KAE LLVHGGDKLDAENQVYRRKLHSFYDVQEEIGR
GVFGFVKRVQHKGNMFCAAKFIPLRSKTRAQAYQERDILATLGHPLVTGLLDQFETRKTLLILILELCSSEEL
LDRLFKKGVVTEAEVKVYIQQLVEGLHYLHSHGILHLDIKPPNIMVHPAREDIKICDFGFAQKITPSEPOYS
KYGSPFVSP EIIIEQNPVSEGS DIWAMGVI SYLSLTCSSPFAGESDRATLLNVLEGRVSWSSPTAAHLS EDAK
DFIKATLQRTPRARPSTSQC LAHPWFLKSMPAAEHAHFINTKQLKFL LARSRWQRSLMSYKSI LVMRSIP ELLQ
GPPDSPSLGVARHLRGEASGASSSSSSSDNELAPFARAKSLPPSPVTHSPLLHPRGFRLRPSASLPEETEASMP
TADAAVPASPQASAGPPASPGCVPRHSV ISSLFYQQAGEGAERGNKTS GAKRHPARRRHLKGGYIARALPGLR
EPLMEYSLLEEEAAREEQASLMTKTPSFETALRPLSSSVREVPGRSHSLDNPPVTTGSPPEACKEQLLFPST
GLTHETTAKDRGHKEGFLQESVFPFPMSGDSRPGKQEGSSQVDS CRGKPASSCHSELGSGSQEGCGPPSSQSLG
SLPQPSTLKKELSTSCGPLFSEQPQAAPFP TQVSPLLGSEKEPQDGS LSEGVPVPSSSPGSASQVDA SLDT EG
LSEAGDTCDFTPPPQRPEQATTRKFSLESRGGYAGVAGYGTFAFGGDAGGMLGQGPLWARMWAVS QSSEEQ
DEAATESPQPLES LGPIAEASGVPLRTSPSLTPWEEVEQVSLVQIRDLSGDAEAADTISLDISEVDPAYLNL S
DLYDIKYL PFEFMI FRRV PKPIEQPESPGSETEAGQGLADFL EEAAWPWP GELGLRAGLEIT EEP EEPGDLEA

LLGEAAVGRKRKWSRGLFQFPGRCLSGEEPVELGLRQVVKASMAHISRILKGRPEGPEREPPRKKAGLAS  
FRLSGLKGRDQELSDEAVVLGQSVTLACQVLAQPTAQATWSKDGVLLESSGHLLISSTLKNFQLLTILVVKEE  
DLGTYTCCVSDPLGTAVTTGVLKKAERPSSSPRPEVGELYKDAVLLVWKPVESECGPVTYIVQCCIEGGSWTTL  
ASDISDCCYLTKGLSRGGMYIFRTACVSKAGMGPYSSPSEQVLLGGPNHLASEEESSRGRPAQLLPSTKTF  
QMQIRRGRFVSVRQCREKASGRALAAKIVPYQPEDKTAVLREYEALKRLLHHPHLAQLHAAYLSPRHLVLI  
LELCSGPELLPSLAERESYSESVDKDYLDWQMSLATQYLHAQHILHLLDLRSENMMVTEYNLLKVIDL  
GNAQSLDQEKVPAPENFKDYLETMAPELLEGGQAVPQTDIWAIGVTAFIMLSGEYEPSESETRDLQK  
GLRKLIRLSRCYAGLSGGAVAFLOSSLCAQPWGRPCASTCLQCGWLTEEGPTGSRPTPVTFPTVRLRA  
FVREKRRALLYKXHNLAQVR\*

>rs26971904\_ENSMUSP00000121092\_c.471:G>A\_p.G158S

ENSMUST00000138587.9|Obscn-206|ENSMUSG00000061462|-|chr11:g.58890714:C>T  
KQEGSSQDSCRGKPASSCHSELGSGSQEGCGPPSSQSLGSLPQSLKKELSTSCGPLFSEQPQAAFPPTQVSP  
LLGSEKEPQDGLSEGPVVPSSSPGSASQVDASLDTEGLSEAGDTCDFTPPPQRPQEQATTRKFSLESRGGY  
AGVAGYGTFAFGDAGGMLGQGPLWARMAWAVSQSSEEQDEAATESPQPLESLGPIAEASGVPLRTSPSLTPW  
EEVEQVSLVQIRDLSGDAEAADTISLIDISEVDPAYLNLSDLYDIKYLPPFFFMIFRRVPKPIEQPESPGSETEA  
GQGLADFLLEEAAWPWPGELGLRAGLEITEEPEEPGDLEALLGEAAVGRKRKWSRGLFQFPGRCLSGEEPVE  
LGLRQVVKASMAHISRILKGRPEGPEREPPRKKAGLASFRLSGLKGRDQAPSFLRELSDEAVVLGQSVTLAC  
QVLAQPTAQATWSKDGVLLESSGHLLISSTLKNFQLLTILVVKEEDLGTYTCCVSNPLGTAVTTGVLKKAERP  
SSSPRPEVGELYKDAVLLVWKPVESECGPVTYIVQCCIEGGSWTTLASDISDCCYLTKGLSRGGMYIFRTACV  
SKAGMGPYSSPSEQVLLGGPNHLASEEESSRGRPAQLLPSTKTFQMQIRRGRFVSVRQCREKASGRALA  
AKIVPYQPEDKTAVLREYEALKRLLHHPHLAQLHAAYLSPRHLVLI LELCSGPELLPSLAERESYSES  
VDKDYLDWQMSLATQYLHAQHILHLLDLRSENMMVTEYNLLKVIDLGNQSLDQEKVPAPENFKDYLET  
MAPELLEGGQAVPQTDIWAIGVTAFIMLSGEYEPSESETRDLQKGLRKLIRLSRCYAGLSGGAVAFLO  
SSLCAQPWGRPCASTCLQCGWLTEEGPTGSRPTPVTFPTVRLRA FVREKRRALLYKXHNLAQVR\*

>rs26971904\_ENSMUSP00000158795\_c.24378:G>A\_p.G8127S

ENSMUST00000238536.2|Obscn-210|ENSMUSG00000061462|-|chr11:g.58890714:C>T  
MDHSFSGAPRFLTRPKAFVSVGKDATLSCQIVGNPTPHVSWEKDRQPVEAGARFRLAQDGDVYRLTILDLAL  
GDSGQYVCRARNAIGEFAAVGLRVDSEGTCAEQAPHFLLRPTSIRVREGADATFRCRVGGSPQPAVSWSKDG  
RRLGPPDAPHVRVEEHGESSALRIRSARPRDGGTYEVRAENPLGSASAAAALVVDSDAEVAGPPGTSTATLLA  
HLQORREAMRAEGIPSPPGAGTRTCTVTEGKHARLSCFVTGEPKPETVWKKDGQLVTEGRRHVVEDEQENF  
VLKILFCKQSDRGLYTCTASNLVGQTYSSVLVVREPTVPFKKRLQDLEVREKESATFQCEVAQPAEA  
AWFK EETRLWASAKYDIEEGETERLTVRNVSADDDAVYICETTEGSRVAELSVQGNLTKLPRKTA  
VRTGDTAIFWVELAVPEGPVWRWLRNQEEMVAGGRVAITAEGTCHTLTI FQCTLEDMGEVAFVSGGCRT  
TTTQFCVSAPRRPPL YPPADPVVKAKTESVTLWSAPPHGDRPVTIDGYVLEKRRKLGAYAWSRCHEAG  
WLATTEFTITGVAEEGDFQFRVSAINHFGQGPYLEFPGTMHLVPLAVKTLKAVEAVEGGEVTF  
SVDLTVASSGEWFLDGEALKASSIYVIRCDRTRHMLTIREVPARLHGAQLKFEVANGIETSIQMVVRAALGL  
PSSKLPAAAAAREVLAQLHEEAQLLALSQAAA VTLWKDGRELSLGPKYEMQVSAGRRALLVRDVAQDDA  
GLYECVSRGSRTAYQLLVQDITDGYRDWGPAGPQKHMCKCAGAKIARYLGSSCYRFLQYDKGV  
WHLEAALDTRQKGKTS SCSLHEKPKLVFAKQQAHSEVKA EAGNSATLSCEVTQAQTEVTWFKD  
GKKLSSSSKVRMEASGCSRRLVVQQAGKADAGEYSCEAGGQKLSFRLDVAEPKLVFAKQQAH  
SEVKA EAGASATLSCEVAQAQTEVTWFKDGGKLS SSSKVRMEASGCSRRLVVQQAGKADAGE  
YSCEAGGQKLSFRLDVAE PKMVF AKEQQARSEVKAEAGASATLSCEVAQAQTEVTWFKDGGK  
LSSSKVRMEASGCSRRLVVQQAGKADAGEYSCEAGGQKLSFRLDVAE PKLVFAKEQQARSEV  
KAEVGN SATLSCEVAQAQTEVTWFKDGGKLS SSSKVRMEASGCSRRLVVQQAGKADAGEYS  
CEAGGQKLSFRLDVAEPKLVFAKEQQARSEV KAEAGASATLSCEVAQAQTEVTWFKDGGKLS  
SSSKVRMEASGCSRRLVVQQAGKADAGEYSCEAGGQKLSFRLDVAE PKLVFAKEQQARSEV  
KAEAGASATLSCEVAQAQTEVTWFKDGGKLS SSSKVRMEASGCSRRLVVQQAGKADAGEYS  
CEAGGQKLSFHL DVTEPKLVFAKEQQAHSEVKAEAGASATLSCEVAQAQTEVTWFKDGGKLS  
SSSKVRMEASGCSRRLVVQQAGKADAGEYSCEAGGQKLSFRLDVAE PKLVFAKEQQARSEV  
KAEAGASATLSCEVAQAQTEVTWFKDGGKLS SSSKVRMEASGCSRRLVVQQAGKADAGEYS  
CEAGGQKLSFRLDVAE PKLVFAKEQQAHSEVKAEAGASATLSCEVAQAQTEVTWFKDGGKLS  
SSSKVRMEASGCSRRLVVQQAGKADAGEYSCEAGGQKLFRLDVAE PKLMFAKEQQAHSEV  
KAEAGASATLSCEVAQAQTEVTWFKDGGKLS SSSKVRMEASGCSRRLVVQQAGKADAGEYS  
CEAGGQKLSFRLDVAE PKLVFAKEQQAHSEVKAEAGASATLSCEVAQAQTEVTWFKDGGKLS  
SSSKVRMEASGCSRRLVVQQAGKADAGEYSCEAGGQKLSFRLDVAE PKLVFAKEQQAHSEV  
KAEAGASATLSCEVAQAQTEVTWFKDGGKLS SSSKVRMEASGCSRRLVVQQAGKADAGEYS  
CEARGQKLSFRLDVAE PKLVFAKEQQARTEVVKAEAGASATLSCEVAQAQTEVTWFKDGGKLS  
SSSKVRMEASGCSRRLVVQQAGKADAGEYSCEAGGQKLSFRLDVAEAEQSIPERPSRREPLVV  
KEHETIILTATIAAPSAAVTWLKDGVEIRRSKRHEATSLGDHTLTVRGAQVLDSAIYSCR  
VGKEGQDFPVQVEEVAAKFSKPLEPVEGELGGTVMLVC ELSPEQAEVWRCGNTQLRPGKRF  
QMTSEGPRRTTLTVSGLREDDAEYVCE SRDDRTSARLTVKVPVVKFTS



ILREGQYVEVLDSAHPLRWLVRTKPTKSSPSRQGWVSPAYLDRKRLKLSPEWGPTEAPEFPGEAVSEDEYRTRL  
 SSVIQEELLSSEQAFVUGELQFLESHHMKHLERSPRVPAAVASQKTVI FRNVQDISHFHSSFLKELQGCCTDDDV  
 AMCFIKNQEAFEKYLEFLVGRVQAESVVVSTPVQEFYKKYAEETLSAKDPTQPPPPPLQHYLEQPVERVQKYQ  
 ALLKELIRNKARNRQNCALLEQAYAVVSALPQRAENKLVSLMENYPGTLEALGEPIRQGHFIVWEGAPGARM  
 PWKGHNHRVFLFRNYLVICKPRRDSRTDTFSYVFRNMMKLS SIDLNDQVEGDDRAFEVWHEREDSVRKYLLQA  
 RTVI IKNSWVKEICGIQQLAQPVWRPPEFEEELADCTAELGETVKLACRVTGTPKPIVSWYKDGKPVVEVDPH  
 HILIEDPDGSC TLI LDNL TGDISGQYMCFAASAAGNASTLGKILVQVPPRFVNVKVRATPFVEGEDAQITCTVE  
 GAPYQQIRWYKDG TLLAPGNRYRMLNEPRSGVLV LVIQAASKEDLGHYECELVNRLGSTRGGGELYMOSPALR  
 ARDQHHREQIVAAVEDTSEVGSASHSAQDGADQQAASVLWRLLGSEALGPS PGDLPNTRQSEPPAFEEAASQIP  
 GAASGTPEVSPQPGTHKGLEQETTSSGSQGWTPVIRVEGTAWPGAGTGQLLLDVHSQVIMETTQRTYVCQAPDT  
 GVTRAPSMQVTIEDVQVQVGDMAQF DAVIEGHPPP IVTWYKGSTQLTSSARLSQRQDGTYSLVLTDVAPHDA  
 GVYTCVANNAGGQVLCKAELLVHGGDKLDAENQVYRRKLHSFYDVQEE IGRGVFGFVKRVQHKGNMFCAAKF  
 IPLRSKTRAQAYQERDILATLGHPLVTGLLDQFETRKTILILILELCSSEELLDRLFKKGVVTEAEVKVYIQQL  
 VEGHLHLHSHGILHLDIKPPNILMVHPAREDIKICDFGFAQKI TPSEPQYSKYGSPEFVSPEIIEQN PVSEGS  
 DIWAMGVI SYLSLTCS SPFAGESDRATLLNVLEGRVSWSSPTAAHLS EDAKDFIKATLQRTPRARPSTSQCLA  
 HPWFLKSMPEAAEHFINTKQLKFL LARSRWQRSLMSYKSILVMRSIPELLOQPPDPSPLGVARHLRGEASGAS  
 SSSSSDNELAPFARAKSLPPSPVTHSPLLHPRGFLRPSASLPEETEASMP TADA AVPAS PQSAGPPASPGCV  
 PRHSVLSLIFYQQAGEGAERGNKTS GAKRHPARRRHLLKGGYIARALPGLREPLMEYSLLEEEAAREEQASLM  
 TKTPSFETALRLPSSSVREVPGRSHSLDNPVTTGPSPEACKEQLLFPSTGLTHEHTAKDRGHKEGFLQESV  
 PFPMSGDSRPGKQEGSSQDSCRGKPASSCHSELGSGSQEGCGPPSSQSLGSLPPQSLKELSTSCGPLFSEQ  
 PQAAPFPPTQVSPLLGSEKEPQDGS LSEGPVVPVSSSPGSASQVDASLDTEGLSEAGDTCDFTPPPQRPQEQAT  
 TRKFSLESRGGYAGVAGYGTFAFSGDAGGMLGQGPLWARMAWAVSQSSEEQDEAATESPQPLES LGPIAEASG  
 VPLRTSPSLTPWEEVEQVSLVQIRDLSGDAEAADTISLDISEVDPAYLNLSDLYDIKYL PFEFMI FRRVPKPI  
 EQPESPGSETEAGQGLADFL EEAAPWPPELGLRAGLEIT EEPPEPGDLEALLGEAAVGRKRKWSPSRGLFQF  
 PGRCLSGEEPVELGLRQVRKASMAHISRILKGRPEGEREGPPRKKAGLASFRLSGLKGRDQELSDEAVVLGQ  
 SVTLACQVLAQPTAQATWSKDGVLLES SGHLLISSTLKNVQLLTILVVKEEDLGTITCCVSNPLGTAVTTGVL  
 RKAERPSSSRARNAIGEAFAAVGLRVDSEGTCAEQAPHFLLRPTSIRVREGADATFRCRVGGSPQPAVSWSKDG  
 RRLGPPDAPHVRVEEHGESSALRIRSARPRDGGTYEVRAENPLGSASAAAAALVVDSDAEVAGPPGTSTATLLA  
 HLQORREAMRAEGIPPSPPGAGTRTCTVTEGKHARLSCFVTGEPKPE TVWKKDQGLVTEGRRHVVEDEQENF  
 VLKILFCKQSDRGLYTCTASNLVGQTYSSVLVVVREPTVPFKKRLQDLEVREKESATFQCEVAQ PATEAAWFK  
 EETRLWASAKYDIEEEGTERRLTVRNVSADDDAVYICETTEGSRVVAELSVQGNLTRKLPKRTAVRTGDTAIF  
 WV ELAVPEGPVRWLRNQEEMVAGGRVAITAEGTCHTLTI FQCTLEDMGEVAFVSGGCRTTTQFCVSAPRRPPL  
 YPPADPVVKAKTESSVTL SWSAPPHGDRPVTIDGYVLEKRKLGAYAWSRCHEAGWLATTEFTITGVAAEEDGFQ  
 FRVSAINHFGQGPYLEFPGTMHLVPM LAVKTPKAVEAVEGGEVTFVSDLTVASSGEWFLDGEALKASSIYVI  
 RCDRTRHMLTIREV PARLHGAQLKFVANGIETS IQMVVRAALGLPSSKLPAAAAREVLAQLH EEAQLLAE LSD  
 QAAAVTWLKDGRELSLGPKYEMQVSAGRRALLVRDVAQDDAGLYECVSRGSR TAYQLLVQDITDGYRDWGPAG  
 PQKHMCKCAGAKIARYLGSSCYRFLQYDKGVWHLEAALDTRQKGKTS SCSLHEKPKLVFAKQQAHSEVKA E  
 AGASATLSCEVAQAQTEVTWFKDGKKLSSSSKVRMEASGCSRRLVVQQAGKADAGEYSCEAGGQKLSFR LDVA  
 EPKMFVFAKEQQARSEVKA EAGASATLSCEVAQAQTEVTWFKDGKKLSSSSKVRMEASGCSRRLVVQQAGKADA  
 GEYSCEAGGQKLSFR LDVTEPKLVFAKEQQARSEVKA EVGNSATLSCEVAQAQTEVTWFKDGKKLSSSSKVRM  
 EASGCSRRLVVQQAGKADAGEYSCEAGGQKLSFR LDVAEPKLVFAKEQQARSEVKA EAGNSATLSCEVAQAQ T  
 EVTWFKDGKKLSSSSKVRMEASGCSRRLVVQQAGKADAGEYSCEAGGQKLSFR LDVTEPKLVFAKEQQAHSEV  
 KAEAGASATLSCEVAQAQTEVTWFKDGKKLSSSSKVRMEASGCSRRLVVQQAGKADAGEYSCEAE GQKLSFR L  
 DVAEPKLVFAKEQQARSEVKA EAGASATLSCEVAQAQTEVTWFKDGKKLSSSSKVRVEASGCSRRLVVQQAGK  
 ADAGEYSCEAGGQKLSFR LDVAEPKLVFAKEQQANSEVKA EAGASATLSCEVAQAQTEVTWFKDGKKLSSSSK  
 VRVEASGCSRRLVVQQAGKADAGEYSCEAGGQKLSFR LDVAEPKLVFAKEQQAHSEVKA EAGASATLSCEVAQ  
 AQTEVTWFKDGKKLSSSSKVRVEASGCSRRLVVQQAGKADAGEYSCEAGGQKLSFR LDVAEPKLVFAKEQQAH  
 SEVKA EAGASATLSCEVAQAQTEVTWFKDGKKLSSSSKVRVEASGCSRRLVVQQAGKADAGEYSCEAGGQKLS  
 FR LDVAEPKLVFAKEQQAHSEVKA EAGASATLSCEVAQAQTEVTWFKDGKKLSSSSKVRVEASGCSRRLVVQQ

AGKADAGEYSCEAGGQKLFRLDVAEPKLVFAKEQQAHSVEKAEAGASATLSCEVAQAQTEVTFWKDGKLLSS  
 SSKVRVEASGCSRRLVVQVQVKADAGEYSCEARGQKLSFRLDVAEAEESQIPERPSRREPLVVEKHETIILTAT  
 IAAPSVAAVTWLKDGVEIRRSKRHEATSLGDTHLTVRGAQVLDIAIYSCRVGKEGQDFPVQVEEVAAKFSKP  
 LEPVEGELGGTVMLVCELSPEQAEVVWRCGNTQLRPGKRFQMTSEGPRTTLTVSGLREDDAEYVCESRDDRT  
 SARLTVKVPVVKFTSGLSAMVAEEGQEATFQCVVSPSDAGVTWYKDGMLQPSSEKFMVVEGASRSILTILGL  
 TLEDAGQVTVAEAGASSAALRVREAPVLFKKKLEPQTVEERTSVTLEVELTRPWPEVKWTRNAAVLTPSENV  
 EIRAEGARHCLVLRVSGFADRGGFFGCETPDDKTQAKLNVEMRQVRLVVRGLQEVEAKEQGTASMDVELSHAEVE  
 GSWTRDGLRLQPGPKCHLAVQGPVHILTLALSALQPQDSGLVAFRAEGVHTSARLIVTELPVSAFTRVLQDQVATQ  
 KEKVTLECELSRPVDVRLKDGVELRAGKAIGIVAQGTCSRSLVIYRCETGDQGVYVCDALDAITRCELSLRVQGR  
 TYTLIFRRVLAEDAGEVKFVAENAESRAHLRVKELPVTLLRPLRDKIAMEKHRGVLECCQVSRASAQVRFKGG  
 VELQSGPKYEVVSDGLYRKLVINQVPEDEDTYTCDAGNVKTSAQFFVEEQSITIVRGLKDMTVMEPAPAWFE  
 CETSIPSVRPPKWLKGKTVLQAGNVGLEQDGTVHRLTLHKTCSTMTGPFVHFTIGKSRSSAQLVSDIPVVL  
 RPLEPKAGRELQSVVLSCDFRPAPKAVQWYKDDTPLSPSEKFKMALEGQMAELRILRLTPADAGVYRCQAGSA  
 QSSAEVTVAREVTVIQPLQDAEAMEEGRVCFSCELSHKDEDEIWSLNGTPLYNDSFHEISHEGCLHTLVLKS  
 VRQADTGTVCATSPKVSVSARLVVKGKPVVFLKALDDVSAEERGTTLQCEVSDPEARVVWRKDGVELGPSDK  
 YDFLHKAGARGLTVHDLSDHEDAGLYTCQVGSKETQSKVSVHDLHVGITKRLKTVEVLEGESECFEVLVSHESP  
 SDPAVWTVGGKTVGGSGHFHAVRQGRKYTLTVKDAALSADAGEVVFVGLTSLKASLIIRERPVDIKPLEDQR  
 TTLGEDVMLSCELSRAGTSVRWLKDGKAIKRSQKYDLSSEGTRAVLVVRKASLKDSEYTCETEASKSTAKLC  
 VEEKANRFTEELADLQVEEKGRAVFTCKTEHPASVVTWRKGLLELRASGKHVPSQEGTLKLTINALERTDSD  
 TYTCDIGQARTQARLLVHGQKVRVIEDLEDTAVQEGSSAKFCCRIPADYGPVHWFLLDKTPLHSNELNEITVQ  
 PGGYHVLTLRQLALKDSGTVYFEAGDQRTSALRVTEKPSIFSRPLTDVTVTEGEDTLVCEVTTVDSSVRWT  
 KDGKTLRPSARCQLSHEGCAQLLITATTPQDGGRYKCEIGGASSSIVRVHALPVRFRESLKDVEVPEGKAA  
 TLRCVLSVAAPVEWRHGDDVLKSSNKYSLRQEGAVLELVIDRLQPDQSGQYSCSFGDQTTSATLTVKTSQAQ  
 FVGKLRNKEATEGTTVTLRCELTKEAPVEWKKGTETLRNGDKYSLKQDGAVCELQICSLLVADAGEYSCVCGQ  
 EKTSATLTVKALLVHFVRRRLRSKEATEGDTTTLQCELSKAAPVEWRKGTETLRDGDYSLKQDGAVCELQIRS  
 LTIADAGEYLCTCGEKTSATLTVRALPAKFKDSLKNEEATEGTTATLSCELSKAAPVTWKKGPKTLQSGDKY  
 VLRQDGAECGLQIHGLTMADAGEYSCVCGQEKTSATLTVRGLPAKFIEDLRSQEATEGATLRLCELSKAAPV  
 EWRKGETLTKDGDYTLRQDGAECVLEQIRGLAVVDTGTYSLPLTKFTEGLRNEEATEGTMATLRCQMSKAAPV  
 EWRKGETLTDGDYSLRQDGAECVLEQIRGLTIEDSGEYTCVCGQEKTSATLSVKALPPRFIEDLRSQEATEG  
 TMATLRCQMSKAAPVEWRKGETLTDGGYSLRQNGAVCELQIHDLAVEDTGEYSCVCGQEKTSATLNVKALP  
 PRFIEDLRSQEATEGTMATLRCQMSKAAPVEWRKGETLTDGGYSLRQDGAECVLEQIHDLDVEDAGQYSCVC  
 GQEKTSAVLTVDALPPKFTEGLKKEEATEGTMVTLRQMSKEATVEWRKGAKTLSDGGYSLRQDGAECVLEQI  
 CGLAVEDAGEYSCVCGQEKTSATLSVKALPPRFIEDLRSQEATEGTMATLRCQMSKAAPVEWRKGSKTLRDGD  
 RYSLRQDGAECVLEQICDLAVEDTGDYSCVCGQEKTSATLSVKAPQVVFQQLQNLQAEEGSMASLRCELSVFN  
 AAMVWSKGGLELQDGTREARQQCVAEALLRLDRLEDAGEYSCVCGQEKTSATLMTVAAPVRFRLQAOQDV  
 DEGATARLRCELSREAVSVWRKGSGLQFLPFCAKYQMVQEGTTAELLVHGVEQEDAGEYSCVCGQEKTSATL  
 RAPKPKFKTDLQSTEQEAGGTARLCCQLSEAEPTPVQWLKEGVELVHVGSKYEMRRQGAECVLEQIHDLEAKDT  
 GEYACLVGQKTLASLRVKEPEVTIVRGLVDMVEQADEDEFTCKVVSQAGATDVQWHLQGLPLQSNVTEVAV  
 LADGCTHVLQKGVTLLEDAGTVSFHVGGLSSSAQLTVRVPEVTVLEPLKDVQLSEGQDAHFRCLSRASGQEA  
 RWALGGVPLQCNEMNDITVEQGTLYLLTLHKVTLLEDAGTIITLQVGSSESAQLKVTAKNTVLRGLENVDALEG  
 GEALFECQLSQPEVAHTWLLDDEPVHTSEKVEVVYFENGLRHLLLLKLNKLPQDSCRVTFLAGDVVTSFAFLTV  
 RALPDPPEDAEVVGRSDHSVTLVWVAPMSDGGGGLCGYRVEMKEASTGQWQLCHDLVPGPECVVDDLVPKTY  
 RFRVAAVGPAGAGEPVHLPQMVKIAPAPAPAPAPAPAPAPETRQAVVGEDICLELEVAADGGVEVWHKGTERRI  
 QPGGHFEVLSRGQRQMLVIKGFRTEDQGEYRCGPIQGLPSSGAATFNVMVMTSGSGDEVPAQPSLPPAAQEGD  
 LHLLWEALARKRRMSREPTLDSISELPEEDSRVQHLRQEAETAPDLSEGYSTADELARTGEADLSHTSSDDE  
 SRAGTPSLVTYLKKAGGPGISPLASKHEAQVTTSVKPKQKQEPVVPVTPCPPGDLSAADLMDPSLDKAAVKIQA  
 AFKGYKVRKEMKQOEGPVFSRFTFGDTEAQVGDVLRLECVLATKTKDMRACWLKDGIELTDGRHYHIDQLKDGTC  
 SLLVTVGLAPTDSGRYTCQVSTKSGRVSHSACVVVSGTESEAESSSGGELDDAFRRAARLHRLFRTKSPAELS  
 EEELFLSADEGPEPEPADWQTYREDENFVCIRFESLAEARQAVTCFRNMFATMGIGVEISLGEQGPVGVEM  
 RIGKVAPTPTPAVPLAKTPGLQTSDAAPVFLTELQNDVQDGYPMSFDCVVTGQPVPSVRWFKDKLLEEDDH  
 YMINEDQGGHQLIITAVVPADMGVYRCLAENSMGVSSTKAELRVELTSTDYDTAADATETSSYFSAQGYLSS  
 REQEGTESDEGQLPQVLEELKDLQVAPGTRAKFQLKVKGYAPKLYWFKDGQPLTSDHIRMTDKKTLHTLE  
 IVSVTRESDSGVYAAYISNAVGAAYSSARLLVRGPSEPEEKPASDVHERLVPPRILEKFTPKKVKRGSITFSV  
 KVEGHPAPSVHHLKKEEAEGVLIWIGPDTPGYTMASSSQHSLVLLLDVGRQHGGTYTCIATNPAGQALCSASLH  
 ISGLAKEEEQERVKEALISSFLQGTSAQVSAQMSSEAGFADLVGQSKGSLVAEEAHSHLSLAEVGTTEEFLOK  
 LTSQITEMVSAKISQAKLQVPGGDSDEETKTPSASPRHGRSRPSSSVQESSSESEDGDSRGEIFDIYVVTADY  
 LPLGAEQDAIILREGQYVEVLDLVAHPLRVLVVRTKPTKSSPSRQGWVSPAYLDKRLKLSPEWGPTEAPEFPGEA  
 VSEDEYRTRLSSVIQELLSSEQAFVQELQFLESHHMKHLERSPRVPAAVASQKTVIIFRNVQDISHFHSSFLKE

LQCGCTDDDVAMCFIKNQEA FEKYLEFLVGRVQAESVVVSTPVQEFYKKYAEETLSAKDPTQPPPPPLQHYLE
QPVERVQKYQALLKELIRNKARNRQNCALLEQAYAVVSALPQRAENKLVHSLMENYPGTLEALGEPVIRQGHFI
VWEGAPGARMPPWKGNHRHVFVFRNYLVICKPRRDSRTDTFSYVFRNMMKLSSIDLNDQVEGDRAFEVWHERE
DSVRKYLQARTVIKNSWVKEICGIQQRLAQPVWRPPEFEELADCTAELGETVKLACRVTGTGPKPIVSWYK
DGKPVVEVDPHHILIEDPDGSCSTLILDNLTGIDSGQYMCFAASAAGNASTLGKILVQVPPRFVNVKVRATPFVEG
EDAQITCTVEGAPYPQIRWYKDGTLAPGNRYRMLNEPRSGVLVLIQAASKEDLGHYECELVNRLGSTRGGG
ELYMOSPALRARDQHHREQIVAAVEGAPSMQVTTIEDVQVQVGDMAQFDAVIEGHPPPVTWYKGSTQLTSSAR
LSQRQDGTYSLVLTVDVAPHDAGVYTCVANNAGGQVLCCKAELLVHGGDKLDAENQVYRRKLSHSFYDVQEEIGR
GVFGFVKRVQHKGNMFCAAKFIPLRSKTRAQAYQERDILATLGHPLVTGLLDQFETRKTLILILELCSSEEL
LDRLFKKGVVTEAEVKVYIQQLVEGLHYLHSHGILHLDIKPPNII LMVHPAREDIKICDFGFAQKITPSEPYQS
KYGSPFVVSPEIIEQNPNVSEGSDIWAMGVISYLSLTCSSPFAGESDRATLLNVLEGRVSWSSPTAAHLSEDA
DFIKATLQRTPRARPSTSQCLAHPWFLKSMPAAEAHFINTKQLKFLARSRWQRSLMSYKSI LVMRSIPELLQ
GPPDPSPLGVARHLRGEASGASSSSSSDNELAPFARAKSLPPSPVTHSPLLHPRGFLRPSASLPEETEASMP
TADA AVPAS PQSAGPPASPGCVPRHSVSSLFYQQAGEGAERGNKTS GAKRHPARRRHLLKGGYIARALPGLR
EPLMEYSLLEEEAAREEQASLMTKTPSFETALRLPSSSVREVPGRSHSLDNPPVTTGSPPEACKEQLLFPST
GLTHETAKDRGHKEGFLQESVFPFPMMSGDSRPGKQEGSSQDSCRGKPASSCHSELGSGSQEGCGPPSSQSLG
SLPFPQSLKKESTSCGPLFSEQPQAAPFPTQVSPLLGSEKPEPQDGSLEGPVVPVSSSPGSASQVDA SLDTEG
LSEAGDTCDFTPPPQRPQEQATTRKFSLESRGGYAGVAGYGTFAFSGDAGGMLGQGPLWARMWAVSQSSEEQ
DEAATESPQPLESGLPIAEASGVPLRTSPSLTPWEEVEQVSLVQIRDLSGDAEAADTISLDISEVDPAYLNLS
DLYDIKYLPPFEFMI FRRV PKPIEQPESPGSETEAGQGLADFL EEAAWPWPGE LGLRAGLEITEEPEEPGDLEA
LLGEAAVGRKRKWSPSRGLFQFPGRCLSGEEPVELGLRQRVKASMAHISRI LKGRPEGPEREPPRKKAGLAS
FRLSGLKGRDQELSDEAVVLGQSVTLACQVLAQPTAQATWSKDGVLLESSGHLLISSTLKNFQLLTI LVVKEE
DLGTYTCCVSNPLGTAVTTGVLKKAERPSSSPRPEVGEYKDAVLLVWKPVE SCGPVTYIVQCCIEGGSWTTL
ASDISDCCYLTGKLSRGGMYIFRTACVSKAGMGPYSSPSEQVLLGGPNHLASEEESSRGRPAQLLPSTKTF
QMQIRGRFVSVRQCREKASGRALAAKIVPYQPEDKTA VLREYEA LKRLHHPHLAQLHAAYLSPRHLVLI LEL
CSGPELLPSLAERESYSES DVKDYLWQMLSATQYLHAQHI LHLDLRSENMMVTEYNLLKVI DLGNAQSLDQEK
VPAPENFKDYLETMAPELLEGQGAVPQTDIWAIGVTA FIMLSGEYPESESEGT RDQLKGLIRLSRCYAGL
SGGAVAF LQSSLCAQPWGRPCASTCLQCGWLTEEGPTGSRPTPVTFPTVRLRAFVREKRRALLYKKNHNAQ
VR\*

>rs26971901\_ENSMUSP00000158795\_c.23857:T>C\_p.L7953S
ENSMUST00000238536.2|Obscn-210|ENSMUSG00000061462|-|chr11:g.58891235:A>G
MDHSFSGAPRFLTRPKAFVSVGKDATLSCQIVGNPTPHVSWEKDRQPVEAGARFRLAQDGDVYRLTILDLAL
GDSGQYVCRARNAIGEAFAAVGLRVDSEGTCAEQAPHFLLRPTSIRVREGADATFRCRVGGSPQPAVSWSKDG
RRLGPPDAPHVRVEEHGESSALRIR SARPRDGGTYEVRAENPLGSASAAAALVVDSDAEVAGPPGTSTATLLA
HLQORREAMRAEGIPSPPGAGTRTCTVTEGKHARLSCFVTGEPKPE TVWKKDGLVTEGRRHVVEDEQENF
VLKILFECKQSDRGLYTCASNLVGQTYSSVLVVVREPTVPFKKRLQDLEVREKESATFCVAPATEAAWFK
EETRLWASAKYDIEEEGTERRLTVRNVSADDDAVYICETTEGSR TVAELSVQGNLTRKLPKRTAVRTGDTAIF
WVELAVPEGPVRWLRNQEEMVAGGRVAITAEGTCHTLTIFQCTLEDMGEVAFVSGGCRTTTQFCVSAPRRPPL
YPPADPVVKAKTESSVTLWSAPPHGDRPVTIDGYVLEKRKLGAYAWSRCHEAGWLATTEFTITGVAAEGDFQ
FRVSAINHFGQGPYLEFPGTMHLVPLAVKTPLKAVEAVEGGEVTFVSDLTVASSGEWFLDGEALKASSIYVI
RCDRTRHMLTIREV PARLHGAQLKFVANGIETS IQMVVRAALGLPS SKLPAAAAREVLAQLH EEAQLLAELSD
QAAA VTWLKDGRELSLGPKEYMQVSAGRRALLVRDVAQDDAGLYECVSRGSR TAYQLLVQDITDGYRDWGPAG
PQKHMCKCAGAKIARYLGS SCYRFLQYDKGVWHLEAALDTRQKGKTS SCSLHEKPKLVFAKGQQAHSEVKA
AGNSATLSCEVTQAQTEVTWFKDGKLLSSSSKVRMEASGCSRRLVVQQAGKADAGEYSCEAGGQKLSFRLDVA
EPKLVFAKGQQAHSEVKA EAGASATLSCEVAQAQTEVTWFKDGKLLSSSSKVRMEASGCSRRLVVQQAGKADA
GEYSCEAGGQKLSFRLDVAEPKLVFAKEQQARSEVKA EAGASATLSCEVAQAQTEVTWFKDGKLLSSSSKVRM
EASGCSRRLVVQQAGKADAGEYSCEAGGQKLSFRLDVTEPKLVFAKEQQARSEVKA EVGNSATLSCEVAQAQ
EVTWFKDGKLLSSSSKVRMEASGCSRRLVVQQAGKADAGEYSCEAGGQKLSFRLDVAEPKLVFAKEQQARSEV
KAEAGNSATLSCEVAQAQTEVTWFKDGKLLSSSSKVRMEASGCSRRLVVQQAGKADAGEYSCEAGGQKLSFHL
DVTEPKLVFAKEQQAHSEVKA EAGASATLSCEVAQAQTEVTWFKDGKLLSSSSKVRMEASGCSRRLVVQQAGK
ADAGEYSCEAEGQKLSFRLDVAEPKLVFAKEQQARSEVKA EAGASATLSCEVAQAQTEVTWFKDGKLLSSSSK
VRVEASGCSRRLVVQQAGKADAGEYSCEAGGQKLSFRLDVAEPKLVFAKEQQANSEVKA EAGASATLSCEVAQ
AQTEVTWFKADGKLLSSSSKVRVEASGCSRRLVVQQAGKADAGEYSCEAGGQKLSFRLDVAEPKLVFAKEQQAH
SEVKA EAGASATLSCEVAQAQTEVTWFKDGKLLSSSSKVRVEASGCSRRLVVQQAGKADAGEYSCEAGGQKLS
FRLDVAEPKLVFAKEQQAHSEVKA EAGASATLSCEVAQAQTEVTWFKDGKLLSSSSKVRVEASGCSRRLVVQQ
AGKADAGEYSCEAGGQKLSFRLDVAEPKLVFAKEQQAHSEVKA EAGASATLSCEVAQAQTEVTWFKDGKLLSS
SSKVRVEASGCSRRLVVQQAGKADAGEYSCEAGGQKLFRLDVAEPKLVFAKEQQAHSEVKA EAGASATLSCE
VAQAQTEVTWFKDGKLLSSSSKVRVEASGCSRRLVVQQAGKADAGEYSCEAGGQKLSFRLDVAEPKLVFAKEQ



QAHSEVKAEAGASATLSCEVAQAQTEVTFWFKDGKLLSSSSKVRVEASGCSRRLVVQQVQVKADAGEYSCEARGQ
KLSFRLDVADTRLMFAKEQQARTEVKAEAGNSATLSCEVAQAQTEVTFWFKDGKLLSSSSKVRVEASGCSRRLV
VQQAGKADAGEYSCEAGGQKLSFRLDVAEAEESQIPERPSRREPLVVKEHETIILTATIAAPSVAAVTWLKDGV
EIRRSKRHEATSLGDTHTLTVRGAQVLDSAIYSCRVGKEGQDFPVQVEEVAAKFSKPLEPVEGELGGTVMLVC
ELSPQAEVWRCGNTQLRPGKRFQMTSEGPRTTLTVSGLREDDAEYVCESTRDDRTSARLTVKVPVVKFTS
GLSAMVAEEGQEAATFQCVVSPSDAGVTWYKDGMLQVQSEKFMVESGASRSLTILGLTLEDAGQVTVAEAGAS
SSAALRVREAPVLFKFKKLEPQVTEERTSVTLEVELTRPWPEVKWTRNAAVLTPSENVEIRAEGARHCLVLRV
GFADRGFFGCETPDDKTQAKLNVEMRQVRLVVRGLQEVEAKEQGTASMDVELSHAEEVGSWTRDGLRLQVGPKC
HLAVQGPVHILTLALQPDQSLVAFRAEGVHTSARLIVTELPVSTFTRVLQDVVATQKEKVTLECELSRQVVDV
RWLKDGVLELRAGKAIQVAVQGTCSRSLVIYRCETGDQGVYVCDALDAQTSASLRVQGRYTYTLIFRRLAEDAGE
VKFVAENAESRAHLRVKELPVTLLRPLRDKIAMEKHRGVLECCQVSRASQVRWFKGGVELQSGPKYEVVSDGL
YRKLVINVDVQPEDEDTYTCDAGNVKTSAQFFVVEEQSITIVRGLKDMTVMEPAPAWFECETSIPSVRPPKWLIG
KTVLQAGGNVGLQDGTVHRLTLHKTCSTMTGVPVHFTIGKSRSSAQLVVSDIPVVLTRPLEPKAGRELQSVVL
SCDFRPAPKAVQWYKDDTPLSPSEKFKMALEGGMAELRILRLTPADAGVYRCQAGSAQSSAEVTVAREVTVI
QPLQDAEAMEEGRVCFSCLESHKDEDIEWSLNGTPLYNDSFHEISHGCLHTLVLSVVRQADTGTVCATSPKV
SVSARLVVVGKGPVFLKALDDVSAEERGLTLQCEVSDPEARVVRKDGVELGSPDKYDFLHKAGARGLTVHD
LSHEDAGLYTCQVGSKETQSKVSVHDLHVGITKRLKTVEVLEGESECFEVLSHESPSDPVAVWTVGGKTVGGS
GHFHAVRQGRKYTLTVKDAALS DAGEVVFVSVLGLTSKASLIIRERPVDIKPLEDQRTTLGEDVMLSCLSRA
GTSVRWLKDGKAIRKSQKYDLLSEGTRAVLVVRKASLKDSSGEYTCETEASKSTAKLCVEEKANRFTTEELADLQ
VEEKGRAVFTCKTEHPASVVTWRKGLLELRASGKHVPSQEGTLTKLTINALERTDSDTYTCDIGQARTQARLL
VHGQKVRVIEDLEDTAVQEGSSAKFCRIAPADYGPVHWFLLDKTPLHSNELNEITVQPGGYHVLTLRQLALKD
SGTVYFEAGDQRTSALRVTEKPSIFSRPLTDVTVTEGEDTLVCEVTTVDSVVRWTKDGKTLRPSARCQLSH
EGCQAQLLITATTPQDGGRYKCEIGGASSSSIVRVHALPVRFRESLKDVEVPEGKAATLRCVLSVAAPVEWR
HGDDVLKSSNKYSRQEGAVLELVIRDLQPDQSGQYSCSFGDQTTSATLTVKTSQAQFVVGKLRNKEATEGTTV
TLRCELTKAEAPVEWKKGTETLRNGDKYSLKQDGA VCELQICSLLVADAGEYSCVCGQEKTSATLTVKALLVHF
VRLRSKEATEGDTTTLQCELSKAAPVEWRKGTETLRDGDYSLKQDGA VCELQIRSLTIADAGEYLCTCGQE
KTSATLTVRALPAKFKDSLKNEEATEGTTATLSELSKAAPVTVWKKGPKTLQSGDKYVLRQDGA VCGLQIHGL
TMADAGEYSCVCGQEKTSATLTVRGLPAKFIEDLRSQEATEGATAILRCELSKAAPVEWRKGSSETLRDGDYR
LRQDGA VCELQIRGLAVVDGTGYSLSLPTKFTEGLRNEEATEGTMATLRCQMSKAAPVEWRKGSSETLRDGDYR
LRQDGA MCELQIRGLTIEDSGEYTCVCGQEKTSATLSVKALPSRFIEDLRSQEATEGTMATLRCQMSKTA PVE
WKKGSETLRDGGRYSLRQDGPVCELQICDLAVEDAGEYSCVCGQEKTSATLSIKALPPRFIEDLRSQEATEG
MATLRCQMSKAAPVEWRKGSSETLRDGGRYSLRQNGAVCELQIHDLAVEDTGEYSCVCGQEKTSATLNVKALPP
RFIEDLRSQEATEGTMATLRCQMSKAAPVEWRKGSSETLRDGGRYSLRQDGA VCELQIHDLVDVEDAGQYSCVCG
QEKTSAVLTVDALPPKFTEGLKKEEATEGTMVTLRCQMSKEATVEWRKGAKTSLDGGRYSLRQDGA MCELQIC
GLAVEDAGEYSCVCGQEKTSATLSVKALPPRFIEDLRSQEATEGTMATLRCQMSKAAPVEWRKGSSETLRDGD
YSLRQDGA VCELQIRDLAVEDAGEYLCVCGQEKTSATLSVKALPPRFIEDLRSQEATEGTMATLRCQMSKAAP
VEWRKGSKTLRQDGDYSLRQDGA MCELQICDLAVEDTGDYSCVCGQEKTSATLSVKALPPRFIEDLRSQEARE
GTVATLRCRMSKAAPVEWRKGSSETLRDGDYSLRQEGNLCELQIRDLAVEDTEEYSCVCGQEKTSATLSVKAL
PAKFIEDLRSQEAPESSTVTLRCKLSKASVWKKGSETLRNGARYSLRQDGA VCELEIRDLTVEDTGEYSCT
CGQERTSATLSIMAPQVVFQQPLQNLQAEEGSMASLRCELSVPNAAMVWSKGGLELQGDTRREARQQGCVAEL
LLRDLRREDAGEYSCTCGSQTTSATLMVTAAPVRFLRELQAQDVDEGATARLRCELSREAVSVEWRKGS LQLF
PCAKYQMVQEGTTAELLVHGVEQEDAGEYTCDAHTQSIARLSVRAPKPKFKTDLQSTEQEAGGTARLCCQLS
EAEPGTPVQWLKEGVELHVGSKYEMRRQGA VCELLIHGLEAKDTGEYACLVGGQKTLASLRVKEPEVTIVRGL
VDMEVQADEDVEFTCKVSAQATDVQWHLQGLPLQSNVTEVAVLADGCTHVLQKGVTLLEDAGTVSFHVGG
SSSATLTVRVPEVTVLEPLKDVQLSEGDHFRCLRSASGQEARWALGGVPLQCNEMNDITVEQGTLYLLTL
HKVTLLEDAGTITLQVGSSESQAQLKVTAKNTVLRGLENVDALLEGGEALFECQLSQPEVAHAHTWLLDDEPVHTS
EKVEVVYFENGLRHLLLLKLNKPKQDSCRVTFLAGDVVTSFAFLTVRGRLEVLLEPPHDASVKAGMQVRFTCILS
EAVPVGEATWYINGAAIQPDDTDWTVTTDGSHHALTLSNAQPQHAGEVTF AARDAVASARLSVLALPDPPEDA
EUVGRSDHSVTLVSWVAPMSDGGGGLCGYRVEMKEASTGQWQLCHDLVPGPECVDDLVPGKTYRFRVAAVGPA
GAGEPVHLPQMVKIAPAPAPAPAPAPAPAPETRAVVGEDICLELEVAADGGEVWVHKGTERIQPGGHFEVLS
RGQRQMLVIKGFRTEDQGEYRCGPIQGLPSSGAATFNVMVMTSGSGDEVPAQPSLPPEAAQEGDLHLLWEALAR
KRRMSREPTLDSISELPEEDSRVQHLRQEAEEETAPDLSEGYSTADELARTGEADLSHTSSDDES RAGT PSLVT
YLKAGGPGFISPLASKHEAQVTTSVKPKQKQEQVPEVPTCP PPGDLSAADLMDPSLDKAAVKIQAAFKG YKVRKE
MKQQEGPVRTSRTFGDTEAQVGDVLRLECEVLAETKTD MRCALWLDKGIELTDGRHYHIDQLKDGTCSSLVTVGLAPT
DSGRYTCQVSTKSGRVSHSACVVVSGTSEAESSSGGELDDAFRAARRLHRLFRKSPAE LSEELFLSADE
GPGEPEEPADWQTYREDENFVCIREFESLAEARQAVTCFRNMFMATMIGIVEISLGEQGPGRVEMRIGKVAPTVT
PAVPLAKTPGLQTSDAAPVFLTELQNDVQDGYPMSFDCVVTGQPVPSVRWFKDGKLEEDDHYMINEDQGG
HQLIITAVVPADMGVYRCLAENSMGVSSTKAELRVELTSTDYDTAADATETSSYFSAQGYLSSREQEGTESDE

GQLPQVLEELKDLQVAPGTRLAKFQLKVKGYPAKLYWFKDGGQPLTTSDHIRMTDKKTLHTLEIVSVTREDSG  
QYAAYSNAVGAAYSSARLLVVRGPSEPEEKPASDVHERLVPPRILEKFTPKKVKRGSSITFSVKVEGHPAPSV  
HWLKEEAKEKGVLWIGPDTPGYTMASSSKQHSLLVLDVGRQHGTYTTCIATNPAGQALCSASLHISGLAKEEEQ  
ERVKEALISSFLQGTSAQVSAQMSSESAGFADLVGQSKGESLVAEEAHSHLSLAEVGTEEFQKLTSTQITEMVS  
AKISQAKLQVPGGDSDEETKTPSASPRHGRSRPSSSVQESSSEEDGDSRGEIFDIYVVTADYLPGLAEQDAI  
ILREGQYVEVLDSAHPLRWLVRTKPTKSSPSRQGWVSPAYLDKRLKLSPEWGPTEAPEFPGEAVSEDEYRTRL  
SSVIQELLSSEQAFVQELQFLESHHMKHLERSPRVPAAVASQKTVIFRNVQDISHFHSSFLKELQCGCTDDDV  
AMCFIKNQEAFAFEKYLEFLVGRVQAESVVVSTPVQEFYKKAEEETLSAKDPTQPPPPPLQHYLEQPVVERVQKYQ  
ALLKELIRNKARNRQNCALLEQAYAVVSALPQRAENKLVSLMENYPGTLEALGEPHQGHFIVWEGAPGARM  
PWKGHNHRVFLFRNYLVICKPRRDSRTDTFSYVFRNMMKLSSIDLNDQVEGDDRAFEVWHEREDSVRKYLLQA  
RTVIKNSWVKEICGIQORLAQPVWRPPEFEEELADCTAELGETVKLACRVTGTPKPIVSWYKDGKPVVDPH  
HILIEDPDGSCCTLILDNLTGIDSGQYMCFAASAAGNASTLGKILVQVPPRFVNVKVRATPFVEGEDAQITCTVE  
GAPYQIRWYKDGTLTLLAPGNRYRMLNEPRSGVLVVIQAASKEDLGHYECELVNRLGSTRGGELYMQSPALR  
ARDQHHREQIVAAVEDTSVEGSAHSAQDQADQQAASVLWRLLGSEALGSPSPGDLNTRQSEPPAFEEAASQIP  
GAASGTPEVSPQPGTHKGLEQETTSSGSQGWTVPIRVEGTAWPGAGTGQLLLDVHSQVIMETTQRTYVCQAPDT  
GVTRAPSMQVTIEDVQVQVGDMAQFDAVIEGHPPPIVTVWYKGSTQLTSSARLSQRQDGTYSVLVTDVAPHA  
GVYTCVANNAGGQVLCKAELLVHGGDKLDAENQVYRRLKHSFYDVQEEIGRGVFGFVKRVQHKGNKMFCAAKF  
IPLRSKTRAQAYQERDILATLGHPLVTGLLDQFETRKTLLIILELCSSEELLDRLFKKGVVTEAEVKVYIQQL  
VEGLHYLHSHGILHLHDIKPPNIMLVHPAREDIKICDFGFAQKITPSEPQYSKYGSPEFVSPEIIEQNPVSEGS  
DIWAMGVISYLSLTCSSPFAGESDRATLLNVLEGRVSWSSPTAAHLSSEDAKDFIKATLQRTPRARPSTSQCLA  
HPWFLKSMPAEEAHFINTKQKFLARSRWQRSLMSYKSI LVMRSIPPELLQGPPDSPSLGVARHLRGEASGAS  
SSSSSSDNELAPFARAKSLPPSPVTHSPLLHPRGFLRPSASLPEETEASMPPTADA AVPASQOSAGPPASPGCV  
PRHSVSISSLFYQQAGEGAERGNKTSGAKRHPARRRHLKGGYIARALPGLREPLMEYSLEEEEAAREEQASIM  
TKTPSFETALRLPSSSVREVPGRSHSLDNPPVTGTPSPEACKEQLLFPSTGLTHETAKDRGHKEGFSQESV  
PFPMSGDSRPGKQEGSSQDSRCRGPASSCHSELGSGSGEGCGPPSSQSLGSLPPQSLKKELESTSCGPLFSEQ  
PQAAPFPTQVSPLLGSEKQDQGLSEGVVPPVSSPGSASQVDASLDTEGLSEAGDTCDFTPPPQRPQEQAT  
TRKFSLSRGGYAGVAGYGTFAFGDAGGMLGQGPLWARMAWAVSQSSEEQDEAATESQPLESGLPIAEASG  
VPLRTSPSLTPWEEVEQVSLVQIRDLSDGDAEAADTISLDISEVDPAYLNLSDLYDIKYLPEFEMI FRRVPKPI  
EQPESPGSETEAGQGLADFLLEAAWPWPGLGLRAGLEITEEPEEPGDLEALLGEAAVGRKRKWSPSRGLFQF  
PGRCLSGEEPVELGLRQRVKASMAHISRIKGRPEGPEREPPRKKAGLASFRLSGLKGRDQELSDEAVVLGQ  
SVTLACQVLAQPTAQATWSKDGVLLESSGHLLISSTLKNFQLLTI LVVKEEDLGTYTCCVSNPLGTAVTTGVL  
RKAERPSSSPREVGELYKDAVLLVWKPVEVSCGPVTVIVQCCIEGGSWTTLASDISDCCYLTGKLSRGGMYIF  
RTACVSKAGMGPYSSPSEQVLLGGPNHLASEEESRRGRPAQLLPSTKTFAFQMQIRRRGRFSVVRQCREKASGR  
ALAAKIVPYQPEDKTAVLRREYEAALKRHLHPLHAQLHAAYLSRHLVLIILELCSGPELLPSLAERESYSESDVK  
DYLWQMSATQYLHAQHIHLDLRSENMMVTEYNLLKVIDLGNALDQEKVPAPENFKDYLETMAPELLEGGQ  
GAVPQTDIWAIGVTAIFIMLSGEYPESSSEGRDLQKGLRKLIRLSRCYAGLSGGAVAFLOSSLCAQPWGRPCA  
STCLQCGLWTEEGPTGSRPTVTFPTVRLRAFVREKRRRALLYKKNLAQVR\*  
>rs26971901\_ENSMUSP00000038264\_c.21295:T>C\_p.L7099S  
ENSMUST00000047441.14|Obscn-202|ENSMUSG00000061462|-|chr11:g.58891235:A>G  
MDHSFSGAPRFLTRPKAFVSVGKDATLSCQIVGNPTPHVSWEKDRQFVEAGARFRLAQDGDVYRLTILDLAL  
GDSGQYVCRARNAIGEFAAVGLRVDSEGTCAEQAPHLLRPTSIRVREGADATFRCRVGGSPPAVSWSKDG  
RRLGPPDAPHVRVEEHGESSALRIRSARPRDGGTYEVRAENPLGSASAAAALVVDSDAEVAGPPGTSTATLLA  
HLQORREAMRAEGIPSPPGAGTRTCTVTEGKHARLSCFVTGEPKPEVWKKDQGLVTEGRRHVVEDEQENF  
VLKILFCKQSDRGLTYCTASNLVGQTYSSVLVVVREPTVPFKKRLQDLEVREKESATFQCEVAQAPATEAAWFK  
EETRLWASAKYDIEEEGTERRLTVRNVSADDDAVYICETTEGSRVAELSVQGNLTKLPRKTAVRTGDTAIF  
WVELAVPEGPVRWLRNQEEMVAGGRVAITAEGTCHTLTI FQCTLEDMGEVAFVSGGCRTTTQFCVSAPRRPPL  
YPPADPVVKAKTESSVTLWSAPPHGDRPVTIDGYVLEKRLKLGAYAWSRCHEAGWLATTEFTITGVAAEEGDFQ  
FRVSAINHFGQGPYLEFPGTMHLVPLAVKTPKAVEAVEGGEVTFVSDLTVASSGEWFLDGEALKASSIYVI  
RCDRTRHMLTIREVPARLHGAQLKLVANGIETS IQMVVRAALGLPSSKLPAAAAREVLAQLHEEAQLLAELSD  
QAAAVTWLKDGRELSLGPKEYMQVSAGRRALLVRDVAQDDAGLYECVSRGSRRTAYQLLVQDITDGYRDWGPAG  
PQKHMCKCAGAKIARYLGSscyRFLQYDKGVWHLEAALDTRQKGTSSCSLHEKPKLVFAKQQAHSEVKA  
AGASATLSCEVAQAQTEVTFWFKDGKLLSSSSKVRMEASGCSRRLVVQQAGKADAGEYSCEAGGQKLSFRLDVA  
EPKMFVFAKEQQARSEVKAEGASATLSCEVAQAQTEVTFWFKDGKLLSSSSKVRMEASGCSRRLVVQQAGKAD  
GEYSCEAGGQKLSFRLDVTEPKLVFAKEQQARSEVKAEGVNSATLSCEVAQAQTEVTFWFKDGKLLSSSSKVRM  
EASGCSRRLVVQQAGKADAGEYSCEAGGQKLSFRLDVAEPKLVFAKEQQARSEVKAEGVNSATLSCEVAQAQ  
EVTWFKDGKLLSSSSKVRMEASGCSRRLVVQQAGKADAGEYSCEAGGQKLSFRLDVTEPKLVFAKEQQAHSEV  
KAEAGASATLSCEVAQAQTEVTFWFKDGKLLSSSSKVRMEASGCSRRLVVQQAGKADAGEYSCEAGGQKLSFRL  
DVAEPKLVFAKEQQARSEVKAEGASATLSCEVAQAQTEVTFWFKDGKLLSSSSKVRMEASGCSRRLVVQQAGK

ADAGEYSCEAGGQKLSFRLDVAEPKLVFAKEQQANSEVKAEAGASATLSCEVAQAQTEVTFWKDGGKLSSSSK
VRVEASGCSRRLVVQQAGKADAGEYSCEAGGQKLSFRLDVAEPKLAFAKEQQAHSEVKAEAGASATLSCEVAQ
AQTEVTFWKDGGKLSSSSKVRVEASGCSRRLVVQQAGKADAGEYSCEAGGQKLSFRLDVAEPKLAFAKEQQAH
SEVKAEAGASATLSCEVAQAQTEVTFWKDGGKLSSSSKVRVEASGCSRRLVVQQAGKADAGEYSCEAGGQKLS
FRLDVAEPKLAFAKEQQAHSEVKAEAGASATLSCEVAQAQTEVTFWKDGGKLSSSSKVRVEASGCSRRLVVQQ
AGKADAGEYSCEAGGQKLFRLDVAEPKLVFAKEQQAHSEVKAEAGASATLSCEVAQAQTEVTFWKDGGKLS
SSKVRVEASGCSRRLVVQQVQKADAGEYSCEARGQKLSFRLDVAEAEESQI PERPSRREPLVKEHETI I LTAT
IAAPSVAAVTWLKDGV EIRRSKRHEATSLGDTHLTTRVGAQVLD SAIYSCRVGKEGQDFPVQVEEVAAKFSKP
LEPVEGELGGTVMLVCELSPEQA EVVWRGNTQLRPGKRFQMTSEGP RR TLTVSGLREDDAE EYVCE SRDDRT
SARLTVKVPRVVKFTSGLSAMVAEEGQEATFQCVVSPSDAGVTWYKDGMLQ PSEKFMVME S GASRS LTI LGL
TLEDAGQVTVEAEGASSAALRVREAPVLFKKKLEPQTVEERTSVTLEVELTRPWPEVKWTRNAAVLTPSENV
EIRAEGARHCLVLRVSGFADRGF FGCETPDDKTQAKLNVEMRQVRLV RGLQEVEAKEQGTASMDVELSHAEVE
GSWTRDGLRLQPGPKCHLAVQGPVHIL TLSALQPQDSGLVAFRAEGVHTSARLIVTELPVSFTRVLQDVVATQ
KEKVTLECELSRPVDVRWLKDGVELRAGKAI GIVAQGTCSRSLVIYRCETGDQGVYVCDALDAQTSASLRVQGR
TYTLIFRRVLAEDAGEVKFVAENAESRAHLRVKELPVTLRLRDKIAMEKHRGVLECVSRSASAQVRWFKGG
VELQSGPKYEVVSDGLYRKLVIN DVQPEDEDTYTC DAGNVKTSAQFFVEEQSITIVRGLKDMTVM EPAPAWFE
CETSI PSVRPPKWL LKGTVLQAGNVGLEQDGTVHRLTLHKTCSTMTG PVHFTIGKSRSSAQLV VSDI PVVLT
RPLEPKAGRELQSVVLSCDFRPA PKAVQWYKDDT PLSPEKFKMALEGO MAELRILRLTPADGAVYRCQAGSA
QSSAEVTV EAREVTVIQPLQDAEAMEEGRVCFSCELSHKDEDI EWSLNGTPLYNDSFHEI SHEGCLHTLV LKS
VRQADTGTVCATSPKVSVSARLVVKGKPVVFLKALDDVSAEERGTLT LQCEVSDPEARV VWRKDGVELGPSDK
YDFLHKAGARGLTVHDL SHEDAGLYTCQVGSKETQSKVSVHDLHVGITKRLKTVEVLEGE SCSFECVLSHESP
SDPAVWTVGGKTVGGSGHFHAVRQGRKYTLTVKDAALSDAGEV VFSVLGLT SKASLIIRERPVDI TKPLEDQR
TTLGEDVMLSCELSRAGTSVRWLKDGKAI RKSQKYDLLSEGTRAVLVVRKASLKDSGEYTCETEASKSTAKLC
VEEKANRFTEELADLQVEEKGRAVFTCKTEHPASVVTWRKGLLELRASGKHVPSQEGTLTKLTINALERTDSD
TYTCDIGQARTQARLLVHGQKVRVIEDLEDTAVQEGSSAKFCCR IAPADYGPVHWFLDKTPLHSNELNEITVQ
PGYHVLTLRQLALQLKLVYFEAGDQRTSAALRVTEKPSIFSRPLTDVTVTEGEDLTLVCEKTTVDVSDGRWT
KDGKTLRPSARCLSHEGCQAQLLITATTPQDGGRYKESIGGASSSIVRVHALPVRFRESLKDVEVPEGKAA
TLRCVLSVAAPVEWRHGDDVLKSSNKYSLRQEGAVLELVIRDLQPDQSGQYSCSFGDQTT SATLTVKTS SAQ
FVGKLRNKEATEGTTVTLRCELTK EAPVEWKGTETLRNGDKYSLKQDGAVCELQIC SLLVADAGEYSCVCGQ
EKTSATLTVKALLVHFVRR LRSKEATEGDTTTLQCELSKAAPVEWRKGTETLRDGD RYSLKQDGAVCELQIRS
LTIADAGEYLCTCGQEKTSATLTVRALPAKFKDSLKNEEATEGTATLSCELSKAAPVTWKKGPKTLQSGDKY
VLRQDGAVCGLQIHGLTMADAGEYSCVCGQEKTSATLTVRGLPAKFIEDLRSQEATEGATAILRCEL SKAAPV
EWRKGSETLTKDGD RYTLRQDGAVCELQIRGLAVVDGTYS SLP TKFTEGLRNEEATEGTMATLRCQMSKAAPV
EWRKGSETLRDGD RYSLRQDGAMCELQIRGLTIEDSGEYTCVCGQEKTSATLSVKALPPRFIEDLRSQEATEG
TMATLRCQMSKAAPVEWRKGSETLGDGGRYSLRQNGAVCELQI HDLAVEDTGEYSCVCGQEKTSATLNVKALP
PRFIEDLRSQEATEGTMATLRCQMSKAAPVEWRKGSETLRDGGRYSLRQDGAVCELQI HDLVEDAGQYSCVC
GQEKTSAVLTVDALPPKFTEGLKKEEATEGTMVTLRQMSKEATVEWRKGAKT LSDGGRYSLRQDGAMCELQI
CGLAVEDAGEYSCVCGQEKTSATLSVKALPPRFIEDLRSQEATEGTMATLRCQMSKAAPVEWRKGSKTLRDGD
RYSRLRQDGAMCELQICDLAVEDTGDYSCVCGQEKTSATLSVKAPQVVFQQLQNLQAEEGSMASLRCELSV PN
AAMVWSKGGLELQGDTRREARQQGCVAELLLRDLRREDAGEYSCTCGSQTTSATLMVTAAPVRFLRELQAQDV
DEGATARLRCELSREAVSVEWRKGS LQLFPCA KYQMVQEGTTAELLVHGVEQEDAGEYTC DAGHTQS IARLSV
RAPKPKFKTDLQSTEQEAGGTARLCCQLSEAE PGTPVQWLKEGVELHVGSKYEMRRQGA VCELLIHGLEAKDT
GEYACLVGQKTLASLRVKEPEVTIVRGLVDMEVQADEDFEFTCKVSQAGATDVQWHLQGLPLQ SNEVTEVAV
LADGCTHV LQLKGV TLEDAGTVSFHVGG LSSSAQLTVRVPEVTVLEPLKDVQLSEGQDAHFRCRLSRASGQEA
RWALGGVPLQC NEMNDITVEQGTLYLTLHKTLEDAGTITLQV GSCSSEAQLKVTAKNTVLRGLENVDALEG
GEALFECQLSQPEVA AHTWLLDDEPVHTSEKVEVYFENGLRHLL LKLNKPKQDSCRVTFLAGDVVTS AFLTV
RALPDPPEDAEVVGRSDHSV TLSWVAPMSDGGGGLCGYRVMKEASTGQWQLCHDLVPGPECVDDLVPGKTY
RFRVAAVGPAGAGEPVHLPQMVKIAPAPAPAPAPAPAPAPETRQAVVGEDIC LELEVAADGGEVVWHKGT ERI
QPGGHFEVLSRGRQMLVIKGFRTEDQGEYRCGPIQGLPSSGAATFNVVMTSGSGDEVPAQPSLPPEAAQEGD
LHLLWEALARKRRMSREPTLDSISELPEEDSRVQHLRQEA EETAPDLSEGYS TADELARTGEADLSHTSSDDE
SRAGTPSLV TYLKKAGGPGISPLASKHEAQVTT SVKPKQKQEPVVP TCPPPGDLSAADLMDPSLDKAAVKIQA
AFKGYKVRKEMKQEGPVFSRTFGDTEAQVGDVLRLECVLATKTD MRACWLKDGIELTDGRHYHIDQLKDGTC
SLLVTGLAPTDGPRYTCQVSTKSGRVSHSACVVVSGTESAEASSSGGELDDAFRRAARRLHRLFRTKSPAELS
EEELFLSADEGPEPEPADWQTYREDENFVCIRFESLAEARQAVTCFRNMFATMGIV EISLGEQGP RGVEM
RIGKVAPT VTPAVPLAKTPGLQTS DAAPVFLTELQNQDVQDGYPMSFDCVVTGQPVPSVRWFKDGLLEEDDH
YMINEDQQGGHQLIITAVVPADMGVYRCLAENSMGVSSTKAE LRVELTSTDYDTAADATETSSYFSAQGYLSS
REQEGTESDEGQLPQVLEELKDLQVAPGTR LAKFQLKVKGY PAKLYWFKDGOPLTSDHIRMTDKKTLHTLE
IVSVTREDSGQYAAIYI SNAVGAAYSSARLLVVRGPSEPEEK PASDVHERLVPPRI LEKFTPKKVKRGSITFSV

KVEGHPAPSVHVLKEEAEGVWLWIGPDTPGYTMASSSKQHSVLVLLDVGRQHOGTYTTCIATNPAGQALCSASLH  
 ISGLAKEEEQERVKEALISSFLQGTSAQVSAQMSEAGFADLVGQSKGESLVAAEEAHSHLSLAEVGTTEEFLQK  
 LTSQITMVSAKISQAKLQVPGGDSDEETKTPSASPRHGRSRPSSSVQESSSESEDGDSRGEIFDIYVVTADY  
 LPLGAEQDAIILREGQYVEVLDSAHPLRWLVRTKPTKSSPSRQGWVSPAYLDKRLKLSPEWGPTEAPEFPGEA  
 VSEDEYRTRLSSVIQELLSSEQAFVQFLESHHMKHLERSPRVPAAVASQKTVIFRNVQDISHFHSFLKE  
 LQCGCTDDDVAMCFIKNQEAFAFEKYLEFLVGRVQAESVVVSTPVQEFYKKYAEETLSAKDPTQPPPPPLQHYLE  
 QPVERVQKYQALLKELIRNKARNRQNCALLEQAYAVVSALPQRAENKLVHSLMENYPGTLEALGEPVIRQGHFI  
 VWEGAPGARMPPWKGNHRHVFLFRNYLVICPKRRDSRTDTFSYVFRNMMKLSIDLNDQVEGDDRAFEVWHERE  
 DSVRKYLLQARTVIKNSWVKEICGIQORLAQPVWRPPEFEELADCTAELGETVKLACRVGTGPKPIVSWYK  
 DGKPVVDPHHLIEDPDGSCSTLILDNLGTIDSGQYMCFAASAAGNASTLGKILVQVPPRFVNVKVRATPFVVEG  
 EDAQITCTVEGAPYPQIRWYKDGTLAPGNRYRMLNEPRSGVLVLIQAASKEDLGHYECELVNRLGSTRGGG  
 ELYMQSPALRARDQHHREQIVAAVEGAPSMQVTIEDVQVQVGDMAQFDAVIEGHPPPVTWYKGTQLTSSAR  
 LSQRQDGTYSVLVLTVDVAPHDAGVYTCVANNAGQVLCCKAELLVHGGDKLDAENQVYRRLKHSFYDVQEEIGR  
 GVFGFVQVQHKGNKMFCAAKFIPLRSKTRAQAYQERDILATLGHPLVTGLLDQFETRKTLLILELCSSEEL  
 LDRLFKKGVVTEAEVKVYIQQLVEGLHYLHSHGILHLDIKPPNII MVHPAREDIKICDFGFAQKITPSEPQYS  
 KYGSPFVSPETIEQNPVSEGSIDIWAMGVI SYLSLTCSSPFAGESDRATLLNVLEGRVSWSSPTAAHLSERDAK  
 DFIKATLQRTPRARPSTQCLAHFWFLKSMPEAAEHFINTKQLKFLRLARSRWQRSLMSYKSLVMRSIPPELLQ  
 GPDSPSLGVARHLRGEASGASSSSSSDNELAPFARAKSLPPSPVTHSPLLHPRGFLRPSASLPEETEASMP  
 TADAAPVSPQASAGPPASPGCVPRHSVIVSSLFYQQAGEGAERGNKTSGAKRHPARRRHLKGGYIARALPGLR  
 EPLMEYSLLEEEAAREEQASLMTKTPSFETALRLPSSSVREVPGRSHSLDNPPVTTGSPPEACKEQLLFPST  
 GLTHETAKDRGHKEGFSQESVFPFMSGDSRPGKQEGSSQDSCRGKPASSCHSELGSGSQEGCGPPSSQSLG  
 SLPPQSLKKELESTSCGPLFSEQPQAAPFTQVSPLLGSEKEPQDGLSEGPVVPVSSSPGSASQVDAASLDTEG  
 LSEAGDTCDFTPPPQRPQEQATRKFSLSRGGYAGVAGYGTFAFGGDAGGMLGQGPLWARMWAVVQSSEEQ  
 DEAAATESPQPLESGLPIAEASGVPLRTSPSLTPWEEVEQVSLVQIRDLSGDAEAAADTISLDISEVDPAYLNLS  
 DLYDIKYLPEFEMI FRRVPKPIEQPESPGSETEAGQGLADFLLEAAWPWPGEGLGLRAGLEITEEPEEPGDLEA  
 LLGEEAVGRKRKWSRGLFQFPGRCLSGEEPVELGLRQRVKASMAHISRIKGRPEGEREPGRKAGLAS  
 FRLSGLKRDQELSDAEAVVLGQSVTLACQVLAQPTAQLRQVLESSGHLLISSTLKNFQLLTLIVLVKKEE  
 DLGTYTCCVSNPLGTAVTTGVLKAERPSSSPRPEVGEYKDAVLLVWKPVESECGPVTYIVQCCIEGGSWTTL  
 ASDISDCCYLTKLSRGGMYIFRTACVSKAGMPYSSPSEQVLLGGPNHLASEEESSRGRPAQLLPSTKTFAF  
 QMQIRRRGRFVVRQCREKASGRALAAKIVPYQPEDKTAVREYEALKRLHHPHLAQLHAAYLSPRHLVLI LEL  
 CSGPELLPSLAERESYSESDVKDYLWQMLSATQYLHAQHILHLDLRSNNMMVTEYNLLKVIDLGNASLDQEK  
 VPAPENFKDYLETMAPELLEGQAVPQTDIWAIGVTAIFIMLSGEY PESSGTRDLQKGLRKLIRLSRCYAGL  
 SGGAVAFQLSSLCAQPWGRPCASTCLQCGWLTEEGPTGSRPTVPTFPTVRLRAFVREEREKRRALLYKXHNLAQ  
 VR\*

>rs48878909\_ENSMUSP00000158795\_c.23776:A>G\_p.K7926R  
 ENSMUST00000238536.2|Obscn-210|ENSMUSG00000061462|-|chr11:g.58891316:T>C  
 MDHSFSGAPRFLTRPKAFVSVGKDATLSCQIVGNPTPHVSWEKDRQPVEAGARFRLAQDGDVYRLTILDLAL  
 GDSGQYVCRARNAIGEAFVAVGLRVDSEGTCAEQAPHFLLRPTSIRVREGADATFRCRVGGSPQPAVSWSKDG  
 RRLGPPDAPHVRVEEHGESSALRIRSARPRDGGTYEVRAENPLGSASAAAALVVDSDAEVAGPPGTSTATLLA  
 HLQORREAMRAEGIPPSPPGAGTRTCTVTEGKHARLSCFVTGEPKPEVWKKDGQLVTEGRRHVVEDEQENF  
 VLKILFCKQSDRGLYTCTASNLVGQTYSSVLVVREPTVPFKKRLQDLEVREKESATFQCEVAQPAEAAWFK  
 EETRLWASAKYDIEEGTERRLTVRNVSADDDAVYICETTEGSRVVAELSVQGNLTKLPRKTAVRTGDTAIF  
 WVVELAVPEGPVWRWRNQEEMVAGGRVAITAEGTCHTLTIFQCTLEDMGVAFVSGGCRTTTQFCVSAPRRPPL  
 YPPADPVVKAKTESSVTLWSAPPHGDRPVTIDGYVLEKRLKLGAYAWSRCHEAGWLATTEFTITGVAEEGDFQ  
 FRVSAINHFVGGPYLEFPGTMHLVPMPLAVKTPKAVEAVEGGEVTFVSDLTVASSGEWFLDGEALKASSIYVI  
 RCDRTRHMLTIREVPARLHGAQLKFVANGIETSIQMVVRAALGLPSSKLPAAAAREVLAQLHHEAQLLAEVSD  
 QAAAAVTWLKDGRELSLGPYEMQVSAGRRALLVRDVAQDDAGLYECVSRGSRTAYQLLVQDITDGYRDWGPAG  
 PQKHMCKCAGAKIARYLGSSCYRFLQYDKGVWHLEAALDTRQKGTSSCSLHEKPKLVFAKQQAHSEVKA  
 AGNSATLSCEVTQAQTEVTWFKDGKLLSSSSKVRMEASGCSRRLVVQQAGKADAGEYSCEAGGQKLSFRLDVA  
 EPKLVFAKQQAHSEVKAEGASATLSCEVAQAQTEVTWFKDGKLLSSSSKVRMEASGCSRRLVVQQAGKADA  
 GEYSCEAGGQKLSFRLDVAEPKLVFAKEQQARSEVKAEGASATLSCEVAQAQTEVTWFKDGKLLSSSSKVRM  
 EASGCSRRLVVQQAGKADAGEYSCEAGGQKLSFRLDVTEPKLVFAKEQQARSEVKAEGVNSATLSCEVAQAQ  
 EVTWFKDGKLLSSSSKVRMEASGCSRRLVVQQAGKADAGEYSCEAGGQKLSFRLDVAEPKLVFAKEQQARSEV  
 KAEAGNSATLSCEVAQAQTEVTWFKDGKLLSSSSKVRMEASGCSRRLVVQQAGKADAGEYSCEAGGQKLSFHL  
 DVTEPKLVFAKEQQAHSEVKAEGASATLSCEVAQAQTEVTWFKDGKLLSSSSKVRMEASGCSRRLVVQQAGK  
 ADAGEYSCEAGGQKLSFRLDVAEPKLVFAKEQQARSEVKAEGASATLSCEVAQAQTEVTWFKDGKLLSSSSK  
 VRVEASGCSRRLVVQQAGKADAGEYSCEAGGQKLSFRLDVAEPKLVFAKEQQANSEVKAEGASATLSCEVAQ  
 AQTEVTWFKDGKLLSSSSKVRVEASGCSRRLVVQQAGKADAGEYSCEAGGQKLSFRLDVAEPKLVFAKEQQAH

SEVKAEAGASATLSCEVAQAQTEVTFWFKDGKLLSSSSKVRVEASGCSRRLVVQQAGKADAGEYSCEAGGQKLS  
 FRLDVAEPKLAFAKEQQAHSEVKAEAGASATLSCEVAQAQTEVTFWFKDGKLLSSSSKVRVEASGCSRRLVVQQ  
 AGKADAGEYSCEAGGQKLSFRLDVAEPKLAFAKEQQAHSEVKAEAGASATLSCEVAQAQTEVTFWFKDGKLLSS  
 SSKVRVEASGCSRRLVVQQAGKADAGEYSCEAGGQKLFRLDVAEPKLMFAKEQQAHSEVKAEAGASATLSCE  
 VAQAQTEVTFWFKDGKLLSSSSKVRVEASGCSRRLVVQQAGKADAGEYSCEAGGQKLSFRLDVAEPKLVFAKEQ  
 QAHSEVKAEAGASATLSCEVAQAQTEVTFWFKDGKLLSSSSKVRVEASGCSRRLVVQQVQKADAGEYSCEARGQ  
 KLSFRLDVADTRLMFAKEQQARTEVKAEAGNSATLSCEVAQAQTEVTFWFKDGKLLSSSSKVRVEASGCSRRLV  
 VQQAGKADAGEYSCEAGGQKLSFRLDVAEAEESQIPERPSRREPLVVKEHETIILTATIAAPSVAAVTWLKDG  
 EIRRSKRHEATSLGDHTLTVRGAQVLDLSAIYSCRVGKEGQDFVQVEEVAAKFSKPLEPVEGELGGTVMLVC  
 ELSPEQAQEVVWRCGNTQLRPGKRFQMTSEGPRRTLTVSGLREDDAEYVCESRDDRTSARLTVKVPVVKFTS  
 GLSAMVAEEGQEQATFQCVVSPDAGVTWYKDGMLQPSKFKVMVESGASRSLTILGLTLEDAGQVTEAEGAS  
 SSAALRVREAPVLFKKLEPQTEVEERTSVTLEVELTRPWPEVKWTRNAAVLTPSENVEIRAEGARHCLVLRV  
 GFADRGFFGCETPDDKTQAKLNVEMRQVRLVVRGLQVEEAKEQGTASMDVELSHAEEVGSWTRDGLRLQPGPKC  
 HLAVQGPVHILTLALSALQPQDSGLVAFRAEGVHTSARLIVTELPVSFTRVLQDVVATQKEKVTLECELSRPVDV  
 RWLKDGVLELRAGKAIIGIVAQGTCSRSLVIYRCETGDQGVYVCDALDAQTSASLRVQGRTYTLIFRRLAEDAGE  
 VKFVAENAESRAHLRVKELPVTLLRPLRDKIAMEKHRGVLEQCQVSRASAQVRWFKGGVLELQSGPKYEVVSDGL  
 YRKLVDVQPEDEDTYTCDAENVKTSAQFFVEEQSITIVRGLKDMTVMPEPAPAFECETSIPSVRPPKWLGLG  
 KTVLQAGGNVGLQDGTVHRLTLHKTCSTMTGPVHFTIGKSRSSAQLVVSDIPVVLTRPLEPKAGRELGQSVVL  
 SCDFRPAPKAVQWYKDDTPLSPSEKFKMALEGQMAELRILRLTPADAGVYRCQAGSAQSSAEVTEAREVTVI  
 QPLQDAEAMEEGRVCFSCELSHKDEDIEWSLNGTPLYNDSFHEISHGCLHTLVLSVRQADTGTVCATSPKV  
 SVSARLVVKGKPVVFLKALDDVSAEERGTTLTQCEVSDPEARVVRKDGVELGSPDKYDFLHKAGARGLTVHD  
 LSHEDAGLYTCQVGSKETQSKVSVHDLHVGITKRLKTVEVLEGESECFEVLSHESPSDPAVWTVGGKTVGGS  
 GHFHAVRQGRKYTLTVKDAALS DAGEVVFVSVLGLTSKASLI IRERPVDITKPLEDQRTTLGEDVMLSCELSRA  
 GTSVRWLKDGKAIRKSQKYDLLSEGTRAVLVVRKASLKDSSGEYTCETEASKSTAKLCVEEKANRFTTEELADLQ  
 VEEKGRAVFTCKTEHPASVVTWRKGLLELRASGKHVPSQEGTLKLTINALERTDSDTYTCDIGQARTQARLL  
 VHGGKVRVIEDLEDTAVQEGSSAKFCRIAPADYVGVHWFLDKTPHLSNELNEITVQPGGYHVLTLRQLALKD  
 SGTVYFEAGDQRTSALRVTEKPSIFSRPLTDVTVTEGDELTLVCETTTVDSSVRWTKDGKTLRQALQLSH  
 EGCQAQLLITATTPQDGGRYKCEIGGASSSSIVRVHALPVRFRFESLKDVEVPEGKAATLRCVLSVAAPVEWR  
 HGDDVLKSSNKYSLRQEGAVLELVIRDLQPDQSGQYSCSFGDQTTSATLTVKTSQAQFVGLRKNKEATEGTTV  
 TLRCELTKAPVEWKKGTETLRNGDKYSLKQDGA VCELQICSLLVADAGEYSCVCGQEKTSATLTVKALLVHF  
 VRRLSKEATEGDTTTLQCELSKAAPVEWRKGTETLRDGDYSLKQDGA VCELQIRSLTIADAGEYLCTCGQE  
 KTSATLTVRALPAKFKDSLKNEEATEGTTATLSCELSKAAPVWKKGPKTLQSGDKYVLRQDGA VCGLQIHGL  
 TMADAGEYSCVCGQEKTSATLTVRGLPAKFIEDLRSQEATEGATAILRCELSKAAPVEWRKGSSETLKDGDYR  
 LRQDGA VCELQIRGLAVVDGTYSLSLPTKFTTEGLRNEEATEGTMATLRCQMSKAAPVEWRKGSSETLRDGDYR  
 LRQDGA MCELQIRGLTIEDSGEYTCVCGQEKTSATLSVKALPSRFIEDLRSQEATEGTMATLRCQMSKATAPVE  
 WKKQSETLRDGGYSLRQDGPVCELQICDLAVEDAGEYSCVCGQEKTSATLSIKALPPRFIEDLRSQEATEGT  
 MATLRCQMSKAAPVEWRKGSSETLGDGGYSLRQNGAVCELQIHDLAVEDTGEYSCVCGQEKTSATLNVKALPP  
 RFIEDLRSQEATEGTMATLRCQMSKAAPVEWRKGSSETLRDGGYSLRQDGA VCELQIHDLVEDAGQYSCVCG  
 QEKTSAVLTVDALPPKFTTEGLKKEEATEGTMVTLRCQMSKEATVEWRKGAKTLSDGGRYSLRQDGA MCELQIC  
 GLAVEDAGEYSCVCGQEKTSATLSVKALPPRFIEDLRSQEATEGTMATLRCQMSKAAPVEWRKGSSETLRDGD  
 YSLRQDGA VCELQIRDLAVEDAGEYLCVCGQEKTSATLSVKALPPRFIEDLRSQEATEGTMATLRCQMSKAAP  
 VEWRKGSKTLRDGDYSLRQDGA MCELQICDLAVEDTGDYSCVCGQEKTSATLSVKALPPRFIEDLRSQEARE  
 GTVATLRCRMSKAAPVEWRKGSSETLKDGDYSLRQEGNLCELQIRDLAVEDTEEYSCVCGQEKTSATLSVKAL  
 PAKFIEDLRSQEAPESSTVTLRCKLSKKASVVWKKGSETLRNGARYSLRQDGA VCELEIRDLTVEDTGEYSCT  
 CGQERTSATLSIMAPQVVFQQPLQNLQAEEGSMASLRCELSVNAAMVWSKGGLELQGDTRREARQQCVAEL  
 LLRDLRREDAGEYSCTCGSQTTSATLMVTAAPVRFLRELQAQDVDEGATARLRCELSREAVSVEWRKGSQQLF  
 PCAKYQMVGEGTTAELLVHGVEQEDAGEYTCDAHTQSIARLSVRAPKPKFKTDLQSTEQEAGGTARLCCQLS  
 EAEPGTPVQWLKEGVELHVGSKYEMRRQGA VCELLIHGLEAKDTGEYACLVGQKTLASLRVKEPEVTIVRGL  
 VDMEVQADEDEFTCKVSQAGATDVQWHLQGLPLQSNVTEVAVLADGCTHVLQKGVTLLEDAGTVSFHVGGL  
 SSSAQLTVRVPEVTVLEPLKDVQLSEGQDAHFRCRLSRASGQEARWALGGVPLQCNEMNDITVEQGTLYLLTL  
 HKVTLEDAGTITLQVGS CSSEAQLKVTAKNVTLRGLENVDALEGGEALFECQLSQPEVAHAHTWLLDDEPVHTS  
 EKVEVVYFENGLRHLLLLKNLKPQDSCRVTFLAGDVVTS AFLTVRGWRLEVLEPPHDASVKAGMQVRFTCILS  
 EAVPVGEATSVYINGAAIQPDDTDWTVTTDGSHEALTSNAQPQHAGEVTF AARDAVASARLSVLALPDPPEDA  
 EVVGRSDHSTVTLSSVAPMSDGGGGLCGYRVEMKEASTGQWQPLCHDLVPGPECVVDDLVPKTYRFRVAAVGPA  
 GAGEPVHLPQMVKIAPAPAPAPAPAPAPAPAPAPAVETRQAVVGEDICLELEVAADGGEVWHKGTERTIQPGHFVLS  
 RGQRQMLVIKGFRTEDQGEYRCGPIQGLPSSGAATFNVMVMTSGSGDEVPAQPSLPPEAAQEGDLHLLWEALAR  
 KRRMSREPTLDSISELPEEDSRVQHLRQEAEEETAPDLSEGYSTADELARTGEADLSHTSSDDES RAGTPSLV  
 YLKKAGGPGISPLASKHEAQVTTSVKPKQKQEPVVPTCPPPGDLSAADLMDPSLDKAAVKIQAAFQYKVRKE

MKQQEGPVFSRTFGDTEAQVGDVLRLECVLATKTDMRACWLKDGIELTDGRHYHIDQLKDGTCSSLVLTGLAPT  
 DSGRYTCQVSTKSGRVSHSACVVVSGTESEAESSSGGELDDAFRRAARRLHRLFRTKSPAELSEEELFLSADE  
 GPGEPEEPADWQTYREDENFVCIRFESLAEARQAVTCFRNMFATMIGVEISLGEQGRGVEMRIGKVAPTVT  
 PAVPLAKTPGLQTSDAAPVFLTELQNDQVDQGYPMSFDCVVTGQPVPSVRWFKDGKLLLEEDDHVMINEDQQGG  
 HQLIITAVVPADMGVYRCLAENSMGVSSSTKAELRVELTSTDYDTAADATETSSYFSAQGYLSSREQGTESE  
 GQLPQVLEELKDLQVAPGTRLAKFQLKVKGYPAKLYWFKDGGQPLTSDHIRMTDKKTLHTLEIVSVTREDSG  
 QYAAYSNAVGAAYSSARLLVRGPSEPEEKPASDVHERLVPPRILEKFTPKKVKRGSSITFSVKVEGHPAPSV  
 HWLKEEAKEGVLWIGPDTPGYTMASSSKQHSVLVLDVGRQHQTTCIATNPAGQALCSASLHISGLAKEEEQ  
 ERVKEALISSFLQGTSAVSAQMSSEAGFADLVGQSKGESLVAEEAHSHLSLAEVGTFFLQKLTSTQITEMVS  
 AKISQAKLQVPGGDSDEETKTPSASPRHGRSRPSSSVQESSSEEDGDSRGEIFDIYVVTADYLPGLAEQDAI  
 ILREGQYVEVLDSAHPLRWLVRTKPKSSPSRQGWVSPAYLDRKRLKLSPEWGPTEAPEFPGEAVSEDEYRTRL  
 SSVIQELLSSEQAFVQELQFLESHHMKHLERSPRVPAAVASQKTVIFRNVQDISHFHSSFLKELQCGCTDDDV  
 AMCFIKNQEAFAKEYLEFLVGRVQAESVVVSTPVQEFYKKYAEETLSAKDPTQPPPPPLQHYLEQPVVERVQKYQ  
 ALLKELIRNKARNRQNCALLEQAYAVVSALPQRAENKLHVSLMENYPGTLEALGEPHQGHFIWEGAPGARM  
 PWKGNHRHVFLFRNYLVICKPRRDSRTDTFSYVFRNMMKLSSIDLNDQVEGDDRAFEVWHEREDSVRKYLLQA  
 RTVIKNSWVKEICGIQORLAQPVWRPPEFEEELADCTAELGETVKLACRVTGTPKPIVSWYKDGKPEVEVDPH  
 HILIEDPDGSCITLIDNLTGIDSGQYMCFAASAAGNASTLGKILVQVPPRFVNVKVRATPFVEGEDAQITCTVE  
 GAPPYQIRWYKDGITLLAPGNRYRMLNEPRSGVLVVIQAASKEDLGHYECELVNRGLSTRGEGEDALYMQSPALR  
 ARDQHHREQIVAAVEDTSVEGSAHSAQDQADQQAASVLWRLLGSEALGSPSPGDLPNTRQSEPPAFEEEAASQIP  
 GAASGTPEVSPQPGTHKLEQETTSSSGSQGWTPVIRVEGTAWPGAGTGQLLLDVHSQVIMETTQRTYVCQAPDT  
 GVTRAPSMQVTIEDVQVQVGDMAQFDAVIEGHPPPITVWYKGSTQLTSSARLSQRQDGTYSVLVTDVAPHDA  
 GVYTCVANNAGGQVLCKAELLVHGGDKLDAENQVYRRKLHSFYDVQEEIGRGVFGFVKRVQHKGNKMFCAAKF  
 IPLRSKTRAQAYQERDILATLGHPLVTGLLDQFETRKTLLIILELCSSEELLDRLFKKGVVTEAEVKVYIQQL  
 VEGHLHLHSHGILHLDIKPPNIMLVHPAREDIKICDFGFAQKITPSEPQYSKYGSPEFVSPETIEQNPVSEGS  
 DIWAMGVISYLSLTCSSPFAGESDRATLLNVLEGRVSWSSPTAAHLESDAKDFIKATLQRTPRARPSTSQCLA  
 HPWFLKSDNPAEEAHFINTKQLKFLARSRWQRSLMSYKSIIVMRSIPPELLQGPDPSPVGLVARHLRGEASGAS  
 SSSSSSSMELAPFARAKSLPPSPVTHSPLLHPRGLRPSASLPEETEASMPATAAASPASQAGPPASPGCV  
 PRHSVISSLFYQQAGEGAERGNKTSGAKRHPARRRHLKGGYIARALPGLREPLMEYSLLEEEEAAREEQASLM  
 TKTPSFETALRLPSSSVREVPGRSHSLDNPPVTTGSPPEACREQLLFPSTGLTHETTAKDRGHKEGFLQESV  
 PFPMSGDSRPGKQEGSSQDSCRGKPASSCHSELGSGSQEGCPSQSLGSLPPQSLKELSTSCGPLFSEQ  
 PQAAPFPTQVSPLLGSEKEPQDGLSEGPVVPSSSPGSASQVDASLDTEGLSEAGDTCDFTPPPQRPQEQAT  
 TRKFSLESRGGYAGVAGYGTFAFGGDAGGMLQGGPLWARMWAVVQSSEEQDEAATESPQPLESGLPFAEASG  
 VPLRTSPSLTPWEEVEQVSLVQIRDLSGDAEAADTISLDISEVDPAYLNLSDLYDIKYLPEFEMI FRRVPKPI  
 EQPESPGSETEAGQGLADFLLEAAWPWPGELGLRAGLEITEEPEEPGDLEALLGEAAVGRKRKWSPSRGLFQF  
 PGRCLSGEEPVELGLRQVRKASMAHISRIKGRPEPEREGPPRKKAGLASFRLSGLKGRDQELSDEAVVLGQ  
 SVTLACQVLAQPTAATWSKDGVLLESSGHLLISSTLKNFQLLTLVVKEDLDGTYTCCVSNPLGTAVTTGVL  
 RKAERPSSSPREVEGELYKDAVLLVWKPVEESCGPVTVYIVQCCIEGGSWTTLASDISDCCYLTGKLSRGGMYIF  
 RTACVSKAGMGPISSPSEQVLLGGPNHLASEEESRRGRPAQLLPSTKTFQFQMQIRRRGRFSVVRQCREKASGR  
 ALAAKIVPYQPEDKTAVLREYEAALKRLHHPHLAQLHAAYLSPRHLVLIILELCSGPELLPSLAERESYSESDVK  
 DYLWQMLSATQYLHAQHILHLDLRSENMMVTEYNLLKVIDLGNALDQEKVPAPENFKDYLETMAPELLEGGQ  
 GAVPQTDIWAIGVTAIIMLSGEYPESSSEGTDLQKGLRKLIRLSRCYAGLSGGAVAFQSSSLCAQPWGRPCA  
 STCLQCGLWTEEGPTGSRPTVTFPTVRLRAFVREKRRALLYKKNLAQVR\*

>rs48878909\_ENSMUSP00000038264\_c.21214:A>G\_p.K7072R  
 ENSMUST00000047441.14|Obscn-202|ENSMUSG00000061462|-|chr11:g.58891316:T>C  
 MDHSFSGAPRFLTRPKAFVVSVGKDATLSCQIVGNPTPHVSWEKDRQPVEAGARFLAQDGDVYRLTILDLAL  
 GDSGQYVCRARNAIGEAFAAVGLRVDSEGTCAEQAPHLLRPTSIRVREGADATFRCRVGGSPQPAVSWSKDG  
 RRLGPPDAPHVRVEEHGESSALRIRSARPRDGGTYEVRAENPLGSASAAAALVVDSDAEVAGPPGTSTATLLA  
 HLQORREAMRAEGIPPSPPGAGTRTCTVTEGKHARLSCFVTGEPKPETVWKKDQGLVTEGRRHVVEDEQENF  
 VLKILFCKQSDRGLYTCTASNLVGQTYSSVLVVVREPTVPFKKRLQDLEVREKESATFQCEVAQPAEAAWFK  
 EETRLWASAKYDIEEEGTERRLTVRNVSADDDAVYICETTEGSRVAELSVQGNLTKLPRKTAVRTGDTAIF  
 WVELAVPEGPVRLRNQEEMVAGGRVAITAEGTCHTLTI FQCTLEDMGEVAFVSGGCRTTTQFCVSAPRRPPL  
 YPPADPVVKAKTESSVTLWSAPPHGDRPVTIDGYVLEKRKLGAAYAWSRCHEAGWLATTEFTITGVAAEEDGFQ  
 FRVSAINHFGQIREYLEFPGTMHLVPMALAVKTLKAVEAVEAGGEVTFVSDLTVAASSGEWFLDGEALKASSIYVI  
 RCDRTRHMLTDREVPARLHGAQLKVFVANGIETSIQMVVRAALGLPSSKLPAAAAREVLVAQLHHEEAQLLAELS  
 QAAAVTWLKDRELSLGPKEYMQVSAGRRALLVRDVAQDDAGLYECVSRGSRRTAYQLLVQDITDGYRDWGPAG  
 PQKHMCKCAGAKIARYLGSSCYRFLQYDKGVWHLEAALDTRQKGTSSCSLHEKPKLVFAKQQAHSEVKA  
 AGASATLSCEVAQAQTEVTFWFKDGKLLSSSSKVRMEASGCSRRLVVQQAGKADAGEYSCEAGGQKLSFRLDVA  
 EPKVMFAKEQQARSEVKAEGASATLSCEVAQAQTEVTFWFKDGKLLSSSSKVRMEASGCSRRLVVQQAGKADA

GEYSCEAGGQKLSFRLDVTEPKLVFAKEQQARSEVKAEVGNSATLSCEVAQAQTEVTFWKDGKKLSSSSKVRM  
 EASGCSRRLVVQQAGKADAGEYSCEAGGQKLSFRLDVAEPKLVFAKEQQARSEVKAEGNSATLSCEVAQAQT  
 EVTWFKDGKKLSSSSKVRMEASGCSRRLVVQQAGKADAGEYSCEAGGQKLSFHLDVTEPKLVFAKEQQAHSEV  
 KAEAGASATLSCEVAQAQTEVTFWKDGKKLSSSSKVRMEASGCSRRLVVQQAGKADAGEYSCEAEGQKLSFRL  
 DVAEPKLVFAKEQQARSEVKAEGASATLSCEVAQAQTEVTFWKDGKKLSSSSKVRVEASGCSRRLVVQQAGK  
 ADAGEYSCEAGGQKLSFRLDVAEPKLVFAKEQQANSEVKAEGASATLSCEVAQAQTEVTFWKDGKKLSSSSK  
 VRVEASGCSRRLVVQQAGKADAGEYSCEAGGQKLSFRLDVAEPKLAFAKEQQAHSEVKAEGASATLSCEVAQA  
 AQTEVTFWKDGKKLSSSSKVRVEASGCSRRLVVQQAGKADAGEYSCEAGGQKLSFRLDVAEPKLAFAKEQQAH  
 SEVKAEGASATLSCEVAQAQTEVTFWKDGKKLSSSSKVRVEASGCSRRLVVQQAGKADAGEYSCEAGGQKLS  
 FRLDVAEPKLAFAKEQQAHSEVKAEGASATLSCEVAQAQTEVTFWKDGKKLSSSSKVRVEASGCSRRLVVQQ  
 AGKADAGEYSCEAGGQKLFRLDVAEPKLVFAKEQQAHSEVKAEGASATLSCEVAQAQTEVTFWKDGKKLSS  
 SSKVRVEASGCSRRLVVQQVQKADAGEYSCEARGQKLSFRLDVAEAEISQIPERPSRREPLVKEHETIILTAT  
 IAAPSVAAVTWLKDGVIEIRRSKRHEATSLGDTHTLTVRGAQVLDIAIYSCRVGKEGQDFPVQVEEVAAKFSKP  
 LEVVEGELGGTVMLVCELSPEQAEVWRCNGTQLRPGKRFQMTSEGPRRTLTVSGLREDDAEYVCESRDDRT  
 SARLTVKVPVVKFTSGLSAMVAEEGQEAFTQCVVSPSDAGVTWYKDGMLQVQSEKFMVMEVSGASRSLTILGL  
 TLEDAGQVTEAEGASSAALRVREAPVLFKKKLEPQTVEERTSVTLEVELTRPWPEVKWTRNAAVLTPSENV  
 EIRAEGARHCLVLRVSGFADRGRFGCETPDDKTQAKLNVEMRQVRLVRLGQVEAKEQGTASMDVLESHAEVE  
 GSWTRDGLRLQPGPKCHLAVQGVHILTLTSLALQPQDSGLVAFRAEGVHTSARLIVTELPVSTFRLVQDVVATQ  
 KEKVTLECELSRPVDVRLKDGVELRAGKAIQIVAQGTCSLVIYRCETGDQGVYVCDALDAQTSASLRVQGR  
 TYTLIFRRLVLAEDAGEVVFVAENAESRAHLRVKELPVTLLRPLRDKIAMEKHRGVLECVSRASAVRWFKGG  
 VELQSGPKYEVVSDGLYRKLVINQVPEDEDTYTCDAENVKTSAQFFVEEQSITIVRGLKDMTVMEPAPAWFE  
 CETSIPSVRPPKWLKGTVLQAGNVGLEQDGTVHRLTLHKTCSMTMGVHFTIGKSRSSAQLVSDIPVVL  
 RPLEPKAGRELQSVVLSDFRPAKAVQWYKDDTPLSPSEKFKMALEGQMAELRILRLTPADAGVYRCQAGSA  
 QSSAEVTVAREVTVIQPLQDAEAMEEGRVCFSCELSHKDEIEWSLNGTPLYNDSFHEISHEGLHTLVLSK  
 VRQADTGTVCATSPKVSVSARLVVKGKPVVFLKALDDVSAEERGTLTLQCEVSDPEARVWVRKDGVELGSPDK  
 YDFLHKAGARGLTVHDLSHEDAGLYTCQVGSKEQKSVSVHDLHVGITKRLKTVLEVLEGESFCFVLSHES  
 SDFPAVWTVGGKTLVGGSGHFHAVRQGRKYTLTVKDAALSADAGEVVFVSVLGLTSKASLIIRERPVDTKPLEDQR  
 TTLGEDVMLSCELSRAGTSVRWLKDGKAIKRSQKYDLLSEGTRAVLVVRKASLKDSGEYTCETEASKSTAKLC  
 VEEKANRFTEELADLQVEEKGRAVFTCKTEHPASVVTWRKGLLELRASGKHVPSQEGTLTKLTINALERTDSD  
 TYTCDIGQARTQARLLVHGQKVRVIEDLEDTAVQEGSSAKFCCRIAPADYGPVHWFLDKTPLHSNELNEITVQ  
 PGGYHVLTLRQLALKDSGTVYFEAGDQRTSALRVTEKPSIFSRPLTDVTVTEGEDTLTVCETTTVDSVSRWT  
 KDGKTLRPSARCQLSHEGCAQLLITATTPQDGGRYKCEIGGASSSSIVRVHALPVRFRESLKDVEVPEGKAA  
 TLRCVLSVAAPVEWRHGDDVLKSSNKYSLRQEGAVLELVIRDLQPQDSGQYSCSFGDQTTSATLTVKTSSAQ  
 FVGKLRNKEATEGTTVTLRCELTKEAPVEWKKGTETLRNGDKYSLKQDGAVCELQICSLLVADAGEYSCVCGQ  
 EKTSATLTVKALLVHFVRRRLRSKEATEGDTTLQCELSKAAPVEWRKGTETLRDGDYSLKQDGAVCELQIRS  
 LTADAGEYLCTCGEKTSATLTVRALPAKFKDSLKNEEATEGTTATLSCELSKAAPVTWKKGPKTLQSGDKY  
 VLRQDGAVCGLQIHGLTMADAGEYSCVCGQEKTSATLTVRGLPAKFIEDLRSQEATEGATAILRCELSKAAPV  
 EWRKGETLTKDGDYTLRQDGAVCELQIRGLAVVDGTYSLSLPTKFTTEGLRNEEATEGTMATLRCQMSKAAPV  
 EWRKGETLRDGDYSLRQDGAVCELQIRGLTIEDSGEYTCVCGQEKTSATLSVKALPPRFIEDLRSQEATEG  
 TMATLRCQMSKAAPVEWRKGETLGDGGYSLRQNGAVCELQIHDLAVEDTGEYSCVCGQEKTSATLNVKALP  
 PRFIEDLRSQEATEGTMATLRCQMSKAAPVEWRKGETLRDGGYSLRQDGAVCELQIHDLVEDAGQYSCVC  
 GQEKTSAVLTVDALPPKFTTEGLKKEEATEGTMVTLRQMSKEATVEWRKGAKTLSDDGGYSLRQDGAVCELQI  
 CGLAVEDAGEYSCVCGQEKTSATLSVKALPPRFIEDLRSQEATEGTMATLRCQMSKAAPVEWRKGSKTLRDGD  
 RYSLRQDGAVCELQICDLAVEDTGDYSCVCGQEKTSATLSVKAPQVVFQQPLQNLQAEEGSMASLRCELSVFN  
 AAMVWSKGGLELQGDTRREARQQGCVAEALLRDLRREDAGEYSCVCGSQTTSATLMTVAAPVRFRLRELQAQDV  
 DEGATARLRCELSREAVSVEWRKGSQVLPFCQAKYQMVQEGTTAEALLVHGVEQEDAGEYTCDAHTQS IARLSV  
 RAPKPKFKTDLQSTEQEAGGTARLCCQLSEAEPTPVQWLKEGVELHVGSKYEMRRQGAVCELLIHGLEAKDT  
 GEYACLVGQKTLASLRVKEPEVTIVRGLVDMVEQADEDEFTCKVVSQAGATDVQWHLQGLPLQSNVTEVAV  
 LADGCTHVLQKGVTTLEDAGTVSFHVGGLSSSAQLTVRVPEVTVLEPLKDVQLSEGQDAHFRCRLSRASGQEA  
 RWALGGVPLQCNEMNDITVEQGTLYLLTLHKVTTLEDAGTITLQVGSSESAQLKVTAKNTVLRGLENDVALEG  
 GEALFECQLSQPEVAHAHTWLLDDEPVHTSEKVEVVYFENGLRHLLLLKNLKPQDSCRVTFLAGDVVTSAFITV  
 RALPDPPEDAEVVGRSDHSVTLVWVAPMSDGGGGLCGYRVEMKEASTGQWQLCHDLVPGPECVDDLVPGKTY  
 RFRVAAVGPAGAGEPVHLPQMVKIAAPAPAPAPAPAPAPETRQAVVGEDICLELEVAADGGEVWVHKGTERI  
 QPGHFEVLSRGQRMLVIKGFRTEDQGEYRCGPIQAPLPSGAAFTFNVMTSGSGDEVPAQPSLPPEAAQEGD  
 LHLLEALARKRRMSREPTLDSISELPEEDSRVQHLRQEAEEETAPDLSEGYSTADELARTGEADLSHTSSDDE  
 SRAGTPSLVTYLKKAGGPGISPLASKHEAQVTTSVKPKQKQEPVPTCPPPGDLSAADLMDPSLDKAAVKIQA  
 AFKGYKVRKEMKQOEGPVFSRTFGDTEAQVGDVLRLECVLATKTDMRACWLKDGIELTDGRHYHIDQLKDGTC  
 SLLVTGLAPTDSGRYTCQVSTKSGRVSHSACVVVSGTESEAESSSGGELDDAFRRAARRLHRLFRTKSPAELS

EEELFLSADEGPEPEEPADWQTYREDENFVCIRFESLAEARQAVTCFRNMFATMGIGVEISLGEQGPGRVEM
RIGKVAPTPTPAVPLAKTPGLQTSDAAPVFLTELQNDVQDGYPMSFDCVVTGQPVPSVRWFKDGLLEEDDH
YMINEDQQGGHQLIITAVVPADMGVYRCLAENSMGVSSSTKAE LRVELTSTDYDTAADATETSSYFSAQGYLSS
REQEGTESDEGQLPQVLEELKDLQVAPGTRLAKFQKLVKGYPAKLYWFKDQPLTSDHIRMTDKKTLHTLE
IVSVTREDSDGQYAAIYI SNAVGAAYSSARLLVRGPSEPEEKPASDVHERLVPRILEKFTPKKVKRGSSITFSV
KVEGHPAPSVHWLKEEAEGVLWIGPDTPGYTMASSSKQHSLVLLDVGRQHOGTYTCIATNPAGQALCSASLH
ISGLAKEEEQERVKEALISSFLQGT SQAVSAQMSESA GFADLVGQSKGESLVAAEEAHSHLSLAEVGTETEFLOK
LTSQITMVS AKISQAKLQVPGGDSDEETKTPSASPRHGRSRPSSSVQESSSESEDGDSRGEIFDIYVVVTADY
LPLGAEQDAIILREGQYFEVLDSAHPLRWLVRTKPTKSSPSRQGWVSPAYLDKRLKLSPEWGPTAEPEFPGEA
VSEDEYRTRLSSVIQELLSSEQAFV GELQFLESHHMKHLERSPRVPAAVASQKTVIFRNVQDISHFHSSFLKE
LQCGCTDDDVAMCFIKNQEA FEKYLEFLVGRVQAESVVVSTPVQEFYKKYAEETLSAKDPTQPPPPPLQHYLE
QPVERVQKYQALLKELIRNKARNRQNCALLEQAYAVVSALPQRAENKLVSLMENYPGTLEALGEP I RQGHFI
VWEGAPGARM PWKGNHRHVFLFRNYLVICKPRRDSRTDTFSYVFRNMMKLSSIDLNDQVEGDRAFEVWHERE
DSVRKYLQARTVI IKNSWVKEICGIQORLAQPVWRPPEFEEELADCTAELGETVKLACRVTGT PKPIVSWYK
DGKPVVEVDPHHILIEDPDGSC TLI LDNLGTIGDSGQYMCFAASAAGNASTLGKILVQVPPRFVNKVRATPFVEG
EDAQITCTVEGAPYPQIRWYKDG TLLAPGNRYRMLNEPRSGV LVLVIAASKEDLGHYECELVNRLGSTRGGG
ELYMQSPALRARDQHREQIVAAVEGAPSMQV TIEDVQVQVGDMAQF DAVIEGHPPP I V TWYKGSTQLTSSAR
LSQRQDGTYSLVLT DVAPHDAGVYTCVANNAGGV LCKAELLVHGDKLDAENQVYRKLHFSYDVQEEI GR
GVFGFVKRVQHKGKMFCAAKFIPLRSKTRAQAYQERDILATLGHPLVTGLLDQFETRKTLLIILELCSSEEL
LDRLFKKGVVTEAEVKVYIQQLVEGLHYLHSHGILHLDIKPPN I LMVHPAREDIKICDFGFAQKITPSEPOYS
KYGSPFVSP EII EQNPVSEGS DIWAMGVI SYLSLTCSSPFAGESDRATLLNVLEGRVSWSSPTAAHLS EDAK
DFIKATLQRTPRARPSTSQC LAHPWFLKSMPAAEAHFINTKQLKFL LARSRWQRSLMSYKSI LVMRSIPELLQ
GPPDSPSLGVARHLRGEASGASSSSSSSDNELAPFARAKSL PPSVTHSPLLHPRGFLRPSASLPEETEASMP
TADA AVPAS PQSAGPPASPGCVPRHSV ISSLFYQQAGEGAERGNKTS GAKRHPARRRHL LKGGYIARALPGLR
EPLMEYSLLEEEAAREEQASLMTKT PSFETALRLPSSSVREV PGRSHSLDNPPVTTG P SPEACREQLLFPST
GLTHETTAKLRGHKEGFLQESV PFPMSGDSRPGKQEGSSQDSCRGKPASSCHSELGSGS QEGCGPPSSQSLG
SLPQSTLKKELSTSCGFLFSEQPQAAPFPTQVSP LLSGKEPQDGSLSSEGVPVPVSSPGSASLPEASLDTEG
LSEAGDTCDFTPPPQR PQEQATTRKFSLES RGGYAGVAGYGTFAFGGDAGGMLGQGPLWARM AVS QSSEEQ
DEAATESPQPLESGLPIAEASGVPLRTSPSLTPWEEVEQVSLVQ I RDLSGDAEAADTISLDISEVDPAYLNL S
DLYDIKYL PFEFMI FRRV PKPIEQPESPGSETEAGQGLADFL EEAAWPWPGE LGLRAGLEITEEPEEPDLEA
LLGEAAVGRKRKWSPSRGLFQFPGRCLSGEEPVELGLRQRVKASMAHISRILKGRPEGPEREGPPRKKAGLAS
FRLSGLKGRDQELSDEAVVLGQSVTLACQVLAQPTAQATWSKDGVLLES SGHLLISSTLKNFQLLTI L VVKEE
DLGTYTCCVSNPLGTAVTTGVL RKAERPSSSPRPEVGE LYKDAVLLVWKPVESCGPVTYIVQCCIEGGSWTTL
ASDISDCCYL TGKLSRGGMYIFRTACVSKAGMGPYSSPSEQVLLGGPNHLASEEESSRGRPAQLLPSTKTF AF
QMQIRRRGRFSVVRQCREKASGRALAAKIVPYQPEDKTA VLREYEA LKRLHHPHLAQLLHAAYLSPRHLVLI LEL
CSGPPELLPSLAERESYSES DVKDYLWQMLSATQYLHAQHIHLDLRSENMMVTEYNLLKVIDLGN AQSLDQEK
VPAPENFKDYLETMAPELLEGQ GAVPQTDIWAIGVTA FIMLSGEY PESSGETRDLQKGLRKLGLRISRCYAGL
SGGAVAF LQSS LCAQPWGRPCASTCLQCGWLTEEGPTGSRPTVPTFPTVRLRAFVREKRRALLYKKNH LAQ
VR\*

>rs26971899\_ENSMUSP00000158795\_c.23760:T>C\_p.S7921P
ENSMUST00000238536.2|Obscn-210|ENSMUSG00000061462|-|chr11:g.58891332:A>G
MDHSFSGAPRFLTRPKAFVSVGKDATLSCQIVGNPTPHVSWEKDRQPVEAGARFRLAQDGDVYRLTILDLAL
GDSGQYVCRARNAIGEAFAAVGLRVDSEGTCAEQAPHFLLRPTSIRVREGADATFRCRVGSGSPQPAVSWSKDG
RRLGPPDAPHVRVEEHGESSALRIRSARPRDGGTYEVRAENPLGSASAAAALVVDSDAEVAGPPGTSTATLLA
HLQQRREAMRAEGIPSPPGAGTRTCTVTEGKHARLSCFVTGEPKPE TVWKKDGQLVTEGRRHVVEDEQENF
VLKILFCQSDRGLYTCTASNLVGQTYSSVLVVREPTVPFKKRLQDLEVREKESATFQCEVAQPATEAAWFK
EETRLWASAKYDIEEEGTERRLTVRNVSADDDAVYICETTEGSR TVAELSVQGNLTRKLPKRTAVRTGDTAIF
WVELAVPEGPVRWRNQEEMVAGGRVAITAEGTCHTLTI FQCTLEDMGEVAFVSGGCRTTTQFCV SAPRRPPL
YPPADPVVKAKTESSVTL SWSAPPHGDRPVTIDGYVLEKRKLGAYAWSRCHEAGWLATTEFTITGVAAEGDFQ
FRVSAINHFGQGPYLEFPGMTMLVPLAVKTP LKAVEAVEGGEVTF SVDLTVASSGEWFLDGEALKASSIYVI
RCDRTRHMLTIREV PARLHGAQLKFVANGIETSIQMVVRAALGLPSSKLPAAAAAREVLAQLHEEAQLLAE LSD
QAAA VTWLKDGRELSLGPKEYMQVSAGRRALLVRDVAQDDAGLYECVSRGSR TAYQLLVQDITDGYRDWGPAG
PQKHMCKCAGAKIARYLGS SCYRFLQYDKGVWHWLEAALDTRQKGKTS SCSLHEKPKLVFAKQQAHSEVKA E
AGNSATLSCEVTAQTEVTWFKDGKLLSSSSKVRMEASGCSRRLVVQQAGKADAGEYSCEAGGQKLSFRLDVA
EPKLVFAKQQAHSEVKA EAGASATLSCEVAQAQTEVTWFKDGKLLSSSSKVRMEASGCSRRLVVQQAGKADA
GEYSCEAGGQKLSFRLDVAEPKMFVFAKEQQARSEVKA EAGASATLSCEVAQAQTEVTWFKDGKLLSSSSKVRM
EASGCSRRLVVQQAGKADAGEYSCEAGGQKLSFRLDVTEPKLVFAKEQQARSEVKA EAGNSATLSCEVAQAQ T
EVTWFKDGKLLSSSSKVRMEASGCSRRLVVQQAGKADAGEYSCEAGGQKLSFRLDVAEPKLVFAKEQQARSEV



KAEAGNSATLSCEVAQAQTEVTFWFKDGKKLSSSSKVRMEASGCSRRLVVQQAGKADAGEYSCEAGGQKLSFHL
DVTEPKLVFAKEQQAHSEVKAEAGASATLSCEVAQAQTEVTFWFKDGKKLSSSSKVRMEASGCSRRLVVQQAGK
ADAGEYSCEAEGQKLSFRLDVAEPKLVFAKEQQARSEVKAEAGASATLSCEVAQAQTEVTFWFKDGKKLSSSSK
VRVEASGCSRRLVVQQAGKADAGEYSCEAGGQKLSFRLDVAEPKLVFAKEQQANSEVKAEAGASATLSCEVAQ
AQTEVTFWFKDGKKLSSSSKVRVEASGCSRRLVVQQAGKADAGEYSCEAGGQKLSFRLDVAEPKLAFAKEQQAH
SEVKAEAGASATLSCEVAQAQTEVTFWFKDGKKLSSSSKVRVEASGCSRRLVVQQAGKADAGEYSCEAGGQKLS
FRLDVAEPKLAFAKEQQAHSEVKAEAGASATLSCEVAQAQTEVTFWFKDGKKLSSSSKVRVEASGCSRRLVVQQ
AGKADAGEYSCEAGGQKLSFRLDVAEPKLAFAKEQQAHSEVKAEAGASATLSCEVAQAQTEVTFWFKDGKKLSS
SSKVRVEASGCSRRLVVQQAGKADAGEYSCEAGGQKLSFRLDVAEPKLMFAKEQQAHSEVKAEAGASATLSCE
VAQAQTEVTFWFKDGKKLSSSSKVRVEASGCSRRLVVQQAGKADAGEYSCEAGGQKLSFRLDVAEPKLVFAKEQ
QAHSEVKAEAGASATLSCEVAQAQTEVTFWFKDGKKLSSSSKVRVEASGCSRRLVVQQVQKADAGEYSCEARGQ
KLSFRLDVADTRLMFAKEQQARTEVKAEAGNSATLSCEVAQAQTEVTFWFKDGKKLSSSSKVRVEASGCSRRLV
VQQAGKADAGEYSCEAGGQKLSFRLDVAEAEESQIPERPSRREPLVVKEHETIILTATIAAPSVAAVTVLKDGV
EIRRSKRHEATSLGDTHTLTVRGAQVLDSAIYSCRVGKEGQDFPVQVEEVAAKFSKPLEPVEGELGGTVMLVC
ELSPQAEVWRCGNTQLRPGKRFQMTSEGPRRTLTVSGLREDDAEYVCESRDDRTSARLTVKVPVVKFTS
GLSAMVAEEGQEAATFQCVVSPDAGVTWYKDGMLQPSKFKVMVESGASRSLTILGLTLEDAGQVTEAEGAS
SSAALRVREAPVLFKKKLEPQTVERTSVTLEVELTRPWEVKWTRNAAVLTPSENVEIRAEGARHCLVLRVSV
GFADRGFFGCETPDDKTQAKLNVEMRQVRLVRLVGLQEVEAKEQGTASMDVELSHAEEVGSVTRDGLRLQPGPKC
HLAVQGPVHILTLALSALQPQDSGLVAFRAEGVHTSARLIVTELPSVSTRVLQDVVATQKEKVTLECELSRPVDV
RWLKDGVLELRAGKAIIGIVAQGTCSRSLVIYRCETGDQGVYVCDALDAQTSASLRVQGRYTLIFRRLAEDAGE
VKFVAENAESRAHLRVKELPVTLLRPLRDKIAMEKHRGVLECCQVSRASAQVRWFKGGVELQSGPKYEVVSDGL
YRKLVINVDVQPEDEDTYTCDAENVKTSAQFFVVEQSITIVRGLKDMTVMEPAPAWFECETSIPSVRPPKWLGLG
KTVLQAGGNVGLQDGTVHRLTLHKTCSTMTGPVHFTIGKSRSSAQLVVSDIPVVLTRPLEPKAGRELQSVVL
SCDFRPAPKAVQWYKDDTPLSPSEKFKMALEGQMAELRILRLTPADAGVYRCQAGSAQSSAEVTEAREVTVI
QPLQDAEAMEEGRVCFSCELSHKDEDIEWLSLNGTPLYNDSFHEISHEGCLHTLVLSKSVRQADTGTVCATSPKV
SVSARLVVKGKPVVFLKALDDVSAEERGTLLTQCEVSDPEARVVWRKDGVELGSPDKYDFLHKAGARGLTVHD
LSHEDAGLYTCQVSKTQSKVSVHDLHVGITKRLKTVEVLEGESECSFECVLSHESPSDPAVMTVGGKTVGGS
GHFHAVRQGRKYTLTVKDAALSDAGEVVSVLGLTSKASLIIRERPVDTKPLEDQRTTLGEDVMLSCELSRA
GTSVRWLKDGKAIRKSQKYDLLSEGTRAVLVVRKASLKDSGEYTCETEASKSTAKLCVEEKANRFTTEELADLQ
VEEKGRAVFTCKTEHPASVVTWRKGLLELRASGKHVPSQEGTLTKLTINALERTSDTYTCDIGQARTQARLL
VHGQKVRVIEDLEDTAVQEGSSAKFCRIAPADYGPVHWFLLDKTPLHSNELNEITVQPGGYHVLTLRQLALKD
SGTVYFEAGDQRTSALRVTEKPSIFSRPLTDVTVTEGEDTLVCETTTVDSVVRWTKDGKTLRPSARCQLSH
EGCQAQLLITATTPQDGGRYKCEIGGASSSSIVRVHALPVRFRRESLKDVEVPEGKAATLRCVLSVAAPVEWR
HGDDVLKSSNKYSLRQEGAVLELVIRDLQPDQSGQYSCSFGDQTTSATLTVKTSQAQFVGLRKNKEATEGTTV
TLRCELTKAEAPVEWKKGTETLRNGDKYSLKQDGAVCELQICSLLVADAGEYSCVCGQEKTSATLTVKALLVHF
VRRLRSKEATEGDTTTLQCELSKAAPVEWRKGTETLRDGDYSLKQDGAVCELQIRSLTIADAGEYLCTCGQE
KTSATLTVRALPAKFKDSLKNEEATEGTTATLSCELSKAAPVTWKKGPKTLQSGDKYVLRQDGAVCGLQIHGL
TMADAGEYSCVCGQEKTSATLTVRGLPAKFIEDLRSQEATEGATAILRCELSKAAPVEWRKGSSETLKDGDYR
LRQDGAVCELQIRGLAVVDTGTYSSLPTKFTTEGLRNEEATEGTMATLRCQMSKAAPVEWRKGSSETLRDGDYR
LRQDGAMCELQIRGLTIEDSGEYTCVCGQEKTSATLSVKALPSRFIEDLRSQEATEGTMATLRCQMSKTAPVE
WKKGSETLRDGGYSLRQDGPVCELQICDLAVEDAGEYSCVCGQEKTSATLSIKALPPRFIEDLRSQEATEGT
MATLRCQMSKAAPVEWRKGSSETLGDGGYSLRQNGAVCELQIHDLAVEDTGEYSCVCGQEKTSATLNVKALPP
RFIEDLRSQEATEGTMATLRCQMSKAAPVEWRKGSSETLRDGGYSLRQDGAVCELQIHDLVEDAGQYSCVCG
QEKTSAVLTVDALPPKFTTEGLKKEEATEGTMVTLRCQMSKEATVEWRKGAKTSLDGGYSLRQDGAMCELQIC
GLAVEDAGEYSCVCGQEKTSATLSVKALPPRFIEDLRSQEATEGTMATLRCQMSKAAPVEWRKGSSETLRDGD
YSLRQDGAVCELQIRDLAVEDAGEYLCVCGQEKTSATLSVKALPPRFIEDLRSQEATEGTMATLRCQMSKAAP
VEWRKGSKTLRDGDYSLRQDGAMCELQICDLAVEDTGDYSCVCGQEKTSATLSVKALPPRFIEDLRSQEARE
GTVATLRCRMSKAAPVEWRKGSSETLKDGDYSLRQEGNLCELQIRDLAVEDTEEYSCVCGQEKTSATLSVKAL
PAKFIEDLRSQEAPESSTVTLRCKLSKKASVVWKKGSETLRNGARYSLRQDGAVCELEIRDLTVEDTGEYSCT
CGQERTSATLSIMAPQVVFPQPLQNLQAEEGSMASLRCELSVNAAMVWSKGGLELQGDTRREARQQGCVAEL
LLRDLRREDAGEYSCTCGSQTTSATLMVTAAPVRFRLRELQAQDVDEGATARLRCELSREAVSVEWRKGSLLQF
PCAKYQMVQEGTTAELLVHGVEQEDAGEYTCDAHTQSIARLSVRAPKPKFKTDLQSTEQEAGGTARLCCQLS
EAEPGTPVQWLKEFTLVHVGSKYEMRRQGAPELLIHGLEAKDTGEYACLVGGQKTLASLRVKEPEVTIVRGL
VDMEVQADEDEVEFTCKVSOAGATDVQWHLQGLPLLISNEVTEVAVLADGCTHVLQLKGVTLLEDAGTVSFHVGGL
SSSAQLTVRVPEVTVLEPLKDVQLSEGQDAHFRCRLSRASQEARWALGGVPLQCNEMNNDITVEQGTLYLLTL
HKVTLLEDAGTITLQVGSSESQAQLKVTAKNTVLRGLENVDALEGGREALFECQLSQPEVAHAHTWLLDDEPVHTS
EKVEVVYFENGLRHLLLLKNLKPQDSCRVTFLAGDVVTSFAFLTVRGRWLEVLPPHDASVKAGMQVRFCTILS
EAVPVGEATWYINGAAIQPDDTDWTVTTDGSHHALTLNAQPPQHAGEVTFFAARDAVASARLSVLALPDPPEDA

EVVGRSDHSVTLWSVAPMSDGGGGLCGYRVMKEASTGQWQLCHDLVPGPECVVDDLVPKGTYRFRVAAVGPA  
 GAGEPVHLPQMVKIAPAPAPAPAPAPAPAPAPETRQAVVGEDICLELEVAADGGEVVWHKGTERTIQGGHFEVLS  
 RGQRQMLVIKGFRTEDQGEYRCGPIQGLPSSGAATFNVMVMTSGSGDEVPAQPSLPPEAAQEGDLHLLWEALAR  
 KRRMSREPTLDSISELPEEDSRVQHLRQEAETAPDLSEGYSTADELARTGEADLSHTSSDDESRACTPSLVT  
 YLKKAGGPGISPLASKHEAQVTTSVKPKQKQEPVVPTCPPPGDLAADLMDPSLDKAAVKIQAAFQYKVRKE  
 MKQQEGPVSRTFGDTEAQVGDVLRLECVLATKTDMRACWLKDGIELTDGRHYHIDQLKDGTCSSLVVTGLAPT  
 DSGRYTCQVSTKSGRVSHSACVVVSGTESEAESSSGGELDDAFRAARRLHRLFRTKSPAELSEELFLSADE  
 GPGEPEPADWQTYREDENFVCIRFESLAEARQAVTCFRNMFATMIGVEISLGEQGPGRVEMRIGKVAPTVT  
 PAVPLAKTPGLQTSDAAPVFLTELQNDVQDGYPMSFDCVVTGQVPVSVRWFKDGKLEEDDHKMINEDQQGG  
 HQLIITAVVPADMGVYRCLAENSMGVSSTKAELRVELTSTDYDTAADATETSSYFSAQGYLSSREQEGTESDE  
 GQLPQVLEELKDLQVAPGTRLAKFQLKVKGYPAKLYWFKDGGPLTSDHIRMTDKKTLHTLEIVSVTREDSG  
 QYAAYSNAVGAAYSSARLLVRGPSEPEEKPASDVHERLVPPRILEKFTPKKVKRGSSITFSVKVEGHPAPSV  
 HWLKEEAKEKGVLLWIGPDTPGYTMASSSKQHSLLVLDVGRQHQTTCIATNPAGQALCSASLHISGLAKEEEEQ  
 ERVKEALISSFLQGTSAQVSAQMSSEAGFADLVGQSKGESLVAEEAHSHLSLAEVGTFFLQKLTSTQITEMVS  
 AKISQAKLQVPGGDSDEETKTPSASPRHGRSRPSSSVQESSSESEDGDSRGEIFDIYVVTADYLPGLAEQDAI  
 ILREGQYVEVLDSAHPLRWLVRTKPTKSSPSRQGWVSPAYLDRKRLKLSPEWGPTEAPEFPGEAVSEDEYRTRL  
 SSVIQELLSSSEQAFVGELEFLSHHMKHLERSPRVPAVASQKTVIFRNVQDISHFHSSFLKELQCGCTDDDV  
 AMCFIKNQEAFAEKYLEFLVGRVQAESVVVSTPVQEFYKKYAEETLSAKDPTQPPPLQHYLEQPVFRVQKYQ  
 ALLKELIRNKARNRQNCALLEQAYAVVSALPQRAENKLVSLMENYPGTLEALGEPHQGHFIVWEGAPGARM  
 PWKGHNHRVFLFRNYLVICKPRRDSRTDTFSYVFRNMMKLSSIDLNDQVEGDDRAFEVWHEREDSVRKYLLQA  
 RTVIKNSWVKEICGIQQLAQPVWRPPEFEEELADCTAELGETVKLACRVTGTPKPIVSWYKDGKPVVDPH  
 HILIEDPDGSLTILDLNLTGIDSGQYMCFAASAAGNASTLGKILVQVPPRFVNVKVRATPFVEGEDAQITCTVE  
 GAPYQIRWYKDGTLAPGNRYRMLNEPRSGVLVVIQAASKEDLGHYECELVNRLGSTRGGGELYMQSPALR  
 ARDQHHREQIVAAVEDTSVEGSAHSAQDQGAASVLWRLLGSEALGPSPGDLPNTRQSEPPAFEEAASQIP  
 GAASGTPPEVSPQPGTHKGLEQETTSSGSQGWTVPIRVEGTAWPGAGTGQLLDVHVSQVIMETTQRTYVCQAPDT  
 GVTRAPSMQVTEIDVQVQVGDMAQFDAVIEGHPPPIVITWYKGSTQLTSSARLSQRQDGTTYSLVLTVDVAPHA  
 GYVTCVANNAGGQVLCQAEELLVHGDKLDAENQVYRKLHSHFYDVQEEIGRGVGFVYKRVQHKGNMFCAAKF  
 IPLRSKTRAQAYQERDILATLGHPLVTGLLDQFETRKTLLILILELCSSEELLDRFLFKKGVVTEAEVKVYIQQL  
 VEGHLHLHSHGILHLDIKPPNILMVHPAREDIKICDFGFAQKITPSEPQYSKYGSPEFVSPEIIEQNPVSEGS  
 DIWAMGVISYLSLTCSSPFAGESDRATLLNVLEGRVSWSSPTAAHLSEDAKDFIKATLQRTPRARPSTSQCLA  
 HPWFLLKSMPEAAHFINTKQLKFLARSRWQRSLMSYKSILVMRSIPPELLQGPDPSPSLGVARHLRGEASGAS  
 SSSSSSDNELAPFARAKSLPPSPVTHSPLLHPRGFLRPSASLPEETEASMTADA AVPASQPSAGPPASPGCV  
 PRHSVSISSLFYQQAGEGAERGNKTSGAKRHPARRRHLKGGYIARALPGLREPLMEYSLLEEEAAREEQASLM  
 TKTPSFETALRLPSSSVREVPGRSHSLDNPPVTGPPPEACKEQLLFPSTGLTHETAKDRGHKEGFLQESV  
 PFPMSGDSRPGKQEGSSQDSCRKPASSCHSELGSGSGEGCGPPSSQSLGSLPPQSLKKEKELSTSCGFLSEQ  
 PQAAPFTQVSPLLGSEKPEQDQGLSEGPVVPVSSSPGSASQVDASLDTEGLSEAGDCTDFTPPPQRPFQEQAT  
 TRKFSLESRGGYAGVAGYGTFAFGGDAGGMLGQGPLWARMAWAVSQSSEEQDEAATESQPPLSLGPIAEASG  
 VPLRTSPSLTPWEEVEQVSLVQIRDLSGDAEAADTISLDISEVDPAYLNLSDLYDIKYLPEFEMI FRRVPKPI  
 EQPESPGSETEAGQGLADFLLEAAWPWPGELGLRAGLEITEEPEEPGDLEALLGEAAVGRKRKWSPSRGLFQF  
 PGRCLSGEEPVELGLRQRVKASMAHISRIKGRPEGPREGPPRKKAGLASFRLSGLKGRDQELSDEAVVLGQ  
 SVTLACQVLAQPTAQATWSKDGVLLESSGHLLISSTLKNFQLLTILVVKEEDLGTYTCCVSNPLGTAVTTGVL  
 RKAERPSSSPRPEVGEYKDAVLLVWKPVESECGPVTYIVQCCIEGGSWTTLASDISDCCYLTGKLSRGGMYIF  
 RTACVSKAGMGPIYSSPSEQVLLGGPNHLASEEESRRGRPAQLLPSTKTFAFQMQIRRRGRFSVVRQCREKASGR  
 ALAAKIVPYQPEDKTAVLREYEAALKRHLHHPHLAQLHAAYLSRHLVLIILELCSGPELLPSLAERESYSESDVK  
 DYLWQMSLQYLHAQHIHLHLDRSENMMVTEYNLLKVIDLGNAQSLDQEKVPAPENFKDYLETMAPELLEGGQ  
 GAVPQTDIWAIGVTAIFIMLSGEYPESESETRDLQKGLRKLGLIRLSRCYAGLSGGAVAFLOSSLCAQPWGRPCA  
 STCLQCGWLTEEGPTGSRPTVPTVPTVRLRAVFREREKRRRALLYKKNLAQVR\*  
 >rs26971899\_ENSMUSP00000038264\_c.21198:T>C\_p.s7067P  
 ENSMUST00000047441.14|Obscn-202|ENSMUSG00000061462|-|chr11:g.58891332:A>G  
 MDHSFSGAPRFLTRPKAFVSVGKDATLSCQIVGNPTPHVSWEKDRQVEAGARFRLAQDGDVYRLTILDLAL  
 GDSGQYVCRARNAIGEFAAVGLRVDSEGTCAEQAPHLLRPTSIRVREGADATFRCRVGGSPQPAVSWSKDG  
 RRLGPPDAPHVRVEEHGESSALRIRSARPRDGGTYEVRAENPLGSASAAAAALVVDSDAEVAGPPGTSTATLLA  
 HLQORREAMRAEGIPSPPGAGTRTCTVTEGKHARLSCFVTGEPKPEVWKKDGLVTEGRRHVVEDEQENF  
 VLKILFCKQSDRGLTYCTASNLVGQTYSSVLVVVREPTVFPFKKRLQDLEVRKEKESATFQCEVAQAPATEAAWFK  
 EETRLWASAKYDIEEGETERRLTVRNVSADDDAVICETTEGSRVVAELSVQGNLTKLPRKTAVRTGDTAIF  
 WVELAVPEGPVWRWRNQEEMVAGGRVAITAEGTCHTLTIFQCTLEDMGEVAFVSGGCRTTTQFCVSAPRRPPL  
 YPPADPVVKAKTESVTLWSAPPHGDRPVTIDGYVLEKRKLGAYAWSRCHEAGWLATTEFTITGVAAEEDGFQ  
 FRVSAINHFGQGPYLEFPGMTMLVPLAVKTPKAVEAVEGGEVTFVSDLTVASSGEWFLDGEALKASSIYVI

RCDRTRHMLTIREVPARLHGAQLKVFVANGIETSIQMVVRAALGLPSSKLPAAAAAREVLAQLHEEAQLLAEELSD  
 QAAAVTWLKDGRELSLGPKEYMQVSAGRRALLVRDVAQDDAGLYECVSRGSRRTAYQLLVQDITDGYRDWGPAG  
 PQKHMKCKAGAKIARYLGSSCYRFLQYDKGVVHLEAALDTRQKGKTS SCSLHEKPKLVFAKQQAHSEVKA  
 AGASATLSCEVAQAQTEVTFWKDGKLLSSSSKVRMEASGCSRRLVVQQAGKADAGEYSCEAGGQKLSFRLDVA  
 EPKMVFAKEQQARSEVKAEGASATLSCEVAQAQTEVTFWKDGKLLSSSSKVRMEASGCSRRLVVQQAGKADA  
 GEYSCEAGGQKLSFRLDVTEPKLVFAKEQQARSEVKAEGVNSATLSCEVAQAQTEVTFWKDGKLLSSSSKVRM  
 EASGCSRRLVVQQAGKADAGEYSCEAGGQKLSFRLDVAEPKLVFAKEQQARSEVKAEGVNSATLSCEVAQAQ  
 EVTWFKDGKLLSSSSKVRMEASGCSRRLVVQQAGKADAGEYSCEAGGQKLSFHLDVTEPKLVFAKEQQAHSEV  
 KAEAGASATLSCEVAQAQTEVTFWKDGKLLSSSSKVRMEASGCSRRLVVQQAGKADAGEYSCEAGGQKLSFR  
 DVAEPKLVFAKEQQARSEVKAEGASATLSCEVAQAQTEVTFWKDGKLLSSSSKVRVEASGCSRRLVVQQAGK  
 ADAGEYSCEAGGQKLSFRLDVAEPKLVFAKEQQANSEVKAEGASATLSCEVAQAQTEVTFWKDGKLLSSSSK  
 VRVEASGCSRRLVVQQAGKADAGEYSCEAGGQKLSFRLDVAEPKLVFAKEQQAHSEVKAEGASATLSCEVAQ  
 AQTEVTFWKDGKLLSSSSKVRVEASGCSRRLVVQQAGKADAGEYSCEAGGQKLSFRLDVAEPKLVFAKEQQAH  
 SEVKAEGASATLSCEVAQAQTEVTFWKDGKLLSSSSKVRVEASGCSRRLVVQQAGKADAGEYSCEAGGQKLS  
 FRLDVAEPKLVFAKEQQAHSEVKAEGASATLSCEVAQAQTEVTFWKDGKLLSSSSKVRVEASGCSRRLVVQQ  
 AGKADAGEYSCEAGGQKLSFRLDVAEPKLVFAKEQQAHSEVKAEGASATLSCEVAQAQTEVTFWKDGKLLSS  
 SSKVRVEASGCSRRLVVQQAGKADAGEYSCEAGGQKLSFRLDVAEAEBSQI PERPSRREPLVKEHETIILTAT  
 IAAPSVAAVTWLKDGV EIRRSKRHEATSLGDTHLTVRGAQVLD SAIYSCRVGKEGQDFPVQVEVAAKFSK  
 LEPEVEGELGGTVMLVCELSPEQAEVVRWCNTQLRPGKRFQMTSEGPRTTLTVSGLREDDAEYVCESRDDRT  
 SARLTVKVPVVKFTSGLSAMVAEEGQEA TFQCVVSPSDAGVTWYKDMQLQPSSEKFMVMEVSGASRSLTILGL  
 TLEDAGQVTVAEAGASSAALRVREAPVLFKKKLEPQTVEERTSVTLEVELTRPWPEVKWTRNAAVLTPSENV  
 EIRAEGARHCLVLRVGFADRGFFGCETPDDKTQAKLVNEMRQVRLVRLGQVEVAKEQGTASMDVELSHAEVE  
 GSWTRDGLRLQPGPKHLAVQGPVHILTL SALQPQDSGLVAFRAEGVHTSARLIVTEL PVSFTRVLQDQVATQ  
 KEKVTLECELSRPVDVRWLKDGVELRAGKAI GIVAQGTCSRSLVIYRCETGDQGVYVCDALDAQTSASLRVQGR  
 TYTLIFRRVLAEDAGEVKFVAENAESRAHLRVKELPVTLLRPLRDKIAMEKHRGVLECVSRASAQVRWFKGG  
 VELQSGPKYEVVSDGLYRKLVIN DVQPEDEDTYTC DAGNVKTSAQFFVEEQSITIVRGLKDMTVMPEPAPAFE  
 CETSI PSVRPPKLLGKTVLQAGGNVGLQDGTVHRLTLHKTCSTMTGVPVHFTIGKSRSSAQMLVSDIPVVL  
 RPLEPKAGRELQSVVLSCDFRPAKAVQWYKDDTPLSPSEKFKMALEGMALRILRLTPADAGVYRCQAGSA  
 QSSAEVTVAREVTVIQPLQDAEAMEEGRVCFSCELSHKDEDI EWSLNGTPLYNDSFHEISHEGCLHTLVLS  
 VRQADTGTVCATSPKVSVSARLVVKGKPVVFLKALDDVSAEERGTTLQCEVSDPEARVVWRKDGVELGPSDK  
 YDFLHKAGARGLTVHDLSDHEDAGLYTCQVGSKETQSKVSVHDLHVGITKRLKTVEVLEGESECSFCVLSHESP  
 SDPAVWTVGGKTVGGSGHFHAVRQGRKYTLTVKDAALSDAGEVVFVGLGTSKASLIIRERPVDITKPLEDQR  
 TTLGEDVMLSCELSRAGTSVRWLKDGKAI RKSQKYDLLSEGTRAVLVVRKASLKDSGEYTCETEASKSTAKLC  
 VEEKANRFTTEELADLQVEEKGRAVFTCKTEHPASVVTWRKGLLELRASGKHVPSQEGTLTKLTINALERTDSD  
 TYTCDIGQARTQARLLVHGQKVRVIEDLEDTAVQEGSSAKFCCRIAPADYGPVHWFLDKTPHLSNELNEITVQ  
 PGGYHVLTLRQLALKDSGTVYFEAGDQRTSAALRVTEKPSIFSRPLTDVTVTEGEDLTLVCETTTTVDSSVRWT  
 KDGKTLRPSARCQLSHEGCAQLLITATTPQDGGRYKCEIGGASSSSIVRVHALPVRFRESLKDVEVPEGKAA  
 TLRCVLSSVAAPVEWRHGDDVLKSSNKYSLRQEGAVLELVIRDLQPDQSGQYSCSFGDQTTSATLTVKTSQAQ  
 FVGKLRNKEATEGTTVTLRCELTKEAPVEWKKGTETLRNGDKYSLKQDGA VCELQICSLLVADAGEYSCVCGQ  
 EKTSATLTVKALLVHFVRRRLRSKEATEGDTTTLQCELSKAAPVEWRKGTETLRDGD RYSLKQDGA VCELQIRS  
 LTIADAGEYLCTCGQEKTSATLTVRALPAKFKDSLKNEEATEGTATLSCELSKAAPVTWKKGPKTLQSGDKY  
 VLRQDGA VCELQIHGLTMADAGEYSCVCGQEKTSATLTVRGLPAKFIEDLRSQEATEGATAILRCELSKAAPV  
 EWRKGSSETLKDGD RYTLRQDGA VCELQIRGLAVVDGTYS SLPKTFTEGLRNEEATEGTMATLRCQMSKAAPV  
 EWRKGSSETLRDGD RYSLRQDGA MCELQIRGLTIEDSGEYTCVCGQEKTSATLSVKALPPRFIEDLRSQEATEG  
 TMATLRCQMSKAAPVEWRKGSSETLGDGGYSLRQNGAVCELQIHDLAVEDTGEYSCVCGQEKTSATLNVKALP  
 PRFIEDLRSQEATEGTMATLRCQMSKAAPVEWRKGSSETLRDGGYSLRQDGA VCELQIHDLVDV DAGYSCVC  
 GQEKTSAVLTVDALPPKFTTEGLKKEEATEGTMVTLRCQMSKEATVEWRKGAKTLS DGGYSLRQDGA MCELQI  
 CGLAVEDAGEYSCVCGQEKTSATLSVKALPPRFIEDLRSQEATEGTMATLRCQMSKAAPVEWRKGSKT LRDGD  
 RYSLRQDGA MCELQICDLAVEDTGDYSCVCGQEKTSATLSVKAPQVVFQQLQNLQAEEGSMASLRCELSV PN  
 AAMVWSKGGLELQGDTRREARQQGVAELLLRDLRREDAGEYSC TCGSQTTSATLMVTAAPVRFRLQLAQDV  
 DEGATARLRCELSREAVSVEWRKGS LQFPKAKYQMVQEGTTAELLVHGVEQEDAGEYTC DAGHTQS IARLSV  
 RAPKPKFKTDLQSTEQEAGGTARLCCQLSEAE PGTPVQWLKEGVELHVGSKYEMRRQGA VCELLIHGLEAKDT  
 GEYACLGVGQKTLASLRVKEPEVTIVRGLVDMVEQVADVEFTCKVSOAGATDVQWHLQGLPLQSNVTEVAV  
 LADGCTHVLQKLGLEDAGTVSFHVGG LSSSAQLTDRVPEVTVLEPLKDVQLSEGQDAHFRCRLSRASGQEA  
 RWALGGVPLQCNE MNDITVEQGTLYLLTLHKVTLEDAGTITLQVGS CSSEAQLKVTAKNTVLRGL ENVLRDALEG  
 GEALFECQLSQPEVA AHTWLLDDEPVHTSEKVEVVYFENGLRHLLLLKNLKPQDSCRVTFLAGDVVTS AFLTV  
 RALPDPPEDAEVVGRSDHSVTL SWAPMSDGGGGLCGYRVMKEASTGQWQLCHDLVPGPECVDDLVPGKTY  
 RFRVAAVGPAGAGEPVHLPQMVKIAPAPAPAPAPAPAPAPETRQAVVGEDICLELEVAADGGVEVWHKGTERRI

QPGGHFEVLSRGRQMLVIKGFRTEDQGEYRCGPIQGLPSSGAATFNVVMTSGSGDEVPAQPSLPPPEAAQEGD
LHLLWEALARKRRMSREPTLDSISELPEEDSRVQHLRQEAETAPDLSEGYSTADELARTGEADLSHTSSDDE
SRAGTPSLVTYLKKAGGPGISPLASKHEAQVTTSVKPKQKQEPVVPVTPPPPGDLSAADLMDPSLDKAAVKIQA
AFKGYKVRKEMKQQEGPVFSRTFGDTEAQVGDVLRLECVLATKTDMRACWLKDGIELTDGRHYHIDQLKDGTC
SLLVLTGLAPTDSGRYTCQVSTKSGRVSHSACVVVSGTESEAESSGGELDDAFRRAARRLHRLFRKSPAEELS
EEELFLSADEGPEPEEPADWQTYREDENFVCIRFESLAEARQAVTCFRNMFMATMGIGVEISLGEQGPGRVEM
RIGKVAPTVTPAVPLAKTPGLQTSDAAPVFLTELQNDVQDGYPMSFDCVVTGQPVVPSVRWFKDGKLLLEDDH
YMINEDQQGGHQLIITAVVPADMGVYRCLAENSMGVSSSTKAELRVELTSTDYDTAADATETSSYFSAQGYLSS
REQEGTESDEGQLPVLEELKDLQVAPGTRLAKFQLKVKGYPAKLYWFKDQPLTSDHIRMTDKKTLHTLE
IVSVTREDSGQYAAIISNAVGAAYSARLLVRGPSEPEEKPASDVHERLVPVPRILEKFTPKKVKRGSSITFSV
KVEGHPAPSVHHLKEEAKEGVLWIGPDTPGYTMASSSKQHSLLVLDVGRQHOGTYTTCIATNPAGQALCSASLH
ISGLAKEEEQERVKEALISSFLQTSQAVSAQMSESAGFADLVGQSKGESLVAAEAHSHLSLAEVGTTEFLQK
LTSQITEMVSAKISQAKLQVPGGDSDEETKTPSASPRHGRSRPSSSVQESSSESEDGDSRGEIFDIYVVTADY
LPLGAEQDAIILREGQYVEVLDSAHPLRWLVRTKPTKSSPSRQGWVSPAYLDKRLKLSPEWGPTEAPEFPGEA
VSEDEYRTRLSSVIQELLSSEQAFVQFLESHHMKHLERSPRVPAAVASQKTVIFRNVQDISHFHSSFLKE
LQCGCTDDDVAMCFIKNQEAFAKEYLEFLVGRVQAESVVVSTPVQEFYKKYAEETLSAKDPTQPPPPPLQHYLE
QPVERVQKYQALLKELIRNKARNRQNCALLEQAYAVVSALPQRAENKLVSLMENYPTGLEALGEPVIRQGHFI
VWEGAPGARMPWKGNHRHVFLFRNYLVICPKRRDSDTDFSYVFRNMMKLLSSIDLNDQVEGDDRAFVEMWHERE
DSVRKYLQARTVIKNSWVKEICGIQORLAQPVWRPPEFEEELADCTAELGETVKLACRVTGTPKPIVSWYK
DGKPEVDPHHLIEDPDGSCSTLILDNLTGIDSGQYMCFAASAAGNASTLGKILVQVPPRFVNVKVRATPFVEG
EDAQITCTVEGAPYPQIRWYKDGTLAPGNRYRMLNEPRSGVLVLIQAASKEDLGHYECELVNRLGSTRGGG
ELYMQSPALRARDQHHREQIVAAVEGAPSMQVTIEDVQVQVGDMAQFDAVIEGHPPPPIVTWYKGSTQLTSSAR
LSQRQDGTYSVLVTDVAPHDAGVYTCVANNAGQVLCCKAELLVHGGDKLDAENQVYRRLKHSFYDVQEEIGR
GVFGFVKRVQHKGNMFCAAKFIPLRSKTRAQAYQERDILATLGHPLVTGLLDQFETRKTLLILELCSSEEL
LDRLFKKGVVTEAEVKVYIQQLVEGLHYLHSHGILHLDIKPPNIMVHPAREDIKICDFGFAQKITPSEPOYS
KYGSPFVSPPEIEQNPVSEGSDIWAMGVI SYLSLTCSSPFAGESDRATLLNVLEGRVSWSSPTAAHLSDEAK
DFIKATLQRTPRARPSTSQCLAHWPFLKSMPEAAEHFINTKQLKFLRLARSRWQRSLMSYKLSILVMRSIPPELLQ
GPPDPSLGVARHLRGEASGASSSSSSSDNELAPFARAKSLPSPVTHSPLLHPRGFLRPSASLPEETEASMP
TADAAVPASPQASAGPPASPGCVPRHSVSSLFYQQAGEGAERGNKTSGAKRHPARRRHLKGGYIARALPGLR
EPLMEYSLLEEEAAREEQASLMTKTPSFETALRLPSSSVREVPGRSHSLDNPPVTTGPPPEACKEQLLFPST
GLTHETTAKDRGHKEGFLQESVFPFPMGDSRPGKQEGSSQDSCRGKPASSCHSELGSGSQEGCGPPSSQSLG
SLPPQSLKKELESTSCGPLFSEQQAAPFTQVSPLLGSEKEPQDGLSEGVPVPSSSPGSASQVDASLDTEG
LSEAGDTCDFTPPPQRPQEQATTRKFSLESRGGYAGVAGYGTFAFGGDAGGMLGQGPLWARMWAVSQSSEEQ
DEAATESPQPLESLGPIAEASGVPLRTSPSLTPWEEVEQVSLVQIRDLSGDAEAADTISLDISEVDPAYLNL
DLYDIKYLPPFEMIFRRVPKPIEQPESPGSETEAGQGLADFLLEAAWPWPGEGLGLRAGLEITEEPPEPGDLEA
LLGEAAVGRKRKWSPSRGLFQFPGRCLSGEEPVELGLRQVVKASMAHISRILKGRPEGPEREGPPRKKAGLAS
FRLSGLKGRDQELSDEAVVLGQSVTLACQVLAQPTAQTATWSKDGVLLESSGHLLISSTLKNFQLLTLIVVKEE
DLGTYTCCVSNPLGTAVTTGVLKRAERPSSSPRPEVGEYKDAVLLVWKPVESECGPVTYIVQCCIEGGSWTTL
ASDISDCCYLTKLSRGGMYIFRTACVSKAGMPYSSPSEQVLLGPNHLASEEESRGRPAQLLPSTKTFAF
QMQIRRRGRFSVVRQCREKASGRALAAKIVPYQPEDKTAVLREYEALKRLLHHPHLAQLHAAYLSPRHLVLI
CSGPELLPSLAERESYSESDVKDYLWQMLSATQYLHAQHILHLDLRSENMMVTEYNLLKVIDLGNASLDQEK
VPAPENFKDYLETMAPELLEGGQAVPQTDIWAIGVTAIFIMLSGEYPESEGETRDLQKGLRKLIRLSRCYAGL
SGGAVAFQLSSCAQPWGRPCASTCLQCGWLTEEGPTGSRPTVPTVPTVRLRAFVREEREKRRALLYKKNHNAQ
VR\*

>rs254357296\_ENSMUSP00000158795\_c.23568:G>A\_p.A7857T
ENSMUST00000238536.2|obscn-210|ENSMUSG00000061462|-|chr11:g.58891524:c>T
MDHSFSGAPRFLTRPKAFVSVGKDATLSCQIVGNPTPHVSWEKDRQPVEAGARFLAQDGDVYRLTILDLAL
GDSGQYVCRARNAIGEFAAVGLRVDSEGTCAEQAPHFLLRPTSIRVREGADATFRCRVGGSPQPAVSWSKDG
RRLGPPDAPHVRVEEHGESSALRIRSARPRDGGTYEVRAENPLGSASAAAALVVDSDAEVAGPPGTSTATLLA
HLQQRREAMRAEGIPPSPPGAGTRTCTVTEGKHARLSCFVTGEPKPEVWKKDQGLVTEGRRHVYDEQENF
VLKILFCKQSDRGLYTCTASNLVGQTYSSVLVVVREPTVPFKKRLQDLEVREKESATFQCEVAQPATEAAWFK
EETRLWASAKYDIEEGTERRLTVRNVSADDDAVYICETTEGSRVAELSVQGNLTKLPRKTAVRTGDTAIF
WVELAVPEGKAKTESLNRNQEEMVAGGRVAITAEGTCHTLTI FQCTLEDMGEVAFVSGGCRTTTQFCVSAPRRPPL
YPPADPVVVKPVTWSSVTLSSWAPPHGDRPVTIDGYVLEKRLKLGAYAWSRCHEAGWLATTEFTITGVAEEGDFQ
FRVSAINHFGQTPYLEFPGMTMLVPLAVKTPKAVEAVEGGEVTFVSDLTVASSGEWFLDGEALKASSIYVI
RCDRTRHMLTIREVPARLHGAQLKVFVANGIETSIQMVVRAALGLPSSKLPAAAAREVLAQLHEEAQLLAELSD
QAAAAVTWLKDGRELSLGPKEYMQVSAGRRALLVRDVAQDDAGLYECVSRGSRRTAYQLLVQDITDGYRDWGPAG
PQKHMCKCAGAKIARYLGSSCYRFLQYDKGVWHLEAALDTRQKGKTS SCSLHEKPKLVFAKQQAHSEVKA

AGNSATLSCEVTQAQTEVTWFKDGKLLSSSSKVRMEASGCSRRLVVQQAGKADAGEYSCEAGGQKLSFRLDVA  
EPKLVFAKGQQAHEVKAEGASATLSCEVAQAQTEVTWFKDGKLLSSSSKVRMEASGCSRRLVVQQAGKADA  
GEYSCEAGGQKLSFRLDVAEPKMVFAKEQQARSEVKAEGASATLSCEVAQAQTEVTWFKDGKLLSSSSKVRM  
EASGCSRRLVVQQAGKADAGEYSCEAGGQKLSFRLDVTEPKLVFAKEQQARSEVKAEVGNSATLSCEVAQAQ  
EVTWFKDGKLLSSSSKVRMEASGCSRRLVVQQAGKADAGEYSCEAGGQKLSFRLDVAEPKLVFAKEQQARSEV  
KAEAGNSATLSCEVAQAQTEVTWFKDGKLLSSSSKVRMEASGCSRRLVVQQAGKADAGEYSCEAGGQKLSFHL  
DVTEPKLVFAKEQQAHSEVKAEGASATLSCEVAQAQTEVTWFKDGKLLSSSSKVRMEASGCSRRLVVQQAGK  
ADAGEYSCEAGGQKLSFRLDVAEPKLVFAKEQQARSEVKAEGASATLSCEVAQAQTEVTWFKDGKLLSSSSK  
VRVEASGCSRRLVVQQAGKADAGEYSCEAGGQKLSFRLDVAEPKLVFAKEQQANSEVKAEGASATLSCEVAQ  
AQTEVTWFKDGKLLSSSSKVRVEASGCSRRLVVQQAGKADAGEYSCEAGGQKLSFRLDVAEPKLAFAKEQQAH  
SEVKAEGASATLSCEVAQAQTEVTWFKDGKLLSSSSKVRVEASGCSRRLVVQQAGKADAGEYSCEAGGQKLS  
FRLDVAEPKLAFAKEQQAHSEVKAEGASATLSCEVAQAQTEVTWFKDGKLLSSSSKVRVEASGCSRRLVVQQ  
AGKADAGEYSCEAGGQKLSFRLDVAEPKLAFAKEQQAHSEVKAEGASATLSCEVAQAQTEVTWFKDGKLLSS  
SSKVRVEASGCSRRLVVQQAGKADAGEYSCEAGGQKLFRLDVAEPKLMFAKEQQAHSEVKAEGASATLSCE  
VAQAQTEVTWFKDGKLLSSSSKVRVEASGCSRRLVVQQAGKADAGEYSCEAGGQKLSFRLDVAEPKLVFAKEQ  
QAHEVKAEGASATLSCEVAQAQTEVTWFKDGKLLSSSSKVRVEASGCSRRLVVQQVQKADAGEYSCEARGQ  
KLSFRLDVADTRLMFAKEQQARTEVKAEGNSATLSCEVAQAQTEVTWFKDGKLLSSSSKVRVEASGCSRRLV  
VQQAGKADAGEYSCEAGGQKLSFRLDVAEAEASQIPERPSRREPLVVKHEHETIILTATIAAPSVAAVTWLKDG  
EIRRSKRHEATSLGDHTLTVRGAQVLDIAIYSCRVGKEGQDFPVQVEEVAAKFSKPLEPVEGELGGTVMLVC  
ELSPQAEVWRCGNTQLRPGKRFQMTSEGPRRTLTVSGLREDDAEYVCESRDDRTSARLTVKVPVVKFTS  
GLSAMVAEEGQEQATFQCVVSPSDAGVTWYKDGMLQPSKFKVMVESGASRSLTILGLTLEDAGQVTEAEGAS  
SSAALRVREAPVLFKKLEPQTVERTSVTLEVELTRPWPEVKWTRNAAVLTPSENVEIRAEGARHCLVLRV  
GFADRGFFGCETPDDKTQAKLNVEMRQVRLVVRGLQEVEAKEQGTASMDVELSHAEEVGSWTRDGLRQLQPGPKC  
HLAVQGPVHILTLALSALQPDQSGLVAFRAEGVHTSARLIVTELPVSFTRVLQDVVATQKEKVTLECELSRPVDV  
RWLKDGVNELRAGKAIQVAGQTCRSLVIYRCETGDQGVYVCDALDAQTSASLRVQGRTYTLIFRRLAEDAGE  
VKFVAENAESRAHLRVELPVTLLRPLRDKIAMEKRGVFLDQVSRASAQVRWFKGGVLELQSGPKYEVVSDGL  
YRKLVINDDVQPEDEDTYCTDAGNVKTSAQFFVEEQSITIVRGLKDMTVMPEPAPAWFECETSIPSVRPPKWL  
KTVLQAGGNVLEQDGTVHRLTLHKTCSTMTGPVHFTIGKSRSSAQLVSDIPVVLTRPLEPKAGRELQSVVL  
SCDFRPAPKAVQWYKDDTPLSPSEKFKMALEGQMAELRILRLTPADAGVYRCQAGSAQSSAEVTEAREVTVI  
QPLQDAEAMEEGRVCFSCELSHKDEDIEWSLNGTPLYNDSFHEISHEGCLHTLVLSVRQADTGTVCATSPKV  
SVSARLVVKGKPVVFLKALDDVSAEERGTTLQCEVSDPEARVVWRKDGVELGSPDKYDFLHKAGARGLTVHD  
LSHEDAGLYTCQVGSKETQSKVSVHDLHVGITKRLKTVEVLEGECSFECVLSHESPSDPAVWTVGGKTVGGS  
GHFHAVRQGRKYTLTVKDAALSDAGEVVSVLGLTSKASLIIRERPVDITKPLEDQRTTLGEDVMLSCELSRA  
GTSVRWLKDGKAIRKSQKYDLLSEGTRAVLVVRKASLKDSGEYTCETEASKSTAKLCVEEKANRFTTELADLQ  
VEEKGRAVTFCKTEHPASVVTWRKGLLELRASGKHVPSQEGTLKLTINALERTDSDTYCTDIGQARTQARLL  
VHGQKVRVIEDLEDTAVQEGSSAKFCRIAPADYGPVHVFLEDKTPLHSNELNEITVQPGGYHVLTLRQLALKD  
SGTVYFEAGDQRTSAAALRVTEKPSIFSRPLTDVTVTEGEDTLVCETTTVDSVVRWTKDGKTLRPSARCQLSH  
EGCQAQLLITATTPQDGGRYKCEIGGASSSSIVRVHALPVRFRRESLKDVEVPEGKAATLRCVLSVAAPVEWR  
HGDDVLKSSNKYSLRQEGAVLELVIRDLQPDQSGQYSCSFGDQTTSATLTVKTSQAQFVGLRKNKEATEGTTV  
TLRCELTKEAPVEWKKGTETLRNGDKYSLKQDGAVCELQICSLLVADAGEYSCVCGQEKTSATLTVKALLVHF  
VRLRSKEATEGDTTLQCELSKAAPVEWRKGTETLRDGDYSLKQDGAVCELQIRSLTIADAGEYLCTCGQE  
KTSATLTVRALPAKFKDSLKNEEATEGTTATLSCELSKAAPVWKKGPKTLQSGDKYVLRQDGAVCGLQIHGL  
TMADAGEYSCVCGQEKTSATLTVRGLPAKFIEDLRSQEATEGATAILRCELSKAAPVEWRKGSSETLKDGDYR  
LRQDGAVCELQIRGLAVDTGTYSLSPTKFTTEGLRNEEATEGTMATLRCQMSKAAPVEWRKGSSETLRDGDYR  
LRQDGAMCELQIRGLTIEDSGEYTCVCGQEKTSATLSVKALPSRFIEDLRSQEATEGTMATLRCQMSKTA  
PVEWRKGSSETLRDGGYSLRQDGAVCELQICDLAVEDAGEYSCVCGQEKTSATLSIKALPPRFIEDLRSQE  
ATEGTMATLRCQMSKAAPVEWRKGSSETLGDGGYSLRQNGAVCELQIHDLAVEDTGEYSCVCGQEKTSATL  
NVKALPPRFIEDLRSQEATEGTMATLRCQMSKAAPVEWRKGSSETLRDGGYSLRQDGAVCELQIHDLVEDA  
GQYSCVCGQEKTSAVLTVDALPPKFTTEGLKKEEATEGTMVTLRCQMSKEATVEWRKGAKTLSDGGRYSLRQ  
DGAMCELQICGLAVEDAGEYSCVCGQEKTSATLSVKALPPRFIEDLRSQEATEGTMATLRCQMSKAAPVE  
WRKGSSETLRDGDYSLRQDGAMCELQICDLAVEDTGDYSCVCGQEKTSATLSVKALPPRFIEDLRSQEARE  
GTVATLRCRMSKAAPVEWRKGSSETLKDGDYSLRQEGNLCELQIRDLAVEDTEEYSCVCGQEKTSATLSVK  
ALPAKFIEDLRSQEAPESSTVTLRCKLSKKASVWKKGSETLRNGARYSLRQDGAVCELEIRDLTVEDTGEYSCT  
CGQERTSATLSIMAPQVVFQQPLQNLQAEEGSMASLRELSVNAAMVWSKGGLELQGDTRREARQQCGVAEL  
LLRDLRREDAGEYSCTCGSQTTSATLMVTAAPVRFRLRELQAQDVDEGATARLRCELSREAVSVEWRKGS  
LQLFPCAKYQMVQEGTTAELLVHGVEQEDAGEYTCDAHTQSIARLSVRAPKPKFKTDLQSTEQEAGGTARLCC  
QLSEAEFGTPVQWLKEGVELHVGSKYEMRRQGAVCELLIHGLEAKDTGEYACLVGQKTLASLRVKEPEVTIVRGL

VDMEVQADEDVEFTCKVVSQAGATDVQWHLQGLPLQSNVTEVAVLADGCTHVLQKGVTLLEDAGTVSFHVGGGL  
SSSAQLTVRVPEVTVLEPLKDVQLSEGDQAHFRCLRSRASGQEARWALGGVPLQCNEMNDITVEQGTLYLLTL  
HKVTLLEDAGTITLQVGSSESQAQLKVTAKNTVLRGLENVDALEGGEALFECQLSQPEVAHAHTWLLDDEPVHTS  
EKVEVVYFENGLRHLLLLKLNKPKQDSCRVTFLAGDVVTS AFLTVRGWRLEVLEPPHDASVKAGMQVRFTCILS  
EAVPVGEATWYINGAAIQPDDTDWTVTTDGSHHALTLSNAQPQHAGEVTF AARDAVASARLSVLALPDPEDA  
EAVGRSDHSVTLWSVAPMSDGGGGLCGYRVMKEASTGQWQLCHDLVPGPECVDDLVPGKTYRFRVAAVGPA  
GAGEPVHLPQMVKIAPAPAPAPAPAPAPAPAPETRAVVGEDICLELEVAADGGEVVWHKGTERRIQPGGHFEVLS  
RGQRQMLVIKGFRTEDQGEYRCGPIQGLPSSGAATFNVMVMTSGSGDEVPAQPSPLPPEAAQEGDLHLLWEALAR  
KRRMSREPTLDSISELPEEDSRVQHLRQEAETAPDLSEGYSTADELARTGEADLSHTSSDDESAGTTPSLVT  
YLKKAAGGPGISPLASKHEAQVTTSVKPKQEQEPVVPTCPPPGDLSAADLMDPSLDKAAVKIQAAFKGYKVRKE  
MKQQEGPVFSRTFGDTEAQVGDVLRLECVLATKTD MRACWLKDGIELTDGRHYHIDQLKDGTCSSLVVTGLAPT  
DSGRYTCQVSTKSGRVSHSACVVVSGTESEAESSGGELDDAFRRAARRLHRLFRTKSPAELSEELFLSADE  
GPGEPEEPADWQTYREDENFVCIRFESLAEARQAVTCFRNMFMATMIGVEISLGEQGPGRVEMRIGKVAPTVT  
PAVPLAKTPGLQTSDAAPVFLTELQNDVQDGYPMSFDCVVTGQVPVSVRWFKDGKLEEDDHYMINEDQQGG  
HQLIITAVVPADMGVYRCLAENSMGVSSSTKAELRVELTSTDYDTAADATETSSYFSAQGYLSSREQEGTESDE  
GQLPQVLEELKDLQVAPGTRLAKFQLKVKGYPAKLYWFKDGGQPLTSDHIRMTDKKTLHLEIVSVTREDSG  
QYAAIISNAVGAAYSSARLLVVRGPSEPEEKPASDVHERLVPPRILEKFTPKKVKRGSSTIFSVKVEGHPAPSV  
HWLKEEAKEGVLWIGPDTPGYTMASSSKQHSLSVLLDVGRQHOGTYTCIATNPAGQALCSASLHISGLAKEEEQ  
ERVKEALISSFLQGTSAQVSAQMSSEAGFADLVGQSKGESLVAEEAHSHLSLAEVGTEEFQKLTSSQITEMVS  
AKISQAKLQVPGGDSDEETKTPSASPRHGRSRPSSSVQESSSESEDGDSRGEIFDIYVVTADYLP LGAEQDAI  
ILREGQYVEVLDSAHPLRWLVRTKPTKSSPSRQGWVSPAYLDRKRLKLSPEWGPTEAPEFPGEAVSEDEYRTRL  
SSVIQELLSSEQAFVQELQFLESHHMKHLERSPRVPAAVASQKTVIFRNVQDISHFHSSFLKELQCGCTDDDDV  
AMCFIKNQEAFAKEYLEFLVGRVQAESVVVSTPVQEFYKKYAEETLSAKDPTQPPPPPLQHYLEQPVVERVQKYQ  
ALLKELIRNKARNRQNCALLEQAYAVVSALPQRAENKLHVS LMENYPGTLEALGEP I RQGHFIVWEGAPGARM  
PWKGHNRHVFLFRNYLVICKPRRDSRTDTFSYVFRNMMKLSSIDLNDQVEGDDRAFEVWHEREDSVRKYLLQA  
RTVI IKNSWVKEICIGIQRQLAQPVWRPPEFEEELNACTAELGETVKLACRVTGTPKPIVSWYKDGKPVVEVDPH  
HILLEDDPDGSC TLI LDNLTGIDSGQYMCFAASAAGNASTLGKILVQVPPRFVFNKVRATPFVYEGEDAQITCTVE  
GAPYPQIRWYKDGTL L LAPGNRYRMLNEPRSGVLV LVIQAASKEDLGHYECELVNRLGSTRGGGELYMQSPALR  
ARDQHHREQIVAAVEDTSVEGSAHSAQDQADQQAASVLWRLLGSEALGPS PGDLPNTRQSEPPAFEEEAASQIP  
GAASGTPEVSPQPGTHKLEQETTSSGSQGWTVPIRVEGTAWPGAGTGQLLLDVHSQVIMETTQRTYVCQAPDT  
GVTRAPSMQVTIEDVQVQVGDMAQF DAVIEGHPPP I V TWYKGSTQLTSSARLSQRQDGTYSVLVTDVAPHDA  
GVYTCVANNAGGQV LCKAELLVHGDKLDAENQVYRRKLHSFYDVQEE I GRGVFGFVKRVQHKGNMFCAAKF  
IPLRSKTRAQAYQERDILATLGHPLVTGLLDQFETRKT LILILELCSSEELLDRLFKKGVVTEAEVKVYIQQL  
VEGLHYLHSHGILHLDIKPPNIMLVHPAREDIKICDFGFAQKITPSEPQYSKYGSPFEVSP E I IEQNPVSEGS  
DIWAMGVISYLSLTCSSPFAGESDRATLLNVLEGRVSWSSPTAAHLEDAKDFIKATLQRTPRARPSTSQCLA  
HPWFLKSMPAEEAHFINTKQLKFL LARSRWQRSLMSYKSI LVMRSIPELLQGGPPDSPSLGVARHLRGEASGAS  
SSSSSSDNELAPFARAKSLPPSPVTHSPLLHPRGFLRPSASLPEETEASMP TADA AVPAS PQSAGPPASPGCV  
PRHSVISSLFYQQAGEGAERGNKTS GAKRHPARRRHLLKGGYIARTLPGLREPLMEYSLLEEEAAREEQASLM  
TKTPSFETALRLPSSSVREVPGRSHSLDNPPVTTGPSPEACKEQLLFPSTGLTHETTAKDRGHKEGFLQESV  
PFPMSGDSRPGKQEGSSQDSCRGKPASSCHSELGSGSQEGCGPPSSQSLGSLPPQSLKELSTSCGPLFSEQ  
PQAAPFPPTQVSP LLGSEKEPQDGS LSEGVPVPVSSSPGSASQVDASLDTEGLSEAGDTCDFTPPPQRPQEQAT  
TRKFSLESRGGYAGVAGYGTFAFGGDAGGMLGQGPLWARMAWAVS QSSEEQDEAATESPQPLES LGPIAEASG  
VPLRTSPSLTPWEEVEQVSLVQIRDLSGDAEAADTISLDISEVDPAYLNLSDLYDIKYL PFEFMI FRRVPKPI  
EQPESPGSETEAGQGLADFL EEAAPWPPELG LGLRAGLEIT EEPPEPGDLEALLGEAAVGRKRKWSPSRGLFQF  
PGRCLSGEEPVELGLRQVRKASMAHISRI LKGRPEGPEREGPPRKKAGLASFRLSGLKGRDQELSD EAVVLGQ  
SVTLACQVLAQPTAQATWSKDGVLLESSGHLLI SSSLKNFQLLTI L VVKEEDLGTYTCCVSNPLGTAVTTGVL  
RKAERPSSSPREVGELYKDAVLLVWKPVE SCGPVTVYIVQCCIEGGSWTTLASDISDCCYLTGKLSRGGMYIF  
RTACVSKAGMGPISSPSEQVLLGGPNHLASEEESRRGRPAQLLPSTKTF AFQMQIRRRGRFSVVRQCREKASGR  
ALAAKIVPYQPEDKTAVLREYEALKRLHHPHLAQLHAAYLSPRHLVLI LELCSGPELLPSLAERESYSESDVK  
DYLWQMLSATQYLHAQHI LHLDLRSENMMVTEYNLLKVIDLGN AQSLDQEKVPAPENFKDYLETMAPELLEGG  
GAVPQTDIWAIGVTA FIMLSGEY P ESSEGTRDLQKGLRKLIRLSRCYAGLSGGAVAF LQSSSLCAQPWGRPCA  
STCLQCGWLTEEGPTGSRPTPVTFPTVRLRA FVREKRRRALLYKKNLAQVR\*  
>rs254357296\_ENSMUSP00000038264\_c.21006:G>A\_p.A7003T  
ENSMUST00000047441.14|Obscn-202|ENSMUSG00000061462|-|chr11:g.58891524:C>T  
MDHSFSGAPRFLTRPKAFVSVGKDATLSCQIVGNPTPHVSWEKDRQPVEAGARFLAQDGDVYRLTILDLAL  
GDSGQYVCRARNAIGEAFAAVGLRVDSEGTCAEQAPHLLRPTSIRVREGADATFRRCRVGGSPQPAVSWSKDG  
RRLGPPDAPHVRVEEHGESSALRIRSARPRDGGTYEVRAENPLGSASAAAALVVDSDAEVAGPPGTSTATLLA  
HLQQRREAMRAEGIPSPPGAGTRTCTVTEGKHARLSCFVTGEPKPETVWKKDQGLVTEGRRHVVEDEQENF

VLKILFCKQSDRGLYTCTASNLVGQTYSSVLVVVREPTVPFKKRLQDLEVREKESATFQCEVAQPATEAAWFK
EETRLWASAKYDIEEEGETERRLTVRNVSADDDAVYICETTEGSRVAELSVQGNLTKRKLPRKTAVRTGDTAIF
WVELAVPEGPVWRWRNQEEMVAGGRVAITAEGTCHTLTI FQCTLEDMGEVAFVSGGCRTTTTQFCVSA PRRPPL
YPPADPVVKAKTESSVTLWSAPPHGDRPVTIDGYVLEKRKLGAYAWSRCHEAGWLATTEFTITGVAAEGDFQ
FRVSAINHFGQGPYLEFPGTMHLVPLAVKTPKAVEAVEGGEVTFVSDLTVASSGEWFLDGEALKASSIYVI
RCDRTRHMLTIREVPARLHGAQLKFVANGIETSIQMVVRAALGLPSSKLPAAAAAREVLAQLHHEEAQLLAE LSD
QAAAVTWLKDGRELSLGPKEYMQVSAGRALLVDRVAQDDAGLYECVSRGSRRTAYQLLVQDITDGYRDWGPAG
PQKHMCKCAGAKIARYLGSSCYRFLQYDKGVWHWLEAALDTRQGKGTSSCSLHEKPKLVFAKQQAHSEVKAE
AGASATLSCEVAQAQTEVTFWKDGKLLSSSSKVRMEASGCSRRLLVVQQAGKADAGEYSCEAGGQKLSFRLDVA
EPKMFVFAKEQQARSEVKAEGASATLSCEVAQAQTEVTFWKDGKLLSSSSKVRMEASGCSRRLLVVQQAGKADA
GEYSCEAGGQKLSFRLDVTEPKLVFAKEQQARSEVKAEGVNSATLSCEVAQAQTEVTFWKDGKLLSSSSKVRM
EASGCSRRLLVVQQAGKADAGEYSCEAGGQKLSFRLDVAEPKLVFAKEQQARSEVKAEGNSATLSCEVAQAQT
EVTWFKDGKLLSSSSKVRMEASGCSRRLLVVQQAGKADAGEYSCEAGGQKLSFHLVDVTEPKLVFAKEQQAHSEV
KAEAGASATLSCEVAQAQTEVTFWKDGKLLSSSSKVRMEASGCSRRLLVVQQAGKADAGEYSCEAGGQKLSFR L
DVAEPKLVFAKEQQARSEVKAEGASATLSCEVAQAQTEVTFWKDGKLLSSSSKVRVEASGCSRRLLVVQQAGK
ADAGEYSCEAGGQKLSFRLDVAEPKLVFAKEQQANSEVKAEGASATLSCEVAQAQTEVTFWKDGKLLSSSSK
VRVEASGCSRRLLVVQQAGKADAGEYSCEAGGQKLSFRLDVAEPKLVFAKEQQAHSEVKAEGASATLSCEVAQA
AQTEVTFWKDGKLLSSSSKVRVEASGCSRRLLVVQQAGKADAGEYSCEAGGQKLSFRLDVAEPKLVFAKEQQAH
SEVKAEGASATLSCEVAQAQTEVTFWKDGKLLSSSSKVRVEASGCSRRLLVVQQAGKADAGEYSCEAGGQKLS
FRLDVAEPKLVFAKEQQAHSEVKAEGASATLSCEVAQAQTEVTFWKDGKLLSSSSKVRVEASGCSRRLLVVQQ
AGKADAGEYSCEAGGQKLFRLDVAEPKLVFAKEQQAHSEVKAEGASATLSCEVAQAQTEVTFWKDGKLLSS
SSKVRVEASGCSRRLLVVQQVQKADAGEYSCEARGQKLSFRLDVAEAE SQI PERPSRREPLVVEKHETIILTAT
IAAPSVAAVTWLKDGVEIRRSKRHEATSLGDTHLTVRGAQVLD SAIYSCRVGKEGQDFPVQVEEVAAKFSKP
LEPVEGELGGTVMLVCELSPEQAEVWRCNGNTQLRPGKRFQMTSEGPRRTLTVSGLREDDAEYVCESRDDRT
SARLTVKVPVVKFTSGLSAMVAEEGQEATFQCVVSPSDAGVTWYKDGMLQOPSEKFMVMEVSGASRSLTILGL
TLEDAGQVTVAEAGASSAALRVREAPVLFKKKLEPQTVERTSVTLEVELTRPWPEVKWTRNAAVLTPSENV
EIRAEGARHCLTVHDLSHEDAGLYTCQVGSKETQSKVSVHDLHVGITKRLKTVEVLEGECSFEVLSHESP
SDPAVWTVGGKTVGGSGHFHAVRQGRKYTLTVKDAALSDAGEVVFVSVLGLTSKASLIIRERPVDITKPLEDQR
TTLGEDVMLSCELSRAGTSVRWLKDGKAIKRSQKYDLLSEGTRAVLVVRKASLKDSGEYTCETEASKSTAKLC
VEEKANRFTEELADLQVEEKGRAVFTCKTEHPASVVTWRKGLLELRASGKHVPSQEGTLTKLTINALERTDSD
TYTCDIGQARTQARLLVHGQKVRVIEDLEDTAVQEGSSAKFCCRIAPADYGPVHWFLLDKTPLHSNELNEITVQ
PGGYHVLTLRQLALKDSGTVYFEAGDQRTSAALRVTEKPSIFSRPLTDVTVTEGEDTLVCETTTTVDSSVRWT
KDGTLRPSARCQLSHEGCAQLLI TATTPQDGGRYKCEIGGASSSSIVRVHALPVRFRFRESLKDVEVPEGKAA
TLRCVLSVAAPVEWRHGDDVLKSSNKYSLRQEGAVLELVIRDLQPQDSGQYSCSFGDQTT SATLTVKTS SAQ
FVGKLRNKEATEGTTVTLRCELTKEAPVEWKKGTETLRNGDKYSLKQDGAVCELQICSLLVADAGEYSCVCGQ
EKTSATLTVKALLVHFVRRRLRSKEATEGDTTLQCELSKAAPVEWRKGTETLRDGDRLSLKQDGAVCELQIRS
LTIA DAGEYLCTCGQEKT SATLTVRALPAKFKDSLKNEEATEGTATLSCELSKAAPVTWKKGPKTLQSGDKY
VLRQDGA VCGLQIHGLTMADAGEYSCVCGQEKT SATLTVRGLPAKFIEDLRSQEATEGATAILRCELSKAAPV
EWRKGSETLTKDGD RYTLRQDGA VCELQIRGLAVVDTGTYS SLPKFTTEGLRNEEATEGTMATLRCQMSKAAPV
EWRKGSETLRDGD RYSLRQDGA MCELQIRGLTIEDSGEYTCVCGQEKT SATLSVKALPPRFIEDLRSQEATEG
TMATLRCQMSKAAPVEWRKGSETLGDGGRYSLRQNGAVCELQIHDLAVEDTGEYSCVCGQEKT SATLNVKALP
PRFIEDLRSQEATEGTMATLRCQMSKAAPVEWRKGSETLRDGGRYSLRQDGA VCELQIHDLVDVEDAGQYSCVC
GQEKTSAVLTVDALPPKFTTEGLKKEEATEGTMVTLRCQMSKEATVEWRKGAKTSLDGGRYSLRQDGA MCELQI
CGLAVEDAGEYSCVCGQEKT SATLSVKALPPRFIEDLRSQEATEGTMATLRCQMSKAAPVEWRKGSKTLR DGD
RYSRLRQDGA MCELQICDLAVEDTGDYSCVCGQEKT SATLSVKAPQVVFQQPLQNLQAEEGSMASLRCELSVFN
AAMVWSKGGLELQGDTRREARQQCVAE LLLRDLRREDAGEYSCTCGSQTT SATLMVTAAPVRFRLRELQAQDV
DEGATARLRCELSREAVSVEWRKGS LQLFPCA KYQMVQEGTTAE LLLVHGVEQEDAGEYTC DAGHTQS IARLSV
RAPKPKFKTDLQSTEQEAGGTARLCCQLSEAE PGTPVQWLKEGVELHVGSKYEMRRQGA VCELLIHGLEAKDT
GEYACLVGQKTLASLRVKEPEVTIVRGLVDMEVQADE DVEFTCKV SQAGATDVQWHLQGLPLQSNVEVAV

LADGCTHVLQKGVTLLEDAGTVSFHVGGGLSSSAQLTVRVPEVTVLEPLKDVQLSEGDADHFRCLRSRASGQEA  
RWALGGVPLQCNEMNDITVEQGTLYLLTLHKVTLLEDAGTITLQVGSSEASQLKVTAKNTVLRGLENVDALLEG  
GEALFECQLSQPEVAHAHTWLLDDEPVHTSEKVEVVYFENGLRHLLLLLKNLKPQDSCRVTFLAGDVVTS AFLTV  
RALPDPPEDAEVVGRSDHSVTLVWVAPMSDGGGGLCGYRVMKEASTGQWQLCHDLVPGPECVVDLVP GKTY  
RFRVAAVGPAGAGEPVHLPQMVKIAPAPAPAPAPAPAPAPETRQAVVGEDICLELEVAADGGEVVWHKGTERRI  
QPGGHFEVLSRGQRQMLVIKGFRTEDQGEYRCGPIQGLPSSGAATFNVMVMTSGSGDEVPAQPSLPPEAAQEGD  
LHLLWEALARKRRMSREPTLDSISELPEEDSRVQHLRQEAETAPDLSEGYSTADELARTGEADLSHTSSDDE  
SRAGTPSLVTYLKKAGGPGISPLASKHEAQVTTSVKPKQKQEPVVPTCPPPGDLAADLMDPSLDKA AVKIQA  
AFKGYKVRKEMKQQEGPVFSRTFGDTEAQVGDVLRLECVLATKTDMRACWLKDGIELTDGRHYHIDQLKDGTC  
SLLVTGLAPTDSGRYTCQVSTKSGRVSHSACVVVSGTESEAESSSGGELDDAFRRAARRLHRLFRTRKSPAELS  
EEELFLSADEGPGPEEPADWQTYREDENFVCIRFESLAEARQAVTCFRNMFATMGIGVEISLGEQGRGVEM  
RIGKVAPTVT PAVPLAKTPGLQTS DAAPVFLTELQNDVQDGYPMSFDCVVTGQPVPSVRWFKDGKLL EEDDH  
YMINEDQQGGHQLIITAVVPADMGVYRCLAENSMGVSSSTKAE LRVELTSTDYDTAADATETSSYFSAQGYLSS  
REQEGTESDEGQLPQVLEELKDLQVAPGTRLAKFQLKVKGYPAPKLYWFKDGOPLTSDHIRMTDKKTLHTLE  
IVSVTREDSGQYAAIISNAVGAAYSSARLLVRGPSEPEEKPASDVHERLVPPRILEKFTPKVKRGSSITFSV  
KVEGHPAPSVHHLKEEAKEGVLWIGPDTPGYTMASSSKQHSLVLLDVGRQHOGTYTICIATNPAGQALCSASLH  
ISGLAKEEEQERVKCALISSFLQGTSAVSAQMSASAGFADLVGQSKGSELVAEEAHSHLSLAEVGT EEFLOK  
LTSQITEMVSAKISQAKLQVPGGDSDEETKTPSASPRHGRSRPSSSVQESSSESEDGDSRGEIFDIYVVVTADY  
LPLGAEQDAIILREGQYVEVLDSAHPLRWLVRTKPKSSPSRQGWVSPAYLDKRLKLSPEWGPTEAPEFPGEA  
VSEDEYRTRLSSVIQELLSSEQAFVGELOFLESHHMKHLERSPRVPAAVASQKTVIFRNVQDISHFHSSFLKE  
LQCGCTDDDVAMCFIKNQEA FEKYLEFLVGRVQAESVVVSTPVQEFYKKYAEETLSAKDPTQPPPPLOHYLE  
QPVERVQKYQALLKELIRNKARNRQNCALLEQAYAVVSALPQRAENKLVSLMENYPGTLEALGEP IROGHFI  
VWEGAPGAMPWKGNHRHVFLFRNYLVICKPRRDSRTDTFSYVFRNMMKLSSIDLNDQVEGDDRAFEVWHERE  
DSVRKYLLQARTVIKNSWVKEICGIQORLAQPVWRPPEFEEELADCTAELGETVKLACRVGTGPKPIVSWYK  
DGKPEVEVDPHHILIEDPDGSCSTLIDLNLTGIDSGQYMCFAASAAGNASTLGKILVQVPPRFVNKVRATPFVVEG  
EDAQITCTVEGAPYPQIRWYKDGTL LAPGNRYRMLNEPRSGVVLVLIQAASKEDLGHYVCELVRNLGSTRGGG  
ELYMQSPALRMEKQHQHREQIVAAVEGAPSMQVTIEDVQVQVGDMAQF DAVIEGHPPPVIETWYKGSQLTSSAR  
LSQRQDGTYSLVLT DVAPHDAGVYTCVANAGGQVLCCKAELLVHGGDKLDAENQVYRRLKHSFYDVQEEIGR  
GVFGFVKRVQHKGNMFC AAKFIPLRSKTRAQAYQERDILATLGHPLVTGLLDQFETRKTLLIILELCSSEEL  
LDRLFKKGVVTEAEVKVYIQQLVEGLHYLHSHGILHLDIKPPNIMVHPAREDIKICDFGFAQKITPSEPOYS  
KYGSPFVVSPEIIEQNPVSEGS DIWAMGVISYLSLTCSSPFAGESDRATLLNVLEGRVSWSSPTAAHLS EDAK  
DFIKATLQRTPRARPSTSQC LAHPWFLKSMPAEEAHFINTKQLKFLARSRWQRSLMSYKSI LVMRSIP ELLQ  
GPPDSPSLGVARHLRGEASGASSSSSSSDNELAPFARAKSLPPSPVTHSPLLHPRGFLRPSASLP EETEASMP  
TADAAVPASPQASAGPPASPGCVPRHSV ISSLFYQQAGEGAERGNKTS GAKRHPARRRHLLKGGYIARTLPGLR  
EPLMEYSLLEEEAAREEQASLMTKTPSFETALRLPSSSVREVPRGSHSLDNPPVTTGSP EACKEQLLFPST  
GLTHETTAKDRGHKEGFLQESVFPFPMSGDSRPGKQEGSSQDRSGKPASSCHSELGSGSQEGCGPPSSQLG  
SLPPQSLKKELESTSCGPLFSEQPQAAPFPQTQVSPLLGSEKEPQDGSLSSEGVPVPSSSPGSASQVDASLDTEG  
LSEAGDTCDFTPPPQRPQEQATTRKFSLESRGGYAGVAGYGTFAFGGDAGGMLGQGPLWARMWAVS QSSEEQ  
DEAATESPQPLESLGPIAEASGVPLRTSPSLTPWEEVEQVSLVQIRDLSGDAEAADTISLDISEVDPAYLNLS  
DLYDIKYL PFEFMI FRRV PKPIEQPESPGSETEAGQGLADFL EEAAWPWPGE LGLRAGLEITEEPEEPGDLEA  
LLGEAAVGRKRKWSPSRGLFQFPGRCLSGEEPVELGLRQRVKASMAHISRI LKGRPEGPEREGPPRKKAGLAS  
FRLSGLKGRDQELSDEAVVLGQSVTLACQVLAQPTAQTATWSKDGVLLES SGHLLISSTLKNFQLLTI LVVKEE  
DLGTYTCCVSNPLGTAVTTGVL RKAERPSSSPRPEVGE LYKDAVLLVWKPVESCGPVTYIVQCCIEGGSWTTL  
ASDISDCCYLTKLSRGGMYIFRTACVSKAGMGPYSSPSEQVLLGPNHLASEEESSRGRPAQLLPSTKTFAF  
QMQIRRGFRFSVVRQCREKASGRALAAKIVPYQPEDKTAVLREYEA LKRLHHPHLAQLHAAYLS PRHLVLI LEL  
CSGPELLPSLAERESYSES DVKDYLWQMSATQYLHAQHILHLDLRSENMMVTEYNLLKVIDLGN AQSLDQEK  
VPAPENFKDYLETMAPELLEGQGAVPQTDIWAIGVTA FIMLSGEY PESSSEGTRDLQKGLRKLIRLSRCYAGL  
SGGAVAFLOSSLCAQPWGRPCASTLQCGWLTEEGPTGSRPTPVTFTVRLRAFVREKRRALLYKXHNLAQ  
VR\*

>rs26971883\_ENSMUSP00000158795\_c.22431:C>T\_p.Q7478\*  
ENSMUST00000238536.2|Obscn-210|ENSMUSG00000061462|-|chr11:g.58898390:G>A  
MDHSFSGAPRFLTRPKAFVSVGKDATLSCQIVGNPTPHVSWEKDRQPV EAGARFRLAQDGDVYRLTILDLAL  
GDSGQYVDARNAIIEGFAAVGLRVDSEGTCAEQAPHFLLRPTSIRVREGADATFCR VGGSPQPAVSWSKDG  
RRLGPPDAPHRVVEHEGESSALRIRSARPRDGGTYEVRAENPLGSASAAAALVVDSDAEVAGPPGTSTATLLA  
HLQQRREAMRAEGIPSPPGAGTRTCTVTEGKHARLSCFVTGEPKPETVWKKDQGLVTEGRRHVVEDEQENF  
VLKILFCKQSDRGLYTCTASNLVGQTYSSVLVVVREPTVPFKKRLQDLEVREKESATFQCEVAQPATEAAWFK  
EETRLWASAKYDIEEGTERRLTVRNVSADDDAVYICETTEGSR TVALSVQGNLTRKLRKLTAVRTGDTAIF  
WVELAVPEGPVRWLRNQEEMVAGGRVAITAEGTCHTLTI FQCTLEDMGEVAFVSGGCRTTTQFCVSPARRPPL



YPPADPVVKAKTESSVTLWSAPPHGDRPVTTIDGYVLEKRKLGAYAWSRCHEAGWLATTEFTITGVAAEEGDFQ  
FRVSAINHFGQGPYLEFPGTMHLVPLAVKTPKAVEAVEGGEVTFVSDLTVASSGEWFLDGEALKASSIYVI  
RCDRTRHMLTIREVPARLHGAQLKVFVANGIETS IQMVVRAALGLPSSKLPAAAAREVLAQLHEEAQLLAE LSD  
QAAA VTWLKDGRELSLGPYEMQVSAGRRALLVRDVAQDDAGLYECVSRGSRRTAYQLLVQDITDGYRDWGPAG  
PQKHMCKCAGAKIARYLGSSCYRFLQYDKGVVHWEAALDTRQGKGTSSCSLHEKPKLVFAKGOAHSEVKAE  
AGNSATLSCEVTQAQTEVTFWKDGKLLSSSSKVRMEASGCSRRLVVQQAGKADAGEYSCEAGGQKLSFRLDVA  
EPKLVFAKGOAHSEVKAEAGASATLSCEVAQAQTEVTFWKDGKLLSSSSKVRMEASGCSRRLVVQQAGKADA  
GEYSCEAGGQKLSFRLDVAEPKMFVFAKEQQARSEVKAEAGASATLSCEVAQAQTEVTFWKDGKLLSSSSKVRM  
EASGCSRRLVVQQAGKADAGEYSCEAGGQKLSFRLDVTEPKLVFAKEQQARSEVKAEVGN SATLSCEVAQAQ  
EVTWFKDGKLLSSSSKVRMEASGCSRRLVVQQAGKADAGEYSCEAGGQKLSFRLDVAEPKLVFAKEQQARSEV  
KAEAGNSATLSCEVAQAQTEVTFWKDGKLLSSSSKVRMEASGCSRRLVVQQAGKADAGEYSCEAGGQKLSFHL  
DVTEPKLVFAKEQQAHSEVKAEAGASATLSCEVAQAQTEVTFWKDGKLLSSSSKVRMEASGCSRRLVVQQAGK  
ADAGEYSCEAGGQKLSFRLDVAEPKLVFAKEQQARSEVKAEAGASATLSCEVAQAQTEVTFWKDGKLLSSSSK  
VRVEASGCSRRLVVQQAGKADAGEYSCEAGGQKLSFRLDVAEPKLVFAKEQQANSEVKAEAGASATLSCEVAQ  
AQTEVTFWKDGKLLSSSSKVRVEASGCSRRLVVQQAGKADAGEYSCEAGGQKLSFRLDVAEPKLVFAKEQQAH  
SEVKAEAGASATLSCEVAQAQTEVTFWKDGKLLSSSSKVRVEASGCSRRLVVQQAGKADAGEYSCEAGGQKLS  
FRLDVAEPKLVFAKEQQAHSEVKAEAGASATLSCEVAQAQTEVTFWKDGKLLSSSSKVRVEASGCSRRLVVQQ  
AGKADAGEYSCEAGGQKLSFRLDVAEPKLVFAKEQQAHSEVKAEAGASATLSCEVAQAQTEVTFWKDGKLLSS  
SSKVRVEASGCSRRLVVQQAGKADAGEYSCEAGGQKLFRLDVAEPKLMFAKEQQAHSEVKAEAGASATLSCE  
VAQAQTEVTFWKDGKLLSSSSKVRVEASGCSRRLVVQQAGKADAGEYSCEAGGQKLSFRLDVAEPKLVFAKEQ  
QAHSEVKAEAGASATLSCEVAQAQTEVTFWKDGKLLSSSSKVRVEASGCSRRLVVQQVQKADAGEYSCEARGQ  
KLSFRLDVADTRLMFAKEQQARTEVKAEAGNSATLSCEVAQAQTEVTFWKDGKLLSSSSKVRVEASGCSRRLV  
VQQAGKADAGEYSCEAGGQKLSFRLDVAEAE SQI PERPSRREPLVVKEHETI ILTATIAAPSVAAV TWLKDGV  
EIRRSKRHEATSLGDTHTLTVRGAQVLD SAIYSCRVGKEGQDFPVQVEEVAAKFSKPLEPEVEGELGGTVMLVC  
ELSPQAEVWRCNGTQLRPGKRFQMTSEGPRTTLTVSGLREDDAEYVCE SRDDRTSARLTVKVPVVKFTS  
GLSAMVAEEGQEA TFCVSPSDAGVTWYKQGMQLPSEKFMVMEVSGASRSLTILGLTLEDAGQVTEVAEGAS  
SSAALRVREAPVFLFKKLEPQTVVEERTSVTLEVE LTRPWEVWTRNAAVLTPSENVE I RAEGARHCLVLRV  
GFADRGGFFGCETPDDKTQAKLNVEMRQVRLVRLGLQEVEAKEQGTASMDVELSHAEVEG SWTRDGLRLQPGPKC  
HLAVQGPVHILTL SALQPQDSGLVAFRAEGVHTSARLIVTELPVSFTRVLQDVVATQKEKVTLECELSRPVDV  
RWLKDGVLELRAGKAIGIVAQGTCSRSLVIYRCETGDQGVYVCDALDAQTSASLRVQGRTYTLIFRRVLAEDAGE  
VKFVAENAESRAHLRVKELPVTLLRPLRDKIAMEKHRGVLECCQVSRASAQVRWFKGGVELQSGPKYEVVSDGL  
YRKLVIN DVQPEDEDTYTC DAGNVKTSAQFFVVEQSITIVRGLKDMTVMEPAPAWFECETSIPSVRPPKWL LG  
KTVLQAGGNVGLQDGTVHRLTLHKTCSTMTGPVHFTIGKSRSSAQLVVSDI PVVLRTRPLEPKAGRELQSVVL  
SCDFRPAPKAVQWYKDDTPLSPSEKFKMALEGQMAELRILRLTPADAGVYRCQAGSAQSSAEVTEAREVTVI  
QPLQDAEAMEEGRVCFSCELSHKDEDIEWLSLNGTPLYNDSFHEISHEGCLHTLVLKSVRQADTGTVCATSPKV  
SVSARLVVKGKPVVFLKALDDVSAEERGTTLTQCEVSDPEARVVWRKDGVELGSPDKYDFLHKAGARGLTVHD  
LSHEDAGLYTCQVGSKETQSKVSVHDLHVGITKRLKTVEVLEGE SCSFECVLSHESPSDPAVWTVGGKTVGGS  
GHFHAVRQGRKYTLTVKDAALSDAGEVVSVLGLT SKASLIIRERPV DITKPLEDQRTTLGEDVMLSCELSRA  
GTSVRWLKDGKAIRKSQKYDLLSEGTRAVLVVRKASLKDSGEYTCETEASKSTAKLCVEEKANRFTEELADLQ  
VEEKGRAVFTCKTEHPASVVTWRKGLLELRASGKHVPSQEGTLKLTINALERTSDTYTCDIGQARTQARLL  
VHGQKVRVIEDLED TAVQEGSSAKFCCRIAPADYGPVHWFLDKTPLHSNELNEITVQPGGYHVLTLRQLALKD  
SGTVYFEAGDQRTS AALRVTEKPSIFSRPLTDVTVTEGEDTLVCE TTTVDSSVRWTKDGKTLRPSARCQLSH  
EGCQAQLLITATTPQDGGRYKCEIGGASSSSIVRVHALPVRFRESLKDVEVPEGKAATLRCVLSVAAPVEWR  
HGDDVLKSSNKYSLRQEGAVLELVIRDLQPQDSGQYSCSFGDQTT SATLTVKTS SAQFVFKLRNKEATEGTTV  
TLRCELTK EAPVEWKKGTETLRNGDKYSLKQDGAVCELQICSLLVADAGEYS CVCGQEKTSATLTVKALLVHF  
VRLRSKEATEGDTTTLQCELSKAAPVEWRKGTETLRDGD RYSLKQDGAVCELQIRSLTIADAGEYLCTCGQE  
KTSATLTVRALPAKFKDSLKNEEATEGTTATLSCELSKAAPVTWKKGPKTLQSGDKYVLRQDGAVCGLQIHGL  
TMADAGEYSCVCGQEKTSATLTVRGLPAKFIEDLRSQEATEGATAILRCELSKAAPVEWRKGS ETLKDGDRYT  
LRQDGAVCELQIRGLAVVDGTYS LPTKFTEGLRNEEATEGTMATLRCQMSKAAPVEWRKGS ETLR DGD RYS  
LRQDGAMCELQIRGLTIEDSGEYTCVCGQEKTSATLSVKALPSRFIEDLRSQEATEGTMATLRCQMSKTAPVE  
WKKGSETLRDGGRYSLRQDGPVCELQICDLAVEDAGEYSCVCGQEKTSATLSIKALPPRFIEDLRSQEATEGT  
MATLRCQMSKAAPVEWRKGS ETLGDGGRYSLRQNGAVCELQIHDLAVEDTGEYSCVCGQEKTSATLNVKALPP  
RFIEDLRSQEATEGTMATLRCQMSKAAPVEWRKGS ETLRDKGGRYSLRQDGAVCELQIHDLVEDAGQYSCVCG  
QEKTSAVLTVDALETPPKFTEGLKKEEATEGTMVTLRCLMSKEATVEWRKGAKTLS DGGRYSLRQDGAMCELQIC  
GLAVEDAGEYSCVCGQEKTSATLSVKALPPRFIEDLRSQEATEGTMATLRCQMSKAAPVEWRKGS ETLR DGD R  
YSLRQDGAVCELQIRDLAVEDAGEYLCVCGQEKTSATLSVKALPPRFIEDLRSQEATEGTMATLRCQMSKAAP  
VEWRKGS KTLR DGD RYSLRQDGAMCELQICDLAVEDTGDYSCVCGQEKTSATLSVKALPPRFIEDLRSQEARE  
GTVATLRCRMSKAAPVEWRKGS ETLKDGDRYSLRQEGNLCELQIRDLAVEDTEEYSCVCGQEKTSATLSVKAL

PAKFIEDLRSQEAPESSTVTLRCKLSKKASVVWKKGSETLRNGARYSLRQDGAUCELEIRDLTVEEDTGEYSCT  
CGQERTSATLSIMAPQVVFQQPLQNLQAEEGSMASLRCELSVNPAAAMVWSKGGLELQGDTRREARQQGCVAEL  
LLRDLRREDAGEYSCTCGSQTTSATLMVTAAPVRFLRELQAQDVDEGATARLRCELSREAVSVEWRKGLQLF  
PCAKYQMVQEGTTAELLVHGVEQEDAGEYTCDAHTQSIARLSVRAPKPKFKTDLQSTEQEAGGTARLCCQLS  
EAEPGTPVQWLKEGVELHVGSKYEMRRQGAUCELLIHGLEAKDTGEYACLVGGQKTLASLRVKEPEVTIVRGL  
VDMEVQADEDEVEFTCKVVSQAGATDVQWHLQGLPLQSNVTEVAVLADGCTHVLQKGVTLLEDAGTVSFHVGGL  
SSSAQLTVRVPEVTVLEPLKDVQLSEGQDAHFRCRLSRASGQEARWALGGVPLQCNEMNDITVEQGTLYLLTL  
HKVTLEDAGTITLQVGSCEAQLKVTAKNTVLRGLENVDALLEGGEALFECQLSQPEVAHAHTWLLDDEFPVHTS  
EKVEVVYFENGLRHLLLLKNLKPQDSCRVTFLAGDVVTSAFLLTVRGRLEVLPPHDASVKAGMQVRFTCILS  
EAVPVGEATWYINGAAIQPDDTDWTVTTDGSHHALTLSNAQPQHAGEVTFAAARDAVASARLSVLAALPDPEDA  
EAVGRSDHSVTLVSWVAPMSDGGGGLCGYRVMKEASTGQWQLCHDLVPGPECVDDLVPGKTYRFRVAAVGPA  
GAGEPVHLPQMVKIAPAPAPAPAPAPAPAPAPAPAPAPAPAPAPAPAPAPAPAPAPAPAPAPAPAPAPAPAP  
RGQRQMLVIKGFRTEDQGEYRCGPIQGLPSSGAATFNVMVMTSGSGDEVPAQPSLPPEAAQEGDLHLLWEALAR  
KRRMSREPTLDSISELPEEDSRVQHLRQEAETAPDLSEGYSTADELARTGEADLSHTSSDDESAGTPSLVT  
YLKKGAGGPGISPLASKHEAQVTTSVKPKQKQEPVVPTCPPGGDLAADMPSLDKAAVKIQAAFKGYKVRKE  
MKQQEGPVFSRTFGDTEAQVGDVLRLECVLATKTDMRACWLKDGIELTDGRHYHIDQLKDGTCSSLVTLGLAPT  
DSGRYTCQVSTKSGRVSHSACVVVSGTESEAESSSGGELDDAFRAARRLHRLFRTKSPAELSEELFLSADE  
GPGEPEEPADWQTYREDENFVCIREFESLAEARQAVTCFRNMFATMGIGVEISLGEQGGPRGEMRIKGVAPT  
PAVPLAKTPGLQTSDAAPVFLTELQNDVQDGYPMSFDCVVTGQPVPSVRWFKDGKLEEDDHYMINEDQQGG  
HQLIITAVVPADMVYRCLAENSMGVSSTKAELRVELTSTDYDTAADATETSSYFSAQGYLSSREQEGTESDE  
GQLPQVLEELKDLQVAPGTRLAKFQLKVKGYPAKLYWFKDGPPLTSDHIRMTDKKTLHTLEIVSVTREDSG  
QYAAYSNAVGAAYSSARLLVRGPSEPEEKPASDVHERLVPPRILEKFTPKKVKRGSSITFSVKVEGHPAPSV  
HWLKEEAKEKGLWIGPDTPGYTMASSSKQHSVLVLDVGRQHGGTYTCIATNPAGQALCSASLHISGLAKEEEQ  
ERVKEALISSFLQGTSAVSAQMSSEAGFADLVGQSKGESLVAAEAHSHLSLAEVGTTEFLQKLTSSQITEMVS  
AKISQAKLQVPGGDSDEETKTPSASPRHGRSRPSSSVQESSESEDGDSRGEIFDIYVVTADYPLGAEQDAI  
ILREGQYVELLSDAHPRLWLVRTKPTKSSPSRQWVSPAYLDRKRLKLSPEWGPTEAEPFGEAVSEDEYRTRL  
SSVIEQLLESLQSAHFLQFLESHHMKHLERSPRVPAAVASQKTVIFRNVQDISHFHSSFLKELQCGCTDDDV  
AMCFIKNQEAFEKYLEFLVGRVQAESVVVSTPVQEFYKKYAEETLSAKDPTQPPPPPLQHYLEQPVERVQKYQ  
ALLKELIRNKARNRQNCALLEQAYAVVSALPQRAENKLVSLMENYPGTLEALGEPTRQGHFIVWEGAPGARM  
PWKGHNHRVFLFRNYLVICKPRRDSRTDTSYVFRNMMKLSSIDLNDQVEGDDRAFEVWHEREDSVRKYLLQA  
RTVLIKNSWVKEICGIQQLAQPVWRPPEFEEELADCTAELGETVKLACRVTGTTPKPIVSWYKDGKPVVDPH  
HILLIEDPDGSCTLILDNLTGIDSGQYMCFAASAAGNASTLGKILVQVPPRFVNVKVRATPFVEGEDAQITCTVE  
GAPYPQIRWYKDGTLAPGNRYRMLNEPRSGVLVVIQAASKEDLGHYECELVNRGLGSTRGGGELYMQSPALR  
ARDQHHREQIVAAVEDTSEVGSASHAQDQADQAAASVLWRLLGSEALGPSPGDLPNTRQSEPPAFEEAASQIP  
GAASGTPEVSQPETHKGLQETSSSGSQGWTPIRVEGTAWPGAGTGQLLDVHSQVIMETTQRTYVCQAPDT  
GVTRAPSMQVTIEDVQVQVGDMAQFDAVIEGHPPPIVVTWYKGSTQLTSSARLSQRQDGTYSVLVTDVAPHDA  
GVYTCVANNAGGQVLCKAELLVHGGDKLDAENQVYRRKLHSFYDVQEEIGRGVFGFVKRVQHKGNKMFCAAKF  
IPLRSKTRAQAYQERDILATLGHPLVTGLLD\*FETRKTLLILILELCSSEELLDRLFKKGVVTEAEVKVYIQQL  
VEGLHYLHSHGILHLDIKPPNIMVHPAREDIKICDFGFAQKITPSEPQYSKYGSPEFVSPEIEQNPVSEGS  
DIWAMGVI SYLSLTCSSPFAGESDRATLLNVLEGRVSWSSPTAAHLSSEDAKDFIKATLQRTPRARPSTSQCLA  
HPWFLKSMPAEEAHFINTKQLKFLARSRWQRSLMSYKSI LVMRSIPELLQGGPDPSPSLGVARHLRGEASGAS  
SSSSSSDNELAPFARAKSLPPSPVTHSPLLHPRGFLRPSASLPEETEASMTADA AVPAS PQSAGPPASPGCV  
PRHSVISSLFYQQAGEGAERGNKTS GAKRHPARRRHLKGGYIARALPGLREPLMEYSLLEEEAAREEQASLM  
TKTPSFETALRLPSSSVREVPRGRSHSLDNPPVTTGPSPEACKEQLLFPSTGLTHETAKDRGHKEGFLQESV  
PFPMSGDSRPGKQEGSSQDSRCRGPASSCHSELGSGSQEGCGPPSSQSLGSLPPQSLKKELESTSCGLFSEQ  
PQAAPFPTQVSPLLGSEKEPQDGSLESGPVPVPSPPSGSASQVDASLDTEGLSEAGDTCDFTPPPQRPQEQAT  
TRKFSLESRGGYAGVAGYGTFAFGGDAGGMLGQGPLWARMAWAVS QSSEEQDEAATESPQPLES LGPIAEASG  
VPLRTSPSLTPWEEVEQVSLVQIRDLSGDAEAADTISLIDISEVDPAYLNLSDLYDIKYL PPFEMI FRRVPKPI  
EQPESPGSETEAGQGLADFL EEAAWPWP GELGLRAGLEIT EEPPEPGDLEALLGEEAVGRKRKWSPSRGLFQF  
PGRCLSGEEPVELGLRQVRKASMAHISRI LKGRPEGP ERGPPRKKAGLASFRLSGLKGRDQELSDEAVVLGQ  
SVTLACQVLAQPTAQATWSKDGVLLESSGHLLISSTLKNFQLLTI LVVKEEDLGTYTCCVSNPLGTAVTTGVL  
RKAERPSSSRPEVGELEKDAVLLVWKPVESCGPVTVIVQCCIEGGSWTTLASDISDCCYLTGKLSRGGMYIF  
RTACVSKAGMGPPYSSPEQVLLGGPNHLASEEESLRGRPAQLLPSTKTFQFMQIRRRGRFSVVRQCREKASGR  
ALAAKIVPYQPEDKTAVLEREYEAALKRHLHHPHLAAQLLHAYLSPRHLVLI LELCSGPELLPSLAERESYSESDVK  
DYLWQMLSATQYLHAQHILHLDLRSENMMVTEYNLLKVIDLGNASLDQEKVPAPENFKDYLETMAPELLEGGQ  
GAVPQTDIWAIGVTA FIMLSGEY PESSSEGTRDLQKGLRKLIRLSRCYAGLSGGAVAF LQSSSLCAQPWGRPCA  
STCLQCGWLTEEGPTGSRPTVTFPTVRLRA FVREKRRALLYKKNLAQVR\*

>rs26971883\_ENSMUSP00000038264\_c.19869:C>T\_p.Q6624\*  
ENSMUST00000047441.14|Obscn-202|ENSMUSG00000061462|-|chr11:g.58898390:G>A  
MDHSFSGAPRFLTRPKAFVSVGKDATLSCQIVGNPTPHVSWEKDRQVEAGARFRLAQDGDVYRLTILDIAL  
GDSGQYVCRARNAIGEFAAVGLRVDSEGTCAEQAPHFLLRPTSIRVREGADATFRCRVGGSPPAVSWSKDG  
RRLGPPDAPHVRVEEHGESSALRIRSARPRDGGTYEVRAENPLGSASAAAALVVDSDAEVAGPPGTSTATLLA  
HLQQRREAMRAEGIPSPPPGAGTRTCTVTEGKHARLSCFVTGEPKPEVWKKDGLVTEGRRHVVEDEQENF  
VLKILFCKQSDRGLYTCTASNLVGQTYSSVLVVVREPTVPFKKRLQDLEVREKESATFQCEVAQAPATEAAWFK  
EETRLWASAKYDIEEEGETERRRLTVRNVSAADDVAVYICETTEGSRVVAELSVQGNLTKLPRKTAVRTGDTAIF  
WVELAVPEGPVRWLRNQEEMVAGGRVAITAEGTCHTLTI FQCTLEDMGEVAFVSGGCRTTTFQCVSAPRRPPL  
YPPADPVVKAKTESSVTLWSAPPHGDRPVTIDGYVLEKRLKLGAYAWSRCHEAGWLATTEFTITGVAAEEDGFQ  
FRVSAINHFGQGPYLEFPGTMHLVPLAVKTPKAVEAVEGGEVTFVSDLTVASSGEWFLDGEALKASSIYVI  
RCDRTRHMLTIREVPARLHGAQLKRVANGIETS IQMVVRAALGLPSSKLPAAAAREVLAQLHEEAQLLAE LSD  
QAAA VTWLKDGRELSLGP KYEMQVSAGRRALLVRDVAQDDAGLYECVSRGSR TAYQLLVQDITDGYRDWGPAG  
PQKHMCKCAGAKIARYLGSSCYRFLQYDKGVVHWLEAALDTRQKGKTS SCSLHEKPKLVFAKQQAHSEVKA E  
AGASATLSCEVAQAQTEVTFWKDGKLLSSSSKVRMEASGCSRRLVVQQAGKADAGEYSCEAGGQKLSFR LDVA  
EPKMVFAKEQQARSEVKA EAGASATLSCEVAQAQTEVTFWKDGKLLSSSSKVRMEASGCSRRLVVQQAGKAD A  
GEYSCEAGGQKLSFR LDVTEPKLVFAKEQQARSEVKA EAGASATLSCEVAQAQTEVTFWKDGKLLSSSSKVRM E  
EASGCSRRLVVQQAGKADAGEYSCEAGGQKLSFR LDVAEPKLVFAKEQQARSEVKA EAGASATLSCEVAQAQ T  
EVTWFKDGKLLSSSSKVRMEASGCSRRLVVQQAGKADAGEYSCEAGGQKLSFHL DVTEPKLVFAKEQQAHSEV  
KAEAGASATLSCEVAQAQTEVTFWKDGKLLSSSSKVRMEASGCSRRLVVQQAGKADAGEYSCEAGGQKLSFR L  
DVAEPKLVFAKEQQARSEVKA EAGASATLSCEVAQAQTEVTFWKDGKLLSSSSKVRVEASGCSRRLVVQQAGK  
ADAGEYSCEAGGQKLSFR LDVAEPKLVFAKEQQANSEVKA EAGASATLSCEVAQAQTEVTFWKDGKLLSSSSK  
VRVEASGCSRRLVVQQAGKADAGEYSCEAGGQKLSFR LDVAEPKLAFAKEQQAHSEVKA EAGASATLSCEVAQ  
AQTEVTFWKDGKLLSSSSKVRVEASGCSRRLVVQQAGKADAGEYSCEAGGQKLSFR LDVAEPKLAFAKEQQAH  
SEVKA EAGASATLSCEVAQAQTEVTFWKDGKLLSSSSKVRVEASGCSRRLVVQQAGKADAGEYSCEAGGQKLS  
FR LDVAEPKLAFAKEQQAHSEVKA EAGASATLSCEVAQAQTEVTFWKDGKLLSSSSKVRVEASGCSRRLVVQQ  
AGKADAGEYSCEAGGQKLSFR LDVAEPKLVFAKEQQAHSEVKA EAGASATLSCEVAQAQTEVTFWKDGKLLSS  
SSKVRVEASGCSRRLVVQQV GKADAGEYSCEAGGQKLSFR LDVAEAE SQIPERPSRREPLVVKHEHETIILTAT  
IAAPSVAAVTWLKDGV EIRRSKRHEATSLGDHTLTVRGAQVLD SAIYSCRVGKEGQDFPVQVEEVA AKFSKP  
LEPVEGELGGTVMLVCELSPEQAEVWRCGNTQLRPGKRFQMTSEGPRTTLTVSGLREDDAEYVCE SRDRT  
SARLTVKVPVVKFTSGLSAMVAEEGQ EATFQCVVSPSDAGVTWYK DGMQLQPSEKFMVME S GASRSLTILGL  
TLEDAGQVTVAEAGASSAALRVREAPVLFKKKLEPQTVEERTSVTLEVELTRPWPEVKWTRNAAVLTPSENV  
EIRAEGARHCLVLRVSGFADRGFFGCETPDDKTQAKLNVEMRQVRLVVRGLQEVEAKEQGTASMDVELSHA EVE  
GSWTRDGLRQLQPGPKCHLAVQGPVHIL TLSALQPQDSGLVAFRAEGVHTSARLIVTELPVSFTRVLQDVVATQ  
KEKVTLCELSRPPVDVRLKDGVELRAGKAI GIVAQGTCSRSLVIYRCETGDQGVYVCDALDAQTSASLRVQGR  
TYTLIFRRVLAEDAGEV KFVAENAESRAHLRVKELPVTLLRPLRDKIAMEKHRGVLECVSRASAQVRWFKGG  
VELQSGPKYEVVSDGLYRKLVIN DVQPEDEDTYTC DAGNVKTS AQFFVEEQSITIVRGLKDMTVM EPAPAWFE  
CETSIPSVRPPKWL LGKTVLQAGGNVGL EQDGTVHRLTLHKTCSTMTGPVHFTIGKSRSSAQLVVS DIPVVL T  
RPLEPKAGRELQSVVLSCDFRPAPKAVQWYKDDTPLSPSEKFKMALEGQMAELRILRLTPADAGVYRCQAGSA  
QSSAEVTV EAREVTVIQPLQDAEAMEEGRVCFSCELSHKDEDI EWSLNGTPLYNDSFHEI SHEGCLHTLV LKS  
VRQADTGTVCATSPKVSVSARLVVKGKPVVFLKALDDVSAEERGTLTLQCEVSDPEARVVWRKDGVELGPS DK  
YDFLHKAGARGLTVHDL SHEDAGLYTCQVGSKETQSKVSVHDLHVGITKRLKTVEVLEGE SCSFECVLSHESP  
SDPAVWTVGGKTVGGSGHFHAVRQGRKYTLTVKDAALSDAGEV VFSVLGLT SKASLIIRERPVDITKPLEDQR  
TTLGEDVMLSCELSRAGTSVRWLKDGKAI RKSQKYDLLSEGTRAVLVVRKASLKDSGEYTCETEASKSTAKLC  
VEEKANRFTEELADLQVEEKGRAVFTCKTEHPASVVTWRKGLLELRASGKHVPSQEGTLTKLTINALERTDSD  
TYTCDIGQARTQARLLVHGQKVRVIEDLED TAVQEGSSAKFCCR IAPADYGPVHWFLDKTPLHSNELNEITVQ  
PGGYHVLT LRQLALKDSGTVYFEAGDQRTSAALRVTEKPSIFSRPLTDVTVTEGEDLTLVCETTTVDSSVRWT  
KDGKTLRPSARCQLSHEGCAQLLITATTPQDGGRYKCEIGGASSSSIVRVHALPVRFRESLKDVEVPEGKAA  
TLRCVLSSVAAPVEWRHGDDVLKSSNKYSLRQEGAVLELVIRDLQPDGSGQYSCSFGDQTTSATLTVKTS SAQ  
FVGKLRNKEATEGTTVTLRCELTK EAPVEWKKGTETLRNGDKYSLKQDGAVCELQICSLLVADAGEYSCVCGQ  
EKTSATLTVKALLVHFVRRRLRSKEATEGDTTTLQCELSKAAPVEWRKGTETLRDGD RYSLKQDGAVCELQIRS  
LTIADAGEYLCTCGQEKTSATLTVRALPAKFKDSLKNEEATEGTTATLSCELSKAAPVTWKKGPKTLQSGDKY  
VLRQDGAVCGLQIHGLTMADAGEYSCVCGQEKTSATLTVRGLPAKFIEDLRSQEATEGATAILRCELSKAAPV  
EWRKGETLTKDGD RYTLRQDGAVCELQIRGLAVVDGTGYS LPTKFT EGLRNEEATEGTMATLRCQMSKAAPV  
EWRKGETLTDGD RYSLRQDGAMCELQIRGLTIEDSGEYTCVCGQEKTSATLSVKALPPRFIEDLRSQEATEG  
TMATLRCQMSKAAPVEWRKGETLGDGGRYSLRQNGAVCELQIHDLAVEDTGEYSCVCGQEKTSATLNVKALP  
PRFIEDLRSQEATEGTMATLRCQMSKAAPVEWRKGETLTDGGRYSLRQDGAVCELQIHDL DVEDAGQYSCVC  
GQEKTSAVLTVDALPPKFT EGLKKEEATEGTMVTLRCQMSKEATVEWRKGA KTLSDGGRYSLRQDGAMCELQI

CGLAVEDAGEYSCVCGQEKTSATLSVKALPPRFIEDLRSQEATEGTMATLRCQMSKAAPVEWRKGSKTLRDGD  
RYSLRQDGMCELQICDLAVEDTGDYSCVCGQEKTSATLSVKAPQVVFQQLQNLQAEEGSMASLRCELSVFN  
AAMVWSKGGLELQGDTRREARQQGCVAELLLRDLRREDAGEYSTCTGSGQTTSATLMVTAAPVRFRLRELQAQDV  
DEGATARLRCELSREAVSVEWRKGSLLQFPCAKYQMVQEGTTAELLVHGVEQEDAGEYTC DAGHTQS IARLSV  
RAPKPKFKTDLQSTEQEAGGTARLCCQLSEAEPTGTPVQWLKEGVELHVGSKYEMRRQGAVCELLIHGLEAKDT  
GEYACLVGQKTLASLRVKEPEVTIVRGLVDMEVQADEDEVEFTCKVSQAGATDVQWHLQGLPLQSNVTEVAV  
LADGCTHVLQKGVTLLEDAGTVSFHVGGLSSSAQLTVRVPEVTVLEPLKDVQLSEGQDAHFRCRLSRASGQEA  
RWALGGVPLQCNEMNDITVEQGTLYLLTLHKVTLLEDAGTITLQVGSSESQAQLKVTAKNTVLRGLENVDALEG  
GEALFECQLSQPEVAHTWLLDDEPVHTSEKVEVYFENGLRHLLLLKLNKLPQDSCRVTFLAGDVVTS AFLTV  
RALPDPPEDAEVVGRSDHSVTLVWVAPMSDGGGGLCGYRVMKEASTGQWQLCHDLVPGPECVDDLVPGKTY  
RFRVAAVGPAGAGEPVHLPQMVKIAPAPAPAPAPAPAPAPETRQAVVGEDICLELEVAADGGVEVWHKGTERRI  
QPGGHFEVLSRGRQMLVIKGFRTEDQGEYRCGPIQGLPSSGAATFNVVMTSGSGDEVPAQPSLPEAAQEGD  
LHLLWEALARKRRMSREPTLDSISELPEEDSRVQHLRQEAEEETAPDLSEGYSTADELARTGEADLSHTSSDDE  
SRAGTPSLVTYLKKAGGPGISPLASKHEAQVTTSVKPKQKQEPVVPTCPPPGDLAADLMDPSLDKAAVKIQA  
AFKGYKVRKEMKQEGPVFSRTFGDTEAQVGDVLRLECVLATKTDMRACWLKDGIELTDGRHYHIDQLKDGTC  
SLLVTGLAPTDSGRYTCQVSTKSGRVSHSACVVVSGTESEAESSSGGELDDAFRAARRLHRLFRTKSPAELS  
EEELFLSADEGPGEPEPADWQTYREDENFVCIRFESLAEARQAVTCFRNMFATMGIGVEISLGEQGRGVEM  
RIGKVAPTVT PAVPLAKTPGLQTS DAAPVFLTELQNDVQDGYPMSFDCVVTGQPVPVSRVFKDKLLEEDDH  
YMINEDQQGGHQLIITAVVPADMGVYRCLAENSMGVSSTKAELRVELTSTDYDTAADATETSSYFSAQGYLSS  
REQEGTESDEGQLPQVLEELKDLQVAPGTRLAKFQLKVKGYPAKLYWFKDGQPLTSDHIRMTDKKTLHTLE  
IVSVTREDSGQYAAIISNAVGAAYSARLLVRGPSEPEEKPASDVHERLVPPRILEKFTPKKVKRGSITFSV  
KVEGHPAPSVHHLKEEAKEKGLVWIGPDTPGYTMASSSKQHSVLVLDVGRQHOGTYTCIATNPAGQALCSASLH  
ISGLAKEEEQERVKEALISSFLQGTSAQVSAQMSSESAGFADLVGQSKGSLVAEEAHSHLSLAEVGTTEEFLOK  
LTSQITEMVSAKISQAKLQVPGGDSDEETKTPSASPRHGRSRPSSSVQESSSESEDGDSRGEIFDIYVVTADY  
LPLGAEQDAIILREGQYVEVLDSAHPLRWLVRTKPTKSSPSRQGWVSPAYLDRKRLKLSPEWGPTEAPEFPGEA  
VSEDEYTRLSSVIEQLLSSEQAFVGELOFLESHMKHLERSPRVPAAVASQKTVI FRNVQDISHFHSSFLKE  
LQCGCTDDDDVAMCFIKNQEA FEKYLEFLVGRVQAEVSVVSTPVQEFYKKYAEETLSAKDPTQPPPPPLQHYLE  
QPVERVQKYQALLKELIRNKARNRQNCALLEQAYAVVSALPQRAENKLVSLMENYPGTLEALGEP IRQGHFI  
VWEGAPGARMPWKGNHRHVF LFRNYLVICKPRRDSRTDTFSYVFRNMMKLSSIDLNDQVEGDRAFEVWHERE  
DSVRKYLLOARTVI IKNSWVKEICGIQORLAQPVWRPPEFEELADCTAELGETVKLACRVTGTPKPIVSWYK  
DGKPVVEVDPHHILIEDPDGSC TLI LDNLTGIDSGQYMCFAASAAGNASTLGKILVQVPPRFVNKVRATPFVEG  
EDAQITCTVEGAPY PQIRWYKDG TLLAPGNRYRMLNE PRSGVLVLIQAASKEDLGHYECELVNLRGSTRGGG  
ELYMQSPALRARDQHHREQIVAAVEGAPSMQVTIEDVQVQVGDMAQF DAVIEGHPPP IVTWYKGTSLTSSAR  
LSQRQDGT TYSLVLT DVAPHDAGVYTCVANNAGGQVLCKAELLVHGGDKLDAENQVYRRKLHSFYDVQEEIGR  
GVFGFVKRVQHKGNMFC AAKFIPLRSKTRAQAYQERDILATLGHPLVTGLLD\*FETRKTLLIILELCSSEEL  
LDRLFKKGVVTEAEVKVYIQQLVEGLHYLHSHGILHLDIKPPNII LMVHPAREDIKICDFGFAQKITPSE PQYS  
KYGSPFVVSPEIIEQN PVSEGS DIWAMGVISYLSLTCSSPFAGESDRATLLNVLEGRVSWSSPTAAHLS EDAK  
DFIKATLQRTPRARPSTSQC LAHPWFLKSMPAEAAHFINTKQLK FLLARSRWQRSLMSYKSI LVMRSIPELLQ  
GPPDSPSLGVARHLRGEASGASSSSSSDNE LAPFARAKSLPPSPVTHSPLLHPRGFLRPSASLPEETEASMP  
TADA AVPAS PQSAGPPASPGCVPRHSV ISSLFYQQAGEGAERGNKTS GAKRHPARRRHLLKGGYIARALPGLR  
EPLMEYSLLEEEAAREEQASLMTKTPSFETALRLPSSSVREVPGRSHSLDNPPVTTGSPPEACKEQLLFPST  
GLTHE TTAADRGHKEGFLQESVFPFPMMSGDSRPGKQEGSSQDSCRGKPASSCHSELGSGSQEGCGPPSSQSLG  
SLPPQSLKKE LSTSCGPLFSEQPQAAPFPTQVSPLLGSEKEPQDGS LSEGVPVPVSSSPGSASQVDASLDTEG  
LSEAGDTCDFTPPPQRPEQATTRKFSLESRGGYAGVAGYGTFAFGGDAGGMLGQGPLWARMAWAVSQSSEEQ  
DEAATESPQPLESLGPIAEASGVPLRTSPSLTPWEEVEQVSLVQIRDLSGDAEAADTISLDISEVDPAYLNL S  
DLYDIKYL PFEFMI FRRVPKPIEQPESPGSETEAGQGLADFL EEAAPWPWPGELGLRAGLEITEEPEEPGDLEA  
LLGEAAVGRKRKWSPSRGLFQFPGRCLSGEEPVELGLRQRVKASMAHISRILKGRPEGPEREPPRRKAGLAS  
FRLSGLKGRDQELSDEAVVLGQSVTLACQVLAQPTAQATWSKDGVLLESSGHLLISSTLKNFQLLTI LVVKEE  
DLGTYTCCVSNPLGTAVTTGVLKKAERPSSSPRPEVGEYKDAVLLVWKPVE SCGPVTYIVQCCIEGGSWTTL  
ASDISDCCYLTGKLSRGGMYIFRTACVSKAGMPYSSPSEQVLLGGPNHLASEEESRGRPAQLLPSTKTF AF  
QMQIRRGRFSVVRQCREKASGRALAAKIVPYQPEDKTA VLREYEALKRLHHPHLAQLHAAYLSPRHLVLI LEL  
CSGPELLPSLAERESYSESDVKDYLWQMSATQYLHAQHILHLDLRSENMMVTEYNLLKVIDLGNASLDQEK  
VPAPENFKDYLETMAPELLEGGQAVPQTDIWAIGVTA FIMLSGEY PESSSEGETRDLQKGLRGLIRLSRCYAGL  
SGGAVAFQLSSSLCAQPWGRPCASTCLQCGWLTEEGPTGSRPTPVTFPTVRLRAFVREKRRRALLYKKNHLAQ  
VR\*

>rs47227203\_ENSMUSP00000158795\_c.21795:A>G\_p.T7266A  
ENSMUST00000238536.2|Obscn-210|ENSMUSG00000061462|-|chr11:g.58900038:T>C

MDHSFSGAPRFLTRPKAFVSVGKDATLSCQIVGNPTPHVSWEKDRQPVEAGARFRLAQDGDVYRLTILDLAL
GDSGQYVCRARNAIGEFAAVGLRVDSEGTCAEQAPHFLLRPTSIRVREGADATFRCRVGGSPQPAVSWSKDG
RRLGPPDAPHVRVEEHGESSALRIR SARPRDGGTYEVRAENPLGSASAAAALVVDSDAEVAGPPGTSTATLLA
HLQQRREAMRAEGIPSPPGAGTRTCTVTEGKHARLSCFVTGEPKPEVWKKDQGLVTEGRRHVVEDEQENF
VLKILFCKQSDRGLYTCTASNLVGQTYSSVLVVVREPTVPFKKRLQDLEVREKESATFQCEVAQPAEEAAWFK
EETRLWASAKYDIEEEGETERRLTVRNVSADDDAVYICETTEGSRVVAELSVQGNLTKLPRKTAVRTGDTAIF
WVELAVPEGPVWRWRNQEEMVAGGRVAITAEGTCHTLTI FQCTLEDMGEVAFVSGGCRTTTQFCVSAPRRPPL
YPPADPVVKAKTESSVTLWSAPPHGDRPVTIDGYVLEKRLGAYAWSRCHEAGWLATTEFTITGVAAEEDGFQ
FRVSAINHFGQGPYLEFPGTMHLVPM LAVKTP LKAVEAVEGGEVTFVSDLT VASSGEWFLDGEAL KASSIYVI
RCDRTRHMLTIREV PARLHGAQLKFVANGIETSIQMVVRAALGLPSSKLPAAAAAREVLAQLHEEAQLLAE LSD
QAAA VTWLKDGRELSLGPYEMQVSAGRRALLVRDVAQDDAGLYECVSRGSR TAYQLLVQDITDGYRDWGPAG
PQKHMCKCAGAKIARYLGSSCYRFLQYDKGVWHWLEAALDTRQKGKTS SCSLHEKPKLVFAKQQAHSEVKA E
AGNSATLSCEVTQAQTEVTWFKDGKLLSSSSKVRMEASGCSRRLVVQQAGKADAGEYSCEAGGQKLSFRLDVA
EPKLVFAKQQAHSEVKA EAGASATLSCEVAQAQTEVTWFKDGKLLSSSSKVRMEASGCSRRLVVQQAGKADA
GEYSCEAGGQKLSFRLDVAEPKMFVFAKEQQARSEVKA EAGASATLSCEVAQAQTEVTWFKDGKLLSSSSKVRM
EASGCSRRLVVQQAGKADAGEYSCEAGGQKLSFRLDVTEPKLVFAKEQQARSEVKA EAGASATLSCEVAQAQ T
EVTWFKDGKLLSSSSKVRMEASGCSRRLVVQQAGKADAGEYSCEAGGQKLSFRLDVAEPKLVFAKEQQARSEV
KAEAGNSATLSCEVAQAQTEVTWFKDGKLLSSSSKVRMEASGCSRRLVVQQAGKADAGEYSCEAGGQKLSFHL
DVTEPKLVFAKEQQAHSEVKA EAGASATLSCEVAQAQTEVTWFKDGKLLSSSSKVRMEASGCSRRLVVQQAGK
ADAGEYSCEAGGQKLSFRLDVAEPKLVFAKEQQARSEVKA EAGASATLSCEVAQAQTEVTWFKDGKLLSSSSK
VRVEASGCSRRLVVQQAGKADAGEYSCEAGGQKLSFRLDVAEPKLVFAKEQQANSEVKA EAGASATLSCEVAQ
AQTEVTWFKDGKLLSSSSKVRVEASGCSRRLVVQQAGKADAGEYSCEAGGQKLSFRLDVAEPKLAFAKEQQAH
SEVKA EAGASATLSCEVAQAQTEVTWFKDGKLLSSSSKVRVEASGCSRRLVVQQAGKADAGEYSCEAGGQKLS
FRLDVAEPKLAFAKEQQAHSEVKA EAGASATLSCEVAQAQTEVTWFKDGKLLSSSSKVRVEASGCSRRLVVQQ
AGKADAGEYSCEAGGQKLSFRLDVAEPKLAFAKEQQAHSEVKA EAGASATLSCEVAQAQTEVTWFKDGKLLSS
SSKVRVEASGCSRRLVVQQAGKADAGEYSCEAGGQKLFRLDVAEPKLMFAKEQQAHSEVKA EAGASATLSCE
VAQAQTEVTWFKDGKLLSSSSKVRVEASGCSRRLVVQQAGKADAGEYSCEAGGQKLSFRLDVAEPKLVFAKEQ
QAHSEVKA EAGASATLSCEVAQAQTEVTWFKDGKLLSSSSKVRVEASGCSRRLVVQQVQKADAGEYSCEARGQ
KLSFRLDVADTRLMFAKEQQARTEVKA EAGNSATLSCEVAQAQTEVTWFKDGKLLSSSSKVRVEASGCSRRLV
VQQAGKADAGEYSCEAGGQKLSFRLDVAEAE SQIPERPSRREPLVVKEHETIILTATIAAPSVAAV TWLKDGV
EIRRSKRHEATSLGDTHTLTVRGAQVLD SAIYSCRVGKEGQDFPVQVEEVA AKFSKPLEPVEGELGGTVMLVC
ELSP EQAEVWRCGNTQLRPGKRFQMTSEGPRRTLTVSGLREDDAE EYVCE SRDDRTSARLT VKVPRVVKFTS
GLSAMVAEEGQEATFQCVVSPSDAGVTWYKDGMLQLPSEKFMVESGASRSLTILGLTLEDAGQVTVAEAGAS
SSAALRVREAPVLFKKKLEPQTVEERTSVTLEVELTRPWPEVKWTRNAAVLTPSENVEIRAEGARHCLVLR SV
GFADRGGFFGCETPDDKTQAKLNVEMRQVRLVRLGQLEVEAKEQGTASMDVELSHAEVEGSWTRDGLRLQPGPKC
HLAVQGPVHILTL SALQPQDSGLVAFRAEGVHTSARLIVTELPVSFTRVLQDQVATQKEKVTLECELSRPFVDV
RWLKDGVELRAGKAIGIVAQGTCSRSLVIYRCETGDQGVYVCDALDAQTSASLRVQGRTYTLIFRRVLAEDAGE
VKFVAENAESRAHLRVKELPVTLLRPLRDKIAMEKHRGVLECCQVSRASAVRWFKGGVELQSGPKYEVVSDGL
YRKLVIN DVQPEDEDTYTC DAGNVKTS AQFFVEEQSITIVRGLKDMTVM EPAPAWFECETSIPSVRPPKWL LG
KTVLQAGGNVGL EQDGTVHRLTLHKTCSTMTGPVHFTIGKSRSSAQLVSDI PVVLT RPLEPKAGRELQSVVL
SCDFRPAPKAVQWYKDDT PLSPEKFKMALEGGMAELRILRLTPADAGVYRCQAGSAQSSAEVTV EAREVTVI
QPLQDAEAMEEGRVCFSC ELSHKDEDIEWLSLNGTPLYNDSFHEISHEGCLHTLVLSVSRQADTGTVCATSPKV
SVSARLVVKGKPVVFLKALDDVSAEERGTLT LQCEVSDPEARVVWRKDGVELGSPDKYDFLHKAGARGLTVHD
LSHEDAGLYTCQVGSKETQSKVSVHDLHVGITKRLKTVEVLEGE SCSFECVLSHESPSDPVAVTVGGKTVGGS
GHFHAVRQGRKYTLTVKDAALSDAGEVVF SVLGLT SKASLI IRE RPVDITKPLEDQRTTLGEDVMLSCELSRA
GTSVRWLKDGKAIRKSQKYDLLSEGTRAVLVVRKASLKDSGEYTCETEASKSTAKLCEVEKANRFTEELADLQ
VEEKGRAVFTCKTEHPASVVTWRKGLLELRASGKHVPSQEGLTLKLTINALERTSDTYTCDIGQARTQARLL
VHGQKVRVIEDLED TAVQEGSSAKFCCRIAPADYGPVHWFLDKTPLHSNELNEITVQPGGYHVLTLRQLALKD
SGTVYFEAGDQRTS AALRVTEKPSIFSRPLTDVTVTEGEDLTLVCETTTVDSSVRWTKDGKTLRPSARCQLSH
EGCQAQLLITATTPQDGGRYKCEIGGASSSIVRVHALPVRFRESLKDVEVPEGKAATLRCVLSVAAPVEWR
HGDDVLKSSNKYSLRQEGAVLELVIRDLPQDQSGQYSCSFGDQTTSATLTVKTS SAQFVGLRKNKEATEGTTV
TLRCELTK EAPVEWKKGTETLRNGDKYSLKQDGA VCELQICSLLVADAGEYSCVCGQEKTSATLTVKALLVHF
VRRLSRKEATEGDTTTLQCELSKAAPVEWRKGTETLRDGD RYSLKQDGA VCELQIRSLTIADAGEYLCTCGQE
KTSATLTVRALPAKFKDSLKNEEATEGTTATLSELSKAAPVTWKKGPKTLQSGDGVVLRQDGA VCGLQIHGL
TMADAGEYSCVCGQEKTSATLTVRGLPAKFIEDLRSQEATEGATAILRCELSKAAPVEWRKGETLKDGD RYT
LRQDGA VCELQIRGLAVVDGTGTYSSLPKFT EGLRNEEATEGTMATLRCQMSKAAPVEWRKGETLRDGD RYS
LRQDGA MCELQIRGLTIEDSGEYTCVCGQEKTSATLSVKALPSRFIEDLRSQEATEGTMATLRCQMSKTAPVE
WKKGSETLRDGGRYSLRQDGPVCELQICDLAVEDAGEYSCVCGQEKTSATLSIKALPPRFIEDLRSQEATEGT

MATLRCQMSKAAPVEWRKGSSETLGDGGRYSLRQNGAVCELQIHDLAVEDTGEYSCVCGQEKTSATLNVKALPP
RFIEDLRSQEATEGTMATLRCQMSKAAPVEWRKGSSETLRDGGRYSLRQDGAVCELQIHDLVDVADAGQYSCVCG
QEKTSAVLTVDALPPKFTEGLKKEEATEGTMVTLRCQMSKEATVEWRKGAKTSLSDGGRYSLRQDGAMCELQIC
GLAVEDAGEYSCVCGQEKTSATLSVKALPPRFIEDLRSQEATEGTMATLRCQMSKAAPVEWRKGSSETLRDGD
YSLRQDGAVCELQIRDLAVEDAGEYLCVCGQEKTSATLSVKALPPRFIEDLRSQEATEGTMATLRCQMSKAAP
VEWRKGSKTLRDGDYSLRQDGAMCELQICDLAVEDTDYSCVCGQEKTSATLSVKALPPRFIEDLRSQEARE
GTVATLRCRMSKAAPVEWRKGSSETLKDGDYSLRQEGNLCELQIRDLAVEDTEEYSCVCGQEKTSATLSVKAL
PAKFIEDLRSQEAPESSTVTLRCKLSKKASVWKKGSETLRNGARYSLRQDGAVCELEIRDLTVEDTGEYSCT
CGQERTSATLSIMAPQVVFLQQLNLQAEEGSMASLRCELSVNAAMVWSKGGLELQGDTRREARQQGCVAEL
LLRDLRREDAGEYSCTCGSQTTSATLMVTAAPVRFRELAQADVDEGATARLRCELSREAVSVEWRKGSQQLF
PCAKYQMVQEGTTAELLVHGVEQEDAGEYTCDAHTQSIARLSVRAPKPKFKTDLQSTEQEAAGTARLCCQLS
EAEPGTPVQWLKEGVELHVGSKYEMRRQGAUCELLIHGLEAKDTGEYACLVGQKTLASLRVKEPEVTIVRGL
VDMEVQADEDEFTCKVQAGATDVQWHLQGLPLQSNVTEVAVLADGCTHVLQKGVTLLEDAGTVSFHVGGL
SSSAQLTVRVPEVTVLEPLKDVQLSEGQDAHFRCRLSRASGQEARWALGGVPLQCNEMNDITVEQGTLYLLTL
HKVTLEDAGTITLQVGSSESSEALQKVTAKNTVLRGLENVDALEGGEALFECQLSQPEVAHAHTWLLDDEPVHTS
EKVEVVYFENGLRHLLLLKNLKPQDSCRVTFLAGDVVTSFAFLTVRGWRLEVLEPPHDASVKAGMQVRFTCILS
EAVPVGEATWYINGAAIQPDDTDWTVTTDGSHHALTLNAQPQHAGEVTFFAARDAVASARLSVLALPDPPEDA
EVVGRSDHSVTLSSWVAPMSDGGGLCGYRVEMKEASTGQWQLCHDLVPGPECVVDDLVPKGYFRFVAAVGA
GAGEPVHLPQMVKIAPAPAPAPAPAPAPAPAPETRQAVVGEDICLELEVAADGGEVVWHKGTERRIQPGGHFEVLS
RGQRQMLVIKGFRTEDQGEYRCGPIQGLPSSGAATFNVMVMTSGSGDEVPAQPSLPPEAAQEGDLHLLWEALAR
KRRMSREPTLDSISELPEEDSRVQHLRQEAETAPDLSEGYSTADELARTGEADLSHTSSDDESAGTPSLVT
YLKAGGPGISPLASKHEAQVTSVKPQKQEPVPTCPGGDLAADMPSLDKAAVKIQAAFQYKVRKE
MKQQEGPVFSRTFGDTEAQVGVLRLECVLATKTDMRACWLKDGIELTDGRHYHIDQLKDGTCSLLVTGLAPT
DSGRYTCQVSTKSGRVSHSACVVVSGTESEAESSGGELDDAFRAARRLHRLFRTKSPAELSEELFLSADE
GPGEPEEPADWQTYREDENFVCIRFESLAEARQAVTCFRNMFATMGIGVEISLGEQGRGVEMRIGKVAPTVT
PAVPLAKTPGLQTSDAAPVFLTELQNDVQDGYPMSFDCVVTGQVPSVRWFKDGKLEEDDHYMINEDQQGG
HQLIITAVVPADMGVYRCLAEENSMGVSSSTKAELRVELTSTDYDTAADATETSSYFSAQDDESSREQEGTESDE
GQLPQVLEELKDLQVAPGTRLAKFQLKVKGYPAKLYWFKDGGPLTSDHIRMTDKKTLHTLEIVSVTREDSG
QYAAYSNAVGAAYSSARLLVRGPSEPEEKPASDVHERLVPPRILEKFTPKKVKRGSSITFSVKVEGHPAPSV
HWLKEEAKEKGLWIGPDTPGYTMASSSKQHSVLVLDVGRQHOGTYTCIATNPAGQALCSASLHISGLAKEEEQ
ERVKEALISSFLQGTSAQVSAQMSAESAGFADLVGQSKGESLVAEEAHSHLSLAEVGTTEEFLQKLTQITMVS
AKISQAKLQVPGGDSDEETKTPSASPRHGRSRPSSSVQESSSEEDGDSRGEIFDIYVVTADYPLIGAEQDAI
ILREGQYVEVLDSAHPLRWLVRTKPTKSSPSRQGWVSPAYLDKRLKLSPEWGPTEAPEFPGEAVSEDEYRTRL
SSVIQELLSSEQAFVGELOFLESHHMKHLERSPRVPAVASQKTVIFRNVQDISHFHSSFLKELQCGCTDDD
AMCFIKNQEAFAKEYLELFLVGRVQAESVVVSTPVQEFYKKAEEETLSAKDPTQPPPPPLQHYLEQPVVERVQKYQ
ALLKELIRNKARNRQNCALLEQAYAVVSALPQRAENKLVSLMENYPGTLEALGEPHQGHFIWEGAPGARM
PWKGHNHRVFLFRNYLVICKPRRDSRTDFTSYVFRNMMKLSSIDLNDQVEGDDRAFEVWHEREDSVRKYLLQA
RTVIKNSWVKEICGIQQLRAQPVWRPPEFEEELADCTAELGETVKLACRVTGTPKPIVSWYKDGKPVVDPH
HILIEDPDGSCCTLILDNLTGIDSGQYMCFAASAAGNASTLGKILVQVPPRFVNVKVRATPFVEGEDAQITCTVE
GAPYPQIRWYKDGTLAPGNRYRMLNEPRSGVLVLIQAASKEDLGHYECELVNRLGSTRGGGELYMQSPALR
ARDQHHREQIVAAVEDTSVEGSAHSAQDQAAASVLWRLLGSEALGPSGDLPNTRQSEPPAFEEAASQIP
GAASGTPEVSPQPGTHKGLEQETTSSGSQGWTPVIRVEGAAWPGAGTGQLLLDVHSQVIMETTQRTYVCQAPDT
GVTRAPSMQVTIEDVQVQVGDMAQFDAVIEGHPPPITVWYKGSTQLTSSARLSQRQDGTYSVLVTDVAPHDA
GVYTCVANNAGGQVLCKAELLVHGGDKLDAENQVYRRKLSHSFYDVQEEIGRGVFGFVKRVQHKGNMFCAAKF
IPLRSKTRAQAYQYRILATLGHPLVTGLLDQFETRKTLLIILELCSSEELLDRLFKKGVVTEAEVKVYIQQL
VEGLHYLHSHGILHLDIKPPNIIIMVHPAREDIKICDFGFAQKITPSEPQYSKYGSPEFVSPEIEQNPVSEGS
DIWAMGVISYLSLTCSSPFAGESDRATLLNVLEGRVSWSSPTAAHLSSEDAKDFIKATLQRTPRARPSTSQCLA
HPWFLKSMPAEEAHFINTKQLKFLARSRWQRSLSMSYKSIIVMRSIPELLQGPPDPSPLGVARHLRGEASGAS
SSSSSSDNELAPFARAKSLPPSPVTHSPLLHPRGFLRPSASLPEETEASMPPTADAAPASPQASAGPPASPGCV
PRHSVSISSLFYQQAGEGAERGNKTSGAKRHPARRRHLLKGGYIARALPGLREPLMEYSLEEEAAREEQASIM
TKTPSFETALRLPSSSVREVPGRSHSLDNPPVTTGPSPEACKEQLLFPSTGLTHETAKDRGHKEGFLQESV
PFPMSGDSRPGKQEGSSQDSCRKPASSCHSELGSGSQEGCGPPSSQSLGSLPPQSLKKELTSCGPLFSEQ
PQAAPFPTQVSPLLGKEPEQDGSLEGPVVPSSSPGASQVDASLDTEGLESEAGTDCDFTPPPQRPQEQAT
TRKFSLESRGGYAGVAGYGTFAFGDAGGMLGQGLPLMARMAVWSQSSEEQDEAATESQPLESGLPIAEASG
VPLRTSPSLTPWEEVEQVSLVQIRDLSGDAEAADTISLDISEVDPAYLNLSDLYDIKYLPEFEMI FRRVPKPI
EQPESPGSETEAGQGLADFLLEAAWPWPGELGLRAGLEITEEPEEPGDLEALLGEAAVGRKRKWSPSRGLFQF
PGRCLSGEEPVELGLRQRVKASMAHISRILKGRPEGPEREPPRKKAGLASFRLSGLKGRDQELSDEAVVLGQ
SVTLACQVLAQPTAQTWSKDGVLLESSGHLLISSTLKNFQLLTIIVVKEEDLGTYTCCVSNPLGTAVTTGVL

RKAERPSSSPRPEVGEELYKDAVLLVWKPVESCGPVTYIVQCCIEGGSWTTLASDISDCCYLTKGLSRGGMYIF  
RTACVSKAGMGPISSPSEQVLLGGPNHLASEEESSRGRPAQLLPSTKTFQFQMQIRRRGRFSVVRQCREKASGR  
ALAAKIVPYQPEDKTAVLREYEALRHLHPHLAQLHAAYLSRHLVLI LELCSGPELLPSLAERESYSESDVK  
DYLWQMLSATQYLHAQHILHLDLRSNNMMVTEYNLLKVIDLGNALDQEKVPAPENFKDYLETMAPELLEGG  
GAVPQTDIWAIGVTAIFIMLSGEY PESSSEGTRDLQKGLRKLIRLSRCYAGLSGGAVAFLOSSLCAQPWGRPCA  
STCLQCGLWTEEGPTGSRPTPVTFPTVRLRAVFREREKRRALLYKKNLAQVR\*  
>rs256529946\_ENSMUSP00000158795\_c.21349:T>AATCAATCAATCT\_p.V7117ESINL-ins  
ENSMUST00000238536.2|Obscn-210|ENSMUSG00000061462|-  
|chr11:g.58912292:A>AGATTGATTGATT  
MDHSFSGAPRFLTRPKAFVSVGKDATLSCQIVGNPTPHVSWEKDRQPVEAGARFRLAQDGDVYRLTILDLAL  
GDSGQYVCRARNAIGEFAAVGLRVDSEGTCAEQAPHFLLRPTSIRVREGADATFRCRVGGSPQPAVSWSKDG  
RRLGPPDAPHVRVEEHGESSALRIR SARPRDGGTYEVRAENPLGSASAAAALVVDSDAEVAGPPGTSTATLLA  
HLQQRREAMRAEGIPSPPGAGTRTCTVTEGKHARLSCFVTGEPKPEVWKKDQGLVTEGRRHVVEDEQENF  
VLKILFCQKSDRGLYTCTASNLVQTYSSVLVVVREPTVPFKKRLQDLEVREKESATFQCEVAQPAEAWFK  
EETRLWASAKYDIEEGETERRLTVRNVSADDDAVYICETTEGSRVVAELSVQGNLTKLPRKTAVRTGDTAIF  
WVELAVPEGPVWRWRNQEEMVAGGRVAITAEGTCHTLTI FQCTLEDMGEVAFVSGGCRTTTQFCVSAPRRPPL  
YPPADFPVVKAKTESSVTLWSAPPHGDRPVITDGYVLEKRLKLGAYAWSRCHEAGWLATFTITGVAEEGDFQ  
FRVSAINHFGQGPYLEFPGTMHLVPLAVKTPKAVEAVEGGEVTFVSDLTAVASSGEWFLDGEALKASSIYVI  
RCDRTRHMLTIREV PARLHGAQLKVFVANGIETSIQMVVRAALGLPSSKLPAAAAAREVLAQLHEEAQLLAE LSD  
QAAA VTLKDGRELSLGPKEYMQVSAGRRALLVRDVAQDDAGLYECVSRGSR TAYQLLVQDITDGYRDWGPAG  
PQKHMCKCAGAKIARYLGSSCYRFLQYDKGVWHWLEAALDTRQKGTSSCSLHEKPKLVFAKQQAHSEVKA  
AGNSATLSCEVTQAQTEVTWFKDGKLLSSSSKVRMEASGCSRRLVVQQAGKADAGEYSCEAGGQKLSFRLDVA  
EPKLVFAKQQAHSEVKAEGASATLSCEVAQAQTEVTWFKDGKLLSSSSKVRMEASGCSRRLVVQQAGKADA  
GEYSCEAGGQKLSFRLDVAEPKMFVFAKEQQARSEVKAEGASATLSCEVAQAQTEVTWFKDGKLLSSSSKVRM  
EASGCSRRLVVQQAGKADAGEYSCEAGGQKLSFRLDVTEPKLVFAKEQQARSEVKAEGVNSATLSCEVAQAQ  
EVTWFKDGKLLSSSSKVRMEASGCSRRLVVQQAGKADAGEYSCEAGGQKLSFRLDVAEPKLVFAKEQQARSEV  
KAEAGNSATLSCEVAQAQTEVTWFKDGKLLSSSSKVRMEASGCSRRLVVQQAGKADAGEYSCEAGGQKLSFHL  
DVTEPKLVFAKEQQAHSEVKAEGASATLSCEVAQAQTEVTWFKDGKLLSSSSKVRMEASGCSRRLVVQQAGK  
ADAGEYSCEAGGQKLSFRLDVAEPKLVFAKEQQARSEVKAEGASATLSCEVAQAQTEVTWFKDGKLLSSSSK  
VRVEASGCSRRLVVQQAGKADAGEYSCEAGGQKLSFRLDVAEPKLVFAKEQQANSEVKAEGASATLSCEVAQ  
AQTEVTWFKDGKLLSSSSKVRVEASGCSRRLVVQQAGKADAGEYSCEAGGQKLSFRLDVAEPKLAFAKEQQAH  
SEVKAEGASATLSCEVAQAQTEVTWFKDGKLLSSSSKVRVEASGCSRRLVVQQAGKADAGEYSCEAGGQKLS  
FRLDVAEPKLAFAKEQQAHSEVKAEGASATLSCEVAQAQTEVTWFKDGKLLSSSSKVRVEASGCSRRLVVQQ  
AGKADAGEYSCEAGGQKLSFRLDVAEPKLAFAKEQQAHSEVKAEGASATLSCEVAQAQTEVTWFKDGKLLSS  
SSKVRVEASGCSRRLVVQQAGKADAGEYSCEAGGQKLFRLDVAEPKLMFAKEQQAHSEVKAEGASATLSCE  
VAQAQTEVTWFKDGKLLSSSSKVRVEASGCSRRLVVQQAGKADAGEYSCEAGGQKLSFRLDVAEPKLVFAKEQ  
QAHSEVKAEGASATLSCEVAQAQTEVTWFKDGKLLSSSSKVRVEASGCSRRLVVQQVQKADAGEYSCEARGQ  
KLSFRLDVADTRLMFAKEQQARTEVKAEGNSATLSCEVAQAQTEVTWFKDGKLLSSSSKVRVEASGCSRRLV  
VQQAGKADAGEYSCEAGGQKLSFRLDVAEAEESQIPERPSRREPLVVKEHETIILTATIAAPSAAVTWLKDG  
EIRRSKRHEATSLGDTHTLTVRGAQVLD SAIYSCRVGKEGQDFPVQVEEVAAKFSKPLEPVEGELGGTVMLVC  
ELSPQAEVWRCGNTQLRPGKRFQMTSEGPRRTLTVSGLREDDAEYVCE SRDDRTSARLTVKVPVVKFTS  
GLSAMVAEEGQEATFQCVVSPSDAGVTWYKDGMLQPSKFKVMVESGASRSLTILGLTLEDAGQVTVAEAGAS  
SSAALRVREAPVFLFKKLEPQTEERTSVTLEVELTRPWPEVKWTRNAAVLTPSENVEIRAEGARHCLVLRV  
GFADRGGFFGCETPDDKTQAKLNVEMRQVRLVVRGLQVEEAKEQGTASMDVELSHAEEVGSWTRDGLRQLQPGPKC  
HLAVQGPVHILTL SALQPQDSGLVAFRAEGVHTSARLIVTEL PVSFTRVLQDVVATQKEKVTLECELSRPVDV  
RWLKDGVELRAGKAIGIVAQGTCSRSLVIYRCETGDQGVYVCDALDAQTSASLRVQGRTYTLIFRRLAEDAGE  
VKFVAENAESRAHLRVKELPVTLLRPLRDKIAMEKHRGVLECCQVSRASAVRWFKGGVELQSGPKYEVVSDGL  
YRKLVINVDQPEDEDTYTC DAGNVKTSAQFFVEEQSITIVRGLKDMTVMEPAPAWFECETSIPSVRPPKWL  
KTVLQAGGNVGLQDGTVHRLTLHKTCSTMTGPVHFTIGKSRSSAQLVSDIPVVLTRPLEPKAGRELQSVVL  
SCDFRPAPKAVQWYKDDTPLSPSEKFKMALEGMALRILRLTPADAGVYRCQAGSAQSSAEVTVAREVTVI  
QPLQDAEAMEEGRVCFSCELSHKDEDEI EWSLNGTPLYNDSFHEISHEGCLHTLVLSVSRQADTGTVCATSPKV  
SVSARLVVKGKPVVFLKALDDVSAEERGLTLTQCEVSDPEARVVRKDGVELGSPDKYDFLHKAGARGLTVHD  
LSHEDAGLTYCQVGTSTKTSKVSVDLHVGITKRLKTVEVLEGESECSFECVLSHESPSDPAVWTVGGKTVGGS  
GHFHAVRQRKTYTLTKVDAALSDAGEVVSGLVGLTASKASLIIRERPV DITKPLEDQRTTLGEDVMLSCELSRA  
GTSVRWLKDGKAIRKSQYD LLSSEGTRAVLVVRKASLKDSGEYTCETEASKSTAKLTCVEEKANRFEELADLQ  
VEEKGRAVFTCKTEHPASVVTWRKGLLELRASGKHVPSQEGTLTKLTINALERTSDTYTCDIGQARTQARLL  
VHGQKVRVIEDLEDTAVQEGSSAKFCRIAPADYGPVHWFLDKTPLHSNELNEITVQPGGYHVLTLRQLALKD  
SGTVYFEAGDQRTS AALRVTEKPSIFSRPLTDVTVTEGEDLTLVCE TTTVDSSVRWTKDGKTLRPSARCQLSH

EGCQAQLLITATTPQDGGRYKCEIGGASSSSIVRVHALPVRFRRESLKDVEVPEGKAATLRCVLSVVAAPVEWR  
 HGDDVLKSSNKYSLRQEGAVLELVIRDLQPDQSGQYSCSFGDQTTSATLTVKTSQAQFVGLKRNKEATEGTTV  
 TLRCELTKAPVEWKKGTETLRNGDKYSLKQDGAVALCELQICSLVADAGEYSCVCGQEKTSATLTVKALLVHF  
 VRRLSKEATEGDTTTLQCELSKAAPVEWRKGTETLRDGDYSLKQDGAVALCELQIRSLTIADAGEYLCTCGQE  
 KTSATLTVRALPAKFKDSLKNEEATEGTTATLSCELSKAAPVTWKKGPKTLQSGDKYVLRQDGAVALCELQIHGL  
 TMADAGEYSCVCGQEKTSATLTVRGLPAKFIEDLRSQEATEGATAILRCELSKAAPVEWRKGSSETLKDGDYR  
 LRQDGAVALCELQIRGLAVVDGTYSLSLPTKFTTEGLRNEEATEGTMATLRCQMSKAAPVEWRKGSSETLRDGDYR  
 LRQDGAVALCELQIRGLTIEDSGEYTCVCGQEKTSATLSVKALPSRFIEDLRSQEATEGTMATLRCQMSKTA  
 PVEWKKGSETLRDGGYSLRQDGPVCELQICDLAVEDAGEYSCVCGQEKTSATLSIKALPPRFIEDLRSQEATEG  
 MATLRCQMSKAAPVEWRKGSSETLGDGGYSLRQNGAVCELQIHDLAVEDTGEYSCVCGQEKTSATLNVKALPP  
 RFIEDLRSQEATEGTMATLRCQMSKAAPVEWRKGSSETLRDGGYSLRQDGAVALCELQIHDLVEDAGQYSCVCG  
 QEKTSAVLTVDALPPKFTTEGLKKEEATEGTMVTLRCQMSKEATVEWRKGAKTLSDDGGYSLRQDGAVALCELQI  
 GLAVEDAGEYSCVCGQEKTSATLSVKALPPRFIEDLRSQEATEGTMATLRCQMSKAAPVEWRKGSSETLRDGD  
 YSLRQDGAVALCELQIRDLAVEDAGEYLCVCGQEKTSATLSVKALPPRFIEDLRSQEATEGTMATLRCQMSKAAP  
 VEWRKGSSETLRDGDYSLRQDGAVALCELQICDLAVEDTGDYSCVCGQEKTSATLSVKALPPRFIEDLRSQEARE  
 GTVATLRCRMSKAAPVEWRKGSSETLKDGDYSLRQEGNLCELQIRDLAVEDTEEYSCVCGQEKTSATLSVKAL  
 PAKFIEDLRSQEATEGTMVTLRCKLSKASVWVWKKGSETLRNGARYSLRQDGAVALCELQIRDLTVEDTGEYSCT  
 CGQERTSATLSIMAPQVVFQQPLQNLQAEEGSMASLRCELSVNAAMVWSKGGLELQGDTRREARQQCGVAEL  
 LLRDLRREDAGEYSCTCGSQTTSATLMVTAAPVRFRLRELQAQDVDEGATARLRCELSREAVSVEWRKGSQQLF  
 PCAKYQMVQEGTTAELLVHGVEQEDAGEYTCDAHTQSIARLSVRAPKPKFKTDLQSTEQEAAGTARLCCQLS  
 EAEPGTPVQWLKEGVELHVGSKYEMRRQGAVALCELLIHGLEAKDTGEYACLVGGQKTLASLRVKEPEVTIVRGL  
 VDMEVQADEDEFTCKVQAGATDVQWHLQGLPLQSNVTEVAVLADGCTHVLQKGVTLLEDAGTVSFHVGGL  
 SSSAQLTVRVPEVTVLEPLKDVQLSEGQDAHFRCRLSRASGQEARWALGGVPLQCNEMNDITVEQGTLYLLTL  
 HKVTLEDAGTITLQVGSSESQAQLKVTAKNTVLRGLENVDALEGGELFECQLSQPEVAHAHTWLLDDEPVHTS  
 EKVEVVYFENGLRHLLKLNKLPQDSCRVTFLAGDVVTSFAFLTVRGWRLEVLPEPHDASVKAGMQVRFTCILS  
 EAVPVGEATWYINGAAIQPDDTDWTVTTDGSHHALTLNAQPHAGEVTFAAARDAVASARLSVLAALPDPPEDA  
 EYVGRSDHSVTLSWVAPMSDGGGLCGYRVEMKEASTQWQQLCHDLVPGPECVDDLVPGKTYRFRVAAVGPA  
 GAGEPVHLPQMVKIAPAPAPAPAPAPAPAPAPETRAVVGEDICLELEVAADGGEVVWHKGTERRIQPGGHFEVLS  
 RGQRQMLVIKGFRTEDQGEYRCGPIQGLPSSGAATFNVMVMTSGSGDEVPAQPSLPPEAAQEGDLHLLWEALAR  
 KRRMSREPTLDSISELPEEDSRVQHLRQEAETAPDLSEGYSTADELARTGEADLSHTSSDDESRACTPSLVT  
 YLKKAGGPGISPLASKHEAQVTSVKPQKQEPVPTCPGGDLAADMPSLDKAAVKIQAAFQYKVRKE  
 MKQQEGPVFSRTFGDTEAQVGDVLRLECVLATKTDMRACWLKDGIELTDGRHYHIDQLKDGTCSSLVVTGLAPT  
 DSGRYTCQVSTKSGRVSHSACVVVSGTESEAESSGGELDDAFRAARRLHRLFRTKSPAELSEELFLSADE  
 GPGEPEPADWQTYREDENFVCIRFESLAEARQAVTCFRNMFATMGIGVEISLGEQGRGVEMRIGKVAPTVT  
 PAVPLAKTGLQTSDAAPVFLTELQNDVQDGYPMSFDCVVTGQVPSVRWFKDGLLEDDHYMINEDQQGG  
 HQLLITAVVPADMVYRCLAENSMGVSSTKAELRVELTSTDYDTAADATETSSYFSAQYLSRREQEGTESDE  
 GQLPQVLEELKDLQVAPGTRLAKFQLKVKGYPAKLYWFKDGGQPLTSDHIRMTDKKTLHTLEIVSVTREDSG  
 QYAAYSNAVGAAYSSARLLVRGPSEPEEKPASDVHERLVPPRILEKFTPKKVKRGSSITFSVKVEGHPAPSV  
 HWLKEEAKEKGLWIGPDTPGYTMASSSKQHSVLVLDVGRQHQTTCIATNPAGQALCSASLHISGLAKEEEQ  
 ERVKEALISSFLQGTSAVSAQMSAESAGFADLVGQSKGESLVAEEAHSHLSLAEVGTTEEFLQKLTQITMVS  
 AKISQAKLQVPGGDSDEETKTPSASPRHGRSRPSSSVQESSSEEDGDSRGEIFDIYVVTADYPLGAEQDAI  
 ILREGQYVEVLDSAHPLRWLVRTPKTKSSPSRQGWVSPAYLDKRLKLSPEWGPTEAPEFPGEAVSEDEYRTRL  
 SSVIQELLSSEQAFVQELQFLESHHMKHLERSPRVPAAVASQKTVIFRNVQDISHFHSSFLKELQCGTDDDDV  
 AMCFIKNQEAFAFEKYLEFLVGRVQAESVVVSTPVQEFYKKYAEETLSAKDPTQPPPPLOHYLEQPVERVQKYQ  
 ALLKELIRNKARNRQNCALLEQAYAVVSALPQRAENKLVSLMENYPGTLEALGEPHQGHFIWVGAAPGARM  
 PWKGNHRHVFVFRNYLVICKPRRDSRTDTFSYVFRNMMKLSSIDLNDQVEGDDRAFEVWHEREDSVRKYLLQA  
 RTVVIKNSWVKEICGIQQLRAQPVWRPPEFEEELADCTAELGETVKLACRVTGTPKPIVSWYKDGKPVVDPH  
 HILIEDPDGCTLILDLNLTGIDSGQYMCFAASAAGNASTLGKILVQVPPRFVNVKVRATPFVEGEDAQITCTVE  
 GAPYPQIRWYKDGTLTLLAPGNRYRMLNEPRSGVLVLESINLIQAASKEDLGHYECVNLVRLGSTRGGGELYMQS  
 PALRARDQHHREQIVAAVEDTSVEGSAHSAQDQAAASVLWRLGSEALGPSGDLPNTRQSEPPAFEEAAA  
 SQIPGAASGTPEVSPQPGTHKGLEQETTSSGSQGWVPIRVEGTAWPGAGTQQLLLDVHSQVIMETTQRTYVQC  
 APDGTGVTTRAPSMQVTIEDVQVQVGDMAQFDAVIEGHPPPITVWYKGSTQLTSSARLSQRQDGTYSVLVTDVA  
 PHDAGVYTVKANNAGQVLCKAELLVHGGDKLDAENQVYRRKLHSFYDVQEEIGRGVFGFVKRVQHKGNKMF  
 AAKFIPLRSKTRAQAYQERDILATLGHPLVTGLLDQFETRKTLLILILELCSSEELDLRFLFKKGVVTEAEVKVY  
 IQQLVEGLHLYLHSHGILHLDIKPPNILLMVHPAREDIKICDFGFAQKITPSEPQYSKYGSPEFVSPETIEQNPV  
 SEGSDIWMAGVISYLSLTCSSPFAGESDRATLLNVLEGRVSWSSPTAAHLSSEDAKDFIKATLQRTPRARPSTS  
 QCLAHPWFLKSMPAEEAHFINTKQLKFLARSRWQRSLMSYKSIIVMRSIPPELLQGPDPSPSLGVARHLRGEA  
 SGASSSSSSSDNELAPFARAKSLPPSPVTHSPLLHPRGFLRPSASLPEETEASMTADAAVPASPQAGPPAS



PGCVPRHSVSISSLFYQQAGEGAERGNKTSGAKRHPARRRHLLKGGYIARALPGLREPLMEYSLLEEEAAREEQ  
ASLMTKTPSFETALRLPSSSVREVPGRSHSLDNPPVTTGPSPEACKQQLFPPSTGLTHETAKDRGHKEGFL  
QESVFPFPPMSGDSRPGKQEGSSQDSCRGPASSCHSELGSSQEGCGPPSSQSLGSLPPQSLKKELESTSCGPL  
FSEQPQAAPFPTQVSPLLGSEKEPQDGLSEGPVVPVSSSPGSASQVDASLDTEGLSEAGDTCDFTPPPQRPQ  
EQATTRKFSLESRRGGYAGVAGYGTFAFGGDAGGMLGQGPLWARMMAVVSQSSEEQDEAATESPQPLESLGPIA  
EASGVPLRTSPSLTPWEEVEQVSLVQIRDLSGDAAEADTISLDISEVDPAYLNLSDLYDIKYLPFEFMI FRRV  
PKPIEQPESPGSETEAGQGLADFLLEAAWPWPGELGLRAGLEITEEPPEPGDLEALLGEAAVGRKRKWSPSRG  
LFQFPGRCLSGEEPVELGLRQVRKASMAHISRIKGRPEGPEREGP PRKKAGLASFRLSGLKGRDQELSD EAV  
VLGQSVTLACQVLAQPTAQATWSKDGVLLES SGHLLISSTLKNFQLLTILVVKEEDLGTYTCCVSNLGTAVT  
TGVLKRAERPSSSPRPEVGELYKDAVLLVWKPVE SCGPVTYIVQCCIEGGSWTTLASDISDCCYLTGKLSRGG  
MYIFRTACVSKAGMGPYSSPSEQVLLGGPNHLASEEESRGRPAQLLPSTKTFAFQMQIRRGFRSVVRQCREK  
ASGRALAAKIVPYQPEDKTAVLREYEALKRHLHHPHLAQLHAAVLSRHLVLI LELCSGPELLPSLAERESYSE  
SDVKDYLWQMLSATQYLHAQHILHLDLRSENMMVTEYNLLKVIDLGNAQSLDQEKVPAPENFKDYLETMAPEL  
LEGQGAVPQTDIWAIGVTA FIMLSGEY PESS EGTDLQKGLRGLIRLSRCYAGLSGGAVAF LQSS LCAQPWG  
RPCASTCLQCGLWTEEGPTGSRPTPVTFPTVRLRAFVREKRRALLYKKNLAQVR\*  
>rs256529946\_ENSMUSP00000038264\_c.19189:T>AATCAATCAATCT\_p.V6397ESINL-ins  
ENSMUST00000047441.14|Obscn-202|ENSMUSG00000061462|-  
|chr11:g.58912292:A>AGATTGATTGATT  
MDHSFSGAPRFLTRPKAFVSVGKDATLSCQIVGNPTPHVSWEKDRQPVEAGARFLAQDGDVYRLTILDLAL  
GDSGQYVCRARNAIGEFAAVGLRVDSEGTCAEQAPHFLLRPTSIRVREGADATFRCRVGGSPQPAVSWSKDG  
RRLGPPDAPHVRVEEHGESSALRIRSARPRDGGTYEVRAENPLGSASAAAALVVDSDAEVAGPPGTSTATLLA  
HLQQRREAMRAEGIPSPPGAGTRTCTVTEGKHARLSCFVTGEPKPE TVWKKDQGLVTEGRRHVVEDEQENF  
VLKILFCKQSDRGLYTCTASNLVGQTYSSVLVVVREPTVPFKKRLQDLEVREKESATFQCEVAQPAEEAAWFK  
EETRLWASAKYDIEEEGETERRLTVRNVSADDDAVYICETTEGSR TVAELSVQGNLTKLPRKTAVRTGDTAIF  
WVELAVPEGPPVRWLRNQEEMVAGGRVAITAEGTCHTLTI FQCTLEDMGEVAFVSGGCRTTTQFCVSAPRRPPL  
YPPADFPVVKAKTESVTLWSAPPHGDRPVTIDGYVLEKRLKGLAYAWSRCHEAGWLATFTITGVAEEDGFQ  
FRVSAINHFQKQPYLEFPGTMHLVPLAVKTP LKVAEVEGGEVTFVSDLTVASGSEWFLDGEALKASSIYVI  
RCDRTRHMLTIREV PARLHGAQLKFVANGIETSIQMVVRAALGLPSSKLPAAAAAREVLAQLHHEEAQLLAE LSD  
QAAA VTWLKDGRELSLGPKYEMQVSAGRRALLVRDVAQDDAGLYECVSRGSR TAYQLLVQDITDGYRDWGPAG  
PQKHMCKCAGAKIARYLGSSCYRFLQYDKGVWHLEAALDTRQKGTSSCSLHEKPKLVFAKQQAHSEVKA E  
AGASATLSCEVAQAQTEVTWFKDGKLLSSSSKVRMEASGCSRRLVVQQAGKADAGEYSCEAGGQKLSFRLDVA  
EPKMFVFAKEQQARSEVKA EAGASATLSCEVAQAQTEVTWFKDGKLLSSSSKVRMEASGCSRRLVVQQAGKADA  
GEYSCEAGGQKLSFRLDVTEPKLVFAKEQQARSEVKA EAGASATLSCEVAQAQTEVTWFKDGKLLSSSSKVRM  
EASGCSRRLVVQQAGKADAGEYSCEAGGQKLSFRLDVAE PKLVFAKEQQARSEVKA EAGASATLSCEVAQAQ  
EVTWFKDGKLLSSSSKVRMEASGCSRRLVVQQAGKADAGEYSCEAGGQKLSFHLDVTEPKLVFAKEQQAHSEV  
KAEAGASATLSCEVAQAQTEVTWFKDGKLLSSSSKVRMEASGCSRRLVVQQAGKADAGEYSCEAGGQKLSFR L  
DVAE PKLVFAKEQQARSEVKA EAGASATLSCEVAQAQTEVTWFKDGKLLSSSSKVRVEASGCSRRLVVQQAGK  
ADAGEYSCEAGGQKLSFRLDVAE PKLVFAKEQQANSEVKA EAGASATLSCEVAQAQTEVTWFKDGKLLSSSSK  
VRVEASGCSRRLVVQQAGKADAGEYSCEAGGQKLSFRLDVAE PKLAFAKEQQAHSEVKA EAGASATLSCEVAQ  
AQTEVTWFKDGKLLSSSSKVRVEASGCSRRLVVQQAGKADAGEYSCEAGGQKLSFRLDVAE PKLAFAKEQQAH  
SEVKA EAGASATLSCEVAQAQTEVTWFKDGKLLSSSSKVRVEASGCSRRLVVQQAGKADAGEYSCEAGGQKLS  
FRLDVAE PKLAFAKEQQAHSEVKA EAGASATLSCEVAQAQTEVTWFKDGKLLSSSSKVRVEASGCSRRLVVQQ  
AGKADAGEYSCEAGGQKLFRLDVAE PKLVFAKEQQAHSEVKA EAGASATLSCEVAQAQTEVTWFKDGKLLSS  
SSKVRVEASGCSRRLVVQQVQKADAGEYSCEARGQKLSFRLDVAEAEBSQIPERPSRREPLVVKHEHETIILTAT  
IAAPSVAAAVTWLKDGV EIRRSKRHEATSLGDTHTLTVRGAQVLD SAIYSCRVGKEGQDFPVQVEEVA AKFSK P  
LEPVEGELGGTVMLVCELSPEQA E VVWRCNGTQLRPGKRFQMTSEGPRRTLT VSGLREDDAE EYVCE SRDDRT  
SARLTVKVPRVVKFTSGLSAMVAEEGQEATFQCVVSPSDAGVTWYKDGMLQ PSEKFMVMEVGASRSLTILGL  
TLEDAGQVTVEAEGASSAALRVREAPVLFKKKLEPQTVEERTSVTLEVELTRPWPEVKWTRNAAVLTPSENV  
EIRAEGARHCLVLRVSGFADRGFFGCETPDDKTQAKLNVEMRQVRLV RGLQEVEAKEQGTASMDVELSHAEVE  
GSWTRDGLRLQPGPKHLAVQGPVHILTL SALQPQDSGLVAFRAEGVHTSARLIVTEL PVSFTRVLQDVVATQ  
KEKVTLECELSRPVDVRWLKDGVELRAGKAI GIVAQGTCSRSLVIYRCETGDQGVYVCDALDAQTSASLRVQGR  
TYTLIFRRVLAEDAGEVKFVAENAESRAHLRVKELPVTLLRPLRDKIAMEKHRGVLECVSRASAQVRWFKGG  
VELQSGPKYEVVSDGLYKRLVINDVQPEDEDYTGTC DAGNVKTSAQFFVEEQSITIVRGLKDMTVM EPAPAWFE  
CETSIPSVRPPKWLGLKTVLQAGGNVLEQDGTVHRLTLHKTCSTMTGPVHFTIGKSRSSAQLVSDIPVVL T  
RPLEPKAGRELQSVVLSCDFRPAPKAVQWYKDDTPLSPSEKFKMALEGM AELRILRLTPADAGVYRCQAGSA  
QSSAEVTVAREVTVIQPLQDAEAMEEGRVCFSCELSHKDEDI EWSLNGTPLYNDSFHEISHEGCLHTLV LKS  
VRQADTGTVCATSPKVSVSARLVVKGPVVF LKALDDVSAEERGTLTLQCEVSDPEARVVWRKDGVELG PSDK  
YDFLHKAGARGLTVHDL SHEDAGLYTCQVGSKETQSKVSVHDLHVGITKRLKTVEVLEGE SCSFCVLSHESP

SDPAVWTVGGKTVGGSGHFHAVRQGRKYTLTVKDAALSDAGEVVFVSVLGLTSKASLIIRERPVDITKPLEDQR  
TTLGEDVMLSCELSRAGTSVRWLKDGKAIKRSQKYDLLSEGTRAVLVVRKASLKDSGEYTCETEASKSTAKLC  
VEEKANRFTEELADLQVEEKGRAVFTCKTEHPASVVTWRKGLLELRASGKHVPSQEGTLTKLTINALERTDSD  
TYTCDIGQARTQARLLVHGQKVRVIEDLEDTAVQEGSSAKFCCRIAPADYGPVHWFLLDKTPLHSNELNEITVQ  
PGGYHVLTLRQLALKDSGTVYFEAGDQRTSAALRVTEKPSIFSRPLTDVTVTEGEDTLVCEFTTVDSSVRWT  
KDGTKLRPSARCQLSHEGCQAQLLITATTPQDGGRYKCEIGGASSSSIVRVHALPVRVRESLKDVEVPEGKAA  
TLRCVLSVAAPVEWRHGDDVLKSSNKYSLRQEGAVLELVIRDLQPQDSGQYSCSFGDQTTSATLTVKTSQAQ  
FVGKLRNKEATEGTTVTLRCELTKAPVEWKKGTETLRNGDKYSLKQDGAVCELQICSLLVADAGEYSCVCGQ  
EKTSAFLTVMKALLVHFVRRRLRSKEATEGDTTTLQCELSKAAPVEWRKGTETLRDGDYSLKQDGAVCELQIRS  
LTIADAGEYLCTCGQEKTSAITLTVRALPAKFKDSLKNEEATEGTTATLSCELSKAAPVTWKKGPKTLQSGDKY  
VLRQDGAVCGLQIHGLTMADAGEYSCVCGQEKTSAITLTVRGLPAKFIEDLRSQEATEGATAILRCELSKAAPV  
EWRKGETLTKDGDYTLRQDGAVCELQIRGLAVVDTGTYSPLTKFTEGLRNEEATEGTMATLRCQMSKAAPV  
EWRKGETLRDGDYSLRQDGAMCELQIRGLTIEDSGEYTCVCGQEKTSAITLSVKALPPRFIEDLRSQEATEG  
TMATLRCQMSKAAPVEWRKGETLRDGGYSLRQNGAVCELQIHDLAVEDTGEYSCVCGQEKTSAITLNVKALP  
PRFIEDLRSQEATEGTMATLRCQMSKAAPVEWRKGETLRDGGYSLRQDGAVCELQIHDLVEDAGQYSCVC  
GQEKTSAVLTVDALPPKFTEGLKKEEATEGTMVTLRCQMSKEATVEWRKGAKTLSGGYSLRQDGAMCELQI  
CGLAVEDAGEYSCVCGQEKTSAITLSVKALPPRFIEDLRSQEATEGTMATLRCQMSKAAPVEWRKGETLRDGD  
RYSLRQDGAMCELQICDLAVEDTGDYSCVCGQEKTSAITLSVKAPQVVFQQLQNLQAEEGSMASLRCELSDVPN  
AAMVWSKGGLELQGDTRREARQQGCVAELLLRDLRREDAGEYSCVCGSQTTSATLMVTAAPVRFRLRQAQDV  
DEGATARLRCELSREAVSVEWRKGSLLFPKAKYQMVQEGTTAEELLVHGVEQEDAGEYTC DAGHTQSIARLSV  
RAPKPKFKTDLQSTEQEAGGTARLCCQLSEAEPTPVQWLKEGVELHVGSKYEMRRQGA VCELLIHGLEAKDT  
GEYACLVGQKTLASLRVKEPEVTIVRGLVDMEVQADEDFEFTCKVSOAGATDVQWHLQGLPLQSNVEVAV  
LADGCTHVLQKGVTLDEAGTVSFHVGGSSAQLTVRVPEVTVLEPLKDVQLSEGQDAHFRCRLSRASGQEA  
RWALGGVPLQCNEMNDITVEQGTLYLLTLHKVTLEDAGTITLQVGSSESQAQLKVTAKNTVLRGLENVDALEG  
GEALFECQDSQPEVAHTWLLDDEPVHTSEKVEVVYFENGLRHLLLLKLNKLPQDSCRVTFLAGDVVTS AFLTV  
RALPDPPEQDAEVVGRSDHVSVLSWVAPMSDGGGGLCGYRVMKEASTGQWQLCHDLVPGPEVCVDDLVPGKTY  
RFRVAAVGPAGAGEVPVHLPQMVKIA PAPAPAPAPAPAPAPAPETRQAVVGEDICLELEVAADGGEVWHKGTERRI  
QPGGHFEVLSRQQRQMLVIKGFRTEDQGEYRCGPIQGLPSSGAATFNVMVTS GSGDEVPAQPSLPPEAAQEGD  
LHLLWEALARKRRMSREPTLDSISELPEEDSRVQHLRQEAEEAPDLSEGYSTADELARTGEADLSHTSSDDE  
SRAGTPSLVTYLKKAGGPGISPLASKHEAQVTTSVKPKQKQEPVVPFCPPPGDLSAADLMDPSLDKAAVKIQ  
AFKGYKVRKEMKQEGPVFSRTFGDTEAQVGDVLRLECVLATKTD MRACWLKDGIELTDGRHYHIDQLKDGTC  
SLLVTVGLAPTDSGRYTCQVSTKSGRVSHSACVVVSGTESEAESSGGELDDAFRRAARLHRLFRFKSPAELS  
EEELFLSADEGPGEPEPADWQTYREDENFVCIRFESLAEARQAVTCFRNMFMATMGIGVEISLGEQGPGRVEM  
RIGKVAPTVPVAVPLAKTPGLQTSDAAPVFLTELQNDVQDGYPMSFDCVVTGQPVPSVRWFKDGKLEEDDH  
YMINEDQQGGHQLIITAVVPADMGVYRCLAENSMGVSSTKAE LRVELTSTDYDTAADATTESTSYFSAQGYLSS  
REQEGTESDEGLPQVLEELKDLQVAPGTRLAKFQLKVKGYPA PKLYWFKDQPLTSDHIRMTRDKTLHTLE  
IVSVTREDSGQYAAIISNAVGAAYS SARLLVRGPSEPEEK PASDVHERLVPPRILEKFTPKKVKRGSSITFSV  
KVEGHPAPSVHWLKEEAEGVLIWIGPDTPGYTMASSKQHSVLVLLDVGRQHGGTYTCIATNPAGQALCSASLH  
ISGLAKEEEQERVKEALISSFLQGTSAVSAQMSSEAGFADLVGQSKGESLVAAEAHSHLSLAEVGTTEEFLOK  
LTSQITEMVSAKISQAKLQVPGGDSDEETKTPSASPRHGRSRPSSSVQESSSESEDGDSRGEIFDIYVVTADY  
LPLGAEQDAIILREGQYVEVLDSAHPLRWLVRTKPTKSSPSRQGWVSPAYLDKRLKLSPEWGPTEAPEFPGEA  
VSEDEYRTRLSSVIQELLSSEQAFV GELQFLESHHMKHLERSPRVPAAVASQKTVI FRNVQDISHFHSSFLKE  
LQCGCTDDDVAMCFIKNQEA FEKYLEFLVGRVQAESVVVSTPVQEFYKKYAEETLSAKDPTQPPPPLOHYLE  
QPVERVQKYQALLKELIRNKARNRQNCALLEQAYAVVSALPQRAENKLVSLMENYPGTLEALGEP I RQGHFI  
VWEGAPGARMPWKGNHRHVFLFRNYLVICKPRRDSRTDTFSYVFRNMMKLSSIDLNDQVEGDDRAFVWHERE  
DSVRKYLQARTVIKNSWVKEICGIQORLAQPVWRPPEFEELADCTAELGETVKLACRVTGTPKPIVSWYK  
DGKPV EVDPHHILIEDPDGSC TLI LDNLTGIDSGQYMCFAASAAGNASTLGKILVQVPPRFVNVKVRATPFVEG  
EDAQITCTVEGAPYPQIRWYKDGTL LAPGNRYRMLNEPRSGVLVLESINLIQAASKEDLGHYCELVNRLGST  
RGGGELYMQSPALRARDQHHREQIVA AVEGAPSMQVTIEDVQVQVGDMAQFD AVIEGHPPP I V TWYKGSTQLT  
SSARLSQRQDGTYSLVLTVDVAPHDAGVYTCVANNAGQVLCKAELLVHGDKLDAENQVYRRKLHSFYDVQE  
EIGRGVFGVVKRVQHKGNMFC AAKFIPLRSKTRAQAYQERDILATLGHPLVTGLLDQFETRKTLLIILELCS  
SEELLDRLFKKGVVTEAEVKVYIQQLVEGLHYLHSHGILHLDIKPPNIMVHPAREDIKICDFGFAQKITPSE  
PQYSKYGSEPEFVSP EIEQNVPVSEGS DIWAMGVI SYLSLTCCSSP FAGESDRATLLNVLEGRVSWSSPTAAHLS  
EDAKDFIKATLQRTPRARPSTSQCLAHWPFLKSMPEAAEEHFINTKQLFLLARSRWQRSLMSYKSI LVMRSIP  
ELLQGGPPDSPSLGVARHLRGEASGASSSSSSDNELAPFARAKSLPPSPVTHSPLLHPRGFLRPSASLPEETE  
ASMP TADA AV P ASP Q SAG P P AS P G C V P R H S V I S S L F Y Q Q A G E G A E R G N K T S G A K R H P A R R R H L L K G G Y I A R A L  
PGLREPLMEYSLLEEEAAREEQASLMTKTPSFETALRLPSSSVREVPGRSHSLDNPPVTTGSPPEACKEQLLF  
PPSTGLTHETTAKDRGHKEGFLQESVFPFPMSGDSRPGKQEGSSQDSCRGKPASSCHSELGSGSQEGCGPPSS

QSLGSLPPQSLKKELESTSCGPLFSEQPQAAPFPQTQVSPLLGSEKEPQDGLSLEGPVVPVSSSPGSASQVDASL  
 DTEGLSEAGDTCDFTPPPQRPQEQATTRKFSLESRRGGYAGVAGYGTFAFGGDAGGMLGQGPLWARMWAVSOS  
 SEEQDEAATESPQPLESGLPIAEASGVPLRTSPSLTPWEEVEQVSLVQIRDLSGDAEAADTISLSDISEVDPAY  
 LNLSLDLYDIKYLPPFEFMI FRRVPKPIEQPESPGSETEAGQGLADFL EEAAWPWPGEGLGLRAGLEIT EEPPEEPG  
 DLEALLGEAAVGRKRKWSPSRGLFQFPGRCLSGEEPVELGLRQVRKASMAHISRI LKGRPEGPEREPPRKA  
 GLASFRLSGLKGRDQELSDEAVVLGQSVTLACQVLAQPTAQATWSKDGVLLESSEGHLLISSTLKNFQLLTLV  
 VKEEDLGTYTCCVSNPLGTAVTTGVLKKAERPSSSPRPEVGEVLYKDAVLLVWKPVESECGPVTYIVQCCIEGGS  
 WTTLASDISDCCYLTKLSRGGMYIFRTACVSKAGMGPYSSPSEQVLLGGPNHLASEEESRRGRPAQLLPSTK  
 TFAFQMQUIRRGRFSVVRQCREKASGRALAAKIVPYQPEDKTA VLREYEALKRRLHHPHLAQLHAAYLSRHLVL  
 ILELCSGPELLPSLAERESYSESDVKDYLWQMSATQYLHAQHILHLDLRSNNMMVTEYNLLKVIDLGNQSL  
 DQEKVPAPENFKDYLETMAPELLEGQAVPQTDIWAIGVTA FIMLSGEYPESSEGETRDLQKGLRKLIRLSRC  
 YAGLSGGAVAFLOSSLCAQPWGRPCASTCLOCGWLTEEGPTGSRPTPVTFPTVRLRAFVREKRRALLYKXH  
 NLAQVR\*  
 >rs256529946\_ENSMUSP00000049737\_c.21148:T>AATCAATCAATCT\_p.V7050ESINL-ins  
 ENSMUST00000052872.15|Obscn-203|ENSMUSG00000061462|-  
 |chr11:g.58912292:A>AGATTGATTGATT  
 MDHSFSGAPRFLTRPKAFVSVGKDATLSCQIVGNPTPHVSWEKDRQVVEAGARFRLAQDGDVYRLTILDLAL  
 GDSQYVCRARNAIGEAFVAVGLRVDSEGTCAEQAPHFLLRPTSIRVREGADATFRCRVGGSPQPAVSWSKDG  
 RRLGPPDAPHVRVEEHGESSALRIRSARPRDGGTYEVRAENPLGSASAAAAALVVDSDAEVAGPPGTSTATLLA  
 HLQORREAMRAEGIPPSPPGAGTRTCTVTEGKHARLSCFVTGEPKPEVWKKDGQLVTEGRRHVVEDEQENF  
 VLKILFCKQSDRGLYTCTASNLVGTYSVSVLVVREPTVPFKKRLQDLEVREKESATFQCEVAQPAEAAWFK  
 EETRLWASAKYDIEEEGETERRLTVRNVSADDDAVYICETTEGSRVVAELSVQGNLTKLPRKTAVRTGDTAIF  
 WVVELAVPEGPVWRNQEEMVAGGRVAITAEGTCHTLTI FQCTLEDMGEVAFVSGGCRTTTTQFCVSAPRRPPL  
 YPPADPVVKAKTESSVTLSSWAPPHGDRPVTIDGYVLEKRLKLGAYAWSRCHEAGWLATTEFTITGVAAEEDGFQ  
 FRVSAINHFGQGPYLEFPGTMHLVPLAVKTPKAVEAVEGGEVTFVSDLTVASSGEWFLDGEALKASSIYVI  
 RCDRTRHMLTIREVPARLHGAQLKVFANGIETSIQMVVRAALGLPSSKLPAAAAREVLAQLHEEAQLLAELSD  
 QAAAVTWLKDGRSLGPKYEMQVSAGRRALLVDAVQADAGLYECVSRGSRRTAYQLLVQEPKLVFAKQQA  
 SEVKAEEAGNSATLSCEVTQAQTEVTFWKDGKLLSSSSKVRMEASGCSRRLVVQQAGKADAGEYSCEAGGQKLS  
 FRLDVAEPKLVFAKQQAHEVKAEEAGASATLSCEVAQAQTEVTFWKDGKLLSSSSKVRMEASGCSRRLVVQQ  
 AGKADAGEYSCEAGGQKLSFRLDVAEPMVFKEQQARSEVKAEEAGASATLSCEVAQAQTEVTFWKDGKLLSS  
 SSKVRMEASGCSRRLVVQQAGKADAGEYSCEAGGQKLSFRLDVTEPKLVFAKEQQARSEVKAEEVNSATLSCE  
 VAQAQTEVTFWKDGKLLSSSSKVRMEASGCSRRLVVQQAGKADAGEYSCEAGGQKLSFRLDVAEPKLVFAKEQ  
 QARSEVKAEEAGNSATLSCEVAQAQTEVTFWKDGKLLSSSSKVRMEASGCSRRLVVQQAGKADAGEYSCEAGGQ  
 KLSFHLDVTEPKLVFAKEQQAHSEVKAEEAGASATLSCEVAQAQTEVTFWKDGKLLSSSSKVRMEASGCSRRLV  
 VQQAGKADAGEYSCEAGGQKLSFRLDVAEPKLVFAKEQQARSEVKAEEAGASATLSCEVAQAQTEVTFWKDGK  
 LSSSSKVRVEASGCSRRLVVQQAGKADAGEYSCEAGGQKLSFRLDVAEPKLVFAKEQQANSEVKAEEAGASATL  
 SCEVAQAQTEVTFWKDGKLLSSSSKVRVEASGCSRRLVVQQAGKADAGEYSCEAGGQKLSFRLDVAEPKLAFA  
 KEQQAHSEVKAEEAGASATLSCEVAQAQTEVTFWKDGKLLSSSSKVRVEASGCSRRLVVQQAGKADAGEYSCEA  
 GGQKLSFRLDVAEPKLAFAKEQQAHSEVKAEEAGASATLSCEVAQAQTEVTFWKDGKLLSSSSKVRVEASGCSR  
 RLVVQQAGKADAGEYSCEAGGQKLSFRLDVAEPKLAFAKEQQAHSEVKAEEAGASATLSCEVAQAQTEVTFWKD  
 GKLLSSSSKVRVEASGCSRRLVVQQAGKADAGEYSCEAGGQKLFRLDVAEPKLMFAKEQQAHSEVKAEEAGAS  
 ATLSCEVAQAQTEVTFWKDGKLLSSSSKVRVEASGCSRRLVVQQAGKADAGEYSCEAGGQKLSFRLDVAEPK  
 VFAKEQQAHSEVKAEEAGASATLSCEVAQAQTEVTFWKDGKLLSSSSKVRVEASGCSRRLVVQQVQKADAGEYS  
 CEARGQKLSFRLDVADTRLMFKEQQARTEVKAEEAGNSATLSCEVAQAQTEVTFWKDGKLLSSSSKVRVEASG  
 CSRRLVVQQAGKADAGEYSCEAGGQKLSFRLDVAEAEESQIPERPSRREPLVVKEHETIILTATIAAPSVAAVT  
 WLKDGVEIRRKRHEATSLGDTHLTVRGAQVLDSAIYSCRVGKEGQDFPVQVEEVAAKFSKPLEPVEGELGG  
 TVMLVCELSPEQAEVWRCGNTQLRPGKRFQMTSEGPRRTLVSGLREDDAEYVCESRDDRTSARLTVKVP  
 VVKFTSGLSAMVAEEGQEQATFQCVVSPSDAGVTWYKDGMLQPSSEKFMVVEGASRSLTILGLTLEDAGQVTV  
 EAEGASSAALRVREAPVLFKFKLEPQTVTEERTSVTLEVELTRPWPVEVKWTRNAAVLTPSENVEIRAEGARHC  
 LVLRVGFADRGFFGCETPDDKTQAKLVNEMRQVRLVRLGQVEVAKEQGTASMDVELSHAEEVGSWTRDGLRL  
 QPGPKCHLAVQGPVHILTLALSALQPDQSGLVAFRAEGVHTSARLIVTELPVSFTRVLQDVVATQKEKVTLECEL  
 SRPVDVRLKDGVELRAGKAI GIVAQGTCSRSLVIYRCETGDQGVYVCDALDAQTSASLRVQGRTYTLIFRVL  
 AEDAGEVVKFAENAESRAHLRVKELPVTLLRPLRDKIAMEKHRGVLECVSRASAVRWFKGGVLEQSGPKYE  
 VVSDGLYRKLVINDDVPEDEDTYTCDAGNVKTSQMTFVEEQSITIVRGLKDMTVMPEPAPAWFECETSIPSVRP  
 PKWLLGKTVLQAGGNVLEQDGTVHRLTLHKTCSTMTGPVHFTIGKSRSSAQLVVS DIPVVLTRPLEPKAGRE  
 LQSVVLSCDFRPAPKAVQWYKDDTPLSPSEKFKMALEGQMAELRILRLTPADAGVYRCQAGSAQSSAEVTVEA  
 REVTVIQPLQDAEAMEEGRVCFSCLELHKDEDI EWSLNGTPLYNDSFHEISHEGCLHTLVLKSVRQADTGTVC  
 ATSPKVSVSARLVVKGKPVVFLKALDDVSAEERGTLLTQCEVSDPEARVVWRKDGVELGPSDKYDFLHKAGAR

GLTVHDLSDHEDAGLYTCQVGSKETQSKVSVHDLHVGITKRLKTVEVLEGESECSFECVLSHESPSDPAVWTVGG  
 KTVGGSGHFHAVRQGRKYTLTVKDAALSDAGEVVSVLGLTSKASLIIRERPVDITKPLEDQRTTLGEDVMLS  
 CELSRAGTSVRWLKDGKAIKRSQKYDLLSEGTRAVLVVRKASLKDSGEYTCETEASKSTAKLCVEEKANRFTE  
 ELADLQVEEKGRAVFTCKTEHPASVVTWRKGLLELRASGKHVPSQEGTLKLTINALERTDSDTYTCDIGQAR  
 TQARLLVHGQKVRVIEDLEDTAVQEGSSAKFCCRIAPADYGPVHWFIDKTPHLSNELNEITVQPGGYHVLTLR  
 QLALKDSGTVYFEAGDQRTSAALRVTEKPSIFSRPLTDVTVTEGEDLTLVCETTTVDSSVVRWTKDGKTLRPSA  
 RCQLSHEGCAQLLITATTPQDGGRYKCEIGGASSSSIVRVHALPVRFRFRESLKDVEVPEGKAATLRCVLSVA  
 APVEWRHGDDVLKSSNKYSLRQEGAVLELVIRDLPQDQSGQYSCSFGDQTTSATLTVKTTSSAQFVGLRNKEA  
 TEGTTVTLRCELTKAPVEWKKGTETLRNGDKYSLKQDGAVCELQICSLLVADAGEYSCVCGQEKTSATLTVK  
 ALLVHFVRRLSKEATEGDTTTLQCELSKAAPVEWRKGTETLRDGDYSLKQDGAVCELQIRSLTIADAGEYL  
 CTCGQEKTSATLTVRALPAKFKDSLKNEEATEGTTATLSCELSKAAPVTWKKGPKTLQSGDKYVLRQDGAVCG  
 LQIHGLTMADAGEYSCVCGQEKTSATLTVRGLPAKFIEDLRSQEATEGATAILRCELSKAAPVEWRKGETL  
 DGDYTLRQDGAVCELQIRGLAVVDGTYSLSLPTKFTTEGLRNEEATEGTMATLRCQMSKAAPVEWRKGETL  
 DGDYSLRQDGAMCELQIRGLTIEDSGEYTCVCGQEKTSATLSVKALPSRFIEDLRSQEATEGTMATLRCQMS  
 KTAPVEWKKGSETLRDGGYSLRQDGPVCELQICDLAVEDAGEYSCVCGQEKTSATLSIKALPPRFIEDLRSQ  
 EATEGTMATLRCQMSKAAPVEWRKGETLGDGGYSLRQNGAVCELQIHDLAVEDTGEYSCVCGQEKTSATLN  
 VKALPPRFIEDLRSQEATEGTMATLRCQMSKAAPVEWRKGETLDRDGGYSLRQDQAVCELQIHDLVEDAGQ  
 YSCVCGQEKTSAVLTVDALPPKFTTEGLKKEEATEGTMVTLRCQMSKEATVEWRKGAKTLSDGGYSLRQDQAM  
 CELQICGLAVEDAGEYSCVCGQEKTSATLSVKALPPRFIEDLRSQEATEGTMATLRCQMSKAAPVEWRKGET  
 LRDGDYSLRQDGAVCELQIRDLAVEDAGEYLCVCGQEKTSATLSVKALPPRFIEDLRSQEATEGTMATLRCQ  
 MSKAAPVEWRKGSKTLRDGDYSLRQDGAMCELQICDLAVEDTGDYSCVCGQEKTSATLSVKALPPRFIEDLR  
 SQEAREGTVATLRCRMSKAAPVEWRKGETLKDGDYSLRQEGNLCELQIRDLAVEDTEEYSCVCGQEKTSAT  
 LSVKALPAKFIEDLRSQEAPESSTVTLRCKLSKKASVWKKGSETLRNGARYSLRQDGAVCELEIRDLTVEEDT  
 GEYSCTCGQERTSATLSIMAPQVVFQQLQNLQAEEGSMASLRCELSVPAAMVWSKGGLELQGDTRREARQQ  
 GCVAELLLRDLRREDAGEYSCVCGQEKTSATLMVTAAPVRFRELAQDQVDEGATARLCELSREAVSVEWRK  
 GSLQLFPCAKYQMVQEGTTAELLVHGVEQEDAGEYTCDAHTQSIARLSVRAPKPKFKDLQSTEQEAGGTAR  
 LCCQLSEAEKPGTQVQWLKEGVELHVGSKYEMRQYQAVCELQIHGLEAKDTGEYACLVGQKTLASLRVKEPEV  
 TIVRGLVDMEVQADEDEFTCKVVSQAGATDVQWHLQGLPLQSNVTEVAVLADGCTHVLQKGVTLQEDAGTVS  
 FHVGGSSSAQLTVRVPEVTVLEPLKDVQLSEGQDAHFRCRLSRASGQEARWALGGVPLQCNEMNDITVEQGT  
 LYLLTLHKVTLQEDAGTITLQVGSSESAQLKVTAKNTVLRGLENVDALEGGALFECQLSQPEVAHTWLLDD  
 EPVHTSEKVEVVYFENGLRHLLLLKLNKPKQDSCRVTFLAGDVVTSAFLLTVRGWRLEVLPEPHDASVKAGMQR  
 FTCELLSEAVPVGEATWYINGAAIQPDDTDWTVTTDGSHHALTLSNAQPQHAGEVTFAAARDAVASARLSVLALP  
 DPPEDAEEVGRSDHSVTLVWVAPMSDGGGGLCGYRVMKEASTGQWQLCHDLVPGPECVVDDLVPGKTYRFRV  
 AAVGPAGAGEPVHLPQMVKIAPAPAPAPAPAPAPETRAVVGEDIACLEVAADGGVEVWHKGTERRIQPGG  
 HFEVLSRGQRQMLVIKGFRTEDQGEYRCGPIQGLPSSGAATFNVVMTSGSGDEVPAQPSLPEAAQEGDLHL  
 WEALARKRRMSREPTLDSISELPEEDSRVQHRLRQEAETAPDLSEGYSTADELARTGEADLSHTSSDDESRA  
 TPSLVTYLKKAGGPGISPLASKHEAQVTVSVKPKQKQEPVVPTCPPPGDLSAADLMDPSLDKAAVKIQAAF  
 YKVRKEMKQQEGPVFSRTFGDTEAQVGDVLRLECVLATKTDMRACWLKDGIELTDGRHYHIDQLKDGTC  
 TGLAPTDSGRYTCQVSTKSGRVSHSACVVVSGTESEAESSSGGELDDAFRRAARLHRLFRTKSPAELSEEEL  
 FLSADEGPGPEEPADWQTYREDENFVCIRFESLAEARQAVTCFRNMFATMGIGVEISLGEQGRGVEMRIGK  
 VAPTVPAPVPLAKTPGLQTSDAAPVFLTELQNDVQDGYPMSFDCVVTGQPVPSVRWFKDGKLEEDDHYMIN  
 EDQQGGHQLIITAVVPADMGVYRCLAENSMGVSSTKAELRVELTSTDYDTAADATETSSYFSAQGYLSSRQE  
 GTESDEGQLPQVLEELKDLQVAPGTRLAKFQLKVKGYPAKLYWFKDQGPLTSDHIRMTDKKTLHTLEIVSV  
 TREDSGQYAAIISNAVGAAYSSARLLVRGPSEPEEKPASDVHERLVPPRIEKFTPKKVKRGSSTFVSVKVEG  
 HPAPSVHHLKEEAEGVLWIGPDTPGYTMASSSKQHSVLVLDVGRQHOGTYTCIATNPAGQALCASLHISGL  
 AKEEEQERVKEALISSFLQGTSQAVSAQMSESAGFADLVGQSKGESLVAEEAHSHLSLAEVGTTEFLQKLSQ  
 ITEMVSAKISQAKLQVPGGDSDEETKTPSASPRHGRSRPSSSVQESSSESEDGDSRGEIFDIYVVTADYLP  
 AEQDAIILREGQYVEVLDSAHPLRWLVRTKPTKSSPSRQGWVSPAYLDKRLKLSPEWGPTEAPEFPGEAVS  
 EYRTRLSSVIQELLSSEQAFVGEQFLESHHMKHLERSPRVPAAVASQKTVIFRNVQDISHFHSSFLKELQGC  
 GTDDVAMCFIKNQEAKEYLEFLVGRVQAESVVVSTPVQEFYKKAETLSAKDPTQPPPPPLQHYLEQPV  
 RVQKYQALLKELIRNKARNRQNCALLEQAYAVVSALPQRAENKLVSLMENYPGTLEALGEPVIRQGHFVWEG  
 APGARMPWKGNHRVFLFRNYLVICKPRRDSRTDFTSYVFRNMMKLSSIDLNDQVEGDDRAFEVWHEREDSVR  
 KYLLQARTVIEIKNSVWKEICGIQORLAQPVWRPPEFEELADCTAELGETVKLACRVGTGPKPIVSWYKDGK  
 VEVDPHHILIEDPDGSKTILIDLNLGTIDSGQYMCFAASAAGNASTLKGILVQVPPRFVNVKVRATPFVEGEDAQ  
 ICTVEGAPYPQIRWYKDGTLTLLAPGNRYRMLNEPRSGVVLVESINLIQAASKEDLGHYECELVNLGSTRGGG  
 ELYMQSPALRARDQHHREQIVAAVEVTEQETKVPKKTVIEETITTVVKS PRGRRQSPGKSPSRSPSRRSASP  
 RRPGLLAPERLYPPGTPSRRLVEVEQGRKAPVPALYVTEAEVHAPASQSPKWLEVEETIEVRVKKTGSRGAS  
 PVREMTSRGEGILFTLPGGIPGRDPNANNNSNKS SVYQEARWGPVAVHVGEFFIFQVDSVGNVDVVAASPEPE

QVRASQKEENTERQEGCSGDENTFLMEEPQDQDSDLQGRDPKILTHNGRVLTLADLEDYVPOEGETFSGCDST  
PSTPDEPPCEVSVLQREISEPTVQGPVLLNVGRPPGTGATPSFFRPGSQVHSPESVSFLLREAWSGPVSAAPW  
TSSFHHTHVQSSVDGSHGSKTEVSTQTVSFGAVGETVTLHIDPDGGEAPGPSQG\*  
>rs256529946\_ENSMUSP00000020732\_c.21349:T>AATCAATCAATCT\_p.V7117ESINL-ins  
ENSMUST00000020732.13|Obscn-201|ENSMUSG00000061462|-  
|chr11:g.58912292:A>AGATTGATTGATT  
MDHSFSGAPRFLTRPKAFVSVGKDATLSCQIVGNPTPHVSWEKDRQVVEAGARFRLAQDGDVYRLTILDLAL  
RDLGPPDAPHVRVEEHGESSALRIRSARPRDGGTYEVRAENPLGSASAAAALVVDSAEVAGPPGTSTATLLA  
HLQORREAMRAEGIPPSPPGAGTRTCTVTEGKHARLSCFVTGEPKPEVWKKDQGLVTEGRRHVVEDEQENF  
VLKILFCKQSDRGLYTCTASNLVGQTYSSVLVVVREPTVPFKKRLQDLEVREKESATFQCEVAQPAEAAWFK  
EETRLWASAKYDIEEGETERRLTVRNVSADDDAVYICETTEGSRVVAELSVQGNLTKRKLPRKTAVRTGDTAIF  
WVELAVPEGPVWRWRNQEEMVAGGRVAITAEGTCHTLTI FQCTLEDMGEVAFVSGGCRTTTQFCVSAAPRRPPL  
YPPADPVVKAKTESVTLWSAPPHGDRPVTIDGYVLEKRLGAYAWSRCHEAGWLATTEFTITGVAAEEDGFQ  
FRVSAINHFGQGPYLEFPGTMHLVPLAVKTPKAVEAVEGGEVTFVSDLTVASSGEWFLDGEALKASSIYVI  
RCDRTRHMLTIREVPARLHGAQLKVFANGIETSIQMVVRAALGLPSSKLPAAAAREVLAQLHHEEAQLLAEALS  
QAAAFTWLDKDGRELSLGPKYEMQVSAARRALLVRDVAQDDAGLYECVSRGSRRTAYQLLVQDITDGYRWDWGPAG  
PQKHMCKCAGAKIARYLGSSCYRFLQYDKGVVHWEAALDTRQKGTSSCSLHEKPKLVFAKQQAHSVEKAE  
AGNSATLSCEVTQAQTEVTFWKDGGKLSSSSKVRMEASGCSRRLVVQQAGKADAGEYSCEAGGQKLSFRLDVA  
EPKLVFAKQQAHSVEKAEAGASATLSCEVAQAQTEVTFWKDGGKLSSSSKVRMEASGCSRRLVVQQAGKADA  
GEYSCEAGGQKLSFRLDVAEPKMFVFAKEQQARSEVKAEGASATLSCEVAQAQTEVTFWKDGGKLSSSSKVRM  
EASGCSRRLVVQQAGKADAGEYSCEAGGQKLSFRLDVTEPKLVFAKEQQARSEVKAEVGNSATLSCEVAQAQ  
EVTWFKDGGKLSSSSKVRMEASGCSRRLVVQQAGKADAGEYSCEAGGQKLSFRLDVAEPKLVFAKEQQARSEV  
KAEAGNSATLSCEVAQAQTEVTFWKDGGKLSSSSKVRMEASGCSRRLVVQQAGKADAGEYSCEAGGQKLSFHL  
DVTEPKLVFAKEQQAHSEVKAEGASATLSCEVAQAQTEVTFWKDGGKLSSSSKVRMEASGCSRRLVVQQAGK  
ADAGEYSCEAGGQKLSFRLDVAEPKLVFAKEQQARSEVKAEGASATLSCEVAQAQTEVTFWKDGGKLSSSSK  
VRVEASGCSRRLVVQQAGKADAGEYSCEAGGQKLSFRLDVAEPKLVFAKEQQANSEVKAEGASATLSCEVAQ  
AQTEVTFWKDGGKLSSSSKVRVEASGCSRRLVVQQAGKADAGEYSCEAGGQKLSFRLDVAEPKLVFAKEQQAH  
SEVKAEGASATLSCEVAQAQTEVTFWKDGGKLSSSSKVRVEASGCSRRLVVQQAGKADAGEYSCEAGGQKLS  
FRLDVAEPKLVFAKEQQAHSEVKAEGASATLSCEVAQAQTEVTFWKDGGKLSSSSKVRVEASGCSRRLVVQQ  
AGKADAGEYSCEAGGQKLSFRLDVAEPKLVFAKEQQAHSEVKAEGASATLSCEVAQAQTEVTFWKDGGKLS  
SSSKVRVEASGCSRRLVVQQAGKADAGEYSCEAGGQKLFRLDVAEPKLMFAKEQQAHSEVKAEGASATLSCE  
VAQAQTEVTFWKDGGKLSSSSKVRVEASGCSRRLVVQQAGKADAGEYSCEAGGQKLSFRLDVAEPKLVFAKEQ  
QAHSVEKAEAGASATLSCEVAQAQTEVTFWKDGGKLSSSSKVRVEASGCSRRLVVQQVQKADAGEYSCEARGQ  
KLSFRLDVADTRLMFAKEQQARTEVKAEGNSATLSCEVAQAQTEVTFWKDGGKLSSSSKVRVEASGCSRRLV  
VQQAGKADAGEYSCEAGGQKLSFRLDVAEAEASQIPERPSRREPLVVKEHETIILTATIAAPSVAAVTVLKDGV  
EIRRSKRHEATSLGDTHTLTVRGAQVLDIAIYSCRVGKEGQDFPVQVEEVAAKFSKPLEPVEGELGGTVMLVC  
ELSPQAEVWRCGNTQLRPGKRFQMTSEGPRRTLTVSGLREDDAEYVCESRDDRTSARLTVKVPVVKFTS  
GLSAMVAEEGQEQATFQCVVPSDAGVTWYKDGMLQPSKFMVMEVSGASRSLTILGLTLEDAGQVTEAEGAS  
SSAALRVREAPVLFKKKLEPQTEVEERTSVTLEVELTRPWPEVKWTRNAAVLTPSENVEIRAEGARHCLVLRV  
GFADRGFFGCETPDDKTQAKLNVEMRQVRLVRLGLQEVEAKEQGTASMDVELSHAEEVGSWTRDGLRLQPGPKC  
HLAVQGPVHILTLALSALQPQDSGLVAFRAEGVHTSARLIVTELPVSTFTRVLQDVVATQKEKVTLECELSRPV  
RWLKDGVLELRAGKAIIGIVAQGTCSRSLVIYRCETGDQGVYVCDALDAQTSASLRVQGRTYTLIFRRVLAEDAGE  
VKFVAENAESRAHLRVKELPVTLLRPLRDKIAMEKHRGVLECCQVSRASAQVRWFKGGVELQSGPKYEVVSDGL  
YRKLVINQVPEDEDTYTCDAGNVKTSAQFFVEEQSITIVRGLKDMTVMPEPAPWFECETSIPSVRPPKLLG  
KTVLQAGGNVLEQDGTVHRLTLHKTCSTMTGPVHFTIGKSRSSAQLVVSDIPVVLTRPLEPKAGRELQSVVL  
SCDFRPAPKAVQWYKDDTPLSPSEKFKMALEGQMAELRILRLTPADAGVYRCQAGSAQSSAEVTEAREVTVI  
QPLQDAEAMEEGRVCFSCELSHKDEDEIWSLNGTPLYNDSFHEISHEGCLHTLVLSVRQADTGTVCATSPKV  
SVSARLVVKGKPVVFLKALDDVSAEERGTLLTQCEVSDPEARVVWRKDGVELGSPDKYDFLHKAGARGLTVHD  
LSHEDAGLYTCQVGSKETQSKVSVHDLHVGITKRLKTVLEVLEGECSFECVLSHESPSDPAVWTVGGKTVGGS  
GHFHAVRQGRKYTLTVKDAALSDAGEVVSFVGLTSSKASLIIRERPVDITKPLEDQRTTLGEDVMLSCELSRA  
GTSVRWLKDGKAIRKSQKYDLLSEGTRAVLVVRKASLKDSEYTCETEASKSTAKLCVEEKANRFTEELADLQ  
VEEKGRAVFTCKTEHPASVVTWRKGLLELRASGKHVPSQEGTLTKLTINALERTDSDTYTCDIGQARTQARLL  
VHGQKVRVIEDLEDTEASVQEGSSAKFCCRIAPADYGVPHWFVLDKTPHLSNELNEITVQPGGYHVLTLRQLALD  
SGTVYFEAGDQRTSAALRVTEKPSIFSRPLTDVTVTEGEDTLVCEFTTTVDSSVRWTKDGKTLRPSARCQLSH  
EGCQAQLLITATTPQDGGRYKCEIGGASSSSIVRVHALPVRFRRESLKDVEVPEGKAATLRCVLSVVAAPVEWR  
HGDDVLKSSNKYSLRQEGAVLELVIRDLQPDQSGQYSCSFGDQTTSATLTVKTSQAQFVGLKRNKEATEGTTV  
TLRCELTKAEVWKKGTETLRNGDKYSLKQDQAVCELQICSLLVADAGEYSCVCGQEKTSATLTVKALLVHF

VRRLRSKEATEGDTTTLQCELSKAAPVEWRKGTETLRDGDYSLKQDQAVCELQIRSLTIADAGEYLCTCGQE  
KTSATLTVRALPAKFKDSLKNEEATEGTTATLSCELSKAAPVTWKKGPKTLQSGDKYVLRQDQAVCGLQIHGL  
TMADAGEYSCVCGQEKTSATLTVRGLPAKFIEDLRSQEATEGATAILRCELSKAAPVEWRKGSSETLKDGDYR  
LRQDQAVCELQIRGLAVVDGTYSLSLPTKFTTEGLRNEEATEGTMATLRCQMSKAAPVEWRKGSSETLRDGDYR  
LRQDQAVCELQIRGLTIEDSGEYTCVCGQEKTSATLSVKALPSRFIEDLRSQEATEGTMATLRCQMSKTAPVE  
WKKGSETLRDGGYSLRQDGPVCELQICDLAVEDAGEYSCVCGQEKTSATLSIKALPPRFIEDLRSQEATEG  
MATLRCQMSKAAPVEWRKGSSETLGDGGYSLRQNGAVCELQIHDLAVEDTGEYSCVCGQEKTSATLNVKALPP  
RFIEDLRSQEATEGTMATLRCQMSKAAPVEWRKGSSETLRDGGYSLRQDQAVCELQIHDLVEDAGQYSCVCG  
QEKTSAVLTVDALPPKFTTEGLKKEEATEGTMVTLRCQMSKEATVEWRKGAKTLDGGYSLRQDQAVCELQIC  
GLAVEDAGEYSCVCGQEKTSATLSVKALPPRFIEDLRSQEATEGTMATLRCQMSKAAPVEWRKGSSETLRDGD  
YSLRQDQAVCELQIRDLAVEDAGEYLCVCGQEKTSATLSVKALPPRFIEDLRSQEATEGTMATLRCQMSKAAP  
VEWRKGSKTALRDGDYSLRQDQAVCELQICDLAVEDTGDYSCVCGQEKTSATLSVKALPPRFIEDLRSQEARE  
GTVATLRCRMSKAAPVEWRKGSSETLKDGDYSLRQEGNLCELQIRDLAVEDTEEYSCVCGQEKTSATLSVKAL  
PAKFIEDLRSQEAPESSTVTLRCKLSKKASVVWKKGSETLRNGARYSLRQDQAVCELEIRDLTVEDTGEYSCT  
CGQERTSATLSIMAPQVVFQQLQNLQAEEGSMASLRCELSVPAAMVWSKGGLELQGDTRREARQQGCVAEL  
LLRDLRREDAGEYSCVCGQEKTSATLMVTAAPVRFLELQAQDVDEGATARLRCELSREAVSVEWRKGSLLQF  
PCAKYQMVQEGTTAELLVHGVEQEDAGEYTCDAHTQSIARLSVRAPKPKFKTDLQSTEQEAGGTARLCCQLS  
EABPGTPVQWLKEGVELHVGSKYEMRRQAVCELLIHGLEAKDTGEYACLVGQKTLASLRVKEPEVTVIRGL  
VDMEVQADEDEFTCKVSAQATDVQWHLQGLPLQSNVTEVAVLADGCTHVLQKGVTLLEDAGTVSFHVGGL  
SSSAQLTVRVPEVTVLEPLKDVQLSEGQDAHFRCLRSRSGQEARWALGGVPLQCNEMNDITVEQGTLYLLTL  
HKVTVLEDAGTITLQVGSSEEAQLKVTAKNTVLRGLENVDALEGGEALFECQLSQPEVAHAHTWLLDDEPVHTS  
EKVEVVYFENGLRHLLLLKLNKPKQDSCRVTFLAGDVVTSFAFLTVRGWRLEVLEPPHDASVKAGMQVRFCTILS  
EAVPVGEATWYINGAAIQPDDTWTVTDDGSHHALTLSNAQPQHAGEVTFFAARDAVASARLSVLALPDPEDA  
EUVGRSDHSVTLVSWVAPMSDGGGGLCGYRVMKEASTGQWQLCHDLVPGPECVVDDLVPGKTYRFRVAAVGPA  
GAGEPVHLPQMVKIAPAPAPAPAPAPAPAPETRAVAVGVEDICILELEVAADGGEVVWHKGTERRIQPGGHFEVLS  
RGQRQMLVIKGFRTEDQGEYRCGPIQGLPSSGAATFNVMVTSVSGSDEVPAQPSLPPPEAAQEDLHLLWEALAR  
KRMSREPLIKGFTLSELPEEDSRVQHLRQEAETAPDLSEGYSTADELARTGEADLSHTSSDDESAGTSPSLVT  
YLKKAAGPGISPLASKHEAQVTTSVKPKQKQEPVPTCPGGDLAADLMDPSLDKAAVKIQAFAFKYKVRKE  
MKQQEGPVFSRTFGDTEAQVGDVLRLECVLATKTDMRACWLKDGIELTDGRHYHIDQLKDGTCSSLVTLGLAPT  
DSGRYTCQVSTKSGRVSHSACVVVSGTESEAESSSGGELDDAFRRAARRLHRLFRTKSPAELSEELFLSADE  
GPGEPEEPADWQTYREDENFVCIRFESLAEARQAVTCFRNMFMATMIGVEISLGEQGPGRVEMRIGKVAPTVT  
PAVPLAKTPGLQTSDAAPVFLTELQNDVQDGYPMSFDCVVTGQVPSVRWFKDGKLEEDDHVMINEDQQGG  
HQLIITAVVPADMGVYRCLAENSMGVSSTKAELRVELTSTDYDTAADATETSSYFSAQGYLSSREQEGTESDE  
GQLPQVLEELKDLQVAPGTRLAKFQLKVKGYPAKLYWFKDGGQPLTSDHIRMTDKKTLHLEIVSVTREDSG  
QYAAIYI SNAVGAAYSSARLLVRGPSEPEEKPASDVHERLVPRILEKFTPKKVKRGSSTIFSVKVEGHPAPS  
HWLKEEAEGVVLWIGPDTPGYTMASSSKQHSVLVLLDVGRQHGTQYTCIATNPAGQALCSASLHISGLAKEEEQ  
ERVKEALISSFLQGTSAQVSAQMSSEAGFADLVGQSKGESLVAAEAHSHLSLAEVGTEEFQKLTSSQITEMVS  
AKISQAKLQVPGGDSDEETKTPSASPRHGRSRPSSSVQESSESEEDGDSRGEIFDIYVVTADYLPPLGAEQDAI  
ILREGQYVEVLDLSDAHLRVLVTRTKPTKSSPSRQGWVSPAYLDRKRLKLSPEWGPTEAPEFPGEAVSEDEYRTRL  
SSVIQELLSSEQAFVQELQFLESHHMKHLERSPRVPAAVASQKTVIFRNVQDISHFHSSFLKELQCGTDDDDV  
AMCFIKNQEAFAEKYLEFLVGRVQAESVVVSTPVQEFYKKYAEETLSAKDPTQPPPPPLQHYLEQPVVERVQKYQ  
ALLKELIRNKARNRQNCALLEQAYAVVSALPQRAENKLVSLMENYPGTLEALGEPHQGHFIVWEGAPGARM  
PWKGHNHRVFLFRNYLVICKPRRDSRTDFTSYVFRNMMKLSSIDLNDQVEGDDRAFEVWHEREDSVRKYLLQA  
RTVILKNSWVKEICIGIQORLAQPVWRPPEFEEELADCTAELGETVKLACRVTGTPKPIVSWYKDGKPEVVDPH  
HILIEDPDGSLTILDNLTGIDSGYMCFAASAAGNASTLGLKILVQVPPRFVKNVRATPFVEGEDAQITCTVE  
GAPYPQIRWYKDGTLTLLAPGNRYRMLNEPRSGVLVLESINLIQAASKEDLGHYECELVNRGLGSTRGGELYMQS  
PALRARDQHHREQIVAAVEERRPSPP\*

>rs256529946\_ENSMUSP00000151217\_c.18643:T>AATCAATCAATCT\_p.V6215ESINL-ins  
ENSMUST00000219084.3|Obscn-207|ENSMUSG00000061462|-  
|chr11:g.58912292:A>AGATTGATTGATT  
MDHSFSGAPRFLTRPKAFVSVGKDATLSCQIVGNPTPHVSWEKDRQPVEAGARFRLAQDGDVYRLTILDLAL  
GDSGQYVCRARNAIGEFAAVGLRVDSEGTCAEQAPHFLLRPTSIRVREGADATFRCRVGGSPQPAVSWSKDG  
RRLGPPADAMRVEEHEGESSALRIR SARPRDGGTYEVRANPLGSASAAAAALVVDSDAEVAGPPGTSTATLLA  
HLQRRREAMRAEIIPPSPGAGTRTCTVTTEGKHARLSCFVTGEPKPETVWKKDQGLVTEGRRHVVYEDEQENF  
VLKILFCKQSDRGLYCTASNLVQTYSSVLVVREPTVPFKKRLQDLEVRKESATFQCEVAQPATEAAWFK  
EETRLWASAKYDIEEGETERRLTVRNVSADDDAVYICETTEGSRVAELSVQGNLTKLPRKTAVRTGDTAIF  
WVELAVPEGPVRWLRNQEEMVAGGRVAITAEGTCHTLTIFQCTLEDMGEVAFVSGGCRTTTQFCVSAPRRPPL  
YPPADPVVKAKTESSVTLVSWAPPHGDRPVTIDGYVLEKRKLGAYAWSRCHEAGWLATTEFTITGVAAEEDGFQ

FRVSAINHFGQGPYLEFPGTMHLVPLAVKTPKAVEAVEGGEVTFVSDTLTVASSGEWFLDGEALKASSIYVI  
RCDRTRHMLTIREVPARLHGAQLKVFANGIETSIQMVVRAALGLPSSKLPAAAAREVLQAQLHEEAQLLAELSD  
QAAAVTWLKDGRELSLGPKEYMQVSAGRRALLVRDVAQDDAGLYECVSRGSRRTAYQLLVQDITDGYRDWGPAG  
PQKHMCKCAGAKIARYLGSscyRFLQYDKGVVHLEAALDTRQKGTSSCSLHEKPKLVFAKQQAHSEVKA  
AGNSATLSCEVTQAQTEVTFWKDGKLLSSSSKVRMEASGCSRRLVVQQAGKADAGEYSCEAGGQKLSFRLDVA  
EPKLVFAKQQAHSEVKAEGASATLSCEVAQAQTEVTFWKDGKLLSSSSKVRMEASGCSRRLVVQQAGKADA  
GEYSCEAGGQKLSFRLDVAEPKMFVFAKEQQARSEVKAEGASATLSCEVAQAQTEVTFWKDGKLLSSSSKVRM  
EASGCSRRLVVQQAGKADAGEYSCEAGGQKLSFRLDVTEPKLVFAKEQQARSEVKAEGNSATLSCEVAQAQ  
EVTWFKDGKLLSSSSKVRMEASGCSRRLVVQQAGKADAGEYSCEAGGQKLSFHLDVTEPKLVFAKEQQAHSEV  
KAEAGASATLSCEVAQAQTEVTFWKDGKLLSSSSKVRMEASGCSRRLVVQQAGKADAGEYSCEAGGQKLSFR  
DVAEPKLVFAKEQQARSEVKAEGASATLSCEVAQAQTEVTFWKDGKLLSSSSKVRVEASGCSRRLVVQQAGK  
ADAGEYSCEAGGQKLSFRLDVAEPKLVFAKEQQANSEVKAEGASATLSCEVAQAQTEVTFWKDGKLLSSSSK  
VRVEASGCSRRLVVQQAGKADAGEYSCEAGGQKLSFRLDVAEPKLVFAKEQQAHSEVKAEGASATLSCEVAQ  
AQTEVTFWKDGKLLSSSSKVRVEASGCSRRLVVQQAGKADAGEYSCEAGGQKLSFRLDVAEPKLVFAKEQQAH  
SEVKAEGASATLSCEVAQAQTEVTFWKDGKLLSSSSKVRVEASGCSRRLVVQQVKGADAGEYSCEARGQKLS  
FRLDVAEAEIQIPERPSRREPLVVEKETIILTATIAAPSVAAVTWLKDGVETIRRSKRHEATSLGDTHLTVR  
GAQVLDIAIYSCRVGKEGQDFPVQVEEVAAKFSKPLEPVEGELGGTVMLVCELSPEQAEEVWRCGNTQLRPGK  
RFQMTSEGPRTTLTVSGLREDDAEYVCESRDDRTSARLTVKVRPVVFTSGLSAMVAEEGQEAFTQCVVSPS  
DAGVTWYKDGMLQPSSEKFMVVEGASRSILTILGLTLEDAGQVTEAEGASSAALRVREAPVLFKFKLEPQT  
VEERTSVTLEVELTRPWPVEKWRNAAVLTPSENVEIRAEGARHCLVLRVGFADRGFFGCETPDDKTQAKLN  
VEMRQVRLVRLQVEEAKQGTASMDVELSHAEEGSWTRDGLRQPGPKCHLAVQGPVHILTLALSALQFQDSG  
LVAFRAEGVHTSARLIVTELPVSFTRVLQDVVATQKEKVTLECELSRPVDVRWLKDGVELRAGKAI GIVAQGT  
CRSLVIYRCETGDQGVYCDALDAQTSASLRVQGRYTLIFRRLAEDAGEVKFVAENAESRAHLRVKELPVT  
LLRPLRDKIAMEKHRGVLECVSRASAQVRWFKGGVELQSGPKYEVVSDGLYRKLVINVDVQPEDEDTYTC  
NVKTSAQFTFVEEQSITIVRGLKDMTVMEPAPAWFECETSIPSVRPPKWLGLKTVLQAGGNVLEQDGTVHRLT  
LHKTCSTMTGPVHFTIGKSRSSAQLVVSIPVVLTRPLEPKAGRELQSVVLSCDFRPAPKAWQYKDDTFLSP  
SEKFKMALEGGMAELRILRLTPADAGVYRCQAGSAQSSAEVTVAREVTVIQPLQDAEAMEEGVCFCELSH  
KDEDIEWSLNGTPLYNDSFHEISHEGLHTLVLKSVRQADTGTVCATSPKVSVSARLVVKGKPVVFLKALDDV  
SAEERGTTLTQCEVSDPEARVVWRKDGVELGSPDKYDFLHKAGARGLTVHDLSHEDAGLYTCQVGSKETQSKV  
SVHDLHVGITKRLKTVEVLEGESECFEVLSSHESPDPAVWTVGGKTVGGSGHFHAVRQGRKYTLTVKDAALS  
DAGEVVSVLGLTSKASLIIRERPVDITKPLEDQRTTLGEDVMLSCELSRAGTSVRWLKDGKAIKRSQKYDLL  
SEGTRAVLVVRKASLKDSGEYTCETEASKSTAKLCVEKANRFEELADLQVEEKGRAVFTCKTEHPASVVTW  
RKGLLELRASGKHVPSQEGTLTKLTINALERTSDSYTCDIGQARTQARLLVHGQKVRVIEDLEDTAVQEGSS  
AKFCCRIAPADYGPVHWFLDKTPHLSNELNEITVQPGGYHVLTLRQLALKDSGTVYFEAGDQRTSAAALRVTEK  
PSIFSRPLTDVTVTEGEDTLVCETTTVDSVSRWTKDGKTLRPSARCQLSHEGCAQLLITATTPQDGGRYKC  
EIGGASSSIVRVHALPVRFRESLKDVEVPEGKAATLRCVLSVAAPVEWRHGDDVLKSSNKYSLRQEGAVLE  
LVIRDLQPDQSGQYSCSFGDQTSATLTVKTSQAQFVGLKRNKEATEGTTVTLRCELTKAPVEWKKGTETLR  
NGDKYSLKQDGA VCELQICSLLVADAGEYSCVCGQEKTSATLTVKALLVHFVRRLRSKEATEGDTTTLQCELS  
KAAPVEWRKGTETLRDGDYSLKQDGA VCELQIRSLTIADAGEYLCTCGQEKTSATLTVRGLPAKFIEDLRSQ  
EATEGATAILRCELSKAAPVEWRKGSSETLKDGDYTLRQDGA VCELQIRGLAVVDTGTYSLPTKFTGLRNE  
EATEGTMATLRCQMSKAAPVEWRKGSSETLRDGDYSLRQDGA MCELQIRGLTIEDSGEYTCVCGQEKTSATLS  
VKALPPRFIEDLRSQEATEGTMATLRCQMSKAAPVEWRKGSSETLGDGGYSLRQNGAVCELQIHDLAVEDTGE  
YSCVCGQEKTSATLNVKALPPKFTGLKKEEATEGTMVTLRCQMSKEATVEWRKGAKTLSDDGGYSLRQDGA  
MCELQICGLAVEDAGEYSCVCGQEKTSATLSVKALPPRFIEDLRSQEATEGTMATLRCQMSKAAPVEWRKGS  
SETLRDGDYSLRQDGA VCELQIRDLAVEDAGEYLCVCGQEKTSATLSVKALPPRFIEDLRSQEATEGTMATLRCQ  
MSKAAPVEWRKGSSETLRDGDYSLRQDGA MCELQICDLAVEDTGDYSCVCGQEKTSATLSVKAPQVVFQQPLQ  
NLQAEEGSMASLRCELSVPNAAMVWSKGGLELQGDTRREARQQGCVAELLLRDLRREDAGEYSCTCGSQTTSA  
TLMVTAAPVRFLRELQAQDVDEGATARLRCELSREAVSVEWRKGSQVLPKAKYQMVQEGTTAELLVHGVEQE  
DAGEYTC DAGHTQSIARLSVRAPKPKFKTDLQSTEQEAGGTARLCCQLSEAPGTPVQWLKEGVELHVGSKYE  
MRRQGA VCELLIHGLEAKDTGEYACL VGGQKTLASLRVKEPEVTVRGLVDMEVQADEVFTCKVQAGATD  
VQWHLQGLPLQSNVTEVAVLADGCTHVLQLKGVTELDAGTVSFHVGGSSSAQLTVRVPVETVLEPLKDVQL  
SEGQDAHFRCLSRASGQEARWALGGVPLQCNEMNDITVEQGTLYLLTLHKVTLEDAGTITLQVGSSESQAQL  
KVTAKNTVLRGLNVDALLEGGEALFECQLSQPEVAASHVWLLDDEPVHTSEKVEVVYFENGLRHLLLLKLNKLPQ  
DSCRVTFLAGDVNTSAFLTVRGRLEVLEPPHDAASVKAGMQVRFITCILEAVPVGEATVYINGAAIQPDDTDW  
TVTTDGS HHALTLSNAQPQHAGEVTF AARDAVASARLSVLALPDPPEDAEVVGRSDHSVTLSSWVAPMSDGGGG  
LCGYRVEMKEASTGQWQLCHDLVPGPECVVDDLVPKTYRFRVAAVGPAGAGEPVHLPQMVKIAPAPAPAPAP  
APAPETROAVVGEDICLELEVAADGGEVWHKGTERRIQPGGHFEVLSRGRQMLVIKGFRTEDQGEYRCGPIQ  
GLPSSGAATFNVVMTSGSGDEVPAQPSLPPEAAQEGDLHLLWEALARKRRMSREPTLDSISELPEEDSRVQHL

RQEAEETAPDLSEGYSTADELARTGEADLSHTSSDDESRAGTPSLVTYLKKAGGPGISPLASKHEAQVTTSVK  
PQKQQEPVVPPTCPPPGDLAADLMDPSLDKAAVKIQAAFQYKVRKEMKQQEGPVFSRTFGDTEAQVGDVLRRL  
ECVLATKTKDMRACWLKDGIELTDGRHYHIDQLKDGTCSSLVTGLAPTDSGRYTCQVSTKSGRVSHSACVVVSG  
TESEAESSSGGELDDAFRRARLRHLRFRTKSPAELSEEELFLSADEGPGEPEEPADWQTYREDENFVCIRFE  
SLAEARQAVTCFRNMFATMGIGVEISLGEQGPGRVEMRIGKVAPTPTPAVPLAKTPGLQTSDAAPVFLTELQN  
QDVQDGYPMFDCVVTGQPVPSVRWFKDGKLEEDDHMINEDQQGGHQLIITAVVPADMVYRCLAENSMGV  
SSTKAELRVELTSTDYDTAADATETSSYFSAQGYLSSREQEGTESDEGQLPQVLEELKDLQVAPGTRLAKFQL  
KVKGYPAKPLYWFKDGGPLTSDHIRMTDKKTLHTLEIVSVTREDSGQYAAIISNAVGAAYSSARLLVRGPSE  
PEEKPASDVHERLVPPRILEKFTPKKVKRGSSITFSVKVEGHPAPSVHWLKEEAEGVLWIGPDTPGYTMASS  
SKQHSLVLLDVGQRHQGTYTCTIATNPAGQALCSASLHISGLAKEEEQERVKEALISSFLQGTSAVSAQMSES  
AGFADLVGQSKGESLVAEEAHSHLSLAEVGTTEFLQKLTSTIEMVSAKISQAKLQVPGGDSDEETKTPSASP  
RHGRSRPSSSVQESSSESEDGDSRGEIFDIYVVTADYLPGLAEQDAIILREGQYVEVLDSAHPLRVLVTRTKPT  
KSSPSRQGWVSPAYLDKRLKLSPEWGPTEAPEFPGEAVSEDEYRTRLSVVIQELLSSEQAFVQELQFLESHEM  
KHLERSRVPAAVASQKTVIFRNVQDISHFHSSFLKELQCGCTDDVAMCFIKNQEAFEKYLEFLVGRVQAES  
VVVSTPVQEFYKKYAEETLSAKDPTQPPPPPLQHYLEQPVVERVQKYQALLKELIRNKARNRQNCALLEQAYAV  
VSALPQRAENKLVSLMENYPGTLEALGEPiRQGHFIVWEGAPGARMPWKGNHRHVFLFRNYLVIICKPRRDSR  
TDTFSYVFRNMMLKSSIDLNDQVEGDDRAFEVWHEREDSVRKYLLQARTVIKNSWVKEICIGIQRLAQPVWR  
PEEFEEELADCTAELGETVKLACRVGTGPKPIVSVYKDGKPFVEVDPHHILIEDPDGSCSTLIIDLNTGIDSGQY  
MCFASAAGNASTLGKILVQVPPRFVNVKVRATPFVEGEDAQITCTVEGAPYPQIRWYKDGTLAPGNRYRMLN  
EPRSGVLVLESINLIQAASKEDLGHYECELVNRGSTRGGGELYMQSPALRARDQHHREQIVAAVEVTEQETK  
VPKKTVIIETITTVVKS PRGRRQSPGKSPSRSPRRSASPRRPGLLAPERLYPPGTSPSRRLEVEQGRKAPV  
PALYVTEAEVHAPASQSQPKWLEVEETIEVRVKKTGSRGASPVREMTSRGEGILFTLPGGIPGRDPNANNSNN  
KSVYQEQARTWGPVAVHVGEPFIFQVDSVGNVDVAASPEPEQVRSQKEENTERQEGCSDGDENTFLMEEPQD  
TDSLQGRDPKILTHNGRVLTLADLEDYVPQEGETFQCGDSTPSTPDEPPCEVSVLQREI SEPTVGGQPVLLNVG  
RPPGTGATPSFFRPGSQVHSPESVFLLEAWSGPVSAAPWTSSFHTHVQSSVDGSHGFSFKTEVSTQTVSFGA  
VGETVTLHIDPDGGEAPGPSQG\*

>rs50563985\_ENSMUSP00000158795\_c.21024:C>A\_p.H7009N  
ENSMUST00000238536.2|Obscn-210|ENSMUSG00000061462|-|chr11:g.58913192:G>T  
MDHSFSGAPRFLTRPKAFVSVGKDATLSCQIVGNPTPHVSWEKDRQPVEAGARFRLAQDGDVYRLTILDLAL  
GDSGQYVCRARNAIGEAFAAVGLRVDSEGTCAEQAPHLLRPTSIRVREGADATFRCRVGGSPQPAVSWSKDG  
RRLGPPDAPHVRVEEHGESSALRIRSARPRDGGTYEVRAENPLGSASAAAALVVDSDAEVAGPPGTSTATLLA  
HLQQRREAMRAEGIPSPPGAGTRTCTVTEGKHARLSCFVTGEPKPKETVWKKDQQLVTEGRRHVVEDEQENF  
VLKILFCKQSDRGLYTCTASNLVGQTYSSVLVVVREPTVPFKKRLQDLEVREKESATFQCEVAQPAEAAWFK  
EETRLWASAKYDIEEGTERRLTVRNVSADDDAVYICETTEGSRVAELSVQGNLTKLPRKTAVRTGDTAIF  
WVELAVPEGPVWRWRNQEEMVAGGRVAITAEGTCHTLTIQCTLEDMGEVAFVSGGCRTTTTFCVSAAPRRPPL  
YPPADPVVKAKTESSVTLSSWAPPHGDRPVTIDGYVLEKRLKLGAYAWSRCHAEAGWLATTEFTITGVAAEGDFQ  
FRVSAINHFGQGPYLEFPGMTMLVPLAVKTPKAVEAVEGGEVTFVSDLTVASSGEWFLDGEALKASSIYVI  
RCDRTRHMLTIREVPARLHGAQLKFVANGIETSIQMVVRAALGLPSSKLPAAAAREVLAQLHEEAQLLAELSD  
QAAAVTWLKDGRELSLGPKYEMQVSAGRRALLVRDVAQDDAGLYECVSRGSRRTAYQLLVQDITDGYRDWGPAG  
PQKHMCKCAGAKIARYLGSscyRFLQYDKGVWHWLEAALDTRQKGTSSCSLHEKPKLVFAKQQAHSEVKA  
AGNSATLSCEVTQAQTEVTWFKDGKLLSSSSKVRMEASGCSRRLVVQQAGKADAGEYSCEAGGQKLSFRLDVA  
EPKLVFAKQQAHSEVKAEGASATLSCEVAQAQTEVTWFKDGKLLSSSSKVRMEASGCSRRLVVQQAGKADA  
GEYSCEAGGQKLSFRLDVAEPKLVFAKEQQARSEVKAEGASATLSCEVAQAQTEVTWFKDGKLLSSSSKVRM  
EASGCSRRLVVQQAGKADAGEYSCEAGGQKLSFRLDVTEPKLVFAKEQQARSEVKAEGVNSATLSCEVAQAQ  
EVTWFKDGKLLSSSSKVRMEASGCSRRLVVQQAGKADAGEYSCEAGGQKLSFRLDVAEPKLVFAKEQQARSEV  
KAEAGNSATLSCEVAQAQTEVTWFKDGKLLSSSSKVRMEASGCSRRLVVQQAGKADAGEYSCEAGGQKLSFHL  
DVTEPKLVFAKEQQAHSEVKAEGASATLSCEVAQAQTEVTWFKDGKLLSSSSKVRMEASGCSRRLVVQQAGK  
ADAGEYSCEAEGQKLSFRLDVAEPKLVFAKEQQARSEVKAEGASATLSCEVAQAQTEVTWFKDGKLLSSSSK  
VRVEASGCSRRLVVQQAGKADAGEYSCEAGGQKLSFRLDVAEPKLVFAKEQQANSEVKAEGASATLSCEVAQ  
AQTEVTWFKDGKLLSSSSKVRVEASGCSRRLVVQQAGKADAGEYSCEAGGQKLSFRLDVAEPKLVFAKEQQAH  
SEVKAEGASATLSCEVAQAQTEVTWFKDGKLLSSSSKVRVEASGCSRRLVVQQAGKADAGEYSCEAGGQKLS  
FRLDVAEPKLVFAKEQQAHSEVKAEGASATLSCEVAQAQTEVTWFKDGKLLSSSSKVRVEASGCSRRLVVQQ  
AGKADAGEYSCEAGGQKLSFRLDVAEPKLVFAKEQQAHSEVKAEGASATLSCEVAQAQTEVTWFKDGKLLSS  
SSKVRVEASGCSRRLVVQQAGKADAGEYSCEAGGQKLFRLDVAEPKLVFAKEQQAHSEVKAEGASATLSCE  
VAQAQTEVTWFKDGKLLSSSSKVRVEASGCSRRLVVQQAGKADAGEYSCEAGGQKLSFRLDVAEPKLVFAKEQ  
QAHEVKAEGASATLSCEVAQAQTEVTWFKDGKLLSSSSKVRVEASGCSRRLVVQQVQKADAGEYSCEARGQ  
KLSFRLDVADTRLMFAKEQQARTEVKAEGNSATLSCEVAQAQTEVTWFKDGKLLSSSSKVRVEASGCSRRLV  
VQQAGKADAGEYSCEAGGQKLSFRLDVAEAEESQIPERPSRREPLVVKEHETIILTATIAAPSVAAVTWLKDG



EIRRSKRHEATSLGDTHTLTVRGAQVLDLSAIYSCRVGKEGQDFPVQVEEVAAKFSKPLEPVEGELGGTVMLVC  
ELSPQEAEVWRCGNTQLRPGKRFQMTSEGPRTTLTVSGLREDDAEYVCESRDDRTSARLTVKVPVVKFTS  
GLSAMVAEEGQEATFQCVVSPSDAGVTWYKDGMLQPSKFKVMVESGASRSLTILGLTLEDAGQVTEAEGAS  
SSAALRVREAPVLFKKKLEPQTVEERTSVTLEVELTRPWPEVKWTRNAAVLTPSENVEIRAEGARHCLVLRV  
GFADRGFFGCETPDDKTQAKLNVEMRQVRLVRGLQEVEAKEQGTASMDVELSHAEEVGSWTRDGLRLQPGPKC  
HLAVQGPVHILTLALSALQPDSSGLVAFRAEGVHTSARLIVTELPVSFTRVLQDVVATQKEKVTLECELSRPVDV  
RWLKDGVLELRAGKAIGIVAQGTCSRSLVIYRCETGDQGVYVCDALDAQTSASLRVQGRTYTLIFRRVLAEDAGE  
VKFVAENAESRAHLRVKELPVTLLRPLRDKIAMEKHRGVLECCQVSRASAQVRWFKGGVLELQSGPKYEVVSDGL  
YRKLVINLVQPEDEDTYTCDAENVKTSAQFFVEEQSITIVRGLKDMTVMPEPAPAWFECETSIPSVRPPKWLGL  
KTVLQAGGNVLEQDGTVHRLTLHKTCSTMTGPVHFTIGKSRSSAQLVSDIPVVLTRPLEPKAGRELQSVVL  
SCDFRPAPKAVQWYKDDTPLSPSEKFKMALEGQMAELRILRLTPADAGVYRCQAGSAQSSAEVTEAREVTVI  
QPLQDAEAMEEGRVCFSCELSHKDEDIEWSLNGTPLYNDSFHEISHEGCLHTLVLSVRQADTGTVCATSPKV  
SVSARLVVKGKPVVFLKALDDVSAEERGTTLTQCEVSDPEARVVWRKDGVELGSPDKYDFLHKAGARGLTVHD  
LSHEDAGLYTCQVGSKETQSKVSVHDLHVGITKRLKTVLEVLEGECSFECVLSHESPSDPAVWTVGGKTVGGS  
GHFHAVRQGRKYTLTVKDAALSDAGEVVSVLGLTSKASLIIRERPVDITKPLEDQRTTLGEDVMLSCELSRA  
GTSVRWLKDGKAIRKSQKYDLLSEGTRAVLVVRKASLKDSGEYTCETEASKSTAKLCVEEKANRFTTEELADLQ  
VEEKGRAVFTCKTEHPASVVTWRKGLLELRASGKHVPSQEGTLTKLTINALERTSDSTYTCIDIGQARTQARLL  
VHGQKRVVIEDLEDTAVQEGSSAKFCCRIAPADYGPVHWFLDKTPLHSNELNEITVQPGGYHVLTLRQLALKD  
SGTVYFEAGDQRTSAALRVTEKPSIFSRPLTDVTVTEGEDTLVCEETTVDSSVRWTKDGKTLRPSARCQLSH  
EGCQAQLLITATTPQDGGRYKCEIGGASSSSIVRVHALPVRFRRESLKDVEVPEGKAATLRCVLSVAAPVEWR  
HGDDVLKSSNKYSLRQEGAVLELVIRDLQPDQSGQYSCSFGDQTTSATLTVKTSQAQFVGLRNKEATEGTTV  
TLRCELTKAEAPVEWKKGTETLRNGDKYSLKQDGAVCELQICSLVADAGEYSCVCGQEKTSATLTVKALLVHF  
VRRLRSKEATEGDTTTLQCELSKAAPVEWRKGTETLRDGDYSLKQDGAVCELQIRSLTIADAGEYLCTCGQE  
KTSATLTVRALPAKFKDSLKNEEATEGTTATLSCELSKAAPVWKKGPKTLQSGDKYVLRQDGAVCGLQIHGL  
TMADAGEYSCVCGQEKTSATLTVRGLPAKFIEDLRSQEATEGATAILRCELSKAAPVEWRKGSSETLKDGDYR  
LRQDGAVCELQIRGLAVDTGTYSPLTKFTEGLRNEEATEGTMATLRCQMSKAAPVEWRKGSSETLRDGDYR  
LRQDGAVCELQIRGLTIEDSGEYTCVCGQEKTSATLSVKALPSRFIEDLRSQEATEGTMATLRCQMSKTA  
PVEWKKGSETLRDGGYSLRQDGPVCELQICDLAVEDAGEYSCVCGQEKTSATLSIKALPPRFIEDLRSQEATEG  
MATLRCQMSKAAPVEWRKGSSETLGDGGYSLRQNGAVCELQIHDLAVEDTGEYSCVCGQEKTSATLNVKALPP  
RFIEDLRSQEATEGTMATLRCQMSKAAPVEWRKGSSETLRDGGYSLRQDGAVCELQIHDLVEDAGQYSCVCG  
QEKTSAVLTVDALPPKFTEGLKKEEATEGTMVTLRCQMSKEATVEWRKGAKTLSDGGRYSLRQDGAMCELQIC  
GLAVEDAGEYSCVCGQEKTSATLSVKALPPRFIEDLRSQEATEGTMATLRCQMSKAAPVEWRKGSSETLRDGD  
YSLRQDGAVCELQIRDLAVEDAGEYLCVCGQEKTSATLSVKALPPRFIEDLRSQEATEGTMATLRCQMSKAAP  
VEWRKGSKTLRDGDYSLRQDGAMCELQICDLAVEDTGDYSCVCGQEKTSATLSVKALPPRFIEDLRSQEARE  
GTVATLRCRMSKAAPVEWRKGSSETLKDGDYSLRQEGNLCELQIRDLAVEDTEEYSCVCGQEKTSATLSVKAL  
PAKFIEDLRSQEAPESSTVTLRCKLSKKASVWVWKKGSETLRNGARYSLRQDGAVCELEIRDLTVEFTGEYSCT  
CGQERTSATLSIMAPQVVFQQPLQNLQAEEGSMASLRCELSVNAAMVWSKGGLELQGDTRREARQQGCVAEL  
LLRDLRREDAGEYSCTCGSQTTSATLMVTAAPVRFLRELQAQDVDEGATARLRCELSREAVSVEWRKGSQQLF  
PCAKYQMVQEGTTAELLVHGVEQEDAGEYTCDAHTQSIARLSVRAPKPKFKTDLQSTEQEAAGTARLCCQLS  
EAEPGTPVQWLKEGVELHVGSKYEMRRQGAUCELLIHGLEAKDTGEYACLVGGQKTLASLRVKEPEVTIVRGL  
VDMEVQADEDVEFTCKVSQAGATDVQWHLQGLPLQSNVTEVAVLADGCTHVLQLKGVTLLEDAGTVSFHVGGL  
SSSAQLTVRVPEVTVLEPLKDVQLSEGQDAHFRCRLSRASGQEARWALGGVPLQCNEMNDITVEQGTLYLLTL  
HKVTLEDAGTITLQVGSSESSEALQKVTAKNTVLRGLENVDALEGGELFECQLSQPEVAHAHTWLLDDEPVHTS  
EKVEVYFENGLRHLLLLKLNKLPQDSCRVTFLAGDVVTS AFLTVRGRLEVVLEPPHDASVKAGMQVRFTCILS  
EAVPVGEATWYINGAAIQPDDTDWTVTTDGSHHALTLNAQPPQHAGEVTF AARDAVASARLSVLALPDPEDA  
EAVVGRSDHSVTLVSWAPMSDGGGGLCGYRVMKEASTGQWQLCHDLVPGPECVDDLVPGKTYRFRVAAVGPA  
GAGEPVHLPQMVKIAPAPAPAPAPAPAPAPETRQAVVGEDICLELEVAADGGEVVWHKGTERRIQPGGHFEVLS  
RGQRQMLVIKGFRTEDQGEYRCGPIQGLPSSGAATFNVMVMTSGSGDEVPAQPSLPPEAAQEGDLHLLWEALAR  
KRRMSREPTLDSISELPEEDSRVQHLRQEAETAPDLSEGYSTADELARTGEADLSHTSSDDESAGTPSLVT  
YLKAGGPGISPLASKHEAQVTTSVKPKQKQEPVPTCP PPGDLSAADLMDPSLDKAAVKIQAAFQYKVRKE  
MKQQEGPVFSRTFGDTEAQVGDVLRLECVLATKTDMRACWLKDGIELTDGRHYHIDQLKDGTCSSLVTVGLAPT  
DSGRYTCQVSTKSGRVSHSACVVVSGTESEAESSSGGELDDAFRAARRLHRLFRTKSPAELSEELFLSADE  
GPGEPEAPADLQTYREDENFVCIRFESLAEARQAVTCFRNMVATMGI GVEISLGEQGRGVEMRIGKVAPTVT  
PAVPLAKTPGLQTSDAAPVFLTELQNDVQDGYPMSFDCVMTGQVPSVSRWFKDGKLEEDDHVMINEDDQGG  
HQLIITAVVPADMVYRCLAENSMGVSSTKAELRVELTSTDYDTAADATETSSYFSAQGYLSRREQETESDE  
GQLPQVLEELKDLQVAPGTRLAKFQLKVKGYPAKLYWFKDGPPLTSDHIRMTDKKTLHTLEIVSVTREDSG  
QYAAYSNAVGAAYSSARLLVRGPSEPEEKPASDVHERLVPPRILEKFTPKKVKRGSSTIFSVKVEGHPAPSV  
HWLKEEAKEKGLWIGPDTPGYTMASSSKQHSVLVLLDVGRQHGTYTIC IATNPAGQALCSASLHISGLAKEEQ

ERVKEALISSFLOGTSQAVSAQMSESAGFADLVGQSKGESLVAAEEAHSHLSLAIEVGTTEFLQKLTQSQITEMVS  
AKISQAKLQVPGGDSDEETKTPSASPRHGRSRPSSSVQESSESEEDGDSRGEIFDIYVVTADYLPGLAEQDAI  
ILREGQYVEVLDSAHPLRWLVRTKPTKSSPSRQGWVSPAYLDRKRLKLSPEWGPTEAPEFPGEAVSEDEYRTRL  
SSVIQELLSSEQAFVQELQFLESHHMKHLERSPRVPAAVASQKTVIFRNVQDISHFHSSFLKELQCGGTDDDDV  
AMCFIKNQEAFAKEYLEFLVGRVQAESVVVSTPVQEFYKKYAEETLSAKDPTQPPPPPLQHYLEQPVVERVQKYQ  
ALLKELIRNKARNRQNCALLEQAYAVVSALPQRAENKLVSLMENYPGTLEALGEPHQGHFVWEGAPGARM  
PWKGHNRHVFLFRNYLVICKPRRDSRTDTFSYVFRNMMKLSSIDLNDQVEGDDRAFEVWHEREDSVRKYLLQA  
RTVI IKNSWVKEICGIIQORLAQPVWRPPEFEEELADCTAELGETVKLACRVGTGTPKPIVSWYKDGKPVVEVDPH  
NILIEDPDGSCTLILDNLGTIDSGQYMCFAASAAGNASTLGKILVQVPPRFVNVKVRATPFVEGDAQITCTVE  
GAPYPQIRWYKDGTLAPGNRYRMLNEPRSGVLVVIQAASKEDLGHYECELVNRGSGTRGGGELYMQSPALR  
ARDQHHREQIVAAVEDTSSVEGSAHSAQDQADQQAASVLWRLGSEALGPSPGDLPNTRQSEPPAFEEAASQIP  
GAASGTPEVSQPGTHKGLEQETSSSGSQGWTVPIRVEGTAWPGAGTGQLLDDVHSQVIMETTQRTYVCQAPDT  
GVTRAPSMQVTIEDVQVQVGDMAQFDAVIEGHPPPIVTVWYKGSTQLTSSARLSQRQDGTYSVLVTDVAPHDA  
GVYTCVANNAGGQVLCKAELLVHGGDKLDAENQVYRRKLHSFYDVQEEIGRGVFGFVKRVQHKGNMFCAAKF  
IPLRSKTRAQAYQERDILATLGHPLVTGLLDQFETRKTLLIILELCSSEELLDRLFKKGVVTEAEVKVYIQQL  
VEGLHYLHSHGILHLDDIKPPNIMLVHPAREDIKICDFGFAQKITPSEPQYSKYGSPFEVSPETIEQNPVSEGS  
DIWAMGVISYLSLTCSSPFAGESDRATLLNVLEGRVSWSSPTAAHLESDAKDFIKATLQRTPRARPSTSQCLA  
HPWFLKSMPEAAEHFINTKQLKFLLRARSRWQRSLMSYKSIIVMRSIPELLQGGPPDSPSLGVARHLRGEASGAS  
SSSSSSDNELAPFARAKSLPPSPVTHSPLHPRGFLRPSASLPEETEASMPATAAASPASQASAGPPASPGCV  
PRHSVISSLFYQQAGEGAERGNKTSGAKRHPARRRHLLKGGYIARALPGLREPLMEYSLLEEEAAREEQASLM  
TKTPSFETALRLPSSSVREVPGRSHSLDNPPVTTGPSPEACKEQLLFPSTGLTHETTAKDRGHKEGFLQESV  
PFPMSGDSRPGKQEGSSQDSCRKPASSCHSELGSGSQEGCGPPSSQSLGSLPPQSLKELSTSCGPLFSEQ  
PQAAPFPPTQVSPLLGSEKEPQDGSLSGEPVVPVSSSPGSASQVDASLDTEGLSEAGDTCDFTPPPQRPQEQAT  
TRKFSLESRGGYAGVAGYGTFAFGGDAGGMLGQGPLWARMMAVAVSSESSEQDEAATESPQPLESGLPIAEASG  
VPLRTSPSLTPWEEVEQVSLVQIRDLSGDAEAADTISLDISEVDPAYLNLSDLYDIKYLPEFEMI FRRVPKPI  
EQPESPGSETEAGQGLADFLEAAAWPWPGLLGRAGLEITTEPEEPGDLEALLGEAAVGRKRKWSPSRGLFP  
PGRCLSGMPEAAEHFINTKQLKFLLRARSRWQRSLMSYKSIIVMRSIPELLQGGPPDSPSLGVARHLRGEASGAS  
SVTLACQVLAQPTAQATWSKDGVLLESSGHLIISSTLKNFQLLTIIVVKEEDLGTYTCCVSNPLGTAVTTGVL  
RKAERPSSSPREVEGELYKDAVLLVWKPVEESCGPVTVYIVQCCIEGGSWTTLASDISDCCYLTGKLSRGGMYIF  
RTACVSKAGMGPYSSPSEQVLLGGPNHLASEEESRGRPAQLLPSTKTFAFQMQIRRRGRFSVVRQCREKASGR  
ALAAKIVPYQPEDKTAVLREYEALKRHLHHPHLAQLHAAYLSPRHLVLIILELCSGPELLPSLAERESYSESDVK  
DYLWQMLSATQYLHAQHIHLDLRSENMMVTEYNLLKVIDLGNQSLDQEKVPAPENFKDYLETMAPELLEGG  
GAVPQTDIWAIGVTAIFIMLSGEYPESESETRDLQKGLRKLIRLSRCYAGLSGGAVAFLLQSSSLCAQPWGRPCA  
STCLQCGWLTEEGPTGSRPTVTFPTVRLRAVFREREKRRALLYKKNLAQVR\*

>rs50563985\_ENSMUSP00000038264\_c.18864:C>A\_p.H6289N  
ENSMUST00000047441.14|Obscn-202|ENSMUSG00000061462|-|chr11:g.58913192:G>T  
MDHSFSGAPRFLTRPKAFVSVGKDATLSCQIVGNPTPHVSWEKDRQVPEAGARFLAQDGDVYRLTILDLAL  
GDSGQYVCRARNAIGEAFVAVGLRVDSEGTCAEQAPHFLLRPTSIRVREGADATFRCRVGGSPQPAVSWSKDG  
RRLGPPDAPHVRVEEHGESSALRIRSARPRDGGTYEVRAENPLGSASAAAALVVDSDAEVAGPPGTSTATLLA  
HLQORREAMRAEGIPPSPPGAGTRTCTVTEGKHARLSCFVTGEPKPEVWKKDGQLVTEGRRHVVEDEQENF  
VLKILFCKQSDRGLYTCTASNLVGQTYSSVLVVVREPTVPFKKRLQDLEVREKESATFQCEVAQPAEAAWFK  
EETRLWASAKYDIEEGTERRLTVRNVSADDDAVYICETTEGSRVVAELSVQGNLTKLPRKTAVRTGDTAIF  
WVELAVPEGPVWRWRNQEEMVAGGRVAITAEGTCHTLTI FQCTLEDMGEVAFVSGGCRTTTQFCVSAPRRPPL  
YPPADPVPVAKTESVTLVSWAPPHGDRPVTIDGYVLEKRLKLGAYAWSRCHEAGWLATTEFTITGVAEEGDFQ  
FRVSAINHFGQGPYLEFPGTMHLVPLAVKTPLKAVEAVEGGEVTFVSDLTVASSGEWFLDGEALKASSIYVI  
RCDRTRHMLTIREVPARLHGAQLKVFVANGIETSIQMVVRAALGLPSSKLPAAAAREVLAQLHHEAQLLAELSD  
QAAAVTWLKDGRELSLGPKEYMQVSAGRRALLVRDVAQDDAGLYECVSRGSRTAYQLLVQDITDGYRDWGPAG  
PQKHMCKCAGAKIARYLGSSCYRFLQYDKGVWHLEAALDTRQKGTSSCSLHEKPKLVFAKQQAHSEVKA  
AGASATLSCEVAQAQTEVTFWFKDGKLLSSSSKVRMEASGCSRRLVVQQAGKADAGEYSCEAGGQKLSFRLDVA  
EPKMFVFAKEQQARSEVKAEGASATLSCEVAQAQTEVTFWFKDGKLLSSSSKVRMEASGCSRRLVVQQAGKADA  
GEYSCEAGGQKLSFRLDVTEPKLVFAKEQQARSEVKAEGVNSATLSCEVAQAQTEVTFWFKDGKLLSSSSKVRM  
EASGCSRRLVVQQAGKADAGEYSCEAGGQKLSFRLDVAEPKLVFAKEQQARSEVKAEGVNSATLSCEVAQAQTE  
EVTWFKDGKLLSSSSKVRMEASGCSRRLVVQQAGKADAGEYSCEAGGQKLSFHLVDVTEPKLVFAKEQQAHSEV  
KAEAGASATLSCEVAQAQTEVTFWFKDGKLLSSSSKVRMEASGCSRRLVVQQAGKADAGEYSCEAGGQKLSFR  
DVAEPKLVFAKEQQARSEVKAEGASATLSCEVAQAQTEVTFWFKDGKLLSSSSKVRVEASGCSRRLVVQQAGK  
ADAGEYSCEAGGQKLSFRLDVAEPKLVFAKEQQANSEVKAEGASATLSCEVAQAQTEVTFWFKDGKLLSSSSK  
VRVEASGCSRRLVVQQAGKADAGEYSCEAGGQKLSFRLDVAEPKLVFAKEQQAHSEVKAEGASATLSCEVAQ  
AQTEVTFWFKDGKLLSSSSKVRVEASGCSRRLVVQQAGKADAGEYSCEAGGQKLSFRLDVAEPKLVFAKEQQAH

SEVKAEEAGASATLSCEVAQAQTEVTFWFKDGKLLSSSSKVRVEASGCSRRLVVQQAGKADAGEYSCEAGGQKLS  
 FRLDVAEPKLAFAKEQQAHSEVKAEEAGASATLSCEVAQAQTEVTFWFKDGKLLSSSSKVRVEASGCSRRLVVQQ  
 AGKADAGEYSCEAGGQKLFRLDVAEPKLVFAKEQQAHSEVKAEEAGASATLSCEVAQAQTEVTFWFKDGKLLSS  
 SSKVRVEASGCSRRLVVQQVQKADAGEYSCEARGQKLSFRLDVAEAEESQI PERPSRREPLVVKHEHETI I LTAT  
 IAAPSVAAVTWLKDGV EIRRSKRHEATSLGDTHTLTVRGAQVLD SAIYSCRVGKEGQDFPVQVEEVAAKFSKP  
 LEPEVEGELGGTVMLVCELSPEQAEVWRCNGTQLRPGKRFQMTSEGPRRTLTVSGLREDDAEYVCESRDDRT  
 SARLTVKVPRVVKFTSGLSAMVAEEGQEA TFQCVVSPSDAGVTWYKDGMLQOPSEKFFVMVESGASRSLTILGL  
 TLEDAGQVTVEAEGASSAALRVREAPVLFKKKLEPQTVEERTSVTLEVELTRPWPVEVKWTRNAAVLTPSENV  
 EIRAEGARHCLVLRVGFADRGFCEPDDDKTQAKLNVEMRQVRLVVRGLQEVEAKEQGTASMDVELSHA EVE  
 GSWTRDGLRLQPGPKCHLAVQGPVHILTLSALQPQDSGLVAFRAEGVHTSARLIVTELPVSFTRVLQDQVATQ  
 KEKVTLECELSRPVDVRWLKDGVELRAGKAI GIVAQGTCSRSLVIYRCETGDQGVVCDALDAQTSASLRVQGR  
 TYTLIFRRVLAEDAGEVKFVAENAESRAHLRVKELPVTLLRPLRDKIAMEKHRGVLECCQVSRASAQVRWFKGG  
 VELQSGPKYEVVSDGLYRKLVIN DVQPEDEDTYTCDAGNVKTSAQFFVEEQSITIVRGLKDMTVMPEPAPAWFE  
 CETSI PSVRPPKWL LKGTVLQAGNVGLEQDGTVHRLTLHKTCSTMTGPFVHFTIGKSRSSAQLVVS D I PVVLT  
 RPLEPKAGRELQSVVLSCDFRPAPKAVQWYKDDTPLSPSEKFKMALEGOAELRILRLTPADAGVYRCQAGSA  
 QSSAEVTVEAREVTVIQPLQDAEAMEEGRVCFSCELSHKDEDI EWSLNGTPLYNDSFHEI SHEGCLHTLV LKS  
 VRQADTGTVCATSPKVS SARLVVKGKPVVFLKALDDVSAEERGTTLQCEVSDPEARVVRKDGVELGPFSDK  
 YDFLHKAGARGLTVHDL SHEDAGLYTCQVGSKETQSKVSVHDLHVGITKRLKTVEVLEGECSDFEVL SHESP  
 SDPAVWTVGGKTVGGSGHFHAVRQGRKYTLTVKDAALSDAGEVVF SVLGLT SKASLI I RERPV DITKPLEDQR  
 TTLGEDVMLSCELSRAGTSVRWLKDGKAI RKSQKYDLLSEGTRAVLVVRKASLKDSGEYTCETEASKSTAKLC  
 VEEKANRFTEELADLQVEEKGRAVFTCKTEHPASVVTWRKGLLELRASGKHVPSQEGTLTKLTINALERTDSD  
 TYTCDIGQARTQARLLVHGQKVRVIEDLED TAVQEGSSAKFCCR IAPADYGPVHWF LDKTPLHSNELNEITVQ  
 PGGYHVLTLRQLALKDSGTVYFEAGDQRTSAALRVTEKPSIFSRPLTDVTVTEGEDTLTVCE TTTVDSSVRWT  
 KDGKTLRPSARCQLSHEGCAQLLITATTPQDGGRYKCEIGGASSSSIVRVHALPVRFRESLKDVEVPEGKAA  
 TLRVLSVVAAPVEWRHGDDVLKSSNKYSLRQEGAVLELVIRDLQPDGSGQYSCSFGDQTTSATLTVKTS SAQ  
 FVGKLRNKEATEGTTVTLRCELTK EAPVEWKKGETELRNGDKYSLKQDGA VCELQICSLLVADAGEYSCVCGQ  
 EKT SATLTVKALLVHFVRLRSKEATEGDTTLQCELSKAAPVEWRKGTETLRDGD RYSLKQDGA VCELQIRS  
 LT IADAGEYLCTCGQEKT SATLTVRALPAKFKDSLKNEEATEGTTATLSCELSKAAPV TWKKGPKTLQSGDKY  
 VLRQDGA VCELQIHGLTMADAGEYSCVCGQEKT SATLTVRGLPAKFIEDLRSQEATEGATAILRCELSKAAPV  
 EWRKGETLKDGD RYTLRQDGA VCELQIRGLAVVDTGTYS SLP TKFTEGLRNEEATEGTMATLRCQMSKAAPV  
 EWRKGETLRDGD RYSLRQDGA MCELQIRGLTIEDSGEYTCVCGQEKT SATLSVKALPPRFIEDLRSQEATEG  
 TMATLRCQMSKAAPVEWRKGETLGDGG RYSLRQNGAVCELQIHDLAVEDTGEYSCVCGQEKT SATLNVKALP  
 PRFIEDLRSQEATEGTMATLRCQMSKAAPVEWRKGETLRDGG RYSLRQDGA VCELQIHDL DVEDAGQYSCVC  
 GQEKTSAVLTVDALPPKFTEGLKKEEATEGTMVTLRCQMSKEATVEWRKGAKTLS DGG RYSLRQDGA MCELQI  
 CGLAVEDAGEYSCVCGQEKT SATLSVKALPPRFIEDLRSQEATEGTMATLRCQMSKAAPVEWRKGSKT LR DGD  
 RYSLRQDGA MCELQICDLAVEDTGDYSCVCGQEKT SATLSVKAPQVVFQQLQNLQAEEGSMASLRCELSVFN  
 AAMVWSKGGLELQGDTRREARQQCVAELLLRDLRREDAGEYSC TCGSQTTSATLMVTAAPVRFRLRELQAQDV  
 DEGATARLRCELSREAVSVEWRKGS LQLFPCA K YQMVQEGTTAE LLVHGVEQEDAGEYTC DAGHTQS IARLSV  
 RAPKPKFKTDLQSTEQEAGGTARLCCQLSEAE PGT PVQWLKEGVELHVGS KYEMRRQGA VCELLIHGLEAKDT  
 GEYACL VGGQKT LASLRVKEPEVTIVRGLVDMEVQADE DVEFTCKV SQAGATDVQWHLQGLPLQSNEVTEVAV  
 LADGCTHVLQLKGV TLEDAGTVSFHVGG LSSAQLTVRVPEVTVLEPLKDVQLSEGQDAHFRCRLSRASGQEA  
 RWALGGVPLQCNEMNDITVEQGTLYLLTLHKVTLEDAGTITLQVGS CSSEAQLKVTA KNTVLRGL ENVDAL E G  
 GEALFECQLSQPEVA AHTWLLDDEPVHTSEKVEVVYFENGLRHLL LKLNKLPQDSCRVTFLAGDVVTS AFLTV  
 RALPDPPEDAEVVGRSDHSVTL SWVAPMSDGGGGLCGYR VEMKEASTGQWQLCHDLVPGPECVDDLVPGKTY  
 RFRVAAVGPAGAGEPVHLPQMVK IAPAPAPAPAPAPAPAPETRQAVVGEDICLELEVAADGGEV VWHKGT ERI  
 QPGGHFEVLSRGRQMLVIKGFRTEDQGEYRCGPIQGLPSSGAATFNVMVTS GSGDEVPAQPSLPPEAAQEGD  
 LHLLWEALARKRRMSREPTLDSISELPEEDSRVQHLRQEAEE TAPDLSEGYSTADELARTGEADLSHTSSDDE  
 SRAGT PSLV TYLKKAGGPGISPLASKHEAQVTT SVKPKQKQEPVVP TCPPPGDLSAADLMDPSLDKAAVKIQ A  
 AFKGYKVRKEMKQQEGPVFSRTFGDTEAQVGDVLRLECVLATKTD MRACWLKDGIELTDGRHYHIDQLKDGTC  
 SLLVTVGLAPTDSGRYTCQVSTKSGRVSHSACVVVSGTESEAE SSGGELDDAFRRAARRLHRLFRFKSPAELS  
 EEELFLSADEGPGEPEPADWQTYREDENFVCIRFESLAEARQAVTCFRNM FATMGIGVEISLGEQGP RGVEM  
 RIGKVAPT VTPAVPLAKTPGLQTS DAAPVFLTELQNDVQDGYPMSFDCVVTGQPVPSVRWFKDGKLL EEDDH  
 YMINEDQGGHQLIITAVVPADMGVYRCLAENSMGVSSTKAE LRVELTSTDYDTAADATETSSYFSAQGYLSS  
 REQEGTESDEGQQLPVLEELKDLQVAPGTRLAKFVKVGY PAKLYWFKDGP LTTSDHIRMTDKKTLHTLE  
 IVSVTREDSGQYAAIYI SNAVGAAYSSARLLVRGPSEPEEK PASDVHERLVPPRILEKFTPKKVRGSSITFSV  
 KVEGHPAPSVHWLKEEA EKGVLWIGPDTPGYTMASSSKQHS LVLVDVGRQHGGTYTCIATNPAGQALCSASLH  
 ISGLAKEEEQERVKEALISSFLQGT SQAVSAQMSESAGFADLVGQSKGESLVAAEHAHSHLSLAEVGT EEF LQK  
 LTSQITEMVSAKISQAKLQVPGGDSDEETKTPSASPRHGRSRPSSSVQESSSESEDGDSRGEI FDIYVVTADY

LPLGAEQDAIILREGQYVEVLDSAHPLRLWLVRTKPTKSSPSRQGWVSPAYLDKRLKLSPEWGPTEAPEFPGEA  
VSEDEYRTRLSSVIQELLSSEQAFVQELQFLESHHMKHLERSPRVPAAVASQKTVIFRNVQDISHFHSSFLKE  
LQCGCTDDDDVAMCFIKNQEAFAKEYLEFLVGRVQAESVVVSTPVQEFYKKYAETLSAKDPTQPPPPLOHYLE  
QPVERVQKYQALLKELIRNKARNRQNCALLEQAYAVVSALPQRAENKLVSLMENYPGTLEALGEPIRQGHFI  
VWEGAPGARMPPWKGNHRHVFLFRNYLVICKPRRDSRTDTFSYVFRNMMKLSSIDLNDQVEGDDRAFEVWHERE  
DSVRKYLLQARTVIKNSWVKEICGIQQRLAQPVWRPPEFEEELADCTAELGETVKLACRVGTGPKPIVSWYK  
DGKPEVEVDPHNILIEDPDGSCSTLILDNLTGIDSGQYMCFAASAAGNASTLGKILVQVPPRFVNKVRATPFVEG  
EDAIITCTVEGAPYPQIRWYKDGTLAPGNRYRMLNEPRSGVLLVLIQAASKEDLGHYECVELVNRLGSTRGGG  
ELYMQSPALRARDQHHREQIVAAVEGAPSMQVTIEDVQVQVGDMAQFDAVIEGHPPPIVTWYKGSTQLTSSAR  
LSQRQDGTYSLVLTVDVPHDAGVYTCVANNAGQVLCCKAELLVHGGDKLDAENQVYRRLKHSFYDVQEEIGR  
GVFGFVKRVQHKGNMFCFAAKFIPLRSKTRAQAYQERDILATLGHPLVTGLLDQFETRKTLLILILELCSSEEL  
LDRLFKKGVVTEAEVKVYIQQLVEGLHYLHSHGILHLDIKPPNIMVHPAREDIKICDFGFAQKITPSEPOYS  
KYGSPFVVSPEIIEQNPVSEGSIDIWAMGVISYLSLTCSSPFAGESDRATLLNVLEGRVSWSSPTAAHLSSEDAK  
DFIKATLQRTPRARPSTSQC LAHPWFLKSMPEEAHFINTKQLKFLARSRWQRSLMSYKSIIVMRSIPPELLQ  
GPPDPSPLGVARHLRGEASGASSSSSSSDNELAPFARAKSLPPSPVTHSPLLHPRGFLRPSASLPEETEASMP  
TADAAVPASPOASAGPPASPGCVPRHSVISSLFYQQAGEGAERGNKTSKAKRHPARRRHLLKGGYIARALPGLR  
EPLMEYSLLEEEAAREEQASLMTKTPSFETALRPLSSSVREVPGRSHSLDNPPVTTGSPPEACKQLLFPST  
GLTHETTAKDRGHKEGFLQESVFPFPPMSGDSRPGKQEGSSQDSCRGKPASSCHSELGSGSQEGCPESSQSLG  
SLPPQSLKKELESTSCGPLFSEQPQAAPFPQTQVSPLLGSEKEPQDGSLSSEGPVVPVSSSPGSASQVDASLDTEG  
LSEAGDTCDFTPPPQRPQEQATTRKFSLESRGGYAGVAGYGTFAFGGDAGGMLGQGPLWARMWAVSQSSEEQ  
DEAATESPQPLESLGPIAEASGVPLRTSPSLTPWEEVEQVSLVQIRDLSGDAEAADTISLDISEVDPAYLNL  
DLYDIKYLPPFEFMI FRRVPKPIEQPESPGSETEAGQGLADFLLEEAAPWPWGPGLGLRAGLEITEEPPEPGDLEA  
LLGEAAVGRKRKWSPSRGLFQFGRCLSGEEPVELGLRQRVKASMAHISRIKGRPEGPEREPPRKKAGLAS  
FRLSGLKGRDQELSDEAVVLGQSVTLACQVLAQPTAQTATWSKDGVLLESSEGHLLISSTLKNFQLLTLIVVKEE  
DLGTYTCCVSNPLGTAVTTGVLKRAERPSSSPRPEVVELYKDAVLLVWKPVESECGPVTYIVQCCIEGGSWTTL  
ASDISDCCYLTGKLSRGGMYIFRTACVSKAGMGPYSSPSEQVLLGGPNHLASEEESRRRPAQLLPSKTFAF  
QMQIRRRGFRVGRKREKASGRALAAKIVPYQPEDKTAVLREYEAALKRHLHHPHLAQLHAAYLSRHLVLI  
CSGPELLPSLAERESYSESDVKDYLWQMSATQYLHAQHILHLDLRSENMMVTEYNLLKVIDLGNASLDQEK  
VPAPENFKDYLETMAPELLEGGQAVPQTDIWAIGVTAIFIMLSGEYPESEGETRDLQKGLRKLIRLSRCYAGL  
SGGAVAFLOSSLCAQPWGRPCASTCLOCGWLTEEGPTGSRPTPVTFTVRLRAFVREKRRRALLYKKNH  
LAQVR\*

>rs50563985\_ENSMUSP00000049737\_c.20823:C>A\_p.H6942N  
ENSMUST00000052872.15|Obscn-203|ENSMUSG00000061462|-|chr11:g.58913192:G>T  
MDHSFSGAPRFLTRPKAFVSVGKDATLSCQIVGNPTPHVSWEKDRQPVVEAGARFRLAQDGDVYRLTILDLAL  
GDSGQYVCRARNAIGEAFAAVGLRVDSEGTCAEQAPHFLLRPTSIRVREGADATFRCRVGSSPQPAVSWSKDG  
RRLGPPDAPHVRVKEEHGESSALRIRSARPRDGGTYEVRAENPLGSASAAAALVVDSDAEVAGPPGTSTATLLA  
HLQQRRREAMRAEGIPPSPPGAGTRTCTVTEGKHARLSCFVTGEPKPEVWKKDGQLVTEGRRHVVEDEQENF  
VLKILFCKQSDRGLYTCTASNLVGQTYSSVLVVVREPTVPFKKRLQDLEVREKESATFQCEVAQPAEAAWFK  
EETRLWASAKYDIEEGTERRLTVRNVSADDDAVYICETTEGSRVVAELSVQGNLTKLPRKTAVRTGDTAIF  
WVELAVPEGPVRWLRNQEEMVAGGRVAITAEGTCHTLTI FQCTLEDMGEVAFVSGGCRTTTQFCVSAAPRRPPL  
YPPADPVVKAKTESSVTLWSAPPHGDRPVTIDGYVLEKRLKLGAYAWSRCHEAGWLATTEFTITGVAAEEDFQ  
FRVSAINHFGQGPYLEFPGTMHLVPLAVKTPKAVEAVEGGEVTFVSDLTVASSGEWFLDGEALKASSIYVI  
RCDRTRHMLTIREVPARLHGAQLKFVANGIETSIQMVVRAALGLPSSKLPAAAAREVLAQLHEEAQLLAELSD  
QAAAVTWLKDGRELSLGPYEMQVSAGRRALLVRDVAQDDAGLYECVSRGSRRTAYQLLVQEPKLVFAKQQA  
SEVKAEGANSATLSCEVTQAQTEVTFWFKDGKLLSSSSKVRMEASGCSRRLLVVQQAGKADAGEYSCEAGGQKLS  
FRLDVAEPKLVFAKQQAHSVEKAEAGASATLSCEVAQAQTEVTFWFKDGKLLSSSSKVRMEASGCSRRLLVVQQ  
AGKADAGEYSCEAGGQKLSFRLDVAEPMVFAKEQQARSEVKAEGASATLSCEVAQAQTEVTFWFKDGKLLSS  
SSKVRMEASGCSRRLLVVQQAGKADAGEYSCEAGGQKLSFRLDVTEPKLVFAKEQQARSEVKAEGVNSATLSCE  
VAQAQTEVTFWFKDGKLLSSSSKVRMEASGCSRRLLVVQQAGKADAGEYSCEAGGQKLSFRLDVAEPKLVFAKEQ  
QARSEVKAEGANSATLSCEVAQAQTEVTFWFKDGKLLSSSSKVRMEASGCSRRLLVVQQAGKADAGEYSCEAGGQ  
KLSFHLVDVTEPKLVFAKEQQAHSEVKAEGASATLSCEVAQAQTEVTFWFKDGKLLSSSSKVRMEASGCSRRLLV  
VQQAGKADAGEYSCEAGGQKLSFRLDVAEPKLVFAKEQQARSEVKAEGASATLSCEVAQAQTEVTFWFKDGK  
LSSSSKVRVEASGCSRRLLVVQQAGKADAGEYSCEAGGQKLSFRLDVAEPKLVFAKEQQANSEVKAEGASATL  
SCEVAQAQTEVTFWFKDGKLLSSSSKVRVEASGCSRRLLVVQQAGKADAGEYSCEAGGQKLSFRLDVAEPKLAFA  
KEQQAHSEVKAEGASATLSCEVAQAQTEVTFWFKDGKLLSSSSKVRVEASGCSRRLLVVQQAGKADAGEYSCEA  
GGQKLSFRLDVAEPKLAFAKEQQAHSEVKAEGASATLSCEVAQAQTEVTFWFKDGKLLSSSSKVRVEASGCSR  
RLVVQQAGKADAGEYSCEAGGQKLSFRLDVAEPKLAFAKEQQAHSEVKAEGASATLSCEVAQAQTEVTFWFKD  
GKLLSSSSKVRVEASGCSRRLLVVQQAGKADAGEYSCEAGGQKLFRLDVAEPKLMFAKEQQAHSEVKAEGAS

ATLSCEVAQAQTEVTFWFKDGKLLSSSSKVRVEASGCSRRLLVVQQAGKADAGEYSCEAGGQKLSFRLDVAEPKL
VFAKEQQAHSEVKAEGASATLSCEVAQAQTEVTFWFKDGKLLSSSSKVRVEASGCSRRLLVVQQVQKADAGEYS
CEARGQKLSFRLDVADTRLMFAKEQQARTEVKAEGNSATLSCEVAQAQTEVTFWFKDGKLLSSSSKVRVEASG
CSRRLLVVQQAGKADAGEYSCEAGGQKLSFRLDVAEAEESQIPERPSRREPLVVKEHETIILTATIAAPSVAAVT
WLKDGVEIRRSKRHEATSLGDTHTLTVRGAQVLDIAIYSCRVGKEGQDFPVQVEEVAAKFSKPLEPVEGELGG
TVMLVCELSPEQAEVWRCGNTQLRPGKRFQMTSEGPRRTLTVSGLREDDAEYVCESTRDDRTSARLTVKVPR
VVKFTSGLSAMVAEEGQEAATFQCVVSPSDAGVTWYKDGMLQPSSEKFMVMEVSGASRSLTILGLTLEDAGQVTV
EAEGASSAALRVREAPVLFKFKKLEPQTVEERTSVTLEVELTRPWEVVKWTRNAAVLTPSENVEIRAEGARHC
LVLRSVGFADRGFFGCETPDDKTQAKLNVEMRQVRLVRGLQVEVAKEQGTASMDVELSHAEEVGSWTRDGLRL
QPGPKCHLAVQGPVHILTLALSALQPQDSGLVAFRAEGVHTSARLIVTELPVSFTRVLQDVVATQKEKVTLECEL
SRPVDVRLKDGVELRAGKAI GIVAQGTCSRSLVIYRCETGDQGVYCDALDAQTSASLRVQGRTYTLIFRRVL
AEDAGEVVFVAENAESRAHLRVKELPVTLLRPLRDKIAMEKHRGVLECVSRASAQVRWFVKGGLVQSGPKYE
VVDGLYRKLVINVDVQPEDEDTYTCDAGNVKTSAQFFVVEEQSITIVRGLKDMTVMPEPAPAWFECETSIPSVRP
PKWLLGKTVLQAGGNVGLQDGTVHRLTLHKTCSTMTGPVHFTIGKSRSSAQLVVS DI PVVLTRPLEPKAGRE
LQSVVLSCDFRPAPKAVQWYKDDTPLSPSEKFKMALEGQMAELRILRLTPADAGVYRCQAGSAQSSAEVTVEA
REVTVIQPLQDAEAMEEGRVCFSCELSHKDEDI EWSLNGTPLYNDSFHEISHEGCLHTLVLKSVRQADTGTVC
ATSPKVSVSARLVVKGKPVVFLKALDDVSAEERGTLLQCEVSDPEARVWVRKDGVELGSPDKYDFLHKAGAR
GLTVHDLSHEDAGLYTCQVGSKETQSKVSVHDLHVGITKRLKTVLEVLEGE SCSFECVLSHESPSDPAVWTVGG
KTVGGSGHFHAVRQGRKYTLTVKDAALSDAGEVVSVLGLTSKASLIIRERPVDITKPLEDQRTTLGEDVMLS
CELSRAGTSVRWLKDGKAIKRSQKYDLLSEGTRAVLVVRKASLKDSGEYTCETEASKSTAKLCVEEKANRFTTE
ELADLQVEEKGRAVFTCKTEHPASVVTWRKGLLELRASGKHVPSQEGTLKLTINALERTDSDTYTCDIGQAR
TQARLLVHGQKVRVIEDLEDTA VQEGSSAKFCCRIAPADYGPVHWF LDKTPLHSNELNEITVQPGGYHVLTLR
QLALKDSGTVYFEAGDQRTS AALRVTEKPSIFSRPLTDVTVTEGEDTLVCETTTVDSSVRWTKDGKTLRPSA
RCQLSHEGCAQLLITATTPQDGGRYKCEIGGASSSSIVRVHALPVRFRESLKDVEVPEGKAATLRCVLSSVA
APVEWRHGDDVLKSSNKYSLRQEGAVLELVIDRLQPDQSGQYSCSFGDQTTSATLTVKTSQAQFVGLKRNKEA
TEGTVTTLRCELTKKEAPVEWKKGTETLRNGDKYSLKQDGA VCELQICSLLVADAGEYSCVCGQEKTSATLTVK
ALLVHFVRRRLRKEATEGDTTTLQCELSKAAPVYERKGTETLRDGDYSLKQDGA VCELQIRSLTADAGEYL
CTCGQEKTSATLTVRALPAKFKDSLKNEEATEGTTATLSCELSKAAPVTWKKGPKTLQSGDKYVLRQDGA VCG
LQIHGLTMADAGEYSCVCGQEKTSATLTVRGLPAKFIEDLRSQEATEGATAILRCELSKAAPVEWRKGETL
DGDRYTLRQDGA VCELQIRGLAVVDGTYSLSLPTKFTTEGLRNEEATEGTMATLRCQMSKAAPVEWRKGETL
DGDRYSLRQDGA MCELQIRGLTIEDSGEYTCVCGQEKTSATLSVKALPSRFIEDLRSQEATEGTMATLRCQMS
KTAPVEWKKGSETLRDGGYSLRQDGPVCELQICDLAVEDAGEYSCVCGQEKTSATLSIKALPPRFIEDLRSQ
EATEGTMATLRCQMSKAAPVEWRKGETLGDGGYSLRQNGAVCELQIHDLAVEDTGEYSCVCGQEKTSATLN
VKALPPRFIEDLRSQEATEGTMATLRCQMSKAAPVEWRKGETLRDGGYSLRQDGA VCELQIHDLVEDAG
YSCVCGQEKTSAVLTVDALPPKFTTEGLKKEEATEGTMATLRCQMSKAEATVEWRKGA KTLSDGGYSLRQDGA
MCELQICGLAVEDAGEYSCVCGQEKTSATLSVKALPPRFIEDLRSQEATEGTMATLRCQMSKAAPVEWRKGET
LRDGDYSLRQDGA VCELQIRDLAVEDAGEYLCVCGQEKTSATLSVKALPPRFIEDLRSQEATEGTMATLRCQ
MSKAAPVEWRKGSKTLR DGDYSLRQDGA MCELQICDLAVEDTGDYSCVCGQEKTSATLSVKALPPRFIEDL
RQEAAREGTVATLRCMSKAAPVEWRKGETLKDGDYSLRQEGNLCELQIRDLAVEDTEEYSCVCGQEKTSAT
LSVKALPAKFIEDLRSQEAPESSTVTLRCKLSKKASVVWKKGSETLRNGARYSLRQDGA VCELEIRDLTVEDT
GEYSCTCGQERTSATLSIMAPQVVFQQPLQNLQAEEGSMASLRCEL SVPNAMVWSKGGLELQGDTRREARQQ
GCVAELLLRDLRREDAGEYSCCTCGSQTTSATLMVTAAPVRFRELQAQDVDEGATARLRCELSREAVSVEWRK
GSLQLFPAKAYQMVQEGTTAELLVHGVEQEDAGEYTC DAGHTQS IARLSVRAPKPKFKTDLQSTEQEAGGTAR
LCCQLSEAE PGTPVQWLKEGVELHVGSKYEMRRQVAGCELLIHGLEAKDTGEYACL VGGQKTLASLRVKEPEV
TIVRGLVDMEVQADEDEFTCKVSAQAGATDVQWHLQGLPLQSNEVTEVAVLADGCTHVLQKGVTL EDAGTVS
FHVGGLSSSAQLTVRVPEVTVLEPLKDVQLSEGDQDAHFRCRLSRASGQEARWALGGVPLQCNEMNDITVEQGT
LYLLTLHKVTLEDAGTITLQVGS CSSEAQLKVTAKN TVLRGLENVDALEGGEALFECQLSQPEVA AHTWLLDD
EPVHTSEKVEVVYFENGLRHLLLLKLNKLPQDSCRVTFLAGDVVTS AFLTVRGRWLEVL EPPHDASVKAGMQVR
FTCILSEAVPVGEATWYINGAAIQPDDTDWTVTTDGS HHALTLSNAQPHAGEVTF AARDAVASARLSVLALP
DPEPEAEVVGSRDHSVTL SWVAPMSDGGGGLCGYR VEMKEASTGQWQLCHDLVPGPECVVDLVP GKTYRFRV
AAVGPAGAGEPVHLPQMVKIAPAPAPAPAPAPAPAPETRQAVVGEDICLELEVAADGGEV VWHKGTERRIQPGG
HFEVLSRGRQRLVIKGFRTEDQGEYRCGPIQGLPSSGAATFNVMVMTSGSGDEVPAQPSLPPEAAQEGDLHLL
WEALARKRRMSREPTLDSISELPEEDSRVQLHRQEAETAPDLSEGYSTADELARTGEADLSHTSSDDES RAG
TPSLVITYLKKAGGPGI SPLASKHEAQVTT SVKPKQEQEPVPTCPPGDL SAADLMDPSLDKAAVKIQAAFKG
YKVRKEMKQQEGPVFSRTFGDTEAQVGDVLRLECVLATKTD MRACWLKDGIELTDGRHYHIDQLKDGTC SLLV
TGLAPTDSGRYTCQVSTKSGRVSHSACVVVSGTESEAE SSSGGE LDDAFRRAARRLHRLFRTKSPAELSEEEL
FLSADEGPGEPEEPADWQTYREDENFVCIRFESLAEARQAVTCFRNMFATMGIGVEISLGEQGPGRVEMRIGK
VAPVTVPVAVPLAKTPGLQTS DAAPVFLTELQNDVQDGYPMSFDCVVTGQPVPSVRWFKDGKLL EEDDHYMIN

EDQQGGHQLIITAVVPADMGVYRCLAENSMGVSSTKAELRVELTSTDYDTAADATETSSYFSAQGYLSSREQE  
 GTESDEGQLPQVLEELKDLQVAPGTRLAKFQKLVKGYPAKLYWFKDQPLTSDHIRMTDKKTLHTLEIVSV  
 TREDSGQYAAIYISNAVGAAYSSARLLVGRGPSEPEEKPASDVHERLVPPRILEKFTPKKVKRGSSTIFSVKVEG  
 HPAPSVHWLKEEAKEGVLWIGPDTPGYTMASSSKQHSVLVLDVGRQHOGTYTCIATNPAGQALCSASLHISGL  
 AKEEQERVKEALISSFLQGTSAVSAQMSEAGFADLVGQSKGESLVAEEAHSHLSLAEVGTEEFQKLTSTQ  
 ITEMVSAKISQAKLQVPGGDSDEETKTPSASPRHGRSRPSSSVQESSSESEDGDSRGEIFDIYVVTADYLPGLG  
 AEQDAIILREGQYVEVLDSAHPLRWLVRTKPTKSSPSRQGWVSPAYLDKRLKLSPEWGPTEAPEFPGEAVSED  
 EYRTRLSSVIQELLSSEQAFVQELQFLESHHMKHLERSPRVPAAVASQKTVI FRNVQDI SHFHSSFLKELQGC  
 GTDDDVAMCFIKNQEA FEKYLEFLVGRVQAE SVVSTPVQEFYKKYAEETLSAKDPTQPPPPPLQHYLEQVVE  
 RVQKYQALLKELIRNKARNRQNCALLEQAYAVVSALPQRAENKLVSLMENYPGTLEALGEPiRQGHFIVWEG  
 APGARMPWKGNHRHVF LFRNYLVICKPRRDSRTDFTSYVFRNMMKLSSIDLNDQVEGDDRAFEVWHEREDESVR  
 KYLLQARTVI IKNSWVKEICGIQORLAQPVWRPPEFEELADCTAELGETVKLACRVTGTPKPIVSWYKDGKP  
 VEVDPHNILIEDPDGSC TLI LDNL TGIDSGQYMCFAASAAGNASTLGKILVQVPPRFVNVKVRATPFVEGEDAQ  
 ITCTVEGAPYPQIRWYKDG TLLAPGNRYRMLNEPRSGVLVLIQAASKEDLGHYECELVNRLGSTRGGGELYM  
 QSPALRARDQHHREQIVAAVEVTEQETKVPKKTVI I EETITTVVKSPRGRRQSPGKSPSRSPRRSASPRRPG  
 LLAPERLYPPGTSPSRRLEVEQGRKAPVPALYVTEAEVHAPASQSQPKWLEVEETIEVRVKKTGSRGASPVRE  
 MTSRGEGLF LTPGGI PGRDPNANNNSNKSVYQEARTWGPVAVHVGEFFIFQVDSVGNVDVAASPEPEQVRA  
 SQKEENTERQEGCSDGDENTFLMEEPQD TDSLQGRDPKILTHNGRVLTLADLEDYVQEGEFTGCGDSTPSTP  
 DEPPCEVSVLQREI SEPTVGQPVLLNVGRPPGTGATPSFFRPGSQVHSPESVSFLLREAWSGPVSAAWPTSSSF  
 HTHVQSSVDGSHGSFKTEVSTQTVSFGAVGETVTLHIDPDGGEAPGPSQG\*  
 >rs50563985\_ENSMUSP00000020732\_c.21024:C>A\_p.H7009N  
 ENSMUST00000020732.13|Obscn-201|ENSMUSG00000061462|-|chr11:g.58913192:G>T  
 MDHSFSGAPRFLTRPKAFVSVGKDATLSCQIVGNPTPHVSWEKDRQPV EAGARFRLAQDGDVYRLTILDLAL  
 GDSGQYVCRARNAIGEAFAAVGLRVDSEGTCAEQAPHFLLRPTSIRVREGADATFRCRVGGSPQPAVSWSKDG  
 RRLGPPDAPHVRVEEHGESSALRIR SARPRDGGTYEVRAENPLGSASAAAALVVDSDAEVAGPPGTSTATLLA  
 HLQQRREAMRAEGIPSPPGAGTRTCTVTEGKHARLSCFVTEGPKPETVWKKDGQLVTEGRRHVVEDEQENF  
 VLKILLECKQSDRGLYCTASNLVGGQTYSSVLVVVREPTVPFKKRLQDLEVREKESATFQCEVAQPA TEAAWFK  
 EETRLWASAKYDIEEEGTERRLTVRNVSADDDAVYICETTEGSR TVAELSVQGNLTKLPRKTAVRTGDTAIF  
 WV ELAVPEGPVRWLRNQEEMVAGGRVAITAEGTCHTLTIFQCTLEDMGEVAFVSGGCRTTTQFCVSAPRRPPL  
 YPPADPVVKAKTESSVTLWSAPPHGDRPVTIDGYVLEKRKLGAYAWSRCHEAGWLATTEFTITGVAAEGDFQ  
 FRVSAINHFGQGPYLEFPGTMHLVPLAVKTPKAVEAVEGGEVTFVSDLTVASSGEWFLDGEALKASSIYVI  
 RCDRTRHMLTIREV PARLHGAQLKFVANGIETS IQMVVRAALGLPSKLPAAAAREVLAQLHHEEAQLLAE LSD  
 QAAA VTWLKDGRELSLGPKEYMQVSAGRRALLVRDVAQDDAGLYECVSRGSR TAYQLLVQDITDGYRDWGPAG  
 PQKHMCKCAGAKIARYLGS SCYRFLQYDKGVWHWLEAALDTRQKGKTS SCSLHEKPKLVFAKQQAHSEVKA E  
 AGNSATLSCEVTQAQTEVTWFKDGKLS SSSSKVRMEASGCSRRLVVQQAGKADAGEYSCEAGGQKLSFRLDVA  
 EPKLVFAKQQAHSEVKAEAGASATLSCEVAQAQTEVTWFKDGKLS SSSSKVRMEASGCSRRLVVQQAGKADA  
 GEYSCEAGGQKLSFRLDVAEPKMFVFAKEQQARSEVKA EAGASATLSCEVAQAQTEVTWFKDGKLS SSSSKVRM  
 EASGCSRRLVVQQAGKADAGEYSCEAGGQKLSFRLDVTEPKLVFAKEQQARSEVKA EAGASATLSCEVAQAQ  
 EVTWFKDGKLS SSSSKVRMEASGCSRRLVVQQAGKADAGEYSCEAGGQKLSFRLDVAEPKLVFAKEQQARSEV  
 KAEAGNSATLSCEVAQAQTEVTWFKDGKLS SSSSKVRMEASGCSRRLVVQQAGKADAGEYSCEAGGQKLSFHL  
 DVTEPKLVFAKEQQAHSEVKAEAGASATLSCEVAQAQTEVTWFKDGKLS SSSSKVRMEASGCSRRLVVQQAGK  
 ADAGEYSCEAEGQKLSFRLDVAEPKLVFAKEQQARSEVKA EAGASATLSCEVAQAQTEVTWFKDGKLS SSSK  
 VRVEASGCSRRLVVQQAGKADAGEYSCEAGGQKLSFRLDVAEPKLVFAKEQQANSEVKA EAGASATLSCEVAQ  
 AQTEVTWFKDGKLS SSSSKVRVEASGCSRRLVVQQAGKADAGEYSCEAGGQKLSFRLDVAEPKLVFAKEQQAH  
 SEVKA EAGASATLSCEVAQAQTEVTWFKDGKLS SSSSKVRVEASGCSRRLVVQQAGKADAGEYSCEAGGQKLS  
 FRLDVAEPKLVFAKEQQAHSEVKAEAGASATLSCEVAQAQTEVTWFKDGKLS SSSSKVRVEASGCSRRLVVQQ  
 AGKADAGEYSCEAGGQKLSFRLDVAEPKLVFAKEQQAHSEVKAEAGASATLSCEVAQAQTEVTWFKDGKLS S  
 SSKVRVEASGCSRRLVVQQAGKADAGEYSCEAGGQKLFRLDVAEPKLMFAKEQQAHSEVKAEAGASATLSCE  
 VAQAQTEVTWFKDGKLS SSSSKVRVEASGCSRRLVVQQAGKADAGEYSCEAGGQKLSFRLDVAEPKLVFAKEQ  
 QAHSEVKA EAGASATLSCEVAQAQTEVTWFKDGKLS SSSSKVRVEASGCSRRLVVQQVQKADAGEYSCEARGQ  
 KLSFRLDVADTRLMFAKEQQARTEVKAEAGNSATLSCEVAQAQTEVTWFKDGKLS SSSSKVRVEASGCSRRLV  
 VQQAGKADAGEYSCEAGGQKLSFRLDVAEAE SQIPERPSRREPLVVKEHETIILTATIAAPSVAAVTWLKDG V  
 EIRRSKRHEATVLCGDTHTLTVRGAQVLD SAIYSCRVQGEKQDFPVQVEEVA AKFSKPLEPVEGELGTTVMMLVC  
 ELSPEQAEVVWRGNTQLRPGKRFQMTSEGPRRTLTVSGLEDDAEYVCE SRDDRTSARLTIVKVP RVVFKFTS  
 GLSAMVAEEGQEATFQC VVSPSDAGVTWYKDGMLQPSEKFMVME SGASRSLTILGLTLEDAGQVTVAEAGAS  
 SSAALRVREAPVLFK KLEPQTVEERTSVTLEVELTRPWPEVKWTRNAAVLTPSENVEIRAEGARHCLVLR SV  
 GFADRGF FGCETPDDKTQAKLNVEMRQVRLV RGLQVEVEAKEQGTASMDVELSHA EVEG SWTRDGLRLQPGPKC  
 HLAVQGPVHILTL SALQPQDSGLVAFRAEGVHTSARLIVTEL PVSFTRVLQD VVATQKEKVTLECELSRPVDV

RWLKDGVELRAGKAIGIVAQGTCSRSLVIYRCETGDQGVYVCDALDAQTSASLRVQGRTYTLIFRRVLAEDAGE
VKFVAENAESRAHLRVKELPVTLLRPLRDKIAMEKHRGVLECCQVSRASAQVRWFKGGVELQSGPKYEVVSDGL
YRKLVINVDVQPEDEDTYTC DAGNVKTSAQFFVVEEQSITIVRGLKDMTVMEPAPAWFECETSIPSVRPPKWLIG
KTVLQAGGNVGLQDGTVHRLTLHKTCSTMTGPHVFTIGKSRSSAQLVVSDIPVVLTRPLEPKAGRELQSVVL
SCDFRPAPKAVQWYKDDTPLSPSEKFKMALEGQMAELRILRLTPADAGVYRCQAGSAQSSAEVTVAREVTVI
QPLQDAEAMEEGRVCFSCELSHKDEDIEWSLNGTPLYNDSFHEISHGCLHTLVLSVSRQADTGTVCATSPKV
SVSARLVVVKGKPVVFLKALDDVSAEERGLTLTQCEVSDPEARVVWRKDGVELGSPDKYDFLHKAGARGLTVHD
LSHEDAGLYTCQVGSKETQSKVSVHDLHVGITKRLKTVEVLEGESECSFECVLSHESPSDPAVWTVGGKTVGGS
GHFHAVRQGRKYTLTVKDAALS DAGEVVFVSVLGLTSKASLIIRERPV DITKPLEDQRTTLGEDVMLSCELSRA
GTSVRWLKDGKAIRKSQKYDLLSEGTRAVLVVRKASLKDSGEYTCETEASKSTAKLCVEEKANRFTEELADLQ
VEEKGRAVFTCKTEHPASVVTWRKGLLELRASGKHVPSQEGLTLKLTINALERTDSDTYTCDIGQARTQARLL
VHGQKVRVIEDLEDTAVQEGSSAKFCRIAPADYGPVHWF LDKTPLHSNELNEITVQPGGYHVLTLRQLALKD
SGTVYFEAGDQRTS AALRVTEKPSIFSRPLTDVTVTEGEDTLTVCE TTTVDSSVRWTKDGKTLRPSARCQLSH
EGCQAQLLITATTPQDGGRYKCEIGGASSSSIVRVHALPVRFRESLKDVEVPEGKAATLRCVLSVAAPVEWR
HGDDVLKSSNKYSLRQEGAVLELVIRDLQPDQSGQYSCSFGDQTTSATLTVKTS SAQFVGLRKNKEATEGTTV
TLRCELTK EAPVEWKKGTETLRNGDKYSLKQDGA VCELQICSLLVADAGEYSCVCGQEKTSATLTVKALLVHF
VRLRSKEATEGDTTLTQCELSKAAPVEWRKGTETLRDGD RYSLKQDGA VCELQIRSLTIADAGEYLC TCGQE
KTSATLTVRALPAKFKDSLKNEATEGTTATLSCELSKAAPV TWKKGPKTLQSGDKYVLRQDGA VCYLHGL
TMADAGEYSCVCGQEKTSATLTVRGLPAKFIEDLRSQEATEGATAILRCELSKAAPVEWRKGS ETLKDGD RYT
LRQDGA VCELQIRGLAVVD TGTYS SLPTKFTEGLRNEEATEGTMATLRCQMSKAAPVEWRKGS ETLRDGD RYS
LRQDGA MCELQIRGLTIEDS GEYTCVCGQEKTSATLSVKALPSRFIEDLRSQEATEGTMATLRCQMSK TAPVE
WKKGSETLRDGGRYSLRQDGPVCELQICDLAVEDAGEYSCVCGQEKTSATLSIKALPPRFIEDLRSQEATEG T
MATLRCQMSKAAPVEWRKGS ETLGDGGRYSLRQNGAVCELQI HDLAVEDTGEYSCVCGQEKTSATLNVKALPP
RFIEDLRSQEATEGTMATLRCQMSKAAPVEWRKGS ETLRDGGRYSLRQDGA VCELQI HDL DVEDAGQYSCVCG
QEKTSAVLTVDALPPKFTEGLKKEEATEGTMVTLRCQMSKEATVEWRKGAKT LSDGGRYSLRQDGA MCELQIC
GLAVEDAGEYSCVCGQEKTSATLSVKALPPRFIEDLRSQEATEGTMATLRCQMSKAAPVEWRKGS ETLRDGD R
YSLRQDGA VCELQIRDLAVEDAGEYLCVCGQEKTSATLSVKALPPRFIEDLRSQEATEGTMATLRCQMSKAAP
VEWRKGS KTLRDGD RYSLRQDGA MCELQICDLAVEDTGDYSCVCGQEKTSATLSVKALPPRFIEDLRSQEARE
GTVATLRCRMSKAAPVEWRKGS ETLKDGD RYSLRQEGNLCELQIRDLAVEDTEEYSCVCGQEKTSATLSVKAL
PAKFIEDLRSQEAPESSTVTLRCKLSKASVWVWKKGSETLRNGARYSLRQDGA VCELEIRDLTVEDTGEYSCT
CGQERTSATLSIMAPQVVFQQPLQNLQAEEGSMASLRCELSVPNAAMVWSKGGLELQGDTRREARQQCVAEL
LLRDLRREDAGEYSCTCGSQTTSATLMVTAAPVRFLRELQAQDVDEGATARLRCELSREAVSVEWRKGS LQLF
PCAKYQMVQEGTTAELLVHGVEQEDAGEYTC DAGHTQSIARLSVRAPKPKFKTDLQSTEQEAGGTARLCCQLS
EAEFGTPVQWLKEGVELHVGSKYEMRRQGA VCELLIHGLEAKDTGEYACLVGGQKT LASLRVKEPEVTIVRGL
VDMEVQADEDVEFTCKVSQAGATDVQWHLQGLPLQSN E VTEVAVLADGCTHVLQ LKGVTL EDAGTVSFHVGG L
SSAQLTVRVPEVTVLEPLKDVQLSEGD AHFRCLRSRASQEARWALGGVPLQCNEMNDITVEQGTLYLLTL
HKVTLEDAGTITLQVGS CSSEAQLKVTAKN TVLRGLENVD ALEGGEALFECQLSQPEVA AHTWLLDDEPVHTS
EKVEVVYFENGLRHLLLLLKNLKPQDSCRVTFLAGDVVTS AFLTVRGWRLEVL EPPHDASVKAGMQVRFTCILS
EAVPVGEATWYINGAAIQPDDTDWTVTTDGS HHALTLSNAQPQHAGEVTF AARDAVASARLSVLALPDPPEDA
E VVGRSDHSVTL SWVAPMSDGGG LCGYRVMKEASTGQWQLCHDLVPGPECVDDLVPGKTYRFRVA AVGPA
GAGEPVHLPQMVKIAPAPAPAPAPAPAPAPETRQAVVGEDICLELEVAADGGEVVWHKGTERRIQPGGHFEVLS
RGQRQMLVIKGFRTEDQGEYRCGPIQGLPSSGAATFNVMVMTSGSGDEVPAQPSLPPEAAQEGDLHLLWEALAR
KRRMSREPTLDSISELPEEDSRVQHLRQEAEE TAPDLSEGYSTADELARTGEADLSHTSSDDES RAGT PSLVT
YLKAGGPGISPLASKHEAQVTT SVKPKQKQEPVPTCP PPGDLSAADLMDPSLDKAAVKIQAAF KGYKVRKE
MKQEQGPVFSRTFGDTEAQVGDVLRLECVLATKTD MRACWLKDGIELTDGRHYHIDQLKDGTC SLLV TGLAPT
DSGRYTCQVSTKSGRVSHSACVVVSGTESEAESSGGELDDAFRRAARRLHRLFRTKSPAELSEELFLSADE
GPGEPEEPADWQTYREDENFVCIRFESLAEARQAVTCFRNM FATMGIGVEISLGEQGPRGVEMRIGKVAPTVT
PAVPLAKTPGLQTS DAAPVFLTELQNDVQDGYPMSFDCVVTGQPVPSVRWFKDGKLEEDDHYMINEDQGGG
HQLIITAVVPADMGVYRCLAENSMGVSSTKAELRVELTSTDYDTAADATETSSYFSAQGYLSSREQEGTESDE
GQLPQVLEELKDLQVAPGTR LAKFQLKVKGYPAPKLYWFKDGP LTTSDHIRMTDKKTLHTLEIVSVTREDSG
QYAAYSNAVGAAYSSARLLVRGPSEPEEK PASDVHERLVPPRI LEKFTPKKVKRGSSITFSVKVEGHPAPSV
HWLKEEA EKGV LWIGPDTPGYTMASSSKQHS LVLLDVGRQH QGTYTCIATNPAGQALCSASLHISGLAKEEEQ
ERVKEALISSFLQGTSAVSAQMSESA GFADLRVGSKGESLVAAEASHLSLAEVGT EEFLOKLTSSQITEMVS
AKISQAKLVQVPGGDSDEETKTPSASPRHGRSRPSSSVQYESSSESEDGDSRGEIFDIYVVTADYLP LGAEQDAI
ILREGQYVEVLDSAHPLRWLVRTKPTKSSPSRQGWVSPAYLDKRLKLSPEWGPTEAPEFPGEAVSEDEYRTRL
SSVIQELLSSEQAFV GELQFLESHHMKHLERSPRVPAAVASQKT VIFRNVQDISHFHSSFLKELQCGCTDDDV
AMCFIKNQEA FEKYLEFLVGRVQAESVVVSTPVQEFYKKYAEETLSAKDPTQPPPPPLQHYLEQPVERVQKYQ
ALLKELIRNKARNRQNCALLEQAYAVVSALPQRAENKLVHSLMENYPGTLEALGEP I RQGHFIVWEGAPGARM

PWKGNHRHVFLFRNYLVICKPRRDSRTDTFSYVFRNMMKLSIDLNDQVEGDDRAFEVWHEREDSVRKYLLQA  
 RTVI IKNSWVKEICGIQORLAQPVWRPPEFEEELADCTAELGETVKLACRVTGTPKPIVSWYKDGKPEVDPH  
 NILIEDPDGSCTLILDLNLTGIDSGQYMCFAASAAGNASTLGKILVQVPPRFVNVKVRATPFVEGEDAQITCTVE  
 GAPYPQIRWYKDGTLTLLAPGNRYRMLNEPRSGVLVVIQAASKEDLGHYECELVNRLGSTRGGGELYMQSPALR  
 ARDQHHREQIVAAVEERRPSP\*  
 >rs50563985\_ENSMUSP00000151217\_c.18318:C>A\_p.H6107N  
 ENSMUST00000219084.3|Obscn-207|ENSMUSG00000061462|-|chr11:g.58913192:G>T  
 MDHSFSGAPRFLTRPKAFVSVGKDATLSCQIVGNPTPHVSWEKDRQFVEAGARFRLAQDGDVYRLTILDLAL  
 GDSGQYVCRARNAIGEAFVAVGLRVDSEGTCAEQAPHLLRPTSIRVREGADATFRCRVGGSPQPAPVWSKDG  
 RRLGPPDAPHVRVEEHGESSALRIRSARPRDGGTYEVRAENPLGSASAAAAALVVDSDAEVAGPPGTSTATLLA  
 HLQORREAMRAEGIPSPPGAGTRTCTVTEGKHARLSCFVTGEPKPEVWKKDQGLVTEGRRHVVEDEQENF  
 VLKILFCKQSDRGLYTCTASNLVGQTYSSVLVVREPTVFPKKRLQDLEVREKESATFQCEVAQAPATEAAWFK  
 EETRLWASAKYDIEEEGETERRLTVRNVSADDDAVYICETTEGSRVVAELSVQGNLTKRKLPRKTAVRTGDTAIF  
 WVELAVPEGPVRWLRNQEEMVAGGRVAITAEGTCHTLTI FQCTLEDMGEVAFVSGGCRTTTTQFCVSAPRRPPL  
 YPPADPVVKAKTESSVTLWSAPPHGDRPVTIDGYVLEKRKLGAAYAWSRCHEAGWLATTEFTITGVAAEEDGFQ  
 FRVSAINHFGQGPYLEFPGTMHLVPLAVKTPKAVEAVEGGEVTFVSDLTVASSGEWFLDGEALKASSIYVI  
 RCDRTRHMLTIREVPARLHGAQLKVFANGIETS IQMVVRAALGLPSSKLPAAAAREVLAQLHHEEAQLLAELSD  
 QAAAVTWLKDGRELSLGPKYEMQVSAGRRALLVRDVAQDDAGLYECVSRGSRRTAYQLLVQDITDGYRDWGPAG  
 PQKHMCKCAGAKIARYLGSSCYRFLQYDKGVVHWEAALDTRQGKGTSSCSLHEKPKLVFAKQQAHSEVKA  
 AGNSATLSCEVTQAQTEVTWFKDGKLLSSSSKVRMEASGCSRRLVVQQAGKADAGEYSCEAGGQKLSFRLDVA  
 EPKLVFAKQQAHSEVKAEGASATLSCEVAQAQTEVTWFKDGKLLSSSSKVRMEASGCSRRLVVQQAGKADA  
 GEYSCEAGGQKLSFRLDVAEPKMFVFAKEQQARSEVKAEGASATLSCEVAQAQTEVTWFKDGKLLSSSSKVRM  
 EASGCSRRLVVQQAGKADAGEYSCEAGGQKLSFRLDVTEPKLVFAKEQQARSEVKAEGNSATLSCEVAQAQ  
 EVTWFKDGKLLSSSSKVRMEASGCSRRLVVQQAGKADAGEYSCEAGGQKLSFHLDVTEPKLVFAKEQQAHSEV  
 KAEAGASATLSCEVAQAQTEVTWFKDGKLLSSSSKVRMEASGCSRRLVVQQAGKADAGEYSCEAGGQKLSFR  
 DVAEPKLVFAKEQQARSEVKAEGASATLSCEVAQAQTEVTWFKDGKLLSSSSKVRMEASGCSRRLVVQQAGK  
 ADAGEYSCEAGGQKLSFRLDVAEPKLVFAKEQQARSEVKAEGASATLSCEVAQAQTEVTWFKDGKLLSSSSK  
 VRVEASGCSRRLVVQQAGKADAGEYSCEAGGQKLSFRLDVAEPKLVFAKEQQAHSEVKAEGASATLSCEVAQ  
 AQTEVTWFKDGKLLSSSSKVRVEASGCSRRLVVQQAGKADAGEYSCEAGGQKLSFRLDVAEPKLVFAKEQQAH  
 SEVKAEGASATLSCEVAQAQTEVTWFKDGKLLSSSSKVRVEASGCSRRLVVQQVQKADAGEYSCEARGQKLS  
 FRLDVAEAEESQIPERPSRREPLVVKHEHETIILTATIAAPSVAAVTWLKDGEIRRSKRHEATSLGDTHTLTVR  
 GAQVLD SAIYSCRVGKEGQDFPVQVEEVAAKFSKPLEPVEGELGGTVMLVCELSPEQAEVVRCCGNTQLRPGK  
 RFQMTSEGPRRTLTVSGLREDDAEYVCESRDDRTSARLTVKVPVVKFTSGLSAMVAEEGQEAFTQCVVSPS  
 DAGVTWYKDGMLQVPESEKFMVVEGASRSLTILGLTLEDAGQVTEAEGASSAALRVREAPVLFKKKLEPQT  
 VEERTSVTLEVELTRPWPEVKWTRNAAVLTPSENVEIRAEGARHCLVLRVSGFADRGFFGCETPDDKTQAKLN  
 VEMRQVRLVRLGQLEVEAKEQGTASMDVELSHAEEVGSWTRDGLRLQPGPKCHLAVQGPVHILTL SALQPQDSG  
 LVAFRAEGVHTSARLIVTELPVVFTRVLQDVVATQKEKVTLECELSRPVDVRWLKDGVELRAGKAI GIVAQGT  
 CRSLVIYRCETGDQGVYVCDALDAQTSASLRVQGRYTLIFRRVLAEDAGEVKFVAENAESRAHLRVKELPVT  
 LLRPLRDKIAMEKHRGVLECCQVSRASAQVRWFKGGVLELQSGPKYEVVSDGLYRKLVIINDVQPEDEDTYTC DAG  
 NVKTSAQFFVVEEQSITIVRGLKDMTVMEPAPAWFECETSIPSVRPPKWL LKGTVLQAGGNVLEQDGTVHRLT  
 LHKTCSTMTGPVHFTIGKSRSSAQLVVSDIPVVLTRPLEPKAGRELQSVVLSCDFRPAPKAVQWYKDDTPLSP  
 SEKFKMALEGQMAELRILRLTPADAGVYRCQAGSAQSSAEVTVAEAREVTVIQPLQDAEAMEEGRVCFSCELSH  
 KDEDIEWSLNGTPLYNDSFHEISHEGCLHTLVLKSVRQADTGTVCATSPKVSVSARLVVKGKPVVFLKALDDV  
 SAEERGLTLTQCEVSDPEARVVWRKDGVELGSPDKYDFLHKAGARGLTVHDLSHEDAGLYTCQVGSKETQSKV  
 SVHDLHVGITKRLKTVEVLEGESCFEVLSSHESPSDPAVWTVGGKTVGSGHFHAVRQGRKYTLTVKDAALS  
 DAGEVVFVSVLGLTSKASLIIRERPVDITKPLEDQRTTLGEDVMLSCELSRAGTSVRWLKDGKAIKRSQKYDLL  
 SEGTRAVLVVRKASLKDSGEYTCETEASKSTAKLCVEEKANRFTTELADLQVEEKGRAVFTCKTEHPASVVTW  
 RKGLLELRASGKHVPSQEGTLKLTINALERTSDTYTCDIGQARTQARLLVHGQKVRVIEDLEDTAVQEGSS  
 AKFCCRIPADYGPVHWF LDKTPLHSNELNEITVQPGYHVLTLRQLALKDSGTVYFEAGDQRTSAAALRVTEK  
 PSIFSRPLTDVTVTEGEDTLVCETTTTVDSSVRWTKDGKTLRPSARCQLSHEGCAQLLITATTPQDGGRYKC  
 EIGGASSSSIVRVHALPVRFRESLKDVEVPEGKAATLRCVLSVAAPVEWRHGDDVLKSSNKYSLRQEGAVLE  
 LVIRDLQPQDSGQYSCSFGDQTTSATLTVKTSQAQFVGLKRNKEATEGTTVTLRCELTKAPVEWKKGTETLR  
 NGDKYSLKQDGA VCELQICSLLVADAGEYSCVCGQEKTSATLTVKALLVHFVRRRLRSKEATEGEDTTTTQCELS  
 KAAPVEWRKGTETLRDGDYSLKQDGA VCELQIRSLTIADAGEYLCTCGQEKTSATLTVRGLPAKFIEDLRSQ  
 EATEGATAILRCELSKAAPVEWRKGETLKDGDYTLRQDGA VCELQIRGLAVVDGTYS LPTKFTTEGLRNE  
 EATEGTMATLRCQMSKAAPVEWRKGETLRDGDYSLRQDGA MCELQIRGLTIEDSGEYTCVCGQEKTSATLS  
 VKALPPRFIEDLRSQ EATEGTMATLRCQMSKAAPVEWRKGETLGDGGYSLRQNGAVCELQI HDLAVEDTGE  
 YSCVCGQEKTSATLNVKALPPKFTTEGLKKEEATEGTMVTLRCQMSKEATVEWRKGAKT LSDGGYSLRQDGA M



CELQICGLAVEDAGEYSCVCGQEKTSATLSVKALPPRFIEDLRSQEATEGTMATLRCQMSKAAPVEWRKGET  
LRDGDYSLRQDGAUCELOIRDLAVEDAGEYLCVCGQEKTSATLSVKALPPRFIEDLRSQEATEGTMATLRCQ  
MSKAAPVEWRKGSKTLRDGDYSLRQDGAUCELOICDLAVEDTGDYSCVCGQEKTSATLSVKAPQVVFQOPLQ  
NLQAEEGSMASLRCELSVPNAAMVWSKGGLELQGDTRREARQQGCVAELLLRDLRREDAGEYSCTCGSQTTSA  
TLMVTAAPVRFRLRELQAQDVDEGATARLRCELSREAVSVEWRKGSILQFLPCAQYQMVQEGTTAELLVHGVEQE  
DAGEYTCDAHTQSIARLSVRAPKPKFKTDLQSTEQEAGGTARLCCQLSEAEPTPVQWLKEGVELHVGSKYE  
MRRQGAUCELLIHGLEAKDTGEYACLVGGQKTLASLRVKEPEVTIVRGLVDMEVQADEDEVEFTCKVSQAGATD  
VQWHLQGLPLQSNVEVEAVLADGCTHVLQKGFVLELDAGTVSFHVGGSSSAQLTVRVPEVTVLEPLKDVQL  
SEGQDAHFRCRLSRASGQEARWALGGVPLQCNEMNDITVEQGTLYLLTLHKVTLLEDAGTITLQVGCSSAQL  
KVTAKNTVLRGLENDVALEGGELFECQLSQPEVAHTWLLDDEPVHTSEKVEVVYFENGLRHLHLLKLNKPKQ  
DSCRVTFLAGDVVTSFALTVRGWRLEVLEPPHDASVKAGMQVRFTCILSEAVPVGEATWYINGAAIQPDDTDW  
TVTTDGGSHHALTLSNAQPQHAGEVTFARDAVASARLSVLALPDPPEDAEVVGRSDHSVTLWSVAPMSDGGGG  
LCGYRVEMKEASTGQWQLCHDLVPGPECVVDLVPKTYRFRVAAVGPAGAGEPVHLPQMVKIAPAPAPAPAP  
APAPETRQAVVGEDICLELEVAADGGEVWVHKGTERIQPGGHFEVLSRGRQMLVIKGFRTEDQGEYRCGP IQ  
GLPSSGAATFNVVMTSGSGDEVPAPQPSLPPEAAQEGDLHLLWEALARKRRMSREPTLDSISELPEEDSRVQHL  
RQEAETAPDLSEGYSTADELARTGEADLSHTSSDDESRAGTPSLVTYLKKAGGPGISPLASKHEAQVTTSVK  
PQKQEPVVVPTCPPPGDLAADLMDPSLDKAAVKIQAAFQKGYKVRKEMKQEGPVFSRTFGDTEAQVGDVLR  
ECVLATKTDMRACWLKDGIELTDGRHYHIDQLKDGTCSSLVTLGLAPTDSGRYTCQVSTKSGRVSHSACVVVSG  
TESEAESSSGELDDAFRRARLRHLRFRTKSPAELSEEEFLSADEGPGPEEPADWQTYREDEFVIRFE  
SLAEARQAVTCFRNMFATMGIGVEISLGEQGPVEMRIGKVPVTPAVPLAKTPGLQTSDAAPVFLTELQN  
QDVQDGYPMSFDCVVTGQPVPSVRWFKDGKLEEDDHIMINEDQQGGHQLIITAVVPADMVYRCLAENSMGV  
SSTKAELRVELTSTDYDTAADATETSSYFSAQGYLSSREQEGTESDEGQLPQVLEELKDLQVAPGTRLAKFQL  
KVKGYPAKLYWFKDQGLTTSDHIRMTDKKTLHTLEIVSVTREDSQYAAAYISNAVGAAYSARLLVVRGPSE  
PEEKPASDVHERLVPPRILEKFTPKKVKRGSSITFSVKVEGHPAPSVHVLKKEEAEGVLWIGPDPGTYTMASS  
SKQHSVLVLDVGRQHOGTYTCIATNPAGQALCSASLHISGLAKEEEQERVKEALISSFLOGTSQAVSAQMSSES  
AGFADLVGSSKGSSELVAEEAHSHLSLAEVGTTEEFLEKLTSLQITEMVSAKISQAKLQVPGGDSDEETKTPSASP  
RHGRSRPSSQGESSEEDGSRGEIFDIYVVVTADYLPGLGAEQDAIILREGQYVEVLDLSAHLRVLVVRTKPT  
KSSPSRQGWVSPAYLDRKRLKSPWGPTEAPEFPGEAVSEDEYRTRLSSVIQELLSSEQAFVGGELQFLESHHM  
KHLERSPRVPAAVASQKTVIFRNVQDISHFHSSFLKELQCGCTDDDVAMCFIKNQEAFEKYLEFLVGRVQAES  
VVVSTPVQEFYKYYAETLSAKDPTQPPPPPLQHYLEQPVVERVQKYQALLKELIRNKARNRQNCALLEQAYAV  
VSALPQRAENKLVSLMENYPGTLEALGEPRIQGHFIVWEGAPGARMPWKGNHRHVFLFRNYLVICPRRDSR  
TDTFSYVFRNMMKLSSIDLNDQVEGDDRAFEVWHEREDSVRKYLQARTVIKNSWVKEICGIQQRLAQPVWR  
PPEFEEELADCTAELGETVKLACRVTGTPKPIVSWYKDGKPEVDPHNLIEDPDGSCSLIIDLNLTGIDSGQY  
MCFASAAGNASTLGLKILVQVPPRFVNVKVRATPFVEGEDAQITCTVEGAPYPQIRWYKDGTLAPGNRYRMLN  
EPRSGVLVLIQAASKEDLGHYECVLNRLGSTRGGELLYMQSPALRARDQHHREQIVAAVEVTEQETKVPKK  
TVIIEETITTVVKS PRGRRQS PGKSPSRSPRSASPRRPGLLAPERLYPPGTSPSRRLEVEQGRKAPVPALY  
VTEAEVHAPASQSQPKWLEVEETIEVRVKKTGSRGASPVREMTSRGEGILFTLPGGIPGRDPNANNNSNKS  
QEARWGPVAVHVGEPFIQVDSVGNVDVVAASPEPEQVRSQKEENTERQEGCSDGDENTFLMEEPQDTS  
QGRDPKILTHNGRVLTLADLEDYVPQEGETFQCGDSTPSTPDEPPCEVSVLQREI SEPTVQPVLLNVGRPPG  
TGATPSFFRPGSQVHSPESVSFLREAWSGPVSAAPWTSSFHVQSSVDGSHGSKFTEVSTQTVSFGAVGET  
VTLHIDPDGGEAPGPSQ\*

>rs50849759\_ENSMUSP00000158795\_c.21000:A>C\_p.K7001Q  
ENSMUST00000238536.2|Obscn-210|ENSMUSG00000061462|-|chr11:g.58913216:T>G  
MDHSFSGAPRFLTRPKAFVSVGKDATLSCQIVGNPTPHVSWEKDRQFVEAGARFRLAQDGDVYRLTILDLAL  
GDSQYVCRARNAIGEFAAVGLRVDSEGTCAEQAPHFLRPTSIRVREGADATFRCRVGGSPPQAVSWSKDG  
RRLGPPDAPHVRVEEHGESSALRIRSARPRDGGTYEVRAENPLGSASAAAALVVDSDAEVAGPPGTSTATLLA  
HLQORREAMRAEGIPPSPPGAGTRTCTVTEGKHARLSCFVTGEPKPEVWKKDGQLVTEGRRHVVEDEQENF  
VLKILFCKQSDRGLYTCTASNLVGTYSVSVLVVREPTVPFKKRLQDLEVREKESATFQCEVAQPAEAAWFK  
EETRLWASAKYDIEEGTERRLTVRNVSADDDAVYICETTEGSRVVAELSVQGNLTKLPRKTAVRTGDTAIF  
WVELAVPEGPVWRNQEEMVAGGRVAITAEGTCHTLTI FQCTLEDMGEVAFVSGGCRTTTQFCVSAPRRPPL  
YPPADPVVKAKTESVTLWSAPPHGDRPVTIDGYVLEKRLKLGAYAWSRCHEAGWLATTEFTITGVAAEEDGFQ  
FRVSAINHFGQGPYLEFPGTMLVPLAVKTPKAVEAVEGGEVTFVSDLTVASSGEWFLDGEALKASSIYVI  
RCDRTRHMLTIREVPARLHGAQLKVFANGIETSIQMVVRAALGLPSSKLPAAAAREVLAQLHHEEAQLLAE  
QAAAVTWLKDGRELSLGPKYEMQVSAGRRALLVVDVAQDDAGLYECVSRGSRRTAYQLLVQDITDGYRDWGPAG  
PQKHMCKCAGAKIARYLGSSCYRFLQYDKGVVHLEAALDTRQKGTSSCSLHEKPKLVFAKQQAHSEVKA  
AGNSATLSCEVTQAQTEVTFWFKDGKLLSSSSKVRMEASGCSRRLVQVQAGKADAGEYSCEAGGQKLSFR  
LDVAEPKLVFAKQQAHSEVKAEGASATLSCEVAQAQTEVTFWFKDGKLLSSSSKVRMEASGCSRRLVQVQAG  
KADAGEYSCEAGGQKLSFRLDVAEPKLVFAKEQQARSEVKAEGASATLSCEVAQAQTEVTFWFKDGKLLSSSSK  
VRM

EASGCSRRLVVQQAGKADAGEYSCEAGGQKLSFRLDVTEPKLVFAKEQQARSEVKAEVGNSATLSCEVAQAQT  
EVTWFKDGKLLSSSSKVRMEASGCSRRLVVQQAGKADAGEYSCEAGGQKLSFRLDVAEPKLVFAKEQQARSEV  
KAEAGNSATLSCEVAQAQTEVTWFKDGKLLSSSSKVRMEASGCSRRLVVQQAGKADAGEYSCEAGGQKLSFHL  
DVTEPKLVFAKEQQAHSEVKAEAGASATLSCEVAQAQTEVTWFKDGKLLSSSSKVRMEASGCSRRLVVQQAGK  
ADAGEYSCEAEGQKLSFRLDVAEPKLVFAKEQQARSEVKAEGASATLSCEVAQAQTEVTWFKDGKLLSSSSK  
VRVEASGCSRRLVVQQAGKADAGEYSCEAGGQKLSFRLDVAEPKLVFAKEQQANSEVKAEGASATLSCEVAQ  
AQTEVTWFKDGKLLSSSSKVRVEASGCSRRLVVQQAGKADAGEYSCEAGGQKLSFRLDVAEPKLVFAKEQQAH  
SEVKAEGASATLSCEVAQAQTEVTWFKDGKLLSSSSKVRVEASGCSRRLVVQQAGKADAGEYSCEAGGQKLS  
FRLDVAEPKLVFAKEQQAHSEVKAEAGASATLSCEVAQAQTEVTWFKDGKLLSSSSKVRVEASGCSRRLVVQQ  
AGKADAGEYSCEAGGQKLSFRLDVAEPKLVFAKEQQAHSEVKAEAGASATLSCEVAQAQTEVTWFKDGKLLSS  
SSKVRVEASGCSRRLVVQQAGKADAGEYSCEAGGQKLFRLDVAEPKLVFAKEQQAHSEVKAEAGASATLSCE  
VAQAQTEVTWFKDGKLLSSSSKVRVEASGCSRRLVVQQAGKADAGEYSCEAGGQKLSFRLDVAEPKLVFAKEQ  
QAHSEVKAEGASATLSCEVAQAQTEVTWFKDGKLLSSSSKVRVEASGCSRRLVVQQVQKADAGEYSCEARGQ  
KLSFRLDVADTRLMFAKEQQARTEVKAEGNSATLSCEVAQAQTEVTWFKDGKLLSSSSKVRVEASGCSRRLV  
VQQAGKADAGEYSCEAGGQKLSFRLDVAEAEESQIPERPSRREPLVVKEHETIILTATIAAPSVAAVTWLKDG  
V EIRRSKRHEATSLGDTHTLTVRGAQVLDIAIYSCRVGKEGQDFPVQVEEVAAKFSKPLEPEVEGELGGTVMLVC  
ELSPQAEVWRCNGTQLRPGKRFQMTSEGPRRLTVSGLREDDAEYVCESTRDDRTSARLTVKVPVVKFTS  
GLSAMVAEEGQEAFTQCQVPSDAGVTWYKDGMLQPSSEKFMVMEVSGASRSLTILGLTLEDAGQTVVEAEGAS  
SSAALRVREAPVFLFKKLEPQTEVEERTSVTLEVELTRPWPEVKWTRNAAVLTPSENVEIRAEGARHCLVLRV  
GFADRGFFGCETPDDKTQAKLNVEMRQVRLVRLGLQVEEVAKEQGTASMDVELSHAEEVGSWTRDGLRLQPGPKC  
HLAVQGPVHILTLALQPDQSGLVAFRAEGVHTSARLIVTELPSVSTRVLQDVVATQKEKVTLECELSRPVDV  
RWLKDGVLELRAGKAIGIVAQGTCSRSLVIYRCETGDQGVYVCDALDAQTSASLRVQGRTYTLIFRVLAEADAGE  
VKFVAENAESRAHLRVKELPVTLLRPLRDKIAMEKHGVLQVSRASAVRWFVGGVQLQSGPKYEVVSDGL  
YRKLVINVDQPEDEDTYTCDAENVKTSAQFFVEEQSITIVRGLKDMTVMPEPAPAWFECETSIPSVRPPKWL  
KTVLQAGNVGLEQDGTVHRLTLHKTCSTMTGPVHFTIGKSRSSAQLVVDIPIVVLTRPLEPKAGRELQSVV  
SCDFRPAKNAVYKDDTPLSPSEKFKMALEGGMAELNIRLTPADAGVYRCQAGSQAESAEVTEAREVTVI  
QPLQDAEAMEEGRVFCSELSHKDEDIWLSLNGTPLYNDSFHEISHEGLHTLVLKSVRQADTGTVCATSPKV  
SVSARLVVKGKPVVFLKALDDVSAEERGLTLTQCEVSDPEARVVWRKDGVELGSPDKYDFLHKAGARGLTVHD  
LSHEDAGLYTCQVGSKETQSKVSVHDLHVGITKRLKTVLEVLEGESECFEVLSSHESPSDPAVWTVGGKTVGGS  
GHFHAVRQGRKYTLTVKDAALSDAGEVVSVLGLTSLKASLIIRERPVDTIKPLEDQRTTLGEDVMLSCELSRA  
GTSVRWLKDGKAIRKSQKYDLLSEGTRAVLVVRKASLKDSEYTCETEASKSTAKLCVEEKANRFTBELADLQ  
VEEKGRAVFTCKTEHPASVVTWRKGLLELRASGKHVPSQEGTLKLTINALERTDSDTYTCDIGQARTQARLL  
VHGQKVRVIEDLEDTAVQEGSSAKFCRIAPADYGPVHWFLLDKTPLHSNELNEITVQPGGYHVLTLRQLALKD  
SGTVYFEAGDQRTSALRVTEKPSIFSRPLTDVTVTEGEDTLVCEETTVDSSVRWTKDGKTLRPSARCQLSH  
EGCQAQLLITATTPQDGGRYKCEIGGASSSSIVRVHALPVRFRESLKDVEVPEGKAATLRCVLSVAAPVEWR  
HGDDVLKSSNKYSLRQEGAVLELVIRDLQPDQSGYSCSFGDQTTSATLTVKTSQAQFVGLKRNKEATEGTTV  
TLRCELTKAEAPVEWKKGTETLRNGDKYSLKQDGAVCLELQICSLLVADAGEYSCVCGQEKTSATLTVKALLVHF  
VRRLSKEATEGDTTLQCELSKAAPVEWRKGTETLRDGDYSLKQDGAVCLELQIRSLTIADAGEYLCTCGQE  
KTSATLTVRALPAKFKDSLKNEEATEGTTATLSCELSKAAPVTWKKGPKTLQSGDKYVLRQDGAVCGLQIHGL  
TMADAGEYSCVCGQEKTSATLTVRGLPAKFIEDLRSQEATEGATAILRCELSKAAPVEWRKGSSETLKDGDYR  
LRQDGAVCLELQIRGLAVVDGTYSLSLPTKFTTEGLRNEEATEGTMATLRCQMSKAAPVEWRKGSSETLRDGDYR  
LRQDGAVCLELQIRGLTIEDSGEYTCVCGQEKTSATLSVKALPSRFIEDLRSQEATEGTMATLRCQMSKTAPVE  
WKKGSETLRDGGYSLRQDGPVCELELQICDLAVEDAGEYSCVCGQEKTSATLSIKALPPRFIEDLRSQEATEG  
MATLRCQMSKAAPVEWRKGSSETLGDGGYSLRQNGAVCELELQIHDLAVEDTGEYSCVCGQEKTSATLNVKALPP  
RFIEDLRSQEATEGTMATLRCQMSKAAPVEWRKGSSETLRDGGYSLRQDGAVCLELQIHDLVEDAGQYSCVCG  
QEKTSAVLTVDALPPKFTTEGLKKEEATEGTMATLRCQMSKATVEWRKGAKTLSDGGYSLRQDGAVCLELQIC  
GLAVEDAGEYSCVCGQEKTSATLSVKALPPRFIEDLRSQEATEGTMATLRCQMSKAAPVEWRKGSSETLRDGD  
YSLRQDGAVCLELQIRDLAVEDAGEYLCVCGQEKTSATLSVKALPPRFIEDLRSQEATEGTMATLRCQMSKAAP  
VEWRKGSSETLRDGDYSLRQDGAVCLELQICDLAVEDTGDYSCVCGQEKTSATLSVKALPPRFIEDLRSQEARE  
GTVATLRCRMSKAAPVEWRKGSSETLKDGDYSLRQEGNLCELELQIRDLAVEDTEEYSCVCGQEKTSATLSVKAL  
PAKFIEDLRSQEAPESSTVTLRCKLSKKASVVWKKGSETLRNGARYSLRQDGAVCLELQIRDLTVEDTGEYSCT  
CGQERTSATLSIMAPQVVFQQLQNLQAEEGSMASLRCELSVPNAAMVWSKGGLELQGDTRREARQQGCVAEL  
LLRDLRREAGEYSSCTCGSQTTSATLMVTAAPVRFLELQADQVDEGATARLRCLELSREAVSEWRKGLSLQLF  
PCAKYQMVQEGTTEALLVHGVQEEDAGEYTCDAHTGTSIARLSVRAPKPKFKTDLQSTEQEAGGTARLCCQLS  
EAEFGTVPVQWLKEGVELHVGSKYEMRRQGAVCLELQIHGLEAKDTGEYACLVGGQKTLASLRVKEPEVTIVRGL  
VDMEVQADEDEFTCKVQAGATDVQWHLQGLPLQSNVTEVAVLADGCTHVLQKGVTLLEDAGTVSFHVGGL  
SSSAQLTVRVPEVTVLEPLKDVQLSEGDQAHFRCLRSRASGQEARWALGGVPLQCNEMNDITVEQGTLYLLTL  
HKVTLLEDAGTITLQVGSSESQAQLKVTAKNTVLRGLENDVALEGGEALFECQLSQPEVAHAHTWLLDDEPVHTS

EKVEVVYFENGLRHLKLLKLNKLPQDSCRVTFLAGDVVTSFAFLTVRGRLEVLLEPPHDASVKAGMQVRFVTCILS  
EAVPVGEATWYINGAAIQPDDTDWTVTTDGSHHALTLNSAQPHAGEVTF AARDAVASARLSVLALPDPEDA  
EUVGRSDHSVTLSSWVAPMSDGGGGLCGYRVMKEASTGQWQLCHDLVPGPECVDDLDVPGKTYRFRVAAVGPA  
GAGEPVHLPQMVKIAPAPAPAPAPAPAPAPAPAPETRQAVVGEDICLELEVAADGGEVVWHKGTERRIQPGGHFEVLS  
RGQRQMLVIKGFRTEDQGEYRCGPIQGLPSSGAATFNVMVMTSGSGDEVPAQPSLPPEAAQEGDLHLLWEALAR  
KRRMSREPTLDSISELPEEDSRVQHLRQEAEEETAPDLSEGYSTADELARTGEADLSHTSSDDESRACTPSLVT  
YLKAGGPGISPLASKHEAQVTTSVKPKQKQEPVVPTCPPPGDLSAADLMDPSLDKAAVKIQAFAFKGYKVRKE  
MKQQEGPVFSRTFGDTEAQVGDVLRLECVLATKTDMRACWLKDGIELTDGRHYHIDQLKDGTCSSLVTLGLAPT  
DSGRYTCQVSTKSGRVSHSACVVVSGTSEAESSSGGELDDAFRAARRLHRLFRTKSPAELSEELFLSADE  
GPGEPEEPADWQTYREDENFVCIRFESLAEARQAVTCFRNMFATMGIGVEISLGEQGPGRVEMRIKGVAPTVT  
PAVPLAKTPGLQTSDAAPVFLTELQNDVQDGYPMSFDCVVTGQPVPSVRWFKDGKLEEDDHYMINEDQGGG  
HQLIITAVVPADMGVYRCLAENSMGVSSTKAELRVELTSTDYDTAADATETSSYFSAQGYLSSREQEGTESDE  
GQLPQVLEELKDLQVAPGTRLAKFQLKVKGYPAKLYWFKDGGPLTSDHIRMTDKKTLHTLEIVSVTREDSG  
QYAAIYINAVGAAYSSARLLVRGPSEPEEKPASDVHERLVPPRILEKFTPKKVKRGSSITFSVKVEGHPAPSV  
HWLKEEAKEKGVLWIGPDTPGYTMASSSKQHSLLVLDVGRQHOGTYTCIATNPAGQALCSASLHISGLAKEEEQ  
ERVKEALISSFLOGTSQAVSAQMSSESAGFADLVGQSKGESLVAEEAHSHLSLAEVGTTEEFLQKLTSTQITEMVS  
AKISQAKLQVPGGDSDEETKTPSASPRHGRSRPSSSVQESSSESEDGDSRGEIFDIYVVVTADYLPAGAEQDAI  
ILREGQYVEVLDSAHPLRWLVRTKPTKSSPSRQGVSPAYLDKRLKLSPEWGPTEAPEFPGEAVSEDEYRTRL  
SSVIQELLESEQAFVQELQFLESHHMKHLERSPRVPAAVASQKTVIFRNVQDISHFHSSFLKELQCGCTDDDV  
AMCFIKNQEAFAEKYLEFLVGRVQAESVVVSTPVQEFYKKAEEETLSAKDPTQPPPPPLQHYLEQPVVERVQKYQ  
ALLKELIRNKARNRQNCALLEQAYAVVSALPQRAENKLVSLMENYPGTLEALGEPTRQGHFVWEGAPGARM  
PWKGHNHRVFLFRNYLVICKPRRDSRTDTFSYVFRNMMKLSSIDLNDQVEGDDRAFEVWHEREDSVRKYLLQA  
RTVI IKNSWVKEICGIQQRLAQPVWRPPEFEEELADCTAELGETVKLACRVTGTPKPIVSWYKDGQPVVEVDPH  
HILIEDPDGSCTLILDNLGTIDSGQYMCFAASAAGNASTLGKILVQVPPFRFVNKVRATPFVEGEDAQITCTVE  
GAPYPQIRWYKDGTELLAPGNRYRMLNEPRSGVLVLIQAASKEDLGHYECELVNLGSTRGGGELYMQSPALR  
ARDQHHREQIVAAVEDTSEVGSASQAQDADQQAASVLRLLGSEALGSPGDLPNTRQSEPPAFEEAASQIP  
GAASGTPEVSLRPLSSSPLRVLVGRSHSLDNPPVTGTGSPPEACKQLLFPSTGLTHETTAKDRGHEGFLQESV  
GVTRAPSMQVTIEDVQVQVGDMAQFDAVIEGHPPPIVWTYKGGSTQLTSSARLSQRQDGTYSVLVTDVAPHDA  
GVYTCVANNAGGQVLCKAELLVHGGDKLDAENQVYRRKLHSFYDVQEEIGRGVFGFVKRVQHKGNKMFCAAKF  
IPLRSKTRAQAYQERDILATLGHPLVTLGLDQFETRKTLLIILELCSSEELLDRLFKKGVVTEAEVKVYIQQL  
VEGLHYLHSHGILHLDIKPPNIMVHPAREDIKICDFGFAQKITPSEPOYSKYGSPEFVSPEIIEQNPFVSEGS  
DIWAMGVI SYLSLTCSSPFAGESDRATLLNVLEGRVSWSSPTAAHLSEDAKDFIKATLQRTPRARPTSQCLA  
HPWFLKSMPEAAEHFINTKQLKFLARSRWQRSLMSYKSILVMRSIPELLQGPPDPSPLGVARHLRGEASGAS  
SSSSSSDNELAPFARAKSLPPSPVTHSPLLHPRGFLRPSASLPEETEASMTADA AVPASQASAGPPASPGCV  
PRHSVSISSLFYQQAGEGAERGNKTSKAKRHPARRRHLLKGGYIARALPGLREPLMEYSLLEEEAAREEQASLM  
TKTPSFETALRLPSSSVREVPGRSHSLDNPPVTGTGSPPEACKQLLFPSTGLTHETTAKDRGHEGFLQESV  
FFPPMSGDSRPGKQEGSSQDSCRGPASSCHSELGSGSQEGCGPPSSQSLGSLPPQSLKELSTSCGPLFSEQ  
PQAAPFPTQVSPLLGSEKEPQDGSLSSEGPVVPVSSSPGASQVDASLDTEGLSEAGDTCDFTPPPQRPQEQAT  
TRKFSLESRGGYAGVAGYGTFAFGGDAGGMLGQGPLWARMAWAVSOSSEEQDEAATESPQPLESIGPIAEASG  
VPLRTPSPSLTPWEEVEQVSLVQIRDLSGDAEAADTISLIDISEVDPAYLNLSDLYDIKYLPEFEMI FRRVPKPI  
EQPESPGSETEAGQGLADFLLEAAWPWPGEGLGLRAGLEITEEPEEPGDLEALLGEEAVGRKRKWSPSRGLFQF  
PGRCLSGEEPVELGLRQVRKASMAHISRI LKGRPEGPEREPPRKKAGLASFRLSGLKGRDQELSDEAVVLGQ  
SVTLACQVLAQPTAQTATWSKDGVLLESSGHLIISSTLKNFQLLTILVVKEEDLGTYTCCVSNPLGTAVTTGVL  
RKAERPSSSPRPEVGELEYKDAVLLVWKPVESECGPVYIVQCCIEGGSWTTLASDISDCCYLTKLSRGGMYIF  
RTACVSKAGMPYSSPSEQVLLGGPNHLASEEESRRRPAQLLPSTKTFAFQMQRIRGRFVVRQCREKASGR  
ALAAKIVPYQPEDKTA VLREYEAALKRLHHPHLAQLHAAYLSPRHLVLIILELCSGPELLPSLAERESYSESDVK  
DYLWQMLSATQYLHAQHILHLDLRSNMMVTEYNLLKVIDLGNASLDQEKVPAPENFKDYLETMAPELLEGG  
GAVPQTDIWAIGVTA FIMLSGEYPESESEGTDLQKGLRKLIRLSRCYAGLSGGAVAFLOSSLCAQPWGRPCA  
STCLQCGLWTEEGPTGSRPTPVTFTVRLRAFVREREKRRALLYKKNLAQVR\*

>rs50849759\_ENSMUSP00000038264\_c.18840:A>C\_p.K6281Q  
ENSMUST00000047441.14|Obscn-202|ENSMUSG00000061462|-|chr11:g.58913216:T>G  
MDHSFSGAPRFLTRPKAFVSVGKDATLSCQIVGNPTPHVSWEKDRQVVEAGARFRLAQDGDVYRLTILDLAL  
GDSGQYVCDARNAI GEFAAVGLRVDSEGTCAEQYHFLRLRPTSIRVREGADATFCRCRVGSSPQPAVSWSKDG  
RRLGPPDAPHVRVEEHGESSALRIRSARPRDGGTYEVRAENPLGSASAAAALVVDSDAEAVGPPGTSTATLLA  
HLQQRRREAMHVEEIGI PPSPPGAGTRTCTVTETGKHARLSCFVTGEPKPEVWKKDQGLVTEGRRHVVEDEQENF  
VLKILFCKQSDRGLYTCTASNLVGQTYSSVLVVVREPTVPFKKRLQDLEVREKESATFQCEVAQPAATEAAWFK  
EETRLWASAKYDIEEGTERRLTVRNVSADDDAVYICETTEGSRVAELSVQGNLTKLPRKTAVRTGDTAIF  
WVELAVPEGPVWRWLNQEEEMVAGGRVAITAEGTCHTLTI FQCTLEDMGEVAFVSGGCRTTTQFCVSPRRPPL

YPPADPVVKAKTESSVTLWSAPPHGDRPVTTIDGYVLEKRKLGAYAWSRCHEAGWLATTEFTITGVAAEEGDFQ
FRVSAINHFGQGPYLEFPGTMHLVPLAVKTPKAVEAVEGGEVTFVSDLTVASSGEWFLDGEALKASSIYVI
RCDRTRHMLTIREVPARLHGAQLKVFVANGIETS IQMVVRAALGLPSSKLPAAAAREVLAQLHHEEAQLLAE LSD
QAAA VTWLKDGRELSLGP KYEMQVSAGRRALLVRDVAQDDAGLYECVSRGSRRTAYQLLVQDITDGYRDWGPAG
PQKHMCKCAGAKIARYLGSSCYRFLQYDKGVVHWEAALDTRQGKGTSSCSLHEKPKLVFAKQQAHSEVKAE
AGASATLSCEVAQAQTEVTFWKDGKLLSSSSKVRMEASGCSRRLVVQQAGKADAGEYSCEAGGQKLSFRLDVA
EPKMFVFAKEQQARSEVKAEGASATLSCEVAQAQTEVTFWKDGKLLSSSSKVRMEASGCSRRLVVQQAGKADA
GEYSCEAGGQKLSFRLDVTEPKLVFAKEQQARSEVKAEGVNSATLSCEVAQAQTEVTFWKDGKLLSSSSKVRM
EASGCSRRLVVQQAGKADAGEYSCEAGGQKLSFRLDVAEPKLVFAKEQQARSEVKAEGVNSATLSCEVAQAQTE
EVTWFKDGKLLSSSSKVRMEASGCSRRLVVQQAGKADAGEYSCEAGGQKLSFHLVDVTEPKLVFAKEQQAHSEV
KAEAGASATLSCEVAQAQTEVTFWKDGKLLSSSSKVRMEASGCSRRLVVQQAGKADAGEYSCEAGGQKLSFRL
DVAEPKLVFAKEQQARSEVKAEGASATLSCEVAQAQTEVTFWKDGKLLSSSSKVRVEASGCSRRLVVQQAGK
ADAGEYSCEAGGQKLSFRLDVAEPKLVFAKEQQANSEVKAEGASATLSCEVAQAQTEVTFWKDGKLLSSSSK
VRVEASGCSRRLVVQQAGKADAGEYSCEAGGQKLSFRLDVAEPKLAFAKEQQAHSEVKAEGASATLSCEVAQ
AQTEVTFWKDGKLLSSSSKVRVEASGCSRRLVVQQAGKADAGEYSCEAGGQKLSFRLDVAEPKLAFAKEQQAH
SEVKAEGASATLSCEVAQAQTEVTFWKDGKLLSSSSKVRVEASGCSRRLVVQQAGKADAGEYSCEAGGQKLS
FRLDVAEPKLAFAKEQQAHSEVKAEGASATLSCEVAQAQTEVTFWKDGKLLSSSSKVRVEASGCSRRLVVQQ
AGKADAGEYSCEAGGQKLFRLDVAEPKLVFAKEQQAHSEVKAEGASATLSCEVAQAQTEVTFWKDGKLLSS
SSKVRVEASGCSRRLVVQQVQKADAGEYSCEARGQKLSFRLDVAEAEESQIPERPSRREPLVVEKHETIILTAT
IAAPSVAAVTWLKDGV EIRRSKRHEATSLGDHTLTVRGAQVLD SAIYSCRVGKEGQDFPVQVEEVAAKFSKP
LEPVEGELGGTVMLVCELSPEQAEVVRWCNTQLRPGKRFQMTSEGPRTLTVSGLREDDAEYVCESRDDRT
SARLTVKVPVVKFTSGLSAMVAEEGQEATFQCVVSPSDAGVTWYKDGMLQPSSEKFMVMEVGASRSLTILGL
TLEDAGQVTVAEAGASSAALRVREAPVLFKKKLEPQTVEERTSVTLEVELTRPWPEVKWTRNAAVLTPSENV
EIRAEGARHCLVLRVSGFADRGGFFGCETPDDKTQAKLNVEMRQVRLVVRGLQEVEAKEQGTASMDVELSHAEVE
GSWTRDGLRQLQPGPKCHLAVQGPVHILTL SALQPQDSGLVAFRAEGVHTSARLIVTELPVSFTRVLQDVVATQ
KEKVTLECELSRPPVDVRLKDGVELRAGKAI GIVAQGTCSRSLVIYRCETGDQGVYVCDALDAQTSASLRVQGR
TYTLIFRRVLADEAGVLFVAENAESRAHLRVKELPVTLRLPLRDKIAMEKHARGVLECVSRSASQVRFVKG
VELQSGPKYEVVSDGLYRKLVIN DVQPEDEDTYTC DAGNVKTSAQFFVEEQSITIVRGLKDMTVM EPAPAWFE
CETSIPSVRPPKWL LGKTVLQAGGNVGLQDGT VHRLTLHKTCSTMTGPVHFTIGKSRSSAQLVVS DIPVVL
RPLEPKAGRELQSVVLSCDFRPAPKAVQWYKDDTPLSPSEKFKMALEGQMAELRILRLTPADAGVYRCQAGSA
QSSAEVTVAREVTVIQLQDAEAMEEGRVCFSCELSHKDEDIEWSLNGTPLYNDSFHEISHEGCLHTLVLSK
VRQADTGTVCATSPKVSVSARLVVKGKPVVFLKALDDVSAEERGTTLTQCEVSDPEARVVWRKDGVELGPSDK
YDFLHKAGARGLTVHDL SHEDAGLYTCQVGSKETQSKVSVHDLHVGITKRLKTVEVLEGESECSFECVLSHESP
SDPAVWTVGGKTVGGSGHFHAVRQGRKYTLTVKDAALSDAGEVVFVSVLGLT SKASLIIRERPVDITKPLEDQR
TTLGEDVMSCELSRAGTSVRWLKDGKAI RKSQKYDLLSEGTRAVLVRKASLKDSEYTCETEASKSTAKLC
VEEKANRFTHEELADLQVEEKGRAVFTCKTEHPASVVTWRKGLLELRASGKHVPSQEGTLTKLTINALERTDSD
TYTCDIGQARTQARLLVHGQKVRVIEDLEDTAVQEGSSAKFCCR IAPADYGPVHWFLDKTPLHSNELNEITVQ
PGGYHVLT LRQLALKDSGTVYFEAGDQRTSAALRVTEKPSIFSRPLTDVTVTEGEDLTLVCETTTVDSSVRWT
KDGKTLRPSARCQLSHEGCQAQLLITATTPQDGGRYKCEIGGASSSIVRVHALPVRFRESLKDVEVPEGKAA
TLRCVLSVAAPVEWRHGDDVLKSSNKYSLRQEGAVLELVIRDLQPDGSGQYSCSFGDQTTSATLTVKTSQAQ
FVGKLRNKEATEGTTVTLRCELTK EAPVEWKKGTETLRNGDKYSLKQDGAVCELQICSLLVADAGEYSCVCGQ
EKTSATLTVKALLVHFVRRLSKEATEGDTTTLQCELSKAAPVEWRKGTETLRDGD RYSLKQDGAVCELQIRS
LTIADAGEYLCTCGQEKT SATLTVRALPAKFKDSLKNEEATEGTTATLSCELSKAAPVTWKKGPKTLQSGDKY
VLRQDGAVCGLQIHGLTMADAGEYSCVCGQEKT SATLTVRGLPAKFIEDLRSQEATEGATAILRCELSKAAPV
EWRKGETLKDGD RYTLRQDGAVCELQIRGLAVDPTGTYSSLPTKFT EGLRNEEATEGTMATLRCQMSKAAPV
EWRKGETL RDGD RYSLRQDGAMCELQIRGLTIEDSGEYTCVCGQEKT SATLSVKALPPRFIEDLRSQEATEG
TMATLRCQMSKAAPVEWRKGETLGDGGRYSLRQNGAVCELQIHDLAVEDTGEYSCVCGQEKT SATLNVKALP
PRFIEDLRSQEATEGTMATLRCQMSKAAPVEWRKGETL RDGGRYSLRQDGAVCELQIHDL DVEDAGQYSCVC
GQEKTSAVLTVDALPPKFT EGLKKEEATEGTMVTLRCQMSKEATVEWRKGAKT LSDGGRYSLRQDGAMCELQI
CGLAVEDAGEYSCVCGQEKT SATLSVKALPPRFIEDLRSQEATEGTMATLRCQMSKAAPVEWRKGSKTLRDGD
RYSRLRQDGAMCELQICDLAVEDTGDYSCVCGQEKT SATLSVKAPQVVFQQPLQNLQAEEGSMASLRCELSVPN
AAMVWSKGGLELQGDTRREARQQGCVAELLLRDLRREADAGEYSCTCGSQTT SATLMVTAAPVRFRLQLAQDV
DEGATARLCELSREAVSVEWRKGS LQLFP CAKYQMVQEGTTAELLVHGVEQEDAGEYTC DAGHTQS IARLSV
RAPKPKFKTDLQSTQEAGGTARLCCQLSEAEPTPVQWLKEGVELHVGSKYEMRRQVAGVCELLIHGLEAKDT
GEYACL VGGQKT LASLRVKEPEVTIVRGLVDMEVQADEDFEFTCKV SQAGATDVQWHLQGLPLQSN EVTEVAV
LADGCTHV LQLKGV TLEDAGTVSFHVGGLSSSAQLTVRVPEVTVLEPLKDVQLSEGD ADFRCRLSRASGQEA
RWALGGVPLQCNEMNDITVEQGTLYLLTLHKVTLEDAGTITLQVGS CSSEAQLKVTAKNTVLRGLENVDALEG
GEALFECQLSQPEVA AHTWLLDDEPVHTSEKVEVVYFENGLRHLLLLKNLKPQDSCRVTFLAGDVVTS AFLTV

RALPDPPEAEVVGSRDHSVTLVSWAPMSDGGGGLCGYRVMKEASTGQWQLCHDLVPGPECVDDLVPGKTY  
RFRVAAVGAPAGAGEPVHLPQMVKIAPAPAPAPAPAPAPAPETRQAVVGEDICLELEVAADGGVEVWHKGTERRI  
QPGGHFEVLSRQQRQMLVIKGFRTEDQGEYRCGPIQGLPSSGAATFNVMVMTSGSGDEVPAQPSLPPPEAAQEGD  
LHLLWEALARKRRMSREPTLDSISELPEEDSRVQHLRQEAEEETAPDLSEGYSTADELARTGEADLSHTSSDDE  
SRAGTPSLVTYLKKAGGPGISPLASKHEAQVTTSVKPKQKQEPVVPTCPPPGDLSAADLMDPSLDKAAVKIQA  
AFKGYKVRKEMKQOEGPVFSRTFGDTEAQVGDVLRLECVLATKTDMRACWLKDGIELTDGRHYHIDQLKDGTC  
SLLVTGLAPTDSGRYTCQVSTKSGRVSHSACVVVSGTESEAESSSGGELDDAFRAARRLHRLFRTKSPAELS  
EELFLSADEGPEPEPADWQTYREDENFVCIRFESLAEARQAVTCFRNMFATMGIGVEISLGEQGPGRVEM  
RIGKVAPTVT PAVPLAKTPGLQTSDAAPVFLTELQNQDVQDGYPMSFDCVVTGQPVPSVRWFKDGKLLLEEDDH  
YMINEDQQGGHQLIITAVVPADMGVYRCLAENSMGVSSSTKAELRVELTSTDYDTAADATETSSYFSAQGYLSS  
REQEGTESDEGQLPQVLEELKDLQVAPGTRLAKFQLKVKGYPAKLYWFKDGQPLTSDHIRMTDKKTLHTLE  
IVSVTREDSGQYAAIYISNAVGAAYSARLLVGRGPSEPEEKPASDVHERLVPPRILEKFTPKKVKRGSITFSV  
KVEGHPAPSVHHLKEEAEGVWLWIGPDTPGYTMASSSKQHSVLVLDVGRQHOGTYTCIATNPAGQALCSASLH  
ISGLAKEEEQERVKEALISSFLQGTSAQVSAQMSSEAGFADLVGQSKGESLVAAEAHSHLSLAEVGTTEEFLLQK  
LTSQITEMVSAKISQAKLQVPGGDSDEETKTPSASPRHGRSRPSSSVQESSSESEEDGDSRGEIFDIYVVTADY  
LPLGAEQDAIILREGQYVEVLDSAHPLRWLVRTKPTKSSPSRQGWVSPAYLDRKRLKLSPEWGPTEAPEFPGEA  
VSEDEYRTRLSSVIEQLLSEQAQFVGELOFLESHMKHLERSPRVPAAVASQKTVIFRNVQDISHFHSSFLKE  
LQCGCTDDDVAMCFIKNQEAFAKYLEFLVGRVQAESVVVSTPVQEFYKKYAEETLSAKDPTQPPPPPLQHYLE  
QPVERVQKYQALLKELIRNKARNRQNCALLEQAYAVVSALPQRAENKLVSLMENYPGTLEALGEPVIRQGHFI  
VWEGAPGARMPWKGHNHRVFLFRNYLVICKPRRDSRTDTFSYVFRNMMKLSSIDLNDQVEGDRAFEVWHERE  
DSVRKYLQARTVIKNSWVKEICGIQORLAQPVWRPPEFEELADCTAELGETVKLACRVTGTPKPIVSWYK  
DGQPVVEVDPHHILIEDPDGSCITLIDNLTGIDSGQYMCFAASAAGNASTLGKILVQVPPRFVNVKVRATPFVEG  
EDAQITCTVEGAPYQIRWYKDGTLAPGNRYRMLNEPRSGVLLVVIQAASKEDLGHYECELVNLGSTRGGG  
ELYMQSPALRARDQHREQIVAAVEGAPSMQVTIEDVQVQVGDMAQFDAVIEGHPPPIVTWYKGSTQLTSSAR  
LSQRQDGTYSVLVTDVAPHDAGVYTCVANNAGGQVLCKAELLVHGGDKLDAENQVYRRLKHSFYDVQEEIGR  
GVFGFVKRVQHKGNMFCFAAKFIPLRSKTRAQAYQERDILATLGHPLVTGLLDQFETRKTLLIILELCSSEEL  
LDRLFKKGVVTEAEVVKVYIQQLVEGLHYLHSHGILHLDIKPPNILLMVHPAREDIKICDFGFAQKITPSEFPQYS  
KYGSPFVVSPEIIEQNPNVSEGSDIWAMGVISYLSLTCSSPFAGESDRATLLNVLEGRVSWSSPTAAHLSSEDAK  
DFIKATLQRTPRARPSTSQC LAHPWFLKSMPAAEAHFINTKQLKFLLRARSRWQRSLMSYKSI LVMRSIPELLQ  
GPPDPSLGVARHLRGEASGASSSSSSSDNELAPFARAKSLPSPVTHSPLLHPRGFLRPSASLPEETEASMP  
TADAAPASQPASAGPPASPGCVPRHSVSSLFYQQAGEGAERGNKTS GAKRHPARRRHLLKGGYIARALPGLR  
EPLMEYSLLEEEAAREEQASLMTKTPSFETALRLPSSSVREVPGRSHSLDNPVTTGSPPEACKEQLLFPST  
GLTHETAKDRGHKEGFLQESVFPFPMMSGDSRPGKQEGSSQDSCRGKPASSCHSELGSGSQEGCGPPSSQSLG  
SLPPQSLKKELESTSCGPLFSEQPQAAPFPTQVSPLLGSEKEPQDGLSEGPVVPVSSSPGSASQVDASLDTEG  
LSEAGDTCDFTPPPQRPQEQATTRKFSLESRGGYAGVAGYGTFAFGGDAGGMLGQGPLWARMAWAVSQSSEEQ  
DEAATESPQPLESLGPIAEASGVPLRTSPSLTPWEEVEVSLVQIRDLSGDAEAADTISLDISEVDPAYLNL  
DLYDIKYLPPFEFMI FRRVPKPIEQPESPGSETEAGQGLADFLLEAAWPWPGEGLGLRAGLEITEEPEEPGDLEA  
LLGEAAVGRKRKWSPSRGLFQFPGRCLSGEEPVELGLRQRVKASMAHISRILKGRPEGPEREPPRRKAGLAS  
FRLSGLKGRDQELSDEAVVLGQSVTLACQVLAQPTAQATWSKDGVLLESSGHLLISSTLKNFQLLTLVVKEE  
DLGTYTCCVSNPLGTAVTTGVLKKAERPSSSPRPEVGEYKDAVLLVWKPVESECGPVTYIVQCCIEGGSWTTL  
ASDISDCCYLTGKLSRGGMYIFRTACVSKAGMGPYSSPSEQVLLGGPNHLASEEESRGRPAQLLPSTKTFAP  
QMQIRGRFVSVRQCREKASGRALAAKIVPYQPEDKTAVLRREYALKRLLHHPHLAQLHAAYLSPRHLVLI  
CSGPELLPSLAERESYSESDVKDYLWQMSATQYLHAQHILHLDLRSENMMVTEYNLLKVIDLGNASLDQEK  
VPAPENFKDYLETMAPELLEGGQAVPQTDIWAIGVTAIFIMLSGEYPESESEGETRDLQKGLRKLIRLSRCYAGL  
SGGAVAFLLQSSSLCAQPWGRPCASTCLQCGWLTEEGPTGSRPTPVTFPTVRLRAFVREKRRRALLYKKNH  
LAQVR\*

>rs50849759\_ENSMUSP00000049737\_c.20799:A>C\_p.K6934Q  
ENSMUST00000052872.15|Obscn-203|ENSMUSG00000061462|-|chr11:g.58913216:T>G  
MDHSFSGAPRFLTRPKAFVSVGKDATLSCQIVGNPTPHVSWEKDRQFVEAGARFRLAQDGDVYRLTILDLAL  
GDSGQYVCRARNAIGEAFAAVGLRVDSEGTCAEQAPHLLRPTSIRVREGADATFRCRVGGSPPAVSWSKDG  
RRLGPPDAPHVRVEEHGESSALRIRSARPRDGGTYEVRAENPLGSASAAAAALVVDSAEVAGPPGTSTATLLA  
HLQORREAMRAEGIPSPPPGAGTRTCTVTEGKHARLSCFVTGEPKPEVWKKDGQLVTEGRRHVVEDEQENF  
VLKILFCKQSDRGLYECTASNLVGQTYSSVLDVVVREPTVFFKKRLQDLEVREKESATFQCEVAQVATEAAWFK  
EETRLWASAKYDIEEETERRLTVRNVSADDDAVYICETVETGSRVTAELSVQGNLTKRLKPRKAVRTGDTAIF  
WVELAVPEGPVRWLRNQEEMVAGGRVAITAEGTCHTLTI FQCTLEDMGEVAFVSGGCRTTTTQFCVSA  
PPRPPYPPADPVVKAKTESVTLVSWAPPHGDRPVTIDGYVLEKRLKLGAYAWSRCHEAGWLATTEFTITGV  
AAEEDGDFQFRVSAINHFGQGPYLEFPGMTMHLVPLAVKTPKAVEAVEGGEVTFVSDLTVASSGEWFLDGE  
ALKASSIYVIRCDRTRHMLTIREVPARLHGAQLKVFVANGIETS IQMVVRAALGLPSSKLPAAAAREVLAQL  
HEEAQLLAE LSD

QAAAVTWLKDGRELSLGPKEYMQVSAGRALLVRDVAQDDAGLYECVSRGSRTAYQLLVQEPKLVFAKQQAQ  
 SEVKAEAGNSATLSCEVTQAQTEVTWFKDGKLLSSSSKVRMEASGCSRRLVVQQAGKADAGEYSCEAGGQKLS  
 FRLDVAEPKLVFAKQQAQSEVKAEAGASATLSCEVAQAQTEVTWFKDGKLLSSSSKVRMEASGCSRRLVVQQ  
 AGKADAGEYSCEAGGQKLSFRLDVAEPMVFVFAKEQQARSEVKAEAGASATLSCEVAQAQTEVTWFKDGKLLSS  
 SSKVRMEASGCSRRLVVQQAGKADAGEYSCEAGGQKLSFRLDVTEPKLVFAKEQQARSEVKAEVNSATLSCE  
 VAQAQTEVTWFKDGKLLSSSSKVRMEASGCSRRLVVQQAGKADAGEYSCEAGGQKLSFRLDVAEPMVFVFAKEQ  
 QARSEVKAEAGNSATLSCEVAQAQTEVTWFKDGKLLSSSSKVRMEASGCSRRLVVQQAGKADAGEYSCEAGGQ  
 KLSFHLDVTEPKLVFAKEQQAHSEVKAEAGASATLSCEVAQAQTEVTWFKDGKLLSSSSKVRMEASGCSRRLV  
 VQQAGKADAGEYSCEAGGQKLSFRLDVAEPMVFVFAKEQQARSEVKAEAGASATLSCEVAQAQTEVTWFKDGK  
 LSSSSKVRVEASGCSRRLVVQQAGKADAGEYSCEAGGQKLSFRLDVAEPMVFVFAKEQQANSEVKAEAGASATL  
 SCEVAQAQTEVTWFKDGKLLSSSSKVRVEASGCSRRLVVQQAGKADAGEYSCEAGGQKLSFRLDVAEPMVFA  
 KEQQAHSEVKAEAGASATLSCEVAQAQTEVTWFKDGKLLSSSSKVRVEASGCSRRLVVQQAGKADAGEYSCEA  
 GGQKLSFRLDVAEPMVFAKEQQAHSEVKAEAGASATLSCEVAQAQTEVTWFKDGKLLSSSSKVRVEASGCSR  
 RLVVQQAGKADAGEYSCEAGGQKLSFRLDVAEPMVFAKEQQAHSEVKAEAGASATLSCEVAQAQTEVTWFKD  
 GKLLSSSSKVRVEASGCSRRLVVQQAGKADAGEYSCEAGGQKLFRLDVAEPMVFAKEQQAHSEVKAEAGAS  
 ATLSCEVAQAQTEVTWFKDGKLLSSSSKVRVEASGCSRRLVVQQAGKADAGEYSCEAGGQKLSFRLDVAEPMV  
 FFAKEQQAHSEVKAEAGASATLSCEVAQAQTEVTWFKDGKLLSSSSKVRVEASGCSRRLVVQQVQKADAGEYS  
 CEARGQKLSFRLDVADTRLMFAKEQQARTEVKAEAGNSATLSCEVAQAQTEVTWFKDGKLLSSSSKVRVEASG  
 CSRRLVVQQAGKADAGEYSCEAGGQKLSFRLDVAEAEESQIPERPSRREPLVVKEHETIILTATIAAPSVAAVT  
 WLKDGVEIRRSKRHEATS LGDTHLTVRGAQVLD SAIYSCRVGKEGQDFPVQVEEVAAKFSKPLEPVEGELGG  
 TVMLVCELSPEQAEVWRCGNTQLRPGKRFQMTSEGPRRTLTVSGLREDDAEYVCESTRDRTSARLTVKVP  
 VVKFTSGLSAMVAEEGQEATFQCVVSPSDAGVTWYKDGMLQLPSEKFMVVESEGASRSLTILGLTLEDAGQVTV  
 EAEGASSAALRVREAPVLFKFKLEPQTVEERTSVTLEVELTRPWEVKWTRNAAVLTPSENVEIRAEGARHC  
 LVLRVGFADRGFFGCETPDDKTQAKLNVEMRQVRLVVRGLQVEEAKQGTASMDVELSHAEVEGSWTRDGLRL  
 QPGPKCHLAVQGPVHILTLALSALQPQDSGLVAFRAEGVHTSARLIVTELPVSFTRVLQDVVATQKEKVTLECEL  
 SRPVDVRWLKDGVELRAGKAIGIVAQGTCSRSLVIYRCIETAGDQGVYVCDALDAQTSASLRVQGRTYTLIFRRLV  
 AEDAGVVKFVAENAESRAHLRVKELPVTLLRPLRDKIAMEKHRGVLECCQVSRASAQVRWFKGGVELQSGPKYE  
 VVSDGLYRKLVINVDVQPEDEDTYTCDAGNVKTSAQFFVVEEQSITIVRGLKDMTVMPEPAPAWFECETSIPSVRP  
 PKWLLGKTVLQAGGNVLEQDGTVHRLTLHKTCSTMTGPVHFTIGKSRSSAQLVVS D I P V V L T R P L E P K A G R E  
 LQSVVLSCDFRPAPKAVQWYKDDTPLSPSEKFKMALEGQMAELRILRLTPADAGVYRCQAGSAQSSAEVTVEA  
 REVTVIQLQDAEAMEEGRVCFSCELSHKDEDI EWSLNGTPLYNDSFHEISHEGCLHTLVLSKSVRQADTGTVC  
 ATSPKVSVSARLVVKGKPVVFLKALDDVSAEERGTLLTQCEVSDPEARVVWRKDGVELGPSDKYDFLHKAGAR  
 GLTVHDLSDHEDAGLYTCQVGSKETQSKVSVHDLHVGITKRLKTVEVLEGESECSFECVLSHESPSDPVAVTVGG  
 KTVGGSGHFHAVRQGRKYTLTVKDAALSDAGEVVFVSVLGLTSKASLIRERPVDTIKPLEDQRTTLGEDVMLS  
 CELSRAGTSVRWLKDGKAIRKSQKYDLLSEGTRAVLVRKASLKDSGEYTCETEASKSTAKLCEVEKANRFTE  
 ELADLQVEEKGRAVFTCKTEHPASVVWTRKGLLELRASGKHVPSQEGTLKLTINALERTSDTYTCDIQAR  
 TQARLLVHGQKVRVIEDLEDTAVQEGSSAKFCCRIAPADYGPVHWF LDKTPLHSNELNEITVQPGGYHVLT L R  
 QLALKDSGTVYFEAGDQRTSAAALRVTEKPSIFSRPLTDVTVTEGEDLTLVCETTTVDSSVRWTKDGKTLRPSA  
 RCQLSHEGCAQLLITATTPQDGGRYKCEIGGASSSSIVRVHALPVRFRFRESLKDVEVPEGKAATLRCVLSVA  
 APVEWRHGDDVLKSSNKYSLRQEGAVLELVIRDLQPDQSGQYSCSFGDQTTSATLTVKTSQAQFVGKLRNKEA  
 TEGTTVTLRCELTKEAPVEWKKGTETLRNGDKYSLKQDGAVCELQICSLLVADAGEYSCVCGQEKT SATLTVK  
 ALLVHFVRRRLRSKEATEGDTTLQCELSKAAPVEWRKGTETLRDGDYSLKQDGAVCELQIRSLTIADAGEYL  
 CTCGQEKT SATLTVRALPAKFKDSLKNEEATEGTTATLSCELSKAAPVTWKKGPKTLQSGDKYVLRQDGAVCG  
 LQIHGLTMADAGEYSCVCGQEKT SATLTVRGLPAKFIEDLRSQEATEGATAILRCELSKAAPVEWRKGSSETLK  
 DGDRYTLRQDGAVCELQIRGLAVVDGTGYSSLPKFTFTEGLRNEEATEGTMATLRCQMSKAAPVEWRKGSSETLR  
 DGDRYSLRQDGAMCELQIRGLTIEDSGEYTCVCGQEKT SATLSVKALPSRFIEDLRSQEATEGTMATLRCQMS  
 KTAPVEWKKGSETLRDGGRYSLRQDGPVCELQICDLAVEDAGEYSCVCGQEKT SATLSIKALPPRFIEDLRSQ  
 EATEGTMATLRCQMSKAAPVEWRKGSSETLGDGGRYSLRQNGAVCELQIHDLAVEDTGEYSCVCGQEKT SATLN  
 VKALPPRFIEDLRSQEATEGTMATLRCQMSKAAPVEWRKGSSETLRDGGRYSLRQDGAVCELQIHDLVEDAGQ  
 YSCVCGQEKT SAVLTVDALPPKFTTEGLKKEEATEGTMVTLRCQMSKEATVEWRKGAKT L SDGGRYSLRQDGAM  
 CELQICGLAVEDAGEYSCVCGQEKT SATLSVKALPPRFIEDLRSQEATEGTMATLRCQMSKAAPVEWRKGSSET  
 LRDGDYSLRQDGAVCELQIRDLAVEDAGEYLCVCGQEKT SATLSVKALPPRFIEDLRSQEATEGTMATLRCQ  
 MSKAAPVEWRKGSSETLRDGDYSLRQDGAMCELQICDLAVEDTGDYSCVCGQEKT SATLSVKALPPRFIEDLR  
 SQEAREGTVATLRCRMSKAAPVEWRKGSSETLKDGDYSLRQEGNLCELQIRDLAVEDTGEYSCVCGQEKT SAT  
 LSVKALPAKFIEDLRSQEAPESSTVTLRCKLSKKASVWKKGSETLRNGARYSLRQDGAVCELEIRDLTVEDT  
 GEYSCTCGQERTSATLSIMAPQVVFQPLQNLQAEEGSMASLRCELSVPNAAMVWSKGGLELQGDTRREARQQ  
 GCVAELLLRDLRREDAGEYSCTCGSQTT SATLMVTAAPVRFLRELQAQDVDEGATARLRCELSREAVSVEWRK  
 GSLQLFPCAQYQMVQEGTTAELLVHGVEQEDAGEYTC DAGHTQS IARLSVRAPKPKFKTDLQSTEQEAGGTAR

LCCQLSEAEPTPVQWLKEGVELHVGSKYEMRRQGA VCELLIHGLEAKDTGEYACL VGGQKT LASLRVKEPEV  
TIVRGLVDMEVQADEDEFTCKVSOAGATDVQWHLQGLPLQSNVTEVAVLADGCTHVLQKGVTL EDAGTVS  
FHVGGSSSAQLTVRVPEVTVLEPLKDVQLSEGDQAHFRCRLSRASGQEARWALGGVPLQCNEMNDITVEQGT  
LYLLTLHKVTLEDAGTITLQVGSSEAEQLKVTAKNTVLRGLENVDALEGGEALFECQLSQPEVAHAHTWLLDD  
EPVHTSEKVEVVYFENGLRHLLLLKLNKLPQDSCRVTFLAGDVVTS AFLTVRGWRLEVLEPPHDASVKAGMQVR  
FTCILSEAVPVGEATWYINGAAIQPDDTDWTVTTDGS HHALTLSNAQPQHAGEVTF AARDAVASARLSVLALP  
DPPEDA EVVGRSDHSVTL SWVAPMSDGGGGLCGYRVEMKEASTGQWQLCHDLVPGPECVVDDLVP GKTYRFRV  
AAVGPAGAGEPVHL PQMVKIAPAPAPAPAPAPAPAPETRQAVVGEDICLELEVAADGGEV VVHKGTERIQPGG  
HFEVLSRGQRQMLVIKGFRTEDQGEYRCGPIQGLPSSGAATFNVVMTSGSGDEVPAQPSLPPEAAQEGDLHLL  
WEALARKRRMSREPTLDSISELPEEDSRVQHLRQEAEEETAPDLSEGYSTADELARTGEADLSHTSSDDES RAG  
TPSLVTYLKKAGGPGISPLASKHEAQVTT SVKPKQKQEPVPTCPPPGDLSAADLMDPSLDKAAVKIQAAF KG  
YKVRKEMKQOEGPVFSRTFGDTEAQVGDVLRLECVLATKTD MRACWLKDGIELTDGRHYHIDQLKDGTC SLIV  
TGLAPTDSGRYTQCVSTKSGRVSHSACVVVSGTESEAESSSGGELDDAFRRAARRLHRLFRTKSPAELSEEEL  
FLSADEGPGPEEPADWQTYREDENFVCIRFESLAEARQAVTCFRNMFATMIGVEISLGEQGPVGVEMRIGK  
VAPT VTPAVPLAKTPGLQTS DAAPVFLTELQNDVQDGYPMSFDCVVTGQPVPSVRWFKDGKLL EEDDHYMIN  
EDQQGGHQLIITAVVPADMGVYRCLAENSMGVSSTKAELRVELTSTDYDTAADATETSSYFSAQGYLSSREQE  
GTESDEGQLPQVLEELKDLQVAPGTR LAKFQLKVKGYPAKLYWFKDGOPLTTS DHIRMTDKKTLHTLEIVSV  
TREDSGQYAAAYISNAVGAAYSSARLLVRGSPSEPEEK PASDVHERLVP PRILEKFTPKKVKRGSSTF SVKVEG  
HPAPSVHVLKEEAKEGVLWIGPDTPGYTMASSSKQHS LVLVDVGRQHOGTYT CIATNPAGQALCSASLHISGL  
AKEEEQERVKEALISSFLQGTSQAVSAQMSE SAGFADLVGQSKGESLVAEAAHSHLSLAEVGT EEFQKLT SQ  
ITEMVSAKISQAKLQVPGGDSDEETKTPSASPRHGRSRPSSSVQESSSESEDGDSRGEIFDIYVVTADYLP LG  
AEQDAIILREGQYVEVLD SAHPLRWLVRTKPTKSSPSRQGWVSPAYLDKRLKLSPEWGPTEAPEFPGEAVSED  
EYRTRLSSVIQELLSSEQAFVGLQFLESHHMKHLERSPRVPAAVASQKTVI FRNVQDI SHFHSSFLKELQGC  
GTDDDVAMCFIKNQEA FEKYLEFLVGRVQAESVVVSTPVQEFYKKYAEETLSAKDPTQPPPPPLQHYLEQ PVE  
RVQKYQALLKELIRNKARNRQNCALLEQAYAVVSALPQRAENKLVSLMENYPGTLEALGEP IRQGHFIVWEG  
APGARMPWKGNHRVFLFRNYLVICKPRRDSRTDFTFSYFRNMMKLSIDLNDQVEGD DRAFEVWHEREDSVR  
KYLQARTVI IKNSAVKEICGIQQR LAQPVWRPPEFEELADCTAELGETVKLACRVDTGTPKPIVSWYKDGQP  
VEVDPHHILIEDPDG SCTLILDNLTGIDSGQYMCFAASAAGNASTLGKILVQVPPRFVNVKVRATPFVEGEDAQ  
ITCTVEGAPYPQIRWYKDG TLLAPGNRYRMLNEPRSGVLV LVIQAASKEDLGHYECELVNRLGSTRGGGELYM  
QSPALRARDQHHREQIVAAVEVTEQETKVPKKTVI IETITTVVKS PRGRRQSPGKSPSRSPRRSASPRRPG  
LLAPERLYPPGTSPSRRLVEVEQGRKAPVPALYVTEAEVHAPASQSQPKWLEVEETIEVRVKKTGSRGASPVRE  
MTRSGEGILFTLPGGI PGRDPNANN SNKSVYQEA RTWGPVAVHVGE PPIFQVDSVGNVDWVAASPEPEQVRA  
SQKEENTERQEGCS DGENTFLMEEPQD TDSLQGRDPKILTHNGRVLTLADLE DYVPQEGETFGCGDSTPSTP  
DEPPCEVSVLQREI SEPTVGQPVLLNVGRPPGTGATPSFFRPGSQVHSPESVSFLLREAWSGPVSAAPWTSS F  
HTHVQSSVDGSHG SFKTEVSTQTVSFGAVGETVTLHIDPDGGEAPGPSQ\*

>rs50849759\_ENSMUSP0000020732\_c.21000:A>C\_p.K7001Q  
ENSMUST0000020732.13|Obscn-201|ENSMUSG00000061462|-|chr11:g.58913216:T>G  
MDHSFSGAPRFLTRPKAFVSVGKDATLSCQIVGNPTPHVSWEKDRQVPEAGARFRLAQDGDVYRLTILDLAL  
GDSGQYVCRARNAIGEAFVAVGLRVDSEGTCAEQAPHFLLRPTSIRVREGADATFRCRVGGSPPAVSWSKDG  
RRLGPPDAPHVRVEEHGESSALRIRSARPRDGGTYEVRAENPLGSASAAAALVVDSDAEVAGPPGTSTATLLA  
HLQQRREAMRAEGIPPSPPGAGTRTCTVTEGKHARLSCFVTGEPKPKETVWKKDQQLVTEGRRHVYEDQENF  
VLKILFCKQSDRGLYTCTASNLVGQTYSSVLVVVREPTVPFKKRLQDLEVREKESATFQCEVAQ PATEAAWFK  
EETRLWASAKYDIEEGTERRLTVRNVSADDDAVYICETTEGSRVAELSVQGNLTRKLPKRTAVRTGDTAIF  
WVELAVPEGPVWRWRNQEEMVAGGRVAITAEGTCHTLTI FQCTLEDMGEVAFVSGGCRTTTQFCVSAPRRPPL  
YPPADPVVKAKTESSVTL SWSAPPHGDRPVTIDGYVLEKRKLGA YAWSRCHEAGWLATTEFTITGVAEEGDFQ  
FRVSAINHFGQGPYLEFPGMTMLVPLAVKTPKAVEAVEGGEVTF SVDLTVASSGEWFLDGEALKASSIYVI  
RCDRTRHMLTIREV PARLHGAQLKFVANGIETS IQMVVRAALGLPSSKLPAAAAREVLAQLHEEAQLLAELSD  
QAAA VTWLKDGRELSLGPKYEMQVSAGRRALLVRDVAQDDAGLYECVSRGSR TAYQLLVQDITDGYRDWGPAG  
PQKHMCKCAGAKIARYLGSSCYRFLQYDKGVVHWEALDTRQKGTSSCSLHEKPKLVFAKQQAHSEVKA E  
AGNSATLSCEVTQAQTEVTFWKDGKLLSSSSKVRMEASGCSRRLVVQQAGKADAGEYSCEAGGQKLSFRLDVA  
EPKLVFAKQQAHSEVKA EAGASATLSCEVAQAQTEVTFWKDGKLLSSSSKVRMEASGCSRRLVVQQAGKADA  
GEYSCEAGGQKLSFRLDVAEPKMFVFAKEQQARSEVKA EAGASATLSCEVAQAQTEVTFWKDGKLLSSSSKVRM  
EASGCSRRLVVQQAGKADAGEYSCEAGGQKLSFRLDVTEPKLVFAKEQQARSEVKA EAGNSATLSCEVAQAQ  
EVTWFKDRGKLLSSSSKVRMEASGCSRRLVVQQAGKADAGEYSCEAGGQKLSFRLDVAEPKLVFAKEQQARSEV  
KAEAGNSATLSCEVAQAQTEVTFWKDGKLLSSSSKVRMEASGCSRRLVVQQAGKADAGEYSCEAGGQKLSFHL  
DVTEPKLVFAKEQQAHSEVKA EAGASATLSCEVAQAQTEVTFWKDGKLLSSSSKVRMEASGCSRRLVVQQAGK  
ADAGEYSCEAGGQKLSFRLDVAEPKLVFAKEQQARSEVKA EAGASATLSCEVAQAQTEVTFWKDGKLLSSSSK  
VRVEASGCSRRLVVQQAGKADAGEYSCEAGGQKLSFRLDVAEPKLVFAKEQQANSEVKA EAGASATLSCEVAQ

AQTEVTFWFKDGKKLSSSSKVRVEASGCSRRLVVQQAGKADAGEYSCEAGGQKLSFRLDVAEPKLAFAKEQQAHS  
SEVKAEAGASATLSCEVAQAQTEVTFWFKDGKKLSSSSKVRVEASGCSRRLVVQQAGKADAGEYSCEAGGQKLS  
FRLDVAEPKLAFAKEQQAHSSEVKAEAGASATLSCEVAQAQTEVTFWFKDGKKLSSSSKVRVEASGCSRRLVVQQ  
AGKADAGEYSCEAGGQKLSFRLDVAEPKLAFAKEQQAHSSEVKAEAGASATLSCEVAQAQTEVTFWFKDGKKLSS  
SSKVRVEASGCSRRLVVQQAGKADAGEYSCEAGGQKLFRLDVAEPKLMFAKEQQAHSSEVKAEAGASATLSCE  
VAQAQTEVTFWFKDGKKLSSSSKVRVEASGCSRRLVVQQAGKADAGEYSCEAGGQKLSFRLDVAEPKLVFAKEQ  
QAHSSEVKAEAGASATLSCEVAQAQTEVTFWFKDGKKLSSSSKVRVEASGCSRRLVVQQVQKADAGEYSCEARGQ  
KLSFRLDVADTRLMFAKEQQAHSSEVKAEAGASATLSCEVAQAQTEVTFWFKDGKKLSSSSKVRVEASGCSRRLV  
VQQAGKADAGEYSCEAGGQKLSFRLDVAEAEASQIPERPSRREPLVVKEHETIILTATIAAPSVAAVTWLKDG  
EIRRSKRHEATSLGDTHTLTVRGAQVLDIAIYSCRVGKEGQDFPVQVEEVAAKFSKPLEPVEGELGGTVMLVC  
ELSPQAEVWRCGNTQLRPGKRFQMTSEGPRRTLTVSGLREDDAEYVCESTRDDRTSARLTVKVPVVKFTS  
GLSAMVAEEGQEAFTQCVVSPSDAGVTWYKDGMLQPSKFKVMVESGASRSLTILGLTLEDAGQVTEAEGAS  
SSAALRVREAPVLFKKLEPQTVERTSVTLEVELTRPWPEVKWTRNAAVLTPSENVEIRAEGARHCLVLRVSV  
GFADRGFFGCETPDDKTQAKLNVEMRQVRLVRGLQEVEAKEQGTASMDVELSHAEEVGSWTRDGLRQLQPGPKC  
HLAVQGPVHILTLALSALQPDSSGLVAFRAEGVHTSARLIVTELPVSFTRVLQDVVATQKEKVTLECELSRPVDV  
RWLKDGVNELRAGKAIGIVAQGTCSRSLVIYRCETGDQGVYVCDALDAQTSASLRVQGRTYTLIFRRLAEDAGE  
VKFVAENAESRAHLRVKELPVTLLRPLRDKIAMEKHRGVLECCQVSRASAVRWFKGGVLEQSGPKYEVVSDGL  
YRKLVINADVQPEDEDTYTCDAENVKTSAQFFVEEQSITIVRGLKDMTVMPEPAPAWFECETSIPSVRPEKWL  
KTVLQAGGNVGLQDGTVHRLTLHKTCSTMTGPVHFTIGKSRSSAQLVSDIPVVLTRPLEPKAGRELQSVVL  
SCDFRPAPKAVQWYKDDTPLSPSEKFKMALEGQMAELRILRLTPADAGVYRCQAGSAQSSAEVTEAREVTVI  
QPLQDAEAMEEGRVCFSCELSHKDEDIEWSLNGTPLYNDSFHEISHEGCLHTLVLSVRQADTGTVCATSPKV  
SVSARLVVKGKPVVFLKALDDVSAEERGTLLTQCEVSDPEARVVRKDGVELGSPDKYDFLHKAGARGLTVHD  
LSHEDAGLYTCQVGSKETQSKVSVHDLHVGITKRLKTVEVLEGECSFECVLSHESPSDPAVWTVGGKTVGGS  
GHFHAVRQGRKYTLTVKDAALSDAGEVVSVLGLTSKASLIIRERPVDITKPLEDQRTTLGEDVMLSCELSRA  
GTSVRWLKDGKAIRKSQKYDLLSEGTRAVLVVRKASLKDSEYTCETEASKSTAKLCVEEKANRFTTELADLQ  
VEEKGRAVFTCKTEHPASVVTWRKGLLELRASGKHPVSEGLTLKLTINALERTSDTYTCDIGQARTQARLL  
VHGQKRVIEDLEDTVAEQEGSSAKFCCRIAPADYGPVHWFLDKTPLHSNELNEITVQPGGYHVLTLRQLALKD  
SGTVYFEAGDQRTSAAALRVTEKPSIFSRPLTDVTVTEGEDTLVCETTTVDSVVRWTKDGKTLRPSARCQLSH  
EGCQAQLLITATTPQDGGRYKCEIGGASSSSIVRVHALPVRFRRESLKDVEVPEGKAATLRCVLSVAAPVEWR  
HGDDVLKSSNKYSLRQEGAVLELVIRDLQPDQSGQYSCSFGDQTTSATLTVKTSQAQFVGLKRNKEATEGTTV  
TLRCELTKAEAPVEWKKGTETLRNGDKYSLKQDGAVCELQICSLVADAGEYSCVCGQEKTSATLTVKALLVHF  
VRLRSKEATEGDTTTLQCELSKAAPVEWRKGTETLRDGDYSLKQDGAVCELQIRSLTIADAGEYLCTCGQE  
KTSATLTVRALPAKFKDSLKNEEATEGTTATLSCELSKAAPVWKKGPKTLQSGDKYVLRQDGAVCGLQIHGL  
TMADAGEYSCVCGQEKTSATLTVRGLPAKFIEDLRSQEATEGATAILRCELSKAAPVEWRKGSSETLKDGDYR  
LRQDGAVCELQIRGLAVDTGTYSPLTKFTEGLRNEEATEGTMATLRCQMSKAAPVEWRKGSSETLRDGDYR  
LRQDGAVCELQIRGLTIEDSGEYTCVCGQEKTSATLSVKALPSRFIEDLRSQEATEGTMATLRCQMSKTA  
PVEWRKGSSETLRDGGYSLRQDGPVCELQICDLAVEDAGEYSCVCGQEKTSATLSIKALPPRFIEDLRSQEATEG  
MATLRCQMSKAAPVEWRKGSSETLGDGGYSLRQNGAVCELQIHDLAVEDTGEYSCVCGQEKTSATLNVKALPP  
RFIEDLRSQEATEGTMATLRCQMSKAAPVEWRKGSSETLRDGGYSLRQDGAVCELQIHDLVEDAGQYSCVCG  
QEKTSAVLTVDALPPKFTEGLKKEEATEGTMVTLRCQMSKAEATVEWRKGAKTLSDGGRYSLRQDGAMCELQIC  
GLAVEDAGEYSCVCGQEKTSATLSVKALPPRFIEDLRSQEATEGTMATLRCQMSKAAPVEWRKGSSETLRDGD  
YSLRQDGAVCELQIRDLAVEDAGEYLCVCGQEKTSATLSVKALPPRFIEDLRSQEATEGTMATLRCQMSKAAP  
VEWRKGSSETLRDGDYSLRQDGAMCELQICDLAVEDTGDYSCVCGQEKTSATLSVKALPPRFIEDLRSQEARE  
GTVATLRCRMSKAAPVEWRKGSSETLKDGDYSLRQEGNLCELQIRDLAVEDTEEYSCVCGQEKTSATLSVKAL  
PAKFIEDLRSQEAPESSTVTLRCKLSKKASVWKKGSETLRNGARYSLRQDGAVCELEIRDLTVEDTGEYSCT  
CGQERTSATLSIMAPQVVFQQLQNLQAEEGSMASLRCELSVNAAMVWSKGGLELQGDTRREARQQGCVAEL  
LLRDLRREDAGEYSCTCGSQTTSATLMVTAAPVRFRLRELQAQDVDEGATARLRCELSREAVSVEWRKGS  
LQFLPCAKYQMVQEGTTAELLVHGVEQEDAGEYTCDAHTQSIARLSVRAPKPKFKTDLQSTEQEAAGGTARLCC  
QLSEAEFGTPVQWLKEGVELHVGSKYEMRRQGAUCELLIHGLEAKDTGEYACLVGGQKTLASLRVKEPEVTIVR  
GLVDMEVQADEDEFTCKVSQAGATDVQWHLQGLPLQSNVTEVAVLADGCTHVLQKGVTLQEDAGTVSFHVGGL  
SSSAQLTVRVPEVTVLEPLKDVQLSEGQDAHFRCRLSRASGQEARWALGGVPLQCNEMNDITVEQGTLYLLTL  
HKVTLEDAGTITLQVGSSESQAQLKVTAKNTVLRGLENVDALEGGELFECQLSQPEVAHAHTWLLDDEPVHTS  
EKVEVVEYFENGLRHALLKLNKLPQDSCRVTFLAGDVVTSFAFLTVRGWRLEVLPPHDASVWKAGMQRVFTCILS  
EAVPVGAEATVINGAAIQPDDTWTVTDDGSHHALTLSNAQPQHAGEVTFFAARDAVASARLSVLAALPDPPE  
DAEAVVGRSDHSVTLVSWVAPMSDGGGGLCGYRVMKEASTGNAQWLCHDLVPGPECVVDDLVPKTYFRVAAV  
GPA GAGEPVHLPQMVKIAPAPAPAPAPAPAPAPETRQAVVGEDICLELEVAADGGEVVWHKGTERRIQPGGH  
FEVLSRGQRQMLVIKGFRTEDQGEYRCGPIQGLPSSGAATFNVMVMTSGSGDEVPAQPSLPPEAAQEGDL  
HLLWEALAR KRRMSREPTLDSISELPEEDSRVQHLRQEAEEETAPDLSEGYSTADELARTGEADLSHTSSD  
DESRACTPSLVT



YLKKAGGPGISPLASKHEAQVTTSVKPKQEQEPVVPTCPPPGDLSAADLMDPSLDKAAVKIQAAFQKGYKVRKE  
MKQQEGPVFSRTFGDTEAQVGDVLRLECVLATKTDMRACWLKDGIELTDGRHYHIDQLKDGTCSSLVTLGLAPT  
DSGRYTCQVSTKSGRVSHSACVVVSGTESEAESSSSGGELDDAFRRAARRLHRLFRTKSPAELSEELFLSADE  
GPGEPEEPADWQTYREDENFVCIRFESLAEARQAVTCFRNMFATMIGVEISLGEQGPGRVEMRIGKVAPTVT  
PAVPLAKTPGLQTSDAAPVFLTELQNDVQDGYPMSFDCVVTGQPVPSVRWFKDGLLEEDDHYMINEDQQGG  
HQLIITAVVPADMGVYRCLAENSMGVSSTKAELRVELTSTDYDTAADATETSSYFSAQGYLSSREQEGTESDE  
GQLPQVLEELKDLQVAPGTRLAKFQLKVKGYPAKPLYWFKDGGQPLTSDHIRMTDKKTLHTLEIVSVTREDSG  
QYAAIISNAVGAAYSSARLLVRGPSEPEEKPASDVHERLVPRILEKFTPKKVKRGSSITFSVKVEGHPAPSV  
HWLKEEAEGVWLWIGPDTPGYTMASSSKQHSVLVLDVGRQHOGTYTCIATNPAGQALCSASLHISGLAKEEEQ  
ERVKEALISSFLQGTSAQVSAQMSSEAGFADLVGQSKGESLVAEEAHSHLSLAEVGTTEFLQKLSQITEMVS  
AKISQAKLQVPGGDSDEETKTPSASPRHGRSRPSSSVQESSESEEDGDSRGEIFDIYVVTADYLPGLAEQDAI  
ILREGQYVEVLD SAHPLRVLRTKPTKSSPSRQGWVSPAYLDRKRLKLSPEWGPTEAPEFPGEAVSEDEYRTRL  
SSVIQELLSSEQAFVQELQFLESHHMKHLERSPRVPAAVASQKTVIFRNVQDISHFHSSFLKELQCGTDDDDV  
AMCFIKNQEAFAKEYLEFLVGRVQAESVVVSTPVQEFYKKYAEETLSAKDPTQPPPPPLQHYLEQPVVERVQKYQ  
ALLKELIRNKARNRQNCALLEQAYAVVSALPQRAENKLVSLMENYPGTLEALGEPHQGHFVWEGAPGARM  
PWKGHNHRVFLFRNYLVICKPRRDSRTDFTSYVFRNMMKLSSIDLNDQVEGDDRAFEVWHEREDSVRKYLLQA  
RTVIKNSWVKEICIGIQRLAQPVWRPPEFEEELADCTAELGETVKLACRVTGTPKPIVSWYKDGQPVVEVDPH  
HLLIEDPDGSCSTLILDNLTGIDSGQYMCFAASAAGNASTLTKLILVQVPPRFVKNVRATPFVYGEDAQITCTVE  
GAPYPQIRWYKDGTLAPGNRYRMLNEPRSGVLVVIQAASKEDLGHYECELVNRLGSTRGGGELYMQSPALR  
ARDQHHREQIVA AVEERRPSP\*  
>rs50849759\_ENSMUSP00000151217\_c.18294:A>C\_p.K6099Q  
ENSMUST00000219084.3|Obscn-207|ENSMUSG00000061462|-|chr11:g.58913216:T>G  
MDHSFSGAPRFLTRPKAFVSVGKDATLSCQIVGNPTPHVSWEKDRQPVEAGARFLAQDGDVYRLTILDLAL  
GDSGQYVCRARNAIGEFAAVGLRVDSEGTCAEQAPHFLLRPTSIRVREGADATFRCRVGGSPQPAVSWSKDG  
RRLGPPDAPHVRVEEHGESSALRIRSARPRDGGTYEVRANPLGSASAAAALVVDSDAEVAGPPGTSTATLLA  
HLQQRREAMRAEGIPSPPGAGTRTCTVTEGKHARLSCFVTEGPKPETVWKKDGLVTEGRRHVVEDEQENF  
VLKILFECKQSDRGLYCTASNLVGGQTYSSVLVVVREPTVPFKKRLQDLEVREKESATVFCEVAQAPATEAAWFK  
EETRLWASAKYDIEEEGTERRLTVRNVSADDDAVYICETTEGSRVAELSVQGNLTKLPRKTAVRTGDTAIF  
WVELAVPEGPVRWLRNQEEMVAGGRVAITAEGTCHTLTIFQCTLEDMGEVAFVSGGCRTTTQFCVSAPRRPPL  
YPPADPVVKAKTESSVTLWSAPPHGDRPVTIDGYVLEKRKLGAYAWSRCHEAGWLATTEFTITGVAAEGDFQ  
FRVSAINHFGQGPYLEFPGTMHLVPLAVKTPKAVEAVEGGEVTFVSDLTVASSGEWFLDGEALKASSIYVI  
RCDRTRHMLTIREVPARLHGAQLKFVANGIETS IQMVVRAALGLPSKLPAAAAREVLAQLHEEAQLLAE LSD  
QAAA VTWLKDGRELSLGPKEYMQVSAGRRALLVRDVAQDDAGLYECVSRGSRTAYQLLVQDITDGYRDWGPAG  
PQKHMCKCAGAKIARYLGS SCYRFLQYDKGVWHLEAALDTRQKGTSSCSLHEKPKLVFAKQQAHSEVKA  
AGNSATLSCEVTAQTEVTWFKDGKLS SSSSKVRMEASGCSRRLVVQQAGKADAGEYSCEAGGQKLSFRLDVA  
EPKLVFAKQQAHSEVKAEGASATLSCEVAQAQTEVTWFKDGKLS SSSSKVRMEASGCSRRLVVQQAGKADA  
GEYSCEAGGQKLSFRLDVAEPKLVFAKEQQARSEVKAEGASATLSCEVAQAQTEVTWFKDGKLS SSSSKVRM  
EASGCSRRLVVQQAGKADAGEYSCEAGGQKLSFRLDVTEPKLVFAKEQQARSEVKAEGNSATLSCEVAQAQ  
EVTWFKDGKLS SSSSKVRMEASGCSRRLVVQQAGKADAGEYSCEAGGQKLSFRLDVTEPKLVFAKEQQAHSEV  
KAEAGASATLSCEVAQAQTEVTWFKDGKLS SSSSKVRMEASGCSRRLVVQQAGKADAGEYSCEAGGQKLSFRL  
DVAEPKLVFAKEQQARSEVKAEGASATLSCEVAQAQTEVTWFKDGKLS SSSSKVRVEASGCSRRLVVQQAGK  
ADAGEYSCEAGGQKLSFRLDVAEPKLVFAKEQQANSEVKAEGASATLSCEVAQAQTEVTWFKDGKLS SSSK  
VRVEASGCSRRLVVQQAGKADAGEYSCEAGGQKLSFRLDVAEPKLVFAKEQQAHSEVKAEGASATLSCEVAQ  
AQTEVTWFKDGKLS SSSSKVRVEASGCSRRLVVQQAGKADAGEYSCEAGGQKLSFRLDVAEPKLVFAKEQQAH  
SEVKAEGASATLSCEVAQAQTEVTWFKDGKLS SSSSKVRVEASGCSRRLVVQQVQKADAGEYSCEARGQKLS  
FRLDVAEAESQIPERPSRREPLVVEKETIILTATIAAPSVAAVTWLKDGVERRSKRHEATSLGDTHTLTVR  
GAQVLD SAIYSCRVGKEGQDFPVQVEEVAKF SKPLEPVEGELGGTVMLVCELSPEQAEVWRCGNTQLRPGK  
RFQMTSEGPRRTLTVSGLREDDAEYVCE SRDDRTSARLTVKVPVVKFTSGLSAMVAEEGQEATFCQCVVSPS  
DAGVTWYKDGMLQLPSEKFMVVEGASRSILTILGLTLEDAGQVTEAEGASSAALRVREAPVLFKFKLEPQT  
VEERTSVTLEVELTRPWPVEKWRNAAVLTPSENVEIRAEGARHCLVLRVGFADRGFFGCETPDDKTQAKLN  
VEMRQVRLVRGLQEVEAKEQGTASMDVELSHAEVEGSWTRDGLRLQPGPKCHLAVQGPVHILTL SALQPQDSG  
LVAFRAEGVHTSARLIVTELPVSFTRVLQDVVATQKEKVTLECELSRPVDVRLWKDGVLELRAGKAI GIVAQGT  
CRSLVIYRCETGQGVYCDALDAQTSASLRVQGRYTYLIFRVLAEADAGEVKFVAENAESRAHLRVKELPVT  
LLRPLRDKIAMEKHGVLLECQVSRASAQVRWFKGVELQSGPKYEVVSDGLYRKLKLVINDVQPEDEDTYTC DAG  
NVKTSAQFFVEEQSITIVRGLKDMTVMEPAPAWFECETSIPSVRPPKWL LGKTVLQAGGNVGLQDGTVHRLT  
LHKTCSTMTGVPVHFTIGKSRSSAQLVVS DIPVVLTRPLEPKAGRELQSVVLSCDFRPAPKAVQWYKDDTPLSP  
SEKFKMALEGQMAELRILRLTPADAGVYRCQAGSAQSSAEVTVAREVTVIQPLQDAEAMEEGRVCFSCELSH  
KDEDIEWSLNGTPLYNDSFHEISHEGCLHTLVLKSVRQADTGTVCATSPKVS SARLVVKGPVVF LKALDDV

SAEERTGLTLQCEVSDPEARVVWRKDGVELGPSDKYDFLHKAGARGLTVHDLSDHEDAGLYTCQVGSKETQSKV SVHDLHVGITKRLKTVLEVLEGESCSFECVLSHESPSDPAVWTVGGKTVGGSGHFHAVRQGRKYTLTVKDAALS DAGEVVFVSVLGLTSKASLIIRERPVDITKPLEDQRTTLGEDVMLSCELSRAGTSVRWLKDGKAIRKSQKYDLL SEGTRAVLVVRKASLKDSEYTCETEASKSTAKLCVEEKANRFTEELADLQVEEKGRAVFTCKTEHPASVVTW RKGLEELRASGKHVPSQEGTLTKLTINALERTSDTYTCDIGQARTQARLLVHGQKVRVIEDLEDTAVQEGSS AKFCCRIAPADYGPVHWFLDKTPLHSNELNEITVQPGGYHVLTLRQLALKDSGTVYFEAGDQRTSAAALRVTEK PSIFSRPLTDVTVTEGEDLTLVCETTTVDSSVRWTKDGKTLRPSARCQLSHEGCQAQLLITATTPQDGGGRYKC EIGGASSSSIVRVHALPVRFRFRESLKDVEVPEGKAATLRCVLSVAAPVEWRHGDDVLKSSNKYSLRQEGAVLE LVIRDLQPDSDGQYSCSFGDQTTSATLTVKTSASAQFVGKLRNKEATEGTTVTLRCELTKAPVEWKGTETLR NGDKYSLKQDGAVCELQICSLLVADAGEYSCVCGQEKTSATLTVKALLVHFVRRLRSKEATEGDTTTLQCELS KAAPVEWRKGTETLRDGDYSLKQDGAVCELQIRSLTIADAGEYLCTCGQEKTSATLTVRGLPAKFIEDLRSQ EATEGATAILRCELSKAAPVEWRKGSSETLKDGDYTLRQDGAVCELQIRGLAVVDTGTYSLPTKFTTEGLRNE EATEGTMATLRCQMSKAAPVEWRKGSSETLRDGDYSLRQDGAMCELQIRGLTIEDSGEYTCVCGQEKTSATLS VKALPPRFIEDLRSQEATEGTMATLRCQMSKAAPVEWRKGSSETLGDGGYSLRQNGAVCELQIHDLAVEDTGE YSCVCGQEKTSATLNVKALPPKFTTEGLKKEEATEGTMVTLRCQMSKEATVEWRKGAKTSLDGGYSLRQDGAM CELQICGLAVEDAGEYSCVCGQEKTSATLSVKALPPRFIEDLRSQEATEGTMATLRCQMSKAAPVEWRKGSSET LRDGDYSLRQDGAVCELQIRDLAVEDAGEYLCVCGQEKTSATLSVKALPPRFIEDLRSQEATEGTMATLRCQ MSKAAPVEWRKGSSETLRDGDYSLRQDGAMCELQICDLAVEDTGDYSCVCGQEKTSATLSVKAPVVFQQLQ NLQAEEGSMASLRCELSVPNAAMVWSKGGLELQGDTRREARQQGCVAEALLRDLRREDAGEYSCTCGSQTSA TLMVTAAPVRFLRELQAQDVDEGATARLRCELSREAVSVEWRKGSQQLFPCAQYQMVQEGTTAELLVHGVEQE DAGEYTC DAGHTQSIARLSVRAPKPKFKTDLQSTEQEAGGTARLCCQLSEAPGTPVQWLKEGVELHVGSKYE MRRQGAVCELLIHGLEAKDTGEYACLVGQKTLASLRVKEPEVTIVRGLVDMEVQADEDVEFTCKVSOAGATD VQWHLQGLPLQSNVEVAVLADGCTHVLQKGVTLDEAGTVSFHVGGLSSSAQLTVRVPVTVLEPLKDVQL SEGQDAHFRCRLSRASGQEARWALGGVPLQCENEMNDITVEQGTLYLLTLHKVTLEDAGITTLQVGSSESQAQL KVTAKNTVLRGLENDVALEGGALFECQLSQPEVAHTWLLDDEPVHTSEKVEVVYFENGLRHLKLNKLPQ DSCRVTFLAGDVVTSFAFLTVRGWRLEVLEPPHDASVAKGMQVRFTCILSEAVPVGEATWYINGAAIQPDDTDW TVTDTGSHHALTLSNAQPHAGEVTFFAARDAVASARLSVLAALPDPEDAEVEVGRSDHSVTLRCLLAEENSMGV LCGYRVEMKEASTGQWQLCHDLVPGPECVDDLVPGKYRFRVAAVGPAGAGEPVHLPQMVKIAPAPAPAPAP APAPETRAVVEDICLELEVAADGGEVVWHKGTERRIQPGGHFEVLSRGQRQMLVIKGFRTEDQGEYRCGPIQ GLPSSGAATFNVVMTSGSGDEVPAQPSLPPPEAAQEGDLHLLWEALARKRRMSREPTLDSISELPEEDSRVQHL RQEAEBETAPDLSEGYSTADELARTGEADLSHTSSDDESAGTPSLVTYLKKAGGPGISPLASKHEAQVTTSVK PQKQPEPVVPTCPPPGDLAADMPSLDKAAVKIQAQAFKGYKVRKEMKQOEGPVFSRTFGDTEAQVGDVLRLECVLTKTDMRACWLKDGIELTDGRHYHIDQLKDGTCSELLVTGLAPTDGGRYTCQVSTKSGRVSHSACVVVSG TESEAESSSGGLEDDAFRRAARLHRLFRTKSPAELSEELFLSADEGPGPEEPADWQTYREDENFVCIRFE SLAEARQAVTCFRNMFATMGIGVEISLGEQGRGVMERIGKVAFTVTPAVPLAKTQGLQTSDAAPVFLTELQN QVDQDGYPMSEFDCVVTGQPVPSVRWFKDGKLLLEEDDHVMINEDQQGGHQLIITAVVPADMGVYRCLAEENSMGV SSTKAELRVELTSTDYDADAATETSSYFSAQGYLSSREQEGTESDEGQLPQVLEELKDLQVAPGTRLAKFQL KVKGYAPKLYWFKDGQPLTSDHIRMTDKKTLHTLEIVSVTREDSGQYAAYSNAVGAAYSSARLLVRGPSE PEEKPASDVHERLVPVRILEKFTPKKVKRGSSITFSVQVEGHPAPSVHVLKKEAEKGVLLWIGPDTPGYTMAS SKQHSLLVLLDVGRRHQGTYTICATNPAGQALCSASLHISGLAKEEEQERVKEALISSFLQGTSAVAQMSSES AGFADLVGQSKGESLVAEEAHSHLSLAEVGTEEFLLKLTSTIEMVSAKISQAKLQVPGGDSDEETKTPSASP RHGRSRPSSSVQESSSESEDGDSRGEIFDIYVVVTADYLLPLGAEQDAIILREGQYVEVLDSAHPLRWLVRTKPT KSSPSRQGWVSPAYLDRKRLKLSPEWGPTEAPEFPGEAVSEDEYRTRLSSVIQELLSSEQAFVGELOFLESHHM KHLERSPRVPAAVASQKTVIFRNVDISHFHSSFLKELQCGCTDDDVAMCFIKNQEAFAKEYLEFLVGRVQAES VVVSTPVQEFYKKAEEATLSAKDPTQPPPPPLQHYLEQPVERVQKYQALLKELIRNKARNRQCALLEQAYAV VSALPQRAENKLVSLMENYPGTLEALGEPTRQGHFVWEGAPGARMPWKGNRHRVFLFRNYLVICKPRRDSR TDTFSYVFRNMMKLSIDLNDQVEGDRAFEVWHEREDESVRKYLLQARTVVIKNSWVKEICGIQQRLAQPVWR PPEFEELADCTAELGETVKLACRVGTGPKPIVSWYKDGQPVVEVDPHHILIEDPDGSCTLILDNLGTIDSGQY MCFASAAGNASTLGKILVQVPPRFVNKVRATPFVEGEDAQITCTVEGAPYPQIRWYKDGTLAPGNRYRMLN EPRSGVLVIVIQAAASKEDLGHYECELVNRIGSTRGGGELYMQSPALRARDQHHRQIIVAAVEVTEQETKVPKK TVIIETITTVVKSPPRRRQSPGKSPSRSPRRSASPRRPGLLAPERLYPPGTSPSRRLEVEQGRKAPVPALY VTEAEVHAPASQSQPKWLEVEETIEVRVKKTGSRGASPVREMTSRGEGILFTLPGGIPGRDPNANNNSNKSVY QEARTWGPVAVVHGVEPFIQVDSVGNVDWVAASPEPEQVRASQKEENTERQEGCSDGENTFLMEEPQDSTDLSL QGRDPKILTRHNVRGLTLADLEDYVPOEGETFGCGDSTPSTPDEPPCEVSVLQREI SEPTVQPVLLNVGRPPG TGATPSFFRPGSQVHSPESVSFLLREAWSGPVSAAPWTSSFHTHVQSSVDGSHGSFKTEVSTQTVSFGAVGET VTLHIDPDGGEAPGPSQG\*

>rs26971834\_ENSMUSP00000158795\_c.20392:A>G\_p.N6798S

ENSMUST00000238536.2|Obscn-210|ENSMUSG00000061462|-|chr11:g.58920178:T>C

MDHSFSGAPRFLTRPKAFVSVGKDATLSCQIVGNPTPHVSWEKDRQPVEAGARFRLAQDGDVYRLTILDLAL
GDSGQYVCRARNAIGEFAAVGLRVDSEGTCAEQAPHFLLRPTSIRVREGADATFRCRVGGSPQPAVSWSKDG
RRLGPPDAPHVRVEEHGESSALRIR SARPRDGGTYEVRAENPLGSASAAAALVVDSDAEVAGPPGTSTATLLA
HLQQRREAMRAEGIPSPPGAGTRTCTVTEGKHARLSCFVTGEPKPEVWKKDQGLVTEGRRHVVEDEQENF
VLKILFCKQSDRGLYTCTASNLVQTYSSVLVVVREPTVPFKKRLQDLEVREKESATFQCEVAQPAEAAWFK
EETRLWASAKYDIEEEGETERRLTVRNVSADDDAVYICETTEGSRVVAELSVQGNLTKLPRKTAVRTGDTAIF
WVELAVPEGPVWRWRNQEEMVAGGRVAITAEGTCHTLTI FQCTLEDMGEVAFVSGGCRTTTQFCVSAPRRPPL
YPPADPVVKAKTESSVTLWSAPPHGDRPVTIDGYVLEKRRKLGAYAWSRCHEAGWLATTEFTITGVAAEEDFQ
FRVSAINHFQGPYLEFPGTMHLVPM LAVKTP LKAVEAVEGGEVTFVSDLTVASSGEWFLDGEALKASSIYVI
RCDRTRHMLTIREV PARLHGAQLKFVANGIETSIQMVVRAALGLPSSKLPAAAAAREVLAQLHEEAQLLAE LSD
QAAA VTWLKDGRELSLGPYEMQVSAGRRALLVRDVAQDDAGLYECVSRGSR TAYQLLVQDITDGYRDWGPAG
PQKHMCKCAGAKIARYLGSSCYRFLQYDKGVVHWEAALDTRQKGKTS SCSLHEKPKLVFAKQQAHSEVKA E
AGNSATLSCEVTQAQTEVTWFKDGKLLSSSSKVRMEASGCSRRLVVQQAGKADAGEYSCEAGGQKLSFRLDVA
EPKLVFAKQQAHSEVKA EAGASATLSCEVAQAQTEVTWFKDGKLLSSSSKVRMEASGCSRRLVVQQAGKADA
GEYSCEAGGQKLSFRLDVAEPKMFVFAKEQQARSEVKA EAGASATLSCEVAQAQTEVTWFKDGKLLSSSSKVRM
EASGCSRRLVVQQAGKADAGEYSCEAGGQKLSFRLDVTEPKLVFAKEQQARSEVKA EGVNSATLSCEVAQAQ T
EVTWFKDGKLLSSSSKVRMEASGCSRRLVVQQAGKADAGEYSCEAGGQKLSFRLDVAEPKLVFAKEQQARSEV
KAEAGNSATLSCEVAQAQTEVTWFKDGKLLSSSSKVRMEASGCSRRLVVQQAGKADAGEYSCEAGGQKLSFHL
DVTEPKLVFAKEQQAHSEVKA EAGASATLSCEVAQAQTEVTWFKDGKLLSSSSKVRMEASGCSRRLVVQQAGK
ADAGEYSCEAGGQKLSFRLDVAEPKLVFAKEQQARSEVKA EAGASATLSCEVAQAQTEVTWFKDGKLLSSSSK
VRVEASGCSRRLVVQQAGKADAGEYSCEAGGQKLSFRLDVAEPKLVFAKEQQANSEVKA EAGASATLSCEVAQ
AQTEVTWFKDGKLLSSSSKVRVEASGCSRRLVVQQAGKADAGEYSCEAGGQKLSFRLDVAEPKLAFAKEQQAH
SEVKA EAGASATLSCEVAQAQTEVTWFKDGKLLSSSSKVRVEASGCSRRLVVQQAGKADAGEYSCEAGGQKLS
FRLDVAEPKLAFAKEQQAHSEVKA EAGASATLSCEVAQAQTEVTWFKDGKLLSSSSKVRVEASGCSRRLVVQQ
AGKADAGEYSCEAGGQKLSFRLDVAEPKLAFAKEQQAHSEVKA EAGASATLSCEVAQAQTEVTWFKDGKLLSS
SSKVRVEASGCSRRLVVQQAGKADAGEYSCEAGGQKLFRLDVAEPKLMFAKEQQAHSEVKA EAGASATLSCE
VAQAQTEVTWFKDGKLLSSSSKVRVEASGCSRRLVVQQAGKADAGEYSCEAGGQKLSFRLDVAEPKLVFAKEQ
QAHSEVKA EAGASATLSCEVAQAQTEVTWFKDGKLLSSSSKVRVEASGCSRRLVVQQVQKADAGEYSCEARGQ
KLSFRLDVADTRLMFAKEQQARTEVKA EAGNSATLSCEVAQAQTEVTWFKDGKLLSSSSKVRVEASGCSRRLV
VQQAGKADAGEYSCEAGGQKLSFRLDVAEAE SQIPERPSRREPLVVKEHETIILTATIAAPSVAAVTWLKDG V
EIRRSKRHEATSLGDTHTLTVRGAQVLD SAIYSCRVGKEGQDFPVQVEEVA AKFSKPLEPVEGELGGTVMLVC
ELSP EQAEVWRCGNTQLRPGKRFQMTSEGPRRTLTVSGLREDDAE EYVCE SRDDRTSARLT VKVPRVVKFTS
GLSAMVAEEGQEATFQCVVSPSDAGVTWYKDGMLQLPSEKFMVESGASRSLTILGLTLEDAGQVTEAEGAS
SSAALRVREAPVLFKKLEPQTVEERTSVTLEVELTRPWPEVKWTRNAAVLTPSENVEIRAEGARHCLVLR SV
GFADRGGFFGCETPDDKTQAKLNVEMRQVRLVRGLQEVEAKEQGTASMDVELSHAEVEGSWTRDGLRLQPGPKC
HLAVQGPVHILTL SALQPQDSGLVAFRAEGVHTSARLIVTELPVSFTRVLQDQVATQKEKVTLECELSRPFVDV
RWLKDGVELRAGKAIGIVAQGTCSRSLVIYRCETGDQGVYVCDALDAQTSASLRVQGRTYTLIFRRLAEDAGE
VKFVAENAESRAHLRVKELPVTLLRPLRDKIAMEKHRGVLECCQVSRASAVRWFKGGVELQSGPKYEVVSDGL
YRKLVIN DVQPEDEDTYTC DAGNVKTS AQFFVEEQSITIVRGLKDMTVM EPAPAWFECETSIPSVRPPKWL LG
KTVLQAGGNVGL EQDGTVHRLTLHKTCSTMTGPVHFTIGKSRSSAQLVSDI PVVLT RPLEPKAGRELQSVVL
SCDFRPAPKAVQWYKDDT PLSPEKFKMALEGM AELRILRLTPADAGVYRCQAGSAQSSAEVTV EAREVTVI
QPLQDAEAMEEGRVCFSC ELSHKDEDIEW SLNGTPLYNDSFHEI SHEGCLHTLVLSV RQADTGTVCATSPKV
SVSARLVVKGKPVVFLKALDDVSAEERGTLTLQCEVSDPEARVWVRKDGVELGSPDKYDFLHKAGARGLTVHD
LSHEDAGLYTCQVGSKETQSKVSVHDLHVGITKRLKTVEVLEGE SCSFECVLSHESPSDPAVWTVGGKTVGGS
GHFHAVRQGRKYTLTVKDAALSDAGEVVF SVLGLT SKASLI IRE RPVDITKPLEDQRTTLGEDVMLSC ELSRA
GTSVRWLKDGKAIRKSQKYDLLSEGTRAVLVVRKASLKDSGEYTCETEASKSTAKLCEVEKANRFTEELADLQ
VEEKGRAVFTCKTEHPASVVTWRKGLLELRASGKHVPSQEGTLTKLTINALERTSDTYTCDIGQARTQARLL
VHGQKVRVIEDLED TAVQEGSSAKFCCRIAPADYGPVHWF LDKTPLHSNELNEITVQPGGYHVLTLRQLAL KD
SGTVYFEAGDQRTS AALRVTEKPSIFSRPLTDVTVTEGEDLTLVCETTTVDSSVRWTKDGKTLRPSARCQLSH
EGCQAQLLITATTPQDGGRYKCEIGGASSSIVRVHALPVRFRESLKDVEVPEGKAATLRCVLSVAAPVEWR
HGDDVLKSSNKYSLRQEGAVLELVIRDLQPQDSGQYSCSFGDQTT SATLTVKTTSSAQFV GKLNRKEATEGTTV
TLRCELTK EAPVEWKKGTETLRNGDKYSLKQD GAVCELQICSLLVADAGEYSCVCGQEKTSATLTVKALLVHF
VRRLSRKEATEGDTTTLQCELSKAAPVEWRKGTETLRDGD RYSLKQD GAVCELQIRSLTIADAGEYLC TCGQE
KTSATLTVRALPAKFKDSLKNEEATEGTTATLSELSKAAPVTWKKGPKTLQSGD VAKYVLRQD GAVCGLQIHGL
TMADAGEYSCVCGQEKTSATLTVRGLPAKFIEDLRSQEATEGATAILRCELSKAAPVEWRKGETLKDGD RYT
LRQD GAVCELQIRGLAVVDGTGYS SLPKTFTEGLRNEEATEGTMATLRCQMSKAAPVEWRKGETLRDGD RYS
LRQD GAVCELQIRGLTIEDSGEYTCVCGQEKTSATLSVKALPSRFIEDLRSQEATEGTMATLRCQMSK TAPVE
WKKGSETLRDGGRYSLRQDGPVCELQICDLAVEDAGEYSCVCGQEKTSATLSIKALPPRFIEDLRSQEATEG T

MATLRCQMSKAAPVEWRKGETLGDGGYSLRQNGAVCELQIHDLAVEDTGEYSCVCGQEKTSA TLNVKALPP  
RFIEDLRSQEATEGTMATLRCQMSKAAPVEWRKGETLRDGGYSLRQDGA VCELQIHDLDVEDAGQYSCVCG  
QEKTSAVLTVDALPPKFTEGLKKEEATEGTMVTLRCQMSKEATVEWRKGAKTSLSDGGYSLRQDGA MCELQIC  
GLAVEDAGEYSCVCGQEKTSA TLVKALPPRFIEDLRSQEATEGTMATLRCQMSKAAPVEWRKGETLRDGD R  
YSLRQDGA VCELQIRDLAVEDAGEYLVCVCGQEKTSA TLVKALPPRFIEDLRSQEATEGTMATLRCQMSKAAP  
VEWRKGSKTLRDGDYSLRQDGA MCELQICDLAVEDTDYSCVCGQEKTSA TLVKALPPRFIEDLRSQEARE  
GTVATLRCRMSKAAPVEWRKGETLKDGDYSLRQEGNLCCELQIRDLAVEDTEEYSCVCGQEKTSA TLVKAL  
PAKFIEDLRSQEAPESSTVTLRCKLSKKASVVWKKGSETLRNGARYSLRQDGA VCELEIRDLTVEDTGEYSCT  
CGQERTSATSIMAPQVVFLQNLQAEEGSMASLRCSELSVNAAMVWSKGGLELQGDTRREARQQGCVAEL  
LLRDLRREDAGEYSCTCGSQTTSATLMVTAAPVRFRELAQAQDVDEGATARLRCELSREAVSVEWRKGS LQLF  
PCAKYQMVQEGTTAELLVHGVEQEDAGEYTCDAHTQSIARLSVRAPKPKFKTDLQSTEQEAGGTARLCCQLS  
EAEPGTFVQWLKEGVELHVGSKYEMRRQGA VCELLIHGLEAKDTGEYACLVGGQKTLASLRVKEPEVTIVRGL  
VDMEVQADEDEFTCKVSQAGATDVQWHLQGLPLQSNVTEVAVLADGCTHVLQKGVTLLEDAGTVSFHVGGL  
SSSAQLTVRVPEVTVLEPLKDVQLSEGQDAHFRCRLSRASGQEERWALGGVPLQCNEMNDITVEQGTLYLLTL  
HKVTLLEDAGTITLQVGSSESSEALQKVTAKNVTLRGLENVDALEGGEALFECQLSQPEVAHAHTWLLDDEPVHTS  
EKVEVVYFENGLRHLLLLKNLKPQDSCRVTFLAGDVTSAFLTVRGRLEVL EPPHDASVKAGMQVRFCTILS  
EAVPVGEATWYINGAAIQPDDTDWTVTTDGSHHALTSLNAQPQHAGEVTF AARDAVASARLSVLALPDPPEDA  
EUVGRSDHSVTLSWVAPMSDGGGGLCGYRVEMKEASTGQWQLCHDLVPGPECVVDDLVPGKTYFRFVA AVGPA  
GAGEPVHLPQMVKIAPAPAPAPAPAPAPAPAPETRQAVVGEDICLELEVAADGGEVVWHKGTERRIQPGGHFEVLS  
RGQRQMLVIKGFRTEDQGEYRCGPIQGLPSSGAATFNVMVTSGSGDEVPAQPSLPPEAAQEGDLHLLWEALAR  
KRRMSREPTLDSISELPEEDSRVQHLRQEAETAPDLSEGYSTADELARTGEADLSHTSSDDES RAGTPSLVT  
YLKAGGPGISPLASKHEAQVTSVKPQKQEPVPTCPPGDL SAADLMDPSLDKAAVKIQAAF KG YKVRKE  
MKQQEGPVFSRTFGDTEAQVGVLRLECVLATKTD MRACWLKDGIELTDGRHYHIDQLKDGTC SLLVTGLAPT  
DSGRYTCQVSTKSGRVSHSACVVVSGTESEAESSSGGELDDAFRAARRLHRLFR TKSPAELSEEELFLSADE  
GPGEPEEPADWQTYREDENFVCIRFESLAEARQAVTCFRNMFATMGIGVEISLGEQGRGVEMRIGKVAPTVT  
PAVPLAKTPGLQTSDAAPVFLTELQNDVDQGYPMSFDCVVTGQVPVSVRWFKDGKLEEDDHYMINEDQQGG  
HQLIITAVVPADMGYRCLAEENSMGVSSSTKAELRVELTSTDYDTAADATETSSYFSAQGDYSSREQEGETSDE  
GQLPQVLEELKDLQVAPGTRLAKFQLKVKGYPAPKLYWFKDGGQPLTTSDHIRMTDKKTLH TLEIVSVTREDSG  
QYAAYSNAVGAAYSSARLLVRGPSEPEEK PASDVHERLVPRILEKFTPKKV KRGSSITFSVKVEGHPAPSV  
HWLKEEA EKGV LWIGPDTPGYTMASSSKQHSVLVLDVGRQHOGTYTCIATNPAGQALCSASLHISGLAKEEEQ  
ERVKEALISSFLQGTSAVSAQMSAESAGFADLVGQSKGESLVAEEAHSHLSLAEVGT EEFLOKLTQSIT EMVS  
AKISQAKLQVPGGDSDEETKTPSASPRHGRSRPSSSVQESSSEEDGDSRGEIFDIYVVTADYLP LGAEQDAI  
ILREGQYVEVLD SAHPLRWLVRTKPKSSPSRQGWVSPAYLDKRLKLSPEWGPTEAPEFPGEAVSEDEYRTRL  
SSVIQELLSSEQAFVGELOFLESHHMKHLERSPRVPAVASQKTVIFRNVQDISHFHSSFLKELQCGCTDDD  
AMCFIKNQEAFAEKYLELFLVGRVQAESVVVSTPVQEFYKKAEEETLSAKDPTQPPPPPLQHYLEQVVERVQKYQ  
ALLKELIRSKARNRNCALLEQAYAVVSALPQRAENKLHVSLMENYPGTLEALGEP I RQGHFIWEGAPGARM  
PWKGHNHRVFLFRNYLVICPRRDSRTD TFSYVFRNMMLSSIDLNDQVEGD DRAFEVWHEREDSVRKYLLQA  
RTVI IKNSWVKEICGIQORLAPVWRPPEFEEELADCTAELGETVKLACRVTGT PKPIVSWYKDGKPV EVDPH  
HILIEDPDG SCTLILDNLTGIDSGQYMCFAASAAGNASTLGKILVQVPPRFVNVKVRATPFVEGEDAQITCTVE  
GAPYQIRWYKDG TLLAPGNRYRMLNPRSGVLV LVIQAASKEDLGHYEC ELVNRLGSTRGGGEL YMQSPALR  
ARDQHHRQIVAAVEDTSVEGSAHSAQDGADQQAASVLWRLLGSEALGPS PGDLPNTRQSEPPAFEEAASQIP  
GAASGTP EVSQPGTHKGLEQETTSSGSQGWTVPIRVEGTAWPGAGTGQ LLLDVHVSQVIMETTQR TYVCQAPDT  
GVTRAPSMQVTIEDVQVQVGDMAQF DAVIEGHPPP IVTWYKGSTQLTSSARLSQRQDGT TYSLVLT DVAPHDA  
GVYTCVANNAGGQVLCKAELLVHGDKLDAENQVYRRKLHSFYDVQEE IGRGVFGFVKRVQHKGNMFC AAKF  
IPLRSKTRAQAYQYRIDLATLGHPLVTGLLDQFETRKTLLIILELCSSEELLDRLFKKG VVTEAEVKVYIQQL  
VEGLHYLHSHGILHLDIKPPN ILMVHPAREDIKICDFGFAQK ITPSEPQYSKYGSPEFVSPEIIEQN PVSEGS  
DIWAMGVISYLSLTCS SPPFAGESDRATLLNVLEGRVSWSSPTAAHLS EDAKDFIKATLQRTPRARPSTSQCLA  
HPWFLKSMPAEEAHFINTKQLKFLARSRWQRSLMSYKSI LVMRSIPELLQGPDPSPSLGVARHLRGEASGAS  
SSSSSSDNELAPFARAKSLPPSPVTHSPLLHPRGFLRPSASLPEETEASMP TADA AVPASQPASGPPASPGCV  
PRHSV ISSLFYQQAGEGA ERGNKTSGAKRHPARRRHLLKGGYIARALPGLREPLMEYSLLEEEAAREEQASIM  
TKTPSFETALRLPSSSVREVPGRSHSLDNPPVTGSPPEACKEQLLFPSTGLTHE TTAKDRGHKEGFLQESV  
PFPMSGDSRPGKQEGSSQDSRCRGPASSCHSELGSGSQEGCGPPSSQSLGSLPPQSLKKELSTSCGPLFSEQ  
PQAAFPTQVSPLLGKEPEQDGSLEGPVPPSSSPGASQVDASLDTEGLESEAGDTCDFTPPPQR PQEQAT  
TRKFSLESRGGYAGVAGYGTFAFGDAGGMLGQGPLWARMAVAWSQSSEEQDEAATESQPLES LGPIAEASG  
VPLRTSPSLTPWEEVEQVSLVQIRDLSGDAEAADTISLDISEVDPAYLNLSDLYDIKYL PFEFMI FRRVPKPI  
EQPESPGSETEAGQGLADFL EEAAPWPPELGLRAGLEITEEPEEPGDLEALLGEEAAVGRKRKWSPSRGLFQF  
PGRCLSGEEPVELGLRQRVKASMAHISRILKGRPEGPEREPPRKKAGLASFRLSGLKGRDQELSDEAVVLGQ  
SVTLACQVLAQPTAQTWSKDGVLLESSGHLLISSTLKNFQLLTI LVVKEEDLGTYTCCVSNPLGTA VTTGVL

RKAERPSSSPRPEVGEELYKDAVLLVWKPVESCGPVTYIVQCCIEGGSWTTLASDISDCCYLTGKLSRGGMYIF  
RTACVSKAGMGPISSPSEQVLLGGPNHLASEEESSRRGPAQLLPSTKTFAFQMQIRRRGRFSVVRQCREKASGR  
ALAAKIVPYQPEDKTAVLREYEALRHLHHPHLAQLHAAYLSPRHLVLI LELCSGPELLPSLAERESYSESDVK  
DYLWQMLSATQYLHAQHILHLDLRSNNMMVTEYNLLKVIDLGNALDQEKVPAPENFKDYLETMAPELLEGG  
GAVPQTDIWAIGVTAIFIMLSGEY PESSSEGTRDLQKGLRKLIRLSRCYAGLSGGAVAFLOSSLCAQPWGRPCA  
STCLQCGLWTEEGPTGSRPTPVTFPTVRLRAVFREREKRRALLYKKNLAQVR\*  
>rs26971834\_ENSMUSP00000038264\_c.18232:A>G\_p.N6078S  
ENSMUST00000047441.14|Obscn-202|ENSMUSG00000061462|-|chr11:g.58920178:T>C  
MDHSFSGAPRFLTRPKAFVVSVGKDATLSCQIVGNPTPHVSWEKDRQPVEAGARFRLAQDGDVYRLTILDLAL  
GDSGQYVCRARNAIGEFAAVGLRVDSEGTCAEQAPHFLLRPTSIRVREGADATFRCRVGGSPQPAVSWSKDG  
RRLGPPDAPHVRVEEHGESSALRIRSARPRDGGTYEVRAENPLGSASAAAALVVDSDAEVAGPPGTSTATLLA  
HLQORREAMRAEGIPSPPGAGTRTCTVTEGKHARLSCFVTGEPKPEVWKKDQGLVTEGRRHVVEDEQENF  
VLKILFCKQSDRGLYTCTASNLVGQTYSSVLVVVREPTVPFKKRLQDLEVREKESATFQCEVAQPAEAAWFK  
EETRLWASAKYDIEEGETERRLTVRNVSADDDAVYICETTEGSRVVAELSVQGNLTKLPRKTAVRTGDTAIF  
WVELAVPEGPVRLRNQEEMVAGGRVAITAEGTCHTLTI FQCTLEDMGEVAFVSGGCRTTTQFCVSAPRRPPL  
YPPADPVVAKTESVTLWSAPPHGDRPVTIDGYVLEKRLKLAGAYAWSRCHEAGWLATTEFTITGVAEEGDFQ  
FRVSAINHFGQGPYLEFPGTMHLVPLAVKTPKAVEAVEGGEVTFVSDLTVAASSGEWFLDGEALKASSIYVI  
RCDRTRHMLTIREVPARLHGAQLKFEVANGIETS IQMVVRAALGLPSSKLPAAAAREVLAQLHEEAQLLAE LSD  
QAAA VTLWKDGRELSLGPKEYMQVSAGRRALLVRDVAQDDAGLYECVSRGSRRTAYQLLVQDITDGYRDWGPAG  
PQKHMCKCAGAKIARYLGSSCYRFLQYDKGVWHLEAALDTRQKGTSSCSLHEKPKLVFAKQQAHSEVKA  
AGASATLSCEVAQAQTEVTFWFKDGKLSSSSKVRMEASGCSRRLVVQQAGKADAGEYSCEAGGQKLSFRLDVA  
EPKMFVFAKEQQARSEVKAEGASATLSCEVAQAQTEVTFWFKDGKLSSSSKVRMEASGCSRRLVVQQAGKAD  
GEYSCEAGGQKLSFRLDVTEPKLVFAKEQQARSEVKAEGVNSATLSCEVAQAQTEVTFWFKDGKLSSSSKVRM  
EASGCSRRLVVQQAGKADAGEYSCEAGGQKLSFRLDVAEPKLVFAKEQQARSEVKAEGNSATLSCEVAQAQ  
EVTWFKDGKLSSSSKVRMEASGCSRRLVVQQAGKADAGEYSCEAGGQKLSFHLDVTEPKLVFAKEQQAHSE  
KAEAGASATLSCEVAQAQTEVTFWFKDGKLSSSSKVRMEASGCSRRLVVQQAGKADAGEYSCEAGGQKLS  
DVAEPKLVFAKEQQARSEVKAEGASATLSCEVAQAQTEVTFWFKDGKLSSSSKVRVEASGCSRRLVVQQAGK  
ADAGEYSCEAGGQKLSFRLDVAEPKLVFAKEQQANSEVKAEGASATLSCEVAQAQTEVTFWFKDGKLSSSSK  
VRVEASGCSRRLVVQQAGKADAGEYSCEAGGQKLSFRLDVAEPKLVFAKEQQAHSEVKAEGASATLSCEVAQ  
AQTEVTFWFKDGKLSSSSKVRVEASGCSRRLVVQQAGKADAGEYSCEAGGQKLSFRLDVAEPKLVFAKEQQAH  
SEVKAEGASATLSCEVAQAQTEVTFWFKDGKLSSSSKVRVEASGCSRRLVVQQAGKADAGEYSCEAGGQKLS  
FRLDVAEPKLVFAKEQQAHSEVKAEGASATLSCEVAQAQTEVTFWFKDGKLSSSSKVRVEASGCSRRLVVQQ  
AGKADAGEYSCEAGGQKLSFRLDVAEPKLVFAKEQQAHSEVKAEGASATLSCEVAQAQTEVTFWFKDGKLS  
SSKVRVEASGCSRRLVVQQVQKADAGEYSCEAGGQKLSFRLDVAEAEESQIPERPSRREPLVKEHETIILTAT  
IAAPSVAAVTWLKDGVEIRRSKRHEATSLGDTHLTVRGAQVLD SAIYSCRVGKEGQDFPVQVEEVAKF SKP  
LEPVEGELGGTVMLVCELSPEQAEEVWRCGNTQLRPGKRFQMTSEGPRTTLTVSGLREDDAEYVCE SRDDRT  
SARLTVKVPVVKFTSGLSAMVAEEGQEATFQCVVSPSDAGVTWYKDGMLQPSSEKFMVMEVSGASRSLTILGL  
TLEDAGQVTVAEAGASSAALRVREAPVLFKKKLEPQTVERTSVTLEVELTRPWPVEVKWTRNAAVLTPSENV  
EIRAEGARHCLVLRVGFADRGFFGCETPDDKTQAKLVNEMRQVRLVRLQVEVEAKEQGTASMDVELSHAEVE  
GSWTRDGLRLQPGPKCHLAVQGPVHILTL SALQPQDSGLVAFRAEGVHTSARLIVTEL PVSFTRVLQDVVATQ  
KEKVTLECELSRPVDVRLKDGVELRAGKAIGIVAQGTCSRSLVIYRCETGDQGVYVCDALDAQTSASLRVQGR  
TYTLIFRRVLAEDAGEVKFVAENAESRAHLRVKELPVTLLRPLRDKIAMEKHRGVLEQCQVSRASAQVRWFKGG  
VELQSGPKYEVVSDGLYRKLVIINDVQPEDEDTYTC DAGNVKTSAQFFVEEQSITIVRGLKDMTVMEPAPAWFE  
CETSIPSVRPPKWLGLKTVLQAGGNVLEQDGTVHRLTLHKTCSTMTGVPVHFTIGKSRSSAQLVVS DIPVLT  
RPLEPKAGRELQSVVLSCDFRPAPKAVQWYKDDTPLSPSEKFKMALEGQMAELRILRLTPADAGVYRCQAGSA  
QSSAEVTVAREVTVIQPLQDAEAMEEGRVCFSCELSHKDEDIEWSLNGTPLYNDSFHEISHEGLHTLVLKS  
VRQADTGTVCATSPKVSVSARLVVKGKPVVFLKALDDVSAEERGTTLQCEVSDPEARVVWRKDGVELGPSDK  
YDFLHKAGARGLTVHDLSDHEDAGLYTCQVGSKETQSKVSVHDLHVGITKRLKTVEVLEGESECFEVLSP  
SDPAVWTVGGKTVGGSGHFHAVRQGRKYTLTVKDAALSDAGEVVFVSLGLTSKASLIIRERPVDTKPLEDQR  
TTLGEDVMLSCELSRAGTSVRWLKDGKAIKRSQKYDLLSEGTRAVLVVRKASLKDSGEYTCETEASKSTAKLC  
VEEKANRFTEELADLQVEEKGRAVFTCKTEHPASVVTWRKGLLELRASGKHVPSQEGTLTKLTINALERTDSD  
TYTCDIGQARTQARLLVHGQKVRVIEDLEDTAVQEGSSAKFCCRIPADYGPVHWFLLDKTPLHSNELNEITVQ  
PGGYHVLTLRQLALKDSGTVYFEAGDQRTSAALRVTEKPIFSRPLTDVTVTEGEDTLVCE TTTVDSSVRWT  
KDGTTLRPSARQLSHEGCAQLLITATTPQDGGRYKECIGGASSSIVRVHALPVRFRESLTKDVEVPEGKAA  
TLRCVLSSVAAPVWRHGDVLSNKNYSRLRQEGAVLELVIRDLQPDQSGYSCSFGDQTTSATLTVKTS SAQ  
FVGKLRNKEATEGTTVTLRCELTKEAPVEWKKGTETLRNGDKYSLKQDGA VCELQICSLLVADAGEYSCVCGQ  
EKTSATLTVKALLVHFVRRRLRSKEATEGDTTTLQCELSKAAPVEWRKGTETLRDGDYSLKQDGA VCELQIRS  
LTIADAGEYLCTCGQEKTSATLTVRALPAKFKDSLKNEEATEGTTATLSCELSKAAPVTWKKGPKTLQSGDKY

VLRQDGA VCG LQIHGLTMADAGEYSCVCGQEKTSATLTVRGLPAKFIEDLRSQEATEGATAILRCELSKAAPV  
 EWRKGSETLTKDGD RYTLRQDGA VCELQIRGLAVVDGTYS SLP TKFTEGLRNEEATEGTMATLRCQMSKAAPV  
 EWRKGSETLRDGD RYSLRQDGA MCELQIRGLTIEDS GEYTCVCGQEKTSATLSVKALPPRFIEDLRSQEATEG  
 TMATLRCQMSKAAPVEWRKGSETLGDGG RYSLRQNGAVCELQIHDLAVEDTGEYSCVCGQEKTSATLNVKALP  
 PRFIEDLRSQEATEGTMATLRCQMSKAAPVEWRKGSETLRDGG RYSLRQDGA VCELQIHDLDVD EAGQYSCVC  
 GQEKTSAVLTV DALPPKFTEGLKKEEATEGTMVTLRCQMSKEATVEWRKGAKT LSDGG RYSLRQDGA MCELQI  
 CGLAVEDAGEYSCVCGQEKTSATLSVKALPPRFIEDLRSQEATEGTMATLRCQMSKAAPVEWRKGSKT LRDGD  
 RYSLRQDGA MCELQICDLAVEDTGDYSCVCGQEKTSATLSVKAPQVVFQOPLQNLQAEEGSMASLRCELSVFN  
 AAMVWSKGGLELQGDTRREARQQGCVAELLLRD LRREDAGEYSC TCGSQTTSATLMVTAAPVRFLELQAQDV  
 DEGATARLRCELSREAVSVEWRKGS LQ LFP CAKYQMVQEGTTAE LLVHGVEQEDAGEYTCDAGHTQS IARLSV  
 RAPKPKFKTDLQSTEQEAGGTARLCCQLSEAE PGTPVQWLKEGVELHVGSKYEMRRQGA VCELLIHGLEAKDT  
 GEYA CLVGGQKT LASLRVKEPEVTIVRGLVDM EVQADEDFEFTCKV SQAGATDVQWHLQGLPLQSN EVTEVAV  
 LADGCTHVLQ LKGV TLEDAGTVS FHV GGLSSSAQLTVRVPEVTVLE PLKDVQLSEGD AHFRCRLSRASGQEA  
 RWALGGVPLQC NEMNDITVEQGTLYLL TLHKVTLEDAGTITLQV GSCSSEAQLKVTAKNTVLRGLE NVDAL E  
 GEALFECQLSQPEVA AHTWLLDDEPVHTSEKVEVVYFENGLRHLLLLLKNLKPQDSCRVTFLAGDVVTS AFLT  
 V RALPDPPEDAEVVGRSDHSV TLSWVAPMSDGGGGLCGYRVEMKEASTGQWQLCHDLVPGPECVDDLVPGKTY  
 RFRVA AVGPAGAGEPRVHLPQWVKIAPAPAPAPAPAPAPAPETRAVVGEDICLELEVAADGGEV VVHKGTERI  
 QPGGHFEVL SRGQRQMLVIKGFRTEDQGEYRCGPIQGLPSSGAATFNVMVTSGSGDEVPAPQPSLPPEAAQEGD  
 LLLLWEALARKRRMSREPTLDSISELPEEDSRVQH LRQEAEEETAPDLSEGYSTADELARTGEADLSHTSSDDE  
 SRAGTPSLVTYLK KAGGPGISPLASKHEAQVTT SVKPKQKQPEVPTCPPPGDL S AADLMDPSLDKAAVKIQ A  
 AFKGYKVRKEMKQOEGPVFSRTFGDTEAQVGDVLRLECVLATKTDMRACWLDGIELTDGRHYHIDQLKDGTC  
 SLLVTGLAPTDSGRYTCQVSTKSGRVSHSACVVVSGTESEAESSSGGELDDA FRRAARRLHRLFR TKSPAELS  
 EEELFLSADEGPGEPEPADWQTYREDENFVCIRFESLAEARQAVTCFRNMFATMIGIVEISLGEQGPRGVEM  
 RIGKVAPTVTPAVPLAKTPGLQTSDAAPVFLTELQNDVQDGYPMSFDCVVVTGQPVPSVRWFKDGK LLEEDDH  
 YMINEDQGGHQLIITAVVPADMGVYRCLAENSMGVSSTKAE LRVELTSTDYDTAADATETSSYFSAQGYLSS  
 REQEGTESDEGQLPQVLEELKDLQVAPGTRLAKFVKVYKVPAPKLYWFKDQGPLTSDHIRMTDKKTLHTLE  
 IVSVTREDSGYLQYAAYSARLLVRGPSEPEEK PASDVHERLVPPRILEKFTPKKVRGSSITFSV  
 KVEGHPAPSVHWLKEEA EKGV LWIGPDTPGYTMASSKQHSLVLLDVG RQH QGYTTCIATNPAGQALCSASLH  
 ISGLAKEEEQERVKEALISSFLQGTSQAVSAQMSE SAGFADLVGQSKGESLVAE EAHSHLSLAEVGT EEF LQK  
 LTSQITEMVSAKISQAKLQVPGGDSDEETKTPSASPRHGRSRPSSSVQESSSESEDGDSRGEIFDIYVV TADY  
 LPLGAEQDAIILREGQYVEVLDSAHPLRWLVRTKPTKSSPSRQGWVSPAYLDKRLKLSPEWGPTEAEPFPGA  
 VSEDEYRTRLSSVIQELLSSEQAFV GELQFLESHHMKHLERSPRVPAAVASQKTVIFRNVQDI SHFSSFLKE  
 LQCGCTDDD VAMCFIKNQEA FEKYLEFLVGRVQAESV VVSTPVQEFYKKYAEETLSAKDPTQPPPPPLQHYLE  
 QPVERVQKYQALLKELIRSKARNRQNCALLEQAYAVVSALPQRAENKLHVSLMENYPGTLEALGEPIRQGHFI  
 VWEGAPGARMPPKGNHRHVFLFRNYLVICKPRRDSRTDTFSYVFRNMMKLSSIDLNDQVEGDDRAF EVWHERE  
 DSVRKYLLQARTVIKNSWVKEICGIQORLAQPVWRPPEFEEELADCTAELGETVKLACRVTGTPKPIVSWYK  
 DGKPV EVDPHHILIEDPDG SCTLILDNL TGIDSGQYMCFAASAAGNASTLGKILVQVPPRFVNVKVRATPFVEG  
 EDAQITCTVEGAPYPQIRWYKDGTL LAPGNRYRMLNEPRSGV LVLV IQAASKEDLGHYECELVNR LGSTRGGG  
 ELYMQSPALRARDQH HREQI VAAVEGAPSMQVTIEDVQVQVGDMAQF DAVIEGHPPP IVTWYKGTQLTSSAR  
 LSQRQDGTYSLVLT DVA PHDAGVYTCVANNAGQV LCKAELLVHGGDKLDAENQVYRRLKHSFYDVQEEIGR  
 GVFGFVKRVQHKG NKM FCAAKFIPLRSKTRAQAYQERDILATLGHPLVTGLLDQFETRKTLLILLELCSSEEL  
 LDRLFKKGVVTEAEVKVYIQQLVEGLHYLHSHGILHLDIKPPNILMVHPAREDIKICDFGFAQKITPSE PQYS  
 KYGSPEFVSP EIEQNPVSEGSDIWAMGVISYLSLTCSSPFAGESDRATLLNVLEGRVSWSSPTAAHLS EDAK  
 DFIKATLQRTPRARPSTSQC LAHPWFLKSMPEAEAHFINTKQLKFL LARSRWQRSLMSYKSI LMVRSIP ELLQ  
 GPPDSPSLGVARHLRGEASGASSSSSSDNELAPFARAKSLPPSPVTHSPLLHPRGFLRPSASLPEETEASMP  
 TADA AVPAS PQSAGPPASPGCVPRHSV ISSLFYQQAGEGA ERGNKTS GAKRHPARRRHLKGGYIARALPGLR  
 EPLMEYSLLEEEAAREEQASLMTKTPSFETALRLPSSSVREV PGRSHSLDNPPVTTGPSPEACKEQLLFPST  
 GLTHE TTA KDRGHKEGFLQESVFPFPPMSGDSRP GKQEGSSQDSCRGKPASSCHSELGSGSQEGCGPPSSQSLG  
 SLPPQSLKKE LSTSCGPLFSEQPQA AFPPTQVSP LLGSEKEPQDGS LSEGVPVPSSSPGSASQV DASLDTEG  
 LSEAGDTCDFTPPPQR PQEQATTRKFSLESRGGYAGVAGYGTFAFGGDAGGMLGQGPLWARM AVQSSEEQ  
 DEAAATESPQPLESLGPIAEASGVPLRTSPSLTPWEEVEQVSLVQIRDLSGDAEAAADTISLDISEVDPAYLNLS  
 DLYDIKYL PFEFMI FRRVPKPIEQPESPGSETEAGQLADFL EEAAPWP GELGLRAGLEITEEPEEPGDLEA  
 LLGEAAKGRKRKWSPSRGLFQFPGRCLSGEEPVELGLRQRVKASMAHISRILKGRPEGEREPGRPKKAGLAS  
 FRLSGLKGRDQELSDEAVVLGQSVTLACQVLAQPTAQATWSKDG VLESSGHLLISSTLKNFQLLTI LVVKEE  
 DLGTYTCCVSNPLGTA VTTGVL RKAERPSSPRPEVGE LKDAVLLVWKPVE SCGPVTYIVQCCIEGGSWTTL  
 ASDISDCCYLTGKLSRGGMYIFRTACVSKAGMPYSSPSEQVLLGGPNHLASEEESSRGRPAQLLPSTKTFAF  
 QMQIRGRFSVVRQCREKASGRALAAKIVPYQPEDKTAVLREYEAL KRLHHPHLAQLHAAYLSPRHLV LILEL  
 CSGPELLPSLAERESYSESDVKDYLWQMLSATQYLHAQHILHLDLRSENMMMVTEYNLLKVIDLGNASLDQEK

VPAPENFKDYLETMAPELLEGQGAVPQTDIWAIGVTAIFIMLSGEYPESSEGETRDLQKGLRKLIRLSRCYAGL  
SGGAVAFLOSSLCAQPWGRPCASTCLQCGWLTEEGPTGSRPTPVTFTVRLRAFVREKRRALLYKXHNLAQ  
VR\*

>rs26971834\_ENSMUSP00000049737\_c.20191:A>G\_p.N6731S

ENSMUST00000052872.15|Obscn-203|ENSMUSG00000061462|-|chr11:g.58920178:T>C  
MDHSFSGAPRFLTRPKAFVSVGKDATLSCQIVGNPTPHVSWEKDRQPVEAGARFRLAQDGDVYRLTILDLAL  
GDSGQYVCRARNAIGEFAAVGLRVDSEGTCAEQAPHFLLRPTSIRVREGADATFRCRVGSGPQPAVSWSKDG  
RRLGPPDAPHVRVEEHGESSALRIRSARPRDGGTYEVRAENPLGSASAAAALVVDSDAEVAGPPGTSTATLLA  
HLQQRRREAMAEGI PPSPPGAGTRTCTVTEGKHARLSCFVTGEPKPEVWKKDQQLVTEGRRHVYDEQENF  
VLKILFCKQSDRGLYTCTASNLVGGQTYSSVLVVVREPTVPFKKRLQDLEVREKESATFQCEVAQPATEAAWFK  
EETRLWASAKYDIEEEGETERRLTVRNVSADDDAVYICETTEGSRVVAELSVQGNLTKLPRKTAVRTGDTAIF  
WVELAVPEGPVWRWRNQEEMVAGGRVAITAEGTCHTLTI FQCTLEDMGVAFVSGGCRTTTFQFCVSAPRRPPL  
YPPADPVVKAKTESSVTLWSAPPHGDRPVTIDGYVLEKRKLGAYAWSRCHEAGWLATTEFTITGVAEEGDFQ  
FRVSAINHFGQGPYLEFPGMTMLVPLAVKTPKAVEAVEGGEVTFVSDLTVASSGEWFLDGEALKASSIYVI  
RCDRTRHMLTIREVPARLHGAQLKFVANGIETSIQMVVRAALGLPSSKLPAAAAAREVLAQLHEEAQLLAE LSD  
QAAA VTLKDGRELSLGPYEMQVSAGRRALLVRDVAQDDAGLYECVSRGSRRTAYQLLVQEPKLVFAKQQAH  
SEVKAEGNSATLSCEVTQAQTEVTWFKDGKLLSSSSKVRMEASGCSRRLLVVQQAGKADAGEYSCEAGGQKLS  
FRLDVAEPKLVFAKQQAHSEVKAEGASATLSCEVAQAQTEVTWFKDGKLLSSSSKVRMEASGCSRRLLVVQQ  
AGKADAGEYSCEAGGQKLSFRLDVAEPMVFQARSEVKAEGASATLSCEVAQAQTEVTWFKDGKLLSS  
SSKVRMEASGCSRRLLVVQQAGKADAGEYSCEAGGQKLSFRLDVTEPKLVFAKQQARSEVKAEGNSATLSCE  
VAQAQTEVTWFKDGKLLSSSSKVRMEASGCSRRLLVVQQAGKADAGEYSCEAGGQKLSFRLDVAEPMVFQAR  
QARSEVKAEGNSATLSCEVAQAQTEVTWFKDGKLLSSSSKVRMEASGCSRRLLVVQQAGKADAGEYSCEAGGQ  
KLSFHLVDVTEPKLVFAKQQAHSEVKAEGASATLSCEVAQAQTEVTWFKDGKLLSSSSKVRMEASGCSRRLLV  
VQQAGKADAGEYSCEAGGQKLSFRLDVAEPMVFQARSEVKAEGASATLSCEVAQAQTEVTWFKDGKLL  
LSSSSKVRMEASGCSRRLLVVQQAGKADAGEYSCEAGGQKLSFRLDVAEPMVFQARSEVKAEGASATLS  
CEVAQAQTEVTWFKDGKLLSSSSKVRMEASGCSRRLLVVQQAGKADAGEYSCEAGGQKLSFRLDVAEPMV  
KEQQAHSVKAEGASATLSCEVAQAQTEVTWFKDGKLLSSSSKVRMEASGCSRRLLVVQQAGKADAGEYSCEA  
GGQKLSFRLDVAEPMVFQARSEVKAEGASATLSCEVAQAQTEVTWFKDGKLLSSSSKVRMEASGCSR  
RLVVQQAGKADAGEYSCEAGGQKLSFRLDVAEPMVFQARSEVKAEGASATLSCEVAQAQTEVTWFKD  
GKLLSSSSKVRMEASGCSRRLLVVQQAGKADAGEYSCEAGGQKLFRLDVAEPMVFQARSEVKAEGAS  
ATLSCEVAQAQTEVTWFKDGKLLSSSSKVRMEASGCSRRLLVVQQAGKADAGEYSCEAGGQKLSFRLDVAEPMV  
VFAKQQAHSEVKAEGASATLSCEVAQAQTEVTWFKDGKLLSSSSKVRMEASGCSRRLLVVQQVQKADAGEYS  
CEARGQKLSFRLDVADTRLMFAKQQARTEVKAEGNSATLSCEVAQAQTEVTWFKDGKLLSSSSKVRMEASG  
CSRLLVVQQAGKADAGEYSCEAGGQKLSFRLDVAEAEESQI PERPSRREPLVVKEHETIILTATIAAPSVAAVT  
WLKDGEVIRRSKRHEATSLGDTHLTVRGAQVLDLSAIYSCRVGKEGQDFPQVVEEVAAKFSKPLEPVEGELGG  
TVMLVCELSPEQAQEVVWRCGNTQLRPGKRFQMTSEGRRTTLTVSGLREDDAEYVCEESRDRDTSARLTVKVP  
VVKFTSGLSAMVAEEGQEAFTQCVVSPSDAGVTWYKDGMLQLPSEKFMVMEVSGASRSLTILGLTLEDAGQVTV  
EAEGASSAALRVREAPVLFKKLEPQTEERTSVTLEVELTRPWPEVKWTRNAAVLTPSENVEIRAEGARHC  
LVLRSVGFADRGFFGCETPDDKTQAKLNVEMRQVRLVRLQVEEAKQGTASMDVELSHAEVEGSWTRDGLRL  
QPGPKCHLAVQGPVHILTLALSALQPQDSGLVAFRAEGVHTSARLIVTELPSFTRVLQDVVATQKEKVTLECEL  
SRPVDVRLKDGVELRAGKAI GIVAQGTCSRSLVIYRCETGDQGVYVCDALDAQTSASLRVQGRTYTLIFRRVL  
AEDAGEVVFVAENAESRAHLRVKELPVTLLRPLRDKIAMEKHRGVLECVSRASAQVRWFVGGVLELQSGPKYE  
VVSDGLYRKLVINVDVQPEDEDYTC DAGNVKTSAQFFVEEQSITIVRGLKDMTVMPEPAPAWFECETSIPSVRP  
PKWLLGKTVLQAGGNVLEQDGTVHRLTLHKTCSTMTGPVHFTIGKSRSSAQLVVS DIPVVLTRPLEPKAGRE  
LQSVVLSCDFRPAKAVQWYKDDTPLSPSEKFKMALEGQMAELRILRLTPADAGVYRCQAGSAQSSAEVTVEA  
REVTVIQPLQDAEAMEEGRVCFSCELSHKDEDIEWLSLNGTPLYNDSFHEISHEGCLHTLVLSVRQADTGTVC  
ATSPKVSVSARLVVKGKPVVFLKALDDVSAEERGTLLTQCEVSDPEARVVWRKDGVELGSPDKYDFLHKAGAR  
GLTVHDLSDHEDAGLYTCQVGSKETQSKVSVHDLHVGITKRLKTEVLEGESECFECVLSHESPSDPVAVTVGG  
KTVGGSGHFHAVRQGRKYTLTVKDAALSDAGEVVSFVGLTSLKASLIIRERPVDITKPLEDQRTTLGEDVMLS  
CELSRAGTSVRWLKDGKAIKRSQYDLLSEGTRAVLVVRKASLKDSGEYTCETEASKSTAKLCVEEKANRFT  
ELADLQVEEKGRAVFTCKTEHPASVVTWRKGLLELRASGKHVPSQEGTLTKLTINALERTDSDTYTCDIGQAR  
TQARLLVHGQKVRVIEDLEDTAVQEGSSAKFCRIAPADYGPVHWF LDKTPLHSNELNEITVQPGGYHVLT  
QLALKSHGCTVYFEAGDRTSAAALRVTEKPSIFSRPLTDVTVTEGEDTLVCEETTVDSSVRWTKDGKTLRPSA  
RCQLSHEGQAQLLITATTPQDGGRYKCEIGGASSSIVRVHALPVRFRRESLKDVEVPEGKAATLRCVLSVA  
APVEWRHGDDVLSNKYSLRQEGAVLELVI RDLQPDQSGQYSCSFGDQTTSATLTVKTTSAQFVGLRNKEA  
TEGTTVTLRCELTKAEVWKKGTETLRNGDKYSLKQDGA VCELQICSLLVADAGEYSCVCGQEKTSATLTVK  
ALLVHFVRRRLRSKEATEGDTTTLQCELSKAAPVEWRKGTETLRDGDYSLKQDGA VCELQIRSLTIADAGEYL  
CTCGQEKTSATLTVRALPAKFKDSLKNEEATEGTTATLSCELSKAAPVWKKGPKTLQSGDKYVLRQDGA VCG

LQIHGLTMADAGEYSCVCGQEKTSATLTVRGLPAKFIEDLRSQEATEGATAILRCELSKAAPVEWRKGETLKD  
 DGDRYTLRQDGA VCELQIRGLAVVDGTYSLSLPTKFTTEGLRNEEATEGTMATLRCQMSKAAPVEWRKGETLKD  
 DGDRYSLRQDGA MCELQIRGLTIEDSGEYTCVCGQEKTSATLSVKALPSRFIEDLRSQEATEGTMATLRCQMS  
 KTAPVEWKKGSETLRDGGRYSLRQDGPVCELQICDLAVEDAGEYSCVCGQEKTSATLSIKALPPRFIEDLRSQ  
 EATEGTMATLRCQMSKAAPVEWRKGETLGDGGRYSLRQNGAVCELQIHDLAVEDTGEYSCVCGQEKTSATLN  
 VKALPPRFIEDLRSQEATEGTMATLRCQMSKAAPVEWRKGETLRDGGRYSLRQDGA VCELQIHDLVDVEDAGQ  
 YSCVCGQEKTSAVLTVDALPPKFTEGLKKEEATEGTMVTLRCQMSKEATVEWRKGA KTLS DGGRYSLRQDGA M  
 CELQICGLAVEDAGEYSCVCGQEKTSATLSVKALPPRFIEDLRSQEATEGTMATLRCQMSKAAPVEWRKGET  
 LRDGGRYSLRQDGA VCELQIRDLAVEDAGEYLCVCGQEKTSATLSVKALPPRFIEDLRSQEATEGTMATLRCQ  
 MSKAAPVEWRKGSKTLR DGGRYSLRQDGA MCELQICDLAVEDTGDYSCVCGQEKTSATLSVKALPPRFIEDLR  
 SQEAREGTVATLRCRMSKAAPVEWRKGETLKDGGRYSLRQEGNLCELQIRDLAVEDTEEYSCVCGQEKTSAT  
 LSVKALPAKFIEDLRSQEAPESSTVTLRCKLSKKASVVWKKGSETLRNGARYSLRQDGA VCELEIRDLTVEDT  
 GEYSCTCGQERTSATLSIMAPQVVFQQPLQNLQAEEGSMASLRCELSVPNAAMVWSKGGLELQGDTRREARQQ  
 GCVAE LLLLRLDLREDAGEYSCTCGSQTT SATLMVTAAPVRFLRELQAQDVDEGATARLRCELSREAVSVEWRK  
 GSIQLFPCA KYQMVQEGTTAE LLLVHGVEQEDAGEYTC DAGHTQS IARLSVRAPKPKFKTDLQSTEQEAGGTAR  
 LCCQLSEAE PGTPVQWLKEGVELHVGSKYEMRRQGA VCELLIHGLEAKDTGEYACL VGGQKT LASLRVKEPEV  
 TIVRGLVDMVEVQADEVFTCKV SQAGATDVQWHLQGLPLQSN EVTEVA VLADGCTHVLQ LKGVTL EDAGTVS  
 FHVGLSSSAQLTVRVPEVTVLEPLKDVQLSEGD AHFRCLSRASGQEARWALGGVPLQCNEMNDITVEQGT  
 LYLLTLHKVTLEDAGTITLQV GSCSSEAQLKVTAKNTVLRGLENVDALEGG EALFECQLSQPEVA AHTWLLDD  
 EPVHTSEKVEVVYFENGLRHLLLLKNLKPQDSCRVTFLAGDVVTS AFLTVRGWRLEVL EPPHDASVKAGMQVR  
 FTCILSEAVPVGEATWYINGAAIQPDDTDWVT TTDGSHHALT LSNAPQHAGEVTF AARDAVASARLSVLALP  
 DPPEDAEVVGRSDHSVTL SWVAPMSDGGGGLCGYR VEMKEASTGQWQLCHDLVPGPECVVDLVP GKTYRFRV  
 AAVGPAGAGEPVHL PQMVKIAPAPAPAPAPAPAPAPETRA VVGEDIC LELEVAADGGEVVWHKGTERRIQPGG  
 HFEVLSRGRQMLVIKGFRTEDQGEYRCGPIQGLPSSGAATFNVM TSGSGDEVPAQP SLPPEAAQEGDLHLL  
 WEALARKRRMSREPTLDSISELPEEDSRVQHLRQEA EETAPDLSEGYSTADELARTGEADLSHTSSDDES RAG  
 TPSLVTYLKKAGGPGISPLASKHEAQVTT SVKPKQVLEQVFPVPTCPPGDLSAADLMDPSLKDAAVKIQAAFKG  
 YKVRKEMKQEGPVSRFTFGDTEA QVGDVLRLEKCTDMRACWLKDGIELTDGRHYHIDQLKDGTCSSLV  
 TGLAPTDSGRYTCQVSTKSGRVSHSACVVVSGTESEAE SSSGGELDDAFRRAARRLHRLFRTKSPAELSEEEL  
 FLSADEGPEPEEPADWQTYREDFV CIRFESLAEARQAVTCFRNMFATMIGIVEISLGEQGP RVEMRIGK  
 VAPTVPAPVPLAKTPGLQTS DAAPVFLTELQNDVQDGYPMSFDCVVTGQPVPSVRWFKDGLLEEDDHYMIN  
 EDQQGGHQLIITAVVPADMGVYRCLAENSMGVSSTKAELRVELTSTDYDTA ADATETSSYFSAQGYLSSRQE  
 GTESDEGQLPQVLEELKDLQVAPGTRLAKFQLKVKGY PAKLYWFKDGOPLTTS DHIRMTDKKTLHTLEIVSV  
 TREDSGQYAAYSNAVGAAYSSARLLVRGPSEPEEK PASDVHERLVP PPRILEKFTPKKVKRGS SITFSVKVEG  
 HPAPSVHWLKEEA EKGV LWIGPDPGYTMAS SSKQHS LVLVDVGRHQGT YTCIATNPAGQALCSASLHISGL  
 AKEEEQERVKEALISSFLQGT SQAVSAQMS EAGFADLVGQSKGESLV AEEAHSHLSLAEVGT EEFLOKLT SQ  
 ITEMVSAKISQAKLQVPGGDSDEETKTPSASPRHGRSRPSSSVQESSSESEDGDSRGEI FDIYVVTADYLP LG  
 AEQDAIILREGQYVEVLDSAHPLRWLVRTKPTKSSPSRQGWVSPAYLDKRLKLSPEWGPTEAPEFPGEAVSED  
 EYRTRLSSVIQELLSSEQAFV GELQFLES HMKHLERSPRVPA AVASQKT VIFRNVQDISHFHSSFLKELQGC  
 GTDDDVAMCFIKNQEA FEKYLEFLVGRVQAESVVVSTPVQEFYK KYAEETLSAKDPTQPPPPLOHYLEQ PVE  
 RVQKYQALLKELIRSKARNRQNCALLEQAYAVVSALPQRAENKLVSLMENYPGTLEALGEP IRQGHFIVWEG  
 APGARMPWKGHNRHVFLFRNYLVICKPRRDSRTDTFSYVFRNMMKLSSIDLNDQVEGD DRAFEVWHEREDSVR  
 KYLLQARTVI IKNSWVKEICGIQQRLAQPVWRPPEFEELADCTAELGETVKLACRVTGTPKPIVSWYKDGKP  
 VEVDPHHILIEDPDGSCTLILDLNLTGIDSGQYMCFAASAAGNASTLGKILVQVPPRFVNVKVRATPFVEGEDAQ  
 ITCTVEGAPYPQIRWYKDGTL LLAGPNRYRMLNEPRSGVLVLV IQAASKEDLGHYECELVNRLGSTRGGELYM  
 QSPALRARDQHHREQIVA AVEVTEQETKVPKKT VIEETITTVVKS PRGRRQSPGKSPSRSPRRSASPRRPG  
 LLAPERLYPPGTPSPRRLEVEQGRKAPVPALYVTEAEVHAPASQSQPKWLEVEETIEVRVKKTGSRGASPVRE  
 MTSRGE GILFTLPGGIPGRDPNANN SNNSVYQEA RTWGP AVVHVGE PFI FQVDSVGNVDWVAASPEPEQVRA  
 SQKEENTERQEGCS DGDENTFLMEEPQD TDSLQGRDPKIL THNGRVLT LADLEDYVPQEGE TFGCGDSTPSTP  
 DEPPCEVSVLQREI SEPTVGQPVL LNVRPPGTGATPSFFRPGSQVHSPESVSFLLREAWSGPVS AAWPTSSS  
 HTHVQSSVDGSHG SFKTEVSTQTVSFGAVGETVTLHIDPDGGEAPGPSQG\*  
 >rs26971834\_ENSMUSP00000020732\_c.20392:A>G\_p.N6798S  
 ENSMUST00000020732.13|Obscn-201|ENSMUSP00000061462|-|chr11:g.58920178:T>C  
 MDHSFSGAPRFLTRPKAFVSVGKDATLSCQIVGNPTPHVSWEKDRQFVEAGARFLAQDGDVYRLTILDLAL  
 GDSGQYVCRARNAIEGAFAAVGLRVDSEGTCAEQAPHFLLRPTSIRVREGADATFRCRVGGSPQPAVSWSKDG  
 RRLGPPDAPHVRVEEHGESSALRIRSARPRDGGTYEVRAENPLGSASAAAALVVDSDAEVAGPPGTSTATLLA  
 HLQORREAMRAEGIPSPPGAGTRTCTVTEGKHARLSCFVTGEPKPETVWKKDGQLVTEGRRHVVEDEQENF  
 VLKILFCKQSDRGLYTCTASNLVGQTYSSVLVVVREPTVPFKKRLQDLEVREKESATFQCEVAQPA TEAAWFK  
 EETRLWASAKYDIEEGETERRLTVRNVSADDDAVYICETTEGSRVVAELSVQGNLTKLPRKTAVRTGDTAIF



WVELAVPEGPVWRWRNQEEMVAGGRVAITAEGTCHTLTI FQCTLEDMGEVAFVSGGCRTTTQFCVSAAPRRPPL  
YPPADPVVKAKTESSVTLWSAPPHGDRPVTIDGYVLEKRKLGAYAWSRCHEAGWLATTEFTITGVAAEGDFQ  
FRVSAINHFGQGPYLEFPGTMHLVPLAVKTPKAVEAVEGGEVTFVSDLTVASSGEWFLDGEALKASSIYVI  
RCDRTRHMLTIREVPARLHGAQLKVFVANGIETSIQMVVRAALGLPSSKLPAAAAREVLQAQLHEEAQLLAEALS  
QAAAVTWLKDGRELSLGPYEMQVSAGRRALLVRDVAQDDAGLYECVSRGSRRTAYQLLVQDITDGYRDWGPAG  
PQKHMCKCAGAKIARYLGSSCYRFLQYDKGVWHLEAALDTRQGKGTSSCSLHEKPKLVFAKQQAHSEVKA  
AGNSATLSCEVTQAQTEVTFWFKDGKLLSSSSKVRMEASGCSRRLVVQQAGKADAGEYSCEAGGQKLSFR  
LDVAEPKLVFAKQQAHSEVKAEGASATLSCEVAQAQTEVTFWFKDGKLLSSSSKVRMEASGCSRRLVVQ  
QAGKADAGEYSCEAGGQKLSFRLDVTEPKLVFAKEQQARSEVKAEGVNSATLSCEVAQAQTEVTFWFK  
DGKLLSSSSKVRMEASGCSRRLVVQQAGKADAGEYSCEAGGQKLSFRLDVAEPKLVFAKEQQARSEV  
KAEAGNSATLSCEVAQAQTEVTFWFKDGKLLSSSSKVRMEASGCSRRLVVQQAGKADAGEYSCEAGGQ  
KLSFHL DVTEPKLVFAKEQQAHSEVKAEGASATLSCEVAQAQTEVTFWFKDGKLLSSSSKVRMEASG  
CSRRLVVQQAGKADAGEYSCEAGGQKLSFRLDVAEPKLVFAKEQQARSEVKAEGASATLSCEVAQAQTE  
VTFWFKDGKLLSSSSKVRMEASGCSRRLVVQQAGKADAGEYSCEAGGQKLSFRLDVAEPKLVFAKEQQ  
ANSEVKAEGASATLSCEVAQAQTEVTFWFKDGKLLSSSSKVRMEASGCSRRLVVQQAGKADAGEYS  
CEAGGQKLSFRLDVAEPKLVFAKEQQAHSEVKAEGASATLSCEVAQAQTEVTFWFKDGKLLSSSSK  
VRMEASGCSRRLVVQQAGKADAGEYSCEAGGQKLSFRLDVAEPKLVFAKEQQANSEVKAEGASATLS  
CEVAQAQTEVTFWFKDGKLLSSSSKVRMEASGCSRRLVVQQAGKADAGEYSCEAGGQKLSFRLDVAEP  
KLVFAKEQQAHSEVKAEGASATLSCEVAQAQTEVTFWFKDGKLLSSSSKVRMEASGCSRRLVVQQAG  
KADAGEYSCEAGGQKLSFRLDVAEPKLVFAKEQQAHSEVKAEGASATLSCEVAQAQTEVTFWFKDGK  
LLSSSSKVRMEASGCSRRLVVQQAGKADAGEYSCEAGGQKLSFRLDVAEPKLVFAKEQQAHSEVKA  
EGASATLSCEVAQAQTEVTFWFKDGKLLSSSSKVRMEASGCSRRLVVQQAGKADAGEYSCEAGGQK  
LSFRLDVAEPKLVFAKEQQAHSEVKAEGASATLSCEVAQAQTEVTFWFKDGKLLSSSSKVRMEASG  
CSRRLVVQQAGKADAGEYSCEAGGQKLSFRLDVAEPKLVFAKEQQAHSEVKAEGASATLSCEVAQAQ  
TEVTFWFKDGKLLSSSSKVRMEASGCSRRLVVQQAGKADAGEYSCEAGGQKLSFRLDVAEPKLVFAKE  
QQAHSEVKAEGASATLSCEVAQAQTEVTFWFKDGKLLSSSSKVRMEASGCSRRLVVQQAGKADAGE  
YSCEAGGQKLSFRLDVAEPKLVFAKEQQAHSEVKAEGASATLSCEVAQAQTEVTFWFKDGKLLSSSS  
KVRMEASGCSRRLVVQQAGKADAGEYSCEAGGQKLSFRLDVAEPKLVFAKEQQAHSEVKAEGASAT  
LSCEVAQAQTEVTFWFKDGKLLSSSSKVRMEASGCSRRLVVQQAGKADAGEYSCEAGGQKLSFRLD  
VAEPKLVFAKEQQAHSEVKAEGASATLSCEVAQAQTEVTFWFKDGKLLSSSSKVRMEASGCSRRLV  
VQQAGKADAGEYSCEAGGQKLSFRLDVAEPKLVFAKEQQAHSEVKAEGASATLSCEVAQAQTEVTFW  
FKDGKLLSSSSKVRMEASGCSRRLVVQQAGKADAGEYSCEAGGQKLSFRLDVAEPKLVFAKEQQAH  
SEVKAEGASATLSCEVAQAQTEVTFWFKDGKLLSSSSKVRMEASGCSRRLVVQQAGKADAGEYSCE  
ARGQKLSFRLDVADTRLMFAKEQQARTEVKAEGNSATLSCEVAQAQTEVTFWFKDGKLLSSSSKVR  
MEASGCSRRLVVQQAGKADAGEYSCEAGGQKLSFRLDVAEPKLVFAKEQQAHSEVKAEGASATLS  
CEVAQAQTEVTFWFKDGKLLSSSSKVRMEASGCSRRLVVQQAGKADAGEYSCEAGGQKLSFRLDVA  
EAEESQIPERPSRREPLVVKEHETIILTATIAAPSAAVTWLKDGV EIRRSKRHEATSLGDTHTLTV  
RGAQVLDIAIYSCRVGKEGQDFPVQVEEVAAKFSKPLEPVEGELGGTVMLVC ELSPEQAEVWRCNT  
QLRPGKRFQMTSEGPRTLTYSGLREDDAEYVCESRDDRTSARLTVKVPVVKFTS GLSAMVAEEGQ  
VCSFELSHKDEDI EWSLNGTPLYNDSFHEISHEGLHTLVLSKVRQADTGTVCATSPKV SVSARL  
VVKGKPVVFLKALDDVSAEERGLTLTQCEVSDPEARVVWRKDGVELGSPDKYDFLHKAGARGLTVHD  
LSHEDAGLYTCQVGSKETQSKVSVHDLHVGITKRLKTVLEVLEGESECFEVLSSHESPDPAVWTVGGK  
TVGGS GHFHAVRQGRKYTLTVKDAALSDAGEVVFVSVLGLTSKASLIIRERPVDTKPLEDQRTTLG  
EDVMLSCELSRA GTSVRWLKDGKAIRKSQKYDLLSEGTRAVLVVRKASLKDSGEYTCETEASKSTAK  
LCVEEKANRFTBELADLQ VEEKGRAVFTCKTEHPASVVTWRKGLLELRASGKHVPSQEGTLKLTIN  
ALERTDSDTYTCDIGQARTQARLL VHQQKVRVIEDLEDTAVQEGSSAKFCCRIAPADYGPVHWF  
LDKTPHLSNELNEITVQPGGYHVLTLRQLALKD SGTVYFEAGDQRTSAAALRVTEKPSIFSRPL  
TDVTVTEGEDTLVCETTTVDSVVRWTKDGKTLRPSARCQLSH EGCQAQLLITATTPQDGGRYK  
CEIGGASSSSIVRVHALPVRFRFRESLKDVEVPEGKAATLRCVLSSVAAPVEWR HGDDVLKSSN  
KYSRLRQEGAVLELVIRDLQPQDSGQYSCSFGDQTTSATLTVKTSQAQFVQKLRNKEATEGTTV  
TLRCELTKAEAPVEWKKGTETLRNGDKYSLKQDGA VCELQICSLLVADAGEYSCVCGQEKTSATL  
TVKALLVHF VRRLRSKEATEGDTTLQCELSKAAPVEWRKGTETLRDGDYSLKQDGA VCELQIRSLT  
IADAGEYLCTCGQE KTSATLTVRALPAKFKDSLKNEEATEGTTATLSCELSKAAPVTWKKGPKTLQ  
SGDKYVLRQDGA VCGLIHGL TMADAGEYSCVCGQEKTSATLTVRGLPAKFIEDLRSQEATEGATAI  
LRCELSKAAPVEWRKGTETLRDGDYSLRQDGA VCELQIRGLAVVDGTYSLSLPTKFTTEGLRNEE  
ATEGTMATLRCQMSKAAPVEWRKGTETLRDGDYSLRQDGA MCELQIRGLTIEDSGEYTCVCGQ  
EKTSATLSVKALPSRFIEDLRSQEATEGTMATLRCQMSKTAPVE WKKGSETLRDGGRYSLRQD  
GPVCELQICDLAVEDAGEYSCVCGQEKTSATLSIKALPPRFIEDLRSQEATEGTMATLRCQMS  
KAAPVEWRKGTETLRDGDYSLRQDGA VCELQIHDLAVEDTGEYSCVCGQEKTSATLNVKALPP  
RFIEDLRSQEATEGTMATLRCQMSKAAPVEWRKGTETLRDGGRYSLRQDGA VCELQIHDLVEDA  
GQYSCVCG QEKTSAVLTVDALPPKFTEGLKKEEATEGTMVTLRCQMSKEATVEWRKGAKTLDG  
GRYSLRQDGA MCELQIC GLAVEDAGEYSCVCGQEKTSATLSVKALPPRFIEDLRSQEATEGTM  
ATLRCQMSKAAPVEWRKGTETLRDGDYSLRQDGA VCELQICDLAVEDTGDYSCVCGQEKTSAT  
LSVKALPPRFIEDLRSQEARE

GTVATLRCRMSKAAPVEWRKGSSETLKDGDYSLRQEGNLCELQIRDLAVEDTEEYSCVCGQEKTSATLSVKAL  
 PAKFIEDLRSQEAPESSTVTLRCKLSKKASVVWKKGSETLRNGARYSLRQDGAVCELEIRDLTVEDTGEYSCT  
 CGQERTSATLSIMAPQVVFQQPLQNLQAEEGSMASLRCELSVPNAAMVWSKGGLELQGDTRREARQQGCVAEL  
 LLRDLRREDAGEYSCTCGSQTTSATLMVTAAPVRFLRELQAQDVDEGATARLRCELSREAVSVEWRKGSLLQF  
 PCAKYQMVQEGTTAELLVHGVEQEDAGEYTCDAHGHTQSIARLSVRAPKPKFKTDLQSTEQEAGGTARLCCQLS  
 EAEPGTPVQWLKEGVELHVGSKYEMRRQGAUCELLIHGLEAKDTGEYACLVGGQKTLASLRVKEPEVTIVRGL  
 VDMEVQADEDEFTCKVSOAGATDVQWHLQGLPLQSNVTEVAVLADGCTHVLQKGVTLLEDAGTVSFHVGGL  
 SSSAQLTVRVPEVTVLEPLKDVQLSEGQDAHFRCRLSRASGQEARWALGGVPLQCNEMNDITVEQGTLYLLTL  
 HKVTLEDAGTITLQVGSSEEAQLKVTAKNTVLRGLENVDALEGGALFECQLSQPEVAHAHTWLLDDEPVHTS  
 EKVEVVYFENGLRHLLLLKNLKPQDSCRVTFLAGDVVTSFAFLTVRGWRLEVLPEPHDASVKAGMQVRFCTILS  
 EAVPVGEATWYINGAAIQPDDTDWTVTTDGSHHALTLSNAQPQHAGEVTFAAARDAVASARLSVLALPDPEDA  
 EVVGRSDHSVTLSSWVAPMSDGGGGLCGYRVMKEASTGQWQLCHDLVPGPECVDDLVPGKTYRFRVAAVGPA  
 GAGEPVHLPQMVKIAPAPAPAPAPAPAPAPAPETRQAVVGEDICLELEVAADGGEVVWHKGTERRIQPGHFVLS  
 RGQRQMLVIKGFRTEDQGEYRCGPIQGLPSSGAATFNVMVMTSGSGDEVPAQPSLPPEAAQEGDLHLLWEALAR  
 KRRMSREPTLDSISELPEEDSRVQHLRQEAEEETAPDLSEGYSTADELARTGEADLSHTSSDDESAGTPSLVT  
 YLKKAGGPGISPLASKHEAQVTTSVKPKQKQEPVPTCPPPGDLSAADLMDPSLDKAAVKIQAAFKGYKVRKE  
 MKQQEGPVFSRTFGDTEAQVGDVLRLECVLATKTDMRACWLKDGIELTDGRHYHIDQLKDGTCSSLVTLGLAPT  
 DSGRYTCQVSTKSGRVSHSACVVVSGTESEAESSSGGELDDAFRRAARRLHRLFRTKSPAELSEELFLSADE  
 GPGEPEEPADWQTYREDENFVCIRFESLAEARQAVTCFRNMFMATMGIGVEISLGEQGPGRVEMRIGKVAPTVT  
 PAVPLAKTPGLQTSDAAPVFLTELQNDVQDGYPMSFDCVVTGQPVPSVRWFKDGKLEEDDHYMINEDQQGG  
 HQLIITAVVPADMGVYRCLAENSMGVSSTKAELRVELTSTDYDTAADATETSSYFSAQGYLSSREQEGTESDE  
 GQLPQVLEELKDLQVAPGTRLAKFQLKVKGYPAKLYWFKDGGPLTSDHIRMTDKKTLHTLEIVSVTREDSG  
 QYAAIYISNAVGAAYSSARLLVRGPSEPEEKPASDVHERLVPPRILEKFTPKKVKRGSSITFSVKVEGHPAPSV  
 HWLKEEAKEKGLVWIGPDTPGYTMASSSKQHSLLVLLDVGRQHGGTYTCIATNPAGQALCSASLHISGLAKEEEQ  
 ERVKEALISSFLOGTSQAVSAQMSSESAGFADLVGQSKGESLVAAEAHSHLSLAEVGTTEFLQKLTSTQITEMVS  
 AKISQAKLVQVPGGDSDEETKTPSASPRHGRSRPSSSVQSESSSESEDGDSRGEIFDIYVVVTADYLPGLAEQDAI  
 LLREGQYVEVLDLSDAHLRVLVTKPTKSSPSRQVSVSPAYLDRKRLKLSPEWGPTEAPEFPGEAVSEDEYTRTL  
 SSVIQEELLSSEQAFVQELQFLESHHMKHLERSPRVPAAVASQKTVIFRNVQDISHFHSSFLKELQCGCTDDDV  
 AMCFIKNQEAFAEKYLEFLVGRVQAESVVVSTPVQEFYKKAEEETLSAKDPTQPPPPPLQHYLEQPVVERVQKYQ  
 ALLKELIRSKARNRQNCALLEQAYAVVSALPQRAENKLVSLMENYPGTLEALGEPHQGHFIVWEGAPGARM  
 PWKGHNHRVFLFRNYLVICKPRRDSRTDFTSYVFRNMMKLSIDLNDQVEGDDRAFEVWHEREDSVRKYLLQA  
 RTVILKNSWVKEICGIQQLAQPVWRPPEFEEELADCTAELGETVKLACRVTGTPKPIVSWYKDGKPVVEVDPH  
 HILIEDPDGSCTLILDNLTGIDSGQYMCFAASAAGNASTLGKILVQVPPRFVNVKVRATPFVEGEDAQITCTVE  
 GAPYPQIRWYKDGTLTLLAPGNRYRMLNEPRSGVLVLIQAASKEDLGHYECELVNRLGSTRGGGELYMQSPALR  
 ARDQHHREQIVAAVEERRPSP\*

>rs26971834\_ENSMUSP00000151217\_c.17686:A>G\_p.N5896S  
 ENSMUST00000219084.3|Obscn-207|ENSMUSG00000061462|-|chr11:g.58920178:T>C  
 MDHSFSGAPRFLTRPKAFVSVGKDATLSCQIVGNPTPHVSWEKDRQPVVEAGARFLAQDGDVYRLTILDLAL  
 GDSGQYVCRARNAIGEAFVAVGLRVDSEGTCAEQAPHFLLRPTSIRVREGADATFRCRVGGSPPAVSWSKDG  
 RRLGPPDAPHVRVEEHGESSALRIRSARPRDGGTYEVRAENPLGSASAAAALVVDSDAEVAGPPGTSTATLLA  
 HLQQRREAMRAEGIPPSPPGAGTRTCTVTEGKHARLSCFVTGEPKPKETVWKKDQQLVTEGRRHVVEDEQENF  
 VLKILFCKQSDRGLYTCTASNLVGQTYSSVLVVVREPTVPFKKRLQDLEVREKESATFQCEVAQAPATEAAWFK  
 EETRLWASAKYDIEEGETERRLTVRNVSADDDAVYICETTEGSRVVAELSVQGNLTKLPRKTAVRTGDTAIF  
 WVVELAVPEGPVWRWRNQEEMVAGGRVAITAEGTCHTLTIQCTLEDMGVAVFVSGGCRTTTTQFCVSAPRRPPL  
 YPPADPVVAKTESVTLSSWAPPHGDRPVTIDGYVLEKRLKLGAYAWSRCHEAGWLATTEFTITGVAAEGDFQ  
 FRVSAINHFGQGPYLEFPGMTMLVPLAVKTPKAVEAVEGGEVTFVSDTLTVASSGEWFLDGEALKASSIYVI  
 RCDRTRHMLTIREVPARLHGAQLKVFVANGIETSIQMVVRAALGLPSSKLPAAAAAREVLAQLHEEAQLLAELSD  
 QAAAVTWLKDGRELSLGPKEYMQVSAGRRALLVRDVAQDDAGLYECVSRGSRRTAYQLLVQDITDGYRDWGPAG  
 PQKHMCKCAGAKIARYLGSSCYRFLQYDKGVVHLEAALDTRQKGTSSCSLHEKPKLVFAKQQAHSEVKA  
 AGNSATLSCEVTQAQTEVTWFKDGKLLSSSSKVRMEASGCSRRLVVQQAGKADAGEYSCEAGGQKLSFRLDVA  
 EPKLVFAKQQAHSEVKAEGASATLSCEVAQAQTEVTWFKDGKLLSSSSKVRMEASGCSRRLVVQQAGKADA  
 GEYSCEAGGQKLSFRLDVAEPMVFAKEQQARSEVKAEGASATLSCEVAQAQTEVTWFKDGKLLSSSSKVRM  
 EASGCSRRLVVQQAGKADAGEYSCEAGGQKLSFRLDVTEPKLVFAKEQQARSEVKAEGASATLSCEVAQAQ  
 EVTWFKDGLKLLSSSSKVRMEASGCSRRLVVQQAGKADAGEYSCEAGGQKLSFHLVTEPKLVFAKEQQAHSEV  
 KAEAGASATLSCEVAQAQTEVTWFKDGKLLSSSSKVRMEASGCSRRLVVQQAGKADAGEYSCEAGGQKLSFR  
 DVAEPMVFAKEQQARSEVKAEGASATLSCEVAQAQTEVTWFKDGKLLSSSSKVRMEASGCSRRLVVQQAGK  
 ADAGEYSCEAGGQKLSFRLDVAEPMVFAKEQQANSEVKAEGASATLSCEVAQAQTEVTWFKDGKLLSSSSK  
 VRVEASGCSRRLVVQQAGKADAGEYSCEAGGQKLSFRLDVAEPMVFAKEQQAHSEVKAEGASATLSCEVAQ

AQTEVTFWFKDGKLLSSSSKVRVEASGCSRRLVVQQAGKADAGEYSCEAGGQKLSFRLDVAEPKLVFAKEQQAH  
SEVKAEGASATLSCEVAQAQTEVTFWFKDGKLLSSSSKVRVEASGCSRRLVVQQVKGADAGEYSCEARGQKLS  
FRLDVAEAEESQIPERPSRREPLVVKEHETIILTATIAAPSVAAVTWLKDGVERRSKRHEATSLGDHTLTVR  
GAQVLDASAIYSCRVGKEGQDFPVQVEEVAAKFSKPLEPVEGELGGTVMLVCELSPEQAEVWRCGNTQLRPGK  
RFQMTSEGPRTTLTVSGLREDDAEYVCESRDDRTSARLTVKVPVVKFTSGLSAMVAEEGQEAFTQCQVSPS  
DAGVTWYKDGMLQVSEKFMVVEGASRSLTILGLTLEDAGQVTVAEAGASSAALRVREAPVLFKFKLEPQT  
VEERTSVTLEVELTRPWPEVKWTRNAAVLTPSENVEIRAEGARHCLVLRVSGFADRGFFGCETPDDKTQAKLN  
VEMRQVRLVRGLQEVEAKEQGTASMDVELSHAEEVGSWTRDGLRLQPGPKCHLAVQGPVHILTLSALQFQDSG  
LVAEFAEGVHTSARLIVTELPVSFTRVLQDVVATQKEKVTLECELSRPVDVRLWKDGVLELRAGKAIQIVAQGT  
CRSLVIYRCETGDQGVYVCDALDAQTSASLRVQGRYTLIFRRVLAEDAGEVKFVAENAESRAHLRVKELPVT  
LLRPLRDKIAMEKHRGVLECVSRASAQVRWFKGGVELQSGPKYEVVSDGLYRKLVIINDVQPEDEDTYTC DAG  
NVKTSAQFFVEEQSITIVRGLKDMTVMEPAPAWFECETSIPSVRPPKWLKGKTVLQAGGNVLEQDGTVHRLT  
LHKTCSTMTGVPVHFTIGKSRSSAQLVVSDIPVVLTRPLEPKAGRELQSVVLSCDFRPAPKAVQWYKDDTPLSP  
SEKFKMALEGOAELRILRLTPADAGVYRCQAGSAQSSAEVTVAEAREVTVIQPLQDAEAMEEGRVCFSCELSH  
KDEDIEWSLNGTPLYNDSFHEISHEGCLHTLVLKSVRQADTGTVCATSPKVSARSRLVVKGPVVFLLKALDDV  
SAEERGLTLTQCEVSDPEARVWVRKDGVELGSPDKYDFLHKAGARGLTVHDLSHEDAGLYTCQVGSKETQSKV  
SVHDLHVGITKRLKTVELEGESECFEVLSHESPSDPAVWTVGGKTVGGSGHFHAVRQGRKYTLTVKDAALS  
DAGEVVFVSVLGLTSKASLIIRERPVDTIKPLEDQRTTLGEDVMLSCELSRAGTSVRWLKDGKAIKRSQKYDLL  
SEGTRAVLVVRKASLKDSGEYTCETEASKSTAKLCVEEKANRFTTEELADLQVEEKGRAVFTCKTEHPASVVTW  
RKGLLELRASGKHVPSQEGTLTKLTINALERTSDTYTCDIGQARTQARLLVHGQKVRVIEDLEDTAVQEGSS  
AKFCCRIPADYGPVHWFLLDKTPLHSNELNEITVQPGYHVLTLRQLALKDSGTVYFEAGDQRTSAAALRVTEK  
PSIFSRPLTDVTVTEGEDTLTVCETTTVDSSVRWTKDGKTLRPSARCQLSHEGCAQQLLITATTPQDGGRYKC  
EIGGASSSSIVRVHALPVRFRFRESLKDVEVPEGKAATLRCVLSVAAPVEWRHGDDVLKSSNKYSLRQEGAVLE  
LVIRDLQFQDSGQYSCSFGDQTTSATLTVKTSQAQFVGLKRNKEATEGTTVTLRCELTKPEVWKKGTETLR  
NGDKYSLKQDGA VCELQICSLLVADAGEYSCVCGQEKTSATLTVKALLVHFVRRRLRSKEATEGDTTTLQCELS  
KAAPVEWRKGTETLRDGDYSLKQDGA VCELQIRSLTIADAGEYLCTCGQEKTSATLTVRGLPAKFIEDLRSQ  
EATEGATAILRCELSKAAPVEWRKGETLKDGDYRQDGA VCELQIRGLAVVDGTGYSSTLPTKFTTEGLRNE  
EATEGTMATLRCQMSKAAPVEWRKGETLRDGDYSLRQDGA MCELQIRGLTIEDSGEYTCVCGQEKTSATLS  
VKALPPRFIEDLRSQEAEGTMATLRCQMSKAAPVEWRKGETLGDGGYSLRQNGAVCELQIHDLAVEDTGE  
YSCVCGQEKTSATLNVKALPPKFTTEGLKKEEATEGTMVTLRCQMSKEATVEWRKGAKTLSDDGGYSLRQDGA  
MCELQICGLAVEDAGEYSCVCGQEKTSATLSVKALPPRFIEDLRSQEAEGTMATLRCQMSKAAPVEWRKGET  
LRDGDYSLRQDGA VCELQIRDLAVEDAGEYLCVCGQEKTSATLSVKALPPRFIEDLRSQEAEGTMATLRCQ  
MSKAAPVEWRKGSKTLRDGDYSLRQDGA MCELQICDLAVEDTGDYSCVCGQEKTSATLSVKAPQVVFQQPLQ  
NLQAEEGMSARLCELSVNPAAVMVWSKGGLELQGDTRREARQQGCVAELLLRDLRREDAGEYSCTCGSQTTSA  
TLMVTAAPVRFLELQADVDEGATARLRCLELSREAVSVEWRKGSQQLFPKAKYQMVQEGTTAELLVHGVEQE  
DAGEYTC DAGTYSIARLSVRAPKPKFKTDLQSTEQEAGGTARLCCQLSEAEPTPVQWLKEGVELHVGSKYE  
MRRQGA VCELLIHGLEAKDTGEYACL VGGQKTLASLRVKEPEVTIVRGLVDMEVQADEDEFTCKV SQAGATD  
VQWHLQGLPLQSNEVTEVAVLADGCTHVQLKGVTLLEDAGTVSFHVGGSSSAQLTVRVPEVTVLEPLKDVQL  
SEGQDAHFRCRLSRASGQEARWALGGVPLQCNEMNDITVEQGTLYLLTLHKVTLEDAGTITLVGSCSSEAQL  
KVTAKNTVLRGLENDVALEGGAEALFECQLSQPEVAHTWLLDDEPVHTSEKVEVVYFENGLRHLLLLKLNKPKQ  
DSRVTFFLAGDVVTS AFLTVRGWRLEVLEPPHDASVKAGMQVRFTCILSEAVPVGEATWYINGAAIQPDDTDW  
TVTTDGS HHALTL SNAQPQHAGEVTF AARDAVASARLSVLALPDPPEDAEVVGRSDHSVTL SWSVAPMSDGGGG  
LCGYRVEMKEASTGQWQLCHDLVPGPECVVDDLVPKGTYRFRVAAVGPAGAGEPVHLPQMVKIAPAPAPAPAP  
APAPETRQAVVGEDICLELEVAADGGEVWVHKGTERIQPGGHFEVLSRGRQMLVIKGFRTEDQGEYRCGPIQ  
GLPSSGAATFNVMVMTSGSGDEVPAQPSLPPEAAQEGDLHLLWEALARKRRMSREPTLDSISELPEEDSRVQHL  
RQEAETAPDLSEGYSTADELARTGEADLSHTSSDDESRAGTPSLVTYLKKAGGPGISPLASKHEAQVTTSVK  
PQKQQEPVVPPTCPPPGDLSAADLMDPSLDKAAVKIQAAFKGYKVRKEMKQOEGPVFSRTFGDTEAQVGDVLR  
ECVLATKTD MRACWLKDGIELTDGRHYHIDQLKDGTC SLVLTGLAPTD SGRYTCQVSTKSGRVSHSACVVVSG  
TESEAESSSGGELDDAFRRARRLHRLFRTKSPAELSEELFLSADEGPGEPEEPADWQTYREDENFVCIRFE  
SLAEARQAVTCFRNMFATMGI GVEISLGEQGPVEMRIGKVA PTVTPAVPLAKTPGLQTS DAAVFLTELQN  
QDVQDGYPMSFDCVVTGQPVPSVRWFKDGKLLLEDDHYMINEDQQGGHQLIITAVVPADMGVYRCLAENSMGV  
SSTKAELRVELTSTDYDTAADATETSSYFSAQGYLSSREQEGTESDEGQLPQVLEELKDLQVAPGTRLAKFQL  
KVKGYAPAKLVYFKDGPPLTSDHIRMTDKKTLTLEIVSVTREDSGQYAAIISNAVGAAYSSARLLVVRGPE  
PEEKPSADVHERLVPRILEKFTPKKVKRGSSITFVSVKVEGHPAPSVHWLKEEAKEKGVLWIGPDTPGYTMAS  
SKQHSLVLLDVGRQHGYTCIATNPAGQALCSASLHISGLAKEEEQERVKEALISSFLQGTSAQVSAQMSSES  
AGFADLVGQSKGESLVAEEAHSHLSLAEVGT EEFLOKLT SQI TEMVSAKISQAKLQVPGGDSDEETKTPSASP  
RHGRSRPSSSVQESSSESEDGDSRGEIFDIYVVTADYLP LGAEQDAIILREGQYVEVLDSAHPLRVLVTRTKPT  
KSSPSRQGWVSPAYLDKRLKLSPEWGPTEAPEFPGEAVSEDEYRTRLSSVIQELLSSEQAFVQVLESHHM

KHLERSPRVPAAVASQKTVIFRNVQDISHFHSSFLKELQCGCTDDDDVAMCFIKNQEAFKYLEFLVGRVQAES  
 VVVSTPVQEFYKKYAEETLSAKDPTQPPPPPLQHYLEQPVERVQKYQALLKELIRSKARNRQNCALLEQAYAV  
 VSALPQRAENKLVSLMENYPGTLEALGEPiRQGHFIVWEGAPGARMPWKGHNRHVFLFRNYLVICKPRRDSR  
 TDTFSYVFRNMMKLSSIDLNDQVEGDDRAFEVWHEREEDSVRKYLLQARTVI IKNSWVKEICGIQQRQAQPVWR  
 PPEFEEELADCTAELGETVKLACRVGTGPKPIVSWYKDGKPEVDPHHILIEDPDGSCSTLI LDNLTGIDSGQY  
 MCFASAAGNASTLGKILVQVPPRFVNVKVRATPFVEGEDAQITCTVEGAPYPQIRWYKDGTLTLLAPGNRYRMLN  
 EPRSGVLVVIQAASKEDLGHYECELVNRLGSTRGGGELYMQSPALRARDQHHREQIVAAVEVTEQETKVPKK  
 TVIIEETITTVVKS PRGRRQSPGKSPSRSPSRSSASPRRPGLLAPERLYPPGTSPSRRLVEVEQGRKAPVPALY  
 VTEAEVHAPASQSQPKWLEVEETIEVVRVKKTGSRGASPVREMTSRGEGILFTLPGGI PGRDPNANNNSNNKSVY  
 QEARTWGPVAVHVGEPFI FQVDSVGNVDVVAASPEPEQVRASQKEENTERQEGCSDGDENTFLMEEPQD TDSL  
 QGRDPKILTHNGRVLT LADLEDYVPQEGETF GCGDSTPSTPDEPPCEVSVLQREI SEPTVGPVLLNVGRPPG  
 TGATPSFFRPGSQVHSPESVSFLLREAWSGPVSAAPWTSSFHTHVQSSVDGSHGSFKTEVSTQTVSFGAVGET  
 VTLHIDPDGGEAPGPSQG\*  
 >rs47781492\_ENSMUSP00000158795\_c.19977:G>A\_p.E6660K  
 ENSMUST00000238536.2|Obscn-210|ENSMUSG00000061462|-|chr11:g.58921977:C>T  
 MDHSFSGAPRFLTRPKAFVSVGKDATLSCQIVGNPTPHVSWEKDRQFVEAGARFRLAQDGDVYRLTILDLAL  
 GDSGQYVCRARNAIGEAFAAVGLRVDSEGTCAEQAPHFLLRPTSIRVREGADATFRCRVVGGSPQPAVSWSKDG  
 RRLGPPDAPHVRVEEHGESSALRIRSARPRDGGTYEVRVAENPLGSASAAAALVVDSDAEVGAGPGTSTATLLA  
 HLQQRREAMRAEGIPPSPPGAGTRTCTVTEGKHARLSCFVTGEPKPEVWKKDGQLVTEGRRHVVEDEQENF  
 VLKILFCKQSDRGLYTCTASNLVGQTYSSVLVVVREPTVPFKKRLQDLEVREKESATFQCEVAQAPATEAAWFK  
 EETRLWASAKYDIEEGTERRLTVRNVSADDDAVYICETTEGSRVVAELSVQGNLTKLPRKTAVRTGDTAIF  
 WVAVLAVPEGPVRWLRNQEEMVAGGRVAITAEGTCHTLTI FQCTLEDMGEVAFVSGGCRTTTQFCVSA PRRPPL  
 YPADPVVKAKTSSVTLWSAPPHGDRPVTIDGYVLEKRKLGA YAWSRCHEAGWLATTEFTITGVAAEEDGFQ  
 FRVSAINHFGQGPYLEFPGTMHLVPLAVKTPKAVEAVEGGEVTFVSDLTVASSGEWFLDGEALKASSIYVI  
 RCDRTRHMLTIREVPARLHGAQLKFVANGIETSIQMVVRAALGLPSSKLPAAAAREVLAQLHAEAQLLAE LSD  
 QAAAVTWLKDGRELSLGPKYEMQVSAGRRALLVRDVAQDDAGLYECVSRGSR TAYQLLVQDITDGYRWDGVPAG  
 PQKHMCCKAGAKIARYLGS SCYRFLQYDKGVVWHLEAALDTRQKGTSSCSLHEKPKLVFAKQQAHSVKA  
 AGNSATLSCEVTQAQTEVTFWKDGKLLSSSSKVRMEASGCSRRLLVVQQAGKADAGEYSCEAGGQKLSFR LDVA  
 EPKLVFAKQQAHSVKAEGASATLSCEVAQAQTEVTFWKDGKLLSSSSKVRMEASGCSRRLLVVQQAGKADA  
 GEYSCEAGGQKLSFR LDVAEPKMFVFAKEQQARSEVKAEGASATLSCEVAQAQTEVTFWKDGKLLSSSSKVRM  
 EASGCSRRLLVVQQAGKADAGEYSCEAGGQKLSFR LDVTEPKLVFAKEQQARSEVKAEVGNSATLSCEVAQAQ  
 EVTFWKDGKLLSSSSKVRMEASGCSRRLLVVQQAGKADAGEYSCEAGGQKLSFR LDVAEPKLVFAKEQQARSEV  
 KAEAGNSATLSCEVAQAQTEVTFWKDGKLLSSSSKVRMEASGCSRRLLVVQQAGKADAGEYSCEAGGQKLSFHL  
 DVTEPKLVFAKEQQAHSEVKAEGASATLSCEVAQAQTEVTFWKDGKLLSSSSKVRMEASGCSRRLLVVQQAGK  
 ADAGEYSCEAGGQKLSFR LDVAEPKLVFAKEQQARSEVKAEGASATLSCEVAQAQTEVTFWKDGKLLSSSSK  
 VRVEASGCSRRLLVVQQAGKADAGEYSCEAGGQKLSFR LDVAEPKLVFAKEQQANSEVKAEGASATLSCEVAQ  
 AQTEVTFWKDGKLLSSSSKVRVEASGCSRRLLVVQQAGKADAGEYSCEAGGQKLSFR LDVAEPKLAFAKEQQAH  
 SEVKAEGASATLSCEVAQAQTEVTFWKDGKLLSSSSKVRVEASGCSRRLLVVQQAGKADAGEYSCEAGGQKLS  
 FR LDVAEPKLAFAKEQQAHSEVKAEGASATLSCEVAQAQTEVTFWKDGKLLSSSSKVRVEASGCSRRLLVVQQ  
 AGKADAGEYSCEAGGQKLSFR LDVAEPKLAFAKEQQAHSEVKAEGASATLSCEVAQAQTEVTFWKDGKLLSS  
 SSKVRVEASGCSRRLLVVQQAGKADAGEYSCEAGGQKLFRLDVAEPKLMFAKEQQAHSEVKAEGASATLSCE  
 VAQAQTEVTFWKDGKLLSSSSKVRVEASGCSRRLLVVQQAGKADAGEYSCEAGGQKLSFR LDVAEPKLVFAKEQ  
 QAHSVKAEGASATLSCEVAQAQTEVTFWKDGKLLSSSSKVRVEASGCSRRLLVVQQVQKADAGEYSCEARGQ  
 KLSFR LDVADTRLMFAKEQQARTEVKAEGNSATLSCEVAQAQTEVTFWKDGKLLSSSSKVRVEASGCSRRLLV  
 VQQAGKADAGEYSCEAGGQKLSFR LDVAEAESQI PERPSRREPLVVKHEHETIILTATIAAPSVAAVTWLKDG  
 EIRRSKRHEATSLGDTHTLTVRGAQVLDSAIYSCRVGKEGQDFPVQVEEVAAKFSKPLEPVEGELGGTVMLVC  
 ELSPEQAQEVVWRCGNTQLRPGKRFQMTSEGPRRTLTVSGLREDDAEYVCESRDDRTSARLTVKVPVVKFTS  
 GLSAMVAEEGQEQATFQCVVSPSDAGVTWYKDGMLQLPSEKFMVESGASRSLTILGLTLEDAGQVTEAEGAS  
 SSAALRVREAPVLFKKLEPQTVERTSVTLEVELTRPWPEVKWTRNAAVLTPSENVEIRAEGARHCLVLRVSV  
 GFADRGGFGCETPDDKTQAKLNVEMRQVRLVRGLQEVEAKEQGTASMDVELSHAEEVGSWTRDGLRQLQPGPKC  
 HLAVQGPVHILTLALSALQPQDSGLVAFRAEGVHTSARLIVTELPVSFTRVLQDVVATQKEKVTLECELSRPVDV  
 RWLKDGVLELRAGKAI GIVAQGTCSRSLVIYRCETGDQGVYVCDALDAQTSASLRVQGRTYTLIFRRVLAEDAGE  
 VKFVAENAESRAHLRVKELPVTLLRPLRDKIAMEKHRGIVLECCQVSRASAQVRFKGGVETLQSGPKYEVVSDGL  
 YRKLVINQVQPEDEDTYCTDAGNVKTSAQFFVVEEQSITIVRGLKDMTVMPEPAPAWFECETSIPSVRPPKWLGLG  
 KTVLQAGGNVGLQDGTVHRLTLHKTCSTMTGPVHFTIGKSRSSAQLVVSDIPVVLTRPLEPKAGRELQSVVL  
 SCDFRPAPKAVQWYKDDTPLSPSEKFKMALEGQMAELRILRLTPADAGVYRCQAGSAQSSAEVTEAREVTVI  
 QPLQDAEAMEEGRVCFSCELSHKDEDIEWSLNGTPLYNDSFHEISHEGCLHTLVLSVRQADTGTVCATSPKV  
 SVSARLVVKGKPVVFLKALDDVSAEERGTLTLQCEVSDPEARVVWRKDGVELGSPDKYDFLHKAGARGLTVHD

LSHEDAGLYTCQVGSKETQSKVSVHDLHVGITKRLKTVEVLEGESECSFECVLSHESPSDPAVWTVGGKTVGGS
GHFHAVRQGRKYTLTVKDAALSDAGEVVFVSVLGLTSKASLIIRERPVDIKPLEDQRTTLGEDVMLSCELSRA
GTSVRWLKDGKAIRKSQKYDLLSEGTRAVLVVRKASLKDSGEYTCETEASKSTAKLCVEEKANRFTTELADLQ
VEEKGRAVFTCKTEHPASVVTWRKGLLELRASGKHVPSQEGTLTKLTINALERTDSDTYTCDIGQARTQARLL
VHGQKVRVIEDLEDTAVQEGSSAKFCRIAPADYGPVHWFLDKTPLHSNELNEITVQPGGYHVLTLRQLALKD
SGTVYFEAGDQRTSAALRVTEKPSIFSRPLTDVTVTEGEDTLVCETTTVDSSVRWTKDGKTLRPSARCQLSH
EGCQAQLLITATTPQDGGRYKCEIGGASSSSIVRVHALPVRFRESLKDVEVPEGKAATLRCVLSVAAPVEWR
HGDDVLKSSNKYSLRQEGAVLELVIRDLQPDQSGQYSCSFGDQTTSATLTVKTTSSAQFVQKLRNKEATEGTTV
TLRCELTKAPVEWKKGTETLRNGDKYSLKQDGA VCELQICSLLVADAGEYSCVCGQEKTSATLTVKALLVHF
VRRLSKEATEGDTTTLQCELSKAAPVEWRKGTETLRDGDYSLKQDGA VCELQIRSLTIADAGEYLCTCGQE
KTSATLTVRALPAKFKDSLKNEEATEGTTATLSCELSKAAPVTWKKGPKTLQSGDKYVLRQDGA VCGLIHGL
TMADAGEYSCVCGQEKTSATLTVRGLPAKFIEDLRSQEATEGATAILRCELSKAAPVEWRKGSSETLKDGDYR
LRQDGA VCELQIRGLAVVDGTYSLSPTKFTTEGLRNEEATEGTMATLRCQMSKAAPVEWRKGSSETLRDGDYR
LRQDGA MCELQIRGLTIEDSGEYTCVCGQEKTSATLSVKALPSRFIEDLRSQEATEGTMATLRCQMSKTAPVE
WKKGSETLRDGGRYSLRQDGPVCELQICDLAVEDAGEYSCVCGQEKTSATLSIKALPPRFIEDLRSQEATEG
MATLRCQMSKAAPVEWRKGSSETLGDGGYSLRQNGAVCELQIHDLAVEDTGEYSCVCGQEKTSATLNVKALPP
RFIEDLRSQEATEGTMATLRCQMSKAAPVEWRKGSSETLRDGGYSLRQDGA VCELQIHDLVEDAGQYSCVCG
QEKTSAVLTVDALPPKFTTEGLKKEEATEGTMVTLRCQMSKEATVEWRKGA KTLSDGGYSLRQDGA MCELQIC
GLAVEDAGEYSCVCGQEKTSATLSVKALPPRFIEDLRSQEATEGTMATLRCQMSKAAPVEWRKGSSETLRDGD
YSLRQDGA VCELQIRDLAVEDAGEYLCVCGQEKTSATLSVKALPPRFIEDLRSQEATEGTMATLRCQMSKAAP
VEWRKGSKTLRDGDYSLRQDGA MCELQICDLAVEDTGDYSCVCGQEKTSATLSVKALPPRFIEDLRSQEARE
GTVATLRCRMSKAAPVEWRKGSSETLKDGDYSLRQEGNLCELQIRDLAVEDTEEYSCVCGQEKTSATLSVKAL
PAKFIEDLRSQEAPESSTVTLRCKLSKKASVVWKKGSETLRNGARYSLRQDGA VCELEIRDLTVEDTGEYSCT
CGQERTSATLSIMAPQVVFQQLQNLQAEEGSMASLRCELSVPAAMVWSKGGLELQGDTRREARQQGCVAEL
LLRDLRREDAGEYSCTCGSQTTSATLMVTAAPVRFLELQADVDEGATARLRCELSREAVSVEWRKGS LQLF
PCAKYQMVQEGTTAELLVHGVEQEDAGEYTCDAHELLIARLSVRAPKPKFKTDLQSTASQEAGGTARLCCQLS
EABPGTPVQWLKEGVELHVGSKYEMRRQGA VCELQIHGLEAKDTGEYACLVGGQKTLASLRVKEPEVTVIRGL
VDMEVQADEDEFTCKVQAGATDVQWHLQGLPLQSNVTEVAVLADGCTHVLQKGVTLLEDAGTVSFHVGGL
SSSAQLTVRVPEVTVLEPLKDVQLSEGQDAHFRCLRSRASGQEARWALGGVPLQCNEMNDITVEQGTLYLLTL
HKVTLLEDAGTITLQVGSSEEAQLKVTAKNTVLRGLENVDALEGGEALFECQLSQPEVA AHTWLLDDEPVHTS
EKVEVVYFENGLRHLLLLKNLKPQDSCRVTFLAGDVVTS AFLTVRGWRLEVLEPPHDASVKAGMQVRFTCILS
EAVPVGEATWYINGAAIQPDDTDWTVTTDGS HHALTLSNAQPQHAGEVTF AARDAVASARLSVLALPDPEDA
EVVGRSDHSVTL SWVAPMSDGGGGLCGYRVMKEASTGQWQLCHDLVPGPECVVDDLVPGKTYRFRVA AVGPA
GAGEPVHLPQMVKIAPAPAPAPAPAPAPAPETRAVVGEDICLELEVAADGGEVVWHKGTERRIQPGGHFEVLS
RGQRQMLVIKGFRTEDQGEYRCGPIQGLPSSGAATFNVVMTSGSGDEVPAQPSLPPEAAQEGDLHLLWEALAR
KRRMSREPTLDSISELPEEDSRVQHLRQEAETAPDLSEGYSTADELARTGEADLSHTSSDDES RAGTPSLVT
YLK KAGGPGISPLASKHEAQVTT SVKPKQKQEPVPTCPPPGDLSAADLMDPSLDKAAVKIQA AFKGYKVRKE
MKQQEGPVFSRTFGDTEAQVGDVLRLECVLATKTD MRACWLKDGIELTDGRHYHIDQLKDGTC SLLVTGLAPT
DSGRYTCQVSTKSGRVSHSACVVVSGTESEAE SSSGGELDDAFRRAARRLHRLFRTKSPAELSEELFLSADE
GPGEPEEPADWQTYREDENFVCIRFESLAEARQAVTCFRNM FATMIGVEISLGEQGPGRVEMRIGKVAPTVT
PAVPLAKTPGLQTS DAAPVFLTELQNQDVQDGYPMSFDCVVTGQVPVSVRWFKDGKLEEDDH YMINEDQQGG
HQLIITAVVPADMGVYRCLAENSMGVSSTKAELRVELTSTDYDTA ADATETSSYFSAQGYLSSREQEGTESDE
GQLPQVLEELKDLQVAPGTR LAKFQLKVKGYPAPKLYWFKDGP LTTSDHIRMTDKKTLHTLEIVSVTREDSG
QYAAI SNAVGAAYSSARLLVRGPSEPEEK PASDVHERLVPPRI LEKFTPKKVKRGS S ITFSVKVEGHPAPS
HWLKEEA EKGVLWIGPDTPGYTMASSSKQHS LVLLDVGRQH QGTYTCIATNPAGQALCSASLHISGLAKEEEQ
ERVKEALISSFLQGTSAQVSAQMS ESAGFADLVGQSKGESLVAAEASHLSLA EVGTEEF LQKLT SQI TEMVS
AKISQAKLQVPGGDSDEETKTPSASPRHRSRPS SSVQESSSESEDGDSRGEIFDIYVVTADYLP LGAEQDAI
ILREGQYVEVLDSAHPLRWLVRTKPTKSSPSRQGWVSPAYL DKRLKLSPEWGPTEAPEFPGEAVSEDEYRTRL
SSVIQELLSSEQAFVGLQLFLESHHMKHLERSPRVPA AVASQKTVI FRNVQDISHFHSSFLKELQCGTDDDDV
AMCFIKNQEA FEKYLEFLVGRVQAESVVVSTPVQEFYKKYAEETLSAKDPTQPPPP LQHYLEQPV ERVQKYQ
ALLKELIRNKARNRQNCALLEQAYAVVSALPQRAENK LHVSLMENYPGTLEALGEP IRQGHFIVWEGAPGARM
PWKGHNHRVFLFRNYLVICKPRRDSRTD TFSYVFRNMMKLSSIDLNDQVEGDDRAFEVWHEREDSVRKYLLQA
RTVI IKNWVGKEICIGIQRLAQPVWRPPEFEEELNACTAELGETVKLACRVTGT PKPIVSWYKDGKPEVVDPH
HILIEDPDG SCTLILDLNLTGIDSGQYMCFAASAAGNASTLGKILVQVPPRFV NKVRATPFVEGEDAQITCTVE
GAPY PQIRWYKDG TLLAPGNRYRMLNEPRSGVLV LVIQAASKEDLGHYECELVNR LGSTRGGGEL YMQSPALR
ARDQHHREQIVA AVEDTSVEGSAHSAQDGA DQQAASVLRLLGSEALGPS PGDLPNTRQSEPPAFEEAASQIP
GAASGTPEV SQPGTHKGLEQETTSSGSQGWTVPIRVEGTAWPGAGTGQLLLDVHSQVIMETTQRTYVCQAPDT
GVTRAPSMQVTIEDVQVQVGDMAQF DAVIEGHPPPIV TWYKGSTQLTSSARLSQRQDGT TYSVLVTDVAPHDA

GVYTCVANNAGGQVLCKAELLVHGGDKLDAENQVYRRKLHSFYDVQEEIGRGVFGFVKRVQHKGNKMFCAAKF  
IPLRSKTRAQAYQERDILATLGHPLVTGLLDQFETRKTLLILILELCSSEELLDRLFKKGVVTEAEVKVYIQQL  
VEGLHLYLHSHGILHLDIKPPNIMLVHPAREDIKICDFGFAQKITPSEPOYSKYGSPEFVSPEIIEQNPFVSEGS  
DIWAMGVI SYLSLTCSSPFAGESDRATLLNVLEGRVSWSSPTAAHLSSEDAKDFIKATLQRTPRARPSTSQCLA  
HPWFLKSMPAEEAHFINTKQLKFLARSRWQRSLMSYKSIILVMRSIPPELLQGPPDSPSLGVARHLRGEASGAS  
SSSSSSDNELAPFARAKSLPPSPVTHSPLLHPRGFLRPSASLPEETEASMTADAAVPASPQASAGPPASPGCV  
PRHSVISSLFYQQAGEGAERGNKTSGAKRHPARRRHLKGGYIARALPGLREPLMEYSLLEEEAAREEQASLM  
TKTPSFETALRLPSSSVREVPGRSHSLDNPPVTTGSPPEACKQLLFPSTGLTHETTAKDRGHKEGFLQESV  
FFPPMSGDSRPGKQEGSSQDSCRGKPASSCHSELGSGSQEGCGPPSSQSLGSLPPQSLKKEKELSTSCGPLFSEQ  
PQAAPFPTQVSPLLGSEKEPQDGSLSSEGPVVPVSSSPGSASQVDASLDTEGLSEAGDTCDFTPPPQRPQEQAT  
TRKFSLESRGGYAGVAGYGTFAFGGDAGGMLGQGPLWARMAWAVSQSSEEQDEAATESPQPLESIGPIAEASG  
VPLRTPSPSLTPWEEVEQVSLVQIRDLSGDAEAADTISLDISEVDPAYLNLSLDYDIKYLPEFEMI FRRVFKPI  
EQPESPGSETEAGQGLADFLLEAAWPWPGELGLRAGLEITEEPEEPGDLEALLGEEAVGRKRKWSPSRGLFQF  
PGRCLSGEEPVELGLRQVRKASMAHISRILKGRPEGPREGPPRKKAGLASFRLSGLKGRDQELSDEAVVLGQ  
SVTLACQVLAQPTAQATWSKDGVLLESSGHLLISSTLKNFQLLTIILVVKEEDLGTYTCCVSNPLGTAVTTGVL  
RKAERPSSSPRPEVGEELYKDAVLLVWKPVESECGPVYIVQCCIEGGSWTTLASDISDCCYLTGKLSRGGMYIF  
RTACVSKAGMGPYSSPSEQVLLGGPNHLASEEESRRGRPAQLLPSTKTFAFQMQIRRRGRFSVVRQCREKASGR  
ALAAKIVPYQPEDKTAVLRREYEAALKRLLHHPHLAQLHAAYLSPRHLVLIILELCSGPELLPSLAERESYSESDVK  
DYLWQMLSATQYLHAQHILHLDLRSENMMVTEYNLLKVIDLGNQSLDQEKVPAPENFKDYLETMAPELLEGGQ  
GAVPQTDIWAIGVTAIFIMLSGEYPESEGTDLQKGLRKLIRLSRCYAGLSGGAVAFLOSSLCAQPWGRPCA  
STCLQCGLWTEEGPTGSRPTPVTFTVRLRAFVREKRRRALLYKKNLAQVR\*  
>rs47781492\_ENSMUSP00000038264\_c.17817:G>A\_p.E5940K  
ENSMUST00000047441.14|Obscn-202|ENSMUSG00000061462|-|chr11:g.58921977:C>T  
MDHSFSGAPRFLTRPKAFVSVGKDATLSCQIVGNPTPHVSWEKDRQFVEAGARFLAQDGDVYRLTILDLAL  
GDSGQYVCRARNAIGEAFAAVGLRVDSEGTCAEQAPHFLLRPTSIRVREGADATFRCRVGGSPPAVSWSKDG  
RRLGPPDAPHRVVEEHGESSALRIR SARPRDGGTYEVRANPLGSASAAAALVVDSDAEVAPPGTSTATLLA  
HLQRRREAMRAEGIPSPPGAGTRTCTVTTEGKHARLSCFVTEGPKPETVWKKDQGLVTEGRRHVVEYDEQENF  
VLKILFCQSDRGLYTCTASNLVGQTYSSVLVVVREPTVPFKKRLQDLEVREKESATFQCEVAQPATEAAWFK  
EETRLWASAKYDIEEEGTERRLTVRNVSADDDAVYICETTEGSRVAELSVQGNLTKLPRKTAVRTGDTAIF  
WVELAVPEGPVRWLRNQEEMVAGGRVAITAEGTCHTLTI FQCTLEDMGEVAFVSGGCRTTTQFCVSAPRRPPL  
YPPADPVVKAKTESSVTLSSWAPPHGDRPVTIDGYVLEKRKLGAYAWSRCHEAGWLATTEFTITGVABEGDFQ  
FRVSAINHFGQGPYLEFPGTMHLVPLAVKTPLKAVEAVEGGEVTFVSDLTVASSGEWFLDGEALKASSIYVI  
RCDRTRHMLTIREVPARLHGAQLKFVANGIETSIQMVVRAALGLPSSKLPAAAAREVLAQLHEEAQLLAE LSD  
QAAA VTWLKDGRELSLGPKEYMQVSAGRRALLVRDVAQDDAGLYECVSRGSRRTAYQLLVQDITDGYRDWGPAG  
PQKHMCKCAGAKIARYLGSSCYRFLQYDKGVWHWLEAALDTRQGKGTSSCSLHEKPKLVFAKQQAHSEVKAE  
AGASATLSCEVAQAQTEVTWFKDGKLLSSSSKVRMEASGCSRRLLVVQQAGKADAGEYSCEAGGQKLSFRLDVA  
EPKMFVFAKEQQARSEVKAEGASATLSCEVAQAQTEVTWFKDGKLLSSSSKVRMEASGCSRRLLVVQQAGKADA  
GEYSCEAGGQKLSFRLDVTEPKLVFAKEQQARSEVKAEGVNSATLSCEVAQAQTEVTWFKDGKLLSSSSKVRM  
EASGCSRRLLVVQQAGKADAGEYSCEAGGQKLSFRLDVAEPKLVFAKEQQARSEVKAEGNSATLSCEVAQAQ  
EVTWFKDGKLLSSSSKVRMEASGCSRRLLVVQQAGKADAGEYSCEAGGQKLSFHLDVTEPKLVFAKEQQAHSEV  
KAEAGASATLSCEVAQAQTEVTWFKDGKLLSSSSKVRMEASGCSRRLLVVQQAGKADAGEYSCEAGGQKLSFR  
DVAEPKLVFAKEQQARSEVKAEGASATLSCEVAQAQTEVTWFKDGKLLSSSSKVRVEASGCSRRLLVVQQAGK  
ADAGEYSCEAGGQKLSFRLDVAEPKLVFAKEQQANSEVKAEGASATLSCEVAQAQTEVTWFKDGKLLSSSSK  
VRVEASGCSRRLLVVQQAGKADAGEYSCEAGGQKLSFRLDVAEPKLVFAKEQQAHSEVKAEGASATLSCEVAQ  
AQTEVTWFKDGKLLSSSSKVRVEASGCSRRLLVVQQAGKADAGEYSCEAGGQKLSFRLDVAEPKLVFAKEQQAH  
SEVKAEGASATLSCEVAQAQTEVTWFKDGKLLSSSSKVRVEASGCSRRLLVVQQAGKADAGEYSCEAGGQKLS  
FRLDVAEPKLVFAKEQQAHSEVKAEGASATLSCEVAQAQTEVTWFKDGKLLSSSSKVRVEASGCSRRLLVVQQ  
AGKADAGEYSCEAGGQKLSFRLDVAEPKLVFAKEQQAHSEVKAEGASATLSCEVAQAQTEVTWFKDGKLLSS  
SSKVRVEASGCSRRLLVVQQVQKADAGEYSCEARGQKLSFRLDVAEAEBSQI PERPSRREPLVVEKHETIILTAT  
IAAPSVAAVTWLKDGV EIRRSKRHEATSLGDTHLTVRGAQVLD SAIYSCRVGKEGQDFPVQVEEVAAKFSKP  
LEPVEGELGGTVMLVCELSPEQAEVVWRCGNTQLRPGKRFQMTSEGPRRTLTVSGLREDDAEYVCESRDDRT  
SARLTVKVPRVVKFTSGLSAMVAEEGQEA TFQCVVSPSDAGVTWYKDGMLQLPSEKFMVMEVGASRSLTILGL  
TLEDAGQVTHVEAEGSSAALRVREAPVLFKKKLEPQTVEERTSVTLEVELTRPWEVVKWTRNAAVLTPSENV  
EIRAEGARLCLVLRSGVFADRGFEGCETPDDKTQAKLNVEMRQVRLVVRGLQEVAEQGTASMDVELSHA EVE  
GSWTRDGLRLQPGPKCHLAVQGPVHILTL SALQPQDSGLVAFRAEGVHTSARLIVTELPVSFTRVLQDVVATQ  
KEKVTLECELSRPVDVRWLKDGVELRAGKAI GIVAQGTCSRLVIYRCETGDQGVVCDALDAQTSASLRVQGR  
TYTLIFRRVLAEDAGEVKFVAENAESRAHLRVKELPVTLLRPLRDKIAMEKHRGVLECCQVSRASAQVRWFKGG  
VELQSGPKYEVVSDGLYRKLVIN DVQPEDEDYTC DAGNVKTS AQFFVEEQSITIVRGLKDMTVMFPAPAWFE

CETSIPSVRPPKWLKGTVLQAGGNVLEQDGTVHRLTLHKTCSTMTGPHFTIGKSRSSAQLVVS DIPVVLTRPLEPKAGRELQSVVLSCDFRPAPKAVQWYKDDTPLSPSEKFKMALEGQMAELRILRLTPADAGVYRCQAGSAQSSAEVTVAREVTVIQPLQDAEAMEEGRVCFSCELSHKDEDIEWSLNGTPLYNDSFHEISHEGCLHTLVLKSVRQADTGTVCATSPKVSVSARLVVKGKPVVFLKALDDVSAEERGTTLQCEVSDPEARVVWRKDGVELGSPDKYDFLHKAGARGLTVHDLSDHEDAGLYTCQVGSKETQSKVSVHDLHVGITKRLKTVEVLEGESCSFECVLSHESPSDFAVWTVGGKTVGGSGHFHAVRQGRKYTLTVKDAALSDAGEVVFVGLGLTSKASLIIRERPVDITKPLEDQRTTLGEDVMLSCELSRAGTSVRWLKDGKAIKRSQKYDLLSEGTRAVLVVRKASLKDSGEYTCETEASKSTAKLCVEEKANRFTTEELADLQVEEKGRAVFTCKTEHPASVVTWRKGLLELRASGKHVPSQEGTLTKLTINALERTDSDTYTCDIGQARTQARLLVHGQKVRVIEDLEDTAVQEGSSAKFCCRIAPADYGPVHWFLDKTPLHSNELNEITVQPGGYHVLTLRQLALKDSGTVYFEAGDQRTSAALRVTEKPSIFSRPLTDVTVTEGEDLTLVCETTTVDSSVRWTKDGKTLRPSARCQLSHEGCQAQLLITATTPQDGGRYKCEIGGASSSSIVRVHALPVRFRESLKDVEVPEGKAA TLRCVLSVAAPVEWRHGDDVLKSSNKYSLRQEGAVLELVIRDLQPDQSGQYSCSFGDQTTSATLTVKTSAAQFVGKLRNKEATEGTTVTLRCELTKEAPVEWKKGTETLRNGDKYSLKQDGAVCELQICSLLVADAGEYSCVCGQEKTSATLTVKALLVHFVRRLSKEATEGDTTTLQCELSKAAPVEWRKGTETLRDGDYSLKQDGAVCELQIRSLTIADAGEYLCTCGQEKTSATLTVRALPAKFKDSLKNEEATEGTTATLSCELSKAAPVTWKKGPKTLQSGDKYVLRQDGAVCGLQIHGLTMADAGEYSCVCGQEKTSATLTVRGLPAKFIEDLRSQEATEGATAILRCELSKAAPVEWRKGETLRDGDYSLRQDGAVCELQIRGLAVVDGTYSLSLPTKFTTEGLRNEEATEGTMATLRQMSKAAPVEWRKGETLRDGDYSLRQDGAMCELQIRGLTIEDSGEYTCVCGQEKTSATLSVKALPPRFIEDLRSQEATEGTMATLRQMSKAAPVEWRKGETLRDGDYSLRQDGAMCELQIHDLAVEDTGEYSCVCGQEKTSATLNVKALPPRFIEDLRSQEATEGTMATLRQMSKAAPVEWRKGETLRDGGYSLRQDGAVCELQIHDLDVEDAGQYSCVCGQEKTSAVLTVDALPPKFTTEGLKKEEATEGTMVTLRQMSKEATVEWRKGAKTSLDGGYSLRQDGAMCELQICGLAVEDAGEYSCVCGQEKTSATLSVKALPPRFIEDLRSQEATEGTMATLRQMSKAAPVEWRKGSKTLRDGDRYSLRQDGAMCELQICDLAVEDTGDYSCVCGQEKTSATLSVKAPQVVFQQPLQNLQAEEGSMASLRCELSVPNAAMVWSKGGLELQGDTRREARQQCVAELLLRDLRREDAGEYSCCTCGSQTTSATLMVTAAPVRFRLRLQAQDVDEGATARLRCELSREAVSVEWRKGSLLQFPKAKYQMVQEGTTAELLVHGVEQEDAGEYTC DAGHTQSIARLSVRAPKPKFKTDLQSTASEAGGTARLCCQLSEAEQVGTQVWLKEGVELHVGSKYEMRRQWAVCELLIHGLEAKDTEYACLVGGQKTLASLRVKEPEVTVIRGLVDMEVQADEDEVEFTCKVVSQAGATDVQVHGLQVPLQSNNEVTEVAVLADGCTHVLQKGVTLLEDAGTVSFHVGGLSSAQLTVRVPEVTVLEPLKDVQLSEGQDAHFRCRLSRASGQEARWALGGVPLQCNEMNDITVEQGTLYLLTLHKVTLLEDAGTITLQVGCSSSEAKLVAKNTVLRGLENVDALEGGEALFECQLSQPEVAHAHTWLLDDEPVHTSEKVEVVYFENGLRHLLLLKLNKPKQDSCRVTFLAGDVVTS AFLTVRALPDPPEDAEVVGRSDHSVTLVSWVAPMSDGGGGLCGYRVMKEASTGQWQLCHDLVPGPECVDDLVPGKTYRFRVAAVGPAGAGEPVHLPQMVKIAPAPAPAPAPAPAPAPETRAVVGEDICLELEVAADGGVEVWHKGTERRIQPGGHFEVLSRGQRQMLVIKGFRTEDQGEYRCGPIQGLPSSGAATFNVMVMTSGSGDEVPAQPSLPPEAAQEGDLHLLWEALARKRRMSREPTLDSISELPEEDSRVQHLRQEAETAPDLSEGYSTADELARTGEADLSHTSSDDES RAGTTPSLVTYLKKAGGPGISPLASKHEAQVTTSVKPKQKQEPVVPVTPCPPPGDLSAADLMDPSLDKAAVKIQAFKGYKVRKEMKQEGPVFSRTFGDTEAQVGDVLRLECVLATKTDMRACWLKDGIELTDGRHYHIDQLKDGTC SLLVTGLAPTDSGRYTCQVSTKSGRVSHSACVVVSGTESEAESSSGGELDDAFRRAARRLHRLFRTKSPAELS EEELFLSADEGPGEPEEPADWQTYREDENFVCIRFESLAEARQAVTCFRNMFMATMGIGVEISLGEQGPVGVEMRIGKVAPTPTPAVPLAKTPGLQTSDAAPVFLTELQNDVQDGYPMSFDCVVTGQPVPSVRWFKDGKLLLEDDHYMINEDQQGGHQLIITAVVPADMGVYRCLAENSMGVSSSTKAEALRVELTSTDYDTAADATETSSYFSAQGYLSSREQEGTESDEGQLPQVLEELKDLQVAPGTRLAKFQLKVKGYPAKLYWFKDGQPLTSDHIRMTDKKTLHTLEIVSVTREDSDGQYAAIISNAVGAAYSSARLLVVRGPEPEEKPASDVHERLVPPRILEKFTPKKVKRGSSITFSVKVEGHPAPSVHWLKEEAKEGVLWIGPDTPGYTMASSSKQHSVLVLDVGRQHOGTYTICIATNPAGQALCSASLHISGLAKEEEEQERVKEALISSFLQGTSAQVSAQMSSESAGFADLVGQSKGESLVAAEEAHSHLSLAEVGTETEEFLQKLT SQITEMVSAKISQAKLQVPGGDSDEETKTPSASPRHGRSRPSSSVQESSSESEDGDSRGEIFDIYVVTADYLPLGAEQDAIILREGQYVEVLDSAHPLRWLVRTKPTKSSPSRQGWVSPAYLDKRLKLSPEWGPTEAPEFPGEAVSEDEYRTRLSSVIQELLSSEQAFVGLQFLESHHMKHLERSPRVPAAVASQKTVIFRNVQDISHFHSSFLKEIQCGCTDDDVAMCFIKNQEA FEKYLEFLVGRVQAESVVVSTPVQEFYKKYAEETLSAKDPTQPPPPLOHYLEQPVERVQKYQALLKELIRNKARNRQNCALLEQAYAVVSALPQRAENKLVSLMENYPGTLEALGEPVIRQGHFIVWEGAPGAMPWKGNHRHVFVFRNYLVICKPRRDSRTDFTSYVFRNMMKLSSIDLNDQVEGDDRAFEVWHEREDSVRKYLQARTVIKNSWVKEICGIQORLAQPVWRPPEFEEELADCTAELGETVKLACRVGTGPKPIVSWYKD GKPVEVDPHHILIEDPDGSCSTLILDNLGTIGDSGQYMCFAASAAGNASTLGKILVQVPPRFVNKVRATPFVEGEDAQITCTVEGAPYPQIRWYKDGTLAPGNRYRMLNEPRSGVVLVLIQAASKEDLGHYECELVNRILGSTRGGGELYMQSPALRARDQHHREQIVAAVEGAPSMQVTEIDVQVQVGDMAQFDAVIEGHPPPIVTVYKGSTQLTSSARLSQRQDGTYSLVLTVDVAPHDAVYTCVANNAGGVLCQAEELLVHGGDKLDAENQVYRRKLSHFYDVQEEIGRGVFGFVKRVQHKGNMFCAAKFIPLRSKTRAQAYQERDILATLGHPLVTGLLDQFETRKTLLILILELCSSEELDLRLFKKGVVTEAEVKVYIQQLVEGLHYLHSHGILHLDIKPPNIMVHPAREDIKICDFGFAQKITPSEPOYSKYGSPFVVSPEIIEQNPVSEGSDIWAMGVISYLSLTCSSPFAGESDRATLLNVLEGRVSWSSPTAAHLSEDA

DFIKATLQRTPRARPSTSQCCLAHWPFLKSMPEAAEHFINTKQLKFLLRASRWQRSLMSYKSIILVMRSIPELLO  
GPPDPSLGVARHLRGEASGASSSSSSDNEAPFARAKSLPPSPVTHSPLLHPRGFLRPSASLPEETEASMP  
TADAAVPASPQASAGPPASPGCVPRHSVSSLFYQQAGEGAERGNKTSKAKRHPARRRHLLKGGYIARALPGLR  
EPLMEYSLLEEEAAREEQASLMTKTPSFETALRLPSSSVREVPGRSHSLDNPPVTTGSPPEACKEQLLFPST  
GLTHETAKDRGHKEGFLQESVFPFPMMSGDSRPGKQEGSSQDSCRGKPASSCHSELGSGSQEGCGPPSSQSLG  
SLPPQSLKKELESTSCGPLFSEQPQAAPFPTQVSPLLGSEKEPQDGSLSSEGPVFPVSSSPGSASQVDASLDT  
LSEAGDTCDFTPPPQRPQEQATTRKFSLESRRGGYAGVAGYGTFAFGGDAGGMLGGQPLWARMWAVSOSSEEQ  
DEAATESPPLESLEGPAAEASGVPLRTSPSLTPWEEVEQVSLVQIRDLSDGDAEAADTISLDISEVDPAYLNL  
DLYDIKYLPPFEFMI FRRVPKPIEQPESPGSETEAGQLADFLLEAAWPPWPGELGLRAGLEITEEPEEPGDLEA  
LLGEAAVGRKRKWSPSRGLFQFPGRCLSGEPELGLRQRVKASMAHISRILKGRPEGPEREGPPRKKAGLAS  
FRLSGLKGRDQELSDEAVVLGQSVTLACQVLAQPTAQATWSKDGVLLESSGHLLISSTLKNFQLLTLIVVKEE  
DLGTYTCCVSNPLGTAVTTGVLKKAERPSSSPRPEVGEYKDAVLLVWKPVESECGPVTYIVQCCIEGGSWTTL  
ASDISDCCYLTKLSRGGMYIFRTACVSKAGMPYSSPSEQVLLGGPNHLASEEESSRGRPAQLLPSTKTF  
QMQIRRRGRFSVVRQCREKASGRALAAKIVPYQPEDKTAVLREYEALKRLHHPHLAQLHAAYLSPRHLVLI  
LELCSGPELLPSLAERESYSESDVKDYLWQMSATQYLHAQHILHLDLRSNMMVTEYNLLKVIDLGNASLDQEK  
VPAPENFKDYLETMAPELLEGQAVPQTDIWAIGVTAIFIMLSGEYPESEGETRDLQKGLRKLIRLSRCYAGL  
SGGAVAFLOSSLCAQPWGRPCASTCLQCGWLTEEGPTGSRPTPVTFTVRLRAFVREKRRRALLYKKNH  
LAQVR\*

>rs47781492\_ENSMUSP00000049737\_c.19776:G>A\_p.E6593K  
ENSMUST00000052872.15|Obscn-203|ENSMUSG00000061462|-|chr11:g.58921977:C>T  
MDHSFSGAPRFLTRPKAFVSVGKDATLSCQIVGNPTPHVSWEKDRQFVEAGARFRLAQDGDVYRLTILDLAL  
GDSGQYVCRARNAIGEFAAVGLRVDSEGTCAEQAPHLLRPTSIRVREGADATFRCRVGGSQPAPVSWSKDG  
RRLGPPDAPHVRVEEHGESSALRIRSARPRDGGTYEVRAENPLGSASAAAALVVDSDAEVAGPPGTSTATLLA  
HLQQRRREAMRAEGIPPSPPGAGTRTCTVTEGKHARLSCFVTGEPKPKETVWKKDQGLVTEGRRHVVEDEQENF  
VLKILFCCKQSDRGLYTCTASNVLVGGTYSSVLLVVVREPTVPFKKRLQDLEVREKESATFQCEVAQAPATEAAWFK  
EETRLWASAKYDIEEETERRLTVRNVSADDDAVYICETTEGSRVAELSVQGNLPRKTAVRTGDTAIF  
WVELAVPEGPVVRVLRVAITAEGDCHTLTITFQCTLEDMGEVAFVSGGCRTTTTQFCVSAAPRRPPL  
YPPADPVVKAKESSVTLWSAPPHGDRPVTIDGYVLEKRLKLGAYAWSRCHEAGWLATTEFTITGVAAEEDGFQ  
FRVSAINHFGQGPYLEFPGMTMLVPLAVKTPKAVEAVEGGEVTFVSDLTVASSGEWFLDGEALKASSIYVI  
RCDRTRHMLTIREVPARLHGAQLKVFANGIETSIQMVVRAALGLPSSKLPAAAAREVLAQLHEEAQLLAE  
LSDQAAAVTWLKDGRELSLGPYEMQVSAGRRALLVRDVAQDDAGLYECVSRGSRRTAYQLLVQEPKLVFAKQQA  
HSEVKAEAGNSATLSCEVTQAQTEVTWFKDGKLLSSSSKVRMEASGCSRRLVVQQAGKADAGEYSCEAGGQKLS  
FRLDVAEPKLVFAKQQAHSSEVKAEAGASATLSCEVAQAQTEVTWFKDGKLLSSSSKVRMEASGCSRRLVVQQ  
AGKADAGEYSCEAGGQKLSFRLDVAEPKMFVFAKEQQARSEVKAEAGASATLSCEVAQAQTEVTWFKDGKLLSS  
SSKVRMEASGCSRRLVVQQAGKADAGEYSCEAGGQKLSFRLDVTEPKLVFAKEQQARSEVKAEVGNASATLSCE  
VAQAQTEVTWFKDGKLLSSSSKVRMEASGCSRRLVVQQAGKADAGEYSCEAGGQKLSFRLDVAEPKLVFAKEQ  
QARSEVKAEAGNSATLSCEVAQAQTEVTWFKDGKLLSSSSKVRMEASGCSRRLVVQQAGKADAGEYSCEAGGQ  
KLSFHLDVTEPKLVFAKEQQAHSEVKAEAGASATLSCEVAQAQTEVTWFKDGKLLSSSSKVRMEASGCSRRLV  
VQQAGKADAGEYSCEAGGQKLSFRLDVAEPKLVFAKEQQARSEVKAEAGASATLSCEVAQAQTEVTWFKDGK  
LSSSSKVRVEASGCSRRLVVQQAGKADAGEYSCEAGGQKLSFRLDVAEPKLVFAKEQQANSEVKAEAGASATL  
SCEVAQAQTEVTWFKDGKLLSSSSKVRVEASGCSRRLVVQQAGKADAGEYSCEAGGQKLSFRLDVAEPKLAFA  
KEQQAHSEVKAEAGASATLSCEVAQAQTEVTWFKDGKLLSSSSKVRVEASGCSRRLVVQQAGKADAGEYSCEA  
GGQKLSFRLDVAEPKLAFAKEQQAHSEVKAEAGASATLSCEVAQAQTEVTWFKDGKLLSSSSKVRVEASGCSR  
RLVVQQAGKADAGEYSCEAGGQKLSFRLDVAEPKLAFAKEQQAHSEVKAEAGASATLSCEVAQAQTEVTWFKD  
GKLLSSSSKVRVEASGCSRRLVVQQAGKADAGEYSCEAGGQKLFRLDVAEPKLMFAKEQQAHSEVKAEAGAS  
ATLSCEVAQAQTEVTWFKDGKLLSSSSKVRVEASGCSRRLVVQQAGKADAGEYSCEAGGQKLSFRLDVAEPK  
VFAKEQQAHSEVKAEAGASATLSCEVAQAQTEVTWFKDGKLLSSSSKVRVEASGCSRRLVVQQVQKADAGEYS  
CEARGQKLSFRLDVADTRLMFAKEQQARTEVKAEAGNSATLSCEVAQAQTEVTWFKDGKLLSSSSKVRVEASG  
CSRRLVVQQAGKADAGEYSCEAGGQKLSFRLDVAEAEESQIPERPSRREPLVVKEHETIILTATIAAPVAAVT  
WLKDGVEIRRKRHEATSLGDTHLTVRGAQVLDSAIYSCRVGKEGQDFPVQVEEVAAKFSKPLEPVEGELGG  
TVMLVCELSPEQAEVWRCGNTQLRPGKRFQMTSEGPRRTLTVSGLREDDAEYVCESRDDRTSARLTVKVP  
VVKFTSGLSAMVAEEGQEAATFQCVVSPSDAGVTWYKDGMLQPSSEKFMVMEVSGASRSLTILGLTLEDAGQVTV  
EAEGASSSAAALRVREAPVLFKKKLEPQTVEERTSVTLLEVELTRPWPPEVKWTRNAAVLTPSENVEIRAEGARHC  
LVLRSVGFADRGFFGCEPDDKTQAKLNVEMRQVRLVRLQVEVEAKEQGTASMDVLSHAEVEGSWTRDGLRL  
QPGPKCHLAVQGPVHILTLALQPDSSGLVAFRAEGVHTSARLIVTELPVSFTRVLQDVVATQKEKVTLECEL  
SRPVDVRWLKDGVELRAGKAIGIVAQGTCSRSLVIYRCETGDQGVVCDALDAQTSASLRVQGRTYTLIFRRVL  
AEDAGEVVFVAENAESRAHLRVKELPVTLLRPLRDKIAMEKHRGVLECVSRASAQVRFWFKGGVLEQSGPKYE  
VVS DGLYRKLVIN DVQPEDEDTYTC DAGNVKTS AQFFVVEQSITIVRGLKDMTVMPEPAPAWFECETSIPSVRP



PKWLLGKTVLQAGGNVGLQDGTVHRLTLHKTCSTMTGPVHFTIGKSRSSAQLVVSDDIPVVLTRPLEPKAGRE
LQSVVLSCDFRPAPKAVQWYKDDTPLSPSEKFKMALEGQMAELRILRLTPADAGVYRCQAGSAQSSAEVTVEA
REVTVIQPLQDAEAMEEGRVCFSCELSHKDEDEIWSLNGTPLYNDSFHEISHEGCLHTLVLSVRQADTGTVC
ATSPKVSVSARLVVKGKPVVFLKALDDVSAEERGTLTLQCEVSDPEARVVWRKDGVELGPSDKYDFLHKAGAR
GLTVHDLSDHEDAGLYTCQVGSKETQSKVSVHDLHVGITKRLKTVEVLEGESECSFECVLSHESPSDPAVWTVGG
KTVGGSGHFHAVRQGRKYTLTVKDAALSDAGEVVSFLGLTSKASLIIRERPVDITKPLEDQRTTLGEDVMLS
CELSRAGTSVRWLKDGKAIKRSQKYDLLSEGTRAVLVVRKASLKDSGEYTCETEASKSTAKLCVEEKANRFTE
ELADLQVEEKGRAVFTCKTEHPASVVWTRKGLLELRASGKHVPSQEGTLKLTINALERTDSDTYTCDIGQAR
TQARLLVHGQKVRVIEDLEDTAVQEGSSAKFCCRIAPADYGPVHWFLDKTPHLSNELNEITVQPGGYHVLTLR
QLALKDSGTVYFEAGDQRTSAALRVTEKPSIFSRPLTDVTVTEGEDTLVCETTTTVDSSVRWTKDGKTLRPSA
RCQLSHEGCAQQLLITATTPQDGGRYKCEIGGASSSSIVRVHALPVRFRESLKDVEVPEGKAATLRCVLSVA
APVEWRHGDDVLKSSNKYSLRQEGAVLELVIRDLQPDQSGQYSCSFGDQTTSATLTVKTSQAQVFGKLRNKEA
TEGTVTVLRCCLTKEAPVEWKKGTETLRNGDKYSLKQDGAVCELQICSLLVADAGEYSCVCGQEKTSATLTVK
ALLVHFVRRRLRSKEATEGDTTTLQCELSKAAPVEWRKGTETLRDGDYSLKQDGAVCELQIRSLTIADAGEYL
CTCGQEKTSATLTVRALPAKFKDSLKNEEATEGTTATLSCELSKAAPVTWKKGPKTLQSGDKYVLRQDGAVCG
LQIHGLTMADAGEYSCVCGQEKTSATLTVRGLPAKFIEDLRSQEATEGATAILRCELSKAAPVEWRKGETLQ
DGDYSLRQDGAVCELQIRGLAVVDGTYSLSLPTKFTTEGLRNEEATEGTMATLRCQMSKAAPVEWRKGETLR
DGDYSLRQDGAVCELQIRGLTIEDSGEYTCVCGQEKTSATLSVKALPSRFIEDLRSQEATEGTMATLRCQMS
KTAPVEWKKGSETLRDGGYSLRQDGPVCELQICDLAVEDAGEYSCVCGQEKTSATLSIKALPPRFIEDLRSQ
EATEGTMATLRCQMSKAAPVEWRKGETLGDGGYSLRQNGAVCELQIHDLAVEDTGEYSCVCGQEKTSATLN
VKALPPRFIEDLRSQEATEGTMATLRCQMSKAAPVEWRKGETLRDGGYSLRQDGAVCELQIHDLVEDAGQ
YSCVCGQEKTSAVLTVDALPPKFTTEGLKKEEATEGTMVTLRCQMSKEATVEWRKGAKTLSDGGRYSLRQDGAM
CELQICGLAVEDAGEYSCVCGQEKTSATLSVKALPPRFIEDLRSQEATEGTMATLRCQMSKAAPVEWRKGET
LRDGDYSLRQDGAVCELQIRDLAVEDAGEYLCVCGQEKTSATLSVKALPPRFIEDLRSQEATEGTMATLRCQ
MSKAAPVEWRKGSKTLRDGDYSLRQDGAVCELQICDLAVEDTGDYSCVCGQEKTSATLSVKALPPRFIEDLR
SQEAREGTVATLRCRMSKAAPVEWRKGETLKDGDYSLRQEGNLCELQIRDLAVEDTGEYSCVCGQEKTSAT
LSVKALPAKFIEDLRSQEAPESSTVTLRCKLSKASVWKKGSETLRNGARYSLRQDGAVCELEIRDLTVEDT
GEYSCTCGQERTSATLSIMAPQVVFQQPLQNLQAEEGSMASLRCELSVPNAAMVWSKGGLELQGDTRREARQQ
GCVAELLLRDLRREDAGEYSCCTGSQTTSATLMVTAAPVRFLRELQAQDVDEGATARLRCELSREAVSVEWRK
GSLQLFPCAKYQMVQEGTTAELLVHGVEQEDAGEYTCDAHTQS IARLSVRAPKPKFKTDLQSTEQEAGGTAR
LCCQLSEAEPTPVQWLKEGVELHVGSKYEMRRQGAVCELLIHGLEAKDTGEYACLVGQKTLASLRVKEPEV
TIVRGLVDMEVQADEDEFTCKVSAQAGATDVQWHLQGLPLQSNVEVAVLADGCTHVLQKGVTLQDAGTVS
FHVGGSSSAQLTVRVPEVTVLEPLKDVQLSEGQDAHFRCRLSRASGQEARWALGGVPLQCNEEMNDITVEQGT
LYLLTLHKVTLQDAGTITLQVGSSEAEQKVTAKNTVLRGLENVDALEGGALFECQLSQPEVAHTWLLDD
EPVHTSEKVEVVYFENGLRHLHLLKLNKLPQDSCRVTFLAGDVVTS AFLTVRGRWLEVLPPHDASVKAGMQVR
FTCILLSEAVPVGEATWYINGAAIQPDDTDWTVTTDGSHHALTLNAQPQHAGEVTFAAARDAVASARLSVLALP
DPPEDAEEVGRSDHVSVTLVWVAPMSDGGGGLCGYRVMKEASTGQWQLCHDLVPGPECVDDLVPGKTYRFRV
AAVGPAGAGEPVHLPQMVKIAPAPAPAPAPAPAPAPETRQAVVGEDICLELEVAADGGEVVWHKGTERRIQPGG
HFEVLSRQORQMLVIKGFRTEDQGEYRCGPIQGLPSSGAATFNVVMTSGSGDEVPAQPSLPPEAAQEGDLHLL
WEALARKRRMSREPTLDSISELPEEDSRVQHLRQEAETAAPDLSEGYSTADELARTGEADLSHTSSDDESRAG
TPSLVTVLKKAGGPGI SPLASKHEAQVTT SVKPKQKQEPVVPTCPPPGDLSAADLMDPSLDKAAVKIQAAFKG
YKVRKEMKQOEGPVFSRTFGDTEAQVGDVLRLECVLATKTDMRACWLKDGIELTDGRHYHIDQLKDGTCSSLLV
TGLAPTDSGRYTCQVSTKSGRVSHSACVVVSGTESEAESSSGGELDDAFRRRAARLHRLFRTKSPAELSEEEL
FLSADEGPGPEPEPADWQTYREDENFVCIRFESLAEARQAVTCFRNMFATMGIGVEISLGEQGPGRVEMRIGK
VAPTPTPAVPLAKTPGLQTSDAAPVFLTELQNDQDVQDGYPMSFDCVVTGQPVPSVRWFKDGKLLLEDDHYMIN
EDQQGGHQLIITAVVPADMGVYRCLAENSMGVSSTKAELRVELTSTDYDTAADATETSSYFSAQGYLSSREQE
GTESDEGQLPQVLEELKDLQVAPGTRLAKFQLKVKGYPAKLYWFKDQPLTSDHIRMTDKKTLHTLEIVSV
TREDSGQYAAYSNAVGAAYSSARLLVRGPSEPEEKPASDVHERLVPPRILEKFTPKKVKRGSSTFVSVKVEG
HPAPSVHWLKEEAKEGVLWIGPDTPGYTMASSSKQHSVLVDVGRQHOGTYTCIATNPAGQALCSASLHISGL
AKEEEQERVKEALISSFLQGTSAVSAQMSEAGFADLVGQSKGESLVAEEAHSHLSLAEVGTTEFLQKLT SQ
ITEMVSAKISQAKLQVPGGDSDEETKTPSASPRHGRSRPSSSVQESSSESEDGDSRGEIFDIYVVTADYLPGLG
AEQDAIILREGQYVEVLDSAHPLRWLVRTKPTKSSPSRQGWVSPAYLDKRLKLSPEWGPTEAPEFPGEAVSED
EYRTRLSSVICHELLSSEQAFVGLKQFLESHHMKHLVSRPVAASQKTVI FRNVQDISHFHSSFLKELQGC
GTDDDVAMVICIKNQEA FEKYLEFLVGRVQAESVHVSPTVQEFYKKYAEBETLSAKDTPQPPPPPLQHYLEQVPE
RVQKYQALLKELIRNKARNRQNCALLEQAYAVVSALPQRAENKLVHSLMENYPGTLEALGEP IRQGHFIVWEG
APGARMPWKGNHRHVF LFRNYLVICKPRRDSRTDFTSYVFRNMMKLSSIDLNDQVEGDDRAFEVWHEREDSVR
KYLQARTVI IKNSWVKEICGIQORLAQPVWRPPEFEELADCTAELGETVKLACRVTGTPKPIVSWYKDGKP
VEVDPHHILIEDPDGSCTLIIDLNLTGIDSGQYMCFAASAAGNASTLGKILVQVPPRFVNVKVRATPFVEGEDAQ

ITCTVEGAPYPQIRWYKDGTLTLLAPGNRYRMLNEPRSGVLVVLVIQAASKEDLGHYECELVNRLGSTRGGGELYM  
 QSPALRARDQHHREQIVAAVEVTEQETKVPKKTVIIEETITTTVVKSPRGRRQSPGKSPSRSPRRSASPRRPG  
 LLAPERLYPPGTSPSRRLVEVEQGRKAPVPALYVTEAEVHAPASQSQPKWLEVEETIEVRVKKTGSRGASPVRE  
 MTSRGEGLIFTLPGGI PGRDPNANNNSNKS SVYQEARTWGPVAVHVGEFFIFQVDSVGNVDVWAASPEPEQVRA  
 SQKEENTERQEGCSDGENTFLMEEPQDTSLQGRDPKILTHNGRVLTLADLEDYVPQEGETFGCGDSTPSTP  
 DEPPCEVSVLQREISEPTVGQPVLNNGRPPGTGATPSFFRPGSQVHSPESVSFLLREAWSGPVSAAPWTSSSF  
 HTHVQSSVDGSHGSFKTEVSTQTVSFGAVGETVTLHIDPDGGEAPGPSQG\*  
 >rs47781492\_ENSMUSP00000020732\_c.19977:G>A\_p.E6660K  
 ENSMUST00000020732.13|Obscn-201|ENSMUSG00000061462|-|chr11:g.58921977:C>T  
 MDHSFSGAPRFLTRPKAFVSVGKDATLSCQIVGNPTPHVSWEKDRQPVEAGARFRLAQDGDVYRLTILDLAL  
 GDSGQYVCRARNAIGEFAAVGLRVDSEGTCAEQAPHFLLRPTSIRVREGADATFRCRVGGSPQPAVSWSKDG  
 RRLGPPDAPHVRVEEHGESSALRIRSARPRDGGTYEVRAENPLGSASAAAALVVDSDAEVAGPPGTSTATLLA  
 HLQQRREAMRAEGIPSPPGAGTRTCTVTEGKHARLSCFVTGEPKPETVWKKDQGLVTEGRRHVVEDEQENF  
 VLKILFCKQSDRGLYTCTASNLVGQTYSSVLVVVREPTVPFKKRLQDLEVREKESATFQCEVAQPAEAAWFK  
 EETRLWASAKYDIEEEGETERRLTVRNVSADDDAVYICETTEGSRVVAELSVQGNLTKLPRKTAVRTGDTAIF  
 WVVELAVPEGPVWRNRNQEEMVAGGRVAITAEGTCHTLTI FQCTLEDMGEVAFVSGGCRTTTTQFCVSAPRRPPL  
 YPPADFPVVKAKTESSVTLWSAPPHGDRPVTIDGYVLEKRLGAYAWSRCHEAGWLATFTITGVAEEGDFQ  
 FRVSAINHFGQGPYLEFPGTMLHVPMLAVKTPLKAVEAVEGGEVTFVSDLTVAASSGEWFLDGEALKASSIYVI  
 RCDRTRHMLTIREVPARLHGAQLKFVANGIETSIQIMVVRAALGLPSSKLPAAAAAREVLAQLHEEAQLLAE LSD  
 QAAA VTWLKDGRELSLGPKEYMQVSAGRRALLVRDVAQDDAGLYECVSRGSRRTAYQLLVQDITDGYRDWGPAG  
 PQKHMCKCAGAKIARYLGSSCYRFLQYDKGVWHLEAALDTRQKGTSSCSLHEKPKLVFAKQQAHSEVKA  
 AGNSATLSCEVTQAQTEVTWFKDGKLLSSSSKVRMEASGCSRRLVVQQAGKADAGEYSCEAGGQKLSFRLDVA  
 EPKLVFAKQQAHSEVKAEGASATLSCEVAQAQTEVTWFKDGKLLSSSSKVRMEASGCSRRLVVQQAGKADA  
 GEYSCEAGGQKLSFRLDVAEPKMFVFAKEQQARSEVKAEGASATLSCEVAQAQTEVTWFKDGKLLSSSSKVRM  
 EASGCSRRLVVQQAGKADAGEYSCEAGGQKLSFRLDVTEPKLVFAKEQQARSEVKAEGVNSATLSCEVAQAQ  
 EVTWFKDGKLLSSSSKVRMEASGCSRRLVVQQAGKADAGEYSCEAGGQKLSFRLDVAEPKLVFAKEQQARSEV  
 KAEAGNSATLSCEVAQAQTEVTWFKDGKLLSSSSKVRMEASGCSRRLVVQQAGKADAGEYSCEAGGQKLSFHL  
 DVTEPKLVFAKEQQAHSEVKAEGASATLSCEVAQAQTEVTWFKDGKLLSSSSKVRMEASGCSRRLVVQQAGK  
 ADAGEYSCEAEGQKLSFRLDVAEPKLVFAKEQQARSEVKAEGASATLSCEVAQAQTEVTWFKDGKLLSSSSK  
 VRVEASGCSRRLVVQQAGKADAGEYSCEAGGQKLSFRLDVAEPKLVFAKEQQANSEVKAEGASATLSCEVAQ  
 AQTEVTWFKDGKLLSSSSKVRVEASGCSRRLVVQQAGKADAGEYSCEAGGQKLSFRLDVAEPKLAFAKEQQAH  
 SEVKAEGASATLSCEVAQAQTEVTWFKDGKLLSSSSKVRVEASGCSRRLVVQQAGKADAGEYSCEAGGQKLS  
 FRLDVAEPKLAFAKEQQAHSEVKAEGASATLSCEVAQAQTEVTWFKDGKLLSSSSKVRVEASGCSRRLVVQQ  
 AGKADAGEYSCEAGGQKLSFRLDVAEPKLAFAKEQQAHSEVKAEGASATLSCEVAQAQTEVTWFKDGKLLSS  
 SSKVRVEASGCSRRLVVQQAGKADAGEYSCEAGGQKLFRLDVAEPKLMFAKEQQAHSEVKAEGASATLSCE  
 VAQAQTEVTWFKDGKLLSSSSKVRVEASGCSRRLVVQQAGKADAGEYSCEAGGQKLSFRLDVAEPKLVFAKEQ  
 QAHEVKAEGASATLSCEVAQAQTEVTWFKDGKLLSSSSKVRVEASGCSRRLVVQQVQKADAGEYSCEARGQ  
 KLSFRLDVADTRLMFAKEQQARTEVKAEGNSATLSCEVAQAQTEVTWFKDGKLLSSSSKVRVEASGCSRRLV  
 VQQAGKADAGEYSCEAGGQKLSFRLDVAEAEESQIPERPSRREPLVVKEHETIILTATIAAPSAAVTWLKDGV  
 EIRRSKRHEATSLGDHTLTVRGAQVLDIAIYSCRVGKEGQDFPVQVEEVAAKFSKPLEPVEGELGGTVMLVC  
 ELSPEQAQEVVWRCGNTQLRPGKRFQMTSEGPRRTLTVSGLREDDAEYVCE SRDDRTSARLTVKVPVVKFTS  
 GLSAMVAEEGQEATFQCVVSPSDAGVTWYKDGMLQLPSEKFMVVEGASRSRLTILGLTLEDAGQVTVAEAGAS  
 SSAALRVREAPVFLFKKLEPQTEERTSVTLEVELTRPWPEVKWTRNAAVLTPSENVEIRAEGARHCLVLRV  
 GFADRGGFFGCETPDDKTQAKLNVEMRQVRLVVRGLQEVEAKEQGTASMDVELSHAEEVGSWTRDGLRLQPGPKC  
 HLAVQGPVHILTLALQPQDSGLVAFRAEGVHTSARLIVTELPVSFTRVLQDVVATQKEKVTLECELSRPVDV  
 RWLKDGVELRAGKAIGIVAQGTCSRSLVIYRCETGDQGVYVCDALDAQTSASLRVQGRTYTLIFRRLAEDAGE  
 VKFVAENAESRAHLRVKELPVTLLRPLRDKIAMEKHGRVLECCQVSRASAVRWFKGGVELQSGPKYEVVSDGL  
 YRKLVINVDQPEDEDTYTC DAGNVKTSAQFFVEEQSITIVRGLKDMTVMPEPAPAWFECETSIPSVRPPKWL  
 LGKTVLQAGGNVGLQDGTVHRLTLHKTCSTMTGPVHFTIGKSRSSAQLVSDIPVVLTRPLEPKAGRELQSVVL  
 SCDFRPAPKAVQWYKDDTPLSPSEKFKMALEGMALRLRLTPADAGVYRCQAGSAQSSAEVTVAREVTVI  
 QPLQDAEAMEEGRVCFSCELSHKDEDEIWSLNGTPLYNDSFHEISHEGCLHTLVLSVSRQADTGTVCATSPKV  
 SVSARLVVKGKPVVFLKALDDVSAEERGLTLTQCEVSDPEARVVRKDGVELGSPDKYDFLHKAGARGLTVHD  
 LSHEDAGLTYKQVTSKETQSKVSVHDLHVGITKRLKTPEVLEGESECSFECVLSHESPSDPAVWTVGGKTVGGS  
 GHFHAVRQRKTYTLTKVDAALSDAGEVVSGLVGLTASKASLIIRERPVDTIKPLEDQRTTLGEDVMLSCLSRA  
 GTSVRWLKDGKAIRKSQYDLSSEGTRAVLVVRKASLKDSGEYTCETEASKSTAKLCEVEKANRFTEELADLQ  
 VEEKGRAVFTCKTEHPASVVTWRKGLLELRASGKHVPSQEGTLTKLTINALERTSDTYTCDIGQARTQARLL  
 VHGGKVRVIEDLEDTAVQEGSSAKFCRIAPADYGPVHWFLLDKTPLHSNELNEITVQPGGYHVLTLRQLALKD  
 SGTVYFEAGDQRTSALRVTEKPSIFSRPLTDVTVTEGEDLTLVCE TTTVDSSVRWTKDGKTLRPSARCQLSH

EGCQAQLLITATTPQDGGRYKCEIGGASSSSIVRVHALPVRFRRESLKDVEVPEGKAATLRCVLSVAAPVEWR  
HGDDVLKSSNKYSLRQEGAVLELVIRDLQPDQSGQYSCSFGDQTTSATLTVKTSQAQFVGKLRNKEATEGTTV  
TLRCELTKAPVEWKKGTETLRNGDKYSLKQDGAVCELQICSLLVADAGEYSCVCGQEKTSATLTVKALLVHF  
VRRLSKEATEGDTTTLQCELSKAAPVEWRKGTETLRDGDYSLKQDGAVCELQIRSLTIADAGEYLCTCGQE  
KTSATLTVRALPAKFKDSLKNEEATEGTTATLSCELSKAAPVTWKKGPKTLQSGDKYVLRQDGAFCGLQIHGL  
TMADAGEYSCVCGQEKTSATLTVRGLPAKFIEDLRSQEATEGATAILRCELSKAAPVEWRKGSSETLKDGDYR  
LRQDGAFCGLQIRGLAVVDGTYSYSLPTKFTTEGLRNEEATEGTMATLRCQMSKAAPVEWRKGSSETLRDGDYR  
LRQDGAFCGLQIRGLTIEDSGEYTCVCGQEKTSATLSVKALPSRFIEDLRSQEATEGTMATLRCQMSKTAPVE  
WKKGSETLRDGGRYSLRQDGPVCELQICDLAVEDAGEYSCVCGQEKTSATLSIKALPPRFIEDLRSQEATEG  
MATLRCQMSKAAPVEWRKGSSETLGDGGYSLRQNGAVCELQIHDLAVEDTGEYSCVCGQEKTSATLNVKALPP  
RFIEDLRSQEATEGTMATLRCQMSKAAPVEWRKGSSETLRDGGYSLRQDGAFCGLQIHDLVEDAGQYSCVCG  
QEKTSAVLTVDALPPKFTTEGLKKEEATEGTMVTLRCQMSKEATVEWRKGAKTLSDDGGYSLRQDGAFCGLQI  
GLAVEDAGEYSCVCGQEKTSATLSVKALPPRFIEDLRSQEATEGTMATLRCQMSKAAPVEWRKGSSETLRDGD  
YSLRQDGAFCGLQIRDLAVEDAGEYLCVCGQEKTSATLSVKALPPRFIEDLRSQEATEGTMATLRCQMSKAAP  
VEWRKGSSETLRDGDYSLRQDGAFCGLQICDLAVEDTGDYSCVCGQEKTSATLSVKALPPRFIEDLRSQEARE  
GTVATLRCRMSKAAPVEWRKGSSETLKDGDYSLRQEGNLCELQIRDLAVEDTEEYSCVCGQEKTSATLSVKAL  
PAKFIEDLRSQEATEGTMATLRCQMSKAAPVEWRKGSSETLRNGARYSLRQDGAFCGLQIRDLVEDTGEYSCT  
CGQERTSATLSIMAPQVVFQQLQNLQAEEGSMASLRCELSVNAAMVWSKGGLELQGDTRREARQQCGVAEL  
LLRDLRREDAGEYSCTCGSQTTSATLMVTAAPVRFRLRELQAQDVDEGATARLRCELSREAVSVEWRKGSQQLF  
PCAKYQMVQEGTTAELLVHGVEQEDAGEYTCDAHTQSIARLSVRAPKPKFKTDLQSTEQEAAGTARLCCQLS  
EAEFGTPVQWLKEGVELHVGSKYEMRRQGAFCGLQIHGLEAKDTGEYACLVGGQKTLASLRVKEPEVTIVRGL  
VDMEVQADEDEFTCKVQAGATDVQWHLQGLPLQSNVTEVAVLADGCTHVLQKGVTLLEDAGTVSFHVGGL  
SSSAQLTVRVPEVTVLEPLKDVQLSEGQDAHFRCRLSRASGQEARWALGGVPLQCNEMNDITVEQGTLYLLTL  
HKVTLLEDAGTITLQVGSSESQAQLKVTAKNTVLRGLENVDALEGGELFECQLSQPEVAHAHTWLLDDEPVHTS  
EKVEVVYFENGLRHLLLLKLNKPKQDSCRVTFLAGDVVTSFAFLTVRGRLEVLPEPHDASVKAGMQVRFTCILS  
EAVPVGEATSWYINGAAIQPDDTDWTVTTDGSHHALTLSNAQPHAGEVTFAAARDAVASARLSVLAALPDPPEA  
EYVGRSDHSVTLSWVAIPMSDGGGLCGYRVEMKEASTGQWQLCHDLVPGPECVDDLVPGKTYRFRVAAVGPA  
GAGEPVHLPQMVKIAPAPAPAPAPAPAPAPAPETRQAVVGEDICLELEVAADGGEVVWHKGTERRIQPGGHFEVLS  
RGQRQMLVIKGFRTEDQGEYRCGPIQGLPSSGAATFNVMVMTSGSGDEVPAQPSLPPEAAQEGDLHLLWEALAR  
KRRMSREPTLDSISELPEEDSRVQHLRQEAETAPDLSEGYSTADELARTGEADLSHTSSDDESRACTPSLV  
YLLKAGGPGISPLASKHEAQVTSVKPQKQEPVPTCPGGDLAADLMDPSLDKAAVKIQAAFQYKVRKE  
MKQQEGPVFSRTFGDTEAQVGDVLRLECVLATKTDMRACWLKDGIELTDGRHYHIDQLKDGTCSLLVTLGLAPT  
DSGRYTCQVSTKSGRVSHSACVVVSGTESEAESSGGELDDAFRAARRLHRLFRTKSPAELSEELFLSADE  
GPGEPEPADWQTYREDENFVCIRFESLAEARQAVTCFRNMFATMGIGVEISLGEQGRGVEMRIGKVAPTVT  
PAVPLAKTGLQTSDAAPVFLTELQNDVQDGYPMSFDCVVTGQVPSVRWFKDGLLEDDHYMINEDQQGG  
HQLLITAVVPADMVGYRCLAEENSMGVSSTKAELRVELTSTDYDTAADATETSSYFSAQYLSREQEGTESDE  
GQLPQVLEELKDLQVAPGTRLAKFQLKVKGYPAKLYWFKDGGPLTSDHIRMTDKKTLHTLEIVSVTREDSG  
QYAAYSNAVGAAYSSARLLVRGPSEPEEKPASDVHERLVPPRILEKFTPKKVKRGSSITFSVKVEGHPAPSV  
HWLKEEAKEKGLVWIGPDTPGYTMASSSKQHSLLVLDVGRQHQTCTIATNPAGQALCSASLHISGLAKEEEQ  
ERVKEALISSFLQGTSAQVSAQMSAESAGFADLVGQSKGESLVAEEAHSHLSLAEVGTTEFLQKLTQITMVS  
AKISQAKLQVPGGDSDEETKTPSASPRHGRSRPSSSVQESSSEEDGDSRGEIFDIYVVTADYPLGAEQDAI  
ILREGQYVEVLDSAHPLRWLVRTPKTKSSPSRQGWVSPAYLDKRLKLSPEWGPTEAPEFPGEAVSEDEYRTRL  
SSVIQELLSSEQAFVGLKQFLESHEHMKHLERSPRVPAAVASQKTVIFRNVQDISHFHSSFLKELQCGTDDDV  
AMCFIKNQEAFAFEKYLEFLVGRVQAESVVVSTPVQEFYKKAETLSAKDPTQPPPPLOHYLEQPVERVQKYQ  
ALLKELIRNKARNRQNCALLEQAYAVVSALPQRAENKLVSLMENYPTLEALGEPHQGHFIWVWEGAPGARM  
PWKGHNHRVFLFRNYLVICPRRDSRTDTFSYVFRNMMKLSIDLNDQVEGDDRAFEVWHEREDSVRKYLLQA  
RTVIKNSWVKEICGIQQLAQPVWRPPEFEEELADCTAELGETVKLACRVTGTPKPIVSWYKDGKPVVDPH  
HILIEDPDGCTLILDLNLTGIDSGQYMCFAASAAGNASTLGKILVQVPPRFVNVKVRATPFVEGEDAQITCTVE  
GAPYQIRWYKDGTLTLLAPGNRYRMLNEPRSGVLVVIQAASKEDLGHYECELVNRLGSTRGGGELYMQSPALR  
ARDQHHREQIVAAVEERRPSP\*

>rs47781492\_ENSMUSP00000151217\_c.17271:g>A\_p.E5758K  
ENSMUST00000219084.3|Obscn-207|ENSMUSG00000061462|-|chr11:g.58921977:C>T  
MDHSFSGAPRFLTRPKAFVVSVGKDATLSCQIVGNPTPHVSWEKDRQFVEAGARFRLAQDGDVYRLTILDLAL  
GDSGQYVCRARNAIEGAFAVGLRVDSEGTCAEQAPHFLRLRPTSIRVREGADATFRCRVGGSPQPAVSWSKDG  
RRLGPPDAPHVRVEEHGESSALRIRSAARPDGGTYEVRAENPLGSASAAAALVVDSAEVAGPPGTSTATLLA  
HLQORREAMRAEGIPSPPGAGTRTCTVTEGKHARLSCFVTGEPKPEVWKKDGLVTEGRRHVVEDEQENF  
VLKILFCKQSDRGLYTCTASNLVGQTYSSVLVVVREPTVPFKKRLQDLEVREKESATFQCEVAQPAEAAWFK  
EETRLWASAKYDIEEGTERRLTVRNVSADDDAVYICETTEGSRVVAELSVQGNLTKLPRKTAVRTGDTAIF

WVELAVPEGPVWRWRNQEEMVAGGRVAITAEGTCHTLTI FQCTLEDMGEVAFVSGGCRTTTQFCVSAAPRRPPL  
YPPADPVVKAKTESSVTLWSAPPHGDRPVTIDGYVLEKRKLGAYAWSRCHEAGWLATTEFTITGVAAEEDGFQ  
FRVSAINHFGQGPYLEFPGTMHLVPLAVKTPKAVEAVEGGEVTFVSDTLTVASSGEWFLDGEALKASSIYVI  
RCDRTRHMLTIREVPARLHGAQLKVFVANGIETSIQMVVRAALGLPSSKLPAAAAAREVLAQLHEEAQLLAEALS  
QAAAVTWLKDGRELSLGPKEYMQVSAGRRALLVRDVAQDDAGLYECVSRGSRRTAYQLLVQDITDGYRDWGPAG  
PQKHMCKCAGAKIARYLGS SCYRFLQYDKGVWHWLEAALDTRQKGTSSCSLHEKPKLVFAKQQAHSEVKA  
AGNSATLSCEVTQAQTEVTFWKDGKLLSSSSKVRMEASGCSRRLLVVQQAGKADAGEYSCEAGGQKLSFRLDVA  
EPKLVFAKQQAHSEVKAEGASATLSCEVAQAQTEVTFWKDGKLLSSSSKVRMEASGCSRRLLVVQQAGKADA  
GEYSCEAGGQKLSFRLDVAEPKLVFAKEQQARSEVKAEGASATLSCEVAQAQTEVTFWKDGKLLSSSSKVRMEASGCSRRLLVVQQAGKADA  
EASGCSRRLLVVQQAGKADAGEYSCEAGGQKLSFRLDVTEPKLVFAKEQQARSEVKAEGASATLSCEVAQAQ  
EVTWTFKDGKLLSSSSKVRMEASGCSRRLLVVQQAGKADAGEYSCEAGGQKLSFRLDVTEPKLVFAKEQQAHSEV  
KAEAGASATLSCEVAQAQTEVTFWKDGKLLSSSSKVRMEASGCSRRLLVVQQAGKADAGEYSCEAGGQKLSFRL  
DVAEPKLVFAKEQQARSEVKAEGASATLSCEVAQAQTEVTFWKDGKLLSSSSKVRMEASGCSRRLLVVQQAGK  
ADAGEYSCEAGGQKLSFRLDVAEPKLVFAKEQQANSEVKAEGASATLSCEVAQAQTEVTFWKDGKLLSSSSK  
VRVEASGCSRRLLVVQQAGKADAGEYSCEAGGQKLSFRLDVAEPKLVFAKEQQAHSEVKAEGASATLSCEVAQ  
AQTEVTFWKDGKLLSSSSKVRVEASGCSRRLLVVQQAGKADAGEYSCEAGGQKLSFRLDVAEPKLVFAKEQQAH  
SEVKAEGASATLSCEVAQAQTEVTFWKDGKLLSSSSKVRVEASGCSRRLLVVQQVQKADAGEYSCEARGQKLS  
FRLDVAAEASQIPEPSPRREPLVVKHEHETIILTATIAAPSVAAVWTLKDGVEIRRSKRHEATSLGDTHTLTVR  
GAQVLD SAIYSCRVGKEGQDFPVQVEEVAAKFSKPLEPVEGELGGTVMLVCELSPEQAEVWRCGNTQLRPGK  
RFQMTSEGPRRTLTVSGLEDDAEYVCESRDDRTSARLTVKVRPVKFTSGLSAMVAEEGQEAFTQCVVSPS  
DAGVTWYKDGMLQPSSEKFMVVEGASRSILTILGLTLEDAGQVTEAEGASSAALRVREAPVLFKPKLEPQT  
VEERTSVTLEVELTRPWPVEVKWTRNAAVLTPSENVEIRAEGARHCLVLRVSGFADRGFFGCETPDDKTQAKLN  
VEMRQVRLVRGLQEVEAKEQGTASMDVELSHAEEVGSWTRDGLRLQPGPKCHLAVQGPVHILTL S ALQPQDSG  
LVAFAEGVHTSARLIVTELPVSFTRVLQDVVATQKEKVTLECELSRPVDVRLKDGVELRAGKAI GIVAQGT  
CRSLVIYRCIEMTDGQGVYVCDALDAQTSASLRVQGRYTLIFRRVLAEDAGEVKFVAENAESRAHLRVKELPVT  
LLRPLRDKIAMEKQVLECCQVSRASAQVRWFKGGVELQSGPKYEVVSDGLYRKLVLINDVQPEDEDTYTC DAG  
NVKTSAGQFFVEEQSITIVRGLKDMTVMPEPAPAWFECETSIPSVRPPKWL LGKTVLQAGGNVGLQDGTVHRLT  
LHKTCSTMTGVPVHFTIGKSRSSAQLVVS DIPVVLTRPLEPKAGRELQSVVLSCDFRPAPKAVQWYKDDTPLSP  
SEKFKMALEGQMAELRILRLTPADAGVYRCQAGSAQSSAEVTVAREVTVIQPLQDAEAMEEGRVCFSCELSH  
KDEDIEWSLNGTPLYNDSFHEISHEGCLHTLVLKSVRQADTGTVCATSPKVSVSARLVVKGKPVVFLKALDDV  
SAEERGTTLTQCEVSDPEARVVWRKDGVELGPSDKYDFLHKAGARGLTVHDL SHEDAGLYTCQVGSKETQSKV  
SVHDLHVGITKRLKTVLEVLEGESCSFECVLSHESPSDPAVWTVGGKTVGGSGHFHAVRQGRKYTLTVKDAALS  
DAGEVVSFVLGLT SKASLIIRERPVDITKPLEDQRTTLGEDVMLSCELSRAGTSVRWLKDGKAIKRSQKYDLL  
SEGTRAVLVRKASLKDSGEYTCETEASKSTAKLCVEEKANRFTTEELADLQVEEKGRAVFTCKTEHPASVVTW  
RKGLLELRASGKHPVQEGLETLKLTINALERTSDTYTCDIGQARTQARLLVHGQKVRVIEDLEDTAVQEGSS  
AKFFCRIA PADYGPVHWF LDKTPLHSNELNEITVQPGYHVLT LRQLALKDSGTVYFEAGDQRTS AALRVTEK  
PSIFSRPLTDVTVTEGEDTLTVCE TTTVDSSVRWTKDGKTLRPSARCQLSHEGCQAQLLITATTPQDGGRYKC  
EIGGASSSSIVRVHALPVRFRFRESLKDVEVPEGKAATLRCVLSVAAPVEWRHGDDVLKSSNKYSLRQEGAVLE  
LVIRDLQPDGSGQYSCSFGDQTTSATLTVKTSQAQFVGKLRNKEATEGTTVTLRCELTKEAPVEWKKGTETLR  
NGDKYSLKQDGAVCELQICSLLVADAGEYSCVCGQEKTSATLTVKALLVHFVRRRLRSKEATEGDTTLQCELS  
KAAPVEWRKGTETLRDGDYSLKQDGAVCELQIRSLTIADAGEYLCTCGQEKTSATLTVRGLPAKFIEDLRSQ  
EATEGATAILRCELSKAAPVEWRKGSSETLKDGDYTLRQDGAVCELQIRGLAVVDGTGYSSLPKFTTEGLRNE  
EATEGTMATLRCQMSKAAPVEWRKGSSETLRDGDYSLRQDGAMCELQIRGLTIEDSGEYTCVCGQEKTSATLS  
VKALPPRFIEDLRSQEATEGTMATLRCQMSKAAPVEWRKGSSETLGDGGYSLRQNGAVCELQIHDLAVEDTGE  
YSCVCGQEKTSATLNVKALPPKFTTEGLKKEEATEGTMVTLRQMSKEATVEWRKGAKTLS DGGYSLRQDGAM  
CELQICGLAVEDAGEYSCVCGQEKTSATLSVKALPPRFIEDLRSQEATEGTMATLRCQMSKAAPVEWRKGSSET  
LRDGDYSLRQDGAVCELQIRDLAVEDAGEYLCVCGQEKTSATLSVKALPPRFIEDLRSQEATEGTMATLRCQ  
MSKAAPVEWRKGSKTLR DGDYSLRQDGAMCELQICDLAVEDTGDYSCVCGQEKTSATLSVKAPQVVFQOPLQ  
NLQAEEGSMASLRCELSVPNAAMVWSKGGLELQGDTRREARQQGCVAELLLRDLRREDAGEYSCTCGSQTTSA  
TLMVTAAPVRFRLRELQAQDVDEGATARLRCELSREAVSVEWRKGSGLQFLPCAQYQMVQEGTTAELLVHGVQE  
DAGEYTC DAGHTQSIARLSVRAPKPKFKTDLQSTEQEAGGTARLCCQLSEAEPTPVQWLKEGVLEHVGSKYE  
MRRQGA VCELLIHGLEAKDTGEYACL VGGQKTLASLRVKEPEVTIVRGLVDMEVQADEDEVEFTCKV SQAGATD  
VQWHLQGLPLQSNEVTEVAVLADGCTHV LQLKGVTLLEDAGTVSFHVGGLS SQAQLTVRVPVETVLEPLKDVQL  
SEGQDAHFRCRLSRASGQEARWALGGVPLQCNEMNDITVEQGTLYLLTLHKVTLLEDAGTITLQVGS CSSEAAQL  
KVTAKNTVLRGL ENVDAL EGG EALFECQLSQPEVAHAHTWLLDDEPVHTSEKVEVYFENGLRHLLLLKLNLPQ  
DSCRVTFLAGDVVTS AFLTVRGWRLEVLEPPHDASVKAGMQVRF TCILSEAVPVGEATWYINGAAIQPDDTDW  
TVTTD GSHHALT L SNAQPQHAGEVTF AARDAVASARLSVLALPDPPEDAEVVGRSDHSVTL S WVA PMSDGGGG  
LCGYRVEMKEASTGQWQLCHDLVPGPECVVDDLVP GKTYRFRVAAVGPAGAGEPVHLPQMVKIAPAPAPAPAP

APAPETRQAVVGEDICLELEVAADGGEVVWHKGTERRIQPGGHFEVLSRGRQMLVIKGFRTEDQGEYRCGPIQ
GLPSSGAATFNVVMTSGSGDEVPAQPSLPPEAAQEGDLHLLWEALARKRRMSREPTLDSISELPEEDSRVQHL
RQEAEETAPDLSEGYSTADELARTGEADLSHTSSDDESRAGTPSLVTYLKKAGGPGISPLASKHEAQVTTSVK
PQKQQEPVVPTCPPPGDLSAADLMDPSLDKAAVKIQAAFKGYKVRKEMKQQEGPVFSRTFGDTEAQVGDVLR
ECVLATKTKDMRACWLKDGIELTDGRHYHIDQLKDGTCSSLVTGLAPTDSGRYTCQVSTKSGRVSHSACVVVSG
TESEAESSSGGELDDAFRRARRLHRLFRTKSPAELSEELFLSADEGPGEPEEPADWQTYREDENFVCIRFE
SLAEARQAVTCFRNMFATMGIGVEISLGEQGRGVEMRIGKVPVTPAVPLAKTPGLQTSDAAPVFLTELQN
QDVQDGYPMSFDCVVTGQPVPVSRWFKDGKLEEDDHYMINEDQQGGHQLIITAVVPADMGVYRCLAENSMGV
SSTKAELRVELTSTDYDTAADATETSSYFSAQGYLSSREQEGTESDEGQLPQVLEELKDLQVAPGTRLAKFQL
KVKGYPAKLYWFKDGOPLTTSDHIRMTDKKTLHTLEIVSVTREDSDGQYAAAYISNAVGAAYSSARLLVGRPSE
PEEKPASDVHERLVPVPRILEKFTPKKVKRGSSITFSVKVEGHPAPSVHWLKEEAKEGVLWIGPDTPGYTMAS
SKQHSVLVLDVGRQHOGTYTCIATNPAGQALCSASLHISGLAKEEEQERVKEALISSFLOGTSQAVSAQMSSES
AGFADLVGQSKGESLVAEEAHSHLSLAEVGTTEFLQKLTSTQITEMVSAKISQAKLQVPGGDSDEETKTPSASP
RHGRSRPSSSVQESSSESEDGDSRGEIFDIYVVTADYLP LGAEQDAIILREGQYVEVLDSAHPLRWLVRTKPT
KSSPSRQGWVSPAYLDKRLKLSPEWGPTEAPEFPGEAVSEDEYRTRLSSVIQELLSSEQAFVQGLQFLESHM
KHLERSPRVPAAVASQKTVIFRNVDISHFHSSFLKELQCGCTDDVAMCFIKNQEAFAFEKYLEFLVGRVQAES
VVVTFVQEFYKKYAEETLSAKDTPPPPLQHYLEQPVERVQKYQALLKELIRNKARNRNCALLEQAYAV
VSALPQRAENKLVSLMENYPGTLEALGEPHQGHFIVWEGAPGARMPWKGHNHRHVFLFRNYLVICKPRRDSR
TDTFSYVFRNMMKLSSIDLNDQVEGDDRAFEVWHEREDESVRKYLLQARTVIKNSWVKEICGIQQRLAQPVWR
PPEFEEELADCTAELGETVKLACRVGTGPKPIVSWYKDGKPEVDPHHILIEDPDGSCSTLIDLNLGTIDSGQY
MCFASAAGNASTLGKILVQVPPRFVNKVRATPFVEGEDAQITCTVEGAPYPQIRWYKDGTLAPGNRYRMLN
EPRSGVLVQVIAASKEDLGHYECLELVNRLGSTRGGGELYMQSPALRARDQHHREQIVAAVEVTEQETKVPKK
TVIIEETITTVVKS PRGRRQSPGKSPSRSPRRSASPRRPGLLAPERLYPPGTSPSRRLEVEQGRKAPVPALY
VTEAEVHAPASQSQPKWLEVEETIEVRVKKTGSRGASPVREMTSRGEGILFTLPGGIPGRDPNANNSNKS SVY
QEARTWGPVAVHVGEPFIFQVDSVGNVDWVAASPEPEQVRASQKEENTERQEGCSDGDENTFLMEEPQD TDSL
QGRDPKILTHNGRVLTLADLEDYVQEGETFQCGDSTPSTPDEPPCEVSVLQREI SEPTVGGQVLLNVGRPPG
TGATPSFFRPGSQVHSPESVFLREAWSGPVSAAPWTSSFHTHVQSSVDGSHGSFKTEVSTQTVSFGAVGET
VTLHIDPDGGEAPGPSQG\*

>ENSMUSP00000158795\_c.18380:G>T\_p.E6127D ENSMUST00000238536.2|Obscn-
210|ENSMUSG00000061462|-|chr11:g.58928485:C>A
MDHSFSGAPRFLTRPKAFVVSVGKDATLSCQIVGNPTPHVSWEKDRQFVEAGARFRLAQDGDVYRLTILDLAL
GDSGQYVCRARNAIGEFAAVGLRVDSEGTCAEQAPHLLRPTSIRVREGADATFRCRVGGSPPAVSWSKDG
RRLGPPDAPHVRVEEHGESSALRIRSARPRDGGTYEVRAENPLGSASAAAALVVDSAEVAGPPGTSTATLLA
HLQORREAMRAEGIPSPPGAGTRTCTVTEGKHARLSCFVTGEPKPEVWKKDGQLVTEGRRHVVEDEQENF
VLKILFCKQSDRGLYCTASNLVGGTYSSVLVVVREPTVFPKKRLQDLEVREKESATFQCEVAQAPATEAAWFK
EETRLWASAKYDIEEGTERRLTVRNVSADDDAVYICETTEGSRVVAELSVQGNLTKLPRKTAVRTGDTAIF
WVELAVPEGPVRWLRNQEEMVAGGRVAITAEGTCHTLTI FQCTLEDMGEVAFVSGGCRTTTTQFCVSAPRRPPL
YPPADPVVKAKTESSVTLWSAPPHGDRPVTIDGYVLEKRLKLGAYAWSRCHEAGWLATTEFTITGVAAEEDFQ
FRVSAINHFGQGPYLEFPGMTMLVPLAVKTPKAVEAVEGGEVTFVSDLTVASSGEWFLDGEALKASSIYVI
RCDRTRHMLTIREVPARLHGAQLKRVANGIETS IQMVVRAALGLPSSKLPAAAAREVLAQLHEEAQLLAELSD
QAAAVTWLKDGRELSLGPKEYMQVSAGRRALLVRDVAQDDAGLYECVSRGSRRTAYQLLVQDITDGYRDWGPAG
PQKHMCKCAGAKIARYLGS SCYRFLQYDKGVWHLEAALDTRQKGKTS SCSLHEKPKLVFAKQQAHSEVKA
AGNSATLSCEVTQAQTEVTWFKDGKLLSSSSKVRMEASGCSRRLVVQQAGKADAGEYSCEAGGQKLSFRLDVA
EPKLVFAKQQAHSEVKAEGASATLSCEVAQAQTEVTWFKDGKLLSSSSKVRMEASGCSRRLVVQQAGKADA
GEYSCEAGGQKLSFRLDVAEPKLVFAKEQQARSEVKAEGASATLSCEVAQAQTEVTWFKDGKLLSSSSKVRM
EASGCSRRLVVQQAGKADAGEYSCEAGGQKLSFRLDVTEPKLVFAKEQQARSEVKAEGVNSATLSCEVAQAQ
EVTWFKDGKLLSSSSKVRMEASGCSRRLVVQQAGKADAGEYSCEAGGQKLSFRLDVAEPKLVFAKEQQARSE
KAEAGNSATLSCEVAQAQTEVTWFKDGKLLSSSSKVRMEASGCSRRLVVQQAGKADAGEYSCEAGGQKLSFHL
DVTEPKLVFAKEQQAHSEVKAEGASATLSCEVAQAQTEVTWFKDGKLLSSSSKVRMEASGCSRRLVVQQAG
ADAGEYSCEAEGQKLSFRLDVAEPKLVFAKEQQARSEVKAEGASATLSCEVAQAQTEVTWFKDGKLLSSSS
VRVEASGCSRRLVVQQAGKADAGEYSCEAGGQKLSFRLDVAEPKLVFAKEQQANSEVKAEGASATLSCEVAQ
AQTEVTWFKDGKLLSSSSKVRVEASGCSRRLVVQQAGKADAGEYSCEAGGQKLSFRLDVAEPKLVFAKEQQAH
SEVKAEGASATLSCEVAQAQTEVTWFKDGKLLSSSSKVRVEASGCSRRLVVQQAGKADAGEYSCEAGGQKLS
FRLDVAEPKLVFAKEQQAHSEVKAEGASATLSCEVAQAQTEVTWFKDGKLLSSSSKVRVEASGCSRRLVVQQ
AGKADAGEYSCEAGGQKLSFRLDVAEPKLVFAKEQQAHSEVKAEGASATLSCEVAQAQTEVTWFKDGKLLSS
SSKVRVEASGCSRRLVVQQAGKADAGEYSCEAGGQKLFRLDVAEPKLVFAKEQQAHSEVKAEGASATLSCE
VAQAQTEVTWFKDGKLLSSSSKVRVEASGCSRRLVVQQAGKADAGEYSCEAGGQKLSFRLDVAEPKLVFAKEQ
QAHSEVKAEGASATLSCEVAQAQTEVTWFKDGKLLSSSSKVRVEASGCSRRLVVQQVQKADAGEYSCEARGQ

KLSFRLDVADTRLMFAKEQQARTEVKAEAGNSATLSCEVAQAQTEVTWFKDGKLLSSSSKVRVEASGCSRRLV
VQQAGKADAGEYSCEAGGQKLSFRLDVAEAEESQIPERPSRREPLVVKEHETIILTATIAAPSVAAVTWLKDG
EIRRKRHEATSLGDTHTLTVRGAQVLDIAIYSCRVGKEGQDFPVQVEEVAAKFSKPLEPVEGELGTVMLVC
ELSPQEAEVWRCGNTQLRPGKRFQMTSEGPRTTLTVSGLREDDAEYVCESTRDDRTSARLTVKVPVVKFSTS
GLSAMVAEEGQEATFQCVVSPSDAGVTWYKDGMLQPSSEKFMVVEGASRSILTILGLTLEDAGQVTVAEAGAS
SSAALRVREAPVLFKKKLEPQTVEERTSVTLEVELTRPWPEVKWTRNAAVLTPSENVEIRAEGARHCLVLRV
GFADRGGFFGCETPDDKTQAKLNVEMRQVRLVVRGLQVEEAKQGTASMDVELSHAEEVEGSWTRDGLRLQPGPK
HLAVQGPVHILTLALQPDQSLVAFRAEGVHTSARLIVTELPVSFTRVLQDVVATQKEKVTLECELSRPVDV
RWLKDGVLELRAGKAIQIVAQGTCRSLVIRYRCETGDQGVYVCDALDAQTSASLRVQGRTYTLIFRRVLAEDAGE
VKFVAENAESRAHLRVKELPVTLLRPLRDKIAMEKHRGVLECCQVSRASQVRWFKGGVELQSGPKYEVVSDGL
YRKLVINVDQPEDEDTYTCDAGNVKTSAQFFVEEQSITIVRGLKDMTVMPPAWFECETSIPSVRPPKWLGL
KTVLQAGGNVGLQDGTVHRLTLHKTCSTMTGPVHFTIGKSRSSAQLVVS DIPVVLTRPLEPKAGRELQSVVL
SCDFRPAPKAVQWYKDDTPLSPSEKFKMALEGGQMAELRILRLTPADAGVYRCQAGSAQSSAEVTVAREVTVI
QPLQDAEAMEEGRVCFSCELSHKDEDEIWSLNGTPLYNDSFHEISHEGCLHTLVLSVRQADTGTVCATSPKV
SVSARLVVKGKPVVFLKALDDVSAEERGTTLTQCEVSDPEARVWVRKDGVELGSPDKYDFLHKAGARGLTVHD
LSHEDAGLYTCQVGSKETQSKVSVHDLHVGITKRLKTVEVLEGESECSFECVLSHESPSDPAVWTVGGKTVGGS
GHFHAVRQGRKYTLTVKDAALSDAGEVVFVGLTSLKASLIIRERPVDITKPLEDQRTTELEDVMLSCELSRA
GTSVRWLKDGKAIRKSQKYDLLSEGTAVLVVRKASLKDSEYTCETEASKSTAKLCEVEEKANRTEELADLQ
VEEKGRAVFTCKTEHPASVVTWRKGLLELRASGKHVPSQEGTLTKLTINALERTSDTYTCDIGQARTQARLL
VHGQKVRVIEDLEDTAVQEGSSAKFCRIAPADYGPVHWFLLDKTPLHSNELNEITVQPGGYHVLTLRQLALKD
SGTVYFEAGDQRTSAALRVTEKPSIFSRPLTDVTVTEGEDTLVCEVTTVDSSVRWTKDGKTLRPSARCQLSH
EGCQAQLLITATTPQDGGRYKCEIGGASSSSIVRVHALPVRFRESLKDVEVPEGKAATLRCVLSVAAPVEWR
HGDDVLKSSNKYSRQEGAVLELVIRDLQPDQSGQYSCSFGDQTTSATLTVKTSQAQFVGLRNKEATEGTTV
TLRCELTKAPVEWKKGTETLRNGDKYSLKQDGA VCELQICSLLVADAGEYSCVCGQEKTSATLTVKALLVHF
VRLRSKEATEGDTTLQCELSKAAPVEWRKGTETLRDGDYSLKQDGA VCELQIRSLTIADAGEYLCTCGQE
KTSATLTVRALPAKFKDSLKNEEATEGTTATLSCELSKAAPVTWKKGPKTLQSGDKYVLRQDGA VCGLIHGL
TMADAGEYSCVCGQEKTSATLTVRGLPAKFIEDLRSQEAETEGATAILRCELSKAAPVEWRKGETLKDGDYR
LRQDGA VCELQIRGLAVVDGTYSLSLPTKFTTEGLRNEEATEGTMATLRCQMSKAAPVEWRKGETLKDGDYR
LRQDGA MCELQIRGLTIEDSGEYTCVCGQEKTSATLSVKALPSRFIEDLRSQEAETEGTMATLRCQMSKTAPVE
WKKGSETLRDGGRYSLRQDGPVCELQICDLAVEDAGEYSCVCGQEKTSATLSIKALPPRFIEDLRSQEAETEGT
MATLRCQMSKAAPVEWRKGETLGDGGRYSLRQNGAVCELQIHDLAVEDTGEYSCVCGQEKTSATLNVKALPP
RFIEDLRSQEAETEGTMATLRCQMSKAAPVEWRKGETLRDGGRYSLRQDGA VCELQIHDLVEDAGQYSCVCG
QEKTSAVLTVDALPPKFTTEGLKKEEATEGTMVTLRCQMSKEATVEWRKGAKTSLDGGRYSLRQDGA MCELQIC
GLAVEDAGEYSCVCGQEKTSATLSVKALPPRFIEDLRSQEAETEGTMATLRCQMSKAAPVEWRKGETLRDGD
YSLRQDGA VCELQIRDLAVEDAGEYLCVCGQEKTSATLSVKALPPRFIEDLRSQEAETEGTMATLRCQMSKAAP
VEWRKGETLRDGDYSLRQDGA MCELQICDLAVEDTGDYSCVCGQEKTSATLSVKALPPRFIEDLRSQEA
GTVATLRCRMSKAAPVEWRKGETLKDGDYSLRQEGNLCELQIRDLAVEDTEEYSCVCGQEKTSATLSVKAL
PAKFIEDLRSQEAEPESSTVTLRCKLSKKASVVWKKGSETLRNGARYSLRQDGA VCELEIRDLTVEDTGEYSCT
CGQERTSATLSIMAPQVVFQQPLQNLQAEEGSMASLRCELSVNAAMVWSKGGLELQGDTRREARQQGCVAEL
LLRDLRREDAGEYSCVCGQEKTSATLMVTAAPVRFLRELQAQDVDEGATARLRCELSREAVSVEWRKGSLLQF
PCAKYQMVQEGTTAELLVHGVEQEDAGEYTC DAGHTQSIARLSVRAPKPKFKTDLQSTEQEAGGTARLCCQLS
EAEPTGPVQWLKEGVELHVGSKYEMRRQGA VCELLIHGLEAKDTGEYACLVGGQKTLASLRVKEPEVTIVRGL
VDMEVQADEDEFTCKVQAGATDVQWHLQGLPLQSNVTEVAVLADGCTHVLQKGVTLLEDAGTVSFHVGGL
SSSAQLTVRVPEVTVLEPLKDVQLSEGQDAHFRCRLSRASGQEARWALGGVPLQCNEMNDITVEQGTLYLLTL
HKVTLEDAGTITLQVGSSEEAQLKVTAKNTVLRGLENVDALEGGALFECQLSQPEVAHAHTWLLDDEPVHTS
EKVEVVYFENGLRHLLLLKLNLPQDSCRVTFLAGDVVTS AFLTVRGWRLEVLPPHDASVKAGMQVRFCTILS
EAVPVGEATWYINGAAIQPDDTDWTVTTDGS HALTLSNAQPQHAGEVTF AARDAVASARLSVLALPDPEDA
EAVGRSDHSVTLVSWAPMSDGGGGLCGYRVMKEASTGQWQLCHDLVPGPECVDDLVPGKTYRFRVAAVGPA
GAGEPVHLPQMVKIAPAPAPAPAPAPAPAPETRQAVVGEDICLELEVAADGGEVWVKGTERIQPGHFVLS
RGQRQMLVIKGFRTEDQGEYRCGPIQGLPSSGAATFNVMVMTSGSDEVPAQPSLPPEAAQEGDLHLLWEALAR
KRRMSREPTLDSISELPEEDSRVQHLRQEAEEETAPDLSEGYSTADELARTGEADLSHTSSDDES RAGTPSLVT
YLK KAGGPGISPLASKHEAQVTTSVKPKQKQEPVVPTCPPPGDLSAADLMDPSLDKAAVKIQA AFKGYKVRKE
MKQQEGPVFSTRTSGRVSASHACVVVSGTESEAESSSGGELDDAFRAARRLHRLFRKSPAEELSEELFLSADE
GPGEPEEPADWQTYREDENFVCIRFESLAEARQAVTCFRNMFATMIGVEISLGEQGGPRGVMIRIGKVAPTVT
PAVPLAKTPGLQTS DAAPVFLTELQNDVQDGYPMSFDCVVTGQPVPSVRWFKDGKLEEDDHYMINDDQGGG
HQLIITAVVPADMGVYRCLAENSMGVSSTKAELRVELTSTDYDTAADATETSSYFSAQGYLSSREQEGTESDE
GQLPQVLEELKDLQVAPGTRLAKFQLKVKGYPA PKLYWFKDGQPLTTS DHIRMTDKKTLHTLEIVSVTREDSG

QYAAYSNAVGAAYSSARLLVVRGPSEPEEKPASDVHERLVPPRI LEKFTPKKVKRGSSITFSVKVEGHPAPSV  
HWLKEEAKEKGLVLIWIPDTPGYTMASSSKQHSVLVLDVGRQHQTTCIATNPAGQALCSASLHISGLAKEEEQ  
ERVKEALISSFLOGTSQAVSAQMSEASAGFADLVGQSKGESLVAEEAHSHLSLAEVGTTEEFLQKLTSTQITEMVS  
AKISQAKLQVPGGDSDEETKTPSASPRHGRSRPSSSVQESSSESEEDGDSRGEIFDIYVVTADYLLPLGAEQDAI  
ILREGQYVEVLDSAHPLRWLVRTKPTKSSPSRQGWVSPAYLDKRLKLSPEWGPTEAPEFPGEAVSEDEYRTRL  
SSVIQELLSSEQAFVQELQFLESHHMKHLERSPRVPAAVASQKTVIFRNVQDISHFHSSFLKELQCGCTDDDDV  
AMCFIKNQEAFAKEYLEFLVGRVQAESVVVSTPVQEFYKKAEEETLSAKDPTQPPPPLOHYLEQPVERVQKYQ  
ALLKELIRNKARNRQNCALLEQAYAVVSALPQRAENKLVSLMENYPGTLEALGEPHPIRQGHFIVWEGAPGARM  
PWKGHNHRHVFLFRNYLVICKPRRDSRTDTFSYVFRNMKLLSSIDLNDQVEGDRAFEVWHEREDSVRKYLLQA  
RTVI IKNSWVKEICGIQORLAQPVWRPPEFEEELADCTAELGETVKLACRVTGTPKPIVSWYKDGKPVVDPH  
HILIEDPDGSCCTLILDNLTGIDSGQYMCFAASAAGNASTLGKILVQVPPRFVNVKVRATPFVEGEDAQITCTVE  
GAPYPQIRWYKDGTLAPGNRYRMLNEPRSGVLVLIQAASKEDLGHYECELVNRLGSTRGGGELYMOSPALR  
ARDQHHREQIVAAVEDTSVEGSAHSAQDQADQQAASVLWRLLGSEALGPSPGDLPNTRQSEPPAFEEAASQIP  
GAASGTPEVSPGTHKLEQETSSSGSQGWTPVIRVEGTAWPGAGTGQLLLDVHSQVIMETTQRTYVQCAPDT  
GVTRAPSMQVTIEDVQVQVGDMAQFDAVIEGHPPPIVTVWYKGSTQLTSSARLSQRQDGTYSVLVTDVAPHDA  
GVYTCVANNAGGQVLCKAELLVHGGDKLDAENQVYRRLKLSHFYDVQEEIGRGVFGFVKRVQHKGNKMFCAAKF  
IPLRSKTRAQAYQERDILATLGHPLVTGLLDQFETRKTLLIILELCSSEELLDRLFKKGVVTEAEVNVYIQQL  
VEGLHYLHSHGILHLDIKPPNLLMVHPAREDIKICDFGFAQKITPSEPQYSKYGSPEFVPEIIEQNVPVSEGS  
DIWAMGVISYLSLTCSSPFAGESDRATLLNVLEGRVSWSSPTAAHLSSEDAKDFIKATLQRTPRARPSTSQCLA  
HPWFLKSMFAEEAHFINTKQKFLLRASRWQRSLMSYKSI LVMRSIPELLQGPPDPSPLGVARHLRGEASGAS  
SSSSSDNELAPFARAKSLPPSPVTHSPLLHPRGFLRPSASLPEETEASMTADAAVPASPQAGPPASPGCV  
PRHSVISSLFYQQAGEGAERGNKTSGAKRHPARRRHLLKGGYIARALPGLREPLMEYSLLEEEAAREEQASLM  
TKTPSFETALRLPSSSVREVPGRSHSLDNPPVTTGPSPEACKQLLFPSTGLTHETTAKDRGHKEGFLQESV  
PFPPMSGDSRPGKQEGSSQDSRCRGPASSCHSELGSGSQEGCGPPSSQSLGSLPPQSLKELSTSCGPLFSEQ  
PQAAPFPTQVSPLLGSEKEPQDGSLEGPVVPVSSSPGASQVDASLDTEGLSEAGDTCDFTPPPQRPQEQAT  
TRKFSLESRGGYAGVAGYGTFAFGGDAGGMLGQPLWARMAWAVSOSSEEQDEAATESPQPLESLGPIAEASG  
VPLRTSPSLTPWEEVQVSLVQIRDLSGDAEAADTISLDISEVDPAYLNLSDLYDIKYLPEFEMI FRRVPKPI  
EQPESPGSETEAGQGLADFLLEAAWPWPGELGLRAGLEITEEPEEPGDLEALLGEAAVGRKRKWSPSRGLFQF  
PGRCLSGEEPVELGLRQVRKASMAHISRI LKGRPEGPEREPPRKKAGLASFRLSGLKGRDQELSDEAVVLGQ  
SVTLACQVLAQPTAQATWSKDGVLLESSGHLIISSTLKNFQLLTI LVVKEEDLGTYTCCVSNPLGTAVTTGVL  
RKAERPSSSPRPEVGELYKDAVLLVWKPVESECGPVTVIVQCCIEGGSWTTLASDISDCCYLTGKLSRGGMYIF  
RTACVSKAGMGPISSPSEQVLLGGPNHLASEEESRGRPAQLLPSTKTFAFQMQIRGRFVSVRQCREKASGR  
ALAAKIVPYQPEDKTAVLREYEAALKRHLHPLHAQLHAAYLSPRHLVLI LELCSGPELLPSLAERESYSESDVK  
DYLWQMLSATQYLHAQHILHLDLRSENMMVTEYNLLKVIDLGNALDQEKVPAPENFKDYLETMAPELLEGG  
GAVPQTDIWAIGVTAFIMLSGEY PESSSEGTDLQKRLKGLIRLSRCYAGLSGGAVAFLOSSLCAQPWGRPCA  
STCLQCGWLTTEEGPTGSRPTPVTFPTVRLRAFVREKRRALLYKHNLAQVR\*

>ENSMUSP00000038264\_c.16220:g>T\_p.E5407D ENSMUST00000047441.14|Obscn-  
202|ENSMUSG00000061462|-|chr11:g.58928485:C>A

MDHSFSGAPRFLTRPKAFVSVGKDATLSCQIVGNPTPHVSWEKDRQPVVEAGARFRLAQDGDVYRLTILDLAL  
GDSGQYVCRARNAIGEFAAVGLRVDSEGTCAEQAPHLLRPTSIRVREGADATFRCRVGGSPPAVSWSKDG  
RRLGPPDAPHVRVEEHGESSALRIRSARPRDGGTYEVRAENPLGSASAAAALVVDSAEVAGPPGTSTATLLA  
HLQQRREAMRAEGIPPSPPGAGTRTCTVTEGKHARLSCFVTGEPKPEVWKKDQGLVTEGRRHVVEDEQENF  
VLKILFCKQSDRGLYTCTASNLVGQTYSSVLVVVREPTVPFKKRLQDLEVREKESATFQCEVAQAPATEAAWFK  
EETRLWASAKYDIEEGETERRLTVRNVSADDDAVYICETTEGSRVAVELSVQGNLTKRKLPRKTAVRTGDTAIF  
WVELAVPEGPVRWLRNQEEMVAGGRVAITAEGTCHTLTI FQCTLEDMGEVAFVSGGCRTTTFQCVSAPRRPPL  
YPPADPVVKAKTESVTLWSAPPHGDRPVTIDGYVLEKRLKGLAYAWSRCHEAGWLATTEFTITGVAAEGDFQ  
FRVSAINHFGQGPYLEFPGMTMLVPLAVKTPKAVEAVEGGEVTFVSDLTVASSGEWFLDGEALKASSIYVI  
RCDRTRHMLTIREVPARLHGAQLKVFANGIETS IQMVVRAALGLPSSKLPAAAAREVLAQLHEEAQLLAELSD  
QAAAVTWLKDGRELSLGPYEMQVSAGRRALLVRDVAQDDAGLYECVSRGSRRTAYQLLVQDITDGYRDWGPAG  
PQKHMCKCAGAKIARYLGSSCYRFLQYDKGVVHWEAALDTRQKGTSSCSLHEKPKLVFAKQQAHSEVKA  
AGASATLSCEVAQAQTEVTFWFKDGKLLSSSSKVRMEASGCSRRLVVQQAGKADAGEYSCEAGGQKLSFRLDVA  
EPKMFVFAKEQQARSEVKAEEAGASATLSCEVAQAQTEVTFWFKDGKLLSSSSKVRMEASGCSRRLVVQQAGKADA  
GEYSCEAGGQKLSFRLDVTEPKLVFAKEQQARSEVKAEEAGNSATLSCEVAQAQTEVTFWFKDGKLLSSSSKVRM  
EASGCSRRLVVQQAGKADAGEYSCEAGGQKLSFRLDVAEPLVFAKEQQARSEVKAEEAGNSATLSCEVAQAQTE  
EVTWFKDGKLLSSSSKVRMEASGCSRRLVVQQAGKADAGEYSCEAGGQKLSFRLDVTEPKLVFAKEQQARSEV  
KAEAGASATLSCEVAQAQTEVTFWFKDGKLLSSSSKVRMEASGCSRRLVVQQAGKADAGEYSCEAGGQKLSFRL  
DVAEPLVFAKEQQARSEVKAEEAGASATLSCEVAQAQTEVTFWFKDGKLLSSSSKVRMEASGCSRRLVVQQAGK  
ADAGEYSCEAGGQKLSFRLDVAEPLVFAKEQQANSEVKAEEAGASATLSCEVAQAQTEVTFWFKDGKLLSSSSK

VRVEASGCSRRLVVQQAGKADAGEYSCEAGGQKLSFRLDVAEPKLAFAKEQQAHSVEVKAEAGASATLSCEVAQ  
AQTEVTFWKDGGKLSSSSSKVRVEASGCSRRLVVQQAGKADAGEYSCEAGGQKLSFRLDVAEPKLAFAKEQQAHS  
SEVKAEAGASATLSCEVAQAQTEVTFWKDGGKLSSSSSKVRVEASGCSRRLVVQQAGKADAGEYSCEAGGQKLS  
FRLDVAEPKLAFAKEQQAHSVEVKAEAGASATLSCEVAQAQTEVTFWKDGGKLSSSSSKVRVEASGCSRRLVVQQ  
AGKADAGEYSCEAGGQKLSFRLDVAEPKLVFAKEQQAHSVEVKAEAGASATLSCEVAQAQTEVTFWKDGGKLS  
SSKVRVEASGCSRRLVVQQVQKADAGEYSCEARGQKLSFRLDVAEAEESQIPERPSRREPLVVEKHETIILTAT  
IAAPSVAAVTWLKDGVETRRSKRHEATSLGDTHTLTVRGAQVLDIAIYSCRVGKEGQDFPVQVEEVAAKFSKP  
LEPVGELGGTVMLVCELSPEQAEVWVRCGNTQLRPGKRFQMTSEGPRTTLTVSGLREDDAEYVCESRDDRT  
SARLTVKVPVVKFTSGLSAMVAEEGQEAFTQCVCVSPSDAGVTWYKQDGMQLQPSSEKFMVMEVSGASRSLTILGL  
TLEDAGQVTVAEAGASSAALRVREAPVLFKKKLEPQTVTEERTSVTLEVELTRPWPEVKWTRNAAVLTPSENV  
EIRAEGARHCLVLRVSVGFADRGFFGCETPDDKTQAKLNVEMRQVRLVVRGLQEVEAKEQGTASMDVELSHAEVE  
GSWTRDGLRLQPGPKCHLAVQGPVHILTLTSLALQPQDSGLVAFRAEGVHTSARLIVTELTPVSTFRVLQDVVATQ  
KEKVTLECELSRVPDVRWLKDGVELRAGKAI GIVAQGTCSRSLVIYRCETGDQGVYVCDALDAQTSASLRVQGR  
TYTLIFRRVLAEDAGEVKFVAENAESRAHLRVKELPVTLLRPLRDKIAMEKHRGVLEQCQVSRASQVRFWFKGG  
VELQSGPKYEVVSDGLYRKLVINQVPEDEDTYTCDAGNVKTSAQFFVEEQSITIVRGLKDMTVMEPAPAWFE  
CETSIPSVRPPKWLKGTVLQAGGNVLEQDGTVHRLTLHKTCSTMTGPFVHFTIGKSRSSAQLVVSDIPVVLT  
RPLEPKAGRELQSVVLSCDFRPAPKAVQWYKDDTPLSPSEKFKMALEGQMAELRILRLTPADAGVYRCQAGSA  
QSSAEVTVAEAEVTVIQPLQDAEAMEEGRVCFSELSHKDEDIEWSLNGTPLYNDSFHEISHEGHLRCLVLKLS  
VRQADTGTVCATSPKVSVSARLVVKGKPVVFLKALDDVSAEERGTTLQCEVSDPEARVVWRKDGVELGPSDK  
YDFLHKAGARGLTVHDLSDHEDAGLYTCQVGSKETQSKVSVHDLHVGITKRLKTVEVLEGESECFEVLVSHESP  
SDPAVWTVGGKTVGGSGHFHAVRQGRKYTLTVKDAALSDAGEVVFVGLTTSKASLIIRERPVDITKPLEDQR  
TTLGEDVMLSCELSRAGTSVRWLKDGKAIKRSQKYDLLSEGTRAVLVVRKASLKDSGEYTCETEASKSTAKLC  
VEEKANRFTEELADLQVEEKGRAVFTCKTEHPASVVTWRKGLLELRASGKHVPSQEGTLTKLTINALERTDSD  
TYTCDIGQARTQARLLVHGQKVRVIEDLEDTAVQEGSSAKFCRRIAPADYGPVHWFLLDKTPLHSNELNEITVQ  
PGGYHVLTLRQLALKDSGTVYFEAGDQRTSAALRVTEKPSIFSRPLTDVTVTEGEDTLVCEVTTVDSSVRWT  
KDGKTLRPSARCPQLESHGCAQLLITATTPQDGGRYKIEIGASSSSIVRVHALPVRFRESLTKDVEVPEGKAA  
TLRCVLSVAAPVLRHGDVLSKSNKYSLRQEGAVLELIVIRDLQPDQSGQYSCSFGDQTTSATLTVKTSQAQ  
FVGLKRNKEATEGTTVTLRCELTKAEAPVEWKKGTETLRNGDKYSLKQDGAVCELQICSLLVADAGEYSCVCGQ  
EKTSATLTVKALLVHFVRRRLRSKEATEGDTTTLQCELSKAAPVEWRKGTETLRDGDYSLKQDGAVCELQIRS  
LTIADAGEYLCTCGQEKTSATLTVRALPAKFKDSLKNEEATEGTTATLSCELSKAAPVTWKKGPKTLQSGDKY  
VLRQDGAVCGLQIHGLTMADAGEYSCVCGQEKTSATLTVRGLPAKFIEDLRSQEATEGATAILRCELSKAAPV  
EWRKGETLTKDGDYTLRQDGAVCELQIRGLAVVDTGTYSPLPKFTEGLRNEEATEGTMATLRCQMSKAAPV  
EWRKGETLTDGDYSLRQDGAMCELQIRGLTIEDSGEYTCVCGQEKTSATLSVKALPPRFIEDLRSQEATEG  
TMATLRCQMSKAAPVEWRKGETLTDGGGRYSLRQNGAVCELQIHDLAVEDTGEYSCVCGQEKTSATLNVKALP  
PRFIEDLRSQEATEGTMATLRCQMSKAAPVEWRKGETLTDGGGRYSLRQDGAVCELQIHDLVEDAGQYSCVC  
GQEKTSAVLTVDALPPKFTEGLKKEEATEGTMVTLRQMSKEATEVWRKGAKTLSGGGRYSLRQDGAMCELQI  
CGLAVEDAGEYSCVCGQEKTSATLSVKALPPRFIEDLRSQEATEGTMATLRCQMSKAAPVEWRKGSKTLRDGD  
RYSLRQDGAMCELQICDLAVEDTGDYSCVCGQEKTSATLSVKAPQVVFQQLQNLQAEEGSMASLRCELSVFN  
AAMVWSKGGLELQGDTRREARQQGCVAELLLRDLRREDAGEYSCVCGQEKTSATLMVTAAPVRFRLRQADV  
DEGATARLRCELSREAVSVEWRKGSLLQFPKAKYQMVQEGTTAELLVHGVEQEDAGEYTCDAHTQSARLSV  
RAPKPKFKTDLQSTEQEAGGTARLCCQLSEAEPTPVQWLKEGVELHVGSKYEMRRQGAVCELLIHGLEAKDT  
GEYACLVGQKTLASLRVKEPEVTIVRGLVDMVEQADEDFEFTCKVVSQAGATDVQWHLQGLPLQSNVTEVAV  
LADGCTHVLQKGVTTLEDAGTVSFHVGGLSSSAQLTVRVPEVTVLEPLKDVQLSEGQDAHFRCLSRASGQEA  
RWALGGVPLQCNEMNDITVEQGTLYLLTLHKVTTLEDAGTITLQVGSSESAQLKVTAKNTVLRGLENVDALEG  
GEALFECQLSQPEVAHAHTWLLDDEPVHTSEKVEVVYFENGLRHLRLLKLNKLPQDSCRVTFLAGDVVTS AFLTV  
RALPDPPEDAEVVGRSDHSVTLVSWAPMSDGGGGLCGYRVMKEASTGQWQLCHDLVPGPECVDDLVPGKTY  
RFRVAAVGPAGAGEPVHLPQMVKIAPAPAPAPAPAPAPAPETRQAVVGEDICLELEVAADGGVEVWHKGTERRI  
QPGGHFEVLSRQGRQMLVIKGFRTEDQGEYRCGPIQGLPSSGAATFNVMVMTSGSGDEVPAQPSLPPEAAQEGD  
LHLLWEALARKRRMSREPTLDSISELPEEDSRVQHLRQEAEEETAPDLSEGYSTADELARTGEADLSHTSSDDE  
SRAGTPSLVTYLKKAGGPGISPLASKHEAQVTTSVKPKQKQEPVVPPTCPPPGDL SAADLMDPSLDKAAVKIQA  
AFKGYKVRKEMKQOEGPVFSRTFGDTEAQVGDVLRLECVLATKTDMRACWLKDGIELTDGRHYHIDQLKDGTC  
SLLVTVGLAPTDSGRYTCQVSTKSGRVSHSACVVVSGTESEAESSSGGELDDAFRRAARRLHRLFRTKSPAELS  
EELFLSADEGPPEPEKPADWQTYREDENFVCFIRFESLAEARQAVTCFRNMFMATMIGIVEISLGEQGRGVEM  
RIGKVAQTVTPAVPLAKTGLQTSDAAPVFLTELQNDVQDGYPMSFDCVVVTGQPVSVRWFKDKLLEEDDH  
YMINDDQQGGHQLIITAVVPADMGVYRCLAENSMGVSSTKAELRVELTSTDYDTAADATETSSYFSAQGYLSS  
REQEGTESDEGQLPQVLEELKDLQVAPGTRAKFQLKVKGYAPKLYWFKDQPLTSSDHIRMTRDKKTLHTLE  
IVSVTREDSGQYAAIYISNAVGAAYSARLLVVRGPEPEEKPASDVHERLVPPRIEKFTPKKVKRGSITFSV  
KVEGHPAPSVHHLKEEAKEGVLWIGPDTPGYTMASSSKQHSVLVLDVGRQHOGTYTCIATNPAGQALCSASLH



ISGLAKEEEQERVKEALISSFLQGTSAQVSAQMSESAQFADLVGQSKGESLVAAEEAHSHLSLAEVGTTEEFLOK
LTSQITEMVSAKISQAKLQVPGGDSDEETKTPSASPRHGRSRPSSSVQESSSESEDGDSRGEIFDIYVVTADY
LPLGAEQDAIILREGQYVEVLDSAHPLRVLVVRTKPTKSSPSRQGWVSPAYLDKRLKLSPEWGPTEAPEFPGEA
VSEDEYRTRLSSVIQELLSSEQAFVQELQFLESHHMKHLERSPRVPAAVASQKTVI FRNVQDISHFHSSFLKE
LQCGCTDDDVAMCFIKNQEAFAEKYLEFLVGRVQAESVVVSTPVQEFYKKYAEETLSAKDPTQPPPPPLQHYLE
QPVERVQKYQALLKELIRNKARNRQNCALLEQAYAVVSALPQRAENKLVHSLMENYPGTLEALGEP IRQGHFI
VWEGAPGARMPPWKGNHRHVFLFRNYLVICKPRRDSRTDTFSYVFRNMMKLSSIDLNDQVEGDRAFEVWHERE
DSVRKYLQARTVI IKNSWVKEICGIQORLAQPVWRPPEFEEELADCTAELGETVKLACRVTGTGPKPIVSWYK
DGKPEVVDPHHILIEDPDGCTLLILDNLTGIDSGQYMCFAASAAGNASTLGKILVQVPPRFRVNVKVRATPFVEG
EDAQITCTVEGAPYPQIRWYKDGTLAPGNRYRMLNEPRSGVLVVIQAASKEDLGHYECELVNRLGSTRGGG
ELYMOSPALRARDQHHREQIVAAVEGAPSMQVTIEDVQVQVGDMAQFDAVIEGHPPPPIVTWYKGTQLTSSAR
LSQRQDGTYSLVLTVDVAPHDAGVYTCVANNAGQVLCCKAELLVHGGDKLDAENQVYRRLKLSFYDVQEEIGR
GVFGFVKRVQHKGNMFCAAKFIPLRSKTRAQAYQERDILATLGHPLVTGLLDQFETRKTLLILILELCSSEEL
LDRLFKKGVVTEAEVKVYIQQLVEGLHYLHSHGILHLDIKPPNII MVHPAREDIKICDFGFAQKI TPSEPQYS
KYGSPEFVSPETIEQNPVSEGSDIWAMGVISYLSLTCSSPFAGESDRATLLNVLEGRVSWSSPTAAHLSEDA
DFIKATLQRTPRARPSTSQCLAHPWFLKSMPEAAEHFINTKQLKFLARSRWQRSLMSYKSI LVMRSIPELLQ
GPPDSPSLGVARHLRGEASGASSSSSSDNELAPFARAKSLPPSPVTHSPLLHPRGFRLRPSASLPEETEASMP
TADAAPVSPQASAGPPASPGCVPRHSVSSLFYQQAGEGAERGNKTSGAKRHPARRRHLLKGGYIARALPGLR
EPLMEYSLLEEEAAREEQASLMTKTPSFETALRLPSSSVREVPGRSHSLDNPPVTTGSPPEACKEQLLFPST
GLTHETAKDRGHKEGFLQESVFPFPMMSGDSRPGKQEGSSQDSCRGKPASSCHSELGSGSQEGCGPPSSQSLG
SLPPQSLKKESTSCGPLFSEQPQAAPFPTQVSPLLGSEKEPQDGLSEGPVVPVSSSPGSASQVDAASLDTEG
LSEAGDTCDFTPPPQRPQEQATTRKFSLESRGGYAGVAGYGTFAFGGDAGGMLGQGPLWARMWAVSQSSEEQ
DEAATESPQPLESGLPIAEASGVPLRTSPSLTPWEEVEQVSLVQIRDLSGDAEAADTISLDISEVDPAYLNL
DLYDIKYLPEFEMI FRRVKPIEQPESPGSETEAGQGLADFLLEAAWPWPGEGLGLRAGLEITEEPEEPGDLEA
LLGEAAVGRKRKWSPSRGLFQFPGRCLSGEEPVELGLRQRVKASMAHISRI LKGRPEGPEREGPPRKKAGLAS
FRLSGLKGRDQELSDAEAVLGGQSVTLACQVLAQPTAQATWSKDGVLLESSGHLLISSTLKNFQLLTI LVVKKE
DLGTYTCCVSNPLGTAVTGTGVLKRAERPSSSPREVEGELYKDAVLLVWPKPVEPCGPVTVIVQCCIEGGSWTT
ASDISDCCYLTKLSRGGMYIFRTACVSKAGMPYSSPSEQVLLGGPNHLASEEESSRGRPAQLLPSTKTF
QMQIRGRFVSVRQCREKASGRALAAKIVPYQPEDKTAVLRVYEAALKRLHHPHLAQLHAAYLSPRHLVLI
CSGPELLPSLAERESYSESDVKDYLWQMSATQYLHAQHILHLDLRSENMMVTEYNLLKVIDLGNASLDQEK
VPAPENFKDYLETMAPELLEGQAVPQTDIWAIGVTAIFIMLSGEY PESSSETRDLQKGLRKLIRLSRCYAGL
SGGAVAFLOSSLCAQPWGRPCASTLQCGWLTEEGPTGSRPTPVTFTVRLRAFVREKRRALLYKKNHQAQ
VR\*

>ENSMUSP00000049737\_c.18179:G>T\_p.E6060D ENSMUST00000052872.15|Obscn-
203|ENSMUSG00000061462|-|chr11:g.58928485:C>A
MDHSFSGAPRFLTRPKAFVSVGKDATLSCQIVGNPTPHVSWEKDRQPVEAGARFRLAQDGDVYRLTILDLAL
GDSGQYVCRARNAIGEAFVAVGLRVDSEGTCAEQAPHFLLRPTSIRVREGADATFRVCRVGGSPQPAVSWSKDG
RRLGPPDAPHVRVEEHGESSALRIR SARPRDGGTYEVRAENPLGSASAAAALVVDSDAEVAGPPGTSTATLLA
HLQORREAMRAEGIPSPPGAGTRTCTVTEGKHARLSCFVTGEPKPEVWKKDGQLVTEGRRHVVEDEQENF
VLKILFCKQSDRGLYTCTASNLVGQTYSSVLVVVREPTVPFKKRLQDLEVREKESATFQCEVAQPAEAWFK
EETRLWASAKYDIEEEGTERRLTVRNVSADDDAVYICETTEGSRVVAELSVQGNLTKLPRKTAVRTGDTAIF
WVELAVPEGPVRLRNQEEMVAGGRVAITAEGTCHTLTI FQCTLEDMGEVAFVSGGCRTTTQFCVSAPRRPPL
YPPADPVVKAKTESVTLWSAPPHGDRPVTIDGYVLEKRRKLGAYAWSRCHEAGWLATTEFTITGVAAEGDFQ
FRVSAINHFGQGPYLEFPGTMHLVPLAVKTPKAVEAVEGGEVTFVSDLTVASSGEWFLDGEALKASSIYVI
RCDRTRHMLTIREVPARLHGAQLKFEVANGIETS IQMVVRAALGLPSSKLPAAAAREVLAQLHHEEAQLLAELSD
QAAAVTWLKDGRELSLGPKEYMQVSAGRRALLVRDVAQDDAGLYECVSRGSRRTAYQLLVQEPKLVFAKGQQA
SEVKAEAGNSATLSCEVTQAQTEVTWFKDGKLLSSSSKVRMEASGCSRRLVVQQAGKADAGEYSCEAGGQKLS
FRLDVAEPKLVFAKGQQAHEVKAEEAGASATLSCEVAQAQTEVTWFKDGKLLSSSSKVRMEASGCSRRLVVQQ
AGKADAGEYSCEAGGQKLSFRLDVAEPKMFVFAKEQQARSEVKAEEAGASATLSCEVAQAQTEVTWFKDGKLLS
SSKVRMEASGCSRRLVVQQAGKADAGEYSCEAGGQKLSFRLDVTEPKLVFAKEQQARSEVKAEEVNSATLSCE
VAQAQTEVTWFKDGKLLSSSSKVRMEASGCSRRLVVQQAGKADAGEYSCEAGGQKLSFRLDVAEPKLVFAKEQ
QARSEVKAEEAGNSATLSCEVAQAQTEVTWFKDGKLLSSSSKVRMEASGCSRRLVVQQAGKADAGEYSCEAGGQ
KLSFHLDVTEPKLVFAKEQQAHSEVKAEEAGASATLSCEVAQAQTEVTWFKDGKLLSSSSKVRMEASGCSRRLV
VQQAGKADAGEYSCEAGGQKLSFRLDVAEPKLVFAKEQQARSEVKAEEAGASATLSCEVAQAQTEVTWFKDGK
LSSSSKVRVEASGCSRRLVVQQAGKADAGEYSCEAGGQKLSFRLDVAEPKLVFAKEQQANSEVKAEEAGASATL
SCEVAQAQTEVTWFKDGKLLSSSSKVRVEASGCSRRLVVQQAGKADAGEYSCEAGGQKLSFRLDVAEPKLAFA
KEQQAHSEVKAEEAGASATLSCEVAQAQTEVTWFKDGKLLSSSSKVRVEASGCSRRLVVQQAGKADAGEYSCEA
GGQKLSFRLDVAEPKLAFAKEQQAHSEVKAEEAGASATLSCEVAQAQTEVTWFKDGKLLSSSSKVRVEASGCSR

RLVVQQAGKADAGEYSCEAGGQKLSFRLDVAEPKLAFAKEQQAHSEVKAEAGASATLSCEVAQAQTEVTFWFKD
GKKLSSSSKVRVEASGCSRRLLVVQQAGKADAGEYSCEAGGQKLFRLDVAEPKLMFAKEQQAHSEVKAEAGAS
ATLSCEVAQAQTEVTFWFKDGKKLSSSSKVRVEASGCSRRLLVVQQAGKADAGEYSCEAGGQKLSFRLDVAEPK
VFAKEQQAHSEVKAEAGASATLSCEVAQAQTEVTFWFKDGKKLSSSSKVRVEASGCSRRLLVVQQVQKADAGEYS
CEARGQKLSFRLDVADTRLMFAKEQQARTEVKAEAGNSATLSCEVAQAQTEVTFWFKDGKKLSSSSKVRVEASG
CSRRLLVVQQAGKADAGEYSCEAGGQKLSFRLDVAEAEESQIPERPSRREPLVVKEHETIILTATIAAPSVAAVT
WLKDGVEIRRSKRHEATS LGDHTLTVRGAQVLD SAIYSCRVGKEGQDFPVQVEEVAAKFSKPLEPVEGELGG
TVMLVCELSPEQAEEVWRCGNTQLRPGKRFQMTSEGRRTTLTVSGLREDDAEYVCESTRDDTSARLTVKVPR
VVKFTSGLSAMVAEEGQEATFQCVVSPSDAGVTWYKDGMLQPSSEKFMVVESSGASRSLTILGLTLEDAGQVTV
EAEGASSAALRVREAPVLFKFKLEPQTVTEERTSVTLEVELTRPWEVKWTRNAAVLTPSENVEIRAEGARHC
LVLRSVGFADRGFFGCETPDDKTQAKLNVEMRQVRLVRGLQEVEAKEQGTASMDVELSHAEVEGSWTRDGLRL
QPGPKCHLAVQGPVHILTLALSALQPQDSGLVAFRAEGVHTSARLIVTEL PVSFTRVLQDVVATQKEKVTLECEL
SRPVDVRWLKDGVELRAGKAIGIVAQGTCSRSLVIYRCETGDQGVVCDALDAQTSASLRVQGRTYTLIFRRVL
AEDAGEVVKFAENAESRAHLRVKELPVTLLRPLRDKIAMEKHGVL ECVSRASAQVRWFKGGVELQSGPKYE
VVSDGLYRKLVIN DVQPEDEDYTC DAGNVKTS AQFFVVEEQSITIVRGLKDMTVM EPAPAWFECETSIPSVRP
PKWLLGKTVLQAGGNVGL EQDGT VHRLTLHKTCSTMTGPVHFTIGKSRSSAQLVVS DIPPVLRPLEPKAGRE
LQSVVLSCDFRPAPKAVQWYKDDTFLSPSEKFKMAELRILRLTPADAGVYRCQAGSAQSSAEVTVEA
REVTVIQPLQDAEAMEEGRVCFCELSHKDEDI EWSLNGTPLYNDSFHEI SHEGCLHTLV LKSVRQADTGTVC
ATS PKVSV SARLVVKGKPVVFLKALDDVSAEERGTLLTQCEVSDPEARV VWRKDGVELGPSDKYDFLHKAGAR
GLTVHDLSDHEDAGLYTCQVGSKETQSKVSVHDLHVGITRRLKTVLEVLEGE SCFECVLSHESPSDPAVWTVGG
KTVGGSGHFHAVRQGRKYTLTVKDAALSDAGEVVSVLGLTSKASLIIRERPVDITKPLEDQRTTLGEDVMLS
CELSRAGTSVRWLKDGKAIRKSQKYDLLSEGTRAVLVVRKASL KDSGEYTCETEASKSTAKLCVEEKANRFT E
ELADLQVEEKGRAVFTCKTEHPASVVTWRKGLLELRASGKHVPSQ EGLTKLKTINALERTDSDTYTCDIGQAR
TQARLLVHGQKVRVIEDLED TAVQEGSSAKFCCRIAPADYGPVHWF LDKTPLHSNELNEITVQPGGYHVLT LR
QLALKDSGTVYFEAGDQRTS AALRVTEKPSIFSRPLTDVTVTEGED LTLVCETTTVDSSVRWTKDGKTLRPSA
RCQLSHEGQQAQLLITATTPQDGGRYKCEIGGASSSSIVRHALPVRFR ES LKDVVEPSSKAATLRVLSVVA
APVEWRHGDVLLKSSNKSLRQEGAVLELVIRDLQPDQSGVSLRQVSCSFGDQTT SATLTVTKTSSQA FVGLKLRNKEA
TEGTTVTLRCELTK EAPVEWKKGTETLRNGDKYSLKQDGAVCELQIC SLLVADAGEYSCVCGQEKT SATLTVK
ALLVHFVRRRLRSKEATEGDTTTLQCELSKAAPVEWRKGTETLRDGD RYSLKQDGAVCELQIRSLTIADAGEYL
CTCGQEKT SATLTVRALPAKFKDSLKNEEATEGTTATLSCELSKAAPV TWKKGPKTLQSGDKYVLRQD GAVCG
LQIHGLTMADAGEYSCVCGQEKT SATLTVRGLPAKFIEDLRSQEATEGATAILRCELSKAAPVEWRK GSETLK
DGDRTYTLRQD GAVCELQIRGLAVVDGTYS SLPTKFTEGLRNEEATEGTMATLR CQMSKAAPVEWRK GSETLR
DGDRTYSLRQD GAVCELQIRGLTIEDSGEYTCVCGQEKT SATLSVKALPSRFIEDLRSQEATEGTMATLR CQMS
KTAPVEWKKGSETLRDGGRYSLRQDGPVCELQICDLAVEDAGEYSCVCGQEKT SATLSIKALPPRFIEDLRSQ
EATEGTMATLR CQMSKAAPVEWRK GSETLRDGGRYSLRQNGAVCELQI HDLAVEDTGEYSCVCGQEKT SATLN
VKALPPRFIEDLRSQEATEGTMATLR CQMSKAAPVEWRK GSETLRDGGRYSLRQD GAVCELQI HDLVEDAGQ
YSCVCGQEKT SAVLTVDALPPKFTEGLKKEEATEGTMVTLR CQMSKEATVEWRK GAKT LSDGGRYSLRQD GAV
CELQICGLAVEDAGEYSCVCGQEKT SATLSVKALPPRFIEDLRSQEATEGTMATLR CQMSKAAPVEWRK GSET
LRDGDRTYSLRQD GAVCELQIRDLAVEDAGEYLCVCGQEKT SATLSVKALPPRFIEDLRSQEATEGTMATLR CQ
MSKAAPVEWRK GSKTLR DGDRTYSLRQD GAVCELQICDLAVEDTGDYSCVCGQEKT SATLSVKALPPRFIEDLR
SQEAREGT VATLR CRMSKAAPVEWRK GSETLKDGDRTYSLRQEGNLCELQIRDLAVEDTEEYSCVCGQEKT SAT
LSVKALPAKFIEDLRSQEAPESSTVTLRCKLSKKASV VVWKKGSETLRNGARYSLRQD GAVCELEIRDLTVEDT
GEYSCTCGQERTS ATLSIMAPQVVFQQPLQNLQAEEGSMASLRCELSVPNAAMVWSKGGLELQGDTRREARQQ
GCVAELLLRDLRREDAGEYSC TCGSQTTSATLMVTAAPVRFLELQ AQDVDEGATARLRCELSREAVSVEWRK
GSLQLFP CAKYQMVQEGTTAELLVHGVEQEDAGEYTC DAGHTQS IARLSVRAPKPKFKTDLQSTEQEAGGTAR
LCCQLSEAEPGTPVQWLKEGVELHVGSKYEMRRQ GAVCELLIHGLEAKDTGEYACL VGGQKTLASLRVKEPEV
TIVRGLVDMEVQADEDEFTCKVSQAGATDVQWHLQGLPLQSNEVTEVAVLADGCTHVLQ LKGVTL EDAGTVS
FHVGG LSSSAQLTVRVPEVTVLEPLKDVQLSEGQDAHFRCRLSRASGQEARWALGGVPLQCNEMNDITVEQGT
LYLLTLHKVTLEDAGTITLQVGS CSSEAQLKVTAKNTVLRGLENVDALEGG EALFECQLSQPEVA AHTWLLDD
EPVHTSEKVEVVYFENGLRHLLLLKNLKPQDSCRVTFLAGDVVTS AFLTVRGWRLEVLEPPHDASVKAGMQVR
FTCILSEAVPVGEATWYINGAAIQPDDTDWTVTTDGS HHALTLSNAQPQHAGEVTF AARDAVASARLSVLALP
DPPEDAEEVVRSDHSVTL SWVAPMSDGGGGLCGYR VEMKEASTGQWQLCHDLVPGPECVVDLVP GKTYRFRV
AAVG PAGAEPVHLPIQMVK IAPAPAPAPAPAPAPAPETRAATVVGEDI CLELEVAADGGEV VVHKGTERIQPGG
HFEVLSRGQRQMLVIKGFRTE DQGEYRCGPIQGLPSSGAATFNVMVMTSGSGDEVPAQPSLPPEAAQEGDLHLL
WEALARKRRMSREPTLDSISELPEEDSRVQHRLRQEAEETAPDLSEGYSTADELARTGEADLSHTSDDDES RAG
TPSLV TYLKKAGGPGI SPLASKHEAQVTT SVKPKQKQEPVPTCPPPGDLSAADLMDPSLDKAAVKIQAAF KG
YKVRKEMKQOEGPVFSRTFGDTEAQVGDVLRLECVLATKTD MRACWLKDGIELTDGRHYHIDQLKDGTC SLLV
TGLAPTDSGRYTCQVSTKSGRVSHSACVVVSGTESEAESSSGGELDDAFRRAARRLHRLFR TKSPAELSEEEL

FLSADEGPEPEPADWQTYREDENFVCIRFESLAEARQAVTFCFRNMFATMGIGVEISLGEQGPRGVEMRIGK  
VAPTVPFVPLAKTPGLQTSDAAPVFLTELQNDVQDGYPMSFDCVVTGQPVPSVRWFKDGKLLLEDDHYMIN  
DDQQGGHQLIITAVVPADMGVYRCLAENSMGVSSTKAELRVELTSTDYDTAADATETSSYFSAQGYLSSREQE  
GTESDEGQLPQVLEELKDLQVAPGTRLAKFQLKVKGYPAKLYWFKDGOPLTSSDHIRMTDKKTLHTLEIVSV  
TREDSGQYAAIYISNAVGAAYSSARLLVRGPSEPEEKPASDVHERLVPRILEKFTPKKVGRSSITFSVKVEG  
HPAPSVHWLKEEAEGVWLWIGPDTPGYTMASSSKQHSLLVLDVGRQHOGTYTCIATNPAGQALCSASLHISGL  
AKEEEQERVKEALISSFLOGTSQAVSAQMSSEAGFADLVGQSKGESLVAAEEAHSHLSLAEVGTTEFLQKLSQ  
ITEMVSAKISQAKLQVPGGDSDEETKTPSASPRHGRSRPSSSVQESSSESEDGDSRGEIFDIYVVVTADYLP  
AEQDAIILREGQYVEVLDSSAHLRVLVTRKPTKSSPSRQGWVSPAYLDKRLKLSPEWGPTEAPEFPGAEVSED  
EYRTRLSSVIQELLSSEQAFVGEQFLSHHMKHLERSPRVPAAVASQKTVIFRNVQDISHFHSSFLKELQGC  
GTDDDVAMCFIKNQEAFAKEYLEFLVGRVQAESVVVSTPVQEFYKYYAEETLSAKDPTQPPPPPLQHYLEQVVE  
RVQKYQALLKELIRNKARNRQNCALLEQAYAVVSALPQRAENKLVSLMENYPGTLEALGEP  
IRQGHFIVWEG  
APGARMFWKGNHRHVFVFRNYLVICKPRRDSRTDTFSYVFRNMMKLSIDLNDQVEGDDRAFEVWHEREDSVR  
KYLQARTVIKNSWVKEICGIQQLAQPVWRPPEFEELADCTAELGETVKLACRVTGTPKPIVSWYKDGKP  
VEVDPHHILIEDPDGSCCTLILDLNLTGIDSGQYMCFAASAAGNASTLGKILVQVPPRFVNVKVRATPFVEGEDAQ  
ITCTVEGAPYPQIRWYKDGTLAPGNRYRMLNEPRSGVLVVIQAASKEDLGHYECELVNLGSTRGGGELYM  
QSPALRRADQHHREQIVAAVEVTEQETKVPKKTVEIETITTVVKSFRGRRQSPGKSPSRSPRRSASPRRPG  
LLAPERLYPPGTSPSRREVEQGRKAPVPALYVTEAEVHAPASQSQPKWLEVEETIEVRVKKTGSRGASPVRE  
MTRSREGILFTLPGGI PGRDPNANNNSNNSVYQEARWGPVAVHVGEPFIFQVDSVGNVDWVAASPEPEQVRA  
SQKEENTERQEGCSDGIDENTFLMEEPQDTSLQGRDPKILTHNGRVLTLADLEDYVPQEGETFGCGDSTPSTP  
DEPPCEVSVLQREISEPTVGQPVLLNVGRPPGTGATPSFFRPGSQVHSPESVSFLLREAWSGPVSAAPWTSSSF  
HTHVQSSVDGSHGSKTEVSTQTVSFGAVGETVTLHIDPDGGEAPGPSQ\*

>ENSMUSP00000020732\_c.18380:G>T\_p.E6127D ENSMUST00000020732.13|Obscn-  
201|ENSMUSG00000061462|-|chr11:g.58928485:C>A

MDHSFSGAPRFLTRPKAFVSVGKDATLSCQIVGNPTPHVSWEKDRQFVEAGARFRLAQDGDVYRLTILDLAL  
GDSGQYVCRARNAIGEFAAVGLRVDSEGTCAEQYHFLLRPTSIRVREGADATFRCRVGGSPQPAVSWSKDG  
RRLGPPDAPHRVVEEHGESSALRIR SARPRDGGTYEVRANPLGSASAAAALVVDSDAEVAGPPGTSTATLLA  
HLQORREAMRAEGIPPSPPGAGTRTCTVTEGKHARLSCFVTGEPKPEVWKKDGQLVTEGRRHVVEDEQENF  
VLKILFCKQSDRGLYTCTASNLVGQTYSSVLVVVREPTVPFKKRLQDLEVREKESATFQCEVAQPAEAAWFK  
EETRLWASAKYDIEEGTERRLTVRNVSADDDAVYICETTEGSRVVAELSVQGNLTKRKLPRKTAVRTGDTAIF  
WVELAVPEGPVRWLRNQEEMVAGGRVAITAEGTCHTLTI FQCTLEDMGEVAFVSGGCRTTTQFCVSAAPRRPPL  
YPPADPVVKAKTSSVTLWSAPPHGDRPVTIDGYVLEKRLGAYAWSRCHEAGWLATTEFTITGVAAEGDFQ  
FRVSAINHFGQGPYLEFPGTMHLVPLAVKTPKAVEAVEGGEVTFVSDLTVASSGEWFLDGEALKASSIYVI  
RCDRTRHMLTIREVPARLHGAQLKVFVANGIETS IQMVVRAALGLPSSKLPAAAAREVLAQLHAEAQLLAE  
QAAAVTWLKDRELSLGPKEYEMQVSAGRRALLVRDVAQDDAGLYECVSRGSRRTAYQLLVQDITDGYR  
DWGPAG  
PQKHMCKCAGAKIARYLGSSEYRFLQYDKGVVHWLEAALDTRQKGTSSCSLHEKPKLVFAKQQA  
HSEVKAE  
AGNSATLSCEVTQAQTEVTWFKDGKLLSSSSKVRMEASGCSRRLVVQQAGKADAGEYSCEAGGQKLS  
FRLDVA  
EPKLVFAKQQAHSSEVKAEAGASATLSCEVAQAQTEVTWFKDGKLLSSSSKVRMEASGCSRRLVV  
QQAGKAD  
AGEYSCEAGGQKLSFRLDVAEPKLVFAKEQQARSEVKAEAGASATLSCEVAQAQTEVTWFKDGKLL  
SSSSKVR  
MEASGCSRRLVVQQAGKADAGEYSCEAGGQKLSFRLDVTEPKLVFAKEQQARSEVKAEVGN  
SATLSCE  
VAQAQT  
EVTWFKDGKLLSSSSKVRMEASGCSRRLVVQQAGKADAGEYSCEAGGQKLSFRLDVAEPKLV  
FAKEQQ  
ARSEV  
KAEAGNSATLSCEVAQAQTEVTWFKDGKLLSSSSKVRMEASGCSRRLVVQQAGKADAGEYS  
CEAGGQ  
KLSFHL  
DVTEPKLVFAKEQQAHSEVKAEAGASATLSCEVAQAQTEVTWFKDGKLLSSSSKVRMEASGCS  
RRLVVQ  
QAGK  
ADAGEYSCEAEGQKLSFRLDVAEPKLVFAKEQQARSEVKAEAGASATLSCEVAQAQTEVTWFK  
DGKLLS  
SSSS  
KVRVEASGCSRRLVVQQAGKADAGEYSCEAGGQKLSFRLDVAEPKLVFAKEQQANSEVKAEAG  
ASATLS  
CEVAQ  
AQTEVTWFKDGKLLSSSSKVRVEASGCSRRLVVQQAGKADAGEYSCEAGGQKLSFRLDVAEP  
KLAFAK  
EQQA  
HSEVKAEAGASATLSCEVAQAQTEVTWFKDGKLLSSSSKVRVEASGCSRRLVVQQAGKADAGE  
YSCEAG  
GQKLS  
FRLDVAEPKLAFAKEQQAHSEVKAEAGASATLSCEVAQAQTEVTWFKDGKLLSSSSKVRVEAS  
GCSRRL  
VVQQ  
AGKADAGEYSCEAGGQKLSFRLDVAEPKLAFAKEQQAHSEVKAEAGASATLSCEVAQAQTEVT  
WFKDGG  
KLLSS  
SSKVRVEASGCSRRLVVQQAGKADAGEYSCEAGGQKLFRLDVAEPKLMFAKEQQAHSEVKAEAG  
ASATLS  
SCE  
VAQAQTEVTWFKDGKLLSSSSKVRVEASGCSRRLVVQQAGKADAGEYSCEAGGQKLSFRLDVA  
EPKLVFA  
KEQ  
QAHSSEVKAEAGASATLSCEVAQAQTEVTWFKDGKLLSSSSKVRVEASGCSRRLVVQQVQ  
GKADAGE  
YSCEAR  
GQ  
KLSFRLDVADAGTRLMFAKEQQARTEVKAEAGNSATLSCEVAQAQTEVTWFKDGKLLSSSSK  
VRVEAS  
GCSRRL  
VVQQ  
VQAGKADAGEYSCEAGGQKLSFRLDVAEAEASQI PERPSRREPLVVKHEHETIILTATIAAP  
SVAAVT  
WLDG  
V  
EIRRSKRHEATSLGDHTLTVRGAQVLDLSAIYSCRVGKEGQDFPVQVEEVAAKFSKPLEPVE  
GELGCT  
VMLVC  
ELSP  
EQAEV  
VWRCG  
NTQLR  
PGKRF  
QMTSE  
GPRRT  
LTVSGL  
REDDA  
EEYV  
CESRD  
RDSAR  
LTVK  
VPRV  
VKFTS  
GLSAM  
VAEEG  
QEAT  
FQCV  
VSPSD  
AGVT  
WYKDG  
MQLQ  
PSEK  
FVMV  
ESGAS  
RSLT  
ILGL  
TLED  
AGQV  
TVEAG  
S  
SSAAL  
RVRE  
APVLF  
KFKLE  
PQTVE  
ERTSV  
TLEVE  
LTRP  
WPEV  
KWRN  
AAVLT  
PSEN  
VEIRA  
EAGAR  
HCLV  
LRSV

GFADRGFFGCETPDDKTQAKLNVEMRQVRLVVRGLQVEVEAKEQGTASMDVELSHAEVEGSWTRDGLRLQPGPKC
HLAVQGPVHILTLALSALQPQDSGLVAFRAEGVHTSARLIVTELPVSFTRVLQDVVATQKEKVTLECELSRPVDV
RWLKDGVLELRAGKAIGIVAQGTCSRSLVIYRCETGDQGVYVCDALDAQTSASLRVQGRTYTLIFRRVLAEDAGE
VKFVAENAESRAHLRVKELPVTLLRPLRDKIAMEKHRGVLECCVSRASQVRWFKGGVELQSGPKYEVVSDGL
YRKLVINADVQPEDEDTYTCDAENVKTSAQFFVVEEQSITIVRGLKDMTVMEPAPAWFECETSIPSVRFPKWLLG
KTVLQAGGNVGLQDGTVHRLTLHKTCSTMTGPVHFTIGKSRSSAQLVVS DIPVVLTRPLEPKAGRELQSVVL
SCDFRPAPKAVQWYKDDTPLSPSEKFKMALEGQMAELRILRLTPADAGVYRCQAGSAQSSAEVTEAREVTVI
QPLQDAEAMEEGRVCFSELSHKDEDEIEWSLNGTPLYNDSFHEISHEGCLHTLVLKSVRQADTGTVCATSPKV
SVSARLVVKGKPVVFLKALDDVSAEERGTTLTQCEVSDPEARVVWRKDGVELGSPDKYDFLHKAGARGLTVHD
LSHEDAGLYTCQVGSKETQSKVSVHDLHVGITKRLKTVLEVLEGESECFEVLSSHESPDPAVWTVGGKTVGGS
GHFHAVRQGRKYTLTVKDAALSDAGEVVSFVGLTSLKASLIIRERPVDITKPLEDQRTTLGEDVMLSCELSRA
GTSVRWLKDGKAIRKSQKYDLLSEGTRAVLVVRKASLKDSGEYTCETEASKSTAKLCVEEKANRFTTELADLQ
VEEKGRAVFTCKTEHPASVVTWRKGLLELRASGKHVPSQEGTLTKLTINALERTDSDTYTCDIGQARTQARLL
VHGQKVRVIEDLEDTAVQEGSSAKFCCRIAPADYGPVHWFLDKTPLHSNELNEITVQPGGYHVLTLRQLALKD
SGTVYFEAGDQRTSAAALRVTEKPSIFSRPLTDVTVTEGEDTLVCETTTTVDSVVRWTKDGKTLRPSARCQLSH
EGCQAQLLITATTPQDGGRYKCEIGGASSSSIVRVHALPVRFRESLKDVEVPEGKAATLRCVLSVAAPVEWR
HGDDVLKSSNKYSLRQEGAVLELVIRDLQPDQSGQYSCSFGDQTTSATLTVKTSQAQFVGLRKNKEATEGTTV
TLRCELTKAEPVEWKKGTETLRNGDKYSLKQDGA VCELQICSLLVADAGEYSCVCGQEKTSATLTVKALLVHF
VRRLSKEATEGDTTTLQCELSKAAPVEWRKGTETLRDGDYSLKQDGA VCELQIRSLTIADAGEYLCTCGQE
KTSATLTVRALPAKFKDSLKNEEATEGTTATLSCELSKAAPVTWKKGPKTLQSGDKYVLRQDGA VCGLQIHGL
TMADAGEYSCVCGQEKTSATLTVRGLPAKFIEDLRSQEATEGATAILRCELSKAAPVEWRKGSSETLKDGDYR
LRQDGA VCELQIRGLAVVDGTYSLSPTKFTTEGLRNEEATEGTMATLRCQMSKAAPVEWRKGSSETLRDGDYR
LRQDGA MCELQIRGLTIEDSGEYTCVCGQEKTSATLSVKALPSRFIEDLRSQEATEGTMATLRCQMSKTAPVE
WKKGSETLRDGGYSLRQDGPVCELQICDLAVEDAGEYSCVCGQEKTSATLSIKALPPRFIEDLRSQEATEG
MATLRCQMSKAAPVEWRKGSSETLGDGGYSLRQNGAVCELQIHDLAVEDTGEYSCVCGQEKTSATLNVKALPP
RFIEDLRSQEATEGTMATLRCQMSKAAPVEWRKGSSETLRDGGYSLRQDGA VCELQIHDLVEDAGQYSCVCG
QEKTSAVLTVDALPPKFTTEGLKKEEATEGTMVTLRQCMSKEATVEWRKGAKTLSDDGGYSLRQDGA MCELQIC
GLAVEDAGEYSCVCGQEKTSATLSVKALPPRFIEDLRSQEATEGTMATLRCQMSKAAPVEWRKGSSETLRDGD
YSLRQDGA VCELQIRDLAVEDAGEYLCVCGQEKTSATLSVKALPPRFIEDLRSQEATEGTMATLRCQMSKAAP
VEWRKGSKTLRDGDYSLRQDGA MCELQICDLAVEDTGDYSCVCGQEKTSATLSVKALPPRFIEDLRSQEARE
GTVATLRCRMSKAAPVEWRKGSSETLKDGDYSLRQEGNLCELQIRDLAVEDTEEYSCVCGQEKTSATLSVKAL
PAKFIEDLRSQEAPESSTVTLRCKLSKKASVVWKKGSETLRNGARYSLRQDGA VCELEIRDLTVEDTGEYSCT
CGQERTSATLSIMAPQVVFQQPLQNLQAEEGSMASLRCELSVPNAAMVWSKGGLELQGDTRREARQQGCV AEL
LLRDLRREDAGEYSCTCGSQTTSATLMVTAAPVRFLELQADQVDEGATARLRCELSREAVSVEWRKGS LQLF
PCAKYQMVQEGTTAELLVHGVEQEDAGEYTCDAHTQSIARLSVRAPKPKFKTDLQSTEQEAGGTARLCCQLS
EABPGTPVQWLKEGVLEHVGSKYEMRRQGA VCELLIHGLEAKDTGEYACLVGQKTLASLRVKEPEVTIVRGL
VDMEVQADEDEVEFTCKVSAQATDVQWHLQGLPLQSNVTEVAVLADGCTHVLQKGVTLLEDAGTVSFHVGGL
SSSAQLTVRVPEVTVLEPLKDVQLSEGQDAHFRCLRSRASGQEARWALGGVPLQCNEMNDITVEQGTLYLLTL
HKVTLLEDAGTITLQVGSSEEAQLKVTAKNTVLRGLENVDALEGGEALFECQLSQPEVAHAHTWLLDDEPVHTS
EKVEVVYFENGLRHLLLLKNLKPQDSCRVTFLAGDVVTS AFLTVRGWRLEVLEPPHDASVKAGMQVRFTCILS
EAVPVGEATWYINGAAIQPDDTDWTVTTDGS SHALTLSNAQPQHAGEVTF AARDAVASARLSVLALPDPPEDA
EVVGRSDHSVTLSSWVAPMSDGGGGLCGYRVMKEASTGQWQLCHDLVPGPECVVDDLVP GKTYRFRVAAVGPA
GAGEPVHLPQMVKIAPAPAPAPAPAPAPAPETRQAVVGEDICLELEVAADGGEVVWHKGTERRIQPGGHFEVLS
RGQRQMLVIKGFRTEDQGEYRCGPIQGLPSSGAATFNVVMTSGSGDEVPAQPSLPPEAAQEGDLHLLWEALAR
KRMSREPTLDSISELPEEDSRVQHLRQEAETAPDLSEGYSTADELARTGEADLSHTSSDDES RAGTPSLVT
YLKKAGGPGISPLASKHEAQVTTSVKPKQKQEPVPTCPPPGDLSAADLMDPSLDKAAVKIQAAFKG YKVRKE
MKQQEGPVFSRTFGDTEAQVGDVLRLECVLATKTD MRACWLKDGIELTDGRHYHIDQLKDGTCSSLVTLGLAPT
DSGRYTCQVSTKSGRVSHSACVVVSGTESEAESSGGELDDAFRRAARRLHRLFRTKSPAELSEELFLSADE
GPGEPEEPADWQTYREDENFVCIRFESLAEARQAVTCFRNM FATMIGVEISLGEQGPGRGEMRIGKVAPTVT
PAVPLAKTPGLQTS DAAPVFLTELQNQDVQDGYPMSFDCVVTGQVPVPSVRWFKDGKLEEDDHYMINDDQGG
HQLIITAVVPADMGVYRCLAENSMGVSSTKAELRVELTSTDYDTAADATETSSYFSAQGYLSSREQEGTESDE
GQLPQVLEELKDLQVAPGTR LAKFQLKVKGYPA PKLYWFKDGGQPLTSDHIRMTDKKTLHTLEIVSVTREDSG
QYAAYSNAVGAAYSSARLLVRGPSEPEEK PASDVHERLVPPRILEKFTPKKVGRGSSITFSVKVEGHPAPSV
HWLKEEAEGV LVI GPDTPGYTMASSSKHSLVLLDVG RQHGT YTCIATNPAGALCSASLHISGLAKEEEQ
ERVKEALISSFLQGTSAQVSAQMSSEAGFADLVGQSKGESLVAAEHAHSHLSLAEVGT EEF LQKLT SQI TEMVS
AKISQAKLQVPGGDSDEETKTPSASPRHGRSRPSSSVQESSSESEDGDSRGEIFDIYVVTADYLP LGAEQDAI
ILREGQYVEVLDSAHPLRWLVRTKPTKSSPSRQGWVSPAYLDRKRLKLSPEWGPTEAPEFPGEAVSEDEYRTRL
SSVIQELLSSEQAFV GELQFLESHHMKHLERSPRVPAAVASQKTVIFRNVQDISHFHSSFLKELQCGCTDDDDV

AMCFIKNQEAFEKYLEFLVGRVQAESVWVSTPVQEFYKKYAEETLSAKDPTQPPPPPLQHYLEQPVERVQKYQ  
 ALLKELIRNKARNRQNCALLEQAYAVVSALPQRAENKLVSLMENYPGTLEALGEPHQGHFIVWEGAPGARM  
 PWKGNHRHVFLFRNYLVICKPRRDSRTDTFSYVFRNMMKLSSIDLNDQVEGDDRAFEVWHEREDSVRKYLLQA  
 RTVLIKNSWVKEICIGIQQLAQPVWRPPEFEEELADCTAELGETVKLACRVGTGTPKPIVSWYKDGKPVVEVDPH  
 HILIEDPDGSCTLILDNLGTIDSGQYMCFAASAAGNASTLGKILVQVPPRFVNVKVRATPFVEGEDAQITCTVE  
 GAPYPQIRWYKDGTLTLLAPGNRYRMLNEPRSGVLVVIQAASKEDLGHYECELVNRLGSTRGGGELYMQSPALR  
 ARDQHHREQIVAAVEERRPSP\*  
 >ENSMUSP00000151217\_c.15674:G>T\_p.E5225D ENSMUST00000219084.3|Obscn-  
 207|ENSMUSG00000061462|-|chr11:g.58928485:C>A  
 MDHSFSGAPRFLTRPKAFVSVGKDATLSCQIVGNPTPHVSWEKDRQPVEAGARFRLAQDGDVYRLTILDLAL  
 GDSGQYVCRARNAIGEFAAVGLRVDSEGTCAEQAPHFLLRPTSIRVREGADATFRCRVGGSPQPAVSWSKDG  
 RRLGPPDAPHVRVEEHGESSALRIRSARPRDGGTYEVRAENPLGSASAAAALVVDSDAEVAGPPGTSTATLLA  
 HLQQRREAMRAEGIPSPPGAGTRTCTVTEGKHARLSCFVTGEPKPEVWKKDQGLVTEGRRHVVEDEQENF  
 VLKILFCQKQSDRGLYTCTASNLVGQTYSSVLVVVREPTVPFKKRLQDLEVREKESATFQCEVAQPAEAAWFK  
 EETRLWASAKYDIEEEGETERRLTVRNVSADDDAVYICETTEGSRVVAELSVQGNLTKLPRKTAVRTGDTAIF  
 WVVELAVPEGPVWRWRNQEEMVAGGRVAITAEGTCHTLTI FQCTLEDMGEVAFVSGGCRTTTQFCVSAPRRPPL  
 YPPADPVVHAKTESSVTLWSAPPHGDRPVTIDGYVLEKRLKLGAYAWSRCHEAGWLATFTITGVAEEGDFQ  
 FRVSAINHFGQGPYLEFPGMTMLVPLAVKTPKAVEAVEGGEVTFVSDLTAVASSGEWFLDGEALKASSIYVI  
 RCDRTRHMLTIREVPARLHGAQLKFVANGIETSIQMVVRAALGLPSSKLPAAAAAREVLAQLHEEAQLLAE LSD  
 QAAA VTLKDGRELSLGPKEYMQVSAGRRALLVRDVAQDDAGLYECVSRGSRTAYQLLVQDITDGYRDWGPAG  
 PQKHMCKCAGAKIARYLGSSCYRFLQYDKGVWHWLEAALDTRQKGTSSCSLHEKPKLVFAKQQAHSVEKAE  
 AGNSATLSCEVTQAQTEVTWFKDGKLLSSSSKVRMEASGCSRRLVVQQAGKADAGEYSCEAGGQKLSFRLDVA  
 EPKLVFAKQQAHSVEKAEAGASATLSCEVAQAQTEVTWFKDGKLLSSSSKVRMEASGCSRRLVVQQAGKADA  
 GEYSCEAGGQKLSFRLDVAEPKMFVFAKEQQARSEVKAEGASATLSCEVAQAQTEVTWFKDGKLLSSSSKVRM  
 EASGCSRRLVVQQAGKADAGEYSCEAGGQKLSFRLDVTEPKLVFAKEQQARSEVKAEGASATLSCEVAQAQ  
 EVTWFKDGKLLSSSSKVRMEASGCSRRLVVQQAGKADAGEYSCEAGGQKLSFHLVDVTEPKLVFAKEQQAHSEV  
 KAEAGASATLSCEVAQAQTEVTWFKDGKLLSSSSKVRMEASGCSRRLVVQQAGKADAGEYSCEAGGQKLSFR  
 LDVAEPKLVFAKEQQARSEVKAEGASATLSCEVAQAQTEVTWFKDGKLLSSSSKVRVEASGCSRRLVVQQAGK  
 ADAGEYSCEAGGQKLSFRLDVAEPKLVFAKEQQANSEVKAEGASATLSCEVAQAQTEVTWFKDGKLLSSSSK  
 VRVEASGCSRRLVVQQAGKADAGEYSCEAGGQKLSFRLDVAEPKLAFAKEQQAHSEVKAEGASATLSCEVAQ  
 AQTEVTWFKDGKLLSSSSKVRVEASGCSRRLVVQQAGKADAGEYSCEAGGQKLSFRLDVAEPKLVFAKEQQAH  
 SEVKAEGASATLSCEVAQAQTEVTWFKDGKLLSSSSKVRVEASGCSRRLVVQQVQKADAGEYSCEARGQKLS  
 FRLDVAEAEQSIPERPSRREPLVVEKHETIILTATIAAPSVAAVTWLKDGVIEIRRSKRHEATSLGDTHTLTVR  
 GAQVLD SAIYSCRVGKEGQDFPVQVEEVAAKFSKPLEPVEGELGGTVMLVCELSPEQAEVWRCGNTQLRPGK  
 RFQMTSEGRRTLTVSGLEDDAEYVCESRDDRTSARLTVKVPVVKFTSGLSAMVAEEGQEAFTQCQVVS PS  
 DAGVTWYKQGMQLPSEKFMVMEVGASRSLTILGLTLEDAGQVTVAEAGASSAALRVREAPVLFKKKLEPQT  
 VEERTSVTLEVELTRPWPEVKWTRNAAVLTPSENVEIRAEGARHCLVLRVSGFADRGFFGCETPDDKTQAKLN  
 VEMRQVRLVRGLQEVEAKEQGTASMDVELSHAEVEGSWTRDGLRLQPGPKCHLAVQGPVHILTLALSALQPQDSG  
 LVAFRAEGVHTSARLIVTELPVSFTRVLQDVVATQKEKVTLECELSRPVDVRLKDGVELRAGKAIGIVAQGT  
 CRSLVIYRCETGDQGVYCDALDAQTSASLRVQGRYTLIFRRVLAEDAGEVKFVAENAESRAHLRVKELPVT  
 LLRPLRDKIAMEKHRGVLECVSRASAQVRWFKGGVELQSGPKYEVVSDGLYRKLVINQVPEDEDTYTCDAG  
 NVKTSAQFFVEEQSITIVRGLKDMTVMEMPAPAWFECETSIPSVRPPKWLKGKTVLQAGGNVLEQDGTVHRLT  
 LHKTCSTMTGPVHFTIGKSRSSAQLVSDIPVVLTRPLEPKAGRELQSVVLSCDFRPAPKAVQWYKDDTPLSP  
 SEKFKMALEGQMAELRILRLTPADAGVYRCQAGSAQSSAEVTVAEAREVTVIQPLQDAEAMEEGRVCFSCELSH  
 KDEDIEWSLNGTPLYNDSFHEISHGCLHTLVLKSVRQADTGTVCATSPKVS SARLVVKGKPVVFLKALDDV  
 SAEERGTTLTQCEVSDPEARVVWRKDGVELGPSDKYDFLHKAGARGLTVHDLSDHEDAGLYTCQVGSKETQSKV  
 SVHDLHVGITKRLKTVEVLEGESECFEVLSSHESPSDPAVWTVGGKTVGGSGHFHAVRQGRKYTLTVKDAALS  
 DAGEVVFVSVLGLT SKASLIIRERPVDITKPLEDQRTTLGEDVMLSCELSRAGTSVRWLKDGKAIRKSQKYDLL  
 SEGTRAVLVVRKASLKDSGEYTCETEASKSTAKLCVEEKANRFTBELADLQVEEKGRAVFTCKTEHPASVVTW  
 RKGLLELRASGKHVPSQEGTLKLTINALERTSDTYTCDIGQARTQARLLVHGQKVRVIEDLEDTAVQEGSS  
 AKFCCRIPADYGPVHWFLLDKTPLHSNELNEITVQPGGYHVLTLRQLALKDSGTVYFEAGDQRTSAAALRVTEK  
 PSIFSRPLTDVTVTEGEDTLVCETTTTVDSSVRWTKDGKTLRPSARCQLSHEGCAQLLITATTPQDGGRYKC  
 EIGGASSSIVRVHLPVRFRESLKDVEVPEGKAATLRCVLSVAAPVEWRHGDDVLKSSNKYSLRQEGAVLE  
 LVIRDLQPDGSGQYSCSFGDQTTSATLTVKTTSSAQFVGLKRNKEATEGTTVTLRCELTKAPVEWKKGTETLR  
 NGDKYSLKQDGA VCELQICSLLVADAGEYSCVCGQEKTSATLTVKALLVHFVRRLRSKEATEGDTTTLQCELS  
 KAAPVEWRKGTETLRDGDYSLKQDGA VCELQIRSLTIADAGEYLCTCGQEKTSATLTVRGLPAKFIEDLRSQ  
 EATEGATAILRCELSKAAPVEWRKGSSETLKDGDYTLRQDGA VCELQIRGLAVVDTGTYSLPTKFTTEGLRNE  
 EATEGTMATLRCQMSKAAPVEWRKGSSETLRDGDYSLRQDGA MCELQIRGLTIEDSGEYTCVCGQEKTSATLS

VKALPPRFIEDLRSQEATEGTMATLRCQMSKAAPVEWRKGSSETLGDGGRYSLRQNGAVCELQIHDLAVEDTGE
YSCVCGQEKTSATLNVKALPPKFTEGLKKEEATEGTMVTLRCQMSKEATVEWRKGAKTLSDDGGRYSLRQDGM
CELQICGLAVEDAGEYSCVCGQEKTSATLSVKALPPRFIEDLRSQEATEGTMATLRCQMSKAAPVEWRKGSSET
LRDGDYSLRQDGA VCELQIRDLAVEDAGEYLCVCGQEKTSATLSVKALPPRFIEDLRSQEATEGTMATLRCQ
MSKAAPVEWRKGSKTLRDGDYSLRQDGMCELQICDLAVEDTDYSCVCGQEKTSATLSVKAPQVVFQQPLQ
NLQAEEGSMASLRCELSVPNAAMVWSKGGLELQGDTRREARQQGCVAELLRLDRREDAGEYSTCTCGSQTTSA
TLMVTAAPVRFLELQAQDVDEGATARLRCELSREAVSVEWRKGS LQLFPKAKYQMVQEGTTAELLVHGVEQE
DAGEYTC DAGHTQSIARLSVRAPKPKFKTDLQSTEQEAGGTARLCCQLSEAE PGTPVQWLKEGVELHVGSKYE
MRRQYAVCELLIHGLEAKDTGEYACLVGQKTLASLRVKEPEVTIVRGLVDMEVQADEDFEFTCKVSAQAGATD
VQWHLQGLPLQSNEVTEVAVLADGCTHVLQLKGVTLLEDAGTVSFHVGGSSSAQLTVRVPVTVLEPLKDVQL
SEGQDAHFRCRLSRASGQEARWALGGVPLQCNEMNDITVEQGTLYLLTLHKVTLEDAGTITLQVGS CSSEAQL
KVTAKNTVLRGLENDVALEGG EALFECQLSQPEVAHTWLLDDEPVHTSEKVEVVYFENGLRHL LLLKLNKLPQ
DSCRVTFLAGDVVTS AFLTVRGWRLEVLEPPHDASVKAGMQVRFTCILSEAVPVGEATWYINGAAIQPDDTDW
TVTTDGS HHALTLSNAQPQHAGEVTF AARDAVASARLSVLALPDPEDA EVVGRSDHSVTL SWVAPMSDGGGG
LCGYRVEMKEASTGQWQLCHDLVPGPECVVDDLVP GKTYRFRVA AVGPAGAGEPVHLPQMVKIAPAPAPAPAP
APAPETRAQAVVGEDICLELEVAADGGEVVWHKGTERRIQPGGHFEVLSRGRQMLVIKGFRTEDQGEYRCGPIQ
GLPSSGAATFNVVMTSGSGDEVPAQPSLPPEAAQEGDLHLLEALARKRRMSREPTLDSISELPEEDSRVQHL
RQEAETAPDLSEGYSTADELARTGEADLSHTSSDDES RAGT PSLVTYLKKAGGPGISPLASKHEAQVTTSVK
PQKQQEPVVPPTCPPPGDLSAADLMDPSLDKAAVKIQAAF KGYKVRKEMKQQEGPVFSRTFGDTEAQVDVLR
ECVLATKTD MRACWLKDGIELTDGRHYHIDQLKDGTC SLLVTGLAPTD SGRYTCQVSTKSGRVSHSACVVVSG
TESEAESSSGGELDDAFRRARRLHRLFR TKSPAELSEELFLSADEGPGEPEEPADWQTYREDEFVCI RFE
SLAEARQAVTCFRNM FATMGI GVEISLGEQGP RGVEMRIGK VAPT VTPAVPLAKTPGLQTS DAAPVFLTELQN
QVDQDGY PMSFDCVVTGQVPVSVRWFKDGKLL EEDDH YMINDDQ QGGHQLIITAVVPADMGVYRCLAENSMGV
SSTKAELRVELTSTDYDTAADATETSSYFSAQGYLSSREQEGTESDEGQLPQVLEELKDLQVAPGTRLAKFQL
KVKGY PAKPLYWFKDGOPLTSDHIRMTDKKTLTLEIVSVTREDSGQYAA YISNAVGAAYSSARLLV RGPSE
PEEK PASDVHERLWPPRI LEKFTPKKVKRGSSITFSVKVEGHPAPSVHWLKKEAEKGVLWIGPDTPGYTMASS
SKQHSVLVLLDVGRQHGYTYC IATNPAGQALCSASLHISGLAKEEEQERVKEALISSFLQIGTSSQAVSAQMSSES
AGFADLVGQSKGESLVAAEEAHSHLSLAEVGT EEF LQKLT SQITEMVSAKISQAKLQVPGGDSDEETKTPSASP
RHGRSRPSSSVQESSSESEDGDSRGEIFDIYVVTADY LPLGAEQDAIILREGQYVEVLDSAHPLRVLVTRTKPT
KSSPSRQGWVSPAYLDKRLKLSPEWGPTEAPEFPGEAVSEDEYRTRLS SVIQELLSSEQAFVGE LQFLESHHM
KHLERSPRVPAAVASQKT VIFRNVQDISHFHSSFLKELQCGCTDDDVAMCFIKNQEA FEKYLEFLVGRVQAES
VVVSTPVQEFYKKYAEETLSAKDPTQPPPPPLQHYLEQPVERVQKYQALLKELIRNKARNRQNCALLEQAYAV
VSALPQRAENKLVSLMENYPGTLEALGEP I RQGHFIVWEGAPGARM PWKGHNHRVFLFRNYLVI CKPRRDSR
TDTFSYVFRNMMLSSIDLNDQVEGDDRAFEVWHERE DSVRKYLLQARTV I IKNSWVKEICGIQQRLAQPVWR
PPEFEELADCTAELGETVKLACRVGTGPKPIVSWYKDGKPEVDPHILIEDPDG SCTLIDLNLGTIDSGQY
MCFEASAAGNASTLGKILVQVPPRFV NKVRATPFVEGEDAQITCTVEGAPYPQIRWYKDGTL LAPGNRYMLN
EPRSGVLV LVIQAASKEDLGHYEC ELVNR LGSTRGGGEL YMQSPALRARDQHHR EQIVA AAVEVTEQETKVPKK
TVIIEETITTVVKS PRGRRQSPGKSPSRPSRRSASPRR PGLLAPERLYPPGTSPSRRL EVEQGRKAPVPALY
VTEAEVHAPASQS QPKWLEVEETIEVRVKKTGSRGASPVREMTSRGEGILFTLPGGIPGRDPNANN SNKSVY
QEARTWGP AVVHVGE PFI FQVDSVGNVDWVAASPEPEQVRASQKEENTERQEGCSDGDENTFLMEEPQD TDSL
QGRDPKILTHNGRVLT LADLEDYVPQEGETF GCGDSTPSTPDEPPCEVSVLQREI SEPTV GQPVLLNVGRPPG
TGATPSFFRPGSQVHSPESVSFLLEAWSGPVSAAPWTSSFHTHVQSSVDGSHGFSFKTEVSTQTVSF GAVGET
VTLHIDPDGGEAPGPSQG\*

>rs47135419\_ENSMUSP00000158795\_c.18354:G>A\_p.E6119K
ENSMUST0000238536.2|Obscn-210|ENSMUSG00000061462|-|chr11:g.58928511:C>T
MDHSFSGAPRFLTRPKAFVSVGKDATLSCQIVGNPTPHVSWEKDRQPVEAGARFLAQDGDVYRLTILDLAL
GDSGQYVCRARNAIGEAFAAVGLRVDSEGTCAEQAPHLLRPTSIRVREGADATFRCRVGGSPQPAVSWSKDG
RRLGPPDAPHVRVEEHGESSALRIRSARPRDGGTYEVRAENPLGSASAAAALVVDSDAEVAGPPGTSTATLLA
HLQORREAMRAEGIPPSPPGAGTRTCTVTEGKHARLSCFVTGEPKPETVWKKDGLVTEGRRHVVEDEQENF
VLKILFCKQSDRGLYTCTASNLVGTYSVVLVVVREPTVPFKKRLQDLEVREKESATFQCEVAQPA TEAAWFK
EETRLWASAKYDIEEEGTERRLTVRNVSADDDAVYICETTEGSR TVAELSVQGNLTRKLPKRTAVRTGDTAIF
WVELAVPEGPVWRWRNQEEMVAGGRVAITAEGTCHTLTI FQCTLEDMGEVAFVSGGCRTTTQFCVSAPRRPPL
YPPADPVVKAKTESVTLWSAPPHGDRPVTIDGYVLEKRRKLGAYAWSRCHEAGLWATEFTITGVAEEGDFQ
FRVSAINHFQGGQPIYLEFPGMTMLVPLAVKTPLKAVEAEGGVEVTFVSDLTVASSGEWFLDGEALKASSIYVI
RCDRTRHMLTIREVPARLHGAQLK FVANGIETS IQMVVRAALGLPS SKLPAAAAREVLAQLHEEAQLLAELSD
QAAA VTWLKDGRELSLGP KYEMQVSAGRRALLVRDVAQDDAGLYECVSRGSR TAYQLLVQDITDGYRDWGPAG
PQKHMCKCAGAKIARYLGSSCYRFLQYDKGVWHWLEAALDTRQKGKTS SCSLHEKPKLVFAKQQAHSEVKA E
AGNSATLSCEVTQAQTEVTWFKDGKLLSSSSKVRMEASGCSRRLV VQQAGKADAGEYSCEAGGQKLSFRLDVA

EPKLVFAKQQAHSEVKAEGASATLSCEVAQAQTEVTFWKDGKLLSSSSKVRMEASGCSRRLVVQQAGKADA  
GEYSCEAGGQKLSFRLDVAEPKMFVFAKEQQARSEVKAEGASATLSCEVAQAQTEVTFWKDGKLLSSSSKVRM  
EASGCSRRLVVQQAGKADAGEYSCEAGGQKLSFRLDVTEPKLVFAKEQQARSEVKAEVGN SATLSCEVAQAQT  
EVTWFKDGKLLSSSSKVRMEASGCSRRLVVQQAGKADAGEYSCEAGGQKLSFRLDVAEPKLVFAKEQQARSEV  
KAEAGNSATLSCEVAQAQTEVTFWKDGKLLSSSSKVRMEASGCSRRLVVQQAGKADAGEYSCEAGGQKLSFHL  
DVTEPKLVFAKEQQAHSEVKAEGASATLSCEVAQAQTEVTFWKDGKLLSSSSKVRMEASGCSRRLVVQQAGK  
ADAGEYSCEAGGQKLSFRLDVAEPKLVFAKEQQARSEVKAEGASATLSCEVAQAQTEVTFWKDGKLLSSSSK  
VRVEASGCSRRLVVQQAGKADAGEYSCEAGGQKLSFRLDVAEPKLVFAKEQQANSEVKAEGASATLSCEVAQA  
AQTEVTFWKDGKLLSSSSKVRVEASGCSRRLVVQQAGKADAGEYSCEAGGQKLSFRLDVAEPKLVFAKEQQAH  
SEVKAEGASATLSCEVAQAQTEVTFWKDGKLLSSSSKVRVEASGCSRRLVVQQAGKADAGEYSCEAGGQKLS  
FRLDVAEPKLVFAKEQQAHSEVKAEGASATLSCEVAQAQTEVTFWKDGKLLSSSSKVRVEASGCSRRLVVQQ  
AGKADAGEYSCEAGGQKLSFRLDVAEPKLVFAKEQQAHSEVKAEGASATLSCEVAQAQTEVTFWKDGKLLSS  
SSKVRVEASGCSRRLVVQQAGKADAGEYSCEAGGQKLFRLDVAEPKLVFAKEQQAHSEVKAEGASATLSCE  
VAQAQTEVTFWKDGKLLSSSSKVRVEASGCSRRLVVQQAGKADAGEYSCEAGGQKLSFRLDVAEPKLVFAKEQ  
QAHSEVKAEGASATLSCEVAQAQTEVTFWKDGKLLSSSSKVRVEASGCSRRLVVQQVQKADAGEYSCEARGQ  
KLSFRLDVADTRLMFAKEQQARTEVKAEGNSATLSCEVAQAQTEVTFWKDGKLLSSSSKVRVEASGCSRRLV  
VQQAGKADAGEYSCEAGGQKLSFRLDVAEAEASQIPERPSRREPLVVKHEHETIILTATIAAPSVAAVTWLKDG  
VEIRRSKRHEATSLGDHTLTVRGAQVLDLSAIYSCRVGKEGQDFPVQVEEVAAKFSKPLEPVEGELGTVMLVC  
ELSPQAEVWRCGNTQLRPGKRFQMTSEGPRRTLTVSGLREDDAEYVCESRDDRTSARLTVKVPVVKFTS  
GLSAMVAEEGQEQATFQCVVSPSDAGVTWYKDGMLQPSKFKVMVESGASRSLTILGLTLEDAGQVTEAEGAS  
SSAALRVREAPVLFKFKLEPQTEVEERTSVTLEVELTRPWPEVKWTRNAAVLTPSENVEIRAEGARHCLVLRV  
GFADRGFFGCETPDDKTQAKLNVEMRQVRLVRLGQVEEAKQGTASMDVELSHAEEVGSWTRDGLRLQPGPKC  
HLAVQGPVHILTLALSALQPQDSGLVAFRAEGVHTSARLIVTELPSFTRVLQDVVATQKEKVTLECELSRPVDV  
RWLKDGVLELRAGKAIIGIVAQGTCSRSLVIYRCETGDQGVYVCDALDAQTSASLRVQGRTYTLIFRRLAEDAGE  
VKFVAENAESRAHLRVKELPVTLLRPLRDKIAMEKHRGVLEQCQVSRASQVRWFKGGVLELQSGPKYEVVSDGL  
YRKLVINDDPEDEDTYTCDAENVKTSAQFFVVEEQSITIVRGLKDMTVMEPAPAWFECETSIPSVRPPKWLGLG  
KTVLQAGGNVLEQDGTYVHRLTLHKTCSTMTGPHFTIGKSRSSAQLVVSDIPVVLTRPLEPKAGRELQSVVL  
SCDFRPAPKAVQWYKDDTPLSPSEKFKMALEGMALRILRLTPADAGVYRCQAGSAQSSAEVTEAREVTVI  
QPLQDAEAMEEGRVCFSCELSHKDEDEIWSLNGTPLYNDSFHEISHGCLHTLVLSVRQADTGTVCATSPKV  
SVSARLVVKGKPVVFLKALDDVSAEERGLTLTQCEVSDPEARVVRKDGVELGSPDKYDFLHKAGARGLTVHD  
LSHEDAGLYTCQVGSKETQSKVSVHDLHVGITKRLKTVEVLEGESECFEVLSHESPSDPAVWTVGGKTVGGS  
GHFHAVRQGRKYTLTVKDAALSDAGEVVFVSVLGLTSKASLIRERPVDTKPLEDQRTTLGEDVMLSCELSRA  
GTSVRWLKDGKAIRKSQKYDLLSEGTRAVLVVRKASLKDSDGEYTCETEASKSTAKLCVEEKANRFTTEELADLQ  
VEEKGRAVFTCKTEHPASVVTWRKGLLELRASGKHVPSQEGTLKLTINALERTDSDTYTCDIGQARTQARLL  
VHGQKVRVIEDLEDTAVQEGSSAKFCRIAPADYGPVHWFLDKTPHLSNELNEITVQPGGYHVLTLRQLALKD  
SGTVYFEAGDQRTSAAALRVTEKPSIFSRPLTDVTVTEGEDLTLVCEVTTVDSSVRWTKDGKTLRPSARCQLSH  
EGCQAQLLITATTPQDGGRYKCEIGGASSSSIVRVHALPVRFRFRESLKDVEVPEGKAATLRCVLSVVAAPVEWR  
HGDDVLKSSNKYSLRQEGAVLELVIRDLQPDQSGQYSCSFGDQTTSATLTVKTSQAQFVGLKRNKEATEGTTV  
TLRCELTKAEAPVEWKKGTETLRNGDKYSLKQDGA VCELQICSLLVADAGEYSCVCGQEKTSATLTVKALLVHF  
VRLRSKEATEGDTTTLQCELSKAAPVEWRKGTETLRDGDYSLKQDGA VCELQIRSLTIADAGEYLCTCGQE  
KTSATLTVRALPAKFKDSLKNEEATEGTTATLSCELSKAAPVTWKKGPKTLQSGDKYVLRQDGA VCGLQIHGL  
TMADAGEYSCVCGQEKTSATLTVRGLPAKFIEDLRSQEATEGATAILRCELSKAAPVEWRKGSSETLKDGDYR  
LRQDGA VCELQIRGLAVVDGTYSLSLPTKFTTEGLRNEEATEGTMATLRCQMSKAAPVEWRKGSSETLRDGDYR  
LRQDGA MCELQIRGLTIEDSGEYTCVCGQEKTSATLSVKALPSRFIEDLRSQEATEGTMATLRCQMSKTAPVE  
WKKGSETLRDGGYSLRQDGPVCELQICDLAVEDAGEYSCVCGQEKTSATLSIKALPPRFIEDLRSQEATEG  
MATLRCQMSKAAPVEWRKGSSETLGDGGYSLRQNGAVCELQIHDLAVEDTGEYSCVCGQEKTSATLNVKALPP  
RFIEDLRSQEATEGTMATLRCQMSKAAPVEWRKGSSETLRDGGYSLRQDGA VCELQIHDLVEDAGQYSCVCG  
QEKTSAVLTVDALPPKFTTEGLKKEEATEGTMVTLRCQMSKEATVEWRKGAKTLSDDGGYSLRQDGA MCELQIC  
GLAVEDAGEYSCVCGQEKTSATLSVKALPPRFIEDLRSQEATEGTMATLRCQMSKAAPVEWRKGSSETLRDGD  
YSLRQDGA VCELQIRDLAVEDAGEYLCVCGQEKTSATLSVKALPPRFIEDLRSQEATEGTMATLRCQMSKAAP  
VEWRKGSSETLRDGDYSLRQDGA MCELQICDLAVEDTGDYSCVCGQEKTSATLSVKALPPRFIEDLRSQEARE  
GTVATLRCRMSKAAPVEWRKGSSETLKDGDYSLRQEGNLCELQIRDLAVEDTEEYSCVCGQEKTSATLSVKAL  
PAKFIEDLRSQEAPESSTVTLRCKLSKASVWKKGSETLRNGARYSLRQDGA VCELEIRDLTVEDTGEYSCT  
CGQERTSATLSIMAPQVVFQQLQNLQAEEGSMASLRCLELSPVNAAMVWSKGGLELQGDTRREARQQGCVAEL  
LLRDLRREDAGEYSCGQTTSATLMVTAAPVRFLELQAQDVDEGATARLRCLELSREAVSVEWRKGSLLQLF  
PCAKYQMVQEGTTAELLVHGVEQEDAGEYTCDAHTQSIARLSVRAPKPKFKTDLQSTEQEAAGGTARLCCQLS  
EAEFGTPVQWLKEGVELHVGSKYEMRRQGA VCELLIHGLEAKDTGEYACLVGQKTLASLRVKEPEVTIVRGL  
VDMEVQADEDEFTCKVSAQATDVQWHLQGLPLQSNVTEVAVLADGCTHVLQKGVTLLEDAGTVSFHVGGL

SSSAQLTVRVPEVTVLEPLKDVQLSEGDQAHFRCLRSRASGQEARWALGGVPLQCNEMNDITVEQGTLYLLTL  
HKVTLEDAGTITLQVGSSEEAQLKVTAKNTVLRGLENVDALEGGEALFECQLSQPEVAHAHTWLLDDEPVHTS  
EKVEVVYFENGLRHLLLLKLNKLPQDSCRVTFLAGDVVTSFAFLTVRGWRLEVLEPPHDASVKAGMQVRFTCILS  
EAVPVGEATWYINGAAIQPDDTDWTVTTDGSHHALTLNSAQPQHAGEVTFFAARDAVASARLSVLALPDPPEDA  
EYVGRSDHSVTLWSVAPMSDGGGGLCGYRVMKEASTGQWQLCHDLVPGPECVVDDLVPGKTYRFRVAAVGPA  
GAGEPVHLPQMVKIAPAPAPAPAPAPAPAPETRQAVVGEDICLELEVAADGGEVVWHKGTERRIQPGGHFEVLS  
RGQRQMLVIKGFRTEDQGEYRCGPIQGLPSSGAATFNVMVMTSGSGDEVPAQPSLPPEAAQEGDLHLLWEALAR  
KRRMSREPTLDSISELPEEDSRVQHLRQEAETAPDLSEGYSTADELARTGEADLSHTSSDDESRACTPSLVT  
YLKAGGPGISPLASKHEAQVTTSVKPKQKQEPVVTCPGGDLAADMPSLDKAAVKIQAAFKGYKVRKE  
MKQQEGPVFSRTFGDTEAQVGDVLRLECVLATKTDMRACWLKDGIELTDGRHYHIDQLKDGTCSSLVVTGLAPT  
DSGRYTCQVSTKSGRVSHSACVVVSGTESEAESSSGGELDDAFRAARRLHRLFRTKSPAELSEELFLSADE  
GPGEPEPADWQTYREDENFVCIRFESLAEARQAVTCFRNMFATMIGVEISLGEQGRGVEMRIGKVAPTVT  
PAVPLAKTPGLQTSDAAPVFLTELQNDQVDQDGYPMSFDCVVTGQPVPSVRWFKDGLKLEKDDHYMINEDQGG  
HQLIITAVVPADMVYRCLAENSMGVSSTKAELRVELTSTDYDTAADATETSSYFSAQGYLSSREQEGTESDE  
GQLPQVLEELKDLQVAPGTRLAKFQLKVKGYPAKLYWFKDGGPLTSDHIRMTDKKTLHTLEIVSVTREDSG  
QYAAYSNAVGAAYSSARLLVRGPSEPEEKPASDVHERLVPPRILEKFTPKKVKRGSSTIFSVKVEGHPAPSV  
HWLKEEAKEKGVWIGPDTPGYTMASSSKQHSVLVLDVGRQHOGTYTCIATNPAGQALCSASLHISGLAKEEEQ  
ERVKEALISSFLQGTSAVSAQMSSESAGFADLVGQSKGESLVAEEAHSHLSLAEVGTEEFQKLTSTQIEMVS  
AKISQAKLQVPGGDSDEETKTPSASPRHRSRSPSSSVQESSSEEDGDSRGEIFDIYVVTADYLPGLAEQDAI  
ILREGQYVEVLDSAHPLRWLVRTKPTKSSPSRQGWVSPAYLDRKRLKLSPEWGPTEAPEFPGEAVSEDEYRTRL  
SSVIQELLSSEQAFVQELQFLESHHMKHLERSPRVPAAVASQKTVIFRNVQDISHFHSSFLKELQCGTDDDV  
AMCFIKNQEAFEKYLEFLVGRVQAESVVVSTPVQEFYKKAEEETLSAKDPTQPPPPPLQHYLEQPVVERVQKYQ  
ALLKELIRNKARNRQNCALLEQAYAVVSALPQRAENKLVSLMENYPGTLEALGEPHQGHFIWEGAPGARM  
PWKGHNHRVFLFRNYLVICPRRDSRTDTFSYVFRNMMKLSSIDLNDQVEGDDRAFEVWHEREDSVRKYLLQA  
RTVIKNSWVKEICIGIQRLAQPVWRPPEFEEELADCTAELGETVKLACRVTGTPKPIVSWYKDGKPVVEVDPH  
HILIEDPDGSCITLIDNLTGIDSGQYMCFAASAAGNASTLGIILVQVPPRFVNVKVRATPFVEGEDAQITCTVE  
GAPYPIRQWYKDGTLTLAGPNRYRMLNEPRSGVLVVLVIAQASKEDELGHYECELVNRLGTSRGGELQYMSPALR  
ARDQHHREQIVAAVEDTSVEGSAHSAQDQADQQAASVLWRLLGSEALGSPSPGDLNTRQSEPPAFEEAASQIP  
GAASGTPEVSPQPGTHKLEQETTSSGSQGWTPVIRVEGTAWPGAGTGQLLLDVHSQVIMETTQRTYVCQAPDT  
GVTRAPSMQVTIEDVQVQVGDMAQFDAVIEGHPPPVTWYKGSTQLTSSARLSQRQDGTYSVLVTDVAPHDA  
GVYTCVANNAGGQVLCKAELLVHGGDKLDAENQVYRRKLHSFYDVQEEIGRGVFGFVKRVQHKGNMFCAAKF  
IPLRSKTRAQAYQERDILATLGHPLVTGLLDQFETRKTLLIILELCSSEELLDRLFKKGVVTEAEVKVYIQQL  
VEGLHYLHSHGILHLDIKPPNIMVHPAREDIKICDFGFAQKITPSEPQYSKYGSPEFVSPETIEQNPVSEGS  
DIWAMGVISYLSLTCSSPFAGESDRATLLNVLEGRVSWSSPTAAHLSSEDAKDFIKATLQRTPRARPSTSQCLA  
HPWFLKSMPAAEEAHFINTKQLKFLARSRWQRSLMSYKSILVMRSIPPELLQGPDPSPSLGVARHLRGEASGAS  
SSSSSDNELAPFARAKSLPPSPVTHSPLLHPRGFLRPSASLPEETEASMPADAAVSPASQSGAPPSPGCV  
PRHSVSISSLFYQQAGEGAERGNKTSGAKRHPARRRHLLKGGYIARALPGLREPLMEYSLLEEEAAREEQASLM  
TKTPSFETALRLPSSSVREVPGRSHSLDNPPVTTGSPPEACKEQLLFPSTGLTHETTAKDRGHKEGFLQESV  
PFPPMGSRSRPGKQEGSSQDSCRGPASSCHSELGSGSQEGCPSQSLGSLPPQSLKKEKELSTSCGPLFSEQ  
PQAAPFPTQVSPLLGSEKEPQDGLSEGPVVPSSSPGSASQVDASLDTEGLSEAGDTCDFTPPPQRQEQAT  
TRKFSLESRGGYAGVAGYGTFAFGGDAGGMLQGGPLWARMWAVSQSSEEQDEAATESPQPLESGLPIAEASG  
VPLRTSPSLTPWEEVEQVSLVQIRDLSGDAEAADTISLDISEVDPAYLNLSLDYDIKYLPEFEMI FRRVPKPI  
EQPESPGSETEAGQGLADFLLEAAWPWPGELGLRAGLEITEEPEEPGDLEALLGEAAVGRKRKWSPSRGLFQF  
PGRCLSGEEPVELGLRQVRKASMAHISRILKGRPEGEREGPPRKKAGLASFRLSGLKGRDQELSDEAVVLGQ  
SVTLACQVLAQPTAQTATWSKDGVLLESSGHLISSTLKNFQLLTIILVVKEEDLGTYTCCVSNPLGTAVTTGVL  
RKAERPSSSPREVEGELYKDAVLLVWKPVESCGPVTVIVQCCIEGGSWTTLASDISDCCYLTGKLSRGGMYIF  
RTACVSKAGMGPISSPSEQVLLGGPNHLASEEESRGRPAQLLPSTKTFQAFQMQIRRRGRFSVVRQCREKASGR  
ALAAKIVPYQPEDKTAVLREYEAALKRLHHPHLAQLHAAYLSPRHLVLIILELCSGPELLPSLAERESYSESDVK  
DYLWQMLSATQYLHAQHILHLDLRSENMMVTEYNLLKVIDLGNALDQEKVPAPENFKDYLETMAPELLEGG  
GAVPQTDIWAIGVTAIFIMLSGEYPESSSEGRDLQKGLRKLIRLSRCYAGLSGGAVAFQSSLCAQPWGRPCA  
STCLQCGLWTEEGPTGSRPTVTFPTVRLRAVFREREKRRALLYKKNLAQVR\*

>rs47135419\_ENSMUSP00000038264\_c.16194:G>A\_p.E5399K  
ENSMUST00000047441.14|Obscn-202|ENSMUSG00000061462|-|chr11:g.58928511:C>T  
MDHSFSGAPRFLTRPKAFVVSVGKDATLSCQIVGNPTPHVSWEKDRQFVEAGARFRLAQDGDVYRLTILDLAL  
GDSGQYVCRARNAIGEFAAVGLRVDSEGTCAEQAPHFLLRPTSIRVREGADATFRCRVGGSPQPAVSWSKDG  
RRLGPPDAPHVRVEEHGESSALRIRSARPRDGGTYEVRAENPLGSASAAAALVVDSDAEVAGPPGTSTATLLA  
HLQORREAMRAEGIPSPPGAGTRTCTVTEGKHARLSCFVTGEPKPEVWKKDQGLVTEGRRHVVEDEQENF  
VLKILFCKQSDRGLYCTASNLVGQTYSSVLVVVREPTVPFKKRLQDLEVREKESATFQCEVAQPAEAAWFK



EETRLWASAKYDIEEEGETERRLTVRNVSADDDAVYICETTEGSRRTVAELSVQGNLTKLPRKTAVRTGDTAIF  
WVELAVPEGPVRWLRNQEEMVAGGRVAITAEGTCHTLTI FQCTLEDMGEVAFVSGGCRTTTTQFCVSAPRRPPL  
YPPADPVVKAKTESSVTLWSAPPHGDRPVTIDGYVLEKRKLGAYAWSRCHEAGWLATTEFTITGVAAEGDFQ  
FRVSAINHFGQGPYLEFPGTMHLVPLAVKTPLKAVEAVEGGEVTFVSDTLTVASSGEWFLDGEALKASSIYVI  
RCDRTRHMLTIREVPARLHGAQLKVFVANGIETS IQMVVRAALGLPS SKLPAAAAREVLAQLHHEAQLLAE LSD  
QAAA VTWLKDGRELSLGPYEMQVSAGRRALLVRDVAQDDAGLYECVSRGSRTAYQLLVQDITDGYRDWGPAG  
PQKHMCKCAGAKIARYLGSSCYRFLQYDKGVWHWLEAALDTRQGKGTSSCSLHEKPKLVFAKQQAHSEVKA  
AGASATLSCEVAQAQTEVTFWKDGKLLSSSSKVRMEASGCSRRLVVQQAGKADAGEYSCEAGGQKLSFRLDVA  
EPKMVFAKEQQARSEVKAEGASATLSCEVAQAQTEVTFWKDGKLLSSSSKVRMEASGCSRRLVVQQAGKAD  
GEYSCEAGGQKLSFRLDVTEPKLVFAKEQQARSEVKAEGVNSATLSCEVAQAQTEVTFWKDGKLLSSSSKVRM  
EASGCSRRLVVQQAGKADAGEYSCEAGGQKLSFRLDVAE PKLVFAKEQQARSEVKAEGNSATLSCEVAQAQ  
EVTWTFWKDGKLLSSSSKVRMEASGCSRRLVVQQAGKADAGEYSCEAGGQKLSFHLDVTEPKLVFAKEQQAHSEV  
KAEAGASATLSCEVAQAQTEVTFWKDGKLLSSSSKVRMEASGCSRRLVVQQAGKADAGEYSCEAGGQKLSFR  
LDVAE PKLVFAKEQQARSEVKAEGASATLSCEVAQAQTEVTFWKDGKLLSSSSKVRVEASGCSRRLVVQQAG  
ADAGEYSCEAGGQKLSFRLDVAE PKLVFAKEQQANSEVKAEGASATLSCEVAQAQTEVTFWKDGKLLSSSSK  
VRVEASGCSRRLVVQQAGKADAGEYSCEAGGQKLSFRLDVAE PKLFAKEQQAHSEVKAEGASATLSCEVAQA  
AQTEVTFWKDGKLLSSSSKVRVEASGCSRRLVVQQAGKADAGEYSCEAGGQKLSFRLDVAE PKLFAKEQQAH  
SEVKAEGASATLSCEVAQAQTEVTFWKDGKLLSSSSKVRVEASGCSRRLVVQQAGKADAGEYSCEAGGQKLS  
FRLDVAE PKLFAKEQQAHSEVKAEGASATLSCEVAQAQTEVTFWKDGKLLSSSSKVRVEASGCSRRLVVQQ  
AGKADAGEYSCEAGGQKLSFRLDVAE PKLVFAKEQQAHSEVKAEGASATLSCEVAQAQTEVTFWKDGKLLSS  
SSKVRVEASGCSRRLVVQQV GKADAGEYSCEARGQKLSFRLDVAE AESQI PERPSRREPLVKEHETIILTAT  
IAAPSVAAVTWLKDGV EIRRSKRHEATSLGDTHLTVRGAQVLD SAIYSCRVGKEGQDFPVQVEEVAAKFSKP  
LEPVEGELGGTVMLVCELSPEQAEVWRCNGTQLRPGKRFQMTSEGPRRTLTVSGLREDDAE EYVCE SRDDRT  
SARLTVKVPVVKFTSGLSAMVAEEGQEATFQCVVSPSDAGVTWYKDGMLQ PSEKFMVMEVGASRSLTILGL  
TLEDAGQVTVEAEGASSAALRVREAPVLFKKKLEPQTVEERTSVTLEVELTRPWPEVKWTRNAAVLTPSENV  
EIRAEGARHCLVLRVSGFADRGF FGCETPDDKTQAKLNVEMRQVRLV RGLQEVEAKEQTGASMDVLESHAEVE  
GSWTRDGLRLQPGPKCHLAVQGPVHILTL SALQPQD SGLVAFRAEGVHTSARLIVTELPVSTFRVLQD VVATQ  
KEKVTLECELSRPVDVRWLKDGVELRAGKAI GIVAQGTCSRSLVIYRCETGDQGVYVCDALDAQTSASLRVQGR  
TYTLIFRRVLAEDAGEVKFVAENAESRAHLRVKELPVTLLRPLRDKIAMEKHRGVLECVSRASAQVRWFKGG  
VELQSGPKYEVVSDGLYRKLVIN DVQPEDEDTYTC DAGNVKTSAQFFVEEQSITIVRGLKDMTVM EPAPAWFE  
CETSIPSVRPPKWL LGKTVLQAGNVGLEQDGTVHRLTLHKTCSTMTGPHFTIGKSRSSAQLVSDIPVVL  
RPLEPKAGRELQSVVLSDFRPA PKAVQWYKDDTPLSPSEKFKMALEGQMAELRILRLTPADAGVYRCQAGSA  
QSSAEVTVAREVTVIQPLQDAEAMEEGRVCFSCELSHKDEDI EWSLNGTPLYNDSFHEISHEGLHTLV LKS  
VRQADTGTVCATSPKVSVSARLVVKGKPVVFLKALDDVSAEERGTLTLQCEVSDPEARVVRKDGVELGPSDK  
YDFLHKAGARGLTVHDLSHEDAGLYTCQVGSKETQSKVSVHDLHVGITKRLKTVEVLEGESCFECVLSHES  
SDPAVWTVGGKTVGSGHFAVRQGRKYTLTVKDAALS DAGEVVFVSVLGLTSKASLIIRERPVDITKPLEDQR  
TTLGEDVMLSCELSRAGTSVRWLKDGKAI RKSQKYDLLSEGTRAVLVVRKASLKDSGEYTCETEASKSTAKLC  
VEEKANRFTEELADLQVEEKGRAVFTCKTEHPASVVTWRKGLLELRASGKHVPSQEGTLTKLTINALERTDSD  
TYTCDIGQARTQARLLVHGQKVRVIEDLEDTAVQEGSSAK FCCRIAPADYGPVHWFLDKTPLHSNELNEITVQ  
PGGYHVLTLRQLALKDSGTVYFEAGDQRTS AALRVTEKPSIFSRPLTDVTVTEGEDLTLVCETTTVDSSVRWT  
KDGKTLRPSARCQLSHEGCAQLLITATTPQDGGRYKCEIGGASSSIVRVHALPVRFRESLKDVEVPEGKAA  
TLRCVLSSVAAPVEWRHGDDVLKSSNKYSLRQEGAVLELVIRDLQPQDSGQYSCSFGDQTTSATLTVKTSSAQ  
FVGKLRNKEATEGTTVTLRCELTK EAPVEWKGTETLRNGDKYSLKQDGAVCELQICSLLVADAGEYSCVCGQ  
EKTSATLTVKALLVHFVRR LRSKEATEGDTTTLQCELSKAAPVEWRKGTETLRDGD RYSLKQDGAVCELQIRS  
LTIADAGEYLCTCGQEKTSATLTVRALPAKFKDSLKNEEATEGTTATLSCELSKAAPVTWKKGPKTLQSGDKY  
VLRQDGAVCGLQIHGLTMADAGEYSCVCGQEKTSATLTVRGLPAKFIEDLRSQEATEGATAILRCELSKAAPV  
EWRKGSETLKDGD RYTLRQDGAVCELQIRGLAVVDGTYS SLP TKFTEGLRNEEATEGTMATLRCQMSKAAPV  
EWRKGSETLRDGD RYSLRQDGAMCELQIRGLTIEDSGEYTCVCGQEKTSATLSVKALPPRFIEDLRSQEATEG  
TMATLRCQMSKAAPVEWRKGSETLRDGG RYSLRQDGAVCELQIHDLAVEDTGEYSCVCGQEKTSATLNVKALP  
PRFIEDLRSQEATEGTMATLRCQMSKAAPVEWRKGSETLRDGG RYSLRQDGAVCELQIHDLVEDAGQYSCVC  
GQEKTSAVLTVDALPPKFT EGLKKEEATEGTMVTLRQMSKEATVEWRKGAKTSLDGG RYSLRQDGAMCELQI  
CGLAVEDAGEYSCVCGQEKTSATLSVKALPPRFIEDLRSQEATEGTMATLRCQMSKAAPVEWRKGSKTLR DGD  
RYSRLRQDGAMCELQICDLAVEDTGDYSCVCGQEKTSATLSVKAPQVVFQQPLQNLQAEEGSMASLRCELSV PN  
AAMVWSKGGLELQGDTRREARQQGCVAELLRLDRLEDAGEYSCTCGSQTTSATLMTVAAPVRFRLRLQAQDV  
DEGATARLRCELSREAVSVEWRKGS LQLFPKAKYQMVQEGTTAELLVHGVEQEDAGEYTC DAGHTQS IARLSV  
RAPKPKFKTDLQSTEQEAGGTARLCCQLSEAE PGTPVQWLKEGVELHVGSKYEMRRQGAVCELLIHGLEAKDT  
GEYACLVGQKTLASLRVKEPEVTIVRGLVDMEVQADEDFEFTCKV SQAGATDVQWHLQGLPQSNVTEVAV  
LADGCTHVLQLKGVTTLEDAGTVSFHVGGLSSSAQLTVRVPEVTVLEPLKDVQLSEGD AHFRCRLSRASGQEA

RWALGGVPLQCNEMNDITVEQGTLYLLTLHKVTLEDAGTITLQVGSSESQAQLKVTAKNTVLRGLENVDALEG
GEALFECQLSQPEVAHAHTWLLDDEPVHTSEKVEVVYFENGLRHLLLLLNKLPQDSCRVTFLAGDVVTS AFLTV
RALPDPPEDAEVVGRSDHSVTLVSWVAPMSDGGGGLCGYRVMKEASTGQWQLCHDLVPGPECVDDLVPGKTY
RFRVAAVGPAGAGEPVHLPQMVKIAPAPAPAPAPAPAPAPAPETRAVVGEDICLELEVAADGGEVWHKGTERRI
QPGGHFEVLSRGQRQMLVIKGFRTEDQGEYRCGPIQGLPSSGAATFNVMVMTSGSGDEVPAQPSLPEAAQEGD
LHLLWEALARKRRMSREPTLDSISELPEEDSRVQHLRQEAETAPDLSEGYSTADELARTGEADLSHTSSDDE
SRAGTPSLVTYLKKAGGPGISPLASKHEAQVTTSVKPKQKQPEVVPVTCPPPGDLSAADLMDPSLDKAAVKIQA
AFKGYKVRKEMKQQEGPVFSRTFGDTEAQVGDVLRLECVLATKTKDMRACWLKDGIELTDGRHYHIDQLKDGTC
SLLVTVGLAPTDSGRYTCQVSTKSGRVSHSACVVVSGTESEAESSGGELDDAFRRAARRLHRLFRTKSPAEELS
EEELFLSADEGPGPEPEPADWQTYREDENFVCIRFESLAEARQAVTCFRNMFMATMGIGVEISLGEQGPGRVEM
RIGKVAPTVTPAVPLAKTPGLQTSDAAPVFLTELQNDVQDGYPMSFDCVVTGQPVPSVRWFKDGKLEKDDH
YMINEDQQGGHQLIITAVVPADMGVYRCLAENSMGVSSTKAE LRVELTSTDYDTAADATETSSYFSAQGYLSS
REQEGTESDEGQLPQVLEELKDLQVAPGTRLAKFQLKVKGYPAKLYWFKDGOPLTSDHIRMTDKKTLHTLE
IVSVTREDSDGQYAAIYI SNAVGAAYSSARLLVRGPSEPEEKPASDVHERLVPPRILEKFTPKKVKRGSSTFSV
KVEGHPAPSVHWLKEEAEGVWLVIGPDTPGYTMASSSKQHSLVLLDVGQRHQGTYTCTIATNPAGQALCSASLH
ISGLAKEEEEQERVKEALISSFLQGTSAVSAQMSESAFADLVGQSKGESLVAAEAHSHLSLAEVGTETEEFLQK
LTSQITEMVSAKISQAKLQVPGGDSDEETKTPSAPRHGRSRPSSSVQESSSEEDGDSRGEIFDIYVVVTADY
LPLGAEQDAIILREGQYVEVLDSAHPLRWLVRTKPTKSSPSRQGWVSPAYLDKRLKLSPEWGPTEAPEFPGEA
VSEDEYRTRLSSVIQELLSSEQAFVQFLESHHMKHLERSPRVPAAVASQKTVIFRNVQDISHFHSSFLKE
LQCGCTDDDVAMCFIKNQEAFAKEYLEFLVGRVQAESVVVSTPVQEFYKKAEEETLSAKDPTQPPPPPLQHYLE
QPVERVQKYQALLKELIRNKARNRQNCALLEQAYAVVSALPQRAENKLVSLMENYPGTLEALGEPTRQGHFI
VWEGAPGARMPWKGNHRHVFLFRNYLVICKPRRDSRTDTFSYVFRNMMKLSSIDLNDQVEGDRAFEVWHERE
DSVRKYLQARTVI IKNSWVKEICGIQORLAQPVWRPPEFEEELADCTAELGETVKLACRVTGTPKPIVSWYK
DGKPVVEVDPHHILIEDPDGSCSTLILDNLGTIGDSQYMCFAASAAGNASTLGKILVQVPPRFVNVKVRATPFVEG
EDAQITCTVEGAPYPQIRWYKDGTLAPGNRYRMLNEPRSGVVLVLIQAASKEDLGHYCELVNRLGSTRGGG
ELYMQSPALRRYDQHHREQIVAAVEGAPSMQVTEIDVQVQVGDMAQFDAVIEGHPPPVTWYKGSTQLTSSAR
LSQRQDGLTDTYSLVLTVDVAPHDAGVYTCVANNAGGVQVCKAEELLVHGGDKLDAENQVYRRKLHSLFYDVQEEIGR
GVFGVFKRVQHKGNMFCAAKFIPLRSKTRAQAYQERDILATLGHPLVTGLLDQFETRKTLLIILELCSSEEL
LDRLFKKGVVTEAEVKVYIQQLVEGLHYLHSHGILHLDIKPPNIMVHPAREDIKICDFGFAQKITPSEPOYS
KYGSPFVVSPEIIEQNPVSEGSDIWAMGVI SYLSLTCSSPFAGESDRATLLNVLEGRVSWSSPTAAHLSERDAK
DFIKATLQRTPRARPSTSQC LAHPWFLKSMPAAEAHFINTKQLKFLARSRWQRSLMSYKSI LVMRSIPELLQ
GPPDSPSLGVARHLRGEASGASSSSSSSDNELAPFARAKSLPPSPVTHSPLLHPRGFLRPSASLPEETEASMP
TADAAPVAPSPQASAGPPASPGCVPRHSVSISSLFYQQAGEGAERGNKTS GAKRHPARRRHLKGGYIARALPGLR
EPLMEYSLLEEEAAREEQASLMTKTPSFETALRLPSSSVREVPGRSHSLDNPVTTGSPPEACKEQLLFPST
GLTHETTAKKDRGHKEGFLQESVFPFPMGDSRPGKQEGSSQDSCRGKPASSCHSELGSGSQEGCGPPSSQSLG
SLPPQSLKKEKELSTSCGPLFSEQQAAPFPTQVSPLLGSEKPEQDGSLSSEGVPVPSSSPGSASQVDSLDTGEG
LSEAGDTCDFTPPPQRPQEQATRKFSLERSGGYAGVAGYGTFAFGGDAGGMLGQGPLWARMWAVSQSSEEQ
DEAATESPQPLESLGPIAEASGVPLRTSPSLTPWEEVEQVSLVQIRDLSDGAEAAADTISLDISEVDPAYLNL
DLYDIKYLPPFEFMI FRRVPKPIEQPESPGSETEAGQGLADFLLEAAWPWPGEGLGLRAGLEITEEPEEPDLEA
LLGAAVGRKRKWSPSRGLFQFPGRCLSGEEPVELGLRQRVKASMAHISRILKGRPEGPEREPPRKKAGLAS
FRLSGLKGRDQELSDEAVVLGQSVTLACQVLAQPTAQATWSKDGVLLES SGHLLISSTLKNFQLLTIILVVKEE
DLGTYTCCVSNPLGTAVTTGVLKRAERPSSSPRPEVGEYKDAVLLVWKPVESECGPVTYIVQCCIEGGSWTTL
ASDISDCCYLTGKLSRGGMYIFRTACVSKAGMGPYSSPSEQVLLGGPNHLASEEESSRGRPAQLLPSTKTFAP
QMQIRRRGRFVVRQCREKASGRALAAKIVPYQPEDKTAVLREYEAALKRHLHHPHLAQLHAAYLSPRHLVLI LEL
CSGPELLPSLAERESYSESDVKDYLWQMLSATQYLHAQHILHLDLRSENMMVTEYNLLKVIDLGNAQSLDQEK
VPAPENFKDYLETMAPELLEGGQAVPQTDIWAIGVTA FIMLSGEY PESSSEGTDLQKGLRKLIRLSRCYAGL
SGGAVAFLOSSLCAQPWGRPCASTCLQCGWLTEEGPTGSRPTVPTFPTVRLRAFVREKRRALLYKKNHNAQ
VR\*

>rs47135419\_ENSMUSP00000049737\_c.18153:G>A\_p.E6052K
ENSMUST00000052872.15|Obscn-203|ENSMUSG00000061462|-|chr11:g.58928511:C>T
MDHSFSGAPRFLTRPKAFVSVGKDATLSCQIVGNPTPHVSWEKDRQPVEAGARFLAQDGDVYRLTILDLAL
GDSGQYVCRARNAIGEFAAVGLRVDSEGTCAEQAPHFLLRPTSIRVREGADATFRCRVGGSPQPAVSWSKDG
RRLGPPADAMHVRVEEHGESSALRIR SARPRDGGTYEVRANPLGSASAAAALVVDSDAEVAGPPGTSTATLLA
HLQQRREAMRAEIQIPSPGAGTRTCTVTTEGKHARLSCFVTGEPKPETVWKKDGLVTEGRHVYVEDEQENF
VLKILFCKQSDRGLYCTASNLVQTYSSVLVVVREPTVPFKKRLQDLEVREKESATFQCEVAQVATEAAWFK
EETRLWASAKYDIEEGETERRLTVRNVSADDDAVYICETTEGSRVAELSVQGNLTKLPRKTAVRTGDTAIF
WVELAVPEGPVWRWRNQEEMVAGGRVAITAEGTCHTLTIFQCTLEDMGEVAFVSGGCRTTTFQCVSAPRRPPL
YPPADPVVKAKTESSVTLWSAPPHGDRPVTIDGYVLEKRKLGAYAWSRCHEAGWLATTEFTITGVAAEEDGFQ

FRVSAINHFGQGPYLEFPGTMHLVPLAVKTPKAVEAVEGGEVTFVSDLTVASSGEWFLDGEALKASSIYVI  
RCDRTRHMLTIREVPARLHGAQLKVFVANGIETSIQMVVRAALGLPSSKLPAAAAAREVLAQLHEEAQLLAELSD  
QAAAVTWLKDGRELSLGPYEMQVSAGRRALLVRDVAQDDAGLYECVSRGSRRTAYQLLVQEPKLVFAKGQQA  
SEVKAEAGNSATLSCEVTQAQTEVTFWKDGGKLSSSSKVRMEASGCSRRLVVQQAGKADAGEYSCEAGGQKLS  
FRLDVAEPKLVFAKGQQAHESEVKAEAGASATLSCEVAQAQTEVTFWKDGGKLSSSSKVRMEASGCSRRLVVQQ  
AGKADAGEYSCEAGGQKLSFRLDVAEPKLVFAKEQQARSEVKAEAGASATLSCEVAQAQTEVTFWKDGGKLS  
SSKVRMEASGCSRRLVVQQAGKADAGEYSCEAGGQKLSFRLDVTEPKLVFAKEQQARSEVKAEVGNATLSCE  
VAQAQTEVTFWKDGGKLSSSSKVRMEASGCSRRLVVQQAGKADAGEYSCEAGGQKLSFRLDVAEPKLVFAKEQ  
QARSEVKAEAGNSATLSCEVAQAQTEVTFWKDGGKLSSSSKVRMEASGCSRRLVVQQAGKADAGEYSCEAGGQ  
KLSFHLDVTEPKLVFAKEQQAHSEVKAEAGASATLSCEVAQAQTEVTFWKDGGKLSSSSKVRMEASGCSRRLV  
VQQAGKADAGEYSCEAGGQKLSFRLDVAEPKLVFAKEQQARSEVKAEAGASATLSCEVAQAQTEVTFWKDGGK  
LSSSSKVRVEASGCSRRLVVQQAGKADAGEYSCEAGGQKLSFRLDVAEPKLVFAKEQQANSEVKAEAGASATL  
SCEVAQAQTEVTFWKDGGKLSSSSKVRVEASGCSRRLVVQQAGKADAGEYSCEAGGQKLSFRLDVAEPKLAFA  
KEQQAHSEVKAEAGASATLSCEVAQAQTEVTFWKDGGKLSSSSKVRVEASGCSRRLVVQQAGKADAGEYSCEA  
GGQKLSFRLDVAEPKLAFAKEQQAHSEVKAEAGASATLSCEVAQAQTEVTFWKDGGKLSSSSKVRVEASGCSR  
RLVVQQAGKADAGEYSCEAGGQKLSFRLDVAEPKLAFAKEQQAHSEVKAEAGASATLSCEVAQAQTEVTFWKD  
GKLSSSSKVRVEASGCSRRLVVQQAGKADAGEYSCEAGGQKLFRLDVAEPKLMFAKEQQAHSEVKAEAGAS  
ATLSCEVAQAQTEVTFWKDGGKLSSSSKVRVEASGCSRRLVVQQAGKADAGEYSCEAGGQKLSFRLDVAEPK  
VFAKEQQAHSEVKAEAGASATLSCEVAQAQTEVTFWKDGGKLSSSSKVRVEASGCSRRLVVQQVQKADAGEYS  
CEARGQKLSFRLDVADTRLMFAKEQQARTEVKAEAGNSATLSCEVAQAQTEVTFWKDGGKLSSSSKVRVEASG  
CSRRLVVQQAGKADAGEYSCEAGGQKLSFRLDVAEAEESQIPERPSRREPLVVKEHETIILTATIAAPSVAAVT  
WLKDGVEIRRSKRHEATSLGDTHLTVRGAQVLDIAIYSCRVGKEGQDFPVQVEEVAAKFSKPLEPVEGELGG  
TVMLVCELSPEQAEVWRCGNTQLRPGKRFQMTSEGPRRTLTVSGLREDDAEYVCESRDDRTSARLTVKVPR  
VVKFTSGLSAMVAEEGQEATFQCVVSPSDAGVTWYKDGMLQPSSEKFMVESGASRSLTILGLTLEDAGQVTV  
EAEGASSAALRVREAPVLFKKKLEPQTVEERTSVTLEVELTRPWPVEVKWTRNAAVLTPSENVEIRAEGARHC  
LVLRSVGFADRGFFGCETPDDKTQAKLNVEMRQVRLVGLQEVEAKEQGTASMDVELSHVAEVEGSWTRDGLRL  
QPGPKCHLAVRQGRKYTLTVKDAALSADAGEVVFVSLGLTSKASLIIRERPVDITKPLEDQRTTLGEDVMLS  
SRPVDVRWLKDGVELRAGKAI GIVAQGTCSRSLVIYRCETGDQGVYVCDALDAQTSASLRVQGRTYTLIFRRVL  
AEDAGEVKFVAENAESRAHLRVKELPVTLLRPLRDKIAMEKHRGVLECVSRASAQVRWFVGGVLEQSGPKYE  
VVDGLYRKLVINDEVQPEDEDTYTCDAGNVKTSAQFFVEEQSITIVRGLKDMTVMPEPAPAWFECETSIPSVRP  
PKWLLGKTVLQAGGNVLEQDGTVHRLTLHKTCSTMTGPVHFTIGKSRSSAQLVVSIDI PVVLRPLPKAGRE  
LQSVVLSCDFRPAPKAVQWYKDDTPLSPSEKFKMALEGQMAELRILRLTPADAGVYRCQAGSAQSSAEVTVEA  
REVTVIQPLQDAEAMEEGRVCFSCELSHKDEDIEWSLNGTPLYNDSFHEISHEGCLHTLVLSVRQADTGTVC  
ATSPKVSVSARLVVKGKPVVFLKALDDVSAEERGTTLTQCEVSDPEARVVWRKDGVELGPSDKYDFLHKAGAR  
GLTVHDLSDHEDAGLYTCQVGSKETQSKVSVHDLHVGITKRLKTEVELEGECSFECVLSHESPSDPAVWTVGG  
KTVGSGHFHAVRQGRKYTLTVKDAALSADAGEVVFVSLGLTSKASLIIRERPVDITKPLEDQRTTLGEDVMLS  
CELSRAGTSVRWLKDGKAIKRSQKYDLLSEGTRAVLVVRKASLKDSGEYTCETEASKSTAKLVCVEEKANRFT  
ELADLQVEEKGRAVFTCKTEHPASVVTWRKGLLELRASGKHVPSQEGTLTKLTINALERTDSDTYTCDIGQAR  
TQARLLVHGQKVRVIEDLEDTAVQEGSSAKFCCRIAPADYGPVHWF LDKTPLHSNELNEITVQPGGYHVTLR  
QLALKDSGTVYFEAGDQRTSAAALRVTEKPSIFSRPLTDVTVTEGEDTLVCETTTVDSSVRWTKDGKTLRPSA  
RCQLSHEGCQAQLLITATTPQDGGRYKCEIGGASSSIVRVHALPVRFRRESLKDVEVPEGKAATLRCVLSVA  
APVEWRHGDDVLKSSNKYSLRQEGAVLELVIRDLQPDQSGQYSCSFGDQTTSATLTVKTSQAQFVGKLRNKEA  
TEGTTVTLRCELTKEAPVEWKKGTETLRNGDKYSLKQDGA VCELQICSLLVADAGEYSCVCGQEKTSATLTVK  
ALLVHFVRRRLRSKEATEGDTTLQCELSKAAPVEWRKGTETLRDGDYSLKQDGA VCELQIRSLTIADAGEYL  
CTCQEKTSATLTVRALPAKFKDSLKNEEATEGTTATLSCELSKAAPVTWKKGPKTLQSGDKYVLRQDGA VCG  
LQIHGLTMADAGEYSCVCGQEKTSATLTVRGLPAKFIEDLRSQEATEGATAILRCELSKAAPVEWRKGS  
DGDYTLRQDGA VCELQIRGLAVVDGTYSLSLPTKFTTEGLRNEEATEGTMATLRCQMSKAAPVEWRKGS  
DGDYSLRQDGA MCELQIRGLTIEDSGEYTCVCGQEKTSATLSVKALPSRFIEDLRSQEATEGTMATLRCQMS  
KTAPVEWKKGSETLRDGGYSLRQDGPVCELQICDLAVEDAGEYSCVCGQEKTSATLSIKALPPRFIEDLRSQ  
EATEGTMATLRCQMSKAAPVEWRKGSSETLGDGGYSLRQNGAVCELQIHDLAVEDTGEYSCVCGQEKTSATLN  
VKALPPRFIEDLRSQEATEGTMATLRCQMSKAAPVEWRKGSSETLRDGGYSLRQDGA VCELQIHDLVEDAGQ  
YSCVCGQEKTSAVLTVDALPPKFTTEGLKKEEATEGTMVTLRQMSKEATVEWRKGAKTLSDDGGYSLRQDGA  
MCELQICGLAVEDAGEYSCVCGQEKTSATLSVKALPPRFIEDLRSQEATEGTMATLRCQMSKAAPVEWRKGS  
LRDGDYSLRQDGA VCELQIRDLAVEDAGEYLCVCGQEKTSATLSVKALPPRFIEDLRSQEATEGTMATLRCQ  
MSKAAPVEWRKGSSETLRDGDYSLRQDGA MCELQICDLAVEDTGDYSCVCGQEKTSATLSVKALPPRFIEDL  
SQEAREGTVATLRCMSKAAPVEWRKGSSETLKDGDYSLRQEGNLCELQIRDLAVEDTEEYSCVCGQEKTSAT  
LSVKALPAKFIEDLRSQEAPESSTVTLRCKLSKKASVVWKKGSETLRNGARYSLRQDGA VCELEIRDLTVEDT  
GEYSCTCGQERTSATLSIMAPQVVFQPLQNLQAEEGSMASLRCELSVPNAAMVWSKGGLELQGDTRREARQQ

GCVAEALLLRDLRREDAGEYSCTCGSQTTSATLMVTAAPVRFLELQAQDVDEGATARLRCELSREAVSVEWRK  
GSIQLFPKAKYQMVQEGTTAELLVHGVEQEDAGEYTC DAGHTQS IARLSVRAPKPKFKTDLQSTEQEAGGTAR  
LCCQLSEAEPTPVQWLKEGVELHVGSKYEMRRQGAVCELLIHGLEAKDTGEYACLVGQKTLASLRVKEPEV  
TIVRGLVDMEVQADEDEVEFTCKVSQAGATDVQWHLQGLPLQSNEVTEVAVLADGCTHVLQKGVTLLEDAGTVS  
FHVGGSSSAQLTVRVPEVTVLEPLKDVQLSEGQDAHFRCRLSRASGQEARWALGGVPLQCNEMNDITVEQGT  
LYLLTLHKVTLEDAGTITLQVGSCSSEAKLVTAKNVTLRGLENVDALEGGEALFECQLSQPEVAHAHTWLLDD  
EPVHTSEKVEVVYFENGLRHLLLLKNLKPQDSCRVTFLAGDVVTSAFITVTRGWRLEVLEPPHDASVKAGMQVR  
FTCILSEAVPVGEATWYINGAAIQPDDTDWTVTTDGSHHALTLSNAQFQHAGEVTF AARDAVASARLSVLALP  
DPEEDAEEVGRSDHSVTLRWSVAPMSDGGGLCGYRVEMKEASTGQWQLCHDLVPGPECVVDDLVPGKTYRFRV  
AAVGPAGAGEPVHLPQMVKIAPAPAPAPAPAPAPAPETROAVVGEDICLELEVAADGGEVVWHKGTERTIQPGG  
HFEVLSRGRQMLVIKGFRTEDQGEYRCGPIQGLPSSGAATFNVMVMTSGSGDEVPAQPSLPPEAAQEGDLHLL  
WEALARKRRMSREPTLDSISELPEEDSRVQHLRQEAETAPDLSEGYSTADELARTGEADLSHTSSDDES RAG  
TPSLVTYLKKAGGPGISPLASKHEAQVTTSVKPKQKQEPVPTCPPPGDLSAADLMDPSLDKAAVKIQAAFKG  
YKVRKEMKQOEGPVFSRTFGDTEAQVGDVLRLECVLATKTDMRACWLKDGIELTDGRHYHIDQLKDGTC SLLV  
TGLAPTDSGRYTCQVSTKSGRVSHSACVVVSGTESEAESSSGGELDDAFRRAARLHRLFRTKSPAELSEEEL  
FLSADEGPEPEEPADWQTYREDENFVICRFESLAEARQAVTCFRNMFATMGIGVEISLGEQGPGRVEMRIGK  
VAPTVTPAVPLAKTGLQTSDAAPVFLTELQNDVQDGYPMSFDCVVTGQPVPSVRVFKDGKLEKDDHYMIN  
EDQQGGVQLIITAVVPADMGVYRCLAENSMGVSSTKAELRVELTSTDYDTAADATETSSYFSAQYLSRSREQE  
GTESDEGQLPQVLEELKDLQVAPGTRLAKFQKLVKGYPAKLYWFKDQGPLTSDHIRMTDKKTLHTLEIVSV  
TREDSGQYAAIYISNAVGAAYSSARLLVRGPSEPEEKPASDVHERLVPRILEKFTPKKVKRGSSTFSVKVEG  
HPAPSVHWLKEEAKEGVLWIGPDTPGYTMASSSKQHSLLVLDVGRHQGTYTCIATNPAGQALCSASLHISGL  
AKEEEQERVKEALISSFLQTSQAVSAQMSSESAGFADLVGQSKGESLVAEEAHSHLSLAEVGTTEFLQKLT SQ  
ITEMVSAKISQAKLQVPGGDSDEETKTPSASPRHGRSRPSSSVQESSSESEDGDSRGEIFDIYVVTADYLP LG  
AEQDAIILREGQYVEVLD SAHPLRWLVRTKPTKSSPSRQGWVSPAYLDKRLKLSPEWGPTEAPEFPGEAVSED  
EYRTRLSSVIQELLSSEQAFVGELEQFLESHHMKHLERSPRVPAVASQKTVIFRNVQDISHFHSSFLKELQGC  
GTDDDVAMCFIKNQAEFAKEYLEFLVGRVQAEVSVVSTPVQEFYKKAEBETLSAKDTPPPPPLOHYLEQVVE  
RVQKYQALLKELIRNKARNRQNCALLEQAYAVVVALPQRAENKLVSLMENYPGTLEALGHEPIRQGHFVWEG  
APGARMPWKGNHRHVF LFRNYLVICKPRRDSRTDTFSYVFRNMMKLSSIDLNDQVEGDDRAFEVWHERE SVR  
KYLQARTVIKNSWVKEICGIQORLAQPVWRPPEFEEELADCTAELGETVKLACRVTGTPKPIVSWYKDGKP  
VEVDPHHILIEDPDGSC TLI LDNLTGIDSGOYMCFAASAAGNASTLGKILVQVPPRFVNVKVRATPFVEGEDAQ  
ITCTVEGAPYPQIRWYKDGTL LAPGNRYRMLNEPRSGVLV LVIQAASKEDLGHYECELVNRLGSTRGGELYM  
QSPALRARDQHHREQIVAAVEVTEQETKVPKKTVIEETITTVVKS PRGRRQSPGKSPSRSPRRSASPRRPG  
LLAPERLYPPGTSPSRLEVEQGRKAPVPALYVTEAEVHAPASQSQPKWLEVEETIEVRVKKTGSRGASPVRE  
MTRSREGILFTLPGGIPGRDPNANNNSNKS SVYQEARWGPVAVHVGEPFIFQVDSVGNVDVVAASPEPEQVRA  
SQKEENTERQEGCSDGENTFLMEEPQD TDSLQGRDPKILTHNGRVLTADLEDYVQEGETF GCGDSTPSTP  
DEPPCEVSVLQREI SEPTVGQPVLLNVGRPPGTGATPSFFRPGSQVHSPESVFLLEAWSGPVSAAPWTSS F  
HTHVQSSVDGSHGSFKTEVSTQTVSFGAVGETVTLHIDPDGGEAPGPSQG\*

>rs47135419\_ENSMUSP00000020732\_c.18354:g>A\_p.E6119K  
ENSMUST00000020732.13|Obscn-201|ENSMUSG00000061462|-|chr11:g.58928511:C>T  
MDHSFSGAPRFLTRPKAFVSVGKDATLSCQIVGNPTPHVSWEKDRQFVEAGARFRLAQDGDVYRLTILDLAL  
GDSGQYVCRARNAIGEAFVAVGLRVDSEGTCAEQAPHLLRPTSIRVREGADATFRCRVGGSPQPAVSWSKDG  
RRLGPPDAPHVRVEEHGESSALRIRRSARPRDGGTYEVRAENPLGSASAAAALVVDSAEVAGPPGTSTATLLA  
HLQORREAMRAEGIPSPPPGAGTRTCTVTEGKHARLSCFVTGEPKPEVWKKDGLVTEGRRHVVEDEQENF  
VLKILFCKQSDRGLYCTASNLVGGTYSSVLVVVVREPTVPFKKRLQDLEVREKESATFQCEVAQPAEAAWFK  
EETRLWASAKYDIEEKGTERRLTVRNVSADDDAVYICETTEGSRVVAELSVQGNLTKLPRKTAVRTGDTAIF  
WVELAVPEGPVRWLRNQEEMVAGGRVAITAEGTCHTLTI FQCTLEDMGEVAFVSGGCRTTTQFCVSAPRRPPL  
YPPADPVVKAKTESSVTLWSAPPHGDRPVTIDGYVLEKRLKLGAYAWSRCHEAGWLATTEFTITGVAAEEDFQ  
FRVSAINHFGQGPYLEFPGMTMLVPLAVKTPKAVEAVEGGEVTFVSDLTVASSGEWFLDGEALKASSIYVI  
RCDRTRHMLTIREV PARLHGAQLK FVANGIETS IQMVVRAALGLPSSKLPAAAAREVLAQLHEEAQLLAE LSD  
QAAAVTWLKDGRELSLGPKEYMQVSAGRRALLVRDVAQDDAGLYECVSRGSR TAYQLLVQDITDGYRDWGPAG  
PQKHMCKCAGAKIARYLGSSCYRFLQYDKGVWHLEAALDTRQKGTSSCSLHEKPKLVFAKQQAHSVEKAE  
AGNSATLSCEVTQAQTEVTFWKDGGKLSSSSKVRMEASGCSRRLVVQQAGKADAGEYSCEAGGQKLSFRLDVA  
EPKLVFAKQQAHSVEKAEAGASATLSCEVAQAQTEVTFWKDGGKLSSSSKVRMEASGCSRRLVVQQAGKADA  
GEYSCEAGGQKLSFRLDVAEPKMFVFAKEQQARSEVKAEGASATLSCEVAQAQTEVTFWKDGGKLSSSSKVRM  
EASGCSRRLVVQQAGKADAGEYSCEAGGQKLSFRLDVTEPKLVFAKEQQARSEVKAEGVNSATLSCEVAQAQ  
EVTWFKDGGKLSSSSKVRMEASGCSRRLVVQQAGKADAGEYSCEAGGQKLSFRLDVAEPKLVFAKEQQARSEV  
KAEAGNSATLSCEVAQAQTEVTFWKDGGKLSSSSKVRMEASGCSRRLVVQQAGKADAGEYSCEAGGQKLSFHL  
DVTEPKLVFAKEQQAHSEVKAEGASATLSCEVAQAQTEVTFWKDGGKLSSSSKVRMEASGCSRRLVVQQAGK

ADAGEYSCEAEGQKLSFRLDVAEPKLVFAKEQQARSEVKAEAGASATLSCEVAQAQTEVTFWKDGGKLSSSSK
VRVEASGCSRRLVVQQAGKADAGEYSCEAGGQKLSFRLDVAEPKLVFAKEQQANSEVKAEAGASATLSCEVAQ
AQTEVTFWKDGGKLSSSSKVRVEASGCSRRLVVQQAGKADAGEYSCEAGGQKLSFRLDVAEPKLAFAKEQQAH
SEVKAEAGASATLSCEVAQAQTEVTFWKDGGKLSSSSKVRVEASGCSRRLVVQQAGKADAGEYSCEAGGQKLS
FRLDVAEPKLAFAKEQQAHSEVKAEAGASATLSCEVAQAQTEVTFWKDGGKLSSSSKVRVEASGCSRRLVVQQ
AGKADAGEYSCEAGGQKLSFRLDVAEPKLAFAKEQQAHSEVKAEAGASATLSCEVAQAQTEVTFWKDGGKLS
SSKVRVEASGCSRRLVVQQAGKADAGEYSCEAGGQKLFRLDVAEPKLMFAKEQQAHSEVKAEAGASATLSCE
VAQAQTEVTFWKDGGKLSSSSKVRVEASGCSRRLVVQQAGKADAGEYSCEAGGQKLSFRLDVAEPKLVFAKEQ
QAHSEVKAEAGASATLSCEVAQAQTEVTFWKDGGKLSSSSKVRVEASGCSRRLVVQQVQVQKADAGEYSCEA
RQKLSFRLDVADTRLMFAKEQQARTEVKAEAGNSATLSCEVAQAQTEVTFWKDGGKLSSSSKVRVEASGCSRRLV
VQQAGKADAGEYSCEAGGQKLSFRLDVAEAEESQIPERPSRREPLVVKEHETIILTATIAAPSVAAVTWLKDGV
EIRRKRHEATSLGDTHTLTVRGAQVLDIAIYSCRVGKEGQDFPVQVEEVAAKFSKPLEPVEGELGGTVMLVC
ELSPQAEVWRCGNTQLRPGKRFQMTSEGPRRTLTVSGLREDDAEYVCESRDDRTSARLTVKVPVVKFTS
GLSAMVAEEGQEATFQCVVSPSDAGVTWYKDGMLQPSKFKVMVESGASRSLTILGLTLEDAGQVTEAEGAS
SSAALRVREAPVLFKKKLEPQTVTEERTSVTLEVELTRPWPEVKWTRNAAVLTPSENVEIRAEGARHCLVLRV
GFADRGGFFGCETPDDKTQAKLNVEMRQVRLVVRGLQVEEAKQGTASMDVELSHAEEVEGSWTRDGLRQLQPGPK
HLAVQGPVHILTLALQPDGLVAFRAEGVHTSARLIVTELPVSFTRVLQDQVAVTQKEKVTLECELSRFPVDV
RWLKDGVLELRAGKAIQVQGTQCRSLVIRYRCEGTGQGVYVCDALDAQTSASLRVQGRTYTLIFRRLAEDAGE
VKFVAENAESRAHLRVKELPVTLLRPLRDKIAMEKHRGVLECCQVSRASAQVRWFKGGVELQSGPKYEVVSDGL
YRKLVINVDQPEDEDTYTCDAENVKTSAQFFVEEQSITIVRGLKDMTVMPEPAPAWFECETSIPSVRPPKWL
KTVLQAGGNVGLQDGTVHRLTLHKTCSTMTGPHFTIGKSRSSAQLVSDIPVVLTRPLEPKAGRELQSVVL
SCDFRPAPKAVQWYKDDTPLSPSEKFKMALEGGMAELRILRLTPADAGVYRCQAGSAQSSAEVTEAREVTVI
QPLQDAEAMEEGRVCFSCELSHKDEDEIWSLNGTPLYNDSFHEISHGCLHTLVLSKVRQADTGTVCATSPKV
SVSARLVVKGKPVVFLKALDDVSAEERGTTLTQCEVSDPEARVVRKDGVELGSPDKYDFLHKAGARGLTVHD
LSHEDAGLYTCQVGSKETQSKVSVHDLHVGITKRLKTVEVLEGESECSFECVLSHESPSDPAVWTVGGKTVGGS
GHFHAVRQGRKYTLTKVDAALSDAGEVVFVSVLGLTSLKASLIIRERPVDITKPLEDQRTTELEDVMLSCELSRA
GTSVVRWLKAGAIRKVAIGIVAQGTQCRSLVIRYRCEGTGQGVYVCDALDAQTSASLRVQGRTYTLIFRRLAEDAGE
VEEKGRAVFTCKTEHPASVVTWRKGLLELRASGKHVPSQEGTLTKLTINALERTSDTYTCDIQQARTQARLL
VHGQKVRVIEDLEDTAVQEGSSAKFCRIAPADYGPVHWFLLDKTPLHSNELNEITVQPGGYHVLTLRQLALKD
SGTVYFEAGDQRTSAALRVTEKPSIFSRPLTDVTVTEGEDTLTVCETTTVDSVVRWTKDGKTLRPSARCQLSH
EGCQAQLLITATTPQDGGRYKCEIGGASSSSIVRVHALPVRFRRESLKDVEVPEGKAATLRCVLSVAAPVEWR
HGDDVLKSSNKYSLRQEGAVLELVIRDLQPDQSGQYSCSFGDQTSATLTVKTSQAQFVQKLRNKEATEGTTV
TLRCELTKAEPVEWKKGTETLRNGDKYSLKQDGAVCCELQICSLLVADAGEYSCVCGQEKTSATLTVKALLVHF
VRRLSKEATEGDTTLQCELSKAAPVEWRKGTETLRDGDYSLKQDGAVCCELQIRSLTIADAGEYLCTCGQE
KTSATLTVRALPAKFKDSLKNEEATEGTTATLSCELSKAAPVTWKKGPKTLQSGDKYVLRQDGAVCGLQIHGL
TMADAGEYSCVCGQEKTSATLTVRGLPAKFIEDLRSQEATEGATAILRCELSKAAPVEWRKGTETLRDGDYR
LRQDGAVCCELQIRGLAVVDGTGYSLSLPTKFTTEGLRNEEATEGTMATLRCQMSKAAPVEWRKGTETLRDGDYR
LRQDGAVCCELQIRGLTIEDSGEYTCVCGQEKTSATLSVKALPSRFIEDLRSQEATEGTMATLRCQMSKTAPVE
WKKGSETLRDGGRYSLRQDGPVCELQICDLAVEDAGEYSCVCGQEKTSATLSIKALPPRFIEDLRSQEATEGT
MATLRCQMSKAAPVEWRKGTETLRDGGRYSLRQNGAVCELQIHDLAVEDTGEYSCVCGQEKTSATLNVKALPP
RFIEDLRSQEATEGTMATLRCQMSKAAPVEWRKGTETLRDGGRYSLRQDGAVCCELQIHDLVEDAGQYSCVCG
QEKTSAVLTVDALPPKFTTEGLKKEEATEGTMVTLRCQMSKAEATVEWRKGAKTSLDGGRYSLRQDGAVCCELQI
GLAVEDAGEYSCVCGQEKTSATLSVKALPPRFIEDLRSQEATEGTMATLRCQMSKAAPVEWRKGTETLRDGD
YSLRQDGAVCCELQIRDLAVEDAGEYLCVCGQEKTSATLSVKALPPRFIEDLRSQEATEGTMATLRCQMSKAAP
VEWRKGTETLRDGDYSLRQDGAVCCELQICDLAVEDTGDYSCVCGQEKTSATLSVKALPPRFIEDLRSQEARE
GTVATLRCRMSKAAPVEWRKGTETLRDGDYSLRQEGNLCELQIRDLAVEDTEEYSCVCGQEKTSATLSVKAL
PAKFIEDLRSQEAPESSTVTLRCKLSKKASVVWKKGSETLRNGARYSLRQDGAVCLEIRDLTVEDTGEYSCT
CGQERTSATLSIMAPQVVFQQLQNLQAEEGSMASLRCELSVNAAMVWSKGGLELQGDTRREARQQGCVAEL
LLRDLRREDAGEYSCTCGSQTTSATLMVTAAPVRFLRELQAQDVDEGATARLRCELSREAVSVEWRKGLQLF
PCAKYQMVQEGTTAELLVHGVEQEDAGEYTCDAHTQSIARLSVRAPKPKFKTDLQSTEQEAGGTARLCCQLS
EAEPTGTPVQWLKEGVELHVGSKYEMRRQGAVCCELLIHGLEAKDTGEYACLVGGQKTLASLRVKEPEVTIVRGL
VDMEVQADEDEFTCKVQAGATDVQWHLQGLPLQSNVTEVAVLADGCTHVLLQKGVTLLEDAGTVSFHVGGL
SSAQLTVRVEPVTVLEPLKDVQLSEGQDAHFRCLRSRNASGQEARWALGGVPLQCNEMNDITVEQGTLYLLTL
HKVTLVEDAGTITLQVGSSEEAQLKVTAKNTVLRGLVENADLEGGEALFECQLSQPEVAHTWLLDDEPVHTS
EKVEVVYFENGLRHLLLLKNLKPQDSCRVTFLAGDVVTSFAFLTVRGRWLEVLPPHDASVKAGMQVRFCTILS
EAVPVGEATWYINGAAIQPDDTDWTVTTDGSHALTLSNAQPQHAGEVTFAAARDAVASARLSVLALPDPPEDA
EAVGRSDHSVTLVSWAPMSDGGGGLCGYRVMKEASTGQWQLCHDLVPGPECVDDLVPGKTYRFRVAAVGPA
GAGEPVHLPQMVKIAPAPAPAPAPAPAPAPETRQAVVGEDICILELEVAADGGEVVWHKGTERRIQPGHFVLS

RGQRQMLVIKGFRTEDQGEYRCGPIQGLPSSGAATFNVMVMTSGSGDEVPAQPSPLPPEAAQEGDLHLLWEALAR  
 KRMSREPTLDSISELPEEDSRVQHLRQEAEEETAPDLSEGYSTADELARTGEADLSHTSSDDESAGTGPLSVT  
 YLKKAGGPGISPLASKHEAQVTSVKPQKQOQEPVVPTCPPGDLAADLMDPSLDKAAVKIQAAFQYKVRKE  
 MKQOQEGPVFSRTFGDTEAQVGDVLRLECVLATKTDMRACWLKDGIELTDGRHYHIDQLKDGTCSSLVVTGLAPT  
 DSGRYTCQVSTKSGRVSHSACVVVSGTESEAESSGGELDDAFRAARRLHRLFRTKSPAELSEEELFLSADE  
 GPGEPEEPADWQTYREDENFVCIRFESLAEARQAVTCFRNMFATMGIGVEISLGEQGGPRGVEMRIGKVAPTVT  
 PAVFLAKTPGLQTSDAAPVFLTELQNDVQDGYPMSFDCVVTGQVPVPSVRWFKDGKLEKDDHYMINEDQGG  
 HQLIITAVVPADMVGYRCLAENSMGVSSSTKAELRVELTSTDYDTAADATETSSYFSAQGYLSSREQEGTESDE  
 GQLPQVLEELKDLQVAPGTRLAKFQLKVKGYPAKPLYWFKDQPLTSDHIRMTDKKTLHTLEIVSVTREDSG  
 QYAAYSNAVGAAYSSARLLVRGPSEPEEKPASDVHERLVPPRILEKFTPKKVKRGSSITFSVKVEGHPAPSV  
 HWLKEEAKEKGLVWIGPDTPGYTMASSSKQHSVLVLDVGRQHQTGTYTCIATNPAGQALCSASLHISGLAKEEEQ  
 ERVKEALISSFLQGTSAQVSAQMSSEAGFADLVGQSKGESLVAEEAHSHLSLAEVGTTEEFLQKLTSTQITEMVS  
 AKISQAKLQVPGGDSDEETKTPSASPRHGRSRPSSSVQESSSESEDGDSRGEIFDIYVVTADYLPGLAEQDAI  
 ILREGQYVEVLDSAHPLRWLVRTKPTKSSPSRQGWVSPAYLDKRLKLSPEWGPTEAPEFPGEAVSEDEYRTRL  
 SSVIQEELLSSEQAFVQELQFLESHHMKHLERSPRVPAAVASQKTVIFRNVQDISHFHSSFLKELQCGCTDDDV  
 AMCFIKNQEAFAKEYLEFLVGRVQAESVVVSTPVQEFYKKAEEETLSAKDPTQPPPPLOHYLEQPVVERVQKYQ  
 ALLKELIRNKARNRQNCALLEQAYAVVSALPQRAENKLVSLMENYPGTLEALGEPHPIRQGHFIWEGAPGARM  
 PWKGHNHRHVFLFRNYLVICKPRRDSRTDTFSYVFRNMKLSIDLNDQVEGDRAFEVWHEREDSVRYKYLQA  
 RTVIKNSWVKEICGIQORLAQPVWRPPEFEEELADCTAELGETVKLACRVTGTPKPIVSWYKDGKPVVDPH  
 HILIEDPDGCTLILDNLTGIDSGQYMCFAASAAGNASTLGKILVQVPPRFVNVKVRATPFVEGEDAQITCTVE  
 GAPYPQIRWYKDGTLTLLAPGNRYRMLNEPRSGVLVVIQAASKEDLGHYECELVNRLGSTRGGGELYMOSPALR  
 ARDQHHREQIVAAVEERRPSP\*  
 >rs47135419\_ENSMUSP00000151217\_c.15648:G>A\_p.E5217K

ENSMUST00000219084.3|Obscn-207|ENSMUSG00000061462|-|chr11:g.58928511:C>T  
 MDHSFSGAPRFLTRPKAFVVSVGKDATLSCQIVGNPTPHVSWEKDRQFVEAGARFRLAQDGDVYRLTILDLAL  
 GDSGQYVPCARNAIAGEFAAVGLRVDSEGTCAEQYHFLLRPTSIRVREGADATFRCRVGGSPQPAVSWSKDG  
 RRLGPPDAPHRVVEEHGESSALRIRSARPRDGGTYEYVRAENPLGSASAAAALVVDSDAEVAGPVSTATLLA  
 HLQORREAMRAEGIPPSPPGAGTRTCTVTEGKHARLSCFVTGEPKPEVWKKDQGLVTEGRRHVVEDEQENF  
 VLKILFCKQSDRGLYTCTASNLVGQTYSSVLVVREPTVPFKKRLQDLEVREKESATFQCEVAQPAEAAWFK  
 EETRLWASAKYDIEEGTERRLTVRNVSADDDAVYICETTEGSRVVAELSVQGNLTKLPRKTAVRTGDTAIF  
 WVAVLAVPEGPVWRWRNQEEMVAGGRVAITAEGTCHTLTI FQCTLEDMGEVAFVSGGCRTTTQFCVSAAPRRPPL  
 YPADPVVKAKTSSVTLWSAPPHGDRPVTIDGYVLEKRLGAYAWSRCHEAGWLATTEFTITGVAAEGDFQ  
 FRVSAINHFGQGPYLEFPGTMHLVPLAVKTPKAVEAVEGGEVTFVSDLTVASSGEWFLDGEALKASSIYVI  
 RCDRTRHMLTIREVPARLHGAQLKFVANGIETSIQMVVRAALGLPSSKLPAAAAREVLAQLHEEAQLLAEALS  
 QAAAVTWLKDRELSLGPKEYEMQVSAGRRALLVRDVAQDDAGLYECVSRGSRRTAYQLLVQDITDGYRWDGPA  
 POKHMCCKAGAKIARYLGSYCYRFLQYDKGVVHWLEAALDTRQKGTSSCSLHEKPKLVFAKQQAHEVKA  
 AGNSATLSCEVTQAQTEVTFWKDGGKLSSSSKVRMEASGCSRRLVVQQAGKADAGEYSCEAGGQKLSFRLDVA  
 EPKLVFAKQQAHEVKAEGASATLSCEVAQAQTEVTFWKDGGKLSSSSKVRMEASGCSRRLVVQQAGKADA  
 GEYSCEAGGQKLSFRLDVAEPKMFVFAKEQQARSEVKAEGASATLSCEVAQAQTEVTFWKDGGKLSSSSKVRM  
 EASGCSRRLVVQQAGKADAGEYSCEAGGQKLSFRLDVTEPKLVFAKEQQARSEVKAEGNSATLSCEVAQAQ  
 EVTFWKDGGKLSSSSKVRMEASGCSRRLVVQQAGKADAGEYSCEAGGQKLSFRLDVTEPKLVFAKEQQAHSEV  
 KAEAGASATLSCEVAQAQTEVTFWKDGGKLSSSSKVRMEASGCSRRLVVQQAGKADAGEYSCEAEQKLSFRL  
 DVAEPKLVFAKEQQARSEVKAEGASATLSCEVAQAQTEVTFWKDGGKLSSSSKVRVEASGCSRRLVVQQAGK  
 ADAGEYSCEAGGQKLSFRLDVAEPKLVFAKEQQANSEVKAEGASATLSCEVAQAQTEVTFWKDGGKLSSSSK  
 VRVEASGCSRRLVVQQAGKADAGEYSCEAGGQKLSFRLDVAEPKLVFAKEQQAHSEVKAEGASATLSCEVAQ  
 AQTEVTFWKDGGKLSSSSKVRVEASGCSRRLVVQQAGKADAGEYSCEAGGQKLSFRLDVAEPKLVFAKEQQAH  
 SEVKAEGASATLSCEVAQAQTEVTFWKDGGKLSSSSKVRVEASGCSRRLVVQQVQKADAGEYSCEARGQKLS  
 FRLDVAEAEQSIPERPSRREPLVVKHEHETIILTATIAAPSVAAVTWLKDGVERRSKRHEATSLGDTHLTVR  
 GAQVLDASAIYSCRVGKEGQDFPVQVEEVAAKFSKPLEPVEGELGGTVMLVCELSPEQAEVWRCGNTQLRPGK  
 RFQMTSEGPRRTLTVSGLREDDAEYVCESRDDRTSARLTVKVPVVKFTSGLSAMVAEEGQEAFTQCVVSPS  
 DAGVTWYKDGMLQLPSEKFMVVEGASRSLTILGLTLEDAGQVTVAEAGASSAALRVREAPVLFKFKLEPQT  
 VEERTSVTLEVELTRPWPEVKWTRNAAVLTPSENVEIRAEGARHCLVLRVSGFADRGFFGCETPDDKTQAKLN  
 VEMRQAEVLRGLQVEVEAKEQGTASMDVELSHAETVEGWSVTRDGLRLQPGPKCHLAVQGPVHILTLALQFQDSG  
 LVAFRAGRVHTSARLIVTELPVSFTRVLQDVVATQKEKVTLECELSRPVDVVRWLKDGVELRAGKAIQVAVQGT  
 CRSLVLYRCETGQGVYVCDALDAQTSASLRVQGRTYTLIFRRLAEDAGEVKFVAENAESRAHLRVKELPVT  
 LLRPLRDKIAMEKHRGVLECCVSRASAQVRWFKGGVELQSGPKYEVVSDGLYRKLVIINDVQPEDEDTYTCDA  
 NVKTSAQFFVEEQSITIVRGLKDMTVMEPAPAWFECETSIPSVRPPKWLKGTVLQAGGNVLEQDGTVHRLT  
 LHKTCTMTGPVHFTIGKSRSSAQLVVS DIPVVLTRPLEPKAGRELQSVVLSCDFRPAPKAVQWYKDDTFLSP

SEKFKMALEGQMAELRILRLTPADAGVYRCQAGSAQSSAEVTVVEAREVTVIQPLQDAEAMEEGRVCFSCELSH  
 KDEDIEWSLNGTPLYNDSFHEISHEGCLHTLVLKSVRQADTGTVCATSPKVSVSARLVVKGPVVFVKALDDV  
 SAEERGTTLTQCEVSDPEARVVWRKDGVELGSPDKYDFLHKAGARGLTVHDLSHEDAGLYTCQVGSKETQSKV  
 SVHDLHVGITKRKLTVEVLEGESECFEVLVSHESPSDPAVWTVGGKTVGGSGHFHAVRQGRKYTLTVKDAALS  
 DAGEVVFVSVLGLTSKASLIIRERPVDITKPLEDQRTTLGEDVMLSCELSRAGTSVRWLKDGKAIKRSQKYDLL  
 SEGTRAVLVVRKASLKDSGEYTCETEASKSTAKLCVEEKANRFTEELADLQVEEKGRAVFTCKTEHPASVVTW  
 RKGLLELRASGKHVPSQEGTLTKLTINALERTSDTYTCDIGQARTQARLLVHGQKVRVIEDLEDTAVQEGSS  
 AKFCCRIAPADYGPVHWFLLDKTPLHSNELNEITVQPGGYHVLTLRQLALKDSGTVYFEAGDQRTSAAALRVTEK  
 PSIFSRPLTDVTVTEGEDTLVCEFTTVDSVSRWTKDGKTLRPSARCQLSHEGCQAQLLITATTPQDGGRYKC  
 EIGGASSSSIVRVHALPVRFRESLKDVEVPEGKAATLRCVLSVAAPVEWRHGDDVLKSSNKYSLRQEGAVLE  
 LVIRDLQPDQSGQYSCSFGDQTTSATLTVKTSQAQFVKGKLNKEATEGTTVTLRCELTKPEAPVEWKKGTETLR  
 NGDKYSLKQDGAVCELQICSLVADAGEYSCVCGQEKTSATLTVKALLVHFVRRRLRSKEATEGDTTTLQCELS  
 KAAPVEWRKGTETLRDGDYSLKQDGAVCELQIRSLTIADAGEYLCTCGQEKTSATLTVRGLPAKFIEDLRSQ  
 EATEGATAILRCELSKAAPVEWRKGSSETLKDGDYTLRQDGAVCELQIRGLAVVDTGTYSLPTKFTTEGLRNE  
 EATEGTMATLRCQMSKAAPVEWRKGSSETLRDGDYSLRQDGAAMCELQIRGLTIEDSGEYTCVCGQEKTSATLS  
 VKALPPRFIEDLRSQEATEGTMATLRCQMSKAAPVEWRKGSSETLGDGGYSLRQNGAVCELQIHDLAVEDTGE  
 YSCVCGQEKTSATLNVKALPPKFTTEGLKKEEATEGTMVTLRQMSKEATVEWRKGAKTLSDDGGYSLRQDGA  
 CELQICGLAVEDAGEYSCVCGQEKTSATLSVKALPPRFIEDLRSQEATEGTMATLRCQMSKAAPVEWRKGS  
 LRDGDYSLRQDGAVCELQIRDLAVEDAGEYLCVCGQEKTSATLSVKALPPRFIEDLRSQEATEGTMATLRCQ  
 MSKAAPVEWRKGSKTLRDGDYSLRQDGAAMCELQICDLAVEDTGDYSCVCGQEKTSATLSVKAPQVVFQQLQ  
 NLQAEEGSMASLRCELSVNAAMVWSKGGLELQGDTRREARQQGCVAELLLRDLRREDAGEYSCVCGQTTSA  
 TLMVTAAPVRFRLRELQAQDVDEGATARLRCELSREAVSVEWRKGSLLQFPKAKYQMVQEGTTAELLVHGVQE  
 DAGEYTCDAAGHTQSIARLSVRAPKPKFKTDLQSTEQEAGGARLCCQLSEAPGTPVQWLKEGVELHVGSKYE  
 MRRQGAVALLEHGLEAKDTGEYACLVGGQKTLASLRVKEPEVTIVRGLVDMEVQADEDEVEFTCKVSAQATD  
 VQWHLQGLPLQSNVTEVAVLADGCTHVLQKGVTLLEDAGTVSFHVGLSSSAQLTVRVPEVTVLEPLKDVQL  
 SEGQDAHFRCRLSRASGQEARWALGGVPLQCNEMNDITVEQGTLYLLTLHKVTLLEDAGTITLQVGSSESAQL  
 KVTAKNTVLRGLNSRVALEGGELFECQLSQVEAHTWLLDDEPVTSEKVEVVYFENGLRHLLELLKLNKPKQ  
 DSCRVTFLAGDVVTSFALTVRGWRLEVLPPHDASVKAGMQVRFTCILSEAVPVGEATWYINGAAIQPDDTDW  
 TVTDDGSHHALTSLNAQPPQHAGEVTFAAARDAVASARLSVLALPDPPEAEVGRSDHSVTLVSWVAPMSDGGGG  
 LCGYRVEMKEASTGQWQLCHDLVPGPECVVDDLVPKTYRFRVAAVGPAGAGEPVHLPQMVKIAPAPAPAPAP  
 APAPETRQAVVGEDICLELEVAADGGEVWWHKGTERIQPGGHFEVLSRQQRQMLVIKGFRTEDQGEYRCGPIQ  
 GLPSSGAATFNVVMTSGSGDEVPAQPSLPPEAAQEGDLHLLWEALARKRRMSREPTLDSISELPEEDSRVQHL  
 RQEAETAPDLSEGYSTADELARTGEADLSHTSSDDESRAGTPSLVTYLKKAGGPGISPLASKHEAQVTTSVK  
 PQKQQEPVVTCPPPGDLAADLMDPSLDKAAVKIQAFAFKGYKVRKEMKQEGPVFSRTFGDTEAQVGDVLR  
 ECVLATKTDMPRACWLKDGIELTDGRHYHIDQLKDGTCSELLVGLAPTDSGRYTCQVSTKSRVSHSACVVVSG  
 TESEAESSSGGELEDDAFRRAARLHRLFRFTKSPAELSEEELFLSADEGPGPEEPADWQTYREDENFVCIRFE  
 SLAEARQAVTCFRNMFMATMGIIVEISLGEQGPVEMRIGKVAPVTPAVPLAKTPGLQTSDAAPVFLTELQN  
 QDVQDGYPMSFDCVVTGQPVPSVRWFKDGKLEKDDHYMINEDQQGGHQLIITAVVPADMVYRCLAENSMGV  
 SSTKAELRVELTSTDYDTAADATETSSYFSAQGYLSSREQEGTESDEGQLPQVLEELKDLQVAPGTRLAKFQL  
 KVKGYPAKPLYWFKDQPLTSDHIRMTDKKTLHTLEIVSVTREDSGQYAAIISNAVGAAYSSARLLVGRPSE  
 PEEKPASDVHERLVPPRILEKFTPKKVKRGSSITFSVKVEGHPAPSVHWLKEEAEGVLWIGPDPGYTMASS  
 SKQHSVLVLDVGRQHOGTYTCIATNPAGQALCSASLHISGLAKEEEQERVKEALISSFLQGTSSQAVSAQMS  
 AGFADLVGQSKGESLVAEEAHSHLSLAEVGTTEFLQKLTSSQITEMVSAKISQAKLQVPGGDSDEETKTPSASP  
 RHGRSRPSSSVQESSSESEDGDSRGEIFDIYVVVTADYLPPLGAEQDAIILREGQYVEVLDLSDAHLRVLVTRTKPT  
 KSSPSRQGWVSPAYLDRKRLKLSPEWGPTEAPEFPEAVSEDEYRTRLSVVIQELLSSEQAFVGLQFLESHHM  
 KHLERSPRVPAAVASQKTVIFRNVQDISHFHSSFLKELQCGCTDDVAMCFIKNQEAFAKEYLEFLVGRVQAES  
 VVVSTPVQEFYKKYAEETLSAKDPTQPPPPPLQHYLEQPVVERVQKYQALLKELIRNKARNRQNCALLEQAYAV  
 VSALPQRAENKLVSLMENYPGTLEALGEPVIRQGHFVWEGAPGARMPWKGHNHRVFLFRNYLVICPPRRDSR  
 TDTFSYVFRNMMKLSSIDLNDQVEGDDRAFEVWHHEREDSVRKYLLQARTVIKNSWVKEICGIQQRLAQPVWR  
 PEFEEELADCTAELGETVKLACRVGTGPKPIVSWYKDGKPEVDPHHILIEDPDGSCSLIDLNLGTIDSGQY  
 MCFAASAAGNASTLGKILVQVPPRFVNVKVRATPFVEGEDAQITCTVEGAPYPQIRWYKDGTLAPGNRYRMLN  
 EPRSGVLVVLVIQAASKEDLGHYECLELVNRLGSTRGGGELYMQSPALRARDQHHREQIVAAVEVTEQETKVPKK  
 TVIIEETITTVVKSPPRRRQSPGKSPSRSPSRSPRRPGLLAPERLYPPGTSPPRRLEVEQGRKAPVPALY  
 VTEAEVHAPASQSQPKWLEVEETIEVRVKKTSRSGASPVREMTSRGEGILFTLPGGIPGRDPNANNNSNNSVY  
 QEARTWGPVAVHVGEPFIQVDSVGNVDWAASPEPEQVRASQKEENTERQEGCSDGDENTFLMEEPQDQDSDL  
 QGRDPKILTHNGRVLTADLEDYVPQEGETFQCGDSTPSTPDEPPCEVSVLQREI SEPTVQPVLLNVGRPPG  
 TGATPSFFRPGSQVHSPESVSFLLREAWSGPVSAAPWTSSFHHTVQSSVDGSHGSFKTEVSTQTVSFGAVGET  
 VTLHIDPDGGEAPGPSQG\*

>rs243764830\_ENSMUSP00000158795\_c.18160:T>A\_p.V6054E  
ENSMUST00000238536.2|Obscn-210|ENSMUSG00000061462|-|chr11:g.58929213:A>T  
MDHSFSGAPRFLTRPKAFVSVGKDATLSCQIVGNPTPHVSWEKDRQVEAGARFRLAQDGDVYRLTILDLAL  
GDSGQYVCRARNAIGEFAAVGLRVDSEGTCAEQAPHFLLRPTSIRVREGADATFRCRVGGSPPQAVSWSKDG  
RRLGPPDAPHVRVEEHGESSALRIRSARPRDGGTYEVRAENPLGSASAAAALVVDSDAEVAGPPGTSTATLLA  
HLQQRREAMRAEGIPSPPPGAGTRTCTVTEGKHARLSCFVTGEPKPEPVVKKDQGLVTEGRRHVVEDEQENF  
VLKILFCKQSDRGLYTCTASNLVGQTYSSVLVVVREPTVPFKKRLQDLEVREKESATFQCEVAQAPATEAAWFK  
EETRLWASAKYDIEEEGETERRRLTVRNVASADDDAVYICETTEGSRVAELSVQGNLTKLPRKTAVRTGDTAIF  
WVELAVPEGPVWRNQEEMVAGGRVAITAEGTCHTLTI FQCTLEDMGEVAFVSGGCRTTTQFCVSAAPRRPPL  
YPPADPVVKAKTESSVTLWSAPPHGDRPVITIDGYVLEKRLKLGAYAWSRCHEAGWLATTEFTITGVAAEEDGFQ  
FRVSAINHFGQGPYLEFPGTMHLVPLAVKTPKAVEAVEGGEVTFVSDLTVASSGEWFLDGEALKASSIYVI  
RCDRTRHMLTIREVPARLHGAQLKVFANGIETS IQMVVRAALGLPSSKLPAAAAREVLAQLHEEAQLLAE LSD  
QAAA VTWLKDGRELSLGPKYEMQVSAGRRALLVRDVAQDDAGLYECVSRGSR TAYQLLVQDITDGYRDWGPAG  
PQKHMCKCAGAKIARYLGSSCYRFLQYDKGVWHLEAALDTRQKGKTS SCSLHEKPKLVFAKQQAHSEVKA E  
AGNSATLSCEVTQAQTEVTFWKDGKLLSSSSKVRMEASGCSRRLVVQQAGKADAGEYSCEAGGQKLSFR LDVA  
EPKLVFAKQQAHSEVKA EAGASATLSCEVAQAQTEVTFWKDGKLLSSSSKVRMEASGCSRRLVVQQAGKAD A  
GEYSCEAGGQKLSFR LDVAEPKMFVFAKEQQARSEVKA EAGASATLSCEVAQAQTEVTFWKDGKLLSSSSKVRM  
EASGCSRRLVVQQAGKADAGEYSCEAGGQKLSFR LDVTEPKLVFAKEQQARSEVKA EAGASATLSCEVAQAQ T  
EVTWFKDGKLLSSSSKVRMEASGCSRRLVVQQAGKADAGEYSCEAGGQKLSFR LDVAEPKLVFAKEQQARSEV  
KA EAGNSATLSCEVAQAQTEVTFWKDGKLLSSSSKVRMEASGCSRRLVVQQAGKADAGEYSCEAGGQKLSFHL  
DVTEPKLVFAKEQQAHSEVKA EAGASATLSCEVAQAQTEVTFWKDGKLLSSSSKVRMEASGCSRRLVVQQAGK  
ADAGEYSCEAGGQKLSFR LDVAEPKLVFAKEQQARSEVKA EAGASATLSCEVAQAQTEVTFWKDGKLLSSSSK  
VRVEASGCSRRLVVQQAGKADAGEYSCEAGGQKLSFR LDVAEPKLVFAKEQQANSEVKA EAGASATLSCEVAQ  
AQTEVTFWKDGKLLSSSSKVRVEASGCSRRLVVQQAGKADAGEYSCEAGGQKLSFR LDVAEPKLAFAKEQQAH  
SEVKA EAGASATLSCEVAQAQTEVTFWKDGKLLSSSSKVRVEASGCSRRLVVQQAGKADAGEYSCEAGGQKLS  
FR LDVAEPKLAFAKEQQAHSEVKA EAGASATLSCEVAQAQTEVTFWKDGKLLSSSSKVRVEASGCSRRLVVQQ  
AGKADAGEYSCEAGGQKLSFR LDVAEPKLAFAKEQQAHSEVKA EAGASATLSCEVAQAQTEVTFWKDGKLLSS  
SSKVRVEASGCSRRLVVQQAGKADAGEYSCEAGGQKLFRLDVAEPKLMFAKEQQAHSEVKA EAGASATLSCE  
VAQAQTEVTFWKDGKLLSSSSKVRVEASGCSRRLVVQQAGKADAGEYSCEAGGQKLSFR LDVAEPKLVFAKEQ  
QAHSEVKA EAGASATLSCEVAQAQTEVTFWKDGKLLSSSSKVRVEASGCSRRLVVQQV GKADAGEYSCEARGQ  
KLSFR LDVADTRLMFAKEQQARTEVKA EAGNSATLSCEVAQAQTEVTFWKDGKLLSSSSKVRVEASGCSRRLV  
VQQAGKADAGEYSCEAGGQKLSFR LDVAEAE SQIPERPSRREPLVVKEHETIILTATIAAPSVAAV TWLKDGV  
EIRRSKRHEATSLGDTHTLTVRGAQVLD SAIYSCRVGKEGQDFPVQVEEVA AKFSKPLEPEVEGELGGTVMLVC  
ELSP EQAEVWRCGN TQLRPGKRFQMTSEGP RRTLTVSGLREDDAE EYVCE SRDDRTSARLTVKVP RVV KFTS  
GLSAMVAEEGQEATFQCVVSPS DAGVTWYKDGMLQPSSEKFMVVEGASRS LTI LGLTLEDAGQVTEAEGAS  
SSAALRVREAPVLFKKKLEPQTV EERTSVTLEVELTRPWPVEVKWTRNAAVLTPSENVEIRAEGARHCLVLR SV  
GFADR GFFGCETPDDKTQAKLNVEMRQVRLVVRGLQEVEAKEQGTASMDVLSHAEVEG SWTRDGLRLQPGPKC  
HLAVQGPVHIL TLSALQPQDSGLVAFRAEGVHTSARLIVTELPVSFTRVLQDVVATQKEKVTLECELSRPVDV  
RWLKDGV ELRAGKAIGIVAQGTCSRSLVIYRCETGDQGVYVCDALDAQTSASLRVQGRTYTLIFRRVLAEDAGE  
VKFVAENAESRAHLRVKELPVTLLRPLRDKIAMEKHGVLQCVSRASAQVRWFKGGV ELQSGPKYEVVSDGL  
YRKLVIN DVQPEDEDTYTC DAGNVKTSAQFFVVEEQSITIVRGLKDMTVM EPAPAWFECETSIPSVRPPKWL LG  
KTVLQAGGNVGL EQDGTVHRLTLHKTCSTMTGPVHFTIGKSRSSAQLV VSDI PVVLRPLEPKAGRELQSVVL  
SCDFRPAPKAVQWYKDDTPLSPSEKFKMALEGQMAELRILRLTPADAGVYRCQAGSAQSSAEVTEVAREVTVI  
QPLQDAEAMEEGRVCFSCELSHKDEDIEWLSLNGTPLYNDSFHEISHEGCLHTLV LKSVRQADTGTVCATSPKV  
SVSARLVVVKGPV VFLKALDDVSAEERGTLLQCEVSDPEARVVWRKDGVELG PSDKYDFLHKAGARGLTVHD  
LSHEDAGLYTCQVGSKETQSKVSVHDLHVGITKRLKTVEVLEGE SCSFECVLSHESPSDPAVWTVGGKTVGGS  
GHFHAVRQGRKYTLTVKDAALSDAGEV VSVLGLT SKASLIIRERPV DITKPLEDQRTTLGEDVMLSCELSRA  
GTSVRWLKDGKAIRKSQKYDLLSEGTRAVLVVRKASLKDSGEYTCETEASKSTAKLCVEEKANRFTEELADLQ  
VEEKGRAVFTCKTEHPASVVTWRKGLLELRASGKHVPSQEGTLKLTINALERTDSDTYTCDIGQARTQARLL  
VHGQKVRVIEDLEDTAVQEGSSAKFCRIAPADYGPVHWFLDKTPLHSNELNEITVQPGGYHVLTLRQLALKD  
SGTVYFEAGDQRTS AALRVTEKPSIFSRPLTDVTVTEGEDTLVCE TTTVDSSVRWTKDGKTLRPSARCQLSH  
EGCQAQLLITATTPQDGGRYKCEIGGASSSSIVRVHALPVRVFRESLKDVEVPEGKAATLRCVLSSVAAPVEWR  
HGDDVLKSSNKYSLRQEGAVLELVIRDLQPDGSGQYSCSFGDQTSATLT VKTSSAQFV GKLRNKEATEGTTV  
TLRCELTKAEAPVEWKKGTETLRNGDKYSLKQDGA VCELQICSLLVADAGEYS CVCGQEKTSATLTVKALLVHF  
VRRLRSKEATEGDTTTLQCELSKAAPVEWRKGTETLRDGD RYSLKQDGA VCELQIRSLTIADAGEYLCTCGQE  
KTSATLTVRALPAKFKDSLKNEEATEGTTATLSCELSKAAPVTKKGP KTLQSGDKYVLRQDGA VCGLQIHGL  
TMADAGEYS CVCGQEKTSATLTVRGLPAKFIEDLRSQEATEGATAI LRCELSKAAPVEWRKGS ETLKDGDRYT  
LRQDGA VCELQIRGLAVVDGTYS LPTKFTEGLRNEEATEGTMATLRQMSKAAPVEWRKGS ETLR DGRYS



LRQDGAMCELQIRGLTIEDSGEYTCVCGQEKTSATLSVKALPSRFIEDLRSQEATEGTMATLRCQMSKTAPVE  
WKKGSETLRDGGRYSLRQDGPVCELQICDLAVEDAGEYSCVCGQEKTSATLSIKALPPRFIEDLRSQEATEGT  
MATLRCQMSKAAPVEWRKGSSETLGDGGRYSLRQNGAVCELQIHDLAVEDTGEYSCVCGQEKTSATLNVKALPP  
RFIEDLRSQEATEGTMATLRCQMSKAAPVEWRKGSSETLRDGGRYSLRQDGAVCCELQIHDLVEDAGQYSCVCG  
QEKTSAVLTVDALPPKFTEGLKKEEATEGTMVTLRCQMSKEATVEWRKGAKTSLSDGGRYSLRQDGAVCCELQIC  
GLAVEDAGEYSCVCGQEKTSATLSVKALPPRFIEDLRSQEATEGTMATLRCQMSKAAPVEWRKGSSETLRDGD  
YSLRQDGAVCCELQIRDLAVEDAGEYLCVCGQEKTSATLSVKALPPRFIEDLRSQEATEGTMATLRCQMSKAAP  
VEWRKGSSETLRDGGRYSLRQDGAVCCELQICDLAVEDTGDYSCVCGQEKTSATLSVKALPPRFIEDLRSQEARE  
GTVATLRCRMSKAAPVEWRKGSSETLKDGDYSLRQEGNLCELQIRDLAVEDTGEYSCVCGQEKTSATLSVKAL  
PAKFIEDLRSQEAPESSTVTLRCKLSKASVVKKGSSETLRNGARYSLRQDGAVCLEIRDLTVEEDTGEYSCT  
CGQERTSATLSIMAPQVVFQQLQNLQAEEGSMASLRCELSVNAAMVWSKGGLELQGDTRREARQQGCVAEL  
LLRDLRREDAGEYSCTCGSQTTSATLMVTAAPVRFLELQAQDVDEGATARLRCELSREAVSVEWRKGSLLQF  
PCAKYQMVQEGTTAELLVHGVEQEDAGEYTCDAHTQSIARLSVRAPKPKFKTDLQSTEQEAGGTARLCCQLS  
EAEFGTVPVQWLKEGVELHVGSKYEMRRQGAVCCELLIHGLEAKDTGEYACLVGGQKTLASLRVKEPEVTIVRGL  
VDMEVQADEDEFTCKVQAGATDVQWHLQGLPLQSNVTEVAVLADGCTHVLQKGVTLQDAGTQVSHVGG  
SSSAQLTVRPEVTVLEPLKDVQLSEGQDAHFRCRLSRASGQEARWALGGVPLQCNEMNDITVEQGTLYLLTL  
HKVTLEDAGTITLQVGSSEEAQLKVTAKNTVLRGLENVDALEGGEALFECQLSQPEVAHAHTLLDDEPVHTS  
EKVEVVYFENGLRHLLLLKLNKLPQDSCRVTFLAGDVVTS AFLTVRGWRLEVLEPPHDASVKAGMQGQVFTCILS  
EAVPVGEATWYINGAAIQPDDTDWTVTTDGSHHALTLSNAQPQHAGEVTF AARDAVASARLSVLAALPDPEDA  
EVVGRSDHSVTLSWVAPMSDGGGGLCGYRVMKEASTGQWQLCHDLVPGPECVDDLVPGKTYRFRVAAVGPA  
GAGEPVHLPQMVKIAPAPAPAPAPAPAPAPAPETRQAVVGEDICILEVAADGGEVVWHKGTERRIQPGGHFEVLS  
RGQRQMLVIKGFRTEDQGEYRCGPIQGLPSSGAATFNVMVMTSGSGDEVPAQPSLPPEAAQEGDLHLLWEALAR  
KRRMSREPTLDSISELPEEDSRVQHLRQEAETAPDLSEGYSTADELARTGEADLSHTSSDDESAGTPSLVT  
YLKKGAGGPGISPLASKHEAQVTTSVKPKQKQEPVVPTCPPPGDLSAADLMDPSLDKAAVKIQAAFKGYKVRKE  
MKQQEGPVFSRTFGDTEAQVGDVLRLECVLATKTDMRACWLKDGIELTDGRHYHIDQLKDGTCSSLVTLGLAPT  
DSGRYTCQVSTKSGYRSHSACVVVSGTESEAESSSGGELDDAFRAARRLHRLFRTKSPAELSEELFLSADE  
GPGEPEEPADWQTYREDENFVCIREFESLAEARQAVTCFRNMFATMIGVEISLGEQGPGRVEMRIKGEAPT  
PAVPLAKTPGLQTSDAAPVFLTELQNDVQDGYPMSFDCVVTGQPVPSVRWFKDGKLEEDDHYMINEDQGG  
HQLIITAVVPADMGVYRCLAENSMGVSSTKAELRVELTSTDYDTAADATETSSYFSAQGYLSSREQEGTESDE  
GQLPQVLEELKDLQVAPGTRLAKFQLKVKGYPAKLYWFKDGGPLTSDHIRMTDKKTLHTLEIVSVTREDSG  
QYAAYSNAVGAAYSSARLLVRGPSEPEEKPASDVHERLVPPRILEKFTPKKVKRGSSITFSVKVEGHPAPSV  
HWLKEEAKEKGLWIGPDTPGYTMASSSKQHSVLVLDVGRQHGGTYTCIATNPAGQALCSASLHISGLAKEEEQ  
ERVKEALISSFLQGTSAVSAQMSSEAGFADLVGQSKGESLVAEEAHSHLSLAEVGTTEFLQKLTSTQITEMVS  
AKISQAKLQVPGGDSDEETKTPSASPRHGRSRPSSSVQESSESEEDGDSRGEIFDIYVVTADYLPGLAEQDAI  
ILREGQYVEVLDSAHPLRWLVRTKPTKSSPSRQGWVSPAYLDRKRLKLSPEWGPTEAPEFPGEAVSEDEYRTRL  
SSVIQELLSSEQAFVGLQFLESHHMKHLERSPRVPAAVASQKTVIFRNVQDISHFHSSFLKELQCGCTDDDV  
AMCFIKNQEAFAKEYLEFLVGRVQAESVVVSTPVQEFYKKYAEETLSAKDPTQPPPPPLQHYLEQVPERVQKYQ  
ALLKELIRNKARNRQNCALLEQAYAVVSALPQRAENKLVSLMENYPGTLEALGEPHQGHFIVWEGAPGARM  
PWKGHNHRVFLFRNYLVICKPRRDSRTDTSYVFRNMMKLSSIDLNDQVEGDDRAFEVWHEREDSVRKYLLQA  
RTVVIKNSWVKEICGIQQLAQPVWRPPEFEEELADCTAELGETVKLACRVTGTPKPIVSWYKDGKPVVDPH  
HILLIEDPDGSCTLILDNLTGIDSGQYMCFAASAAGNASTLGKILVQVPPRFVNVKVRATPFVEGEDAQITCTVE  
GAPYPQIRWYKDGTLAPGNRYRMLNEPRSGVLVVIQAASKEDLGHYECELVNRGLGSTRGGGELYMQSPALR  
ARDQHHREQIVAAVEDTSEVGSASHAQDQGAASVLRLLGSEALGPS PGDLPNTRQSEPPAFEEAASQIP  
GAASGTPPEVSQPGTHKGLEQETTSSGSQGWTVPIRVEGTAWPGACTGQLLLDVHSQVIMETTQRTYVCQAPDT  
GVTRAPSMQVTIEDVQVQVGDMAQF DAVIEGHPPPIVWTYKGSTQLTSSARLSQRQDGTYSVLVLDVAPHDA  
GVYTCVANNAGGQVLCKAELLVHGGDKLDAENQVYRRKLHSFYDVQEEIGRGVFGFVKRVQHKGNKMFCAAKF  
IPLRSKTRAQAYQERDILATLGHPLVTGLLDQFETRKTLLILILELCSSEELLDRLFKKGVVTEAEVKVYIQQL  
VEGLHLYLHSHGILHLDIKPPNIMVHPAREDIKICDFGFAQKITPSEPQYSKYGSPEFVSPEIIEQNVPVSEGS  
DIWAMGVI SYLSLTCCSPFAGESDRATLLNVLEGRVSWSSPTAAHLSSEDAKDFIKATLQRTPRARPSTSQCLA  
HPWFLKSMPAEEAHFINTKQLKFLARSRWQRSLMSYKSLVMRSIPPELLQGPDPSPSLGVARHLRGEASGAS  
SSSSSSDNELAPFARAKSLPPSPVTHSPLLHPRGFLRPSASLPEETEASMTADAAVPASPQASAGPPASPGCV  
PRHSVISSLFYQAGAGEAERGNKTS GAKRHPARRRHLLKGGYIARALPGLREPLMEYSLLEEEAAREEQASLM  
TKTPSFETALRLPSSSVREVPRGRSHSLDNPPVLTGSPPEACKQLLFPSTGLTHETAKDRGHKEGFLQESV  
PFPMPGSDSRPGKQEGSSQDSCRGKPASSCHVELSGSGSQEGCGPPSSQSLGSLPQSLKCELSTSCGFLFSEQ  
PQAAPFPPTQVSPLLGSEKEPQDGSLSSEGPVPSLSSSPGSASQVDASLDTEGLSEAGDTCDFTPPPQRPOEQAT  
TRKFSLESRGGYAGVAGYGTFAFGGDAGGMLGQGPLWARMAWAVS QSSEEQDEAATESPQPLES LGPIAEASG  
VPLRTSPSLTPWEEVEQVSLVQIRDLSGDAEAADTISLDISEVDPAYLNLSDLYDIKYLPEFEMI FRRVPKPI  
EQPESPGETEAGQGLADFLLEAAWFPWFGELGLRAGLEITEEPEEPGDLEALLGEEAVGRKRKWSPSRGLFQF

PGRCLSGEEPVELGLRQRVKASMAHISRILKGRPEGEREGPPRKKAGLASFRLSGLKGRDQELSDEAVVLGQ  
 SVTLACQVLAQPTAQATWSKDGVLLESSGHLIISSTLKNFQLLTIILVVKEEDLGTYTCCVSNPLGTAVTGVL  
 RKAERPSSSPRPEVGEYKDAVLLVWKPVESECGPVYIVQCCIEGGSWTTLASDISDCCYLTKGLSRGGMYIF  
 RTACVSKAGMGPISSPSEQVLLGGPNHLASEEESSRGRPAQLLPSTKTFQMQIRRRGRFSVVRQCREKASGR  
 ALAAKIVPYQPEDKTAVLREYEAALKRHLHPHLAQLHAAYLSRHLVLIILELCSGPELLPSLAERESYSESDVK  
 DYLWQMLSATQYLHAQHILHLDLRSNNMVTYNNLLKVIDLGNQSLDQEKVPAPENFKDYLETMAPELLEGGQ  
 GAVPQTDIWAIGVTAIFIMLSGEYPESESEGRDLQKGLRKLIRLSRCYAGLSGGAVAFVLSLCAQPWGRPCA  
 STCLQCGWLTEEGPTGSRPTPVTFTVRLRAFVREKRRRALLYKKNLAQVR\*  
 >rs243764830\_ENSMUSP00000038264\_c.16000:T>A\_p.V5334E  
 ENSMUST00000047441.14|Obscn-202|ENSMUSG00000061462|-|chr11:g.58929213:A>T  
 MDHSFSGAPRFLTRPKAFVSVGKDATLSCQIVGNPTPHVSWEKDRQVEAGARFRLAQDGDVYRLTILDLAL  
 GDSGQYVCRARNAIGEAFVAVGLRVDSEGTCAEQAPHFLLRPTSIRVREGADATFRCRVGGSPQPAVSWSKDG  
 RRLGPPDAPHVRVEEHGESSALRIRRSARPRDGGTYEVRAENPLGSASAAAALVVDSDAEVAGPPGTSTATLLA  
 HLQQRREAMRAEGIPSPPGAGTRTCTVTEGKHARLSCFVTGEPKPKETVWKKDQGLVTEGRRHVVEDEQENF  
 VLKILFCKQSDRGLYTCTASNLVGQTYSSVLVVVREPTVPFKKRLQDLEVREKESATFQCEVAQAPATEAAWFK  
 EETRLWASAKYDIEEGTERRLTVRNVSADDDAVYICETTEGSRVVAELSVQGNLTKRKLPRKTAVRTGDTAIF  
 WVAVPEPVRWLRNQEEMVAGGRVAITAEGTCHTLTI FQCTLEDMGEVAFVSGGCRTTTFQCEVASAPRRPPL  
 YPPADPVVKAKTESSVTLSSWAPPHGDRPVTIDGYVLEKRLKLGAYAWSRCHEAGWLATTEFTITGVAAEEGDFQ  
 FRVSAINHFGQGPYLEFPGTMHLVPLAVKTPKAVEAVEGGEVTFVSDLTVASSGEWFLDGEALKASSIYVI  
 RCDRTRHMLTIREVPARLHGAQLKVFANGIETSIQMVVRAALGLPSSKLPAAAAREVLAQLHEEAQLLAELSD  
 QAAAVTWLKDGRELSLGPYEMQVSAGRRALLVRDVAQDDAGLYECVSRGSRRTAYQLLVQDITDGYRDWGPAG  
 PQKHMCKCAGAKIARYLGSSCYRFLQYDKGVVHWEAALDTRQKGTSSCSLHEKPKLVFAKQQAHSVEKAE  
 AGASATLSCEVAQAQTEVTFWKDGKLLSSSSKVRMEASGCSRRLVVQQAGKADAGEYSCEAGGQKLSFRLDVA  
 EPKMFVFAKEQQARSEVKAEGASATLSCEVAQAQTEVTFWKDGKLLSSSSKVRMEASGCSRRLVVQQAGKADA  
 GEYSCEAGGQKLSFRLDVTEPKLVFAKEQQARSEVKAEGVNSATLSCEVAQAQTEVTFWKDGKLLSSSSKVRM  
 EASGCSRRLVVQQAGKADAGEYSCEAGGQKLSFRLDVAEYKLVFAKEQQARSEVKAEGVNSATLSCEVAQAQ  
 EVTFWKDGKLLSSSSKVRMEASGCSRRLVVQQAGKADAGEYSCEAGGQKLSFHLVTEPKLVFAKEQQAHSEV  
 KAEAGASATLSCEVAQAQTEVTFWKDGKLLSSSSKVRMEASGCSRRLVVQQAGKADAGEYSCEAGGQKLSFR  
 LDVAEYKLVFAKEQQARSEVKAEGASATLSCEVAQAQTEVTFWKDGKLLSSSSKVRVEASGCSRRLVVQQAGK  
 ADAGEYSCEAGGQKLSFRLDVAEYKLVFAKEQQANSEVKAEGASATLSCEVAQAQTEVTFWKDGKLLSSSSK  
 VRVEASGCSRRLVVQQAGKADAGEYSCEAGGQKLSFRLDVAEYKLVFAKEQQAHSEVKAEGASATLSCEVAQ  
 AQTEVTFWKDGKLLSSSSKVRVEASGCSRRLVVQQAGKADAGEYSCEAGGQKLSFRLDVAEYKLVFAKEQQAH  
 SEVKAEGASATLSCEVAQAQTEVTFWKDGKLLSSSSKVRVEASGCSRRLVVQQAGKADAGEYSCEAGGQKLS  
 FRLDVAEYKLVFAKEQQAHSEVKAEGASATLSCEVAQAQTEVTFWKDGKLLSSSSKVRVEASGCSRRLVVQQ  
 AGKADAGEYSCEAGGQKLFRLDVAEYKLVFAKEQQAHSEVKAEGASATLSCEVAQAQTEVTFWKDGKLLSS  
 SSKVRVEASGCSRRLVVQQAGKADAGEYSCEAGGQKLSFRLDVAEYKLVFAKEQQAHSEVKAEGASATLS  
 IAAPSVAAVTWLKDGVETIRRSKRHEATSLGDTHTLTVRGAQVLDLSDAIYSCRVGKEGQDFPVQVEEVAAKFSK  
 LEVPEGELGGTVMLVCELSPEQAEVWRCNGTQLRPGKRFQMTSEGPRRTLTVSGLREDDAEYVCESRDRT  
 SARLTVKVPVVKFTSGLSAMVAEEGQEAFTQCVVSPSDAGVTWYKDGMLQPSSEKFMVVESEGASRSLTILGL  
 TLEDAGQVTVAEAGASSAALRVREAPVLFKKKLEPQTVERTSVTLEVELTRPWPEVKWTRNAAVLTPSENV  
 EIRAEGARHCLVLRVSVGFADRGFFGCETPDDKTQAKLVNEMRQVRLVVRGLQEVEAKEQGTASMDVELSHA  
 EVEGSWTRDGLRQLQPGPKCHLAVQGPVHILTLTSLALQPDGSLVAFRAEGVHTSARLIVTELPVSVFTRVLQD  
 VVATQKEKVTLECELSRPVDVRLKDGVELRAGKAI GIVAQGTCSRSLVIYRCETGDQGVVCDALDAQTSASLRVQGR  
 TYTLIFRRVLAEDAGEVKFVAENAESRAHLRVKELPVTLLRPLRDKIAMEKHRGVLECVSRASQAQRVWFKGG  
 VELQSGPKYEVVSDGLYRKLVINLVQPEDEDTYTCDAGNVKTSAQFFVEEQSITIVRGLKDMVMEPAPAWFE  
 CETSI PSVRPPKWLKGKTVLQAGNVGLEQDGTVHRLTLHKTCSTMTGVPVHFTIGKSRSSAQLVSDIPVVL  
 RPLEPKAGRELQSVVLSCDFRPAKAVQWYKDDTPLSPSEKFKMALEGQMAELRILRLTPADAGVYRCQAGSA  
 QSSAEVTVAREVTVIQPLQDAEAMEEGRVCFSCELSHKDEDIEWSLNGTPLYNDSFHEISHEGCLHTLVLS  
 VRQADTGTVCATSPKVSVSARLVVKGKPVVFLKALDDVSAEERGTLTLQCEVSDPEARVVWRKDGVELGPSDK  
 YDFLHKAGARGLTVHDLSDHEDAGLYTCQVGSKETQSKVSVHDLHVGITKRLKTVEVLEGECSFCVLSHESP  
 SDPAVWTVGGKTVGGSGHFHAVRQGRKYTLTVKDAALSDAGEVVFVSVLGLTSSKASLIIRERPVDTKPLEDQR  
 TTLGEDVMSCELSRAGTSVRWLKDGKAIKRSQKYDLLSEGTRAVLVVRKASLKDSGEYTCETEASKSTAKLC  
 VEEKANRFTTEELADLQVEEKGRAVFTCKTEHPASVVTWRKGLLELRASGKHVPSQEGTLTKLTINALERTSD  
 TYTCDIQQARTQARLLVHGQKVRVIEDLEDTAVQEGSSAKFCCRIAPADYGPVHWFLLDKTPLHSNELNEITVQ  
 PGGYHVLTLRQLALKDSGTVYFEAGDQRTSAALRVTEKPSIFSRPLTDVTVTEGEDTLVCETTTTVDSSV  
 RWT KDGKTLRPSARCQLSHEGCAQLLITATTPQDGGRYKCEIGGASSSSIVRVHALPVRFRESLKDVEVPEGKAA  
 TLRCVLSVAAPVEWRHGDDVLKSSNKYSLRQEGAVLELVIRDLQPDGSGQYSCSFGDQTTSATLTVKTS  
 SAQ FVGKLRNKEATEGTTVTLRCELTKAEAPVEWKKGTETLRNGDKYSLKQDGA VCELQICSLLVADAGEYSCVCGQ

EKTSATLTVKALLVHFVRRRLRSKEATEGDTTTLQCELSKAAPVEWRKGTETLRDGDYSLKQDGA VCELQIRS  
LTIADAGEYLCTCGQEKSATLTVRALPAKFKDSLKNEEATEGTTATLSCELSKAAPVTWKKGPKTLQSGDKY  
VLRQDGA VCGLQIHGLTMADAGEYSCVCGQEKSATLTVRGLPAKFIEDLRSQEATEGATAILRCELSKAAPV  
EWRKGSSETLTKDGDYSLRQDGA VCELQIRGLAVVDTGTYSLSLPTKFTTEGLRNEEATEGTMATLRCQMSKAAPV  
EWRKGSSETLRDGDYSLRQDGA MCELQIRGLTIEDSGEYTCVCGQEKSATLSVKALPPRFIEDLRSQEATEG  
TMATLRCQMSKAAPVEWRKGSSETLGDGGYSLRQNGAVCELQIHDLAVEDTGEYSCVCGQEKSATLNVKALP  
PRFIEDLRSQEATEGTMATLRCQMSKAAPVEWRKGSSETLRDGGYSLRQDGA VCELQIHDLVEDAGQYSCVC  
GQEKSATVLTVDALPPKFTTEGLKKEEATEGTMVTLRCQMSKEATVEWRKGA KTLSDGGYSLRQDGA MCELQI  
CGLAVEDAGEYSCVCGQEKSATLSVKALPPRFIEDLRSQEATEGTMATLRCQMSKAAPVEWRKGSKTLRDGD  
RYSLRQDGA MCELQICDLAVEDTGDYSCVCGQEKSATLSVKAPQVVFQQLQNLQAEEGSMASLRCELSVFN  
AAMVWSKGGLELQGDTRREARQQGCVAELLLRDLRREDAGEYSCVCGSQTTSATLMVTAAPVRFRLRLQAQDV  
DEGATARLRCELSREAVSVEWRKGS LQLFPCAKYQMVQEGTTAELLVHGVEQEDAGEYTC DAGHTQS IARLSV  
RAPKPKFKTDLQSTEQEAGGTARLCCQLSEAEPTPVQWLKEGVELHVGSKYEMRRQGAVCELLIHGLEAKDT  
GEYACLVGQKTLASLRVKEPEVTIVRGLVDMEVQADEDFEFTCKVSOAGATDVQWHLQGLPLQSNVTEVAV  
LADGCTHVLQKGVTLLEDAGTVSFHVGGLSSAQLTVRVPEVTVLEPLKDVQLSEGQDAHFRCRLSRASGQEA  
RWALGGVPLQCNEMNDITVEQGTLYLLTLHKVTLLEDAGTITLQVGCSSSEAEQLKVTA KNTVLRGLENVDALEG  
GEALFECQLSQPEVAHTWLLDDEPVHTSEKVEVVYFENGLRHLLLLKLNKLPQDSCRVTFLAGDVVTS AFLTV  
RALPDPPEDAEVVGRSDHSVTLVWVAPMSDGGGGLCGYRVEMKEASTGQWQLCHDLVPGPECVLQDLVPGKTY  
RFRVAAVGPAGAGEPVHLPQMVKIAPAPAPAPAPAPAPAPETRQAVVGEDICLELEVAADGGVEVWHKGTERRI  
QPGGHFEVLSRQGRQMLVIKGFRTEDQGEYRCGPIQGLPSSGAATFNVMVMTSGSGDEVPAQPSLPPEAAQEGD  
LHLLWEALARKRRMSREPTLDSISELPEEDSRVQHLRQEAEETAPDLSEGYSTADELARTGEADLSHTSSDDE  
SRAGTPSLVTYLKKAGGPGISPLASKHEAQVTTSVKPKQKQEPVPTCPPPGDL SAADLMDPSLDKAAVKIQA  
AFKGYKVRKEMKQEGPVFSRFTFGDTEAQVGDVLRLECVLATKTD MRACWLKDGIELTDGRHYHIDQLKDGTC  
SLLVTGLAPTDSGRYTCQVSTKSGRVSHSACVVVSGTESEAESSSGGELDDAFRRAARLHRLFRTRKSPAELS  
EELFLSADEGPEPEPADWQTYREDENFVCIRFESLAEARQAVTCFRNMFMATMIGIVEISLGEQGRGVEM  
RIGKEAPTPTPAVPLAKTGLQTS DAAPVFLTELQVSDVQDGYPMSFDCVVTGQPVPSVRWFKDGKLLLEEDDH  
YMINEDQQGGHQLIITAVVPADMGVYRCLAENSMGVNSSTKAELELVELTSTDYDTAADATETSSYFSAQGLSS  
REQEGTESDEGLPQVLEELKDLQVAPGTRLAKFQLKVKGYPA PKLYWFKDGQPLTSDHIRMTPDKTLHTLE  
IVSVTREDSGQYAAIISNAVGAAYSSARLLVRGPSEPEEKPASDVHERLVPPRILEKFTPKVKRGSSITFSV  
KVEGHPAPSVHHLKEEA EKGVLWIGPDTPGYTMASSSKQHSVLVLDVGRQHOGTYTCIATNPAGQALCSASLH  
ISGLAKEEEQERVKEALISSFLQGTSAVSAQMSESAGFADLVGQSKGESLVAAEAHSHLSLAEVGTTEEFLOK  
LTSQITEMVSAKISQAKLQVPGGDSDEETKTPSASPRHGRSRPSSSVQESSSESEDGDSRGEIFDIYVVTADY  
LPLGAEQDAIILREGQYVEVLDSAHPLRWLVRTKPTKSSPSRQGWVSPAYLDKRLKLSPEWGPTEAPEFPGEA  
VSEDEYRTRLSSVIQELLSSEQAFVGELOFLESHHMKHLERSPRVPAAVASQKTVIFRNVQDISHFHSSFLKE  
LQCGTDDDVAMCFIKNQEA FEKYLEFLVGRVQAEVSVVSTPVQEFYKKYAEETLSAKDPTQPPPPPLQHYLE  
QPVVERVQYQALLKELIRNKARNRQNCALLEQAYAVVSALPQRAENKLVSLMENYPGTLEALGEPIRQGHFI  
VWEGAPGARMPWKGNHRHVLFNRNYLVICKPRRDSRTDFTSYVFRNMMKLSSIDLNDQVEGDRAFEVWHERE  
DSVRKYLQARTVIKNSWVKEICGIQQRLAQPVWRPPEFEELADCTAELGETVKLACRVTGTPKPIVSWYK  
DGKPVVEVDPHHILIEDPDGSCTLILDNLTGIDSGQYMCFAASAAGNASTLGKILVQVPPRFVNKVRATPFVEG  
EDAQITCTVEGAPYPQIRWYKDGTL LAPGNRYRMLNEPRSGVLVLIQAASKEDLGHYECELVNRGSTRGGG  
ELYMQSPALRARDQHHREQIVAAVEGAPSMQVTIEDVQVQVGDMAQF DAVIEGHPPPIVTWYKGTQLTSSAR  
LSQRQDGTYSLVLTVDVAPHDAGVYTCVANNAGQVLCCKAELLVHGGDKLDAENQVYRRKLSFYDVQEEIGR  
GVFGFVKRVQHKGNMFC AAKFIPLRSKTRAQAYQERDILATLGHPLVTGLLDQFETRKTLLILILELCSSEEL  
LDRLFKKGVVTEAEVKVYIQQLVEGLHYLHSHGILHLDIKPNILMVHPAREDIKICDFGFAQKIPSEPOYS  
KYGSPFVSP EIIIEQNPVSEGS DIWAMGVISYLSLTCSSPFAGESDRATLLNVLEGRVSWSSPTAAHLS EDAK  
DFIKATLQRTPRARPSTSQC LAHPWFLKSMPAEAAHFINTKQLKFL LARSRWQRSLMSYKSI LVMRSIPELLQ  
GPPDPSLGVARHLRGEASGASSSSSSDNE LAPFARAKSLPPSPVTHSPLLHPRGFLRPSASLPEETEASMP  
TADA AVPAS PQSAGPPASPGCVPRHSV ISSLFYQQAGEGA ERGNKTS GAKRHPARRRHLLKGGYIARALPGLR  
EPLMEYSLLEEEAAREEQASLMTKTPSFETALRLPSSSVREV PGRSHSLDNPPVTTGSPPEACKELLPFPST  
GLTHETTAKDRGHKEGFLQESVFPFPMMSGDSRPGKQEGSSQDS CRGKPASSCHSELGSGSQEGC PPSQS LG  
SLPPQSLKKELESTSCGPLFSEQPQAAPFPTQVSPLLGSEKEPQDGS LSEGVPVPSSSPGSASQVDASLDTEG  
LSEAGDTCDFTPPPQRPQEATTRKFSLESRGGYAGVAGYGTFAFGGDAGGMLGQGPLWARMAWAVSQSSEEQ  
DEAATESPQFLESMLGIAEASGVPLRTSPSLTPWEEVEQVSLVQIRDLSGDAEAADTISLDISEVDPAYLNS  
DLYDIKYLPEFELMIFRRVPKPIEQPESPGSETEAGQVADFL EEAAWPWPGEGLGLRAGLEITEEPEEPGLLEA  
LLGEAAVGRKRKWSPSRGLFQFPGRCLSGEEPVELGLRQRVKASMAHISRILKGRPEGPEREGPPRKKAGLAS  
FRLSGLKGRDQELSDEAVVLGQSVTLACQVLAQPTAQATWSKDGVLLESSGHLLISSTLKNFQLLTLVVKEE  
DLGTYTCCVSNPLGTAVTTGVLKKAERPSSSPRPEVGEYKDAVLLVWKPVESCGPVTYIVQCCIEGGSWTTL  
ASDISDCCYLTKLSRGGMYIFRTACVSKAGMPYSSPSEQVLLGGPNHLASEEESRGRPAQLLPSTKTFAF

QMQIRRGFRSVVRQCREKASGRALAAKIVPYQPEDKTAVLREYEALKRLHHPHLAQLHAAYLSPRHLVLILEL  
 CSGPELLPSLAERESYSESDVKDYLWQMSATQYLHAQHILHLDLRSNNMMVTEYNLLKVIDLGNASLDQEK  
 VPAPENFKDYLETMAPELLEGQAVPQTDIWAIGVTAIFIMLSGEYEPESSEGTDRDLQKGLRKLIRLSRCYAGL  
 SGGAVAFLLQSSSLCAQPWGRPCASTCLQCGWLTTEEGPTGSRPTPVTFPTVRLRAFVREKRRALLYKKNLAQ  
 VR\*  
 >rs243764830\_ENSMUSP00000049737\_c.17959:T>A\_p.v5987E  
 ENSMUST00000052872.15|Obscn-203|ENSMUSG00000061462|-|chr11:g.58929213:A>T  
 MDHSFSGAPRFLTRPKAFVSVGKDATLSCQIVGNPTPHVSWEKDRQFVEAGARFRLAQDGDVYRLTILDLAL  
 GDSGQYVCRARNAIGEAFVAVGLRVDSEGTCAEQAPHFLLRPTSIRVREGADATFRCRVGGSPPAVSWSKDG  
 RRLGPPDAPHVRVEEHGESSALRIRSARPRDGGTYEVRAENPLGSASAAAAALVVDSAEVAGPPGTSTATLLA  
 HLQORREAMRAEGIPPSPPGAGTRTCTVTEGKHARLSCFVTGEPKPEVWKKDQGLVTEGRRHVVEDEQENF  
 VLKILFCKQSDRGLYTCTASNLVGQTYSSVLVVREPTVPFKKRLQDLEVREKESATFQCEVAQAPATEAAWFK  
 EETRLWASAKYDIEEEGETERRLTVRNVSADDDAVYICETTEGSRVVAELSVQGNLTKLPRKTAVRTGDTAIF  
 WVELAVPEGPVRWLRNQEEMVAGGRVAITAEGTCHTLTI FQCTLEDMGEVAFVSGGCRTTTTQFCVSAPRRPPL  
 YPPADPVVKAKTESSVTLSSWAPPHGDRPVTIDGYVLEKRLKLGAYAWSRCHEAGWLATTEFTITGVAAEEDGFQ  
 FRVSAINHFQGGPYLEFPGTMHLVPLAVKTPKAVEAVEGGEVTFVSDLTVASSGEWFLDGEALKASSIYVI  
 RCDRTRHMLTIREVPARLHGAQLKVFVANGIETSIQMVVRAALGLPSSKLPAAAAREVLAQLHHEEAQLLAELS  
 QAAAVTWLKDGRRELSLGPKYEMQVSAGRRALLVRDVAQDDAGLYECVSRGSRRTAYQLLVQEPHFAKQQAH  
 SEVKAEEAGNSATLSCEVTQAQTEVTFWKDGGKLSSSSKVRMEASGCSRRLVVQQAGKADAGEYSCEAGGQKLS  
 FRLDVAEPKLVFAKQQAHSEVKAEEAGASATLSCEVAQAQTEVTFWKDGGKLSSSSKVRMEASGCSRRLVVQQ  
 AGKADAGEYSCEAGGQKLSFRLDVAEPKMFVFAKEQQARSEVKAEEAGASATLSCEVAQAQTEVTFWKDGGKLS  
 SSKVRMEASGCSRRLVVQQAGKADAGEYSCEAGGQKLSFRLDVTEPKLVFAKEQQARSEVKAEEVNSATLSCE  
 VAQAQTEVTFWKDGGKLSSSSKVRMEASGCSRRLVVQQAGKADAGEYSCEAGGQKLSFRLDVAEPKLVFAKEQ  
 QARSEVKAEEAGNSATLSCEVAQAQTEVTFWKDGGKLSSSSKVRMEASGCSRRLVVQQAGKADAGEYSCEAGGQ  
 KLSFHLDVTEPKLVFAKEQQAHSEVKAEEAGASATLSCEVAQAQTEVTFWKDGGKLSSSSKVRMEASGCSRRLV  
 VQQAGKADAGEYSCEAGGQKLSFRLDVAEPKLVFAKEQQARSEVKAEEAGASATLSCEVAQAQTEVTFWKDGGK  
 LSSSKVRVEASGCSRRLVVQQAGKADAGEYSCEAGGQKLSFRLDVAEPKLVFAKEQQANSEVKAEEAGASATL  
 SCEVAQAQTEVTFWKDGGKLSSSSKVRVEASGCSRRLVVQQAGKADAGEYSCEAGGQKLSFRLDVAEPKLAFA  
 KEQQAHSEVKAEEAGASATLSCEVAQAQTEVTFWKDGGKLSSSSKVRVEASGCSRRLVVQQAGKADAGEYSCEA  
 GGQKLSFRLDVAEPKLAFAKEQQAHSEVKAEEAGASATLSCEVAQAQTEVTFWKDGGKLSSSSKVRVEASGCSR  
 RLVVQQAGKADAGEYSCEAGGQKLSFRLDVAEPKLAFAKEQQAHSEVKAEEAGASATLSCEVAQAQTEVTFWKD  
 GKKLSSSKVRVEASGCSRRLVVQQAGKADAGEYSCEAGGQKLFRLDVAEPKLMFAKEQQAHSEVKAEEAGAS  
 ATLSCEVAQAQTEVTFWKDGGKLSSSSKVRVEASGCSRRLVVQQAGKADAGEYSCEAGGQKLSFRLDVAEPK  
 VFAKEQQAHSEVKAEEAGASATLSCEVAQAQTEVTFWKDGGKLSSSSKVRVEASGCSRRLVVQQVQKADAGEYS  
 CEARGQKLSFRLDVADTRLMFAKEQQARTEVKAEEAGNSATLSCEVAQAQTEVTFWKDGGKLSSSSKVRVEASG  
 CSRRLVVQQAGKADAGEYSCEAGGQKLSFRLDVAEEAESQI PERPSRREPLVVKEHETIILTATIAAPSVAAVT  
 WLKDGEVIRRKRHEATS LGDTHLTVRGAQVLD SAIYSCRVGKEGQDFPVQVEEVAAKFSKPLEPVEGELGG  
 TVMLVCELSPEQAEVWRCGNTQLRPGKRFQMTSEGPRRTLVSGLREDDAEYVCESRDDRTSARLTVKVP  
 VVKFTSGLSAMVAEEGQEAFTQC VVSPSDAGVTWYKDGMLQPSSEKFMVVEGASRSLTILGLTLEDAGQVTV  
 EAEGASSAALRVREAPVLFKKLEPQTVVEERTSVTLEVELTRPWPVEVKWTRNAAVLTPSENVEIRAEGARHC  
 LVLSVGFADRGFFGCETPDDKTQAKLVNEMRQVRLVRGLQVEVAKEQGTASMDVELSHAEVEGSWTRDGLRL  
 QPGPKCHLAVQGPVHILTLALSALPQD SGLVAFRAEGVHTSARLIVTELPVSFTRVLQDVVATQKEKVTLECEL  
 SRPVDVRWLKDGVELRAGKAI GIVAQGTCSRSLVIYRCETGDQGVVCDALDAQTSASLRVQGRTYTLIFRRVL  
 AEDAGEVVFVAENAESRAHLRVKELPVTLLRPLRDKIAMEKHRGVLECVSRASAVRWFVKGVELQSGPKYE  
 VVSDGLYRKLVINVDVPEDEDTYTC DAGNVKTSAQFFVEEQSITIVRGLKDMTVMPEPAPAWFECE TIPSVRP  
 PKWLLGKTVLQAGGNVLEQDGTVHRLTLHKTCSTMTGPVHFTIGKSRSSAQLVSDI PVVLTTRPLEPKAGRE  
 LQSVVLSCDFRPAPKAVQWYKDDTPLSPSEKFKMALEGQMAELRILRLTPADAGVYRCQAGSAQSSAEVTVEA  
 REVTVIQPLQDAEAMEEGRVCFSC ELSHKDEDI EWSLNGTPLYNDSFHEISHEGCLHTLVLSVRQADTGTVC  
 ATSPKVSVSARLVVKGKPVVFLKALDDVSAEERGTLTLQCEVSDPEARVVWRKDGVELGPSDKYDFLHKAGAR  
 GLTVHDLSDHEDAGLYTCQVGSKETQSKVSVHDLHVGITKRLKTVEVLEGE SCSFECVLSHESPSDPVAVTVGG  
 KTVGGSGHFHAVRQGRKYTLTVKDAALSDAGEVVSFVLGLTSKASLI IRERPVDITKPLEDQRTTLGEDVMLS  
 CELSRAGTSVRWLKDGKAI RKSQKYDLLSEGTRAVLVVRKASLKDSGEYTCETEASKSTAKLCVVEEKANRFTE  
 ELADLQVEEKGRAVFTCKTEHPASVVTWRKGLLELRASGKHPVPSQEGTLKLTINALERNTSDTYTCDI GQAR  
 TQARLLVHGKVRVIEDLEDTAVQEGSSAKGCCRIAPADYGPVHWFLDKTPHLSNELN EITVQPGGYHVLTLR  
 QLALKDSGTVYFEAGDQRTS AALRVTEKPSIFSRPLTDVTVTEGEDLTLVCETTTVDSSVRWTKDGKTLRPSA  
 RCQLSHEGCAQLLITATTPQDGGRYKCEIGGASSSIVRVHALPVRFRESLKDVEVPEGKAATLRCVLSVA  
 APVEWRHGDDVLKSSNKYSLRQEGAVLELVIDRLQPD SGGYSCSFGDQTTSATLTVKTSQAQVFGKLRNKEA  
 TEGTTVTLRCELTKAEVWKKGTETLRNGDKYSLKQDGA VCELQICSLLVADAGEYSCVCGQEKTSATLTVK

ALLVHFVRRRLRSKEATEGDTTTLQCELSKAAPVEWRKGTETLRDGDYSLKQDGA VCELQIRSLTIADAGEYL  
 CTCGQEKTSATLTVRALPAKFKDSLKNEEATEGTTATLSCELSKAAPVTWKKGPKTLQSGDKYVLRQDGA VCG  
 LQIHGLTMADAGEYSCVCGQEKTSATLTVRGLPAKFIEDLRSQEATEGATAILRCLELSKAAPVEWRKGS ETLK  
 DGDYRSLRQDGA VCELQIRGLAVVDGTYS SLPKFTFTEGLRNEEATEGTMATLRCQMSKAAPVEWRKGS ETLR  
 DGDYRSLRQDGA MCELQIRGLTIEDSGEYTCVCGQEKTSATLSVKALPSRFIEDLRSQEATEGTMATLRCQMS  
 KTAPVEWKKGSETLRDGGYSLRQDGPVCELQICDLAVEDAGEYSCVCGQEKTSATLSIKALPPRFIEDLRSQ  
 EATEGTMATLRCQMSKAAPVEWRKGS ETLGDGGYSLRQNGAVCELQIHDLAVEDTGEYSCVCGQEKTSATLN  
 VKALPPRFIEDLRSQEATEGTMATLRCQMSKAAPVEWRKGS ETLR DGGYSLRQDGA VCELQIHDLVEDAGQ  
 YSCVCGQEKTSAVLTVDALPPKFTTEGLKKEEATEGTMVTLRCQMSKEATVEWRKGAKT LSDGGYSLRQDGA M  
 CELQICGLAVEDAGEYSCVCGQEKTSATLSVKALPPRFIEDLRSQEATEGTMATLRCQMSKAAPVEWRKGS ETL  
 LR DGGYSLRQDGA VCELQIRDLAVEDAGEYLCVCGQEKTSATLSVKALPPRFIEDLRSQEATEGTMATLRCQ  
 MSKAAPVEWRKGS KTLR DGGYSLRQDGA MCELQICDLAVEDTGDYSCVCGQEKTSATLSVKALPPRFIEDLR  
 SQEAREGTVATLRCRMSKAAPVEWRKGS ETLK DGGYSLRQEGNLCELQIRDLAVEDTEEYSCVCGQEKTSAT  
 LSVKALPAKFIEDLRSQEAPESSTVTLRCKLSKKASVWKKGSETLRNGARYSLRQDGA VCELEIRDLTVEEDT  
 GEYSCTCGQERTSATLSIMAPQVVFQQLQNLQAEEGSMASLRCELSVPNAAMVWSKGGLELQGDTRREARQQ  
 GCVAELLLRDLRREDAGEYSCCTGSQTTSATLMVTAAPVRFRELQAQDVDEGATARLRCLELSREAVSVEWRK  
 GSLQLFPCAQYQMVQEGTTAELLVHGVEQEDAGEYTC DAGHTQSIARLSVRAPKPKFKTDLQSTEQEAGGTAR  
 LCCQLSEAEPTPVQWLKEGVELHVGSKYEMRRQGA VCELLIHGLEAKDTGEYACLVGQKTLASLRVKEPEV  
 TIVRGLVDMEVQADEDEVEFTCKVSQAGATDVQWHLQGLPLQSNVETEVAVLADGCTHVLQKGVTL EDAGTVS  
 FHVGG LSSSAQLTVRVPEVTVLEPLKDVQLSEGQDAHFRCLRSRASGQEARWALGGVPLQCNEMNDITVEQGT  
 LYLLTLHKVTL EDAGTITLQVGS CSSEAQLKVTAKNTVLRGLENVDALEGG EALFECQLSQPEVA AHTWLLDD  
 EPVHTSEKVEVVYFENGLRHLLLLKLNKPKQDSCRVTFLAGDVVTS AFLTVRGRWRLEVLEPPHDASVKAGMQVR  
 FTCILSEAVPVGEATWYINGAAIQPDDTDWTVTTDGS HHALTLSNAQPQHAGEVTF AARDAVASARLSVLALP  
 DPPEDA EVVGRSDHSVTL SWVAPMSDGGGGLCGYRVMKEASTGQWQLCHDLVPGPECVVDDLVPGKTYRFRV  
 AAVGPAGAGEPVHLPQMVKIAPAPAPAPAPAPAPETRAVVGEDICLELEVAADGGEVVWHKGTERRIQPGG  
 HFEVLSRGRQMLVIKGFRTEDQGEYRCGPIQGLPSSGAATFNVVMTSGSGDEVPAQPSLPEAAQEGDLHLHL  
 WEALARKRRMSREPTLDSISELPEEDSRVQHRLRQEAEETAPDLSEGYSTADELARTGEADLSHTSSDDESRA G  
 TPSLVTYLKKAGGPGISPLASKHEAQVTT SVKPKQKQEPVVPTCPPPGDLSAADLMDPSLDKAAVKIQAAFKG  
 YKVRKEMKQQEGPVFSRTFGDTEAQVGDVLRLECVLATKTDMRACWLKDGIELTDGRHYHIDQLKDGTC SLLV  
 TGLAPTDSGRYTCQVSTKSGRVSHSACVVVSGTESEAE SSSGGELDDAFRRAARLRLHRLFRTKSPAELSEEEL  
 FLSADEGPGPEPEPADWQTYREDENFVCIRFESLAEARQAVTCFRNMFATMGIGVEISLGEQGRGVEMRIGK  
 EAPTVT PAVPLAKTPGLQTS DAAPVFLTELQNDVQDGYPMSFDCVVTGQPVPSVRWFKDKLLEEDDHYMIN  
 EDQQGGHQLIITAVVPADMGVYRCLAENSMGVSSTKAELRVELTSTDYDTAADATETSSYFSAQGYLSSREQE  
 GTESDEGQLPQVLEELKDLQVAPGTRLAKFQLKVKGYPA PKLYWFKDQGPLTTS DHIRMTDKKTLHTLEIVSV  
 TREDSGQYAA YISNAVGAAYSSARLLVRGPSEPEEK PASDVHERLVPPRIEKFTPKKVGRGSSITFSVKVEG  
 HPAPSVHWLKEEA EKGVLWIGPDTPGYTMASSSKQHSVLVLDVGRQHOGTYTCIATNPAGQALCSASLHISGL  
 AKEEEQERVKEALISSFLQGTSAQVSAQMSESAGFADLVGQSKGESLVAEEAHSHLSLAEVGT EEFQLKLSQ  
 ITEMVSAKISQAKLQVPGGDSDEETKTPSASPRHGRSRPSSSVQESSSESEDGDSRGEIFDIYVVTADY LPLG  
 AEQDAIILREGQYVEVLDSAHPLRWLVRTKPTKSSPSRQGWSPAYLDKRLKLSPEWGPTEAPEFPGEAVSED  
 EYRTRLSSVIQELLSSEQAFVGE LQFLES SHMKHLERSPRVPAAVASQKTVIFRNVQDISHFHSSFLKELQGC  
 GTDDVAMCFIKNQEA FEKYLEFLVGRVQAESVVVSTPVQEFYKKYAEETLSAKDPTQPPPPPLQHYLEQPVE  
 RVQKYQALLKELIRNKARNRQNCALLEQAYAVVSALPQRAENKLVSLMENYPGTLEALGEP IRQGHFIVWEG  
 APGARMPWKGNHRHVF LFRNYLVICKPRRDSRTD TFSYVFRNMMKLSSIDLNDQVEGD DRAFEVWHEREDSVR  
 KYLLQARTV I IKNSWVKEICGIQQR LAQPVWRPPEFEELADCTAELGETVKLACRVTGTPKPIVSWYKDGKP  
 VEVDPHHILIEDPDGSC TLI LDNLTGIDSGYMCFAASAAGNASTLGKILVQVPPRFVKNVRATPPEVEGEDAQ  
 ITCTVEGAPYPQIRWYKDG TLLAPGNRYRMLNEPRSGVLV LVIQAASKEDLGHYECELVNRLGSTRGGGELYM  
 QSPALRARDQHHREQIVA AVEVTEQETKVPKKTVIIEETITTVVKS PRGRRQSPGKSPSRSPRRSASPRRPG  
 LLAPERLYPPGTS PSRRLEVEQGRKAPVPALYVTEAEVHAPASQS QPKWLEVEETIEVRVKKTGSRGASPVRE  
 MTSRGEGLIFLTPGGI PGRDPNANN SNKSVYQEARTWGP AVVHVGEFFIFQVDSVGNVDWVAASPEPEQVRA  
 SQKEENTERQEGCS DGDENTFLMEEPQD TDSLQGRDPKILTHNGRVLTLADLEDYVPQEGETFGCGDSTPSTP  
 DEPPCEVSVLQREI SEPTVGQPVLLNVGRPPGTGATPSFFRPGSQVHSPESVSFLLREAWSGPVSAAPWTSS F  
 HTHVQSSVDGSHGSFKTEVSTQTVSFGAVGETVTLHIDPDGGEAPGPSQG\*  
 >rs243764830\_ENSMUSP0000020732\_c.18160:T>A\_p.V6054E  
 ENSMUST0000020732.13|Obscn-201|ENSMUSG00000061462|-|chr11:g.58929213:A>T  
 MDHSFSGAPRFLTRPKAFVSVGKDATLSCQIVGNPTPHVSWEKDRQPVEAGARFLAQDGDVYRLTILDLAL  
 GDSGQYVCRARNAIGEAFAAVGLRVDSEGTCAEQAPHLLRPTSIRVREGADATFRCRVGGSPQPAVSWSKDG  
 RRLGPPDAPHVRVEEHGESSALRIRSARPRDGGTYEVRAENPLGSASAAAALVVDSDAEVAGPPGTSTATLLA  
 HLQQRREAMRAEGIPPSPPGAGTRTCTVTEGKHARLSCFVTGEPKPETVWKKDGLVTEGRRHVYDEQENF

VLKILFCKQSDRGLYTCTASNLVGQTYSSVLVVVREPTVPFKKRLQDLEVREKESATFQCEVAQPATEAAWFK  
EETRLWASAKYDIEEEGETERRLTVRNVSADDDAVYICETTEGSRVAELSVQGNLTKRKLPRKTAVRTGDTAIF  
WVELAVPEGPVWRWRNQEEMVAGGRVAITAEGTCHTLTI FQCTLEDMGEVAFVSGGCRTTTTQFCVSA PRRPPL  
YPPADPVVKAKTESSVTLWSAPPHGDRPVTIDGYVLEKRKLGAYAWSRCHEAGWLATTEFTITGVAEEGDFQ  
FRVSAINHFGQGPYLEFPGTMHLVPLAVKTPKAVEAVEGGEVTFVSDLTVASSGEWFLDGEALKASSIYVI  
RCDRTRHMLTIREVPARLHGAQLKFVANGIETSIQMVVRAALGLPSSKLPAAAAAREVLAQLHHEEAQLLAE LSD  
QAAAVTWLKDGRELSLGPKEYMQVSAGRRALLVRDVAQDDAGLYECVSRGSRRTAYQLLVQDITDGYRDWGPAG  
PQKHMCKCAGAKIARYLGSscyRFLQYDKGVWHWLEAALDTRQGKGTSSCSLHEKPKLVFAKGGQQAHSSEVKA  
AGNSATLSCEVTQAQTEVTWFKDGKLLSSSSKVRMEASGCSRRLVVQQAGKADAGEYSCEAGGQKLSFRLDVA  
EPKLVFAKGGQQAHSSEVKAEGASATLSCEVAQAQTEVTWFKDGKLLSSSSKVRMEASGCSRRLVVQQAGKAD  
GEYSCEAGGQKLSFRLDVAEPKMFVFAKEQQARSEVKAEGASATLSCEVAQAQTEVTWFKDGKLLSSSSKVRM  
EASGCSRRLVVQQAGKADAGEYSCEAGGQKLSFRLDVTEPKLVFAKEQQARSEVKAEGVNSATLSCEVAQAQ  
EVTWFKDGKLLSSSSKVRMEASGCSRRLVVQQAGKADAGEYSCEAGGQKLSFRLDVAEPKLVFAKEQQARSEV  
KAEAGNSATLSCEVAQAQTEVTWFKDGKLLSSSSKVRMEASGCSRRLVVQQAGKADAGEYSCEAGGQKLSFHL  
DVTEPKLVFAKEQQAHSEVKAEGASATLSCEVAQAQTEVTWFKDGKLLSSSSKVRMEASGCSRRLVVQQAGK  
ADAGEYSCEAGGQKLSFRLDVAEPKLVFAKEQQARSEVKAEGASATLSCEVAQAQTEVTWFKDGKLLSSSSK  
VRVEASGCSRRLVVQQAGKADAGEYSCEAGGQKLSFRLDVAEPKLVFAKEQQANSEVKAEGASATLSCEVAQ  
AQTEVTWFKDGKLLSSSSKVRVEASGCSRRLVVQQAGKADAGEYSCEAGGQKLSFRLDVAEPKLVFAKEQQAH  
SEVKAEGASATLSCEVAQAQTEVTWFKDGKLLSSSSKVRVEASGCSRRLVVQQAGKADAGEYSCEAGGQKLS  
FRLDVAEPKLVFAKEQQAHSEVKAEGASATLSCEVAQAQTEVTWFKDGKLLSSSSKVRVEASGCSRRLVVQQ  
AGKADAGEYSCEAGGQKLSFRLDVAEPKLVFAKEQQAHSEVKAEGASATLSCEVAQAQTEVTWFKDGKLLSS  
SSKVRVEASGCSRRLVVQQAGKADAGEYSCEAGGQKLFRLDVAEPKLMFAKEQQAHSEVKAEGASATLSCE  
VAQAQTEVTWFKDGKLLSSSSKVRVEASGCSRRLVVQQAGKADAGEYSCEAGGQKLSFRLDVAEPKLVFAKEQ  
QAHSSEVKAEGASATLSCEVAQAQTEVTWFKDGKLLSSSSKVRVEASGCSRRLVVQQVQKADAGEYSCEARGQ  
KLSFRLDVADTRLMFAKEQQARTEVKAEGNSATLSCEVAQAQTEVTWFKDGKLLSSSSKVRVEASGCSRRLV  
VQQAGKADAGEYSCEAGGQKLSFRLDVAEAEISYIPERPSRREPLVVKHEHETIILTATIAAPVAAVTWLKDGV  
EIRRSKRHEATSLGDHTLTVRGAQVLDLSAISYICRVGKQDFPVQVEEVAAKFSKPLEPVEGELGGTVMLVC  
ELSPQAEVWRCGNTQLRPGKRFQMTSEGPRRRLTVSGLREDDAEYVCESRDDRTSARLTVKVPVVKFTS  
GLSAMVAEEGQEAFTQCVVSPSDAGVTWYKDGMLQPSKFMVESGASRSLTILGLTLEDAGQVTVAEAGAS  
SSAALRVREAPVLFKKKLEPQTVVEERTSVTLEVELTRPWPEVKWTRNAAVLTPSENVEIRAEGARHCLVLRV  
GFADRGFFGCETPDDKTQAKLNVEMRQVRLVRLGQVEEAKEQGTASMDVELSHAEEVGSWTRDGLRLQPGPKC  
HLAVQGPVHILTLALQPDQSGLVAFRAEGVHTSARLIVTELPSFTRVLQDVVATQKEKVTLECELSRPVVDV  
RWLKDGVLELRAGKAIIGIVAQGTCSRSLVIYRCETGDQGVYVCDALDAQTSASLRVQGRTYTLIFRRLAEDAGE  
VKFVAENAESRAHLRVKELPVTLLRPLRDKIAMEKHRGVLEQCQVSRASAQVRWFKGGVELQSGPKYEVVSDGL  
YRKLVINQVPEDEDTYTCDAENVKTSAQFFVEEQSITIVRGLKDMTVMEPAPAWFECETSIPSVRPPKWLGLG  
KTVLQAGGNVGLQDGTVHRLTLHKTCSTMTGPVHFTIGKSRSSAQLVVSDIPVVLTRPLEPKAGRELQSVVL  
SCDFRPAPKAVQWYKDDTPLSPSEKFKMALEGMALRILRLTPADAGVYRCQAGSAQSSAEVTVAEAREVTVI  
QPLQDAEAMEEGRVCFSCELSHKDEDIEWLSNGTPLYNDSFHEISHGCLHTLVLSVRQADTGTVCATSPKV  
SVSARLVVKGKPVVFLKALDDVSAEERGLTLQCEVSDPEARVVWRKDGVELGSPDKYDFLHKAGARGLTVHD  
LSHEDAGLYTCQVGSKETQSKVSVHDLHVGITKRLKTVEVLEGECSFECVLSHESPSDPAVWTVGGKTVGGS  
GHFHAVRQGRKYTLTVKDAALSDAGEVVFVSVLGLTSKASLIIRERPVDTKPLEDQRTTLGEDVMLSCELSRA  
GTSVRWLKDGKAIRKSQKYDLLSEGTRAVLVVRKASLKDSSGEYTCETEASKSTAKLCVEEKANRFTTEELADLQ  
VEEKGRAVFTCKTEHPASVVTWRKGLLELRASGKHVPSQEGTLKLTINALERTDSDTYTCDIGQARTQARLL  
VHGQKVRVIEDLEDTAVQEGSSAKFCCRIAPADYGPVHWFLLDKTPLHSNELNEITVQPGGYHVLTLRQLALKD  
SGTVYFEAGDQRTSAAALRVTEKPSIFSRPLTDVTVTEGEDTLVCETTTTVDSSVRWTKDGKTLRPSARCQLSH  
EGCQAQLLITATTPQDGGRYKCEIGGASSSSIVRVHALPVRFRSLKDVEVPEGKAATLRCVLSVAAPVEWR  
HGDDVLKSSNKYSLRQEGAVLELVIRDLQPDQSGQYSCSFGDQTTSATLTVKTSQAQFVGLRKNKEATEGTTV  
TLRCELTKAEAPVEWKKGTETLRNGDKYSLKQDGAVCELQICSLLVADAGEYSCVCGQEKTSATLTVKALLVHF  
VRLRSKEATEGDTTTLQCELSKAAPVEWRKGTETLRDGDYSLKQDGAVCELQIRSLTIADAGEYLCTCGQE  
KTSATLTVRALPAKFKDSLKNEEATEGTTATLSCELSKAAPVWKKGPKTLQSGDKYVLRQDGA VCGLIHGL  
TMADAGEYSCVCGQEKTSATLTVRGLPAKFIEDLRSQEATEGATAILRCELSKAAPVEWRKGSSETLKDGDYR  
LRQDGA VCELQIRGLAVVDGTYSLSLPTKFTTEGLRNEEATEGTMATLRCQMSKAAPVEWRKGSSETLRDGDYR  
LRQDGA MCELQIRGLTIEDSGEYTCVCGQEKTSATLSVKALPSRFIEDLRSQEATEGTMATLRCQMSKTAPE  
WKKGSETLRDGGRYSLRQDGPVCELQICDLAVEDAGEYSCVCGQEKTSATLSIKALPPRFIEDLRSQEATEG  
MATLRCQMSKAAPVEWRKGSSETLGDGGRYSLRQNGAVCELQIHDLAVEDTGEYSVCGQEKTSATLNVKALPP  
RFIEDLRSQEATEGTMATLRCQMSKAAPVEWRKGSSETLRDGGRYSLRQDGA VCELQIHDLVEDAGQYSCVCG  
QEKTSAVLTVDALPPKFTTEGLKKEEATEGTMVTLRCQMSKEATVEWRKGAKTLS DGGRYSLRQDGA MCELQIC  
GLAVEDAGEYSCVCGQEKTSATLSVKALPPRFIEDLRSQEATEGTMATLRCQMSKAAPVEWRKGSSETLRDGD

YSLRQDGAVCELQIRDLAVEDAGEYLCVCGQEKTSATLSVKALPPRFIEDLRSQEATEGTMATLRCQMSKAAP  
VEWRKGSKTLRDGDYSLRQDGAMCELQICDLAVEDTDYSCVCGQEKTSATLSVKALPPRFIEDLRSQEARE  
GTVATLRCRMSKAAPVEWRKGSSETLKDGDYSLRQEGNLCELQIRDLAVEDTEEYSCVCGQEKTSATLSVKAL  
PAKFIEDLRSQEAPESSTVTLRCKLSKKASVWKKGSETLRNGARYSLRQDGAVCELEIRDLTVEDTGEYSCT  
CGQERTSATLSIMAPQVVQQPLQNLQAEEGSMASLRCELSVPNAAMVWSKGGLELQGDTRREARQQGCVAEL  
LLRDLRREDAGEYSCTCGSQTTSATLMVTAAPVRFRLRELQAQDVEGATARLRCELSREAVSVEWRKGSQQLF  
PCAKYQMVQEGTTAELLVHGVEQEDAGEYTCDAHTQSIARLSVRAPKPKFKTDLQSTEQEAGGTARLCCQLS  
EAEPGTPVQWLKEGVELHVGSKYEMRRQGAVCELLIHGLEAKDTGEYACLVGGQKTASLRVKEPEVTIVRGL  
VDMEVQADEDEFTCKVSOAGATDVQWHLQGLPLQSNKEVAVLADGCTHVLQKGVTLQKGTLEDAGTVSFHVGG  
SSSAQLTVRVPEVTVLEPLKDVQLSEGDQAHFRCLRSRASGQEARWALGGVPLQCNEMNDITVEQGTLYLLTL  
HKVTLEDAGTITLQVGSSESQAQLKVTAKNTVLRGLENVDALEGGEALFECQLSQPEVAHAHTWLLDDEPVHTS  
EKVEVVYFENGLRHLLLLKLNKLPQDSCRVTFLAGDVVTSFAFLTVRGWRLEVLEPPHDASVKAGMQVRFCTILS  
EAVPVGEATWYINGAAIQPDDTDWTVTTDGSHHALTLSNAQPQHAGEVTFFAARDAVASARLSVLALPDPPEDA  
EYVGRSDHSVTLSSWVAPMSDGGGGLCGYRVMKEASTGQWQLCHDLVPGPECVVDDLVPKTYRFRVAAVGPA  
GAGEPVHLPQMVKIAPAPAPAPAPAPAPAPETRQAVVGEDICLELEVAADGGEVVWHKGTERRIQPGGHFEVLS  
RGQRQMLVIKGFRTEDQGEYRCGPIQGLPSSGAATFNVVMTSGSGDEVPAQPSLPPEAAQEGDLHLLWEALAR  
KRMSREPTLDSISELPEEDSRVQHLRQEAETAPDLSEGYSTADELARTGEADLSHTSSDDESAGTSPSLVT  
YLKAGGPGISPLASKHEAQVTTSVKPKQKQEPVVPTCPPGDLAADMPSLDKAAVKIQAAFKGYKVRKE  
MKQQEGPVFSRTFGDTEAQVGDVLRLECVLATKTDMRACWLKDGIELTDGRHYHIDQLKDGTCSSLVTLGLAPT  
DSGRYTCQVSTKSGRVSHSACVVVSGTESEAESSGGELDDAFRRAARLHRLFRTKSPAELSEELFLSADE  
GPGEPEPADWQTYREDENFVCIRFESLAEARQAVTCFRNMFATMIGVEISLGEQGRGVEMRIGKEAPTVT  
PAVPLAKTPGLQTSDAAPVFLTELQNDQVDQDGYPMSFDCVVTGQPVPSVRWFKDGKLEEDDHVMINEDQGG  
HQLIITAVVPADMGVYRCLAENSMGVSSTKAELRVELTSTDYDTAADATETSSYFSAQGYLSSREQEGTESDE  
GQLPQVLEELKDLQVAPGTRRLAKFQLKVKGYPAKLYWFKDGGQPLTTSDHIRMTDKKTLHTLEIVSVTREDSG  
QYAAYSNAVGAAYSSARLLVRGPSEPEEKPASDVHERLVPPRILEKFTPKKVKRGSSITFSVKVEGHPAPSV  
HWLKEEAEGVFLWIGPDTPGYTMASSSKQHSLLVLDVGRQHQTCTIATNPAGQALCSASLHISGLAKEEEQ  
ERVKEALISSFLQGTSAVSAQMSSEAGFADLVGQSKGESLVAEEAHSHLSLAEVQTEEFQKLTQITMVVS  
AKISQAKLQVPGGDSDEETKTPSASPRHGRSRPSSSVQESSSESEDGDSRGEIFDIYVVTADYLPGLAEQDAI  
ILREGQYVEVLDSAHPLRWLVRTKPKSSPSRQGWVSPAYLDRKRLKLSPEWGPTEAPEFPGEAVSEDEYRTRL  
SSVIQELLSSEQAFVQELQFLESHHMKHLERSPRVPAAVASQKTVI FRNVQDISHFHSSFLKELQCGCTDDDV  
AMCFIKNQEAFEKYLEFLVGRVQAESVVVSTPVQEFYKKAETLSAKDPTQPPPPPLQHYLEQPVERVQKYQ  
ALLKELIRNKARNRQNCALLEQAYAVVSALPQRAENKLVSLMENYPGTLEALGEPHQGHFVWEGAPGARM  
PWKGHNHRVFLFRNYLVICPPRRDSRTDTFSYVFRNMMKLSIDLNDQVEGDDRAFEVWHEREDSVRKYLLQA  
RTVI IKNSWVKEICGIQORLAQPVWRPPEFEEELADCTAELGETVKLACRVTGTPKPIVSWYKDGKPVVDPH  
HILIEDPDGSCITLIDLNLTGIDSGQYMCFAASAAGNASTLGKILVQVPPRFVNVKVRATPFVEGEDAQITCTVE  
GAPYPIRWYKDGTLAPGNRYRMLNEPRSGVLVVIQAASKEDLGHYECELVNRLGSTRGGGELYMQSPALR  
ARDQHHREQIVAAVEERRPSP\*  
>rs243764830\_ENSMUSP00000151217\_c.15454:T>A\_p.V5152E  
ENSMUST00000219084.3|Obscn-207|ENSMUSG0000061462|-|chr11:g.58929213:A>T  
MDHSFSGAPRFLTRPKAFVSVGKDATLSCQIVGNPTPHVSWEKDRQFVEAGARFRLAQDGDVYRLTILDLAL  
GDSGQYVCRARNAIGEFAAVGLRVDSEGTCAEQAPHLLRPTSIRVREGADATFRCRVGGSPQPAVSWSKDG  
RRLGPPDAPHVRVEEHGESSALRIRSARPRDGGTYEVRAENPLGSASAAAALVVDSAEVAGPPGTSTATLLA  
HLQORREAMRAEGIPSPPPGAGTRTCTVTEGKHARLSCFVTGEPKPEVWKKDQGLVTEGRRHVVEDEQENF  
VLKILFCKQSDRGLYTCASNLVGQTYSSVLVVVREPTVPFKKRLQDLEVREKESATFQCEVAQAPATEAAWFK  
EETRLWASAKYDIEEEGETERRLTVRNVSADDDAVYICETTEGSRVAELSVQGNLTKLPRKTAVRTGDTAIF  
WVELAVPEGPVRWLRNQEEMVAGGRVAITAEGTCHTLTI FQCTLEDMGEVAFVSGGCRTTTTQFCVSAPRRPPL  
YPPADPVVKAKTESSVTLSSWAPPHGDRPVTIDGYVLEKRLKLGAYAWSRCHEAGWLATTEFTITGVAAEEGDFQ  
FRVSAINHFGQGPYLEFPGMTMLVPLAVKTPKAVEAVEGGEVTFVSVDLTVASSGEWFLDGEALKASSIYVI  
RCDRTRHMLTIREVPARLHGAQLKVFVANGIETS IQMVVRAALGLPSSKLPAAAAREVLAQLHEEAQLLAELSD  
QAAAVTWLKDGRELSLGPKEYMQVSAGRRALLVRDVAQDDAGLYECVSRGSRRTAYQLLVQDITDGYRDWGPAG  
PQKHMCKCAGAKIARYLGSscyRFLQYDKGVWHLEAALDTRQKGTSSCSLHEKPKLVFAKQQAHSEVKA  
AGNSATLSCEVTQAQTEVTFWFKDGKLSSSSKVRMEASGCSRRLVVQQAGKADAGEYSCEAGGQKLSFRLDVA  
EPKLVFAKQQAHSEVKAEGASATLSCEVAQAQTEVTFWFKDGKLSSSSKVRMEASGCSRRLVVQQAGKADA  
GEYSCEAGGQKLSFRLDVAEPKMFVFAKEQQARSEVKAEGASATLSCEVAQAQTEVTFWFKDGKLSSSSKVRM  
EASGCSRRLVVQQAGKADAGEYSCEAGGQKLSFRLDVTEPKLVFAKEQQARSEVKAEGASATLSCEVAQAQ  
EVTWFKDGKLSSSSKVRMEASGCSRRLVVQQAGKADAGEYSCEAGGQKLSFRLDVTEPKLVFAKEQQAHSEV  
KAEAGASATLSCEVAQAQTEVTFWFKDGKLSSSSKVRMEASGCSRRLVVQQAGKADAGEYSCEAGGQKLSFRL  
DVAEPKLVFAKEQQARSEVKAEGASATLSCEVAQAQTEVTFWFKDGKLSSSSKVRMEASGCSRRLVVQQAGK

ADAGEYSCEAGGQKLSFRLDVAEPKLVFAKEQQANSEVKAEAGASATLSCEVAQAQTEVTFWKDGKLLSSSSK
VRVEASGCSRRLVVQQAGKADAGEYSCEAGGQKLSFRLDVAEPKLAFAKEQQAHEVKAEGASATLSCEVAQ
AQTEVTFWKDGKLLSSSSKVRVEASGCSRRLVVQQAGKADAGEYSCEAGGQKLSFRLDVAEPKLVFAKEQQA
SEVKAEGASATLSCEVAQAQTEVTFWKDGKLLSSSSKVRVEASGCSRRLVVQQVKGADAGEYSCEARGQKLS
FRLDVAEAEESQIPERPSRREPLVVKHEHETIILTATIAAPSVAAVTWLKDGVEIRRSKRHEATSLGDTHTLTVR
GAQVLDSAIYSCRVGKEGQDFPVQVEEVAAKFSKPLEPVEGELGGTVMLVCELSPEQAEVWRCGNTQLRPGK
RFQMTSEGPRRTLTVSGLREDDAEYVCESRDDRTSARLTVKVPVVKFTSGLSAMVAEEGQEAFTQCVVSPS
DAGVTWYKQDGMQLQPSEKFMVESGASRSLTILGLTLEDAGQVTEAEGASSAALRVREAPVLFKKKLEPQT
VEERTSVTLEVELTRPWPEVKWTRNAAVLTPSENVEIRAEGARHCLVLRVSGFADRGGFCETPDDKTQAKLN
VEMRQVRLVVRGLQEVEAKEQGTASMDVELSHAEVEGSWTRDGLRLQPGPKCHLAVQGPVHILTLALSALQPQDSG
LVAFRAEGVHTSARLIVTELPVSFTRVLQDVVATQKEKVTLECELSRPVDVRWLKDGVELRAGKAIIGIVAQGT
CRSLVIYRCETGDQGVYCDALDAQTSASLRVQGRYTLIFRRVLAEDAGEVKFVAENAESRAHLRVKELPVT
LLRPLRDKIAMEKHRGVLECCQVSRASAQVRWFKGGVELQSGPKYEVVSDGLYRKLVIINDVQPEDEDTYTCDAG
NVKTSAQFFVVEEQSITIVRGLKDMTVMEPAPAWFECETSIPSVRPPKWLKGKTVLQAGGNVLEQDGTVHRLT
LHKTCSTMTGPVHFTIGKSRSSAQLVVS DIPVVLTRPLEPKAGRELQSVVLSCDFRPAPKAVQWYKDDTPLSP
SEKFKMALEGQMAELRILRLTPADAGVYRCQAGSAQSSAEVTVAREVTVIQPLQDAEAMEEGRVCFSCELSH
KDEDIEWLNGLTPLYNDSFHEISHGCLHTLVLSKVRQADTGTVCATSPKVSVSARLVVKGKPVFLKALDDV
SAEERGLTLTQCEVSDPEARVVWRKDGVELGSPDKYDFLHKAGARGLTVHDLSHEDAGLYTCQVVGSKETQSKV
SVHDLHVGITKRLKTVLEVLEGESCSFECVLSHESPSDPAVWTVGGKTVGGSGHFHAVRQGRKYTLTVKDAALS
DAGEVVFVSVLGLTSKASLIIRERPVDITKPLEDQRTTLGEDVMLSCELSRAGTSVRWLKDGKAIKRSQKYDLL
SEGTRAVLVVRKASLKDSGEYTCETEASKSTAKLCVEEKANRFTEELADLQVEEKGRAVFTCKTEHPASVVTW
RKGLLELRASGKHVPSQEGTLKLTINALERTSDTYTCDIGQARTQARLLVHGQKVRVIEDLEDTAVQEGSS
AKFCCRIAPADYGPVHFLDKTPLHSNELNEITVQPGGYHVLTLRQLALKDSGTVYFEAGDQRTSAAALRVTEK
PSIFSRPLTDVTVTEGEDTLVCETTTTVDSSVRWTKDGKTLRPSARCQLSHEGCAQLLITATTPQDGGRYKC
EIGGASSSSIVRVHALPVRFRFRESLKDVEVPEGKAATLRCVLSVAAPVEWRHGDDVLKSSNKYSLRQEGAVLE
LVIRDLQPDQSGQYSCSFGDQTTSATLTVKTSQAQVFGKLRNKEATEGTTVTLRCELTKEAPVEWVKGTETLR
NGDKYSLKQDGAUCELVICSLLVADAGEYSCVCGQEKTSATLTVKALLVHFVRRRLRSKEATEGDTTTLQCELS
KAAPVEWRKGTETLRDGDYSLKQDGAUCELQIRSLTIADAGEYLCTCGQEKTSATLTVRGLPAKFIEDLRSQ
EATEGATAILRCELSKAAPVEWRKGTETLRDGDYSLRQDGAUCELQIRGLAVVDTGTYSLPTKFTTEGLRNE
EATEGTMATLRCQMSKAAPVEWRKGTETLRDGDYSLRQDGAUCELQIRGLTIEDSGEYTCVCGQEKTSATLS
VKALPPRFIEDLRSQEATEGTMATLRCQMSKAAPVEWRKGTETLRDGGGRYSLRQNGAVCELOIHLAVEDTGE
YSCVCGQEKTSATLNVKALPPKFTTEGLKKEEATEGTMVTLRQMSKEATVEWRKGAKTLSDGGRYSLRQDGA
CELQICGLAVEDAGEYSCVCGQEKTSATLSVKALPPRFIEDLRSQEATEGTMATLRCQMSKAAPVEWRKGTET
LRDGDYSLRQDGAUCELQIRDLAVEDAGEYLCVCGQEKTSATLSVKALPPRFIEDLRSQEATEGTMATLRCQ
MSKAAPVEWRKGTETLRDGDYSLRQDGAUCELQICDLAVEDTGDYSCVCGQEKTSATLSVKAPQVVFQOPLQ
NLQAEEGSMASLRCELSVPNAAMVWSKGGLELQGDTRREARQQGCVAEILLRDLRREDAGEYSLCTGSAQTTSA
TLMVTAAPVRFRLRELQAQDVDEGATARLRCELSREAVSVEWRKGSLLQFPKAKYQMVQEGTTAELLVHGVQE
DAGEYTC DAGHTQSIARLSVRAPKPKFKTDLQSTEQEAGGTARLCCQLSEAEPGTPVQWLKEGVELHVGSKYE
MRRQGAUCELLIHGLEAKDTGEYACLVGQKTLASLRVKEPEVTIVRGLVDMEVQADEDEFTCKVSOAGATD
VQWHLQGLPLQSNEVTEVAVLADGCTHVLQKGVTLLEDAGTVSFHVGGSSSAQLTVRVPEVTVLEPLKDVQL
SEGQDAHFRCLSRASGQEARWALGGVPLQCNEMNITVEQGTLYLLTLHKVTLEDAGTITLQVGCSSSEAQL
KVTAKNTVLRGLENVDALEGGEALFECQLSQPEVAHTWLLDDEPVHTSEKVEVVYFENGLRHLKLNKLPQ
DSCRVTFLAGDVVTS AFLTVRGRWLEVLEPPHDASVKAGMQVRFTCILSEAVPVGEATWYINGAAIQPDDTDW
TVTTDGGSHHALTLSNAQPQHAGEVTF AARDAVASARLSVLALPDPEDAEEVGRSDHSVTLWSVAPMSDGGGG
LCGYRVEMKEASTGQWQLCHDLVPGPECVVDDLVPKTYRFRVAAVGPAGAGEPVHLPQMVKIAPAPAPAPAP
APAPETRQAVVGEDICLELEVAADGGEVWHKGTERRIQPGGHFEVLSRGRQMLVIKGFRTEDQGEYRCGP IQ
GLPSSGAATFNVVMTSGSGDEVPAQPSLPPEAAQEGDLHLLWEALARKRRMSREPTLDSISELPEEDSRVQHL
RQEAETAPDLSEGYSTADELARTGEADLSHTSSDDESRAGTPSLVTYLKKAGGPGISPLASKHEAQVTTSVK
PQKQQEPVVPTCPPPGDLSAADLMDPSLDKAAVKIQAFAFKGYKVRKEMKQOEGPVFSRTFGDTEAQVDVLR
ECVLATKTDMRACWLKDGIELTDGRHYHIDQLKDGTCSSLVTLGLAPTD SGRYTCQVSTKSGRVSHSACVVVSG
TESEAESSSGELDDAFRRARRLHRLFRTKSPAELSEELFLSADEGPGEPEEPADWQTYREDEFVFCIRFE
SLAEARQAVTCFRNMFATMGIGVEISLGEQGPGRVEMRIGKEAPTVPVAVPLAKTPGLQTSDAAPVFLTELQN
QDVQDGYPMSFDCVVTGQVPVSVRWFKDGKLLLEEDDHYMINEQDQGGHQLIITAVVPADMGVYRCLAENSMGV
SSTKAELRVELTSTDYDTAADATESTSYFSAQGYLSREVEGETESDEGQLPQVLEELKDLQVAPGTRLAKFQL
KVKGYPAKPLYWFKDQPLTSDHIRMTDKKTLTLEIRVSVTREDSGQYAAAYISNAVGAAYSSARLLVVRGPSE
PEEKPASDVHERLVPVPRILEKFTPKKVKRGSSITFSVKVEGHPAPSVHVLKKEEAKEKGLWIGPDPGTYTMASS
SKQHSVLVLDVGRQHOGTYTCIATNPAGQALCSASLHISGLAKEEEQERVKEALISSFLQGTSAVSAQMSSES
AGFADLVGQSKGESLVAEEAHSHLSLAEVGT EEFLLQKLT SQITEMVSAKISQAKLQVPGGDSDEETKTPSASP



RHGRSRPSSSVQESSSESEDGDSRGEIFDIYVVTADYLPLGAEQDAIILREGQYVEVLDSAHPLRWLVRTKPT  
 KSSPSRQGWVSPAYLDKRLKLSPEWGPTEAPEFPGEAVSEDEYRTRLSSVIQELLSSEQAFVVELQFLESHHM  
 KHLERSPRVPAAVASQKTVI FRNVQDI SHFHSSFLKELQCGCTDDDDVAMCFIKNQEAFEKYLEFLVGRVQAES  
 VVVSTPVQEFYKKYAETLSAKDPTQPPPPPLQHYLEQPVERVQKYQALLKELIRNKARNRQNCALLEQAYAV  
 VSALPQRAENKLVSLMENYPGTLEALGEP I RQGHFIVWEGAPGARMFWKGNHRHVFLFRNYLVI CKPRRDSR  
 TDTFSYVFRNMMKLSSIDLNDQVEGDDRAFEVWHEREDESVRKYLLQARTVI IKNSWVKEICGIQQRLAQPVWR  
 PPEFEEELADCTAELGETVKLACRVGTGPKPIVSWYKDGKPVVDPHHILIEDPDGSCSTLI LDNLGTIDSGQY  
 MCFASAAGNASTLGKILVQVPPRFVNVKVRATPFVEGEDAQITCTVEGAPYPQIRWYKDGTL LAPGNRYRMLN  
 EPRSGVLVLIQAASKEDLGHYECELVNRIGSTRGGGELYMQSPALRARDQHHRREQIVAAVEVTEQETKVPKK  
 TVIIEETITTVVKS PRGRRQSPGKSPSRSPRRSASPRRPGLLAPERLYPPGTSPSRRLVEVEQGRKAPVPALY  
 VTEAEVHAPASQSQPKWLEVEETIEVRVKKTGSRGASPVREMTSRGEGILFTLPGGIPGRDPNANNNSNKS SVY  
 QEARTWGPVAVHVGEFFIFQVDSVGNVDWVAASPEPEQVRASQKEENTERQEGCSDGDENTFLMEEPQD TDSL  
 QGRDPKILTHNGRVLTLADLEDYVPOEGETFGCGDSTPSTPDEPPCEVSVLQREI SEPTVQGPVLLNVGRPPG  
 TGATPSFFRPGSQVHSPESVSFLLREAWSGPVSAAPWTSSFHTHVQSSVDGSHGSFKTEVSTQTVSFGAVGET  
 VTLHIDPDGGEAPGPSQG\*

>rs46464091\_ENSMUSP00000158795\_c.17377:A>G\_p.K5793R

ENSMUST00000238536.2|Obscn-210|ENSMUSG00000061462|-|chr11:g.58929996:T>C  
 MDHSFSGAPRFLTRPKAFVSVGKDATLSCQIVGNPTPHVSWEKDRQPVEAGARFLAQDGDVYRLTILDLAL  
 GDSGQYVCRARNAIGEAFAAVGLRVDSEGTCAEQAPHFLLRPTSIRVREGADATFRCRVGGSPQPAVSWSKDG  
 RRLGPPDAPHVRVEEHGESSALRIRSARPRDGGTYEVRAENPLGSASAAAALVVDSDAEVAGPPGTSTATLLA  
 HLQORREAMRAEGIPPSPPGAGTRTCTVTEGKHARLSCFVTGEPKPEVWKKDGLVTEGRRHVVEDEQENF  
 VLKILFCKQSDRGLYTCTASNLVGQTYSSVLVVREPTVPFKKRLQDLEVREKESATFQCEVAQPAEAWFK  
 EETRLWASAKYDIEEGETERRLTVRNVSADDDAVYICETTEGSRVVAELSVQGNLTKLPRKTAVRTGDTAIF  
 WVELAVPEGPVWRWRNQEEMVAGGRVAITAEGTCHTLTI FQCTLEDMGEVAFVSGGCRTTTQFCVSAPRRPPL  
 YPPADPVVKAKTESSVTLWSAPPHGDRPVTIDGYVLEKRKLGAYAWSRCHEAGWLATTEFTITGVAEEGDFQ  
 FRVSAINHFGQGPYLEFPGTMHLVPM LAVKTPKVAEAVEGGEVTFVSDLTVASSGEVFLDGEALKASSIYVI  
 RCDRTRHMLTIREVPARLHGAQLKFFVANGIETS IQMVVRAALGLPSSSKLPAAAAREVLAQLHHEEAQLLAE LSD  
 QAAA VTLWKDGRELSLGPKYEMQVSAGRRALLVRDVAQDDAGLYECVSRGSRRTAYQLLVQDITDGYRDWGPAG  
 PQKHMCKCAGAKIARYLGSSCYRFLQYDKGVWHLEAALDTRQKGKTS SCSLHEKPKLVFAKQQAHSEVKA E  
 AGNSATLSCEVTQAQTEVTWFKDGKLLSSSSKVRMEASGCSRRLVVQQAGKADAGEYSCEAGGQKLSFRLDVA  
 EPKLVFAKQQAHSEVKA EAGASATLSCEVAQAQTEVTWFKDGKLLSSSSKVRMEASGCSRRLVVQQAGKADA  
 GEYSCEAGGQKLSFRLDVAEPKMVFAKEQQARSEVKA EAGASATLSCEVAQAQTEVTWFKDGKLLSSSSKVRM  
 EASGCSRRLVVQQAGKADAGEYSCEAGGQKLSFRLDVTEPKLVFAKEQQARSEVKA EVGNSATLSCEVAQAQ  
 EVTWFKDGKLLSSSSKVRMEASGCSRRLVVQQAGKADAGEYSCEAGGQKLSFRLDVAEPKLVFAKEQQARSE  
 KAEAGNSATLSCEVAQAQTEVTWFKDGKLLSSSSKVRMEASGCSRRLVVQQAGKADAGEYSCEAGGQKLSFHL  
 DVTEPKLVFAKEQQAHSEVKA EAGASATLSCEVAQAQTEVTWFKDGKLLSSSSKVRMEASGCSRRLVVQQAGK  
 ADAGEYSCEAEGQKLSFRLDVAEPKLVFAKEQQARSEVKA EAGASATLSCEVAQAQTEVTWFKDGKLLSSSSK  
 VRVEASGCSRRLVVQQAGKADAGEYSCEAGGQKLSFRLDVAEPKLVFAKEQQANSEVKA EAGASATLSCEVAQ  
 AQTEVTWFKDGKLLSSSSKVRVEASGCSRRLVVQQAGKADAGEYSCEAGGQKLSFRLDVAEPKLVFAKEQQAH  
 SEVKA EAGASATLSCEVAQAQTEVTWFKDGKLLSSSSKVRVEASGCSRRLVVQQAGKADAGEYSCEAGGQKLS  
 FRLDVAEPKLVFAKEQQAHSEVKA EAGASATLSCEVAQAQTEVTWFKDGKLLSSSSKVRVEASGCSRRLVVQQ  
 AGKADAGEYSCEAGGQKLSFRLDVAEPKLVFAKEQQAHSEVKA EAGASATLSCEVAQAQTEVTWFKDGKLLSS  
 SSKVRVEASGCSRRLVVQQAGKADAGEYSCEAGGQKLFRLDVAEPKLMFAKEQQAHSEVKA EAGASATLSCE  
 VAQAQTEVTWFKDGKLLSSSSKVRVEASGCSRRLVVQQAGKADAGEYSCEAGGQKLSFRLDVAEPKLVFAKEQ  
 QAHSEVKA EAGASATLSCEVAQAQTEVTWFKDGKLLSSSSKVRVEASGCSRRLVVQQVQKADAGEYSCEARGQ  
 KLSFRLDVADTRLMFAKEQQARTEVKA EAGNSATLSCEVAQAQTEVTWFKDGKLLSSSSKVRVEASGCSRRLV  
 VQQAGKADAGEYSCEAGGQKLSFRLDVAEAE SQIPERPSRREPLVVKEHETIILTATIAAPSVAAVTLWKDGV  
 EIRRSKRHEATSLGDTHTLTVRGAQVLD SAIYSCRVGKEGQDFPVQVEEVA AKFSKPLEPVEGELGGTVMLVC  
 ELSPEQAEVWRCGNTQLRPGKRFQMTSEGPRRTLTVSGLREDDAEYVCE SRDDRTSARLTVKVP RVVKFTS  
 GLSAMVAEEGQEATFQCVVSPSDAGVTWYKDGMLQPSKFMVMEVSGASRSLTILGLTLEDAGQVTVAEAGAS  
 SSAALRVREAPVLFKKLEPQTV EERTSVTLEVELTRPWPEVKWTRNAAVLTPSENVEIRAEGARHCLVLR SV  
 GFADRGGFFGCETPDDKTQAKLNVEMRQVRLVVRGLQVEEAKEQGTASMDVELSHAEEVGSWTRDGLRLQPGPKC  
 HLAVQGPVHILTLALSALPQDSGLVAFRAEGVETSGARLIVTEL PVSFTRVLQDVVATQKEKVTLECELSRPVDV  
 RWLKDGENELRAGKAI GIVAQGTCSRSLVIYRCVETGDQVYVCDALDAQTSASLRVQGRTYTLIFRVLAEADAGE  
 VKFVAENAESRAHLRVKELPVTLRLRDKIAMEKHRGVLECCQVSRASAQVRWFKGGVELQSGPKYEVVSDGL  
 YRKLVINVDQPEDEDTYTC DAGNVKTS AQFFVEEQSITIVRGLKDMTVMEPAPAWFECETSIPSVRPPKWL LG  
 KTVLQAGGNVGLQDGTVHRLTLHKTCSTMTGPVHFTIGKSRSSAQLVSDI PVVLRPLEPKAGRELQSVVL  
 SCDFRPAPKAVQWYKDDTPLSPSEKFKMALEGGQMAELRILRLTPADAGVYRCQAGSAQSSAEVTV EAREVTVI

QPLQDAEAMEEGRVCFSCELSHKDEDEIWSLNGTPLYNDSFHEISHEGCLHTLVLKSVRQADTGTVCATSPKV  
 SVSARLVVKGKPVVFLKALDDVSAEERGLTLTQCEVSDPEARVVRKDGVELGSPDKYDFLHKAGARGLTVHD  
 LSHEDAGLYTCQVGSKETQSKVSVHDLHVGITKRLKTVEVLEGESECSFECVLSHESPSDPAVWTVGGKTVGGS  
 GHFHAVRQGRKYTLTVKDAALSDAGEVVFVSVLGLTSKASLIIRERPVDIITKPLEDQRTTLGEDVMLSCELSRA  
 GTSVRWLKDGKAIRKSQKYDLLSEGTRAVLVVRKASLKDSGEYTCETEASKSTAKLCVEEKANRFTEELADLQ  
 VEEKGRAVFTCKTEHPASVVTWRKGLLELRASGKHVPSQEGTLTKLTINALERTDSDTYTCDIGQARTQARLL  
 VHQQKVRVIEDLEDTAVQEGSSAKFCRIAPADYGPVHWFLDKTPLHSNELNEITVQPGGYHVLTLRQLALKD  
 SGTVYFEAGDQRTSAALRVTEKPSIFSRPLTDVTVTEGEDTLVCEETTVDSSVRWTKDGKTLRPSARCQLSH  
 EGCQAQLLITATTPQDGGRYKCEIGGASSSIVRVHALPVRFRESLKDVEVPEGKAATLRVLSVAAPVEWR  
 HGDDVLKSSNKYSRQEGAVLELVIRDLQPDQSGQYSCSFGDQTTSATLTVKTSQAQFVQKLNKEATEGTTV  
 TLRCELTKAPVEWKKGTETLRNGDKYSLKQDGAVCELQICSLLVADAGEYSCVCGQEKTSATLTVKALLVHF  
 VRRLRSKEATEGDTTTLQCELSKAAPVEWRKGTETLRDGDYSLKQDGAVCELQIRSLTIADAGEYLCTCGQE  
 KTSATLTVRALPAKFKDSLKNEEATEGTTATLSCELSKAAPVTWKKGPKTLQSGDKYVLRQDGAVCGLQIHGL  
 TMADAGEYSCVCGQEKTSATLTVRGLPAKFIEDLRSQEATEGATAILRCELSKAAPVEWRKGTETLRDGDYSL  
 LRQDGAVCELQIRGLAVVDGTYSLSLPTKFTTEGLRNEEATEGTMATLRCQMSKAAPVEWRKGTETLRDGDYSL  
 LRQDGAMCELQIRGLTIEDSGEYTCVCGQEKTSATLSVKALPSRFIEDLRSQEATEGTMATLRCQMSKATAPVE  
 WKKGSETLRDGGYSLRQDGPVCELQICDLAVEDAGEYSCVCGQEKTSATLSIKALPPRFIEDLRSQEATEG  
 MATLRCQMSKAAPVEWRKGTETLRDGGYSLRQNGAVCELQIHDLAVEDTGEYSCVCGQEKTSATLNVKALPP  
 RFIEDLRSQEATEGTMATLRCQMSKAAPVEWRKGTETLRDGGYSLRQDGAVCELQIHDLVEDAGQYSCVCG  
 QEKTSAVLTVDALPPKFTTEGLKKEEATEGTMVTLRCQMSKEATVEWRKGAKTLSDDGGYSLRQDGAMCELQIC  
 GLAVEDAGEYSCVCGQEKTSATLSVKALPPRFIEDLRSQEATEGTMATLRCQMSKAAPVEWRKGTETLRDGD  
 YSLRQDGAVCELQIRDLAVEDAGEYLCVCGQEKTSATLSVKALPPRFIEDLRSQEATEGTMATLRCQMSKAAP  
 VEWRKGSKTLRDGDYSLRQDGAMCELQICDLAVEDTGDYSCVCGQEKTSATLSVKALPPRFIEDLRSQEARE  
 GTVATLRCRMSKAAPVEWRKGTETLRDGDYSLRQEGNLCELQIRDLAVEDTEEYSCVCGQEKTSATLSVKAL  
 PAKFIEDLRSQEAPESSTVTLRCKLSKASVWKKGSETLRNGARYSLRQDGAVCELEIRDLTVEDTGEYSCT  
 CGQERTSATLSIMAPQVVFQQPLQNLQAEEGSMASLRELSVPAAMVWSKGGLELQGDTRREARQQGCVAEL  
 LLRDLRREDAGEYSCVCGQEKTSATLMTVAAPVFLRELQAQDVDEGATARLRCELSREAVSVEWRKGSVQLF  
 PCAKYQMVQEGTTAELLVHGVEQEDAGEYTCDAHGTSIARLSVRAPKPKFKTDLQSTEQEAGGTARLCCQLS  
 EAEPGTPVQWLKEGVELHVGSKYEMRRQGAVALLEIHLGLEAKDTGEYACLVGGQKTLASLRVKEPEVTIVRGL  
 VDMEVQADEDEFTCKVQAGATDVQWHLQGLPLQSNVTEVAVLADGCTHVLLQKGVTLLEDAGTVSFHVGG  
 SSSAQLTVRVPEVTVLEPLKDVQVLESEGQDAHFRCRLSRASGQEARWALGGVPLQCNEMNDITVEQGTLYLLTL  
 HKVTLEDAGTITLQVGSSEEAQLKVTAKNTVLRGLENVDALEGGALFECQLSQPEVAHAHTWLLDDEPVHTS  
 EKVEVVYFENGLRHLLLLKNLKPQDSCRVTFLAGDVVTSFAFLTVRGWRLEVLPPHDA SVKAGMQVRFCTILS  
 EAVPVGEATWYINGAAIQPDDTDWTVTTDGSHHALTL SNAQPQHAGEVTF AARDAVASARLSVLALPDPPEDA  
 EVVGRSDHSVTL SWVAPMSDGGGLCGYRVMKEASTGQWQLCHDLVPGPECVVDDLVPKGYRFRVAAVGPA  
 GAGEPVHLPQMVKIIAPAPAPAPAPAPAPAPETRQAVVGEDICLELEVAADGGEVVWHKGTERTIQPGGHFEVLS  
 RGQRQMLVIKGFRTEDQGEYRCGPIQGLPSSGAATFNVMVMTSGSGDEVPAQPSLPPEAAQEGDLHLLWEALAR  
 KRRMSREPTLDSISELPEEDSRVQHLRQEAEEETAPDLSEGYSTADELARTGEADLSHTSSDDESRACTPSLVT  
 YLKKAGGPGISPLASKHEAQVTSVRPQKQEPVPTCPPPGDL SAADLMDPSLDKAAVKIQAAFQYKVRKE  
 MKQQEGPVFSRTFGDTEAQVGDVLRLECVLATKTD MRACWLKDGIELTDGRHYHIDQLKDGTCSLLVTLGLAPT  
 DSGRYTCQVSTKSGRVSHSACVVVSGTESEAESSGGELDDAFRAARRLHRLFRTKSPAELSEELFLSADE  
 GPGEPEEPADWQTYREDENFVCIRFESLAEARQAVTCFRNMFMATMGIGVEISLGEQGPGRVEMRIKVAPTVT  
 PAVPLAKTPGLQTSDAAPVFLTELQNDVQDGYPMSFDCVVTGQPVPSVRWFKDGKLEEDDHYMINEDQQGG  
 HQLIITAVVPADMGVYRCLAENSMGVSSTKAELRVELTSTDYDTAADATETSSYFSAQGYLSSREQEGTESDE  
 GQLPQVLEELKDLQVAPGTRLAKFQLKVKGYPAKPLYWFKDGGPLTTS DHIRMTDKKTLHTLEIVSVTREDSG  
 QYAAYSNAVGAAYSSARLLVRGPSEPEEKPASDVHERLVPPRILEKFTPKKVKRGSSITFSVKVEGHPAPSV  
 HWLKEEAKEKGVWLGPDTPGYTMASSSKQHSLVLLDVGRQHGTQYTCIATNPAGQALCSASLHISGLAKEEEQ  
 ERVKEALISSFLQGTSAQVSAQMSSESAGFADLVGQSKGESLVAEEAHSHLSLAEVGTEEFQKLTSTQITEMVS  
 AKISQAKLQVPGGDSDEETKTPSASPRHGRSRPSSSVQESSSESEDGDSRGEIFDIYVVTADYLP LGAEQDAI  
 ILREGQYVEVLD SAHPLRVLVTKPTKSSPSRQGWVSPAYLDRKRLKLSPEWGPTEAPEFPGEAVSEDEYRTRL  
 SSVIQEELLSSEQAFVQELQFLESHHMKHLERSPRVPAAVASQKTVIFRNVQDISHFHSSFLKELQCGCTDDDV  
 AMCFIKNQEAFAKEYLEFLVGRVQAESVVVSTPVQEFYKKYAEETLSAKDPTQPPPPPLQHYLEQPVERVQKYQ  
 ALLKELIRNKARNRNYNCALLEQAYAVVSALPQRAENKLVSLMENYPGTLEALGEPRIQGHFIVWEGAPGARM  
 PWKGHNHVVFLFRNLVICKPRDRSRTDFTFSYFRNMMLKSSIDLNDQVEGDDRAFEVWHEREDSVRKYLLQA  
 RTVVIKNSVVKIEICGIQQLAQPVWRPPEFEEELADCTAELGETVVKLACRVTGTPKPIVSWYKDGKPVVEVDPH  
 HILIEDPDGSCTLILDNLTGIDSGQYMCFAASAAGNASTLGKILVQVPPRFVNVKVRATPFVEGEDAQITCTVE  
 GAPYPQIRWYKDGTL LAPGNRYRMLNEPRSGVLVVIQAASKEDLGHYECELVNRLGSTRGGGELYMQSPALR  
 ARDQHHREQIVAAVEDTSVEGSAHSAQDQGAASVLRLLGSEALGSPSGDLPNTRQSEPPAFEEAASQIP

GAASGTPEVSPQPGTHKGLEQETTSSGSQGWTPVIRVEGTAWPGAGTGQLLLDVHSQVIMETTQRTYVQCQAPDT  
GVTRAPSMQVTTIEDVQVQVGDMAQFDAVIEGHPPPIVWTYKGSTQLTSSARLSQRQDGTYSVLVTDVAPHDA  
GVYTCVANNAGGQVLCKAELLVHGGDKLDAENQVYRRKLHSFYDVQEEIGRGVFGFVKRVQHKGNKMFCAAKF  
IPLRSKTRAQAYQERDILATLGHPLVLTGLLDQFETRKTLLILILELCSSEELLDRFLFKKGVVTEAEVKVYIQQL  
VEGLHYLHSHGILHLDIKPPNILMVHPAREDIKICDFGFAQKITPSEFPQYSKYGSPEFVSPEIIEQNVPVSEGS  
DIWAMGVISYLSLTCSSPFAGESDRATLLNVLEGRVSWSSPTAAHLSSEDAKDFIKATLQRTPRARPSTSQCLA  
HPWFLKSMPEAAEHFINTKQLKFLARSRWQRSLMSYKSILVMRSIPPELLQGPDPSPSLGVARHLRGEASGAS  
SSSSSSDNELAPFARAKSLPPSPVTHSPLLHPRGFRLRPSASLPEETEASMPPTADAAPVSPQASGPPASPGCV  
PRHSVSSLFYQQAGEGAERGNKTSGAKRHPARRRHLKGGYIARALPGLREPLMEYSLLEEEAAREEQASLM  
TKTPSFETALRPLSSSVREVPGRSHSLDNPVTTGPSPEACKEQLLFPSTGLTHETHTAKDRGHKEGFLQESV  
PFPPMSGDSRPGKQEGSSQDSCRGKPASSCHSELGSGSQEGCGPPSSQSLGSLPPQSLKKEKELSTSCGPLFSEQ  
PQAAPFPPTQVSPLLGSEKEPQDGLSEGPVVPVSSSPGSASQVDASLDTEGLSEAGDTCDFTPPPQRPQEQAT  
TRKFSLESRGGYAGVAGYGTFAFGGDAGGMLGQGPLWARMAWAVSQSSEEQDEAATESPQPLESGLPIAEASG  
VPLRTSPSLTPWEEVEQVSLVQIRDLSGDAEAADTISLDISEVDPAYLNLSDLYDIKYLPEFEMI FRRVVKPI  
EQPESPGSETEAGQGLADFLLEAAWPWPGELGLRAGLEITEEPEEPGDLEALLGEAAVGRKRKWSPSRGLFQF  
PGRCLSGEEPVELGLRQVRKASMAHISRILKGRPEGPEREGPPRKKAGLASFRLSGLKGRDQELSDEAVVLGQ  
SVTLACQVLAQPTAQATWSKDGVLLESSGHLLISSTLKNFQLLTIILVVKEEDLGTYTCCVSNPLGTAVTTGVL  
RKAERPSSSPRPEVGEVLYKDAVLLVWKPVESCGPVTYIVQCCIEGGSWTTLASDISDCCYLTGKLSRGGMYIF  
RTACVSKAGMGPISSPSEQVLLGGPNHLASEEESRRGRPAQLLPSTKTFAFQMQRIRGRFVSVRQCREKASGR  
ALAAKIVPYQPEDKTAVALREYEAALKRLHHPHLAQLHAAYLSPRHLVLIILELCSGPELLPSLAERESYSESDVK  
DYLWQMLSATQYLHAQHIHLDLRSENMMVTEYNLLKVIDLGNALDQEKVPAPENFKDYLETMAPELLEGGQ  
GAVPQTDIWAIGVTAIFIMLSGEY PESSSEGTDLQKGLRKLIRLSRCYAGLSGGAVAFLOSSLCAQPWGRPCA  
STCLQCGLWTEEGPTGSRPTPVTFPTVRLRAFAVREKRRALLYKKNLAQVR\*  
>rs46464091\_ENSMUSP00000038264\_c.15217:A>G\_p.K5073R  
ENSMUST00000047441.14|Obscn-202|ENSMUSG00000061462|-|chr11:g.58929996:T>C  
MDHSFGSAGPRFLTRPKAFVSVGKDATLSCQIVGNPTPHVSWEKDRQFVEAGARFRLAQDGDVYRLTILDLAL  
GDSGQYVCRARNAIGEFAAAGLVRVDSGTCQCAEQAPHFLLRPTSIRVREGADATFRCRVGGSQPAAVSWSKDG  
RRLGPPDAPHVRVEEHGESSALRIRSARPRDGGTYEVRAENPLGSASAAAAALVVDSDAEVAGPPGTSTATLLA  
HLQORREAMRAEGIPPSPPGAGTRTCTVTEGKHARLSCFVTGEPKPKETVWKKDQGLVTEGRRHVVEDEQENF  
VLKILFCKQSDRGLYTCTASNLVGQTYSSVLVVVREPTVPFKKRLQDLEVREKESATFQCEVAQAPATEAAWFK  
EETRLWASAKYDIEEEGTERRLTVRNVSADDDAVYICETTEGSRVAELSVQGNLTKLPRKTAVRTGDTAIF  
WVELAVPEGPRWLRNQEEMVAGGRVAITAEGTCHTLTI FQCTLEDMGEVAFVSGGCRTTTQFCVSAPRRPPL  
YPPADPVVKAKTESSVTLWSAPPHGDRPVTIDGYVLEKRLKLGAYAWSRCHEAGWLATTEFTITGVAAEEDGFQ  
FRVSAINHFGQGPYLEFPGTMHLVPLAVKTPKAVEAVEGGEVTFVSDLTVASSGEWFLDGEALKASSIYVI  
RCDRTRHMLTIREVPARLHGAQLKVFANGIETS IQMVVRAALGLPSSKLPAAAAREVLAQLHHEAQLLAELSD  
QAAAVTWLKDGRELSLGPKEYMQVSAGRRALLVRDVAQDDAGLYECVSRGSRRTAYQLLVQDITDGYRDWGPAG  
PQKHMCKCAGAKIARYLGSSCYRFLQYDKGVVHWEAALDTRQKGKTS SCSLHEKPKLVFAKQQAHSEVKA  
AGASATLSCEVAQAQTEVTFWKDGGKLS SSKVRMEASGCSRRLVVQQAGKADAGEYSCEAGGQKLSFRLDVA  
EPKMFVFAKEQQARSEVKAEGASATLSCEVAQAQTEVTFWKDGGKLS SSKVRMEASGCSRRLVVQQAGKAD  
GEYSCEAGGQKLSFRLDVTEPKLVFAKEQQARSEVKAEGVNSATLSCEVAQAQTEVTFWKDGGKLS SSKVRM  
EASGCSRRLVVQQAGKADAGEYSCEAGGQKLSFRLDVAEPKLVFAKEQQARSEVKAEGNSATLSCEVAQAQ  
EVTWFKDGGKLS SSKVRMEASGCSRRLVVQQAGKADAGEYSCEAGGQKLSFRLDVTEPKLVFAKEQQAHSEV  
KAEAGASATLSCEVAQAQTEVTFWKDGGKLS SSKVRMEASGCSRRLVVQQAGKADAGEYSCEAGGQKLSFRL  
DVAEPKLVFAKEQQARSEVKAEGASATLSCEVAQAQTEVTFWKDGGKLS SSKVRVEASGCSRRLVVQQAGK  
ADAGEYSCEAGGQKLSFRLDVAEPKLVFAKEQQANSEVKAEGASATLSCEVAQAQTEVTFWKDGGKLS SSK  
VRVEASGCSRRLVVQQAGKADAGEYSCEAGGQKLSFRLDVAEPKLAFAKEQQAHSEVKAEGASATLSCEVAQ  
AQTEVTFWKDGGKLS SSKVRVEASGCSRRLVVQQAGKADAGEYSCEAGGQKLSFRLDVAEPKLAFAKEQQAH  
SEVKAEGASATLSCEVAQAQTEVTFWKDGGKLS SSKVRVEASGCSRRLVVQQAGKADAGEYSCEAGGQKLS  
FRLDVAEPKLAFAKEQQAHSEVKAEGASATLSCEVAQAQTEVTFWKDGGKLS SSKVRVEASGCSRRLVVQQ  
AGKADAGEYSCEAGGQKLFRLDVAEPKLVFAKEQQAHSEVKAEGASATLSCEVAQAQTEVTFWKDGGKLS  
SSKVRVEASGCSRRLVVQQVQKADAGEYSCEARGQKLSFRLDVAEAEESQIPERPSRREPLVVEKHETIILTAT  
IAAPSVAAVTWLKDGVIEIRRSKRHEATSLGDTHTLTVRGAQVLD SAIYSCRVGKEGQDFPVQVEEVAAKFSK  
LEPVEGELGGTVMLVCELSPEQAEVWRCGNTOCVLRPGKRFQMTSEGPRTLTVQLGREDDAEYVCESRDDRT  
SARLTVKVPVVKVFTSGLSAMVAEEGQEAFTQCVVSPFDAGVTWYKDMQLOPSEKFMVESGASRSLTILGL  
TLEDAGQVTVEAGASSAALRVREAPVLFKKKLEPQTVEERTSVTLEVELTRPWPEVVKWTRNAAVLTPSENV  
EIRAEGARHCLVLRVGFADRGFFGCETPDDKTQAKLNVEMRQVRLVVRGLQEVEAKEQGTASMDVELSHAEVE  
GSWTRDGLRQLQPGPKCHLAVQGPVHILTSLALQPQDSGLVAFRAEGVHTSARLIVTELVPVSTRVLDVVATQ  
KEKVTLECELSRPVDVRWLKDGVELRAGKAI GIVAQGTCSRSLVIYRCETGDQGVYVCDALDAQTSASLRVQGR

TYTLIFRRVLAEDAGEVKFVAENAESRAHLRVKELPVTLLRPLRDKIAMEKHRGVLECVSRASQAQVRFKGG  
VELQSGPKYEVVSDGLYRKLVINOVPEDEDYTCDAENVKTSAQFFVEEQSITIVRGLKDMTVMPEPAPAWFE  
CETSIPSVRPPKWLKGTVLQAGNVGLEQDGTVHRLTLHKTCSTMTGPFVHFTIGKSRSSAQLVVSIDI PVVLT  
RPLEPKAGRELQSVVLSCDFRPAPKAVQWYKDDTPLSPSEKFKMALEGQMAELRILRLTPADAGVYRCQAGSA  
QSSA EVTVEAREVTVIQPLQDAEAMEEGRVCFSCELSHKDEDEIWSLNGTPLYNDSFHEISHEGCLHTLVLKS  
VRQADTGTVCATSPKVSVSARLVVKGKPVVFLKALDDVSAEERGTLTLQCEVSDPEARVVWRKDGVELGPSDK  
YDFLHKAGARGLTVHDLSDHEDAGLYTCQVGSKETQSKVSVHDLHVGITKRLKTVEVLEGESECFVLSHESP  
SDPAVWTVGGKTVGGSGHFHAVRQGRKYTLTVKDAALSDAGEVVFVSLGLTSKASLIIRERPVDI TKPLEDQR  
TTLGEDVMLSCELSRAGTSVRWLKDGKAIKRSQKYDLLSEGTRAVLVVRKASLKDSEYTCETEASKSTAKLC  
VEEKANRFTEELADLQVEEKGRAVFTCKTEHPASVVTWRKGLLELRASGKHVPSQEGTLTKLTINALERTDSD  
TYTCDIGQARTQARLLVHGQKVRVIEDLEDTAVQEGSSAKFCCRIPADYGPVHWFLDKTPLHSNELNEITVQ  
PGGYHVLTLRQLALKDSGTVYFEAGDQRTSAALRVTEKPSIFSRPLTDVTVTEGEDTLTV CETTTVDSSVRWT  
KDGTLRPSARCQLSHEGCAQLLITATTPQDGGRYKCEIGGASSSIVRVHALPVRFRESLKDVEVPEGKAA  
TLRCVLSVAAPVEWRHGDDVLKSSNKYSLRQEGAVLELVIRDLQPQDSGQYSCSFGDQTTSATLTVKTSQAQ  
FVGKLRNKEATEGTTVTLRCELTKEAPVEWKKGTETLRNGDKYSLKQDGAVCELQICSLLVADAGEYSCVCGQ  
EKTSATLTVKALLVHFVRRLSKEATEGDTTTLQCELSKAAPVEWRKGTETLRDGDYSLKQDGAVCELQIRS  
LTIADAGEYLCTCGEKTSATLTVRALPAKFKDSLKNEEATEGTTATLSCELSKAAPVWKKGPKTLQSGDKY  
VLRQDGA VCGQLIHLTMADAGEYSCVCGQEKTSATLTVRGLPAKFIEDLRSQEATEGATAILRCELSKAAPV  
EWRKGETLTKDGDYTLRQDGA VCELQIRGLAVVDTGTYSLPTKFTTEGLRNEEATEGTMATLRCQMSKAAPV  
EWRKGETLRDGDYSLRQDGA MCELQIRGLTIEDSGEYTCVCGQEKTSATLSVKALPPRFIEDLRSQEATEG  
TMATLRCQMSKAAPVEWRKGETLGDGGYSLRQNGAVCELQIHDLAVEDTGEYSCVCGQEKTSATLNVKALP  
PRFIEDLRSQEATEGTMATLRCQMSKAAPVEWRKGETLRDGGYSLRQDGA VCELQIHDLDVEDAGQYSCVC  
GQEKTSAVLTVDALPPKFTTEGLKKEEATEGTMVTLRQMSKEATVEWRKGAKTSLDGGYSLRQDGA MCELQI  
CGLAVEDAGEYSCVCGQEKTSATLSVKALPPRFIEDLRSQEATEGTMATLRCQMSKAAPVEWRKGSKTLRDGD  
RYSLRQDGA MCELQICDLAVEDTGDYSCVCGQEKTSATLSVKAPQVVFQQLQNLQAEEGSMASLRCELSVFN  
AAMVWSKGGLELQDGTREARQQGCVAELLLDRREDAGEYSCVCGQEKTSATLMTVAAPVFLRLELQAQDV  
DEGATARLRCLELSREAVSVEWRKGSLLQFLPCAKYQMVQEGTTAEILLVHGVVEQEDAGEYTCEDAGHTQS IARLSV  
RAPKPKFKTDLQSTEQEAGGTARLCCQLSEAEPTPVQWLKEGVELHVGSKYEMRRQGA VCELLIHGLEAKDT  
GEYACLVGQKTASLRVKEPEVTIVRGLVDMVQADEDEFTCKVVSQAGATDVQWHLQGLPLQSNVTEVAV  
LADGCTHVLQKGVTLLEDAGTVSFHVGGLSSSAQLTVRVPEVTVLEPLKDVQLSEGQDAHFRCRLSRASGQEA  
RWALGGVPLQCNEMNDITVEQGTLYLLTLHKVTLEDAGTIITLQVGSSESAQLKVTAKNTVLRGLENVDALEG  
GEALFECQLSQPEVA AHTWLLDDEPVHTSEKVEVYFENGLRHLLLLKNLKPQDSCRVTFLAGDVVTS AFLTV  
RALPDPPEDAEVVGRSDHSVTLVWVAPMSDGGGGLCGYRVEMKEASTGQWQLCHDLVPGPECVDDLVPGKTY  
RFRVAAGVPAGAGEPVHLPQMVKIAPAPAPAPAPAPAPAPETRQAVVGEDICLELEVAADGGEVWHKGTERRI  
QPGGHFEVLSRGQRQMLVIKGFRTEDQGEYRCGPIQGLPSSGAATFNVMVMTSGSGDEVPAQPSLPPEAAQEGD  
LHLLWEALARKRRMSREPTLDSISELPEEDSRVQHLRQEAETAPDLSEGYSTADELARTGEADLSHTSSDDE  
SRAGTPSLVTYLKKAGGPGISPLASKHEAQVTTSVRPQKQEPVVPPTCPPPGDLSAADLMDPSLDKAAVKIQA  
AFKGYKVRKEMKQEGPVFSRTFGDTEAQVGDVLRLECVLATKTKDMRACWLKDGIELTDGRHYHIDQLKDGTC  
SLLVTLGLAPTDSGRYTCQVSTKSGRVSHSACVVVSGTESEAESSSGGELDDAFRRAARRLHRLFRTKSPAELS  
EELFLSADEGPEPEPADWQTYREDENFVCIRFESLAEARQAVTCFRNMFMATMGIGVEISLGEQGRGVEM  
RIGKVAPTPTPAVPLAKTPGLQTSDAAPVFLTELQNDVQDGYPMSFDCVVTGQPVPSVRWFKDGKLEEDDH  
YMINEDQGGHQLIITAVVPADMGVYRCLAENSMGVSSTKAE LRVELTSTDYDTAADATETSSYFSAQGYLSS  
REQEGTESDEGQLPQVLEELKDLQVAPGTRLAKFQLKVKGY PAPKLYWFKDGQPLTSDHIRMTDKKTLHTLE  
IVSVTREDSGQYAAIYI SNAVGAAYSSARLLVRGPSEPEEKPASDVHERLVPPRILEKFTPKKVKRGSITFSV  
KVEGHPAPSVHHLKEEAEGVLIWIGPDTPGYTMASSSKQHSLLVLLDVGRQHOGTYTCIATNPAGQALCASLH  
ISGLAKEEEQERVKEALISSFLQGTSAVSAQMSSESAGFADLVGQSKGESLVAAEEAHSHLSLAEVGTTEFFLQK  
LTSQITEMVSAKISQAKLQVPGGDSDEETKTPSASPRHGRSRPSSSVQESSSESEDGDSRGEIFDIYVVTADY  
LPLGAEQDAIILREGQYVEVLD SAHPLRWLVRTKPTKSSPSRQGWVSPAYLDKRLKLSPEWGPTEAPEFPGEA  
VSEDEYRTRLSSVIQELLSSEQAFVGE LQFLESHHMKHLERSPRVPAAVASQKTVI FRNVQDISHFSSFLKE  
LQCCGTDVDDVAMCFIKNQEA FEKYLEFLVGRVQAESVVVSTPVQEFYKKYAEETLSAKDPTQPPPPPLQHYLE  
QPVERVQKYQALLKELIRNKARNRQNCALLEQAYAVVSALPQRAENKLVSLMENYPGTLEALGEP IRQGHFI  
VWEGAPGARMPWKGNHRHVF LFRNYLVICKPRRDSRTDTFSYVFRNMMLSSIDLNDQVEGDRAFEVWHERE  
DSVRKYLLQARTVI IKNSWVKEICGIQORLAQPVWRPPEFEEELADCTAELGETVKLACRVNTGTPKPIVSWYK  
DGKPVVEYDHHILIEDPDGSC TLI LDNLTGIDSGQYMCFAASAAGNASTLGKILVQVPPRVFNKVRATPFVVEG  
EDAQITCTVEGAPYPIEDIRWYKDGTL LAPGNRYRMLNEPRSGVLVLIQAASKEDLGHYECELVNRLGSTRGGG  
ELYMQSPALRARDQHHREQI VAAVEGAPSMQVTIEDVQVQVGDMAQF DAVIEGHPPP IVTWYKGTQLTSSAR  
LSQRQDGTYSLVLT DVA PHDAGVYTCVANNAGQVLC KAE LLVHGGDKLDAENQVYRRLKLSFYDVQEEIGR  
GVFGFVKRVQHKGNMFC AAKFIPLRSKTRAQAYQERDILATLGHPLVLTGLLDQFETRKTLLIILELCSSEEL

LDRLFKKGVVTEAEVKVYIQQLVEGLHYLHSHGILHLDDIKPPNII LMVHPAREDIKICDFGFAQKITPSEPOYS  
KYGSPEFVSPETIEQNPVSEGSIDIWAMGVI SYLSLTCSSPFAGESDRATLLNVLEGRVSWSSPTAAHLSERDAK  
DFIKATLQRTPRARPSTSQCLAHFWFLKSMPAAEAHFINTKQLKFLLRARSRWQRSLMSYKSI LVMRSIPELLQ  
GPPDSPSLGVARHLRGEASGASSSSSSSDNELAPFARAKSLPPSPVTHSPLLHPRGFLRPSASLPEETEASMP  
TADAAVPASPQASAGPPASPGCVPRHSVSSLFYQQAGEGAERGNKTS GAKRHPARRRHLKGGYIARALPGLR  
EPLMEYSLLEEEAAREEQASLMTKTPSFETALRLPSSSVREVPGRSHSLDNPPVTTGSPPEACKEQLLFPST  
GLTHETAKDRGHKEGFLQESVFPFPMMSGDSRPGKQEGSSQDSCRGKPASSCHSELGSGSQEGCGPPSSQSLG  
SLPQQSLKKELSTSCGPLFSEQPQAAPFPTQVSPLLGSEKEPQDGSLSSEGVPVPVSSSPGSASQVDAASLDTEG  
LSEAGDTCDFTPPPQRPQEQATTRKFSLESRGGYAGVAGYGTFAFGGDAGGMLGQGPLWARMAWVSQSSEEQ  
DEAATESPQPLESGLPIAEASGVPLRTSPSLTPWEEVEQVSLVQIRDLSGDAEAADTISLDISEVDPAYLNLS  
DLYDIKYLPPFEFMI FRRVPKPIEQPESPGSETEAGQGLADFLLEAAWPWPGEGLRAGLEITEEPEEPGDLEA  
LLGEAAVGRKRKWSPSRGLFQFPGRCLSGEEPVELGLRQRVKASMAHISRILKGRPEGPEREPPRKKAGLAS  
FRLSGLKGRDQELSDEAVVLGQSVTLACQVLAQPTAQATWSKDGVLLESSGHLLISSTLKNFQLLTI LVVKEE  
DLGTYTCCVSNPLGTAVTTGVLKKAERPSSSPRPEVGEYKDAVLLVWKPVE SCGPVTYIVQCCIEGGSWTTL  
ASDISDCCYLTKLSRGGMYIFRTACVSKAGMGPYSSPSEQVLLGGPNHLASEEESSRGRPAQLLPSTKTF  
QMQIRRRGRFSVVRQCREKASGRALAAKIVPYQPEDKTA VLREYEALKRLLHHPHLAQLHAAYLSPRHLVLI  
LELCSGPELLPSLAERESYSESDVKDYLWQMLSATQYLHAQHILHLDLRSENMMVTEYNLLKVIDLGN  
AQSLDQEKVPAPENFKDYLETMAPELLEGGAVPQTDIWAIGVTA FIMLSGEY PESSSEGRDLQKGLR  
KGLRSLRKYAGL SGGAVAF LQSSSLCAQPWGRPCASTCLQCGWLTEEGPTGSRPTVPTVPTVRLRAFV  
REREKRRALLYKKNHNAQVR\*

>rs46464091\_ENSMUSP00000049737\_c.17176:A>G\_p.K5726R  
ENSMUST00000052872.15|Obscn-203|ENSMUSG00000061462|-|chr11:g.58929996:T>C  
MDHSFSGAPRFLTRPKAFVSVGKDATLSQIVGNPTPHVSWEKDRQPVEAGARFRLAQDGDVYRLTILDLAL  
GDSGQYVCRARNAIGEAFAAVGLRVDSEGTCAEQAPHLLRPTSIRVREGADATFRCRVGGSPPAVSWSKDG  
RRLGPPDAPHVRVEEHGESSALRIR SARPRDGGTYEVR AENPLGSASAAAAALVVDSDAEVAGPPGTSTATLLA  
HLQQRREAMRAEGIPSPPGAGTRTCTVTGK HARLSFCVTEGPKPETVWKKDGLVTEGRRHVVEDEQENF  
VLKILLFCKQSDRGLYCTASNLVGGTYSSVLVVVREPTVPFKKRLQDLEVREKESATFQCEAAVPA  
TEAAWFK EETRLWASAKYDIEEEGTERRLTVRNVSADDDAVYICETTEGSRTVAE LSVQGNLTKLPRKTA  
VRTGDTAIFWVELAVPEGPVRWLRNQEEMVAGGRVAITAEGTCHTLTIFQCTLEDMGEVAFVSGGCRTT  
TQFCVSAPRRPPL YPPADPVVKAKTESSVTLWSAPPHGDRPVTIDGYVLEKRKLGAYAWSRCHEAGW  
LATTEFTITGVAAEGDFQFRVSAINHFGQGPYLEFPGMTMLVPLAVKTPLKAVEAVEGGEVTF  
SVDLTVASSGEWFLDGEALKASSIYVIRCDRTRHMLTIREV PARLHGAQLKFVANGIETS  
IQMVVRAALGLPS SKLPAAAAAREVLAQLHHEEAQLLAE LSDQAAA VTWLKDGRELSLGP  
KYEMQVSAGRRALLVRDVAQDDAGLYECVSRGSR TAYQLLVQEPKLVFAKQQAHSEVKAEAGNS  
ATLSCEVTAQTEVTWFKDGKLLSSSSKVRMEASGCSRRLVVQQAGKADAGEYSCEAGGQKLS  
FRLDVAEPKLVFAKQQAHSEVKAEAGASATLSCEVAQAQTEVTWFKDGKLLSSSSKVRMEASG  
CSRRLVVQQAGKADAGEYSCEAGGQKLSFRLDVTEPKLVFAKEQQARSEVKAEVGN SATLSCE  
VAQAQTEVTWFKDGKLLSSSSKVRMEASGCSRRLVVQQAGKADAGEYSCEAGGQKLSFRLDV  
AEPKLVFAKEQQARSEVKAEAGNSATLSCEVAQAQTEVTWFKDGKLLSSSSKVRMEASGCSR  
RLVVQQAGKADAGEYSCEAGGQKLSFRLDVAEPKLVFAKEQQARSEVKAEAGASATLSCEVAQA  
QTEVTWFKDGKLLSSSSKVRMEASGCSRRLVVQQAGKADAGEYSCEAGGQKLSFRLDVAEPKLV  
FAKEQQAHSEVKAEAGASATLSCEVAQAQTEVTWFKDGKLLSSSSKVRMEASGCSRRLV  
VQQAGKADAGEYSCEAGGQKLSFRLDVAEPKLVFAKEQQARSEVKAEAGASATLSCEVAQAQTE  
VTWFKDGKLLSSSSKVRMEASGCSRRLVVQQAGKADAGEYSCEAGGQKLSFRLDVAEPKLVFA  
KEQQAHSEVKAEAGASATLSCEVAQAQTEVTWFKDGKLLSSSSKVRMEASGCSRRLVVQQAG  
KADAGEYSCEAGGQKLSFRLDVAEPKLVFAKEQQAHSEVKAEAGASATLSCEVAQAQTEVTWFK  
DGKLLSSSSKVRMEASGCSRRLVVQQAGKADAGEYSCEAGGQKLFRLDVAEPKLMFAKEQQAH  
SEVKAEAGASATLSCEVAQAQTEVTWFKDGKLLSSSSKVRMEASGCSRRLVVQQAGKADAGE  
YSCEAGGQKLSFRLDVAEPKLVFAKEQQAHSEVKAEAGASATLSCEVAQAQTEVTWFKDGKLL  
SSSSKVRMEASGCSRRLVVQQAGKADAGEYSCEAGGQKLSFRLDVAEPKLVFAKEQQAHSEV  
KAEAGASATLSCEVAQAQTEVTWFKDGKLLSSSSKVRMEASGCSRRLVVQQAGKADAGEYS  
CEARGQKLSFRLDVADTRLMFAKEQQARTEVKAEAGNSATLSCEVAQAQTEVTWFKDGKLLSS  
SSKVRMEASGCSRRLVVQQAGKADAGEYSCEAGGQKLSFRLDVAEAEESQIPERPSRREPLV  
VKEHETIILTATIAAPSVAAVTWLKDGEIRR SKRHEATS LGDHTLTVRGAQVLD SAIYSCRV  
GKEGQDFPVQVEEVAAKFSKPLEPVEGELGTVMLVCELSPEQAEVWRCGNTQLRPGKRFQMT  
SEGPRRTLTVSGLREDDAEYVCSERDRDTSARLTVKVPRVVKFTSGLSAMVAEEGQEA  
TFQC VVSPSDAGVTWYKDMQLQPSKFMVMEVSGASRSLTILGLTLEDAGQVTV  
EAEGASSSAALRVREAPVLFKFKLEPQTVEERTSVHTELEVELTRWPPEVKWTRNAAVLTP  
SENVEIRAEGARHC LVLRSVGFADRGFFGCETPDDKTQAKLNVEMRQVRLVVRGLQEVEAKE  
QGTASMDVELSHAEVEGSWTRDGLRLQPGPKCHLAVQGPVHILTL SALQPQDSGLVAFRAE  
GVHTSARLIVTEL PVSFTRVLQDVVATQKEKVTLECEL SRPVDVRWLKDGVELRAGKAIGI  
VAQGTCSRSLVIYRCETGDQGVVYCDALDAQTSASLRVQGRTYTLIFRRVL

AEDAGEVVFVAENAESRAHLRVKELPVTLLRPLRDKIAMEKHRGVLECVSRASAQVRWFKGGVLELQSGPKYE
VVSDGLYRKLVINVDVQPEDEDYTC DAGNVKTS AQFFVVEEQSITIVRGLKDMTVM EPAPAWFECETSIPSVRP
PKWLLGKTVLQAGGNVLEQDGT VHRLTLHKTCSTMTGPVHFTIGKSRSSAQLVVSDIPVVLTRPLEPKAGRE
LQSVVLSCDFRPAPKAVQWYKDDTPLSPSEKFKMALEGQMAELRILRLTPADAGVYRCQAGSAQSSAEVTVEA
REVTVIQPLQDAEAMEEGRVCFSCELSHKDEDI EWSLNGTPLYNDSFHEISHEGCLHTLVLKSVRQADTGTVC
ATS PKVSVSARLVVKGKPVVFLKALDDVSAEERGTTLTQCEVSDPEARVWVRKDGVELGPSDKYDFLHKAGAR
GLTVHDLSDHEDAGLYTCQVGSKETQSKVSVHDLHVGITRRLKTVEVLEGESECSFECVLSHESPSDPAVWTVGG
KTVGGSGHFHAVRQRGRKYTLTVKDAALSDAGEVVFVSVLGLTSKASLIIRERPVDITKPLEDQRTTLGEDVMLS
CELSRAGTSVRWLKDGKAIRKSQKYDLLSEGTAVLVVRKASLKDSGEYTCETEASKSTAKLCVEEKANRFTE
ELADLQVEEKGRAVFTCKTEHPASVVTWRKGLLELRASGKHVPSQEGTLTKLTINALERTSDSPTYTCDIGQAR
TQARLLVHGQKVRVIEDLEDTAVQEGSSAKFCCRIAPADYGPVHWF LDKTPLHSNELNEITVQPGGYHVLT LR
QLALKDSGTVYFEAGDQRTSAALRVTEKPSIFSRPLTDVTVTEGEDTLVCETTTTVDSSVRWTKDGKTLRPSA
RCQLSHEGCAQLLITATTPQDGGRYKCEIGGASSSSIVRVHALPVRFRRESLKDVEVPEGKAATLRCVLSVA
APVEWRHGDDVLKSSNKYSLRQEGAVLELVI RDLQPQDSGQYSCSFGDQTT SATLTVKTS SAQFVGLRNKEA
TEGTTVTLRCELTK EAPVEWKKGTETLRNGDKYSLKQDGAVCELQICSLLVADAGEYSCVCGQEKTSATLTVK
ALLVHFVRRRLRSKEATEGDTTTLQCELSKAAPVEWRKGTETLRDGDYSLKQDGAVCELQIRSLTIADAGEYL
CTCGQEKTSATLTVRALPAKFKDSLKNEEATEGTTATLSCELSKAAPVTWKKGPKTLQSGDKYVLRQDGAVCG
LQIHGLTMADAGEYSCVCGQEKTSATLTVRGLPAKFTIEDLRSQEATEGATAILRCELSKAAPVEWRKGETLK
DGDYRDLRQDGAVCELQIRGLAVVDGTYSLPTKFTTEGLRNEEATEGTMATLRCQMSKAAPVEWRKGETLR
DGDYRDLRQDGAMCELQIRGLTIEDSGEYTCVCGQEKTSATLSVKALPSRFIEDLRSQEATEGTMATLRCQMS
KTAPVEWKKGSETLRDGGYSLRQDGPVCELQICDLAVEDAGEYSCVCGQEKTSATLSIKALPPRFIEDLRSQ
EATEGTMATLRCQMSKAAPVEWRKGETLRDGGYSLRQNGAVCELQIHDLAVEDTGEYSCVCGQEKTSATLN
VKALPPRFIEDLRSQEATEGTMATLRCQMSKAAPVEWRKGETLRDGGYSLRQDGAVCELQIHDLVDEDAGQ
YSCVCGQEKTSAVLTVDALPPKFTTEGLKKEEATEGTMVTLRCQMSKEATVEWRKGAKT LSDGGYSLRQDGAM
CELQICGLAVEDAGEYSCVCGQEKTSATLSVKALPPRFIEDLRSQEATEGTMATLRCQMSKAAPVEWRKGET
LRDGDYRDLRQDGAVCELQIRDLAVEDAGEYLCVCGQEKTSATLSVKALPPRFIEDLRSQEATEGTMATLRCQ
MSKAAPVEWRKGSKTLR DGDYSLRQDGAMCELQICDLAVEDTGDYSCVCGQEKTSATLSVKALPPRFIEDLR
SQEAREGTVATLRCMSKAAPVEWRKGETLKDGDYSLRQEGNLCELQIRDLAVEDTEEYSCVCGQEKTSAT
LSVKALPAKFIEDLRSQEAPESSTVTLRCKLSKKASVWKKGSETLRNGARYSLRQDGAVCELEIRDLTVEDT
GEYSCTCGQERTSATLSIMAPQVVFQOPLQNLQAEEGSMASLRCELSVPNAAMVWSKGGLELQGDTRREARQQ
GCVAELLLRDLRREDAGEYSCTCGSQTT SATLMVTAAPVRFLRELQAQDVDEGATARLRCELSREAVSVEWRK
GSLQLFPCAQYQMVQEGTTAEELLVHGVEQEDAGEYTC DAGHTQS IARLSVRAPKPKFKTDLQSTEQEAGGTAR
LCCQLSEAEPTPVQWLKEGVELHVGSKYEMRRQGAVCELLIHGLEAKDTGEYACL VGGQKT LASLRVKEPEV
TIVRGLVDMVQADEDEVEFTCKVSQAGATDVQWHLQGLPLQSNVTEVAVLADGCTHVLQKGVTL EDAGTVS
FHVGGSSSAQLTVRPEVTVLEPLKDVQLSEGQDAHFRCLRSRASGQEARWALGGVPLQCNEMNDITVEQGT
LYLLTLHKVTLEDAGTITLQVGSCSSEAQLKVTAKNTVLRGLENVDALEGG EALFECQPEVAHTWLLDD
EPVHTSEKVEVVYFENGLRHLLLLKNLKPQDSCRVTFLAGDVVTS AF LTVRGRLEVLEPPHDASVKAGMQVR
FTCILSEAVPVGEATWYINGAAIQPDDTDWTVTTDGS HALTLSNAQPQHAGEVTF AARDAVASARLSVLALP
DPPEDA EVVGRSDHSVTL SWVAPMSDGGGGLCGYRVMKEASTGQWQLCHDLVPGPECVDDLVPGKTYRFRV
AAVGPAGAGEPVHLPQMVKIAPAPAPAPAPAPAPAPETRQAVVGEDICLELEVAADGGEVVWHKGTERTIQPGG
HFEVLSRGRQMLVIKGFRTEDQGEYRCGPIQGLPSSGAATFNVVMTSGSGDEVPAQPSLPPEAAQEGDLHLL
WEALARKRRMSREPTLDSISELPEEDSRVQHLRQEAEEETAPDLSEGYSTADELARTGEADLSHTSSDDES RAG
TPSLVTYLKKAGGPGISPLASKHEAQVTTSVRPPKQQEPVVP TCPPPGDLSAADLMDPSLDKAAVKIQAAFKG
YKVRKEMKQOEGPVFSRTFGDTEAQVGDVLRLECVLATKTD MRACWLKDGIELTDGRHYHIDQLKDGTC SLLV
TGLAPTDSGRYTCQVSTKSGRVSHSACVVVSGTESEAESSSGGELDDAFRRAARRLHRLFRTKSPAELSEEL
FLSADEGPGPEEPADWQTYREDENFVCIRFESLAEARQAVTCFRNMFATMGIGVEISLGEQGPGRVEMRIGK
VAPTVPAPVPLAKTPGLQTS DAAPVFLTELQNDVQDGYPMSFDCVVTGQPVPSVRWFKDGKLL EEDDHYMIN
EDQQGGHQLIITAVVPADMGVYRCLAENSMGVSSTKAELVELTSTDYDTAADATETSSYFSAQGYLSSREQE
GTESDEGQLPQVLEELKDLQVAPGTR LAKFQLKVKGY PAPKLYWFKDGOPLTTS DHIRMTDKKTLHTLEIVSV
TREDSGQYAAYSNAVGAAYSARLLVRGPSEPEEK PASDVHERLVP PRILEKFTPKKVKRGSSTF SVKVEG
HPAPSVHWLKEEAKEGVLWIGPDTPGYTMASSSKQHSLVLLDVGRQHOGTYTCIATNPAGQALCSASLHISGL
AKEEEQERVKEALISSFLQGTSQAVSAQMSE SAGFADLVGQSKGESLVAEEAHSHLSLAEVGT EEFLOKLT SQ
ITEMVSAKISQAKLVPPGGDSDEETKTPSPASPRHGRSRPSSSVQESSSESEDGDSRGEIFDIYVVTADYLP LG
AEQDAIILREGQYVEVLD SAHPLRWLVRTKPTKSSPSRQGVSPAYLDKRLKLSPEWGPTEAPEFPGEAVSED
EYRTRLSSVIQELLSSEQAFVGLQFLES HHMKHLERSPRVPAAVASQKTVI FRNVQDISHFHSSFLKELQGC
GTDDDVAMCFIKNQEA FEKYLEFLVGRVQAESVVVSTPVQEFYKKYAEETLSAKDPTQPPPPPLQHYLEQVPE
RVQKYQALLKELIRNKARNRQNCALLEQAYAVVSALPQRAENKLVSLMENYPGTLEALGEP IRQGHFIVWEG
APGARMFWKGNHRHVFLFRNYLVICKPRRDSRTDTFSYVFRNMMKLSSIDLNDQVEGDDRAFEVWHEREDSVR

KYLLQARTVI IKNSWVKEICGIQQRLAQPVWRPPEFEEELADCTAELGETVVKLACRVTGTPKPIVSWYKDGKP  
VEVDPHHILIEDPDGSCCTLILDNLTGIDSGQYMCFAASAAGNASTLGKILVQVPPRFVNVKVRATPFVEGEDAQ  
ITCTVEGAPYPQIRWYKDGTLAPGNRYRMLNEPRSGVLVLIQAASKEDLGHYECELVNRLGSTRGGGELYM  
QSPALRARDQHHREQIVAAVEVTEQETKVPKKTVIIIEETITTVVKS PRGRRQSPGKSPSRSPSRASPRRPG  
LLAPERLYPPGTSPSRLEVEQGRKAPVPALYVTEAEVHAPASQSQPKWLEVEETIEVRVKKTGSRGASPVRE  
MTRSREGILFTLPGGIPGRDPNANNNSNKS SVYQEARTWGPVAVHVGEFFIFQVDSVGNVDVVAASPEPEQVRA  
SQKEENTERQEGCSDGENTFLMEEPQDTSLQGRDPKILTHNGRVLTADLEDYVPQEGETFSGDSTPSTP  
DEPPCEVSVLQREI SEPTVGGQPVLLNVGRPPGTGATPSFFRPGSQVHSPESVSFLLREAWSGPVS AAPWTSSSF  
HTHVQSSVDGSHGSKFKEVSTQTVSFGAVGETVTLHDIDPDGGEAPGPSQG\*  
>rs46464091\_ENSMUSP00000020732\_c.17377:A>G\_p.K5793R  
ENSMUST00000020732.13|Obscn-201|ENSMUSG00000061462|-|chr11:g.58929996:T>C  
MDHSFSGAPRFLTRPKAFVSVGKDATLSCQIVGNPTPHVSWEKDRQVEAGARFRLAQDGDVYRLTILDLAL  
GDSGQYVCRARNAIGEAFVAVGLRVDSEGTCAEQAPHFLLRPTSIRVREGADATFRRCRVGGSQPAPVSWSKDG  
RRLGPPDAPHVRVEEHGESSALRIRSARPRDGGTYEVRAENPLGSASAAAALVVDSDAEVAGPPGTSTATLLA  
HLQQRRREAMRAEGIPPSPPGAGTRTCTVTEGKHARLSCFVTGEPKPKETVWKKDQGLVTEGRRHVVEDEQENF  
VLKILFCKQSDRGLYCTASNLVGGTYSSVLVVVREPTVPFKKRLQDLEVREKESATFQCEVAQAPATEAAWFK  
EETRLWASAKYDIEEGETERRRLTVRNVSADDDAVYICETTEGSRVAELSVQGNLTKRKLPRKTAVRTGDTAIF  
WVELAVPEGPVRWLRNQEEMVAGGRVAITAEGTCHTLTI FQCTLEDMGEVAFVSGGCRTTTFQCVSAPRRPPL  
YPPADPVVKAKTESSVTLWSAPPHGDRPVTIDGYVLEKRKLGAYAWSRCHEAGWLATTEFTITGVAAEEGDFQ  
FRVSAINHFGQGPYLEFPGMTMLVPLAVKTPKAVEAVEGGEVTFVSDLTVASSGEWFLDGEALKASSIYVI  
RCDRTRHMLTIREV PARLHGAQLK FVANGIETS IQMVVRAALGLPSSKLPAAAAREVLAQLHEEAQLLAE LSD  
QAAA VTWLKDGRELSLGP KYEMQVSAGRRALLVRDVAQDDAGLYECVSRGSR TAYQLLVQDITDGYRDWGPAG  
PQKHMCKCAGAKIARYLGSSCYRFLQYDKGVVHWEAALDTRQKGKTS SCSLHEKPKLVFAKGQQA HSEVKA E  
AGNSATLSCEVTQAQTEVTWFKDGK KLS SSKVRMEASGCSRRLVVQQAGKADAGEYSCEAGGQKLSFR LDVA  
EPKLVFAKGQQA HSEVKA EAGASATLSCEVAQAQTEVTWFKDGK KLS SSKVRMEASGCSRRLVVQQAGKADA  
GEYSCEAGGQKLSFR LDVAEPKMFVFAKEQQARSEVKA EAGASATLSCEVAQAQTEVTWFKDGK KLS SSKVRM  
EASGCSRRLVVQQAGKADAGEYSCEAGGQKLSFR LDVAEPKLVFAKEQQARSEVKA EAGASATLSCEVAQAQTE  
EVTWFKDGK KLS SSKVRMEASGCSRRLVVQQAGKADAGEYSCEAGGQKLSFR LDVAEPKLVFAKEQQARSEV  
KAEAGNSATLSCEVAQAQTEVTWFKDGK KLS SSKVRMEASGCSRRLVVQQAGKADAGEYSCEAGGQKLSFHL  
DVTEPKLVFAKEQQAHSEVKA EAGASATLSCEVAQAQTEVTWFKDGK KLS SSKVRMEASGCSRRLVVQQAGK  
ADAGEYSCEAGGQKLSFR LDVAEPKLVFAKEQQARSEVKA EAGASATLSCEVAQAQTEVTWFKDGK KLS SSK  
VRVEASGCSRRLVVQQAGKADAGEYSCEAGGQKLSFR LDVAEPKLVFAKEQQANSEVKA EAGASATLSCEVAQ  
AQTEVTWFKDGK KLS SSKVRVEASGCSRRLVVQQAGKADAGEYSCEAGGQKLSFR LDVAEPKLVFAKEQQAH  
SEVKA EAGASATLSCEVAQAQTEVTWFKDGK KLS SSKVRVEASGCSRRLVVQQAGKADAGEYSCEAGGQKLS  
FR LDVAEPKLVFAKEQQAHSEVKA EAGASATLSCEVAQAQTEVTWFKDGK KLS SSKVRVEASGCSRRLVVQQ  
AGKADAGEYSCEAGGQKLSFR LDVAEPKLVFAKEQQAHSEVKA EAGASATLSCEVAQAQTEVTWFKDGK KLS  
SSKVRVEASGCSRRLVVQQAGKADAGEYSCEAGGQKLFRLDVAEPKLVFAKEQQAHSEVKA EAGASATLSCE  
VAQAQTEVTWFKDGK KLS SSKVRVEASGCSRRLVVQQAGKADAGEYSCEAGGQKLSFR LDVAEPKLVFAKEQ  
QAHSEVKA EAGASATLSCEVAQAQTEVTWFKDGK KLS SSKVRVEASGCSRRLVVQQVQKADAGEYSCEARGQ  
KLSFR LDVADTRLMFAKEQQARTEVKA EAGNSATLSCEVAQAQTEVTWFKDGK KLS SSKVRVEASGCSRRLV  
VQQAGKADAGEYSCEAGGQKLSFR LDVAEAE SQIPERPSRREPLVVKEHETIILTATIAAPSVAAVTWLDG V  
EIRRSKRHEATSLGDTHTLTVRGAQVLD SAIYSCRVGKEGQDFPVQVEEVA AKFSKPLEPVEGELGGTVMLVC  
ELSP EQAEVWRCGNTQLRPGKRFQMTSEGPRTTLTVSGLREDDAE EYVCE SRDDRTSARLTVKVP RVV KFTS  
GLSAMVAEEGQEATFQCVVSPSDAGVTWYKDGMLQLPSEKFMVVEGASRS LTI LGLTLEDAGQVTEAE GAS  
SSAALRVREAPVLFKKKLEPQTV EERTSVTLEVELTRPWPEVKWTRNAAVLTPSENVEIRAEGARHCLVLR SV  
GFADR GFFGCETPDDKTQAKLNVEMRQVRLV RGLQEVEAKEQGTASMDVELSHA EVEG SWTRDGLRLQPGPKC  
HLAVQGPVHIL TLSALQPQDSGLVAFRAEGVHTSARLIVTEL PVSFTRVLQDVVATQKEKV TLECELSRPVDV  
RWLKDGV ELRAGKAIGIVAQGT CRSLVIYRCETGDQGVYVCDALDAQTSASLRVQGR TYTLIFRRVLAEDAGE  
VKFVAENAESRAHLRVKELPVTLLRPLRDKIAMEKH RGVLECCVSRASAQVRWFKGGVELQSGPKYEVVSDGL  
YRKLVIN DVQPEDEDTYTC DAGNVKTS AQFFVVEQSITIVRGLKDMT VMEPAPAWFECETSIPSVRPPK WLLG  
KTVLQAGGNV GLEQDGTVHRLTLHKTCSTMTGPVHFTIGKSRSSAQLV VSDIPVVLTRPLEPKAGRELQSVVL  
SCDFRPAPKAVQWYKDDT PLSPEKFKMALEGGMAELRILRLTPADAGVYRCQAGSAQSSAEVTEAREVTVI  
QPLQDAEEMVEGRVCFSCELSHKDEDIEWLSLNGTPLYNDSPEARVVSHEGCLHTLV LKSVRQADTGTVCATSPKV  
SVSARLVVXKGPVVFLKALDDVSAEERGTLLTQCEVYNDPEARVVWRKDGVELG PSDKYDFLHKAGARGLTVHD  
LSHEDAGLYTCQVGSKETQSKVSVHDLHVGITKRLKTV E VLEGE SCSFECVLSHESPSDPAVWTVGGKTVGGS  
GHFHAVRQGRKYTLTVKDAALSDAGEV VSVLGLT SKASLIIRERPV DITKPLEDQRTTLGEDVMLSCELSRA  
GTSVRWLKDGKAIRKSQKYDLLSEGTRAVLVVRKASL KDSGEYTCETEASKSTAKLCVEEKANRFTEELADLQ  
VEEKGRAVFTCKTEHPASVVTWRKGLLELRASGKHVPSQEGTLKLTINALERTDSDTYTCDIGQARTQARLL

VHGQKVRVIEDLEDTAVQEGSSAKFCCRIAPADYGPVHWFLLDKTPLHSNELNEITVQPGGYHVLTLRQLALKD  
SGTVYFEAGDQRTSAALRVTEKPSIFSRPLTDVTVTEGEDTLTVCEFTTVVDSVVRWTKDGKTLRPSARCQLSH  
EGCQAQLLITATTPQDGGRYKCEIGGASSSSIVRVHALPVRFRRESLKDVEVPEGKAATLRVLSVAAPVEWR  
HGDDVLKSSNKYSLRQEGAVLELVIRDLQPQDSGQYSCSFGDQTTSATLTVKTSQAQFVKGKLRNKEATEGTTV  
TLRCELTKAPVEWKKGTETLRNGDKYSLKQDGAVCELQICSLLVADAGEYSCVCGQEKTSAATLTKALLVHF  
VRLRSKEATEGDTTTLQCELSKAAPVEWRKGTETLRDGDYSLKQDGAVCELQIRSLTIADAGEYLCTCGQE  
KTSATLTVRALPAKFKDSLKNEEATEGTTATLSCELSKAAPVTWKKGPKTLQSGDKYVLRQDGAFCGLQIHGL  
TMADAGEYSCVCGQEKTSAATLTVRGLPAKFIEDLRSQEATEGATAILRCELSKAAPVEWRKGTETLRDGDYR  
LRQDGAFCGLQIRGLAVVDGTYSLSPTKFTLEGLRNEEATEGTMATLRCQMSKAAPVEWRKGTETLRDGDYR  
LRQDGAFCGLQIRGLTIEDSGEYTCVCGQEKTSAATLSVKALPSRFIEDLRSQEATEGTMATLRCQMSKTAPVE  
WKKGSETLRDGGYSLRQDGPVCELQICDLAVEDAGEYSCVCGQEKTSAATLSIKALPPRFIEDLRSQEATEG  
MATLRCQMSKAAPVEWRKGTETLRDGGYSLRQNGAVCELQIHDLAVEDTGEYSCVCGQEKTSAATLNVKALPP  
RFIEDLRSQEATEGTMATLRCQMSKAAPVEWRKGTETLRDGGYSLRQDGAFCGLQIHDLVEDAGQYSCVCG  
QEKTSAVLTVDALPPKFTLEGLKKEEATEGTMVTLRCQMSKEATVEWRKGAKTLSDGGYSLRQDGAFCGLQIC  
GLAVEDAGEYSCVCGQEKTSAATLSVKALPPRFIEDLRSQEATEGTMATLRCQMSKAAPVEWRKGTETLRDGD  
YSLRQDGAFCGLQIRDLAVEDAGEYLCVCGQEKTSAATLSVKALPPRFIEDLRSQEATEGTMATLRCQMSKAAP  
VEWRKGTETLRDGDYSLRQDGAFCGLQICDLAVEDTGDYSCVCGQEKTSAATLSVKALPPRFIEDLRSQEARE  
GTVATLRCRMSKAAPVEWRKGTETLRDGDYSLRQEGNLCELQIRDLAVEDTGEYSCVCGQEKTSAATLSVKAL  
PAKFIEDLRSQEAPESSTVTLRCKLSKASVWKKGSETLRNGARYSLRQDGAFCGLQIRDLVEDTGEYSCT  
CGQERTSATLSIMAPQVVFQQLQNLQAEEGSMASLRCELSVNPAAWWSKGGLELQGDTRREARQQGCVAEL  
LLRDLRREDAGEYSCVCGQEKTSAATLMVTAAPVRFLRELQAQDVDEGATARLRCELSREAVSVEWRKGSLLQF  
PCAKYQMVQEGTTAELLVHGVEQEDAGEYTCDAHTQSIARLSVRAPKPKFKTDLQSTEQEAAGTARLCCQLS  
EAEFGTVPVQWLKEGVELHVGSKYEMRRQGAFCGLQIHGLEAKDTGEYACLVGGQKTASLRVKEPEVTIVRGL  
VDMEVQADEDEFTCKVSAQATDVQWHLQGLPLQSNVTEVAVLADGCTHVLQKGVTLDEAGTVSFHVGGL  
SSSAQLTVRVPEVTVLEPLKDVQLSEGQDAHFRCRLSRASGQEARWALGGVPLQCNEMNDITVEQGTLYLLTL  
HKVTLEDAGTITLQVGCSSSEALQKVTAKNTVLRGLVNDVALEGGEALFECQLSQPEVAHAHTWLLDDEPVHTS  
EKVEVVYFENGLRHLKLLKLPQDSCRVTFLAGDVTSAFLTVRGRLEVLPEPHDASVKAGMQRVFTCILS  
EAVPVGEATWYINGAAIQPDDTDWTVTTDGSHALTLSNAQPQHAGEVTFFAARDAVASARLSVLAALPDPEDA  
EAVGRSDHSVTLVSWVAPMSDGGGLCGYRVMKEASTGQWQLCHDLVPGPECVDDLVPGKTYRFRVAAVGPA  
GAGEPVHLPQMVKIAPAPAPAPAPAPAPAPETROAVVEDICILEVAADGGEVVWHKGTERTIQPGHFVLS  
RGQRQMLVIKGFRTEDQGEYRCGPIQGLPSSGAATFNVMVMTSGSGDEVPAQPSLPPEAAQEGDLHLLWEALAR  
KRRMSREPTLDSISELPEEDSRVQHLRQEAETAPDLSEGYSTADELARTGEADLSHTSSDDESAGTPSLVT  
YLKAGGPGISPLASKHEAQVTTSVRPQKQEPVPTCPPPGDLAADMPSLDKAAVKIQAAFKGYKVRKE  
MKQEGPVFSRTFGDTEAQVGDVLRLECVLATKTDMRACWLKDGIELTDGRHYHIDQLKDGTCSSLVTLGLAPT  
DSGRYTCQVSTKSGRVSHSACVVVSGTESEAESSSGGELDDAFRAARRLHRLFRTKSPAELSEELFLSADE  
GPGEPEPADWQTYREDEFVCIREFESLAEARQAVTCFRNMFATMIGVEISLGEQGRGVEMRIKGVAPTVT  
PAVPLAKTPGLQTSDAAPVFLTELQNDVQDGYPMSFDCVVTGQPVPSVRWFKDGKLEEDDHYMINEDQQGG  
HQLIITAVVPADMGVYRCLAENSMGVSSTKAELRVELTSTDYDTAADATETSSYFSAQGYLSSREQEGTESDE  
GQLPQVLEELKDLQVAPGTRLAKFQLKVKGYPAKLYWFKDGGQPLTSDHIRMTDKKTLHTLEIVSVTREDSG  
QYAAYSNAVGAAYSSARLLVRGPSEPEEKPASDVHERLVPPRILEKFTPKKVKRGSSITFSVKVEGHPAPSV  
HWLKEEAKEGVLWIGPDTPGYTMASSSKQHSVLVLDVGRQHGTYTICATNPAGQALCSASLHISGLAKEEEEQ  
ERVKEALISSFLQGTSAQVSAQMSSEAGFADLVGQSKGESLVAAEAHSHLSLAEVGTTEFLQKLTSTIEMVS  
AKISQAKLQVPGGDSDEETKTPSASPRHGRSRPSSSVQESSESEEDGDSRGEIFDIYVVTADYLPGLAEQDAI  
ILREGQYVEVLDSAHPLRWLVRTKPTKSSPSRQGWSPAYLDKRLKLSPEWGPTEAPEFPGEAVSEDEYRTRL  
SSVIQELLSSSEQAFVGLLQFLESHHMKHLERSPRVPAAVASQKTVIFRNVDISHFHSSFLKELQCGCTDDDV  
AMCFIKNQEAFAKYLEFLVGRVQAESVVVSTPVQEFYKKYAEETLSAKDPTQPPPPPLQHYLEQVPERVQKYQ  
ALLKELIRNKARNRQNCALLEQAYAVVSALPQRAENKLVSLMENYPGTLEALGEPHQGHFIVWEGAPGARM  
PWKGHNHRVFLFRNYLVICKPRRDSRTDFTSYVFRNMMKLSSIDLNDQVEGDDRAFEVWHEREDSVRKYLLQA  
RTVVIKNSWVKEICGIQQLAQPVWRPPEFEEELADCTAELGETVKLACRVTGTPKPIVSWYKDGKPVVDPH  
HILLIEDPDGCTLIILDNLTGIDSGQYMCFAASAAGNASTLGKILVQVPPRFVNVKVRATPFVEGEDAQITCTVE  
GAPYPQIRWYKDGTLAPGNRYRMLNEPRSGVLVVIQAASKEDLGHYECELVNLGSTRGGGELYMQSPALR  
ARDQHHREQIVAAVEERRPSP\*  
>rs46464091\_ENSMUSP00000151217\_c.14671:A>G\_p.K4891R

ENSMUST00000219084.3|Obscn-207|ENSMUSG00000061462|-|chr11:g.58929996:T>C  
MDHSFSGAPRFLTRPKAFVSVGKDATLSCQIVGNPTPHVSEKDRQPVEAGARFLAQDGDVYRLTILDLAL  
GDSGQYVCRARNAIGEAFVAVGLRVDSEGTCAEQAPHLLRPTSIRVREGADATFRCRVGGSPQPAVSWSKDG  
RRLGPPDAPHVRVEEHGESSALRIRSARPRDGGTYEVRAENPLGSASAAAALVVDSDAEVAGPPGTSTATLLA  
HLQQRREAMRAEGIPSPPGAGTRTCTVTEGKHARLSCFVTGEPKPEVWKKDGLVTEGRRHVVEDEQENF



VLKILFCKQSDRGLYTCTASNLVGQTYSSVLVVVREPTVPFKKRLQDLEVREKESATFQCEVAQPATEAAWFK  
EETRLWASAKYDIEEEGETERRLTVRNVSADDDAVYICETTEGSRVVAELSVQGNLTKRKLPRKTAVRTGDTAIF  
WVELAVPEGPVWRWRNQEEMVAGGRVAITAEGTCHTLTI FQCTLEDMGVAFVSGGCRTTTTQFCVSAPRRPPL  
YPPADPVVKAKTESSVTLWSAPPHGDRPVTIDGYVLEKRKLGAAYAWSRCHEAGWLATTEFTITGVAAEGDFQ  
FRVSAINHFGQGPYLEFPGMTMLVPMPLAVKTPKAVEAVEGGEVTFVSDTLTVASSGEWFLDGEALKASSIYVI  
RCDRTRHMLTIREVPARLHGAQLKFVANGIETSIQMVVRAALGLPSSKLPAAAAAREVLAQLHHEEAQLLAE LSD  
QAAAVTWLKDGRELSLGPKEYMQVSAGRRALLVRDVAQDDAGLYECVSRGSRRTAYQLLVQDITDGYRDWGPAG  
PQKHMCKCAGAKIARYLGSscyRFLQYDKGVWHWLEAALDRQGKGTSSCSLHEKPKLVFAKQQAHSEVKA  
AGNSATLSCEVTQAQTEVTFKDGKLLSSSSKVRMEASGCSRRLVVQQAGKADAGEYSCEAGGQKLSFRLDVA  
EPKLVFAKQQAHSEVKAEGASATLSCEVAQAQTEVTFKDGKLLSSSSKVRMEASGCSRRLVVQQAGKADA  
GEYSCEAGGQKLSFRLDVAEPKMFVFAKEQQARSEVKAEGASATLSCEVAQAQTEVTFKDGKLLSSSSKVRM  
EASGCSRRLVVQQAGKADAGEYSCEAGGQKLSFRLDVTEPKLVFAKEQQARSEVKAEGNSATLSCEVAQAQ  
EVTWFKDGKLLSSSSKVRMEASGCSRRLVVQQAGKADAGEYSCEAGGQKLSFHLDVTEPKLVFAKEQQAHSEV  
KAEAGASATLSCEVAQAQTEVTFKDGKLLSSSSKVRMEASGCSRRLVVQQAGKADAGEYSCEAGGQKLSFR  
LDVAEPKLVFAKEQQARSEVKAEGASATLSCEVAQAQTEVTFKDGKLLSSSSKVRVEASGCSRRLVVQQAGK  
ADAGEYSCEAGGQKLSFRLDVAEPKLVFAKEQQANSEVKAEGASATLSCEVAQAQTEVTFKDGKLLSSSSK  
VRVEASGCSRRLVVQQAGKADAGEYSCEAGGQKLSFRLDVAEPKLVFAKEQQAHSEVKAEGASATLSCEVAQ  
AQTEVTFKDGKLLSSSSKVRVEASGCSRRLVVQQAGKADAGEYSCEAGGQKLSFRLDVAEPKLVFAKEQQAH  
SEVKAEGASATLSCEVAQAQTEVTFKDGKLLSSSSKVRVEASGCSRRLVVQQVQKADAGEYSCEARGQKLS  
FRLDVAEAEQSIPERPSRREPLVVKEHETIILTATIAAPSVAAVTWLKDGVERRSKRHEATSLGDTHLTVR  
GAQVLDIAIYSCRVGKEGQDFPVQVEEVAAKFSKPLEPVEGELGGTVMLVCELSPEQAEVWRCGNTQLRPGK  
RFQMTSEGPRRTLTVSGLREDDAEYVCESRDDRTSARLTVKVRVVKFTSGLSAMVAEEGQEAFTQCVVSPS  
DAGVTWYKDGMLQPSKFMVMEGASRSLTILGLTLEDAGQVTVAEAGASSAALRVREAPVLFKKLEPQT  
VEERTSVTLEVELTRPWPEVKWTRNAAVLTPSENVEIRAEGARHCLVLRVSGFADRGFFGCETPDDKTQAKLN  
VEMRQVRLVRLQVEEAKQGTASMDVELSHAEEVGSWTRDGLRLQPGPKCHLAVQGPVHILTLALQPDQSG  
LVAFRAEGVHTSARLIVTELPVSTFRVLQDVVATQKEKVTLECELSRPVDVRLKDGVELRAGKAIQVAGGT  
CRSLVIYRCETGDQGVYVCDALDAQTSASLRVQGRTYTLIFRRVLAEDAGEVVFVAENAESRAHLRVLKELPVT  
LLRPLRDKIAMEKHRGVLECCQVSRASAQVRWFKGGVELQSGPKYEVVSDGLYRKLVIINDVQPEDEDTYTC DAG  
NVKTSAQFFVEEQSITIVRGLKDMTVMEPAPAWFECETSIPSVRPPKWLKGKTVLQAGGNVLEQDGTVHRLT  
LHKTCSTMTGPFVHTIGKSRSSAQLVSDIPVVLTRPLEPKAGRELQSVVLSCDFRPAPKAVQWYKDDTPLSP  
SEKFKMALEGQMAELRILRLTPADAGVYRCQAGSAQSSAEVTVAREVTVIQPLQDAEAMEEGRVCFSCELSH  
KDEDIEWSLNGTPLYNDSFHEISHGCLHTLVLKSVRQADTGTVCATSPKVSVSARLVVKGKPVVFLKALDDV  
SAEERGTTLTQCEVSDPEARVWRKDGVELGSPDKYDFLHKAGARGLTVHDLSDHEDAGLYTCQVGSKETQSKV  
SVHDLHVGITKRLKTVEVLEGECSFECVLSHESPSDPAVWTVGGKTVGGSGHFHAVRQGRKYTLTVKDAALS  
DAGEVVFVSLGLTSKASLIIRERPVDITKPLEDQRTTLGEDVMLSCELSRAGTSVRWLKDGKAIKRSQKYDLL  
SEGTRAVLVVRKASLKDSGEYTCETEASKSTAKLCVEEKANRFTEELADLQVEEKGRAVFTCKTEHPASVVTW  
RKGLLELRASGKHVPSQEGTLTKLTINALERTSDTYTCDIGQARTQARLLVHGQKVRVIEDLEDTAVQEGSS  
AKFCCRIPADYGPVHWFLDKTPHLSNELNEITVQPGGYHVLTLRQLALKDSGTVYFEAGDQRTSAAALRVTEK  
PSIFSRPLTDVTVTEGEDTLVCETTTVDSVVRWTKDGKTLRPSARCQLSHEGCAQLLITATTPQDGGRYKC  
EIGGASSSSIVRVHALPVRFRFRESLKDVEVPEGKAATLRCVLSVAAPVEWRHGDDVLKSSNKYSRLQREGAVLE  
LVIRDLPQDQSGQYSCSFGDQTTSATLTVKTSQAQFVGKLRNKEATEGTTVTLRCELTKAPVEWKKGTETLR  
NGDKYSLKQDGA VCELQICSLLVADAGEYSCVCGQEKTSATLTVKALLVHFVRRRLRSKEATEGDTTTLQCELS  
KAAPVEWRKGTETLRDGDRLYSLKQDGA VCELQIRSLTIADAGEYLCTCGQEKTSATLTVRGLPAKFIEDLRSQ  
EATEGATAILRCELSKAAPVEWRKGSSETLKDGDRLYSLRQDGA VCELQIRGLAVVDTGTYSLSLPTKFTTEGLRNE  
EATEGTMATLRCQMSKAAPVEWRKGSSETLRDGDRLYSLRQDGA MCELQIRGLTIEDSGEYTCVCGQEKTSATLS  
VKALPPRFIEDLRSQEATEGTMATLRCQMSKAAPVEWRKGSSETLGDGGYSLRQNGAVCELQIHDLAVEDTGE  
YSCVCGQEKTSATLNVKALPPKFTTEGLKKEEATEGTMVTLRCQMSKEATVEWRKGAKTSLDGGYSLRQDGA  
MCELQICGLAVEDAGEYSCVCGQEKTSATLSVKALPPRFIEDLRSQEATEGTMATLRCQMSKAAPVEWRKGS  
SETLRDGDRLYSLRQDGA VCELQIRDLAVEDAGEYLCVCGQEKTSATLSVKALPPRFIEDLRSQEATEGTMATLRC  
QMSKAAPVEWRKGSSETLRDGDRLYSLRQDGA MCELQICDLAVEDTGDYSCVCGQEKTSATLSVKAPVVFQOPLQ  
NLQAEEGSMASLRCELSVPNAAMVWSKGGLELQGDTRREARQQGCVAELLLRDLRREDAGEYSCTCGSQTTSA  
TLMVTAAPVRFRLRELQAQDVDEGATARLRCLELSREAVSVEWRKGSILQFPCAQYQMVQEGTTAELLVHGVEQE  
DAGEYTCDAAGHTIQLSARLSVRAPKPKFKTDLQSTEQEAGGTARLCCQLSEAEPGTPVQVLEKEGVELHVGSKYE  
MRQGA VCELLIHGLEAKDTGEYACLVGKQKTLASLRVLEKEPEVTIVRGLVDMVEVQADEVDLEFTCKVSOAGATD  
VQWHLQGLPLQSNEVTEAVLADGCTHVLQKGVTLVEDAGTVSFHVGGSSSAQLTVRVPVTVLEPLKDVQL  
SEGQDAHFRCRLSRASGQEARWALGGVPLQCNEMNDITVEQGTLYLLTLHKVTLLEDAGTITLQVGS CSSEAQL  
KVTAKNTVLRGLENDVALEGGALFECQLSQPEVAHTWLLDDEPVHTSEKVEVVYFENGLRHLLLLLKNLKPQ  
DSCRVTFLAGDVVTS AFLTVRGWRLEVLEPPHDASVKAGMQVRFTCILSEAVPVGEATWYINGAAIQPDDTDW

TVTTDGS HHAL TSN AQPQH AGEV TFAARDAVASARLSVLALPDPPEDA EVVGRSDHSV TLSWVAPMSDGGGG  
LCGYR VEMKEASTGQWQLCHDLVPGPECVVDDLVP GKTYRFRVA AVGPAGAGEPVHLPQMVKIAPAPAPAPAP  
APAPETRQAVVGEDIC LELEVAADGGEVVWHKGT ERIQPGGHFEVLSRGQRQMLVIKGFRTEDQGEYRCGPIQ  
GLPSSGAATFNVVMTSGSGDEVPAQPSLPPEAAQEGDLHLLWEALARKRRMSREPTLDSISELPEEDSRVQHL  
RQEAEETAPDLSEGYSTADELARTGEADLSHTSSDDESRAGTPSLVTYLKKAGGGPISPLASKHEAQVTTSVR  
PQKQQEPVVPTCPPPGDLSAADLMDPSLDKAAVKIQAAF KGYKVRKEMKQQEGPVFSRTFGDTEAQVGDVLR  
ECVLATKTD MRACWLKDGIELTDGRHYHIDQLKDGTC SLLVTGLAPTDSGRYTCQVSTKSGRVSHSACVVVSG  
TESEAESSSGGELDDAFRRAARLHRLFR TKSPAELSEEEFLSADEGPGPEEPADWQTYREDENFVCIRFE  
SLAEARQAVTCFRNMFATMGIGVEISLGEQGP RGVEMRIGKVAPT VTPAVPLAKTPGLQTSDAAPVFLTELQN  
QDVQDGYPMSFDCVVTGQPVPSVRWFKDGKLL EEDDH YMINEDQQGGHQLIITAVVPADMGVYRCLAENSMGV  
SSTKAELRVELTSTDYDTAADATETSSYFSAQGYLSSREQEGTESDEGQLPQVLEELKDLQVAPGTRLAKFQL  
KVKGY PAKPLYWFKDGQPLTSDHIRMTDKKTLHTLEIVSVTREDSGQYAA YISNAVGAAYSSARLLVRGPSE  
PEEKPASDVHERLVP PRILEKFTPKKVKRGS SITSVKVEGHPAPSVH WLKEEA EKGLWIGPDTPGYTM ASS  
SKQHS LVL LDVGRQHGT YTCIATNPAGQALCSASLHISGLAKEEEQERVKEALISSFLQGTSQAVSAQMS ES  
AGFADLVGQSKGESLVAAEASHLSLAEVGT EEF LQKLT SQI TEMVSAKISQAKLQVPGGDSDEETKTPSASP  
RHGRSRPSSSVQESSSESEDGDSRGEIFDIYVVTADYLP LGAEQDAIILREGQYVEV LDSAHLPLRWLVRTKPT  
KSSPSRQGWVSPAYL DKRLKLSPEWGPTEAEPFGEAVSEDEYRTR LSSVIQELLSSEQAFV GELQFLSHHM  
KHLERSPRVPAAVASQKTVIFRNVQDISHFHSSFLKELQCGCTDDVAMCFIKNQEA FEKYLEFLVGRVQAES  
VVVSTPVQEFYK KYAEETLSAKDPTQPPPPPLQHYLEQPVERVQKYQALLKELIRNKARNRQNCALLEQAYAV  
VSALPQRAENKLVSLMENYPGTLEALGEP I RQGHFIVWEGAPGARMPWKGNHRHVFLFRNYLVICP RRRDSR  
TDTFSYVFRNMMKLSSIDLNDQVEGDDRAFEVWHERE DSVRKYLQARTV I IKN SWKEICIGIQORLAQPVWR  
PPEFEEELADCTAELGETVKLACRVGTGPKPIVSWYKDGK PVEVDPHHILIEDPDG SCTLILDNLGTIDSGQY  
MCF AASAAGNASTLGKILVQVPPRFV NKVRATPFVEGEDAQITCTVEGAPYPQIRWYKDG TLLAPGNRYRMLN  
EPRSGVLV LVIQAASKEDLGHYECELVNR LGSTRGGGEL YMQSPALRARDQH HREQIVA AAVEVTEQETKVPKK  
TVIIEETITTVVKS PRGRRQSPGKSPSRSPRRSASPRR PGLLAPERLYPPGTSPSRRLVEVEQGRKAPV PALY  
VTEAEVHAPASQSQPKLEVEETIEVRVKKTGSRGASPRVREMTSRGEGILFTLPGGI PRDPNANNNSNNKSVY  
QEARTWGP AVVHVEPFIFQVDSVGNVDWVAASPEPEQVRSQKEENTERQEGCSGDGENTFLMEEPQD TDSL  
QGRDPKILTHNGRVLT LADLEDYVPQEGETF GCGDSTPSTPDEPPCEVSVLQREI SEPTVGGQPVLLNVGRPPG  
TGATPSFFRPGSQVHSPESVSFLLREAWSGPVSAAPWTSSFH THVQSSVDGSHGSFKTEVSTQTVSFGAVGET  
VTLHIDPDGGEAPGPSQG\*

>rs47381157\_ENSMUSP00000158795\_c.17290:C>G\_p.S5764C

ENSMUST00000238536.2|Obscn-210|ENSMUSG00000061462|-|chr11:g.58931095:G>C  
MDHSFSGAPRFLTRPKAFVVS VGKDATLSCQIVGNPTPHVSWEKDRQPV EAGARFLAQDGDVYRLTILDLAL  
GDSGQYVCRARNAIGEFAAVGLRVDSEGTC AEQAPHFLLRPTSIRVREGADATFRCRVGGSPQPAVSWSKDG  
RRLGPPDAPHVRVEEHGESSALRIR SARPRDGGTYEVR AENPLGSASAAAALVVDSDAEVAGPPGTSTATLLA  
HLQQRREAMRAEGIPSPPGAGTRTCTVTEGHARLSCEVFTGEPKPE TVWKKDQGLVTEGRRHVVEDEQENF  
VLKILFCQSDRGLYTCTASNLVGQTYSSVLVVREPTVPFKKRLQDLEVREKESATFQCEVAQPATEAAWFK  
EETRLWASAKYDIEEGETERRLTVRNVSADDDAVYICETTEGSR TVAELSVQGNLTRKLRKTAVRTGDTAIF  
WVELAVPEGPVRWLRNQEEMVAGGRVAITAEGTCHTLTIFQCTLEDMGEVAFVSGGCRTTTQFCVSAPRRPPL  
YPPADPVVKAKTESSVTL SWSAPPHGDRPVTIDGYVLEKRKLGAYAWSRCHEAGWLATTEFTITGVAAEGDFQ  
FRVSAINHFGQGPYLEFPGTMHLVPM LAVKTPLKAVEAVEGGEVTF SVDLTVASSGEWFLDGEALKASSIYVI  
RCDRTRHMLTIREV PARLHGAQLKFVANGIETS IQMVVRAALGLPSSKLPAAAAREVLAQLHEEAQLLAE LSD  
QAAA VTWLKDGRELSLGP KYEMQVSAGRRALLVRDVAQDDAGLYECVSRGSR TAYQLLVQDITDGYRDWGPAG  
PQKHMCKCAGAKIARYLGSSCYRFLQYDKGVWHWLEAALDTRQKGKTS SCSLHEKPKLVFAKQQAHSEVKA E  
AGNSATLSCEVTQAQTEVTWFKDGKLLSSSSKVRMEASGCSRRLLV VQQAGKADAGEYSCEAGGQKLSFRLDVA  
EPKLVFAKQQAHSEVKA EAGASATLSCEVAQAQTEVTWFKDGKLLSSSSKVRMEASGCSRRLLV VQQAGKADA  
GEYSCEAGGQKLSFRLDVAEPKMF AKEQQARSEVKA EAGASATLSCEVAQAQTEVTWFKDGKLLSSSSKVRM  
EASGCSRRLLV VQQAGKADAGEYSCEAGGQKLSFRLDVTEPKLVFAKEQQARSEVKA EGVNSATLSCEVAQAQ  
EVTWFKDGKLLSSSSKVRMEASGCSRRLLV VQQAGKADAGEYSCEAGGQKLSFRLDVAEPKLVFAKEQQARSEV  
KAEAGNSATLSCEVAQAQTEVTWFKDGKLLSSSSKVRMEASGCSRRLLV VQQAGKADAGEYSCEAGGQKLSFHL  
DVTEPKLVFAKEQQAHSEVKA EAGASATLSCEVAQAQTEVTWFKDGKLLSSSSKVRMEASGCSRRLLV VQQAGK  
ADAGEYSCEAGGQKLSFRLDVAEPKLVFAKEQQARSEVKA EAGASATLSCEVAQAQTEVTWFKDGKLLSSSSK  
VRVEASGCSRRLLV VQQAGKADAGEYSCEAGGQKLSFRLDVAEPKLVFAKEQQANSEVKA EAGASATLSCEVAQA  
AQTEVTWFKDGKLLSSSSKVRMEASGCSRRLLV VQQAGKADAGEYSCEAGGQKLSFRLDVAEPKLVFAKEQQAH  
SEVKA EAGASATLSCEVAQAQTEVTWFKDGKLLSSSSKVRMEASGCSRRLLV VQQAGKADAGEYSCEAGGQKLS  
FRLDVAEPKLVFAKEQQAHSEVKA EAGASATLSCEVAQAQTEVTWFKDGKLLSSSSKVRMEASGCSRRLLV VQQ  
AGKADAGEYSCEAGGQKLSFRLDVAEPKLVFAKEQQAHSEVKA EAGASATLSCEVAQAQTEVTWFKDGKLLSS  
SSKVRMEASGCSRRLLV VQQAGKADAGEYSCEAGGQKLFRLDVAEPKLMFAKEQQAHSEVKA EAGASATLSCE

VAQAQTEVTFWFKDGKLLSSSSKVRVEASGCSRRLVVQQAGKADAGEYSCEAGGQKLSFRLDVAEPKLVFAKEQ  
 QAHSEVKAEAGASATLSCEVAQAQTEVTFWFKDGKLLSSSSKVRVEASGCSRRLVVQQVQKADAGEYSCEARGQ  
 KLSFRLDVADTRLMFAKEQQARTEVKAEAGNSATLSCEVAQAQTEVTFWFKDGKLLSSSSKVRVEASGCSRRLV  
 VQQAGKADAGEYSCEAGGQKLSFRLDVAEAEESQIPERPSRREPLVVKEHETIILTATIAAPSVAAVTVLKDGV  
 EIRRSKRHEATSLGDTHTLTVRGAQVLDIAIYSCRVGKEGQDFPVQVEEVAAKFSKPLEPVEGELGGTVMLVC  
 ELSPEQAEVWRCGNTQLRPGKRFQMTSEGPRRTLTVSGLREDDAEYVCESTRDDRTSARLTVKVPVVKFTS  
 GLSAMVAEEGQEAFTQCVVSPSDAGVTWYKQGMQLPSEKFMVESGASRSLTILGLTLEDAGQVTEAEGAS  
 SSAALRVREAPVLFKKKLEPQTVVEERTSVTLEVELTRPWPEVKWTRNAAVLTPSENVEIRAEGARHCLVLRVSV  
 GFADRGFFGCETPDDKTQAKLNVEMRQVRLVVRGLQEVEAKEQGTASMDVELSHAEEVGSWTRDGLRLQPGPKC  
 HLAVQGPVHILTLALSALQPQDSGLVAFRAEGVHTSARLIVTELPVSFTRVLQDVVATQKEKVTLECELSRPVDV  
 RWLKDGVLELRAGKAIGIVAQGTCSRSLVIYRCETGDQGVYVCDALDAQTSASLRVQGRTYTLIFRRVLAEDAGE  
 VKFVAENAESRAHLRVKELPVTLLRPLRDKIAMEKHRGVLECCQVSRASAQVRWFKGGVELQSGPKYEVVSDGL  
 YRKLVINVDVQPEDEDTYTCDAENVKTSAQFFVVEEQSITIVRGLKDMTVMPEPAPAWFECETSIPSVRPPKWLGL  
 KTVLQAGGNVGLQDGTVHRLTLHKTCSTMTGPVHFTIGKSRSSAQLVVSDIPVVLTRPLEPKAGRELQSVVL  
 SCDFRPAPKAVQWYKDDTPLSPSEKFKMALEGQMAELRILRLTPADAGVYRCQAGSAQSSAEVTEAREVTVI  
 QPLQDAEAMEEGRVCFSCSELSHKDEDIEWSLNGTPLYNDSFHEISHEGCLHTLVLSKSVRQADTGTVCATSPKV  
 SVSARLVVKGKPVVFLKALDDVSAEERGTLLTQCEVSDPEARVVWRKDGVELGSPDKYDFLHKAGARGLTVHD  
 LSHEDAGLYTCVQSGKETQSKVSVHDLHVGITKRLKTVEVLEGESECSFECVLSHESPSDPAVMTVGGKTVGGS  
 GHFHAVRQGRKYTLTVKDAALSDAGEVVSFVGLTSLKASLIIRERPVDTKPLEDQRTTLGEDVMLSCELSRA  
 GTSVRWLKDGKAIRKSQKYDLLSEGTRAVLVVRKASLKDSGEYTCETEASKSTAKLCVEEKANRFTTEELADLQ  
 VEEKGRAVFTCKTEHPASVVTWRKGLLELRASGKHVPSQEGTLKLTINALERTSDTYTCDIGQARTQARLL  
 VHGGKVRVIEDLEDTAVQEGSSAKFCRIAPADYGPVHWFLLDKTPLHSNELNEITVQPGGYHVLTLRQLALKD  
 SGTVYFEAGDQRTSALRVTEKPSIFSRPLTDVTVTEGEDLTLVCETTTVDSVVRWTKDGKTLRPSARCQLSH  
 EGCQAQLLITATTPQDGGRYKCEIGGASSSSIVRVHALPVRFRESLKDVEVPEGKAATLRCVLSVAAPVEWR  
 HGDDVLKSSNKYSLRQEGAVLELVIRDLQPDQSGQYSCSFGDQTTSATLTVKTSQAQFVGLKRNKEATEGTTV  
 TLRCELSTKEAPVEWKKGTETLRNGDKYSLKQDGAVALCELQICSLLVADAGEYSCVCGQEKTSATLTVKALLVHF  
 VRRLRSKEATEGDTTTLQCELSKAAPVEWRKGTETLRDGDYSLKQDGAVALCELQIRSLTIADAGEYLCTCGQE  
 KTSATLTVRALPAKFKDSLKNEEATEGTTATLSCELSKAAPVTWKKGPKTLQSGDKYVLRQDGAVALCELQIHGL  
 TMADAGEYSCVCGQEKTSATLTVRGLPAKFIEDLRSQEATEGATAILRCELSKAAPVEWRKGSSETLKDGDYR  
 LRQDGAVALCELQIRGLAVVDGTYSLSLPTKFTTEGLRNEEATEGTMATLRCQMSKAAPVEWRKGSSETLRDGDYR  
 LRQDGAVALCELQIRGLTIEDSGEYTCVCGQEKTSATLSVKALPSRFIEDLRSQEATEGTMATLRCQMSKTA  
 PVWKKGSETLRDGGYSLRQDGPVCELQICDLAVEDAGEYSCVCGQEKTSATLSIKALPPRFIEDLRSQEATEG  
 MATLRCQMSKAAPVEWRKGSSETLGDGGYSLRQNGAVCELQIHDLAVEDTGEYSCVCGQEKTSATLNVKALPP  
 RFIEDLRSQEATEGTMATLRCQMSKAAPVEWRKGSSETLRDGGYSLRQDGAVALCELQIHDLVEDAGQYSCVCG  
 QEKTSAVLTVDALPKPFTEGLKKEEATEGTMVTLRQMSKEATVEWRKGAKTLSDDGGYSLRQDGAVALCELQI  
 GLAVEDAGEYSCVCGQEKTSATLSVKALPPRFIEDLRSQEATEGTMATLRCQMSKAAPVEWRKGSSETLRDGD  
 YSLRQDGAVALCELQIRDLAVEDAGEYLCVCGQEKTSATLSVKALPPRFIEDLRSQEATEGTMATLRCQMSKA  
 APVEWRKGSSETLRDGDYSLRQDGAVALCELQICDLAVEDTGDYSCVCGQEKTSATLSVKALPPRFIEDLRS  
 QEAREGTVALRRCMSKAAPVEWRKGSSETLKDGDYSLRQEGNLCELQIRDLAVEDTEEYSCVCGQEKTSATLS  
 VKALPAKFIEDLRSQEAPESSTVTLRCKLSKKASVVWKKGSETLRNGARYSLRQDGAVALCELQIRDLTVEDT  
 GEYSCTCGQERTSATLSIMAPQVVFQQPLQNLQAEEGSMASLRCELSVNAAMVWSKGGLELQGDTRREARQQGC  
 VAELLLRDLRREDAGEYSCTCGSQTTSATLMVTAAPVRFRLRELQAQDVDEGATARLRCELSREAVSVEWRKGS  
 LQLFPCAKYQMVQEGTTAELLVHGVEQEDAGEYTCDAHTQSIARLSVRAPKPKFKTDLQSTEQEAGGTARLCCQLS  
 EAEPGTPVQWLKEGVELHVGSKYEMRRQGAVALCELLIHGLEAKDTGEYACLVGGQKTLASLRVKEPEVTIVRGL  
 VDMEVQADEDVEFTCKVSQAGATDVQWHLQGLPLQSNVTEVAVLADGCTHVLQKGVTVLEDAGTVSFHVGGL  
 SSSAQLTVRVPEVTVLEPLKDVQLSEGQDAHFRCRLSRASGQEARWALGGVPLQCNEMNDITVEQGTLYLLTL  
 HKVTVLEDAGTITLQVGSSESQAQLKVTAKNTVLRGLENVDALLEGGEALFECQLSQPEVAHAHTWLLDDEPVHTS  
 EKVEVVYFENGLRHLLLLKLNKPKQDSCRVTFLAGDVVTSFAFLTVRGRLEVLLEPPHDASVKAGMQVRFTCILS  
 EAVPVGEATWYINGAAIQPDDTDWTVTTDGSHHALTLNAQPPHAGEVTFFAARDAVASARLSVLALPDPPEDA  
 EVVGRSDHSVTLVSWAPMSDGGGGLCGYRVMKEASTGQWQLCHDLVPGPECVDDLVPGKTYRFRVAAVGPA  
 GAGEPVHLPQMVKIAPAPAPAPAPAPAPAPETRQAVVGEDICLELEVAADGGEVVWHKGTERRIQPGGHFEVLS  
 RGQRQMLVIKGFRTEDQGEYRCGPIQGLPSSGAATFNVMTSGSGDEVPAQPSLPPEAAQEGDLHLLWEALAR  
 KRRMSREPTLDSISELPEEDSRVQHLRQEAETAPDLSEGYSTADELARTGEADLSSTDDSESRAGTFCPLVT  
 YLKKAGGPGISPLASKHEAQVTTSVKPKQKQEPVPTCPGGDLAADMPSLDKAAVKIQAAFQKGYKVRKE  
 MKQQEGPVFSRTFGDTEAQVGLRLECVLTKTCDMRACWLKDGIELTDGRHYHIDQLKDGTCSSLVTVGLAPT  
 DSGRYTCQVSTKSGRVSHSACVVVSGTESEAESSGGELDDAFRRAARRLHRLFRTKSPAELSEEELFLSADE  
 GPGEPEPADWQTYREDENFVCIRFESLAEARQAVTCFRNMFATMGIGVEISLGEQGPVEMRIGKVAPTVT  
 PAVPLAKTPGLQTSDAAPVFLTELQNDQVQDGYPMSFDCVVTGQPVPSVRWFKDGKLLLEDDHYMINEDQQGG

HQLIITAVVPADMGVYRCLAENSMGVSSSTKAELRVELTSTDYDTAADATETSSYFSAQGYLSSREQEGTESDE  
GQLPQVLEELKDLQVAPGTRLAKFQLKVKGYPAKLYWFKDGGPLTTS DHIRMTDKKTLHTLEIVSVTREDSG  
QYAAIISNAVGAAYSSARLLVRGPSEPEEKPASDVHERLVPPRILEKFTPKKVKRGSSITFSVKVEGHPAPSV  
HWLKEEAKEKGV LWIGPDTPGYTMASSSKQHSVLVLLDVGRQHQTTCIATNPAGQALCSASLHISGLAKEEEQ  
ERVKEALISSFLQGTSAQVSAQMSSEAGFADLVGQSKGESLVAEEAHSHLSLAEVGTEEFLLQKLTSTQITEMVS  
AKISQAKLQVPGGDSDEETKTPSASPRHGRSRPSSSVQESSSESEDGDSRGEIFDIYVVTADYLP LGAEQDAI  
ILREGQYVEVLDSAHPLRWLVRTKPTKSSPSRQGWVSPAYLDKRLKLSPEWGPTEAPEFPGEAVSEDEYRTRL  
SSVIQELLSSEQAFVGGELQFLESHHMKHLERSPRVPAAVASQKTVI FRNVQDISHFHSSFLKELQCGCTDDDV  
AMCFIKNQEAFEKYLEFLVGRVQAESV VVSTPVQEFYKKYAEETLSAKDPTQPPPPPLQHYLEQPVVERVQKYQ  
ALLKELIRNKARNRQNCALLEQAYAVVSALPQRAENKLVSLMENYPGTLEALGEP I RQGHFIVWEGAPGARM  
PWKGHNHRVFLFRNYLVICKPRRDSRTDTFSYVFRNMMKLSSIDLNDQVEGDDRAFEVWHEREDSVRKYLLQA  
RTVIKNSWVKEICGIQORLAQPVWRPPEFEEELADCTAELGETVKLACRVTGT PKPIVSWYKDGKPV EVDPH  
HILIEDPDG SCTLILDNLTGIDSGQYMCFAASAAGNASTLGKILVQVPPRFVNVKVRATPFVEGEDAQITCTVE  
GAPYQIRWYKDGTL LAGPNRYRMLNEPRSGVLV LVIQAASKEDLGHYECELVNRLGSTRGGGELYMQSPALR  
ARDQHHREQIVAAVEDT SVEGSAHSAQDQGAASVLRLLGSEALGPS PGDLPNTRQSEPPAFEEAASQIP  
GAASGTPEVSPQPGTHKGLEQETTSSGSQGWTVPIRVEGTAWPGAGTGQLL LDVHSQVIMETTQRTYVCQAPDT  
GVTRAPSMQVTIEDVQVQGDMAQF DAVIEGHPPP I V TWYKGSTQLTSSARLSQRQDGTTYSLVLT D VAPHDA  
GYTVCVANNAGQV LCKAELLVHGGDKLDAENQVYRRLKHSFYDVQEEI GRGVFGFVKRVQHKGNKMFCAAKF  
IPLRSKTRAQAYQERDILATLGHPLVTGLLDQFETRKTLLI LILELCSSEELLDRLFKKGVVTEAEVKVYIQQL  
VEGLHYLHSHGILHLDIKPPNIMLVHPAREDIKICDFGFAQKITPSEPQYSKYGSPEFVSPEIIEQNPVSEGS  
DIWAMGVISYLSLTCS SPFAGESDRATLLNVLEGRVSWSSPTAAHLS EDAKDFIKATLQRTPRARPSTSQCLA  
HPWFLKSMPAEEAHFINTKQLKFL LARSRWQRSLMSYKSI LVMRSIPELLQGPDPSPSLGVARHLRGEASGAS  
SSSSSSDNELAPFARAKSLPPSPVTHSPLLHPRGFLRPSASLPEETEASMTADAAVPAS PQSAGPPASPGCV  
PRHSVSISSLFYQQAGEGAERGNKTS GAKRHPARRRHLKGGYIARALPGLREPLMEYSLLEEEAAREEQASLM  
TKTPSFETALR L P S SSVREVPGRSHSLDNPPVT T G P S P E A C K E Q L L F P P S T G L T H E T T A K D R G H K E G F L Q E S V  
PFPMPGSDSRPGKQEGSSQDSCRGKPASSCHSELGSGSQEGCGPPSSQSLGSLPPQSLKELSTSCGFLFSEQ  
PQAAPFPQTQVSPLLGSEKEPQDGSLSSEGPVVPSSSPGSASQVDASLDTEGLSEAGDTCDFTPPPQRPQEQAT  
TRKFSLESRGGYAGVAGYGTFAFGGDAGGMLGQGPLWARMAWAVS QSSEEQDEAATESPQPLES LGPIAEASG  
VPLRTSPSLTPWEEVEQVSLVQIRDLSDGAEAA DTISLDISEVDPAYLNLSDLYDIKYL PFEFMI FRRVPKPI  
EQPESPGSETEAGQGLADFL EEAAWPWP GELGLRAGLEITEEPEEPGDLEALLGEAAVGRKRKWSPSRGLFQF  
PGRCLSGEEPVELGLRQRVKASMAHISRI LKGRPEGP EREGPPRKKAGLASFRLSGLKGRDQELSDEAVVLGQ  
SVTLACQVLAQPTAQATWSKDGVLLESSGHL L I S S T L K N F Q L L T I L V V K E E D L G T Y T C C V S N P L G T A V T T G V L  
RKAERPSSSPRPEVGELYKDAVLLVWKPVE SCGPVTYIVQCCIEGGSWTTLASDISDCCYLTGKLSRGGMYIF  
RTACVSKAGMGPYSSPSEQVLLGGPNHLASEEESSRGRPAQLLPSTKTFAFQMQIRRRGRFSVVRQCREKASGR  
ALAAKIVPYQPEDKTAV LREYEA LKRLHHPHLAQLHAAYLSPRHLVLI L E L C S G P E L L P S L A E R E S Y S E S D V K  
DYLWQMLSATQYLHAQHILHLDLRSENMMVTEYNLLKVIDLGN AQSLDQEKVPAPENFKDYLETMAPELLEGQ  
GAVPQTDIWAIGVTA FIMLSGEY P E S S E G T R D L Q K G L R K G L I R L S R C Y A G L S G G A V A F L Q S S L C A Q P W G R P C A  
STCLQCGLWTEEGPTGSRPTVTFPTVRLRA FVREERKRRALLYKKNLAQVR\*  
>rs47381157\_ENSMUSP00000038264\_c.15130:C>G\_p.s5044C  
ENSMUST00000047441.14|Obscn-202|ENSMUSG00000061462|-|chr11:g.58931095:G>C  
MDHSFSGAPRFLTRPKAFVVS VGKDATLSCQIVGNPTPHVSWEKDRQPVEAGARFRLAQDGDVYRLTILDLIAL  
GDSGQYVCRARNAIGEAFAAVGLRVDSEGTCAEQAPHLLRPTSIRVREGADATFRCRVGGSPQPAVSWSKDG  
RRLGPPDAPHVRVEEHGESSALRIR SARPRDGGTYEVRAENPLGSASAAAAALVVDSDAEVAGPPGTSTATLLA  
HLQORREAMRAEGIPSPPGAGTRTCTVTEGKHARLSCFVTGEPKPE TVWKKDGQLVTEGRRHVVEDEQENF  
VLKILFCKQSDRGLYTCASNLVGTYSVVLVVVREPTVPFKKRLQDLEVREKESATFQCEVAQAPATEAAWFK  
EETRLWASAKYDIEEEGTERRLTVRNVSADDDAVYICETTEGSRVAELSVQGNLTRKLPKRTAVRTGDTAIF  
WVELAVPEGPVRWLRNQEEMVAGGRVAITAEGTCHTLTIFQCTLEDMGEVAFVSGGCRTTTQFCVSAPRRPPL  
YPPADPVVKAKTESSVTL SWSAPPHGDRPVTIDGYVLEKRKLGAYAWSRCHEAGWLATTEFTITGVAAEGDFQ  
FRVSAINHFGQGPYLEFPGTMHLVPLAVKTP LKAVEAVEGGEVTFVSDLTVASSGEWFLDGEALKASSIYVI  
RCDRTRHMLTIREV PARLHGAQLKFVANGIETS IQMVVRAALGLPS SKLPAAAAAREVLAQLHEEAQLLAE LSD  
QAAA V T W L K D G R E L S L G P K Y E M Q V S A G R R A L L V R D V A Q D D A G L Y E C V S R G S R T A Y Q L L V Q D I T D G Y R D W G P A G  
PQKHMCKCAGAKIARYLGS SCYRFLQYDKGVWHLEAALDTRQKGKTS SCSLHEKPKLVFAKQQQAHSEVKAE  
AGASATLSCEVAQAQTEVTWFKDGKLLSSSSKVRMEASGCSRRLVVQQAGKADAGEYSCEAGGQKLSFRLDVA  
EPKMVFAKEQQARSEVKAEGASATLSCEVAQAQTEVTWFKDGKLLSSSSKVRMEASGCSRRLVVQQAGKAD  
GEYSCEAGGQKLSFRLDVTEPKLVFAKEQQARSEVKAEGVNSATLSCEVAQAQTEVTWFKDGKLLSSSSKVRM  
EASGCSRRLVVQQAGKADAGEYSCEAGGQKLSFRLDVAEPKLVFAKEQQARSEVKAEGNSATLSCEVAQAQ  
EVTWFKDGKLLSSSSKVRMEASGCSRRLVVQQAGKADAGEYSCEAGGQKLSFRLDVTEPKLVFAKEQQAHSEV  
KAEAGASATLSCEVAQAQTEVTWFKDGKLLSSSSKVRMEASGCSRRLVVQQAGKADAGEYSCEAGGQKLSFRL

DVAEPKLVFAKEQQARSEVKAEEAGASATLSCEVAQAQTEVTFWFKDGGKLSSSSKVRVEASGCSRRLVVQQAGK
ADAGEYSCEAGGQKLSFRLDVAEPKLVFAKEQQANSEVKAEEAGASATLSCEVAQAQTEVTFWFKDGGKLSSSSK
VRVEASGCSRRLVVQQAGKADAGEYSCEAGGQKLSFRLDVAEPKLAFAKEQQAHSEVKAEEAGASATLSCEVAQ
AQTEVTFWFKDGGKLSSSSKVRVEASGCSRRLVVQQAGKADAGEYSCEAGGQKLSFRLDVAEPKLAFAKEQQAH
SEVKAEEAGASATLSCEVAQAQTEVTFWFKDGGKLSSSSKVRVEASGCSRRLVVQQAGKADAGEYSCEAGGQKLS
FRLDVAEPKLAFAKEQQAHSEVKAEEAGASATLSCEVAQAQTEVTFWFKDGGKLSSSSKVRVEASGCSRRLVVQQ
AGKADAGEYSCEAGGQKLSFRLDVAEPKLVFAKEQQAHSEVKAEEAGASATLSCEVAQAQTEVTFWFKDGGKLS
SSSKVRVEASGCSRRLVVQQAGKADAGEYSCEAGGQKLSFRLDVAEAEBSQI PERPSRREPLVVKHEHETIILTAT
IAAPSVAAVTWLKDGEIIRRSKRHEATSLGDTHLTVRGAQVLDLSAIYSCRVGKEGQDFPVQVEVAAKFSKP
LEPVEGELGGTVMLVCELSPEQAEVWRCNGTQLRPGKRFQMTSEGPRRTLTVSGLREDDAEYVCESRDDRT
SARLTVKVPVVKFTSGLSAMVAEEGQEA TFQCVVSPSDAGVTWYKDGMLQPSSEKFMVMEVSGASRSLTILGL
TLEDAGQVTVAEAGASSAALRVREAPVLFKKKLEPQTVEERTSVTLEVELTRPWPEVKWTRNAAVLTPSENV
EIRAEGARHCLVLRVSVGFADRGFFGCETPDDKTQAKLNVEMRQVRLVRLGLQEVEAKEQGTASMDVELSHAEVE
GSWTRDGLRLQPGPKHLAVQGPVHILTLTALQPDQSGLVAFRAEGVHTSARLIVTELPVSTFTRVLQDVVATQ
KEKVTLECELSRPVDVRLKDGVELRAGKAI GIVAQGTCSRSLVIYRCETGDQGVYVCDALDAQTSASLRVQGR
TYTLIFRRVLAEDAGEVKFVAENAESRAHLRVKELPVTLLRPLRDKIAMEKHRGVLECVSRASQAQRWFKGG
VELQSGPKYEVVSDGLYRKLVINOVPEDEDTYTCADAGNVKTSAQFFVVEEQSITIVRGLKDMTVMPEPAPAWFE
CETSI PSVRPPKWLGLKTVLQAGGNVGLQDGTVHRLTLHKTCSMTMGVPHFTIGKSRSSAQLVSDIPVVL
RPLEPKAGRELQSVVLSCDFRPAKAVQWYKDDTPLSPSEKFKMALEGMALRILRLTPADAGVYRCQAGSA
QSSAEVTVAEAREVTVIQPLQDAEAMEEGRVCFSCELSHKDEDEIWSLNGTPLYNDSFHEISHEGCLHTLVLS
VRQADTGTVCATSPKVSVSARLVVKGKPVVFLKALDDVSAEERGTTLQCEVSDPEARVVWRKDGVELGSPDK
YDFLHKAGARGLTVHDLSDHEDAGLYTCQVGSKETQSKVSVHDLHVGITKRLKTVEVLEGESECSFECVLSHESP
SDPAVWTVGGKTVGGSGHFHAVRQGRKYTLTVKDAALSDAGEVVFVSVLGLTSKASLIIRERPVDTKPLEDQR
TTLGEDVMLSCELSRAGTSVRWLKDGKAIKRSQKYDLLSEGTRAVLVVRKASLKDSGEYTCETEASKSTAKLC
VEEKANRFTTEELADLQVEEKGRAVFTCKTEHPASVVWTRKGLLELRASGKHVPSQEGTLTKLTINALERTDSD
TYTCDIGQARTQARLLVHGQKVRVIEDLEDTAVQEGSSAKFCRIA PADYGPVHWFLLDKTPLHSNELNEITVQ
PGYHVLTLRQLALKDSGTVYFEAGDQRTSAALVRETEKPSIFSRPLTDVTVTEGEDTLVCEDETTTVDSVSRWT
KDGKTLRPSARCQLSHEGCAQLLITATTPQDGGRYKCEIGGASSSSIVRVHALPVRFRESLKDVEVPEGKAA
TLRCVLSVAAPVEWRHGDDVLKSSNKYSLRQEGAVLELVIRDLQPDQSGQYSCSFGDQTTSATLTVKTSQAQ
FVGKLRNKEATEGTTVTLRCELTKEAPVWKKGTETLRNGDKYSLKQDGA VCELOICSLLVADAGEYSCVCGQ
EKTSATLTVKALLVHFVRRRLRSKEATEGDTTTLQCELSKAAPVEWRKGTETLRDGD DRYSLKQDGA VCELOIRS
LTIADAGEYLCCTCGQEKTSATLTVRALPAKFKDSLKNEEATEGTATLSCELSKAAPVTWKKGPKTLQSGDKY
VLRQDGA VCELOIHLTMADAGEYSCVCGQEKTSATLTVRGLPAKFIEDLRSQEATEGATAILRCELSKAAPV
EWRKGSSETLKDGD DRYTLRQDGA VCELOIRGLAVVDGTYS SLP TKFTEGLRNEEATEGTMATLRCQMSKAAPV
EWRKGSSETLRDGD DRYSLRQDGA MCELQIRGLTIEDSGEYTCVCGQEKT SATLSVKALP PRFIEDLRSQEATEG
TMATLRCQMSKAAPVEWRKGSSETLGDGGRYSLRQNGAVCELOIHDLAVEDTGEYSCVCGQEKT SATLNVKALP
PRFIEDLRSQEATEGTMATLRCQMSKAAPVEWRKGSSETLRDGGRYSLRQDGA VCELOIHDLDVEDAGQYSCVC
GQEKTSAVLTVDALPPKFTEGLKKEEATEGTMVTLRCQMSKEATVEWRKGAKTLS DGGRYSLRQDGA MCELQI
CGLAVEDAGEYSCVCGQEKTSATLSVKALP PRFIEDLRSQEATEGTMATLRCQMSKAAPVEWRKGSKT LR DGD
RYSLRQDGA MCELQICDLAVEDTGDYSCVCGQEKTSATLSVKAPQVVFQOPLQNLQAEEGSMASLRCELSVPN
AAMVWSKGGLELQGDTRREARQQGCVAELLLRDLRREDAGEYSC TCGSQTT SATLMVTAAPVRFRLRQLAQDV
DEGATARLRCELSREAVSVEWRKGS LQLFPCA KYQMVQEGTTAELLVHGVEQEDAGEYTC DAGHTQS IARLSV
RAPKPKFKTDLQSTEQEAGGTARLCCQLSEAE PGTPVQWLKEGVELHVGS KYEMRRQGA VCELLIHGLEAKDT
GEYA CLVGGQKT LASLRVKEPEVTIVRGLVDMVEVQADEVFEFTCKV SQAGATDVQWHLQGLPLQSNVTEVAV
LADGCTHVLQLKGVTL EDAGTVSFHVGGLS SQAQLTVRVPEVTVLEPLKDVQLSEGQDAHFRCLSRASGQEA
RWALGGVPLQCNEMNDITVEQGTLYLLTLHKVTL EDAGTITLQVGCSSSEAQLKV TAKNTVLRGLENDVALEG
GEALFECQLSQPEVA AHTWLLDDEPVHTSEKVEVVYFENGLRHLLLLKNLKPQDSCRVTFLAGDVVTS AFLTV
RALPDPPEDA EVVGRSDHSVTL SWVAPMSDGGGGLCGYRVMKEASTGQWQLCHDLVPGPECVDDLVPGKTY
RFRVA AVGPAGAGEPVHLPQMVKIAPAPAPAPAPAPAPAPETRQAVVGEDIC LELEVAADGGEV VWHKGTERRI
QPGGHFEVLSRGRQMLVIKGFRTEDQGEYRCGPIQGLPSSGAATFNVVMTSGSGDEVPAQPSLPPEAAQEGD
LHLLWEALARKRRMSREPTLDSISELPEEDSRVQHLRQEAETAPDLSEGYSTADELARTGEADLSHTSSDDE
SRAGTPCLVTYLLKAGGPGISPLASKHEAQVTT SVKPKQKQEPVVP TCPPPGDLSAADLMDPSLDKAAVKIQA
AFKGYKVRKEMKQEGPVSRTFGDTEAQVGDVLRLECVLATKTD MRACWLKDGIELTDGRHYHIDQLKDGTC
SLLVTLGLAPTD SGRYTCQVSTKSGRVSHSACVNVSGTSEAESSGGELDDAFRRAARRLHRLFRTPKSPAE LS
EELFLSADEGPPEPADWQTYREDENFVCIRFESLAEARQAVTCFRNMFMATMIGIVEISLGEQGP RGVEM
RIGKVAPT VTPAVPLAKTPGLQTS DAAPVFLTELQNDVQDGYPMSFDCVVTGQPVPSVRWFKDGLLEEDDH
YMINEDQQGGHQLIITAVVPADMGVYRCLAENSMGVSSTKAE LRVELTSTDYDTAADATETSSYFSAQGYLSS
REQEGTESDEGQLPQVLEELKDLQVAPGTR LAKFQLKVKGY PAKLYWFKDGOPLTSDHIRMTDKKTLHTLE

IVSVTREDSDGQYAAIYISNAVGAAYSARLLVVRGPEPEEKPASDVHERLVPPRILEKFTPKKVKRGSSITFSV
KVEGHPAPSVHVLKEEAKEGVLWIGPDTPGYTMASSSKQHSLLVLDVGRQHOGTYTTCIATNPAGQALCSASLH
ISGLAKEEEQERVKEALISSFLQGTSAQVSAQMSEASAGFADLVGQSKGESLVAAEEAHSHLSLAEVGTTEFLQK
LTSQITEMVSAKISQAKLQVPGGDSDEETKTPSASPRHGRSRPSSSVQESSSESEDGDSRGEIFDIYVVTADY
LPLGAEQDAIILREGQYVEVLDSAHPLRWLVRTKPTKSSPSRQGWVSPAYLDRKRLKLSPEWGPTEAPEFPGEA
VSEDEYRTRLSSVIQELLSSEQAFVQFLESHHMKHLERSPRVPAAVASQKTVIFRNVQDISHFHSSFLKE
LQCGCTDDDVAMCFIKNQEAFKEYLEFLVGRVQAESVVVSTPVQEFYKKYAEETLSAKDPTQPPPPPLQHYLE
QPVERVQKYQALLKELIRNKARNRQNCALLEQAYAVVSALPQRAENKLVSLMENYPGTLEALGEPVIRQGHFI
VWEGAPGARMPWKGNHRHVFVFRNYLVICPKRRDSRTDTFSYVFRNMMKLSSIDLNDQVEGDDRAFVWHERE
DSVRKYLQARTVIKNSWVKEICGIQORLAQPVWRPPEFEEELADCTAELGETVKLACRVTGTPKPIVSWYK
DGKPVVDPHHLIEDPDGSCCTLILDNLGTIGDSQYMCFAASAAGNASTLGKILVQVPPRFVNVKVRATPFVEG
EDAQITCTVEGAPYPQIRWYKDGTLAPGNRYRMLNEPRSGVLVLIQAASKEDLGHYECELVNRGSTRGGG
ELYMQSPALRARDQHHREQIVAAVEGAPSMQVTIEDVQVQVGDMAQFDAVIEGHPPPPIVTWYKGSTQLTSSAR
LSQRQDGTYSVLVTDVAPHDAGVYTCVANNAGQVLCCKAELLVHGDKLDAENQVYRRLKHSFYDVQEEIGR
GVFGFVKRVQHKGNMFCFAAKFIPLRSKTRAQAYQERDILATLGHPLVTGLLDQFETRKTLLILILELCSSEEL
LDRLFKKGVVTEAEVKVYIQQLVEGLHYLHSHGILHLDIKPPNIMVHPAREDIKICDFGFAQKITPSEFPQYS
KYGSPFVSPVPEIIEQNPVSEGSIDIWAMGVISYLSLTCSSPFAGESDRATLLNVLEGRVSWSSPTAAHLSSEDAK
DFIKATLQRTPRARPSTSQCLAHWPFLKSMPEAAEHFINTKQLKFLLRASRWRQRSLMSYKSLVMRSIPPELLQ
GPPDPSLGVARHLRGEASGASSSSSSSDNELAPFARAKSLPPSPVTHSPLLHPRGFLRPSASLPEETEASMP
TADAAVPASPQASAGPPASPGCVPRHSVIVSSLFYQQAGEGAERGNKTSKAKRHPARRRHLKGGYIARALPGLR
EPLMEYSLLEEEAAREEQASLMTKTPSFETALRLPSSSVREVPGRSHSLDNPPVTTGSPPEACKEQLLFPST
GLTHETTAKDRGHKEGFLQESVPPFMSGDSRPGKQEGSSQDSCRGKPASSCHSELGSGSQEGCGPPSSQSLG
SLPPQSLKKELESTSCGPLFSEQQAAPFPTQVSPLLGSEKEPQDGLSEGVPVPSSSPGSASQVDASLDTEG
LSEAGDTCDFTPPPQRPQEQATTRKFSLESRGGYAGVAGYGTFAFGGDAGGMLGQGPLWARMWAVSQSSEEQ
DEAATESPQPLESLGPIAEASGVPLRTSPSLTPWEEVEQVSLVQIRDLSGDAEAADTISLDISEVDPAYLNL
LLYDIKYLPEFEMIFRRVPKPIEQPESPGSETEAGQLADFLLEAAWFPWPGELGLRAGLEITEEPEEPGDLEA
LLEAAVAVGARMKGNRHFVFRNYLVICPKRRDSRTDTFSYVFRNMMKLSSIDLNDQVEGDDRAFVWHERE
FRLSGLKGRDQELSDEAVVLGQSVTLACQVLAQPTAQTATWSKDGVLLESSGHLLISSTLKNFQLLTIILVVKEE
DLGTYTCCVSNPLGTAVTTGVLKRAERPSSSPRPEVGEYKDAVLLVWKPVESECGPVTYIVQCCIEGGSWTTL
ASDISDCCYLTKLSRGGMYIFRTACVSKAGMGPYSSPSEQVLLGGPNHLASEEESRGRPAQLLPSTKTFAF
QMQIRRRGRFSVVRQCREKASGRALAAKIVPYQPEDKTAVLREYEALKRLLHHPHLAQLHAAYLSPRHLVLI
CSGPELLPSLAERESYSESDVKDYLWQMSLQYLHAQHILHLDLRSENMMVTEYNLLKVIDLGNASLDQEK
VPAPENFKDYLETMAPELLEGGQAVPQTDIWAIGVTAIFIMLSGEYPESEGETRDLQKGLRKLIRLSRCYAGL
SGGAVAFLOSSLCAQPWGRPCASTCLQCGWLTEEGPTGSRPTPVTFTVRLRAFVREKRRRALLYKKNLQ
VR\*

>rs47381157\_ENSMUSP00000049737\_c.17089:C>G\_p.S5697C

ENSMUST00000052872.15|Obscn-203|ENSMUSG00000061462|-|chr11:g.58931095:G>C
MDHSFSGAPRFLTRPKAFVSVGKDATLSCQIVGNPTPHVSWEKDRQVPEAGARFLAQDGDVYRLTILDLAL
GDSGQYVCRARNAIGEAFVAVGLRVDSEGTCAEQAPHFLLRPTSIRVREGADATFRCRVGGSPQPAVSWSKDG
RRLGPPDAPHVRVEEHGESSALRIRRSARPRDGGTYEVRAENPLGSASAAAALVVDSDAEVAGPPGTSTATLLA
HLQQRREAMRAEGIPPSPPGAGTRTCTVTEGKHARLSCFVTGEPKPKETVWKKDQQLVTEGRRHVYDEQENF
VLKILFCKQSDRGLYTCTASNLVGQTYSSVLVVVREPTVPFKKRLQDLEVREKESATFQCEVAQPATEAAWFK
EETRLWASAKYDIEEGETERRLTVRNVSADDDAVYICETTEGSRVVAELSVQGNLTKLPRKTAVRTGDTAIF
WVELAVPEGPPVRLRNQEEVAGGRVAITAEGTCHTLTI FQCTLEDMGVAFVSGGCRTTTFQCVSAPRRPPL
YPPADPVVKAKTESSVTLSSWAPPHGDRPVTIDGYVLEKRLKLGAYAWSRCHEAGWLATTEFTITGVAAEEGDFQ
FRVSAINHFGQGPYLEFPGMTMLVPLAVKTPKAVEAVEGGEVTFVSDLTVASSGEWFLDGEALKASSIYVI
RCDRTRHMLTIREVPARLHGAQLKVFVANGIETSIQMVVRAALGLPSSKLPAAAAREVLAQLHEEAQLLAELSD
QAAAAVTWLKDGRELSLGPKEYMQVSAGRRALLVRDVAQDDAGLYECVSRGSRRTAYQLLVQEPKLVFAKQQA
SEVKAEGNSATLSCEVTQAQTEVTFWFKDGKLLSSSSKVRMEASGCSRRLVVQQAGKADAGEYSCEAGGQKLS
FRLDVAEPKLVFAKQQAHEVKAEGASATLSCEVAQAQTEVTFWFKDGKLLSSSSKVRMEASGCSRRLVVQQ
AGKADAGEYSCEAGGQKLSFRLDVAEPMVFAKEQQARSEVKAEGASATLSCEVAQAQTEVTFWFKDGKLLS
SSKVRMEASGCSRRLVVQQAGKADAGEYSCEAGGQKLSFRLDVTEPKLVFAKEQQARSEVKAEGNSATLSCE
VAQAQTEVTFWFKDGKLLSSSSKVRMEASGCSRRLVVQQAGKADAGEYSCEAGGQKLSFRLDVAEPMVFAKEQ
QARSEVKAEGNSATLSCEVAQAQTEVTFWFKDGKLLSSSSKVRMEASGCSRRLVVQQAGKADAGEYSCEAGGQ
KLSFHLDVTEPKLVFAKEQQAHSEVKAEGASATLSCEVAQAQTEVTFWFKDGKLLSSSSKVRMEASGCSRRLV
VQQAGKADAGEYSCEAGGQKLSFRLDVAEPMVFAKEQQARSEVKAEGASATLSCEVAQAQTEVTFWFKDGK
LSSSSKVRVEASGCSRRLVVQQAGKADAGEYSCEAGGQKLSFRLDVAEPMVFAKEQQANSEVKAEGASATL
SCEVAQAQTEVTFWFKDGKLLSSSSKVRVEASGCSRRLVVQQAGKADAGEYSCEAGGQKLSFRLDVAEPMVFA

KEQQAHSEVKAEGASATLSCEVAQAQTEVTWFKDGKKLSSSSKVRVEASGCSRRLVVQQAGKADAGEYSCEA
GGQKLSFRLDVAEPKLAFAKEQQAHSEVKAEGASATLSCEVAQAQTEVTWFKDGKKLSSSSKVRVEASGCSR
RLVVQQAGKADAGEYSCEAGGQKLSFRLDVAEPKLAFAKEQQAHSEVKAEGASATLSCEVAQAQTEVTWFKD
GKKLSSSSKVRVEASGCSRRLVVQQAGKADAGEYSCEAGGQKLFRLDVAEPKLMFAKEQQAHSEVKAEGAS
ATLSCEVAQAQTEVTWFKDGKKLSSSSKVRVEASGCSRRLVVQQAGKADAGEYSCEAGGQKLSFRLDVAEPKL
VFAKEQQAHSEVKAEGASATLSCEVAQAQTEVTWFKDGKKLSSSSKVRVEASGCSRRLVVQQVQKADAGEYS
CEARGQKLSFRLDVADTRLMFAKEQQARTEVKAEGASATLSCEVAQAQTEVTWFKDGKKLSSSSKVRVEASG
CSRRLVVQQAGKADAGEYSCEAGGQKLSFRLDVAEAEESQI PERPSRREPLVVKEHETI IILTATIAAPSVAAVT
WLKDGVEIRRKRHEATSLGDTHLTVRGAQVLDIAIYSCRVGKEGQDFPVQVEEVAAKFSKPLEPVEGELGG
TVMLVCELSPEQAEVWRCGNTQLRPGKRFQMTSEGPRRTLTVSGLREDDAEYVCESTRDDRTSARLTVKVPR
VVKFTSGLSAMVAEEGQEAFTQCVVSPSDAGVTWYKDGMLQPSSEKFMVESGASRSLTILGLTLEDAGQVTV
EAEGASSAALRVREAPVLFKKKLEPQTVTEERTSVTLEVELTRPWPEVKWTRNAAVLTPSENVEIRAEGARHC
LVLSVGFADRGFFGCETPDDKTQAKLNVEMRQVRLVRLQVEVEAKEQGTASMDVELSHAEEVGSWTRDGLRL
QPGPKCHLAVQGPVHILTLALQPDQSGLVAFRAEGVHTSARLIVTELPSVFTRVLQDVVATQKEKVTLECEL
SRPVDVRWLKDGVELRAGKAI GIVAQGTCSRSLVIYRCETGDQGVVCDALDAQTSASLRVQGRTYTLIFRRVL
AEDAGEVKFVAENAESAHLRVKELPVTLRPLRDKIAMEKHRGVLECVSRASQAQVRFWFKGGVLEQSGPKYE
VVDGGLYRKLVLQAGNVLEQDGTVHRLTLHKTCSTMTGPVHFTIGKSRSSAQLVSDIPVVLTRPLEPKAGRE
LQSVVLSCDFRPAPKAVQWYKDDTPLSPSEKFKMALEGQMAELRILRLTPADAGVYRCQAGSAQSSAEVTEA
REVTVIQPLQDAEAMEEGRVCFSCELSHKDEDI EWSLNGTPLYNDSFHEISHEGCLHTLVLSVRQADTGTVC
ATSPKVSVSARLVVKGKPVVFLKALDDVSAEERGTLLTQCEVSDPEARVVRKDGVELGPSDKYDFLHKAGAR
GLTVHDLSDHEDAGLYTCQVGSKETQSKVSVHDLHVGITRRLKTVLEVLEGESECSFECVLSHESPSDPAVWTVGG
KTVGGSGHFHAVRQGRKYTLTVKDAALSDAGEVFSVLGLTSKASLIIRERPVDITKPLEDQRTTLGEDVMLS
CELSRAGTSVRWLKDGKAIKRSQKYDLLSEGTRAVLVVRKASLKDSGEYTCETEASKSTAKLCVEEKANRFTE
ELADLQVEEKGRAVFTCKTEHPASVVTWRKGLLELRASGKHVPSQEGTLKLTINALERTDSDTYTCDIQGAR
TQARLLVHGQKVRVIEDLEDTAVQEGSSAKFCCRIAPADYGPVHWFLDKTPHLSHNEIITVQPGGYHVLTLR
QLALKDSGTVYFEAGDQRTSAAALRVTEKPSIFSRPLTDVTVTEGEDTLVCETTTTVDSVVRWTKDGKTLRPSA
RCQLSHEGCAQQLLITATTPQDGGRYKCEIGGASSSSIVRVHALPVRFRRESLKDVEVPEGKAATLRCVLSVA
APVEWRHGDDVLKSSNKYSLRQEGAVLELVIRDLQPDQSGQYSCSFGDQTTSATLTVTKTSQAQVFGKLRNKEA
TEGTTVTLRCELTKAPVEWKKGTETLRNGDKYSLKQDGAVCELQICSLLVADAGEYSCVCGQEKT SATLTVK
ALLVHFVRRRLRSKEATEGDTTLQCELSKAAPVEWRKGTETLRDGDYSLKQDGAVCELQIRSLTIADAGEYL
CTCGQEKT SATLTVRALPAKFKDSLKNEEATEGTTATLSCELSKAAPVTWKKGPKTLQSGDKYVLRQDGAVCG
LQIHGLTMADAGEYSCVCGQEKT SATLTVRGLPAKFIEDLRSQEATEGATAILRCELSKAAPVEWRKGETLK
DGDYTLRQDGAVCELQIRGLAVVDGTYSLSLPTKFTTEGLRNEEATEGTMATLRCQMSKAAPVEWRKGETLR
DGDYSLRQDGAVCELQIRGLTIEDSGEYTCVCGQEKT SATLSVKALPPRFIEDLRSQEATEGTMATLRCQMS
KTAPVEWKKGSETLRDGGYSLRQDGPVCELQICDLAVEDAGEYSCVCGQEKT SATLSIKALPPRFIEDLRSQ
EATEGTMATLRCQMSKAAPVEWRKGETLGDGGYSLRQNGAVCELQIHDLAVEDTGEYSCVCGQEKT SATLN
VKALPPRFIEDLRSQEATEGTMATLRCQMSKAAPVEWRKGETLRDGGYSLRQDGAVCELQIHDLVDVEDAGQ
YSCVCGQEKTSAVLTVDALPPKFTEGLKKEEATEGTMVTLRCQMSKEATVEWRKGAKTLSDDGGYSLRQDGAM
CELQICGLAVEDAGEYSCVCGQEKT SATLSVKALPPRFIEDLRSQEATEGTMATLRCQMSKAAPVEWRKGET
LRDGDYSLRQDGAVCELQIRDLAVEDAGEYLCVCGQEKT SATLSVKALPPRFIEDLRSQEATEGTMATLRCQ
MSKAAPVEWRKGSKTLRQDGGYSLRQDGAVCELQICDLAVEDTGDYSCVCGQEKT SATLSVKALPPRFIEDLR
SQEAREGTVATLRCRMSKAAPVEWRKGETLKDGDYSLRQEGNLCELQIRDLAVEDTEEYSCVCGQEKT SAT
LSVKALPAKFIEDLRSQEAPESSTVTLRCKLSKASVWKKGSETLRNGARYSLRQDGAVCELEIRDLTVEDT
GEYSCTCGQVYTSATLSIMAPQVVFQQPLQNLQAEEGSMASLRCELSVFNAMVWSKGGLELQGDTRREARQQ
GCVAELLLRDLRREDAGEYSCTCGSQTTSATLMVTAAPVRFLRELQAQDVDEGATARLRCELSREAVSVEWRK
GSLQLFPKAKYQMVQEGTTAELLVHGVEQEDAGEYTCDAHTQS IARLSVRAPKPKFKTDLQSTEQEAGGTAR
LCCQLSEAEPTPVQWLKEGVELHVGSKYEMRRQGAVCELLIHGLEAKDTGEYACLVGGQKTLASLRVKEPEV
TIVRGLVDMVEQADEDEFTCKVSAQATDVQWHLQGLPLQSNVTEVAVLADGCTHVLQKGVTLLEDAGTVS
FHVGGSSSAQLTVRVPEVTVLEPLKDVQLSEGQDAHFRCRLSRASGQEARWALGGVPLQCNEMNDITVEQGT
LYLLTLHKVTLEDAGTITLQVGSSEAEQLKVTAKNVTVLRGLENVDALEGGEALFECQLSQPEVAHAHTWLLDD
EPVHTSEKVEVVYFENGLRHLLLLLNKLPQDSCRVTFLAGDVVTS AFLTVRGWRLEVLEPPHDASVKAGMQVR
FTCILSEAVPVGEATSVYINGAAIQPDDTDWTVTDDGSHHALTSNAQFQHAGEVTF AARDAVASARLSVLALP
DPPEDAEVVGRSDHSTVLSWVAPMSDGGGGLCVGRVEMKEASTGQWQLCHDLVPGPEACVVDLVPKTYRFRV
AAVGPAGAGEPVHLPQMVKIA PAPA PAPA PAPA PAPA PETA RQAVVGEDICLELEVAADGGEVWVKGTERTIQPGG
HFEVLSRGRQMLVIKGFRTEDQGEYRCGPIQGLPSSGAATFNVMVTS GSGDEVPAQPSLPPEAAQEGDLHLL
WEALARKRRMSREPTLDSISELPEEDSRVQHLRQEAETAPDLSEGYSTADELARTGEADLSHTSSDDES RAG
TPCLVITYLKKAGGPGI SPLASKHEAQVTT SVKPKQKQEPVVPTCPPGDL SAADLMDPSLDKAAVKIQAAFKG

YKVRKEMKQQEGPVFSRTFGDTEAQVGDVLRLECVLATKTDMRACWLKDGIELTDGRHYHIDQLKDGTCSSLLV  
 TGLAPTDSGRYTCQVSTKSGRVSHSACVVVSGTESEAESSSGGELDDAFRRAARLHRLFRTKSPAELSEEEL  
 FLSADEGPGPEEPADWQTYREDENFVCIRFESLAEARQAVTCFRNMFATMGIGVEISLGEQGPGRVEMRIGK  
 VAPTVPVAVPLAKTPGLQTSDAAPVFLTELQNDQVDQGYPMSFDCVVTGQPVPSVRWFKDGLLEEDDHYMIN  
 EDQQGGHQLIITAVVPADMGVYRCLAENSMGVSSSTKAELRVELTSTDYDTAADATETSSYFSAQGYLSSREQE  
 GTESDEGQLPQVLEELKDLQVAPGTRLAKFQKLVKGYPAKLYWFKDGOPLTSDHIRMTDKKTLHTLEIVSV  
 TREDSGQYAAIISNAVGAAYSARLLVRGPSEPEEKPASDVHERLVPRILEKFTPKKVKRGSSTFVSVKVEG  
 HPAPSVHWLKEEAKEGVLWIGPDTFGYTMASSSKQHSVLVLDVGRQHOGTYTICIATNPAGQALCSASLHISGL  
 AKEEEQERVKEALISSFLQGTSAQVSAQMSESAQFADLVGQSKGESLVAEEAHSHLSLAEVGTVEEFLQKLT SQ  
 ITEMVSAKISQAKLQVPGGDSDEETKTPSASPRHGRSRPSSSVQESSSESEDGDSRGEIFDIYVVTADYLP LG  
 AEQDAIILREGQYVEVLDSAHPLRWLVRTKPTKSSPSRQGWVSPAYLDKRLKLSPEWGPTEAPEFPGEAVSED  
 EYRTRLSVVIQELLSSEQAFVGELOFLESHHMKHLERSPRVPAAVASQKTVI FRNVQDISHFHSSFLKELQGC  
 GTDDDVAMCFIKNQEA FEKYLEFVLVGRVQAESVVVSTPVQEFYKKYAEBETLSAKDPTQPPPPPLQHYLEQVVE  
 RVQKYQALLKELIRNKARNRQNCALLEQAYAVVSALPQRAENKLVHVSIMENYPGTLEALGEP IRQGHFIVWEG  
 APGARMPWKGNHRHVF LFRNYLVICKPRRDSRTDTFSYVFRNMMKLSSIDLNDQVEGDRAFEVWHEREDESVR  
 KYLLQARTVI IKNSWVKEICGIQQRLAQPVWRPPEFEELADCTAELGETVKLACRVTGTPKPIVSWYKDGKP  
 VEVDPHHILIEDPDGSC TLI LDNLTGIDSGQYMCFAASAAGNASTLGKILVQVPPRFVNVKVRATPFVEGEDAQ  
 ITCTVEGAPYPQIRWYKDGTL LAPGNRYRMLNEPRSGVLVVLVIQAASKEDLGHYECELVNLRLGTRGGGELYM  
 QSPALRARDQHHRQIVAAVEVTEQETKVPKKTVI I EETITTVVKS PRGRRQSPGKSPSRSPRRSASPRRPG  
 LLAPERLYPPGTSPRRLEVEQGRKAPVPALYVTEAEVHAPASQSPKWLEVEETIEVRVKKTGSRGASPVRE  
 MTSRGEGLIFTLPGGI PGRDPNANNNSNKS SVYQEA RTWGPVAVHVGEFFIFQVDSVGNVDVWAASPEPEQVRA  
 SQKEENTERQEGCSDG DENTFLMEEPQD TDSLQGRDPKILTHNGRVLTLADLEDYVPQEGETFGCGDSTPSTP  
 DEPPCEVSVLQREI SEPTVGQPVLLNVGRPPGTGATPSFFRPGSQVHSPESVSFLLREAWSGPVSAPWTSSF  
 HTHVQSSVDGSHGSFKTEVSTQTVSFGAVGETVTLHIDPDGGEAPGPSQG\*  
 >rs47381157\_ENSMUSP00000020732\_c.17290:C>G\_p.s5764C  
 ENSMUST00000020732.13|Obscn-201|ENSMUSG00000061462|-|chr11:g.58931095:G>C  
 MDHSFSGAPRFLTRPKAFVVSVGKDATLSCQIVGNPTPHVSWEKDRQPVEAGARFLAQDGDVYRLTILDLAL  
 GDSGQYVCRARNAIGEAFAAVGLRVDSEGTCAEQAPHFLLRPTSIRVREGADATFRRCRVGGSPQPAVSWSKDG  
 RRLGPPDAPHVRVEEHGESSALRIR SARPRDGGTYEVRAENPLGSASAAAALVVDSDAEVAGPPGTSTATLLA  
 HLQORREAMRAEGIPPSPPGAGTRTCTVTEGKHARLSCFVTGEPKPE TVWKKDQGLVTEGRRHVVEDEQENF  
 VLKILFCKQSDRGLYTCTASNLVGQTYSSVLVVVREPTVPFKKRLQDLEVREKESATFQCEVAQPAEAWFK  
 EETRLWASAKYDIEEEGTERRLTVRNVSADDDAVYICETTEGSRVVAELSVQGNLTKLPRKTAVRTGDTAIF  
 WVELAVPEGPVWRWRNQEEMVAGGRVAITAEGTCHTLTI FQCTLEDMGEVAFVSGGCRTTTTQFCVSAPRRPPL  
 YPPADPVVKAKTESSVTL SWSAPPHGDRPVTIDGYVLEKRRKLGAYAWSRCHEAGWLATTEFTITGVAEEGDFQ  
 FRVSAINHFGQGPYLEFPGTMHLVPLAVKTPLKAEVAEVEGGEVTFVSDLTVASSGEWFLDGEALKASSIYVI  
 RCDRTRHMLTIREVPARLHGAQLK FVANGIETS IQMVVRAALGLPSSKLPAAAAAREVLAQLHEEAQLLAE LSD  
 QAAA VTLWKDGRELSLGP KYEMQVSAGRRALLVRDVAQDDAGLYECVSRGSR TAYQLLVQDITDGYRDWGPAG  
 PQKHMCKCAGAKIARYLGSSCYRFLQYDKGVWHWLEAALDTRQKGKTS SCSLHEKPKLVFAKQQAHSEVKA E  
 AGNSATLSCEVTQAQTEVTWFKDGKLLSSSSKVRMEASGCSRRLVVQQAGKADAGEYSCEAGGQKLSFRLDVA  
 EPKLVFAKQQAHSEVKA EAGASATLSCEVAQAQTEVTWFKDGKLLSSSSKVRMEASGCSRRLVVQQAGKADA  
 GEYSCEAGGQKLSFRLDVAEPKMVFAKEQQARSEVKA EAGASATLSCEVAQAQTEVTWFKDGKLLSSSSKVRM  
 EASGCSRRLVVQQAGKADAGEYSCEAGGQKLSFRLDVTEPKLVFAKEQQARSEVKA EVGN SATLSCEVAQAQT  
 EVTWFKDGKLLSSSSKVRMEASGCSRRLVVQQAGKADAGEYSCEAGGQKLSFRLDVAEPKLVFAKEQQARSEV  
 KAEAGNSATLSCEVAQAQTEVTWFKDGKLLSSSSKVRMEASGCSRRLVVQQAGKADAGEYSCEAGGQKLSFHL  
 DVTEPKLVFAKEQQAHSEVKA EAGASATLSCEVAQAQTEVTWFKDGKLLSSSSKVRMEASGCSRRLVVQQAGK  
 ADAGEYSCEAEGQKLSFRLDVAEPKLVFAKEQQARSEVKA EAGASATLSCEVAQAQTEVTWFKDGKLLSSSSK  
 VRVEASGCSRRLVVQQAGKADAGEYSCEAGGQKLSFRLDVAEPKLVFAKEQQANSEVKA EAGASATLSCEVAQ  
 AQTEVTWFKDGKLLSSSSKVRVEASGCSRRLVVQQAGKADAGEYSCEAGGQKLSFRLDVAEPKLAFAKEQQAH  
 SEVKA EAGASATLSCEVAQAQTEVTWFKDGKLLSSSSKVRVEASGCSRRLVVQQAGKADAGEYSCEAGGQKLS  
 FRLDVAEPKLAFAKEQQAHSEVKA EAGASATLSCEVAQAQTEVTWFKDGKLLSSSSKVRVEASGCSRRLVVQQ  
 AGKADAGEYSCEAGGQKLSFRLDVAEPKLAFAKEQQAHSEVKA EAGASATLSCEVAQAQTEVTWFKDGKLLSS  
 SSKVRVEASGCSRRLVVQQAGKADAGEYSCEAGGQKLFRLDVAEPKLMFAKEQQAHSEVKA EAGASATLSCE  
 VAQAQTEVTWFKDGKLLSSSSKVRVEASGCSRRLVVQQAGKADAGEYSCEAGGQKLSFRLDVAEPKLVFAKEQ  
 QAHSEVKA EAGASATLSCEVAQAQTEVTWFKDGKLLSSSSKVRVEASGCSRRLVVQQVQVQKADAGEYSCEARGQ  
 KLSFRLDVADTRLMFAKEQQARTEVKA EAGNSATLSCEVAQAQTEVTWFKDGKLLSSSSKVRVEASGCSRRLV  
 VQQAGKADAGEYSCEAGGQKLSFRLDVAEAE SQIPERPSRREPLVVKEHETIILTATIAAPSVAAVTWLKDGV  
 EIRRSKRHEATSLGDHTLTVRGAQVLD SAIYSCRVGKEGQDFPVQVEEVA AKFSKPLEPVEGELGGTVMLVC  
 ELSPEQAEVWRCGNTQLRPGKRFQMTSEGPRRTLTVSGLREDDAEYVCE SRDDRTSARLTVKVP RVVKFTS



GLSAMVAEEGQEQATFQCVVSPSDAGVTWYKDGMLQOPSEKFMVVEGASRSRLTILGLTLEDAGQVTVAEAGAS  
 SAAALRVREAPVLFKKKLEPQTVEERTSVTLEVELTRPWPEVKWTRNAAVLTPSENVEIRAEGARHCLVLRV  
 GFADRGFFGCETPDDKTQAKLNVEMRQVRLVRLGLQVEEAKEQGTASMDVELSHAEEVGSWTRDGLRLQPGPKC  
 HLAVQGPVHILTLALSALQPQDSGLVAFRAEGVHTSARLIVTELVSFTRVLQDVVATQKEKVTLECELSRPVDV  
 RWLKDGVLELRAGKAIIGIVAQGTCSRSLVIYRCETGDQGVYVCDALDAQTSASLRVQGRTYTLIFRVLAEADAGE  
 VKFVAENAESRAHLRVKELPVTLLRPLRDKIAMEKHRGVLECCQVSRASAQVRWFKGGVELQSGPKYEVVSDGL  
 YRKLVINDVQPEDEDTYTCDAENVKTSAQFFVVEEQSITIVRGLKDMTVMPEPAPAWFECETSIPSVRPPKWL  
 KTVLQAGGNVGLQDGTVHRLTLHKTCSTMTGPHVFTIGKSRSSAQLVVSDIPVVLTRPLEPKAGRELQSVVL  
 SCDFRPAPKAVQWYKDDTPLSPSEKFKMALEGQMAELRILRLTPADAGVYRCQAGSAQSSAEVTVAREVTVI  
 QPLQDAEAMEEGRVCFSCELSHKDEDEIWSLNGTPLYNDSFHEISHGCLHTLVLKSVRQADTGTVCATSPKV  
 SVSARLVVKGKPVVFLKALDDVSAEERGLTLTQCEVSDPEARVVRKDGVELGSPDKYDFLHKAGARGLTVHD  
 LSHEDAGLYTCQVGSKETQSKVSVHDLHVGITKRLKTVEVLEGESECFEVLSSHESPSDPAVWTVGGKTVGGS  
 GHFHAVRQGRKYTLTVKDAALSDAGEVVSVLGLTSSKASLIIRERPVDITKPLEDQRTTLGEDVMLSCELSRA  
 GTSVRWLKDGKAIRKSQKYDLLSEGTRAVLVVRKASLKDSGEYTCETEASKSTAKLCVEEKANRFTTEELADLQ  
 VEEKGRAVFTCKTEHPASVVTWRKGLLELRASGKHVPSQEGTLTKLTINALERTDSDTYTCDIGQARTQARLL  
 VHGGKVRVIEDLEDTAVQEGSSAKFCRIAPADYGPVHWFLLDKTPLHSNELNEITVQPGGYHVLTLRQLALKD  
 SGTVYFEAGDQRTSAAALRVTEKPSIFSRPLTDVTVTEGEDTLVCEVTVVDSVVRWTKDGKTLRPSARCQLSH  
 EGCAQQLLITATTPQDGGRYKCEIGGASSSIVRVHALPVRFRFRESLKDVEVPEGKAATLRCVLSVAAPVEWR  
 HGDDVLKSSNKYSLRQEGAVLELVIRDLPQDQSGQYSCSFGDQTTSATLTVKTSQAQFVGLKRNKEATEGTTV  
 TLRCELKEAPVEWKKGTETLRNGDKYSLKQDGAVCLEQICSLLVADAGEYSCVCGQEKTSATLTVKALLVHF  
 VRRLSKEATEGDTTLTQCELSKAAPVEWRKGTETLRDGDYSLKQDGAVCLEQIRSLTIADAGEYLCTCGQE  
 KTSATLTVRALPAKFKDSLKNEEATEGTTATLSCELSKAAPVTWKKGPKTLQSGDKYVLRQDGAVCGLQIHGL  
 TMADAGEYSCVCGQEKTSATLTVRGLPAKFIEDLRSQEATEGATAILRCELSKAAPVEWRKGETLKDGDYR  
 LRQDGAVCLEQIRGLAVVDGTYSLSLPTKFTTEGLRNEEATEGTMATLRCQMSKAAPVEWRKGETLRDGDYR  
 LRQDGAVCLEQIRGLTIEDSGEYTCVCGQEKTSATLSVKALPSRFIEDLRSQEATEGTMATLRCQMSKTA  
 PVEWKKGETLRCQMSKAAPVEWRKGETLGDGGYSLRQDGAVCLEQIHDLAVEDTGEYSCVCGQEKTSATL  
 NVKALPPRFIEDLRSQEATEGTMATLRCQMSKAAPVEWRKGETLRDGGYSLRQDGAVCLEQIHDLDVEDAG  
 QYSCVCGQEKTSAVLTVDALPPKFTTEGLKKEEATEGTMATLRCQMSKAAPVEWRKGETLRDGDYR  
 YSLRQDGAVCLEQIRDLAVEDAGEYLCVCGQEKTSATLSVKALPPRFIEDLRSQEATEGTMATLRCQMS  
 KAAPVEWRKGETLRDGDYRSLRQDGAVCLEQIHDLAVEDTGEYSCVCGQEKTSATLSVKALPPRFIEDL  
 RSQEAREGTVALRCRMSKAAPVEWRKGETLKDGDYRSLRQEGNLCELQIRDLAVEDTEEYSCVCGQEKTS  
 ATLSVKALPAKFIEDLRSQEAPESSTVTLRCKLSKASVWKKGSETLRNGARYSLRQDGAVCLEIRDLTVE  
 DTEGEYSCTCGQERTSATLSIMAPVVFQQPLQNLQAEEGSMASLRCELSVPNAAMVWSKGGLELQGDTRR  
 EARQQGCVAELLRDLRREDAGEYSCVCGQEKTSATLMVTAAPVRFRLRELQAQDVDEGATARLRCEL  
 SREAVSVEWRKGSLLQFPCAKYQMVQEGTTAELLVHGVEQEDAGEYTCDAQHTQSIARLSVRAPKPKFKT  
 DLQSTEQEAGGTARLCCQLSEAEFGTPVQWLKEGVELHVGSKYEMRRQGAVCLELHGLEAKDTGEYAC  
 LVGGQKTLASLRVKEPEVTIVRGLVDMEVQADEDEFTCKVSQAGATDVQWHLQGLPLQSNVTEVA  
 VLADGCTHVLQKGVTLLEDAGTVSFHVGGLSSSAQLTVRVPEVTVLEPLKDVQLESEGQDAHFRCRLS  
 RASGQEARWALGGVPLQCNEMNDITVEQGTLYLLTLHKVTLEDAGTITLQVGSSESAQLKVTAKNT  
 VLRGLENVDALLEGGEALFECQLSQPEVAHAHTWLLDDEPVHTSEKVEVVYFENGLRHLLLLK  
 NLPQDSCRVTFLAGDVVTSFAFLTVRGWRLEVLPEPHDASVKAGMQVRFCTILSEAVPVGEATWY  
 INGAAIQPDDTDWTVTTDGSHHALTLNSAQPHAGEVTFAAARDAVASARLSVLALPDPPEDA  
 EVVGRSDHSVTLSSWAPMSDGGGLCGYRVEMKEASTGQWQLCHDLVPGPECVVDDLVPGKTYRFR  
 VAAVGPAGEPVHLPMVKIAPAPAPAPAPAPAPAPAPETRQAVVGEDICLELEVAADGGEVWVKGTE  
 RIQPGGHFEVLSRGQRQMLVIKGFRTEDQGEYRCGPIQGLPSSGAATFNVMVMTSGSGDEVPAQPS  
 LPPEAAQEGDLHLLWEALARKRRMSREPTLDSISELPEEDSRVQHLRQEAEEETAPDLSEGYSTADE  
 LARTGEADLSHTSSDDESRACTPCLVTYLKAGGPGISPLASKHEAQVTTSVKPKQEQEPVPTCP  
 PPGDLSAADLMDPSLDKAAVKIQAAFKYKVRKEMKQEQGPVFSRTFGDTEAQVGDVLRLECVL  
 ATKTDMRACWLKDGIELTDGRHYHIDQLKDGTCSLLVTLGLAPDSGRYTCQVSTKSGRVSHS  
 ACVVVSGTESEAESSSGGELDDAFRAARRLHRLFRTKSPAELSEELFLSADEGPGEPEEPADWQ  
 TYREDENFVCIRFESLAEARQAVTCFRNMFMATMGIGVEISLGEQGPGRVEMRIGKVAPT  
 VTPAVPLAKTPGLQTSDAAPVFLTELQNDVQDGYPMSFDCVVTGQPVPSVRWFKDGKLEEDDHY  
 MINEDQQGGHQLIITAVVPADMGVYRCLAENSMGVSSTKALREVELTSTDYDTAADATETSSYFSA  
 QKGLYSSREQEGTESDEGQLPQVLEELKDLQVAPGTRLAKFQLKVKGYAPKLYWFKDQGLP  
 LTTSDHIRMTDKKTLHTLEIVSVTREDSGQYAAIISNAVGAAYSSARLLVRGSEPEEK  
 PASDVHERLVPPRILEKFTPKKVKRGSSITFSVKVEGHPAPSVHWLKEEAKEGVLWIGPDT  
 PGYTMASSSKQHSLLVLLDVGRQHGTQYTCIATNPAGQALCSASLHISGLAKEEEQ  
 ERVKEALISSFLQGTSAQVSAQMSSESAGFADLVGQSKGESLVAEEAHSHLSLAEVGT  
 EEFLLQKLTSTQITEMVSAKISQAKLQVPGGDSDEETKTPSASPRHGRSRPSSSVQESSSE  
 SEDGDSRGEIFDIYVVTADYLPPLGAEQDAI

ILREGQYVEVLDSAHPLRWLVRTKPTKSSPSRQGWVSPAYLDKRLKLSPEWGPTEAPEFPGEAVSEDEYRTRL  
SSVIQELLSSEQAFVQELQFLESHHMKHLERSPRVPAAVASQKTVI FRNVQDISHFHSSFLKELQGCCTDDDDV  
AMCFIKNQEAFEKEYLEFLVGRVQAESVVVSTPVQEFYKKYAEETLSAKDPTQPPPPPLQHYLEQPVVERVQKYQ  
ALLKELIRNKARNRQNCALLEQAYAVVSALPQRAENKLVSLMENYPGTLEALGEPPIRQGHFIVWEGAPGARM  
PWKGHNHRVFLFRNYLVICKPRRDSRTDTFSYVFRNMMKLSSIDLNDQVEGDDRAFEVWHEREDSVRKYLLQA  
RTVI IKNSWVKEICGIQQLAQPVWRPPEFEEELADCTAELGETVKLACRVTGTGPKPIVSWYKDGKPVVEVDPH  
HILIEDPDGSCCTLILDNLTGIDSGQYMCFAASAAGNASTLGKILVQVPPRFVNVKVRATPFVEGEDAQITCTVE  
GAPYPQIRWYKDGTLAPGNRYRMLNEPRSGVLVVIQAASKEDLGHYECELVNRLGSTRGGGELYMQSPALR  
ARDQHHREQIVAAVEERRPSP\*  
>rs47381157\_ENSMUSP00000151217\_c.14584:C>G\_p.S4862C  
ENSMUST00000219084.3|Obscn-207|ENSMUSG00000061462|-|chr11:g.58931095:G>C  
MDHSFSGAPRFLTRPKAFVSVGKDATLSCQIVGNPTPHVSWEKDRQVEAGARFRLAQDGDVYRLTILDIAL  
GDSGQYVCRARNAIGEFAAVGLRVDSEGTCAEQAPHFLLRPTSIRVREGADATFRCRVGGSPPQPAVSWSKDG  
RRLGPPDAPHVRVEEHGESSALRIRSARPRDGGTYEVRAENPLGSASAAAALVVDSDAEVAGPPGTSTATLLA  
HLQORREAMRAEGIPPSPPGAGTRTCTVTEGKHARLSCFVTGEPKPKETVWKKDQGLVTEGRRHVVEDEQENF  
VLKILFCKQSDRGLYCTASNLVGGTYSSVLVVVREPTVPFKKRLQDLEVREKESATFQCEVAQPAATEAAWFK  
EETRLWASAKYDIEEETERRRLTVRNVSAADDADAVYICETTEGSRVAELSVQGNLTKLPRKTVARTGDTAIF  
WVELAVPEGPVWRVLRNQEEMVAGGRVAITAEGTCHTLTI FQCTLEDMGEVAFVSGGCRTTTFQCVSAPRRPPL  
YPPADPVVKAKTESSVTLWSAPPHGDRPVTIDGYVLEKRLKLGAYAWSRCHEAGWLATTEFTITGVAAEEDGFQ  
FRVSAINHFGQGPYLEFPGMTMLVPLAVKTPKAVEAVEGGEVTFVSDLTVASSGEWFLDGEALKASSIYVI  
RCDRTRHMLTIREVPARLHGAQLKVFANGIETS IQMVVRAALGLPSSKLPAAAAREVLAQLHEEAQLLAE LSD  
QAAA VTWLKDGRELSLGPYEMQVSAGRRALLVRDVAQDDAGLYECVSRGSRRTAYQLLVQDITDGYRDWGPAG  
PQKHMCKCAGAKIARYLGSSCYRFLQYDKGVVHWLEAALDTRQKGKTS SCSLHEKPKLVFAKQQAHSVEKAE  
AGNSATLSCEVTQAQTEVTFWKDGKLLSSSSKVRMEASGCSRRLVVQQAGKADAGEYSCEAGGQKLSFRLDVA  
EPKLVFAKQQAHSVEKAEAGASATLSCEVAQAQTEVTFWKDGKLLSSSSKVRMEASGCSRRLVVQQAGKADA  
GEYSCEAGGQKLSFRLDVAEPKLVFAKEQQARSEVKAEGASATLSCEVAQAQTEVTFWKDGKLLSSSSKVRM  
EASGCSRRLVVQQAGKADAGEYSCEAGGQKLSFRLDVTEPKLVFAKEQQARSEVKAEGASATLSCEVAQAQ  
EVTWFKDGKLLSSSSKVRMEASGCSRRLVVQQAGKADAGEYSCEAGGQKLSFHLVDVTEPKLVFAKEQQAHSEV  
KAEAGASATLSCEVAQAQTEVTFWKDGKLLSSSSKVRMEASGCSRRLVVQQAGKADAGEYSCEAEQGKLSFR  
LDVAEPKLVFAKEQQARSEVKAEGASATLSCEVAQAQTEVTFWKDGKLLSSSSKVRMEASGCSRRLVVQQAG  
ADAGEYSCEAGGQKLSFRLDVAEPKLVFAKEQQANSEVKAEGASATLSCEVAQAQTEVTFWKDGKLLSSSSK  
VRVEASGCSRRLVVQQAGKADAGEYSCEAGGQKLSFRLDVAEPKLVFAKEQQAHSEVKAEGASATLSCEVAQ  
AQTEVTFWKDGKLLSSSSKVRMEASGCSRRLVVQQAGKADAGEYSCEAGGQKLSFRLDVAEPKLVFAKEQQAH  
SEVKAEGASATLSCEVAQAQTEVTFWKDGKLLSSSSKVRMEASGCSRRLVVQQVKGADAGEYSCEARGQKLS  
FRLDVAEASQI PERPSRREPLVVKHEHETIILTATIAAPSVAAVTWLKDGV EIRRSKRHEATS LGDHTLTVR  
GAQVLD SAIYSRVRGEGQDFPVQVEEVAAKFSKPLEPVEGELGGTVMLVCELSPEQAEVWVRCGNTRQLRPGK  
RFQMTSEGPRRTLTVSGLREDDAEYVCESRDDRTSARLTVKVRVVKFTSGLSAMVAEEGQEAFTQCQVSPS  
DAGVTWYKDGMLQPSSEKFMVVEGASRSLTILGLTLEDAGQVTVAEAGASSAALRVREAPVLFKKKLEPQT  
VEERTSVTLEVELTRPWPEVKWTRNAAVLTPSENVEIRAEGARHCLVLRVSGFADRGFFGCETPDDKTQAKLN  
VEMRQVRLVVRGLQEVEAKEQGTASMDVELSHAEEVGSWTRDGLRLQPGPKCHLAVQGPVHILTALSALQPDG  
LVAFRAEGVHTSARLIVTELPVSFTRVLQDVVATQKEKVTLECELSRPVDVVRWLKDGVELRAGKAI GIVAQGT  
CRSLVIYRCETGDQGVYVCDALDAQTSASLRVQGRYTTLIFRRVLAEDAGEVKFVAENAESRAHLRVKELPVT  
LLRPLRDKIAMEKHRGVLECVSRASAQVRWFKGGVLEQSGPKYEVVSDGLYRKLVIINDVQPEDEDTYTC DAG  
NVKTSAQFFVEEQSITIVRGLKDMTVMEPAPAWFECETSIPSVRPPKWL LGKTVLQAGGNVLEQDGTVHRLT  
LHKTCSTMTGPVHFTIGKSRSSAQLVVSDIPVVLTRPLEPKAGRELQSVVLSCDFRPAPKAVQWYKDDTPLSP  
SEKFKMALEGMMAELRILRLTPADAGVYRCQAGSAQSSAEVTVAEAREVTVIQPLQDAEAMEEGRVCFSCELSH  
KDEDIEWSLNGTPLYNDSFHEISHEGCLHTLVLKSVRQADTGTVCATSPKVS SARLVVKGKPVVFLKALDDV  
SAEERGLTLTQCEVSDPEARVVWRKDGVELGPSDKYDFLHKAGARGLTVHDL SHEDAGLYTCQVGSKETQSKV  
SVHDLHVGITKRLKTVEVLEGESECFEVLVSHESPSDPAVWTVGGKTVGGSGHFHAVRQGRKYTLTVKDAALS  
DAGEVVFVSVLGLT SKASLIIRERPVDITKPLEDQRTTLGEDVMLSCELSRAGTSVRWLKDGKAI RKSQKYDLL  
SEGTRAVLVVRKASLKDSGEYTCETEASKSTAKLCVEEKANRFTTEELADLQVEEKGRAVFTCKTEHPASVVTW  
RKGLLELRASGKHVPSQEGLTLKLTINALERTDSDTYTCDIGQARTQARLLVHGQKVRVIEDLEDTAVQEGSS  
AKFCCR IAPADYGPVHWF LDKTPLHSNELNETIVQPGGYHVLTLRQLALKDSGTVYFEAGDQRTS AALRVTEK  
PSIFSRPLTDVTVTEGEDLTLVCETTTVDSSVRWTKDGKTLRPSARCQLSHEGCAQLLITATTPQDGGRYKC  
ETCGASSSIVRVHALPVRFRFRESLKDVEVPEGKAATLRCVLSVAAPVEWRHGDV LKSSNKYSLRQEGAVLE  
LVIRDLPQDQSGQYSCSFGDQTTSATLTVKTSQAQFVGLKRNKEATEGTTVTLRCELTKEAPVEWKKGTETLR  
NGDKYSLKQDGA VCELQICSLLVADAGEYSCVCGQEKTSATLTVKALLVHFVRRLRSKEATEGDTTTLQCELS  
KAAPVEWRKGTETLRDGDRLYSLKQDGA VCELQIRSLTIADAGEYLCTCGQEKTSATLTVRGLPAKFIEDLRSQ

EATEGATAILRCELSKAAPVEWRKGSETLKDGDRYTLRQDGA VCELQIRGLAVVDTGTYS SLP TKFTEGLRNE  
EATEGTMATLRCQMSKAAPVEWRKGSETLRDGDYSLRQDGA MCELQIRGLTIEDSGEYTCVCGQEKTSATLS  
VKALPPRFIEDLRSQEATEGTMATLRCQMSKAAPVEWRKGSETLGDGGYSLRQNGAVCELQI HDLAVEDTGE  
YSCVCGQEKTSATLNVKALPPKFTEGLKKEEATEGTMVTLRCQMSKEATVEWRKGAKT LSDGGYSLRQDGA  
CELQICGLAVEDAGEYSCVCGQEKTSATLSVKALPPRFIEDLRSQEATEGTMATLRCQMSKAAPVEWRKGSET  
LRDGDYSLRQDGA VCELQIRDLAVEDAGEYLCVCGQEKTSATLSVKALPPRFIEDLRSQEATEGTMATLRCQ  
MSKAAPVEWRKGSKTLRDGDYSLRQDGA MCELQICDLAVEDTGDYSCVCGQEKTSATLSVKAPQVVFQOPLQ  
NLQAEEGSMASLRCELSVNAAMVWSKGGLELQGDTRREARQQGCVAELLLRDLRREDAGEY SCTCGSQTTSA  
TLMVTAAPVRFLRELQAQDVDEGATARLRCELSREAVSVEWRKGS LQLFPCA KYQMVQEGTTAELLVHGVEQE  
DAGEYTC DAGHTQSIARLSVRAPKPKFKTDLQSTEQEAGGTARLCCQLSEAE PGTPVQWLKEGVELHVGSKYE  
MRRQGA VCELLIHGLEAKDTGEYACL VGGQKTASLRVKEPEVTIVRGLVDMEVQAEDVEFTCKVSQAGATD  
VQWHLQGLPLQSNEVTEVAVLADGCTHVLQ LKGVTL EDAGTVSFHV GGLSSSAQLTVRVPEVTVLEPLKDVQL  
SEGQDAHFRCRLSRASGQEARWALGGVPLQCNEMNDITVEQGTLYLLTLHKVTLEDAGTITLQVGS CSSEAQL  
KVTA KNTVLRGLENVDALEGG EALFECQLSQPEVA AHTWLLDDEPVHTSEKVEVVYFENGLRHLLLLK NLKPQ  
DSCRVTFLAGDVVTS AFLTVRGRWLEVLEPPHDASVKAGMQVRF TCILSEAVPVGEATWYINGAAIQPDDTDW  
TVTTD GSHHALTLSNAQPQHAGEVTF AARDAVASARLSVLALPDPPEDAEVVGRSDHSVTL SWVAPMSDGGG  
LCGYRVMKEASTGQWQLCHDLVPGPECVVDDLVP GKTYRFRVA AVGPAGAGEPVHLPQMVKIAPAPAPAP  
APAPETRQAVVGEDICLELEVAADGGEV VVWHKGTERRIQPGGHFEVLSRGRQMLVIKGFRTEDQGEYRCGP IQ  
GLPSSGAATFNVVMTSGSGDEVP AQPSLPPEAAQEGDLHLLWEALARKRRMSREPTLDSISELPEEDSRVQHL  
RQEAETAPDLSEGYSTADELARTGEADLSHTSSDDESRAGT PCLV TYLKKAGGPGISPLASKHEAQVTT SVK  
PQKQQEPVVPTCPPPGDL SAADLMDPSLDKAAVKIQA AFKGYKVRKEMKQOEGPVFSRTFGDTEAQVGDVLR  
ECVLATKTKDMRACWLKDGIELTDGRHYHIDQLKDGTC SLLVTGLAPTDSGRYTCQVSTKSGRVSHSACVVVSG  
TESEAE SSSGGELDDAFRRARLHRLFR TKSPAELSEEELFLSADEGPGEPEEPADWQTYREDEFVCIRFE  
SLAEARQAVTCFRNM FATMGI GVEISLGEQGP RGVEMRIGKVAPT VTPAVPLAKTPGLQTSDAAPVFLTELQN  
QDVQDGYPMSFDCVVTGQPVPSVRWFKDGKLEEDDHYMINEDQQGGHQLIITAVVPADMGVYRCLAENSMGV  
SSTKAELRVELTSTDYDTAADATETSSYFSAQGYLSSREGETSEDEGQLPQVLEELKDLQVAPGTR LAKFQL  
KVKGYPA PKLYWFKDGQPLTSDHIRMTDKKTLHTLEIVSVTREDSGQYAA YISNAVGAAYSSARLLVVRG PSE  
PEEKPASDVHERLVP PPRILEKFTPKKVKRGSSITFSVKVEGHPAPSVH WLKKEEAEKGV LWIGPDP TPGYTMAS  
SKQHSLVLLDVGRQH QGTYTICATNPAGQALCSASLHISGLAKEE EQRVKEALISSFLQGT SQAVSAQMS  
AGFADLVGQSKGESLVAAEAHSHLSLAEVGT EEFLOKLT SQITEMVSAKISQAKLQVPGGDSDEETKTPSASP  
RHGRSRPSSSVQESSSESEDGDSRGEIFDIYVVTADYLP LGAEQDAIILREGQYVEVLDSAHPLRWLVRTKPT  
KSSPSRQGWVSPAYLDKRLKLSPEWGPTEAPEFPGEAVSEDEYRTRLSSVIQELLSSEQAFVGLQFLESHM  
KHLERSPRVPAAVASQKTVIFRNVQDISHFHSSFLKELQCGCTDDDVAMCFIKNQEA FEKYLEFLVGRVQAES  
VVVSTPVQEFYKKYAEETLSAKDPTQPPPPPLQHYLEQPVERVQKYQALLKELIRNKARNRQNCALLEQAYAV  
VSALPQRAENKLVSLMENYPTLEALGEP I RQGHFIVWEGAPGARM PWKGHNHVF LFRNYLVICKPRRDSR  
TDTFSYVFRNMMKLSIDLNDQVEGD DRAFEVWHEREDSVRKYL LQARTVIKNSWVKEICGIQQRLAQPVWR  
PPEFEEELADCTAELGETVKLACRVTGTPKPIVSWYKDGK PVEVDPHHILIEDPDG SCTLILDNLTGIDSGQY  
MCF AASAAGNASTLGKILVQVPPRFVNKVRATPFVEGEDAQITCTVEGAPYPQIRWYKDG TLLAPGNRYRMLN  
EPRSGVLV LVIQAASKEDLGHYEC ELVNR LGSTRGGGEL YMQSPALRARDQH HREQIVA AAVEVTEQETKVPKK  
TVIEETITTVVKS PRGRRQSPGKSPSRSPRRSASPRR PGLLAPERLYPPGTSPSRRLEVEQGRKAPVPALY  
VTEAEVHAPASQSQPKWLEVEETIEVRVKKTGSRGASPVREMTSRGEGILFTLPGGIPGRDPNANN SNNKSVY  
QEARTWGP AVVHVGEFFIFQVDSVGNVDWVAASPEPEQVRASQKEENTERQE GCSGDGENTFLMEEPQD TDSL  
QGRDPKILTHNGRVLTLADLEDYVPQEGETF GCGDSTPSTPDEPPCEVSVLQREI SEPTVGGPVLLNVGRPPG  
TGATPSFFRPGSQVHSPESVFLREAWSGPVSAAPWTSSFH THVQSSVDGSHG SFKTEVSTQTVSFGAVGET  
VTLHIDPDGGEAPGPSQ\*

>rs48899298\_ENSMUSP00000158795\_c.16720:C>T\_p.P5574L  
ENSMUST00000238536.2|Obscn-210|ENSMUSG00000061462|-|chr11:g.58932645:G>A  
MDHSFSGAPRFLTRPKAFVSVGKDATLSCQIVGNPTPHVSWEKDRQVEAGARFRLAQDGDVYRLTILD LAL  
GDSGQYVCRARNAIGEAFAAVGLRVDSEGTCAEQAPHLLRPTSIRVREGADATFRCRVGGSPQPAVSWSKDG  
RRLGPPDAPHVRVEEHGESSALRIRSARPRDGGTYEVRAENPLGSASAAAALVVDSDAEVAGPPGTSTATLLA  
HLQORREAMRAEGIPSPPGAGTRTCTVTEGKHARLSCFVTGEPKPETVWKKDGQLVTEGRRHVVEDEQENF  
VLKILFCKQSDRGLYTCTASNLVGQTYSSVLVVVREPTVPFKKRLQDLEVREKESATFQCEVAQPATEAAWFK  
EETRLWASAKYDIEEGETERRLTVRNVSADDAVYICETTEGSRVAELSVQGNLTKRLPRKTAVRTGDTAIF  
WVELAVPEGPVRWLRNQEEMVAGGRVAITAEGTCHTLTI FQCTLEDMG EFAVFGSGC RTTTFQFCVSAPRRPPL  
YPPADPVVKAKTESVTL SWSAPPHGDRPVTIDGYVLEKRLKLGAYAWSRCHEAGW LATTEFTITGVAAEEGDFQ  
FRVSAINHFGQGPYLEFPGMTMHLVPM LAVKTP LKAVEAVEGGEVTF SVDLTVASSGEWFLDGEALKASSIYVI  
RCDRTRHMLTIREV PARLHGAQLK FVANGIETS IQMVVRAALGLPSSKLPAAAAREVLAQLHEEAQLLAE LSD  
QAAA VTWLKDGRELSLGP KYEMQVSAGRRALLVRDVAQDDAGLYECVSRGSR TAYQLLVDITDGYRDWGPAG

PQKHMCKCAGAKIARYLGSSCYRFLQYDKGVWHLEAALDTRQGKGTSSCSLHEKPKLVFAKGQQAHSVEKAE
AGNSATLSCEVTQAQTEVTFWKDGKLLSSSSKVRMEASGCSRRLLVQQAGKADAGEYSCEAGGQKLSFRLDVA
EPKLVFAKGQQAHSVEKAEAGASATLSCEVAQAQTEVTFWKDGKLLSSSSKVRMEASGCSRRLLVQQAGKADA
GEYSCEAGGQKLSFRLDVAEPKMFVFAKEQQARSEVKAEGASATLSCEVAQAQTEVTFWKDGKLLSSSSKVRM
EASGCSRRLLVQQAGKADAGEYSCEAGGQKLSFRLDVTEPKLVFAKEQQARSEVKAEVGNSATLSCEVAQAQT
EVTWFKDGKLLSSSSKVRMEASGCSRRLLVQQAGKADAGEYSCEAGGQKLSFRLDVAEPKLVFAKEQQARSEV
KAEAGNSATLSCEVAQAQTEVTFWKDGKLLSSSSKVRMEASGCSRRLLVQQAGKADAGEYSCEAGGQKLSFHL
DVTEPKLVFAKEQQAHSEVKAEGASATLSCEVAQAQTEVTFWKDGKLLSSSSKVRMEASGCSRRLLVQQAGK
ADAGEYSCEAEGQKLSFRLDVAEPKLVFAKEQQARSEVKAEGASATLSCEVAQAQTEVTFWKDGKLLSSSSK
VRVEASGCSRRLLVQQAGKADAGEYSCEAGGQKLSFRLDVAEPKLVFAKEQQANSEVKAEGASATLSCEVAQ
AQTEVTFWKDGKLLSSSSKVRVEASGCSRRLLVQQAGKADAGEYSCEAGGQKLSFRLDVAEPKLAFAKEQQAHS
SEVKAEGASATLSCEVAQAQTEVTFWKDGKLLSSSSKVRVEASGCSRRLLVQQAGKADAGEYSCEAGGQKLS
FRLDVAEPKLAFAKEQQAHSVEKAEAGASATLSCEVAQAQTEVTFWKDGKLLSSSSKVRVEASGCSRRLLVQQ
AGKADAGEYSCEAGGQKLSFRLDVAEPKLAFAKEQQAHSVEKAEAGASATLSCEVAQAQTEVTFWKDGKLLSS
SSKVRVEASGCSRRLLVQQAGKADAGEYSCEAGGQKLFRLDVAEPKLMFAKEQQAHSVEKAEAGASATLSCE
VAQAQTEVTFWKDGKLLSSSSKVRVEASGCSRRLLVQQAGKADAGEYSCEAGGQKLSFRLDVAEPKLVFAKEQ
QAHSVEKAEAGASATLSCEVAQAQTEVTFWKDGKLLSSSSKVRVEASGCSRRLLVQQAGKADAGEYSCEARGQ
KLSFRLDVADTRLMFAKEQQARTEVKAEGNSATLSCEVAQAQTEVTFWKDGKLLSSSSKVRVEASGCSRRLLV
VQQAGKADAGEYSCEAGGQKLSFRLDVAEAEESQIPERPSRREPLVVKEHETIILTATIAAPSVAAVTWLKDG
V EIRRSKRHEATSLGDTHTLTVRGAQVLDSAIYSCRVGKEGQDFPVQVEEVAAKFSKPLEPVEGELGGTVMLVC
ELSPQAEVWRCGNTQLRPGKRFQMTSEGPRTTLTVSGLREDDAEYVCESTRDDRTSARLTVKVPVVKFTS
GLSAMVAEEGQEQATFQCVVSPSDAGVTWYKDGMLQPSKFKVMVESGASRSLTILGLTLEDAGQVTVAEAGAS
SSAALRVREAPVLFKKLEPQTVEERTSVTLEVELTRPWPEVKWTRNAAVLTPSENVEIRAEGARHCLVLRV
GFADRGGFFGCETPDDKTQAKLNVEMRQVRLVVRGLQVEVEAKEQGTASMDVLSHAEVEGSWTRDGLRLQFPGKC
HLAVQGPVHILTLALSALQPDQSGLVAFRAEGVHTSARLIVTELPVSFTRVLQDQVATQKEKVTLECELSRPVDV
RWLKDGVLELRAGKAIGIVAQGTCSRSLVIYRCETGDKQGVYCDALDAQTSASLRVQGRVYTLIFRVLAEADAGE
VKFVAENAESRAHLRKLQVTLRPLRDKIAMEKHRGVLECCQVSRASQVRWFKGGVELQSGPKYEVVSDGL
YRKLVINVDQPEDEDTYTCDAENVKTSAQFFVVEEQSITIVRGLKDMTVMPEPAPAWFECETSIPSVRPPKWL
KTVLQAGGNVLEQDGTVHRLTLHKTCSTMTGPVHFTIGKSRSSAQLVSDIPVVLTRPLEPKAGRELQSVVL
SCDFRPAPKAVQWYKDDTPLSPSEKFKMALEGQMAELRILRLTPADAGVYRCQAGSAQSSAEVTVAREVTVI
QPLQDAEAMEEGRVCFSCELSHKDEDIEWSLNGTPLYNDSFHEISHGCLHTLVLSVRQADTGTVCATSPKV
SVSARLVVKGKPVVFLKALDDVSAEERGTTLTQCEVSDPEARVVWRKDGVELGPSDKYDFLHKAGARGLTVHD
LSHEDAGLYTCQVGSKETQSKVSVHDLHVGITKRLKTVEVLEGESECSFECVLSHESPSDPAVWTVGGKTVGGS
GHFHAVRQGRKYTLTVKDAALSDAGEVVFVSVLGLTSKASLIIRERPVDITKPLEDQRTTLGEDVMLSCELSRA
GTSVRWLKDGKAIKRSKYDLSSEGTRAVLVVRKASLKDSGEYTCETEASKSTAKLCEVEKANRFTBELADLQ
VEEKGRAVFTCKTEHPASVVTWRKGLLELRASGKHVPSQEGTLTKLTINALERTSDSTYTCDIGQARTQARLL
VHGQKVRVIEDLEDTAVQEGSSAKFCCRIAPADYGPVHWFLLDKTPLHSNELNEITVQPGGYHVLTRQLALKD
SGTVYFEAGDQRTSAAALRVTEKPSIFSRPLTDVTVTEGEDTLVCEVTTVDSSVRWTKDGKTLRPSARCQLSH
EGCQAQLLITATTPQDGGRYKCEIGGASSSSIVRVHALPVRFRESLKDVEVPEGKAATLRCVLSVAAPVEWR
HGDDVLKSSNKYSLRQEGAVLELVIRDLQPDQSGQYSCSFGDQTTSATLTVKTSQAQFVGLKRNKEATEGTTV
TLRCELTKAEAPVEWKKGTETLRNGDKYSLKQDGAVCELQICSLLVADAGEYSCVCGQEKTSAITLVKALLVHF
VRRLSKEATEGDTTLQCELSKAAPVEWRKGTETLRDGDYSLKQDGAVCELQIRSLTIADAGEYLCTCGQE
KTSATLTVRALPAKFKDSLKNEEATEGTTATLSCELSKAAPVWKKGPKTLQSGDKYVLRQDGAVCGLQIHGL
TMADAGEYSCVCGQEKTSAITLTVRGLPAKFIEDLRSQEATEGATAILRCELSKAAPVEWRKGSSETLKDGDYR
LRQDGAVCELQIRGLAVVDGTYSLSLPTKFTTEGLRNEEATEGTMATLRCQMSKAAPVEWRKGSSETLRDGDYR
LRQDGAMCELQIRGLTIEDSGEYTCVCGQEKTSAITLTVKALPSRFIEDLRSQEATEGTMATLRCQMSKTAPVE
WKKGSETLRDGGYSLRQDGPVCELQICDLAVEDAGEYSCVCGQEKTSAITLTVKALPPRFIEDLRSQEATEG
MATLRCQMSKAAPVEWRKGSSETLGDGGYSLRQNGAVCELQIHDLAVEDTGEYSCVCGQEKTSAITLTVKALPP
RFIEDLRSQEATEGTMATLRCQMSKAAPVEWRKGSSETLRDGGYSLRQDGAVCELQIHDLVEDAGQYSCVCG
QEKTSAVLTVDALPPKFTTEGLKKEEATEGTMVTLRCQMSKEATVEWRKGAKTLSDGGRYSLRQDGAMCELQIC
GLAVEDAGEYSCVCGQEKTSAITLTVKALPPRFIEDLRSQEATEGTMATLRCQMSKAAPVEWRKGSSETLRDGD
YSLRQDGAVCELQIRDLAVEDAGEYLCVCGQEKTSAITLTVKALPPRFIEDLRSQEATEGTMATLRCQMSKAAP
VEWRKGSSETLRDGDYSLRQDGAMCELQICDLAVEDTGDYSCVCGQEKTSAITLTVKALPPRFIEDLRSQEATE
GTATLRCRMSKAAPVEWRKGSSETLKDGDYSLRQEGNLCELQIRDLAVEDTEEYSCVCGQEKTSAITLTVKAL
PAKFIEDLRSQEAPESSTVTLRCKLSKASVWVWKKGSETLRNGARYSLRQDGAVCELEIRDLTVEEDTGEYSCT
CGQERTSATLSIMAPQVVFQQLQNLQAEEGSMASLRCELSVPNAAMVWSKGGLELQGDTRREARQQGCVAEL
LLRDLRREDAGEYSCVCGQTTSATLMVTAAPVRFLELQAQDVDEGATARLRCELSREAVSVEWRKGSLLQF
PCAKYQMVQEGTTAELLVHGVEQEDAGEYTCDAHTQSIARLSVRAPKPKFKTDLQSTEQEAAGGTARLCCQLS

EAEPTGTPVQWLKEGVELHVGSKYEMRRQGA VCELLIHGLEAKDTGEYACLVGGQKTLASLRVKEPEVTIVRGL  
VDMEVQADEDEVEFTCKVQSAGATDVQWHLQGLPLQSNVTEVAVLADGCTHVQLKGVTLLEDAGTVSFHVGG  
SSSAQLTVRVPEVTVLEPLKDVQLSEGQDAHFRCRLSRASGQEARWALGGVPLQCNEMNDITVEQGTLYLLTL  
HKVTLLEDAGTITLQVGSSESQAQLKVTAKNTVLRGLENVDALEGGEALFECQLSQPEVA AHTWLLDDEPVHTS  
EKVEVVYFENGLRHLLLLKNLKPQDSCRVTFLAGDVVTS AFLTVRGWRLEVL EPPHDASVKAGMQVRF TCILS  
EAVPVGEATWYINGAAIQPDDTDWTVTTDGS SHAL TLSNAQPQHAGEVTF AARDAVASARLSVLALPDPPEDA  
EVVGRSDHSVTL SWVAPMSDGGGGLCGYRVEMKEASTGQWQLCHDLVPGPECVVDDLVP GKTYRFRVA AVGPA  
GAGEPVHL PQMVKIAPAPAPAPAPALAPAPETRQAVVMGEDICLELEVAADGGEVVWHKGT ERIQPGGHFEVLS  
RQQRQMLVIKGFRTEDQGEYRCGPIQGLPSSGAATFNVMVTSGSGDEVPAQPSLPPEAAQEGDLHLLWEALAR  
KRRMSREPTLDSISELPEEDSRVQHLRQEA EETAPDLSEGYSTADELARTGEADLSHTSSDDES RAGTPSLVT  
YLKKAGGPGISPLASKHEA QVTT SVKPKQKQEPVVTCP PPGLS AADLM DPLSKAAVKIQA AFKG YKVRKE  
MKQQEGPVFSRTPFGDTEA QVGDVLRLECVL ATKTDMRACWLKDGIELTDGRHYHIDQLKDGTC SLLVTGLAPT  
DSGRYTCQVSTKSGRVSHSACVVVSGTESEAE SSSGGELDDAFRAARRLHRLFRTKSPAELSEEELFLSADE  
GPGPEEPADWQTYREDEFVCIRFESLAEARQAVTCFRNMFATMGIGVEISLGEQGPGRGEMRI GKVAPTVT  
PAVPLAKTPGLQTS DAAPVFLTELQNDVQDGYPMSFDCVVTGQPVP SVRWFKDGKLEEDDHYMINEDQQGG  
HQLIITAVVPADMGVYRCLAENSMGVSSTKAELRVELTSTDYDTA ADATETSSYFSAQGYLSSREQEGTESDE  
GQLPQVLEELKDLQVAPGTRLAKFQLKVKGYPAPKLYWFKDGQPLTSDHIRMTDKKTLHTEIIVSVTR EDSG  
QYAAIISNAVGAAYSSARLLVRGPSEPEEK PASDVHERLVPRI LEKFTPKKVKRGSSITFSVKVEGHPAPSV  
HWLKEEA EKGV LWIGPDTPGYTMAS SSKQHS LVLLDVGRQHQTGTYTCIATNPAGQALCSASLHISGLAKEEQ  
ERVKEALISSFLQGTSAVSAQMS EAGFADLVGQSKGESLVAEEAHSHLSLAEVGT EEF LQKLT S QIT E MV S  
AKISQAKLQVPGGDSDEETKTPSASPRHGRSRPSSSVQESSESSEDGDSRGEIFDIYVVTADYLP LGAEQDAI  
ILREGQYVEVLD SAHPLRWLVRTKPTKSSPSRQGWVSPAYLDRKRLKLSPEWGPTEAPEFPGEAVSEDEYRTRL  
SSVIQELLSSEQAFV GELQFLESHHMKHLERSPRVPAAVASQKTVIFRNVQDISHFHSSFLKELQCGCTDDDDV  
AMCFIKNQEA FEKYLEFLVGRVQAESVVVSTPVQEFYKKYAEETLSAKDPTQPPPPPLQHYLEQPVERVQKYQ  
ALLKELIRNKARNRNCALLEQAYAVVSALPQRAENKLVHSLMENYPGTLEALGEP IRQGHFIVWEGAPGARM  
PWKGNHRHVLFERNYL VICKPRRDSRTDTFSYVFRNMKLS SIDLNDQVEGDDRAFEVWHEREDSRVKYLLQA  
RTVILKNSWVLEICG IQRLAQPVWRPPEFE EELADCTAE LGETVKLACRVTGT PKPIVSWYKDGKPEVVDPH  
HILIEDPDG SCTLILDNLTGIDSGQYMCFAASAAGNASTLGKILVQVPPRFVNVKVRATPFVEGEDAQITCTVE  
GAPYPQIRWYKDG TLLAPGNRYRMLNEPRSGVLV LVIQAASKEDLGHYEC ELVNRLGSTRGGGELYM QSPALR  
ARDQHHREQIVAAVEDT SVEGSAHSAQDGADQQAASVLWRLLGSEALGPS PGDLNTRQSEPPAFEEAASQIP  
GAASGTPEVSPQPGTHKGLEQETTSSG SQGWTPV IRVEGTAWPGAGTGQLL DVHSQVIMETTQRTYVQAPDT  
GVTRAPSMQVTIEDVQVQVGDMAQF DAVIEGHPPPIV TWYKGSTQLTSSARLSQRQDGTTYSLVLT DVAPHDA  
GVYTCVANNAGGQVLCKAELLVHGGDKLDAENQVYRRKLSHFYDVQEE IGRGVFGFVVRVQHKGNKMFCAAKF  
IPLRSKTRAQAYQERDILATLGHP LVTGLLDQFETRKT LILILELCSSEELLDRLFKKGVVTEAEVKVYIQQL  
VEGLHYLHSHGILHLDIKPPN ILMVHPAREDIKICDFGFAQKITPSE PQYSKYGSP E FVSP E IIEQNPVSEGS  
DIWAMGVI SYLSLTCSSPFAGESDRATLLNVLEGRVSWSSPFLAAHLEDAKDFIKATLQRTPRARVST SQCLA  
HPWFLKSMPAEEAHFINTKQLKFL LARSRWRSLMSYKSILVMRSIPELLQGPPDSPSLGVARHLRGEAS GAS  
SSSSSSDNELAPFARAKSLPPSPVTHSPLLHPRGFLRPSASLPEETEASMP TADA AVPASPQSAGPPASPGCV  
PRHSVISSLFYQQAGEGAERG NKTSGAKRHPARRRHLLKGGYIARALPGLREPLMEYSLLEEEAAREEQASLM  
TKTSPFETALRLPSSSVREV PGRSHSLDNPPVT TGPSPEACEQLLFPSTGLTHE TTA KDRGHKEGFLQESV  
PFPPMSGDSRPGKQEGSSQDSCRGKP ASSCHSELGSGSQEGC GPPSSQSLGSLPPQSLKKE LSTSCGPLFSEQ  
PQAAPFPTQVSPLLGSEKEPQDGS LSEGPVPVSPSSPGSASQVDASLDTEGLSEAGDTCDFTPPPQRPQE QAT  
TRKFSLESRGGYAGVAGYGTFAFGGDAGGMLGQGPLWARMAWAVS QSSEEQDEAATESPQPLES LGPIAEASG  
VPLRTSPSLTPWEEVEQVSLVQIRDL SGDAAEADTISLDISEVDPAYLNLS DLYDIKYL PFEFMI FRRVPKPI  
EQPESPGETEAGQLADFL EEAAPWPGELGLRAGLEITEEPEEPGDLEALLGEEA AVGRKRKWSPSRGLFQF  
PGRCLSGEEPVELGLRQRVKASMAHISRILKGRPEGPEREGPPRKKAGLASFRLSGLKGRDQELSDEAVVLGQ  
SVTLACQVLAQPTAQTATWSKDGVLLES SGLLISSTLKNFQLLTIILVVK EEDLGTYTCCVSNPLGTAVTTGVL  
RKAERPSSSRPEVGE LYKDAVLLVWKP VESCGPVTYIVQCCIEGGSWTTLASDISDCCYLTGKLSRGGMYIF  
RTACVSKAGMGPYSSPSEQVLLGGPNHLASEE SRRGRPAQLLPSTKTF AFQM QIRRGFRFSVVRQCREKASGR  
ALAAKIVPYQPEDKTAVLREYEALKRLHHPHLAQLHAAYLSPRHLVLI LELCSGPELLPSLAERESYSES DVK  
DYLWQMLSATQYLHAQHILHLDLRS ENMMVTEYNLLKVIDLGN AQSLDQEKVPAPENFKDYLETMAPELLEGQ  
GAVPQTDIWAIGVTA FIMLSGEY PESS EGT RD LQKGLR KGLIRLSRCYAGLSGGAVAF LQSS LCAQPWGRPCA  
STLQCGWLTEEGTSGSRPTPVTFTVRLRAFVREREKR RALLYKKNLAQVR\*

>rs48899298\_ENSMUSP00000038264\_c.14560:C>T\_p.P4854L  
ENSMUST00000047441.14|Obscn-202|ENSMUSG00000061462|-|chr11:g.58932645:G>A  
MDHSFSGAPRFLTRPKAFVSVGKDATLSCQIVGNPTPHVSWEKDRQPVEAGARFLAQDGDVYRLTILDLAL  
GDSGQYVCRARNAIGEAFVAVGLRVDSEGTCAEQAPHLLRPTSIRVREGADATFRCRVGGSPQPAVSWSKDG  
RRLGPPDAPHVRVEEHGESSALRIRSARPRDGGTYEVRAENPLGSA SAAAALVVDSDAEVAGPPGTSTATLLA

HLQQRREAMRAEGIPPSPPGAGTRTCTVTEGKHARLSCFVTGEPKPEVWKKDQGLVTEGRRHVVEDEQENF
VLKILFCKQSDRGLYTCTASNLVGQTYSSVLVVVREPTVPFKKRLQDLEVREKESATFQCEVAQPATEAAWFK
EETRLWASAKYDIEEEGETERRLTVRNVSADDDAVYICETTEGSRVVAELSVQGNLTKRKLPRKTAVRTGDTAIF
WVELAVPEGPVWRWRNQEEMVAGGRVAITAEGTCHTLTI FQCTLEDMGEVAFVSGGCRTTTQFCVSAPRRPPL
YPPADPVVKAKTESVTLWSAPPHGDRPVTIDGYVLEKRKLGAYAWSRCHEAGWLATTEFTITGVAAEEDGFQ
FRVSAINHFGQGPYLEFPGTMHLVPLAVKTPKAVEAVEGGEVTFVSVDLTVASSGEWFLDGEALKASSIYVI
RCDRTRHMLTIREVPARLHGAQLKFVANGIETSIQMVVRAALGLPSSKLPAAAAREVLAQLHHEEAQLLAE LSD
QAAAVTWKLKDGRELSLGPKYEMQVSAGRRALLVRDVAQDDAGLYECVSRGSRRTAYQLLVQDITDGYRDWGPAG
PQKHMCKCAGAKIARYLGSSCYRFLQYDKGVVHWEAALDTRQKGTSSCSLHEKPKLVFAKQQAHSVKA
AGASATLSCEVAQAQTEVTFWKDGKLLSSSSKVRMEASGCSRRLVVQQAGKADAGEYSCEAGGQKLSFRLDVA
EPKMFVFAKEQQARSEVKAEGASATLSCEVAQAQTEVTFWKDGKLLSSSSKVRMEASGCSRRLVVQQAGKADA
GEYSCEAGGQKLSFRLDVTEPKLVFAKEQQARSEVKAEGVNSATLSCEVAQAQTEVTFWKDGKLLSSSSKVRM
EASGCSRRLVVQQAGKADAGEYSCEAGGQKLSFRLDVAEPKLVFAKEQQARSEVKAEGVNSATLSCEVAQAQ
EVTWTFWKDGKLLSSSSKVRMEASGCSRRLVVQQAGKADAGEYSCEAGGQKLSFRLDVTEPKLVFAKEQQAHSEV
KAEAGASATLSCEVAQAQTEVTFWKDGKLLSSSSKVRMEASGCSRRLVVQQAGKADAGEYSCEAGGQKLSFR
DVAEPKLVFAKEQQARSEVKAEGASATLSCEVAQAQTEVTFWKDGKLLSSSSKVRVEASGCSRRLVVQQAGK
ADAGEYSCEAGGQKLSFRLDVAEPKLVFAKEQQANSEVKAEGASATLSCEVAQAQTEVTFWKDGKLLSSSSK
VRVEASGCSRRLVVQQAGKADAGEYSCEAGGQKLSFRLDVAEPKLVFAKEQQAHSEVKAEGASATLSCEVAQ
AQTEVTFWKDGKLLSSSSKVRVEASGCSRRLVVQQAGKADAGEYSCEAGGQKLSFRLDVAEPKLVFAKEQQAH
SEVKAEGASATLSCEVAQAQTEVTFWKDGKLLSSSSKVRVEASGCSRRLVVQQAGKADAGEYSCEAGGQKLS
FRLDVAEPKLVFAKEQQAHSEVKAEGASATLSCEVAQAQTEVTFWKDGKLLSSSSKVRVEASGCSRRLVVQQ
AGKADAGEYSCEAGGQKLSFRLDVAEPKLVFAKEQQAHSEVKAEGASATLSCEVAQAQTEVTFWKDGKLLSS
SSKVRVEASGCSRRLVVQQVQKADAGEYSCEARGQKLSFRLDVAEAE SQI PERPSRREPLVVKHEHTI I LTAT
IAAPSVAAVTWLKDGV EIRRSKRHEATSLGDTHTLTVRGAQVLD SA IYSCRVGKEGQDFPVQVEEVAAKFSKP
LEPVEGELGGTVMLVCELSPEQAEVWRCNGTQLRPGKRFQMTSEGPRRTLTVSGLREDDAEYVCE SRDDRT
SARLTVKVPRVVKFTSGLSAMVAEEGQEA TFQCVVSPDAGVTWYKDMQLQ PSEKFMVWESGASRSLTILGL
TLEDAGQVTVEAEGASSAALRVREAPVLFKKKLEPQTVEERTSVTLEVELTRPWPPEVWRKDVLELGPSEN
EIRAEGARHCLVLRVGFADRGFFGCETPDDKTQAKLNVEMRQVRLVVRGLQEVEAKEQGTASMDVELSHAEVE
GSWTRDGLRLQPGPKCHLAVQGPVHILTL SALQPQDSGLVAFRAEGVHTSARLIVTELPVSFTRVLQDVVATQ
KEKVTLECELSRPVDVRWLKDGVELRAGKAI GIVAQGTCSRSLVIYRCETGDQGVYVCDALDAQTSASLRVQGR
TYTLIFRRVLAEDAGEVKFVAENAESRAHLRVKELPVTLLRPLRDKIAMEKHRGVLECCQVSRASAQVRWFKGG
VELQSGPKYEVVSDGLYRKLVIN DVQPEDEDTYTCDAGNVKTSAQFFVEEQSITIVRGLKDMTVMPEPAPAWFE
CETSIPSVRPPKWL LGKTVLQAGGNVGLQDGTVHRLTLHKTCSTMTGPVHFHTIGKSRSSAQLVVS DIPVVL
RPLEPKAGRELQSVVLSCDFRPAPKAVQWYKDDTPLSPSEKFKMALEGQMAELRILRLTPADAGVYRCQAGSA
QSSAEVTVAEAREVTVIQPLQDAEAMEEGRVCFSCELSHKDEDIEWSLNGTPLYNDSFHEI SHEGCLHTLVLS
VRQADTGTVCATSPKVSARL VVKGKPVVFLKALDDVSAEERGLTLQCEVSDPEARVVRKDVLELGP SDK
YDFLHKAGARGLTVHDL SHEDAGLYTCQVGSKETQSKVSVHDLHVGITKRLKTVEVLEGE SCSFECVLSHESP
SDPAVWTVGGKTVGGSGHFHAVRQGRKYTLTVKDAALSDAGEV VFSVLGLTSKASLIIRERPV DITKPLEDQR
TTLGEDVMLSCELSRAGTSVRWLKDGKAI RKSQKYDLLSEGTRAVLVVRKASLKDSGEYTCETEASKSTAKLC
VEEKANRFTEELADLQVEEKGRAVFTCKTEHPASVVTWRKGLLELRASGKHVPSQEGTLTKLTINALERTDSD
TYTCDIGQARTQARLLVHGQKVRVIEDLED TAVQEGSSAKFCCR IAPADYGPVHWFLDKTPLHSNELNEITVQ
PGGYHVLT LRQLALKDSGTVYFEAGDQRTSAALRVTEKPSIFSRPLTDVTVTEGEDLTLVCETTTVDSSVRWT
KDGKTLRPSARCQLSHEGCQAQLLITATTPQDGGRYKCEIGGASSSSIVRVHALPVRFRESLKDVEVPEGKAA
TLRCVLSVAAPVEWRHGDDVLKSSNKYSLRQEGAVLELVIRDLQPDGSGQYSCSFGDQTTSATLTVKTS SAQ
FVGLKRNKEATEGTTVTLRCEL TKEAPVEWKKGTETLRNGDKYSLKQDGAVCELQICSLLVADAGEYS CVCGQ
EKTSATLTVKALLVHFVRRRLRSKEATEGDTTTLQCELSKAAPVEWRKGTETLRDGD RYSLKQDGAVCELQIRS
LT IADAGEYLCTCGQEKTSATLTVRALPAKFKDSLKNEEATEGTATLSCELSKAAPVTWKKGPKTLQSGDKY
VLRQDGAVCGLQIHGLTMADAGEYSCVCGQEKTSATLTVRGLPAKFIEDLRSQEATEGATAILRCELSKAAPV
EWRKGSETLTKDGD RYTLRQDGAVCELQIRGLAVVDTGTYS SLPTKFT EGLRNEEATEGTMATLRCQMSKAAPV
EWRKGSETLRDGD RYSLRQDGAMCELQIRGLTIEDSGEYTCVCGQEKTSATLSVKALPPRFIEDLRSQEATEG
TMATLRCQMSKAAPVEWRKGSETLGDGGRYSLRQNGAVCELQIHDLAVEDTGEYSCVCGQEKTSATLNVKALP
PRFIEDLRSQEATEGTMATLRCQMSKAAPVEWRKGSETLRDGGRYSLRQDGAVCELQIHDL DVEDAGQYSCVC
GQEKTSAVLTVDALPPKFT EGLKKEEATEGTMATLRCQMSKEATVEWRKGAKT LSDGGRYSLRQDGAMCELQI
CGLAVEDAGEYSCVCGQEKTSATLSVKALPPRFIEDLRSQEATEGTMATLRCQMSKAAPVEWRKGSKTLR DGD
RYSLRQDGAMCELQICDLAVEDTGDYSCVCGQEKTSATLSVKAPQVVFQQPLQNLQAEEGSMASLRCELSVPN
AAMVWSKGGLELQGDTRREARQQGCVAELLLRDLRREDAGEYSCTCGSQTTSATLMVTAAPVRFRLRLQAQDV
DEGATARLRCELSREAVSVEWRKGS LQLFPKAKYQMVQEGTTAE LLVHGVEQEDAGEYTC DAGHTQS IARLSV
RAPKPKFKTDLQSTEQEAGGTARLCCQLSEAE PGTPVQWLKEGVELHVGSKYEMRRQGAVCELLIHGLEAKDT

GEYACLVGQKTLASLRVKEPEVTIVRGLVDMEVQADEDVEFTCKVVSQAGATDVQWHLQGLPLQSNEVTEVAV  
LADGCTHVLQKGVTLLEDAGTVSFHVGGSSSAQLTVRVPEVTVLEPLKDVQLSEGQDAHFRCRLSRASGQEA  
RWALGGVPLQCNEMNDITVEQGTLYLLTLHKVTLLEDAGTITLQVGCSSSEAQLKVTAKNTVLRGLENVDALEG  
GEALFECQLSQPEVAHAHTWLLDDEPVHTSEKVEVVYFENGLRHLLELKNLKPQDSCRVTFLAGDVVTSAPLTV  
RALPDPPEDAEVVGRSDHVSVTLVWVAPMSDGGGGLCGYRVMKEASTGQWQLCHDLVPGPECVVDDLVPGKTY  
RFRVAAVGPAGAGEPVHLPQMVKIAAPAPAPAPALAPAPETRQAVVGEDICLELEVAADGGEVVWHKGTERRI  
QPGGHFEVLSRGQRQMLVIKGFRTEDQGEYRCGPIQGLPSSGAATFNVMVMTSGSGDEVPAQPSLPPAAQEGD  
LHLLWEALARKRRMSREPTLDSISELPEEDSRVQHLRQEAETAAPDLSEGYSTADELARTGEADLSHTSSDDE  
SRAGTPSLVTYLKAGGPGISPLASKHEAQVTTSVKPKQKQEPVVPTCPPGDLSAADLMDPSLDKAAVKIQA  
AFKGYKVRKEMKQOEGPVFSRTFGDTEAQVGDVLRLECVLATKTKDMRACWLDKGIELTDGRHYHIDQLKDGTC  
SLLVTGLAPTDSGRYTCQVSTKSGRVSHSACVVVSGTESEAESSSGGELDDAFRRAARLHRLFRTKSPAELS  
EELFLSADEGPEPEPADWQTYREDENFVCIRFESLAEARQAVTCFRNMFMATMGIGVEISLGEQGPGRVEM  
RIGKVAVPTVTPAVPLAKTPGLQTSDAAPVFLTELQNDQVDQGYPMSFDCVVTGQPVPSVRWFKDGKLLLEDDH  
YMINEDQQGGHQLIITAVVPADMGVYRCLAENSMGVSSTKAELRVELTSTDYDTAADATETSSYFSAQGYLSS  
REQEGTESDEGQLPVLEELKDLQVAPGTRLAKFQLKVKGYPAPKLYWFKDGQPLTSSDHIRMDDKTLHTLE  
IVSVTREDSGQYAAIYI SNAVGAAYSSARLLVVRGVPSEPEEKPASDVHERLVPPRILEKFTPKVKRGSSITFSV  
KVEGHVAPSVHWLKEEAEGVLWIGPDTPGYTMASSSQHSVLVLDVGRQHOGTYTCIATNPAGQALCSASLH  
ISGLAKEEEEQERVKEALISSFLQGTSAQVSAQMSSESAGFADLVGQSKGESLVAAEAAHSHLSLAEVGTTEEFLOK  
LTSQITEMVSAKISQAKLQVPGGDSDEETKTPSASPRHGRSRPSSSVQESSSESEDGDSRGEIFDIYVVTADY  
LPLGAEQDAIILREGQYVEVLDSAPLRWLVRTKPTKSSPSRQGWVSPAYLDKRLKLSPEWGPTEAPEFPGEA  
VSEDEYRTRLSSVIQELLSSEQAFVGELOFLESHHMKHLERSPRVPAAVASQKTVIFRNVQDISHFHSSFLKE  
LQCGGTDDDVAMCFIKNQEAFEKYLEFLVGRVQAESVVVSTPVQEFYKKYAEETLSAKDPTQPPPLQHYLE  
QPVFERVQKYQALLKELIRNKARNRQNCALLEQAYAVVSALPQRAENKLHVSLMENYPGTLEALGEPPIRQGHFI  
VWEGAPGARMPPWKGNHRHVFVFRNYLVICKPRRDSRTDTFSYVFRNMMLSSIDLNDQVEGDDRAFEVWHERE  
DSVRKYLLQARTVI IKNSVWKEICGIQORLAQPVWRPPEFEEELADCTAELGETVKLACRVGTGPKPIVSWYK  
DGKPVVEVDPHHILIEDPDGSCTLIIDLNLTGIDSGYMCFAASAAGNASTLGKILVQVPRFVNKVRATPFVEG  
EDAQITCTVEGAPYQPIRWYKDGTLAPGNRYRMLNEPRSGVLLVLIQAASKEDLGHYECELVNLRGSTRGGG  
ELYMQSPALRARDQHREQIIVAAVEGAPSMQVTIEDVQVQVGDMAQF DAVIEGHPPPIVTVWYKGTQLTSSAR  
LSQRQDGTYSVLTVDVAPHDAGVYTCVANNAGQVLCCKAELLVHGDKLDAENQVYRRLKHSFYDVQEEIGR  
GVFVGVKRVQHKGNMFCACAFIPLRSKTRAQAYQERDILATLGHPVLTGLLDQFETRKTLLILILELCSSEEL  
LDRLFKKGVVTEAEVKVYIQQLVEGLHYLHSHGILHLDIKPPNIMVHPAREDIKICDFGFAQKI TPSEPOYS  
KYGSPFVSPPEIIEQN PVSEGS DIWAMGVI SYLSLTCSSPFAGESDRATLLNVLEGRVSWSSPTAAHLSDAK  
DFIKATLQRTPRARPSTSQC LAHPWFLKSMPAEEAHFINTKQLKFLLRARSRWQRSLMSYKSI LVMRSIPELLQ  
GPPDSPSLGVARHLRGEASGASSSSSSSDNELAPFARAKSLPPSPVTHSPLLHPRGFLRPSASLPEETEASMP  
TADAAVPASPQASGPPSPGCVPRHSV ISSLFYQQAGEGAERGNKTS GAKRHPARRRHLLKGGYIARALPGLR  
EPLMEYSLLLEEAAREEQASLMTKTPSFETALRRLPSSSVREVPGRSHSLDNPPVTTGPSPEACKQLLFPST  
GLTHEHTAKDRGHKEGFLQESVFPFMSGDSRPGKQEGSSQDSCRGKPASSCHSELGSGSQEGCGPPSSQSLG  
SLPPQSLKKELESTSCGPLFSEQPQAAPFPTQVSPLLGSEKEPQDGSLSSEGVPVPSSSPGSASQVDASLDTEG  
LSEAGDTCDFTPPPQRPEQATTRKFSLESRGGYAGVAGYGTFAFGGDAGGMLGQGPLWARMWAVSOSSEEQ  
DEAATESPQPLESGLPIAEASGVPLRTSPSLTPWEEVEQVSLVQIRDLSGDAEAADTISLDISEVDPAYLNL  
DLYDIKYL PFEFMI FRRVPKPIEQPESPGSETEAGQGLADFL EEAAPWPWGELGLRAGLEITEEPEEPGDLEA  
LLGEAAVGRKRKWSPSRGLFQFPGRCLSGEEPVELGLRQRVKASMAHISRILKGRPEGPEREPPRKKAGLAS  
FRLSGLKGRDQELSDEAVVLGQSVTLACQVLAQPTAQTATWSKDGVLLESSEGHLLISSTLKNFQLLTLIVVKEE  
DLGTYTCCVSNPLGTAVTTGVLKRAERPSSSPRPEVVELYKDAVLLVWKPVESCGPVTVYIVQCCIEGGSWTTL  
ASDISDCCYLTGKLSRGGMIIFRTACVSKAGMPYSSPEQVLLGGPNHLASEEESSRGRPAQLLPSTKTFAF  
QMQIRRGFRSVVRQCREKASGRALAAKIVPYQPEDKTA VLREYEALKRHLHPHLAQLHAAYSRHLVLIILEL  
CSGPELLPSLAERESYSESDVKDYLWQMSATQYLHAQHILHLDLRSENMMVTEYNLLKVIDLGNAQSLDQEK  
VPAPENFKDYLETMAPELLEGQAVPQTDIWAIGVTA FIMLSGEY P ESSEGETRDLQKGLRKLIRLSRCYAGL  
SGGAVAFLLQSSLCAQWPWRPCASTCLQCGWLT EEGPTGSRPTPVTFTVRLRAFVREKRRALLYKKNHLAQ  
VR\*

>rs48899298\_ENSMUSP00000049737\_c.16519:C>T\_p.P5507L

ENSMUST00000052872.15|Obscn-203|ENSMUSG00000061462|-|chr11:g.58932645:G>A  
MDHSFSGAPRFLTRPKAFVVSVGKDATLSCQIVGNPTPHVSWEKDRQPVEAGARFRLAQDGDVYRLTILDLAL  
GDSGQYVCRARNAIKEAFAAVGLRVDSEGTCAEQAPHFLLRPTSIRVREGADATFRCRVGGSPPAVSWSKDG  
RRLGPPDAPHVRVEEHGESSALRIR SARPRDGGTYEVRANPLGSASAAAALVVDSDAEVAGPPGTSTATLLA  
HLQQRRREAMRAEGIPSPPPGAGTRTCTVTEGKHARLSCFVTGEPKPEVWKKDGQLVTEGRRHVVEDEQENF  
VLKILFKQSDRGLYTCTASNLVGQTYSSVLVVVREPTVPFKKRLQDLEVREKESATFQCEVAQPA TEAAWFK  
EETRLWASAKYDIEEGETERRLTVRNVSADDDAVYICETTEGSRVVAELSVQGNLTKLPRKTAVRTGDTAIF

WVELAVPEGPVRWLRNQEEMVAGGRVAITAEGTCHTLTI FQCTLEDMGEVAFVSGGCRTTTQFCVSA PRRPPL  
YPPADPVVKAKTESSVTL SWSAPPHGDRPVTIDGYVLEKRKLGAYAWSRCHEAGWLATTEFTITGVAAEEGDFQ  
FRVSA INHFGQGPYLEFPGTMHLVPLAVKTPKAVEAVEGGEVTFVSDLTVASSGEWFLDGEALKASSIYVI  
RCDRTRHMLTIREV PARLHGAQLKFVANGIETSIQMVVRAALGLPSSKLPAAAAREVLAQLHEEAQLLAE LSD  
QAAAVTWLKDGRELSLGPYEMQVSAGRRALLVRDVAQDDAGLYECVSRGSRRTAYQLLVQEPKLVFAKGOQAH  
SEVKAEAGNSATLSCEVTQAQTEVTFWFKDGKLLSSSSKVRMEASGCSRRLVVQQAGKADAGEYSCEAGGQKLS  
FRLDVAEPKLVFAKGOQAHSEVKAEAGASATLSCEVAQAQTEVTFWFKDGKLLSSSSKVRMEASGCSRRLVVQQ  
AGKADAGEYSCEAGGQKLSFRLDVAEPKMFVFAKEQQARSEVKAEAGASATLSCEVAQAQTEVTFWFKDGKLLSS  
SSKVRMEASGCSRRLVVQQAGKADAGEYSCEAGGQKLSFRLDVTEPKLVFAKEQQARSEVKAEVGN SATLSCE  
VAQAQTEVTFWFKDGKLLSSSSKVRMEASGCSRRLVVQQAGKADAGEYSCEAGGQKLSFRLDVAEPKLVFAKEQ  
QARSEVKAEAGNSATLSCEVAQAQTEVTFWFKDGKLLSSSSKVRMEASGCSRRLVVQQAGKADAGEYSCEAGGQ  
KLSFHLDVTEPKLVFAKEQQAHSEVKAEAGASATLSCEVAQAQTEVTFWFKDGKLLSSSSKVRMEASGCSRRLV  
VQQAGKADAGEYSCEAGGQKLSFRLDVAEPKLVFAKEQQARSEVKAEAGASATLSCEVAQAQTEVTFWFKDGK  
LSSSSKVRVEASGCSRRLVVQQAGKADAGEYSCEAGGQKLSFRLDVAEPKLVFAKEQQANSEVKAEAGASATL  
SCEVAQAQTEVTFWFKDGKLLSSSSKVRVEASGCSRRLVVQQAGKADAGEYSCEAGGQKLSFRLDVAEPKLAFA  
KEQQAHSEVKAEAGASATLSCEVAQAQTEVTFWFKDGKLLSSSSKVRVEASGCSRRLVVQQAGKADAGEYSCEA  
GGQKLSFRLDVAEPKLAFAKEQQAHSEVKAEAGASATLSCEVAQAQTEVTFWFKDGKLLSSSSKVRVEASGCSR  
RLVVQQAGKADAGEYSCEAGGQKLSFRLDVAEPKLAFAKEQQAHSEVKAEAGASATLSCEVAQAQTEVTFWFKD  
GKLLSSSSKVRVEASGCSRRLVVQQAGKADAGEYSCEAGGQKLFRLDVAEPKLMFAKEQQAHSEVKAEAGAS  
ATLSCEVAQAQTEVTFWFKDGKLLSSSSKVRVEASGCSRRLVVQQAGKADAGEYSCEAGGQKLSFRLDVAEPK  
VFAKEQQAHSEVKAEAGASATLSCEVAQAQTEVTFWFKDGKLLSSSSKVRVEASGCSRRLVVQQV GKADAGEYS  
CEARGQKLSFRLDVADTRLMFAKEQQARTEVKAEAGNSATLSCEVAQAQTEVTFWFKDGKLLSSSSKVRVEASG  
CSRRLVVQQAGKADAGEYSCEAGGQKLSFRLDVAEAE SQI PERPSRREPLVVKEHETIILTATIAAPSVAAVT  
WLKDGVEIRRSKRHEATS LGDTHLTVRGAQVLD SAIYSCRVGKEGQDFPVQVEEVA AKFSKPLEPVEGELGG  
TVMLVCELSPEQAEVWRCGNTQLRPGKRFQMTSEGPRTLT VSGLREDDAE EYVCE SRDDRTSARLTVKVPR  
VVKFTSGLSAMVAEEGQEATFQC VVSPSDAGVT SVYKDMGLQPSEK FVMVESGASRSLTILGLTLEDAGQVTV  
EAE GASSAALRVREAPVLFK KLEPQTVEERTWTLLEVELTRPWEVVKWTRNAAVLTPSENVEIRAEGARHC  
LVLRVGFADRGFFGCETPDDKTQAKLNVEMRQVRLV RGLQEVEAKEQGTASMDVELSHAEVEGSWTRDGLRL  
QPGPKCHLAVQGPVHILTL SALQPQDSGLVAFRAEGVHTSARLIVTELPVSFTRVLQDVVATQKEKVTLECEL  
SRPVDVRWLKDGVELRAGKAIGIVAQGTCSRSLVIYRCETGDQGVYVCDALDAQTSASLRVQGRTYTLIFRVL  
AEDAGEV KFVAENAESRAHLRVKELPVTLLRPLRDKIAMEKHRGVLE CQVSRASAQVRWFVKGVELQSGPKYE  
VVS DGLYRKLVIN DVQPEDEDTYTC DAGNVKTS AQFFVEEQSITIVRGLKDMTVME PAPA WFE CETSIPSVRP  
PKWLLGKTVLQAGGNVGLQDGT VHRLTLHKTCSTMTGPVHFTIGKSRSSAQLVVS DI PVVLRTRPLEPKAGRE  
LQSVVLSCDFRPAPKAVQWYKDDTPLSPSEKFKMALEGQMAELRILRLTPADAGVYRCQAGSAQSSAEVTV EA  
REVTVIQPLQDAEAMEEGRVCFSC ELSHKDEI EWSLNGTPLYNDSFHEI SHEGCLHTLVLKSVRQADTGTVC  
ATSPKVS SARLVVKGKPVVFLKALDDVSAEERGLTLTQCEVSDPEARVVWRKDGVELGPSDKYDFLHKAGAR  
GLTVHDL SHEDAGLYTCQVGSKETQSKVSVHDLHVGITKRLKTVEVLEGE SCSFECVLSHESPSDPAVWTVGG  
KTVGGSGHFHAVRQGRKYTLTVKDAALSDAGEV VSVLGLTSKASLIIRERPVDITKPLEDQRTTLGEDVMLS  
CELSRAGTSVRWLKDGKAIRKSQKYDLLSEGTRAVLVVRKASLKDSGEYTCETEASKSTAKLCVEEKANR FTE  
ELADLQVEEKGRAVFTCKTEHPASVVTWRKGLLELRASGKHVPSQEGTLKLTINALERTDSDTYTCDIGQAR  
TQARLLVHGQKVRVIEDLED TAVQEGSSAKFCCRIAPADYGPVHWF LDKTPLHSNELNEITVQPGGYHVLT LR  
QLALKDSGTVYFEAGDQRTS AALRVTEKPSIFSRPLTDVTVTEGEDLTLVCETTTVDSSVRWTKDGKTLRPSA  
RCQLSHEGCAQLLITATTPQDGGRYKCEIGGASSSSIVRVHALPVRFRESLKDVEVPEGKAATLR CVLSSVA  
APVEWRHGDDVLKSSNKYSLRQEGAVLELVIRDLQPQDSGQYSCSFGDQTT SATLTVKTS SAQFVGKLRNKEA  
TEGTTVTLRCELTK EAPVEWKGTETLRNGDKYSLKQDGAVCELQICSLLVADAGEYSCVCGQEKTSATLTVK  
ALLVHFVRRLRSKEATEGDTTTLQCELSKAAPVEWRKGTETLRDGD RYSLKQDGAVCELQIRSLTIADAGEYL  
CTCGQEKTSATLTVRALPAKFKDSLKNEEATEGTTATLSCELSKAAPVTWKKGPKTLQSGDKYVLRQDGAVCG  
LQIHGLTMADAGEYSCVCGQEKTSATLTVRGLPAKFIEDLRSQEATEGATAILRCELSKAAPVEWRKGSETLK  
DGD RYTLRQDGAVCELQIRGLAVVDGTYS SLPKFTTEGLRNEEATEGTMATLRCQMSKAAPVEWRKGSETLR  
DGD RYSLRQDGAMCELQIRGLTIEDSGEYTCVCGQEKTSATLSVKALPSRFIEDLRSQEATEGTMATLRCQMS  
KTAPVEWKKGSETLRDGG RYSLRQDGPVCELQICDLAVEDAGEYSCVCGQEKTSATLSIKALPPRFIEDLRSQ  
EATEGTMATLRCQMSKAAPVEWRKGSETLGDGG RYSLRQNGAVCELQIHDLAVEDTGEYSCVCGQEKTSATLN  
VKALPPRFIEDLRSQEATEGTMATLRCQMSKAAPVEWRKGSETLRDGG RYSLRQDGAVCELQIHDL DVEDAGQ  
YSCVCGQEKTSAVLTVDALPPKFTTEGLKKEEATEGTMVTLR CQMSKEATVEWRKGAKTLSDGG RYSLRQDGAM  
CELQICGLAVEDAGEYSCVCGQEKTSATLSVKALPPRFIEDLRSQEATEGTMATLRCQMSKAAPVEWRKGSET  
LRDGD RYSLRQDGAVCELQIRDLAVEDAGEYLCVCGQEKTSATLSVKALPPRFIEDLRSQEATEGTMATLRCQ  
MSKAAPVEWRKGSKTLR DGD RYSLRQDGAMCELQICDLAVEDTGDYSCVCGQEKTSATLSVKALPPRFIEDLR  
SQEAREGTVATLRCRMSKAAPVEWRKGSETLKDGD RYSLRQEGNLCELQIRDLAVEDTEEYSCVCGQEKTSAT



LSVKALPAKFIEDLRSQEAPESSTVTLRCKLSKKASVVWKKGSETLRNGARYSLRQDGAUCELEIRDLTVEEDT  
GEYSCTCGQERTSATLSIMAPQVVFQQPLQNLQAEEGSMASLRCELSVPNAAMVWSKGGLELQGDTRREARQQ  
GCVAELLLRDLRREDAGEYSCTCGSQTTSATLMVTAAPVRFLELQAQDVDEGATARLRCELSREAVSVEWRK  
GSLQLFPCAKYQMVQEGTTAELLVHGVEQEDAGEYTC DAGHTQS IARLSVRAPKPKFKTDLQSTEQEAGGTAR  
LCCQLSEAEPTPVQWLKEGVELHVGSKYEMRRQGAVCELLIHGLEAKDTGEYACLGGQKTLASLRVKEPEV  
TIVRGLVDMEVQADEDEFTCKVSQAGATDVQWHLQGLPLQSNVEVEAVLADGCTHVLQKGVTLLEDAGTVS  
FHVGGSSSAQLTVRVPEVTVLEPLKDVQLSEGQDAHFRCRLSRASGQEARWALGGVPLQCNEMNDITVEQGT  
LYLLTLHKVTLLEDAGTITLQVGSSEAEQLKVTAKNTVLRGLENVDALEGGALFECQLSQPEVAHAHTWLLDD  
EPVHTSEKVEVVYFENGLRHLLLLKLNKLPQDSCRVTFLAGDVVTSAFVTVRGWRLEVEPPHDASVKAGMQVR  
FTCII LSEAVPVGEATWYINGAAIQPDDTDWTVTTDGSHHALTLSNAQPQHAGEVTF AARDAVASARLSVLALP  
DPPEDAEEVGRSDHSVTLVWVAPMSDGGGGLCGYRVMKEASTGQWQLCHDLVPGPECVDDLVPGKTYRFRV  
AAVGPAGAGEPVHLPQMVKIAPAPAPAPALAPAPETRQAVVGEDICLELEVAADGGEVVWHKGTERTIQPGG  
HFEVLSRGRQMLVIKGFRTEDQGEYRCGPIQGLPSSGAATFNVVMTSGSGDEVPAQPSLPPEAAQEGDLHLL  
WEALARKRRMSREPTLDSISELPEEDSRVQHLRQEAETAPDLSEGYSTADELARTGEADLSHTSSDDESRAG  
TPSLVTVLKKAGGPGISPLASKHEAQVTTSVKPKQKQEPVPTCPPPGDLSAADLMDPSLDKAAVKIQAAFKG  
YKVRKEMKQOEGPVFSRTFGDTEAQVGDVLRLECVLATKTDMRACWLKDGIELTDGRHYHIDQLKDGTCSSLLV  
TGLAPTDSGRYTCQVTEKSGRVSHSACVVVSGTESEAESSSGGELDDAFRRAARRLHRLFRTKSPAELSEEEL  
FLSADEGPEPEEPADWQTYREDEFVFCIRFESLAEARQAVTCFRNMFATMGIGVEISLGEQGRGVEMRIGK  
VAPTVPAPVPLAKTPGLQTSDAAPVFLTELQNDVQDGYPMSFDCVVTGQPVPSVRWFKDGKLEEDDHYMIN  
EDQQGGHQLIITAVVPADMGVYRCLAENSMGVSSTKAELRVELTSTDYDTAADATETSSYFSAQGYLSSREQE  
GTESDEGQLPQVLEELKDLQVAPGTRLAKFQLKVKGYPAKLYWFKDGQPLTSDHIRMTDKKTLHTLEIVSV  
TREDSGQYAAIYISNAVGAAYSSARLLVRGPSEPEEKPASDVHERLVPRILEKFTPKKVKRGSSTFSVKVEG  
HPAPSVHWLKEEAKEKGLVWIGPDTPGYTMASSSKQHSVLVDVGRQHGGTYTCIATNPAGQALCSASLHISGL  
AKEEEQERVKEALISSFLQGTSAQVSAQMSSEAGFADLVGQSKGESLVAEEAHSHLSLAEVGTTEEFLQKLTSSQ  
ITEMVSAKISQAKLQVPGGDSDEETKTPSASPRHGRSRPSSSVQESSSESEDGDSRGEIFDIYVVTADYLPLG  
AEQDAIILREGQYVEVLDSAHPLRWLVRTKPTKSSPSRQGWVSPAYLDKRLKLSPEWGPTEAPEFPGEAVSED  
EYRTRLSSVIGQELLSSEQAFVGLQFLESHHMKHLERSPRVPAAVASQKTVIFRNVQDISHFHSSFLKELQGC  
GTDDDVAMCFIKNQEA FEKYLEFLVGRVQAESVVVSTPVQEFYKKYAEETLSAKDPTQPPPPPLQHYLEQVPE  
RVQKYQALLKELIRNKARNRQNCALLEQAYAVVSALPQRAENKLVSLMENYPGTLEALGEPHQGHFVWEG  
APGARMPWKGNHRHVF LFRNYLVICKPRRDSRTDTFSYVFRNMMKLSSIDLNDQVEGDDRAFEVWHEREDESVR  
KYLQARTVI IKNSWVKEICGIQQRQAQPVWRPPEFEELADCTAELGETVKKLACRVTGTPKPIVSWYKDGKP  
VEVDPHHILIEDPDGSCTLILDNLTGIDSGQYMCFAASAAGNASTLGKILVQVPPRFVNVKVRATPEVEGEDAQ  
ITCTVEGAPYPQIRWYKDGTLAPGNRYRMLNEPRSGVLVLIQAASKEDLGHYECELVNLRLGSTRGGGELYM  
QSPALRARDQHHREQIVAAVEVTEQETKVPKKTVIIEETITTVVKS PRGRRQSPGKSPSRSPRRSASPRRPG  
LLAPERLYPPGTSPRRLEVEQGRKAPVPALYVTEAEVHAPASQSOPKWEVEETIEVRVKKTGSRGASPVRE  
MTRSREGILFTLPGGI PGRDPNANNNSNKS SVYQEARTWGPVAVVHVGEPFIFQVDSVGNVDWVAASPEPEQVRA  
SQKEENTERQEGCSDGIDENTFLMEEPQDQDLSLQGRDPKILTHNGRVLTLADLEDYVPQEGETFQCGDSTPSTP  
DEPPCEVSVLQREISEPTVGGQPVLLNVGRPPGTGATPSFFRPGSQVHSPESVSFLLREAWSGPVSAAAPTSSSF  
HTHVQSSVDGSHGSFKTEVSTQTVSFGAVGETVTLHIDPDGGEAPGPSQG\*

>rs48899298\_ENSMUSP00000020732\_c.16720:C>T\_p. P5574L

ENSMUST00000020732.13|Obscn-201|ENSMUSG00000061462|-|chr11:g.58932645:G>A  
MDHSFSGAPRFLTRPKAFVVSVGKDATLSCQIVGNPTPHVSWEKDRQVPEAGARFRLAQDGDVYRLTILDLAL  
GDSGQYVCRARNAIGEAFAAVGLRVDSEGTCAEQAPHFLLRPTSIRVREGADATFRCRVGGSPQPAVSWSKDG  
RRLGPPDAPHVRVEEHGESSALRIR SARPRDGGTYEVRAENPLGSASAAAALVVDSDAEVAGPPGTSTATLLA  
HLQQRREAMRAEGIPSPPGAGTRTCTVTEGKHARLSCFVTGEPKPEVTVWKKDGLVTEGRRHVVEDEQENF  
VLKILFCKQSDRGLYTCTASNLVGQTYSSVLVVREPTVPFKKRLQDLEVREKESATFQCEVAQPATEAAWFK  
EETRLWASAKYDIEEEGETERRLTVRNVSADDDAVYICETTEGSRVVAELSVQGNLTKLPRKTAVRTGDTAIF  
WVELAVPEGPVRWRNQEEMVAGGRVAITAEGTCHTLTIFQCTLEDMGEVAFVSGGCRTTTQFCVSA PRRPPL  
YPPADPVVKAKTESSVTLVSWAPPHGDRPVTIDGYVLEKRKLGAYAWSRCHEAGWLATTEFTITGVAAEGDFQ  
FRVSAINHFGQGPYLEFPGTMHLVPLAVKTPKAVEAVEGGEVTFVSDTLTVASSGEWFLDGEALKASSIYVI  
RCDRTRHMLTIREV PARLHGAQLKFVANGIETSIQMVVRAALGLPSSKLPAAAAAREVLAQLHEEAQLLAE LSD  
QAAA VTWLKDGRELSLGPKEYMQVSAGRRALLVRDVAQDDAGLYECVSRGSR TAYQLLVQDITDGYRDWGPAG  
PQKHMCKCAGAKIARYLGS SCYRFLQYDKGVVHWLEAALDRQKGTSSCSLHEKPKLVFAKQQAHSEVKA  
AGNSATLSCEVTAQTEVTFWKDGGKLSSSSKVRMEASGCSRRLVVQQAGKADAGEYSCEAGGQKLSFRLDVA  
EPKLVFAKQQAHSEVKA EAGASATLSCEVAQAQTEVTFWKDGGKLSSSSKVRMEASGCSRRLVVQQAGKADA  
GEYSCEAGGQKLSFRLDVAEPKMFVFAKEQQARSEVKA EAGASATLSCEVAQAQTEVTFWKDGGKLSSSSKVRM  
EASGCSRRLVVQQAGKADAGEYSCEAGGQKLSFRLDVTEPKLVFAKEQQARSEVKA EAGASATLSCEVAQAQ  
EVTWTFKDGKLSSSSKVRMEASGCSRRLVVQQAGKADAGEYSCEAGGQKLSFRLDVAEPKLVFAKEQQARSEV

KAEAGNSATLSCEVAQAQTEVTFWFKDGKLLSSSSKVRMEASGCSRRLVVQQAGKADAGEYSCEAGGQKLSFHL  
DVTEPKLVFAKEQQAHSEVKAEAGASATLSCEVAQAQTEVTFWFKDGKLLSSSSKVRMEASGCSRRLVVQQAGK  
ADAGEYSCEAEGQKLSFRLDVAEPKLVFAKEQQARSEVKAEAGASATLSCEVAQAQTEVTFWFKDGKLLSSSSK  
VRVEASGCSRRLVVQQAGKADAGEYSCEAGGQKLSFRLDVAEPKLVFAKEQQANSEVKAEAGASATLSCEVAQ  
AQTEVTFWFKDGKLLSSSSKVRVEASGCSRRLVVQQAGKADAGEYSCEAGGQKLSFRLDVAEPKLVFAKEQQAH  
SEVKAEAGASATLSCEVAQAQTEVTFWFKDGKLLSSSSKVRVEASGCSRRLVVQQAGKADAGEYSCEAGGQKLS  
FRLDVAEPKLVFAKEQQAHSEVKAEAGASATLSCEVAQAQTEVTFWFKDGKLLSSSSKVRVEASGCSRRLVVQQ  
AGKADAGEYSCEAGGQKLSFRLDVAEPKLVFAKEQQAHSEVKAEAGASATLSCEVAQAQTEVTFWFKDGKLLSS  
SSKVRVEASGCSRRLVVQQAGKADAGEYSCEAGGQKLSFRLDVAEPKLVFAKEQQAHSEVKAEAGASATLSCE  
VAQAQTEVTFWFKDGKLLSSSSKVRVEASGCSRRLVVQQAGKADAGEYSCEAGGQKLSFRLDVAEPKLVFAKEQ  
QAHSEVKAEAGASATLSCEVAQAQTEVTFWFKDGKLLSSSSKVRVEASGCSRRLVVQQVQKADAGEYSCEARGQ  
KLSFRLDVADTRLMFAKEQQARTEVKAEAGNSATLSCEVAQAQTEVTFWFKDGKLLSSSSKVRVEASGCSRRLV  
VQQAGKADAGEYSCEAGGQKLSFRLDVAEAEESQIPERPSRREPLVVKEHETIILTATIAAPSVAAVTVLKDGV  
EIRRSKRHEATSLGDTHTLTVRGAQVLDSAIYSCRVGKEGQDFPVQVEEVAAKFSKPLEPVEGELGGTVMLVC  
ELSPQAEVWRCGNTQLRPGKRFQMTSEGPRRTLTVSGLREDDAEYVCESTRDDRTSARLTVKVPVVKFTS  
GLSAMVAEEGQEAATFQCVVSPDAGVTWYKDGMLQPSKFKVMVESGASRSLTILGLTLEDAGQVTVAEAGAS  
SSAALRVREAPVLFKKKLEPQTVERTSVTLEVELTRPWEVKWTRNAAVLTPSENVEIRAEGARHCLVLRVSV  
GFADRGFFGCETPDDKTQAKLNVEMRQVRLVRLVGLQVEVAKEQGTASMDVELSHAEEVGSVTRDGLRLQPGPKC  
HLAVQGPVHILTLALSALQPQDSGLVAFRAEGVHTSARLIVTELPSFTRVLQDVVATQKEKVTLECELSRPVDV  
RWLKDGVLELRAGKAIIGIVAQGTCSRSLVIYRCETGDQGVYVCDALDAQTSASLRVQGRTYTLIFRRLAEDAGE  
VKFVAENAESRAHLRVKELPVTLLRPLRDKIAMEKHRGVLECCQVSRASAQVRWFKGGVELQSGPKYEVVSDGL  
YRKLVINVDVQPEDEDTYTCDAENVKTSAQFFVVEQSITIVRGLKDMTVMPEPAPAWFECETSIPSVRPPKWL  
KTVLQAGGNVGLQDGTVHRLTLHKTCSTMTGPVHFTIGKSRSSAQLVVSDIPVVLTRPLEPKAGRELQSVVL  
SCDFRPAPKAVQWYKDDTPLSPSEKFKMALEGQMAELRILRLTPADAGVYRCQAGSAQSSAEVTVAREVTVI  
QPLQDAEAMEEGRVCFSCELSHKDEDIEWSLNGTPLYNDSFHEISHGCLHTLVLSKSVRQADTGTVCATSPKV  
SVSARLVVKGKPVVFLKALDDVSAEERGTLLTQCEVSDPEARVVWRKDGVELGSPDKYDFLHKAGARGLTVHD  
LSHEDAGLYTCQVFKLTLHVGITKRLKTVEVLEGESECSFECVLSHESPSDPAVMTVGGKTVGGS  
GHFHAVRQGRKYTLTVKDAALSDAGEVVSFVGLTSLKASLIIRERPVDTKPLEDQRTTLGEDVMLSCELSRA  
GTSVRWLKDGKAIRKSQKYDLLSEGTRAVLVVRKASLKDSEYTCETEASKSTAKLCVEEKANRFTTEELADLQ  
VEEKGRAVFTCKTEHPASVVTWRKGLLELRASGKHVPSQEGTLTKLTINALERTSDTYTCDIGQARTQARLL  
VHGQKVRVIEDLEDTAVQEGSSAKFCRIAPADYGPVHWFLLDKTPLHSNELNEITVQPGGYHVLTLRQLALKD  
SGTVYFEAGDQRTSALRVTEKPSIFSRPLTDVTVTEGEDTLVCETTTVDSVVRWTKDGKTLRPSARCQLSH  
EGCQAQLLITATTPQDGGRYKCEIGGASSSSIVRVHALPVRFRRESLKDVEVPEGKAATLRCVLSVVAAPVEWR  
HGDDVLKSSNKYSLRQEGAVLELVIRDLQPDQSGQYSCSFGDQTTSATLTVKTSQAQFVGLRKNKEATEGTTV  
TLRCELTKEAPVEWKKGTETLRNGDKYSLKQDGAVALCELIQCSLLVADAGEYSCVCGQEKTSATLTVKALLVHF  
VRRLRSKEATEGDTTTLQCELSKAAPVEWRKGTETLRDGDYSLKQDGAVALCELIQIRSLTIADAGEYLCTCGQE  
KTSATLTVRALPAKFKDSLKNEEATEGTTATLSCELSKAAPVTWKKGPKTLQSGDKYVLRQDGAVALCELIQIHL  
TMADAGEYSCVCGQEKTSATLTVRGLPAKFIEDLRSQEATEGATAILRCELSKAAPVEWRKGSSETLKDGDYR  
LRQDGAVALCELIQIRGLAVVDTGTYSSLPTKFTTEGLRNEEATEGTMATLRCQMSKAAPVEWRKGSSETLRD  
LRQDGAVALCELIQIRGLTIEDSGEYTCVCGQEKTSATLSVKALPSRFIEDLRSQEATEGTMATLRCQMSKTA  
PVEWKKGSETLRDGGYSLRQDGPVCELQICDLAVEDAGEYSCVCGQEKTSATLSIKALPPRFIEDLRSQEATE  
GTMATLRCQMSKAAPVEWRKGSSETLGDGGYSLRQNGAVCELQIHDLAVEDTGEYSCVCGQEKTSATLNVKAL  
PPRFIEDLRSQEATEGTMATLRCQMSKAAPVEWRKGSSETLRDGGYSLRQDGAVALCELIHDLVEDAGQYSCV  
CGQEKTSAVLTVDALPPKFTTEGLKKEEATEGTMVTLRCQMSKEATVEWRKGAKTSLDGGYSLRQDGAVALCE  
LIQGLAVEDAGEYSCVCGQEKTSATLSVKALPPRFIEDLRSQEATEGTMATLRCQMSKAAPVEWRKGSSETLRD  
GDRYSLRQDGAVALCELIQIRDLAVEDAGEYLCVCGQEKTSATLSVKALPPRFIEDLRSQEATEGTMATLRCQ  
MSKAAPVEWRKGSSETLRDGGYSLRQDGAVALCELIQICDLAVEDTGDYSCVCGQEKTSATLSVKALPPRFIE  
DLRSQEAREGTVATLRCMSKAAPVEWRKGSSETLKDGDYSLRQEGNLCELQIRDLAVEDTEEYSCVCGQEKTS  
ATLSVKALPAKFIEDLRSQEAPESSTVTLRCKLSKKASVVWKKGSETLRNGARYSLRQDGAVALCELEIRDLT  
VEDTGEYSCTCGQERTSATLSIMAPQVVFQQPLQNLQAEEGSMASLRCELSVNAAMVWSKGGLELQGDTRREAR  
QQGCVAELLLRDLRREDAGEYSCTCGSQTTSATLMVTAAPVRFRLRELQAQDVDEGATARLRCELSREAVSVE  
WRKGSLLQPCAKYQMVQEGTTAELLVHGVEQEDAGEYTCDAHTQSIARLSVRAPKPKFKTDLQSTEQEAGGTAR  
LCCQLSEAEFGTPVQWLKEFTLVHVGSKYEMRRQGAVALCELIHGLEAKDTGEYACLVGGQKTLASLRVKEPE  
VTVIRGLVDMVEQADEDEVEFTCKVSOAGATDVQWHLQGLPELLISNEVTEVAVLADGCTHVLQLKGVTLLEDA  
GTVSFHVGGLSSSAQLTVRVPEVTVLEPLKDVQLSEGQDAHFRCRLSRASQEARWALGGVPLQCNEMNNDITVE  
QGTLYLLTLHKVTLLEDAGTITLQVGSSESQAQLKVTAKNTVLRGLENVDALLEGGEALFECQLSQPEVAHAHT  
WLLDDEPVHTSEKVEVVYFENGLRHLLLLKNLKPQDSCRVTFLAGDVVTSFAFLTVRGRWLEVLPPHDASVKAG  
MQVRFCTILSEAVPVGEATWYINGAAIQPDDTDWTVTTDGSHHALTLNSAQPQHAGEVTFAAARDAVASARLS  
VLAALPDPPEDA

EVVGRSDHSVTLWSVAPMSDGGGGLCGYRVMKEASTGQWQLCHDLVPGPECVVDDLVP GKTYFRVAAVGPA  
GAGEPVHLPQMVKIAPAPAPAPALAPAPETRQAVVGEDICLELEVAADGGEVVWHKGTERTIQPGGHFEVLS  
RGQRQMLVIKGFRTEDQGEYRCGPIQGLPSSGAATFNVMVMTSGSGDEVPAQPSLPPEAAQEGDLHLLWEALAR  
KRRMSREPTLDSISELPEEDSRVQHLRQEAETAPDLSEGYSTADELARTGEADLSHTSSDDES RAGTPSLVT  
YLK KAGGPGISPLASKHEAQVTTSVKPKQKQEPVPTCP PGDL SAADLMDPSLDKAAVKIQAAF KGYKVRKE  
MKQQEGPVFSRTFGDTEAQVGDVLRLECVLATKTD MRACWLKDGIELTDGRHYHIDQLKDGTC SLLVTGLAPT  
DSGRYTCQVSTKSGRVSHSACVVVSGTESEAESSSGGELDDAFRAARRLHRLFRTKSPAELSEELFLSADE  
GPGEPEEPADWQTYREDEFVFCIRFESLAEARQAVTCFRNMFATMGI GVEISLGEQGRGVEMRIGKVAPTVT  
PAVPLAKTPGLQTSDAAPVFLTELQNDVQDGYPMSFDCVVTGQVPVSVRWFKDGKLEEDDHVMINEDQQGG  
HQLIITAVVPADMGVYRCLAENSMGVSSTKAELRVELTSTDYDTAADATETSSYFSAQGYLSSREQEGTESDE  
GQLPQVLEELKDLQVAPGTR LAKFQLKVKGYPAKLYWFKDGGPLTSDHIRMTDKKTLHTLEIVSVTREDSG  
QYAAYSNAVGAAYSSARLLVRGPSEPEEK PASDVHERLVPPRI LEKFTPKKVKRGSSITFSVKVEGHPAPSV  
HWLKEEA EKGV LWIGPDTPGYTMASSSKQHS LVL LDVGRQHQT YTCIATNPAGQALCSASLHISGLAKEEEQ  
ERVKEALISSFLQGT SQAVSAQ MSE SAGFADLVGQSKGESLVAEEAHSHLSLAEVGT EEF LQKLT SQI TEMVS  
AKISQAKLQVPGGDSDEETKTPSASPRHGRSRPSSSVQESSSESEDGDSRGEIFDIYVVTADYLP LGAEQDAI  
ILREGQYVEVLDSAHPLRWLVR TKPTKSSPSRQGWVSPAYLDRKRLKLSPEWGPTEAPEFPGEAVSEDEYRTRL  
SSVIQELLSSEQAFVGE LQFLESHHMKHLERSPRVPAAVASQKTVIFRNVQDISHFHSSFLKELQCGCTDDD  
AMCFIKNQEAFEKYLEFLVGRVQAESVVVSTPVQEFYKKYAEETLSAKDPTQPPPPPLQHYLEQPVVERVQKYQ  
ALLKELIRNKARNRQNCALLEQAYAVVSALPQRAENKLVSLMENYPGTLEALGEP I RQGHFIVWEGAPGARM  
PWKGHNHRVFLFRNYLVICKPRRDSRTDTFSYVFRNMMKLSSIDLNDQVEGDDRAFEVWHEREDESVRKYLLQA  
RTVIKNSWVKEICGIQQLAQPVWRPPEFEEELADCTAELGETVKLACRVTGT PKPIVSWYKDGKPV EVDPH  
HILIEDPDG SCTLILDNLTGIDSGQYMCFAASAAGNASTLGKILVQVPPRFVNVKVRATPFVEGEDAQITCTVE  
GAPY PQIRWYKDG TLLAPGNRYRMLNEPRSGVLV LVIQAASKEDLGHYECELVNRLGSTRGGGELYMQS PALR  
ARDQHHREQIVAAVEERRPSP\*  
>rs48899298\_ENSMUSP00000151217\_c.14014:C>T\_p.P4672L  
ENSMUST00000219084.3|Obscn-207|ENSMUSG00000061462|-|chr11:g.58932645:G>A  
MDHSFSGAPRFLTRPKAFVVSVGKDATLSCQIVGNPTPHVSWEKDRQPVEAGARFLAQDGDVYRLTILDLAL  
GDSGQYVCRARNAIGEAFAAVGLRVDSEGTCAEQAPHFLLRPTSIRVREGADATFRCRVGGSPQPAVSWSKDG  
RRLGPPDAPHVRVEEHGESSALRIRSARPRDGGTYEVRAENPLGSASAAAALVVDSDAEVAGPPGTSTATLLA  
HLQORREAMRAEGIPSPPGAGTRTCTVTEGKHARLSCFVTGEPKPETVWKKDQGLVTEGRRHVVEDEQENF  
VLKILFCKQSDRGLYTCTASNLVGQTYSSVLVVREPTVPFKKRLQDLEVREKESATFQCEVAQ PATEAAWFK  
EETRLWASAKYDIEEEGTERRLTVRNVSADDDAVYICETTEGSRVAELSVQGNLTKLPRKTAVRTGDTAIF  
WVELAVPEGPVWRWRNQEEMVAGGRVAITAEGTCHTLTI FQCTLEDMGEVAFVSGGCRTTTQFCVSAPRRPPL  
YPPADPVVKAKTESSVTLWSAPPHGDRPVTIDGYVLEKRLKLGAYAWSRCHEAGWLATTEFTITGVAEEGDFQ  
FRVSAINHFGQGPYLEFPGTMHLVPLAVKTLKVAEAVEGGEVTFVSDLTVASSGEWFLDGEALKASSIYVI  
RCDRTRHMLTIREVPARLHGAQLK FVANGIETS IQMVVRAALGLPSSKLPAAAAREVLAQLHEEAQLLALS D  
QAAA VTLKDGRELSLGP KYEMQVSAGRRALLVRDVAQDDAGLYECVSRGSR TAYQLLVQDITDGYRDWGPAG  
PQKHMCKCAGAKIARYLGSSCYRFLQYDKGVWHLEAALDRQKGTSSCSLHEKPKLVFAKQQAHSEVKA E  
AGNSATLSCEVTQAQTEVTWFKDGKLLSSSSKVRMEASGCSRRLVVQQAGKADAGEYSCEAGGQKLSFRLDVA  
EPKLVFAKQQAHSEVKA EAGASATLSCEVAQAQTEVTWFKDGKLLSSSSKVRMEASGCSRRLVVQQAGKADA  
GEYSCEAGGQKLSFRLDVAEPKMVFAKEQQARSEVKA EAGASATLSCEVAQAQTEVTWFKDGKLLSSSSKVRM  
EASGCSRRLVVQQAGKADAGEYSCEAGGQKLSFRLDVTEPKLVFAKEQQARSEVKA EAGNSATLSCEVAQAQ T  
EVTWFKDGKLLSSSSKVRMEASGCSRRLVVQQAGKADAGEYSCEAGGQKLSFHLDVTEPKLVFAKEQQAHSEV  
KAEAGASATLSCEVAQAQTEVTWFKDGKLLSSSSKVRMEASGCSRRLVVQQAGKADAGEYSCEAEGQKLSFRL  
DVAEPKLVFAKEQQARSEVKA EAGASATLSCEVAQAQTEVTWFKDGKLLSSSSKVRVEASGCSRRLVVQQAGK  
ADAGEYSCEAGGQKLSFRLDVAEPKLVFAKEQQANSEVKA EAGASATLSCEVAQAQTEVTWFKDGKLLSSSSK  
VRVEASGCSRRLVVQQAGKADAGEYSCEAGGQKLSFRLDVAEPKLVFAKEQQAHSEVKA EAGASATLSCEVAQ  
AQTEVTWFKDGKLLSSSSKVRVEASGCSRRLVVQQAGKADAGEYSCEAGGQKLSFRLDVAEPKLVFAKEQQAH  
SEVKA EAGASATLSCEVAQAQTEVTWFKDGKLLSSSSKVRVEASGCSRRLVVQQV GADAGEYSCEARGQKLS  
FRLDVAEAESQIPERPSRREPLVVKHEHETIILTATIAAPSVAAVTWLKDGVEIRRSKRHEATSLGDTHTLTVR  
GAQVLD SAIYSCRVGKEGQDFPVQVEEVA AKFSKPLEPVEGELGGTVMLVCELSPEQAEVVWRCGNTQLRPGK  
RFQMTSEGPRRTLTVSGLREDDAEYVCE SRDDRTSARLTVKVPRVVKFTSGLSAMVAEEGQ EATFQC VVSPS  
DAGVTWYKDMGLQLPSEKFMVVE S GARSRLTILGLTLEDAGQVTV EAGASSAALRVREAPVLFK KLEPQT  
VEERTSVTLEVELETRPWPVEVKWTRNAAVLTPSENVEIRAEGARHCLVLRVSVGFADRGVFACETPDDKTQAKLN  
VEMRQVRLVLRGLQEVEAKEQGTASMDVELSHA E VEGSWTRDGLRLQPGPKCHLAVQGPVHILTL SALQPQDSG  
LVAFRAEGVHTSARLIVTELPVSFTRVLQDVVATQKEKVTLECELSRPVDVRWLKDGVELRAGKAIGIVAQGT  
CRSLVIYRCETGDQGVYCDALDAQTSASLRVQGRTYTLIFRRVLAEDAGEVKFVAENAESRAHLRVKELPVT  
LLRPLRDKIAMEKHRGVLECCQVSRASAQVRWFKGGVELQSGPKYEVVSDGLYRKLVLINDVQPEDEDYTC DAG

NVKTSAQFFVEEQSITIVRGLKDMTVMPEPAPAWFECETSIPSVRPPKWLLGKTVLQAGGNVBLEQDGTVHRLT
LHKTCSTMTGVPVHFTIGKSRSSAQLVVSIDI PVVLRTRPLEPKAGRELQSVVLSCDFRPAPKAVQWYKDDTPLSP
SEKFKMALEGQMAELRILRLTPADAGVYRCQAGSAQSSAEVTVEAREVTVIQPLQDAEAMEEGRVCFSCELSH
KDEDIEWSLNGTPLYNDSFHEISHEGCLHTLVLKSVRQADTGTVCATSPKVSVSARLVVKGKPVVFLKALDDV
SAEERGTTLTQCEVSDPEARVVWRKDGVELGPSDKYDFLHKAGARGLTVHDLSHEDAGLYTCQVGSKETQSKV
SVHDLHVGITKRLKTVEVLEGESECSFECVLSHESPSDPAVWTVGGKTVGGSGHFHAVRQGRKYTLTVKDAALS
DAGEVVFVSVLGLTSKASLIIRERPVDTIKPLEDQRTTLGEDVMLSCELSRAGTSVRWLKDGKAIKRSQKYDLL
SEGTRAVLVVRKASLKDSGEYTCETEASKSTAKLVCVEEKANRFTTELADLQVEEKGRAVFTCKTEHPASVVW
RKGLLELRASGKHVPSQEGLTLKLTINALERTSDSTYTCDIGQARTQARLLVHGQKVRVIEDLEDTAVQEGSS
AKFCCRIPADYGPVHWFLDKTPHLSNELNEITVQPGGYHVLTLRQLALKDSGTVYFEAGDQRTSAAALRVTEK
PSIFSRPLTDVTVTEGEDTLVLCETTTVDSSVRWTKDGKTLRPSARCQLSHEGCAQLLITATTPQDGGRYKC
EIGGASSSSIVRVHALPVRFRFRESLKDVEVPEGKAATLRCVLSVAAPVEWRHGDDVLKSSNKYSLRQEGAVLE
LVIRDLQPDQSGQYSCSFGDQTTSATLTVKTSQAQFVGLRNKEATEGTTVTLRCELTKEAPVEWKKGTETLR
NGDKYSLKQDGA VCELQICSLLVADAGEYSCVCGQEKTSATLTVKALLVHFVRRRLRSKEATEGDTTTLQCELS
KAAPVEWRKGTETLRDGDYSLKQDGA VCELQIRSLTIADAGEYLCTCGQEKTSATLTVRGLPAKFIEDLRSQ
EATEGATAILRCELSKAAPVEWRKGSSETLKDGDYTLRQDGA VCELQIRGLAVVDTGTYSLSLPTKFTTEGLRNE
EATEGTMATLRCQMSKAAPVEWRKGSSETLRDGDYSLRQDGA MCELQIRGLTIEDSGEYTCVCGQEKTSATLS
VKALPPRFIEDLRSQEAETEGTMATLRCQMSKAAPVEWRKGSSETLRDGDYSLRQNGAVCELQIHDLAVEDTGE
YSCVCGQEKTSATLNVKALPPKFTTEGLKKEEATEGTMVTLRQMSKEATVEWRKGAKTLS DGGRYSLRQDGA M
CELQICGLAVEDAGEYSCVCGQEKTSATLSVKALPPRFIEDLRSQEAETEGTMATLRCQMSKAAPVEWRKGSSET
LRDGDYSLRQDGA VCELQIRDLAVEDAGEYLCVCGQEKTSATLSVKALPPRFIEDLRSQEAETEGTMATLRCQ
MSKAAPVEWRKGSKTLRQDGDYSLRQDGA MCELQICDLAVEDTGDYSCVCGQEKTSATLSVKAPQVVFQOPLQ
NLQAEEGSMASLRCELSVPNAAMVWSKGGLELQGDTRREARQQGCVAELLLRDLRREDAGEYSCTCGSQTTSA
TLMVTAAPVRFRLRQLAQDQVDEGATARLRCELSREAVSVEWRKGSLLQFPKAKYQMVQEGTTAELLVHGVEQE
DAGEYTCDAAGHTQSIARLSVRAPKPKFKTDLQSTEQEAGGTARLCCQLSEAEPGTPVQWLKEGVELHVGSKYE
MRRQGA VCELLIHGLEAKDTGEYACL VGGQKTLASLRVKEPEVTIVRGLVDMVEVQADEVVEFTCKVVSQAGATD
VQWHLQGLPLQSNVEVAVLADGCTHVLQKGVTLVEDAGTVSFHVGGLSSSAQLTVRVEVTVLEPLKDVQL
SEGQDAHFRCRLSRASGQEARWALGGVPLQCNE MNDITVEQGTLYLLTLHKVTLLEDAGTITLQVGS CSSEAQL
KVTAKNTVLRGLENVDALEGGEALFECQLSQPEVAHTWLLDDEPVHTSEKVEVVYFENGLRHLLLLLKNLKPQ
DSCRVTFLAGDVVTS AFLTVRGWRLEVLEPPHDASVKAGMQVRFTCILSEAVPVGEATWYINGAAIQPDDTDW
TVTTDGSHHALTLSNAQPQHAGEVTF AARDAVASARLSVLALPDPPEDAEVVGRSDHSVTLSSWVAPMSDGGGG
LCGYRVEMKEASTGQWQLCHDLVPGPECVVDDLVP GKTYRFRVAAVGPAGAGEPVHLPQMVKIAPAPAPAPAL
APAPETRQAVVGEDICLELEVAADGGEVVWHKGTERRIQPGGHFEVLSRGRQMLVIKGFRTEDQGEYRCGPIQ
GLPSSGAATFNVVMTSGSGDEVPAPQPSLPPEAAQEGDLHLLEALARKRRMSREPTLDSISELPEEDSRVQHL
RQEAETAPDLSEGTSTADELARTGEADLSHTSSDDESAGTPSLVTYLKKAGGPGISPLASKHEAQVTTSVK
PQKQQEPVVPTCPPPGDLSAADLMDPSLDKAAVKIQAAFKGYKVRKEMKQEQEGPVFSRTFGDTEAQVGDVLR
ECVLAATKTDMRACWLKDGIELTDGRHYHIDQLKDGTC SLLVTGLAPTD SGRYTCQVSTKSGRVSHSACVVVSG
TESEAESSSGGELDDAFRRAARLHRLFRTKSPAELSEEEFLSADEGPGEPEEPADWQTYREDEFV CIRFE
SLAEARQAVTCFRNMFMATMGIGVEISLGEQGRGVEMRIGKVAPTVTPAVPLAKTPGLQTS DAAPVFLTELQN
QDVQDGYPMSFDCVVTGQPVPSVRWFKDGKLLLEDDHYMINEDQQGGHQLIITAVVPADMGVYRCLAENSMGV
SSTKAELRVELTSTDYDTAADATETSSYFSAQGYLSSREQEGTESDEGQLPQVLEELKDLQVAPGTRLAKFQL
KVKGYPA PKLYWFKDGOPLTSTDHIRM TDKKT LH TLEIVSVTREDSGQYAAAYISNAVGAAYSSARLLVGRPSE
PEEKPASDVHERLVPPRILEKFTPKKVKRGSSITFSVKVEGHPAPSVHVLKKEEAEGVLWIGPDP TPGYTMAS
SKQHSVLVLLDVGRQHGTYYTCIATNPAGQALCSASLHISGLAKEEEQERVKEALISSFLQGT SQAVSAQMSSES
AGFADLVGQSKGESLVAEEAHSHLSLAEVGTEEF LQKLT SQI TEMVSAKISQAKLQVPGGDSDEETKTPSASP
RHGRSRPSSSVQESSSESEDGDSRGEIFDIYVVTADYLP LGAEQDAIILREGQYVEVLDSAHPLRLVTRTKPT
KSSPSRQGWVSPAYLDKRLKLSPEWGPTEAPEFPGEAVSEDEYRTRLSSVIQELLSSEQAFV GELQFLESHM
KHLERSPRVPAAVASQKT VIFRNVQDISHFHSSFLKELQCGCTDDDVAMCFIKNQEA FEKYLEFLVGRVQAES
VVVSTPVQEFYKKYAETLSAKDPTQPPPPPLQHYLEQPVERVQKYQALLKELIRNKARNRQNCALLEQAYAV
VSALPQRAENKLVSLMENYPGTLEALGEP I RQGHFIVWEGAPGARMPWKGNHRHVFLFRNYLVICKPRRDSR
TDTFSYVFRNMMKLSSIDLNDQVEGDDRAFEVWHERE DSVRKYLLQARTVVIKNSWVKEICGIQQRLAQPVWR
PPEFEEELADCTAELGETVKLACRVGTGPKPIVSWYKDGKPEVDPHHILIEDPDG SCTLIDLNLGTIDSGQY
MCFASAAGNASTL GKILVQVPPRFVNKVRATPFVEGEDAQITCTVEGAPYQIRWYKDGTL LAPGNRYRMLN
EPRSGVLVVLVIAASKEDLGHYECELVNRLGSTRGGELLYMQSPALRARDQHHREQIVAAVEVTEQETKVPKK
TVIIEETITTVVKS PRGRRQS PGKSPSRSPSRSSPRRPGLLAPERLYPPGTS PSRRLEVEVTEQGRKAPVPALY
VTEAEVHAPASQS QPKWLEVEETIEVRVKKTGSRGASPVREMTSRGEGILFTLPGGIPGRDPNANNNSNKS SVY
QEARTWGPVAVHVGEPFIFQVDSVGNVDVVAASPEPEQVRASQKEENTERQEGCSDGDENTFLMEEPQD TDSL
QGRDPKILTHNGRVLTLADLEDYVPOEGE TFGCGDSTPSTPDEPPCEVSVLQREI SEPTVGGQPVLLNVGRPPG

TGATPSFFRPGSQVHSPESVSFLLREAWSGPVSAAPWTSSFHTHVQSSVDGSHGSFKTEVSTQTVSFGAVGET  
 VTLHIDPDGGEAPGPSQG\*  
 >rs217506487\_ENSMUSP00000158795\_c.16070:A>GAGA\_p.R5357R-ins  
 ENSMUST00000238536.2|Obscn-210|ENSMUSG00000061462|-  
 |chr11:g.58934759:T>TCTC  
 MDHSFSGAPRFLTRPKAFVSVGKDATLSCQIVGNPTPHVSWEKDRQPVEAGARFRLAQDGDVYRLTILDLAL  
 GDSGQYVCRARNAIGEFAAVGLRVDSEGTCAEQAPHFLLRPTSIRVREGADATFRCRVGSGPQPAVSWSKDG  
 RRLGPPDAPHVRVEEHGESSALRIRSARPRDGGTYEVRAENPLGSASAAAALVVDSDAEVAGPPGTSTATLLA  
 HLQQRRREAMRAEGIPSPPGAGTRTCTVTTEGKHARLSCFVTGEPKPEVWKKDGLVTEGRRRHVVYEDEQENF  
 VLKILFCKQSDRGLYTCTASNLVGQTYSSVLVVVREPTVPFKKRLQDLEVREKESATFQCEVAQAPATEAAWFK  
 EETRLWASAKYDIEEEGTERRLTVRNVSADDDAVYICETTEGSRVAELSVQGNLTKRKLPRKTAVRTGDTAIF  
 WVVELAVPEGPVRWLRNQEEMVAGGRVAITAEGTCHTLTI FQCTLEDMGEVAFVSGGCRTTTQFCVSA PRRPPL  
 YPPADPVVKAKTESSVTLWSAPPHGDRPVTIDGYVLEKRKLGAYAWSRCHEAGWLATTEFTITGVAAEGDFQ  
 FRVSAINHFGQGPYLEFPGMTMLVPLAVKTPKAVEAVEGGEVTFVSDLTVASSGEWFLDGEALKASSIYVI  
 RCDRTRHMLTIREVPARLHGAQLKFVANGIETSIQMVVRAALGLPSSKLPAAAAREVLAQLHEEAQLLAE LSD  
 QAAA VTWLKDGRELSLGPKEYMQVSAGRRALLVRDVAQDDAGLYECVSRGSRRTAYQLLVQDITDGYRDWGPAG  
 PQKHMCKCAGAKIARYLGS SCYRFLQYDKGVWHWLEAALDRQKGTSSCSLHEKPKLVFAKQQAHSEVKA  
 AGNSATLSCEVTQAQTEVTFWKDGKLLSSSSKVRMEASGCSRRLVVQQAGKADAGEYSCEAGGQKLSFRLDVA  
 EPKLVFAKQQAHSEVKAEGASATLSCEVAQAQTEVTFWKDGKLLSSSSKVRMEASGCSRRLVVQQAGKADA  
 GEYSCEAGGQKLSFRLDVAEPKMFVFAKEQQARSEVKAEGASATLSCEVAQAQTEVTFWKDGKLLSSSSKVRM  
 EASGCSRRLVVQQAGKADAGEYSCEAGGQKLSFRLDVTEPKLVFAKEQQARSEVKAEVGNSATLSCEVAQAQ  
 EVTWFKDGKLLSSSSKVRMEASGCSRRLVVQQAGKADAGEYSCEAGGQKLSFRLDVAEPKLVFAKEQQARSEV  
 KAEAGNSATLSCEVAQAQTEVTFWKDGKLLSSSSKVRMEASGCSRRLVVQQAGKADAGEYSCEAGGQKLSFHL  
 DVTEPKLVFAKEQQAHSEVKAEGASATLSCEVAQAQTEVTFWKDGKLLSSSSKVRMEASGCSRRLVVQQAGK  
 ADAGEYSCEAGGQKLSFRLDVAEPKLVFAKEQQARSEVKAEGASATLSCEVAQAQTEVTFWKDGKLLSSSSK  
 VRVEASGCSRRLVVQQAGKADAGEYSCEAGGQKLSFRLDVAEPKLVFAKEQQANSEVKAEGASATLSCEVAQA  
 AQTEVTFWKDGKLLSSSSKVRVEASGCSRRLVVQQAGKADAGEYSCEAGGQKLSFRLDVAEPKLVFAKEQQAH  
 SEVKAEGASATLSCEVAQAQTEVTFWKDGKLLSSSSKVRVEASGCSRRLVVQQAGKADAGEYSCEAGGQKLS  
 FRLDVAEPKLVFAKEQQAHSEVKAEGASATLSCEVAQAQTEVTFWKDGKLLSSSSKVRVEASGCSRRLVVQQ  
 AGKADAGEYSCEAGGQKLSFRLDVAEPKLVFAKEQQAHSEVKAEGASATLSCEVAQAQTEVTFWKDGKLLSS  
 SSKVRVEASGCSRRLVVQQAGKADAGEYSCEAGGQKLFRLDVAEPKLMFAKEQQAHSEVKAEGASATLSCE  
 VAQAQTEVTFWKDGKLLSSSSKVRVEASGCSRRLVVQQAGKADAGEYSCEAGGQKLSFRLDVAEPKLVFAKEQ  
 QAHSEVKAEGASATLSCEVAQAQTEVTFWKDGKLLSSSSKVRVEASGCSRRLVVQQVQKADAGEYSCEARGQ  
 KLSFRLDVADTRLMFAKEQQARTEVKAEGNSATLSCEVAQAQTEVTFWKDGKLLSSSSKVRVEASGCSRRLV  
 VQQAGKADAGEYSCEAGGQKLSFRLDVAEAE SQIPERPSRREPLVVKHEHETIILTATIAAPVAAVTWLKDG  
 VEIRRSKRHEATSLGDHTTLTVRGAQVLD SAIYSCRVKGEGQDFPVQVEEVAAKFSKPLEPVEGELGGTVMLVC  
 ELSPEQAEVWRCGNTQLRPGKRFQMTSEGPRTTLTVSGLREDDAEYVCE SRDDRTSARLTVKVPVVKFTS  
 GLSAMVAEEGQEQATFQCVVSPSDAGVTWYKDGMLQPSKFKVMVESGASRSLTILGLTLEDAGQVTEAEGAS  
 SSAALRVREAPVLFKKKLEPQTEERTSVTLEVELTRPWPEVKWTRNAAVLTPSENVEIRAEGARHCLVLRV  
 GFADRGFFGCETPDDKTQAKLNVEMRQVRLVRLGLQEVEAKEQGTASMDVELSHAEEVGSWTRDGLRLQPGPKC  
 HLAVQGPVHILTL SALQPQDSGLVA FRAEGVHTSARLIVTELPVSFTRVLQD VVATQKEKVTLECELSRPVDV  
 RWLKDGVLELRAGKAI GIVAQGTCSRSLVIYRCETGDQGVYVCDALDAQT SASLRVQGRTYTLIFRRLAEDAGE  
 VKFVAENAESRAHLRVKELPVTLLRPLRDKIAMEKHRGVLECCQVSRASAQVRWFKGGVELQSGPKYEVVSDGL  
 YRKLVIN DVQPEDEDTYTC DAGNVKTSAQFFVEEQSITIVRGLKDMTVMPEPAPAWFECETSIPSVRPPKWL  
 LGKTIVLQAGGNVGLQDGT VHRLTLHKTCSTMTGPVHFTIGKSRSSAQLVVS D I PVVLRPLEPKAGRELQSVV  
 LSCDFRPAPKAVQWYKDDTPLSPSEKFKMALEGM AELRILRLTPADAGVYRCQAGSAQSSAEVTV EAREVTVI  
 QPLQDAEAMEEGRVCFSCELSHKDEDI EWSLNGTPLYNDSFHEISHEGCLHTLV LKSVRQADTGTVCATSPKV  
 SVSARLVVKGKPVVFLKALDDVSAEERGLTLTQCEVSDPEARVVRKDGVELGSPDKYDFLHKAGARGLTVHD  
 LSHEDAGLYTCQVGSKETQSKVSVHDLHVGITKRLKTVEVLEGE SCFECVLSHESPSDPAVWTVGGKTVGGS  
 GHFHAVRQGRKYTLTVKDAALSDAGEVVF SVLGLT SKASLI IRERPVDITKPLEDQRTTLGEDVMLSCELSRA  
 GTSVRWLKDGKAIRKSQKYDLLSEGTRAVLVVRKASLKD SGEYTCETEASKSTAKLCVEEKANRFT EELADLQ  
 VEEKGRAVFTCKTEHPASVVTWRKGLLELRASGKHVPSQEGTLTKLTINALERTDSDTYTCDIGQARTQARLL  
 VHGQKVRVIEDLEDLTAQVEGSSAKFC CRIAPADYVGPVHWF LDKTPLHSNELNEITVQPGGYHVLTLRQLALKD  
 SGTVYFEAGDQRTS AALRVTEKPSIFSRPLTDVTVTEGEDTLTVCE TTTVDSSVRWTKDGGYKDLRPSARCQLSH  
 EGCQAQLLITATTPQDGGRYKCEIGGASSSIVRVHALPVRFRESLKDVEVPEGKAATLRCVLSVAAPVEWR  
 HGDDVLKSSNKYSLRQEGAVLELVIRDLQPQDSGQYSCSFGDQTT SATLTVKTS SAQFVGLKRNKEATEGTTV  
 TLRCELTK EAPVEWKKGTETLRNGDKYSLKQD GAVCELQICSLLVADAGEYSCVCGQEKTSATLTVKALLVHF  
 VRRLRSKEATEGDTTTLQCELSKAAPVEWRKGTETLRDGD RYSLKQD GAVCELQIRSLTIADAGEYLCTCGQE

KTSATLTVRALPAKFKDSLKNEEATEGTTATLSCELSKAAPVTWKKGPKTLQSGDKYVLRQDGAUCGLQIHGL
TMADAGEYSCVCGQEKTSATLTVRGLPAKFIEDLRSQEATEGATAILRCELSKAAAPVEWRKGSSETLKDGDRTY
LRQDGAUCVCELQIRGLAVVDGTYSLSPTKFTTEGLRNEEATEGTMATLRCQMSKAAAPVEWRKGSSETLRDGDRTY
LRQDGAUCVCELQIRGLTIEDSGEYTCVCGQEKTSATLSVKALPSRFIEDLRSQEATEGTMATLRCQMSKTAPVE
WKKGSETLRDGGRYSLRQDGPVCELQICDLAVEDAGEYSCVCGQEKTSATLSIKALPPRFIEDLRSQEATEGT
MATLRCQMSKAAAPVEWRKGSSETLGDGGRYSLRQNGAVCELQIHDLAVEDTGEYSCVCGQEKTSATLNVKALPP
RFIEDLRSQEATEGTMATLRCQMSKAAAPVEWRKGSSETLRDGGRYSLRQDGAUCVCELQIHDLVEDAGQYSCVCG
QEKTSAVLTVDALPPKFTEGLKKEATEGTMVTLRCQMSKEATVEWRKGAKTSLDGGRYSLRQDGAUCVCELQIC
GLAVEDAGEYSCVCGQEKTSATLSVKALPPRFIEDLRSQEATEGTMATLRCQMSKAAAPVEWRKGSSETLRDGD
YSLRQDGAUCVCELQIRDLAVEDAGEYLCVCGQEKTSATLSVKALPPRFIEDLRSQEATEGTMATLRCQMSKAA
VEWRKGSKTLRDGDRTYSLRQDGAUCVCELQICDLAVEDTGDYSCVCGQEKTSATLSVKALPPRFIEDLRSQEA
RGTVALRCRMSKAAAPVEWRKGSSETLKDGDRTYSLRQEGNLCELQIRDLAVEDTEEYSCVCGQEKTSATLSVKAL
PAKFIEDLRSQEAPESSTVTLRCKLSKKASVVWKKGSETLRNGARYSLRQDGAUCVCELEIRDLTVEDTGEYSCT
CGQERTSATLSIMAPQVVFQQPLQNLQAEEGSMASLRCELSVNAAMVWSKGGLELQGDTRREARQQGCVAEL
LLRDLRREDAGEYSCVCGQEKTSATLMVTAAPVRFLELQAQDVDEGATARLRCELSREAVSVEWRKGSLLQF
PCAKYQMVQEGTTAELLVHGVEQEDAGEYTCDAHTQSIARLSVRAPKPKFKTDLQSTEQEAAGTARLCCQLS
EAEPGTPVQWLKEGVLHVGSKYEMRRQGAUCVCELLIHGLEAKDTGEYACLVGGQKTLASLRVKEPEVTIVRGL
VDMEVQADEDEFTCKVQAGATDVQWHLQGLPLQSNVTEVAVLADGCTHVLQKGVTEFLQKLTSTQITEMV
SSSAQLTVRVPEVTVLEPLKDVQLSEGDQDAHFRCRLSRASGQEARWALGGVPLQCNEMNDITVEQGTLYLLTL
HKVTLLEDAGTITLQVGSSESAQLKVTAKNTVLRGLENVDALEGGEALFECQLSQPEVAHAHTWLLDDEPVHTS
EKVEVVYFENGLRHLLLLKLNKLPQDSCRRTVFLAGDVVTSFALTIVRGRLEVLPPHDASVKAGMQRVFTCIL
SEAVPVGEATWYINGAAIQPDDTWTVTDDGSHHALTLSNAQPQHAGEVTFAARDAVASARLSVLALPDPED
AEVVGSRSDHSVTLVSWAPMSDGGGGLCGYRVMKEASTGQWQLCHDLVPGPECVVDDLVPKTYRFRVAAVGP
AGAGEPVHLPQMVKIAPAPAPAPAPAPAPAPETRAVVGEDICLELEVAADGGEVWHKGTERTIQPGGHFEVL
SRGQRQMLVIKGFRTEDQGEYRCGPIQGLPSSGAATFNVMVMTSGSGDEVPAQPSLPPEAAQEGDLHLLWEALA
RKRMSREPTLDSISELPEEDSRVQHLRQEAETAPDLSEGYSTADELARTGEADLSHTSSDDESAGTPSLV
TYLKKAGGPGISPLASKHEAQVTTSVKPKQKQEPVVPVTPPPGDLAADLMDPSLDKAAVKIQAAPFKYKVRK
EMKQQEGPVFSRTFGDTEAQVGDVLRLECVLATKTDMRACWLKDGIELTDGRHYHIDQLKDGTCSSLVTGLAP
TDSGRYTCQVSTKSGRVSHSACVVVSGTESEAESSSGGELDDAFRRAARLHRLFRTKSPAELSEELFLSAD
EGPGEPEEPADWQTYREDEFVFCIRFESLAEARQAVTCFRNMFATMGIGVEISLGEQGPGRVEMRIGKVAPTV
TPAVPLAKTPGLQTSDAAPVFLTELQNDQVDQGYPMSFDCVVTGQVPSVRWFKDGKLEEDDHVMINEDQQG
GHQLIITAVVPADMGVYRCLAENSMGVSSTKAELRVELTSTDYDTAADATETSSYFSAQGYLSSREQEGTESD
EGQLPQVLEELKDLQVAPGTRLAKFQLKVKGYPAKPLYWFKDGGPLTTSDHIRMTDKKTLHTLEIVSVTRES
GQYAAAYISNAVGAAYSSARLLVRGPSEPEEKPASDVHERLVPRILEKFTPKKVKRGSSTIFSVKVEGHPAPS
VHVLKEEAKESSFLWIGPDPGTYMSSSKQHSLVLLDVGRRHQGTTCIATNPAGQALCSASLHISGLAKEEEE
QERVKEALISSFLQGTSAVSAQMSSESAGFADLVGQSKGESLVAAEAHSHLSLAEVGTTEFLQKLTSTQITEMV
SAKISQAKLQVPGGDSDEETKTPSASPRHGRSRPSSSVQESSSESEDGDSRGEIFDIYVVTADYLPGLAEQDA
IILREGQYVEVLDSAPLRLVTRTKPTKSSPSRQGWVSPAYLDKRLKLSPEWGPTEAPEFPGEAVSEDEYRTR
LSSVIQELLSSEQAFVQELQFLESHMKHLERSPRVPAAVASQKTVIFRNVQDISHFHSSFLKELQCGTDDD
VAMCFIKNQEAFAEKYLEFLVGRVQAESVVVSTPVQEFYKKYAETLSAKDPTQPPPPPLQHYLEQVPERVQKY
QALLKELIRNKARNRQNCALLEQAYAVVSALPQRAENKLHVSLMENYPGTLEALGEPRIQGHFIVWEGAPGAR
MPWKGHNRHVFLFRNYLVICKPRRDSRTDTFSYVFRNMMKLSIDLNDQVEGDDRAFEVWHEREDSVRKYLLQ
ARTVIKNSWVKEICGIQQRLAQPVWRPPEFEELADCTAELGETVKLACRVGTGPKPIVSWYKDGKPEVDP
HHILIEDPDGSCTLILDNLGTIDSGQYMCFAASAAGNASTLGIILVQVPPRFVNVKVRATPFVEGEDAQITCTV
EGAPYPQIRYKDGTLAPGNRYRMLNPRSGVVLVLIQAASKEDLGHYECELVNLRLGSTRGGELYMQSPAL
RARDQHREQIVAAVEDTSVEGSAHSAQDQQAASVLRLLGSEALGPPGDLPNTRQSEPPAFEEAASQI
PGAASGTPEVSPQPGTHKLEQETSSSGSQGWTVPIRVEGTAWPGAGTGQLLDVHSQVIMETTQRTYVCQAPD
TGVTTRAPSMQVTIEDVQVQVGDMAQFDAVIEGHPPPITVWYKGSTQLTSSARLSQRQDGTYSVLVTDVAPHD
AGVYTCVANNAGQVLCCKAELLVHGGDKLDAENQVYRRLKHSFYDVQEEIIRGVFVGFVQVHKGNKMFCAAK
FIPLRSKTRAQAYQERDILATLGHPLVTGLLDQFETRKTLLILELCSSEELLDRLFKKGVVTEAEVKVYIQQ
LVEGLHYLHSHGILHLDIKPPNIMVHPAREDIKICDFGFAQKITPSEPQYSKYGSPEFVSPETIEQNPVSEG
SDIWAMGVISYLSLTCSSPFAGESDRATLLNVLEGRVSWSSPTAAHLSADAKDFIKATLQRTPRARPSTSQCL
AHPWFLKSDMPAAEAAHFINTKQLKFLARSRWLLKLSMSYKISLVMRSIPPELLQGPDPSPSLGARVHLRGEASGA
SSSSSSDNEAPFAARAKSLPPSPVTHSPLHLPRGLFRPSASLPEETEASMPPTADAAPVSPASQAGPPASPGC
VPRHSVISLQFYQQAGAGEAERGNKTSGAKRHPARRRHLKGGYIARALPGLREPLMEYSLLEEEAREEQASL
MTKTPSFETALRLPSSSVREVPGRSHSLDNPPVTTGSPPEACKEQLLFPSTGLTHETTAKDRGHKEGFLQES
VFPFPMMSGDSRPGKQEGSSQDSCRGKPASSCHSELGSGSQEGCGPPSSQSLGSLPPQSLKKELESTSCGPLFSE
QPQAAPFPTQVSPLLGSEKEPQDGSLEGPVVPSSSPGSASQVDASLDTEGLSEAGDTCDFTPPPQRPEQA

TTRKFSLESRGGYAGVAGYGTFAFGGDAGGMLGQGPLWARMWAVSQSSEEQDEAATESPQPLESIGPIAEAS  
 GVPLRTSPSLTPWEEVEQVSLVQIRDLSGDAEAADTISLDISEVDPAYLNLSDLYDIKYLPFEFMI FRRV PKP  
 IEQPESPGSETEAGQGLADFL EEAAPWP GELGLRAGLEITEEPEEPGDLEALLGEAAVGRKRKWSPSRGLFQ  
 FPGRCLSGEEPVELGLRQRVKASMAHISRILKGRPEGPEREGPPRKKAGLASFRLSGLKGRDQELSDEAVVLG  
 QSVTLACQVLAQPTAQATWSKDGVLLESSGHLLISSTLKNFQLLTI LVVKEEDLGTYTCCVSNPLGTAVTTGV  
 LRKAERPSSSPRPEVGEYKDAVLLVWKPVESCGPVTYIVQCCIEGGSWTTLASDISDCCYLTKLSRGGMYI  
 FRTACVSKAGMGPYSSPSEQVLLGGPNHLASEEESSRGRPAQLLPSTKTFAFQMQRIRGRF SVVRQCREKASG  
 RALAAKIVPYQPEDKTA VLREYEAL KRLHHPHLAQLHAAYLSRHLVLI LELCSGPELLPSLAERESYSESDV  
 KDYLWQMLSATQYLHAQHILHLDLRSENMVTEYNLLKVIDLGNAQSLDQEKVPAPENFKDYLETMAPELLEG  
 QGAVPQTDIWAIGVTA FIMLSGEYPESSEGETRDLQKGLRKLIRLSRCYAGLSGGAVAF LQSSSLCAQPWGRPC  
 ASTCLQCGWLTEEGPTGSRPTVTFPTVRLRAFVREKRRRALLYKKNLAQVR\*  
 >rs217506487\_ENSMUSP00000038264\_c.14186:A>GAGA\_p.R4729R-ins  
 ENSMUST00000047441.14|Obscn-202|ENSMUSG00000061462|-  
 |chr11:g.58934759:T>TCTC  
 MDHSFSGAPRFLTRPKAFVSVGKDATLSCQIVGNPTPHVSWEKDRQPVEAGARFRLAQDGDVYRLTILDLAL  
 GDSGQYVCRARNAIGEAFAAVGLRVDSEGTCAEQAPHFLLRPTSIRVREGADATFRCRVGSGSPQPAVSWSKDG  
 RRLGPPDAPHVRVEEHGESSALRIRSARPRDGGTYEVRAENPLGSASAAAALVVDSDAEVAGPPGTSTATLLA  
 HLQQRREAMRAEGIPSPPGAGTRTCTVTEGKHARLSCFVTGEPKPEVTVWKKDGLVTEGRRHVYDEQENF  
 VLKILFCKQSDRGLYTCTASNLVGQTYSSVLVVREPTVPFKKRLQDLEVREKESATFQCEVAQPAEEAAWFK  
 EETRLWASAKYDIEEGTERRLTVRNVSADDDAVYICETTEGSRVVAELSVQGNLTKLPRKTAVRTGDTAIF  
 WVAVPEGPVVRWRNQEEMVAGGRVAITAEGTCHTLTI FQCTLEDMGEVAFVSGGCRTTTQFCVSAPRRPPL  
 YPPADPVVKAKTESSVTL SWSAPPHGDRPVTIDGYVLEKRKLGAYAWSRCHEAGWLATTEFTITGVAAEGDFQ  
 FRVSAINHFGQGPYLEFPGMTMLVPLAVKTPKAVEAVEGGEVTFVSDLTVASSGEWFLDGEALKASSIYVI  
 RCDRTRHMLTIREV PARLHGAQLKFVANGIETS IQMVVRAALGLPSSSKLPAAAAREVLAQLHEEAQLLAE LSD  
 QAAA VTWLKDGRELSLGPKEYMQVSAGRALLVRDVAQDDAGLYECVSRGSR TAYQLLVQDITDGYRDWGPAG  
 PQKHMCKCAGAKIARYLGS SCYRFLQYDKGVWHWLEAALDRQKGTSSCSLHEKPKLVFAKQQAHSEVKA  
 AGASATLSCEVAQAQTEVTFWKDGGKLSSSSKVRMEASGCSRRLVVQQAGKADAGEYSCEAGGQKLSFRLDVA  
 EPKMFVFAKEQQARSEVKAEGASATLSCEVAQAQTEVTFWKDGGKLSSSSKVRMEASGCSRRLVVQQAGKADA  
 GEYSCEAGGQKLSFRLDVTEPKLVFAKEQQARSEVKAEGNSATLSCEVAQAQTEVTFWKDGGKLSSSSKVRM  
 EASGCSRRLVVQQAGKADAGEYSCEAGGQKLSFRLDVAEPKLVFAKEQQARSEVKAEGNSATLSCEVAQAQ  
 EVTWFKDGGKLSSSSKVRMEASGCSRRLVVQQAGKADAGEYSCEAGGQKLSFHLDVTEPKLVFAKEQQAHSEV  
 KAEAGASATLSCEVAQAQTEVTFWKDGGKLSSSSKVRMEASGCSRRLVVQQAGKADAGEYSCEAGGQKLSFR  
 LDVAEPKLVFAKEQQARSEVKAEGASATLSCEVAQAQTEVTFWKDGGKLSSSSKVRVEASGCSRRLVVQQAGK  
 ADAGEYSCEAGGQKLSFRLDVAEPKLVFAKEQQANSEVKAEGASATLSCEVAQAQTEVTFWKDGGKLSSSSK  
 VRVEASGCSRRLVVQQAGKADAGEYSCEAGGQKLSFRLDVAEPKLVFAKEQQAHSEVKAEGASATLSCEVAQA  
 AQTEVTFWKDGGKLSSSSKVRVEASGCSRRLVVQQAGKADAGEYSCEAGGQKLSFRLDVAEPKLVFAKEQQAH  
 SEVKAEGASATLSCEVAQAQTEVTFWKDGGKLSSSSKVRVEASGCSRRLVVQQAGKADAGEYSCEAGGQKLS  
 FRLDVAEPKLVFAKEQQAHSEVKAEGASATLSCEVAQAQTEVTFWKDGGKLSSSSKVRVEASGCSRRLVVQQ  
 AGKADAGEYSCEAGGQKLSFRLDVAEPKLVFAKEQQAHSEVKAEGASATLSCEVAQAQTEVTFWKDGGKLS  
 SSKVRVEASGCSRRLVVQQAGKADAGEYSCEAGGQKLSFRLDVAEAEBSQI PERPSRREPLVKEHETIILTAT  
 IAAPSVAAVTWLKDGV EIRRSKRHEATSLGDTHLTVRGAQVLD SAIYSCRVGKEGQDFPVQVEEVA AKFSKP  
 LEVPEGELGGTVMLVCELSPEQAEVVRWCNTQLRPGKRFQMTSEGPRRTLTVSGLREDDAEYVCE SRDDRT  
 SARLTVKVPVVKFTSGLSAMVAEEGQEA TFQCVVSPSDAGVTWYKDGMLQLPSEKFMVMEVSGASRSLTILGL  
 TLEDAGQVTVEAEGASSAALRVREAPVLFKKKLEPQTVEERTSVTLEVELTRPWPEVKWTRNAAVLTPSENV  
 EIRAEGARHCLVLRVSVGFADRGFFGCETPDDKTQAKLNVMRQVRLVRLGLQEVEAKEQGTASMDVELSHAEVE  
 GSWTRDGLRLQPGPKCHLAVQGPVHILTSLALQPQDSGLVAFRAEGVHTSARLIVTEL PVSFTRVLQDVVATQ  
 KEKVTLECELSRPVDVRWLKDGVELRAGKAI GIVAQGTCSRSLVIYRCETGDQGVVCDALDAQTSASLRVQGR  
 TYTLIFRRVLAEDAGEVKFVAENAESRAHLRVKELPVTLLRPLRDKIAMEKHRGVLECVSRASAVRWFKGG  
 VELQSGPKYEVVSDGLYRKLVIN DVQPEDEDTYTCDAGNVKTS AQFFVEEQSITIVRGLKDMTVMEPAPAWFE  
 CETSI PSVRPPKWL LKGTVLQAGNVGLEQDGTVHRLTLHKTCSTMTGPVHFTIGKSRSSAQLVVS DIPVVL T  
 RPLEPKAGRELQSVVLSCDFRPAPKAVQWYKDDTPLSPSEKFKMALEGQMAELRILRLTPADAGVYRCQAGSA  
 QSSAEVTVAREVTVIQPLQDAEAMEEGRVCFSCELSHKDEDI EWSLNGTPLYNDSFHEISHEGLHTLVLSK  
 VRQADTGTVCATLSPVSVSARLVVKGKPVVFLKALDDKSVSAEHERGTLTLQCEVSDPEARVWRKDGVELGSPDK  
 YDFLHKAGARGLTVHDSLHEDAGLYTCQVGSKETQKSVSVHDLHVGITKRLKTVLEVLEGESECSFECVLSHESP  
 SDPAVWTVGGKTVGGSGHFHAVRQGRKYTLTVDKDAALSDAGEVVFVSVLGLTSKASLIRERPVDI TKPLEDQR  
 TTLGEDVMLSCELSRAGTSVRWLKDGKAI RKSQKYDLLSEGTRAVLVVRKASLKDSGEYTCETEASKSTAKLC  
 VEEKANRFTEELADLQVEEKGRAVFTCKTEHPASVVTWRKGLLELRASGKHVPSQEGTLTKLTINALERTDSD  
 TYTCDIGQARTQARLLVHGQKVRVIEDLED TAVQEGSSAKFCCR IAPADYGPVHWF LDKTPLHSNELNEITVQ

PGGYHVLTLRQLALKDSGTVYFEAGDQRTSAALRVTEKPSIFSRPLTDVTVTEGEDLTLVCETTTVDSSVRWT  
 KDGKTLRPSARCQLSHEGCQAQLLI TATTPQDGGRYKCEIGGASSSSIVRVHALPVRFRESLKDVEVPEGKAA  
 TLRCVLSVAAPVEWRHGDDVLKSSNKYSLRQEGAVLELVIRDLQPQDSGQYSCSFGDQTTSATLTVKTSQAQ  
 FVGKLRNKEATEGTTVTLRCELTKAPVEWKKGTTETLRNGDKYSLKQDGAVCELQICSLLVADAGEYSCVCGQ  
 EKT SATLTVKALLVHFVRLRSKEATEGDTTTLQCELSKAAPVEWRKGTETLRDGDYSLKQDGAVCELQIRS  
 LTIADAGEYLCTCGQEKT SATLTVRALPAKFKDSLKNEEATEGTTATLSCELSKAAPVTWKKGPKTLQSGDKY  
 VLRQDGAVCGLQIHGLTMADAGEYSCVCGQEKT SATLTVRGLPAKFIEDLRSQEATEGATAILRCELSKAAPV  
 EWRKGTETLRDGDYSLRQDGAVCELQIRGLAVVDTGTYSLLPTKFTTEGLRNEEATEGTMATLRCQMSKAAPV  
 EWRKGTETLRDGDYSLRQDGAVCELQIRGLTIEDSGEYTCVCGQEKT SATLSVKALPPRFIEDLRSQEATEG  
 TMATLRCQMSKAAPVEWRKGTETLRDGDYSLRQDGAVCELQIHDLAVEDTGEYSCVCGQEKT SATLNVKALP  
 PRFIEDLRSQEATEGTMATLRCQMSKAAPVEWRKGTETLRDGDYSLRQDGAVCELQIHDLVDEDAGQYSCVC  
 GQEKTSAVLTVDALPPKFTTEGLKKEEATEGTMVTLRCQMSKEATVEWRKGAKTLSGGGRYSLRQDGAMCELQI  
 CGLAVEDAGEYSCVCGQEKT SATLSVKALPPRFIEDLRSQEATEGTMATLRCQMSKAAPVEWRKGSKTLRDGD  
 RYSLRQDGAMCELQICDLAVEDTGDYSCVCGQEKT SATLSVKAPQVVFQQLQNLQAEEGSMASLRCELSVPN  
 AAMVWSKGGLELQGDTRREARQQGCVAELLLRDLRREDAGEYSCCTCGSQTTSATLMVTAAPVRFRLRLQAQDV  
 DEGATARLCELSREAVSVEWRKGSLLQFPKAKYQMVQEGTTAELLVHGVEQEDAGEYTC DAGHTQS IARLSV  
 RAPKPKFKTDLQSTEQEAGGTARLCCQLSEAEPTPVQWLKEGVELHVGSKYEMRRQGA VCELLIHGLEAKDT  
 GEYACLVGQKTLASLRVKEPEVTI VRGLVDMEVQADEDEVEFTCKV SQAGATDVQWHLQGLPLQSNVEVAV  
 LADGCTHVLQKGVTL EDAGTVSFHVGGLSSSAQLTVRVPEVTVLEPLKDVQLSEGQDAHFRCLSRASGQEA  
 RWALGGVPLQCNEMNDITVEQGTLYLLTLHKVTL EDAGTITLQVGSSEAEQLKVTAKNVLRGLENDVALEG  
 GEALFECQLSQPEVA AHTWLLDDEPVHTSEKVEVVYFENGLRHLLLLKNLKPQDSCRRTVFLAGDVVTS AFLT  
 VRALPDPPEDAEVVGRSDHSVTL SWVAPMSDGGGGLCGYRVMKEASTGQWQLCHDLVPGPECVVDLVPKGT  
 YRFRVA AVGPAGAGEPVHLPQMVKIAPAPAPAPAPAPAPAPETRQAVVGEDICLELEVAADGGEV VWHKGT  
 IQPGGHFEVL SRGQRQMLVIKGFRTEDQGEYRCGP IQGLPSSGAATFNVMVMTSGSGDEVPAQPSLPPEAAQEG  
 DLHLLWEALARKRRMSREPTLDSISELPEEDSRVQHLRQEAETAPDLSEGYSTADELARTGEADLSHTSSDD  
 ESRAGT PSLVYTKKAGGPGISPLASKHEAQVTT SVKQPQEPVPTCP PPGDLSAADLMDP SLDKAAVKIQ  
 AAFKGYKVRKEMKAGGPFVSRFTFGDTEAQVGDVLRLECVLTKTDMRACWLKDGI ELDGRHYHIDQLKDG  
 CSLLVTGLAPTDSGRYTCQVSTKSGRVSHSACVVVSGTESEAESSSGGELDDAFRRAARRLHRLFRTKSPAEL  
 SEELFLSADEGPEPEPADWQTYREDEFVFCIRFESLAEARQAVTCFRNMFATMGIGVEISLGEQGPRGVE  
 MRIGKVAPT VTPAVPLAKTPGLQTS DAAPVFLTELQNDVQDGYPMSFDCVVTGQPVPSVRWFKDGKLEEDD  
 HYMINEDQQGGHQLIITAVVPADMGVYRCLAENSMGVSSTKAELRVELTSTDYDTAADATETSSYFSAQGYLS  
 SREQEGTESDEGQLPQVLEELKDLQVAPGTRLAKFQLKVKGYPAPKLYWFKDQPLTSSDHIRMTDKKTLHTL  
 EIVSVTREDSGQYAAAYISNAVGAAYSARLLVRGPSEPEEK PASDVHERLVPPRILEKFTPKKVKRGSSITFS  
 VKVEGHPAPSVHWLKEEA EKGLWIGPDTPGYTMASSSKQHSVLVLLDVGRQHOGTYTCIATNPAGQALCSASL  
 HISGLAKEEEQERVKEALISSFLQGTSAQVSAQMSSEAGFADLVGQSKGESLVAEEAHSHLSLAEVGT EEFLO  
 KLTSQITEMVSAKISQAKLQVPGGDSDEETKTPSASPRHGRSRPSSSVQESSESEDEGDSRGEIFDIYVVTAD  
 YLPLGAEQDAIILREGQYVEVLDSAHPLRVLVTRTKPTKSSPSRQGWSPAYLDRKRLKLSPEWGPTEAPEFPGE  
 AVSEDEYRTRLS SVIQELLSSEQAFV GELQFLESHMKHLERSPRVPAAVASQKTVIFRNVDISHFHSSFLK  
 ELQCGTDDDVMCFIKNQEAFEKYLEFLVGRVQAE SVVSTPVQEFYKKYAEETLSAKDPTQPPPPLOHYL  
 EQPVERVQKYQALLKELIRNKARNRQNCALLEQAYAVVSALPQRAENKLHVSLMENYPGTLEALGEP IROGHF  
 I VWEGAPGAMPWKGNRHVFLFRNYLVI CKPRRDRSTDFSYVFRNMMKLS SIDLNDQVEGDDRAFEVWHER  
 EDSVRKYLLQARTV I IKN SWVKEICGIQQRLAQPVWRPPEFEELADCTAELGETVKLACRVGTGPKPIVSWY  
 KDGKPV EVDPHHILIEDPDGSC TLI LDNLTGIDSGQYMCFAASAAGNASTLGKILVQVPPRFVNVKVRATPFVE  
 GEDAQITCTVEGAPYPQIRWYKDGTL LAPGNRYRMLNEPRSGVLV LVIQAASKEDLGHYECELVNRLGSTRGG  
 GELYMQSPALRARDQHREQIVAAVEGAPSMQVTIEDVQVGDMAQFD AVIEGHPPPIV TWYKGS TQLTSSA  
 RLSQRQDGT TYSVLVTDVAPHDAGVYTCVANNAGGQVLCKAE LLVHGGDKLDAENQVYRRKLHSFYDVEEIG  
 RGVFGFVKRVQHKGKMFCAAKF I PLRSKTRAQAYQERDILATLGHPLVTGLLDQFETRKTLLILILELCSSEE  
 LLDRLFKKGVVTEAEVKVYIQQLVEGLHYLHSHGILHLDIKPPNIMVHPAREDIKICDFGFAQKITPSEPQY  
 SKYGSPEFVSP EII EQNPVSEGSDIWAMGVI SYLSLTCS SPFAGESDRATLLNVLEGRVSWSSPTAAHLSEDA  
 KDFIKATLQRTPRARPSTSQC LAHPWFLKSMPAEAAHFINTKQLKFL LARSRWQRSLMSYKSI LVMRSIPELL  
 QGPPDSPSLGVARHLRGEASGASSSSSSSDNELAPFARAKSLPPSPVTHSPLLHPRGFLRPSASLPEETEASM  
 PTADAAVPASPQASGPPASPGCVPRHSV ISSLFYQQAGEGAERGNKTS GAKRHPARRRHLKGGYIARALPGL  
 REPLMEYSLLLEEEAAREEQASLMTKTPSFETALRLPSSSREVVPGRSHSLDNPPVTTPGSP EACKELQLFPSP  
 TGLTHETTAKDRGHKEGFLQESVFPFPMMSGDRPGKQEGSSQDSRCRGPASSCHSELSEGSQEGCGPSSQSL  
 GSLPHQTS LKELSTKCGPLFSEQQAAPFP TQVSPLLGSEKEPQDGS LSEGPVVPVSSSPGSASQVDAASLDTE  
 GLSEAGDTCDFTPPPQRPQEQA TTRKFSLESRGGYAGVAGYGTFAFGGDAGGMLGQGPLWARMAWAVS QSSEE  
 QDEAATESPQPLESLGPIAEASGVPLRTSPSLTPWEEVEQVSLVQIRDLSGDAEAADTISLDISEVDPAYLNL  
 SDLYDIKYL PPFEMIFRRVPKPIEQPESPGSETEAGQGLADFL EEAAWPWP GELGLRAGLEITEEPEEPGDLE



ALLGEAAVGRKRKWSRGLFQFPGRCLSGEEPVELGLRQRVKASMAHISRILKGRPEGPEREPPRKKAGLA  
SFRLSGLKGRDQELSDEAVVLGQSVTLACQVLAQPTAQATWSKDGVLLESSGHLISSTLKNFQLLTIILVVKE  
EDLGTYTCCVSNPLGTAVTTGVLKKAERPSSSPRPEVGEYKDAVLLVWKPVESECGPVTYIVQCCIEGGSWTT  
LASDISDCCYLTGKLSRGGMYIFRTACVSKAGMGPISSPSEQVLLGGPNHLASEEESSRGRPAQLLPSTKTFA  
FQMQIRRRGRFSVVRQCREKASGRALAAKIVPYQPEDKTAVLREYEALKRHLHPHLAQLHAAYLSPRHLVLI  
LCSGPELLPSLAERESYSESVDVKDYLWQMLSATQYLHAQHILHLDLRSNMVTEYNLLKVIDLGNQSLDQE  
KVPAPENFKDYLETMAPELLEGQAVPQTDIWAIGVTAIFIMLSGEYPESSEGTDLQKGLRKLIRLSRCYAG  
LSGGAVALFQSSSLCAQPWGRPCASTCLQCGLWTEEGPTGSRPTPVTFFPTVRLRAFVREKRRALLYKKNLA  
QVR\*

>rs217506487\_ENSMUSP00000049737\_c.15869:A>GAGA\_p.R5290R-ins  
ENSMUST00000052872.15|Obscn-203|ENSMUSG00000061462|-  
|chr11:g.58934759:T>TCTC

MDHSFSGAPRFLTRPKAFVSVGKDATLSCQIVGNPTPHVSWEKDRQPVEAGARFRLAQDGDVYRLTILDLAL  
GDSGQYVCRARNAIGEFAAVGLRVDSEGTCAEQAPHLLRPTSIRVREGADATFRCRVGGSPQPAVSWSKDG  
RRLGPPDAPHVRVEEHGESSALRIRSARPRDGGTYEVRAENPLGSASAAAALVVDSAEVAGPPGTSTATLLA  
HLQORREAMRAEGIPSPPGAGTRTCTVTEGKHARLSCFVTGEPKPEVWKKDGQLVTEGRRHVVEDEQENF  
VLKILFCKQSDRGLYTCTASNLVGQTYSSVLLVVVREPTVPFKKRLQDLEVRKESATFQCEVAQPAEAAWFK  
EETRLWASAKYDIEEGETERRLLTVRNVSADDDAVYICETTEGSRVVAELSVQGNLTKLPRKTAVRTGDTAIF  
WVELAVPEGPVRWLRNQEEMVAGGRVAITAEGTCHTLTI FQCTLEDMGEVAFVSGGCRTTTQFCVSAPRRPPL  
YPPADPVVKAKTESSVTLWSAPPHGDRPVTIDGYVLEKRLKAYAWSRCHEAGWLATTEFTITGVAAEGDFQ  
FRVSAINHFGQGPYLEFPGMTMLVPLAVKTPKAVEAVEGGEVTFVSDLTVASSGEWFLDGEALKASSIYVI  
RCDRTRHMLTIREVPARLHGAQLKVFANGIETSIQMVVRAALGLPSSKLPAAAAREVLAQLHEEAQLLAE  
QAAAVTWLKDGRELSLGPKEYMQVSAGRRALLVRDVAQDDAGLYECVSRGSRRTAYQLLVQEPKLVFAKQQA  
SEVKAEEAGNSATLSCEVTQAQTEVTWFKDGKLLSSSSKVRMEASGCSRRLVVQQAGKADAGEYSCEAGGQKLS  
FRLDVAEPKLVFAKQQAHEVKAEEAGASATLSCEVAQAQTEVTWFKDGKLLSSSSKVRMEASGCSRRLVVQQ  
AGKADAGEYSCEAGGQKLSFRLDVAEPKLVFAKEQQARSEVKAEEAGASATLSCEVAQAQTEVTWFKDGKLLS  
SSKVRMEASGCSRRLVVQQAGKADAGEYSCEAGGQKLSFRLDVTEPKLVFAKEQQARSEVKAEEVGN SATLSCE  
VAQAQTEVTWFKDGKLLSSSSKVRMEASGCSRRLVVQQAGKADAGEYSCEAGGQKLSFRLDVAEPKLVFAKEQ  
QARSEVKAEEAGNSATLSCEVAQAQTEVTWFKDGKLLSSSSKVRMEASGCSRRLVVQQAGKADAGEYSCEAGGQ  
KLSFHLDVTEPKLVFAKEQQAHSEVKAEEAGASATLSCEVAQAQTEVTWFKDGKLLSSSSKVRMEASGCSRRLV  
VQQAGKADAGEYSCEAGGQKLSFRLDVAEPKLVFAKEQQARSEVKAEEAGASATLSCEVAQAQTEVTWFKDGK  
LSSSSKVRVEASGCSRRLVVQQAGKADAGEYSCEAGGQKLSFRLDVAEPKLVFAKEQQANSEVKAEEAGASATL  
SCEVAQAQTEVTWFKDGKLLSSSSKVRVEASGCSRRLVVQQAGKADAGEYSCEAGGQKLSFRLDVAEPKLAFA  
KEQQAHSEVKAEEAGASATLSCEVAQAQTEVTWFKDGKLLSSSSKVRVEASGCSRRLVVQQAGKADAGEYSCEA  
GGQKLSFRLDVAEPKLAFAKEQQAHSEVKAEEAGASATLSCEVAQAQTEVTWFKDGKLLSSSSKVRVEASGCSR  
RLVVQQAGKADAGEYSCEAGGQKLSFRLDVAEPKLAFAKEQQAHSEVKAEEAGASATLSCEVAQAQTEVTWFKD  
GKLLSSSSKVRVEASGCSRRLVVQQAGKADAGEYSCEAGGQKLFRLDVAEPKLMFAKEQQAHSEVKAEEAGAS  
ATLSCEVAQAQTEVTWFKDGKLLSSSSKVRVEASGCSRRLVVQQAGKADAGEYSCEAGGQKLSFRLDVAEPK  
VFAKEQQAHSEVKAEEAGASATLSCEVAQAQTEVTWFKDGKLLSSSSKVRVEASGCSRRLVVQQV GKADAGEYS  
CEARGQKLSFRLDVADTRLMFAKEQQARTEVKAEEAGNSATLSCEVAQAQTEVTWFKDGKLLSSSSKVRVEASG  
CSRRLVVQQAGKADAGEYSCEAGGQKLSFRLDVAEAEESQIPERPSRREPLVVKEHETIILTATIAAPSVAAVT  
WLKDGVEIRRSKRHEATSLGDTHLTVRGAQVLDIAIYSCRVGKEGQDFPVQVEEVAAKFSKPLEPVEGELGG  
TVMLVCELSPEQAEVWRCGNQTLRPGKRFQMTSEGPRRTLTVSGLREDDAEYVCESRDDRTSARLTVKVP  
VVKFTSGLSAMVAEEGQEATFQCQVSPSDAGVTWYKDGMLQPSSEKFMVMEVSGASRSLTILGLTLEDAGQVTV  
EAEGASSAALRVREAPVLFKFKLEPQTVEERTSVTLELTRPWEVVKWTRNAAVLTPSENVEIRAEGARHC  
LVLRSVGFADRGFFGCETPDDKTQAKLNEMRQVRLVRLVGLQVEEAKEQGTASMDVELSHAEEVGSWTRDGLRL  
QPGPKCHLAVQGPVHILTLALQPQDSGLVAFRAEGVHTSARLIVTELVPVSTRVLQDVVATQKEKVTLECEL  
SRPVDVRLWKDGVLELRAGKAIGIVAQGTCSRSLVIYRCETGDQGVYVCDALDAQTSASLRVQGRTYTLIFRRL  
AEDAGEVVFVAENAESRAHLRVKELPVTLLRPLRDKIAMEKHRGVLECVSRASAQVRWFKGGVLEQSGPKYE  
VVS DGLYRKLVIN DVQPEDEDTYTC DAGNVKTS AQFFVVEQSITIVRGLKDMTVMEPAPAWFECETSIPSVRP  
PKWLLGKTVLQAGGNVGLQDGTVHRLTLHKTCSTMTGPVHFTIGKSRSSAQLVVS D I PVVLRTRPLEPKAGRE  
LQSVVLSCDFRPAPKAVQWYKDDTPLSPSEKFKMALEGQMAELRILRLTPADAGVYRCQAGSAQSSAEVTV  
EATSPKVS SARLVVKGKPVVFLKALDDVSAEERGLTLTQCEVSDPEARVVWRKDGVELGPSDKYDFLHKAGAR  
GLTVHDLSDARLADGLYTCQVGSKETQSKVSVHDLHVTITKRLKTVLEVLEGE SCSFECVLSHESPSDPAVWTVGG  
KTVGGSGHFHAVRQGRKYTLTVKDAALSDAGEVVSVLGLTSSKASLIIRERPVDITKPLEDQRTTLGEDVMLS  
CELSRAGTSVRWLKDGKAIRKSQKYDLLSEGTRAVLVVRKASLKDSGEYTCETEASKSTAKLCVEEKANRFTE  
ELADLQVEEKGRAVFTCKTEHPASVVTWRKGLLELRASGKHVPSQEGTLKLTINALERTDSDTYTCDIGAR

TQARLLVHGQKVRVIEDLEDTAVQEGSSAKFCCRIAPADYGPVHWFLDKTPHLSNELNEITVQPGGYHVLTLR
QLALKDSGTVYFEAGDQRTSAAALRVTEKPSIFSRPLTDVTVTEGEDLTLVCETTTVDSSVRWTKDGKTLRPSA
RCQLSHEGCQAQLLITATTPQDGGRYKCEIGGASSSSIVRVHALPVRFRFRESLKDVEVEPEGKAATLRCVLSVA
APVEWRHGDDVLKSSNKYSRQEGAVLELVIRDLPQDQSGQYSCSFGDQTTSATLTVKTSQAQFVGLRNKEA
TEGTTVTLRCELTKKEAPVEWKKGTETLRNGDKYSLKQDQAVCELQICSLLVADAGEYSCVCGQEKTSATLTVK
ALLVHFVRLRSKEATEGDTTTLQCELSKAAPVEWRKGTETLRDGDYSLKQDQAVCELQIRSLTIADAGEYL
CTCGQEKTSATLTVRALPAKFKDSLKNEEATEGTTATLSCELSKAAPVTWKKGPKTLQSGDKYVLRQDQAVCG
LQIHGLTMADAGEYSCVCGQEKTSATLTVRGLPAKFIEDLRSQEATEGATAILRCELSKAAPVEWRKGTETLR
DGDYTLRQDQAVCELQIRGLAVVDGTYSLSLPTKFTFTEGLRNEEATEGTMATLRCQMSKAAPVEWRKGTETLR
DGDYSLRQDQAVCELQIRGLTIEDSGEYTCVCGQEKTSATLSVKALPSRFIEDLRSQEATEGTMATLRCQMS
KTAPVEWKKGSETLRDGGYSLRQDQAVCELQICDLAVEDAGEYSCVCGQEKTSATLSIKALPPRFIEDLRSQ
EATEGTMATLRCQMSKAAPVEWRKGTETLRDGGYSLRQNGAVCELQIHDLAVEDTGEYSCVCGQEKTSATLN
VKALPPRFIEDLRSQEATEGTMATLRCQMSKAAPVEWRKGTETLRDGGYSLRQDQAVCELQIHDLVEDAGQ
YSCVCGQEKTSAVLTVDALPPKFTFTEGLKKEEATEGTMVTLRCQMSKEATVEWRKGAKTLSGGYSLRQDQAV
CELQICGLAVEDAGEYSCVCGQEKTSATLSVKALPPRFIEDLRSQEATEGTMATLRCQMSKAAPVEWRKGTET
LRDGDYSLRQDQAVCELQIRDLAVEDAGEYLCVCGQEKTSATLSVKALPPRFIEDLRSQEATEGTMATLRCQ
MSKAAPVEWRKGTETLRDGDYSLRQDQAVCELQICDLAVEDTGDYSCVCGQEKTSATLSVKALPPRFIEDLR
SQEAREGTVATLRCRMSKAAPVEWRKGTETLRDGDYSLRQEGNLCQLQIRDLAVEDTEEYSCVCGQEKTSAT
LSVKALPAKFIEDLRSQEAPESSTVTLRCKLSKASVVKKGTETLRNGARYSLRQDQAVCELEIRDLTVEDT
GEYSCTCGQERTSATLSIMAPQVVFQQLQNLQAEEGSMASLRCELSVPNAAMVWSKGGLELQGDTRREARQQ
GCVAELLLRDLRREDAGEYSCVCGQEKTSATLMVTAAPVRFLELQAQDVDEGATARLRCELSREAVSVEWRK
GSLQLFPCAKYQMVQEGTTAELLVHGVEQEDAGEYTCDAHTQS IARLSVRAPKPKFKTDLQSTEQEAGGTAR
LCCQLSEAEPTPVQWLKEGVELHVGSKYEMRRQAVCELLIHGLEAKDTGEYACLVGQKTLASLRVKEPEV
TIVRGLVDMEVQADEDFEFTCKVSQAGATDVQWHLQGLPLQSNVTEVAVLADGCTHVLQKGVTLQDAGTVS
FHVGGSSSAQLTTRVPEVTVLEPLKDVQLSEGQDAHFRCRLSRASGQEARWALGGVPLQCNEMNDITVEQGT
LYLLTLHKVTELDAGTITLQVGSSEAEQLKVTAKNTVLRGLENVDALEGGALFECQLSQPEVAHAHTWLLDD
EPVHTSEKVEVVYFENGLRHLHLLKLNKLPQDSCRRTVFLAGDVVTSFAFLTVRGRWRLEVLEPPHDSVVKAGMV
RFTCILSEAVPVGEATWYINGAAIQPDDTDWTVTTDGSHHALTLNSAQPQHAGEVTFAARDAVASARLSVLAL
PDPPEADAEVGRSDHSVTLVWVAPMSDGGGLCGYRVEMKEASTGQWQLCHDLVPGPECVVDDLVPKTYRFR
VAAVGPAGAGEPVHLPQMVKIAPAPAPAPAPAPAPAPETRQAVVGEDICLELEVAADGGEVWHKGTERTIQPG
GHFEVLSRGRQMLVIKGFRTEDQGEYRCGPIQGLPSSGAATFNVVMTSGSGDEVPAQPSLPPEAAQEGDLHL
LWEALARKRRMSREPTLDSISELPEEDSRVQHLRQEAETAPDLSEGYSTADELARTGEADLSHTSSDDESRA
GTPSLVTVYLLKAGGPGISPLASKHEAQVTTSVKPKQKQEPVVPVTPCPPPGDLSAADLMDPSLDKAAVKIQAAFK
GYKVRKEMKQEGEPVFSRTFGDTEAQVGDVLRLECVLATKTDMRACWLKDGIELTDGRHYHIDQLKDGTCSSL
VTGLAPTDSSGRYTCQVSTKSGRVSHSACVVVSGTESEAESSGGELDDAFRRAARRLHRLFRTKSPAELSEEE
LFLSADEGPGEPEEPADWQTYREDEFVFCIRFESLAEARQAVTCFRNMFMATMGIGVEISLGEQGPGRVEMRIG
KVAPTVPVAVPLAKTPGLQTSDAAPVFLTELQNDVDQDGYPMSFDCVVTGQPVPSVRWFKDGKLEEDDHYMI
NEDQQGGHQLIITAVVPADMVYRCLAENSMGVSSTKAELRVELTSTDYDTAADATETSSYFSAQGYLSSREQ
EGTESDEGQLPQVLEELKDLQVAPGTRLAKFQLKVKGYPAKLYWFKDQPLTSDHIRMTDKKTLHTLEIVS
VTREDSGQYAAAYISNAVGAAYSARLLVGRGPSEPEEKPASDVHERLVPPRILEKFTPKKVKRGSITFSVKVE
GHPAPSVHHLKEEAEGVLWIGPDPGYTMASSKQHSVLVLDVGRQHOGTYTCIATNPAGQALCSASLHISG
LAKEEQERVKEALISSFLQGTSQAVSAQMSSESAGFADLVGQSKGESLVAEEAHSHLSLAEVGTTEEFLQKLS
QITMVSAKISQAKLQVPGGDSDEETKTPSASPRHGRSRPSSSVQESSSESEDGDSRGEIFDIYVVTADYLPL
GAEQDAIILREGQYVEVLDSAHPLRWLVRTKPTKSSPSRQGWVSPAYLDKRLKLSPEWGPTEAPEFPGEAVSE
DEYRTRLSSVIQELLSSEQAFVGLQFLESHHMKHLERSPRVPAAVASQKTVIFRNVQDISHFHSSFLKELQG
CGTDDDVMCFIKNQEAFAFEKYLEFLVGRVQAESVVSTPVQEFYKKYAEETLSAKDPTQPPPPPLQHYLEQPV
ERVQKYQALLKELIRNKARNRQNCALLEQAYAVVSALPQRAENKLVSLMENYPGTLEALGEPVIRQGHFVWE
GAPGAMPWKGNHRHVFLFRNYLVICKPRRDSRTDTSYVFRNMMLSSIDLNDQVEGDDRAFEVWHEREHSV
RKYLLQARTVVIKNSWVKEICGIQQRQAQPVWRPPEFEELADCTAELGETVVKLACRVGTGPKPIVSWYKDGK
PVEVDPHHILIEDPDGSCTLILDNLGTIDSGQYMCFAASAAGNASTLGKILVQVPPRFVNVKVRATPFVEGEDA
QITCTVEGAPYPQIRWYKDGTLAPGNRYRMLNEPRSGVLVVLVIAASKEDLGHYECLELVNRLGSTRGGELY
MQSPALRARDQHREQIVAAVEVTEQETKVPKKTVIEETITTVVKSPPRGRRQSPGKSPRSRPSRRSASPRRP
GLLAPERLYPPGTSRRLLEVEQGRKAPVPALYVTEAETHVAPASQSQPKWLEVEETIEVRVKKTSRGSAPVR
EMTSRGEILFTLPGGIPGRDPNANNNSNNKSIVYQEARVWPAVVHVGEFFIFQVDSVGNVDVVAASPEPEQVR
ASQKEENTERQEGCSDGDENTFLMEEPQDSDSLQGRDPKILTHNGRVLTLADLEDYVQEGETFCCGDSTPST
PDEPPCEVSVLQREISEPTVQPVLLNVGRPPGTGATPSFFRPGSQVHSPESVSVLLREAWSGPVSAAAPWTSS
FHTHVQSSVDGSHGSFKTEVSTQTVSFGAVGETVTLHIDPDGGEAPGPSQG\*

```

>rs217506487_ENSMUSP00000020732_c.16070:A>GAGA_p.R5357R-ins
ENSMUST00000020732.13|Obscn-201|ENSMUSG00000061462|-
|chr11:g.58934759:T>TCTC
MDHSFSGAPRFLTRPKAFVSVGKDATLSCQIVGNPTPHVSWEKDRQPVEAGARFRLAQDGDVYRLTILDLAL
GDSGQYVCRARNAIGEAFVAVGLRVDSEGTCAEQAPHFLLRPTSIRVREGADATFRRCRVGGSPQPAVSWSKDG
RRLGPPDAPHVRVEEHGESSALRIRRSARPRDGGTYEVRAENPLGSASAAAALVVDSDAEVAGPPGTSTATLLA
HLQQRREAMRAEGIPSPPPGAGTRTCTVTEGKHARLSCFVTGEPKPEVWKKDQGLVTEGRRHVVEDEQENF
VLKILFCKQSDRGLYTCTASNLVGQTYSSVLVVVREPTVPFKKRLQDLEVREKESATFQCEVAQPAEAAWFK
EETRLWASAKYDIEEEGTERRLTVRNVASADDDAVYICETTEGSRVVAELSVQGNLTKLPRKTAVRTGDTAIF
WVELAVPEGPVWRWRNQEEMVAGGRVAITAEGTCHTLTI FQCTLEDMGEVAFVSGGCRTTTFQCVSAPRRPPL
YPPADPVVKAKTESSVTLWSAPPHGDRPVTIDGYVLEKRKLGAYAWSRCHEAGWLATTEFTITGVAAEGDFQ
FRVSAINHFGQGPYLEFPGMTMLVPLAVKTPKAVEAVEGGEVTFVSDLTVASSGEWFLDGEALKASSIYVI
RCDRTRHMLTIREVPARLHGAQLKVFVANGIETS IQMVVRAALGLPSSKLPAAAAAREVLAQLHEEAQLLAE LSD
QAAAVTWLKDGRELSLGPKEYMQVSAGRRALLVRDVAQDDAGLYECVSRGSRRTAYQLLVQDITDGYRDWGPAG
PQKHMCKCAGAKIARYLGS SCYRFLQYDKGVWHLEAALDTRQKGTSSCSLHEKPKLVFAKQQAHSEVKA E
AGNSATLSCEVTQAQTEVTFWKDGGKLS SSSSKVRMEASGCSRRLVVQQAGKADAGEYSCEAGGQKLSFR LDVA
EPKLVFAKQQAHSEVKA EAGASATLSCEVAQAQTEVTFWKDGGKLS SSSSKVRMEASGCSRRLVVQQAGKADA
GEYSCEAGGQKLSFR LDVAEPKLVFAKEQQARSEVKA EAGASATLSCEVAQAQTEVTFWKDGGKLS SSSSKVRM
EASGCSRRLVVQQAGKADAGEYSCEAGGQKLSFR LDVTEPKLVFAKEQQARSEVKA EAVGNSATLSCEVAQAQ T
EVTWFKDGGKLS SSSSKVRMEASGCSRRLVVQQAGKADAGEYSCEAGGQKLSFR LDVAEPKLVFAKEQQARSEV
KAEAGNSATLSCEVAQAQTEVTFWKDGGKLS SSSSKVRMEASGCSRRLVVQQAGKADAGEYSCEAGGQKLSFHL
DVTEPKLVFAKEQQAHSEVKA EAGASATLSCEVAQAQTEVTFWKDGGKLS SSSSKVRMEASGCSRRLVVQQAGK
ADAGEYSCEAGGQKLSFR LDVAEPKLVFAKEQQARSEVKA EAGASATLSCEVAQAQTEVTFWKDGGKLS SSSK
VRVEASGCSRRLVVQQAGKADAGEYSCEAGGQKLSFR LDVAEPKLVFAKEQQANSEVKA EAGASATLSCEVAQ
AQTEVTFWKDGGKLS SSSSKVRVEASGCSRRLVVQQAGKADAGEYSCEAGGQKLSFR LDVAEPKLVFAKEQQAH
SEVKA EAGASATLSCEVAQAQTEVTFWKDGGKLS SSSSKVRVEASGCSRRLVVQQAGKADAGEYSCEAGGQKLS
FR LDVAEPKLVFAKEQQAHSEVKA EAGASATLSCEVAQAQTEVTFWKDGGKLS SSSSKVRVEASGCSRRLVVQ
AGKADAGEYSCEAGGQKLSFR LDVAEPKLVFAKEQQAHSEVKA EAGASATLSCEVAQAQTEVTFWKDGGKLS S
SSKVRVEASGCSRRLVVQQAGKADAGEYSCEAGGQKLFRLDVAEPKLVFAKEQQAHSEVKA EAGASATLSCE
VAQAQTEVTFWKDGGKLS SSSSKVRVEASGCSRRLVVQQAGKADAGEYSCEAGGQKLSFR LDVAEPKLVFAKEQ
QAHSEVKA EAGASATLSCEVAQAQTEVTFWKDGGKLS SSSSKVRVEASGCSRRLVVQQVQKADAGEYSCEARGQ
KLSFR LDVADTRLMFAKEQQARTEVKA EAGNSATLSCEVAQAQTEVTFWKDGGKLS SSSSKVRVEASGCSRRLV
VQQAGKADAGEYSCEAGGQKLSFR LDVAEAE SQIPERPSRREPLVVKEHETIILTATIAAPSVAAV TWLKDGV
EIRRSKRHEATSLGDTHTLTVRGAQVLD SAIYSCRVGKEGQDFPVQVEEVA AKFSKPLEPVEGELGGTVMLVC
ELSPQAEVWRCNGT LRPGRFQMTSEGPRRTLTVSGLREDDAEYVCE SRDDRTSARLTVKVP RVVKFTS
GLSAMVAEEGQEA TFQC VVSPSDAGVTWYKDGMLQ PSEKFMVVE SGASRSLTILGLTLEDAGQVTV EAEGAS
SSAALRVREAPVLFKKLEPQTVEERTSVTLEVELTRPWPEVKWTRNAAVLTPSENVEIRAEGARHCLVLR SV
GFADRGF FGCETPDDKTQAKLNVEMRQVRLV RGLQEVEAKEQGTASMDVELSHA EVEGSWTRDGLRLQPGPKC
HLAVQGPVHIL TLSALQPQDSGLVAFRAEGVHTSARLIVTELPVSFTRVLQDVVATQKEKVTLECELSRPVDV
RWLKDGV ELRAGKAI GIVAQGTCSLVIYRCETGDQGVYVCDALDAQTSASLRVQGRTYTLIFRVLAE DAGE
VKFVAENAESRAHLRVKELPVTLLRPLRDKIAMEKHRGVLECVSRASAQVRWFKGGVELQSGPKYEVVSDGL
YRKLVIN DVQPEDEDTYTC DAGNVKTS AQFFVEEQSITIVRGLKDMTVM EPAPAWFECETSIPSVRPPKWL LG
KTVLQAGGNVGL EQDGTVHRLTLHKTCSTMTGPVHFTIGKSRSSAQLVVDI PVVLT RPLEPKAGRELQSVVL
SCDFRPAPKAVQWYKDDT PLS PSEKFKMALEGM AELRILRLTPADAGVYRCQAGSAQSSAEVTV EAAREVTVI
QPLQDAEAMEEGRVCFSCELSHKDEDIEWSLNGTPLYNDSFHEI SHEGCLHTLV LKSVRQADTGTVCATSPKV
SVSARLVVVGKPVVFLKALDDVSAEERGLTLTQCEVSDPEARVVWRKDGVELGPSDKYDFLHKAGARGLTVHD
LSHEDAGLYTCQVGSKETQSKVSVHDLHVGITKRLKTV E VLEGE SCSFECVLSHESPSDPAVTVGGKTVGGS
GHFHAVRQGRKYTLTVKDAALSDAGEV VSVLGLT SKASLIIRERPVDITKPLEDQRTTLGEDVMLSCELSRA
GTSVRWLKDGKAI RKSQKYDLLSEGTRAVLVVRKASL KDSGEYTCETEASKSTAKLCVEEKANRFTBELADLQ
VEEKGRAVFTCKTEHPASVVTWRKGLLELRASGKHVPSQEGTLKLTINALERTSDTYTCDIGQARTQARLL
VHGQKVRVIEDLEDTAVQEGSSAKFCCRIAPADYGPVHWF LDKTPLHSNELNEITVQPGGYHVLTLRQLALKD
SGTVYFEAGDQRTS AALRVTEKPSIFSRPLTDVTVTEGEDTLTVCE TTTVDSSVRWTKDGKTLRPSARCQLSH
EGCQALLITATTPQDGGRYKCEIGGASSSSIVRVHALPVRFRFRESLKDVEVPEGKAATLRCVLSVVAAPVEWR
HGDDVLKSSNKYSLRQEGAVLELVIRDLQPQDSGQYSCSFVDGQTT SATLTVKTS SAQFVWGLRKNKEATEGTTV
TLRCELTK EAPVEWKGTETLRNGDKYSLKQDGA VCELQICSLLVADAGEYS CVCGQEKTSATLTVKALLVHF
VRRLSKEATEGDTTTLQCELSKAAPVEWRKGTETLRDGD RYSLKQDGA VCELQIRSLTIADAGEY LCTCGQE
KTSATLTVRALPAKFKDSLKNEEATEGTTATLSCELSKAAPVTWKKGPKTLQSGDKYVLRQDGA VCELQI HGL
TMADAGEYSCVCGQEKTSATLTVRGLPAKFIEDLR SQEATEGATAILRCELSKAAPVEWRKGS ETLKDGDRYT

```

LRQDGA VCELQIRGLAVVDVTGTYSSLPKTFTEGLRNEEATEGTMATLRCQMSKAAPVEWRKGETLRDGD RYS  
LRQDGA MCELQIRGLTIEDSGEYTCVCGQEKTSATLSVKALPSRFIEDLRSQEATEGTMATLRCQMSKTAPVE  
WKKGSETLRDGG RYSLRQDGPVCELQICDLAVEDAGEYSCVCGQEKTSATLSIKALPPRFIEDLRSQEATEGT  
MATLRCQMSKAAPVEWRKGETLRDGG RYSLRQNGAVCELQIHDLAVEDTGEYSCVCGQEKTSATLNVKALPP  
RFIEDLRSQEATEGTMATLRCQMSKAAPVEWRKGETLRDGG RYSLRQDGA VCELQIHDL DVEDAGQYSCVCG  
QEKTSAVLTVDALPPKTFTEGLKKEEATEGTMVTLRCQMSKEATVEWRKGAKT LSDGG RYSLRQDGA MCELQIC  
GLAVEDAGEYSCVCGQEKTSATLSVKALPPRFIEDLRSQEATEGTMATLRCQMSKAAPVEWRKGETLRDGD R  
YSLRQDGA VCELQIRDLAVEDAGEYLCVCGQEKTSATLSVKALPPRFIEDLRSQEATEGTMATLRCQMSKAAP  
VEWRKGSKTLRDGD RYSLRQDGA MCELQICDLAVEDTGDYSCVCGQEKTSATLSVKALPPRFIEDLRSQEARE  
GTVATLRCRMSKAAPVEWRKGETLRDGD RYSLRQEGNLCELQIRDLAVEDTEEYSCVCGQEKTSATLSVKAL  
PAKFIEDLRSQEAPESSTVTLRCKLSKKASVVWKKGSETLRNGARYSLRQDGA VCELEIRDLTVEDTGEYSCT  
CGQERTSATLSIMAPQVVFQQPLQNLQAEEGSMASLRCELSVPNAAMVWSKGGLELQGDTRREARQQGCVAEL  
LLRDLRREDAGEYSCTCGSQTTSATLMVTAAPVRFLRELQAQDVDEGATARLRCELSREAVSVEWRKGS LQLF  
PCAKYQMVQEGTTAELLVHGVEQEDAGEYTCDAHTQSIARLSVRAPKPKFKTDLQSTEQEAGGTARLCCQLS  
EAEPTGTPVQWLKEGVELHVGSKYEMRRQGA VCELLIHGLEAKDTGEYACLVGGQKT LASLRVKEPEVTIVRGL  
VDMEVQADEDV EFTCKVSOAGATDVQWHLQGLPLQSNVTEVAVLADGCTHVLQ LKGVTL EDAGTVSFHVGG L  
SSSAQLTVRVP ETVLEPLKDVQLSEGQDAHFRCRLSRASGQEARWALGGVPLQCNEMNDITVEQGTLYLLTL  
HKVTLEDAGTITLQVGS CSSEAQLKVTAKNTVLRGLENVDALEGGEALFECQLSQPEVAHTWLLDDEPVHTS  
EKVEVVYFENGLRHLLLLKLNKLPQDSCRRTVFLAGDVVTS AFLTVRGRLEVLEPPHDASVKAGMQVRF TCIL  
SEAVPVGEATWYINGAAIQPDDTDWTVTTDGSHHALT LSNAPQHAGEVTFAARDAVASARLSVLALPDPPE  
AEVGRSDHSVTL SWVAPMSDGGGGLCGYRVMKEASTGQWQLCHDLVPGPECVDDLVPGKTYRFRVA AVGP  
AGAGEPVHLPQMVKIAPAPAPAPAPAPAPAPETRQAVVGEDICLELEVAADGGEV VWHKGTERRIQPGHFV L  
SRGQRQMLVIKGFRTEDQGEYRCGPIQGLPSSGAATFNVMVMTSGSGDEVPAQPSLPPEAAQEGDLHLLWEALA  
RKRMSREPTLDSISELPEEDSRVQHLRQEAEETAPDLSEGYSTADELARTGEADLSHTSSDDESRA GTPSLV  
TYLKKAGGPGISPLASKHEAQVTT SVKPKQKQEPVVPTCPPGDL SAADLMDPSLDKAAVKIQAAF KGYKVRK  
EMKQYEGPVFSRTFGDTEAQVGDVLRLECVLATKTDMMRACELDKGIELTDGRHYHIDQLKDGTC SLLVTLGAP  
TDSGRYTCQVSTKSGRVSHSACVVVSGTESEAESSSGELDDAFRAARRLHRLFRTKSPAELSEELFLSAD  
EGPGEPEEPADWQTYREDENFVCIRFESLAEARQAVTCFRNMFATMGIGVEISLGEQGP RGVEMRIGKVAPTV  
TPAVPLAKTPGLQTS DAAPVFLTELQNDVQDGYPMSFDCVVTGQPVPSVRWFKDGKLL EDDHYMINEDQQG  
GHQLIITAVVPADMGVYRCLAENSMGVSSTKAELRVELTSTDYDTAADATETSSYFSAQGYLSSREQEGTESD  
EGQLPQVLEELKDLQVAPGTRLAKFQLKVKGY PAPKLYWFKDQPLTTS DHIRMTDKKTLHTLEIVSVTREDS  
GQYAA YISNAVGAAYSSARLLVRGPSEPEEK PASDVHERLVPPRILEKFTPKVKRGS S ITFSVKVEGHPAPS  
VHWLKEEA EKGV LWIGPDP TPGYTMASSSKQHSVLVLLDVGRQH QGTYTCIATNPAGQALCSASLHISGLAKEEE  
QERVKEALISSFLQGT SQAVSAQMS ESAGFADLVGQSKGESLVAEEAHSHLSLAEVGT EEFLOKLT SQIT E MV  
SAKISQAKLQVPGGDSDEETKTPSAPRHGRSRPSSSVQESSSESEDGDSRGEIFDIYVVTADYLP LGAEQDA  
IILREGQYVEVLDSAHPLRWLVRTKPTKSSPSRQGVSPAYLDRKRLKLSPEWGPTEAPEFPGEA VSEDEYRTR  
LSSVIQELLSSEQAFV GELQFLESHMKHLERSPRVPAAVASQKTVIFRNVQDISHFHSSFLKELQCGCTDDD  
VAMCFIKNQEA FEKYLEFLVGRVQAESVVVSTPVQEFYK KYAEETLSAKDPTQPPPPPLQHYLEQPVERVQKY  
QALLKELIRNKARNRQNCALLEQAYAVVSALPQRAENKLVSLMENYPGTLEALGEP IROGHFIVWEGAPGAR  
MPWKGNHRHVFLFRNYLVICKPRRDSRTD TFSYVFRNMMKLSIDLNDQVEGDDRAFEVWHEREDSVRKYLLQ  
ARTV I IKNSWVKEICGIQQRLAQPVWRPPEFEELADCTAELGETVKLACRVTGT PKPIVSWYKDGKPV EVD P  
HHILIEDPDG SCTLILDNLGTGIDSGQYMCFAASAAGNASTLGKILVQVPPRFVNKVRATPFVEGEDAQITCTV  
EGAPYPQIRWYKDG TLLAPGNRYRMLNEPRSGVLV LVIQAASKEDLGHYECELVNRLGSTRGGGEL YMQSPAL  
RARDQHREQI VAAVEERRPSP\*

>rs217506487\_ENSMUSP00000151217\_c.13370:A>GAGA\_p.R4457R-ins  
ENSMUST00000219084.3|Obscn-207|ENSMUSG00000061462|-  
|chr11:g.58934759:T>TCTC

MDHSFSGAPRFLTRPKAFVSVGKDATLSCQIVGNPTPHVSWEKDRQPV EAGARFRLAQDGDVYRLTILDLAL  
GDSGQYVCRARNAIGEAFVAVGLRVDSEGTCAEQAPHLLRPTSIRVREGADATFRCRVGGSPQPAVSWSKDG  
RRLGPPDAPHVRVEEHGESSALRIRSARPRDGGTYEVRAENPLGASAAAALVVDSDAEVAGPPGTSTATLLA  
HLQORREAMRAEGIPSPPGAGTRTCTVTEGKHARLSCFVTGEPKPE TVWKKDQGLVTEGRRHVVEDEQENF  
VLKILFCKQSDRGLYTCTASNLVGQTYSSVLVVVREPTVPFKKRLQDLEVREKESATFQCEVAQ PATEAAWFK  
EETRLWASAKYDIEEGTERRLTVRNVSADDDAVYICETTEGSRVAELSVQGNLTKRKLPRKTAVRTGDTAIF  
WVELAVPEGPVRWLRNQEEMVAGGRVAITAEGTCHTLTIFQCTLEDMG EFAVSVGGCRITTTQFCVSA PRRPL  
YPPADPVVKAKTESVTL SWSAPPHGDRPVTIDGYVLEKRLKLGAYAWSRCHEAGWLATTEFTITGVAEEGDFQ  
FRVSAINHFGQGPYLEFPGMTMHLVPLAVKTP LKAVEAVEGGEVTFVSDLT VASSGEWFLDGEALKASSIYVI  
RCDRTRHMLTIREV PARLHGAQLK FVANGIETS IQMVVRAALGLPSSKLPAAAAREVLAQLHEEAQLLAE LSD  
QAAA VTWLKDGRELSLGP KYEMQVSAGRRALLVRDVAQDDAGLYECVSRGSR TAYQLLVQDITDGYRDWGPAG

PQKHMCKCAGAKIARYLGSSCYRFLQYDKGVWHLEAALDTRQKGKTS SCSLHEKPKLVFAKQQAHSEVKA  
 AGNSATLSCEVTQAQTEVTFWKDGKLLSSSSKVRMEASGCSRRLLVQQAGKADAGEYSCEAGGQKLSFRLDVA  
 EPKLVFAKQQAHSEVKAEGASATLSCEVAQAQTEVTFWKDGKLLSSSSKVRMEASGCSRRLLVQQAGKADA  
 GEYSCEAGGQKLSFRLDVAEPKMFVFAKEQQARSEVKAEGASATLSCEVAQAQTEVTFWKDGKLLSSSSKVRM  
 EASGCSRRLLVQQAGKADAGEYSCEAGGQKLSFRLDVTEPKLVFAKEQQARSEVKAEGNSATLSCEVAQAQ  
 EVTFWKDGKLLSSSSKVRMEASGCSRRLLVQQAGKADAGEYSCEAGGQKLSFHLDVTEPKLVFAKEQQAHSEV  
 KAEAGASATLSCEVAQAQTEVTFWKDGKLLSSSSKVRMEASGCSRRLLVQQAGKADAGEYSCEAGGQKLSFRL  
 DVAEPKLVFAKEQQARSEVKAEGASATLSCEVAQAQTEVTFWKDGKLLSSSSKVRVEASGCSRRLLVQQAGK  
 ADAGEYSCEAGGQKLSFRLDVAEPKLVFAKEQQANSEVKAEGASATLSCEVAQAQTEVTFWKDGKLLSSSSK  
 VRVEASGCSRRLLVQQAGKADAGEYSCEAGGQKLSFRLDVAEPKLAFAKEQQAHSEVKAEGASATLSCEVAQ  
 AQTEVTFWKDGKLLSSSSKVRVEASGCSRRLLVQQAGKADAGEYSCEAGGQKLSFRLDVAEPKLVFAKEQQAH  
 SEVKAEGASATLSCEVAQAQTEVTFWKDGKLLSSSSKVRVEASGCSRRLLVQQVQKADAGEYSCEARGQKLS  
 FRLDVAEAEQSIPERPSRREPLVVKHEHETIILTATIAAPSVAAVTWLKDGV EIRRSKRHEATSLGDTHTLTVR  
 GAQVLD SAIYSCRVGKEGQDFPVQVEEVAAKFSKPLEPVEGELGGTVMLVCELSPEQAEVVRWCNTQLRPGK  
 RFQMTSEGPRRTLVSGLEDDAEYVCESRDDRTSARLTVKVRVVKFTSGLSAMVAEEGQEATFQCVVSPS  
 DAGVTWYKDGMLQVPESEKFMVVESEGASRLTILGLTLEDAGQVTVAEAGASSAALRVREAPVLFKKKLEPQT  
 VEERTSVTLEVELTRPWEVKWTRNAAVLTPSENVEIRAEGARHCLVLRVSGFADRGFFGCETPDDKTQAKLN  
 VEMRQVRLVRLQVEVAKEQGTASMDVELSHAEEVGSWTRDGLRLQPGPKCHLAVQGGPVHILTL SALSALQVQDSG  
 LVAFRAEGVHTSARLIVTELPVSFTRVLQDVVATQKEKVTLECELSRPVDVRWLKDGV E L RAGKAIGIVAQGT  
 CRSLVIYRCETGDQGVYVCDALDAQTSASLRVQGRYTLIFRRVLAEDAGEVKFVAENAESRAHLRVKELPVT  
 LLRPLRDKIAMEKHRGVLECVSRASAQVRWFKGGVLELQSGPKYEVVSDGLYRKLVIINDVQPEDEDYTC DAG  
 NVKTSAQFFVVEEQSITIVRGLKDMTVM E PAPA W F E C E T S I P S V R P P K W L L G K T V L Q A G G N V G L E Q D G T V H R L T  
 LHKTCTMTGPVHFITIGKSRSSAQLVVSDIPVVLTRPLEPKAGRELQSVVLSCDFRPAPKAVQWYKDDTPLSP  
 SEKFKMALEGQMAELRILRLTPADAGVYRCQAGSAQSSAEVTV EAREVTVIQPLQDAEAMEEGRVCFSCELSH  
 KDEDIEWSLNGTPLYNDSFHEISH EGCLHTLV LKSVRQADHTGTVCATSPKVS SARLVVKGKPVVFLKALDDV  
 SAEERGLTLQCEVSDPEARVVRKDGVELGSPDKYDFLHKAGARGLTVHDL SHEDAGLTYCQVGSKETQSKV  
 SVHDLHVGITKRLKTVEVEKSEFCVLSHESPSDPAVWTVGGKTVGGSGHFHAVRQGRKYTLTVKDAALS  
 DAGEVVFVSVLGLTSKASLIIRERPVDITKPLEDQRTTLGEDVMLSCELSRAGTSVRWLKD GKAIRKSQKYDLL  
 SEGTRAVLVVRKASLKDSGEYTCETEASKSTAKLCVEEKANRFT EELADLQVEEKGRAVFTCKTEHPASVVTW  
 RKGLLELRASGKHVPSQEGTLTKLTINALERTSDTYTCDIGQARTQARLLVHGQKVRVIEDLEDTAVQEGSS  
 AKFCCRIPADYGPVHWF LDKTPLHSNELNEITVQPGGYHVLTLRQLALKDSGTVYFEAGDQRTS AALRVTEK  
 PSIFSRPLTDVTVTEGEDTLVCE TTTVDSSVRWTKDGKTLRPSARCQLSHEGCAQLLITATTPQDGGRYKC  
 EIGGASSSSIVRVHALPVRFRESLKDVEVPEGKAATLRCVLSVAAPVEWRHGDDVLKSSNKYS LRQEGAVLE  
 LVIRDLQPDQSGQYSCSFGDQTTSATLTVKTS SAQFVGLKRNKEATEGTTVTLRCELTK EAPVEWKKGTETLR  
 NGDKYSLKQDGA VCELQICSLLVADAGEYSCVCGQEKTSATLTVKALLVHFVRRRLRSKEATEGDTTLQCELS  
 KAAPVEWRKGTETLRDGD RYSLKQDGA VCELQIRSLTIADAGEYLCTCGQEKTSATLTVRGLPAKFIEDLRSQ  
 EATEGATAILRCELSKAAPVEWRKGSETLKDGD RYTLRQDGA VCELQIRGLAVVDTGTYS SLPKTFTEGLRNE  
 EATEGTMATLRCQMSKAAPVEWRKGSETLRDGD RYSLRQDGA MCELQIRGLTIEDSGEYTCVCGQEKTSATLS  
 VKALPPRFIEDLRSQEATEGTMATLRCQMSKAAPVEWRKGSETLGDGGRYSLRQNGAVCELQI HDLAVEDTGE  
 YSCVCGQEKTSATLNVKALPPKFTEGLKKEEATEGTMVTLRCQMSKEATVEWRKGAKT L SDGGRYSLRQDGA  
 MCELQICGLAVEDAGEYSCVCGQEKTSATLSVKALPPRFIEDLRSQEATEGTMATLRCQMSKAAPVEWRKGSET  
 LRDGD RYSLRQDGA VCELQIRDLAVEDAGEYLCVCGQEKTSATLSVKALPPRFIEDLRSQEATEGTMATLRCQ  
 MSKAAPVEWRKGSKTLRDGD RYSLRQDGA MCELQICDLAVEDTGDYSCVCGQEKTSATLSVKAPQVVFQQPLQ  
 NLQAEEGSMASLRCELSVPNAAMVWSKGGLELQGDTRREARQQGCVAELLLRDLRREDAGEYSCTCGSQTTS  
 TLMVTAAPVRFRLRELQAQDVDEGATARLRCELSREAVSVEWRKGS LQLFPCA K Y Q M V E G T T A E L L V H G V E Q E  
 DAGEYTC DAGHTQSIARLSVRAPKPKFKTDLQSTEQEAGGTARLCCQLSEAE PGT PVQWLKEGV E LHVGS KYE  
 MRRQGA VCELLIHGLEAKDTGEYACLVGGQKTLASLRVKEPEVTIVRGLVDM EVQADEDEVEFTCKV S QAGATD  
 VQWHLQGLPLQSNEVTEVAVLADGCTHV LQLKGV TLEDAGTVSFHVGG LSSSAQLTVRVPEVTVLEPLKDVQL  
 SEGQDAHFRCRLSRASGQEARWALGGVPLQCNE MN DITVEQGTLYLLTLHKVTLEDAGTITLQVGS CSSEAQL  
 KVTAKNTVLRGLE NVDALEGG EALFECQLSQPEVAHTWLLDDEPVHTSEKVEVVYFENGLRHLLLLKLNLPQ  
 DSCRRTVFLAGDVVTS AFLTVRGWRLEVLEPPHDASVKAGMQRFTCILSEAVPVGEATWYINGAAIQPDDTD  
 WTVT TDGSHHALTLSNAQPQHAGEVTF AARDAVASARLSVLALPDPPEAEVVG RSDHSVTL SWAPMSDGGG  
 GLCGYRVMKEASTGQWQLCHDLVPGPECVVDDLVPGKTYRFRVAAVGPAGAGEPVHL PQMVKIAPAPAPAPA  
 PAPAPETRQAVVEDICLELEVAADGGEVVDHKGTERIQPGGHFEVLSRGRQMLVILKFRTEDEQGEYRCGPI  
 QGLPSSGAATFNVVMTSGSGDEVPAQPSLPPEAAQEGEDLHLLWEALARKRRMSREPTLDSISELPEEDSRVQH  
 LRQEAEEETAPDLSEGYSTADELARTGEADLSHTSSDDES RAGT PSLV TY LK KAGGPGI S P L A S K H E A Q V T T S V  
 KPQKQOEPVVPTCPPPGDLSAADLMDPSLDKAAVKIQAAF KGYKVRKEMKQOEGPVFSRTFGDTEAQVGDVLR  
 LECVLATKTD MRACWLKDGI E L T D G R H Y H I D Q L K D G T C S L L V T G L A P T D S G R Y T C Q V S T K S G R V S H S A C V V V S

GTESEAESSGGELDDAFRRAARRLHRLFRTKSPAELSEEELFLSADEGPGEPEEPADWQTYREDEFVFCIRF  
 ESLAEARQAVTFCFRNMFATMGIGVEISLGEQGRGEMRIGKVAPTPTPAVPLAKTPGLQTSDAAPVFLTELQ  
 NQDVQDGYPMSFDCVVTGQPVPVSRWFKDGKLLLEDDHYMINEDQQGGHQLIITAVVPADMGVYRCLAENSMG  
 VSSTKAELRVELTSTDYDADAATETSSYFSAQGYLSSREQEGTESDEGQLPQVLEELKDLQVAPGTRLAKFQ  
 LKVKGYPAKLYWFKDQPLTSDHIRMTDKKTLHTLEIVSVTREDSDGQYAAIYISNAVGAAYSSARLLVRGPS  
 EPEEKPASDVHERLVPPRILEKFTPKKVKRGSSITFSVKVEGHPAPSVHWLKEEAKEGVLWIGPDTPGYTMAS  
 SSKQHSLVLLDVGRQHOGTYTCIATNPAGQALCSASLHISGLAKEEEQERVKEALISSFLOGTSQAVSAQMSE  
 SAGFADLVGQSKGESLVAEEAHSHLSLAEVGTEEFLOKLTSSQITEMVSAKISQAKLQVPGGDSDEETKTPSAS  
 PRHGRSRPSSVQESSSEEDGDSRGEIFDIYVVVTADYLPGLAEQDAIILREGQYVEVLDSAHPLRVLVTRTKP  
 TKSSPSRQGWVSPAYLDRKRLKLSPEWGPTEAPEFPGEAVSEDEYRTRLSVVIQELLSSEQAFVGELOFLSHH  
 MKHLERSPRVPAAVASQKTVIFRNVQDISHFHSSFLKELQCGCTDDVAMCFIKNQEAFAKEYLEFLVGRVQAE  
 SVVVSTPVQEFYKKAEEETLSAKDPTQPPPPPLQHYLEQPVVERVQKYQALLKELIRNKARNRQNCALLEQAYA  
 VVSALPQRAENKLVSLMENYPGTLEALGEPIRQGHFIVWEGAPGARMWPKGHNHRVFLFRNYLVICPKPRRDS  
 RTDFTSYVFRNMMKLSIDLNDQVEGDDRAFEVWHEREDSVRYLLQARTVIKNSWVKEICGIQORLAQPVW  
 RPPEFEEELADCTAELGETVKLACRVGTGTPKPIVSWYKDGKPVVEVDPHHILIEDPDGSCCTLIIDLNLTGIDSGQ  
 YMCFAASAAGNASTLGKILVQVPPRFVNVKVRATPFVEGEDAQITCTVEGAPYPQIRWYKDGTLAPGNRYRML  
 NEPRSGVLVLIQAASKEDLGHYECELVNRGLGSTRGGELYMQSAPALRARDQHHRREQIVAAVEVTEQETKVPK  
 KTVIIEETITTVVKSPPRGRQSPGKSPSRSSRSASPRRPGLLAPERLYPPGTSPSRRLEVEQGRKAPVPAL  
 YVTEAEVHAPASQSQPKWLEVEETIEVRVKKTGSRGASPVREMTSRGEGILFTLPGGI PGRDPNANNNSNNSV  
 YQEARTWGPVAVHVGEFFIFQVDSVGNVDWVAASPEPEQVRASQKEENTERQEGCSDGDENTFLMEEPQDTS  
 LQGRDPKILTHNGRVLTLADLEDYVQEGETFGCGDSTPSTPDEPPCEVSVLQREISEPTVGQPVLLNVGRPP  
 GTGATPSFFRPGSQVHSPESVFLREAWSGPVSAAPWTSSFHTHVQSSVDGSHGSKTEVSTQTVSFGAVGE  
 TVTLHIDPDGGEAPGPSQ\*

>rs217506487\_ENSMUSP00000158662\_c.836:A>GAGA\_p.R279R-ins  
 ENSMUST00000238202.2|Obscn-208|ENSMUSG00000061462|-  
 |chr11:g.58934759:T>TCTC

VTLEDAGTITLQVGSSEEAQLKVTEAALCLVRGLQNVDFVAGEVATFSCVSVRAGGPEARWLLDGTLLQNSP  
 ESAITVQEGIVHSLTSLGLGVADSGTITFRGTPLVSTAKLLVKDPTVEVVSAMQDLVVEEGGSAELLCQYSRP  
 VQATWKMNEREVCADGHRVIEQDWTVARLTLRPLPCDSGIYSCEAAGTRVVALLOVQAKNTVLRGLENVDA  
 LEGGEALFECQLSQPEVAHTWLLDDEPVHTSEKVEVVYFENGLRHLLLLKLNKPKQDSCRRTVFLAGDVVTS  
 FLTVR

>rs51583444\_ENSMUSP00000158795\_c.15894:G>C\_p.E5299Q

ENSMUST00000238536.2|Obscn-210|ENSMUSG00000061462|-|chr11:g.58934935:C>G  
 MDHSFSGAPRFLTRPKAFVSVGKDATLSCQIVGNPTPHVSWEKDRQPVVEAGARFRLAQDGDVYRLTILDLAL  
 GDSGQYVCRARNAIGEFAAVGLRVDSEGTCAEQAPHFLLRPTSIRVREGADATFRCRVGGSPQPAVSWSKDG  
 RRLGPPDAPHVRVEEHGESSALRIR SARPRDGGTYEVRAENPLGSASAAAALVVDSDAEVAGPPGTSTATLLA  
 HLQQRREAMRAEGIPPSPPGAGTRTCTVTEGKHARLSCFVTGEPKPEVWKKDGQLVTEGRRHVVEDEQENF  
 VLKILFCKQSDRGLYTCTASNLVGQTYSSVLVVVREPTVPFKKRLQDLEVREKESATFQCEVAQAPATEAAWFK  
 EETRLWASAKYDIEEGTERRLTVRNVSADDDAVYICETTEGSRVVAELSVQGNLTKLPRKTAVRTGDTAIF  
 WVAVLAVPEGPVWRNRNQEEMVAGGRVAITAEGTCHTLTI FQCTLEDMGEVAFVSGGCRTTTQFCVSAAPRRPPL  
 YPPADPVVKAKTESSVTLWSAPPHGDRPVTIDGYVLEKRLKLGAYAWSRCHEAGWLATTEFTITGVAAEEDGFQ  
 FRVSAINHFGQGPYLEFPGTMHLVPLAVKTPKAVEAVEGGEVTFVSDLTVASSGEWFLDGEALKASSIYVI  
 RCDRTRHMLTIREVPARLHGAQLKVFVANGIETSIQMVVRAALGLPSSKLPAAAAREVLAQLHHEEAQLLAE  
 QAAAVTWLKDGRELSLGPKYEMQVSAGRRALLVRDVAQDDAGLYECVSRGSRRTAYQLLVQDITDGYRDWGPAG  
 PQKHMCKCAGAKIARYLGSSCYRFLQYDKGVVHWEAALDTRQKGTSSCSLHEKPKLVFAKQQAHSSEVKA  
 AGNSATLSCEVTQAQTEVTWFKDGKLLSSSSKVRMEASGCSRRLVVQQAGKADAGEYSCEAGGQKLSFRLDVA  
 EPKLVFAKQQAHSSEVKAEGASATLSCEVAQAQTEVTWFKDGKLLSSSSKVRMEASGCSRRLVVQQAGKADA  
 GEYSCEAGGQKLSFRLDVAEPKMFVFAKEQQARSEVKAEGASATLSCEVAQAQTEVTWFKDGKLLSSSSKVRM  
 EASGCSRRLVVQQAGKADAGEYSCEAGGQKLSFRLDVTEPKLVFAKEQQARSEVKAEGVNSATLSCEVAQAQ  
 EVTWFKDGKLLSSSSKVRMEASGCSRRLVVQQAGKADAGEYSCEAGGQKLSFRLDVAEPKLVFAKEQQARSEV  
 KAEAGNSATLSCEVAQAQTEVTWFKDGKLLSSSSKVRMEASGCSRRLVVQQAGKADAGEYSCEAGGQKLSFHL  
 DVTEPKLVFAKEQQAHSEVKAEGASATLSCEVAQAQTEVTWFKDGKLLSSSSKVRMEASGCSRRLVVQQAGK  
 ADAGEYSCEAEGQKLSFRLDVAEPKLVFAKEQQARSEVKAEGASATLSCEVAQAQTEVTWFKDGKLLSSSSK  
 VRVEASGCSRRLVVQQAGKADAGEYSCEAGGQKLSFRLDVAEPKLVFAKEQQANSEVKAEGASATLSCEVAQ  
 AQTEVTWFKDGKLLSSSSKVRVEASGCSRRLVVQQAGKADAGEYSCEAGGQKLSFRLDVAEPKLVFAKEQQAH  
 SEVKAEGASATLSCEVAQAQTEVTWFKDGKLLSSSSKVRVEASGCSRRLVVQQAGKADAGEYSCEAGGQKLS  
 FRLDVAEPKLVFAKEQQAHSEVKAEGASATLSCEVAQAQTEVTWFKDGKLLSSSSKVRVEASGCSRRLVVQQ  
 AGKADAGEYSCEAGGQKLSFRLDVAEPKLVFAKEQQAHSEVKAEGASATLSCEVAQAQTEVTWFKDGKLLSS

SSKVRVEASGCSRRLVVQQAGKADAGEYSCEAGGQKLFRLDVAEPKLMFAKEQQAHSEVKAEAGASATLSCE  
VAQAQTEVTFWFKDGKLLSSSSKVRVEASGCSRRLVVQQAGKADAGEYSCEAGGQKLSFRLDVAEPKLVFAKEQ  
QAHSEVKAEAGASATLSCEVAQAQTEVTFWFKDGKLLSSSSKVRVEASGCSRRLVVQQVQKADAGEYSCEARGQ  
KLSFRLDVADTRLMFAKEQQARTEVKAEAGNSATLSCEVAQAQTEVTFWFKDGKLLSSSSKVRVEASGCSRRLV  
VQQAGKADAGEYSCEAGGQKLSFRLDVAEAEESQIPERPSRREPLVVKEHETIILTATIAAPSVAAVTWLKDG  
EIRRSKRHEATSLGDTHTLTVRGAQVLDIAIYSCRVGKEGQDFPVQVEEVAAKFSKPLEPEVEGELGGTVMLVC  
ELSPEQAEVWRCGNTQLRPGKRFQMTSEGPRTTLTVSGLREDDAEYVCESTRDDRTSARLTVKVPVVKFTS  
GLSAMVAEEGQEAFTQCQVSPSDAGVTWYKQDGMQLQPSSEKFMVESGASRSLTILGLTLEDAGQVTEAEGAS  
SSAALRVREAPVLFKKKLEPQTVVEERTSVTLEVALTRPWPEVKWTRNAAVLTPSENVEIRAEGARHCLVLRV  
GFADRGGFFGCETPDDKTQAKLNVEMRQVRLVRLGQVEEVAKEQGTASMDVELSHAEVEGWSWTRDGLRLQPGPKC  
HLAVQGPVHILTLALSALQPDGSLVAFRAEGVHTSARLIVTELPVSFTRVLQDVVATQKEKVTLECELSRPVDV  
RWLKDGVLELRAGKAIGIVAQGTCSLVIYRCETGDQGVYVCDALDAQTSASLRVQGRTYTLIFRRLAEDAGE  
VKFVAENAESRAHLRVKELPVTLLRPLRDKIAMEKHGVLCEQVSRASAVRWFVKGVELQSGPKYEVVSDGL  
YRKLVINVDVQPEDEDTYTCDAENVKTSAQFFVVEEQSITIVRGLKDMTVMPEPAPAWFECETSIPSVRPPKWL  
KTVLQAGGNGLEQDGTVHRLTLHKTCSTMTGPVHFTIGKSRSSAQLVVDIPVVLTRPLEPKAGRELQSVVL  
SCDFRPAPKAVQWYKDDTPLSPSEKFKMALEGQMAELRILRLTPADAGVYRCQAGSAQSSAEVTEAREVTVI  
QPLQDAEAMEEGRVCFSCELSHKDEDIEWSLNGTPLYNDSFHEISHEGLHTLVLKSVRQADTGTVCATSPKV  
SVSARLVVKGKPVVFLKALDDVSAEERGTTLTQCEVSDPEARVWVRKDGVELGSDKYDFLHKAGARGLTVHD  
LSHEDAGLYTCQVGSKETQSKVSVHDLHVGITKRLKTVLEVLEGESECFEVLSSHESPSDPAVWTVGGKTVGGS  
GHFHAVRQGRKYTLTVKDAALSDAGEVVSFVGLTSLKASLIIRERPVDTKPLEDQRTTLGEDVMLSCELSRA  
GTSVRWLKDGKAIRKSQKYDLLSEGTRAVLVVRKASLKDSGEYTCETEASKSTAKLCEVEKANRFTTELADLQ  
VEEKGRAVFTCKTEHPASVVTWRKGLLELRASGKHVPSQEGTLKLTINALERTDSDTYTCDIGQARTQARLL  
VHGQKVRVIEDLEDTAVQEGSSAKFCCRIAPADYGPVHWFLDKTPLHSNELNEITVQPGGYHVLTLRQLALKD  
SGTVYFEAGDQRTSAAALRVTEKPSIFSRPLTDVTVTEGEDTLVCETTTTVDSVVRWTKDGKTLRPSARCQLSH  
EGCQAQLLITATTPQDGGRYKCEIGGASSSSIVRVHALPVRFRFRESLKDVEVPEGKAATLRCVLSVAAPVEWR  
HGDDVLKSSNKYSLRKEGAVLELVIRDLQPDGSGQYSCSFGDQTTSATLTVKTSAAQFVKGKLRNKEATEGTT  
TLRCELTKREAPVLFKKKLEPQTVVEERTSVTLEVALTRPWPEVKWTRNAAVLTPSENVEIRAEGARHCLVLRV  
VRRLSKEATEGDTTTLQCELSKAAPVEWRKGTETLRDGDYSLKQDGAVALCELQIRSLTIADAGEYLCTCGQE  
KTSATLTVRALPAKFKDSLKNEEATEGTTATLSCELSKAAPVTKKGPKTLQSGDKYVLRQDGAVALCELQIHGL  
TMADAGEYSCVCGQEKTSATLTVRGLPAKFIEDLRSQEATEGATAILRCELSKAAPVEWRKGSSETLKDGDYR  
LRQDGAVALCELQIRGLAVVDGTYSLSLPTKFTTEGLRNEEATEGTMATLRCQMSKAAPVEWRKGSSETLRDGD  
LRQDGAVALCELQIRGLTIEDSGEYTCVCGQEKTSATLSVKALPSRFIEDLRSQEATEGTMATLRCQMSKTAPVE  
WKKGSETLRDGGYSLRQDGPVCELQICDLAVEDAGEYSCVCGQEKTSATLSIKALPPRFIEDLRSQEATEG  
MATLRCQMSKAAPVEWRKGSSETLGDGGYSLRQNGAVCELQIHDLAVEDTGEYSCVCGQEKTSATLNVKALPP  
RFIEDLRSQEATEGTMATLRCQMSKAAPVEWRKGSSETLRDGGYSLRQDGAVALCELQIHDLVEDAGQYSCVCG  
QEKTSAVLTVDALPPKFTTEGLKKEEATEGTMVTLRQMSKEATVEWRKGAKTLSDGGYSLRQDGAVALCELQI  
GLAVEDAGEYSCVCGQEKTSATLSVKALPPRFIEDLRSQEATEGTMATLRCQMSKAAPVEWRKGSSETLRDGD  
YSLRQDGAVALCELQIRDLAVEDAGEYLCVCGQEKTSATLSVKALPPRFIEDLRSQEATEGTMATLRCQMSKAAP  
VEWRKGSSETLRDGDYSLRQDGAVALCELQICDLAVEDTGDYSCVCGQEKTSATLSVKALPPRFIEDLRSQEARE  
GTVATLRCRMSKAAPVEWRKGSSETLKDGDYSLRQEGNLCELQIRDLAVEDTEEYSCVCGQEKTSATLSVKAL  
PAKFIEDLRSQEAPESSTVTLRCKLSKASVWKKGSETLRNGARYSLRQDGAVALCELQIRDLTVEDTGEYSCT  
CGQERTSATLSIMAPQVVFQQPLQNLQAEEGSMASLRCELSVPAAMVWSKGGLELQGDTRREARQQGCVAEL  
LLRDLRREDAGEYSCTCGSQTTSATLMVTAAPVRFLRELQAQDVDEGATARLRCELSREAVSVEWRKGSQQLF  
PCAKYQMVQEGTTAELLVHGVEQEDAGEYTCDAHTQSIARLSVRAPKPKFKTDLQSTEQEAGGTARLCCQLS  
EAEFGTPVQWLKEGVELHVGSKYEMRRQGAVALCELLIHGLEAKDTGEYACLVGGQKTLASLRVKEPEVTVRGL  
VDMEVQADEDEFTCKVSQAGATDVQWHLQGLPLQSNVTEVAVLADGCTHVLQKGLVLEAGTVSFHVGGL  
SSSAQLTVRVPEVTVLEPLKDVQLSEGQDAHFRCLRSRASGQEARWALGGVPLQCNEMNDITVEQGTLYLLTL  
HKVTVLEAGTITLQVGSSEEAQLKVTAKNTVLRGLENVDALQGGALFECQLSQPEVAHAHTWLLDDEPVHTS  
EKVEVVYFENGLRHLLLLKLNKPKQDSCRVTFLAGDVVTSFAFLTVRGRLEVLPEPPHDA SVKAGMQVRFTCILS  
EAVPVGEATWYINGAAIQPDDTDWTVTTDGSHHALTL SNAQPQHAGEVTF AARDAVASARLSVLALPDPPEDA  
EVVGRSDHSVTL SWVAPMSDGGGGLCGYRVMKEASTGQWQLCHDLVPGPECVVDLVP GKTYRFRVAAVGPA  
GAGEPVHLPQMVKIAPAPAPAPAPAPAPAPETRAVVGEDICLELEVAADGGEVVWHKGTERRIQPGGHFEVLS  
RGQRQMLVIKGFRTEDQGEYRCGPIQGLPSSGAATFNVVMTSGSGDEVPAQPSLPPEAAQEGDLHLLWEALAR  
KRMSREPTLDSISELPEEDSRVQHLRQEAETAPDLSEGYSTADELARTGEADLSHTSSDDESRACTPSLVT  
YLKKAAGPGISPLASKHEAQVTSVKPQKQEPVVPTCP PPGDLSAADLMDPSLDKAAVKIQAAFKGYKVRKE  
MKQQEGPVFSRTFGDTEAQVGDVLRLECVLATKTD MRACWLKDGIELTDGRHYHIDQLKDGTCSSLVVTGLAPT  
DSGRYTCQVSTKSGRVSHSACVVVSGTESEAESSSGGELDDAFRRAARRLHRLFRTKSPAELSEEELFLSADE  
GPGEPEEPADWQTYREDENFVCIRFESLAEARQAVTCFRNMFMATMIGVEISLGEQGPGRGEMRIGKVAPTVT

PAVPLAKTPGLQTSDAAPVFLTELQNDVQDGYPMSFDCVVTGQPVPSVRWFKDGKLEEDDHYMINEDQGGG  
HQLIITAVVPADMGVYRCLAENSMGVSSTKAELRVELTSTDYDTAADATETSSYFSAQGYLSSREQEGTESDE  
GQLPQVLEELKDLQVAPGTRLAKFQLKVKGYPAKLYWFKDGPPLTSDHIRMTDKKTLHLEIVSVTREDSDG  
QYAAYSNAVGAAAYSSARLLVRGPSEPEEKPPASDVHERLVPPRILEKFTPKKVKRGSSITFSVKVEGHPAPSV  
HWLKEEAKEKGVLWIGPDTPGYTMASSSKQHSVLVLDVGRQHGTYTTCIATNPAGQALCSASLHISGLAKEEEQ  
ERVKEALISSFLQGTSAVSAQMSESAFADLVGQSKGESLVAEEAHSHLSLAEVGTTEFLQKLTSTQITEMVS  
AKISQAKLQVPGGDSDEETKTPSASPRHGRSRPSSSVQESSESEDGDSRGEIFDIYVVTADYLPGLAEQDAI  
ILREGQYVEVLDSAHPLRVLVTRKPTKSSPSRQGWVSPAYLDRKRLKLSPEWGPTEAPEFPGEAVSEDEYRTRL  
SSVIQELLSSQAFVQELQFLESHHMKHLERSPRVPAAVASQKTVIFRNVQDISHFHSSFLKELQCCTDDDDV  
AMCFIKNQEAFAKEYLEFLVGRVQAESVVVSTPVQEFYKKYAEETLSAKDPTQPPPPPLQHYLEQPVERVQKYQ  
ALLKELIRNKARNRQNCALLEQAYAVVSALPQRAENKLHVSLMENYPGTLEALGEPTRQGHFIVWEGAPGARM  
PWKGHNHRVFLFRNYLVICKPRRDSRTDFTSYVFRNMMKLSSIDLNDQVEGDDRAFEVWHEREDSVRKYLLQA  
RTVLIKNSWVKEICGIQQLAQPVWRPPEFEEELADCTAELGETVKLACRVTGTTPKPIVSWYKDGKPVVEVDPH  
HILIEDPDGSLTILDLNLTGIDSGQYMCFAASAAGNASTLGKILVQVPPRFVNVKVRATPFVEGEDAQITCTVE  
GAPYPQIRWYKDGTLAPGNRYRMLNEPRSGVLVVIQAASKEDLGHYECELVNRGLSTRRGGELYMQSPALR  
ARDQHHREQIVAAVEDTSTVEGSAHSAQDQADQQAASVLRLLGSEALGSPSGDLPNTRQSEPPAFEEAASQIP  
GAASGTPEVSQPGTHKLEQETSSSGSQGWTPVIRVEGTAWPGAGTGQLLLDVHSQVIMETTQRTYVQAPDT  
GVTRAPSMQVTIEDVQVQVGDMAQFDAVIEGHPPPIVITWYKGSTQLTSSARLSQRQDGTITSLVLTDVAPHDA  
GVYTCVANNAGGQVLCKAELLVHGGDKLDAENQVYRRKLHSFYDVQEEIGRGVFGFVKRVQHKGNKMFCAAKF  
IPLRSKTRAQAYQERDILATLGHPLVTGLLDQFETRKTLLILELCSSEELLDRLFKKGVVTEAEVKVYIQQL  
VEGLHLYLHSHGILHLDIKPPNILMVHPAREDIKICDFGFAQKITPSEPOYSKYGSPEFVSPEIEQNPFVSEGS  
DIWAMGVI SYLSLTCSSPFAGESDRATLLNVLEGRVSWSSPTAAHLSSEDAKDFIKATLQRTPRARPSTSQCLA  
HPWFLKSMPEAAEHFINTKQLKFLARSRWQRSLMSYKSI LVMRSIPPELLQGPPDPSLGLVARHLRGEASGAS  
SSSSSSDNELAPFARAKSLPPSPVTHSPLLHPRGFLRPSASLPEETEASMTADAAVPASPQASAGPPASPGCV  
PRHSVSISSLFYQQAGEGAERGNKTSGAKRHPARRRHLKGGYIARALPGLREPLMEYSLLEEEAAREEQASLM  
TKTPSFETALRLLPSSSVREVPRGRSHLDNPPVLTGSPPEACKQLLFPSTGLTHETAKDRGHKEGFLQESV  
FPFPMMSGDSRPGKQEGSSQDSRCRGPASSCHSELGSGSQCCEGCPSSSQSLGSLPPPQSLKKELESTSCGFLFSEQ  
PQAAPFPPTQVSPLLGSEKEPQDGSLSSEGPVVPVSSSPGSASQVDASLDTEGLSEAGDTCDFTPPPQRPQEQAT  
TRKFSLESRGGYAGVAGYGTFAFGGDAGGMLGQGPLWARMAWAVS QSSEEQDEAATESPQPLES LGPIAEASG  
VPLRTPSLTPWEEVEQVSLVQIRDLSGDAEAADTISLDISEVDPAYLNLSDLYDIKYLPEFEMI FRRVPKPI  
EQPESPGSETEAGQGLADFLLEAAWPWPGEGLGLRAGLEITEEPEEPGDLEALLGEEAVGRKRKWSPSRGLFQF  
PGRCLSGEEPVELGLRQRVKASMAHISRI LKGRPEGPEREPPRKKAGLASFRLSGLKGRDQELSDEAVVLGQ  
SVTLACQVLAQPTAQATWSKDGVLLESSGHLLISSTLKNFQLLTI LVVKEEDLGTYTCCVSNPLGTAVTTGVL  
RKAERPSSSRPEVEGELYKDAVLLVWKPVESECGPVTYIVQCCIEGGSWTTLASDISDCCYLTGKLSRGGMYIF  
RTACVSKAGMGPIYSSPSEQVLLGGPNHLASEEESRRGRPAQLLPSTKTFQMQIRRRGRFVVRQCREKASGR  
ALAAKIVPYQPEDKTAVLEREYALKRHLHHPHLAQLHAAYLSRPHLVLILELCSGPELLPSLAERESYSESDVK  
DYLWQMLSATQYLHAQHILHLDLRSENMMVTEYNLLKVIDLGNQSLDQEKVPAPENFKDYLETMAPELLEGQ  
GAVPQTDIWAIGVTAIFIMLSGEYPESESETRDLQKGLRKLIRLSRCYAGLSGGAVAFLLQSSLCAQPWGRPCA  
STCLQCGLWTEEGPTGSRPTVPTVPTVRLRAVFREREKRRALLYKKNLAQVR\*  
>rs51583444\_ENSMUSP00000038264\_c.14010:G>C\_p.E4671Q  
ENSMUST00000047441.14|Obscn-202|ENSMUSG00000061462|-|chr11:g.58934935:C>G  
MDHSFSGAPRFLTRPKAFVVSVGKDATLSCQIVGNPTPHVSWEKDRQPVVEAGARFLAQDGDVYRLTILDLAL  
GDSGQYVCRARNAIGEAFAAVGLRVDSEGTCAEQAPHFLLRPTSIRVREGADATFRCRVGGSPPAVSWSKDG  
RRLGPPDAPHVRVEEHGESSALRIRSARPRDGGTYEVRANPLGSASAAAALVVDSDAEVAGPPGTSTATLLA  
HLQQRREAMRAEGIPPSPPGAGTRTCTVTEGKHARLSCFVTGEPKPEVWKKDQGLVTEGRRHVVEDEQENF  
VLKILFCKQSDRGLYTCTASNLVGQTYSSVLVVREPTVPFKKRLQDLEVREKESATFQCEVAQPATEAAWFK  
EETRLWASAKYDIEEEGTERRLTVRNVSADDDAVYICETTEGSRVAELSVQGNLTKLPRKTAVRTGDTAIF  
WVELAVPEGPVRWLRNQEEMVAGGRVAITAEGTCHTLTIFQCTLEDMGVAFVSGGCRTTTQFCVSAPRRPPL  
YPPADPVVKAKTESSVTLSSWAPPHGDRPVTIDGYVLEKRKLGAAYAWSRCHEAGWLATTEFTITGVAAEGDFQ  
FRVSAINHFGQGPYLEFPGTMHLVPLAVKTPLKAVEAVEGGEVTFVSDLTVASSGEWFLDGEALKASSIYVI  
RCDRTRHMLTIREVPARLHGAQLKFVANGIETSIQMVVRAALGLPSSKLPAAAAAREVLAQLHEEAQLLAEALS  
QAAAVTWLKDGRELSLGPKEYMQVSAGRALLVRDVAQDDAGLYECVSRGSRRTAYQLLVQDITDGYRDWGPAG  
PQKHMCKCAGAKIARYLGSSCYRFLQYDKGVWHWLEAALDTRQKGTSSCSLHEKPKLVFAKQQAHSEVKA  
AGASATLSCEVAQAQTEVTFWKDGGKLSSSSKVRMEASGCSRRLVVQQAGKADAGEYSCEAGGQKLSFRLDVA  
EPKMVFAKEQQARSEVKAEGASATLSCEVAQAQTEVTFWKDGGKLSSSSKVRMEASGCSRRLVVQQAGKADA  
GEYSCEAGGQKLSFRLDVTEPKLVFAKEQQARSEVKAEGVNSATLSCEVAQAQTEVTFWKDGGKLSSSSKVRM  
EASGCSRRLVVQQAGKADAGEYSCEAGGQKLSFRLDVAEPKLVFAKEQQARSEVKAEGVNSATLSCEVAQAQ  
EVTWTFKDGKLSSSSKVRMEASGCSRRLVVQQAGKADAGEYSCEAGGQKLSFRLDVTEPKLVFAKEQQAHSEV



KAEAGASATLSCEVAQAQTEVTFWKDGKLLSSSSKVRMEASGCSRRLVVQQAGKADAGEYSCEAEGQKLSFRL  
 DVAEPKLVFAKEQQARSEVKAEGASATLSCEVAQAQTEVTFWKDGKLLSSSSKVRVEASGCSRRLVVQQAGK  
 ADAGEYSCEAGGQKLSFRLDVAEPKLVFAKEQQANSEVKAEGASATLSCEVAQAQTEVTFWKDGKLLSSSSK  
 VRVEASGCSRRLVVQQAGKADAGEYSCEAGGQKLSFRLDVAEPKLVFAKEQQAHSEVKAEGASATLSCEVAQ  
 AQTEVTFWKDGKLLSSSSKVRVEASGCSRRLVVQQAGKADAGEYSCEAGGQKLSFRLDVAEPKLVFAKEQQAH  
 SEVKAEGASATLSCEVAQAQTEVTFWKDGKLLSSSSKVRVEASGCSRRLVVQQAGKADAGEYSCEAGGQKLS  
 FRLDVAEPKLVFAKEQQAHSEVKAEGASATLSCEVAQAQTEVTFWKDGKLLSSSSKVRVEASGCSRRLVVQQ  
 AGKADAGEYSCEAGGQKLFRLDVAEPKLVFAKEQQAHSEVKAEGASATLSCEVAQAQTEVTFWKDGKLLSS  
 SSKVRVEASGCSRRLVVQQAGKADAGEYSCEAGGQKLSFRLDVAEAEESQI PERPSRREPLVVKHEHTIILTAT  
 IAAPSVAAVTWLKDGV EIRRSKRHEATSLGDTHLTVRGAQVLD SAIYSCRVGKEGQDFPVQVEEVAAKFSKP  
 LEPEVEGELGGTVMLVCELSPEQAEVWRCGNTQLRPGKRFQMTSEGPRRTLTVSGLREDDAEYVCESRDDRT  
 SARLTVKVPVVKFTSGLSAMVAEEGQEA TFQCVVSPSDAGVTWYKDMQLQ PSEKFMVMEVSGASRSLTILGL  
 TLEDAGQVTVEAEGASSAALRVREAPVLFKKKLEPQTVEERTSVTLEVELTRPWPVEVKWTRNAAVLTPSENV  
 EIRAEGARHCLVLRVSVGFADRGFFGCETPDDKTQAKLNVEMRQVRLVVRGLQEVEAKEQGTASMDVELSHA EVE  
 GSWTRDGLRLQPGPKCHLAVQGPVHIL TLSALQPQDSGLVAFRAEGVHTSARLIVTELPVSFTRVLQDVVATQ  
 KEKVTLECELSRPVDVRLWKDGV E L RAGKAI GIVAQGTCSRSLVIYRCETGDQGVVCDALDAQTSASLRVQGR  
 TYTLIFRRVLAEADAGEV KFVAENAESRAHLRVKELPVTLLRPLRDKIAMEKHRGVLECCQVSRASAQVRWFKGG  
 VELQSGPKYEVVSDGLYRKLVIN DVQPEDEDTYTCDAGNVKTSAQFFVEEQSITIVRGLKDMTVMPEPAPAWFE  
 CETSIPSVRPPKWL LGKTVLQAGGNVGLQDGT VHRLLT LHKTCSTMTGPHVFTIGKSRSSAQLVVS DIPVVL T  
 RPLEPKAGRELQSVVLSCDFRPAPKAVQWYKDDTPLSPSEKFKMALEGQMAELRILRLTPADAGVYRCQAGSA  
 QSSAEVTVAEAREVTVIQPLQDAEAMEEGRVCFSCELSHKDEDIEWSLNGTPLYNDSFHEISHEGCLHTLVLS  
 VRQADTGTVCATSPKVSVSARLVVKGKPVVFLKALDDVSAEERGTTLQCEVSDPEARVVWRKDGVELGPSDK  
 YDFLHKAGARGLTVHDL SHEDAGLYTCQVGSKETQSKVSVHDLHVGITKRLKTVEVLEGECSFCVLSHESP  
 SDPAVWTVGGKTVGGSGHFHAVRQGRKYTLTVKDAALSDAGEVVF SVLGLT SKASLIIRERPVDITKPLEDQR  
 TTLGEDVMSCELSRAGTSVRWLKDGKAI RKSQKYDLLSEGTRAVLVVRKASLKDSGEYTCETEASKSTAKLC  
 VEEKANRFTTEELADLQVEEKGRAVFTCKTEHPASVVTWRKGLLELRASGKHVPSQEGTLTKLTINALERTSD  
 TYTCDIGQARTARLLVHGQKVRVIEDLED TAVQEGSSAKFCCL IAPADYGPVHWFLDKTLPLHSNELNEITVQ  
 PGGYHVLT LRQLALKDSGTVYFEAGDQRTSAALRVTEKPSIFSRPLTDVTVTEGEDLTLVCETTTVDSSVRWT  
 KDGKTLRPSARCQLSHEGCAQLLI TATTPQDGGRYKCEIGGASSSSIVRVHALPVRFRESLKDVEVPEGKAA  
 TLRCVLSVAAPVEWRHGDDVLKSSNKYSLRQEGAVLELVIRDLQPDGSGQYSCSFGDQTT SATLTVKTS SAQ  
 FVGKLRNKEATEGTTVTLRCELTK EAPV EWKKG TETLRNGDKYSLKQDGAVCELQICSLLVADAGEYSCVCGQ  
 EKT SATLTVKALLVHFVRR LRSKEATEGDTTTLQCELSKAAPVEWRKGTETLRDGD RYSLKQDGAVCELQIRS  
 LT IADAGEYLCTCGQEKT SATLTVRALPAKFKDSLKNEEATEGTTATLSCELSKAAPVTWKKGPKTLQSGDKY  
 VLRQDGAVCGLQIHGLTMADAGEYSCVCGQEKT SATLTVRGLPAKFIEDLRSQEATEGATAILRCELSKAAPV  
 EWRKGETLKDGD RYTLRQDGAVCELQIRGLAVVDGTYS SLP TKFTEGLRNEEATEGTMATLRCQMSKAAPV  
 EWRKGETLRDGD RYSLRQDGAMCELQIRGLTIEDSGEYTCVCGQEKT SATLSVKALPPRFIEDLRSQEATEG  
 TMATLRCQMSKAAPVEWRKGETLGDGGRYSLRQNGAVCELQIHDLAVEDTGEYSCVCGQEKT SATLNVKALP  
 PRFIEDLRSQEATEGTMATLRCQMSKAAPVEWRKGETLRDGGRYSLRQDGAVCELQIHDL DVEDAGQYSCVC  
 GQEKTSAVLTVDALPPKFTEGLKKEEATEGTMVTLRQMSKEATVEWRKGAKTLS DGGRYSLRQDGAMCELQI  
 CGLAVEDAGEYSCVCGQEKT SATLSVKALPPRFIEDLRSQEATEGTMATLRCQMSKAAPVEWRKGSKTLRDGD  
 RYSLRQDGAMCELQICDLAVEDTGDYSCVCGQEKT SATLSVKAPQVVFQQPLQNLQAEEGSMASLRCELSV PN  
 AAMVWSKGGLELQGDTRREARQQCVAELLLRDLRREDAGEYSC TCGSQTTSATLMVTAAPVRFRLRELQAQDV  
 DEGATARLRCELSREAVSVEWRKGS LQ LFP CAKYQMVQEGTTAE LLVHGVEQEDAGEYTC DAGHTQS IARLSV  
 RAPKPKFKTDLQSTEQEAGGTARLCCQLSEAEPTPVQWLKEGVELHVGSKYEMRRQGA VCELLIHGLEAKDT  
 GEYACLVGQKTLASLRVKEPEVTIVRGLVDMEVQADEDEFTCKVSQAGATDVQWHLQGLPLQSN E VTEVAV  
 LADGCTHVLQ LKGV TLEDAGTVSFHVGG LSSAQLTVRVPEVTVLEPLKDVQLSEGD A HFRCRLSRASGQEA  
 RWALGGVPLQCNEMNDITVEQGTLYLLTLHKVTLEDAGTITLQVGS CSSEAQLKVTAKNTVLRGLENVDALQG  
 GEALFECQLSQPEVA AHTWLLDDEPVHTSEKVEVVYFENGLRHLLLLLKNLKPQDSCRVTFLAGDVVTS AFLTV  
 RALPDPPEDAEVVGRSDHSVTL SWVAPMSDGGGGLCGYRVMKEASTGQWQLCHDLVPGPECVDDLVPGKTY  
 RFRVAAVGPAGAGEPVHLPQMVKIAPAPAPAPAPAPAPAPETRAVVGEDI CLELEVAADGGEVVWHKGTERRI  
 QPGGHFEVLSRGRQMLVIKGFRTEDQGEYRCGPIQGLPSSGAATFNVMVTS GSGDEVPAQPSLPPEAAQEGD  
 LHLLWEALARKRRMSREPTLDSISELPEEDSRVQHLRQEAETAPDLSEGYSTADELARTGEADLSHTSSDDE  
 SRAGTYSLVTYLKKAGGPGISPLASKHEAQVTT SVKPKQKQEQEPVVP TCPPPGDLSAADLMDPSLDKAAVKIQA  
 AFKGYKVRKEMKQGEQPVFSRTFGDTEAQVGDVLRLECKLQATKTD MRACWLKDGIELTDGRHYHIDQLKDGTC  
 SLLV TGLAPTD SGRYTCQVSTKSGRVSHSACVVVSGTESEAESSGGELDDAFRAARRLHRLFRTKSPAELS  
 EEELFLSADEGPGEPEEPADWQTYREDEFV CIRFESLAEARQAVTCFRNM FATMGIGVEISLGEQGPGRVEM  
 RIGKVAPT VTPAVPLAKTPGLQTS DAAPVFLTELQNDVQDGYPMSFDCVVTGQPVPSVRWFKDGKLL EEDDH  
 YMINEDQQGGHQLIITAVVPADMGVYRCLAENSMGVSSTKAE LRVELTSTDYDTA ADATETSSYFSAQGYLSS

REQEGTESDEGQLPQVLEELKDLQVAPGTRLAKFQKLVKGYAPKLYWFKDQPLTSDHIRMTDKKTLHTLE
IVSVTREDSGQYAAIYISNAVGAAYSARLLVVRGPEPEEKPASDVHERLVPPRILEKFTPKVKRGSSITFSV
KVEGHPAPSVHHLKEEAEGVWLVIGPDTPGYTMASSSKQHSVLVLDVGRQHOGTYTCIATNPAGQALCSASLH
ISGLAKEEEEQERVKEALISSFLQGTSAQVSAQMSSESAGFADLVGQSKGESLVAAEEAHSHLSLAEVGTTEEFLOK
LTSQITEMVSAKISQAKLQVPGGDSDEETKTPSASPRHGRSRPSSSVQESSSESEDGDSRGEIFDIYVVTADY
LPLGAEQDAIILREGQYVEVLDLPLRVLVVRTKPTKSSPSRQGWVSPAYLDKRLKLSPEWGPTEAPEFPGEA
VSEDEYRTRLSSVIQELLSSEQAFVGELOFLESHHMKHLERSPRVPAAVASQKTVIFRNVQDISHFHSSFLKE
LQCGGTDDDVAMCFIKNQEAFAFEKYLEFLVGRVQAESVVVSTPVQEFYKKYAEETLSAKDPTQPPPPPLQHYLE
QPVERVQKYQALLKELIRNKARNRQNCALLEQAYAVVSALPQRAENKLVSLMENYPGTLEALGEPVIRQGHFI
VWEGAPGARMVWKGHNRHVLFVFRNYLVICKPRRDSRTDTFSYVFRNMMKLSSIDLNDQVEGDDRAFEVWHERE
DSVRKYLQARTVIKNSWVKEICGIQQRLAQVWRPPEFEELADCTAELGETVKLACRVTGTPKPIVSWYK
DGKPEVEVDPHHILIEDPDGSCITLIDNLTGIDSGQYMCFAASAAGNASTLGKILVQVPPRFVNKVRATPFVEG
EDAQITCTVEGAPYPQIRWYKDGTLAPGNRYRMLNEPRSGVLVLIQAASKEDLGHYECELVNRLGSTRGGG
ELYMQSPALRARDQHHREQIVAAVEGAPSMQVTIEDVQVQVGDMAQFDAVIEGHPPPIVTWYKSTQLTSSAR
LSQRQDGTYSVLVTDVAPHDAGVYTCVANNAGGQVLCKAELLVHGDKLDAENQVYRRLKHSFYDVQEEIGR
GVFGVVKRVQHKGNKMFCAAKFIPLRSKTRAQAYQERDILATLGHPLVLTGLLDQFETRKTLLILILELCSSEEL
LDRLFKKGVVTEAEVKVYIQQLVEGLHYLHSHGILHLDIKPPNIMVHPAREDIKICDFGFAQKITPSEFPQYS
KYGSPFVSPFIIEQNPNVSEGSIDWAMGVISYLSLTCSSPFLAGESDRATLLNVLEGRVSWSSPTAAHLSSEDAK
DFIKATLQRTPRARPSTSQC LAHPWFLKSMPEAAEHFINTKQLKFLLRARSRWRSLMSYKSI LVMRSIPELLQ
GPPDPSPLGVARHLRGEASGASSSSSSDNE LAPFARAKSLPPSPVTHSPLLHPRGFLRPSASLPEETEASMP
TADAAPASPOASAGPPASPGCVPRHSVIVSSLFYQQAGEGAERGNKTS GAKRHPARRRHLLKGGYIARALPGLR
EPLMEYSLLEEEAAREEQASLMTKTPSFETALRLPSSSVREVPRGRSHSLDNPPVTTGSPPEACKEQLLFPST
GLTHETTAKDRGHKEGFLQESVFPFMSGDSRPGKQEGSSQDSCRGKPASSCHSELGSGSQEGCGPPSSQSLG
SLPPQSLKKELESTSCGPLFSEQPQAAPFPTQVSPLLGSEKEPQDGSLSSEGPVVPVSSSPGSASQVDASLDETEG
LSEAGDTCDFTPPPQRPQEATTRKFSLESRRGGYAGVAGYGTFAFGGDAGGMLGQGPLWARMWAVSOSSEEQ
DEAATESPQPLESLGPIAEASGVPLRTSPSLTPWEEVEQVSLVQIRDLSGDAEAADTISLDISEVDPAYLNS
DLYDIKYLPEFEFMI FRRVPKPIEQPESPGSETEAGQGLADFLLEAAWVWPGELGLRAGLEITEEPEEPGLLEA
LLGEAAVGRKRKWSPSRGLFQFPGRCLSGEELVGLRQRVKASMAHISRILKGRPEGPEREPPRKKAGLAS
FRLSGLKGRDQELSDEAVVLGQSVTLACQVLAQPTAQATWSKDGVLLESSGHLLISSTLKNFQLLTLIVVKEE
DLGTYTCCVSNPLGTAVTTGVLKRAERPSSSPRPEVGEYKDAVLLVWKPVESECGPVTYIVQCCIEGGSWTTL
ASDISDCCYLTGKLSRGGMYIFRTACVSKAGMPYSSPSEQVLLGGPNHLASEEESSRGRPAQLLPSTKTFAF
QMQIRRRGRFSVVRQCREKASGRALAAKIVPYQPEDKTAVLRYEALKRLLHHPHLAQLHAAYLSPRHLVLI LEL
CSGPELLPSLAERESYSESVDKDYLWQMSLQYLHAQHILHLDLRSENMMVTEYNLLKVIDLGNASLDQEK
VPAPENFKDYLETMAPELLEGQAVPQTDIWAIGVTAIFIMLSGEYPESEGETRDLQKGLRKLIRLSRCYAGL
SGGAVAFLOSSLCAQPWGRPCASTLQCGWLTEEGPTGSRPTPVTFTVRLRAFVREKRRRALLYKKNHQAQ
VR\*

>rs51583444\_ENSMUSP00000049737\_c.15693:G>C\_p.E5232Q
ENSMUST00000052872.15|Obscn-203|ENSMUSG00000061462|-|chr11:g.58934935:C>G
MDHSFSGAPRFLTRPKAFVSVGKDATLSCQIVGNPTPHVSWEKDRQPVVEAGARFRLAQDGDVYRLTILDLAL
GDSGQYVCRARNAIGEAFVAVGLRVDSEGTCAEQAPHLLRPTSIRVREGADATFRICRVGGSPQPAVSWSKDG
RRLGPPDAPHVRVEEHGESSALRIRSARPRDGGTYEVRAENPLGSASAAAALVVDSAEVAGPPGTSTATLLA
HLQQRREAMRAEGIPPSPPGAGTRTCTVTEGKHARLSCFVTGEPKPEVWKKDQGLVTEGRRHVVEDEQENF
VLKILFCKQSDRGLYTCTASNVLVQTYSSVLVVVREPTVPFKKRLQDLEVREKESATFQCEVAQPAATEAAWFK
EETRLWASAKYDIEEETERRLTVRNVSADDDAVYICETTEGSRVAVELSVQGNLTKRKLPRKTAVRTGDTAIF
WVELAVPEGPVWRNQRNQEEMVAGGRVAITAEGTCHTLTIFQCTLEDMGEVAVFVSGGCRTTTTFCVSAAPRRPPL
YPPADPVVKAKTESVTLWSAPPHGDRPVTIDGYVLEKRLKLGAYAWSRCHEAGWLATTEFTITGVAEEGDFQ
FRVSAINHFGQGPYLEFPGMTMLVPLAVKTPKAVEAVEGGEVTFVSDLTVASSGEWFLDGEALKASSIYVI
RCDRTRHMLTIREVPARLHGAQLKVFANGIETSIQMVVRAALGLPSSKLPAAAAREVLAQLHEEAQLLAE LSD
QAAAVTWLKDGRELSLGPYEMQVSAGRRALLVRDVAQDDAGLYECVSRGSRRTAYQLLVQEPKLVFAKQQAHA
SEVKAEAGNSATLSCEVTQAQTEVTWFKDGKLLSSSSKVRMEASGCSRRLLVVQQAGKADAGEYSCEAGGQKLS
FRLDVAEPKLVFAKQQAHSSEVKAEAGASATLSCEVAQAQTEVTWFKDGKLLSSSSKVRMEASGCSRRLLVVQQ
AGKADAGEYSCEAGGQKLSFRLDVAEPKLVFAKEQQARSEVKAEAGASATLSCEVAQAQTEVTWFKDGKLLSS
SSKVRMEASGCSRRLLVVQQAGKADAGEYSCEAGGQKLSFRLDVTEPKLVFAKEQQARSEVKAEVGNATLSCE
VAQAQTEVTWFKDGKLLSSSSKVRMEASGCSRRLLVVQQAGKADAGEYSCEAGGQKLSFRLDVAEPKLVFAKEQ
QARSEVKAEAGNSATLSCEVAQAQTEVTWFKDGKLLSSSSKVRMEASGCSRRLLVVQQAGKADAGEYSCEAGGQ
KLSFHLDVTEPKLVFAKEQQAHSEVKAEAGASATLSCEVAQAQTEVTWFKDGKLLSSSSKVRMEASGCSRRLV
VQQAGKADAGEYSCEAGGQKLSFRLDVAEPKLVFAKEQQARSEVKAEAGASATLSCEVAQAQTEVTWFKDGK
LSSSSKVRVEASGCSRRLLVVQQAGKADAGEYSCEAGGQKLSFRLDVAEPKLVFAKEQQANSEVKAEAGASATL

SCEVAQAQTEVTFWFKDGKKLSSSSKVRVEASGCSRRLVVQQAGKADAGEYSCEAGGQKLSFRLDVAEPKLAFA  
KEQQAHSEVKAEGASATLSCEVAQAQTEVTFWFKDGKKLSSSSKVRVEASGCSRRLVVQQAGKADAGEYSCEA  
GGQKLSFRLDVAEPKLAFAKEQQAHSEVKAEGASATLSCEVAQAQTEVTFWFKDGKKLSSSSKVRVEASGCSR  
RLVVQQAGKADAGEYSCEAGGQKLSFRLDVAEPKLAFAKEQQAHSEVKAEGASATLSCEVAQAQTEVTFWFKD  
GKKLSSSSKVRVEASGCSRRLVVQQAGKADAGEYSCEAGGQKLFRLDVAEPKLMFAKEQQAHSEVKAEGAS  
ATLSCEVAQAQTEVTFWFKDGKKLSSSSKVRVEASGCSRRLVVQQAGKADAGEYSCEAGGQKLSFRLDVAEPK  
VFAKEQQAHSEVKAEGASATLSCEVAQAQTEVTFWFKDGKKLSSSSKVRVEASGCSRRLVVQVQKADAGEYS  
CEARGQKLSFRLDVADTRLMFAKEQQARTEVKAEGASATLSCEVAQAQTEVTFWFKDGKKLSSSSKVRVEASG  
CSRRLVVQQAGKADAGEYSCEAGGQKLSFRLDVAEAEESQI PERPSRREPLVVKEHETIILTATIAAPSVAAVT  
WLKDGVEIRRSKRHEATS LGDTHLTVRGAQVLD SAIYSCRVGKEGQDFPVQVEEVAAKFSKPLEPVEGELGG  
TVMLVCELSPEQAEVWRCGNTQLRPGKRFQMTSEGPRRTLT VSGLREDDAEYVCE SRDDRTSARLTVKVPR  
VVKFTSGLSAMVAEEGQEATFQCVVSPSDAGVTWYKDGMLQLPSEKFMVVEGASRSLTILGLTLEDAGQVTV  
EAEGASSAALRVREAPVLFKFKLEPQTVEERTSVTLEVELTRPWEVVKWTRNAAVLTPSENVEIRAEGARHC  
LVLRVGFADRGFFGCETPDDKTQAKLNVEMRQVRLVRGLQVEVAKEQGTASMDVELSHAEVEGSWTRDGLRL  
QPGPKCHLAVQGPVHILTLALSALQPDQSGLVAFRAEGVHTSARLIVTELVPVSTRVLQDVVATQKEKVTLECEL  
SRPVDVRWLKDGVELRAGKAI GIVAQGTCSRSLVIYRCETGDQGVYVCDALDAQTSASLRVQGRTYTLIFRRVL  
AEDAGEVGFVAENAESRAHLRVKELPVTLLRPLRDKIAMEKHRGVLECGVSRASAVRWFVKGVELQSGPKYE  
VVS DGLYRKLVINDDVQPEDEDTYTC DAGNVKTSAQFFVEEQSITIVRGLKDMTVMPEPAPAFWECETSIPSVRP  
PKWLLGKTVLQAGGNVLEQDGT VHRLLHKTCTMTGPVHFTIGKSRSSAQLVVS DI PVVLRPLEPKAGRE  
LQSVVLSCDFRPAPKAVQWYKDDTPLSPSEKFKMALEGQMAELRILRLTPADAGVYRCQAGSAQSSAEVTVEA  
REVTVIQPLQDAEAMEEGRVCFSCELSHKDEDI EWSLNGTPLYNDSFHEISHEGCLHTLVLSVRQADTGTVC  
ATSPKVSVSARLVVKGKPVVFLKALDDVSAEERGTTLTQCEVSDPEARVVWRKDGVELGPSDKYDFLHKAGAR  
GLTVHDLSHEDAGLYTCQVGSKETQSKVSVHDLHVGITKRLKTVLEVLEGE SCSFECVLSHESPSDPAVWTVGG  
KTVGGSGHFHAVRQGRKYTLTVKDAALSDAGEVVSVLGLTSKASLIRERPV DITKPLEDQRTTLGEDVMLS  
CELSRAGTSVRWLKDGKAI RKSQKYDLLSEGTRAVLVRKASLKDSGEYTCETEASKSTAKLVEEKANRFTE  
ELADLQVEEKGRAVFTCKTEHPASVVTWRKGLLELRASGKHPVPSQEGTLTKLTINALERTSDTYTCDI GQAR  
TQARLLVHGQKADAVIEDLEDTA VQEGSSAKFCCLRIAPADYGPVHWF LDKTPLHLSNELNEITVQPGGYHVLTLR  
QLALKDSGTVYFEAGDQRTS AALRVTEKPSIFSRPLTDVTVTEGEDTLVCE TTTVDSSVRWTKDGKTLRPSA  
RCQLSHEGCAQLLITATTPQDGGRYKCEIGGASSSSIVRVHALPVRFRESLKDVEVPEGKAATLRCVLSSVA  
APVEWRHGDDVLKSSNKYSLRQEGAVLELVIDRLQPDQSGQYSCSFGDQTTSATLTVKTSSAQFVGKLRNKEA  
TEGTTVTLRCELTKAEAPVEWKKGTETLRNGDKYSLKQDGAVCELQICSLLVADAGEYSCVCGQEKT SATLTVK  
ALLVHFVRRRLRSKEATEGDTTLQCELSKAAPVEWRKGTETLRDGD RYSLKQDGAVCELQIRSLT IADAGEYL  
CTCGQEKT SATLTVRALPAKFKDSLKNEEATEGTTATLSCELSKAAPVTWKKGPKTLQSGDKYVLRQDGAVCG  
LQIHGLTMADAGEYSCVCGQEKT SATLTVRGLPAKFIEDLRSQEATEGATAILRCELS KAAPVEWRKGETL  
DGD RYTLRQDGAVCELQIRGLAVDGTYS SLPKFTTEGLRNEEATEGTMATLRCQMSKAAPVEWRKGETLR  
DGD RYSLRQDGAMCELQIRGLTIEDSGEYTCVCGQEKT SATLSVKALPSRFIEDLRSQEATEGTMATLRCQMS  
KTAPVEWKKGSETLRDGGRYSLRQDGPVCELQICDLAVEDAGEYSCVCGQEKT SATLSIKALPPRFIEDLRSQ  
EATEGTMATLRCQMSKAAPVEWRKGETLGDGGRYSLRQNGAVCELQIHDLAVEDTGEYSCVCGQEKT SATLN  
VKALPPRFIEDLRSQEATEGTMATLRCQMSKAAPVEWRKGETLRDGGRYSLRQDGAVCELQIHDLVEDAGQ  
YSCVCGQEKTSAVLTVDALPPKFTTEGLKKEEATEGTMVTLRCQMSKEATVEWRKGAKTSLDGGRYSLRQDGAM  
CELQICGLAVEDAGEYSCVCGQEKT SATLSVKALPPRFIEDLRSQEATEGTMATLRCQMSKAAPVEWRKGET  
LRDGD RYSLRQDGAVCELQIRDLAVEDAGEYLCVCGQEKT SATLSVKALPPRFIEDLRSQEATEGTMATLRCQ  
MSKAAPVEWRKGSKTLR DGD RYSLRQDGAMCELQICDLAVEDTGDYSCVCGQEKT SATLSVKALPPRFIEDLR  
SQEAREGTVATLRCRMSKAAPVEWRKGETLKDGD RYSLRQEGNLCELQIRDLAVEDTEEYSCVCGQEKT SAT  
LSVKALPAKFIEDLRSQEAPESSTVTLRCKLSKKASVVWKKGSETLRNGARYSLRQDGAVCELEIRDLTVEDT  
GEYSCTCGQERTSATLSIMAPQVVFQQPLQNLQAEEGSMASLRCELSVPNAAMVWSKGGLELQGDTRREARQQ  
GCVAELLLRDLRREDAGEYSCCTCGSQTTSATLMVTAAPVRFLRELQAQDVDEGATARLRCELSREAVSVEWRK  
GSLQLFPKAKYQMVQEGTTAELLVHGVEQEDAGEYTC DAGHTQS IARLSVRAPKPKFKTDLQSTEQEAGGTAR  
LCCQLSEAEPTPVQWLKEGVELHVGSKYEMRRQGAVCELLIHGLEAKDTGEYACLVGQKTLASLRVKEPEV  
TIVRGLVDMEVQADEDEFTCKVSQAGATDVQWHLQGLPLQSNVEVAVLADGCTHVLQKGVTLLEDAGTVS  
FHVGGSSSAQLTVRVPEVTVLEPLKDVQLSEGQDAHFRCRLSRASGQEARWALGGVPLQCNE MNDITVEQGT  
LYLLTLHKVTLEDAGTITLQVGS CSSEAQLKVTAKNTVLRGLENVDALQGG EALFECQLSQPEVA AHTWLLDD  
EPVHTSEKVEVVYFENGLRHLLLLKLNKPKQDSRVTF LAGDVVTS AFLTVRGRWLEVELP PHDASVRLKAGMQVR  
FTCILSEAVPVGEATYINGAAIQPDDTDWTVTTDGSHHALTSNAQPQHAGEVTF AARDVASARLSVLALP  
DPEDAEEVGRSDHSVTLSSWVAPMSDGGGLCGYRVE MKEASTGQWQLCHDLVPGPECVVDLVP GKTYRFRV  
AAVGPAGAGEPVHLPQMVKIAPAPAPAPAPAPAPAPETRQAVVGEDICLELEVAADGGVEVWHKGTERRIQPGG  
HFEVLSRGRQMLVIKGFRTEDQGEYRCGPIQGLPSSGAATFNVM TSGSGDEVPAQPSLPPEAAQEGDLHLL  
WEALARKRRMSREPTLDSISELPEEDSRVQHLRQEAEEETAPDLSEGYSTADELARTGEADLSHTSSDDES RAG

TPSLVTYLKKAGGPGISPLASKHEAQVTTSVKPKQKQEPVVPTCPPPGDLSAADLMDPSLDKAAVKIQAAFKG  
 YKVRKEMKQOEGPVFSRTFGDTEAQVGDVLRLECVLATKTDMRACWLKDGIELTDGRHYHIDQLKDGTCSSLLV  
 TGLAPTDSGRYTCQVSTKSGRVSHSACVVVSGTESEAESSSGGELDDAFRRAARRLHRLFRTKSPAELSEEEL  
 FLSADEGPGPEEPADWQTYREDENFVCIRFESLAEARQAVTCFRNMFATMGIGVEISLGEQGPVEMRIGK  
 VAPTPTPAVPLAKTPGLQTSDAAPVFLTELQNDVDQDGYPMSFDCVVTGQPVPSVRWFKDGKLEEDDHYMIN  
 EDQGGHQLIITAVVPADMGVYRCLAENSMGVSSTKAELRVELTSTDYDTAADATETSSYFSAQGYLSSREQE  
 GTESDEGQLPQVLEELKDLQVAPGTRLAKFQKLVKGYPAKLYWFKDGOPLTSTDHIRMTDKKTLHTLEIVSV  
 TREDSGQYAAIYISNAVGAAYSSARLLVRGPEPEEKPASDVHERLVPFRILEKFTPKKVKRGSSITFSVKVEG  
 HPAPSVHKLKEEAEGVLIWGPDTPGYTMASSSKQHSVLVLDVGRQHOGTYTCIATNPAGQALCSASLHISGL  
 AKEEEQERVKEALISSFLQGTSAQVSAQMSESAGFADLVGQSKGESLVAEEAHSHLSLAEVGTTEFLQKLSQ  
 ITEMVSAKISQAKLQVPGGDSDEETKTPSASPRHGRSRPSSSVQESSSESEDGDSRGEIFDIYVVTADYLPLG  
 AEQDAIILREGQYVEVLDSAHPLRWLVRTKPTKSSPSRQGWVSPAYLDKRLKLSPEWGPTEAPEFPGEAVSED  
 EYRTRLSSVIQELLSSEQAFVGELOFLESHHMKHLERSPRVPAAVASQKTVI FRNVQDISHFHSSFLKELQGC  
 GTDDDVAMCFIKNQEAFEKYLEFLVGRVQAESVVVSTPVQEFYKKYAEETLSAKDPTQPPPPPLQHYLEQPVE  
 RVQKYQALLKELIRNKARNRQNCALLEQAYAVVSALPQRAENKLVSLMENYPGTLEALGEPVIRQGHFVWEG  
 APGARMPWKGNHRHVFLFRNYLVICKPRRDSRTDFTSYVFRNMMKLSSIDLNDQVEGDDRAFEVWHEREDSVR  
 KYLLQARTVI IKNSWVKEICGIQORLAQPVWRPPEFEELADCTAELGETVKLACRVGTGPKPIVSWYKDGP  
 VEVDPHHILIEDPDGSCITLIDNLTGIDSGQYMCFAASAAGNASTLGKILVQVPPRFVKNKVRATPEFVEGEDAQ  
 ITCTVEGAPYPQIRWYKDGTLAPGNRYRMLNEPRSGVLVLIQAASKEDLGHYECELVNRLGSTRGGGELYM  
 QSPALRARDQHHREQIVAAVEVTEQETKVPKKTVI IETITTVVKS PRGRRQSPGKSPSRSPRRSASPRRPG  
 LLAPERLYPPGTSPSRRLVEVEQGRKAPVPALYVTEAEVHAPASQSPKWLEVEETIEVRVKKTGSRGASPVRE  
 MTSRGEGLIFLTPGGI PGRDPNANNNSNKS SVYQEAARTWGPVAVHVGEFFIFQVDSVGNVDVVAASPEPEQVRA  
 SQKEENTERQEGCSGDENTFLMEEPQDTSLQGRDPKILTHNGRVLTLADLEDYVPQEGETFGCGDSTPSTP  
 DEPPCEVSVLQREISEPTVGQPVLLNVGRPPGTGATPSFFRPGSQVHSPESVSFLLREAWSGPVSAAPWTSSF  
 HTHVQSSVDGSHGSFKTEVSTQTVSFGAVGETVTLHIDPDGGEAPGPSQG\*  
 >rs51583444\_ENSMUSP00000020732\_c.15894:G>C\_p.E5299Q  
 ENSMUST00000020732.13|Obscn-201|ENSMUSG000000061462|-|chr11:g.58934935:C>G  
 MDHSFSGAPRFLTRPKAFVSVGKDATLSCQIVGNPTPHVSWEKDRQVPEAGARFLAQDGDVYRLTILDLAL  
 GDSGQYVCRARNAIGEAFVAVGLRVDSEGTCAEQAPHFLLRPTSIRVREGADATFRRCRVGGSPQPAVSWSKDG  
 RRLGPPDAPHVRVEEHGESSALRIR SARPRDGGTYEVRAENPLGSASAAAALVVDSDAEVAGPPGTSTATLLA  
 HLQORREAMRAEGIPPSPPGAGTRTCTVTEGKHARLSCFVTGEPKPEVWKKDQGLVTEGRRHVVEDEQENF  
 VLKILFCKQSDRGLYTCTASNLVGQTYSSVLVVVREPTVPFKKRLQDLEVREKESATFQCEVAQPAEAAWFK  
 EETRLWASAKYDIEEGETERRLTVRNVSADDDAVYICETTEGSRVVAELSVQGNLTKLPRKTAVRTGDTAIF  
 WVVELAVPEGPVWRWRNQEEMVAGGRVAITAEGTCHTLTI FQCTLEDMGEVAFVSGGCRTTTTQFCVSAPRRPPL  
 YPPADPVVAKTESVTLWSAPPHGDRPVTIDGYVLEKRLKGLAYAWSRCHEAGWLATTEFTITGVAEEGDFQ  
 FRVSAINHFGQGPYLEFPGTMLHVPMLAVKTPKAVEAVEGGEVTFVSDLTVAASGEVFLDGEALKASSIYVI  
 RCDRTRHMLTIREVPARLHGAQLKFVANGIETSIQMVVRAALGLPSSKLPAAAAAREVLAQLHHEAQLLAE LSD  
 QAAA VTLWKDGRELSLGPYEMQVSAGRRALLVRDVAQDDAGLYECVSRGSR TAYQLLVQDITDGYRDWGPAG  
 PQKHMCKCAGAKIARYLGSSCYRFLQYDKGVWHLEAALDTRQKGTSSCSLHEKPKLVFAKQQAHSEVKA  
 AGNSATLSCEVTQAQTEVTWFKDGKLLSSSSKVRMEASGCSRRLVVQQAGKADAGEYSCEAGGQKLSFRLDVA  
 EPKLVFAKQQAHSEVKA EAGASATLSCEVAQAQTEVTWFKDGKLLSSSSKVRMEASGCSRRLVVQQAGKADA  
 GEYSCEAGGQKLSFRLDVAEPKLVFAKEQQARSEVKA EAGASATLSCEVAQAQTEVTWFKDGKLLSSSSKVRM  
 EASGCSRRLVVQQAGKADAGEYSCEAGGQKLSFRLDVTEPKLVFAKEQQARSEVKA EAGASATLSCEVAQAQ  
 EVTWFKDGKLLSSSSKVRMEASGCSRRLVVQQAGKADAGEYSCEAGGQKLSFRLDVAEPKLVFAKEQQARSEV  
 KAEAGNSATLSCEVAQAQTEVTWFKDGKLLSSSSKVRMEASGCSRRLVVQQAGKADAGEYSCEAGGQKLSFHL  
 DVTEPKLVFAKEQQAHSEVKA EAGASATLSCEVAQAQTEVTWFKDGKLLSSSSKVRMEASGCSRRLVVQQAGK  
 ADAGEYSCEAEGQKLSFRLDVAEPKLVFAKEQQARSEVKA EAGASATLSCEVAQAQTEVTWFKDGKLLSSSSK  
 VRVEASGCSRRLVVQQAGKADAGEYSCEAGGQKLSFRLDVAEPKLVFAKEQQANSEVKA EAGASATLSCEVAQ  
 AQTEVTWFKDGKLLSSSSKVRVEASGCSRRLVVQQAGKADAGEYSCEAGGQKLSFRLDVAEPKLVFAKEQQAH  
 SEVKA EAGASATLSCEVAQAQTEVTWFKDGKLLSSSSKVRVEASGCSRRLVVQQAGKADAGEYSCEAGGQKLS  
 FRLDVAEPKLVFAKEQQAHSEVKA EAGASATLSCEVAQAQTEVTWFKDGKLLSSSSKVRVEASGCSRRLVVQQ  
 AGKADAGEYSCEAGGQKLSFRLDVAEPKLVFAKEQQAHSEVKA EAGASATLSCEVAQAQTEVTWFKDGKLLSS  
 SSKVRVEASGCSRRLVVQQAGKADAGEYSCEAGGQKLFRLDVAEPKLVFAKEQQAHSEVKA EAGASATLSCE  
 VAQAQTEVTWFKDGKLLSSSSKVRVEASGCSRRLVVQQAGKADAGEYSCEAGGQKLSFRLDVAEPKLVFAKEQ  
 QAHSEVKA EAGASATLSCEVAQAQTEVTWFKDGKLLSSSSKVRVEASGCSRRLVVQQVQVADAGEYSCEARGQ  
 KLSFRLDVADTRLMFAKEQQARTEVKA EAGNSATLSCEVAQAQTEVTWFKDGKLLSSSSKVRVEASGCSRRLV  
 VQQAGKADAGEYSCEAGGQKLSFRLDVAEAE SQIPERPSRREPLVVKEHETIILTATIAAPSVAAVTLWKDGV  
 EIRRSKRHEATSLGDTHTLTVRGAQVLD SAIYSCRVGKEGQDFPVQVEEVAAKFSKPLEPVEGELGGTVMLVC

ELSPEQAEVWRCGNTQLRPGKRFQMTSEGPRTTLTVSGLREDDAEYVCESTRDDRTSARLTVKVPVVKFSTS  
GLSAMVAEEGQEQATFQCVVSPSDAGVTWYKDGMLQOPSEKFMVVEGASRSLTILGLTLEDAGQVTEAEGAS  
SSAALRVREAPVLFKKKLEPQTVVEERTSVTLEVELTRPWPEVKWTRNAAVLTPSENVEIRAEGARHCLVLRVSV  
GFADRGFFGCETPDDKTQAKLNVEMRQVRLVVRGLQEVEAKEQGTASMDVELSHAEEVGSWTRDGLRLQPGPKC  
HLAVQGPVHILTLALSALQPQDSGLVAFRAEGVHTSARLIVTELPVSFTRVLQDVVATQKEKVTLECELSRPVDV  
RWLKDGVLELRAGKAIGIVAQGTCSRSLVIYRCETGDQGVYVCDALDAQTSASLRVQGRTYTLIFRRVLAEDAGE  
VKFVAENAESRAHLRVKELPVTLLRPLRDKIAMEKHRGVLECCQVSRASAQVRWFKGGVELQSGPKYEVVSDGL  
YRKLVINVDVQPEDEDTYTCDAENVKTSAQFFVVEEQSITIVRGLKDMTVMEPAPAWFECETSIPSVRPPKWLGLG  
KTVLQAGGNVGLQDGTVHRLTLHKTCSTMTGPVHFTIGKSRSSAQLVVSIDI PVVLRPPEPKAGRELQSVVL  
SCDFRPAPKAVQWYKDDTPLSPSEKFKMALEGQMAELRILRLTPADAGVYRCQAGSAQSSAEVTEAREVTVI  
QPLQDAEAMEEGRVCFSCELSHKDEDEIWSLNGTPLYNDSFHEISHGCLHTLVLSVRQADTGTVCATSPKV  
SVSARLVVKGKPVVFLKALDDVSAEERGTTLTQCEVSDPEARVVRKDGVELGSPDKYDFLHKAGARGLTVHD  
LSHEDAGLYTCQVGSKETQSKVSVHDLHVGITKRLKTVEVLEGESECSFECVLSHESPSDPAVWTVGGKTVGGS  
GHFHAVRQGRKYTLTVKDAALSDAGEVVFVSVLGLTSKASLI IRERPVDITKPLEDQRTTLGEDVMLSCELSRA  
GTSVRWLKDGKAIRKSQKYDLLSEGTRAVLVVRKASLKDSEYTCETEASKSTAKLCVEEKANRFTEELADLQ  
VEEKGRAVFTCKTEHPASVVTWRKGLLELRASGKHVPSQEGTLTKLTINALERTDSDTYTCDIGQARTQARLL  
VHGQKVRVIEDLEDTAVQEGSSAKFCRIAPADYGPVHWFLLDKTPLHSNELNEITVQPGGYHVLTLRQLALKD  
SGTVYFEAGDQRTSAALRVTEKPSIFSRPLTDVTVTEGEDLTVLVCETTTVDSSVRWTKDGKTLRPSARCLSH  
EGCQAQLLITATTPQDGGRYKCEIGGASSSSIVRVHALPVRFRESLKDVEVPEGKAATLRCVLSVVAAPVEWR  
HGDDVLKSSNKYSLRQEGAVLELVIRDLQPDQSGQYSCSFGDQTTSATLTVKTSQAQFVGLKRNKEATEGTTV  
TLRCELTKAPVEWKKGTETLRNGDKYSLKQDGAVCELQICSLLVADAGEYSCVCGQEKTSATLTVKALLVHF  
VRLRSKEATEGDTTTLQCELSKAAPVEWRKGTETLRDGDYSLKQDGAVCELQIRSLTIADAGEYLCTCGQE  
KTSATLTVRALPAKFKDSLKNEEATEGTTATLSCELSKAAPVWKKGPKTLQSGDKYVLRQDGAFCGLQIHGL  
TMADAGEYSCVCGQEKTSATLTVRGLPAKFIEDLRSQEATEGATAILRCELSKAAPVEWRKGSSETLKDGDYR  
LRQDGAVCELQIRGLAVVDGTYSLSLPTKFTTEGLRNEEATEGTMATLRCQMSKAAPVEWRKGSSETLRDGDYR  
LRQDGAFCGLQIRGLTIEDSGEYTCVCGQEKTSATLSVKALPSRFIEDLRSQEATEGTMATLRCQMSKATAPVE  
WKKGSETLRDGGYSLRQDGPVCELQICDLAVEDAGEYSCVCGQEKTSATLSIKALPPRFIEDLRSQEATEG  
MATLRCQMSKAAPVEWRKGSSETLGDGGYSLRQNGAVCELQIHDLAVEDTGEYSCVCGQEKTSATLNVKALPP  
RFIEDLRSQEATEGTMATLRCQMSKAAPVEWRKGSSETLRDGGYSLRQDGAFCGLQIHDLVEDAGQYSCVCG  
QEKTSAVLTVDALPPKFTTEGLKKEEATEGTMVTLRCQMSKEATVEWRKGAKTLSDDGGYSLRQDGAFCGLQIC  
GLAVEDAGEYSCVCGQEKTSATLSVKALPPRFIEDLRSQEATEGTMATLRCQMSKAAPVEWRKGSSETLRDGD  
YSLRQDGAFCGLQIRDLAVEDAGEYLCVCGQEKTSATLSVKALPPRFIEDLRSQEATEGTMATLRCQMSKAAP  
VEWRKGSSETLRDGDYSLRQDGAFCGLQICDLAVEDTGDYSCVCGQEKTSATLSVKALPPRFIEDLRSQEARE  
GTVATLRCRMSKAAPVEWRKGSSETLKDGDYSLRQEGNLCELQIRDLAVEDTEEYSCVCGQEKTSATLSVKAL  
PAKFIEDLRSQEAPESSTVTLRCKLSKASVWKKGSETLRNGARYSLRQDGAFCGLQIRDLVEDTGEYSCT  
CGQERTSATLSIMAPQVVVQQLQNLQAEEGSMASLRCELSVPAAMVWSKGGLELQGDTRREARQQGCVAEL  
LLRDLRREDAGEYSCTCGSQTTSATLMVTAAPVRFLRELQAQDVDEGATARLRCELSREAVSVEWRKGSQQLF  
PCAKYQMVQEGTTAELLVHGVEQEDAGEYTCDAHTQSIARLSVRAPKPKFKTDLQSTEQEAAGGTARLCCQLS  
EAEPGTPVQWLKEGVELHVGSKYEMRRQGAFCGLQIHGLEAKDTGEYACLVGGQKTLASLRVKEPEVTIVRGL  
VDMEVQADEDEFTCKVQAGATDVQWHLQGLPLQSNVTEVAVLADGCTHVLQKGVTLLEDAGTVSFHVGGL  
SSAQLTVRVPEVTVLEPLKDVQLSEGQDAHFRCRLSRASGQEARWALGGVPLQCNEMNDITVEQGTLYLLTL  
HKVTLLEDAGTITLQVGSSESQAQLKVTAKNTVLRGLENVDALQGGEALFECQLSQPEVAHAHTWLLDDEPVHTS  
EKVEVVYFENGLRHLLLLLKNLKPQDSCRVTFLAGDVVTSFAFLTVRGWRLEVLPEPHDASVKAGMQVRFCTILS  
EAVPVGEATWYINGAAIQPDDTDWTVTTDGSHHALTLNAQPPHAGEVTFFAARDAVASARLSVLALPDPPEDA  
EVRGRSDHSVTLSSWVAPMSDGGGLCGYRVEMKEASTGQWQLCHDLVPGPECVVDDLVPKTYFRVVAAVGPA  
GAGEPVHLPQMVKIAPAPAPAPAPAPAPAPETRAVVGEDICLELEVAADGGEVWVHKGTERIQPGGHFEVLS  
RGQRQMLVIKGFRTEDQGEYRCGPIQGLPSSGAATFNVMVMTSGSGDEVPAQPSLPPEAAQEGDLHLLWEALAR  
KRRMSREPTLDSISELPEEDSRVQHLRQEAEEETAPDLSEGYSTADELARTGEADLSHTSSDDESRACTPSLVT  
YLKAGGPGISPLASKHEAQVTSVKPQKQEPVPTCPPPGDLSAADLMDPSLDKAAVKIQAQAFKGYKVRKE  
MKQQEGPVFSRTFGDTEAQVGDVLRLECVLATKTDMRACWLKDGIELTDGRHYHIDQLKDGTCSSLVTVGLAPT  
DSGRYTCQVSTKSGRVSHSACVVVSGTESEAESSSGGELDDAFRAARRLHRLFRKTPAELSEELFLSADE  
GPGEPEPADWQTYREDENFVCIRFESLAEARQAVTCFRNMFATMGIGVEISLGEQGPGRVEMRIGKVAPTVT  
PAVPLAKTPGLQTSDAAPVFLTELQNDQVQDGYPMSFDCVSTYDQVPSVVRWFKDGKLEEDDHVMINEDQQGG  
HQLIITAVVPADMVGYRCLAEENSMGVSSTKAELVELTSTDYDTAADATETSSYFSAQGYLSSREQEGTESDE  
GQLPQVLEELKDLQVAPGTRLAKFQLKVKYPAKPLYWFKDGGQPLTTSDBIRMTDKKTLHTLEIVSVTREDSG  
QYAAYSNAVGAAYSSARLLVRGPSEPEEKPASDVHERLVPPRILEKFTPKKVKRGSSTIFSVEGHPAPSV  
HWLKEEAKEKGLWIGPDTPGYTMASSSKQHSVLVLDVGRQHGTYTICATNPAGQALCSASLHISGLAKEEEQ  
ERVKEALISSFLQGTSAQVSAQMSSEAGFADLVGQSKGESLVAEEAHSHLSLAEVGTEEFLOKLTSTQITEMVS

AKISQAKLQVPGGDSDEETKTPSASPRHGRSRPSSSVQESSSESEDGDSRGEIFDIYVVTADYLPLGAEQDAI  
 I LREGQYVEVLDSAHPLRWLVRTKPTKSSPSRQGWVSPAYLDRKRLKLSPEWGPTEAPEFPGEAVSEDEYRTRL  
 SSVIQELLSSEQAFVGLQFLESHHMKHLERSPRVPAAVASQKTVIFRNVQDISHFHSSFLKELQCGTDDDDV  
 AMCFIKNQEAFEKYLEFLVGRVQAESVWVSTPVQEFYKKYAEETLSAKDPTQPPPPPLQHYLEQPVVERVQKYQ  
 ALLKELIRNKARNRQNCALLEQAYAVVSALPQRAENKLHVSLMENYPGTLEALGEPHQGHFIVWEGAPGARM  
 PWKGNHRHVFLFRNYLVICKPRRDSRTDTFSYVFRNMMKLSSIDLNDQVEGDRAFEVWHEREDSVRKYLLQA  
 RTVI IKNSWVKEICGIQORLAQPVWRPPEFEEELADCTAELGETVKLACRVTGTPKPIVSWYKDGKPVVEVDPH  
 HILIEDPDGSCITLIDLNLTGIDSGQYMCFAASAAGNASTLTKILVQVPPRFVNVKVRATPFVEGEDAQITCTVE  
 GAPYPQIRWYKDGTLAPGNRYRMLNEPRSGVLVVIQAASKEDLGHYECELVNLRLGSTRGGGELYMQSPALR  
 ARDQHHREQIVAAVEERRPSP\*  
 >rs51583444\_ENSMUSP00000151217\_c.13194:G>C\_p.E4399Q  
 ENSMUST00000219084.3|Obscn-207|ENSMUSG00000061462|-|chr11:g.58934935:C>G  
 MDHSFSGAPRFLTRPKAFVSVGKDATLSCQIVGNPTPHVSWEKDRQVEAGARFRLAQDGDVYRLTILDLAL  
 GDSGQYVCRARNAIGEFAAVGLRVDSEGTCAEQAPHLLRPTSIRVREGADATFRCRVGGSQPAVSWSKDG  
 RRLGPPDAPHVRVEEHGESSALRIRSARPRDGGTYEVRAENPLGSASAAAALVVDSDAEVAGPPGTSTATLLA  
 HLQORREAMRAEGIPSPPGAGTRTCTVTEGKHARLSCFVTGEPKPEVWKKDGLVTEGRRHVVEDEQENF  
 VLKILFCKQSDRGLYCTASNLVGTYSVVLVVVREPTVPFKKRLQDLEVREKESATFQCEVAQPAATEAAWFK  
 EETRLWASAKYDIEEGTERLLTVRNVSADDDAVYICETTEGSRVLAELSVQGNLTKLPRKTAVRTGDTAIF  
 WVVELAVPEGPVWRWLRNQEEMVAGGRVAITAEGTCHTLTI FQCTLEDMGEVAFVSGGCRTTTQFCVSAPRRPPL  
 YPPADPVVKAKTESSVTLWSAPPHGDRPVTIDGYVLEKRLKLGAYAWSRCHEAGWLATTEFTITGVAAEGDFQ  
 FRVSAINHFGQGPYLEFPGMTMLVPLAVKTPKAVEAVEGGEVTFVSDTLTVASSGEWFLDGEALKASSIYVI  
 RCDRTRHMLTIREVPARLHGAQLKRVANGIETS IQMVVRAALGLPSSKLPAAAAREVLAQLHEEAQLLAE LSD  
 QAAAVTWLKDGRELSLGPKEYMQVSAGRRALLVRDVAQDDAGLYECVSRGSRRTAYQLLVQDITDGYRDWGPAG  
 PQKHMCKCAGAKIARYLGS SCYRFLQYDKGVWHWLEAALDTRQKGKTS SCSLHEKPKLVFAKQQAHSEVKA  
 AGNSATLSCEVTQAQTEVTWFKDGKLLSSSSKVRMEASGCSRRLVVQQAGKADAGEYSCEAGGQKLSFRLDVA  
 EPKLVFAKQQAHSEVKAEGASATLSCEVAQAQTEVTWFKDGKLLSSSSKVRMEASGCSRRLVVQQAGKADA  
 GEYSCEAGGQKLSFRLDVAEPKLVFAKEQQARSEVKAEGASATLSCEVAQAQTEVTWFKDGKLLSSSSKVRM  
 EASGCSRRLVVQQAGKADAGEYSCEAGGQKLSFRLDVTEPKLVFAKEQQARSEVKAEGNSATLSCEVAQAQ  
 EVTWFKDGKLLSSSSKVRMEASGCSRRLVVQQAGKADAGEYSCEAGGQKLSFRLDVTEPKLVFAKEQQAHSEV  
 KAEAGASATLSCEVAQAQTEVTWFKDGKLLSSSSKVRMEASGCSRRLVVQQAGKADAGEYSCEAGGQKLSFRL  
 DVAEPKLVFAKEQQARSEVKAEGASATLSCEVAQAQTEVTWFKDGKLLSSSSKVRVEASGCSRRLVVQQAGK  
 ADAGEYSCEAGGQKLSFRLDVAEPKLVFAKEQQANSEVKAEGASATLSCEVAQAQTEVTWFKDGKLLSSSSK  
 VRVEASGCSRRLVVQQAGKADAGEYSCEAGGQKLSFRLDVAEPKLAFAKEQQAHSEVKAEGASATLSCEVAQ  
 AQTEVTWFKDGKLLSSSSKVRVEASGCSRRLVVQQAGKADAGEYSCEAGGQKLSFRLDVAEPKLVFAKEQQAH  
 SEVKAEGASATLSCEVAQAQTEVTWFKDGKLLSSSSKVRVEASGCSRRLVVQQVKGADAGEYSCEARGQKLS  
 FRLDVAEAEASQIPEPSPRREPLVVEKHETIILTATIAAPSVAAVTWLKDGVEIRRSKRHEATSLGDTHTLTVR  
 GAQVLD SAIYSCRVGKEGQDFPVQVEEVAAKFSKPLEPVEGELGGTVMLVCELSPEQAEVWRCGNTQLRPGK  
 RFQMTSEGPRRTLTVSGLREDDAEYVCESRDDRTSARLTVKVRVVKFTSGLSAMVAEEGQEAFTQCQVSPS  
 DAGVTWYKDGMLQPPSEKFMVVEGASRSLTILGLTLEDAGQVTEAEGASSAALRVREAPVLFKKKLEPQT  
 VEERTSVTLEVELTRPWPEVKWTRNAAVLTPSENVEIRAEGARHCLVLRVSGFADRGFFGCETPDDKTQAKLN  
 VEMRQVRLVRLQVEEAKEQGTASMDVELSHAEEVGSWTRDGLRLQPGPKCHLAVQGPVHILTL SALQPQDSG  
 LVAFAEGVHTSARLIVTELPVSFTRVLQDVVATQKEKVTLECELSRPVDVRLKDGVELRAGKAI GIVAQGT  
 CRSLVIYRCETGDQGVYVCDALDAQTSASLRVQGRYTLIFRRVLAEDAGEVKFVAENAESRAHLRVKELPVT  
 LLRPLRDKIAMEKHRGVLECCQVSRASAQVRWFKGGVELQSGPKYEVVSDGLYRKLIVINDVQPEDEDTYTC DAG  
 NVKTSAQFFVEEQSITIVRGLKDMTVMPEPAPAWFECETSIPSVRPPKWL LGKTVLQAGGNVGLQDGTVHRLT  
 LHKTCSTMTGPVHFTIGKSRSSAQLVSDIPVVLTRPLEPKAGRELQSVVLSCDFRPAPKAVQWYKDDTPLSP  
 SEKFKMALEGQMAELRILRLTPADAGVYRCQAGSAQSSAEVTVAEAREVTVIQPLQDAEAMEEGRVCFSCELSH  
 KDEDIEWSLNGTPLYNDSFHEISHEGCLHTLVLKSVRQADTGTVCATSPKVSVSARLVVKGKPVVFLKALDDV  
 SAEERGTTLTQCEVSDPEARVVWRKDGVELGPSDKYDFLHKAGARGLTVHDL SHEDAGLYTCQVGSKETQSKV  
 SVHDLHVGITKRLKTVLEVLEGESCFECVLSHESPSDPAVWTVGGKTVGGSGHFHAVRQGRKYTLTVKDAALS  
 DAGEVVFVSVLGLT SKASLIRERPVDITKPLEDQRTTLGEDVMLSCELSRAGTSVRWLKDGKAIKRSQKYDLL  
 SEGTRAVLVVRKASLKDSGEYTCETEASKSTAKLCVEEKANRFTTELADLQVEEKGRAVFTCKTEHPASVVTW  
 RKGLLELRASGKHVPWHQEGLETLKLTINALERTDSDTYTCDIGQARTQARLLVHGQKVRVIEDLEDTAVQEGSS  
 AKFCRIIRADYPADYQPVHFLDKTPLHSNELNETVDPGGYHVLTLRQLALKDSGTVYFEAGDQRTS AALRVTEK  
 PSIFSRPLTDVTVTEGEDTLVCETTTVDSSVRWTKDGKTLRPSARCQLSHEGCQAQLLITATTPQDGGRYKC  
 EIGGASSSSIVRVHALPVRFRFRESLKDVEVPEGKAATLRCVLSVAAPVEWRHGDDVLKSSNKYSLRQEGAVLE  
 LVIRDLQPDGSGQYSCSFGDQTTSATLTVKTSQAQFVGLRNKEATEGTTVTLRCELTKEAPVEWKKGTETLR  
 NGDKYSLKQDGAVCELQICSLLVADAGEYSCVCGQEKTSATLTVKALLVHFVRRRLRSKEATEGDTTTLQCELS

KAAPVEWRKGTETLRDGDYSLKQDGA VCE LQIRSLTIADAGEYLCTCGQEKTSATLTVRGLPAKFIEDLRSQ
EATEGATAILRCELSKAAPVEWRK GSETLKDGDYTLRQDGA VCE LQIRGLAVVDTGTYS SLP TKFTEGLRNE
EATEGTMATLRCQMSKAAPVEWRK GSETLRDGDYSLRQDGA MCE LQIRGLTIEDSGEYTCVCGQEKTSATLS
VKALPPRFIEDLRSQEATEGTMATLRCQMSKAAPVEWRK GSETLGDGGYSLRQNGAVCE LQI HDLAVEDTGE
YSCVCGQEKTSATLNVKALPPKFTEGLKKEEATEGTMVTLRCQMSKEATVEWRKGAKT LSDGGYSLRQDGA M
CE LQICGLAVEDAGEYSCVCGQEKTSATLSVKALPPRFIEDLRSQEATEGTMATLRCQMSKAAPVEWRK GSET
LRDGDYSLRQDGA VCE LQIRDLAVEDAGEYLCVCGQEKTSATLSVKALPPRFIEDLRSQEATEGTMATLRCQ
MSKAAPVEWRKSKTLRDGDYSLRQDGA MCE LQICDLAVEDTGDYSCVCGQEKTSATLSVKAPQVVFQQPLQ
NLQAEEGSMASLRCELSVPNAAMVWSKGLELQGDTRREARQQGCVAELLRLRDLRREDAGEYSC TCGSQTSA
TLMVTAAPVRFRLRELQAQDVDEGATARLRCELSREAVSVEWRK GSLQLFPKAKYQMVQEGTTAELLVHGVEQE
DAGEYTC DAGHTQSIARLSVRAPKPKFKTDLQSTEQEAGGTARLCCQLSEAE PGTPVQWLKEGVELHVGS KYE
MRRQGA VCELLIHGLEAKDTGEYACL VGGQKT LASLRVKEPEVTIVRGLVDMEVQADEDEFTCKV SQAGATD
VQWHLQGLPLQSNEVTEVAVLADGCTHVLQLKGVTL EDAGTVSFHVGG LSSSAQLTVRVPEVTVLEPLKDVQL
SEGQDAHFRCRLSRASGQEARWALGGVPLQC NEMNDITVEQGTLYLLTLHKVTLEDAGTITLQVGS CSSEAQL
KVTAKNTVLRGLE NVDALQGG EALFECQLSQPEVA AHTWLLDDEPVHTSEKVEVVYFENGLRH LLLLK NLPKQ
DSCRVTFLAGDVVTS AFLTVRGRWLEVLEPPHDASVKAGMQVRFTCILSEAVPVGEATWYINGAAIQPDDTDW
TVTTDGSHHALTLSNAQPQHAGEVTF AARDAVASARLSVLALPDPPEDAE VVGRSDHSVTLSWVAPMS DGGG
LCGYRVEMKEASTGQWQLCHDLVPGPECVVDDLVP GKTYRFRVA AVGPAGAGEPVHLPQMVKIAPAPAPAPAP
APAPETRQAVVGEDICLELEVAADGGEVVWHKGT ERIQPGGHFEVLSRGRQMLVIKGFRTEDQGEYRCGPIQ
GLPSSGAATFNVVMTSGSGDEVPAQPSLPPEAAQEGDLHLLWEALARKRRMSREPTLDSISELPEEDSRVQHL
RQEAETAPDLSEGYSTADELARTGEADLSHTSSDDESRAGT PSLVTYLKKAGGPGISPLASKHEAQVTT SVK
PQKQQEPVVPTCPPPGDLSAADLMDPSLDKAAVKIQAAF KGYKVRKEMKQQEGPVFSRTFGDTEAQVDVLR L
ECVLATKTD MRACWLKDGIELTDGRHYHIDQLKDGTC SLVTLGLAPTDSGRYTCQVSTKSGRVSHSACVVVSG
TESEAESSSGGELDDAFRRARRLHRLFRTKSPAELSEEEFLSADEGPGEPEEPADWQTYREDENFVCIRFE
SLAEARQAVTCFRNMFATMGIGVEISLGEQGRGVEMRIGKVAPTVTPAVPLAKTPGLQTSDAAPVFLTELQN
QVDQDGYPMSFDCVVTGQPVPSVRWFKDGKLL EEDDHYMINEDQQGGHQLIITAVVPADMGVYRCLAENSMGV
SSTKAELRVELTSTDYDTAADATETSSYFSAQGYLSSREQEGTESDEGQLPQVLEELKDLQVAPGTRLAKFQL
KVKGYPA PKLYWFKDQGPLTTS DHIRMTDKKTLHTLEIVSVTREDSGQYAAAYISNAVGAAYSSARLLV RGPSE
PEEKPASDVHERLVP PPRILEKFTPKKVKRGSSITFSVKVEGHPAPSVHWLKEEA EKGLWIGPDP TPGYTMAS S
SKQHS LVLLDVGRQHOGTYTCIATNPAGALCSASLHISGLAKEEEQERVKEALISSFLOGTSQAVSAQMS ES
AGFADLVGQSKGESLVAAEAHSHLSLAEVGT EEF LQKLTSQITEMVSAKISQAKLQVPGGDSDEETKTPSASP
RHGRSRPSSSVQESSSEEDGDSRGEIFDIYVVTADYLP LGAEQDAIILREGQYVEVLDSAHPLRWLVRTKPT
KSSPSRQGWVSPAYLDKRLKLSPEWGPTEAPEFPGEAVSEDEYRTRLSSVIQELLSSEQAFV GELQFLESHM
KHLERSPRVPAAVASQKT VIFRNVDISHFHSSFLKELQCGCTDDDVAMCFIKNQEA FEKYLEFLVGRVQAES
VVVSTPVQEFYKKYAETLSAKDPTQPPPPPLQHYLEQGVVERVQKYQALLKELIRNKARNRQNCALLEQAYAV
VSALPQRAENK LHVSLMENYPGTLEALGEP I RQHGFIVWEGAPGARMPWKGNHRHVFLFRNYLVICKPRRDSR
TDTFSYVFRNMMKLSSIDLNDQVEGD DRAFEVWHERE DSVRKYLLQARTVIKNSWKEICGIQQRLAQPVWR
PPEFEEELADCTAELGETVKLACRVGTGPKPIVSWYKDGK PVEVDPHHILIEDPDG SCTLILDNLTGIDSGQY
MCFAASAAGNASTLGKILVQVPPRFVNKVRATPFVEGEDAQITCTVEGAPYPQIRWYKDGTL LAPGNRYRMLN
EPRSGVLV LVIQAASKEDLGHYEC ELVNRLGSTRGGGELYMQSPALRARDQH HREQIVA AAVEVTEQETKVPKK
TVII EETITTVVKS PRGRRQSPGKSPSRSPRRSASPRR PGLLAPERLYPPGTSPSRRLEVEQGRKAPVPALY
VTEAEVHAPASQS QPKWLEVEETIEVRVKKTGSRGASPVREMTSRGEGILFTLPGGIPGRDPNANN SNKSVY
QEARTWGP AVVHVGEFFIFQVDSVGNVDWVAASPEPEQVRASQKEENTERQEGCSDG DENTFLMEEPQD TDSL
QGRDPKILTHNGRVLTLADLEDYV PQEGETFGCGDSTPSTPDEPPCEVSVLQREI SEPTVGGPVL LNVRPPG
TGATPSFFRPGSQVHSPESVFLREAWSGPVSAAPWTSSFH THVQSSVDGSHG SFKTEVSTQTVSFGAVGET
VTLHIDPDGGEAPGPSQG\*

>rs51583444\_ENSMUSP00000158662\_c.660:G>C\_p.E221Q
ENSMUST00000238202.2|Obscn-208|ENSMUSG00000061462|-|chr11:g.58934935:C>G
VTLEDAGTITLQVGS CSSEAQLKVTEAALCLVRGLQNVDFAGEVATFSCEVSRAGGPEARWWLDGTL LQNSP
ESAITVQEGIVHSLTSLGLGVADSGTITFR TGPLVSTAKLLVKDPTVEVVSAMQDLVVEEGGSAELLCQYSRP
VQATWKMNEREVCADGHRVIEIQDWTVARLTLR PALPCDSGIYSCEAAGTRVVAL LQVQAKNTVLRGLE NVDA
LQGG EALFECQLSQPEVA AHTWLLDDEPVHTSEKVEVVYFENGLRH LLLLK NLPKQDSCRVTFLAGDVVTSAF
LTVR

>rs46013744\_ENSMUSP00000158662\_c.609:G>A\_p.V204M
ENSMUST00000238202.2|Obscn-208|ENSMUSG00000061462|-|chr11:g.58935646:C>T
VTLEDAGTITLQVGS CSSEAQLKVTEAALCLVRGLQNVDFAGEVATFSCEVSRAGGPEARWWLDGTL LQNSP
ESAITVQEGIVHSLTSLGLGVADSGTITFR TGPLVSTAKLLVKDPTVEVVSAMQDLVVEEGGSAELLCQYSRP
VQATWKMNEREVCADGHRVIEIQDWTVARLTLR PALPCDSGIYSCEAAGTRVVAL LQMQAKNTVLRGLE NVDA

LEGGEALFECQLSQPEVAHAHTWLLDDEPVHTSEKVEVVYFENGLRHLLLLLKNLKPQDSCRVTFLAGDVVTSAF  
LTVR  
>rs29421098\_ENSMUSP00000158662\_c.466:G>A\_p.R156Q  
ENSMUST00000238202.2|Obscn-208|ENSMUSG00000061462|-|chr11:g.58935789:C>T  
VTLEDAGTITLQVGSSEEAQLKVTEAALCLVRGLQNVDFAGEVATFSCVSRAGGPEARWWLDGTLQNSP  
ESAITVQEGIVHSLTSLGLGVADSGTITFRTGPLVSTAKLLVKDPTVEVVSAMQDLVVEEGGSSELLCQYSRP  
VQATWKMNEQEVCADGHRVIEEQDWTVARLTLRPAALPCDSGIYSCEAAGTRVVALLOVQAKNTVLRGLENVDA  
LEGGEALFECQLSQPEVAHAHTWLLDDEPVHTSEKVEVVYFENGLRHLLLLLKNLKPQDSCRVTFLAGDVVTSAF  
LTVR  
>rs51724502\_ENSMUSP00000158795\_c.14664:G>A\_p.A4889T  
ENSMUST00000238536.2|Obscn-210|ENSMUSG00000061462|-|chr11:g.58943367:C>T  
MDHSFSGAPRFLTRPKAFVSVGKDATLSCQIVGNPTPHVSWEKDRQFVEAGARFRLAQDGDVYRLTILDLAL  
GDSGQYVCRARNAIGEFAAVGLRVDSEGTCAEQAPHFLLRPTSIRVREGADATFRCRVGGSPPAVSWSKDG  
RRLGPPDAPHVRVEEHGESSALRIRSARPRDGGTYEVRAENPLGSASAAAALVVDSDAEVAGPPGTSTATLLA  
HLQORREAMRAEGIPSPPPGAGTRTCTVTEGKHARLSCFVTGEPKPKETVWKKDQGLVTEGRRHVVEDEQENF  
VLKILFCKQSDRGLYCTASNLVGGTYSSVLVVVREPTVFFKRLQDLEVREKESATFQCEVAQPAATEAAWFK  
EETRLWASAKYDIEEETERRLTVRNVSADDDAVYICETTEGSRVAELSVQGNLTKLPRKTAVRTGDTAIF  
WVELAVPEGPVRWLRNQEEMVAGGRVAITAEGTCHTLTI FQCTLEDMGEVAFVSGGCRTTTFQCVSAPRRPPL  
YPPADPVVKAKTESSVTLWSAPPHGDRPVTIDGYVLEKRKLGAYAWSRCHEAGWLATTEFTITGVAAEEDGFQ  
FRVSAINHFGQGPYLEFPGMTMLVPLAVKTPKAVEAVEGGEVTFVSDLTVASSGEWFLDGEALKASSIYVI  
RCDRTRHMLTIREVPARLHGAQLKVFANGIETS IQMVVRAALGLPSSKLPAAAAREVLAQLHEEAQLLAELSD  
QAAAVTWLKDGRELSLGPYEMQVSAGRRALLVRDVAQDDAGLYECVSRGSRRTAYQLLVQDITDGYRDWGPAG  
PQKHMCKCAGAKIARYLGSSCYRFLQYDKGVWHLEAALDTRQKGKTS SCSLHEKPKLVFAKQQAHSVEKAE  
AGNSATLSCEVTQAQTEVTFWKDGKLLSSSSKVRMEASGCSRRLVVQQAGKADAGEYSCEAGGQKLSFRLDVA  
EPKLVFAKQQAHSVEKAEAGASATLSCEVAQAQTEVTFWKDGKLLSSSSKVRMEASGCSRRLVVQQAGKADA  
GEYSCEAGGQKLSFRLDVAEPKMFVFAKEQQARSEVKAEAGASATLSCEVAQAQTEVTFWKDGKLLSSSSKVRM  
EASGCSRRLVVQQAGKADAGEYSCEAGGQKLSFRLDVTEPKLVFAKEQQARSEVKAEVGNATLSCEVAQAQ  
EVTWFKDGKLLSSSSKVRMEASGCSRRLVVQQAGKADAGEYSCEAGGQKLSFRLDVAEPKLVFAKEQQARSEV  
KAEAGNSATLSCEVAQAQTEVTFWKDGKLLSSSSKVRMEASGCSRRLVVQQAGKADAGEYSCEAGGQKLSFHL  
DVTEPKLVFAKEQQAHSEVKAEAGASATLSCEVAQAQTEVTFWKDGKLLSSSSKVRMEASGCSRRLVVQQAGK  
ADAGEYSCEAGGQKLSFRLDVAEPKLVFAKEQQARSEVKAEAGASATLSCEVAQAQTEVTFWKDGKLLSSSSK  
VRVEASGCSRRLVVQQAGKADAGEYSCEAGGQKLSFRLDVAEPKLVFAKEQQANSEVKAEAGASATLSCEVAQ  
AQTEVTFWKDGKLLSSSSKVRVEASGCSRRLVVQQAGKADAGEYSCEAGGQKLSFRLDVAEPKLVFAKEQQAH  
SEVKAEAGASATLSCEVAQAQTEVTFWKDGKLLSSSSKVRVEASGCSRRLVVQQAGKADAGEYSCEAGGQKLS  
FRLDVAEPKLVFAKEQQAHSEVKAEAGASATLSCEVAQAQTEVTFWKDGKLLSSSSKVRVEASGCSRRLVVQQ  
AGKADAGEYSCEAGGQKLSFRLDVAEPKLVFAKEQQAHSEVKAEAGASATLSCEVAQAQTEVTFWKDGKLLSS  
SSKVRVEASGCSRRLVVQQAGKADAGEYSCEAGGQKLFRLDVAEPKLVFAKEQQAHSEVKAEAGASATLSCE  
VAQAQTEVTFWKDGKLLSSSSKVRVEASGCSRRLVVQQAGKADAGEYSCEAGGQKLSFRLDVAEPKLVFAKEQ  
QAHSEVKAEAGASATLSCEVAQAQTEVTFWKDGKLLSSSSKVRVEASGCSRRLVVQQVQKADAGEYSCEARGQ  
KLSFRLDVADTRLMFAKEQQARTEVKAEAGNSATLSCEVAQAQTEVTFWKDGKLLSSSSKVRVEASGCSRRLV  
VQQAGKADAGEYSCEAGGQKLSFRLDVAEAEQSIPERPSRREPLVVKEHETIILTATIAAPSVAAVTWLKDG  
EIRRSKRHEATSLGDTHTLTVRGAQVLDIAIYSCRVGKEGQDFPVQVEEVAAKFSKPLEPVEGELGGTVMLVC  
ELSPQAEVWRCGNTQLRPGKRFQMTSEGPRTTLTVSGLREDDAEYVCESRDDRTSARLTVKVPVVKFTS  
GLSAMVAEEGQEAATFQCVVSPSDAGVTWYKDGMLQPSSEKFMVESGASRSLTILGLTLEDAGQVTEAEGAS  
SSAALRVREAPVLFKKLEPQTVVEERTSVTLEVELTRPPEVKWTRNAAVLTPSENVEIRAEGARHCLVLRVSV  
GFADRGGFFGCETPDDKTQAKLNVEMRQVRLVVRGLQEVEAKEQGTASMDVELSHAEEGVSWTRDGLRLQPGPKC  
HLAVQGPVHILTLALSALQPQDSGLVAFRAEGVHTSARLIVTELPSVTRVLQDVVATQKEKVTLECELSRPVDV  
RWLKDGVLELRAGKAIGIVAQGTCSRSLVIYRCETGDQGVYVCDALDAQTSASLRVQGRTYTLIFRRVLAEDAGE  
VKFVAENAESRAHLRVKELPVTLLRPLRDKIAMEKHGVLQVSRASAQVRWFKGGVELQSGPKYEVVSDGL  
YRKLVINLVQPEDEDTYTCDAENVKTSAQFFVVEQSITIVRGLKDMTVMPEPAPAWFECETSIPSVRPPKWL  
KTVLQAGGNVGLQDGTVHRLTLHKTCSTMTGPVHFTIGKSRSSAQLVVS DIPVVLTRPLEPKAGRELQSVVL  
SCDFRPAPKAVQWYKDDTPLSPSEKFKMALEGQMAELRILRLTPADAGVYRCQAGSAQSSAEVTEAREVTVI  
QPLQDAEEMEGEVCFSCELSHKDEDIEWLSLNGTPLYNDSPEARVIVSHEGCLHTLVLKSVRQADTGTVCATSPKV  
SVSARLVVKGKPVVFLKALDDVSAEERGTLLQCEVYDSEARVVRKDGVELGSPDKYDFLHKAGARGLTVHD  
LSHEDAGLYTCQVGSKETQSKVSVHDLHVGITKRLKTVLEVLEGECSFECVLSHESPSDPAVWTVGKTVGGS  
GHFHAVRQGRKYTLTVKDAALSDAGEVVSVLGLTSKASLIIRERPVDTKPLEDQRTTLGEDVMLSCELSRA  
GTSVRWLKDGKAIRKSQKYDLLSEGTRAVLVVRKASLKDSGEYTCETEASKSTAKLCVEEKANRFTEELADLQ  
VEEKGRAVFTCKTEHPASVVTWRKGLLELRASGKHVPSQEGTLTKLTINALERTSDTYTCDIGQARTQARLL



VHGQKVRVIEDLEDTAVQEGSSAKFCCRIAPADYGPVHWFLLDKTPLHSNELNEITVQPGGYHVLTLRQLALKD  
SGTVYFEAGDQRTSAALRVTEKPSIFSRPLTDVTVTEGEDTLTVCEFTTVVDSVVRWTKDGKTLRPSARCQLSH  
EGCQAQLLITATTPQDGGRYKCEIGGASSSSIVRVHALPVRFRRESLKDVEVPEGKAATLRCVLSVAAPVEWR  
HGDDVLKSSNKYSRQEGAVLELVIRDLQPQDSGQYSCSFGDQTTSATLTVKTSQAQFVGLKRNKEATEGTTV  
TLRCELTKAPVEWKKGTETLRNGDKYSLKQDGAVCELQICSLLVADAGEYSCVCGQEKTSAATLTKALLVHF  
VRLRSKEATEGDTTTLQCELSKAAPVEWRKGTETLRDGDYSLKQDGAVCELQIRSLTIADAGEYLCTCGQE  
KTSATLTVRALPAKFKDSLKNEEATEGTTATLSCELSKAAPVWKKGPKTLQSGDKYVLRQDGAVCGLQIHGL  
TMADAGEYSCVCGQEKTSAATLTVRGLPAKFIEDLRSQEATEGATAILRCLELSKAAPVEWRKGTETLRDGDYR  
LRQDGAVCELQIRGLAVVDTGTYSPLTKFTFLAGLRNEEATEGTMATLRCQMSKAAPVEWRKGTETLRDGDYR  
LRQDGAMCELQIRGLTIEDSGEYTCVCGQEKTSAATLSVKALPSRFIEDLRSQEATEGTMATLRCQMSKTAPVE  
WKKGSETLRDGGYSLRQDGPVCELQICDLAVEDAGEYSCVCGQEKTSAATLSIKALPPRFIEDLRSQEATEG  
MATLRCQMSKAAPVEWRKGTETLRDGGYSLRQNGAVCELQIHDLAVEDTGEYSCVCGQEKTSAATLNVKALPP  
RFIEDLRSQEATEGTMATLRCQMSKAAPVEWRKGTETLRDGGYSLRQDGAVCELQIHDLVEDAGQYSCVCG  
QEKTSAVLTVDALPPKFTTEGLKKEEATEGTMVTLRCQMSKEATVEWRKGAKTSLDGGYSLRQDGAMCELQIC  
GLAVEDAGEYSCVCGQEKTSAATLSVKALPPRFIEDLRSQEATEGTMATLRCQMSKAAPVEWRKGTETLRDGD  
YSLRQDGAVCELQIRDLAVEDAGEYLCVCGQEKTSAATLSVKALPPRFIEDLRSQEATEGTMATLRCQMSKAAP  
VEWRKGTETLRDGDYSLRQDGAMCELQICDLAVEDTGDYSCVCGQEKTSAATLSVKALPPRFIEDLRSQEARE  
GTVATLRCRMSKAAPVEWRKGTETLRDGDYSLRQEGNLCELQIRDLAVEDTGEYSCVCGQEKTSAATLSVKAL  
PAKFIEDLRSQEAPESSTVTLRCKLSKASVWKKGSETLRNGARYSLRQDGAVCELEIRDLTVEDTGEYSCT  
CGQERTSATSIMAPQVVFQQLQNLQAEEGSMASLRCELSVNPAAWWSKGGLELQGDTRREARQQGCVTEL  
LLRDLRREDAGEYSCVCGQEKTSAATLMVTAAPVRFLRELQAQDVDEGATARLRCELSREAVSVEWRKGSLLQF  
PCAKYQMVQEGTTAELLVHGVEQEDAGEYTCDAHTQSIARLSVRAPKPKFKTDLQSTEQEAAGTARLCCQLS  
EAEFGTVPVQWLKEGVELHVGSKYEMRRQGAVALLEIHLGLEAKDTGEYACLVGGQKTASLRVKEPEVTIVRGL  
VDMEVQADEDEFTCKVQAGATDVQWHLQGLPLQSNVTEVAVLADGCTHVLQKGVTLLEDAGTVSFHVGGL  
SSSAQLTVRVPEVTVLEPLKDVQLSEGQDAHFRCRLSRASGQEARWALGGVPLQCNEMNDITVEQGTLYLLTL  
HKVTLEDAGTITLQVGCSSSEALQKVTAKNTVLRGLVNDVALEGGEALFECQLSQPEVAHAHTWLLDDEPVHTS  
EKVEVVYFENGLRHLKLLKLPQDSCRVTFLAGDVNTSAFLTVRGRWLEVLPPHDASVKAGMQRVFTCILS  
EAVPVGEATWYINGAAIQPDDTDWTVTTDGSHALTLSNAQPQHAGEVTFFAARDAVASARLSVLAALPDPEDA  
EAVGRSDHSVTLVSWVAPMSDGGGLCGYRVMKEASTGQWQLCHDLVPGPECVDDLVPGKTYRFRVAAVGPA  
GAGEPVHLPQMVKIAPAPAPAPAPAPAPAPETROAVVEDICILEVAADGGEVVWHKGTERTIQPGHFVLS  
RGQRQMLVIKGFRTEDQGEYRCGPIQGLPSSGAATFNVMVMTSGSGDEVPAQPSLPPEAAQEGDLHLLWEALAR  
KRRMSREPTLDSISELPEEDSRVQHLRQEAETAPDLSEGYSTADELARTGEADLSHTSSDDESAGTPSLVT  
YLKAGGPGISPLASKHEAQVTTSVKPKQKQEPVPTCPPPGDLSAADLMDPSLDKAAVKIQAAPFKYKVRKE  
MKQQEGPVFSRTFGDTEAQVGDVLRLECVLATKTDMRACWLKDGIELTDGRHYHIDQLKDGTCSLVTLGLAPT  
DSGRYTCQVSTKSGRVSHSACVVVSGTESEAESSSGGELDDAFRAARRLHRLFRTKSPAELSEELFLSADE  
GPGEPEPADWQTYREDENFVCIRFESLAEARQAVTCFRNMFATMIGIVEISLGEQGRGVEMRIKGVAPTVT  
PAVPLAKTPGLQTSDAAPVFLTELQNDVQDGYPMSFDCVVTGQPVPSVRWFKDGKLEEDDHYMINEDQQGG  
HQLIITAVVPADMGVYRCLAENSMGVSSTKAELRVELTSTDYDTAADATETSSYFSAQGYLSSREQEGTESDE  
GQLPQVLEELKDLQVAPGTRLAKFQLKVKGYPAKLYWFKDGGQPLTSDHIRMTDKKTLHTLEIVSVTREDSG  
QYAAYSNAVGAAYSSARLLVRGPSEPEEKPASDVHERLVPPRILEKFTPKKVKRGSSITFSVKVEGHPAPSV  
HWLKEEAKEGVLWIGPDTPGYTMASSSKQHSVLVLDVGRQHGTYTCIATNPAGQALCSASLHISGLAKEEEEQ  
ERVKEALISSFLQGTSAQVSAQMSSEAGFADLVGQSKGESLVAAEAHSHLSLAEVGTTEFLQKLTLSQITEMVS  
AKISQAKLQVPGGDSDEETKTPSASPRHGRSRPSSSVQESSSESEDGDSRGEIFDIYVVTADYLPGLGAEQDAI  
ILREGQYVEVLDSAHPLRWLVRTKPTKSSPSRQGWVSPAYLDKRLKLSPEWGPTEAPEFPGEAVSEDEYRTRL  
SSVIOELLSSSEQAFVGLLQFLESHHMKHLERSPRVPAAVASQKTVIFRNVQDISHFSSFLKELQCGGTDDDV  
AMCFIKNQEAFEKYLEFLVGRVQAESVVVSTPVQEFYKKYAEETLSAKDPTQPPPPPLQHYLEQPVVERVQKYQ  
ALLKELIRNKARNRQNCALLEQAYAVVSALPQRAENKLVSLMENYPGTLEALGEPHQGHFIVWEGAPGARM  
PWKGHNHRVFLFRNYLVICKPRRDSRTDFTSYVFRNMMKLSSIDLNDQVEGDDRAFEVWHEREDSVRKYLLQA  
RTVLIKNSWVKEICGIQQLAQPVWRPPEFEEELADCTAELGETVKLACRVGTGTPKPIVSWYKDGKPVVDPH  
HILLIEDPDGCTLILDLNLTGIDSGQYMCFAASAAGNASTLGKILVQVPPRFVNVKVRATPFVEGEDAQITCTVE  
GAPYPQIRWYKDGTLAPGNRYRMLNEPRSGVLVVIQAASKEDLGHYECELVNRLGSTRGGGELYMQSPALR  
ARDQHHREQIVAAVEDTSVEGSAHSAQDGADQQAASVLWRLLGSEALGPSPGDLPNTRQSEPPAFEEAASQIP  
GAASGTPEVSQPGTHKLEQETSSSGSQGWTVIRVEGTAWPGAGTQQLLDVHSQVIMETTQRTYVCQAPDT  
GVTRAMPQVTEIDVQVQGDMAQFDAVIEGHPPPITVWYKGSTQLTSSARLSQRQDGTYSVLVTDVAPHDA  
GVYTCVANNAGGVLCKAELLVHGDKLDAENQVYRRKLHSFYDVQEEIGRGVFGVVKRQHKGNKMFCAAKF  
IPLRSKTRAQAYQERDILATLGHPLVTGLLDQFETRKTLLILILELCSSEELLDRLFKKGVVTEAEVKVYIQQL  
VEGLHYLHSHGILHLDIKPPNIMVHPAREDIKICDFGFAQKITPSEPQYSKYGSPEFVSPEIIEQNPFVSEGS  
DIWAMGVI SYLSLTCSSPFAGESDRATLLNVLEGRVSWSSPTAAHLSSEDAKDFIKATLQRTPRARPSTSQCLA

HPWFLKSMPEAAEHFINTKQLKFLLRASRWRQSLMSYKSI LVMRSIPELLQGPPDPSPLGVARHLRGEASGAS  
SSSSSSDNELAPFARAKSLPPSPVTHSPLLHPRGFLRPSASLPEETEASMP TADA AV PAS PQSAGPPASPGCV  
PRHSVISSLFYQQAGEGAERGNKTS GAKRHPARRRHLLKGGYIARALPGLREPLMEYSLLEEEAAREEQASLM  
TKTPSFETALRLPSSSVREVPGRSHSLDNPPVTTGPSPEACEQLLFPSTGLTHETTAKDRGHKEGFLQESV  
PFPMSGDSRPGKQEGSSQDSCRGPASSCHSELGSGSQEGCGPPSSQSLGSLPPQSLKKE LSTSCGPLFSEQ  
PQAAPFPTQVSPLLGSEKEPQDGSLSSEGPVVPVSSSPGSASQVDASLDTEGLSEAGDTCDFTPPPQRPQEQAT  
TRKFSLESRGGYAGVAGYGTFAFGGDAGGMLGQGPLWARMAWAVS QSSEEQDEAATESPQPLESIGPIAEASG  
VPLRTPSPSLTPWEEVEQVSLVQIRDLSGDAEAADTISLDISEVDPAYLNLSDLYDIKYLPEFEMI FRRVPKPI  
EQPESPGSETEAGQLADFL EEA AWPWP GELGLRAGLEITEEPEEPGDLEALLGEEAAVGRKRKWSPSRGLFQF  
PGRCLSGEEPVELGLRQRVKASMAHISRILKGRPEGPERE GPPRKKAGLASFRLSGLKGRDQELSDEAVVLGQ  
SVTLACQVLAQPTAQATWSKDGVLLESSGHLISSTLKNFQLLTI LVVKEEDLGTYTCCVSNPLGTAVTTGVL  
RKAERPSSSPRPEVGELYKDAVLLVWKPVE SCGPVTVYIVQCCIEGGSWTTLASDISDCCYLTGKLSRGGMYIF  
RTACVSKAGMGPYSSPSEQVLLGGPNHLASEEESSRGRPAQLLPSTKTFAFQMQIRRGFRFSVVRQCREKASGR  
ALAAKIVPYQPEDKTAVLREYEALKRLHHPHLAQLHAAYLSPRHLVLI LELCSGPELLPSLAERESYSESDVK  
DYLWQMLSATQYLHAQHILHLDLRSENMMVTEYNLLKVIDLGN AQSLDQEKVPAPENFKDYLETMAPELLEGQ  
GAVPQTDIWAIGVTA FIMLSGEY P ESSEGRDLQKGLRKLIRLSRCYAGLSGGAVAFLOSSLCAQPWGRPCA  
STCLQCGLWTEEGPTGSRPTPVTFTVRLRAFVREKRRALLYKKNLAQVR\*  
>rs51724502\_ENSMUSP00000038264\_c.12780:G>A\_p.A4261T  
ENSMUST00000047441.14|Obscn-202|ENSMUSG00000061462|-|chr11:g.58943367:C>T  
MDHSFSGAPRFLTRPKAFVSVGKDATLSCQIVGNPTPHVSWEKDRQPVEAGARFRLAQDGDVYRLTILDLAL  
GDSGQYVCRARNAIGEFAAVGLRVDSEGTCAEQAPHFLLRPTSIRVREGADATFRCRVGGSPQPAVSWSKDG  
RRLGPPDAPHVRVEEHGESSALRIRSARPRDGGTYEVRAENPLGSASAAAALVVDSDAEVAGPPGTSTATLLA  
HLQQRRREAMRAEGIPPSPPGAGTRTCTVTEGKHARLSCFVTGEPKPKETVWKKDQGLVTEGRRHVYVEDEQENF  
VLKILFCKQSDRGLYTCTASNLVGQTYSSVLVVVREPTVPFKKRLQDLEVREKESATFQCEVAQPA TEAAWFK  
EETRLWASAKYDIEEGETERRLTVRNVSADDDAVYICETTEGSRVVAELSVQGNLTKRKLPRKTAVRTGDTAIF  
WVELAVPEGPVTRWLRNQEEMVAGGRVAITAEGTCHTLTI FQCTLEDMGEVAFVSGGCRTTTFVCSAPRRPPL  
YPPADPVVKAKTSLWSAPPHGDRPVITIDGYVLEKRLKLGAYAWSRCHEAGWLATTEFTITGVAAEEGDFQ  
FRVSAINHFGQGPYLEFPGMTMLVPLAVKTPKAVEAVEGGEVTFVSDLTVASSGEWFLDGEALKASSIYVI  
RCDRTRHMLTIREVPARLHGAQLKFVANGIETS IQMVVRAALGLPSSKLPAAAAREVLAQLHEEAQLLAELSD  
QAAA VTWLKDGRELSLGPKYEMQVSAGRRALLVRDVAQDDAGLYECVSRGSR TAYQLLVQDITDGYRDWGPAG  
PQKHMCKCAGAKIARYLGSSCYRFLQYDKGVWHWLEAALDTRQKGTSSCSLHEKPKLVFAKQQAHSEVKA  
AGASATLSCEVAQAQTEVTFWKDGGKLSSSSKVRMEASGCSRRLVVQQAGKADAGEYSCEAGGQKLSFRLDVA  
EPKMVFAKEQQARSEVKA EAGASATLSCEVAQAQTEVTFWKDGGKLSSSSKVRMEASGCSRRLVVQQAGKADA  
GEYSCEAGGQKLSFRLDVTEPKLVFAKEQQARSEVKA EAGASATLSCEVAQAQTEVTFWKDGGKLSSSSKVRM  
EASGCSRRLVVQQAGKADAGEYSCEAGGQKLSFRLDVAEPKLVFAKEQQARSEVKA EAGASATLSCEVAQAQ  
EVTWFKDGGKLSSSSKVRMEASGCSRRLVVQQAGKADAGEYSCEAGGQKLSFHLDVTEPKLVFAKEQQAHSEV  
KAEAGASATLSCEVAQAQTEVTFWKDGGKLSSSSKVRMEASGCSRRLVVQQAGKADAGEYSCEAGGQKLSFR  
LDVAEPKLVFAKEQQARSEVKA EAGASATLSCEVAQAQTEVTFWKDGGKLSSSSKVRMEASGCSRRLVVQQAG  
ADAGEYSCEAGGQKLSFRLDVAEPKLVFAKEQQANSEVKA EAGASATLSCEVAQAQTEVTFWKDGGKLSSSSK  
VRVEASGCSRRLVVQQAGKADAGEYSCEAGGQKLSFRLDVAEPKLVFAKEQQAHSEVKA EAGASATLSCEVAQ  
AQTEVTFWKDGGKLSSSSKVRMEASGCSRRLVVQQAGKADAGEYSCEAGGQKLSFRLDVAEPKLVFAKEQQAH  
SEVKA EAGASATLSCEVAQAQTEVTFWKDGGKLSSSSKVRMEASGCSRRLVVQQAGKADAGEYSCEAGGQKLS  
FRLDVAEPKLVFAKEQQAHSEVKA EAGASATLSCEVAQAQTEVTFWKDGGKLSSSSKVRMEASGCSRRLVVQQ  
AGKADAGEYSCEAGGQKLFRLDVAEPKLVFAKEQQAHSEVKA EAGASATLSCEVAQAQTEVTFWKDGGKLS  
SSKVRMEASGCSRRLVVQQVQKADAGEYSCEARGQKLSFRLDVAEAE SQI PERPSRREPLVKEHETIILTAT  
IAAPSVAAVTWLKDGV EIRRSKRHEATSLGDHTLTVRGAQVLD SAIYSCRVGKEGQDFPVQVEEVA AKFSKP  
LEPVEGELGGTVMLVCELSPEQA EVVWRCNGTQLRPGKRFQMTSEGPRRTLTVSGLREDDAEYVCE SRDDRT  
SARLTVKVPRVVKFTSGLSAMVAEEGQEATFQCVVSPSDAGVTWYKDGMLQPSSEKFMVME SGASRSLTILGL  
TLEDAGQVTVEAEGASSAALRVREAPVLFKKKLEPQTVEERTSVTLEVELTRPWPEVKWTRNAAVLTPSENV  
EIRAEGARHCLVLRVGFADRGGFCETPDDKTQAKLNVEMRQVRLVRLVGLQEVEAKEQGTASMDVELSHA EVE  
GSWTRDGLRLQPGPKCHLAVQGPVHILTLSALQPQDSGLVAFRAEGVHTSARLIVTEL PVSFTRVLQDQVATQ  
KEKVTLECELSRPVDVRWLKDGVELRAGKAI GIVAQGTCSRSLVIYRCETGDQGVYVCDALDAQTSASLRVQGR  
TYTLIFRRVLAEDDAGEVKFVAENAE SRAHLRDKLPTVLLRPLRDKIAMEKHRGVLECCQVSRASAVQWRWFKGG  
VELQSGPKYEVVSDGLYRKLVIN DVQPEDEDTYTC DAGNVKTSAQFFVEEQSITIVRGLKDMTVM EPAPAWFE  
CETSI PSVRPPKWL LGGKTVLQAGGNVGL EQDGT VHRLTLHKTCSTMTGPVHFTIGKSRSSAQLVVS DIPVVL  
RPLEPKAGRELQSVVLSCDFRPAPKAVQWYKDDTPLSPSEKFKMALEGM AELRILRLTPADAGVYRCQAGSA  
QSSAEVTVAREVTVIQPLQDAEAMEEGRVCFSCELSHKDEDI EWSLNGTPLYNDSFHEISHEGCLHTLVLKS  
VRQADTGTVCATSPKVSVSARLVVKGKPVVFLKALDDVSAEERGTLTLQCEVSDPEARVVWRKDGVELGPSDK

YDFLHKAGARGLTVHDLSDHEDAGLYTCQVGSKETQSKVSVHDLHVGI TKRLKTVEVLEGESECSFECVLSHESP
SDPAVWTVGGKTVGGSGHFHAVRQGRKYTLTVKDAALSDAGEVVFVSVLGLTSKASLIIRERPVDITKPLEDQR
TTLGEDVMLSCELSRAGTSVRWLKDGKAIKRSQKYDLLSEGTRAVLVVRKASLKDSGEYTCETEASKSTAKLC
VEEKANRFTEELADLQVEEKGRAVFTCKTEHPASVVTWRKGLLELRASGKHVPSQEGTLTKLTINALERTDSD
TYTCDIGQARTQARLLVHGQKVRVIEDLEDTAVQEGSSAKFCCRIAPADYGPVHWFLDKTPLHSNELNEITVQ
PGGYHVLTLRQLALKDSGTVYFEAGDQRTSAALRVTEKPSIFSRPLTDVTVTEGEDLTLVCETTTVDSSVRWT
KDGKTLRPSARCQLSHEGCQAQLLITATTPQDGGRYKCEIGGASSSSIVRVHALPVRFRESLKDVEVPEGKAA
TLRCVLSVAAPVEWRHGDDVLKSSNKYSLRQEGAVLELVIRDLQPDQSGQYSCSFGDQTTSATLTVKTSQAQ
FVGLKRNKEATEGTTVTLRCELTKAPVWKKGTETLRNGDKYSLKQDGAVCELQICSLLVADAGEYSCVCGQ
EKTSATLTVKALLVHFVRRRLRSKEATEGDTTTLQCELSKAAPVEWRKGTETLRDGDYSLKQDGAVCELQIRS
LTADAGEYLCTCGQEKTSATLTVRALPAKFKDSLKNEEATEGTTATLSCELSKAAPVTWKKGPKTLQSGDKY
VLRQDGAVCGLQIHGLTMADAGEYSCVCGQEKTSATLTVRGLPAKFIEDLRSQEATEGATAILRCELSKAAPV
EWRKGETLTKDGDYTLRQDGAVCELQIRGLAVVDTGTYSPLPTKFTTEGLRNEEATEGTMATLRCQMSKAAPV
EWRKGETLTDGDYSLRQDGAMCELQIRGLTIEDSGEYTCVCGQEKTSATLSVKALPPRFIEDLRSQEATEG
TMATLRCQMSKAAPVEWRKGETLTDGGGRYSLRQNGAVCELQIHDLAVEDTGEYSCVCGQEKTSATLNVKALP
PRFIEDLRSQEATEGTMATLRCQMSKAAPVEWRKGETLTDGGGRYSLRQDGAVCELQIHDLVEDAGQYSCVC
GQEKTSAVLTVDALPPKFTTEGLKKEEATEGTMVTLRQMSKEATVEWRKGAKTLSDGGGRYSLRQDGAMCELQI
CGLAVEDAGEYSCVCGQEKTSATLSVKALPPRFIEDLRSQEATEGTMATLRCQMSKAAPVEWRKGETLTDGD
RYSLRQDGAMCELQICDLAVEDTGDYSCVCGQEKTSATLSVKAPQVVFQOPLQNLQAEEGSMASLRCELSVFN
AAMVWSKGGLELQGDTRREARQQGCVTELLLRDLRREDAGEYSCVCGSQTTSATLMVTAAPVRFRLRLQAQDV
DEGATARLRCELSREAVSVEWRKGSLLQFPCAKYQMVQEGTTAE LLVHGVEQEDAGEYTC DAGHTQS IARLSV
RAPKPKFKTDLQSTEQEAGGTARLCCQLSEAEPTPVQWLKEGVELHVGSKYEMRRQGAVCELLIHGLEAKDT
GEYACLVGQKTLASLRVKEPEVTIVRGLVDMEVQADEDFEFTCKVSOAGATDVQWHLQGLPLQSNVTEVAV
LADGCTHVQLKGVTLLEDAGTVSFHVGGLSSSAQLTVRVPEVTVLEPLKDVQLSEGQDAHFRCRLSRASGQEA
RWALGGVPLQCNEMNDITVEQGTLYLLTLHKVTLLEDAGTITLQVGSSEAEQLKVTAKNVTLRGLENVDALEG
GEALFECQLSQVEVRAAHTWLLDDEPVHTSEKVEVVYFENGLRHLLLLKLNKLPQDSRVTFLAGDVVTSFAFLT
RALPDPPEDEAEVVSADHSVTLVWVAPMSDGGGLCGYRVMKEASTGQWQLCHDLVPGCEVVDLVPGKTY
RFRVAAVGPAGAGEPVHLPQMVKIAPAPAPAPAPAPAPAPETRQAVVGEDICLELEVAADGGVEVWHKGTERRI
QPGGHFEVLSRQGRQMLVIKGFRTEDQGEYRCGPIQGLPSSGAATFNVMVMTSGSGDEVPAQPSLPPEAAQEGD
LHLLWEALARKRRMSREPTLDSISELPEEDSRVQHLRQEAETAPDLSEGYSTADELARTGEADLSHTSSDDE
SRAGTPSLVTYLKKAGGPGISPLASKHEAQVTTSVKPKQKQEPVVPVTPCPPGDLAADLMDPSLDKAAVKIQA
AFKGYKVRKEMKQEGPVFSRTFGDTEAQVGDVLRLECVLATKTKDMRACWLKDGIELTDGRHYHIDQLKDGTC
SLLVTGLAPTDSGRYTCQVSTKSGRVSHSACVVVSGTESEAESSSGGELDDAFRRRAARLHRLFRTRKSPAELS
EELFLSADEGPEPEEPADWQTYREDENFVCIRFESLAEARQAVTCFRNMFMATMGIGVEISLGEQGPGRVEM
RIGKVAPTVTAVPLAKTGLQTSDAAPVFLTELQNDVQDGYPMSFDCVVTGQPVPSVRWFKDGKLLLEDDH
YMINEDQQGGHQLIITAVVPADMVYRCLAENSMGVSSTKAELELVELTSTDYDTAADATETSSYFAAQYLS
REQEGTESDEGQLPQVLEELKDLQVAPGTRLAKFQLKVKGYPAKLYWFKDGQPLTSDHIRMTPDKTLHTLE
IVSVTREDSGQYAAIISNAVGAAYSSARLLVRGPSEPEEKPASDVHERLVPPRILEKFTPKKVKRGSSITFSV
KVEGHPAPSVHHLKEEAKEGVLWIGPDTPGYTMASSKQHSVLVLDVGRQHOGTYTCIATNPAGQALCSASLH
ISGLAKEEEQERVKEALISSFLQGTSAVSAQMSSESAGFADLVGQSKGESLVAAEAHSHLSLAEVGTTEFLQK
LTSQITEMVSAKISQAKLQVPGGDSDEETKTPSASPRHGRSRPSSSVQESSSESEDGDSRGEIFDIYVVTADY
LPLGAEQDAIILREGQYVEVLDLSDAHPLRWLVRTKPTKSSPSRQGWVSPAYLDKRLKLSPEWGPTEAPEFPGEA
VSEDEYRTRLSSVIQELLSSEQAFVGELEQFLESHHMKHLERSPRVPAAVASQKTVIFRNVQDISHFHSSFLKE
LQCGCTDDDVAMCFIKNQEAFAFEKYLEFLVGRVQAESVVVSTPVQEFYKKYAEETLSAKDPTQPPPPPLQHYLE
QPVERVQKYQALLKELIRNKARNRQNCALLEQAYAVVSALPQRAENKLVSLMENYPTGLEALGEPVIRQGHFI
VWEGAPGARMPWKGNHRHVFLFRNYLVICKPRRDSRTDFTSYVFRNMMKLSSIDLNDQVEGDDRAFEVWHERE
DSVRKYLQARTVIKNSWVKEICGIQORLAQPVWRPPEFEELADCTAELGETVKLACRVTGTPKPIVSWYK
DGKPEVDPHHILIEDPDGSCCTLILDNLTGIDSGQYMCFAASAAGNASTLGKILVQVPPRFVNKVRATPFVEG
EDAQITCTVEGAPYPQIRWYKDGTLAPGNRYRMLNEPRSGVLVLIQAASKEDLGHYECELVNRGSTRGGG
ELYMQSPALRARDQHHREQIVAAVEGAPSMQVTIEDVQVQVGDMAQFDAVIEGHPPPIVTWYKGTQLTSSAR
LSQRQDGTYSLVLTVDVAPHDAGVYTCVANNAGGQVLCCKAELLVHGGDKLDAENQVYRRKLSHFYDVQEEIGR
GVFGFVKRVQHKGNMFCFAAKFIPLRSKTRAQYQERDILATLGHPLVTGLLDQFETRKTLLILILELCSSEEL
LDRLFLKGVVTEAEVVKYIQQLVEGLHYLHSHGILHLDIKPNILMVHPAREDIKICDFGFAQKIPSEFPQYS
KYGSEPFVSPPEIEQNPVSEGSDIWAMGVI SYLSLTCSSPFAGESDRATLLNVLEGRVSSWSPTAHLSEDAK
DFIKATLQRTPRARPSTSQCLAHPWFLKSMPEAAEHAHINTKQLKFLLRASRWRQSLMSYKSLVMSRIPPELLQ
GPPDPSPLGVARHLRGEASGASSSSSSDNE LAPFARAKSLPPSPVTHSPLLHPRGFLRPSASLPEETEASMP
TADA AVPAS PQSAGPPASPGCVPRHSV ISSLFYQQAGEGAERGNKTS GAKRHPARRRHLLKGGYIARALPGLR
EPLMEYSLLEEEAAREEQASLMTKTPSFETALRLPSSSVREVPGRSHSLDNPVTTGSPPEACKEQLLFPST

GLTHETAKDRGHKEGFLQESVFPFPPMSGDSRPGKQEGSSQDSRCRGPASSCHSELGSGSQEGCGPPSSQSLG  
 SLPPQSLKKELESTSCGPLFSEQPQAAPFPTQVSPLLGSEKEPQDGLSEGPVVPVSSSPGSASQVDAASLDTEG  
 LSEAGDTCDFTPPPQRPQEQATTRKFSLESRRGGYAGVAGYGTFAFGGDAGGMLGQGPLWARMWAVSOSSEEQ  
 DEAATESPQPLESGLPIAEASGVPLRTSPSLTPWEEVEQVSLVQIRDLSGDAEAADTISLDISEVDPAYLNLS  
 DLYDIKYLPEFEMI FRRVPKPIEQPESPGSETEAGQGLADFLLEAAWPWPGEGLGLRAGLEITTEEPPEPGDLEA  
 LLGEAAVGRKRKWSPSRGLFQFPGRCLSGEEPVELGLRQRVKASMAHISRILKGRPEGPEREPPRKKAGLAS  
 FRLSGLKGRDQELSDEAVVLGQSVTLACQVLAQPTAQATWSKDGVLLESSGHLLISSTLKNFQLLTI LVVKEE  
 DLGTYTCCVSNPLGTAVTTGVLKRAERPSSSPRPEVGEYKDAVLLVWKPVESECGPVYIVQCCIEGGSWTTL  
 ASDISDCCYLTKGLSRGGMYIFRTACVSKAGMGPYSSPSEQVLLGGPNHLASEEESRRRPAQLLPLSTKTFAF  
 QMQIRRGRFSVVRQCREKASGRALAAKIVPYQPEDKTAVLRREYALKRLLHHPHLAQLHAAYLSPRHLVLI LEL  
 CSGPELLPSLAERESYSESDVKDYLWQMSATQYLHAQHILHLDLRSENMMVTEYNLLKVIDLGNASLDQEK  
 VPAPENFKDYLETMAPELLEGQAVPQTDIWAIGVTAIFIMLSGEY PESSSEGTDLQKGLRKLIRLSRCYAGL  
 SGGAVAFLOSSLCAQPWGRPCASTCLQCGWLTEEGPTGSRPTPVTFTVRLRAFVREKRRRALLYKKNHQAQ  
 VR\*

>rs51724502\_ENSMUSP00000049737\_c.14463:G>A\_p.A4822T

ENSMUST00000052872.15|Obscn-203|ENSMUSG00000061462|-|chr11:g.58943367:C>T  
 MDHSFSGAPRFLTRPKAFVSVGKDATLSCQIVGNPTPHVSWEKDRQVEAGARFRLAQDGDVYRLTILDLAL  
 GDSGQYVCRARNAIGEAFVAVGLRVDSEGTCAEQAPHFLLRPTSIRVREGADATFRCRVGSPQPAVSWSKDG  
 RRLGPPDAPHVRVEEHGESSALRIRSARPRDGGTYEVRAENPLGSASAAAAALVVDSDAEVAGPPGTSTATLLA  
 HLQORREAMRAEGIPPSPPGAGTRTCTVTEGKHARLSCFVTGEPKPEVWKKDGQLVTEGRRHVVEDEQENF  
 VLKILFCKQSDRGLYCTASNLVQTYSSVLVVREPTVPFKKRLQDLEVREKESATFQCEVAQPAEAWFK  
 EETRLWASAKYDIEEGTERRLTVRNVSADDDAVYICETTEGSRVVAELSVQGNLTKLPRKTAVRTGDTAIF  
 WVELAVPEGPVRWLRNQEEMVAGGRVAITAEGTCHTLTI FQCTLEDMGEVAFVSGGCRTTTTQFCVSAPRRPPL  
 YPPADPVVKAKTESSVTLWSAPPHGDRPVTIDGYVLEKRLKLGAYAWSRCHEAGWLATTEFTITGVAAEEDGFQ  
 FRVSAINHFGQGPYLEFPGTMHLVPLAVKTPKAVEAVEGGEVTFVSDLTVASSGEWFLDGEALKASSIYVI  
 RCDRTRHMLTIREVPARLHGAQLKVFVANGIETSIQMVVRAALGLPSKLPAAAAREVLLAQHHEEAQLLAELSD  
 QAAAATVWLKDGRELSLGPKYEMQVSAGRRALLVRDVAQDDAGLYECVSRGSRRTAYQLLVQEPKLVFAKQQA  
 SEVKAEEAGNSATLSCEVTQAQTEVTFWKDGKLLSSSSKVRMEASGCSRRLVVQQAGKADAGEYSCEAGGQKLS  
 FRLDVAEPKLVFAKQQAHSSEVKAEEAGASATLSCEVAQAQTEVTFWKDGKLLSSSSKVRMEASGCSRRLVVQQ  
 AGKADAGEYSCEAGGQKLSFRLDVAEPKMFVFAKEQQARSEVKAEEAGASATLSCEVAQAQTEVTFWKDGKLLSS  
 SSKVRMEASGCSRRLVVQQAGKADAGEYSCEAGGQKLSFRLDVTEPKLVFAKEQQARSEVKAEEVGNATLSCE  
 VAQAQTEVTFWKDGKLLSSSSKVRMEASGCSRRLVVQQAGKADAGEYSCEAGGQKLSFRLDVAEPKLVFAKEQ  
 QARSEVKAEEAGNSATLSCEVAQAQTEVTFWKDGKLLSSSSKVRMEASGCSRRLVVQQAGKADAGEYSCEAGGQ  
 KLSFHLDVTEPKLVFAKEQQAHSEVKAEEAGASATLSCEVAQAQTEVTFWKDGKLLSSSSKVRMEASGCSRRLV  
 VQQAGKADAGEYSCEAGGQKLSFRLDVAEPKLVFAKEQQARSEVKAEEAGASATLSCEVAQAQTEVTFWKDGKLL  
 LSSSSKVRVEASGCSRRLVVQQAGKADAGEYSCEAGGQKLSFRLDVAEPKLVFAKEQQANSEVKAEEAGASATL  
 SCEVAQAQTEVTFWKDGKLLSSSSKVRVEASGCSRRLVVQQAGKADAGEYSCEAGGQKLSFRLDVAEPKLAFA  
 KEQQAHSEVKAEEAGASATLSCEVAQAQTEVTFWKDGKLLSSSSKVRVEASGCSRRLVVQQAGKADAGEYSCEA  
 GGQKLSFRLDVAEPKLAFAKEQQAHSEVKAEEAGASATLSCEVAQAQTEVTFWKDGKLLSSSSKVRVEASGCSR  
 RLVVQQAGKADAGEYSCEAGGQKLSFRLDVAEPKLAFAKEQQAHSEVKAEEAGASATLSCEVAQAQTEVTFWKD  
 GKLLSSSSKVRVEASGCSRRLVVQQAGKADAGEYSCEAGGQKLFRLDVAEPKLMFAKEQQAHSEVKAEEAGAS  
 ATLSCEVAQAQTEVTFWKDGKLLSSSSKVRVEASGCSRRLVVQQAGKADAGEYSCEAGGQKLSFRLDVAEPKL  
 VFAKEQQAHSEVKAEEAGASATLSCEVAQAQTEVTFWKDGKLLSSSSKVRVEASGCSRRLVVQQVQKADAGEYS  
 CEARGQKLSFRLDVADTRLMFAKEQQARTEVKAEEAGNSATLSCEVAQAQTEVTFWKDGKLLSSSSKVRVEASG  
 CSRRLVVQQAGKADAGEYSCEAGGQKLSFRLDVAEEAESQI PERPSRREPLVVKEHETIILTATIAAPSVAAVT  
 WLKDGVEIRRKRHEATSLGDTHLTVRGAQVLDIAIYSCRVGKEGQDFPVQVEEVAAKFSKPLEPVEGELGG  
 TVMLVCELSPEQAEVWRCGNTQLRPGKRFQMTSEGPRRTLVSGLREDDAEYVCESRDDRTSARLTVKVP  
 VVKFTSGLSAMVAEEGQEAFTQCVVSPSDAGVTWYKDGMLQPSSEKFMVVEGASRSLTILGLTLEDAGQVTV  
 EAEGASSAALRVREAPVLFKFKLEPQTVTEERTSVTLEVELTRPWPVEVKWTRNAAVLTPSENVEIRAEGARHC  
 LVLRVGFADRGFFGCETPDDKTQAKLVNEMRQVRLVRLGQVEVAKEQGTASMDVELSHAEEVGSWTRDGLRL  
 QPGPKCHLAVQGPVHILTLALQPDQDGLVAFRAEGVHTSARLIVTELPVSFTRVLQDVVATQKEKVTLECEL  
 SRPVDVRWLKDGVELRAGKAI GIVAQGTCSRSLVIYRCETGDQGVYVCDALDAQTSASLRVQGRTYTLIFRRLV  
 AEDAGEVVKFAENAESRAHLRVKELPVTLLRPLRDKIAMEKHRGVLECVSRASQAQVRFKGGVLELQSGPKYE  
 VVSDGLYRKLVINDDVQPEDEDTYTCDAGNVKTSQMTFVEEQSITIVRGLKDMVMEPAWFECEETSIPSVRP  
 PKWLLGKTVLQAGGNVLEQDGTVHRLTLHKTCSSTTGVPHFTIGKSRSSAQLVSDI PVVLTREPLEPKAGRE  
 LQSVVLSCDFRPAPKAVQWYKDDTPLSPSEKFKMALEGQMAELRILRLTPADAGVYRCQAGSAQSSAEVTVEA  
 REVTVIQPLQDAEAMEEGRVCFSCLELHKDEDI EWSLNGTPLYNDSFHEISHEGCLHTLVLKSVRQADTGTVC  
 ATSPKVSVSARLVVKGKPVVFLKALDDVSAEERGTLLTQCEVSDPEARVVWRKDGVELGPSDKYDFLHKAGAR

GLTVHDLSDHEDAGLYTCQVGSKETQSKVSVHDLHVGITKRLKTVEVLEGESECSFECVLSHESPSDPAVWTVGG  
 KTVGGSGHFHAVRQGRKYTLTVKDAALSDAGEVVFVSVLGLTSKASLIIRERPVDITKPLEDQRTTLGEDVMLS  
 CELSRAGTSVRWLKDGKAIKRSQKYDLLSEGTRAVLVVRKASLKDSGEYTCETEASKSTAKLCVEEKANRFTE  
 ELADLQVEEKGRAVFTCKTEHPASVVTWRKGLLELRASGKHVPSQEGTLKLTINALERTDSDTYTCDIGAR  
 TQARLLVHGQKVRVIEDLEDTAVQEGSSAKFCCRIAPADYGPVHWFIDKTPHLSNELNEITVQPGGYHVLTLR  
 QLALKDSGTVYFEAGDQRTSAALRVTEKPSIFSRPLTDVTVTEGEDLTLVCETTTVDSSVVRWTKDGKTLRPSA  
 RCQLSHEGCAQLLITATTPQDGGRYKCEIGGASSSSIVRVHALPVRFRFRESLKDVEVPEGKAATLRCVLSVA  
 APVEWRHGDDVLKSSNKYSLRQEGAVLELVIRDLQPDQDSGQYSCSFGDQTTSATLTVKTTSSAQFVGLKRNKEA  
 TEGTTVTLRCELTKAPVEWKKGTETLRNGDKYSLKQDGAVCELQICSLLVADAGEYSCVCGQEKTSATLTVK  
 ALLVHFVRRLSKEATEGDTTTLQCELSKAAPVEWRKGTETLRDGDYSLKQDGAVCELQIRSLTIADAGEYL  
 CTCGQEKTSATLTVRALPAKFKDSLKNEEATEGTTATLSCELSKAAPVTWKKGPKTLQSGDKYVLRQDGAVCG  
 LQIHGLTMADAGEYSCVCGQEKTSATLTVRGLPAKFIEDLRSQEATEGATAILRCELSKAAPVEWRKGETL  
 DGDYTLRQDGAVCELQIRGLAVVDGTYSLSLPTKFTTEGLRNEEATEGTMATLRCQMSKAAPVEWRKGETL  
 DGDYSLRQDGAMCELQIRGLTIEDSGEYTCVCGQEKTSATLSVKALPSRFIEDLRSQEATEGTMATLRCQMS  
 KTAPVEWKKGSETLRDGGYSLRQDGPVCELQICDLAVEDAGEYSCVCGQEKTSATLSIKALPPRFIEDLRSQ  
 EATEGTMATLRCQMSKAAPVEWRKGETLGDGGYSLRQNGAVCELQIHDLAVEDTGEYSCVCGQEKTSATLN  
 VKALPPRFIEDLRSQEATEGTMATLRCQMSKAAPVEWRKGETLDRDGGYSLRQDGGYSLRQDGGYSLRQDGGY  
 YSCVCGQEKTSAVLTVDALPPKFTTEGLKKEEATEGTMVTLRCQMSKEATVEWRKGAKTLSDGGYSLRQDGGY  
 CELQICGLAVEDAGEYSCVCGQEKTSATLSVKALPPRFIEDLRSQEATEGTMATLRCQMSKAAPVEWRKGET  
 LRDGDYSLRQDGAVCELQIRDLAVEDAGEYLCVCGQEKTSATLSVKALPPRFIEDLRSQEATEGTMATLRCQ  
 MSKAAPVEWRKGSKTLRDGDYSLRQDGAMCELQICDLAVEDTGDYSCVCGQEKTSATLSVKALPPRFIEDLR  
 SQEAREGTVATLRCRMSKAAPVEWRKGETLKDGDYSLRQEGNLCCELQIRDLAVEDTEEYSCVCGQEKTSAT  
 LSVKALPAKFIEDLRSQEAPESSTVTLRCKLSKKASVWKKGSETLRNGARYSLRQDGAVCELEIRDLTVEEDT  
 GEYSCTCGQERTSATLSIMAPQVVFQQLQNLQAEEGSMASLRCELSVPAAMVWSKGGLELQGDTRREARQQ  
 GCVTELLLRDLRREDAGEYSCVCGQEKTSATLMVTAAPVRFRELAQDQVDEGATARLCELSREAVSVEWRK  
 GSLQLFPCAKYQMVQEGTTAELLVHGVEQEDAGEYTCDAHTQS IARLSVRAPKPKFKDLQSTEQEAGGTAR  
 LCCQLSEAEPTGPTVQWLKTEGVELHVGSKYEMRQYQAVCELIIHGLEAKDTGEYACLVGQKTLASLRVKEPEV  
 TIVRGLVDMEVQADEDEFTCKVVSQAGATDVQWHLQGLPLQSNVTEVAVLADGCTHVLQKGVTLLEDAGTVS  
 FHVGGSSSAQLTVRVPEVTVLEPLKDVQLSEGQDAHFRCRLSRASGQEARWALGGVPLQCNEMNDITVEQGT  
 LYLLTLHKVTLLEDAGTITLQVGSSESAQLKVTAKNTVLRGLENVDALEGGALFECQLSQPEVAHTWLLDD  
 EPVHTSEKVEVVYFENGLRHLLLLKLNKPKQDSCRVTFLAGDVVTS AFLTVRGRWRLEVLPEPHDASVKAGMQR  
 FTCELLSEAVPVGEATWYINGAAIQPDDTDWTVTTDGSHHALTLSNAQPQHAGEVTF AARDAVASARLSVLALP  
 DPPEDAEEVGRSDHSVTLSSWVAPMSDGGGGLCGYRVMKEASTGQWQLCHDLVPGPECVVDDLVPGKTYRFRV  
 AAVGPAGAGEPVHLPQMVKIAPAPAPAPAPAPAPETRAVVGEDI CLELEVAADGGVEVWHKGTERRIQPGG  
 HFEVLSRGQRQMLVIKGFRTEDQGEYRCGPIQGLPSSGAATFNVVMTSGSGDEVPAQPSLPEAAQEGDLHLL  
 WEALARKRRMSREPTLDSISELPEEDSRVQHRLRQEAETAPDLSEGYSTADELARTGEADLSHTSSDDESRAG  
 TPSLVTYLKKAGGPGISPLASKHEAQVTTSVKPKQKQEPVVPTCPPPGDLSAADLMDPSLDKAAVKIQAAFKG  
 YKVRKEMKQQEGPVFSRTFGDTEAQVGDVLRLECVLATKTDMRACWLKDGIELTDGRHYHIDQLKDGTCSLLV  
 TGLAPTDSGRYTCQVSTKSGRVSHSACVVVSGTESEAESSSGGELDDAFRRAARLHRLFRKTPSAPLSEEL  
 FLSADEGPGPEEPADWQTYREDENFVCIRFESLAEARQAVTCFRNMFMATMGIGVEISLGEQGRGVEMRIGK  
 VAPTVPAPVPLAKTPGLQTSDAAPVFLTELQNDVQDGYPMSFDCVVTGQPVPSVRWFKDGKLEDDHYMIN  
 EDQQGGHQLIITAVVPADMGVYRCLAENSMGVSSTKAELRVELTSTDYDTAADATETSSYFSAQGYLSSREQE  
 GTESDEGQLPQVLEELKDLQVAPGTRLAKFQLKVKGYPAKLYWFKDQGPLTTS DHIRMTDKKTLHTLEIVSV  
 TREDSGQYAAIISNAVGAAYSARLLVRGPSEPEEKPASDVHERLVPPRIEKFTPKKVKRGSSTFVSVKVEG  
 HPAPSVHHLKKEAEKGLWIGPDTPGYTMASSSKQHSVLVLDVGRQHOGTYTCIATNPAGQALCSALHISGL  
 AKEEEQERVKEALISSFLQGTSQAVSAQMSEAGFADLVGQSKGESLVAEEAHSHLSLAEVGTTEFLQKLT SQ  
 ITEMVSAKISQAKLQVPGGDSDEETKTPSASPRHGRSRPSSSVQESSSESEDGDSRGEIFDIYVVTADYLP LG  
 AEQDAIILREGQYVEVLD SAHPLRWLVRTKPTKSSPSRQGWVSPAYLDKRLKLSPEWGPTEAPEFPGEAVSED  
 EYRTRLSSVIQELLSSEQAFVGEQFLESHHMKHLERSPRVPAAVASQKTVIFRNVQDISHFHSSFLKELQGC  
 GTDDVAMCFIKNQEAKEYLEFLVGRVQAESVVVSTPVQEFYKKAETLSAKDPTQPPPPPLQHYLEQPV  
 RVQKYQALLKELIRNKARNRQNCALLEQAYAVVSALPQRAENKLVSLMENYPGTLEALGEP IRQGHFIVWEG  
 APGARMPWKGNHRHVF LFRNYLVICKPRRDSRTDTFSYVFRNMMLSSIDLNDQVEGDDRAFEVWHEREDSVR  
 KYLLQARTVILIKNSWVKEICGIQORLAQPVWRPPEFEELADCTAELGETVKLACRVGTGPKPIVSWYKDGK  
 VEVDPHHILIEDPDGSKTILIDLNLGTIDSGQYMCFAASAAGNASTLGIILVQVPPRFVNVKVRATPFVEGEDAQ  
 ICTVEGAPYPQIRWYKDGTL LLAGPNRYRMLNEPRSGVLVLIQAASKEDLGHYECELVNRGLSTRGGELYM  
 QSPALRARDQHHREQIVA AVEVTEQETKVPKKTVIIEETITTVVKS PRGRRQSPGKSPSRSPRRSASPRRPG  
 LLAPERLYPPGTS PSRRLEVEQGRKAPVPALYVTEAEVHAPASQS QPKWLEVEETIEVRVKKTGSRGASPVRE  
 MTSRGEGLIFTLPGGI PGRDPNANNNSNNKSVYQEA RTWGPVAVHVGEFFIFQVDSVGNVDWVAASPEPEQVRA

SQKEENTERQEGCSGDGENTFLMEEPQDTSLSQGRDPKILTHNGRVLTADLEDYVPPQEGETFGCGDSTPSTP  
DEPPCEVSVLQREISEPTVGGPVLNNGRPPGTGATPSFFRPGSQVHSPESVSFLLREAWSGPVSAAAPWTSSSF  
HTHVQSSVDGSHGSFKTEVSTQTVSFGAVGETVTLHIDPDGGEAPGPSQG\*

>rs51724502\_ENSMUSP00000020732\_c.14664:G>A\_p.A4889T  
ENSMUST00000020732.13|Obscn-201|ENSMUSG00000061462|-|chr11:g.58943367:C>T  
MDHSFSGAPRFLTRPKAFVSVGKDATLSCQIVGNPTPHVSWEKDRQPVEAGARFRLAQDGDVYRLTILDLAL  
GDSGQYVCRARNAIGEFAAVGLRVDSEGTCAEQAPHFLLRPTSIRVREGADATFRCRVGSGPQPAVSWSKDG  
RRLGPPDAPHVRVEEHGESSALRIRSARPRDGGTYEVRAENPLGSASAAAALVVDSDAEVAGPPGTSTATLLA  
HLQQRRREAMRAEGIPSPPGAGTRTCTVTEGKHARLSCFVTGEPKPEVWKKDQQLVTEGRRHVVEDEQENF  
VLKILFCKQSDRGLYTCTASNLVGQTYSSVLVVVREPTVPFKKRLQDLEVREKESATFQCEVAQAPATEAAWFK  
EETRLWASAKYDIEEEGTERRLTVRNVSADDDAVYICETTEGSRVVAELSVQGNLTKRKLPRKTAVRTGDTAIF  
WVELAVPEGPVWRWRNQEEMVAGGRVAITAEGTCHTLTI FQCTLEDMGEVAFVSGGCRTTTQFCVSAPRRPPL  
YPPADPVVKAKTESSVTLWSAPPHGDRPVTIDGYVLEKRKLGAYAWSRCHEAGWLATTEFTITGVAEEGDFQ  
FRVSAINHFGQGPYLEFPGMTMLVPLAVKTPKAVEAVEGGEVTFVSVDLTVASSGEWFLDGEALKASSIYVI  
RCDRTRHMLTIREVPARLHGAQLKFVANGIETSIQMVVRAALGLPSSKLPAAAAREVLAQLHEEAQLLAE LSD  
QAAAVTWLKDGRELSLGPKEYMQVSAGRRALLVRDVAQDDAGLYECVSRGSRRTAYQLLVQDITDGYRDWGPAG  
PQKHMCKCAGAKIARYLGSscyRFLQYDKGVWHWLEAALDRQKGTSSCSLHEKPKLVFAKQQAHSEVKA  
AGNSATLSCEVTQAQTEVTFWKDGKLLSSSSKVRMEASGCSRRLLVVQQAGKADAGEYSCEAGGQKLSFRLDVA  
EPKLVFAKQQAHSEVKAEGASATLSCEVAQAQTEVTFWKDGKLLSSSSKVRMEASGCSRRLLVVQQAGKADA  
GEYSCEAGGQKLSFRLDVAEPKMFVFAKEQQARSEVKAEGASATLSCEVAQAQTEVTFWKDGKLLSSSSKVRM  
EASGCSRRLLVVQQAGKADAGEYSCEAGGQKLSFRLDVTEPKLVFAKEQQARSEVKAEGVNSATLSCEVAQAQ  
EVTWFKDGKLLSSSSKVRMEASGCSRRLLVVQQAGKADAGEYSCEAGGQKLSFRLDVAEPKLVFAKEQQARSEV  
KAEAGNSATLSCEVAQAQTEVTFWKDGKLLSSSSKVRMEASGCSRRLLVVQQAGKADAGEYSCEAGGQKLSFHL  
DVTEPKLVFAKEQQAHSEVKAEGASATLSCEVAQAQTEVTFWKDGKLLSSSSKVRMEASGCSRRLLVVQQAGK  
ADAGEYSCEAGGQKLSFRLDVAEPKLVFAKEQQARSEVKAEGASATLSCEVAQAQTEVTFWKDGKLLSSSSK  
VRVEASGCSRRLLVVQQAGKADAGEYSCEAGGQKLSFRLDVAEPKLVFAKEQQANSEVKAEGASATLSCEVAQA  
AQTEVTFWKDGKLLSSSSKVRVEASGCSRRLLVVQQAGKADAGEYSCEAGGQKLSFRLDVAEPKLVFAKEQQAH  
SEVKAEGASATLSCEVAQAQTEVTFWKDGKLLSSSSKVRVEASGCSRRLLVVQQAGKADAGEYSCEAGGQKLS  
FRLDVAEPKLVFAKEQQAHSEVKAEGASATLSCEVAQAQTEVTFWKDGKLLSSSSKVRVEASGCSRRLLVVQQ  
AGKADAGEYSCEAGGQKLSFRLDVAEPKLVFAKEQQAHSEVKAEGASATLSCEVAQAQTEVTFWKDGKLLSS  
SSKVRVEASGCSRRLLVVQQAGKADAGEYSCEAGGQKLFRLDVAEPKLMFAKEQQAHSEVKAEGASATLSCE  
VAQAQTEVTFWKDGKLLSSSSKVRVEASGCSRRLLVVQQAGKADAGEYSCEAGGQKLSFRLDVAEPKLVFAKEQ  
QAHSEVKAEGASATLSCEVAQAQTEVTFWKDGKLLSSSSKVRVEASGCSRRLLVVQQVQKADAGEYSCEARGQ  
KLSFRLDVADTRLMFAKEQQARTEVKAEGNSATLSCEVAQAQTEVTFWKDGKLLSSSSKVRVEASGCSRRLV  
VQQAGKADAGEYSCEAGGQKLSFRLDVAEAEISQIIPERPSRREPLVVKEHETIILTATIAAPVAAVTWLKDG  
VEIRRSKRHEATSLGDTHTLTVRGAQVLDLSAIYSCRVKEGQDFPVQVEEVAAKFSKPLEPVEGELGGTVMLVC  
ELSPQAEVWRCGNTQLRPGKRFQMTSEGPRRTLTVSGLREDDAEEYVCESRDDRTSARLTVKVPVVKFTS  
GLSAMVAEEGQEQATFQCVVSPSDAGVTWYKDGMLQPSKFMVVEGASRSILTILGLTLEDAGQVTEAEGAS  
SSAALRVREAPVLFKKLEPQTEERTSVTLEVELTRPWPEVKWTRNAAVLTPSENVEIRAEGARHCLVLRV  
GFADRGFFGCETPDDKTQAKLNVEMRQVRLVRLGLQVEEAKEQGTASMDVELSHAEEVGSWTRDGLRLQPGPKC  
HLAVQGPVHILTLALQPQDSGLVAFRAEGVHTSARLIVTELPVSFTRVLQDQVATQKEKVTLECELSRPVDV  
RWLKDGVLELRAGKAIIGIVAQGTCSRSLVIYRCETGDQGVYVCDALDAQTSASLRVQGRTYTLIFRRLAEDAGE  
VKFVAENAESRAHLRVKELPVTLLRPLRDKIAMEKHRGVLECCQVSRASAQVRWFKGGVELQSGPKYEVVSDGL  
YRKLVINQVQPEDEDTYTCDAENVKTSAQFFVEEQSITIVRGLKDMTVMPEPAPAWFECETSIPSVRPPKWL  
KTVLQAGGNVGLQDGTVHRLTLHKTCSTMTGPVHFTIGKSRSSAQLVVSDIPVVLTRPLEPKAGRELQSVVL  
SCDFRPAPKAVQWYKDDTPLSPSEKFKMALEGMALRILRLTPADAGVYRCQAGSAQSSAEVTVAREVTVI  
QPLQDAEAMEEGRVCFSCELSHKDEDEIWSLNGTPLYNDSFHEISHGCLHTLVLSVRQADTGTVCATSPKV  
SVSARLVVKGKPVVFLKALDDVSAEERGLTLQCEVSDPEARVVWRKDGVELGSPDKYDFLHKAGARGLTVHD  
LSHEDAGLYTCQVGSKETQSKVSVHDLHVGITKRLKTVLEVLEGESECFEVLVSHESPSDPAVWTVGGKTVGGS  
GHFHAVRQGRKYTLTVKDAALSDAGEVVFVSVLGLTSLKASLIIRERPVDITKPLEDQRTTLGEDVMLSCELSRA  
GTSVRWLKDGKAIRKSQKYDLLSEGTRAVLVVRKASLKDSSGEYTCETEASKSTAKLCVEEKANRFTTEELADLQ  
VEEKGRAVFTCKTEHPASVVTWRKGLLELRASGKHVPSQEGTLTKLTINALERTDSDTYTCDIGQARTQARLL  
VHGQKVRVIEDLEDLTAQVEGSSAKFCRIAIPADYVGPVHWFVLDKTPHLSNELNEITVQPGGYHVLTLRQLALKD  
SGTVYFEAGDQRTSAAALRVTEKPSIFSRPLTDVTVEGEDLTLVCEITTTVDSSVRWTKDGGYKTLRPSARCQLSH  
EGCQAQLLITATTPQDGGRYKCEIGGASSSSIVRVHALPVRFRESLKDVEVPEGKAATLRCVLSVAAPVEWR  
HGDDVLKSSNKYSLRQEGAVLELVIRDLQPDQSGQYSCSFGDQTTSATLTVKTSQAQFVGLKRNKEATEGTTV  
TLRCELTKAPVEWKKGTETLRNGDKYSLKQDGA VCELQICSLLVADAGEYSCVCGQEKTSATLTVKALLVHF  
VRLRSKATEGDTTTLQCELSKAAPVEWRKGTETLRDGDYSLKQDGA VCELQIRSLTIADAGEYLCCTCGQE

KTSATLTVRALPAKFKDSLKNEEATEGTTATLSCELSKAAPVTWKKGPKTLQSGDKYVLRQDGAVCGLQIHGL  
 TMADAGEYSCVCGQEKTSATLTVRGLPAKFIEDLRSQEATEGATAILRCELSKAAPVEWRKGSSETLKDGDRTY  
 LRQDGAVCCELQIRGLAVVDGTYSLSPTKFTTEGLRNEEATEGTMATLRCQMSKAAPVEWRKGSSETLRDGDRTYS  
 LRQDGAVCCELQIRGLTIEDSGEYTCVCGQEKTSATLSVKALPSRFIEDLRSQEATEGTMATLRCQMSKTAPVE  
 WKKGSETLRDGGRYSLRQDGPVCELQICDLAVEDAGEYSCVCGQEKTSATLSIKALPPRFIEDLRSQEATEGT  
 MATLRCQMSKAAPVEWRKGSSETLGDGGRYSLRQNGAVCELQIHDLAVEDTGEYSCVCGQEKTSATLNVKALPP  
 RFIEDLRSQEATEGTMATLRCQMSKAAPVEWRKGSSETLRDGGRYSLRQDGAVCCELQIHDLVEDAGQYSCVCG  
 QEKTSAVLTVDALPPKFTEGLKKEEATEGTMVTLRCQMSKEATVEWRKGAKTSLSDGGRYSLRQDGAVCCELQIC  
 GLAVEDAGEYSCVCGQEKTSATLSVKALPPRFIEDLRSQEATEGTMATLRCQMSKAAPVEWRKGSSETLRDGD  
 YSLRQDGAVCCELQIRDLAVEDAGEYLCVCGQEKTSATLSVKALPPRFIEDLRSQEATEGTMATLRCQMSKAAP  
 VEWRKGSKTLRDGDRTYSLRQDGAVCCELQICDLAVEDTGDYSCVCGQEKTSATLSVKALPPRFIEDLRSQEARE  
 GTVATLRCRMSKAAPVEWRKGSSETLKDGDRTYSLRQEGNLCELQIRDLAVEDTEEYSCVCGQEKTSATLSVKAL  
 PAKFIEDLRSQEAPESSTVTLRCKLSKKASVVWKKGSETLRNGARYSLRQDGAVCLEIRDLTVEDTGEYSCT  
 CGQERTSATLSIMAPQVVFQQPLQNLQAEEGSMASLRCELSVNAAMVWSKGGLELQGDTRREARQQGCVTEL  
 LLRDLRREDAGEYSCTCGSQTTSATLMVTAAPVRFRLRELQAQDVDEGATARLRCELSREAVSVEWRKGSLLQF  
 PCAKYQMVQEGTTAELLVHGVEQEDAGEYTCDAHTQSIARLSVRAPKPKFKTDLQSTEQEAGGTARLCCQLS  
 EAEPGTPVQWLKEGVLHVSGKYEMRRQGAVCCELLIHGLEAKDTGEYACLVGGQKTLASLRVKEPEVTIVRGL  
 VDMEVQADEDEVEFTCKVSQAGATDVQWHLQGLPLQSNVTEVAVLADGCTHVLQKGVTLVDAGTVSFHVGGL  
 SSSAQLTVRVPEVTVLEPLKDVQLSEGQDAHFRCRLSRASGQEARWALGGVPLQCNEMNNDITVEQGTLYLLTL  
 HKVTLEDAGTITLQVGSSESQAQLKVTAKNTVLRGLENVDALLEGGEALFECQLSQPEVAHAHTWLLDDEPVHTS  
 EKVEVVYFENGLRHLLLLLKNLKPQDSCRVTFLAGDVVTSFAFLTVRGWRLEVLLEPPHDASVKAGMQVRFCTILS  
 EAVPVGEATWYINGAAIQPDDTDWTVTTDGSHHALTLNAQPPHAGEVTFFAARDAVASARLSVLALPDPPEDA  
 EVVGRSDHSVTLVSWAPMSDGGGGLCGYRVMKEASTGQWQLCHDLVPGPECVDDLVPGKTYRFRVAAVGPA  
 GAGEPVHLPQMVKIAPAPAPAPAPAPAPAPETRQAVVGEDICLELEVAADGGEVVWHKGTERRIQPGGHFEVLS  
 RGQRQMLVIKGFRTEDQGEYRCGPIQGLPSSGAATFNVVMTSSGSDDEVPAQPSLPPEAAQEGDLHLLWEALAR  
 KRRMSREPTLDSISELPEEDSRVQHLRQEAETAPDLSEGYSTADELARTGEADLSHTSSDDESRACTPSLVT  
 YLKKAGGPGISPLASKHEAQVTTSVKPKQKQEPVVTCPGGDLAADLMDPSLDKAAVKIQAAFKGYKVRKE  
 MKQQEGPVFSRTFGDTEAQVGDVLRLECVLATKTDMRACWLKDGIELTDGRHYHIDQLKDGTCSSLVTVGLAPT  
 DSGRYTCQVSTKSGRVSHSACVVVSGTESEAESSGGELDDAFRRRAARLHRLFRTKSPAELSEELFLSADE  
 GPGEPEPADWQTYREDENFVCIRFESLAEARQAVTCFRNMFATMGIGVEISLGEQGRGVEMRIGKVAPTVT  
 PAVPLAKTPGLQTSDAAPVFLTELQNDQVDQDGYPMSFDCVVTGQPVPSVRWFKDGKLEEDDHVMINEDQGG  
 HQLIITAVVPADMGVYRCLAENSMGVSSTKAELRVELTSTDYDTAADATETSSYFSAQGYLSSREQEGTESDE  
 GQLPQVLEELKDLQVAPGTRRLAKFQLKVKGYPAKLYWFKDGGQPLTSDHIRMTDKKTLHTLEIVSVTREDSG  
 QYAAYSNAVGAAYSSARLLVRGPSEPEEKPASDVHERLVPPRILEKFTPKKVKRGSSITFSVKVEGHPAPSV  
 HWLKEEAEGVGLWIGPDTPGYTMASSSKQHSLLVLDVGRHQGTYTCTIATNPAGQALCSASLHISGLAKEEEQ  
 ERVKEALISSFLQGTSAVSAQMSSESAGFADLVGQSKGESLVAEEAHSHLSLAEVGTTEFLQKLTSTQITMVS  
 AKISQAKLQVPGGDSDEETKTPSASPRHGRSRPSSSVQESSSESEDGDSRGEIFDIYVVTADYLPGLAEQDAI  
 ILREGQYVEVLDSAHPLRWLVRTKPTKSSPSRQGWVSPAYLDRKRLKLSPEWGPTEAPEFPGEAVSEDEYRTRL  
 SSVIQELLSSEQAFVGLQFLESHHMKHLERSPRVPAVASQKTVI FRNVQDISHFHSSFLKELQCGCTDDDV  
 AMCFIKNQEAFAKEYLEFLVGRVQAESVVVSTPVQEFYKKAETLSAKDPTQPPPPPLQHYLEQPVERVQKYQ  
 ALLKELIRNKARNRQNCALLEQAYAVVSALPQRAENKLHVSLMENYPGTLEALGEPHQGHFIVWEGAPGARM  
 PWKGNHRHVFLFRNYLVICPPRRDSRTDTFSYVFRNMMKLSSIDLNDQVEGDDRAFEVWHEREDSVRKYLLQA  
 RTVI IKNSWVKEICGIQORLAQPVWRPPEFEEELADCTAELGETVKLACRVTGTPKPIVSWYKDGKPEVDPH  
 HILIEDPDGSCCTLILDNLGTIDSGQYMCFAASAAGNASTLGKILVQVPPRFVNVKVRATPFVEGEDAQITCTVE  
 GAPYPQIRWYKDGTLTLLAPGNRYRMLNEPRSGVLVLIQAASKEDLGHYECELVNRLGSTRGGGELYMQSPALR  
 ARDQHHREQIVAAVEERRPSP\*  
 >rs51724502\_ENSMUSP00000151217\_c.11964:G>A\_p.A3989T  
 ENSMUST00000219084.3|Obscn-207|ENSMUSG00000061462|-|chr11:g.58943367:C>T  
 MDHSFSGAPRFLTRPKAFVSVGKDATLSCQIVGNPTPHVSWEKDRQFVEAGARFRLAQDGDVYRLTILDLAL  
 GDSGQYVCRARNAIGEAFAAVGLRVDSEGTCAEQAPHLLRPTSIRVREGADATFRCRVGGSPQPAVSWSKDG  
 RRLGPPDAPHVRVEEHGESSALRIRSARPRDGGTYEVRAENPLGSASAAAAALVVDSAEVAGPPGTSTATLLA  
 HLQORREAMRAEGIPSPPGAGTRTCTVTEGKHARLSCFVTGEPKPEVWKKDGLVTEGRRHVVEDEQENF  
 VLKILFCKQSDRGLYCTASNLVGQTYSSVLDVVVREIPTVFFKKRLQDLEVRKESATFQCEVAQAPATEAAWFK  
 EETRLWASAKYDIEEECTERRLTVRNVSADDDAVYICETTEGSRVTAELSVQGNLTKRLKPRKTAVRTGDTAIF  
 WVELAVPEGPVRWLRNQEEMVAGGRVAITAEGTCHTLTI FQCTLEDMGVAFVSGGCRTTTTQFCVSAAPRRPPL  
 YPPADPVVKAKTESVTLWSAPPHGDRPVTIDGYVLEKRLGAYAWSRCHEAGWLATTEFTITGVAAEEGDFQ  
 FRVSAINHFGQGPYLEFPGMTMHLVPLAVKTPKAVEAVEGGEVTFVSDLTVASSGEWFLDGEALKASSIYVI  
 RCDRTRHMLTIREVPARLHGAQLKVFVANGIETS IQMVVRAALGLPSSKLPAAAAREVLAQLHEEAQLLAE LSD

QAAAVTWLKDGRELSLGPKEYMQVSAGRALLVRDVAQDDAGLYECVSRGSRTAYQLLVQDITDGYRDWGPAG
PQKHMCKCAGAKIARYLGSSCYRFLQYDKGVWHLEAALDTRQKGKTSSCSLHEKPKLVFAKQQAHSEVKA
AGNSATLSCEVTQAQTEVTFWKDGKLLSSSSKVRMEASGCSRRLVVQQAGKADAGEYSCEAGGQKLSFRLDVA
EPKLVFAKQQAHSEVKAEGASATLSCEVAQAQTEVTFWKDGKLLSSSSKVRMEASGCSRRLVVQQAGKADA
GEYSCEAGGQKLSFRLDVAEPMVFAKEQQARSEVKAEGASATLSCEVAQAQTEVTFWKDGKLLSSSSKVRM
EASGCSRRLVVQQAGKADAGEYSCEAGGQKLSFRLDVTEPKLVFAKEQQARSEVKAEGNSATLSCEVAQAQ
EVTWFKDGKLLSSSSKVRMEASGCSRRLVVQQAGKADAGEYSCEAGGQKLSFHLVDVTEPKLVFAKEQQAHSEV
KAEAGASATLSCEVAQAQTEVTFWKDGKLLSSSSKVRMEASGCSRRLVVQQAGKADAGEYSCEAGGQKLSFRL
DVAEPMVFAKEQQARSEVKAEGASATLSCEVAQAQTEVTFWKDGKLLSSSSKVRVEASGCSRRLVVQQAGK
ADAGEYSCEAGGQKLSFRLDVAEPMVFAKEQQANSEVKAEGASATLSCEVAQAQTEVTFWKDGKLLSSSSK
VRVEASGCSRRLVVQQAGKADAGEYSCEAGGQKLSFRLDVAEPMVFAKEQQAHSEVKAEGASATLSCEVAQ
AQTEVTFWKDGKLLSSSSKVRVEASGCSRRLVVQQAGKADAGEYSCEAGGQKLSFRLDVAEPMVFAKEQQAH
SEVKAEGASATLSCEVAQAQTEVTFWKDGKLLSSSSKVRVEASGCSRRLVVQQVKGADAGEYSCEARGQKLS
FRLDVAEAEESQIPERPSRREPLVVKEHETIILTATIAAPSVAAVTWLKDGVEIRRSKRHEATSLGDTHTLTVR
GAQVLDIAIYSCRVGKEGQDFPVQVEEVAAKFSKPLEPVEGELGGTVMLVCELSPEQAEVWRCGNTQLRPGK
RFQMTSEGPRTTLTVSGLREDDAEYVCESRDDRTSARLTVKVPVVKFTSGLSAMVAEEGQEAFTQCVVSPS
DAGVTWYKDMQLQPESEKFMVESGASRSLTILGLTLEDAGQVTEAEGASSAALVRREAPVLFKFKKLEPQT
VEERTSVTLEVELTRPWPEVKWTRNAAVLTPSENVEIRAEGARHCLVLRVSVGFADRGFFGCETPDDKTQAKLN
VEMRQVRLVLRGLQEVEAKEQGTASMDVELSHAEVEGSWTRDGLRLQPGPKCHLAVQGPVHILTLALSALQPD
LVAFRAEGVHTSARLIVTELPVSTFRVLQDVVATQKEKVTLECELSRPVDVRWLKDGVELRAGKAIIGIVAQGT
CRSLVIYRCETGDQGVYCDALDAQTSASLRVQGRYTLIFRRVLAEDAGEVKFVAENAESRAHLRVKELPVT
LLRPLRDKIAMEKHRGVLECCVSRASAQVRWFKGGVELQSGPKYEVVSDGLYRKLVIINDVQPEDEDYTC
DAGNVKTSAQFFVVEEQSITIVRGLKDMTVMPEPAPAWFECETSIPSVRPPKWLGLKTVLQAGGNVLEQDGT
VHRLTLHKTCSTMTGVPVHFTIGKSRSSAQLVVSDIPVVLTRPLEPKAGRELQSVVLSCDFRPAPKAVQWYK
DDTPLSPSEKFKMALEGQMAELRILRLTPADAGVYRCQAGSAQSSAEVTVAREVTVIQPLQDAEAMEEGRV
CFSCELSHKDEDIEWSLNGTPLYNDSFHEISHGCLHTLVLSKVRQADGTVCATSPKVSVSARLVKVGKPV
VFLKALDDVSAEERGLTLTQCEVLDPEARVVWRKDGVELGSPDKYDFLHKAGARGLTVHDLSHEDLVGK
TQVGSKTVSVHDLHVGITKRLKTVLEVLEGESECFEVLVSHESPSDPAVWTVGGKTVGGSGHFHAVRQGR
KYTLTVKDAALS DAGEVVFVSVLGLTSKASLIIRERPVDITKPLEDQRTTLGEDVMLSCELSRAGTSVR
WLKDGKAIKRSQKYDLLSEGTRAVLVVRKASLKDSGEYTCETEASKSTAKLCVEEKANRFTTELADLQVE
EKGRAVFTCKTEHPASVVTWRKGLLELRASGKHVPSQEGTLKLTINALERTSDTYTCDIGQARTQARLLV
HGQKVRVIEDLEDTAVQEGSSAKFCCRIAPADYGPVHFLDKTPLHSNELNEITVQPGGYHVLTLRQLAL
KDSGTVYFEAGDQRTSALRVTEKPSIFSRPLTDVTVTEGEDTLVCETTTTVDSSVRWTKDGKTLRPS
ARCCQLSHEGCAQLLITATTPQDGGRYKEIGGASSSSIVRVHALPVRFRFRESLKDVEVPEGKAATL
RCLVLSVAAPVEWRHGDDVLKSSNKYSLRQEGAVLELVIRDLQPDGSGQYSCSFGDQTTSATLTVKT
SSAQFVGLRNKEATEGTTVTLRCELTKAPVEWKKGTETLRNGDKYSLKQDGAVCELQICSLLVADAGE
YSCVCGQEKTSATLTVKALLVHFVRRLRSKEATEGDTTTLQCELSKAAPVEWRKGTETLRDGDYSLK
QDGA VCELQIRSLTIADAGEYLCTCGQEKTSATLTVRGLPAKFIEDLRSQEATEGATAILRCELSKA
APVEWRKGSSETLKDGDYTLRQDGA VCELQIRGLAVVDTGTYSLPTKFTTEGLRNEEATEGTMATL
RQCMSKAAPVEWRKGSSETLRDGDYSLRQDGA MCELQIRGLTIEDSGEYTCVCGQEKTSATLSVKAL
PPRFIEDLRSQEATEGTMATLRCQMSKAAPVEWRKGSSETLGDGGYSLRQNGAVCELQIHDLAVEDT
GEYSCVCGQEKTSATLNVKALPPKFTTEGLKKEEATEGTMVTLRQCMSKEATVEWRKGAKTLDGGRY
SLRQDGA MCELQICGLAVEDAGEYSCVCGQEKTSATLSVKALPPRFIEDLRSQEATEGTMATLRCQMS
KAAPVEWRKGSSETLRDGDYSLRQDGA MCELQICDLAVEDTGDYSCVCGQEKTSATLSVKAPQVVFQ
QPLONLQAEEGSMASLRCELSVPNAAMVWSKGGLELQGDTRREARQQGCVTLELLRDLRREDAGEY
SCTCGSQTTSATLMVTAAPVRFRLRELQAQDVDEGATARLRCELSREAVSVEWRKGSGLQFPKAKYQ
MVQEGTTAELLVHGVEQEDAGEYTC DAGHTQSIARLSVRAPKPKFKTDLQSTEQEAGGTARLCCQLS
EAEPGTPVQWLKEGVELHVGSKYEMRRQGA VCELLIHGLEAKDTGEYACLVGQKTLASLRVKEPEVT
IVRGLVDMEVQADEDEFTCKVSOAGATDVQWHLQGLPLQSNEVTEVAVLADGCTHVLQLKGVTL
EDAGTVSFHVGGSSSAQLTVRVPEVTVLEPLKDVQLSEGQDAHFRCLSRASGQEARWALGGVPL
QCNE MNDI TVEQGTLYLLTLHKVTLEDAGTITLQVGCSSSEAQLKVTAKNTVLRGLENVDALEGG
EALFECQLSQPEVAHTWLLDDEPVHTSEKVEVVYFENGLRHLLLLLKNLKPQDSCRVTFLAGDVVT
SAFLTVRGRWLEVLEPPHDASVKAGMQVRFTCILSEAVPVGEATWYINGAAIQPDDTDWTVTTD
GSHHALTSLNAQPQHAGEVTF AARDAVASLARLSVLA LDPPEDAEVVGRSDHSVTLWSVAPMSD
GGGLCGYRVEMKEASTGQWQLCHDLVPGPECVDDLVPGKTYRFRVAAVGPAGAGEPVHLPQMVKI
APAPAPAPAPAPAPETRQAVVGEDICLELEVAADGGEVWWHKGTERIQPGGHFEVLSRGRQMLVI
KGFRTEDQGEYRCGPIQGLPSSGAATFNVVMTSGSGDEVPAQPSLPPEAAQEGDLHLLWEALARKR
RMSREPTLDSISELPEEDSRVQHLRQEAETAPDLSEGYSTADELARTGEADLSHTSSDDESRAGT
PSLVTYLKKAGGPGISPLASKHEAQVTTSVK PQQQEPVVPTCPPPGDLSAADLMDPSLDKAAVKI
QA AFKGYKVRKEMKQQEGPVFSRTFGDTEAQVGDVLR



ECVLATKTDMRACWLKDGIELTDGRHYHIDQLKDGTCSSLVTLGLAPTDSGRYTCQVSTKSGRVSHSACVVVSG  
 TESEAESSSGGELDDAFRRARRLHRLFRTRKSPAELSEELFLSADEGPGEPEEPADWQTYREDEFVFCIRFE  
 SLAEARQAVTCFRNMFATMGIGVEISLGEQGRVEMRIGKVAPTVTPAVPLAKTPGLQTSDAAPVFLTELQN  
 QDVQDGYPMFDCVVTGQPVPSVRWFKDGLLEEDDHMINEDQQGGHQLIITAVVPADMGVYRCLAENSMGV  
 SSTKAELRVELTSTDYDTAADATETSSYFSAQGYLSSREQEGTESDEGQLPQVLEELKDLQVAPGTRLAKFQL  
 KVKGYPAKLYWFKDQPLTSDHIRMTDKKTLHTLEIVSVTREDSGQYAAAYISNAVGAAYSSARLLVGRPSE  
 PEEKPASDVHERLVPFRILEKFTPKKVKRGSSITFSVKVEGHPAPSVHWLKEEAKEKGLWIGPDTPGYTMASS  
 SKQHSVLVLDVGRQHGTCTCIATNPAGQALCSASLHISGLAKEEEQERVKEALISSFLOGTSQAVSAQMSSES  
 AGFADLVGQSKGESLVAEEHSHLSLAEVGTEEFLLQKLTSTQITEMVSAKISQAKLQVPGGDSDEETKTPSASP  
 RHGRSRPSSSVQESSSESEDGDSRGEIFDIYVVTADYLPLGAEQDAIILREGQYVEVLDSAPLRLVTRTKPT  
 KSSPSRQGWVSPAYLDKRLKLSPEWGPTEAPEFPGEAVSEDEYRTRLSSVIQELLSSEQAFVGELOFLESHHM  
 KHLERSPRVPAAVASQKTVI FRNVQDISHFHSSFLKELQCGCTDDDVAMCFIKNQEAFAFEKYLEFLVGRVQAES  
 VVVSTPVQEFYKKYAETLSAKDPTQPPPPPLQHYLEQPVVERVQKYQALLKELIRNKARNRQNCALLEQAYAV  
 VSALPQRAENKLVSLMENYPGTLEALGEPTRQGHFIVWEGAPGARMPWKGHNHRVFLFRNYLVI CKPRRDSR  
 TDTFSYVFRNMMKLSSIDLNDQVEGDDRAFEVWHEREDESVRKYLLQARTVI IKNSWVKEICGIQQRLAQPVWR  
 PPEFEEELADCTAELGETVKLACRVGTGPKPIVSWYKDGKPEVDPHHILIEDPDGSCSLIDLNLTGIDSGQY  
 MCFASAAGNASTLGKILVQVPPRFVNVKVRATPFVEGEDAQITCTVEGAPYPIRIRWYKDGTLAPGNRYRMLN  
 EPRSGVLVLIQAASKEDLGHYECELVNLRLGSTRGGELYMQS PALRARDQHHRQIIVAAVEVTEQTKVPKK  
 TVIIETITTVVKS PRGRRQSPGKSPSRSPRRSASPRRGLLAPERLYPPGTSPSRRLVEVEQGRKAPVPALY  
 VTEAEVHAPASQSQPKWLEVEETIEVRVKKTGSRGASPVREMTSRGEGILFTLPGGIPGRDPNANNNSNKS SVY  
 QEARTWGPVVHVGEFFIFQVDSVGNVDWAASPEPEQVRASQKEENTERQEGCSDGDENTFLMEEPQD TDSL  
 QGRDPKILTHNGRVLTLADLEDYVPOEGETFGCGDSTPSTPDEPPCEVSVLQREI SEPTVQGPVLLNVGRPPG  
 TGATPSFFRPGSQVHSPESVFLREAWSGPVSAAPWTSSFHTHVQSSVDGSHGSKFEVSTQT VSF GAVGET  
 VTLHIDPDGGEAPGPSQG\*

>rs50048074\_ENSMUSP00000158795\_c.14572:T>C\_p.L4858S  
 ENSMUST00000238536.2|Obscn-210|ENSMUSG00000061462|-|chr11:g.58943459:A>G  
 MDHSFSGAPRFLTRPKAFVSVGKDATLSCQIVGNPTPHVSWEKDRQPVEAGARFLAQDGDVYRLTILDLAL  
 GDSGQYVCRARNAIGEAFAAVGLRVDSEGTCAEQAPHFLLRPTSIRVREGADATFRCRVGGSPQPAVSWSKDG  
 RRLGPPDAPHVRVEEHGESSALRIR SARPRDGGTYEVRAENPLGSASAAAALVVDSDAEVAGPPGTSTATLLA  
 HLQORREAMRAEGIPPSPPGAGTRTCTVTEGKHARLSCFVTGEPKPEVWKKDGLVTEGRRHVVEDEQENF  
 VLKILFCKQSDRGLYCTASNLVGTYSVSVLVVREPTVPFKKRLQDLEVREKESATFQCEVAQPAEA AWFK  
 EETRLWASAKYDIEEEGTERRLTVRNVSADDDAVYICETTEGSRVVAELSVQGNLTKLPRKTAVRTGDTAIF  
 WVELAVPEGPVRLRNQEEMVAGGRVAITAEGTCHTLTI FQCTLEDMGEVAFVSGGCRTTTQFCVSAPRRPPL  
 YPPADPVVKAKTESVTLWSAPPHGDRPVTIDGYVLEKRLKLGAYAWSRCHEAGWLATTEFTITGVAEEGDFQ  
 FRVSAINHFGQGPYLEFPGTMHLVPLAVKTLKVAEAVEGGEVTFVSDLTVAASSGEWFLDGEALKASSIYVI  
 RCDRTRHMLTIREVPARLHGAQLKFEVANGIETS IQMVVRAALGLPSSKLPAAAAREVLAQLHEEAQLLAE LSD  
 QAAA VTLKDGRELSLGPKYEMQVSAGRRALLVRDVAQDDAGLYECVSRGSRRTAYQLLVQDITDGYRDWGPAG  
 PQKHMCKCAGAKIARYLGS SCYRFLQYDKGVWHLEAALDRQKGTSSCSLHEKPKLVFAKQQAHSEVKA E  
 AGNSATLSCEVTQAQTEVTWFKDGKLLSSSSKVRMEASGCSRRLVVQQAGKADAGEYSCEAGGQKLSFRLDVA  
 EPKLVFAKQQAHSEVKA EAGASATLSCEVAQAQTEVTWFKDGKLLSSSSKVRMEASGCSRRLVVQQAGKAD A  
 GEYSCEAGGQKLSFRLDVAEPKMVFAKEQQARSEVKA EAGASATLSCEVAQAQTEVTWFKDGKLLSSSSKVRM  
 EASGCSRRLVVQQAGKADAGEYSCEAGGQKLSFRLDVTEPKLVFAKEQQARSEVKA EVGN SATLSCEVAQAQ T  
 EVTWFKDGKLLSSSSKVRMEASGCSRRLVVQQAGKADAGEYSCEAGGQKLSFRLDVAEPKLVFAKEQQARSEV  
 KAEAGNSATLSCEVAQAQTEVTWFKDGKLLSSSSKVRMEASGCSRRLVVQQAGKADAGEYSCEAGGQKLSFHL  
 DVTEPKLVFAKEQQAHSEVKA EAGASATLSCEVAQAQTEVTWFKDGKLLSSSSKVRMEASGCSRRLVVQQAGK  
 ADAGEYSCEAEGQKLSFRLDVAEPKLVFAKEQQARSEVKA EAGASATLSCEVAQAQTEVTWFKDGKLLSSSSK  
 VRVEASGCSRRLVVQQAGKADAGEYSCEAGGQKLSFRLDVAEPKLVFAKEQQANSEVKA EAGASATLSCEVAQ  
 AQTEVTWFKDGKLLSSSSKVRVEASGCSRRLVVQQAGKADAGEYSCEAGGQKLSFRLDVAEPKLAFAKEQQAH  
 SEVKA EAGASATLSCEVAQAQTEVTWFKDGKLLSSSSKVRVEASGCSRRLVVQQAGKADAGEYSCEAGGQKLS  
 FRLDVAEPKLAFAKEQQAHSEVKA EAGASATLSCEVAQAQTEVTWFKDGKLLSSSSKVRVEASGCSRRLVVQQ  
 AGKADAGEYSCEAGGQKLSFRLDVAEPKLAFAKEQQAHSEVKA EAGASATLSCEVAQAQTEVTWFKDGKLLSS  
 SSKVRVEASGCSRRLVVQQAGKADAGEYSCEAGGQKLFRLDVAEPKLMFAKEQQAHSEVKA EAGASATLSCE  
 VAQAQTEVTWFKDGKLLSSSSKVRVEASGCSRRLVVQQAGKADAGEYSCEAGGQKLSFRLDVAEPKLVFAKEQ  
 QAHSEVKA EAGASATLSCEVAQAQTEVTWFKDGKLLSSSSKVRVEASGCSRRLVVQQVQVQKADAGEYSCEARGQ  
 KLSFRLDVADATRLMFAKEQQARTEVKA EAGNSATLSCEVAQAQTEVTWFKDGKLLSSSSKVRVEASGCSRRLV  
 VQQAGKADAGEYSCEAGGQKLSFRLDVAEAE SQIPERPSRREPLVVKEHETIILTATIAAPSVAAVTWLKDG V  
 EIRRSKRHEATSLGDHTLTVRGAQVLD SAIYSCRVGKEGQDFPVQVEEVA AKFSKPLEPVEGELGGTVMLVC  
 ELSPEQAEVWRCGNTQLRPGKRFQMTSEGPRRTLTVSGLREDDAEYVCE SRDDRTSARLTVKVP RVVKFTS

GLSAMVAEEGQEATFQCVVSPSDAGVTWYKDGMLQOPSEKFMVVEGASRSRLTILGLTLEDAGQVTVAEAGAS  
SSAALRVREAPVLFKKKLEPQTVEERTSVTLEVELTRPWPEVKWTRNAAVLTPSENVEIRAEGARHCLVLRV  
GFADRGFFGCETPDDKTQAKLNVEMRQVRLVRLGLQVEEAKEQGTASMDVELSHAEEVGSWTRDGLRLQPGPKC  
HLAVQGPVHILTLALSALQPQDSGLVAFRAEGVHTSARLIVTELPVSFTRVLQDVVATQKEKVTLECELSRPVDV  
RWLKDGVLELRAGKAIIGIVAQGTCSRSLVIYRCETGDQGVYVCDALDAQTSASLRVQGRTYTLIFRVLAEADAGE  
VKFVAENAESRAHLRVKELPVTLLRPLRDKIAMEKHRGVLECCQVSRASAQVRWFKGGVELQSGPKYEVVSDGL  
YRKLVINDEVQPEDEDTYTCADAGNVKTSAQFFVVEEQSITIVRGLKDMTVMEPAPAWFECETSIPSVRPPKWL  
KTVLQAGGNVGLQDGTVHRLTLHKTCSTMTGPHVHTIGKSRSSAQLVVSDIPVVLTRPLEPKAGRELQSVVL  
SCDFRPAPKAVQWYKDDTPLSPSEKFKMALEGQMAELRILRLTPADAGVYRCQAGSAQSSAEVTVAREVTVI  
QPLQDAEAMEEGRVCFSCELSHKDEDEIWSLNGTPLYNDSFHEISHGCLHTLVLKSVRQADTGTVCATSPKV  
SVSARLVVKGKPVVFLKALDDVSAEERGLTLTQCEVSDPEARVVRKDGVELGSPDKYDFLHKAGARGLTVHD  
LSHEDAGLYTCQVGSKETQSKSVVHDLHVGITKRLKTVEVLEGESECFEVLSSHESPSDPAVWTVGGKTVGGS  
GHFHAVRQGRKYTLTVKDAALSDAGEVVSVLGLTSSKASLIIRERPVDIKPLEDQRTTLGEDVMLSCELSRA  
GTSVRWLKDGKAIRKSQKYDLLSEGTRAVLVVRKASLKDSGEYTCETEASKSTAKLCVEEKANRFTHEELADLQ  
VEEKGRAVFTCKTEHPASVVTWRKGLLELRASGKHVPSQEGTLTKLTINALERTDSDTYTCDIGQARTQARLL  
VHGQKVRVIEDLEDTAVQEGSSAKFCRIAPADYGPVHWFLDKTPLHSNELNEITVQPGGYHVLTLRQLALKD  
SGTVYFEAGDQRTSAALRVTEKPSIFSRPLTDVTVTEGEDTLVCEITTVDSVVRWTKDGKTLRPSARCQLSH  
EGCQAQLLITATTPQDGGRYKCEIGGASSSIVRVHALPVRFRFRESLKDVEVPEGKAATLRVLSVAAPVEWR  
HGDDVLKSSNKYSLRQEGAVLELVIRDLPQDQSGQYSCSFGDQTTSATLTVKTSQAQFVGLKRNKEATEGTTV  
TLRCELKEAPVEWKKGTETLRNGDKYSLKQDGA VCELQICSLLVADAGEYSCVCGQEKTSATLTVKALLVHF  
VRLRSKEATEGDTTTLQCELSKAAPVEWRKGTETLRDGDYSLKQDGA VCELQIRSLTIADAGEYLCTCGQE  
KTSATLTVRALPAKFKDSLKNEEATEGTTATLSCELSKAAPVTWKKGPKTLQSGDKYVLRQDGA VCELQIHGL  
TMADAGEYSCVCGQEKTSATLTVRGLPAKFIEDLRSQEATEGATAILRCELSKAAPVEWRKGTETLRDGDY  
LRQDGA VCELQIRGLAVVDGTGYSLSLPTKFTTEGLRNEEATEGTMATLRCQMSKAAPVEWRKGTETLRDGDY  
LRQDGA MCELQIRGLTIEDSGEYTCVCGQEKTSATLSVKALPSRFIEDLRSQEATEGTMATLRCQMSKTA  
PVEWKKGSETLRDGGRYSLRQDGPVCELQICDLAVEDAGEYSCVCGQEKTSATLSIKALPRFIEDLRSQE  
ATEGTMATLRCQMSKAAPVEWRKGTETLRDGGRYSLRQDGA VCELQIHDLAVEDTGEYSCVCGQEKTS  
ATLNVKALPRFIEDLRSQEATEGTMATLRCQMSKAAPVEWRKGTETLRDGGRYSLRQDGA VCELQIHDL  
DVEDAGQYSCVCGQEKTSAVLTVDALPPKFTTEGLKKEEATEGTMATLRCQMSKATVEWRKGAKTLS  
DGGRYSLRQDGA MCELQICGLAVEDAGEYSCVCGQEKTSATLSVKALPPRFIEDLRSQEATEGTMAT  
LRCQMSKAAPVEWRKGTETLRDGDYSLRQDGA VCELQIRDLAVEDAGEYLCVCGQEKTSATLSVKAL  
PPRFIEDLRSQEATEGTMATLRCQMSKAAPVEWRKGTETLRDGDYSLRQDGA MCELQICDLAVEDT  
GDYSCVCGQEKTSATLSVKALPPRFIEDLRSQEAREGTVATLRCRMSKAAPVEWRKGTETLRDGDY  
SLRQEGNLCELQIRDLAVEDTEEYSCVCGQEKTSATLSVKALPAKFIEDLRSQEAPESSTVTLRCK  
LSKKASVVWKKGSETLRNGARYSLRQDGA VCELEIRDLTVEDETEYSCVCGQERTSATLSIMAPV  
FQQPLQNLQAEEGSMASLRCESSVPNAAMVWSKGGLELQGDTRREARQQGCVAELLRDLRREDAGE  
YSCVCGQEKTSATLMVTAAPVRFRLRELQAQDVDEGATARLRCELSREAVSVEWRKGSLLQFPCAKY  
QMVQEGTTAELLVHGVEQEDAGEYTCDAHTQSIARLSVRAPKPKFKTDLQSTEQEAGGTARLCCQLS  
EAEPGTPVQWLKEGVELHVGSKYEMRRQGA VCELLIHGLEAKDTGEYACLVGQKTLASLRVKEPEVT  
IVRGLVDMEVQADEDEFTCKVSQAGATDVQWHLQGLPLQSNVTEVAVLADGCTHVLQKGVTL  
EDAGTVSFHVGGLSSSAQLTVRVPEVTVLEPLKDVQLESEGQDAHFRCRLSRASGQEARWALGGV  
PLQCNEMNDITVEQGTLYLLTLHKVTLEDAGTITLQVGSSESAQLKVTAKNVLRGLENVDALEGG  
EALFECQLSQPEVAHAHTWLLDDEPVHTSEKVEVVYFENGLRHLLKLNKLPQDSCRVTFLAGD  
VVTSAFLTVRGWRLEVLPEPHDASVKAGMQVRFTCILSEAVPVGEATWYINGAAIQPDDTDW  
TVTDDGSHHALTLSNAQPQHAGEVTFAAARDAVASARLSVLALPDPPEDAEVPVHLPMVKI  
APAPAPAPAPAPAPAPAPETRQAVVGEDICLELEVAADGGEVWVKGTERIQPGGHFEVLS  
RGQRQMLVIKGFRTEDQGEYRCGPIQGLPSSGAATFNVMVMTSGSGDEVPAQPSLPPEAAQ  
EGDLHLLWEALARKRRMSREPTLDSISELPEEDSRVQHLRQEAEEETAPDLSEGYSTADELART  
GEADLSHTSSDDESRACTPSLVTYLKAGGPGISPLASKHEAQVTTSVKPKQEQEPVPTCP  
PPGDLAADLMDPSLDKAAVKIQAAFQYKVRKEMKQEQGPVFSRTFGDTEAQVGDVLRLE  
CVLATKTDMRACWLKDGIELTDGRHYHIDQLKDGTCSSLVVTGLAPTDGRTYTCQVSTK  
SGRVSHSACVVVSGTESEAESSSGGELDDAFRAARRLHRLFRTKSPAELSEELFLSADE  
GPGEPEEPADWQTYREDENFVCIRFESLAEARQAVTCFRNMFMATMGIGVEISLGEQGP  
RGVEMRIGKVAPTVTPAVPLAKTPGLQTSDAAPVFLTELQNDVQDGYPMSFDCVVTGQ  
PVPSVRWFKDGLLEEDDHYMINEDQQGGHQLIITAVVPADMGVYRCLAENSMGVSSTK  
AELRVELTSTDYDTAADATETSSYFSAQKGLSSREQEGTESDEGQLPQVLEELKDLQV  
APGTRLAKFQLKVKGYAPKLYWFKDQGLPSTSDHIRMDDKTLHTLEIVSVTREDSG  
QYAAIYISNAVGAAYSSARLLVRGSEPEEKPASDVHERLVPPRILEKFTPKKVKRGS  
SITFSVKEGHPAPSVHWLKEEAKEGVLWIGPDTPGYTMASSSKQHSLLVLDVGRQH  
QGTYTICATNPAGQALCSASLHISGLAKEEEQERVKEALISSFLQGTSAQVSAQMS  
ESAGFADLVGQSKGESLVAEEAHSHLSLAEVGTTEFLQKLTSTQITEMVSAKISQAKLQ  
VPGGDSDEETKTPSASPRHGRSRPSSSVQESSSESEDGDSRGEIFDIYVVTADY  
LPLGAEQDAI

ILREGQYVEVLDSAHPLRWLVRTKPTKSSPSRQGWVSPAYLDRKRLKLSPEWGPTEAPEFPGEAVSEDEYRTRL  
 SSVIQEELLSSEQAFVQELQFLESHHMKHLERSPRVPAAVASQKTVI FRNVQDISHFHSSFLKELQGCCTDDDV  
 AMCFIKNQEAFEKYLEFLVGRVQAESVVVSTPVQEFYKKYAEETLSAKDPTQPPPPPLQHYLEQPVVERVQKYQ  
 ALLKELIRNKARNRQNCALLEQAYAVVSALPQRAENKLVSLMENYPGTLEALGEPHQGHFIVWEGAPGARM  
 PWKGHNHRVFLFRNYLVICKPRRDSRTDTFSYVFRNMMKLS SIDLNDQVEGDDRAFEVWHEREDSVRKYLLQA  
 RTVI IKNSWVKEICGIQQLAQPVWRPPEFEEELADCTAELGETVKLACRVTGTPKPIVSWYKDGKPVVEVDPH  
 HILIEDPDGSCCTLILDNLTGIDSGQYMCFAASAAGNASTLGKILVQVPPRFVNVKVRATPFVEGEDAQITCTVE  
 GAPYQQIRWYKDGTTLLAPGNRYRMLNEPRSGVLVVIQAASKEDLGHYECELNVNRLGSTRGGGELYMOSPALR  
 ARDQHHREQIVAAVEDTSVEGSAHSAQDQADQQAASVLWRLLGSEALGPS PGDLNTRQSEPPAFEEAASQIP  
 GAASGTPEVSPQPGTHKGLEQETTSSGSQGWTPVIRVEGTAWPGAGTGQLLLDVHSQVIMETTQRTYVCQAPDT  
 GVTRAPSMQVTIEDVQVQVGDMAQFDAVIEGHPPPITVWYKGSTQLTSSARLSQRQDGTYSVLVTDVAPHDA  
 GVYTCVANNAGGQVLCKAELLVHGGDKLDAENQVYRRKLHSFYDVQEEIGRGVFGFVKRVQHKGNMFCAAKF  
 IPLRSKTRAQAYQERDILATLGHPLVTGLLDQFETRKTILILILELCSSEELLDRLFKKGVVTEAEVKVYIQQL  
 VEGHLHLHSHGILHLDIKPPNILMVHPAREDIKICDFGFAQKITPSEPQYSKYGSPEFVSPEIEQNPFVSEGS  
 DIWAMGVI SYLSLTCSSPFAGESDRATLLNVLEGRVSWSSPTAAHLSSEDAKDFIKATLQRTPRARPSTSQCLA  
 HPWFLKSMPAEAAHFINTKQLKFLARSRWQRSLMSYKSILVMRSIPELLQGPDPSPSLGVARHLRGEASGAS  
 SSSSSDNELAPFARAKSLPPSPVTHSPLLHPRGFLRPSASLPEETEASMPPTADAAPVSPQAGPPASPGCV  
 PRHSVSSSLFYQQAGEGAERGNKTSGAKRHPARRRHLLKGGYIARALPGLREPLMEYSLLEEEAAREEQASLM  
 TKTPSFETALRLPSSSVREVPGRSHSLDNPVTTGPSPEACKEQLLFPSTGLTHEHTAKDRGHKEGFLQESV  
 PFPMSGDSRPGKQEGSSQDSCRKPASSCHSELGSGSQEGCGPPSSQSLGSLPPQSLKELSTSCGPLFSEQ  
 PQAAPFPPTQVSPLLGSEKEPQDGSLEGPVVPVSSSPGSASQVDASLDTEGLSEAGDTCDFTPPPQRPQEQAT  
 TRKFSLESRGGYAGVAGYGTFAFGGDAGGMLGQGPLWARMAWAVSQSSEEQDEAATESPQPLES LGPIAEASG  
 VPLRTSPSLTPWEEVEQVSLVQIRDLSGDAEAADTISLDISEVDPAYLNLSLDLYDIKYL PFEFMI FRRVPKPI  
 EQPESPGSETEAGQGLADFLLEEAAWPWPGELGLRAGLEITEEPEEPGDLEALLGEEAVGRKRKWSPSRGLFQF  
 PGRCLSGEEPVELGLRQVRKASMAHISRILKGRPEGEREGPPRKKAGLASFRLSGLKGRDQELSDEAVVLGQ  
 SVTLACQVLAQPTAQATWSKDGVLLESSGHLLISSTLKNVQFLLTILVVKEEDLGTITCCVSNPLGTAVTGVL  
 RKAERPSSSRARNAIGEFAAAGLVRVDSEGTCAEQAPHFLLRPTSIRVREGADATFRCRVGGSPQPAVSWSKDG  
 RRLGPPDAPHVRVEEHGESSALRIRSARPRDGGTYEVRAENPLGSASAAAAALVVDSDAEVAGPPGTSTATLLA  
 HLQORREAMRAEGIPPSPPGAGTRTCTVTEGKHARLSCFVTGEPKPEVWKKDGQLVTEGRRHVVEDEQENF  
 VLKILFCKQSDRGLYTCTASNLVGQTYSSVLVVVREPTVPFKKRLQDLEVREKESATFQCEVAQPAEAAWFK  
 EETRLWASAKYDIEEEGETERRLTVRNVSADDDAVYICETTEGSRVVAELSVQGNLTKLPRKTAVRTGDTAIF  
 WVELAVPEGPVRWLRNQEEMVAGGRVAITAEGTCHTLTI FQCTLEDMGEVAFVSGGCRTTTFQFCVSAPRRPPL  
 YPPADPVVKAKTESSVTLWSAPPHGDRPVTIDGYVLEKRLKLGAYAWSRCHEAGWLATTEFTITGVAAEEDGFQ  
 FRVSAINHFGQGPYLEFPGTMHLVPLAVKTPKAVEAVEGGEVTFVSDLTVASSGEWFLDGEALKASSIYVI  
 RCDRTRHMLTIREVPARLHGAQLKVFANGIETS IQMVVRAALGLPSSKLPAAAAREVLAQLHHEEAQLLAE LSD  
 QAAAVTWLKDGRELSLGPKYEMQVSAGRRALLVRDVAQDDAGLYECVSRGSRRTAYQLLVQDITDGYRDWGPAG  
 PQKHMCKCAGAKIARYLGSSCYRFLQYDKGVVHWEAALDTRQKGKTS SCSLHEKPKLVFAKQQAHSEVKA  
 AGASATLSCEVAQAQTEVTFWKDGKLLSSSSKVRMEASGCSRRLVVQQAGKADAGEYSCEAGGQKLSFRLDVA  
 EPKMFVFAKEQQARSEVKAEGASATLSCEVAQAQTEVTFWKDGKLLSSSSKVRMEASGCSRRLVVQQAGKADA  
 GEYSCEAGGQKLSFRLDVTEPKLVFAKEQQARSEVKAEGVNSATLSCEVAQAQTEVTFWKDGKLLSSSSKVRM  
 EASGCSRRLVVQQAGKADAGEYSCEAGGQKLSFRLDVAEPKLVFAKEQQARSEVKAEGNSATLSCEVAQAQ  
 EVTWFKDGKLLSSSSKVRMEASGCSRRLVVQQAGKADAGEYSCEAGGQKLSFRLDVTEPKLVFAKEQQAHSEV  
 KAEAGASATLSCEVAQAQTEVTFWKDGKLLSSSSKVRMEASGCSRRLVVQQAGKADAGEYSCEAGGQKLSFR  
 DVAEPKLVFAKEQQARSEVKAEGASATLSCEVAQAQTEVTFWKDGKLLSSSSKVRVEASGCSRRLVVQQAGK  
 ADAGEYSCEAGGQKLSFRLDVAEPKLVFAKEQQANSEVKAEGASATLSCEVAQAQTEVTFWKDGKLLSSSSK  
 VRVEASGCSRRLVVQQAGKADAGEYSCEAGGQKLSFRLDVAEPKLVFAKEQQAHSEVKAEGASATLSCEVAQ  
 AQTEVTFWKDGKLLSSSSKVRVEASGCSRRLVVQQAGKADAGEYSCEAGGQKLSFRLDVAEPKLVFAKEQQAH  
 SEVKAEGASATLSCEVAQAQTEVTFWKDGKLLSSSSKVRVEASGCSRRLVVQQAGKADAGEYSCEAGGQKLS  
 FRLDVAEPKLVFAKEQQAHSEVKAEGASATLSCEVAQAQTEVTFWKDGKLLSSSSKVRVEASGCSRRLVVQQ

AGKADAGEYSCEAGGQKLFRLDVAEPKLVFAKEQQAHSVEVKAEAGASATLSCEVAQAQTEVTFWKDGKLLSS
SSKVRVEASGCSRRLVVQVQVKADAGEYSCEARGQKLSFRLDVAEAEESQIPERPSRREPLVVEKETIILTAT
IAAPSVAAVTWLKDGVEIRRSKRHEATSLGDTHLTVRGAQVLDIAIYSCRVGKEGQDFPVQVEEVAAKFSKP
LEPVEGELGGTVMLVCELSPEQAEVVWRCGNTQLRPGKRFQMTSEGPRTTLTVSGLREDDAEYVCESRDDRT
SARLTVKVPRVVKFTSGLSAMVAEEGQEATFQC VVSPSDAGVTWYKDGMLQPSEKFMVMEVGASRSILTILGL
TLEDAGQVTVAEAGASSAALRVREAPVLFKKKLEPQTVEERTSVTLEVELTRPWPVEVKWTRNAAVLTPSENV
EIRAEGARHCLVLRVSGFADRGGFFGCETPDDKTQAKLNVEMRQVRLVVRGLQEVEAKEQGTASMDVELSHA EVE
GSWTRDGLRLQPGPKCHLAVQGPVHILTL SALQPQDSGLVAFRAEGVHTSARLIVTELPVVFTRVLQDVVATQ
KEKVTLECELSRPVDVRLKDGVELRAGKAIGIVAQGTCSRSLVIYRCETGDQGVYVCDALDAQSASLRVQGR
TYTLIFRRVLAEDAGEVKFVAENAESRAHLRVKELPVTLLRPLRDKIAMEKHRGVLECCQVSRASAQVRWFKGG
VELQSGPKYEVVSDGLYRKLVIN DVQPEDEDTYTC DAGNVKTSAQFFVEEQSITIVRGLKDMTVM EPAPAWFE
CETSIPSVRPPKWL LGKTVLQAGNVGLEQDGT VHRLTLHKTCSTMTG PVHFTIGKSRSSAQLVSDIPVVL T
RPLEPKAGRELQSVVLSCDFRPAPKAVQWYKDDTPLSPSEKFKMALEGQMAELRILRLTPADAGVYRCQAGSA
QSSAEVTVAREVTVIQPLQDAEAMEEGRVCFSCELSHKDEDEI EWSLNGTPLYNDSFHEISHEGCLHTLV LKS
VRQADTGTVCATSPKVSVSARLVVKGKPVVFLKALDDVSAEERGTLTLQCEVSDPEARVVWRKDGVELGPSDK
YDFLHKAGARGLTVHDL SHEDAGLYTCQVGSKETQSKVSVHDLHVGITKRKKTVEVLEGESECFEVL SHESP
SDPAVWTVGGKTVGGSGHFHAVRQGRKYTLTVKDAALSDAGEVVFVSVLGLTSKASLIIRERPVDI TKPLEDQR
TTLGEDVMLSCELSRAGTSVRWLKDGKAIKRSQKYDLLSEGTAVLVRKASLKDSEGYTCETEASKSTAKLC
VEEKANRFTEELADLQVEEKGRAVFTCKTEHPASVVTWRKGLLELRASGKHVPSQEGTLTKLTINALERTDSD
TYTCDIGQARTQARLLVHGQKVRVIEDLED TAVQEGSSAKFCCR IAPADYGPVHWFLDKTPLHSNELNEITVQ
PGGYHVLT LRQLALKDSGTVYFEAGDQRTS AALRVTEKPSIFSRPLTDVTVTEGEDLTLVCETTTVDSSVRWT
KDGTLRPSARCQLSHEGCAQLLI TATTPQDGGRYKCEIGGASSSIVRVHALPVRFRESLKDVEVPEGKAA
TLRCVLSVVAAPVEWRHGDDVLKSSNKYSLRQEGAVLELVIDRLQPDQSGQYSCSFGDQTTSATLTVKTS SAQ
FVGKLRNKEATEGTTVTLRCELTK EAPVEWKKGTETLRNGDKYSLKQDGAVCELQICSLLVADAGEYSCVCGQ
EKTSATLTVKALLVHFVRRRLSKEATEGDTTTLQCELSKAAPVEWRKGTETLRDGD DRYSLKQDGAVCELQIRS
LT IADAGEYLCTCGEKTSATLTVRALPAKFKDSLKNEEATEGTATLSCELSKAAPVTWKKGPKTLQSGDKY
VLRQDGAVCGLQIHGLTMADAGEYSCVCGQEKTSATLTVRGLPAKFIEDLRSQEATEGATAILRCELSKAAPV
EWRKGSSETLKDGD RYTLRQDGAVCELQIRGLAVVDGTYS SLPKFTEGLRNEEATEGTMATLRCQMSKAAPV
EWRKGSSETLRDGD RYSLRQDGAMCELQIRGLTIEDSGEYTCVCGQEKTSATLSVKALPPRFIEDLRSQEATEG
TMATLRCQMSKAAPVEWRKGSSETLGDGGRYSLRQNGAVCELQIHDLAVEDTGEYSCVCGQEKTSATLNVKALP
PRFIEDLRSQEATEGTMATLRCQMSKAAPVEWRKGSSETLRDGGRYSLRQDGAVCELQIHDLDVEDAGQYSCVC
GQEKTSAVLTVDALPPKFTEGLKKEEATEGTMVTLRQMSKEATVEWRKGAKTLDGGRYSLRQDGAMCELQI
CGLAVEDAGEYSCVCGQEKTSATLSVKALPPRFIEDLRSQEATEGTMATLRCQMSKAAPVEWRKGSKTLRDGD
RYSLRQDGAMCELQICDLAVEDTGDYSCVCGQEKTSATLSVKAPQVVFQQLQNLQAEEGSMASLRCESSVFN
AAMVWSKGGLELQGDTRREARQQCV AELLRLDRLEDAGEYSCTCGSQTTSATLMVTAAPVRFRELQAQDV
DEGATARLRCELSREAVSVWRKGS LQLFPCKAKYQMVQEGTTAELLVHGVEQEDAGEYTCIARLSV
RAPKPKFKTDLQSTEQEAGGTARLCCQLSEAEPTPVQWLKEGVELHVGSKYEMRRQGAVCELLIHGLEAKDT
GEYACLVGQKTASLRVKEPEVTIVRGLVDMEVQADEDEVEFTCKV SQAGATDVQWHLQGLPLQSN E VTEVAV
LADGCTHV LQLKGV TLEDAGTVSFHVGGLSSSAQLTVRVPEVTVLEPLKDVQLSEGD DAHFRCLSRASGQEA
RWALGGVPLQCNEMNDITVEQGTLYLLTLHKVTLEDAGTITLQVGS CSSEAQLKVTAKNTVLRGLENVDALEG
GEALFECQLSQPEVA AHTWLLDDEPVHTSEKVEVVFENGLRHLLLLKLNKLPQDSCRVTFLAGDVVTS AFLTV
RALPDPPEDAEVVGRSDHSVTL SWAPMSDGGGGLCGYRVEMKEASTGQWQLCHDLVPGPECVDDLVPGKTY
RFRVAAVGPAGAGEPVHLPQMVKIAPAPAPAPAPAPAPAPETRQAVVGEDICLELEVAADGGVEVWHKGERI
QPGGHFEVLSRGQRQMLVIKGFRTEDQGEYRCGPIQGLPSSGAATFNVVMTSGSGDEVPAQPSLPP EAAQEGD
LHLLWEALARKRRMSREPTLDSISELPEEDSRVQHRLRQEA EETAPDLSEGYSTADELARTGEADLSHTSSDDE
SRAGTPSLVTYLKKAGGPGISPLASKHEAQVTTSVKPKQKQEPVVP TCPPPGDLSAADLMDPSLDKAAVKIQA
AFKGYKVRKEMKQOEGPVFSR TFGDTEAQVGDVLRLECVLATKTKDMRACWLKDGIELTDGRHYHIDQLKDGT C
SLLVTGLAPTDSGRYTCQVSTKSGRVSHSACVVVSGTESEAESSSGGELDDAFRRAARRLHRLFRTKSPAELS
EELFLSADEGPGEPEPADWQTYREDENFVCIRFESLAEARQAVTCFRNMFATMGIGVEISLGEQGP RGVEM
RIGKVAPTVT PAVPLAKTPGLQTS DAAPVFLTELQNQDVQDGYPMSFDCVVTGQPVPSVRWFKDGKLL EEDDH
YMINEDQQGGHQLIITAVVPADMGVYRCLAENSMGVSSTKAELRVELTSTDYDTAADATETSSYFSAQGYLSS
REQEGTESDEGQLPQVLEELKDLQVAPGTR LAKFQLKVKGY PAPKLYWFKDGQPLTSDHIRMTDKKTLHTLE
IVSVTRESDSGVYAAYISNAVGAAY SARLLVRGPSEPEEK PASDVHERLVPPRILEKFTPKKVKRGSITFSV
KVEGHPAPSVHWLKEEA EKGVLWIGPDTPGYTMASSSQHSLVLLLDVGRQHOGQTYTCIATNPAGQALCSASLH
ISGLAKEEEEQERVKEALISSFLQGT SQAVSAQMSE SAGFADLVGQSKGSLVAEEAHSHLSLAEVGTEEF LQK
LTSQITEMVSAKISQAKLQVPGGDSDEETKTPSASPRHGRSRPSSSVQESSSESESDGDSRGEIFDIYVVTADY
LPLGAEQDAIILREGQYVEVLD SAHPLRVLVVRTKPTKSSPSRQGWVSPAYLDKRLKLSPEWGPTEAPEFPGEA
VSEDEYRTRLSSVIQELLSSEQAFV GELQFLESHHMKHLERSPRVPAAVASQKTVI FRNVQDISHFHSSFLKE

LQCGCTDDDVAMCFIKNQEAFAEKYLEFLVGRVQAESVVVSTPVQEFYKKYAEETLSAKDPTQPPPPPLQHYLE
QPVERVQKYQALLKELIRNKARNRQNCALLEQAYAVVSALPQRAENKLVHSLMENYPGTLEALGEPVIRQGHFI
VWEGAPGARMPPWKGNHRHVFVFRNYLVICKPRRDSRTDTFSYVFRNMMKLSSIDLNDQVEGDRAFEVWHERE
DSVRKYLQARTVIKNSVWKEICGIQORLAQPVWRPPEFEELADCTAELGETVKLACRVTGTGPKPIVSWYK
DGKPVVEVDPHHILIEDPDGSCSTLILDNLTGIDSGQYMCFAASAAGNASTLGKILVQVPPRFVNVKVRATPFVEG
EDAQITCTVEGAPYPQIRWYKDGTLAPGNRYRMLNEPRSGVLLVLIQAASKEDLGHYECELVNRLGSTRGGG
ELYMOSPALRARDQHHREQIVAAVEGAPSMQVTIEDVQVQVGDMAQFDAVIEGHPPPVTWYKGSTQLTSSAR
LSQRQDGTYSVLVTDVAPHDAGVYTCVANNAGGQVLCCKAELLVHGGDKLDAENQVYRRKLSHSFYDVQEEIGR
GVFGFVKRVQHKGNMFCAAKFIPLRSKTRAQAYQERDILATLGHPLVTGLLDQFETRKTLLILELCSSEEL
LDRLFKKGVVTEAEVKVYIQQLVEGLHYLHSHGILHLDIKPPNIIIMVHPAREDIKICDFGFAQKITPSEPQYS
KYGSPFVVSPEIIEQNPNVSEGSIDIWAMGVISYLSLTCSSPFAGESDRATLLNVLEGRVSWSSPTAAHLSEDA
DFIKATLQRTPRARPSTSQCLAHFWFLKSMPAAEAHFINTKQLKFLARSRWQRSLMSYKSIIVMRSIPPELLQ
GPPDSPSLGVARHLRGEASGASSSSSSDNEAPFARAKSLPPSPVTHSPLLHPRGFLRPSASLPEETEASMP
TADAAPVSPQASAGPPASPGCVPRHSVSSLFYQQAGEGAERGNKTSAGKRHPARRRHLKGGYIARALPGLR
EPLMEYSLLEEEAAREEQASLMTKTPSFETALRLPSSSVREVPGRSHSLDNPVTTGSPPEACKEQLLFPST
GLTHETAKDRGHKEGFLQESVFPFPMMSGDSRPGKQEGSSQDSCRGKPASSCHSELGSGSQEGCGPPSSQSLG
SLPFPQSLKKELSTSCGPLFSEQPQAAPFPTQVSPLLGSEKPEQDGSLSSEGPVVPVSSSPGSASQVDAASLDTEG
LSEAGDTCDFTPPPQRPQEQATTRKFSLESRGGYAGVAGYGTFAFGGDAGGMLGQGPLWARMVAWSQSSEEQ
DEAATESPQPLESGLPIAEASGVPLRTSPSLTPWEEVEQVSLVQIRDLSDGAEAAADTISLDISEVDPAYLNL
DLYDIKYLPPFEFMI FRRVPKPIEQPESPGSETEAGQLADFLLEAAWPWPGEGLRAGLEITEEPEEPDLEA
LLGEAAVGRKRKWSPSRGLFQFPGRCLSGEEPVELGLRQRVKASMAHISRIKGRPEGPEREPPRKKAGLAS
FRLSGLKGRDQELSDEAVVLGQSVTLACQVLAQPTAQATWSKDGVLLESSGHLLISSTLKNFQLLTIIVVKEE
DLGTYTCCVSNPLGTAVTTGVLKKAERPSSSPRPEVGEYKDAVLLVWKPVE SCGPVTYIVQCCIEGGSWTTL
ASDISDCCYLTKLSRGGMYIFRTACVSKAGMGPYSSPSEQVLLGGPNHLASEEESSRGRPAQLLPSTKTF
QMQIRRRGRFSVVRQCREKASGRALAAKIVPYQPEDKTAVREYEAALKRLLHHPHLAQLHAAYLSPRHLVLI
CSGPELLPSLAERESYSESDVKDYLWQMLSATQYLHAQHILHLDLRSNNMMVTEYNLLKVIDLGNASQLDQEK
VPAPENFKDYLETETMAPELLEGGQAVPQTDIWAIGVTAIFIMLSGEYPESESETRDLQKGLRSLRSCYAGL
SGGAVAFVQLSSLCAQPWGRPCASTCLQCGWLTEEGPTGSRPTVPTVPTVRLRAFVREKRRRALLYKKNHNAQ
VR\*

>rs50048074\_ENSMUSP00000049737\_c.14371:T>C\_p.L4791S
ENSMUST00000052872.15|Obscn-203|ENSMUSG00000061462|-|chr11:g.58943459:A>G
MDHSFSGAPRFLTRPKAFVSVGKDATLSCQIVGNPTPHVSWEKDRQPVEAGARFRLAQDGDVYRLTILDLAL
GDSGQYVCRARNAIGEAFAAVGLRVDSEGTCAEQAPHFLLRPTSIRVREGADATFRCRVGGSPQPAVSWSKDG
RRLGPPDAPHVRVEEHGESSALRIRRSARPRDGGTYEVRAENPLGSASAAAALVVDSDAEVAGPPGTSTATLLA
HLQORREAMRAEGIPSPPGAGTRTCTVTTEGKHARLSFCVTEGPKPETVWKKDGLVTEGRRHVVEDEQENF
VLKILFCKQSDRGLYCTASNLVGGTYSSVVLVVVREPTVFPFKRLQDLEVREKESATFPCEVAQPATEAAWFK
EETRLWASAKYDIEEEGTERRLTVRNVSADDDAVYICETTEGSRVVAELSVQGNLTKLPRKTAVRTGDTAIF
WVELAVPEGPVWRWRNQEEMVAGGRVAITAEGTCHTLTIFQCTLEDMGEVAFVSGGCRTTTQFCVSAPRRPPL
YPPADPVVAKAKTESVTLWSAPPHGDRPVTIDGYVLEKRLKLGAYAWSRCHEAGWLATTEFTITGVAAEGDFQ
FRVSAINHFGQGPYLEFPGTMHLVPLAVKTPKAVEAVEGGEVTFVSDLTVASSGEWFLDGEALKASSIYVI
RCDRTRHMLTIREVPARLHGAQLKFVANGIETS IQMVVRAALGLPSKLPAAAAREVLAQLHEEAQLLAELSD
QAAAVTWLKDGRELSLGPKEYMQVSAGRRALLVRDVAQDDAGLYECVSRGSRRTAYQLLVQEPKLVFAKQQA
SEVKAEAGNSATLSCEVTAQTEVTWFKDGKLLSSSSKVRMEASGCSRRLVVQQAGKADAGEYSCEAGGQKLS
FRLDVAEPKLVFAKQQAHEVKAEGASATLSCEVAQAQTEVTWFKDGKLLSSSSKVRMEASGCSRRLVVQQ
AGKADAGEYSCEAGGQKLSFRLDVAEPKLVFAKEQQARSEVKAEGASATLSCEVAQAQTEVTWFKDGKLLS
SSKVRMEASGCSRRLVVQQAGKADAGEYSCEAGGQKLSFRLDVTEPKLVFAKEQQARSEVKAEGVNSATLSCE
VAQAQTEVTWFKDGKLLSSSSKVRMEASGCSRRLVVQQAGKADAGEYSCEAGGQKLSFRLDVAEPKLVFAKEQ
QARSEVKAEGNSATLSCEVAQAQTEVTWFKDGKLLSSSSKVRMEASGCSRRLVVQQAGKADAGEYSCEAGGQ
KLSFHLVDVTEPKLVFAKEQQAHSEVKAEGASATLSCEVAQAQTEVTWFKDGKLLSSSSKVRMEASGCSRRLV
VQQAGKADAGEYSCEAGGQKLSFRLDVAEPKLVFAKEQQARSEVKAEGASATLSCEVAQAQTEVTWFKDGK
LSSSSKVRVEASGCSRRLVVQQAGKADAGEYSCEAGGQKLSFRLDVAEPKLVFAKEQQANSEVKAEGASATL
SCEVAQAQTEVTWFKDGKLLSSSSKVRVEASGCSRRLVVQQAGKADAGEYSCEAGGQKLSFRLDVAEPKLAFA
KEQQAHSEVKAEGASATLSCEVAQAQTEVTWFKDGKLLSSSSKVRVEASGCSRRLVVQQAGKADAGEYSCEA
GGQKLSFRLDVAEPKLAFAKEQQAHSEVKAEGASATLSCEVAQAQTEVTWFKDGKLLSSSSKVRVEASGCSR
RLVVQQAGKADAGEYSCEAGGQKLSFRLDVAEPKLAFAKEQQAHSEVKAEGASATLSCEVAQAQTEVTWFKD
GKLLSSSSKVRVEASGCSRRLVVQQAGKADAGEYSCEAGGQKLFRLDVAEPKLMFAKEQQAHSEVKAEGAS
ATLSCEVAQAQTEVTWFKDGKLLSSSSKVRVEASGCSRRLVVQQAGKADAGEYSCEAGGQKLSFRLDVAEPK
LVFAKEQQAHSEVKAEGASATLSCEVAQAQTEVTWFKDGKLLSSSSKVRVEASGCSRRLVVQQVQKADAGEYS

CEARGQKLSFRLDVADTRLMFAKEQQARTEVKA EAGNSATLSCEVAQAQTEVTFWKDGGKLLSSSSKVRVEASG  
CSRRLVVQQAGKADAGEYSCEAGGQKLSFRLDVAEAE SQI PERPSRREPLVVKEHETII LTATIAAPSVAAVT  
WLKDGVEIRRSKRHEATS LGDHTLT VTRGAQVLDSAIYSCRVGKEGQDFPVQVEEVAAKFSKPLEPVEGELGG  
TVMLVCELSPEQA EVVWRCGNTQLRPGKRFQMTSEGPRRTLT VSGLREDDAEYVCESRDDRTSARLTVKVPR  
VVKFTSGLSAMVAEEGQEATFQC VVSPSDAGVTWYKDGMLQPSEK FVMVESGASRSLTILGLTLEDAGQVTV  
EAEGASSAALRVREAPVLFKKKLEPQTVEERTSVTLEVELTRPWPEVKWTRNAAVLT PSENVEIRAEGARHC  
LVLRVGFADRGFFGCETPDDKTQAKLNVEMRQVRLVRGLQVEVAKEQGTASMDVELSHAEVEGSWTRDGLRL  
QPGPKCHLAVQGPVHILTL SALQPQDSGLVAFRAEGVHTSARLIVTELPV SFTRVLQD VVATQKEKVTLECEL  
SRPVDVRWLKDGVELRAGKAI GIVAQGTCSRSLVIYRCETGDQGVYVCDALDAQTSASLRVQGRTYTLI FRRVL  
AEDAGEVKFVAENAESRAHLRVKELPVTLLRPLRDKIAMEKHRGVLE CQVSRASAQVRWFKGGVELQSGPKYE  
VVSDGLYRKLVIN DVQPEDEDTYTCDAGNVKTSAQFFVVEEQSITIVRGLKDMTVM EPAPAWFECETSIPSVRP  
PKWLLGKTVLQAGGNVGL EQDGT VHRLTLHKTCSTMTGPVHFTIGKSRSSAQLVVSDIPVVLTRPLEPKAGRE  
LQSVVLSCDFRPAPKAVQWYKDDTPLSPSEKFKMALEGQMAELRILRLTPADAGVYRCQAGSAQSSAEVTVEA  
REVTVIQPLQDAEAMEEGRVCFSC ELSHKDEDI EWSLNGTPLYNDSFHEI SHEGCLHTLV LKSVRQADTGTVC  
ATS PKVSV SARLVVKGKPVVFLKALDDVSAEERGTLT LQCEVSDPEARV VWRKDGVELGPSDKYDFLHKAGAR  
GLTVHDL SHEDAGLYTCQVGSKETQSKVSVHDLHVGITKRLKTVEVLEGE SCSFECVLSHESPSDPAVWTVGG  
KTVGGSGHFHAWRQRKYTLTVKDAALSDAGEV VSVLGLT SKASLIIRERPV DITKPLEDQRTELTGEDVMLS  
CELSRAGT SVRWLKD GKAI RKSQYDLLSEGTRAVLVVRKASL KDSGEYTCETEASKSTAKLCVBEKANRFTE  
ELADLQVEEKGRAVFTCKTEHPASVVTWRKGLLELRASGKHVPSQ EGLTLKLTINALERTDS DTYTCDIGQAR  
TQARLLVHGQKVRVIEDLEDTAVQEGSSAKFCCRIAPADYGPVHWF LDKTPLHSNELNEITVQPGGYHVLTLR  
QLALKDSGT VYFEAGDQRTS AALRVTEKPSI FSRPLTDVTVTEGEDLTLVCETTTVDSSVRWTKDGKTLRPSA  
RCQLSHEGCAQLLITATTPQDGGRYKCEIGGASSSSIVRVHALPVRFRESLKDVEVPEGKAATLRCVLS SVA  
APVEWRHGDDVLKSSNKYSLRQEGAVLELVI RDLQPQDSGQYSCSFGDQTT SATLT VKTSSAQFVGKLRNKEA  
TEGTTVTLRCELTK EAPVEWKKGTETLRNGDKYSLKQDGAVCELQIC SLLVADAGEYSCVCGQE KTSATLTVK  
ALLVHFVRRRLRSKEATEGDTTTLQCELSKAAPVEWRKGTETLRDGD RYSLKQDGAVCELQIRSLTIADAGEYL  
CTCGEKT SATLTVRALPAKFKDSLKNEEATEGTTATLSCELSKAAPVTWKKGPKTLQSGDKYVLRQDGAVCG  
LQIHGLTMADAGEYSCVCGQE KTSATLTVRGLPAKFIEDLRSQEATEGATAILRCELSKAAPVEWRKGETL K  
DGDRYTLRQDGAVCELQIRGLAVVDTGTYS SLPKFTTEGLRNEEATEGTMATLRCQMSKAAPVEWRKGETLR  
DGDRYSLRQDGAMCELQIRGLTIEDSGEYTCVCGQE KTSATLSVKALPSRFIEDLRSQEATEGTMATLRCQMS  
KTAPVEWKKGSETLRDGGRYSLRQDGPVCELQICDLAVEDAGEYSCVCGQE KTSATLSIKALPPRFIEDLRSQ  
EATEGTMATLRCQMSKAAPVEWRKGETLGDGGRYSLRQNGAVCELQIHDLAVEDTGEYSCVCGQE KTSATLN  
VKALPPRFIEDLRSQEATEGTMATLRCQMSKAAPVEWRKGETLRDGGRYSLRQDGAVCELQIHDL DVEDAGQ  
YSCVCGQE KTSAVLTVDALPPKFTTEGLKKEEATEGTMVTLRCQMSKEATVEWRKGAKT LSDGGRYSLRQDGAM  
CELQICGLAVEDAGEYSCVCGQE KTSATLSVKALPPRFIEDLRSQEATEGTMATLRCQMSKAAPVEWRKGET  
LRDGD RYSLRQDGAVCELQIRDLAVEDAGEYLCVCGQE KTSATLSVKALPPRFIEDLRSQEATEGTMATLRCQ  
MSKAAPVEWRKGETLRDGD RYSLRQDGAMCELQICDLAVEDTGDYSCVCGQE KTSATLSVKALPPRFIEDLR  
SQEAREGTVATLRCMSKAAPVEWRKGETLKDGD RYSLRQEGNLCELQIRDLAVEDTEEYSCVCGQE KTSAT  
LSVKALPAKFIEDLRSQEAPESSTVTLRCKLSKKASVWKKGSETLRNGARYSLRQDGAVCELEIRDLTVEDT  
GEYSCTCGQERTSATLSIMAPQVVFQQPLQNLQAEEGSMASLRCESSVPNAAMVWSKGGLELQGDTRREARQQ  
GCVAELLLRDLRREDAGEYSC TCGSQTT SATLMVTAAPVRFLRELQAQDVDEGATARLRCELSREAVSVEWRK  
GSLQLFPCA KYQMVQEGTTAE LLVHGVEQEDAGEYTC DAGHTQS IARLSVRAPKPKFKTDLQSTEQEAGGTAR  
LCCQLSEAE PGTPVQWLKEGVELHVGSKYEMRRQ GAVCELLIHGLEAKDTGEYACL VGGQKT LASLRVKEPEV  
TIVRGLVDMEVQADEDEFTCKV SQAGATDVQWHLQGLPLQSN E VTEVAVLADGCTHV LQLKGVTL EDAGTVS  
FHVGG LSSSAQLTVRVPEVTVLEPLKDVQLSEGD AHFRCLSRASGQEARWALGGVPLQC NEMNDITVEQGT  
LYLLTLHKVTLEDAGTITLQV GSCSSEAQLKVTAKNTVLRGLENVD ALEGGEALFECQLSQPEVAHTWLLDD  
EPVHTSEKVEVVYFENGLRH LLLLKLNKLPQDSCRVTFLAGDVVTS AFLTVRGWRLEVLEPPHDASVKAGMQVR  
FTCILSEAVPVGEATWYINGAAIQPDDTDWTVTTDGS HHALTLSNAQPQHAGEVTF AARDAVASARLSVLALP  
DPPEDA EVVGRSDHSVTLSWVAPMSDGGG LCGYRVMKEASTGQWQLCHDLVPGPECVDDLVPGKTYRFRV  
AAVGPAGAGEPVHLPQMVKIAPAPAPAPAPAPAPAPETRQAVVGEDIC LELEVAADGGEVVWHKGTERTIQPGG  
HFVLSRGRQMLVIKGRFTE DQGEYRCGPIQGLPSSGAATFNVMVMTSGSGDEVPAQPSLPPEAAQEGDLHLL  
WEALARKRRMSREPTLDSISELPEEDSRVQH LRQEAEE TAPDLSEGYSTADELARTGEADLSHTSSDDES RAG  
TPSLVTYLK KAGGPGI SPLASKHEAQVTT SVKPKQKQEPVVP TCPPPGDL SAADLMDPSLDKAAVKIQAAF KG  
YKVRKEMKQYEGPVSRTFGDTEAQVGDVLRLECVLATAKTTDMRACWLKDGIELTDGRHYHIDQLKDGTC SLV  
TGLAPTDSGRYTCQVSTKSGRVSHSACVVVSGTESAEAES SGGELDDA FRRAARRLHRLFRKSPAE LSEEL  
FLSADEGPGEPEPADWQTYRE DENFVCIRFESLAEARQAVTCFRNM FATMIGVEISLGEQGP RVEMRIGK  
VAPT VTPAVPLAKTPGLQTS DAAPVFLTELQNDVQDGYPMSFDCVVTGQP VPSVRWFKDGKLEEDDHYMIN  
EDQQGGHQLIITAVVPADMGVYRCLAENSMGVSSTKAELRVELTSTDYDTAADATETSSYFSAQGYLSSREQE  
GTESDEGQLPQVLEELKDLQVAPGTR LAKFQLKVKGY PAPKLYWFKDGOPLT TSDHIRMTDKKTLHTLEIVSV

TREDSGQYAAAYISNAVGAAAYSSARLLVVRGPSEPEEKPASDVHERLVPRIILEKFTPKKVKRGSSITFSVKVEG  
HPAPSVHWLKEEAKEGVLWIGPDTPGYTMASSSKQHSLLVLDVGRQHOGTYTCIATNPAGQALCSASLHISGL  
AKEEEQERVKEALISSFLOGTSQAVSAQMSESAGFADLVGQSKGESLVAAEEAHSHLSLAEVGTEEFLOKLTSSQ  
ITEMVSAKISQAKLQVPGGDSDEETKTPSASPRHGRSRPSSSVQESSSESEDGDSRGEIFDIYVVTADYLPGLG  
AEQDAIILREGQYVEVLDSAHPLRWLVRTKPTKSSPSRQGWVSPAYLDKRLKLSPEWGPTEAPEFPGEAVSED  
EYRTRLSSVIQELLSSEQAFVGELOFLSHHMKHLERSPRVPAAVASQKTVIFRNVQDISHFHSSFLKELQGC  
GTDDDVAMCFIKNQEAFAFEKYLEFLVGRVQAESVVVSTPVQEFYKKYAEETLSAKDPTQPPPPLOHYLEQFVE  
RVQKYQALLKELIRNKARNRQNCALLEQAYAVVSALPQRAENKLHVSLMENYPGTLEALGEPIRQGHFIVWEG  
APGARMPWKGNHRHVFLFRNYLVICKPRRDSRTDTFSYVFRNMMKLSSIDLNDQVEGDDRAFEVWHEREDSVR  
KYLQARTVIKNSWVKEICGIQQRLAQPVWRPPEFEEELADCTAELGETVKLACRVTGTPKPIVSWYKDGKP  
VEVDPHHILIEDPDGSCTLILDNLTGIDSGQYMCFAASAAGNASTLGKILVQVPPRFVNVKVRATPFVEGEDAQ  
ITCTVEGAPYPQIRWYKDGTLAPGNRYRMLNEPRSGVLVVIQAASKEDLGHYECELVNRLGSTRGGGELYM  
QSPALRARDQHHREQIVAAVEVTEQETKVPKKTVIEETITTVVKS PRGRRQSPGKSPSRSPSRSSASPRRPG  
LLAPERLYPPGTSPSRLEVEQGRKAPVPALYVTEAEVHAPASQSQPKWLEVEETIEVRVKKTGSRGASPVRE  
MTSRGEGLFRTLPGGIPGRDPNANNSNNSVYQEARWGPVAVHVGEPFIQVDSVGNVDVVAASPEPEQVRA  
SQKEENTERQEGCSDGDENTFLMEEPQDTSLQGRDPKILTHNGRVLTADLEDYVPQEGETFSGDSTPSTP  
DEPPCEVSVLQREI SEPTVGGPVLLNVGRPPTGATPSFFRPGSQVHSPESVSFLLREAWSGPVSAAPWTSSF  
HTHVQSSVDGSHGSFKTEVSTQTVSFGAVGETVTLHIDPDGGEAPGPSQG\*  
>rs50048074\_ENSMUSP00000020732\_c.14572:T>C\_p.L4858S  
ENSMUST00000020732.13|Obscn-201|ENSMUSG00000061462|-|chr11:g.58943459:A>G  
MDHSFSGAPRFLTRPKAFVSVGKDATLSCQIVGNPTPHVSWEKDRQVEAGARFRLAQDGDVYRLTILDLAL  
GDSGQYVCRARNAIGEAFVAVGLRVDSEGTCAEQAPHLLRPTSIRVREGADATFRCRVGGSPQPAVSWSKDG  
RRLGPPDAPHVRVEEHGESSALRIRSARPRDGGTYEVRAENPLGASAAAAALVVDSAEVAGPPGTSTATLLA  
HLQQREAMRAEGIPSPPGAGTRTCTVTEGKHARLSCFVTGEPKPKETVWKKDGQLVTEGRRHVVEDEQENF  
VLKILFCKQSDRGLYTCTASNLVGQTYSSVLLVVVREPTVPFKKRLQDLEVREKESATFQCEVAQPAEAAWFK  
EETRLWASAKYDIEEGETERRLTVRNVSAADDAYVICETTEGSRVAVELSVQGNLPRKTAVRTGDTAIF  
WVELAVPEGPVRWLRNQEEMVAGGRVAITAEGDCHTLTI FQCTLEDMGEVAFVSGGCRTTTTQFCVSAAPRRPPL  
YPPADPVVKAKTESSVTLSSWAPPHGDRPVTIDGYVLEKRLKLGAYAWSRCHEAGWLATTEFTITGVAAEGDFQ  
FRVSAINHFGQGPYLEFPGMTMLVPLAVKTPKAVEAVEGGEVTFVSDLTVASSGEWFLDGEALKASSIYVI  
RCDRTRHMLTIREVPARLHGAQLKFVANGIETS IQMVVRAALGLPSSKLPAAAAAREVLAQLHEEAQLLAE LSD  
QAAAVTWLKDGRELSLGPYEMQVSAGRRALLVRDVAQDDAGLYECVSRGSRRTAYQLLVQDITDGYRDWGPAG  
PQKHMCKCAGAKIARYLGSSCYRFLQYDKGVWHWLEAALDTRQKGKTS SCSLHEKPKLVFAKQQAHSEVKA  
AGNSATLSCEVTQAQTEVTFWKDGGKLS SSKVRMEASGCSRRLVVQQAGKADAGEYSCEAGGQKLSFRLDVA  
EPKLVFAKQQAHSEVKAEGASATLSCEVAQAQTEVTFWKDGGKLS SSKVRMEASGCSRRLVVQQAGKAD  
GEYSCEAGGQKLSFRLDVAEPKLVFAKEQQARSEVKAEGASATLSCEVAQAQTEVTFWKDGGKLS SSKVR  
EASGCSRRLVVQQAGKADAGEYSCEAGGQKLSFRLDVTEPKLVFAKEQQARSEVKAEGVNSATLSCEVAQAQ  
EVTWFKDGGKLS SSKVRMEASGCSRRLVVQQAGKADAGEYSCEAGGQKLSFRLDVAEPKLVFAKEQQARSEV  
KAEAGNSATLSCEVAQAQTEVTFWKDGGKLS SSKVRMEASGCSRRLVVQQAGKADAGEYSCEAGGQKLSFHL  
DVTEPKLVFAKEQQAHSEVKAEGASATLSCEVAQAQTEVTFWKDGGKLS SSKVRMEASGCSRRLVVQQAG  
ADAGEYSCEAGGQKLSFRLDVAEPKLVFAKEQQARSEVKAEGASATLSCEVAQAQTEVTFWKDGGKLS SSK  
VRVEASGCSRRLVVQQAGKADAGEYSCEAGGQKLSFRLDVAEPKLVFAKEQQANSEVKAEGASATLSCEVAQ  
AQTEVTFWKDGGKLS SSKVRVEASGCSRRLVVQQAGKADAGEYSCEAGGQKLSFRLDVAEPKLVFAKEQQAH  
SEVKAEGASATLSCEVAQAQTEVTFWKDGGKLS SSKVRVEASGCSRRLVVQQAGKADAGEYSCEAGGQKLS  
FRLDVAEPKLVFAKEQQAHSEVKAEGASATLSCEVAQAQTEVTFWKDGGKLS SSKVRVEASGCSRRLVVQQ  
AGKADAGEYSCEAGGQKLSFRLDVAEPKLVFAKEQQAHSEVKAEGASATLSCEVAQAQTEVTFWKDGGKLS  
SSKVRVEASGCSRRLVVQQAGKADAGEYSCEAGGQKLFRLDVAEPKLVFAKEQQAHSEVKAEGASATLSCE  
VAQAQTEVTFWKDGGKLS SSKVRVEASGCSRRLVVQQAGKADAGEYSCEAGGQKLSFRLDVAEPKLVFAKEQ  
QAHSEVKAEGASATLSCEVAQAQTEVTFWKDGGKLS SSKVRVEASGCSRRLVVQQVQKADAGEYSCEARGQ  
KLSFRLDVADTRLMFAKEQQARTEVKAEGNSATLSCEVAQAQTEVTFWKDGGKLS SSKVRVEASGCSRRLV  
VQQAGKADAGEYSCEAGGQKLSFRLDVAEASQIPERPSRREPLVVKEHETIILTATIAAPSVAAVWTKDGV  
EIRRSKRHEATSLGDTHLTVRGAQVLD SAIYSCRVGKEGQDFPVQVEEVAAKFSKPLEPVEGELGGTVMLVC  
ELSPQAEVWRCGNTQLRPGKRFQMTSEGPRRTLTVSGLREDDAEYVCESRDDRTSARLTVKVPVVKFTS  
GLSAMVAEBEQEATFQC VVSPSDAGVTWYKDMQELQPSKFKVMVESGASRSLTILGLTLEDAGQVTVAEAGAS  
SSAALRVREAPQVLFKKLEPQTVERTSVTLEMLTRPWPVEVKWTRNAAVLTPSENVEIRAEGARHCLVLRVSV  
GFADRGFFGCETPDDKTQAKLVNEMRQVRLVRGLQEVEAKEQGTASMDVELSHAEEVGSWTRDGLRLQPGPKC  
HLAVQGPVHILTL SALQPQDSGLVAFRAEGVHTSARLIVTELPSVSTRVLQDVVATQKEKVTLECELSRPVDV  
RWLKDGVLELRAGKAIGIVAQGTCSRSLVIYRCETGDQGVYVCDALDAQTSASLRVQGRTYTLIFRRVLAEDAGE  
VKFVAENAESRAHLRVKELPVTLLRPLRDKIAMEKHGRLVLECQVSRASAQVRWFKGGVELQSGPKYEVVSDGL

YRKLVINVDVQPEDEDTYTCDAAGNVKTSAQFFVEEQSITIVRGLKDMTVMPEPAPAWFECETSIPSVRPPKWLIG  
KTVLQAGGNVLEQDGTVHRLTLHKTCSTMTGPVHFTIGKSRSSAQLVVDI PVVLTRPLEPKAGRELQSVVL  
SCDFRPAPKAVQWYKDDTPLSPSEKFKMALEGQMAELRILRLTPADAGVYRCQAGSAQSSAEVTVEAREVTVI  
QPLQDAEAMEEGRVCFSCELSHKDEDIEWSLNGTPLYNDSFHEISHGCLHTLVLSVSRQADTGTVCATSPKV  
SVSARLVVKGKPVVFLKALDDVSAEERGTTLQCEVSDPEARVVWRKDGVELGPSDKYDFLHKAGARGLTVHD  
LSHEDAGLYTCQVGSKETQSKVSVHDLHVGITKRLKTVEVLEGESECSFECVLSHESPSDPAVWTVGGKTVGGS  
GHFHAVRQGRKYTLTVKDAALSDAGEVVFVGLTSSKASLIIRERPVDITKPLEDQRTTLGEDVMLSCELSRA  
GTSVRWLKDGKAIRKSQKYDLLSEGTAVLVVRKASLKDSEYTCETEASKSTAKLCEVEEKANRFTTELADLQ  
VEEKGRAVFTCKTEHPASVVTWRKGLLELRASGKHVPSQEGELTLKLTINALERTSDSTYTCDIGQARTQARLL  
VHGQKVRVIEDLEDTAVQEGSSAKFCCRIAPADYGPVHWFLLDKTPLHSNELNEITVQPGGYHVLTLRQLAKD  
SGTVYFEAGDQRTSAALRVTEKPSIFSRPLTDVTVTEGEDTLVCEFTTTVDSSVRWTKDGKTLRPSARCQLSH  
EGCQAQLLITATTPQDGGRYKCEIGGASSSSIVRVHALPVRFRSLKDVVEVPEGKAATLRCVLSVAAPVEWR  
HGDDVLKSSNKYSRQEGAVLELVIRDLQPQDSGQYSCSFGDQTTSATLTVKTSQAQFVQKLRNKEATEGTTV  
TLRCELTKAEAPVEWKKGTETLRNGDKYSLKQDGAVCELQICSLLVADAGEYSCVCGQEKTSATLTVKALLVHF  
VRLRSKEATEGDTTLQCELSKAAPVEWRKGTETLRDGDYSLKQDGAVCELQIRSLTIADAGEYLCTCGQE  
KTSATLTVRALPAKFKDLSKNEEATEGTTATLSCELSKAAPVWKKGPKTLQSGDKYVLRQDGAVCGLQIHGL  
TMADAGEYSCVCGQEKTSATLTVRGLPAKFIEDLRSQEATEGATAILRCELSKAAPVEWRKGSSETLRDGDYR  
LRQDGAVCELQIRGLAVVDGTYSLSLPTKFTTEGLRNEEATEGTMATLRCQMSKAAPVEWRKGSSETLRDGDYR  
LRQDGAMCELQIRGLTIEDSGETCVCGQEKTSATLSVKALPSRFIEDLRSQEATEGTMATLRCQMSKTAPVE  
WKKGSETLRDGGRYSLRQDGPVCELQICDLAVEDAGEYSCVCGQEKTSATLSIKALPPRFIEDLRSQEATEGT  
MATLRCQMSKAAPVEWRKGSSETLRDGGRYSLRQNGAVCELQIHDLAVEDTGEYSCVCGQEKTSATLNVKALPP  
RFIEDLRSQEATEGTMATLRCQMSKAAPVEWRKGSSETLRDGGRYSLRQDGAVCELQIHDLVEDAGQYSCVCG  
QEKTSAVLTVDALPPKFTTEGLKKEEATEGTMVTLRCQMSKEATVEWRKGAKTSLDGGRYSLRQDGAMCELQIC  
GLAVEDAGEYSCVCGQEKTSATLSVKALPPRFIEDLRSQEATEGTMATLRCQMSKAAPVEWRKGSSETLRDGD  
YSLRQDGAVCELQIRDLAVEDAGEYLCVCGQEKTSATLSVKALPPRFIEDLRSQEATEGTMATLRCQMSKAAP  
VEWRKGSSETLRDGDYSLRQDGAMCELQICDLAVEDTGDYSCVCGQEKTSATLSVKALPPRFIEDLRSQEA  
RETVATLRCRMKAAPVEWRKGSSETLRDGDYSLRQEGNCELQIRDLAVEDTEEYSCVCGQEKTSATLSVKAL  
PAKFIEDLRSQEAPESSVTTLRCKLSKKASVVWKKGSETLRNGARYSLRQDGAVCELEIRDLTVEEDTGEYSCT  
CGQERTSATLSIMAPQVVFQQPLQNLQAEEGSMASLRCESSVNPAAWWSKGGLELQGDTRREARQQGCVAEL  
LLRDLRREDAGEYSCVCGQEKTSATLMVTAAPVRFLRELQAQDVDEGATARLRCELSREAVSVEWRKGSQQLF  
PCAKYQMVQEGTTAELLVHGVEQEDAGEYTCDAHTQSIARLSVRAPKPKFKTDLQSTEQEAAGTARLCCQLS  
EAEFGTVPVQWLKEGVELHVGSKYEMRRQGA VCELLIHGLEAKDTGEYACLVGGQKTLASLRVKEPEVTIVRGL  
VDMEVQADEDEFTCKVSAQATDVQWHLQGLPLQSNVTEVAVLADGCTHVLQKGVTLLEDAGTVSFHVGGL  
SSSAQLTVRVPEVTVLEPLKDVQLSEGQDAHFRCLSRASGQEARWALGGVPLQCNEMNDITVEQGTLYLLTL  
HKVTLEDAGTITLQVGSSEEAQLKVTAKNTVLRGLENVDALEGGEALFECQLSQPEVAHAHTWLLDDEPVHTS  
EKVEVVYFENGLRHLLLLKLNKLPQDSCRVTFLAGDVVTS AFLTVRGRLEVLPPHDASVFKAGMQVRFTCILS  
EAVPVGEATWYINGAAIQPDDTDWTVTTDGSHHALTL SNAQPQHAGEVTFFAARDAVASARLSVLALPDPEDA  
EAVGRSDHSVTL SWVAPMSDGGGLCGYRVMKEASTGQWQLCHDLVPGPECVDDLVPGKTYRFRVAAVGPA  
GAGEPVHLPQMVKIAPAPAPAPAPAPAPAPETRQAVVGEDICLELEVAADGGEVVWHKGTIERIQPGHFVLS  
RGQRQMLVIKGFRTEDQGEYRCGPIQGLPSSGAATFNVMVMTSGSGDEVPAQPSLPPEAAQEGDLHLWALAR  
KRRMSREPTLDSISELPEEDSRVQHLRQEAETAPDLSEGYSTADELARTGEADLSHTSSDDESAGTPSLVT  
YLKKGAGPGISPLASKHEAQVTTSVKPKQKQEPVVPTCPPPGDLSAADLMDPSLDKAAVKIQAAFKGYKVRKE  
MKQQEGPVFSRTFGDTEAQVGDVLRLECVLATKTDMRACWLKDGIELTDGRHYHIDQLKDGTCSLLVTVGLAPT  
DSGRYTCQVSTKSGRVSHSACVVVSGTESEAESSSGGELDDAFRRAARRLHRLFRTKSPAELSEELFLSADE  
GPGEPEEPADWQTYREDEFVCIREFESLAEARQAVTCFRNMFATMIGVEISLGEQGPGRVEMRIKVAPTVT  
PAVPLAKTPGLQTS DAAPVFLTELQNDVQDGYPMSFDCVVTGQPVPSVRWFKDGKLEEDDHYMINEDQQGG  
HQLIITAVVPADMGVYRCLAENSMGVSSKAELRVELTSTDYDTAADATETSSYFSAQGYLSSREQEGTESDE  
GQLPQVLEELKDLQVAPGTRLAKFQLKVKGYPAKLYWFKDGPPLTSDHIRMTDKKTLHTLEIVSVTREDSG  
QYAAYSNAVGAAYSSARLLVRGPSEPEEKPASDVHERLVPPRILEKFTPKKVKRGSSITFSVKVEGHPAPSV  
HWLKEEAEGVLIWIGPDTPGYTMASSSKQHSVLVLDVGRQHQTCTCIATNPAGQALCSASLHISGLAKEEEQ  
ERVKEALISSFLQGTSAVSAQMSESAFADLVGQSKGESLVAEEAHSHLSLAEVGTEEFQKLTSSQITEMVS  
AKISQAKLQVPGGDSDEETKTPSASPRHGRSRPSSSVQESSESESDGDSRGEIFDIYVVTADYLP LGAEQDAI  
ILREGQYLLSEVLEDSAHPLRWLVRTKPTKSSPSRQGWVSPAYLDRKLKLSPEWGPTEAPEFPGEAVSEDEYRTRL  
SSVIQELLSEAEQAFYVLEFLVGRVQAESVVVSTPVQEFYKKYAEETLSAKDPTQPPPPPLQHYLEQPVVERVQKYQ  
ALLKELIRNKARNRQNCALLEQAYAVVSALPQRAENKLVSLMENYPGTLEALGEP IRQGHFIVWEGAPGARM  
PWKGHNHRVFLFRNYLVICKPRRDSRTDTFSYVFRNMMKLSSIDLNDQVEGDDRAFEVWHEREDSVRKYLLQA  
RTVI IKNSWVKEICGIQQLAQPVWRPPEFEEELADCTAELGETVKLACRVGTGPKPIVSWYKDGKPVVEVDPH



HILIEDPDGSC TLLDNLGTGIDSGQYMCFAASAAGNASTLGKILVQVPPRFVNVKVRATPFVEGEDAQITCTVE  
GAPYPQIRWYKDG TLLAPGNRYRMLNEPRSGVLV LVIQAASKEDLGHYECELVNRLGSTRGGGELYMOSPALR  
ARDQHHREQI VAAVEERRPSP\*  
>rs50048074\_ENSMUSP00000151217\_c.11872:T>C\_p.L3958S  
ENSMUST00000219084.3|Obscn-207|ENSMUSG00000061462|-|chr11:g.58943459:A>G  
MDHSFSGAPRFLTRPKAFVVS VGKDATLSCQIVGNPTPHVSWEKDRQFVEAGARFRLAQDGDVYRLTILDLAL  
GDSGQYVCRARNAIGEAFAAVGLRVDSEGTCAEQAPHFLLRPTSIRVREGADATFRCRVGGSPPAVSWSKDG  
RRLGPPDAPHVRVEEHGESSALRIRSARPRDGGTYEVRAENPLGSASAAAALVVDSDAEVAGPPGTSTATLLA  
HLQQRRREAMRAEGIPSPPGAGTRTCTVTGK HARLSCFVTGEPKPE TVWKKDGLVTEGRRHVVEDEQENF  
VLKILFCKQSDRGLYTCTASNLVGQTYSSVLVVVREPTVPFKKRLQDLEVREKESATFQCEVAQ PATEAAWFK  
EETRLWASAKYDIEEGTERRLTVRNVSADDDAVYICETTEGSRVAELSVQGNLTRKLRKTAVRTGDTAIF  
WVELAVPEGPVRWLRNQEEMVAGGRVAITAEGTCHTLTI FQCTLEDMGEVAFVSGGCRTTTQFCVSAPRRPPL  
YPPADPVVKAKTESSVTL SWSAPPHGDRPVTIDGYVLEKRKLGAYAWSRCHEAGWLATTEFTITGVAEEGDFQ  
FRVSAINHFGQGPYLEFPGMTMLVPLAVKTP LKAVEAVEGGEVTFVSDLT VASSGEWFLDGEALKASSIYVI  
RCDRTRHMLTIREV PARLHGAQLKFVANGIETS IQMVVRAALGLPSSKLPAAAAREVLAQLHEEAQLLAE LSD  
QAAA VTWLKDGRELSLGP KYEMQVSAGRRALLVRDVAQDDAGLYECVSRGSR TAYQLLVQDITDGYRDWGPAG  
PQKHMCKCAGAKIARYLGSSCYRFLQYDKGVWHWLEAALDRQKGTSSCSLHEKPKLVFAKQQAHSEVKAE  
AGNSATLSCEVTQAQTEVTWFKDGKLLSSSSKVRMEASGCSRRLLVVQQAGKADAGEYSCEAGGQKLSFRLDVA  
EPKLVFAKQQAHSEVKAEAGASATLSCEVAQAQTEVTWFKDGKLLSSSSKVRMEASGCSRRLLVVQQAGKADA  
GEYSCEAGGQKLSFRLDVAEPKMFVFAKEQQARSEVKAEAGASATLSCEVAQAQTEVTWFKDGKLLSSSSKVRM  
EASGCSRRLLVVQQAGKADAGEYSCEAGGQKLSFRLDVTEPKLVFAKEQQARSEVKAEAGNSATLSCEVAQAQ  
EVTWFKDGKLLSSSSKVRMEASGCSRRLLVVQQAGKADAGEYSCEAGGQKLSFHLDVTEPKLVFAKEQQAHSEV  
KAEAGASATLSCEVAQAQTEVTWFKDGKLLSSSSKVRMEASGCSRRLLVVQQAGKADAGEYSCEAGGQKLSFR L  
DVAEPKLVFAKEQQARSEVKAEAGASATLSCEVAQAQTEVTWFKDGKLLSSSSKVRVEASGCSRRLLVVQQAGK  
ADAGEYSCEAGGQKLSFRLDVAEPKLVFAKEQQANSEVKAEAGASATLSCEVAQAQTEVTWFKDGKLLSSSSK  
VRVEASGCSRRLLVVQQAGKADAGEYSCEAGGQKLSFRLDVAEPKLAFAKEQQAHSEVKAEAGASATLSCEVAQ  
AQTEVTWFKDGKLLSSSSKVRVEASGCSRRLLVVQQAGKADAGEYSCEAGGQKLSFRLDVAEPKLVFAKEQQAH  
SEVKAEAGASATLSCEVAQAQTEVTWFKDGKLLSSSSKVRVEASGCSRRLLVVQQV GKADAGEYSCEARGQKLS  
FRLDVAEAESQIPERPSRREPLVVKHEHETIILTATIAAPSVAAVTWLKDGV EIRRSKRHEATSLGDTHTLTVR  
GAQVLD SAIYSCRVGKEGQDFPVQVEEVA AKFSKPLEPVEGELGGTVMLVCELSPEQAEVWRCGNTQLRPGK  
RFQMTSEGPRRTLTVSGLREDDAEYVCE SRDDRTSARLTVKVRVVKFTSGLS AMVAEEGQEATFQCVVSPS  
DAGVTWYKDGMLQ PSEKFMVME SGASRSLTILGLTLEDAGQVTVAEAGASSAALRVREAPVLFKKLEPQT  
VEERTSVTLEVELTRPWPVEVKWTRNAAVLTPSENVEIRAEGARHCLVLR SVGFADRGFFGCETPDDKTQAKLN  
VEMRQVRLVRGLQEVEAKEQGTASMDVELSHA EVEGSWTRDGLRLQPGPKCHLAVQGPVHILTL SALQPQDSG  
LVAFRAEGVHTSARLIVTELPVSFTRVLQDVVATQKEKVTLECELSRPVDVRWLKDGVELRAGKAIGIVAQGT  
CRSLVIYRCETGDQGVYVCDALDAQTSASLRVGRTYTLIFRRVLAEDAGEV KFVAENAESRAHLRVKELPVT  
LLRPLRDKIAMEKHRGVLECCVSRASAQVRWFKGGVELQSGPKYEVVSDGLYRKL VINDVQPEDEDTYTC DAG  
NVKTSAQFFVEEQSITIVRGLKDMTVM EPAPAWFECETSIPSVRPPKWL LGKTVLQAGGNVLEQDGTVHRLT  
LHKTCSTMTGVPVHFTIGKSRSSAQLV VSDIPVVLTRPLEPKAGRELQSVVLSCDFRPAPKAVQWYKDDTPLSP  
SEKFKMALEGQMAELRI LR LTPADAGVYRCQAGSAQSSAEVTVEAREVTVIQPLQDAEAMEEGRVCFSCELSH  
KDEDIEWSLNGTPLYNDSFHEISH EGCLHTLVLKSVRQADTGTVCATSPKVSVSARLVVKGKPVVFLKALDDV  
SAEERGTTLTQCEVSDPEARV VWRKDGVELGPSDKYDFLHKAGARGLTVHDLSHEDAGLYTCQVGSKETQSKV  
SVHDLHVGITKRLKTVEVLEGE SCSEFCVLSHESPSDPAVWTVGGKTVGGSGHFHAVRQGRKYTLTVKDAALS  
DAGEVVFVSVLGLT SKASLIIRERPVDITKPLEDQRTTLGEDVMLSCELSRAGTSVRWLKDGKAIRKSQKYDLL  
SEGTRAVLVVRKASL KDSGEYTCETEASKSTAKLQVEEKANRFT EELADLQVEEKGRAVFTCKL TEHPASVVTV  
RGLLELRASGKHVPSQEGTLKLTINALERTSDTYTCDIGQARTQARLLVHGQKVRVIEDLED TAVQEGSS  
AKFCCRIAPADYGPVHWF LDKTPLHSNELNEITVQPGYHVLT LRQLALKDSGTVYFEAGDQRTSAAALRVTEK  
PSIFSRPLTDVTVTEGEDLTLVCETTTVDSSVRWTKDGKTLRPSARCQLSHEGCAQLLITATTPQDGGRYKC  
EIGGASSSSIVRVHALPVRFRESLKDVEVPEGKAATLRCVLSVAA PVWHRHGDDVLKSSNKYSLRQEGAVLE  
LVIRDLPQDQSGQYSCSFGDQTT SATLTVKTSQAQFVGLKRNKEATEGTTVTLRCELTK EAPVEWKKGTETLR  
NGDKYSLKQDGAVCELQICSLLVADAGEYSCVCGQEKTSATLTVKALLVHFVRRRLRSKEATEGDTTTLQCELS  
KAAPVEWRKGTETLRDGD RYSLKQDGAVCELQIRSLTIADAGEYLCTCGQEKTSATLTVRGLPAKFIEDLRSQ  
EATEGATAILRCELSKAAPVEWRK GSETLKDGDYTLRQDGA VCELQIRGLAVVDTGTYS SLPKTFTEGLRNE  
EATEGTMATLRCQMSKAAPVEWRK GSETLRDGDYSLRQDGA MCELQIRGLTIEDSGEYTCVCGQEKTSATLS  
VKALPPRFIEDLRSQEATEGTMATLRCQMSKAAPVEWRK GSETLRDGDGGRYSLRQNGAVCELQI HDLAVEDTGE  
YSCVCGQEKTSATLNVKALPPKFTEGLKKEEATEGTMVTLRCQMSKEATVEWRKGAKT LSDGGRYSLRQDGA M  
CELQICGLAVEDAGEYSCVCGQEKTSATLSVKALPPRFIEDLRSQEATEGTMATLRCQMSKAAPVEWRK GSET  
LRDGDYSLRQDGA VCELQIRDLAVEDAGEYLCVCGQEKTSATLSVKALPPRFIEDLRSQEATEGTMATLRCQ

MSKAAPVEWRKGSKTLRDGDYSLRQDGMCELQICDLAVEDTDYDSCVCGQEKTSATLSVKAPQVVFQOPLQ  
 NLQAEEGSMASLRCESSVPAAMVWSKGGLELQGDTRREARQQGCVAELLLRDLRREDAGEYSCTCGSQTTSA  
 TLMVTAAPVRFRLRELQAQDVEGATARLRCELSREAVSVEWRKGSLLQFPKAKYQMVQEGTTAELLVHGVEQE  
 DAGEYTC DAGHTQSIARLSVRAPKPKFKTDLQSTEQEAGGTARLCCQLSEAEPTPVQWLKEGVELHVGSKYE  
 MRQGA VCELLIHGLEAKDTGEYACL VGGQKTLASLRVKEPEVTIVRGLVDMEVQADEDFEFTCKV SQAGATD  
 VQWHLQGLPLQSNEVTEVAVLADGCTHVLQKGVTLLEDAGTVSFHVGGSSSAQLTVRVPEVTVLEPLKDVQL  
 SEGQDAHFRCLSRASGQEARWALGGVPLQCNE MNDI TVEQGTLYLLTLHKVTLEDAGTITLQVGS SSEAQL  
 KVTAKNTVLRGLNVDALLEGGEALFECQLSQPEVAHAHTWLLDDEPVHTSEKVEVVYFENGLRHLLLLKLNKLPQ  
 DSCRVTFLAGDVVTS AFLTVRGRWLEVLPPHDASVKAGMQVRF TCILSEAVPVGEATWYINGAAIQPDDTDW  
 TVT TDGSHHALTLSNAQPQHAGEVTF AARDAVASARLSVLALPDPPEDAEVVGRSDHSVTL SVWVAPMSDGGGG  
 LCGYR VEMKEASTGQWQLCHDLVPGPECVVDDLVP GKTYRFRVA AVGPAGAGEPVHLPQMVKIAPAPAPAPAP  
 APAPETRQAVVGEDICLELEVAADGGEV VWHKGT ERIQPGGHFEVLSRGRQMLVIKGFRTEDQGEYRCGP IQ  
 GLPSSGAATFNVVMTSGSGDEVPAQPSLPPEAAQEGDLHLLWEALARKRRMSREPTLDSISELPEEDSRVQHL  
 RQEAETAPDLSEGYSTADELARTGEADLSHTSSDDESRAGT PSLVTYLKKAGGPGI S PLASKHEAQVTT SVK  
 PQKQQEPVVP TCPPPGDLSAADLMDPSLDKAAVKIQAAFKGYKVRKEMKQQEGPVFSRTFGDTEAQVGDVLR  
 ECVLATKTD MRACWLKDGIELTDGRHYHIDQLKDGTC SLLVTGLAP TDSGRYTCQVSTKSGRVSHSACVVVSG  
 TESEAE SSSGGELDDAFRAARLRHLRFR TKSPAELSEELFLSADEGPGPEPEPADWQTYREDENFVCIRFE  
 SLAEARQAVTCFRNM FATMGIGVEISLGEQGP RGVEMRIGKVAPVTPAVPLAKTPGLQTS DAAPVFLTELQN  
 QDVQDGY PMSFDCVVTGQPVPSVRWFKDGKLL EEDDHYMINEDQQGGHQLIITAVVPADMGVYRCLAENSMGV  
 SSTKAELRVELTSTDYD TAADATETSSYFSAQGYLSSREQEGTESDEGQLPQVLEELKDLQVAPGTRLAKFQL  
 KVKGY PAKPLYWFKD GQPLTTS DHIRMTDKKTLHTLEIVSVTREDSGQYAA YISNAVGAAYSSARLLVRGPSE  
 PEEKPASDVHERLVPPRI LEKFTPKKVKRGSSITFSVKVEGHPAPSVHWLKEEA EKGVLWIGPDTPGYTM ASS  
 SKQHS LVLDDVGRQHOGTYTCIATNPAGQALCSASLHISGLAKEEQERVKEALISSFLQGTSQAVSAQMSSES  
 AGFADLVGQSKGESLVAAEEAHSHLSLAEVGT EEFLOKLT SQITEMVSAKISQAKLQVPGGDSDEETKTPSASP  
 RHGRSRPSSSVQESSSESE DGSRGEIFDIYVVTADYLPLGAEQDAIILREGQYVEVLDSAHPLRWLVRTKPT  
 KSSPSRQGWVSPAYL DKRLKLSPEWGPTEAPEFPEAVSEDEYRTRLS SVIQELLSSEQAFV GELQFLSHHM  
 KHLERSPRVPAAVVHQDVI FRNVQDISHFHSSFLKELGQCGTDDDVAMCFIKNQEAFKEYLEFLVGRVQAES  
 VVVSTPVQEFYKKYAEETLSAKDPTQPPPPPLQHYLEQPVERVQKYQALLKELIRNKARNRQNCALLEQAYAV  
 VSALPQRAENKLVSLMENYPGTLEALGEP I RQGHFIVWEGAPGARMPWKGNHRHVFLFRNYLVICP RRDSR  
 TDTFSYVFRNMMKLSSIDLNDQVEGD DRAFEVWHERE DSVRKYLLQARTV I IKNSWVKEICGIQORLAQPVWR  
 PPEFEEELADCTAELGETVKLACRVGTGPKPIVSWYKDGKPEVDPHHILIEDPDG SCTLILDNLGTIDSGQY  
 MCF AASAAGNASTLGKILVQVPPRFV NKVRATPFVEGEDAQITCTVEGAPYPQIRWYKDGTL LAGNRYRMLN  
 EPRSGVLV LVIQAASKEDLGHYEC ELVNR LGSTRGGGELYMQSPALRARDQHREQIVAAVEVTEQETKVPKK  
 TVIIEETITTVVKS PRGRRQSPGKSPSRSPRRSASPRR PGLLAPERLYPPGTSPSRRLEVEQGRKAPVPALY  
 VTEAEVHAPASQSQPKLEVEETIEVRVKKTGSRGASPVREMTSRGEGILFTLPGGIPGRDPNANNNSNKS VY  
 QEARTWGP AVVHVGE PFI FQVDVSGNV DWVAASPEPEQVRASQKEENTERQEGCSDGDENTFLMEEPQD TDSL  
 QGRDPKILTHNGRVLT LADLEDYVPQEGETFGCGDSTPSTPDEPPCEVSVLQREI SEPTVGGQPVLLNVGRPPG  
 TGATPSFFRPGSQVHSPESVSFLLREAWSGPVSAAPWTSSFH THVQSSVDGSHGSFKTEVSTQTVSFGAVGET  
 VTLHIDPDGGEAPGPSQG\*

>ENSMUSP00000158795\_c.14010:A>T\_p.R4671W ENSMUST00000238536.2|Obscn-  
 210|ENSMUSG00000061462|-|chr11:g.58945207:T>A

MDHSFSGAPRFLTRPKAFVSVGKDATLSCQIVGNPTPHVSWEKDRQPVEAGARFRLAQDGDVYRLTILDLAL  
 GDSGQYVCRARNAIGEAFAAVGLRVDSEGTCAEQAPHFLLRPTSIRVREGADATFRCRVGGSPQPAVSWSKDG  
 RRLGPPDAPHVRVEEHGESSALRIR SARPRDGGTYEVR AENPLGSASAAAALVVDSDAEVAGPPGTSTATLLA  
 HLQORREAMRAEGIPPSPPGAGTRTCTVTEGKHARLSCFVTGEPKPETVWKKDGQLVTEGRRHVVEYEDQENF  
 VLKILFCQSDRGLYTCTASNLVGQTYSSVLVVREPTVPFKKRLQDLEVREKESATFQCEVAQPATEAAWFK  
 EETRLWASAKYDIEEGETERRLTVRNVSADDDAVYICETTEGSR TVAELSVQGNLTRKLRKTAVRTGDTAIF  
 WV ELAVPEGPVRWRNQEEMVAGGRVAITAEGTCHTLTI FQCTLEDMGEVAFVSGGCRTTTQFCV SAPRRPPL  
 YPPADPVV KAKTESSVTL SWSAPPHGDRPVTIDGYVLEKRLKLGAYAWSRCHEAGWLATTEFTITGVAAEGDFQ  
 FRVSAINHFGQGPYLEFP GTMHLVPM LAVKTP LKAVEAVEGGEVTF SVDLTVASSGEWFLDGEALKASSIYVI  
 RCDRTRHMLTIREV PARLHGAQLKFVANGIETSIQMVVRAALGLPSSKLPAAAAREVLAQLHEEAQLLAELSD  
 QAAA VTWLKDGRELSLGPKEYMQVSAGRRALLVRDVAQDDAGLYECVSRGSR TAYQLLVQDITDGYRDWGPAG  
 PQKHMCKCAGAKIARYLGS SCYRFLQYDKGVWHWLEAALDTRQKGKTS SCSLHEKPKLVFAKQQAHSEVKA  
 AGNSATLSCEVTQAQTEVTWFKD GKKLSSSSKVRMEASGCSRRLVVQQAGKADAGEYSCEAGGQKLSFRDVA  
 EPKLVFAKQQAHSEVKA EAGASATLSCEVAQAQTEVTWFKD GKKLSSSSKVRMEASGCSRRLVVQQAGKADA  
 GEYSCEAGGQKLSFRLDVAEPKMVFAKEQQARSEVKA EAGASATLSCEVAQAQTEVTWFKD GKKLSSSSKVRM  
 EASGCSRRLVVQQAGKADAGEYSCEAGGQKLSFRLDVTEPKLVFAKEQQARSEVKA EVGNSATLSCEVAQAQT  
 EVTWFKD GKKLSSSSKVRMEASGCSRRLVVQQAGKADAGEYSCEAGGQKLSFRLDVAEPKLVFAKEQQARSEV

KAEAGNSATLSCEVAQAQTEVTFWKDGKKLSSSSKVRMEASGCSRRLVVQQAGKADAGEYSCEAGGQKLSFHL  
 DVTEPKLVFAKEQQAHSEVKAEAGASATLSCEVAQAQTEVTFWKDGKKLSSSSKVRMEASGCSRRLVVQQAGK  
 ADAGEYSCEAEGQKLSFRLDVAEPKLVFAKEQQARSEVKAEAGASATLSCEVAQAQTEVTFWKDGKKLSSSSK  
 VRVEASGCSRRLVVQQAGKADAGEYSCEAGGQKLSFRLDVAEPKLVFAKEQQANSEVKAEAGASATLSCEVAQ  
 AQTEVTFWKDGKKLSSSSKVRVEASGCSRRLVVQQAGKADAGEYSCEAGGQKLSFRLDVAEPKLVFAKEQQAH  
 SEVKAEAGASATLSCEVAQAQTEVTFWKDGKKLSSSSKVRVEASGCSRRLVVQQAGKADAGEYSCEAGGQKLS  
 FRLDVAEPKLVFAKEQQAHSEVKAEAGASATLSCEVAQAQTEVTFWKDGKKLSSSSKVRVEASGCSRRLVVQQ  
 AGKADAGEYSCEAGGQKLSFRLDVAEPKLVFAKEQQAHSEVKAEAGASATLSCEVAQAQTEVTFWKDGKKLSS  
 SSKVRVEASGCSRRLVVQQAGKADAGEYSCEAGGQKLSFRLDVAEPKLVFAKEQQAHSEVKAEAGASATLSCE  
 VAQAQTEVTFWKDGKKLSSSSKVRVEASGCSRRLVVQQAGKADAGEYSCEAGGQKLSFRLDVAEPKLVFAKEQ  
 QAHSEVKAEAGASATLSCEVAQAQTEVTFWKDGKKLSSSSKVRVEASGCSRRLVVQQVQKADAGEYSCEARGQ  
 KLSFRLDVADTRLMFAKEQQARTEVKAEAGNSATLSCEVAQAQTEVTFWKDGKKLSSSSKVRVEASGCSRRLV  
 VQQAGKADAGEYSCEAGGQKLSFRLDVAEAEESQIPERPSRREPLVVKEHETIILTATIAAPSVAAVWTKDGV  
 EIRRSKRHEATSLGDTHTLTVRGAQVLDSAIYSCRVGKEGQDFPVQVEEVAAKFSKPLEPVEGELGGTVMLVC  
 ELSPEQAEVWRCGNTQLRPGKRFQMTSEGPRRTLTVSGLREDDAEYVCESRDDRTSARLTVKVPVVKFTS  
 GLSAMVAEEGQEAFTQCIVVSPDAGVTWYKDGMLQPSKFKVMVESGASRSLTILGLTLEDAGQVTEAEGAS  
 SSAALRVREAPVLFKKKLEPQTVERTSVTLEVELTRPWEVKWTRNAAVLTPSENVEIRAEGARHCLVLRVSV  
 GFADRGFFGCETPDDKTQAKLVNEMRQVRLVRGLQVEVAKEQGTASMDVELSHAEEVGSVTRDGLRLQPGPKC  
 HLAVQGPVHILTLALSALQPQDSGLVAFRAEGVHTSARLIVTELPVSFTRVLQDVVATQKEKVTLECELSRPVDV  
 RWLKDGVLELRAGKAIIGIVAQGTCSRSLVIYRCETGDQGVYVCDALDAQTSASLRVQGRTYTLIFRRLAEDAGE  
 VKFVAENAESRAHLRVKELPVTLLRPLRDKIAMEKHRGVLECCVSRASAVRWFKGGVELQSGPKYEVVSDGL  
 YRKLVINVDVQPEDEDTYTCDAGNVKTSAQFFVVEQSITIVRGLKDMTVMEPAPAWFECETSIPSVRPKWLGL  
 KTVLQAGGNVGLQDGTVHRLTLHKTCSTMTGPVHFTIGKSRSSAQLVVSDIPVVLTRPLEPKAGRELQSVVL  
 SCDFRPAPKAVQWYKDDTPLSPSEKFKMALEGQMAELRILRLTPADAGVYRCQAGSAQSSAEVTEAREVTVI  
 QPLQDAEAMEEGRVCFSCSELCHKDEDEIWSLNGTPLYNDSFHEISHGCLHTLVLSKSVRQADTGTVCATSPKV  
 SVSARLVVKGKPVVFLKALDDVSAEERGTLLTQCEVSDPEARVVWRKDGVELGSPDKYDFLHKAGARGLTVHD  
 LSHEDAGLYTCQVFKLTLHVGITKRLKTVEVLEGESECSFECVLSHESPSDPAVWTVGGKTVGGS  
 GHFHAVRQGRKYTLTVKDAALSADAGEVVSFVGLTSLKASLIIRERPVDTKPLEDQRTTLGEDVMLSCELSRA  
 GTSVRWLKDGKAIRKSQKYDLLSEGTRAVLVVRKASLKDSEYTCETEASKSTAKLCVEEKANRFTTELADLQ  
 VEEKGRAVFTCKTEHPASVVTWRKGLLELRASGKHVPSQEGTLTKLTINALERTSDTYTCDIGQARTQARLL  
 VHGGKVRVIEDLEDTAVQEGSSAKFCRIAPADYGPVHWFLLDKTPLHSNELNEITVQPGGYHVLTLRQLALKD  
 SGTVYFEAGDQRTSALRVTEKPSIFSRPLTDVTVTEGEDTLVCETTTVDSVVRWTKDGKTLRPSARCQLSH  
 EGCQAQLLITATTPQDGGRYKCEIGGASSSSIVRVHALPVRFRRESLKDVEVPEGKAATLRCVLSVAAPVEWR  
 HGDDVLKSSNKYSLRQEGAVLELVIRDLQPDQSGQYSCSFGDQTTSATLTVKTSQAQFVGLRKNKEATEGTTV  
 TLRCELTKAEAPVEWKKGTETLRNGDKYSLKQDGAVCELQICSLLVADAGEYSCVCGQEKTSATLTVKALLVHF  
 VRRLRSKEATEGDTTTTLQCELSKAAPVEWRKGTETLRDGDYSLKQDGAVCELQIRSLTIADAGEYLCTCGQE  
 KTSATLTVRALPAKFKDSLKNEEATEGTTATLSCELSKAAPVTWKKGPKTLQSGDKYVLRQDGAVCGLQIHGL  
 TMADAGEYSCVCGQEKTSATLTVRGLPAKFIEDLRSQEAETEGATAILRCELSKAAPVEWRKGSSETLKDGDRTY  
 LRQDGAVCELQIRGLAVVDTGTYSLLPTKFTTEGLRNEEATEGTMATLRCQMSKAAPVEWRKGSSETLRDGDRTY  
 LRQDGAVCELQIRGLTIEDSGEYTCVCGQEKTSATLSVKALPSRFIEDLRSQEAETEGTMATLRCQMSKTAPVE  
 WKKGSETLRDGGYSLRQDGPVCELQICDLAVEDAGEYSCVCGQEKTSATLSIKALPPRFIEDLRSQEAETEGT  
 MATLRCQMSKAAPVEWRKGSSETLGDGGYSLRQNGAVCELQIHDLAVEDTGEYSCVCGQEKTSATLNVKALPP  
 RFIEDLRSQEAETEGTMATLRCQMSKAAPVEWRKGSSETLRDGGYSLRQDGAVCELQIHDLVEDAGQYSCVCG  
 QEKTSAVLTVDALPPKFTTEGLKKEEATEGTMATLRCQMSKEATVEWRKGAKTLSDGGRYSLRQDGAVCELQIC  
 GLAVEDAGEYSCVCGQEKTSATLSVKALPPRFIEDLRSQEAETEGTMATLRCQMSKAAPVEWRKGSSETLRDGDRTY  
 YSLRQDGAVCELQIRDLAVEDAGEYLCVCGQEKTSATLSVKALPPRFIEDLRSQEAETEGTMATLRCQMSKAAP  
 VEWRKGSSETLRDGDRTYSLRQDGAVCELQICDLAVEDTGDYSCVCGQEKTSATLSVKALPPRFIEDLRSQEAWE  
 GTVATLRCMSKAAPVEWRKGSSETLKDGDRTYSLRQEGNLCELQIRDLAVEDTEEYSCVCGQEKTSATLSVKAL  
 PAKFIEDLRSQEAEPESSTVTLRCKLSKKASVVWKKGSETLRNGARYSLRQDGAVCELEIRDLTVEDTGEYSCT  
 CGQERTSATLSIMAPQVVFPQPLQNLQAEEGSMASLRCELSVNAAMVWSKGGLELQGDTRREARQQGCVAEL  
 LLRDLRREDAGEYSCTCGSQTTSATLMVTAAPVRFRLRELQAQDVDEGATARLRCELSREAVSVEWRKGSLLQF  
 PCAKYQMVQEGTTAELLVHGVEQEDAGEYTCDAHTQSIARLSVRAPKPKFKTDLQSTEQEAGGTARLCCQLS  
 EAEPGTPVQWLKEFTEGLVHGSKYEMRRQGAPELLIHGLEAKDTGEYACLVGGQKTLASLRVKEPEVTIVRGL  
 VDMEVQADEDEVEFTCKVSOAGATDVQWHLQGLLQSLNEVTEVAVLADGCTHVLQKLGVTLEADAGTVSFHVGGL  
 SSSAQLTVRVPEVTVLEPLKDVQLSEGQDAHFRCRLSRASQEARWALGGVPLQCNEMNDITVEQGTLYLLTL  
 HKVTLEADAGTITLVGSCSSQAQLKVTAKNTVLRGLENVDALEGGEALFECQLSQPEVAHAHTWLLDDEPVHTS  
 EKVEVVYFENGLRHLLLLKNLKPQDSCRVTFLAGDVVTSFAFLTVRGRWLVLEPPHDASVKAGMQVRFCTILS  
 EAVPVGEATWYINGAAIQPDDTDWTVTTDGSHHALTLNSAQPQHAGEVTFAAARDAVASARLSVLALPDPPEDA

EVVGRSDHSVTLWSVAPMSDGGGGLCGYRVMKEASTGQWQLCHDLVPGPECVVDDLVPKGTYRFRVAAVGPA  
 GAGEPVHLPQMVKIAPAPAPAPAPAPAPAPETRQAVVGEDICLELEVAADGGEVVWHKGTERTIQPGGHFEVLS  
 RGQRQMLVIKGFRTEDQGEYRCGPIQGLPSSGAATFNVMVMTSGSGDEVPAQPSLPPEAAQEGDLHLLWEALAR  
 KRRMSREPTLDSISELPEEDSRVQHLRQEAETAPDLSEGYSTADELARTGEADLSHTSSDDESRACTPSLVT  
 YLKKAGGPGISPLASKHEAQVTTSVKPKQKQEPVPTCP PGDL SAADLMDPSLDKAAVKIQAAFQYKVRKE  
 MKQQEGPVFSRTFGDTEAQVGDVLRLECVLATKTD MRACWLKDGIELTDGRHYHIDQLKDGTCSSLVVTGLAPT  
 DSGRYTCQVSTKSGRVSHSACVVVSGTESEAESSSGGELDDAFRAARRLHRLFRTKSPAELSEELFLSADE  
 GPGEPEPADWQTYREDENFVCIRFESLAEARQAVTCFRNMFATMIGVEISLGEQQGRGVEMRIGKVAPTVT  
 PAVPLAKTPGLQTSDAAPVFLTELQNQDVQDGYPMSFDCVVTGQVPSVSRWFKDGKLEEDDHVMINEDQQGG  
 HQLIITAVVPADMGVYRCLAENSMGVSSSTKAELRVELTSTDYDTAADATETSSYFSAQGYLSSREQEGTESDE  
 GQLPQVLEELKDLQVAPGTRLAKFQLKVKGYPAKLYWFKDGGQPLTSDHIRMTDKKTLHLEIVSVTREDSG  
 QYAAYSNAVGAAYSSARLLVRGPSEPEEKPASDVHERLVPPRI LEKFTPKKVKRGSSITFSVKVEGHPAPSV  
 HWLKEEAKEKGVLWIGPDTPGYTMASSSKQHSLVLLDVGQRHQGTYTIC IATNPAGQALCSASLHISGLAKEEEEQ  
 ERVKEALISSFLQGTSAQVSAQMSSEAGFADLVGQSKGESLVAEEAHSHLSLAEVGTEEFQKLT SQITEMVS  
 AKISQAKLQVPGGDSDEETKTPSASPRHGRSRPSSSVQESSESESDGDSRGEIFDIYVVTADYLP LGAEQDAI  
 ILREGQYVEVLD SAHPLRWLVRTKPTKSSPSRQGWVSPAYLDRKRLKLSPEWGPTEAPEFPGEAVSEDEYRTRL  
 SSVIQELLSSEQAFVGELEFLSHHMKHLERSPRVPAVASQKTVIFRNVQDISHFHSSFLKELQCGCTDDD  
 AMCFIKNQEAFAKEYLEFLVGRVQAESVVVSTPVQEFYKKYAEETLSAKDPTQPPPPPLQHYLEQPVERVQKYQ  
 ALLKELIRNKARNRQCALLEQAYAVVSALPQRAENKLHVSLENYPGTLEALGEP IQGHFIVWEGAPGARM  
 PWKGHNHRVFLFRNYLVICKPRRDSRTDTSYVFRNMMKLSSIDLNDQVEGDDRAFEVWHEREDSVRKYLLQA  
 RTVIKNSWVKEICGIQORLAQPVWRPPEFEEELADCTAELGETVKLACRVTGT PKPIVSWYKDGKPV EVDPH  
 HILIEDPDGSLTILDLNLTGIDSGQYMCFAASAAGNASTLGKILVQVPPRFVNVKVRATPFVEGEDAQITCTVE  
 GAPPYQIRWYKDGTLTLLAPGNRYRMLNEPRSGVLVVIQAASKEDLGHYECELVNRLGSTRGGGELYMQSPALR  
 ARDQHHREQIVAAVEDTSVEGSAHSAQDQGAASVLWRLLGSEALGPS PGDLPNTRQSEPPAFEEAASQIP  
 GAASGTPPEVSPQPGTHKGLEQETSSSGSQGWTVPIRVEGTAWPGAGTGQLLDDVHSQVIMETTQRTYVCQAPDT  
 GVTRAPSMQVTEIDVQVQVGDMAQF DAVIEGHPPP IIVTWYKGSTQLTSSARLSQRQDGTTYSLVLT DVAPHDA  
 GYVTCVANNAGGVLCKAELLVHGDKLDAENQVYRRKLHSFYDVQEEIGRGVGFVQRVQHKGNMFCAAKF  
 IPLRSKTRAQAYQERDILATLGHPLVTGLLDQFETRKTLLIILELCSSEELLDRFLKKGVVTEAEVKVYIQQL  
 VEGHLHLHSHGILHLDIKPPNILMVHPAREDIKICDFGFAQKITPSEPQYSKYGSPEFVSPEIIEQNPVSEGS  
 DIWAMGVISYLSLTCSSPFAGESDRATLLNVLEGRVSWSSPTAAHLSEDAKDFIKATLQRTPRARPSTSQCLA  
 HPWFLLKSMPAEEAHFINTKQLKFLARSRWQRSLMSYKSILVMRSIPPELLQGPPDPSPLGVARHLRGEASGAS  
 SSSSSSDNELAPFARAKSLPPSPVTHSPLLHPRGFLRPSASLPEETEASMTADA AVPAS PQSAGPPASPGCV  
 PRHSVSISSLFYQQAGEGAERGNKTS GAKRHPARRRHLLKGGYIARALPGLREPLMEYSLLEEEAAREEQASLM  
 TKTPSFETALRLPSSSVREVPGRSHSLDNPPVTGTPSPEACKEQLLFPPSTGLTHETAKDRGHKEGFLQESV  
 PFPMSGDSRPGKQEGSSQDSCRGKPASSCHSELGSGSQEGCGPPSSQSLGSLPPQSLKKEKELSTSCGFLSEQ  
 PQAAPFPTQVSPLLGSEKEPQDGSLSGEPVVPVSSSPGSASQVDASLDTEGLSEAGDCTDFTPPPQRPEQAT  
 TRKFSLESRGGYAGVAGYGTFAFGGDAGGMLGQGPLWARMAWAVSQSSEEQDEAATESQPPLSLGPIAEASG  
 VPLRTSPSLTPWEEVEQVSLVQIRDLSGDAEAADTISLIDISEVDPAYLNLSDLYDIKYLPEFEMI FRRVPKPI  
 EQPESPGSETEAGQGLADFL EEAAPWPGELGLRAGLEITEPEEPGDLEALLGEAAVGRKRKWSPSRGLFQF  
 PGRCLSGEEPVELGLRQRVKASMAHISRILKGRPEGPREGPPRKKAGLASFRLSGLKGRDQELSDEAVVLGQ  
 SVTLACQVLAQPTAQATWSKDGVLLESSEGHLLISSTLKNFQLLTI LVVKEEDLGTYTCCVSNPLGTAVTTGVL  
 RKAERPSSSPRPEVGEYKDAVLLVWKPVESECGPVTYIVQCCIEGGSWTTLASDISDCCYLTKGLSRGGMYIF  
 RTACVSKAGMGPYSSPSEQVLLGGPNHLASEEESRRGRPAQLLPSTKTFAFQM QIRGRFVSVRQCREKASGR  
 ALAAKIVPYQPEDKTAVLREYEAALKRHLHHPHLAQLHAAYLSPRHLVLIILELCSGPELLPSLAERESYSESDVK  
 DYLWQMSLQYLHAQHIHLHLDRSENMMVTEYNLLKVIDLGNAQSLDQEKVPAPENFKDYLETMAPELLEGGQ  
 GAVPQTDIWAIGVTA FIMLSGEY PESSSEGRDLDQKGLRKLGLIRLSRCYAGLSGGAVAFLOSSLCAQPWGRPCA  
 STCLQCGLWTEEGPTGSRPTPVTFPTVRLRA FVREERKRALLYKKNLAQVR\*

>ENSMUSP00000049737\_c.13809:A>T\_p.R4604W ENSMUST00000052872.15|Obscn-  
 203|ENSMUSG00000061462|-|chr11:g.58945207:T>A

MDHSFSGAPRFLTRPKAFVVSVGKDATLSCQIVGNPTPHVSWEKDRQPVEAGARFRLAQDGDVYRLTILDLAL  
 GDSGQYVCRARNAIGEAFAAVGLRVDSEGTCAEQAPHLLRPTSIRVREGADATFRCRVGGSPQPAVSWSKDG  
 RRLGPPDAPHVRVEEHGESSALRIRSARPRDGGTYEVRAENPLGSASAAAALVVDSAEVAGPPGTSTATLLA  
 HLQORREAMRAEGIPPSPPGAGTRTCTVTTEGKHARLSCFVTGEPKPEPVVKKDGLVTEGRRHVVEDEQENF  
 VLKILFCKQSDRGLTYTASNLVGQTYSSVLVVVREPTVPFKKRLQDLEVRKEKESATFQCEVAQPAATEAAWF  
 EETRLWASAKSDIEEETTERRLTVRNVSADDDAVYICETTEGSRVVAELSVQGNLTRKLPKRTAVRTGDTAIF  
 WVAVLAVPEGPVWRWRNQEEMVAGGRVAITAEGTCHTLTIFQCTLEDMGEVAFVSGGCRTTQFCVSAPRRPPL  
 YPPADPVVKAKTESVTLWSAPPHGDRPVTIDGYVLEKRLKLGAYAWSRCHEAGWLATTEFTITGVAAEEDGFQ  
 FRVSAINHFGQGPYLEFPGMTMLVPLAVKTPKAVEAVEGGEVTFVSDLTVASSGEWFLDGEALKASSIYVI

RCDRTRHMLTIREV PARLHGAQLK FVANGIETS IQMVVRAALGLPSSKLPAAAAREVLAQLHEEAQLLAELSD
QAAA VTWLKD GRELSLGP KYEMQVSAGRRALLVRDVAQDDAGLYECVSRGSR TAYQLLVQEPKLVFAKGQQA H
SEVKAEAGNSATLSCEVTQAQTEVTWFKDGKLS SSSSKVRMEASGCSRRLLVVQQAGKADAGEYSCEAGGQKLS
FRLDVAEPKLVFAKGQQA HSEVKAEAGASATLSCEVAQAQTEVTWFKDGKLS SSSSKVRMEASGCSRRLLVVQQ
AGKADAGEYSCEAGGQKLS FRLDVAEPKLVFAKEQQARSEVKAEAGASATLSCEVAQAQTEVTWFKDGKLS S
SSKVRMEASGCSRRLLVVQQAGKADAGEYSCEAGGQKLS FRLDVTEPKLVFAKEQQARSEVKAEVGN SATLSCE
VAQAQTEVTWFKDGKLS SSSSKVRMEASGCSRRLLVVQQAGKADAGEYSCEAGGQKLS FRLDVAEPKLVFAKEQ
QARSEVKAEAGNSATLSCEVAQAQTEVTWFKDGKLS SSSSKVRMEASGCSRRLLVVQQAGKADAGEYSCEAGGQ
KLSFHLDVTEPKLVFAKEQQAHSEVKAEAGASATLSCEVAQAQTEVTWFKDGKLS SSSSKVRMEASGCSRRLLV
VQQAGKADAGEYSCEAGGQKLS FRLDVAEPKLVFAKEQQARSEVKAEAGASATLSCEVAQAQTEVTWFKDGK
LSSSSKVRVEASGCSRRLLVVQQAGKADAGEYSCEAGGQKLS FRLDVAEPKLVFAKEQQANSEVKAEAGASATL
SCEVAQAQTEVTWFKDGKLS SSSSKVRVEASGCSRRLLVVQQAGKADAGEYSCEAGGQKLS FRLDVAEPKLAFA
KEQQAHSEVKAEAGASATLSCEVAQAQTEVTWFKDGKLS SSSSKVRVEASGCSRRLLVVQQAGKADAGEYSCEA
GGQKLS FRLDVAEPKLAFAKEQQAHSEVKAEAGASATLSCEVAQAQTEVTWFKDGKLS SSSSKVRVEASGCSR
RLVVQQAGKADAGEYSCEAGGQKLS FRLDVAEPKLAFAKEQQAHSEVKAEAGASATLSCEVAQAQTEVTWFKD
GKLS SSSSKVRVEASGCSRRLLVVQQAGKADAGEYSCEAGGQKLF FRLDVAEPKLMFAKEQQAHSEVKAEAGAS
ATLSCEVAQAQTEVTWFKDGKLS SSSSKVRVEASGCSRRLLVVQQAGKADAGEYSCEAGGQKLS FRLDVAEPK
L VFAKEQQAHSEVKAEAGASATLSCEVAQAQTEVTWFKDGKLS SSSSKVRVEASGCSRRLLVVQQAGKADAGEYS
CEARGQKLS FRLDVADTRLMFAKEQQARTEVKAEAGNSATLSCEVAQAQTEVTWFKDGKLS SSSSKVRVEASG
CSRRLLVVQQAGKADAGEYSCEAGGQKLS FRLDVAEAE SQI PERPSRREPLVVKEHETI ILTATIAAPSVA AVT
WLKDGVEIRRSKRHEATS LGDTHLTVRGAQVLD SAIYSCRVGKEGQDFPVQVEEVA AKFSKPLEPVEGELGG
TVMLVCELSPEQAEVWRCGNTQLRPGKRFQMTSEGPRRTLTVSGLREDDAEYV CESRDDRTSARLTVKVPR
VVKFTSGLSAMVAEEGQEATFQC VVSPSDAGVTWYKDGMLQPSSEKFMVMSGASRSLTILGLTLEDAGQVTV
EAEGASSAALRVREAPVLFKKKLEPQTVEERTSVTLEVELTRPWPEVKWTRNAAVLTPSENVEIRAEGARHC
LVLRSVGFADRGFFGCETPDDKTQAKLNVEMRQVRLVRGLQVEVAKEQGTASMDVELSHAEVEGSWTRDGLRL
QPGPKCHLAVQGPVHILTL SALQPQDSGLVAFRAEAGVHTSARLIVTELPVSFTRVLQDVVATQKEKVTLCECEL
SRPVDVRLWKDGVLELRAGKAI GIVAQGTCSRSLVIYRCETGDTGQGVVCDALDAQTSASLRVQGRTYTLI FRRVL
AEDAGEVKFVAENAESRAHLRVKELPVTLLRPLRDKIAMEKHRGVLE CQVSRASAQVRWFKGGVLEQSGPKYE
VVSDGLYRKLVIN DVQPEDEDTYTCDAGNVKTSAQFFVVEQSI TIVRGLKDMTVM EPAPAWFECETSIPSVRP
PKWLLGKTVLQAGGNVGL EQDGT VHRLTLHKTCSTMTGPVHFTIGKSRSSAQLVVS D I PVVLRTRPLEPKAGRE
LQSVVLSCDFRPAKAVQWYKDDT PLSPEKFKMALEGQMAELRILRLTPADAGVYRCQAGSAQSSAEVTV EA
REVTVIQPLQDAEAMEEGRVCFSC ELSHKDEDI EWSLNGTPLYNDSFHEI SHEGCLHTLVLSVQADTGTVC
ATS PKVSV SARLVVKGKPVVFLKALDDVSAEERGTLLTQCEVSDPEARV VWRKDGVELGPSDKYDFLHKAGAR
GLTVHDLSDHEDAGLYTCQVGSKETQSKVSVHDLHVGI TKRLKTVEVLEGE SCSEFCVLSHESPSDPAVWTVGG
KTVGSGGHFHAVRQRKYTLTVKDAALSDAGEVVSGLGLT SKASLIIRERPVDITKPLEDQRTTLGEDVMLS
CELSRAGTSVRWLKDGKAIRKSQYDLLSEGTAVLVVRKASL KDSGEYTCETEASKSTAKLCVEKANRFTE
ELADLQVEEKGRAVFTCKTEHPASVVTWRKGLLELRASGKHVPSQEG LTKLKTINALERTDSDTYTCDIGQAR
TQARLLVHGQKVRVIEDLED TAVQEGSSAKFCCRIAPADYGPVHWF LDKTPLHSNELNEITVQPGGYHVLTLR
QLALKDSGTVYFEAGDQRTSAALRVTEKPSIFSRPLTDVTVTEGEDTLVCE TTTVDSSVRWTKDGKTLRPSA
RCQLSHEGCAQLLITATTPQDGGRYKCEIGGASSSSIVRVHALPVRFRFRESLKDVEVPEGKAATLRCVLS SVA
APVEWRHGDDVLKSSNKYSLRQEGAVLELVIRDLQPQDSGQYSCSFGDQTTSATLTVKTS SAQFVGKLRNKEA
TEGTTVTLRCELTK EAPVEWKKGTETLRNGDKYSLKQDGAVCELQIC SLLVADAGEYSCVCGQEKT SATLTVK
ALLVHFVRRRLRSKEATEGDTTTLQCELSKAAPVEWRKGTETLRDGD RYSLKQDGAVCELQIRSLTIADAGEYL
CTCGQEKT SATLTVRALPAKFKDSLKNEEATEGTTATLSCELSKAAPVTWKKGP KTLQSGDKYVLRQDGAVCG
LQIHGLTMADAGEYSCVCGQEKT SATLTVRGLPAKFIEDLRSQEATEGATAILRCELSKAAPVEWRKGETL K
DGDRYTLRQDGAVCELQIRGLAVVDGTYS SLPKTFTEGLRNEEATEGTMATLRCQMSKAAPVEWRKGETLR
DGDRYSLRQDGAMCELQIRGLTIEDSGEYTCVCGQEKT SATLSVKALPSRFIEDLRSQEATEGTMATLRCQMS
KTAPVEWKKGSETLRDGGRYSLRQDGPVCELQICDLAVEDAGEYSCVCGQEKT SATLSIKALPPRFIEDLRSQ
EATEGTMATLRCQMSKAAPVEWRKGETLGDGGRYSLRQNGAVCELQIHDLAVEDTGEYSCVCGQEKT SATLN
VKALPPRFIEDLRSQEATEGTMATLRCQMSKAAPVEWRKGETLRDGGRYSLRQDGAVCELQIHDL DVEDAGQ
YSCVCGQEKTSAVLTVDALPPKFTEGLKKEEATEGTMVTLRCQMSKEATVEWRKGAKT LSDGGRYSLRQDGAM
CELQICGLAVEDAGEYSCVCGQEKT SATLSVKALPPRFIEDLRSQEATEGTMATLRCQMSKAAPVEWRKGET
LRDGGRYSLRQDGAVCELQIRDLAVEDAGEYLCVCGQEKT SATLSVKALPPRFIEDLRSQEATEGTMATLRCQ
MSKAAPVEWRKGSKTLR DGGRYSLRQDGAMCELQICDLAVEDTGDYSCVCGQEKT SATLSVKALPPRFIEDLR
SQEAWEGTVATLRCRMSKAAPVEWRKGETLKDGGRYSLRQEGNLCELQIRDLAVEDTEEYSCVCGQEKT SAT
LSVKALPAKFIEDLRSQEAPESSTVTLRCKLSKKASVWKKGSETLRNGARYSLRQDGAVCELEIRDLTVEDT
GEYSCTCGQERTSATLSIMAPQVVFQQPLQNLQAEEGSMASLRCELSVPNAAMVWSKGGLELQGDTRREARQQ
GCVAELLLRDLRREDAGEYSCTCGSQTT SATLMVTAAPVRFLRELQAQDVDEGATARLRCELSREAVSVEWRK

GSLQLFPKAKYQMVQEGTAEELLVHGVQEEDAGEYTC DAGHTQS IARLSVRAPKPKFKTDLQSTEQEAGGTAR  
LCCQLSEAEPTPVQWLKEGVELHVGSKYEMRRQGA VCELLIHGLEAKDTGEYACL VGGQKT LASLRVKEPEV  
TIVRGLVDMEVQADEDEVEFTCKV SQAGATDVQWHLQGLPLQSN EVTEVA VLADGCTHVLQ LKGVTL EDAGTVS  
FHVGLSSSAQLTVRVPEVTVLEPLKDVQLSEGD ADFRCRLSRASGQEARWALGGVPLQCNEMNDITVEQGT  
LYLLTLHKVTLEDA GTITLQVGS CSSEAQLKVTA KNTVLRGLENVDALEGG EALFECQLSQPEVA AHTWLLDD  
EPVHTSEKVEVVYFENGLRHLLLLKNLKPQDSCRVTFLAGDVVTS AFLTVRGWRLEVLEPPHDASVKAGMQVR  
FTCILSEAVPVGEATWYINGAAIQPDDTDWTVTTD GSHHALTLSNAQPQHAGEVTF AARDAVASARLSVLALP  
DPPEDAE VVGRSDHSVTL SWVAPMSDGGGGLCGYR VEMKEASTGQWQLCHDLVPGPECVVDDLVP GKTYRFRV  
AAVGPPAGAGEPVHLPQMVKIAPAPAPAPAPAPAPAPETRQAVVGEDIC LELEVAADGGEVVWHKGTERRIQPGG  
HFEVLSRGRQMLVIKGFRTEDQGEYRCGPIQGLPSSGAATFNVM TSGSGDEVPAQPSLPPEAAQEGDLHLL  
WEALARKRRMSREPTLDSISELPEEDSRVQHLRQEA EETAPDLSEGYSTADELARTGEADLSHTSSDDES RAG  
TPSLVTYLLK KAGGPGISPLASKHEAQVTT SVKPKQKQEPV VPTCPPPGDLSAADLMDPSLDKAAVKIQAAF KG  
YKVRKEMKQQEGPVFSRTFGDTEAQVGDVLRLECVLATK TDMRACWLKDGI ELTDGRHYHIDQLKDGTC SLIV  
TGLAPTDSGRYTCQVSTKSGRVSHSACVVVSGTESEAE SSSGGELDDAFRRAARRLHRLFRTKSPAELSEEEL  
FLSADEGPGEPEEPADWQTYREDFVFCIRFESLAEARQAVTCFRNMFATMGIGVEISLGEQGPGRVEMRIGK  
VAPT VTPAVPLAKT PGLQTS DAAPVFLTELQNDVQDGY PMSFDCVVTGQPVPSVRWFKDGKLEEDDHYMIN  
EDQQGGHQLIITAVVPADMGVYRCLAENSMGVSSTKAELRVELTSTDYDTAADATETSSYFSAQGYLSSREQE  
GTESDEGQLPQVLEELKDLQVAPGTR LAKFQLKVKGY PAKLYWFKDGP LTTSDHIRMTDKKTLHTLEIVSV  
TREDSGQYAAIYSNAVGAAYSSARLLVRGPSEPEEK PASDVHERLVPPRILEKFTPKKVKRGS S ITFSVKVEG  
HPAPSVHVLKEEA EKGV LWIGPDTPGYTMAS SSKQHS LVLVDVGRQH QGTYT CIATNPAGQALCSASLHISGL  
AKEEEQERVKEALISSFLQGTSQAVSAQMSESAGFADLVGQSKGESLV AEEAHSHLSLAEVGT EEFLOKLT SQ  
ITEMVSAKISQAKLQVPGGDSDEETKTPSASPRHGRSRPSSSVQESSSESEDGDSRGEIFDIYVVTADYLPLG  
AEQDAIILREGQYVEVLDSAHPLRVLVVRTKPTKSSPSRQGWVSPAYLDKRLKLSPEWGPTEAPEFPGEAVSED  
EYRTRLSSVIQELLSSEQAFVGE LQFLESHHMKHLERSPRVPAVASQKTVIFRNVQDISHFHSSFLKELQGC  
GTDDDVAMCFIKNQEA FEKYLEFLVGRVQAESVVVSTPVQEFYK KYAEETLSAKDPTQPPPPLOHYLEQVVE  
RVQKYQALLKELIRNKARNRQNCALLEQAYAVVSALPQRAENKLVSLMENYPGTLEALGEP IRQGHFIVWEG  
APGARMPWKGNHRHVFLFRNYLVICKPRRDSRTDTSFYFRNMMKLS SIDLNDQVEGDDRAFEVWHEREDSVR  
KYLQARTVI IKNSWVKEICGIQQLRAQPVWRPPEFE EELADCTAELGETVKLACRVTGTPKPIVSWYKDGKP  
VEVDPHHILIEDPDG SCTLILDNLTGIDSGQYMCFAASAAGNASTLGKILVQVPPRFVNVKVRATPFVEGEDAQ  
ITCTVEGAPYPQIRWYKDGTL LAPGNRYRMLNEPRSGVLV LVIQAASKEDLGHYEC ELVNLGSTRGGGELYM  
QSPALRARDQHREQIVAAVEVTEQETKVPKKTVI I EETITTVVKS PRGRRQSPGKSPSRSPRRSASPRRPG  
LLAPERLYPPGTSPSRRLEVEQGRKAPVPALYVTEAEV HAPASQSQPKWLEVEETIEVRVKKTGSRGASPVRE  
MTRSREGILFTLPGGIPGRDPNANNSNNSVYQEA RTWGPVAVHVGE PFI FQVDSVGNVDVVAASPEPEQVRA  
SQKEENTERQEGCSDG DENTFLMEEPQD TDSLQGRDPKIL THNGRVLTLADLEDYVPQEGE TFGCGDSTPSTP  
DEPPCEVSVLQREI SEPTVGQPVLLNVGRPPGTGATPSDFRPGSQVHSPESV SFLLEAWSGPVSAAPWTSS F  
HTHVQSSVDGSHSGSFKTEVSTQTVSFGAVGETVTLHIDPFDGGEAPGPSQG\*

>ENSMUSP00000020732\_c.14010:A>T\_p.R4671W ENSMUST00000020732.13|Obscn-  
201|ENSMUSG00000061462|-|chr11:g.58945207:T>A

MDHSFSGAPRFLTRPKAFVSVGKDATLSCQIVGNPTPHVSWEKDRQFVEAGARFRLAQDGDVYRLTILDLAL  
GDSGQYVCRARNAIGEAFAAVGLRVDSEGTC AEQAPHFLLRPTS IRVREGADATFRICRVGGSPQPAVSWSKDG  
RRLGPPDAPHVRVEEHGESSALRIRSARPRDGGTYEVRAENPLGSASAAAALVVDSAEVAGPPGTSTATLLA  
HLQQRREAMRAEGIPPSPPGAGTRTCTVTEGKHARLS CFVTGEPKPETVWKKDGQLVTEGRRHVVEDEQENF  
VLKILFCKQSDRGLYTCTASNLVGQTYSSVLVVVREPTVPFKKRLQDLEVREKESATFQCEVAQPA TEAAWFK  
EETRLWASAKYDIEEGETERRLTVRNVSADDDAVYICETTEGSRVAELSVQGNLTKRKLPRKTAVRTGD TAI F  
WVELAVPEGPVRWLRNQEEMVAGGRVAITAEGTCHTLTIFQCTLEDMGEVAFVSGGCRTTTQFCVSA PRRPPL  
YPPADPVVKAKTESVTL SWSAPPHGDRPVTIDGYVLEKRLKGA YAWSRCHEAGWLATTEFTITGVAAEGDFQ  
FRVSAINHFGQGPYLEFPGTMHLVPLAVKTP LKAVEAVEGGEVTFVSDLTVASSGEWFLDGEALKASSIYVI  
RCDRTRHMLTIREV PARLHGAQLKFVANGIETS IQMVVRAALGLPSSKLPAAAAREVLAQLHEEAQLLAE LSD  
QAAA VTWLKDGRELSLGP KYEMQVSAGRRALLVRDVAQDDAGLYECVSRGSR TAYQLLVQDITDGYRDWGPAG  
PQKHMKCKAGAKIARYLGSSCYRFLQYDKGVWHWLEAALDTRQKGKTS SCSLHEKPKLVFAKQQAHSEVKA E  
AGNSATLSCEVTQAQTEVTWFKDGKLLSSSSKVRMEASGCSRRLLVQQAGKADAGEYSCEAGGQKLSFR LDVA  
EPKLVFAKQQAHSEVKA EAGASATLSCEVAQAQTEVTWFKDGKLLSSSSKVRMEASGCSRRLLVQQAGKADA  
GEYSCEAGGQKLSFRLDVAEPKMVF AKEQQARSEVKA EAGASATLSCEVAQAQTEVTWFKDGKLLSSSSKVRM  
EASGCSRRLLVQQAGKADAGEYSCEAGGQKLSFRLDVTEPKLVFAKEQQARSEVKA EAGNSATLSCEVAQAQ T  
EVTWFKDGKLLSSSSKVRMEASGCSRRLLVQQAGKADAGEYSCEAGGQKLSFRLDVAEPKLVFAKEQQARSEV  
KAEAGNSATLSCEVAQAQTEVTWFKDGKLLSSSSKVRMEASGCSRRLLVQQAGKADAGEYSCEAGGQKLSFHL  
DVTEPKLVFAKEQQAHSEVKA EAGASATLSCEVAQAQTEVTWFKDGKLLSSSSKVRMEASGCSRRLLVQQAGK  
ADAGEYSCEAGGQKLSFRLDVAEPKLVFAKEQQARSEVKA EAGASATLSCEVAQAQTEVTWFKDGKLLSSSSK

VRVEASGCSRRLVVQQAGKADAGEYSCEAGGQKLSFRLDVAEPKLVFAKEQQANSEVKAEEAGASATLSCEVAQ  
AQTEVTFWFKDGKLLSSSSKVRVEASGCSRRLVVQQAGKADAGEYSCEAGGQKLSFRLDVAEPKLAFAKEQQAH  
SEVKAEEAGASATLSCEVAQAQTEVTFWFKDGKLLSSSSKVRVEASGCSRRLVVQQAGKADAGEYSCEAGGQKLS  
FRLDVAEPKLAFAKEQQAHSEVKAEEAGASATLSCEVAQAQTEVTFWFKDGKLLSSSSKVRVEASGCSRRLVVQQ  
AGKADAGEYSCEAGGQKLSFRLDVAEPKLAFAKEQQAHSEVKAEEAGASATLSCEVAQAQTEVTFWFKDGKLLSS  
SSKVRVEASGCSRRLVVQQAGKADAGEYSCEAGGQKLFRLDVAEPKLMFAKEQQAHSEVKAEEAGASATLSCE  
VAQAQTEVTFWFKDGKLLSSSSKVRVEASGCSRRLVVQQAGKADAGEYSCEAGGQKLSFRLDVAEPKLVFAKEQ  
QAHSEVKAEEAGASATLSCEVAQAQTEVTFWFKDGKLLSSSSKVRVEASGCSRRLVVQQAGKADAGEYSCEARGQ  
KLSFRLDVADTRLMFAKEQQARTEVKAEAGNSATLSCEVAQAQTEVTFWFKDGKLLSSSSKVRVEASGCSRRLV  
VQQAGKADAGEYSCEAGGQKLSFRLDVAEAEQSIPERPSRREPLVVKEHETIILTATIAAPSVAAVTWLKDG  
EIRRSKRHEATSLGDTHTLTVRGAQVLDASAIYSCRVGKEGQDFPVQVEEVAAKFSKPLEPVEGELGGTVMLVC  
ELSPQAEVWRCGNTQLRPGKRFQMTSEGPRRTLTVSGLREDDAEYVCESTRDDRTSARLTVKVPVVKFTS  
GLSAMVAEEGQEQATFQCVVSPSDAGVTWYKDGMLQPSKFKVMVESGASRSLTILGLTLEDAGQVTVAEAGAS  
SSAALRVREAPVLFKKLEPQTVVEERTSVTLEVELTRPWPEVKWTRNAAVLTPSENVEIRAEGARHCLVLRV  
GFADRGGFFGCETPDDKTQAKLVNEMRQVRLVVRGLQVEVEAKEQGTASMDVELSHAEVEGSWTRDGLRQLQPGPK  
HLAVQGPVHILTLALSALQPDQSGLVAFRAEGVHTSARLIVTELPSVSTRVLQDVVATQKEKVTLECELSRPVDV  
RWLKDGVLELRAGKAIIGVAGTCSRSLVIYRCETGDQGVYCDALDAQTSASLRVQGRYTLIFRVLAEADAGE  
VKFVAENAESRAHLRVKLEPVTLLRPLRDKIAMEKHRGVLECVSRASQVRWFKGGVELQSGPKYEVVSDGL  
YRKLVINVDQPEDEDTYTCDAENVKTSAQFFVEEQSITIVRGLKDMTVMPEPAPAWFECETSIPSVRPPKWL  
KTVLQAGGNVLEQDGTVHRLTLHKTCSTMTGPVHFTIGKSRSSAQLVSDIPVVLTRPLEPKAGRELQSVVL  
SCDFRPAPKAVQWYKDDTPLSPSEKFKMALEGGMAELRILRTPADAGVYRCQAGSAQSSAEVTVAREVTVI  
QPLQDAEAMEEGRVCFSCELSHKDEDEIWSLNGTPLYNDSFHEISHGCLHTLVLSVSRQADTGTVCATSPKV  
SVSARLVVKGKPVVFLKALDDVSAEERGTTLQCEVSDPEARVVWRKDGVELGPSDKYDFLHKAGARGLTVHD  
LSHEDAGLYTCQVGSKETQSKVSVHDLHVGITKRLKTVEVLEGECSFECVLSHESPSDPAVWTVGGKTVGGS  
GHFHAVRQGRKYTLTKDAALSDAGEVVFVSVLGLTSLKASLIRERPVDTIKPLEDQRTTLGEDVMLSCELSRA  
GTSVRWLKDGKAIKRSQYDLSSEGTRAVLVRKASLKDSGEYTCETEASKSTAKLCEVEKANRFTEELADLQ  
VEEKGRAVFTCKTEHPASVVWTRKGLLELRASGKHPVSEGLETLKLTINALERTSDTYTCDIGQARTLQARLL  
VHGQKVRVIEDLEDTAVQEGSSAKFCRIAPADYGPVHWFLLDKTPLHSNELNEITVQPGGYHVLTLRQLALKD  
SGTVYFEAGDQRTSALRVTEKPSIFSRPLTDVTVTEGEDTLVCETTTVDSSVRWTKDGKTLRPSARCQLSH  
EGCQALLITATTPQDGGRYKCEIGGASSSSIVRVHALPVRFRRESLKDVEVPEGKAATLRCVLSVAAPVEWR  
HGDDVLKSSNKYSLRQEGAVLELVIDLQPDQSGQYSCSFGDQTTSATLTVKTSQAQFVGLKRNKEATEGTTV  
TLRCELTKAEAPVEWKKGTETLRNGDKYSLKQDGAVCLEQICSLLVADAGEYSCVCGQEKTSATLTVKALLVHF  
VRRLSKEATEGDTTLQCELSKAAPVEWRKGTETLRDGDYSLKQDGAVCLEQIRSLTIADAGEYLCTCGQE  
KTSATLTVRALPAKFKDSLKNEEATEGTTATLSCELSKAAPVWKKGPKTLQSGDKYVLRQDGAVCGLQIHL  
TMADAGEYSCVCGQEKTSATLTVRGLPAKFIEDLRSQEATEGATAILRCELSKAAPVEWRKGSSETLKDGDY  
LRQDGAVCLEQIRGLAVVDGTYSLSLPTKFTTEGLRNEEATEGTMATLRCQMSKAAPVEWRKGSSETLRDGDY  
LRQDGAVCLEQIRGLTIEDSGETCVCGQEKTSATLSVKALPSRFIEDLRSQEATEGTMATLRCQMSKTAPVE  
WKKGSETLRDGGYSLRQDGPVCELEQICDLAVEDAGEYSCVCGQEKTSATLSIKALPPRFIEDLRSQEATEG  
MATLRCQMSKAAPVEWRKGSSETLGDGGYSLRQNGAVCELEQIHLAVEDTGEYSCVCGQEKTSATLNVKALPP  
RFIEDLRSQEATEGTMATLRCQMSKAAPVEWRKGSSETLRDGGYSLRQDGAVCLEQIHLDLVEDAGQYSCVCG  
QEKTSAVLTVDALPPKFTTEGLKKEEATEGTMVTLRCQMSKEATVEWRKGAKTLSDGGYSLRQDGAVCLEQIC  
GLAVEDAGEYSCVCGQEKTSATLSVKALPPRFIEDLRSQEATEGTMATLRCQMSKAAPVEWRKGSSETLRDGD  
YSLRQDGAVCLEQIRDLAVEDAGEYLCVCGQEKTSATLSVKALPPRFIEDLRSQEATEGTMATLRCQMSKAAP  
VEWRKGSSETLRDGDYSLRQDGAVCLEQICDLAVEDTGDYSCVCGQEKTSATLSVKALPPRFIEDLRSQEAVE  
GTVATLRCRMSKAAPVEWRKGSSETLKDGDYSLRQEGNLCELEQIRDLAVEDTGEYSCVCGQEKTSATLSVKAL  
PAKFIEDLRSQEAPESSTVTLRCKLSKKASVVWKKGSETLRNGARYSLRQDGAVCLEIRDLTVEDTGEYSCT  
CGQERTSATLSIMAPQVVFQQPLQNLQAEEGSMASLRCELSVNPAAAMVWSKGGLELQGDTRREARQQGCVAEL  
LLRDLRREDAGEYSCTCGSQTTSATLMVTAAPVRFLRELQAQDVDEGATARLRCELSREAVSVEWRKGSLEQLF  
PCAKYQMVQEGTTAELLVHGVEQEDAGEYTCDAHTQSIARLSVRAPKPKFKTDLQSTEQEAAGGTARLCCQLS  
EABPGTPVQWLKEGVELHVGSKYEMRRQGAVCLELHGLEAKDTGEYACLVGGQKTLASLRVKEPEVTIVRGL  
VDMEVQADEDEFTCKVSAQATDVQWHLQGLPLQSNVTEVAVLADGCTHVVLQKGVTLLEDAGTVSFHVGGL  
SSSAQLTVRVPEVTVLEPLKDVQLSEGQDAHFRCLSRASGQEARWALGGVPLQCNEMNDITVEQGTLYLLTL  
HKVTLVEDAGTITLHQVSSSEALQKVTAKNTVLRGLNVDLEGGALFECQLSQPEVAVAHTWLLDDEPVHTS  
EKVEVVEYFENLRHLLKLPQDSRVTFVLADVVTSFAFLTVRGRWLEVLEPPHDASVAKGMQVRFCTILS  
EAVPVGEATWYINGAAIQPDDTDWTVTDDGSHHALTLSNAQPQHAGEVTFFAARDAVASARLSVLLALPDPEDA  
EUVGRSDHSVTLVSWAPMSDGGGGLCGYRVMKEASTGQWQLCHDLVPGPECVDDLVPGKTYRFRVAAVGPA  
GAGEPVHLPQMVKIAPAPAPAPAPAPAPAPAPETRQAVVGEDICLELEVAADGGEVVWHKGTERRIQPGHFVLS  
RGQRQMLVIKGFRTEDQGEYRCGPIQGLPSSGAATFNVMVMTSGSGDEVPAQPSLPPEAAQEGDLHLLWEALAR

KRRMSREPTLDSISELPEEDSRVQHRLRQEAEEETAPDLSEGYSTADELARTGEADLSHTSSDDESFRAGTPSLVT  
YLKKGAGPGISPLASKHEAQVTTSVKPKQEQEPVVPTCPPPGDLSAADLMDPSLDKAAVKIQAAFQKGYKVRKE  
MKQQEGPVFSRTFGDTEAQVGDVLRLECVLATKTDMRACWLKDGIELTDGRHYHIDQLKDGTCSSLVTLGLAPT  
DSGRYTCQVSTKSGRVSHSACVVVSGTESEAESSSSGGELDDAFRAARRLHRLFRTKSPAELSEEELFLSADE  
GPGPEEPADWQTYREDENFVCIRFESLAEARQAVTCFRNMFATMGIGVEISLGEQGPGRVEMRIGKVAPTVT  
PAVPLAKTPGLQTSDAAPVFLTELQNDVQDGYPMSFDCVVTGQPVPSVRWFKDGKLEEDDHYMINEDQQGG  
HQLIITAVVPADMGVYRCLAENSMGVSSTKAELRVELTSTDYDTAADATETSSYFSAQGYLSSREQEGTESDE  
GQLPQVLEELKDLQVAPGTRLAKFQLKVKGYPAKPLYWFKDQGPLTSDHIRMTDKKTLHTLEIVSVTREDSDG  
QYAAAYISNAVGAAYSSARLLVRGPSEPEEKPASDVHERLVPPRILEKFTPKKVKRGSSITFSVKVEGHPAPSV  
HWLKEEAKEKGLVWIGPDTPGYTMASSSKQHSVLVLDVGRQHOGTYTCIATNPAGQALCSASLHISGLAKEEEQ  
ERVKEALISSFLQGTSAQVSAQMSSEAGFADLVGQSKGESLVAEEAHSHLSLAEVGTTEFLQKLTSTQITEMVS  
AKISQAKLQVPGGDSDEETKTPSASPRHGRSRPSSSVQESSESEEDGDSRGEIFDIYVVTADYLPGLAEQDAI  
ILREGQYVEVLDSAHPLRWLVRTKPTKSSPSRQGWVSPAYLDRKRLKLSPEWGPTEAPEFPGEAVSEDEYRTRL  
SSVIQELLSSEQAFVQELQFLESHHMKHLERSPRVPAAVASQKTVIFRNVQDISHFHSSFLKELQCGCTDDDDV  
AMCFIKNQEAFAKEYLEFLVGRVQAESVVVSTPVQEFYKKYAEETLSAKDPTQPPPPPLQHYLEQPVERVQKYQ  
ALLKELIRNKARNRQNCALLEQAYAVVSALPQRAENKLVSLMENYPGTLEALGEPTRQGHFVWEGAPGARM  
PWKGHNHRHVFLFRNYLVICKPRRDSRTDTFSYVFRNMMLSSIDLNDQVEGDDRAFVWHEREDSVRKYLLQA  
RTVLIKNSWVKEICGIQQLAQVWRPPEFEELADCTAELGETVKLACRVGTGPKPIVSWYKDGKPEVEVDPH  
HILIEDPDGSCTLILDNLTGIDSGQYMCFAASAAGNASTLGKILVQVPPRFVNVKVRATPFVEGEDAQITCTVE  
GAPYPQIRWYKDGTLTLLAPGNRYRMLNEPRSGVLVVIQAASKEDLGHYECELVNRLGSTRGGGELYMQSPALR  
ARDQHHREQIIVAAVEERRPSP\*  
>rs217953617\_ENSMUSP00000158795\_c.13009:A>C\_p.E4337A  
ENSMUST00000238536.2|Obscn-210|ENSMUSG00000061462|-|chr11:g.58951834:T>G  
MDHSFSGAPRFLTRPKAFVVSVGKDATLSCQIVGNPTPHVSWEKDRQPVVEAGARFRLAQDGDVYRLTILDLAL  
GDSGQYVCRARNAIGEFAAVGLRVDSEGTCAEQAPHFLLRPTSIRVREGADATFRCRVGGSPPAVSWSKDG  
RRLGPPDAPHRVEEHGESSALRIRSARPRDGGTYEVRAENPLGSASAAAALVVDSDAEVAGPPGTSTATLLA  
HLQQRRREAMRAEIGIPSPPGAGTRTCTVTTEGKHARLSCFVTEGPKPETVWKKDQGLVTEGRRHVVYDEQENF  
VLKILFCKQSDRGLYTCTASNLVGQTYSSVLVVVREPTVPFKKRLQDLEVREKESATFQCEVAQPAEAAWFK  
EETRLWASAKYDIEEEGTERRLTVRNVSADDDAVYICETTEGSRVAELSVQGNLTKRKLPRKTAVRTGDTAIF  
WVELAVPEGPVWRWLRNQEEMVAGGRVAITAEGTCHTLTI FQCTLEDMGEVAFVSGGCRTTTQFCVSAPRRPPL  
YPPADPVVKAKTESVTLWSAPPHGDRPVTIDGYVLEKRKLGAYAWSRCHEAGWLATTEFTITGVAEEGDFQ  
FRVSAINHFGQGPYLEFPGMTMLVPM LAVKTPKAVEAVEGGEVTFVSDLTVASSGEWFLDGEALKASSIYVI  
RCDRTRHMLTIREVPARLHGAQLKFVANGIETSIQMVVRAALGLPSSSKLPAAAAREVLAQLHEEAQLLAE LSD  
QAAAVTWLKDGRELSLGPKEYMQVSAGRRALLVRDVAQDDAGLYECVSRGSRRTAYQLLVQDITDGYRDWGPAG  
PQKHMCKCAGAKIARYLGSSCYRFLQYDKGVWHWLEAALDTRQKGTSSCSLHEKPKLVFAKQQAHSEVKA  
AGNSATLSCEVTQAQTEVTWFKDGKLLSSSSKVRMEASGCSRRLVVQQAGKADAGEYSCEAGGQKLSFRLDVA  
EPKLVFAKQQAHSEVKAEGASATLSCEVAQAQTEVTWFKDGKLLSSSSKVRMEASGCSRRLVVQQAGKADA  
GEYSCEAGGQKLSFRLDVAEPKLVFAKEQQARSEVKAEGASATLSCEVAQAQTEVTWFKDGKLLSSSSKVRM  
EASGCSRRLVVQQAGKADAGEYSCEAGGQKLSFRLDVTEPKLVFAKEQQARSEVKAEVGNSATLSCEVAQAQ  
EVTWFKDGKLLSSSSKVRMEASGCSRRLVVQQAGKADAGEYSCEAGGQKLSFRLDVAEPKLVFAKEQQARSEV  
KAEAGNSATLSCEVAQAQTEVTWFKDGKLLSSSSKVRMEASGCSRRLVVQQAGKADAGEYSCEAGGQKLSFHL  
DVTEPKLVFAKEQQAHSEVKAEGASATLSCEVAQAQTEVTWFKDGKLLSSSSKVRMEASGCSRRLVVQQAGK  
ADAGEYSCEAGGQKLSFRLDVAEPKLVFAKEQQARSEVKAEGASATLSCEVAQAQTEVTWFKDGKLLSSSSK  
VRVEASGCSRRLVVQQAGKADAGEYSCEAGGQKLSFRLDVAEPKLVFAKEQQANSEVKAEGASATLSCEVAQ  
AQTEVTWFKDGKLLSSSSKVRVEASGCSRRLVVQQAGKADAGEYSCEAGGQKLSFRLDVAEPKLVFAKEQQAH  
SEVKAEGASATLSCEVAQAQTEVTWFKDGKLLSSSSKVRVEASGCSRRLVVQQAGKADAGEYSCEAGGQKLS  
FRLDVAEPKLVFAKEQQAHSEVKAEGASATLSCEVAQAQTEVTWFKDGKLLSSSSKVRVEASGCSRRLVVQQ  
AGKADAGEYSCEAGGQKLSFRLDVAEPKLVFAKEQQAHSEVKAEGASATLSCEVAQAQTEVTWFKDGKLLSS  
SSKVRVEASGCSRRLVVQQAGKADAGEYSCEAGGQKLFRLDVAEPKLVFAKEQQAHSEVKAEGASATLSCE  
VAQAQTEVTWFKDGKLLSSSSKVRVEASGCSRRLVVQQAGKADAGEYSCEAGGQKLSFRLDVAEPKLVFAKEQ  
QAHSEVKAEGASATLSCEVAQAQTEVTWFKDGKLLSSSSKVRVEASGCSRRLVVQQVQKADAGEYSCEARGQ  
KLSFRLDVADTRLMFAKEQQARTEVKAEAGNSATLSCEVAQAQTEVTWFKDGKLLSSSSKVRVEASGCSRRLV  
VQQAGKADAGEYSCEAGGQKLSFRLDVAEAIQSIPERSRREPLVVKEHETIILTATIAAPVAAVTWLKDG  
EIRRSKRHEATSLDHTLTVRGAQVLDLSAISCRVKEGQDFPVQVEEVAAKFSKPLEPVEGELGGTVMLVLC  
ELSPQAEVWRCGNTQLRPGKRFQMTSEGPRTLTVSGLREDDAEYVCSRDRTSARLTVKVPRVVKFTS  
GLSAMVAEEGQEATFQCVVSPSDAGVTWYKDGMLQLPSEKFMVESGASRSLTILGLTLEDAGQVTVAEAGAS  
SSAALRVREAPVLFKKLEPQTVVEERTSVTLEVELTRPWPEVKWTRNAAVLTPSENVEIRAEGARHCLVLRV  
GFADRGFFGCETPDDKTQAKLVNEMRQVRLVVRGLQVEVEAKEQGTASMDVELSHAEEVGSWTRDGLRLQPGPKC



HLAVQGPHVHILTLALSALQPQDSGLVAFRAEGVHTSARLIVTELPSVSTRVLDQVVATQKEKVTLECELSRPVDV  
RWLKDGVELRAGKAIGIVAQGTCSRSLVIYRCETGDQGVYVCDALDAQTSASLRVQGRTYTLIFRRVLAEDAGE  
VKFVAENAESRAHLRVKELPVTLLRPLRDKIAMEKHRGVLECCQVSRASAQVRWFKGGVELQSGPKYEVVSDGL  
YRKLVINADVQPEDEDYTCDAAGNVKTSAQFFVVEEQSITIVRGLKDMTVMEPAPAWFECETSIPSVRPPKWL  
KTVLQAGGNVLEQDGTVHRLTLHKTCSTMTGPVHFTIGKSRSSAQLVVSDIPVVLTRPLEPKAGRELQSVVL  
SCDFRPAPKAVQWYKDDTPLSPSEKFKMALEGQMAELRILRLTPADAGVYRCQAGSAQSSAEVTEAREVTVI  
QPLQDAEAMEEGRVCFSCSELCHKDEDIEWSLNGTPLYNDSFHEISHEGCLHTLVLSVRQADTGTVCATSPKV  
SVSARLVVKGKPVVFLKALDDVSAEERGTLLTQCEVSDPEARVWVRKDGVELGSPDKYDFLHKAGARGLTVHD  
LSHEDAGLYTCQVGSKETQSKVSVHDLHVGITKRLKTVEVELEGESCSEFCVLSHESPSDPAVWTVGGKTVGGS  
GHFHAVRQGRKYTLTVKDAALSDAGEVVSFVGLTSLKASLIIRERPVDTKPLEDQRTTLGEDVMLSCELSRA  
GTSVRWLKDGKAIRKSQKYDLLSEGTRAVLVVRKASLKDSGEYTCETEASKSTAKLCVEEKANRFTEELADLQ  
VEEKGRAVFTCKTEHPASVVTWRKGLLELRASGKHVPSQEGTLKLTINALERTSDTYTCDIGQARTQARLL  
VHGQKVRVIEDLEDTAVQEGSSAKFCRIAPADYGPVHWFLDKTPLHSNELNEITVQPGGYHVLTLRQLALKD  
SGTVYFEAGDQRTSALRVTEKPSIFSRPLTDVTVTEGEDTLVCETTTVDSSVRWTKDGKTLRPSARCQLSH  
EGCQAQLLITATTPQDGGRYKCEIGGASSSSIVRVHALPVRFRRESLKDVEVPEGKAATLRCVLSVAAPVEWR  
HGDDVLKSSNKYSRQEGAVLELVIRDLQPDQSGQYSCSFGDQTTSATLTVKTSQAQFVGLKRNKEATEGTTV  
TLRCELTKEAPVEWKKGTETLRNGDKYSLKQDGAVCELQICSLLVADAGEYSCVCGQEKTSATLTVKALLVHF  
VRLRSKEATEGDTTTLQCELSKAAPVEWRKGTETLRDGDYSLKQDGAVCELQIRSLTIADAGEYLCTCGQE  
KTSATLTVRALPAKFKDSLKNEEATEGTTATLSCELSKAAPVTWKKGPKTLQSGDKYVLRQDGAVCGLQIHGL  
TMADAGEYSCVCGQEKTSATLTVRGLPAKFIEDLRSQEAEGATAILRCELSKAAPVEWRKGSSETLKDGDYR  
LRQDGAVCELQIRGLAVVDGTYSLSLPTKFTEGLRNEEATEGTMATLRCQMSKAAPVEWRKGSSETLRDGDYR  
LRQDGAMCELQIRGLTIEDSGEYTCVCGQEKTSATLSVKALPSRFIEDLRSQEAEGTMATLRCQMSKTAPVE  
WKKGSETLRDGGYSLRQDGPVCELQICDLAVEDAGEYSCVCGQEKTSATLSIKALPPRFIEDLRSQEAEGT  
MATLRCQMSKAAPVEWRKGSSETLGDGGYSLRQNGAVCELQIHDLAVEDTGEYSCVCGQEKTSATLNVKALPP  
RFIEDLRSQEAEGTMATLRCQMSKAAPVAWRKGSSETLRDGGYSLRQDGAVCELQIHDLDVEDAGQYSCVCG  
QKTSAVLTVDALPPKFTEGLKKEEATEGTMVTLRQMSKEATEVWRKGAKTLSDGGYSLRQDGAMCELQIC  
GLAVEDAGEYSCVCGQEKTSATLSVKALPPRFIEDLRSQEAEGTMATLRCQMSKAAPVEWRKGSSETLRDGD  
YSLRQDGAVCELQIRDLAVEDAGEYLCVCGQEKTSATLSVKALPPRFIEDLRSQEAEGTMATLRCQMSKAAP  
VEWRKGSSETLRDGDYSLRQDGAMCELQICDLAVEDTGDYSCVCGQEKTSATLSVKALPPRFIEDLRSQEA  
GTVALRRCMSKAAPVEWRKGSSETLKDGDYSLRQEGNLCELQIRDLAVEDTEEYSCVCGQEKTSATLSVKAL  
PAKFIEDLRSQEAEPESSTVTLRCKLSKKASVVWKKGSETLRNGARYSLRQDGAVCELEIRDLTVEDTGEYSCT  
CGQERTSATLSIMAPQVVFQQLQNLQAEEGSMASLRCELSVNAAMVWSKGGLELQGDTRREARQQGCVAEL  
LLRDLRREDAGEYSCTCGSQTTSATLMVTAAPVRFRLRELQAQDVEGATARLRCELSREAVSVEWRKGSQQLF  
PCAKYQMVQEGTTAELLVHGVEQEDAGEYTCDAHTQSIARLSVRAPKPKFKTDLQSTEQEAAGTARLCCQLS  
EAEPTPVQWLKEGVELHVGSKYEMRRQGAIVCELLIHGLEAKDTGEYACLVGGQKTLASLRVKEPEVTIVRGL  
VDMEVQADEDEFTCKVVSQAGATDVQWHLQGLPLQSNVEVAVLADGCHVQLKGVTFLEDAGTVSFHVGGL  
SSSAQLTVRVPEVTVLEPLKDVQLSEGQDAHFRCRLSRASGQEARWALGGVPLQCNEMNNDITVEQGTLYLLTL  
HKVTLLEDAGTITLQVGSSESQAQLKVTAKNTVLRGLENVDALLEGGEALFECQLSQPEVAHAHTWLLDDEPVHTS  
EKVEVVYFENGLRHLLLLKNLKPQDSCRVTFLAGDVVTSFAFLTVRGWRLEVLPEPHDASVKAGMQVRFCTILS  
EAVPVGEATWYINGAAIQPDDTDWTVTTDGSHHALTLNAQPQHAGEVTFFAARDAVASARLSVLALPDPPEDA  
EVVGRSDHSVTLVSWVAPMSDGGGGLCGYRVMKEASTGQWQLCHDLVPGPECVDDLVPGKTYRFRVAAVGPA  
GAGEPVHLPQMVKIAPAPAPAPAPAPAPAPETRQAVVGEDICLELEVAADGGEVVWHKGTERRIQPGGHFEVLS  
RGQRQMLVIKGFRTEDQGEYRCGPIQGLPSSGAATFNVVMTSGSGDEVPAQPSLPPEAAQEGDLHLLWEALAR  
KRRMSREPTLDSISELPEEDSRVQHLRQEAEEETAPDLSEGYSTADELARTGEADLSHTSSDDESRACTPSLVT  
YLKKAAGPGISPLASKHEAQVTSVKPQKQEPVVPVTPCPPGDLAADLMDPSLDKAARKIQAAFKGYKVRKE  
MKQQEGPVFSRTFGDTEAQVGDVLRLECVLATKTDMRACWLKDGIELTDGRHYHIDQLKDGTCSSLVVTGLAPT  
DSGRYTCQVSTKSGRVSHSACVVVSGTESEAESSSGGELDDAFRRAARRLHRLFRTKSPAELSEELFLSADE  
GPGEPEPADWQTYREDENFVCIRFESLAEARQAVTCFRNMFATMGIGVEISLGEQGPVGMERIGKVAPTVT  
PAVPLAKTPGLQTSDAAPVFLTELQNDQVQDGYPMSFDCVVTGQPVPSVRWFKDGKLEEDDHYMINEDQGG  
HQLIITAVVPADMGVYRCLAENSMGVSSKAELRVELTSTDYDTAADATETSYSFSAQGYLSSREQEGTESDE  
GQLPQVLEELKDLQVAPGTRTLAKFQLKVKGYPAKLYWFKDGGPLTTSDHIRMTDKKTLHTLEIVSVTREDSG  
QYAAYSNAVGAAYSSARLLVRGPSEPEEKPASDVHERLVPPRILEKFTPKVKVRGSSITFSVKVEGHPAPSV  
HWLKEEAEGVFLWIGPDTPGYTMASSSKQHSLLVLDVGRQHGTYTTCIATNPAGQALCSASLHISGLAKEEEQ  
ERVKEALISSFLQGTSAVSAQMSSEAGFADLVGQSKGESLVAEEAHSHLSLAEVGTETEFLOKLTSTQITEMVS  
AKISQAKLQVPGGDSDEETKTPSASPRHGRSRPSSSVQESSSESEDGDSRGEIFDIYVVVTADYPLGAEQDAI  
ILREGQYVEVLDASHPLRWLVRTKPKSSPSRQGWVSPAYLDKRLKLSPEWGPTEAPEFPGEAVSEDEYRTRL  
SSVIQELLSSEQAFVGLQFLESHHMKHLERSPRVPAAVASQKTVI FRNVQDISHFHSSFLKELQCGCTDDDV  
AMCFIKNQEAFAKEYLEFLVGRVQAESVVVSTPVQEFYKKYAETLSAKDPTQPPPPPLQHYLEQPVERVQKYQ

ALLKELIRNKARNRQNCALLEQAYAVVSALPQRAENKLVSLMENYPGTLEALGEPPIRQGHFIVWEGAPGARM  
 PWKGHNHRVFLFRNYLVICKPRRDSRTDTFSYVFRNMMKLSSIDLNDQVEGDDRAFEVWHEREDSVRKYLLQA  
 RTVI IKNSWVKEICIGIQORLAQPVWRPPEFEEELADCTAELGETVKLACRVTGTPKPIVSWYKDGKPVVEVDPH  
 HILIEDPDGSCITLILDNLGTIDSGQYMCFAASAAGNASTLGKILVQVPPRFVNVKVRATPFVEGEDAQITCTVE  
 GAPY PQIRWYKDGTLTLLAPGNRYRMLNEPRSGVLVLVIQAASKEDLGHYECELVNRLGSTRGGGELYMQSPALR  
 ARDQHHREQIVAAVEDTSEVESAHAQDQADQQAASVLWRLLGSEALGPS PGDLPNTRQSEPPAFEEAASQIP  
 GAASGTPEVSPQPGTHKGLEQETTSSGSQGWTVPIRVEGTAWPGAGTGQLLDVHVSQVIMETTQRTYVCQAPDT  
 GVTRAPSMQVTIEDVQVQVGDMAQFDAVIEGHPPPIVTVWYKGSTQLTSSARLSQRQDGTYSVLVTDVAPHDA  
 GYTCVANNAGGQVLCKAELLVHGDKLDAENQVYRRKLHSFYDVQEEIGRGVFGFVKRVQHKGNKMFCAAKF  
 IPLRSKTRAQAYQERDILATLGHPLVTGLLDQFETRKTLLILELCSSEELLDRLFKKGVVTEAEVKVYIQQL  
 VEGHLHLHSHGILHLDIKPPNIMVHPAREDIKICDFGFAQKITPSEPQYSKYGSPEFVSPEIIEQNPVSEGS  
 DIWAMGVISYLSLTCSPPFAGESDRATLLNVLEGRVSWSSPTAAHLEDAKDFIKATLQRTPRARPSTSQCLA  
 HPWFLLKSMPAAEEAHFINTKQLKFLARSRWQRSLMSYKSILVMRSIPPELLQGPPDSPSLGVARHLRGEASGAS  
 SSSSSSDNELAPFARAKSLPPSPVTHSPLHPRGFLRPSASLPEETEASMTADAAVPASPQAGPPASPGCV  
 PRHSVSISSLFYQQAGEGAERGNKTSGAKRHPARRRHLKGGYIARALPGLREPLMEYSLLEEEAAREEQASLM  
 TKTPSFETALRLPSSSVREVPGRSHSLDNPPVTTGSPPEACKEQLLFPSTGLTHETAKDRGHKEGFLQESV  
 PFPMPGDSRPGKQEGSSQDSCRKPASSCHSELGSGSQEGCGPPSSQSLGSLPPQSLKKELESTSCGPLFSEQ  
 PQAAPFPTQVSPLLGSEKEPQDGSLEGPVVPSSSPGSASQVDASLDTEGLSEAGDTCDFTPPPQRPQEQAT  
 TRKFSLESRGGYAGVAGYGTFAFGGDAGGMLGQGPLWARMAWAVS QSSEEQDEAATESQPPLSLGPIAEASG  
 VPLRTSPSLTPWEEVEQVSLVQIRDLSGDAEAADTISLDISEVDPAYLNLSDLYDIKYLPEFEMI FRRVPKPI  
 EQPESPGSETEAGQGLADFLLEAAWPWPGEGLGLRAGLEITEEPEEPGDLEALLGEAAVGRKRKWSPSRGLFQF  
 PGRCLSGEEPVELGLRQRVKASMAHISRILKGRPEGPEREGPPRKKAGLASFRLSGLKGRDQELSDEAVVLGQ  
 SVTLACQVLAQPTAQATWSKDGVLLESSGHLLISSTLKNFQLLTIILVVKEEDLGTYTCCVSNPLGTAVTTGVL  
 RKAERPSSSPRPEVGEELYKDAVLLVWKPVESECGPVTVIVQCCIEGGSWTTLASDISDCCYLTGKLSRGGMYIF  
 RTACVSKAGMGYSSPSEQVLLGGPNHLASEEESRGRPAQLLPSTKTFAFQMQRIRGRFVSVRQCREKASGR  
 ALAAKIVPYQPEDKTAHLREYEAALKRHLHHPHLAHLAAYLSPRHLVLI LELCSGPELLPSLAERESYSESDVK  
 DYLVQMLSATQYLHAQHIHLDLRSENMMVTYENLLKVIDLGNQSLDQEKVPAPENLLKDYLETMAPELLEGGQ  
 GAVPQTDIWAIGVTAIFIMLSGEYPESESETRDLQKGLRKLGLIRLSRCYAGLSGGAVAFVLSLCAQPPWRPCA  
 STCLQCGLWTEEGPTGSRPTVTFPTVRLRAFFVREERKRRALLYKKNLAQVR\*  
 >rs217953617\_ENSMUSP00000038264\_c.11917:A>C\_p.E3973A  
 ENSMUST00000047441.14|Obscn-202|ENSMUSG00000061462|-|chr11:g.58951834:T>G  
 MDHSFSGAPRFLTRPKAFVSVGKDATLSCQIVGNPTPHVSWEKDRQPVEAGARFRLAQDGDVYRLTILDLAL  
 GDSGQYVCRARNAIGEFAAVGLRVDSEGTCAEQAPHFLLRPTSIRVREGADATFRCRVGGSPQPAVSWSKDG  
 RRLGPPDAPHVRVEEHGESSALRIRARSARPRDGGTYEVRAENPLGSASAAAAALVVDSDAEVAGPPGTSTATLLA  
 HLQORREAMRAEGIPSPPGAGTRTCTVTEGKHARLSCFVTEGPKPETVWKKDGQLVTEGRRHVVEDEQENF  
 VLKILFCQSDRGLYCTASNLVGGQTYSSVLVVVREPTVFFKKRLQDLEVREKESATFQCEVAQPATEAAWFK  
 EETRLWASAKYDIEEGTERRLTVRNVSADDDAVYICETTEGSRVAELSVQGNLTKLPRKTAVRTGDTAIF  
 WVVELAVPEGPVWRWRNQEEMVAGGRVAITAEGTCHTLTIFQCTLEDMGEVAFVSGGCRTTTQFCVSAPRRPPL  
 YPPADPVVKAKTESSVTLWSAPPHGDRPVTIDGYVLEKRKLGAAYAWSRCHEAGWLATTEFTITGVAAEGDFQ  
 FRVSAINHFGQGPYLEFPGTMHLVPLAVKTPKAVEAVEGGEVTFVSDLTVASSGEWFLDGEALKASSIYVI  
 RCDRTRHMLTIREVPARLHGAQLKFVANGIETS IQMVVRAALGLPSKLPAAAAAREVLAQLHEEAQLLAE LSD  
 QAAA VTWLKDGRELSLGPKEYMQVSAGRRALLVRDVAQDDAGLYECVSRGSRTAYQLLVQDITDGYRDWGPAG  
 PQKHMCKCAGAKIARYLGSSCYRFLQYDKGVWHWLEAALDTRQKGKTS SCSLHEKPKLVFAKQQAHSEVKAE  
 AGASATLSCEVAQAQTEVTWFKDGGKLS SSSSKVRMEASGCSRRLVVQQAGKADAGEYSCEAGGQKLSFRLDVA  
 EPKMVFAKEQQARSEVKAEGASATLSCEVAQAQTEVTWFKDGGKLS SSSSKVRMEASGCSRRLVVQQAGKADA  
 GEYSCEAGGQKLSFRLDVTEPKLVFAKEQQARSEVKAEGVNSATLSCEVAQAQTEVTWFKDGGKLS SSSSKVRM  
 EASGCSRRLVVQQAGKADAGEYSCEAGGQKLSFRLDVAEPKLVFAKEQQARSEVKAEGVNSATLSCEVAQAQ  
 EVTWFKDGGKLS SSSSKVRMEASGCSRRLVVQQAGKADAGEYSCEAGGQKLSFHLDVTEPKLVFAKEQQAHSEV  
 KAEAGASATLSCEVAQAQTEVTWFKDGGKLS SSSSKVRMEASGCSRRLVVQQAGKADAGEYSCEAGGQKLSFR  
 LDVAEPKLVFAKEQQARSEVKAEGASATLSCEVAQAQTEVTWFKDGGKLS SSSSKVRVEASGCSRRLVVQQAGK  
 ADAGEYSCEAGGQKLSFRLDVAEPKLVFAKEQQANSEVKAEGASATLSCEVAQAQTEVTWFKDGGKLS SSSK  
 VRVEASGCSRRLVVQQAGKADAGEYSCEAGGQKLSFRLDVAEPKLAFAKEQQAHSEVKAEGASATLSCEVAQ  
 AQTEVTWFKDGGKLS SSSSKVRVEASGCSRRLVVQQAGKADAGEYSCEAGGQKLSFRLDVAEPKLAFAKEQQAH  
 SEVKAEGASATLSCEVAQAQTEVTWFKDGGKLS SSSSKVRVEASGCSRRLVVQQAGKADAGEYSCEAGGQKLS  
 FRLDVAEPKLAFAKEQQAHSEVKAEGASATLSCEVAQAQTEVTWFKDGGKLS SSSSKVRVEASGCSRRLVVQQ  
 AGKADAGEYSCEAGGQKLFRLDVAEPKLVFAKEQQAHSEVKAEGASATLSCEVAQAQTEVTWFKDGGKLS  
 SSKVRVEASGCSRRLVVQQVQKADAGEYSCEARGQKLSFRLDVAEAEESQIPERPSRREPLVKEHETIILTAT  
 IAAPSVAAVTWLKDGVEIRRSKRHEATSLGDTHTLTVRGAQVLD SAIYSCRVGKEGQDFPVQVEEVAKF SKP

LEPVEGELGGTVMLVCELSPEQAEVVWRCGNTQLRPGKRFQMTSEGPRRTLTVSGLREDDAEYVCESRDDRT  
SARLTVKVPRVVKFTSGLSAMVAEEGQEAFTQCVVSPSDAGVTWYKDMQLQPSEKFMVMEVSGASRSLTILGL  
TLEDAGQVTVEAEGASSAALRVREAPVLFKKKLEPQTVEERTSVTLEVELTRPWPEVKWTRNAAVLTPSENV  
EIRAEGARHCLVLRVSVGFADRGFFGCETPDDKTQAKLNVEMRQVRLVVRGLQEVEAKEQGTASMDVELSHAEVE  
GSWTRDGLRLQPGPKCHLAVQGPVHILTLALSALQPQDSGLVAFRAEGVHTSARLIVTELPVSFTRVLQDQVATQ  
KEKVTLECELSRPVDVRWLKDGVELRAGKAIIGIVAQGTCSRSLVIYRCETGDQGVYVCDALDAQTSASLRVQGR  
TYTLIFRRVLAEDAGEVKFVAENAESRAHLRVKELPVTLLRPLRDKIAMEKHRGVLECVSRASQAQRWFKGG  
VELQSGPKYEVVSDGLYRKLVINOVPEDEDTYTCDAGNVKTSAQFFVEEQSITIVRGLKDMTVMFPAPAWFE  
CETSI PSVRPPKWLGLKTVLQAGGNVGLQDGTVHRLTLHKTCSTMTGPVHFTIGKSRSSAQLVVSVDIPVVL  
RPLEPKAGRELQSVVLSCDFRPAKAVQWYKDDTPLSPSEKFKMALEGQMAELRILRLTPADAGVYRCQAGSA  
QSSAEVTVEAREVTVIQPLQDAEAMEEGRVCFSCELSHKDEDIWSLNGTPLYNDSFHEISHEGCLHTLVLKS  
VRQADTGTVCATSPKVSVSARLVVKGKPVVFLKALDDVSAEERGLTLQCEVSDPEARVVWRKDGVELGPSDK  
YDFLHKAGARGLTVHDLSDHEDAGLYTCQVGSKETQSKVSVHDLHVGITKRLKTVEVLEGESECSFECVLSHESP  
SDPAVWTVGGKTVGGSGHFHAVRQGRKYTLTVKDAALSDAGEVVFVSVLGLTSKASLIIRERPVDITKPLEDQR  
TTLGEDVMLSCELSRAGTSVRWLKDGKAIKRSQKYDLLSEGTRAVLVVRKASLKDSGEYTCETEASKSTAKLC  
VEEKANRFTTEELADLQVEEKGRAVFTCKTEHPASVVTWRKGLLELRASGKHVPSQEGTLTKLTINALERTSD  
TYTCDIGQARTQARLLVHGQKVRVIEDLEDTAVQEGSSAKFCRIAPADYGPVHWFLDKTPHLSNELNEITVQ  
PGYHVLTLRQLALKDGSFTVFEAGDQRTSAALRVTEKPSIFSRPLTDVTVTEGEDTLVCEITTVDSVSRWT  
KDGKTLRPSARCQLSHEGCAQLLITATTPQDGGRYKCEIGGASSSSIVRVHALPVRFRSLKDVVEVPEGKAA  
TLRCVLSVAAPVEWRHGDDVLKSSNKYSLRQEGAVLELVIRDLQPDQSGQYSCSFGDQTTSATLTVKTSQAQ  
FVGKLRNKEATEGTTVTLRCELTKAPVEWKKGTETLRNGDKYSLKQDGA VCELQICSLLVADAGEYSCVCGQ  
EKTSATLTVKALLVHFVRRRLRSKEATEGDTTTLQCELSKAAPVEWRKGTETLRDGDYSLKQDGA VCELQIRS  
LTIADAGEYLCCTCGQEKTSATLTVRALPAKFKDSLKNEEATEGTATLSCELSKAAPVTWKKGPKTLQSGDKY  
VLRQDGA VCGLQIHGLTMADAGEYSCVCGQEKTSATLTVRGLPAKFIEDLRSQEATEGATAILRCELSKAAPV  
EWRKGETLTKDGDYTLRQDGA VCELQIRGLAVVDGTYSLSLPTKFTTEGLRNEEATEGTMATLRCQMSKAAPV  
EWRKGETLRLDGDYTLRQDGA MCELQIRGLTIEDSGEYTCVCGQEKTSATLSVKALPRFIEDLRSQEATEG  
TMATLRCQMSKAAPVEWRKGETLGDGGRYSLRQDGA VCELQIHDLAVEDTGEYSCVCGQEKTSATLNVKALP  
PRFIEDLRSQEATEGTMATLRCQMSKAAPVAVWRKGETLRDGGRYSLRQDGA VCELQIHDLVDVADAGYSCVC  
GQEKTSAVLTVDALPPKFTTEGLKKEEATEGTMVTLRQMSKEATVEWRKGAKTLSGGRYSLRQDGA MCELQI  
CGLAVEDAGEYSCVCGQEKTSATLSVKALPRFIEDLRSQEATEGTMATLRCQMSKAAPVEWRKGSKTLRDGD  
RYSRLRQDGA MCELQICDLAVEDTGDYSCVCGQEKTSATLSVKAPQVVFQQLQNLQAEEGSMASLRCELSVPN  
AAMVWSKGGLELQGDTRREARQQCVAELLLRDLRREDAGEYSCTCGSQTTSATLMVTAAPVRFRLQLAQDV  
DEGATARLRCELSREAVSVEWRKGSLLQFPKAKYQMVQEGTTAELLVHGVEQEDAGEYTC DAGHTQS IARLSV  
RAPKPKFKTDLQSTEQEAGGTARLCCQLSEAEPGTPVQWLKEGVELHVGSKYEMRRQGA VCELLIHGLEAKDT  
GEYAACLVGGQKTLASLRVKEPEVTIVRGLVDMVEVQADEVFEFTCKVSQAGATDVQWHLQGLPLQSNEVTEVAV  
LADGCTHVLQLKGVTLLEDAGTVSFHVGGLSAQLTVRVPEVTLEPLKDVQLSEGQDAHFRCRLSRASGQEA  
RWALGGVPLQCNEMNDITVEQGTLYLLTLHKVTLEDAGTITLQVGSSESAQLKVTAKNTVLRGLENDVALEG  
GEALFECQLSQPEVAHAHTWLLDDEPVHTSEKVEVYFENGLRHLLLLKNLKPQDSCRVTFLAGDVVTS AFLTV  
RALPDPPEDA EVVGRSDHSVTLVSWVAPMSDGGGGLCGYRVMKEASTGQWQLCHDLVPGPECVDDLVPGKTY  
RFRVAAVGPAGAGEPVHLPQMVKIA PAPA PAPA PAPA PAPA PETRQAVVGEDICLELEVAADGGEVVWHKGT  
QPGGHFEVLSRGRQMLVIKGFRTEDQGEYRCGPIQGLPSSGAATFNVVMTSGSGDEVPAQPSLPPEAAQEGD  
LHLLWEALARKRRMSREPTLDSISELPEEDSRVQHLRQEAETAPDLSEGYSTADELARTGEADLSHTSSDDE  
SRAGTPSLVTYLKKAGGPGISPLASKHEAQVTTSVKPKQKQEPVVPPTCPPPGDLSAADLMDPSLDKAAVKIQ  
AFKGYKVRKEMKQEGPVFSRTFGDTEAQVGDVLRLECVLATKTD MRACWLKDGIELTDGRHYHIDQLKDGT  
SLLVTGLAPTDSDGRYTCQVSTKSGRVSHSACVVVSGTESEAESSGGELDDAFRRAARRLHRLFRTKSPAELS  
EELFLSADGEPGPEEPADWQTYREDENFVCIRFESLAEARQAVTCFRNMFMATMIGVEISLGEQGRGVEM  
RIGKVAPTPTPAVPLAKTPGLQTSDAAPVFLTELQNDVQDGYPMSFDCVVTGQPVPSVRWFKDGKLEEDDH  
YMINEDQGGHQLIITAVVPADMGVYRCLAENSMGVSSSTKAE LRVELTSTDYDTAADATETSSYFSAQGYLSS  
REQEGTESDEGQLPQVLEELKDLQVAPGTRLAKFQLKVKGYPAKLYWFKDGQPLTSDHIRMTDKKTLHTLE  
IVSVTREDSGQYAAIY SNAVGAAYSARLLVRGPSEPEEKPASDVHERLVPPRILEKFTPKKVGRGSSITFSV  
KVEGHPAPSVHWLKEEAEGVLWIGPDTPGYTMASSSKQHSLLVLDVGRQHOGTYTCTIATNPAGQALCSASLH  
ISGLAKEEEQERVKEALISSFLQGTSAVSAQMSEAGFADLVGQSKGESLVAAEAAHSHLSLAEVGTETEEFLQK  
LTSQITEMVSAKISQAKLQVPGGDSDEETKTPSASPRHGRSRPSSSVQESSSESEDDGDSRGEIFDIYVVVTADY  
LPLGAEQDAIILREGQYVEVLD SAHPLRVLRTKPTKSSPSRQGWVSPAYLDKRLKLSPEWGPTEAPEFPGEA  
VSEDEYRTRLSSVIQELLSSEQAFVGLQFLSHMKHLERSPRVPAAVASQKTVI FRNVQDI SHFSSFLKE  
LQCGCTDDDVAMCFIKNQEA FEKYLEFLVGRVQAESVVVSTPVQEFYKKYAEETLSAKDPTQPPPPPLQHYLE  
QPVERVQKYQALLKELIRNKARNRQNCALLEQAYAVVSALPQRAENKLVHSLMENYPGTLEALGEP IRQGHFI  
VWEGAPGARMPWKGHNRHVFLFRNYLVICKPRRDSRTDTFSYVFRNMMKLSSIDLNDQVEGDRAFEVWHERE

DSVRKYLQARTVI IKNSWVKEICGIQQRLAQPVWRPPEFEEELADCTAELGETVKLACRVGTGPKPIVSWYK  
 DGKPEVEVDPHHILIEDPDGSCSTLILDNLTGIDSGQYMCFAASAAGNASTLGKILVQVPPRFVNVKVRATPFVEG  
 EDQITCTVEGAPYPQIRWYKDGTLAPGNRYRMLNEPRSGVLVLVQAASKEDLGHYECVLNRLGSTRGGG  
 ELYMQSPALRARDQHREQIVAAVEGAPSMQVTIEDVQVQVGDMAQFDAVIEGHPPPIVTWYKGSTQLTSSAR  
 LSQRQDGTYSVLVTDVAPHDAGVYTCVANNAGQVLCKAELLVHGDKLDAENQVYRKLHSFYDVQEEIGR  
 GVFGFVKRVQHKGNMFCAAKFIPLRSKTRAQAYQERDILATLGHPLVTGLLDQFETRKTLLILELCSSEEL  
 LDRLFKKGVVTEAEVKVYIQQLVEGLHYLHSHGILHLDIKPPNIMVHPAREDIKICDFGFAQKITPSEPOYS  
 KYGSPFVSPFIEIQNPVSEGSDIWAMGVISYLSLTCSSPFAGESDRATLLNVLEGRVSWSSPTAAHLSERDAK  
 DFIKATLQRTPRARPSTSQCLAHWPFLKSMPEAAEHFINTKQLKFLARSRWQRSLMSYKSILVMRSIPELLQ  
 GPPDPSPLGVARHLRGEASGASSSSSSSDNELAPFARAKSLPPSPVTHSPLLHPRGFLRPSASLPEETEASMP  
 TADAAVPASPQASAGPPASPGCVPRHSVIVSSLFYQQAGEGAERGNKTSKAKRHPARRRHLKGGYIARALPGLR  
 EPLMEYSLLEEEAAREEQASLMTKTPSFETALRLPSSSVREVPGRSHSLDNPVTTGPSPEACKEQLLFPST  
 GLTHETTAKDRGHKEGFLQESVPPFPMMSGDSRPGKQEGSSQDSCRGKPASSCHSELGSGSQEGCGPPSSQSLG  
 SLPPQSLKKELESTSCGPLFSEQQAAPFTQVSPLLGSEKEPQDGLSEGVPVPSSSPGSASQVDASLDTEG  
 LSEAGDTCDFTPPPQRPEQATTRKFSLESRGGYAGVAGYGTFAFGGDAGGMLGQGPLWARMWAVSQSSEEQ  
 DEAAATESPQPLESLGPIAEASGVPLRTSPSLTPWEEVEQVSLVQIRDLSGDAEAADTISLDISEVDPAYLNLS  
 DLYDIKYLPEFEMIFRRVPKPIEQPESPGSETEAGQLADFLAEAAPWPGELGLRAGLEITEEPEEPGDLEA  
 LLGEAAVGRKRKWSPSRGLFQFPGRCLSGEEPVELGLRQRVKASMAHISRILKGRPEGPEREGPRKAGLAS  
 FRLSGLKGRDQELSDEAVVLGQSVTLACQVLAQPTAQATWSKDGVLLESSGHLLISSTLKNFQLLTLILVVKEE  
 DLGTYTCCVSNPLGTAVTTGVLKRAERPSSSPRPEVGEYKDAVLLVWKPVESCGPVTYIVQCCIEGGSWTTL  
 ASDISDCCYLTKLSRGGMYIFRTACVSKAGMGPYSSPSEQVLLGGPNHLASEEESSRGRPAQLLPSTKTFAF  
 QMQIRRGFRS VVRQCREKASGRALAAKIVPYQPEDKTAVLREYEALKRHLHPHLAQLHAAYLSRHLVLI  
 LELCSPELLPSLAERESYSESDVKDYLWQMSATQYLHAQHILHLDLRSENMMVTEYNLLKVIDLGNASLDQEK  
 VPAPENFKDYLETMAPELLEGQAVPQTDIWAIGVTAFIGLSGEYPESEGETRDLQKGLRKLIRLSRCYAGL  
 SGGAVAFLOSSLCAQPWGRPCASTCLQCGWLTEEGPTGSRPTVTFPTVRLRAFVREKRRRALLYKKNLAQ  
 VR\*

>rs217953617\_ENSMUSP00000049737\_c.12808:A>C\_p.E4270A  
 ENSMUST00000052872.15|Obscn-203|ENSMUSG00000061462|-|chr11:g.58951834:T>G  
 MDHSFSGAPRFLTRPKAFVSVGKDATLSCQIVGNPTPHVSWEKDRQPVEAGARFRLAQDGDVYRLTILDLAL  
 GDSGQYVCRARNAIGEFAAVGLRVDSEGTCAEQAPHLLRPTSIRVREGADATFRCRVGGSPQPAVSWSKDG  
 RRLGPPDAPHVRVEEHGESSALRIRSARPRDGGTYEVRAENPLGSASAAAALVVDSDAEVAGPPGTSTATLLA  
 HLQQRREAMRAEGIPPSPPGAGTRTCTVTEGKHARLSCFVTGEPKPKETVWKKDQQLVTEGRRHVYVEDEQENF  
 VLKILFCKQSDRGLYTCTASNLVGQTYSSVLVVVREPTVFPFKRLQDLEVREKESATFQCEVAQPAEAAWFK  
 EETRLWASAKYDIEEEGTERRLTVRNVSADDDAVYICETTEGSRVAELSVQGNLTKLPRKTAVRTGDTAIF  
 WVLEAVPEGPVWRWLRNQEEMVAGGRVAITAEGTCHTLTIQCTLEDMGEVAFVSGGCRITTEQFCVSAPRRPPL  
 YPPADPVVKAKTSSVTLWSAPPHGDRPVTIDGYVLEKRLKLGAYAWSRCHAEAGWLATTEFTITGVAAEEDFQ  
 FRVSAINHFGQGPYLEFPGMTMLVPLAVKTPKAVEAVEGGEVTFVSDLTVASSGEWFLDGEALKASSIYVI  
 RCDRTRHMLTIREVPARLHGAQLKFVANGIETSIQMVVRAALGLPSSKLPAAAAREVLAQLHEEAQLLAELSD  
 QAAAVTWLKDGRELSLGPKEYMQVSAGRRALLVRDVAQDDAGLYECVSRGSRRTAYQLLVQEPKLVFAKQQA  
 SEVKAEAGNSATLSCEVTQAQTEVTWFKDGKLLSSSSKVRMEASGCSRRLLVVQQAGKADAGEYSCEAGGQKLS  
 FRLDVAEPKLVFAKQQAHSSEVKAEAGASATLSCEVAQAQTEVTWFKDGKLLSSSSKVRMEASGCSRRLLVVQQ  
 AGKADAGEYSCEAGGQKLSFRLDVAEPKLVFAKEQQARSEVKAEAGASATLSCEVAQAQTEVTWFKDGKLLS  
 SSKVRMEASGCSRRLLVVQQAGKADAGEYSCEAGGQKLSFRLDVTEPKLVFAKEQQARSEVKAEVGNATLSCE  
 VAQAQTEVTWFKDGKLLSSSSKVRMEASGCSRRLLVVQQAGKADAGEYSCEAGGQKLSFRLDVAEPKLVFAKEQ  
 QARSEVKAEAGNSATLSCEVAQAQTEVTWFKDGKLLSSSSKVRMEASGCSRRLLVVQQAGKADAGEYSCEAGGQ  
 KLSFHLDVTEPKLVFAKEQQAHSEVKAEAGASATLSCEVAQAQTEVTWFKDGKLLSSSSKVRMEASGCSRRLLV  
 VQQAGKADAGEYSCEAEGQKLSFRLDVAEPKLVFAKEQQARSEVKAEAGASATLSCEVAQAQTEVTWFKDGK  
 LSSSSKVRVEASGCSRRLLVVQQAGKADAGEYSCEAGGQKLSFRLDVAEPKLVFAKEQQANSEVKAEAGASATL  
 SCEVAQAQTEVTWFKDGKLLSSSSKVRVEASGCSRRLLVVQQAGKADAGEYSCEAGGQKLSFRLDVAEPKLAFA  
 KEQQAHSEVKAEAGASATLSCEVAQAQTEVTWFKDGKLLSSSSKVRVEASGCSRRLLVVQQAGKADAGEYSCEA  
 GGQKLSFRLDVAEPKLAFAKEQQAHSEVKAEAGASATLSCEVAQAQTEVTWFKDGKLLSSSSKVRVEASGCSR  
 RLVVQQAGKADAGEYSCEAGGQKLSFRLDVAEPKLAFAKEQQAHSEVKAEAGASATLSCEVAQAQTEVTWFKD  
 GKKLSSSSKVRVEASGCSRRLLVVQQAGKADAGEYSCEAGGQKLFRLDVAEPKLMFAKEQQAHSEVKAEAGAS  
 ATLSCEVAQAQTEVTWFKDGKLLSSSSKVRVEASGCSRRLLVVQQAGKADAGEYSCEAGGQKLSFRLDVAEPK  
 LFAKEQQAHSEVKAEAGASATLSCEVAQAQTEVTWFKDGKLLSSSSKVRVEASGCSRRLLVVQQVQKADAGEYS  
 CEARGQKLSFRLDVADTRLMFAKEQQARTEVKAEAGNSATLSCEVAQAQTEVTWFKDGKLLSSSSKVRVEASG  
 CSRRLLVVQQAGKADAGEYSCEAGGQKLSFRLDVAEAEESQIPERPSRREPLVVKEHETIILTATIAAPSVAAVT  
 WLKDGVEIRRSKRHEATSLGDTHTLTVRGAQVLDSAIYSCRVGKEGQDFPVQVEEVAAKFSKPLEPVEGELGG

TVMLVCELSPEQAEVWRCGNTQLRPGKRFQMTSEGPRRTLTVSGLREDDAEYVCESTRDDRTSARLTVKVP  
 VVKFTSGLSAMVAEEGQEAFTQCVVSPSDAGVTWYKDMQLQPSSEKFMVVEGASRSLTILGLTLEDAGQVTV  
 EAEGASSAALRVREAPVLFKKKLEPQTVEERTSVTLEVELTRPWPVEVKWTRNAAVLTPSENVEIRAEGARHC  
 LVLRVGFADRGFFGCETPDDKTQAKLNVEMRQVRLVRLGLQEVEAKEQGTASMDVELSHAEEVGSWTRDGLRL  
 QPGPKCHLAVQGPVHILTLSALQPQDSGLVAFRAEGVHTSARLIVTELVPVFTFTRVLQDVVATQKEKVTLECEL  
 SRPVDVRWLKDGVELRAGKAIGIVAQGTCSRSLVIYRCETGDQGVYVCDALDAQTSASLRVQGRTYTLIFRRVL  
 AEDAGEVVFVAENAESAHLRVKELPVTLLRPLRDKIAMEKHRGVLECVSRASAVRWFKGGVLELQSGPKYE  
 VVSDGLYRKLVLINDVQPEDEDTYTCDAGNVKTSAQFFVEEQSITIVRGLKDMTVMPEPAPAWFECETSIPSVRP  
 PKWLLGKTVLQAGGNVLEQDGTVHRLTLHKTCSTMTGPVHFTIGKSRSSAQLVSDIPVVLTRPLEPKAGRE  
 LQSVVLSCDFRPAPKAVQWYKDDTPLSPSEKFKMALEGQMAELRILRLTPADAGVYRCQAGSAQSSAEVTVEA  
 REVTVIQPLQDAEAMEEGRVCFSCELSHKDEDIEWSLNGTPLYNDSFHEISHEGCLHTLVLSVRQADTGTVC  
 ATSPKVSVSARLVVKGKPVVFLKALDDVSAEERGTLLTQCEVSDPEARVVRKDGVELGPSDKYDFLHKAGAR  
 GLTVHDLSDHEDAGLYTCQVGSKETQSKVSVHDLHVGITKRLKTVEVLEGESECSFECVLSHESPSDPAVWTVGG  
 KTVGGSGHFHAVRQGRKYTLTVKDAALSDAGEVFSVLGLTSKASLIRERPVDITKPLEDQRTTLGEDVMLS  
 CELSRAGTSVRWLKDGKAIKRSQKYDLLSEGTRAVLVVRKASLKDSGEYTCETEASKSTAKLCVEEKANRFTE  
 ELADLQVEEKGRAVFTCKTEHPASVVTWRKGLLELRASGKHVPSQEGTLKLTINALERTDSDTYTCDIGQAR  
 TQARLLVHGQKVRVIEDLEDTAVQEGSSAKFCCRIAPADYGPVHWFLDKTPHLSNELNEITVQPGGYHVLTLR  
 QLALKDSGTVYFEAGDQRTSAAALRVTEKPSIFSRPLTDVTVTEGEDTLVCESTTVVSSVRWTKDGKTLRPSA  
 RCQLSHEGCAQLLITATTPQDGGRYKCEIGGASSSSIVRVHALPVRFRRESLKDVEVPEGKAATLRCVLSSVA  
 APVEWRHGDDVLKSSNKYSLRQEGAVLELVIDRLQPDQSGQYSCSFGDQTTSATLTVKTSQAQVFGKLRNKEA  
 TEGTTVTLRCELTKAPVEWKKGTETLRNGDKYSLKQDGAVCELQICSLLVADAGEYSCVCGQEKTSATLTVK  
 ALLVHFVRRRLRSKEATEGDTTTLQCELSKAAPVEWRKGTETLRDGDYSLKQDGAVCELQIRSLTIADAGEYL  
 CTCGQEKTSATLTVRALPAKFKDSLKNEEATEGTTATLSCELSKAAPVTWKKGPKTLQSGDKYVLRQDGAVCG  
 LQIHGLTMADAGEYSCVCGQEKTSATLTVRGLPAKFIEDLRSQEATEGATAILRCELSKAAPVEWRKGSSETLK  
 DGDYTLRQDGAVCELQIRGLAVVDGTYSLSLPTKFTTEGLRNEEATEGTMATLRCQMSKAAPVEWRKGSSETLR  
 DGDYSLRQDGAVCELQIRGLTIEDSGEYTCVCGQEKTSATLSVKALPSRFIEDLRSQEATEGTMATLRCQMS  
 KTAPVEWKKGSSETLRDGGYSLRQDGAVCELQICDLAVEDAGEYSCVCGQEKTSATLSIKALPPRFIEDLRSQ  
 EATEGTMATLRCQMSKAAPVEWRKGSSETLRDGGYSLRQNGAVCELQIHDLAVEDTGEYSCVCGQEKTSATLN  
 VKALPPRFIEDLRSQEATEGTMATLRCQMSKAAPVAWRKGSSETLRDGGYSLRQDGAVCELQIHDLVEDAGQ  
 YSCVCGQEKTSAVLTVDALPPKFTTEGLKKEEATEGTMVTLRCQMSKEATVEWRKGAKTLSGGYSLRQDGAM  
 CELQICGLAVEDAGEYSCVCGQEKTSATLSVKALPPRFIEDLRSQEATEGTMATLRCQMSKAAPVEWRKGSSET  
 LRDGDYSLRQDGAVCELQIRDLAVEDAGEYLCVCGQEKTSATLSVKALPPRFIEDLRSQEATEGTMATLRCQ  
 MSKAAPVEWRKGSSETLRDGDYSLRQDGAVCELQICDLAVEDTGDYSCVCGQEKTSATLSVKALPPRFIEDLR  
 SQEAREGTVAATLRCMSKAAPVEWRKGSSETLRDGDYSLRQEGNLCELQIRDLAVEDTEEYSCVCGQEKTSAT  
 LSVKALPAKFIEDLRSQEAPESSTVTLRCKLSKASVWKKGSSETLRNGARYSLRQDGAVCELEIRDLTVEDT  
 GEYSCTCGQERTSATLSIMAPQVVFQQLQNLQAEEGSMASLRCELSVNAAMVWSKGGLELQGDTRREARQQ  
 GCVAELLLRDLRREDAGEYSCVCGQTTSATLMVTAAPVRFLRELQAQDVDEGATARLRCELSREAVSVEWRK  
 GSIQLFPCAKYQMVQEGTTAELLVHGVEQEDAGEYTCDAHTQS IARLSVRAPKPKFKTDLQSTEQEAGGTAR  
 LCCQLSEAEPTPVQWLKEGVELHVGSKYEMRRQAVCELLIHGLEAKDTGEYACLVGQKTLASLRVKEPEV  
 TIVRGLVDMEVQADEDEFTCKVSQAGATDVQWHLQGLPLQSNVTEVAVLADGCTHVLQKGVTLLEDAGTVS  
 FHVGGSSSAQLTVRVPEVTVLEPLKDVQLSEGQDAHFRCRLSRASGQEARWALGGVPLQCNEMNDITVEQGT  
 LYLLTLHKVTLEDAGTITLQVGSCSSEALQKVTAKNTVLRGLENVDALEGGEALFECQLSQPEVAHAHTWLLDD  
 EPVHTSEKVEVVYFENGLRHLLLLLNKLPQDSCRVTFLAGDVVTSFAFLTVRGWRLEVLEPPHDASVKAGMQVR  
 FTCILSEAVPVGEATWYINGAAIQPDDTDWTVTTDGSHHALTLNSAQFQHGAGEVTFAAARDAVASARLSVLALP  
 DPEDAEVVGRSDHSVTLVSWVAPMSDGGGLCGYRVEMKEASTGQWQLCHDLVPGPECVDDLVPGKTYRFRV  
 AAVGPAGAGEPVHLPQMVKIAPAPAPAPAPAPAPAPETRAVVGEDI CLELEVAADGGEVWVHKGTERTIQPGG  
 HFEVLSRQQRQMLVIKGFRTEDQGEYRCGPIQGLPSSGAATFNVVMTSGSGDEVPAQPSLPPEAAQEGDLHLL  
 WEALARKRRMSREPTLDSISELPEEDSRVQHLRQEAETAPDLSEGYSTADELARTGEADLSHTSSDDESRA  
 TPLSVTYLKKAGGPGISPLASKHEAQVTTSVKPKQKQEPVVPTCPPPGDLSAADLMDPSLDKAAVKIQAAFKG  
 YKVRKEMKQQEGPVFSRTFGDTEAQVGDVLRLECVLATKTDMRACWLKDGIELTDGRHYHIDQLKDGTCSLLV  
 TGLAPTDSGRYTQCVSTKSGRVSHSACVVVSGTESEAESSSGGELDDAFRRRAARLHRLFRTKSPAELSEEEL  
 FLAEDGEPEPEPADWQTYREDENFVICRFESLAEARQAVTCFRNMFMATMGIGVEISLGEQGPGRVEMRIGK  
 VAPTVPAPVPLAKTGLQTSDAAPVFLTELQNVSDVQDGYPMSFDCVVTGQPVPSVRWFKDGKLEEDDHMYIN  
 EDQQGGHQLIITAVVPADMGVYRCLAENSMGVSSTKAELRVELTSTDYDTAADATETSSYFSAQGYLSSREQE  
 GTESDEGQLPVLEELKDLQVAPGTRLAKFQLKVKGYPAKLYWFKDGQPLTSSDHIRMTDKKTLHTLEIVSV  
 TREDSGQYAAYSNAVGAAYSSARLLVRGPSEPEEKPASDVHERLVPPRILEKFTPKKVKRGSSTFVSVKVEG  
 HPAPSVHWLKEEAKEKGVWLGPDTPGYTMASSSKQHSLLVLDVGRQHGTYTCTIATNPAGQALCSASLHISGL  
 AKEEEQERVKEALISSFLQTSQAVSAQMSESAGFADLVGQSKGESLVAEEAHSHLSLAEVGTTEEFLQKLTSSQ

ITEMVSAKISQAKLQVPGGDSDEETKTPSASPRHGRSRPSSSVQESSSESEDGDSRGEIFDIYVVTADYLPGLG  
AEQDAIILREGQYVEVLDSAHPLRWLVRTKPTKSSPSRQGWVSPAYLDKRLKLSPEWGPTEAPEFPGEAVSED  
EYRTRLSSVIQELLSSEQAFVGELOFLESHHMKHLERSPRVPAAVASQKTVI FRNVQDISHFHSSFLKELQGC  
GTDDDVAMCFIKNQEAFAFEKYLEFLVGRVQAESVVVSTPVQEFYKKYAEETLSAKDPTQPPPPPLQHYLEQPV  
RVQKYQALLKELIRNKARNRQNCALLEQAYAVVSALPQRAENKLHVSLMENYPGTLEALGEPTRQGHFIVWEG  
APGARMFWKGNHRVFLFRNYLVICKPRRDSRTDTFSYVFRNMMKLSSIDLNDQVEGDRAFEVWHEREDSVR  
KYLLQARTVI IKNSWVKEICGIQORLAQPVWRPPEFEELADCTAELGETVKLACRVTGTPKPIVSWYKDGKP  
VEVDPHHILIEDPDGSCITLIDNLTGIDSGQYMCFAASAAGNASTLGKILVQVPPRFVNVKVRATPFVEGEDAQ  
ITCTVEGAPYPQIRWYKDGTLTLLAPGNRYRMLNEPRSGVLVLIQAASKEDLGHYECELVNRLGSTRGGELYM  
QSPALRARDQHHREQIVAAVEVTEQETKVPKKTVI IETITTVVKS PRGRRQSPGKSPSRSPRRSASPRRPG  
LLAPERLYPPGTSPRRLEVEQGRKAPVPALYVTEAEVHAPASQSPKWLEVEETIEVRVKKTGSRGASPVRE  
MTRGEGILFTLPGGI PGRDPNANNNSNKSVYQEAARTWGPVAVHVGEFFIFQVDSVGNVDWVAASPEPEQVRA  
SQKEENTERQEGCSDGIDENTFLMEEPODTSLQGRDPKILTHNGRVLTLADLEDYVPQEGETFGCGDSTPSTP  
DEPPCEVSVLQREI SEPTVGQVLLNVGRPPGTGATPSFFRPGSQVHSPEVSVSFLLRREAWSGPVSAAPWTSSF  
HTHVQSSVDGSHGSKTEVSTQTVSFGAVGETVTLHIDPDGGEAPGPSQG\*  
>rs217953617\_ENSMUSP0000020732\_c.13009:A>C\_p.E4337A  
ENSMUST0000020732.13|Obscn-201|ENSMUSG0000061462|-|chr11:g.58951834:T>G  
MDHSFSGAPRFLTRPKAFVVSVGKDATALSCQIVGNPTPHVSWEKDRQPV EAGARFLAQDGDVYRLTILDLAL  
GDSGQYVCRARNAIGEFAAVGLRVDSEGTCAEQAPHFLLRPTSIRVREGADATFRCRVGGSPQPAVSWSKDG  
RRLGPPDAPHVRVEEHGESSALRIRSARPRDGGTYEVRAENPLGSASAAAALVVDSDAEVAGPPGTSTATLLA  
HLQORREAMRAEGIPPSPPGAGTRTCTVTEGKHARLSCFVTGEPKPEVWKKDGQLVTEGRRHVVEDEQENF  
VLKILFCKQSDRGLYCTASNLVGQTYSSVLVVVREPTVPFKKRLQDLEVREKESATFQCEVAQPAEAWFK  
EETRLWASAKYDIEEEGETERLLTVRNVSADDDAVYICETTEGSRVAELSVQGNLTKLPRKTAVRTGDTAIF  
WVELAVPEGPVWRWRNQEEMVAGGRVAITAEGTCHTLTI FQCTLEDMGEVAFVSGGCRTTTTQFCVSAPRRPPL  
YPPADPVVKAKTESVTLWSAPPHGDRPVTIDGYVLEKRRKLGAYAWSRCHEAGWLATTEFTITGVAEEGDFQ  
FRVSAINHFGQGPYLEFPGTMHLVPLAVKTKPLKAEVAEVEGGEVTFVSDLTVASSGEVFLDGEALKASSIYVI  
RCDRTRHMLTIREVPARLHGAQLKFFVANGIETS IQMVRAALGLPSSKLPAAAAAREVLAQLHHEEAQLLAEALS  
QAAAVTWLKDGRELSLGPKEYMVSAGRRALLVRDVAQDDAGLYECVSRGSRRTAYQLLVQDITDGYRDWGPAG  
PQKHMCKCAGAKIARYLGSscyRFLQYDKGVWHWLEAALDTRQGGKTS SCSLHEKPKLVFAKQQAHSEVKA  
AGNSATLSCEVTQAQTEVTWFKDGKLLSSSSKVRMEASGCSRRLVVQQAGKADAGEYSCEAGGQKLSFRLDVA  
EPKLVFAKQQAHSEVKAEGASATLSCEVAQAQTEVTWFKDGKLLSSSSKVRMEASGCSRRLVVQQAGKAD  
GEYSCEAGGQKLSFRLDVAE PKMVFKEQQARSEVKAEGASATLSCEVAQAQTEVTWFKDGKLLSSSSKVRM  
EASGCSRRLVVQQAGKADAGEYSCEAGGQKLSFRLDVTEPKLVFAKEQQARSEVKAEVGNSATLSCEVAQAQ  
EVTWFKDGKLLSSSSKVRMEASGCSRRLVVQQAGKADAGEYSCEAGGQKLSFRLDVAE PKLVFAKEQQAR  
KAEAGNSATLSCEVAQAQTEVTWFKDGKLLSSSSKVRMEASGCSRRLVVQQAGKADAGEYSCEAGGQKLS  
DVTEPKLVFAKEQQAHSEVKAEGASATLSCEVAQAQTEVTWFKDGKLLSSSSKVRMEASGCSRRLVVQQAG  
ADAGEYSCEAEGQKLSFRLDVAE PKLVFAKEQQARSEVKAEGASATLSCEVAQAQTEVTWFKDGKLLSSSSK  
VRVEASGCSRRLVVQQAGKADAGEYSCEAGGQKLSFRLDVAE PKLVFAKEQQANSEVKAEGASATLSCEVAQ  
AQTEVTWFKDGKLLSSSSKVRVEASGCSRRLVVQQAGKADAGEYSCEAGGQKLSFRLDVAE PKLAFAKEQQA  
SEVKAEGASATLSCEVAQAQTEVTWFKDGKLLSSSSKVRVEASGCSRRLVVQQAGKADAGEYSCEAGGQKLS  
FRLDVAE PKLAFAKEQQAHSEVKAEGASATLSCEVAQAQTEVTWFKDGKLLSSSSKVRVEASGCSRRLVVQ  
AGKADAGEYSCEAGGQKLSFRLDVAE PKLAFAKEQQAHSEVKAEGASATLSCEVAQAQTEVTWFKDGKLLSS  
SSKVRVEASGCSRRLVVQQAGKADAGEYSCEAGGQKLFRLDVAE PKLMFAKEQQAHSEVKAEGASATLSCE  
VAQAQTEVTWFKDGKLLSSSSKVRVEASGCSRRLVVQQAGKADAGEYSCEAGGQKLSFRLDVAE PKLVFAKEQ  
QAHSEVKAEGASATLSCEVAQAQTEVTWFKDGKLLSSSSKVRVEASGCSRRLVVQQVKGADAGEYSCEARGQ  
KLSFRLDVADTRLMFAKEQQARTEVKAEAGNSATLSCEVAQAQTEVTWFKDGKLLSSSSKVRVEASGCSRRLV  
VQQAGKADAGEYSCEAGGQKLSFRLDVAE AESQIPERPSRREPLVVKEHETIILTATIAAPSVAAVTWLKDG  
EIRRSKRHEATSLGDTHTLTVRGAQVLD SAIYSCRVGKEGQDFPVQVEEVAAKFSKPLEPVEGELGGTVMLVC  
ELSPQAEVWRCGNTQLRPGKRFQMTSEGPRRTLTVSGLREDDAEYVCE SRDDRTSARLTVKVPVVKFTS  
GLSAMVAEEGQEATFQC VVS PSDAGVTWYKDGMLQPSKFVMEVSGASRSLTILGLTLEDAGQVTV EAGAS  
SSAALRVREAPVLFKKLEPQTEVERTSVTLEVELTRPWPEVKWTRNAAVLTPSENVEIRAEGARHCLVLRV  
GFADRGGFFGCETPDDKTQAKLNVEMRQVRLVVRGLQVEEAKQGTASMDVELSHAEEVGSWTRDGLRQLQPGPK  
HLAVQGPVHILTLALSALPQDSGLVAFRAEGVHTSARLIVTELPSVSTRVLQDVVATQKEKVTLECELSRPVDV  
RWLKDGVNELRAGKAIGIVAQGTCSRSLVIYRCETGDLGVYVCDALDAQTSASLRVQGRTYTLIFRVLAEADAGE  
VKFVAENAESRAHLRVKELPVTLRLRDKIAMEKHRGVLECCQVSRASAQVRWFKGGVELQSGPKYEVVSDGL  
YRKLVINVDQPEDEDTYTC DAGNVKTSAQFFVEEQSITIVRGLKDMTVMEPAPAWFECETSIPSVRPPKWL  
KTVLQAGGNVGLQDGTVHRLTLHKTCSTMTGPVHFTIGKSRSSAQLVSDI PVVLRPLEPKAGRELQSVVL  
SCDFRPAPKAVQWYKDDTPLSPSEKFKMALEGGMAELRILRLTPADAGVYRCQAGSAQSSAEVTV EAREVTVI

QPLQDAEAMEEGRVCFSCELSHKDEDI EWSLNGTPLYNDSFHEI SHEGCLHTLVLKSVRQADTGTVCATSPKV  
SVSARLVVKGKPVVFLKALDDVSAEERGLTLTQCEVSDPEARVVRKDGVELGSPDKYDFLHKAGARGLTVHD  
LSHEDAGLYTCQVGSKETQSKVSVHDLHVGITKRLKTVEVLEGESECSFECVLSHESPSDPAVWTVGGKTVGGS  
GHFHAVRQGRKYTLTVKDAALSDAGEVVFVSVLGLTTSKASLIIRERPVDIITKPLEDQRTTLGEDVMLSCELSRA  
GTSVRWLKDGKAIRKSQKYDLLSEGTRAVLVVRKASLKDSGEYTCETEASKSTAKLCVEEKANRFTEELADLQ  
VEEKGRAVFTCKTEHPASVVTWRKGLLELRASGKHVPSQEGTLTKLTINALERTDSDTYTCIDIGQARTQARLL  
VHGQKVRVIEDLEDTAVQEGSSAKFCRIAPADYGPVHWFLDKTPLHSNELNEITVQPGGYHVLTLRQLALKD  
SGTVYFEAGDQRTSAALRVTEKPSIFSRPLTDVTVTEGEDTLVCEVTTVDSSVRWTKDGKTLRPSARCQLSH  
EGCQAQLLITATTPQDGGRYKCEIGGASSSIVRVHALPVRFRESLKDVEVPEGKAATLRVLSVAAPVEWR  
HGDDVLKSSNKYSRQEGAVLELVIRDLQPQDSGQYSCSFGDQTTSATLTVKTSQAQFVGKLRNKEATEGTTV  
TLRCELTKAPVEWKKGTETLRNGDKYSLKQDGAVCELQICSLLVADAGEYSCVCGQEKTSATLTVKALLVHF  
VRRLRSKEATEGDTTTLQCELSKAAPVEWRKGTETLRDGDYSLKQDGAVCELQIRSLTIADAGEYLCTCGQE  
KTSATLTVRALPAKFKDSLKNEEATEGTTATLSCELSKAAPVTWKKGPKTLQSGDKYVLRQDGAVCGLQIHGL  
TMADAGEYSCVCGQEKTSATLTVRGLPAKFIEDLRSQEATEGATAILRCELSKAAPVEWRKGTETLRDGDYSL  
LRQDGAVCELQIRGLAVVDGTGYSSLPKTFTEGLRNEEATEGTMATLRCQMSKAAPVEWRKGTETLRDGDYSL  
LRQDGAMCELQIRGLTIEDSGEYTCVCGQEKTSATLSVKALPSRFIEDLRSQEATEGTMATLRCQMSKATAPVE  
WKKGSETLRDGGYSLRQDGPVCELQICDLAVEDAGEYSCVCGQEKTSATLSIKALPPRFIEDLRSQEATEG  
MATLRCQMSKAAPVEWRKGTETLRDGGYSLRQNGAVCELQIHDLAVEDTGEYSCVCGQEKTSATLNVKALPP  
RFIEDLRSQEATEGTMATLRCQMSKAAPVAWRKGTETLRDGGYSLRQDGAVCELQIHDLDVEDAGQYSCVCG  
QEKTSAVLTVDALPPKFTTEGLKKEEATEGTMVTLRCQMSKEATVEWRKGAKTLSDGGYSLRQDGAMCELQIC  
GLAVEDAGEYSCVCGQEKTSATLSVKALPPRFIEDLRSQEATEGTMATLRCQMSKAAPVEWRKGTETLRDGD  
YSLRQDGAVCELQIRDLAVEDAGEYLCVCGQEKTSATLSVKALPPRFIEDLRSQEATEGTMATLRCQMSKAAP  
VEWRKGSKTLRQDGDYSLRQDGAMCELQICDLAVEDTGDYSCVCGQEKTSATLSVKALPPRFIEDLRSQEARE  
GTVATLRCRMSKAAPVEWRKGTETLRDGDYSLRQEGNLCELQIRDLAVEDTEEYSCVCGQEKTSATLSVKAL  
PAKFIEDLRSQEAPESSTVTLRCKLSKASVWKKGSETLRNGARYSLRQDGAVCELEIRDLTVEDTGEYSCT  
CGQERTSATLSIMAPQVVFQQLQNLQAEEGSMASLRELSELVNPAAAMVWSKGGLELQGDTRREARQQGCVAEL  
LLRDLRREDAGEYSCVCGQEKTSATLMVTAAPVRFLELQADVDDEGATARLRCELSREAVSVEWRKGSVQLF  
PCAKYQMVQEGTTAELLVHGVEQEDAGEYTCDAHGHTQSIARLSVRAPKPKFKTDLQSTEQEAGGTARLCCQLS  
EAEPGTPVQWLKEGVELHVGSKYEMRRQGAVCELLIHGLEAKDTGEYACLVGQKTLASLRVKEPEVTIVRGL  
VDMEVQADEDEFTCKVSQAGATDVQWHLQGLPLOSNEVTEVAVLADGCTHVLLQLKGVTLLEDAGTVSFHVGG  
SSSAQLTVRVPEVTVLEPLKDVQLESEGQDAHFRCRLSRASGQEARWALGGVPLQCNEMNNDITVEQGTLYLLTL  
HKVTLEDAGTITLQVGSSESQAQLKVTAKNTVLRGLENDVALEGGALFECQLSQPEVAHAHTWLLDDEPVHTS  
EKVEVVYFENGLRHLLLLKLNKPKQDSCRVTFLAGDVVTSFAFLTVRGWRLEVLPPHDASVKAGMQVRFTCILS  
EAVPVGEATWYINGAAIQPDDTDWTVTTDGSHHALTLNAQPHAGEVTFAAARDAVASARLSVLALPDPPEDA  
EUVGRSDHSVTLSSWVAPMSDGGGGLCGYRVMKEASTGQWQLCHDLVPGPECVVDDLVPGKTYRFRVAAVGPA  
GAGEPVHLPQMVKIAAPAPAPAPAPAPAPAPAPETRQAVVGEDICLELEVAADGGEVWVKGTERIQPGGHFEVLS  
RGQRQMLVIKGFRTEDQGEYRCGPIQGLPSSGAATFNVMVMTSGSGDEVPAQPSLPPEAAQEGDLHLLWEALAR  
KRRMSREPTLDSISELPEEDSRVQHLRQEAEEETAPDLSEGYSTADELARTGEADLSHTSSDDESRACTPSLVT  
YLKAGGPGISPLASKHEAQVTSVKPKQKQEPVPTCPGGDLAADMPSLDKAAVKIQAAFKGYKVRKE  
MKQQEGPVFSRTFGDTEAQVGDVLRLECVLATKTDMRACWLKDGIELTDGRHYHIDQLKDGTCSLLVTLGLAPT  
DSGRYTCQVSTKSGRVSHSACVVVSGTESEAESSGGELDDAFRAARRLHRLFRTKSPAELSEELFLSADE  
GPGEPEEPADWQTYREDENFVCIRFESLAEARQAVTCFRNMFMATMGIGVEISLGEQGPGRVEMRIGKVAPTVT  
PAVPLAKTPGLQTSDAAPVFLTELQNDVQDGYPMSFDCVVTGQPVPSVRWFKDGKLEEDDHYMINEDQGG  
HQLIITAVVPADMGVYRCLAENSMGVSSTKAELRVELTSTDYDTAADATETSSYFSAQGYLSSREQEGTESDE  
GQLPQVLEELKDLQVAPGTRLAKFQLKVKGYPAKPLYWFKDGGPLTTSDHIRMTDKKTLHTLEIVSVTREDSG  
QYAAAYSNAVGAAYSSARLLVRGPSEPEEKPASDVHERLVPPRILEKFTPKKVKRGSSITFSVKVEGHPAPSV  
HWLKEEAKEKGLVWIGPDTPGYTMASSSKQHSVLVLDVGRQHGTYTCIATNPAGQALCSASLHISGLAKEEEQ  
ERVKEALISSFLQGTSAQVSAQMSSEAGFADLVGQSKGESLVAEEAHSHLSLAEVGTEEFLOKLTSTQITEMVS  
AKISQAKLQVPGGDSDEETKTPSASPRHGRSRPSSSVQESSSESEDGDSRGEIFDIYVVTADYLPGLAEQDAI  
ILREGQYVEVLD SAHPLRWLVTKPTKSSPSRQGWVSPAYLDKRLKLSPEWGPTEAPEFPGEAVSEDEYRTRL  
SSVIQELLSSEQAFVGGELQFLESHHMKHLERSPRVPAAVASQKTVIFRNVQDISHFHSSFLKELQCGCTDDDV  
AMCFIKNQEAFAKEYLEFLVGRVQAESVVVSTPVQEFYKKAEEETLSAKDPTQPPPPPLQHYLEQPVERVQKYQ  
ALLKELIRNKARNRNCALLEQAYAVVSALPQRAENKLHVSIMENYPGTLEALGEPVIRQGHFIVWEGAPGARM  
PWKGHNHVVFLFRNYLICKPRRDSRTDFTFSYFRNMMLKSSIDLNDQVEGDRAFEVWHEREDSVRKYLLQA  
RTVVIKNSHVKEICGIQQLRAQPVWRPPEFEEELADCTAELGETVKLACRVTGTPKPIVSWYKDGKPVVDPH  
HILIEDPDGSCTLIIDNLGTIDSGQYMCFAASAAGNASTLGKILVQVPPRFVNVKVRATPFVEGEDAQITCTVE  
GAPYPQIRWYKDGTLAPGNRYRMLNEPRSGVLVVIQAASKEDLGHYECELVNRLGSTRGGGEYMQSPALR  
ARDQHHREQIVAAVEERRPSP\*

>rs46320494\_ENSMUSP00000158795\_c.12924:T>C\_p.F4309L  
ENSMUST00000238536.2|Obscn-210|ENSMUSG00000061462|-|chr11:g.58951919:A>G  
MDHSFSGAPRFLTRPKAFVSVGKDATLSCQIVGNPTPHVSWEKDRQFVEAGARFRLAQDGDVYRLTILDIAL  
GDSGQYVCRARNAIGEFAAVGLRVDSEGTCAEQAPHFLLRPTSIRVREGADATFRCRVGGSPPAVSWSKDG  
RRLGPPDAPHVRVEEHGESSALRIRSARPRDGGTYEVRAENPLGSASAAAALVVDSDAEVAGPPGTSTATLLA  
HLQQRRREAMRAEGIPPSPPGAGTRTCTVTEGKHARLSCFVTGEPKPEPVWKKDQGLVTEGRRHVVEDEQENF  
VLKILFCKQSDRGLYTCTASNLVGQTYSSVLVVVREPTVPFKKRLQDLEVREKESATFQCEVAQAPATEAAWFK  
EETRLWASAKYDIEEEGETERRRLTVRNVSADDDAVYICETTEGSRVAELSVQGNLTKLPRKTAVRTGDTAIF  
WVELAVPEGPVWRNQEEMVAGGRVAITAEGTCHTLTI FQCTLEDMGEVAFVSGGCRTTTTQFCVSAAPRRPPL  
YPPADPVVKAKTESSVTLWSAPPHGDRPVTIDGYVLEKRLKLGAYAWSRCHEAGWLATTEFTITGVAAEEGDFQ  
FRVSAINHFGQGPYLEFPGMTMLVPLAVKTPKAVEAVEGGEVTFVSDTLTVASSGEWFLDGEALKASSIYVI  
RCDRTRHMLTIREVPARLHGAQLKFVANGIETSIQMVVRAALGLPSSKLPAAAAREVLAQLHEEAQLLAE LSD  
QAAA VTWLKDGRELSLGPKYEMQVSAGRRALLVRDVAQDDAGLYECVSRGSRRTAYQLLVQDITDGYRDWGPAG  
PQKHMCKCAGAKIARYLGSSCYRFLQYDKGVWHLEAALDTRQGKGTSSCSLHEKPKLVFAKQQAHSEVKA  
AGNSATLSCEVTQAQTEVTFWKDGKKLSSSSKVRMEASGCSRRLVVQQAGKADAGEYSCEAGGQKLSFRLDVA  
EPKLVFAKQQAHSEVKAEGASATLSCEVAQAQTEVTFWKDGKKLSSSSKVRMEASGCSRRLVVQQAGKAD  
GEYSCEAGGQKLSFRLDVAEPKMFVFAKEQQARSEVKAEGASATLSCEVAQAQTEVTFWKDGKKLSSSSKVRM  
EASGCSRRLVVQQAGKADAGEYSCEAGGQKLSFRLDVTEPKLVFAKEQQARSEVKAEGVNSATLSCEVAQAQ  
EVTWFKDGKKLSSSSKVRMEASGCSRRLVVQQAGKADAGEYSCEAGGQKLSFRLDVAEPKLVFAKEQQARSEV  
KAEAGNSATLSCEVAQAQTEVTFWKDGKKLSSSSKVRMEASGCSRRLVVQQAGKADAGEYSCEAGGQKLSFHL  
DVTEPKLVFAKEQQAHSEVKAEGASATLSCEVAQAQTEVTFWKDGKKLSSSSKVRMEASGCSRRLVVQQAGK  
ADAGEYSCEAGGQKLSFRLDVAEPKLVFAKEQQARSEVKAEGASATLSCEVAQAQTEVTFWKDGKKLSSSSK  
VRVEASGCSRRLVVQQAGKADAGEYSCEAGGQKLSFRLDVAEPKLVFAKEQQANSEVKAEGASATLSCEVAQ  
AQTEVTFWKDGKKLSSSSKVRVEASGCSRRLVVQQAGKADAGEYSCEAGGQKLSFRLDVAEPKLVFAKEQQAH  
SEVKAEGASATLSCEVAQAQTEVTFWKDGKKLSSSSKVRVEASGCSRRLVVQQAGKADAGEYSCEAGGQKLS  
FRLDVAEPKLVFAKEQQAHSEVKAEGASATLSCEVAQAQTEVTFWKDGKKLSSSSKVRVEASGCSRRLVVQQ  
AGKADAGEYSCEAGGQKLSFRLDVAEPKLVFAKEQQAHSEVKAEGASATLSCEVAQAQTEVTFWKDGKKLSS  
SSKVRVEASGCSRRLVVQQAGKADAGEYSCEAGGQKLFRLDVAEPKLVFAKEQQAHSEVKAEGASATLSCE  
VAQAQTEVTFWKDGKKLSSSSKVRVEASGCSRRLVVQQAGKADAGEYSCEAGGQKLSFRLDVAEPKLVFAKEQ  
QAHSEVKAEGASATLSCEVAQAQTEVTFWKDGKKLSSSSKVRVEASGCSRRLVVQQVQKADAGEYSCEARGQ  
KLSFRLDVADTRLMFAKEQQARTEVKAEGNSATLSCEVAQAQTEVTFWKDGKKLSSSSKVRVEASGCSRRLV  
VQQAGKADAGEYSCEAGGQKLSFRLDVAEAE SQIPERPSRREPLVVKEHETIILTATIAAPSVAAV TWLKDGV  
EIRRSKRHEATSLGDTHTLTVRGAQVLD SAIYSCRVGKEGQDFPVQVEEVA AKFSKPLEPEVEGELGGTVMLVC  
ELSPQAEVWRCGNTQLRPGKRFQMTSEGPRRTLTVSGLREDDAE EYVCE SRDDRTSARLTVKVPVVKFTS  
GLSAMVAEEGQEA TFQCVVSPDAGVTWYKDGMLQPSEKFMVESGASRSLTILGLTLEDAGQVTEAEGAS  
SSAALRVREAPVLFKKLEPQTVBEERTSVTLEVELTRPWPPEVKWTRNAAVLTPSENVEIRAEGARHCLVLR SV  
GFADRGGFFGCETPDDKTQAKLVNEMRQVRLVVRGLQEVEAKEQGTASMDVELSHAEVEGSWTRDGLRLQPGPKC  
HLAVQGPVHILTL SALQPQD SGLVAFRAEGVHTSARLIVTELPVSFTRVLQDVVATQKEKVTLECELSRPVDV  
RWLKDGVLELRAGKAIGIVAQGTCSRSLVIYRCETGDQGVYVCDALDAQTSASLRVQGRTYTLIFRRVLAEDAGE  
VKFVAENAESRAHLRVKELPVTLLRPLRDKIAMEKHRGVLECCQVSRASAQVRWFKGGVELQSGPKYEVVSDGL  
YRKLVIN DVQPEDEDTYTC DAGNVKTSAQFFVVEEQSITIVRGLKDMTVM EPAPAWFECETSIPSVRPPKWL LG  
KTVLQAGGNVGLQDGTVHRLTLHKTCSTMTGPVHFTIGKSRSSAQLVVS D I PVVLRPLEPKAGRELQSVVL  
SCDFRPAPKAVQWYKDDTPLSPSEKFKMALEGQMAELRILRLTPADAGVYRCQAGSAQSSAEVTEVAREVTVI  
QPLQDAEAMEEGRVCFSCELSHKDEDIEWLSLNGTPLYNDSFHEISHEGCLHTLVLSVRQADTGTVCATSPKV  
SVSARLVVVKGPVFLKALDDVSAEERGTTLTLCQEVSDPEARVVWRKDGVELGSPDKYDFLHKAGARGLTVHD  
LSHEDAGLYTCQVGSKETQSKVSVHDLHVGITKRLKTVEVLEGE SCSFECVLSHESPSDPAVWTVGGKTVGGS  
GHFHAVRQGRKYTLTVKDAALSDAGEVVSVLGLTSKASLIIRERPVDITKPLEDQRTTLGEDVMLSCELSRA  
GTSVRWLKDGKAIRKSQKYDLLSEGTRAVLVVRKASLKDSGEYTCETEASKSTAKLCVEEKANRFTEELADLQ  
VEEKGRAVFTCKTEHPASVVTWRKGLLELRASGKHVPSQEGTLKLTINALERTDSDTYTCDIGQARTQARLL  
VHGQKVRVIEDLEDTAVQEGSSAKFCRIAPADYGPVHWF LDKTPLHSNELNEITVQPGGYHVLTLRQLALKD  
SGTVYFEAGDQRTS AALRVTEKPSIFSRPLTDVTVTEGEDTLVCE TTTVDSSVRWTKDGKTLRPSARCQLSH  
EGCQAQLLITATTPQDGGRYKCEIGGASSSSIVRVHALPVRVFRESLKDVEVPEGKAATLRCVLSSVAAPVEWR  
HGDDVLKSSNKYSLRQEGAVLELVIRDLQPDGSGVYSCSFGDQTSATLTVKTSQAQFVGLKRNKEATEGTTV  
TLRCELTKAEAPVEWKKGTETLRNGDKYSLKQDGA VCELQICSLLVADAGEYSVCVCGQEKTSATLTVKALLVHF  
VRRLRSKEATEGDTTTLQCELSKAAPVEWRKGTETLRDGDYSLKQDGA VCELQIRSLTIADAGEYLCTCGQE  
KTSATLTVRALPAKFKDSLKNEEATEGTTATLSCELSKAAPVTWKKGPKTLQSGDKYVLRQDGA VCGLQIHGL  
TMADAGEYSVCVCGQEKTSATLTVRGLPAKFIEDLRSQEATEGATAILRCELSKAAPVEWRKGS ETLKDGDRYT  
LRQDGA VCELQIRGLAVVDGTYSLSLPTKFTEGLRNEEATEGTMATLRCQMSKAAPVEWRKGS ETLR DGRYS



LRQDGAMCELQIRGLTIEDSGEYTCVCGQEKTSATLSVKALPSRFIEDLRSQEATEGTMATLRCQMSKTAPVE
WKKGSETLRDGGGRYSLRQDGPVCELQICDLAVEDAGEYSCVCGQEKTSATLSIKALPPRFIEDLRSQEATEGT
MATLRCQMSKAAPVEWRKGSSETLGDGGGRYSLRQNGAVCELQIHDLAVEDTGEYSCVCGQEKTSATLNVKALPP
RLIEDLRSQEATEGTMATLRCQMSKAAPVEWRKGSSETLRDGGGRYSLRQDGAVALCELQIHDLVEDAGQYSCVCG
QEKTSAVLTVDALPPKFTEGLKKEEATEGTMVTLRCQMSKEATVEWRKGAKTSLSDGGGRYSLRQDGAMCELQIC
GLAVEDAGEYSCVCGQEKTSATLSVKALPPRFIEDLRSQEATEGTMATLRCQMSKAAPVEWRKGSSETLRDGD
YSLRQDGAVALCELQIRDLAVEDAGEYLCVCGQEKTSATLSVKALPPRFIEDLRSQEATEGTMATLRCQMSKAAP
VEWRKGSSETLRDGGDRYSLRQDGAMCELQICDLAVEDTGDYSCVCGQEKTSATLSVKALPPRFIEDLRSQEARE
GTVATLRCRMSKAAPVEWRKGSSETLKDGDGRYSLRQEGNLCELQIRDLAVEDTGEYSCVCGQEKTSATLSVKAL
PAKFIEDLRSQEAPESSTVTLRCKLSKASVVKKGSSETLRNGARYSLRQDGAVALCELEIRDLTVEDTGEYSCT
CGQERTSATLSIMAPQVVFQQLQNLQAEEGSMASLRCELSVNAAMVWSKGGLELQGDTRREARQQGCVAEL
LLRDLRREDAGEYSCVCGQEKTSATLMVTAAPVRFLELQAQDVDEGATARLRCELSREAVSVEWRKGSLLQF
PCAKYQMVQEGTTAELLVHGVEQEDAGEYTCDAHGHTQSIARLSVRAPKPKFKTDLQSTEQEAGGTARLCCQLS
EAEFGTPVQWLKEGVELHVGSKYEMRRQGAVALCELLIHGLEAKDTGEYACLVGQKTLASLRVKEPEVTIVRGL
VDMEVQADEDEVEFTCKVQAGATDVQWHLQGLPLQSNVTEVAVLADGCTHVLQKGVTLVEDAGTVSFHVGG
SSSAQLTVRPEVTVLEPLKDVQLSEGQDAHFRCRLSRASGQEARWALGGVPLQCNEMNDITVEQGTLYLLTL
HKVTLEDAGTITLQVGSSEEAQLKVTAKNTVLRGLENVDALLEGGEALFECQLSQPEVAHAHTLLDDEPVHTS
EKVEVVYFENGLRHLLLLKLNKLPQDSCRVTFLAGDVVTS AFLTVRGWRLEVLEPPHDASSVKAGMQGQVFTCILS
EAVPVGEATWYINGAAIQPDDTDWTVTDDGSHHALTLSNAQPQHAGEVTF AARDAVASARLSVLAALPDPEDA
EAVGRSDHSVTLVSWAPMSDGGGGLCGYRVMKEASTGQWQLCHDLVPGPECVDDLVPGKTYRFRVAAVGPA
GAGEPVHLQMVKIAPAPAPAPAPAPAPAPETROAVVEDICILEVAADGGEVVWHKGTERTIQPGGHFEVLS
RGQRQMLVIKGFRTEDQGEYRCGPIQGLPSSGAATFNVMVMTSGSGDEVPAQPSLPPEAAQEGDLHLLWEALAR
KRRMSREPTLDSISELPEEDSRVQHLRQEAETAPDLSEGYSTADELARTGEADLSHTSSDDESAGTPSLVT
YLKKGAGGPGISPLASKHEAQVTTSVKPKQKQEPVVPTCPPGGDLAADMPLDKAARKIQAQAFKGYKVRKE
MKQQEGPVFSRTFGDTEAQVGDVLRLECVLATKTDMRACWLKDGIELTDGRHYHIDQLKDGTCSSLVTLGLAPT
DSGRYTCQVSTKSGYRSHSACVVVSGTESEAESSSGGELDDAFRAARRLHRLFRTKSPAELESEELFLSADE
GPGEPEEPADWQTYREDENFVCIREFESLAEARQAVTCFRNMFATMGI GVEISLGEQGPGRVEMRIGKVAPTVT
PAVPLAKTPGLQTSDAAPVFLTELQNDQVQDGYPMSFDCVVTGQPVPSVRWFKDGKLEEDDHYMINEDQQGG
HQLIITAVVPADMGVYRCLAENSMGVSSTKAELRVELTSTDYDTAADATETSSYFSAQGYLSSREQEGTESDE
GQLPQVLEELKDLQVAPGTRLAKFQLKVKGYPAKLYWFKDQGPLTSDHIRMTDKKTLHLEIVSVTREDSG
QYAAYSNAVGAAYSSARLLVRGPSEPEEKPASDVHERLVPPRILEKFTPKKVKRGSSITFSVKVEGHPAPSV
HWLKEEAKEKGLWIGPDTPGYTMASSSKQHSVLVLLDVGRQHGGTYTCIATNPAGQALCSASLHISGLAKEEEQ
ERVKEALISSFLQGTSAQVSAQMSSEAGFADLVGQSKGESLVAEEAHSLSLAEVGTEEFLOKLTSSQITEMVS
AKISQAKLQVPGGDSDEETKTPSASPRHGRSRPSSSVQESSESEEDGDSRGEIFDIYVVTADYLPGLAEQDAI
ILREGQYVEVLDSAHPLRWLVRTKPTKSSPSRQGWVSPAYLDRKRLKLSPEWGPTEAPEFPGEAVSEDEYRTRL
SSVIQELLSSSEQAFVGLQFLESHHMKHLERSPRVPAAVASQKTVIFRNVQDISHFHSSFLKELQCGCTDDD
AMCFIKNQEAFAKEYLEFLVGRVQAESVVVSTPVQEFYKKAEEETLSAKDPTQPPPPPLQHYLEQVPERVQKYQ
ALLKELIRNKARNRQNCALLEQAYAVVSALPQRAENKLHVSMLMENYPGTLEALGEPHQGHFIVWEGAPGARM
PWKGHNHRVFLFRNYLVICKPRRDSRTDTSYVFRNMMKLSSIDLNDQVEGDDRAFEVWHEREDSVRKYLLQA
RTVVIKNSWVKEICGIQQLRAQPVWRPPEFEEELADCTAELGETVKLACRVGTGTPKPIVSWYKDGKPVVDPH
HILLIEDPDGSCTLILDNLTGIDSGQYMCFAASAAGNASTLGKILVQVPPRFVNVKVRATPFVEGEDAQITCTVE
GAPYPQIRWYKDGTLAPGNRYRMLNEPRSGVLVVIQAASKEDLGHYECELVNRLGSTRGGGELYMQSPALR
ARDQHHREQIVAAVEDTSEVGSASHAQDQGAASVLWRLLGSEALGPS PGDLPNTRQSEPPAFEEAASQIP
GAASGTPPEVSQPGTHKGLEQETTSSGSQGWTVPIRVEGTAWPGACTGQLLLDVHSQVIMETTQRTYVCQAPDT
GVTTRAPSMQVTIEDVQVQVGDMAQF DAVIEGHPPPIVTWYKGSTQLTSSARLSQRQDGTYSVLVLDVAPHDA
GVYTCVANNAGGQVLCKAELLVHGGDKLDAENQVYRRKLHSFYDVQEEIGRGVFGFVKRVQHKGNKMFCAAKF
IPLRSKTRAQAYQERDILATLGHPLVTGLLDQFETRKTLLILILELCSSEELLDRLFKKGVVTEAEVKVYIQQL
VEGLHLYLHSHGILHLDIKPPNILMVHPAREDIKICDFGFAQKITPSEPQYSKYGSPEFVSPEIIEQN PVSEGS
DIWAMGVI SYLSLTCSSPFAGESDRATLLNVLEGRVSWSSPTAAHLSSEDAKDFIKATLQRTPRARPSTSQCLA
HPWFLKSMPAAEEAHFINTKQLKFLARSRWRQSLMSYKSI LVMRSIPELLQGPDPSPSLGVARHLRGEASGAS
SSSSSSDNELAPFARAKSLPPSPVTHSPLHPRGFLRPSASLPEETEASMTADAAVPASPQASAGPPASPGCV
PRHSVISSLFYQQAGEGAERGNKTSGAKRHPARRRHLLKGGYIARALPGLREPLMEYSLLEEEAAREEQASLM
TKTPSFETALRLPSSSVREVPRGRSHSLDNPPVLTGSPPEACKQLLFPSTGLTHETAKDRGHKEGFLQESV
PFPMPSSGDSRPGKQEGSSQDSCRGKPASSCHSELVSGSGSEGCQGPSSQSLGSLPPQSLKCELSTSCGFLFSEQ
PQAAPFPPTQVSPLLGEKEPQDGSLSSEGVPVPLSSSPGSASQVDASLDTEGLSEAGDTCDFTPPPQRPOEQAT
TRKFSLESRGGYAGVAGYGTFAFGGDAGGMLGQGPLWARMAWAVS QSSEEQDEAATESPQPLES LGPIAEASG
VPLRTSPSLTPWEEVEQVSLVQIRDLSGDAEAADTISLDISEVDPAYLNLSDLYDIKYL PPFEMI FRRVPKPI
EQPESPGETEAGQGLADFL EEAAPWPF GELGLRAGLEITEEPEEPGDLEALLGEEAVGRKRKWSPSRGLFQF

PGRCLSGEEPVELGLRQRVKASMAHISRILKGRPEGEREGPPRKKAGLASFRLSGLKGRDQELSDEAVVLGQ  
 SVTLACQVLAQPTAQATWSKDGVLLESSGHLISSTLKNFQLLTIILVVKEEDLGTYTCCVSNPLGTAVTTGVL  
 RKAERPSSSPRPEVGEELYKDAVLLVWKPVESECGPVYIVQCCIEGGSWTTLASDISDCCYLTKGLSRGGMYIF  
 RTACVSKAGMGPISSPSEQVLLGGPNHLASEEESSRGRPAQLLPSTKTFQMQIRRRGRFSVVRQCREKASGR  
 ALAAKIVPYQPEDKTAVLREYEALKRHLHPLHAQLHAAYLSRHLVLIILELCSGPELLPSLAERESYSESDVK  
 DYLWQMLSATQYLHAQHILHLDLRSENMMVTEYNLLKVIDLGNQSLDQEKVPAPENFKDYLETMAPELLEGG  
 GAVPQTDIWAIGVTAIFIMLSGEYPESESEGRDLQKGLRKLIRLSRCYAGLSGGAVAFLOSSLCAQPWGRPCA  
 STCLQCGWLTEEGPTGSRPTPVTFTVRLRAFVREKRRRALLYKKNLAQVR\*  
 >rs46320494\_ENSMUSP00000038264\_c.11832:T>C\_p.F3945L  
 ENSMUST00000047441.14|Obscn-202|ENSMUSG00000061462|-|chr11:g.58951919:A>G  
 MDHSFSGAPRFLTRPKAFVSVGKDATLSCQIVGNPTPHVSWEKDRQVEAGARFRLAQDGDVYRLTILDLAL  
 GDSGQYVCRARNAIGEFAAVGLRVDSEGTCAEQAPHFLLRPTSIRVREGADATFRCRVGGSPQPAVSWSKDG  
 RRLGPPDAPHVRVEEHGESSALRIRSARPRDGGTYEVRAENPLGSASAAAALVVDSDAEVAGPPGTSTATLLA  
 HLQQRREAMRAEGIPSPPGAGTRTCTVTEGKHARLSCFVTGEPKPKETVWKKDQGLVTEGRRHVVEDEQENF  
 VLKILFCKQSDRGLYTCTASNVLVGGTYSSVLVVVREPTVPFKKRLQDLEVREKESATFQCEVAQPAATEAAWFK  
 EETRLWASAKYDIEEGTERRLTVRNVSADDDAVYICETTEGSRVVAELSVQGNLTKRKLPRKTAVRTGDTAIF  
 WVAVPEPVRWLRNQEEMVAGGRVAITAEGTCHTLTI FQCTLEDMGVAVFVSGGCRTTTTQCFVSAAPRRPPL  
 YPPADPVVKAKTESSVTLSSWAPPHGDRPVTIDGYVLEKRLKLGAYAWSRCHEAGWLATTEFTITGVAAEEGDFQ  
 FRVSAINHFGQGPYLEFPGTMHLVPLAVKTPKAVEAVEGGEVTFVSDLTVASSGEWFLDGEALKASSIYVI  
 RCDRTRHMLTIREVPARLHGAQLKVFANGIETSIQMVVRAALGLPSSKLPAAAAREVLAQLHEEAQLLAELSD  
 QAAAVTWLKDGRELSLGPYEMQVSAGRRALLVRDVAQDDAGLYECVSRGSRRTAYQLLVQDITDGYRDWGPAG  
 PQKHMCKCAGAKIARYLGSSCYRFLQYDKGVVHWEALDTRQKGTSSCSLHEKPKLVFAKQQAHSVEKAE  
 AGASATLSCEVAQAQTEVTFWKDGGKLSSSSKVRMEASGCSRRLVVQQAGKADAGEYSCEAGGQKLSFRLDVA  
 EPKMFVFAKEQQARSEVKAEGASATLSCEVAQAQTEVTFWKDGGKLSSSSKVRMEASGCSRRLVVQQAGKADA  
 GEYSCEAGGQKLSFRLDVTEPKLVFAKEQQARSEVKAEGVNSATLSCEVAQAQTEVTFWKDGGKLSSSSKVRM  
 EASGCSRRLVVQQAGKADAGEYSCEAGGQKLSFRLDVAEPKLVFAKEQQARSEVKAEGVNSATLSCEVAQAQ  
 EVTFWKDGGKLSSSSKVRMEASGCSRRLVVQQAGKADAGEYSCEAGGQKLSFRLDVTEPKLVFAKEQQAHSEV  
 KAEAGASATLSCEVAQAQTEVTFWKDGGKLSSSSKVRMEASGCSRRLVVQQAGKADAGEYSCEAGGQKLSFR  
 DVAEPKLVFAKEQQARSEVKAEGASATLSCEVAQAQTEVTFWKDGGKLSSSSKVRVEASGCSRRLVVQQAGK  
 ADAGEYSCEAGGQKLSFRLDVAEPKLVFAKEQQANSEVKAEGASATLSCEVAQAQTEVTFWKDGGKLSSSSK  
 VRVEASGCSRRLVVQQAGKADAGEYSCEAGGQKLSFRLDVAEPKLVFAKEQQAHSEVKAEGASATLSCEVAQ  
 AQTEVTFWKDGGKLSSSSKVRVEASGCSRRLVVQQAGKADAGEYSCEAGGQKLSFRLDVAEPKLVFAKEQQAH  
 SEVKAEGASATLSCEVAQAQTEVTFWKDGGKLSSSSKVRVEASGCSRRLVVQQAGKADAGEYSCEAGGQKLS  
 FRLDVAEPKLVFAKEQQAHSEVKAEGASATLSCEVAQAQTEVTFWKDGGKLSSSSKVRVEASGCSRRLVVQQ  
 AGKADAGEYSCEAGGQKLSFRLDVAEPKLVFAKEQQAHSEVKAEGASATLSCEVAQAQTEVTFWKDGGKLS  
 SSKVRVEASGCSRRLVVQQAGKADAGEYSCEAGGQKLSFRLDVAEAEESQIPERPSRREPLVVEHETIILTAT  
 IAAPSVAAVTWLKDGVETIRRSKRHEATSLGDTHLTVRGAQVLDLSDAIYSCRVGKEGQDFPVQVEEVAAKFSKP  
 LEVPEGELGGTVMLVCELSPEQAEVWRCNGTQLRPGKRFQMTSEGPRRTLTVSGLREDDAEYVCESRDDRT  
 SARLTVKVPVVKFTSGLSAMVAEEGQEAFTQCVVSPSDAGVTWYKDGMLQPSSEKFMVVESEGASRSLTILGL  
 TLEDAGQVTVEAEGASSAALRVREAPVLFKKKLEPQTVEERTSVTLEVELTRPWPEVKWTRNAAVLTPSENV  
 EIRAEGARHCLVLRVSVGFADRGFFGCETPDDKTQAKLVNEMRQVRLVRLVGLQEVEAKEQGTASMDVELSHA  
 EVEGSWTRDGLRLQPGPKCHLAVQGPVHILTLTALQPDQSGLVAFRAEGVHTSARLIVTELPVSVFTRVLQD  
 VVATQKEKVTLECELSRPVDVRLKDGVELRAGKAI GIVAQGTCSRSLVIYRCETGDQGVVCDALDAQTSASLRVQGR  
 TYTLIFRRVLAEDAGEVKFVAENAESRAHLRVKELPVTLLRPLRDKIAMEKHRGVLECCQVSRASAQVRWFKGG  
 VELQSGPKYEVVSDGLYRKLVINOVQPEDEDTYTCADAGNVKTSAQFFVEEQSITIVRGLKDMTVMPEPAPAWFE  
 CETSI PSVRPPKWLKGKTVLQAGNVGLEQDGTVHRLTLHKTCSTMTGPFVHFTIGKSRSSAQLVSDIPVVL  
 RPLEPKAGRELQSVVLSCDFRPAPKAVQWYKDDTPLSPSEKFKMALEGQMAELRILRLTPADAGVYRCQAGSA  
 QSSAEVTVAREVTVIQPLQDAEAMEEGRVCFSCELSHKDEDIEWSLNGTPLYNDSFHEISHEGCLHTLVLSK  
 VRQADTGTVCATSPKVSVSARLVVKGKPVVFLKALDDVSAEERGTLTLQCEVSDPEARVVWRKDGVELGSPDK  
 YDFLHKAGARGLTVHDLSDHEDAGLYTCQVGSKETQSKVSVHDLHVGITKRLKTVEVLEGECSFCVLSHESP  
 SDPAVWTVGGKTVGGSGHFHAVRQGRKYTLTVKDAALSDAGEVVFVSVLGLTFSKASLIIRERPVDTKPLEDQR  
 TTLGEDVMSCELSRAGTSVRWLKDGKAIKRSQKYDLLSEGTRAVLVVRKASLKDSGEYTCETEASKSTAKLC  
 VEEKANRFTTEELADLQVEEKGRAVFTCKTEHPASVVTWRKGLLELRASGKHVPSQEGTLTKLTINALERTSD  
 TYTCDIQQARTQARLLVHGQKVRVIEDLEDTAVQEGSSAKFCCRIAPADYGPVHWFLLDKTPLHSNELNEITVQ  
 PGGYHVLTLRQLALKDSGTVYFEAGDQRTSAALRVTEKPSIFSRPLTDVTVTEGEDTLVCETTTTVDSVSRWT  
 KDGKTLRPSARCQLSHEGCQAQLLITATTPQDGGRYKCEIGGASSSSIVRVHALPVRFRESLKDVEVPEGKAA  
 TLRVLSVVAAPVEWRHGDDVLKSSNKYSLRQEGAVLELVIRDLQPDQSGQYSCSFGDQTTSATLTVKTSQAQ  
 FVGKLRNKEATEGTTVTLRCELTKAEAPVEWKKGTETLRNGDKYSLKQDGA VCELQICSLLVADAGEYSCVCGQ

EKTSATLTVKALLVHFVRRRLRSKEATEGDTTTLQCELSKAAPVEWRKGTETLRDGDYRSLKQDGA VCE LQIRSL  
LTIADAGEYLCTCGQE KTSATLTVRALPAKFKDSLKNEEATEGTTATLSCELSKAAPVTWKKGPKTLQSGDKY  
VLRQDGA VCG LQIHGLTMADAGEYSCVCGQE KTSATLTVRGLPAKFIEDLRSQEATEGATAILRCELSKAAPV  
EWRKGS ETLKDGDRYTLRQDGA VCE LQIRGLAVVDGTYS SLP TKFTEGLRNEEATEGTMATLRCQMSKAAPV  
EWRKGS ETLR DGDYSLRQDGA MCE LQIRGLTIEDSGEYTCVCGQE KTSATLSVKALPPRFIEDLRSQEATEG  
TMATLRCQMSKAAPVEWRKGS ETLGDGGRYSLRQNGAVCE LQIHDLAVEDTGEYSCVCGQE KTSATLNVKALP  
PRLIEDLRSQEATEGTMATLRCQMSKAAPVEWRKGS ETLR DGGRYSLRQDGA VCE LQIHDLVEDAGQYSCVC  
GQE KTSAVLTVDALPPKFTEGLKKEEATEGTMVTLRCQMSKEATVEWRKGA KTLSDGGRYSLRQDGA MCE LQI  
CGLAVEDAGEYSCVCGQE KTSATLSVKALPPRFIEDLRSQEATEGTMATLRCQMSKAAPVEWRKGS KTLR DGD  
RYSLRQDGA MCE LQICDLAVEDTGDYSCVCGQE KTSATLSVKAPQVVFQQLQNLQAE EGS MASLRCELSV PN  
AAMVWSKGGLELQGDTRREARQQGCVAELLLRDLRREDAGEYSC TCGSQTTSATLMVTAAPVRFRELQAQDV  
DEGATARLRCELSREAVSVEWRKGS LQLFPCAKYQMVQEGTTAELLVHGVEQEDAGEYTC DAGHTQS IARLSV  
RAPKPKFKTDLQSTEQEAGGTARLCCQLSEAE PGTPVQWLKEGVELHVGS KYEMRRQGA VCELLIHGLEAKDT  
GEYACL VGGQKTLASLRVKEPEVTIVRGLVDMEVQADE DVEFTCKV SQAGATDVQWHLQGLPLQSN E VTEVAV  
LADGCTHV LQ LKGV TLEDAGTVSFHVGG LSSSAQLTVRVPEVTVLEPLKDVQLSE GQDAHFRCRLSRASGQEA  
RWALGGVPLQCNEMNDITVEQGTLYLLTLHKVTLEDAGTITLQVGCSSSEAQLKVTAKNTVLRGL ENVDAL EG  
GEALFECQLSQPEVA AHTWLLDDEPVHTSEKVEVVYFENGLRHLL LKLNLPQDS CRVTF LAGDVVTS AFLTV  
RALPDPPEDA EVVGRSDHSVTL SWVAPMSDGGGGLCGYRVEMKEASTGQWQLCHDLVPGPE CVLDPGKTY  
RFRVA AVGPAGAGEPVHLPQMVKIAPAPAPAPAPAPAPAPAPETRQAVVGEDIC LELEVAADGGEVVWHKGT ERI  
QPGGHFEVLSRGRQMLVIKGFRTEDQGEYRCGPIQGLPSSGAATFNVVMTSGSGDEVPAQPSLPPEAAQEGD  
LHLLWEALARKRRMSREPTLDSISELPEEDSRVQHLRQEAEETAPDLSEGYSTADELARTGEADLSHTSSDDE  
SRAGT PSLVTYLKAGGPGISPLASKHEAQVTT SVKPKQKQEPVVPTCPPPGDL SAADLMDPSLDKAAVKIQ A  
AFKGYKVRKEMKQEGPVFSRTFGDTEAQVGDVLRLECVLATKTD MRACWLKDGI ELTDGRHYHIDQLKDGTC  
SLLVTGLAPTDSGRYTCQVSTKSGRVSHSACVVVSGT ESEAESSGGELDDA FRRAARLHRLFR TKSPAELS  
EELFLSADEGPGEPEPADWQTYRE DENFVCIRFESLAEARQAVTCFRNM FATMGI GVEISLGEQGP RGVEM  
RIGKVAPTVTPAVPLAKT PGLQTS DAAPVFLTELQNDVQDGY PMSFDCVVTGQPVPSVRWFKDGKLL EEDDH  
YMNEDQQGGHQLIITAVVPADMGVYRCLAENSMGVNSTKAE LRVELTSTDYDTAADATETSSYFSAQGYLSS  
REQEGTESDEGQLPQVLEELKDLQVAPGTRLAKFQLKVKGYPAPKLYWFKDGQPLTSDHIRM TDKKT LHTLE  
IVSVTREDSGQYAA YISNAVGAA YSSARLLVRGPSEPEEK PASDVHERLVPPRI LEKFTPKKVKRGSSITFSV  
KVEGHPAPSVHHLKEEA EKGVLWIGPDTPGYTMAS SSKQHS LVLVLDVGRQHOGTYTCIATNPAGQALCSASLH  
ISGLAKEEEQERVKEALISSFLQGT SQAVSAQMSESAGFADLVGQSKGESLVAAEEAHSHLSLAEVGT EEF LQK  
LTSQIT EMVSAKISQAKLQVPGGDSDEETKT PSASPRHGRSRPSSSVQESSSESEDGDSRGEIFDIYVVTADY  
LPLGAEQDAIILREGQYVEVLDSAHPLRWLVRTKPTKSSPSRQGWVSPAYLDKRLKLSPEWGPTEAPEFPGEA  
VSEDEYRTRLSSVIQELLSSEQAFVGE LQFLESHHMKHLERSPRVPAAVASQKTVIFRNVQDISHFHSSFLKE  
LQCGTDDDVMCFIKNQEA FEKYLEFLVGRVQAESVVVSTPVQEFYKKYAEETLSAKDPTQPPPP LQHYLE  
QPVVERVQKYQALLKELIRNKARNRQNCALLEQAYAVVSALPQRAENKLVSLMENYPGTLEALGEP I RGHFI  
VWEGAPGARMPWKGNHRHVLF RNYLVICKPRRDSRTD TFSYVFRNMMLSSIDLNDQVEGDDRAFEVWHERE  
DSVRKYLLQARTVI IKNSWVKEICGIQQRLAQPVWRPPEFEELADCTAELGETVKLACRVTGT PKPIVSWYK  
DGKPV EVDPHHILIEDPDGSCTLILDNLTGIDSGQYMCFAASAAGNASTLGKILVQVPPRFVNKVRATPFVEG  
EDAQITCTVEGAPYPQIRWYKDGTL LAPGNRYRMLNEPRSGVLVLIQAASKEDLGHYECELVNR LGS TRGGG  
ELYMQSPALRARDQH HREQIVAAVEGAPSMQVTIEDVQVQVGDMAQF DAVIEGHPPPIVTWYKGTQLTSSAR  
LSQRQDGT TYSLVLT DVAPHDAGVYTCVANNAGGQVLCKAELLVHG GDKLDAENQVYRRKLSFYDVQEE IGR  
GVFGVFKRVQHKGK NMFCAAKFIPLRSKTRAQAYQERDILATLGHPLVTGLLDQFETRKT LILILELCSSEEL  
LDRLF KKGVVTEAEVKVYIQQLVEGLHYLHSHGILHLDIKPNILMVHPAREDIKICDFGFAQKITPSE PQYS  
KYGSP E FVSPEIIEQNPVSEGS DIWAMGVISYLSLTCSSPFAGESDRATLLNVLEGRVSWSSPTAAHLS EDAK  
DFIKATLQRTPRARPSTSQC LAHPWFLKSMPAAE AHFINTKQLKFL LARSRWQRSLMSYKSI LVMRSIPELLQ  
GPPDPSLGVARHLRGEASGASSSSSSDNE LAPFARAKSLPPSPVTHSPLLHPRGFLRPSASLPEETEASMP  
TADA AVPAS PQSAGPPASPGCVPRHSV ISSLFYQQAGEGA ERGNKTS GAKRHPARRRHLLKGGYIARALPGLR  
EPLMEYSLLEEEAAREEQASLMTKTPSFETALRLPSSSVREV PGRSHSLDNPPVTTGPSPEACKEQLLFPST  
GLTHE TTA KDRGHKEGFLQESVFPFPMMSGDSRPGKQEGSSQDS CRGKPASSCHSELGSGSQEGC PPSQS LG  
SLPPQSLKKE LSTSCGPLFSEQPQAAPFPTQVSP LLGSEKEPQDGS LSEGVPVPSSSPGSASQVDASLDTEG  
LSEAGDTCDFTPPPQRPEQATTRKFSLESRGGYAGVAGYGTFAFGGDAGGMLGQGPLWARM AVS QSSEEQ  
DEAATESPQLESFLGPIAEASGVPLRTSPSLTPWEEVEQVSLVQIRDLSGDAEAADTISLDISEVDPAYLNS  
DLYDIKLYPFEFMI FRRVPKPIEQPESPGSETEAGQADFL EEAAWPWPGE LGLRAGLEITEEP EEPDLLEA  
LLGEAAVGRKRKWSPSRGLFQFPGRCLSGEEPVELGLRQRVKASMAHISRILKGRPEGPEREGPPRKKAGLAS  
FRLSGLKGRDQELSDEAVVLGQSVTLACQVLAQPTAQATWSKDGVLLESSGHLLISSTLKNFQLLTLIVVKEE  
DLGTYTCCVSNPLGTAVTTGVLKAE RPSSSPRPEV GELYKDAVLLVWKPVESC GPVTYIVQCCIEGGSWTTL  
ASDISDCCYL TGKLSRGGMYIFRTACVSKAGMPYSSPSEQVLLGGPNHLASEEESSRGRPAQLLPSTKTF AF

QMQIRRGFRSVVRQCREKASGRALAAKIVPYQPEDKTAVLREYEALKRLHHPHLAQLHAAAYLSPRHLVLILEL  
 CSGPELLPSLAERESYSESDVKDYLWQMSATQYLHAQHILHLDLRSNNMMVTEYNLLKVIDLGNASLDQEK  
 VPAPENFKDYLETMAPELLEGQAVPQTDIWAIGVTAIFIMLSGEYEPESSEGRDLQKGLRKLIRLSRCYAGL  
 SGGAVAFLLQSSSLCAQPWGRPCASTCLQCGWLTTEEGPTGSRPTPVTFTVRLRAFVREKRRALLYKKNLAQ  
 VR\*  
 >rs46320494\_ENSMUSP00000049737\_c.12723:T>C\_p.F4242L  
 ENSMUST00000052872.15|Obscn-203|ENSMUSG00000061462|-|chr11:g.58951919:A>G  
 MDHSFSGAPRFLTRPKAFVSVGKDATLSCQIVGNPTPHVSWEKDRQFVEAGARFRLAQDGDVYRLTILDLAL  
 GDSGQYVCRARNAIGEAFVAVGLRVDSEGTCAEQAPHFLLRPTSIRVREGADATFRCRVGGSPPAVWSKDG  
 RRLGPPDAPHVRVEEHGESSALRIRSARPRDGGTYEVRAENPLGSASAAAAALVVDSAEVAGPPGTSTATLLA  
 HLQORREAMRAEGIPPSPPGAGTRTCTVTEGKHARLSCFVTGEPKPEVWKKDQGLVTEGRRHVVEDEQENF  
 VLKILFCKQSDRGLYTCTASNLVGQTYSSVLVVREPTVPFKKRLQDLEVREKESATFQCEVAQAPATEAAWFK  
 EETRLWASAKYDIEEEGTERRLTVRNVSADDDAVYICETTEGSRVVAELSVQGNLTKLPRKTAVRTGDTAIF  
 WVELAVPEGPVRWLRNQEEMVAGGRVAITAEGTCHTLTI FQCTLEDMGEVAFVSGGCRTTTTQFCVSAPRRPPL  
 YPPADPVVKAKTESSVTLWSAPPHGDRPVTIDGYVLEKRLKLGAYAWSRCHEAGWLATTEFTITGVAAEEDGFQ  
 FRVSAINHFGQGPYLEFPGTMHLVPLAVKTPKAVEAVEGGEVTFVSDLTVASSGEWFLDGEALKASSIYVI  
 RCDRTRHMLTIREVPARLHGAQLKVFANGIETS IQMVVRAALGLPSSKLPAAAAREVLAQLHHEAQLLAELS  
 QAAAVTWLKDGRELSLGPKYEMQVSAGRRALLVRDVAQDDAGLYECVSRGSRRTAYQLLVQEPKLVFAKQQA  
 SEVKAEAGNSATLSCEVTQAQTEVTFWKDGGKLSSSSKVRMEASGCSRRLVVQQAGKADAGEYSCEAGGQKLS  
 FRLDVAEPKLVFAKQQAHSSEVKAEAGASATLSCEVAQAQTEVTFWKDGGKLSSSSKVRMEASGCSRRLVVQQ  
 AGKADAGEYSCEAGGQKLSFRLDVAEPKMFVFAKEQQARSEVKAEAGASATLSCEVAQAQTEVTFWKDGGKLS  
 SSKVRMEASGCSRRLVVQQAGKADAGEYSCEAGGQKLSFRLDVTEPKLVFAKEQQARSEVKAEVGNASATLSCE  
 VAQAQTEVTFWKDGGKLSSSSKVRMEASGCSRRLVVQQAGKADAGEYSCEAGGQKLSFRLDVAEPKLVFAKEQ  
 QARSEVKAEAGNSATLSCEVAQAQTEVTFWKDGGKLSSSSKVRMEASGCSRRLVVQQAGKADAGEYSCEAGGQ  
 KLSFHLDVTEPKLVFAKEQQAHSEVKAEAGASATLSCEVAQAQTEVTFWKDGGKLSSSSKVRMEASGCSRRLV  
 VQQAGKADAGEYSCEAGGQKLSFRLDVAEPKLVFAKEQQARSEVKAEAGASATLSCEVAQAQTEVTFWKDGGK  
 LSSSKVRVEASGCSRRLVVQQAGKADAGEYSCEAGGQKLSFRLDVAEPKLVFAKEQQANSEVKAEAGASATL  
 SCEVAQAQTEVTFWKDGGKLSSSSKVRVEASGCSRRLVVQQAGKADAGEYSCEAGGQKLSFRLDVAEPKLAFA  
 KEQQAHSEVKAEAGASATLSCEVAQAQTEVTFWKDGGKLSSSSKVRVEASGCSRRLVVQQAGKADAGEYSCEA  
 GGQKLSFRLDVAEPKLAFAKEQQAHSEVKAEAGASATLSCEVAQAQTEVTFWKDGGKLSSSSKVRVEASGCSR  
 RLVVQQAGKADAGEYSCEAGGQKLSFRLDVAEPKLAFAKEQQAHSEVKAEAGASATLSCEVAQAQTEVTFWKD  
 GKKLSSSSSKVRVEASGCSRRLVVQQAGKADAGEYSCEAGGQKLFRLDVAEPKLMFAKEQQAHSEVKAEAGAS  
 ATLSCEVAQAQTEVTFWKDGGKLSSSSKVRVEASGCSRRLVVQQAGKADAGEYSCEAGGQKLSFRLDVAEPK  
 VFAKEQQAHSEVKAEAGASATLSCEVAQAQTEVTFWKDGGKLSSSSKVRVEASGCSRRLVVQQVQKADAGEYS  
 CEARGQKLSFRLDVADTRLMFAKEQQARTEVKAEAGNSATLSCEVAQAQTEVTFWKDGGKLSSSSKVRVEASG  
 CSRRLVVQQAGKADAGEYSCEAGGQKLSFRLDVAEAEESQI PERPSRREPLVVKEHETIILTATIAAPSVAAVT  
 WLKDGEVIRRKRHEATS LGDTHLTVRGAQVLD SAIYSCRVKGEGQDFPVQVEEVAAKFSKPLEPVEGELGG  
 TVMLVCELSPEQAEVWRCGNTQLRPGKRFQMTSEGPRRTLVSGLREDDAEYVCESRDDRTSARLTVKVPR  
 VVKFTSGLSAMVAEEGQEAFTQC VVSPSDAGVTWYKDGMLQPSSEKFMVVEGASRSLTILGLTLEDAGQVTV  
 EAEGASSAALRVREAPVLFKFKLEPQTV EERTSVTLEVELTRPWPVEVKWTRNAAVLTPSENVEIRAEGARHC  
 LVLSVGFADRGFFGCETPDDKTQAKLVNEMRQVRLVRGLQVEVAKEQGTASMDVELSHAEVEGSWTRDGLRL  
 QPGPKCHLAVQGPVHILTLALSALPQD SGLVAFRAEGVHTSARLIVTELPVSFTRVLQDVVATQKEKVTLECEL  
 SRPVDVRWLKDGVELRAGKAI GIVAQGTCSRSLVIYRCETGDQGVVCDALDAQTSASLRVQGRTYTLIFRRVL  
 AEDAGEVVFVAENAESRAHLRVKELPVTLLRPLRDKIAMEKHRGVLECVSRASAQVRWFKGGVLELQSGPKYE  
 VVSDGLYRKLVINVDVPEDEDTY TCDAGNVKTSAQFFVEEQSITIVRGLKDMTVMPEPAPAWFECE TIPSVRP  
 PKWLLGKTVLQAGGNVGLQDGT VHRLLTHKTCSTMTGPVHFTIGKSRSSAQLVSDI PVVLRPLEPKAGRE  
 LQSVVLSCDFRPAPKAVQWYKDDTPLSPSEKFKMALEGQMAELRILRLTPADAGVYRCQAGSAQSSAEVTVEA  
 REVTVIQPLQDAEAMEEGRVCFSC ELSHKDEDI EWSLNGTPLYNDSFHEISHEGCLHTLVLSVRQADTGTVC  
 ATSPKVSVSARLVVKGKPVVFLKALDDVSAEERGTLLTQCEVSDPEARVVWRKDGVELGPSDKYDFLHKAGAR  
 GLTVHDLSDHEDAGLYTCQVGSKETQSKVSVHDLHVGITKRLKTVEVLEGE SCSFECVLSHESPSDPAVWTVGG  
 KTVGGSGHFHAVRQGRKYTLTVKDAALSDAGEVVSVLGLTSKASLI IRERPVDITKPLEDQRTTLGEDVMLS  
 CELSRAGTSVRWLKDGKAI RKSQKYDLLSEGTRAVLVVRKASLKDSGEYTCETEASKSTAKLCVVEEKANRFTE  
 ELADLQVEEKGRAVFTCKTEHPASVVTWRKGLLELRASGKHPVPSQEGTLKLTINALERTSDTYTCDI GQAR  
 TQARLLVHGQKVRVIEDLEDTAVQE GSSAKFCCRIAPADYGPVHWFLDKTPHLSNELNETITVQPGGYHVLTLR  
 QLALKDSGTVYFEAGDQRTS AALRVTEKPSIFSRPLTDVTVTEGEDLTLVCETTTVDSSVRWTKDGKTLRPSA  
 RCQLSHEGCAQLLITATTPQDGGRYKCEIGGASSSSIVRVHALPVRVFRESLKDVEVPEGKAATLRCVLSVA  
 APVEWRHGDDVLKSSNKYSLRQEGAVLELVIDRLQPD SGOYSCSFGDQTTSATLTVKTSQAQVFGKLRNKEA  
 TEGTTVTLRCELTK EAPVEWKKGTETLRNGDKYSLKQDGA VCELQICSLLVADAGEYSCVCGQEKTSATLTVK

ALLVHFVRRRLRSKEATEGDTTTLQCELSKAAPVEWRKGTETLRDGDYSLKQDGAUCELQIRSLTIADAGEYL  
 CTCGQEKTSATLTVRALPAKFKDSLKNEEATEGTTATLSCELSKAAPVTWKKGPKTLQSGDKYVLRQDGAUCG  
 LQIHGLTMADAGEYSCVCGQEKTSATLTVRGLPAKFIEDLRSQEATEGATAILRCLELSKAAPVEWRKGSSETLK  
 DGDYSLRQDGAUCELQIRGLAVVDGTYSSTLPTKFTTEGLRNEEATEGTMATLRCQMSKAAPVEWRKGSSETLR  
 DGDYSLRQDGAUCELQIRGLTIEDSGEYTCVCGQEKTSATLSVKALPSRFIEDLRSQEATEGTMATLRCQMS  
 KTAPVEWKKGSETLRDGGYSLRQDGPVCELQICDLAVEDAGEYSCVCGQEKTSATLSIKALPPRFIEDLRSQ  
 EATEGTMATLRCQMSKAAPVEWRKGSSETLGDGGYSLRQNGAVCELQIHDLAVEDTGEYSCVCGQEKTSATLN  
 VKALPPRLIEDLRSQEATEGTMATLRCQMSKAAPVEWRKGSSETLRDGGYSLRQDGAUCELQIHDLVEDAGQ  
 YSCVCGQEKTSATLTVDALPPKFTTEGLKKEEATEGTMVTLRCQMSKEATVEWRKGAKTLSDGGYSLRQDGAUC  
 CELQICGLAVEDAGEYSCVCGQEKTSATLSVKALPPRFIEDLRSQEATEGTMATLRCQMSKAAPVEWRKGSSET  
 LRDGDYSLRQDGAUCELQIRDLAVEDAGEYLCVCGQEKTSATLSVKALPPRFIEDLRSQEATEGTMATLRCQ  
 MSKAAPVEWRKGSSETLRDGDYSLRQDGAUCELQICDLAVEDTGDYSCVCGQEKTSATLSVKALPPRFIEDLR  
 SQEAREGTVATLRCRMSKAAPVEWRKGSSETLKDGDYSLRQEGNLCELQIRDLAVEDTEEYSCVCGQEKTSAT  
 LSVKALPAKFIEDLRSQEAPESSTVTLRCKLSKKASVWKKGSETLRNGARYSLRQDGAUCELEIRDLTVEEDT  
 GEYSCTCGQERTSATLSIMAPQVVFQQLQNLQAEEGSMASLRCELSVPAAMVWSKGGLELQGDTRREARQQ  
 GCVAELLLRDLRREDAGEYSCCTGSQTTSATLMVTAAPVRFRELAQDQVDEGATARLRCLELSREAVSVEWRK  
 GSLQLFPCAKYQMVQEGTTAELLVHGVEQEDAGEYTCDAHTQS IARLSVRAPKPKFKTDLQSTEQEAGGTAR  
 LCCQLSEAEPTPVQWLKEGVELHVGSKYEMRRQGAUCELLEHGLEAKDTGEYACLVGQKTLASLRVKEPEV  
 TIVRGLVDMEVQADEDEFTCKVSQAGATDVQWHLQGLPLQSNVETEVAVLADGCTHVLQKGVTLLEDAGTVS  
 FHVGGSSSAQLTVRVPEVTVLEPLKDVQLSEGQDAHFRCRLSRASQGEARWALGGVPLQCNEMNDITVEQGT  
 LYLLTLHKVTLLEDAGTITLQVGSSEAEQKVTAKNTVLRGLENVDALEGGALFECQLSQPEVAHTWLLDD  
 EPVHTSEKVEVVYFENGLRHLLLLKLNKPKQDSCRVTFLAGDVVTS AFLTVRGRWRLEVLPPHDASVKAGMQRV  
 FTICILSEAVPVGEATWYINGAAIQPDDTDWTVTTDGSHHALTLSNAQPQHAGEVTF AARDAVASARLSVLALP  
 DPPEDAEEVGRSDHSVTLSSWVAPMSDGGGGLCGYRVMKEASTGQWQLCHDLVPGPECVVDDLVPGKTYRFRV  
 AAVGPAGAGEPVHLPQMVKIAPAPAPAPAPAPAPETRAVVGEDICLELEVAADGGVEVWHKGTERRIQPGG  
 HFEVLSRGRQMLVIKGFRTEDQGEYRCGPIQGLPSSGAATFNVMVMTSGSGDEVPAQPSLPEAAQEGDLHLL  
 WEALARKRRMSREPTLDSISELPEEDSRVQHLRQEAEETAPDLSEGYSTADELARTGEADLSHTSSDDESRAG  
 TPSLVTYLKKAGGPGISPLASKHEAQVTTSVKPKQKQEPVVPTCPPPGDLSAADLMDPSLDKAAVKIQAAFKG  
 YKVRKEMKQQEGPVFSRTFGDTEAQVGDVLRLECVLATKTDMRACWLKDGIELTDGRHYHIDQLKDGTCSSLLV  
 TGLAPTDSGRYTCQVSTKSGRVSHSACVVVSGTESEAESSSGGELDDAFRRAARLHRLFRTKSPAELSEEEL  
 FLSADEGPGPEEPADWQTYREDENFVCIRFESLAEARQAVTCFRNMFATMGIGVEISLGEQGRGVEMRIGK  
 VAPTPTPAVPLAKTPGLQTSDAAPVFLTELQNDVQDGYPMSFDCVVTGQPVPSVRWFKDKLLEEDDHYMIN  
 EDQQGGHQLIITAVVPADMGVYRCLAENSMGVSSTKAELRVELTSTDYDTAADATETSSYFSAQGYLSSREQE  
 GTESDEGQLPQVLEELKDLQVAPGTRLAKFQKLVKGYPAKLYWFKDQGPLTTSDHIRMTDKKTLHTLEIVSV  
 TREDSGQYAAIYISNAVGAAYSSARLLVRGPEPEEKSPASDVHERLVPPRIEKFTPKKVRGSSITFSVKVEG  
 HPAPSVHWLKEEAEGVLIWGPDPGYTMASSSKQHSVLVLDVGRQHOGTYTCIATNPAGQALCSASLHISGL  
 AKEEEQERVKEALISSFLQGTSAQVSAQMSSEAGFADLVGQSKGESLVAEEAHSHLSLAEVGTTEFLQKLTSSQ  
 ITEMVSAKISQAKLQVPGGDSDEETKTPSASPRHGRSRPSSSVQESSSESEDGDSRGEIFDIYVVTADYLPGLG  
 AEQDAIILREGQYVEVLDSAHPLRWLVRTKPTKSSPSRQGWVSPAYLDKRLKLSPEWGPTEAPEFPGEAVSED  
 EYRTRLSSVIQELLSSEQAFVQELQFLESHHMKHLERSPRVPAAVASQKTVI FRNVQDI SHFHSSFLKELQGC  
 GTDDVAMCFIKNQEA FEKYLEFLVGRVQAESVVVSTPVQEFYKKAETLSAKDPTQPPPPPLQHYLEQPV  
 RVQKYQALLKELIRNKARNRQNCALLEQAYAVVSALPQRAENKLVSLMENYPGTLEALGEPVIRQGHFVWEG  
 APGARMPWKGNHRHVFVFRNYLVICKPRRDSRTDFTSYVFRNMMKLSSIDLNDQVEGDDRAFEVWHEREDSVR  
 KYLLQARTVI IKNSWVKEICGIQORLAQPVWRPPEFEELADCTAELGETVKLACRVTGTPKPIVSWYKDGKP  
 VEVDPHHILIEDPDGSCTLILDNLTGIDSGYMCFAASAAGNASTLGKILVQVPPRFVNVKVRATPEFVEGEDAQ  
 ITCTVEGAPYPQIRWYKDGTLAPGNRYRMLNEPRSGVLVLIQAASKEDLGHYECELVNRLGSTRGGGELYM  
 QSPALRARDQHHREQIVA AVEVTEQETKVPKKTVI I EETITTVVKS PRGRRQSPGKSPSRSPRRSASPRRPG  
 LLAPERLYPPGTPSPRRLEVEQGRKAPVPALYVTEAEVHAPASQSPKWLEVEETIEVRVKKTGSRGASPVRE  
 MTSRGEGLIFLTPGGI PGRDPNANNNSNKS SVYQEARTWGPVAVHVGEFFIFQVDSVGNVDWVAASPEPEQVRA  
 SQKEENTERQEGCSGDENTFLMEEPQDTS LQGRDPKILTHNGRVLTLADLEDYVPQEGETFGCGDSTPSTP  
 DEPPCEVSVLQREISEPTVGQPVLLNVGRPPGTGATPSFFRPGSQVHSPESVSFLLREAWSGPVSAAPWTSSF  
 HTHVQSSVDGSHGSFKTEVSTQTVSFGAVGETVTLHIDPDGGEAPGPSQG\*  
 >rs46320494\_ENSMUSP00000020732\_c.12924:T>C\_p.F4309L  
 ENSMUST00000020732.13|Obscn-201|ENSMUSG00000061462|-|chr11:g.58951919:A>G  
 MDHSFSGAPRFLTRPKAFVSVGKDATLSQIVGNPTPHVSWEKDRQPVEAGARFLAQDGDVYRLTILDLAL  
 GDSGQYVCRARNAIGEAFVAVGLRVDSEGTCAEQAPHLLRPTSIRVREGADATFRCRVGGSPQPAVSWSKDG  
 RRLGPPDAPHVRVEEHGESSALRIRSARPRDGGTYEVRAENPLGSASAAAALVVDSDAEVAGPPGTSTATLLA  
 HLQQRREAMRAEGIPPSPPGAGTRTCTVTEGKHARLSCFVTGEPKPETVWKKDGLVTEGRRHVVEDEQENF

VLKILFCKQSDRGLYTCTASNLVGQTYSSVLVVVREPTVPFKKRLQDLEVREKESATFQCEVAQPATEAAWFK  
EETRLWASAKYDIEEEGETERRLTVRNVSADDDAVYICETTEGSRVAELSVQGNLTKRKLPRKTAVRTGDTAIF  
WVELAVPEGPVWRWRNQEEMVAGGRVAITAEGTCHTLTI FQCTLEDMGEVAFVSGGCRTTTTQFCVSA PRRPPL  
YPPADPVVKAKTESSVTLWSAPPHGDRPVTIDGYVLEKRKLGAYAWSRCHEAGWLATTEFTITGVAEEGDFQ  
FRVSAINHFGQGPYLEFPGTMHLVPLAVKTPKAVEAVEGGEVTFVSDLTVASSGEWFLDGEALKASSIYVI  
RCDRTRHMLTIREVPARLHGAQLKFVANGIETSIQMVVRAALGLPSSKLPAAAAAREVLAQLHHEEAQLLAE LSD  
QAAAVTWLKDGRELSLGPKEYMQVSAGRRALLVRDVAQDDAGLYECVSRGSRRTAYQLLVQDITDGYRDWGPAG  
PQKHMCKCAGAKIARYLGSscyRFLQYDKGVWHWLEAALDTRQGKGTSSCSLHEKPKLVFAKGGQQAHSSEVKA  
AGNSATLSCEVTQAQTEVTWFKDGKLLSSSSKVRMEASGCSRRLVVQQAGKADAGEYSCEAGGQKLSFRLDVA  
EPKLVFAKGGQQAHSSEVKAEGASATLSCEVAQAQTEVTWFKDGKLLSSSSKVRMEASGCSRRLVVQQAGKAD  
GEYSCEAGGQKLSFRLDVAEPKMFVFAKEQQARSEVKAEGASATLSCEVAQAQTEVTWFKDGKLLSSSSKVRM  
EASGCSRRLVVQQAGKADAGEYSCEAGGQKLSFRLDVTEPKLVFAKEQQARSEVKAEGVNSATLSCEVAQAQ  
EVTWFKDGKLLSSSSKVRMEASGCSRRLVVQQAGKADAGEYSCEAGGQKLSFRLDVAEPKLVFAKEQQARSEV  
KAEAGNSATLSCEVAQAQTEVTWFKDGKLLSSSSKVRMEASGCSRRLVVQQAGKADAGEYSCEAGGQKLSFHL  
DVTEPKLVFAKEQQAHSEVKAEGASATLSCEVAQAQTEVTWFKDGKLLSSSSKVRMEASGCSRRLVVQQAGK  
ADAGEYSCEAGGQKLSFRLDVAEPKLVFAKEQQARSEVKAEGASATLSCEVAQAQTEVTWFKDGKLLSSSSK  
VRVEASGCSRRLVVQQAGKADAGEYSCEAGGQKLSFRLDVAEPKLVFAKEQQANSEVKAEGASATLSCEVAQ  
AQTEVTWFKDGKLLSSSSKVRVEASGCSRRLVVQQAGKADAGEYSCEAGGQKLSFRLDVAEPKLVFAKEQQAH  
SEVKAEGASATLSCEVAQAQTEVTWFKDGKLLSSSSKVRVEASGCSRRLVVQQAGKADAGEYSCEAGGQKLS  
FRLDVAEPKLVFAKEQQAHSEVKAEGASATLSCEVAQAQTEVTWFKDGKLLSSSSKVRVEASGCSRRLVVQQ  
AGKADAGEYSCEAGGQKLSFRLDVAEPKLVFAKEQQAHSEVKAEGASATLSCEVAQAQTEVTWFKDGKLLSS  
SSKVRVEASGCSRRLVVQQAGKADAGEYSCEAGGQKLSFRLDVAEPKLVFAKEQQAHSEVKAEGASATLSCE  
VAQAQTEVTWFKDGKLLSSSSKVRVEASGCSRRLVVQQAGKADAGEYSCEAGGQKLSFRLDVAEPKLVFAKEQ  
QAHSSEVKAEGASATLSCEVAQAQTEVTWFKDGKLLSSSSKVRVEASGCSRRLVVQQVQKADAGEYSCEARGQ  
KLSFRLDVADTRLMFAKEQQARTEVKAEGNSATLSCEVAQAQTEVTWFKDGKLLSSSSKVRVEASGCSRRLV  
VQQAGKADAGEYSCEAGGQKLSFRLDVAEAEISQI PERPSRREPLVVKEHETIILTATIAAPSAVAVTWLKDGV  
EIRRSKRHEATSLGDHTLTVRGAQVLDLSAISYSCRVPKGEQDFPVQVEEVAAKF SKPLEPVEGELGGTVMLVC  
ELSPQAEVWRCGNTQLRPGKRFQMTSEGPRRLTLTVSGLREDDAEYVCESRDDRTSARLTVKVPVVKFTS  
GLSAMVAEEGQEQATFQCVVSPSDAGVTWYKDGMLQPSKFMVVEGASRSILTILGLTLEDAGQVTEVAEGAS  
SSAALRVREAPVLFKKKLEPQTEVEERTSVTLEVELTRPWPEVKWTRNAAVLTPSENVEIRAEGARHCLVLRV  
GFADRGFFGCETPDDKTQAKLNVEMRQVRLVRLGLQEVEAKEQGTASMDVELSHAEEVGSWTRDGLRLQPGPKC  
HLAVQGPVHIILTLALQPQDSGLVAFRAEGVHTSARLIVTEL PVSFTRVLQDVVATQKEKVTLECELSRPVDV  
RWLKDGVLELRAGKAIGIVAQGTCSRSLVIYRCETGDQGVYVCDALDAQTSASLRVQGRTYTLIFRRLAEDAGE  
VKFVAENAESRAHLRVKELPVTLLRPLRDKIAMEKHRGVLEQCQVSRASAQVRWFKGGVELQSGPKYEVVSDGL  
YRKLVINVDQPEDEDTYTC DAGNVKTSAQFFVEEQSITIVRGLKDMTVMEPAPAWFECETSIPSVRPPKWLGLG  
KTVLQAGGNVGLQDGTVHRLTLHKTCSTMTGPVHFTIGKSRSSAQLVVSDIPVVLTRPLEPKAGRELQSVVL  
SCDFRPAPKAVQWYKDDTPLSPSEKFKMALEGMALRILRLTPADAGVYRCQAGSAQSSAEVTEVAREVTVI  
QPLQDAEAMEEGRVCFSCELSHKDEDIEWLSNGTPLYNDSFHEISHGCLHTLVLSVRQADTGTVCATSPKV  
SVSARLVVKGKPVVFLKALDDVSAEERGLTLQCEVSDPEARVVWRKDGVELGSPDKYDFLHKAGARGLTVHD  
LSHEDAGLYTCQVGSKETQSKVSVHDLHVGITKRLKTVEVLEGECSFECVLSHESPSDPAVWTVGGKTVGGS  
GHFHAVRQGRKYTLTVKDAALSDAGEVVFVSVLGLTSKASLI IRERPVDITKPLEDQRTTLGEDVMLSCELSRA  
GTSVRWLKDGKAIRKSQKYDLLSEGTRAVLVVRKASLKDSSGEYTCETEASKSTAKLCVEEKANRFTTEELADLQ  
VEEKGRAVFTCKTEHPASVVTWRKGLLELRASGKHVPSQEGTLKLTINALERTDSDTYTCDIGQARTQARLL  
VHGQKVRVIEDLEDTAVQEGSSAKFCCRIAPADYGPVHWF LDKTPLHSNELNEITVQPGGYHVLTLRQLALKD  
SGTVYFEAGDQRTSAAALRVTEKPSIFSRPLTDVTVTEGEDTLVCE TTTVDSSVRWTKDGKTLRPSARCQLSH  
EGCQAQLLITATTPQDGGRYKCEIGGASSSSIVRVHALPVRFRESLKDVEVPEGKAATLRCVLSVAAPVEWR  
HGDDVLKSSNKYSLRQEGAVLELVIRDLQPDQSGQYSCSFGDQTTSATLTVKTSQAQFVGLRKNKEATEGTTV  
TLRCELTKAEAPVEWKKGTETLRNGDKYSLKQDGAVCELQICSLLVADAGEYSCVCGQEKTSATLTVKALLVHF  
VRLRSKEATEGDTTTLQCELSKAAPVEWRKGTETLRDGDYSLKQDGAVCELQIRSLTIADAGEYLCTCGQE  
KTSATLTVRALPAKFKDSLKNEEATEGTTATLSCELSKAAPVWKKGPKTLQSGDKYVLRQDGAVCGLQIHGL  
TMADAGEYSCVCGQEKTSATLTVRGLPAKFIEDLRSQEATEGATAILRCELSKAAPVEWRKGSSETLKDGDYR  
LRQDGAVCELQIRGLAVVDGTYSLSLPTKFTTEGLRNEEATEGTMATLRCQMSKAAPVEWRKGSSETLRDGDYR  
LRQDGAMCELQIRGLTIEDSGEYTCVCGQEKTSATLSVKALPSRFIEDLRSQEATEGTMATLRCQMSKTA  
PVEWKKGSETLRDGGRYSLRQDGAVCELQICDLAVEDAGEYSCVCGQEKTSATLSIKALPPRFIEDLRSQEATEG  
MATLRCQMSKAAPVEWRKGSSETLRDGGRYSLRQDGAVCELQIHDLAVEDTGEYSVCGQEKTSATLNVKALPP  
RLIEDLRSQEATEGTMATLRCQMSKAAPVEWRKGSSETLRDGGRYSLRQDGAVCELQIHDLVEDAGQYSCVCG  
QEKTSAVLTVDALPPKFTTEGLKKEEATEGTMVTLRCQMSKATVEWRKGAKTLSDGGRYSLRQDGAMCELQIC  
GLAVEDAGEYSCVCGQEKTSATLSVKALPPRFIEDLRSQEATEGTMATLRCQMSKAAPVEWRKGSSETLRDGD

YSLRQDGA VCELQIRDLAVEDAGEYLCVCGQEKTSATLSVKALPPRFIEDLRSQEATEGTMATLRCQMSKAAP  
VEWRKGSKTLRDGDYSLRQDGAMCELQICDLAVEDTDYSCVCGQEKTSATLSVKALPPRFIEDLRSQEARE  
GTVATLRCRMSKAAPVEWRKGSSETLKDGDYSLRQEGNLCELQIRDLAVEDTEEYSCVCGQEKTSATLSVKAL  
PAKFIEDLRSQEAPESSTVTLRCKLSKKASVWKKGSETLRNGARYSLRQDGA VCELEIRDLTVEDTGEYSCT  
CGQERTSATLSIMAPQVVFQQPLQNLQAEEGSMASLRCELSVPNAAMVWSKGGLELQGDTRREARQQGCVAEL  
LLRDLRREDAGEYSCTCGSQTTSATLMVTAAPVRFRLRELQAQDVDEGATARLRCELSREAVSVEWRKGS LQLF  
PCAKYQMVQEGTTAELLVHGVEQEDAGEYTC DAGHTQSIARLSVRAPKPKFKTDLQSTEQEAGGTARLCCQLS  
EAEPGTFVQWLKEGVELHVGSKYEMRRQGAVCELLIHGLEAKDTGEYACLVGGQKTLASLRVKEPEVTIVRGL  
VDMEVQADEDEFTCKVSQAGATDVQWHLQGLPLQSNKEVAVLADGCTHVLQKGVTLQKGVTLQKGVTLQKGVTL  
SSSAQLTVRVPEVTVLEPLKDVQLSEGDQAHFRCLRSRASGQEARWALGGVPLQCNEMNDITVEQGTLYLLTL  
HKVTLEDAGTITLQVGS CSSEAQLKVTAKNTVLRGLENVDALEGGEALFECQLSQPEVA AHTWLLDDEPVHTS  
EKVEVVYFENGLRHLLLLKLNKLPQDSCRVTFLAGDVVTS AFLTVRGWRLEVLEPPHDASVKAGMQVRFTCILS  
EAVPVGEATWYINGAAIQPDDTDWTVTTDGS HHALTL SNAQPQHAGEVTF AARDAVASARLSVLALPDPPEDA  
EYVGRSDHSVTL SWVAPMSDGGGGLCGYRVMKEASTGQWQLCHDLVPGPECVVDDLVP GKTYRFRVA AVGPA  
GAGEPVHLPQMVKIAPAPAPAPAPAPAPAPETRQAVVGEDIC LELEVAADGGEVVWHKGTERRIQPGHFVLS  
RGQRQMLVIKGFRTEDQGEYRCGPIQGLPSSGAATFNVVMTSGSGDEVPAQPSLPPEAAQEGDLHLLWEALAR  
KRMSREPTLDSISELPEEDSRVQHLRQEAETAPDLSEGYSTADELARTGEADLSHTSSDDES RAGTSPSLVT  
YLK KAGGPGISPLASKHEAQVTT SVKPKQKQEPVVPTCPPGDL SAADLMDPSLDKAAVKIQAAFKGYKVRKE  
MKQQEGPVFSRTFGDTEAQVGDVLRLECVLATKTD MRACWLKDGIELTDGRHYHIDQLKDGTCSSLVVTGLAPT  
DSGRYTCQVSTKSGRVSHSACVVVSGTESEAESSGGELDDAFRRAARLHRLFRTKSPAELSEELFLSADE  
GPGEPEEPADWQTYREDEFVFCIRFESLAEARQAVTCFRNMFATMIGVEISLGEQGRGVEMRIGKVAPTVT  
PAVPLAKTPGLQTS DAAPVFLTELQNDQVDQDGYPMSFDCVVTGQPVPSVRWFKDGKLEEDDHVMINEDQGG  
HQLIITAVVPADMGVYRCLAENSMGVSSTKAELRVELTSTDYDTAADATETSSYFSAQGYLSSREQEGTESDE  
GQLPQVLEELKDLQVAPGTR LAKFQLKVKGYPA PKLYWFKDGGQPLTTSDHIRMTDKKTLHTLEIVSVTREDSG  
QYAAYSNAVGAAYSSARLLVRGPSEPEEK PASDVHERLVPPRI LEKFTPKKVKRGSSITFSVKVEGHPAPSV  
HWLKEEA EKGVFLWIGPDTPGYTMASSSKQHSLLVLDVGRQHQT YTCIATNPAGQALCSASLHISGLAKEEEQ  
ERVKEALISSFLQGTSAVSAQMS EASAGFADLVGQSKGESLVAEEAHSHLSLAEVGTEEF LQKLTQITMVVS  
AKISQAKLQVPGGDSDEETKTPSASPRHGRSRPSSSVQESSSESEDGDSRGEIFDIYVVTADY LPLGAEQDAI  
ILREGQYVEVLDSAHPLRWLVRTKPTKSSPSRQGWVSPAYLDKRLKLSPEWGPTEAPEFPGEAVSEDEYRTRL  
SSVIQELLSSEQAFV GELQFLES HHMKHLERSPRVPAAVASQKT VIFRNVQDISHFHSSFLKELQCGCTDDDV  
AMCFIKNQEA FEKYLEFLVGRVQAESVVVSTPVQEFYKKYAEETLSAKDPTQPPPPPLQHYLEQPVERVQKYQ  
ALLKELIRNKARNRQNCALLEQAYAVVSALPQRAENKLHVSLMENYPGTLEALGEP I RQGHFIVWEGAPGARM  
PWKGHNHRVFLFRNYLVICKPRRDSRTDTFSYVFRNMMKLSIDLNDQVEGD DRAFEVWHEREDSVRKYLLQA  
RTVI IKNSWVKEICGIQORLAQPVWRPPEFEEELADCTAELGETVKLACRVTGT PKPIVSWYKDGKPV EVDPH  
HILIEDPDG SCTLILDNLGTIDSGQYMCFAASAAGNASTLGKILVQVPPRFVNVKVRATPFVEGEDAQITCTVE  
GAPYPIRWYKDGTTLLAPGNRYRMLNEPRSGVLV LVIQAASKEDLGHYECELVNRLGSTRGGGELYMQSPALR  
ARDQHHREQIVAAVEERRPSP\*  
>rs50739555\_ENSMUSP00000158795\_c.12868:T>G\_p.V4290G  
ENSMUST00000238536.2|Obscn-210|ENSMUSG00000061462|-|chr11:g.58952291:A>C  
MDHSFSGAPRFLTRPKAFVSVGKDATLSCQIVGNPTPHVSWEKDRQFVEAGARFRLAQDGDVYRLTILDLAL  
GDSGQYVCRARNAIGEAFAAVGLRVDSEGTCAEQAPHLLRPTSIRVREGADATFRCRVGGSPQPAVSWSKDG  
RRLGPPDAPHVRVEEHGESSALRIRSARPRDGGTYEVRAENPLGSASAAAALVVDSDAEVAGPPGTSTATLLA  
HLQORREAMRAEGIPPSPPGAGTRTCTVTEGKHARLSCFVTGEPKPEVWKKDQGLVTEGRRHVVEDEQENF  
VLKILFCKQSDRGLYTCASNLVGQTYSSVLVVVREPTVPFKKRLQDLEVREKESATFQCEVAQPA TEAAWFK  
EETRLWASAKYDIEEEGTERRLTVRNVSADDDAVYICETTEGSRVAELSVQGNLTKLPRKTAVRTGDTAIF  
WVELAVPEGPVRWLRNQEEMVAGGRVAITAEGTCHTLTI FQCTLEDMGEVAFVSGGCRTTTQFCVSAPRRPPL  
YPPADPVVKA KTESSVTL SWSAPPHGDRPVTIDGYVLEKRKLGAYAWSRCHEAGWLATTEFTITGVAAEEGDFQ  
FRVSAINHFGQGPYLEFPGTMHLVPLAVKTPLKAVEAVEGGEVTFVSDLTVASSGEWFLDGEALKASSIYVI  
RCDRTRHMLTIREV PARLHGAQLK FVANGIETS IQMVVRAALGLPSSKLPAAAAREVLAQLHEEAQLLAELSD  
QAAAVTWLKDGRELSLGPKEYMQVSAGRRALLVRDVAQDDAGLYECVSRGSR TAYQLLVQDITDGYRDWGPAG  
PQKHMCKCAGAKIARYLGSSCYRFLQYDKGVWHLEAALDTRQKGKTS SCSLHEKPKLVFAKQQAHSEVKA E  
AGNSATLSCEVTQAQTEVTFWKDGKLLSSSSKVRMEASGCSRRLVVQQAGKADAGEYSCEAGGQKLSFRLDVA  
EPKLVFAKGGQAHSEVKA EAGASATLSCEVAQAQTEVTFWKDGKLLSSSSKVRMEASGCSRRLVVQQAGKADA  
GEYSCEAGGQKLSFRLDVAEPKMFVFAKEQQARSEVKA EAGASATLSCEVAQAQTEVTFWKDGKLLSSSSKVRM  
EASGCSRRLVVQQAGKADAGEYSCEAGGQKLSFRLDVTFKLVFAKEQQARSEVKA EAVGNSATLSCEVAQAQ  
EVTWFKDGKLLSSSSKVRMEASGCSRRLVVQQAGKADAGEYSCEAGGQKLSFRLDVAEPKLVFAKEQQARSEV  
KAEAGNSATLSCEVAQAQTEVTFWKDGKLLSSSSKVRMEASGCSRRLVVQQAGKADAGEYSCEAGGQKLSFHL  
DVTEPKLVFAKEQQAHSEVKA EAGASATLSCEVAQAQTEVTFWKDGKLLSSSSKVRMEASGCSRRLVVQQAGK

ADAGEYSCEAEGQKLSFRLDVAEPKLVFAKEQQARSEVKAEAGASATLSCEVAQAQTEVTFWKDGGKLSSSSK
VRVEASGCSRRLVVQQAGKADAGEYSCEAGGQKLSFRLDVAEPKLVFAKEQQANSEVKAEAGASATLSCEVAQ
AQTEVTFWKDGGKLSSSSKVRVEASGCSRRLVVQQAGKADAGEYSCEAGGQKLSFRLDVAEPKLAFAKEQQAH
SEVKAEAGASATLSCEVAQAQTEVTFWKDGGKLSSSSKVRVEASGCSRRLVVQQAGKADAGEYSCEAGGQKLS
FRLDVAEPKLAFAKEQQAHSEVKAEAGASATLSCEVAQAQTEVTFWKDGGKLSSSSKVRVEASGCSRRLVVQQ
AGKADAGEYSCEAGGQKLSFRLDVAEPKLAFAKEQQAHSEVKAEAGASATLSCEVAQAQTEVTFWKDGGKLS
SSKVRVEASGCSRRLVVQQAGKADAGEYSCEAGGQKLFRLDVAEPKLMFAKEQQAHSEVKAEAGASATLSCE
VAQAQTEVTFWKDGGKLSSSSKVRVEASGCSRRLVVQQAGKADAGEYSCEAGGQKLSFRLDVAEPKLVFAKEQ
QAHSEVKAEAGASATLSCEVAQAQTEVTFWKDGGKLSSSSKVRVEASGCSRRLVVQQVQAGKADAGEYSCEARGQ
KLSFRLDVADTRLMFAKEQQARTEVKAEAGNSATLSCEVAQAQTEVTFWKDGGKLSSSSKVRVEASGCSRRLV
VQQAGKADAGEYSCEAGGQKLSFRLDVAEAEESQIPERPSRREPLVVKEHETIILTATIAAPSVAAVTWLKDGV
EIRRSKRHEATSLGDTHTLTVRGAQVLDIAIYSCRVGKEGQDFPVQVEEVAAKFSKPLEPVEGELGGTVMLVC
ELSPQAEVWRCGNTQLRPGKRFQMTSEGPRRTLTVSGLREDDAEYVCESTRDDRTSARLTVKVPVVKFTS
GLSAMVAEEGQEATFQCVVSPSDAGVTWYKDGMLQPSSEKFMVVEGASRSILTILGLTLEDAGQVTEAEGAS
SSAALRVREAPVLFKKKLEPQTEVEERTSVTLEVELTRPWPEVKWTRNAAVLTPSENVEIRAEGARHCLVLRV
GFADRGGFFGCETPDDKTQAKLNVEMRQVRLVRLGQVEEAKQGTASMDVELSHAEEVEGSWTRDGLRQLQPGPKC
HLAVQGPVHILTLALSALQPDGLVAFRAEGVHTSARLIVTELPVSFTRVLQDQVVTQKEKVTLECELSRFPDV
RWLKDGVLELRAGKAIQVAVQGTCSRSLVIRYRCETGDQGVYVCDALDAQTSASLRVQGRTYTLIFRRLAEDAGE
VKFVAENAESRAHLRVKELPVTLLRPLRDKIAMEKHRGVLECCQVSRASAQVRWFKGGVELQSGPKYEVVSDGL
YRKLVINVDQPEDEDTYTCDAGNVKTSAQFFVEEQSITIVRGLKDMTVMPEPAPAWFECETSIPSVRPPKWL
KTVLQAGGNVGLQDGTVHRLTLHKTCSTMTGPHFTIGKSRSSAQLVSDIPVVLTRPLEPKAGRELQSVVL
SCDFRPAPKAVQWYKDDTPLSPSEKFKMALEGGMAELRILRLTPADAGVYRCQAGSAQSSAEVTEAREVTVI
QPLQDAEAMEEGRVCFSCELSHKDEDIEWSLNGTPLYNDSFHEISHGCLHTLVLSKVRQADTGTVCATSPKV
SVSARLVVKGKPVVFLKALDDVSAEERGTTLTQCEVSDPEARVWVRKDGVELGPSDKYDFLHKAGARGLTVHD
LSHEDAGLYTCQVGSKETQSKVSVHDLHVGITKRLKTVEVLEGESECSFECVLSHESPSDPAVWTVGGKTVGG
GHFHAVRQGRKYTLTVKDAALSDAGEVVFVSLVGLTSLKASLIIRERPVDITKPLEDQRTTELEDVMLSCELSRA
GTSVVRWLKAGAIRKVAIGIVAQGTCSRSLVIRYRCETGDQGVYVCDALDAQTSASLRVQGRTYTLIFRRLAEDAGE
VEEKGRAVFTCKTEHPASVVTWRKGLLELRASGKHVPSQEGTLTKLTINALERTDSDTYTCDIGQARTQARLL
VHGQKVRVIEDLEDTAVQEGSSAKFCRIAPADYGPVHWFLLDKTPLHSNELNEITVQPGGYHVLTLRQLALKD
SGTVYFEAGDQRTSAALRVTEKPSIFSRPLTDVTVTEGEDTLTVCETTTVDSVVRWTKDGKTLRPSARCQLSH
EGCQAQLLITATTPQDGGRYKCEIGGASSSSIVRVHALPVRFRRESLKDVEVPEGKAATLRCVLSVAAPVEWR
HGDDVLKSSNKYSLRQEGAVLELVIRDLQPDQSGQYSCSFGDQTSATLTVKTSQAQFVQKLRNKEATEGTTV
TLRCELTKAEPVEWKKGTETLRNGDKYSLKQDGAVCCELQICSLLVADAGEYSCVCGQEKTSATLTVKALLVHF
VRLRSKEATEGDTTLQCELSKAAPVEWRKGTETLRDGDYSLKQDGAVCCELQIRSLTIADAGEYLCTCGQE
KTSATLTVRALPAKFKDSLKNEEATEGTTATLSCELSKAAPVTWKKGPKTLQSGDKYVLRQDGAVCGLQIHGL
TMADAGEYSCVCGQEKTSATLTVRGLPAKFIEDLRSQEATEGATAILRCELSKAAPVEWRKGTETLRDGDYR
LRQDGAVCCELQIRGLAVVDGTGYSLSLPTKFTTEGLRNEEATEGTMATLRCQMSKAAPVEWRKGTETLRDGDYR
LRQDGAVCCELQIRGLTIEDSGEYTCVCGQEKTSATLSVKALPSRFIEDLRSQEATEGTMATLRCQMSKTA
PVEWKKGSETLRDGGRYSLRQDGPVCELQICDLAVEDAGEYSCVCGQEKTSATLSIKALPPRFIEDLRSQEATEG
MATLRCQMSKAAPVEWRKGTETLRDGGRYSLRQNGAVCELQIHDLAVEDTGEYSCGCGQEKTSATLNVKALPP
RFIEDLRSQEATEGTMATLRCQMSKAAPVEWRKGTETLRDGGRYSLRQDGAVCCELQIHDLVEDAGQYSCVCG
QEKTSAVLTVDALPPKFTTEGLKKEEATEGTMVTLRCQMSKATEVWRKGAKTLSDGGRYSLRQDGAVCCELQI
GLAVEDAGEYSCVCGQEKTSATLSVKALPPRFIEDLRSQEATEGTMATLRCQMSKAAPVEWRKGTETLRDGD
YSLRQDGAVCCELQIRDLAVEDAGEYLCVCGQEKTSATLSVKALPPRFIEDLRSQEATEGTMATLRCQMSKAAP
VEWRKGTETLRDGDYSLRQDGAVCCELQICDLAVEDTGDYSCVCGQEKTSATLSVKALPPRFIEDLRSQEARE
GTVATLRCRMSKAAPVEWRKGTETLRDGDYSLRQEGNLCELQIRDLAVEDTEEYSCVCGQEKTSATLSVKAL
PAKFIEDLRSQEAPESSTVTLRCKLSKASVWKKGSETLRNGARYSLRQDGAVCLEIRDLTVEEDTGEYSCT
CGQERTSATLSIMAPQVVFQQLQNLQAEEGSMASLRCELSVPNAAMVWSKGGLELQGDTRREARQQGCVAEL
LLRDLRREDAGEYSCTCGSQTTSATLMVTAAPVRFLRELQAQDVDEGATARLRCELSREAVSVEWRKGSLLQF
PCAKYQMVQEGTTAELLVHGVEQEDAGEYTCDAHTQSIARLSVRAPKPKFKTDLQSTEQEAGGTARLCCQLS
EAEPTGTPVQWLKEGVELHVGSKYEMRRQGAVCCELLIHGLEAKDTGEYACLVGGQKTLASLRVKEPEVTIVRGL
VDMEVQADEDEFTCKVQAGATDVQWHLQGLPLQSNVTEVAVLADGCTHVLLQKGVTLLEDAGTVSFHVGGL
SSAQLTVRVEPVTVLEPLKDVQLSEGQDAHFRCRLSRASGQEARWALGGVPLQCNEMNDITVEQGTLYLLTL
HKVTELEDAGTITLQVGSSEEAQLKVTAKNTVLRGLNENVALEGGALFECQLSQPEVAHNTWLLDDEPVHTS
EKVEVVYFENGLRHLLLLKLNLPQDSCRVTFLAGDVVTSFAFLTVRGRWLEVPVPHDASVKAGMQVRFCTILS
EAVPVGEATWYINGAAIQPDDTDWTVTTDGSHALTLSNAQPQHAGEVTFAAARDAVASARLSVLALPDPPEDA
EAVGRSDHSVTLVSWAPMSDGGGGLCGYRVMKEASTGQWQLCHDLVPGPECVDDLVPGKTYRFRVAAVGPA
GAGEPVHLPQMVKIAPAPAPAPAPAPAPAPETRQAVVGEDICILELEVAADGGEVVWHKGTERRIQPGHFVLS



RGQRQMLVIKGFRTEDQGEYRCGPIQGLPSSGAATFNVMVMTSGSGDEVPAQPSLPPEAAQEGDLHLLWEALAR  
 KRMSREPTLDSISELPEEDSRVQHLRQEAETAPDLSEGYSTADELARTGEADLSHTSSDDESAGTPSLVT  
 YLKKAGGPGISPLASKHEAQVTTSVKPKQKQEPVVPTCPPGDLAADLMDPSLDKAAVKIQAAPFKYKVRKE  
 MKQQEGPVFSRTFGDTEAQVGDVLRLECVLATKTDMRACWLKDGIELTDGRHYHIDQLKDGTCSSLVTLGLAPT  
 DSGRYTCQVSTKSGRVSHSACVVVSGTESEAESSGGELDDAFRAARRLHRLFRTKSPAELSEEELFLSADE  
 GPGEPEEPADWQTYREDENFVCIRFESLAEARQAVTCFRNMFATMGIGVEISLGEQGGPRGVEMRIKGVAPTVT  
 PAVFLAKTPGLQTSDAAPVFLTELQNDVQDGYPMSFDCVVTGQVPVPSVRWFKDGKLEEDDHYMINEDQQGG  
 HQLIITAVVPADMVYRCLAENSMGVSSSTKAELRVELTSTDYDTAADATETSSYFSAQGYLSSREQEGTESDE  
 GQLPQVLEELKDLQVAPGTRLAKFQLKVKGYPAKPLYWFKDQGPLTTSDHIRMTDKKTLHTLEIVSVTRESG  
 QYAAYSNAVGAAYSSARLLVRGPSEPEEKPASDVHERLVPPRILEKFTPKKVKRGSSITFSVKVEGHPAPSV  
 HWLKEEAKEKGVLWIGPDTPGYTMASSSKQHSVLVLDVGRQHQTCTCIATNPAGQALCSASLHISGLAKEEEQ  
 ERVKEALISSFLQGTSAQVSAQMSSEAGFADLVGQSKGESLVAEEAHSHLSLAEVGTTEFLQKLTSTQITEMVS  
 AKISQAKLQVPGGDSDEETKTPSASPRHGRSRPSSSVQESSSESEDGDSRGEIFDIYVVTADYLPGLAEQDAI  
 ILREGQYVEVLDSAHPLRWLVRTKPTKSSPSRQGWVSPAYLDKRLKLSPEWGPTEAPEFPGEAVSEDEYRTRL  
 SSVIQELLSSEQAFVQELQFLESHHMKHLERSPRVPAAVASQKTVIFRNVQDISHFHSSFLKELQCGCTDDDV  
 AMCFIKNQEAFAKEYLEFLVGRVQAESVVVSTPVQEFYKKAEEETLSAKDPTQPPPPPLQHYLEQPVVERVQKYQ  
 ALLKELIRNKARNRNCALLEQAYAVVSALPQRAENKLVSLMENYPGTLEALGEPHQGHFIWEGAPGARM  
 PWKGHNHRHVFLFRNYLVICKPRRDSRTDTFSYVFRNMMKLSIDLNDQVEGDRAFEVWHEREDSVRKYLLQA  
 RTVIKNSWVKEICGIQORLAQPVWRPPEFEEELADCTAELGETVKLACRVTGTPKPIVSWYKDGKPVVDPH  
 HILIEDPDGCTLLIDNLTGIDSGQYMCFAASAAGNASTLGKILVQVPPRFVNVKVRATPFVEGEDAQITCTVE  
 GAPYPQIRWYKDGTLAPGNRYRMLNEPRSGVLVVIQAASKEDLGHYECELVNRLGSTRGGELYMOSPALR  
 ARDQHHREQIVAAVEDTSVEGSAHSAQDQGAASVLWRLLGSEALGPSPGDLPNTRQSEPPAFEEAASQIP  
 GAASGTPEVSPGTHKGLEQETSSSGSQGWTVPIRVEGTAWPGAGTGQLLLDVHSQVIMETTQRTYVQAPDT  
 GVTRAPSMQVTIEDVQVQVGDMAQFDAVIEGHPPPIVTVWYKGSTQLTSSARLSQRQDGTYSVLVTDVAPHDA  
 GVYTCVANNAGGQVLCKAELLVHGGDKLDAENQVYRRKLSHFYDVQEEIGRGVFGFVKRVQHKGNKMFCAAKF  
 IPLRSKTRAQAYKEDILATLGHPLVTGLLDQFETKRTLILILELCSSEELLDRLFKKGVVTEAEVKVYIQQL  
 VEGHLHSHGILHLDIKPPNILMVHAPAREDIKICDFGAKLITPSEPQYSKYGSPEFVSPETIEQNPVSEGS  
 DIWAMGVISYLSLTCSSPFAGESDRATLLNVLEGRVSWSSPTAAHLSSEDAKDFIKATLQRTPRARSTSQCLA  
 HPWFLKSMPEEAHFINTKQLKFLARSRWQRSLMSYKSIIVMRSIPELLQGPPDPSPLGVARHLRGEASGAS  
 SSSSSDNELAPFARAKSLPPSPVTHSPLLHPRGFLRPSASLPEETEASMPATAAASPASQAGPPASPGCV  
 PRHSVISSLFYQQAGEGAERGNKTSGAKRHPARRRHLLKGGYIARALPGLREPLMEYSLLEEEAAREEQASLM  
 TKTPSFETALRLPSSSVREVPGRSHSLDNPPVTTGPSPEACEKQLLFPSTGLTHETTAKDRGHKEGFLQESV  
 PFPMSGDSRPGKQEGSSQDSCRKPASSCHSELGSGSQEGCGPPSSQSLGSLPPQSLKKEKELSTSCGPLFSEQ  
 PQAAPFPTQVSPLLGSEKEPQDGSLEGPVVPVSSSPGSASQVDASLDTEGLSEAGDTCDFTPPPQRPQEQAT  
 TRKFSLESRGGYAGVAGYGTFAFGDAGGMLGQGPLWARMWAVSOSSEEQDEAATESQPPELESGLPIAEASG  
 VPLRTSPSLTPWEEVEQVSLVQIRDLSGDAEAADTISLDISEVDPAYLNLSDLYDIKYLPEFEMIFRRVPKPI  
 EQPESPGSETEAGQGLADFLLEAAWPWPGELGLRAGLEITTEPEEPGDLEALLGEAAVGRKRKWSPSRGLFQF  
 PGRCLSGEEPVELGLRQRVKASMAHISRIKGRPEGPEREPPRKKAGLASFRLSGLKGRDQELSDEAVVLGQ  
 SVTLACQVLAQPTAQATWSKDGVLLESSGHLIISSTLKNFQLLTIIVVKEEDLGTYTCCVSNPLGTAVTTGVL  
 RKAERPSSSPRPEVGEYKDAVLLVWKPVESECGPVTVIVQCCIEGGSWTTLASDISDCCYLTGKLSRGGMYIF  
 RTACVSKAGMPYSSPSEQVLLGGPNHLASEEESRGRPAQLLPSTKTFQAFQMQIRGRFSVVRQCREKASGR  
 ALAAKIVPYQPEDKTAVLREYEALKRHLHPLHAQLHAAYLSPRHLVLIILELCSGPELLPSLAERESYSESDVK  
 DYLWQMLSATQYLHAQHILHLDLRSNNMVTYENLLKVIDLGNALDQEKVPAPENFKDYLETMAPELLEGG  
 GAVPQTDIWAIGVTAIFIMLSGEYPESESETRDLQKGLRKLIRLSRCYAGLSGGAVAFVLSLCAQPWGRPCA  
 STCLQCGWLTEEGPTGSRPTPVTFPTVRLRAFVREKRRALLYKHNLAQVR\*  
 >rs50739555\_ENSMUSP00000038264\_c.11776:T>G\_p.V3926G  
 ENSMUST00000047441.14|Obscn-202|ENSMUSG00000061462|-|chr11:g.58952291:A>C  
 MDHSFSGAPRFLTRPKAFVSVGKDATLSCQIVGNPTPHVSWEKDRQVVEAGARFRLAQDGDVYRLTILDLAL  
 GDSGQYVCRARNAIGEFAAVGLRVDSEGTCAEQAPHLLRPTSIRVREGADATFRCRVGGSPQPAVSWSKDG  
 RRLGPPDAPHVRVEEHGESSALRIRSARPRDGGTYEVRAENPLGSASAAAALVVDSAEVAGPPGTSTATLLA  
 HLQORREAMRAEGIPPSPPGAGTRTCTVTEGKHARLSCFVTGEPKPEVWKKDQGLVTEGRRHVVEDEQENF  
 VLKILFCKQSDRGLYTCTASNLVGQTYSSVLVVVREPTVPFKKRLQDLEVREKESATFQCEVAQPAATEAAWFK  
 EETRLWASAKYDIEEGETERRLTVRNVSADDDAVYICETTEGSRVAELSVQGNLTKRKLPRKTAVRTGDTAIF  
 WVLEAVPEGPVWRWLRNVEEMVAGGRVAITAEGTCHTLTIHQCTLEDMGEVAFVSGGCRITTTQFCVSAPRRPPL  
 YPADPVVKAKTSSVTLSSWAPPHGDRPVTIDGYLKEKRLGAYAWSRCHEAGWLATTEFTITGVAAEGDFQ  
 FRVSAINHFGQGPYLEFPGTMHLVPLAVKTPKAVEAVEGGEVTFVSDLTVASSGEWFLDGEALKASSIYVI  
 RCDRTRHMLTIREVPARLHGAQLKLVANGIETSIQMVVRAALGLPSSKLPAAAAREVLAQLHEEAQLLAELSD  
 QAAAVTWLKDGRELSLGPKEYMQVSAGRRALLVRDVAQDDAGLYECVSRGSRRTAYQLLVQDITDGYRDWGPAG

PQKHMCKCAGAKIARYLGSSCYRFLQYDKGVWHLEAALDTRQGKGTSSCSLHEKPKLVFAKQQAHSEVKAE  
 AGASATLSCEVAQAQTEVTFWKDGKLLSSSSKVRMEASGCSRRLLVVQQAGKADAGEYSCEAGGQKLSFRLDVA  
 EPKMFVFAKEQQARSEVKAEGASATLSCEVAQAQTEVTFWKDGKLLSSSSKVRMEASGCSRRLLVVQQAGKADA  
 GEYSCEAGGQKLSFRLDVTEPKLVFAKEQQARSEVKAQVGNATLSCEVAQAQTEVTFWKDGKLLSSSSKVRM  
 EASGCSRRLLVVQQAGKADAGEYSCEAGGQKLSFRLDVAEPKLVFAKEQQARSEVKAEGNSATLSCEVAQAQ  
 EVTFWKDGKLLSSSSKVRMEASGCSRRLLVVQQAGKADAGEYSCEAGGQKLSFHLDVTEPKLVFAKEQQAHSEV  
 KAEAGASATLSCEVAQAQTEVTFWKDGKLLSSSSKVRMEASGCSRRLLVVQQAGKADAGEYSCEAGGQKLSFR  
 LDVAEPKLVFAKEQQARSEVKAEGASATLSCEVAQAQTEVTFWKDGKLLSSSSKVRVEASGCSRRLLVVQQAG  
 ADAGEYSCEAGGQKLSFRLDVAEPKLVFAKEQQANSEVKAEGASATLSCEVAQAQTEVTFWKDGKLLSSSSK  
 VRVEASGCSRRLLVVQQAGKADAGEYSCEAGGQKLSFRLDVAEPKLAFAKEQQAHSEVKAEGASATLSCEVAQ  
 AQTEVTFWKDGKLLSSSSKVRVEASGCSRRLLVVQQAGKADAGEYSCEAGGQKLSFRLDVAEPKLAFAKEQQAH  
 SEVKAEGASATLSCEVAQAQTEVTFWKDGKLLSSSSKVRVEASGCSRRLLVVQQAGKADAGEYSCEAGGQKLS  
 FRLDVAEPKLAFAKEQQAHSEVKAEGASATLSCEVAQAQTEVTFWKDGKLLSSSSKVRVEASGCSRRLLVVQQ  
 AGKADAGEYSCEAGGQKLSFRLDVAEPKLVFAKEQQAHSEVKAEGASATLSCEVAQAQTEVTFWKDGKLLSS  
 SSKVRVEASGCSRRLLVVQQVQKADAGEYSCEARGQKLSFRLDVAEAEESQIPERPSRREPLVVEKHETIILTAT  
 IAAPSVAAVTWLKDGVIEIRRSKRHEATSLGDTHTLTVRGAQVLDIAIYSCRVGKEGQDFPVQVEEVAAKFSKP  
 LEVPEGELGGTVMLVCELSPEQAEVWRCGNTQLRPGKRFQMTSEGPRTLTVSGLREDDAEYVCSRDDRT  
 SARLTVKVPVVKFTSGLSAMVAEEGQEAATFQCVVSPSDAGVTWYKDKGMQLQPSEKFMVMEAGSRSLTILGL  
 TLEDAGQVTVAEAGASSAALRVREAPVLFKCKLEPQTVTEERTSVTLEVELTRPWPEVKWTRNAAVLTPSENV  
 EIRAEGARHCLVLRVGFADRGFFGCETPDDKTQAKLNVEMRQVRLVRLVGLQEVEAKEQGTASMDVELSHAEVE  
 GSWTRDGLRLQPGPKCHLAVQGPVHILTLALQPDQSGLVAFRAEGVHTSARLIVTELPSFTRVLQDVVATQ  
 KEKVTLECELSRPVDVRLKDGVELRAGKAI GIVAQGTCSRSLVIYRCETGDQGVYVCDALDAQTSASLRVQGR  
 TYTLIFRRVLAEDAGEVKFVAENAESRAHLRVKELPVTLLRPLRDKIAMEKHRGVLECVSRASAVRWFKGG  
 VELQSGPKYEVVSDGLYRKLVINQVPEDEDTYTCDAGNVKTSAQFFVEEQSITIVRGLKDMTVMEPAPAWFE  
 CETSIPSVRPPKWLKGTVLQAGGNVLEQDGTVHRLTLHKTCSTMTGPFVHFTIGKSRSSAQLVVS DIPVLT  
 RPLEPKAGRELQSVLSCDFRPAPKAVQWYKDDTPLSPSEKFKMALEGQMAELRILRLTPADAGVYRCQAGSA  
 QSSAEVTVAEAREVTVIQPLQDAEAMEEGRVCFSELSHKDEDIEWSLNGTPLYNDSFHEISHEGCLHTLVLKS  
 VRQADTGTVCATSPKVSVSARLVVKGKPVVFLKALDDVSAEERGTTLQCEVSDPEARVVWRKDGVELGPSDK  
 YDFLHKAGARGLTVHDLSDHEDAGLYTCQVGSKETQSKVSVHDLHVGITKRLKTVEVLEGESECFEVLVSHESP  
 SDPAVWTVGGKTVGGSGHFHAVRQGRKYTLTVKDAALSDAGEVVFVGLTTSKASLIIRERPVDTKPLEDQR  
 TTLGEDVMLSCELSRAGTSVRWLKDGKAIKRSQKYDLLSEGTRAVLVVRKASLKDSGEYTCETEASKSTAKLC  
 VEEKANRFTEELADLQVEEKGRAVFTCKTEHPASVVTWRKGLLELRASGKHVPSQEGTLTKLTINALERTDSD  
 TYTCDIGQARTQARLLVHGQKVRVIEDLEDTAVQEGSSAKFCRRIAPADYGPVHWFLDKTPHLSNELNEITVQ  
 PGGYHVLTLRQLALKDSGTVYFEAGDQRTSAALRVTEKPSIFSRPLTDVTVTEGEDTLVCETTTTVDSSVRWT  
 KDGTLRPSARCQLSHEGCGAQLLITATTPQDGGRYKCEIGGASSSSIVRVHALPVRFRFRESLKDVEVPEGKAA  
 TLRCLVSSVAAPVEWRHGDVLLKSSNKYSLRQEGAVLELVIDRLQPDQSGQYSCSFGDQTTSATLTVKTSQAQ  
 FVGKLRNKEATEGTTVTLRCELTKAEAPVEWKKGTETLRNGDKYSLKQDGA VCELQICSLLVADAGEYSCVCGQ  
 EKTSATLTVKALLVHFVRRRLRSKEATEGDTTTLQCELSKAAPVEWRKGTETLRDGDYSLKQDGA VCELQIRS  
 LTIADAGEYLCTCGQEKTSATLTVRALPAKFKDSLKNEEATEGTTATLSCELSKAAPVTWKKGPKTLQSGDKY  
 VLRQDGA VCELQIHGLTMADAGEYSCVCGQEKTSATLTVRGLPAKFIEDLRSQEATEGATAILRCELSKAAPV  
 EWRKGETLKDGDYTLRQDGA VCELQIRGLAVVDTGTYS SLPKFTTEGLRNEEATEGTMATLRCQMSKAAPV  
 EWRKGETLTDGDYSLRQDGA MCELQIRGLTIEDSGEYTCVCGQEKTSATLSVKALPPRFIEDLRSQEATEG  
 TMATLRCQMSKAAPVEWRKGETLTDGGGRYSLRQNGAVCELQIHDLAVEDTGEYSCGCGQEKTSATLNVKALP  
 PRFIEDLRSQEATEGTMATLRCQMSKAAPVEWRKGETLTDGGGRYSLRQDGA VCELQIHDLVEDAGQYSCVC  
 GQEKTSAVLTVDALPPKFTEGLKKEEATEGTMVTLRQMSKEATVEWRKGAKTLSDDGGRYSLRQDGA MCELQI  
 CGLAVEDAGEYSCVCGQEKTSATLSVKALPPRFIEDLRSQEATEGTMATLRCQMSKAAPVEWRKGSKTLRDGD  
 RYSLRQDGA MCELQICDLAVEDTGDYSCVCGQEKTSATLSVKAPQVVFQQLQNLQAEEGSMASLRCELSVFN  
 AAMVWSKGGLELQGDTRREARQQGCVAELLLRDLRREDAGEYSCVCGQEKTSATLMVTAAPVRFRLRLQADV  
 DEGATARLRCELSREAVSVEWRKGSLLQFPKAKYQMVQEGTTAE LLVHGVEQEDAGEYTC DAGHTQS IARLSV  
 RAPKPKFKTDLQSTEQEAGGTARLCCQLSEAEPTPVQWLKEGVELHVGSKYEMRRQGA VCELLHGLEAKDT  
 GEYACLVGQKTLASLRVKEPEVTIVRGLVDMEVQADEDFEFTCKVVSQAGATDVQWHLQGLPLQSNVTEVAV  
 LADGCTHVLQKGVTLLEDAGTVSFHVGGLSSSAQLTTRVPEVTVLEPLKDVQLSEGQDAHFRCLSRASGQEA  
 RWALGGVPLQCNEMNDITVEQGTLYLLTLHKVTLLEDAGTITLQVGS CSSEAQLKVTAKNTVLRGLNENVDAL  
 GEALFECVLSQPEVAANTWLLDDEPVHTSEKVEVYVFNGLRHLHLLKLNKLPQDSCRVTFLAGDVVTSFAFLTV  
 RALPDPPEDAEVVGRSDHSVTLVWVAPMSDGGGGLCGYRVMKEASTGQWQLCHDLVPGPECVVDDLVPGKTY  
 RFRVAAVGPAGAGEPVHLPQMVKIA PAPAPAPAPAPAPAPETRQAVVGEDICLELEVAADGGVEVWHKGTERRI  
 QPGGHFEVLSRGRQMLVIKGFRTEDQGEYRCGPIQGLPSSGAATFNVMVMTSGSGDEVPAQPSLPPEAAQEGD  
 LHLLEALARKRRMSREPTLDSISELPEEDSRVQHLRQEAEEETAPDLSEGYSTADELARTGEADLSHTSSDDE

SRAGTPSLVTYLKKAGGPGISPLASKHEAQVTTSVKPKQKQEPVVPVTCPPPGDLAADLMDPSLDKAAVKIQAFKGYKVRKEMKQOEGPVFSRTFGDTEAQVGDVLRLECVLATKTKDMRACWLKDGIELTDGRHYHIDQLKDGTC SLLVTGLAPTDSGRYTCQVSTKSGRVSHSACVVVSGTESEAESSSGGELDDAFRRAARRLHRLFRTKSPAELS EEEFLSADEGPEPEEPADWQTYREDENFVCIRFESLAEARQAVTCFRNMFATMGIGVEISLGEQGRGVEM RIGKVAPTPTPAVPLAKTPGLQTSDAAPVFLTELQNDVDGYPMSFDCVVTGQPVPSVRWFKDGLLEEDDH YMINEDQQGGHQLIITAVVPADMGVYRCLAENSMGVSSSTKAELRVELTSTDYDTAADATETSSYFSAQGYLSS REQEGTESDEGQLPQVLEELKDLQVAPGTRLAKFQLKVKGYAPAPKLYWFKDGOPLTSSDHIRMTDKKTLHLE I VSVTREDSGQYAAIYI SNAVGAAYSSARLLVVRGPEPEEKPASDVHERLVPPRILEKFTPKKVKRGSITFSV KVEGHPAPSVHWLKEEAKEKGLVWIGPDTPGYTMASSSKQHSVLVLDVGRQHOGTYTCIATNPAGQALCSASLH ISGLAKEEEQERVKEALISSFLQGTSAQVSAQMSEAGFADLVGQSKGESLVAAEEAHSHLSLAEVGTETEEFLQK LTSQITEMVSAKISQAKLQVPGGDSDEETKTPSASPRHGRSRPSSSVQESSSESEDGDSRGEIFDIYVVTADY LPLGAEQDAIILREGQYVEVLDLVAHPLRVLVVRTKPTKSSPSRQGWVSPAYLDKRLKLSPEWGPTEAPEFPGEA VSEDEYRTRLSSVIQELLSSEQAFVGELOFLESHMKHLERSPRVPAAVASQKTVI FRNVQDISHFSSFLKE LQCGCTDDDVAMCFIKNQEAFFKYLEFLVGRVQAESVVVSTPVQEFYKKYAEETLSAKDPTQPPPPPLQHYLE QPVERVQKYQALLKELIRNKARNRQNCALLEQAYAVVSALPQRAENKLVSLMENYPGTLEALGEPVIRQGHFI VWEGAPGARMPWKGHNHRVFLFRNYLVICKPRRDSRTDTFSYVFRNMMKLSSIDLNDQVEGDDRAFEVWHERE DSVRKYLLQARTVI IKNSVWKEICGIQORLAQPVWRPFEFEEELADCTAELGETVKLACRVTGTPTKPIVSWYK DGKPEVEVDPHHILIEDPDGSCTLILDNLGTGIDSGYMCFAASAAGNASTLGKILVQVPPRVFNKRPATPFVEG EDAQITCTVEGAPYPQIRWYKDGTLAPGNRYRMLNEPRSGVVLVVIQAASKEDLGHYECELVNRLGSTRGGG ELYMQSPALRARDQHHREQIVAAVEGAPSMQVTIEDVQVQVGDMAQFDAVIEGHPPPIVTWYKGTQLTSSAR LSQRQDGTYSVLVLDVAPHDAGVYTCVANNAGQVLCCKAELLVHGDKLDAENQVYRRLKLSFYDVQEEIGR GVFGFVKRVQHKGNMFCAAKFIPLRSKTRAQAYQERDILATLGHPLVTGLLDQFETRKTLLILELCSSEEL LDRLFCKGVVTEAEVKVYIQQLVEGLHYLHSHGILHLDIKPPNII MVHPAREDIKICDFGFAQKITPSEFPQYS KYGSPEFVSPETIEQNPVSEGSIDIWAMGVISYLSLTCSSPFAGESDRATLLNVLEGRVSWSSPTAAHLSDAK DFIKATLQRTPRARPSTQCLAHPWFLKSMPEAAEHFINTKQLKFLARSRWQRSLMSYKSI LVMRSIPELLQ GPPDSPSLGVARHLRGEASGASSSSSSDNELAPFAAGAKLPPSPVTHSPLLHPRGFLRPSASLPEETEASMP TADAAPVSPQSAAGPPASPGCVPRHSVSISSLFYQAGAGEAERGNKTSGAKRHPARRRHLLKGGYIARALPGLR EPLMEYSLLEEEAAREEQASLMTKTPSFETALRLPSSSVREVPGRSHSLDNPPVTTGPSPEACKEQLLFPST GLTHETTAKDRGHKEGFLQESVPPFPMSGDSRPGKQEGSSQDSCRGKPASSCHSELGSGSQEGCGPPSSQSLG SLPPQSLKELSTSCGPLFSEQPQAAPFPTQVSPLLGSEKEPQDGLSEGPVFPVSSSPGSASQVDAASLDTEG LSEAGDTCDFTPPPQRPEQATTRKFSLESRGGYAGVAGYGTFAFGGDAGGMLGGQPLWARMWAVSOSSEEQ DEAAATESPQPLESLGPIAEASGVPLRTSPSLTPWEEVEQVSLVQIRDLSGDAEAADTISLDISEVDPAYLNLS DLYDIKYLPEFEMI FRRVPPKPIEQPESPGSETEAGQGLADFLLEEAAPWPPELGLRAGLEITEEPEEPGDLEA LLGEAAVGRKRKWSPSRGLFQFPGRCLSGEEPVELGLRQRVKASMAHISRILKGRPEGPEREPPRKKAGLAS FRLSGLKGRDQELSDEAVVLGQSVTLACQVLAQPTAQTWSKDGVLLESSGHLLISSTLKNFQLLTIIVVKEE DLGTYTCCVSNPLGTAVTTGVLKRAERPSSSPREVELYKDAVLLVWPKPVESECGPVTVIVQCCIEGGSWTTL ASDISDCCYLTKLSRGGMYIFRTACVSKAGMGPYSSPSEQVLLGGPNHLASEEESSRGRPAQLLPSTKTFAF QMQIRRGRFVVRQCREKASGRALAAKIVPYQPEDKTAVREYEAALKRLHHPHLAQLHAAYLSPRHLVLI LEL CSGPELLPSLAERESYSESDVKDYLWQMSLQYLHAQHILHLDRSENMMVTEYNLLKVIDLGNASLDQEK VPAPENFKDYLETMAPELLEGQAVPQTDIWAIGVTAIFIMLSGEYPESEGETRDLQKGLRKLIRLSRCYAGL SGGAVAFLLQSSSLCAQPWGRPCASTLQCGWLTEEGPTGSRPTPVTFPTVRLRAFVREKRRALLYKKNHQAQ VR\*

>rs50739555\_ENSMUSP00000049737\_c.12667:T>G\_p.V4223G

ENSMUST00000052872.15|Obscn-203|ENSMUSG00000061462|-|chr11:g.58952291:A>C MDHSFSGAPRFLTRPKAFVVSVGKDATALSCQIVGNPTPHVSWEKDRQPVVEAGARFLAQDGDVYRLTILDLAL GDSGQYVCRARNAIGEFAAVGLRVDSEGTCAEQAPHLLRPTSIRVREGADATFRCRVGGSPQPAVSWSKDG RRLGPPDAPHVRVEEHGESSALRIRSARPRDGGTYEVRAENPLGSASAAAALVVDSDAEVAGPPGTSTATLLA HLQORREAMRAEGIPPSPPGAGTRTCTVTEGKHARLSCFVTGEPKPEVWKKDGLVTEGRRHVVEDEQENF VLKILFCKQSDRGLYTCTASNLVGQTYSSVLVVVREPTVPFKKRLQDLEVREKESATFQCEVAQPAEAWFK EETRLWASAKYDIEEEGTERRLTVRNVSADDDAVYICETTEGSRVAELSVQGNLTKLPRKTAVRTGDTAIF WVAVLAVPEGPVRLRNQEEMVAGGRVAITAEGTCHTLTI FQCTLEDMGEVAFVSGGCRTTTFQCVSAPRRPPL YPPADPVVKAKTESVTLSSWAPPHGDRPVTIDGYVLEKRLKLAGAYAWSRCHEAGWLATTEFTITGVAAEGDFQ FRVSAINHFGQIPEYLEFPGTMHLVPMPLAVKTPKAVEAVEAGGEVTFVSDLTVAASSGEWFLDGEALKASSIYVI RCDRTRHMLTIREVPARLHGAQLKVFVANGIETSIQMVVAAAGLPLPSSKLPAAAAREVLAQLHAAAQLLAELSD QAAAVTWLKDRELSLGPKEYMQVSAGRALLVRDVAQDDAGLYECVSRGSRRTAYQLLVQEPKLVFAKQQAH SEVKAEAGNSATLSCEVTQAQTEVTFWFKDGKLLSSSSKVRMEASGCSRRLVVQQAGKADAGEYSCEAGGQKLS FRLDVAEPKLVFAKQQAHSEVKAEAGASATLSCEVAQAQTEVTFWFKDGKLLSSSSKVRMEASGCSRRLVVQQ AGKADAGEYSCEAGGQKLSFRLDVAEPKLVFAKQQAHSEVKAEAGASATLSCEVAQAQTEVTFWFKDGKLLSS

SSKVRMEASGCSRRLVVQQAGKADAGEYSCEAGGQKLSFRLDVTEPKLVFAKEQQARSEVKAIEVGN SATLSCE  
VAQAQTEVTFWKDGKLLSSSSKVRMEASGCSRRLVVQQAGKADAGEYSCEAGGQKLSFRLDVAEPKLVFAKEQ  
QARSEVKAIEAGNSATLSCEVAQAQTEVTFWKDGKLLSSSSKVRMEASGCSRRLVVQQAGKADAGEYSCEAGGQ  
KLSFHLDVTEPKLVFAKEQQAHSEVKAIEAGASATLSCEVAQAQTEVTFWKDGKLLSSSSKVRMEASGCSRRLV  
VQQAGKADAGEYSCEAGGQKLSFRLDVAEPKLVFAKEQQARSEVKAIEAGASATLSCEVAQAQTEVTFWKDGK  
LSSSSKVRVEASGCSRRLVVQQAGKADAGEYSCEAGGQKLSFRLDVAEPKLVFAKEQQANSEVKAIEAGASATL  
SCEVAQAQTEVTFWKDGKLLSSSSKVRVEASGCSRRLVVQQAGKADAGEYSCEAGGQKLSFRLDVAEPKLAFA  
KEQQAHSEVKAIEAGASATLSCEVAQAQTEVTFWKDGKLLSSSSKVRVEASGCSRRLVVQQAGKADAGEYSCEA  
GGQKLSFRLDVAEPKLAFAKEQQAHSEVKAIEAGASATLSCEVAQAQTEVTFWKDGKLLSSSSKVRVEASGCSR  
RLVVQQAGKADAGEYSCEAGGQKLSFRLDVAEPKLAFAKEQQAHSEVKAIEAGASATLSCEVAQAQTEVTFWKD  
GKLLSSSSKVRVEASGCSRRLVVQQAGKADAGEYSCEAGGQKLFRLDVAEPKLMFAKEQQAHSEVKAIEAGAS  
ATLSCEVAQAQTEVTFWKDGKLLSSSSKVRVEASGCSRRLVVQQAGKADAGEYSCEAGGQKLSFRLDVAEPK  
VFAKEQQAHSEVKAIEAGASATLSCEVAQAQTEVTFWKDGKLLSSSSKVRVEASGCSRRLVVQQVQKADAGEYS  
CEARGQKLSFRLDVADTRLMFAKEQQARTEVKAIEAGNSATLSCEVAQAQTEVTFWKDGKLLSSSSKVRVEASG  
CSRRLVVQQAGKADAGEYSCEAGGQKLSFRLDVAEAEESQIPERPSRREPLVVKEHETIILTATIAAPSVAAVT  
WLKDGVEIRRSKRHEATSLGDHTLTVRGAQVLDIAIYSCRVGKEGQDFPVQVEEVAAKFSKPLEPVEGELGG  
TVMLVCELSPEQAIEVWRCGNTQLRPGKRFQMTSEGRRTLTVSGLEDDAEIYVCESTRDDRTSARLTVKVP  
VVKFTSGLSAMVAEEGQEAFTQCIVVSPSDAGVTWYKDGMLQPSSEKFMVMSGASRSLTILGLTLEDAGQVTV  
EAEGASSAALRVREAPVLFKFKLEPQTEVERTSVTLEVELTRPWEVKWTRNAAVLTPSENVEIRAEGARHC  
LVLRSVGFADRGFFGCETPDDKTQAKLNVEMRQVRLVRLQVEEAKQGTASMDVELSHAEVEGSWTRDGLRL  
QPGPKCHLAVQGPVHILTLALQPQDSGLVAFRAEGVHTSARLIVTELPVSFTRVLQDVVATQKEKVTLECEL  
SRPVDVRWLKDGVELRAGKAIGIVAQGTCSRSLVIYRCETGDQGVVCDALDAQTSASLRVQGRTYTLIFRRVL  
AEDAGEVVFVAENAESRAHLRVKELPVTLLRPLRDKIAMEKHRGVLECVSRASAVRWFVKGVELQSGPKYE  
VVS DGLYRKLVIN DVQPEDEDYTC DAGNVKTS AQFFVVEQSITIVRGLKDMTVMEPAPAWFECETSIPSVRP  
PKWLLGKTVLQAGGNVLEQDGTVHRLTLHKTCSTMTGPVHFTIGKSRSSAQLVVS D I PVVLRTRPLEPKAGRE  
LQSVVLSCDFRPAKPAKAVQWYKDDTPLSPSEKFKMALESLNGMAELRILRLTPADAGVYRCQAGSAQSSAEVTVEA  
REVTVIQPLQDAEAMEEGRVCFSCSELSHKDEDIEWSLNGMPLYNDSFHEISHGCLHTLVLSKVRQADTGTVC  
ATSPKVSVSARLVVKGKPVVFLKALDDVSAEERGLTLQCEVSDPEARVVWRKDGVELGPSDKYDFLHKAGAR  
GLTVHDLSDHEDAGLYTCQVGSKETQSKVSVHDLHVGITRRLKTVLEVLEGECSFCVLSHESPSDPVAVTVGG  
KTVGGSGHFHAVRQGRKYTLTVKDAALSDAGEVVSVLGLTSKASLIIRERPVDITKPLEDQRTTLGEDVMLS  
CELSRAGTSVRWLKDGKAIRKSQKYDLLSEGTRAVLVVRKASLKDSEYTCETEASKSTAKLCVEEKANRFTE  
ELADLQVEEKGRAVFTCKTEHPASVVWTRKGLLELRASGKHVPSQEGTLKLTINALERTDSDTYTCDIGQAR  
TQARLLVHGQKVRVIEDLEDTA VQEGSSAKFCCRIAPADYGPVHWF LDKTPLHSNELNEITVQPGGYHVLT LR  
QLALKDSGTVYFEAGDQRTS AALRVTEKPSIFSRPLTDVTVTEGEDLTLVCETTTVDSSVRWTKDGKTLRPSA  
RCQLSHEGCAQLLITATTPQDGGRYKCEIGGASSSSIVRVHALPVRFRFRESLKDVEVPEGKAATLRCVLSVA  
APVEWRHGDDVLKSSNKYSLRQEGAVLELVIRDLQPDQSGQYSCSFGDQTTSATLTVKTSQAQFVGLRNLKEA  
TEGTTVTLRCELTKAEAPVEWKKGTETLRNGDKYSLKQDGA VCELQICSLLVADAGEYSCVCGQEKTSATLTVK  
ALLVHFVRRRLRSKEATEGDTTTLQCELSKAAPVEWRKGTETLRDGDYSLKQDGA VCELQIRSLTIADAGEYL  
CTCGQEKTSATLTVRALPAKFKDSLKNEEATEGTTATLSCELSKAAPVTWKKGPKTLQSGDKYVLRQDGA VCG  
LQIHGLTMADAGEYSCVCGQEKTSATLTVRGLPAKFIEDLRSQEATEGATAILRCELSKAAPVEWRKGETL  
DGDYTLRQDGA VCELQIRGLAVVDGTYS LPTKFT EGLRNEEATEGTMATLRCQMSKAAPVEWRKGETL  
DGDYSLRQDGA MCELQIRGLTIEDSGEYTCVCGQEKTSATLSVKALPPRFIEDLRSQEATEGTMATLRCQMS  
KTAPVEWKKGSETLRDGGYSLRQDGPVCELQICDLAVEDAGEYSCVCGQEKTSATLSIKALPPRFIEDLRSQ  
EATEGTMATLRCQMSKAAPVEWRKGETLGDGGYSLRQNGAVCELQIHDLAVEDTGEYSCGCGQEKTSATLN  
VKALPPRFIEDLRSQEATEGTMATLRCQMSKAAPVEWRKGETLRDGGYSLRQDGA VCELQIHDLVEDDAGQ  
YSCVCGQEKTSAVLTVDALPPKFTEGLKKEEATEGTMVTLRCQMSKEATVEWRKGAKTLS DGGYSLRQDGA  
CELQICGLAVEDAGEYSCVCGQEKTSATLSVKALPPRFIEDLRSQEATEGTMATLRCQMSKAAPVEWRKGET  
LRDGDYSLRQDGA VCELQIRDLAVEDAGEYLCVCGQEKTSATLSVKALPPRFIEDLRSQEATEGTMATLRCQ  
MSKAAPVEWRKGSKTLR DGDYSLRQDGA MCELQICDLAVEDTGDYSCVCGQEKTSATLSVKALPPRFIEDL  
SQEAREGTVATLRCMSKAAPVEWRKGETLKDGDYSLRQEGNLCELQIRDLAVEDTEEYSCVCGQEKTSAT  
LSVKALPAKFIEDLRSQEAPESSTVTLRCKLSKKASVVWKKGSETLRNGARYSLRQDGA VCELEIRDLTVEDT  
GEYSCTCGQERTSATLSIMAPQVVFQPLQNLQAEEGSMASLRCELSVPNAAMVWSKGGLELQGDTRREARQQ  
GCVAELLRLDRLEDAGEYSC TCGSQTTSATLDMVTAAPVRFLRELQAQDVDEGATARLRCELSR EAVSVEWRK  
GSLQLFPACKRYQMVQEGTTAELLVHGVEQEDAGEYTC DAGHTQS IARLSVRAPKPKFKTDLQSTEQEAGGTAR  
LCCQLSEAEPGTPVQWLKEGVELHVGSKYEMRRQGA VCELLIHGLEAKDTGEYACL VGGQKTLASLRVKEPEV  
TIVRGLVDMEVQADEDEFTCKVVSQAGATDVQWHLQGLPLQSNVTEVAVLADGCTHVLQKGVTL EDAGTVS  
FHVGGSSSAQLTVRVPEVTVLEPLKDVQLSEGQDAHFRCLRSRASGQEARWALGGVPLQCNEMNDITVEQGT  
LYLLTLHKVTLEDAGTITLQVGS SSEAQLKVTAKNTVLRGLENVDALEGGEALFECQLSQPEVAHAHTWLLDD

EPVHTSEKVEVVYFENGLRHLLLLLKNLKPQDSCRVTFLAGDVVTSFAFLTVRGWRLEVLPEPHDASVKAGMQVR  
FTCILSEAVPVGEATWYINGAAIQPDDTDWTVTTDGSHHALTLSNAQPQHAGEVTFFAARDAVASARLSVLALP  
DPPEDAEAVVGRSDHSVTLWSVAPMSDGGGGLCGYRVMKEASTGQWQLCHDLVPGPECVDDLVPGKTYRFRV  
AAVGPAGAGEPVHLPMVKIAPAPAPAPAPAPAPAPETRQAVVGEDICLELEVAADGGEVVWHKGTERTIQPGG  
HFEVLSRGRQMLVIKGFRTEDQGEYRCGPIQGLPSSGAATFNVMVMTSGSGDEVPAQPSLPPEAAQEGDLHLL  
WEALARKRRMSREPTLDSISELPEEDSRVQHLRQEAEEETAPDLSEGYSTADELARTGEADLSHTSSDDESRAQ  
TPSLVTYLLKAGGPGISPLASKHEAQVTTSVKPKQKQEPVVPCTCPPPGDLSAADLMDPSLDKAAVKIQAAFVK  
YKVRKEMKQQEGPVFSRTFGDTEAQVGDVLRLECVLATKTTDMRACWLKDGIELTDGRHYHIDQLKDGTCSLLV  
TGLAPTDSDGRYTCQVSTKSGRVSHSACVVVSGTESEAESSGGELDDAFRRAARRLHRLFRKTSPAELSEEL  
FLSADEGPGPEEPADWQTYREDENFVCIRFESLAEARQAVTFCFRNMFATMGIGVEISLGEQGPGRVEMRIGK  
VAPTVPAPVPLAKTPGLQTSDAAPVFLTELQNDQVQDGYPMSFDCVVTGQPVPSVRWFKDGKLLLEDDHYMIN  
EDQQGGHQLIITAVVPADMGVYRCLAENSMGVSSTKAELRVELTSTDYDTAADATETSSYFSAQGYLSSREQE  
GTESDEGQLPQVLEELKDLQVAPGTRLAKFQLKVKGYPAKLYWFKDQPLTTSDHIRMTDKKTLHLEIVSV  
TREDSGQYAAYSNAVGAAYSARLLVVRGPSEPEEKPASDVHERLVPRILEKFTPKKVKRGSSTFVSVKVEG  
HPAPSVHWLKEEAKEGVLWIGPDTPGYTMASSSKQHSLLVLDVGRQHOGTYTCIATNPAGQALCSASLHISGL  
AKEEEQERVKEALISSFLQGTSAVSAQMSSEAGFADLVGQSKGESLVAAEEAHSHLSLAEVGTETEFLOKLTSSQ  
ITEMVSAKISQAKLQVPGGDSDEETKTPSPASPRHGRSRPSSSVQESSSESEDGDSRGEIFDIYVVTADYLPGLG  
AEQDAIILREGQYVEVLDSAHPLRWLVRTKPTKSSPSRQGWVSPAYLDKRLKLSPEWGPTEAPEFGEAVSED  
EYRTRLSSVIQELLSSEQAFVGEQLFLESHHMKHLERSPRVPAAVASQKTIVIFRNVQDISHFHSSFLKELQGC  
GTDDDVAMCFIKNQEAFAKEYLEFLVGRVQAESVVVSTPVQEFYKYYAEETLSAKDPTQPPPPPLQHYLEQVVE  
RVQKYQALLKELIRNKARNRQNCALLEQAYAVVSALPQRAENKLVSLMENYPGTLEALGEPIRQGHFVWEG  
APGARMFWKGNHRHVFLEFRNYLVICKPRRDSRTDTFSYVFRNMMKLSSIDLNDQVEGDDRAFEVWHEREDESVR  
KYLQARTVIKNSWVKEICGIQQLAQPVWRPPEFEELADCTAELGETVVKLACRVTGTPKPIVSWYKDGKPK  
VEVDPHHILIEDPDGSCCTLILDLNLTGIDSGQYMCFAASAAGNASTLGKILVQVPPRFVNVKVRATPFVEGEDAQ  
ITCTVEGAPYPQIRWYKDGTLAPGNRYRMLNEPRSGVLLVLIQAASKEDLGHYECELVNRLGSTRGGGELYM  
QSPALRARDQHHREQIVAAVEVTEQETKVPKKTVIIEETITTVVKSFRGRRQSPGKSPSRSPRRSASPFRPG  
LLAPERLYPPGTSPRLEVEQGRKAPVPALYVTEAENPLGSASAAAALVVDSDAEVAGPPGTSTATLLA  
MSTRGEGILFTLPGGI PGRDPNANNNSNKS SVYQEARWGPVAVHVGEPFIFQVDSVGNVDWVAASPEPEQVRA  
SQKEENTERQEGCSDGDENTFLMEEPQDQDLSQGRDPKILTHNGRVLTLADLEDYVPQEGETFGCGDSTPSTP  
DEPPCEVSVLQREISEPTVGGQPVLLNVGRPPGTGATPSFFRPGSQVHSPESVSFLLREAWSGPVSAAPTSSSF  
HTHVQSSVDGSHGSFKTEVSTQTVSFGAVGETVTLHIDPDGGEAPGPSQ\*

>rs50739555\_ENSMUSP00000020732\_c.12868:T>G\_p.V4290G  
ENSMUST00000020732.13|Obscn-201|ENSMUSG00000061462|-|chr11:g.58952291:A>C  
MDHSFSGAPRFLTRPKAFVSVGKDATLSCQIVGNPTPHVSWEKDRQPVVEAGARFRLAQDGDVYRLTILDLAL  
GDSGQYVCRARNAIGEAFAAVGLRVDSEGTCAEQAPHFLLRPTSIRVREGADATFRCRVGGSPQPAVSWSKDG  
RRLGPPDAPHVRVEEHGESSALRIRSARPRDGGTYEVRAENPLGSASAAAALVVDSDAEVAGPPGTSTATLLA  
HLQQRREAMRAEGIPPSPPGAGTRTCTVTEGKHARLSCFVTGEPKPEVWKKDGQLVTEGRRHVVEDEQENF  
VLKILFCKQSDRGLYTCTASNLVGQTYSSVLVVVREPTVPFKKRLQDLEVREKESATFQCEVAQAPATEAAWFK  
EETRLWASAKYDIEEGTERRLTVRNVSADDDAVYICETTEGSRVVAELSVQGNLTKRKLPRKTAVRTGDTAIF  
WVELAVPEGPVRWLRNQEEMVAGGRVAITAEGTCHTLTI FQCTLEDMGVAFVSGGCRTTTQFCVSAAPRRPPL  
YPPADPVVKAKTESSVTLWSAPPHGDRPVTIDGYVLEKRLGAYAWSRCHEAGWLATTEFTITGVAAEGDFQ  
FRVSAINHFGQGPYLEFPGTMHLVPMPLAVKTPKAVEAVEGGEVTFVSDLTVASSGEWFLDGEALKASSIYVI  
RCDRTRHMLTIREVPARLHGAQLKVFANGIETSIQMVVRAALGLPSSKLPAAAAREVLAQLHHEEAQLLAE LSD  
QAAAVTWLKDGRELSLGPKYEMQVSAGRRALLVRDVAQDDAGLYECVSRGSRRTAYQLLVQDITDGYRDWGPAG  
PQKHMCKCAGAKIARYLGSSCYRFLQYDKGVVWHLEAALDTRQKGTSSCSLHEKPKLVFAKQQAHEVKA  
AGNSATLSCEVTQAQTEVTWFKDGKLLSSSSKVRMEASGCSRRLVVQQAGKADAGEYSCEAGGQKLSFRLDVA  
EPKLVFAKQQAHEVKAEGASATLSCEVAQAQTEVTWFKDGKLLSSSSKVRMEASGCSRRLVVQQAGKADA  
GEYSCEAGGQKLSFRLDVAEPKMFVFAKEQQARSEVKAEGASATLSCEVAQAQTEVTWFKDGKLLSSSSKVRM  
EASGCSRRLVVQQAGKADAGEYSCEAGGQKLSFRLDVTEPKLVFAKEQQARSEVKAEGVNSATLSCEVAQAQ  
EVTWFKDGKLLSSSSKVRMEASGCSRRLVVQQAGKADAGEYSCEAGGQKLSFRLDVAEPKLVFAKEQQARSEV  
KAEAGNSATLSCEVAQAQTEVTWFKDGKLLSSSSKVRMEASGCSRRLVVQQAGKADAGEYSCEAGGQKLSFHL  
DVTEPKLVFAKEQQAHEVKAEGASATLSCEVAQAQTEVTWFKDGKLLSSSSKVRMEASGCSRRLVVQQAGK  
ADAGEYSCEAEGQKLSFRLDVAEPKLVFAKEQQARSEVKAEGASATLSCEVAQAQTEVTWFKDGKLLSSSSK  
VRVEASGCSRRLVVQQAGKADAGEYSCEAGGQKLSFRLDVAEPKLVFAKEQQANSEVKAEGASATLSCEVAQ  
AQTEVTWFKDGKLLSSSSKVRVEASGCSRRLVVQQAGKADAGEYSCEAGGQKLSFRLDVAEPKLVFAKEQQA  
SEVKAEGASATLSCEVAQAQTEVTWFKDGKLLSSSSKVRVEASGCSRRLVVQQAGKADAGEYSCEAGGQKLS  
FRLDVAEPKLVFAKEQQAHEVKAEGASATLSCEVAQAQTEVTWFKDGKLLSSSSKVRVEASGCSRRLVVQQ  
AGKADAGEYSCEAGGQKLSFRLDVAEPKLVFAKEQQAHEVKAEGASATLSCEVAQAQTEVTWFKDGKLLSS

SSKVRVEASGCSRRLVVQQAGKADAGEYSCEAGGQKLFRLDVAEPKLMFAKEQQAHSEVKAEAGASATLSCE  
VAQAQTEVTFWKDGKLLSSSSKVRVEASGCSRRLVVQQAGKADAGEYSCEAGGQKLSFRLDVAEPKLVFAKEQ  
QAHSEVKAEAGASATLSCEVAQAQTEVTFWKDGKLLSSSSKVRVEASGCSRRLVVQQVQKADAGEYSCEARGQ  
KLSFRLDVADTRLMFAKEQQARTEVKAEAGNSATLSCEVAQAQTEVTFWKDGKLLSSSSKVRVEASGCSRRLV  
VQQAGKADAGEYSCEAGGQKLSFRLDVAEAEESQIPERPSRREPLVVKEHETIILTATIAAPSVAAVTWLKDG  
EIRRSKRHEATSLGDTHTLTVRGAQVLDIAIYSCRVGKEGQDFPVQVEEVAAKFSKPLEPEVEGELGGTVMLVC  
ELSPQAEVWRCGNTQLRPGKRFQMTSEGPRTTLTVSGLREDDAEYVCESTRDDRTSARLTVKVPVVKFTS  
GLSAMVAEEGQEQATFQCVVSPSDAGVTWYKQDMQLQPSSEKFMVESGASRSLTILGLTLEDAGQVTEAEGAS  
SSAALRVREAPVLFKKKLEPQTVVEERTSVTLEVALTRPWPEVKWTRNAAVLTPSENVEIRAEGARHCLVLRV  
GFADRGGFFGCETPDDKTQAKLNVEMRQVRLVLRGLQVEVEAKEQGTASMDVELSHAEVEGWSWTRDGLRLQPGPKC  
HLAVQGPVHILTLALSALQPDGSLVAFRAEGVHTSARLIVTELPVSFTRVLQDVVATQKEKVTLECELSRPVDV  
RWLKDGVLELRAGKAIGIVAQGTCSLVIYRCETGDQGVYVCDALDAQTSASLRVQGRTYTLIFRRVLAEDAGE  
VKFVAENAESRAHLRVKELPVTLLRPLRDKIAMEKHRGVLECCQVSRASQVRWFVKGVELQSGPKYEVVSDGL  
YRKLVINVDVQPEDEDTYTCDAENVKTSAQFFVVEEQSITIVRGLKDMTVMPEPAPAWFECETSIPSVRPPKWL  
KTVLQAGGNVGLQDGTVHRLTLHKTCSTMTGPVHFTIGKSRSSAQLVVDIPVVLTRPLEPKAGRELQSVVL  
SCDFRPAPKAVQWYKDDTPLSPSEKFKMALEGQMAELRILRLTPADAGVYRCQAGSQAESAETVEAREVTVI  
QPLQDAEAMEEGRVCFSCELSHKDEDIEWSLNGTPLYNDSFHEISHEGLHTLVLKSVRQADTGTVCATSPKV  
SVSARLVVKGKPVVFLKALDDVSAEERGTTLTLQCEVSDPEARVWVRKDGVELGSDKYDFLHKAGARGLTVHD  
LSHEDAGLYTCQVGSKETQSKVSVHDLHVGITKRLKTVLEVLEGECSFECVLSHESPSDPAVWTVGGKTVGGS  
GHFHAVRQGRKYTLTVKDAALSDAGEVVSFVGLTSLKASLIIRERPVDTKPLEDQRTTLGEDVMLSCELSRA  
GTSVRWLKDGKAIRKSQKYDLLSEGTRAVLVVRKASLKDSEYTCETEASKSTAKLCEVEKANRFTTELADLQ  
VEEKGRAVFTCKTEHPASVVTWRKGLLELRASGKHVPSQEGTLKLTINALERTDSDTYTCDIGQARTQARLL  
VHGQKVRVIEDLEDTAVQEGSSAKFCCRIAPADYGPVHWFLLDKTPLHSNELNEITVQPPGYHVLTLRQLALKD  
SGTVYFEAGDQRTSAAALRVTEKPSIFSRPLTDVTVTEGEDTLVCETTTTVDSVVRWTKDGKTLRPSARCQLSH  
EGCQAQLLITATTPQDGGRYKCEIGGASSSSIVRVHALPVRFRFRESLKDVEVPEGKAATLRCVLSVAAPVEWR  
HGDDVLKSSNKYSLRKEGAVLELVIRDLQPDGSGQYSCSFGDQTTSATLTVKTSQAQFVKGKLRNKEATEGTT  
TLRCELTKREAPVLFKKKLEPQTVVEERTSVTLEVALTRPWPEVKWTRNAAVLTPSENVEIRAEGARHCLVLRV  
VRRLSKEATEGDTTTLQCELSKAAPVEWRKGTETLRDGDYSLKQDGAVALCELQIRSLTIADAGEYLCTCGQE  
KTSATLTVRALPAKFKDSLKNEEATEGTTATLSCELSKAAPVWKKGPKTLQSGDKYVLRQDGAVALCELQIHGL  
TMADAGEYSCVCGQEKTSATLTVRGLPAKFIEDLRSQEATEGATAILRCELSKAAPVEWRKGSSETLKDGDYR  
LRQDGAVALCELQIRGLAVVDGTYSLSLPTKFTTEGLRNEEATEGTMATLRCQMSKAAPVEWRKGSSETLRDGDYR  
LRQDGAVALCELQIRGLTIEDSGEYTCVCGQEKTSATLSVKALPSRFIEDLRSQEATEGTMATLRCQMSKTAPVE  
WKKGSETLRDGGYSLRQDGPVCELQICDLAVEDAGEYSCVCGQEKTSATLSIKALPPRFIEDLRSQEATEG  
MATLRCQMSKAAPVEWRKGSSETLGDGGYSLRQNGAVCELQIHDLAVEDTGEYSCVCGQEKTSATLNVKALPP  
RFIEDLRSQEATEGTMATLRCQMSKAAPVEWRKGSSETLRDGGYSLRQDGAVALCELQIHDLVEDAGQYSCVCG  
QEKTSAVLTVDALPPKFTTEGLKKEEATEGTMVTLRQMSKEATVEWRKGAKTLSDGGYSLRQDGAVALCELQI  
GLAVEDAGEYSCVCGQEKTSATLSVKALPPRFIEDLRSQEATEGTMATLRCQMSKAAPVEWRKGSSETLRDGD  
YSLRQDGAVALCELQIRDLAVEDAGEYLCVCGQEKTSATLSVKALPPRFIEDLRSQEATEGTMATLRCQMSKAAP  
VEWRKGSSETLRDGDYSLRQDGAVALCELQICDLAVEDTGDYSCVCGQEKTSATLSVKALPPRFIEDLRSQEA  
RGTVALRRCMSKAAPVEWRKGSSETLKDGDYSLRQEGNLCELQIRDLAVEDTEEYSCVCGQEKTSATLSVKAL  
PAKFIEDLRSQEAPESSTVTLRCKLSKASVWKKGSETLRNGARYSLRQDGAVALCELQIRDLTVEDTGEYSCT  
CGQERTSATLSIMAPQVVFQQPLQNLQAEEGSMASLRCELSVPNAAMVWSKGGLELQGDTRREARQQGCVAEL  
LLRDLRREDAGEYSCTCGSQTTSATLMVTAAPVRFRLRELQAQDVDEGATARLRCELSREAVSVEWRKGSQQLF  
PCAKYQMVQEGTTAELLVHGVEQEDAGEYTCDAHTQSIARLSVRAPKPKFKTDLQSTEQEAGGTARLCCQLS  
EAEFGTPVQWLKEGVELHVGSKYEMRRQGAVALCELLIHGLEAKDTGEYACLVGGQKTLASLRVKEPEVTVRGL  
VDMEVQADEDEFTCKVSQAGATDVQWHLQGLPLQSNVTEVAVLADGCTHVLQKGLVLEAGTVSFHVGGL  
SSSAQLTVRVPEVTVLEPLKDVQLSEGQDAHFRCLRSRASGQEARWALGGVPLQCNEMNDITVEQGTLYLLTL  
HKVTVLEAGTITLQVGSSESQAQLKVTAKNTVLRGLENVDALEGGEALFECQLSQPEVAHAHTWLLDDEPVHTS  
EKVEVVYFENGLRHLLLLKLNKPKQDSCRVTFLAGDVVTSFAFLTVRGRLEVLPEPPHDASVKAGMQVRFTCILS  
EAVPVGEATWYINGAAIQPDDTDWTVTTDGSHHALTLNSAQPQHAGEVTFFAARDAVASARLSVLALPDPPEDA  
EVVGRSDHSVTLVSWAPMSDGGGGLCGYRVMKEASTGQWQLCHDLVPGPECVVDLVPKTYRFRVAAVGPA  
GAGEPVHLPQMVKIAPAPAPAPAPAPAPAPETRAVVGEDICLELEVAADGGEVVWHKGTERRIQPGGHFEVLS  
RGQRQMLVIKGFRTEDQGEYRCGPIQGLPSSGAATFNVVMTSGSGDEVPAQPSLPPEAAQEGDLHLLWEALAR  
KRMSREPTLDSISELPEEDSRVQHLRQEAETAPDLSEGYSTADELARTGEADLSHTSSDDESRACTPSLVT  
YLKKAAGPGISPLASKHEAQVTSVKPQKQEPVVPTCPGDLAADLMDPSLDKAAVKIQAAFKGYKVRKE  
MKQQEGPVFSRTFGDTEAQVGDVLRLECVLATKTDMRACWLKDGIELTDGRHYHIDQLKDGTCSSLVVTGLAPT  
DSGRYTCQVSTKSGRVSHSACVVVSGTESEAESSSGGELDDAFRRAARLHRLFRKTPAELSEEELFLSADE  
GPGEPEPADWQTYREDENFVCIRFESLAEARQAVTCFRNMFMATMIGVEISLGEQGPVEMRIGKVAPT

PAVPLAKTPGLQTSDAAPVFLTELQNDVQDGYPMSFDCVVTGQPVPSVRWFKDGLLEEDDHYMINEDQQGG  
HQLIITAVVPADMGVYRCLAENSMGVSSTKAELRVELTSTDYDTAADATETSSYFSAQGYLSSREQEGTESDE  
GQLPQVLEELKDLQVAPGTRLAKFQLKVKGYPAKLYWFKDGPPLTSDHIRMTDKKTLHTLEIVSVTREDSDG  
QYAAYSNAVGAAAYSSARLLVRGPSEPEEKPPASDVHERLVPPRILEKFTPKKVKRGSSITFSVKVEGHPAPSV  
HWLKEEAKEGVLWIGPDTPGYTMASSSKQHSVLVLDVGRQHGGTYTCIATNPAGQALCSASLHISGLAKEEEQ  
ERVKEALISSFLQGTSAVSAQMSESAFADLVGQSKGESLVAEEAHSLSLAEVGTTEFLQKLTSTQITEMVS  
AKISQAKLQVPGGDSDEETKTPSASPRHGRSRPSSSVQESSESESDGDSRGEIFDIYVVTADYLPGLAEQDAI  
ILREGQYVEVLDSAHPLRWLVRTKPTKSSPSRQGWVSPAYLDKRLKLSPEWGPTEAPEFPGEAVSEDEYRTRL  
SSVIQELLSSEQAFVGELEFLSHHMKHLERSPRVPAAVASQKTVIFRNVDI SHFHSSFLKELQCGTDDDDV  
AMCFIKNQEAFAKEYLEFLVGRVQAESVVVSTPVQEFYKKYAEETLSAKDPTQPPPPPLQHYLEQPVERVQKYQ  
ALLKELIRNKARNRQNCALLEQAYAVVSALPQRAENKLVSLMENYPGTLEALGEPTRQGHFIVWEGAPGARM  
PWKGHNHRVFLFRNYLVICKPRRDSRTDFTSYVFRNMMKLSSIDLNDQVEGDDRAFEVWHEREDSVRKYLLQA  
RTVLIKNSWVKEICGIQQLAQPVWRPPEFEEELADCTAELGETVKLACRVTGTTPKPIVSWYKDGKPVVEVDPH  
HILIEDPDGSLTILDNLTGIDSGQYMCFAASAAGNASTLGKILVQVPPRFVNVKVRATPFVEGEDAQITCTVE  
GAPYPQIRWYKDGTLTLLAPGNRYRMLNEPRSGVLVLIQAASKEDLGHYECELVNRLGSTRGGGELYMQSPALR  
ARDQHHREQIVAAVEERRPSP\*  
>rs50739555\_ENSMUSP00000151217\_c.10960:T>G\_p.V3654G  
ENSMUST00000219084.3|Obscn-207|ENSMUSG00000061462|-|chr11:g.58952291:A>C  
MDHSFSGAPRFLTRPKAFVSVGKDATLSCQIVGNPTPHVSWEKDRQPVEAGARFRLAQDGDVYRLTILDLAL  
GDSGQYVCRARNAIGEAFVAVGLRVDSEGTCAEQAPHFLLRPTSIRVREGADATFRCRVGGSPQPAVSWSKDG  
RRLGPPDAPHVRVEEHGESSALRIRSARPRDGGTYEVRAENPLGSASAAAALVVDSDAEVAGPPGTSTATLLA  
HLQORREAMRAEGIPPSPPGAGTRTCTVTEGKHARLSCFVTGEPKPEVWKKDGLVTEGRRHVVEDEQENF  
VLKILFCKQSDRGLYTCTASNLVGQTYSSVLVVREPTVPFKKRLQDLEVREKESATFQCEVAQPAEAAWFK  
EETRLWASAKYDIEEEGTERRLTVRNVSADDDAVYICETTEGSRVAELSVQGNLTKLPRKTAVRTGDTAIF  
WVELAVPEGPRWLRNQEEMVAGGRVAITAEGTCHTLTI FQCTLEDMGEVAFVSGGCRTTTQFCVSAPRRPPL  
YPPADPVVKAKTESVTLWSAPPHGDRPVTIDGYVLEKRKLGAYAWSRCHEAGLATTEFTITGVAEEGDFQ  
FRVSAINHFGQTPYLEFPFGTMLHVLVPLAVKTPLKAVEAERKGEVTFVSDLTVASSGEWFLDGEALCASSIYVI  
RCDRTRHMLTIREVPARLHGAQLKFVANGIETSIQMVVRAALGLPSSKLPAAAAAREVLAQLHEEAQLLAE LSD  
QAAA VTLKDGRELSLGPKEYMQVSAGRRALLVRDVAQDDAGLYECVSRGSRRTAYQLLVQDITDGYRDWGPAG  
PQKHMCKCAGAKIARYLGSSCYRFLQYDKGVWHLEAALDTRQKGTSSCSLHEKPKLVFAKQQAHSEVKA  
AGNSATLSCEVTQAQTEVTWFKDGKLLSSSSKVRMEASGCSRRLVVQQAGKADAGEYSCEAGGQKLSFRLDVA  
EPKLVFAKQQAHSEVKAEGASATLSCEVAQAQTEVTWFKDGKLLSSSSKVRMEASGCSRRLVVQQAGKADA  
GEYSCEAGGQKLSFRLDVAEPKMFVFAKEQQARSEVKAEGASATLSCEVAQAQTEVTWFKDGKLLSSSSKVRM  
EASGCSRRLVVQQAGKADAGEYSCEAGGQKLSFRLDVTEPKLVFAKEQQARSEVKAEGASATLSCEVAQAQ  
EVTWFKDGKLLSSSSKVRMEASGCSRRLVVQQAGKADAGEYSCEAGGQKLSFHLDVTEPKLVFAKEQQAHSEV  
KAEAGASATLSCEVAQAQTEVTWFKDGKLLSSSSKVRMEASGCSRRLVVQQAGKADAGEYSCEAGGQKLSFR  
DVAEPKLVFAKEQQARSEVKAEGASATLSCEVAQAQTEVTWFKDGKLLSSSSKVRVEASGCSRRLVVQQAGK  
ADAGEYSCEAGGQKLSFRLDVAEPKLVFAKEQQANSEVKAEGASATLSCEVAQAQTEVTWFKDGKLLSSSSK  
VRVEASGCSRRLVVQQAGKADAGEYSCEAGGQKLSFRLDVAEPKLAFAKEQQAHSEVKAEGASATLSCEVAQ  
AQTEVTWFKDGKLLSSSSKVRVEASGCSRRLVVQQAGKADAGEYSCEAGGQKLSFRLDVAEPKLVFAKEQQAH  
SEVKAEGASATLSCEVAQAQTEVTWFKDGKLLSSSSKVRVEASGCSRRLVVQQVQKADAGEYSCEARGQKLS  
FRLDVAEAEQSIPERPSRREPLVVEKHETIILTATIAAPSVAAVTWLKDGVERRSKRHEATSLGDTHTLTVR  
GAQVLD SAIYSCRVGKEGQDFPVQVEEVAAKFSKPLEPVEGELGGTVMLVCELSPEQAEVWRCGNTQLRPGK  
RFQMTSEGPRTTLTVSGLREDDAEYVCESRDDRTSARLTVKVPVVKFTSGLSAMVAEEGQEAFTQCQVSPS  
DAGVTWYKDMQLQPSEKFMVESGASRSLTILGLTLEDAGQVTVAEAGASSAALRVREAPVLFKCKLEPQT  
VEERTSVTLEVELTRPWPEVKWTRNAAVLTPSENVEIRAEGARHCLVLRVSGFADRGGFCETPD DKTQAKLN  
VEMRQVRLVRGLQEVEAKEQGTASMDVELSHAEVEGSWTRDGLRLQPGPKCHLAVQGPVHILTLALSALQPQDSG  
LVAFRAEGVHTSARLIVTELPVSFTRVLQDVVATQKEKVTLECELSRPVDVRWLKDGVELRAGKAIGIVAQGT  
CRSLVIYRCETGDQGVYCDALDAQTSASLRVQGRYTLIFRVLAEADAGEVKFVAENAESRAHLRVKELPVT  
LLRPLRDKIAMEKHRGVLECVSRASAQVRWFKGGVELQSGPKYEVVSDGLYRKLVIINDVQPEDEDYTC DAG  
NVKTSAQFFVEEQSITIVRGLKDMTVMEMPAPAWFECETSIPSVRPPKWLKGTVLQAGGNVLEQDGTVHRLT  
LHKTCSTMTGPVHFTIGKSRSSAQLVSDIPVVLTRPLEPKAGRELQSVVLSCDFRPAPKAVQWYKDDTPLSP  
SEKFKMALEGQMAELRILRLTPADAGVYRCQAGSAQSADVTVEAREVTVIQPLQDAEAMEEGRVCFSELSSH  
KDEDIEWLNGTPLYNDSFHEISHGCLHTLVLSKVRQADGTVCATSPKVS SARLVVKGPFVFLKALDDV  
SAEERGLTLTQCEVSDPEARVWVRKDGVELGSPDKYDFLHKAGARGLTVHDLSHEDAGLYTCQVGSKETQSKV  
SVHDLHVGITKRLKTVEVLEGESECFVLSHESPSDPAVWTVGGKTVGGSGHFHAVRQGRKYTLTVKDAALS  
DAGEVVFVGLTTSKASLIIRERPVDITKPLEDQRTTLGEDVMLSCELSRAGTSVRWLKDGKAIRKSQKYDLL  
SEGTRAVLVVRKASLKDSGEYTCETEASKSTAKLCVEEKANRFTTELADLQVEEKGRAVFTCKTEHPASVVTW

RKGLLELRASGKHVPSQEGTLTKLTINALERTSDTYTCDIGQARTQARLLVHGQKVRVIEDLEDTAVQEGSS  
AKFCRIAPADYGPVHWFVLDKTPHLSNELNEITVQPGGYHVLTLRQLALKDSGTVYFEAGDQRTSAAALRVTEK  
PSIFSRPLTDVTVTEGEDLTLVCETTTVDSSVRWTKDGKTLRPSARCQLSHEGCGAQLLITATTPQDGGRYKC  
EIGGASSSSIVRVHALPVRFRESLKDVEVPEGKAATLRCVLSVAAPVEWRHGDDVLKSSNKYSLRQEGAVLE  
LVIRDLQPQDSGQYSCSFGDQTTSATLTVKTSQAQFVGLKRNKEATEGTTVTLRCELTKKEAPVEWKKGTETLR  
NGDKYSLKQDGAVCELQICSLLVADAGEYSCVCGQEKTSATLTVKALLVHFVRRRLRSKEATEGDTTTLQCELS  
KAAPVEWRKGTETLRDGDYSLKQDGAVCELQIRSLTIADAGEYLCTCGQEKTSATLTVRGLPAKFIEDLRSQ  
EATEGTMATLRCESKAAPVEWRKGSSETLKDGDYTLRQDGAVCELQIRGLAVVDTGTYSSTLPTKFTTEGLRNE  
EATEGTMATLRCESKAAPVEWRKGSSETLKDGDYTLRQDGAVCELQIRGLAVVDTGTYSSTLPTKFTTEGLRNE  
VKALPPRFIEDLRSQEATEGTMATLRCQMSKAAPVEWRKGSSETLGDGGYSLRQNGAVCELQIHDLAVEDTGE  
YSCGCGQEKTSATLNVKALPPKFTTEGLKKEEATEGTMVTLRCQMSKEATVEWRKGAKTLSDDGGYSLRQDGAM  
CELQICGLAVEDAGEYSCVCGQEKTSATLSVKALPPRFIEDLRSQEATEGTMATLRCQMSKAAPVEWRKGSSET  
LRDGDYSLRQDGAVCELQIRDLAVEDAGEYLCVCGQEKTSATLSVKALPPRFIEDLRSQEATEGTMATLRCQ  
MSKAAPVEWRKGSSETLKDGDYSLRQDGAVCELQICDLAVEDTGDYSCVCGQEKTSATLSVKAPQVVFQQPLQ  
NLQAEEGSMASLRCELSVNAAMVWSKGGLELQGDTRREARQQGCVAELLLRDLRREDAGEYSCVCGSQTTS  
TLMVTAAPVRFRLRELQAQDVDEGATARLRCESREAVSVEWRKGSQVFPKAYQMVQEGTTAELLVHGVEQE  
DAGEYTCDAHTQSIARLSVRAPKPKFKTDLQSTEQEAGGTARLCCQLSEAEPTPVQWLKEGVELHVGSQY  
MRRQGAFCCELLIHGLEAKDTGEYACLVGQKTLASLRVKEPEVTIVRGLVDMEVQADEVTEFTCKVQAGATD  
VQWHLQGLPLQSNEVTEVAVLADGCTHVLQKGVTLDEAGTVSFHVGGSSSAQLTVRVPVTVLEPLKDVQL  
SEGQDAHFRCRLSRASQEARWALGGVPLQCNEMNDITVEQGTLYLLTLHKVTLDEAGTITLVQVGSSEAQL  
KVTAKNTVLRGLENDVALEGGALFECQLSQPEVAHTWLLDDEPVHTSEKVEVVYFENGLRHLKLNKLPQ  
DSCRVTFLAGDVVTSFALTVRGWRLEVLEPPHDASVKAGMQRFTCILSEAVPVGEATWYINGAAIQPDDTDW  
TVTTDGGSHHALTLSNAQPQHAGEVTFFAARDAVASARLSVLALPDPPEDAEVVGRSDHVSVLSWVAPMSDGGG  
LCGYRVEMKEASTGQWQLCHDLVPGPECVDDLVPGKTYRFRVAAVGPAGAGEPVHLPQMVKIAPAPAPAPAP  
APAPETRAQAVVGEDICLELEVAADGGEVVWHKGTERTIQPGGHFEVLSRGRQMLVIKGFRTEDQGEYRCGPIQ  
GLPSSGAATFNVMTSGSGDEVPAQPSLPPEAAQEGDLHLLEALARKRRMSREPTLDSISELPEEDSRVQHL  
RQEAEEETAPDLSEGYSTADELARTGEADLSHSDDESFRAGTPSLVTYLKKAGGPGISPLASKHEAQVTTSVK  
PQKQQEPVVPPTCPPPGDLSAADLMDPSLDKAAVKIQAAFQKGYKVRKEMKQOQEGPVFSRTFGDTEAQVGDVLR  
ECVLATKTDMRACWLKDGIELTDGRHYHIDQLKDGTCSLLVTLGLAPTDGGRYTCQVSTKSGRVSHSACVVVSG  
TESEAESSSGGELDDAFRRARRLHRLFRTKSPAELSEELFLSADEGPGEPEEPADWQTYREDEFVFCIRFE  
SLAEARQAVTCFRNMFMATMGIGVEISLGEQGPGRVEMRIGKVAPTVTPAVPLAKTPGLQTSDAAPVFLTELQN  
QVDQDGYPMSFDCVVTGQVPSVRWFKDGKLLLEDDHYMINEDQGGHQLIITAVVPADMGVYRCLAENSMGV  
SSTKAELRVELTSTDYDTAADATETSSYFSAQGYLSSREQEGTESDEGQLPQVLEELKDLQVAPGTRLAKFQL  
KVKGYPAPKLYWFKDQGLTTSDHIRMTDKKTLHTLEIVSVTREDSGQYAAAYISNAVGAAYSSARLLVGRPSE  
PEEKASDVHRLVPPRILEKFTPKKVKRGSSITFSVKVEGHPAPSVHWLKEEAKEGVLWIGPDTPGYTMAS  
SKQHSVLVLDVGRQHGTYTCIATNPAGQALCSASLHISGLAKEEEQERVKEALISSFLQGSTQAVSAQMSSES  
AGFADLVGQSKGESLVAEEAHSHLSLAEVGTTEFLQKLTSTIEMVSAKISQAKLQVPGGDSDEETKTPSASP  
RHGRSRPSSSVQESSSESEDGDSRGEIFDIYVVTADYLPLGAEQDAIILREGQYVEVLDSAPHLRVLVTRKPT  
KSSPSRQGWVSPAYLDKRLKLSPEWGPTEAPEFPGEAVSEDEYRTRLSVVIQELLSSEQAFVGELOFLSHHM  
KHLERSPRVPAAVASQKTVI FRNVQDISHFHSSFLKELQCGCTDDDVAMCFIKNQEAFEKYLEFLVGRVQAES  
VVVSTPVQEFYKKYAETLSAKDPTQPPPPPLQHYLEQPVERVQKYQALLKELIRNKARNRQNCALLEQAYAV  
VSALPQRAENKLVSLMENYPGTLEALGEPTRQGHFIVWEGAPGARMPWKGNRHRVFLFRNYLVI CKPRRDSR  
TDTFSYVFRNMMKLSSIDLNDQVEGDDRAFEVWHEREVSRKYLQARTV I IKNSWVKEICGIQQRQAQPVWR  
PPEFEEELADCTAELGETVKLACRVGTGPKPIVSWYKDGKPEVDPHILIEDPDGSCTLIDLNLGTIDSGQY  
MCFASAAGNASTLTKILVQVPPRFVNVKVRATPFVEGEDAQITCTVEGAPYPQIRWYKDGTLAPGNRYRMLN  
EPRSGVLVLIQAASKEDLGHYECELVNRGSTRGGGELYMQSPALRARDQHHREQIVAAVEVTEQETKVPKK  
TVIIEETITTVVKSPPRRRQSPGKSPSRPSRRSASPRRPGLLAPERLYPPGTSPSRRLEVEQGRKAPVPALY  
VTEAEVHAPASQSQPKWLEVEETIEVRVKKTGSRGASPVREMTSRGEGILFTLPGGIPGRDPNANNNSNKS  
QVYQARTWGPVVHVGEFFIFQVDSVGNVDWVAASPEPEQVRASQKEENTERQEGCSDGDENTFLMEEPQD  
TDSLQGRDPKILTHNGRVLTLADLEDYVPQEGETFQCGDSTPSTPDEPPEVSVLQREI SEPTVQPVLLNVGRPPG  
TGATPSFFRPGSQVHSPESVSFLLEAWSGPVSAAPWTSSFHHTVQSSVDGSHGFSFKTEVSTQTVSFGAVGET  
VTLHIDPDGGEAPGPSQG\*

>ENSMUSP00000158795\_c.12828:C>AGGCCCTTGTGGGTGGGAC\_p.H4277RPLWVGH-ins  
ENSMUST00000238536.2|Obscn-210|ENSMUSG00000061462|-  
|chr11:g.58952331:g>GTCCACCCACAAGGCCCT  
MDHSFSGAPRFLTRPKAFVSVGKDATLSCQIVGNPTPHVSWEKDRQPVVEAGARFLAQDGDVYRLTILDLAL  
GDSGQYVCRARNAIGEFAAVGLRVDSEGTCAEQAPHLLRPTSIRVREGADATFRCRVGGSPQPAVSWSKDG  
RRLGPPDAPHVRVEEHGESSALRIRSARPRDGGTYEVRAENPLGSASAAAALVVDSDAEVAGPPGTSTATLLA



HLQQRREAMRAEGIPPSPPGAGTRTCTVTEGKHARLSCFVTGEPKPEVWKKDQGLVTEGRRHVVEDEQENF
VLKILFCKQSDRGLYTCTASNLVGQTYSSVLVVVREPTVPFKKRLQDLEVREKESATFQCEVAQPATEAAWFK
EETRLWASAKYDIEEEGETERRLTVRNVSADDDAVYICETTEGSRVVAELSVQGNLTKRKLPRKTAVRTGDTAIF
WVELAVPEGPVWRWRNQEEMVAGGRVAITAEGTCHTLTI FQCTLEDMGEVAFVSGGCRTTTQFCVSAPRRPPL
YPPADPVVKAKTESVTLWSAPPHGDRPVTIDGYVLEKRLGAYAWSRCHEAGWLATTEFTITGVAAEEDGFQ
FRVSAINHFGQGPYLEFPGTMHLVPLAVKTPKAVEAVEGGEVTFVSDTLTVASSGEWFLDGEALKASSIYVI
RCDRTRHMLTIREVPARLHGAQLKFVANGIETSIQMVVRAALGLPSSKLPAAAAREVLAQLHAEAQLLAE LSD
QAAAFTWLKDGRELSLGPKYEMQVSAGRRALLVRDVAQQDDAGLYECVSRGSRRTAYQLLVQDITDGYRDWGPAG
PQKHMCKCAGAKIARYLGSSCYRFLQYDKGVVHWEAALDTRQKGTSSCSLHEKPKLVFAKGOQAHSEVKA
AGNSATLSCEVTQAQTEVTFWKDGKLLSSSSKVRMEASGCSRRLVVQQAGKADAGEYSCEAGGQKLSFRLDVA
EPKLVFAKGOQAHSEVKAEGASATLSCEVAQAQTEVTFWKDGKLLSSSSKVRMEASGCSRRLVVQQAGKADA
GEYSCEAGGQKLSFRLDVAEPKMFVFAKEQQARSEVKAEGASATLSCEVAQAQTEVTFWKDGKLLSSSSKVRM
EASGCSRRLVVQQAGKADAGEYSCEAGGQKLSFRLDVTEPKLVFAKEQQARSEVKAEGVNSATLSCEVAQAQ
EVTWTFKDGKLLSSSSKVRMEASGCSRRLVVQQAGKADAGEYSCEAGGQKLSFRLDVAEPKLVFAKEQQARSEV
KAEAGNSATLSCEVAQAQTEVTFWKDGKLLSSSSKVRMEASGCSRRLVVQQAGKADAGEYSCEAGGQKLSFHL
DVTEPKLVFAKEQQAHSEVKAEGASATLSCEVAQAQTEVTFWKDGKLLSSSSKVRMEASGCSRRLVVQQAGK
ADAGEYSCEAGGQKLSFRLDVAEPKLVFAKEQQARSEVKAEGASATLSCEVAQAQTEVTFWKDGKLLSSSSK
VRVEASGCSRRLVVQQAGKADAGEYSCEAGGQKLSFRLDVAEPKLVFAKEQQANSEVKAEGASATLSCEVAQ
AQTEVTFWKDGKLLSSSSKVRVEASGCSRRLVVQQAGKADAGEYSCEAGGQKLSFRLDVAEPKLAFAKEQQAH
SEVKAEGASATLSCEVAQAQTEVTFWKDGKLLSSSSKVRVEASGCSRRLVVQQAGKADAGEYSCEAGGQKLS
FRLDVAEPKLAFAKEQQAHSEVKAEGASATLSCEVAQAQTEVTFWKDGKLLSSSSKVRVEASGCSRRLVVQQ
AGKADAGEYSCEAGGQKLSFRLDVAEPKLAFAKEQQAHSEVKAEGASATLSCEVAQAQTEVTFWKDGKLLSS
SSKVRVEASGCSRRLVVQQAGKADAGEYSCEAGGQKLFRLDVAEPKLMFAKEQQAHSEVKAEGASATLSCE
VAQAQTEVTFWKDGKLLSSSSKVRVEASGCSRRLVVQQAGKADAGEYSCEAGGQKLSFRLDVAEPKLVFAKEQ
QAHSEVKAEGASATLSCEVAQAQTEVTFWKDGKLLSSSSKVRVEASGCSRRLVVQQVKGADAGEYSCEARGQ
KLSFRLDVADATRLMFAKEQQARTEVKAEGANSATLSCEVAQAQTEVTFWKDGKLLSSSSKVRVEASGCSRRLV
VQQAGKADAGEYSCEAGGQKLSFRLDVAEAEASQIPERPRREPLVVKHEHETIILTATIAAPSVAAVTVLKDGV
EIRRSKRHEATSLGDHTLTVRGAQVLDIAIYSCRVGKEGQDFPVQVEEVAAKFSKPLEPVEGELGGTVMLVC
ELSPQAEVWRCGNTQLRPGKRFQMTSEGPRRTLTVSGLREDDAEYVCESRDDRTSARLTVKVPVVKFTS
GLSAMVAEEGQEQATFQCVVSPSDAGVTWYKDGMLQPSKFMVMEVSGASRSLTILGLTLEDAGQVTEAEGAS
SSAALRVREAPVLFKKLEPQTVERTSVTLEVELTRPWPEVKWTRNAAVLTPSENVEIRAEGARHCLVLRV
GFADRGFFGCETPDDKTQAKLNVEMRQVRLVRGLQEVEAKEQGTASMDVELSHAEEVGSWTRDGLRQLQPGPKC
HLAVQGPVHILTLALQPDQSGLVAFRAEGVHTSARLIVTELPSVSTRVLQDVVATQKEKVTLECELSRPVDV
RWLKDGVNELRAGKAIGIVAQGTCSRSLVIYRCETGDQGVYVCDALDAQTSASLRVQGRTYTLIFRRLAEDAGE
VKFVAENAESRAHLRVELPVTLLRPLRDKIAMKHRGVLECCQVSRASAQVRWFKGGVELQSGPKYEVVSDGL
YRKLVINADVQPEDEDTYTCDAGNVKTSAQFFVEEQSITIVRGLKDMTVMPEPAPAWFECETSIPSVRPPKWL
KTVLQAGGNVLEQDGTVHRLTLHKTCSTMTGPVHFTIGKSRSSAQLVVSDIPVVLTRPLEPKAGRELQSVVL
SCDFRPAPKAVQWYKDDTPLSPSEKFKMALEGQMAELRILRLTPADAGVYRCQAGSAQSSAEVTEAREVTVI
QPLQDAEAMEEGRVCFSCELSHKDEDIEWSLNGTPLYNDSFHEISHEGCLHTLVLSVRQADTGTVCATSPKV
SVSARLVVKGKPVVFLKALDDVSAEERGTLLTQCEVSDPEARVVWRKDGVELGSPDKYDFLHKAGARGLTVHD
LSHEDAGLYTCQVGSKETQSKVSVHDLHVGITKRLKTVEVLEGECSFECVLSHESPSDPAVWTVGGKTVGGS
GHFHAVRQGRKYTLTVKDAALSDAGEVVSVLGLTSKASLIIRERPVDITKPLEDQRTTLGEDVMLSCELSRA
GTSVRWLKDGKAIRKSQKYDLLSEGTRAVLVVRKASLKDSGEYTCETEASKSTAKLCVEEKANRFTEELADLQ
VEEKGRAVFTCKTEHPASVVTWRKGLLELRASGKHVPSQEGTLKLTINALERTDSDTYTCDIGQARTQARLL
VHGQKVRVIEDLEDTAVQEGSSAKFCRIAPADYGPVHWFLLDKTPLHSNELNEITVQPGYHVLTLRQLALKD
SGTVYFEAGDQRTSAALRVTEKPSIFSRPLTDVTVTEGEDTLVCETTTTVDSVVRWTKDGKTLRPSARCQLSH
EGCQAQLLITATTPQDGGRYKCEIGGASSSSIVRVHALPVRFRRESLKDVEVPEGKAATLRCVLSVAAPVEWR
HGDDVLKSSNKYSLRQEGAVLELVIRDLQPDQSGQYSCSFGDQTTSATLTVKTSQAQFVGLKRNKEATEGTTV
TLRCELTKAEAPVEWKKGTETLRNGDKYSLKQDGAVCELQICSLLVADAGEYSCVCGQEKTSATLTVKALLVHF
VRLRSKEATEGDTTTLQCELSKAAPVEWRKGTETLRDGDYSLKQDGAVCELQIRSLTIADAGEYLCTCGQE
KTSATLTVRALPAKFKDSLKNEEATEGTTATLSCELSKAAPVWKKGPKTLQSGDKYVLRQDGAVCGLQIHGL
TMADAGEYSCVCGQEKTSATLTVRGLPAKFIEDLRSQEATEGATAILRCELSKAAPVEWRKGSSETLKDGDYR
LRQDGAVCELQIRGLAVDTGTYSLLPTKFTTEGLRNEEATEGTMATLRCQMSKAAPVEWRKGSSETLRDGDYR
LRQDGAVCELQIRGLTIEDSGEYTCVCGQEKTSATLSVKALPSRFIEDLRSQEATEGTMATLRCQMSKATAPVE
WKKGSETLRDGGYSLRQDGPVCELQICDLAVEDAGEYSCVCGQEKTSATLSIKALPPRFIEDLRSQEATEG
MATLRCQMSKAAPVEWRKGSSETLGDGGYSLRQNGAVCELQIRPLWVGHDLAVEDTGEYSCVCGQEKTSATLN
VKALPPRFIEDLRSQEATEGTMATLRCQMSKAAPVEWRKGSSETLRDGGYSLRQDGAVCELQIHDLVDVEDAGQ
YSCVCGQEKTSAVLTVDALPPKFTTEGLKKEEATEGTMVTLRCQMSKEATVEWRKGAKTSLSDGGYSLRQDGAM

CELQICGLAVEDAGEYSCVCGQEKTSATLSVKALPPRFIEDLRSQEATEGTMATLRCQMSKAAPVEWRKGET  
 LRDGDRYSLRQDGAUCELQIRDLAVEDAGEYLCVCGQEKTSATLSVKALPPRFIEDLRSQEATEGTMATLRCQ  
 MSKAAPVEWRKGSKTLRDGDRYSLRQDGAUCELQICDLAVEDTGDYSCVCGQEKTSATLSVKALPPRFIEDLR  
 SQEAREGTVATLRCRMSKAAPVEWRKGETLKDGDYSLRQEGNLCELQIRDLAVEDTEEYSCVCGQEKTSAT  
 LSVKALPAKFIEDLRSQEAPESSTVTLRCKLSKKASVVWKKGETLRNGARYSLRQDGAUCELEIRDLTVEEDT  
 GEYSCTCGQERTSATLSIMAPQVVFQQPLQNLQAEEGSMASLRCELSVPNAAMVWSKGGLELQGDTRREARQQ  
 GCVAELLLRDLRREDAGEYSCCTGSQTTSATLMVTAAPVRFLELQAQDVDEGATARLRCELSREAVSVEWRK  
 GSLQLFPCAQYQMVQEGTTAEELLVHGVEQEDAGEYTCDAAGTQS IARLSVRAPKPKFKTDLQSTEQEAGGTAR  
 LCCQLSEAEPTPVQWLKEGVELHVGSKYEMRRQGAUCELLIHGLEAKDTGEYACLVGQKTLASLRVKEPEV  
 TIVRGLVDMEVQADEDEFTCKVVSQAGATDVQWHLQGLPLQSNVETEVAVLADGCTHVLQKGVTLLEDAGTVS  
 FHVGGSSSAQLTVRVPEVTVLEPLKDVQLSEGQDAHFRCRLSRASQGEARWALGGVPLQCNEMNDITVEQGT  
 LYLLTLHKVTLLEDAGTITLQVGSSESAQLKVTAKNTVLRGLENVDALEGGALFECQLSQPEVAATWLLDD  
 EPVHTSEKVEVVYFENGLRHLLLLKNLKPQDSCRVTFLAGDVVTS AFLTVRGRWLEVLPPHDASVKAGMQVR  
 FTCLLSEAVPVGEATWYINGAATQPDWVTVDGSHHALTLSNAQPQHAGEVTF AARDAVASARLSVLALP  
 DPPEDAEEVGRSDHVSVTLSSWVAPMSDGGGGLCGYRVMKEASTGQWQLCHDLVPGPECVVDDLVPKTYRFRV  
 AAVGPAGAGEPVHLPQMVKIAPAPAPAPAPAPAPETRAVVGEDICLELEVAADGGEVWVHKGTERIQPGG  
 HFEVLSRGQMLVIKGFRTEDQGEYRCGPIQGLPSSGAATFNVMVMTSGSGDEVPAQPSLPPEAAQEGDLHLL  
 WEALARKRRMSREPTLDSISELPEEDSRVQHLRQEAETAPDLSEGYSTADELARTGEADLSHTSSDDESFRAG  
 TPSLVTYLKKAGGPGISPLASKHEAQVTVSVKPKQKQEPVVPTCPPPGDLSAADLMDPSLDKAAVKIQAAFKG  
 YKVRKEMKQOEGPVFSRTFGDTEAQVGDVLRLECVLATKTDMRACWLKDGIELTDGRHYHIDQLKDGTCSSLLV  
 TGLAPTDSGRYTCQVSTKSGRVSHSACVVVSGTESEAESSSGGELDDAFRRAARRLHRLFRTKSPAELSEEEL  
 FLSADEGPGPEEPADWQTYREDENFVCIRFESLAEARQAVTCFRNMFATMIGVEISLGEQGRGVEMRIGK  
 VAPTVPAPVPLAKTPGLQTSDAAPVFLTELQNDVDQDGYPMSFDCVVTGQPVPSVRWFKDGKLEEDDHYMIN  
 EDQGGHQLIITAVVPADMGVYRCLAENSMGVSSTKAELRVELTSTDYDTAADATETSSYFSAQGYLSSREQE  
 GTESDEGQLPQVLEELKDLQVAPGTRLAKFQLKVKGYPAKLYWFKDQGLTSSDHIRMDDKTLHTLEIVSV  
 TREDSGQYAAIYISNAVGAAYSARLLVRGVPSEPEEKSPASDVHERLVPRILEKFTPKKVKRGSSTFVSVKVEG  
 HPAPSVHHLKEEAEGVLIWIGPDTPGYTMASSSKQHSVLLDVGQRHQGTYTIC IATNPAGQALCSASLHISGL  
 AKEEEQERVKEALISSFLQGTSAQVSAQMSSEAGFADLVGQSKGESLVAEEAHSHLSLAEVGTTEFLQKLTSSQ  
 ITEMVSAKISQAKLQVPGGDSDEETKTPSASPRHGRSRPSSSVQESSSESEDGDSRGEIFDIYVVTADYLPLG  
 AEQDAIILREGQYVEVLDSAHPLRWLVRTKPTKSSPSRQGWSPAYLDKRLKLSPEWGPTEAPEFPGEAVSED  
 EYRTRLSSVIQELLSSEQAFVGELOFLESHHMKHLERSPRVPAAVASQKTVI FRNVQDISHFHSSFLKELQGC  
 GTDDVAMCFIKNQEA FEKYLEFLVGRVQAESVVVSTPVQEFYKKAETLSAKDPTQPPPPPLQHYLEQPV  
 RVQKYQALLKELIRNKARNRQNCALLEQAYAVVSALPQRAENKLVSLMENYPGTLEALGEPVIRQGHFVWEG  
 APGARMPWKGNHRVFLFRNYLVICKPRRDSRTDTFSYVFRNMMLSSIDLNDQVEGDRAFEVWHEREDSVR  
 KYLLQARTVI IKNSWVKEICGIQQLRAQPVWRPPEFEELADCTAELGETVKLACRVGTGPKPIVSWYKDGK  
 VEVDPHHILIEDPDGSCITLIDNLTGIDSGQYMCFAASAAGNASTLGKILVQVPPRFVNKVRATPFVEGEDAQ  
 ITCTVEGAPYPQIRWYKDGTLTLLAPGNRYRMLNEPRSGVLVLIQAASKEDLGHYECELVNRLGSTRGGGELYM  
 QSPALRARDQHHREQIVAAVEDTSVEGSAHSAQDGDADQQAASVLRLLGSEALGSPGDLNTRQSEPPAFEE  
 AASQIPGAASGTPEVSQPGTHKGLEQETTSSGSQGWTVPIRVEGTAWPGAGTGQLLLDVHSQVIMETTORTYV  
 CQAPDGTGTRAPSMQVTIEDVQVQVGDMAQF DAVIEGHPPPIVITWYKSTQLTSSARLSQRQDGTYSLVLTD  
 VAPHDAGVYTCVANNAGGQVLCKAELLVHGGDKLDAENQVYRRKLHSFYDVQEEIGRGVFGFVKRVQHKGNKM  
 FCAAKFIPLRSKTRAQAYQERDILATLGHPLVTGLLDQFETRKTLLILELCSSEELLDRLFKKGVVTEAEVK  
 VYIQQLVEGLHYLHSHGILHLDDIKPPNIMLVHPAREDIKICDFGFAQKITPSEPQYSKYGSPEFVSPETIEQN  
 TVSEGSDIWMAGVISYLSLTCSSPFAGESDRATLLNVLEGRVSWSSPTAAHLSSEDAKDFIKATLQRTPRARPS  
 TSQCLAHWPFLKSMPEEAHFINTKQLKFLARSQRSLMSYKSILVMRSIPELLQGPDPSPSLGVARHLRG  
 EASGASSSSSSSDNELAPFARAKSLPPSPVTHSPLLHPRGFLRPSASLPEETEASMTADAAPASPQASAGPP  
 ASPGCVPRHSVISSLFYQQAGEGAERGNTSGAKRHPARRRHLLKGGYIARALPGLREPLMEYSLLEEEAARE  
 EQASLMTKTPSFETALRLPSSSVREVPGRSHSLDNPVTTGPSPEACKEQLLFPPSTGLTHETTAKDRGHKEG  
 FLQESVFPFPPMSGDSRPGKQEGSSQDSCRGPASSCHSELGSGSQEGCGPPSSQSLGSLPPQSLKKEKELSTSCG  
 PLFSEQPQAAPFPTQVSPLLGSEKEPQDGSLSSEGPVVPSSPGSASQVDASLDTEGLSEAGDTCDFTPPPQR  
 PQEQATTRKFSLESRGGYAGVAGYGTFAFGGDAGGMLGQGPLWARMWAVS QSSEEQDEAATESPQPLES LGP  
 IAEASGVPLRTSPSLTPWEEVEQVSLVQIRDLSDGAEAAADTISLDISEVDPAYLNLSDLYDIKYLPEFEMI FR  
 RVPKPIEQESPSGSETAGQGLADFL EEAAWPWPGEGLGRAGLEIT EEPPEPGDLEALLGEAAVGRKRKWSPS  
 RGLVQFPGRCLSGEETVELGLRQRVKASMAHISRILKGRPEGEREPGRKKAGLASFRLSGLKGRDQELSDSE  
 AVVLGQSVTLACQVLAQPTAQTWSKDGVLLESSGHLLISSTLKNFQLLTLVVKKEEDLGTYTCCVSNPLGTA  
 VTTGVLKAERPSSSPRPEVGEYKDAVLLVWKPVEESCGPVTYIVQCCIEGGSWTTLASDISDCCYLTGKLSR  
 GGMYIFRTACVSKAGMGPYSSPSEQVLLGGPNHLASEEESRRGRPAQLLPSTKTFAFQMQIRRGFRSVVRQCR  
 EKASGRALAAKIVPYQPEDKTAVLREYEALKRLHHPHLAQLHAAVLSRHLVLI LELCSGPELLPSLAERESY

SESDVKDYLDWQMLSATQYLHAQHILHLDLRSENMMVTEYNLLKVIDLGNAQSLDQEKVPAPENFKDYLETMAP  
 ELLEGQAVPQTDIWAIGVTAIFIMLSGEYPESSEGRDLQKGLRKLIRLSRCYAGLSGGAVAFLOSSLCAQP  
 WGRPCASTCLOCGWLTEEGPTGSRPTPVTFPTVRLRAFVREERERKRRALLYKKNLAQVR\*  
 >ENSMUSP00000038264\_c.11736:C>AGGCCCTTGTGGGTGGGAC\_p.H3913RPLWVGH-ins  
 ENSMUST00000047441.14|Obscn-202|ENSMUSG00000061462|-  
 |chr11:g.58952331:g>GTCCCACCCACAAGGGCCT  
 MDHSFSGAPRFLTRPKAFVSVGKDATLSCQIVGNPTPHVSWEKDRQPVVEAGARFRLAQDGDVYRLTILDLAL  
 RRLGPPDAPHVRVEEHGESSALRIR SARPRDGGTYEVRAENPLGSASAAAALVVDSAEVAGPPGTSTATLLA  
 HLQORREAMRAEGIPPSPPGAGTRTCTVTEGKHARLSCFVTGEPKPEVWKKDGQLVTEGRRHVVEDEQENF  
 VLKILFCKQSDRGLYTCTASNLVGQTYSSVLVVVREPTVPFKKRLQDLEVREKESATFQCEVAQPAEAAWFK  
 EETRLWASAKYDIEEGETERRLTVRNVSADDDAVYICETTEGSRVVAELSVQGNLTKLPRKTAVRTGDTAIF  
 WVVELAVPEGPVWRWRNQEEMVAGGRVAITAEGTCHTLTI FQCTLEDMGEVAFVSGGCRTTTQFCVSAPRRPPL  
 YPADPVVKAKTESVTLWSAPPHGDRPVTIDGYVLEKRKLGA YAWSRCHEAGWLATTEFTITGVAAEEDGFQ  
 FRVSAINHFGQGPYLEFPGTMHLVPLAVKTPKAVEAVEGGEVTFVSDLTVASSGEWFLDGEALKASSIYVI  
 RCDRTRHMLTIREV PARLHGAQLKVFANGIETSIQMVVRAALGLPSSKLPAAAAREVLAQLHHEEAQLLAE LSD  
 QAAA VTWLKDGRELSLGPKYEMQVSAGRRALLVRDVAQDDAGLYECVSRGSR TAYQLLVQDITDGYR DWGPAG  
 PQKHMCKCAGAKIARYLGSSCYRFLQYDKGVVHWEAALDRQKGTSSCSLHEKPKLVFAKGQQAHSEVKA E  
 AGASATLSCEVAQAQTEVTFWKDGKLLSSSSKVRMEASGCSRRLVVQQAGKADAGEYSCEAGGQKLSFR LDVA  
 EPKMFVFAKEQQARSEVKA EAGASATLSCEVAQAQTEVTFWKDGKLLSSSSKVRMEASGCSRRLVVQQAGKAD A  
 GEYSCEAGGQKLSFR LDVTEPKLVFAKEQQARSEVKA EAGASATLSCEVAQAQTEVTFWKDGKLLSSSSKVRM  
 EASGCSRRLVVQQAGKADAGEYSCEAGGQKLSFR LDVAEPKLVFAKEQQARSEVKA EAGASATLSCEVAQAQ T  
 EVTWFKDGKLLSSSSKVRMEASGCSRRLVVQQAGKADAGEYSCEAGGQKLSFR LDVTEPKLVFAKEQQAHSEV  
 KAEAGASATLSCEVAQAQTEVTFWKDGKLLSSSSKVRMEASGCSRRLVVQQAGKADAGEYSCEAGGQKLSFR L  
 DVAEPKLVFAKEQQARSEVKA EAGASATLSCEVAQAQTEVTFWKDGKLLSSSSKVRVEASGCSRRLVVQQAGK  
 ADAGEYSCEAGGQKLSFR LDVAEPKLVFAKEQQANSEVKA EAGASATLSCEVAQAQTEVTFWKDGKLLSSSSK  
 VRVEASGCSRRLVVQQAGKADAGEYSCEAGGQKLSFR LDVAEPKLVFAKEQQAHSEVKA EAGASATLSCEVAQ  
 AQTEVTFWKDGKLLSSSSKVRVEASGCSRRLVVQQAGKADAGEYSCEAGGQKLSFR LDVAEPKLVFAKEQQAH  
 SEVKA EAGASATLSCEVAQAQTEVTFWKDGKLLSSSSKVRVEASGCSRRLVVQQAGKADAGEYSCEAGGQKLS  
 FR LDVAEPKLVFAKEQQAHSEVKA EAGASATLSCEVAQAQTEVTFWKDGKLLSSSSKVRVEASGCSRRLVVQQ  
 AGKADAGEYSCEAGGQKLSFR LDVAEPKLVFAKEQQAHSEVKA EAGASATLSCEVAQAQTEVTFWKDGKLLSS  
 SSKVRVEASGCSRRLVVQQVQKADAGEYSCEARGQKLSFR LDVAEAE SQI PERPSRREPLVVKHEHTIILTAT  
 IAAPSVAAVTWLKDGV EIRRSKRHEATSLGDTHLTVRGAQVLD SA IYSCRVGKEGQDFPVQVEEVA AKFSKP  
 LEPVEGELGGTVMLVCELSPEQAEV VWRGNTQLRPGKRFQMTSEGPRRTLTVSGLREDDAEYVCE SRDDRT  
 SARLTVKVP RVVFKFTSGLSAMVAEEGQEA TFQCVVSPSDAGVTWYKDGMLQ PSEKFMVMEVSGASRSLTILGL  
 TLEDAGQVTVAEAGASSAALRVREAPVLFK KLEPQTV EERTSVTLEVELTRPWPEVKWTRNAAVLTPSENV  
 EIRAEGARHCLVLR SVGFADRGFFGCETPDDKTQAKLNVEMRQVRLV RGLQEVEAKEQGTASMDVELSHAEVE  
 GSWTRDGLRLQPGPKCHLAVQGPVHIL TLSALQPQDSGLVAFRAEGVHTSARLIVTELPVSFTRVLQDVVATQ  
 KEKVTLECELSRPVDVRWLKDGVELRAGKAI GIVAQGTCSRSLVIYRCETGDQGVYVCDALDAQTSASLRVQGR  
 TYTLIFRRVLAEDAGEVKFVAENAESRAHLRVKELPVTLLRPLRDKIAMEKHRGVLECCQVSRASAQVRWFKGG  
 VELQSGPKYEVVSDGLYRKLVIN DVQPEDEDTYTCDAGNVKTSAQFFVEEQSITIVRGLKDMTVM EPAPAWFE  
 CETSIPSVRPPKWL LGKTVLQAGGNVGLQDGTVHRLTLHKTCSTMTGPVHFHTIGKSRSSAQLVVS DIPVVL T  
 RPLEPKAGRELQSVVLSCDFRPAPKAVQWYKDDTPLSPSEKFKMALEGO MAELRILRLTPADAGVYRCQAGSA  
 QSSAEVTV EAREVTVIQPLQDAEAMEEGRVCFSCELSHKDEDIEWSLNGTPLYNDSFHEI SHEGLHTLV LKS  
 VRQADTGTVCATSPKVSVSARLVVKGKPVVFLKALDDVSAEERGLTLQCEVSDPEARVWRKDGVELG PSDK  
 YDFLHKAGARGLTVHDL SHEDAGLYTCQVGSKETQSKVSVHDLHVGITKRLKTVEVLEGE SCSFECVLSHESP  
 SDPAVWTVGGKTVGGSGHFHAVRQGRKYTLTVKDAALSDAGEV VFSVLGLTSKASLIIRERPV DITKPLEDQR  
 TTLGEDVMLSCELSRAGTSVRWLKDGKAI RKSQKYDLLSEGTRAVLVVRKASLKDSGEYTCETEASKSTAKLC  
 VEEKANRFTEELADLQVEEKGRAVFTCKTEHPASVVTWRKGLLELRASGKHVPSQEGTLTKLTINALERTDSD  
 TYTCDIGQARTQARLLVHGQKVRVIEDLEDTAVQEGSSAKFCCR IAPADYGPVHWF LDKTPLHSNELNEITVQ  
 PGGYHVLT LRQLALKDSGTVYFEAGDQRTSAALRVTEKPSIFSRPLTDVTVTEGEDLTLVCETTTVDSSVRWT  
 KDGKTLRPSARCQLSHEGCQAQLLITATTPQDGGRYKCEIGGASSSSIVRVHALPVRFRESLKDVEVPEGKAA  
 TLRVLSVAAPVWRHGDV LKSSNKYS LRQEGAVLELVIRDLQPDQSGQYSCSFGDQTTSATLTVKTTSSAQ  
 FVGKLRNKEATEGTTVTRCELTK EAPVEWKKGTETLRNGDKYSLKQD GAVCELQICSLLVADAGEYSCVCGQ  
 EKT SATLTVKALLVHFVRRLRSKEATEGDTTTLQCELSKAAPVEWRKGTETLRDGD RYSLKQD GAVCELQIRS  
 LT IADAGEYLCTCGQEKTSATLTVRALPAKFKDSLKNEEATEGTTATLSCELSKAAPV TWKKGPKTLQSGDKY  
 VLRQD GAVCGLQIHGLTMADAGEYSCVCGQEKTSATLTVRGLPAKFIEDLRSQEATEGATAILRCELSKAAPV  
 EWRKGETLKDGD RYTLRQD GAVCELQIRGLAVVDTGTYS SLP TKFTEGLRNEEATEGTMATLRCQMSKAAPV

EWRKGETLRDGDYSLRQDGMCELQIRGLTIEDSGEYTCVCGQEKTSATLSVKALPPRFIEDLRSQEATEG
TMATLRCQMSKAAPVEWRKGETLRDGGYSLRQNGAVCELQIRPLVWGHDLAVEDTGEYSCVCGQEKTSATL
NVKALPPRFIEDLRSQEATEGTMATLRCQMSKAAPVEWRKGETLRDGGYSLRQDGA VCELQIHDLVDVEDAG
QYSCVCGQEKTSAVLTVDALPPKFTEGLKKEEATEGTMVTLRCQMSKEATVEWRKGAKTSLDGGYSLRQDGA
MCELQICGLAVEDAGEYSCVCGQEKTSATLSVKALPPRFIEDLRSQEATEGTMATLRCQMSKAAPVEWRKGSK
TLRDGDYSLRQDGMCELQICDLAVEDTGDYSCVCGQEKTSATLSVKAPQVVFQQPLQNLQAEEGSMASLRC
ELSVPNAMVWSKGGLELQGDTRREARQQGCVAELLLRDLRREDAGEYSCTCGSQTTSATLMVTAAPVRFRE
LQAQDVDEGATARLRCELSREAVSVEWRKGSLLQFPACAKYQMVQEGTTAELLVHGVEQEDAGEYTC DAGHTQS
IARLSVRAPKPKFKTDLQSTEQEAGGTARLCCQLSEAEPTPVQWLKEGVELHVGSKYEMRRQGA VCELLIHG
LEAKDTGEYAACLVGGQKTLASLRVKEPEVTIVRGLVDMEVQADEDFEFTCKVSQAGATDVQWHLQGLPLQSNE
VTEVAVLADGCTHVLQKGVTLLEDAGTVSFHVGGLSSSAQLTVRVPVTVLEPLKDVQLSEGQDAHFRCRLSR
ASGQEARWALGGVPLQCNEMNDITVEQGTLYLLTLHKVTLEDAGTITLQVGSSESAQLKVTAKNTVLRGLEN
VDALEGGEALFECQLSQPEVAHAHTWLLDDEPVHTSEKVEVVYFENGLRHLLLLLNKLPQDSCRVTFLAGDVVT
SAFLTVRALPDPPEAEVVGSRDHSVTLSSWVAPMSDGGGGLCGYRVMKEASTGQWQLCHDLVPGPECVVDDL
VPGKTYRFRVAAVGPAGAGEPVHLPQMVKIAPAPAPAPAPAPAPAPAPETRQAVVGEDICLELEVAADGGEVVWH
KGTERRIQPGGHFEVLSRGQRQMLVIKGFRTEDQGEYRCGPIQGLPSSGAATFNVMVMTSGSGDEVPAQPSLPPE
AAQEGDLHLLWEALARKRRMSREPTLDSISELPEEDSRVQHLRQEAEEAPDLSEGYSTADELARTGEADLSH
TSSDDESRAAGTTPSLVTYLLKAGGPGISPLASKHEAQVTTSVKPKQKQEPVVPTCPPPGDLSAADLMDPSLDKA
AVKIQA AFKGYKVRKEMKQEGPVFSRTFGDTEAQVGDVLRLECVLATKTDMRACWLKDGIELTDGRHYHIDQ
LKDGTC SLLVTGLAPTDSGRYTCQVSTKSGRVSHSACVVVSGTSEAESSSGGELDDAFRRAARRLHRLFRTK
SPAELSEEEFLLSADEGPEPEEPADWQTYREDENFVCIRFESLAEARQAVTCFRNMFATMGIGVEISLGEQG
PRGVEMRIGKVAPTPTPAVPLAKTPGLQTSDAAPVFLTELQNDVDQGYPMSFDCVVTGQPVPSVRWFKDGKL
LEEDDHYMINEDQGGHQLIITAVVPADMGVYRCLAENSMGVSTKAE LRVELTSTDYDTAADATETSSYFSA
QGYLSSREQEGTESDEGQLPQVLEELKDLQVAPGTRLAKFQLKVKGYPAKLYWFKDQGPLTTS DHIRMTDKK
TLHTLEIVSVTREDSGQYAAYSNAVGAAYSSARLLVRGPSEPEEKPASDVHERLVPVRILEKFTPKVKRGS
SITFSVKVEGHPAPSVHWLKEEA EKGVLWIGPDTPGYTMASSSKQHSVLVLLDVGQRHQGTYTCIATNPAGQAL
CSASLHISGLAKEEEQERVKEALISSFLQGTSAQVSAQMSSESAGFADLVGQSKGELVAEEAHSLSLAEEVGT
EEFLQKLT SQITEMVSAKISQAKLQVPGGDSDEETKTPSASPRHGRSRPSSSVQESSSESEDGDSRGEIFDIY
VVTADYLPLGAEQDAIILREGQYVEVLDSAHPLRWLVRTKPKSSPRQGWVSPAYLDRKRLKLSPEWGPTEAP
EFPGEAVSEDEYRTRLSSVIEQLLSSEQAFVGGELQFLESHMKHLERSPRVPAAVASQKTVI FRNVQDISHFH
SSFLKELQCGCTDDDVAMCFIKNQEAF EKYLEFLVGRVQAESVVVSTPVQEFYKKYAEETLSAKDPTQPPPPP
LQHYLEQPVERVQKYQALLKELIRNKARNRQNCALLEQAYAVVSALPQRAENKLVSLMENYPTLEALGEP I
RQG HFI V WEGAPGARMPWKGNHRHVFLFRNYLVICKPRRDSRTDTFSYVFRNMMKLSSIDLNDQVEGDDRAFE
VWHERE DSVRKYLLQARTVI IKNSWVKEICGIQORLAQPVWRPPEFEELADCTAELGETVKLACRVGTGPKP
IVSWYKDGKPVVEVDPHHILIEDPDG SCTLILDNLTGIDSGQYMCFAASAAGNASTLGKILVQVPPRFVNVKRA
TFPVEGEDAQITCTVEGAPYPQIRWYKDGDTLLAPGNRYRMLNEPRSGVLVVLV IQAASKEDLGHYCELVNRLG
STRGGGELYMQSPALRARDQHHRQIVAAVEGAPSMQVTIEDVQVQVGDMAQF DAVIEGHPPP I V TWYKGSTQ
LTSSARLSQRQDGTYSLVLTVDVAPHDAGVYTCVANNAGQVLC KAELLVHGDKLDAENQVYRRKLSHFYDV
QEEIGRGVFGFVQKRVQHKGNMFC AAKFIPLRSKTRAQAYQERDILATLGHPLVTGLLDQFETRKTLLI L I L E L
CSSEELLDRLFKKGVVTEAEVKVYIQQLVEGLHYLHSHGILHLDIKPPNILMVHPAREDIKICDFGFAQKITP
SEPQYSKYGSPFVSP E I E Q N P V S E G S D I W A M G V I S Y L S L T C S S P F A G E S D R A T L L N V L E G R V S W S S P T A A H
L S E D A K D F I K A T L Q R T P R A R P S T S Q C L A H P W F L K S M P A E E A H F I N T K Q L K F L L A R S R W Q R S L M S Y K S I L V M R S
I P E L L Q G P P D S P S L G V A R H L R G E A S G A S S S S S S D N E L A P F A R A K S L P P S P V T H S P L L H P R G F L R P S A S L P E E
T E A S M P T A D A A V P A S P Q S A G P P A S P G C V P R H S V I S S L F Y Q Q A G E G A E R G N K T S G A K R H P A R R R H L L K G G Y I A R
A L P G L R E P L M E Y S L L E E E A R E E Q A S L M T K T P S F E T A L R L P S S V R E V P G R S H S L D N P P V T T G P S P E A C K E Q L
L F P P S T G L T H E T T A K D R G H K E G F L Q E S V P F P P M S G D S R P G K Q E G S S Q D S C R G K P A S S C H S E L G S G S Q E G C G P P
S S Q S L G S L P P Q S L K K E L S T S C G P L F S E Q P Q A A P F P T Q V S P L L G S E K E P Q D G S L S E G P V P V P S S S P G S A S Q V D A
S L D T E G L S E A G D T C D F T P P P Q R P Q E Q A T T R K F S L E S R G G Y A G V A G Y G T F A F G G D A G G M L G Q G P L W A R M A W A V S
Q S S E E Q D E A A T E S P Q P L E S L G P I A E A S G V P L R T S P S L T P W E E V E Q V S L V Q I R D L S G D A E A A D T I S L D I S E V D P
A Y L N L S D L Y D I K Y L P F E F M I F R R V P K P I E Q P E S P G S E T E A G Q G L A D F L E E A A W P W P G E L G L R A G L E I T E E P E E
P G D L E A L L G E A A V G R K R K W S P S R G L F Q F P G R C L S G E E P V E L G L R Q R V K A S M A H I S R I L K G R P E G P E R E G P P R K
K A G L A S F R L S G L K G R D Q E L S D E A V V L G Q S V T L A C Q V L A Q P T A Q A T W S K D G V L L E S S G H L L I S S T L K N F Q L L T I
L V V K E E D L G T Y T C C V N L G L S R G M Y I F R T A C V S K A G M G Y S S P S E Q V L L G G P N H L A S E E S S R G R P A Q L L P S
T K T F A F Q M Q I R R G R F S V V R Q C R E K A S G R A L A A K I V P Y Q P E D K T A V L R E Y E A L K R L H H P H L A Q L H A Y L S P R H L
V L I L E L C S G P E L L P S L A E R E S Y S E S D V K D Y L W Q M L S A T Q Y L H A Q H I L H L D L R S E N M M V T E Y N L L K V I D L G N A Q
S L D Q E K V P A P E N F K D Y L E T M A P E L L E G Q G A V P Q T D I W A I G V T A F I M L S G E Y P E S S E G T R D L Q K G L R K G L I R L S

RCYAGLSGGAVAFLOSSLCAQPWGRPCASTCLQCGWLTEEGPTGSRPTPVTFPTVRLRAFVREKERRALLYK  
KHNLAQVR\*  
>ENSMUSP00000049737\_c.12627:C>AGGCCCTTGTGGGTGGGAC\_p.H4210RPLWVGH-ins  
ENSMUST00000052872.15|Obscn-203|ENSMUSG00000061462|-  
|chr11:g.58952331:G>GTCCACCCACAAGGGCCT  
MDHSFSGAPRFLTRPKAFVSVGKDATLSCQIVGNPTPHVSWEKDRQPVEAGARFRLAQDGDVYRLTILDLAL  
GDSGQYVCRARNAIGEFAAVGLRVDSEGTCAEQAPHFLLRPTSIRVREGADATFRCRVGSSPQPAVSWSKDG  
RRLGPPDAPHVRVEEHGESSALRIRSARPRDGGTYEVRAENPLGSASAAAALVVDSDAEVAGPPGTSTATLLA  
HLQQRRREAMRAEGI PPSPPGAGTRTCTVTEGKHARLSCFVTGEPKPEVWKKDQQLVTEGRRRHVYEDQENF  
VLKILFCKQSDRGLYTCTASNLVGQTYSSVLVVVREPTVPFKKRLQDLEVREKESATFQCEVAQPATEAAWFK  
EETRLWASAKYDIEEGTERRLTVRNVSADDDAVYICETTEGSRVVAELSVQGNLTKLPRKTAVRTGDTAIF  
WVELAVPEGPVRWLRNQEEMVAGGRVAITAEGTCHTLTI FQCTLEDMGEVAFVSGGCRTTTQFCVSAPRRPPL  
YPPADPVVKAKTESSVTLWSAPPHGDRPVTIDGYVLEKRKLGAYAWSRCHEAGWLATTEFTITGVAAEGDFQ  
FRVSAINHFGQGPYLEFPGMTMLVPLAVKTPKAVEAVEGGEVTFVSDLTVASSGEWFLDGEALKASSIYVI  
RCDRTRHMLTIREVPARLHGAQLKFVANGIETSIQMVVRAALGLPSSKLPAAAAREVLAQLHEEAQLLAE LSD  
QAAA VTWLKDGRELSLGPKEYMQVSAGRRALLVRDVAQDDAGLYECVSRGSRRTAYQLLVQEPKLVFAKQQAH  
SEVKAEGNSATLSCEVTAQTEVTWFKDGKLLSSSSKVRMEASGCSRRLLVVQQAGKADAGEYSCEAGGQKLS  
FRLDVAEPKLVFAKQQAHSEVKAEGASATLSCEVAQAQTEVTWFKDGKLLSSSSKVRMEASGCSRRLLVVQQ  
AGKADAGEYSCEAGGQKLSFRLDVAEPKLVFAKEQQARSEVKAEGASATLSCEVAQAQTEVTWFKDGKLLSS  
SSKVRMEASGCSRRLLVVQQAGKADAGEYSCEAGGQKLSFRLDVTEPKLVFAKEQQARSEVKAEGNSATLSCE  
VAQAQTEVTWFKDGKLLSSSSKVRMEASGCSRRLLVVQQAGKADAGEYSCEAGGQKLSFRLDVAEPKLVFAKEQ  
QARSEVKAEGNSATLSCEVAQAQTEVTWFKDGKLLSSSSKVRMEASGCSRRLLVVQQAGKADAGEYSCEAGGQ  
KLSFHLDVTEPKLVFAKEQQAHSEVKAEGASATLSCEVAQAQTEVTWFKDGKLLSSSSKVRMEASGCSRRLLV  
VQQAGKADAGEYSCEAGGQKLSFRLDVAEPKLVFAKEQQARSEVKAEGASATLSCEVAQAQTEVTWFKDGK  
LSSSSKVRVEASGCSRRLLVVQQAGKADAGEYSCEAGGQKLSFRLDVAEPKLVFAKEQQANSEVKAEGASATL  
SCEVAQAQTEVTWFKDGKLLSSSSKVRVEASGCSRRLLVVQQAGKADAGEYSCEAGGQKLSFRLDVAEPKLAFA  
KEQQAHEVKAEGASATLSCEVAQAQTEVTWFKDGKLLSSSSKVRVEASGCSRRLLVVQQAGKADAGEYSCEA  
GGQKLSFRLDVAEPKLAFAKEQQAHSEVKAEGASATLSCEVAQAQTEVTWFKDGKLLSSSSKVRVEASGCSR  
RLVVQQAGKADAGEYSCEAGGQKLSFRLDVAEPKLAFAKEQQAHSEVKAEGASATLSCEVAQAQTEVTWFKD  
GKLLSSSSKVRVEASGCSRRLLVVQQAGKADAGEYSCEAGGQKLFRLDVAEPKLMFAKEQQAHSEVKAEGAS  
ATLSCEVAQAQTEVTWFKDGKLLSSSSKVRVEASGCSRRLLVVQQAGKADAGEYSCEAGGQKLSFRLDVAEPK  
VFAKEQQAHSEVKAEGASATLSCEVAQAQTEVTWFKDGKLLSSSSKVRVEASGCSRRLLVVQQVQKADAGEYS  
CEARGQKLSFRLDVADTRLMFAKEQQARTEVKAEGNSATLSCEVAQAQTEVTWFKDGKLLSSSSKVRVEASG  
CSRRLLVVQQAGKADAGEYSCEAGGQKLSFRLDVAEAEESQI PERPSRREPLVVKEHETIILTATIAAPSVAAVT  
WLKDGEVIRRSKRHEATSLGDTHLTVRGAQVLDLSAIYSCRVGKEGQDFPVQVEEVAAKFSKPLEPVEGELGG  
TVMLVCELSPEQAEEVVRWRCGNTQLRPGKRFQMTSEGPRRTLTVSGLREDDAEYVCESTRDDRTSARLTVKVPR  
VVKFTSGLSAMVAEEGQEATFQCVVSPSDAGVTWYKDGMLQLPSEKFMVVEGASRSLTILGLTLEDAGQVTV  
EAEGASSAALRVREAPVLFKKLEPQTEERTSVTLEVELTRPWPVKWTRNAAVLTPSENVEIRAEGARHC  
LVLRSVGFADRGFFGCETPDDKTQAKLNVEMRQVRLVRLQVEAKEQGTASMDVELSHAEVEGSWTRDGLRL  
QPGPKCHLAVQGPVHILTLALSALQPQDSGLVAFRAEGVHTSARLIVTELPSVFTTRVLQDVVATQKEKVTLECEL  
SRPVDVRLKDGVELRAGKAI GIVAQGTCSRSLVIYRCETGDQGVYVCDALDAQTSASLRVQGRYTLIFRRVL  
AEDAGEVKFVAENAESRAHLRVKELPVTLRPLRDKIAMEKHRGVLECVSRASAQVRWFKGGVLELQSGPKYE  
VVSDGLYRKLVINVDVQPEDEDYTC DAGNVKTSAQFFVEEQSITIVRGLKDMTVMPEPAPAWFECETSIPSVRP  
PKWLLGKTVLQAGGNVLEQDGTVHRLTLHKTCSTMTGPVHFTIGKSRSSAQLVVS D I PVVLRPLEPKAGRE  
LQSVVLSCDFRPAKAVQWYKDDTPLSPSEKFKMALEGQMAELRILRLTPADAGVYRCQAGSAQSSAEVTVEA  
REVTVIQPLQDAEAMEEGRVCFSCELSHKDEDI EWSLNGTPLYNDSFHEISHEGCLHTLVLSVRQADTGTVC  
ATSPKVSVSARLVVKGKPVVFLKALDDVSAEERGTLLTQCEVSDPEARVVWRKDGVELGSPDKYDFLHKAGAR  
GLTVHDLSDHEDAGLYTCQVGSKETQSKVSVHDLHVGITKRLKTVLEVLEGECSFCVLSHESPSDPAVWTVGG  
KTVGGSGHFHAVRQGRKYTLTVKDAALSDAGEVVSVLGLTSKASLIIRERPVDITKPLEDQRTTLGEDVMLS  
CELSRAGTSVRWLKDGKAIRKSQYDLLSEGTRAVLVVRKASLKDSGEYTCETEASKSTAKLCVEEKANRFT  
ELADLQVEEKGRAVFTCKTEHPASVVTWRKGLLELRASGKHVPSQEGTLKLTINALERTDSDTYTCDIGQAR  
TQARLLVHGQKVRVIEDLEDTAVQEGSSAKFCRIAPADYGPVHWF LDKTPLHSNELNEITVQPGGYHVLT  
QLALKSHGTCVYFEAGDRTSAAALRVTEKPSIFSRPLTDVTVTEGEDTLVCEETTVDSSVRWTKDGKTLRPSA  
RCQLSHEGQQAQLLITATTPQDGGRYKCEIGGASSSIVRVHALPVRFRSLKDVPEGKAATLRCVLSVA  
APVEWRHGDDVLKSSNKYSLRQEGAVLELVIRDLQPQDSGQYSCSFGDQTTSATLTVKTSQAQFVGLRNKEA  
TEGTTVTLRCELTKAEVWKKGTETLRNGDKYSLKQDGA VCELQICSLLVADAGEYSCVCGQEKT SATLTVK  
ALLVHFVRRLSKEATEGDTTTLQCELSKAAPVEWRKGTETLRDGDYSLKQDGA VCELQIRSLTIADAGEYL  
CTCGQEKT SATLTVRALPAKFKDSLKNEEATEGTTATLSCELSKAAPVWKKGPKTLQSGDKYVLRQDGA VCG

LQIHGLTMADAGEYSCVCGQEKTSATLTVRGLPAKFIEDLRSQEATEGATAILRCELSKAAPVEWRKGETLK  
 DGDRYTLRQDGA VCELQIRGLAVVDGTYSLSLPTKFTTEGLRNEEATEGTMATLRCQMSKAAPVEWRKGETLR  
 DGDRYSLRQDGA MCELQIRGLTIEDSGEYTCVCGQEKTSATLSVKALPSRFIEDLRSQEATEGTMATLRCQMS  
 KTAPVEWKKGSETLRDGGRYSLRQDGPVCELQICDLAVEDAGEYSCVCGQEKTSATLSIKALPPRFIEDLRSQ  
 EATEGTMATLRCQMSKAAPVEWRKGETLGDGGRYSLRQNGAVCELQIRPLWVGHDLAVEDTGEYSCVCGQEK  
 TSATLNVKALPPRFIEDLRSQEATEGTMATLRCQMSKAAPVEWRKGETLRDGGRYSLRQDGA VCELQIHDLD  
 VEDAGQYSCVCGQEKTSAVLTVDALPPKFTTEGLKKEEATEGTMVTLRCQMSKEATVEWRKGA KTLSDGGRYSL  
 RQDGA MCELQICGLAVEDAGEYSCVCGQEKTSATLSVKALPPRFIEDLRSQEATEGTMATLRCQMSKAAPVE  
 RKGETLRDGGRYSLRQDGA VCELQIRDLAVEDAGEYLCVCGQEKTSATLSVKALPPRFIEDLRSQEATEGTM  
 ATLRCQMSKAAPVEWRKGSKTLRQDGGRYSLRQDGA MCELQICDLAVEDTGDYSCVCGQEKTSATLSVKALPP  
 FIEDLRSQEAREGTVATLRCRMSKAAPVEWRKGETLKDGGRYSLRQEGNLCELQIRDLAVEDTGEYSCVCGQ  
 EKTSATLSVKALPAKFIEDLRSQEAPESSTVTLRCKLSKKASVWKKGSETLRNGARYSLRQDGA VCELEIRD  
 LTVEDTGEYSCTCGQERTSATLSIMAPQVVFQQLQNLQAEEGSMASLRCELSVPNAAMVWSKGGLELQGDTR  
 REARQQGCVAELLLRDLRREDAGEYSCVCGQEKTSATLSVKA LPPRFIEDLRSQEATEGTMATLRCQMSKAAP  
 SVEWRKGS LQFLPCKAKYQMVQEGTAE LLVHGVQE DAGEYTC DAGHTQS IARLSVRAPKPKFKTDLQSTEQE  
 AGGTARLCCQLSEAEPTPVQWLKEGVELHVGSKYEMRRQGA VCELLIHGLEAKDTGEYACLVGGQKTLASLR  
 VKEPEVTIVRGLVDMVEQADEDFEFTCKVSOAGATDVQWHLQGLPLQSNVTEVAVLADGCTHVLQKGVTLLE  
 DAGTVSFHVGGSSSAQLTVRVEVTVLEPLKDVQLSEGQDAHFRCRLSRASGQEARWALGGVPLQCNEMNDI  
 TVEQGTLYLLTLHKVTLLEDAGTITLQVGS CSSEAQLKVTAKNTVLRGLENDVALEGG EALFECQLSQPEVA AH  
 TWLLDDEPVHTSEKVEVVYFENGLRHLLLLKLNKPKQDSCRVTFLAGDVVTS AFLTVRGRWLEVLEPPHDASVK  
 AGMQVRFTCILSEAVPVGEATWYINGAAIQPDDTDWTVTDTGSHHALTLSNAQPQHAGEVTF AARDAVASARL  
 SVLALPDPPEDAEVVGRSDHSVTL SWVAPMSDGGGGLCGYR VEMKEASTGQWQLCHDLVPGPECVDDLVPGK  
 TYRFRVAAVGPAGAGEPVHLPQMVKIAPAPAPAPAPAPAPAPETRQAVVGEDICLELEVAADGGEV VWHKGT  
 RIQPGGHFEVLSRQQRMLVIKGFRTEDQGEYRCGPIQGLPSSGAATFNVMVMTSGSGDEVPAQPSLPPEAAQE  
 GDLHLLWEALARKRRMSREPTLDSISELPEEDSRVQHLRQEAEETAPDLSEGYSTADELARTGEADLSHTSSD  
 DESRAGTPSLVTYLKKAGGPGISPLASKHEAQVTT SVKALPQKQEPVVPTCPPPGDLSAADLMDPSLDKA AVKI  
 QAAFKGKVRKAGGEGPVFSRFTFGDTEAQVGDVLRLEQVCLATKTD MRACWLKDGIELTDGRHYHIDQLKDG  
 TCSLLVTGLAPTDSGRYTCQVSTKSGRVSHSACVVVSGTSEAESSSGGELDDAFRRARRLHRLFRTKSPA E  
 LSEELFLSADEGPGEPEPADWQTYREDENFVCIRFESLAEARQAVTCFRNMFATMGIGVEISLGEQGPRGV  
 EMRIGKVAPTPTPAVPLAKTPGLQTS DAAPVFLTELQNDVQDGYPMSFDCVVTGQPVPSVRWFKDGLLEED  
 DHYMINEDQGGHQLIITAVVPADMGVYRCLAENSMGVSSTKAELRVELTSTDYDTAADATETSSYFSAQGYL  
 SSREQEGTESDEGQLPQVLEELKDLQVAPGTRLAKFQLKVKGYPA PKLYWFKDQPLTSDHIRM TDKKT LHT  
 LEIVSVTREDSGQYAAYSNAVGAAYSARLLVRGPSEPEEKPASDVHERLVPPRILEKFTPKVKRGSSITF  
 SVKVEGHPAPSVHWLKEEA EKGLVWIGPDTPGYTMASSKQHSVLVLDVGRQHQTGTYTCIATNPAGQALCSAS  
 LHSGLAKEEEQERVKEALISSFLQGT SQAVSAQMSESAGFADLVGQSKGESLVAAEEAHSHLSLAEVGT EEF  
 QKLT SQI TEMVSAKISQAKLQVPGGDSDEETKTPSASPRHGRSRPSSSVQESSESESDGDSRGEIFDIYVVTA  
 DYLP LGAEQDAIILREGQYVEVLDSAHPLRWLVRTKPTKSSPSRQGWVSPAYLDKRLKLSPEWGPTEAPEFP  
 EAVSEDEYRTRLSSVIQELLSSEQAFV GELQFLESHHMKHLERSPRVPAAVASQKTVIFRNVQDISHFHSSFL  
 KELQCGTDDD VAMCFIKNQEAF EKYLEFLVGRVQAE SVVSTPVQEFYKKYAEETLSAKDPTQPPPPLOHY  
 LEQPVERVQKYQALLKELIRNKARNRQNCALLEQAYAVVSALPQRAENKLVSLMENYPGTLEALGEP I RQGH  
 FIVWEGAPGARMPWKGNHRHVFLFRNYLVICKPRRDSRTD TFSYVFRNMMKLSIDLNDQVEGDRAFEVWHE  
 REDSVRKYLLQARTVIKNSWVKEICGIQORLAQPVWRPPEFEEELADCTAELGETVKLACRVGTGPKPIVSW  
 YKDGKPEVDPHHILIEDPDGSC TLI LDNLTGIDSGQYMCFAASAAGNASTLGKILVQVPPRFVNKVRATPFV  
 EGEDAQITCTVEGAPYPQIRWYKDGTL LAPGNRYRMLNEPRSGVLVLIQAASKEDLGHYECELVNR LGSTRG  
 GGEALYMQSPALRARDQHREQIVAAVEVTEQETKVPKKTVIEETITTVVKS PRGRRQSPGKSPRS SRRSA  
 SPRRPGLLAPERLYPPGTS PRSRLEVEQGRKAPVPALYVTEAEVHAPASQSQPKWLEVEETIEVRVKKTGSRG  
 ASPVREMTSRGEGILFTLPGGIPGRDPNANN SNNKSVYQEAR TWGPAVVHVGEPIFQVDSVGNVDVAASPE  
 PEQVRASQKEENTERQEGCSGDENTFLMEEPQD TDSLQGRDPKILTHNGRVLTLADLEDYVPQEGETF GCGD  
 STPSTPDEPPCEVSVLQREISEPTVGPVLLNVGRPPGTGATPSFRPGSQVHSPESVSFLLREAWSGFVSAA  
 PWTSSFH THVQSSVDGSHGSFKTEVSTQTVSFGAVGETVTLHIDPDGGEAPGPSQG\*

>ENSMUSP00000020732\_c.12828:C>AGGCCCTGTGGGTGGGAC\_p.H4277RPLWVGH-ins  
 ENSMUST00000020732.13|Obscn-201|ENSMUSG00000061462|-  
 |chr11:g.58952331:g>GTCCCACCCACAGGCCT  
 MDHSFSGAPRFLTRPKAFVSVGKDATLSCQIVGNPTPHVSWEKDRQVPEAGARFRLAQDGDVYRLTILDLAL  
 GDSGQYVCRARNAIGEFAAVGLRVDSEGTCAEQAPHLLRPTSIRVREGADATFCRVRGGSPQPAVSWSKDG  
 RRLGPPDAPHVRVEEHGESSALRIRSARPRDGGTYEVRAENPLGSASAAAALVVDSDAEVAGPPGTSTATLLA  
 HLQORREAMRAEGIPSPPGAGTRTCTVTEGKHARLSCFVTGEPKPETVWKKDGLVTEGRRHVVEDEQENF  
 VLKILFCKQSDRGLYTCTASNLVGQTYSSVLVVVREPTVPFKKRLQDLEVREKESATFQCEVAQPA TEAAWFK

EETRLWASAKYDIEEEGETERRLTVRNVSADDDAVYICETTEGSRRTVAELSVQGNLTKLPRKTAVRTGDTAIF
WVELAVPEGPVRWLRNQEEMVAGGRVAITAEGTCHTLTI FQCTLEDMGEVAFVSGGCRTTTQFCVSAPRRPPL
YPPADFPVVKAKTESSVTLWSAPPHGDRPVTIDGYVLEKRKLGAYAWSRCHEAGWLATTEFTITGVAAEGDFQ
FRVSAINHFGQGPYLEFPGTMHLVPLAVKTPKAVEAVEGGEVTFVSDTLTVASSGEWFLDGEALKASSIYVI
RCDRTRHMLTIREVPARLHGAQLKFVANGIETS IQMVVRAALGLPS SKLPAAAAREVLAQLHHEAQLLAE LSD
QAAA VTWLKDGRELSLGPYEMQVSAGRRALLVRDVAQDDAGLYECVSRGSRTAYQLLVQDITDGYRDWGPAG
PQKHMCKCAGAKIARYLGSSCYRFLQYDKGVWHLEAALDTRQKGTSSCSLHEKPKLVFAKQQAHSEVKA
AGNSATLSCEVTQAQTEVTFWKDGKLLSSSSKVRMEASGCSRRLVVQQAGKADAGEYSCEAGGQKLSFRLDVA
EPKLVFAKQQAHSEVKAEGASATLSCEVAQAQTEVTFWKDGKLLSSSSKVRMEASGCSRRLVVQQAGKADA
GEYSCEAGGQKLSFRLDVAEPKMFVFAKEQQARSEVKAEGASATLSCEVAQAQTEVTFWKDGKLLSSSSKVRM
EASGCSRRLVVQQAGKADAGEYSCEAGGQKLSFRLDVTEPKLVFAKEQQARSEVKAEGNSATLSCEVAQAQ
EVTWTFWKDGKLLSSSSKVRMEASGCSRRLVVQQAGKADAGEYSCEAGGQKLSFRLDVAEPKLVFAKEQQARSEV
KAEAGNSATLSCEVAQAQTEVTFWKDGKLLSSSSKVRMEASGCSRRLVVQQAGKADAGEYSCEAGGQKLSFHL
DVTEPKLVFAKEQQAHSEVKAEGASATLSCEVAQAQTEVTFWKDGKLLSSSSKVRMEASGCSRRLVVQQAGK
ADAGEYSCEAEGQKLSFRLDVAEPKLVFAKEQQARSEVKAEGASATLSCEVAQAQTEVTFWKDGKLLSSSSK
VRVEASGCSRRLVVQQAGKADAGEYSCEAGGQKLSFRLDVAEPKLVFAKEQQANSEVKAEGASATLSCEVAQ
AQTEVTFWKDGKLLSSSSKVRVEASGCSRRLVVQQAGKADAGEYSCEAGGQKLSFRLDVAEPKLVFAKEQQAH
SEVKAEGASATLSCEVAQAQTEVTFWKDGKLLSSSSKVRVEASGCSRRLVVQQAGKADAGEYSCEAGGQKLS
FRLDVAEPKLVFAKEQQAHSEVKAEGASATLSCEVAQAQTEVTFWKDGKLLSSSSKVRVEASGCSRRLVVQQ
AGKADAGEYSCEAGGQKLSFRLDVAEPKLVFAKEQQAHSEVKAEGASATLSCEVAQAQTEVTFWKDGKLLSS
SSKVRVEASGCSRRLVVQQAGKADAGEYSCEAGGQKLFRLDVAEPKLVFAKEQQAHSEVKAEGASATLSCE
VAQAQTEVTFWKDGKLLSSSSKVRVEASGCSRRLVVQQAGKADAGEYSCEAGGQKLSFRLDVAEPKLVFAKEQ
QAHSEVKAEGASATLSCEVAQAQTEVTFWKDGKLLSSSSKVRVEASGCSRRLVVQQVQKADAGEYSCEARGQ
KLSFRLDVADTRLMFAKEQQARTEVKAEGNSATLSCEVAQAQTEVTFWKDGKLLSSSSKVRVEASGCSRRLV
VQQAGKADAGEYSCEAGGQKLSFRLDVAEAE SQI PERPSRREPLVVKEHETIILTATIAAPSVAAVTWLKDG
VEIRRSKRHEATSLGDTHLTVRGAQVLD SAIYSCRVGQDFPVQVEEVAAKFSKPLEPVEGELGGTVMLVC
ELSPQAEVWRCGNTQLRPGKRFQMTSEGRRTLT VSGLEDDAEYVVCESRDDRSTARLTVKVRVVKFTS
GLSAMVAEEGQEATFQCVVSPSDAGVTWYKDGMLQPSKFKVMVESGASRSLTILGLTLEDAGQVTEAEGAS
SSAALRVREAPVLFKKKLEPQTEVEERTSVTLEVELTRPWPEVKWTRNAAVLTPSENVEIRAEGARHCLVLR
SVGFADRGFVGCETPDDKTQAKLNVEMRQVRLVVRGLQVEVEAKEQGTASMDVELSHAEEVGSWTRDGLR
LQPGPKC HLAVQGPVHILTL SALQPQDSGLVAFRAEGVHTSARLIVTEL PVSFTRVLQDVVATQKEKVTLE
CELSRPVDV RWLKDGVELRAGKAIGIVAQGT CRSLVIYRCETGDQGVYVCDALDAQTSASLRVQGR
TYTLIFRRLAEDAGE VKFVAENAESRAHLRVKELPVTLLRPLRDKIAMEKHRGVLECCQVSRASAQVRW
FKGGVELQSGPKYEVVSDGL YRKLVIN DVQPEDEDTYTC DAGNVKTS AQFFVVEEQSITIVRGLKDM
TVMEPAPAWFECETSIPSVRPPKWL LGKTVLQAGGNVLEQDGTVHRLTLHKTCSTMTGPVHFTIGKSR
SSAQLVVSDIPVVLTRPLEPKAGRELQSVVL SCDFRPAPKAVQYKDDTPLSPSEKFKMALEGQMAELR
ILRLTPADAGVYRCQAGSAQSSAEVAREVTVI QPLQDAEAMEEGRVCFSCELSHKDEDIEW
SLNGTPLYNDSFHEISHEGCLHTLVLKSVRQADTGTVCATSPKV SVSARLVVKGKPVVFLKALDD
VSAEERGLTLTQCEVSDPEARVVWRKDGVELGSPDKYDFLHKAGARGLTVHDL SHEDAGLYTCQ
VGSKETQSKVSVHDLHVGITKRLKTVLEVLEGE SCFECVLSHESPSDPAVWTVGGKTVGG
SGHFHAVRQGRKYTLTVKDAALSDAGEVVFVSVLGLT SKASLIIRERPV DITKPLEDQRTTLGED
VMLSCELSRA GTSVRWLKDGAIRKSQKYDLLSEGTRAVLVVRKASLKDSEYTCETEASKSTAKLC
VEEKANRFT EELADLQ VEEKGRAVFTCKTEHPASVVTWRKGLLELRASGKHVPSQEGTLTKLTIN
ALERTDSDTYTCDIGQARTQARLL VHGQKVRVIEDLEDTAVQEGSSAKFCRIAPADYGPVHWF
LDKTPHLSNELNEITVQPGGYHVLT LRQLALKD SGTVYFEAGDQRTS AALRVTEKPSIFSRPL
TDVTVTEGEDLTLVCE TTTVDSSVRWTKDGKTLRPSARCQLSH EGCQAQLLITATTPQDGGRYK
CEIGGASSSSIVRVHALPVRFRESLKDVEVPEGKAATLRCVLSVAAPVEWR HGDVVLKSSNKYSLR
QEGAVLELVIRDLQPQDSGQYSCSFGDQTT SATLTVKTS SAQFVGLKRNKEATEGTTV TLRCEL
TKEAPVEWKKGTETLRNGDKYSLKQDGAVCELQICSLLVADAGEYSCVCGQEKTSATLTVKALLV
HFVRRLSKEATEGDTTTLQCELSKAAPVEWRKGTETLRDGD RYSLKQDGAVCELQIRSLTIADAGEY
LCTCGQE KTSATLTVRALPAKFKDSLKNEEATEGTTATLSCELSKAAPVTWKKGPKTLQSGDKYV
LVRQDGAVCGLQIHGL TMADAGEYSCVCGQEKTSATLTVRGLPAKFIEDLRSQEATEGATAILR
CELSKAAPVEWRKGS ETLKDGDRYTLRQDGAVCELQIRGLAVVDGTGYSSLPKFTTEGLRNEE
ATEGTMATLRCQMSKAAPVEWRKGS ETLRQDGDRYSLRQDGAMCELQIRGLTIEDSGEYTCVCG
QEKTSATLSVKALPSRFIEDLRSQEATEGTMATLRCQMSKTAPVE WKKGSETLMSKAAPRYSLRQ
DGPVCELQICDLAVEDAGEYSCVCGQEKTSATLSIKALPPRFIEDLRSQEATEGTMATLRCQMS
KAPVEWRKGS ETLRQDGDRYSLRQDGAVCELQIRLWVGHDLAVEDTGEYSCVCGQEKTSATLN
VKALPPRFIEDLRSQEATEGTMATLRCQMSKAAPVEWRKGS ETLRQDGDRYSLRQDGAVCELQI
HDLVEDAGQ YSCVCGQEKTSAVLTVDALPPKFTTEGLKKEEATEGTMVTLRQMSKEATVEWRK
GAKTSLDGGRYSLRQDGAM CELQICGLAVEDAGEYSCVCGQEKTSATLSVKALPPRFIEDLRS
QEATEGTMATLRCQMSKAAPVEWRKGS ETLRQDGDRYSLRQDGAVCELQIRDLAVEDAGEYLCV
CGQEKTSATLSVKALPPRFIEDLRSQEATEGTMATLRCQ

MSKAAPVEWRKGSKTLRDGDYSLRQDGMCELQICDLAVEDTGDYSCVCGQEKTSATLSVKALPPRFIEDLR  
SQEAREGTVATLRCRMSKAAPVEWRKGETLKDGDYSLRQEGNLCELQIRDLAVEDTEEYSCVCGQEKTSAT  
LSVKALPAKFIEDLRSQEAPESSTVTLRCKLSKKASVVKKGETLRNGARYSLRQDGAUCELEIRDLTVEDT  
GEYSCTCGQERTSATLSIMAPQVVFQQPLQNLQAEEGSMASLRCELSVPNAAMVWSKGGLELQGDTRREARQQ  
GCVAEALLRDLRREDAGEYSCTCGSQTTSATLMVTAAPVRFLRELQAQDVDEGATARLRCELSREAVSVEWRK  
GSLQLFPCAQYQMVQEGTTAEALLVHGVEQEDAGEYTC DAGHTQS IARLSVRAPKPKFKTDLQSTEQEAGGTAR  
LCCQLSEAEPTPVQWLKEGVELHVGSKYEMRRQGA VCELLIHGLEAKDTGEYACLVGQKTLASLRVKEPEV  
TIVRGLVDMVEVADEDEVEFTCKVSQAGATDVQWHLQGLPLQSNVTEVAVLADGCTHVLQKGVTLLEDAGTVS  
FHVGGSSSAQLTTRVPEVTVLEPLKDVQLSEGDQDAHFRCLSRASGQEARWALGGVPLQCENMNDITVEQGT  
LYLLTLHKVTLEDAGTITLQVGSSEAEQLKVTAKNTVLRGLENVDALEGGEALFECQLSQPEVAATWLLDD  
EPVHTSEKVEVVYFENGLRHLLLNKLPQDSCRVTFLAGDVVTS AFLTVRGWRLEVLEPPHDASVKAGMQVR  
FTCILSEAVPVGEATWYINGAAIQPDDTDWTVTTDGS HHALTLSNAQPHAGEVTF AARDAVASARLSVLALP  
DPPEDAEVVGRSDHSVTLSSWVAPMSDGGGGLCGYRVMKEASTGQWQLCHDLVPGPECVDDLVPGKTYRFRV  
AAVGPAGAGEPVHLPQMVKIAPAPAPAPAPAPAPAPETRAVVGEDICLELEVAADGGEV VWHKGTERRIQPGG  
HFEVLSRGRQMLVIKGFRTEDQGEYRCGPIQGLPSSGAATFNVMVTS GSGDEVPAQPSLPPEAAQEGDLHLL  
WEALARKRRMSREPTLDSISELPEEDSRVQHLRQEAETAPDLSEGYSTADELARTGEADLSHTSSDDESRA  
TPSLVTLKKGAGPGI SPLASKHEAQVTT SVKPKQKQEPVVPPTCPPGDL SAADLMDPSLDKAAVKIQAQFKG  
YKVRKEMKQEGPVFSRTFGDTEAQVGDVLRLECVLATKTD MRACWLKDGIELTDGRHYHIDQLKDKTCSLLV  
TGLAPTDSGRYTCQVSTKSGRVSHSACVVVSGTESEAESSSGGELDDAFRRAARRLHRLFRTKSPAELSEEEL  
FLSADEGPGEPEEPADWQTYREDENFVCIRFESLAEARQAVTCFRNMFATMGIGVEISLGEQGPGRVEMRIGK  
VAPTVPAPVPLAKTPGLQTS DAAPVFLTELQNDVQDGYPMSFDCVVTGQPVPSVRWFKDGKLEEDDHYMIN  
EDQQGGHQLIITAVVPADMGVYRCLAENSMGVSSTKAELRVELTSTDYDTAADATETSSYFSAQGYLSSREQE  
GTESDEGQLPQVLEELKDLQVAPGTR LAKFQLKVKGY PAKLYWFKDQGPLTSDHIRMTDKKTLHTLEIVSV  
TREDSGQYAAIYISNAVGAAYSSARLLVRGPSEPEEK PASDVHERLVPRI LEKFTPKKVKRGSSTIFS VKVEG  
HPAPSVHWLKEEAKEGVLWIGPDTPGYTMASSSKQHSLVLLDVG RQHOGTYTCIATNPAGQALCSASLHISGL  
AKEEEQERVKEALISSFLQGTSAVSAQMSESAFADLVGQSKGESLVAAEHAHSHLSLAEVQTEEF LQKLTSSQ  
ITEMVSAKISSQAKLVPGGDSDEETKTPSASPRHGRSRPSSSVQESSSESEDGDSRGEI FDIYVVTADYLP LG  
AEQDAIILREGQYVEVLDSAHPLRWLVRTKPTKSSPSRQGWVSPAYLDKRLKLSPEWGPTEAPEFPGEAVSED  
EYRTRLSSVIQELLSSEQAFV GELQFLESHHMKHLERSPRVPAAVASQKTVI FRNVQDISHFHSSFLKELQGC  
GTDDDVAMCFIKNQEA FEKYLEFLVGRVQAESVVVSTPVQEFYKKYAEETLSAKDPTQPPPPLOHYLEQVVE  
RVQKYQALLKELIRNKARNRQNCALLEQAYAVVSALPQRAENKLVSLMENYPGTLEALGEP IRQGHFIVWEG  
APGARM PWKGNHRHVFLFRNYLVICKPRRDSRTDTFSYVFRNMMKLSIDLNDQVEGD DRAFEVWHEREDSVR  
KYLQARTVI IKNSWVKEICGIQQRLAQPVWRPPEFEEELADCTAELGETVKLACRVTGT PKPIVSWYKDGKP  
VEVDPHHILIEDPDG SCTLILDNLTGIDSGQYMCFAASAAGNASTLGKILVQVPPRFVNVKVRATPFVEGEDAQ  
ITCTVEGAPYPQIRWYKDGTL LAPGNRYRMLNEPRSGVLVLIQAASKEDLGHYECELVNR LRGSTRGGGELYM  
QSPALRARDDHREQIIVA AVEERRPSP\*  
>ENSMUSP00000151217\_c.10920:c>AGGCCCTGTGGGTGGGAC\_p.H3641RPLWVGH-ins  
ENSMUST00000219084.3|Obscn-207|ENSMUSG00000061462|-  
|chr11:g.58952331:g>GTCCCACCCACAAGGGCCT

MDHSFSGAPRFLTRPKAFVVS VGKDATLSCQIVGNPTPHVSWEKDRQPV EAGARFRLAQDGDVYRLTILDLAL  
GDSGQYVCRARNAIGEAF AAVGLRVDSEGTCAEQAPHLLRPTSIRVREGADATFR CRVGGSPQPAVSWSKDG  
RRLGPPDAPHVRVEEHGESSALRIR SARPRDGGTYEVRAENPLGSASAAAALVVDSDAEVAGPPGTSTATLLA  
HLQORREAMRAEGIPSPPGAGTRTCTVTEGKHARLSCFVTGEPKPE TVWKKDQGLVTEGRRHVVEDEQENF  
VLKILFCKQSDRGLYTC TASNLVGQTYSSVLVVVREPTVPFKKRLQDLEVREKESATFQCEVAQ PATEAAWFK  
EETRLWASAKYDIEEEGTERRLTVRNV SADDADAVYICETTEGSR TVAELSVQGNLTKRLPRKTAVRTGDTAIF  
WVELAVPEGPVRWLRNQEEMVAGGRVAITAEGTCHTLTI FQCTLEDMGEVAFVSGGCRTTTQFCVSAPRRPPL  
YPPADPVVKAKTESVTL SWSAPPHGDRPVTIDGYVLEKRKLGAYAWSRCHEAGWLATTEFTITGVAAEEGDFQ  
FRVSAINHFGQGPYLEFPGMTMLVPLAVKTP LKAVEAVEGGEVTFVSDLTVASSGEWFLDGEALKASSIYVI  
RCDRTRHMLTIREV PARLHGAQLK FVANGIETS IQMVVRAALGLPSSKLPAAAAREVLAQLHEEAQLLAELSD  
QAAAVTWLKDGRELSLGP KYEMQVSAGRRALLVRDVAQDDAGLYECVSRGSR TAYQLLVQDITDGYRDWGPAG  
PQKHMCKCAGAKIARYLGSSCYRFLQYDKGVWHLEAALDTRQKGKTS SCSLHEKPKLVFAKQQA HSEVKA  
AGNSATLSCEVTQAQTEVTFWFKDGKLS SSSSKVRMEASGCSRRLVVQQAGKADAGEYSCEAGGQKLSFRLDVA  
EPKLVFAKQQA HSEVKA EAGASATLSCEVAQAQTEVTFWFKDGKLS SSSSKVRMEASGCSRRLVVQQAGKAD  
GEYSCEAGGQKLSFRLDVAEPKMF AKEQQARSEVKA EAGASATLSCEVAQAQTEVTFWFKDGKLS SSSSKVRM  
EASGCSRRLVVQQAGKADAGEYSCEAGGQKLSFRLDVTEPKLVFAKEQQARSEVKA EAGNSATLSCEVAQAQ  
EVTWFKDGKLS SSSSKVRMEASGCSRRLVVQQAGKADAGEYSCEAGGQKLSFRLDVTEPKLVFAKEQQAHSEV  
KAEAGASATLSCEVAQAQTEVTFWFKDGKLS SSSSKVRMEASGCSRRLVVQQAGKADAGEYSCEAGGQKLSFRL  
DVAEPKLVFAKEQQARSEVKA EAGASATLSCEVAQAQTEVTFWFKDGKLS SSSSKVRMEASGCSRRLVVQQAGK



ADAGEYSCEAGGQKLSFRLDVAEPKLVFAKEQQANSEVKAEEAGASATLSCEVAQAQTEVTFWKDGGKLSSSSK
VRVEASGCSRRLVVQQAGKADAGEYSCEAGGQKLSFRLDVAEPKLAFAKEQQAHSEVKAEEAGASATLSCEVAQ
AQTEVTFWKDGGKLSSSSKVRVEASGCSRRLVVQQAGKADAGEYSCEAGGQKLSFRLDVAEPKLVFAKEQQAH
SEVKAEEAGASATLSCEVAQAQTEVTFWKDGGKLSSSSKVRVEASGCSRRLVVQQVKGADAGEYSCEARGQKLS
FRLDVAEAESQIPERPSRREPLVVKEHETIILTATIAAPSVAAVTWLKDGVEIRRSKRHEATSLGDTHTLTVR
GAQVLDASAIYSCRVGKEGQDFPVQVEEVAAKFSKPLEPVEGELGGTVMLVCELSPEQAEVWRCGNTQLRPGK
RFQMTSEGPRRTLTVSGLREDDAEYVCESRDDRTSARLTVKVPVVKFTSGLSAMVAEEGQEAFTQCVVSPS
DAGVTWYKQDGMQLQPSSEKFMVESGASRSLTILGLTLEDAGQVTEAEGASSAALRVREAPVLFKKKLEPQT
VEERTSVTLEVELTRPWPEVKWTRNAAVLTPSENVEIRAEGARHCLVLRVSVGFADRGFFGCETPDDKTQAKLN
VEMRQVRLVVRGLQEVEAKEQGTASMDVELSHAEVEGSWTRDGLRLQPGPKCHLAVQGPVHILTLALSALQPQDSG
LVAFRAEGVHTSARLIVTELPVSFTRVLQDVVATQKEKVTLECELSRPVDVRLKDGVELRAGKAIIGIVAQGT
CRSLVIYRCETGDQGVYCDALDAQTSASLRVQGRYTLIFRRVLAEDAGEVKFVAENAESRAHLRVKELPVT
LLRPLRDKIAMEKHRGVLECCVSRASAQVRWFKGGVELQSGPKYEVVSDGLYRKLVIINDVQPEDEDYTC DAG
NVKTSAQFFVVEEQSITIVRGLKDMTVMPEPAPAWFECETSIPSVRPPKWLKGKTVLQAGGNVLEQDGTVHRLT
LHKTCSTMTGPVHFTIGKSRSSAQLVVS DIPVVLTRPLEPKAGRELQSVVLSCDFRPAPKAVQWYKDDTPLSP
SEKFKMALEGQMAELRILRLTPADAGVYRCQAGSAQSSAEVTVAREVTVIQPLQDAEAMEEGRVCFSCELSH
KDEDIEWSLNGTPLYNDSFHEISHGCLHTLVLKSVRQADGTVCATSPKVSVSARLVVKGKPVVFLKALDDV
SAEERGLTLTQCEVSDPEARVVWRKDGVELGSPDKYDFLHKAGARGLTVHDLSHEDAGLYTCQVVGSKETQSKV
SVHDLHVGITKRLKTVLEVLEGESCSFECVLSHESPSDPAVWTVGGKTVGGSGHFHAVRQGRKYTLTVKDAALS
DAGEVVSFVLGLTSKASLIIRERPVDITKPLEDQRTTLGEDVMLSCELSRAGTSVRWLKDGKAIKRSQKYDLL
SEGTRAVLVVRKASLKDSGEYTCETEASKSTAKLCVEEKANRFTEELADLQVEEKGRAVFTCKTEHPASVVTW
RKGLLELRASGKHVPSQEGTLKLTINALERTSDTYTCDIGQARTQARLLVHGQKVRVIEDLEDTAVQEGSS
AKFCCRIAPADYGPVHWFLLDKTPLHSNELNEITVQPGGYHVLTLRQLALKDSGTVYFEAGDQRTSALRVTEK
PSIFSRPLTDVTVTEGEDTLVCETTTVDSSVRWTKDGKTLRPSARCQLSHEGCAQLLITATTPQDGGRYKC
EIGGASSSSIVRVHALPVRFRFRESLKDVEVPEGKAATLRCVLSVAAPVEWRHGDDVLKSSNKYSLRQEGAVLE
LVIRDLQPDQSGQYSCSFGDQTTSATLTVKTSQAQVFGKLRNKEATEGTTVTLRCELTKEAPVEWKKGTETLR
NGDKYSLKQDGAVCELQICSLLVADAGEYSCVCGQEKTSATLTVKALLVHFVRRRLRSEATEGDTTTLQCELS
KAAPVEWRKGTETLRDGDYSLKQDGAVCELQIRSLTIADAGEYLCTCGQEKTSATLTVRGLPAKFIEDLRSQ
EATEGATAILRCELSKAAPVEWRKGSSETLKDGDYTLRQDGAVCELQIRGLAVVDTGTYSLPTKFTTEGLRNE
EATEGTMATLRCQMSKAAPVEWRKGSSETLRDGDYSLRQDGA MCELQIRGLTIEDSGEYTCVCGQEKTSATLS
VKALPPRFIEDLRSQEATEGTMATLRCQMSKAAPVEWRKGSSETLGDGGYSLRQNGAVCELQIRPLVWGHDLA
VEDTGEYSCVCGQEKTSATLNVKALPPKFTEGLKKEEATEGTMVTLRQMSKEATVEWRKGAKTLS DGGYSL
RQDGA MCELQICGLAVEDAGEYSCVCGQEKTSATLSVKALPPRFIEDLRSQEATEGTMATLRCQMSKAAPVEW
RKGSETLRDGDYSLRQDGA VCELQIRDLAVEDAGEYLCVCGQEKTSATLSVKALPPRFIEDLRSQEATEGTM
ATLRCQMSKAAPVEWRKGSKTLR DGDYSLRQDGA MCELQICDLAVEDTGDYSCVCGQEKTSATLSVKAPQV
FQPLQNLQAEEGSMASLRCELSVPNAAMVWSKGGLELQGDTRREARQQGCVAELLLRDLRREDAGEYSCVCG
SQTTSATLMVTAAPVRFRLRELQAQDVDEGATARLRCELSREAVSVEWRKGS LQLFPCAQYQMVQEGTTAELLV
HGVEQEDAGEYTC DAGHTQSIARLSVRAPKPKFKTDLQSTEQEAGGTARLCCQLSEAE PGTPVQWLKEGVELH
VGSKYEMRRQGA VCELLIHGLEAKDTGEYACL VGGQKTLASLRVKEPEVTIVRGLVDMEVQADEDEVEFTCKVS
QAGATDVQWHLQGLPLQSNEVTEVAVLADGCTHVLQLKGVTL EDA GTVSFHVGG LSSSAQLTVRVP E VTL E P
LKDVQLSEGQDAHFRCRLSRASQEARWALGGVPLQCNE MNDITVEQGTLYLLTLHKVTLEDAGTITLQV GSC
SSEAQLKVTAKNTVLRGLENVDALEGG EALFECQLSQPEVAHTWLLDDEPVHTSEKVEVVYFENGLRHLLLL
KNLKPQDSCRVTFLAGDVVTS AFLTVRGRWLEVLEPPHDASVKAGMQVRFTCILSEAVPVGEATWYINGAAIQ
PDDTDWTVTTDGSHHALTLSNAQPQHAGEVTFAARDAVASARLSVLALPDPPEDAE VVGRSDHSVTL SWVAPM
SDGGGGLCGYR VEMKEASTGQWQLCHDLVPGPECVVDDLVP GKTYRFRVA AVGPAGAGEPVHLPQMVKIAPAP
APAPAPAPAPETRQAVVGEDI CLELEVAADGGEV VWHKGT ERIQPGGHFEVLSRGQRQMLVIKGFRTEDQGEY
RCGPIQGLPSSGAATFNVVMTSGSGDEVPAQPSLPPEAAQEGDLHLLWEALARKRRMSREPTLDSISELPEED
SRVQHLRQEA EETAPDLSEGYSTADELARTGEADLSHTSSDDES RAGT PSLV TYLKKAGGPGISPLASKHEAQ
VTTSVKPKQKQEPV VPTCPPPGDLSAADLMDPSLDKAAVKIQAAF KGYKVRKEMKQQEGPVFSRTFGDTEAQV
GDVLRLECVLATKTD MRACWLKDGIELTDGRHYHIDQLKDG TCSLLVTGLAPTDSGRYTCQVSTKSGRVSHA
CVVVSGTESEAESSSGELDDAFRRAARRLHRLFRTKSPAELSEEEFLSADEGPGPEEPADWQTYREDEFN
VCIRFESLAEARQAVTCFRNMFATMGIGVEISLGEQGRGVEMRIGKVAPT VTPAVPLAKT PGLQTS DAAPVF
LTELQNVSDQDGYPMSFDCVVTGQPVPSVRWFKSLDGKLL EDDHYMINEDQOQGHQLIITAVVPADMGVYRCLA
ENSMGVSSTKAELRVELTSTDYDTAADATETSSYFSAQGYLSREQEGETESDEGQLPQVLEELKDLQVAPGTR
LAKFQLKVKYGPAPKLYWFKDGQPLTTS DHIRMTDKKTLHTLEIVSVTREDSGQYAA YISNAVGAAYSSARLL
VRGPSEPEEKPASDVHERLVPPRILEKFTPKVKRGS SIFSVKVEGHPAPSVHWLKKEAEKGV LWIGPDT PG
YTMASSSKQHSLVLLDVGRQH QGT YTCIATNPAGQALCSASLHISGLAKEEEQERVKEALISSFLQGT SQAVS
AQMSESAGFADLVGQSKGESLVAAEAHSHLSLAEVGT EEF LQKLT SQITEMVSAKISQAKLQVPGGDSDEETK

TPSASPRHGRSRPSSSVQESSSESEEDGDSRGEIFDIYVVTADYLP LGAEQDAIILREGQYVEVLDSAHPLRWL  
 VRTKPTKSSPSRQGWVSPAYLDKRLKLSPEWGPTEAPEFPGEAVSEDEYRTRLSSSVIQELLSSSEQAFVGGELQF  
 LESHMHLKHLERSPRVPAAVASQKTVIFRNVQDISHFHSSFLKELQCGTDDDVMCFIKNQEAFEFKYLEFLVG  
 RVQAESVVVSTPVQEFYKKYAEETLSAKDPTQPPPPPLQHYLEQPVVERVQKYQALLKELIRNKARNRQNCALL  
 EQAYAVVSALPQRAENKLHVSLMENYPGTLEALGEPTRQGHFIVWEGAPGARMPPWKGNHRHVFLFRNYLVICK  
 PRRDSRTDTFSYVFRNMMKLSSIDLNDQVEGDDRAFEVWHEREDSVRKYLLQARTVIIKNSWVKEICGIQQRL  
 AQPVWRPPEFEEELADCTAELGETVKLACRVGTGPKPIVSWYKDGKPVVDPHHILIEDPDGSCCTLI LDNLTG  
 IDSGQYMCFAASAAGNASTLGKILVQVPPRFVNVKVRATPFVEGEDAQITCTVEGAPYPQIRWYKDGTLAPGN  
 RYRMLNEPRSGVLVLIQAASKEDLGHYECELVNRLGSTRGGELYMQSALRARDQHHREQIVAAVEVTEQE  
 TKVPKKTVIIIEETITTVVKS PRGRRQSPGKSPSRSPRRSASPRRPGLLAPERLYPPGTSPSRRELEVEQGRKA  
 PVPALYVTEAEVHAPASQSOPKWLEVEETIEVRVKKTGSRGASPVREMTSRGEGILFTLPGGIPGRDPNANNS  
 NNKSVYQEAARTWGPVAVHVGEPFIFQVDSVGNVDWAASPEPEQVRASQKEENTERQEGCSDGENTFLMEEP  
 QDTSLQGRDPKILTHNGRVLTLADLEDYVPOEGETFGCGDSTPSTPDEPPCEVSVLQREI SEPTVGGQVLLN  
 VGRPPGTGATPSFFRPGSQVHSPESVSFLLREAWSGPVSAAPWTSSFHTHVQSSVDGSHGSKFTEVSTQTVSF  
 GAVGETVTLHIDPDGGEAPGPSQG\*

>rs45824303\_ENSMUSP00000158795\_c.12685:A>G\_p.E4229G

ENSMUST00000238536.2|Obscn-210|ENSMUSG00000061462|-|chr11:g.58952474:T>C  
 MDHSFSGAPRFLTRPKAFVSVGKDATLSCQIVGNPTPHVSWEKDRQPVEAGARFLAQDGDVYRLTILDLAL  
 GDSGQYVCRARNAIGEAFAAVGLRVDSEGTCAEQAPHFLLRPTSIRVREGADATFRCRVGGSPQPAVSWSKDG  
 RRLGPPDAPHVRVEEHGESSALRIRSARPRDGGTYEVRAENPLGSASAAAALVVDSDAEVAGPPGTSTATLLA  
 HLQORREAMRAEGIPPSPPGAGTRTCTVTEGKHARLSCFVTGEPKPEVWKKDGQLVTEGRRHVVEDEQENF  
 VLKILFCKQSDRGLYCTASNLVQTYSSVLVVREPTVPFKKRLQDLEVREKESATFQCEVAQPAEAAWFK  
 EETRLWASAKYDIEEEGTERRLTVRNVSADDDAVYICETTEGSRVVAELSVQGNLTKLPRKTAVRTGDTAIF  
 WVELAVPEGPVWRWRNQEEMVAGGRVAITAEGTCHTLTIFQCTLEDMGEVAFVSGGCRTTTQFCVSAPRRPPL  
 YPPADPVVKAKTESSVTLWSAPPHGDRPVTIDGYVLEKRRKLGAYAWSRCHEAGWLATTEFTITGVAEEGDFQ  
 FRVSAINHFGQGPYLEFPGTMHLVPLAVKTKPLKAEVAVEGGEVTFVSDLTVASSGEVFLDGEALKASSIYVI  
 RCDRTRHMLTIREVPARLHGAQLKFFVANGIETS IQMVVRAALGLPSSSKLPAAAAAREVLAQLHHEAQLLAELSD  
 QAAAVTWLKDGRELSLGPKEYMVSAGRRALLVRDVAQDDAGLYECVSRGSRRTAYQLLVQDITDGYRDWGPAG  
 PQKHMCKCAGAKIARYLGSSCYRFLQYDKGVWHLEAALDTRQGGKTS SCSLHEKPKLVFAKQQAHSEVKA  
 AGNSATLSCEVTQAQTEVTFWKDGKLLSSSSKVRMEASGCSRRLVVQQAGKADAGEYSCEAGGQKLSFRLDVA  
 EPKLVFAKQQAHSEVKAEGASATLSCEVAQAQTEVTFWKDGKLLSSSSKVRMEASGCSRRLVVQQAGKADA  
 GEYSCEAGGQKLSFRLDVAEPKMFVFAKEQQARSEVKAEGASATLSCEVAQAQTEVTFWKDGKLLSSSSKVRM  
 EASGCSRRLVVQQAGKADAGEYSCEAGGQKLSFRLDVTEPKLVFAKEQQARSEVKAEVGN SATLSCEVAQAQ  
 EVTWFKDGKLLSSSSKVRMEASGCSRRLVVQQAGKADAGEYSCEAGGQKLSFRLDVAEPKLVFAKEQQARSE  
 KAEAGNSATLSCEVAQAQTEVTFWKDGKLLSSSSKVRMEASGCSRRLVVQQAGKADAGEYSCEAGGQKLSFHL  
 DVTEPKLVFAKEQQAHSEVKAEGASATLSCEVAQAQTEVTFWKDGKLLSSSSKVRMEASGCSRRLVVQQAGK  
 ADAGEYSCEAEGQKLSFRLDVAEPKLVFAKEQQARSEVKAEGASATLSCEVAQAQTEVTFWKDGKLLSSSSK  
 VRVEASGCSRRLVVQQAGKADAGEYSCEAGGQKLSFRLDVAEPKLVFAKEQQANSEVKAEGASATLSCEVAQ  
 AQTEVTFWKDGKLLSSSSKVRVEASGCSRRLVVQQAGKADAGEYSCEAGGQKLSFRLDVAEPKLVFAKEQQAH  
 SEVKAEGASATLSCEVAQAQTEVTFWKDGKLLSSSSKVRVEASGCSRRLVVQQAGKADAGEYSCEAGGQKLS  
 FRLDVAEPKLVFAKEQQAHSEVKAEGASATLSCEVAQAQTEVTFWKDGKLLSSSSKVRVEASGCSRRLVVQQ  
 AGKADAGEYSCEAGGQKLSFRLDVAEPKLVFAKEQQAHSEVKAEGASATLSCEVAQAQTEVTFWKDGKLLSS  
 SSKVRVEASGCSRRLVVQQAGKADAGEYSCEAGGQKLFRLDVAEPKLVFAKEQQAHSEVKAEGASATLSCE  
 VAQAQTEVTFWKDGKLLSSSSKVRVEASGCSRRLVVQQAGKADAGEYSCEAGGQKLSFRLDVAEPKLVFAKEQ  
 QAHSEVKAEGASATLSCEVAQAQTEVTFWKDGKLLSSSSKVRVEASGCSRRLVVQQVQKADAGEYSCEARGQ  
 KLSFRLDVADTRLMFAKEQQARTEVKAEGNSATLSCEVAQAQTEVTFWKDGKLLSSSSKVRVEASGCSRRLV  
 VQQAGKADAGEYSCEAGGQKLSFRLDVAEASQIPERPSRREPLVVKEHETIILTATIAAPSVAAVTWLKDG  
 EIRRSKRHEATSLGDTHTLTVRGAQVLD SAIYSCRVGKEGQDFPVQVEEVAAKFSKPLEPVEGELGGTVMLVC  
 ELSPEQAEVWRCGNTQLRPGKRFQMTSEGPRRTLTVSGLREDDAEYVCE SRDDRTSARLTVKVPVVKFTS  
 GLSAMVAEEGQEATFQCVVSPSDAGVTWYKDGMLQPSKFMVMEVSGASRSLTILGLTLEDAGQVTVAEAGAS  
 SSAALRVREAPVLFKKLEPQTVVEERTSVTLEVELTRPWPEVKWTRNAAVLTPSENVEIRAEGARHCLVLRV  
 GFADRGGFFGCETPDDKTQAKLNVEMRQVRLVVRGLQVEEAKEQGTASMDVELSHAEEVGSWTRDGLRLQPGPKC  
 HLAVQGPVHILTLALSALPQDSGLVAFRAEGVHTSARLIVTELPSVFTRVLQDVVATQKEKVTLECELSRPVDV  
 RWLKDGENELRAGKAIGIVAQGTCSRSLVIYRCETGDLGVTECDALDAQTSASLRVQGRTYTLIFRVLAEADAGE  
 VKFVAENAESRAHLRVKELPVTLRLRDKIAMEKHRGVLECCQVSRASAQVRWFKGGVELQSGPKYEVVSDGL  
 YRKLVINVDQPEDEDTYTC DAGNVKTSAQFFVEEQSITIVRGLKDMTVMEPAPAWFECETSIPSVRPPKWL  
 LGKTVLQAGGNVGLQDGTVHRLTLHKTCSTMTGPVHFTIGKSRSSAQLVSDIPVVLTRPLEPKAGRELQSVVL  
 SCDFRPAPKAVQWYKDDTPLSPSEKFKMALEGGQMAELRILRLTPADAGVYRCQAGSAQSSAEVTVAREVTVI

QPLQDAEAMEEGRVCFSCELSHKDEDEIWSLNGTPLYNDSFHEISHEGCLHTLVLKSVRQADTGTVCATSPKV  
 SVSARLVVVKGKPVVFLKALDDVSAEERGLTLTQCEVSDPEARVVRKDGVELGSPDKYDFLHKAGARGLTVHD  
 LSHEDAGLYTCQVGSKETQSKVSVHDLHVGITKRLKTVEVLEGESECSFECVLSHESPSDPAVWTVGGKTVGGS  
 GHFHAVRQGRKYTLTVKDAALSDAGEVVFVSVLGLTSKASLIIRERPVDIITKPLEDQRTTLGEDVMLSCELSRA  
 GTSVRWLKDGKAIRKSQKYDLLSEGTRAVLVVRKASLKDSGEYTCETEASKSTAKLCVEEKANRFTEELADLQ  
 VEEKGRAVFTCKTEHPASVVTWRKGLLELRASGKHVPSQEGTLTKLTINALERTDSDTYTCDIGQARTQARLL  
 VHQQKVRVIEDLEDTAVQEGSSAKFCRIAPADYGPVHWFLDKTPLHSNELNEITVQPGGYHVLTLRQLALKD  
 SGTVYFEAGDQRTSAALRVTEKPSIFSRPLTDVTVTEGEDTLVCEETTVDSSVRWTKDGKTLRPSARCQLSH  
 EGCQAQLLITATTPQDGGRYKCEIGGASSSIVRVHALPVRFRESLKDVEVPEGKAATLRVLSVAAPVEWR  
 HGDDVLKSSNKYSLRQEGAVLELVIRDLQPDQSGQYSCSFGDQTTSATLTVKTSQAQFVQKLNKEATEGTTV  
 TLRCELTKAPVEWKKGTETLRNGDKYSLKQDGAVCELQICSLLVADAGEYSCVCGQEKTSATLTVKALLVHF  
 VRRLRSKEATEGDTTTLQCELSKAAPVEWRKGTETLRDGDYSLKQDGAVCELQIRSLTIADAGEYLCTCGQE  
 KTSATLTVRALPAKFKDSLKNEEATEGTTATLSCELSKAAPVTWKKGPKTLQSGDKYVLRQDGAVCGLQIHGL  
 TMADAGEYSCVCGQEKTSATLTVRGLPAKFIEDLRSQEATEGATAILRCELSKAAPVEWRKGTETLRDGDYSL  
 LRQDGAVCELQIRGLAVVDGTGYSLSLPTKFTTEGLRNEEATEGTMATLRCQMSKAAPVEWRKGTETLRDGDYSL  
 LRQDGAMCELQIRGLTIEDSGEYTCVCGQEKTSATLSVKALPSRFIEDLRSQEATEGTMATLRCQMSKATAPVE  
 WKKGSETLRDGGYSLRQDGPVCELQICDLAVEDAGEYSCVCGQEKTSATLSIKALPPRFIEDLRSQGATEGT  
 MATLRCQMSKAAPVEWRKGTETLRDGGYSLRQNGAVCELQIHDLAVEDTGEYSCVCGQEKTSATLNVKALPP  
 RFIEDLRSQEATEGTMATLRCQMSKAAPVEWRKGTETLRDGGYSLRQDGAVCELQIHDLVEDAGQYSCVCG  
 QEKTSAVLTVDALPPKFTTEGLKKEEATEGTMVTLRCQMSKEATVEWRKGAKTLSDGGYSLRQDGAMCELQIC  
 GLAVEDAGEYSCVCGQEKTSATLSVKALPPRFIEDLRSQEATEGTMATLRCQMSKAAPVEWRKGTETLRDGDY  
 YSLRQDGAVCELQIRDLAVEDAGEYLCVCGQEKTSATLSVKALPPRFIEDLRSQEATEGTMATLRCQMSKAAP  
 VEWRKGTETLRDGDYSLRQDGAMCELQICDLAVEDTGDYSCVCGQEKTSATLSVKALPPRFIEDLRSQEARE  
 GTVATLRCRMSKAAPVEWRKGTETLRDGDYSLRQEGNLCELQIRDLAVEDTEEYSCVCGQEKTSATLSVKAL  
 PAKFIEDLRSQEAPESSTVTLRCKLSKASVWKKGSETLRNGARYSLRQDGAVCELEIRDLTVEDTGEYSCT  
 CGQERTSATLSIMAPQVVFQQPLQNLQAEEGSMASLRELSVPAAMVWSKGGLELQGDTRREARQQGCVAEL  
 LLRDLRREDAGEYSCVCGQEKTSATLMTVAAPVFLRELQAQDVDEGATARLRCELSREAVSVEWRKGSVLQF  
 PCAKYQMVQEGTTAELLVHGVEQEDAGEYTCDAHTQSIARLSVRAPKPKFKTDLQSTEQEAGGTARLCCQLS  
 EAEPGTPVQWLKEGVELHVGSKYEMRRQGAVALLEIHLGLEAKDTGEYACLVGQKTLASLRVKEPEVTIVRGL  
 VDMEVQADEDEFTCKVQAGATDVQWHLQGLPLQSNVTEVAVLADGCTHVLLQKGVTLLEDAGTVSFHVGG  
 SSSAQLTVRVPEVTVLEPLKDVQVLESEGQDAHFRCRLSRASGQEARWALGGVPLQCNEMNDITVEQGTLYLLTL  
 HKVTLEDAGTITLQVGSSESQAQLKVTAKNTVLRGLENVDALEGGELFCQLSQPEVAHAHTWLLDDEPVHTS  
 EKVEVVYFENGLRHLLLLKLNKLPQDSCRVTFLAGDVVTSFAFLTVRGRLEVLLEPPHDASVKAGMQVRFCTILS  
 EAVPVGEATWYINGAAIQPDDTDWTVTTDGSHHALTLNSAQPQHAGEVTFAAARDAVASARLSVLALPDPPEA  
 EVVGRSDHSVTLVSWAPMSDGGGLCGYRVMKEASTGQWQLCHDLVPGPECVDDLVPGKTYRFRVAAVGPA  
 GAGEPVHLPQMVKIIAPAPAPAPAPAPAPAPAPETRQAVVGEDICLELEVAADGGEVVWHKGTERTIQPGGHFEVLS  
 RGQRQMLVIKGFRTEDQGEYRCGPIQGLPSSGAATFNVMVMTSGSGDEVPAQPSLPPEAAQEGDLHLLEALAR  
 KRRMSREPTLDSISELPEEDSRVQHLRQEAETAPDLSEGYSTADELARTGEADLSHTSSDDESRAAGTPLSVT  
 YLKKAGGPGISPLASKHEAQVTSVKPKQKQEPVPTCPGGDLAADLMDPSLDKAAVKIQAQAFKGYKVRKE  
 MKQQEGPVFSRTFGDTEAQVGDVLRLECVLATKTDMRACWLKDGIELTDGRHYHIDQLKDGTCSLLVTLGLAPT  
 DSGRYTCQVSTKSGRVSHSACVVVSGTESEAESSGGELDDAFRAARRLHRLFRTKSPAELSEELFLSADE  
 GPGEPEEPADWQTYREDENFVCIRFESLAEARQAVTCFRNMFMATMGIGVEISLGEQGPGRVEMRIKVAPTVT  
 PAVPLAKTPGLQTSDAAPVFLTELQNDVQDGYPMSFDCVVTGQPVPSVRWFKDGKLEEDDHYMINEDQQGG  
 HQLIITAVVPADMGVYRCLAENSMGVSSTKAELRVELTSTDYDTAADATETSSYFSAQGYLSSREQEGTESDE  
 GQLPQVLEELKDLQVAPGTRLAKFQLKVKGYPAKPLYWFKDQGLTTSDHIRMTDKKTLHTLEIVSVTREDSDG  
 QYAAAYSNAVGAAYSSARLLVRGPSEPEEKPASDVHERLVPPRILEKFTPKKVKRGSSTIFSVKVEGHPAPSV  
 HWLKEEAKEKGLVWIGPDTPGYTMASSSKQHSVLVLDVGRQHGTQYTCIATNPAGQALCSASLHISGLAKEEEQ  
 ERVKEALISSFLQGTSAQVSAQMSSEAGFADLVGQSKGESLVAEEAHSHLSLAEVGTEEFQKLTSTQITEMVS  
 AKISQAKLQVPGGDSDEETKTPSASPRHGRSRPSSSVQESSSESEDGDSRGEIFDIYVVTADYLPGLAEQDAI  
 ILREGQYVEVLDLASHPLRVLVTKPTKSSPSRQGWVSPAYLDRKRLKLSPEWGPTEAPEFPGEAVSEDEYRTRL  
 SSVIQEELLSSEQAFVQELQFLESHHMKHLERSPRVPAAVASQKTVIFRNVQDISHFHSSFLKELQCGCTDDDDV  
 AMCFIKNQEAFAKEYLEFLVGRVQAESVVVSTPVQEFYKKYAEETLSAKDPTQPPPPPLQHYLEQPVVERVQKYQ  
 ALLKELIRNKARNRNYNCALLEQAYAVVSALPQRAENKLVSLMENYPGTLEALGEPVIRQGHFVWEGAPGARM  
 PWKGHNHVVFLFRNLVICKPRDRSRTDFTFSYFRNMMLKSSIDLNDQVEGDRAFEVWHEREDSVRKYLLQA  
 RTVVIKNSVVKKEICGIQQLAQPVWRPPEFEEELADCTAELGETVVKLACRVTGTPKPIVSWYKDGKPVVEVDPH  
 HILIEDPDGSCTLILDNLTGIDSGQYMCFAASAAGNASTLGKILVQVPPRFVNVKVRATPFVEGEDAQITCTVE  
 GAPYPQIRWYKDGTLAPGNRYRMLNEPRSGVLVVIQAASKEDLGHYECELVNRLGSTRGGGELYMQSPALR  
 ARDQHHREQIVAAVEDTSVEGSAHSAQDQGAASVLRLLGSEALGSPSPGDLNTRQSEPPAFEEAASQIP

GAASGTPEVSPQPGTHKGLEQETTSSGSQGWTPVIRVEGTAWPGAGTGQQLLDVHSQVIMETTQRTYVQCQAPDT  
GVTRAPSMQVTTIEDVQVQVGDMAQFDAVIEGHPPPIVWTYKGSTQLTSSARLSQRQDGTYSVLVTDVAPHDA  
GVYTCVANNAGGQVLCKAELLVHGGDKLDAENQVYRRKLHSFYDVQEEIGRGVFGFVKRVQHKGNKMFCAAKF  
IPLRSKTRAQAYQERDILATLGHPLVLTGLLDQFETRKTLLILILELCSSEELLDRFLFKKGVVTEAEVKVYIQQL  
VEGLHYLHSHGILHLDIKPPNILMVHPAREDIKICDFGFAQKITPSEFPQYSKYGSPEFVSPEIIEQNVPVSEGS  
DIWAMGVISYLSLTCSSPFAGESDRATLLNVLEGRVSWSSPTAAHLSSEDAKDFIKATLQRTPRARPSTSQCLA  
HPWFLKSMFAEEAHFINTKQLKFLARSRWQRSLMSYKSILVMRSIPPELLQGPPDPSPLGVARHLRGEASGAS  
SSSSSSDNELAPFARAKSLPPSPVTHSPLLHPRGFRLRPSASLPEETEASMPPTADAAPVSPQASGPPASPGCV  
PRHSVSSSLFYQQAGEGAERGNKTSGAKRHPARRRHLKGGYIARALPGLREPLMEYSLLEEEAAREEQASLM  
TKTPSFETALRLPSSSVREVPGRSHSLDNPPVTTGPSPEACKEQLLFPSTGLTHETHTAKDRGHKEGFLQESV  
PFPPMSGDSRPGKQEGSSQDSCRKPASSCHSELGSGSQEGCGPPSSQSLGSLPPQSLKKEKELSTSCGPLFSEQ  
PQAAPFPTQVSPLLGSEKEPQDGLSEGPVVPVSSSPGSASQVDASLDTEGLSEAGDTCDFTPPPQRPQEQAT  
TRKFSLESRGGYAGVAGYGTFAFGGDAGGMLGQGPLWARMAWAVSQSSEEQDEAATESPQPLESGLPIAEASG  
VPLRTSPSLTPWEEVEQVSLVQIRDLSGDAEAADTISLDISEVDPAYLNLSDLYDIKYLPEFEMI FRRVVKPI  
EQPESPGSETEAGQGLADFLLEEAAWPWPGELGLRAGLEITEEPEEPGDLEALLGEAAVGRKRKWSPSRGLFQF  
PGRCLSGEEPVELGLRQVRKASMAHISRILKGRPEGPEREGPPRKKAGLASFRLSGLKGRDQELSDEAVVLGQ  
SVTLACQVLAQPTAQATWSKDGVLLESSGHLLISSTLKNFQLLTIILVVKEEDLGTYTCCVSNPLGTAVTTGVL  
RKAERPSSSPRPEVGEVLYKDAVLLVWKPVESCGPVTYIVQCCIEGGSWTTLASDISDCCYLTGKLSRGGMYIF  
RTACVSKAGMGPISSPSEQVLLGGPNHLASEEESRRGRPAQLLPSTKTFQAFQMQIRRRGRFSVVRQCREKASGR  
ALAAKIVPYQPEDKTAVLREYEAALKRLHHPHLAQLHAAYLSPRHLVLIILELCSGPELLPSLAERESYSESDVK  
DYLWQMLSATQYLHAQHIHLDLRSENMMVTEYNLLKVIDLGNALDQEKVPAPENFKDYLETMAPELLEGGQ  
GAVPQTDIWAIGVTAIFIMLSGEYSESSEGTDLQKGLRKLIRLSRCYAGLSGGAVAFQSSLCAQPWGRPCA  
STCLQCGWLTEEGPTGSRPTPVTFPTVRLRAFAVREKRRALLYKKNLAQVR\*  
>rs45824303\_ENSMUSP00000038264\_c.11593:A>G\_p.E3865G  
ENSMUST00000047441.14|Obscn-202|ENSMUSG00000061462|-|chr11:g.58952474:T>C  
MDHSFGSAPRFLTRPKAFVSVGKDATLSCQIVGNPTPHVSWEKDRQFVEAGARFRLAQDGDVYRLTILDLAL  
GDSGQYVCRARNAIGEFAAVGLRVDSEGTCAEQAPHFLLRPTSIRVREGADATFRCRVGGSQPAPVSWSKDG  
RRLGPPDAPHVRVEEHGESSALRIRSARPRDGGTYEVRAENPLGSASAAAAALVVDSDAEVAGPPGTSTATLLA  
HLQORREAMRAEGIPPSPPGAGTRTCTVTEGKHARLSCFVTGEPKPKETVWKKDQGLVTEGRRHVVEDEQENF  
VLKILFCKQSDRGLYTCTASNLVGQTYSSVLVVREPTVPFKKRLQDLEVREKESATFQCEVAQAPATEAAWFK  
EETRLWASAKYDIEEEGETERRLTVRNVSADDDAVYICETTEGSRVAELSVQGNLTKLPRKTAVRTGDTAIF  
WVELAVPEGPVRWLRNQEEMVAGGRVAITAEGTCHTLTI FQCTLEDMGEVAFVSGGCRTTTQFCVSAPRRPPL  
YPPADPVVKAKTESSVTLWSAPPHGDRPVTIDGYVLEKRLKLGAYAWSRCHEAGWLATTEFTITGVAAEEDGFQ  
FRVSAINHFGQGPYLEFPGTMHLVPLAVKTPKAVEAVEGGEVTFVSDLTVASSGEWFLDGEALKASSIYVI  
RCDRTRHMLTIREVPARLHGAQLKVFANGIETS IQMVVRAALGLPSSKLPAAAAREVLAQLHEEAQLLAELSD  
QAAAVTWLKDGRELSLGPKEYMQVSAGRRALLVRDVAQDDAGLYECVSRGSRRTAYQLLVQDITDGYRDWGPAG  
PQKHMCKCAGAKIARYLGSSCYRFLQYDKGVVHWEAALDTRQKGKTS SCSLHEKPKLVFAKQQAHSEVKA  
AGASATLSCEVAQAQTEVTFWKDGKLLSSSSKVRMEASGCSRRLVVQQAGKADAGEYSCEAGGQKLSFRLDVA  
EPKMFVFAKEQQARSEVKAEGASATLSCEVAQAQTEVTFWKDGKLLSSSSKVRMEASGCSRRLVVQQAGKAD  
GEYSCEAGGQKLSFRLDVTEPKLVFAKEQQARSEVKAEGVNSATLSCEVAQAQTEVTFWKDGKLLSSSSKVRM  
EASGCSRRLVVQQAGKADAGEYSCEAGGQKLSFRLDVAEPKLVFAKEQQARSEVKAEGNSATLSCEVAQAQ  
EVTWFKDGKLLSSSSKVRMEASGCSRRLVVQQAGKADAGEYSCEAGGQKLSFRLDVTEPKLVFAKEQQAHSEV  
KAEAGASATLSCEVAQAQTEVTFWKDGKLLSSSSKVRMEASGCSRRLVVQQAGKADAGEYSCEAGGQKLSFRL  
DVAEPKLVFAKEQQARSEVKAEGASATLSCEVAQAQTEVTFWKDGKLLSSSSKVRVEASGCSRRLVVQQAGK  
ADAGEYSCEAGGQKLSFRLDVAEPKLVFAKEQQANSEVKAEGASATLSCEVAQAQTEVTFWKDGKLLSSSSK  
VRVEASGCSRRLVVQQAGKADAGEYSCEAGGQKLSFRLDVAEPKLAFAKEQQAHSEVKAEGASATLSCEVAQ  
AQTEVTFWKDGKLLSSSSKVRVEASGCSRRLVVQQAGKADAGEYSCEAGGQKLSFRLDVAEPKLAFAKEQQAH  
SEVKAEGASATLSCEVAQAQTEVTFWKDGKLLSSSSKVRVEASGCSRRLVVQQAGKADAGEYSCEAGGQKLS  
FRLDVAEPKLAFAKEQQAHSEVKAEGASATLSCEVAQAQTEVTFWKDGKLLSSSSKVRVEASGCSRRLVVQQ  
AGKADAGEYSCEAGGQKLFRLDVAEPKLVFAKEQQAHSEVKAEGASATLSCEVAQAQTEVTFWKDGKLLSS  
SSKVRVEASGCSRRLVVQQVQKADAGEYSCEARGQKLSFRLDVAEAEESQIPERPSRREPLVVEKHETIILTAT  
IAAPSVAAVTWLKDGVIEIRRSKRHEATSLGDTHTLTVRGAQVLD SAIYSCRVGKEGQDFPQVVEEVAAKFSKP  
LEPVEGELGGTVMLVCELSPEQAEVWRCGNTOVLRPGKRFQMTSEGPRTLTVQLGREDDAEYVCESRDDRT  
SARLTVKVRVVKFSTGLSAMVAEEGQEAFTQCVVSPFDAGVTWYKDMQLOPSEKFMVESGASRSLTILGL  
TLEDAGQVTVVEAGASSAALRVREAPVLFKKKLEPQTVEERTSVTLEVELTRPWPEVVKWTRNAAVLTPSENV  
EIRAEGARHCLVLRVGFADRGFFGCETPDDKTQAKLNVEMRQVRLVVRGLQEVEAKEQGTASMDVELSHAEVE  
GSWTRDGLRQLQPGPKCHLAVQGPVHILTSLALQPD SGLVAFRAEGVHTSARLIVTEL PVSFTRVLQDVVATQ  
KEKVTLCELSRPVDVRWLKDGVELRAGKAI GIVAQGTCSRSLVIYRCETGDQGVYVCDALDAQTSASLRVQGR

TYTLIFRRVLAEDAGEVKFVAENAESRAHLRVKELPVTLLRPLRDKIAMEKHRGVLECVSRASQAQVRFKGG
VELQSGPKYEVVSDGLYRKLVINOVPEDEDYTCAGNVKTSAQFFVEEQSITIVRGLKDMTVMPEPAPAWFE
CETSI PSVRPPKWLKGKTVLQAGNVGLEQDGTVHRLTLHKTCSTMTGPFVHFTIGKSRSSAQLVSDIPVVL
RPLEPKAGRELQSVVLSCDFRPAPKAVQWYKDDTPLSPSEKFKMALEGQMAELRILRLTPADAGVYRCQAGSA
QSSAEVTVAREVTVIQPLQDAEAMEEGRVCFSCELSHKDEDEIWSLNGTPLYNDSFHEISHEGCLHTLVLKS
VRQADTGTVCATSPKVSVSARLVVKGKPVVFLKALDDVSAEERGTLTLQCEVSDPEARVVRKDGVELGPSDK
YDFLHKAGARGLTVHDLSDHEDAGLYTCQVGSKETQSKVSVHDLHVGITKRLKTVEVLEGESECFVLSHESP
SDPAVWTVGGKTVGGSGHFHAVRQGRKYTLTVKDAALSDAGEVVFVSVLGLTSKASLIIRERPVDTKPLEDQR
TTLGEDVMLSCELSRAGTSVRWLKDGKAIKRSQKYDLLSEGTRAVLVVRKASLKDSEYTCETEASKSTAKLC
VEEKANRFTEELADLQVEEKGRAVFTCKTEHPASVVTWRKGLLELRASGKHVPSQEGTLTKLTINALERTDSD
TYTCDIGQARTQARLLVHGQKVRVIEDLEDTAVQEGSSAKFCCRIPADYGPVHWFLDKTPLHSNELNEITVQ
PGGYHVLTLRQLALKDSGTVYFEAGDQRTSAALRVTEKPSIFSRPLTDVTVTEGEDLTLVCETTTVDSSVRWT
KDGTLRPSARCQLSHEGCAQLLITATTPQDGGRYKCEIGGASSSIVRVHALPVRFRFRESLKDVEVPEGKAA
TLRCVLSVAAPVEWRHGDDVLKSSNKYSLRQEGAVLELVIRDLQPDQSGQYSCSFGDQTTSATLTVKTSQAQ
FVGKLRNKEATEGTTVTLRCELTKAEAPVEWKKGTETLRNGDKYSLKQDGAVCELQICSLLVADAGEYSCVCGQ
EKTSATLTVKALLVHFVRRLSKEATEGDTTLQCELSKAAPVEWRKGTETLRDGDYSLKQDGAVCELQIRS
LTIADAGEYLCTCGEKTSATLTVRALPAKFKDSLKNEEATEGTTATLSCELSKAAPVWKKGPKTLQSGDKY
VLRQDGAVCGLQIHGLTMADAGEYSCVCGQEKTSATLTVRGLPAKFIEDLRSQEATEGATAILRCELSKAAPV
EWRKGSSETLKDGDYTLRQDGAVCLEQIRGLAVVDTGTYSLSLPTKFTTEGLRNEEATEGTMATLRCQMSKAAPV
EWRKGSSETLRDGDYSLRQDGAVCLEQIRGLTIEDSGEYTCVCGQEKTSATLSVKALPPRFIEDLRSQGATEG
TMATLRCQMSKAAPVEWRKGSSETLGDGGYSLRQNGAVCELQIHDLAVEDTGEYSCVCGQEKTSATLNVKALP
PRFIEDLRSQEATEGTMATLRCQMSKAAPVEWRKGSSETLRDGGYSLRQDGAVCLEQIHDLVEDAGQYSCVC
GQEKTSAVLTVDALPPKFTTEGLKKEEATEGTMVTLRQMSKEATVEWRKGAKTSLDGGYSLRQDGAVCLEQI
CGLAVEDAGEYSCVCGQEKTSATLSVKALPPRFIEDLRSQEATEGTMATLRCQMSKAAPVEWRKGSKTLRDGD
RYSLRQDGAVCLEQICDLAVEDTGDYSCVCGQEKTSATLSVKAPQVVFQQLQNLQAEEGSMASLRCELSVFN
AAMVWSKGGLELQDGTREARQQGCVAELLLRDLRREDAGEYSCVCGQEKTSATLMTVAAPVFLRLELQAQDV
DEGATARLRCLELSREAVSVEWRKGSLLQFLPCAKYQMVQEGTTAELLVHGVVEQEDAGEYTCEDAGHTQSIARLSV
RAPKPKFKTDLQSTEQEAGGTARLCCQLSEAEPTPVQWLKEGVELHVGSKYEMRRQGAVCCELLIHGLEAKDT
GEYACLVGQKTLASLRVKEPEVTIVRGLVDMVEQADEDEFTCKVVSQAGATDVQWHLQGLPLQSNVTEVAV
LADGCTHVLQKGVTLLEDAGTVSFHVGGLSSSAQLTVRVPEVTVLEPLKDVQLSEGQDAHFRCRLSRASGQEA
RWALGGVPLQCNEMNDITVEQGTLYLLTLHKVTLEDAGTIITLQVGSSESAQLKVTAKNTVLRGLENVDALEG
GEALFECQLSQPEVAHAHTWLLDDEPVHTSEKVEVYFENGLRHLLLLKLNKLPQDSCRVTFLAGDVVTSAPFLTV
RALPDPPEDAEVVGRSDHSVTLVWVAPMSDGGGGLCGYRVEMKEASTGQWQLCHDLVPGPECVDDLVPGKTY
RFRVAAGVPAGAGEPVHLPQMVKIAPAPAPAPAPAPAPAPETRQAVVGEDICLELEVAADGGEVWHKGTERRI
QPGGHFEVLSRGQRQMLVIKGFRTEDQGEYRCGPIQGLPSSGAATFNVMVMTSGSGDEVPAQPSLPEAAQEGD
LHLLWEALARKRRMSREPTLDSISELPEEDSRVQHLRQEAETAPDLSEGYSTADELARTGEADLSHTSSDDE
SRAGTPSLVTYLKKAGGPGISPLASKHEAQVTTSVKPKQKQEPVPTCPPPGDLSAADLMDPSLDKAAVKIQA
AFKGYKVRKEMKQEGPVFSRTFGDTEAQVGDVLRLECVLATKTKDMRACWLKDGIELTDGRHYHIDQLKDGTC
SLLVTLGLAPTDSGRYTCQVSTKSGRVSHSACVVVSGTESEAESSSGGELDDAFRRAARLHRLFRTKSPAELS
EELFLSADEGPEPEEPADWQTYREDENFVCIRFESLAEARQAVTCFRNMFATMGIGVEISLGEQGRGVEM
RIGKVAPTPTPAVPLAKTPGLQTSDAAPVFLTELQNDVQDGYPMSFDCVVTGQPVPSVRWFKDGKLEEDDH
YMINEDQGGHQLIITAVVPADMGVYRCLAENSMGVSSTKAE LRVELTSTDYDTAADATETSSYFSAQGYLSS
REQEGTESDEGQLPQVLEELKDLQVAPGTRLAKFQLKVKGYPAKLYWFKDGQPLTSDHIRMTDKKTLHTLE
IVSVTREDSGQYAAIYISNAVGAAYSSARLLVRGPSEPEEKPASDVHERLVPPRILEKFTPKKVKRGSITFSV
KVEGHPAPSVHHLKEEAEGVLIWIGPDTPGYTMASSSKQHSVLVLLDVGRQHQTGYTCIATNPAGQALCASLH
ISGLAKEEEQERVKEALISSFLQGTSAVSAQMSSESAGFADLVGQSKGESLVAAEEAHSHLSLAEVGTTEFFLQK
LTSQITEMVSAKISQAKLQVPGGDSDEETKTPSASPRHGRSRPSSSVQESSSESEDGDSRGEIFDIYVVTADY
LPLGAEQDAIILREGQYVEVLDLVAHPLRVLVVRTKPTKSSPSRQGWVSPAYLDKRLKLSPEWGPTEAPEFPGEA
VSEDEYRTRLSSVIQELLSSEQAFVGELEQFLESHHMKHLERSPRVPAAVASQKTVIIRNVQDISHFHSSFLKE
LQCCGTDVDDVAMCFIKNQEAFFEKYLEFLVGRVQAESVVVSTPVQEFYKKYAEETLSAKDPTQPPPPPLQHYLE
QPVERVQKYQALLKELIRNKARNRQNCALLEQAYAVVSALPQRAENKLVSLMENYPGTLEALGEPVIRQGHFI
VWEGAPGARMPWKGNHRHVFLEFRNYLVICKPRRDSRTDTFSYVFRNMMKLSSIDLNDQVEGDDRAFEVWHERE
DSVRKYLLQARTVLIKNSWVKEICGIQORLAQPVWRPPEFEEELADCTAELGETVKLACRVNTGTPKPIVSWYK
DGKPEVEYDPPHHILIEDPDGSCSTLILDNLTGIDSGQYMCFAASAAGNASTLGKILVQVPPRVFNKVRATPFVEG
EDAQITCTVEGAPYPIEDIRWYKDGTLAPGNRYRMLNEPRSGVLVLIQAASKEDLGHYECELVNRLGSTRGGG
ELYMQSPALRARDQHHREQIVAAVEGAPSMQVTIEDVQVQVGDMAQFDAVIEGHPPPVTWYKGTQLTSSAR
LSQRQDGTYSVLVTDVAPHDAGVYTCVANNAGQVLCCKAELLVHGGDKLDAENQVYRRLKHSFYDVQEEIGR
GVFGFVKRVQHKGNMFCAAKFIPLRSKTRAQAYQERDILATLGHPLVTLGLLDQFETRKTLLIILELCSSEEL

LDRLFKKGVVTEAEVKVYIQQLVEGLHYLHSHGILHLDIKPPNII MVHPAREDIKICDFGFAQKITPSEPOYS  
KYGSPEFVSPETIEQNPVSEGSIDIWAMGVI SYLSLTCSSPFAGESDRATLLNVLEGRVSWSSPTAAHLSEDAK  
DFIKATLQRTPRARPSTSQCLAHFWFLKSMPAEEAHFINTKQLKFLARSRWQORSLMSYKSI LVMRSIPELLQ  
GPPDSPSLGVARHLRGEASGASSSSSSSDNELAPFARAKSLPPSPVTHSPLLHPRGFLRPSASLPEETEASMP  
TADAAVPASPQASAGPPASPGCVPRHSVSSSLFYQQAGEGAERGNKTS GAKRHPARRRHLLKGGYIARALPGLR  
EPLMEYSLLEEEAAREEQASLMTKTSPFETALRLPSSSVREVPGRSHSLDNPPVTTGSPPEACKEQLLFPST  
GLTHETAKDRGHKEGFLQESVFPFPPMSGDSRPGKQEGSSQDSCRGKPASSCHSELGSGSQEGCGPPSSQSLG  
SLPPQSLKKELSTSCGPLFSEQPQAAPFPTQVSPLLGSEKEPQDGSLSSEGPVVPVSSSPGSASQVDASLDTEG  
LSEAGDTCDFTPPPQRPEQATTRKFSLSRGGYAGVAGYGTFAFGGDAGMGLGQGPLWARMAWVSQSSEEQ  
DEAATESPQPLESGLPIAEASGVPLRTSPSLTPWEEVEQVSLVQIRDLSGDAEAADTISLDISEVDPAYLNLS  
DLYDIKYLPPFEFMI FRRVPKPIEQPESPGSETEAGQGLADFL EEEAAMPWPGEGLRAGLEITEEPEE PGDLEA  
LLGEAAVGRKRKWSPSRGLFQFPGRCLSGEEPVELGLRQRVKASMAHISRILKGRPEGPEREPPRKKAGLAS  
FRLSGLKGRDQELSDEAVVLGQSVTLACQVLAQPTAQATWSKDGVLLESSGHLLISSTLKNFQLLTI LVVKEE  
DLGTYTCCVSNPLGTAVTTGVLKKAERPSSSPRPEVGEYKDAVLLVWKPVE SCGPVTYIVQCCIEGGSWTTL  
ASDISDCCYLTKLSRGGMYIFRTACVSKAGMGPYSSPSEQVLLGGPNHLASEEESSRGRPAQLLPSTKTF AF  
QMQIRRGRFVVRQCREKASGRALAAKIVPYQPEDKTAVREYEAALKRLLHHPHLAQ LHAAYLSPRHLVLI LEL  
CSGFELLP S LAERESYSESDVKDYLWQMLSATQYLHAQHILHLDLRSENMMVTEYNLLKVIDLGN AQSLDQEK  
VPAPENFKDYLETMAPELLEGGAVPQTDIWAIGVTAFIMLSGEYPESESEGTDLQKGLRKLRLSRCYAGL  
SGGAVAF LQSSSLCAQPWGRPCASTCLQCQWLTEEGPTGSRPTPVTFPTVRLRAFVREKRRALLYKXHNLAQ  
VR\*

>rs45824303\_ENSMUSP00000049737\_c.12484:A>G\_p.E4162G  
ENSMUST00000052872.15|Obscn-203|ENSMUSG00000061462|-|chr11:g.58952474:T>C  
MDHSFSGAPRFLTRPKAFVSVGKDATLSQIVGNPTPHVSWEKDRQPVEAGARFLAQDGDVYRLTILDLAL  
GDSGQYVCRARNAIGEAFAAVGLRVDSEGTCAEQAPHFLLRPTSIRVREGADATFRCRVGGSPPAVSWSKDG  
RRLGPPDAPHVRVEEHGESSALRIRSARPRDGGTYEVRANPLGSASAAAAALVVDSDAEVAGPPGTSTATLLA  
HLQQREAMRAEGIPSPPGAGTRTCTVTGKHLARLSFCVTEGPKPETVWKKDGLVTEGRRHVVEDEQENF  
VLKILLFCKQSDRGLYCTASNLVGGTYSSVLVVRREPTVPFKKRLQDLEVREKESATFVCEAQAAPATEAAWFK  
EETRLWASAKYDIEEEGTERRLTVRNVSADDDAVYICETTEGSRTVAEHSVQGNLTKLPRKTAVRTGDTAIF  
WVELAVPEGPVWRWRNQEEMVAGGRVAITAEGTCHTLTIFQCTLEDMGEVAFVSGGCRTTTFQCVSAPRRPPL  
YPPADPVVKAKTESSVTLWSAPPHGDRPVTIDGYVLEKRKLGAYAWSRCHEAGWLATTEFTITGVAAEGDFQ  
FRVSAINHFGQGPYLEFPGMTMLVPLAVKTPKAVEAVEGGEVTFVSDTLTVASSGEWFLDGEALKASSIYVI  
RCDRTRHMLTIREVPARLHGAQLKFVANGIETS IQMVVRAALGLPSKLPAAAAAREVLAQLHEEAQLLAE LSD  
QAAA VTWLKDGRELSLGPKYEMQVSAGRRALLVRDVAQDDAGLYECVSRGSR TAYQLLVQEPKLVFAKQQAH  
SEVKAEAGNSATLSCEVTAQTEVTFWKDGGKLSSSSKVRMEASGCSRRLVVQQAGKADAGEYSCEAGGQKLS  
FRLDVAEPKLVFAKQQAHSEVKAEAGASATLSCEVAQAQTEVTFWKDGGKLSSSSKVRMEASGCSRRLVVQQ  
AGKADAGEYSCEAGGQKLSFRLDVAEPKLVFAKEQQARSEVKAEAGASATLSCEVAQAQTEVTFWKDGGKLS  
SSSKVRMEASGCSRRLVVQQAGKADAGEYSCEAGGQKLSFRLDVTEPKLVFAKEQQARSEVKAEVGN SATLSCE  
VAQAQTEVTFWKDGGKLSSSSKVRMEASGCSRRLVVQQAGKADAGEYSCEAGGQKLSFRLDVAEPKLVFAKEQ  
QARSEVKAEAGNSATLSCEVAQAQTEVTFWKDGGKLSSSSKVRMEASGCSRRLVVQQAGKADAGEYSCEAGGQ  
KLSFHL DVTEPKLVFAKEQQAHSEVKAEAGASATLSCEVAQAQTEVTFWKDGGKLSSSSKVRMEASGCSRRLV  
VQQAGKADAGEYSCEAGGQKLSFRLDVAEPKLVFAKEQQARSEVKAEAGASATLSCEVAQAQTEVTFWKDGGK  
LSSSSKVRVEASGCSRRLVVQQAGKADAGEYSCEAGGQKLSFRLDVAEPKLVFAKEQQANSEVKAEAGASATL  
SCEVAQAQTEVTFWKDGGKLSSSSKVRVEASGCSRRLVVQQAGKADAGEYSCEAGGQKLSFRLDVAEPKLAFA  
KEQQAHSEVKAEAGASATLSCEVAQAQTEVTFWKDGGKLSSSSKVRVEASGCSRRLVVQQAGKADAGEYSCEA  
GGQKLSFRLDVAEPKLAFAKEQQAHSEVKAEAGASATLSCEVAQAQTEVTFWKDGGKLSSSSKVRVEASGCSR  
RLVVQQAGKADAGEYSCEAGGQKLSFRLDVAEPKLAFAKEQQAHSEVKAEAGASATLSCEVAQAQTEVTFWKD  
GKKLSSSSKVRVEASGCSRRLVVQQAGKADAGEYSCEAGGQKLFRLDVAEPKLMFAKEQQAHSEVKAEAGAS  
ATLSCEVAQAQTEVTFWKDGGKLSSSSKVRVEASGCSRRLVVQQAGKADAGEYSCEAGGQKLSFRLDVAEPKLV  
FAKEQQAHSEVKAEAGASATLSCEVAQAQTEVTFWKDGGKLSSSSKVRVEASGCSRRLVVQQVQKADAGEYS  
CEARGQKLSFRLDVADTRLMFAKEQQARTEVTKAEAGNSATLSCEVAQAQTEVTFWKDGGKLSSSSKVRVEASG  
CSRRLVVQQAGKADAGEYSCEAGGQKLSFRLDVAEAEESQI PERPSRREPLVVKEHETIILTATIAAPSVAAVT  
WLKDGVEIRRKRHEATS LGDTHLTVRGAQVLD SAIYSCRVKGEGQDFPVQVEEVAAKFSKPLEPVEGELGG  
TVMLVCELSPEQAEVWRCNGNTQLRPGKRFQMTSEGPRTTLTVSGLREDDAEYVCSERDDRTSARLTVKVP  
VVKFTSGLSAMVAEEGQEA TFQCVVSPSDAGVTWYKDMQLQPSKFMVMEVSGASRSLTILGLTLEDAGQVTV  
EAEGASSSAALRVREAPVLFKFKLEPQTV EERTSVHTELEVELTRWPPEVKWTRNAAVLTPSENVEIRAEGARHC  
LVLRVGFADRGFFGCETPDDKTQAKLNVEMRQVRLVVRGLQEV EAKEQGTASMDVELSHAEVEG SWTRDGLRL  
QPGPKCHLAVQGPVHILTLALSALQPQDSGLVAFRAEGVHTSARLIVTEL PVSFTRVLQDVVATQKEKVTLECEL  
SRPVDVRWLKDGVELRAGKAIGIVAQGTCSRSLVIYRCETGDQGVVYCDALDAQTSASLRVQGRTYTLIFRRVL

AEDAGEVVFVAENAESRAHLRVKELPVTLRPLRDKIAMEKHRGVLECVSRASAQVRWFKGGVLELQSGPKYE
VVSDGLYRKLVINVDVQPEDEDYTC DAGNVKTS AQFFVVEEQSITIVRGLKDMTVM EPAPAWFECETSIPSVRP
PKWLLGKTVLQAGGNVLEQDGTVHRLTLHKTCSTMTGPVHFTIGKSRSSAQLVVSDIPVVLTRPLEPKAGRE
LQSVVLSCDFRPAPKAVQWYKDDTPLSPSEKFKMALEGQMAELRILRLTPADAGVYRCQAGSAQSSAEVTVEA
REVTVIQPLQDAEAMEEGRVCFSCELSHKDEDEI EWSLNGTPLYNDSFHEISHEGCLHTLVLKSVRQADTGTVC
ATS PKVSVSARLVVKGKPVVFLKALDDVSAEERGTTLTQCEVSDPEARVWVRKDGVELGPSDKYDFLHKAGAR
GLTVHDLSDHEDAGLYTCQVGSKETQSKVSVHDLHVGITRRLKTVLEVLEGESECSFECVLSHESPSDPAVWTVGG
KTVGGSGHFHAVRQRGRKYTLTVKDAALSDAGEVVFVSVLGLTSKASLIIRERPVDITKPLEDQRTTLGEDVMLS
CELSRAGTSVRWLKDGKAIRKSQKYDLLSEGTRAVLVVRKASLKDSGEYTCETEASKSTAKLCEVEKANRFTTE
ELADLQVEEKGRAVFTCKTEHPASVVTWRKGLLELRASGKHVPSQEGTLTKLTINALERTSDSPTYTCDIGQAR
TQARLLVHGQKVRVIEDLEDTAVQEGSSAKFCCRIAPADYGPVHWF LDKTPLHSNELNEITVQPGGYHVLT LR
QLALKDSGTVYFEAGDQRTSAALRVTEKPSIFSRPLTDVTVTEGEDTLVCETTTTVDSSVRWTKDGKTLRPSA
RCQLSHEGCQAQLLITATTPQDGGRYKCEIGGASSSSIVRVHALPVRFRRESLKDVEVPEGKAATLRCVLSVA
APVEWRHGDDVLKSSNKYSLRQEGAVLELVI RDLQPQDSGQYSCSFGDQTT SATLTVKTS SAQFVKG LRNKEA
TEGTTVTLRCELTK EAPVEWKKGTETLRNGDKYSLKQDGAVCELQICSLLVADAGEYSCVCGQEKTSATLTVK
ALLVHFVRRRLRSKEATEGDTTTLQCELSKAAPVEWRKGTETLRDGDYSLKQDGAVCELQIRSLTIADAGEYL
CTCGQEKTSATLTVRALPAKFKDSLKNEEATEGTTATLSCELSKAAPVTWKKGPKTLQSGDKYVLRQDGAVCG
LQIHGLTMADAGEYSCVCGQEKTSATLTVRGLPAKFI EDLRSQEATEGATAILRCELSKAAPVEWRKGETL K
DGDYRDLRQDGAVCELQIRGLAVVDGTYSLPTKFTTEGLRNEEATEGTMATLRCQMSKAAPVEWRKGETLR
DGDYRDLRQDGAMCELQIRGLTIEDSGEYTCVCGQEKTSATLSVKALPSRFIEDLRSQEATEGTMATLRCQMS
KTAPVEWKKGSETLRDGGYSLRQDGPVCELQICDLAVEDAGEYSCVCGQEKTSATLSIKALPPRFIEDLRSQ
GATEGTMATLRCQMSKAAPVEWRKGETLRDGGYSLRQNGAVCELQIHDLAVEDTGEYSCVCGQEKTSATLN
VKALPPRFIEDLRSQEATEGTMATLRCQMSKAAPVEWRKGETLRDGGYSLRQDGAVCELQIHDLVEDAGQ
YSCVCGQEKTSAVLTVDALPPKFTTEGLKKEEATEGTMVTLRCQMSKEATVEWRKGAKT LSDGGYSLRQDGAM
CELQICGLAVEDAGEYSCVCGQEKTSATLSVKALPPRFIEDLRSQEATEGTMATLRCQMSKAAPVEWRKGET
LRDGDYSLRQDGAVCELQIRDLAVEDAGEYLCVCGQEKTSATLSVKALPPRFIEDLRSQEATEGTMATLRCQ
MSKAAPVEWRKGSKTLR DGDYSLRQDGAMCELQICDLAVEDTGDYSCVCGQEKTSATLSVKALPPRFIEDLR
SQEAREGTVATLRCRMSKAAPVEWRKGETLKDGDYSLRQEGNLCELQIRDLAVEDTEEYSCVCGQEKTSAT
LSVKALPAKFIEDLRSQEAPESSTVTLRCKLSKKASVWKKGSETLRNGARYSLRQDGAVCELEIRDLTVEDT
GEYSCTCGQERTSATLSIMAPQVVFQOPLQNLQAEEGSMASLRCELSVPNAAMVWSKGGLELQGDTRREARQQ
GCVAELLLRDLRREDAGEYSCTCGSQTT SATLMVTAAPVRFLRELQAQDVDEGATARLRCELSREAVSVEWRK
GSLQLFPCAQYQMVQEGTTAEELLVHGVEQEDAGEYTC DAGHTQS IARLSVRAPKPKFKTDLQSTEQEAGGTAR
LCCQLSEAEPTPVQWLKEGVELHVGSKYEMRRQGAVCELLIHGLEAKDTGEYACL VGGQKT LASLRVKEPEV
TIVRGLVDMVQADEDEVEFTCKVSOAGATDVQWHLQGLPLQSNVETEVAVLADGCTHVLQ LKGVTL EDAGTVS
FHVGGSSSAQLTVRVPVTVLEPLKDVQLSEGQDAHFRCRLSRASGQEARWALGGVPLQCNEMNDITVEQGT
LYLLTLHKVTLEDAGTITLQVGSCSSEAQLKVTAKNTVLRGLENVDALEGG EALFECQPEVAHTWLLDD
EPVHTSEKVEVVYFENGLRHLLLLLKNLKPQDSCRVTFLAGDVVTS AF LTVRGRLEVLEPPHDASVKAGMQVR
FTCILSEAVPVGEATWYINGAAIQPDDTDWTVTTDGS HALTLSNAQPQHAGEVTF AARDAVASARLSVLALP
DPPEDA EVVGRSDHSVTL SWVAPMSDGGGGLCGYRVMKEASTGQWQLCHDLVPGPECVDDLVPGKTYRFRV
AAVGPAGAGEPVHLPQMVKIAPAPAPAPAPAPAPAPETRQAVVGEDICLELEVAADGGEVVWHKGTERTIQPGG
HFEVLSRGRQMLVIKGFRTEDQGEYRCGPIQGLPSSGAATFNVVMTSGSGDEVPAQPSLPPEAAQEGDLHLL
WEALARKRRMSREPTLDSISELPEEDSRVQHLRQEAEEETAPDLSEGYSTADELARTGEADLSHTSSDDES RAG
TPSLVTYLKKAGGPGISPLASKHEAQVTTSVKPKQKQPEVVPVTCPPPGDLSAADLMDPSLDKAAVKIQAAFKG
YKVRKEMKQOEGPVFSRTFGDTEAQVGDVLRLECVLATKTD MRACWLKDGIELTDGRHYHIDQLKDGTC SLV
TGLAPTDSGRYTCQVSTKSGRVSHSACVVVSGTESEAESSSGGELDDAFRRAARRLHRLFRTKSPAELSEEEL
FLSADEGPGEPEEPADWQTYREDENFVCIRFESLAEARQAVTCFRNMFATMGIGVEISLGEQGPGRVEMRIGK
VAPTVPAPVPLAKTPGLQTS DAAPVFLTELQNDVQDGYPMSFDCVVTGQPVPSVRWFKDGKLL EEDDHYMIN
EDQQGGHQLIITAVVPADMGVYRCLAENSMGVSSTKAELRVELTSTDYDTAADATETSSYFSAQGYLSSREQE
GTESDEGQLPQVLEELKDLQVAPGTR LAKFQLKVKGY PAPKLYWFKDGOPLTTS DHIRMTDKKTLHTLEIVSV
TREDSGQYAAYSNAVGAAYSARLLVRGPSEPEEK PASDVHERLVP PRILEKFTPKKVKRGSSTF SVKVEG
HPAPSVHWLKEEA EKGV LWIGPDTPGYTMASSSKQHSLVLLDVGRQH QGTYTCIATNPAGQALCSASLHISGL
AKEEEQERVKEALISSFLQGTSQAVSAQMSE SAGFADLVGQSKGESLVAEEAHSHLSLAEVGT EEFLOKLT SQ
ITEMVSAKISQAKLVPPGGDSDEETKTPSPASPRHGRSRPSSSVQESSSESEDGDSRGEIFDIYVVTADYLP LG
AEQDAIILREGQYVEVLD SAHPLRWLVRTKPTKSSPSRQGVSPAYLDKRLKLSPEWGPTEAPEFPGEAVSED
EYRTRLSSVIQELLSSEQAFVGLQFLES HHMKHLERSPRVPAAVASQKTVI FRNVQDISHFHSSFLKELQGC
GTDDDVAMCFIKNQEA FEKYLEFLVGRVQAESVVVSTPVQEFYKYYAEETLSAKDPTQPPPPPLQHYLEQ PVE
RVQKYQALLKELIRNKARNRQNCALLEQAYAVVSALPQRAENKLVSLMENYPGTLEALGEP IRQGHFIVWEG
APGARMFWKGNHRHVFLFRNYLVICKPRRDSRTDTFSYVFRNMMKLSSIDLNDQVEGDDRAFEVWHEREDSVR

KYLLQARTVI IKNSWVKEICGIQQRLAQPVWRPPEFEELADCTAELGETVVKLACRVTGTPKPIVSVYKDGKP  
VEVDPHHILIEDPDGSCSTLILDNLTGIDSGQYMCFAASAAGNASTLGKILVQVPPRFVNVKVRATPFVEGEDAQ  
ITCTVEGAPYPQIRWYKDGTLAPGNRYRMLNEPRSGVLVLIQAASKEDLGHYECELVNRLGSTRGGGELYM  
QSPALRARDQHHREQIVAAVEVTEQETKVPKKTVIIEETITTVVKS PRGRRQSPGKSPSRSPSRASPRRPG  
LLAPERLYPPGTSPSRLEVEQGRKAPVPALYVTEAEVHAPASQSQPKWLEVEETIEVRVKKTGSRGASPVRE  
MTRSREGILFTLPGGIPGRDPNANNNSNKS SVYQEARTWGPVAVHVGEFFIFQVDSVGNVDVVAASPEPEQVRA  
SQKEENTERQEGCSDGENTFLMEEPQDTSLQGRDPKILTHNGRVLTADLEDYVPQEGETFSGDSTPSTP  
DEPPCEVSVLQREI SEPTVGGQPVLLNVGRPPGTGATPSFFRPGSQVHSPESVSFLLREAWSGPVSAAPWTSSF  
HTHVQSSVDGSHGSKADAVSTQTVSFGAVGETVTLHDIDPDGGEAPGPSQG\*  
>rs45824303\_ENSMUSP00000020732\_c.12685:A>G\_p.E4229G  
ENSMUST00000020732.13|Obscn-201|ENSMUSG00000061462|-|chr11:g.58952474:T>C  
MDHSFSGAPRFLTRPKAFVSVGKDATLSCQIVGNPTPHVSWEKDRQVEAGARFRLAQDGDVYRLTILDIAL  
GDSGQYVCRARNAIGEAFVAVGLRVDSEGTCAEQAPHLLRPTSIRVREGADATFRCRVGGSPQPAVSWSKDG  
RRLGPPDAPHVRVEEHGESSALRIRSARPRDGGTYEVRAENPLGSASAAAALVVDSDAEVAGPPGTSTATLLA  
HLQQREAMRAEGIPSPPPGAGTRTCTVTEGKHARLSCFVTGEPKPKETVWKKDQGLVTEGRRHVVEDEQENF  
VLKILFCKQSDRGLYCTASNLVGGTYSSVLVVVREPTVPFKKRLQDLEVREKESATFQCEVAQPAATEAAWFK  
EETRLWASAKYDIEEGETERRRLTVRNVSADDDAVYICETTEGSRVAELSVQGNLTKLPRKTAVRTGDTAIF  
WVELAVPEGPVRWLRNQEEMVAGGRVAITAEGTCHTLTI FQCTLEDMGEVAFVSGGCRTTTFQCVSAPRRPPL  
YPPADPVVKAKTESSVTLWSAPPHGDRPVTIDGYVLEKRKLGAYAWSRCHEAGWLATTEFTITGVAAEEDGFQ  
FRVSAINHFGQGPYLEFPGMTMLVPLAVKTPKAVEAVEGGEVTFVSDLTVASSGEWFLDGEALKASSIYVI  
RCDRTRHMLTIREV PARLHGAQLK FVANGIETS IQMVVRAALGLPSSKLPAAAAREVLAQLHEEAQLLAE LSD  
QAAA VTWLKDGRELSLGP KYEMQVSAGRRALLVRDVAQDDAGLYECVSRGSR TAYQLLVQDITDGYRDWGPAG  
PQKHMCKCAGAKIARYLGSSCYRFLQYDKGVWHLEAALDTRQKGKTS SCSLHEKPKLVFAKGQQAHS EVKAE  
AGNSATLSCEVTQAQTEVTWFKDGKLS SSSSKVRMEASGCSRRLVVQQAGKADAGEYSCEAGGQKLSFRLDVA  
EPKLVFAKGQQAHS EVKAEAGASATLSCEVAQAQTEVTWFKDGKLS SSSSKVRMEASGCSRRLVVQQAGKADA  
GEYSCEAGGQKLSFRLDVAEPKMFVFAKEQQARSEVKAEEAGASATLSCEVAQAQTEVTWFKDGKLS SSSSKVRM  
EASGCSRRLVVQQAGKADAGEYSCEAGGQKLSFRLDVAEPKLVFAKEQQARSEVKAEEVGN SATLSCEVAQAQ  
EVTWFKDGKLS SSSSKVRMEASGCSRRLVVQQAGKADAGEYSCEAGGQKLSFRLDVAEPKLVFAKEQQARSEV  
KAEAGNSATLSCEVAQAQTEVTWFKDGKLS SSSSKVRMEASGCSRRLVVQQAGKADAGEYSCEAGGQKLSFHL  
DVTEPKLVFAKEQQAHSEVKAEEAGASATLSCEVAQAQTEVTWFKDGKLS SSSSKVRMEASGCSRRLVVQQAGK  
ADAGEYSCEAGGQKLSFRLDVAEPKLVFAKEQQARSEVKAEEAGASATLSCEVAQAQTEVTWFKDGKLS SSSSK  
VRVEASGCSRRLVVQQAGKADAGEYSCEAGGQKLSFRLDVAEPKLVFAKEQQANSEVKAEEAGASATLSCEVAQ  
AQTEVTWFKDGKLS SSSSKVRVEASGCSRRLVVQQAGKADAGEYSCEAGGQKLSFRLDVAEPKLVFAKEQQAH  
SEVKAEEAGASATLSCEVAQAQTEVTWFKDGKLS SSSSKVRVEASGCSRRLVVQQAGKADAGEYSCEAGGQKLS  
FRLDVAEPKLVFAKEQQAHSEVKAEEAGASATLSCEVAQAQTEVTWFKDGKLS SSSSKVRVEASGCSRRLVVQQ  
AGKADAGEYSCEAGGQKLSFRLDVAEPKLVFAKEQQAHSEVKAEEAGASATLSCEVAQAQTEVTWFKDGKLS S  
SSKVRVEASGCSRRLVVQQAGKADAGEYSCEAGGQKLFRLDVAEPKLVFAKEQQAHSEVKAEEAGASATLSCE  
VAQAQTEVTWFKDGKLS SSSSKVRVEASGCSRRLVVQQAGKADAGEYSCEAGGQKLSFRLDVAEPKLVFAKEQ  
QAHS EVKAEAGASATLSCEVAQAQTEVTWFKDGKLS SSSSKVRVEASGCSRRLVVQQVQKADAGEYSCEARGQ  
KLSFRLDVADTRLMFAKEQQARTEVKAEEAGNSATLSCEVAQAQTEVTWFKDGKLS SSSSKVRVEASGCSRRLV  
VQQAGKADAGEYSCEAGGQKLSFRLDVAEAE S QIPERPSRREPLVVKEHETIILTATIAAPSVAAVTWLDG V  
EIRRSKRHEATSLGDTHTLTVRGAQVLD SAIYSCRVGKEGQDFPVQVEEVAAKFSKPLEPVEGELGGTVMLVC  
ELSPQAEVWRCGNTQLRPGKRFQMTSEGPRTTLTVSGLREDDAE EYVCE SRDDRTSARLTVKVPVVKFTS  
GLSAMVAEEGQEATFQCVVSPSDAGVTWYKDGMLQPSSEKFMVMEVSGASRSLTILGLTLEDAGQVTEAEAGAS  
SSAALRVREAPVLFKKKLEPQTV EERTSVTLEVELTRPWPEVKWTRNAAVLTPSENVEIRAEGARHCLVLR SV  
GFADRGGFFGCETPDDKTQAKLVNEMRQVRLVVRGLQEVEAKEQGTASMDVELSHAEEVGSWTRDGLRLQPGPKC  
HLAVQGPVHILTL SALQPQDSGLVAFRAEGVHTSARLIVTEL PVSFTRVLQDVVATQKEKVTLCELSRPVDV  
RWLKDGVLELRAGKAIGIVAQGTCSRSLVIYRCETGDQGVYVCDALDAQTSASLRVQGRTYTLIFRRVLAEDAGE  
VKFVAENAESRAHLRVKELPVTLLRPLRDKIAMEKHRGVLECCVSRASAQVRWFKGGVELQSGPKYEVVSDGL  
YRKLVIN DVQPEDEDTYTC DAGNVKTS AQFFVVEQSITIVRGLKDMTVMEPAPAWFECETSIPSVRPPKWL LG  
KTVLQAGGNVGLQDGTVHRLTLHKTCSTMTGPVHFTIGKSRSSAQLVVS DIPVVLTRPLEPKAGRELQSVVL  
SCDFRPAPKAVQWYKDDTPLSPSEKFKMALEGQMAELRILRLTPADAGVYRCQAGSAQSSAEVTEAREVTVI  
QPLQDAEEMVEGRVCFSCELSHKDEDIEWLSLNGTPLYNDSFHEISHEGCLHTLVLKSVRQADTGTVCATSPKV  
SVSARLVVXKGPVVFLKALDDVSAEERGTLLTQCEVSDPEARVVWRKDGVELGSPDKYDFLHKAGARGLTVHD  
LSHEDAGLYTCQVGSKETQSKVSVHDLHVGITKRLKTV E VLEGE SCSFECVLSHESPSDPAVWTVGGKTVGGS  
GHFHAVRQGRKYTLTVKDAALSDAGEVVS VLVGLT SKASLIIRERPV DITKPLEDQRTTLGEDVMLSCELSRA  
GTSVRWLKDGKAIRKSQKYDLLSEGTRAVLVVRKASLKDSGEYTCETEASKSTAKLCVEEKANRFTEELADLQ  
VEEKGRAVFTCKTEHPASVVTWRKGLLELRASGKHVPSQEGTLTKLTINALERTSDTYTCDIGQARTQARLL



VHGQKVRVIEDLEDTAVQEGSSAKFCCRIAPADYGPVHWFLDKTPLHSNELNEITVQPGGYHVLTLRQLALKD  
 SGTVYFEAGDQRTSAALRVTEKPSIFSRPLTDVTVTEGEDTLTVCEFTTVVDSVVRWTKDGKTLRPSARCQLSH  
 EGCQAQLLITATTPQDGGRYKCEIGGASSSSIVRVHALPVRFRRESLKDVEVPEGKAATLRVLSVAAPVEWR  
 HGDDVLKSSNKYSRQEGAVLELVIRDLQPQDSGQYSCSFGDQTSATLTVKTSQAQFVGLKRNKEATEGTTV  
 TLRCELTKAPVEWKKGTETLRNGDKYSLKQDGAVCELQICSLLVADAGEYSCVCGQEKTSAATLTKALLVHF  
 VRRLSKEATEGDTTTLQCELSKAAPVEWRKGTETLRDGDYSLKQDGAVCELQIRSLTIADAGEYLCTCGQE  
 KTSATLTVRALPAKFKDSLKNEEATEGTTATLSCELSKAAPVWKKGPKTLQSGDKYVLRQDGAFCGLQIHGL  
 TMADAGEYSCVCGQEKTSAATLTVRGLPAKFIEDLRSQEATEGATAILRCELSKAAPVEWRKGSSETLRDGDYR  
 LRQDGAFCGLQIRGLAVVDGTYSLSPTKFTLEGLRNEEATEGTMATLRCQMSKAAPVEWRKGSSETLRDGDYR  
 LRQDGAFCGLQIRGLTIEDSGEYTCVCGQEKTSAATLSVKALPSRFIEDLRSQEATEGTMATLRCQMSKTAPVE  
 WKKGSETLRDGGYSLRQDGPVCELQICDLAVEDAGEYSCVCGQEKTSAATLSIKALPPRFIEDLRSQATEGT  
 MATLRCQMSKAAPVEWRKGSSETLRDGGYSLRQNGAVCELQIHDLAVEDTGEYSCVCGQEKTSAATLNVKALPP  
 RFIEDLRSQEATEGTMATLRCQMSKAAPVEWRKGSSETLRDGGYSLRQDGAFCGLQIHDLVEDAGQYSCVCG  
 QEKTSAVLTVDALPPKFTLEGLKKEEATEGTMVTLRCQMSKEATVEWRKGAKTLSDGGYSLRQDGAFCGLQIC  
 GLAVEDAGEYSCVCGQEKTSAATLSVKALPPRFIEDLRSQEATEGTMATLRCQMSKAAPVEWRKGSSETLRDGD  
 YSLRQDGAFCGLQIRDLAVEDAGEYLCVCGQEKTSAATLSVKALPPRFIEDLRSQEATEGTMATLRCQMSKAAP  
 VEWRKGSSETLRDGDYSLRQDGAFCGLQICDLAVEDTGDYSCVCGQEKTSAATLSVKALPPRFIEDLRSQEARE  
 GTVATLRCRMSKAAPVEWRKGSSETLRDGDYSLRQEGNLCGLQIRDLAVEDTGEYSCVCGQEKTSAATLSVKAL  
 PAKFIEDLRSQEAPESSTVTLRCKLSKASVWKKGSETLRNGARYSLRQDGAFCGLQIRDLVEDTGEYSCT  
 CGQERTSAATLSIMAPQVVFQQLQNLQAEEGSMASLRCELSVPAAMVWSKGGLELQGDTRREARQQGCVAEL  
 LLRDLRREDAGEYSCVCGQEKTSAATLMVTAAPVRFLELQAQDVDEGATARLRCELSREAVSVEWRKGSLLQF  
 PCAKYQMVQEGTTAELLVHGVEQEDAGEYTCDAHTQSIARLSVRAPKPKFKTDLQSTEQEAAGTARLCCQLS  
 EAEFGTVPVQWLKEGVELHVGSKYEMRRQGAFCGLQIHGLEAKDTGEYACLVGGQKTASLRVKEPEVTIVRGL  
 VDMEVQADEDFEFTCKVSAQATDVQWHLQGLPLQSNVTEVAVLADGCTHVLQKGVTLDEAGTVSFHVGGL  
 SSSAQLTVRVPEVTVLEPLKDVQLSEGQDAHFRCRLSRASGQEARWALGGVPLQCNEMNDITVEQGTLYLLTL  
 HKVTLEDAGTITLQVGCSSSEAQLKVTAKNTVLRGLVNDVALEGGEALFECQLSQPEVAHAHTWLLDDEPVHTS  
 EKVEVVYFENGLRHLKLLKLPQDSCRVTFLAGDVTSAFTLTVRGRLEVLPPHDASVKAGMQRVFTCILS  
 EAVPVGEATWYINGAAIQPDDTDWTVTTDGSHALTLSNAQPQHAGEVTFFAARDAVASARLSVLAALPDPEDA  
 EVVGRSDHSVTLVSWVAPMSDGGGGLCGYRVMKEASTGQWQLCHDLVPGPECVDDLVPGKTYRFRVAAVGPA  
 GAGEPVHLPQMVKIAPAPAPAPAPAPAPAPETROAVVEDICILEVAADGGEVVWHKGTERTIQPGHFVLS  
 RGQRQMLVIKGFRTEDQGEYRCGPIQGLPSSGAATFNVMVMTSGSGDEVPAQPSLPPEAAQEGDLHLLWEALAR  
 KRMSREPTLDSISELPEEDSRVQHLRQEAETAPDLSEGYSTADELARTGEADLSHTSSDDESAGTPSLVT  
 YLKKAGGPGISPLASKHEAQVTTSVKPKQKQEPVPTCPPPGDLAADLMDPSLDKAAVKIQAAFKGYKVRKE  
 MKQQEGPVFSRTFGDTEAQVGDVLRLECVLATKTDMRACWLKDGIELTDGRHYHIDQLKDGTCSLVLTGLAPT  
 DSGRYTCQVSTKSGRVSHSACVVVSGTESEAESSSGGELDDAFRAARRLHRLFRTKSPAELSEELFLSADE  
 GPGEPEPADWQTYREDEFVCIREFESLAEARQAVTCFRNMFATMIGIVEISLGEQGRGVEMRIKGVAPTVT  
 PAVPLAKTPGLQTSDAAPVFLTELQNDVQDGYPMSFDCVVTGQPVPSVRWFKDGKLEEDDHYMINEDQQGG  
 HQLIITAVVPADMGVYRCLAENSMGVSSTKAELRVELTSTDYDTAADATETSSYFSAQGYLSSREQEGTESDE  
 GQLPQVLEELKDLQVAPGTRLAKFQLKVKGYPAKLYWFKDGGQPLTSDHIRMTDKKTLHTLEIVSVTREDSG  
 QYAAYSNAVGAAYSSARLLVRGPSEPEEKPASDVHERLVPPRILEKFTPKKVKRGSSITFSVKVEGHPAPSV  
 HWLKEEAKEKGLWIGPDTPGYTMASSSKQHSVLVLDVGRQHGTYTICATNPAGQALCSASLHISGLAKEEEEQ  
 ERVKEALISSFLQGTSAVSAQMSSEAGFADLVGQSKGESLVAAEAHSHLSLAEVGTTEFLQKLTLSQITEMVS  
 AKISQAKLQVPGGDSDEETKTPSASPRHGRSRPSSSVQESSSESEDGDSRGEIFDIYVVTADYLPGLAEQDAI  
 ILREGQYVEVLDLSDAHLRVLVTRKPTKSSPSRQGWVSPAYLDKRLKLSPEWGPTEAPEFPGEAVSEDEYRTRL  
 SSVIQELLSSSEQAFVGLLQFLESHHMKHLERSPRVPAAVASQKTVIFRNVDISHFHSSFLKELQCGCTDDDV  
 AMCFIKNQEAFAKYLEFLVGRVQAESVVVSTPVQEFYKKYAEETLSAKDPTQPPPPPLQHYLEQPVVERVQKYQ  
 ALLKELIRNKARNRQNCALLEQAYAVVSALPQRAENKLVSLMENYPGTLEALGEPHQGHFIVWEGAPGARM  
 PWKGNHRHVFVFRNYLVICKPRRDSRTDFTSYVFRNMMKLSSIDLNDQVEGDDRAFEVWHEREDSVRKYLLQA  
 RTVVIKNSWVKEICGIQQLAQPVWRPPEFEEELADCTAELGETVKLACRVGTGTPKPIVSWYKDGKPVVDPH  
 HILLIEDPDGCTLIILDNLTGIDSGQYMCFAASAAGNASTLGKILVQVPPRFVNVKVRATPFVEGEDAQITCTVE  
 GAPYPQIRWYKDGTLAPGNRYRMLNEPRSGVLVVIQAASKEDLGHYECELVNRLGSTRGGGELYMQSPALR  
 ARDQHHREQIVAAVEERRPSP\*  
 >rs45824303\_ENSMUSP00000151217\_c.10777:A>G\_p.E3593G

ENSMUST00000219084.3|Obscn-207|ENSMUSG00000061462|-|chr11:g.58952474:T>C  
 MDHSFSGAPRFLTRPKAFVSVGKDATLSCQIVGNPTPHVSEKDRQPVEAGARFLAQDGDVYRLTILDLAL  
 GDSGQYVCRARNAIGEAFVAVGLRVDSEGTCAEQAPHLLRPTSIRVREGADATFRCRVGGSPQPAVSWSKDG  
 RRLGPPDAPHVRVEEHGESSALRIRSARPRDGGTYEVRAENPLGSASAAAALVVDSDAEVAGPPGTSTATLLA  
 HLQQRREAMRAEGIPSPPGAGTRTCTVTEGKHARLSCFVTGEPKPEVWKKDGLVTEGRRHVVEDEQENF

VLKILFCKQSDRGLYTCTASNLVGQTYSSVLVVVREPTVPFKKRLQDLEVREKESATFQCEVAQPATEAAWFK  
EETRLWASAKYDIEEEGETERRLTVRNVSADDDAVYICETTEGSRVAELSVQGNLTKLPRKTAVRTGDTAIF  
WVELAVPEGPVWRWRNQEEMVAGGRVAITAEGTCHTLTI FQCTLEDMGEVAFVSGGCRTTTTQFCVSA PRRPPL  
YPPADPVVKAKTESSVTLWSAPPHGDRPVTIDGYVLEKRKLGAYAWSRCHEAGWLATTEFTITGVAEEGDFQ  
FRVSAINHFGQGPYLEFPGTMHLVPMPLAVKTPKAVEAVEGGEVTFVSDTLTVASSGEWFLDGEALKASSIYVI  
RCDRTRHMLTIREVPARLHGAQLKFVANGIETSIQMVVRAALGLPSSKLPAAAAAREVLAQLHHEEAQLLAE LSD  
QAAAVTWLKDGRELSLGPKEYMQVSAGRRALLVRDVAQDDAGLYECVSRGSRRTAYQLLVQDITDGYRDWGPAG  
PQKHMCKCAGAKIARYLGSscyRFLQYDKGVWHWLEAALDRQGKGTSSCSLHEKPKLVFAKQQAHSEVKA  
AGNSATLSCEVTQAQTEVTFKDGKLLSSSSKVRMEASGCSRRLVVQQAGKADAGEYSCEAGGKLSFRLDVA  
EPKLVFAKQQAHSEVKAEGASATLSCEVAQAQTEVTFKDGKLLSSSSKVRMEASGCSRRLVVQQAGKADA  
GEYSCEAGGKLSFRLDVAEPKMFVFAKEQQARSEVKAEGASATLSCEVAQAQTEVTFKDGKLLSSSSKVRM  
EASGCSRRLVVQQAGKADAGEYSCEAGGKLSFRLDVTEPKLVFAKEQQARSEVKAEGNSATLSCEVAQAQ  
EVTWFKDGKLLSSSSKVRMEASGCSRRLVVQQAGKADAGEYSCEAGGKLSFHLDVTEPKLVFAKEQQAHSEV  
KAEAGASATLSCEVAQAQTEVTFKDGKLLSSSSKVRMEASGCSRRLVVQQAGKADAGEYSCEAGGKLSFR  
LDVAEPKLVFAKEQQARSEVKAEGASATLSCEVAQAQTEVTFKDGKLLSSSSKVRVEASGCSRRLVVQQAGK  
ADAGEYSCEAGGKLSFRLDVAEPKLVFAKEQQANSEVKAEGASATLSCEVAQAQTEVTFKDGKLLSSSSK  
VRVEASGCSRRLVVQQAGKADAGEYSCEAGGKLSFRLDVAEPKLVFAKEQQAHSEVKAEGASATLSCEVAQ  
AQTEVTFKDGKLLSSSSKVRVEASGCSRRLVVQQAGKADAGEYSCEAGGKLSFRLDVAEPKLVFAKEQQAH  
SEVKAEGASATLSCEVAQAQTEVTFKDGKLLSSSSKVRVEASGCSRRLVVQQVQKADAGEYSCEARGKLS  
FRLDVAEAEQSIPERPSRREPLVVKHEHETIILTATIAAPSVAAVTWLKDGVERRSKRHEATSLGDTHLTVR  
GAQVLDIAIYSCRVGKEGQDFPVQVEEVAKFSPLEPVEGELGGTVMLVCELSPEQAEVWRCGNTQLRPGK  
RFQMTSEGPRRTLTVSGLREDDAEYVCESRDDRTSARLTVKVRVVKFTSGLSAMVAEEGQEAFTQCVVSPS  
DAGVTWYKDGMLQPSKFMVMEGASRSLTILGLTLEDAGQVTVAEAGASSAALRVREAPVLFKKLEPQT  
VEERTSVTLEVELTRPWPEVKWTRNAAVLTPSENVEIRAEGARHCLVLRVSGFADRGFFGCETPDDKTQAKLN  
VEMRQVRLVRLQVEEAKQGTASMDVELSHAEEVGSWTRDGLRLQPGPKCHLAVQGPVHILTLALQPDQSG  
LVAFRAEGVHTSARLIVTELPVSTFRVLQDVVATQKEKVTLECELSRFPVDVRWLKDGVELRAGKAIGIVAQGT  
CRSLVIYRCETGDQGVYVCDALDAQTSASLRVQGRTYTLIFRRVLAEDAGEVKFVAENAESRAHLRVKELPVT  
LLRPLRDKIAMEKHRGVLECVSRASAQVRWFKGGVELQSGPKYEVVSDGLYRKLVIINDVQPEDEDTYTC DAG  
NVKTSAQFFVEEQSITIVRGLKDMTVMEPAPAWFECETSIPSVRPPKWLKGKTVLQAGGNVLEQDGTVHRLT  
LHKTCSTMTGPVHFTIGKSRSSAQLVSDIPVVLTRPLEPKAGRELQSVVLSCDFRPAPKAVQWYKDDTPLSP  
SEKFKMALEGQMAELRILRLTPADAGVYRCQAGSAQSSAEVTVAREVTVIQPLQDAEAMEEGRVCFSCELSH  
KDEDIEWSLNGTPLYNDSFHEISHGCLHTLVLKSVRQADTGTVCATSPKVSVSARLVVKGKPVVFLKALDDV  
SAEERGTTLTQCEVSDPEARVWRKDGVELGSPDKYDFLHKAGARGLTVHDLSHEDAGLYTCQVGSKETQSKV  
SVHDLHVGITKRLKTVEVLEGECSFECVLSHESPSDPAVWTVGGKTVGGSGHFHAVRQGRKYTLTVKDAALS  
DAGEVVFVGLGLTSKASLIIRERPVDITKPLEDQRTTLGEDVMLSCELSRAGTSVRWLKDGKAIKRSQKYDLL  
SEGTRAVLVVRKASLKDSGEYTCETEASKSTAKLCVEEKANRFTEELADLQVEEKGRAVFTCKTEHPASVVTW  
RKGLLELRASGKHVPSQEGLTLKLTINALERTSDTYTCDIGQARTQARLLVHGQKVRVIEDLEDTAVQEGSS  
AKFCCRIPADYGPVHWFLDKTPHLSNELNEITVQPGGYHVLTLRQLALKDSGTVYFEAGDQRTSAAALRVTEK  
PSIFSRPLTDVTVTEGEDTLVCETTTVDSVVRWTKDGKTLRPSARCQLSHEGCAQLLITATTPQDGGRYKC  
EIGGASSSSIVRVHALPVRFRFRESLKDVEVPEGKAATLRCVLSVAAPVEWRHGDDVLKSSNKYSLRQEGAVLE  
LVIRDLPQDQSGQYSCSFGDQTTSATLTVKTSQAQFVGKLRNKEATEGTTVTLRCELTKAPVEWKKGTETLR  
NGDKYSLKQDGA VCELQICSLLVADAGEYSCVCGQEKTSATLTVKALLVHFVRRLRSKEATEGDTTTLQCELS  
KAAPVEWRKGTETLRDGDRLYSLKQDGA VCELQIRSLTIADAGEYLCTCGQEKTSATLTVRGLPAKFIEDLRSQ  
EATEGATAILRCELSKAAPVEWRKGSSETLKDGDRLYSLRQDGA VCELQIRGLAVVDTGTYSLSLPTKFTTEGLRNE  
EATEGTMATLRCQMSKAAPVEWRKGSSETLRDGDRLYSLRQDGA MCELQIRGLTIEDSGEYTCVCGQEKTSATLS  
VKALPPRFIEDLRSQGATEGTMATLRCQMSKAAPVEWRKGSSETLGDGGYSLRQNGAVCELQIHDLAVEDTGE  
YSCVCGQEKTSATLNVKALPPKFTTEGLKKEEATEGTMVTLRCQMSKEATVEWRKGAKTSLDGGYSLRQDGA  
MCELQICGLAVEDAGEYSCVCGQEKTSATLSVKALPPRFIEDLRSQEATEGTMATLRCQMSKAAPVEWRKGS  
LTDGDRLYSLRQDGA VCELQIRDLAVEDAGEYLCVCGQEKTSATLSVKALPPRFIEDLRSQEATEGTMATLRCQ  
MSKAAPVEWRKGSKTLRDGDRLYSLRQDGA MCELQICDLAVEDTGDYSCVCGQEKTSATLSVKAPVVFQQPLQ  
NLQAEEGSMASLRCELSVPNAAMVWSKGGLELQGDTRREARQQGCVAELLLRDLRREDAGEYSCTCGSQTTSA  
TLMVTAAPVRFRLRELQAQDVDEGATARLRCELSREAVSVEWRKGSILQFPCAQYQMVQEGTTAELLVHGVEQE  
DAGEYTCDAAGHTISLARLSVRAPKPKFKTDLQSTEQEAGGTARLCCQLSEAEPGTPVQVLEKEGVELHVGSKYE  
MRQGA VCELLIHGLEAKDTGEYACLVGKQKTLASLRVLEKPEVTVIRGLVDMVEVQADEVLEFTCKVSAQATD  
VQWHLQGLPLQSNEVTEAVLADGCTHVLQKGVTLVEDAGTVSFHVGGSSSAQLTVRVPVTVLEPLKDVQL  
SEGQDAHFRCRLSRASGQEARWALGGVPLQCNEMNITVEQGTLYLLTLHKVTVLEDAGITTLQVGS CSSEAQL  
KVTAKNTVLRGLENVDALEGGALFECQLSQPEVAHTWLLDDEPVHTSEKVEVVYFENGLRHLLLLLKNLKPQ  
DSCRVTFLAGDVVTS AFLTVRGWRLEVLEPPHDASVKAGMQVRFTCILSEAVPVGEATWYINGAAIQPDDTDW

TVTTDGSHHALTLSNAQPQHAGEVTF AARD AVASARLSVLALPDPPEDA EVVGRSDHSVTL SVWVAPMSDGGGG  
LCGYRVEMKEASTGQWQLCHDLVPGPECVVDDLVP GKTYRFRVA AVGPAGAGEPVHLPQMVKIAPAPAPAPAP  
APAPETRQAVVGEDICLELEVAADGGEVVWHKGTERRIQPGGHFEVLSRGQRQMLVIKGFRTEDQGEYRCGPIQ  
GLPSSGAATFNVVMTSGSGDEVPAQPSLPPEAAQEGDLHLLWEALARKRRMSREPTLDSISELPEEDSRVQHL  
RQEAEETAPDLSEGYSTADELARTGEADLSHTSSDDESRAGTPSLVTYLKKAGGPGISPLASKHEAQVTTSVK  
PQKQQEPVVPPTCPPPGDLSAADLMDPSLDKAAVKIQAAFKGYKVRKEMKQQEGPVFSRTFGDTEAQVGDVLR  
ECVLATKTD MRACWLKDGIELTDGRHYHIDQLKDGTC SLLVTGLAPTD SGRYTCQVSTKSGRVSHSACVVVSG  
TESEAESSSGGELDDAFRRAARLHRLFRFKSPAELSEEEFLSADEGPGPEEPADWQTYREDENFVCIRFE  
SLAEARQAVTCFRNMFATMGIGVEISLGEQGPGRVEMRIGKVAPT VTPAVPLAKTPGLQTSDAAPVFLTELQN  
QDVQDGYPMSFDCVVTGQPVPSVRWFKDGKLL EEDDH YMINEDQQGGHQLIITAVVPADMGVYRCLAENSMGV  
SSTKAELRVELTSTDYDTAADATETSSYFSAQGYLSSREQEGTESDEGQLPQVLEELKDLQVAPGTRLAKFQL  
KVKGY PAKPLYWFKDGQPLTSDHIRMTDKKTLHTLEIVSVTREDSGQYAA YISNAVGAAYSSARLLVRGPSE  
PEEKPASDVHERLVP PRILEKFTPKKVKRGSSITFSVKVEGHPAPSVHWLKEEA EKGLWIGPDTPGYTMASS  
SKQHSVLVLLDVGRQHOGTYTCTIATNPAGQALCSASLHISGLAKEEEQERVKEALISSFLQGTSQAVSAQMSSES  
AGFADLVGQSKGESLVAAEAHSHLSLAEVGT EEF LQKLT SQI TEMVSAKISQAKLQVPGGDSDEETKTPSASP  
RHGRSRPSSSVQESSSEEDGDSRGEIFDIYVVTADYLPLGAEQDAIILREGQYVEVLDSAHPLRWLVRTKPT  
KSSPSRQGWVSPAYL DKRLKLSPEWGPTEAEPFGEAVSEDEYRTRLS SVIQELLSSSEQAFV GELQFLSHHM  
KHLERSPRVPAAVASQKTVIFRNVQDISHFHSSFLKELQCGCTDDVAMCFIKNQEA FEKYLEFLVGRVQAES  
VVVSTPVQEFYKKYAEETLSAKDPTQPPPPPLQHYLEQPVERVQKYQALLKELIRNKARNRQNCALLEQAYAV  
VSALPQRAENKLVSLMENYPGTLEALGEP I RQGHFIVWEGAPGARMPWKGNHRHVFLFRNYLVICP RRDSR  
TDTFSYVFRNMMKLSSIDLNDQVEGDDRAFEVWHERE DSVRKYLQARTV I IKN SWVKEICGIQQR LAQPVWR  
PPEFEEELADCTAELGETVKLACRVGTGPKPIVSWYKDGK PVEVDPHHILIEDPDG SCTLILDNLGTIDSGQY  
MCF AASAAGNASTLGKILVQVPPRFV NKVRATPFVEGEDAQITCTVEGAPYPQIRWYKDGTL LAPGNRYRMLN  
EPRSGVLV LVIQAASKEDLGHYECELVNR LGSTRGGGEL YMQSPALRARDQH HREQIVA AAVEVTEQETKVPKK  
TVIIEETITTVVKS PRGRRQSPGKSPSRSPSRRSASPRR PGLLAPERLYPPGTSPSRRLVEVEQGRKAPV PALY  
VTEAEVHAPASQSQPKLEVEETIEVRVKKTGSRGASPRVREMTSRGEGILFTLPGGIPGRDPNANNNSNKS VY  
QEARTWGP AVVHVEPFIFQVDSVGNVDWVAASPEPEQVRSQKEENTERQEGCSGDGENTFLMEEPQD TDSL  
QGRDPKILTHNGRVLT LADLEDYVPQEGETFGCGDSTPSTPDEPPCEVSVLQREI SEPTVGGQPVLLNVGRPPG  
TGATPSFFRPGSQVHSPESVSFLLREAWSGPVSAAPWTSSFH THVQSSVDGSHGSFKTEVSTQTVSFGAVGET  
VTLHIDPDGGEAPGPSQG\*

>rs51177498\_ENSMUSP00000158795\_c.12346:G>C\_p.G4116A  
ENSMUST00000238536.2|Obscn-210|ENSMUSG00000061462|-|chr11:g.58953508:C>G  
MDHSFSGAPRFLTRPKAFVVS VGKDATLSCQIVGNPTPHVSWEKDRQPVEAGARFLAQDGDVYRLTILDLAL  
GDSGQYVDCRARNAI GEFAAVGLRVDSEGTC AEQAPHFLLRPTSIRVREGADATFRCRVGGSPQPAVSWSKDG  
RRLGPPDAPHVRVEEHGESSALRIR SARPRDGGTYEVR AENPLGSASAAAALVVDSDAEVAGPPGTSTATLLA  
HLQQRREAMRAEGI PPSPPGAGTRTCTVTEGHARLSCEVFTGEPKPE TVWKKDQGLVTEGRRHVVYEDENF  
VLKILFCKQSDRGLYTCTASNLVGQTYSSVLVVREPTVPFKKRLQDLEVREKESATFQCEVAQPATEAAWFK  
EETRLWASAKYDIEEEGTERRLTVRNVSADDDAVYICETTEGSR TVAELSVQGNLTRKLRKTAVRTGDTAIF  
WVELAVPEGPVRWLRNQ EEMVAGGRVAITAEGTCHTLTI FQCTLEDMGEVAFVSGGCRTTTQFCVSAPRRPPL  
YPPADPVVKA KTESVTL SWSAPPHGDRPVTIDGYVLEKRKLGAYAWSRCHEAGWLATTEFTITGVAAEGDFQ  
FRVSAINHFGQGPYLEFPGTMHLV PMLAVKTP LKAVEAVEGGEVTF SVDLTVASSGEWFLDGEALKASSIYVI  
RCDRTRHMLTIREV PARLHGAQLKFVANGIETS IQMVVRAALGLPSSKLPAAAAREVLAQLHEEAQLLAE LSD  
QAAA VTWLKDGRELSLGP KYEMQVSAGRRALLVRDVAQDDAGLYECVSRGSR TAYQLLVQDITDGYRDWGPAG  
PQKHMCKCAGAKIARYLGS SCYRFLQYDKGVWHWLEAALDTRQKGKTS SCSLHEKPKLVFAKQQAHSEVKA E  
AGNSATLSCEVTQAQTEVTWFKDGKLLSSSSKVRMEASGCSRRLLV VQQAGKADAGEYSCEAGGQKLSFRLDVA  
EPKLVFAKQQAHSEVKA EAGASATLSCEVAQAQTEVTWFKDGKLLSSSSKVRMEASGCSRRLLV VQQAGKADA  
GEYSCEAGGQKLSFRLDVAEPKMF AKEQQARSEVKA EAGASATLSCEVAQAQTEVTWFKDGKLLSSSSKVRM  
EASGCSRRLLV VQQAGKADAGEYSCEAGGQKLSFRLDVTEPKLVFAKEQQARSEVKA EGVNSATLSCEVAQAQ  
EVTWFKDGKLLSSSSKVRMEASGCSRRLLV VQQAGKADAGEYSCEAGGQKLSFRLDVAEPKLVFAKEQQARSEV  
KAEAGNSATLSCEVAQAQTEVTWFKDGKLLSSSSKVRMEASGCSRRLLV VQQAGKADAGEYSCEAGGQKLSFHL  
DVTEPKLVFAKEQQAHSEVKA EAGASATLSCEVAQAQTEVTWFKDGKLLSSSSKVRMEASGCSRRLLV VQQAGK  
ADAGEYSCEAEGQKLSFRLDVAEPKLVFAKEQQARSEVKA EAGASATLSCEVAQAQTEVTWFKDGKLLSSSSK  
VRVEASGCSRRLLV VQQAGKADAGEYSCEAGGQKLSFRLDVAEPKLVFAKEQQANSEVKA EAGASATLSCEVAQA  
AQTEVTWFKDGKLLSSSSKVRMEASGCSRRLLV VQQAGKADAGEYSCEAGGQKLSFRLDVAEPKLVFAKEQQAH  
SEVKA EAGASATLSCEVAQAQTEVTWFKDGKLLSSSSKVRMEASGCSRRLLV VQQAGKADAGEYSCEAGGQKLS  
FRLDVAEPKLVFAKEQQAHSEVKA EAGASATLSCEVAQAQTEVTWFKDGKLLSSSSKVRMEASGCSRRLLV VQQ  
AGKADAGEYSCEAGGQKLSFRLDVAEPKLVFAKEQQAHSEVKA EAGASATLSCEVAQAQTEVTWFKDGKLLSS  
SSKVRMEASGCSRRLLV VQQAGKADAGEYSCEAGGQKLFRLDVAEPKLMFAKEQQAHSEVKA EAGASATLSCE

VAQAQTEVTFWFKDGKLLSSSSKVRVEASGCSRRLVVQQAGKADAGEYSCEAGGQKLSFRLDVAEPKLVFAKEQ  
 QAHSEVKAEAGASATLSCEVAQAQTEVTFWFKDGKLLSSSSKVRVEASGCSRRLVVQQVQKADAGEYSCEARGQ  
 KLSFRLDVADTRLMFAKEQQARTEVKAEAGNSATLSCEVAQAQTEVTFWFKDGKLLSSSSKVRVEASGCSRRLV  
 VQQAGKADAGEYSCEAGGQKLSFRLDVAEAEESQIPERPSRREPLVVKEHETIILTATIAAPSVAAVTVLKDGV  
 EIRRSKRHEATSLGDTHTLTVRGAQVLDIAIYSCRVGKEGQDFPVQVEEVAAKFSKPLEPVEGELGGTVMLVC  
 ELSPEQAEVWRCGNTQLRPGKRFQMTSEGPRTTLTVSGLREDDAEYVCESTRDRTSARLTVKVPVVKFTS  
 GLSAMVAEEGQEAFTQCVVSPSDAGVTWYKQGMQLPSEKFMVESGASRSLTILGLTLEDAGQVTEAEAGAS  
 SSAALRVREAPVLFKKKLEPQTVERTSVTLEVELTRPWPEVKWTRNAAVLTPSENVEIRAEGARHCLVLRVSV  
 GFADRGFFGCETPDDKTQAKLNVEMRQVRLVRLGQVEVAKEQGTASMDVELSHAEEVGSWTRDGLRLQPGPKC  
 HLAVQGPVHILTLALSALQPQDSGLVAFRAEGVHTSARLIVTELPVSFTRVLQDVVATQKEKVTLECELSRPVDV  
 RWLKDGVLELRAGKAIGIVAQGTCSRSLVIYRCETGDQGVYVCDALDAQTSASLRVQGRTYTLIFRRVLAEDAGE  
 VKFVAENAESRAHLRVKELPVTLLRPLRDKIAMEKHRGVLECCQVSRASAQVRWFKGGVELQSGPKYEVVSDGL  
 YRKLVINVDVQPEDEDTYTCDAENVKTSAQFFVVEEQSITIVRGLKDMTVMPEPAPAWFECETSIPSVRPPKWLGL  
 KTVLQAGGNVGLQDGTVHRLTLHKTCSTMTGPVHFTIGKSRSSAQLVVSDIPVVLTRPLEPKAGRELQSVVL  
 SCDFRPAPKAVQWYKDDTPLSPSEKFKMALEGQMAELRILRLTPADAGVYRCQAGSAQSSAEVTEAREVTVI  
 QPLQDAEAMEEGRVCFSCSELSHKDEDIEWLSLNGTPLYNDSFHEISHEGCLHTLVLKSVRQADTGTVCATSPKV  
 SVSARLVVKGKPVVFLKALDDVSAEERGTLLTQCEVSDPEARVVWRKDGVELGSPDKYDFLHKAGARGLTVHD  
 LSHEDAGLYTCVQSGKETQSKVSVHDLHVGITKRLKTVLEVLEGECSFECVLSHESPSDPAVMTVGGKTVGGS  
 GHFHAVRQGRKYTLTVKDAALSDAGEVVSFVGLTSLKASLIIRERPVDTKPLEDQRTTLGEDVMLSCELSRA  
 GTSVRWLKDGKAIRKSQKYDLLSEGTRAVLVVRKASLKDSGEYTCETEASKSTAKLCVEEKANRFTTELADLQ  
 VEEKGRAVFTCKTEHPASVVTWRKGLLELRASGKHVPSQEGTLKLTINALERTSDTYTCDIGQARTQARLL  
 VHGGKVRVIEDLEDTAVQEGSSAKFCRIAPADYGPVHWFLLDKTPLHSNELNEITVQPGGYHVLTLRQLALKD  
 SGTVYFEAGDQRTSALRVTEKPSIFSRPLTDVTVTEGEDLTLVCETTTVDSVVRWTKDGKTLRPSARCQLSH  
 EGCQAQLLITATTPQDGGRYKCEIGGASSSSIVRVHALPVRFRRESLKDVEVPEGKAATLRCVLSVAAPVEWR  
 HGDDVLKSSNKYSLRQEGAVLELVIRDLQPDQSGQYSCSFGDQTTSATLTVKTSQAQFVGLKRNKEATEGTTV  
 TLRCELSTKEAPVEWKKGTETLRNGDKYSLKQDGAVALCELQICSLLVADAGEYSCVCGQEKTSATLTVKALLVHF  
 VRRLRSKEATEGDTTTLQCELSKAAPVEWRKGTETLRDGDYSLKQDGAVALCELQIRSLTIADAGEYLCTCGQE  
 KTSATLTVRALPAKFKDSLKNEEATEGTTATLSCELSKAAPVTWKKGPKTLQSGDKYVLRQDGAVALCELQIHGL  
 TMADAGEYSCVCGQEKTSATLTVRGLPAKFIEDLRSQEATEGATAILRCELSKAAPVEWRKGSSETLKDGDYR  
 LRQDGAVALCELQIRGLAVVDGTYSLSLPTKFTTEGLRNEEATEGTMATLRCQMSKAAPVEWRKGSSETLRDGDYR  
 LRQDGAVALCELQIRGLTIEDSGEYTCVCAQEKTSATLSVKALPSRFIEDLRSQEATEGTMATLRCQMSKTAPVE  
 WKKGSETLRDGGYSLRQDGPVCELQICDLAVEDAGEYSCVCGQEKTSATLSIKALPPRFIEDLRSQEATEG  
 MATLRCQMSKAAPVEWRKGSSETLGDGGYSLRQNGAVCELQIHDLAVEDTGEYSCVCGQEKTSATLNVKALPP  
 RFIEDLRSQEATEGTMATLRCQMSKAAPVEWRKGSSETLRDGGYSLRQDGAVALCELQIHDLVEDAGQYSCVCG  
 QEKTSAVLTVDALPKPFTEGLKKEEATEGTMVTLRQMSKEATVEWRKGAKTLSDDGGYSLRQDGAVALCELQIC  
 GLAVEDAGEYSCVCGQEKTSATLSVKALPPRFIEDLRSQEATEGTMATLRCQMSKAAPVEWRKGSSETLRDGD  
 YSLRQDGAVALCELQIRDLAVEDAGEYLCVCGQEKTSATLSVKALPPRFIEDLRSQEATEGTMATLRCQMSKAAP  
 VEWRKGSKTLRQDGGYSLRQDGAVALCELQICDLAVEDTGDYSCVCGQEKTSATLSVKALPPRFIEDLRSQEARE  
 GTVATLRCMSKAAPVEWRKGSSETLKDGDYSLRQEGNLCELQIRDLAVEDTEEYSCVCGQEKTSATLSVKAL  
 PAKFIEDLRSQEAPESSTVTLRCKLSKKASVVWKKGSETLRNGARYSLRQDGAVALCELQIRDLTVEDTGEYSCT  
 CGQERTSATLSIMAPQVVFQQPLQNLQAEEGSMASLRCELSVNAAMVWSKGGLELQGDTRREARQQGCVAEL  
 LLRDLRREDAGEYSCTCGSQTTSATLMVTAAPVRFRLRELQAQDVDEGATARLRCELSREAVSVEWRKGSLLQF  
 PCAKYQMVQEGTTAELLVHGVEQEDAGEYTCDAHTQSIARLSVRAPKPKFKTDLQSTEQEAGGTARLCCQLS  
 EAEPGTPVQWLKEGVELHVGSKYEMRRQGAVALCELLIHGLEAKDTGEYACLVGGQKTASLRVKEPEVTIVRGL  
 VDMEVQADEDEFTCKVSQAGATDVQWHLQGLPLQSNVTEVAVLADGCTHVLQLKGVTVLEDAGTVSFHVGGL  
 SSSAQLTVRVPEVTVLEPLKDVQLSEGQDAHFRCRLSRASGQEARWALGGVPLQCNEMNDITVEQGTLYLLTL  
 HKVTVLEDAGTITLQVGSSESQAQLKVTAKNTVLRGLENVDALLEGGEALFECQLSQPEVAHAHTWLLDDEPVHTS  
 EKVEVVYFENGLRHLLLLKLNKPKQDSCRVTFLAGDVVTSFAFLTVRGRVLELVLEPPHDASVKAGMQVRFCTILS  
 EAVPVGEATWYINGAAIQPDDTDWTVTTDGSHHALTLNAQPPHAGEVTFFAARDAVASARLSVLALPDPPEDA  
 EVVGRSDHSVTLVSWAPMSDGGGGLCGYRVMKEASTGQWQLCHDLVPGPECVDDLVPGKTYRFRVAAVGPA  
 GAGEPVHLPQMVKIAPAPAPAPAPAPAPAPETRQAVVGEDICLELEVAADGGEVVWHKGTERRIQPGGHFEVLS  
 RGQRQMLVIKGFRTEDQGEYRCGPIQGLPSSGAATFNVMYTSVSGSDEVPAQPSLPPEAAQEGDLHLLWEALAR  
 KRRMSREPTLDSISELPEEDSRVQHLRQEAETAPDLSEGYSTADELARTGEADLSSTDDSEACTPSLVT  
 YLKKAGGPGISPLASKHEAQVTTSVKPKQKQEPVPTCPGGDLAADMPSLDKAAVKIQAAFQKGYKVRKE  
 MKQQEGPVFSRTFGDTEAQVGLRLECVLTKTCDMRACWLKDGIELTDGRHYHIDQLKDGTCSSLVTVGLAPT  
 DSGRYTCQVSTKSGRVSHSACVVVSGTESEAESSSGGELDDAFRRAARRLHRLFRTKSPAELSEELFLSADE  
 GPGEPEPADWQTYREDENFVCIRFESLAEARQAVTCFRNMFMGIGVEISLGEQGPVEMRIGKVAPTVT  
 PAVPLAKTPGLQTSDAAPVFLTELQNDQVQDGYPMSFDCVVTGQPVPSVRWFKDGKLLLEDDHYMINEDQQGG

HQLIITAVVPADMGVYRCLAENSMGVSSSTKAELRVELTSTDYDTAADATETSSYFSAQGYLSSREQEGTESDE  
GQLPQVLEELKDLQVAPGTRLAKFQLKVKGYPAKLYWFKDGGPLTSDHIRMTDKKTLHTLEIVSVTREDSDG  
QYAAIISNAVGAAYSSARLLVRGPSEPEEKPASDVHERLVPPRILEKFTPKKVKRGSSITFSVKVEGHPAPSV  
HWLKEEAKEKGVLIWGPDPGTMASSSKQHSLVLLDVGRQHQTTCIATNPAGQALCSASLHISGLAKEEEQ  
ERVKEALISSFLQGTSAVSAQMSEASAGFADLVGQSKGESLVAEEAHSHLSLAEVGTEEFLLQKLTSTQITEMVS  
AKISQAKLQVPGGDSDEETKTPSASPRHGRSRPSSSVQESSSESEDGDSRGEIFDIYVVTADYLPGLAEQDAI  
ILREGQYVEVLDSAHPLRWLVRTKPTKSSPSRQGWVSPAYLDKRLKLSPEWGPTEAPEFPGEAVSEDEYRTRL  
SSVIQELLSSEQAFVGGELQFLESHHMKHLERSPRVPAAVASQKTVI FRNVQDISHFHSSFLKELQCGCTDDDV  
AMCFIKNQEAFAFEKYLEFLVGRVQAESVWVSTPVQEFYKKYAEETLSAKDPTQPPPPPLQHYLEQPVERVQKYQ  
ALLKELIRNKARNRQCALLEQAYAVVSALPQRAENKLVSLMENYPGTLEALGEPHQGHFIVWEGAPGARM  
PWKGHNHRVFLFRNYLVICKPRRDSRTDTFSYVFRNMMLSSIDLNDQVEGDDRAFEVWHEREDESVRKYLLQA  
RTVIKNSWVKEICGIQORLAQPVWRPPEFEEELADCTAELGETVKLACRVTGTPKPIVSWYKDGKPVVEVDPH  
HILIEDPDGSCITLILDNLTGIDSGQYMCFAASAAGNASTLGKILVQVPPRFVNVKVRATPFVEGEDAQITCTVE  
GAPYQIRWYKDGTLTLLAPGNRYRMLNEPRSGVLVVIQAASKEDLGHYECELVNRLGSTRGGGELYMQSPALR  
ARDQHHREQIVAAVEDTSEVGSASHAQDQADQQAASVLWRLLGSEALGPSPGDLPNTRQSEPPAFEEAASQIP  
GAASGTPPEVSQPGTHKGLEQETSSSGSQGWTVPIRVEGTAWPGAGTGQLLDDVHSQVIMETTQRTYVCQAPDT  
GVTRAPMQVTIEDVQVQGDMAQFDVIEGHPPPVTWYKGSTQLTSSARLSQRQDGTYSVLVTDVAFPHDA  
GYVTCVANNAGQVLCKAELLVHGDKLDAENQVYRKLHSFYDVQEEIGRGVFGFVKRVQHKGNKMFCAAKF  
IPLRSKTRAQAYQERDILATLGHPLVTGLLDQFETRKTLLILELCSSEELLDRFLFKKGVVTEAEVKVYIQQL  
VEGLHYLHSHGILHLDIKPPNILMVHPAREDIKICDFGFAQKITPSEPQYSKYGSPEFVSPEIIEQNPVSEGS  
DIWAMGVI SYLSLTCSPPFAGESDRATLLNVLEGRVSWSSPTAAHLSSEDAKDFIKATLQRTPRARPSTSQCLA  
HPWFLKSMPAEEAHFINTKQKFLARSRWQRSLMSYKSILVMRSIPPELLQGPPDSPSLGVARHLRGEASGAS  
SSSSSSDNELAPFARAKSLPPSPVTHSPLLHPRGFLRPSASLPEETEASMTADAAVPASPQAGPPASPGCV  
PRHSVSSSLFYQQAGEGAERGNKTSGAKRHPARRRHLKGGYIARALPGLREPLMEYSLLEEEAAREEQASLM  
TKTPSFETALRLPSSSVREVPGRSHSLDNPPVTTGPSPEACKEQLLFPSTGLTHETAKDRGHKEGFLQESV  
PFPMPGSDSRPGKQEGSSQDSRCRGPASSCHSELGSGSQEGCGPPSSQSLGSLPPQSLKELSTSCGFLFSEQ  
PQAAPFPDQVSPLLGSEKEPQDGSLSSEGPVPPSSSPGSASQVDASLDTEGLSEAGDTCDFTPPPQRPQEQAT  
TRKFSLESRGGYAGVAGYGTFAFGGDAGGMLGQGPLWARMAWAVSQSSEEQDEAATESPQPLES LGPIAEASG  
VPLRTSPSLTPWEEVEQVSLVQIRDLSDGAEAAADTISLDISEVDPAYLNLSDLYDIKYLPEFEMI FRRVPKPI  
EQPESPGSETEAGQGLADFLLEAAWPWPGELGLRAGLEITEEPEEPGDLEALLGEEAVGRKRKWSPSRGLFQF  
PGRCLSGEEPVELGLRQRVKASMAHISRIKGRPEGPREGPPRKKAGLASFRLSGLKGRDQELSDEAVVLGQ  
SVTLACQVLAQPTAQTWSKDGVLLESSGHLLISSTLKNFQLLTI LVVKEEDLGTYTCCVSNPLGTAVTTGVL  
RKAERPSSSPRPEVGEYKDAVLLVWKPVESECGPVYIVQCCIEGGSWTTLASDISDCCYLTGKLSRGGMYIF  
RTACVSKAGMGPIYSSPSEQVLLGGPNHLASEEESRRGRPAQLLPSTKTFAFQMQIRRRGRFSVVRQCREKASGR  
ALAAKIVPYQPEDKTAVLEREYALKRHLHPLHAQLLHAAYLSPRHLVLI LELCSGPELLPSLAERESYSESDVK  
DYLWQMLSATQYLHAQHILHLDLRSENMMVTYNNLLKVIDLGNQSLDQEKVPAPENFKDYLETMAPELLEGGQ  
GAVPQTDIWAIGVTA FIMLSGEY PESSSEGRDRLQKGLRKLRLSRYAGLSGGAVAFVLSLCAQWPWRPCA  
STCLQCGLWTEEGPTGSRPTVTFPTVRLRA FVREKRRALLYKKNLAQVR\*  
>rs51177498\_ENSMUSP00000038264\_c.11518:G>C\_p.G3840A  
ENSMUST00000047441.14|Obscn-202|ENSMUSG00000061462|-|chr11:g.58953508:C>G  
MDHSFSGAPRFLTRPKAFVVSVGKDATLSCQIVGNPTPHVSWEKDRQPVEAGARFRLAQDGDVYRLTILDLIAL  
GDSGQYVCRARNAIGEAFVAVGLRVDSEGTCAEQAPHFLLRPTSIRVREGADATFRCRVGGSPQPAVSWSKDG  
RRLGPPDAPHVRVEEHGESSALRIR SARPRDGGTYEVRAENPLGSASAAAAALVVDSDAEVAGPPGTSTATLLA  
HLQQRREAMRAEGIPSPPGAGTRTCTVTEGKHARLSCFVTGEPKPEVWKKDQGLVTEGRRHVVEDEQENF  
VLKILFCKQSDRGLYTCTASNLVGQTYSSVLVVVREPTVPFKKRLQDLEVREKESATFQCEVAQAPTEAAWFK  
EETRLWASAKYDIEEEGTERRLTVRNVSADDDAVYICETTEGSRVAELSVQGNLTKLPRKTAVRTGDTAIF  
WVELAVPEGPVRWLRNQEEMVAGGRVAITAEGTCHTLTIFQCTLEDMGEVAFVSGGCRTTTQFCVSAPRRPPL  
YPPADPVVKAKTESVTLWSAPPHGDRPVTIDGYVLEKRKLGA YAWSRCHEAGWLATTEFTITGVAAEGDFQ  
FRVSAINHFGQGPYLEFPGTMHLVPLAVKTPKAVEAVEGGEVTFVSDLTVASSGEWFLDGEALKASSIYVI  
RCDRTRHMLTIREV PARLHGAQLKFVANGIETS IQMVVRAALGLPSKLPAAAAAREVLAQLHHEEAQLLAE LSD  
QAAA VTLWKDGRELSLGPKEYMQVSAGRRALLVRDVAQDDAGLYECVSRGSR TAYQLLVQDITDGYRDWGPAG  
PQKHMCKCAGAKIARYLGSSCYRFLQYDKGVWHLEAALDTRQGKTSSCSLHEKPKLVFAKQQQAHSEVKA  
AGASATLSCEVAQAQTEVTWFKDGKLLSSSSKVRMEASGCSRRLLVQQAGKADAGEYSCEAGGQKLSFRLDVA  
EPKMFVFAKEQQARSEVKAEGASATLSCEVAQAQTEVTWFKDGKLLSSSSKVRMEASGCSRRLLVQQAGKAD  
GEYSCEAGGQKLSFRLDVTEPKLVFAKEQQARSEVKAEGVNSATLSCEVAQAQTEVTWFKDGKLLSSSSKVRM  
EASGCSRRLLVQQAGKADAGEYSCEAGGQKLSFRLDVAEPKLVFAKEQQARSEVKAEGNSATLSCEVAQAQ  
EVTWFKDGKLLSSSSKVRMEASGCSRRLLVQQAGKADAGEYSCEAGGQKLSFRLDVTEPKLVFAKEQQAHSEV  
KAEAGASATLSCEVAQAQTEVTWFKDGKLLSSSSKVRMEASGCSRRLLVQQAGKADAGEYSCEAGGQKLSFRL

DVAEPKLVFAKEQQARSEVKAEAGASATLSCEVAQAQTEVTFWKDGGKLSSSSKVRVEASGCSRRLVVQQAGK
ADAGEYSCEAGGQKLSFRLDVAEPKLVFAKEQQANSEVKAEAGASATLSCEVAQAQTEVTFWKDGGKLSSSSK
VRVEASGCSRRLVVQQAGKADAGEYSCEAGGQKLSFRLDVAEPKLAFAKEQQAHSEVKAEAGASATLSCEVAQ
AQTEVTFWKDGGKLSSSSKVRVEASGCSRRLVVQQAGKADAGEYSCEAGGQKLSFRLDVAEPKLAFAKEQQAH
SEVKAEAGASATLSCEVAQAQTEVTFWKDGGKLSSSSKVRVEASGCSRRLVVQQAGKADAGEYSCEAGGQKLS
FRLDVAEPKLAFAKEQQAHSEVKAEAGASATLSCEVAQAQTEVTFWKDGGKLSSSSKVRVEASGCSRRLVVQQ
AGKADAGEYSCEAGGQKLSFRLDVAEPKLVFAKEQQAHSEVKAEAGASATLSCEVAQAQTEVTFWKDGGKLS
SSKVRVEASGCSRRLVVQQAGKADAGEYSCEAGGQKLSFRLDVAEAEBSQI PERPSRREPLVVEKETI I LTAT
IAAPSVAAVTTLKDGVEIRRKRHEATSLGDTHLTVRGAQVLDSAIYSCRVGKEGQDFPVQVEVAAKFSKP
LEPVEGELGGTVMLVCELSPEQAEVWRCNGTQLRPGKRFQMTSEGPRRTLTVSGLREDDAEYVCESRDDRT
SARLTVKVPVVKFTSGLSAMVAEEGQEQATFQCVVSPSDAGVTWYKDGMLQPSSEKFMVMEVSGASRSLTILGL
TLEDAGQVTVAEAGASSAALRVREAPVLFKKKLEPQTVEERTSVTLEVELTRPWPEVKWTRNAAVLTPSENV
EIRAEGARHCLVLRVGFADRGFFGCETPDDKTQAKLNVEMRQVRLVRLGQVEVAKEQGTASMDVELSHAEVE
GSWTRDGLRQLQPGPKHLAVQGPVHILTLTSLALQPDQSGLVAFRAEGVHTSARLIVTEL PVSFTRVLQDVVATQ
KEKVTLECELSRPVDVRWLKDGVELRAGKAI GIVAQGTCSRSLVIYRCETGDQGVYVCDALDAQTSASLRVQGR
TYTLIFRRVLAEDAGEVKFVAENAESRAHLRVKELPVTLLRPLRDKIAMEKHRGVLECVSRASAQVRWFKGG
VELQSGPKYEVVSDGLYRKLVINOVPEDEDTYTCDAGNVKTSAQFFVVEEQSITIVRGLKDMTVMPEPAPAWFE
CETSI PSVRPPKWLGLKTVLQAGGNVGLQDGTVHRLTLHKTCSTMTGVPVHFTIGKSRSSAQLVSDIPVVLT
RPLEPKAGRELQSVVLSCDFRPAPKAVQWYKDDTPLSPSEKFKMALEGQMAELRILRLTPADAGVYRCQAGSA
QSSAEVTVAREVTVIQPLQDAEAMEEGRVCFSCELSHKDEDI EWSLNGTPLYNDSFHEISHEGCLHTLVLKS
VRQADTGTVCATSPKVSVSARLVVKGKPVVFLKALDDVSAEERGTTLQCEVSDPEARVVRKDGVELGSPDK
YDFLHKAGARGLTVHDLSDHEDAGLYTCQVGSKETQSKVSVHDLHVGITKRLKTVEVLEGESECSFECVLSHESP
SDPAVWTVGGKTVGGSGHFHAVRQGRKYTLTVKDAALSDAGEVVFVGLGTSKASLIIRERPVDTKPLEDQR
TTLGEDVMSCELSRAGTSVRWLKDGKAI RKSQKYDLLSEGTRAVLVVRKASLKDSGEYTCETEASKSTAKLC
VEEKANRFTEELADLQVEEKGRAVFTCKTEHPASVVWTRKGLLELRASGKHVPSQEGTLTKLTINALERTDSD
TYTCDIGQARTQARLLVHGQKVRVIEDLEDTAVQEGSSAKFCRIA PADYGPVHWFLDKTPHLSNELNEITVQ
PGYHVLTLRQLALKDSGTVYFEAGDQRTSAALVRETEKPSIFSRPLTDVTVTEGEDTLVCEVSDSSVRWT
KDGKTLRPSARCQLSHEGCAQLLI TATTPQDGGRYKCEIGGASSSSIVRVHALPVRFRESLKDVEVPEGKAA
TLRCVLSVAAPVEWRHGDDVLKSSNKYSLRQEGAVLELVIRDLQPDQSGQYSCSFGDQTTSATLTVKTSQAQ
FVGKLRNKEATEGTTVTLRCELTKEAPVWKKGTETLRNGDKYSLKQDGA VCELQICSLLVADAGEYSCVCGQ
EKTSATLTVKALLVHFVRRRLRSKEATEGDTTTLQCELSKAAPVEWRKGTETLRDGD RYSLKQDGA VCELQIRS
LTADAGEYLCCTCGQEKTSATLTVRALPAKFKDSLKNEEATEGTATLSCELSKAAPVTWKKGPKTLQSGDKY
VLRQDGA VCGLQIHGLTMADAGEYSCVCGQEKTSATLTVRGLPAKFIEDLRSQEATEGATAILRCESKAAPV
EWRKGSSETLKDGD RYTLRQDGA VCELQIRGLAVVDGTYS SLPKTFTEGLRNEEATEGTMATLRCQMSKAAPV
EWRKGSSETLRDGD RYSLRQDGA MCELQIRGLTIEDSGEYTCVCAQEKT SATLSVKALP PRFIEDLRSQEATEG
TMATLRCQMSKAAPVEWRKGSSETLGDGGRYSLRQNGAVCELQIHD LAVEDTGEYSCVCGQEKT SATLNVKALP
PRFIEDLRSQEATEGTMATLRCQMSKAAPVEWRKGSSETLRDGGRYSLRQDGA VCELQIHDLDVEDAGQYSCVC
GQEKTSAVLTVDALPPKTFTEGLKKEEATEGTMVTLRCQMSKEATVEWRKGA KTLSDGGRYSLRQDGA MCELQI
CGLAVEDAGEYSCVCGQEKT SATLSVKALP PRFIEDLRSQEATEGTMATLRCQMSKAAPVEWRKGS KTLRDGD
RYS LRQDGA MCELQICDLAVEDTGDYSCVCGQEKT SATLSVKAPQVVFQOPLQNLQAEEGSMASLRCELSVPN
AAMVWSKGGLELQGDTRREARQQGCVAELLLRDLRREDAGEYSC TCGSQTT SATLMVTAAPVRFRLRLQAQDV
DEGATARLRCELSREAVSVEWRKGS LQLFPCA KYQMVQEGTTAELLVHGVEQEDAGEYTC DAGHTQS IARLSV
RAPKPKFKTDLQSTEQEAGGTARLCCQLSEAE PGTPVQWLKEGVELHVGSKYEMRRQGA VCELLIHGLEAKDT
GEYACL VGGQKT LASLRVKEPEVTIVRGLVDMEVQADEDFVEFTCKVSQAGATDVQWHLQGLPLQSNVTEVAV
LADGCTHVLQLKGVTL EDAGTVSFHVGGLS SQAQLTVRVPEVTVLEPLKDVQLSEGQDAHFRCLSRASGQEA
RWALGGVPLQCNEMNDITVEQGTLYLLTLHKVTL EDAGTITLQVGCSSSEAQLKV TAKNTVLRGLENDVALEG
GEALFECQLSQPEVA AHTWLLDDEPVHTSEKVEVVYFENGLRHLLLLLKNLKPQDSCRVTFLAGDVVTS AFLTV
RALPDPPEDAEVVGRSDHSVTL SWVAPMSDGGGGLCGYRVMKEASTGQWQLCHDLVPGPECVDDLVPGKTY
RFRVAAVGPAGAGEPVHLPQMVK IAPAPAPAPAPAPAPAPETRQAVVGEDIC LELEVAADGGEVVWHKGTERRI
QPGGHFEVLSRGQRQMLVIKGFRTEDQGEYRCGPIQGLPSSGAATFNVMVMTSGSGDEVPAQPSLPPEAAQEGD
LHLLWEALARKRRMSREPTLDSISELPEEDSRVQHLRQEA EETAPDLSEGYSTADELARTGEADLSHTSSDDE
SRAGTPSLVTYLKKAGGPGISPLASKHEAQVTT SVKPKQKQEPVVP TCPPPGLD SAADLMDPSLDKAAVKIQA
AFKGYKVRKEMKQEGPVSRTFGDTEAQVGDVLRLECVLATKTD MRACWLKDGIELTDGRHYHIDQLKDGTCS
LLVLTGLAPTD SGRYTCQVSTKSGRVSHSACVNVSGTSEAE SSGGELDDAFRRAARRLHRLFRTPKSPAELS
EEELFLSADEGPPEPADWQTYREDENFVCIRFESLAEARQAVTCFRNMFMATMIGIVEISLGEQGP RGVEM
RIGKVAPT VTPAVPLAKTPGLQTS DAAPVFLTELQNDVQDGYPMSFDCVVTGQPVPSVRWFKDGKLL EEDDH
YMINEDQQGGHQLIITAVVPADMGVYRCLAENSMGVSSTKAE LRVELTSTDYDTAADATETSSYFSAQGYLSS
REQEGTESDEGQLPQVLEELKDLQVAPGTR LAKFQLKVKGY PAKLYWFKDGQPLTSDHIRMTDKKTLHTLE

IVSVTREDSDGQYAAIYISNAVGAAYSARLLVVRGPEPEEKPASDVHERLVPPRILEKFTPKKVKRGSSITFSV
KVEGHPAPSVHVLKEEAKEGVLWIGPDTPGYTMASSSKQHSLLVLDVGRQHOGTYTTCIATNPAGQALCSASLH
ISGLAKEEEQERVKEALISSFLQGTSAQVSAQMSEASAGFADLVGQSKGESLVAAEAHSHLSLAEVGTTEFLQK
LTSQITMVSAKISQAKLQVPGGDSDEETKTPSASPRHGRSRPSSSVQESSSESEDGDSRGEIFDIYVVTADY
LPLGAEQDAIILREGQYVEVLDSAHPLRWLVRTKPTKSSPSRQGWVSPAYLDRKRLKLSPEWGPTEAPEFPGEA
VSEDEYRTRLSSVIQELLSSEQAQFVQFLESHHMKHLERSPRVPAAVASQKTVIFRNVQDISHFHSSFLKE
LQCGCTDDDVAMCFIKNQEAFAFEKYLEFLVGRVQAESVVVSTPVQEFYKKYAEETLSAKDPTQPPPPPLQHYLE
QPVERVQKYQALLKELIRNKARNRQNCALLEQAYAVVSALPQRAENKLVSLMENYPGTLEALGEPVIRQGHFI
VWEGAPGARMPWKGNHRHVFVFRNYLVICKPRRDSRTDFTSYVFRNMMKLSSIDLNDQVEGDDRAFVWHERE
DSVRKYLQARTVIKNSWVKEICGIQORLAQPVWRPPEFEEELADCTAELGETVKLACRVTGTPKPIVSWYK
DGKPVVDPHHLIEDPDGSCCTLIIDNLTGIDSGQYMCFAASAAGNASTLGKILVQVPPRFVNVKVRATPFVEG
EDAQITCTVEGAPYPQIRWYKDGTLAPGNRYRMLNEPRSGVLVLIQAASKEDLGHYECELVNRLGSTRGGG
ELYMQSPALRARDQHHREQIVAAVEGAPSMQVTIEDVQVQVGDMAQFDAVIEGHPPPPIVTWYKGSTQLTSSAR
LSQRQDGTYSVLVTDVAPHDAGVYTCVANNAGQVLCCKAELLVHGGDKLDAENQVYRRLKHSFYDVQEEIGR
GVFGFVKRVQHKGNMFCFAAKFIPLRSKTRAQAYQERDILATLGHPLVTGLLDQFETRKTLLILILELCSSEEL
LDRLFKKGVVTEAEVKVYIQQLVEGLHYLHSHGILHLDIKPPNIMVHPAREDIKICDFGFAQKITPSEFPQYS
KYGSPEFVSPVIEQNPVSEGSDIWAMGVISYLSLTCSSPFAGESDRATLLNVLEGRVSWSSPTAAHLSSEDAK
DFIKATLQRTPRARPSTSQCLAHWPFLKSMPEAAEHFINTKQLKFLRLARSRWQRSLMSYKSLVMRSIPPELLQ
GPPDPSPLGVARHLRGEASGASSSSSSSDNELAPFARAKSLPPSPVTHSPLLHPRGFLRPSASLPEETEASMP
TADAAVPASPQASAGPPASPGCVPRHSVIVSSLFYQQAGEGAERGNKTSAGAKRHPARRRHLKGGYIARALPGLR
EPLMEYSLLEEEAAREEQASLMTKTPSFETALRLPSSSVREVPGRSHSLDNPPVTTGSPPEACKEQLLFPST
GLTHETTAKDRGHKEGFLQESVPPFMSGDSRPGKQEGSSQDSCRKGPASSCHSELGSGSQEGCGPPSSQSLG
SLPFPQSLKKELESTSCGPLFSEQQAAPFPQTQVSPLLGSEKEPQDGLSEGPVPVPSSSPGSASQVDASLDTEG
LSEAGDTCDFTPPPQRPQEQATTRKFSLESRGGYAGVAGYGTFAFGGDAGGMLGQGPLWARMWAVSQSSEEQ
DEAATESPQPLESGLPIAEASGVPLRTPSLTPWEEVEQVSLVQIRDLSGDAEAADTISLDISEVDPAYLNL
LLYDIKYLPPFEFMI FRRVPKPIEQPESPGSETEAGQGLADFLLEAAWFPWPGELGLRAGLEITEEPEEPGDLEA
LLEAAVAVGRMPWKGNHRHVFVFRNYLVICKPRRDSRTDFTSYVFRNMMKLSSIDLNDQVEGDDRAFVWHERE
FRLSGLKGRDQELSDEAVVLGQSVTLACQVLAQPTAQTATWSKDGVLLESSGHLLISSTLKNFQLLTIIVVKEE
DLGTYTCCVSNPLGTAVTTGVLKRAERPSSSPRPEVGEVLYKDAVLLVWKPVESECGPVTYIVQCCIEGGSWTTL
ASDISDCCYLTKLSRGGMYIFRTACVSKAGMPYSSPSEQVLLGPNHLASEEESSRGRPAQLLPSTKTFAF
QMQIRRRGRFSVVRQCREKASGRALAAKIVPYQPEDKTAVLREYEALKRLLHHPHLAQLHAAYLSPRHLVLI
LLELCSGPELLPSLAERESYSESDVKDYLWQMLSATQYLHAQHILHLDLRSENMMVTEYNLLKVIDLGNQSLDQEK
VPAPENFKDYLETMAPELLEGGQAVPQTDIWAIGVTAIFIMLSGEYPESEGETRDLQKGLRKLIRLSRCYAGL
SGGAVAFLOSSLCAQPWGRPCASTCLQCGWLTEEGPTGSRPTPVTFTVRLRAFVREEREKRRALLYKKNLQ
VR\*

>rs51177498\_ENSMUSP00000049737\_c.12145:G>C\_p.G4049A
ENSMUST00000052872.15|Obscn-203|ENSMUSG00000061462|-|chr11:g.58953508:C>G
MDHSFSGAPRFLTRPKAFVSVGKDATLSCQIVGNPTPHVSWEKDRQVPEAGARFRLAQDGDVYRLTILDLAL
GDSGQYVCRARNAIGEAFVAVGLRVDSEGTCAEQAPHFLLRPTSIRVREGADATFRCRVGGSPPAVSWSKDG
RRLGPPDAPHVRVEEHGESSALRIRSARPRDGGTYEVRAENPLGSASAAAALVVDSDAEVAGPPGTSTATLLA
HLQQRREAMRAEGIPPSPPGAGTRTCTVTEGKHARLSCFVTGEPKPKETVWKKDQQLVTEGRRHVYVEDEQENF
VLKILFCKQSDRGLYTCTASNLVGQTYSSVLVVVREPTVPFKKRLQDLEVREKESATFQCEVAQPAEAWFK
EETRLWASAKYDIEEGETERRLTVRNVSADDDAVYICETTEGSRVVAELSVQGNLTKLPRKTAVRTGDTAIF
WVELAVPEGPVWRVLRNQEEMVAGGRVAITAEGTCHTLTI FQCTLEDMGVAFVSGGCRTTTFQCVSAPRRPPL
YPPADPVVKAKTESSVTLWSAPPHGDRPVTIDGYVLEKRLKLGAYAWSRCHEAGWLATTEFTITGVAAEGDFQ
FRVSAINHFGQGPYLEFPGMTMLVPLAVKTPKAVEAVEGGEVTFVSDLTVASSGEWFLDGEALKASSIYVI
RCDRTRHMLTIREVPARLHGAQLKLVANGIETSIQMVVRAALGLPSSKLPAAAAREVLAQLHEEAQLLAE
QAAAAVTWLKDGRELSLGPKYEMQVSAGRRALLVRDVAQDDAGLYECVSRGSRRTAYQLLVQEPKLVFAKQQA
SEVKAEAGNSATLSCEVTQAQTEVTWFKDGKLLSSSSKVRMEASGCSRRLVVQQAGKADAGEYSCEAGGQKLS
FRLDVAEPKLVFAKQQAHEVKAEGASATLSCEVAQAQTEVTWFKDGKLLSSSSKVRMEASGCSRRLVVQQ
AGKADAGEYSCEAGGQKLSFRLDVAEPMVFQEQARSEVKAEGASATLSCEVAQAQTEVTWFKDGKLLSS
SSKVRMEASGCSRRLVVQQAGKADAGEYSCEAGGQKLSFRLDVTEPKLVFAKEQQARSEVKAEGNSATLSCE
VAQAQTEVTWFKDGKLLSSSSKVRMEASGCSRRLVVQQAGKADAGEYSCEAGGQKLSFRLDVAEPMVFQEQ
ARSEVKAEGNSATLSCEVAQAQTEVTWFKDGKLLSSSSKVRMEASGCSRRLVVQQAGKADAGEYSCEAGGQ
KLSFHLDVTEPKLVFAKEQQAHSEVKAEGASATLSCEVAQAQTEVTWFKDGKLLSSSSKVRMEASGCSRRLV
VQQAGKADAGEYSCEAGGQKLSFRLDVAEPMVFQEQARSEVKAEGASATLSCEVAQAQTEVTWFKDGK
LSSSSKVRVEASGCSRRLVVQQAGKADAGEYSCEAGGQKLSFRLDVAEPMVFQEQANSEVKAEGASATL
SCEVAQAQTEVTWFKDGKLLSSSSKVRVEASGCSRRLVVQQAGKADAGEYSCEAGGQKLSFRLDVAEPMVLAFA

KEQQAHSEVKAEGASATLSCEVAQAQTEVTFWKDGGKLSSSSSKVRVEASGCSRRLVVQQAGKADAGEYSCEA  
GGQKLSFRLDVAEPKLAFAKEQQAHSEVKAEGASATLSCEVAQAQTEVTFWKDGGKLSSSSSKVRVEASGCSR  
RLVVQQAGKADAGEYSCEAGGQKLSFRLDVAEPKLAFAKEQQAHSEVKAEGASATLSCEVAQAQTEVTFWKD  
GKLSSSSSKVRVEASGCSRRLVVQQAGKADAGEYSCEAGGQKLFRLDVAEPKLMFAKEQQAHSEVKAEGAS  
ATLSCEVAQAQTEVTFWKDGGKLSSSSSKVRVEASGCSRRLVVQQAGKADAGEYSCEAGGQKLSFRLDVAEPKL  
VFAKEQQAHSEVKAEGASATLSCEVAQAQTEVTFWKDGGKLSSSSSKVRVEASGCSRRLVVQQVQKADAGEYS  
CEARGQKLSFRLDVADTRLMFAKEQQARTEVKAEAGNSATLSCEVAQAQTEVTFWKDGGKLSSSSSKVRVEASG  
CSRRLVVQQAGKADAGEYSCEAGGQKLSFRLDVAEAEESQIPERPSSREPLVVKEHETIILTATIAAPSVAAVT  
WLKDGVEIRRSKRHEATSLGDTHLTVRGAQVLDLSAIYSCRVGKEGQDFPVQVEEVAAKFSKPLEPVEGGG  
TVMLVCELSPEQAEVWRCGNTQLRPGKRFQMTSEGPRRTLTVSGLREDDAEYVCESTRDDRTSARLTVKVPR  
VVKFTSGLSAMVAEEGQEATFQCVVSPSDAGVTWYKDGMLQPSSEKFMVESGASRSLTILGLTLEDAGQVTV  
EAEGASSAALRVREAPVLFKKKLEPQTVVEERTSVTLEVELTRPWPEVKWTRNAAVLTPSENVEIRAEGARHC  
LVLSVGFADRGFFGCETPDDKTQAKLNVEMRQVRLVRLQVEEAKEQGTASMDVELSHAEEVGSWTRDGLRL  
QPGPKCHLAVQGPVHILTSALQPQDSGLVAFRAEGVHTSARLIVTELPVSFTRVLQDVVATQKEKVTLECEL  
SRPVDVRWLKDGVELRAGKAIGIVAQGTCSRSLVIYRCETGDQGVYVCDALDAQTSASLRVQGRTYTLIFRRVL  
AEDAGEVVFVAENAESAHLRVKELPVTLRPLRDKIAMEKHRGVLECVSRASAQVRFWFKGGVLEQSGPKYE  
VVDGLYRKLQVAGNVLEQDGTVHRLTLHKTCSTMTGPVHFTIGKSRSSAQLVVSIDI PVVLTPLPKAGRE  
LQSVVLSCDFRPAPKAVQWYKDDTPLSPSEKFKMALEGQMAELRILRLTPADAGVYRCQAGSAQSSAEVTEA  
REVTVIQPLQDAEAMEEGRVCFSCELSHKDEDEIWSLNGTPLYNDSFHEISHEGCLHTLVLSVRQADTGTVC  
ATSPKVSVSARLVVKGKPVVFLKALDDVSAEERGTLTLQCEVSDPEARVVWRKDGVELGPSDKYDFLHKAGAR  
GLTVHDLSDHEDAGLYTCQVGSKETQSKVSVHDLHVGITKRLKTEVLEGESECSFECVLSHESPSDPAVWTVGG  
KTVGGSGHFHAVRQGRKYTLTKDAALSDAGEVVSVLGLTSKASLIIRERPVDITKPLEDQRTTLGEDVMLS  
CELSRAGTSVRWLKDGKAIKRSQKYDLLSEGTRAVLVVRKASLKDSGEYTCETEASKSTAKLCVVEEKANRTE  
ELADLQVEEKGRAVFTCKTEHPASVVTWRKGLLELRASGKHVPSQEGTLKLTINALERTDSDTYTCDIQGAR  
TQARLLVHGQKVRVIEDLEDTAQVEGSSAKFCCRIAPADYGPVHWFLDKTPHLSHNEIITVQPGGYHVLTLR  
QLALKDSGTVYFEAGDQRTSAAALRVTEKPSIFSRPLTDVTVTEGEDTLVCETTTTVDSVVRWTKDGKTLRPSA  
RCQLSHEGCAQLLITATTPQDGGRYKCEIGGASSSSIVRVHALPVRFRFRESLKDVEVPEGKAATLRCVLSVA  
APVEWRHGDDVLKSSNKYSLRQEGAVLELVIRDLQPDGSGQYSCSFGDQTTSATLTVTKTSQAQVFGKLRNKEA  
TEGTTVTLRCELTKAEAPVEWKKGTETLRNGDKYSLKQDGAVCELQICSLLVADAGEYSCVCGQEKTSATLTVK  
ALLVHFVRRRLRSKEATEGDTTLQCELSKAAPVEWRKGTETLRDGDRLYSLKQDGAVCELQIRSLTIADAGEYL  
CTCGQEKTSATLTVRALPAKFKDSLKNEEATEGTTATLSCELSKAAPVTWKKGPKTLQSGDKYVLRQDGAVCG  
LQIHGLTMADAGEYSCVCGQEKTSATLTVRGLPAKFIEDLRSQEATEGATAILRCELSKAAPVEWRKGETLK  
DGDRLYTLRQDGAVCELQIRGLAVVDGTYSLSLPTKFTTEGLRNEEATEGTMATLRCQMSKAAPVEWRKGETLR  
DGDRLYSLRQDGAVCELQIRGLTIEDSGEYTCVCAQEKTSATLSVKALPSRFIEDLRSQEATEGTMATLRCQMS  
KTAPVEWKKGSETLRDGGRYSLRQDGPVCELQICDLAVEDAGEYSCVCGQEKTSATLSIKALPPRFIEDLRSQ  
EATEGTMATLRCQMSKAAPVEWRKGETLGDGGRYSLRQNGAVCELQIHDLAVEDTGEYSCVCGQEKTSATLN  
VKALPPRFIEDLRSQEATEGTMATLRCQMSKAAPVEWRKGETLRDGGRYSLRQDGAVCELQIHDLVDVEDAGQ  
YSCVCGQEKTSAVLTVDALPPKFTEGLKKEEATEGTMVTLRCQMSKEATVEWRKGAKTLSDDGGRYSLRQDGAM  
CELQICGLAVEDAGEYSCVCGQEKTSATLSVKALPPRFIEDLRSQEATEGTMATLRCQMSKAAPVEWRKGET  
LRDGDRLYSLRQDGAVCELQIRDLAVEDAGEYLCVCGQEKTSATLSVKALPPRFIEDLRSQEATEGTMATLRCQ  
MSKAAPVEWRKGSKTLRQDGGRYSLRQDGAVCELQICDLAVEDTGDYSCVCGQEKTSATLSVKALPPRFIEDLR  
SQEAREGTVATLRCMSKAAPVEWRKGETLKDGDRLYSLRQEGNLCELQIRDLAVEDTEEYSCVCGQEKTSAT  
LSVKALPAKFIEDLRSQEAPESSTVTLRCKLSKASVWKKGSETLRNGARYSLRQDGAVCELEIRDLTVEDT  
GEYSCTCGQYTSATLSIMAPQVVFQQPLQNLQAEEGSMASLRCELSVNPAAAMVWSKGGLELQGDTRREARQQ  
GCVAELLLRDLRREDAGEYSCTCGSQTTSATLMVTAAPVRFLRELQAQDVDEGATARLRCELSREAVSVEWRK  
GSLQLFPKAKYQMVQEGTTAEALLVHGVEQEDAGEYTCDAHTQS IARLSVRAPKPKFKTDLQSTEQEAGGTAR  
LCCQLSEAEPGTPVQWLKEGVELHVGSKYEMRRQAVCELLIHGLEAKDTGEYACLVGGQKTLASLRVKEPEV  
TIVRGLVDMVEQADEDEFTCKVSQAGATDVQWHLQGLPLQSNVTEVAVLADGCTHVLQKGVTLLEDAGTVS  
FHVGGSSSAQLTVRVPEVTVLEPLKDVQLSEGQDAHFRCRLSRASGQEARWALGGVPLQCNEMNDITVEQGT  
LYLLTLHKVTLEDAGTITLQVGSCSSEALQKVTAKNVTVLRGLENVDALEGGEALFECQLSQPEVAHAHTWLLDD  
EPVHTSEKVEVVYFENGLRHLLLLKLNKLPQDSCRVTFLAGDVVTSFAFLTVRGWRLEVLEPPHDASVKAGMQVR  
FTCILSEAVPVGEATSVYINGAAIQPDDTDWVTITDGSHHALTSNAQFQHAGEVTFARDAVASARLSVLALP  
DPPEDAEVVGRSDHSTVLSWVAPMSDGGGGLCVYRVEKMAESTGQWQLCHDLVPGPEACVDDLVPGKTYRFRV  
AAVGPA GAGEPVHLPQMVKIAAPAPAPAPAPAPAPETRAVVGEDICLELEVAADGGEVWVKGTERTIQPGG  
HFEVLSRGRQMLVIKGRFTEQGEYRCGPIQGLPSSGAATFNVMVTSVSGDEVPAQPSLPPPEAAQEGDLHLL  
WEALARKRRMSREPTLDSISELPEEDSRVQHLRQEAETAPDLSEGYSTADELARTGEADLSHTSSDDESRA  
TPSLVTYLKKGAGGPGISPLASKHEAQVTTSVKPKQKQEPVVPTCPPPGDLSAADLMDPSLDKAAVKIQAAFKG



YKVRKEMKQQEGPVFSRTFGDTEAQVGDVLRLECVLATKTDMRACWLKDGIELTDGRHYHIDQLKDGTCSSLLV  
 TGLAPTDSGRYTCQVSTKSGRVSHSACVVVSGTESEAESSSGGELDDAFRRAARLHRLFRTKSPAELSEEEL  
 FLSADEGPGPEEPADWQTYREDENFVCIRFESLAEARQAVTCFRNMFATMGIGVEISLGEQGPGRVEMRIGK  
 VAPTVPVAVPLAKTPGLQTSDAAPVFLTELQNDQVDQGYPMSFDCVVTGQPVPSVRWFKDGLLEEDDHYMIN  
 EDQQGGHQLIITAVVPADMGVYRCLAENSMGVSSSTKAELRVELTSTDYDTAADATETSSYFSAQGYLSSREQE  
 GTESDEGQLPQVLEELKDLQVAPGTRLAKFQKLVKGYPAKLYWFKDQGPLTSDHIRMTDKKTLHTLEIVSV  
 TREDSGQYAAIISNAVGAAYSARLLVRGPSEPEEKPASDVHERLVPRILEKFTPKKVKRGSSTFVSVKVEG  
 HPAPSVHWLKEEAKEGVLWIGPDTPGYTMASSSKQHSVLVLDVGRQHOGTYTICIATNPAGQALCSASLHISGL  
 AKEEEQERVKEALISSFLQGTSAQVSAQMSSEAGFADLVGQSKGESLVAEEAHSHLSLAEVGTTEFLQKLTSSQ  
 ITEMVSAKISQAKLQVPGGDSDEETKTPSASPRHGRSRPSSSVQESSSESEDGDSRGEIFDIYVVTADYLPGLG  
 AEQDAIILREGQYVEVLDSAHPLRWLVRTKPTKSSPSRQGWVSPAYLDKRLKLSPEWGPTEAPEFPGEAVSED  
 EYRTRLSVVIQELLSSEQAFVGELOFLESHHMKHLERSPRVPAAVASQKTVI FRNVQDISHFHSSFLKELQGC  
 GTDDDVAMCFIKNQEAFEKYLEFLVGRVQAESVVVSTPVQEFYKKYAEBETLSAKDPTQPPPPPLQHYLEQVVE  
 RVQKYQALLKELIRNKARNRQNCALLEQAYAVVSALPQRAENKLVSLMENYPGTLEALGEP IRQGHFIVWEG  
 APGARMPWKGNHRHVF LFRNYLVICKPRRDSRTDTFSYVFRNMMKLSSIDLNDQVEGDRAFEVWHEREDESVR  
 KYLLQARTVI IKNSWVKEICGIQQRLAQPVWRPPEFEELADCTAELGETVKLACRVTGTPKPIVSWYKDGKP  
 VEVDPHHILIEDPDGSC TLI LDNLTGIDSGQYMCFAASAAGNASTLGKILVQVPPRFVNVKVRATPFVEGEDAQ  
 ITCTVEGAPYPQIRWYKDGTL LAPGNRYRMLNEPRSGVLVLIQAAASKEDLGHYECELVNLRLGTRGGGELYM  
 QSPALRARDQHHREQIVA AVEVTEQETKVPKKTVI I EETITTVVKS PRGRRQSPGKSPSRSPRRSASPRRPG  
 LLAPERLYPPGTSPRRLEVEQGRKAPVPALYVTEAEVHAPASQSPKWLEVEETIEVRVKKTGSRGASPVRE  
 MTSRGEGLIFTLPGGI PGRDPNANNNSNKS SVYQEA RTWGPVAVHVGEFFIFQVDSVGNVDVWAASPEPEQVRA  
 SQKEENTERQEGCSDG DENTFLMEEPQD TDSLQGRDPKIL THNGRVLTLADLEDYVPQEGETFGCGDSTPSTP  
 DEPPCEVSVLQREI SEPTVGQPVLLNVGRPPGTGATPSFFRPGSQVHSPESVSFLLREAWSGPVSAAPWTSSF  
 HTHVQSSVDGSHGSFKTEVSTQTVSFGAVGETVTLHIDPDGGEAPGPSQG\*  
 >rs51177498\_ENSMUSP00000020732\_c.12346:G>C\_p.G4116A  
 ENSMUST00000020732.13|Obscn-201|ENSMUSG00000061462|-|chr11:g.58953508:C>G  
 MDHSFSGAPRFLTRPKAFVVS VGKDATLSCQIVGNPTPHVSWEKDRQPVEAGARFLAQDGDVYRLTILDLAL  
 GDSGQYVCRARNAIGEAFAAVGLRVDSEGTCAEQAPHFLLRPTSIRVREGADATFRCRVGGSPQPAVSWSKDG  
 RRLGPPDAPHVRVEEHGESSALRIR SARPRDGGTYEVRAENPLGSASAAAALVVDSDAEVAGPPGTSTATLLA  
 HLQORREAMRAEGIPSPPGAGTRTCTVTEGKHARLSCFVTGEPKPE TVWKKDQGLVTEGRRHVVEDEQENF  
 VLKILFCKQSDRGLYTCTASNLVGQTYSSVLVVVREPTVPFKKRLQDLEVREKESATFQCEVAQPAEAWFK  
 EETRLWASAKYDIEEEGTERRLTVRNVSADDDAVYICETTEGSRVVAELSVQGNLTKLPRKTAVRTGDTAIF  
 WVELAVPEGPVWRWRNQEEMVAGGRVAITAEGTCHTLTI FQCTLEDMGEVAFVSGGCRTTTTQFCVSAPRRPPL  
 YPPADPVVKAKTESSVTL SWSAPPHGDRPVTIDGYVLEKRRKLGAYAWSRCHEAGWLATTEFTITGVAEEGDFQ  
 FRVSAINHFGQGPYLEFPGTMHLVPLAVKTPLKAEVAEVEGGEVTFVSDLTVASSGEWFLDGEALKASSIYVI  
 RCDRTRHMLTIREVPARLHGAQLK FVANGIETS IQMVVRAALGLPSSKLPAAAAREVLAQLHEEAQLLAELSD  
 QAAA VTWLKDGRELSLGP KYEMQVSAGRRALLVRDVAQDDAGLYECVSRGSR TAYQLLVQDITDGYRDWGPAG  
 PQKHMCKCAGAKIARYLGSSCYRFLQYDKGVWHWLEAALDTRQKGKTS SCSLHEKPKLVFAKQQAHSEVKA  
 AGNSATLSCEVTQAQTEVTWFKDGKLLSSSSKVRMEASGCSRRLVVQQAGKADAGEYSCEAGGQKLSFRLDVA  
 EPKLVFAKQQAHSEVKA EAGASATLSCEVAQAQTEVTWFKDGKLLSSSSKVRMEASGCSRRLVVQQAGKADA  
 GEYSCEAGGQKLSFRLDVAEPKMVFAKEQQARSEVKA EAGASATLSCEVAQAQTEVTWFKDGKLLSSSSKVRM  
 EASGCSRRLVVQQAGKADAGEYSCEAGGQKLSFRLDVTEPKLVFAKEQQARSEVKA EVGNSATLSCEVAQAQ  
 EVTWFKDGKLLSSSSKVRMEASGCSRRLVVQQAGKADAGEYSCEAGGQKLSFRLDVAEPKLVFAKEQQARSEV  
 KAEAGNSATLSCEVAQAQTEVTWFKDGKLLSSSSKVRMEASGCSRRLVVQQAGKADAGEYSCEAGGQKLSFHL  
 DVTEPKLVFAKEQQAHSEVKA EAGASATLSCEVAQAQTEVTWFKDGKLLSSSSKVRMEASGCSRRLVVQQAGK  
 ADAGEYSCEAEGQKLSFRLDVAEPKLVFAKEQQARSEVKA EAGASATLSCEVAQAQTEVTWFKDGKLLSSSSK  
 VRVEASGCSRRLVVQQAGKADAGEYSCEAGGQKLSFRLDVAEPKLVFAKEQQANSEVKA EAGASATLSCEVAQ  
 AQTEVTWFKDGKLLSSSSKVRVEASGCSRRLVVQQAGKADAGEYSCEAGGQKLSFRLDVAEPKLAFAKEQQAH  
 SEVKA EAGASATLSCEVAQAQTEVTWFKDGKLLSSSSKVRVEASGCSRRLVVQQAGKADAGEYSCEAGGQKLS  
 FRLDVAEPKLAFAKEQQAHSEVKA EAGASATLSCEVAQAQTEVTWFKDGKLLSSSSKVRVEASGCSRRLVVQQ  
 AGKADAGEYSCEAGGQKLSFRLDVAEPKLAFAKEQQAHSEVKA EAGASATLSCEVAQAQTEVTWFKDGKLLSS  
 SSKVRVEASGCSRRLVVQQAGKADAGEYSCEAGGQKLFRLDVAEPKLMFAKEQQAHSEVKA EAGASATLSCE  
 VAQAQTEVTWFKDGKLLSSSSKVRVEASGCSRRLVVQQAGKADAGEYSCEAGGQKLSFRLDVAEPKLVFAKEQ  
 QAHSEVKA EAGASATLSCEVAQAQTEVTWFKDGKLLSSSSKVRVEASGCSRRLVVQQVQVQKADAGEYSCEARGQ  
 KLSFRLDVADTRLMFAKEQQARTEVKA EAGNSATLSCEVAQAQTEVTWFKDGKLLSSSSKVRVEASGCSRRLV  
 VQQAGKADAGEYSCEAGGQKLSFRLDVAEAE SQIPERPSRREPLVVKEHETIILTATIAAPSVAAVTWLKDGV  
 EIRRSKRHEATSLGDHTLTVRGAQVLD SAIYSCRVGKEGQDFPVQVEEVA AKFSKPLEPVEGELGGTVMLVC  
 ELSPEQAEVWRCGNTQLRPGKRFQMTSEGPRRTLTVSGLREDDAEYVCE SRDDRTSARLTVKVPVVKFTS

GLSAMVAEEGQEATFQCVVSPSDAGVTWYKDGMLQOPSEKFMVESGASRSLTILGLTLEDAGQVTVAEAGAS  
SSAALRVREAPVLFKKKLEPQTVEERTSVTLEVELTRPWPEVKWTRNAAVLTPSENVEIRAEGARHCLVLRV  
GFADRGFFGCETPDDKTQAKLNVEMRQVRLVRLGLQVEEAKEQGTASMDVELSHAEEVGSWTRDGLRLQPGPKC  
HLAVQGPVHILTLALSALQPQDSGLVAFRAEGVHTSARLIVTELPVSFTRVLQDVVATQKEKVTLECELSRPVDV  
RWLKDGVLELRAGKAIIGIVAQGTCSRSLVIYRCETGDQGVYVCDALDAQTSASLRVQGRTYTLIFRVLAEADAGE  
VKFVAENAESRAHLRVKELPVTLLRPLRDKIAMEKHRGVLECCQVSRASAQVRWFKGGVELQSGPKYEVVSDGL  
YRKLVINDVQPEDEDTYTCDAENVKTSAQFFVVEEQSITIVRGLKDMTVMPEPAPAWFECETSIPSVRPPKWL  
KTVLQAGGNVGLQDGTVHRLTLHKTCSTMTGPHVHTIGKSRSSAQLVVSDIPVVLTRPLEPKAGRELQSVVL  
SCDFRPAPKAVQWYKDDTPLSPSEKFKMALEGQMAELRILRLTPADAGVYRCQAGSAQSSAEVTVAREVTVI  
QPLQDAEAMEEGRVCFSCELSHKDEDEIWSLNGTPLYNDSFHEISHGCLHTLVLKSVRQADTGTVCATSPKV  
SVSARLVVKGKPVVFLKALDDVSAEERGLTLTQCEVSDPEARVVRKDGVELGPDSDKYDFLHKAGARGLTVHD  
LSHEDAGLYTCQVGSKETQSKSVVHDLHVGITKRLKTVEVLEGESECFEVLSSHESPSDPAVWTVGGKTVGGS  
GHFHAVRQGRKYTLTVKDAALSDAGEVVSVLGLTSSKASLIIRERPVDITKPLEDQRTTLGEDVMLSCELSRA  
GTSVRWLKDGKAIRKSQKYDLLSEGTRAVLVVRKASLKDSEYTCETEASKSTAKLCVEEKANRFTHEELADLQ  
VEEKGRAVFTCKTEHPASVVTWRKGLLELRASGKHVPSQEGTLTKLTINALERTDSDTYTCDIGQARTQARLL  
VHGQKVRVIEDLEDTAVQEGSSAKFCRIAPADYGPVHWFLLDKTPLHSNELNEITVQPGGYHVLTLRQLALKD  
SGTVYFEAGDQRTSAALRVTEKPSIFSRPLTDVTVTEGEDTLVCETTTVDSVVRWTKDGKTLRPSARCQLSH  
EGCQAQLLITATTPQDGGRYKCEIGGASSSIVRVHALPVRFRFRESLKDVEVPEGKAATLRCVLSVAAPVEWR  
HGDDVLKSSNKYSLRQEGAVLELVIRDLPQDSGQYSCSFGDQTTSATLTVKTSQAQFVGLKRNKEATEGTTV  
TLRCELKEAPVEWKKGTETLRNGDKYSLKQDGAVCLEQICSLLVADAGEYSCVCGQEKTSATLTVKALLVHF  
VRLRSKEATEGDTTTLQCELSKAAPVEWRKGTETLRDGDYSLKQDGAVCLEQIRSLTIADAGEYLCTCGQE  
KTSATLTVRALPAKFKDSLKNEEATEGTTATLSCELSKAAPVTWKKGPKTLQSGDKYVLRQDGAVCGLQIHGL  
TMADAGEYSCVCGQEKTSATLTVRGLPAKFIEDLRSQEATEGATAILRCELSKAAPVEWRKGETLKDGDYR  
LRQDGAVCLEQIRGLAVVDGTYSLSLPTKFTTEGLRNEEATEGTMATLRCQMSKAAPVEWRKGETLRDGDYR  
LRQDGAVCLEQIRGLTIEDSGEYTCVCAQEKTSATLSVKALPSRFIEDLRSQEATEGTMATLRCQMSKTA  
PVEWKKGETLRSKAGPVEWRKGETLQDGPVCELEQICDLAVEDAGEYSCVCGQEKTSATLSIKALPRFIEDLRS  
QEATEGTMATLRCQMSKAAPVEWRKGETLQDGGRYSLRQNGAVCELEQIHDLAVEDTGEYSCVCGQEKTS  
ATLNVKALPPRFIEDLRSQEATEGTMATLRCQMSKAAPVEWRKGETLRDGGRYSLRQDGAVCLEQIHDLV  
DVEDAGQYSCVCGQEKTSAVLTVDALPPKFTTEGLKKEEATEGTMATLRCQMSKATVEWRKGAKTLS  
DGGRYSLRQDGAVCLEQICGLAVEDAGEYSCVCGQEKTSATLSVKALPPRFIEDLRSQEATEGTMATLRC  
QMSKAAPVEWRKGETLRDGDYSLRQDGAVCLEQIRDLAVEDAGEYLCVCGQEKTSATLSVKALPPRFIE  
DLRSQEAREGTVAATLRCMSKAAPVEWRKGETLKDGDYSLRQEGNLCELEQIRDLAVEDTEEYSCVCG  
QEKTSATLSVKALPAKFIEDLRSQEAPESSTVTLRCKLSKASVWKKGSETLRNGARYSLRQDGAVCLE  
IRDLTVEDETEGYSCTCGQERTSATLSIMAPVFFQQPLQNLQAEEGSMASLRCELSVPNAAMVWSKGG  
LELQGDTRREARQQGCVAELLRDLRREDAGEYSCVCGQEKTSATLMVTAAPVRFRLRELQAQD  
VDEGATARLRCELSREAVSVEWRKGSLELPCAKYQMVQEGTTAELLVHGVEQEDAGEYTCDA  
GHTQSIARLSVRAPKPKFKTDLQSTEQEAGGTARLCCQLSEAEFGTPVQWLKEGVELHVGSKYEM  
RRQGAVCCELLIHGLEAKDTGEYACLVGGQKTLASLRVKEPEVTIVRGLVDMEVQADEDEFTCKV  
SQAGATDVQWHLQGLPLQSNVTEVAVLADGCTHVLQKGVTLLEDAGTVSFHVGGLSSSAQLTVR  
VPEVTVLEPLKDVQLESEGQDAHFRCRLSRASGQEARWALGGVPLQCNEMNDITVEQGTLYLLTL  
HKVTLEDAGTITLQVGSSEEAQLKVTAKNVLRGLENVDALLEGGEALFECQLSQPEVAHAHTWLLD  
DEPVHTSEKVEVVYFENGLRHLLLLKNLKPQDSCRVTFLAGDVVTSFAFLTVRGWRLEVLPPHDA  
SVKAGMQVRFCTILSEAVPVGEATWYINGAAIQPDDTDWTVTTDGSHHALTLNSAQPHAGEVTF  
AARDAVASARLSVLALPDPPEDAEVPVHLPPQMVKIAAPAPAPAPAPAPAPAPETRQAVVGE  
DICLELEVAADGGEVWVKGTERIQPGGHFEVLSRGQRQMLVIKGFRTEDQGEYRCGPIQGLP  
SSGAATFNVMVMTSGSGDEVPAQPSLPPEAAQEGDLHLLWEALARKRRMSREPTLDSISELPE  
EDSRVQHLRQEAEEETAPDLSEGYSTADELARTGEADLSHTSSDDESRACTPSLVTYLKKA  
GGPGISPLASKHEAQVTTSVKPKQKQEPVPTCPGGDLAADLMDPSLDKAAVKIQAAF  
KGYKVRKEMKQQEGPVFSRTFGDTEAQVGDVLRLECVLATKTDMRACWLKDGIELTDGRHYH  
IDQLKDGTCSLLVTLGLAPDSGRYTCQVSTKSGRVSHSACVVVSGTESEAESSGGELDDA  
FRRAARRLHRLFRTKSPAELSEELFLSADEGPGEPEEPADWQTYREDENFVCIRFESLAEAR  
QAVTCFRNMFMATMIGIVEISLGEQGPGRVEMRIGKVAPTVTPAVPLAKTPGLQTS  
DAAPVFLTELQNDVQDGYPMSFDCVVTGQPVPSVRWFKDGKLEEDDHYMINEDQQGG  
HQLIITAVVPADMGVYRCLAENSMGVSSTKALREVELTSTDYDTAADATETSSYFSAQK  
LYLSSREQEGTESDEGQLPQVLEELKDLQVAPGTRLAKFQLKVKGYAPKLYWFKDQGLP  
LTTSDHIRMTDKKTLHTLEIVSVTREDSGQYAAIYISNAVGAAYSSARLLVRGSEPEEK  
PASDVHERLVPPRILEKFTPKKVKRGSSITFSVKEGHPAPSVHWLKEEA  
EKGVLWIGPDTPGYTMASSSKQHSLLVLDVGRQHGTQYTCIATNPAGQALCSASLHISGLAKE  
EEQERVKEALISSFLQGTSAQVSAQMSSESAGFADLVGQSKGESLVAEEAHSHLSLAEVGT  
EEFLQKLTSTQITEMVSAKISQAKLQVPGGDSDEETKTPSASPRHGRSRPSSSVQESS  
SESEDGDSRGEIFDIYVVTADYLPGLAEQDAI

ILREGQYVEVLDSAHPLRWLVRTKPTKSSPSRQGWVSPAYLDRKRLKLSPEWGPTEAPEFPGEAVSEDEYRTRL  
SSVIQELLSSEQAFVQELQFLESHHMKHLERSPRVPAAVASQKTVI FRNVQDISHFHSSFLKELQGCCTDDDV  
AMCFIKNQEAFEKYLEFLVGRVQAESVVVSTPVQEFYKKYAEETLSAKDPTQPPPPPLQHYLEQPVERVQKYQ  
ALLKELIRNKARNRQNCALLEQAYAVVSALPQRAENKLVSLMENYPGTLEALGEPPIRQGHFIVWEGAPGARM  
PWKGHNHRVFLFRNYLVICKPRRDSRTDTFSYVFRNMMKLSSIDLNDQVEGDDRAFEVWHEREDSVRKYLLQA  
RTVI IKNSWVKEICGIQQLAQPVWRPPEFEEELADCTAELGETVKLACRVTGTGPKPIVSWYKDGKPVVEVDPH  
HILIEDPDGSCCTLILDNLTGIDSGQYMCFAASAAGNASTLGKILVQVPPRFVNVKVRATPFVEGEDAQITCTVE  
GAPYPQIRWYKDGTLTLLAPGNRYRMLNEPRSGVLVVIQAASKEDLGHYECELVNRLGSTRGGGELYMQSPALR  
ARDQHHREQIVAAVEERRPSP\*  
>rs51177498\_ENSMUSP00000151217\_c.10702:G>C\_p.G3568A  
ENSMUST00000219084.3|Obscn-207|ENSMUSG00000061462|-|chr11:g.58953508:C>G  
MDHSFSGAPRFLTRPKAFVSVGKDATLSCQIVGNPTPHVSWEKDRQVEAGARFRLAQDGDVYRLTILDIAL  
GDSGQYVCRARNAIGEAFVAVGLRVDSEGTCAEQAPHFLLRPTSIRVREGADATFRCRVGGSPQPAVSWSKDG  
RRLGPPDAPHVRVEEHGESSALRIRSARPRDGGTYEVRAENPLGSASAAAALVVDSDAEVAGPPGTSTATLLA  
HLQORREAMRAEGIPPSPPGAGTRTCTVTEGKHARLSCFVTGEPKPKETVWKKDQGLVTEGRRHVVEDEQENF  
VLKILFCKQSDRGLYCTASNLVGGTYSSVLVVVREPTVPFKKRLQDLEVREKESATFQCEVAQPAATEAAWFK  
EETRLWASAKYDIEEETERRRLTVRNVSAADDVAVICETTEGSRVAELSVQGNLTKLPRKTAVRTGDTAIF  
WVELAVPEGPVWRVLRNQEEMVAGGRVAITAEGTCHTLTI FQCTLEDMGEVAFVSGGCRTTTQFCVSAAPRRPPL  
YPPADPVVKAKTESSVTLWSAPPHGDRPVTIDGYVLEKRLKLGAYAWSRCHEAGWLATTEFTITGVAAEEDGFQ  
FRVSAINHFGQGPYLEFPGTMHLVPLAVKTPKAVEAVEGGEVTFVSDLTVASSGEWFLDGEALKASSIYVI  
RCDRTRHMLTIREVPARLHGAQLKVFANGIETS IQMVVRAALGLPSSKLPAAAAREVLAQLHEEAQLLAE LSD  
QAAA VTWLKDGRELSLGPYEMQVSAGRRALLVRDVAQDDAGLYECVSRGSRRTAYQLLVQDITDGYRDWGPAG  
PQKHMCKCAGAKIARYLGSSCYRFLQYDKGVVHWEAALDTRQKGKTS SCSLHEKPKLVFAKQQAHSEVKA  
AGNSATLSCEVTQAQTEVTFWKDGKLLSSSSKVRMEASGCSRRLVVQQAGKADAGEYSCEAGGQKLSFRLDVA  
EPKLVFAKQQAHSEVKAEGASATLSCEVAQAQTEVTFWKDGKLLSSSSKVRMEASGCSRRLVVQQAGKADA  
GEYSCEAGGQKLSFRLDVAEPKLVFAKEQQARSEVKAEGASATLSCEVAQAQTEVTFWKDGKLLSSSSKVRM  
EASGCSRRLVVQQAGKADAGEYSCEAGGQKLSFRLDVTEPKLVFAKEQQARSEVKAEGNSATLSCEVAQAQ  
EVTWFKDGKLLSSSSKVRMEASGCSRRLVVQQAGKADAGEYSCEAGGQKLSFHLDVTEPKLVFAKEQQAHSEV  
KAEAGASATLSCEVAQAQTEVTFWKDGKLLSSSSKVRMEASGCSRRLVVQQAGKADAGEYSCEAGGQKLSFR  
LDVAEPKLVFAKEQQARSEVKAEGASATLSCEVAQAQTEVTFWKDGKLLSSSSKVRMEASGCSRRLVVQQAG  
ADAGEYSCEAGGQKLSFRLDVAEPKLVFAKEQQANSEVKAEGASATLSCEVAQAQTEVTFWKDGKLLSSSSK  
VRVEASGCSRRLVVQQAGKADAGEYSCEAGGQKLSFRLDVAEPKLVFAKEQQAHSEVKAEGASATLSCEVAQ  
AQTEVTFWKDGKLLSSSSKVRMEASGCSRRLVVQQAGKADAGEYSCEAGGQKLSFRLDVAEPKLVFAKEQQAH  
SEVKAEGASATLSCEVAQAQTEVTFWKDGKLLSSSSKVRMEASGCSRRLVVQQVQKADAGEYSCEARGQKLS  
FRLDVAEASQI PERPSRREPLVVKHEHETIILTATIAAPSVAAVTWLKDVEIRRSKRHEATS LGDHTLTVR  
GAQVLD SAIYSCRVKEGQDFPVQVEEVAAKFSKPLEPVEGELGGTVMLVCELSPEQAEVWVRCGNVQLRPGK  
RFQMTSEGPRRTLTVSGLREDDAEYVCESRDDRTSARLTVKVPVVKFTSGLSAMVAEEGQEAFTQCVVSPS  
DAGVTWYKDGMLQPSSEKFMVVEGASRSLTILGLTLEDAGQVTVAEAGASSAALRVREAPVLFKKKLEPQT  
VEERTSVTLEVELTRPWPEVKWTRNAAVLTPSENVEIRAEGARHCLVLRVSGFADRGFFGCETPDDKTQAKLN  
VEMRQVRLVVRGLQEVEAKEQGTASMDVELSHAEEVGSWTRDGLRLQPGPKCHLAVQGPVHILTL SALQPQDSG  
LVAFRAEGVHTSARLIVTELPVSFTRVLQDVVATQKEKVTLECELSRPVDVVRWLKDGVELRAGKAI GIVAQGT  
CRSLVIYRCETGDQGVYVCDALDAQTSASLRVQGRYTLIFRRLAEDAGEVKFVAENAESRAHLRVKELPVT  
LLRPLRDKIAMEKHRGVLECVSRASAQVRWFKGGVLEQSGPKYEVVSDGLYRKLVIINDVQPEDEDTYTC DAG  
NVKTSAQFFVVEEQSITIVRGLKDMTVMEPAPAWFECETSIPSVRPPKWL LGKTVLQAGGNVLEQDGTVHRLT  
LHKTCSTMTGPVHFTIGKSRSSAQLVVS DIPVVLTRPLEPKAGRELQSVVLSCDFRPAPKAVQWYKDDTPLSP  
SEKFKMALEGQMAELRILRLTPADAGVYRCQAGSAQSSAEVTVAEAREVTVIQPLQDAEAMEEGRVCFSCELSH  
KDEDIEWSLNGTPLYNDSFHEISHEGCLHTLVLKSVRQADTGTVCATSPKVS SARLVVKGPVVF LKALDDV  
SAEERGLTLTQCEVSDPEARVVWRKDGVELGPSDKYDFLHKAGARGLTVHDL SHEDAGLYTCQVGSKETQSKV  
SVHDLHVGITKRLKTVEVLEGESECFEVLVSHESPSDPAVWTVGGKTVGGSGHFHAVRQGRKYTLTVKDAALS  
DAGEVVFVSVLGLT SKASLIIRERPVDITKPLEDQRTTLGEDVMLSCELSRAGTSVRWLKDGKAI RKSQKYDLL  
SEGTRAVLVVRKASLKDSGEYTCETEASKSTAKLCVEEKANRFTTEELADLQVEEKGRAVFTCKTEHPASVVTW  
RKGLLELRASGKHVPSQEGLTLKLTINALERTDSDTYTCDIGQARTQARLLVHGQKVRVIEDLEDTAVQEGSS  
AKFCCR IAPADYGPVHWF LDKTPLHSNELNETIVQPGGYHVLTLRQLALKDSGTVYFEAGDQRTS AALRVTEK  
PSIFSRPLTDVTVTEGEDLTLVCETTTVDSSVRWTKDGKTLRPSARCQLSHEGCAQLLITATTPQDGGRYKC  
ETGASSSSIVRVHGLPVRFRFRESLKDVEVPEGKAATLRCVLSVAAPVEWRHGDV LKSSNKYSLRQEGAVLE  
LVIRDLQPDGSGQYSCSFGDQTTSATLTVKTSQAQFVGKLRNKEATEGTTVTLRCELTKEAPVEWKKGTETLR  
NGDKYSLKQDGAVCELQICSLLVADAGEYSCVCGQEKTSATLTVKALLVHFVRRLRSKEATEGDTTTLQCELS  
KAAPVEWRKGTETLRDGDYSLKQDGAVCELQIRSLTIADAGEYLCTCGQEKTSATLTVRGLPAKFIEDLRSQ

EATEGATAILRCELSKAAPVEWRKGETLKDGDYRTRLRQDGA VCELQIRGLAVVDTGTYS SLP TKFTEGLRNE  
EATEGTMATLRCQMSKAAPVEWRKGETLRDGDYRSLRQDGA MCELQIRGLTIEDSGEYTCVCAQEKTSATLS  
VKALPPRFIEDLRSQEATEGTMATLRCQMSKAAPVEWRKGETLGDGGYRSLRQNGAVCELQI HDLAVEDTGE  
YSCVCGQEKTSATLNVKALPPKFTEGLKKEEATEGTMVTLRCQMSKEATVEWRKGA KTLSDGGYRSLRQDGA  
CELQICGLAVEDAGEYSCVCGQEKTSATLSVKALPPRFIEDLRSQEATEGTMATLRCQMSKAAPVEWRKGET  
LRDGDYRSLRQDGA VCELQIRDLAVEDAGEYLCVCGQEKTSATLSVKALPPRFIEDLRSQEATEGTMATLRCQ  
MSKAAPVEWRKGSKTLRDGDYRSLRQDGA MCELQICDLAVEDTGDYSCVCGQEKTSATLSVKAPQVVFQQPLQ  
NLQAEEGSMASLRCELSVPNAAMVWSKGGLELQGDTRREARQQGCVAELLLRDLRREDAGEY SCTCGSQTTSA  
TLMVTAAPVRFRLRQLAQDVDEGATARLRCELSREAVSVEWRKGS LQLFP CAKYQMVQEGTTAELLVHGVEQE  
DAGEYTC DAGHTQSIARLSVRAPKPKFKTDLQSTEQEAGGTARLCCQLSEAE PGTPVQWLKEGVELHVGSKYE  
MRRQGA VCELLIHGLEAKDTGEYACL VGGQKTLASLRVKEPEVTIVRGLVDMEVQADE DVEFTCKV SQAGATD  
VQWHLQGLPLQSNEVTEVAVLADGCTHV LQLKGV TLEDAGTVSFHVGG LSSSAQLTVRVPEVTVLEPLKDVQL  
SEGQDAHFRCRLSRASGQEARWALGGVPLQC NEMNDITVEQGTLYLLTLHKVTLEDAGTITLQVGS CSSEAQL  
KVTA KNTVLRGLENVDAL EGGEALFECQLSQPEVA AHTWLLDDEPVHTSEKVEV VYFENGLRH LLLLK NLPKQ  
DSCRVTFLAGDVVTS AFLTVRGRWLEVLEPPHDASVKAGMQVRF TCILSEAVPVGEATWYINGAAIQPDDTDW  
TVTTD GSHHALT LSNAPQPHAGEVTF AARDAVASARLSVLALPDPPEDAE VVGRSDHSVTLSWVAPMSDGGG  
LCGYRVMKEASTGQWQLCHDLVPGPECVVDDLVP GKTYRFRVA AVGPAGAGEPVHLPQMVKIAPAPAPAP  
APAPETRQAVVGEDICLELEVAADGGEV VVWHKGTERRIQPGGHFVLSRGRQMLVIKGFRTEDAGEYRCGPIQ  
GLPSSGAATFNVVMTSGSGDEVPAQPSLPPEAAQEGDLHLLWEALARKRRMSREPTLDSISELPEEDSRVQHL  
RQEAETAPDLSEGYSTADELARTGEADLSHTSSDDES RAGTPSLVTYLKKAGGPGISPLASKHEAQVTT SVK  
PQKQQEPVVPTCPPPGDL SAADLMDPSLDKAAVKIQAAF KGYKVRKEMKQOEGPVFSRTFGDTEAQVGDVLR  
ECVLATKTKDMRACWLKDGIELTDGRHYHIDQLKDGTC SLLVTGLAPTDSGRYTCQVSTKSGRVSHSACVVVSG  
TESEAE SSSGGE LDDAFRRAARLHRLFR TKSPAELSEEFLSADEGPGEPEEPADWQTYRE DENFVCIRFE  
SLAEARQAVTCFRNMFATMGI GVEISLGEQGP RGVEMRIGKVAPT VTPAVPLAKTPGLQTS DAAPVFLTELQN  
QDVQDGYPMSFDCVVTGQPVPSVRWFKDGKLEEDDHYMINEDQQGGHQLIITAVVPADMGVYRCLAENSMGV  
SSTKAELRVELTSTDYDTAADATETSSYFSAQGYLSSREGETSEDEGQLPQVLEELKDLQVAPGTR LAKFQL  
KVKGYPAKPLYWFKDGQPLTSDHIRMTDKKTLHTLEIVSVTREDSGQYAA YISNAVGAAYSSARLLVVRGPSE  
PEEKPASDVHERLVPPRI LEKFTPKKVKRGS SITFSVKVEGHPAPSVHVLKKEEA EKGLWIGPDP TPGYTMAS  
SKQHSVLVLLDVG RQHGTYTICATNPAGQALCSASLHISGLAKEEEQERVKEALISSFLQGT SQAVSAQMS ES  
AGFADLVGQSKGESLVAAEAHSHLSLAEVGT EEFLOKLT SQITEMVSAKISQAKLQVPGGDSDEETKTPSASP  
RHGRSRPSSSVQESSSESEDGDSRGEIFDIYVVTADYLP LGAEQDAIILREGQYVEVLDSAHPLRVLVTRTKPT  
KSSPSRQGWVSPAYLDKRLKLSPEWGPTEAPEFPGEAVSEDEYRTRLSSVIQELLSSEQAFVGLQLFLESHM  
KHLERSPRVPAAVASQKTVIFRNVQDISHFHSSFLKELQCGCTDDDVMCFIKNQEA FEKYLEFLVGRVQAES  
VVVSTPVQEFYKKYAEETLSAKDPTQPPPPPLQHYLEQPVERVQKYQALLKELIRNKARNRQNCALLEQAYAV  
VSALPQRAENKLHVSLMENYPTLEALGEP I RQGHFIVWEGAPGARM PWKGHNHRVFLFRNYLVICKPRRDSR  
TDTFSYVFRNMMKLSSIDLNDQVEGD DRAFEVWHEREDSVRKYLLQARTVI IKNSWVKEICG IQQRLAQPVWR  
PPEFEEELADCTAELGETVKLACRVTGTPKPIVSWYKDGK PVEVDPHHILIEDPDG SCTLILDNLTGIDSGQY  
MCFAASAAGNASTLGKILVQVPPRFVNKVRATPFVEGEDAQITCTVEGAPYPQIRWYKDG TLLAPGNRYRMLN  
EPRSGVLV LVIQAASKEDLGHYEC ELVNR LGSTRGGGELYMQSPALRARDQHHRREQIVA AVEVTEQETKVPKK  
TVIEETITTVVKS PRGRRQSPGKSPSRSPRRSASPRR PGLLAPERLYPPGTSPSRRLEVEQGRKAPVPALY  
VTEAEVHAPASQS QPKWLEVEETIEVRVKKTGSRGASPVREMTSRGEGILFTLPGGIPGRDPNANN SNNKSVY  
QEARTWGPVAVHVGEFFIFQVDSVGNVDWVAASPEPEQVRASQKEENTERQE GCSGDGENTFLMEEPQD TDSL  
QGRDPKILTHNGRVLTLADLEDYVPQEGE TFGCGDSTPSTPDEPPCEVSVLQREI SEPTVGGPVLLNVGRPPG  
TGATPSFFRPGSQVHSPESVFL LREAWSGPVSAAPWTSSFH THVQSSVDGSHG SFKTEVSTQTVSFGAVGET  
VTLHIDPDGGEAPGPSQ\*

>rs49663840\_ENSMUSP00000158795\_c.12262:G>T\_p.S4088I  
ENSMUST00000238536.2|Obscn-210|ENSMUSG00000061462|-|chr11:g.58953592:C>A  
MDHSFSGAPRFLTRPKAFVSVGKDATLSCQIVGNPTPHVSWEKDRQPV EAGARFRLAQDGDVYRLTILDLAL  
GDSGQYVCRARNAIGEAFAAVGLRVDSEGTCAEQAPHLLRPTSIRVREGADATFRCRVGGSPQPAVSWSKDG  
RRLGPPDAPHVRVEEHGESSALRIRSARPRDGGTYEVRAENPLGSASAAAALVVDSAEVAGPPGTSTATLLA  
HLQQRRREAMRAEGIPPSPPGAGTRTCTVTEGKHARLSCFVTGEPKPEVWKKDGQLVTEGRRHVVEDEQENF  
VLKILFCKQSDRGLYTCTASNLVGQTYSSVLVVVREPTVPFKKRLQDLEVREKESATFQCEVAQPATEAAWFK  
EETRLWASAKYDIEEGETERRLTVRNVSADDAVYICETTEGSRVAELSVQGNLTKRKLPRKTAVRTGDTAIF  
WVELAVPEGPVRWLRNQEEMVAGGRVAITAEGTCHTLTI FQCTLEDMG EFAVSVGGCR TTTQFCVSAPRRPPL  
YPPADPVVKAKTESVTLSSAPPHGDRPVTIDGYVLEKRLKLGAYAWSRCHEAGWLATTEFTITGVAAEEGDFQ  
FRVSAINHFGQGPYLEFPGMTMHLVPM LAVKTP LKAVEAVEGGEVTF SVDLTVASSGEWFLDGEALKASSIYVI  
RCDRTRHMLTIREV PARLHGAQLK FVANGIETS IQMVVRAALGLPSSKLPAAAAREVLAQLHEEAQLLAE LSD  
QAAA VTWLKDGRELSLGP KYEMQVSAGRRALLVRDVAQDDAGLYECVSRGSR TAYQLLVQDITDGYRDWGPAG

PQKHMCKCAGAKIARYLGSSCYRFLQYDKGVWHLEAALDTRQGKGTSSCSLHEKPKLVFAKGQQAHSVEKAE  
 AGNSATLSCEVTQAQTEVTFWKDGKLLSSSSKVRMEASGCSRRLLVQAGKADAGEYSCEAGGQKLSFRLDVA  
 EPKLVFAKGQQAHSVEKAEAGASATLSCEVAQAQTEVTFWKDGKLLSSSSKVRMEASGCSRRLLVQAGKADA  
 GEYSCEAGGQKLSFRLDVAEPKMFVFAKEQQARSEVKAEGASATLSCEVAQAQTEVTFWKDGKLLSSSSKVRM  
 EASGCSRRLLVQAGKADAGEYSCEAGGQKLSFRLDVTEPKLVFAKEQQARSEVKAEVGNSATLSCEVAQAQT  
 EVTFWKDGKLLSSSSKVRMEASGCSRRLLVQAGKADAGEYSCEAGGQKLSFRLDVAEPKLVFAKEQQARSEV  
 KAEAGNSATLSCEVAQAQTEVTFWKDGKLLSSSSKVRMEASGCSRRLLVQAGKADAGEYSCEAGGQKLSFHL  
 DVTEPKLVFAKEQQAHSEVKAEGASATLSCEVAQAQTEVTFWKDGKLLSSSSKVRMEASGCSRRLLVQAGK  
 ADAGEYSCEAEGQKLSFRLDVAEPKLVFAKEQQARSEVKAEGASATLSCEVAQAQTEVTFWKDGKLLSSSSK  
 VRVEASGCSRRLLVQAGKADAGEYSCEAGGQKLSFRLDVAEPKLVFAKEQQANSEVKAEGASATLSCEVAQ  
 AQTEVTFWKDGKLLSSSSKVRVEASGCSRRLLVQAGKADAGEYSCEAGGQKLSFRLDVAEPKLAFAKEQQA  
 SEVKAEGASATLSCEVAQAQTEVTFWKDGKLLSSSSKVRVEASGCSRRLLVQAGKADAGEYSCEAGGQKLS  
 FRLDVAEPKLAFAKEQQAHSVEKAEAGASATLSCEVAQAQTEVTFWKDGKLLSSSSKVRVEASGCSRRLLVQ  
 AGKADAGEYSCEAGGQKLSFRLDVAEPKLAFAKEQQAHSVEKAEAGASATLSCEVAQAQTEVTFWKDGKLLSS  
 SSKVRVEASGCSRRLLVQAGKADAGEYSCEAGGQKLFRLDVAEPKLMFAKEQQAHSEVKAEGASATLSCE  
 VAQAQTEVTFWKDGKLLSSSSKVRVEASGCSRRLLVQAGKADAGEYSCEAGGQKLSFRLDVAEPKLVFAKEQ  
 QAHSVEKAEAGASATLSCEVAQAQTEVTFWKDGKLLSSSSKVRVEASGCSRRLLVQAGKADAGEYSCEARGQ  
 KLSFRLDVADTRLMFAKEQQARTEVKAEGNSATLSCEVAQAQTEVTFWKDGKLLSSSSKVRVEASGCSRRLLV  
 VQAGKADAGEYSCEAGGQKLSFRLDVAEAEESQIPERPSRREPLVVKEHETIILTATIAAPSVAAVTWLKDG  
 EIRRSKRHEATSLGDTHTLTVRGAQVLDSAIYSCRVGKEGQDFPVQVEEVAAKFSKPLEPVEGELGGTVMLVC  
 ELSPEQAEVWRCGNTQLRPGKRFQMTSEGPRTTLTVSGLREDDAEYVCESTRDDRTSARLTVKVPVVKFTS  
 GLSAMVAEEGQEQATFQCVVSPSDAGVTWYKDGMLQPSKFKVMVESGASRSLTILGLTLEDAGQVTVAEAGAS  
 SSAALRVREAPVLFKKLEPQTVERTSVTLEVELTRPWPEVKWTRNAAVLTPSENVEIRAEGARHCLVLRV  
 GFADRGGFFGCETPDDKTQAKLNVEMRQVRLVVRGLQVEVEAKEQGTASMDVLSHAEVEGSWTRDGLRLQFPGPK  
 HLAVQGPVHILTLALSALQPDQSGLVAFRAEGVHTSARLIVTELPVSFTRVLQDVVATQKEKVTLECELSRPV  
 RWLKDGVLELRAGKAIGIVAQGTCSRSLVIYRCETGDKQGVYVCDALDAQTSASLRVQGRVYTLIFRVLAE  
 DAGEYVKEGRAVFTCKTEHPASVVTWRKGLLELRASGKHVPSQEGTLTKLTINALERTSDSTYTCDIGQARTQ  
 YRKLVINVDQPEDEDTYTCDAENVKTSAQFFVEEQSITIVRGLKDMTVMPEPAPAWFECETSIPSVRPPK  
 WLLGKTVLQAGGNVGLQDGTVHRLTLHKTCSTMTGPVHFTIGKSRSSAQLVSDIPVVLTRPLEPKAGRELQSV  
 VLSCDFRPAPKAVQWYKDDTPLSPSEKFKMALEGGMAELRILRLTPADAGVYRCQAGSAQSSAEVTV  
 EAREVTVIQPLQDAEAMEEGRVCFSCELSHKDEDIEWSLNGTPLYNDSFHEISHGCLHTLVLSVRQADTGT  
 VCATSPKVSVSARLVVKGKPVVFLKALDDVSAEERTLTLQCEVSDPEARVVWRKDGVELGPSDKYDFLH  
 KAGARGLTVHDLSHEDAGLYTCQVGSKETQSKVSVHDLHVGITKRLKTVEVLEGESECSFECVLSHES  
 PSDPAVWTVGGKTVGGS GHFHAVRQGRKYTLTVKDAALSDAGEVVFVSVLGLTSKASLIIRERPVDIT  
 KPLEDQRTTLGEDVMLSCELSRA GTSVRWLKDGKAIRKSYDLSSEGTRAVLVVRKASLKDSGEYTCETE  
 ASKSTAKLDCVEEKANRFTBELADLQVEEKGRAVFTCKTEHPASVVTWRKGLLELRASGKHVPSQEGTL  
 TKLTINALERTSDSTYTCDIGQARTQYHGGQKVRVIEDLEDTAVQEGSSAKFCCRIAPADYGPVH  
 WFLDKTPLHSNELNEITVQPGGYHVLTRQLALKD SGTVYFEAGDQRTSAAALRVTEKPSIFSR  
 PLTDVTVTEGEDTLVCEETTVDSSVRWTKDGKTLRPSARCQLSH EGCQAQLLITATTPQDGGRY  
 KCEIGGASSSSIVRVHALPVRFRESLKDVEVPEGKAATLRCVLSVAAPVEWR HGDDVLKSSNKY  
 SLRQEGAVLELVIRDLQPDQSGQYSCSFGDQTTSATLTVKTSQAQFVGLRNKEATEGTTV  
 TLRCELTKEAPVEWKKGTETLRNGDKYSLKQDGAVCELQICSLLVADAGEYSCVCGQEKT  
 SATLTVKALLVH VRRLSKEATEGDTTLQCELSKAAPVEWRKGTETLRDGDYSLKQDGAVCELQIR  
 SLTIADAGEYLCTCGQE KTSATLTVRALPAKFKDSLKNEEATEGTTATLSCELSKAAPVWKKGPK  
 TLQSGDKYVLRQDGAVCGLQIHGL TMADAGEYSCVCGQEKT SATLTVRGLPAKFIEDLRSQEA  
 TEGATAILRCELSKAAPVEWRKGSSETLKDGDYR LRDGAVCELQIRGLAVVDGTYS  
 SLPTKFTTEGLRNEEATEGTMATLRCQMSKAAPVEWRKGSSETLRDGDYI LRQDGAMCELQIR  
 GLTIEDSGEYTCVCGQEKT SATLSVKALPSRFIEDLRSQEA TEGTMATLRCQMSKTAPVE  
 WKKGSETLRDGGYSLRQDGPVCELQICDLAVEDAGEYSCVCGQEKT SATLSIKALPPRFIE  
 DLRSQEA TEGTMATLRCQMSKAAPVEWRKGSSETLGDGGYSLRQNGAVCELQIHDLAVEDT  
 GEYSCVCGQEKT SATLNVKALPP RFIEDLRSQEA TEGTMATLRCQMSKAAPVEWRKGS  
 SETLRDGGYSLRQDGAVCELQIHDLVEDAGQYSCVCG QEKTSAVLTVDALPPKFTTEGLK  
 EEEATEGTMVTLRCQMSKEATVEWRKGAKT LSDGGYSLRQDGAMCELQIC GLAVEDAGEY  
 SCVCGQEKT SATLSVKALPPRFIEDLRSQEA TEGTMATLRCQMSKAAPVEWRKGSSETLR  
 DGDYSLRQDGAVCELQIRDLAVEDAGEYLCVCGQEKT SATLSVKALPPRFIEDLRSQEA  
 TEGTMATLRCQMSKAAP VEWKRSKTRMSKAAPVEWRKGSSETLKDGDYSLRQEGNLCELQIR  
 DLAVEDTEEYSCVCGQEKT SATLSVKAL PAKFIEDLRSQEA PESSTVTLRCKLSKASV  
 VVWKKGSETLRNGARYSLRQDGAVCELEIRDLTVE DTGEYSCT CGQERTSATLSIMAPQV  
 VFQQLQNLQAEEGSMASLRCELSVPNAAMVWSKGGLELQGDTRREARQQGCVAEL  
 LLRDLRREDAGEYSCVCGQTTSATLMVTAAPVRFLELQAQDVDEGATARLRCELSREAVS  
 VEWRKGS LQFPCAQYQMVQEGTTAELLVHGVEQEDAGEYTCDAHTQSIARLSVRAPKPKFKTDLQ  
 STEQEAGGTARLCCQLS

EAEPGTPVQWLKEGVELHVGSKYEMRRQGAUCELLIHGLEAKDTGEYACLVGGQKTLASLRVKEPEVTIVRGL  
VDMEVQADEDEVEFTCKVSOAGATDVQWHLQGLPLQSNVTEVAVLADGCTHVLQKGVTLLEDAGTVSFHVGG  
SSSAQLTVRVPEVTVLEPLKDVQLSEGQDAHFRCRLSRASGQEARWALGGVPLQCNEMNDITVEQGTLYLLTL  
HKVTLEDAGTITLQVGSSESQAQLKVTAKNTVLRGLENVDALLEGGEALFECQLSQPEVAHAHTWLLDDEPVHTS  
EKVEVVYFENGLRHLLKLNKLPQDSCRVTFLAGDVVTSAFLLTVRGWRLEVLEPPHDASVKAGMQVRFCTILS  
EAVPVGEATWYINGAAIQPDDTDWTVTTDGSHHALTLSNAQPPHAGEVTFAAARDAVASARLSVLALPDPPEDA  
EUVGRSDHSVTLSSWVAPMSDGGGGLCGYRVEMKEASTGQWQLCHDLVPGPECVDDLVPGKTYRFRVAAVGPA  
GAGEPVHLQPMVKIAPAPAPAPAPAPAPAPETRQAVVMGEDICLELEVAADGGGEVVWHKGTERRIQPGGHFEVLS  
RGQRMLVIKGFRTEDQGEYRCGPIQGLPSSGAATFNVMVMTSGSGDEVPAQPSPLEAAQEGDLHLLEALAR  
KRRMSREPTLDSISELPEEDSRVQHLRQEAEEETAPDLSEGYSTADELARTGEADLSHTSSDDESAGTPSLVT  
YLKKAAGGPGISPLASKHEAQVTTSVKPKQKQEPVVPTCPPPGDLSAADLMDPSLDKAAVKIQAAPFKYKVRKE  
MKQQEGPVFSRFTFGDTEAQVGDVLRLECVLATKTDMRACWLKDGIELTDGRHYHIDQLKDGTCSSLVTLGLAPT  
DSGRYTCQVSTKSGRVSHSACVVVSGTESEAESSSSGGELDDAFRAARRLHRLFRTKSPAELSEELFLSADE  
GPGEPEEPADWQTYREDENFVCIRFESLAEARQAVTCFRNMFATMGIGVEISLGEQGPVGVEMRIKGVAPTVT  
PAVPLAKTPGLQTSDAAPVFLTELQNDVQDGYPMSFDCVVTGQVPVSVRWFKDGKLEEDDHYMINEDQQGG  
HQLIITAVVPADMGVYRCLAENSMGVSSTKAELRVELTSTDYDTAADATETSSYFSAQGYLSSREQEGTESDE  
GQLPQVLEELKDLQVAPGTRLAKFQLKVKGYPAKLYWFKDGGQPLTSDHIRMTDKKTLHTLEIVSVTREDSG  
QYAAIISNAVGAAYSSARLLVRGPSEPEEKPASDVHERLVPPRILEKFTPKKVKRGSSITFSVKVEGHPAPSV  
HWLKEEAKEKGVLWIGPDTPGYTMASSSKQHSLVLLDVGRQHOGTYTCIATNPAGQALCSASLHISGLAKEEEQ  
ERVKEALISSFLQGTSAVSAQMSSESAGFADLVGQSKGESLVAEEAHSHLSLAEVGTEEFQKLTSSQITEMVS  
AKISQAKLQVPGGDSDEETKTPSASPRHGRSRPSSSVQESSSEEDGDSRGEIFDIYVVTADYLPGLAEQDAI  
ILREGQYVEVLD SAHPLRWLVRTKPTKSSPSRQGWVSPAYLDRKRLKLSPEWGPTEAPEFPGEAVSEDEYRTRL  
SSVIQELLSSEQAFVQELQFLESHHMKHLERSPRVPAAVASQKTVIFRNVQDISHFHSSFLKELQCGCTDDDDV  
AMCFIKNQEAFAEKYLEFLVGRVQAESVVVSTPVQEFYKKAEEETLSAKDPTQPPPPPLQHYLEQPVERVQKYQ  
ALLKELIRNKARNRQCALLEQAYAVVSALPQRAENKLVSLMENYPGTLEALGEPVIRQGHFIVWEGAPGARM  
PWKGNHRHVLFRNYLVICKPRRDSRTDFTSYVFRNMKLLSIDLNDQVEGDRAFEVWHEREDSVRKYLLQA  
RTVILKNSWVKEICGIIQVWRPPEFEFEEELADCTAELGETVKLACRVTGTPKPIVSWRYKDGKPEVEVDPH  
HILIEDPDGSCCTLILDNLTGIDSGQYMCFAASAAGNASTLGKILVQVPPRFVNVKVRATPFVEGEDAQITCTVE  
GAPYPQIRWYKDGTLAPGNRYRMLNEPRSGVLVVIQAASKEDLGHYECELVNRLGSTRGGGELYMQSPALR  
ARDQHHREQIVAAVEDTSVEGSAHSAQDGADQQAASVLWRLLGSEALGSPGDLNTRQSEPPAFEEAASQIP  
GAASGTPEVSQPGTHKLEQETTSSGSQGWTVPIRVEGTAWPGAGTGQLLDDVHSQVIMETTQRTYVQAPDT  
GVTRAPSMQVTIEDVQVQVGDMAQFDAVIEGHPPPIVTVWYKGSTQLTSSARLSQRQDGTYSLVLTDVAPHDA  
GVYTCVANNAGGQVLCKAELLVHGGDKLDAENQVYRRKLHSFYDVQEEIGRGVFGFVKRVQHKGNKMFCAAKF  
IPLRSKTRAQAYQERDILATLGHPLVTLGLDQFETRKTLLILILELCSSEELLDRLFKKGVVTEAEVKVYIQQL  
VEGLHYLHSHGILHLDIKPPNIMVHPAREDIKICDFGFAQKITPSEPQYSKYGSPFVSPPEIEQNPVSEGS  
DIWAMGVI SYLSLTCSPPFAGESDRATLLNVLEGRVSWSSPFLTAHLESEDAKDFIKATLQRTPRARPSQSCLA  
HPWFLKSMPAEEAHFINTKQKFLRLARSRWQRSLMSYKSIIVMRSIPPELLQGPPDPSPLGVARHLRGEASGAS  
SSSSSSDNELAPFARAKSLPPSPVTHSPLHPRGFLRPSASLPEETEASMPATAAASPASQASAGPPASPGCV  
PRHSVSISSLFYQQAGEGAERGNKTSGAKRHPARRRHLKGGYIARALPGLREPLMEYSLLEEEAAREEQASLM  
TKTSPFETALRLPSSSVREVPGRSHSLDNPPVTTGPSPEACKEQLLFPSTGLTHETAKDRGHKEGFLQESV  
PFPPMSGDSRPGKQEGSSQDSCRGKPASSCHSELGSGSQEGCGPPSSQSLGSLPPQSLKKELESTSCGPLFSEQ  
PQAAPFPTQVSPLLGSEKEPQDGSLSSEGPVVPVSSSPGSASQVDASLDTEGLSEAGDTCDFTPPPQRPQEQAT  
TRKFSLESRGGYAGVAGYGTFAFGGDAGGMLGQGPLWARMAWAVSOSSEEQDEAATESPQPLESIGPIAEASG  
VPLRTSPSLTPWEEVEQVSLVQIRDLSDGAEAAADTISLDISEVDPAYLNLSDLYDIKYLPEFEMI FRRVPKPI  
EQPESPGETEAGQGLADFLLEAAWPWPGELGLRAGLEITEEPEEPGDLEALLGEEAVGRKRKWSPSRGLFQF  
PGRCLSGEEPVELGLRQVRKASMAHISRIILKGRPEGPREGPPRKKAGLASFRLSGLKGRDQELSDEAVVLGQ  
SVTLACQVLAQPTAQATWSKDGVLLESSGHLLISSTLKNFQLLTIIVVKEEDLGTYTCCVSNPLGTAVTTGVL  
RKAERPSSSPRPEVGEELYKDAVLLVWKPVEESCGPVTVYIVQCCIEGGSWTTLASDISDCCYLTGKLSRGGMYIF  
RTACVSKAGMGPISSPSEQVLLGGPNHLASEEESRRGRPAQLLPSTKTFQFMQIRRGFRFSVVRQCREKASGR  
ALAAKIVPYQPEDKTAVLREYEAALKRLHHPHLAQLHAAYLSPRHVLVLIILELCSGPELLPSLAERESYSES DVK  
DYLWQMLSATQYLHAQHILHLDLRSENMMVTEYNLLKVIDLGNAAQSLDQEKVPAPENFKDYLETMAPELLEGG  
GAVPQTDIWAIGVTAIFIMLSGEYPESESEGTDLQKGLRKLIRLSRCYAGLSGGAVAFLOSSLCAQPWGRPCA  
STCLQCGWLTEEGTGSRPTPVTFPTVRLRAVFREREKRRALLYKKNLAQVR\*  
>rs49663840\_ENSMUSTP00000038264\_c.11434:G>T\_p.S3812I  
ENSMUST00000047441.14|Obscn-202|ENSMUSG00000061462|-|chr11:g.58953592:c>A  
MDHSFSGAPRFLTRPKAFVSVGKDATLSCQIVGNPTPHVSWEKDRQPVEAGARFLAQDGDVYRLTILDLAL  
GDSGQYVCRARNAIGEAFVAVGLRVDSEGTCAEQAPHLLRPTSIRVREGADATFCRVRGSGPQPAVSWSKDG  
RRLGPPDAPHVRVEEHGESSALRIRSARPRDGGTYEVRAENPLGSASAAAALVVDSDAEVAGPPGTSTATLLA

HLQQRREAMRAEGIPPSPPGAGTRTCTVTEGKHARLSCFVTGEPKPEVWKKDQGLVTEGRRHVVEDEQENF
VLKILFCKQSDRGLYTCTASNLVGQTYSSVLVVVREPTVPFKKRLQDLEVREKESATFQCEVAQPATEAAWFK
EETRLWASAKYDIEEEGETERRLTVRNVSADDDAVYICETTEGSRVVAELSVQGNLTKRKLPRKTAVRTGDTAIF
WVELAVPEGPVRWLRNQEEMVAGGRVAITAEGTCHTLTI FQCTLEDMGEVAFVSGGCRTTTQFCVSAPRRPPL
YPPADPVVKAKTESVTLWSAPPHGDRPVTIDGYVLEKRKLGA YAWSRCHEAGWLATTEFTITGVAAEEDGFQ
FRVSAINHFGQGPYLEFPGTMHLVPLAVKTPKAVEAVEGGEVTFVSDLTVASSGEWFLDGEALKASSIYVI
RCDRTRHMLTIREVPARLHGAQLKFVANGIETSIQMVVRAALGLPSSKLPAAAAREVLAQLHHEEAQLLAE LSD
QAAA VTWLKDGRELSLGPKYEMQVSAGRRALLVRDVAQDDAGLYECVSRGSRRTAYQLLVQDITDGYRDWGPAG
PQKHMCKCAGAKIARYLGSSCYRFLQYDKGVVHWEAALDTRQGKGTSSCSLHEKPKLVFAKQQAHSSEVKA
AGASATLSCEVAQAQTEVTFWKDGKLLSSSSKVRMEASGCSRRLVVQQAGKADAGEYSCEAGGQKLSFR LDVA
EPKMFVFAKEQQARSEVKA EAGASATLSCEVAQAQTEVTFWKDGKLLSSSSKVRMEASGCSRRLVVQQAGKAD
GEYSCEAGGQKLSFR LDVTEPKLVFAKEQQARSEVKA EGVNSATLSCEVAQAQTEVTFWKDGKLLSSSSKVRM
EASGCSRRLVVQQAGKADAGEYSCEAGGQKLSFR LDVAEPKLVFAKEQQARSEVKA EAGNSATLSCEVAQAQ
EVTWTFWKDGKLLSSSSKVRMEASGCSRRLVVQQAGKADAGEYSCEAGGQKLSFR LDVTEPKLVFAKEQQAHSEV
KAEAGASATLSCEVAQAQTEVTFWKDGKLLSSSSKVRMEASGCSRRLVVQQAGKADAGEYSCEAE GQKLSFR
DVAEPKLVFAKEQQARSEVKA EAGASATLSCEVAQAQTEVTFWKDGKLLSSSSKVRVEASGCSRRLVVQQAGK
ADAGEYSCEAGGQKLSFR LDVAEPKLVFAKEQQANSEVKA EAGASATLSCEVAQAQTEVTFWKDGKLLSSSSK
VRVEASGCSRRLVVQQAGKADAGEYSCEAGGQKLSFR LDVAEPKLVFAKEQQAHSEVKA EAGASATLSCEVAQ
AQTEVTFWKDGKLLSSSSKVRVEASGCSRRLVVQQAGKADAGEYSCEAGGQKLSFR LDVAEPKLVFAKEQQAH
SEVKA EAGASATLSCEVAQAQTEVTFWKDGKLLSSSSKVRVEASGCSRRLVVQQAGKADAGEYSCEAGGQKLS
FR LDVAEPKLVFAKEQQAHSEVKA EAGASATLSCEVAQAQTEVTFWKDGKLLSSSSKVRVEASGCSRRLVVQQ
AGKADAGEYSCEAGGQKLSFR LDVAEPKLVFAKEQQAHSEVKA EAGASATLSCEVAQAQTEVTFWKDGKLLSS
SSKVRVEASGCSRRLVVQQVQKADAGEYSCEARGQKLSFR LDVAEAE SQI PERPSRREPLVVKHEHTI I LTAT
IAAPSVAAVTWLKDGV EIRRSKRHEATSLGDTHTLTVRGAQVLD SA IYSCRVGKEGQDFPVQVEEVA AKFSKP
LEPVEGELGGTVMLVCELSPEQAEVWRCNGTQLRPGKRFQMTSEGPRRTLTVSGLREDDAE EYVCE SRDDRT
SARLTVKVPRVVKFTSGLSAMVAEEGQEATFQC VVSPDAGVTWYKDMQLQPSEKFMVWESGASRSLTILGL
TLEDAGQVTVEAEGASSAALRVREAPVLFK KKLTEPQTVEERTSVTLEVELTRPWPPEVWRKDVLELGP SDK
EIRAEGARHCLVLRVSVGFADRGFFGCETPDDKTQAKLNVEMRQVRLVVRGLQEVEAKEQGTASMDVELSHAEVE
GSWTRDGLRLQPGPKCHLAVQGPVHIL TLSALQPQDSGLVAFRAEGVHTSARLIVTELPVSFTRVLQDVVATQ
KEKVTLECELSRPVDVRWLKDGVELRAGKAI GIVAQGTCSRSLVIYRCETGDQGVYVCDALDAQTSASLRVQGR
TYTLIFRRVLAEDAGEVKFVAENAESRAHLRVKELPVTLLRPLRDKIAMEKHRGVLECCQVSRASAQVRWFKGG
VELQSGPKYEVVSDGLYRKLVIN DVQPEDEDTYTCDAGNVKTSAQFFVEEQSITIVRGLKDMTVMFPAPAWFE
CETSIPSVRPPKWL LGKTVLQAGGNVGLQDGTVHRLTLHKTCSTMTGPVHFHTIGKSRSSAQLVVS DIPVVL
RPLEPKAGRELQSVVLSCDFRPAPKAVQWYKDDTPLSPSEKFKMALEGQMAELRILRLTPADAGVYRCQAGSA
QSSAEVTVAEAREVTVIQLQDAEAMEEGRVCFSCELSHKDEDIEWSLNGTPLYNDSFHEI SHEGLHTLV LKS
VRQADTGTVCATSPKVSARL VVKGKPVVFLKALDDVSAEERGLTLQCEVSDPEARVWVRKDVLELGP SDK
YDFLHKAGARGLTVHDL SHEDAGLYTCQVGSKETQSKVSVHDLHVGITKRLKTVEVLEGE SCSFECVLSHESP
SDPAVWTVGGKTVGGSGHFHAVRQGRKYTLTVKDAALSDAGEVVFVSVLGLTSKASLIIRERPV DITKPLEDQR
TTLGEDVMLSCELSRAGTSVRWLKDGKAI RKSQKYDLLSEGTRAVLVVRKASLKDSGEYTCETEASKSTAKLC
VEEKANRFTEELADLQVEEKGRAVFTCKTEHPASVVTWRKGLLELRASGKHVPSQEGTLTKLTINALERTDSD
TYTCDIGQARTQARLLVHGQKVRVIEDLED TAVQEGSSAKFCCR IAPADYGPVHWFLDKTPLHSNELNEITVQ
PGGYHVLT LRQLALKDSGTVYFEAGDQRTSAALRVTEKPSIFSRPLTDVTVTEGEDLTLVCETTTVDSSVRWT
KDGKTLRPSARCQLSHEGCAQLLITATTPQDGGRYKCEIGGASSSSIVRVHALPVRFRESLKDVEVPEGKAA
TLRCVLSVAAPVEWRHGDDVLKSSNKYSLRQEGAVLELVIRDLQPQDSGQYSCSFQDQTTSATLTVKTS SAQ
FVGLKRNKEATEGTTVTLRCEL TKEAPVEWKKGTETLRNGDKYSLKQDGAVCELQICSLLVADAGEYS CVCGQ
EKTSATLTVKALLVHFVRRRLRSKEATEGDTTTLQCELSKAAPVEWRKGTETLRDGD RYSLKQDGAVCELQIRS
LT IADAGEYLCTCGQEKTSATLTVRALPAKFKDSLKNEEATEGTATLSCELSKAAPVTWKKGPKTLQSGDKY
VLRQDGAVCGLQIHGLTMADAGEYSCVCGQEKTSATLTVRGLPAKFIEDLRSQEATEGATAILRCELSKAAPV
EWRKGSETLTKDGD RYTLRQDGAVCELQIRGLAVVDTGTYS SLPKFTTEGLRNEEATEGTMATLRCQMSKAAPV
EWRKGSETLRDGD RYILRQDGAMCELQIRGLTIEDSGEYTCVCGQEKTSATLSVKALPPRFIEDLRSQEATEG
TMATLRCQMSKAAPVEWRKGSETLGDGGRYSLRQNGAVCELQIHDLAVEDTGEYSCVCGQEKTSATLNVKALP
PRFIEDLRSQEATEGTMATLRCQMSKAAPVEWRKGSETLRDGGRYSLRQDGAVCELQIHDL DVEDAGQYSCVC
GQEKTSAVLTVDALPPKFTTEGLKKEEATEGTMATLRCQMSKEATVEWRKGAKT LSDGGRYSLRQDGAMCELQI
CGLAVEDAGEYSCVCGQEKTSATLSVKALPPRFIEDLRSQEATEGTMATLRCQMSKAAPVEWRKGSKTLR DGD
RYSLRQDGAMCELQICDLAVEDTGDYSCVCGQEKTSATLSVKAPQVVFQQPLQNLQAEEGSMASLRCELSVPN
AAMVWSKGGLELQGDTRREARQQGCVAELLLRDLRREDAGEYSCTCGSQTTSATLMVTAAPVRFRLRLQAQDV
DEGATARLRCELSREAVSVEWRKGS LQLFPCA KYQMVQEGTTAE LLVHGVEQEDAGEYTC DAGHTQS IARLSV
RAPKPKFKTDLQSTEQEAGGTARLCCQLSEAE PGTPVQWLKEGVELHVGSKYEMRRQGAVCELLIHGLEAKDT





WVELAVPEGPVWRWRNQEEMVAGGRVAITAEGTCHTLTI FQCTLEDMGEVAFVSGGCRTTTTQFCVSA PRRPPL  
YPPADPVVKAKTESSVTLWSAPPHGDRPVTIDGYVLEKRKLGAYAWSRCHEAGWLATTEFTITGVAAEEGDFQ  
FRVSAINHFGQGPYLEFPGTMHLVPLAVKTPKAVEAVEGGEVTFVSDLTVASSGEWFLDGEALKASSIYVI  
RCDRTRHMLTIREV PARLHGAQLK FVANGIETSIQMVVRAALGLPSSKLPAAAAREVLAQLHEEAQLLAE LSD  
QAAAVTWLKDGRELSLGPKEYMQVSAGRRALLVRDVAQDDAGLYECVSRGSRRTAYQLLVQEPKLVFAKGOQAH  
SEVKAEAGNSATLSCEVTQAQTEVTFWFKDGKLLSSSSKVRMEASGCSRRLVVQQAGKADAGEYSCEAGGQKLS  
FRLDVAEPKLVFAKGOQAHSEVKAEAGASATLSCEVAQAQTEVTFWFKDGKLLSSSSKVRMEASGCSRRLVVQQ  
AGKADAGEYSCEAGGQKLSFRLDVAEPKMFVFAKEQQARSEVKAEAGASATLSCEVAQAQTEVTFWFKDGKLLSS  
SSKVRMEASGCSRRLVVQQAGKADAGEYSCEAGGQKLSFRLDVTEPKLVFAKEQQARSEVKAEVGN SATLSCE  
VAQAQTEVTFWFKDGKLLSSSSKVRMEASGCSRRLVVQQAGKADAGEYSCEAGGQKLSFRLDVAEPKLVFAKEQ  
QARSEVKAEAGNSATLSCEVAQAQTEVTFWFKDGKLLSSSSKVRMEASGCSRRLVVQQAGKADAGEYSCEAGGQ  
KLSFHLDVTEPKLVFAKEQQAHSEVKAEAGASATLSCEVAQAQTEVTFWFKDGKLLSSSSKVRMEASGCSRRLV  
VQQAGKADAGEYSCEAGGQKLSFRLDVAEPKLVFAKEQQARSEVKAEAGASATLSCEVAQAQTEVTFWFKDGK  
LSSSSKVRVEASGCSRRLVVQQAGKADAGEYSCEAGGQKLSFRLDVAEPKLVFAKEQQANSEVKAEAGASATL  
SCEVAQAQTEVTFWFKDGKLLSSSSKVRVEASGCSRRLVVQQAGKADAGEYSCEAGGQKLSFRLDVAEPKLAFA  
KEQQAHSEVKAEAGASATLSCEVAQAQTEVTFWFKDGKLLSSSSKVRVEASGCSRRLVVQQAGKADAGEYSCEA  
GGQKLSFRLDVAEPKLAFAKEQQAHSEVKAEAGASATLSCEVAQAQTEVTFWFKDGKLLSSSSKVRVEASGCSR  
RLVVQQAGKADAGEYSCEAGGQKLSFRLDVAEPKLAFAKEQQAHSEVKAEAGASATLSCEVAQAQTEVTFWFKD  
GKLLSSSSKVRVEASGCSRRLVVQQAGKADAGEYSCEAGGQKLFRLDVAEPKLMFAKEQQAHSEVKAEAGAS  
ATLSCEVAQAQTEVTFWFKDGKLLSSSSKVRVEASGCSRRLVVQQAGKADAGEYSCEAGGQKLSFRLDVAEPK  
VFAKEQQAHSEVKAEAGASATLSCEVAQAQTEVTFWFKDGKLLSSSSKVRVEASGCSRRLVVQQV GKADAGEYS  
CEARGQKLSFRLDVADTRLMFAKEQQARTEVKAEAGNSATLSCEVAQAQTEVTFWFKDGKLLSSSSKVRVEASG  
CSRRLVVQQAGKADAGEYSCEAGGQKLSFRLDVAEAE SQI PERPSRREPLVVKEHETIILTATIAAPSVAAVT  
WLKDGVEIRRSKRHEATS LGDTHLTVRGAQVLD SAIYSCRVGKEGQDFPVQVEEVA AKFSKPLEPVEGELGG  
TVMLVCELSPEQAEVWRCGNTQLRPGKRFQMTSEGPRTTLTVSGLREDDAE EYVCE SRDDRTSARLTVKVPR  
VVKFTSGLSAMVAEEGQEATFQC VVSPSDAGVTSYKDMGLQPSEK FVMVESGASRSLTILGLTLEDAGQVTV  
EAE GASSAALRVREAPVLFK KLEPQTVEERTSVTLLEVELTRPWEVVKWTRNAAVLTPSENVEIRAEAGRHC  
LVLRSVGFADRGFFGCETPDDKTQAKLNVEMRQVRLVVRGLQEVEAKEQGTASMDVELSHAEVEGSWTRDGLRL  
QPGPKCHLAVQGPVHILTL SALQPQDSGLVAFRAEGVHTSARLIVTELPVSFTRVLQDVVATQKEKVTLECEL  
SRPVDVRWLKDGVELRAGKAIGIVAQGTCSRSLVIYRCETGDQGVYVCDALDAQTSASLRVQGRTYTLIFRRVL  
AEDAGEV KFVAENAESRAHLRVKELPVTLLRPLRDKIAMEKHRGVLE CQVSRASAQVRWFVKGVELQSGPKYE  
VVS DGLYRKLVIN DVQPEDEDTYTC DAGNVKTSAQFFVEEQSITIVRGLKDMTVME PAPA WFE CETSIPSVRP  
PKWLLGKTVLQAGGNVGLQDGT VHRLTLHKTCSTMTGPVHFTIGKSRSSAQLVVS DI PVVLRTRPLEPKAGRE  
LQSVVLSCDFRPAPKAVQWYKDDTPLSPSEKFKMALEGQMAELRILRLTPADAGVYRCQAGSAQSSAEVTVEA  
REVTVIQPLQDAEAMEEGRVCFSC ELSHKDEI EWSLNGTPLYNDSFHEI SHEGCLHTLVLKSVRQADTGTVC  
ATSPKVS SARLVVKGKPVVFLKALDDVSAEERGLTLTQCEVSDPEARVVWRKDGVELGPSDKYDFLHKAGAR  
GLTVHDL SHEDAGLYTCQVGSKETQSKVSVHDLHVGITKRLKTVEVLEGE SCSFECVLSHESPSDPAVWTVGG  
KTVGGSGHFHAVRQGRKYTLTVKDAALSDAGEV VSVLGLTSKASLIIRERPVDITKPLEDQRTTLGEDVMLS  
CELSRAGTSVRWLKDGKAIRKSQKYDLLSEGTRAVLVVRKASLKDSGEYTCETEASKSTAKLCVEEKANR FTE  
ELADLQVEEKGRAVFTCKTEHPASVVTWRKGLLELRASGKHVPSQEGTLKLTINALERTDSDTYTCDIGQAR  
TQARLLVHGQKVRVIEDLED TAVQEGSSAKFCCRIAPADYGPVHWF LDKTPLHSNELNEITVQPGGYHVLT LR  
QLALKDSGTVYFEAGDQRTS AALRVTEKPSIFSRPLTDVTVTEGEDLTLVCETTTVDSSVRWTKDGKTLRPSA  
RCQLSHEGCAQLLITATTPQDGGRYKCEIGGASSSSIVRVHALPVRFRFRESLKDVEVPEGKAATLR CVLSSVA  
APVEWRHGDDVLKSSNKYSLRQEGAVLELVIRDLQPQDSGQYSCSFGDQTT SATLTVKTS SAQFVGKLRNKEA  
TEGTTVTLRCELTK EAPVEWKGTETLRNGDKYSLKQDGAVCELQICSLLVADAGEYSCVCGQEKTSATLTVK  
ALLVHFVRRLRSKEATEGDTTTLQCELSKAAPVEWRKGTETLRDGD RYSLKQDGAVCELQIRSLTIADAGEYL  
CTCGQEKTSATLTVRALPAKFKDSLKNEEATEGTTATLSCELSKAAPVTWKKGPKTLQSGDKYVLRQDGAVCG  
LQIHGLTMADAGEYSCVCGQEKTSATLTVRGLPAKFIEDLRSQEATEGATAILRCELSKAAPVEWRK GSETLK  
DGD RYTLRQDGAVCELQIRGLAVVDTGTYS SLPKFTTEGLRNEEATEGTMATLRCQMSKAAPVEWRK GSETLR  
DGD RYILRQDGAMCELQIRGLTIEDSGEYTCVCGQEKTSATLSVKALPSRFIEDLRSQEATEGTMATLRCQMS  
KTAPVEWKKGSETLRDGG RYSLRQDGPVCELQICDLAVEDAGEYSCVCGQEKTSATLSIKALPPRFIEDLRSQ  
EATEGTMATLRCQMSKAAPVEWRK GSETLGDGG RYSLRQNGAVCELQIHDLAVEDTGEYSCVCGQEKTSATLN  
VKALPPRFIEDLRSQEATEGTMATLRCQMSKAAPVEWRK GSETLRDGG RYSLRQDGAVCELQIHDL DVEDAGQ  
YSCVCGQEKTSATLTVDALPPKFTTEGLKKEEATEGTMVTLRQMSKEATVEWRKGAKTLS DGG RYSLRQDGAM  
CELQICGLAVEDAGEYSCVCGQEKTSATLSVKALPPRFIEDLRSQEATEGTMATLRCQMSKAAPVEWRK GSET  
LRDGD RYSLRQDGAVCELQIRDLAVEDAGEYLCVCGQEKTSATLSVKALPPRFIEDLRSQEATEGTMATLRCQ  
MSKAAPVEWRK GSKTLR DGD RYSLRQDGAMCELQICDLAVEDTGDYSCVCGQEKTSATLSVKALPPRFIEDLR  
SQEAREGTVATLRCRMSKAAPVEWRK GSETLKDGD RYSLRQEGNLCELQIRDLAVEDTEEYSCVCGQEKTSAT

LSVKALPAKFIEDLRSQEAPESSTVTLRCKLSKKASVVKKGSSETLRNGARYSLRQDGAUCELEIRDLTVEEDT  
GEYSCTCGQERTSATLSIMAPQVVFQOPLQNLQAEEGSMASLRCELSVPNAAMVWSKGGLELQGDTRREARQQ  
GCVAELLLRDLRREDAGEYSCTCGSQTTSATLMVTAAPVRFRELQAQDVDEGATARLRCELSREAVSVEWRK  
GSLQLFPCAKYQMVQEGTTAELLVHGVEQEDAGEYTC DAGHTQS IARLSVRAPKPKFKTDLQSTEQEAGGTAR  
LCCQLSEAEPTPVQWLKEGVELHVGSKYEMRRQGAVCELLIHGLEAKDTGEYACLGGQKTLASLRVKEPEV  
TIVRGLVDMEVQADEDEFTCKVSQAGATDVQWHLQGLPLQSNVEVAVLADGCTHVLQKGVTLLEDAGTVS  
FHVGGSSSAQLTVRVPEVTVLEPLKDVQLSEGQDAHFRCRLSRASGQEARWALGGVPLQCNEMNDITVEQGT  
LYLLTLHKVTLEDAGTITLQVGSSEEAQLKVTAKNTVLRGLENVDALEGGALFECQLSQPEVAHAHTWLLDD  
EPVHTSEKVEVVYFENGLRHLLLLKLNKPKQDSCRVTFLAGDVVTSAFVTVRGWRLEVEPPHDSVVKAGMQVR  
FTCII LSEAVPVGEATWYINGAAIQPDDTDWTVTTDGSHHALTLSNAQPQHAGEVTF AARDAVASARLSVLALP  
DPPEDAEEVGRSDHSVTLVSWVAPMSDGGGGLCGYRVMKEASTGQWQLCHDLVPGPECVDDLVPGKTYRFRV  
AAVGPAGAGEPVHLPQMVKIAPAPAPAPAPAPAPAPETRQAVVGEDICLELEVAADGGEVVWHKGTERTIQPGG  
HFEVLSRGRQMLVIKGFRTEDQGEYRCGPIQGLPSSGAATFNVVMTSGSGDEVPAQPSLPPEAAQEGDLHLL  
WEALARKRRMSREPTLDSISELPEEDSRVQHLRQEAETAPDLSEGYSTADELARTGEADLSHTSSDDESRAG  
TPSLVTYLLKAGGPGISPLASKHEAQVTTSVKPKQKQEPVVPVTCPPPGDLSAADLMDPSLDKAAVKIQAAFKG  
YKVRKEMKQOEGPVFSRTFGDTEAQVGDVLRLECVLATKTDMRACWLKDGIELTDGRHYHIDQLKDGTCSSLLV  
TGLAPTDSGRYTCQVAFKSGRVSHSACVVVSGTESEAESSSGGELDDAFRRAARRLHRLFRTKSPAELSEEEEL  
FLSADEGPEPEEPADWQTYREDEFVFCIRFESLAEARQAVTCFRNMFATMGIGVEISLGEQGRPVEMRIGK  
VAPTVPAPVPLAKTPGLQTSDAAPVFLTELQNDVQDGYPMSFDCVVTGQPVPSVRWFKDGKLLLEDDHYMIN  
EDQQGGHQLIITAVVPADMGVYRCLAENSMGVSSTKAELRVELTSTDYDTAADATETSSYFSAQGYLSSREQE  
GTESDEGQLPQVLEELKDLQVAPGTRLAKFQLKVKGYPAKLYWFKDGQPLTSDHIRMTDKKTLHTLEIVSV  
TREDSGQYAAIYISNAVGAAYSSARLLVRGPSEPEEKPASDVHERLVPRILEKFTPKKVKRGSSTFVSVKVEG  
HPAPSVHWLKEEAKEKGLVWIGPDTPGYTMASSSKQHSVLVDVGRQHGGTYTCIATNPAGQALCSASLHISGL  
AKEEEQERVKEALISSFLQGTSAQVSAQMSSEAGFADLVGQSKGESLVAEEAHSHLSLAEVGTTEEFLQKLTSSQ  
ITEMVSAKISQAKLQVPGGDSDEETKTPSASPRHGRSRPSSSVQESSSESEDGDSRGEIFDIYVVTADYLPLG  
AEQDAIILREGQYVEVLDSAHPLRWLVRTKPKSSPSRQGWVSPAYLDKRLKLSPEWGPTEAPEFPGEAVSED  
EYRTRLSSVIQELLSEQAFVGLQFLESHHMKHLERSPRVPAAVASQKTVIFRNVQDISHFHSSFLKELQGC  
GTDDDVAMCFIKNQEAFAKEYLEFLVGRVQAESVVVSTPVQEFYKKYAEETLSAKDPTQPPPPPLQHYLEQVVE  
RVQKYQALLKELIRNKARNRQNCALLEQAYAVVSALPQRAENKLVSLMENYPGTLEALGEPHQGHFVWEG  
APGARMPWKGNHRHVFVLFNRNYLVICKPRRDSRTDTFSYVFRNMMKLSSIDLNDQVEGDDRAFEVWHEREDESVR  
KYLQARTVIKNSWVKEICGIQQRQAQPVWRPPEFEELADCTAELGETVKKLACRVTGTPKPIVSWYKDGKP  
VEVDPHHILIEDPDGSCTLIIDNLTGIDSGQYMCFAASAAGNASTLGKILVQVPPRFVNVKVRATPEVEGEDAQ  
ITCTVEGAPYPQIRWYKDGTLAPGNRYRMLNEPRSGVLVLIQAASKEDLGHYECELVNLRLGSTRGGGELYM  
QSPALRARDQHHREQIVAAVEVTEQETKVPKKTVIIEETITTVVKS PRGRRQSPGKSPSRSPRRSASPRRPG  
LLAPERLYPPGTSPRRLEVEQGRKAPVPALYVTEAEVHAPASQSOPKWLEVEETIEVRVKKTGSRGASPVRE  
MTRSREGILFTLPGGI PGRDPNANNSNNKSVYQEARTWGPVAVVHVEGEPFIQVDSVGNVDWVAASPEPEQVRA  
SQKEENTERQEGCSDGIDENTFLMEEPQDQDLSLQGRDPKILTHNGRVLTLADLEDYVPQEGETFQCGDSTPSTP  
DEPPCEVSVLQREISEPTVGGQPVLLNVGRPPGTGATPSFFRPGSQVHSPESVSVFLLREAWSGPVSAAPWTSSSF  
HTHVQSSVDGSHGSFKTEVSTQTVSFGAVGETVTLHIDPDGGEAPGPSQG\*

>rs49663840\_ENSMUSP00000020732\_c.12262:G>T\_p.S4088I  
ENSMUST00000020732.13|Obscn-201|ENSMUSG00000061462|-|chr11:g.58953592:C>A  
MDHSFSGAPRFLTRPKAFVSVGKDATLSCQIVGNPTPHVSWEKDRQVPEAGARFRLAQDGDVYRLTILDLAL  
GDSGQYVCRARNAIGEAFAAVGLRVDSEGTCAEQAPHFLLRPTSIRVREGADATFRCRVGGSPQPAVSWSKDG  
RRLGPPDAPHVRVEEHGESSALRIR SARPRDGGTYEVRAENPLGSASAAAALVVDSDAEVAGPPGTSTATLLA  
HLQQRREAMRAEGIPSPPPGAGTRTCTVTEGKHARLSCFVTEGPKPETVWKKDGQLVTEGRRHVVEDEQENF  
VLKILFCKQSDRGLYTCTASNLVGQTYSSVLVVREPTVPFKKRLQDLEVREKESATFQCEVAQPATEAAWFK  
EETRLWASAKYDIEEEGETERRLTVRNVSADDDAVYICETTEGSRVVAELSVQGNLTKLPRKTAVRTGDTAIF  
WVELAVPEGPVRWRNQEEMVAGGRVAITAEGTCHTLTIFQCTLEDMGEVAFVSGGCRTTTQFCVSAAPRRPPL  
YPPADPVVKAKTESSVTLVSWAPPHGDRPVTIDGYVLEKRKLGAYAWSRCHEAGWLATTEFTITGVAAEGDFQ  
FRVSAINHFGQGPYLEFPGMTMLVPLAVKTPKAVEAVEGGEVTFVSDLTVASSGEWFLDGEALKASSIYVI  
RCDRTRHMLTIREVPARLHGAQLKFVANGIETSIQMVVRAALGLPSSKLPAAAAAREVLAQLHEEAQLLAEVSD  
QAAAVTWLKDGRELSLGPKEYMQVSAGRRALLVRDVAQDDAGLYECVSRGSRRTAYQLLVQDITDGYRDWGPAG  
PQKHMCKCAGAKIARYLGSACYRFLQYDKGVVHWLEAALDTRQKGTSSCSLHEKPKLVFAKQQAHSEVKA  
AGNSATLSCEVTAQTEVTFWKDGGKLSSSSKVRMEASGCSRRLLVVQQAGKADAGEYSCEAGGQKLSFRLDVA  
EPKLVFAKQQAHSEVKAEGASATLSCEVAQAQTEVTFWKDGGKLSSSSKVRMEASGCSRRLLVVQQAGKADA  
GEYSCEAGGQKLSFRLDVAEPMVFAKEQQARSEVKAEGASATLSCEVAQAQTEVTFWKDGGKLSSSSKVRM  
EASGCSRRLLVVQQAGKADAGEYSCEAGGQKLSFRLDVTEPKLVFAKEQQARSEVKAEGVNSATLSCEVAQAQ  
EVTWFKDGGKLSSSSKVRMEASGCSRRLLVVQQAGKADAGEYSCEAGGQKLSFRLDVAEPMVFAKEQQARSEV

KAEAGNSATLSCEVAQAQTEVTFWKDGKLLSSSSKVRMEASGCSRRLVVQQAGKADAGEYSCEAGGQKLSFHL
DVTEPKLVFAKEQQAHSEVKAEAGASATLSCEVAQAQTEVTFWKDGKLLSSSSKVRMEASGCSRRLVVQQAGK
ADAGEYSCEAEGQKLSFRLDVAEPKLVFAKEQQARSEVKAEAGASATLSCEVAQAQTEVTFWKDGKLLSSSSK
VRVEASGCSRRLVVQQAGKADAGEYSCEAGGQKLSFRLDVAEPKLVFAKEQQANSEVKAEAGASATLSCEVAQ
AQTEVTFWKDGKLLSSSSKVRVEASGCSRRLVVQQAGKADAGEYSCEAGGQKLSFRLDVAEPKLVFAKEQQAH
SEVKAEAGASATLSCEVAQAQTEVTFWKDGKLLSSSSKVRVEASGCSRRLVVQQAGKADAGEYSCEAGGQKLS
FRLDVAEPKLVFAKEQQAHSEVKAEAGASATLSCEVAQAQTEVTFWKDGKLLSSSSKVRVEASGCSRRLVVQQ
AGKADAGEYSCEAGGQKLSFRLDVAEPKLVFAKEQQAHSEVKAEAGASATLSCEVAQAQTEVTFWKDGKLLSS
SSKVRVEASGCSRRLVVQQAGKADAGEYSCEAGGQKLSFRLDVAEPKLVFAKEQQAHSEVKAEAGASATLSCE
VAQAQTEVTFWKDGKLLSSSSKVRVEASGCSRRLVVQQAGKADAGEYSCEAGGQKLSFRLDVAEPKLVFAKEQ
QAHSEVKAEAGASATLSCEVAQAQTEVTFWKDGKLLSSSSKVRVEASGCSRRLVVQQVQKADAGEYSCEARGQ
KLSFRLDVADTRLMFAKEQQARTEVKAEAGNSATLSCEVAQAQTEVTFWKDGKLLSSSSKVRVEASGCSRRLV
VQQAGKADAGEYSCEAGGQKLSFRLDVAEAEESQIPERPSRREPLVVKEHETIILTATIAAPSVAAVTWLKDG
V EIRRSKRHEATSLGDTHTLTVRGAQVLDSAIYSCRVGKEGQDFPVQVEEVAAKFSKPLEPVEGELGGTVMLVC
ELSPQAEVWRCGNTQLRPGKRFQMTSEGPRRTLTVSGLREDDAEYVCESRDDRTSARLTVKVPVVKFTS
GLSAMVAEEGQEAATFQCVVSPDAGVTWYKDGMLQPSKFKVMVESGASRSLTILGLTLEDAGQVTEAEAGAS
SSAALRVREAPVLFKKKLEPQTVERTSVTLEVELTRPWEVKWTRNAAVLTPSENVEIRAEGARHCLVLRVSV
GFADRGFFGCETPDDKTQAKLNVEMRQVRLVRLVGLQEVEAKEQGTASMDVELSHAEEVGSVTRDGLRLQPGPKC
HLAVQGPVHILTLALSALQPQDSGLVAFRAEGVHTSARLIVTELPSVSTRVLQDQVATQKEKVTLECELSRPVDV
RWLKDGVLELRAGKAIIGIVAQGTCSRSLVIYRCETGDQGVYVCDALDAQTSASLRVQGRTYTLIFRRLAEDAGE
VKFVAENAESRAHLRVKELPVTLLRPLRDKIAMEKHRGVLECCQVSRASAQVRWFKGGVELQSGPKYEVVSDGL
YRKLVINVDQPEDEDTYTCDAGNVKTSAQFFVVEQSITIVRGLKDMTVMEPAPAWFECETSIPSVRPPKWL
KTVLQAGGNVGLQDGTVHRLTLHKTCSTMTGPVHFTIGKSRSSAQLVVSDIPVVLTRPLEPKAGRELQSVVL
SCDFRPAPKAVQWYKDDTPLSPSEKFKMALEGQMAELRILRLTPADAGVYRCQAGSAQSSAEVTEAREVTVI
QPLQDAEAMEEGRVCFSCELSHKDEDIEWSLNGTPLYNDSFHEISHGCLHTLVLSKSVRQADTGTVCATSPKV
SVSARLVVKGKPVVFLKALDDVSAEERGTLLTQCEVSDPEARVVWRKDGVELGSPDQYDFLHKAGARGLTVHD
LSHEDAGLYTCQVSKTQSKVSVHDLHVGITKRLKTVEVLEGESECSFECVLSHESPSDPAVMTVGGKTVGGS
GHFHAVRQGRKYTLTVKDAALSDAGEVVSVLGLTSLKASLIIRERPVDTKPLEDQRTTLGEDVMLSCELSRA
GTSVRWLKDGKAIRKSQKYDLLSEGTRAVLVVRKASLKDSGEYTCETEASKSTAKLCVEEKANRFTTEELADLQ
VEEKGRAVFTCKTEHPASVVTWRKGLLELRASGKHVPSQEGTLTKLTINALERTSDTYTCDIGQARTQARLL
VHGQKVRVIEDLEDTAVQEGSSAKFCRIAPADYGPVHWFLDKTPLHSNELNEITVQPGGYHVLTLRQLALKD
SGTVYFEAGDQRTSAALRVTEKPSIFSRPLTDVTVTEGEDTLVCETTTVDSVSRWTKDGKTLRPSARCQLSH
EGCQAQLLITATTPQDGGRYKCEIGGASSSSIVRVHALPVRFRESLKDVEVPEGKAATLRCVLSVVAAPVEWR
HGDDVLKSSNKYSLRQEGAVLELVIRDLPQDQSGQYSCSFGDQTTSATLTVKTSQAQFVGLRKNKEATEGTTV
TLRCELTKAEAPVEWKKGTETLRNGDKYSLKQDGAVALCELIQCSLLVADAGEYSCVCGQEKTSATLTVKALLVHF
VRRLRSKEATEGDTTTLQCELSKAAPVEWRKGTETLRDGDYSLKQDGAVALCELIQIRSLTIADAGEYLCTCGQE
KTSATLTVRALPAKFKDSLKNEEATEGTTATLSCELSKAAPVTWKKGPKTLQSGDKYVLRQDGAVALCELIQI
HGLTMADAGEYSCVCGQEKTSATLTVRGLPAKFIEDLRSQEATEGATAILRCELSKAAPVEWRKGSSETLKDGD
RYTLRQDGAVALCELIQIRGLAVVDTGTYSSLPTKFTTEGLRNEEATEGTMATLRCQMSKAAPVEWRKGSSET
LRDGDYTLRQDGAVALCELIQIRGLTIEDSGEYTCVCGQEKTSATLSVKALPSRFIEDLRSQEATEGTMATLRC
QMSKTAPEVWKKGSETLRDGGRYSLRQDGPVCELQICDLAVEDAGEYSCVCGQEKTSATLSIKALPPRFIEDL
RSQEATEGTMATLRCQMSKAAPVEWRKGSSETLGDGGRYSLRQNGAVCELQIHDLAVEDTGEYSCVCGQEK
TSATLNVKALPPRFIEDLRSQEATEGTMATLRCQMSKAAPVEWRKGSSETLRDGGRYSLRQDGAVALCELIQI
HDLVEDAGQYSCVCGQEKTSAVLTVDALPPKFTTEGLKKEEATEGTMVTLRQMSKEATVEWRKGAKTLDGGRY
SLRQDGAVALCELIQICGLAVEDAGEYSCVCGQEKTSATLSVKALPPRFIEDLRSQEATEGTMATLRCQMSKA
APVEWRKGSSETLRDGDYSLRQDGAVALCELIQIRDLAVEDAGEYLCVCGQEKTSATLSVKALPPRFIEDLRS
QEATEGTMATLRCQMSKAAPVEWRKGSSETLKDGDYSLRQEGNLCELQIRDLAVEDTEEYSCVCGQEKTSAT
LSVKALPAKFIEDLRSQEAPESSTVTLRCKLSKKASVVWKKGSETLRNGARYSLRQDGAVALCELIQIRDLT
VEDTGEYSCTCGQERTSATLSIMAPQVVFPQPLQNLQAEEGSMASLRCELSVNAAMVWSKGGLELQGDTRR
EARQQGCVAELLLRDLRREDAGEYSCTCGSQTTSATLMVTAAPVRFRLRELQAQDVEGATARLRCELSREAVS
VEWRKGSLLQPCAKYQMVQEGTTAELLVHGVEQEDAGEYTCDAHTQSIARLSVRAPKPKFKTDLQSTEQEAG
GTARLCCQLSEAEFGTPVQWLKEGTEVLHVGSKYEMRRQGAVALCELIHGLEAKDTGEYACLVGGQKTLASL
RVKEPEVTIVRGLVMEVQADEDEVEFTCKVSOAGATDVQWHLQGLPELLISNEVTEVAVLADGCTHVLQLKGV
TLLEDAGTVSFHVGGSSSAQLTVRVPEVTVLEPLKDVQLSEGQDAHFRCRLSRASQGEARWALGGVPLQCNE
MNDITVEQGTLYLLTLHKVTLLEDAGTITLQVGSSESQAQLKVTAKNTVLRGLENVDALLEGGEALFECQLS
QPEVAHAHTWLLDDEPVHTSEKVEVVYFENGLRHLLLLKNLKPQDSCRVTFLAGDVVTSFAFLTVRGRW
RLEVLPPHDASVKAGMQVRFCTILSEAVPVGEATWYINGAAIQPDDTDWTVTTDGSHHALTLNSAQPQHAGE
VTFAAARDAVASARLSVLALPDPEDA

EVVGRSDHSVTLWSVAPMSDGGGGLCGYRVMKEASTGQWQLCHDLVPGPECVVDDLVPKTYRFRVAAVGPA  
 GAGEPVHLPQMVKIAPAPAPAPAPAPAPAPAPETRQAVVGEDICLELEVAADGGEVVWHKGTERTIQPGGHFEVLS  
 RGQRQMLVIKGFRTEDQGEYRCGPIQGLPSSGAATFNVMVMTSGSGDEVPAQPSLPPEAAQEGDLHLLWEALAR  
 KRRMSREPTLDSISELPEEDSRVQHLRQEAETAPDLSEGYSTADELARTGEADLSHTSSDDESRACTPSLVT  
 YLKKAGGPGISPLASKHEAQVTTSVKPKQKQEPVPTCP PGDLAADLMDPSLDKAAVKIQAAFQYKVRKE  
 MKQQEGPVFSRTFGDTEAQVGDVLRLECVLATKTDMRACWLKDGIELTDGRHYHIDQLKDGTCSSLVVTGLAPT  
 DSGRYTCQVSTKSGRVSHSACVVVSGTESEAESSSGGELDDAFRAARRLHRLFRTKSPAELSEELFLSADE  
 GPGEPEEPADWQTYREDEFVFCIRFESLAEARQAVTCFRNMFATMIGVEISLGEQGRGVEMRIGKVAPTVT  
 PAVPLAKTPGLQTSDAAPVFLTELQNDVQDGYPMSFDCVVTGQVPVSVRWFKDGKLEEDDHVMINEDQQGG  
 HQLIITAVVPADMGVYRCLAENSMGVSSSTKAELRVELTSTDYDTAADATETSSYFSAQGYLSSREQEGTESDE  
 GQLPQVLEELKDLQVAPGTRLAKFQLKVKGYPAKLYWFKDGGPLTSDHIRMTDKKTLHTLEIVSVTREDSG  
 QYAAIYISNAVGAAYSSARLLVRGPSEPEEKPASDVHERLVPPRILEKFTPKKVKRGSSITFSVKVEGHPAPSV  
 HWLKEEAKEKGVLWIGPDTPGYTMASSSKQHSLLVLDVGRQHQTTCIATNPAGQALCSASLHISGLAKEEEEQ  
 ERVKEALISSFLQGTSAQVSAQMSSEAGFADLVGQSKGESLVAEEAHSHLSLAEVGTTEFLQKLTSTQITMVS  
 AKISQAKLQVPGGDSDEETKTPSASPRHGRSRPSSSVQESSSESEDGDSRGEIFDIYVVTADYLPGLAEQDAI  
 ILREGQYVEVLDSAHPLRWLVRTKPTKSSPSRQGWVSPAYLDRKRLKLSPEWGPTEAPEFPGEAVSEDEYRTRL  
 SSVIQELLSSEQAFVGEFLQFLESHHMKHLERSPRVPAAVASQKTVIFRNVQDISHFHSSFLKELQCGCTDDDV  
 AMCFIKNQEAFAEKYLEFLVGRVQAESVVVSTPVQEFYKKYAEETLSAKDPTQPPPPPLQHYLEQPVVERVQKYQ  
 ALLKELIRNKARNRQNCALLEQAYAVVSALPQRAENKLVSLMENYPGTLEALGEPHQGHFIVWEGAPGARM  
 PWKGHNHRVFLFRNYLVICKPRRDSRTDTFSYVFRNMMKLSSIDLNDQVEGDDRAFEVWHEREDSVRKYLLQA  
 RTVIKNSWVKEICGIQQLAQPVWRPPEFEEELADCTAELGETVKLACRVTGTGPKPIVSWYKDGKPVVEVDPH  
 HILIEDPDGSLTILDLNLTGIDSGQYMCFAASAAGNASTLGKILVQVPPRFVNVKVRATPFVEGEDAQITCTVE  
 GAPYQIRWYKDGTLTLLAPGNRYRMLNEPRSGVLVVIQAASKEDLGHYECELVNRLGSTRGGGELYMQSPALR  
 ARDQHHREQIVAAVEERRPSP\*

>rs49663840\_ENSMUSP00000151217\_c.10618:g>T\_p.S3540I  
 ENSMUST00000219084.3|Obscn-207|ENSMUSG00000061462|-|chr11:g.58953592:C>A  
 MDHSFSGAPRFLTRPKAFVVSVGKDATLSCQIVGNPTPHVSWEKDRQPVEAGARFLAQDGDVYRLTILDLAL  
 GDSGQYVCRARNAIGEAFAAVGLRVDSEGTCAEQAPHFLLRPTSIRVREGADATFRCRVGGSPQPAVSWSKDG  
 RRLGPPDAPHVRVEEHGESSALRIRSARPRDGGTYEVRAENPLGSASAAAALVVDSDAEVAGPPGTSTATLLA  
 HLQORREAMRAEGIPSPPGAGTRTCTVTEGKHARLSCFVTGEPKPEVWKKDQGLVTEGRRHVVEDEQENF  
 VLKILFCKQSDRGLYTCTASNLVGQTYSSVLVVVREPTVPFKKRLQDLEVREKESATFQCEVAQPAEAWFK  
 EETRLWASAKYDIEEEGTERRLTVRNVSADDDAVYICETTEGSRVAELSVQGNLTKLPRKTAVRTGDTAIF  
 WVELAVPEGPVRLRNQEEMVAGGRVAITAEGTCHTLTI FQCTLEDMGEVAFVSGGCRTTTTQFCVSAPRRPPL  
 YPPADPVVKAKTESVTLWSAPPHGDRPVTIDGYVLEKRLKLGAYAWSRCHEAGWLATTEFTITGVAEEGDFQ  
 FRVSAINHFGQGPYLEFPGTMHLVPLAVKTLKVAEAVEGGEVTFVSDLTVAASSGEWFLDGEALKASSIYVI  
 RCDRTRHMLTIREVPARLHGAQLKFFVANGIETSIQMVVRAALGLPSSKLPAAAAAREVLAQLHEEAQLLASLSD  
 QAAAVTWLKDGRELSLGPKYEMQVSAGRRALLVRDVAQDDAGLYECVSRGSRRTAYQLLVQDITDGYRDWGPAG  
 PQKHMCKCAGAKIARYLGSSCYRFLQYDKGVWHLEAALDTRQKGTSSCSLHEKPKLVFAKQQAHSEVKA  
 AGNSATLSCEVTQAQTEVTWFKDGKLLSSSSKVRMEASGCSRRLVVQQAGKADAGEYSCEAGGQKLSFRLDVA  
 EPKLVFAKQQAHSEVKAEGASATLSCEVAQAQTEVTWFKDGKLLSSSSKVRMEASGCSRRLVVQQAGKADA  
 GEYSCEAGGQKLSFRLDVAEPKMVFAKEQQARSEVKAEGASATLSCEVAQAQTEVTWFKDGKLLSSSSKVRM  
 EASGCSRRLVVQQAGKADAGEYSCEAGGQKLSFRLDVTEPKLVFAKEQQARSEVKAEGASATLSCEVAQAQ  
 EVTWFKDGKLLSSSSKVRMEASGCSRRLVVQQAGKADAGEYSCEAGGQKLSFRLDVTEPKLVFAKEQQAHSEV  
 KAEAGASATLSCEVAQAQTEVTWFKDGKLLSSSSKVRMEASGCSRRLVVQQAGKADAGEYSCEAGGQKLSFRL  
 DVAEPKLVFAKEQQARSEVKAEGASATLSCEVAQAQTEVTWFKDGKLLSSSSKVRMEASGCSRRLVVQQAGK  
 ADAGEYSCEAGGQKLSFRLDVAEPKLVFAKEQQANSEVKAEGASATLSCEVAQAQTEVTWFKDGKLLSSSSK  
 VRVEASGCSRRLVVQQAGKADAGEYSCEAGGQKLSFRLDVAEPKLVFAKEQQAHSEVKAEGASATLSCEVAQ  
 AQTEVTWFKDGKLLSSSSKVRVEASGCSRRLVVQQAGKADAGEYSCEAGGQKLSFRLDVAEPKLVFAKEQQAH  
 SEVKAEGASATLSCEVAQAQTEVTWFKDGKLLSSSSKVRVEASGCSRRLVVQQVQKADAGEYSCEARGQKLS  
 FRLDVAEAESQIPERPSRREPLVVKHEHETIILTATIAAPSVAAVTWLKDGVEIRRSKRHEATSLGDTHTLTVR  
 GAQVLDASAIYSCRVGKEGQDFPVQVEEVAAKFSKPLEPVEGELGGTVMLVCELSPEQAEVVWRCGNTQLRPGK  
 RFQMTSEGPRRTLTVSGLREDDAEYVCESRDDRTSARLTVKVPRVVKFTSGLSAMVAEEGQEAFTQCVVSPS  
 DAGVTWYKDMGLQLPSEKFMVVEGASRSILTILGLTLEDAGQVTEAEGASSAALRVREAPVLFKPKKLEPQT  
 VEERTSVTLEVELETRPWPVEVKWTRNAAVLTPSENVEIRAEGARHCLVLRVSVGFADRGVFRECETPDDKTQAKLN  
 VEMRQVRLVLRGLQVEVAKEQGTASMDVELSHAEEVGSWTRDGLRLQPGPKCHLAVQGPVHILTLALQPDQSG  
 LVAFRAEGVHTSARLIVTELPVSFTRVLQDVVATQKEKVTLECELSRPVDVRLKDGVELRAGKAI GIVAQGT  
 CRSLVIYRCETGDQGVYCDALDAQTSASLRVQGRYTLIFRRVLAEDAGEVKFVAENAESRAHLRVKELPVT  
 LLRPLRDKIAMEKHRGVLECCQVSRASAQVRWFKGGVELQSGPKYEVVSDGLYRKLVIINDVQPEDEDYTC DAG

NVKTSAQFFVVEEQSITIVRGLKDMTVMPEPAPAWFECETSIPSVRPPKWLLGKTVLQAGGNVBLEQDGTVHRLT
LHKTCSTMTGVPVHFTIGKSRSSAQLVVSIDI PVVLRTRPLEPKAGRELQSVVLSCDFRPAPKAVQWYKDDTPLSP
SEKFKMALEGQMAELRILRLTPADAGVYRCQAGSAQSSAEVTVEAREVTVIQPLQDAEAMEEGRVCFSCELSH
KDEDIEWSLNGTPLYNDSFHEISHEGCLHTLVLKSVRQADTGTVCATSPKVSVSARLVVKGKPVVFLKALDDV
SAEERGTTLTQCEVSDPEARVVWRKDGVELGPSDKYDFLHKAGARGLTVHDLSHEDAGLYTCQVGSKETQSKV
SVHDLHVGITKRLKTVEVLEGESECSFECVLSHESPSDPAVWTVGGKTVGGSGHFHAVRQGRKYTLTVKDAALS
DAGEVVFVSVLGLTSSKASLIIRERPVDTIKPLEDQRTTLGEDVMLSCELSRAGTSVRWLKDGKAIKRSQKYDLL
SEGTRAVLVVRKASLKDSGEYTCETEASKSTAKLVCVEEKANRFTTELADLQVEEKGRAVFTCKTEHPASVVWTW
RKGLLELRASGKHVPSQEGTLTKLTINALERTSDSTYTCDIGQARTQARLLVHGQKVRVIEDLEDTAVQEGSS
AKFCCRIPADYGPVHWFLDKTPHLSNELNEITVQPGGYHVLTLRQLALKDSGTVYFEAGDQRTSAAALRVTEK
PSIFSRPLTDVTVTEGEDTLVLCETTTVDSSVRWTKDGKTLRPSARCQLSHEGCAQLLITATTPQDGGRYKC
EIGGASSSSIVRVHALPVRFRFRESLKDVEVPEGKAATLRCVLSVAAPVEWRHGDDVLKSSNKYSLRQEGAVLE
LVIRDLQPDQSGQYSCSFGDQTTSATLTVKTSQAQFVGLRNKEATEGTTVTLRCELTKEAPVEWKKGTETLR
NGDKYSLKQDGA VCELQICSLLVADAGEYSCVCGQEKTSATLTVKALLVHFVRRRLRSKEATEGDTTTLQCELS
KAAPVEWRKGTETLRDGDYSLKQDGA VCELQIRSLTIADAGEYLCTCGQEKTSATLTVRGLPAKFIEDLRSQ
EATEGATAILRCELSKAAPVEWRKGSSETLKDGDYTLRQDGA VCELQIRGLAVVDTGTYSLSLPTKFTTEGLRNE
EATEGTMATLRCQMSKAAPVEWRKGSSETLRDGDYILRQDGA MCELQIRGLTIEDSGEYTCVCGQEKTSATLS
VKALPPRFIEDLRSQEAETEGTMATLRCQMSKAAPVEWRKGSSETLGDGGYSLRQNGAVCELQIHDLAVEDTGE
YSCVCGQEKTSATLNVKALPPKFTEGLKKEEATEGTMVTLRQMSKEATVEWRKGAKTLSDGGYSLRQDGA M
CELQICGLAVEDAGEYSCVCGQEKTSATLSVKALPPRFIEDLRSQEAETEGTMATLRCQMSKAAPVEWRKGSSET
LRDGDYSLRQDGA VCELQIRDLAVEDAGEYLCVCGQEKTSATLSVKALPPRFIEDLRSQEAETEGTMATLRCQ
MSKAAPVEWRKGSKTLRQDGDYSLRQDGA MCELQICDLAVEDTGDYSCVCGQEKTSATLSVKAPQVVFQOPLQ
NLQAEEGSMASLRCELSVFNAAAMVWSKGGLELQGDTRREARQQGCVAELLLRDLRREDAGEYSCTCGSQTTSA
TLMVTAAPVRFRLRELQAQDVDEGATARLRCELSREAVSVEWRKGSLLQFPKAKYQMVQEGTTAELLVHGVEQE
DAGEYTCDAAGHTQSIARLSVRAPKPKFKTDLQSTEQEAGGTARLCCQLSEAEPGTPVQWLKEGVELHVGSKYE
MRRQGA VCELLIHSLEAKDTGEYACLVGQKTLASLRVKEPEVTIVRGLVDMVEVQADEVTEFKCVSQAGATD
VQWHLQGLPLQSNVEVAVLADGCTHVLQKGVTLVEDAGTVSFHVGGLSSSAQTLTVRVEVTVLEPLKDVQL
SEGQDAHFRCRLSRASGQEARWALGGVPLQCNEMNDI TVEQGTLYLLTLHKVTLLEDAGTITLQVGS CSSEAQL
KVTAKNTVLRGLENVDALEGGEALFECQLSQPEVAHTWLLDDEPVHTSEKVEVVYFENGLRHLKLNKLPQ
DSCRVTFLAGDVVTS AFLTVRGWRLEVLEPPHDASVKAGMQVRFTCILSEAVPVGEATWYINGAAIQPDDTDW
TVTTDGSHHALTLSNAQPQHAGEVTF AARDAVASARLSVLALPDPPEDAEVVGRSDHSVTLSSWVAPMSDGGGG
LCGYRVEMKEASTGQWQLCHDLVPGPECVVDDLVPKTYRFRVAAVGPAGAGEPVHLPQMVKIAPAPAPAPAP
APAPETRQAVVGEDICLELEVAADGGEVVWHKGTERRIQPGGHFEVLSRGRQMLVIKGFRTEDQGEYRCGPIQ
GLPSSGAATFNVVMTSGSGDEVPAPQPSLPPEAAQEGDLHLLEALARKRRMSREPTLDSISELPEEDSRVQHL
RQEAETAPDLSEGTSTADELARTGEADLSHTSSDDESRAGTPSLVTYLKKAGGPGISPLASKHEAQVTTSVK
PQKQQEPVVPTCPPPGDLSAADLMDPSLDKAAVKIQAAFLKGYKVRKEMKQEQEGPVFSRTFGDTEAQVGDVLR
ECVLAATKTDMRACWLKDGIELTDGRHYHIDQLKDGTC SLVTLGLAPTD SGRYTCQVSTKSGRVSHSACVVVSG
TESEAESSSGGELDDAFRRARRLHRLFRTKSPAELSEELFLSADEGPGEPEEPADWQTYREDEFVFCIRFE
SLAEARQAVTCFRNMFMATMGIGVEISLGEQGRGVEMRIGKVAPTVTPAVPLAKTPGLQTS DAAPVFLTELQN
QDVQDGYPMSFDCVVTGQPVPSVRWFKDGKLLLEDDHYMINEDQQGGHQLIITAVVPADMGVYRCLAENSMGV
SSTKAELRVELTSTDYDTAADATETSSYFSAQGYLSSREQEGTESDEGQLPQVLEELKDLQVAPGTRLAKFQL
KVKGYAPAPKLYWFKDGOPLTSDHIRMTDKKTLHTLEIVSVTREDSGQYAAAYISNAVGAAYSARLLVGRPSE
PEEKPASDVHERLVPPRILEKFTPKKVKRGSSITFSVKVEGHPAPSVHVLKKEEAKEGVLWIGPDTPGYTMAS
SKQHSVLVLDVGRQHGTQYTCIATNPAGQALCSASLHISGLAKEEEQERVKEALISSFLQGTSAQVSAQMSSES
AGFADLVGQSKGESLVAEEAHSHLSLAEVGTEEFLLKLTSTQITMVSAKISQAKLQVPGGDSDEETKTPSASP
RHGRSRPSSSVQESSSESEDGDSRGEIFDIYVVTADYLPGLAEQDAIILREGQYVEVLDSAHPLRWLVRTKPT
KSSPSRQGWVSPAYLDKRLKLSPEWGPTEAPEFPGEAVSEDEYRTRLSSVIQELLSSEQAFVGVLELQFLESHM
KHLERSPRVPAAVASQKTVI FRNVQDISHFHSSFLKELQCGCTDDDVAMCFIKNQEAFAFEKYLEFLVGRVQAES
VVVSTPVQEFYKKYAEETLSAKDPTQPPPPPLQHYLEQPVERVQKYQALLKELIRNKARNRQNCALLEQAYAV
VSALPQRAENKLVSLMENYPGTLEALGEP I RQGHFIVWEGAPGARMPWKGNHRVFLFRNYLVICKPRRDSR
TDTFSYVFRNMMKLSSIDLNDQVEGDDRAFEVWHEREDSVRKYLQARTVI IKNSWVKEICGIQQRLAQPVWR
PPEFEEELADCTAELGETVKLACRVGTGPKPIVSWYKDGKPEVDPHHILIEDPDGSC TLI LDNLGTIDSGQY
MCFASAAGNASTLKGILVQVPPRFVNKVRATPFVEGEDAQITCTVEGAPYQIRWYKDGTLTLLAPGNRYRMLN
EPRSGVLVVLVIAASKEDLGHYECELVNRLGSTRGGELLYMQSPALRARDQHHREQIVAAVEVTEQETKVPKK
TVIIEETITTVVKS PRGRRQSPGKSPSRSPSRSSPRRPGLLAPERLYPPGTS PSRRLEVEQGRKAPVPALY
VTEAEVHAPASQSQPKWLEVEETIEVRVKKTGSRGASPVREMTSRGEGILFTLPGGIPGRDPNANNSNKS SVY
QEARTWGPVAVVHVGEPFIFQVDSVGNVDWVAASPEPEQVRASQKEENTERQEGCSDGDENTFLMEEPQD TDSL
QGRDPKILTHNGRVLTLADLEDYVPOEGETF GCGDSTPSTPDEPPCEVSVLQREI SEPTVGGQPVLLNVGRPPG

TGATPSFFRPGSQVHSPESVSFLLREAWSGPVSAAPWTSSFHTHVQSSVDGSHGSFKTEVSTQTVSFGAVGET  
 VTLHIDPDGGEAPGPSQG\*  
 >rs26971817\_ENSMUSP00000158795\_c.11967:A>G\_p.R3990G  
 ENSMUST00000238536.2|Obscn-210|ENSMUSG00000061462|-|chr11:g.58954441:T>C  
 MDHSFSGAPRFLTRPKAFVSVGKDATLSCQIVGNPTPHVSWEKDRQPVEAGARFRLAQDGDVYRLTILDLAL  
 GDSGQYVCRARNAIGEAFAAVGLRVDSEGTCAEQAPHFLLRPTSIRVREGADATFRCRVGSGPQPAVSWSKDG  
 RRLGPPDAPHVRVEEHGESSALRIRARPRDGGTYEVRAENPLGSASAAAAALVVDSDAEVAGPPGTSTATLLA  
 HLQQRREAMRAEGIPSPPPGAGTRTCTVTTEGKHARLSCFVTGEPKPEVTVWKKDGLVTEGRRHVVEDEQENF  
 VLKILFCKQSDRGLYTCTASNLVGQTYSSVLVVREPTVPFKKRLQDLEVREKESATFQCEVAQPAATEAAWFK  
 EETRLWASAKYDIEEEGTERRLTVRNVSADDDAVYICETTEGSRVVAELSVQGNLTKLPRKTAVRTGDTAIF  
 WVAVLAVPEGPVWRWRNQEEMVAGGRVAITAEGTCHTLTI FQCTLEDMGEVAFVSGGCRTTTQFCVSAPRRPPL  
 YPPADPVVKAKTESSVTLWSAPPHGDRPVTIDGYVLEKRKLGAYAWSRCHEAGWLATTEFTITGVAAEGDFQ  
 FRVSAINHFGQGPYLEFPGTMHLVPLAVKTPKAVEAVEGGEVTFVSDTLTVASSGEWFLDGEALKASSIYVI  
 RCDRTTRHMLTIREVPARLHGAQLKFFVANGIETS IQMVVRAALGLPSSKLPAAAAAREVLAQLHHEAQLLAE LSD  
 QAAA VTWLKDGRELSLGPKEYMQVSAGRRALLVRDVAQDDAGLYECVSRGSRTAYQLLVQDITDGYRDWGPAG  
 PQKHMCKCAGAKIARYLGS SCYRFLQYDKGVWHLEAALDTRQKGTSSCSLHEKPKLVFAKQQAHSEVKA  
 AGNSATLSCEVTQAQTEVTWFKDGKLLSSSSKVRMEASGCSRRLVVQQAGKADAGEYSCEAGGQKLSFRLDVA  
 EPKLVFAKQQAHSEVKAEGASATLSCEVAQAQTEVTWFKDGKLLSSSSKVRMEASGCSRRLVVQQAGKADA  
 GEYSCEAGGQKLSFRLDVAEPKMFVFAKEQQARSEVKAEGASATLSCEVAQAQTEVTWFKDGKLLSSSSKVRM  
 EASGCSRRLVVQQAGKADAGEYSCEAGGQKLSFRLDVTEPKLVFAKEQQARSEVKAEGVNSATLSCEVAQAQ  
 EVTWFKDGKLLSSSSKVRMEASGCSRRLVVQQAGKADAGEYSCEAGGQKLSFRLDVAEPKLVFAKEQQARSEV  
 KAEAGNSATLSCEVAQAQTEVTWFKDGKLLSSSSKVRMEASGCSRRLVVQQAGKADAGEYSCEAGGQKLSFHL  
 DVTEPKLVFAKEQQAHSEVKAEGASATLSCEVAQAQTEVTWFKDGKLLSSSSKVRMEASGCSRRLVVQQAGK  
 ADAGEYSCEAEGQKLSFRLDVAEPKLVFAKEQQARSEVKAEGASATLSCEVAQAQTEVTWFKDGKLLSSSSK  
 VRVEASGCSRRLVVQQAGKADAGEYSCEAGGQKLSFRLDVAEPKLVFAKEQQANSEVKAEGASATLSCEVAQ  
 AQTEVTWFKDGKLLSSSSKVRVEASGCSRRLVVQQAGKADAGEYSCEAGGQKLSFRLDVAEPKLVFAKEQQAH  
 SEVKAEGASATLSCEVAQAQTEVTWFKDGKLLSSSSKVRVEASGCSRRLVVQQAGKADAGEYSCEAGGQKLS  
 FRLDVAEPKLVFAKEQQAHSEVKAEGASATLSCEVAQAQTEVTWFKDGKLLSSSSKVRVEASGCSRRLVVQQ  
 AGKADAGEYSCEAGGQKLSFRLDVAEPKLVFAKEQQAHSEVKAEGASATLSCEVAQAQTEVTWFKDGKLLSS  
 SSKVRVEASGCSRRLVVQQAGKADAGEYSCEAGGQKLFRLDVAEPKLMFAKEQQAHSEVKAEGASATLSCE  
 VAQAQTEVTWFKDGKLLSSSSKVRVEASGCSRRLVVQQAGKADAGEYSCEAGGQKLSFRLDVAEPKLVFAKEQ  
 QAHSEVKAEGASATLSCEVAQAQTEVTWFKDGKLLSSSSKVRVEASGCSRRLVVQQVQKADAGEYSCEARGQ  
 KLSFRLDVADTRLMFAKEQQARTEVKAEGNSATLSCEVAQAQTEVTWFKDGKLLSSSSKVRVEASGCSRRLV  
 VQQAGKADAGEYSCEAGGQKLSFRLDVAEAE SQIPERPSRREPLVVKEHETIILTATIAAPSVAAVTWLKDG  
 VEIRRSKRHEATSLDTHLTVRGAQVLD SAIYSCRVGKEGQDFPVQVEEVAAKFSKPLEPVEGELGGTVMLVC  
 ELSPEQAEEVWRCGNTQLRPGKRFQMTSEGPRTTLTVSGLREDDAEYVCE SRDDRTSARLTVKVPVVKFTS  
 GLSAMVAEEGQEATFQCVVSPSDAGVTWYKDGMLQLPSEKFMVVEGASRSRLTILGLTLEDAGQVTEAEGAS  
 SSAALRVREAPVLFKKKLEPQTEVEERTSVTLEVELTRPWPEVKWTRNAAVLTPSENVEIRAEGARHCLVRSV  
 GFADRGFVFCETPDDKTQAKLNVEMRQVRLVVRGLQVEVEAKEQGTASMDVELSHAEEVGSWTRDGLRLQPGPKC  
 HLAVQGPVHILTL SALQPQD SGLVAFRAEGVHTSARLIVTEL PVSFTRVLQDVVATQKEKVTLECELSRPVDV  
 RWLKDGVLELRAGKAIGIVAQGT CRSLVIYRCETGDQGVYVCDALDAQTSASLRVQGRTYTLIFRRVLAEDAGE  
 VKFVAENAESRAHLRVKELPVTLLRPLRDKIAMEKHRGVLECCVSRASAQVRWFKGGVELQSGPKYEVVSDGL  
 YRKLVIN DVQPEDEDTYTC DAGNVKTS AQFFVEEQSITIVRGLKDMTVM EPAPAWFECETSIPSVRPPKWL  
 LGKTVLQAGGNVGLQDGTVHRLTLHKTCSTMTGPVHFTIGKSRSSAQLVVSDIPVVLTRPLEPKAGRELQSVVL  
 SCDFRPAKAVQYKDDTPLSPSEKFKMALEGQMAELRILRLTPADAGVYRCQAGSAQSSAEVTVAEAREVTVI  
 QPLQDAEAMEEGRVCFSCELSHKDEDIEWSLNGTPLYNDSFHEISHEGCLHTLVLSVRQADTGTVCATSPKV  
 SVSARLVVKGKPVVFLKALDDVSAEERGLTLTQCEVSDPEARVVRKDGVELGSPDKYDFLHKAGARGLTVHD  
 LSHEDAGLYTCQVGSKETQSKVSVHDLHVGITKRLKTVEVLEGE SCFECVLSHESPSDPAVWTVGGKTVGGS  
 GHFHAVRQGRKYTLTVKDAALSDAGEVVFVSVLGLT SKASLIIRERPVDITKPLEDQRTTLGEDVMLSCELSRA  
 GTSVRWLKDGKAIRKSQYD LLESEGTRAVLVVRKASLKD SGEYTCETEASKSTAKLCVEEKANRTEELADLQ  
 VEEKGRAVFTCKTEHPASVVTWRKGLLELRASGKHVPSQEGLTLKLTINALERTSDTYTCDIGQARTQARLL  
 VHGGKVRVIEDLEDTAVQEGSSAKFCRIAPADYGPVHWF LDKTPLHSNELNEITVQPGGYHVLT LRQLALDK  
 SGTVYFEAGDQRTSAAALRVTEKPSIFSRPLTDVTVTEGEDTLTVCE TTTVDSSVRWTKDGKTLRPSARCQLSH  
 EGCAQLLITATTPQDGGRYKCEIGGASSSIVRVHALPVRFRRESLKDVEVPEGKAATLRCVLSVAAPVEWR  
 HGDVVLKSNKYSRLRQEGAVLELVIRDLQPQD SGGYSCSFGDQTT SATLTVKTS SAQFVGLRNKEATEGTTV  
 TLRCELTKAEVWKKGTETLRNGDKYSLKQDGA VCELQICSLLVADAGEYSCVCGQEKTSATLTVKALLVHF  
 VRRLSKEATEGDTTTLQCELSKAAPVEWRKGTETLRDGD RYSLKQDGA VCELQIRSLTIADAGEYLCTCGQE  
 KTSATLTVRALPAKFKDSLKNEEATEGTTATLSCELSKAAPVTWKKGPKTLQSGDKYVLRQDGA VCGLQIHGL

TMADAGEYSCVCGQEKTSATLTVRGLPAKFIEDLRSQEATEGATAILGCELSKAAPVEWRKGETLKDGDRTY  
 LRQDGA VCELQIRGLAVVDGTYSLSLPTKFTTEGLRNEEATEGTMATLRCQMSKAAPVEWRKGETLDRDGRYS  
 LRQDGA MCELQIRGLTIEDSGEYTCVCGQEKTSATLSVKALPSRFIEDLRSQEATEGTMATLRCQMSKTAPVE  
 WKKGSETLRDGGRYSLRQDGPVCELQICDLAVEDAGEYSCVCGQEKTSATLSIKALPPRFIEDLRSQEATEGT  
 MATLRCQMSKAAPVEWRKGETLGDGGRYSLRQNGAVCELQIHDLAVEDTGEYSCVCGQEKTSATLNVKALPP  
 RFIEDLRSQEATEGTMATLRCQMSKAAPVEWRKGETLRDGGRYSLRQDGA VCELQIHDLVDVEDAGQYSCVCG  
 QEKTSAVLTVDALPPKFTEGLKKEEATEGTMVTLRCQMSKEATVEWRKGA KTLSDGGRYSLRQDGA MCELQIC  
 GLAVEDAGEYSCVCGQEKTSATLSVKALPPRFIEDLRSQEATEGTMATLRCQMSKAAPVEWRKGETLDRDGR  
 YSLRQDGA VCELQIRDLAVEDAGEYLCVCGQEKTSATLSVKALPPRFIEDLRSQEATEGTMATLRCQMSKAAP  
 VEWRKGSKTLRDGDRTYSLRQDGA MCELQICDLAVEDTGDYSCVCGQEKTSATLSVKALPPRFIEDLRSQEARE  
 GTVATLRCRMSKAAPVEWRKGETLKDGDRTYSLRQEGNLCELQIRDLAVEDTEEYSCVCGQEKTSATLSVKAL  
 PAKFIEDLRSQEAPESSTVTLRCKLSKASVWVKKGSETLRNGARYSLRQDGA VCELEIRDLTVEDTGEYSCT  
 CGQERTSATLSIMAPQVVFQQPLQNLQAEEGSMASLRCELSVPNAAMVWSKGGLELQGDTRREARQQCVAAEL  
 LLRDLRREDAGEYSCTCGSQTTATLMVTAAPVRFLRELQAQDVDEGATARLRCELSREAVSVEWRKGS LQLF  
 PCAKYQMVQEGTTAELLVHGVEQEDAGEYTCDAHTQSIARLSVRAPKPKFKTDLQSTEQEAGGTARLCCQLS  
 EAEPGTPVQWLKEGVELHVGSKYEMRRQGA VCELLIHGLEAKDTGEYACLVGGQKTLASLRVKEPEVTIVRGL  
 VDMEVQADEDEFTCKVSQAGATDVQWHLQGLPLQSNVEVAVLADGCTHVLQKGVTLDEAGTVSFVGGGL  
 SSSAQLTVRVPEVTVLEPLKDVQLSEGQDAHFRCRLSRASQGEARWALGGVPLQCNEMNDITVEQVTHYLLTL  
 HKVTLEDAGTITLQVGS SSEAQLKVTAKNTVLRGLENVDALEGG EALFECQLSQPEVA AHTWLLDDEPVHTS  
 EKVEVVFENGLRHLLLLLKNLKPQDSCRVTFLAGDVVTS AFLTVRGRLEVLLEPPHDASVKAGMQVRFTCILS  
 EAVPVGEATWYINGAAIQPDDTDWTVTTDGS HHALTLSNAQPQHAGEVTF AARDAVASARLSVLALPDPEDA  
 EVVGRSDHSVTL SWVAPMSDGGGGLCGYRVMKEASTGQWQLCHDLVPGPECVDDLVPGKTYFRVA AVGPA  
 GAGEPVHLPQMVKIAPAPAPAPAPAPAPAPETRQAVVGEDICLELEVAADGGEVVWHKGTERRIQPGHFVLS  
 RGQRQMLVIKGFRTEDQGEYRCGP IQGLPSSGAATFNVMVMTSGSGDEVPAQPSLPPEAAQEGDLHLLWEALAR  
 KRRMSREPTLDSISELPEEDSRVQHLRQEA EETAPDLSEGYSTADELARTGEADLSHTSSDDES RAGT PSLVT  
 YLKKAGPGI SPLASKHEAQVTT SVKPKQKQEPVPTCP PPGDLSAADLMDPSLDKAAVKIQAAF KGYKVRKE  
 MKQEGGPVSRFTFGDTEAQVGVDLRLECVLAKTKTDMRACVWLKDGIELTDGRHYHIDQLKDGCTSLLVTLGLAPT  
 DSGRYTCQVSTKSGRVSHSACVVVSGTESEAESSGGELDDAFRRAARRLHRLFRTKSPAELSEELFLSADE  
 GPGEPEEPADWQTYREDENFV CIRFESLAEARQAVTCFRNMFATMGIGVEISLGEQGPGRVEMRIGKVAPTVT  
 PAVPLAKTPGLQTS DAAPVFLTELQNDVQDGYPMSFDCVVTGQPVPSVRWFKDGKLEEDDHVMINEDQGG  
 HQLIITAVVPADMGVYRCLAENSMGVSSTKAELRVELTSTDYDTAADATETSSYFSAQGYLSSREQEGTESDE  
 GQLPQVLEELKDLQVAPGTRLAKFQLKVKGYPA PKLYWFKDQGPLTTSDHIRMTDKKTLHTLEIVSVTREDSG  
 QYAAYSNAVGAAYSSARLLVRGPSEPEEK PASDVHERLVPPRI LEKFTPKVKVRGSSITFSVKVEGHPAPSV  
 HWLKEEA EKGVLWIGPDTPGYTMASSSKQHSVLVLDVGRQHOGTYTCIATNPAGQALCSASLHISGLAKEEQ  
 ERVKEALISSFLQGTSAVSAQMSESA GFADLVGQSKGESLVAEEAHSHLSLAEVGT EEFLOKLTSSQITEMVS  
 AKISQAKLQVPGGDSDEETKTPSASPRHGRSRPSSSVQESSSEEDGDSRGEIFDIYVVTADYLP LGAEQDAI  
 ILREGQYVEVLDSAHPLRWLVRTPKTKSSPSRQGWVSPAYLDRKRLKLSPEWGPTEAPEFPGEAVSEDEYRTRL  
 SSVIQELLSSEQAFV GELQFLESHHMKHLERSPRVPA AVASQKTVIFRNVQDISHFHSSFLKELQCGCTDDDV  
 AMCFIKNQEA FEKYLEFLVGRVQAESVVVSTPVQEFYKKYA EETLSAKDPTQPPPPPLQHYLEQPVERVQKYQ  
 ALLKELIRNKARNRQNCALLEQAYAVVSALPQRAENKLVSLMENYPGTLEALGEP I RQGHFIVWEGAPGARM  
 PWKGHNHRVFLFRNYLVICP PRDRTDFTSYVFRNMMKLSIDLNDQVEGD DRAFEVWHEREDSVRKYLLQA  
 RTVI IKNSWVKEICGIQQLAQPVWRPPEFEEELADCTAELGETVKLACRVTGT PKPIVSWYKDGKPV EVDPH  
 HILIEDPDGSCTLILDNLTGIDSGQYMCFAASAAGNASTLGKILVQVPPRFVNVKVRATPFVEGEDAQITCTVE  
 GAPYPQIRWYKDGTL LAPGNRYRMLNEPRSGVLV LVIQAASKEDLGHYECELVNLRLGSTRGGGELYMQSPALR  
 ARDQHHREQIVAAVEDTSVEGSAHSAQDQADQAA SVLWRLLGSEALGPS PGDLPNTRQSEPPAFEEAASQIP  
 GAASGTPEVSPGTHKLEQETSSSGSQGWTVPIRVEGTAWPGAGTGQLLLDVHSQVIMETTQRTYVCQAPDT  
 GVTRAPSMQVTIEDVQVQVGDMAQF DAVIEGHPPPIV TWYKGSTQLTSSARLSQRQDGT TYSLVLTVDVAPHA  
 GVYTCVANNAGGQVLCKAELLVHGDKLDAENQVYRRKLSHFYDVQEEIGRGVFGFVKRVQHKGNMFCAAKF  
 IPLRSKTRAQAYQERDILATLGHPLVTGLLDQFETRKTILILILELCSSEELLDRLFKKG VVTEAEVKVYIQQL  
 VEGLHYLHSHGILHLDIKPPNILMVHPAREDIKICDFGFAQKITPSEPQYSKYGSPEFVSPEIIEQN PVSEGS  
 DIWAMGVISYLSLTCSSPFAGESDRATLLNVLEGRVSWSSPTAAHLS EDAKDFIKATLQRTPRARPSTSQCLA  
 HPWFLKSMPAEAAHFINTKQLKFL LARSRWRSLMSYKSILVMRSIPELLQGPPDPSPLGVARHLRGEASGAS  
 SSSSSNDLAPFARAKELPPSPVTHSPLLHPRGFLRPSASLPEETEASMP TADA AVPAS PQSAGPPASPGCV  
 PRHSVISNLFYQQAGEAERGNKTS GAKRHPARRRHLKGGYIARALPGLREPLMEYSLLEEEAAREEQASLM  
 TKTPSFETALRLPSSSVREVPGRSHSLDNPPVTTGSP EACEKQLLFPSTGLTHETTAKDRGHKEGFLOESV  
 PFPMSGDSRPGKQEGSSQDSCRGKPASSCHSELGSGSQEGC PPSQSLGSLPPQSLKELSTSCGPLFSEQ  
 PQAAPFPPTQVSPLLGSEKEPQDGS LSEGPVVPVSSPGSASQVDASLDTEGLSEAGDTCDFTPPPQR PQEQAT  
 TRKFSLESRGGYAGVAGYGTFAFGGDAGGMLGQGPLWARMAWAVS QSSEEQDEAATESPQPLES LGPIAEASG

VPLRTPSPSLTPWEEVEQVSLVQIRDLSDGDAEAADTISLSDISEVDPAYLNLSLDYDIKYLPEFEMIFRRVPKPI  
EQPESPGSETEAGQGLADFLLEAAWPWPGLGLRAGLEITEEPEEPGDLEALLGEAAVGRKRKWSPSRGLFQF  
PGRCLSGEEPVELGLRQRVKASMAHISRILKGRPEGPPEPRKKAGLASFRLSGLKGRDQELSDEAVVLGQ  
SVTLACQVLAQPTAQATWSKDGVLLESSGHLISSTLKNFQLLTLVVKKEEDLGTYTCCVSNPLGTAVTGVL  
RKAERPSSSPRPEVGELYKDAVLLVWKPVESCGPVTYIVQCCIEGGSWTTLASDISDCCYLTGKLSRGGMYIF  
RTACVSKAGMGPISSPSEQVLLGGPNHLASEEESRRGRPAQLLPSTKTFAFQMQIRRRGRFSVVRQCREKASGR  
ALAAKIVPYQPEDKTAVLREYEALKRLHHPHLAQLHAAYLSRHLVLIILELCSGPELLPSLAERESYSESDVK  
DYLWQMSATQYLHAQHILHLDLRSNNMMVTEYNLLKVIDLGNQSLDQEKVPAPENFKDYLETMAPELLEGGQ  
GAVPQTDIWAIGVTAIFIMLSGEYPESESEGRDLQKGLRKLIRLSRCYAGLSGGAVAFLOSSLCAQPWGRPCA  
STCLQCGLWTEEGPTGSRPTVTFPTVRLRAFVREKRRRALLYKKNLAQVR\*  
>rs26971817\_ENSMUSP00000038264\_c.11139:A>G\_p.R3714G  
ENSMUST00000047441.14|Obscn-202|ENSMUSG00000061462|-|chr11:g.58954441:T>C  
MDHSFSGAPRFLTRPKAFVSVGKDATLSCQIVGNPTPHVSWEKDRQVEAGARFRLAQDGDVYRLTILDLAL  
GDSGQYVCRARNAIGEFAAVGLRVDSEGTCAEQAPHLLRPTSIRVREGADATFRCRVGGSPPAVSWSKDG  
RRLGPPDAPHVRVEEHGESSALRIRSARPRDGGTYEVRAENPLGSASAAAAALVVDSDAEVAGPPGTSTATLLA  
HLQORREAMRAEGIPSPPGAGTRTCTVTEGKHARLSCFVTGEPKPEPVWKKDQGLVTEGRRHVVEDEQENF  
VLKILFCKQSDRGLYCTASNLVGTYSVSVLVVREPTVFPKRLQDLEVREKESATFQCEVAQPAATEAAWFK  
EETRLWASAKYDIEEGTERRLTVRNVSADDDAVYICETTEGSRVAVELSVQGNLTKLPRKTAVRTGDTAIF  
WVELAVPEGPVWRWRNQEEMVAGGRVAITAEGTCHTLTI FQCTLEDMGEVAFVSGGCRTTTQFCVSAPRRPPL  
YPPADPVVKAKTESSVTLWSAPPHGDRPVTIDGYVLEKRKLGAYAWSRCHEAGWLATTEFTITGVAAEGDFQ  
FRVSAINHFGQGPYLEFPGTMHLVPLAVKTPKAVEAVEGGEVTFVSDLTVASSGEWFLDGEALKASSIYVI  
RCDRTRHMLTIREVPARLHGAQLKRVANGIETSIQMVVRAALGLPSSKLPAAAAAREVLAQLHEEAQLLAE LSD  
QAAAVTWLKDGRELSLGPKEYMQVSAGRRALLVRDVAQDDAGLYECVSRGSRRTAYQLLVQDITDGYRDWGPAG  
PQKHMCKCAGAKIARYLGSscyRFLQYDKGVWHWLEAALDTRQKGTSSCSLHEKPKLVFAKQQAHSEVKA  
AGASATLSCEVAQAQTEVTFWKDGGKLSSSSKVRMEASGCSRRLVVQQAGKADAGEYSCEAGGQKLSFRLDVA  
EPKMVFAKEQQARSEVKAEGASATLSCEVAQAQTEVTFWKDGGKLSSSSKVRMEASGCSRRLVVQQAGKAD  
GEYSCEAGGQKLSFRLDVTEPKLVFAKEQQARSEVKAEGVNSATLSCEVAQAQTEVTFWKDGGKLSSSSKVRM  
EASGCSRRLVVQQAGKADAGEYSCEAGGQKLSFRLDVAEPKLVFAKEQQARSEVKAEGNSATLSCEVAQAQ  
EVTWFKDGGKLSSSSKVRMEASGCSRRLVVQQAGKADAGEYSCEAGGQKLSFHLDVTEPKLVFAKEQQAHSEV  
KAEAGASATLSCEVAQAQTEVTFWKDGGKLSSSSKVRMEASGCSRRLVVQQAGKADAGEYSCEAGGQKLSFRL  
DVAEPKLVFAKEQQARSEVKAEGASATLSCEVAQAQTEVTFWKDGGKLSSSSKVRVEASGCSRRLVVQQAGK  
ADAGEYSCEAGGQKLSFRLDVAEPKLVFAKEQQANSEVKAEGASATLSCEVAQAQTEVTFWKDGGKLSSSSK  
VRVEASGCSRRLVVQQAGKADAGEYSCEAGGQKLSFRLDVAEPKLVFAKEQQAHSEVKAEGASATLSCEVAQ  
AQTEVTFWKDGGKLSSSSKVRVEASGCSRRLVVQQAGKADAGEYSCEAGGQKLSFRLDVAEPKLVFAKEQQAH  
SEVKAEGASATLSCEVAQAQTEVTFWKDGGKLSSSSKVRVEASGCSRRLVVQQAGKADAGEYSCEAGGQKLS  
FRLDVAEPKLVFAKEQQAHSEVKAEGASATLSCEVAQAQTEVTFWKDGGKLSSSSKVRVEASGCSRRLVVQQ  
AGKADAGEYSCEAGGQKLFRLDVAEPKLVFAKEQQAHSEVKAEGASATLSCEVAQAQTEVTFWKDGGKLS  
SSKVRVEASGCSRRLVVQQVQKADAGEYSCEARGQKLSFRLDVAEAEESQIPERPSRREPLVKEHETIILTAT  
IAAPSVAAVTWLDGVEIRRSKRHEATSLGDHTLTVRGAQVLDIAIYSCRVGKEGQDFPVQVEEVAAKFSKP  
LEPVEGELGGTVMLVCELSPEQAEVWRCGNTQLRPGKRFQMTSEGPRTTLTVSGLREDDAEYVCESRDDRT  
SARLTVKVPVVKFTSGLSAMVAEEGQEAATFQCVVSPSDAGVTWYKDGMLQPSSEKFMVMEVGASRSLTILGL  
TLEDAGQVTVAEAGASSAALRVREAPVLFKKKLEPQTVEERTSVTLEVELTRPWPEVKWTRNAAVLTPSENV  
EIRAEGARHCLVLRVSGFADRGGFFGCETPDDKTQAKLNVEMRQVRLVVRGLQEVEAKEQGTASMDVELSHAEVE  
GSWTRDGLRLQPGPKCHLAVQGPVHILTLALQPDQSGLVAFRAEGVHTSARLIVTELPVSTFTRVLQDVVATQ  
KEKVTLECELSRPVDVRLKDGVELRAGKAIGIVAQGTCSRSLVIYRCETGDQGVVCDALDAQTSASLRVQGR  
TYTLIFRRVLAEDAGEVKFVAENAESRAHLRVKELPVTLLRPLRDKIAMEKHRGVLECCQVSRASQVRWFKGG  
VELQSGPKYEVVSDGLYRKLVINQVPEDEDTYTCDAENVKTSAQFFVEEQSITIVRGLKDMTVMPEPAPAWFE  
CETSIPSVRPPKWLKGKTVLQAGNVGLEQDGTVHRLTLHKTCSTMTGPHFTIGKSRSSAQLVSDIPVVL  
RPLEPKAGRELQSVVLSCDFRPAPKAVQWYKDDTPLSPSEKFKMALEGQMAELRILRLTPADAGVYRCQAGSA  
QSSAEVTVAEAREVTVIQPLQDAEAMEEGRVCFSCELSHKDEDEIWSLNGTPLYNDSFHEISHEGCLHTLVLKS  
VRQADTGTVCATSPKVSVSARLVVKGPVVFALKALDDVSAEERGTTLQCEVSDPEARVVWRKDGVELGPSDK  
YDFLHKAGARGLTVHDLSDHEDAGLYTCQVGSKETQSKVSVHDLHVGITKRLKTVEVLEGESECFEVLVSHESP  
SDPAVWTVGGKTVGGSGHFHAVRQGRKYTLTKVDAALSDAGEVVFVSVLGLTSSKASLIRERPVDTKPLEDQR  
TTLGEDVMSCELSRAGTSVRWLKDGKAIKRSQKYDLSSEGTRAVLVVRKASLSDSEYTCETEASKSTAKLC  
VEEKANRFTTEELADLQVEEKGRAVFTCKTEHPASVVTWRKGLLELRASGKHVPSQEGTLKLTINALERTDSD  
TYTCDIGQARTQARLLVHGQKVRVIEDLEDTAVQEGSSAKFCCRIPADYGPVHWFLLDKTPLHSNELNEITVQ  
PGGYHVLTLRQLALKDSGTVYFEAGDQRTSAALRVTEKPSIFSRPLTDVTVTEGEDLTLVCETTTTVDSSVRWT  
KDGTKLRPSARCQLSHEGCAQLLITATTPQDGGRYKCEIGGASSSIVRVHALPVRFRESLKDVEVPEGKAA



TLRCVLSVAAPVEWRHGDDVLKSSNKYSLRQEGAVLELVIRDLQPQDSGQYSCSFGDQTTSATLTVKTSQAQ
FVGKLRNKEATEGTTVTLRCELTKKEAPVEWKKGTETLRNGDKYSLKQDGAVCELQICSLLVADAGEYSCVCGQ
EKTSATLTVKALLVHFVRRRLRSKEATEGDTTTLQCELSKAAPVEWRKGTETLRDGDYSLKQDGAVCELQIRS
LTADAGEYLCTCGQEKSATLTVRALPAKFKDSLKNEEATEGTTATLSCELSKAAPVTWKKGPKTLQSGDKY
VLRQDGAVCGLQIHGLTMADAGEYSCVCGQEKSATLTVRGLPAKFIEDLRSQEATEGATAILGCELSKAAPV
EWRKGTETLRDGDYSLRQDGAVCELQIRGLAVVDTGTYSLSLPTKFTTEGLRNEEATEGTMATLRCQMSKAAPV
EWRKGTETLRDGDYSLRQDGAMCELQIRGLTIEDSGEYTCVCGQEKSATLSVKALPPRFIEDLRSQEATEG
TMATLRCQMSKAAPVEWRKGTETLRDGGGRYSLRQNGAVCELQIHDLAVEDTGEYSCVCGQEKSATLNVKALP
PRFIEDLRSQEATEGTMATLRCQMSKAAPVEWRKGTETLRDGGGRYSLRQDGAVCELQIHDLVEDAGQYSCVC
GQEKSATLTVDALPPKFTTEGLKKEEATEGTMVTLRCQMSKEATVEWRKGAKTSLDGGGRYSLRQDGAMCELQI
CGLAVEDAGEYSCVCGQEKSATLSVKALPPRFIEDLRSQEATEGTMATLRCQMSKAAPVEWRKGSKTLRDGD
RYSLRQDGAMCELQICDLAVEDTGDYSCVCGQEKSATLSVKAPQVVFQQLQNLQAEEGSMASLRCELSVFN
AAMVWSKGGLELQGDTRREARQQGCVAELLLRDLRREDAGEYSCVCGSQTTSATLMVTAAPVRFRLRLQAQDV
DEGATARLRCELSREAVSVEWRKGSLLQFPKAKYQMVQEGTTAELLVHGVEQEDAGEYTC DAGHTQSIARLSV
RAPKPKFKTDLQSTEQEAGGTARLCCQLSEAEPTPVQWLKEGVELHVGSKYEMRRQGA VCELLIHGLEAKDT
GEYACLVGQKTLASLRVKEPEVTIVRGLVDMVEQADEDEVEFTCKVSQAGATDVQWHLQGLPLQSNVTEVAV
LADGCTHVLQKGLVLEDAAGTVSFHVGLSSSAQLTVRVPVETVLEPLKDVQLSEGQDAHFRCRLSRASGQEA
RWALGGVPLQCNEMNDITVEQGTLYLLTLHKVTLEDAGTITLQVGCSSSEAQLKVTAKNTVLRGLLENVDALLEG
GEALFECQLSQPEVAHAHTWLLDDEPVHTSEKVEVVYFENGLRHLLLLLNKLPQDSCRVTFLAGDVVTSAFITV
RALPDPPEDAEVVGRSDHSVTLVSWAPMSDGGGGLCGYRVMKEASTGQWQLCHDLVPGPECVDDLVPGKTY
RFRVAAVGPAGAGEPVHLPQMVKIAPAPAPAPAPAPAPAPETRQAVVGEDICLELEVAADGGEVWHKGTERRI
QPGHFVLSRGRQMLVIKGFRTEDQGEYRCGPIQGLPSSGAATFNVMVTS GSGDEVPAQPSLPEAAQEGD
LHLLWEALARKRRMSREPTLDSISELPEEDSRVQHLRQEAEEETAPDLSEGYSSTADELARTGEADLSHTSSDDE
SRAGTPSLVTYLKKAGGPGISPLASKHEAQVTTSVKPKQKQEPVVPVTPCPPGDL SAADLMDPSLDKAAVKIQA
AFKGYKVRKEMKQEGPVFSRTFGDTEAQVGDVLRLECVLATKTD MRACWLKDGIELTDGRHYHIDQLKDGTC
SLLVTGLAPTDSGRYTCQVSTKSGRVSHSACVVVSGTESEAESSGGELDDAFRRAARRLHRLFRTKSPAELS
EEELFLSADEGPGEPEEPADWQTYREDENFVCIRFESLAEARQAVTCFRNMFATMGIVEISLGEQGRGVEM
RIGKVAPTVPVAVPLAKTPGLQTSDAAPVFLTELQNDVQDGYPMSFDCVVTGQPVPSVRWFKDGKLLLEEDDH
YMINEDQQGGHQLIITAVVPADMGVYRCLAENSMGVSSTKAELRVELTSTDYD TAADATETSSYFSAQGYLSS
REQEGTESDEGQLPQVLEELKDLQVAPGTRLAKFQLKVKGYPAKLYWFKDGOPLTSDHIRMTDKKTLHTLE
IVSVTREDSGQYAAIYI SNAVGAAYSSARLLVGRGPSEPEEK PASDVHERLVPPRILEKFTPKVKRGSITFSV
KVEGHPAPSVHHLKEEAEGVLIWIGPDTPGYTMASSSKQHSVLVLDVGRQH QGTYTCIATNPAGQALCSASLH
ISGLAKEEEQERVKEALISSFLQGTSQAVSAQMSE SAGFADLVGQSKGESLVAAEEAHSHLSLAEVGTETEEFLQK
LTSQITEMVSAKISQAKLVPPGGDSDEETKTPSASPRHGRSRPSSSVQESSSESEDGDSRGEIFDIYVVTADY
LPLGAEQDAIILREGQYVEVLD SAHPLRWLVRTKTKSSPSRQGWVSPAYLDKRLKLSPEWGPTEAEPFPGA
VSEDEYRTRLSSVIQELLSSEQAFV GELQFLES SHMKHLERSPRVPAAVASQKTVIFRNVQDI SHFHSSFLKE
LQCGCTDDDVAMCFIKNQEA FEKYLEFLVGRVQAESVVVSTPVQEFYKKYAEETLSAKDPTQPPPPPLQHYLE
QPVERVQKYQALLKELIRNKARNRQNCALLEQAYAVVSALPQRAENKLVSLMENYPGTLEALGEP IRQGHFI
VWEGAPGARMPPWKGNHRHVFLFRNYLVICKPRRDSRTDTFSYVFRNMMKLSSIDLNDQVEGD DRAFEVWHERE
DSVRKYLQARTVIKNSWVKEICGIQORLAQPVWRPPEFEELADCTAELGETVKLACRVTGT PKPIVSWYK
DGKPVVEVDPHHILIEDPDG SCTLILDNLTGIDSGQYMCFAASAAGNASTLGKILVQVPPRFVNVKRATPFVEG
EDAQITCTVEGAPYPQIRWYKDG TLLAPGNRYRMLNEPRSGVLVVIQAASKEDLGHYECELVNRLGSTRGGG
ELYMQSPALRARDQHHRQI VAAVEGAPSMQVTIEDVQVQVGDMAQF DAVIEGHPPP IVTWYKGSTQLTSSAR
LSQRQDGTYSLVLTVDVAPHDAGVYTCVANNAGGQVLCKAELLVHGGDKLDAENQVYRRKLSHFYDVQEEIGR
GVFGFVKRVQHKGKMFCAAKFIPLRSKTRAQAYQERDILATLGHPLVTGLLDQFETRKTLLIILELCSSEEL
LDRLFKKGVVTEAEVKVYIQQLVEGLHYLHSHGILHLDIKPPNII MVHPAREDIKICDFGFAQKITPSEPQYS
KYGSPFVSP EII EQNPVSEGS DIWAMGVISYLSLTCSSPFAGESDRATLLNVLEGRVSWSSPTAAHLS EDAK
DFIKATLQRTPRARPSTSQC LAHPWFLKSMPAAEAHFINTKQLKFL LARSRWQRSLMSYKSI LVMRSIP ELLQ
GPPDSPSLGVARHLRGEASGASSSSSSSDNELAPFARAKSLPPSPVTHSPLLHPRGFLRPSASLPEETEASMP
TADA AVPAS PQSAGPPASPGCVPRHSV ISSLFYQQAGEGA ERGNKTS GAKRHPARRRHLLKGGYIARALPGLR
EPLMEYSLLEEEAAREEQASLMTKTPSFETALRLPSSSVREV PGRSHSLDNPPVTTGPSPEACKEQLLFPST
GLTHETAKDRGHKEGFLQESVFPFPM S GDSRPGKQEGSSQDSCRGKPASSCHSELGSGSQEGCGPPSSQSLG
SLPPQSLKKELTSTCGPLFSEQPQAAPFPTQVSPLLGSEKEPQDGSLS EGPVVPVSSPGSASQV DASLDTEG
LSEAGDTCDFLTPPPQRPQEATTRKFSLESRGGYAGVAGYGTFAFGDAGGM LGQGLVARMAWAVS QSSEEQ
DEAATESPQPLES LGPIAEASGVPLRTSPSLTPWEEVEQVSLVQIRDL S GDAEAADTISLDISEVDPAYLNL S
DLYDIKYL PFEFMI FRV PKPIEQPESPGSETEAGQLADFL EEA AWPWP GELGLRAGLEITEEPEEPGDLEA
LLGEAAVGRKRKWSPSRGLFQFPGRCLSGEEPVELGLRQRVKASMAHISRILKGRPEGPERE GP RRKAGLAS
FRLSGLKGRDQELSDEAVVLGQSVTLACQVLAQPTAQTWSKDGVLLESSGHLLISSTLKNFQLLTI LVVKEE

DLGTYTCCVSNPLGTAVTTGVLKRAERPSSSPRPEVGEYKDAVLLVWKPVESECGPVTYIVQCCIEGGSWTTL  
ASDISDCCYLTKGLSRGGMYIFRTACVSKAGMGPYSSPSEQVLLGGPNHLASEEESSRGRPAQLLPSTKTF  
QMQIRRRGRFSVVRQCREKASGRALAAKIVPYQPEDKTAVLREYEALKRLHHPHLAQLHAAYLSRHLVLI  
LELCSGPELLPSLAERESYSESDVKDYLWQMLSATQYLHAQHILHLDLRSNMMVTEYNLLKVIDLGN  
AQSLDQEKVPAPENFKDYLETMAPELLEGQAVPQTDIWAIGVTAFIGLSGEYPESEGETRDLQKGLR  
KGLIRLSRCYAGLSGGAVAFLOSSLCAQPWGRPCASTCLQCGWLTEEGPTGSRPTVTFPTVRLRAFV  
REREKRRALLYKXKHNLAQVR\*

>rs26971817\_ENSMUSP00000049737\_c.11766:A>G\_p.R3923G

ENSMUST00000052872.15|Obscn-203|ENSMUSG00000061462|-|chr11:g.58954441:T>C  
MDHSFSGAPRFLTRPKAFVSVGKDATLSCQIVGNPTPHVSWEKDRQPVEAGARFRLAQDGDVYRLTILDLAL  
GDSGQYVCRARNAIGEAFVAVGLRVDSEGTCAEQAPHFLLRPTSIRVREGADATFRCRVGGSPQPAVSWSKDG  
RRLGPPDAPHVRVEEHGESSALRIRARPRDGGTYEVRAENPLGSASAAAALVVDSDAEVAGPPGTSTATLLA  
HLQQRRREAMRAEGIPPSPPGAGTRTCTVTEGKHARLSCFVTGEPKPEVWKKDQGLVTEGRRHVVEDEQENF  
VLKILFCQSDRGLYTCASNLVQTYSSVLVVREPTVPPFKRLQDLEVREKESATFQCEVAQPAEA  
AWFK EETRLWASAKYDIEEEGETERRLTVRNVSADDDAVYICETTEGSRVVAELSVQGNLTKLPRKTA  
VRTGDTAIFWVELAVPEGPVWRNRNQEEMVAGGRVAITAEGTCHTLTI FQCTLEDMGEVAFVSGGCR  
TTTTQFCVSAPRRPPL YPPADFPVVKAKTESSVTLWSAPPHGDRPVTIDGYVLEKRLGAYAWSR  
CHEAGWLATTEFTITGVAEEGDFQFRVSAINHFGQGPYLEFPGMTMLVPLAVKTPLKAVEAVEGGEV  
TFVSDLTVAASSGEWFLDGEALKASSIYVIRCDRTRHMLTIREVPARLHGAQLKFVANGIETSIQ  
MVVRAALGLPSSKLPAAAAAREVLAQLHEEAQLLAE LSDQAAA VTLKDGRELSLGPYEMQVS  
AGRRALLVRDVAQDDAGLYECVSRGSR TAYQLLVQEPKLVFAKQQA HSEVKAEAGNSATL  
SCEVTQAQTEVTWFKDGKLS SSSSKVRMEASGCSRRLVVQQAGKADAGEYSCEAGGQKLS  
FRLDVAEPKLVFAKQQA HSEVKAEAGASATLSCEVAQAQTEVTWFKDGKLS SSSSKVR  
MEASGCSRRLVVQQAGKADAGEYSCEAGGQKLSFRLDVAEPKLVFAKEQQARSEVKAEAG  
ASATLSCEVAQAQTEVTWFKDGKLS SSSSKVRMEASGCSRRLVVQQAGKADAGEYS  
CEAGGQKLSFRLDVAEPKLVFAKEQQARSEVKAEAGASATLSCEVAQAQTEVTWFKDGKLS  
SSSKVRMEASGCSRRLVVQQAGKADAGEYSCEAGGQKLSFRLDVTEPKLVFAKEQQAR  
SEVKAEVGN SATLSCEVAQAQTEVTWFKDGKLS SSSSKVRMEASGCSRRLVVQQAGKAD  
AGEYSCEAGGQKLSFRLDVAEPKLVFAKEQ QARSEVKAEAGNSATLSCEVAQAQTEVT  
WFKDGKLS SSSSKVRMEASGCSRRLVVQQAGKADAGEYSCEAGGQKLSFRLDVAEPKLV  
FAKEQ KLSFHLDVTEPKLVFAKEQQAHSEVKAEAGASATLSCEVAQAQTEVTWFKDGKLS  
SSSKVRMEASGCSRRLVVQQAGKADAGEYSCEAGGQKLSFRLDVAEPKLVFAKEQQAR  
SEVKAEAGASATLSCEVAQAQTEVTWFKDGKLS SSSSKVRMEASGCSRRLVVQQAGKAD  
AGEYSCEAGGQKLSFRLDVAEPKLVFAKEQQARSEVKAEAGASATLSCEVAQAQTEVT  
WFKDGKLS SSSSKVRMEASGCSRRLVVQQAGKADAGEYSCEAGGQKLSFRLDVAEPKLV  
FAKEQ KEQQAHSEVKAEAGASATLSCEVAQAQTEVTWFKDGKLS SSSSKVRMEASG  
CSRRLVVQQAGKADAGEYSCEAGGQKLSFRLDVAEPKLVFAKEQQAHSEVKAEAGASAT  
LSCEVAQAQTEVTWFKDGKLS SSSSKVRMEASGCSRRLVVQQAGKADAGEYSCEAGG  
QKLSFRLDVAEPKLVFAKEQQAHSEVKAEAGASATLSCEVAQAQTEVTWFKDGKLS  
SSSKVRMEASGCSRRLVVQQAGKADAGEYSCEAGGQKLSFRLDVAEPKLVFAKEQQAH  
SEVKAEAGASATLSCEVAQAQTEVTWFKDGKLS SSSSKVRMEASGCSRRLVVQQAGKAD  
AGEYSCEAGGQKLSFRLDVAEPKLVFAKEQQAHSEVKAEAGASATLSCEVAQAQTEVT  
WFKDGKLS SSSSKVRMEASGCSRRLVVQQAGKADAGEYSCEAGGQKLSFRLDVAEPKLV  
FAKEQ VFAKEQQAHSEVKAEAGASATLSCEVAQAQTEVTWFKDGKLS SSSSKVR  
MEASGCSRRLVVQQAGKADAGEYSCEAGGQKLSFRLDVAEPKLVFAKEQQARSEVKAEAG  
ASATLSCEVAQAQTEVTWFKDGKLS SSSSKVRMEASGCSRRLVVQQAGKADAGEYS  
CEAGGQKLSFRLDVADTRLMFAKEQQARTEVKAEAGNSATLSCEVAQAQTEVTWFKDGKLS  
SSSKVRMEASGCSRRLVVQQAGKADAGEYSCEAGGQKLSFRLDVAEAE SQIPERPSR  
REPLVVKEHETIILTATIAAPSVAAVTWLKDGVEIRRSKRHEATSLGDHTLTVRGAQV  
LDSAIYSCRVGKEGQDFPVQVEEVAAKFSKPLEPVEGELGGTVMLVCELSPEQA  
EVVWRCGNTQLRPGKRFQMTSEGPRRTLTVSGLREDDAEYVCESRDDRTSARLTVK  
VPRVVKFTSGLSAMVAEEGQEATFQC VVSPSDAGVTWYKDGMLQPSSEKFMVMS  
GASRSLTILGLTLEDAGQVTV EAE GASSAALRVREAPVLFKFKLEPQTVEERTSVT  
LEVELTRPWPEVKWTRNAAVLTPSENVEIRAEGARHCLVLRVSGFADRGGFFGCET  
PDDKTQAKLNVEMRQVRLVRGLQEVEAKEQGTASMDVELSHAEVEGSWTRDGLRL  
QPGPKCHLAVQGPPVHILTL SALSALQPD SGLVAFRAEGVHTSARLIVTELPV  
SFTRVLQD VVATQKEKVTLECEL SRPVDVRWLKDGVELRAGKAI GIVAQGT  
CRSLVIYRCETGDQGVYVCDALDAQTSASLRVQGRTYTLIFRRVLAEDAGEV  
KFVAENAESRAHLRVKELPVTLRLPLRDKIAMEKHRGVLE CQVSRASAQVRWFKG  
GVELQSGPKYEVVSDGLYRKLVIN DVQPEDEDYTC DAGNVKTSAQFFVVEEQSIT  
IVRGLKDMTVMEPAPAWFECETSIPSVRPKWL LGKTVLQAGGNVGLEQDGT  
VHRTLHKT CSTMTGPVHFTIGKSRSSAQLVVSDIPVVLTRPLEPKAGRE  
LQSVVLSCDFRPAPKAVQWYKDDTPLSPSEKFKMALEGQMAELRILRLTPADAG  
VYRCQAGSAQSSAEVTVEARVTVIQPLQDAEAMEEGRVCFSCELSHKDE  
DIEWSLNGTPLYNDSFHEI SHEGCLHTLVLSVRQADTGTVCATSPKVS  
VSARLVVKGKPVVFLKALDDVSAEERGTLLTQCEVSDPEARV VWRKDGVELG  
PSDKYDFLHKAGARGLTVHDL SHEDAGLYTCQVGSKETQSKVSVHDLHVGI  
TKRLKTVEVLEGE SCFECVLSHESPSDPAVWTVGGKTVGSGHFHAVRQGRKY  
TLTVKDAALSDAGEV FSVLGLTSKASLIIRERPVDITKPLEDQRTTLG  
EDVMLSCELSRAGTSVRWLKDGKAIKRSQKYDLLSEGTRAVLVRKASLKD  
SGEYTCETEASKSTAKLCEVEKANRFTEELADLQVEEKGRAVFTCKTEHPAS  
VVWTRKGLLELRASGKHVPSQEG LTKLTINALERTDSDTYTCDIGQAR  
TQARLLVHGQKVRVIEDLED TAVQEGSSAKFCCRIAPADYGPVHWF  
LDKTPHLSNELNEITVQPGGYHVLT LRQLALKDSGT VYFEAGDQRTS  
AALRVTEKPSIFSRPLTDVTVTEGEDLTLVCETTTVDSSVRWTKDGKTL  
RPSARCQLSHEGCQAQLLITATTPQDGGRYKCEIGGASSSSIVRVHALP  
VRFRESLKDVEVPEGKAATLRCVLSSVA

APVEWRHGDDVLKSSNKYSLRQEGAVLELVIRDLQPQDSGQYSCSFGDQTTSATLTVKTSQAQFVGLRNKEA  
 TEGTTVTLRCELTKAPVEWKKGTETLRNGDKYSLKQDGA VCELQICSLLVADAGEYSCVCGQEKTSATLTVK  
 ALLVHFVRRRLRSKEATEGDTTTLQCELSKAAPVEWRKGTETLRDGDYSLKQDGA VCELQIRSLTIADAGEYL  
 CTCGQEKTSATLTVRALPAKFKDSLKNEEATEGTTATLSCELSKAAPVTWKKGPKTLQSGDKYVLRQDGA VCG  
 LQIHGLTMADAGEYSCVCGQEKTSATLTVRGLPAKFIEDLRSQEATEGATAILGCELSKAAPVEWRKGS ETLK  
 DGDYRDLRQDGA VCELQIRGLAVVDGTYSLPTKFTTEGLRNEEATEGTMATLRCQMSKAAPVEWRKGS ETLR  
 DGDYRDLRQDGA MCELQIRGLTIEDSGEYTCVCGQEKTSATLSVKALPSRFIEDLRSQEATEGTMATLRCQMS  
 KTAPVEWKKGSETLRDGGYSLRQDGPVCELQICDLAVEDAGEYSCVCGQEKTSATLSIKALPPRFIEDLRSQ  
 EATEGTMATLRCQMSKAAPVEWRKGS ETLGDGGYSLRQNGAVCELQIHDLAVEDTGEYSCVCGQEKTSATLN  
 VKALPPRFIEDLRSQEATEGTMATLRCQMSKAAPVEWRKGS ETLR DGGYSLRQDGA VCELQIHDLVEDAGQ  
 YSCVCGQEKTSAVLTVDALPPKFTEGLKKEEATEGTMVTLRCQMSKEATVEWRKGA KTLSDGGYSLRQDGA M  
 CELQICGLAVEDAGEYSCVCGQEKTSATLSVKALPPRFIEDLRSQEATEGTMATLRCQMSKAAPVEWRKGS ETLR  
 DGDYRDLRQDGA VCELQIRDLAVEDAGEYLCVCGQEKTSATLSVKALPPRFIEDLRSQEATEGTMATLRCQ  
 MSKAAPVEWRKGS KTLR DGGYSLRQDGA MCELQICDLAVEDTGDYSCVCGQEKTSATLSVKALPPRFIEDLR  
 SQEAREGTVATLRCRMSKAAPVEWRKGS ETLKGDYSLRQEGNLCELQIRDLAVEDTEEYSCVCGQEKTSAT  
 LSVKALPAKFIEDLRSQEAPESSTVTLRCKLSKASVWKKGSETLRNGARYSLRQDGA VCELEIRDLTVEDT  
 GEYSCVCGQEKTSATLSIMAPQVVFQQLQNLQAEEGSMASLRCELSVPNAAMVWSKGGLELQGDTRREARQQ  
 GCVAEALLRDLRREDAGEYSCVCGQEKTSATLMVTAAPVRFRLRLQADVDGATARLRCELSREAVSVEWRK  
 GSLQLFPCA QYQMVQEGTAEALLVHGVEQEDAGEYTC DAGHTQS IARLSVRAPKPKFKTDLQSTEQEAGGTAR  
 LCCQLSEAE PGTPVQWLKEGVELHVGSKYEMRRQGA VCELLIHGLEAKDTGEYACL VGGQKTLASLRVKEPEV  
 TIVRGLVDMEQADEDEFTCKVSQAGATDVQWHLQGLPLQSNVTEVA VLADGCTHVLQKGVTL EDAGTVS  
 FHVGLSSSAQLTVRVPEVTLEPLKDVQLSEGQDAHFRCRLSRASQEARWALGGVPLQCNEMNDITVEQGT  
 LYLLTLHKVTLEDAGTITLQVGS CSSEAQLKVTAKNTVLRGLENVDALEGG EALFECQLSQPEVAHTWLLDD  
 EPVHTSEKVEVVYFENGLRHLLLLLNKLPQDSCRVTFLAGDVVTS AFLTVRGWRLEVLEPPHDASVKAGMQR  
 FTCILSEAVPVEGATWYINGAAIQPDDT DWTVTDDGSHHALTLSNAQPQHAGEVTF AARDAVASARLSVLALP  
 DPEDAEVGSRSDHSLVLSWVAPMSDGGGGLCGYRVEKMEASTGQWQLCHDLVPGPECVVDDLVPKTYRFRV  
 AAVGPAGAGEPVHL PQMVKIAPAPAPAPAPAPAPAPETRQAVVGEDICLELEVAADGGEVWVKGTERIQPGG  
 HFEVLSRGRQMLVIKGFRTEDQGEYRCGPIQGLPSSGAATFNVMVMTSGSGDEVPAQPSLPPEAAQEGDLHLL  
 WEALARKRRMSREPTLDSISELPEEDSRVQHLRQEAEEETAPDLSEGYSTADELARTGEADLSHTSSDDES RAG  
 TPSLVTYLKKAGGPGISPLASKHEAQVTTSVKPKQKQEPVPTCPPPGDLSAADLMDPSLDKAAVKIQAAFKG  
 YKVRKEMKQQEGPVFSRTFGDTEAQVGDVLRLECVLATKTD MRACWLKDGIELTDGRHYHIDQLKDGTC SLV  
 TGLAPTDSGRYTCQVSTKSGRVSHSACVVVSGTESEAESSGGELDDAFRRAARLHRLFRTKSPAELSEEEL  
 FLSADEGPEPEEPADWQTYREDENFVICIRFESLAEARQAVTCFRNMFATMGIGVEISLGEQGPGRVEMRIGK  
 VAPTVT PAVPLAKTPGLQTS DAAPVFLTELQNDVQDGYPMSFDCVVTGQPVPSVRWFKDGKLEEDDHYMIN  
 EDQQGGHQLIITAVVPADMGVYRCLAENSMGVSSTKAELRVELTSTDYDTAADATETSSYFSAQGYLSSREQE  
 GTESDEGLPQVLEELKDLQVAPGTRLAKFQLKVKGYPAKLYWFKDQGPLTSDHIRMTDKKTLHTLEIVSV  
 TREDSGQYAAIYISNAVGAAYSSARLLVRGPSEPEEK PASDVHERLVPRILEKFTPKKVKRGS SITTFSVKVEG  
 HPAPSVHWLKEEA EKGV LWIGPDTPGYTMASSSKQHSLVLLDVGQRHQGTYT CIATNPAGQALCSASLHISGL  
 AKEEEQERVKEALISSFLQTSQAVSAQMS ESAGFADLVGQSKGESLVAAEAHSHLSLAEVGT EEFLOKLT SQ  
 ITEMVSAKISQAKLQVPGGDSDEETKTPSASPRHGRSRPSSSVQESSSESEDGDSRGEIFDIYVVTADYLP LG  
 AEQDAIILREGQYVEVLDSAHPLRWLVRTKPTKSSPSRQGWVSPAYLDKRLKLSPEWGPTEAPEFPGEAVSED  
 EYRTRLSSVIQELLSSEQAFVGE LQFLESHHMKHLERSPRVPAVASQKTVIFRNVQDISHFHSSFLKELQGC  
 GTDDDVAMCFIKNQEA FEKYLEFLVGRVQAESVVVSTPVQEFYKKYAEETLSAKDPTQPPPPLOHYLEQ PVE  
 RVQKYQALLKELIRNKARNRQNCALLEQAYAVVSALPQRAENKLVHSLMENYPGTLEALGEP IRQGHFIVWEG  
 APGARMFWKGNHRHVF LFRNYLVICKPRRDSRTDTFSYVFRNMMKLSSIDLNDQVEGDDRAFEVWHEREDESVR  
 KYLLQARTVI IKNSWVKEICGIQQLAQPVWRPPEFEELADCTAELGETVKLACRVTGT PKPIVSWYKDGKP  
 VEVDPHHILIEDPDG SCTLILDNLTGIDSGQYMCFAASAAGNASTLGKILVQVPPRFVNVKVRATPFVEGEDAQ  
 ITCTVEGAPYPQIRWYKDGTL LAPGNRYRMLNEPRSGVLV LVIQAASKEDLGHYECELVNRLGSTRGGGELYM  
 QSPALRARDQHHREQIVAAVEVTEQETKVPKKTV IIEETITTVVKS PRGRRQSPGKSPSRSPRRSASPRRPG  
 LLAPERLYPPGTS PSRRLEVEQGRKAPVPALYVTEAEVHAPASQSPKWLEVEETIEVRVKKTGSRGASPVRE  
 MTSRGE GILFTLPGGIPGRDPNANNNSNKS SVYQEA RTWGP AVVHVGE PFI FQVDSVGNVDWVAASPEPEQVRA  
 SQKEENTERQEGCSDG DENTFLMEEPQD TDSLQGRDPKILTHNGRVLTLADLEDYVPQEGETFGCGDSTPSTP  
 DEPPCEVSVLQREI SEPTVGGQPVLLNVGRPPGTGATPSFFRPGSQVHSPESV SFLLEAWSGPVSAAPWTSS F  
 HTHVQSSVDGSHG SFKTEVSTQTVSFGAVGETVTLHIDPDGGEAPGPSQ\*  
 >rs26971817 ENSMUSP00000020732\_c.11967:A>G\_p.R3990G  
 ENSMUST00000020732.13|Obscn-201|ENSMUSG00000061462|-|chr11:g.58954441:T>C  
 MDHSFSGAPRFLTRPKAFVSVGKDATLSCQIVGNPTPHVSWEKDRQPV EAGARFRLAQDGDVYRLTILDLAL  
 GDSGQYVCRARNAIGEAFVAVGLRVDSEGTCAEQAPHLLRPTSIRVREGADATFRCRVGGSPQPAVSWSKDG

RRLGPPDAPHVRVEEHGESSALRIRRSARPRDGGTYEVRAENPLGSASAAAAALVVDSDAEVAGPPGTSTATLLA
HLQORREAMRAEGIPPSPPGAGTRTCTVTEGKHARLSCFVTGEPKPETVWKKDGLVTEGRRHVVEDEQENF
VLKILFCKQSDRGLYTCTASNLVGQTYSSVLVVVREPTVPFKKRLQDLEVREKESATFQCEVAQPATEAAWFK
EETRLWASAKYDIEEEGETERRLTVRNVSADDDAVYICETTEGSRVVAELSVQGNLTKRLPRKTAVRTGDTAIF
WVELAVPEGPVRWLRNQEEMVAGGRVAITAEGTCHTLTI FQCTLEDMGEVAFVSGGCRTTTFQFCVSAPRRPPL
YPPADPVVKAKTESSVTLWSAPPHGDRPVTIDGYVLEKRKLGAYAWSRCHEAGWLATTEFTITGVAAEEDGFQ
FRVSAINHFGQGPYLEFPGTMHLVPLAVKTPKAVEAVEGGEVTFVSDLTVASSGEWFLDGEALKASSIYVI
RCDRTRHMLTIREVPARLHGAQLKVFVANGIETS IQMVVRAALGLPSSKLPAAAAREVLAQLHEEAQLLAELSD
QAAAVTWLKDGRELSLGPKYEMQVSAGRRALLVRDVAQDDAGLYECVSRGSRRTAYQLLVQDITDGYRDWGPAG
PQKHMCKCAGAKIARYLGS SCYRFLQYDKGVWHLEAALDTRQGKGTSSCSLHEKPKLVFAKGQQAHSVEKAE
AGNSATLSCEVTQAQTEVTFKDGKLLSSSSKVRMEASGCSRRLVVQQAGKADAGEYSCEAGGQKLSFRLDVA
EPKLVFAKGQQAHSVEKAEAGASATLSCEVAQAQTEVTFKDGKLLSSSSKVRMEASGCSRRLVVQQAGKADA
GEYSCEAGGQKLSFRLDVAEPKLVFAKEQQARSEVKAEGASATLSCEVAQAQTEVTFKDGKLLSSSSKVRM
EASGCSRRLVVQQAGKADAGEYSCEAGGQKLSFRLDVTEPKLVFAKEQQARSEVKAEGVNSATLSCEVAQAQ
EVTWFKDGKLLSSSSKVRMEASGCSRRLVVQQAGKADAGEYSCEAGGQKLSFRLDVAEPKLVFAKEQQARSE
KAEAGNSATLSCEVAQAQTEVTFKDGKLLSSSSKVRMEASGCSRRLVVQQAGKADAGEYSCEAGGQKLSFHL
DVTEPKLVFAKEQQAHSEVKAEGASATLSCEVAQAQTEVTFKDGKLLSSSSKVRMEASGCSRRLVVQQAGK
ADAGEYSCEAGGQKLSFRLDVAEPKLVFAKEQQARSEVKAEGASATLSCEVAQAQTEVTFKDGKLLSSSSK
VRVEASGCSRRLVVQQAGKADAGEYSCEAGGQKLSFRLDVAEPKLVFAKEQQANSEVKAEGASATLSCEVAQ
AQTEVTFKDGKLLSSSSKVRVEASGCSRRLVVQQAGKADAGEYSCEAGGQKLSFRLDVAEPKLAFAKEQQA
SEVKAEGASATLSCEVAQAQTEVTFKDGKLLSSSSKVRVEASGCSRRLVVQQAGKADAGEYSCEAGGQKLS
FRLDVAEPKLAFAKEQQAHSVEKAEAGASATLSCEVAQAQTEVTFKDGKLLSSSSKVRVEASGCSRRLVVQ
AGKADAGEYSCEAGGQKLSFRLDVAEPKLAFAKEQQAHSVEKAEAGASATLSCEVAQAQTEVTFKDGKLLS
SSKVRVEASGCSRRLVVQQAGKADAGEYSCEAGGQKLFRLDVAEPKLMFAKEQQAHSEVKAEGASATLSCE
VAQAQTEVTFKDGKLLSSSSKVRVEASGCSRRLVVQQAGKADAGEYSCEAGGQKLSFRLDVAEPKLVFAKEQ
QAHSVEKAEAGASATLSCEVAQAQTEVTFKDGKLLSSSSKVRVEASGCSRRLVVQQAGKADAGEYSCEARGQ
KLSFRLDVADTRFAKEQQARTEVKAEGASATLSCEVAQAQTEVTFKDGKLLSSSSKVRVEASGCSRRLV
VQQAGKADAGEYSCEAGGQKLSFRLDVAEAEESQIPERPSRREPLVVKEHETIILTATIAAPSVAAVTWLKDG
EIRRSKRHEATSLGDTHTLTVRGAQVLDIAIYSCRVGKEGQDFPVQVEEVAAKFSKPLEPVEGELGGTVMLVC
ELSPQAEVWRCGNTQLRPGKRFQMTSEGPRTTLTVSGLREDDAEYVCESRDDRTSARLTVKVPVVKFTS
GLSAMVAEEGQEQATFQCVVSPSDAGVTWYKDGMLQPSKFKVMVESGASRSLTILGLTLEDAGQVTVAEAGS
SSAALRVREAPVLFKKLEPQTVERTSVTLEVELTRPWPEVKWTRNAAVLTPSENVEIRAEGARHCLVLRV
GFADRGGFFGCETPDDKTQAKLVNEMRQVRLVVRGLQVEVEAKEQGTASMDVELSHAEVEGSWTRDGLRQLQ
HLAVQGPHVHILTLALQPDQSLVAFRAEGVHTSARLIVTELPVSTFTRVLQDQVATQKEKVTLECELSRPVD
RWLKDGVLELRAGKAIQIVAGTCSRSLVIYRCETGDQGVYCDALDAQTSASLRVQGRYTYLIFRVLAEADAGE
VKEVAENAESRAHLRVKELPVTLLRPLRDKIAMEKHKGVLCEQVSRASAQVRWFKGGVELQSGPKYEVVSDGL
YRKLVINVDQPEDEDTYTCDAENVKTSAQFFVEEQSITIVRGLKDMTVMPEPAPAWFECETSIPSVRPPKWL
KTVLQAGGNGLEQDGTVHRLTLHKTCSTMTGPVHFTIGKSRSSAQLVSDIPVVLTRPLEPKAGRELQSVVL
SCDFRPAPKAVQWYKDDTPLSPSEKFKMALEGQMAELRILRLTPADAGVYRCQAGSAQSSAEVTVAREVTVI
QPLQDAEAMEEGRVCFSCELSHKDEDIEWLSLNGTPLYNDSFHEISHEGCLHTLVLSVRQADTGTVCATSPKV
SVSARLVVKGKPVVFLKALDDVSAEERGTTLTQCEVSDPEARVVWRKDGVELGSPDKYDFLHKAGARGLTVHD
LSHEDAGLYTCQVGSKETQSKVSVHDLHVGITKRLKTVLEVLEGESECSFECVLSHESPSDPAVWTVGGKTV
GHFHAVRQGRKYTLTVKDAALSDAGEVVSVLGLTSKASLIIRERPVDITKPLEDQRTTLGEDVMLSCELSRA
GTSVRWLKDGKAIKRSQKYDLLSEGTRAVLVVRKASLKDSEYTCETEASKSTAKLCVEEKANRFTEELADLQ
VEEKGRAVFTCKTEHPASVVTWRKGLLELRASGKHVPSQEGTLKLTINALERTDSDTYTCDIGQARTQARLL
VHGQKVRVIEDLEDTAVQEGSSAKFCRIAPADYGPVHWFLDKTPLHSNELNEITVQPGGYHVLTLRQLALKD
SGTVYFEAGDQRTSAALRVTEKPSIFSRPLTDVTVTEGEDTLVCETTTVDSSVRWTKDGKTLRPSARCQLSH
EGCQALLITATTPQDGGRYKCEIGGASSSSIVRVHALPVRFRFRESLKDVEVPEGKAATLRCVLSVAAPVEWR
HGDDVLKSSNKYSLRQEGAVLELVIRDLQPDQSGQYSCSFGDQTSATLTVKTSQAQFVGLRNKEATEGTTV
TLRCELTKAEAPVEWKKGTETLRNGDKYSLKQDGA VCELQICSLLVADAGEYSCVCGQEKTSATLTVKALLVH
VRLRSKEATEGDTTLQCELSKAAPVEWRKGTETLRDGDYSLKQDGA VCELQIRSLTIADAGEYLCTCGQE
KTSATLTVRALPAKFKDSLKNEEATEGTTATLSCELSKAAPVWKKGPKTLQSGDKYVLRQDGA VCGLQIHGL
TMADAGEYSCVCGQEKTSATLTVRGLPAKFIEDLRSQEATEGATAILGCELSKAAPVEWRKGSSETLKDGDYR
LRQDGA VCELQIRGLAVVDGTYSLSPTKFTTEGLRNEEATEGTMATLRCQMSKAAPVEWRKGSSETLRDGDYR
LRQDGA MCELQIRGLTIEDSGEYTCVCGQEKTSATLSVKALPSRFIEDLRSQEATEGTMATLRCQMSKTPAVE
WKKGSETLRDGGRYSLRQDGPVCELQICDLAVEDAGEYSCVCGQEKTSATLSIKALPPRFIEDLRSQEATEG
MATLRCQMSKAAPVEWRKGSSETLGDGGRYSLRQNGAVCELQIHDLAVEDTGEYSCVCGQEKTSATLNVKALPP
RFIEDLRSQEATEGTMATLRCQMSKAAPVEWRKGSSETLRDGGRYSLRQDGA VCELQIHDLVEDAGQYSCVCG

QEKTSAVLTVDALPPKFTEGLKKEEATEGTMVTLRCQMSKEATVEWRKGAKTSLSDGGRYSLRQDGAMCELQIC  
 GLAVEDAGEYSCVCGQEKTSATLSVKALPPRFIEDLRSQEATEGTMATLRCQMSKAAPVEWRKGETLRDGD  
 YSLRQDGAVCELQIRDLAVEDAGEYLCVCGQEKTSATLSVKALPPRFIEDLRSQEATEGTMATLRCQMSKAAP  
 VEWRKGSKTLRDGDYSLRQDGAMCELQICDLAVEDTDYSCVCGQEKTSATLSVKALPPRFIEDLRSQEARE  
 GTVATLRCRMSKAAPVEWRKGETLKDGDYSLRQEGNLCCELQIRDLAVEDTEEYSCVCGQEKTSATLSVKAL  
 PAKFIEDLRSQEAPESSTVTLRCKLSKKASVVVKKGSETLRNGARYSLRQDGAVCELEIRDLTVEEDTGEYSCT  
 CGQERTSATLSIMAPQVVFQQLQNLQAEEGSMASLRCELSVPNAAMVWSKGGLELQGDTRREARQQGCVAEL  
 LLRDLRREEDAGEYSTCGSQTTSATLMVTAAPVRFLELQAQDVDEGATARLRCLELSREAVSVEWRKGSLLQF  
 PCAKYQMVQEGTTAELLVHGVEQEDAGEYTCDAAGTQSIARLSVRAPKPKFKTDLQSTEQEAGGTARLCCQLS  
 EAEPGTPVQWLKEGVELHVGSKYEMRRQGAUCELLIHGLEAKDTGEYACLVGGQKTLASLRVKEPEVTIVRGL  
 VDMEVQADEDVEFTCKVSOAGATDVQWHLQGLPLQSNVTEVAVLADGCTHVLQKGVTLLEDAGTVSFHVGG  
 SSSAQLTVRVPEVTVLEPLKDVQLSEGQDAHFRCRLSRASGQEARWALGGVPLQCNEMNDITVEQGTLYLLTL  
 HKVTLEDAGTITLQVGSSESQAQLKVTAKNTVLRGLENVDALEGGEALFECQLSQPEVAHAHTWLLDDEPVHTS  
 EKVEVVYFENGLRHLLKLNKLPQDSCRVTFLAGDVVTSFAFLTVRGWRLEVLPEPHDASVKAGMQVRFCTILS  
 EAVPVGEATWYINGAAIQPDDTDWTVTTDGSHHALTLSNAQPQHAGEVTFAAARDAVASARLSVLALPDPEDA  
 EVVGRSDHVSVTLWSVAPMSDGGGGLCGYRVEMKEASTGQWQLCHDLVPGPECVVDDLVPKTYRFRVAAVGPA  
 GAGEPVHLPQMVKIAPAPAPAPAPAPAPAPAPETRAVAVGEDICILEVAADGGEVVWHKGTERRIQPGHFVLS  
 RGQRQMLVIKGFRTEDQGEYRCGPIQGLPSSGAATFNVMVMTSGSGDEVPAQPSLPEAAQGERLHLLWEALAR  
 KRRMSREPTLDSISELPEEDSRVQHLRQEAEEETAPDLSEGYSTADELARTGEADLSHTSSDDESAGTPSLVT  
 YLKKAGGPGISPLASKHEAQVTTSVKPKQKQEPVVPTCPGGDLAADMPSLDKAAVKIQAAPFKYKVRKE  
 MKQQEGPVFSRTFGDTEAQVGDVLRLECVLATKTDMRACWLKDGIELTDGRHYHIDQLKDGTCSLVLTGLAPT  
 DSGRYTCQVSTKSGRVSHSACVVVSGTESEAESSGGELDDAFRAARRLHRLFRTKSPAELSEELFLSADE  
 GPGEPEEPADWQTYREDEFVCIREFESLAEARQAVTCFRNMFATMGIGVEISLGEQGPGRVEMRIKVAPTVT  
 PAVPLAKTPGLQTSDAAPVFLTELQNDVQDGYPMSFDCVVTGQPVPSVRWFKDGKLEEDDHYMINEDQQGG  
 HQLIITAVVPADMVYRCLAENSMGVSSTKAELRVELTSTDYDTAADATETSSYFSAQGYLSSREQEGTESDE  
 GQLPQVLEELKDLQVAPGTRLAKFQKLVKGYPAKLYWFKDQGLTTSDDHIRMDDKTLHTLEIVSVTREDPSG  
 QYAAIYLSNAVWKEICGIQQLRAQPVWRPPEFEELADCTAELGETVKLACRVTGTPKPIVSWYKDGKPEVEVDPH  
 HYLKEEAKEKGVLWIGPDTPGYTMASSSKQHSVLVLDVGRQHQTGTYTCIATNPAGQALCSASLHISGLAKEEEQ  
 ERVKEALISSFLQGTSAVSAQMSSESAGFADLVGQSKGESLVAEEAHSLSLAEVGTTEEFLQKLTSTITEMVS  
 AKISQAKLQVPGGDSDEETKTPSASPRHGRSRPSSSVQESSESEEDGDSRGEIFDIYVVTADYLPGLAEQDAI  
 ILREGQYVEVLDSAHPLRWLVRTKPTKSSPSRQGWVSPAYLDRKRLKLSPEWGPTEAPEFPGEAVSEDEYRTRL  
 SSVIQELLSSQAFVQELQFLESHHMKHLERSPRVPAAVASQKTVIFRNVQDISHFHSSFLKELQCGCTDDDDV  
 AMCFIKNQEAFAEKYLEFLVGRVQAESVVVSTPVQEFYKKAEEETLSAKDPTQPPPPPLQHYLEQPVERVQKYQ  
 ALLKELIRNKARNRQNCALLEQAYAVVSALPQRAENKLVSLMENYPGTLEALGEPHQGHFIVWEGAPGARM  
 PWKGNHRHVFLFRNYLVICKPRRDSRTDTFSYVFRNMMLKSSIDLNDQVEGDDRAFEVWHEREDSRKYLLOA  
 RTVILKNSWVKEICGIQQLRAQPVWRPPEFEELADCTAELGETVKLACRVTGTPKPIVSWYKDGKPEVEVDPH  
 HILIEDPDGSCTLILDNLGTIDSGQYMCFAASAAGNASTLGKILVQVPPRFVNVKVRATPFVEGEDAQITCTVE  
 GAPYPQIRWYKDGTLTLLAPGNRYRMLNEPRSGVLVLIQAASKEDLGHYECELVNRLGSTRGGGELYMQSPALR  
 ARDQHHREQIVAAVEERRPSP\*

>rs26971817\_ENSMUSP00000151217\_c.10323:A>G\_p.R3442G

ENSMUST00000219084.3|Obscn-207|ENSMUSG00000061462|-|chr11:g.58954441:T>C  
 MDHSFSGAPRFLTRPKAFVSVGKDATLSCQIVGNPTPHVSWEKDRQVEAGARFLAQDGDVYRLTILDLAL  
 GDSGQYVCRARNAIGEAFAAVGLRVDSEGTCAEQAPHFLLRPTSIRVREGADATFRCRVGGSPQPAVSWSKDG  
 RRLGPPDAPHVRVEEHGESSALRIRSRARPRDGGTYEVRAENPLGSASAAAALVVDSDAEVAGPPGTSTATLLA  
 HLQQRREAMRAEGIPSPPGAGTRTCTVTEGKHARLSCFVTGEPKPEVTVWKKDGLVTEGRRHVVEDEQENF  
 VLKILFCKQSDRGLYTCTASNLVGQTYSSVLVVREPTVPFKKRLQDLEVREKESATFQCEVAQPATEAAWFK  
 EETRLWASAKYDIEEGETERRLTVRNVSADDDAVYICETTEGSRVVAELSVQGNLTKLPRKTAVRTGDTAIF  
 WVAVLAVPEGPVWRWRNQEEMVAGGRVAITAEGTCHTLTIFQCTLEDMGVAVFVSGGCRTTTQFCVSAAPRRPPL  
 YPPADPVVKAKTESSVTLWSAPPHGDRPVTIDGYVLEKRLKLGAYAWSRCHEAGWLATTEFTITGVAAEEDGFQ  
 FRVSAINHFGQGPYLEFPGTMHLVPMPLAVKTPKAVEAVEGGEVTFVSDLTVASSGEWFLDGEALKASSIYVI  
 RCDRTRHMLTIREVPARLHGAQLKFVANGIETSIQMVVRAALGLPSSKLPAAAAAREVLAQLHEEAQLLAEALS  
 QAAAATWLKDGRELSLGPKEYMQVSAGRRALLVRDVAQDDAGLYECVSRGSRATAYQLLVQDITDGYRDWGPAG  
 PQKHMCKCAGAKIARYLGSSCYRFLQYDKGVVHWLEAALDTRQKGTSSCSLHEKPKLVFAKQQAHSEVKA  
 AGNSATLSCEVTAQTEVTFWKDGKLLSSSSKVRMEASGCSRRLVVQQAGKADAGEYSCEAGGQKLSFRLDVA  
 EPKLVFAKQQAHSEVKAAGASATLSCEVAQAQTEVTFWKDGKLLSSSSKVRMEASGCSRRLVVQQAGKADA  
 GEYSCEAGGQKLSFRLDVAEPMVFAKEQQARSEVKAAGASATLSCEVAQAQTEVTFWKDGKLLSSSSKVRM  
 EASGCSRRLVVQQAGKADAGEYSCEAGGQKLSFRLDVTEPKLVFAKEQQARSEVKAAGNSATLSCEVAQAQ  
 EVTWTFKDGKLLSSSSKVRMEASGCSRRLVVQQAGKADAGEYSCEAGGQKLSFRLDVTEPKLVFAKEQQAHSEV

KAEAGASATLSCEVAQAQTEVTFWFKDGKLLSSSSKVRMEASGCSRRLVVQQAGKADAGEYSCEAEGQKLSFRL  
DVAEPLVFAKEQQARSEVKAEGASATLSCEVAQAQTEVTFWFKDGKLLSSSSKVRVEASGCSRRLVVQQAGK  
ADAGEYSCEAGGQKLSFRLDVAEPLVFAKEQQANSEVKAEGASATLSCEVAQAQTEVTFWFKDGKLLSSSSK  
VRVEASGCSRRLVVQQAGKADAGEYSCEAGGQKLSFRLDVAEPLVFAKEQQAHSEVKAEGASATLSCEVAQ  
AQTEVTFWFKDGKLLSSSSKVRVEASGCSRRLVVQQAGKADAGEYSCEAGGQKLSFRLDVAEPLVFAKEQQAH  
SEVKAEGASATLSCEVAQAQTEVTFWFKDGKLLSSSSKVRVEASGCSRRLVVQQVKGADAGEYSCEARGQKLS  
FRLDVAEAEESQIPERPSRREPLVVKEHETIILTATIAAPSVAAVTWLKDGVETIRRSKRHEATSLGDHTLTVR  
GAQVLDIAIYSCRVGKEGQDFPVQVEEVAAKFSKPLEPVEGELGGTVMLVCELSPEQAEVWRCGNTQLRPGK  
RFQMTSEGPRTTLTVSGLREDDAEYVCESRDDRTSARLTVKVPVVKFTSGLSAMVAEEGQEATFQCIVVSPS  
DAGVTWYKDGMLQPSSEKFMVVEGASRSILTILGLTLEDAGQVTVAEAGASSAALRVREAPVLFKKLEPQT  
VEERTSVTLEVELTRPWPEVKWTRNAAVLTPSENVEIRAEGARHCLVLRVSGFADRGFFGCETPDDKTQAKLN  
VEMRQVRLVVRGLQVEVEAKEQGTASMDVELSHAEVEGSWTRDGLRLQPGPKCHLAVQGPVHILTLALSALQPDQSG  
LVAFRAEGVHTSARLIVTELPVSFTRVLQDVVATQKEKVTLECELSRPVDVRLKDGVELRAGKAIQIVAQGT  
CRSLVIYRCETGDQGVYCDALDAQTSASLRVQGRYTLIFRRVLAEDAGEVKFVAENAESRAHLRVKELPVT  
LLRPLRDKIAMEKHRGVLECVSRASAQVRWFKGGVELQSGPKYEVVSDGLYRKLVINQVPEDEDTYTC DAG  
NVKTSAQFFVEEQSITIVRGLKDMTVMEPAPAWFECETSIPSVRPPKWLGLKTVLQAGGNVLEQDGTVHRLT  
LHKTCSTMTGPHFTIGKSRSSAQLVSDIPVVLTRPLEPKAGRELQSVVLSCDFRPAPKAVQWYKDDTFLSP  
SEKFKMALEGQMAELRILRLTPADAGVYRCQAGSAQSSAEVTVAREVTVIQPLQDAEAMEEGRCVCFCELSH  
KDEDIEWSLNGTPLYNDSFHEISHEGCLHTLVLKSVRQADTGTVCATSPKVSVSARLVVKGKPVVFLKALDDV  
SAEERGTTLTQCEVSDPEARVVWRKDGVELGSPDKYDFLHKAGARGLTVHDLSDHEDAGLYTCQVGSKETQSKV  
SVHDLHVGITKRLKTVEVLEGESECFEVLSEHSPDPAVWTVGGKTVGGSGHFHAVRQGRKYTLTVKDAALS  
DAGEVVSVLGLTSKASLIIRERPVDTITKPLEDQRTTLGEDVMLSCELSRAGTSVRWLKDGKAIKRSQKYDLL  
SEGTRAVLVVRKASLKDSGEYTCETEASKSTAKLCVEEKANRFEELADLQVEEKGRAVFTCKTEHPASVVTW  
RKGLLELRASGKHVPSQEGTLTKLTINALERTSDTYTCDIGQARTQARLLVHGQKVRVIEDLEDTAVQEGSS  
AKFCCRIAPADYGPVHWFLLDKTPLHSNELNEITVQPGGYHVLTLRQLALKDSGTVYFEAGDQRTSAAALRVTEK  
PSIFSRPLTDVTVTEGEDTLVCETTTVDSVSRWTKDKGTLRPSARCQLSHEGCAQLLITATTPQDGGRYKC  
EIGGASSSSIVRVHALPVRFRESLKDVEVPKGAATLRCLVLSVAAPVVEWRHGDVLLKSSNKYSLRQEGAVLE  
LVIRDLQPDQSGQYSCSFGDQTTSATLTVKTSQAQFVGLKRNKEATEGTTVTLRCELTKEAPVEWKKGTETLR  
NGDKYSLKQDGAVCELQICSLLVADAGEYSCVCGQEKTSATLTVKALLVHFVRRLRSKEATEGDTTTLQCELS  
KAAPVEWRKGTETLRDGDYSLKQDGAVCELQIRSLTIADAGEYLCTCGQEKTSATLTVRGLPAKFIEDLRSQ  
EATEGATAILGCELSKAAPVEWRKGSSETLKDGDYTLRQDGAVCELQIRGLAVVDTGTYSLPTKFTTEGLRNE  
EATEGTMATLRCQMSKAAPVEWRKGSSETLRDGDYSLRQDGAAMCELQIRGLTIEDSGEYTCVCGQEKTSATLS  
VKALPPRFIEDLRSQEATEGTMATLRCQMSKAAPVEWRKGSSETLGDGGYSLRQNGAVCELQIHDLAVEDTGE  
YSCVCGQEKTSATLNVKALPPKFTTEGLKKEEATEGTMVTLRCQMSKEATVEWRKGAKTLSDDGGYSLRQDGA  
MCELQICGLAVEDAGEYSCVCGQEKTSATLSVKALPPRFIEDLRSQEATEGTMATLRCQMSKAAPVEWRKGS  
SETLRDGDYSLRQDGAVCELQIRDLAVEDAGEYLCVCGQEKTSATLSVKALPPRFIEDLRSQEATEGTMATLRCQ  
MSKAAPVEWRKGSSETLRDGDYSLRQDGAAMCELQICDLAVEDTGDYSCVCGQEKTSATLSVKAPQVVFQQLQ  
NLQAEEGSMASLRCELSVPNAAMVWSKGGLELQGDTRREARQQGCVAELLLRDLRREDAGEYSCTCGSQTTSA  
TLMVTAAPVRFRLRELQAQDVDEGATARLRCLESLREAVSVEWRKGSQVLPFCAKYQMVQEGTTAELLVHGVEQE  
DAGEYTC DAGHTQSIARLSVRAPKPKFKTDLQSTEQEAGGTARLCCQLSEAEPTPVQWLKEGVELHVGSKYE  
MRRQGA VCELLIHGLEAKDTGEYACL VGGQKTLASLRVKEPEVTIVRGLVDMEVQADEDFEFTCKV SQAGATD  
VQWHLQGLPLQSNEVTEVAVLADGCTHVLQLKGVTLLEDAGTVSFHVGGSSSAQLTVRVPEVTVLEPLKDVQL  
SEGQDAHFRCLSRASGQEARWALGGVPLQCNEMNITVEQGTLYLLTLHKVTLLEDAGTITLQVGSSESAQL  
KVTAKNTVLRGLENVDALEGGALFECQLSQPEVAHTWLLDDEPVHTSEKVEVVYFENGLRHLLLLKLNKLPQ  
DSCRVTFLAGDVVTS AFLTVRGWRLEVLEPPHDASVKAGMQVRFTCILSEAVPVGEATWYINGAAIQPDDTDW  
TVTTDGS HHALTLSNAQPQHAGEVTF AARDAVASARLSVLALPDPPEDAEVVGRSDHSVTLVSWVAPMSDGGGG  
LCGYR VEMKEASTGQWQLCHDLVPGPECVVDDLVP GKTYRFRVAAVGPAGAGEPVHLPQMVKIAPAPAPAPAP  
APAPETROAVVGEDICLELEVAADGGEVWHKGTERRIQPGGHFEVLSRGQRQMLVIKGFRTEDQGEYRCGPIQ  
GLPSSGAATFNVVMTSGSGDEVPAQPSLPPEAAQEGDLHLLWEALARKRRMSREPTLDSISELPEEDSRVQHL  
RQEAETAPDLSEGYSTADELARTGEADLSHTSSDDESRAGTPSLVTYLKKAGGPGISPLASKHEAQVTTSVK  
PQKQQEPVVPPTCPPPGDLSAADLMDPSLDKAAVKIQAAFQKGYKVRKEMKQQEGPVFSRTFGDTEAQVGDVLR  
ECVLATKTD MRACWLKDGIELTDGRHYHIDQLKDGTC SLLVTGLAPTD SGRYTCQVSTKSGRVSHSACVVVSG  
TESEAESSVGTLEDLDDAFRRAARRLHRLFRTKSPAELSEELFLSADEGPGEPEEPADWQTYREDENFVCIRFE  
SLAEARQAVTCFRNMFATMIGVEISLGEQGPGRVEMRIGKVAPTVTPAVPLAKT PGLQTS DAAPVFLTELQN  
QDVQDGYPMSFDCVVTGQPVPSVRWFKDGKLLLEEDDH YMINEDQQGGHQLIITAVVPADMGVYRCLAENSMGV  
SSTKAELRVELTSTDYD TAADATETSSYFSAQGYLSSREQEGTESDEGQLPVLEELKDLQVAPGTRLAKFQL  
KVKGY PAKLYWFKDGQPLTSDHIRMTDKKTLHTLEIVSVTREDSGQYAAIISNAVGAAYSSARLLVRGPSE  
PEEKPASDVHERLVPVPRILEKFTPKKVKRGSSITFSVKVEGHPAPSVHWLKEEAEGVLWIGPDTPGYTMASS

SKQHSVLVLLDVGRRHQGTTCIATNPAGQALCSASLHISGLAKEEEEQERVKEALISSFLQGTSSQAVSAQMSES  
 AGFADLVGQSKGESLVAEEAHSHLSLAEVGTTEFLQKLTSTIEMVSAKISQAKLQVPGGDSDEETKTPSASP  
 RHGRSRPSSSVQESSSESEDGDSRGEIFDIYVVTADYLPGLAEQDAIILREGQYVEVLDSAHPLRVLVTRTKPT  
 KSSPSRQGWVSPAYLDKRLKLSPEWGPTEAPEFPGEAVSEDEYRTRLSSVIQELLSSEQAFVVELQFLESHHM  
 KHLERSPRVPAAVASQKTVI FRNVQDI SHFHSSFLKELQGCCTDDVAMCFIKNQEAFEKYLEFVLVGRVQAES  
 VVVTSTPQVEFYKKYAEETLSAKDPTQPPPPPLQHYLEQPVERVQKYQALLKELIRNKARNRQNCALLEQAYAV  
 VSALPQRAENKLVSLMENYPGTLEALGEPTRQGHFIVWEGAPGARMPPWKGNHRVFLFRNYLVI CKPRRDSR  
 TDTFSYVFRNMMKLSSIDLNDQVEGDDRAFEVWHEREDSVRKYLLQARTVI IKNSWVKEICIGIQQRLAQPVWR  
 PPEFEEELADCTAELGETVKLACRVTGTPKPIVSWYKDGKPVVEVDPHHILIEDPDGSCSTLIIDLNTGIDSGQY  
 MCFAASAAGNASTLGKILVQVPPRFVNKVRATPFVEGEDAQITCTVEGAPYPQIRWYKDGTL LAPGNRYRMLN  
 EPRSGVLVLIQAASKEDLGHYECELVNRLGSTRGGGELYMQSPALRARDQHHREQIVAAVEVTEQETKVPKK  
 TVIIEETITTVVKS PRGRRQSPGKSPSRSPRRSASPRRPGLLAPERLYPPGTS PSRRLEVEQGRKAPVPALY  
 VTEAEVHAPASQS QPKWLEVEETIEVRVKKTGSRGASPVREMTSRGEGILFTLPGGIPGRDPNANNNSNKS SVY  
 QEARTWGPVAVHVGEFFIFQVDSVGNVDWAASPEPEQVRASQKEENTERQEGCSDGDENTFLMEEPQD TDSL  
 QGRDPKILTHNGRVLTLADLEDYVPEGETFGCGDSTPSTPDEPPCEVSVLQREI SEPTVGGPVLNNGRPPG  
 TGATPSFFRPGSQVHSPESVFLREAWSGPVSAAPWTSSFHHTHVQSSVDGSHGFSFKTEVSTQTVSFGAVGET  
 VTLHIDPDGGEAPGPSQG\*

>rs51034442\_ENSMUSP00000158795\_c.11684:A>T\_p.E3895D

ENSMUST00000238536.2|Obscn-210|ENSMUSG00000061462|-|chr11:g.58955227:T>A  
 MDHSFSGAPRFLTRPKAFVSVGKDATLSCQIVGNPTPHVSWEKDRQPVVEAGARFLAQDGDVYRLTILDLAL  
 GDGQYVCRARNAIGEFAAVGLRVDSEGTCAEQAPHLLRPTSIRVREGADATFRCRVGGSPQPAVSWSKDG  
 RRLGPPDAPHVRVEEHGESSALRIR SARPRDGGTYEVRAENPLGSASAAAALVVDSDAEVAGPPGTSTATLLA  
 HLQQRREAMRAEGIPSPPGAGTRTCTVTEGKHARLSCFVTGEPKPKETVWKKDQGLVTEGRRHVYVEDEQENF  
 VLKILFCKQSDRGLYTCTASNLVGQTYSSVLVVVREPTVPFKKRLQDLEVREKESATFQCEVAQAPATEAAWFK  
 EETRLWASAKYDIEEGTERRLTVRNVSADDDAVYICETTEGSRVAELSVQGNLTKRKLPRKTAVRTGDTAIF  
 WVLEAVPEGPVRWLRNQEEMVAGGRVAITAEGTCHTLTI FQCTLEDMGVAFVSGGCRATTTTCVCSAPRRPPL  
 YPPADPVVAKTETSLSVAPPHGDRPVTIDGYVLEKRLKLGAYAWSRCHEAGWLATTEFTITGVAAEEDGFQ  
 FRVSAINHFGQGPYLEFPGMTMLVPLAVKTPKAVEAVEGGEVTFVSDLTVASSGEWFLDGEALKASSIYVI  
 RCDRTRHMLTIREV PARLHGAQLKFVANGIETS IQMVVRAALGLPSSKLPAAAAREVLAQLHEEAQLLAE LSD  
 QAAA VTWLKDGRELSLGPYEMQVSAGRRALLVRDVAQDDAGLYECVSRGSR TAYQLLVQDITDGYRDWGPAG  
 PQKHMCKCAGAKIARYLGSSCYRFLQYDKGVWHWLEAALDTRQKGTSSCSLHEKPKLVFAKQQAHSEVKA  
 AGNSATLSCEVTQAQTEVTWFKDGKLLSSSSKVRMEASGCSRRLVVQQAGKADAGEYSCEAGGQKLSFRLDVA  
 EPKLVFAKQQAHSEVKAEGASATLSCEVAQAQTEVTWFKDGKLLSSSSKVRMEASGCSRRLVVQQAGKADA  
 GEYSCEAGGQKLSFRLDVAEPKMFVFAKEQQARSEVKAEGASATLSCEVAQAQTEVTWFKDGKLLSSSSKVRM  
 EASGCSRRLVVQQAGKADAGEYSCEAGGQKLSFRLDVTEPKLVFAKEQQARSEVKAEGVNSATLSCEVAQAQ  
 EVTWFKDGKLLSSSSKVRMEASGCSRRLVVQQAGKADAGEYSCEAGGQKLSFRLDVAEPKLVFAKEQQARSEV  
 KAEAGNSATLSCEVAQAQTEVTWFKDGKLLSSSSKVRMEASGCSRRLVVQQAGKADAGEYSCEAGGQKLSFHL  
 DVTEPKLVFAKEQQAHSEVKAEGASATLSCEVAQAQTEVTWFKDGKLLSSSSKVRMEASGCSRRLVVQQAGK  
 ADAGEYSCEAGGQKLSFRLDVAEPKLVFAKEQQARSEVKAEGASATLSCEVAQAQTEVTWFKDGKLLSSSSK  
 VRVEASGCSRRLVVQQAGKADAGEYSCEAGGQKLSFRLDVAEPKLVFAKEQQANSEVKAEGASATLSCEVAQ  
 AQTEVTWFKDGKLLSSSSKVRVEASGCSRRLVVQQAGKADAGEYSCEAGGQKLSFRLDVAEPKLVFAKEQQAH  
 SEVKAEGASATLSCEVAQAQTEVTWFKDGKLLSSSSKVRVEASGCSRRLVVQQAGKADAGEYSCEAGGQKLS  
 FRLDVAEPKLVFAKEQQAHSEVKAEGASATLSCEVAQAQTEVTWFKDGKLLSSSSKVRVEASGCSRRLVVQQ  
 AGKADAGEYSCEAGGQKLSFRLDVAEPKLVFAKEQQAHSEVKAEGASATLSCEVAQAQTEVTWFKDGKLLSS  
 SSKVRVEASGCSRRLVVQQAGKADAGEYSCEAGGQKLFRLDVAEPKLMFAKEQQAHSEVKAEGASATLSCE  
 VAQAQTEVTWFKDGKLLSSSSKVRVEASGCSRRLVVQQAGKADAGEYSCEAGGQKLSFRLDVAEPKLVFAKEQ  
 QAHEVKAEGASATLSCEVAQAQTEVTWFKDGKLLSSSSKVRVEASGCSRRLVVQQVQKADAGEYSCEARGQ  
 KLSFRLDVADTRLMFAKEQQARTEVKAEGNSATLSCEVAQAQTEVTWFKDGKLLSSSSKVRVEASGCSRRLV  
 VQQAGKADAGEYSCEAGGQKLSFRLDVAEAEESQIPERPSRREPLVVKEHETIILTATIAAPSVAAVTWLKDV  
 EIRRSKRHEATSLGDTHTLTVRGAQVLD SAIYSCRVGKEGQDFPVQVEEVAAKFSKPLEPVEGELGGTVMLVC  
 ELSPEQAEVWRCGNTQLRPGKRFQMTSEGPRRTLTVSGLREDDAEYVCESRDDRTSARLTVKVPVVKFTS  
 GLSAMVAEEGQEATFQCVVSPSDAGVTWYKDGMLQPSKFKVMVESGASRSLTILGLTLEDAGQVTEAEAGAS  
 SSAALRVREAPVLFKKLEPQTVERTSVTLVEVLVRLVLELQVEVEAQQGTASMDVELSHAEVEGSWTRDGLRLQPGPKC  
 HLAVQGPVHILTL SALQPDSGLVAFRAEGVHTSARLIVTELPVSFTRVLQDVVATQKEKVTLECELSRPPVDV  
 RWLKDGVLELRAGKAI GIVAQGTCSRSLVIYRCETGDQGVYVCDALDAQT SASLRVQGRTYTLIFRRVLAEDAGE  
 VKFVAENAESRAHLRVKELPVTLLRPLRDKIAMEKHRGVLECCQVSRASQVRWFKGGVELQSGPKYEVVSDGL  
 YRKLVINVDVQPEDEDTYTC DAGNVKTS AQFFVVEQSITIVRGLKDMTVMEPAPAWFECETSIPSVRPPKWL LG

KTVLQAGGNVGLQDGTVHRLTLHKTCSTMTGPVHFTIGKSRSSAQLVVSIPVVLTRPLEPKAGRELQSVVL  
SCDFRPAPKAVQWYKDDTPLSPSEKFKMALEGQMAELRILRLTPADAGVYRCQAGSAQSSAEVTVAREVTVI  
QPLQDAEAMEEGRVCFSCELSHKDEDEIWSLNGTPLYNDSFHEISHEGCLHTLVLSVRQADTGTVCATSPKV  
SVSARLVVKGKPVVFLKALDDVSAEERGTTLTQCEVSDPEARVVWRKDGVELGSPDKYDFLHKAGARGLTVHD  
LSHEDAGLYTCQVGSKETQSKVSVHDLHVGITKRLKTVEVLEGECSFECVLSHESPSDPAVWTVGGKTVGGS  
GHFHAVRQGRKYTLTVKDAALSDAGEVVSFVGLTSSKASLIIRERPVDITKPLEDQRTTLGEDVMLSCELSRA  
GTSVRWLKDGKAIRKSQKYDLLSEGTRAVLVVRKASLKDSGEYTCETEASKSTAKLCVEEKANRFTEELADLQ  
VEEKGRAVFTCKTEHPASVVTWRKGLLELRASGKHVPSQEGTLTKLTINALERTDSDTYTCDIGQARTQARLL  
VHGQKVRVIEDLEDTAVQEGSSAKFCRIAPADYGPVHWFLDKTPLHSNELNEITVQPGGYHVLTLRQLAKD  
SGTVYFEAGDQRTSAALRVTEKPSIFSRPLTDVTVTEGEDTLVCETTTVDSVVRWTKDGKTLRPSARCQLSH  
EGCQAQLLITATTPQDGGRYKCEIGGASSSSIVRVHALPVRFRRESLKDVEVPEGKAATLRCVLSVAAPVEWR  
HGDDVLKSSNKYSLRQEGAVLELVIRDLQPDQSGQYSCSFGDQTTSATLTVKTSQAQFVGLRNKEATEGTTV  
TLRCELTKAPVEWKKGTETLRNGDKYSLKQDGAVCELQICSLLVADAGEYSCVCGQEKTSATLTVKALLVHF  
VRLRSKEATEGDTTLQCELSKAAPVEWRKGTETLRDGDYSLKQDGAVCELQIRSLTIADAGEYLCTCGQE  
KTSATLTVRALPAKFKDSLKNEEATDGTATLSCELSKAAPVWKKGPKTLQSGDKYVLRQDGAVCGLQIHGL  
TMADAGEYSCVCGQEKTSATLTVRGLPAKFIEDLRSQEATEGATAILRCELSKAAPVEWRKGSSETLKDGDYR  
LRQDGAVCELQIRGLAVDTGTYSPLTKFTEGLRNEEATEGTMATLRCQMSKAAPVEWRKGSSETLRDGDYR  
LRQDGAVCELQIRGLTIEDSGEYTCVCGQEKTSATLSVKALPSRFIEDLRSQEATEGTMATLRCQMSKTAPVE  
WKKGSETLRDGGYSLRQDGPVCELQICDLAVEDAGEYSCVCGQEKTSATLSIKALPPRFIEDLRSQEATEG  
MATLRCQMSKAAPVEWRKGSSETLGDGGYSLRQNGAVCELQIHDLAVEDTGEYSCVCGQEKTSATLNVKALPP  
RFIEDLRSQEATEGTMATLRCQMSKAAPVEWRKGSSETLRDGGYSLRQDGAVCELQIHDLVEDAGQYSCVCG  
QEKTSAVLTVDALPPKFTEGLKKEEATEGTMVTLRCQMSKEATVEWRKGAKTLSDGGRYSLRQDGAMCELQIC  
GLAVEDAGEYSCVCGQEKTSATLSVKALPPRFIEDLRSQEATEGTMATLRCQMSKAAPVEWRKGSSETLRDGD  
YSLRQDGAVCELQIRDLAVEDAGEYLCVCGQEKTSATLSVKALPPRFIEDLRSQEATEGTMATLRCQMSKAAP  
VEWRKGSSETLRDGDYSLRQDGAMCELQICDLAVEDTGDYSCVCGQEKTSATLSVKALPPRFIEDLRSQEARE  
GTVATLRCMSKAAPVEWRKGSSETLKDGDYSLRQEGNLCELQIRDLAVEDTEEYSCVCGQEKTSATLSVKAL  
PAKFIEDLRSQEAPESSTVTLRCKLSKKASVWKKGSETLRNGARYSLRQDGAVCELEIRDLTVEDTGEYSCT  
CGQERTSATLSIMAPQVVFQQLQNLQAEEGSMASLRCELSVNAAMVWSKGGLELQGDTRREARQQGCVAEL  
LLRDLRREDAGEYSCTCGSQTTSATLMVTAAPVRFLRELQAQDVDEGATARLRCELSREAVSVEWRKGSQQLF  
PCAKYQMVQEGTTAELLVHGVEQEDAGEYTCDAHTQSIARLSVRAPKPKFKTDLQSTEQEAAGTARLCCQLS  
EAEPGTPVQWLKEGVELHVGSKYEMRRQAVCELLIHGLEAKDTGEYACLVGGQKTLASLRVKEPEVTIVRGL  
VDMEVQADEDEVEFTCKVSQAGATDVQWHLQGLPLQSNVTEVAVLADGCTHVLQKGVTLLEDAGTVSFHVGGL  
SSSAQLTVRVPEVTVLEPLKDVQLSEGQDAHFRCRLSRASGQEARWALGGVPLQCNEMNDITVEQGTLYLLTL  
HKVTLEDAGTITLQVGSSESQAQLKVTAKNTVLRGLENVDALEGGEALFECQLSQPEVAHAHTWLLDDEPVHTS  
EKVEVVYFENGLRHLLLLKLNKPKQDSCRVTFLAGDVVTSFAFLTVRGWRLEVLEPPHDASVKAGMQVRFTCILS  
EAVPVGEATWYINGAAIQPDDTDWTVTTDGSHHALTLNSAQLPQHAGEVTFFAARDAVASARLSVLALPDPEDA  
EVVGRSDHSVTLVSWAPMSDGGGGLCGYRVMKEASTGQWQLCHDLVPGPECVDDLVPGKTYRFRVAAVGPA  
GAGEPVHLPQMVKIAPAPAPAPAPAPAPAPAPETRAVVGEDICLELEVAADGGEVWHKGTERRIQPGGHFEVLS  
RGQRQMLVIKGFRTEDQGEYRCGPIQGLPSSGAATFNVVMTSGSGDEVPAQPSLPPEAAQEGDLHLLWEALAR  
KRRMSREPTLDSISELPEEDSRVQHLRQEAETAPDLSEGYSTADELARTGEADLSHTSSDDESAGTPSLVT  
YLKAGGPGISPLASKHEAQVTTSVKPKQKQEPVPTCP PPGDLAADMPSLDKAAVKIQAAFQYKVRKE  
MKQQEGPVFSRTFGDTEAQVGDVLRLECVLATKTDMRACWLKDGIELTDGRHYHIDQLKDGTCSSLVVTGLAPT  
DSGRYTCQVSTKSGRVSHSACVVVSGTESEAESSSGGELDDAFRAARRLHRLFRTKSPAELSEELFLSADE  
GPGEPEPADWQTYREDENFVCIRFESLAEARQAVTCFRNMFATMGI GVEISLGEQGRGVEMRIGKVAPTVT  
PAVPLAKTPGLQTSDAAPVFLTELQNDVDQDGYPMSFDCVVTGQVPVSVRWFKDGKLEEDDHYMINEDQGG  
HQLIITAVVPADMVYRCLAENSMGVSTKAELRVELTSTDYDTAADATETSSYFSAQGYLSSREQEGTESDE  
GQLPQVLEELKDLQVAPGTRLAKFQLKVKGYPAKLYWFKDGGPLTSDHIRMTDKKTLHTLEIVSVTREDSG  
QYAAYSNAVGAAYSSARLLVRGPSEPEEKPASDVHERLVPPRILEKFTPKKVKRGSSITFSVKEGHPAPSV  
HWLKEEAKEKGVLWIGPDTPGYTMASSSKQHSVLVLDVGRQHGTYTICATNPAGQALCSASLHISGLAKEEEQ  
ERVKEALISSFLQGTSAQVSAQMSSEAGFADLVGQSKGESLVAEEAHSHLSLAEVGTEEFQKLTSTQITMVS  
AKISQAKLQVPGGDSDEETKTPSASPRHGRSRPSSSVQESSSESEDGDSRGEIFDIYVVVTADYLPGLAEQDAI  
ILREGQYVEVLDSAHPLRWLVRTKPTKSSPSRQGWVSPAYLDKRLKLSPEWGPTEAPEFPGEAVSEDEYRTRL  
SSVIQELLSSQAFVGLQFLESHEHMKHLERSPRVPAVASQKTVIFRNVQDISHFHSSFLKELQCGCTDDDV  
AMCFIKNQEAFAKEYLEFLVGRVQAESVVVSTPVQEFYKKAEEETLSAKDPTQPPPPPLQHYLEQVVERVQKYQ  
ALLKELIRNKARNRQNCALLEQAYAVVSALPQRAENKLVHSLMENYPGTLEALGEPYRQGHFIWEGAPGARM  
PWKGHNHRVFLFRNYLVICKPRRDSRTDTFSYVFRNMMKLSSIDLNDQVEGDDRAFEVWHEREDESVRKYLLQA  
RTVVIKNSWVKEICGIQORLAQPVWRPPEFEEELADCTAELGETVKLACRVTGTPKPIVSWYKDGKPEVDPH  
HILIEDPDGSCTLILDNLTGIDSGQYMCFAASAAGNASTLGKILVQVPPRFVNVKVRATPFVEGEDAQITCTVE



GAPYPQIRWYKDGTLAPGNRYRMLNEPRSGVLVVIQAASKEDLGHYECELVNRLGSTRGGGELYMQSPALR  
ARDQHHREQIVAAVEDTSVEGSAHSAQDQADQQAASVLWRLGSEALGSPSGDLNTRQSEPPAFEEAASQIP  
GAASGTPEVSPQPGTHKLEQETTSSGSQGWTVPIRVEGTAWPGAGTGQLLLDVHSQVIMETTQRTYVCQAPDT  
GVTRAPSMQVTIEDVQVQVGDMAQFDAVIEGHPPPIVITWYKGSTQLTSSARLSQRQDGTYSVLVTDVAPHDA  
GVYTCVANNAGGQVLCKAELLVHGGDKLDAENQVYRRKLHSFYDVQEEIGRGVFGFVKRVQHKGNKMFCAAKF  
IPLRSKTRAQAYQERDILATLGHPLVTGLLDQFETRKTLLILILELCSSEELLDRFLKKGVVTEAEVKVYIQQL  
VEGLHYLHSHGILHLDIKPPNIMLVHPAREDIKICDFGFAQKITPSEPQYSKYGSPEFVSPETIEQNPVSEGS  
DIWAMGVI SYLSLTCCSSPFAGESDRATLLNVLEGRVSWSSPTAAHLEDAKDFIKATLQRTPRARPSTSQCLA  
HPWFLKSMPEAAEHFINTKQLKFLARSRWQRSLMSYKSIILVMRSIPELLQGPPDSPSLGVARHLRGEASGAS  
SSSSSSDNELAPFARAKSLPPSPVTHSPLLHPRGFLRPSASLPEETEASMPATAAASPASQASAGPPASPGCV  
PRHSVISSLFYQQAGEGAERGNKTSGAKRHPARRRHLKGGYIARALPGLREPLMEYSLLEEEAAREEQASLM  
TKTPSFETALRLPSSSVREVPGRSHSLDNPPVTTGPSPEACKEQLLFPSTGLTHETTAKDRGHKEGFLQESV  
PFPMSGDSRPGKQEGSSQDSCRKPASSCHSELGSGSQEGCGPSSQSLGSLPPQSLKELSTSCGPLFSEQ  
PQAAPFPPTQVSPLLGEKEPQDGSLSSEGPVVPSSSPGSASQVDASLDTEGLSEAGDTCDFTPPPQRPQEQAT  
TRKFSLESRGGYAGVAGYGTFAFGGDAGGMLGQGPLWARMAWAVSSESSEQDEAATESPQPLESGLPIAEASG  
VPLRTSPSLTPWEEVEQVSLVQIRDLSDGAEAAADTISLDISEVDPAYLNLSLDYDIKYLPEFEMI FRRVPKPI  
EQPESPGSETEAGQLADFLLEAAWPFPGELGLRAGLEITTEPEEPGDLEALLGEAAVGRKRKWSPSRGLFQF  
PGRCLSGEEPVELGLRQVRKASMAHISRIKGRPEGEREGPPRKKAGLASFRLSGLKGRDQELSDAEVVLGQ  
SVTLACQVLAQPTAQATWSKDGVLLESSGHLISSTLKNFQLLTIILVVKEEDLGTYTCCVSNPLGTAVTTGVL  
RKAERPSSSPREVEGELYKDAVLLVWKPVESECGPVTYIVQCCIEGGSWTTLASDISDCCYLTGKLSRGGMYIF  
RTACVSKAGMGPISSPSEQVLLGGPNHLASEEESRRGRPAQLLPSTKTFAFQMQIRRGFRSVVRQCREKASGR  
ALAAKIVPYQPEDKTAVLREYEALKRHLHHPHLAQLHAAYLSPRHLVLI LELCSGPELLPSLAERESYSESDVK  
DYLWQMLSATQYLHAQHI LHLDLRSENMMVTEYNLLKVIDLGNASLDQEKVPAPENFKDYLETMAPELLEGG  
GAVPQTDIWAIGVTA FIMLSGEY PESSSEGRDLQKGLRKLIRLSRCYAGLSGGAVAFQSSSLCAQPWGRPCA  
STCLQCGLWTEEGPTGSRPTVTFPTVRLRAFVREKERRRALLYKKNLAQVR\*  
>rs51034442\_ENSMUSP00000038264\_c.10856:A>T\_p.E3619D  
ENSMUST00000047441.14|Obscn-202|ENSMUSG000000061462|-|chr11:g.58955227:T>A  
MDHSFSGAPRFLTRPKAFVSVGKDATLSCQIVGNPTPHVSWEKDRQPEAGARFLAQDGDVYRLTILDLAL  
GDSGQYVCRARNAIGEAFVAVGLRVDSEGTCAEQAPHFLLRPTSIRVREGADATFRCRVGGSPQPAVSWSKDG  
RRLGPPDAPHVRVEEHGESSALRIRSARPRDGGTYEVRAENPLGSASAAAALVVDSDAEVAGPPGTSTATLLA  
HLQORREAMRAEGIPSPPGAGTRTCTVTEGKHARLSCFVTGEPKPEVWKKDQGLVTEGRRHVVEDEQENF  
VLKILFCKQSDRGLYTCTASNLVGQTYSSVLVVREPTVPFKKRLQDLEVREKESATFQCEVAQPAEEAAWFK  
EETRLWASAKYDIEEGETERRLTVRNVSADDDAVYICETTEGSRVAELSVQGNLTKLPRKTAVRTGDTAIF  
WVELAVPEGPVWRWRNQEEMVAGGRVAITAEGTCHTLTI FQCTLEDMGEVAFVSGGCRTTTQFCVSAPRRPPL  
YPPADPVVKAKTESSVTLWSAPPHGDRPVTIDGYVLEKRKLGAYAWSRCHEAGWLATEFTITGVAEEGDFQ  
FRVSAINHFQGGPYLEFPGTMLHVPMLAVKTPLKAVEAVEGGEVTFVSDLTVAASGEWFLDGEALKASSIYVI  
RCDRTRHMLTIREVPARLHGAQLKFVANGIETSIQMVVRAALGLPSSKLPAAAAREVLAQLHEEAQLLAELSD  
QAAAAVTWLKDGRELSLGPYEMQVSAGRRALLVRDVAQDDAGLYECVSRGSRRTAYQLLVQDITDGYRDWGPAG  
PQKHMCKCAGAKIARYLGSSCYRFLQYDKGVWHLEAALDTRQKGTSSCSLHEKPKLVFAKQQAHSEVKA  
AGASATLSCEVAQAQTEVTFWKDGKLLSSSSKVRMEASGCSRRLVVQQAGKADAGEYSCEAGGQKLSFRLDVA  
EPKMFVFAKEQQARSEVKAEGASATLSCEVAQAQTEVTFWKDGKLLSSSSKVRMEASGCSRRLVVQQAGKADA  
GEYSCEAGGQKLSFRLDVTEPKLVFAKEQQARSEVKAEGVNSATLSCEVAQAQTEVTFWKDGKLLSSSSKVRM  
EASGCSRRLVVQQAGKADAGEYSCEAGGQKLSFRLDVAEPKLVFAKEQQARSEVKAEGNSATLSCEVAQAQ  
EVTWFKDGKLLSSSSKVRMEASGCSRRLVVQQAGKADAGEYSCEAGGQKLSFHLDVTEPKLVFAKEQQAHSEV  
KAEAGASATLSCEVAQAQTEVTFWKDGKLLSSSSKVRMEASGCSRRLVVQQAGKADAGEYSCEAGGQKLSFR  
DVAEPKLVFAKEQQARSEVKAEGASATLSCEVAQAQTEVTFWKDGKLLSSSSKVRVEASGCSRRLVVQQAGK  
ADAGEYSCEAGGQKLSFRLDVAEPKLVFAKEQQANSEVKAEGASATLSCEVAQAQTEVTFWKDGKLLSSSSK  
VRVEASGCSRRLVVQQAGKADAGEYSCEAGGQKLSFRLDVAEPKLVFAKEQQAHSEVKAEGASATLSCEVAQ  
AQTEVTFWKDGKLLSSSSKVRVEASGCSRRLVVQQAGKADAGEYSCEAGGQKLSFRLDVAEPKLVFAKEQQAH  
SEVKAEGASATLSCEVAQAQTEVTFWKDGKLLSSSSKVRVEASGCSRRLVVQQAGKADAGEYSCEAGGQKLS  
FRLDVAEPKLVFAKEQQAHSEVKAEGASATLSCEVAQAQTEVTFWKDGKLLSSSSKVRVEASGCSRRLVVQQ  
AGKADAGEYSCEAGGQKLFRLDVAEPKLVFAKEQQAHSEVKAEGASATLSCEVAQAQTEVTFWKDGKLLSS  
SSKVRVEASGCSRRLVVQQGKADAGEYSCEAGGQKLSFRLDVAEAEBSQI PERPSRREPLVVKHEHTIILTAT  
IAAPSAAVTWLKDGEVIRRSKRHEATSLGDHTTLTVRQAQVLDLSAIYSCRVKGEGDFPVQVEEVAAKFSK  
LEPVEGELGGTVMLVCELSPEQAEVWVRCGNTQLRPGKRFQMTSEGPRRTLTVSGLREDDAEFYVCESRDRT  
SARLTVKVPVVKFTSGLSAMVAEEGQEA TFQCVVSPSDAGVTWYKDGMLQPSSEKFMVMEVSGASRSLTILGL  
TLEDAGQVTVAEAGASSAALRVREAPVLFKKKLEPQTVTEERTSVTLEVELTRPWPEVKWTRNAAVLTPSENV  
EIRAEGARHCLVLRVSVGFADRGFFGCETPDDKTQAKLVNEMRQVRLVRLGQVEEAKQGTASMDVELSHAEVE

GSWTRDGLRLQPGPKCHLAVQGPVHILTLALSALQPQDSGLVAFRAEGVHTSARLIVTELPVVSFTRVLQDQVAVATQ  
KEKVTLECELSRPVDVRLWKDGVLELRAGKAI GIVAQGTCSRSLVIYRCETGDQGVYVCDALDAQTSASLRVQGR  
TYTTLIFRRVLAEDAGEVKFVAENAESRAHLRVKELPVTLLRPLRDKIAMEKHRGVLECCQVSRASAQVRWFKGG  
VELQSGPKYEVVSDGLYRKLVINQVPEDEDTYTCDAGNVKTSAQFFVEEQSITIVRGLKDMTVMPEPAPAWFE  
CETSI PSVRPPKWLGLKTVLQAGGNVGLQDGTVHRLTLHKTCSMTGPFVHTIIGKSRSSAQLVVSIDI PVVLT  
RPLEPKAGRELQSVVLSCDFRPAPKAVQWYKDDTPLSPSEKFKMALEGQMAELRILRLTPADAGVYRCQAGSA  
QSSAEVTVEAREVTVIQPLQDAEAMEEGRVCFSCELSHKDEDIEWSLNGTPLYNDSFHEISHEGCLHTLVLSK  
VRQADTGTVCATSPKVSVSARLVVKGKPVVFLKALDDVSAEERGTTLQCEVSDPEARVVRKDGVELGSPDK  
YDFLHKAGARGLTVHDLSHEDAGLYTCQVGSKETQSKVSVHDLHVGITKRLKTVEVLEGESCSFCEVLSHESP  
SDPAVWTVGGKTVGGSGHFHAVRQGRKYTLTVKDAALSDAGEVVSFVGLGTSKASLIIRERPVDTKPLEDQR  
TTLGEDVMLSCELSRAGTSVRWLKDGKAIKRSQKYDLLSEGTRAVLVVRKASLKDSGEYTCETEASKSTAKLC  
VEEKANRFTEELADLQVEEKGRAVFTCKTEHPASVVTWRKGLLELRASGKHVPSQEGTLTKLTINALERTDSD  
TYTCDIGQARTQARLLVHGQKVRVIEDLEDTAVQEGSSAKFCCRIPADYGPVHWFLLDKTPLHSNELNEITVQ  
PGGYHVLTLRQLALKDSGTVYFEAGDQRTSAALRVTEKPSIFSRPLTDVTVTEGEDTLVCETTTVDSSVRWT  
KDGTLRPSARCQLSHEGCAQLLITATTPQDGGRYKCEIGGASSSSIVRVHALPVRFRESLKDVEVEPEGKAA  
TLRCVLSVAAPVEWRHGDDVLKSSNKYSLRQEGAVLELVIRDLQPDQSGQYSCSFGDQTTSATLTVKTSQAQ  
FVGKLRNKEATEGTTVTLRCELTKAPVEWKKGTETLRNGDKYSLKQDGAUCELOICSLLVADAGEYSCVCGQ  
EKTSAATLTVKALLVHFVRLRSKEATEGDTTTLQCELSKAAPVEWRKGTETLRDGDYSLKQDGAUCELOIRS  
LTIADAGEYLCTCGQEKTSAATLTVRALPAKFKDSLKNEEATDGTATLSCELSKAAPVTWKKGPKTLQSGDKY  
VLRQDGAUCELOIHLGLTMADAGEYSCVCGQEKTSAATLTVRGLPAKFIEDLRSQEATEGATAILRCELSKAAPV  
EWRKGETLKDGDYTLRQDGAUCELOIRGLAVVDTGTYSLSLPTKFTTEGLRNEEATEGTMATLRCQMSKAAPV  
EWRKGETLRDGDYSLRQDGAUCELOIRGLTIEDSGEYTCVCGQEKTSAATLSVKALPPRFIEDLRSQEATEG  
TMATLRCQMSKAAPVEWRKGETLGDGGYSLRQNGAVCELOIHDLAVEDTGEYSCVCGQEKTSAATLNVKALP  
PRFIEDLRSQEATEGTMATLRCQMSKAAPVEWRKGETLRDGGYSLRQDGAUCELOIHDLDVEDAGYSCVC  
GQEKTSAVLTVDALPPKFTTEGLKKEEATEGTMVTLRQMSKEATVEWRKGAKTLSGGYSLRQDGAUCELOI  
CGLAVEDAGEYSCVCGQEKTSAATLSVKALPPRFIEDLRSQEATEGTMATLRCQMSKAAPVEWRKGSKTLRDGD  
RYSLRQDGAUCELOICDLAVEDTGDYSCVCGQEKTSAATLSVKAPQVVFQQLQNLQAEEGSMASLRCVLSVFN  
AAMVWSKGGLELQGDTRREARQQGCVAELLLRDLRREDAGEYSCVCGSQTTSATLMVTAAPVRFRLRQAQDV  
DEGATARLRCELSREAVSVEWRKGSLLQFPKAKYQMVQEGTTAEELLVHGVEQEDAGEYTCDAHTQSARLSV  
RAPKPKFKTDLQSTEQEAGGTARLCCQLSEAEPTPVQWLKEGVELHVGSKYEMRRQGAUCELLIHGLEAKDT  
GEYACLVGQKTLASLRVKEPEVTIVRGLVDMEVQADEDEFTCKVSOAGATDVQWHLQGLPLQSNVEVAV  
LADGCTHVLQKGVTLLEDAGTVSFHVGGSSSAQLTVRVPEVTLEPLKDVQLSEGQDAHFRCRLSRASGQEA  
RWALGGVPLQCNEMNDITVEQGTLYLLTLHKVTLEDAGTITLQVGSSESQAQLKVTAKNTVLRGLENVDALEG  
GEALFECQLSQPEVAHAHTWLLDDEPVHTSEKVEVVYFENGLRHLLLLKLNKLPQDSCRVTFLAGDVVTSAFITV  
RALPDPPEAEVVGSRDHSVTLVWVAPMSDGGGLCGYRVEMKEASTGQWQLCHDLVPGPECVDDLVPGKTY  
RFVVAAVGPAAGAGEPVHLPQMVKIAAPAPAPAPAPAPAPAPAPAPAPAPAPAPAPAPAPAPAPAPAPAPAP  
QPGGHFEVLSRQQRMLVIKGFRTEDQGEYRCGPIQGLPSSGAATFNVMVTSVSGSDEVPAPQPSLPPEAAQEGD  
LHLLWEALARKRRMSREPTLDSISELPEEDSRVQHLRQEAEEETAPDLSEGYSTADELARTGEADLSHTSSDDE  
SRAGTPSLVTYLKKAGGPGISPLASKHEAQVTTSVKPKQKQEPVVPVTPPPGDLAADLMDPSLDKAAVKIQ  
AFKGYKVRKEMKQEGPVFSRTFGDTEAQVGDVLRLECVLATKTDMRACWLKDGIELTDGRHYHIDQLKDGTC  
SLLVTGLAPTDSGRYTCQVSTKSGRVSHSACVVVSGTESEAESSGGELDDAFRAARRLHRLFRTKSPAELS  
EEELFLSADEGPPEPEPADWQTYREDENFVICRFESLAEARQAVTCFRNMFMATMGIGVEISLGEQGPGRVEM  
RIGKVAPTPTPAVPLAKTPGLQTSDAAPVFLTELQNDVQDGYPMSFDCVVTGQPVVPSVRWFKDGLLEEDDH  
YMINEDQGGHQLIITAVVPADMGVYRCLAENSMGVSSTKAE LRVELTSTDYDTAADATETSSYFSAQGYLSS  
REQEGTESDEGQLPVLEELKDLQVAPGTRLAKFQLKVKGYPAKLYWFKDQGPLTTSDHIRMTDKKTLHTLE  
IVSVTREDSGQYAAIISNAVGAAYSARLLVRGPSEPEEKPASDVHERLVPPRILEKFTPKKVKRGSSITFSV  
KVEGHPAPSVHWLKEEAEGVLIWIGPDTPGYTMASSKQHSVLLLDVGRQHGGTYTCIATNPAGQALCSASLH  
ISGLAKEEEQERVKEALISSFLQGTSAVSAQMSSESAGFADLVGQSKGESLVAEEAHSHLSLAEVGTTEFLQK  
LTSQITEMVSAKISQAKLQVPGGDSDEETKTPSASPRHGRSRPSSSVQESSSESEDGDSRGEIFDIYVVVTADY  
LPLGAEQDAIILREGQYVEVLDSAHPLRWLVRTKPTKSSPSRQGWVSPAYLDKRLKLSPEWGPTEAPEFPGEA  
VSEDEYRTRLSSVIQELLSSEQAFVGELOFLESHHMKHLERSPRVPAAVASQKTVIFRNVQDISHFHSSFLKE  
LQCGCTDDDVAMCFIKNQEAFAKEYLEFLVGRVQAESVVVSTPVQEFYKKYAEETLSAKDPTQPPPPPLQHYLE  
QPVERVQKRYQALLKELIRNKARNRQNCALLEQAYAVSDALPQRAENKLVSLMENYPGTLEALGEPPIRQGHFI  
VWEGAPGARMPPKGNHVFVFRNYLVICPPRRDSRTDTSYVFRNMMLKSSIDLNDQVEGDDRAFEVWHERE  
DSVRKYLQARTVLIKNSWVKEICGIQORLAQPVWRPPEFEELADCTAELGETVKLACRVGTGPKPIVSWYK  
DGKPVVDPHHLIEDPDGSCSTLILDNLGTIGDSQYMCFAASAAGNASTLGKILVQVPPRFVNVKVRATPFVVEG  
EDAQITCTVEGAPYPIRIRWYKDGTLAPGNRYRMLNEPRSGVLVLIQAASKEDLGHYECELVNRIGSTRGGG  
ELYMOSPALRARDQHREQIVAAVEGAPSMQVTTIEDVQVQVGDMAQFDAVIEGHPPPPIVTWYKGSTQLTSSAR

LSQRQDGTYSVLVTDVAPHDAGVYTCVANNAGQVLCKAELLVHGGDKLDAENQVYRRKLHSFYDVQEEIGR
GVFGFVKRVQHKGNMFCFAKFIPLRSKTRAQAYQERDILATLGHPLVTGLLDQFETRKTLLILILELCSSEEL
LDRLFKKGVVTEAEVKVYIQQLVEGLHYLHSHGILHLDIKPPNIMVHPAREDIKICDFGFAQKITPSEPOYS
KYGSPFVVSPEIIEQNPVSEGSDIWAMGVISYLSLTCSSPFAGESDRATLLNVLEGRVSWSSPTAAHLSSEDAK
DFIKATLQRTPRARPSTSQCCLAHWPFLKSMPAEEAHFINTKQLKFLLRARSRWQRSLMSYKSIILVMRSIPELLQ
GPPDSPSLGVARHLRGEASGASSSSSSSDNELAPFARAKSLPPSPVTHSPLLHPRGFLRPSASLPEETEASMP
TADAAVPASPQASAGPPASPGCVPRHSVSISSLFYQQAGEGAERGNKTSGAKRHPARRRHLLKGGYIARALPGLR
EPLMEYSLLEEEAAREEQASLMTKTPSFETALRLPSSSVREVPGRSHSLDNPPVTTGSPPEACKEQLLFPST
GLTHETAKDRGHKEGFLQESVFPFMSGDSRPGKQEGSSQSDSCRGKPASSCHSELGSGSQEGCGPPSSQSLG
SLPPQSLKKELESTSCGPLFSEQPQAAPFPQTQVSPLLGSEKEPQDGSLESEGPVVPVSSSPGSASQVDASLDTEG
LSEAGDTCDFTPPPQRPQEQATTRKFSLESRGGYAGVAGYGTFAFGGDAGGMLGQGPLWARMWAVSQSSEEQ
DEAATESPQPLESGLPIAEASGVPLRTPSLTPWEEVEQVSLVQIRDLSGDAEAADTISLDISEVDPAYLNLS
DLYDIKYLPFEFMI FRRVPKPIEQPESPGSETEAGQGLADFLLEEAAWPWPGEGLGLRAGLEITEEPEEPGDLEA
LLGEAAVGRKRKWSPSRGLFQFGRCLSGEEPVELGLRQRVKASMAHISRILKGRPEGPEREPPRKKAGLAS
FRLSGLKGRDQELSDEAVVLGQSVTLACQVLAQPTAQTWSKDGVLLESSGHLLISSTLKNFQLLTLILVVKEE
DLGTYTCCVSNPLGTAVTTGVLKRAERPSSSPRPEVGEYKDAVLLVWKPVESCGPVTYIVQCCIEGGSWTTL
ASDISDCCYLTKGLSRGGMYIFRTACVSKAGMGPYSSPSEQVLLGGPNHLASEEESSRRGRPAQLLPSTKTFAF
QMQIRRGFRFSVVRQCREKASGRALAAKIVPYQPEDKTAVLREYEAALKRHLHHPHLAQLHAAYLSPRHLVILEL
CSGPELLPSLAERESYSESVDKDYLWQMSATQYLHAQHILHLDLRSENMMVTEYNLLKVIDLGNASLDQEK
VPAPENFKDYLETMAPELLEGQAVPQTDIWAIGVTAIFIMLSGEYPESEGETRDLQKGLRKLIRLSRCYAGL
SGGAVAFLOSSLCAQPWGRPCASTCLOCGWLTEEGPTGSRPTPVTFTVRLRAFVREKRRALLYKXHNLAQ
VR\*

>rs51034442\_ENSMUSP00000049737\_c.11483:A>T\_p.E3828D
ENSMUST00000052872.15|Obscn-203|ENSMUSG00000061462|-|chr11:g.58955227:T>A
MDHSFSGAPRFLTRPKAFVSVGKDATLSCQIVGNPTPHVSWEKDRQFVEAGARFRLAQDGDVYRLTILDLAL
GDSGQYVCRARNAIEGFAAVGLRVDSEGTCAEQAPHFLLRPTSIRVREGADATFRCRVGGSPQPAVSWSKDG
RRLGPPDAPHRVVEHEGESSALRIR SARPRDGGTYEVRAENPLGSASAAAALVVDSAEVAGPPTSTATLLA
HLQQRRREAMRAEGIPPSPPGAGTRTCTVTEGKHARLSCFVTGEPKPEVWKKDGQLVTEGRRHVVEDEQENF
VLKILFCKQSDRGLYTCTASNLVGQTYSSVLVVREPTVPFKKRLQDLEVREKESATFQCEVAQPATEAAWFK
EETRLWASAKYDIEEGTERRLTVRNVSADDDAVYICETTEGSRVVAELSVQGNLTKLPRKTAVRTGDTAIF
WVELAVPEGPVRWLRNQEEMVAGGRVAITAEGTCHTLTI FQCTLEDMGEVAFVSGGCRTTTQFCVSAAPRRPPL
YPPADPVVKAKTESVTLWSAPPHGDRPVTIDGYVLEKRLKLGAYAWSRCHEAGWLATTEFTITGVAAEGDFQ
FRVSAINHFGQGPYLEFPGTMHLVPLAVKTPKAVEAVEGGEVTFVSDLTVASSGEWFLDGEALKASSIYVI
RCDRTRHMLTIREVPARLHGAQLKFVANGIETSIQMVVRAALGLPSSKLPAAAAREVLAQLHEEAQLLAE LSD
QAAAVTWLKDGRELSLGPKYEMQVSAGRRALLVRDVAQDDAGLYECVSRGSRRTAYQLLVQEPKLVFAKQQAH
SEVKAEAGNSATLSCEVTAQTEVTFWFKDGKLLSSSSKVRMEASGCSRRLLVVQQAGKADAGEYSCEAGGQKLS
FRLDVAEPKLVFAKQQAHSEVKAEAGASATLSCEVAQAQTEVTFWFKDGKLLSSSSKVRMEASGCSRRLLVVQQ
AGKADAGEYSCEAGGQKLSFRLDVAEPMVFAKEQQARSEVKAEAGASATLSCEVAQAQTEVTFWFKDGKLLSS
SSKVRMEASGCSRRLLVVQQAGKADAGEYSCEAGGQKLSFRLDVTEPKLVFAKEQQARSEVKAEVGN SATLSCE
VAQAQTEVTFWFKDGKLLSSSSKVRMEASGCSRRLLVVQQAGKADAGEYSCEAGGQKLSFRLDVAEPKLVFAKEQ
QARSEVKAEAGNSATLSCEVAQAQTEVTFWFKDGKLLSSSSKVRMEASGCSRRLLVVQQAGKADAGEYSCEAGGQ
KLSFHLVDVTEPKLVFAKEQQAHSEVKAEAGASATLSCEVAQAQTEVTFWFKDGKLLSSSSKVRMEASGCSRRLV
VQQAGKADAGEYSCEAEGQKLSFRLDVAEPKLVFAKEQQARSEVKAEAGASATLSCEVAQAQTEVTFWFKDGK
LSSSSKVRVEASGCSRRLLVVQQAGKADAGEYSCEAGGQKLSFRLDVAEPKLVFAKEQQANSEVKAEAGASATL
SCEVAQAQTEVTFWFKDGKLLSSSSKVRVEASGCSRRLLVVQQAGKADAGEYSCEAGGQKLSFRLDVAEPKLAFA
KEQQAHSEVKAEAGASATLSCEVAQAQTEVTFWFKDGKLLSSSSKVRVEASGCSRRLLVVQQAGKADAGEYSCEA
GGQKLSFRLDVAEPKLAFAKEQQAHSEVKAEAGASATLSCEVAQAQTEVTFWFKDGKLLSSSSKVRVEASGCSR
RLVVQQAGKADAGEYSCEAGGQKLSFRLDVAEPKLAFAKEQQAHSEVKAEAGASATLSCEVAQAQTEVTFWFKD
GKLLSSSSKVRVEASGCSRRLLVVQQAGKADAGEYSCEAGGQKLFRLDVAEPKLMFAKEQQAHSEVKAEAGAS
ATLSCEVAQAQTEVTFWFKDGKLLSSSSKVRVEASGCSRRLLVVQQAGKADAGEYSCEAGGQKLSFRLDVAEPK
LFAKEQQAHSEVKAEAGASATLSCEVAQAQTEVTFWFKDGKLLSSSSKVRVEASGCSRRLLVVQQVQKADAGEYS
CEARGQKLSFRLDVADTRLMFAKEQQARTEVKAEAGNSATLSCEVAQAQTEVTFWFKDGKLLSSSSKVRVEASG
CSRRLLVVQQAGKADAGEYSCEAGGQKLSFRLDVAEASISQI PERPSRREPLVVKEHETIILTATIAAPSVAAVT
WLKDGEVIRRSKRHEATSLGDTHLTVRGAQVLDASAIYSICRVGKEGQDFPVQVEEVAKFSKPLEPVEGELGG
TVMLVCELSPEQAEEVWRCGNTQLRPGKRFQMTSEGPRRTLTVSLREDDAEEYVCEASRDDRTSARLTVKVP
VVKFTSGLSAMVAEEGQEAFTQC VVSPSDAGVTWYKDGMLQPSSEKFMVVEGASRSLTILGLTLEDAGQVTV
EAEGASSAALRVREAPVLFKKKLEPQTV EERTSVTLEVELTRPWPEVKWTRNAAVLTPSENVEIRAEGARHC
LVLSVGFADRGFFGCETPDDKTQAKLNVEMRQVRLVRLGQVEEAKEQGTASMDVELSHAEVEGSWTRDGLRL

QPGPKCHLAVQGPVHILTLALSALQPQDSGLVAFRAEGVHTSARLIVTELPVSFTRVLQDVVATQKEKVTLECEL
SRPVDVRWLKDGVELRAGKAI GIVAQGTCSRSLVIYRCETGDQGVYVCDALDAQTSASLRVQGRTYTLIFRRVL
AEDAGEVVFVAENAESRAHLRVKELPVTLLRPLRDKIAMEKHRGVLECVSRASAQVRWFVKGVELQSGPKYE
VVDGLYRKLVINVDVQPEDEDTYTCDAGNVKTSAQFFVVEEQSITIVRGLKDMTVMPEPAPAWFECETSIPSVRP
PKWLLGKTVLQAGGNVLEQDGTVHRLTLHKTCSTMTGPVHFTIGKSRSSAQLVVSIPVVLTRPLEPKAGRE
LQSVVLSCDFRPAPKAVQWYKDDTPLSPSEKFKMALEGQMAELRILRLTPADAGVYRCQAGSAQSSAEVTVEA
REVTVIQPLQDAEAMEEGRVCFSCLESHKDEDI EWSLNGTPLYNDSFHEISHEGCLHTLVLKSVRQADTGTVC
ATSPKVSVSARLVVKGKPVVFLKALDDVSAEERGTTLTQCEVSDPEARVVWRKDGVELGPSDKYDFLHKAGAR
GLTVHDLSHEDAGLYTCVGSKETQSKVSVHDLHVGITKRLKTVEVLEGE SCSFECVLSHESPSDPAVWTVGG
KTVGGSGHFHAVRQGRKYTLTVKDAALSDAGEVVSVLGLTSKASLIIRERPVDITKPLEDQRTTLGEDVMLS
CELSRAGTSVRWLKDGKAIKRSQKYDLLSEGTRAVLVVRKASLKDSGEYTCETEASKSTAKLCVEEKANRFTTE
ELADLQVEEKGRAVFTCKTEHPASVVTWRKGLLELRASGKHVPSQEGTLKLTINALERTDSDTYTCDIGQAR
TQARLLVHGQKVRVIEDLEDTAVQEGSSAKFCCRIAPADYGPVHWFWDKTPHLSNELNEITVQPGGYHVLTLR
QLALKDSGTVYFEAGDQRTSAAALRVTEKPSIFSRPLTDVTVTEGEDTLVCETTTVDSSVRWTKDGKTLRPSA
RCQLSHEGCQAQLLITATTPQDGGRYKCEIGGASSSSIVRVHALPVRFRESLKDVEVPEGKAATLRCVLSVA
APVEWRHGDDVLKSSNKYSLRQEGAVLELVIDRLQPDQSGQYSCSFGDQTTSATLTVKTSQAQVFGKLRNKEA
TEGTVTRRCELTKKEAPVEWKKGTETLRNGDKYSLKQDGAVCELQICSLLVADAGEYSCVCGQEKTSATLTVK
ALLVHFVRRLRKEATEEGDTTLQCELSKAAPEVWRKGTETLRDGDYSLKQDGAVCELQIRSLTADAGEYL
CTCGQEKTSATLTVRALPAKFKDSLKNEEATDGTATLSCELSKAAPVTWKKGPKTLQSGDKYVLRQDGAVCG
LQIHGLTMADAGEYSCVCGQEKTSATLTVRGLPAKFIEDLRSQEATEGATAILRCELSKAAPEVWRKGSSETLK
DGDRYTLRQDGAVCELQIRGLAVDGTYSLSLPTKFTTEGLRNEEATEGTMATLRCQMSKAAPEVWRKGSSETLR
DGDRYSLRQDGAMCELQIRGLTIEDSGEYTCVCGQEKTSATLSVKALPSRFIEDLRSQEATEGTMATLRCQMS
KTAPVEWKKGSETLRDGGRYSLRQDGPVCELQICDLAVEDAGEYSCVCGQEKTSATLSIKALPPRFIEDLRSQ
EATEGTMATLRCQMSKAAPEVWRKGSSETLGDGGRYSLRQNGAVCELQIHDLAVEDTGEYSCVCGQEKTSATLN
VKALPPRFIEDLRSQEATEGTMATLRCQMSKAAPEVWRKGSSETLRDGGRYSLRQDGAVCELQIHDLVEDAGAM
YSCVCGQEKTSATLTVDALPPKFTEGLKKEEATEGTMVTLRQMSKEATVEWRKGAKTLSDGGRYSLRQDGAM
CELQICGLAVEDAGEYSCVCGQEKTSATLSVKALPPRFIEDLRSQEATEGTMATLRCQMSKAAPEVWRKGSSET
LRDGDYSLRQDGAVCELQIRDLAVEDAGEYLCVCGQEKTSATLSVKALPPRFIEDLRSQEATEGTMATLRCQ
MSKAAPEVWRKGSSETLRDGDYSLRQDGAMCELQICDLAVEDTGDYSCVCGQEKTSATLSVKALPPRFIEDLR
SQEAREGTVATLRCMSKAAPEVWRKGSSETLKDGDYSLRQEGNLCELQIRDLAVEDTEEYSCVCGQEKTSAT
LSVKALPAKFIEDLRSQEAPESSTVTLRCKLSKKASVVWKKGSETLRNGARYSLRQDGAVCELEIRDLTVEDT
GEYSCTCGQERTSATLSIMAPQVVFQQPLQNLQAEEGSMASLRCELSVPNAAMVWSKGGLELQGDTRREARQQ
GCVAELLLRDLRREDAGEYSCCTCGSQTTSATLMVTAAPVRFLRELQAQDVDEGATARLRCELSREAVSVEWRK
GSLQLFPAKAYQMVQEGTTAELLVHGVEQEDAGEYTC DAGHTQS IARLSVRAPKPKFKTDLQSTEQEAGGTAR
LCCQLSEAEPTPVQWLKEGVELHVGSKYEMRRQGAVCELLIHGLEAKDTGEYACLVGQKTLASLRVKEPEV
TIVRGLVDMEVQADEDEFTCKVQAGATDVQWHLQGLPLQSNVTEVAVLADGCTHVLQKGVTLADAGTVS
FHVGGLSSSAQLTVRVPEVTVLEPLKDVQLSEGDQDAHFRCRLSRASGQEARWALGGVPLQCNEMNDITVEQGT
LYLLTLHKVTLEDAGTITLQVGS SQAQLKVTAKNTVLRGLENVDALEGGEALFECQLSQPEVAHAWLLDD
EPVHTSEKVEVVYFENGLRHLLLLKNLKPQDSCRVTFLAGDVVTS AFLTVRGWRLEVLPPHDASVKAGMQVR
FTCILSEAVPVGEATWYINGAAIQPDDTDWTVTTDGS HHALTL SNAQPQHAGEVTF AARDAVASARLSVLALP
DPEDAEVVGRSDHSVTL SWVAPMSDGGGGLCGYRVMKEASTGQWQLCHDLVPGPECVVDLVP GKTYRFRV
AAVGPAGAGEPVHLPQMVKIAPAPAPAPAPAPAPAPETRAVVGEDI CLELEVAADGGEVVWHKGTERRIQPGG
HFEVLSRGRQMLVIKGFRTEDQGEYRCGPIQGLPSSGAATFNVMVTS GSGDEVPAQPSLPPEAAQEGDLHLL
WEALARKRRMSREPTLDSISELPEEDSRVQHLRQEAETAPDLSEGYSTADELARTGEADLSHTSSDDES RAG
TPSLVTYLKKAGGPGISPLASKHEAQVTT SVKPQKQEPVVP TCPPPGDL SAADLMDPSLDKAAVKIQAAFKG
YKVRKEMKQQEGPVFSRTFGDTEAQVGDVLRLECVLATKTD MRACWLKDGIELTDGRHYHIDQLKDGTC SLIV
TGLAPTDSGRYTCQVSTKSGRVSHSACVVVSGTESEAESSSGGELDDAFRRAARRLHRLFRTKSPAELSEEEL
FLSADEGPGEPEPADWQTYREDENFVCIRFESLAEARQAVTCFRNMFATMGIGVEISLGEQGPRGVEMRIGK
VAPTVPAPVPLAKTPGLQTS DAAPVFLTELQNDVQDGYPMSFDCVVTGQPVPSVRWFKDGKLEEDDHYMIN
EDQQGGHQLIITAVVPADMGVYRCLAENSMGVSTKAELRVELTSTDYDTAADATETSSYFSAQGYLSSREQE
GTESDEGQLPQVLEELKDLQVAPGTRLAKFQLKVKGYPAPKLYWFKDQGPLTTS DHIRMTDKKTLHTLEIVSV
TREDSGQYAAIY SNAVGAAYSSARLLVRGPSEPEEK PASDVHERLVP PPRILEKFTPKKV KRGSSITFSVKVEG
HPAPSVHWLKEEA EKFLWIGPDTPGYTMASSSKQHSADLVLLDVG RQHOGTYTCIATNPAGALCSASLHISGL
AKEEEQERVKREALISSFLQGTSQAVSAQMSESA GFADLVGSKGESLVAEEAHSHLSLAEVGT EEFQLKLT SQ
ITEMVSAKISQAKLQVPGGDSDEETKTPSASPRHGRSRPSSSVQESSSESEDGDSRGEIFDIYVVTADYLP LG
AEQDAIILREGQYVEVLDSAHPLRWLVRTKPTKSSPSRQGWVSPAYLDKRLKLSPEWGPTEAPEFPGEAVSED
EYRTRLSSVIQELLSSEQAFVGE LQFLESHHMKHLERSPRVPAAVASQKTVIFRNVQDISHFHSSFLKELQGC
GTDDDVAMCFIKNQEA FEKYLEFLVGRVQAESVVVSTPVQEFYKKYAEETLSAKDPTQPPPPPLQHYLEQ PVE

RVQKYQALLKELIRNKARNRQNCALLEQAYAVVSALPQRAENKLVSLMENYPGTLEALGEPiRQGHFIVWEG  
 APGARMPWKGHNHRVFLFRNYLVICKPRRDSRTDTFSYVFRNMMKLSSIDLNDQVEGDDRAFEVWHEREDESVR  
 KYLLQARTVVIKNSWVKEICGIQORLAQPVWRPPEFEELADCTAELGETVKKLACRVTGTPKPIVSWYKDGKP  
 VEVDPHHILIEDPDGSCSTLILDNLTGIDSGQYMCFAASAAGNASTLGKILVQVPPRFVNVKVRATPFVEGEDAQ  
 ITCTVEGAPYPQIRWYKDGTLTLLAPGNRYRMLNEPRSGVLVLIQAASKEDLGHYECELVNRLGSTRGGGELYM  
 QSPALRARDQHHREQIVAAVEVTEQETKVPKKTVIEETITTVVKSPRGRRQSPGKSPSRSPSRRSASPRRPG  
 LLAPERLYPPGTSPSRRLEVEQGRKAPVPALYVTEAEVHAPASQSQPKWLEVEETIEVRVKKTGSRGASPVRE  
 MTSRGEGLFTLPGGI PGRDPNANNNSNKS SVYQEARTWGPVAVHVGEFFIFQVDSVGNVDWVAASPEPEQVRA  
 SQKEENTERQEGCSDGDENTFLMEEPQDTSLQGRDPKILTHNGRVLTLADLEDYVPQEGEFTFGCGDSTPSTP  
 DEPPCEVSVLQREISEPTVGQPVLLNVGRPPGTGATPSFFRPGSQVHSPESVSFLLREAWSGPVSAAPWTSSSF  
 HTHVQSSVDGSHGSFKTEVSTQTVSFGAVGETVTLHIDPDGGEAPGPSQG\*  
 >rs51034442\_ENSMUSP00000020732\_c.11684:A>T\_p.E3895D  
 ENSMUST00000020732.13|Obscn-201|ENSMUSG00000061462|-|chr11:g.58955227:T>A  
 MDHSFSGAPRFLTRPKAFVSVGKDATLSQIVGNPTPHVSWEKDRQPVEAGARFRLAQDGDVYRLTILDLAL  
 GDSGQYVCRARNAIGEAFAAVGLRVDSEGTCAEQAPHFLLRPTSIRVREGADATFRCRVGSGSPQPAVSWSKDG  
 RRLGPPDAPHVRVEEHGESSALRIR SARPRDGGTYEVRAENPLGSASAAAAALVVDSDAEVAGPPGTSTATLLA  
 HLQORREAMRAEGIPSPPGAGTRTCTVTEGKHARLSCFVTGEPKPEVTVWKKDGLVLEGRRHVVYEDEQENF  
 VLKILFCKQSDRGLYTCTASNLVGQTYSSVLVVREPTVPFKKRLQDLEVREKESATFQCEVAQATEAAWFK  
 EETRLWASAKYDIEEEGTERRLTVRNVSADDDAVYICETTEGSRRTVAELSVQGNLTKLPRKTAVRTGDTAIF  
 WVAVLAVPEGPVWRWRNQEEMVAGGRVAITAEGTCHTLTIFQCTLEDMGEVAFVSGGCRTTTQFCVSAPRRPPL  
 YPPADPVVKAKTESSVTLWSAPPHGDRPVTIDGYVLEKRKLGAYAWSRCHEAGWLATTEFTITGVAAEGDFQ  
 FRVSAINHFGQGPYLEFPGTMHLVPLAVKTPKAVEAVEGGEVTFVSDLTVASSGEWFLDGEALKASSIYVI  
 RCDRTTRHMLTIREV PARLHGAQLKFVANGIETS IQMVVRAALGLPSKLPAAAAREVLQAQLHHEAQLLAELSD  
 QAAA VTWLKDGRELSLGPKEYMQVSAGRRALLVRDVAQDDAGLYECVSRGSRTAYQLLVQDITDGYRDWGPAG  
 PQKHMCKCAGAKIARYLGS SCYRFLQYDKGVWHLEAALDTRQKGTSSCSLHEKPKLVFAKQQAHSEVKA  
 AGNSATLSCEVTAQTEVTWFKDGKLLSSSSKVRMEASGCSRRLVVQQAGKADAGEYSCEAGGQKLSFRLDVA  
 EPKLVFAKQSAHSEVKAEGASATLSCEVAQAQTEVTWFKDGKLLSSSSKVRMEASGCSRRLVVQQAGKADA  
 GEYSCEAGGQKLSFRLDVAEPKMFVFAKEQQARSEVKAEGASATLSCEVAQAQTEVTWFKDGKLLSSSSKVRM  
 EASGCSRRLVVQQAGKADAGEYSCEAGGQKLSFRLDVTEPKLVFAKEQQARSEVKAEGVNSATLSCEVAQAQ  
 EVTWFKDGKLLSSSSKVRMEASGCSRRLVVQQAGKADAGEYSCEAGGQKLSFRLDVAEPKLVFAKEQQARSEV  
 KAEAGNSATLSCEVAQAQTEVTWFKDGKLLSSSSKVRMEASGCSRRLVVQQAGKADAGEYSCEAGGQKLSFHL  
 DVTEPKLVFAKEQQAHSEVKAEGASATLSCEVAQAQTEVTWFKDGKLLSSSSKVRMEASGCSRRLVVQQAGK  
 ADAGEYSCEAEGQKLSFRLDVAEPKLVFAKEQQARSEVKAEGASATLSCEVAQAQTEVTWFKDGKLLSSSSK  
 VRVEASGCSRRLVVQQAGKADAGEYSCEAGGQKLSFRLDVAEPKLVFAKEQQANSEVKAEGASATLSCEVAQ  
 AQTEVTWFKDGKLLSSSSKVRVEASGCSRRLVVQQAGKADAGEYSCEAGGQKLSFRLDVAEPKLVFAKEQQAH  
 SEVKAEGASATLSCEVAQAQTEVTWFKDGKLLSSSSKVRVEASGCSRRLVVQQAGKADAGEYSCEAGGQKLS  
 FRLDVAEPKLVFAKEQQAHSEVKAEGASATLSCEVAQAQTEVTWFKDGKLLSSSSKVRVEASGCSRRLVVQQ  
 AGKADAGEYSCEAGGQKLSFRLDVAEPKLVFAKEQQAHSEVKAEGASATLSCEVAQAQTEVTWFKDGKLLSS  
 SSKVRVEASGCSRRLVVQQAGKADAGEYSCEAGGQKLFRLDVAEPKLMFAKEQQAHSEVKAEGASATLSCE  
 VAQAQTEVTWFKDGKLLSSSSKVRVEASGCSRRLVVQQAGKADAGEYSCEAGGQKLSFRLDVAEPKLVFAKEQ  
 QAHSEVKAEGASATLSCEVAQAQTEVTWFKDGKLLSSSSKVRVEASGCSRRLVVQQVQKADAGEYSCEARGQ  
 KLSFRLDVADTRLMFAKEQQARTEVKAEGNSATLSCEVAQAQTEVTWFKDGKLLSSSSKVRVEASGCSRRLV  
 VQQAGKADAGEYSCEAGGQKLSFRLDVAEAE SQIPERPSRREPLVVKEHETIILTATIAAPSVAAVTWLKDG  
 VEIRRSKRHEATSLGDTHTLTVRGAQVLD SAIYSCRVGKEGQDFPVQVEEVAAKFSKPLEPVEGELGCTVMLVC  
 ELSPEQAEVWVRGNTQLRPGKRFQMTSEGPRTTLTVSGLREDDAEYVCE SRDDRTSARLTVKVPVVKFTS  
 GLSAMVAEEGQEATFQCVVSPSDAGVTWYKDGMLQPSSEKFMVESGASRSLTILGLTLEDAGQVTEAEGAS  
 SSAALRVREAPVFLFKKLEPQTEVEERTSVTLEVELTRPWPEVKWTRNAAVLTPSENVEIRAEGARHCLVRSV  
 GFADRGFPGCETPDDKTQAKLNVEMRQVRLVVRGLQVEVEAKEQGTASMDVELSHAEEVGSWTRDGLRLQPGPKC  
 HLAVQGPVHILTL SALQPQDSGLVAFRAEGVHTSARLIVTEL PVSFTRVLQDVVATQKEKVTLECELSRPVDV  
 RWLKDGVLELRAGKAI GIVAQGTCSLVIYRCETGDQGVYVCDALDAQTSASLRVQGRTYTLIFRRLAEDAGE  
 VKFVAENAESRAHLRVKELPVTLLRPLRDKIAMEKHRGVLECCQVSRASAQVRWFKGGVELQSGPKYEVVSDGL  
 YRKLVIN DVQPEDEDTYTC DAGNVKTS AQFFVEEQSITIVRGLKDMTVMEPAPAWFECETSIPSVRPPKWL  
 LKTVLQAGGNVGLQDGTVHRLTLHKTCSTMTGQVHFTIGKSRSSAQLVVS DI PVVLT RPLEPKAGRELQSVV  
 LSCDFRPAPKAVQWYKDDT PLS PSEKFKMALEGGMALRILRLTPADAGVYRCQAGSAQSSAEVTVAREVTVI  
 QPLQDAEAMEEGRVCFSELSHKDEDEI EWSLNGTPLYNDSFHEI SHEGCLHTLVLSVRQADTGTVCATSPKV  
 SVSARLVVKGKPVVFLKALDDVSAEERGLTLTQCEVSDPEARVVRKDGVELGSPDKYDFLHKAGARGLTVHD  
 LSHEDAGLYTCQVGSKETQSKVSVHDLHVGITKRLKTVEVLEGE SCSEFCVLSHESPSDPAVWTVGGKTVGGS  
 GHFHAVRQGRKYTLTVKDAALSDAGEVVSVLGLT SKASLIIRERPV DITKPLEDQRTTLGEDVMLSCELSRA

GTSVRWLKDGKAIRKSQKYDLLSEGTRAVLVVRKASLKDSGEYTCETEASKSTAKLCVEEKANRFTEELADLQ  
VEEKGRAVFTCKTEHPASVVTWRKGLLELRASGKHVPSQEGLTLKLTINALERTDSDTYTCDIGQARTQARLL  
VHGQKVRVIEDLEDTAVQEGSSAKFCCRIAPADYGPVHWFLLDKTPLHSNELNEITVQPGGYHVLTLRQLALKD  
SGTVYFEAGDQRTSAALRVTEKPSIFSRPLTDVTVTEGEDTLVCESTTVVDSVVRWTKDGKTLRPSARCQLSH  
EGCQAQLLITATTPQDGGRYKCEIGGASSSSIVRVHALPVRFRRESLKDVEVPEGKAATLRCVLSVAAPVEWR  
HGDDVLKSSNKYSLRQEGAVLELVIRDLQPQDSGQYSCSFGDQTTSATLTVKTSQAQFVGLRKNKEATEGTTV  
TLRCELTKEAPVEWKKGTETLRNGDKYSLKQDGA VCELQICSLLVADAGEYSCVCGQEKTSATLTVKALLVHF  
VRRLSKEATEGDTTTLQCELSKAAPVEWRKGTETLRDGDYSLKQDGA VCELQIRSLTIADAGEYLCTCGQE  
KTSATLTVRALPAKFKDSLKNEEATDGTATLSCELSKAAPVTWKKGPKTLQSGDKYVLRQDGA VCGLQIHGL  
TMADAGEYSCVCGQEKTSATLTVRGLPAKFIEDLRSQEATEGATAILRCELSKAAPVEWRKGSSETLKDGDYR  
LRQDGA VCELQIRGLAVVDGTGYSLSLPTKFTTEGLRNEEATEGTMATLRCQMSKAAPVEWRKGSSETLRDGDYR  
LRQDGA MCELQIRGLTIEDSGEYTCVCGQEKTSATLSVKALPSRFIEDLRSQEATEGTMATLRCQMSKTAPVE  
WKKGSETLRDGGYSLRQDGPVCELQICDLAVEDAGEYSCVCGQEKTSATLSIKALPPRFIEDLRSQEATEGT  
MATLRCQMSKAAPVEWRKGSSETLGDGGYSLRQNGAVCELQIHDLAVEDTGEYSCVCGQEKTSATLNVKALPP  
RFIEDLRSQEATEGTMATLRCQMSKAAPVEWRKGSSETLRDGGYSLRQDGA VCELQIHDLVEDAGQYSCVCG  
QEKTSAVLTVDALPPKFTTEGLKKEEATEGTMVTLRCQMSKEATVEWRKGA KTLSDGGYSLRQDGA MCELQIC  
GLAVEDAGEYSCVCGQEKTSATLSVKALPPRFIEDLRSQEATEGTMATLRCQMSKAAPVEWRKGSSETLRDGDYR  
YSLRQDGA VCELQIRDLAVEDAGEYLCVCGQEKTSATLSVKALPPRFIEDLRSQEATEGTMATLRCQMSKAAP  
VEWRKGSSETLRDGDYSLRQDGA MCELQICDLAVEDTGDYSCVCGQEKTSATLSVKALPPRFIEDLRSQEARE  
GTVATLRCRMSKAAPVEWRKGSSETLKDGDYSLRQEGNLCELQIRDLAVEDTEEYSCVCGQEKTSATLSVKAL  
PAKFIEDLRSQEAPESSTVTLRCKLSKASVWKKGSETLRNGARYSLRQDGA VCELEIRDLTVEDTGEYSCT  
CGQERTSATLSIMAPQVVFQQPLQNLQAEEGSMASLRCELSVPNAAMVWSKGGLELQGDTRREARQQCVAEL  
LLRDLRREDAGEYSCTCGSQTTATLMVTAAPVRFRELQAQDVEGATARLRCELSREAVSVEWRKGS LQLF  
PCAKYQMVQEGTTAELLVHGVEQEDAGEYTC DAGHTQSIARLSVRAPKPKFKTDLQSTEQEAGGTARLCCQLS  
EAEFGTVPVQWLKEGTEFLVHVGSKYEMRRQGA VCELLIHGLEAKDTGEYACLVGGQKTLASLRVKEPEVTIVRGL  
VDMEVQADEVEFTCKVSAQAGATDVQWHLQGLPLQSNVEVAVLADGCTHVLQKGVTLQKGTLEAGTQVSHVGG  
SSAQLTVRVPEVTVLEPLKDVQLSEGQDAHFRCRLSRASGQEARWALGGVPLQCNEMNDI TVEQGTLYLLTL  
HKVTLLEDAGTITLQVGS CSSEAQLKVTAKNTVLRGLENVDALEGG EALFECQLSQPEVA AHTWLLDDEPVHTS  
EKVEVVYFENGLRHLLLLLKNLKPQDSCRVTFLAGDVVTS AFLTVRGRLEVLLEPPHDASVKAGMQVRFTCILS  
EAVPVGEATWYINGAAIQPDDTDWTVTTDGS HHALTLSNAQPQHAGEVTF AARDAVASARLSVLALPDPPEDA  
E VVGRSDHSVTL SWVAPMSDGGG LCGYRVMKEASTGQWQLCHDLVPGPECVDDLVPGKTYRFRVA AVGPA  
GAGEPVHLPQMVKIAPAPAPAPAPAPAPAPETRAVVGEDICLELEVAADGGEVVWHKGTERRIQPGHFVLS  
RGQRQMLVIKGFRTEDQGEYRCGPIQGLPSSGAATFNVVMTSGSGDEVPAQPSLPPEAAQEGDLHLLWEALAR  
KRRMSREPTLDSISELPEEDSRVQHLRQEA EETAPDLSEGYSTADELARTGEADLSHTSSDDES RAGT PSLVT  
Y LKKAAGPGISPLASKHEAQVTT SVKPKQKQEPVPTCP PPGDLSAADLMDPSLDKAAVKIQAAF KYKVRKE  
MKQQEGPVFSRTFGDLEAQVGLRLECVLATKTD MRACWLKDGIELTDGRHYHIDQLKDGCTSLLVTLGLAPT  
DSGRYTCQVSTKSGRVSHSACVVVSGTESEAESSGGELDDAFRAARRLHRLFRTKSPAELSEELFLSADE  
GPGEPEEPADWQTYREDEFV CIRFESLAEARQAVTCFRNMFATMGIGVEISLGEQGPGRVEMRIGKVAPTVT  
PAVPLAKTPGLQTS DAAPVFLTELQNDVQDGYPMSFDCVVTGQPVPSVRWFKDGKLEEDDH YMINEDQGG  
HQLIITAVVPADMGVYRCLAENSMGVSSTKAELRVELTSTDYDTAADATETSSYFSAQGYLSSREQEGTESDE  
GQLPQVLEELKDLQVAPGTR LAKFQLKVKGYPA PKLYWFKDGP LTTSDHIRMTDKKTLHTLEIVSVTREDSG  
QYAAYSNAVGAAYSSARLLVRGPSEPEEK PASDVHERLVPPRI LEKFTPKKVKRGSSITFSVKVEGHPAPSV  
HWLKEEA EKGV LWIGPDTPGYTMASSSKQHSVLVLDVGRQH QGTYTCIATNPAGQALCSASLHISGLAKEEQ  
ERVKEALISSF LQGTSAVSAQMSE SAGFADLVGQSKGESLVAEEAHSHLSLAEVGT EEF LQKLTSSQITEMVS  
AKISQAKLQVPGGDSDEETKTPSASPRHGRSRPSSSVQESSSESE DGSERGEIFDIYVVTADYLP LGAEQDAI  
ILREGQYVEVLD SAHPLRWLVR TKPTKSSPSRQGWVSPAYLDRKRLKLSPEWGPTEAPEFPGEAVSEDEYRTRL  
SSVIQELLSSEQAFV GELQFLESHHMKHLERSPRVPA AVASQKTVIFRNVDISHFHSSFLKELQCGCTDDDV  
AMCFIKNQEA FEKYLEFLVGRVQAESVVVSTPVQEFYKKYAEETLSAKDPTQPPPPPLQHYLEQPVERVQKYQ  
ALLKELIRNKARNRQNCALLEQAYAVVSALPQRAENKLVSLMENYPGTLEALGEP IRQGHFIVWEGAPGARM  
PWKGHNHRVFLFRNYLVICKPRRDSRTDTFSYVFRNMMKLSSIDLNDQVEGDDRAFEVWHEREDSVRKYLLQA  
RTVI IKNSWVKEICGIQQLAQPVWRPPEFEEELADCTAELGETVKLACRVTGT PKPIVSWYKDGKPV EVDPH  
HILIEDPDGSCTLILDNLTGIDSGYMCFAASAAGNASTLGKILVQVPPRFVNVKVRATPFVEGEDAQITCTVE  
GAPYPQIRWYKDGTL LLAGNRYRMLNEPRSGVLV LVIQAASKEDLGHYECELVNLRLGSTRGGGELYMQSPALR  
ARDQHHREQIVA AVEERRPSP\*  
>rs257062692\_ENSMUSP00000158795\_c.11466:G>T\_p.V3823L  
ENSMUST00000238536.2|Obscn-210|ENSMUSG00000061462|-|chr11:g.58958060:C>A  
MDHSFSGAPRFLTRPKAFVSVGKDATLSCQIVGNPTPHVSWEKDRQVPEAGARFRLAQDGDVYRLTILDLAL  
GDSGQYVCRARNAIGEAFAAVGLRVDSEGTCAEQAPHLLRPTSIRVREGADATFRCRVGGSPQPAVSWSKDG

RRLGPPDAPHVRVEEHGESSALRIRRSARPRDGGTYEVRAENPLGSASAAAAALVVDSDAEVAGPPGTSTATLLA
HLQORREAMRAEGIPSPPGAGTRTCTVTEGKHARLSCFVTGEPKPEVWKKDGLVTEGRRHVVEDEQENF
VLKILFCKQSDRGLYTCTASNLVGGQTYSSVLVVVREPTVPFKKRLQDLEVREKESATFQCEVAQPATEAAWFK
EETRLWASAKYDIEEEGETERRLTVRNVSADDDAVYICETTEGSRVVAELSVQGNLTKRKLPRKTAVRTGDTAIF
WVELAVPEGPVRWLRNQEEMVAGGRVAITAEGTCHTLTI FQCTLEDMGEVAFVSGGCRTTTTQFCVSAPRRPPL
YPPADPVVKAKTESSVTLWSAPPHGDRPVTIDGYVLEKRKLGAYAWSRCHEAGWLATTEFTITGVAAEEDGFQ
FRVSAINHFGQGPYLEFPGTMHLVPLAVKTPKAVEAVEGGEVTFVSDLTVASSGEWFLDGEALKASSIYVI
RCDRTRHMLTIREVPARLHGAQLKVFANGIETS IQMVVRAALGLPSSKLPAAAAREVLAQLHEEAQLLAELSD
QAAAVTWLKDGRELSLGPKYEMQVSAGRRALLVRDVAQDDAGLYECVSRGSRRTAYQLLVQDITDGYRCDWGPAG
PQKHMCKCAGAKIARYLGSscyRFLQYDKGVWHLEAALDTRQGKGTSSCSLHEKPKLVFAKQQAHSEVKA
AGNSATLSCEVTQAQTEVTFKDGKLLSSSSKVRMEASGCSRRLVVQQAGKADAGEYSCEAGGQKLSFRLDVA
EPKLVFAKQQAHSEVKAEGASATLSCEVAQAQTEVTFKDGKLLSSSSKVRMEASGCSRRLVVQQAGKADA
GEYSCEAGGQKLSFRLDVAEPKMFVFAKEQQARSEVKAEGASATLSCEVAQAQTEVTFKDGKLLSSSSKVRM
EASGCSRRLVVQQAGKADAGEYSCEAGGQKLSFRLDVTEPKLVFAKEQQARSEVKAEVGNSATLSCEVAQAQ
EVTWFKDGKLLSSSSKVRMEASGCSRRLVVQQAGKADAGEYSCEAGGQKLSFRLDVAEPKLVFAKEQQARSE
KAEAGNSATLSCEVAQAQTEVTFKDGKLLSSSSKVRMEASGCSRRLVVQQAGKADAGEYSCEAGGQKLSFHL
DVTEPKLVFAKEQQAHSEVKAEGASATLSCEVAQAQTEVTFKDGKLLSSSSKVRMEASGCSRRLVVQQAG
ADAGEYSCEAGGQKLSFRLDVAEPKLVFAKEQQARSEVKAEGASATLSCEVAQAQTEVTFKDGKLLSSSS
VRVEASGCSRRLVVQQAGKADAGEYSCEAGGQKLSFRLDVAEPKLVFAKEQQANSEVKAEGASATLSCEVAQ
AQTEVTFKDGKLLSSSSKVRVEASGCSRRLVVQQAGKADAGEYSCEAGGQKLSFRLDVAEPKLAFAKEQQAH
SEVKAEGASATLSCEVAQAQTEVTFKDGKLLSSSSKVRVEASGCSRRLVVQQAGKADAGEYSCEAGGQKLS
FRLDVAEPKLAFAKEQQAHSEVKAEGASATLSCEVAQAQTEVTFKDGKLLSSSSKVRVEASGCSRRLVVQQ
AGKADAGEYSCEAGGQKLSFRLDVAEPKLAFAKEQQAHSEVKAEGASATLSCEVAQAQTEVTFKDGKLLS
SSKVRVEASGCSRRLVVQQAGKADAGEYSCEAGGQKLFRLDVAEPKLMFAKEQQAHSEVKAEGASATLSCE
VAQAQTEVTFKDGKLLSSSSKVRVEASGCSRRLVVQQAGKADAGEYSCEAGGQKLSFRLDVAEPKLVFAKEQ
QAHSEVKAEGASATLSCEVAQAQTEVTFKDGKLLSSSSKVRVEASGCSRRLVVQQAGKADAGEYSCEAGGQ
KLSFRLDVADTRFAKEQQARTEVKAEGASATLSCEVAQAQTEVTFKDGKLLSSSSKVRVEASGCSRRLV
VQQAGKADAGEYSCEAGGQKLSFRLDVAEAEESQIPERPSRREPLVVKEHETIILTATIAAPSVAAVTWLKDG
EIRRSKRHEATSLGDTHTLTVRGAQVLDSAIYSCRVGKEGQDFPVQVEEVAAKFSKPLEPVEGELGGTVMLVC
ELSPQAEVWRCGNTQLRPGKRFQMTSEGPRTTLTVSGLREDDAEYVCESRDDRTSARLTVKVPVVKFTS
GLSAMVAEEGQEQATFQCVVSPSDAGVTWYKDGMLQPSKFKVMVESGASRSLTILGLTLEDAGQVTVAEAGS
SSAALRVREAPVLFKKLEPQTVERTSVTLEVELTRPWPEVKWTRNAAVLTPSENVEIRAEGARHCLVLRV
GFADRGGFFGCETPDDKTQAKLNVEMRQVRLVVRGLQVEVEAKEQGTASMDVELSHAEVEGSWTRDGLRQLQPGPC
HLAVQGPVHILTLALSALQPQDSGLVAFRAEGVHTSARLIVTELPVSFTRVLQDVVATQKEKVTLECELSRPVD
RWLKDGVLELRAGKAIGIVAQGTCSRSLVIYRCETGDQGVYCDALDAQTSASLRVQGRTYTLIFRVLAEADAGE
VKEVAENAESRAHLRVKELPVTLLRPLRDKIAMEKHGVLCEQVSRASAQVRWFKGGVELQSGPKYEVVSDGL
YRKLVINVDQPEDEDTYTCDAENVKTSAQFFVEEQSITIVRGLKDMTVMPEPAPAWFECETSIPSVRPPKWL
KTVLQAGGNVLEQDGTVHRLTLHKTCSTMTGPVHFTIGKSRSSAQLVSDIPVVLTRPLEPKAGRELQSVVL
SCDFRPAPKAVQWYKDDTPLSPSEKFKMALEGQMAELRILRLTPADAGVYRCQAGSAQSSAEVTVAREVTVI
QPLQDAEAMEEGRVCFSCELSHKDEDEIWSLNGTPLYNDSFHEISHEGCLHTLVLSVRQADTGTVCATSPKV
SVSARLVVKGKPVVFLKALDDVSAEERGTTLTQCEVSDPEARVVWRKDGVELGSPDKYDFLHKAGARGLTVHD
LSHEDAGLYTCQVGSKETQSKVSVHDLHVGITKRLKTVEVLEGESECSFECVLSHESPSDPAVWTVGGKTVGGS
GHFHAVRQGRKYTLTVKDAALSDAGEVVSVLGLTSKASLIIRERPVDITKPLEDQRTTLGEDVMLSCELSRA
GTSVRWLKDGKAIKRSQKYDLLSEGTRAVLVVRKASLKDSGEYTCETEASKSTAKLCEVEKANRFTBELADLQ
VEEKGRAVFTCKTEHPASVVTWRKGLLELRASGKHVPSQEGTLTKLTINALERTDSDTYTCDIGQARTQARLL
VHGQKVRVIEDLEDTAVQEGSSAKFCRIAPADYGPVHWFLDKTPLHSNELNEITVQPGGYHVLTLRQLALKD
SGTVYFEAGDQRTSALRVTEKPSIFSRPLTDVTVTEGEDTLVCETTTVDSSVRWTKDGKTLRPSARCQLSH
EGCQALLITATTPQDGGRYKCEIGGASSSSIVRVHALPVRFRESLKDVEVPEGKAATLRCVLSVAAPVEWR
HGDDVLKSSNKYSLRQEGAVLELVIRDLQPDQSGQYSCSFGDQTTSATLTVKTSQAQFVGLRNKEATEGTTV
TLRCELTKAEAPVEWKKGTETLRNGDKYSLKQDGAVCELQICSLVADAGEYSCVCGQEKTSATLTVKALLVHF
VRLRSKEATEGDTTLQCELSKAAPLEWRKGTETLRDGDYSLKQDGAVCELQIRSLTIADAGEYLCTCGQE
KTSATLTVRALPAKFKDSLKNEEATEGTTATLSCELSKAAPVWKKGPKTLQSGDKYVLRQDGAVCGLQIHGL
TMADAGEYSCVCGQEKTSATLTVRGLPAKFIEDLRSQEATEGATAILRCELSKAAPVEWRKGSSETLKDGDYR
LRQDGAVCELQIRGLAVVDGTYSLSPTKFTTEGLRNEEATEGTMATLRCQMSKAAPVEWRKGSSETLRDGDYR
LRQDGAMCELQIRGLTIEDSGEYTCVCGQEKTSATLSVKALPSRFIEDLRSQEATEGTMATLRCQMSKTPAVE
WKKGSETLRDGGRYSLRQDGPVCELQICDLAVEDAGEYSCVCGQEKTSATLSIKALPPRFIEDLRSQEATEG
MATLRCQMSKAAPVEWRKGSSETLGDGGYSLRQNGAVCELQIHDLAVEDTGEYSCVCGQEKTSATLNVKALPP
RFIEDLRSQEATEGTMATLRCQMSKAAPVEWRKGSSETLRDGGYSLRQDGAVCELQIHDLVEDAGQYSCVCG

QEKTSAVLTVDALPPKFTEGLKKEEATEGTMVTLRCQMSKEATVEWRKGAKTSLSDGGRYSLRQDGAMCELQIC  
GLAVEDAGEYSCVCGQEKTSATLSVKALPPRFIEDLRSQEATEGTMATLRCQMSKAAPVEWRKGSETLRDGD  
YSLRQDGAVCELQIRDLAVEDAGEYLCVCGQEKTSATLSVKALPPRFIEDLRSQEATEGTMATLRCQMSKAAP  
VEWRKSGKTLRDGDYSLRQDGAMCELQICDLAVEDTDYSCVCGQEKTSATLSVKALPPRFIEDLRSQEARE  
GTVATLRCRMSKAAPVEWRKGSETLKDGDYSLRQEGNLCELQIRDLAVEDTEEYSCVCGQEKTSATLSVKAL  
PAKFIEDLRSQEAPESSTVTLRCKLSKKASVVVKKGSETLRNGARYSLRQDGAVCELEIRDLTVEEDTGEYSCT  
CGQERTSATLSIMAPQVVFQQLQNLQAEEGSMASLRCELSVPNAAMVWSKGGLELQGDTRREARQQGCVAE  
LLRDLRREDAGEYSCVCGQEKTSATLMVTAAPVRFLELQADVDEGATARLRCELSREAVSVEWRKGSLLQF  
PCAKYQMVQEGTTAELLVHGVEQEDAGEYTCDAAGTQSIARLSVRAPKPKFKTDLQSTEQEAGGTARLCCQLS  
EAEPTGTPVQWLKEGVELHVGSKYEMRRQGAUCELLIHGLEAKDTGEYACLVGGQKTLASLRVKEPEVTIVRGL  
VDMEVQADEDEFTCKVSOAGATDVQWHLQGLPLQSNVTEVAVLADGCTHVLQKGVTLLEDAGTVSFHVGG  
SSSAQLTVRVPEVTVLEPLKDVQLSEGDQAHFRCLSRASGQEARWALGGVPLQCNEMNDITVEQGTLYLLTL  
HKVTLLEDAGTITLQVGSSESQAQLKVTAKNTVLRGLENVDALEGGEALFECQLSQPEVAHAHTWLLDDEPVHTS  
EKVEVVYFENGLRHLLKLNKLPQDSCRVTFLAGDVVTSFAFLTVRGWRLEVLEPPHDASVKAGMQVRFCTILS  
EAVPVGEATWYINGAAIQPDDTDWTVTTDGSHHALTLSNAQPQHAGEVTFAAARDAVASARLSVLALPDPPEDA  
EUVGRSDHSVTLWSVAPMSDGGGGLCGYRVEMKEASTGQWQLCHDLVPGPECVVDDLVPKTYRFRVAAVGPA  
GAGEPVHLPQMVKIAPAPAPAPAPAPAPAPAPETRAVAVGEMDICELEVAADGGVEVWHKGTERRIQPGHFEVLS  
RQQRQMLVIKGFRTEDQGEYRCGPIQGLPSSGAATFNVMVMTSGSGDEVPAQPSLPPEAAQPSLLHWEALAR  
KRRMSREPTLDSISELPEEDSRVQHLRQEAEEETAPDLSEGYSTADELARTGEADLSHTSSDDESAGTPSLVT  
YLKKGAGPGISPLASKHEAQVTTSVKPKQKQEPVVPTCPPPGDLAADMPLSLDKAAVKIQAAPFKYKVRKE  
MKQQEGPVFSRFTFGDTEAQVGDVLRLECVLATKTDMRACWLKDGIELTDGRHYHIDQLKDGTCSLVLTGLAPT  
DSGRYTCQVSTKSGRVSHSACVVVSGTESEAESSSGGELDDAFRAARRLHRLFRTKSPAELSEEELFLSADE  
GPGEPEEPADWQTYREDENFVCIREFESLAEARQAVTCFRNMFATMGIGVEISLGEQGPGRVEMRIKGVAPTVT  
PAVPLAKTPGLQTSDAAPVFLTELQNDVQDGYPMSFDCVVTGQPVPSVRWFKDGKLEEDDHYMINEDQQGG  
HQLIITAVVPADMGVYRCLAENSMGVSSTKAELRVELTSTDYDTAADATETSSYFSAQGYLSSREQEGTESDE  
GQLPQVLEELKDALQVAPGTRLAKFQLKVKGYPAKPLYWFKDQQLTSDHIRMTDKKTLHTEIVSVTREDSG  
QYAAIYISNAVWKEICGIIQQLAQVWRPPEFEELADCTAELGETVKLACRVGTGPKPIVSWYKDGKPEVDPH  
HLLKEEAKEKGVLWIGPDTPGYTMASSSKQHSVLVLDVGRQHQTGTYTCIATNPAGQALCSASLHISGLAKEEQ  
ERVKEALISSFLQGTSAVSAQMSSEAGFADLVGQSKGESLVAAEHAHSHLSLAEVGTTEFLQKLTSTIEMVS  
AKISQAKLQVPGGDSDEETKTPSASPRHGRSRPSSSVQESSESESDGDSRGEIFDIYVVTADYLPGLAEQDAI  
ILREGQYVEVLDSAHPLRVLVTRTKPKSSPSRQGWVSPAYLDRKRLKLSPEWGPTEAPEFPGEAVSEDEYRTRL  
SSVIQELLSSEQAFVQELQFLESHHMKHLERSPRVPAAVASQKTVIFRNVQDISHFHSSFLKELQCGCTDDDDV  
AMCFIKNQEAFAEKYLEFLVGRVQAESVVVSTPVQEFYKKYAEETLSAKDPTQPPPPPLQHYLEQPVERVQKYQ  
ALLKELIRNKARNRQNCALLEQAYAVVSALPQRAENKLVSLMENYPGTLEALGEPHQGHFVWEGAPGARM  
PWKGHNHRVFLFRNYLVICKPRRDSRTDFTSYVFRNMMKLSSIDLNDQVEGDRAFEVWHEREDSVRKYLLQA  
RTVILKNSWVKEICGIIQQLAQVWRPPEFEELADCTAELGETVKLACRVGTGPKPIVSWYKDGKPEVDPH  
HLLIEDPDGCTLLILDNLTGIDSGQYMCFAASAAGNASTLGKILVQVPPRFVNVKVRATPFVEGEDAQITCTVE  
GAPYPQIRWYKDGTLAPGNRYRMLNEPRSGVLVLIQAASKEDLGHYECELVNRLGSTRGGGELYMQSPALR  
ARDQHHREQIVAAVEDTSVEGSAHSAQDQQAASVLRLLGSEALGSPGDLNTRQSEPPAFEEAASQIP  
GAASGTPEVSQPGTHKLEQETSSGSGQGWTVPIRVEGTAWPGAGTGQLLLDVHSQVIMETTQRTYVQAPDT  
GVTRAPSMQVTIEDVQVQVGDMAQFDAVIEGHPPPIVTVWYKGSTQLTSSARLSQRQDGTYSVLVTDVAPHDA  
GVYTCVANNAGGQVLCKAELLVHGDKLDAENQVYRRKLHSFYDVQEEIGRGVFGFVKRVQHKGNKMFCAAKF  
IPLRSKTRAQAYQERDILATLGHPLVTLGLDQFETRKTLLILILECSSEELLDRLFKKGVVTEAEVKVYIQQ  
VEGLHYLHSHGILHLDIKPPNIMVHPAREDIKICDFGFAQKITPSEPQYSKYGSPEFVSPETIEQNPVSEGS  
DIWAMGVI SYLSLTCSSPFAGESDRATLLNVLEGRVSWSSPTAAHLSSEDAKDFIKATLQRTPRARPSTSQCLA  
HPWFLKSMPAEEAHFINTKQLKFLARSRWQRSLMSYKSI LVMRSIPPELLQGPDPSPSLGVARHLRGEASGAS  
SSSSSSDNELAPFARAKSLPPSPVTHSPLLHPRGFLRPSASLPEETEASMPATAAASPASQAGPPASPGCV  
PRHSVISSLFYQQAGEGAERGKNTSGAKRHPARRRHLLKGGYIARALPGLREPLMEYSLLEEEAAREEQASLM  
TKTSPFETALRLPSSSVREVPRGRSHSLDNPPVTGTPSPEACEQLLFPSTGLTHETTAKDRGHKEGFLQESV  
PFPMPGSDSRPGKQEGSSQDSCRGPASSCHSELGSGSQEGCPSQSLGSLPPQSLKELSTSCGPLFSEQ  
PQAAPFPTQVSPLLGSEKEPQDGSLSSEGPVVPVSSSPGSASQVDASLDTEGLSEAGDTCDFTPPPQRPQEQAT  
TRKFSLESRGGYAGVAGYGTFAFGGDAGGMLGQGPLWARMAWAVSOSSEEQDEAATESPQPLESIGPIAEASG  
VPLRTPSPSETPEWEEQVSLVQIRDLSDGAEAAADTISLDISEVDPAYLNLSLDYDIKYLPEFEMI FRRVPKPI  
EQPESPGETEAGQLADFLLEAAWPWPGELGLRAGLEITEEPEEPGDLEALLGEAAVGRKRKWSPSRGLFQF  
PGRCLSGEEPVELGLRQRVKASMAHISRIILKGRPEGERGPPRKKAGLASFRLSGLKGRDQELSDEAVVLGQ  
SVTLACQVLAQPTAQATWSKDGVLLESSGHLLISSTLKNFQLLLTILVVKEEDLGTYTCCVSNPLGTAVTTGVL  
RKAERPSSSRPEVGEYKDAVLLVWKPVESECGPVTVYIVQCCIEGGSWTTLASDISDCCYLTGKLSRGGMYIF  
RTACVSKAGMGPYSSPSEQVLLGGPNHLASEEESRRGRPAQLLPSTKTFAFQMQIRRGFRFSVVRQCREKASGR



ALAAKIVPYQPEDKTA VLREYEAL KRLRHHPLAQLHAA YLSPRHLVLI LELCSGPELLPSLAERESYSESDVK  
DYLWQMLSATQYLHAQHILHLDLRSENMMVTEYNLLKVIDLGNALDQEKVPAPENFKDYLETMAPELLEGG  
GAVPQTDIWAIGVTA FIMLSGEY PESSSEGTRDLQKGLRKLIRLSRCYAGLSGGAVAFLOSSLCAQPWGRPCA  
STCLQCGWLTEEGPTGSRPTPVTFPTVRLRAFVREKRRALLYKKHNLAQVR\*

>rs257062692\_ENSMUSP00000038264\_c.10638:G>T\_p.V3547L  
ENSMUST00000047441.14|Obscn-202|ENSMUSG00000061462|-|chr11:g.58958060:C>A  
MDHSFSGAPRFLTRPKAFVSVGKDATLSCQIVGNPTPHVSWEKDRQFVEAGARFRLAQDGDVYRLTILDLAL  
GDSGQYVCRARNAIGEFAAVGLRVDSEGTCAEQAPHFLLRPTSIRVREGADATFRCRVGGSPQPAVSWSKDG  
RRLGPPDAPHVRVEEHGESSALRIRSARPRDGGTYEVRAENPLGSASAAAALVVDSDAEVAGPPGTSTATLLA  
HLQQRRREAMRAEGIPPSPPGAGTRTCTVTEGKHARLSCFVTGEPKPEVWKKDGQLVTEGRRHVVEDEQENF  
VLKILFCKQSDRGLYTCTASNLVGQTYSSVLVVVREPTVPFKKRLQDLEVREKESATFQCEVAQPAEAAWFK  
EETRLWASAKYDIEEEGETERRLTVRNVSADDDAVYICETTEGSRVVAELSVQGNLTKLPRKTAVRTGDTAIF  
WVELAVPEGPVRWLRNQEEMVAGGRVAITAEGTCHTLTI FQCTLEDMGEVAFVSGGCRTTTQFCVSAAPRRPPL  
YYPADPVVKAKTSSVTLWSAPPHGDRPVTIDGYVLEKRLKLGAYAWSRCHEAGWLATTEFTITGVAAEEDGFQ  
FRVSAINHFGQGPYLEFPGTMHLVPLAVKTPKAVEAVEGGEVTFVSDLTVASSGEWFLDGEALKASSIYVI  
RCDRTRHMLTIREVPARLHGAQLKVFANGIETSIQMVVRAALGLPSSKLPAAAAREVLAQLHHEEAQLLAE LSD  
QAAA VTWLKDGRELSLGPKYEMQVSAGRRALLVRDVAQDDAGLYECVSRGSRRTAYQLLVQDITDGYRDWGPAG  
PQKHMCKCAGAKIARYLGSSCYRFLQYDKGVVHWEAALDTRQKGTSSCSLHEKPKLVFAKGGQAHSEVKA  
AGASATLSCEVAQAQTEVTFWKDGKLLSSSSKVRMEASGCSRRLVVQQAGKADAGEYSCEAGGQKLSFRLDVA  
EPKMFVFAKEQQARSEVKAEGASATLSCEVAQAQTEVTFWKDGKLLSSSSKVRMEASGCSRRLVVQQAGKADA  
GEYSCEAGGQKLSFRLDVTEPKLVFAKEQQARSEVKAEGNSATLSCEVAQAQTEVTFWKDGKLLSSSSKVRM  
EASGCSRRLVVQQAGKADAGEYSCEAGGQKLSFRLDVAEPKLVFAKEQQARSEVKAEGNSATLSCEVAQAQ  
EVTWTFKDGKLLSSSSKVRMEASGCSRRLVVQQAGKADAGEYSCEAGGQKLSFHLDVTEPKLVFAKEQQAHSEV  
KAEAGASATLSCEVAQAQTEVTFWKDGKLLSSSSKVRMEASGCSRRLVVQQAGKADAGEYSCEAGGQKLSFR  
DVAEPKLVFAKEQQARSEVKAEGASATLSCEVAQAQTEVTFWKDGKLLSSSSKVRVEASGCSRRLVVQQAGK  
ADAGEYSCEAGGQKLSFRLDVAEPKLVFAKEQQANSEVKAEGASATLSCEVAQAQTEVTFWKDGKLLSSSSK  
VRVEASGCSRRLVVQQAGKADAGEYSCEAGGQKLSFRLDVAEPKLVFAKEQQAHSEVKAEGASATLSCEVAQ  
AQTEVTFWKDGKLLSSSSKVRVEASGCSRRLVVQQAGKADAGEYSCEAGGQKLSFRLDVAEPKLVFAKEQQAH  
SEVKAEGASATLSCEVAQAQTEVTFWKDGKLLSSSSKVRVEASGCSRRLVVQQAGKADAGEYSCEAGGQKLS  
FRLDVAEPKLVFAKEQQAHSEVKAEGASATLSCEVAQAQTEVTFWKDGKLLSSSSKVRVEASGCSRRLVVQQ  
AGKADAGEYSCEAGGQKLSFRLDVAEPKLVFAKEQQAHSEVKAEGASATLSCEVAQAQTEVTFWKDGKLLSS  
SSKVRVEASGCSRRLVVQQVQKADAGEYSCEARGQKLSFRLDVAEAE SQI PERPSRREPLVVKHEHTIILTAT  
IAAPSVAAVTWLKDGV EIRRSKRHEATSLGDTHLTVRGAQVLD SAIYSCRVGKEGQDFPVQVEEVAAKFSKP  
LEPVEGELGGTVMLVCELSPEQAEVWRCNGTQLRPGKRFQMTSEGPRRTLTVSGLREDDAEYVCE SRDDRT  
SARLTAVKVPVVKFTSGLSAMVAEEGQEA TFQCVVSPDAGVTWYKDMQLQ PSEKFMVMEVSGASRSLTILGL  
TLEDAGQVTVEAEGASSAALRVREAPVLFKKKLEPQTVDEERTSVTLEVELTRPWEVKWTRNAAVLTPSENV  
EIRAEGARHCLVLRVSVGFADRGFFGCETPDDKTQAKLNVEMRQVRLVRGLQEVEAKEQGTASMDVELSHAEVE  
GSWTRDGLRLQPGPKCHLAVQGPVHILTSLALQPQDSGLVAFRAEGVHTSARLIVTEL PVSFTRVLQDVVATQ  
KEKVTLECELSRPVDVRWLKDGVELRAGKAI GIVAQGTCSRSLVIYRCETGDQGVVCDALDAQTSASLRVQGR  
TYTLIFRRVLAEDAGEVKFVAENAESRAHLRVKELPVTLLRPLRDKIAMEKHRGVLEQCQVSRASAQVRWFKGG  
VELQSGPKYEVVSDGLYRKLVIN DVQPEDEDTYTCDAGNVKTS AQFFVEEQSITIVRGLKDMTVM EPAPAWFE  
CETSIPSVRPPKWL LGKTVLQAGGNVGL EQDGTVHRLTLHKTCSTMTGPVHF TIGKSRSSAQLVVS DIPVVL T  
RPLEPKAGRELQSVVLSCDFRPAKAVQWYKDDTPLSPSEKFKMALEGO MAELRILRLTPADAGVYRCQAGSA  
QSSAEVTVEAREVTVIQPLQDAEAMEEGRVCFSCELSHKDEDIEWSLNGTPLYNDSFHEISHEGLHTLV LKS  
VRQADTGTVCATSPKVS SARLVVKGKPVVFLKALDDVSAEERGLTLTQCEVSDPEARVVVRKDGVELG PSDK  
YDFLHKAGARGLTVHDL SHEDAGLYTCQVGSKETQSKVSVHDLHVGITKRLKTVEVLEGE SCSFECVLSHESP  
SDPAVWTVGGKTVGGSGHFHAVRQGRKYTLTVKDAALSDAGEV VFSVLGLTSKASLIIRERPV DITKPLEDQR  
TTLGEDVMLSCELSRAGTSVRWLKDGKAI RKSQKYDLLSEGTRAVLVVRKASLKDSGEYTCETEASKSTAKLC  
VEEKANRFTEELADLQVEEKGRAVFTCKTEHPASVVTWRKGLLELRASGKHVPSQEGTLTKLTINALERTDSD  
TYTCDIGQARTQARLLVHGQKVRVIEDLED TAVQEGSSAKFCCR IAPADYGPVHWF LDKTPLHSNELNEITVQ  
PGGYHVLT LRQLALKDSGTVYFEAGDQRTSAALRVTEKPSIFSRPLTDVTVTEGEDLTLVCETTTVDSSVRWT  
KDGTLRPSARCQLSHEGCQAQLLITATTPQDGGRYKCEIGGASSSSIVRVHALPVRFRESLKDVEVPEGKAA  
TLRCVLSVAAPVWRHGDV LKSSNKYS LRQEGAVLELVIRDLQPDQSGQYSCSFGDQTT SATLTVKTTSSAQ  
FVGKLRNKEATEGTTVTRCEL TKEAPVEWKKGTETLRNGDKYSLKQDGA VCELQICSLLVADAGEYSVCVCGQ  
EKTSATLTVKALLVHFVRR LRSKEATEGDTTTLQCELSKAAPLEWRKGTETLRDGD RYSLKQDGA VCELQIRS  
LTIA DAGEYLCTCGQEKTSATLTVRALPAKFKDSLKNEEATEGTTATLSCELSKAAPV TWKKGPKTLQSGDKY  
VLRQDGA VCGLQIHGLTMADAGEYSCVCGQEKTSATLTVRGLPAKFIEDLRSQEATEGATAILRCELSKAAPV  
EWRKGETLKDGD RYTLRQDGA VCELQIRGLAVVDTGTYS SLP TKFTEGLRNEEATEGTMATLRCQMSKAAPV

EWRKGETLRDGDYSLRQDGAMCELQIRGLTIEDSGEYTCVCGQEKTSATLSVKALPPRFIEDLRSQEATEG
TMATLRCQMSKAAPVEWRKGETLGDGGYSLRQNGAVCELQIHDLAVEDTGEYSCVCGQEKTSATLNVKALP
PRFIEDLRSQEATEGTMATLRCQMSKAAPVEWRKGETLRDGGYSLRQDGAVCELQIHDLVEDAGQYSCVC
GQEKTSAVLTVDALPPKFTEGLKKEEATEGTMVTLRCQMSKEATVEWRKGAKTLDGGYSLRQDGAMCELQI
CGLAVEDAGEYSCVCGQEKTSATLSVKALPPRFIEDLRSQEATEGTMATLRCQMSKAAPVEWRKGSKTLRDGD
RYSLRQDGAMCELQICDLAVEDTGDYSCVCGQEKTSATLSVKAPQVVFQQLQNLQAEEGSMASLRCELSVFN
AAMVWSKGGLELQGDTRREARQQGCVAEILLRDLRREDAGEYSCVCGSQTTSATLMVTAAPVRFRELQAQDV
DEGATARLRCELSREAVSEWRKGSLLQFPKAKYQMVQEGTAEELLVHGVEQEDAGEYTCDAHTQSIARLSV
RAPKPKFKTDLQSTEQEAGGTARLCCQLSEAEPTVQWLKEGVELHVGSKYEMRRQGAVALLELHGLEAKDT
GEYACLVGQKTLASLRVKEPEVTIVRGLVDMEVQADEDFEFTCKVVSQAGATDVQWHLQGLPLQSNVTEVAV
LADGCTHVLQKGVTLLEDAGTVSFHVGGLSSSAQLTVRVPEVTVLEPLKDVQLSEGQDAHFRCLRSRSGQEA
RWALGGVPLQCNEMNDITVEQGTLYLLTLHKVTLLEDAGTITLQVGSSEAEQLKVTAKNTVLRGLENVDALEG
GEALFECQLSQPEVAHAHTWLLDDEPVHTSEKVEVVYFENGLRHLLLLKNLKPQDSCRVTFLAGDVVTSAFITV
RALPDPPEDAEVVGRSDHSVTLVWVAPMSDGGGGLCGYRVMKEASTGQWQLCHDLVPGPECVVDLVPKTY
RFRVAAVGPAGAGEPVHLPQMVKIAPAPAPAPAPAPAPAPETRQAVVGEDICLELEVAADGGVEVWHKGTERRI
QPGGHFEVLSRGQRQMLVIKGFRTEDQGEYRCGPIQGLPSSGAATFNVMVMTSGSGDEVPAQPSLPPEAAQEGD
LHLLWEALARKRRMSREPTLDSISELPEEDSRVQHLRQEAETAPDLSEGYSTADELGEADLSHTSSDDE
SRAGTPSLVTYLKKAGGPGISPLASKHEAQVTTSVKPKQKQEPVVPVTCPPPGDLAADLMDPSLDKAAVKIQA
AFKGYKVRKEMKQOEGPVFSRTFGDTEAQVGDVLRLECVLATKTKDMRACWLKDGIELTDGRHYHIDQLKDGTC
SLLVTGLAPTDSGRYTCQVSTKSGRVSHSACVVVSGTESEAESSSGGELDDAFRRAARLHRLFRFKSPAELS
EELFLSADEGPEPEPADWQTYREDENFVCIRFESLAEARQAVTCFRNMFATMGIGVEISLGEQGRGVEM
RIGKVAPTPTPAVPLAKT PGLQTSDAAPVFLTELQNDQVQDGYPMSFDCVVTGQPVPSVRWFKDGKLLLEDDH
YMNEDQQGGHQLIITAVVPADMGVYRCLAENSMGVSSKAELELVLTSTDYDTAADATETSSYFSAQGYLSS
REQEGTESDEGQLPQVLEELKDLQVAPGTRLAKFQLKVKGYPAKLYWFKDGQPLTSSDHIRMTDKKTLLHTLE
IVSVTREDSGQYAAIYI SNAVGAAYSSARLLVGRVGPSEPEEKPASDVHERLVPPRILEKFTPKKVKRGSSTFSV
KVEGHPAPSVHWLKEEAKEGVLWIGPDTPGYTMASSSKQHSVLVLDVGRQHOGTYTCIATNPAGQALCSASLH
ISGLAKEEEEQERVKALISSFLQGTSAQVSAQMSSEAGFADLVGQSKGESLVAAEEAHSLSLAEVGTTEFLQK
LTSQITEMVSAKISQAKLQVPGGDSDEETKTPSASPRHGRSRPSSSVQESSSESEDGDSRGEIFDIYVVTADY
LPLGAEQDAIILREGQYVEVLDSAHPLRWLVRTKPTKSSPSRQGWVSPAYLDKRLKLSPEWGPTEAPEFPGEA
VSEDEYRTRLSSVIQELLSSEQAFVGELOFLESHHMKHLERSPRVPAAVASQKTVI FRNVQDISHFHSSFLKE
LQCGGTDDDVAMCFIKNQEA FEKYLEFLVGRVQAESVVVSTPVQEFYKKYAEETLSAKDPTQPPPPLOHYLE
QPVERVQKYQALLKELIRNKARNRQNCALLEQAYAVVSALPQRAENKLVHSLMENYPGTLEALGEPFIRQGHFI
VWEGAPGARMPWKGNHRHVFVFRNYLVICKPRRDSRTDTFSYVFRNMMKLSSIDLNDQVEGDDRAFEVWHERE
DSVRKYLQARTVI IKNSWVKEICGIQORLAQPVWRPPEFEEELADCTAELGETVKLACRVTGTPKPIVSWYK
DGKPVVEVDPHHILIEDPDGSCITLIDNLTGIDSGYMCFAASAAGNASTLGKILVQVPPRFVKNVRATPFVVEG
EDAQITCTVEGAPYPQIRWYKDGTLAPGNRYRMLNEPRSGVVLVVIQAASKEDLGHYPELNVRLGSTRGGG
ELYMQSPALRARDQHHRQIIVAAVEGAPSMQVTTIEDVQVQVGDMAQFDVAVIEGHPPPITVWYKGTQLTSSAR
LSQRQDGTYSVLVTDVAPHDAGVYTCVANNAGQVLCCKAELLVHGGDKLDAENQVYRRLKHSFYDVQEEIGR
GVFGVVKRVQHKGNMFCAAKFIPLRSKTRAQAYQERDILATLGHPLVLTGLLDQFETRKTLLILELCSSEEL
LDRLFKKGVVTEAEVKVYIQQLVEGLHYLHSHGILHLDIKPPNIMVHPAREDIKICDFGFAQKITPSEPOYS
KYGSPFVSPPEIIEQNVPVSEGSDIWAMGVISYLSLTCSSPFAGESDRATLLNVLEGRVSWSSPTAAHLSEDA
DFIKATLQRTPRARPSTSQC LAHPWFLKSMPAAEAHFINTKQLKFLARSRWQRSLMSYKSI LVMRSIPELLQ
GPPDPSLGVARHLRGEASGASSSSSSSDNELAPFARAKSLPPSPVTHSPLLHPRGFLRPSASLPEETEASMP
TADAAVPASPQASAGPPASPGCVPRHSVSISSLFYQOAGEGAERGNKTS GAKRHPARRRHLLKGGYIARALPGLR
EPLMEYSLLEEEAAREEQASLMTKTPSFETALRPLSSSVREVPGRSHSLDNPPVTGTGPSPEACKEQLLFPST
GLTHEHTAKDRGHKEGFLQESVFPFMSGDSRPGKQEGSSQDSCRGKPASSCHSELGSGSQEGCGPSSQSLG
SLPPQSLKKELESTSCGPLFSEQPQAAPFPTQVSPLLGSEKEPQDGSLSSEGVPVPSSSPGSASQVDASLDTEG
LSEAGDTCDFTPPPQRPQEQATTRKFSLESRGGYAGVAGYGTFAFGGDAGGMLGQGPLWARMWAVSOSSEEQ
DEAATESPQPLESGLPIAEASGVPLRTSPSLTPWEEVEQVSLVQIRDLSGDAEAADTISLDISEVDPAYLNL
DLYDIKYLPPFEFMI FRRVPKPIEQPESPGSETEAGQGLADFLLEAAWPWPGEGLGLRAGLEITEEPPEPGDLEA
LLGEAAVGRKRKWSPSRGLFQFGRCLSGEEPVELGLRQVRKASMAHISRILKGRPEGPEREPPRKKAGLAS
FRLSGLKGRDQELSDEAVVLGQSVTLACQVLAQPTAQTATWSKDGVLLESSEGHLLISSTLKNFQLLTLIVVKEE
DLGTYTCCVSNLGLTAVTTGVLKAEERPSSSRPEVVELGYKDAVLLVWKPVESCGPVTVYVQCCIEGGSWTTL
ASDISDDCYLTKGLSRGGMYIFRTACVSKAGMGPYSSPEQVLLGGPNHLASEEESRRGPAQLLPSKTTFAF
QMQIRRGFRVSVRQCREKASGRALAAKIVPYQPEDKTAVLREYEAALKRLLHHPHLAQLHAAYLSPRHLVLI
CSGPELLPSLAERESYSESDVKDYLWQMSATQYLHAQHILHLDLRSNMMVTEYNLLKVIDLGNASLDQEK
VPAPENFKDYLETMAPELLEGQAVPQTDIWAIGVTAIFIMLSGEYPESEGETRDLQKGLRKLIRLSRCYAGL

SGGAVAFLOSSLCAQPWGRPCASTCLQCGWLTEEGPTGSRPTVTFPTVRLRAFVREKRRALLYKKNHNAQ  
 VR\*  
 >rs257062692\_ENSMUSP00000049737\_c.11265:G>T\_p.V3756L  
 ENSMUST00000052872.15|Obscn-203|ENSMUSG00000061462|-|chr11:g.58958060:C>A  
 MDHSFSGAPRFLTRPKAFVSVGKDATLSCQIVGNPTPHVSWEKDRQPVEAGARFRLAQDGDVYRLTILDLAL  
 GDSGQYVCRARNAIGEAFVAVGLRVDSEGTCAEQAPHFLLRPTSIRVREGADATFRCRVGGSPQPAVSWSKDG  
 RRLGPPDAPHVRVEEHGESSALRIRSRPRDGGTYEVRAENPLGSASAAAAALVVDSDAEVAGPPGTSTATLLA  
 HLQQRREAMRAEGIPSPGGAGTRTCTVTTEGKHARLSCFVTGEPKPEVWKKDGLVTEGRRHVVEDEQENF  
 VLKILFCKQSDRGLYCTASNLVQTYSSVLVVREPTVPFKKRLQDLEVREKESATFQCEVAQPATEAAWFK  
 EETRLWASAKYDIEEGTERRLTVRNVSADDDAVYICETTEGSRVVAELSVQGNLTKLPRKTAVRTGDTAIF  
 WVAVLAVPEGPVWRWRNQEEMVAGGRVAITAEGTCHTLTI FQCTLEDMGEVAFVSGGCRTTTFQCVSAPRRPPL  
 YPPADPVVKAKTESSVTLWSAPPHGDRPVTIDGYVLEKRKLGAYAWSRCHEAGWLATTEFTITGVAAEGDFQ  
 FRVSAINHFGQGPYLEFPGMTMLVPLAVKTPKAVEAVEGGEVTFVSDTLTVASSGEWFLDGEALKASSIYVI  
 RCDRTTRHMLTIREVPARLHGAQLKVFVANGIETS IQMVVRAALGLPSSKLPAAAAAREVLAQLHEEAQLLAE LSD  
 QAAA VTWLKDGRELSLGPYEMQVSAGRRALLVRDVAQDDAGLYECVSRGSRRTAYQLLVQEPKLVFAKQQAH  
 SEVKAEAGNSATLSCEVTAQTEVTFWFKDGKLLSSSSKVRMEASGCSRRLVVQQAGKADAGEYSCEAGGQKLS  
 FRLDVAEPKLVFAKQQAHSEVKAEAGASATLSCEVAQAQTEVTFWFKDGKLLSSSSKVRMEASGCSRRLVVQQ  
 AGKADAGEYSCEAGGQKLSFRLDVAEPKLVFAKQQARSEVKAEAGASATLSCEVAQAQTEVTFWFKDGKLLSS  
 SSKVRMEASGCSRRLVVQQAGKADAGEYSCEAGGQKLSFRLDVTEPKLVFAKEQQARSEVKAEVGN SATLSCE  
 VAQAQTEVTFWFKDGKLLSSSSKVRMEASGCSRRLVVQQAGKADAGEYSCEAGGQKLSFRLDVAEPKLVFAKEQ  
 QARSEVKAEAGNSATLSCEVAQAQTEVTFWFKDGKLLSSSSKVRMEASGCSRRLVVQQAGKADAGEYSCEAGGQ  
 KLSFHLVDVTEPKLVFAKEQQAHSEVKAEAGASATLSCEVAQAQTEVTFWFKDGKLLSSSSKVRMEASGCSRRLV  
 VQQAGKADAGEYSCEAGGQKLSFRLDVAEPKLVFAKEQQARSEVKAEAGASATLSCEVAQAQTEVTFWFKDGK  
 LSSSSKVRVEASGCSRRLVVQQAGKADAGEYSCEAGGQKLSFRLDVAEPKLVFAKEQQANSEVKAEAGASATL  
 SCEVAQAQTEVTFWFKDGKLLSSSSKVRVEASGCSRRLVVQQAGKADAGEYSCEAGGQKLSFRLDVAEPKLAFA  
 KEQQAHSEVKAEAGASATLSCEVAQAQTEVTFWFKDGKLLSSSSKVRVEASGCSRRLVVQQAGKADAGEYSCEA  
 GGQKLSFRLDVAEPKLAFAKEQQAHSEVKAEAGASATLSCEVAQAQTEVTFWFKDGKLLSSSSKVRVEASGCSR  
 RLVVQQAGKADAGEYSCEAGGQKLSFRLDVAEPKLAFAKEQQAHSEVKAEAGASATLSCEVAQAQTEVTFWFKD  
 GKLLSSSSKVRVEASGCSRRLVVQQAGKADAGEYSCEAGGQKLFRLDVAEPKLMFAKEQQAHSEVKAEAGAS  
 ATLSCEVAQAQTEVTFWFKDGKLLSSSSKVRVEASGCSRRLVVQQAGKADAGEYSCEAGGQKLSFRLDVAEPK  
 VFAKEQQAHSEVKAEAGASATLSCEVAQAQTEVTFWFKDGKLLSSSSKVRVEASGCSRRLVVQQVQKADAGEYS  
 CEARGQKLSFRLDVADTRLMFAKEQQARTEVKAEAGNSATLSCEVAQAQTEVTFWFKDGKLLSSSSKVRVEASG  
 CSRRLVVQQAGKADAGEYSCEAGGQKLSFRLDVAEAEESQIPERPSRREPLVVKEHETIILTATIAAPSVAAVT  
 WLKDGVEIRRSKRHEATSLGDHTLTVRGAQVLD SAIYSCRVGKEGQDFPVQVEEVAAKFSKPLEPVEGELGG  
 TVMLVCELSPEQAEVWRCGNTQLRPGKRFQMTSEGPRRTLTVSGLREDDAEYVCSERDDRTSARLTVKVPR  
 VVKFTSGLSAMVAEEGQEA TFCVVS P SDAGVTWYKDGMLQPSSEKFMVMSGASRSLTILGLTLEDAGQVTV  
 EAEGASSAALRVREAPVLFKFKLEPQTVTEERTSVTLEVELTRPWPVKWTRNAAVLTPSENVEIRAEGARHC  
 LVLRVGFADRGFFGCETPDDKTQAKLVNEMRQVRLVRLQVEVEAKEQGTASMDVELSHAEVEGSWTRDGLRL  
 QPGPKCHLAVQGPVHILTLALSALQPQDSGLVAFRAEGVHTSARLIVTELPVSFTRVLQDVVATQKEKVTLECEL  
 SRPVDVRWLKDGVELRAGKAIGIVAQGTCSRSLVIYRCETGDQGVVCDALDAQTSASLRVQGRTYTLIFRRVL  
 AEDAGEVVKFVAENAESRAHLRVKELPVTLLRPLRDKIAMEKHRGVLECVSRASAVRWFKGGVELQSGPKYE  
 VVSDGLYRKLVIN DVQPEDEDTYTC DAGNVKTS AQFFVVEEQSITIVRGLKDMTVMEPAPAWFECETSIPSVRP  
 PKWLLGKTVLQAGGNVGLQDGTVHRLTLHKTCSTMTGPVHFTIGKSRSSAQLVVSDIPVVLTRPLEPKAGRE  
 LQSVVLSCDFRPAKAVQWYKDDTPLSPSEKFKMALEGQMAELRILRLTPADAGVYRCQAGSAQSSAEVTVEA  
 REVTVIQPLQDAEAMEEGRVCFSCELSHKDEDIWLSLNGTPLYNDSFHEISHEGCLHTLVLSKVRQADTGTVC  
 ATSPKVSVSARLVVKGKPVVFLKALDDVSAEERGTLLTQCEVSDPEARVVWRKDGVELGPSDKYDFLHKAGAR  
 GLTVHDLSDHEDAGLYTCQVGSKETQSKVSVHDLHVGITKRLKTVEVLEGESECFEVLSSHESPSDPVAVTVGG  
 KTVGGSGHFHAVRQGRKYTLTVKDAALSDAGEVVSVLGLTSKASLIIRERPVDITKPLEDQRTTLGEDVMLS  
 CELSRAGTSVRWLKDGKAIRKSQKYDLLSEGTRAVLVVRKASLKDSGEYTCETEASKSTAKLCVEEKANRFTE  
 ELADLQVEEKGRAVFTCKTEHPASVVTWRKGLLELRASGKHVPSQEGTLKLTINALERTDSDTYTCDIGQAR  
 TQARLLVHGQKVRVIEDLED TAVQEGSSAKFCCRIAPADYGPVHWF LDKTPLHSNELNEITVQPGGYHVLT LR  
 QLALKDSGTVYFEAGDQRTS AALRVTEKPSIFSRPLTDVTVTEGEDLTLCETTTVDSSVRWTKDGKTLRPSA  
 RCQLSHEGCAQLLITATTPQDGGRYKCEIGGASSSSIVRVHALPVRFRFRESLKDVEVPEGKAATLRVLSVVA  
 APVEWRHGDDVLKSSNKYSLRQEGAVLELVIRDLQPDQSGYSCSFGDQTTSATLTVKTTSSAQFVGKLRNKEA  
 TEGTTVTLRCELVTKEAPVEWKKGTETLRNGDKYSLKQDGA VCELQICSLLVADAGEYSVCVCGQEKTSATLTVK  
 ALLVHFVRRRLRSKEATEGDTTTLQCELSKAAPLEWRKGTETLRDGDYSLKQDGA VCELQIRSLTIADAGEYL  
 CTCGQEKTSATLTVRALPAKFKDSLKNEEATEGTTATLSCELSKAAPVWKKGPKTLQSGDKYVLRQDGA VCG  
 LQIHGLTMADAGEYSVCVCGQEKTSATLTVRGLPAKFIEDLRSQEATEGATAILRCELSKAAPVEWRKGETLK

DGDRYTLRQDGAVCELQIRGLAVVDGTYSLPTKFTTEGLRNEEATEGTMATLRCQMSKAAPVEWRKGETLR  
 DGDRYSLRQDGAMCELQIRGLTIEDSGEYTCVCGQEKTSATLSVKALPSRFIEDLRSQEATEGTMATLRCQMS  
 KTAPVEWKKGSETLRDGGRYSLRQDGPVCELQICDLAVEDAGEYSCVCGQEKTSATLSIKALPPRFIEDLRSQ  
 EATEGTMATLRCQMSKAAPVEWRKGETLGDGGRYSLRQNGAVCELQIHDLAVEDTGEYSCVCGQEKTSATLN  
 VKALPPRFIEDLRSQEATEGTMATLRCQMSKAAPVEWRKGETLRDGGRYSLRQDGAVCELQIHDLDVEDAGQ  
 YSCVCGQEKTSAVLTVDALPPKFTTEGLKKEEATEGTMVTLRCQMSKEATVEWRKGAKTLSDDGGRYSLRQDGAM  
 CELQICGLAVEDAGEYSCVCGQEKTSATLSVKALPPRFIEDLRSQEATEGTMATLRCQMSKAAPVEWRKGET  
 LRDGGRYSLRQDGAVCELQIRDLAVEDAGEYLCVCGQEKTSATLSVKALPPRFIEDLRSQEATEGTMATLRCQ  
 MKAAPVEWRKGETLRDGGRYSLRQDGAMCELQICDLAVEDTGDYSCVCGQEKTSATLSVKALPPRFIEDLR  
 SQEAREGTVATLRCRMSKAAPVEWRKGETLKDGGRYSLRQEGNLCELQIRDLAVEDTEEYSCVCGQEKTSAT  
 LSVKALPAKFIEDLRSQEAPESSTVTLRCKLSKKASVWKKGSETLRNGARYSLRQDGAVCELEIRDLTVEDT  
 GEYSCTCGQERTSATLSIMAPQVVFQQLQNLQAEEGSMASLRCELSVPNAAMVWSKGGLELQGDTRREARQQ  
 GCVAELLLRDLRREDAGEYSCCTCGSQTTSATLMVTAAPVRFLRELQAQDVDEGATARLRCELSREAVSVEWRK  
 GSIQLFPCAQYQMVQEGTTAELLVHGVEQEDAGEYTC DAGHTQS IARLSVRAPKPKFKTDLQSTEQEAGGTAR  
 LCCQLSEAEPTPVQWLKEGVELHVGSKYEMRRQAVCELLIHGLEAKDTGEYACLVGQKTLASLRVKEPEV  
 TIVRGLVDMVEQADEDFEFTCKVSQAGATDVQWHLQGLPLQSNVTEVAVLADGCTHVLQKGVTLLEDAGTVS  
 FHVGGSSSAQLTRVPEVTVLEPLKDVQLSEGQDAHFRCRLSRASQGEARWALGGVPLQCNEMNDITVEQGT  
 LYLLTLHKVTLEDAGTITLQVGSSESAQLKVTAKNTVLRGLENVDALLEGGEALFECQLSQNEVAHTWLLDD  
 EPVHTSEKVEVVYFENGLRHLLLLKNLKPQDSCRVTFLAGDVVTSAFITVRGWRLEVLPPHDASVKAGMQVR  
 FTCILSEAVPVGEATWYINGAAIQPDDTDWTVTTDGSHHALTLNAQPQHAGEVTF AARDAVASARLSVLALP  
 DPPEDAEEVGRSDHSVTLVSWVAPMSDGGGGLCGYRVMKEASTGQWQLCHDLVPGPECVDDLVPGKTYRFRV  
 AAVGPAGAGEPVHLPQMVKIAPAPAPAPAPAPAPAPETRQAVVGEDICLELEVAADGGEVVWHKGTERTIQPGG  
 HFEVLSRGRQMLVIKGFRTEDQGEYRCGPIQGLPSSGAATFNVMVMTSGSGDEVPAQPSLPEAAQEGDLHLL  
 WEALARKRRMSREPTLDSISELPEEDSRVQHLRQEAEEETAPDLSEGYSTADELARTGEADLSHTSSDDESRA  
 TPSLVTYLKKAGGPGISPLASKHEAQVTTSVKPKQKQEPVVPCTCPPGDLAADLMDPSLDKAAVKIQAAFKG  
 YKVRKEMKQYEGPVSRTFGDTEAQVGDVLRLECEVLAETKDMRACWLKDGIELTDGRHYHIDQLKDGTC SLLV  
 TGLAAPTDSGRYTCQVSTKSGRVSHSACVVVSGTESEAESSSGGELDDAFRRAARRLHRLFRTKSPAELSEEEL  
 FLSADEGPEPEEPADWQTYREDENFVCIRFESLAEARQAVTCFRNMFATMGIGVEISLGEQGPGRVEMRIGK  
 VAPTVPAPVPLAKTPGLQTSDAAPVFLTELQNDVQDGYPMSFDCVVTGQPVPSVRWFKDGKLLLEEDDHYMIN  
 EDQQGGHQLIITAVVPADMGVYRCLAENSMGVSSTKAELRVELTSTDYDTAADATETSSYFSAQGYLSSREQE  
 GTESDEGQLPQVLEELKDLQVAPGTRLAKFQLKVKGYPAKLYWFKDGOPLTSDHIRMTDKKTLHTLEIVSV  
 TREDSGQYAAYSNAVGAAYSARLLVRGPSEPEEKPASDVHERLVPRILEKFTPKKVKRGSSTF SVKVEG  
 HPAPSVHWLKEEAKEGVLWIGPDTPGYTMASSSKQHSLVLLDVGRQHOGTYTCIATNPAGQALCSASLHISGL  
 AKEEEQERVKEALISSFLQGTSQAVSAQMSEAGFADLVGQSKGESLVAAEAHSHLSLAEVGTTEEFLQKLTSSQ  
 ITEMVSAKISQAKLQVPGGDSDEETKTPSASPRHGRSRPSSSVQESSSESEDGDSRGEIFDIYVVTADYLP  
 AEQDAIILREGQYVEVLDSAHPLRWLVRTKPTKSSPSRQGWVSPAYLDKRLKLSPEWGPTEAPEFGEAVSED  
 EYRTRLSSVIQELLSSEQAFVGELEQFLESHHMKHLERSPRVPAAVASQKTVI FRNVQDISHFHSSFLKELQGC  
 GTDDDVAMCFIKNQEA FEKYLEFLVGRVQAEVSVVSTPVQEFYKKYAEETLSAKDPTQPPPPPLQHYLEQVPE  
 RVQKYQALLKELIRNKARNRQNCALLEQAYAVVSALPQRAENKLVSLMENYPGTLEALGEP I RQGHFIVWEG  
 APGARMFWKGNHRHVF LFRNYLVICKPRRDSRTDTFSYVFRNMMKLSSIDLNDQVEGDRAFEVWHEREDSVR  
 KYLLQARTVIKNSWVKEICGIQQLAQPVWRPPEFEELADCTAELGETVKKLACRVTGTPKPIVSWYKDGKP  
 VEVDPHHILIEDPDGSCCTLILDNLTGIDSGQYMCFAASAAGNASTLGKILVQVPPRFVNVKVRATPFVEGEDAQ  
 ITCTVEGAPYPQIRWYKDGTLAPGNRYRMLNEPRSGVLLVLIQAASKEDLGHYECELVNLGSTRGGGELYM  
 QSPALRARDQHHREQIVAAVEVTEQETKVPKKTVIIEETITTVVKS PRGRRQSPGKSPSRSPRRSASPRRPG  
 LLAPERLYPPGTSPSRRLVEEQGRKAPVPALYVTEAEVHAPASQSQPKWLEVEETIEVRVKKTGSRGASPVRE  
 MTSRGEGLIFLTPGGI PGRDPNANNNSNKS SVYQEA RTWGPVAVHVGEPPFI FQVDSVGNVDWVAASPEPEQVRA  
 SQKEENTERQEGCSDGIDENTFLMEEPQD TDSLQGRDPKILTHNGRVLTLADLEDYVPQEGETFGCGDSTPSTP  
 DEPPCEVSVLQREI SEPTVGQPVLLNVGRPPGTGATPSFFRPGSQVHSPESVSFLLREAWSGPVSAAPWTSSF  
 HTHVQSSVDGSHGSFKTEVSTQTVSFGAVGETVTLHIDPDGGEAPGPSQ\*

>rs257062692\_ENSMUSP00000020732\_c.11466:G>T\_p.V3823L  
 ENSMUST00000020732.13|Obscn-201|ENSMUSG00000061462|-|chr11:g.58958060:C>A  
 MDHSFSGAPRFLTRPKAFVSVGKDATLSCQIVGNPTPHVSWEKDRQPVVEAGARFRLAQDGDVYRLTILDLAL  
 GDSGQYVDARNAIIEGFAAVGLRVDSEGTCAGQAPHFLLRPTSIRVREGADATFRCRVGGSQPAPVSWSKDG  
 RRLGPPDAPHRVVEEHGESSALRIRSARPRDGGTIEYVRAENPLGSASAAAALVVDSDAEVAGPPGTSTATLLA  
 HLQQRREAMRAEYPPSPGAGTRTCTVTEGKHARLSCFVTGEPKPETVWKKDQGLVTEGRRHVVEDEQENF  
 VLKILFCKQSDRGLYTCTASNLVGQTYSSVLVVVREPTVPFKKRLQDLEVREKESATFQCEVAQPATEAAWFK  
 EETRLWASAKYDIEEGETERRLTVRNVSADDDAVYICETTEGSRVAELSVQGNLTKRKLPRKTAVRTGDTAIF  
 WVELAVPEGPVRWLRNQEEMVAGGRVAITAEGTCHTLTI FQCTLEDMGEVAFVSGGCRTTTQFCVSAAPRRPPL

YPPADPVVKAKTESSVTLWSAPPHGDRPVTTIDGYVLEKRKLGAYAWSRCHEAGWLATTEFTITGVAAEEGDFQ  
FRVSAINHFGQGPYLEFPGTMHLVPLAVKTPKAVEAVEGGEVTFVSDLTVASSGEWFLDGEALKASSIYVI  
RCDRTRHMLTIREVPARLHGAQLKVFVANGIETS IQMVVRAALGLPSSKLPAAAAREVLAQLHHEEAQLLAE LSD  
QAAA VTWLKDGRELSLGPKYEMQVSAGRRALLVRDVAQDDAGLYECVSRGSRRTAYQLLVQDITDGYRDWGPAG  
PQKHMCKCAGAKIARYLGSSCYRFLQYDKGVVHWEAALDTRQGKGTSSCSLHEKPKLVFAKGQQAHSSEVKA  
AGNSATLSCEVTQAQTEVTFWFKDGKLLSSSSKVRMEASGCSRRLVVQQAGKADAGEYSCEAGGQKLSFRLDVA  
EPKLVFAKGQQAHSSEVKAEGASATLSCEVAQAQTEVTFWFKDGKLLSSSSKVRMEASGCSRRLVVQQAGKAD  
GEYSCEAGGQKLSFRLDVAEPKMFVFAKEQQARSEVKAEGASATLSCEVAQAQTEVTFWFKDGKLLSSSSKVRM  
EASGCSRRLVVQQAGKADAGEYSCEAGGQKLSFRLDVTEPKLVFAKEQQARSEVKAEGVNSATLSCEVAQAQ  
EVTWFKDGKLLSSSSKVRMEASGCSRRLVVQQAGKADAGEYSCEAGGQKLSFRLDVAEPKLVFAKEQQARSEV  
KAEAGNSATLSCEVAQAQTEVTFWFKDGKLLSSSSKVRMEASGCSRRLVVQQAGKADAGEYSCEAGGQKLSFHL  
DVTEPKLVFAKEQQAHSEVKAEGASATLSCEVAQAQTEVTFWFKDGKLLSSSSKVRMEASGCSRRLVVQQAGK  
ADAGEYSCEAGGQKLSFRLDVAEPKLVFAKEQQARSEVKAEGASATLSCEVAQAQTEVTFWFKDGKLLSSSSK  
VRVEASGCSRRLVVQQAGKADAGEYSCEAGGQKLSFRLDVAEPKLVFAKEQQANSEVKAEGASATLSCEVAQ  
AQTEVTFWFKDGKLLSSSSKVRVEASGCSRRLVVQQAGKADAGEYSCEAGGQKLSFRLDVAEPKLVFAKEQQAH  
SEVKAEGASATLSCEVAQAQTEVTFWFKDGKLLSSSSKVRVEASGCSRRLVVQQAGKADAGEYSCEAGGQKLS  
FRLDVAEPKLVFAKEQQAHSEVKAEGASATLSCEVAQAQTEVTFWFKDGKLLSSSSKVRVEASGCSRRLVVQQ  
AGKADAGEYSCEAGGQKLSFRLDVAEPKLVFAKEQQAHSEVKAEGASATLSCEVAQAQTEVTFWFKDGKLLSS  
SSKVRVEASGCSRRLVVQQAGKADAGEYSCEAGGQKLFRLDVAEPKLMFAKEQQAHSEVKAEGASATLSCE  
VAQAQTEVTFWFKDGKLLSSSSKVRVEASGCSRRLVVQQAGKADAGEYSCEAGGQKLSFRLDVAEPKLVFAKEQ  
QAHSSEVKAEGASATLSCEVAQAQTEVTFWFKDGKLLSSSSKVRVEASGCSRRLVVQQVQKADAGEYSCEARGQ  
KLSFRLDVADTRLMFAKEQQARTEVKAEGNSATLSCEVAQAQTEVTFWFKDGKLLSSSSKVRVEASGCSRRLV  
VQQAGKADAGEYSCEAGGQKLSFRLDVAEAE SQIPERPSRREPLVVKEHETIILTATIAAPSVAAVWTKDGV  
EIRRSKRHEATSLGDTHTLTVRGAQVLD SAIYSCRVGKEGQDFPVQVEEVAAKFSKPLEPEVEGELGGTVMLVC  
ELSPQAEVWRCNGTQLRPGKRFQMTSEGPRTTLTVSGLREDDAEYVCE SRDDRTSARLTVKVPVVKFTS  
GLSAMVAEEGQEAFTQC VVSPSDAGVTWYKDGMLQPSKFMVVEGASRSLTILGLTLEDAGQVTEVAEGAS  
SSAALRVREAPVFLFKKLEPQTVVEERTSVTLEVLTRPWEVWTRNAAVLTPSENVEIRAEGARHCLVLRV  
GFADRGGFFGCETPDDKTQAKLVNEMRQVRLVVRGLQEVEAKEQGTASMDVELSHAEVEG SWTRDGLRLQPGPKC  
HLAVQGPVHILTLALSALQPQDSGLVAFRAEGVHTSARLIVTELPVSFTRVLQDVVATQKEKVTLECELSRPVDV  
RWLKDGVLELRAGKAIGIVAQGTCSRSLVIYRCETGDQGVYVCDALDAQTSASLRVQGRTYTLIFRRVLAEDAGE  
VKFVAENAESRAHLRVKELPVTLLRPLRDKIAMEKHRGVLECCQVSRASQVRWFKGGVELQSGPKYEVVSDGL  
YRKLVIN DVQPEDEDTYTC DAGNVKTSAQFFVVEEQSITIVRGLKDMTVMEPAPAWFECETSIPSVRPPKWL LG  
KTVLQAGGNVGLQDGTVHRLTLHKTCSTMTGPVHFTIGKSRSSAQLVVSDIPVVLTRPLEPKAGRELQSVVL  
SCDFRPAPKAVQWYKDDTPLSPSEKFKMALEGQMAELRILRLTPADAGVYRCQAGSAQSSAEVTEAREVTVI  
QPLQDAEAMEEGRVCFSCELSHKDEDIEWLSLNGTPLYNDSFHEISHEGLHTLVLKSVRQADTGTVCATSPKV  
SVSARLVVKGKPVVFLKALDDVSAEERGTTLTQCEVSDPEARVVWRKDGVELGSPDKYDFLHKAGARGLTVHD  
LSHEDAGLYTCQVGSKETQSKVSVHDLHVGITKRLKTVEVLEGE SCSFECVLSHESPSDPAVWTVGGKTVGGS  
GHFHAVRQGRKYTLTVKDAALSDAGEVVSVLGLTSKASLIIRERPV DITKPLEDQRTTLGEDVMLSCELSRA  
GTSVRWLKDGKAIRKSQKYDLLSEGTRAVLVVRKASLKDSGEYTCETEASKSTAKLCVEEKANRFTEELADLQ  
VEEKGRAVFTCKTEHPASVVTWRKGLLELRASGKHVPSQEGTLKLTINALERTSDTYTCDIGQARTQARLL  
VHGQKVRVIEDLED TAVQEGSSAKFCCRIAPADYGPVHWFLDKTPLHSNELNEITVQPGGYHVLTLRQLALKD  
SGTVYFEAGDQRTS AALRVTEKPSIFSRPLTDVTVTEGEDTLVCE TTTVDSSVRWTKDGKTLRPSARCQLSH  
EGCQAQLLITATTPQDGGRYKCEIGGASSSSIVRVHALPVRFRFRESLKDVEVPEGKAATLRCVLSVAAPVEWR  
HGDDVLKSSNKYSLRQEGAVLELVIRDLQPDQSGQYSCSFGDQTTSATLTVKTS SAQFVFKLRNKEATEGTTV  
TLRCELTK EAPVEWKKGTETLRNGDKYSLKQDGAVCELQICSLLVADAGEYS CVCGQEKTSATLTVKALLVHF  
VRLRSKEATEGDTTTLQCELSKAAPLEWRKGTETLRDGD RYSLKQDGAVCELQIRSLTIADAGEYLCTCGQE  
KTSATLTVRALPAKFKDSLKNEEATEGTTATLSCELSKAAPVTWKKGPKTLQSGDKYVLRQDGAVCGLQIHGL  
TMADAGEYSCVCGQEKTSATLTVRGLPAKFIEDLRSQEATEGATAILRCELSKAAPVEWRKGS ETLKDGDRYT  
LRQDGAVCELQIRGLAVVDGTYSLSPTKFTTEGLRNEEATEGTMATLRCQMSKAAPVEWRKGS ETLR DGRYS  
LRQDGAMCELQIRGLTIEDSGEYTCVCGQEKTSATLSVKALPSRFIEDLRSQEATEGTMATLRCQMSKTAPVE  
WKKGSETLRDGGRYSLRQDGPVCELQICDLAVEDAGEYSCVCGQEKTSATLSIKALPPRFIEDLRSQEATEGT  
MATLRCQMSKAAPVEWRKGS ETLGDGGRYSLRQNGAVCELQIHDLAVEDTGEYSCVCGQEKTSATLNVKALPP  
RFIEDLRSQEATEGTMATLRCQMSKAAPVEWRKGS ETLRDKGGRYSLRQDGAVCELQIHDL DVEDAGQYSCVCG  
QEKTSAVLTVDALETPPKFTEGLKKEEATEGTMVTLRQCMSKEATVEWRKGAKT LSDGGRYSLRQDGAMCELQIC  
GLAVEDAGEYSCVCGQEKTSATLSVKALPPRFIEDLRSQEATEGTMATLRCQMSKAAPVEWRKGS ETLR DGR  
YSLRQDGAVCELQIRDLAVEDAGEYLCVCGQEKTSATLSVKALPPRFIEDLRSQEATEGTMATLRCQMSKAAP  
VEWRKGS KTLR DGRYSLRQDGAMCELQICDLAVEDTGDYSCVCGQEKTSATLSVKALPPRFIEDLRSQEARE  
GTVATLRCRMSKAAPVEWRKGS ETLKDGDRYSLRQEGNLCELQIRDLAVEDT EYSCVCGQEKTSATLSVKAL

PAKFIEDLRSQEAPESSTVTLRCKLSKKASVWVKKGSETLRNGARYSLRQDGAUCELEIRDLTVEEDTGEYSCT  
CGQERTSATLSIMAPQVVFQQPLQNLQAEEGSMASLRCELSVNPAAAMVWSKGGLELQGDTRREARQQGCVAEL  
LLRDLRREDAGEYSCTCGSQTTSATLMVTAAPVRFLRELQAQDVDEGATARLRCELSREAVSVEWRKGLQLF  
PCAKYQMVQEGTTAELLVHGVEQEDAGEYTCDAHGHTQSIARLSVRAPKPKFKTDLQSTEQEAGGTARLCCQLS  
EAEPGTPVQWLKEGVELHVGSKYEMRRQGAUCELLIHGLEAKDTGEYACLVGGQKTLASLRVKEPEVTIVRGL  
VDMEVQADEDEVEFTCKVVSQAGATDVQWHLQGLPLQSNVTEVAVLADGCTHVLQKGVTLDEAGTVSFHVGGL  
SSSAQLTVRVPEVTVLEPLKDVQLSEGQDAHFRCRLSRASGQEARWALGGVPLQCNEMNDITVEQGTLYLLTL  
HKVTLDEAGTITLQVGSCESEAQLKVTAKNTVLRGLNVDLEGGALFECQLSQPEVAHAHTWLLDDEFPVHTS  
EKVEVVYFENGLRHLLLLKNLKPQDSCRVTFLAGDVVTS AFLTVRGRLEVLPPHDASVKAGMQVRFCTILS  
EAVPVGEATWYINGAAIQPDDTDWTVTTDGSHHALTLSNAQPQHAGEVTF AARDAVASARLSVLALPDPPEDA  
EUVGRSDHSVTLSWVAPMSDGGGGLCGYRVMKEASTGQWQLCHDLVPGPECVDDLVPGKTYRFRVAAVGPA  
GAGEPVHLPQMVKIAPAPAPAPAPAPAPAPAPETRQAVVGEDICILEVAADGGEVVWHKGTERRIQPGHFVLS  
RGQRQMLVIKGFRTEDQGEYRCGPIQGLPSSGAATFNVMVMTSGSGDEVPAQPSLPPEAAQEGDLHLLWEALAR  
KRRMSREPTLDSISELPEEDSRVQHLRQEAETAPDLSEGYSTADELARTGEADLSHTSSDDESAGTPSLVT  
YLKKGAGGPGISPLASKHEAQVTTSVKPKQKQEPVVPTCPPPGDLSAADLMDPSLDKAAVKIQAAFKGYKVRKE  
MKQQEGPVFSRTFGDTEAQVGDVLRLECVLATKTDMRACWLKDGIELTDGRHYHIDQLKDGTCSSLVTLGLAPT  
DSGRYTCQVSTKSGRVSHSACVVVSGTESEAESSSGGELDDAFRAARRLHRLFRTKSPAELSEELFLSADE  
GPGEPEEPADWQTYREDEFVCIREFESLAEARQAVTCFRNMFATMGIGVEISLGEQGPGRVEMRIKGVAPTVT  
PAVPLAKTPGLQTSDAAPVFLTELQNDQVQDGYPMSFDCVVTGQPVPSVRWFKDGKLEEDDHYMINEDQQGG  
HQLIITAVVPADMGVYRCLAENSMGVSSTKAELRVELTSTDYDTAADATETSSYFSAQGYLSSREQEGTESDE  
GQLPQVLEELKDLQVAPGTRLAKFQLKVKGYPAKLYWFKDGPPLTSDHIRMTDKKTLHTLEIVSVTREDSG  
QYAAYSNAVGAAYSSARLLVRGPSEPEEKPASDVHERLVPPRILEKFTPKKVKRGSSITFSVKVEGHPAPSV  
HWLKEEAKEKGLWIGPDTPGYTMASSSKQHSVLVLDVGRQHGGTYTCIATNPAGQALCSASLHISGLAKEEEQ  
ERVKEALISSFLQGTSAVSAQMSSEAGFADLVGQSKGESLVAAEAHSHLSLAEVGTTEFLQKLTSSQITEMVS  
AKISQAKLQVPGGDSDEETKTPSASPRHGRSRPSSSVQESSESESDGDSRGEIFDIYVVTADYPLGAEQDAI  
ILREGQYVELLDSAHPLRWLVRTPKTKSSPSRQWVSPAYLDRKRLKLSPEWGPTEAPEFPGEAVSEDEYRTRL  
SSVIEQLLSEVLELQFLESHHMKHLERSPRVPAVASQKTVIFRNVQDISHFHSSFLKELQCGCTDDDV  
AMCFIKNQEAFAKEYLEFLVGRVQAESVVVSTPVQEFYKKYAEETLSAKDPTQPPPPPLQHYLEQPVVERVQKYQ  
ALLKELIRNKARNRQNCALLEQAYAVVSALPQRAENKLVSLMENYPGTLEALGEPHQGHFIVWEGAPGARM  
PWKGHNHRVFLFRNYLVICKPRRDSRTDFTSYVFRNMMKLSSIDLNDQVEGDDRAFEVWHEREDSVRKYLLQA  
RTVVIKNSWVKEICGIQQLAQPVWRPPEFEEELADCTAELGETVKLACRVTGTTPKPIVSWYKDGKPVVEVDPH  
HILLIEDPDGSCTLILDNLTGIDSGQYMCFAASAAGNASTLGKILVQVPPRFVNVKVRATPFVEGEDAQITCTVE  
GAPYPQIRWYKDGTLAPGNRYRMLNEPRSGVLVVIQAASKEDLGHYECELVNRLGSTRGGGELYMQSPALR  
ARDQHHREQIVAAVEERRPSP\*  
>rs257062692\_ENSMUSP00000151217\_c.10086:G>T\_p.V3363L  
ENSMUST00000219084.3|Obscn-207|ENSMUSG00000061462|-|chr11:g.58958060:C>A  
MDHSFSGAPRFLTRPKAFVSVGKDATLSCQIVGNPTPHVSWEKDRQPVEAGARFRLAQDGDVYRLTILDLAL  
GDSGQYVCRARNAIGEAFVAVGLRVDSEGTCAEQAPHFLLRPTSIRVREGADATFRCRVGGSPQPAVSWSKDG  
RRLGPPDAPHVRVEEHGESSALRIRSARPRDGGTYEVRAENPLGSASAAAALVVDSDAEVAGPPGTSTATLLA  
HLQORREAMRAEGIPPSPPGAGTRTCTVTEGKHARLSCFVTGEPKPEVWKKDQGLVTEGRRHVVEDEQENF  
VLKILFCKQSDRGLYTCTASNLVGQTYSSVLVVVREPTVPFKKRLQDLEVREKESATFQCEVAQPAEAAWFK  
EETRLWASAKYDIEEGTERRLTVRNVSADDDAVYICETTEGSRVVAELSVQGNLTKLPRKTAVRTGDTAIF  
WVELAVPEGPVWRWRNQEEMVAGGRVAITAEGTCHTLTIFQCTLEDMGVAFVSGGCRTTTQFCVSAPRRPPL  
YPPADPVVKAKTESSVTLWSAPPHGDRPVTIDGYVLEKRLKLGAYAWSRCHEAGWLATTEFTITGVAAEEDGFQ  
FRVSAINHFGQGPYLEFPGTMHLVPLMAVKTPLKAVEAVEGGEVTFVSDLTVASSGEWFLDGEALKASSIYVI  
RCDRTRHMLTIREVPARLHGAQLKVFVANGIETSIQMVVRAALGLPSSKLPAAAAREVLAQLHHEAQLLAELSD  
QAAAVTWLKDGRELSLGPKEYMQVSAGRRALLVRDVAQDDAGLYECVSRGSRTAYQLLVQDITDGYRDWGPAG  
PQKHMCKCAGAKIARYLGSSCYRFLQYDKGVWHLEAALDTRQKGTSSCSLHEKPKLVFAKQQAHSEVKA  
AGNSATLSCEVTQAQTEVTWFKDGKLLSSSSKVRMEASGCSRRLVVQQAGKADAGEYSCEAGGQKLSFRLDVA  
EPKLVFAKQQAHSEVKAEGASATLSCEVAQAQTEVTWFKDGKLLSSSSKVRMEASGCSRRLVVQQAGKADA  
GEYSCEAGGQKLSFRLDVAEPMVFAKEQQARSEVKAEGASATLSCEVAQAQTEVTWFKDGKLLSSSSKVRM  
EASGCSRRLVVQQAGKADAGEYSCEAGGQKLSFRLDVTEPKLVFAKEQQARSEVKAEGASATLSCEVAQAQ  
EVTWFKDGKLLSSSSKVRMEASGCSRRLVVQQAGKADAGEYSCEAGGQKLSFHLDVTEPKLVFAKEQQAHSE  
KAEAGASATLSCEVAQAQTEVTWFKDGKLLSSSSKVRMEASGCSRRLVVQQAGKADAGEYSCEAGGQKLSFR  
DVAEPMVFAKEQQARSEVKAEGASATLSCEVAQAQTEVTWFKDGKLLSSSSKVRMEASGCSRRLVVQQAGK  
ADAGEYSCEAGGQKLSFRLDVAEPMVFAKEQQANSEVKAEGASATLSCEVAQAQTEVTWFKDGKLLSSSSK  
VRVEASGCSRRLVVQQAGKADAGEYSCEAGGQKLSFRLDVAEPMVFAKEQQAHSEVKAEGASATLSCEVAQ  
AQTEVTWFKDGKLLSSSSKVRVEASGCSRRLVVQQAGKADAGEYSCEAGGQKLSFRLDVAEPMVFAKEQQAH

SEVKAEAGASATLSCEVAQAQTEVTFWFKDGKLLSSSSKVRVEASGCSRRLLVVQQVGKADAGEYSCEARGQKLS  
FRLDVAEAEESQIPERPSRREPLVVKEHETIILTATIAAPSVAAVTWLKDGEVIRRSKRHEATSLGDTHLTVR  
GAQVLDIAIYSCRVGKEGQDFPVQVEEVAAKFSKPLEPVEGELGGTVMLVCELSPEQAEVWRCGNTQLRPGK  
RFQMTSEGPRRTLTVSGLREDDAEYVCESRDDRTSARLTVKVPRVVKFTSGLSAMVAEEGQEAFTQCVVSPS  
DAGVTWYKDGMLQPSSEKFMVVESEGASRSLTILGLTLEDAGQVTVAEAGASSAALRVREAPVLFKPKLEPQT  
VEERTSVTLEVELTRPWPEVKWTRNAAVLTPSENVEIRAEGARHCLVLRVSGFADRGFFGCETPDDKTQAKLN  
VEMRQVRLVVRGLQEVEAKEQGTASMDVELSHAEEVGSWTRDGLRLQPGPKCHLAVQGPVHILTLSALQPQDSG  
LVAFRAEGVHTSARLIVTELPVSTFRVLQDVVATQKEKVTLECELSRFPVDVRWLKDGVELRAGKAIGIVAQGT  
CRSLVIYRCETGDQGVYCDALDAQTSASLRVQGRYTLIFRRVLAEDAGEVKFVAENAESRAHLRVKELPVT  
LLRPLRDKIAMEKHRGVLECVSRASAQVRWFKGGVELQSGPKYEVVSDGLYRKLVIINDVQPEDEDTYTC DAG  
NVKTSAQFFVEEQSITIVRGLKDMTVMEPAPAWFECETSIPSVRPPKWLKGKTVLQAGGNVLEQDGTVHRLT  
LHKTCSTMTGPVHFTIGKSRSSAQLVVS DIPVVLTRPLEPKAGRELQSVVLSCDFRPAPKAVQWYKDDTFLSP  
SEKFKMALEGQMAELRILRLTPADAGVYRCQAGSAQSSAEVTVAREVTVIQPLQDAEAMEEGRVCFSCELSH  
KDEDIEWSLNGTPLYNDSFHEISHEGCLHTLVLKSVRQADTGTVCATSPKVSVSARLVVKGKPVVFLKALDDV  
SAEERGTTLTQCEVSDPEARVWVRKDGVELGSPDKYDFLHKAGARGLTVHDLSHEDAGLYTCQVGSKETQSKV  
SVHDLHVGITKRLKTVEVLEGECSFECVLSHESPSDPAVWTVGGKTVGGSGHFHAVRQGRKYTLTVKDAALS  
DAGEVSVLGLTSLKASLIIRERPVDTIKPLEDQRTTLGEDVMLSCELSRAGTSVRWLKDGKAIKRSQKYDLL  
SEGTRAVLVVRKASLKDSEYTCETEASKSTAKLCVEEKANRFEELADLQVEEKGRAVFTCKTEHPASVVTW  
RKGLLELRASGKHVPSQEGTLTKLTINALERTSDTYTCDIGQARTQARLLVHGQKVRVIEDLEDTAVQEGSS  
AKFCCRIAPADYGPVHWFLLDKTPLHSNELNEITVQPGYHVLTLRQLALKDSGTVYFEAGDQRTSAAALRVTEK  
PSIFSRPLTDVTVTEGEDTLTVCETTTVDSSVRWTKDGKTLRPSARCQLSHEGCAQLLITATTPQDGGRYKC  
EIGGASSSSIVRVHALPVRFRESLKDVEVPEGKAATLRCVLSVAAPVEWRHGDDVLKSSNKYSRLQEGAVLE  
LVIRDLPQDQSGQYSCSFGDQTTSATLTVKTSQAQFVGLKRNKEATEGTTVTLRCELTKEAPVWKKGTETLR  
NGDKYSLKQDGA VCELQICSLLVADAGEYSCVCGQEKTSATLTVKALLVHFVRRRLRSKEATEGDTTTLQCELS  
KAAPLEWRKGTETLRDGDRLYSLKQDGA VCELQIRSLTIADAGEYLCTCGQEKTSATLTVRGLPAKFIEDLRSQ  
EATEGATAILRCELSKAAPVEWRKGSSETLKDGDRLYTLRQDGA VCELQIRGLAVVDTGTYSYSLPTKFTTEGRNE  
EATEGTMATLRQMSKAAPVEWRKGSSETLRDGDRLYSLRQDGA MCELQIRGLTIEDSGEYTCVCGQEKTSATLS  
VKALPPRFIEDLRSQEATEGTMATLRQMSKAAPVEWRKGSSETLGDGGRYSLRQNGAVCELQIHDLAVEDTGE  
YSCVCGQEKTSATLNVKALPPKFTEGLKKEEATEGTMVTLRCQMSKEATVEWRKGAKTLSDDGGRYSLRQDGA  
MCELQICGLAVEDAGEYSCVCGQEKTSATLSVKALPPRFIEDLRSQEATEGTMATLRQMSKAAPVEWRKGSSET  
LRDGDRLYSLRQDGA VCELQIRDLAVEDAGEYLCVCGQEKTSATLSVKALPPRFIEDLRSQEATEGTMATLRQ  
MSKAAPVEWRKGSKTLRQDGDRLYSLRQDGA MCELQICDLAVEDTGDYSCVCGQEKTSATLSVKAPQVVFQQLQ  
NLQAEEGSMASLRCELSVPNAAMVWSKGGLELQGDTRREARQQGCVAELLLRDLRREDAGEYSCTCGSQTTSA  
TLMVTAAPVRFRLRELQAQDVDEGATARLRCELSREAVSVEWRKGSILQFPKAYQMVQEGTTAELLVHGVEQE  
DAGEYTC DAGHTQSIARLSVRAPKPKFKTDLQSTEQEAGGTARLCCQLSEAEPGTPVQWLKEGVELHVGSKYE  
MRQGA VCELLIHGLEAKDTGEYACLVGQKTLASLRVKEPEVTVIRGLVDMVEVQADEDEFTCKVVSQAGATD  
VQWHLQGLPLQSNEVTEVAVLADGCTHVLQLKGVTLLEDAGTVSFHVGGSSSAQLTVRVPVTVLEPLKDVQL  
SEGQDAHFRCRLSRASGQEARWALGGVPLQCNEMNDITVEQGTLYLLTLHKVTLLEDAGTITLVGSCSSEAQL  
KVTAKNTVLRGLENVDALEGGALFECQLSQPEVAHTWLLDDEPVHTSEKVEVVYFENGLRHLLLLKLNKPKQ  
DSCRVTFLAGDVVTS AFLTVRGWRLEVLEPPHDASVKAGMQRFTCILSEAVPVGEATWYINGAAIQPDDTDW  
TVTDTDGSHHALTLSNAQPQHAGEVTF AARDAVASARLSVLALPDPPEDAEVVGRSDHSVTLSSWVAPMSDGGG  
LCGYRVEMKEASTGQWQLCHDLVPGPECVVDDLVPKGTYRFRVAAVGPAGAGEPVHLPQMVKIAPAPAPAPAP  
APAPETRQAVVGEDICLELEVAADGGEVVWHKGTERRIQPGGHFEVLSRGRQMLVIKGFRTEDQGEYRCGPIQ  
GLPSSGAATFNVVMTSGSGDEVPAQPSLPPPEAAQEGDLHLLEALARKRRMSREPTLDSISELPEEDSRVQHL  
RQEAEETAPDLSEGYSTADELARTGEADLSHTSSDDESAGTPSLVTYLKKAGGPGISPLASKHEAQVTTSVK  
PQKQQEPVVPTCPPPGDLSAADLMDPSLDKAAVKIQAAFKGKVRKEMKQQEGPVFSRTFGDTEAQVGDVLR  
ECVLATKTDMRACWLKDGIELTDGRHYHIDQLKDGTCSLLVTLGLAPTD SGRYTCQVSTKSGRVSHSACVVVSG  
TESEAESSSGGELDDAFRRARRLHRLFRTKSPAELSEELFLSADEGPGEPEEPADWQTYREDEFVFCIRFE  
SLAEARQAVTCFRNMFMATMGIGVEISLGEQGPGRVEMRIGKVAPVTPAVPLAKTPGLQTSDAAPVFLTELQN  
QDVQDGYPMSFDCVVTGQPVPSVRWFKDGKLLLEDDHYMINEDQQGGHQLIITAVVPADMGVYRCLAENSMGV  
SSTKAELRVELTSTDYDTAADATETSSYFSAQGYLSSREQEGTESDEGQLPVLEELKDLQVAPGTRLAKFQL  
KVKGY PAPKLYWFKDGQPLTTS DHIRMTDKKTLHTLEIVSVTREDSGQYAAAYISNAVGAAYSSARLLVGRPSE  
PEEKPASDVHERLVPPRILEKFTPKKVKRGSSITFSVKVEGHPAPSVHWLKEEAEGVLWIGPDTPGYTMAS  
SKQHSVLVLLDVRQHGTQYTCIATNPAGQALCSASLHISGLAKEEEQERVKEALISSFLQGTSSQAVSAQMSSES  
AGFADLVGQSKGESLVAEEAHSLSLAEVGTEEFLLQKLTSTQITEMVSAKISQAKLQVPGGDSDEETKTPSASP  
RHGRSRPSSSVQESSSESEDGDSRGEIFDIYVVVTADYLP LGAEQDAIILREGQYVEVLDSAPHLRVLVTRTKPT  
KSSPSRQGWVSPAYLDKRLKLSPEWGPTEAPEFPGEAVSEDEYRTRLSSVIQELLSSEQAFVGVLEQLFLESHHM  
KHLERSPRVPAAVASQKTVIFRNVQDISHFHSSFLKELQCGCTDDDVAMCFIKNQEAFAFEKYLEFLVGRVQAES

VVSTPVEQEFYKKYAEETLSAKDPTQPPPPPLQHYLEQPVERVQKYQALLKELIRNKARNRQNCALLEQAYAV  
VSALPQRAENKLVSLMENYPGTLEALGEP I RQGHFIVWEGAPGARM PWKGHNHRHVFLFRNYLVICP RRDSR  
TDTFSYVFRNMMKLSSIDLNDQVEGDDRAFEVWHERE DSVRKYLQARTV I IKN SWVKEICIGIQORLAQPVWR  
PPEFEEELADCTAELGETVKLACRVGTGPKPIVSWYKDGKPV EVDPHHILIEDPDGSCSTLILDNLGTIDSGQY  
MCF AASAAGNASTLGKILVQVPPRFVNKVRATPFVEGEDAQITCTVEGAPYPQIRWYKDGTL LAPGNRYRMLN  
EPRSGVLVLVIQAASKEDLGHYECELVNRLGSTRGGGELYMQSPALRARDQH HREQIVA AAVEVTEQETKVPKK  
TVIIEETITTVVKS PRGRRQSPGKSPSRSPRRSASPRRPGLLAPERLYPPGTS PSRRLEVEQGRKAPVPALY  
VTEAEVHAPASQSQPKWLEVEETIEVRVKKTGSRGASPVREMTSRGEGILFTLPGGIPGRDPNANN SNKSVY  
QEARTWGP AVVHVGEFFIFQVDSVGNVDVVAASPEPEQVRASQKEENTERQEGCSDGDENTFLMEEPQD TDSL  
QGRDPKILTHNGRVLT LADLEDYVPQEGETF GCGDSTPSTPDEPPCEVSVLQREI SEPTV GQPVLLNVGRPPG  
TGATPSFFRPGSQVHSPESVSFLLREAWSGPVSAAPWTSSFH THVQSSVDGSHG SFKTEVSTQTVSFGAVGET  
VTLHIDPDGGEAPGPSQG\*

>ENSMUSP00000158795\_c.11404:G>T\_p.S3802I ENSMUST00000238536.2|Obscn-  
210|ENSMUSG00000061462|-|chr11:g.58958122:C>A

MDHSFSGAPRFLTRPKAFVSVGKDATLSCQIVGNPTPHVSWEKDRQPV EAGARFRLAQDGDVYRLT I LD LAL  
GDSGQYVCRARNAIGEAF AAVGLRVDSEGTC AEQAPHFLLRPTS IRVREGADATFRCRVGSGSPQPAVSWSKDG  
RRLGPPDAPHVRVEEHGESSALRIR SARPRDGGTYEVR AENPLGSASAAAALVVDSDAEVAGPPGTSTATLLA  
HLQRRREAMRAEGIPPSPPGAGTRTCTVTTEGKHARLSCFVTGEPKPE TVWKKDGLVTEGRRHVVEDEQENF  
VLKILFCKQSDRGLYTCTASNLVQGTYSSVLVVVREPTVPFKKRLQDLEVREKESATFQCEVAQ PATEAAWFK  
EETRLWASAKYDIEEEGTERRLTVRNVSADDDAVYICETTEGSR TVAELSVQGNLTRKLRKTAVRTGDTAIF  
WVELAVPEGPVRWLRNQEEMVAGGRVAITAEGTCHTLTI FQCTLEDMGEVAFVSGGCRTTTQFCVSA PRRPPL  
YPPADPVVKAKTESSVTL SWSAPPHGDRPVTIDGYVLEKRKLGAYAWSRCHEAGWLATTEFTITGV AEEGDFQ  
FRVSAINHFGQGPYLEFP GTMHLVPM LAVKTP LKAVEAVEGGEVTF SVDLTVASSGEWFLDGEALKASSIYVI  
RCDRTRHMLTIREV PARLHGAQLKFVANGIETS IQMVVRAALGLPSSKLPAAAAREVLAQLHEEAQLLAE LSD  
QAAAVTWLKDGRELSLGP KYEMQVSAGRRALLVRDVAQDDAGLYECVSRGSR TAYQLLVQDITDGYRDWGPAG  
PQKHMCKCAGAKTIARYL GSSCYRFLQYDKGVWHWLEAALDTRQKGKTS SCSLHEKPKLVFAKQQAHSEVKA E  
AGNSATLSCEVAQAQTEVTWFKDGKLLSSSSKVRMEASGCSRRLVVQQAGKADAGEYSCEAGGQKLSFR LDVA  
EPKLVFAKQQA HSEVKA EAGASATLSCEVAQAQTEVTWFKDGKLLSSSSKVRMEASGCSRRLVVQQAGKADA  
GEYSCEAGGQKLSFR LDVAEPKMF AKEQQARSEVKA EAGASATLSCEVAQAQTEVTWFKDGKLLSSSSKVRM  
EASGCSRRLVVQQAGKADAGEYSCEAGGQKLSFR LDVTEPKLVFAKEQQARSEVKA E VGN SATLSCEVAQAQ T  
EVTWFKDGKLLSSSSKVRMEASGCSRRLVVQQAGKADAGEYSCEAGGQKLSFR LDVAEPKLVFAKEQQARSEV  
KAEAGNSATLSCEVAQAQTEVTWFKDGKLLSSSSKVRMEASGCSRRLVVQQAGKADAGEYSCEAGGQKLSFHL  
DVTEPKLVFAKEQQAHSEVKA EAGASATLSCEVAQAQTEVTWFKDGKLLSSSSKVRMEASGCSRRLVVQQAGK  
ADAGEYSCEAGGQKLSFR LDVAEPKLVFAKEQQARSEVKA EAGASATLSCEVAQAQTEVTWFKDGKLLSSSSK  
VRVEASGCSRRLVVQQAGKADAGEYSCEAGGQKLSFR LDVAEPKLVFAKEQQANSEVKA EAGASATLSCEVAQA  
AQTEVTWFKDGKLLSSSSKVRVEASGCSRRLVVQQAGKADAGEYSCEAGGQKLSFR LDVAEPKLVFAKEQQAH  
SEVKA EAGASATLSCEVAQAQTEVTWFKDGKLLSSSSKVRVEASGCSRRLVVQQAGKADAGEYSCEAGGQKLS  
FR LDVAEPKLVFAKEQQAHSEVKA EAGASATLSCEVAQAQTEVTWFKDGKLLSSSSKVRVEASGCSRRLVVQQ  
AGKADAGEYSCEAGGQKLSFR LDVAEPKLVFAKEQQAHSEVKA EAGASATLSCEVAQAQTEVTWFKDGKLLSS  
SSKVRVEASGCSRRLVVQQAGKADAGEYSCEAGGQKLFRLDVAEPKLMFAKEQQAHSEVKA EAGASATLSCE  
VAQAQTEVTWFKDGKLLSSSSKVRVEASGCSRRLVVQQAGKADAGEYSCEAGGQKLSFR LDVAEPKLVFAKEQ  
QA HSEVKA EAGASATLSCEVAQAQTEVTWFKDGKLLSSSSKVRVEASGCSRRLVVQQV GKADAGEYSCEARGQ  
KLSFR LDVADTRLMFAKEQQARTEVKA EAGNSATLSCEVAQAQTEVTWFKDGKLLSSSSKVRVEASGCSRRLV  
VQQAGKADAGEYSCEAGGQKLSFR LDVAEAE SQI PERPSRREPLVVK EHE TI ILTATIAAPSVAAVTWLKDG V  
EIRRSKRHEATSLGDHTLT VRGAQVLDSAIYSCR VKEGQDFPVQVEEVA AKF SKPLEPVEGELGGTVMLVC  
ELSP EQAEVWRCGNTQLRPGKRFQMTSEGPRRTLT VSGLREDDAE EYVCE SRDRTSARLTVKVRPVVKFTS  
GLSAMVAEEGQEATFQCVVSPSDAGVTWYKDG MQLPSEK FVMVESGASRSLTILGLTLEDAGQVTV EAE GAS  
SSAALRVREAPVLFKKKLEPQTV EERTSVTLEVELTRPWPEVKWTRNAAVLTPSENVEIRAEGARHCLVLR SV  
GFADRGFFGCETPDDKTQAKLNVEMRQVRLVRGLQEVEAKEQGTASMDVELSHA EVEG SWTRDGLRLQPGPKC  
HLAVQGPVHIL TSLALQPQDSGLVAFRAEGVHTSARLIVTELPVSFTRVLQDVVATQKEKVTLECELSRPVDV  
RWLKDGV ELRAGKAIGIVAQGT CRSLVIYRCETGDQGVYVCDALDAQTSASLRVQGRTYTLIFRRLAEDAGE  
VKFVAENAESRAHLRVKELPVTLLRPLRDKIAMEKHRGVLECCQVSRASAQVRWFKGGVELQSGPKYEVVSDGL  
YRKLVINVDQPEDEDTYTC DAGNVKTS AQFFVEEQSITIVRGLKDMTVMEPAPAWFECETSIPSVRPPKWL LG  
KTVLQAGGNVGELEDGTVHRLTLHKTCSTMTGPVHFTIGKSRSSAQLVVSDI PVVLT RPLEPKAGRELQSVVL  
SCDFRPAPKAVQYKDDTPLSPSEKFKMALEGGMAELRILRLTPADAGVYRCQAGSAQSSAEVTV EAREVTVI  
QPLQDAEAMEEGRVCFSC ELSHKDEDI EWSLNGTPLYNDSFHEI SHEGCLHTLV LKSVRQADTGTVCATSPKV  
SVSARLVVKGKPVVFLKALDDVSAEERGLTLTQCEVSDPEARV VWRKDGVELG PSDKYDFLHKAGARGLTVHD  
LSHEDAGLYTCQVGSKETQSKVSVHDLHVGITKRLKTVEVLEGESCSFECVLSHESPSDPAVWTVGGKTVGGS



GHFHAVRQGRKYTLTVKDAALSDAGEVVSFLGLTSKASLIIRERPVDIITKPLEDQRTTLGEDVMLSCELSRA
GTSVRWLKDGKAIRKSQKYDLLSEGTRAVLVVRKASLKDSGEYTCETEASKSTAKLCVEEKANRFTEELADLQ
VEEKGRAVFTCKTEHPASVVTWRKGLLELRASGKHVPSQEGTLTKLTINALERTDSDTYTCDIGQARTQARLL
VHGQKVRVIEDLEDTAVQEGSSAKFCCRIAPADYGPVHWFLDKTPLHSNELNEITVQPGGYHVLTLRQLALKD
SGTVYFEAGDQRTSAALRVTEKPSIFSRPLTDVTVTEGEDLTLVCETTTVDSSVRWTKDGKTLRPSARCQLSH
EGCQAQLLITATTPQDGGRYKCEIGGASSSSIVRVHALPVRFRRESLKDVEVPEGKAATLRCVLSVAAPVEWR
HGDDVLKSSNKYSRLQEGAVLELVIRDLQPDQSDGQYSCSFGDQTTSATLTVKTSQAQFVFKLRNKEATEGTTV
TLRCELTKEAPVEWKKGTETLRNGDKYSLKQDGA VCELQICSLLVADAGEYSCVCGQEKTSATLTVKALLVHF
VRLRLIKEATEGDTTTLQCELSKAAPVEWRKGTETLRDGDYSLKQDGA VCELQIRSLTIADAGEYLCTCGQE
KTSATLTVRALPAKFKDSLKNEEATEGTTATLSCELSKAAPVTWKKGPKTLQSGDKYVLRQDGA VCGLIHGL
TMADAGEYSCVCGQEKTSATLTVRGLPAKFIEDLRSQEATEGATAILRCELSKAAPVEWRKGSSETLKDGDYR
LRQDGA VCELQIRGLAVVDGTYSLSPTKFTTEGLRNEEATEGTMATLRCQMSKAAPVEWRKGSSETLRDGDYR
LRQDGA MCELQIRGLTIEDSGEYTCVCGQEKTSATLSVKALPSRFIEDLRSQEATEGTMATLRCQMSKTAPVE
WKKGSETLRDGGYSLRQDGPVCELQICDLAVEDAGEYSCVCGQEKTSATLSIKALPPRFIEDLRSQEATEG
MATLRCQMSKAAPVEWRKGSSETLGDGGYSLRQNGAVCELQIHDLAVEDTGEYSCVCGQEKTSATLNVKALPP
RFIEDLRSQEATEGTMATLRCQMSKAAPVEWRKGSSETLRDGGYSLRQDGA VCELQIHDLVEDAGQYSCVCG
QEKTSAVLTVDALPKFKFTEGLKKEEATEGTMVTLRCSKEATVEWRKGA KTLSDGGYSLRQDGA MCELQIC
GLAVEDAGEYSCVCGQEKTSATLSVKALPPRFIEDLRSQEATEGTMATLRCQMSKAAPVEWRKGSSETLRDGD
YSLRQDGA VCELQIRDLAVEDAGEYLCVCGQEKTSATLSVKALPPRFIEDLRSQEATEGTMATLRCQMSKAAP
VEWRKGSKTLRQDGDYSLRQDGA MCELQICDLAVEDTGDYSCVCGQEKTSATLSVKALPPRFIEDLRSQEARE
GTVATLRCRMSKAAPVEWRKGSSETLKDGDYSLRQEGNLCELQIRDLAVEDTEEYSCVCGQEKTSATLSVKAL
PAKFIEDLRSQEAPESSTVTLRCKLSKKASVVWKKGSETLRNGARYSLRQDGA VCELEIRDLTVEDTGEYSCT
CGQERTSATLSIMAPQVVFQQPLQNLQAEEGSMASLRCELSVNAAMVWSKGGLELQGDTRREARQQGCVAEL
LLRDLRREDAGEYSCTCGSQTTSATLMVTAAPVRFLELQAQDVDEGATARLRCELSREAVSVEWRKGS LQLF
PCAKYQMVQEGTTAELLVHGVEQEDAGEYTCDAHTQSIARLSVRAPKPKFKTDLQSTEQEAGGTARLCCQLS
EAEPGTPVQWLKEGVELHVGSKYEMRRQGA VCELLIHGLEAKDTGEYACLVGQKTLASLRVKEPEVTIVRGL
VDMEVQADDETEGTCVKSQAGATDVQWHLQGLPLQSNHEVAVLADGCHVQLKGVTLLEDAGTVSFHVGG
SSSAQLTVRVPEVTVLEPLKDVQLSEGDQAHFRCLRSRASGQEARWALGGVPLQCNEMNNDITVEQGTLYLLTL
HKVTLEDAGTITLQVGS CSSEAQLKVTAKNTVLRGLENVDALEGGEALFECQLSQPEVA AHTWLLDDEPVHTS
EKVEVVYFENGLRHLLLLKNLKPQDSCRVTFLAGDVVTS AFLTVRGRLEVLLEPPHDASVKAGMQVRFTCILS
EAVPVGEATWYINGAAIQPDDTDWTVTTDGS HHALTL SNAQPQHAGEVTF AARDAVASARLSVLALPDPPEDA
E VVGRSDHSVTL SWVAPMSDGGG LCGYRVMKEASTGQWQLCHDLVPGPECVDDLVPGKTYRFRVA AVGPA
GAGEPVHLPQMVKIAPAPAPAPAPAPAPAPETRQAVVGEDICLELEVAADGGEVVWHKGTERRIQPGHFVLS
RGQRQMLVIKGFRTEDQGEYRCGPIQGLPSSGAATFNVVMTSGSGDEVPAQPSLPPEAAQEGDLHLLWEALAR
KRRMSREPTLDSISELPEEDSRVQHLRQEAEETAPDLSEGYSTADELARTGEADLSHTSSDDESRACTPSLVT
YLKAGGPGISPLASKHEAQVTTSVKPKQKQEPVPTCP PPGDL SAADLMDPSLDKAAVKIQAAFQYKVRKE
MKQQEGPVFSRTFGDTEAQVGDVLRLECVLATKTD MRACWLKDGIELTDGRHYHIDQLKDGTCSSLVTVGLAPT
DSGRYTCQVSTKSGRVSHSACVVVSGTESEAESSGGELDDAFRRAARRLHRLFRTKSPAELSEELFLSADE
GPGEPEPADWQTYREDENFVCIRFESLAEARQAVTCFRNMFATMGIGVEISLGEQGPRGVEMRIGKVAPTVT
PAVPLAKTPGLQTS DAAPVFLTELQNDVQDGYPMSFDCVVTGQPVPSVRWFKDGKLEEDDHYMINEDQGG
HQLIITAVVPADMGVYRCLAENSMGVSSKAELRVELTSTDYDTAADATETSSYFSAQGYLSSREQEGTESDE
GQLPQVLEELKDLQVAPGTR LAKFQLKVKGYPA PKLYWFKDGP LTTSDHIRMTDKKTLHTLEIVSVTREDSG
QYAAYSNAVGAAYSSARLLVRGPSEPEEK PASDVHERLVPPRI LEKFTPKKVKRGSSITFSVKVEGHPAPSV
HWLKEEA EKGV LWIGPDTPGYTMASSSKQHSLVLLDVGRHQGTYTCTIATNPAGQALCSASLHISGLAKEEEQ
ERVKEALISSFLQGTSAVSAQMS ESAGFADLVGQSKGESLVAAEASHLSLAEVGTEEF LQKLT SQITEMVS
AKISQAKLQVPGGDSDEETKTPSASPRHGRSRPSSSVQESSSESDGDSRGEIFDIYVVTADYLP LGAEQDAI
ILREGQYVEVLDSAHPLRWLVRTPKTKSSPSRQGWVSPAYLDKRLKLSPEWGPTEAPEFPGEAVSEDEYRTRL
SSVIQELLSSEQAFV GELQFLESHHMKHLERSPRVPAAVASQKTVI FRNVQDISHFHSSFLKELQCGCTDDDV
AMCFIKNQEA FEKYLEFLVGRVQAESVVVSTPVQEFYKKYAEETLSAKDPTQPPPPPLQHYLEQPVERVQKYQ
ALLKELIRNKARNRQNCALLEQAYAVVSALPQRAENKLVSLMENYPGTLEALGEP I RQGHFI V WEGAPGARM
PWKGHNHRVFLFRNYLVICPPRRDSRTDTFSYVFRNMMKLSSIDLNDQVEGD DRAFEVWHEREDSVRKYLLQA
RTVI IKNSWVKEICGIQQLRAQPVWRPPEFEEELADCTAELGETVKLACRVTGT PKPIVSWYKDGKPV EVDPH
HILIEDPDG SCTLILDNLTGIDSGQYMCFAASAAGNASTLGKILVQVPPRFVNVKVRATPFVEGEDAQITCTVE
GAPYQJIRWYKDLGTL LAGPNRYRMLNEPRSGV LVLVIAASKEDLGHYECELVNLRLGSTRGGELYMQSPALR
ARDQHREQIVAAVEDTSVEGSAHSAQDGA DQQAASVLRWLLGSEALGPS PGDLPNTRQSEPPAFEEAASQIP
GAASGTPEVSQPGTHKGLEQETTSSGSQGWTVPIRVEGTAWPGAGTGQLLLDVHSQVIMETTQRTYVCQAPDT
GVTRAPSMQVTIEDVQVQVGDMAQF DAVIEGHPPP I V TWYKGSTQLTSSARLSQRQDGT TYSLVLT DVAPHDA
GVYTCVANNAGGQVLC KAELLVHGDKLDAENQVYRRKLHSFYDVQEE IGRGVFGFVKRVQHKGNKMFCAAKF

IPLRSKTRAQAYQERDILATLGHPLVTGLLDQFETRKTLLILILELCSSEELLDRLFKKGVVTEAEVKVYIQQL  
VEGLHYLHSHGILHLDIKPPNIMLVHPAREDIKICDFGFAQKITPSEPQYSKYGSPEFVSPEIIEQNPVSEGS  
DIWAMGVISYLSLTCSSPFAGESDRATLLNVLEGRVSWSSPTAAHLEDAKDFIKATLQRTPRARPSTSQCLA  
HPWFLKSMPAAEEAHFINTKQLKFLARSRWQRSLMSYKSIILVMRSIPPELLQGPPDSPSLGVARHLRGEASGAS  
SSSSSSDNELAPFARAKSLPPSPVTHSPLLHPRGFLRPSASLPEETEASMPATAAASPASQAGPPASPGCV  
PRHSVSISSLFYQQAGEGAERGNKTSGAKRHPARRRHLKGGYIARALPGLREPLMEYSLLEEEAAREEQASLM  
TKTPSFETALRLPSSSVREVPGRSHSLDNPPVTTGPSPEACKEQLLFPSTGLTHETAKDRGHKEGFLQESV  
PFPMPGSDSRPGKQEGSSQDSCRGKPASSCHSELGSGSQEGCGPPSSQSLGSLPPQSLKKEKELSTSCGFLFSEQ  
PQAAPFPPTQVSPLLGSEKEPQDGLSSEGVPVSPSSPGSASQVDASLDTEGLSEAGDTCDFTPPPQRPQEQAT  
TRKFSLESRGGYAGVAGYGTFAFGGDAGGMLGQGPLWARMAWAVSQSSEEQDEAATESPQPLES LGPIAEASG  
VPLRTSPSLTPWEEVEQVSLVQIRDLSDGAEAAADTISLDISEVDPAYLNLSDLYDIKYLPEFEMI FRRVPKPI  
EQPESPGSETEAGQGLADFL EEAAWPWP GELGLRAGLEIT EEP EEPGDLEALLGEAAVGRKRKWSPSRGLFQF  
PGRCLSGEEPVELGLRQRVKASMAHISRILKGRPEGP EREGPPRKKAGLASFRLSGLKGRDQELSDEAVVLGQ  
SVTLACQVLAQPTAQATWSKDGVLLESSGHLISSTLKNFQLLTIILVVKEEDLGTYTCCVSNPLGTAVTTGVL  
RKAERPSSSPRPEVGELYKDAVLLVWKPVEESCGPVYIVQCCIEGGSWTTLASDISDCCYLTGKLSRGGMYIF  
RTACVSKAGMGPISSPSEQVLLGGPNHLASEEESRRGRPAQLLPSTKTF AFQMQRIRGRFVSVRQCREKASGR  
ALAAKIVPYPQEDKTAVLR EYEA LKRLHHPHLAQLHAAYLSPRHLVLI LELCSGPELLPSLAERESYSESDVK  
DYLWQMLSATQYLHAQHILHLDLRSENMMVTEYNLLKVIDLGNAQSLDQEKVPAPENFKDYLEMAPELLEGGQ  
GAVPQTDIWAIGVTA FIMLSGEY P ESSEGTRDLQKGLRKLGLIRLSRCYAGLSGGAVAF LQSS LCAQPWGRPCA  
STCLQCGLWTEEGPTGSRPTVPTFPTVRLRA FVREERERKRRALLYKKNLAQVR\*  
>ENSMUSP00000038264\_c.10576:G>T\_p.S3526I ENSMUST00000047441.14|Obscn-  
202|ENSMUSG00000061462|-|chr11:g.58958122:C>A  
MDHSFSGAPRFLTRPKAFVVS VGKDATLSCQIVGNPTPHVSWEKDRQPVEAGARFRLAQDGDVYRLTILDLAL  
GDSGQYVCRARNAIGEAFAAVGLRVDSEGTCAEQAPHFLLRPTSIRVREGADATFRCRVGGSPQPAVSWSKDG  
RRLGPPDAPHVRVEEHGESSALRIR SARPRDGGTYEVRAENPLGSASAAAALVVDSDAEVAGPPGTSTATLLA  
HLQQRREAMRAEGIPSPGAGTRTCTVTEGKHARLSFCVTEGPKPETVWKKDGQLVTEGRRHVVEDEQENF  
VLKILLECKQSDRGLYCTASNLVGGQTYSSVLVVVREPTVPFKKRLQDLEVREKESATVFCEVAQTEAAWFK  
EETRLWASAKYDIEEEGTERRLTVRNVSADDDAVYICETTEGSRTVAE LSVQGNLTKRKLPRKTAVRTGDTAIF  
WVELAVPEGPVRWLRNQEEMVAGGRVAITAEGTCHTLTIFQCTLEDMGEVAFVSGGCRTTTQFCVSAPRRPPL  
YPPADPVVKAKTESSVTLWSAPPHGDRPVTIDGYVLEKRKLGAYAWSRCHEAGWLATTEFTITGVAAEGDFQ  
FRVSAINHFGQGPYLEFPGTMHLVPLAVKTPKAVEAVEGGEVTFVSDLTVASSGEWFLDGEALKASSIYVI  
RCDRTRHMLTIREV PARLHGAQLKFVANGIETS IQMVVRAALGLPS SKLPAAAAREVLAQLHEEAQLLAE LSD  
QAAA VTWLKDGRELSLGP KYEMQVSAGRRALLVRDVAQDDAGLYECVSRGSR TAYQLLVQDITDGYRDWGPAG  
PQKHMCKCAGAKIARYLGS SCYRFLQYDKGVWHLEAALDTRQGKGTSSCSLHEKPKLVFAKQQAHSEVKA E  
AGASATLSCEVAQAQTEVTWFKDGKLS SSSSKVRMEASGCSRRLVVQQAGKADAGEYSCEAGGQKLSFRLDVA  
EPKMVFAKEQQARSEVKA EAGASATLSCEVAQAQTEVTWFKDGKLS SSSSKVRMEASGCSRRLVVQQAGKADA  
GEYSCEAGGQKLSFRLDVTEPKLVFAKEQQARSEVKA EAGASATLSCEVAQAQTEVTWFKDGKLS SSSSKVRM  
EASGCSRRLVVQQAGKADAGEYSCEAGGQKLSFRLDVAEPKLVFAKEQQARSEVKA EAGASATLSCEVAQAQ  
EVTWFKDGKLS SSSSKVRMEASGCSRRLVVQQAGKADAGEYSCEAGGQKLSFHLDVTEPKLVFAKEQQAHSEV  
KAEAGASATLSCEVAQAQTEVTWFKDGKLS SSSSKVRMEASGCSRRLVVQQAGKADAGEYSCEAGGQKLSFR L  
DVAEPKLVFAKEQQARSEVKA EAGASATLSCEVAQAQTEVTWFKDGKLS SSSSKVRVEASGCSRRLVVQQAGK  
ADAGEYSCEAGGQKLSFRLDVAEPKLVFAKEQQANSEVKA EAGASATLSCEVAQAQTEVTWFKDGKLS SSSK  
VRVEASGCSRRLVVQQAGKADAGEYSCEAGGQKLSFRLDVAEPKLVFAKEQQAHSEVKA EAGASATLSCEVAQ  
AQTEVTWFKDGKLS SSSSKVRVEASGCSRRLVVQQAGKADAGEYSCEAGGQKLSFRLDVAEPKLVFAKEQQAH  
SEVKA EAGASATLSCEVAQAQTEVTWFKDGKLS SSSSKVRVEASGCSRRLVVQQAGKADAGEYSCEAGGQKLS  
FRLDVAEPKLVFAKEQQAHSEVKA EAGASATLSCEVAQAQTEVTWFKDGKLS SSSSKVRVEASGCSRRLVVQQ  
AGKADAGEYSCEAGGQKLSFRLDVAEPKLVFAKEQQAHSEVKA EAGASATLSCEVAQAQTEVTWFKDGKLS S  
SSKVRVEASGCSRRLVVQQV GKADAGEYSCEARGQKLSFRLDVAEAE SQI PERPSRREPLVKEHETIILTAT  
IAAPSVAAVTWLKDGEI RRSKRHEATSLGDTHLTVRGAQVLD SAIYSCRVGKEGQDFPVQVEEVA AKFSKP  
LEPVEGELGGTVMLVCELSPEQA EVVWRCNGNTQLRPGKRFQMTSEGPRRTLTVSGLREDDAE EYVCE SRDDRT  
SARLTVKVP RVV KFTSGLSAMVAEEGQEATFQCVVSPSDAGVTWYKDGMLQ PSEKFMVMEVGASRSLTILGL  
TLEDAGQVTVEAEGSSAALRVREAPVLFKKKLEPQTVEERTSVTLEVELTRPWPVEVKWTRNAAVLTPSENV  
EIRAEGARHCLVLRVSGFADRGRFFGCETPDDKTQAKLNVEMRQVRLV RGLQEVEAKEQTASMDVELSHA EVE  
GSWTRDGLRLQPGKCHLAVQGPVHILTL SALQPQDSGLVAFRAEGVHTSARLIVTELET PVSFTRVLQDVVATQ  
KEKVTLECEL SRPVDVRWLDKGVELRAGKAI GIVAQDGTCSRSLVIYRCETG DQG VYVCDALDAQTSASLRVQGR  
TYTLIFRRVLAEDAGEVKFVAENAESRAHLRVKELPVTLLRPLRDKIAMEKHRGVLECVSRASAQVRWFKGG  
VELQSGPKYEVVSDGLYRKLVIN DVQPEDEDTYTCDAGNVKTS AQFFVEEQSITIVRGLKDMTVM EPAPAWFE  
CETSI PSVRPPKWL LKGTVLQAGNVGLEQDGT VHRLTLHKTCSTMTGPVHFTIGKSRSSAQLVVS DI PVVLT

RPLEPKAGRELQSVVLSCDFRPAKAVQWYKDDTPLSPSEKFKMALEGQMAELRILRLTPADAGVYRCQAGSA
QSSAEVTVAREVTVIQLQDAEAMEEGRVCFSCELSHKDEDIWLSNGTPLYNDSFHEISHEGCLHTLVLKS
VRQADTGTVCATSPKVSVSARLVVKGKPVVFLKALDDVSAEERGTTLQCEVSDPEARVVWRKDGVELGSPDK
YDFLHKAGARGLTVHDLSDHEDAGLYTCQVGSKETQSKVSVHDLHVGI TKRLKTVEVLEGESECSFECVLSHESP
SDPAVWTVGGKTVGGSGHFHAVRQGRKYTLTVKDAALSDAGEVVFVSVLGLTSKASLIIRERPVDITKPLEDQR
TTLGEDVMLSCELSRAGTSVRWLKDGKAIKRSQKYDLLSEGTRAVLVVRKASLKDSGEYTCETEASKSTAKLC
VEEKANRFTEELADLQVEEKGRAVFTCKTEHPASVVTWRKGLLELRASGKHVPSQEGTLTKLTINALERTDSD
TYTCDIGQARTQARLLVHGQKVRVIEDLEDTAVQEGSSAKFCCRIAPADYGPVHWFLDKTPLHSNELNEITVQ
PGGYHVLTLRQLALKDSGTVYFEAGDQRTSAALRVTEKPSIFSRPLTDVTVTEGEDLTLVCETTTVDSSVRWT
KDGKTLRPSARCQLSHEGCAQLLITATTPQDGGRYKCEIGGASSSSIVRVHALPVRFRESLKDVEVPEGKAA
TLRCVLSVAAPVEWRHGDDVLKSSNKYSLRQEGAVLELVIRDLQPDQSGQYSCSFGDQTTSATLTVKTSQAQ
FVGKLRNKEATEGTTVTLRCELTKAPVEWKKGTETLRNGDKYSLKQDGAVCELQICSLLVADAGEYSCVCGQ
EKTSATLTVKALLVHFVRRRLRIKEATEGDTTTLQCELSKAAPVEWRKGTETLRDGDYSLKQDGAVCELQIRS
LTIADAGEYLCTCGQEKTSATLTVRALPAKFKDSLKNEEATEGTATLSCELSKAAPVTWKKGPKTLQSGDKY
VLRQDGAVCGLQIHGLTMADAGEYSCVCGQEKTSATLTVRGLPAKFIEDLRSQEATEGATAILRCELSKAAPV
EWRKGSSETLTKDGDYTLRQDGAVCELQIRGLAVVDTGTYSLSLPTKFTTEGLRNEEATEGTMATLRCQMSKAAPV
EWRKGSSETLRDGDYSLRQDGAMCELQIRGLTIEDSGEYTCVCGQEKTSATLSVKALPPRFIEDLRSQEATEG
TMATLRCQMSKAAPVEWRKGSSETLGDGGYSLRQNGAVCELQIHDLAVEDTGEYSCVCGQEKTSATLNVKALP
PRFIEDLRSQEATEGTMATLRCQMSKAAPVEWRKGSSETLRDGGYSLRQDGAVCELQIHDLVEDAGQYSCVC
GQEKTSAVLTVDALPPKFTTEGLKKEEATEGTMVTLRQMSKEATVEWRKGAKTLSGGYSLRQDGAMCELQI
CGLAVEDAGEYSCVCGQEKTSATLSVKALPPRFIEDLRSQEATEGTMATLRCQMSKAAPVEWRKGSKTLRDGD
RYSLRQDGAMCELQICDLAVEDTGDYSCVCGQEKTSATLSVKAPQVVFQQLQNLQAEEGSMASLRCELSVPN
AAMVWSKGGLELQGDTRREARQQCVAELLLRDLRREDAGEYSCTCGSQTTSATLMVTAAPVRFRELQAQDV
DEGATARLRCELSREAVSVEWRKGSLLQFPCAKYQMVQEGTTAELLVHGVEQEDAGEYTC DAGHTQS IARLSV
RAPKPKFKTDLQSTEQEAGGTARLCCQLSEAEPGT PVQWLKEGVELHVGSKYEMRRQGAVCELLIHGLEAKDT
GEYACLTVGGQKTLASLRVKEPEVTIVRGLVDMVEVADEVEFTCKVSOAGATDVQWHLQGLPLQSNVTEVAV
LADGCTHVLRLQKGVTLQDAGTVSFHVGLSSAQLTVRVEVTVLEPLKDVQLSEGDHAFRRARLHRLFRTKSPAELS
RWALGGVPLQCNEMNDITVEQGTLYLLTLHKVTLQDAGTITLQVGCSSSEAQLKVTAKNTVLRGLENDVALEG
GEALFECQLSQPEVAHAHTWLLDDEPVHTSEKVEVVYFENGLRHLLLLKNLKPQDSCRVTFLAGDVVTS AFLTV
RALPDPPEDAEVVGRSDHSVTLVSWVAPMSDGGGGLCGYRVMKEASTGQWQLCHDLVPGPECVDDLVPGKTY
RFRVAAVGPAGAGEPVHLPQMVKIA PAPAPAPAPAPAPAPETRAVVGEDICLELEVAADGGVEVWHKGTERRI
QPGGHFEVLSRGQRQMLVIKGFRTEDQGEYRCGPIQGLPSSGAATFNVVMTSGSGDEVPAQPSLPEAAQEGD
LHLLWEALARKRRMSREPTLDSISELPEEDSRVQHLRQEAETAPDLSEGYSTADELARTGEADLSHTSSDDE
SRAGTPSLVTYLKKAGGPGISPLASKHEAQVTTSVKPKQKQEPVVPPTCPPPGDLSAADLMDPSLDKAAVKIQA
AFKGYKVRKEMKQEGPVFSRTFGDTEAQVGDVLRLECEVLATKTD MRACWLKDGIELTDGRHYHIDQLKDGTC
SLLVTVGLAPTDSGRYTCQVSTKSGRVSHSACVVVSGTESEAESSSGGELDDAFRRAARRLHRLFRTKSPAELS
EEELFLSADEGPGEPEEPADWQTYREDENFVCIRFESLAEARQAVTCFRNMFMATMGIGVEISLGEQGRGVEM
RIGKVAPTPTPAVPLAKTPGLQTSDAAPVFLTELQNDVQDGYPMSFDCVVTGQPVPSVRWFKDGKLLLEDDH
YMINEDQGGHQLIITAVVPADMGVYRCLAENSMGVSSTKAELRVELTSTDYDTAADATETSSYFSAQGYLSS
REQEGTESDEGQLPQVLEELKDLQVAPGTRLAKFQLKVKGYPAKLYWFKDGOPLTSDHIRMTDKKTLHTLE
IVSVTREDSGQYAAIYI SNAVGAAYSSARLLVRGPSEPEEKPASDVHERLVPPRILEKFTPKKVKRGSSTFSV
KVEGHPAPSVHWLKEEAEGVWLWIGPDTPGYTMASSSKQHSLVLLDVGQRHQGTYTCTIATNPAGQALCSASLH
ISGLAKEEEQERVKEALISSFLQGTSAQVSAQMSEAGFADLVGQSKGESLVAAEEAHSHLSLAEVGTETEFLOK
LTSQITEMVSAKISQAKLQVPGGDSDEETKTPSASPRHGRSRPSSSVQESSSESEDGDSRGEIFDIYVVVTADY
LPLGAEQDAIILREGQYVEVLDSAHPLRWLVRTKPTKSSPSRQGWVSPAYLDKRLKLSPEWGPTEAPEFPGEA
VSEDEYRTRLSSVIQELLSSEQAFVQFLESHHMKHLERSPRVPAAVASQKTVIFRNVQDISHFHSSFLKE
LQCGCTDDDVAMCFIKNQEA FEKYLEFLVGRVQAESVVVSTPVQEFYKKYAEETLSAKDPTQPPPPPLQHYLE
QPVERVQKYQALLKELIRNKARNRQNCALLEQAYAVVSALPQRAENKLVHSLMENYPGTLEALGEP IROGHFI
VWEGAPGARMPPWKGNHRHVFVFRNYLVICKPRRDSRTDTFSYVFRNMMKLSSIDLNDQVEGDDRAFEVWHERE
DSVRKYLQARTVI IKNSWVKEICGIQORLAQPVWRPPEFEEELADCTAELGETVKLACRVTGTPKPIVSWYK
DGKPVVEVDPHHILIEDPDGSCSTLILDNLGTGIDSGQYMCFAASAAGNASTLGKILVQVPPRFVNVKVRATPFVEG
EDAQITCTVEGAPYPQIRWYKDGTL LAPGNRYRMLNEPRSGVLVVIQAASKEDLGHYCELVNRLGSTRGGG
ELYMQSPALRARDQHHREQIVAAVEGAPSMQVTI EDVQVQVGDMAQF DAVIEGHPPP IVTWYKGSTQLTSSAR
LSQRQDGTTYSLVLTVDVAPHDAGVYTCVANNAGGQVLCQKAEELVHGGDKLDAENQVYRRKLSHSFYDVQEEIGR
GVFVGRVYQHKGNMFCAAKFIPLRSKTRAQAYQERDILATLGHPLVLTGLLDQFETRKTLILILELCSSEEL
LDRLFKKGVVTEAEVKVYIQQLVEGLHYLHSHGILHLDIKPPNII LMVHPAREDIKICDFGFAQKITPSEPOYS
KYGSPFVSPETIEQNPVSEGSDIWAMGVI SYLSLTCSSPFAGESDRATLLNVLEGRVSWSSPTAAHLSSEDAK
DFIKATLQRTPRARPSTSQC LAHPWFLKSMPAAEAHFINTKQLKFLARSRWQRSLMSYKSI LVMRSIPELLQ

GPPDPSPLGVARHLRGEASGASSSSSSSDNELAPFARAKSLPPSPVTHSPLLHPRGFLRPSASLPEETEASMP  
TADAAVPASPQASAGPPASPGCVPRHSVSSSLFYQQAGEGAERGNKTSKAKRHPARRRHLKGGYIARALPGLR  
EPLMEYSLLEEEAAREEQASLMTKTPSFETALRLPSSSVREVPGRSHSLDNPVTTGPSPEACKEQLLFFPST  
GLTHETTAKDRGHKEGFLQESVFPFPMMSGDSRPGKQEGSSQDSCRKGPASSCHSELGSGSQEGCGPPSSQSLG  
SLPFPQSLKKELESTSCGPLFSEQQAAPFPTQVSPLLGSEKEPQDGLSEGPVVPVSSSPGSASQVDASLDTEG  
LSEAGDTCDFTPPPQRPQEQATTRKFSLESRRGGYAGVAGYGTFAFGGDAGGMLGQGPLWARMWAVSQSSEEQ  
DEAATESPQPLESGLPIAEASGVPLRTSPSLTPWEEVEQVSLVQIRDLSGDAEAADTISLDISEVDPAYLNLS  
DLYDIKYLPPFEFMI FRRVPKPIEQPESPGSETEAGQGLADFLLEAAWFPWPGELGLRAGLEITEEPEEPGDLEA  
LLGEAAVGRKRKWSPSRGLFQFPGRCLSGEEPVELGLRQRVKASMAHISRILKGRPEGPEREGPPRKKAGLAS  
FRLSGLKGRDQELSDEAVVLGQSVTLACQVLAQPTAQTATWSKDGVLLESSGHLLISSTLKNFQLLTLILVVKEE  
DLGTYTCCVSNPLGTAVTTGVLKRAERPSSSPRPEVGEYKDAVLLVWKPVESECGPVTYIVQCCIEGGSWTTL  
ASDISDCCYLTKLSRGGMYIFRTACVSKAGMGPYSSPSEQVLLGGPNHLASEEESSRGRPAQLLPSTKTFAF  
QMQIRRRGRFSVVRQCREKASGRALAAKIVPYQPEDKTAVLREYEALKRLLHHPHLAQLHAAYLSRHLVLI LEL  
CSGPELLPSLAERESYSESDVKDYLWQMSLQYLHAQHILHLDLRSENMMVTEYNLLKVIDLGNASLDQEK  
VPAPENFKDYLETMAPELLEGQAVPQTDIWAIGVTAIFIMLSGEYPESEGETRDLQKGLRKLIRLSRCYAGL  
SGGAVAFLOSSLCAQPWGRPCASTCLQCGWLTEEGPTGSRPTPVTFPTVRLRAFVREEREKRRALLYKKNHNAQ  
VR\*

>ENSMUSP00000049737\_c.11203:G>T\_p.S3735I ENSMUST00000052872.15|Obscn-  
203|ENSMUSG00000061462|-|chr11:g.58958122:C>A

MDHSFSGAPRFLTRPKAFVSVGKDATLSCQIVGNPTPHVSWEKDRQVVEAGARFRLAQDGDVYRLTILDLAL  
GDSGQYVCRARNAIGEFAAVGLRVDSEGTCAEQAPHFLLRPTSIRVREGADATFRCRVGGSPQPAVSWSKDG  
RRLGPPDAPHVRVEEHGESSALRIRSARPRDGGTYEVRAENPLGSASAAAALVVDSDAEVAGPPGTSTATLLA  
HLQQRRREAMRAEGIPPSPPGAGTRTCTVTEGKHARLSCFVTGEPKPKETVWKKDQQLVTEGRRHVYVEDEQENF  
VLKILFCKQSDRGLYTCTASNLVGQTYSSVLVVVREPTVPFKKRLQDLEVREKESATFQCEVAQPATEAAWFK  
EETRLWASAKYDIEEGTERRLTVRNVSADDDAVYICETTEGSRVAELSVQGNLTKRKLPRKTAVRTGDTAIF  
WVELAVPEGPVWRWLRNQEEMVAGGRVAITAEGTCHTLTI FQCTLEDMGVAVFVSGGCRATTEFTFCVSAAPRRPPL  
YPPADPVVKAKTSLWSAPPHGDRPVTIDGYLVLEKRLKLGAYAWSRCHAGWLATTEFTITGVAAEGDFQ  
FRVSAINHFGQGPYLEFPGMTMLVPLAVKTPKAVEAVEGGEVTFVVDLTVASSGEWFLDGEALKASSIYVI  
RCDRTRHMLTIREVPARLHGAQLKFVANGIETSIQMVVRAALGLPSSKLPAAAAREVLAQLHEEAQLLAELSD  
QAAAVTWLKDGRELSLGPYEMQVSAGRRALLVRDVAQDDAGLYECVSRGSRRTAYQLLVQEPKLVFAKQQA  
SEVKAEAGNSATLSCEVTQAQTEVTWFKDGKLLSSSSKVRMEASGCSRRLVVQQAGKADAGEYSCEAGGQKLS  
FRLDVAEPKLVFAKQQAHSSEVKAEAGASATLSCEVAQAQTEVTWFKDGKLLSSSSKVRMEASGCSRRLVVQQ  
AGKADAGEYSCEAGGQKLSFRLDVAEPMVFQARSEVKAEAGASATLSCEVAQAQTEVTWFKDGKLLSS  
SSKVRMEASGCSRRLVVQQAGKADAGEYSCEAGGQKLSFRLDVTEPKLVFAKEQQARSEVKAEVNSATLSCE  
VAQAQTEVTWFKDGKLLSSSSKVRMEASGCSRRLVVQQAGKADAGEYSCEAGGQKLSFRLDVAEPKLVFAKEQ  
QARSEVKAEAGNSATLSCEVAQAQTEVTWFKDGKLLSSSSKVRMEASGCSRRLVVQQAGKADAGEYSCEAGGQ  
KLSFHLDVTEPKLVFAKEQQAHSEVKAEAGASATLSCEVAQAQTEVTWFKDGKLLSSSSKVRMEASGCSRRLV  
VQQAGKADAGEYSCEAGGQKLSFRLDVAEPKLVFAKEQQARSEVKAEAGASATLSCEVAQAQTEVTWFKDGK  
LSSSSKVRVEASGCSRRLVVQQAGKADAGEYSCEAGGQKLSFRLDVAEPKLVFAKEQQANSEVKAEAGASATL  
SCEVAQAQTEVTWFKDGKLLSSSSKVRVEASGCSRRLVVQQAGKADAGEYSCEAGGQKLSFRLDVAEPKLAFA  
KEQQAHSEVKAEAGASATLSCEVAQAQTEVTWFKDGKLLSSSSKVRVEASGCSRRLVVQQAGKADAGEYSCEA  
GGQKLSFRLDVAEPKLAFAKEQQAHSEVKAEAGASATLSCEVAQAQTEVTWFKDGKLLSSSSKVRVEASGCSR  
RLVVQQAGKADAGEYSCEAGGQKLSFRLDVAEPKLAFAKEQQAHSEVKAEAGASATLSCEVAQAQTEVTWFKD  
GKLLSSSSKVRVEASGCSRRLVVQQAGKADAGEYSCEAGGQKLFRLDVAEPKLMFAKEQQAHSEVKAEAGAS  
ATLSCEVAQAQTEVTWFKDGKLLSSSSKVRVEASGCSRRLVVQQAGKADAGEYSCEAGGQKLSFRLDVAEPKLV  
VFAKEQQAHSEVKAEAGASATLSCEVAQAQTEVTWFKDGKLLSSSSKVRVEASGCSRRLVVQQVQKADAGEYS  
CEARGQKLSFRLDVADTRLMFAKEQQARTEVKAEAGNSATLSCEVAQAQTEVTWFKDGKLLSSSSKVRVEASG  
CSRRLVVQQAGKADAGEYSCEAGGQKLSFRLDVAEAEESQIPERPSRREPLVVKEHETIILTATIAAPSVAAVT  
WLKDGEVIRRSKRHEATS LGDHTLTVRGAQVLDSAIYSCRVGKEGQDFPVQVEEVAAKFSKPLEPVEGELGG  
TVMLVCELSPEQAEVWRCGNTQLRPGKRFQMTSEGPRRTLTVSGLREDDAEYVCESRDDRTSARLTVKVP  
VVKFTSGLSAMVAEEGQEAFTQC VVSPSDAGVTWYKDGMLQPSSEKFMVESGASRSLTILGLTLEDAGQVTV  
EAEAGASSAALRVREAPVLFKKKLEPQTVTEERTSVTLEVELTRPWPEVKWTRNAAVLTPSENVEIRAEGARHC  
LVLRSVGLADRGFFGCETPDDKTQAKLNVEMRQVRLVRLGVEVEAKEQGTASMDVELSHAEVEGSWTRDGLRL  
QPGPKCHLAVQGPVHILTSALQPQDSGLVAFRAEGVHTSARLIVTELVPVSTFRVLAQVAVATQKEKVTLECEL  
SRPVDVRLKDGVELRAGKAI GIVAQGTCSRSLVIYRCETGQGVYVCDALDAQTSASLRVQGRTYTLIFRRVL  
AEDAGEVKFVAENAESRAHLRVKELPVTLLRPLRDKIAMEKHRGVLECVSRASAQVRWFVGGVLEQSGPKYE  
VVSDGLYRKLVINVDVQPEDEDTYTCDAENVKTSAQFFVVEQSITIVRGLKDMTVMPEPAPAWFECETSIPSVRP  
PKWLLGKTVLQAGGNVGLQDGTVHRLTLHKTCSTMTGPVHFTIGKSRSSAQLVVSIDI PVVLRPLRLEPKAGRE

LQSVVLSCDFRPAPKAVQWYKDDTPLSPSEKFKMALEGQMAELRILRLTPADAGVYRCQAGSAQSSAEVTVEA  
REVTVIQPLQDAEAMEEGRVCFSCLESHKDEDI EWSLNGTPLYNDSFHEISHEGCLHTLVLKSVRQADTGTVC  
ATSPKVSVSARLVVKGKPVVFLKALDDVSAEERGTLLTQCEVSDPEARVVWRKDGVELGPSDKYDFLHKAGAR  
GLTVHDLSDHEDAGLYTCQVGSKETQSKVSVHDLHVGITKRLKTVLEVLEGESECSFEVLSHESPSDPAVWTVGG  
KTVGGSGHFHAVRQGRKYTLTVKDAALSDAGEVVSFLGLTSKASLIIRERPVDITKPLEDQRTTLGEDVMLS  
CELSRAGTSVRWLKDGKAIKRSQKYDLLSEGTRAVLVVRKASLKDSGEYTCETEASKSTAKLCVEEKANRFTE  
ELADLQVEEKGRAVFTCKTEHPASVVTWRKGLLELRASGKHVPSQEGTLKLTINALERTSDSPTYCDIGQAR  
TQARLLVHGQKVRVIEDLEDTAVQEGSSAKFCCRIAPADYGPVHWFLLDKTPLHSNELNEITVQPGGYHVLTLR  
QLALKDSGTVYFEAGDQRTSAALRVTEKPSIFSRPLTDVTVTEGEDTLVCETTTVDSSVRWTKDGKTLRPSA  
RCQLSHEGCAQLLITATTPQDGGRYKCEIGGASSSSIVRVHALPVRFRFRESLKDVEVPEGKAATLRCVLSSVA  
APVEWRHGDDVLKSSNKYSLRQEGAVLELVIRDLQPDQSGQYSCSFGDQTTSATLTVKTSQAQVFGKLRNKEA  
TEGTTVTLRCELTKAPVEWKKGTETLRNGDKYSLKQDGAVCELQICSLLVADAGEYSCVCGQEKT SATLTVK  
ALLVHFVRRRLRIKEATEGDTTTLQCELSKAAPVEWRKGTETLRDGDYSLKQDGAVCELQIRSLTIADAGEYL  
CTCGQEKT SATLTVRALPAKFKDSLKNEEATEGTTATLSCLELSKAAPVTWKKGPKTLQSGDKYVLRQDGAVCG  
LQIHGLTMADAGEYSCVCGQEKT SATLTVRGLPAKFIEDLRSQEATEGATAILRCELSKAAPVEWRKGSSETLK  
DGDYTLRQDGAVCELQIRGLAVVDGTYSLSLPTKFTTEGLRNEEATEGTMATLRCQMSKAAPVEWRKGSSETLR  
DGDYSLRQDGAVCELQIRGLTIEDSGEYTCVCGQEKT SATLSVKALPSRFIEDLRSQEATEGTMATLRCQMS  
KTAPVEWKKGSETLRDGGYSLRQDGPVCELQICDLAVEDAGEYSCVCGQEKT SATLSIKALPPRFIEDLRSQ  
EATEGTMATLRCQMSKAAPVEWRKGSSETLGDGGYSLRQNGAVCELQIHDLAVEDTGEYSCVCGQEKT SATLN  
VKALPPRFIEDLRSQEATEGTMATLRCQMSKAAPVEWRKGSSETLRDGGYSLRQDGAVCELQIHDLVEDAGQ  
YSCVCGQEKTSAVLTVDALPPKFTTEGLKKEEATEGTMVTLRCQMSKEATVEWRKGAKTLSGGYSLRQDGAM  
CELQICGLAVEDAGEYSCVCGQEKT SATLSVKALPPRFIEDLRSQEATEGTMATLRCQMSKAAPVEWRKGSSET  
LRDGDYSLRQDGAVCELQIRDLAVEDAGEYLCVCGQEKT SATLSVKALPPRFIEDLRSQEATEGTMATLRCQ  
MSKAAPVEWRKGSSETLRDGDYSLRQDGAVCELQICDLAVEDTGDYSCVCGQEKT SATLSVKALPPRFIEDLR  
SQEAREGTVAFLRCRMSKAAPVEWRKGSSETLKDGDYSLRQEGNLCELQIRDLAVEDTEEYSCVCGQEKT SAT  
LSVKALPAKFIEDLRSQEAPESSTVTLRCKLSKASVYVWKKGSETLRNGARYSLRQDGAVCELEIRDLTVEDT  
GEYSCTCGQERTSATLSIMAPQVVFQQLQNLQAEEGSMASLRCELSVNAAMVWSKGGLELQGDTRREARQQ  
GCVAELLLRDLRREDAGEYSCVCGQEKT SATLMTAAPVRFLELQAQDVDEGATARLRCELSREAVSVEWRK  
GSLQLFPCAKYQMVQEGTTAELLVHGVEQEDAGEYTCDAHTQS IARLSVRAPKPKFKTDLQSTEQEAGGTAR  
LCCQLSEAEPTPVQWLKEGVELHVGSKYEMRRQAVCELLIHGLEAKDTGEYACLVGQKTLASLRVKEPEV  
TIVRGLVDMEVQADEDEFTCKVSAQATDVQWHLQGLPLQSNVTEVAVLADGCTHVLQKGVTLLEDAGTVS  
FHVGGSSSAQLTVRVPEVTVLEPLKDVQLSEGQDAHFRCRLSRASGQEARWALGGVPLQCNEMNDITVEQGT  
LYLLTLHKVTLEDAGTITLQVGSSEAEQLKVTAKNTVLRGLENVDALEGGEALFECQLSQPEVAHAHTWLLDD  
EPVHTSEKVEVVYFENGLRHLLLNKLPQDSCRVTFLAGDVVTSFAFLTVRGWRLEVLPPHDASVKAGMQVR  
FTCILSEAVPVGEATWYINGAAIQPDDTDWTVTTDGSHHALTSNAQPHAGEVTF AARDAVASARLSVLALP  
DPEDAEYVGRSDHVSVTLWSVAPMSDGGGLCGYRVEMKEASTGQWQLCHDLVPGPECVDDLVPGKTYRFRV  
AAVGPAGAGEPVHLPQMVKIAPAPAPAPAPAPAPAPETRAVVGEDICLELEVAADGGEVVWHKGTERRIQPGG  
HFEVLSRGRQMLVIKGFRTEDQGEYRCGPIQGLPSSGAATFNVMVTSVSGDEVPAQPSLPPEAAQEGDLHLL  
WEALARKRMSREPTLDSISELPEEDSRVQHLRQEAETAPDLSEGYSTADELARTGEADLSHTSSDDESRA  
TPSLVTYLKKAGGPGISPLASKHEAQVTTSVKPKQKQEPVPTCPPPGDLAADLMDPSLDKAAVKIQAAFKG  
YKVRKEMKQQEGPVFSRTFGDTEAQVGDVLRLECVLATKTDMRACWLKDGIELTDGRHYHIDQLKDGTCSLLV  
TGLAPTDSGRYTCQVSTKSGRVSHSACVVVSGTESEAESSSGGELDDAFRRARLHRLFRTKSPAELSEEEL  
FLSADEGPGEPEEPADWQTYREDENFVICRFESLAEARQAVTCFRNMFATMGIGVEISLGEQGPVEMRIGK  
VAPTVPVAVPLAKTPGLQTSDAAPVFLTELQNDVQDGYPMSFDCVVTGQPVPSVRWFKDGKLEEDDHYMIN  
EDQQGGHQLIITAVVPADMGVYRCLAENSMGVSSTKAELRVELTSTDYDTAADATETSSYFSAQGYLSSREQE  
GTESDEGQLPQVLEELKDLQVAPGTRLAKFQKLVKGYPAKLYWFKDQGPLTTSDHIRMTDKKTLHTLEIVSV  
TREDSGQYAAYSNAVGAAYSSARLLVRGPSEPEEKPASDVHERLVPPRILEKFTPKKVKRGSSTIFS VKVEG  
HPAPSVHWLKEEAKEGVLWIGPDTPGYTMASSSKQHSVLVLDVGRQHOGTYTCIATNPAGQALCSASLHISGL  
AKEEEQERVKEALISSFLQTSQAVSAQMSESAGFADLVGQSKGESLVAEEAHSHLSLAEVGTTEFLQKLT SQ  
ITEMVSAKISQAKLQVPGGDSDEETKTPSASPRHGRSRPSSSVQESSSESEDGDSRGEIFDIYVVTADYLP  
AEQDAIILREGQYVEVLDSAHPLRWLVRTKPTKSSPSRQGWVSPAYLDKRLKLSPEWGPTEAPEFPGEAVSED  
EYRTRLSSVIQELLSSEQAFVGELEQFLESHHMKHLERSPRVPAVASQKTVIFRNVQDISHFHSSFLKELQGC  
GTDDDVAMCFIKNQEAFKEYLEFLVGRVQAESVVSALPQAEFYKKYAEETLSAKDPTQPPPPLOHYLEQVVE  
RVQKYQALLKELIRNKARNRQNCALLEQAYAVSALPQAEFNKLHVSIMENYPGTLEALGEPHQGHFIVWEG  
APGARMWPKGHNRFVFLFRNYLVICPPRRDSRTDTFSYVFRNMMKLSIDLNDQVEGDDRAFEVWHEREDSVR  
KYLQARTVIKNSWVKEICGIQQRLAQPVWRPPEFEEELADCTAELGETVKLACRVGTGPKPIVSWYKDGK  
VEVDPHHILIEDPDGSCTLILDNLTGIDSGQYMCFAASAAGNASTLGKILVQVPPRFVNVKVRATPFVEGEDAQ  
ITCTVEGAPYPQIRWYKDGTLAPGNRYRMLNEPRSGVLVLIQAASKEDLGHYECELVNRLGSTRGGGELYM

QSPALRARDQHHREQIIVA AVEVTEQETKVPKKTVIIEETITTVVKS PRGRRQSPGKSPSRSPSRRSASPRRPG  
 LLAPERLYPPGTSPSRRLVEVEQGRKAPVPALYVTEAEVHAPASQSPKWLEVEETIEVRVKKTGSRGASPVRE  
 MTSRGEGLFTLPGGI PGRDPNANNNSNNSVYQEQARTWGPVAVHVGEFFIFQVDSVGNVDVWAASPEPEQVRA  
 SQKEENTERQEGCSDGIDENTFLMEEPQDQDSDLQGRDPKILTHNGRVLTLADLEDYVPQEGETFGCGDSTPSTP  
 DEPPCEVSVLQREI SEPTVGQPVLLNVGRPPGTGATPSFFRPGSQVHSPESVSFLLREAWSGPVSAPPTWSSS  
 HTHVQSSVDGSHGSKTEVSTQTVSFGAVGETVTLHIDPDGGEAPGPSQG\*  
 >ENSMUSP00000020732\_c.11404:G>T\_p.S3802I ENSMUST00000020732.13|Obscn-  
 201|ENSMUSG00000061462|-|chr11:g.58958122:C>A  
 MDHSFSGAPRFLTRPKAFVSVGKDATLSCQIVGNPTPHVSWEKDRQPVEAGARFRLAQDGDVYRLTILDLAL  
 GDSGQYVCRARNAIGEAFVAVGLRVDSEGTCAEQAPHFLLRPTSIRVREGADATFRCRVGGSPQPAVSWSKDG  
 RRLGPPDAPHVRVEEHGESSALRIRSARPRDGGTYEVRAENPLGSASAAAALVVDSDAEVAGPPGTSTATLLA  
 HLQORREAMRAEGIPPSPPGAGTRTCTVTEGKHARLSCFVTGEPKPEVWKKDGLVTEGRRHVVEDEQENF  
 VLKILFCKQSDRGLYTCTASNLVGGQTYSSVLVVVREPTVPFKKRLQDLEVREKESATFQCEVAQAPATEAAWFK  
 EETRLWASAKYDIEEGTERRLTVRNVSADDDAVYICETTEGSRVVAELSVQGNLTKLPRKTAVRTGDTAIF  
 WVELAVPEGPVRLRNQEEVAGGRVAITAEGTCHTLTI FQCTLEDMGEVAFVSGGCRTTTQFCVSAPRRPPL  
 YPPADPVVAKTESVTLWSAPPHGDRPVTIDGYVLEKRRKLGAYAWSRCHEAGWLATTEFTITGVAEEGDFQ  
 FRVSAINHFGQGPYLEFPGTMHLVPLAVKTPKAVEAVEGGEVTFVSDLTVAASSGEVFLDGEALKASSIYVI  
 RCDRTRHMLTIREVPARLHGAQLKFFVANGIETS IQMVVRAALGLPSSKLPAAAAREVLAQLHEEAQLLAE LSD  
 QAAA VTLWKDGRELSLGPKEYMQVSAGRRALLVRDVAQDDAGLYECVSRGSRRTAYQLLVQDITDGYRDWGPAG  
 PQKHMCKCAGAKIARYLGSSCYRFLQYDKGVWHLEAALDTRQKGTSSCSLHEKPKLVFAKQQAHSEVKA  
 AGNSATLSCEVTQAQTEVTFWKDGKLLSSSSKVRMEASGCSRRLVVQQAGKADAGEYSCEAGGQKLSFRLDVA  
 EPKLVFAKQQAHSEVKAEGASATLSCEVAQAQTEVTFWKDGKLLSSSSKVRMEASGCSRRLVVQQAGKADA  
 GEYSCEAGGQKLSFRLDVAEPKMFVFAKEQQARSEVKAEGASATLSCEVAQAQTEVTFWKDGKLLSSSSKVRM  
 EASGCSRRLVVQQAGKADAGEYSCEAGGQKLSFRLDVTEPKLVFAKEQQARSEVKAEGVNSATLSCEVAQAQ  
 EVTWTFWKDGKLLSSSSKVRMEASGCSRRLVVQQAGKADAGEYSCEAGGQKLSFRLDVAEPKLVFAKEQQARSE  
 KAEAGNSATLSCEVAQAQTEVTFWKDGKLLSSSSKVRMEASGCSRRLVVQQAGKADAGEYSCEAGGQKLSFHL  
 DVTEPKLVFAKEQQAHSEVKAEGASATLSCEVAQAQTEVTFWKDGKLLSSSSKVRMEASGCSRRLVVQQAGK  
 ADAGEYSCEAEGQKLSFRLDVAEPKLVFAKEQQARSEVKAEGASATLSCEVAQAQTEVTFWKDGKLLSSSSK  
 VRVEASGCSRRLVVQQAGKADAGEYSCEAGGQKLSFRLDVAEPKLVFAKEQQANSEVKAEGASATLSCEVAQ  
 AQTEVTFWKDGKLLSSSSKVRVEASGCSRRLVVQQAGKADAGEYSCEAGGQKLSFRLDVAEPKLVFAKEQQAH  
 SEVKAEGASATLSCEVAQAQTEVTFWKDGKLLSSSSKVRVEASGCSRRLVVQQAGKADAGEYSCEAGGQKLS  
 FRLDVAEPKLVFAKEQQAHSEVKAEGASATLSCEVAQAQTEVTFWKDGKLLSSSSKVRVEASGCSRRLVVQQ  
 AGKADAGEYSCEAGGQKLSFRLDVAEPKLVFAKEQQAHSEVKAEGASATLSCEVAQAQTEVTFWKDGKLLSS  
 SSKVRVEASGCSRRLVVQQAGKADAGEYSCEAGGQKLFRLDVAEPKLMFAKEQQAHSEVKAEGASATLSCE  
 VAQAQTEVTFWKDGKLLSSSSKVRVEASGCSRRLVVQQAGKADAGEYSCEAGGQKLSFRLDVAEPKLVFAKEQ  
 QAHSEVKAEGASATLSCEVAQAQTEVTFWKDGKLLSSSSKVRVEASGCSRRLVVQQVQKADAGEYSCEARGQ  
 KLSFRLDVADTRLMFAKEQQARTEVKAEGNSATLSCEVAQAQTEVTFWKDGKLLSSSSKVRVEASGCSRRLV  
 VQQAGKADAGEYSCEAGGQKLSFRLDVAEASQIPERPSRREPLVVKEHETIILTATIAAPSVAAVTWLKDG  
 EIRRSKRHEATSLGDTHTLTVRGAQVLD SAIYSCRVGKEGQDFPVQVEEVAAKFSKPLEPVEGELGGTVMLVC  
 ELSPEQAEVWRCGNTQLRPGKRFQMTSEGPRRTLTVSGLREDDAEYVCE SRDDRTSARLTVKVPVVKFTS  
 GLSAMVAEEGQEATFQCVVSPSDAGVTWYKDGMLQPSKFMVMEVSGASRSLTILGLTLEDAGQVTVAEAGAS  
 SSAALRVREAPVFLFKKLEPQTEVEERTSVTLEVELTRPWPEVKWTRNAAVLTPSENVEIRAEGARHCLVLRV  
 GFADRGFQGCETPDDKTQAKLVNEMRQVRLVVRGLQVEEAKEQGTASMDVELSHAEEVGSWTRDGLRLQPGPKC  
 HLAVQGPVHILTLALSALQPQDGLVAFRAEGVHTSARLIVTELPVSTFTRVLQDVVATQKEKVTLECELSRPVDV  
 RWLKDGVLELRAGKAI GIVAQGTCSRSLVIYRCETGDQGVYVCDALDAQTSASLRVQGRTYTLIFRRLAEDAGE  
 VKFVAENAESRAHLRVKELPVTLLRPLRDKIAMEKHRGVLECCQVSRASAQVRWFKGGVELQSGPKYEVVSDGL  
 YRKLVINVDQPEDEDTYTC DAGNVKTSAQFFVEEQSITIVRGLKDMTVMEPAPAWFECETSIPSVRPPKWL  
 KTVLQAGGNVGLQDGTVHRLTLHKTCSTMTGPVHFTIGKSRSSAQLVSDI PVVLRPLEPKAGRELQSVVL  
 SCDFRPAPKAVQWYKDDTPLSPSEKFKMALEGGMAELRILRLTPADAGVYRCQAGSAQSSAEVTVAREVTVI  
 QPLQDAEAMEEGRVCFSCELSHKDEDIEWLSLNGTPLYNDSFHEI SHEGCLHTLVLSVRQADTGTVCATSPKV  
 SVSARLVVKGKPVVFLKALDDVSAEERGLTLQCEVSDPEARVVRKDGVELGSPDKYDFLHKAGARGLTVHD  
 LSHEDAGLYTCQVGSKETQSKVSVHDLHVGITKRLKTVEVLEGESECSFECVLSHESPSDPAVWTVGGKTVGGS  
 GHFHAVRQRGRKYLTLVKDAALSDAGEVSVLGLTSLKASLIIRERPVDITKPLEDQRTTLGEDVMLSCELSRA  
 GTSVRWLKDGKAIKRSQKYDLSSEGTRAVLVVRKASLKDSGEYTCETEASKSTAKLCTVEEKANRFTBELADLQ  
 VEEKGRAVFTCKTEHPASVVTWRKGLLELRASGKHVPSQEGTLTKLTINALERTSDTYTCDIGQARTQARLL  
 VHGGQKRVIEDLED TAVQEGSSAKFCRIAPADYGPVHWFLLDKTPLHSNELNEITVQPGGYHVLTLRQLALKD  
 SGTVYFEAGDQRTSALRVTEKPSIFSRPLTDVTVTEGEDTLVCE TTTVDSSVRWTKDGKTLRPSARCQLSH  
 EGCQAQLLITATTPQDGGRYKCEIGGASSSSIVRVHALPVRFRRESLKDVEVPEGKAATLRCVLSVAAFPVEWR

HGDDVLKSSNKYSLRQEGAVLELVIRDLQPQDSGQYSCSFGDQTTSATLTVKTSQAQFVGLKRNKEATEGTTV  
 TLRCELKEAPVEWKKGTETLRNGDKYSLKQDGAVCELQICSLLVADAGEYSCVCGQEKTSATLTVKALLVHF  
 VRRLRKEATEGDTTTLQCELSKAAPVEWRKGTETLRDGDYSLKQDGAVCELQIRSLTIADAGEYLCTCGQE  
 KTSATLTVRALPAKFKDSLKNEEATEGTTATLSCELSKAAPVTWKKGPKTLQSGDKYVLRQDGAVCGLQIHGL  
 TMADAGEYSCVCGQEKTSATLTVRGLPAKFIEDLRSQEATEGATAILRCELSKAAPVEWRKGTETLRDGDYSL  
 LRQDGAVCELQIRGLAVVDGTGYSLSLPTKFTTEGLRNEEATEGTMATLRCQMSKAAPVEWRKGTETLRDGDYSL  
 LRQDGAMCELQIRGLTIEDSGEYTCVCGQEKTSATLSVKALPSRFIEDLRSQEATEGTMATLRCQMSKATAPVE  
 WKKGSETLRDGGYSLRQDGPVCELQICDLAVEDAGEYSCVCGQEKTSATLSIKALPPRFIEDLRSQEATEG  
 MATLRCQMSKAAPVEWRKGTETLRDGGYSLRQNGAVCELQIHDLAVEDTGEYSCVCGQEKTSATLNVKALPP  
 RFIEDLRSQEATEGTMATLRCQMSKAAPVEWRKGTETLRDGGYSLRQDGAVCELQIHDLVEDAGQYSCVCG  
 QEKTSAVLTVDALPPKFTTEGLKKEEATEGTMVTLRCQMSKEATVEWRKGAKTLSDDGGYSLRQDGAMCELQIC  
 GLAVEDAGEYSCVCGQEKTSATLSVKALPPRFIEDLRSQEATEGTMATLRCQMSKAAPVEWRKGTETLRDGD  
 YSLRQDGAVCELQIRDLAVEDAGEYLCVCGQEKTSATLSVKALPPRFIEDLRSQEATEGTMATLRCQMSKAAP  
 VEWRKGTETLRDGDYSLRQDGAMCELQICDLAVEDTGDYSCVCGQEKTSATLSVKALPPRFIEDLRSQEARE  
 GTVATLRCRMSKAAPVEWRKGTETLRDGDYSLRQEGNLCELQIRDLAVEDTEEYSCVCGQEKTSATLSVKAL  
 PAKFIEDLRSQEAPESSTVTLRCKLSKASVWKKGSETLRNGARYSLRQDGAVCELEIRDLTVEDTGEYSCT  
 CGQERTSATLSIMAPQVVFQQPLQNLQAEEGSMASLRCELSVPNAAMVWSKGGLELQGDTRREARQQGCVAE  
 LLRDLRREDAGEYSCVCGQEKTSATLMTAAPVRFRLRELQADVDDEGATARLRCELSREAVSVEWRKGSLLQF  
 PCAKYQMVQEGTTAELLVHGVEQEDAGEYTCDAHTQSIARLSVRAPKPKFKTDLQSTEQEAGGTARLCCQLS  
 EAEPGTPVQWLKEGVELHVGSKYEMRRQGAVALLEHGLEAKDTGEYACLVGGQKTASLRVKEPEVTIVRGL  
 VDMEVQADEDEFTCKVSQAGATDVQWHLQGLPLQSNVTEVAVLADGCTHVLQKGVTLLEDAGTVSFHVGGL  
 SSSAQLTVRVPEVTVLEPLKDVQVLESEGQDAHFRCRLSRASGQEARWALGGVPLQCNEMNDITVEQGTLYLLTL  
 HKVTLEDAGTITLQVGSSEEAQLKVTAKNTVLRGLENDVALEGGALFECQLSQPEVAHAHTWLLDDEPVHTS  
 EKVEVVYFENGLRHLKLLKLPQDSCRVTFLAGDVVTSFAFLTVRGWRLEVLPEPHDASVKAGMQVRFCTILS  
 EAVPVGAEATWYINGAAIQPDDTDWTVTTDGSHHALTLNAQPHAGEVTFAAARDAVASARLSVLALPDPEDA  
 EVVGRSDHVSVTLSWVAPMSDGGGLCGYRVMKEASTGQWQLCHDLVPGPECVDDLVHPGKTYRFRVAAVGPA  
 GAGEPVHLPQMVKIAAPAPAPAPAPAPAPAPAPAPAPAPAPAPAPAPAPAPAPAPAPAPAPAPAPAPAPAP  
 RGQRQMLVIKGFRTEDQGEYRCGPIQGLPSSGAATFNVMVMTSGSGDEVPAQPSLPPEAAQEGDLHLLEALAR  
 KRRMSREPTLDSISELPEEDSRVQHLRQEAEEETAPDLSEGYSTADELARTGEADLSHTSSDDESAGTPSLVT  
 YLKKAGGPGISPLASKHEAQVTTSVKPKQKQEPVPTCPGGDLAADLMDPSLDKAAVKIQAAFQYKVRKE  
 MKQQEGPVFSRTFGDTEAQVGDVLRLECVLATKTDMRACWLKDGIELTDGRHYHIDQLKDGTCSLVLTGLAPT  
 DSGRYTCQVSTKSGRVSHSACVVVSGTESEAESSSGGELDDAFRAARRLHRLFRTKSPAELSEELFLSADE  
 GPGEPEPADWQTYREDENFVCIRFESLAEARQAVTCFRNMFMATMGIGVEISLGEQGPGRVEMRIKVAPTVT  
 PAVPLAKTPGLQTSDAAPVFLTELQNDVQDGYPMSFDCVVTGQPVPSVRWFKDGLLEEDDHYMINEDQGG  
 HQLIITAVVPADMGVYRCLAENSMGVSSTKAELRVELTSTDYDTAADATETSSYFSAQGYLLSREQEGTESDE  
 GQLPQVLEELKDLQVAPGTRLAKFQLKVKGYPAKPLYWFKDQGPLTTSDHIRMTDKKTLHTLEIVSVTREDSG  
 QYAAYSNAVGAAYSSARLLVRGPSEPEEKPASDVHERLVPPRILEKFTPKKVKRGSSITFSVKVEGHPAPSV  
 HWLKEEAKEKGLVWIGPDTPGYTMASSSKQHSLLVLDVGRQHQTGTYTCIATNPAGQALCSASLHISGLAKEEEQ  
 ERVKEALISSFLQGTSAVSAQMSSEAGFADLVGQSKGESLVAEEAHSHLSLAEVGTTEFLQKLTSTITEMVS  
 AKISQAKLQVPGGDSDEETKTPSASPRHGRSRPSSSVQESSSESEDGDSRGEIFDIYVVTADYLPGLAEQDAI  
 LLREGQYVEVLDSAHPLRWLVRTKPTKSSPSRQGWVSPAYLDKRLKLSPEWGPTEAPEFPGEAVSEDEYRTRL  
 SSVIQEELLSSEQAFVGLQFLESHEHMKHLERSPRVPAAVASQKTVIFRNVQDISHFHSSFLKELQCGCTDDDV  
 AMCFIKNQEAFAEKYLEFLVGRVQAESVVVSTPVQEFYKKAEEETLSAKDPTQPPPPPLQHYLEQPVERVQKYQ  
 ALLKELIRNKARNRQNCALLEQAYAVVSALPQRAENKLVSLMENYPGTLEALGEPHQGHFIVWEGAPGARM  
 PWKGHNHRHVFVLFNRYLVICKPRRDSRTDTFSYVFRNMMLSSIDLNDQVEGDDRAFEVWHEREDSVRKYLLQA  
 RTVIKNSWVKEICGIQQLAQPVWRPPEFEEELADCTAELGETVKLACRVTGTPKPIVSWYKDGKPVVDPH  
 HILIEDPDGSCTLILDNLGTIDSGQYMCFAASAAGNASTLGKILVQVPPRFVNVKVRATPFVEGEDAQITCTVE  
 GAPYPQIRWYKDGTLTLLAPGNRYRMLNEPRSGVLVLIQAASKEDLGHYECELVNRLGSTRGGGELYMQSPALR  
 ARDQHHREQIVAAVEERRPSP\*

>ENSMUSP00000151217\_c.10024:G>T\_p.S3342I ENSMUST00000219084.3|Obscn-  
 207|ENSMUSG00000061462|-|chr11:g.58958122:c>A  
 MDHSFSGAPRFLTRPKAFVSVGKDATLSQCIVGNPTPHVSWEKDRQPVVEAGARFRLAQDGDVYRLTILDLAL  
 GDSGQYVCDARNAIGEFAAVGLRVDSEGTCAEQAPHFLLRPTSIRVREGADATFCRCVGGSPQPAVSWSKDG  
 RRLGPPDAPHRVVEEHGESSALRIRSARPRDGGTYEVRAENPLGSASAAAALVVDSDAEVAGPPGTSTATLLA  
 HLQQRREAMRAEGIPSPPGAGTRTCTVTTEGKHARLSCFVTGEPKPEVWKKDQGLVTEGRRHVVEDEQENF  
 VLKILFCKQSDRGLYTCTASNLVGQTYSSVLVVVREPTVPFKKRLQDLEVREKESATFQCEVAQPATEAAWFK  
 EETRLWASAKYDIEEGTERRLTVRNVSADDDAVYICETTEGSRVAELSVQGNLTKLPRKTAVRTGDTAIF  
 WVELAVPEGPVWRVLRNQEEMVAGGRVAITAEGTCHTLTI FQCTLEDMGEVAFVSGGCRTTTQFCVSAAPRRPPL

YPPADPVVKAKTESSVTLSSWAPPHGDRPVITIDGYVLEKRKLGAYAWSRCHEAGWLATTEFTITGVAAEEGDFQ
FRVSAINHFGQGPYLEFPGTMHLVPLAVKTPKAVEAVEGGEVTFVSDLTVASSGEWFLDGEALKASSIYVI
RCDRTRHMLTIREVPARLHGAQLKVFVANGIETS IQMVVRAALGLPSSKLPAAAAREVLAQLHHEEAQLLAE LSD
QAAA VTWLKDGRELSLGPKYEMQVSAGRRALLVRDVAQDDAGLYECVSRGSRRTAYQLLVQDITDGYRDWGPAG
PQKHMCKCAGAKIARYLGSSCYRFLQYDKGVVHWLEAALDTRQGKGTSSCSLHEKPKLVFAKGOQAHSEVKAE
AGNSATLSCEVTQAQTEVTFWKDGKLLSSSSKVRMEASGCSRRLVVQQAGKADAGEYSCEAGGQKLSFRLDVA
EPKLVFAKGOQAHSEVKAEAGASATLSCEVAQAQTEVTFWKDGKLLSSSSKVRMEASGCSRRLVVQQAGKADA
GEYSCEAGGQKLSFRLDVAEPKMFVFAKEQQARSEVKAEAGASATLSCEVAQAQTEVTFWKDGKLLSSSSKVRM
EASGCSRRLVVQQAGKADAGEYSCEAGGQKLSFRLDVTEPKLVFAKEQQARSEVKAEAGNSATLSCEVAQAQ
EVTWFKDGKLLSSSSKVRMEASGCSRRLVVQQAGKADAGEYSCEAGGQKLSFRLDVTEPKLVFAKEQQAHSEV
KAEAGASATLSCEVAQAQTEVTFWKDGKLLSSSSKVRMEASGCSRRLVVQQAGKADAGEYSCEAGGQKLSFR
LDVAEPKLVFAKEQQARSEVKAEAGASATLSCEVAQAQTEVTFWKDGKLLSSSSKVRVEASGCSRRLVVQQAG
ADAGEYSCEAGGQKLSFRLDVAEPKLVFAKEQQANSEVKAEAGASATLSCEVAQAQTEVTFWKDGKLLSSSSK
VRVEASGCSRRLVVQQAGKADAGEYSCEAGGQKLSFRLDVAEPKLAFAKEQQAHSEVKAEAGASATLSCEVAQ
AQTEVTFWKDGKLLSSSSKVRVEASGCSRRLVVQQAGKADAGEYSCEAGGQKLSFRLDVAEPKLVFAKEQQAH
SEVKAEAGASATLSCEVAQAQTEVTFWKDGKLLSSSSKVRVEASGCSRRLVVQQVKGADAGEYSCEARGQKLS
FRLDVAEASQI PERPSRREPLVVKHEHETIILTATIAAPSVAAVTLWKDGV EIRRSKRHEATSLGDTHTLTVR
GAQVLD SAIYSCRVGKEGQDFPVQVEEVAAKFSKPLEPVEGELGTVMLVCELSPEQAEVVRGNTQLRPGK
RFQMTSEGPRTTLTVSGLREDDAEYVCESRDDRTSARLTVKVPVVKFTSGLSAMVAEEGQEATFQCVVSPS
DAGVTWYKDGMLQPSSEKFMVVEGASRSLTILGLTLEDAGQVTVAEAGASSAALRVREAPVLFKKKLEPQT
VEERTSVTLEVELTRPWPEVKWTRNAAVLTPSENVEIRAEGARHCLVLRVGFADRGFFGCETPDDKTQAKLN
VEMRQVRLVVRGLQEVEAKEQGTASMDVELSHAEEVGSWTRDGLRLQPGPKCHLAVQGPVHIILTSALQPDQSG
LVAFRAEGVHTSARLIVTELPVSTFRVLQDVVATQKEKVTLECELSRPVDVRLWKDGV E L RAGKAI GIVAQGT
CRSLVIYRCETGDQGVYVCDALDAQTSASLRVQGRYTLIFRRVLAEDAGEVKFVAENAESRAHLRVKELPVT
LLRPLRDKIAMEKHRGVLECCQVSRASAQVRWFKGGVELQSGPKYEVVSDGLYRKLVINDDVPEDEDTYTC DAG
NVKTSAQTFVVEEQSITIVRGLKDMTVMPEPAPAFECETSIPSVRPPKWL LKGTVLQAGGNVLEQDGTVHRLT
LHKTCSMTGVPVFTIGKSRSSAQLVVSDIPVVLTRPLEPKAGRELQSVVLSCDFRPAKAVQWYKDDTPLSP
SEKFKMALEGO MAELRILRLTPADAGVYRCQAGSAQSSAEVTVAEAREVTVIQPLQDAEAMEEGRVCFSCELSH
KDEDIEWSLNGTPLYNDSFHEISHEGCLHTLVLKSVRQADTGTVCATSPKVSVSARLVVKGPVVF LKALDDV
SAEERGTTLTQCEVSDPEARVVWRKDGVELGSPDKYDFLHKAGARGLTVHDL SHEDAGLYTCQVGSKETQSKV
SVHDLHVGITKRLKTVEVLEGESECFEVLVSHESPSDPAVWTVGGKTVGGSGHFHAVRQGRKYTLTVKDAALS
DAGEVVFVSVLGLT SKASLIIRERPV DITKPLEDQRTTLGEDVMLSCELSRAGTSVRWLKDGKAI RKSQKYDLL
SEGTRAVLVVRKASLKDSGEYTCETEASKSTAKLCVEEKANRFTEELADLQVEEKGRAVFTCKTEHPASVVTW
RKGLLELRASGKHVPSQEGTLTKLTINALERTDSDTYTCDIGQARTQARLLVHGQKVRVIEDLEDTAVQEGSS
AKFCRIAPADYGPVHWF LDKTPLHSNELNETVTPGGYHVLTLRQLALKDSGTVYFEAGDQRTSAAALRVTEK
PSIFSRPLTDVTVTEGEDTLTVCE TTTVDSSVRWTKDGKTLRPSARCQLSHEGQAQLLITATTPQDGGRYKC
EIGGASSSSIVRVHALPVRFRESLKDVEVPEGKAATLRCVLSVAAPVEWRHGDDVLKSSNKYSLRQEGAVLE
LVIRDLQPDQSGQYSCSFGDQTTSATLTVKTSQAQFVGLRNKEATEGTTVTLRCELTK EAPVEWKKGTETLR
NGDKYSLKQDGA VCELQICSLLVADAGEYSCVCGQEKTSATLTVKALLVHFVRRRLRIKEATEGDTTTLQCELS
KAAPVEWRKGTETLRDGD RYSLKQDGA VCELQIRSLTIADAGEYLCTCGQEKTSATLTVRGLPAKFIEDLRSQ
EATEGATAILRCELSKAAPVEWRK GSETLKDGDYTLRQDGA VCELQIRGLAVVDTGTYS SLPKFTEGLRNE
EATEGTMATLRCQMSKAAPVEWRK GSETLRDGD RYSLRQDGA MCELQIRGLTIEDSGEYTCVCGQEKTSATLS
VKALPPRFIEDLRSQEATEGTMATLRCQMSKAAPVEWRK GSETLGDGGRYSLRQNGAVCELQIHDLAVEDTGE
YSCVCGQEKTSATLNVKALPPKFTEGLKKEEATEGTMVTLRCQMSKEATVEWRKGA KTLSDGGRYSLRQDGA
MCELQICGLAVEDAGEYSCVCGQEKTSATLSVKALPPRFIEDLRSQEATEGTMATLRCQMSKAAPVEWRK GSET
LRDGD RYSLRQDGA VCELQIRDLAVEDAGEYLCVCGQEKTSATLSVKALPPRFIEDLRSQEATEGTMATLRCQ
MSKAAPVEWRK GSKTLR DGD RYSLRQDGA MCELQICDLAVEDTGDYSCVCGQEKTSATLSVKAPQVVFQQLQ
NLQAEEGSMASLRCELSVPNAAMVWSKGGLELQGDTRREARQQGCVAELLLRDLRREDAGEYSCTCGSQT TSA
TLMVTAAPVRFRLRELQAQDVDEGATARLRCELSREAVSVEWRK GSLQLFPKAKYQMVQEGTTAELLVHGVEQE
DAGEYTC DAGHTQS IARLSVRAPKPKFKTDLQSTEQEAGGTARLCCQLSEAPGTPVQWLKEGVELHVGS KYE
MRRQGAVCELLIHGLEAKDTGEYACL VGGQKTLASLRVKEPEVTIVRGLVDMEVQADEDV EFTCKV SQAGATD
VQWHLQGLPLQSNEVTEVAVLADGCTHVLQLKGV TLEDAGTVSFHVGG LSSSAQLTVRVPEVTVLEPLKDVQL
SEGQDAHFRCRLSRASGQEARWALGGVPLQCNEMNDITVEQGTLYLLTLHKV TLEDAGTITLQVSCSSEAQL
KVTAKNTVLRGLLENVDALEGG EALFECQLSQNEVAHAHTWLLDDEPVHTSEKVEVVYFENGLRHLLLLKLNLPQ
DSCRVTFLAGDVVTS AFLTVRGWRLEVLEPPHDA SVKAGMQVRF TCILSEAVPVGEATWYINGAAIQPDDTDW
TVT TDGSHHALTLSNAQPQHAGEVTF AARDAVASARLSVLALPDPPEDA EVVGRSDHSVTL SVVAPMSDGGGG
LCGYRVEMKEASTGQWQLCHDLVPGPECVVDDLVP GKTYRFRVA AVGPAGAGEPVHLPQMVKIAPAPAPAPAP
APAPETRQAVVGEDICLELEVAADGGEVVWHKGTERRIQPGGHFEVLSRGQRQMLVIKGFRTEDQGEYRCGPIQ



GLPSSGAATFNVVMTSGSGDEVPAQPSPPEAAQEGDLHLLWEALARKRRMSREPTLDSISELPEEDSRVQHL  
RQEAETAPDLSEGYSTADELARTGEADLSHTSSDDESRAGTPSLVTVLKKAGGPGISPLASKHEAQVTTSVK  
PQKQQEPVVPTCPPPGDLSAADLMDPSLDKAAVKIQAAFQKGYKVRKEMKQQEGPVFSRTFGDTEAQVGDVLR  
ECVLATKTKDMRACWLKDGIELTDGRHYHIDQLKDGTCSSLVTGLAPTDSGRYTCQVSTKSGRVSHSACVVVSG  
TESEAESSSGGELDDAFRRARLHRLFRTKSPAELSEEELFLSADEGPGPEEPADWQTYREDEFVCIRFE  
SLAEARQAVTCFRNMFATMGIGVEISLGEQGPGRVEMRIGKVAPVTPAVPLAKTPGLQTSDAAPVFLTELQN  
QDVQDGYPMSFDCVVTGQPVPSVRWFKDGKLEEDDHYMINEDQQGGHQLIITAVVPADMVYRCLAENSMGV  
SSTKAELRVELTSTDYDTAADATETSSYFSAQGYLSSREQEGTESDEGQLPQVLEELKDLQVAPGTRLAKFQL  
KVKGYPAKPLYWFKDQPLTSDHIRMTDKKTLHTLEIVSVTREDSGQYAAIISNAVGAAYSSARLLVVRGPSE  
PEEKPASDVHERLVPVPRILEKFTPKKVKRGSITFSVKVEGHPAPSVHVLKKEEAEGVLWIGPDTPGYTMAS  
SKQHSVLVLDVGRQHGTYYTCIATNPAGQALCSASLHISGLAKEEEQERVKEALISSFLOGTSQAVSAQMS  
AGFADLVGQSKGESLVAEEAHSHLSLAEVGTTEFLQKLTSTIEMVSAKISQAKLQVPGGDSDEETKTPSASP  
RHGRSRPSSSVQESSSESEDGDSRGEIFDIYVVTADYLPGLAEQDAIILREGQYVEVLDSAPHLRVLVTRTKPT  
KSSPSRQGWVSPAYLDRKRLKSPWGPTEAPEFPGEAVSEDEYRTRLSVVIQELLSSEQAFVQVLESHHM  
KHLERSRVPAAVASQKTVIFRNVQDISHFHSSFLKELQCGCTDDVAMCFIKNQEAFAFEKYLEFVGRVQAES  
VVVSTPVQEFYKKYAEETLSAKDPTQPPPPPLQHYLEQPVVERVQKYQALLKELIRNKARNRQNCALLEQAYAV  
VSALPQRAENKHLVSLMENYPTLEALGEPVIRQGHFVWEGAPGARMFWKGNRHFVFLFRNYLVICKPRRDSR  
TDTFSYVFRNMMKLSSIDLNDQVEGDDRAFEVWHEREDSVRKYLLQARTVIKNSWVKEICGIQQRLAQPVWR  
PPEFEEELADCTAELGETVKLACRVGTGPKPIVSWYKDGKPEVVDPHHILIEDPDGSCSTLILDNLTGIDSGQY  
MCFAASAAGNASTLGKILVQVPPRFVNVKVRATPFVEGEDAQITCTVEGAPYPQIRWYKDGTLAPGNRYRMLN  
EPRSGVLVLIQAASKEDLGHYECELVNRGSTRGGGELYMQSPALRARDQHHREQIVAAVEVTEQETKVPKK  
TVIEETITTVVKS PRGRRQSPGKSPSRSPSRSSASPRRGLLAPERLYPPGTSPSRRLEVEQGRKAPVPALY  
VTEAEVHAPASQSQPKWLEVEETIEVVRVKKTGSRGASPVREMTSRGEGILFTLPGGIPGRDPNANNNSNKS  
VYQEARWGPVAVHVGEPFIQVDSVGNVDWAASPEPEQVVRASQKEENTERQEGCSDGDENTFLMEEPQD  
TDSLQGRDPKILTHNGRVLTLADLEDYVPEGETFGCGDSTPSTPDEPPCEVSVLQREI SEPTVQPVLLN  
VGRPPGTGATPSFFRPGSQVHSPESVFLREAWSGPVSAAPWTSSFHTHVQSSVDGSHGFSFKTEVSTQTVS  
FGAVGETVTLHIDPDGGEAPGPSQG\*

>rs47117923\_ENSMUSP00000158795\_c.10146:g>A\_p.G3383S  
ENSMUST00000238536.2|Obscn-210|ENSMUSG00000061462|-|chr11:g.58964086:C>T  
MDHSFSGAPRFLTRPKAFVSVGKDATLSCQIVGNPTPHVSWEKDRQPVVEAGARFRLAQDGDVYRLTILDLAL  
GDSGQYVCRARNAIGEFAAVGLRVDSEGTCAEQAPHLLRPTSIRVREGADATFRCRVGGSPQPAVSWSKDG  
RRLGPPDAPHVRVEEHGESSALRIRSARPRDGGTYEVRAENPLGSASAAAALVVDSDAEVAGPPGTSTATLLA  
HLQQRREAMRAEGIPPSPPGAGTRTCTVTEGKHARLSCFVTGEPKPEVWKKDGQLVTEGRRHVVEDEQENF  
VLKILFCKQSDRGLYTCTASNLVGQTYSSVLVVVREPTVPFKKRLQDLEVREKESATFQCEVAQPA  
TEAAWFK EETRLWASAKYDIEEGETERRLTVRNVSADDDAVYICETTEGESRTVAELSVQGNLTKRL  
PRKTAVRTGDTAIFWVELAVPEGPVRWLRNQEEMVAGGRVAITAEGTCHTLTI FQCTLEDMGEVAFVSGGCRT  
TTQFVCSAPRRPPL YPPADPVVKAKTESSVTLWSAPPHGDRPVTIDGYVLEKRLKLGAYAWSRCHEAGW  
LATTEFTITGVAEEGDFQFRVSAINHFGQGPYLEFPGTMHLVPLAVKTPKAVEAVEGGEVTFVSDLT  
VASSGEWFLDGEALKASSIYVIRCDRTRHMLTIREV PARLHGAQLKFVANGIETS IQMVVRAALGLP  
SSKLPAAAAREVLAQLHEEAQLLAE LSDQAAA VTWLKDGRELSLGPYEMQVSAGRRALLVRDVAQ  
DDAGLYECVSRGSRRTAYQLLVQDITDGYRDWGPAGPQKHMCKCAGAKIARYLGSSCYRFLQYD  
KGVVHWEAALDTRQKGTS SCSLHEKPKLVFAKQQAHSEVKA EAGNSATLSCEVTQAQTEVTW  
FKDGKLLSSSSKVRMEASGCSRRLVVQQAGKADAGEYSCEAGGQKLSFRLDVAEPKLVFAKQQAH  
SEVKA EAGASATLSCEVAQAQTEVTWFKDGKLLSSSSKVRMEASGCSRRLVVQQAGKADA  
GEYSCEAGGQKLSFRLDVAEPKLVFAKEQQARSEVKA EAGASATLSCEVAQAQTEVTWFKDGKLL  
SSSSKVRMEASGCSRRLVVQQAGKADAGEYSCEAGGQKLSFRLDVAEPKLVFAKEQQARSEV  
EASGCSRRLVVQQAGKADAGEYSCEAGGQKLSFRLDVTEPKLVFAKEQQARSEVKA EAVGNSATLS  
CEVAQAQTEVTWFKDGKLLSSSSKVRMEASGCSRRLVVQQAGKADAGEYSCEAGGQKLSFRLDVA  
EPKLVFAKEQQARSEV KAEAGNSATLSCEVAQAQTEVTWFKDGKLLSSSSKVRMEASGCSRRLVV  
QQAGKADAGEYSCEAGGQKLSFRLDVAEPKLVFAKEQQARSEV KAEAGASATLSCEVAQAQTEVT  
WFKDGKLLSSSSKVRVEASGCSRRLVVQQAGKADAGEYSCEAGGQKLSFRLDVAEPKLVFAKEQQAH  
SEVKA EAGASATLSCEVAQAQTEVTWFKDGKLLSSSSKVRVEASGCSRRLVVQQAGKADAGEYS  
CEAGGQKLSFRLDVAEPKLVFAKEQQARSEV KAEAGASATLSCEVAQAQTEVTWFKDGKLLSSSS  
KVRVEASGCSRRLVVQQAGKADAGEYSCEAGGQKLSFRLDVAEPKLVFAKEQQANSEVKA EAGAS  
ATLSCEVAQAQTEVTWFKDGKLLSSSSKVRVEASGCSRRLVVQQAGKADAGEYSCEAGGQKLSFR  
LDVAEPKLVFAKEQQAH SEVKA EAGASATLSCEVAQAQTEVTWFKDGKLLSSSSKVRVEASGCS  
RRLVVQQAGKADAGEYSCEAGGQKLSFRLDVAEPKLVFAKEQQARSEV KAEAGASATLSCEVAQA  
QTEVTWFKDGKLLSSSSKVRVEASGCSRRLVVQQAGKADAGEYSCEAGGQKLSFRLDVAEPKLVFA  
KEQQAH SEVKA EAGASATLSCEVAQAQTEVTWFKDGKLLSSSSKVRVEASGCSRRLVVQQAGK  
ADAGEYSCEAGGQKLSFRLDVAEPKLVFAKEQQARSEV KAEAGASATLSCEVAQAQTEVTWFKDG  
KLLSSSSKVRVEASGCSRRLVVQQAGKADAGEYSCEAGGQKLSFRLDVAEPKLVFAKEQQAH SEV  
KA EAGASATLSCEVAQAQTEVTWFKDGKLLSSSSKVRVEASGCSRRLVVQQAGKADAGEYSCEAG  
GQKLSFRLDVAEPKLVFAKEQQARSEV KAEAGNSATLSCEVAQAQTEVTWFKDGKLLSSSSKVR  
VEASGCSRRLV

VQQAGKADAGEYSCEAGGQKLSFRLLDVAEAEESQIPERPSRREPLVVKEHETIILTATIAAPSVAAVTWLKDGV
EIRRSKRHEATSLGDTHTLTVRGAQVLDIAIYSCRVGKEGQDFPVQVEEVAAKFSKPLEPVEGELGGTVMLVC
ELSPQAEVWRCGNTQLRPGKRFQMTSEGPRTTLTVSGLREDDAEYVCESTRDDRTSARLTVKVPVVKFTS
GLSAMVAEEGQEATFQCVVSPSDAGVTWYKDGMLQPSSEKFMVESGASRSLTILGLTLEDAGQVTEAEGAS
SSAALRVREAPVLFKKKLEPQTVEERTSVTLEVELTRPWPEVKWTRNAAVLTPSENVEIRAEGARHCLVLRV
GFADRGGFFGCETPDDKTQAKLNVEMRQVRLVVRGLQVEVEAKEQGTASMDVELSHAEVEGWSWTRDGLRLQPGPKC
HLAVQGPVHILTLALSALQPDQSGLVAFRAEGVHTSARLIVTELPVSFTRVLQDVVATQKEKVTLECELSRPVDV
RWLKDGVLELRAGKAIGIVAQGTCSRSLVIYRCETEGDQGVYVCDALDAQTSASLRVQGRTYTLIFRVLAEADAGE
VKFVAENAESRAHLRVKELPVTLLRPLRDKIAMEKHRGVLECVSRASQAQVRWFKGGVELQSGPKYEVVSDGL
YRKLVINVDQPEDEDTYTCDAENVKTSAQFFVEEQSITIVRGLKDMTVMPEPAPAWFECETSIPSVRPPKWL
KTVLQAGGNVLEQDGTVHRLTLHKTCSTMTGPVHFTIGKSRSSAQLVVSDIPVVLTRPLEPKAGRELQSVVL
SCDFRPAPKAVQWYKDDTPLSPSEKFKMALEGGMAELRILRLTPADAGVYRCQAGSAQSSAEVTEAREVTVI
QPLQDAEAMEEGRVCFSCELSHKDEDIEWSLNGTPLYNDSFHEISHEGCLHTLVLSVRQADTGTVCATSPKV
SVSARLVVKGKPVVFLKALDDVSAEERGTTLTQCEVSDPEARVVWRKDGVELGPSDKYDFLHKAGARGLTVHD
LSHEDAGLYTCQVGSKETQSKVSVHDLHVGITKRLKTVEVLEGESECSFECVLSHESPSDPAVWTVGGKTVGGS
GHFHAVRQGRKYTLTVKDAALSDAGEVVSVLGLTSKASLIIRERPVDITKPLEDQRTTLGEDVMLSCELSRA
GTSVRWLKDGKAIRKSQKYDLSSEGTRAVLVVRKASLKDSEYTCETEASKSTAKLCVEEKANRFTEELADLQ
VEEKGRAVFTCKTEHPASVVTWRKSLELRASGKHVPSQEGTLKLTINALERTSDSTYTCDIGQARTQARLL
VHGQKVRVIEDLEDTAVQEGSSAKFCCRIAPADYGPVHWFLDKTPLHSNELNEITVQPGGYHVLTLRQLALKD
SGTVYFEAGDQRTSALRVTEKPSIFSRPLTDVTVTEGEDTLVCESTTTVDSSVRWTKDGKTLRPSARCQLSH
EGCQALLITATTPQDGGRYKCEIGGASSSSIVRVHALPVRFRESLKDVEVPEGKAATLRCVLSVAAPVEWR
HGDDVLKSSNKYSLRQEGAVLELVIRDLQPDQSGQYSCSFGDQTTSATLTVKTSQAQFVGLKRNKEATEGTTV
TLRCELTKEAPVEWKKGTETLRNGDKYSLKQDQAVCELQICSLLVADAGEYSCVCGQEKTSAITLVKALLVHF
VRRLSKEATEGDTTTLQCELSKAAPVEWRKGTETLRDGDYSLKQDQAVCELQIRSLTIADAGEYLCTCGQE
KTSATLTVRALPAKFKDSLKNEEATEGTTATLSCELSKAAPVWKKGPKTLQSGDKYVLRQDQAVCGLIHGL
TMADAGEYSCVCGQEKTSAITLTVRGLPAKFIEDLRSQATEGATAILRCELSKAAPVEWRKGSSETLKDGDYR
LRQDQAVCELQIRGLAVVDGTYSLSLPTKFTTEGLRNEEATEGTMATLRCQMSKAAPVEWRKGSSETLRDGRYS
LRQDQAMCELQIRGLTIEDSGEYTCVCGQEKTSAITLSVKALPSRFIEDLRSQATEGTMATLRCQMSKTAPVE
WKKGSETLRDGGYSLRQDGPVCELQICDLAVEDAGEYSCVCGQEKTSAITLSIKALPPRFIEDLRSQATEG
MATLRCQMSKAAPVEWRKGSSETLGDGGYSLRQNGAVCELQIHDLAVEDTGEYSCVCGQEKTSAITLVKALPP
RFIEDLRSQATEGTMATLRCQMSKAAPVEWRKGSSETLRDGGYSLRQDQAVCELQIHDLDVEDAGQYSCVCG
QEKTSAVLTVDALPPKFTTEGLKKEEATEGTMVTLRCQMSKEATVEWRKGAKTLSDGGRYSLRQDQAMCELQIC
GLAVEDAGEYSCVCGQEKTSAITLSVKALPPRFIEDLRSQATEGTMATLRCQMSKAAPVEWRKGSSETLRDGR
YSLRQDQAVCELQIRDLAVEDAGEYLCVCGQEKTSAITLSVKALPPRFIEDLRSQATEGTMATLRCQMSKAAP
VEWRKGSSETLRDGGYSLRQDQAMCELQICDLAVEDTGDYSCVCGQEKTSAITLSVKALPPRFIEDLRSQEA
RGTVALTRCRMSKAAPVEWRKGSSETLKDGDYSLRQEGNCELQIRDLAVEDTGEYSCVCGQEKTSAITLSVKAL
PAKFIEDLRSQEAPESSVTTLRCKLSKASVWKKGSETLRNGARYSLRQDQAVCELEIRDLTVEDTGEYSCT
CGQERTSATLSIMAPQVVFQQLQNLQAEEGSMASLRCELSVNPAAWWSKGGLELQGDTRREARQQGCVAEL
LLRDLRREDAGEYSCVCGQTTSATLMVTAAPVRFRLRELQAQDVDEGATARLRCELSREAVSVEWRKGSQQLF
PCAKYQMVQEGTTAELLVHGVEQEDAGEYTCDAHTQSIARLSVRAPKPKFKTDLQSTEQEAAGGTARLCCQLS
EAEFGTPVQWLKEGVELHVGSKYEMRRQAVCELLIHGLEAKDTGEYACLVGQKTLASLRVKEPEVTIVRGL
VDMEVQADEDEFTCKVQAGATDVQWHLQGLPLQSNVTEVAVLADGCTHVLQKGVTLLEDAGTVSFHVGGL
SSSAQLTVRVPEVTVLEPLKDVQLSEGQDAHFRCLSRASGQEARWALGGVPLQCNEMNDITVEQGTLYLLTL
HKVTLEDAGTITLQVGSSESQAQLKVTAKNTVLRGLENVDALEGGEALFECQLSQPEVAHAHTWLLDDEPVHTS
EKVEVVYFENGLRHLLLLKNLKPQDSCRVTFLAGDVVTS AFLTVRGWRLEVLEPPHDASVKAGMQVRFTCILS
EAVPVGEATWYINGAAIQPDDTDWTVTTDGSHALTLSNAQPQHAGEVTF AARDAVASARLSVLALPDPEDA
EVVGRSDHSVTLVSWAPMSDGGGGLCGYRVMKEASTGQWQLCHDLVPGPECVDDLVPGKTYRFRVAAVGPA
GAGEPVHLPQMVKIAPAPAPAPAPAPAPAPETRQAVVGEDICLELEVAADGGEVVWHKGTERRIQPGHFVLS
RGQRQMLVIKGFRTEDQGEYRCGPIQGLPSSGAATFNVMVMTSGSGDEVPAQPSLPPEAAQEGDLHLLWEALAR
KRRMSREPTLDSISELPEEDSRVQHLRQEAETAPDLSEGYSTADELARTGEADLSHTSSDDESAGTPSLVT
YLKKGAGGPGISPLASKHEAQVTTSVKPKQKQEPVPTCPPPGDLSAADLMDPSLDKAAVKIQAAFKGYKVRKE
MKQQEGPVFSRTFGDTEAQVGDVLRLECVLATKTDMRACWLKDGIELTDGRHYHIDQLKDGTCSLLVTLGLAPT
DSGRYTCQVSTKSGRVSHSACVVVSGTESEAEASSGGELDDAFRAARRLHRLFRTKSPAELSEELFLSADE
GPGEPEEPADWQTYREDENFVCIREFESLAEARQAVTCFRNMFATMGI GVEISLGEQGPGRVEMRIGKVAPTVT
PAVPLAKTPGLQTSDAAPVFLTELQNDVQDGYPMSFDCVVTGQVPVPSVRWFKDGKLEEDDHYMINEDQGG
HQLIITAVVPADMGVYRCLAENSMGVSSTKAELRVELTSTDYDTAADATETSSYFSAQGYLSSREQEGTESDE
GQLPQVLEELKDLQVAPGTRLAKFQLKVKGYPAKLYWFKDQGPLTTS DHIRMTDKKTLHTLEIVSVTREDSG
QYAAIY SNAVGAAYSSARLLVRGPSEPEEKPASDVHERLVPPRILEKFTPKKVKRGSSITFSVKVEGHPAPSV

HWLKEEAKEKGVLWIGPDTPGYTMASSSKQHSLLVLLDVGRQHOGTYTTCIATNPAGQALCSASLHISGLAKEEEQ  
 ERVKEALISSFLOGTSQAVSAQMSESAFADLVGQSKGESLVAEEAHSHLSLAEVGTTEFLQKLSQITEMVS  
 AKISQAKLQVPGGDSDEETKTPSASPRHGRSRPSSSVQESSSEEDGDSRGEIFDIYVVTADYLPGLAEQDAI  
 ILREGQYVEVLDLSDAHLRVLVTRKPTKSSPSRQGWVSPAYLDKRLKLSPEWGPTEAPEFPGEAVSEDEYRTRL  
 SSVIQEELLSSEQAFVQELQFLESHHMKHLERSPRVPAAVASQKTVI FRNVQDISHFHSSFLKELQCGCTDDDDV  
 AMCFIKNQEAFAKEYLEFLVGRVQAESVVVSTPVQEFYKKYAEETLSAKDPTQPPPPPLQHYLEQPVERVQKYQ  
 ALLKELIRNKARNRNCALLEQAYAVVSALPQRAENKLVSLMENYPGTLEALGEPTRQGHFIVWEGAPGARM  
 PWKGNRHRVFLFRNYLVICKPRRDSRTDTFSYVFRNMMKLSSIDLNDQVEGDDRAFEVWHEREDSVRKYLLQA  
 RTVLIKNSWVKEICGIQQLAQPVWRPPEFEEELADCTAELGETVKLACRVTGTPKPIVSWYKDGKPEVDPH  
 HILIEDPDGSCITLILDNLTGIDSGQYMCFAASAAGNASTLGKILVQVPPRFVNVKVRATPFVEGEDAQITCTVE  
 GAPYPQIRWYKDGTLAPGNRYRMLNEPRSGVLVVIQAASKEDLGHYECELVNRGSTRGGGELYMQSPALR  
 ARDQHHREQIVAAVEDTSVEGSAHSAQDQAAASVLWRLGSEALGSPGDLNTRQSEPPAFEEAASQIP  
 GAASGTPEVSQPGTHKLEQETSSSGSQGWTPVIRVEGTAWPGAGTGQLLLDVHSQVIMETTQRTYVQCAPDT  
 GVTRAPSMQVTIEDVQVQVGDMAQFDAVIEGHPPPIVTVWYKGSTQLTSSARLSQRQDGTYSVLVTDVAPHDA  
 GVYTCVANNAGGQVLCKAELLVHGGDKLDAENQVYRRKLSHFYDVQEEIGRGVFGFVKRVQHKGNMFCAAKF  
 IPLRSKTRAQAYQERDILATLGHPLVLTGLLDQFETRKTLLILILELCSSEELLDRLFKKGVVTEAEVKVYIQQL  
 VEGLHYLHSHGILHLDIKPPNIMVHPAREDIKICDFGFAQKITPSEPOYSKYGSPFVSPPEIIEQNPVSEGS  
 DIWAMGVI SYLSLTCSPPFAGESDRATLLNVLEGRVSWSSPTAAHLSSEDAKDFIKATLQRTPRARPSTSQCLA  
 HPWFLKSMPAEEAHFINTKQKFLARSRWRSLMSYKSI LVMRSIPELLQGPPDPSPLGVARHLRGEASGAS  
 SSSSSSDNELAPFARAKSLPPSPVTHSPLLHPRGFLRPSASLPEETEASMPPTADA AVPASQASAGPPASPGCV  
 PRHSVSISSLFYQQAGEGAERGNKTSGAKRHPARRRHLKGGYIARALPGLREPLMEYSLLEEEAAREEQASLM  
 TKTPSFETALRLPSSSVREVPGRSHSLDNPPVTTGPSPEACEQLLFPSTGLTHETTAKDRGHKEGFLQESV  
 PFPMSGDSRPGKQEGSSQDSCRKPASSCHSELGSGSQEGCPPSSQSLGSLPPQSLKKEKLSSTCGPLFSEQ  
 PQAAPFPTQVSPLLGSEKEPQDGSLSSEGPVVPSSSPGSASQVDASLDTEGLSEAGDTCDFTPPPQRPQEQAT  
 TRKFSLESRRGGYAGVAGYGTFAFGGDAGGMLGQGPLWARMAWAVSQSSEEQDEAATESPQPLESIGPIAEASG  
 VPLRTPSLTPWEEVEQVSLVQIRDLSGDAEAADTISLDISEVDPAYLNLSDLYDIKYLPEFEMI FRVRPKPI  
 EQPESPGSETEAGLEADFLLEAAWPWPGELGLRAGLEITEEPEEPGDLEALLGEAAVTRKRKWSPSRGLFQF  
 PGRCLSGEEPVELGLRQRVKASMAHISRILKGRPEGPEREGPPRKKAGLASFRLSGLKGRDQELSDEAVVLGQ  
 SVTLACQVLAQPTAQATWSKDGVLLESSGHLISSTLKNFQLLTI LVVKEEDLGTYTCCVSNPLGTAVTTGVL  
 RKAERPSSSPRPEVGEYKDAVLLVWKPVESECGPVTYIVQCCIEGGSWTTLASDISDCCYLTGKLSRGGMYIF  
 RTACVSKAGMGPYSSPSEQVLLGGPNHLASEEESSRGRPAQLLPSTKTFAFQMQIRRGFRFSVVRQCREKASGR  
 ALAAKIVPYQPEDKTA VLREYEAALKRHLHHLAQLHAAYLSPRHLVLI LELCSGPELLPSLAERESYSESDVK  
 DYLWQMLSATQYLHAQHILHLDLRSNNMMVTEYNLLKVIDLGNAAQSLDQEKVPAPENFKDYLETMAPELLEGQ  
 GAVPQTDIWAIGVTA FIMLSGEY PESSSEGTRDLQKGLRKLIRLSRCYAGLSGGAVAFLOSSLCAQPWGRPCA  
 STCLQCGWLTEEGPTGSRPTPVTFPTVRLRAFVREKRRRALLYKKNLAQVR\*  
 >rs47117923\_ENSMUSP00000038264\_c.9318:G>A\_p.G3107S  
 ENSMUST00000047441.14|Obscn-202|ENSMUSG00000061462|-|chr11:g.58964086:C>T  
 MDHSFSGAPRFLTRPKAFVSVGKDATLSCQIVGNPTPHVSWEKDRQPVEAGARFRLAQDGDVYRLTILDLAL  
 GDSGQYVCRARNAI GEFAAVGLRVDSEGTCAEQAPHFLLRPTSIRVREGADATFRCRVGGSPPAVSWSKDG  
 RRLGPPDAPHVRVEEHGESSALRIRSARPRDGGTYEVRAENPLGSASAAAALVVDSDAEVAGPPGTSTATLLA  
 HLQQRREAMRAEGIPSPPGAGTRTCTVTEGKHARLSCFVTGEPKPKETVWKKDQQLVTEGRRHVYEDQENF  
 VLKILFCKQSDRGLYTCTASNLVGQTYSSVLVVVREPTVPFKKRLQDLEVREKESATFQCEVAQPATEAAWFK  
 EETRLWASAKYDIEEGETERRLTVRNVSADDDAVYICETTEGSRVAELSVQGNLTKLPRKTAVRTGDTAIF  
 WVELAVPEGPVWRWRNQEEMVAGGRVAITAEGTCHTLTI FQCTLEDMGVAFVSGGCRTTTTQFCVSAPRRPPL  
 YPPADPVVKAKTESSVTLSSWAPPHGDRPVTIDGYVLEKRKLGA YAWSRCHEAGWLAATTEFTITGVAAEEDGFQ  
 FRVSAINHFGQGPYLEFPGMTMLVPLAVKTPKAVEAVEGGEVTFVSDLTVASSGEWFLDGEALKASSIYVI  
 RCDRTRHMLTIREVPARLHGAQLKVFANGIETS IQMVVRAALGLPSSKLPAAAAREVLAQLHEEAQLLAELSD  
 QAAA VTWLKDGRELSLGPKYEMQVSAGRRALLVRDVAQDDAGLYECVSRGSR TAYQLLVQDITDGYRDWGPAG  
 PQKHMCKCAGAKIARYLGSSCYRFLQYDKGVVHLEAALDTRQKGTSSCSLHEKPKLVFAKQQAHSEVKA  
 AGASATLSCEVAQAQTEVTWFKDGKLLSSSSKVRMEASGCSRRLVVQQAGKADAGEYSCEAGGQKLSFRLDVA  
 EPKMVFAKEQQARSEVKA EAGASATLSCEVAQAQTEVTWFKDGKLLSSSSKVRMEASGCSRRLVVQQAGKADA  
 GEYSCEAGGQKLSFRLDVTEPKLVFAKEQQARSEVKA EAGASATLSCEVAQAQTEVTWFKDGKLLSSSSKVRM  
 EASGCSRRLVVQQAGKADAGEYSCEAGGQKLSFRLDVAEPKLVFAKEQQARSEVKA EAGASATLSCEVAQAQ  
 EVTWFKDGLKLLSSSSKVRMEASGCSRRLVVQQAGKADAGEYSCEAGGQKLSFHLVDVTEPKLVFAKEQQAHSEV  
 KAEAGASATLSCEVAQAQTEVTWFKDGKLLSSSSKVRMEASGCSRRLVVQQAGKADAGEYSCEAGGQKLSFR  
 LDVAEPKLVFAKEQQARSEVKA EAGASATLSCEVAQAQTEVTWFKDGKLLSSSSKVRMEASGCSRRLVVQQAGK  
 ADAGEYSCEAGGQKLSFRLDVAEPKLVFAKEQQANSEVKA EAGASATLSCEVAQAQTEVTWFKDGKLLSSSSK  
 VRVEASGCSRRLVVQQAGKADAGEYSCEAGGQKLSFRLDVAEPKLVFAKEQQAHSEVKA EAGASATLSCEVAQ

AQTEVTFWKDGGKLSSSSSKVRVEASGCSRRLVVQQAGKADAGEYSCEAGGQKLSFRLDVAEPKLAFAKEQQA  
SEVKAEAGASATLSCEVAQAQTEVTFWKDGGKLSSSSSKVRVEASGCSRRLVVQQAGKADAGEYSCEAGGQKLS  
FRLDVAEPKLAFAKEQQAHESEVKAEAGASATLSCEVAQAQTEVTFWKDGGKLSSSSSKVRVEASGCSRRLVVQQ  
AGKADAGEYSCEAGGQKLSFRLDVAEPKLVFAKEQQAHESEVKAEAGASATLSCEVAQAQTEVTFWKDGGKLS  
SSKVRVEASGCSRRLVVQQVQKADAGEYSCEARGQKLSFRLDVAEAEESQIPERPSRREPLVVKHEHETIILTAT  
IAAPSVAAVTWLKDGVETRRSKRHEATSLGDTHTLTVRGAQVLDIAIYSCRVGKEGQDFPVQVEEVAAKFSKP  
LEPVEGELGGTVMLVCELSPEQAEVVRWCNGTQLRPGKRFQMTSEGPRRTLTVSGLREDDAEYVCESRDDRT  
SARLTVKVPVVKFTSGLSAMVAEEGQEAFTQCVVSPSDAGVTVYKDGMLQPSSEKFMVVEGASRSALTILGL  
TLEDAGQVTVEAEGASSAALRVREAPVLFKKKLEPQTVEERTSVTLEVELTRPWPEVKWTRNAAVLTPSENV  
EIRAEGARHCLVLRVSVGFADRGFFGCETPDDKTQAKLNVEMRQVRLVVRGLQEVEAKEQGTASMDVELSHAEVE  
GSWTRDGLRQLQPGPKCHLAVQGPVHILTLALQPDQSGLVAFRAEGVHTSARLIVTELTPVSTFRVLQDQVATQ  
KEKVTLECELSRPVDVRLWLDGVELRAGKAI GIVAQGTCSRSLVIYRCETGDQGVYCDALDAQTSASLRVQGR  
TYTLIFRRVLAEDAGEVVFVAENAESRAHLRVKELPVTLLRPLRDKIAMEKHRGVLECCQVSRASAVRWFKGG  
VELQSGPKYEVVSDGLYRKLVINVDVQPEDEDTYTCDAGNVKTSAQFFVEEQSITIVRGLKDMTVMPEPAPAWFE  
CETSIPSVRPPKWLKGTVLQAGNVGLEQDGTVHRLTLHKTCSTMTGPVHFTIGKSRSSAQLVVS DIPVVL  
RPLEPKAGRELQSVVLSCDFRPAPKAVQWYKDDTPLSPSEKFKMALEGQMAELRILRLTPADAGVYRCQAGSA  
QSSAEDTVEAREVTVIQLQDAEAMEEGRVCFSELSHKDEIEWSLNGTPLYNDSFHEISHGCLHTLVLSKS  
VRQADTGTVCATSPKVSARLNVKGPVFLKALDDVSAEERGTLTLQCEVSDPEARVVRWKDVELGSPDK  
YDFLHKAGARGLTVHDLSDHEDAGLYTCQVGSKETQSKVSVHDLHVGITKRLKTVEVLEGESECFVLSHESP  
SDPAVWTVGGKTVGGSGHFHAVRQGRKYTLTVKDAALSDAGEVVFVSVLGLTSKASLIIRERPVIDITKPLEDQR  
TTLGEDVMLSCELSRAGTSVRWLKDGKAIKRSQKYDLLSEGTRAVLVVRKASLKDSGEYTCETEASKSTAKLC  
VEEKANRFTEELADLQVEEKGRAVFTCKTEHPASVVTWRKSLLELRASGKHVPSQEGTLTKLTINALERTDSD  
TYTCDIGQARTQARLLVHGQKVRVIEDLEDTAVQEGSSAKFCRIPADYGPVHWFLDKTPLHNSNELNEITVQ  
PGGYHVLTLRQLALKDSGTVYFEAGDQRTSAALRVTEKPSIFSRPLTDVTVTEGEDTLTVCETTTTVDSSVRWT  
KDGKTLRPSARCQLSHEGCAQLLITATTPQDGGRYKCEIGGASSSSIVRVHALPVRFRESLKDVEVPEGKAA  
TLRCLVSSVAAPVVRHGDVLSKSNKYSLRQEGAVLELVIRDLQPDQSGQYSCSFGDQTTSATLTVKTTSSAQ  
FVGLKLRNKEATEGTTVLRCELTKAEAPVEWKEGTETLRNGDKYSLKQDQAVCELQICSLLVADAGEYSCVCGQ  
EKTSATLTVKALLVHFVRRRLRSKEATEGDTTTLQCELSKAAPVEWRKGTETLRDGDYSLKQDQAVCELQIRS  
LTIADAGEYLCTCGQEKTSATLTVRALPAKFKDSLKNEEATEGTTATLSCELSKAAPVTWKKGPKTLQSGDKY  
VLRQDQAVCGLQIHGLTMADAGEYSCVCGQEKTSATLTVRGLPAKFIEDLRSQEATEGATAILRCELSKAAPV  
EWRKGSETLTKDGDYTLRQDQAVCELQIRGLAVVDTGTYSLSLPTKFTTEGLRNEEATEGTMATLRCQMSKAAPV  
EWRKGSETLRDGDYSLRQDQAVCELQIRGLTIEDSGEYTCVCGQEKTSATLSVKALPPRFIEDLRSQEATEG  
TMATLRCQMSKAAPVEWRKGSETLGDGGYSLRQNGAVCELQIHDLAVEDTGEYSCVCGQEKTSATLNVKALP  
PRFIEDLRSQEATEGTMATLRCQMSKAAPVEWRKGSETLRDGGYSLRQDQAVCELQIHDLVEDAGQYSCVC  
GQEKTSAVLTVDALPVPKFTTEGLKKEEATEGTMVTLRQMSKEATVEWRKGAKTSLDGGYSLRQDQAVCELQI  
CGLAVEDAGEYSCVCGQEKTSATLSVKALPPRFIEDLRSQEATEGTMATLRCQMSKAAPVEWRKGSKTLRDGD  
RYSRLRQDQAVCELQICDLAVEDTGDYSCVCGQEKTSATLSVKAPQVVFQQLQNLQAEEGSMASLRCELSV  
AAMVWSKGGLELQDTRREARQQGCVAELLLRDLRREDAGEYSCVCGQEKTSATLMVTAAPVRFRLRQDQAV  
DEGATARLRCELSREAVSVEWRKGSLLQFPKAKYQMVQEGTTAELLVHGVEQEDAGEYTC DAGHTQSIARLSV  
RAPKPKFKTDLQSTEQEAGGTARLCCQLSEAEPTPVQWLKEGVELHVGSKYEMRRQGAVCELLIHGLEAKDT  
GEYACLVGQKTLASLRVKEPEVTIVRGLVDMEVQADEDFEFTCKVVSQAGATDVQWHLQGLPLQSNVEVAV  
LADGCTHVQLKGVTLLEDAGTVSFHVGGLSSSAQLTVRVPEVTVLEPLKDVQLSEGQDAHFRCRLSRASGQEA  
RWALGGVPLQCNEMNDITVEQGTLYLLTLHKVTLEDAGTITLQVGSSEAEQLKVTAKNTVLRGLENVDALEG  
GEALFECQLSQPEVAHAHTWLLDDEPVHTSEKVEVVYFENGLRHLLLLKLNKLPQDSCRVTFLAGDVVTSAPFLT  
RALPDPPEDAEVVGRSDHSVTLVSWVAPMSDGGGLCGYRVMKEASTGQWQLCHDLVPGPECVVDLVPVKTY  
RFRVAAVGPAGAGEPVHLPQMVKIAPAPAPAPAPAPAPAPETRAVVGEDICLELEVAADGGVEVWHKGTERRI  
QPGGHFEVLSRQQRQMLVIKGFRTEDQGEYRCGPIQGLPSSGAATFNVVMTSGSGDEVPAQPSLPPEAAQEGD  
LHLLWEALARKRRMSREPTLDSISELPEEDSRVQHLRQEAETAPDLSEGYSTADELARTGEADLSHTSSDDE  
SRAGTPSLVTYLKKAGGPGISPLASKHEAQVTTSVKPKQKQEPVVPPTCPPPGDLAADLMDPSLDKAAVKIQA  
AFKGYKVRKEMKQEGPVFSRFTFGDTEAQVGDVLRLECVLATKTDMRACWLKDGIELTDGRHYHIDQLKDGTC  
SLLVTGLAPTDSGRYTCQVSTKSGRVSHSACVVVSGTESEAESSSGGELDDAFRRARRLHRLFRTRKSPAELS  
EELFLSADEGPEPEPADWQTYREDENFVCIRFESLAEARQAVTCFRNMFMATMGIGVEISLGEQGPGRVEM  
RIGKVAPTVTPAVPLAKTGLQTSDAAPVFLTELQNDVQDGYPMSFDCVVTGQPVPSVRWFKDGKLLLEDDH  
YMINEDQQGGHQLIITAVVPADMGVYRCLAENSMGVSSTKAELRVELTSTDYDTAADATETSSYFSAQGYLSS  
REQEGTSEDEGQLPVLEELKDLQVAPGTRAKFQLKVKGYPAKPLYWFKDQPLTSSDHIRMTDKTLHTLE  
IVSVTREDSGQYAAIYISNAVGAAYSARLLVRGPSEPEEKPASDVHERLVPPRILEKFTPKKVKRGSSITFSV  
KVEGHPAPSVHVLKEEAKEGVLWIGPDTPGYTMASSKQHSVLVLLDVGQRHQGTYTICATNPAGQALCSASLH  
ISGLAKEEEQERVKEALISSFLQGTSAVSAQMSSESAGFADLVGQSKGESLVAAEAHSHLSLAEVGTTEEFLQK

LTSQITEMVSAKISQAKLQVPGGDSDEETKTPSASPRHGRSRPSSSVQESSSESEDGDSRGEIFDIYVVTADY
LPLGAEQDAIILREGQYVEVLDSAHPLRVLVVRTKPTKSSPSRQGWVSPAYLDKRLKLSPEWGPTEAPEFPGEA
VSEDEYRTRLSSVIQELLSSEQAFVGELOFLESHHMKHLERSPRVPAAVASQKTVI FRNVQDISHFHSSFLKE
LQCGGTDDDDVAMCFIKNQEA FEKYLEFLVGRVQAESVVVSTPVQEFYKKYAEETLSAKDPTQPPPPPLQHYLE
QPVERVQKYQALLKELIRNKARNRQNCALLEQAYAVVSALPQRAENKLVSLMENYPGTLEALGEP I RQGHFI
VWEGAPGARMPWKGNHRHVFLFRNYLVICKPRRDSRTDTFSYVFRNMMKLS SIDLNDQVEGDRAFEVWHERE
DSVRKYLLQARTVI IKNSWVKEICGIQQRLAQPVWRPPEFEEELADCTAELGETVKLACRVGTGPKPIVSWYK
DGKPVVEVDPHHILIEDPDGSCTLI LDNLTGIDSGQYMCFAASAAGNASTLGKILVQVPPRFVNKVRATPFVEG
EDAQITCTVEGAPYPQIRWYKDGTL LAPGNRYRMLNEPRSGVLVVLV IQAASKEDLGHYECELVNRLGSTRGGG
ELYMQSPALRARDQHHREQI VAAVEGAPSMQVTIEDVQVQVGDMAQF DAVIEGHPPP I V TWYKGTQLTSSAR
LSQRQDGT TYSLVLT D V A P H D A G V Y T C V A N N A G G Q V L C K A E L L V H G G D K L D A E N Q V Y R R K L H S F Y D V Q E E I G R
GVFGFVKRVQHKGNMFC AAKFIPLRSKTRAQAYQERDILATLGHPLV TGLLDQFETRKTLLI L I L E L C S S E E L
LDRLFKKGVVTEAEVKVYIQQLVEGLHYLHSHGILHLDIKPPNIMVHPAREDIKICDFGFAQKITPSEPOYS
KYGSPEFVSP E I I E Q N P V S E G S D I W A M G V I S Y L S L T C S S P F A G E S D R A T L L N V L E G R V S W S S P T A A H L S E D A K
DFIKATLQRTPRARPSTSQC LAHPWFLKSMPAEEAHFINTKQLKFL LARSRWQRSLMSYKSI LVMRSIPELLQ
GPPDSPSLGVARHLRGEASGASSSSSSSDNELAPFARAKSLPPSPVTHSPLLHPRGFLRPSASLPEETEASMP
TADA AV P A S P Q S A G P P A S P G C V P R H S V I S S L F Y Q Q A G E G A E R G N K T S G A K R H P A R R R H L L K G G Y I A R A L P G L R
EPLMEYSLLEEEAAREEQASLMTKTPSFETALRLPSSSVREVPGRSHSLDNPPVTGTPSPEACKQLLFPST
GLTHEHTAKDRGHKEGFLQESVFPFPMMSGDSRPGKQEGSSQDSCRGKPASSCHSELGSGSQEGCGPPSSQSLG
SLPPQSLKKE LSTSCGPLFSEQPQAAPFPTQVSPLLGSEKEPQDGSLSSEGPVFPVSSSPGSASQVDASLDTEG
LSEAGDTCDFTPPPQRQEQATTRKFSLESRGGYAGVAGYGTFAFGGDAGGMLGQGPLWARMAWAVSQSSEEQ
DEAATESPQPLESGLPIAEASGVPLRTSPSLTPWEEVEQVSLVQIRDLSGDAEAADTISLDISEVDPAYLNLS
DLYDIKYL PFEFMI FRRV PKPIEQPESPGSETEAGQGLADFL EEA AWPWP GELGLRAGLEIT EEP EEPGDLEA
LLGEAAVGRKRKWSPSRGLFQFPGRCLSGEEPVELGLRQRVKASMAHISRI LKGRPEGPEREGPPRKKAGLAS
FRLSGLKGRDQELSDEAVVLGQSVTLACQVLAQPTAQTWSKDGVLLES S G H L L I S S T L K N F Q L L T I L V V K E E
DLGTYTCCVSNLGTAVTGVLRKAERPSSSRPEVSEYKDAVLLVWKPVESCGPVTYIQVCCIEGGSWTTL
ASDISDCCYL TGKLSRGGMYIFRTACVSKAGMGPYSSPSEYVLLGGPNHLASEEESSRGRPAQLL PSTKTFAF
QMQIRRGRF SVVRQCREKASGRALAAKIVPYQPEDKTA VLREYEALKRLHHPHLAQLHAAYLS PRHLV L I L E L
CSGPELLPSLAERESYSESDVKDYLWQMSATQYLHAQHILHLDLRSENMMVTEYNLLKVIDLGNASLDQEK
VPAPENFKDYLETMAPELLEGQAVPQTDIWAIGVTA FIMLSGEY P E S S E G T R D L Q K G L R K G L I R L S R C Y A G L
SGGAVAF LQSS LCAQPWGRPCASTCLQCGWLTEEGPTGSRPTPVTFTVRLRAFVREEREKRRALLYKKNLAQ
VR\*

>rs47117923\_ENSMUSP00000049737\_c.9945:G>A\_p.G3316S
ENSMUST00000052872.15|Obscn-203|ENSMUSG00000061462|-|chr11:g.58964086:C>T
MDHSFSGARFLTRPKAFVSVGKDATLSCQIVGNPTPHVSWEKDRQVVEAGARFRLAQDGDVYRLTILDLAL
GDSGQYVCRARNAIEGAFAAVGLRVDSEGTCAEQAPHFLLRPTSIRVREGADATFRCRVGGSPQPAVWSKDG
RRLGPPDAPHVRVEEHGESSALRIRSARPRDGGTYEVRAENPLGSASAAAAALVVDSDAEVAGPPGTSTATLLA
HLQORREAMRAEGIPPSPPGAGTRTCTVTEGKHARLSCFVTGEPKPE TVWKKDGQLVTEGRRHVVYEDEQENF
VLKILFCKQSDRGLYTCTASNLVGQTYSSVLVVVREPTVPFKKRLQDLEVREKESATFQCEVAQ PATEAAWFK
EETRLWASAKYDIEEEGTERRLTVRNVSADDDAVYICETTEGSRVAELSVQGNLTRKLPKRTAVRTGDTAIF
WVELAVPEGPVRWLRNQEEMVAGGRVAITAEGTCHTLTI FQCTLEDMGEVAFVSGGCRTTTQFCVSAPRRPPL
YPPADPVVKAKTESSVTL SWSAPPHGDRPVTIDGYVLEKRKLGAYAWSRCHEAGWLATTEFTITGVAAEEDGFQ
FRVSAINHFGQGPYLEFPGTMHLVPLAVKTPKAVEAVEGGEVTFVSDLTVASSGEWFLDGEALKASSIYVI
RCDRTRHMLTIREV PARLHGAQLK F V A N G I E T S I Q M V V R A A L G L P S S K L P A A A A R E V L A Q L H E E A Q L L A E L S D
QAAAVTWLKDGRELSLGPKYEMQVSAGRRALLVRDVAQDDAGLYECVSRGSR TAYQLLVQEPKLVFAKQQAH
SEVKA EAGNSATLSCEVTQAQTEVTWFKDGKLLSSSSKVRMEASGCSRRLVVQQAGKADAGEYSCEAGGQKLS
FRLDVAEPKLVFAKQQAHSEVKA EAGASATLSCEVAQAQTEVTWFKDGKLLSSSSKVRMEASGCSRRLVVQQ
AGKADAGEYSCEAGGQKLSFRLDVAEPKMFVFAKEQQARSEVKA EAGASATLSCEVAQAQTEVTWFKDGKLLSS
SSKVRMEASGCSRRLVVQQAGKADAGEYSCEAGGQKLSFRLDVTEPKLVFAKEQQARSEVKA EAGNSATLSCE
VAQAQTEVTWFKDGKLLSSSSKVRMEASGCSRRLVVQQAGKADAGEYSCEAGGQKLSFRLDVAEPKLVFAKEQ
QARSEVKA EAGNSATLSCEVAQAQTEVTWFKDGKLLSSSSKVRMEASGCSRRLVVQQAGKADAGEYSCEAGGQ
KLSFHLDVTEPKLVFAKEQQAHSEVKA EAGASATLSCEVAQAQTEVTWFKDGKLLSSSSKVRMEASGCSRRLV
VQQAGKADAGEYSCEAGGQKLSFRLDVAEPKLVFAKEQQARSEVKA EAGASATLSCEVAQAQTEVTWFKDGK
LSSSKVRVEASGCSRRLVVQQAGKADAGEYSCEAGGQKLSFRLDVAEPKLVFAKEQQANSEVKA EAGASATL
SCEVAQAQTEVTWFKDGKLLSSSSKVRVEASGCSRRLVVQQAGKADAGEYSCEAGGQKLSFRLDVAEPKLAFA
KEQQAHSEVKA EAGASATLSCEVAQAQTEVTWFKDGKLLSSSSKVRVEASGCSRRLVVQQAGKADAGEYSCEA
GGQKLSFRLDVAEPKLAFAKEQQAHSEVKA EAGASATLSCEVAQAQTEVTWFKDGKLLSSSSKVRVEASGCSR
RLVVQQAGKADAGEYSCEAGGQKLSFRLDVAEPKLAFAKEQQAHSEVKA EAGASATLSCEVAQAQTEVTWFKD

GKKLSSSSKVRVEASGCSRRLLVQQAGKADAGEYSCEAGGQKLFRRLDVAEPKLMFAKEQQAHSEVKAEEAGAS
ATLSCEVAQAQTEVTFWFKDGKLLSSSSKVRVEASGCSRRLLVQQAGKADAGEYSCEAGGQKLSFRLDVAEPKL
VFAKEQQAHSEVKAEEAGASATLSCEVAQAQTEVTFWFKDGKLLSSSSKVRVEASGCSRRLLVQQVQKADAGEYS
CEARGQKLSFRLDVADTRLMFAKEQQARTEVKAEEAGNSATLSCEVAQAQTEVTFWFKDGKLLSSSSKVRVEASG
CSRRLLVQQAGKADAGEYSCEAGGQKLSFRLDVAEEAESQIPERPSRREPLVVKEHETIILTATIAAPSVAAVT
WLKDGVEIRRSKRHEATS LGDTHLTVRGAQVLD SAIYSCRVGKEGQDFPVQVEEVAAKFSKPLEPVEGELGG
TVMLVCELSPEQAEVWRCGNTQLRPGKRFQMTSEGPRTTLTVSGLREDDAEYVCESRDDRTSARLTVKVPR
VVKFTSGLSAMVAEEGQEAFTQC VVSPSDAGVTWYKDGMLQPSSEKFMVMSGASRSLTILGLTLEDAGQVTV
EAEGASSAALRVREAPVLFKFKLEPQTVEERTSVTLEVELTRPWEVVKWTRNAAVLTPSENVEIRAEGARHC
LVLRSVGFADRGGFFGCETPDDKTQAKLNVEMRQVRLVVRGLQEVEAKEQGTASMDVELSHAEVEGSWTRDGLRL
QPGPKCHLAVQGPVHILTLALSALQPQDSGLVAFRAEGVHTSARLIVTELPVSFTRVLQDVVATQKEKVTLECEL
SRPVDVRWLKDGVELRAGKAIGIVAQGTCSRSLVIYRCETGDQGVVCDALDAQTSASLRVQGRTYTLIFRRVL
AEDAGEVVFVAENAESRAHLRVKELPVTLLRPLRDKIAMEKHRGVLECCQVSRASAQVRWFKGGVELQSGPKYE
VVSDGLYRKLVINVDVQPEDEDYTC DAGNVKTSAQFFVVEEQSITIVRGLKDMTVMPEPAPAWFECETSIPSVRP
PKWLLGKTVLQAGGNVGLQDGTVHRLTLHKTCSTMTGPVHFTIGKSRSSAQLVVSDIPVVLTRPLEPKAGRE
LQSVVLSCDFRPAPKAVQWYKDDTPLSPSEKFKMALEGQMAELRILRLTPADAGVYRCQAGSAQSSAEVTVEA
REVTVIQPLQDAEAMEEGRVCFSCELSHKDEDEIWSLNGTPLYNDSFHEISHEGLHTLVLSKSVRQADTGTVC
ATSPKVSVSARLVVKGKPVVFLKALDDVSAEERGTTLTQCEVSDPEARVVWRKDGVELGKPSDKYDFLHKAGAR
GLTVHDLSDHEDAGLYTCQVGSKETQSKVSVHDLHVGITKRLKTVEVLEGESECSFECVLSHESPSDPAVWTVGG
KTVGGSGHFHAVRQGRKYTLTVKDAALSDAGEVVSFLGLTSKASLIIRERPVDITKPLEDQRTTLGEDVMLS
CELSRAGTSVRWLKDGKAIRKSQKYDLLSEGTRAVLVVRKASLKDSGEYTCETEASKSTAKLCVEEKANRFTTE
ELADLQVEEKGRAVFTCKTEHPASVVTWRKSLLELRASGKHVPSQEGTLKLTINALERTDSDTYTCDIGQAR
TQARLLVHGQKVRVIEDLEDTAVQEGSSAKFCCRIAPADYGPVHWF LDKTPLHSNELNEITVQPGGYHVLTLR
QLALKDSGTVYFEAGDQRTS AALRVTEKPSIFSRPLTDVTVTEGEDLTLVCETTTVDSSVRWTKDGKTLRPSA
RCQLSHEGCAQLLITATTPQDGGRYKCEIGGASSSSIVRVHALPVRFRFRESLKDVEVPEGKAATLRCVLSVA
APVEWRHGDDVLKSSNKYSLRQEGAVLELVIRDLQPDQSGQVSCSFGDQTTSATLTVKTSVCAQVEKVLKRNKEA
TEGTVTLRCELAVLKEAPVEWKKGTETLRNGDKYSLKQDGA VCELQICSLLVADAGEYSVCVCGEKT SATLTVK
ALLVHFVRRRLRSKEATEGDTTTLQCELSKAAPVEWRKGTETLRDGD RYSLKQDGA VCELQIRSLTIADAGEYL
CTCGQEKT SATLTVRALPAKFKDSLKNEEATEGTTATLSCELSKAAPVTWKKGPKTLQSGDKYVLRQDGA VCG
LQIHGLTMADAGEYSCVCGQEKT SATLTVRGLPAKFIEDLRSQEATEGATAILRCELSKAAPVEWRKGSETLK
DGD RYTLRQDGA VCELQIRGLAVVDGTYS SLPKFTTEGLRNEEATEGTMATLRCQMSKAAPVEWRKGSETLR
DGD RYSLRQDGA MCELQIRGLTIEDSGEYTCVCGQEKT SATLSVKALPSRFIEDLRSQEATEGTMATLRCQMS
KTAPVEWKKGSETLRDGG RYSLRQDGPVCELQICDLAVEDAGEYSCVCGQEKT SATLSIKALPPRFIEDLRSQ
EATEGTMATLRCQMSKAAPVEWRKGSETLGDGG RYSLRQNGAVCELQIHDLAVEDTGEYSCVCGQEKT SATLN
VKALPPRFIEDLRSQEATEGTMATLRCQMSKAAPVEWRKGSETLRDGG RYSLRQDGA VCELQIHDLVEDAGQ
YSCVCGQEKT SAVLTVDALPPKFTTEGLKKEEATEGTMVTLRQMSKEATVEWRKGAKTLS DGG RYSLRQDGA M
CELQICGLAVEDAGEYSCVCGQEKT SATLSVKALPPRFIEDLRSQEATEGTMATLRCQMSKAAPVEWRKGSET
LRDGD RYSLRQDGA VCELQIRDLAVEDAGEYLCVCGQEKT SATLSVKALPPRFIEDLRSQEATEGTMATLRCQ
MSKAAPVEWRKGSKTLR DGD RYSLRQDGA MCELQICDLAVEDTGDYSCVCGQEKT SATLSVKALPPRFIEDLR
SQEAREGTVATLRCRMSKAAPVEWRKGSETLKDGD RYSLRQEGNLCELQIRDLAVEDTEEYSCVCGQEKT SAT
LSVKALPAKFIEDLRSQEAPESSTVTLRCKLSKKASVVWKKGSETLRNGARYSLRQDGA VCELEIRDLTVEDT
GEYSCTCGQERTSATLSIMAPQVVFQQPLQNLQAEEGSMASLRCELSVPNAAMVWSKGGLELQGDTRREARQQ
GCVAELLLRDLRREDAGEYSC TCGSQT SATLMVTAAPVRFLRELQAQDVDEGATARLRCELSREAVSVEWRK
GSLQLFPKAKYQMVQEGTAEALLVHGVEQEDAGEYTC DAGHTQS IARLSVRAPKPKFKTDLQSTEQEAGGTAR
LCCQLSEAE PGTPVQWLKEGVELHVGSKYEMRRQGA VCELLIHGLEAKDTGEYA CLVGGQKTLASLRVKEPEV
TIVRGLVDMEVQADEDEFTCKVSQAGATDVQWHLQGLPLQSNEVTEVAVLADGCTHV LQKGVTL EDAGTVS
FHVGG LSSSAQLTVRVPEVTVLEPLKDVQLSEGD ADFRCRLSRASGQEARWALGGVPLQCNE MNDITVEQGT
LYLLTLHKVTLEDAGTITLQVGS CSSEAKLV TAKNTVLRGLENVDALEGG EALFECQLSQPEVA AHTWLLDD
EPVHTSEKVEVVYFENGLRHLLLLKNLKPQDSCRVTFLAGDVVTS AFLTVRGRWRLEVL EPPHDASVKAGMQVR
FTCILLSEAVPVGEATWYINGAAIQPDDTDWTVTTDGS HHALTLSNAQPQHAGEVTF AARDAVASARLSVLALP
DPPEDA EVVGRSDHSVTL SWVAPMSDGGGGLCGYR VEMKEASTGQWQLCHDLVPGPECVDDLVPGKTYRFRV
AAVGPAGAGEPVHLPQMVKIAPAPAPAPAPAPAPETRAVVGEDI CLELEVAADGGEVVWHKGTERRIQPGG
HFEVLSRGRQMLVIKGFRTEDQGEYRCGPIQGLPSSGAATFNVMVMTSGSGDEVPAQP SLPPEAAQEGDLHL
WEALARKRRMSREPTLDSISELPEEDSRVQHLRQEAEETAPDLSEGYSTADELARTGEADLSHTSSDDESRAG
TPSLVTYLKKAAGGPGI SPLASKHEAQVTT SVKPKQKQEPVVPTCPPPGDL SAADLMDPSLDKAAVKIQAAFKG
YKVRKEMKQOEGPVFSRTFGDTEAQVGDVLRLECVLATKTD MRACWLKDGIELTDGRHYHIDQLKDGTC SLLV
TGLAPTDSGRYTCQVSTKSGRVSHSACVVVSGTESEAE SSSGGELDDAFRRAARLHRLFRTKSPAELSEEEL
FLSADEGPGPEEPADWQTYREDENFVCIRFESLAEARQAVTCFRNMFATMIGIVEISLGEQGPGRVEMRIGK

VAPTVPAPVPLAKTPGLQTSDAAPVFLTELQNDVQDGYPMSFDCVVTGQPVPSVRWFKDGLLEEDDHYMIN  
EDQQGGHQLIITAVVPADMGVYRCLAENSMGVSSTKAELRVELTSTDYDTAADATETSSYFSAQGYLSSREQE  
GTESDEGQLPQVLEELKDLQVAPGTRLAKFQLKVKGYPAKLYWFKDQPLTSTDHIRMTDKKTLHTLEIVSV  
TREDSGQYAAIYISNAVGAAYSSARLLVRGPSEPEEKPASDVHERLVPRILEKFTPKKVKRGSSTIFSVMKVEG  
HPAPSVHWLKEEAKEKGLVWIGPDTPGYTMASSSKQHSVLVLDVGRQHGGTYTCIATNPAGQALCSASLHISGL  
AKEEEQERVKEALISSFLQGTSAQVSAQMSEAGFADLVGQSKGESLVAEEAHSHLSLAEVGTEEFLLQKLTSSQ  
ITEMVSAKISQAKLQVPGGDSDEETKTPSASPRHGRSRPSSSVQESSSESEDGDSRGEIFDIYVVTADYLPLG  
AEQDAIILREGQYVEEHLDSAHLRVLVTRTKTPKSSPSRQGWVSPAYLDKRLKLSPEWGPTEAPEFPGEAVSED  
EYRTRLSSVIQELLSSSEQAFVGLQFLESHHMKHLERSPRVPAAVASQKTVIFRNVQDI SHFHSFLKELQGC  
GTDDDVAMCFIKNQEAFAKEYLEFLVGRVQAESVVVSTPVQEFYKKYAEETLSAKDPTQPPPPPLQHYLEQVVE  
RVQKYQALLKELIRNKARNRQNCALLEQAYAVVSALPQRAENKLVSLMENYPGTLEALGEPHQGHFVWEG  
APGARMFWKGNHRHVLFRNYLVICKPRRDSRTDTFSYVFRNMMKLSIDLNDQVEGDDRAFEVWHEREDESVR  
KYLQARTVI IKNSWVKEICGIQQRLAQPVWRPPEFEELADCTAELGETVKKLACRVTGTPKPIVSWYKDGKP  
VEVDPHHILIEDPDGSCTLIDLNLTGIDSGQYMCFAASAAGNASTLGKILVQVPPRFVNVKVRATPEVEGEDAQ  
ITCTVEGAPYPQIRWYKDGTLAPGNRYRMLNEPRSGVLVLIQAASKEDLGHYECELVNLGSTRGGGELYM  
QSPALRARDQHHREQIVAAVEVTEQETKVPKKTVIIEETITTVVKS PRGRRQSPGKSPSRSPRRSASPRRPG  
LLAPERLYPPGTSPSRRLVEVEQGRKAPVPALYVTEAEVHAPASQSOPKWLVEETIEVRVKKTGSRGASPVRE  
MTRSGEGILFTLPGGI PGRDPNANNNSNKS SVYQEARTWGPVAVHVGEPIFQVDSVGNVDWVAASPEPEQVRA  
SQKEENTERQEGCSDGIDENTFLMEEPQDQDLSQGRDPKILTHNGRVLTLADLEDYVPEGETFGCGDSTPSTP  
DEPPCEVSVLQREISEPTVGGQPVLLNVGRPPGTGATPSFFRPGSQVHSPESVSFLLREAWSGPVSAAWPTSSS  
HTHVQSSVDGSHGSFKTEVSTQTVSFGAVGETVTLHIDPDGGEAPGPSQG\*

>rs47117923\_ENSMUSP00000020732\_c.10146:G>A\_p.G3383S  
ENSMUST00000020732.13|Obscn-201|ENSMUSG00000061462|-|chr11:g.58964086:C>T  
MDHSFSGAPRFLTRPKAFVVSVGKDATLSCQIVGNPTPHVSWEKDRQPVVEAGARFRLAQDGDVYRLTILDLAL  
GDSGQYVCRARNAIGEFAAVGLRVDSEGTCAEQAPHFLLRPTSIRVREGADATFRCRVGSGPQPAVSWSKDG  
RRLGPPDAPHVRVEIHGESSALRIR SARPRDGGTYEVRAENPLGSASAAAALVVDSDAEVAGPPGTSTATLLA  
HLQRRREAMRAEGIPSPPGAGTRTCTVTTEGKHARLSCFVTGEPKPEVTVWKKDQGLVTEGRHVVEDEQENF  
VLKILFCKQSDRGLYTCTASNLVGQTYSSVLVVVREPTVPFKKRLQDLEVREKESATFQCEVAQPAEAAWFK  
EETRLWASAKYDIEEEGTERRLTVRNVSADDDAVYICETTEGSRVVAELSVQGNLTKLPRKTAVRTGDTAIF  
WVELAVPEGPVRWLRNQEEMVAGGRVAITAEGTCHTLTI FQCTLEDMGEVAFVSGGCRTTTQFCVSAPRRPPL  
YPPADPVVKAKTESSVTLSSWAPPHGDRPVTIDGYVLEKRKLGAYAWSRCHEAGWLATTEFTITGVAAEGDFQ  
FRVSAINHFGQGPYLEFPGMTMLVPLAVKTPKAVEAVEGGEVTFVSDLTVASSGEWFLDGEALKASSIYVI  
RCDRTRHMLTIREVPARLHGAQLKFVANGIETSIQMVVRAALGLPSSKLPAAAAREVLAQLHEEAQLLAE LSD  
QAAA VTLWKDGRELSLGPKEYMQVSAGRRALLVRDVAQDDAGLYECVSRGSRRTAYQLLVQDITDGYRDWGPAG  
PQKHMCKCAGAKIARYLGSSCYRFLQYDKGVWHWLEAALDRQKGTSSCSLHEKPKLVFAKQQAHSEVKAE  
AGNSATLSCEVTQAQTEVTWFKDGKLLSSSSKVRMEASGCSRRLVVQQAGKADAGEYSCEAGGQKLSFRLDVA  
EPKLVFAKQQAHSEVKAEGASATLSCEVAQAQTEVTWFKDGKLLSSSSKVRMEASGCSRRLVVQQAGKADA  
GEYSCEAGGQKLSFRLDVAEPKLVFAKEQQARSEVKAEGASATLSCEVAQAQTEVTWFKDGKLLSSSSKVRM  
EASGCSRRLVVQQAGKADAGEYSCEAGGQKLSFRLDVTEPKLVFAKEQQARSEVKAEGVNSATLSCEVAQAQ  
EVTWFKDGKLLSSSSKVRMEASGCSRRLVVQQAGKADAGEYSCEAGGQKLSFRLDVAEPKLVFAKEQQARSEV  
KAEAGNSATLSCEVAQAQTEVTWFKDGKLLSSSSKVRMEASGCSRRLVVQQAGKADAGEYSCEAGGQKLSFHL  
DVTEPKLVFAKEQQAHSEVKAEGASATLSCEVAQAQTEVTWFKDGKLLSSSSKVRMEASGCSRRLVVQQAGK  
ADAGEYSCEAGGQKLSFRLDVAEPKLVFAKEQQARSEVKAEGASATLSCEVAQAQTEVTWFKDGKLLSSSSK  
VRVEASGCSRRLVVQQAGKADAGEYSCEAGGQKLSFRLDVAEPKLVFAKEQQANSEVKAEGASATLSCEVAQ  
AQTEVTWFKDGKLLSSSSKVRVEASGCSRRLVVQQAGKADAGEYSCEAGGQKLSFRLDVAEPKLVFAKEQQAH  
SEVKAEGASATLSCEVAQAQTEVTWFKDGKLLSSSSKVRVEASGCSRRLVVQQAGKADAGEYSCEAGGQKLS  
FRLDVAEPKLVFAKEQQAHSEVKAEGASATLSCEVAQAQTEVTWFKDGKLLSSSSKVRVEASGCSRRLVVQQ  
AGKADAGEYSCEAGGQKLSFRLDVAEPKLVFAKEQQAHSEVKAEGASATLSCEVAQAQTEVTWFKDGKLLSS  
SSKVRVEASGCSRRLVVQQAGKADAGEYSCEAGGQKLFRLDVAEPKLVFAKEQQAHSEVKAEGASATLSCE  
VAQAQTEVTWFKDGKLLSSSSKVRVEASGCSRRLVVQQAGKADAGEYSCEAGGQKLSFRLDVAEPKLVFAKEQ  
QAHSEVKAEGASATLSCEVAQAQTEVTWFKDGKLLSSSSKVRVEASGCSRRLVVQQVQKADAGEYSCEARGQ  
KLSFRLDVADTRLMFAKEQQARTEVKAEGNSATLSCEVAQAQTEVTWFKDGKLLSSSSKVRVEASGCSRRLV  
VQQAGKADAGEYSCEAGGQKLSFRLDVAEASISQI PERPRREPLVVKEHETIILTATIAAPVAAVTLWKDGV  
EIRRSKRHEATSLDHTLTVRGAQVLDLSAIYSCRVKEGQDFPVQVEEVAAKFSKPLEPVEGELGGTVMLVC  
ELSPQAEVWRCGNTQLRPGKRFQMTSEGPRTLTVSGLREDDAEYVCESRDDRTSARLTIVKVRVPRVVKFTS  
GLSAMVAEEGQEAFTQCVVSPSDAGVTWYKDGMLQLPSEKFMVESGASRSLTILGLTLEDAGQVTEAEGAS  
SSAALRVREAPVLFKKLEPQTEVEERTSVTLEVELTRPWPEVKWTRNAAVLTPSENVEIRAEGARHCLVLRV  
GFADRGFFGCETPDDKTQAKLNVEMRQVRLVVRGLQEVEAKEQGTASMDVELSHAEEVGSWTRDGLRLQPGPKC

HLAVQGPVHILTLALSALQPQDSGLVAFRAEGVHTSARLIVTELPVSFTRVLQDQVAVTQKEKVTLECELSRPVDV
RWLKDGVLELRAGKAIGIVAQGTCSRSLVIYRCETGDQGVYVCDALDAQTSASLRVQGRTYTLIFRRVLAEDAGE
VKFVAENAESRAHLRVKELPVTLLRPLRDKIAMEKHRGVLECCQVSRASAQVRWFKGGVELQSGPKYEVVSDGL
YRKLVINADVQPEDEDTYTCDAGNVKTSAQFFVVEEQSITIVRGLKDMTVMEPAPAWFECETSIPSVRPPKWLGL
KTVLQAGGNVGLQDGTVHRLTLHKTCSTMTGPVHFTIGKSRSSAQLVVSDIPVVLTRPLEPKAGRELQSVVL
SCDFRPAPKAVQWYKDDTPLSPSEKFKMALEGQMAELRILRLTPADAGVYRCQAGSAQSSAEVTEAREVTVI
QPLQDAEAMEEGRVCFSCSELCHKDEDIEWSLNGTPLYNDSFHEISHEGCLHTLVLSKSVRQADTGTVCATSPKV
SVSARLVVKGKPVVFLKALDDVSAEERGTLLTQCEVSDPEARVWVRKDGVELGSPDKYDFLHKAGARGLTVHD
LSHEDAGLYTCQVGSKETQSKVSVHDLHVGITKRLKTVEVLEGECSFECVLSHESPSDPAVWTVGGKTVGGS
GHFHAVRQGRKYTLTVKDAALSDAGEVVSFVGLTSLKASLIIRERPVDTKPLEDQRTTLGEDVMLSCELSRA
GTSVRWLKDGKAIRKSQKYDLLSEGTRAVLVVRKASLKDSGEYTCETEASKSTAKLCVEEKANRFTEELADLQ
VEEKGRAVFTCKTEHPASVVTWRKSLLELRASGKHVPSQEGTLKLTINALERTSDTYTCDIGQARTQARLL
VHGQKVRVIEDLEDTAVQEGSSAKFCRIAPADYGPVHWFLDKTPLHSNELNEITVQPGGYHVLTLRQLALKD
SGTVYFEAGDQRTSALRVTEKPSIFSRPLTDVTVTEGEDTLVCETTTVDSSVRWTKDGKTLRPSARCQLSH
EGCQAQLLITATTPQDGGRYKCEIGGASSSSIVRVHALPVRFRRESLKDVEVPEGKAATLRCVLSVAAPVEWR
HGDDVLKSSNKYSLRQEGAVLELVIRDLQPDQSGQYSCSFGDQTTSATLTVKTSQAQFVGLKRNKEATEGTTV
TLRCELSTKEAPVEWKKGTETLRNGDKYSLKQDGAVALQICSLLVADAGEYSCVCGQEKTSATLTVKALLVHF
VRLRLSKEATEGDTTTLQCELSKAAPVEWRKGTETLRDGDYSLKQDGAVALQIRSLTIADAGEYLCGCGQE
KTSATLTVRALPAKFKDSLKNEEATEGTTATLSCELSKAAPVWKKGPKTLQSGDKYVLRQDGAVALQIHGL
TMADAGEYSCVCGQEKTSATLTVRGLPAKFIEDLRSQEATEGATAILRCELSKAAPVEWRKGSSETLKDGDYR
LRQDGAVALQIRGLAVVDGTYSLSLPTKFTTEGLRNEEATEGTMATLRCQMSKAAPVEWRKGSSETLRDGDYR
LRQDGAVALQIRGLTIEDSGEYTCVCGQEKTSATLSVKALPSRFIEDLRSQEATEGTMATLRCQMSKTAPVE
WKKGSETLRDGGYSLRQDGPVCELQICDLAVEDAGEYSCVCGQEKTSATLSIKALPPRFIEDLRSQEATEG
MATLRCQMSKAAPVEWRKGSSETLGDGGYSLRQNGAVCELQIHDLAVEDTGEYSCVCGQEKTSATLNVKALPP
RFIEDLRSQEATEGTMATLRCQMSKAAPVEWRKGSSETLRDGGYSLRQDGAVALQIHDLVEDAGQYSCVCG
QEKTSAVLTVDALPPKFTTEGLKKEEATEGTMVTLRQMSKEATEVWRKGAKTLSDDGGYSLRQDGAVALQIC
GLAVEDAGEYSCVCGQEKTSATLSVKALPPRFIEDLRSQEATEGTMATLRCQMSKAAPVEWRKGSSETLRDGD
YSLRQDGAVALQIRDLAVEDAGEYLCVCGQEKTSATLSVKALPPRFIEDLRSQEATEGTMATLRCQMSKAAP
VEWRKGSSETLRDGDYSLRQDGAVALQICDLAVEDTGDYSCVCGQEKTSATLSVKALPPRFIEDLRSQEARE
GTVATLRCRMSKAAPVEWRKGSSETLKDGDYSLRQEGNLCELQIRDLAVEDTEEYSCVCGQEKTSATLSVKAL
PAKFIEDLRSQEAPESSTVTLRCKLSKKASVVWKKGSETLRNGARYSLRQDGAVALQIRDLTVEDTGEYSCT
CGQERTSATLSIMAPQVVFQQLQNLQAEEGSMASLRCELSVNAAMVWSKGGLELQGDTRREARQQGCVAEL
LLRDLRREDAGEYSCTCGSQTTSATLMVTAAPVRFRLRELQAQDVDEGATARLRCELSREAVSVEWRKGSQQLF
PCAKYQMVQEGTTAELLVHGVEQEDAGEYTCDAHTQSIARLSVRAPKPKFKTDLQSTEQEAAGTARLCCQLS
EAEFGTPVQWLKEGVELHVGSKYEMRRQGAVALCELLIHGLEAKDTGEYACLVGGQKTLASLRVKEPEVTIVRGL
VDMEVQADEDEFTCKVVSQAGATDVQWHLQGLPLQSNVEVAVLADGCHVLQKGLVLEADAGTVSFHVGGL
SSSAQLTVRVPEVTVLEPLKDVQLSEGQDAHFRCLRSRASGQEARWALGGVPLQCNEMNDITVEQGTLYLLTL
HKVTLLEDAGTITLQVGSSESQAQLKVTAKNTVLRGLENVDALEGGEALFECQLSQPEVAHAHTWLLDDEPVHTS
EKVEVVYFENGLRHLLLLKLNKPKQDSCRVTFLAGDVVTSFAFLTVRGWRLEVLPEPHDASVKAGMQVRFCTILS
EAVPVGEATWYINGAAIQPDDTDWTVTTDGSHHALTLNAQPPHAGEVTFFAARDAVASARLSVLALPDPPEDA
EYVGRSDHSVTLVSWVAPMSDGGGGLCGYRVEMKEASTGQWQLCHDLVPGPECVDDLVPGKTYRFRVAAVGPA
GAGEPVHLPQMVKIAPAPAPAPAPAPAPAPETRQAVVGEDICLELEVAADGGEVVWHKGTERRIQPGGHFEVLS
RGQRQMLVIKGFRTEDQGEYRCGPIQGLPSSGAATFNVMVMTSGSGDEVPAQPSLPPEAAQEGDLHLLWEALAR
KRRMSREPTLDSISELPEEDSRVQHLRQEAETAPDLSEGYSTADELARTGEADLSHTSSDDESRACTPSLVT
YLKKAAGPGISPLASKHEAQVTSVKPQKQEPVVPVTPCPPGDLAADLMDPSLDKAARKIQAAFKYKVRKE
MKQQEGPVFSRTFGDTEAQVGDVLRLECVLATKTDMRACWLKDGIELTDGRHYHIDQLKDGTCSSLVTVGLAPT
DSGRYTCQVSTKSGRVSHSACVVVSGTESEAESSGGELDDAFRRAARRLHRLFRTKSPAELSEEELFLSADE
GPGEPEPADWQTYREDENFVCIRFESLAEARQAVTCFRNMFATMGIGVEISLGEQGPVEMRIGKVAPTVT
PAVPLAKTPGLQTSDAAPVFLTELQNDQVQDGYPMSFDCVVTGQPVPSVRWFKDGKLEEDDHVMINEDQGG
HQLIITAVVPADMGVYRCLAENSMGVSSTKAELRVELTSTDYDTAADATETSYSFSAQGYLSSREQEGTESDE
GQLPQVLEELKDLQVAPGTRLAKFQLKVKGYPAKLYWFKDGGPLTTSDHIRMTDKKTLHTLEIVSVTREDSG
QYAAYSNAVGAAYSSARLLVRGPSEPEEKPASDVHERLVPPRILEKFTPKKVKRGSSITFSVKVEGHPAPSV
HWLKEEAEEKVFLWIGPDTPGYTMASSSKQHSLLVLDVGRQHGTYTICATNPAGQALCSASLHISGLAKEEEEQ
ERVKEALISSFLQGTSAVSAQMSSEAGFADLVGQSKGESLVAAEEHSHLSLAEVGTETEFLLQKLTSTQITEMVS
AKISQAKLQVPPGGDSDEETKTPSASPRHGRSRPSSSVQESSSESEDGDSRGEIFDIYVVVTADYPLGAEQDAI
ILREGQYVEVLDSAHPLRWLVRTKPTKSSPSRQGWVSPAYLDKRLKLSPEWGPTEAPEFPGEAVSEDEYRTRL
SSVIQELLSSEQAFVGLQFLESHHMKHLERSPRVPAAVASQKTVIFRNVQDISHFHSSFLKELQCGCTDDDV
AMCFIKNQEAFAKEYLEFLVGRVQAESVVVSTPVQEFYKKYAEETLSAKDPTQPPPPPLQHYLEQPVERVQKYQ



ALLKELIRNKARNRQNCALLEQAYAVVSALPQRAENKLVSLMENYPGTLEALGEPHQHFIWVEGAPGARM  
PWKGHNHRVFLFRNYLVICKPRRDSRTDTFSYVFRNMMKLSSIDLNDQVEGDDRAFEVWHEREDSVRKYLLQA  
RTVI IKNSWVKEICIGIQORLAQPVWRPPEFEEELADCTAELGETVKLACRVTGTPKPIVSWYKDGKPVVEVDPH  
HILIEDPDGSCITLILDNLGTIDSGQYMCFAASAAGNASTLGKILVQVPPRFVNVKVRATPFVEGEDAQITCTVE  
GAPYQIRWYKDGITLLAPGNRYRMLNEPRSGVLVVIQAASKEDLGHYECELVNRLGSTRGGGELYMQSPALR  
ARDQHHREQIVAAVEERRPSP\*  
>rs47117923\_ENSMUSP00000151217\_c.8766:G>A\_p.G2923S  
ENSMUST00000219084.3|Obscn-207|ENSMUSG00000061462|-|chr11:g.58964086:C>T  
MDHSFSGAPRFLTRPKAFVSVGKDATALSCQIVGNTPHVSWEKDRQPVEAGARFRLAQDGDVYRLTILDLAL  
GDSGQYVCRARNAIGEFAAVGLRVDSEGTCAEQAPHFLLRPTSIRVREGADATFRCRVGGSPQPAVSWSKDG  
RRLGPPDAPHVRVEEHGESSALRIRSARPRDGGTYEVRAENPLGSASAAAALVVDSDAEVAGPPGTSTATLLA  
HLQORREAMRAEGIPPSPPGAGTRTCTVTEGKHARLSCFVTGEPKPEVWKKDQGLVTEGRRHVVEDEQENF  
VLKILFCKQSDRGLYTCTASNLVGQTYSSVLVVVREPTVPFKKRLQDLEVREKESATFQCEVAQAPATEAAWFK  
EETRLWASAKYDIEEGTERRLTVRNVSADDDAVYICETTEGSRVVAELSVQGNLTKLPRKTAVRTGDTAIF  
WVELAVPEGPVRLRNQEEMVAGGRVAITAEGTCHTLTI FQCTLEDMGEVAFVSGGCRTTTQFCVSAPRRPPL  
YPPADPVVAKTESVTLWSAPPHGDRPVTIDGYVLEKRLKLGAYAWSRCHEAGWLATTEFTITGVAEEGDFQ  
FRVSAINHFGQPYLEFPGTMHLVPLAVKTPKAVEAVEGGEVTFVSDLTVAASSGEVFLDGEALKASSIYVI  
RCDRTRHMLTIREVPARLHGAQLKFFVANGIETS IQMVVRAALGLPSSKLPAAAAREVLAQLHEEAQLLAE LSD  
QAAA VTLWKDGRELSLGPKEYMQVSAGRRALLVRDVAQDDAGLYECVSRGSRRTAYQLLVQDITDGYRDWGPAG  
PQKHMCKCAGAKIARYLGSSCYRFLQYDKGVWHLEAALDTRQKGTSSCSLHEKPKLVFAKQQAHSEVKA  
AGNSATLSCEVTQAQTEVTFWKDGKLLSSSSKVRMEASGCSRRLVVQQAGKADAGEYSCEAGGQKLSFRLDVA  
EPKLVFAKQQAHSEVKAEGASATLSCEVAQAQTEVTFWKDGKLLSSSSKVRMEASGCSRRLVVQQAGKAD  
GEYSCEAGGQKLSFRLDVAEPKMFVFAKEQQARSEVKAEGASATLSCEVAQAQTEVTFWKDGKLLSSSSKVRM  
EASGCSRRLVVQQAGKADAGEYSCEAGGQKLSFRLDVTEPKLVFAKEQQARSEVKAEGNSATLSCEVAQAQ  
EVTWFKDGKLLSSSSKVRMEASGCSRRLVVQQAGKADAGEYSCEAGGQKLSFHLDVTEPKLVFAKEQQAHSE  
KAEAGASATLSCEVAQAQTEVTFWKDGKLLSSSSKVRMEASGCSRRLVVQQAGKADAGEYSCEAGGQKLSFRL  
DVAEPKLVFAKEQQARSEVKAEGASATLSCEVAQAQTEVTFWKDGKLLSSSSKVRMEASGCSRRLVVQQAGK  
ADAGEYSCEAGGQKLSFRLDVAEPKLVFAKEQQANSEVKAEGASATLSCEVAQAQTEVTFWKDGKLLSSSSK  
VRVEASGCSRRLVVQQAGKADAGEYSCEAGGQKLSFRLDVAEPKLVFAKEQQAHSEVKAEGASATLSCEVAQ  
AQTEVTFWKDGKLLSSSSKVRVEASGCSRRLVVQQAGKADAGEYSCEAGGQKLSFRLDVAEPKLVFAKEQQAH  
SEVKAEGASATLSCEVAQAQTEVTFWKDGKLLSSSSKVRVEASGCSRRLVVQQVQKADAGEYSCEARGQKLS  
FRLDVAEAESQIPERPSRREPLVVKHEHETIILTATIAAPSVAAVTWLKDGVEIRRSKRHEATSLGDTHTLTVR  
GAQVLD SAIYSCRVGKEGQDFPVQVEEVAAKFSKPLEPVEGELGGTVMLVCELSPEQAEVWRCGNTQLRPGK  
RFQMTSEGPRRTLTVSGLREDDAEYVCESRDDRTSARLTVKVPVVKFTSGLSAMVAEEGQEAFTQCVVSPS  
DAGVTWYKDGMLQPSKQFVMEVSGASRSLTILGLTLEDAGQVTEAEGASSAALRVREAPVLFKPKLEPQT  
VEERTSVTLEVELTRPWPEVKWTRNAAVLTPSENVEIRAEGARHCLVLRVSGFADRGFFGCETPDDKTQAKLN  
VEMRQVRLVLRGLQEVEAKEQGTASMDVELSHAEVEGSWTRDGLRLQPGPKCHLAVQGPVHILTLALSALQPQDSG  
LVAFRAEGVHTSARLIVTELPVSFTRVLQDVVATQKEKVTLECELSRPVDVRWLKDGVELRAGKAIGIVAQGT  
CRSLVIYRCETGDQGVYCDALDAQTSASLRVQGRYTLIFRRVLAEDAGEVKFVAENAESRAHLRVKELPVT  
LLRPLRDKIAMEKHRGVLECVSRASAQVRWFKGGVELQSGPKYEVVSDGLYRKLVIINDVQPEDEDYTC DAG  
NVKTSAQFFVVEQSITIVRGLKDMTVMPEPAPAWFECETSIPSVRPPKWLKGKTVLQAGGNVGLQDGTVHRLT  
LHKTCSTMTGPVHFTIGKSRSSAQLVVS DIPVVLTRPLEPKAGRELQSVVLSCDFRPAPKAVQWYKDDTPLSP  
SEKFKMALEGQMAELRILRLTPADAGVYRCQAGSAQSSAEVTVAREVTVIQPLQDAEAMEEGRVCFSCELSH  
KDEDIEWSLNGTPLYNDSFHEISHEGCLHTLVLSKVRQADTGTVCATSPKVSVSARLVVKGKPVVFLKALDDV  
SAEERGLTLQCEVSDPEARVVWRKDGVELGSPDKYDFLHKAGARGLTVHDLSHEDAGLYTCQVGSKETQSKV  
SVHDLHVGITKRLKTVEVLEGESECSFECVLSHESPSDPAVWTVGGKTVGGSGHFHAVRQGRKYTLTVKDAALS  
DAGEVVSFVLGLTSKASLIIRERPVDITKPLEDQRTTLGEDVMLSCELSRAGTSVRWLKDGKAIRKSQKYDLL  
SEGTRAVLVVRKASLKDSGEYTCETEASKSTAKLCVEEKANRFTTELADLQVEEKGRAVFTCKTEHPASVVTW  
RKSLELRASGKHVPSQEGTLKLTINALERTSDTYTCDIGQARTQARLLVHGQKVRVIEDLEDTAVQEGSS  
AKFCCRIPADYGPVHFLDKTPLHSNELNEITVQPGGYHVLTRQLALKDSGTVYFEAGDQRTSALRVTEK  
PSIFSRPLTDVTVTEGEDLTLVCETTTVDSSVRWTKDGKTLRPSARCQLSHEGCAQLLITATTPQDGGRYKC  
EIGGASSSSIVRVHALPVRFRFRESLKDVEVPEGKAATLRCVLSSVAAPVEWRHGDDVLKSSNKYSLRQEGAVLE  
LVIRDLPQDSGQYSCSFGDQTTSATLTVKTSQAQFVGLKRNKEATEGTTVTLRCELTKAPVEWKKGTETLR  
NGDKYSLKQDGA VCELQICSLLVADAGEYSCVCGQEKTSATLTVKALLVHFVRRRLRSKEATEGDTTLQCELS  
KAAPVEWRKGTETLRDGDYSLKQDGA VCELQIRSLTIADAGEYLCTCGQEKTSATLTVRGLPAKFIEDLRSQ  
EATEGATAILRCELSKAAPVEWRKGSSETLKDGDYTLRQDGA VCELQIRGLAVVDGTGYSLSLPTKFEGLRNE  
EATEGTMATLRCQMSKAAPVEWRKGSSETLRDGDYSLRQDGA MCELQIRGLTIEDSGEYTCVCGQEKTSATLS  
VKALPPRFIEDLRSQEATEGTMATLRCQMSKAAPVEWRKGSSETLGDGGYSLRQNGAVCELQIHDLAEDTGE

YSCVCGQEKTSATLNVKALPPKFTEGLKKEEATEGTMVTLRCQMSKEATVEWRKGAKTLSDGGRYSLRQDGM  
CELQICGLAVEDAGEYSCVCGQEKTSATLSVKALPPRFIEDLRSQEATEGTMATLRCQMSKAAPVEWRKGS  
LRDGDYSLRQDGA VCELQIRDLAVEDAGEYLCVCGQEKTSATLSVKALPPRFIEDLRSQEATEGTMATLRCQ  
MSKAAPVEWRKGSKTLRDGDYSLRQDGMCELQICDLAVEDTDYSCVCGQEKTSATLSVKAPQVVFQOPLQ  
NLQAEEGSMASLRCELSVPNAAMVWSKGGLELQGDTRREARQQGCVAELLLRDLRREDAGEYSCTCGSQTTSA  
TLMVTAAPVRFRLRELQAQDVDEGATARLRCELSREAVSVEWRKGS LQLFPCAQYQMVQEGTTAELLVHGVEQE  
DAGEYTCDAHTQSIARLSVRAPKPKFKTDLQSTEQEAGGTARLCCQLSEAEPTPVQWLKEGVELHVGSKYE  
MRRQGA VCELLIHGLEAKDTGEYACLVGGQKTLASLRVKEPEVTIVRGLVDMEVQADEDEFTCKVSOAGATD  
VQWHLQGLPLQSNEVTEAVLADGCTHVLQKGVTLLEDAGTVSFHVGGLSSSAQLTVRVPEVTVLEPLKDVQL  
SEGQDAHFRCRLSRASGQEARWALGGVPLQCNE MNDITVEQGTLYLLTLHKVTLEDAGTITLQVGS CSSEAQL  
KVTAKNTVLRGLENVDALEGGEALFECQLSQPEVAHTWLLDDEPVHTSEKVEVVYFENGLRHL LLLKLNKPKQ  
DSCRVTFLAGDVVTS AFLTVRGWRLEVLEPPHDASVKAGMQVRFTCILSEAVPVGEATWYINGAAIQPDDTDW  
TVTTDGS HHALTLSNAQPQHAGEVTF AARDAVASARLSVLALPDPPEDAEVVGRSDHSVTL SWVAPMSDGGGG  
LCGYRVEMKEASTGQWQLCHDLVPGPECVVDDLVP GKTYRFRVA AVGPAGAGEPVHLPQMVKIAPAPAPAPAP  
APAPETRQAVVGEDICLELEVAADGGEVVWHKGTERRIQPGGHFEVLSRGRQMLVIKGFRTEDQGEYRCGPIQ  
GLPSSGAATFNVMVMTSGSGDEVPAQPSLPPEAAQEGDLHLLEALARKRRMSREPTLDSISELPEEDSRVQHL  
RQEAEBETAPDLSEGYSTADELARTGEADLSHTSSDDESRAQTPSLVTYLKKAGGPGISPLASKHEAQVTTSVK  
PQKQGE PVVPTCPPPGDLSAADLMDPSLDKAAVKIQAAFKGYKVRKEMKQOEGPVFSRTFGDTEAQVGDVLR  
ECVLATKTD MRACWLKDGIELTDGRHYHIDQLKDGTC SLLVTGLAPTDSGRYTCQVSTKSGRVSHSACVVVSG  
TESEAESSSGGELDDAFRRAARLHRLFRTKSPAELSEELFLSADEGPGEPEEPADWQTYREDEFV CIRFE  
SLAEARQAVTCFRNMFATMGIGVEISLGEQGRGVEMRIGKVA PTVTPAVPLAKTPGLQTS DAAPVFLTELQN  
QDVQDGYPMSFDCVVTGQPVPSVRWFKDGKLL EEDDH YMINEDQQGGHQLIITAVVPADMGVYRCLAENSMGV  
SSTKAELRVELTSTDYDTAADATETSSYFSAQGYLSSREQEGTESDEGQLPVLEELKDLQVAPGTRLAKFQL  
KVKGY PAPKLYWFKDGOPLTTS DHIRMTDKKTLHTLEIVSVTREDSGQYAAAYISNAVGAAYSSARLLVRGPSE  
PEEKPADVHERLVP PRILEKFTPKKVKRGSSITFSVKVEGHPAPSVHVLKKEEA EKVLWIGPDP TPGYTMAS  
SKQHSVLVLDVGRQHGT YTCIATNPAGQALCSASLHISGLAKEEEQERVKEALISSFLQDTSQAVSAQMSSES  
AGFADLVGQSKNEVVAEEAHSHLSLAEVGTEEFLLKLTSTQITEMVSAKISQAKLQVPGGDSDEETKPTKPSASP  
RHGRSRPSSSVQESSSESEDGDSRGEIFDIYVVTADYLP LGAEQDAIILREGQYVEVLDSAHPLRVLVTRTKPT  
KSSPSRQGWVSPAYLDKRLKLSPEWGPTEAPEFPGEAVSEDEYRTRLSSVIQELLSSEQAFV GELQFLESHHM  
KHLERSPRVPAAVASQKT VIFRNVQDISHFHSSFLKELQCGCTDDDVAMCFIKNQEA FEKYLEFLVGRVQAES  
VVVSTPVQEFYKKYAEETLSAKDPTQPPPPPLQHYLEQPVERVQKYQALLKELIRNKARNRQNCALLEQAYAV  
VSALPQRAENKLVSLMENYPGTLEALGEP I RQGHFIVWEGAPGARMPWKGNHRHVFLFRNYLVIC KPRRDSR  
TDTFSYVFRNMMKLSSIDLNDQVEGDDRAFEVWHERE DSVRKYLLQARTVIKNSWVKEICGIQQRLAQPVWR  
PPEFEEELADCTAELGETVKLACRVGTGPKPIVSWYKDGK PVEVDPHHILIEDPDGSC TLI LDNLTGIDSGQY  
MCFASAAGNASTLGKILVQVPPRFV NKVRATPFVEGEDAQITCTVEGAPYPQIRWYKDGTL LAPGNRYRMLN  
EPRSGVLVLIQAASKEDLGHYECELVNRLGSTRGGGELYMQSPALRARDQH HREQI VAAVEVTEQETKVPKK  
TVIIEETITTVVKS PRGRRQSPGKSPSRSPRRSASPRRPGLLAPERLYPPGTSPSRRLEVEQGRKAPVPALY  
VTEAEVHAPASQSQPKWLEVEETIEVRVKKTGSRGASPVREMTSRGEGILFTLPGGIPGRDPNANN SNKSVY  
QEARTWGP AVVHVGEPFIFQVDSVGNVDWAASPEPEQVRASQKEENTERQEGCSDGDENTFLMEEPQD TDSL  
QGRDPKILTHNGRVLTLADLEDYVQEGETF GCGDSTPSTPDEPPCEVSVLQREI SEPTVQGPVLLNVGRPPG  
TGATPSFFRPGSQVHSPESVS FLLREAWSGPVSAAPWTSSFH THVQSSVDGSHGSFKTEVSTQT VSF GAVGET  
VTLHIDPDGGEAPGPSQG\*

>rs47117923\_ENSMUSP00000122181\_c.2394:G>A\_p.G799S  
ENSMUST00000133040.4|Obscn-205|ENSMUSG00000061462|-|chr11:g.58964086:C>T  
AGKAI GIVAQGTCSRSLVIYRCETGDQGVYVCDALDAQTSASLRVQGRSVQITKPLEDVEVMEKEGATF SCEVS  
HDEVPLWFRSSKLRPSDNVRI RQEGRTYTLIFRRVLAEDAGEVKFVAENAESRAHLRVKELPVTLLRPLRD  
KIAMEKH RGVLEQCQVSRASAQVRWFKGGVELQSGPKYEVVSDGLYRKLVIN DVQPEDEDTYTC DAGNVK TSAQ  
FFVEEQSITIVRGLKDMTVM EPAPAWFECETSIPSVRPPK WLLGKTVLQAGGNV GLEQDGTVHRTLHKT CST  
MTGVPVHFTIGKSRSSAQLVSDI PVVLT RPLEPKAGRELQSVVLSCDFRPAKAVQWYKDDT PLSPEKFKMA  
LEGQMAELRILRLTPADAGVYRCQAGSAQSSAEVTVEAREVTVIQPLQDAEAMEEGRVCF SCEL SHKDEDIEW  
SLNGTPLYNDSFHEISHEGCLHTLV LKSVRQADTGTVCATSPKVSVSARLVVKGKPVVFLKALDDVSAEERGT  
LTLQCEVSDPEARVVWRKDGVELGPSDKYDFLHKAGARGLTVHDL SHEDAGLYTCQVGSKETQSKVSVHDLHV  
GITKRLKTVEVLEGESCSFECVLSHESPSDPAVVTVGKTVGGSGHFHAVRQGRKYTLTVKDAALSDAGEVVF  
SVLGLT SKASLIIRERPV DITKPLEDQRTTLGEDV MFLSCELSRAGTSVRWLKDGKAIKRSQKYDLLSEGTRAV  
LVVRKASLKDSEYTCETEASKSTAKLCVEEKANRFT EELADLQVEEKGRAVFTCKTEHPASVVTWRKS LLEL  
RASGKHVPSQEGTLTKLTINALERTDSDTYTCDIGQARTQARLLVH  
>rs48441780\_ENSMUSP00000158795\_c.9999:G>C\_p.A3334P  
ENSMUST00000238536.2|Obscn-210|ENSMUSG00000061462|-|chr11:g.58964369:C>G

MDHSFSGAPRFLTRPKAFVSVGKDATLSCQIVGNPTPHVSWEKDRQPVEAGARFRLAQDGDVYRLTILDLAL
GDSGQYVCRARNAIGEFAAVGLRVDSEGTCAEQAPHFLLRPTSIRVREGADATFRCRVGGSPQPAVSWSKDG
RRLGPPDAPHVRVEEHGESSALRIR SARPRDGGTYEVRAENPLGSASAAAALVVDSDAEVAGPPGTSTATLLA
HLQQRREAMRAEGIPSPPGAGTRTCTVTEGKHARLSCFVTGEPKPEVWKKDQGLVTEGRRHVVEDEQENF
VLKILFCQSDRGLYTCTASNLVGTYSVVLVVVREPTVFPKKRLQDLEVREKESATFQCEVAQAPATEAAWFK
EETRLWASAKYDIEEEGETERRLTVRNVSADDDAVYICETTEGSRVVAELSVQGNLTKLPRKTAVRTGDTAIF
WVELAVPEGPVWRWRNQEEMVAGGRVAITAEGTCHTLTI FQCTLEDMGEVAFVSGGCRTTTQFCVSAPRRPPL
YPPADPVVKAKTESSVTLWSAPPHGDRPVITIDGYVLEKRLGAYAWSRCHEAGWLATTEFTITGVAAEEDGFQ
FRVSAINHFGQGPYLEFPGTMHLVPM LAVKTP LKAVEAVEGGEVTFVSDLT VASSGEWFLDGEALKASSIYVI
RCDRTRHMLTIREV PARLHGAQLKFVANGIETSIQMVVRAALGLPSSKLPAAAAAREVLAQLHEEAQLLAE LSD
QAAA VTWLKDGRELSLGPYEMQVSAGRRALLVRDVAQDDAGLYECVSRGSR TAYQLLVQDITDGYRDWGPAG
PQKHMCKCAGAKIARYLGSSCYRFLQYDKGVWHWLEAALDTRQKGKTS SCSLHEKPKLVFAKQQAHSEVKA E
AGNSATLSCEVTQAQTEVTWFKDGKLLSSSSKVRMEASGCSRRLVVQQAGKADAGEYSCEAGGQKLSFRLDVA
EPKLVFAKQQAHSEVKA EAGASATLSCEVAQAQTEVTWFKDGKLLSSSSKVRMEASGCSRRLVVQQAGKADA
GEYSCEAGGQKLSFRLDVAEPKMFVFAKEQQARSEVKA EAGASATLSCEVAQAQTEVTWFKDGKLLSSSSKVRM
EASGCSRRLVVQQAGKADAGEYSCEAGGQKLSFRLDVTEPKLVFAKEQQARSEVKA EAGASATLSCEVAQAQ T
EVTWFKDGKLLSSSSKVRMEASGCSRRLVVQQAGKADAGEYSCEAGGQKLSFRLDVAEPKLVFAKEQQARSEV
KAEAGNSATLSCEVAQAQTEVTWFKDGKLLSSSSKVRMEASGCSRRLVVQQAGKADAGEYSCEAGGQKLSFHL
DVTEPKLVFAKEQQAHSEVKA EAGASATLSCEVAQAQTEVTWFKDGKLLSSSSKVRMEASGCSRRLVVQQAGK
ADAGEYSCEAGGQKLSFRLDVAEPKLVFAKEQQARSEVKA EAGASATLSCEVAQAQTEVTWFKDGKLLSSSSK
VRVEASGCSRRLVVQQAGKADAGEYSCEAGGQKLSFRLDVAEPKLVFAKEQQANSEVKA EAGASATLSCEVAQ
AQTEVTWFKDGKLLSSSSKVRVEASGCSRRLVVQQAGKADAGEYSCEAGGQKLSFRLDVAEPKLAFAKEQQAH
SEVKA EAGASATLSCEVAQAQTEVTWFKDGKLLSSSSKVRVEASGCSRRLVVQQAGKADAGEYSCEAGGQKLS
FRLDVAEPKLAFAKEQQAHSEVKA EAGASATLSCEVAQAQTEVTWFKDGKLLSSSSKVRVEASGCSRRLVVQQ
AGKADAGEYSCEAGGQKLSFRLDVAEPKLAFAKEQQAHSEVKA EAGASATLSCEVAQAQTEVTWFKDGKLLSS
SSKVRVEASGCSRRLVVQQAGKADAGEYSCEAGGQKLFRLDVAEPKLMFAKEQQAHSEVKA EAGASATLSCE
VAQAQTEVTWFKDGKLLSSSSKVRVEASGCSRRLVVQQAGKADAGEYSCEAGGQKLSFRLDVAEPKLVFAKEQ
QAHSEVKA EAGASATLSCEVAQAQTEVTWFKDGKLLSSSSKVRVEASGCSRRLVVQQVQKADAGEYSCEARGQ
KLSFRLDVADTRLMFAKEQQARTEVKA EAGNSATLSCEVAQAQTEVTWFKDGKLLSSSSKVRVEASGCSRRLV
VQQAGKADAGEYSCEAGGQKLSFRLDVAEAE SQIPERPSRREPLVVKEHETIILTATIAAPSVAAVTWLKDG V
EIRRSKRHEATSLGDTHTLTVRGAQVLD SAIYSCRVGKEGQDFPVQVEEVA AKFSKPLEPVEGELGGTVMLVC
ELSP EQAEVWRCGNTQLRPGKRFQMTSEGPRRTLTVSGLREDDAE EYVCE SRDDRTSARLT VKVPRVVKFTS
GLSAMVAEEGQEATFQCVVSPSDAGVTWYKDGMLQLPSEKFMVESGASRSLTILGLTLEDAGQVTEAEGAS
SSAALRVREAPVLFKKKLEPQTEVERTSVTLEVELTRPWPEVKWTRNAAVLTPSENVEIRAEGARHCLVLR SV
GFADRGGFFGCETPDDKTQAKLNVEMRQVRLVRGLQEVEAKEQGTASMDVELSHAEVEGSWTRDGLRQLQPGPKC
HLAVQGPVHILTL SALQPQDSGLVAFRAEGVHTSARLIVTELPVSFTRVLQDQVATQKEKVTLECELSRPPVDV
RWLKDGVELRAGKAIGIVAQGTCSRSLVIYRCETGDQGVYVCDALDAQTSASLRVQGRTYTLIFRRLAEDAGE
VKFVAENAESRAHLRVKELPVTLLRPLRDKIAMEKHRGVLECCQVSRASAVRWFKGGVELQSGPKYEVVSDGL
YRKLVIN DVQPEDEDTYTC DAGNVKTS AQFFVEEQSITIVRGLKDMTVM EPAPAWFECETSIPSVRPPKWL LG
KTVLQAGGNVGL EQDGTVHRLTLHKTCSTMTGPVHFTIGKSRSSAQLVVS DI PVVLRPLEPKAGRELQSVVL
SCDFRPAPKAVQWYKDDT PLSPEKFKMALEGM AELRILRLTPADAGVYRCQAGSAQSSAEVTV EAREVTVI
QPLQDAEAMEEGRVCFSC ELSHKDEDIEW SLNGTPLYNDSFHEI SHEGCLHTLV LKSVRQADTGTVCATSPKV
SVSARLVVKGKPVVFLKALDDVSAEERGTLT LQCEVSDPEARV VWRKDGVELG PSDKYDFLHKAGARGLTVHD
LSHEDAGLYTCQVGSKETQSKVSVHDLHVGITKRLKTVEVLEGE SCSFECVLSHESPSDPAVWTVGGKTVGGS
GHFHAVRQGRKYTLTVKDAALSDAGEVVF SVLGLT SKASLI IRE RPVDITKPLEDQRTTLGEDVMLSC ELSRA
GTSVRWLKDGKAIRKSQKYDLLSEGTRAVLVVRKASLKDSGEYTCETEPSKSTAKLCEVEKANRFTEELADLQ
VEEKGRAVFTCKTEHPASVVTWRKGLLELRASGKHVPSQEGLTLKLTINALERTSDTYTCDIGQARTQARLL
VHGQKVRVIEDLED TAVQEGSSAKFCCRIAPADYGPVHWFLDKTPLHSNELNEITVQPGGYHVLTLRQLAL KD
SGTVYFEAGDQRTSAALRVTEKPSIFSRPLTDVTVTEGEDLTLVCETTTVDSSVRWTKDGKTLRPSARCQLSH
EGCQAQLLITATTPQDGGRYKCEIGGASSSIVRVHALPVRFRESLKDVEVPEGKAATLRCVLSVAAPVEWR
HGDDVLKSSNKYSLRQEGAVLELVIRDLQPDQSGQYSCSFGDQTT SATLTVKTS SAQFV GKL RNKEATEGTTV
TLRCELTK EAPVEWKKGTETLRNGDKYSLKQDGAVCELQICSLLVADAGEYSCVCGQE KTSATLTVKALLVHF
VRR LRSKEATEGDTTTLQCELSKAAPVEWRKGTETLRDGD RYSLKQDGAVCELQIRSLT IADAGEY LCTCGQE
KTSATLTVRALPAKFKDSLKNEEATEGTTATLSC ELSKAAPVTWKKGPKTLQSGD VAKYVLRQDGA VCGLQIHGL
TMADAGEYSCVCGQE KTSATLTVRGLPAKFIEDLRSQEATEGATAILRCELSKAAPVEWRKGS ETLKDGDRYT
LRQDGA VCELQIRGLAVVDGTGYS SLPTKFTEGLRNEEATEGTMATLRCQMSKAAPVEWRKGS ETLR DGD RYS
LRQDGA MCELQIRGLTIEDSGEYTCVCGQE KTSATLSVKALPSRFIEDLRSQEATEGTMATLRCQMSK TAPVE
WKKGSETLRDGGRYSLRQDGPVCELQICDLAVEDAGEYSCVCGQE KTSATLSIKALPPRFIEDLRSQEATEG T

MATLRCQMSKAAPVEWRKGSSETLGDGGRYSLRQNGAVCELQIHDLAVEDTGEYSCVCGQEKTSATLNVKALPP  
RFIEDLRSQEATEGTMATLRCQMSKAAPVEWRKGSSETLRDGGRYSLRQDGA VCELQIHDL DVEDAGQYSCVCG  
QEKTSAVLTVDALPPKFTEGLKKEEATEGTMVTLRCQMSKEATVEWRKGAKTSLSDGGRYSLRQDGA MCELQIC  
GLAVEDAGEYSCVCGQEKTSATLSVKALPPRFIEDLRSQEATEGTMATLRCQMSKAAPVEWRKGSSETLRDGD  
YSLRQDGA VCELQIRDLAVEDAGEYLCVCGQEKTSATLSVKALPPRFIEDLRSQEATEGTMATLRCQMSKAAP  
VEWRKGSKTLRDGDYSLRQDGA MCELQICDLAVEDTGDYSCVCGQEKTSATLSVKALPPRFIEDLRSQEARE  
GTVATLRCRMSKAAPVEWRKGSSETLKDGDYSLRQEGNLCELQIRDLAVEDTEEYSCVCGQEKTSATLSVKAL  
PAKFIEDLRSQEAPESSTVTLRCKLSKKASVVWKKGSETLRNGARYSLRQDGA VCELEIRDLTVEDTGEYSCT  
CGQERTSATLSIMAPQVVFLQNLQAEEGSMASLRCELSVNAAMVWSKGGLELQGDTRREARQQGCVAEL  
LLRDLRREDAGEYSCTCGSQTTSATLMVTAAPVRFRELAQADVDEGATARLRCELSREAVSVEWRKGS LQLF  
PCAKYQMVQEGTTAELLVHGVEQEDAGEYTC DAGHTQSIARLSVRAPKPKFKTDLQSTEQEAGGTARLCCQLS  
EAEPGTPVQWLKEGVELHVGSKYEMRRQGA VCELLIHGLEAKDTGEYACL VGGQKTLASLRVKEPEVTIVRGL  
VDMEVQADEDVEFTCKVSQAGATDVQWHLQGLPLQSNVTEVAVLADGCTHVLQ LKGVTL EDAGTVSFHVGGL  
SSSAQLTVRVPEVTVLEPLKDVQLSEGQDAHFRCRLSRASGQEARWALGGVPLQCNEMNDITVEQGTLYLLTL  
HKVTLEDAGTITLQVGS CSSEAQLKVTAKN TVLRGLENVDALEGG EALFECQLSQPEVA AHTWLLDDEPVHTS  
EKVEVVYFENGLRHLLLLKNLKPQDSCRVTFLAGDVVTS AFLTVRGWRLEVLEPPHDASVKAGMQVRF TCI LS  
EAVPVGEATWYINGAAIQPDDTDWTVTTDGS HHALTLSNAQPQHAGEVTF AARDAVASARLSVLALPDPPEDA  
EVVGRSDHSVTLSWVAPMSDGGGLCGYRVEMKEASTGQWQLCHDLVPGPECVVDDLVP GKTYFRFVAAVGA  
GAGEPVHLPQMVKIAPAPAPAPAPAPAPAPETRQAVVGEDIC LELEVAADGGEVVWHKGTERRIQPGGHFEVLS  
RGQRQMLVIKGFRTEDQGEYRCGPIQGLPSSGAATFNVMVMTSGSGDEVPAQPSLPPEAAQEGDLHLLWEALAR  
KRRMSREPTLDSISELPEEDSRVQHLRQEA EETAPDLSEGYSTADELARTGEADLSHTSSDDES RAGT PSLVT  
YLK KAGGPGISPLASKHEAQVTSVKPQKQEPVPTCP PPGDLSAADLMDPSLDKAAVKIQAAF KGYKVRKE  
MKQQEGPVFSRTFGDTEAQVGVLRLECVLATKTD MRACWLKDGIELTDGRHYHIDQLKDG TCSLLVTGLAPT  
DSGRYTCQVSTKSGRVSHSACVVVSGTESEAESSSGGELDDAFRAARRLHRLFR TKSPAELSEELFLSADE  
GPGEPEEPADWQTYREDENFVCIRFESLAEARQAVTCFRNMFATMGIGVEISLGEQGRGVEMRIGKVAPTVT  
PAVPLAKTPGLQTS DAAPVFLTELQNDVDQGYPMSFDCVVTGQVPVPSVRWFKDGKLEEDDHYMINEDQQGG  
HQLIITAVVPADMGVYRCLAE NSMGVSSSTKAELRVELTSTDYDTAADATETSSYFSAQGDYSSREQEGTESDE  
GQLPQVLEELKDLQVAPGTR LAKFQLKVKGYPAPKLYWFKDGGQPLTSDHIRMTDKKTLHTLEIVSVTREDSG  
QYAAYSNAVGAAYSSARLLVRGPSEPEEK PASDVHERLVPPRI LEKFTPKKVKRGSSITFSVKVEGHPAPSV  
HWLKEEA EKGV LWIGPDTPGYTMASSSKQHS LVL LDVGRQH QGT YTCIATNPAGQALCSASLHISGLAKEEEQ  
ERVKEALISSFLQGTSAQVSAQMSESAGFADLVGQSKGESLVAEEAHSHLSLAEVGT EEF LQKLT SQIT EMVS  
AKISQAKLQVPGGDSDEETKTPSASPRHGRSRPSSSVQESSSEEDGDSRGEIFDIYVVTADYLP LGAEQDAI  
ILREGQYVEVLDSAHPLRWLVR TKPKSSPSRQGWVSPAYLDKRLKLSPEWGPTEAPEFPGEAVSEDEYRTRL  
SSVIQELLSSEQAFV GELQFLESHHMKHLERSPRVPAAVASQKTVIFRNVQDISHFHSSFLKELQCGCTDDD  
AMCFIKNQEA FKEYLELFLVGRVQAESVVVSTPVQEFYKKA EETLSAKDPTQPPPPPLQHYLEQ PVERVQKYQ  
ALLKELIRNKARNRNCALLEQAYAVVSALPQRAENKLVSLMENYPGTLEALGEP I RQGHFIWEGAPGARM  
PWKGHNHRHVF LFRNYLVIC KPRRDSRTD TFSYVFRNMMKLSSIDLNDQVEGD DRAFEVWHEREDSVRKYLLQA  
RTVI IKNSWVKEICGIQORLAQP VWRPPEFEEELADCTAELGETVKLACRVTGT PKPIVSWYKDGK PVEVDPH  
HILIEDPDG SCTLILDNLTGIDSGQYMCFAASAAGNASTLGKILVQVPPRFVNVKVRATPFVEGEDAQITCTVE  
GAPYQIRWYKDG TLLAPGNRYRMLNEPRSGVLV LVIQAASKEDLGHYECELVNRLGSTRGGGELYMQSPALR  
ARDQHHREQIVAAVEDTSVEGSAHSAQDGA DQQAASVLWRLLGSEALGPS PGDLPNTRQSEPPAFEEAASQIP  
GAASGTPEVSPQPGTHKGLEQETTSSGSQGWTVPIRVEGTAWPGAGTQQLLLDVHSQVIMETTQRTYVCQAPDT  
GVTRAPSMQVTIEDVQVQVGDMAQF DAVIEGHPPP I V TWYKGSTQLTSSARLSQRQDGT TYSLVLTDVAPHDA  
GVYTCVANNAGGQV LCKAELLVHGDKLDAENQVYRRKLSHSFYDVQEE IGRGVFGFVKRVQHKGNMFCAAKF  
IPLRSKTRAQAYQYRILATLGHPLVTGLLDQFETRKTLLIILELCSSEELLDRLFKKGVVTEAEVKVYIQQL  
VEGLHYLHSHGILHLDIKPPN ILMVHPAREDIKICDFGFAQKITPSEPQYSKYGSPEFVSPEIIEQN PVSEGS  
DIWAMGVISYLSLTCSSPFAGESDRATLLNVLEGRVSWSSPTAAHLS EDAKDFIKATLQRTPRARPSTSQCLA  
HPWFLKSMPAEEAHFINTKQLKFL LARSRWQRSLMSYKSI LVMRSIPELLQGPPDSPSLGVARHLRGEASGAS  
SSSSSSDNELAPFARAKSLPPSPVTHSPLLHPRGFLRPSASLPEETEASMP TADA AVPAS PQSAGPPASPGCV  
PRHSV ISSLFYQQAGEGA ERGNKTS GAKRHPARRRHLLKGGYIARALPGLREPLMEYS LLEEEAAREEQASIM  
TKTPSFETALRLPSSSVREVPGRSHSLDNPPVTTGPSPEACKEQLLFPSTGLTHETTAKDRGHKEGFLQESV  
PFPMSGDSRPGKQEGSSQDSRCRGPASSCHSELGSGSQEGCGPPSSQSLGSLPPQSLKKELTSCGPLFSEQ  
PQAAPFPTQVSPLLGKEPEQDGS LSEGPVVPSSSPGASQVDASLDTEGLSEAGDTCDFTPPPQRPEQAT  
TRKFSLESRGGYAGVAGYGTFAFGDAGGMLGQGLPLMARMAVAVS QSSEEQDEAATESQPLES LGPIAEASG  
VPLRTSPSLTPWEEVEQVSLVQIRDLSGDAEAADTISLDISEVDPAYLNLSDLYDIKYL PFEFMI FRRVPKPI  
EQPESPGSETEAGQGLADFL EEAAWPWP GELGLRAGLEITEEPEEPGDLEALLGEAAVGRKRKWSPSRGLFQF  
PGRCLSGEEPVELGLRQRVKASMAHISRILKGRPEGPEREPPRKKAGLASFRLSGLKGRDQELSDEAVVLGQ  
SVTLACQVLAQPTAQATWSKDGVLLESSGHLLISSTLKNFQLLTI LVVKEEDLGTYTCCVSNPLGTA VTTGVL

RKAERPSSSPRPEVGEELYKDAVLLVWPKPVESCGPVTYIVQCCIEGGSWTTLASDISDCCYLTGKLSRGGMYIF  
RTACVSKAGMGPYSSPSEQVLLGGPNHLASEEESSRRGPAQLLPSTKTFQFQMQIRRRGRFSVVRQCREKASGR  
ALAAKIVPYQPEDKTAVLREYEALKRLHHPHLAQLHAAYLSPRHLVLI LELCSGPELLPSLAERESYSESDVK  
DYLWQMLSATQYLHAQHILHLDLRSNNMMVTEYNLLKVIDLGNALDQEKVPAPENFKDYLETMAPELLEGGQ  
GAVPQTDIWAIGVTAIFIMLSGEY PESSSEGTRDLQKGLRKLIRLSRCYAGLSGGAVAFLOSSLCAQPWGRPCA  
STCLQCGLWTEEGPTGSRPTPVTFPTVRLRAVFREREKRRALLYKKNLAQVR\*  
>rs48441780\_ENSMUSP00000038264\_c.9171:G>C\_p.A3058P  
ENSMUST00000047441.14|Obscn-202|ENSMUSG00000061462|-|chr11:g.58964369:C>G  
MDHSFSGAPRFLTRPKAFVVSVGKDATLSCQIVGNPTPHVSWEKDRQPVEAGARFRLAQDGDVYRLTILDLAL  
GDSGQYVCRARNAIGEFAAVGLRVDSEGTCAEQAPHFLLRPTSIRVREGADATFRCRVGGSPQPAVSWSKDG  
RRLGPPDAPHVRVEEHGESSALRIRSARPRDGGTYEVRAENPLGSASAAAALVVDSDAEVAGPPGTSTATLLA  
HLQORREAMRAEGIPPSPPGAGTRTCTVTEGKHARLSCFVTGEPKPKETVWKKDQGLVTEGRRHVVEDEQENF  
VLKILFCKQSDRGLYTCTASNLVGQTYSSVLVVVREPTVPFKKRLQDLEVREKESATFQCEVAQAPATEAAWFK  
EETRLWASAKYDIEEGETERRLTVRNVSADDDAVYICETTEGSRVVAELSVQGNLTKLPRKTAVRTGDTAIF  
WVELAVPEGPVRLRNQEEVAGGRVAITAEGTCHTLTI FQCTLEDMGEVAFVSGGCRTTTQFCVSAPRRPPL  
YPPADPVVAKTESVTLWSAPPHGDRPVTIDGYVLEKRLKLGAYAWSRCHEAGWLATTEFTITGVAEEGDFQ  
FRVSAINHFGQGPYLEFPGTMHLVPLAVKTKLKAVEAVEGGEVTFVSDLTVAASSGEVFLDGEALKASSIYVI  
RCDRTRHMLTIREVPARLHGAQLKFEVANGIETSIQMVVRAALGLPSSKLPAAAAREVLAQLHEEAQLLAE LSD  
QAAA VTLKDGRELSLGPKEYMQVSAGRRALLVRDVAQDDAGLYECVSRGSRRTAYQLLVQDITDGYRDWGPAG  
PQKHMCKCAGAKIARYLGSSCYRFLQYDKGVWHLEAALDTRQKGTSSCSLHEKPKLVFAKQQAHSEVKA  
AGASATLSCEVAQAQTEVTFWKDGKLLSSSSKVRMEASGCSRRLVVQQAGKADAGEYSCEAGGQKLSFRLDVA  
EPKMFVFAKEQQARSEVKAEGASATLSCEVAQAQTEVTFWKDGKLLSSSSKVRMEASGCSRRLVVQQAGKAD  
GEYSCEAGGQKLSFRLDVTEPKLVFAKEQQARSEVKAEGVNSATLSCEVAQAQTEVTFWKDGKLLSSSSKVRM  
EASGCSRRLVVQQAGKADAGEYSCEAGGQKLSFRLDVAEPKLVFAKEQQARSEVKAEGNSATLSCEVAQAQ  
EVTWFKDGKLLSSSSKVRMEASGCSRRLVVQQAGKADAGEYSCEAGGQKLSFHLDVTEPKLVFAKEQQAHSE  
KAEAGASATLSCEVAQAQTEVTFWKDGKLLSSSSKVRMEASGCSRRLVVQQAGKADAGEYSCEAGGQKLSFRL  
DVAEPKLVFAKEQQARSEVKAEGASATLSCEVAQAQTEVTFWKDGKLLSSSSKVRMEASGCSRRLVVQQAGK  
ADAGEYSCEAGGQKLSFRLDVAEPKLVFAKEQQANSEVKAEGASATLSCEVAQAQTEVTFWKDGKLLSSSSK  
VRVEASGCSRRLVVQQAGKADAGEYSCEAGGQKLSFRLDVAEPKLVFAKEQQAHSEVKAEGASATLSCEVAQ  
AQTEVTFWKDGKLLSSSSKVRVEASGCSRRLVVQQAGKADAGEYSCEAGGQKLSFRLDVAEPKLVFAKEQQAH  
SEVKAEGASATLSCEVAQAQTEVTFWKDGKLLSSSSKVRVEASGCSRRLVVQQAGKADAGEYSCEAGGQKLS  
FRLDVAEPKLVFAKEQQAHSEVKAEGASATLSCEVAQAQTEVTFWKDGKLLSSSSKVRVEASGCSRRLVVQQ  
AGKADAGEYSCEAGGQKLFRLDVAEPKLVFAKEQQAHSEVKAEGASATLSCEVAQAQTEVTFWKDGKLLSS  
SSKVRVEASGCSRRLVVQQVQKADAGEYSCEARGQKLSFRLDVAEAEESQI PERPSRREPLVKEHETIILTAT  
IAAPSVAAVTWLKDGVEIRRSKRHEATSLGDTHLTVRGAQVLD SAIYSCRVGKEGQDFPVQVEEVAKF SKP  
LEPVEGELGGTVMLVCELSPEQAEEVWRCGNTQLRPGKRFQMTSEGPRTTLTVSGLREDDAEYVCE SRDDRT  
SARLTVKVPVVKFTSGLSAMVAEEGQEATFQCVVSPSDAGVTWYKDGMLQPSSEKFMVMEVSGASRSLTILGL  
TLEDAGQVTVEAEGASSAALRVREAPVLFKKKLEPQTVERTSVTLEVELTRPWPEVKWTRNAAVLTPSENV  
EIRAEGARHCLVLRVGFADRGFFGCETPDDKTQAKLNVEMRQVRLVRLQVEVEAKEQGTASMDVELSHAEVE  
GSWTRDGLRLQPGPKCHLAVQGPVHILTL SALQPQDSGLVAFRAEGVHTSARLIVTEL PVSFTRVLQDVVATQ  
KEKVTLECELSRPVDVRLKDGVELRAGKAIGIVAQGTCSRSLVIYRCETGDQGVYCDALDAQTSASLRVQGR  
TYTLIFRRVLAEDAGEVKFVAENAESRAHLRVKELPVTLLRPLRDKIAMEKHRGVLEQCQVSRASAQVRWFKGG  
VELQSGPKYEVVSDGLYRKLVIINDVQPEDEDTYTC DAGNVKTSAQFFVEEQSITIVRGLKDMTVMEPAPAWFE  
CETSIPSVRPPKWL LKGTVLQAGGNVLEQDGTVHRLTLHKTCSTMTGVPVHFTIGKSRSSAQLVVS DI PVVLT  
RPLEPKAGRELQSVVLSCDFRPAPKAVQWYKDDTPLSPSEKFKMALEGQMAELRILRLTPADAGVYRCQAGSA  
QSSAEVTVAREVTVIQPLQDAEAMEEGRVCFSCELSHKDEDI EWSLNGTPLYNDSFHEISHEGLHTLVLKS  
VRQADTGTVCATSPKVSVSARLVVKGKPVVFLKALDDVSAEERGTTLQCEVSDPEARVVWRKDGVELGPSDK  
YDFLHKAGARGLTVHDLSDHEDAGLYTCQVGSKETQSKVSVHDLHVGITKRLKTVEVLEGESECSFECVLSHESP  
SDPAVWTVGGKTVGGSGHFHAVRQGRKYTLTVKDAALSDAGEVVFVSLGLTSKASLIIRERPVDI TKPLEDQR  
TTLGEDVMLSCELSRAGTSVRWLKDGKAIKRSQKYDLLSEGTRAVLVVRKASLKDSGEYTCETEPSKSTAKLC  
VEEKANRFTEELADLQVEEKGRAVFTCKTEHPASVVTWRKGLLELRASGKHVPSQEGTLTKLTINALERTDSD  
TYTCDIQARTQARLLVHGQKVRVIEDLEDTAVQEGSSAKFCCRIPADYGPVHWF LDKTPLHSNELNEITVQ  
PGGYHVLTLRQLALKDSGTVYFEAGDQRTSAALRVTEKPSIFSRPLTDVTVTEGEDTLVCE TTTVDSSVRWT  
KDGTTLRPSARQLSHEGCAQLLITATTPQDGGRYKCEIGGASSSIVRVHALPVRFRESLTKDVEVPEGKAA  
TLRCVLSVAAPVWEHRHGDVLSNKNYSRLRQEGAVLELVIRDLQPDQSGYSCSFGDQTTSATLTVKTS SAQ  
FVGKLRNKEATEGTTVTLRCELTK EAPVEWKKGTETLRNGDKYSLKQDGA VCELQICSLLVADAGEYSCVCGQ  
EKTSATLTVKALLVHFVRRRLRSKEATEGDTTTLQCELSKAAPVEWRKGTETLRDGD RYSLKQDGA VCELQIRS  
LTIADAGEYLCTCGQEKTSATLTVRALPAKFKDSLKNEEATEGTTATLSCELSKAAPVTWKKGPKTLQSGDKY

VLRQDGA VCG LQIHGLTMADAGEYSCVCGQEKTSATLTVRGLPAKFIEDLRSQEATEGATAILRCELSKAAAPV  
EWRKGS ETLKDGDRYTLRQDGA VCELQIRGLAVVDTGTYS SLP TKFTEGLRNEEATEGTMATLRCQMSKAAAPV  
EWRKGS ETLR DGDRYSLRQDGA MCELQIRGLTIEDS GEYTCVCGQEKTSATLSVKALPPRFIEDLRSQEATEG  
TMATLRCQMSKAAAPVEWRKGS ETLDGGRYSLRQNGAVCELQIHDLAVEDTGEYSCVCGQEKTSATLNVKALP  
PRFIEDLRSQEATEGTMATLRCQMSKAAAPVEWRKGS ETLR DGGRYSLRQDGA VCELQIHDL DVEDAGQYSCVC  
GQEKTS AVLTVDALPPKFTEGLKKEEATEGTMVTLRCQMSKEATVEWRKGAKT LSDGGRYSLRQDGA MCELQI  
CGLAVEDAGEYSCVCGQEKTSATLSVKALPPRFIEDLRSQEATEGTMATLRCQMSKAAAPVEWRKGS KTLR DGD  
RYS LRQDGA MCELQICDLAVEDTGDYSCVCGQEKTSATLSVKAPQVVFQQPLQNLQAEEGSMASLRCELSVPN  
AAMVWSKGGLELQGDTRREARQQGCVAELLLRDLRREDAGEYSC TCGSQTT SATLMVTAAPVRFLELQAQDV  
DEGATARLRCELSREAVSVEWRKGS LQLFPCA KYQMVQEGTTAE LLVHGVEQEDAGEYTC DAGHTQS IARLSV  
RAPKPKFKTDLQSTEQEAGGTARLCCQLSEAE PGTPVQWLKEGVELHVGS KYEMRRQGA VCELLIHGLEAKDT  
GEYA CLVGGQKT LASLRVKEPEVTIVRGLVDMEVQADE DVEFTCKV SQAGATDVQWHLQGLPLQSN EVTEVAV  
LADGCTHVLQ LKGV TLEDAGTVSFHVGG LSSSAQLTVRVPEVTVLEPLKDVQLSEGD ADFRCRLSRASGQEA  
RWALGGVPLQCNEMNDITVEQGTLYLLTLHKVTLEDAGTITLQVGCSS EACLKVTAKNTVLRGLE NVDALEGE  
GEALFECQLSQPEVA AHTWLLDDEPVHTSEKVEVVYFENGLRHLLLLKNLKPQDSCRVTFLAGDVVTS AFLTV  
RALPDPPEDAEVVGRSDHSVTL SVWAPMSDGGGGLCGYR VEMKEASTGQWQLCHDLVPGPECVDDLVPGKTY  
RFRVAAGPAGAGEPVHLPQMVKIAPAPAPAPAPAPAPAPETRAVVGEDICLELEVAADGGEVVWHKGTERTI  
QPGHFV ELSRGQRQMLVIKGFRTEDQGEYRCGPIQGLPSSGAATFNVMVTSGSGDEVPAPQPSLPEAAQEGD  
LHLLWEALARKRRMSREPTLDSISELPEEDSRVQHRLRQEAEEETAPDLSEGYSTADELARTGEADLSHTSSDDE  
SRAGT PSLV TYLKKAGGPGISPLASKHEAQV TTSVKPQKQQEPVPTCPPPGDL SAADLMDPSLDKAAVKIQA  
AFKGYKVRKEMKQQEGPVFSRTFGDTEAQVGDVLRLECVLATKTD MRACWLKDGIELTDGRHYHIDQLKDGTC  
SLLVTGLAPTDSGRYTCQVSTKSGRVSHSACVVVSGTESEAESSSGGELDDAFRRAARRLHRLFRTKSPAELS  
EELFLSADEGPGEPEPADWQTYREDENFVICRFESLAEARQAVTCFRNMFATMGIGVEISLGEQGRGVEM  
RIGKVAPT VTPAVPLAKTPGLQTS DAAPVFLTELQNDVQDGYPMSFDCVVTGQPVPSVRWFKDGKLL EEDDH  
YMINEDQQGGHQLIITAVVPADMGVYRCLAENSMGVSSTKAE LRVELTSTDYDTAADATETSSYFSAQGYLSS  
REQEGTESDEGQLPVLEELKDLQVAPGTRLAKFVKVYKYPAPKLYWFKDGOPLTSDHIRMTDKKTLHTLE  
IVSVTREDSGYAAAYISNAVGAAYS SARLLVRGPSEPEEK PASDVHERLVPPRILEKFTPKVKRGS SITFSV  
KVEGHPAPSVHWLKEEA EKGV LWIGPDTPGYTMASSSKQHSLVLLDVG RQHOGTYT CIATNPAGQALCSASLH  
ISGLAKEEEQERVKEALISSFLQGTSQAVSAQMSE SAGFADLVGQSKGESLVAAEEAHSHLSLAEVGT EEFLOK  
LTSQITEMVSAKISQAKLQVPGGDSDEETKTPSASPRHGRSRPSSSVQESSSESEDGDSRGEIFDIYVVTADY  
LPLGAEQDAIILREGQYVEVLD SAHPLRVLVVRTKPTKSSPSRQGWVSPAYLDKRLKLSPEWGPTEAEPFGEA  
VSEDEYRTRLSSVIQELLSSEQA FVGELQFLESHHMKHLERSPRVPAAVASQKT VIFRNVQDI SHFSSFLKE  
LQCGCTDDDVAMCFIKNQEA FEKYLEFLVGRVQAESVVVSTPVQEFYKKYAEETLSAKDPTQPPPPPLQHYLE  
QPVERVQKYQALLKELIRNKARNRQNCALLEQAYAVVSALPQRAENKLVHSLMENYPGTLEALGEP IROGHFI  
VWEGAPGARMPKWHNRHVFLFRNYLVICKPRRDSRTDTFSYVFRNMMKLS SIDLNDQVEGDDRAFEVWHERE  
DSVRKYL LQARTVI IKNSWVKEICGIQORLAQPVWRPPEFEELADCTAELGETVKLACRVTGT PKPIVSWYK  
DGKPV EVDPHHILIEDPDG SCTLILDNLTGIDSGQYMCFAASAAGNASTLGKILVQVPPRFVNVKVRATPFVEG  
EDAQITCTVEGAPYPQIRWYKDG TLLAPGNRYRMLNEPRSGVLV LVIQAASKEDLGHYECELVNR LGSTRGGG  
ELYMQSPALRARDQHHREQIVAAVEGAPSMQVTIEDVQVQVGDMAQF DAVIEGHPPP IVTWYKGTQLTSSAR  
LSQRQDGT TYSLVLT DVA PHDAGVYTCVANNAGGQVLCKAELLVHGGDKLDAENQVYRRKLSHFYDVQEEIGR  
GVFGFVKRVQHKG NMFCAAKFIP LRSKTRAQAYQERDILATLGHPLVTGLLDQFETRKTLLIILELCSSEEL  
LDRLFKKGVVTEAEVKVYIQQLVEGLHYLHSHGILHLDIKPPNIMVHPAREDIKICDFGFAQKITPSE PQYS  
KYGSP E FVSP EIEQN PVSEGS DIWAMGVISYLSLTCSSPFAGESDRATLLNVLEGRVSWSSPTAAHLS EDAK  
DFIKATLQRTPRARPSTSQC LAHPWFLKSMPAAE AHFINTKQLKFL LARSRWQRSLMSYK SILVMRSIPELLQ  
GPPDSPSLGVARHLRGEASGASSSSSSDNELAPFARAKSLPPSPVTHSPLLHPRGF LRPSASLPEETEASMP  
TADA AVPAS PQSAGPPASPGCVPRHSV ISSLFYQQAGEGA ERGNKTS GAKRHPARRRHLKGGYIARALPGLR  
EPLMEYSLLEEEAAREEQASLMTKT PSETALRLPSSSVREV PGRSHSLDNPPVTTG PSPEACKEQLLFPST  
GLTHETAKDRGHKEGFLQESVFPFPPMSGDSRPGKQEGSSQDSCRGKPASSCHSELGSGSQEGCGPPSSQSLG  
SLPPQSLKKE LSTSCGPLFSEQPQA AAFPQTQVSPLLGSEKEPQDGS LSEGVPVPSSSPGSASQVDA SLDTEG  
LSEAGDTCDFTPPPQRPEQATTRKFSLESRGGYAGVAGYGTFAFGGDAGGMLGQGPLWARMAWAVSQSSEEQ  
DEAATESPQPLES LGPIAEASGVPLRTSPSLTPWEEVEQVSLVQIRDLSGDAEAAADTISLDISEVDPAYLNL S  
DLYDIKYL PFEFMI FRRVPKPIEQPESPGSETEAGQLADFL EEAAPWPGE LGLRAGLEITEEPEEPGDLEA  
LLGEAAVKGRKRKWSPSRGLFQFPGRCLSGEEPVELGLRQRVKASMAHISRILKGRPEGPERE GP RRKAGLAS  
FRLSGLKGRDQELSDEAVVLGQSVTLACQVLAQPTAQATWSKDGVLLESSGHLLISSTLKNFQLLTI LVVKEE  
DLGTYTCCVSNPLGTA VTTGVL RKAERPSSPRPEVAGELYKDAVLLVWKPVE SCGPVTYIVQCCIEGGSWTTL  
ASDISDCCYL TGKLSRGGMYIFRTACVSKAGMPYSSPSEQVLLGGPNHLASEEESSRGRPAQLLPSTKTF AF  
QMQIRGRF SVVRQCREKASGRALAAKIVPYQPEDKTA VLREYEALKRLHHPHLAQLHAAYLSPRHLVLI LEL  
CSGPELLPSLAERESYSESDVKDYLWQMLSATQYLHAQHILHLDLRSENMMVTEYNLLKVIDLGNASQLDQEK

VPAPENFKDYLETMAPELLEGQAVPQTDIWAIGVTAIFIMLSGEYPESSEGETRDLQKGLRKLIRLSRCYAGL  
SGGAVAFLOSSLCAQPWGRPCASTCLOCGWLTEEGPTGSRPTPVTFTVRLRAFVREKRRALLYKKNHNAQ  
VR\*

>rs48441780\_ENSMUSP00000049737\_c.9798:G>C\_p.A3267P

ENSMUST00000052872.15|Obscn-203|ENSMUSG00000061462|-|chr11:g.58964369:C>G  
MDHSFSGAPRFLTRPKAFVSVGKDATLSCQIVGNPTPHVSWEKDRQPVEAGARFRLAQDGDVYRLTILDLAL  
GDSGQYVCRARNAIGEFAAVGLRVDSEGTCAEQAPHFLLRPTSIRVREGADATFRCRVGGSPPAVSWSKDG  
RRLGPPDAPHVRVEEHGESSALRIRSARPRDGGTYEVRAENPLGSASAAAALVVDSDAEVAGPPGTSTATLLA  
HLQQRRREAMAEGI PPSPPGAGTRTCTVTEGKHARLSCFVTGEPKPEVWKKDQQLVTEGRRHVVEDEQENF  
VLKILFCKQSDRGLYTCTASNLVGQTYSSVLVVVREPTVPFKKRLQDLEVREKESATFQCEVAQPATEAAWFK  
EETRLWASAKYDIEEGTERRLTVRNVSADDDAVYICETTEGSRVVAELSVQGNLTKLPRKTAVRTGDTAIF  
WVELAVPEGPVWRWRNQEEMVAGGRVAITAEGTCHTLTI FQCTLEDMGEVAFVSGGCRTTTQFCVSAPRRPPL  
YPPADPVVKAKTESSVTLWSAPPHGDRPVTIDGYVLEKRKLGAYAWSRCHEAGWLATTEFTITGVAEEGDFQ  
FRVSAINHFGQGPYLEFPGMTMLVPLAVKTPKAVEAVEGGEVTFVSDLTVASSGEWFLDGEALKASSIYVI  
RCDRTRHMLTIREVPARLHGAQLKFVANGIETSIQMVVRAALGLPSSKLPAAAAREVLAQLHEEAQLLAE LSD  
QAAA VTLKDGRELSLGPYEMQVSAGRRALLVRDVAQDDAGLYECVSRGSRRTAYQLLVQEPKLVFAKQQAH  
SEVKAEGNSATLSCEVTAQTEVTWFKDGKLLSSSSKVRMEASGCSRRLLVVQQAGKADAGEYSCEAGGQKLS  
FRLDVAEPKLVFAKQQAHSEVKAEGASATLSCEVAQAQTEVTWFKDGKLLSSSSKVRMEASGCSRRLLVVQQ  
AGKADAGEYSCEAGGQKLSFRLDVAEPKLVFAKEQQARSEVKAEGASATLSCEVAQAQTEVTWFKDGKLLSS  
SSKVRMEASGCSRRLLVVQQAGKADAGEYSCEAGGQKLSFRLDVTEPKLVFAKEQQARSEVKAEGNSATLSCE  
VAQAQTEVTWFKDGKLLSSSSKVRMEASGCSRRLLVVQQAGKADAGEYSCEAGGQKLSFRLDVAEPKLVFAKEQ  
QARSEVKAEGNSATLSCEVAQAQTEVTWFKDGKLLSSSSKVRMEASGCSRRLLVVQQAGKADAGEYSCEAGGQ  
KLSFHLDVTEPKLVFAKEQQAHSEVKAEGASATLSCEVAQAQTEVTWFKDGKLLSSSSKVRMEASGCSRRLLV  
VQQAGKADAGEYSCEAGGQKLSFRLDVAEPKLVFAKEQQARSEVKAEGASATLSCEVAQAQTEVTWFKDGKLL  
LSSSSKVRMEASGCSRRLLVVQQAGKADAGEYSCEAGGQKLSFRLDVAEPKLVFAKEQQANSEVKAEGASATL  
SCEVAQAQTEVTWFKDGKLLSSSSKVRMEASGCSRRLLVVQQAGKADAGEYSCEAGGQKLSFRLDVAEPKLAFA  
KEQQAHEVKAEGASATLSCEVAQAQTEVTWFKDGKLLSSSSKVRMEASGCSRRLLVVQQAGKADAGEYSCEA  
GGQKLSFRLDVAEPKLAFAKEQQAHSEVKAEGASATLSCEVAQAQTEVTWFKDGKLLSSSSKVRMEASGCSR  
RLVVQQAGKADAGEYSCEAGGQKLSFRLDVAEPKLAFAKEQQAHSEVKAEGASATLSCEVAQAQTEVTWFKD  
GKLLSSSSKVRMEASGCSRRLLVVQQAGKADAGEYSCEAGGQKLFRLDVAEPKLMFAKEQQAHSEVKAEGAS  
ATLSCEVAQAQTEVTWFKDGKLLSSSSKVRMEASGCSRRLLVVQQAGKADAGEYSCEAGGQKLSFRLDVAEPKLV  
FAKEQQAHSEVKAEGASATLSCEVAQAQTEVTWFKDGKLLSSSSKVRMEASGCSRRLLVVQQVQKADAGEYS  
CEARGQKLSFRLDVADTRLMFAKEQQARTEVKAEGNSATLSCEVAQAQTEVTWFKDGKLLSSSSKVRMEASG  
CSRRLLVVQQAGKADAGEYSCEAGGQKLSFRLDVAEAEESQI PERPSRREPLVVKEHETIILTATIAAPSVAAVT  
WLKDGEVIRRSKRHEATSLGDTHLTVRGAQVLDLSAIYSCRVGKEGQDFPQVEEVAAKFSKPLEPVEGELGG  
TVMLVCELSPEQAQEVVWRCGNTQLRPGKRFQMTSEGRRTTLTVSGLREDDAEYVCEESRRDRTSARLTVKVP  
VVKFTSGLSAMVAEEGQEAFTQCVVSPSDAGVTWYKDGMLQLPSEKFMVMEVSGASRSLTILGLTLEDAGQVTV  
EAEGASSAALRVREAPVLFKKLEPQTEERTSVTLEVELTRPWPEVKWTRNAAVLTPSENVEIRAEGARHC  
LVLRSVGFADRGFFGCETPDDKTQAKLNVEMRQVRLVRLQVEEAKQGTASMDVELSHAEVEGSWTRDGLRL  
QPGPKCHLAVQGPVHILTLALSALQPQDSGLVAFRAEGVHTSARLIVTELPSVFTTRVLQDVVATQKEKVTLECEL  
SRPVDVRLKDGVELRAGKAI GIVAQGTCSRSLVIYRCETGDQGVYVCDALDAQTSASLRVQGRYTLIFRRVL  
AEDAGEVKFVAENAESRAHLRVKELPVTLLRPLRDKIAMEKHRGVLECVSRASAQVRWFKGGVLELQSGPKYE  
VVSDGLYRKLVINVDVQPEDEDYTC DAGNVKTSAQFFVEEQSITIVRGLKDMTVMPEPAPAWFECETSIPSVRP  
PKWLLGKTVLQAGGNVLEQDGTVHRLTLHKTCSTMTGPVHFTIGKSRSSAQLVVS DIPVVLTRPLEPKAGRE  
LQSVVLSCDFRPAKAVQWYKDDTPLSPSEKFKMALEGQMAELRILRLTPADAGVYRCQAGSAQSSAEVTVEA  
REVTVIQPLQDAEAMEEGRVCFSCELSHKDEDI EWSLNGTPLYNDSFHEISHEGCLHTLVLSVRQADTGTVC  
ATSPKVSVSARLVVKGKPVVFLKALDDVSAEERGTLLTQCEVSDPEARVVRKDGVELGSPDKYDFLHKAGAR  
GLTVHDLSDHEDAGLYTCQVGSKETQSKVSVHDLHVGITKRLKTVLEVLEGECSFCVLSHESPSDPAVWTVGG  
KTVGGSGHFHAVRQGRKYTLTVKDAALSDAGEVVSVLGLTSKASLIIRERPVDITKPLEDQRTTLGEDVMLS  
CELSRAGTSVRWLKDGKAIRKSQYDLLSEGTRAVLVVRKASLKDSGEYTCETEPSKSTAKLCVEEKANRFT  
ELADLQVEEKGRAVFTCKTEHPASVVTWRKGLLELRASGKHVPSQEGTLTKLTINALERTDSDTYTCDIGQAR  
TQARLLVHGQKVRVIEDLEDTAVQEGSSAKFCRIAPADYGPVHWF LDKTPLHSNELNEITVQPGGYHVLT  
QLALKSHGCTVYFEAGDRTS AALRVTEKPSIFSRPLTDVTVTEGEDTLVCEETTVDSSVRWTKDGKTLRPSA  
RCQLSHEGQAQLLITATTPQDGGRYKCEIGGASSSIVRVHALPVRFRRESLKDVEVPEGKAATLRCVLSVA  
APVEWRHGDDVLKSSNKYSLRQEGAVLELVI RDLQPDQSGQYSCSFGDQTTSATLTVKTSQAQVFGKLRNKEA  
TEGTTVTLRCELTKAPVEWKKGTETLRNGDKYSLKQDGA VCELQICSLLVADAGEYSCVCGQEKT SATLTVK  
ALLVHFVRRLSKEATEGDTTTLQCELSKAAPVEWRKGTETLRDGDYSLKQDGA VCELQIRSLTIADAGEYL  
CTCGQEKT SATLTVRALPAKFKDSLKNEEATEGTTATLSCELSKAAPVWKKGPKTLQSGDKYVLRQDGA VCG

LQIHGLTMADAGEYSCVCGQEKTSATLTVRGLPAKFIEDLRSQEATEGATAILRCELSKAAPVEWRKGETLKD  
 DGDRYTLRQDGA VCELQIRGLAVVDGTYSLSLPTKFTTEGLRNEEATEGTMATLRCQMSKAAPVEWRKGETLKD  
 DGDRYSLRQDGA MCELQIRGLTIEDSGEYTCVCGQEKTSATLSVKALPSRFIEDLRSQEATEGTMATLRCQMS  
 KTAPVVEWKKGSETLRDGGRYSLRQDGPVCELQICDLAVEDAGEYSCVCGQEKTSATLSIKALPPRFIEDLRSQ  
 EATEGTMATLRCQMSKAAPVEWRKGETLGDGGRYSLRQNGAVCELQIHDLAVEDTGEYSCVCGQEKTSATLN  
 VKALPPRFIEDLRSQEATEGTMATLRCQMSKAAPVEWRKGETLRDGGRYSLRQDGA VCELQIHDLVEDAGQ  
 YSCVCGQEKTSAVLTVDALPPKFTEGLKKEEATEGTMVTLRCQMSKEATVEWRKGA KTLSDGGRYSLRQDGA M  
 CELQICGLAVEDAGEYSCVCGQEKTSATLSVKALPPRFIEDLRSQEATEGTMATLRCQMSKAAPVEWRKGET  
 LRDGGRYSLRQDGA VCELQIRDLAVEDAGEYLCVCGQEKTSATLSVKALPPRFIEDLRSQEATEGTMATLRCQ  
 MSKAAPVEWRKGSKTLR DGGRYSLRQDGA MCELQICDLAVEDTGDYSCVCGQEKTSATLSVKALPPRFIEDLR  
 SQEAREGTVATLRCRMSKAAPVEWRKGETLKDGGRYSLRQEGNLCELQIRDLAVEDTEEYSCVCGQEKTSAT  
 LSVKALPAKFIEDLRSQEAPESSTVTLRCKLSKKASVVWKKGSETLRNGARYSLRQDGA VCELEIRDLTVEDT  
 GEYSCTCGQERTSATLSIMAPQVVFQQPLQNLQAEEGSMASLRCELSVPNAAMVWSKGGLELQGDTRREARQQ  
 GCVAE LLLRDLRREDAGEYSC TCGSQTT SATLMVTAAPVRFRLRELQAQDVDEGATARLRCELSREAVSVEWRK  
 GSIQLFPKAKYQMVQEGTAE LLLVHGVEQEDAGEYTC DAGHTQS IARLSVRAPKPKFKTDLQSTEQEAGGTAR  
 LCCQLSEAE PGTPVQWLKEGVELHVGSKYEMRRQGA VCELLIHGLEAKDTGEYACL VGGQKTLASLRVKEPEV  
 TIVRGLVDMVEVQADEVFTECKV SQAGATDVQWHLQGLPLQSNVTEVA VLADGCTHVLQKGVTL EDAGTVS  
 FHVGLSSSAQLTVRVPEVTVLEPLKDVQLSEGDHAFRCRLSRASGQEARWALGGVPLQCNEMNDITVEQGT  
 LYLLTLHKVTL EDAGTITLQVGS CSSEAQLKVTAKNTVLRGLENVDALEGG EALFECQLSQPEVA AHTWLLDD  
 EPVHTSEKVEVVYFENGLRHLLLLKNLKPQDSCRVTFLAGDVVTS AFLTVRGWRLEVL EPPHDASVKAGMQVR  
 FTCILSEAVPVGEATWYINGAAIQPDDTDWTVTTDGS HHALTLSNAQPQHAGEVTF AARDAVASARLSVLALP  
 DPPEDAEVVGRSDHSVTL SWVAPMSDGGGGLCGYRVMKEASTGQWQLCHDLVPGPECVDDLVPGKTYRFRV  
 AAVGPAGAGEPVHL PQMVKIAPAPAPAPAPAPAPAPETRAVVGEDICLELEVAADGGEV VWHKGTERRIQPGG  
 HFEVLSRGRQMLVIKGFRTEDQGEYRCGPIQGLPSSGAATFNVMVTS GSGDEVPAQPSLPPEAAQEGDLHLL  
 WEALARKRRMSREPTLDSISELPEEDSRVQHLRQEA EETAPDLSEGYSTADELARTGEADLSHTSSDDES RAG  
 TPSLVTYLKKAGGPGISPLASKHEAQVTT SVKPKQVLEKQFVVPVPTCPPGDL SAADLMDPSLKDAAVKIQAAFKG  
 YKVRKEMKQEGPVSRTEFGDTEAQVGDVLRLECLVATKTD MRACWLKDGIELTDGRHYHIDQLKDGTCSSLV  
 TGLAPTDSGRYTCQVSTKSGRVSHSACVVVSGTESEAE SSSGGELDDAFRRAARRLHRLFRTKSPAELSEEEL  
 FLSADEGPGEPEEPADWQTYREDENFVCIRFESLAEARQAVTCFRNMFATMGIGVEISLGEQGPGRVEMRIGK  
 VAPTVPAPVPLAKTPGLQTS DAAPVFLTELQNDVQDGYPMSFDCVVTGQPVPSVRWFKDGKLEEDDHYMIN  
 EDQGGHQLIITAVVPADMGVYRCLAENSMGVSSTKAELRVELTSTDYDTAADATETSSYFSAQGYLSSREQE  
 GTESDEGQLPQVLEELKDLQVAPGTRLAKFQLKVKGY PAKLYWFKDQGPLTSDHIRMTDKKTLHTLEIVSV  
 TREDSGQYAAYSNAVGAAYSSARLLVRGPSEPEEK PASDVHERLVPRI LEKFTPKKVKRGS SITFSVKVEG  
 HPAPSVHWLKEEA EKGV LWIGPDTPGYTMAS SSKQHSLVLLDVG RQHOGTYTCIATNPAGQALCSASLHISGL  
 AKEEEQERVKEALISSFLQGTSQAVSAQMSE SAGFADLVGQSKGESLVAAEEAHSHLSLAEVGETEFLQKLT SQ  
 ITEMVSAKISQAKLQVPGGDSDEETKTPSASPRHGRSRPSSSVQESSSESDGDSRGEI FDIYVVTADYLP LG  
 AEQDAIILREGQYVEVLDSAHPLRWLVRTKPTKSSPSRQGWVSPAYLDKRLKLSPEWGPTEAPEFPGEAVSED  
 EYRTRLSSVIQELLSSEQAFV GELQFLESHHMKHLERSPRVPAAVASQKTVI FRNVQDISHFHSSFLKELQGC  
 GTDDDVAMCFIKNQEA FEKYLEFLVGRVQAESVVVSTPVQEFYKKYAEETLSAKDPTQPPPPLOHYLEQVPE  
 RVQKYQALLKELIRNKARNRQNCALLEQAYAVVSALPQRAENKLVSLMENYPGTLEALGEP IRQGHFIVWEG  
 APGARMPWKGNHRHVFLFRNYLVICKPRRDSRTDTFSYVFRNMMKLSSIDLNDQVEGD DRAFEVWHEREDSVR  
 KYLLQARTVI IKNSWVKEICGIQQRLAQPVWRPPEFEELADCTAELGETVKLACRVTGTPKPIVSWYKDGKP  
 VEVDPHHILIEDPDG SCTLILDNLGTGIDSGQYMCFAASAAGNASTLGKILVQVPPRFVNVKVRATPFVEGEDAQ  
 ITCTVEGAPYPQIRWYKDGTL LLAGPNRYRMLNEPRSGVLVLIQAASKEDLGHYECELVNLRLGSTRGGGELYM  
 QSPALRARDQHHREQIVA AVEVTEQETKVPKKTVI I EETITTVVKS PRGRRQSPGKSPSRSPRRSASPRRPG  
 LLAPERLYPPGTPSPRRLEVEQGRKAPVPALYVTEAEVHAPASQSQPKWLEVEETIEVRVKKTGSRGASPVRE  
 MTSRGE GILFTLPGGIPGRDPNANNNSNNSVYQEA RTWGPVAVHVGE PFI FQVDSVGNVDWVAASPEPEQVRA  
 SQKEENTERQEGCS DG DENTFLMEEPQD TDSLQGRDPKILTHNGRVLTLADLE DYVPQEGETFGCGDSTPSTP  
 DEPPCEVSVLQREI SEPTVGQPVLLNVGRPPGTGATPSFFRPGSQVHSPESVSFLLREAWSGPVSAAPWTSSF  
 HTHVQSSVDGSHGSFKTEVSTQTVSFGAVGETVTLHIDPDGGEAPGPSQG\*  
 >rs48441780\_ENSMUSP00000020732\_c.9999:G>C\_p.A3334P  
 ENSMUST00000020732.13|Obscn-201|ENSMUSP00000061462|-|chr11:g.58964369:C>G  
 MDHSFSGAPRFLTRPKAFVSVGKDATLSCQIVGNPTPHVSWEKDRQFVEAGARFRLAQDGDVYRLTILDAL  
 GDSGQYVCRARNAIEGAFAAVGLRVDSEGTCAEQAPHFLLRPTSIRVREGADATFRCRVGGSPPAVSWSKDG  
 RRLGPPDAPHVRVEEHGESSALRIRSARPRDGGTYEVRAENPLGSASAAAALVVDSAEVAGPPGTSTATLLA  
 HLQORREAMRAEGIPSPPGAGTRTCTVTEGKHARLSCFVTGEPKPEVWKKDGQLVTEGRRHVVEDEQENF  
 VLKILFCKQSDRGLYTCTASNLVGQTYSSVLVVVREPTVPFKKRLQDLEVREKESATFQCEVAQPA TEAAWFK  
 EETRLWASAKYDIEEGTERRLTVRNVSADDDAVYICETTEGSRVVAELSVQGNLTKLPRKTAVRTGDTAIF



WVELAVPEGPVWRWRNQEEMVAGGRVAITAEGTCHTLTI FQCTLEDMGEVAFVSGGCRTTTQFCVSAPRRPPL  
YPPADPVVKAKTESSVTLWSAPPHGDRPVTIDGYVLEKRKLGAYAWSRCHEAGWLATTEFTITGVAAEGDFQ  
FRVSAINHFGQGPYLEFPGTMHLVPLAVKTPKAVEAVEGGEVTFVSDLTVASSGEWFLDGEALKASSIYVI  
RCDRTRHMLTIREVPARLHGAQLKVFVANGIETSIQMVVRAALGLPSSKLPAAAAAREVLAQLHEEAQLLAE  
QAAAVTWLKDGRELSLGPYEMQVSAGRRALLVRDVAQDDAGLYECVSRGSRRTAYQLLVQDITDGYRDWGPAG  
PQKHMCKCAGAKIARYLGSSCYRFLQYDKGVWHLEAALDTRQKGTSSCSLHEKPKLVFAKQQAHSEVKA  
AGNSATLSCEVTQAQTEVTFWFKDGKLLSSSSKVRMEASGCSRRLVVQQAGKADAGEYSCEAGGQKLSFR  
LDVAEPKLVFAKQQAHSEVKAEGASATLSCEVAQAQTEVTFWFKDGKLLSSSSKVRMEASGCSRRLVVQ  
QAGKADAGEYSCEAGGQKLSFRLDVTEPKLVFAKEQQARSEVKAEGVNSATLSCEVAQAQTEVTFWFK  
DGKLLSSSSKVRMEASGCSRRLVVQQAGKADAGEYSCEAGGQKLSFRLDVAEPKLVFAKEQQARSEV  
KAEAGNSATLSCEVAQAQTEVTFWFKDGKLLSSSSKVRMEASGCSRRLVVQQAGKADAGEYSCEAGGQ  
KLSFHL DVTEPKLVFAKEQQAHSEVKAEGASATLSCEVAQAQTEVTFWFKDGKLLSSSSKVRMEASG  
CSRRLVVQQAGKADAGEYSCEAGGQKLSFRLDVAEPKLVFAKEQQARSEVKAEGASATLSCEVAQAQTE  
VTFWFKDGKLLSSSSKVRMEASGCSRRLVVQQAGKADAGEYSCEAGGQKLSFRLDVAEPKLVFAKEQQ  
ANSEVKAEGASATLSCEVAQAQTEVTFWFKDGKLLSSSSKVRMEASGCSRRLVVQQAGKADAGEYSCE  
AGGQKLSFRLDVAEPKLVFAKEQQAHSEVKAEGASATLSCEVAQAQTEVTFWFKDGKLLSSSSKVRME  
ASGCSRRLVVQQAGKADAGEYSCEAGGQKLSFRLDVAEPKLVFAKEQQAHSEVKAEGASATLSCEVAQ  
AQTEVTFWFKDGKLLSSSSKVRMEASGCSRRLVVQQAGKADAGEYSCEAGGQKLSFRLDVAEPKLVFA  
KEQQAHSEVKAEGASATLSCEVAQAQTEVTFWFKDGKLLSSSSKVRMEASGCSRRLVVQQAGKADAGE  
YSCEAGGQKLSFRLDVAEPKLVFAKEQQAHSEVKAEGASATLSCEVAQAQTEVTFWFKDGKLLSSSSK  
VRMEASGCSRRLVVQQAGKADAGEYSCEAGGQKLSFRLDVAEPKLVFAKEQQANSEVKAEGASATLSCE  
VAQAQTEVTFWFKDGKLLSSSSKVRMEASGCSRRLVVQQAGKADAGEYSCEAGGQKLSFRLDVAEPKLV  
FAKEQQAHSEVKAEGASATLSCEVAQAQTEVTFWFKDGKLLSSSSKVRMEASGCSRRLVVQQAGKAD  
AGEYSCEARGQKLSFRLDVADTRLMFAKEQQARTEVKAEGNSATLSCEVAQAQTEVTFWFKDGKLLSS  
SSKVRMEASGCSRRLVVQQAGKADAGEYSCEAGGQKLSFRLDVAEPKLVFAKEQQAHSEVKAEGASAT  
LSCEVAQAQTEVTFWFKDGKLLSSSSKVRMEASGCSRRLVVQQAGKADAGEYSCEAGGQKLSFRLDVA  
EAEESQIPERPSRREPLVVKEHETIILTATIAAPSAAVTWLKDGV EIRRSKRHEATSLGDTHTLTVRGA  
QVLDIAIYSCRVGKEGQDFPVQVEEVAAKFSKPLEPEVEGELGGTVMLVC ELSPEQAEVWRCENTQLR  
PGRKRFQMTSEGRRTLSVGLREDDAEYVCESRDDRTSARLTVKVPVVKFTS GLSAMVAEEGQVCFD  
FQCQVSPSDAGVTWYKDGMLQPSEKFMVMEVSGASRSLTILGLTLEDAGQVTVAEAGAS SSAALRVRE  
APVFLFKKLEPQTVERTSVTLEVELTRPWPEVKWTRNAAVLTPSENVEIRAEGARHCLVLRVGFADR  
GFFGCETPDDKTQAKLNVEMRQVRLVVRGLQVEVEAKEQGTASMDVELSHAEEVGSWTRDGLRLQPGPK  
HLAVQGPHVHILTLALQPDGSLVAFRAEGVHTSARLIVTELPSVTRVLQDVVATQKEKVTLECELSRPV  
DVRWLKDGVELRAGKAIIGIVAQGTCSRSLVIYRCETGDQGVYCDALDAQTSASLRVQGRTYTLIFRRL  
AEDAGEVKFVAENAESRAHLRVKELPVTLLRPLRDKIAMEKHGRVLECCQVSRASQVRWFKGGVELQ  
SGPKYEVVSDGL YRKLVINVDQPEDEDTYTCDAENVKTSAQFFVEEQSITIVRGLKDMTVMPEPAPAW  
FECETSIPSVRPPKWLKGKTVLQAGNVGLEQDGTVHRLTLHKTCSTMTGPVHFTIGKSRSSAQLVVSDI  
PVVLTTRPLEPKAGRELQSVVL SCDFRPAPKAVGWYKDDTPLSPSEKFKMALEGGMAELRILRLTPADAG  
VYRCQAGSAQSSAEVTVAREVTVI QPLQDAEAMEEGRVCFSELSHKDEDEIWSLNGTPLYNDSFHEI  
SHEGLHTLVLSKVRQADTGTVCATSPKV SVSARLVVKGKPVVFLKALDDVSAEERGLTLTQCEVSD  
PEARVVWRKDGVELGPSDKYDFLHKAGARGLTVHDL SHEDAGLYTCQVGSKETQSKVSVHDLHVGI  
TKRLKTVLEVLEGESECFEVLSSHESPDPAVWTVGGKTVGGS GHFHAVRQGRKYTLTVKDAALSD  
AGEVVFVSVLGLTSKASLIIRERPVDITKPLEDQRTTLGEDVMLSCELSRA GTSVRWLKDGKAI  
RKSQKYDLLSEGTRAVLVVRKASLKDSGEYTCETEPSKSTAKLCVEEKANRFTBELADLQ VEEK  
GRAVFTCKTEHPASVVTWRKGLLELRASGKHVPSQEGTLKLTINALERTSDTYTCDIGQARTQARLL  
VHGQKVRVIEDLEDTAVQEGSSAKFCRIAPADYGPVHWFLLDKTPLHSNELNEITVQPGGYHVLTLR  
QLALKDSGTVYFEAGDQRTSAAALRVTEKPSIFSRPLTDVTVTEGEDTLVCETTTVDSVVRWTKD  
GKTLRPSARCQLSH EGCQAQLLITATTPQDGGRYKCEIGGASSSSIVRVHALPVRFRFRESLKDVEV  
PEGKAATLRCVLSVAAPVEWR HGDDVLKSSNKYSLRQEGAVLELVIRDLQPDGSGQYSCSFGDQTS  
ATLTVKTSQAQFVGLKRNKEATEGTTV TLRCELTKAEAPVEWKKGTETLRNGDKYSLKQDGAVCEL  
QICSLLVADAGEYSCVCGQEKTSATLTVKALLVHFRRLRSKEATEGDTTLQCELSKAAPVEWRKGT  
ETLRDGDYSLKQDGAVCELQIRSLTIADAGEYLCTCGQEKTSATLTVRALPAKFKDSLKNEEATEG  
TTATLSCELSKAAPVTKKGPKTLSQSGDKYVLRQDGAVCGLQIHGL TMADAGEYSCVCGQEKTS  
ATLTVRGLPAKFIEDLRSQEATEGATAILRCELSKAAPVEWRKGSSETLKDGDYTLRQDGAVCEL  
QIRGLAVVDTGTYSSLPTKFTTEGLRNEEATEGTMATLRCQMSKAAPVEWRKGSSETLRDGDYSL  
RQDGAMCELQIRGLTIEDSGEYTCVCGQEKTSATLSVKALPSRFIEDLRSQEATEGTMATLRCQMS  
KTAPVEWKKGSETLRDGGYSLRQDGPVCELQICDLAVEDAGEYSCVCGQEKTSATLSIKALPPRFIE  
DLRSQEATEGTMATLRCQMSKAAPVEWRKGSSETLGDGGYSLRQNGAVCELQIHDLAVEDTGEYSC  
VCGQEKTSATLNVKALPPRFIEDLRSQEATEGTMATLRCQMSKAAPVEWRKGSSETLRDGGYSLRQ  
DGA  
VCELQIHDLAVEDAGQYSCVCGQEKTSATLSAVLTVDALPPKFTEGLKKEEATEGTMVTLRCQMSKE  
ATVEWRKGAKTLSDDGGYSLRQDGAMCELQICGLAVEDAGEYSCVCGQEKTSATLSVKALPPRFIE  
DLRSQEATEGTMATLRCQMSKAAPVEWRKGSSETLRDGDYSLRQDGAVCELQIRDLAVEDAGEYL  
CVCGQEKTSATLSVKALPPRFIEDLRSQEATEGTMATLRCQMSKAAPVEWRKGSSETLRDGDYSLR  
QDGAMCELQICDLAVEDTGDYSCVCGQEKTSATLSVKALPPRFIEDLRSQEARE

GTVATLRCRMSKAAPVEWRKGSSETLKDGDYSLRQEGNLCELQIRDLAVEDTEEYSCVCGQEKTSATLSVKAL  
 PAKFIEDLRSQEAPESSTVTLRCKLSKKASVVWKKGSETLRNGARYSLRQDGAUCELEIRDLTVEDEGTGEYSCT  
 CGQERTSATLSIMAPQVVFQQPLQNLQAEEGSMASLRCELSVPNAAMVWSKGGLELQGDTRREARQQGCVAEL  
 LLRDLRREDAGEYSCTCGSQTTSATLMVTAAPVRFLRELQAQDVDEGATARLRCELSREAVSVEWRKGSLLQF  
 PCAKYQMVQEGTTAELLVHGVEQEDAGEYTCDAHGHTQSIARLSVRAPKPKFKTDLQSTEQEAGGTARLCCQLS  
 EAEPGTPVQWLKEGVELHVGSKYEMRRQGAUCELLIHGLEAKDTGEYACLVGGQKTLASLRVKEPEVTIVRGL  
 VDMEVQADEDEFTCKVSOAGATDVQWHLQGLPLQSNVTEVAVLADGCTHVLQKGVTLDEAGTVSFHVGGGL  
 SSSAQLTVRVPEVTVLEPLKDVQLSEGDQAHFRCLRSRASEGQEARWALGGVPLQCNEMNDITVEQGTLYLLTL  
 HKVTLEDEAGTITLQVGSSEEAQLKVTAKNTVLRGLENVDALLEGGEALFECQLSQPEVAHAHTWLLDDEFPVHTS  
 EKVEVVYFENGLRHLLLLKNLKPQDSCRVTFLAGDVVTSFAFLTVRGWRLEVLPEPHDASVKAGMQVRFCTILS  
 EAVPVGEATWYINGAAIQPDDTDWTVTTDGSHHALTLSNAQPQHAGEVTFAAARDAVASARLSVLALPDPPEDA  
 EVVGRSDHSVTLSSWVAPMSDGGGGLCGYRVMKEASTGQWQLCHDLVPGPECVDDDLVPGKTYRFRVAAVGPA  
 GAGEPVHLPQMVKIAPAPAPAPAPAPAPAPAPETRQAVVGEDICILEVAADGGEVVWHKGTERRIQPGHFVLS  
 RGQRQMLVIKGFRTEDQGEYRCGPIQGLPSSGAATFNVMVMTSGSGDEVPAQPSLPPEAAQEGDLHLLWEALAR  
 KRRMSREPTLDSISELPEEDSRVQHLRQEAEEETAPDLSEGYSTADELARTGEADLSHTSSDDESRACTPSLVT  
 YLKKAGGPGISPLASKHEAQVTTSVKPKQKQEPVPTCPGGDLAADMPLDKAARKIQAQAFKGYKVRKE  
 MKQQEGPVFSRTFGDTEAQVDVLRLECVLATKTDMMRACWLKDGIELTDGRHYHIDQLKDGTCSSLVTLGLAPT  
 DSGRYTCQVSTKSGRVSHSACVVVSGTESEAESSSGGELDDAFRRAARRLHRLFRTKSPAELSEELFLSADE  
 GPGEPEEPADWQTYREDENFVCIRFESLAEARQAVTCFRNMFMATMGIGVEISLGEQGPGRVEMRIGKVAPTVT  
 PAVPLAKTPGLQTSDAAPVFLTELQNDVQDGYPMSFDCVVTGQPVPSVRWFKDGKLEEDDHYMINEDQQGG  
 HQLIITAVVPADMGVYRCLAENSMGVSSTKAELRVELTSTDYDTAADATETSSYFSAQGYLSSREQEGTESDE  
 GQLPQVLEELKDLQVAPGTRLAKFQLKVKGYPAKLYWFKDQGPLTSDHIRMTDKKTLHTLEIVSVTREDSG  
 QYAAIYISNAVGAAYSSARLLVRGPSEPEEKPASDVHERLVPPRILEKFTPKKVKRGSSITFSVKVEGHPAPSV  
 HWLKEEAKEKGVLWIGPDTPGYTMASSSKQHSLLVLLDVGRQHGGTYTCIATNPAGQALCSASLHISGLAKEEEQ  
 ERVKEALISSFLOGTSQAVSAQMSSESAGFADLVGQSKGESLVAEEAHSHLSLAEVGTFFLQKLTSTQITEMVS  
 AKISQAKLQVPGGDSDEETKTPSASPRHGRSRPSSSVQSESSSESEDGDSRGEIFDIYVVVTADYLPGLAEQDAI  
 LLREGQYVEVLDLQVSAHPLRVLVTKPTKSSPSRQVSVSPAYLDRKRLKLSPEWGPTEAPEFPGAEVSEDEPVRTL  
 SSVIQEELLSSEQAFVQELQFLESHHMKHLERSPRVPAAVASQKTVIFRNVQDISHFHSSFLKELQCGCTDDDV  
 AMCFIKNQEAFAEKYLEFLVGRVQAESVVVSTPVQEFYKKAEEETLSAKDPTQPPPPPLQHYLEQPVVERVQKYQ  
 ALLKELIRNKARNRQNCALLEQAYAVVSALPQRAENKLVSLMENYPGTLEALGEPHQGHFIVWEGAPGARM  
 PWKGHNHRVFLFRNYLVICKPRRDSRTDFTSYVFRNMMLSSIDLNDQVEGDDRAFEVWHEREDSVRKYLLQA  
 RTVILKNSWVKEICGIQQLAQPVWRPPEFEEELADCTAELGETVKLACRVTGTPKPIVSWYKDGKPVVEVDPH  
 HILIEDPDGSCTLILDNLTGIDSGQYMCFAASAAGNASTLGKILVQVPPRFVNVKVRATPFVEGEDAQITCTVE  
 GAPYPQIRWYKDGTLTLLAPGNRYRMLNEPRSGVLVLIQAASKEDLGHYECELVNRLGSTRGGGELYMQSPALR  
 ARDQHHREQIVAAVEERRPSP\*

>rs48441780\_ENSMUSP00000151217\_c.8619:G>C\_p.A2874P  
 ENSMUST00000219084.3|Obscn-207|ENSMUSG00000061462|-|chr11:g.58964369:C>G  
 MDHSFSGAPRFLTRPKAFVSVGKDATLSCQIVGNPTPHVSWEKDRQVPEAGARFLAQDGDVYRLTILDLAL  
 GDSGQYVCRARNAIGEAFVAVGLRVDSEGTCAEQAPHFLLRPTSIRVREGADATFRCRVGGSPQPAVSWSKDG  
 RRLGPPDAPHVRVEEHGESSALRIRSARPRDGGTYEVRAENPLGSASAAAALVVDSDAEVAGPPGTSTATLLA  
 HLQQRREAMRAEGIPPSPPGAGTRTCTVTEGKHARLSCFVTGEPKPKETVWKKDQQLVTEGRRHVVEDEQENF  
 VLKILFCKQSDRGLYTCTASNLVGQTYSSVLVVVREPTVPFKKRLQDLEVREKESATFQCEVAQAPATEAAWFK  
 EETRLWASAKYDIEEGETERRLTVRNVSADDDAVYICETTEGSRVVAELSVQGNLTKLPRKTAVRTGDTAIF  
 WVVELAVPEGPVWRWRNRQEMVAGGRVAITAEGTCHTLTI FQCTLEDMGVAVFVSGGCRTTTTQFCVSAPRRPPL  
 YPPADPVVAKTESVTLSSWVAPPHGDRPVTIDGYVLEKRLKLGAYAWSRCHEAGWLATTEFTITGVAAEGDFQ  
 FRVSAINHFGQGPYLEFPGMTMLVPLAVKTPKAVEAVEGGEVTFVSDTLTVASSGEWFLDGEALKASSIYVI  
 RCDRTRHMLTIREVPARLHGAQLKVFVANGIETSIQMVVRAALGLPSSKLPAAAAAREVLAQLHEEAQLLAELSD  
 QAAAVTWLKDGRELSLGPKEYMQVSAGRRALLVRDVAQDDAGLYECVSRGSRRTAYQLLVQDITDGYRDWGPAG  
 PQKHMCKCAGAKIARYLGSSCYRFLQYDKGVVHLEAALDTRQKGTSSCSLHEKPKLVFAKQQAHSVEKAE  
 AGNSATLSCEVTQAQTEVTWFKDGKLLSSSSKVRMEASGCSRRLVVQQAGKADAGEYSCEAGGQKLSFRLDVA  
 EPKLVFAKQQAHSVEKAEAGASATLSCEVAQAQTEVTWFKDGKLLSSSSKVRMEASGCSRRLVVQQAGKADA  
 GEYSCEAGGQKLSFRLDVAEPMVFAKEQQARSEVKAEEAGASATLSCEVAQAQTEVTWFKDGKLLSSSSKVRM  
 EASGCSRRLVVQQAGKADAGEYSCEAGGQKLSFRLDVTEPKLVFAKEQQARSEVKAEEAGNSATLSCEVAQAQ  
 EVTWFKDGLKLLSSSSKVRMEASGCSRRLVVQQAGKADAGEYSCEAGGQKLSFHLVDVTEPKLVFAKEQQAHSEV  
 KAEAGASATLSCEVAQAQTEVTWFKDGKLLSSSSKVRMEASGCSRRLVVQQAGKADAGEYSCEAGGQKLSFRLD  
 DVAEPMVFAKEQQARSEVKAEEAGASATLSCEVAQAQTEVTWFKDGKLLSSSSKVRMEASGCSRRLVVQQAGK  
 ADAGEYSCEAGGQKLSFRLDVAEPMVFAKEQQANSEVKAEEAGASATLSCEVAQAQTEVTWFKDGKLLSSSSK  
 VRVEASGCSRRLVVQQAGKADAGEYSCEAGGQKLSFRLDVAEPMVFAKEQQAHSEVKAEEAGASATLSCEVAQ

AQTEVTFWFKDGGKLSSSSKVRVEASGCSRRLVVQQAGKADAGEYSCEAGGQKLSFRLDVAEPKLVFAKEQQAH  
SEVKAEGASATLSCEVAQAQTEVTFWFKDGGKLSSSSKVRVEASGCSRRLVVQQVKGADAGEYSCEARGQKLS  
FRLDVAEAEESQIPERPSRREPLVVKEHETIILTATIAAPSVAAVTWLKDGVERRSKRHEATSLGDTHTLTVR  
GAQVLDASAIYSCRVGKEGQDFPVQVEEVAAKFSKPLEPVEGELGGTVMLVCELSPEQAEVWRCGNTQLRPGK  
RFQMTSEGPRTTLTVSGLREDDAEYVCESRDDRTSARLTVKVPVVKFTSGLSAMVAEEGQEAFTQCQVSPS  
DAGVTWYKDGMLQVPESEKFMVVEGASRSLTILGLTLEDAGQVTVAEAGASSAALRVREAPVLFKFKLEPQT  
VEERTSVTLEVELTRPWPEVKWTRNAAVLTPSENVEIRAEGARHCLVLRVSGFADRGFFGCETPDDKTQAKLN  
VEMRQVRLVRGLQEVEAKEQGTASMDVELSHAEEVGSWTRDGLRLQPGPKCHLAVQGPVHILTSLALQFQDSG  
LVAEFAEGVHTSARLIVTELPVSFTRVLQDVVATQKEKVTLECELSRPVDVRWLKDGVELRAGKAIIGIVAQGT  
CRSLVIYRCETGDQGVYVCDALDAQTSASLRVQGRYTLIFRRVLAEDAGEVKFVAENAESRAHLRVKELPVT  
LLRPLRDKIAMEKHRGVLECVSRASAQVRWFKGGVELQSGPKYEVVSDGLYRKLVIINDVQPEDEDTYTC DAG  
NVKTSAQFFVEEQSITIVRGLKDMTVMEPAPAWFECETSIPSVRPPKWLGLKTVLQAGGNVLEQDGTVHRLT  
LHKTCSTMTGVPVHFTIGKSRSSAQLVVS DIPVVLTRPLEPKAGRELQSVVLSCDFRPAPKAVQWYKDDTPLSP  
SEKFKMALEGOAELRILRLTPADAGVYRCQAGSAQSSAEVTVAEAREVTVIQPLQDAEAMEEGRVCFSCELSH  
KDEDIEWSLNGTPLYNDSFHEISHEGCLHTLVLKSVRQADTGTVCATSPKVS SARLVVKGKPVVFLKALDDV  
SAEERGLTLTQCEVSDPEARVWVRKDGVELGSPDKYDFLHKAGARGLTVHDLSHEDAGLYTCQVGSKETQSKV  
SVHDLHVGITKRLKTVELEGESECFEVLSHESPSDPVAVTVGGKTVGGSGHFHAVRQGRKTYTLTKDAALS  
DAGEVVFVSVLGLTSKASLIIRERPV DITKPLEDQRTTLGEDVMLSCELSRAGTSVRWLKDGKAIKRSQKYDLL  
SEGTRAVLVVRKASLKDSGEYTCETEPSKSTAKLCVEEKANRFTTEELADLQVEEKGRAVFTCKTEHPASVVTW  
RKGLLELRASGKHVPSQEGTLTKLTINALERTSDTYTCDIGQARTQARLLVHGQKVRVIEDLEDTAVQEGSS  
AKFCCRIPADYGPVHWF LDKTPLHSNELNEITVQPGYHVLTLRQLALKDSGTVYFEAGDQRTSALRVTEK  
PSIFSRPLTDVTVTEGEDTLTVCE TTTVDSSVRWTKDGKTLRPSARCQLSHEGCAQQLLITATTPQDGGRYKC  
EIGGASSSSIVRVHALPVRFRESLKDVEVPEGKAATLRCVLSVAAPVEWRHGDDVLKSSNKYS LRQEGAVLE  
LVIRDLQFQDSGQYSCSFGDQTTSATLTVKTSQAQFVGKLRNKEATEGTTVTLRCELTKEAPVEWKKGTETLR  
NGDKYSLKQDGA VCELQICSLLVADAGEYSCVCGQEKTSATLTVKALLVHFVRRLRSKEATEGDTTTLQCELS  
KAAPVEWRKGTETLRDGD RYSLKQDGA VCELQIRSLTIADAGEYLCTCGQEKTSATLTVRGLPAKFIEDLRSQ  
EATEGATAILRCESKAAPVEWRKGETLKDGD RYTLRQDGA VCELQIRGLAVVDGTGYS SLPTEKTEGLRNE  
EATEGTMATLRCQMSKAAPVEWRKGETL RDGD RYSLRQDGA MCELQIRGLTIEDSGEYTCVCGQEKTSATLS  
VKALPPRFIEDLRSQEATEGTMATLRCQMSKAAPVEWRKGETLGDGGRYSLRQNGAVCELQIHDLAVEDTGE  
YSCVCGQEKTSATLNVKALPPKFT EGLKKEEATEGTMVTLRCQMSKEATVEWRKGAKTLS DGGRYSLRQDGA  
MCELQICGLAVEDAGEYSCVCGQEKTSATLSVKALPPRFIEDLRSQEATEGTMATLRCQMSKAAPVEWRKGET  
LRDGD RYSLRQDGA VCELQIRDLAVEDAGEYLCVCGQEKTSATLSVKALPPRFIEDLRSQEATEGTMATLRCQ  
MSKAAPVEWRKGSKTLRDGD RYSLRQDGA MCELQICDLAVEDTDYSCVCGQEKTSATLSVKAPQVVFQQPLQ  
NLQAEEGMSARLCELSVPNAAMVWSKGGLELQGDTRREARQQGCVAELLLRDLRREDAGEYSC TCGSQT TSA  
TLMVTAAPVRFLRELQAQDVDEGATARLRCESLREAVSVEWRKGS LQFPKAKYQMVQEGTTAELLVHGVEQE  
DAGEYTC DAGTYSIARLSVRAPKPKFKTDLQSTEGEAGGTARLCCQLSEAE PGTPVQWLKEGVELHVGSKYE  
MRRQGA VCELLIHGLEAKDTGEYACL VGGQKTLASLRVKEPEVTIVRGLVDMEVQADEDEFTCKV SQAGATD  
VQWHLQGLPLQSNEVTEVAVLADGCTHV LQLKGVTL EDAGTVSFHVGLSSSAQLTVRVPEVTVLEPLKDVQL  
SEGQDAHFRCRLSRASGQEARWALGGVPLQCNE MNDITVEQGTLYLLTLHKVTLEDAGTITLQVGS CSSEAQL  
KVTAKNTVLRGLE NVDALEGG EALFECQLSQPEVAHTWLLDDEPVHTSEKVEVVYFENGLRHLLLLKNLKPQ  
DS CRVTF LAGDVVTS AFLTVRGWRLEVLEPPHDASVKAGMQVRFTCILSEAVPVGEATWYINGAAIQPDDTDW  
TVTTD GSHHALTLSNAQPQHAGEVTF AARDAVASARLSVLALPDPPEDAEVVGRSDHSVTL S WVA PMSDGGGG  
LCGYR VEMKEASTGQWQLCHDLVPGPECVVDDLVP GKTYRFRVA AVGPAGAGEPVHLPQMVKIAPAPAPAPAP  
APAPETRQAVVGEDICLELEVAADGGEV VWHKGTERRIQPGGHFEVLSRGQRQMLVIKGFRTEDQGEYRCGP IQ  
GLPSSGAATFNVM TSGSGDEVPAQPSLPPEAAQEGDLHLLWEALARKRRMSREPTLDSISELPEEDSRVQHL  
RQEAEETAPDLSEGYSTADELARTGEADLSHTSSDDESRAGT PSLVTYLKKAGGPGISPLASKHEAQVTT SVK  
PQKQQEPVVP TCPPPGDLSAADLMDPSLDKAAVKIQAAF KGYKVRKEMKQQEGPVFSRTFGDTEAQVGDVLR L  
ECVLATKTD MRACWLKDGIELTDGRHYHIDQLKDGTC SLLVTGLAP TDSGRYTCQVSTKSGRVSHSACVVVSG  
TESEAE SSSG GELDDA FRRAARLHRLFR TKSPAELSEELFLSADEGPGEPEEPADWQTYRE DENFVCIRFE  
SLAEARQAVTCFRNMFATMGI GVEISLGEQGP RGVEMRIGKVAPVTPAVPLAKTPGLQTS DAA PVFLTELQN  
QDVQDGY PMSFDCVVTGQPVPSVRWFKDGGKLEEDDHYMINEDQQGGHQLIITAVVPADMGVYRCLAENSMGV  
SSTKAELRVELTSTDYDTAADATETSSYFSAQGYLSSREQEGTESDEGQLPQVLEELKDLQVAPGTRLAKFQL  
KVKGY PAPKLVYFKDGP LTTSDHIRMTDKKTLTLEIVSVTREDSGQYAAIISNAVGAAYSSARLLVRGPSE  
PEEKPSADVHERLVPRILEKFTPKKVKRGSSITF SVKVEGHPAPSVHWLKEEA EKGVLWIGPDTPGYTMAS S  
SKQHS LVLLDVGRQHGT YTCIATNPAGQALCSASLHISGLAKEEEQERVKEALISSFLQGT SQAVSAQMSSES  
AGFADLVGQSKGESLVAEEAHSHLSLAEVGT EEF LQKLT SQI TEMVSAKISQAKLQVPGGDSDEETKTPSASP  
RHGRSRPSSSVQESSSESEDGDSRGEIFDIYVVTADYLP LGAEQDAIILREGQYVEVLDSAHPLRVLVTRTKPT  
KSSPSRQGWVSPAYLDKRLKLSPEWGPTEAPEFPGEAVSEDEYRTRLSSVIQELLSSEQAFV GELQFLESHHM

KHLERSPRVPAAVASQKTVIFRNVQDISHFHSSFLKELQCGCTDDDDVAMCFIKNQEAFAEKYLEFLVGRVQAES  
VVVSTPVQEFYKKYAEETLSAKDPTQPPPPPLQHYLEQPVERVQKYQALLKELIRNKARNRQNCALLEQAYAV  
VSALPQRAENKLHVSLMENYPGTLEALGEPRIQGHFIVWEGAPGARMFPGKHNHRVFLFRNYLVICKPRRDSR  
TDTFSYVFRNMMKLSSIDLNDQVEGDDRAFEVWHEREDESVRKYLLQARTVIKNSWVKEICGIQQRLAQPVWR  
PEFEHEELADCTAELGETVKLACRVGTGPKPIVSWYKDGKPVVDPHHILIEDPDGSCSTLIDLNLTGIDSGQY  
MCFASAAGNASTLGKILVQVPPRFVNVKVRATPFVEGEDAQITCTVEGAPYPQIRWYKDGTLTLLAPGNRYRMLN  
EPRSGVLVLVIQAASKEDLGHYECELVNRLGSTRGGGELYMQSPALRARDQHHREQIVAAVEVTEQETKVPKK  
TVIEETITTVVKSPPRRRQSPGKSPSRSPSRASPRRGLLAPERLYPPGTSPSRREVEQGRKAPVPALY  
VTEAEVHAPASQSQPKWLEVEETIEVVRVKKTGSRGASPVREMTSRGEGILFTLPGGIPGRDPNANNNSNKS  
QEARWGPVAVHVGEPFIQVDSVGNVDVAASPEPEQVRASQKEENTERQEGCSDGDENTFLMEEPQDTS  
LQGRDPKILTHNGRVLTLDLEDYVPQEGETFQCGDSTPSTPDEPPCEVSVLQREI SEPTVQPVLLNVGRPPG  
TGATPSFFRPGSQVHSPESVSFLLREAWSGPVSAAPWTSSFHTHVQSSVDGSHGSFKTEVSTQTVSFGAVGET  
VTLHIDPDGGEAPGPSQ\*

>rs48441780\_ENSMUSP00000122181\_c.2247:G>C\_p.A750P

ENSMUST00000133040.4|Obscn-205|ENSMUSG00000061462|-|chr11:g.58964369:C>G  
AGKAI GIVAQGTCSRSLVIYRCETGDQGVYVCDALDAQTSASLRVQGRSVQITKPLEDVEVMEKEGATFSCEVS  
HDEVPGLWFRESSKLRPSDNVRIHQEGRTYTLIFRRVLAEDAGEVKFVAENAESRAHLRVKELPVTLLRPLRD  
KIAMEKHRGVLECVSRASQVRWFKGGVELQSGPKYEVSDGLYRKLVINQVQPEDEDTYTCDAENVKTSAQ  
FFVEEQSITIVRGLKDMTVMEPAPAWFECETSIPSVRPPKWLGLKTVLQAGGNVGLQDGTVHRLTLHKTCST  
MTGVPVHFTIGKSRSSAQLVSDIPVVLTRPLEPKAGRELQSVVLSCDFRPAPKAVQWYKDDTPLSPSEKFKMA  
LEGQMAELRILRLTPADAGVYRCQAGSAQSSAEVTVEAREVTVIQPLQDAEAMEEGRVCFSCSELSHKDE  
SLNGTPLYNDSFHEISHEGCLHTLVLSKSVRQADTGTVCATSPKVSVSARLVVKGKPVVFLKALDDVSAE  
ERTLTQCEVSDPEARVVRKDGVELGSPDKYDFLHKAGARGLTVHDLSHEDAGLYTCQVGSKETQSKVSVHDLHV  
GITKRLKTVEVLEGESCSFECVLSHESPSDPAVWTVGGKTVGGSGHFHAVRQGRKYTLTVKDAALSDAGEV  
VSVLGLTSKASLIRERPVDTIKPLEDQRTTLGEDVMLSCELSRAGTSVRWLKDGKAIKRSQKYDLLSEGTRAV  
LVVRKASLKDSGEYTCETEPSKSTAKLCVEEKANFTEELADLQVEEKGRAVFTCKTEHPASVVTWRKGLLEL  
RASGKHVPSQEGTLTKLTINALERTSDTYTCDIQARTQARLLVH

>rs47146051\_ENSMUSP00000158795\_c.9528:G>C\_p.V3177L

ENSMUST00000238536.2|Obscn-210|ENSMUSG00000061462|-|chr11:g.58965954:C>G  
MDHSFSGAPRFLTRPKAFVSVGKDATLSCQIVGNPTPHVSWEKDRQPVVEAGARFRLAQDGDVYRLTILDLAL  
GDSGQYVCRARNAIGEAFVAVGLRVDSEGTCAEQAPHLLRPTSIRVREGADATFRCRVGGSPQPAVSWSKDG  
RRLGPPDAPHVRVEEHGESSALRIRSARPRDGGTYEVRAENPLGSASAAAALVVDSAEVAGPPGTSTATLLA  
HLQQRREAMRAEGIPPSPPGAGTRTCTVTEGKHARLSCFVTGEPKPEVWKKDGQLVTEGRRHVVEDEQENF  
VLKILFCCKQSDRGLYTCTASNLVGQTYSSVLVVVREPTVPFKRLQDLEVREKESATFQCEVAQPAEAAWFK  
EETRLWASAKYDIIEEGTERRLTVRNVSAADDAVYICETTEGSRVAVELSVQGNLTKRKLPRKTAVRTGDTAIF  
WVELAVPEGPVRLRNQEEEMVAGGRVAITAEQTCHTLTIFQCTLEDMEVAVFVSGGCRTTTTQCVSAPRRPPL  
YPPADPVVKAKTESSVTLWSAPPHGDRPVTIDGYVLEKRLKLGAYAWSRCHEAGWLATTEFTITGVAAEGDFQ  
FRVSAINHFGQGPYLEFPGTMHLVPLAVKTPKAVEAVEGGEVTFVSDLTVASSGEWFLDGEALKASSIYVI  
RCDRTRHMLTIREVPARLHGAQLKFVANGIETSIQMVVRAALGLPSSKLPAAAAREVLAQLHEEAQLLAE  
LSDQAAAVTWLKDGRELSLGPYEMQVSAGRRALLVRDVAQDDAGLYECVSRGSRRTAYQLLVQDITDGYR  
DWGPAGPQKHMCKCAGAKIARYLGSSCYRFLQYDKGVVHWEAALDTRQKGKTS SCSLHEKPKLVFAK  
GQQAHSEVKAEGNSATLSCEVTQAQTEVTWFKDGKLLSSSSKVRMEASGCSRRLVVQQAGKADAGEYS  
CEAGGQKLSFRLDVAEPKLVFAKEQQARSEVKAEGASATLSCEVAQAQTEVTWFKDGKLLSSSSKVR  
MEASGCSRRLVVQQAGKADAGEYSCEAGGQKLSFRLDVTEPKLVFAKEQQARSEVKAEGVNSATLSCE  
VAQAQTEVTWFKDGKLLSSSSKVRMEASGCSRRLVVQQAGKADAGEYSCEAGGQKLSFRLDVAEPKLV  
FAKEQQARSEVKAEGNSATLSCEVAQAQTEVTWFKDGKLLSSSSKVRMEASGCSRRLVVQQAGKADAGE  
YSCEAGGQKLSFHL DVTEPKLVFAKEQQAHSEVKAEGASATLSCEVAQAQTEVTWFKDGKLLSSSSKVR  
MEASGCSRRLVVQQAGKADAGEYSCEAEGQKLSFRLDVAEPKLVFAKEQQARSEVKAEGASATLSCEVA  
QAQTEVTWFKDGKLLSSSSKVRVEASGCSRRLVVQQAGKADAGEYSCEAGGQKLSFRLDVAEPKLVFAKE  
QQAHSEVKAEGASATLSCEVAQAQTEVTWFKDGKLLSSSSKVRVEASGCSRRLVVQQAGKADAGEYSCE  
AAGQKLSFRLDVAEPKLVFAKEQQANSEVKAEGASATLSCEVAQAQTEVTWFKDGKLLSSSSKVRVEA  
S GCSRRLVVQQAGKADAGEYSCEAGGQKLSFRLDVAEPKLVFAKEQQAHSEVKAEGASATLSCEVAQAQ  
TEVTWFKDGKLLSSSSKVRVEASGCSRRLVVQQAGKADAGEYSCEAGGQKLSFRLDVAEPKLVFAKEQ  
QAHSEVKAEGASATLSCEVAQAQTEVTWFKDGKLLSSSSKVRVEASGCSRRLVVQQAGKADAGEYSCEA  
RGQKLSFRLDVADTRLMFAKEQQARTEVKAEGNSATLSCEVAQAQTEVTWFKDGKLLSSSSKVRVEA  
S GCSRRLV

VQQAGKADAGEYSCEAGGQKLSFRLLDVAEAEESQIPERPSRREPLVVKEHETIILTATIAAPSVAAVTWLKDGV  
EIRRSKRHEATSLGDTHTLTVRGAQVLDIAIYSCRVGKEGQDFPVQVEEVAAKFSKPLEPVEGELGGTVMLVC  
ELSPQAEVWRCGNTQLRPGKRFQMTSEGPRTTLTVSGLREDDAEYVCESRDDRTSARLTVKVPVVKFTS  
GLSAMVAEEGQEATFQCVVSPSDAGVTWYKDGMLQPSSEKFMVESGASRSLTILGLTLEDAGQVTEAEGAS  
SSAALRVREAPVLFKKKLEPQTVEERTSVTLEVELTRPWPEVKWTRNAAVLTPSENVEIRAEGARHCLVLRV  
GFADRGGFFGCETPDDKTQAKLNVEMRQVRLVVRGLQVEVEAKEQGTASMDVELSHAEVEGWSWTRDGLRLQPGPKC  
HLAVQGPVHILTLALSALQPDQSGLVAFRAEGVHTSARLIVTELPVSFTRVLQDVVATQKEKVTLECELSRPVDV  
RWLKDGVLELRAGKAIGIVAQGTCSRSLVIYRCETGDQGVYVCDALDAQTSASLRVQGRTYTLIFRVLAEADAGE  
VKFVAENAESRAHLRVKELPVTLLRPLRDKIAMEKHRGVLECVSRASAQVRWFKGGVELQSGPKYEVVSDGL  
YRKLVINVDQPEDEDTYTCDAENVKTSAQFFVEEQSITIVRGLKDMTVMPEPAPAWFECETSIPSVRPPKWL  
KTVLQAGGNVLEQDGTVHRLTLHKTCSTMTGPVHFTIGKSRSSAQLVVSDIPVVLTRPLEPKAGRELQSVV  
SCDFRPAPKAVQWYKDDTPLSPSEKFKMALEGGMAELRILRLTPADAGVYRCQAGSAQSSAEVTEAREVTVI  
QPLQDAEAMEEGRVCFSCELSHKDEDIEWSLNGTPLYNDSFHEISHGCLHTLVLSVRQADTGTVCATSPKV  
SVSARLVVKGKPVVFLKALDDVSAEERGTTLQCEVSDPEARVVRKDGVELGPSDKYDFLHKAGARGLTVHD  
LSHEDAGLYTCQVGSKETQSKVSVHDLHVGITKRLKTLVLEGESECSFECVLSHESPSDPAVWTVGGKTVGGS  
GHFHAVRQGRKYTLTVKDAALSDAGEVVSVLGLTSKASLIIRERPVDITKPLEDQRTTLGEDVMLSCELSRA  
GTSVRWLKDGKAIRKSKQYDLSSEGTRAVLVVRKASLKDSEYTCETEASKSTAKLCVEEKANRFTEELADLQ  
VEEKGRAVFTCKTEHPASVVTWRKGLLELRASGKHVPSQEGTLKLTINALERTSDSTYTCDIGQARTQARLL  
VHGQKVRVIEDLEDTAVQEGSSAKFCCRIAPADYGPVHWFLLDKTPLHSNELNEITVQPGGYHVLTLRQLALKD  
SGTVYFEAGDQRTSALRVTEKPSIFSRPLTDVTVTEGEDTLVCETTTTVDSVVRWTKDGKTLRPSARCQLSH  
EGCQALLITATTPQDGGRYKCEIGGASSSSIVRVHALPVRFRSLKDVEVPEGKAATLRCVLSVAAPVEWR  
HGDDVLKSSNKYSLRQEGAVLELVIRDLQPDQSGQYSCSFGDQTSATLTVKTSQAQFVGLRNKEATEGTTV  
TLRCELTKAPVEWKKGTETLRNGDKYSLKQDQAVCELQICSLLVADAGEYSCVCGQEKT SATLTVKALLVHF  
VRLRSKEATEGDTTTLQCELSKAAPVEWRKGTETLRDGDYSLKQDQAVCELQIRSLTIADAGEYLCTCGQE  
KTSATLTVRALPAKFKDSLKNEEATEGTTATLSCELSKAAPVWKKGPKTLQSGDKYVLRQDQAVCGLIHGL  
TMADAGEYSCVCGQEKT SATLTVRGLPAKFIEDLRSQEATEGATAILRCELSKAAPVEWRKGSSETLKDGDYR  
LRQDQAVCELQIRGLAVVDGTYSLPTKFTTEGLRNEEATEGTMATLRCQMSKAAPVEWRKGSSETLRDGDYR  
LRQDQAVCELQIRGLTIEDSGEYTCVCGQEKT SATLSVKALPSRFIEDLRSQEATEGTMATLRCQMSKTAPVE  
WKKGSETLRDGGYSLRQDQAVCELQICDLAVEDAGEYSCVCGQEKT SATLSIKALPPRFIEDLRSQEATEG  
MATLRCQMSKAAPVEWRKGSSETLGDGGYSLRQNGAVCELQIHDLAVEDTGEYSCVCGQEKT SATLNVKALPP  
RFIEDLRSQEATEGTMATLRCQMSKAAPVEWRKGSSETLRDGGYSLRQDQAVCELQIHDLDVEDAGQYSCVCG  
QEKTSAVLTVDALPPKFTTEGLKKEEATEGTMVTLRCQMSKEATVEWRKGAKTLSDGGRYSLRQDQAVCELQIC  
GLAVEDAGEYSCVCGQEKT SATLSVKALPPRFIEDLRSQEATEGTMATLRCQMSKAAPVEWRKGSSETLRDGD  
YSLRQDQAVCELQIRDLAVEDAGEYLCVCGQEKT SATLSVKALPPRFIEDLRSQEATEGTMATLRCQMSKAAP  
VEWRKGSSETLRDGDYSLRQDQAVCELQICDLAVEDTGDYSCVCGQEKT SATLSVKALPPRFIEDLRSQEARE  
GTVATLRCRMSKAAPVEWRKGSSETLKDGDYSLRQEGNCELQIRDLAVEDTGEYSCVCGQEKT SATLSVKAL  
PAKFIEDLRSQEAPESSTVTLRCKLSKKASVVWKKGSETLRNGARYSLRQDQAVCELEIRDLTVEEDTGEYSCT  
CGQERTSATLSIMAPQVVFQQPLQNLQAEEGSMASLRCELSVNPAAWWSKGGLELQGDTRREARQQGCVAEL  
LLRDLRREDAGEYSCVCGQEKT SATLMVTAAPVRFRLRELQAQDVDEGATARLRCELSREAVSVEWRKGSQQLF  
PCAKYQMVQEGTTAELLVHGVEQEDAGEYTCDAHTQSIARLSVRAPKPKFKTDLQSTEQEAAGGTARLCCQLS  
EAEFGTPVQWLKEGVELHVGSKYEMRRQAVCELLIHGLEAKDTGEYACLVGGQKTASLRVKEPEVTIVRGL  
VDMEVQADEDEFTCKVQAGATDVQWHLQGLPLQSNVTEVAVLADGCTHVLPQKGVTLLEDAGTVSFHVGGL  
SSSAQLTVRVPEVTVLEPLKDVQLSEGQDAHFRCLSRASGQEARWALGGVPLQCNEMNDITVEQGTLYLLTL  
HKVTLLEDAGTITLQVGSSESQAQLKVTAKNTVLRGLENVDALEGGEALFECQLSQPEVAHAHTWLLDDEPVHTS  
EKVEVVYFENGLRHLKLLKLNKLPQDSCRVTFLAGDVVTS AFLTVRGRWRLEVLEPPHDASVKAGMQVRFTCILS  
EAVPVGEATWYINGAAIQPDDTDWTVTTDGSHALTLSNAQPQHAGEVTF AARDAVASARLSVLALPDPEDA  
EVVGRSDHSVTLVSWAPMSDGGGGLCGYRVMKEASTGQWQLCHDLVPGPECVDDLVPGKTYRFRVAAVGPA  
GAGEPVHLPQMVKIAPAPAPAPAPAPAPAPETRQAVVGEDICLELEVAADGGEVVWHKGTERRIQPGHFVLS  
RGQRQMLVIKGFRTEDQGEYRCGPIQGLPSSGAATFNVMVMTSGSGDEVPAQPSLPPEAAQEGDLHLLWEALAR  
KRRMSREPTLDSISELPEEDSRVQHLRQEAETAPDLSEGYSTADELARTGEADLSHTSSDDESAGT PSLVT  
YLKAGGPGISPLASKHEAQVTTSVKPKQKQEPVPTCPPPGDLSAADLMDPSLDKAAVKIQAAFKGYKVRKE  
MKQQEGPVFSRTFGDTEAQVGDVLRLECVLATKTD MRACWLKDGIELTDGRHYHIDQLKDGTCSLLVTLGLAPT  
DSGRYTCQVSTKSGRVSHSACVVVSGTESEAEASSGGELDDAFRAARRLHRLFRTKSPAELSEELFLSADE  
GPGEPEEPADQTYREDENFVCIREFESLAEARQAVTCFRNMFATMGI GVEISLGEQGRGVEMRIGKVAPT VV  
PAVPLAKTPGLQTS DAAPVFLTELQNDVQDGYPMSFDCVVTGQVPVSVRWFKDGKLEEDDHYMINEDQGG  
HQLIITAVVPADMGVYRCLAENSMGVSSTKAELRVELTSTDYDTAADATETSSYFSAQGYLSSREQEGTESDE  
GQLPQVLEELKDLQVAPGTRLAKFQLKVKGYPAKLYWFKDQGPLTTS DHIRMTDKKTLHTLEIVSVTREDSG  
QYAAIY SNAVGAAYSSARLLVRGPSEPEEK PASDVHERLVPPRI LEKFTPKKVKRGSSITFSVKVEGHPAPSV

HWLKEEAKEKGLVLIWIGPDTPGYTMASSSKQHSLLVLLDVGRQHOGTYTTCIATNPAGQALCSASLHISGLAKEEEQ  
ERVKEALISSFLOGTSQAVSAQMSESAFADLVGQSKGESLVAEEAHSHLSLAEVGTEEFLOKLTQSITEMVS  
AKISQAKLQVPGGDSDEETKTPSASPRHGRSRPSSSVQESSSEEDGDSRGEIFDIYVVTADYLPGLAEQDAI  
ILREGQYVEVLDSAHPLRWLVRTKPTKSSPSRQGWVSPAYLDKRLKLSPEWGPTEAPEFPGEAVSEDEYRTRL  
SSVIQELLSSEQAFVQELQFLESHHMKHLERSPRVPAAVASQKTVI FRNVQDISHFHSSFLKELQCGTDDDDV  
AMCFIKNQEAFAKEYLEFLVGRVQAESVVVSTPVQEFYKKYAEETLSAKDPTQPPPPPLQHYLEQPVERVQKYQ  
ALLKELIRNKARNRNCALLEQAYAVVSALPQRAENKLVSLMENYPGTLEALGEPITRQGHFIVWEGAPGARM  
PWKGHNHRHVFLFRNYLVICKPRRDSRTDTFSYVFRNMMKLSSIDLNDQVEGDDRAFEVWHEREDSVRKYLLQA  
RTVLIKNSWVKEICGIQQLAQPVWRPPEFEELADCTAELGETVKLACRVTGTPKPIVSWYKDGKPEVDPH  
HILIEDPDGCTLILDNLTGIDSGQYMCFAASAAGNASTLGKILVQVPPRFVNVKVRATPFVEGEDAQITCTVE  
GAPYPQIRWYKDGTLAPGNRYRMLNEPRSGVLVLIQAASKEDLGHYECELVNRLGSTRGGGELYMQSPALR  
ARDQHHREQIVAAVEDTSVEGSAHSAQDQAAASVLWRLGSEALGSPGDLNTRQSEPPAFEEAASQIP  
GAASGTPEVSQPGTHKLEQETSSSGSQGWTPVIRVEGTAWPGAGTGQLLLDVHSQVIMETTQRTYVQCAPDT  
GVTRAPSMQVTIEDVQVQVGDMAQFDAVIEGHPPPIVWTYKGSTQLTSSARLSQRQDGTYSVLVTDVAPHDA  
GVYTCVANNAGGQVLCKAELLVHGGDKLDAENQVYRRKLSHFYDVQEEIGRGVFGFVKRVQHKGNKMFCAAKF  
IPLRSKTRAQAYQERDILATLGHPLVTGLLDQFETRKTLLILILELCSSEELLDRLFKKGVVTEAEVKVYIQQL  
VEGLHYLHSHGILHLDIKPPNIMVHPAREDIKICDFGFAQKITPSEPOYSKYGSPPEFVSPPEIEQNPVSEGS  
DIWAMGVI SYLSLTCSPPFAGESDRATLLNVLEGRVSWSSPTAAHLSSEDAKDFIKATLQRTPRARSTSQCLA  
HPWFLKSMPAEEAHFINTKQLKFLARSRWQRSLMSYKSI LVMRSIPELLQGPPDPSPLGVARHLRGEASGAS  
SSSSSSDNELAPFARAKSLPPSPVTHSPLLHPRGFLRPSASLPEETEASMPPTADA AVPASQASAGPPASPGCV  
PRHSVSISSLFYQQAGEGAERGNKTSGAKRHPARRRHLKGGYIARALPGLREPLMEYSLLEEEAAREEQASLM  
TKTPSFETALRPLSSSVREVPGRSHSLDNPPVTTGPSPEACEQLLFPSTGLTHETTAKDRGHKEGFLQESV  
PFPMSGDSRPGKQEGSSQDSCRKPASSCHSELGSGSQEGCPSQSLGSLPPQSLKKELETS CGPLFSEQ  
PQAAPFPTQVSPLLGSEKEPQDGSLSSEGPVVPSSSPGSASQVDASLDTEGLSEAGDTCDFTPPPQRPQEQAT  
TRKFSLESRRGGYAGVAGYGTFAFGGDAGGMLGQGPLWARMAWAVSQSSEEQDEAATESPQPLES LGPIAEASG  
VPLRTPSPLTPWEEVEQVSLVQIRDLSGDAEAADTISLDISEVDPAYLNLSDLYDIKYLPEFEMI FRVRPKPI  
EQPESPGSETEAGLEADFLLEAAWPWPGELGLRAGLEITTEPEEPGDLEALLGEAAVGRKRKWSPSRGLFQF  
PGRCLSGEEPVELGLRQRVKASMAHISRILKGRPEGPEREGPPRKKAGLASFRLSGLKGRDQELSDEAVVLGQ  
SVTLACQVLAQPTAQATWSKDGVLLESSGHLIISSTLKNFQLLTI LVVKEEDLGTYTCCVSNPLGTAVTTGVL  
RKAERPSSSPRPEVGEYKDAVLLVWKPVESECGPVTYIVQCCIEGGSWTTLASDISDCCYLTGKLSRGGMYIF  
RTACVSKAGMGPYSSPSEQVLLGGPNHLASEEESSRGRPAQLLPSTKTFAFQMQIRRGFRFSVVRQCREKASGR  
ALAAKIVPYQPEDKTA VLREYEAALKRHLHHLAQLHAAYLSPRHLVLI LELCSGPELLPSLAERESYSESDVK  
DYLWQMLSATQYLHAQHILHLDLRSENMMVTEYNLLKVIDLGNAAQSLDQEKVPAPENFKDYLETMAPELLEGQ  
GAVPQTDIWAIGVTA FIMLSGEY PESSSEGTRDLQKGLRKLIRLSRCYAGLSGGAVAFLOSSLCAQPWGRPCA  
STCLQCGWLTEEGPTGSRPTPVTFPTVRLRAFVREKRRRALLYKKNLAQVR\*

>rs47146051\_ENSMUSP00000038264\_c.8700:G>C\_p.V2901L  
ENSMUST00000047441.14|Obscn-202|ENSMUSG00000061462|-|chr11:g.58965954:C>G  
MDHSFSGAPRFLTRPKAFVSVGKDATLSCQIVGNPTPHVSWEKDRQVPEAGARFRLAQDGDVYRLTILDLAL  
GDSGQYVCRARNAIGEAFVAVGLRVDSEGTCAEQAPHFLLRPTSIRVREGADATFRCRVGSGPQPAVSWSKDG  
RRLGPPDAPHVRVEEHGESSALRIRSARPRDGGTYEVRAENPLGSASAAAALVVDSDAEVAGPPGTSTATLLA  
HLQQRREAMRAEGIPSPPGAGTRTCTVTEGKHARLSCFVTGEPKPKETVWKKDQQLVTEGRRHVYDEQENF  
VLKILFCKQSDRGLYTCTASNLVGQTYSSVLVVVREPTVPFKKRLQDLEVREKESATFQCEVAQPATEAAWFK  
EETRLWASAKYDIEEGTERRLTVRNVSADDDAVYICETTEGSRVAELSVQGNLTKLPRKTAVRTGDTAIF  
WVELAVPEGPVWRWRNQEEMVAGGRVAITAEGTCHTLTI FQCTLEDMGVAFVSGGCRTTTFQCVSAPRRPPL  
YPPADPVVKAKTESSVTLSSWAPPHGDRPVTIDGYVLEKRKLGA YAWSRCHEAGWLAETFTITGVAAEEDGFQ  
FRVSAINHFGQGPYLEFPGMTMLVPLAVKTPKAVEAVEGGEVTFVSDLTVASSGEWFLDGEALKASSIYVI  
RCDRTRHMLTIREV PARLHGAQLK FVANGIETS IQMVVRAALGLPSSKLPAAAAREVLAQLHEEAQLLAELSD  
QAAA VTWLKDGRELSLGPKYEMQVSAGRRALLVRDVAQDDAGLYECVSRGSR TAYQLLVQDITDGYRDWGPAG  
PQKHMCKCAGAKIARYLGSSCYRFLQYDKGVWHWLEAALDTRQKGTSSCSLHEKPKLVFAKQQAHSEVKA  
AGASATLSCEVAQAQTEVTWFKDGKLLSSSSKVRMEASGCSRRLVVQQAGKADAGEYSCEAGGQKLSFRLDVA  
EPKMFVFAKEQQARSEVKA EAGASATLSCEVAQAQTEVTWFKDGKLLSSSSKVRMEASGCSRRLVVQQAGKADA  
GEYSCEAGGQKLSFRLDVTEPKLVFAKEQQARSEVKA EAGASATLSCEVAQAQTEVTWFKDGKLLSSSSKVRM  
EASGCSRRLVVQQAGKADAGEYSCEAGGQKLSFRLDVAE PKLVFAKEQQARSEVKA EAGASATLSCEVAQAQ  
EVTWFKDGLKLLSSSSKVRMEASGCSRRLVVQQAGKADAGEYSCEAGGQKLSFHLVDVTEPKLVFAKEQQAHSEV  
KAEAGASATLSCEVAQAQTEVTWFKDGKLLSSSSKVRMEASGCSRRLVVQQAGKADAGEYSCEAGGQKLSFR  
DVAE PKLVFAKEQQARSEVKA EAGASATLSCEVAQAQTEVTWFKDGKLLSSSSKVRMEASGCSRRLVVQQAGK  
ADAGEYSCEAGGQKLSFRLDVAE PKLVFAKEQQANSEVKA EAGASATLSCEVAQAQTEVTWFKDGKLLSSSSK  
VRVEASGCSRRLVVQQAGKADAGEYSCEAGGQKLSFRLDVAE PKLFAKEQQAHSEVKA EAGASATLSCEVAQ

AQTEVTWFKDGGKLSSSSSKVRVEASGCSRRLVVQQAGKADAGEYSCEAGGQKLSFRLDVAEPKLAFAKEQQA  
SEVKAEEAGASATLSCEVAQAQTEVTWFKDGGKLSSSSSKVRVEASGCSRRLVVQQAGKADAGEYSCEAGGQKLS  
FRLDVAEPKLAFAKEQQAHEVKAEEAGASATLSCEVAQAQTEVTWFKDGGKLSSSSSKVRVEASGCSRRLVVQQ  
AGKADAGEYSCEAGGQKLFRLDVAEPKLVFAKEQQAHEVKAEEAGASATLSCEVAQAQTEVTWFKDGGKLS  
SSKVRVEASGCSRRLVVQQVQKADAGEYSCEARGQKLSFRLDVAEAEESQIPERPSRREPLVVKHEHETIILTAT  
IAAPSVAAVTWLKDGVIEIRRSKRHEATSLGDTHLTVRGAQVLDIAIYSCRVGKEGQDFPVQVEEVAAKFSKP  
LEPVEGELGGTVMLVCELSPEQAEVVRWCNGTQLRPGKRFQMTSEGPRRTLTVSGLREDDAEYVCESRDDRT  
SARLTVKVPVVKFTSGLSAMVAEEGQEAFTQCVVSPSDAGVTVYKDGMLQVQSEKFMVVEGASRSRLTILGL  
TLEDAGQVTVEAEGASSAALRVREAPVLFKKKLEPQTVEERTSVTLEVELTRPWPEVKWTRNAAVLTPSENV  
EIRAEGARHCLVLRVSVGFADRGFFGCETPDDKTQAKLNVEMRQVRLVVRGLQEVEAKEQGTASMDVELSHAEVE  
GSWTRDGLRQLQPGPKCHLAVQGPVHILTLALQPDQSGLVAFRAEGVHTSARLIVTELPVSFTRVLQDVVATQ  
KEKVTLECELSRPVDVRLWLDGVELRAGKAI GIVAQGTCSRSLVIYRCETGDQGVYCDALDAQTSASLRVQGR  
TYTLIFRRVLAEDAGEVVFVAENAESRAHLRVKELPVTLLRPLRDKIAMEKHRGVLECCQVSRASAVRWFKGG  
VELQSGPKYEVVSDGLYRKLVINVDVQPEDEDTYTCDAGNVKTSAQFFVEEQSITIVRGLKDMTVMPEPAPAWFE  
CETSIPSVRPPKWLGLKTVLQAGNVGLEQDGTVHRLTLHKTCSTMTGPVHFTIGKSRSSAQLVVS DIPVVL  
RPLEPKAGRELQSVVLSCDFRPAKAVQWYKDDTPLSPSEKFKMALEGQMAELRILRLTPADAGVYRCQAGSA  
QSSAEDTVEAREVTVIQLQDAEAMEEGRVCFSELSHKDEIEWSLNGTPLYNDSFHEISHEGCLHTLVLS  
VRQADTGTVCATSPKVSARLNVKGPVVFLKALDDVSAEERGTLTLQCEVSDPEARVVRKDGVELGSPDK  
YDFLHKAGARGLTVHDLSDHEDAGLYTCQVGSKETQSKVSVHDLHVGITKRLKTLLEVLEGESECFEVLVSHESP  
SDPAVWTVGGKTVGGSGHFHAVRQGRKYTLTVKDAALSDAGEVVFVSVLGLTSKASLIIRERPVDITKPLEDQR  
TTLGEDVMLSCELSRAGTSVRWLKDGKAIKRSQKYDLLSEGTRAVLVVRKASLKDSGEYTCETEASKSTAKLC  
VEEKANRFTEELADLQVEEKGRAVFTCKTEHPASVVTWRKGLLELRASGKHVPSQEGTLKLTINALERTDSD  
TYTCDIGQARTQARLLVHGQKVRVIEDLEDTAVQEGSSAKFCRIPADYGPVHWFLDKTPLHNSNELNEITVQ  
PGGYHVLTLRQLALKDSGTVYFEAGDQRTSAALRVTEKPSIFSRPLTDVTVTEGEDTLVCETTTTVDSSVRWT  
KDGKTLRPSARCQLSHEGCAQLLITATTPQDGGRYKCEIGGASSSSIVRVHALPVRFRESLKDVEVPEGKAA  
TLRCLVSSVAAPVVRHGDVLLKSSNKYSLRQEGAVLELVIRDLQPDQSGQYSCSFGDQTTSATLTVKTTSSAQ  
FVGLKLRNKEATEGTTVLRCELTKAEAPVEWKEGTETLRNGDKYSLKQDQAVCELQICSLLVADAGEYSCVCGQ  
EKTSATLTVKALLVHFVRRRLRSKEATEGDTTTLQCELSKAAPVEWRKGTETLRDGDYSLKQDQAVCELQIRS  
LTIADAGEYLCTCGQEKTSATLTVRALPAKFKDSLKNEEATEGTTATLSCELSKAAPVTWKKGPKTLQSGDKY  
VLRQDQAVCGLQIHGLTMADAGEYSCVCGQEKTSATLTVRGLPAKFIEDLRSQEATEGATAILRCELSKAAPV  
EWRKGSETLTKDGDYTLRQDQAVCELQIRGLAVVDTGTYSLSLPTKFTTEGLRNEEATEGTMATLRCQMSKAAPV  
EWRKGSETLRDGDYSLRQDQAVCELQIRGLTIEDSGEYTCVCGQEKTSATLSVKALPPRFIEDLRSQEATEG  
TMATLRCQMSKAAPVEWRKGSETLGDGGYSLRQNGAVCELQIHDLAVEDTGEYSCVCGQEKTSATLNVKALP  
PRFIEDLRSQEATEGTMATLRCQMSKAAPVEWRKGSETLRDGGYSLRQDQAVCELQIHDLVEDAGQYSCVC  
GQEKTSAVLTVDALPVPKFTTEGLKKEEATEGTMVTLRQMSKEATVEWRKGAKTSLDGGYSLRQDQAVCELQI  
CGLAVEDAGEYSCVCGQEKTSATLSVKALPPRFIEDLRSQEATEGTMATLRCQMSKAAPVEWRKGSKTLRDGD  
RYSRLRQDQAVCELQICDLAVEDTGDYSCVCGQEKTSATLSVKAPQVVFQQLQNLQAEEGSMASLRCELSV  
AAMVWSKGGLELQGDTRREARQQGCVAELLLRDLRREDAGEYSCVCGQEKTSATLMVTAAPVRFRLRQAVD  
DEGATARLRCELSREAVSVEWRKGSLLQFPKAKYQMVQEGTTAELLVHGVEQEDAGEYTC DAGHTQSIARLSV  
RAPKPKFKTDLQSTEQEAGGTARLCCQLSEAEPTPVQWLKEGVELHVGSKYEMRRQAVCELLIHGLEAKDT  
GEYACLVGQKTLASLRVKEPEVTIVRGLVDMEVQADEDFEFTCKVVSQAGATDVQWHLQGLPLQSNVEVAV  
LADGCTHVQLKGVTLLEDAGTVSFHVGGLSSSAQLTVRVPEVTVLEPLKDVQLSEGQDAHFRCRLSRASGQEA  
RWALGGVPLQCNEMNDITVEQGTLYLLTLHKVTLLEDAGTITLQVGSSEAEQLKVTAKNVTLRGLNVDAL  
GALFECQLSQPEVAHAHTWLLDDEPVHTSEKVEVVYFENGLRHLLLLKLNKLPQDSCRVTFLAGDVVTS  
RALPDPPEDAEVVGRSDHSVTLVSWVAPMSDGGGLCGYRVMKEASTGQWQLCHDLVPGPECVVDLVP  
RFRVAAVGPAGAGEPVHLPQMVKIAPAPAPAPAPAPAPAPETRAVVGEDICLELEVAADGGVEVWHK  
QPGGHFEVLSRQQRQMLVIKGFRTEDQGEYRCGPIQGLPSSGAATFNVVMTSGSGDEVPAQPSLPPEAAQEGD  
LHLLWEALARKRRMSREPTLDSISELPEEDSRVQHLRQEAETAPDLSEGYSTADELARTGEADLSHTSSDDE  
SRAGTPSLVTYLKKAGGPGISPLASKHEAQVTTSVKPKQKQEPVVPVTPCPPGDLAADLMDPSLDKAAVKIQA  
AFKGYKVRKEMKQEGPVFSRTFGDTEAQVGDVLRLECVLATKTDMRACWLKDGIELTDGRHYHIDQLKDGTC  
SLLVTGLAPTDSGRYTCQVSTKSGRVSHSACVVVSGTESEAESSSGGELDDAFRRARRLHRLFRTRKSPAELS  
EELFLSADEGPEPEPADWQTYREDENFVCIRFESLAEARQAVTCFRNMFMATMGIGVEISLGEQGP  
RIGKVAPTVTPAVPLAKTGLQTSDAAPVFLTELQNDVQDGYPMSFDCVVTGQVPVSVRWFKDKGLLEEDDH  
YMINEDQQGGHQLIITAVVPADMGVYRCLAENSMGVSSTKAELRVELTSTDYDTAADATETSSYFSAQGYLSS  
REQEGTSEDEGQLPQVLEELKDLQVAPGTRAKFQLKVKGYPAKPLYWFKDQPLTSSDHIRMTDKTLHTLE  
IVSVTREDSGQYAAIYISNAVGAAYSARLLVRGPSEPEEKPASDVHERLVPPRILEKFTPKKVKRGSSITFSV  
KVEGHPAPSVHVLKEEAKEKGLVWIGPDTPGYTMASSKQHSVLVLLDVGRQHOGTYTCIATNPAGQALCSASLH  
ISGLAKEEEQERVKEALISSFLQGTSAVSAQMSSESAGFADLVGQSKGESLVAAEEAHSHLSLAEVGTTEFLQK

LTSQITEMVSAKISQAKLQVPGGDSDEETKTPSASPRHGRSRPSSSVQESSSESEDGDSRGEIFDIYVVTADY  
 LPLGAEQDAIILREGQYVEVLDSAHPLRVLVVRTKPTKSSPSRQGWVSPAYLDKRLKLSPEWGPTEAPEFPGEA  
 VSEDEYRTRLSSVIQELLSSEQAFVGELOFLESHHMKHLERSPRVPAAVASQKTVI FRNVQDISHFSSFLKE  
 LQCGGTDDDDVAMCFIKNQEA FEKYLEFLVGRVQAESVVVSTPVQEFYKKYAEETLSAKDPTQPPPPLOHYLE  
 QPVERVQKYQALLKELIRNKARNRQNCALLEQAYAVVSALPQRAENKLVSLMENYPGTLEALGEPTRQGHFI  
 VWEGAPGARMPWKGNHRHVFLFRNYLVICKPRRDSRTDTFSYVFRNMMKLSIDLNDQVEGDRAFEVWHERE  
 DSVRKYLLQARTVI IKNSWVKEICGIQQRLAQPVWRPPEFEEELADCTAELGETVKLACRVGTGPKPIVSWYK  
 DGKPVVEVDPHHILIEDPDGSCTLI LDNLTGIDSGQYMCFAASAAGNASTLGKILVQVPPRFVNKVRATPFVEG  
 EDAQITCTVEGAPYPQIRWYKDGTL LAPGNRYRMLNEPRSGVLLVLIQAASKEDLGHYECELVNRLGSTRGGG  
 ELYMQSPALRARDQHHREQIVAAVEGAPSMQVTIEDVQVQVGDMAQF DAVIEGHPPP IVTWYKGTQLTSSAR  
 LSQRQDGTYSLVLT DVA PHDAGVYTCVANNAGQVLCCKAELLVHGGDKLDAENQVYRRKLHSFYDVQEEIGR  
 GVFGFVKRVQHKGNMFC AAKFIPLRSKTRAQAYQERDILATLGHPLVTGLLDQFETRKTLLILILELCSSEEL  
 LDRLFKKGVVTEAEVKVYIQQLVEGLHYLHSHGILHLDIKPPNIMVHPAREDIKICDFGFAQKITPSEPOYS  
 KYGSEPFVSP EIEQN PVSEGS DIWAMGVISYLSLTCSSPFAGESDRATLLNVLEGRVSWSSPTAAHLS EDAK  
 DFIKATLQRTPRARPSTSQC LAHPWFLKSMPAEEAHFINTKQLKFL LARSRWQRSLMSYKSI LVMRSIPELLQ  
 GPPDSPSLGVARHLRGEASGASSSSSSSDNELAPFARAKSLPPSPVTHSPLLHPRGFLRPSASLPEETEASMP  
 TADA AVPA PQSAGPPASPGCVPRHSV ISSLFYQQAGEGAERGNKTS GAKRHPARRRHLLKGGYIARALPGLR  
 EPLMEYSLLEEEAAREEQASLMTKTPSFETALRLPSSSVREVPGRSHSLDNPPVTTGSPPEACKQLLFPST  
 GLTHEHTAKDRGHEGFLQESVFPFPMMSGDSRPGKQEGSSQDSCRGKPASSCHSELGSGSQEGCGPPSSQSLG  
 SLPPQSLKKELESTSCGPLFSEQPQAAPFPTQVSPLLGSEKEPQDGSLSSEGVPVPSSSPGSASQVDASLDTEG  
 LSEAGDTCDFTPPPQRPQEQATTRKFSLESRRGGYAGVAGYGTFAFGGDAGGMLGQGPLWARMWAVSQSSEEQ  
 DEAAATESPQPLESGLPIAEASGVPLRTSPSLTPWEEVEQVSLVQIRDLSGDAEAADTISLDISEVDPAYLNL  
 DLYDIKYL PFEFMI FRRV PKPIEQPESPGSETEAGQGLADFL EEAAPWPWGPGLGLRAGLEIT EEP EEPGDLEA  
 LLGEAAVGRKRKWSPSRGLFQFGRCLSGEEPVELGLRQRVKASMAHISRI LKGRPEGP EREGPPRKKAGLAS  
 FRLSGLKGRDQELSDEAVVLGQSVTLACQVLAQPTAQATWSKDGVLLES SGHLLISSTLKNFQLLTI LVVKEE  
 DLGTYTCCVSNLGTAVTTGVLKRAERPSSSRPEVSEYKDAVLLVWKPVESCGPVTYIQVCCIEGGSWTTL  
 ASDISDCCYLTKGLSRGGMYIFRTACVSKAGMGPYSSPSEYVLLGGPNHLASEEESRRGRPAQLL PSTKTFAF  
 QMQIRRGRFVVRQCREKASGRALAAKIVPYQPEDKTA VLREYEALKRLHHPHLAQLHAAYLS PRHLVLI LEL  
 CSGPELLPSLAERESYSESDVKDYLWQMSATQYLHAQHILHLDLRSENMMVTEYNLLKVIDLGNASLDQEK  
 VPAPENFKDYLETMAPELLEGQAVPQTDIWAIGVTA FIMLSGEY PESS EGT RD LQKGLRKLIRLSRCYAGL  
 SGGAVAF LQSS LCAQPWGRPCASTCLQCGWLTEEGPTGSRPTPVTFTVRLRAFVREEREKRRALLYKKNH LAQ  
 VR\*

>rs47146051\_ENSMUSP00000049737\_c.9327:G>C\_p.V3110L  
 ENSMUST00000052872.15|Obscn-203|ENSMUSG00000061462|-|chr11:g.58965954:C>G  
 MDHSFSGARFLTRPKAFVSVGKDATLSCQIVGNPTPHVSWEKDRQVVEAGARFRLAQDGDVYRLTILDLAL  
 GDSGQYVCRARNAIEEAFAAVGLRVDSEGTCAEQAPHFLLRPTSIRVREGADATFRCRVGGSPQPAVWSKDG  
 RRLGPPDAPHVRVEEHGESSALRIRSARPRDGGTYEVRAENPLGSASAAAAALVVDSDAEVAGPPGTSTATLLA  
 HLQORREAMRAEGIPSPPGAGTRTCTVTEGKHARLSCFVTGEPKPE TVWKKDGQLVTEGRRHVVYEDEQENF  
 VLKILFCKQSDRGLYTCTASNLVGTYSVSVLVVREPTVPFKKRLQDLEVREKESATFQCEVAQPA TEAAWFK  
 EETRLWASAKYDIEEGETERRLTVRNVSADDDAVYICETTEGSRVAELSVQGNLTRKLPKRTAVRTGDTAIF  
 WVELAVPEGPVRWLRNQEEMVAGGRVAITAEGTCHTLTI FQCTLEDMGEVAFVSGGCRTTTQFCVSAPRRPPL  
 YPPADPVVKAKTESSVTL SWSAPPHGDRPVTIDGYVLEKRKL GAYAWSRCHEAGWLATTEFTITGVAAEEDFDQ  
 FRVSAINHFGQGPYLEFPGTMHLVPLAVKTPLKAVEAVEGGEVTFVSDLTVASSGEWFLDGEALKASSIYVI  
 RCDRTRHMLTIREV PARLHGAQLK FVANGIETS IQMVVRAALGLPSSKLPAAAAREVLAQLH EEAQLLAE LSD  
 QAAAVTWLKDGRELSLGPKYEMQVSAGRRALLVRDVAQDDAGLYECVSRGSR TAYQLLVQEPKLVFAKGQQA  
 SEVKA EAGNSATLSCEVTQAQTEVTWFKDGKLLSSSSKVRMEASGCSRRLVVQQAGKADAGEYSCEAGGQKLS  
 FRLDVAEPKLVFAKQQA HSEVKA EAGASATLSCEVAQAQTEVTWFKDGKLLSSSSKVRMEASGCSRRLVVQQ  
 AGKADAGEYSCEAGGQKLSFRLDVAEPKMFVFAKEQQARSEVKA EAGASATLSCEVAQAQTEVTWFKDGKLLS  
 SSKVRMEASGCSRRLVVQQAGKADAGEYSCEAGGQKLSFRLDVTEPKLVFAKEQQARSEVKA EAGNSATLSCE  
 VAQAQTEVTWFKDGKLLSSSSKVRMEASGCSRRLVVQQAGKADAGEYSCEAGGQKLSFRLDVAEPKLVFAKEQ  
 QARSEVKA EAGNSATLSCEVAQAQTEVTWFKDGKLLSSSSKVRMEASGCSRRLVVQQAGKADAGEYSCEAGGQ  
 KLSFHLDVTEPKLVFAKEQQAHSEVKA EAGASATLSCEVAQAQTEVTWFKDGKLLSSSSKVRMEASGCSRRLV  
 VQQAGKADAGEYSCEAEGQKLSFRLDVAEPKLVFAKEQQARSEVKA EAGASATLSCEVAQAQTEVTWFKDGK  
 LSSSKVRVEASGCSRRLVVQQAGKADAGEYSCEAGGQKLSFRLDVAEPKLVFAKEQQANSEVKA EAGASATL  
 SCEVAQAQTEVTWFKDGKLLSSSSKVRVEASGCSRRLVVQQAGKADAGEYSCEAGGQKLSFRLDVAEPKLAFA  
 KEQQAHSEVKA EAGASATLSCEVAQAQTEVTWFKDGKLLSSSSKVRVEASGCSRRLVVQQAGKADAGEYSCEA  
 GGQKLSFRLDVAEPKLAFAKEQQAHSEVKA EAGASATLSCEVAQAQTEVTWFKDGKLLSSSSKVRVEASGCSR  
 RLVVQQAGKADAGEYSCEAGGQKLSFRLDVAEPKLAFAKEQQAHSEVKA EAGASATLSCEVAQAQTEVTWFKD



GKKLSSSSKVRVEASGCSRRLLVVQQAGKADAGEYSCEAGGQKLFRRLDVAEPKLMFAKEQQAHSEVKAEEAGAS
ATLSCEVAQAQTEVTFWFKDGKKLSSSSKVRVEASGCSRRLLVVQQAGKADAGEYSCEAGGQKLSFRLDVAEPKL
VFAKEQQAHSEVKAEEAGASATLSCEVAQAQTEVTFWFKDGKKLSSSSKVRVEASGCSRRLLVVQQVQKADAGEYS
CEARGQKLSFRLDVADTRLMFAKEQQARTEVKAEAGNSATLSCEVAQAQTEVTFWFKDGKKLSSSSKVRVEASG
CSRRLLVVQQAGKADAGEYSCEAGGQKLSFRLDVAEAEESQIPERPSRREPLVVKEHETIILTATIAAPSVAAVT
WLKDGVEIRRSKRHEATS LGDTHLTVRGAQVLD SAIYSCRVGKEGQDFPVQVEEVAAKFSKPLEPVEGELGG
TVMLVCELSPEQAEVWRCGNTQLRPGKRFQMTSEGPRTTLTVSGLREDDAEYVCESRDDRTSARLTVKVPR
VVKFTSGLSAMVAEEGQEAFTQC VVSPSDAGVTWYKDGMLQPSSEKFMVMSGASRSLTILGLTLEDAGQVTV
EAEGASSAALRVREAPVLFKFKLEPQTVEERTSVTLEVELTRPWEVVKWTRNAAVLTPSENVEIRAEGARHC
LVLRSVGFADRGGFFGCETPDDKTQAKLVNEMRQVRLVVRGLQEVEAKEQGTASMDVELSHAEVEGSWTRDGLRL
QPGPKCHLAVQGPVHILTLALSALQPQDSGLVAFRAEGVHTSARLIVTEL PVSFTRVLQDVVATQKEKVTLECEL
SRPVDVRWLKDGVELRAGKAIGIVAQGTCSRSLVIYRCETGDQGVYVCDALDAQTSASLRVQGRTYTLIFRRVL
AEDAGEVVFVAENAESRAHLRVKELPVTLLRPLRDKIAMEKHRGVLECCQVSRASAQVRWFKGGVELQSGPKYE
VVSDGLYRKLVIN DVQPEDEDTYTCDAGNVKTSAQFFVVEEQSITIVRGLKDMTVMPEPAPAWFECETSIPSVRP
PKWLLGKTVLQAGGNVGLQDGT VHRLTLHKTCSTMTGPVHFTIGKSRSSAQLVVSDIPVVLTRPLEPKAGRE
LQSVVLSCDFRPAPKAVQWYKDDTPLSPSEKFKMALEGQMAELRILRLTPADAGVYRCQAGSAQSSAEVTVEA
REVTVIQPLQDAEAMEEGRVCFSCELSHKDEDEI EWSLNGTPLYNDSFHEISHEGCLHTLVLSKVRQADTGTVC
ATSPKVSVSARLVVKGKPVVFLKALDDVSAEERGTTLTQCEVSDPEARVVWRKDGVELGKPSDKYDFLHKAGAR
GLTVHDLSDHEDAGLYTCQVGSKETQSKVSVHDLHVGITKRLKTEVLEGESECSFECVLSHESPSDPAVWTVGG
KTVGGSGHFHAVRQGRKYTLTVKDAALSDAGEVVSVLGLTSKASLIIRERPVDITKPLEDQRTTLGEDVMLS
CELSRAGTSVRWLKDGKAIRKSQKYDLLSEGTRAVLVVRKASLKDSGEYTCETEASKSTAKLCVEEKANRFTTE
ELADLQVEEKGRAVFTCKTEHPASVVTWRKGLLELRASGKHVPSQEGTLKLTINALERTDSDTYTCDIGQAR
TQARLLVHGQKVRVIEDLEDTAVQEGSSAKFCCRIAPADYGPVHWF LDKTPLHSNELNEITVQPGGYHVLT LR
QLALKDSGTVYFEAGDQRTS AALRVTEKPSIFSRPLTDVTVTEGEDLTLVCETTTVDSSVRWTKDGKTLRPSA
RCQLSHEGCAQLLITATTPQDGGRYKCEIGGASSSSIVRVHALPVRFRESLKDVEVPEGKAATLRCVLSVA
APVEWRHGDDVLTKSSNKYSLRQEGAVLELVIRDLQPDQSGQVSCSFGDQTTSATLTVKTSQVQVFKLRNKEA
TEGTVTLRCELTSAVLTVDALPPKFTTEGLKKEEATEGTMVTLRCQMSKEATVWEWRKGAKTLS DGGRYSLRQDGAM
CELLQICGLAVEDAGEYSCVCGQEKTSATLSVKALPPRFIEDLRSQEATEGTMATLRCQMSKAAPVEWRKGS
LQIHGLTMADAGEYSCVCGQEKTSATLTVRGLPAKFIEDLRSQEATEGATAILRCELSKAAPVEWRKGS
DGDYTLRQDGAVCELQIRGLAVVDGTYSLPTKFTTEGLRNEEATEGTMATLRCQMSKAAPVEWRKGS
DGDYSLRQDGAMCELQIRGLTIEDSGEYTCVCGQEKTSATLSVKALPSRFIEDLRSQEATEGTMATLRCQMS
KTAPVEWKKGSETLRDGGRYSLRQDGPVCELQICDLAVEDAGEYSCVCGQEKTSATLSIKALPPRFIEDLRSQ
EATEGTMATLRCQMSKAAPVEWRKGSSETLGDGGRYSLRQNGAVCELQIHDLAVEDTGEYSCVCGQEKTSATLN
VKALPPRFIEDLRSQEATEGTMATLRCQMSKAAPVEWRKGSSETLRDGGRYSLRQDGAVCELQIHDLVEDAGQ
YSCVCGQEKTSAVLTVDALPPKFTTEGLKKEEATEGTMVTLRCQMSKEATVWEWRKGAKTLS DGGRYSLRQDGAM
CELQICGLAVEDAGEYSCVCGQEKTSATLSVKALPPRFIEDLRSQEATEGTMATLRCQMSKAAPVEWRKGS
LRDGDYSLRQDGAVCELQIRDLAVEDAGEYLCVCGQEKTSATLSVKALPPRFIEDLRSQEATEGTMATLRCQ
MSKAAPVEWRKGSKTLRDGDYSLRQDGAMCELQICDLAVEDTGDYSCVCGQEKTSATLSVKALPPRFIEDLR
SQEAREGTVATLRCRMSKAAPVEWRKGSSETLKDGDYSLRQEGNLCELQIRDLAVEDTEEYSCVCGQEKTSAT
LSVKALPAKFIEDLRSQEAPESSTVTLRCKLSKKASVVWKKGSETLRNGARYSLRQDGAVCELEIRDLTVEDT
GEYSCTCGQERTSATLSIMAPQVVFQQPLQNLQAEEGSMASLRCELSVPNAAMVWSKGGLELQGDTRREARQQ
GCVAELLLRDLRREDAGEYSCCTGSQTTSATLMVTAAPVRFLRELQAQDVDEGATARLRCELSREAVSVEWRK
GSLQLFPKAKYQMVQEGTAEALLVHGVEQEDAGEYTC DAGHTQS IARLSVRAPKPKFKTDLQSTEQEAGGTAR
LCCQLSEAEPTPVQWLKEGVELHVGSKYEMRRQGA VCELLIHGLEAKDTGEYACL VGGQKTLASLRVKEPEV
TIVRGLVDMEVQADEDEFTCKVSQAGATDVQWHLQGLPLQSNEVTEVAVLADGCTHVQLKGVTLLEDAGTVS
FHVGGSSSAQLTVRVPEVTVLEPLKDVQLSEGDQDAHFRCLRSRASGQEARWALGGVPLQCNEMNDITVEQGT
LYLLTLHKVTLLEDAGTITLQVGSSEAQKVTAKNTVLRGLENVDALEGG EALFECQLSQPEVA AHTWLLDD
EPVHTSEKVEVVYFENGLRHLLLLKNLKPQDSCRVTFLAGDVVTS AFLTVRGRWRLEVL EPPHDASVKAGMQVR
FTCILLSEAVPVGEATWYINGAAIQPDDT DWTVTTDGSHHALTLSNAQPQHAGEVTF AARDAVASARLSVLALP
DPPEDA EVVGRSDHSVTL SWVAPMSDGGGGLCGYR VEMKEASTGQWQLCHDLVPGPECVDDLVPGKTYRFRV
AAVGPAGAGEPVHLPQMVKIAPAPAPAPAPAPAPAPETRAVVGEDICLELEVAADGGEVVWHKGTERRIQPGG
HFEVLSRGRQMLVIKGFRTEDQGEYRCGPIQGLPSSGAATFNVMVMTSGSGDEVPAQP SLPPEAAQEGDLHL
WEALARKRRMSREPTLDSISELPEEDSRVQHLRQEAEETAPDLSEGYSTADELARTGEADLSHTSSDDESFRAG
TPSLVTYLKKAAGGPGI SPLASKHEAQVTT SVKPKQKQEPVVPTCPPPGDLSAADLMDPSLDKAAVKIQAAFKG
YKVRKEMKQOEGPVFSRTFGDTEAQVGDVLRLECVLATKTD MRACWLKDGIELTDGRHYHIDQLKDGTC SLLV
TGLAPTDSGRYTCQVSTKSGRVSHSACVVVSGTESEAE SSSGGELDDAFRRAARLHRLFRTKSPAELSEEEL
FLSADEGPGPEEPADWQTYREDENFVCIRFESLAEARQAVTCFRNMFATMIGIVEISLGEQGPGRVEMRIGK

VAPTVPAPVPLAKTPGLQTSDAAPVFLTELOQNDVQDGYPMSFDCVVTGQPVPSVRWFKDGLLEEDDHYMIN  
EDQQGGHQLIITAVVPADMGVYRCLAENSMGVSSTKAELRVELTSTDYDTAADATETSSYFSAQGYLSSREQE  
GTESDEGQLPQVLEELKDLQVAPGTRLAKFQKLVKGYAPKLYWFKDQPLTTS DHIRMTDKKTLHTLEIVSV  
TREDSGQYAAIYISNAVGAAYSSARLLVRGPSEPEEKPASDVHERLVPPRILEKFTPKKVKRGSSTFVSVKVEG  
HPAPSVHVLKEEAKEKGLVWIGPDTPGYTMASSSKQHSVLVLDVGRQHGGTYTCIATNPAGQALCSASLHISGL  
AKEEEQERVKEALISSFLQGTSAVSAQMSEAGFADLVGQSKGESLVAEEAHSHLSLAEVGTTEEFLQKLTSSQ  
ITEMVSAKISQAKLQVPGGDSDEETKTPSASPRHGRSRPSSSVQESSSESEDGDSRGEIFDIYVVTADYLPLG  
AEQDAIILREGQYVEEHLDSAHPLRVLVTRTKPTKSSPSRQGWVSPAYLDKRLKLSPEWGPTEAPEFPGEAVSED  
EYRTRLSSVIQELLSSEQAFVGLQFLSHHMKHLERSRVPAAVASQKTVIFRNVQDI SHFHSSFLKELQGC  
GTDDDVAMCFIKNQEA FEKYLEFLVGRVQAESVVVSTPVQEFYKKAETLSAKDPTQPPPPPLQHYLEQPV  
RVQKYQALLKELIRNKARNRQNCALLEQAYAVVSALPQRAENKLVSLMENYPGTLEALGEP RQGHFVWEG  
APGARMPWKGHNRHVF LFRNYLVICKPRRDSRTDTFSYVFRNMMKLSIDLNDQVEGDRAFEVWHEREDESVR  
KYLQARTVI IKNWVKEICGIQORLAQPVWRPPEFEELADCTAELGETVKKLACRVTGT PKPIVSWYKDGKP  
VEVDPHHILIEDPDGSC TLI LDNLTGIDSGQYMCFAASAAGNASTLGKILVQVPPRFVNKVRATPEVEGEDAQ  
ITCTVEGAPYPQIRWYKDG TLLAPGNRYRMLNEPRSGVLVVIQAASKEDLGHYECELVNLGSTRGGGELYM  
QSPALRARDQHHREQIVAAVEVTEQETKVPKKTVI IETITTVVKS PRGRRQSPGKSPSRSPRRSASPRRPG  
LLAPERLYPPGTSPRRLEVEQGRKAPVPALYVTEAEVHAPASQS QPKWLEVEETIEVRVKKTVSRGASPVRE  
MTRSGEGLIFTLPGGI PGRDPNANNNSNKSVYQEARWGPVAVHVGEPIFQVDSVGNVDWVAASPEPEQVRA  
SQKEENTERQEGCSGDENTFLMEEPQD TDSLQGRDPKIL THNGRVLTLADLEDYVPQEGETF GCGDSTPSTP  
DEPPCEVSVLQREI SEPTVGQPVLLNVGRPPGTGATPSFFRPGSQVHSPESVSFLLREAWSGPVS AAPWTSSF  
HTHVQSSVDGSHGSFKTEVSTQTVSFGAVGETVTLHIDPDGGEAPGPSQG\*

>rs47146051\_ENSMUSP0000020732\_c.9528:G>C\_p.V3177L  
ENSMUST0000020732.13|Obscn-201|ENSMUSG0000061462|-|chr11:g.58965954:C>G  
MDHSFSGAPRFLTRPKAFVVS VGKDATLSCQIVGNPTPHVSWEKDRQVVEAGARFRLAQDGDVYRLTILDLAL  
GDSGQYVCRARNAIGEAFAAVGLRVDSEGTCAEQAPHFLLRPTSIRVREGADATFRCRVGGSPPAVSWSKDG  
RRLGPPDAPHRVREIGESSALRIR SARPRDGGTYEVRAENPLGSASAAAALVVDSDAEVAPPGTSTATLLA  
HLQQRREAMRAEGIPSPPGAGTRTCTVTTEGKHARLSCFVTGEPKPEVTVWKKDQQLVTEGRHVVEDEQENF  
VLKILFCQSDRGLYTCTASNLVQGTYSSVLVVREPTVPFKKRLQDLEVREKESATFQCEVAQPATEAAWFK  
EETRLWASAKYDIEEEGTERRLTVRNVSADDDAVYICETTEGSRVVAELSVQGNLTRKLRKTAVRTGDTAIF  
WVELAVPEGPVRWRLNQEEMVAGGRVAITAEGTCHTLTI FQCTLEDMGEVAFVSGGCRTTTTQFCVSA PRRPL  
YPPADPVVAKTESVTL SWSAPPHGDRPVTIDGYVLEKRKLGAYAWSRCHEAGWLATTEFTITGVAAEEDFQ  
FRVSAINHFGQGPYLEFPGTMHLVPLAVKTPKAVEAVEGGEVTF SVDLTVASSGEWFLDGEALKASSIYVI  
RCDRTRHMLTIREV PARLHGAQLKFVANGIETS IQMVVRAALGLPSSKLPAAAAREVLAQLHEEAQLLAE LSD  
QAAAVTWLKDGRELSLGPYEMQVSAGRRALLVRDVAQDDAGLYECVSRGSR TAYQLLVQDITDGYRDWGPAG  
PQKHMCKCAGAKIARYLGSSCYRFLQYDKGVVHWEAALDRQGGKTS SCSLHEKPKLVFAKQQAHSEVKA  
AGNSATLSCEVTQAQTEVTWFKDGKLLSSSSKVRMEASGCSRRLVVQQAGKADAGEYSCEAGGQKLSFRLDVA  
EPKLVFAKQQAHSEVKAEGASATLSCEVAQAQTEVTWFKDGKLLSSSSKVRMEASGCSRRLVVQQAGKADA  
GEYSCEAGGQKLSFRLDVAEPKMFVFAKEQQARSEVKAEGASATLSCEVAQAQTEVTWFKDGKLLSSSSKVRM  
EASGCSRRLVVQQAGKADAGEYSCEAGGQKLSFRLDVTEPKLVFAKEQQARSEVKAEGVNSATLSCEVAQAQ  
EVTWFKDGKLLSSSSKVRMEASGCSRRLVVQQAGKADAGEYSCEAGGQKLSFRLDVAEPKLVFAKEQQARSEV  
KAEAGNSATLSCEVAQAQTEVTWFKDGKLLSSSSKVRMEASGCSRRLVVQQAGKADAGEYSCEAGGQKLSFHL  
DVTEPKLVFAKEQQAHSEVKAEGASATLSCEVAQAQTEVTWFKDGKLLSSSSKVRMEASGCSRRLVVQQAGK  
ADAGEYSCEAGGQKLSFRLDVAEPKLVFAKEQQARSEVKAEGASATLSCEVAQAQTEVTWFKDGKLLSSSSK  
VRVEASGCSRRLVVQQAGKADAGEYSCEAGGQKLSFRLDVAEPKLVFAKEQQANSEVKAEGASATLSCEVAQA  
AQTEVTWFKDGKLLSSSSKVRVEASGCSRRLVVQQAGKADAGEYSCEAGGQKLSFRLDVAEPKLVFAKEQQAH  
SEVKAEGASATLSCEVAQAQTEVTWFKDGKLLSSSSKVRVEASGCSRRLVVQQAGKADAGEYSCEAGGQKLS  
FRLDVAEPKLVFAKEQQAHSEVKAEGASATLSCEVAQAQTEVTWFKDGKLLSSSSKVRVEASGCSRRLVVQQ  
AGKADAGEYSCEAGGQKLSFRLDVAEPKLVFAKEQQAHSEVKAEGASATLSCEVAQAQTEVTWFKDGKLLSS  
SSKVRVEASGCSRRLVVQQAGKADAGEYSCEAGGQKLFRLDVAEPKLVFAKEQQAHSEVKAEGASATLSCE  
VAQAQTEVTWFKDGKLLSSSSKVRVEASGCSRRLVVQQAGKADAGEYSCEAGGQKLSFRLDVAEPKLVFAKEQ  
QAHSEVKAEGASATLSCEVAQAQTEVTWFKDGKLLSSSSKVRVEASGCSRRLVVQQVQKADAGEYSCEARGQ  
KLSFRLDVADTRLMFAKEQQARTEVKAEGNSATLSCEVAQAQTEVTWFKDGKLLSSSSKVRVEASGCSRRLV  
VQQAGKADAGEYSCEAGGQKLSFRLDVAEAIYSQI PERPRREPLVVKEHETIILTATI AAPVAVTWLKDGV  
EIRRSKRHEATSLGDTHTLTVRGAQVLD SAIYSRVRGEGQDFPVQVEEVAAKFSKPLEPVEGELGGTVMLVC  
ELSPQAEVWRCGNTQLRPGKRFQMTSEGPRRLTVSGLREDDAEYVCSRDDRTSARLTVKVPVPRVVKFTS  
GLSAMVAEEGQEATFQCVVSPSDAGVTWYKDGMLQPSKFVMEVSGASRSLTILGLTLEDAGQVTEAEAGAS  
SSAALRVREAPVLFKKLEPQTVEERTSVTLEVELTRPWPEVKWTRNAAVLT PSENVEIRAEGARHCLVLR SV  
GFADRGGFFGCETPD DKTQAKLNVEMRQVRLV RGLQEVEAKEQGTASMDVELSHAEEGVS WTRDGLRLQPGPKC

HLAVQGPVHILTLALQPQDSSGLVAFRAEGVHTSARLIVTELVSFTRVLDVVATQKEKVTLECELSRPVDV  
RWLKDGVELRAGKAIGIVAQGTCSRSLVIYRCETGDQGVYVCDALDAQTSASLRVQGRTYTLIFRRVLAEDAGE  
VKFVAENAESRAHLRVKELPVTLLRPLRDKIAMEKHRGVLECCQVSRASAVRWFKGGVELQSGPKYEVVSDGL  
YRKLVINVDVQPEDEDTYTCDAGNVKTSAQFFVVEEQSITIVRGLKDMTVMEPAPAWFECETSIPSVRPPKWL  
KTVLQAGGNVQLEQDGTVHRLTLHKTCSTMTGPVHFTIGKSRSSAQLVVSDIPVVLTRPLEPKAGRELQSVVL  
SCDFRPAPKAVQWYKDDTPLSPSEKFKMALEGQMAELRILRLTPADAGVYRCQAGSAQSSAEVTVAREVTVI  
QPLQDAEAMEEGRVCFSCSELSHKDEDEIWSLNGTPLYNDSFHEISHEGCLHTLVLSKSVRQADTGTVCATSPKV  
SVSARLVVKGKPVVFLKALDDVSAEERGTLLTQCEVSDPEARVVWRKDGVELGSPDKYDFLHKAGARGLTVHD  
LSHEDAGLYTCQVGSKETSQKSVHDLHVGITKRLKTLEVELEGESCSEFVLSHESPSDPVAVWTVGGKTVGGS  
GHFHAVRQGRKYTLTVKDAALSDAGEVVSFLGLTSSKASLIIRERPVDITKPLEDQRTTLGEDVMLSCELSRA  
GTSVRWLKDGKAIRKSKYDLLSEGTRAVLVVRKASLKDSGEYTCETEASKSTAKLCVEEKANRFTEELADLQ  
VEEKGRAVFTCKTEHPASVVTWRKGLLELRASGKHVPSQEGTLTKLTINALERTDSDTYTCDIGQARTQARLL  
VHGQKVRVIEDLEDTAVQEGSSAKFCRIAPADYGPVHWFLDKTPLHSNELNEITVQPGGYHVLTLRQLALKD  
SGTVYFEAGDQRTSAALRVTEKPSIFSRPLTDVTVTEGEDTLVCETTTVDSVVRWTKDGKTLRPSARCQLSH  
EGCQAQLLITATTPQDGGRYKCEIGGASSSSIVRVHALPVRFRRESLKDVEVPEGKAATLRCVLSVAAPVEWR  
HGDDVLKSSNKYSLRQEGAVLELVIRDLQPDQSGQYSCSFGDQTTSATLTVKTSASQFVGLKRNKEATEGTTV  
TLRCELSTEAPVEWKKGTETLRNGDKYSLKQDGAVCELQICSLLVADAGEYSCVCGQEKTSATLTVKALLVHF  
VRLRSKEATEGDTTTLQCELSKAAPVEWRKGTETLRDGDYSLKQDGAVCELQIRSLTIADAGEYLCTCGQE  
KTSATLTVRALPAKFKDSLKNEEATEGTTATLSCELSKAAPVWKKGPKTLQSGDKYVLRQDGAVCGLQIHGL  
TMADAGEYSCVCGQEKTSATLTVRGLPAKFIEDLRSQEATEGATAILRCELSKAAPVEWRKGSSETLKDGDYR  
LRQDGAVCELQIRGLAVVDGTYSLPTKFTEGLRNEEATEGTMATLRCQMSKAAPVEWRKGSSETLRDGDYR  
LRQDGAMCELQIRGLTIEDSGEYTCVCGQEKTSATLSVKALPSRFIEDLRSQEATEGTMATLRCQMSKTAPVE  
WKKGSETLRDGGRYSLRQDGPVCELQICDLAVEDAGEYSCVCGQEKTSATLSIKALPPRFIEDLRSQEATEG  
MATLRCQMSKAAPVEWRKGSSETLGDGGYSLRQNGAVCELQIHDLAVEDTGEYSCVCGQEKTSATLNVKALPP  
RFIEDLRSQEATEGTMATLRCQMSKAAPVEWRKGSSETLRDGGYSLRQDGAVCELQIHDLVEDAGQYSCVCG  
QKTSAVLTVDALPKFTEGLKKEEATEGTMVTLRCQMSKEATEVWRKGAKTLSGGYSLRQDGAMCELQIC  
GLAVEDAGEYSCVCGQEKTSATLSVKALPPRFIEDLRSQEATEGTMATLRCQMSKAAPVEWRKGSSETLRDGD  
YSLRQDGAVCELQIRDLAVEDAGEYLCVCGQEKTSATLSVKALPPRFIEDLRSQEATEGTMATLRCQMSKAAP  
VEWRKGSKTLRDGDYSLRQDGAMCELQICDLAVEDTGDYSCVCGQEKTSATLSVKALPPRFIEDLRSQEARE  
GTVATLRCMSKAAPVEWRKGSSETLKDGDYSLRQEGNLCELQIRDLAVEDTEEYSCVCGQEKTSATLSVKAL  
PAKFIEDLRSQEAPESSTVTLRCKLSKASVVWKKGSETLRNGARYSLRQDGAVCELEIRDLTVEDTGEYSCT  
CGQERTSATLSIMAPQVVFQQLQNLQAEEGSMASLRCELSVPNAAMVWSKGGLELQGDTRREARQQGCVAEL  
LLRDLRREDAGEYSCTCGSQTTSATLMVTAAPVRFRLRELQAQDVDEGATARLRCELSREAVSVEWRKGS  
LQFPCAKYQMVQEGTTAELLVHGVEQEDAGEYTCDAHTQSIARLSVRAPKPKFKTDLQSTEQEAAGTARLCCQLS  
EAEFGTPVQWLKEGVELHVGSKYEMRRQGAVALLEHGLEAKDTGEYACLVGGQKTLASLRVKEPEVTIVRGL  
VDMEVQADEDEFTCKVVSQAGATDVQWHLQGLPLQSNVEVAVLADGCHVLQKGLTLEDAGTVSFHVGG  
SSSAQLTVRVPEVTVLEPLKDVQLSEGQDAHFRCRLSRASGQEARWALGGVPLQCENMNDITVEQGTLYLLTL  
HKVTLLEDAGTITLQVGSSESQAQLKVTAKNTVLRGLNVDALEGGALFECQLSQPEVAHAHTWLLDDEPVHTS  
EKVEVVYFENGLRHLLLLKLNKPKQDSCRVTFLAGDVVTSFAFLTVRGRLELVLEPPHDASVKAGMQRVFTCILS  
EAVPVGEATWYINGAAIQPDWTVDGSHHALTLSNAQPHAGEVTFFAARDAVASARLSVLAALPDPPEDA  
EVLVGRSDHSVTLSWVAPMSDGGGGLCGYRVEMKEASTGQWQLCHDLVPGPECVVDDLVPGKTYRFRVA  
AVGPA GAGEPVHLPQMVKIAPAPAPAPAPAPAPETRQAVVGEDICLELEVAADGGEVWVHKGTERIQPGGHFEVLS  
RGQRQMLVIKGFRTEDQGEYRCGPIQGLPSSGAATFNVVMTSGSGDEVPAQPSLPPEAAQEGDLHLLWEALAR  
KRRMSREPTLDSISELPEEDSRVQHLRQEAEETAPDLSEGYSTADELARTGEADLSHTSSDDESRACTP  
SLVTYLKKAAGPGIPLASKHEAQVTSVKPQKQEPVVTCPPPGDLAADLMDPSLDKAAVKIQAAFKGYKVRKE  
MKQQEGPVFSRTFGDTEAQQVGDVLRLECVLATKTDMRACWLKDGIELTDGRHYHIDQLKDGTCSLLV  
TGLAPT DSGRYTCQVSTKSGRVSHSACVVVSGTESEAESSSGGELDDAFRRAARLHRLFRTKSPA  
ELSEEELFLSADE GPGEPEPADWQTYREDENFVCIRFESLAEARQAVTCFRNMFMATMGIGVEISLGEQ  
GPRGVEMRIGKVAPTVT PAVPLAKTPGLQTSDAAPVFLTELQNDQVQDGYPMSFDCVVTGQPVPS  
VRWFKDGLLEEDDHVMINEDQQGGHQLIITAVVPADMGVYRCLAENSMGVSTKAELRVELTSTDYDTA  
ADATETS SYFSAQGYLSSREQEGTESDE GQLPQVLEELKDLQVAPGTRLAKFQLKVK  
GYPAPKLYWFKDGPPLTSDHIRMTDKKTLHTLEIVSVTREDSG QYAAYSNAVGAAYSARLLV  
RGPSEPEEKPASDVHERLVPPRILEKFTPKVKRGSSTITFSVKVEGHPAPSV HWLKEEA  
EKGVLWIGPDTPGYTMASSSKQHSLLVLDVGRHQGTYTCTIATNPAGQALCSASLHISGLAKE  
EEEEQ ERVKEALISSFLQGTSQAVSAQMSSEAGFADLVGQSGESLVAEEAHSHLSLAEVGT  
EFLQKLTSTQITEMVSAKISQAKLQVPPGGDSDEETKTPSASPRHGRSRPSSSVQESSSE  
SEDGDSRGEIFDIYVVVTADYLPGLGAEQDAI I LREGQYVEVLD SAHPLR  
LWLRVTRKPTKSSPSRQGWVSPAYLDKRLKLSPEWGPTEAPEFPGEAVSEDEYR  
TRLSSVIQELLSSEQAFVQELQFLESHHMKHLERSPRVPAAVASQKTVI  
FRNVQDISHFHSSFLKELQCGCTDDDV AMCFIKNQEAFAEKYLEFLVGRVQAESV  
VVVSTPVQEFYKKYAEETLSAKDPTQPPPPPLQHYLEQPVERVQKYQ

ALLKELIRNKARNRQNCALLEQAYAVVSALPQRAENKLVSLMENYPGTLEALGEPiRQGHFIVWEGAPGARM  
 PWKGHNHRHVFLFRNYLVICKPRRDSRTDTFSYVFRNMMLSSIDLNDQVEGDDRAFEVWHEREDSVRKYLLQA  
 RTVI IKNSWVKEICIGIQORLAQPVWRPPEFEEELADCTAELGETVKLACRVTGTPKPIVSWYKDGKPVVDPH  
 HILIEDPDGSCTLILDNLGTIDSGQYMCFAASAAGNASTLGKILVQVPPRFVNVKRATPFVEGEDAQITCTVE  
 GAPYQIRWYKDGTLTLLAPGNRYRLNEPRSGVLVVIQAASKEDELGHYECELVNRLGSTRGGGELYMQSPALR  
 ARDQHHREQIVAAVEERRPSP\*  
 >rs47146051\_ENSMUSP00000151217\_c.8148:G>C\_p.V2717L  
 ENSMUST00000219084.3|Obscn-207|ENSMUSG00000061462|-|chr11:g.58965954:C>G  
 MDHSFSGAPRFLTRPKAFVVSVGKDATLSCQIVGNTPHVSWEKDRQPVEAGARFRLAQDGDVYRLTILDLAL  
 GDSGQYVCRARNAIGEAFAAVGLRVDSEGTCAEQAPHFLLRPTSIRVREGADATFRCRVGSGSPQPAVSWSKDG  
 RRLGPPDAPHVVEEHGESSALRIRSARPRDGGTYEVRAENPLGSASAAAALVVDSDAEVAGPPGTSTATLLA  
 HLQORREAMRAEGIPPSPPGAGTRTCTVTEGKHARLSCFVTGEPKPEVWKKDGQLVTEGRRHVVEDEQENF  
 VLKILFCKQSDRGLYTCTASNLVGQTYSSVLVVRPTVFPKRLQDLEVREKESATFQCEVAQPATEAAWFK  
 EETRLWASAKYDIEEGETERRLTVRNVSADDDAVYICETTESRVAELSVQGNLTKLPRKTAVRTGDTAIF  
 WVVELAVPEGPVRWLRNQEEMVAGGRVAITAEGTCHTLTI FQCTLEDMGEVAFVSGGCRTTTTQFCVSAPRRPPL  
 YPPADPVVAKTESVTLWSAPPHGDRPVTIDGYVLEKRLKLGAYAWSRCHEAGWLATTEFTITGVAEEGDFQ  
 FRVSAINHFGQPYLFPGTMHLVPLAVKTPKAVEAVEGGEVTFVSDLTVAASSGEVFLDGEALKASSIYVI  
 RCDRTRHMLTIREVPARLHGAQLKFFVANGIETS IQMVVRAALGLPSSKLPAAAAREVLAQLHEEAQLLAE LSD  
 QAAAVTWLKDGRELSLGPKYEMQVSAGRRALLVRDVAQDDAGLYECVSRGSRRTAYQLLVQDITDGYRDWGPAG  
 PQKHMCKCAGAKIARYLGGSSCYRFLQYDKGVWHLEAALDTRQKGKTSSCSLHEKPKLVFAKQQAHSEVKA  
 AGNSATLSCEVTAQTEVTFWFKDGKLLSSSSKVRMEASGCSRRLVQQAGKADAGEYSCEAGGQKLSFRLDVA  
 EPKLVFAKQQAHSEVKAEGASATLSCEVAQAQTEVTFWFKDGKLLSSSSKVRMEASGCSRRLVQQAGKADA  
 GEYSCEAGGQKLSFRLDVAEPKMVFQARSEVKAEGASATLSCEVAQAQTEVTFWFKDGKLLSSSSKVRM  
 EASGCSRRLVQQAGKADAGEYSCEAGGQKLSFRLDVTEPKLVFAKEQQARSEVKAEGNSATLSCEVAQAQ  
 EVTWFKDGKLLSSSSKVRMEASGCSRRLVQQAGKADAGEYSCEAGGQKLSFHLDVTEPKLVFAKEQQAHSE  
 KAEAGASATLSCEVAQAQTEVTFWFKDGKLLSSSSKVRMEASGCSRRLVQQAGKADAGEYSCEAGGQKLS  
 DVAEPKLVFAKEQQARSEVKAEGASATLSCEVAQAQTEVTFWFKDGKLLSSSSKVRMEASGCSRRLVQQAGK  
 ADAGEYSCEAGGQKLSFRLDVAEPKLVFAKEQQANSEVKAEGASATLSCEVAQAQTEVTFWFKDGKLLSSSSK  
 VRVEASGCSRRLVQQAGKADAGEYSCEAGGQKLSFRLDVAEPKLAFAKEQQAHSEVKAEGASATLSCEVAQ  
 AQTEVTFWFKDGKLLSSSSKVRVEASGCSRRLVQQAGKADAGEYSCEAGGQKLSFRLDVAEPKLVFAKEQQAH  
 SEVKAEGASATLSCEVAQAQTEVTFWFKDGKLLSSSSKVRVEASGCSRRLVQQVKGADAGEYSCEARGQKLS  
 FRLDVAAEASQIPERPSRREPLVVKHEHTIILTATIAAPSVAAVTWLKDGVEIRRSKRHEATSLGDTHTLTVR  
 GAQVLDSAIYSCRVGKEGQDFPVQVEEVAAKFSKPLEPVEGELGGTVMLVCELSPEQAEVWRCGNTQLRPGK  
 RFQMTSEGPRRTLTVSGLREDDAEYVCESRDDRTSARLTVKVPVVKFTSGLSAMVAEEGQEAFTQCVVSPS  
 DAGVTWYKDGMLQPSEKFMVVEGASRSLTILGLTLEDAGQVTEAEGASSAALRVREAPVLFKFKLEPQT  
 VEERTSVTLEVELTRPWPEVKWTRNAAVLTPSENVEIRAEGARHCLVLRVSGFADRGFFGCETPDDKTQAKLN  
 VEMRQVRLVRGLQEVEAKEQGTASMDVELSHAEEGVSWRDGLRLQPGPKCHLAVQGPVHILTLALSALQPQDSG  
 LVAFRAEGVHTSARLIVTELPVSFTRVLQDVVATQKEKVTLECELSRPVDVRWLKDGVELRAGKAIGIVAQGT  
 CRSLVIYRCETGDQGVYCDALDAQTSASLRVQGRYTLIFRRVLAEDAGEVKFVAENAESRAHLRVKELPVT  
 LLRPLRDKIAMEKHARGVLEQVSRASAQVRFKGGVLELQSGPKYEVVSDGLYRKLVIINDVQPEDEDTYTC DAG  
 NVKTSAQFFVEEQSITIVRGLKDMTVMPEPAPAWFECETSIPSVRPPKWL LGKTVLQAGGNVGLQDGTVHRLT  
 LHKTCSTMTGPVHFTIGKSRSSAQLVSDIPVVLTRPLEPKAGRELQSVVLSCDFRPAPKAVQWYKDDTPLSP  
 SEKFKMALEGQMAELRILRLTPADAGVYRCQAGSAQSSAEVTVEAREVTVIQPLQDAEAMEEGRVCFSCELSH  
 KDEDIEWSLNGTPLYNDSFHEISHEGCLHTLVLSKVRQADTGTVCATSPKVSVSARLVVKGKPVVFLKALDDV  
 SAEERGLTLQCEVSDPEARVVWRKDGVELGPSDKYDFLHKAGARGLTVHDLSHEDAGLYTCQVSGKETQSKV  
 SVHDLHVGITKRLKTLEVLEGECSFECVLSHESPSDPAVWTVGGKTVGGSGHFHAVRQGRKYTLTVKDAALS  
 DAGEVVSFVLGLTSSKASLIIRERPVDITKPLEDQRTTLGEDVMLSCELSRAGTSVRWLKDGKAIKRSQKYDLL  
 SEGTRAVLVVRKASLKDSGEYTCETEASKSTAKLCVEKANRFTTELADLQVEEKGRAVFTCKTEHPASVVTW  
 RKGLLELRASGKHVPSQEGTLKLTINALERTSDTYTCDIGQARTQARLLVHGQKVRVIEDLEDTAVQEGSS  
 AKFCCRIAPADYGPVHWFLLDKTPLHSNELNEITVQPGYHVLTLRQLALKDSGTVYFEAGDQRTSALRVTEK  
 PSIFSRPLTDVTVEGEDTLVCETTTTVDSSVRWTKDGKTLRPSARCQLSHEGCQAQLLITATTPQDGGRYKC  
 EIGGASSSSIVRVHALPVRFRESLKDVVEPEGKAATLRCVLSSVAAPVEWRHGGDVLSKNKYSRLRQEGAVLE  
 LVIRDLQPDQSGQYSCSFGDQTSATLTVKTSQAQFVGLKRNKEATEGTTVTLRCELTKAPVEWKKGTETLR  
 NGDKYSLKQDGA VCELICSLVADAGEYSCVCGQEKT SATLTVKALLVHVRRLRSKEATEGDTTLQCELS  
 KAAPVEWRKGTETLRDGDYSLKQDGA VCELQIRSLTIADAGEYLCTCGQEKT SATLTVRGLPAKFIEDLRSQ  
 EATEGATAILRCELSKAAPVEWRKGS ET LKDGDRYTLRQDGA VCELQIRGLAVVDGTGYS LPTKFEGLRNE  
 EATEGTMATLRCQMSKAAPVEWRKGS ET LRDGDYSLRQDGA MCELQIRGLTIEDSGEYTCVCGQEKT SATLS  
 VKALPPRFIEDLRSQEAETEGTMATLRCQMSKAAPVEWRKGS ET LRGDRYSLRQNGAVCELQIHDLAVEDTGE

YSCVCGQEKTSATLNVKALPPKFTEGLKKEEATEGTMVTLRCQMSKEATVEWRKGAKTSLSDGGRYSLRQDGM  
CELQICGLAVEDAGEYSCVCGQEKTSATLSVKALPPRFIEDLRSQEATEGTMATLRCQMSKAAPVEWRKGET  
LRDGDYSLRQDGAVCELQIRDLAVEDAGEYLCVCGQEKTSATLSVKALPPRFIEDLRSQEATEGTMATLRCQ  
MSKAAPVEWRKGSKTLRDGDYSLRQDGMCELQICDLAVEDTDYSCVCGQEKTSATLSVKAPQVVFQQPLQ  
NLQAEEGSMASLRCELSVPAAMVWSKGGLELQGDTRREARQQGCVAELLRLDLREDAGEYSCTCGSQTTSA  
TLMVTAAPVRFRLRELQAQDVEGATARLRCELSREAVSVEWRKGSLLQFPCKAKYQMVQEGTTAELLVHGVEQE  
DAGEYTCDAHTQSIARLSVRAPKPKFKTDLQSTEQEAGGTARLCCQLSEAEPGTPVQWLKEGVELHVGSKYE  
MRRQGAVCELLIHGLEAKDTEYACLVGQKTLASLRVKEPEVTIVRGLVDMEVQADEDEFTCKVSOAGATD  
VQWHLQGLPLQSNEVTEAVLADGCTHVLQKGVTLLEDAGTVSFHVGGLSSSAQLTVRVPEVTVLEPLKDVQL  
SEGQDAHFRCRLSRASQGEARWALGGVPLQCNEMNDITVEQGTLYLLTLHKVTLEDAGTITLQVGSSESQAQL  
KVTAKNTVLRGLENVDALEGGEALFECQLSQPEVAHTWLLDDEPVHTSEKVEVVYFENGLRHLHLLKLNKPKQ  
DSCRVTFLAGDVVTSFLTVRGRLEVPDASVKGAMQVRFCTILSEAVPVGEATWYINGAAIQPDDTDW  
TVTDTGSHHALTLASNAQPQHAGEVTFARAADASARLSVLALPDPEDAEEVGRSDHVSVTLVSWVAPMSDGGGG  
LCGYRVEMKEASTGQWQLCHDLVPGPECVVDDLVPKTYRFRVAAGVPAGAGEPVHLPQMVKIAPAPAPAPAP  
APAPETRQAVVGEDICLELEVAADGGEVWVHKGTERIQPGGHFEVLSRGRQMLVIKGFRTEDQGEYRCGPIQ  
GLPSSGAATFNVMVMTSGSGDEVPAQPSLPPPEAAQEGDLHLLWEALARKRRMSREPTLDSISELPEEDSRVQHL  
RQEAETAPDLSEGYSTADELARTGEADLSHTSSDDESRAGTPSLVTYLKKAGGPGISPLASKHEAQVTTSVK  
PQKQEPVVPTCPPPGDLSAADLMDPSLDKAARKVIQAAFKGYKVRKEMKQEGPVFSRTFGDTEQVGDVLR  
EVLATKTDMRACWLKDGIELTDGRHYHIDQLKDGTCSSLVTLGLAPTDSGRYTCQVSTKSGRVSHSACVVVSG  
TESEAESSSGGELDDAFRRARRLHRLFRTKSPAELSEELFSLADEGPGEPEEPADWQTYREDEFVCIRFE  
SLAEARQAVTCFRNMFMATMGIGVEISLGEQGRVEMRIGKVAFTVPAVPLAKTPGLQTSDAAPVFLTELQN  
QDVQDGYPMFDCVVTGQVPSVRWFKDGKLLLEDDHYMINEDQQGGHQLIITAVVPADMVYRCLAENSMTGV  
SSTKAELRVELTSTDYDTAADATETSSYFSAQGYLSSREQEGTESDEGQLPQVLEELKDLQVAPGTRLAKFQL  
KVKGYAPKLYWFKDGQPLTSDHIRMTDKKTLHTLEIVSVTREDSGQYAAAYISNAVGAAYSARLLVGRPSE  
PEEKPASDVHERLVPPRILEKFTPKKVKRGSSITFSVKVEGHPAPSVHVLKKEEAKEKVLWIGPDPGTYTMASS  
SKQHSVLVLDVGRQHGTYTCIATNPAGQALCSASLHISGLAKEEEQERVKEALISSFLQDTSQAVSAQMSSES  
AGFADLVGQSKNEVVAEEAHSLSLAEVGTEEFLLKLTSTQITMVSAKISQAKLQVPGGDSDEETKPTKSASP  
RHGRSRPSSSVQESSSESEDGDSRGEIFDIYVVTADYLPLGAEQDAIILREGQYVEVLDSAHPLRVLVTRTKPT  
KSSPSRQGWVSPAYLDKRLKLSPEWGPTEAPEFPGEAVSEDEYRTRLSVLIQELLSSEQAFVGVLEQFLESHHM  
KHLERSPRVPAAVASQKTVIFRNVQDISHFHSSFLKELQCGCTDDDVAMCFIKNQEAFEKYLEFLVGRVQAES  
VVVSTPVQEFYKKAETLSAKDPTQPPPPPLQHYLEQPVVERVQKYQALLKELIRNKARNRQNCALLEQAYAV  
VSALPQRAENKLHVSLMENYPGTLEALGEPPIRQGHFIVWEGAPGARMPWKGHNHRVFLFRNYLVICPKRRDSR  
TDTFSYVFRNMMLSSIDLNDQVEGDDRAFEVWHEREEDSVRYLLQARTVIKNSWVKEICGIQQRLAQPVWR  
PPEFEELADCTAELGETVKLACRVGTGPKPIVSWYKDGKPEVDPHHILIEDPDGSCSLIDLNLTGIDSGQY  
MCFASAAGNASTLGLKILVQVPPRFVNVKVRATPFVEGEDAQITCTVEGAPYPQIRWYKDGTLAPGNRYRMLN  
EPRSGVLVLIQAASKEDLGHYCELVNRLGSTRGGGELYMQSPALRARDQHREQIIVAAVEVTEQETKVPKK  
TVIIEETITTVVKSPPRGRQSPGKSPSRSPRRSASPRRPLGAPERLYPPGTSPSRRLVEVEQGRKAPVPALY  
VTEAEVHAPASQSQPKWLEVEETIEVRVKKTGSRGASPVREMTSRGEGILFTLPGGIPGRDPNANNNSNKSVMY  
QEARTWGPVAVVHVEPFIFQVDSVGNVDWVAASPEPEQVRSQKEENTERQEGCSDGDENTFLMEEPQDSDL  
QGRDPKILTHNGRVLTLDLEDYVQEGETFQCGDSTPSTPDEPPCEVSVLQREIASEPTVQPVLLNVGRPPG  
TGATPSFFRPGSQVHSPESVSFLLEAWSGPVSAPAWTSSFHHTVQSSVDGSHGSFKTEVSTQTVSFGAVGET  
VTLHIDPDGGEAPGPSQG\*

>rs47146051\_ENSMUSP00000122181\_c.1776:G>C\_p.V593L

ENSMUST00000133040.4|Obscn-205|ENSMUSG00000061462|-|chr11:g.58965954:C>G  
AGKAI GIVAQGTCSRSLVIYRCEITGDQGVYVCDALDAQTSASLRVQGRSVQITKPLEDVEVMEKEGATFSCVVS  
HDEVPLGWFRESSKLRPSDNVRIHQEGRTYTLIFRRVLAEDAGEVKFVAENAESRAHLRVKELPVTLLRPLRD  
KIAMEKHGRVLEQCQVSRASAQVRWFKGGVELQSGPKYEVVSDGLYRKLVINVDVQPEDEDYTCDAENVKTSAQ  
FFVEEQSITIVRGLKDMTVMPEPAPAWFECETSIPSVRPPKWLKGTVLQAGGNVGLQDGTVHRTLHKTCST  
MTGPVHFTIGKSRSSAQLVSDIPVVLTRPLEPKAGRELQSVVLSCDFRPAPKAVQWYKDDTPLSPSEKFKMA  
LEGQMAELRILRLTPADAGVYRCQAGSAQSSAEVTVEAREVTVIQPLQDAEAMEEGRVCFSCELSHKDEDIEW  
SLNGTPLYNDSFHEISHEGCLHTLVLSVRQADTGTVCATSPKVSVSARLVVKGKPVVFLKALDDVSAEERGT  
LTLQCEVSDPEARVVWRKDGVELGPSDKYDFLHKAGARGLTVHDLSDHEDAGLYTCQVGSKETQSKVSVHDLHV  
GITKRLKTLLEVLEGESCSFECVLSHESPSDPAVDVTVGGKTVGGSGHFAVRQGRKYTLTVKDAALSDAGEVVF  
SVLGLTSSKASLIIRERPVDTIKPLEDQRTTLGEDVWMLSCVLSRAGTSVRWLKDGKAIKRSQKYDLLSEGTRAV  
LVVRKASLKSGETCETEASKSTAKLCVEEKANRFTTELADLQVEEKGRAVFTCKTEHPASVVTWRKGLLEL  
RASGKHVPSQEGTLTKLTINALERTDSDTYTCDIGQARTQARLLVH

>rs29481309\_ENSMUSP00000158795\_c.7159:G>T\_p.S2387I

ENSMUST00000238536.2|Obscn-210|ENSMUSG00000061462|-|chr11:g.58972713:C>A

MDHSFSGAPRFLTRPKAFVSVGKDATLSCQIVGNPTPHVSWEKDRQPVVEAGARFRLAQDGDVYRLTILDLAL  
 GDSDGQYVCRARNAI GEAFVAVGLRVDSEGTCAEQAPHFLLRPTSIRVREGADATFRRCRVGSGPPAVSWSKDG  
 RRLGPPDAPHVRVEEHGESSALRIRRSARPRDGGTYEVRAENPLGSASAAAALVVDSDAEVAGPPGTSTATLLA  
 HLQQRREAMRAEGIPSPGAGTRTCTVTEGKHARLSCFVTGEPKPEVWKKDQGLVTEGRRHVVEDEQENF  
 VLKILFCKQSDRGLYCTASNLVQTYSSVLVVREPTVPFKKRLQDLEVREKESATFQCEVAQPATEAAWFK  
 EETRLWASAKYDIEEEGTERRLTVRNVSADDDAVYICETTEGSRVVAELSVQGNLTKLPRKTAVRTGDTAIF  
 WVAVLAVPEGPVWRWRNQEEMVAGGRVAITAEGTCHTLTI FQCTLEDMGEVAFVSGGCRTTTFQCVSAPRRPPL  
 YPPADPVVKAKTESSVTLWSAPPHGDRPVTIDGYVLEKRLGAYAWSRCHEAGWLATTEFTITGVAAEEGDFQ  
 FRVSAINHFQKPPYLEFPGTMHLVPLAVKTPLKAVEAVEGGEVTFVSDLTVASSGEWFLDGEALKASSIYVI  
 RCDRTRHMLTIREVPARLHGAQLKVFVANGIETSIQMVVRAALGLPSSKLPAAAAAREVLAQLHEEAQLLAELSD  
 QAAAVTWTKDRELSTLGPYEMQVSAGRRALLVRDVAQDDAGLYECVSRGSRTAYQLLVQDITDGYRDWGPAG  
 PQKHMCKCAGAKIARYLGSSCYRFLQYDKGVHWALEALDTRQKGTSSCSLHEKPKLVFAKQQAHSEVKA  
 AGNSATLSCEVTQAQTEVTFWKDGGKLSSSSKVRMEASGCSRRLLVVQQAGKADAGEYSCEAGGQKLSFRLDVA  
 EPKLVFAKQQAHSEVKAEGASATLSCEVAQAQTEVTFWKDGGKLSSSSKVRMEASGCSRRLLVVQQAGKADA  
 GEYSCEAGGQKLSFRLDVAEPKMVFQKQARSEVKAEGASATLSCEVAQAQTEVTFWKDGGKLSSSSKVRM  
 EASGCSRRLLVVQQAGKADAGEYSCEAGGQKLSFRLDVTEPKLVFAKEQQARSEVKAEVGNSATLSCEVAQAQT  
 EVTWFKDGGKLSSSSKVRMEASGCSRRLLVVQQAGKADAGEYSCEAGGQKLSFRLDVAEPKLVFAKEQQARSEV  
 KAEAGNSATLSCEVAQAQTEVTFWKDGGKLSSSSKVRMEASGCSRRLLVVQQAGKADAGEYSCEAGGQKLSFHL  
 DVTEPKLVFAKEQQAHSEVKAEGASATLSCEVAQAQTEVTFWKDGGKLSSSSKVRMEASGCSRRLLVVQQAGK  
 ADAGEYSCEAGGQKLSFRLDVAEPKLVFAKEQQARSEVKAEGASATLSCEVAQAQTEVTFWKDGGKLSSSSK  
 VRVEASGCSRRLLVVQQAGKADAGEYSCEAGGQKLSFRLDVAEPKLVFAKEQQANSEVKAEGASATLSCEVAQ  
 AQTEVTFWKDGGKLSSSSKVRVEASGCSRRLLVVQQAGKADAGEYSCEAGGQKLSFRLDVAEPKLAFAKEQQAH  
 SEVKAEGASATLSCEVAQAQTEVTFWKDGGKLSSSSKVRVEASGCSRRLLVVQQAGKADAGEYSCEAGGQKLS  
 FRLDVAEPKLAFAKEQQAHSEVKAEGASATLSCEVAQAQTEVTFWKDGGKLSSSSKVRVEASGCSRRLLVVQQ  
 AGKADAGEYSCEAGGQKLSFRLDVAEPKLAFAKEQQAHSEVKAEGASATLSCEVAQAQTEVTFWKDGGKLS  
 SSKVRVEASGCSRRLLVVQQAGKADAGEYSCEAGGQKLFRLDVAEPKLMFAKEQQAHSEVKAEGASATLSCE  
 VAQAQTEVTFWKDGGKLSSSSKVRVEASGCSRRLLVVQQAGKADAGEYSCEAGGQKLSFRLDVAEPKLVFAKEQ  
 QAHSEVKAEGASATLSCEVAQAQTEVTFWKDGGKLSSSSKVRVEASGCSRRLLVVQQVQKADAGEYSCEARGQ  
 KLSFRLDVADTRLMFAKEQQARTEVKAEGNSATLSCEVAQAQTEVTFWKDGGKLSSSSKVRVEASGCSRRLLV  
 VQQAGKADAGEYSCEAGGQKLSFRLDVAEAEQIIPERPSRREPLVVKHEHETIILTATIAPVAAVTWKDG  
 VEIIRRSKRHEATSLGDHTLTVRGAQVLDSAIYSCRVGKQDQDFVQVEEVAAKFKSKPLEPEVEGELGTVMLVC  
 ELSPEQAQVWRCGNTQLRPGKRFQMTSEGPRTTLTVSGLREDDAEYVCSRDRTSARLTVKVPRVVKFTS  
 GLSAMVAEEGQEQATFQCVVSPSDAGVTWYKDGMLQPSKFKVMVESGASRIILTILGLTLEDAGQVTEAEAGAS  
 SSSAALRVREAPVLFKKKLEPQTEERTSVTLEVELTRPWPEVKWTRNAAVLTPSENVEIRAEGARHCLVLRVSV  
 GFADRGGFFGCEPDDKTKAQLNVEMRQVRLVRLGQVEAKEQGTASMDVELSHAEEVGSWTRDGLRLQPGPKC  
 HLAQVGPVHILTLTALQPDQSGLVAFRAEGVHTSARLIVTELPVSFTRVLQDVVATQKEKVTLECELSRPFV  
 RFLKDGVELRAGKAIGIVAQGTCSRSLVIYRCETGDQGYYVCDALDAQTSASLRVQGRTYTLIFRRLAEDAGE  
 VKFVAENAESRAHLRVKELPVTLLRPLRDKIAMEKHGRVLECCVSRASAQVRWFKGGVELQSGPKYEVVSDGL  
 YRKLVINOVQPEDEDTYCDAGNVKTSQFFVVEQSITIVRGLKDMTVMEMPAPAFECETSIPSVRPPKWLGL  
 KTVLQAGGNGVLEQDGTVHRLTLHKTCSTMTGPVHFTIGKSRSSAQLVVSDIPVVLTRPLEPKAGRELQSVVL  
 SCDFRPAPKAVQWYKDDTPLSPEKFKMALEGGMAELRI LRLTPADAGVYRCQAGSAQSSAEVTVEAREVTVI  
 QPLQDAEAMEEGRVCFSCELSHKDEDIEWLNPTPLYNDSFHEISHGCLHTLVLSKSVRQADTGTVCATSPKV  
 SVSARLVVKGKPVVFLKALDDVSAEERGLTLQCEVSDPEARVVWRKDGVELGSPSKYDFLHKAGARGLTVHD  
 LSHEDAGLYTCQVGSKETQSKVSVHDLHVGITKRLKTVVEVLEGECSFECLVSHESPSDPVAVTVGGKTVGGS  
 GHFHAVRQGRKYTLTKDAALS DAGEVVFSVLGGLTSSKSLI IREPVDTIKPLEDQRTTLDGEDVMLSCLSRA  
 GTSVRWLKDGKAIKRSQKYDLLSEGTRAVLVVRKASLKDSGEYTCETEASKSTAKLCEVEKANRFEELADLQ  
 VEEKGRAVFTCKTEHPASVVTWRKGLLELRASGKHVPSQEGLTLKLTINALERTSDTYTCDIGQARTQARLL  
 VHGGKQVRIEDLEDTA VQEGSSAKFCRIAAPADYGPVHWFLLDKTPLHSNELNETVQPGGYHVLTLRQLALKD  
 SGTVYFEAGDQRTSAALRVTEKPSIFSRPLTDVTVTEGEDTLVCEVTTVDDSVRWTKDGKTLRPSARCLSH  
 EGQAQQLLITATTPQDGGRYKCEIGGASSSIVRVHALPVRFRESLKDVEVPEGKAATLRCVLSVVAAPVEWR  
 HGDVLSKSNKYSRQEGAVLELVIRDLPQDQSGQYSCSFGDQTTSATLTVKTTSSAQFVGLKRNKEATEGTTV  
 TLRCELTKAEAPVEWKGTETLNRNGDKYSLKQDGA VCCELQICSLLVADAGEYSCVCGQEKTSATLTVKALLVHF  
 VRRLSKTEATEGDTTTTLQCELSKAAPVEWRKGTETLNRGDYSLKQDGA VCCELQIRSLTIDAGEYLCGQE  
 KTSATLTVRALPAKFKDSLKNEEATEGTTATLSCELSKAAPVTKKGPKTLLQSGDVVLRQDGA VCGLQIHGL  
 TMADAGEYSCVCGQEKTSATLTVRGLPAKFIEDLRSQEATEGATAILRCLELSKAAPVEWRKGETLKDGDYR  
 LRQDGA VCCELQIRGLAVVDGTGTYSSLPTKFTEGLRNEEATEGTMATLRCQMSKAAPVEWRKGETLNRDGRYS  
 LRQDGA VCCELQIRGLTIEDSGEYTCVCGQEKTSATLSVKALPSRFIEDLRSQEATEGTMATLRCQMSKTA  
 PVEWKKGETLNRDGGYSLRQDGPVCELQICDLAVEDAGEYSCVCGQEKTSATLSIKALPFRFIEDLRSQEATEG

MATLRQCMSKAAPVEWRKGSSETLGDGGRYSLRQNGAVCELQIHDLAVEDTGEYSCVCGQEKTSATLNVKALPP  
 RFIEDLRSQEATEGTMATLRQCMSKAAPVEWRKGSSETLRDGGRYSLRQDGA VCELQIHDLDEDAGQYSCVCG  
 QEKTSAVLTVDALPPKFTEGLKKEEATEGTMVTLRQCMSKEATVEWRKGAKTSLSDGGRYSLRQDGMCELQIC  
 GLAVEDAGEYSCVCGQEKTSATLSVKALPPRFIEDLRSQEATEGTMATLRQCMSKAAPVEWRKGSSETLRDGD  
 YSLRQDGA VCELQIRDLAVEDAGEYLCVCGQEKTSATLSVKALPPRFIEDLRSQEATEGTMATLRQCMSKAAP  
 VEWRKGSKTLRDGDYSLRQDGMCELQICDLAVEDTGDYSCVCGQEKTSATLSVKALPPRFIEDLRSQEARE  
 GTVATLRCRMSKAAPVEWRKGSSETLKDGDYSLRQEGNLCELQIRDLAVEDTEEYSCVCGQEKTSATLSVKAL  
 PAKFIEDLRSQEAPESSTVTLRCKLSKASVWKKGSETLRNGARYSLRQDGA VCELEIRDLTVEDTGEYSCT  
 CGQERTSATLSIMAPQVVFLQNLQAEEGSMASLRCELSVNAAMVWSKGGLELQGDTRREARQQGCVAE  
 LLRDLRREDAGEYSCVCGSQTTSATLMVTAAPVRFRLQEQDQVDEGATARLRCELSREAVSVEWRKGSQQLF  
 PCAKYMVQEGTTAELLVHGVEQEDAGEYTCDAHTQSIARLSVRAPKPKFKTDLQSTEQEQAGGTARLCCQLS  
 EAEPGTPVQWLKEGVELHVGSKYEMRRQGA VCELLIHGLEAKDTGEYACLVGGQKTLASLRVKEPEVTIVRGL  
 VDMVEQADEDEFTCKVQAGATDVQWHLQGLPLQSNVTEVAVLADGCTHVLQKGVTLLEDAGTVSFHVGGL  
 SSSAQLTVRVPEVTVLEPLKDVQLSEGQDAHFRCRLSRASGQEARWALGGVPLQCNEMNDITVEQGTLYLLTL  
 HKVTLEDAGTITLQVGSSESSEALQKVTAKNTVLRGLENVDALEGGELFCQLSQPEVAHAHTWLLDDEPVHTS  
 EKVEVVYFENGLRHLLLLKLNKPQDSCRVTFLAGDVVTSAFLTRVGRLEVELEPPHDASVKAGMQRVFTCILS  
 EAVPVGEATWYINGAAIQPDDTDWTVTTDGS HHALTLSNAQPQHAGEVTF AARDAVASARLSVLA LPDPPEDA  
 EVVGRSDHSVTLSSWVAPMSDGGGGLCGYRVEMKEASTGQQWQLCHDLVPGPECVVDDLVP GKTYFRFVAAVGPA  
 GAGEPVHLPMVKIAPAPAPAPAPAPAPAPETRQAVVGEDICLELEVAADGGEVWVHKGTERIQPGGHFEVLS  
 RGQRQMLVIKGFRTEDQGEYRCGPIQGLPSSGAATFNVMVMTSGSGDEVPAQPSLPPEAAQEGDLHLLWEALAR  
 KRRMSREPTLDSISELPEEDSRVQHLRQEAETAPDLSEGYSTADELARTGEADLSHTSSDDES RAGT PSLVT  
 YLKKAGGPGISPLASKHEAQVTTSVKPQKQEQEPVPTCP PPGDLSAADLMDPSLDKAAVKIQAAFKGYKVRKE  
 MKQQEGPVFSRTFGDTEAQVGVDLRLECVLATKTD MRACWLKDGIELTDGRHYHIDQLKDGTC SLVVTGLAPT  
 DSGRYTCQVSTKSGRVSHSACVVVSGTESEAESSSGGELDDAFRAARRLHRLFRTKSPAELSEELFLSADE  
 GPGEPEEPADWQTYREDENFVCIRFESLAEARQAVTCFRNMFMATMGIGVEISLGEQGRGVEMRIGKVAPTVT  
 PAVPLAKTPGLQTSDAAPVFLTELQNDVQDGYPMSFDCVVTGQVPVSVRWFKDGKLEEDDHYMINEEDQQGG  
 HQLIITAVVPADMGVYRCLAEENSMGVSSSTKAELRVELTSTDYDTAADATETSSYFSAQYDSSREQEGTESDE  
 GQLPQVLEELKDLQVAPGTR LAKFQLKVKGYPAPKLYWFKDGGQPLTTSDHIRMTDKKTLHTLEIVSVTREDSG  
 QYAAYSNAVGAAYSSARLLVRGPSEPEEK PASDVHERLVPRI LEKFTPKKVKRGS SITFSVKVEGHPAPSV  
 HWLKEEA EKGV LWIGPDTPGYTMASSSKHSLVLLDVGRQHGT YTCIATNPAGQALCSASLHISGLAKEEEQ  
 ERVKEALISSFLQGTSAVSAQMSAESAGFADLVGQSKGESLVAEEAHSHLSLAEVGTEEF LQKLT SQITMV S  
 AKISQAKLVPPGGDSDEETKTPSASPRHGRSRPSSSVQESSSEEDGDSRGEIFDIYVV TADYLP LGAEQDAI  
 ILREGQYVEVLD SAHPLRWLVRTKPTKSSPSRQGWVSPAYL DKRLKLSPEWGPTEAPEFPGEAVSEDEYRTRL  
 SSVIQELLSS EQAFV GELQFLES HHMKHLERSPRVPAVASQKTVIFRNVQDISHFHSSFLKELQCGCTDDD  
 AMCFIKNQEA FEKYLELFLVGRVQAESVVVSTPVQEFYKKYAEETLSAKDPTQPPPPPLQHYLEQ PVERVQKYQ  
 ALLKELIRNKARNRNCALLEQAYAVVSALPQRAENKLVSLMENYPGTLEALGEPIRQGHFIWEGAPGARM  
 PWKGHNHRHVF LFRNYLVIC KPRRDSRTDTFSYVFRNMMKLSIDLNDQVEGDDRAFEVWHEREDSVRKYLLQA  
 RTVI IKNSWVKEICGIQQR LAQPVWRPPEFEEELADCTAELGETVKLACRVTGT PKPIVSWYKDGKPV EVDPH  
 HILIEDPDG SCTLILDNLTGIDSGQYMCFAASAAGNASTLGKILVQVPPRFVNVKVRATPFVEGEDAQITCTVE  
 GAPYQIRWYKDG TLLAPGNRYRMLNPRSGVLV LVIQAASKEDLGHYEC ELVNLGSTRGGGEL YMQSPALR  
 ARDQHHR EQI VAAVEDT SVEGSAHSAQDQADQQAASVLWRLLGSEALGSPGDLPNTRQSEPPAFEEAASQIP  
 GAASGTPEVSQPGTHKGLEQETTSSGSQGWTVPIRVEGTAWPGAGTQQLLLDVHSQVIMETTQRTYVCQAPDT  
 GVTRAPSMQVTIEDVQVQVGDMAQF DAVIEGHPPP IVTWYKGSTQLTSSARLSQRQDGT TYSLVLTDVAPHDA  
 GVYTCVANNAGGQVLC KAE LLVHGGDKLDAENQVYRRKLSHSFYDVQEEIGR GVFGVFKRVQHKGNMFC AAKF  
 IPLRSKTRAQAYQERDILATLGHPLVTGLLDQFETRKTLLILILELCSSEELLDRLFKKGVVTEAEVKVYIQQL  
 VEGHLHLHSHGILHLDIKPPN ILMVHPAREDIKICDFGFAQKITPSE PQYSKYGSPEFVSPEIIEQN PVSEGS  
 DIWAMGVI SYLSLTCS SPFAGESDRATLLNVLEGRVSWSSPTAAHLS EDAKDFIKATLQRTPRAR PSTSQCLA  
 HPWFLKSMPAEAAHFINTKQLKFL LARSRWQRSLSMSYKSILVMRSIPELLQGPDPSPSLGVARHLRGEASGAS  
 SSSSSSDNELAPFARAKSLPPSPVTHSPLHPRGFLRPSASLPEETEASMP TADA AVPASPQSA GPPASPGCV  
 PRHSV ISSLFYQQAGEGAERGNKTS GAKRHPARRRHLLKGGYIARALPGLREPLMEYS LLEEEAAREEQASIM  
 TKTPSFETALRLPSSSVREVPGRSHSLDNPPVT TGPSP EACKEQLLFP PSTGLTHE TTAKDRGHKEGFLQESV  
 PFPMSGDSRPGKQEGSSQDSCRGKPASSCHSELGSGSQEGCGPPSSQSLGSLPPQSLKKELSTSCGPLFSEQ  
 PQAAPFPTQVSPLLGKEPEQDGS LSEGPVPVSSSPGASQVDASLDTEGLESEAGTDCDFTPPPQRPQEQAT  
 TRKFSLESRGGYAGVAGYGTFAFGDAGGMLGQGLP LARMAWAVS QSSSEEQDEAATESQPLES LGPIAEASG  
 VPLRTSPSLTPWEEVEQVSLVQIRDLSGDAEAADTISLDISEVDPAYLNLSDLYDIKYL PPFEMIFRRV PKPI  
 EQPESPGSET EAGQGLADFL EEAAWPWPGE LGLRAGLEITEEPEEPGDLEALLGEAAVGRKRKWSPSRGLFQF  
 PGRCLSGEEPVELGLRQVRKASMAHISRI LKGRPEGPERE GPPRKKAGLASFRLSGLKGRDQELSDEAVVLGQ  
 SVTLACQVLAQPTAQTWSKDGVLLESSGHLLI SSTLKNFQLLTI LVVKEEDLGTYTCCVSNPLGTA VTTGVL

RKAERPSSSPRPEVGEELYKDAVLLVWKPVESECGPVTVYIVQCCIEGGSWTTLASDISDCCYLTGKLSRGGMYIF  
 RTACVSKAGMGPYSSPSEQVLLGGPNHLASEEESSRGRPAQLLPSTKTFQFQMQIRRRGRFSVVRQCREKASGR  
 ALAAKIVPYQPEDKTAVLREYEAALKRLHHPHLAQLHAAYLSPRHVLVLELCSGPPELLPSLAERESYSESDVK  
 DYLWQMLSATQYLHAQHILHLDLRSENMMVTEYNLLKVIDLGNQSLDQEKVPAPENFKDYLETMAPELLEGGQ  
 GAVPQTDIWAIGVTAFIGMLSGEYPESESEGTRDLQKGLRKLIRLSRCYAGLSGGAVAFQSSSLCAQPWGRPCA  
 STCLQCQGWLTEEGETSRPTPVTFPTVRLRAVFREREKRRALLYKKNLAQVR\*  
 >rs29481309\_ENSMUSP00000038264\_c.6331:G>T\_p.S2111I  
 ENSMUST00000047441.14|Obscn-202|ENSMUSG00000061462|-|chr11:g.58972713:C>A  
 MDHSFSGAPRFLTRPKAFVVSVGKDATLSCQIVGNTPHVSWEKDRQPVEAGARFRLAQDGDVYRLTILDLAL  
 GDSGQYVCRARNAIGEFAAAGVLRVDSEGTCAEQAPHFLLRPTSIRVREGADATFRCRVGGSPQPAVSWSKDG  
 RRLGPPDAPHVRVEEHGESSALRIRSARPRDGGTYEVRAENPLGSASAAAALVVDSAEVAGPPGTSTATLLA  
 HLQORREAMRAEIGIPSPGAGTRTCTVTEGKHARLSCFVTGEPKPEVWKKDQGLVTEGRRHVVEDEQENF  
 VLKILFCKQSDRGLYTCTASNLVGGQTYSSVLLVVVREPTVPFKKRLQDLEVREKESATFQCEVAQAPATEAAWFK  
 EETRLWASAKYDIEEGETERRLTVRNVSADDDAVYICETTEGSRVVAELSVQGNLTKLPRKTAVRTGDTAIF  
 WVELAVPEGPVWRWRNQEEMVAGGRVAITAEGTCHTLTIFQCTLEDMGEVAFVSGGCRTTTFQCVSAPRRPPL  
 YPPADPVVAKTESVTLWSAPPHGDRPVTIDGYVLEKRLKLAGAYAWSRCHEAGWLATTEFTITGVAEEGDFQ  
 FRVSAINHFQGGPKLEFPGTMHLVPLAVKTKLKAWEAVEGGEVTFVSDLTVASSGEVWLDGEALKASSIYVI  
 RCDRTRHMLTIREVPARLHGAQLKFVANGIETSIQMVVRAALGLPSSKLPAAAAREVLAQLHEEAQLLAELSD  
 QAAAVTWLDGRELKSLGPKYEMQVSAGRRALLVRDVAQDDAGLYECVSRGSRRTAYQLLVQDITDGYRDWGPAG  
 PQKHMKCKAGAKIARYLGSSCYRFLQYDKGVWHWLEAALDTRQKGTSSCSLHEKPKLVFAKQQAHSVEKAE  
 AGASATLSCEVAQAQTEVTFWKDGGKLSSSSKVRMEASGCSRRLVVQQAGKADAGEYSCEAGGQKLSFRLDVA  
 EPKMFVFAKEQQARSEVKAEGASATLSCEVAQAQTEVTFWKDGGKLSSSSKVRMEASGCSRRLVVQQAGKADA  
 GEYSCEAGGQKLSFRLDVTEPKLVFAKEQQARSEVKAEGVNSATLSCEVAQAQTEVTFWKDGGKLSSSSKVRM  
 EASGCSRRLVVQQAGKADAGEYSCEAGGQKLSFRLDVAEPKLVFAKEQQARSEVKAEGNSATLSCEVAQAQTE  
 EVTWFKDGGKLSSSSKVRMEASGCSRRLVVQQAGKADAGEYSCEAGGQKLSFHLDVTEPKLVFAKEQQAHSEV  
 KAEAGASATLSCEVAQAQTEVTFWKDGGKLSSSSKVRMEASGCSRRLVVQQAGKADAGEYSCEAGGQKLSFRL  
 DVAEPKLVFAKEQQARSEVKAEGASATLSCEVAQAQTEVTFWKDGGKLSSSSKVRVEASGCSRRLVVQQAGK  
 ADAGEYSCEAGGQKLSFRLDVAEPKLVFAKEQQANSEVKAEGASATLSCEVAQAQTEVTFWKDGGKLSSSSK  
 VRVEASGCSRRLVVQQAGKADAGEYSCEAGGQKLSFRLDVAEPKLVFAKEQQAHSEVKAEGASATLSCEVAQ  
 AQTEVTFWKDGGKLSSSSKVRVEASGCSRRLVVQQAGKADAGEYSCEAGGQKLSFRLDVAEPKLVFAKEQQAH  
 SEVKAEGASATLSCEVAQAQTEVTFWKDGGKLSSSSKVRVEASGCSRRLVVQQAGKADAGEYSCEAGGQKLS  
 FRLDVAEPKLVFAKEQQAHSEVKAEGASATLSCEVAQAQTEVTFWKDGGKLSSSSKVRVEASGCSRRLVVQQ  
 AGKADAGEYSCEAGGQKLFRLDVAEPKLVFAKEQQAHSEVKAEGASATLSCEVAQAQTEVTFWKDGGKLS  
 SSKVRVEASGCSRRLVVQQVQKADAGEYSCEARGQKLSFRLDVAEAEESQIPEPSPRREPLVKEHETIIILTAT  
 IAAPSVAAVTWLDGVEIIRSKRHEATSLGDTHLTVRGAQVLDSAIYSCRVGKEGQDFPVQVEEVAKFVSKP  
 LEVPEGELGGTVMVLCESPEQAEEVWRCGNTQLRPGKRFQMTSEGPRTTLTVSGLREDDAEHYVCESTRDDRT  
 SARLTVKVPVVKFTSGLSAMVAEEGQEATFQCIVVSPSDAGVWTKDGMQLPSEKFMVMEVSGASRIILTLGL  
 TLEDAGQVTVAEAGASSAALRVREAPVLFKKKLEPQTVERTSVTLEVELTRPWPEVKWTRNAAVLTPSENV  
 EIRAEGARHCLVLRVSGFADRGGFCETPDDKTQAKLNVEMRQVRLVRGLQVEVEAKEQGTASMDVELSHAEVE  
 GSWTRDGLRLQPGPKCHLAVQGPVHILTLALSALQPDGSLVAFRAEGVHTSARLIVTELVPVSTRVLQDVVATQ  
 KEKVTLECELSRPVDVRLKDGVELRAGKAGIVAQGTCSRSLVYRCETGDQGVYCDALDAQTSASLRVQGR  
 TYTLIFRRLVLAEDAGEVKFVAENAESRAHLRVKELPVTLLRPLRDKIAMEKHRGVLECVSRSASAQVRWFKGG  
 VELQSGPKYEVVSDGLYRKLVINLVQPEDEDTYTCDAGNVKTSAQFFVEEQSITIVRGLKDMTVMPEPAPAFWE  
 CETSI PSVRPPKWLGLKTVLQAGGNVLEQDGTVHRLTLHKTCSTMTGPHVHTIIGKSRSSAQLVVS DIPVVL  
 RPLEPKAGRELQSVVLSCDFRPAPKAVQWYKDDTPLSPSEKFKMALEGQMAELRILRLTPADAGVYRCQAGSA  
 QSSAEVTVAREVTVIQLQDAEAMEEGRVCFSCELSHKDEDIEWSLNGTPLYNDSFHEISHEGLHTLVLKS  
 VRQADTGTVCATSPKVSVSARLVVKGKPVVFLKALDDVSAEERGTLTLQCEVSDPEARVVWRKDGVELGSPDK  
 YDFLHKAGARGLTVHDLSDHEDAGLYTCQVGSKETQSKVSVHDLHVGITKRLKTVEVLEGESECFEVLSP  
 SDPAVWTVGGKTVGGSGHFHAVRQRKYLTLTKDAALSDAGEVVFVSLGLTSAKSLIIRERPVDTKPLEDQR  
 TTLGEDVMLSCELSRAGTSVRWLKDGKAIKRSQKYDLLSEGTRAVLVVRKASLKSSEYTCETEASKSTAKLC  
 VEEKANRFTEELADLVVEEKGRAVFTCKTEHPASVVTWRKGLLELRASGKHVPSQEGTLKLTINALERTDSD  
 TYTCDIGQARTQARLLVHGQKVRVIEDLEDTAVQEGSSAKFCCRIPADYGPVHWFLDKTPHLSNELNEITVQ  
 PGGYHVLTLRQLALKDSGTVYFEAGDQRTSAALRVTEKPIFSRPLTDVTVTEGEDLTLVCETTTVDSSVSRWT  
 KDGKTLRPSARCLSHGECQAQLLITATTPQDGGRYKECEIGGASSSIVRVHALPVRFRSLKDDVEVPEGKAA  
 TLRVLSVVAAPVEWRHGDVLSNYSRLRQEGAVLELVIRDLQPDGQYSCSFGDQTTSATLTVKTSQAQ  
 FVGLKRNKEATEGTTVTLRCELTKAPVEWKKGTETLRNGDKYSLKQDGA VCELQICSLLVADAGEYSCVCGQ  
 EKTSATLTVKALLVHVRRLRSKEATEGDTTTLQCELSKAAPVEWRKGTETLRDGDYSLKQDGA VCELQIRS  
 LTIADAGEYLCTCGQEKTSATLTVRALPAKFKDSLKNEEATEGTTATLSELSKAAPVTWKKGPKTLQSGDKY



VLRQDGA VCG LQIHGLTMADAGEYSCVCGQEKTSATLTVRGLPAKFIEDLRSQEATEGATAILRCELSKAAAPV  
 EWRKGS ETLKDGDRYTLRQDGA VCELQIRGLAVVDTGTYS SLP TKFTEGLRNEEATEGTMATLRCQMSKAAAPV  
 EWRKGS ETLRQDGRYSLRQDGA MCELQIRGLTIEDSGEYTCVCGQEKTSATLSVKALPPRFIEDLRSQEATEG  
 TMATLRCQMSKAAAPVEWRKGS ETLRQDGRYSLRQDGA VCELQIHDLAVEDTGEYSCVCGQEKTSATLNVKALP  
 PRFIEDLRSQEATEGTMATLRCQMSKAAAPVEWRKGS ETLRQDGRYSLRQDGA VCELQIHDLVDVDAQYSCVC  
 GQEKTSAVLTVDALPPKFTEGLKKEEATEGTMVTLRQMSKEATVEWRKGAKTSLDGGRYSLRQDGA MCELQI  
 CGLAVEDAGEYSCVCGQEKTSATLSVKALPPRFIEDLRSQEATEGTMATLRCQMSKAAAPVEWRKGSKT LRDGD  
 RYSLRQDGA MCELQICDLAVEDTGDYSCVCGQEKTSATLSVKAPQVVFQQPLQNLQAEEGSMASLRCELSVFN  
 AAMVWSKGGLELQGDTRREARQQGCVAELLLRDLRREDAGEYSCVCGQEKTSATLMTVTAAPVRFRLRLQAQDV  
 DEGATARLRCELSREAVSVEWRKGS LQFPKAKYQMVQEGTTAE LLVHGVEQEDAGEYTC DAGHTQS IARLSV  
 RAPKPKFKTDLQSTEQEAGGTARLCCQLSEAEPTPVQWLKEGVELHVGS KYEMRRQGA VCELLIHGLEAKDT  
 GEYACLVGQKTLASLRVKEPEVTIVRGLVDMVQADEDEVEFTCKVSOAGATDVQWHLQGLPLQSNVTEVAV  
 LADGCTHVLQKGVTLLEDAGTVSFHVGGSSSAQLTVRVPEVTVLEPLKDVQLSEGQDAHFRCRLSRASGQEA  
 RWALGGVPLQCNEMNDITVEQGTLYLLTLHKVTLEDAGTITLQVGCSSSAQLKVTAKNTVLRGLENVDALEG  
 GEALFECQLSQPEVA AHTWLLDDEPVHTSEKVEVVYFENGLRHLLLLKNLKPQDSCRVTFLAGDVVTS AFLTV  
 RALPDPPEDAEVVGRSDHSVTLVWVAPMSDGGGGLCGYRVMKEASTGQWQLCHDLVPGPECVDDLVPGKTY  
 RFRVAAGVPGAGAGEP VHL PQMKIAPAPAPAPAPAPAPAPETRAVVGEDICLELEVAADGGEV VWHKGTERTI  
 QPGHFVFLSRGQRMLVIKGFRTEDQGEYRCGPIQGLPSSGAATFNVMVTSGSGDEVPAPQSPLEAAQEGD  
 LLLLWEALARKRRMSREPTLDSISELPEEDSRVQHLRQEAEEETAPDLSEGYSTADELARTGEADLSHTSSDDE  
 SRAGT PSLV TYLKKAGGPGISPLASKHEAQVTSVKPKQKQEPVPTCPPPGDL SAADLMDPSLDKAAVKIQA  
 AFKGYKVRKEMKQQEGPVFSRTFGDTEAQVGDVLRLECVLATKTD MRACWLKDGIELTDGRHYHIDQLKDGTC  
 SLLVTGLAPTDSGRYTCQVSTKSGRVSHSACVVVSGTESEAESSSGGELDDAFRRAARRLHRLFRTKSPAELS  
 EELFLSADEGPGEPEPADWQTYREDENFVICRFESLAEARQAVTCFRNMFATMGIGVEISLGEQGRGVEM  
 RIGKVAPT VTPAVPLAKTPGLQTS DAAPVFLTELQNDVQDGYPMSFDCVVTGQPVPSVRWFKDGKLEEDDH  
 YMINEDQGGHQLIITAVVPADMGVYRCLAENSMGVSSTKAE LRVELTSTDYDTAADATETSSYFSAQGYLSS  
 REQEGTESDEGQLPVLEELKDLQVAPGTRLAKFVKVYKPKLYWFKDQGLPTTSDHIRMTDKKTLHTLE  
 IVSVTREDSGVLAAYISNAVGAAYSARLLVRGPEPEEKPPASDVHERLVPPRILEKFTPKKVKRGSSTFSV  
 KVEGHPAPSVHLLKEEAEGV L WIGPDTPGYTMASSSKQHS LVLVLDVGRQHOGTYT CIATNPAGQALCSASLH  
 ISGLAKEEEQERVKEALISSFLQGTSQAVSAQMSE SAGFADLVGQSKGESLVAAEEAHSHLSLAEVGT EEF LQK  
 LTSQITEMVSAKISQAKLQVPGGDSDEETKTPSASPRHGRSRPSSSVQESSSESEDGDSRGEIFDIYVVTADY  
 LPLGAEQDAIILREGQYVEVLD SAHPLRVLVVRTKPTKSSPSRQGWVSPAYLDKRLKLSPEWGPTEAEPFGEA  
 VSEDEYRTRLSSVIQELLSSEQAFV GELQFLESHHMKHLERSPRVPAAVASQKT VIFRNVQDI SHFHS SFLKE  
 LQCGCTDDDVAMCFIKNQEA FEKYLEFLVGRVQAESVVVSTPVQEFYKKYAEETLSAKDPTQPPPPPLQHYLE  
 QPVERVQKYQALLKELIRNKARNRQNCALLEQAYAVVSALPQRAENKLVHSLMENYPGTLEALGEP I RQGHFI  
 VWEGAPGARMPKWHNRHVFLFRNYLVICKPRRDSRTDTFSYVFRNMMKLS SIDLNDQVEGDDRAFEVWHERE  
 DSVRKYLLQARTVI IKNSWVKEICGIQORLAQPVWRPPEFEELADCTAELGETVKLACRVTGT PKPIVSWYK  
 DGKPV EVDPHHILIEDPDG SCTLILDNLTGIDSGQYMCFAASAAGNASTLGKILVQVPPRFVNVKVRATPFVEG  
 EDAQITCTVEGAPYPQIRWYKDGTL LAPGNRYRMLNEPRSGVLV LVIQAASKEDLGHYECELVNR LGSTRGGG  
 ELYMQSPALRARDQHHREQIVAAVEGAPSMQVTIEDVQVQVGDMAQF DAVIEGHPPP I V TWYKGTQLTSSAR  
 LSQRQDGT TYSLVLT D VAPHDAGVYTCVANNAGQV LCKAELLVHGDKLDAENQVYRRKLSHFYDVQEEIGR  
 GVFGFVKRVQHKGNMFC AAKFIP LRSKTRAQAYQERDILATLGHPLVTGLLDQFETRKTLLIILELCSSEEL  
 LDRLFKKGVVTEAEVKVYIQQLVEGLHYLHSHGILHLDIKPPNIMVHPAREDIKICDFGFAQKITPSEPQYS  
 KYGSP E FVSP E IIEQN PVSEGS DIWAMGVISYLSLTCSSPFAGESDRATLLNVLEGRVSWSSPTAAHLS EDAK  
 DFIKATLQRTPRARPSTSQC LAHPWFLKSMPAAE AHFINTKQLKFL LARSRWQRSLMSYK SILVMRSIP ELLQ  
 GPPDSPSLGVARHLRGEASGASSSSSSDNELAPFARAKSLPPSPVTHSPLLHPRGFRLPSASLPEETEASMP  
 TADA AVPASPQASAGPPASPGCVPRHSV ISSLFYQQAGEGAERGNKTS GAKRHPARRRHLKGGYIARALPGLR  
 EPLMEYSLLEEEAAREEQASLMTKT P SFETALRLPSSSVREV PGRSHSLDNPPVTTG P SPEACKEQLLFPST  
 GLTHETAKDRGHKEGFLQESVFPFPPMSGDSRPGKQEGSSQDSCRGKPASSCHSELGSGSQEGCGPPSSQSLG  
 SLPPQSLKKE LSTSCGPLFSEQPQAAPFTQVSPLLGSEKEPQDGS LSEGVPVPSSSPGSASQVDA SLDTEG  
 LSEAGDTCDFTPPPQRPEQATTRKFSLESRGGYAGVAGYGTFAFGGDAGGMLGQGPLWARMWAVSQSSEEQ  
 DEAAATESPQPLES LGPIAEASGVPLRTSPSLTPWEEVEQVSLVQIRDLSGDAEAADTISLDISEVDPAYLNL S  
 DLYDIKYL PFEFMI FRRVPKPIEQPESPGSETEAGQLADFL EEAAPWPGEGLGLRAGLEITEEPEEPGDLEA  
 LLGEAAKGRKRKWSPSRGLFQFPGRCLSGEEPVELGLRQRVKASMAHISRILKGRPEGPEREGP PRKAGLAS  
 FRLSGLKGRDQELSDEAVVLGQSVTLACQVLAQPTAQATWSKDGVLLESSGHLLISSTLKNFQLLTI LVVKEE  
 DLGTYTCCVSNPLGTA VTTGVL RKAERPSSSPRPEVAGELYKDAVLLVWKPVE SCGPVTYIVQCCIEGGSWTTL  
 ASDISDCCYL TGKLSRGGMYIFRTACVSKAGMPYSSPSEQVLLGGPNHLASEEESSRGRPAQLLPSTKTF AF  
 QMQIRGRF SVVRQCREKASGRALAAKIVPYQPEDKTA VLREYEALKRLHHPHLAQLHAAYLSPRHLV LILEL  
 CSGPELLPSLAERESYSESDVKDYLWQMLSATQYLHAQHILHLDLRSENMMVTEYNLLKVIDLGNASLDQEK

VPAPENFKDYLETMAPELLEGGQAVPQTDIWAIGVTAIFIMLSGEYPESSEGETRDLQKGLRKLIRLSRCYAGL  
 SGGAVAFLOSSLCAQPWGRPCASTCLQCGWLTEEGPTGSRPTPVTFTVRLRAFVREKRRALLYKKNHNAQ  
 VR\*

>rs29481309\_ENSMUSP00000049737\_c.6958:G>T\_p.S2320I  
 ENSMUST00000052872.15|Obscn-203|ENSMUSG00000061462|-|chr11:g.58972713:C>A  
 MDHSFSGAPRFLTRPKAFVSVGKDATLSCQIVGNPTPHVSWEKDRQPVEAGARFRLAQDGDVYRLTILDLAL  
 GDSGQYVCRARNAIGEFAAVGLRVDSEGTCAEQAPHFLLRPTSIRVREGADATFRCRVGSGPQPAVSWSKDG  
 RRLGPPDAPHVRVEEHGESSALRIRSARPRDGGTYEVRAENPLGSASAAAALVVDSDAEVAGPPGTSTATLLA  
 HLQQRREAMRAEGIPSPGAGTRTCTVTEGKHARLSCFVTGEPKPEVWKKDQQLVTEGRRHVVEDEQENF  
 VLKILFCKQSDRGLYTCTASNLVGGQTYSSVLVVVREPTVPFKKRLQDLEVREKESATFQCEVAQPATEAAWFK  
 EETRLWASAKYDIEEGTERRLTVRNVSADDDAVYICETTEGSRVVAELSVQGNLTKLPRKTAVRTGDTAIF  
 WVVELAVPEGPVWRWRNQEEMVAGGRVAITAEGTCHTLTI FQCTLEDMGEVAFVSGGCRTTTFQFCVSAPRRPPL  
 YPPADPVVKAKTESSVTLWSAPPHGDRPVTIDGYVLEKRKLGAYAWSRCHEAGWLATTEFTITGVAEEGDFQ  
 FRVSAINHFGQGPYLEFPGMTMLVPLAVKTPKAVEAVEGGEVTFVSVDLTVASSGEWFLDGEALKASSIYVI  
 RCDRTRHMLTIREVPARLHGAQLKFVANGIETSIQMVVRAALGLPSSKLPAAAAAREVLAQLHEEAQLLAE LSD  
 QAAAVTWDKDGRELSLGPYEMQVSAGRRALLVRDVAQDDAGLYECVSRGSRRTAYQLLVQEPKLVFAKGGQAH  
 SEVKAEGNSATLSCEVTAQTEVTWFKDGKLLSSSSKVRMEASGCSRRLVVQQAGKADAGEYSCEAGGQKLS  
 FRLDVAEPKLVFAKGGQAHSEVKAEGASATLSCEVAQAQTEVTWFKDGKLLSSSSKVRMEASGCSRRLVVQQ  
 AGKADAGEYSCEAGGQKLSFRLDVAEPKLVFAKEQQARSEVKAEGASATLSCEVAQAQTEVTWFKDGKLLSS  
 SSKVRMEASGCSRRLVVQQAGKADAGEYSCEAGGQKLSFRLDVTEPKLVFAKEQQARSEVKAEGNSATLSCE  
 VAQAQTEVTWFKDGKLLSSSSKVRMEASGCSRRLVVQQAGKADAGEYSCEAGGQKLSFRLDVAEPKLVFAKEQ  
 QARSEVKAEGNSATLSCEVAQAQTEVTWFKDGKLLSSSSKVRMEASGCSRRLVVQQAGKADAGEYSCEAGGQ  
 KLSFHLDVTEPKLVFAKEQQAHSEVKAEGASATLSCEVAQAQTEVTWFKDGKLLSSSSKVRMEASGCSRRLV  
 VQQAGKADAGEYSCEAGGQKLSFRLDVAEPKLVFAKEQQARSEVKAEGASATLSCEVAQAQTEVTWFKDGK  
 LSSSSKVRVEASGCSRRLVVQQAGKADAGEYSCEAGGQKLSFRLDVAEPKLVFAKEQQANSEVKAEGASATL  
 SCEVAQAQTEVTWFKDGKLLSSSSKVRVEASGCSRRLVVQQAGKADAGEYSCEAGGQKLSFRLDVAEPKLAFA  
 KEQQAHSEVKAEGASATLSCEVAQAQTEVTWFKDGKLLSSSSKVRVEASGCSRRLVVQQAGKADAGEYSCEA  
 GGQKLSFRLDVAEPKLAFAKEQQAHSEVKAEGASATLSCEVAQAQTEVTWFKDGKLLSSSSKVRVEASGCSR  
 RLVVQQAGKADAGEYSCEAGGQKLSFRLDVAEPKLAFAKEQQAHSEVKAEGASATLSCEVAQAQTEVTWFKD  
 GKLLSSSSKVRVEASGCSRRLVVQQAGKADAGEYSCEAGGQKLFRLDVAEPKLMFAKEQQAHSEVKAEGAS  
 ATLSCEVAQAQTEVTWFKDGKLLSSSSKVRVEASGCSRRLVVQQAGKADAGEYSCEAGGQKLSFRLDVAEPK  
 VFAKEQQAHSEVKAEGASATLSCEVAQAQTEVTWFKDGKLLSSSSKVRVEASGCSRRLVVQQVQKADAGEYS  
 CEARGQKLSFRLDVADTRLMFAKEQQARTEVKAEGNSATLSCEVAQAQTEVTWFKDGKLLSSSSKVRVEASG  
 CSRRLVVQQAGKADAGEYSCEAGGQKLSFRLDVAEAEESQIPERPSRREPLVVKEHETIILTATIAAPSVAAVT  
 WLKDGEVIRRSKRHEATSLGDHTLTVRGAQVLDLSAIYSCRVGKEGQDFPQVEEVAAKFSKPLEPVEGELGG  
 TVMLVCELSPEQAQAEVWRCGNTQLRPGKRFQMTSEGPRTTLTVSGLREDDAEYVCEASRRDRTSARLTVKVP  
 VVKFTSGLSAMVAEEGQEAFTQCVVSPSDAGVTWYKDGMLQLPSEKFMVMEVSGASRILTLGLTLEDAGQVTV  
 EAEGASSAALRVREAPVLFKKLEPQTEERTSVTLEVELTRPWPEVKWTRNAAVLTPSENVEIRAEGARHC  
 LVLRSVGFADRGFFGCETPDDKTQAKLNVEMRQVRLVRGLQVEAKEQGTASMDVELSHAEVEGSWTRDGLRL  
 QPGPKCHLAVQGPVHILTLALSALQPQDSGLVAFRAEGVHTSARLIVTELPSVSTRVLQDVVATQKEKVTLECEL  
 SRPVDVRLKDGVELRAGKAI GIVAQGTCSRSLVIYRCETGDQGVYVCDALDAQTSASLRVQGRYTLIFRRVL  
 AEDAGEVKFVAENAESRAHLRVKELPVTLLRPLRDKIAMEKHRGVLECVSRASAQVRWFKGGVLELQSGPKYE  
 VVSDGLYRKLVINVDVQPEDEDYTCDAENVKTSAQFFVEEQSITIVRGLKDMTVMPEPAPAWFECETSIPSVRP  
 PKWLLGKTVLQAGGNVLEQDGTVHRLTLHKTCSTMTGPVHFTIGKSRSSAQLVVSDIPVVLTRPLEPKAGRE  
 LQSVVLSCDFRPAPKAVQWYKDDTPLSPSEKFKMALEGQMAELRILRLTPADAGVYRCQAGSAQSSAEVTVEA  
 REVTVIQPLQDAEAMEEGRVCFSCELSHKDEDIEWLSLNGTPLYNDSFHEISHEGCLHTLVLSVRQADTGTVC  
 ATSPKVSVSARLVVKGKPVVFLKALDDVSAEERGTLLTQCEVSDPEARVVRKDGVELGSPDKYDFLHKAGAR  
 GLTVHDLSDHEDAGLYTCQVGSKETQSKVSVHDLHVGITKRLKTVLEVLEGESECFECVLSHESPSDPVWTVGG  
 KTVGGSGHFHAVRQGRKYTLTVKDAALSDAGEVVSFVLGLTSKASLIIRERPVDITKPLEDQRTTLGEDVMLS  
 CELSRAGTSVRWLKDGKAIKRSQYDLLSEGTRAVLVVRKASLKDSGEYTCETEASKSTAKLCVEEKANRFT  
 ELADLQVEEKGRAVFTCKTEHPASVVTWRKGLLELRASGKHVPSQEGTLTKLTINALERTDSDTYTCDIGQAR  
 TQARLLVHGQKVRVIEDLEDTAVQEGSSAKFCRIAPADYGPVHWFLDKTPHLSNELNEITVQPGGYHVLT  
 QLALKSHGCTVYFEAGDRTSAAALRVTEKPSIFSRPLTDVTVTEGEDTLVCEETTVDSSVRWTKDGKTLRPSA  
 RCQLSHEGQAQLLITATTPQDGGRYKCEIGGASSSIVRVHALPVRFRRESLKDVEVPEGKAATLRCVLSVA  
 APVEWRHGDDVLKSSNKYSLRQEGAVLELVIIRDLPQDSGQYSCSFGDQTTSATLTVKTSQAQVFGKLRNKEA  
 TEGTTVTLRCELTKAPVEWKKGTETLRNGDKYSLKQDGA VCELQICSLLVADAGEYSCVCGQEKT SATLTVK  
 ALLVHFVRRRLRSKEATEGDTTTLQCELSKAAPVEWRKGTETLRDGDYSLKQDGA VCELQIRSLTIADAGEYL  
 CTCGQEKT SATLTVRALPAKFKDSLKNEEATEGTTATLSCELSKAAPVWKKGPKTLQSGDKYVLRQDGA VCG

LQIHGLTMADAGEYSCVCGQEKTSATLTVRGLPAKFIEDLRSQEATEGATAILRCELSKAAPVEWRKGETLKD  
 DGDRYTLRQDGA VCELQIRGLAVVDGTYSLSLPTKFTTEGLRNEEATEGTMATLRCQMSKAAPVEWRKGETLKD  
 DGDRYSLRQDGA MCELQIRGLTIEDSGEYTCVCGQEKTSATLSVKALPSRFIEDLRSQEATEGTMATLRCQMS  
 KTAPVVEWKKGSETLRDGGRYSLRQDGPVCELQICDLAVEDAGEYSCVCGQEKTSATLSIKALPPRFIEDLRSQ  
 EATEGTMATLRCQMSKAAPVEWRKGETLGDGGRYSLRQNGAVCELQIHDLAVEDTGEYSCVCGQEKTSATLN  
 VKALPPRFIEDLRSQEATEGTMATLRCQMSKAAPVEWRKGETLRDGGRYSLRQDGA VCELQIHDLVDVEDAGQ  
 YSCVCGQEKTSAVLTVDALPPKFTEGLKKEEATEGTMVTLRCQMSKEATVEWRKGA KTLSDGGRYSLRQDGA M  
 CELQICGLAVEDAGEYSCVCGQEKTSATLSVKALPPRFIEDLRSQEATEGTMATLRCQMSKAAPVEWRKGET  
 LRDGGRYSLRQDGA VCELQIRDLAVEDAGEYLCVCGQEKTSATLSVKALPPRFIEDLRSQEATEGTMATLRCQ  
 MSKAAPVEWRKGSKTLR DGGRYSLRQDGA MCELQICDLAVEDTGDYSCVCGQEKTSATLSVKALPPRFIEDLR  
 SQEAREGTVATLRCRMSKAAPVEWRKGETLKDGGRYSLRQEGNLCELQIRDLAVEDTEEYSCVCGQEKTSAT  
 LSVKALPAKFIEDLRSQEAPESSTVTLRCKLSKKASVVWKKGSETLRNGARYSLRQDGA VCELEIRDLTVEDT  
 GEYSCTCGQERTSATLSIMAPQVVFQQPLQNLQAEEGSMASLRCELSVPNAAMVWSKGGLELQGDTRREARQQ  
 GCVAE LLLRDLRREDAGEYSC TCGSQTT SATLMVTAAPVRFRLRLQAQDVDEGATARLRCELSREAVSVEWRK  
 GSIQLFPKAKYQMVQEGTAE LLLVHGVEQEDAGEYTC DAGHTQS IARLSVRAPKPKFKTDLQSTEQEAGGTAR  
 LCCQLSEAE PGTPVQWLKEGVELHVGSKYEMRRQGA VCELLIHGLEAKDTGEYACL VGGQKTLASLRVKEPEV  
 TIVRGLVDMVEVQADEVFTECKVSAQAGATDVQWHLQGLPLQSNVTEVA VLADGCTHVLQKGVTLLEDAGTVS  
 FHVGLSSSAQLTVRVPEVTVLEPLKDVQLSEGDHAFRCRLSRASGQEARWALGGVPLQCNEMNDITVEQGT  
 LYLLTLHKVTLLEDAGTITLQVGS CSSEAQLKVTAKNTVLRGLENVDALEGG EALFECQLSQPEVA AHTWLLDD  
 EPVHTSEKVEVVYFENGLRHLLLLKLNKLPQDSCRVTFLAGDVVTS AFLTVRGRWLEVLEPPHDASVKAGMQVR  
 FTCILSEAVPVGEATWYINGAAIQPDDTDWTVTTDGS HHALTLSNAQPHAGEVTF AARDAVASARLSVLALP  
 DPPEDAEVVGRSDHSVTL SWVAPMSDGGGGLCGYR VEMKEASTGQWQLCHDLVPGPECVVDLVPKTYRFRV  
 AAVGPAGAGEPVHLPQMVKIAPAPAPAPAPAPAPAPETRAVVGEDICLELEVAADGGEV VWHKGTERRIQPGG  
 HFEVLSRGRQMLVIKGFRTEDQGEYRCGPIQGLPSSGAATFNVMVTS GSGDEVPAQPSLPPEAAQEGDLHLL  
 WEALARKRRMSREPTLDSISELPEEDSRVQHLRQEA EETAPDLSEGYSTADELARTGEADLSHTSSDDES RAG  
 TPSLVTYLKKAGGPGISPLASKHEAQVTT SVKPKQKLVQEPVVPVTCPPPGDL SAADLMDPSLIDKAAVKIQAAFKG  
 YKVRKEMKQEGPVSRFTFGDTEAQVGDVLRLECLATKTD MRACWLKDGIELTDGRHYHIDQLKDGTCSSLV  
 TGLAPTDSGRYTCQVSTKSGRVSHSACVVVSGTESEAE SSSGGELDDAFRRAARRLHRLFRTKSPAELSEEEL  
 FLSADEGPEPEEPADWQTYREDENFVCIRFESLAEARQAVTCFRNMFATMGIGVEISLGEQGP RGVEMRIGK  
 VAPTVPAPVPLAKTPGLQTS DAAPVFLTELQNDVQDGYPMSFDCVVTGQPVPSVRWFKDGKLEEDDHYMIN  
 EDQGGHQLIITAVVPADMGVYRCLAENSMGVSSTKAELRVELTSTDYDTAADATETSSYFSAQGYLSSRQE  
 GTESDEGQLPQVLEELKDLQVAPGTRLAKFQLKVKGY PAKLYWFKDQGPLTSDHIRMTDKKTLHTLEIVSV  
 TREDSGQYAAYSNAVGAAYSSARLLVRGPSEPEEK PASDVHERLVPRI LEKFTPKKVKRGS SITFSVKVEG  
 HPAPSVHWLKEEA EKGV LWIGPDTPGYTMAS SSKQHSLVLLDVG RQHOGTYTCIATNPAGQALCSASLHISGL  
 AKEEEQERVKEALISSFLQGTSQAVSAQMSE SAGFADLVGQSKGESLV AEEAHSHLSLAEVGETEEFLQKLT SQ  
 ITEMVSAKISQAKLQVPGGDSDEETKTPSASPRHGRSRPSSSVQESSSESDGDSRGEI FDIYVVTADYLP LG  
 AEQDAIILREGQYVEVLDSAHPLRWLVRTKPTKSSPSRQGWVSPAYLDKRLKLSPEWGPTEAPEFPGEAVSED  
 EYRTRLSSVIQELLSSEQAFV GELQFLESHHMKHLERSPRVPAAVASQKTVI FRNVQDISHFHSSFLKELQGC  
 GTDDDVAMCFIKNQEA FEKYLEFLVGRVQAESVVVSTPVQEFYKKYAEETLSAKDPTQPPPPPLQHYLEQVVE  
 RVQKYQALLKELIRNKARNRQNCALLEQAYAVVSALPQRAENKLVSLMENYPGTLEALGEP IRQGHFIVWEG  
 APGARMPWKGHNRHVFLFRNYLVICKPRRDSRTDTFSYVFRNMMKLSSIDLNDQVEGD DRAFEVWHEREDSVR  
 KYLLQARTVI IKNSWVKEICGIQQRLAQPVWRPPEFEELADCTAELGETVKLACRVTGTPKPIVSWYKDGKP  
 VEVDPHHILIEDPDGSCTLILDNLTGIDSGQYMCFAASAAGNASTLGKILVQVPPRFVNVKVRATPFVEGEDAQ  
 ITCTVEGAPYPQIRWYKDGTL LLAGPNRYRMLNEPRSGVLVLIQAASKEDLGHYECELVNR LRGSTRGGGELYM  
 QSPALRARDQHHREQIVA AVEVTEQETKVPKKTVI I EETITTVVKS PRGRRQSPGKSPSRSPRRSASPRRPG  
 LLAPERLYPPGTPSPRRLEVEQGRKAPVPALYVTEAEVHAPASQSQPKWLEVEETIEVRVKKTGSRGASPVRE  
 MTSRGE GILFTLPGGIPGRDPNANNNSNNSVYQEA RTWGPVAVHVGE PFI FQVDSVGNVDVVAASPEPEQVRA  
 SQKEENTERQEGCS DG DENTFLMEEPQD TDSLQGRDPKILTHNGRVLTLADLE DYVPQEGETFGCGDSTPSTP  
 DEPPCEVSVLQREI SEPTVGQPVL LNVRPPGTGATPSFFRPGSQVHSPESVSFLLREAWSGPVSAAPWTSSF  
 HTHVQSSVDGSHGSFKTEVSTQTVSFGAVGETVTLHIDPDGGEAPGPSQG\*  
 >rs29481309\_ENSMUSP00000020732\_c.7159:G>T\_p.S2387I  
 ENSMUST00000020732.13|Obscn-201|ENSMUSP00000061462|-|chr11:g.58972713:C>A  
 MDHSFSGAPRFLTRPKAFVSVGKDATLSCQIVGNPTPHVSWEKDRQFVEAGARFRLAQDGDVYRLTILDLAL  
 GDSGQYVCRARNAIEFAAVGLRVDSEGTCAEQAPHFLLRPTSIRVREGADATFRCRVGGSPPAVSWSKDG  
 RRLGPPDAPHVRVEEHGESSALRIRSARPRDGGTYEVRAENPLGSASAAAALVVDSDAEVAGPPGTSTATLLA  
 HLQQRREAMRAEGIPSPPPGAGTRTCTVTEGKHARLSCFVTGEPKPEVWKKDGQLVTEGRRHVVEDEQENF  
 VLKILFCKQSDRGLYTCTASNLVGQTYSSVLVVVREPTVPFKKRLQDLEVREKESATFQCEVAQPA TEAAWFK  
 EETRLWASAKYDIEEGETERRLTVRNVSADDDAVYICETTEGSRVVAELSVQGNLTKLPRKTAVRTGDTAIF

WVELAVPEGPVWRWRNQEEMVAGGRVAITAEGTCHTLTI FQCTLEDMGEVAFVSGGCRTTTQFCVSAPRRPPL
YPPADPVVKAKTESSVTLWSAPPHGDRPVTIDGYVLEKRKLGAYAWSRCHEAGWLATTEFTITGVAAEGDFQ
FRVSAINHFGQGPYLEFPGTMHLVPLAVKTPKAVEAVEGGEVTFVSDLTVASSGEWFLDGEALKASSIYVI
RCDRTRHMLTIREVPARLHGAQLKVFVANGIETSIQMVVRAALGLPSSKLPAAAAAREVLAQLHEEAQLLAE LSD
QAAAVTWLKDGRELSLGPKEYMQVSAGRRALLVRDVAQDDAGLYECVSRGSRRTAYQLLVQDITDGYRDWGPAG
PQKHMCKCAGAKIARYLGSSCYRFLQYDKGVWHWLEAALDTRQGKGTSSCSLHEKPKLVFAKQQAHSEVKA
AGNSATLSCEVTQAQTEVTFWFKDGKLLSSSSKVRMEASGCSRRLVVQQAGKADAGEYSCEAGGQKLSFRLDVA
EPKLVFAKQQAHSEVKAEGASATLSCEVAQAQTEVTFWFKDGKLLSSSSKVRMEASGCSRRLVVQQAGKADA
GEYSCEAGGQKLSFRLDVAEPKLVFAKEQQARSEVKAEGASATLSCEVAQAQTEVTFWFKDGKLLSSSSKVRM
EASGCSRRLVVQQAGKADAGEYSCEAGGQKLSFRLDVTEPKLVFAKEQQARSEVKAEGVNSATLSCEVAQAQ
EVTWFKDGKLLSSSSKVRMEASGCSRRLVVQQAGKADAGEYSCEAGGQKLSFRLDVAEPKLVFAKEQQARSE
KAEAGNSATLSCEVAQAQTEVTFWFKDGKLLSSSSKVRMEASGCSRRLVVQQAGKADAGEYSCEAGGQKLSFHL
DVTEPKLVFAKEQQAHSEVKAEGASATLSCEVAQAQTEVTFWFKDGKLLSSSSKVRMEASGCSRRLVVQQAGK
ADAGEYSCEAGGQKLSFRLDVAEPKLVFAKEQQARSEVKAEGASATLSCEVAQAQTEVTFWFKDGKLLSSSSK
VRVEASGCSRRLVVQQAGKADAGEYSCEAGGQKLSFRLDVAEPKLVFAKEQQANSEVKAEGASATLSCEVAQ
AQTEVTFWFKDGKLLSSSSKVRVEASGCSRRLVVQQAGKADAGEYSCEAGGQKLSFRLDVAEPKLVFAKEQQAH
SEVKAEGASATLSCEVAQAQTEVTFWFKDGKLLSSSSKVRVEASGCSRRLVVQQAGKADAGEYSCEAGGQKLS
FRLDVAEPKLVFAKEQQAHSEVKAEGASATLSCEVAQAQTEVTFWFKDGKLLSSSSKVRVEASGCSRRLVVQQ
AGKADAGEYSCEAGGQKLSFRLDVAEPKLVFAKEQQAHSEVKAEGASATLSCEVAQAQTEVTFWFKDGKLLSS
SSKVRVEASGCSRRLVVQQAGKADAGEYSCEAGGQKLFRLDVAEPKLVFAKEQQAHSEVKAEGASATLSCE
VAQAQTEVTFWFKDGKLLSSSSKVRVEASGCSRRLVVQQAGKADAGEYSCEAGGQKLSFRLDVAEPKLVFAKEQ
QAHSEVKAEGASATLSCEVAQAQTEVTFWFKDGKLLSSSSKVRVEASGCSRRLVVQQVQKADAGEYSCEARGQ
KLSFRLDVADTRLMFAKEQQARTEVKAEGNSATLSCEVAQAQTEVTFWFKDGKLLSSSSKVRVEASGCSRRLV
VQQAGKADAGEYSCEAGGQKLSFRLDVAEAEESQIPERPSRREPLVVKEHETIILTATIAAPSAAVTWLKDGV
EIRRSKRHEATSLGDTHTLTVRGAQVLDIAIYSCRVGKEGQDFPVQVEEVAAKFSKPLEPEVEGELGGTVMLVC
ELSPQAEVWRCENTQLRPGKRFQMTSEGRRTLTVSGLREDDAEYVCESTRDDRTSARLTVKVRVVKFTS
GLSAMVAEEGQVCFDFTQCQVPSDAGVTWYKDGMLQPSEKFMVMEVSGASRILITLGLTLEDAGQVTVAEAGAS
SSAALRVREAPVFLFKKLEPQTVERTSVTLEVELTRPWPEVKWTRNAAVLTPSENVEIRAEGARHCLVLRV
GFADRGFPGCETPDDKTQAKLNVEMRQVRLVVRGLQVEEAKEQGTASMDVELSHAEEVGSWTRDGLRLQPGPKC
HLAVQGPVHILTLALSALQPQDSGLVAFRAEGVHTSARLIVTELPSVSTRVLQDVVATQKEKVTLECELSRPVDV
RWLKDGVLELRAGKAIGIVAQGTCSRSLVIYRCETGDQGVYVCDALDAQTSASLRVQGRTYTLIFRVLAEADAGE
VKFVAENAESRAHLRVKELPVTLRPLRDKIAMEKHGVLQVSRASAQVRWFKGGVELQSGPKYEVVSDGL
YRKLVINVDQPEDEDTYTCDAENVKTSAQFFVEEQSITIVRGLKDMTVMPEPAPAWFECETSIPSVRPPKWL
KTVLQAGQNVGLEQDGTVHRLTLHKTCSTMTGPVHFTIGKSRSSAQLVVDI PVVLRTRPLEPKAGRELQSVVL
SCDFRPAPKAVQWYKDDTPLSPSEKFKMALEGQMAELRILRLTPADAGVYRCQAGSAQSSAEVTVAREVTVI
QPLQDAEAMEEGRVCFSELSHKDEDEIWSLNGTPLYNDSFHEISHEGLHTLVLSKVRQADTGTVCATSPKV
SVSARLVVKGKPVVFLKALDDVSAEERGLTLTQCEVSDPEARVVWRKDGVELGSPDKYDFLHKAGARGLTVHD
LSHEDAGLYTCQVGSKETQSKVSVHDLHVGITKRLKTVLEVLEGESECFEVLSSHESPDPAVWTVGGKTVGGS
GHFHAVRQGRKYTLTVKDAALSDAGEVVFVSVLGLTSKASLIIRERPVDTKPLEDQRTTLGEDVMLSCELSRA
GTSVRWLKDGKAIRKSQKYDLLSEGTRAVLVVRKASLKDSSGEYTCETEASKSTAKLCVEEKANRFTBELADLQ
VEEKGRAVFTCKTEHPASVVTWRKGLLELRASGKHVPSQEGTLKLTINALERTSDTYTCDIGQARTQARLL
VHGQKVRVIEDLEDTAVQEGSSAKFCCRIAPADYGPVHWFLLDKTPLHSNELNEITVQPGGYHVLTLRQLALKD
SGTVYFEAGDQRTSALRVTEKPSIFSRPLTDVTVTEGEDTLVCETTTVDSVVRWTKDGKTLRPSARCQLSH
EGCQAQLLITATTPQDGGRYKCEIGGASSSSIVRVHALPVRFRFRESLKDVEVPEGKAATLRCVLSVAAPVEWR
HGDDVLKSSNKYSLRQEGAVLELVIRDLQPQDSGQYSCSFGDQTSATLTVKTSQAQFVGLKRNKEATEGTTV
TLRCELTKAEAPVEWKKGTETLRNGDKYSLKQDGA VCELQICSLLVADAGEYSCVCGQEKTSATLTVKALLVHF
VRLRSKEATEGDTTLQCELSKAAPVEWRKGTETLRDGDYSLKQDGA VCELQIRSLTIADAGEYLCTCGQE
KTSATLTVRALPAKFKDSLKNEEATEGTTATLSCELSKAAPVTKKGPKTQSGDKYVLRQDGA VCELQIHGL
TMADAGEYSCVCGQEKTSATLTVRGLPAKFIEDLRSQEATEGATAILRCELSKAAPVEWRKGSSETLKDGDYR
LRQDGA VCELQIRGLAVVDTGTYSSLPTKFTTEGLRNEEATEGTMATLRCQMSKAAPVEWRKGSSETLRDGDY
LRQDGA MCELQIRGLTIEDSGEYTCVCGQEKTSATLSVKALPSRFIEDLRSQEATEGTMATLRCQMSKTAPVE
WKKGSETLRDGGRYSLRQDGPVCELQICDLAVEDAGEYSCVCGQEKTSATLSIKALPPRFIEDLRSQEATEG
MATLRCQMSKAAPVEWRKGSSETLGDGGYSLRQNGAVCELQIHDLAVEDTGEYSCVCGQEKTSATLNVKALPP
RFIEDLRSQEATEGTMATLRCQMSKAAPVEWRKGSSETLRDGGYSLRQDGA VCELQIHDLVEDAGQYSCVCG
QEKTSAVLTVDALPPKFTEGLKKEEATEGTMVTLRCQMSKEATVEWRKGAKTSLDGGYSLRQDGA MCELQIC
GLAVEDAGEYSCVCGQEKTSATLSVKALPPRFIEDLRSQEATEGTMATLRCQMSKAAPVEWRKGSSETLRDGD
YSLRQDGA VCELQIRDLAVEDAGEYLCVCGQEKTSATLSVKALPPRFIEDLRSQEATEGTMATLRCQMSKAAP
VEWRKGSSETLRDGDYSLRQDGA MCELQICDLAVEDTGDYSCVCGQEKTSATLSVKALPPRFIEDLRSQEARE

GTVATLRCRMSKAAPVEWRKGSSETLKDGDYSLRQEGNLCELQIRDLAVEDTEEYSCVCGQEKTSATLSVKAL  
PAKFIEDLRSQEAPESSTVTLRCKLSKASVVKKGSSETLRNGARYSLRQDGAUCELEIRDLTVEDEDTGEYSCT  
CGQERTSATLSIMAPQVVFQQPLQNLQAEEGSMASLRCELSVNAAMVWSKGGLELQGDTRREARQQGCVAEL  
LLRDLRREDAGEYSCTCGSQTTSATLMVTAAPVRFLRELQAQDVDEGATARLRCELSREAVSVEWRKGSQQLF  
PCAKYQMVQEGTTAELLVHGVEQEDAGEYTCDAAGHTQSIARLSVRAPKPKFKTDLQSTEQEAGGTARLCCQLS  
EAEPTGTPVQWLKEGVELHVGSKYEMRRQGAUCELLIHGLEAKDTGEYACLVGGQKTLASLRVKEPEVTIVRGL  
VDMEVQADEDEVEFTCKVSOAGATDVQWHLQGLPLQSNVTEVAVLADGCTHVLQKGVTLLEDAGTVSFHVGG  
SSSAQLTVRVPEVTVLEPLKDVQLSEGDHAHFRCLSRASGQEARWALGGVPLQCNEMNDITVEQGTLYLLTL  
HKVTLEDAGTITLQVGSSEEAQLKVTAKNTVLRGLENVDALEGGALFECQLSQPEVAHAHTWLLDDEPVHTS  
EKVEVVYFENGLRHLLLLKNLKPQDSCRVTFLAGDVVTSFAFLTVRGWRLEVLPEPHDASVKAGMQVRFCTILS  
EAVPVGEATWYINGAAIQPDDTDWTVTTDGSHHALTLSNAQPQHAGEVTFAAARDAVASARLSVLALPDPEDA  
EAVGRSDHSVTLSSWVAPMSDGGGGLCGYRVMKEASTGQWQLCHDLVPGPECVDDDLVPGKTYRFRVAAVGPA  
GAGEPVHLPQMVKIAPAPAPAPAPAPAPAPAPETRQAVVGEDICILEVAADGGEVVWHKGTERRIQPGHFVLS  
RGQRQMLVIKGFRTEDQGEYRCGPIQGLPSSGAATFNVMVMTSGSGDEVPAQPSLPPEAAQEGDLHLLWEALAR  
KRRMSREPTLDSISELPEEDSRVQHLRQEAEEETAPDLSEGYSTADELARTGEADLSHTSSDDESAGTPSLVT  
YLKAGGPGISPLASKHEAQVTTSVKPKQKQEPVPTCPGGDLAADMPLDKAARKVIAAFKGYKVRKE  
MKQEGPVFSRTFGDTEAQVGDVLRLECVLATKTDMRACWLKDGIELTDGRHYHIDQLKDGTCSSLLVTLGLAPT  
DSGRYTCQVSTKSGRVSHSACVVVSGTESEAESSSGGELDDAFRAARRLHRLFRTKSPAELSEELFLSADE  
GPGEPEEPADWQTYREDENFVCIRFESLAEARQAVTCFRNMFMATMGIGVEISLGEQGRGVEMRIGKVAPTVT  
PAVPLAKTPGLQTSDAAPVFLTELQNDVQDGYPMSFDCVVTGQPVPSVRWFKDGKLEEDDHYMINEDQGGG  
HQLIITAVVPADMGVYRCLAENSMGVSSTKAELRVELTSTDYDTAADATETSSYFSAQGYLSSREQEGTESDE  
GQLPQVLEELKDLQVAPGTRLAKFQLKVKGYPAKLYWFKDGGPLTSDHIRMTDKKTLHTLEIVSVTREDSG  
QYAAIYISNAVGAAYSSARLLVRGPSEPEEKPASDVHERLVPPRILEKFTPKKVKRGSSITFSVKEGHPAPSV  
HWLKEEAKEKGLVWIGPDTPGYTMASSSKQHSLLVLDVGRQHGGTYTCIATNPAGQALCSASLHISGLAKEEEQ  
ERVKEALISSFLOGTSQAVSAQMSSESAGFADLVGQSKGESLVAEEAHSHLSLAEVGTTEFLQKLSQITEMVS  
AKISQAKLQVPGGDSDEETKTPSASPRHGRSRPSSSVQSESSSESEDGDSRGEIFDIYVVVTADYLPGLAEQDAI  
LLREGQYVEVLDLSDAHLRVLVTKPTKSSPSRQVSVSPAYLDRKRLKLSPEWGPTEAPEFPGEAUVSEDEPVRTL  
SSVIQELLSSEQAFVQELQFLESHHMKHLERSPRVPAAVASQKTVIFRNVQDISHFHSSFLKELQCGCTDDDV  
AMCFIKNQEAFAEKYLEFLVGRVQAESVVVSTPVQEFYKKAEEETLSAKDPTQPPPPPLQHYLEQPVVERVQKYQ  
ALLKELIRNKARNRQNCALLEQAYAVVSALPQRAENKLVSLMENYPGTLEALGEPHQGHFIVWEGAPGARM  
PWKGHNHRVFLFRNYLVICKPRRDSRTDFTSYVFRNMMLSSIDLNDQVEGDDRAFEVWHEREDSVRKYLLQA  
RTVILKNSWVKEICGIQQLAQPVWRPPEFEELADCTAELGETVKLACRVTGTPKPIVSWYKDGKPVVEVDPH  
HILIEDPDGSCTLILDNLGTIDSGQYMCFAASAAGNASTLGKILVQVPPRFVNVKVRATPFVEGEDAQITCTVE  
GAPYPQIRWYKDGTLTLLAPGNRYRMLNEPRSGVLVLIQAASKEDLGHYECELVNRLGSTRGGGELYMQSPALR  
ARDQHHREQIVAAVEERRPSP\*  
>rs29481309\_ENSMUSP00000151217\_c.5779:G>T\_p.S1927I

ENSMUST00000219084.3|Obscn-207|ENSMUSG00000061462|-|chr11:g.58972713:C>A  
MDHSFSGAPRFLTRPKAFVSVGKDATLSCQIVGNPTPHVSWEKDRQVPEAGARFRLAQDGDVYRLTILDLAL  
GDSGQYVCRARNAIGEAFVAVGLRVDSEGTCAEQAPHFLLRPTSIRVREGADATFRCRVGGSPPAVSWSKDG  
RRLGPPDAPHVRVEEHGESSALRIRSARPRDGGTYEVRAENPLGSASAAAALVVDSDAEVAGPPGTSTATLLA  
HLQQRREAMRAEGIPPSPPGAGTRTCTVTEGKHARLSCFVTGEPKPKETVWKKDQQLVTEGRRHVVEDEQENF  
VLKILFCKQSDRGLYTCTASNLVGQTYSSVLVVVREPTVPFKKRLQDLEVREKESATFQCEVAQAPATEAAWFK  
EETRLWASAKYDIEEGTERRLTVRNVSADDDAVYICETTEGSRVVAELSVQGNLTKLPRKTAVRTGDTAIF  
WVELAVPEGPVWRWRNRQEMVAGGRVAITAEGTCHTLTIQCTLEDMGVAVFVSGGCRTTTTQFCVSAPRRPPL  
YPPADPVVAKTESSVTLSSWAPPHGDRPVTIDGYVLEKRLKLGAYAWSRCHEAGWLATTEFTITGVAAEGDFQ  
FRVSAINHFGQGPYLEFPGMTMLVPLAVKTPKAVEAVEGGEVTFVSDLTVASSGEWFLDGEALKASSIYVI  
RCDRTRHMLTIREVPARLHGAQLKVFVANGIETSIQMVVRAALGLPSSKLPAAAAAREVLAQLHEEAQLLAELSD  
QAAAVTWLKDGRELSLGPKEYMQVSAGRRALLVRDVAQDDAGLYECVSRGSRRTAYQLLVQDITDGYRDWGPAG  
PQKHMCKCAGAKIARYLGSSCYRFLQYDKGVVHLEAALDTRQKGTSSCSLHEKPKLVFAKQQAHSEVKA  
AGNSATLSCEVTQAQTEVTWFKDGKLLSSSSKVRMEASGCSRRLVVQQAGKADAGEYSCEAGGQKLSFRLDVA  
EPKLVFAKQQAHSEVKAEEAGASATLSCEVAQAQTEVTWFKDGKLLSSSSKVRMEASGCSRRLVVQQAGKADA  
GEYSCEAGGQKLSFRLDVAEPKMFVFAKEQQARSEVKAEEAGASATLSCEVAQAQTEVTWFKDGKLLSSSSKVRM  
EASGCSRRLVVQQAGKADAGEYSCEAGGQKLSFRLDVTEPKLVFAKEQQARSEVKAEEAGNSATLSCEVAQAQ  
EVTWFKDGLKLLSSSSKVRMEASGCSRRLVVQQAGKADAGEYSCEAGGQKLSFHLVDVTEPKLVFAKEQQAHSEV  
KAEAGASATLSCEVAQAQTEVTWFKDGKLLSSSSKVRMEASGCSRRLVVQQAGKADAGEYSCEAGGQKLSFR  
DVAEPKLVFAKEQQARSEVKAEEAGASATLSCEVAQAQTEVTWFKDGKLLSSSSKVRMEASGCSRRLVVQQAGK  
ADAGEYSCEAGGQKLSFRLDVAEPKLVFAKEQQANSEVKAEEAGASATLSCEVAQAQTEVTWFKDGKLLSSSSK  
VRVEASGCSRRLVVQQAGKADAGEYSCEAGGQKLSFRLDVAEPKLVFAKEQQAHSEVKAEEAGASATLSCEVAQ

AQTEVTFWFKDGGKLSSSSKVRVEASGCSRRLVVQQAGKADAGEYSCEAGGQKLSFRLDVAEPKLVFAKEQQAH  
SEVKAEGASATLSCEVAQAQTEVTFWFKDGGKLSSSSKVRVEASGCSRRLVVQQVKGADAGEYSCEARGQKLS  
FRLDVAEAEESQIPERPSRREPLVVKEHETIILTATIAAPSVAAVTWLKDGVERRSKRHEATSLGDTHTLTVR  
GAQVLDASAIYSCRVGKEGQDFPVQVEEVAAKFSKPLEPVEGELGGTVMLVCELSPEQAEVWRCGNTQLRPGK  
RFQMTSEGPRTTLTVSGLREDDAEYVCESRDDRTSARLTVKVPVVKFTSGLSAMVAEEGQEAFTQCQVSPS  
DAGVTWYKDGMLQVSEKFMVVEGASRIILTILGLTLEDAGQVTVAEAGASSAALRVREAPVLFKFKLEPQT  
VEERTSVTLEVELTRPWPEVKWTRNAAVLTPSENVEIRAEGARHCLVLRVSGFADRGFFGCETPDDKTQAKLN  
VEMRQVRLVRGLQEVEAKEQGTASMDVELSHAEEVGSWTRDGLRLQPGPKCHLAVQGPVHILTSLALQFQDSG  
LVAEFAEGVHTSARLIVTELPVSFTRVLQDVVATQKEKVTLECELSRPVDVRWLKDGVELRAGKAIIGIVAQGT  
CRSLVIYRCETGDQGVYVCDALDAQTSASLRVQGRYTLIFRRVLAEDAGEVKFVAENAESRAHLRVKELPVT  
LLRPLRDKIAMEKHRGVLECVSRASAQVRWFKGGVELQSGPKYEVVSDGLYRKLVIINDVQPEDEDTYTC DAG  
NVKTSAQFFVEEQSITIVRGLKDMTVMEPAPAWFECETSIPSVRPPKWLKGKTVLQAGGNVLEQDGTVHRLT  
LHKTCSTMTGVPVHFTIGKSRSSAQLVVS DIPVVLTRPLEPKAGRELQSVVLSCDFRPAPKAVQWYKDDTPLSP  
SEKFKMALEGOAELRILRLTPADAGVYRCQAGSAQSSAEVTVAEAREVTVIQPLQDAEAMEEGRVCFSCELSH  
KDEDIEWSLNGTPLYNDSFHEISHEGCLHTLVLKSVRQADTGTVCATSPKVS SARLVVKGKPVVFLKALDDV  
SAEERGLTLTQCEVSDPEARVWVRKDGVELGSPDKYDFLHKAGARGLTVHDLSHEDAGLYTCQVGSKETQSKV  
SVHDLHVGITKRLKTVELEGESECFEVLSHESPSDPAVWTVGGKTVGGSGHFHAVRQGRKYTLTVKDAALS  
DAGEVVFVSVLGLTSKASLIIRERPV DITKPLEDQRTTLGEDVMLSCELSRAGTSVRWLKDGKAIKRSQKYDLL  
SEGTRAVLVVRKASLKDSGEYTCETEASKSTAKLCVEEKANRFTTEELADLQVEEKGRAVFTCKTEHPASVVTW  
RKGLLELRASGKHVPSQEGTLTKLTINALERTSDTYTCDIGQARTQARLLVHGQKVRVIEDLEDTAVQEGSS  
AKFCCRIPADYGPVHWF LDKTPLHSNELNEITVQPGYHVLTLRQLALKDSGTVYFEAGDQRTSALRVTEK  
PSIFSRPLTDVTVTEGEDTLTVCE TTTVDSSVRWTKDGKTLRPSARCQLSHEGCAQQLLITATTPQDGGRYKC  
EIGGASSSSIVRVHALPVRFRFRESLKDVEVPEGKAATLRCVLSVAAPVEWRHGDDVLKSSNKYS LRQEGAVLE  
LVIRDLQFQDSGQYSCSFGDQTTSATLTVKTSQAQFVGKLRNKEATEGTTVTLRCELTKEAPVEWKKGTETLR  
NGDKYSLKQDGA VCELQICSLLVADAGEYSCVCGQEKTSATLTVKALLVHFVRRRLRSKEATEGDTTTLQCELS  
KAAPVEWRKGTETLRDGD RYSLKQDGA VCELQIRSLTIADAGEYLCTCGQEKTSATLTVRGLPAKFIEDLRSQ  
EATEGATAILRCELSKAAPVEWRKGETLKDGD RYTLRQDGA VCELQIRGLAVVDGTGYSSLPTKFTTEGLRNE  
EATEGTMATLRCQMSKAAPVEWRKGETL RDGD RYSLRQDGA MCELQIRGLTIEDSGEYTCVCGQEKTSATLS  
VKALPPRFIEDLRSQEATEGTMATLRCQMSKAAPVEWRKGETL RDGG RYSLRQNGAVCELQIHDLAVEDTGE  
YSCVCGQEKTSATLNVKALPPKFTTEGLKKEEATEGTMVTLRCQMSKEATVEWRKGAKT LSDGG RYSLRQDGA  
MCELQICGLAVEDAGEYSCVCGQEKTSATLSVKALPPRFIEDLRSQEATEGTMATLRCQMSKAAPVEWRKGET  
LRDGD RYSLRQDGA VCELQIRDLAVEDAGEYLCVCGQEKTSATLSVKALPPRFIEDLRSQEATEGTMATLRCQ  
MSKAAPVEWRKGSKTL RDGD RYSLRQDGA MCELQICDLAVEDTDYSCVCGQEKTSATLSVKAPQVVFQQPLQ  
NLQAEEGMSASLRCELSV PNAAMVWSKGGLELQGDTRREARQQGCVAELLLRDLRREDAGEYSC TCGSQT TSA  
TLMVTAAPVRFLRELQADVDEGATARLRCELSREAVSVEWRKGS LQFPKAKYQMVQEGTTAELLVHGVEQE  
DAGEYTC DAGTYSIARLSVRAPKPKFKTDLQSTEQEAGGTARLCCQLSEAE PGTPVQWLKEGVELHVGSKYE  
MRRQGA VCELLIHGLEAKDTGEYACL VGGQKTLASLRVKEPEVTIVRGLVDMEVQADEDEFTCKV SQAGATD  
VQWHLQGLPLQSNEVTEVAVLADGCTHV LQLKGVTL EDAGTVSFHVGG LSSSAQLTVRVP ETVLEPLKDVQL  
SEGQDAHFRCRLSRASGQEARWALGGVPLQCNEMNDITVEQGTLYLLTLHKVTLEDAGTITLQVGS CSSEAQL  
KVTAKNTVLRGLENDVALEGG EALFECQLSQPEVAHTWLLDDEPVHTSEKVEVVYFENGLRHLLLLKLNKLPQ  
DSCRVTF LAGDVVTS AFLTVRGWRLEVLEPPHDASVKAGMQVRF TCILSEAVPVGEATWYINGAAIQPDDTDW  
TVTTD GSHHALTLSNAQPQHAGEVTF AARDAVASARLSVLALPDPPEDAEVVGRSDHSVTL S WVA PMSDGGGG  
LCGYRVEMKEASTGQWQLCHDLVPGPECVVDDLVP GKTYRFRVA AVGPAGAGEPVHLPQMVKIAPAPAPAPAP  
APAPETRQAVVGEDICLELEVAADGGEVVWHKGTERRIQPGGHFEVLSRGQRQMLVIKGFRTEDQGEYRCGPIQ  
GLPSSGAATFNVM TSGSGDEVPAQPSLPPEAAQEGDLHLLWEALARKRRMSREPTLDSISELPEEDSRVQHL  
RQEAEETAPDLSEGYSTADELARTGEADLSHTSSDDESRAGT PSLVTYLKKAGGPGISPLASKHEAQVTT SVK  
PQKQQEPVVP TCPPPGDLSAADLMDPSLDKAAVKIQAAF KGYKVRKEMKQQEGPVFSRTFGDTEAQVGDVLR  
ECVLATKTD MRACWLKDGIELTDGRHYHIDQLKDGTC SLLVTGLAPTDSGRYTCQVSTKSGRVSHSACVVVSG  
TESEAESSSGGELDDAFRRARRLHRLFR TKSPAELSEELFLSADEGPGEPEEPADWQTYREDEFV CIRFE  
SLAEARQAVTCFRNMFATMGI GVEISLGEQGP RGVEMRIGK VAPVTPAVPLAKTPGLQTS DAA PVFLTELQN  
QDVQDGY PMSFDCVVTGQPVPSVRWFKDGGKLEEDDH YMINEDQQGGHQLIITAVVPADMGVYRCLAENSMGV  
SSTKAELRVELTSTDYDTAADATETSSYFSAQGYLSSREQEGTESDEGQLPQVLEELKDLQVAPGTR LAKFQL  
KVKGY PAPKLVYFKDGP LTTSDHIRMTDKKTLTLEIVSVTR EDSGQYAAIISNAVGAAYSSARLLVRGPSE  
PEEKPASDVHERLVPRI LEKFTPKKVKRGSSITF SVKVEGHPAPSVHWLKEEA EKGVLWIGPDTPGYTMAS  
SKQHS LVLLDVGRQHGYTCIATNPAGQALCSASLHISGLAKEEEQERVKEALISSFLQGT SQAVSAQMS  
AGFADLVGQSKGESLVAEEAHSHLSLAEVGT EEF LQKLT SQI TEMVSAKISQAKLQVPGGDSDEETKTPSASP  
RHGRSRPSSSVQESSSESEDGDSRGEIFDIYVVTADYLP LGAEQDAIILREGQYVEVLDSAHPLRVLVTRTKPT  
KSSPSRQGWVSPAYLDKRLKLSPEWGPTEAPEFPGEAVSEDEYRTRLSSVIQELLSSEQAFV GELQFLSHHM

KHLERSPRVPAAVASQKTVIFRNVQDISHFHSSFLKELQCGCTDDDDVAMCFIKNQEAFKYLEFLVGRVQAES  
VVVSTPVQEFYKKYAEETLSAKDPTQPPPPPLQHYLEQPVERVQKYQALLKELIRNKARNRQNCALLEQAYAV  
VSALPQRAENKLVSLMENYPGTLEALGEPRIQGHFIVWEGAPGARMPWKGHNHRVFLFRNYLVICKPRRDSR  
TDTFSYVFRNMMKLSSIDLNDQVEGDDRAFEVWHEREEDSVRKYLLQARTVIKNSWVKEICGIQQRLAQPVWR  
PEFEHEELADCTAELGETVKLACRVGTGPKPIVSWYKDGKPEVDPHHILIEDPDGSCSTLI LDNLGTIDSGQY  
MCFAASAAGNASTLGKILVQVPPRFVNKVRATPFVEGEDAQITCTVEGAPYPQIRWYKDGTLTLLAPGNRYRMLN  
EPRSGVLVLIQAASKEDLGHYECELVNRLGSTRGGGELYMQSPALRARDQHHREQIVA AAVEVTEQETKVPKK  
TVIIEETITTVVKS PRGRRQSPGKSPSRSPSRSSASPRRPGLLAPERLYPPGTSPSRLEVEQGRKAPVPALY  
VTEAEVHAPASQSPKWLVEETIEVVRVKKTGSRGASPVREMTSRGEGILFTLPGGIPGRDPNANNNSNKS  
QEARWGPVAVHVGEPFIQVDSVGNVDWAASPEPEQVRASQKEENTERQEGCSDGDENTFLMEEPQD  
TDSLQGRDPKILTHNGRVLTLLADLEDYVPQEGETFQCGDSTPSTPDEPPCEVSVLQREI SEPTVQPVLLN  
VGRPPGTGATPSFFRPGSQVHSPESVSFLLREAWSGPVSAAPWTSSFHTHVQSSVDGSHGSFKTEVSTQTVS  
FGAVGETVTLHIDPDGGEAPGPSQG\*

>rs29425205\_ENSMUSP00000158795\_c.6720:G>A\_p.A2241T

ENSMUST00000238536.2|Obscn-210|ENSMUSG00000061462|-|chr11:g.58973279:C>T  
MDHSFSGAPRFLTRPKAFVSVGKDATLSCQIVGNPTPHVSWEKDRQFVEAGARFRLAQDGDVYRLTILDLAL  
GDSGQYVCRARNAIGEAFVAVGLRVDSEGTCAEQAPHFLLRPTSIRVREGADATFRCRVGSGPPQAVSWSKDG  
RRLGPPDAPHVRVEEHGESSALRIRSARPRDGGTYEVRAENPLGSASAAAALVVDSDAEVGAGPPTSTATLLA  
HLQQRRREAMRAEGIPPSPPGAGTRTCTVTEGKHARLSCFVTGEPKPEVWKKDGQLVTEGRRHVVEDEQENF  
VLKILFCKQSDRGLYTCTASNLVGQTYSSVLVVVREPTVPFKKRLQDLEVREKESATFQCEVAQAPATEAAWFK  
EETRLWASAKYDIEEGTERRLTVRNVSADDDAVYICETTEGSRVVAELSVQGNLTKRKLPRKTAVRTGDTAIF  
WVELAVPEGPVRWLRNQEEMVAGGRVAITAEGTCHTLTI FQCTLEDMGEVAFVSGGCRTTTQFCVSA  
PRRPPLYPADPVVKAKTSSVTLWSAPPHGDRPVTIDGYVLEKRLGAYAWSRCHEAGWLATTEFTITGVA  
EEGDFQFRVSAINHFGQGPYLEFPGTMHLVPLAVKTPKAVEAVEGGEVTFVSDLTVASSGEWFLDGEAL  
KASSIYVIRCDRTRHMLTIREVPARLHGAQLKVFANGIETSIQMVVRAALGLPSSKLPAAAAREVLAQL  
HHEEAQLLAE LSDQAAAVTWLKDGRELSLGPKEYEMQVSAGRRALLVRDVAQDAGLYECVSRGSR  
TAYQLLVQDITDGYRWDGWPAGPQKHMCCKAGAKIARYLQSSCYRFLQYDKGVVHWLEAALDTRQKGT  
SSCSLHEKPKLVFAKQQAHSVKAEAGASATLSCEVAQAQTEVTFWKDGKLLSSSSKVRMEASGCS  
RRLVVQQAGKADAGEYSCEAGGQKLSFRLDVAEPKLVFAKQQAHSVKAEAGASATLSCEVAQAQ  
TEVTFWKDGKLLSSSSKVRMEASGCSRRLVVQQAGKADAGEYSCEAGGQKLSFRLDVAEPKLVFA  
KEQQARSEVKAEGASATLSCEVAQAQTEVTFWKDGKLLSSSSKVRMEASGCSRRLVVQQAGKAD  
AGEYSCEAGGQKLSFRLDVAEPKLVFAKEQQARSEVKAEGASATLSCEVAQAQTEVTFWKDGKLL  
SSSSKVRMEASGCSRRLVVQQAGKADAGEYSCEAGGQKLSFRLDVAEPKLVFAKEQQARSEV  
KAEAGNSATLSCEVAQAQTEVTFWKDGKLLSSSSKVRMEASGCSRRLVVQQAGKADAGEYS  
CEAGGQKLSFHLDVTEPKLVFAKEQQAHSEVKAEGASATLSCEVAQAQTEVTFWKDGKLLSSSS  
KVRMEASGCSRRLVVQQAGKADAGEYSCEAGGQKLSFRLDVAEPKLVFAKEQQAHSEVKAEG  
ASATLSCEVAQAQTEVTFWKDGKLLSSSSKVRMEASGCSRRLVVQQAGKADAGEYSCEAGGQKLS  
FRLDVAEPKLVFAKEQQAHSEVKAEGASATLSCEVAQAQTEVTFWKDGKLLSSSSKVRMEASG  
CSRRLVVQQAGKADAGEYSCEAGGQKLSFRLDVAEPKLVFAKEQQAHSEVKAEGASATLSCE  
VAQAQTEVTFWKDGKLLSSSSKVRMEASGCSRRLVVQQAGKADAGEYSCEAGGQKLSFRLDVA  
EPKLVFAKEQQAHSEVKAEGASATLSCEVAQAQTEVTFWKDGKLLSSSSKVRMEASGCSRRLV  
VQQAGKADAGEYSCEAGGQKLSFRLDVAEAEASQIPEPSPRREPLVVKEHETIILTATIAAPSV  
AAVTWLKDGEIRRSKRHEATSLGDTHTLTVRGAQVLDSAIYSCRVGKEGQDFPVQVEEVTAKF  
SKPLEPVEGELGGTVMLVCELSPEQAEVWRCGNTQLRPGKRFQMTSEGPRRTLTVSGLREDDA  
EEYVCESRDDRTSARLTVKVPVVKFTSGLSAMVAEEGQEAFTQCVVSPSDAGVTWYKDG  
MQLQPSEKFMVESGASRSLTILGLTLEDAGQVTEAEGASSAALRVREAPVLFKKLEPQT  
VEERTSVTLEVELTRPWPEVKWTRNAAVLTPSENVEIRAEGARHCLVLRVSGFADR  
GFFGCETPDDKTQAKLVNEMRQVRLVRGLQEVEAKEQGTASMDVELSHAEEVGSWTRD  
GLRQLQPGPKCHLAVQGPVHILTLALSALQPQDSGLVAFRAEGVHTSARLIVTELPVSFTR  
VLQDVVATQKEKVTLECELSRPVDVRLWLKDGVELRAGKAI GIVAQGTCSRSLVIYRCET  
GDQGVYVCDALDAQTSASLRVQGRTYTLIFRRVLAEDAGEVKFVAENAESRAHLRVKEL  
PVTLLRPLRDKIAMEKHGRTVLECCQVSRASAQVRWFKGGVELQSGPKYEVVSDGL  
YRKLVINDEVQPEDEDTYCTDAGNVKTSAQFFVVEEQSITIVRGLKDMTVMEPAPAWFEC  
ETSIPSVRPPKWLKGTVLQAGGNVLEQDGTVHRLTLHKTCSTMTGPVHFTIGKSRSSAQ  
LVVSDIPVVLTRPLEPKAGRELQSVVLSCDFRPAPKAVQWYKDDTPLSPSEKFKMALE  
GQMAELRILRLTPADAGVYRCQAGSAQSSAEVTEAREVTVIQPLQDAEAMEEGRVCF  
SCELSHKDEDEIWSLNGTPLYNDSFHEISHEGCLHTLVLSVRQADTGTVCATSPKV  
SVSARLVVKGKPVVFLKALDDVSAEERGTLLTQCEVSDPEARVVWRKDGVELG  
PSDKYDFLHKAGARGLTVHD

LSHEDAGLYTCQVGSKETQSKVSVHDLHVGITKRLKTVEVLEGESECSFECVLSHESPSDPAVWTVGGKTVGGS
GHFHAVRQGRKYTLTVKDAALSDAGEVVSFLGLTSKASLIIRERPVDIKPLEDQRTTLGEDVMLSCELSRA
GTSVRWLKDGKAIRKSQKYDLLSEGTRAVLVVRKASLKDSGEYTCETEASKSTAKLCVEEKANRFTTELADLQ
VEEKGRAVFTCKTEHPASVVTWRKGLLELRASGKHVPSQEGTLTKLTINALERTDSDTYTCDIGQARTQARLL
VHGQKVRVIEDLEDTAVQEGSSAKFCRIAPADYGPVHWFLDKTPLHSNELNEITVQPGGYHVLTLRQLALKD
SGTVYFEAGDQRTSAALRVTEKPSIFSRPLTDVTVTEGEDTLVCETTTVDSSVRWTKDGKTLRPSARCQLSH
EGCQAQLLITATTPQDGGRYKCEIGGASSSSIVRVHALPVRFRESLKDVEVPEGKAATLRCVLSVAAPVEWR
HGDDVLKSSNKYSLRQEGAVLELVIRDLQPDQSGQYSCSFGDQTTSATLTVKTTSSAQFVQKLRNKEATEGTTV
TLRCELTKEAPVEWKKGTETLRNGDKYSLKQDGA VCELQICSLLVADAGEYSCVCGQEKTSATLTVKALLVHF
VRRLSKEATEGDTTTLQCELSKAAPVEWRKGTETLRDGDYSLKQDGA VCELQIRSLTIADAGEYLCTCGQE
KTSATLTVRALPAKFKDSLKNEEATEGTTATLSCELSKAAPVTWKKGPKTLQSGDKYVLRQDGA VCGLIHGL
TMADAGEYSCVCGQEKTSATLTVRGLPAKFIEDLRSQEATEGATAILRCELSKAAPVEWRKGSSETLKDGDYR
LRQDGA VCELQIRGLAVVDGTYSLSPTKFTTEGLRNEEATEGTMATLRCQMSKAAPVEWRKGSSETLRDGDYR
LRQDGA MCELQIRGLTIEDSGEYTCVCGQEKTSATLSVKALPSRFIEDLRSQEATEGTMATLRCQMSKTAPVE
WKKGSETLRDGGYSLRQDGPVCELQICDLAVEDAGEYSCVCGQEKTSATLSIKALPPRFIEDLRSQEATEG
MATLRCQMSKAAPVEWRKGSSETLGDGGYSLRQNGAVCELQIHDLAVEDTGEYSCVCGQEKTSATLNVKALPP
RFIEDLRSQEATEGTMATLRCQMSKAAPVEWRKGSSETLRDGGYSLRQDGA VCELQIHDLVEDAGQYSCVCG
QEKTSAVLTVDALPPKFTTEGLKKEEATEGTMVTLRCQMSKEATVEWRKGAKTLSDGGYSLRQDGA MCELQIC
GLAVEDAGEYSCVCGQEKTSATLSVKALPPRFIEDLRSQEATEGTMATLRCQMSKAAPVEWRKGSSETLRDGD
YSLRQDGA VCELQIRDLAVEDAGEYLCVCGQEKTSATLSVKALPPRFIEDLRSQEATEGTMATLRCQMSKAAP
VEWRKGSSETLRDGDYSLRQDGA MCELQICDLAVEDTGDYSCVCGQEKTSATLSVKALPPRFIEDLRSQEARE
GTVATLRCRMSKAAPVEWRKGSSETLKDGDYSLRQEGNLCELQIRDLAVEDTEEYSCVCGQEKTSATLSVKAL
PAKFIEDLRSQEAPESSTVTLRCKLSKKASVVWKKGSETLRNGARYSLRQDGA VCELEIRDLTVEDTGEYSCT
CGQERTSATLSIMAPQVVFQQLQNLQAEEGSMASLRCELSVPNAAMVWSKGGLELQGDTRREARQQGCV AEL
LLRDLRREDAGEYSCTCGSQTTSATLMVTAAPVRFLELQADVDEGATARLCELSREAVSVEWRKGS LQLF
PCAKYQMVQEGTTAELLVHGVEQEDAGEYTCDAHELLIARLSVRAPKPKFKTDLQSTEQEAGGTARLCCQLS
EABPGTPVQWLKEGVELHVGSKYEMRRQGA VCELQIHGLEAKDTGEYACLVGGQKTASLRVKEPEVTVIRGL
VDMEVQADEDEFTCKVSAQATDVQWHLQGLPLQSNVTEVAVLADGCTHVLQKGVTLLEDAGTVSFHVGGL
SSSAQLTVRVPEVTVLEPLKDVQLSEGQDAHFRCLRSRASGQEARWALGGVPLQCNEMNDITVEQGTLYLLTL
HKVTLLEDAGTITLQVGSSESQAQLKVTAKNTVLRGLENVDALEGGEALFECQLSQPEVAHAHTWLLDDEPVHTS
EKVEVVYFENGLRHLLLLKNLKPQDSCRVTFLAGDVVTS AFLTVRGWRLEVLEPPHDASVKAGMQVRFTCILS
EAVPVGEATWYINGAAIQPDDTWTVTTDGSHHALTLSNAQPQHAGEVTF AARDAVASARLSVLALPDPEDA
EVVGRSDHSVTLSSWVAPMSDGGGGLCGYRVMKEASTGQWQLCHDLVPGPECVVDDLVPGKTYRFRVAAVGPA
GAGEPVHLPQMVKIAPAPAPAPAPAPAPAPETRAVVGEDICLELEVAADGGEVVWHKGTERRIQPGGHFEVLS
RGQRQMLVIKGFRTEDQGEYRCGPIQGLPSSGAATFNVVMTSGSGDEVPAQPSLPPEAAQEGDLHLLWEALAR
KRRMSREPTLDSISELPEEDSRVQHLRQEAETAPDLSEGYSTADELARTGEADLSHTSSDDES RAGTPSLVT
YLKKAAGPGISPLASKHEAQVTTSVKPKQKQEPVPTCPPPGDLSAADLMDPSLDKAAVKIQA AFKGYKVRKE
MKQQEGPVFSRTFGDTEAQVGDVLRLECVLATKTD MRACWLKDGIELTDGRHYHIDQLKDGTC SLLVTGLAPT
DSGRYTCQVSTKSGRVSHSACVVVSGTESEAESSSGGELDDAFRRAARRLHRLFRTKSPAELSEELFLSADE
GPGEPEEPADWQTYREDENFVCIRFESLAEARQAVTCFRNMFMATMIGVEISLGEQGPGRVEMRIGKVAPTVT
PAVPLAKTPGLQTS DAAPVFLTELQNQDVQDGYPMSFDCVVTGQVPVSVRWFKDGKLEEDDH YMINEDQQGG
HQLIITAVVPADMGVYRCLAENSMGVSSTKAELRVELTSTDYDTAADATETSSYFSAQGYLSSREQEGTESDE
GQLPQVLEELKDLQVAPGTR LAKFQLKVKGYPAKLYWFKDQGPLTSDHIRMTDKKTLHTLEIVSVTREDSG
QYAAYSNAVGAAYSSARLLVRGPSEPEEKPASDVHERLVPPRILEKFTPKKVKRGSSTIFSVKVEGHPAPS
HWLKEEA EKGVLWIGPDTPGYTMASSSKQHSVLVLLDVGRQHQTTCIATNPAGQALCSASLHISGLAKEEEQ
ERVKEALISSFLQGTSAQVSAQMSSEAGFADLVGQSKGESLVAAEASHLSLAEVGTEEF LQKLT SQI TEMVS
AKISQAKLQVPGGDSDEETKTPSASPRHRSRSPSSSVQESSSESEDGDSRGEIFDIYVVTADYLP LGAEQDAI
ILREGQYVEVLDSAHPLRWLVRTKPTKSSPSRQGWVSPAYLDRKRLKLSPEWGPTEAPEFPGEAVSEDEYRTRL
SSVIQELLSSEQAFV GELQFLESHHMKHLERSPRVPAAVASQKTVI FRNVQDISHFHSSFLKELQCGTDDD
AMCFIKNQEA FEKYLEFLVGRVQAESVVVSTPVQEFYKKYAEETLSAKDPTQPPPPPLQHYLEQPV ERVQKYQ
ALLKELIRNKARNRQNCALLEQAYAVVSALPQRAENKLHVSLMENYPGTLEALGEP I RQGHFIVWEGAPGARM
PWKGHNHRVFLFRNYLVICKPRRDSRTD TFSYVFRNMMKLSSIDLNDQVEGDDRAFEVWHEREDSVRKYLLQA
RTVI IKNSWVGEICIGIQRLAQPVWRPPEFEEELNADCTAELGETVKLACRVTGT PKPIVSWYKDGKPEVVDPH
HILIEDPDG SCTLILDLNLTGIDSGQYMCFAASAAGNASTLKGILVQVPPRFVNVKVRATPFVEGEDAQITCTVE
GAPY PQIRWYKDG TLLAPGNRYRMLNEPRSGVLV LVIQAASKEDLGHYECELVNR LGSTRGGGEL YMQSPALR
ARDQHHREQIVA AVEDTSVEGSAHSAQDGA DQQAASVLWRLLGSEALGPS PGDLPNTRQSEPPAFEEAASQIP
GAASGTPEV SQPGTHKGLEQETTSSGSQGWTVPIRVEGTAWPGAGTGQLLLDVHSQVIMETTQRTYVCQAPDT
GVTRAPSMQVTIEDVQVQVGDMAQF DAVIEGHPPPIV TWYKGSTQLTSSARLSQRQDGT TYSVLVTDVAPHDA



GVYTCVANNAGGQVLCKAELLVHGGDKLDAENQVYRRKLHSFYDVQEEIGRGVFGFVKRVQHKGNKMFCAAKF  
IPLRSKTRAQAYQERDILATLGHPLVTGLLDQFETRKTLLILILELCSSEELLDRLFKKGVVTEAEVKVYIQQL  
VEGLHYLHSHGILHLDIKPPNIMLVHPAREDIKICDFGFAQKITPSEPQYKYSPEFVSPEIIEQNPFVSEGS  
DIWAMGVI SYLSLTCCSPFAGESDRATLLNVLEGRVSWSSPTAAHLESDAKDFIKATLQRTPRARPSTSQCLA  
HPWFLKSMPAEEAHFINTKQLKFLARSRWQRSLMSYKSIIVMRSIPELLQGPPDSPSLGVARHLRGEASGAS  
SSSSSSDNELAPFARAKSLPPSPVTHSPLLHPRGFLRPSASLPEETEASMTADAAVPASPQASAGPPASPGCV  
PRHSVISSLFYQQAGEGAERGNKTSGAKRHPARRRHLLKGGYIARALPGLREPLMEYSLLEEEAAREEQASLM  
TKTPSFETALRLPSSSVREVPGRSHSLDNPPVTTGSPPEACKQLLFPSTGLTHETTAKDRGHKEGFLQESV  
FFPMSGDSRPGKQEGSSQDSCRGKPASSCHSELGSGSQEGCGPPSSQSLGSLPPQSLKKEKELSTSCGPLFSEQ  
PQAAPFPTQVSPLLGSEKEPQDGSLESGPVPVSPSSPGSASQVDASLDTEGLSEAGDTCDFTPPPQRPQEQAT  
TRKFSLESRGGYAGVAGYGTFAFGGDAGGMLGQGPLWARMAWAVSOSSEEQDEAATESPQPLESIGPIAEASG  
VPLRTPSPSLTPWEEVEQVSLVQIRDLSGDAEAADTISLDISEVDPAYLNLSLDYDIKYLPEFEMI FRRVFKPI  
EQPESPGSETEAGQGLADFLLEAAWPWPGELGLRAGLEITTEPEEPGDLEALLGEEAVGRKRKWSPSRGLFQF  
PGRCLSGEEPVELGLRQRVKASMAHISRILKGRPEGPEREGPPRKKAGLASFRLSGLKGRDQELSDEAVVLGQ  
SVTLACQVLAQPTAQATWSKDGVLLESSGHLLISSTLKNFQLLTIILVVKEEDLGTYTCCVSNPLGTAVTTGVL  
RKAERPSSSPRPEVGEELYKDAVLLVWKPVESECGPVYIVQCCIEGGSWTTLASDISDCCYLTGKLSRGGMYIF  
RTACVSKAGMGPYSSPSEQVLLGGPNHLASEEISSRGRPAQLLPSTKTFQMQIRRGFRSVVRQCREKASGR  
ALAAKIVPYQPEDKTAVLRREYEAALKRLLHHPHLAQLHAAYLSPRHLVLIILELCSGPELLPSLAERESYSESDVK  
DYLWQMLSATQYLHAQHILHLDLRSENMMVTEYNLLKVIDLGNQSLDQEKVPAPENFKDYLETMAPELLEGGQ  
GAVPQTDIWAIGVTAIFIMLSGEYPESEGTDLQKGLRKLIRLSRCYAGLSGGAVAFLOSSLCAQPWGRPCA  
STCLQCGLWTEEGPTGSRPTPVTFTVRLRAFVREKRRRALLYKKNLAQVR\*

>rs29425205\_ENSMUSP00000038264\_c.5892:G>A\_p.A1965T  
ENSMUST00000047441.14|Obscn-202|ENSMUSG00000061462|-|chr11:g.58973279:C>T  
MDHSFSGAPRFLTRPKAFVSVGKDATLSCQIVGNPTPHVSWEKDRQFVEAGARFLAQDGDVYRLTILDLAL  
GDSGQYVCRARNAIGEAFAAVGLRVDSEGTCAEQAPHFLLRPTSIRVREGADATFRCRVGGSPQPAVSWSKDG  
RRLGPPDAPHRVVEEHGESSALRIR SARPRDGGTYEVRANPLGSASAAAALVVDSDAEVAGPPGTSTATLLA  
HLQQRREAMRAEGIPSPGGAGTRTCTVTTEGKHARLSCFVTEGPKPETVWKKDQGLVTEGRRHVVEDEQENF  
VLKILFCKQSDRGLYTCTASNLVGQTYSSVLVVVREPTVPFKKRLQDLEVREKESATFQCEVAQPATEAAWFK  
EETRLWASAKYDIEEEGTERRLTVRNVSADDDAVYICETTEGSRVVAELSVQGNLTKLPRKTAVRTGDTAIF  
WVELAVPEGPVRWLRNQEEMVAGGRVAITAEGTCHTLTI FQCTLEDMGEVAFVSGGCRTTTQFCVSAPRRPPL  
YPPADPVVKAKTESSVTLWSAPPHGDRPVTIDGYVLEKRKLGAYAWSRCHEAGWLATTEFTITGVABEGDFQ  
FRVSAINHFGQGPYLEFPGTMHLVPLAVKTPKAVEAVEGGEVTFVSDLTVASSGEWFLDGEALKASSIYVI  
RCDRTRHMLTIREVPARLHGAQLKFVANGIETSIQMVVRAALGLPSSKLPAAAAAREVLAQLHEEAQLLAE LSD  
QAAA VTWLKDGRELSLGPYEMQVSAGRRALLVRDVAQDDAGLYECVSRGSRRTAYQLLVQDITDGYRDWGPAG  
PQKHMCKCAGAKIARYLGSSCYRFLQYDKGVWHWLEAALDTRQKGTSSCSLHEKPKLVFAKQQAHSEVKAE  
AGASATLSCEVAQAQTEVTWFKDGKLLSSSSKVRMEASGCSRRLVVQQAGKADAGEYSCEAGGQKLSFRLDVA  
EPKMFVFAKEQQARSEVKAEGASATLSCEVAQAQTEVTWFKDGKLLSSSSKVRMEASGCSRRLVVQQAGKADA  
GEYSCEAGGQKLSFRLDVTEPKLVFAKEQQARSEVKAEGVNSATLSCEVAQAQTEVTWFKDGKLLSSSSKVRM  
EASGCSRRLVVQQAGKADAGEYSCEAGGQKLSFRLDVAEPKLVFAKEQQARSEVKAEGNSATLSCEVAQAQ  
EVTWFKDGKLLSSSSKVRMEASGCSRRLVVQQAGKADAGEYSCEAGGQKLSFHLDVTEPKLVFAKEQQAHSEV  
KAEAGASATLSCEVAQAQTEVTWFKDGKLLSSSSKVRMEASGCSRRLVVQQAGKADAGEYSCEAGGQKLSFR  
LDVAEPKLVFAKEQQARSEVKAEGASATLSCEVAQAQTEVTWFKDGKLLSSSSKVRVEASGCSRRLVVQQAGK  
ADAGEYSCEAGGQKLSFRLDVAEPKLVFAKEQQANSEVKAEGASATLSCEVAQAQTEVTWFKDGKLLSSSSK  
VRVEASGCSRRLVVQQAGKADAGEYSCEAGGQKLSFRLDVAEPKLVFAKEQQAHSEVKAEGASATLSCEVAQA  
QTEVTWFKDGKLLSSSSKVRVEASGCSRRLVVQQAGKADAGEYSCEAGGQKLSFRLDVAEPKLVFAKEQQAH  
SEVKAEGASATLSCEVAQAQTEVTWFKDGKLLSSSSKVRVEASGCSRRLVVQQAGKADAGEYSCEAGGQKLS  
FRLDVAEPKLVFAKEQQAHSEVKAEGASATLSCEVAQAQTEVTWFKDGKLLSSSSKVRVEASGCSRRLVVQQ  
AGKADAGEYSCEAGGQKLFRLDVAEPKLVFAKEQQAHSEVKAEGASATLSCEVAQAQTEVTWFKDGKLLSS  
SSKVRVEASGCSRRLVVQQVQKADAGEYSCEARGQKLSFRLDVAEAEBSQI PERPSRREPLVVEKHETIILTAT  
IAAPSVAAVTWLKDGV EIRRSKRHEATSLGDTHLTVRGAQVLD SAIYSCRVGKEGQDFPVQVEEVTAKFSKP  
LEPVEGELGGTVMLVCELSPEQAEVVWRCNGTQLRPGKRFQMTSEGPRRTLTVSGLREDDAEYVCESRDDRT  
SARLTVKVPVVKFTSGLSAMVAEEGQEA TFQCVVSPSDAGVTWYKDGMLQLPSEKFMVMEVGASRSLTILGL  
TLEDAGQVHVEAEGSSAALRVREAPVLFKKKLEPQTVEERTSVTLEVELTRPWEVVKWTRNAAVLTPSENV  
EIRAEGARTCLVLRSGVFADRGFEGCETPDDKTQAKLVEMRQVRLVVRGLQEVAEQGTASMDVELSHA EVE  
GSWTRDGLRLQPGPKCHLAVQGPVHILTL SALQPQDSGLVAFRAEGVHTSARLIVTELPVSFTRVLQDVVATQ  
KEKVTLECELSRPVDVRWLKDGVELRAGKAI GIVAQGTCSLVIYRCETGDQGVVCDALDAQTSASLRVQGR  
TYTLIFRRVLAEDAGEVKFVAENAESRAHLRVKELPVTLLRPLRDKIAMEKHRGVLECCQVSRASAQVRWFKGG  
VELQSGPKYEVVSDGLYRKLVIN DVQPEDEDTYTCDAGNVKTSAQFFVEEQSITIVRGLKDMTVMFPAPAWFE

CETSIPSVRPPKWLKGTVLQAGGNVLEQDGTVHRLTLHKTCSTMTGPHFTIGKSRSSAQLVVS DIPVVLTRPLEPKAGRELQSVVLSCDFRPAPKAVQWYKDDTPLSPSEKFKMALEGQMAELRILRLTPADAGVYRCQAGSAQSSAEVTVAREVTVIQPLQDAEAMEEGRVCFSCELSHKDEDEIWSLNGTPLYNDSFHEISHEGCLHTLVLKSVRQADTGTVCATSPKVSVSARLVVKGKPVVFLKALDDVSAEERGTTLQCEVSDPEARVVWRKDGVELGSPDKYDFLHKAGARGLTVHDLSDHEDAGLYTCQVGSKETQSKVSVHDLHVGITKRLKTVEVLEGESECSFECVLSHESPSDFAVWTVGGKTVGGSGHFHAVRQGRKYTLTVKDAALSDAGEVVFVSVLGLTSSKASLIIRERPVDTKPLEDQRTTLGEDVMSCELSRAGTSVRWLKDGKAIKRSQKYDLLSEGTRAVLVVRKASLKDSGEYTCETEASKSTAKLCVEEKANRFTTEELADLQVEEKGRAVFTCKTEHPASVVTWRKGLLELRASGKHVPSQEGTLTKLTINALERTDSDTYTCDIGQARTQARLLVHGQKVRVIEDLEDTAVQEGSSAKFCCRIAPADYGPVHWFLDKTPLHSNELNEITVQPGGYHVLTLRQLALKDSGTVYFEAGDQRTSAALRVTEKPSIFSRPLTDVTVTEGEDLTLVCETTTVDSSVRWTKDGKTLRPSARCQLSHEGCQAQLLITATTPQDGGRYKCEIGGASSSSIVRVHALPVRFRESLKDVEVPEGKAA TLRCVLSVAAPVEWRHGDDVLKSSNKYSLRQEGAVLELVIRDLQPDQSGQYSCSFGDQTTSATLTVKTSAAQFVGKLRNKEATEGTTVTLRCELTKEAPVEWKGTETLRNGDKYSLKQDGAVCELQICSLLVADAGEYSCVCGQEKTSATLTVKALLVHFVRRLSKEATEGDTTTLQCELSKAAPVEWRKGTETLRDGDYSLKQDGAVCELQIRSLTIADAGEYLCTCGQEKTSATLTVRALPAKFKDSLKNEEATEGTTATLSCELSKAAPVTWKKGPKTLQSGDKYVLRQDGAVCGLQIHGLTMADAGEYSCVCGQEKTSATLTVRGLPAKFIEDLRSQEATEGATAILRCELSKAAPVEWRKGSSETLRDGDYSLRQDGAVCELQIRGLAVVDGTGYSLSLPTKFTTEGLRNEEATEGTMATLRQMSKAAPVEWRKGSSETLRDGDYSLRQDGAMCELQIRGLTIEDSGEYTCVCGQEKTSATLSVKALPPRFIEDLRSQEATEGTMATLRQMSKAAPVEWRKGSSETLRDGGRYSLRQDGAVCELQIHDLAVEDTGEYSCVCGQEKTSATLNVKALPPRFIEDLRSQEATEGTMATLRQMSKAAPVEWRKGSSETLRDGGRYSLRQDGAVCELQIHDLVEDAGQYSCVCGQEKTSAVLTVDALPPKFTTEGLKKEEATEGTMVTLRQMSKEATVEWRKGAKTLSGGRYSLRQDGAMCELQICGLAVEDAGEYSCVCGQEKTSATLSVKALPPRFIEDLRSQEATEGTMATLRQMSKAAPVEWRKGSKTLRDGDYSLRQDGAMCELQICDLAVEDTGDYSCVCGQEKTSATLSVKAPQVVFQQPLQNLQAEEGSMASLRCELSVPAAMVWSKGGLELQGDTRREARQQCVAELLLRDLRREDAGEYSCCTCGSQTTSATLMVTAAPVRFRLRLQAQDVDEGATARLRCLEASREAVSVEWRKGSLLQFPKAKYQMVQEGTTAELLVHGVEQEDAGEYTC DAGHTQSIARLSVRAPKPKFKTDLQSTASEAGGTARLCCQLSEAEPTQVQWLKEGVELHVGSKYEMRRQAVCELLIHGLEAKDTEYACLVGGQKTLASLRVKEPEVTVIRGLVDMEVQADEDEVEFTCKVVSQAGATDVQVHGLQVPLQSNNEVTEVAVLADGCTHVLQKGVTLLEDAGTVSFHVGGLSSAQLTVRVPEVTVLEPLKDVQLSEGDQDAHFRCLSRASGQEARWALGGVPLQCNEMNDITVEQGTLYLLTLHKVTLLEDAGTITLQVGSSESAQLKVTAKNTVLRGLENVDALEGGEALFECQLSQPEVAHAHTWLLDDEPVHTSEKVEVVYFENGLRHLLLLKLNKPKQDSCRVTFLAGDVVTS AFLTVRALPDPPEDAEVVGRSDHSVTLVSWVAPMSDGGGGLCGYRVMKEASTGQWQLCHDLVPGPECVDDLVPGKTYRFRVAAVGPAGAGEPVHLPQMVKIAPAPAPAPAPAPAPAPETRAVVGEDICLELEVAADGGVEVWHKGTERRIQPGGHFEVLSRQQRQMLVIKGFRTEDQGEYRCGPIQGLPSSGAATFNVMVMTSGSGDEVPAQPSLPPEAAQEGDLHLLWEALARKRRMSREPTLDSISELPEEDSRVQHLRQEAETAPDLSEGYSTADELARTGEADLSHTSSDDES RAGTTPSLVTYLKAGGPGISPLASKHEAQVTTSVKPKQKQEPVVPVTPCPPPGDLSAADLMDPSLDKAAVKIQAFKGYKVRKEMKQEGPVFSRTFGDTEAQVGDVLRLECVLATKTDMRACWLKDGIELTDGRHYHIDQLKDGTC SLLVTGLAPTDSGRYTCQVSTKSGRVSHSACVVVSGTESEAESSSGGELDDAFRRAARRLHRLFRTKSPAELS EEELFLSADEGPGEPEEPADWQTYREDENFVCIRFESLAEARQAVTCFRNMFMATMGIGVEISLGEQGPGRVEMRIGKVAPTPTPAVPLAKTPGLQTSDAAPVFLTELQNDVQDGYPMSFDCVVTGQPVPSVRWFKDGKLLLEDDHYMINEDQQGGHQLIITAVVPADMGVYRCLAENSMGVSSTKAELRVELTSTDYDTAADATETSSYFSAQGYLSSREQEGTESDEGQLPQVLEELKDLQVAPGTRLAKFQLKVKGYPAKLYWFKDGQPLTSDHIRMTDKKTLHTLEIVSVTREDSGQYAAIISNAVGAAYSSARLLVRGPSEPEEKPASDVHERLVPPRILEKFTPKKVKRGSSITFSVKVEGHPAPSVHWLKEEAKEGVLWIGPDTPGYTMASSKQHSVLVLDVGRQHOGTYTCIATNPAGQALCSASLHISGLAKEEEEQERVKEALISSFLQGTSAQVSAQMSSESAGFADLVGQSKGESLVAAEEAHSHLSLAEVGTETEFLOKLT SQITEMVSAKISQAKLQVPGGDSDEETKTPSASPRHGRSRPSSSVQESSSESEDGDSRGEIFDIYVVTADYLPLGAEQDAIILREGQYVEVLDSAHPLRWLVRTKPTKSSPSRQGWVSPAYLDKRLKLSPEWGPTEAPEFPGEAVSEDEYRTRLSSVIQELLSSEQAFVQFLESHHMKHLERSPRVPAAVASQKTVIFRNVQDISHFHSSFLKEIQCGCTDDDVAMCFIKNQEA FEKYLEFLVGRVQAESVVVSTPVQEFYKKYAEETLSAKDPTQPPPPLOHYLEQPVERVQKYQALLKELIRNKARNRQNCALLEQAYAVVSALPQRAENKLVSLMENYPGTLEALGEPVIRQGHFIVWEGAPGARMPWKGNHRHVFVFRNYLVICKPRRDSRTDFTSYVFRNMMKLSSIDLNDQVEGDDRAFEVWHEREDSVRKYLLQARTVIKNSWVKEICGIQORLAQPVWRPPEFEEELADCTAELGETVKLACRVGTGPKPIVSWYKD GKPVEVDPHHILIEDPDGSCSTLILDNLGTIGDSGQYMCFAASAAGNASTLGKILVQVPPRFVNKVRATPFVEGEDAQITCTVEGAPYQIRWYKDGTL LAPGNRYRMLNEPRSGVVLVLIQAASKEDLGHYECELVNRNLGSTRGGGELYMQSPALRARDQHHREQIVAAVEGAPSMQVTEIDVQVQVGDMAQFDAVIEGHPPPIVTVYKGSTQLTSSARLSQRQDGTYSLVLTVDVAPHDAVYTCVANNAGGVLCQAEELLVHGGDKLDAENQVYRRKLSHFYDVQEEIGRGVFGFVKRVQHKGNMFCAAKFIPLRSKTRAQAYQERDILATLGHPLVTGLLDQFETRKTLLILILELCSSEELDLRLFKKGVVTEAEVKVYIQQLVEGLHYLHSHGILHLDIKPPNIMVHPAREDIKICDFGFAQKITPSEPOYSKYGSPFVVSPEIIEQNPVSEGSDIWAMGVISYLSLTCSSPFAGESDRATLLNVLEGRVSWSSPTAAHLSEDAK

DFIKATLQRTPRARPSTSQCCLAHWPFLKSMPEAAEHFINTKQLKFLLRASRWQRSLMSYKSIILVMRSIPELLO  
 GPPDPSPLGVARHLRGEASGASSSSSSDNEAPFARAKSLPPSPVTHSPLLHPRGFLRPSASLPEETEASMP  
 TADAAVPASPQASAGPPASPGCVPRHSVSSLFYQQAGEGAERGNKTSKAKRHPARRRHLLKGGYIARALPGLR  
 EPLMEYSLLEEEAAREEQASLMTKTPSFETALRLPSSSVREVPGRSHSLDNPPVTTGSPPEACKEQLLFPST  
 GLTHETAKDRGHKEGFLQESVFPFPMMSGDSRPGKQEGSSQDSCRGKPASSCHSELGSGSQEGCGPPSSQSLG  
 SLPPQSLKKELESTSCGPLFSEQPQAAPFPTQVSPLLGSEKEPQDGSLSSEGPVVPSSSPGSASQVDASLDETEG  
 LSEAGDTCDFTPPPQRPQEQATTRKFSLESRRGGYAGVAGYGTFAFGGDAGGMLGGQPLWARMWAVSOSSEEQ  
 DEATEESPQPLESLGPIAEASGVPLRTSPSLTPWEEVEQVSLVQIRDLSDGDAEAADTISLDISEVDPAYLNLS  
 DLYDIKYLPPFEFMI FRRVPKPIEQPESPGSETEAGQGLADFLEEAAPWPWPGELGLRAGLEITEEPEEPGDLEA  
 LLGEAAVGRKRKWSPSRGLFQFPGRCLSGEPELGLRQRVKASMAHISRILKGRPEGPEREGPPRKKAGLAS  
 FRLSGLKGRDQELSDEAVVLGQSVTLACQVLAQPTAQATWSKDGVLLESSGHLLISSTLKNFQLLTIILVVKEE  
 DLGTYTCCVSNPLGTAVTTGVLKKAERPSSSPRPEVGEYKDAVLLVWKPVESECGPVTYIVQCCIEGGSWTTL  
 ASDISDCCYLTKLSRGGMYIFRTACVSKAGMGPYSSPSEQVLLGGPNHLASEEESSRGRPAQLLPSTKTFAF  
 QMQIRRRGRFSVVRQCREKASGRALAAKIVPYQPEDKTAVLREYEALKRLHHPHLAQLHAAYLSPRHLVLI LEL  
 CSGPELLPSLAERESYSESDVKDYLWQMSATQYLHAQHILHLDLRSENMMVTEYNLLKVIDLGNASLDQEK  
 VPAPENFKDYLETMAPELLEGQGAVPQTDIWAIGVTAIFIMLSGEYPESEGETRDLQKGLRKLIRLSRCYAGL  
 SGGAVAFLOSSLCAQPWGRPCASTLQCGWLTEEGPTGSRPTPVTFTVRLRAFVREKRRRALLYKKNHNAQ  
 VR\*

>rs29425205\_ENSMUSP00000049737\_c.6519:G>A\_p.A2174T  
 ENSMUST00000052872.15|Obscn-203|ENSMUSG00000061462|-|chr11:g.58973279:C>T  
 MDHSFSGAPRFLTRPKAFVSVGKDATLSCQIVGNPTPHVSWEKDRQFVEAGARFRLAQDGDVYRLTILDLAL  
 GDSGQYVCRARNAIGEFAAVGLRVDSEGTCAEQAPHLLRPTSIRVREGADATFRCRVGGSQPAPVSWSKDG  
 RRLGPPDAPHVRVEEHGESSALRIRSARPRDGGTYEVRAENPLGSASAAAALVVDSDAEVAGPPGTSTATLLA  
 HLQQRREAMRAEGIPPSPPGAGTRTCTVTEGKHARLSCFVTGEPKPKETVWKKDQGLVTEGRRHVVEDEQENF  
 VLKILFCCKQSDRGLYCTCTASNVLVGGTYSSVLVVVREPTVFFKKRLQDLEVREKESATFQCEVAQAPATEAAWFK  
 EETRLWASAKYDIEEETERRLTVRNVSADDDAVYICETTEGSRVAELSVQGNLPRKTAVRTGDTAIF  
 WVLELAVPEGPVVRVLRVAITAEQDCHTTLTI FQCTLEDMGEVAFVSGGCRTTTTQFCVSAAPRRPPL  
 YPPADPVVKAKTESSVTLWSAPPHGDRPVTIDGYVLEKRKLGAYAWSRCHEAGWLATTEFTITGVAAEEDGFQ  
 FRVSAINHFGQGPYLEFPGMTMLVPLAVKTPKAVEAVEGGEVTFVSDLTVASSGEWFLDGEALKASSIYVI  
 RCDRTRHMLTIREVPARLHGAQLKFVANGIETSIQMVVRAALGLPSSKLPAAAAREVLAQLHEEAQLLAE LSD  
 QAAAVTWLKDGRELSLGPYEMQVSAGRRALLVRDVAQDDAGLYECVSRGSRRTAYQLLVQEPKLVFAKQQA  
 SEVKAEGNSATLSCEVTQAQTEVTWFKDGKLLSSSSKVRMEASGCSRRLVVQQAGKADAGEYSCEAGGQKLS  
 FRLDVAEPKLVFAKQQAHSSEVKAEGASATLSCEVAQAQTEVTWFKDGKLLSSSSKVRMEASGCSRRLVVQQ  
 AGKADAGEYSCEAGGQKLSFRLDVAEPKMFVFAKEQQARSEVKAEGASATLSCEVAQAQTEVTWFKDGKLLS  
 SSKVRMEASGCSRRLVVQQAGKADAGEYSCEAGGQKLSFRLDVTEPKLVFAKEQQARSEVKAEGNSATLSCE  
 VAQAQTEVTWFKDGKLLSSSSKVRMEASGCSRRLVVQQAGKADAGEYSCEAGGQKLSFRLDVAEPKLVFAKEQ  
 QARSEVKAEGNSATLSCEVAQAQTEVTWFKDGKLLSSSSKVRMEASGCSRRLVVQQAGKADAGEYSCEAGGQ  
 KLSFHLDVTEPKLVFAKEQQAHSEVKAEGASATLSCEVAQAQTEVTWFKDGKLLSSSSKVRMEASGCSRRLV  
 VQQAGKADAGEYSCEAGGQKLSFRLDVAEPKLVFAKEQQARSEVKAEGASATLSCEVAQAQTEVTWFKDGK  
 LSSSSKVRVEASGCSRRLVVQQAGKADAGEYSCEAGGQKLSFRLDVAEPKLVFAKEQQANSEVKAEGASATL  
 SCEVAQAQTEVTWFKDGKLLSSSSKVRVEASGCSRRLVVQQAGKADAGEYSCEAGGQKLSFRLDVAEPKLAFA  
 KEQQAHSEVKAEGASATLSCEVAQAQTEVTWFKDGKLLSSSSKVRVEASGCSRRLVVQQAGKADAGEYSCEA  
 GGQKLSFRLDVAEPKLAFAKEQQAHSEVKAEGASATLSCEVAQAQTEVTWFKDGKLLSSSSKVRVEASGCSR  
 RLVVQQAGKADAGEYSCEAGGQKLSFRLDVAEPKLAFAKEQQAHSEVKAEGASATLSCEVAQAQTEVTWFKD  
 GKLLSSSSKVRVEASGCSRRLVVQQAGKADAGEYSCEAGGQKLFRLDVAEPKLMFAKEQQAHSEVKAEGAS  
 ATLSCEVAQAQTEVTWFKDGKLLSSSSKVRVEASGCSRRLVVQQAGKADAGEYSCEAGGQKLSFRLDVAEPK  
 VFAKEQQAHSEVKAEGASATLSCEVAQAQTEVTWFKDGKLLSSSSKVRVEASGCSRRLVVQQVQKADAGEYS  
 CEARGQKLSFRLDVADTRLMFAKEQQARTEVKAEGNSATLSCEVAQAQTEVTWFKDGKLLSSSSKVRVEASG  
 CSRRLVVQQAGKADAGEYSCEAGGQKLSFRLDVAEAESEI PERPSRREPLVVKEHETIILTATIAAPVAAVT  
 WLKDGVEIRRKRHEATSLGDTHLTVRGAQVLDSAIYSCRVGKEGQDFPVQVEEVTAKFSKPLEPVEGELGG  
 TVMLVCELSPEQAEVWRCGNTQLRPGKRFQMTSEGPRRTLTVSGLREDDAEYVCESRDDRTSARLTVKVP  
 VVKFTSGLSAMVAEEGQEAATFQCVVSPSDAGVTWYKDGMLQPSSEKFMVMEVSGASRSLTILGLTLEDAGQVT  
 EAEGASSAALRVREAPVLFKKKLEPQTVEERTSVTLLEVELTRPWPPEVKWTRNAAVLTPSENVEIRAEGARHC  
 LVLRSVGFADRGFFGCEPDDKTQAKLNVEMRQVRLVRLQVEVEAKEQGTASMDVLSHAEVEGSWTRDGLRL  
 QPGPKCHLAVQGPVHILTLALQPDSSGLVAFRAEGVHTSARLIVTELPVSFTRVLQDVVATQKEKVTLECEL  
 SRPVDVRWLKDGVELRAGKAIGIVAQGTCSRSLVIYRCETGDQGVYVCDALDAQTSASLRVQGRTYTLIFRRVL  
 AEDAGEVVFVAENAESRAHLRVKELPVTLLRPLRDKIAMEKHRGVLECVSRASAVRWFVKGGLVQSGPKYE  
 VVSDGLYRKLVINVDVQPEDEDTYTCDAENVKTSAQFFVVEEQSITIVRGLKDMTVMPEPAPAWFECETSIPSVRP

PKWLLGKTVLQAGGNVGLQDGTVHRLTLHKTCSTMTGPVHFTIGKSRSSAQLVVSDDIPVVLTRPLEPKAGRE
LQSVVLSCDFRPAPKAVQWYKDDTPLSPSEKFKMALEGQMAELRILRLTPADAGVYRCQAGSAQSSAEVTVEA
REVTVIQPLQDAEAMEEGRVCFSCELSHKDEDEIWSLNGTPLYNDSFHEISHEGCLHTLVLSVRQADTGTVC
ATSPKVSVSARLVVKGKPVVFLKALDDVSAEERGTLTLQCEVSDPEARVVWRKDGVELGPSDKYDFLHKAGAR
GLTVHDLSDHEDAGLYTCQVGSKETQSKVSVHDLHVGITKRLKTVEVLEGESECSFECVLSHESPSDPAVWTVGG
KTVGGSGHFHAVRQGRKYTLTVKDAALSDAGEVVSFVLGLTSKASLIIRERPVDITKPLEDQRTTLGEDVMLS
CELSRAGTSVRWLKDGKAIKRSQKYDLLSEGTRAVLVVRKASLKDSGEYTCETEASKSTAKLCVEEKANRFTE
ELADLQVEEKGRAVFTCKTEHPASVVWTRKGLLELRASGKHVPSQEGTLKLTINALERTDSDTYTCDIGQAR
TQARLLVHGQKVRVIEDLEDTAVQEGSSAKFCCRIAPADYGPVHWFLDKTPHLSNELNEITVQPGYHVLTLR
QLALKDSGTVYFEAGDQRTSAALRVTEKPSIFSRPLTDVTVTEGEDTLVCETTTTVDSSVRWTKDGKTLRPSA
RCQLSHEGCAQQLLITATTPQDGGRYKCEIGGASSSSIVRVHALPVRFRESLKDVEVPEGKAATLRCVLSVA
APVEWRHGDDVLKSSNKYSLRQEGAVLELVIRDLQPDQSGQYSCSFGDQTTSATLTVKTSQAQVFGKLRNKEA
TEGTVTVLRCCLTKEAPVEWKKGTETLRNGDKYSLKQDGAVCELQICSLLVADAGEYSCVCGQEKTSATLTVK
ALLVHFVRRRLRSKEATEGDTTLQCELSKAAPVEWRKGTETLRDGDYSLKQDGAVCELQIRSLTIADAGEYL
CTCGQEKTSATLTVRALPAKFKDSLKNEEATEGTTATLSCELSKAAPVTWKKGPKTLQSGDKYVLRQDGAVCG
LQIHGLTMADAGEYSCVCGQEKTSATLTVRGLPAKFIEDLRSQEATEGATAILRCELSKAAPVEWRKGETLQ
DGDYSLRQDGAVCELQIRGLAVVDGTYSLSLPTKFTTEGLRNEEATEGTMATLRCQMSKAAPVEWRKGETLR
DGDYSLRQDGAVCELQIRGLTIEDSGEYTCVCGQEKTSATLSVKALPSRFIEDLRSQEATEGTMATLRCQMS
KTAPVEWKKGSETLRDGGYSLRQDGPVCELQICDLAVEDAGEYSCVCGQEKTSATLSIKALPPRFIEDLRSQ
EATEGTMATLRCQMSKAAPVEWRKGETLGDGGYSLRQNGAVCELQIHDLAVEDTGEYSCVCGQEKTSATLN
VKALPPRFIEDLRSQEATEGTMATLRCQMSKAAPVEWRKGETLRDGGYSLRQDGAVCELQIHDLVEDAGQ
YSCVCGQEKTSAVLTVDALPPKFTTEGLKKEEATEGTMVTLRCQMSKEATVEWRKGAKTLSDGGRYSLRQDGAM
CELQICGLAVEDAGEYSCVCGQEKTSATLSVKALPPRFIEDLRSQEATEGTMATLRCQMSKAAPVEWRKGET
LRDGDYSLRQDGAVCELQIRDLAVEDAGEYLCVCGQEKTSATLSVKALPPRFIEDLRSQEATEGTMATLRCQ
MSKAAPVEWRKGSKTLRDGDYSLRQDGAVCELQICDLAVEDTGDYSCVCGQEKTSATLSVKALPPRFIEDLR
SQEAREGTVATLRCRMSKAAPVEWRKGETLKDGDYSLRQEGNLCELQIRDLAVEDTEEYSCVCGQEKTSAT
LSVKALPPRFIEDLRSQEAPESSTVTLRCKLSKASVWKKGSETLRNGARYSLRQDGAVCELEIRDLTVEDT
GEYSCTCGQERTSATLSIMAPQVVFQQLQNLQAEEGSMASLRCELSVPNAAMVWSKGGLELQGDTRREARQQ
GCVAELLLRDLRREDAGEYSCCTGSQTTSATLMVTAAPVRFLRELQAQDVDEGATARLRCELSREAVSVEWRK
GSLQLFPCAKYQMVQEGTTAELLVHGVEQEDAGEYTCDAHTQS IARLSVRAPKPKFKTDLQSTEQEAGGTAR
LCCQLSEAEPTPVQWLKEGVELHVGSKYEMRRQGAVCELLIHGLEAKDTGEYACLVGQKTLASLRVKEPEV
TIVRGLVDMEVQADEDEFTCKVSAQAGATDVQWHLQGLPLQSNVEVAVLADGCTHVLQKGVTLQEDAGTVS
FHVGGSSSAQLTVRVPEVTVLEPLKDVQLSEGQDAHFRCRLSRASGQEARWALGGVPLQCNEMNDITVEQGT
LYLLTLHKVTLEDAGTITLQVGSSEAEQKVTAKNTVLRGLENVDALEGGALFECQLSQPEVAHTWLLDD
EPVHTSEKVEVVYFENGLRHLHLLKLNKPKQDSCRVTFLAGDVVTS AFLTVRGRWLEVLPPHDASVKAGMQVR
FTCILLSEAVPVGEATWYINGAAIQPDDTDWTVTTDGSHHALTLNAQPQHAGEVTFAAARDAVASARLSVLALP
DPPEDAEEVGRSDHSVTLVWVAPMSDGGGGLCGYRVMKEASTGQWQLCHDLVPGPECVDDLVPGKTYRFRV
AAVGPAGAGEPVHLPQMVKIAPAPAPAPAPAPAPAPETRQAVVGEDICLELEVAADGGEVVWHKGTERRIQPGG
HFEVLSRGRQMLVIKGFRTEDQGEYRCGPIQGLPSSGAATFNVVMTSGSGDEVPAQPSLPPEAAQEGDLHLL
WEALARKRRMSREPTLDSISELPEEDSRVQHLRQEAETAAPDLSEGYSTADELARTGEADLSHTSSDDESRAG
TPSLVTVLKKAGGPGISPLASKHEAQVTTSVKPKQKQEPVVPTCPPPGDLSAADLMDPSLDKAAVKIQAAFQK
YKVRKEMKQOEGPVFSRTFGDTEAQVGDVLRLECVLATKTKDMRACWLKDGIELTDGRHYHIDQLKDGTCSSLLV
TGLAPTDSGRYTCQVSTKSGRVSHSACVVVSGTESEAESSSGGELDDAFRRRAARLHRLFRTKSPAELSEEEL
FLSADEGPGPEPEPADWQTYREDENFVCIRFESLAEARQAVTCFRNMFATMIGIVEISLGEQGPGRVEMRIGK
VAPVTPPAVPLAKTPGLQTSDAAPVFLTELQNDQDVQDGYPMSFDCVVTGQPVPSVRWFKDGKLEEDDHYMIN
EDQQGGHQLIITAVVPADMGVYRCLAENSMGVSSTKAELRVELTSTDYDTAADATETSSYFSAQGYLSSREQE
GTESDEGQLPQVLEELKDLQVAPGTRLAKFQKLVKGYAPKLYWFKDGQPLTSDHIRMTDKKTLHTLEIVSV
TREDSGQYAAYSNAVGAAYSSARLLVRGPSEPEEKPASDVHERLVPPRILEKFTPKKVKRGSSTFVSVKVEG
HPAPSVHWLKEEAKEGVLWIGPDTPGYTMASSSKQHSVLVDVGRQHOGTYTCIATNPAGQALCSASLHISGL
AKEEEQERVKEALISSFLQGTSAVSAQMSEAGFADLVGQSKGESLVAEEAHSHLSLAEVGTFFLQKLTSSQ
ITEMVSAKISQAKLQVPGGDSDEETKTPSASPRHGRSRPSSSVQESSSESEDGDSRGEIFDIYVVTADYLPGLG
AEQDAIILREGQYVEVLDSAHPLRWLVRTKPTKSSPSRQGWVSPAYLDKRLKLSPEWGPTEAPEFPGEAVSDE
EYRTRLSSVICHELLSSEQAFVGELOFLESHHMKHLVSRPVAASQKTVIFRNVQDISHFHSSFLKELQGC
GTDDDVAMVICIKNQEAFEKYLEFLVGRVQAESVHVSPTVQEFYKKYAEBETLSAKDTPQPPPPPLQHYLEQVPE
RVQKYQALLKELIRNKARNRQNCALLEQAYAVVSALPQRAENKLVHSLMENYPGTLEALGEP IRQGHFIVWEG
APGARMPWKGNHRHVFVLFNRNYLVICKPRRDSRTDFTSYVFRNMMKLSSIDLNDQVEGDDRAFEVWHEREDSVR
KYLQARTVVIKNSWVKEICGIQORLAQPVWRPPEFEELADCTAELGETVKLACRVTGTPKPIVSWYKDGKP
VEVDPHHILIEDPDGSCTLIIDNLTGIDSGQYMCFAASAAGNASTLTKILVQVPPRFVNVKVRATPFVEGEDAQ

ITCTVEGAPYPQIRWYKDGTLTLLAPGNRYRMLNEPRSGVLVVLVIQAASKEDLGHYECELVNRLGSTRGGGELYM  
QSPALRARDQHHREQIVAAVEVTEQETKVPKKTVIIEETITTTVVKSPRGRRQSPGKSPSRSPRRSASPRRPG  
LLAPERLYPPGTSPSRRLVEVEQGRKAPVPALYVTEAEVHAPASQSQPKWLEVEETIEVRVKKTGSRGASPVRE  
MTRSGEGILFTLPGGI PGRDPNANNNSNKS SVYQEARTWGPVAVHVGEFFIFQVDSVGNVDVWAASPEPEQVRA  
SQKEENTERQEGCSDGENTFLMEEPQDTS LQGRDPKILTHNGRVLTLADLEDYVPQEGETFQCGDSTPSTP  
DEPPCEVSVLQREISEPTVGGPQVLLNVGRPPGTGATPSFFRPGSQVHSPESVSFLLREAWSGPVSAAPWTSSSF  
HTHVQSSVDGSHGSFKTEVSTQTVSFGAVGETVTLHIDPDGGEAPGPSQG\*  
>rs29425205\_ENSMUSP00000020732\_c.6720:G>A\_p.A2241T  
ENSMUST00000020732.13|Obscn-201|ENSMUSG00000061462|-|chr11:g.58973279:C>T  
MDHSFSGAPRFLTRPKAFVSVGKDATLSCQIVGNPTPHVSWEKDRQPVEAGARFRLAQDGDVYRLTILDLAL  
GDSGQYVCRARNAIGEFAAVGLRVDSEGTCAEQAPHFLLRPTSIRVREGADATFRCRVGGSPQPAVSWSKDG  
RRLGPPDAPHVRVEEHGESSALRIRSARPRDGGTYEVRAENPLGSASAAAALVVDSDAEVAGPPGTSTATLLA  
HLQQRREAMRAEGIPSPPGAGTRTCTVTEGKHARLSCFVTGEPKPEVWKKDQGLVTEGRRHVVEDEQENF  
VLKILFCQKQSDRGLYTCTASNLVQTYSSVLVVVREPTVPPFKKRLQDLEVREKESATFQCEVAQPAEAAWFK  
EETRLWASAKYDIEEEGETERRLTVRNVSADDDAVYICETTEGSRVVAELSVQGNLTKLPRKTAVRTGDTAIF  
WVELAVPEGPVWRWRNQEEMVAGGRVAITAEGTCHTLTI FQCTLEDMGEVAFVSGGCRTTTQFCVSAPRRPPL  
YPPADFPVVKAKTESSVTLWSAPPHGDRPVTIDGYVLEKRLGAYAWSRCHEAGWLATFTITGVAEEGDFQ  
FRVSAINHFGQGPYLEFPGTMLHVPMLAVKTPKAVEAVEGGEVTFVSDLTVAASSGEWFLDGEALKASSIYVI  
RCDRTRHMLTIREVPARLHGAQLKFFVANGIETSIQIMVVRAALGLPSSKLPAAAAAREVLAQLHEEAQLLAE LSD  
QAAA VTWLKDGRELSLGPKEYMQVSAGRRALLVRDVAQDDAGLYECVSRGSR TAYQLLVQDITDGYRDWGPAG  
PQKHMCKCAGAKIARYLGSSCYRFLQYDKGVWHWLEAALDTRQKGTSSCSLHEKPKLVFAKQQAHSEVKA  
AGNSATLSCEVTQAQTEVTWFKDGKLLSSSSKVRMEASGCSRRLVVQQAGKADAGEYSCEAGGQKLSFRLDVA  
EPKLVFAKQQAHSEVKA EAGASATLSCEVAQAQTEVTWFKDGKLLSSSSKVRMEASGCSRRLVVQQAGKADA  
GEYSCEAGGQKLSFRLDVAEPKMFVFAKEQQARSEVKA EAGASATLSCEVAQAQTEVTWFKDGKLLSSSSKVRM  
EASGCSRRLVVQQAGKADAGEYSCEAGGQKLSFRLDVTEPKLVFAKEQQARSEVKA EAGASATLSCEVAQAQ  
EVTWFKDGKLLSSSSKVRMEASGCSRRLVVQQAGKADAGEYSCEAGGQKLSFRLDVAEPKLVFAKEQQARSEV  
KAEAGNSATLSCEVAQAQTEVTWFKDGKLLSSSSKVRMEASGCSRRLVVQQAGKADAGEYSCEAGGQKLSFHL  
DVTEPKLVFAKEQQAHSEVKA EAGASATLSCEVAQAQTEVTWFKDGKLLSSSSKVRMEASGCSRRLVVQQAGK  
ADAGEYSCEAGGQKLSFRLDVAEPKLVFAKEQQARSEVKA EAGASATLSCEVAQAQTEVTWFKDGKLLSSSSK  
VRVEASGCSRRLVVQQAGKADAGEYSCEAGGQKLSFRLDVAEPKLVFAKEQQANSEVKA EAGASATLSCEVAQ  
AQTEVTWFKDGKLLSSSSKVRVEASGCSRRLVVQQAGKADAGEYSCEAGGQKLSFRLDVAEPKLAFAKEQQAH  
SEVKA EAGASATLSCEVAQAQTEVTWFKDGKLLSSSSKVRVEASGCSRRLVVQQAGKADAGEYSCEAGGQKLS  
FRLDVAEPKLAFAKEQQAHSEVKA EAGASATLSCEVAQAQTEVTWFKDGKLLSSSSKVRVEASGCSRRLVVQQ  
AGKADAGEYSCEAGGQKLSFRLDVAEPKLAFAKEQQAHSEVKA EAGASATLSCEVAQAQTEVTWFKDGKLLSS  
SSKVRVEASGCSRRLVVQQAGKADAGEYSCEAGGQKLFRLDVAEPKLMFAKEQQAHSEVKA EAGASATLSCE  
VAQAQTEVTWFKDGKLLSSSSKVRVEASGCSRRLVVQQAGKADAGEYSCEAGGQKLSFRLDVAEPKLVFAKEQ  
QAHSEVKA EAGASATLSCEVAQAQTEVTWFKDGKLLSSSSKVRVEASGCSRRLVVQQVQKADAGEYSCEARGQ  
KLSFRLDVADTRLMFAKEQQARTEVKA EAGNSATLSCEVAQAQTEVTWFKDGKLLSSSSKVRVEASGCSRRLV  
VQQAGKADAGEYSCEAGGQKLSFRLDVAEAEESQIPERPSRREPLVVKEHETIILTATIAAPSAAVTWLKDGV  
EIRRSKRHEATSLGDTHTLTVRGAQVLD SAIYSCRVGKEGQDFPVQVEEVTAKFSKPLEPVEGELGGTVMLVC  
ELSP EQAEVWRCGNTQLRPGKRFQMTSEGPRRTLTVSGLREDDAEYVCE SRDDRTSARLTVKVPVVKFTS  
GLSAMVAEEGQEATFQCVVSPSDAGVTWYKDGMLQLPSEKFMVESGASRSLTILGLTLEDAGQVTEAEGAS  
SSAALRVREAPVLFKKKLEPQTEERTSVTLEVELTRPWPEVKWTRNAAVLTPSENVEIRAEGARHCLVLRV  
GFADRGGFFGCETPDDKTQAKLNVEMRQVRLVVRGLQEVEAKEQGTASMDVELSHA EVEGSWTRDGLRLQPGPKC  
HLAVQGPVHILTL SALQPQDSGLVAFRAEGVHTSARLIVTELPVSFTRVLQDVVATQKEKVTLECELSRPVDV  
RWLKDGV ELRAGKAIGIVAQGTCSRSLVIYRCETGDQGVYVCDALDAQTSASLRVQGRTYTLIFRRLAEDAGE  
VKFVAENAESRAHLRVKELPVTLLRPLRDKIAMEKHGRVLECCQVSRASAVRWFKGGVELQSGPKYEVVSDGL  
YRKLVIN DVQPEDEDTYTC DAGNVKTS AQFFVVEQSITIVRGLKDMTVM EPAPAWFECETSIPSVRPPKWL LG  
KTVLQAGGNVGL EQDGTVHRLTLHKTCSTMTGPVHFTIGKSRSSAQLVVS DI PVVLRPLEPKAGRELQSVVL  
SCDFRPAPKAVQWYKDDT PLSPEKFKMALEGM AELRILRLTPADAGVYRCQAGSAQSSAEVTV EAREVTVI  
QPLQDAEAMEEGRVCFSC ELSHKDEDI EWSLNGTPLYNDSFHEISHEGCLHTLV LKSVRQADTGTVCATSPKV  
SVSARLVVKGKPVVFLKALDDVSAEERGLTLTQCEVSDPEARVVRKDGVELGSPDKYDFLHKAGARGLTVHD  
LSHEDAGLTYKQVTSKETQSKVSVHDLHVGITKRLKTPEVLEGE SCSFECVLSHESPSDPAVWTVGGKTVGGS  
GHFHAVRQRKTYTLTKVDAALSDAGEVVSGLVLSKASLIIRERPV DITKPLEDQRTTLGEDVMLSCELSRA  
GTSVRWLKDGKAIRKSQYD LLS EGTTRAVLVVRKASLKDSGEYTCETEASKSTAKLCEVEKANRFTEELADLQ  
VEEKGRAVFTCKTEHPASVVTWRKGLLELRASGKHVPSQEGTLTKLTINALERTSDTYTCDIGQARTQARLL  
VHGQKVRVIEDLED TAVQEGSSAKFCRIAPADYGPVHWFLDKTPLHSNELNEITVQPGGYHVLTLRQLALKD  
SGTVYFEAGDQRTS AALRVTEKPSIFSRPLTDVTVTEGEDLTLVCETTTVDSSVRWTKDGKTLRPSARCQLSH

EGCQAQLLITATTPQDGGRYKCEIGGASSSSIVRVHALPVRFRRESLKDVEVPEGKAATLRCVLSVAAPVEWR  
HGDDVLKSSNKYSLRQEGAVLELVIRDLQPDQSGQYSCSFGDQTTSATLTVKTSQAQFVGLKRNKEATEGTTV  
TLRCELTKAPVEWKKGTETLRNGDKYSLKQDQAVCELQICSLLVADAGEYSCVCGQEKTSATLTVKALLVHF  
VRRLSKEATEGDTTTLQCELSKAAPVEWRKGTETLRDGDYSLKQDQAVCELQIRSLTIADAGEYLCTCGQE  
KTSATLTVRALPAKFKDSLKNEEATEGTTATLSCELSKAAPVTWKKGPKTLQSGDKYVLRQDQAVCGLIHGL  
TMADAGEYSCVCGQEKTSATLTVRGLPAKFIEDLRSQEATEGATAILRCELSKAAPVEWRKGSSETLKDGDYR  
LRQDQAVCELQIRGLAVVDGTYSLSPTKFTTEGLRNEEATEGTMATLRCQMSKAAPVEWRKGSSETLRDGDYR  
LRQDQAVCELQIRGLTIEDSGEYTCVCGQEKTSATLSVKALPSRFIEDLRSQEATEGTMATLRCQMSKTAPVE  
WKKGSETLRDGGRYSLRQDQAVCELQICDLAVEDAGEYSCVCGQEKTSATLSIKALPPRFIEDLRSQEATEG  
MATLRCQMSKAAPVEWRKGSSETLGDGGYSLRQNGAVCELQIHDLAVEDTGEYSCVCGQEKTSATLNVKALPP  
RFIEDLRSQEATEGTMATLRCQMSKAAPVEWRKGSSETLRDGGYSLRQDQAVCELQIHDLVEDAGQYSCVCG  
QEKTSAVLTVDALPPKFTTEGLKKEEATEGTMVTLRCQMSKEATVEWRKGAKTLSDDGGYSLRQDQAVCELQI  
GLAVEDAGEYSCVCGQEKTSATLSVKALPPRFIEDLRSQEATEGTMATLRCQMSKAAPVEWRKGSSETLRDGD  
YSLRQDQAVCELQIRDLAVEDAGEYLCVCGQEKTSATLSVKALPPRFIEDLRSQEATEGTMATLRCQMSKAAP  
VEWRKGSSETLRDGDYSLRQDQAVCELQICDLAVEDTGDYSCVCGQEKTSATLSVKALPPRFIEDLRSQEARE  
GTVATLRCRMSKAAPVEWRKGSSETLKDGDYSLRQEGNLCELQIRDLAVEDTEEYSCVCGQEKTSATLSVKAL  
PAKFIEDLRSQEATEGTMATLRCQMSKAAPVEWRKGSSETLRNGARYSLRQDQAVCELEIRDLTVEDTGEYSCT  
CGQERTSATLSIMAPQVVFQQLQNLQAEEGSMASLRCELSVNAAMVWSKGGLELQGDTRREARQQCGVAEL  
LLRDLRREDAGEYSCTCGSQTTSATLMVTAAPVRFRLRELQAQDVDEGATARLRCELSREAVSVEWRKGSQQLF  
PCAKYQMVQEGTTAELLVHGVEQEDAGEYTCDAHTQSIARLSVRAPKPKFKTDLQSTEQEAAGTARLCCQLS  
EAEPGTPVQWLKEGVELHVGSKYEMRRQAVCELLIHGLEAKDTGEYACLVGGQKTLASLRVKEPEVTIVRGL  
VDMEVQADEDEFTCKVQAGATDVQWHLQGLPLQSNVTEVAVLADGCTHVLQKGVTLLEDAGTVSFHVGGL  
SSSAQLTVRVPEVTVLEPLKDVQLSEGQDAHFRCRLSRASGQEARWALGGVPLQCNEMNDITVEQGTLYLLTL  
HKVTLEDAGTITLQVGSSESQAQLKVTAKNTVLRGLENVDALEGGEALFECQLSQPEVAHAHTWLLDDEPVHTS  
EKVEVVYFENGLRHLLLLKNLKPQDSCRVTFLAGDVVTSFAFLTVRGRLEVLPEPHDASVKAGMQVRFTCILS  
EAVPVGEATSWYINGAAIQPDDTDWTVTTDGSHHALTLSNAQPHAGEVTFAAARDAVASARLSVLALEPDPEDA  
EYVGRSDHSVTLSWVAIPMSDGGGLCGYRVEMKEASTGQWQLCHDLVPGPECVDDLVPGKTYRFRVAAVGPA  
GAGEPVHLPQMVKIAPAPAPAPAPAPAPAPETRAVVGEDICLELEVAADGGEVVWHKGTERRIQPGGHFEVLS  
RGQRQMLVIKGFRTEDQGEYRCGPIQGLPSSGAATFNVMVMTSGSGDEVPAQPSLPPEAAQEGDLHLLWEALAR  
KRRMSREPTLDSISELPEEDSRVQHLRQEAETAPDLSEGYSTADELARTGEADLSHTSSDDESRACTPSLVT  
YLKAGGPGISPLASKHEAQVTSVKPQKQEPVPTCPGGDLAADMPSLDKAAVKIQAAFQYKVRKE  
MKQQEGPVFSRTFGDTEAQVGDVLRLECVLATKTDMRACWLKDGIELTDGRHYHIDQLKDGTCSLLVTLGLAPT  
DSGRYTCQVSTKSGRVSHSACVVVSGTESEAESSGGELDDAFRAARRLHRLFRTKSPAELSEELFLSADE  
GPGEPEPADWQTYREDENFVCIRFESLAEARQAVTCFRNMFATMGIGVEISLGEQGRGVEMRIGKVAPTVT  
PAVPLAKTGLQTSDAAPVFLTELQNDVQDGYPMSFDCVVTGQVPSVRWFKDGLLEDDHYMINEDQQGG  
HQLLITAVVPADMVGYRCLAEENSMGVSSTKAELRVELTSTDYDTAADATETSSYFSAQGLSSREQEGTESDE  
GQLPQVLEELKDLQVAPGTRLAKFQLKVKGYPAKLYWFKDGGQPLTSDHIRMTDKKTLHTLEIVSVTREDSG  
QYAAYSNAVGAAYSSARLLVRGPSEPEEKPASDVHERLVPPRILEKFTPKKVKRGSSITFSVKVEGHPAPSV  
HWLKEEAKEKGLWIGPDTPGYTMASSSKQHSVLVLDVGRQHOGTYTCIATNPAGQALCSASLHISGLAKEEEQ  
ERVKEALISSFLQGTSAVSAQMSESAGFADLVGQSKGESLVAEEAHSHLSLAEVGTTEEFLQKLTQITMVS  
AKISQAKLQVPGGDSDEETKTPSASPRHGRSRPSSSVQESSSEEDGDSRGEIFDIYVVTADYPLGAEQDAI  
ILREGQYVEVLDSAHPLRWLVRTPKTKSSPSRQGWVSPAYLDKRLKLSPEWGPTEAPEFPGEAVSEDEYRTRL  
SSVIQELLSSEQAFVGLQFLESHEHMKHLERSPRVPAAVASQKTVIFRNVQDISHFHSSFLKELQCGTDDD  
AMCFIKNQEAFAFEKYLEFLVGRVQAESVVVSTPVQEFYKKAETLSAKDPTQPPPPPLQHYLEQPVVERVQKYQ  
ALLKELIRNKARNRQNCALLEQAYAVVSALPQRAENKLVSLMENYPTLEALGEPHQGHFIWVEGAPGARM  
PWKGHNHRVFLFRNYLVICPRRDSRTDTFSYVFRNMMKLSSIDLNDQVEGDDRAFEVWHEREDSVRKYLLQA  
RTVIKNSWVKEICGIQQLAQPVWRPPEFEEELADCTAELGETVKLACRVTGTPKPIVSWYKDGKPEVDPH  
HILIEDPDGCTLILDNLGTIDSGQYMCFAASAAGNASTLGKILVQVPPRFVNVKVRATPFVEGEDAQITCTVE  
GAPYQIRWYKDGTLTLLAPGNRYRMLNEPRSGVLVVIQAASKEDLGHYECELVNRLGSTRGGGELYMQSPALR  
ARDQHHREQIVAAVEERRPSP\*

>rs29425205\_ENSMUSP00000151217\_c.5340:G>A\_p.A1781T  
ENSMUST00000219084.3|Obscn-207|ENSMUSG00000061462|-|chr11:g.58973279:C>T  
MDHSFSGAPRFLTRPKAFVVSVGKDATLSCQIVGNPTPHVSWEKDRQFVEAGARFRLAQDGDVYRLTILDAL  
GDSGQYVCRARNAIEGAFAAVGLRVDSEGTCAEQAPHFLRLRPTSIRVREGADATFRCRVGGSPQPAVSWSKDG  
RRLGPPDAPHVRVEEHGESSALRIRSAARPDGGTYEVRAENPLGSASAAAALVVDSDAEVAGPPGTSTATLLA  
HLQORREAMRAEGIPSPPGAGTRTCTVTEGKHARLSCFVTGEPKPEVWKKDGQLVTEGRRHVVEDEQENF  
VLKILFCKQSDRGLYTCTASNLVGQTYSSVLVVVREPTVPFKKRLQDLEVREKESATFQCEVAQPAEAAWFK  
EETRLWASAKYDIEEGTERRLTVRNVSADDDAVYICETTEGSRVVAELSVQGNLTKLPRKTAVRTGDTAIF

WVELAVPEGPVWRWRNQEEMVAGGRVAITAEGTCHTLTI FQCTLEDMGEVAFVSGGCRTTTTQFCVSAPRRPPL  
YPPADPVVKAKTESSVTLWSAPPHGDRPVTIDGYVLEKRKLGAYAWSRCHEAGWLATTEFTITGVAAEGDFQ  
FRVSAINHFGQGPYLEFPGTMHLVPLAVKTPKAVEAVEGGEVTFVSDLTVASSGEWFLDGEALKASSIYVI  
RCDRTRHMLTIREVPARLHGAQLKVFVANGIETSIQMVVRAALGLPSSKLPAAAAAREVLAQLHEEAQLLAE LSD  
QAAAVTWLKDGRELSLGPKEYMQVSAGRRALLVRDVAQDDAGLYECVSRGSRRTAYQLLVQDITDGYRDWGPAG  
PQKHMCKCAGAKIARYLGSSCYRFLQYDKGVWHWLEAALDTRQKGKTS SCSLHEKPKLVFAKQQAHSEVKA  
AGNSATLSCEVTQAQTEVTFWKDGKLLSSSSKVRMEASGCSRRLVVQQAGKADAGEYSCEAGGQKLSFRLDVA  
EPKLVFAKQQAHSEVKAEGASATLSCEVAQAQTEVTFWKDGKLLSSSSKVRMEASGCSRRLVVQQAGKADA  
GEYSCEAGGQKLSFRLDVAEPKLVFAKEQQARSEVKAEGASATLSCEVAQAQTEVTFWKDGKLLSSSSKVRM  
EASGCSRRLVVQQAGKADAGEYSCEAGGQKLSFRLDVTEPKLVFAKEQQARSEVKAEGNSATLSCEVAQAQ  
EVTWFKDGKLLSSSSKVRMEASGCSRRLVVQQAGKADAGEYSCEAGGQKLSFHLDVTEPKLVFAKEQQAHSEV  
KAEAGASATLSCEVAQAQTEVTFWKDGKLLSSSSKVRMEASGCSRRLVVQQAGKADAGEYSCEAGGQKLSFRL  
DVAEPKLVFAKEQQARSEVKAEGASATLSCEVAQAQTEVTFWKDGKLLSSSSKVRVEASGCSRRLVVQQAGK  
ADAGEYSCEAGGQKLSFRLDVAEPKLVFAKEQQANSEVKAEGASATLSCEVAQAQTEVTFWKDGKLLSSSSK  
VRVEASGCSRRLVVQQAGKADAGEYSCEAGGQKLSFRLDVAEPKLAFAKEQQAHSEVKAEGASATLSCEVAQ  
AQTEVTFWKDGKLLSSSSKVRVEASGCSRRLVVQQAGKADAGEYSCEAGGQKLSFRLDVAEPKLVFAKEQQAH  
SEVKAEGASATLSCEVAQAQTEVTFWKDGKLLSSSSKVRVEASGCSRRLVVQQVQKADAGEYSCEARGQKLS  
FRLDVAAEASQIPEPSSRREPLVVKHEHETIILTATIAAPSVAAVWTLKDGVEIRRSKRHEATSLGDTHTLTVR  
GAQVLD SAIYSCRVGKEGQDFPVQVEEVTAKFSKPLEPVEGELGGTVMLVCELSPEQAEVWRCGNTQLRPGK  
RFQMTSEGPRTTLTVSGLREDDAEYVCESRDDRTSARLTVKVRVVKFTSGLSAMVAEEGQEAFTQCVVSPS  
DAGVTWYKDGMLQPSSEKFMVVEGASRSILTILGLTLEDAGQVTEAEGASSAALRVREAPVLFKPKLEPQT  
VEERTSVTLEVELTRPWPVEVKWTRNAAVLTPSENVEIRAEGARHCLVLRVSGFADRGFFGCETPDDKTQAKLN  
VEMRQVRLVRGLQEVEAKEQGTASMDVELSHAEEVGSWTRDGLRLQPGPKCHLAVQGPVHILTL S ALQPQDSG  
LVAFRAEGVHTSARLIVTELPVSFTRVLQDVVATQKEKVTLECELSRPVDVRWLKDGVELRAGKAI GIVAQGT  
CRSLVIYRCIEMTDGQGVYVCDALDAQTSASLRVQGRYTLIFRRVLAEDAGEVKFVAENAESRAHLRVKELPVT  
LLRPLRDKIAMEKQVSRASAQVRWFKGGVELQSGPKYEVVSDGLYRKLKLVINDVQPEDEDTYTC DAG  
NVKTSAGQFFVEEQSITIVRGLKDMTVMPEPAPAWFECETSIPSVRPPKWL LGKTVLQAGGNVGLQDGTVHRLT  
LHKTCSTMTGPVHFTIGKSRSSAQLVVS DIPVVLTRPLEPKAGRELQSVVLSCDFRPAPKAVQWYKDDTPLSP  
SEKFKMALEGQMAELRILRLTPADAGVYRCQAGSAQSSAEVTVAREVTVIQPLQDAEAMEEGRVCFSCELSH  
KDEDIEWSLNGTPLYNDSFHEISHEGCLHTLVLKSVRQADTGTVCATSPKVSVSARLVVKGKPVVFLKALDDV  
SAEERGTTLTQCEVSDPEARVVWRKDGVELGSPDKYDFLHKAGARGLTVHDL SHEDAGLYTCQVGSKETQSKV  
SVHDLHVGITKRLKTVLEVLEGESCSFECVLSHESPSDPAVWTVGGKTVGGSGHFHAVRQGRKYTLTVKDAALS  
DAGEVVSFVLGLTSKASLIIRERPVDITKPLEDQRTTLGEDVMLSCELSRAGTSVRWLKDGKAIKRSQKYDLL  
SEGTRAVLVRKASLKDSGEYTCETEASKSTAKLCVEEKANRFTTEELADLQVEEKGRAVFTCKTEHPASVVTW  
RKGLLELRASGKHPVQEGTLKLTINALERTSDTYTCDIGQARTQARLLVHGQKVRVIEDLEDTAVQEGSS  
AKFFCRIAPADYGPVHWF LDKTPLHSNELNETITVQPGYHVLTLRQLALKDSGTVYFEAGDQRTS AALRVTEK  
PSIFSRPLTDVTVTEGEDTLTVCE TTTVDSSVRWTKDGKTLRPSARCQLSHEGCQAQLLITATTPQDGGRYKC  
EIGGASSSSIVRVHALPVRFRFRESLKDVEVPEGKAATLRCVLSVAAPVEWRHGDDVLKSSNKYS LRQEGAVLE  
LVIRDLPQDQSGQYSCSFGDQTTSATLTVKTSQAQFVQKLNKEATEGTTVTLRCELTKEAPVEWKKGTETLR  
NGDKYSLKQDGA VCELQICSLLVADAGEYSCVCGQEKTSATLTVKALLVHFVRRRLRSKEATEGDTTLTQCELS  
KAAPVEWRKGTETLRDGDYSLKQDGA VCELQIRSLTIADAGEYLCTCGQEKTSATLTVRGLPAKFIEDLRSQ  
EATEGATAILRCELSKAAPVEWRKGS ETLKDGDRYTLRQDGA VCELQIRGLAVVDGTGYSSLPKFTTEGLRNE  
EATEGTMATLRCQMSKAAPVEWRKGS ETLRQDGDYSLRQDGA MCELQIRGLTIEDSGEYTCVCGQEKTSATLS  
VKALPPRFIEDLRSQEATEGTMATLRCQMSKAAPVEWRKGS ETLGDGGYSLRQNGAVCELQIHDLAVEDTGE  
YSCVCGQEKTSATLNVKALPPKFT EGLKKEEATEGTMVTLRCQMSKEATVEWRKGA KTLSDGGYSLRQDGA M  
CELQICGLAVEDAGEYSCVCGQEKTSATLSVKALPPRFIEDLRSQEATEGTMATLRCQMSKAAPVEWRKGS ETL  
LRDGDYSLRQDGA VCELQIRDLAVEDAGEYLCVCGQEKTSATLSVKALPPRFIEDLRSQEATEGTMATLRCQ  
MSKAAPVEWRKGSKTLRQDGDYSLRQDGA MCELQICDLAVEDTGDYSCVCGQEKTSATLSVKAPQVVFQPLQ  
NLQAEEGSMASLRCELSVPNAAMVWSKGGLELQGDTRREARQQGCVAELLLRDLRREDAGEYSCTCGSQTTSA  
TLMVTAAPVRFRLRELQAQDVDEGATARLRCELSREAVSVEWRKGS LQFLPCAQYQMVQEGTTAELLVHGVEQE  
DAGEYTC DAGHTQSIARLSVRAPKPKFKTDLQSTEQEAGGTARLCCQLSEAEPTPVQWLKEGVELHVGSKYE  
MRRQGA VCELLIHGLEAKDTGEYACL VGGQKTLASLRVKEPEVTIVRGLVDMEVQADEDEVEFTCKV SQAGATD  
VQWHLQGLPLQSNEVTEVAVLADGCTHV LQLKGVTLLEDAGTVSFHVGGLS SQAQLTVRVPVTVLEPLKDVQL  
SEGQDAHFRCRLSRASGQEARWALGGVPLQCNEMNDITVEQGTLYLLTLHKVTLLEDAGTITLQVGS CSSEAAQL  
KVTAKNTVLRGL ENVDAL EGG EALFECQLSQPEVAHTWLLDDEPVHTSEKVEVYFENGLRHLLLLKLNLPQ  
DSCRVTFLAGDVVTS AFLTVRGWRLEVLEPPHDASVKAGMQVRF TCILSEAVPVGEATWYINGAAIQPDDTDW  
TVTTD GSHHALT L SNAQPQHAGEVTF AARDAVASARLSVLALPDPPEDAEVVGRSDHSVTL S WVA PMSDGGGG  
LCGYRVEMKEASTGQWQLCHDLVPGPECVVDDLVP GKTYRFRVA AVGPAGAGEPVHLPQMVKIAPAPAPAPAP

APAPETRQAVVGEDICLELEVAADGGEVVWHKGTERRIQPGGHFEVLSRGRQMLVIKGFRTEDQGEYRCGPIQ
GLPSSGAATFNVVMTSGSGDEVPAQPSLPPEAAQEGDLHLLWEALARKRRMSREPTLDSISELPEEDSRVQHL
RQEAEETAPDLSEGYSTADELARTGEADLSHTSSDDESRAGTPSLVTYLKKAGGPGISPLASKHEAQVTTSVK
PQKQQEPVVPTCPPPGDLSAADLMDPSLDKAAVKIQAAFQKGYKVRKEMKQQEGPVFSRTFGDTEAQVGDVLR
ECVLATKTKDMRACWLKDGIELTDGRHYHIDQLKDGTCSSLVTGLAPTDSGRYTCQVSTKSGRVSHSACVVVSG
TESEAESSSGGELDDAFRRARRLHRLFRRTKSPAELSEELFSLADEGPGPEEPADWQTYREDENFVCIRFE
SLAEARQAVTCFRNMFATMGIGVEISLGEQGRGVEMRIGKVPVTPAVPLAKTPGLQTSDAAPVFLTELQN
QDVQDGYPMSFDCVVTGQPVPVSRWFKDGKLLLEEDDHYMINEDQQGGHQLIITAVVPADMGVYRCLAENSMGV
SSTKAELRVELTSTDYDTAADATETSSYFSAQGYLSSREQEGTESDEGQLPQVLEELKDLQVAPGTRLAKFQL
KVKGYPAKPLYWFKDGOPLTTSDHIRMTDKKTLHTLEIVSVTREDSGQYAAAYISNAVGAAYSSARLLVGRPSE
PEEKPASDVHERLVPVPRILEKFTPKKVKRGSSITFSVKVEGHPAPSVHWLKEEAKEKGLWIGPDPGTYTMAS
SKQHSVLVLDVGRQHOGTYTCIATNPAGQALCSASLHISGLAKEEEQERVKEALISSFLOGTSQAVSAQMSSES
AGFADLVGQSKGESLVAEEAHSHLSLAEVGTTEFLQKLTSTQITEMVSAKISQAKLQVPGGDSDEETKTPSASP
RHGRSRPSSSVQESSSESEDGDSRGEIFDIYVVTADYLP LGAEQDAIILREGQYVEVLDSAHPLRWLVRTKPT
KSSPSRQGWVSPAYLDKRLKLSPEWGPTEAPEFPGEAVSEDEYRTRLSSVIQELLSSEQAFVGGELQFLESHM
KHLERSPRVPAAVASQKTVIFRNVDISHFHSSFLKELQCGCTDDVAMCFIKNQEAFAFEKYLEFLVGRVQAES
VVVSTFPVQEFYKKYAEETLSAKDPTQPPPPPLQHYLEQPVERVQKYQALLKELIRNKARNRNCALLEQAYAV
VSALPQRAENKLVHSLMENYPGTLEALGEPVIRQGHFIVWEGAPGARMWPKGHNHRHVFLFRNYLVICKPRRDSR
TDTFSYVFRNMMKLSSIDLNDQVEGDDRAFEVWHEREDESVRKYLLQARTVVIKNSWVKEICGIQQRLAQPVWR
PPEFEEELADCTAELGETVKLACRVGTGPKPIVSWYKDGKPVVEVDPHHILIEDPDGSCSTLIDLNLGTIDSGQY
MCFAASAAGNASTLGKILVQVPPRFVNVKVRATPFVEGEDAQITCTVEGAPYPQIRWYKDGTLAPGNRYRMLN
EPRSGVLVLIQAASKEDLGHYECLELVNRLGSTRGGGELYMQSPALRARDQHHREQIVAAVEVTEQETKVPKK
TVIIEETITTVVKS PRGRRQSPGKSPSRSPRRSASPRRPGLLAPERLYPPGTS PSRRLEVEQGRKAPVPALY
VTEAEVHAPASQSQPKWLEVEETIEVRVKKTGSRGASPVREMTSRGEGILFTLPGGIPGRDPNANNNSNKS VY
QEARTWGPVAVHVGEFFIFQVDSVGNVDWVAASPEPEQVRASQKEENTERQEGCSDGDENTFLMEEPQD TDSL
QGRDPKILTHNGRVLTLADLEDYVPEGETFGCGDSTPSTPDEPPCEVSVLQREI SEPTVGGQVLLNVGRPPG
TGATPSFFRPGSQVHSPESVFLFREAWSGPVSAAPWTSSFHTHVQSSVDGSHGFSFKTEVSTQTVSFGAVGET
VTLHIDPDGGEAPGPSQG\*

>rs48519378\_ENSMUSP00000158795\_c.5122:G>A\_p.S1708N
ENSMUST00000238536.2|Obscn-210|ENSMUSG00000061462|-|chr11:g.58990725:C>T
MDHSFSGAPRFLTRPKAFVVS VGKDATLSCQIVGNPTPHVSWEKDRQFVEAGARFRLAQDGDVYRLTILDLAL
GDSGQYVCRARNAIGEAFAAVGLRVDSEGTCAEQAPHLLRPTSIRVREGADATFRCRVGGSPPAVSWSKDG
RRLGPPDAPHVRVEEHGESSALRIR SARPRDGGTYEVRAENPLGSASAAAAALVVDSDAEVAGPPGTSTATLLA
HLQORREAMRAEGIPSPPGAGTRTCTVTEGKHARLSCFVTGEPKPEVWKKDGQLVTEGRRHVVEDEQENF
VLKILFCKQSDRGLYCTASNLVGGTYSSVLVVVREPTVFPKKRLQDLEVREKESATFQCEVAQAPATEAAWFK
EETRLWASAKYDIEEEGTERRLTVRNVSADDDAVYICETTEGSRVVAELSVQGNLTKLPRKTAVRTGDTAIF
WVELAVPEGPVRWLRNQEEMVAGGRVAITAEGTCHTLTI FQCTLEDMGEVAFVSGGCRTTTTQFCVSAPRRPPL
YPPADPVVKAKTESSVTLWSAPPHGDRPVTIDGYVLEKRKLGAYAWSRCHEAGWLATTEFTITGVAAEEDFQ
FRVSAINHFGQGPYLEFPGMTMLVPLAVKTPKAVEAVEGGEVTFVSDLTVASSGEWFLDGEALKASSIYVI
RCDRTRHMLTIREV PARLHGAQLK FVANGIETS IQMVVRAALGLPSSKLPAAAAAREVLAQLHEEAQLLAE LSD
QAAAVTWLKDGRELSLGPKEYMQVSAGRRALLVRDVAQDDAGLYECVSRGSR TAYQLLVQDITDGYRDWGPAG
PQKHMCKCAGAKIARYLGS SCYRFLQYDKGVWHLEAALDTRQKGKTS SCSLHEKPKLVFAKQQAHSEVKA E
AGNSATLSCEVTQAQTEVTWFKDGKLLSSSSKVRMEASGCSRRLVVQQAGKADAGEYSCEAGGQKLSFR LDVA
EPKLVFAKQQAHSEVKA EAGASATLSCEVAQAQTEVTWFKDGKLLSSSSKVRMEASGCSRRLVVQQAGKADA
GEYSCEAGGQKLSFR LDVAEPKLVFAKEQQARSEVKA EAGASATLSCEVAQAQTEVTWFKDGKLLSSSSKVRM
EASGCSRRLVVQQAGKADAGEYSCEAGGQKLSFR LDVTEPKLVFAKEQQARSEVKA EAVGNSATLSCEVAQAQ
EVTWFKDGKLLSSSSKVRMEASGCSRRLVVQQAGKADAGEYSCEAGGQKLSFR LDVAEPKLVFAKEQQARSEV
KAEAGNSATLSCEVAQAQTEVTWFKDGKLLSSSSKVRMEASGCSRRLVVQQAGKADAGEYSCEAGGQKLSFHL
DVTEPKLVFAKEQQAHSEVKA EAGASATLSCEVAQAQTEVTWFKDGKLLSSSSKVRMEASGCSRRLVVQQAGK
ADAGEYSCEAEGQKLSFR LDVAEPKLVFAKEQQARSEVKA EAGASATLSCEVAQAQTEVTWFKDGKLLSSSSK
VRVEASGCSRRLVVQQAGKADAGEYSCEAGGQKLSFR LDVAEPKLVFAKEQQANSEVKA EAGASATLSCEVAQ
AQTEVTWFKDGKLLSSSSKVRVEASGCSRRLVVQQAGKADAGEYSCEAGGQKLSFR LDVAEPKLVFAKEQQAH
SEVKA EAGASATLSCEVAQAQTEVTWFKDGKLLSSSSKVRVEASGCSRRLVVQQAGKADAGEYSCEAGGQKLS
FR LDVAEPKLVFAKEQQAHSEVKA EAGANATLSCEVAQAQTEVTWFKDGKLLSSSSKVRVEASGCSRRLVVQQ
AGKADAGEYSCEAGGQKLSFR LDVAEPKLVFAKEQQAHSEVKA EAGASATLSCEVAQAQTEVTWFKDGKLLSS
SSKVRVEASGCSRRLVVQQAGKADAGEYSCEAGGQKLFRLDVAEPKLVFAKEQQAHSEVKA EAGASATLSCE
VAQAQTEVTWFKDGKLLSSSSKVRVEASGCSRRLVVQQAGKADAGEYSCEAGGQKLSFR LDVAEPKLVFAKEQ
QAHSEVKA EAGASATLSCEVAQAQTEVTWFKDGKLLSSSSKVRVEASGCSRRLVVQQVQKADAGEYSCEARGQ



KLSFRLDVADTRLMFAKEQQARTEVKAEAGNSATLSCEVAQAQTEVTWFKDGKLLSSSSKVRVEASGCSRRLV
VQQAGKADAGEYSCEAGGQKLSFRLDVAEAEESQIPERPSRREPLVVKEHETIILTATIAAPSVAAVTWLKDGVE
EIRRSKRHEATSLGDTHTLTVRGAQVLDIAIYSCRVGKEGQDFPVQVEEVAAKFSKPLEPVEGELGGTVMLVC
ELSPQEAEVWRCGNTQLRPGKRFQMTSEGPRRTLTVSGLREDDAEYVCESTRDDRTSARLTVKVPVVKFTS
GLSAMVAEEGQEATFQC VVSPSDAGVTWYKDGMLQPSSEKFMVVEGASRSILTILGLTLEDAGQVTVAEAGAS
SSAALRVREAPVFLFKKLEPQTVVEERTSVTLEVELTRPWPEVKWTRNAAVLTPSENVEIRAEGARHCLVLRV
GFADRGGFFGCETPDDKTQAKLNVEMRQVRLVVRGLQVEEAKQGTASMDVELSHAEEVEGSWTRDGLRLQPGPKC
HLAVQGPVHILTLALSALQPQDSGLVAFRAEGVHTSARLIVTELPVSFTRVLQDVVATQKEKVTLECELSRPVDV
RWLKDGVLELRAGKAIIGIVAQGTCSRSLVIYRCETGDQGVYVCDALDAQTSASLRVQGRTYTLIFRRVLAEDAGE
VKFVAENAESRAHLRVKELPVTLLRPLRDKIAMEKHRGVLECCQVSRASQVRWFKGGVELQSGPKYEVVSDGL
YRKLVINVDQPEDEDTYTC DAGNVKTSAQFFVEEQSITIVRGLKDMTVMEPAPAWFECETSIPSVRPPKWLGLG
KTVLQAGGNVGLQDGTVHRLTLHKTCSTMTGPVHFTIGKSRSSAQLVVS D I PVVLRTRPLEPKAGRELQSVVL
SCDFRPAPKAVQWYKDDTPLSPSEKFKMALEGGQMAELRILRLTPADAGVYRCQAGSAQSSAEVTVAREVTVI
QPLQDAEAMEEGRVCFSCELSHKDEDIEWSLNGTPLYNDSFHEISHEGCLHTLVLSVRQADTGTVCATSPKV
SVSARLVVKGKPVVFLKALDDVSAEERGTTLTQCEVSDPEARVWVRKDGVELGSPDKYDFLHKAGARGLTVHD
LSHEDAGLYTCQVGSKETQSKVSVHDLHVGITKRLKTVEVLEGESECSFECVLSHESPSDPAVWTVGGKTVGGS
GHFHAVRQGRKYTLTVKDAALSDAGEVVFVGLTSLKASLIIRERPVDITKPLEDQRTTELEDVMLSCELSRA
GTSVRWLKDGKAIRKSQKYDLLSEGTAVLVVRKASLKDSEGYTCETEASKSTAKLCEVEKANRTEELADLQ
VEEKGRAVFTCKTEHPASVVTWRKGLLELRASGKHVPSQEGTLTKLTINALERTSDTYTCDIGQARTQARLL
VHGQKVRVIEDLEDTAVQEGSSAKFCRIAPADYGPVHWFLLDKTPLHSNELNEITVQPGGYHVLTLRQLALKD
SGTVYFEAGDQRTSAALRVTEKPSIFSRPLTDVTVTEGEDTLVCE TTTVDSSVRWTKDGKTLRPSARCQLSH
EGCQAQLLITATTPQDGGRYKCEIGGASSSSIVRVHALPVRFRESLKDVEVPEGKAATLRCVLSVAAPVEWR
HGDDVLKSSNKYSRQEGAVLELVIRDLQPDQSGQYSCSFGDQTTSATLTVKTSQAQFVGLRNKEATEGTTV
TLRCELTKEAPVEWKKGTETLRNGDKYSLKQDGA VCELQICSLLVADAGEYSCVCGQEKTSATLTVKALLVHF
VRLRSKEATEGDTTLQCELSKAAPVEWRKGTETLRDGDYSLKQDGA VCELQIRSLTIADAGEYLCTCGQE
KTSATLTVRALPAKFKDSLKNEEATEGTTATLSCELSKAAPVTWKKGPKTLQSGDKYVLRQDGA VCGLIHGL
TMADAGEYSCVCGQEKTSATLTVRGLPAKFIEDLRSQEAETEGATAILRCELSKAAPVEWRKGETLTKDGDYR
LRQDGA VCELQIRGLAVVDGTGYSLLPTKFTTEGLRNEEATEGTMATLRCQMSKAAPVEWRKGETLTDGDRYS
LRQDGA MCELQIRGLTIEDSGEYTCVCGQEKTSATLSVKALPSRFIEDLRSQEAETEGTMATLRCQMSKTAPVE
WKKGSETLRDGGRYSLRQDGPVCELQICDLAVEDAGEYSCVCGQEKTSATLSIKALPPRFIEDLRSQEAETEGT
MATLRCQMSKAAPVEWRKGETLTDGGRYSRQNGAVCELQIHDLAVEDTGEYSCVCGQEKTSATLNVKALPP
RFIEDLRSQEAETEGTMATLRCQMSKAAPVEWRKGETLTDGGRYSRQDGA VCELQIHDLVEDAGQYSCVCG
QEKTSAVLTVDALPPKFTTEGLKKEEATEGTMVTLRCQMSKEATVEWRKGAKTSLDGGRYSLRQDGA MCELQIC
GLAVEDAGEYSCVCGQEKTSATLSVKALPPRFIEDLRSQEAETEGTMATLRCQMSKAAPVEWRKGETLTDGDR
YSLRQDGA VCELQIRDLAVEDAGEYLCVCGQEKTSATLSVKALPPRFIEDLRSQEAETEGTMATLRCQMSKAAP
VEWRKGETLTDGDRYSRQDGA MCELQICDLAVEDTGDYSCVCGQEKTSATLSVKALPPRFIEDLRSQEAARE
GTVATLRCRMSKAAPVEWRKGETLTKDGDYSLRQEGNLCELQIRDLAVEDTEEYSCVCGQEKTSATLSVKAL
PAKFIEDLRSQEAEPESSTVTLRCKLSKKASVVWKKGSETLRNGARYSLRQDGA VCELEIRDLTVEDTGEYSCT
CGQERTSATLSIMAPQVVFQQPLQNLQAEEGSMASLRCELSVNAAMVWSKGGLELQDGTREARQQGCVAEL
LLRDLRREDAGEYSCTCGSQTTSATLMVTAAPVRFLRELQAQDVDEGATARLRCELSREAVSVEWRKGS LQLF
PCAKYQMVQEGTTAELLVHGVEQEDAGEYTC DAGHTQSIARLSVRAPKPKFKTDLQSTEQEAGGTARLCCQLS
EAEPTGTPVQWLKEGVELHVGSKYEMRRQGA VCELLIHGLEAKDTGEYACLVGGQKTLASLRVKEPEVTIVRGL
VDMEVQADEDEFTCKVQAGATDVQWHLQGLPLQSNVTEVAVLADGCTHVLQKGVTLLEDAGTVSFHVGGL
SSSAQLTVRVPEVTVLEPLKDVQLSEGQDAHFRCRLSRASGQEARWALGGVPLQCNEMNDITVEQGTLYLLTL
HKVTLEDAGTITLQVGSSEEAQLKVTAKNTVLRGLENVDALEGGALFECQLSQPEVAHAHTWLLDDEPVHTS
EKVEVVYFENGLRHLLLLKLNLPQDSCRVTFLAGDVVTS AFLTVRGWRLEVLPEPHDASVKAGMQVRFCTILS
EAVPVGEATWYINGAAIQPDDTDWTVTTDGS HALTLSNAQPQHAGEVTF AARDAVASARLSVLALPDPEDA
EAVGRSDHSVTLVSWAPMSDGGGGLCGYRVMKEASTGQWQLCHDLVPGPECVDDLVPGKTYRFRVAAVGPA
GAGEPVHLPQMVKIAPAPAPAPAPAPAPAPETRQAVVGEDICLELEVAADGGEVWVKGTERIQPGHFVLS
RGQRQMLVIKGFRTEDQGEYRCGPIQGLPSSGAATFNVMVMTSGSGDEVPAQPSLPPEAAQEGDLHLLWEALAR
KRRMSREPTLDSISELPEEDSRVQHLRQEAEEETAPDLSEGYSTADELARTGEADLSHTSSDDES RAGTPSLVT
YLK KAGGPGISPLASKHEAQVTTSVKPKQKQEPVVPTCPPPGDLSAADLMDPSLDKAAVKIQA AFKGYKVRKE
MKQQEGPVFSTRTFGDTEAQVGDVLRLECVLATKTD MRACVLDKGIELTDGRHYHIDQLKDGTCSSLVTVGLAPT
DSGRYTCQVSTKSGRVSHSACVVVSGTESEAESSSGGELDDAFRAARRLHRLFRKSPAELSEELFLSADE
GPGEPEEPADWQTYREDENFVCIRFESLAEARQAVTCFRNMFATMIGVEISLGEQGGPRGVMIRI GKVAPTVT
PAVPLAKTPGLQTS DAAPVFLTELQNQDVQDGYPMSFDCVVTGQPVPSVRWFKDGKLEEDDHYMINEDQGGG
HQLIITAVVPADMGVYRCLAENSMGVSSTKAELRVELTSTDYDTAADATETSSYFSAQGYLSSREQEGTESDE
GQLPQVLEELKDLQVAPGTR LAKFQLKVKGYPA PKLYWFKDGQPLTTS DHIRMTDKKTLHTLEIVSVTREDSG

QYAAYSNAVGAAYSSARLLVRGPSEPEEKPASDVHERLVPPRI LEKFTPKKVKRGSSITFSVKVEGHPAPSV  
HWLKEEAKEKGLVLIWIPDTPGYTMASSSKQHSVLVLDVGRQHOGTYTTCIATNPAGQALCSASLHISGLAKEEEQ  
ERVKEALISSFLOGTSQAVSAQMSESAFADLVGQSKGESLVAEEAHSHLSLAEVGTTEEFLQKLTSTQITMVS  
AKISQAKLQVPGGDSDEETKTPSASPRHGRSRPSSSVQESSSESEEDGDSRGEIFDIYVVTADYLPGLAEQDAI  
ILREGQYVEVLDSAHPLRWLVRTKPTKSSPSRQGWVSPAYLDKRLKLSPEWGPTEAPEFPGEAVSEDEYRTRL  
SSVIQELLSSEQAFVQELQFLESHHMKHLERSPRVPAAVASQKTVIFRNVQDISHFHSSFLKELQCGCTDDDDV  
AMCFIKNQEAFAEKYLEFLVGRVQAESVVVSTPVQEFYKKAEEETLSAKDPTQPPPPLOHYLEQPVVERVQKYQ  
ALLKELIRNKARNRQNCALLEQAYAVVSALPQRAENKLVHSLMENYPGTLEALGEPHPIRQGHFIVWEGAPGARM  
PWKGHNHRHVFLFRNYLVICKPRRDSRTDTFSYVFRNMKLS SIDLNDQVEGDRAFEVWHEREDSVRKYLLQA  
RTVI IKNSWVKEICGIQORLAQPVWRPPEFEEELADCTAELGETVKLACRVTGTPKPIVSWYKDGKPVVDPH  
HILIEDPDGCTLLIDLNLTGIDSGQYMCFAASAAGNASTLGKILVQVPPRFVNVKVRATPFVEGEDAQITCTVE  
GAPYPQIRWYKDGTLAPGNRYRMLNEPRSGVLVLIQAASKEDLGHYECELVNLGSTRGGGELYMOSPALR  
ARDQHHREQIVAAVEDTSVEGSAHSAQDQADQQAASVLWRLLGSEALGPS PGDLPNTRQSEPPAFEEAASQIP  
GAASGTPEVSPGTHKLEQETSSSGSQGWTPVIRVEGTAWPGAGTGQLLLDVHSQVIMETTQRTYVQAPDT  
GVTRAPSMQVTIEDVQVQVGDMAQFDAVIEGHPPPIVTVWYKGSTQLTSSARLSQRQDGTYSVLVTDVAPHDA  
GVYTCVANNAGGQVLCKAELLVHGGDKLDAENQVYRRLKLSHFYDVQEEIGRGVFGFVKRVQHKGNMFCAAKF  
IPLRSKTRAQAYQERDILATLGHPLVTGLLDQFETRKTLLIILELCSSEELLDRLFKKGVVTEAEVNVYIQQL  
VEGLHYLHSHGILHLHDIKPPNLLMVHPAREDIKCDFGFAQKI TPSEPQYSKYGSPEFVPEIIEQNVPVSEGS  
DIWAMGVISYLSLTCSSPFAGESDRATLLNVLEGRVSWSSPTAAHLSSEDAKDFIKATLQRTPRARPSTSQCLA  
HPWFLKSMPEAAHFINTKQLKFLARSRWQRSLMSYKSI LVMRSIPELLQGPPDPSPLGVARHLRGEASGAS  
SSSSSDNELAPFARAKSLPPSPVTHSPLLHPRGFLRPSASLPEETEASMP TADA AVPAS PQSAGPPASPGCV  
PRHSVSISSLFYQQAGEGAERGNKTSGAKRHPARRRHLLKGGYIARALPGLREPLMEYSLLEEEAAREEQASLM  
TKTPSFETALRLPSSSVREVPGRSHSLDNPPVTTGPSPEACKEQLLFPSTGLTHETTAKDRGHKEGFLQESV  
PFPMSGDSRPGKQEGSSQDSRCRGPASSCHSELGSGSQEGCGPPSSQSLGSLPPQSLKELSTSCGPLFSEQ  
PQAAPFPTQVSPLLGSEKEPQDGSLEGPVVPVSSSPGASQVDASLDTEGLSEAGDTCDFTPPPQRPQEQAT  
TRKFSLESRGGYAGVAGYGTFAFGGDAGGMLQGPLWARMWAVS QSSEEQDEAATESPQPLESLGPIAEASG  
VPLRTSPSLTPWEEVQVSLVQIRDLSGDAEAADTISLDISEVDPAYLNLSDLYDIKYLPEFEMIFRRVPKPI  
EQPESPGSETEAGQGLADFLLEAAWPWPGELGLRAGLEITEEPEEPGDLEALLGEAAVGRKRKWSPSRGLFQF  
PGRCLSGEEPVELGLRQVRKASMAHISRI LKGRPEGPEREPPRKKAGLASFRLSGLKGRDQELSDEAVVLGQ  
SVTLACQVLAQPTAQATWSKDGVLLESSGHLIISSTLKNFQLLTI LVVKEEDLGTYTCCVSNPLGTAVTTGVL  
RKAERPSSSPRPEVGELYKDAVLLVWKPVESECGPVTVIVQCCIEGGSWTTLASDISDCCYLTGKLSRGGMYIF  
RTACVSKAGMGPISSPSEQVLLGGPNHLASEEESRGRPAQLLPSTKTFAFQMQIRRRFVSVRQCREKASGR  
ALAAKIVPYQPEDKTA VLREYEAALKRHLHPLHAQLHAAYLSPRHLVLI LELCSGPELLPSLAERESYSESDVK  
DYLWQMLSATQYLHAQHILHLDLRSENMMVTEYNLLKVIDLGNALDQEKVPAPENFKDYLETMAPELLEGO  
GAVPQTDIWAIGVTAIFIMLSGEY PESSSEGTDLQKGLRKLGLIRLSRCYAGLSGGAVAFLOSSLCAQPWGRPCA  
STCLQCGWLTTEEGTGRPTPVTFPTVRLRAFVREKRRALLYKKNHNAQVR\*

>rs48519378\_ENSMUSP00000038264\_c.4846:G>A\_p.S1616N  
ENSMUST00000047441.14|Obscn-202|ENSMUSG00000061462|-|chr11:g.58990725:C>T  
MDHSFSGAPRFLTRPKAFVSVGKDATLSCQIVGNPTPHVSWEKDRQPVVEAGARFRLAQDGDVYRLTILDLAL  
GDSGQYVCRARNAIGEFAAVGLRVDSEGTCAEQAPHLLRPTSIRVREGADATFRCRVGGSPPAVSWSKDG  
RRLGPPDAPHVRVEEHGESSALRIRSARPRDGGTYEVRAENPLGSASAAAALVVDSDAEVAGPPGTSTATLLA  
HLQQRREAMRAEGIPPSPPGAGTRTCTVTEGKHARLSCFVTGEPKPEVWKKDQGLVTEGRRHVVEDEQENF  
VLKILFCKQSDRGLYTCTASNLVGQTYSSVLVVVREPTVPFKKRLQDLEVREKESATFQCEVAQPAATEAAWFK  
EETRLWASAKYDIEEGETERRLTVRNVSADDDAVYICETTEGSRVAVELSVQGNLTKRKLPRKTAVRTGDTAIF  
WVELAVPEGPVRWLRNQEEMVAGGRVAITAEGTCHTLTI FQCTLEDMGEVAFVSGGCRTTTTQFCVSAAPRRPPL  
YPPADPVVKAKTESVTLWSAPPHGDRPVTIDGYVLEKRLKLGAYAWSRCHEAGWLATTEFTITGVAAEGDFQ  
FRVSAINHFGQGPYLEFPGMTMLVPLAVKTPKAVEAVEGGEVTFVSDLTVASSGEWFLDGEALKASSIYVI  
RCDRTRHMLTIREV PARLHGAQLKVFANGIETS IQMVVRAALGLPSSKLPAAAAREVLAQLHEEAQLLAELSD  
QAAAVTWLKDGRELSLGPYEMQVSAGRRALLVRDVAQDDAGLYECVSRGSRRTAYQLLVQDITDGYRDWGPAG  
PQKHMCKCAGAKIARYLGSSCYRFLQYDKGVWHLEAALDTRQKGTSSCSLHEKPKLVFAKQQAHSEVKA  
AGASATLSCEVAQAQTEVTFWFKDGKLLSSSSKVRMEASGCSRRLVVQQAGKADAGEYSCEAGGQKLSFRLDVA  
EPKMFVFAKEQQARSEVKAEEAGASATLSCEVAQAQTEVTFWFKDGKLLSSSSKVRMEASGCSRRLVVQQAGKADA  
GEYSCEAGGQKLSFRLDVTPEKLVFAKEQQARSEVKAEEAGNSATLSCEVAQAQTEVTFWFKDGKLLSSSSKVRM  
EASGCSRRLVVQQAGKADAGEYSCEAGGQKLSFRLDVAEPKLVFAKEQQARSEVKAEEAGNSATLSCEVAQAQ  
EVTWFKDGKLLSSSSKVRMEASGCSRRLVVQQAGKADAGEYSCEAGGQKLSFRLDVTPEKLVFAKEQQARSEV  
KAEAGASATLSCEVAQAQTEVTFWFKDGKLLSSSSKVRMEASGCSRRLVVQQAGKADAGEYSCEAGGQKLSFRL  
DVAEPKLVFAKEQQARSEVKAEEAGASATLSCEVAQAQTEVTFWFKDGKLLSSSSKVRMEASGCSRRLVVQQAGK  
ADAGEYSCEAGGQKLSFRLDVAEPKLVFAKEQQANSEVKAEEAGASATLSCEVAQAQTEVTFWFKDGKLLSSSSK

VRVEASGCSRRLVVQQAGKADAGEYSCEAGGQKLSFRLDVAEPKLAFAKEQQAHSVEVKAEGASATLSCEVAQ  
AQTEVTFWKDGGKLSSSSSKVRVEASGCSRRLVVQQAGKADAGEYSCEAGGQKLSFRLDVAEPKLAFAKEQQAHS  
SEVKAEGANATLSCEVAQAQTEVTFWKDGGKLSSSSSKVRVEASGCSRRLVVQQAGKADAGEYSCEAGGQKLS  
FRLDVAEPKLAFAKEQQAHSVEVKAEGASATLSCEVAQAQTEVTFWKDGGKLSSSSSKVRVEASGCSRRLVVQQ  
AGKADAGEYSCEAGGQKLSFRLDVAEPKLVFAKEQQAHSVEVKAEGASATLSCEVAQAQTEVTFWKDGGKLS  
SSKVRVEASGCSRRLVVQQVQKADAGEYSCEARGQKLSFRLDVAEAEESQIPERPSRREPLVVEKHETIILTAT  
IAAPSVAAVTWLKDGVIEIRRSKRHEATSLGDTHLTVRGAQVLDIAIYSCRVGKEGQDFPVQVEEVAAKFSKP  
LEPVGELGGTVMLVCELSPEQAEVWVRCGNTQLRPGKRFQMTSEGPRTTLTVSGLREDDAEYVCESRDDRT  
SARLTVKVPVVKFTSGLSAMVAEEGQEAFTQCVCVSPSDAGVTWYKQDGMQLQPSSEKFMVMEVSGARSRLTILGL  
TLEDAGQVTVAEAGASSAALRVREAPVLFKKKLEPQTVEEERTSVTLEVELTRPWPEVKWTRNAAVLTPSENV  
EIRAEGARHCLVLRVSGFADRGFFGCETPDDKTQAKLNVEMRQVRLVRLQVEVEAKEQGTASMDVELSHAEVE  
GSWTRDGLRLQPGPKCHLAVQGPVHILTLTALQPDQSGLVAFRAEGVHTSARLIVTELPVSFTRVLQDVVATQ  
KEKVTLECELSRPVDVRLKDGVELRAGKAI GIVAQGTCSRSLVIYRCETGDQGVYVCDALDAQTSASLRVQGR  
TYTLIFRRVLAEDAGEVKFVAENAESRAHLRVKELPVTLLRPLRDKIAMEKHRGVLEQCQVSRASQVRFWFKGG  
VELQSGPKYEVVSDGLYRKLVINQVPEDEDTYTCDAGNVKTSAQFFVEEQSITIVRGLKDMTVMEPAPAWFE  
CETSIPSVRPPKWLKKTVLQAGGNVLEQDGTVHRLTLHKTCSTMTGPFVHFTIGKSRSSAQLVVSDIPVVLT  
RPLEPKAGRELQSVLSSCDFRPAPKAVQWYKDDTPLSPSEKFKMALEGQMAELRILRLTPADAGVYRCQAGSA  
QSSAEVTVAEAEVTVIQPLQDAEAMEEGRVCFSELSHKDEDIEWSLNGTPLYNDSFHEISHEGCLYRLVLKLS  
VRQADTGTVCATSPKVSVSARLVVKGKPVVFLKALDDVSAEERGTTLQCEVSDPEARVWVRKDGVELGPSDK  
YDFLHKAGARGLTVHDLSDHEDAGLYTCQVGSKETQSKVSVHDLHVGITKRLKTVEVLEGESECSFECVLSHESP  
SDPAVWTVGGKTVGGSGHFHAVRQGRKYTLTVKDAALSDAGEVVFVGLTSSKASLIIRERPVDITKPLEDQR  
TTLGEDVMLSCELSRAGTSVRWLKDGKAIKRSQKYDLLSEGTRAVLVVRKASLKDSGEYTCETEASKSTAKLC  
VEEKANRFTEELADLQVEEKGRAVFTCKTEHPASVVTWRKGLLELRASGKHVPSQEGTLTKLTINALERTDSD  
TYTCDIGQARTQARLLVHGQKVRVIEDLEDTAVQEGSSAKFCRRIAPADYGPVHWFLLDKTPLHSNELNEITVQ  
PGGYHVLTLRQLALKDSGTVYFEAGDQRTSAALRVTEKPSIFSRPLTDVTVTEGEDLTLVCETTTVDSSVRWT  
KDGKTLRPSARCPQLEHSGCQAQLLITATTPQDGGRYKELIGGASSSSIVRVHALPVRFRESLTKDVEVPEGKAA  
TLRCVLSVAAPVLRHGGDDVLKSSNKYSLRQEGAVLELVIIRDQLQPDQSGQYSCSFGDQTTSATLTVKTSQAQ  
FVGKLRNKEATEGTTVTLRCELTKAEAPVEWKKGTETLRNGDKYSLKQDGAVCELQICSLLVADAGEYSCVCGQ  
EKTSATLTVKALLVHFVRRRLRSKEATEGDTTTLQCELSKAAPVEWRKGTETLRDGDYSLKQDGAVCELQIRS  
LTIADAGEYLCTCGQEKTSATLTVRALPAKFKDSLKNEEATEGTTATLSCELSKAAPVTWKKGPKTLQSGDKY  
VLRQDGAVCGLQIHGLTMADAGEYSCVCGQEKTSATLTVRGLPAKFIEDLRSQEATEGATAILRCELSKAAPV  
EWRKGETLTKDGDYTLRQDGAVCELQIRGLAVVDTGTYSPLPKFTEGLRNEEATEGTMATLRCQMSKAAPV  
EWRKGETLRDGDYSLRQDGAMCELQIRGLTIEDSGEYTCVCGQEKTSATLSVKALPPRFIEDLRSQEATEG  
TMATLRCQMSKAAPVEWRKGETLGDGGYSLRQNGAVCELQIHDLAVEDTGEYSCVCGQEKTSATLNVKALP  
PRFIEDLRSQEATEGTMATLRCQMSKAAPVEWRKGETLRDGGYSLRQDGAVCELQIHDLVEDAGYSCVC  
GQEKTSAVLTVDALPPKFTEGLKKEEATEGTMVTLRQMSKEATEVWRKGAKTLSGGYSLRQDGAMCELQI  
CGLAVEDAGEYSCVCGQEKTSATLSVKALPPRFIEDLRSQEATEGTMATLRCQMSKAAPVEWRKGSKTLRDGD  
RYSLRQDGAMCELQICDLAVEDTGDYSCVCGQEKTSATLSVKAPQVVFQQLQNLQAEEGSMASLRCELSVFN  
AAMVWSKGGLELQGDTRREARQQGCVAELLLRDLRREDAGEYSCTCGSQTTSATLMVTAAPVRFRLQAOQDV  
DEGATARLRCELSREAVSVEWRKGSLLQFPKAKYQMVQEGTTAELLVHGVEQEDAGEYTC DAGHTQSIARLSV  
RAPKPKFKTDLQSTEQEAGGTARLCCQLSEAEPTPVQWLKEGVELHVGSKYEMRRQGAVCELLIHGLEAKDT  
GEYACLVGQKTLASLRVKEPEVTIVRGLVDMEVQADEDFEFTCKVVSQAGATDVQWHLQGLPLQSNVTEVAV  
LADGCTHVLQKGVTLLEDAGTVSFHVGGLSSSAQLTVRVPEVTVLEPLKDVQLSEGQDAHFRCRLSRASGQEA  
RWALGGVPLQCNEMNDITVEQGTLYLLTLHKVTLLEDAGTITLQVGSSESAQLKVTAKNTVLRGLENVDALEG  
GEALFECQLSQPEVAHAHTWLLDDEPVHTSEKVEVVYFENGLRHLHLLKLNKLPQDSCRVTFLAGDVVTS AFLTV  
RALPDPPEDAEVVGRSDHSVTLVSWAPMSDGGGGLCGYRVMKEASTGQWQLCHDLVPGPECVDDLVPGKTY  
RFRVAAVGPAGAGEPVHLPQMVKIAPAPAPAPAPAPAPAPETRQAVVGEDICLELEVAADGGVEVWHKGTERRI  
QPGGHFEVLSRQQRQMLVIKGFRTEDQGEYRCGPIQGLPSSGAATFNVMVMTSGSGDEVPAQPSLPPEAAQEGD  
LHLLWEALARKRRMSREPTLDSISELPEEDSRVQHLRQEAEEETAPDLSEGYSTADELARTGEADLSHTSSDDE  
SRAGTPSLVTYLKKAGGPGISPLASKHEAQVTTSVKPKQKQEPVVPPTCPPPGDL SAADLMDPSLDKAAVKIQA  
AFKGYKVRKEMKQOEGPVFSRTFGDTEAQVGDVLRLECVLATKTDMRACWLKDGIELTDGRHYHIDQLKDGTC  
SLLVTVGLAPTDSGRYTCQVSTKSGRVSHSACVVVSGTESEAESSSGGELDDAFRRAARLHRLFRTRKSPAELS  
EELFLSADEGPPEPEKPADWQTYREDENFVLCIRFESLAEARQAVTCFRNMFMATMIGIVEISLGEQGRGVEM  
RIGKVAQTVTPAVPLAKT PGLQTS DAAPVFLTELQNDVQDGYPMSFDCVVVTGQPVSVRWFVKDKLLEEDDH  
YMINEDQQGGHQLIITAVVPADMGVYRCLAENSMGVSSTKAE LRVELTSTDYDTAADATETSSYFSAQGYLSS  
REQEGTESDEGQLPQVLEELKDLQVAPGTRAKFQLKVKGYAPKLYWFKDGQPLTSDHIRMTDKKTLHTLE  
IVSVTREDSGQYAAIYISNAVGAAYSARLLVVRGPEPEEKPASDVHERLVPPRILEKFTPKKVKRGSITFSV  
KVEGHPAPSVHHLKEEAEGVLIWIGPDTPGYTMASSSKQHSVLVLDVGRQHOGTYTCIATNPAGQALCSASLH

ISGLAKEEEQERVKEALISSFLQGTSSQAVSAQMSESAFADLVGQSKGESLVAAEEAHSHLSLAEVGTTEEFLOK  
LTSQITEMVSAKISQAKLQVPGGDSDEETKTPSASPRHGRSRPSSSVQESSSESEDGDSRGEIFDIYVVTADY  
LPLGAEQDAIILREGQYVEVLDLSDAHLRVLVVRTKPTKSSPSRQGWVSPAYLDKRLKLSPEWGPTEAPEFPGEA  
VSEDEYRTRLSSVIQELLSSEQAFVGGELQFLESHHMKHLERSPRVPAAVASQKTVIFRNVQDISHFHSSFLKE  
LQCGCTDDDVAMCFIKNQEAFEKYLEFLVGRVQAESVVVSTPVQEFYKKYAEETLSAKDPTQPPPPPLQHYLE  
QPVERVQKYQALLKELIRNKARNRQNCALLEQAYAVVSALPQRAENKLVSLMENYPGTLEALGEPPIRQGHFI  
VWEGAPGARMPPWKGNHRHVFLFRNYLVICKPRRDSRTDTFSYVFRNMMKLSSIDLNDQVEGDRAFEVWHERE  
DSVRKYLQARTVVIKNSWVKEICGIQORLAQPVWRPPEFEEELADCTAELGETVKLACRVTGTGPKPIVSWYK  
DGKPEVVDPHHILIEDPDGCTLLILDNLTGIDSGQYMCFAASAAGNASTLGKILVQVPPRFRVNVKVRATPFVEG  
EDAQITCTVEGAPYPQIRWYKDGTLAPGNRYRMLNEPRSGVLVVIQAAASKEDLGHYECELVNRLGSTRGGG  
ELYMOSPALRARDQHHREQIVAAVEGAPSMQVTIEDVQVQVGDMAQFDAVIEGHPPPPIVTWYKGTQLTSSAR  
LSQRQDGTYSLVLTVDVAPHDAGVYTCVANNAGQVLCCKAELLVHGGDKLDAENQVYRRLKLSFYDVQEEIGR  
GVFGFVKRVQHKGNMFCFAAKFIPLRSKTRAQAYQERDILATLGHPLVTGLLDQFETRKTLLILILELCSSEEL  
LDRLFKKGVVTEAEVKVYIQQLVEGLHYLHSHGILHLDIKPPNIIIMVHPAREDIKICDFGFAQKITPSEFQYS  
KYGSPEFVSPETIEQNPVSEGSIDIWAMGVISYLSLTCSSPFAGESDRATLLNVLEGRVSWSSPTAAHLSDAK  
DFIKATLQRTPRARPSTSQCLAHPWFLKSMPEAAEHFINTKQLKFLARSRWQRSLMSYKSIIVMRSIPELLQ  
GPPDSPSLGVARHLRGEASGASSSSSSDNELAPFARAKSLPPSPVTHSPLLHPRGFRLPSASLPEETEASMP  
TADAAPVSPQASAGPPASPGCVPRHSVSSLFYQQAGEGAERGNKTSGAKRHPARRRHLLKGGYIARALPGLR  
EPLMEYSLLEEEAAREEQASLMTKTPSFETALRLPSSSVREVPGRSHSLDNPPVTTGSPPEACKEQLLFPST  
GLTHETAKDRGHKEGFLQESVPPFMSGDSRPGKQEGSSQDSCRGKPASSCHSELGSGSQEGCGPPSSQSLG  
SLPPQSLKKELESTSCGPLFSEQPQAAPFPTQVSPLLGSEKEPQDGLSEGPVVPVSSSPGSASQVDAASLDTG  
LSEAGDTCDFTPPPQRPQEQATTRKFSLESRGGYAGVAGYGTFAFGGDAGGMLGQGPLWARMWAVSQSSEEQ  
DEAATESPQPLESGLPIAEASGVPLRTSPSLTPWEEVEQVSLVQIRDLSGDAEAADTISLDISEVDPAYLNL  
DLYDIKYLPEFEMIIFRRVPKPIEQPESPGSETEAGQGLADFLLEAAWPWPGEGLGLRAGLEITEEPEEPGDLEA  
LLGEAAVGRKRKWSPSRGLFQFPGRCLSGEEPVELGLRQRVKASMAHISRIKGRPEGPEREPPRKKAGLAS  
FRLSGLKCRDQELSDAEAVLGGQSVTLACQVLAQPTAQATWSKDGVLLESSGHLLISSTLKNFQLLTIIVVWKEE  
DLGTYTCCVSNPLGTAVTTGVLKRAERPSSSPREVEGELYKDAVLLVWPKPVEPCGPVTVIVQCCIEGGSWTTL  
ASDISDCCYLTKLSRGGMYIFRTACVSKAGMPYSSPSEQVLLGGPNHLASEEESSRGRPAQLLPSTKTF  
QMQIRGRFVSVRQCREKASGRALAAKIVPYQPEDKTAVLRVYEAALKRLHHPHLAQLHAAYLSPRHLVLI  
CSGPELLPSLAERESYSESDVKDYLWQMSLQYLAHQHILHLDLRSENMMVTEYNLLKVIDLGNASLDQEK  
VPAPENFKDYLETMAPELLEGQAVPQTDIWAIGVTAIFIMLSGEYPESEGETRDLQKGLRKLIRLSRCYAGL  
SGGAVAFLOSSLCAQPWGRPCASTLQCGWLTEEGPTGSRPTPVTFTVRLRAFVREKRRALLYKKNH  
LAQVR\*

>rs48519378\_ENSMUSP00000049737\_c.4921:g>A\_p.S1641N  
ENSMUST00000052872.15|Obscn-203|ENSMUSG00000061462|-|chr11:g.58990725:C>T  
MDHSFSGAPRFLTRPKAFVSVGKDATLSCQIVGNPTPHVSWEKDRQVPEAGARFRLAQDGDVYRLTILDLAL  
GDSGQYVCRARNAIGEAFVAVGLRVDSEGTCAEQAPHFLLRPTSIRVREGADATFRVCRVGGSPQPAVSWSKDG  
RRLGPPDAPHVRVEEHGESSALRIRRSARPRDGGTYEVRAENPLGSASAAAALVVDSDAEVAGPPGTSTATLLA  
HLQORREAMRAEGIPSPPGAGTRTCTVTEGKHARLSCFVTGEPKPEVWKKDGQLVTEGRRHVVEDEQENF  
VLKILFCKQSDRGLYTCTASNLVGGQTYSSVLVVVREPTVPFKKRLQDLEVREKESATFQCEVAQPAEA  
EETRLWASAKYDIEEEGTERRLTVRNVSADDDAVYICETTEGSRVVAELSVQGNLTKLPRKTAVRTGDTAIF  
WVELAVPEGPVRLRNQEEVAGGRVAITAEGTCHTLTI FQCTLEDMGEVAFVSGGCRTTTQFCVSAPRRPPL  
YPPADPVVKAKTSSVTLSSWAPPHGDRPVTIDGYVLEKRRKLGAYAWSRCHEAGWLATTEFTITGVAEEGDFQ  
FRVSAINHFGQGPYLEFPGTMHLVPLAVKTPKAVEAVEGGEVTFVSDLTVASSGEWFLDGEALKASSIYVI  
RCDRTRHMLTIREVPARLHGAQLKFEVANGIETS IQMVVRAALGLPSSKLPAAAAAREVLAQLHHEEAQLLAE  
LSDQAAAVTWLKDGRELSLGPKEYMQVSAGRRALLVRDVAQDDAGLYECVSRGSRRTAYQLLVQEPKLVFAK  
GQQAHSVKAEGNSATLSCEVTQAQTEVTWFKDGKLLSSSSKVRMEASGCSRRLVVQQAGKADAGEYSCE  
AGGQKLSFRLDVAEPKLVFAKQQAHSVKAEGASATLSCEVAQAQTEVTWFKDGKLLSSSSKVRMEASG  
CSRRLVVQQAGKADAGEYSCEAGGQKLSFRLDVTEPKLVFAKEQQARSEVKAEGASATLSCEVAQAQTE  
VTWFKDGKLLSSSSKVRMEASGCSRRLVVQQAGKADAGEYSCEAGGQKLSFRLDVAEPKLVFAKEQ  
QARSEVKAEGNSATLSCEVAQAQTEVTWFKDGKLLSSSSKVRMEASGCSRRLVVQQAGKADAGEYSCE  
AGGQKLSFRHLDVTEPKLVFAKEQQAHSEVKAEGASATLSCEVAQAQTEVTWFKDGKLLSSSSKVRME  
ASGCSRRLVVQQAGKADAGEYSCEAGGQKLSFRLDVAEPKLVFAKEQQARSEVKAEGASATLSCEVAQA  
QTEVTWFKDGKLLSSSSKVRMEASGCSRRLVVQQAGKADAGEYSCEAGGQKLSFRLDVAEPKLVFAKE  
QQAHSVKAEGASATLSCEVAQAQTEVTWFKDGKLLSSSSKVRMEASGCSRRLVVQQAGKADAGEYSCE  
AGGQKLSFRLDVAEPKLVFAKEQQAHSEVKAEGANATLSCEVAQAQTEVTWFKDGKLLSSSSKVRMEAS  
GCSR

RLVVQQAGKADAGEYSCEAGGQKLSFRLDVAEPKLAFAKEQQAHSEVKAEAGASATLSCEVAQAQTEVTFWFKD
GKKLSSSSKVRVEASGCSRRLLVVQQAGKADAGEYSCEAGGQKLFRLDVAEPKLMFAKEQQAHSEVKAEAGAS
ATLSCEVAQAQTEVTFWFKDGKKLSSSSKVRVEASGCSRRLLVVQQAGKADAGEYSCEAGGQKLSFRLDVAEPKL
VFAKEQQAHSEVKAEAGASATLSCEVAQAQTEVTFWFKDGKKLSSSSKVRVEASGCSRRLLVVQQVQKADAGEYS
CEARGQKLSFRLDVADTRLMFAKEQQARTEVKAEAGNSATLSCEVAQAQTEVTFWFKDGKKLSSSSKVRVEASG
CSRRLLVVQQAGKADAGEYSCEAGGQKLSFRLDVAEAEESQIPERPSRREPLVVKEHETIILTATIAAPSVAAVT
WLKDGVEIRRSKRHEATS LGDHTLTVRGAQVLD SAIYSCRVGKEGQDFPVQVEEVAAKFSKPLEPVEGELGG
TVMLVCELSPEQAEEVWRCGNTQLRPGKRFQMTSEGPRTTLTVSGLREDDAEYVCESTRDDTSARLTVKVPR
VVKFTSGLSAMVAEEGQEATFQCVVSPSDAGVTWYKDGMLQPSSEKFMVVESSGASRSLTILGLTLEDAGQVTV
EAEGASSAALRVREAPVLFKFKLEPQTVTEERTSVTLEVELTRPWPEVKWTRNAAVLTPSENVEIRAEGARHC
LVLRSVGFADRGFFGCETPDDKTQAKLNVEMRQVRLVLRGLQEVEAKEQGTASMDVELSHAEVEGSWTRDGLRL
QPGPKCHLAVQGPVHILTLALSALQPQDSGLVAFRAEGVHTSARLIVTEL PVSFTRVLQDVVATQKEKVTLECEL
SRPVDVRWLKDGVELRAGKAIGIVAQGTCSRSLVIYRCETGDQGVVCDALDAQTSASLRVQGRTYTLIFRRVL
AEDAGEVKFVAENAESRAHLRVKELPVTLRPLRDKIAMEKHRGVLECVSRASAVRWFKGGVELQSGPKYE
VVS DGLYRKLVIN DVQPEDEDTYTCDAGNVKTSAQFFVVEEQSITIVRGLKDMTVMPEPAPAWFECETSIPSVRP
PKWLLGKTVLQAGGNVLEQDGTVHRLTLHKTCSTMTGPVHFTIGKSRSSAQLVVS DIPPVLRTRPLEPKAGRE
LQSVVLSCDFRPAPKAVQWYKDDTFLSPSEKFKMAELRILRLTPADAGVYRCQAGSAQSSAEVTVEA
REVTVIQPLQDAEAMEEGRVCFCELSHKDEDI EWSLNGTPLYNDSFHEISHEGCLHTLVLSKVRQADTGTVC
ATS PKVSVSARLVVKGKPVVFLKALDDVSAEERGTTLTQCEVSDPEARVVRKDGVELGPSDKYDFLHKAGAR
GLTVHDLSDHEDAGLYTCQVGSKETQSKVSVHDLHVGITKRLKTVLEVLEGECSFCVLSHESPSDPAVWTVGG
KTVGGSGHFHAVRQGRKYTLTVKDAALSDAGEVVSVLGLTSKASLIIRERPVDITKPLEDQRTTLGEDVMLS
CELSRAGTSVRWLKDGKAIRKSQKYDLLSEGTRAVLVVRKASLKDSGEYTCETEASKSTAKLCVEEKANRFT
ELADLQVEEKGRAVFTCKTEHPASVVTWRKGLLELRASGKHVPSQEGTLKLTINALERTDSDTYTCDIGQAR
TQARLLVHGQKVRVIEDLED TAVQEGSSAKFCCRIAPADYGPVHWF LDKTPLHSNELNEITVQPGGYHVLT LR
QLALKDSGTVYFEAGDQRTS AALRVTEKPSIFSRPLTDVTVTEGEDTLVLCETTTVDSSVRWTKDGKTLRPSA
RCQLSHEGQQAQLLITATTPQDGGRYKCEIGGASSSSIVRHALPVRFRFRESLKDVEVPESKAATLRVLSVA
APVEWRHGDVVLKSSNKSLRQEGAVLELVIRDLQPDQSGVLSVCSFGDQTTSATLTVTKTSSAQFVGLKLRNKEA
TEGTTVTLRCELTK EAPVEWKKGTETLRNGDKYSLKQDGAVCELQICSLLVADAGEYSCVCGQEKT SATLTVK
ALLVHFVRRRLRSKEATEGDTTTLQCELSKAAPVEWRKGTETLRDGDYSLKQDGAVCELQIRSLTIADAGEYL
CTCGQEKT SATLTVRALPAKFKDSLKNEEATEGTTATLSCELSKAAPVTWKKGPKTLQSGDKYVLRQDGA VCG
LQIHGLTMADAGEYSCVCGQEKT SATLTVRGLPAKFIEDLRSQEATEGATAILRCELSKAAPVEWRKGETL K
DGDYRDLRQDGA VCELQIRGLAVVDGTYSLSLPTKFT EGLRNEEATEGTMATLRCQMSKAAPVEWRKGETLR
DGDYRDLRQDGA MCELQIRGLTIEDSGEYTCVCGQEKT SATLSVKALPSRFIEDLRSQEATEGTMATLRCQMS
KTAPVEWKKGSETLRDGGYSLRQDGPVCELQICDLAVEDAGEYSCVCGQEKT SATLSIKALPPRFIEDLRSQ
EATEGTMATLRCQMSKAAPVEWRKGETLGDGGYSLRQNGAVCELQIHDLAVEDTGEYSCVCGQEKT SATLN
VKALPPRFIEDLRSQEATEGTMATLRCQMSKAAPVEWRKGETLRDGGYSLRQDGA VCELQIHDLVEDAGQ
YSCVCGQEKTSAVLTVDALPPKFT EGLKKEEATEGTMVTLRQMSKEATVEWRKGAKT LSDGGYSLRQDGA M
CELQICGLAVEDAGEYSCVCGQEKT SATLSVKALPPRFIEDLRSQEATEGTMATLRCQMSKAAPVEWRKGET
LRDGDYSLRQDGA VCELQIRDLAVEDAGEYLCVCGQEKT SATLSVKALPPRFIEDLRSQEATEGTMATLRCQ
MSKAAPVEWRKGSKTLR DGDYSLRQDGA MCELQICDLAVEDTGDYSCVCGQEKT SATLSVKALPPRFIEDLR
SQEAREGT VATLRCRMSKAAPVEWRKGETLKDGDYSLRQEGNLCELQIRDLAVEDTEEYSCVCGQEKT SAT
LSVKALPAKFIEDLRSQEAPESSTVTLRCKLSKKASVWVKKGSETLRNGARYSLRQDGA VCELEIRDLTVEDT
GEYSCTCGQERTS ATLSIMAPQVVFQQLQNLQAEEGSMASLRCELSVPNAAMVWSKGGLELQGDTRREARQQ
GCVAELLLRDLRREDAGEYSC TCGSQTTSATLMVTAAPVRFLELQADVD EGATARLRCCELSREAVSVEWRK
GSLQLFP CAKYQMVQEGTTAELLVHGVEQEDAGEYTC DAGHTQS IARLSVRAPKPKFKTDLQSTEQEAGGTAR
LCCQLSEAEPGTPVQWLKEGVELHVGSKYEMRRQGA VCELLIHGLEAKDTGEYACL VGGQKTLASLRVKEPEV
TIVRGLVDMEVQADEDEFTCKVSQAGATDVQWHLQGLPLQSN E VTEVAVLADGCTHVLQKGVTL EDAGTVS
FHVGG LSSSAQLTVRVPEVTVLEPLKDVQLSEGQDAHFRCRLSRASGQEARWALGGVPLQCNEMNDITVEQGT
LYLLTLHKVTLEDAGTITLQVGS CSSEAQLKVTAKNTVLRGLENVDALEGGEALFECQLSQPEVA AHTWLLDD
EPVHTSEKVEVVYFENGLRHLLLLKNLKPQDSCRVTFLAGDVVTS AFLTVRGWRLEVLEPPHDASVKAGMQVR
FTCILSEAVPVGEATWYINGAAIQPDDTDWTVTTDGS HHALTLSNAQPQHAGEVTF AARDAVASARLSVLALP
DPPEDAEEVVRSDHSVTLSSWVAPMSDGGGGLCGYR VEMKEASTGQWQLCHDLVPGPECVVDDLVPGKTYRFRV
AAVGPAGAGEPVHLPIQMVK IAPAPAPAPAPAPAPAPETRAQAVVGEDICLELEVAADGGEV VWHKGTERRIQPGG
HFEVLSRGQRQMLVIKGFRTE DQGEYRCGPIQGLPSSGAATFNVMVMTSGSGDEVPAQPSLPPEAAQEGDLHLL
WEALARKRRMSREPTLDSISELPEEDSRVQHRLRQEAEETAPDLSEGYSTADELARTGEADLSHTSSDDES RAG
TPSLVTYLKKAGGPGISPLASKHEAQVTT SVKPKQKQEPVPTCPPPGDLSAADLMDPSLDKAAVKIQAAF KG
YKVRKEMKQOEGPVFSRTFGDTEAQVGDVLRLECVLATKTD MRACWLKDGIELTDGRHYHIDQLKDGTC SLLV
TGLAPTDSGRYTCQVSTKSGRVSHSACVVVSGTESEAESSSGGELDDAFRRAARLHRLFRTKSPAELSEEL

FLSADEGPEPEPADWQTYREDENFVCIRFESLAEARQAVTFCFRNMFATMGIGVEISLGEQGPRGVEMRIGK  
VAPTVPFVPLAKTPGLQTSDAAPVFLTELQNDVQDGYPMSFDCVVTGQPVPSVRWFKDGKLEEDDHYMIN  
EDQQGGHQLIITAVVPADMGVYRCLAENSMGVSSTKAELRVELTSTDYDTAADATETSSYFSAQGYLSSREQE  
GTESDEGQLPQVLEELKDLQVAPGTRLAKFQLKVKGYPAKLYWFKDGOPLTSSDHIRMTDKKTLHTLEIVSV  
TREDSGQYAAYSNAVGAAYSSARLLVRGPSEPEEKPASDVHERLVPRIILEKFTPKKVGRGSSITFSVKVEG  
HPAPSVHWLKEEAKEGVLWIGPDTPGYTMASSSKQHSLLVLDVGRQHOGTYTCIATNPAGQALCSASLHISGL  
AKEEEQERVKEALISSFLOGTSQAVSAQMSSEAGFADLVGQSKGESLVAEEAHSHLSLAEVGTTEFLQKLTSSQ  
ITEMVSAKISQAKLQVPGGDSDEETKTPSASPRHGRSRPSSSVQESSSESEDGDSRGEIFDIYVVTADYLPGL  
AEQDAIILREGQYVEVLDSAHPLRWLVRTKPTKSSPSRQGWVSPAYLDKRLKLSPEWGPTEAPEFPGEAVSED  
EYRTRLSSVIQELLSSEQAFVGELOFLESHHMKHLERSPRVPAAVASQKTVI FRNVQDISHFHSSFLKELQGC  
GTDDDVAMCFIKNQEAFAKEYLEFLVGRVQAESVVVSTPVQEFYKYYAEETLSAKDPTQPPPPPLQHYLEQVVE  
RVQKYQALLKELIRNKARNRQNCALLEQAYAVVSALPQRAENKLHVSLMENYPGTLEALGEP IRQGHFIVWEG  
APGARMFWKGNHRHVF LFRNYLVICKPRRDSRTDTFSYVFRNMMKLSSIDLNDQVEGDRAFEVWHEREDSVR  
KYLQARTVI IKNSWVKEICGIQQLAQPVWRPPEFEELADCTAELGETVKLACRVTGTPKPIVSWYKDGKP  
VEVDPHHILIEDPDGSCCTLI LDNLTGIDSGQYMCFAASAAGNASTLGKILVQVPPRFVNVKVRATPFVEGEDAQ  
ITCTVEGAPYPQIRWYKDGTLAPGNRYRMLNEPRSGVLVLIQAASKEDLGHYECELVNLGSTRGGGELYM  
QSPALRRADQHREQIVAAVEVTEQETKVPKKTVIIETITTVVKSFRGRRQSPGKSPSRSPRRSASPRRPG  
LLAPERLYPPGTSPSRRLEVEQGRKAPVPALYVTEAEVHAPASQSQPKWLEVEETIEVRVKKTGSRGASPVRE  
MTRSREGILFTLPGGI PGRDPNANNNSNNSVYQEARWGPVAVHVGEPFIFQVDSVGNVDWVAASPEPEQVRA  
SQKEENTERQEGCSDGIDENTFLMEEPQDTSLQGRDPKILTHNGRVLTLADLEDYVPQEGETFGCGDSTPSTP  
DEPPCEVSVLQREI SEPTVGQPVLLNVGRPPGTGATPSFFRPGSQVHSPESVSFLLREAWSGPVSAAPWTSSF  
HTHVQSSVDGSHGSFKTEVSTQTVSFGAVGETVTLHIDPDGGEAPGPSQ\*

>rs48519378\_ENSMUSP00000020732\_c.5122:G>A\_p.S1708N  
ENSMUST00000020732.13|Obscn-201|ENSMUSG00000061462|-|chr11:g.58990725:C>T  
MDHSFSGAPRFLTRPKAFVVSVGKDATLSCQIVGNPTPHVSWEKDRQFVEAGARFRLAQDGDVYRLTILDLAL  
GDSGQYVCRARNAIGEAFAAVGLRVDSEGTCAEQYHFLLRPTSIRVREGADATFRCRVGGSPQPAVSWSKDG  
RRLGPPDAPHRVVEEHGESSALRIR SARPRDGGTYEVRANPLGSASAAAALVVDSDAEVAGPFGTSTATLLA  
HLQORREAMRAEGIPPSPPGAGTRTCTVTEGKHARLSCFVTGEPKPEVWKKDGQLVTEGRRHVVEDEQENF  
VLKILFCKQSDRGLYTCTASNLVGQTYSSVLVVVREPTVPFKKRLQDLEVREKESATFQCEVAQPAEAAWFK  
EETRLWASAKYDIEEGTERRLTVRNVSADDDAVYICETTEGSRVVAELSVQGNLTKRKLPRKTAVRTGDTAIF  
WVELAVPEGPVRWLRNQEEMVAGGRVAITAEGTCHTLTI FQCTLEDMGEVAFVSGGCRTTTQFCVSAAPRRPPL  
YPPADPVVKAKTSSVTLWSAPPHGDRPVTIDGYVLEKRLGAYAWSRCHEAGWLATTEFTITGVAAEGDFQ  
FRVSAINHFGQGPYLEFPGTMHLVPLAVKTPKAVEAVEGGEVTFVSDLTVASSGEWFLDGEALKASSIYVI  
RCDRTRHMLTIREVPARLHGAQLKVFANGIETS IQMVVRAALGLPSSKLPAAAAREVLAQLHEEAQLLAE LSD  
QAAAVTWLKDGRELSLGPKEYEMQVSAGRRALLVRDVAQDDAGLYECVSRGSRRTAYQLLVQDITDGYRDWGPAG  
PQKHMCKCAGAKIARYLGSSCYRFLQYDKGVVHWLEAALDTRQKGTSSCSLHEKPKLVFAKGQQAHEVKA  
AGNSATLSCEVTQAQTEVTFWFKDGKLLSSSSKVRMEASGCSRRLVVQQAGKADAGEYSCEAGGQKLSFRLDVA  
EPKLVFAKQQAHEVKAEGASATLSCEVAQAQTEVTFWFKDGKLLSSSSKVRMEASGCSRRLVVQQAGKADA  
GEYSCEAGGQKLSFRLDVAEPKLVFAKEQQARSEVKAEGASATLSCEVAQAQTEVTFWFKDGKLLSSSSKVRM  
EASGCSRRLVVQQAGKADAGEYSCEAGGQKLSFRLDVTEPKLVFAKEQQARSEVKAEGVNSATLSCEVAQAQ  
EVTWFKDGKLLSSSSKVRMEASGCSRRLVVQQAGKADAGEYSCEAGGQKLSFRLDVAEPKLVFAKEQQARSEV  
KAEAGNSATLSCEVAQAQTEVTFWFKDGKLLSSSSKVRMEASGCSRRLVVQQAGKADAGEYSCEAGGQKLSFHL  
DVTEPKLVFAKEQQAHSEVKAEGASATLSCEVAQAQTEVTFWFKDGKLLSSSSKVRMEASGCSRRLVVQQAGK  
ADAGEYSCEAGGQKLSFRLDVAEPKLVFAKEQQARSEVKAEGASATLSCEVAQAQTEVTFWFKDGKLLSSSSK  
VRVEASGCSRRLVVQQAGKADAGEYSCEAGGQKLSFRLDVAEPKLVFAKEQQANSEVKAEGASATLSCEVAQ  
AQTEVTFWFKDGKLLSSSSKVRVEASGCSRRLVVQQAGKADAGEYSCEAGGQKLSFRLDVAEPKLVFAKEQQAH  
SEVKAEGASATLSCEVAQAQTEVTFWFKDGKLLSSSSKVRVEASGCSRRLVVQQAGKADAGEYSCEAGGQKLS  
FRLDVAEPKLVFAKEQQAHSEVKAEGANATLSCEVAQAQTEVTFWFKDGKLLSSSSKVRVEASGCSRRLVVQQ  
AGKADAGEYSCEAGGQKLSFRLDVAEPKLVFAKEQQAHSEVKAEGASATLSCEVAQAQTEVTFWFKDGKLLSS  
SSKVRVEASGCSRRLVVQQAGKADAGEYSCEAGGQKLFRLDVAEPKLVFAKEQQAHSEVKAEGASATLSCE  
VAQAQTEVTFWFKDGKLLSSSSKVRVEASGCSRRLVVQQAGKADAGEYSCEAGGQKLSFRLDVAEPKLVFAKEQ  
QAHEVKAEGASATLSCEVAQAQTEVTFWFKDGKLLSSSSKVRVEASGCSRRLVVQQVQKADAGEYSCEARGQ  
KLSFRLDVADATRLMFAKEQQARTEVKAEGANSATLSCEVAQAQTEVTFWFKDGKLLSSSSKVRVEASGCSRRLV  
VQQAGKADAGEYSCEAGGQKLSFRLDVAEAEASQI PERPSRREPLVVEKEHETIILTATIAAPVAAVWTLKDG  
EIRRSKRHEATSLGDHTLTTRVGAQVLDLSAIYSCRVGKEGQDFPVQVEEVAAKFSKPLEPVEGELGCTVMLVC  
ELSPQAEVWRCGNTQLRPGKRFQMTSEGPRRTLTVSGLREDDAEYVCESRDDRTSARLTVKVPVVKFTS  
GLSAMVAEEGQEAFTQCVVSPSDAGVTWYKDGMLQPSKFKVMVESGASRSLTILGLTLEDAGQVTVAEAGAS  
SSAALRVREAPVLFKKLEPQTVVEERTSVTLEVELTRPWPEVKWTRNAAVLTPSENVEIRAEGARHCLVLRVSV

GFADRGFFGCETPDDKTQAKLNVEMRQVRLVVRGLQVEVEAKEQGTASMDVELSHAEVEGSWTRDGLRLQPGPKC
HLAVQGPVHILTLALSALQPQDSGLVAFRAEGVHTSARLIVTELPSVSTRVLQDVVATQKEKVTLECELSRPVDV
RWLKDGVLELRAGKAIGIVAQGTCSRSLVIYRCETGDQGVYVCDALDAQTSASLRVQGRTYTLIFRRVLAEDAGE
VKFVAENAESRAHLRVKELPVTLLRPLRDKIAMEKHRGVLECCQVSRASQVRWFKGGVELQSGPKYEVVSDGL
YRKLVINADVQPEDEDTYTCDAENVKTSAQFFVVEEQSITIVRGLKDMTVMEPAPAWFECETSIPSVRFPKWLLG
KTVLQAGGNVGLQDGTVHRLTLHKTCSTMTGPVHFTIGKSRSSAQLVVS DIPVVLTRPLEPKAGRELQSVVL
SCDFRPAPKAVQWYKDDTPLSPSEKFKMALEGQMAELRILRLTPADAGVYRCQAGSAQSSAEVTEAREVTVI
QPLQDAEAMEEGRVCFSELSHKDEDEIEWSLNGTPLYNDSFHEISHEGCLHTLVLKSVRQADTGTVCATSPKV
SVSARLVVKGKPVVFLKALDDVSAEERGTTLTQCEVSDPEARVVWRKDGVELGSPDKYDFLHKAGARGLTVHD
LSHEDAGLYTCQVGSKETQSKVSVHDLHVGITKRLKTVEVLEGESECSFECVLSHESPSDPAVWTVGGKTVGGS
GHFHAVRQGRKYTLTVKDAALSDAGEVVSVLGLTSKASLIIRERPVDITKPLEDQRTTLGEDVMLSCELSRA
GTSVRWLKDGKAIRKSQKYDLLSEGTRAVLVVRKASLKDSGEYTCETEASKSTAKLCVEEKANRFTTELADLQ
VEEKGRAVFTCKTEHPASVVTWRKGLLELRASGKHVPSQEGTLTKLTINALERTDSDTYTCDIGQARTQARLL
VHGQKVRVIEDLEDTAVQEGSSAKFCCRIAPADYGPVHWFLDKTPLHSNELNEITVQPGGYHVLTLRQLALKD
SGTVYFEAGDQRTSAAALRVTEKPSIFSRPLTDVTVTEGEDTLVCETTTVDSSVRWTKDGKTLRPSARCQLSH
EGCQAQLLITATTPQDGGRYKCEIGGASSSSIVRVHALPVRFRFRESLKDVEVPEGKAATLRCVLSVAAPVEWR
HGDDVLKSSNKYSLRQEGAVLELVIRDLQPDQSGQYSCSFGDQTTSATLTVKTSQAQFVGLRKNKEATEGTTV
TLRCELTKAEPVEWKKGTETLRNGDKYSLKQDGAVCELQICSLLVADAGEYSCVCGQEKTSATLTVKALLVHF
VRRLSKEATEGDTTTLQCELSKAAPVEWRKGTETLRDGDYSLKQDGAVCELQIRSLTIADAGEYLCTCGQE
KTSATLTVRALPAKFKDSLKNEEATEGTTATLSCELSKAAPVTWKKGPKTLQSGDKYVLRQDGAVCGLQIHGL
TMADAGEYSCVCGQEKTSATLTVRGLPAKFIEDLRSQEATEGATAILRCELSKAAPVEWRKGSSETLKDGDYR
LRQDGAVCELQIRGLAVVDGTYSLSPTKFTTEGLRNEEATEGTMATLRCQMSKAAPVEWRKGSSETLRDGDYR
LRQDGAMCELQIRGLTIEDSGEYTCVCGQEKTSATLSVKALPSRFIEDLRSQEATEGTMATLRCQMSKTAPVE
WKKGSETLRDGGYSLRQDGPVCELQICDLAVEDAGEYSCVCGQEKTSATLSIKALPPRFIEDLRSQEATEGT
MATLRCQMSKAAPVEWRKGSSETLGDGGYSLRQNGAVCELQIHDLAVEDTGEYSCVCGQEKTSATLNVKALPP
RFIEDLRSQEATEGTMATLRCQMSKAAPVEWRKGSSETLRDGGYSLRQDGAVCELQIHDLVEDAGQYSCVCG
QEKTSAVLTVDALPPKFTTEGLKKEEATEGTMVTLRQCMSKEATVEWRKGAKTLSDDGGYSLRQDGAMCELQIC
GLAVEDAGEYSCVCGQEKTSATLSVKALPPRFIEDLRSQEATEGTMATLRCQMSKAAPVEWRKGSSETLRDGD
YSLRQDGAVCELQIRDLAVEDAGEYLCVCGQEKTSATLSVKALPPRFIEDLRSQEATEGTMATLRCQMSKAAP
VEWRKGSKTLRDGDYSLRQDGAMCELQICDLAVEDTGDYSCVCGQEKTSATLSVKALPPRFIEDLRSQEARE
GTVATLRCRMSKAAPVEWRKGSSETLKDGDYSLRQEGNLCELQIRDLAVEDTEEYSCVCGQEKTSATLSVKAL
PAKFIEDLRSQEAPESSTVTLRCKLSKASVVWKKGSETLRNGARYSLRQDGAVCELEIRDLTVEDTGEYSCT
CGQERTSATLSIMAPQVVFQQLQNLQAEEGSMASLRCELSVPNAAMVWSKGGLELQGDTRREARQQGCVAEL
LLRDLRREDAGEYSCTCGSQTTSATLMVTAAPVRFLELQADQVDEGATARLRCELSREAVSVEWRKGSQQLF
PCAKYQMVQEGTTAELLVHGVEQEDAGEYTCDAHTQSIARLSVRAPKPKFKTDLQSTEQEAGGTARLCCQLS
EABPGTPVQWLKEGVLEHVGSKYEMRRQGA VCELLIHGLEAKDTGEYACL VGGQKTLASLRVKEPEVTIVRGL
VDMEVQADEDVEFTCKVSAQATDVQWHLQGLPLQSNVTEVAVLADGCTHVLQKGVTLLEDAGTVSFHVGGL
SSSAQLTVRVPEVTVLEPLKDVQLSEGQDAHFRCLRSRASGQEARWALGGVPLQCNEMNDITVEQGTLYLLTL
HKVTLLEDAGTITLQVGSSEEAQLKVTAKNTVLRGLENVDALEGGEALFECQLSQPEVAHAHTWLLDDEPVHTS
EKVEVVYFENGLRHLLLLKLNKPKQDSCRVTFLAGDVVTS AFLTVRGWRLEVLEPPHDASVKAGMQVRFTCILS
EAVPVGEATWYINGAAIQPDDTDWTVTTDGS SHALTL SNAQPQHAGEVTF AARDAVASARLSVLALPDPEDA
EVVGRSDHSVTL SWVAPMSDGGGGLCGYR VEMKEASTGQWQLCHDLVPGPECVVDLVP GKTYRFRVAAVGPA
GAGEPVHLPQMVKIAPAPAPAPAPAPAPAPETRQAVVGEDICLELEVAADGGEVVWHKGTERRIQPGGHFEVLS
RGQRQMLVIKGFRTEDQGEYRCGPIQGLPSSGAATFNVVMTSGSGDEVPAQPSLPPEAAQEGDLHLLWEALAR
KRRMSREPTLDSISELPEEDSRVQHLRQEAEEAPDLSEGYSTADELARTGEADLSHTSSDDESRAGTPSLVT
YLKKAGGPGISPLASKHEAQVTT SVKPKQKQEPVPTCP PPGDLSAADLMDPSLDKAAVKIQAAF KYKVRKE
MKQQEGPVFSRTFGDTEAQVGDVLRLECVLATKTD MRACWLKDGIELTDGRHYHIDQLKDGTCSSLVTGLAPT
DSGRYTCQVSTKSGRVSHSACVVVSGTESEAESSSGGELDDAFRRAARRLHRLFRTKSPAELSEELFLSADE
GPGEPEEPADWQTYREDEFVCFIRFESLAEARQAVTCFRNMFMGIGVEISLGEQGPGRVEMRIGKVAPTVT
PAVPLAKTPGLQTS DAAPVFLTELQNQDVQDGYPMSFDCVVTGQVPVPSVRWFKDGKLEEDDH YMINEDQQGG
HQLIITAVVPADMGVYRCLAENSMGVSSTKAELRVELTSTDYDTAADATETSSYFSAQGYLSSREQEGTESDE
GQLPQVLEELKDLQVAPGTR LAKFQLKVKGYPA PKLYWFKDGGQPLTSDHIRMTDKKTLHTLEIVSVTREDSG
QYAAYSNAVGAAYSSARLLVRGPSEPEEK PASDVHERLVPPRI LEKFTPKKVGRGSSITFSVKVEGHPAPSV
HWLKEEAEGV LVI GPDTPGYTMASSSKHSLVLLDVG RQHQGTYTIC IATNPAGQALCSASLHISGLAKEEEQ
ERVKEALISSFLQGTSAQVSAQMS EAGFADLVGQSKGESLVAAEHAHSHLSLAEVGT EEF LQKLT SQI TEMVS
AKISQAKLQVPGGDSDEETKTPSASPRHRSRPSSSVQESSSESEDGDSRGEIFDIYVVTADYLP LGAEQDAI
ILREGQYVEVLDSAHPLRWLVRTKPTKSSPSRQGWVSPAYLDRKRLKLSPEWGPTEAPEFPGEAVSEDEYRTRL
SSVIQELLSSEQAFV GELQFLESHHMKHLERSPRVPAVASQKTVIFRNVQDISHFHSSFLKELQCGCTDDDDV

AMCFIKNQEAFEKYLEFLVGRVQAESVWVSTPVQEFYKKYAEETLSAKDPTQPPPPPLQHYLEQPVERVQKYQ  
 ALLKELIRNKARNRQNCALLEQAYAVVSALPQRAENKLVSLMENYPGTLEALGEPHQHFIVWEGAPGARM  
 PWKGNHRHVFLFRNYLVICKPRRDSRTDTFSYVFRNMMKLSSIDLNDQVEGDDRAFEVWHEREDSVRKYLLQA  
 RTVLIKNSWVKEICIGIQQLAQPVWRPPEFEEELADCTAELGETVKLACRVGTGTPKPIVSWYKDGKPVVEVDPH  
 HILIEDPDGSCTLILDNLGTIDSGQYMCFAASAAGNASTLGKILVQVPPRFVNVKVRATPFVEGEDAQITCTVE  
 GAPYPQIRWYKDGTLAPGNRYRMLNEPRSGVLVVIQAASKEDLGHYECELVNRLGSTRGGGELYMQSPALR  
 ARDQHHREQIVAAVEERRPSP\*  
 >rs48519378\_ENSMUSP00000151217\_c.4570:G>A\_p.S1524N  
 ENSMUST00000219084.3|Obscn-207|ENSMUSG00000061462|-|chr11:g.58990725:C>T  
 MDHSFSGAPRFLTRPKAFVSVGKDATLSCQIVGNPTPHVSWEKDRQPVEAGARFRLAQDGDVYRLTILDLAL  
 GDSGQYVCRARNAIGEFAAVGLRVDSEGTCAEQAPHFLLRPTSIRVREGADATFRCRVGGSPQPAVSWSKDG  
 RRLGPPDAPHVRVEEHGESSALRIRSARPRDGGTYEVRAENPLGSASAAAALVVDSDAEVAGPPGTSTATLLA  
 HLQQRREAMRAEGIPSPPGAGTRTCTVTEGKHARLSCFVTGEPKPEVWKKDQGLVTEGRRHVVEDEQENF  
 VLKILFCKQSDRGLYTCTASNLVGQTYSSVLVVVREPTVPFKKRLQDLEVREKESATFQCEVAQPAEAWFK  
 EETRLWASAKYDIEEEGETERRLTVRNVSADDDAVYICETTEGSRVVAELSVQGNLTKLPRKTAVRTGDTAIF  
 WVVELAVPEGPVWRWRNQEEMVAGGRVAITAEGTCHTLTI FQCTLEDMGEVAFVSGGCRTTTQFCVSAPRRPPL  
 YPPADPVVAKATESSVTLWSAPPHGDRPVTIDGYVLEKRLKLGAYAWSRCHEAGWLATFTITGVAEEGDFQ  
 FRVSAINHFGQGPYLEFPGTMHLVPLAVKTPKAVEAVEGGEVTFVSDLTVAASSGEWFLDGEALKASSIYVI  
 RCDRTRHMLTIREVPARLHGAQLKFVANGIETSIQMVVRAALGLPSSKLPAAAAAREVLAQLHEEAQLLAE LSD  
 QAAAVTWLKDGRELSLGPKEYMQVSAGRRALLVRDVAQDDAGLYECVSRGSRTAYQLLVQDITDGYRDWGPAG  
 PQKHMCKCAGAKIARYLGSSCYRFLQYDKGVWHLEAALDTRQKGTSSCSLHEKPKLVFAKQQAHSVEKAE  
 AGNSATLSCEVTQAQTEVTWFKDGKLLSSSSKVRMEASGCSRRLVVQQAGKADAGEYSCEAGGQKLSFRLDVA  
 EPKLVFAKQQAHSVEKAEAGASATLSCEVAQAQTEVTWFKDGKLLSSSSKVRMEASGCSRRLVVQQAGKADA  
 GEYSCEAGGQKLSFRLDVAEPKMFVFAKEQQARSEVKAEGASATLSCEVAQAQTEVTWFKDGKLLSSSSKVRM  
 EASGCSRRLVVQQAGKADAGEYSCEAGGQKLSFRLDVTEPKLVFAKEQQARSEVKAEGASATLSCEVAQAQ  
 EVTWFKDGKLLSSSSKVRMEASGCSRRLVVQQAGKADAGEYSCEAGGQKLSFHLDVTEPKLVFAKEQQAHSEV  
 KAEAGASATLSCEVAQAQTEVTWFKDGKLLSSSSKVRMEASGCSRRLVVQQAGKADAGEYSCEAGGQKLSFR  
 LDVAEPKLVFAKEQQARSEVKAEGASATLSCEVAQAQTEVTWFKDGKLLSSSSKVRVEASGCSRRLVVQQAGK  
 ADAGEYSCEAGGQKLSFRLDVAEPKLVFAKEQQANSEVKAEGASATLSCEVAQAQTEVTWFKDGKLLSSSSK  
 VRVEASGCSRRLVVQQAGKADAGEYSCEAGGQKLSFRLDVAEPKLAFAKEQQAHSEVKAEGANATLSCEVAQ  
 AQTEVTWFKDGKLLSSSSKVRVEASGCSRRLVVQQAGKADAGEYSCEAGGQKLSFRLDVAEPKLVFAKEQQAH  
 SEVKAEGASATLSCEVAQAQTEVTWFKDGKLLSSSSKVRVEASGCSRRLVVQQVQKADAGEYSCEARGQKLS  
 FRLDVAEAESQIPERPSRREPLVVEKHETIILTATIAAPSVAAVTWLKDGVIEIRRSKRHEATSLGDHTLTVR  
 GAQVLDIAIYSCRVGKEGQDFPVQVEEVAAKFSKPLEPVEGELGGTVMLVCELSPEQAEVWRCGNTQLRPGK  
 RFQMTSEGRRTLTVSGLEDDAEYVCESRDDRTSARLTVKVPVVKFTSGLSAMVAEEGQEAFTQCVVSPS  
 DAGVTWYKQGMQLPSEKFMVMEVGASRSLTILGLTLEDAGQVTVAEAGASSAALRVREAPVLFKKKLEPQT  
 VEERTSVTLEVELTRPWPEVKWTRNAAVLTPSENVEIRAEGARHCLVLRVSGFADRGGFFGCETPDDKTQAKLN  
 VEMRQVRLVRGLQEVEAKEQGTASMDVELSHAEVEGSWTRDGLRLQPGPKCHLAVQGPVHILTLALSALQPQDSG  
 LVAFRAEGVHTSARLIVTELPVSFTRVLQDVVATQKEKVTLECELSRPVDVRLKDGVELRAGKAIGIVAQGT  
 CRSLVIYRCETGDQGVYCDALDAQTSASLRVQGRYTLIFRRVLAEDAGEVKFVAENAESRAHLRVKELPVT  
 LLRPLRDKIAMEKHRGVLECVSRASAQVRWFKGGVELQSGPKYEVVSDGLYRKLVIINDVQPEDEDTYTCDAG  
 NVKTSAQFFVEEQSITIVRGLKDMTVMEMPAPAWFECETSIPSVRPPKWLKGKTVLQAGGNVLEQDGTVHRLT  
 LHKTCSTMTGPVHFTIGKSRSSAQLVSDIPVVLTRPLEPKAGRELQSVVLSCDFRPAPKAVQWYKDDTPLSP  
 SEKFKMALEGQMAELRILRLTPADAGVYRCQAGSAQSSAEVTVAEAREVTVIQPLQDAEAMEEGRVCFSCELSH  
 KDEDIEWSLNGTPLYNDSFHEISHGCLHTLVLKSVRQADTGTVCATSPKVSVSARLVVKGKPVVFLKALDDV  
 SAEERGLTLTQCEVSDPEARVVWRKDGVELGPSDKYDFLHKAGARGLTVHDLSDHEDAGLYTCQVGSKETQSKV  
 SVHDLHVGITKRLKTVEVLEGESECFEVLSSHESPSDPAVWTVGGKTVGGSGHFHAVRQGRKYTLTVKDAALS  
 DAGEVVFVSVLGLTSSKASLIIRERPVDITKPLEDQRTTLGEDVMLSCELSRAGTSVRWLKDGKAIRKSQKYDLL  
 SEGTRAVLVVRKASLKDSGEYTCETEASKSTAKLCVEEKANRFTBELADLQVEEKGRAVFTCKTEHPASVVTW  
 RKGLLELRASGKHVPSQEGTLKLTINALERTSDTYTCDIGQARTQARLLVHGQKVRVIEDLEDTAVQEGSS  
 AKFCCRIPADYGPVHWFLLDKTPLHSNELNEITVQPGGYHVLTLRQLALKDSGTVYFEAGDQRTSAAALRVTEK  
 PSIFSRPLTDVTVTEGEDTLVCETTTTVDSSVRWTKDGKTLRPSARCQLSHEGCAQLLITATTPQDGGRYKC  
 EIGGASSSSIVRVHALPVRFRRESLKDVEVPEGKAATLRCVLSVAAPVEWRHGDDVLKSSNKYSLRQEGAVLE  
 LVIRDLQPDGSGQYSCSFGDQTTSATLTVKTTSSAQFVGLKRNKEATEGTTVTLRCELTKAPVEWKKGTETLR  
 NGDKYSLKQDGAVCELQICSLLVADAGEYSCVCGQEKTSATLTVKALLVHFVRRRLRSKEATEGDTTTLQCELS  
 KAAPVEWRKGTETLRDGDYSLKQDGAVCELQIRSLTIADAGEYLCTCGQEKTSATLTVRGLPAKFIEDLRSQ  
 EATEGATAILRCELSKAAPVEWRKGSSETLKDGDYTLRQDGAVCELQIRGLAVVDTGTYSLPTKFTTEGLRNE  
 EATEGTMATLRCQMSKAAPVEWRKGSSETLRDGDYSLRQDGAMCELQIRGLTIEDSGEYTCVCGQEKTSATLS



VKALPPRFIEDLRSQEATEGTMATLRCQMSKAAPVEWRKGSSETLGDGGRYSLRQNGAVCELQIHDLAVEDTGE  
YSCVCGQEKTSATLNVKALPPKFTTEGLKKEEATEGTMVTLRCQMSKEATVEWRKGAKTLSDDGGRYSLRQDGM  
CELQICGLAVEDAGEYSCVCGQEKTSATLSVKALPPRFIEDLRSQEATEGTMATLRCQMSKAAPVEWRKGSSET  
LRDGDYSLRQDGAVALCELQIRDLAVEDAGEYLCVCGQEKTSATLSVKALPPRFIEDLRSQEATEGTMATLRCQ  
MSKAAPVEWRKGSKTLRDGDYSLRQDGMCELQICDLAVEDTGDYSCVCGQEKTSATLSVKAPQVVFQQPLQ  
NLQAEEGSMASLRCELSVNAAMVWSKGGLELQGDTRREARQQGCVAELLLRDLRREDAGEYSCTCGSQTTSA  
TLMVTAAPVRFLELQAQDVDEGATARLRCELSREAVSVEWRKGSLLQFPCAKYQMVQEGTTAELLVHGVEQE  
DAGEYTCDAAGHTQSIARLSVRAPKPKFKTDLQSTEQEAGGTARLCCQLSEAEPTPVQWLKEGVELHVGSKEYE  
MRRQYAVCELLIHGLEAKDTGEYACLVGQKTLASLRVKEPEVTIVRGLVDMEVQADEDEVFTCKVSAQAGATD  
VQWHLQGLPLQSNEVTEVAVLADGCTHVLQLKGVTLLEDAGTVSFHVGGSSSAQLTVRVPVTVLEPLKDVQL  
SEGQDAHFRCRLSRASQEARWALGGVPLQCNEMNDITVEQGTLYLLTLHKVTLLEDAGTITLQVGSSESQAQL  
KVTAKNTVLRGLENDVALEGGALFECQLSQPEVAHTWLLDDEPVHTSEKVEVVYFENGLRHLKLNKLPQ  
DSCRVTFLAGDVVTSFALTVRGWRLEVLPPHDASVKAGMQRVFTCILSEAVPVGEATWYINGAAIQPDDTDW  
TVTTDGSHHALTLSNAQPQHAGEVTFAAARDAVASARLSVLALPDPEDAEEVGRSDHVSVLSVWVAPMSDGGGG  
LCGYRVEMKEASTGQWQLCHDLVPGPECVVDDLVPKTYRFRVAAVGPAGAGEPVHLPQMVKIAPAPAPAPAP  
APAPETRAQAVVGEDICLELEVAADGGEVVWHKGTERRIQPGGHFEVLSRGRQMLVIKGFRTEDQGEYRCGPIQ  
GLPSSGAATFNVVMTSGSGDEVPAQPSLPPPEAAQEGDLHLLEALARKRRMSREPTLDSISELPEEDSRVQHL  
RQEAETAPDLSEGYSTADELARTGEADLSHTSSDDESAGTPSLVTYLKKAGGPGISPLASKHEAQVTTSVK  
PQKQQEPVVPPTCPPPGDLSAADLMDPSLDKAAVKIQAAFKGYKVRKEMKQQEGPVFSRTFGDTEAQVGDVLR  
ECVLATKTDMRACWLKDGIELTDGRHYHIDQLKDGTCSLLVTLGLAPTDGGRYTCQVSTKSGRVSHSACVVVSG  
TESEAESSSGGELDDAFRRARRLHRLFRTKSPAELSEELFLSADEGPGEPEEPADWQTYREDENFVCIRFE  
SLAEARQAVTCFRNMFATMGI GVEISLGEQGPGRVEMRIGKVAPTVTPAVPLAKTPGLQTSDAAPVFLTELQN  
QVDQDGYPMSFDCVVTGQVPSVRWFKDGKLLLEDDHYMINEDQGGHQLIITAVVPADMGVYRCLAENSMGV  
SSTKAELRVELTSTDYDTAADATETSSYFSAQGYLSSREQEGTESDEGQLPQVLEELKDLQVAPGTRLAKFQL  
KVKGYPAKPLYWFKDQGLTSDHIRMTDKKTLTLEIVSVTREDSGQYAAIISNAVGAAYSARLLVGRPSE  
PEEKASDVHRLVPPRILEKFTPKKVKRGSSITFVSVKVEGHPAPSVHVKKEAEKGVLWIGPDTPGYTMAS  
SKQHSVLVLLDVGRRHQGTYTCIATNPAGQALCSASLHISGLAKEEEQERVKEALISSFLQGTSSQAVSAQMSSES  
AGFADLVGQSKGESLVAEEAHSHLSLAEVGTTEFLQKLTSTIEMVSAKISQAKLQVPGGDSDEETKTPSASP  
RHGRSRPSSSVQESSSESEDGDSRGEIFDIYVVTADYLPLGAEQDAIILREGQYVEVLDSAPHLRVLVTRTKPT  
KSSPSRQGWVSPAYLDKRLKLSPEWGPTEAPEFPGEAVSEDEYRTRLSVVIQELLSSEQAFVGELOFLSHHM  
KHLERSPRVPAAVASQKTVI FRNVQDISHFHSSFLKELQCGCTDDDVAMCFIKNQEAFAEKYLEFLVGRVQAES  
VVVSTPVQEFYKKYAEETLSAKDPTQPPPPPLQHYLEQPVERVQKYQALLKELIRNKARNRQNCALLEQAYAV  
VSALPQRAENKLVSLMENYPGTLEALGEPTRQGHFIVWEGAPGARMPWKGNRHRVFLFRNYLVI CKPRRDSR  
TDTFSYVFRNMMKLSSIDLNDQVEGDDRAFEVWHEREVSRKYLQARTVVIKNSWVKEICGIQORLAQPVWR  
PPEFEELADCTAELGETVKLACRVGTGPKPIVSWYKDGKPEVDPHILIEDPDGSCCTLIIDLNTGIDSGQY  
MCFEASAAGNASTLGKILVQVPPRFVNVKVRATPFVEGEDAQITCTVEGAPYPQIRWYKDGTLAPGNRYRMLN  
EPRSGVLVLIQAASKEDLGHYECLELVNRLGSTRGGGELYMQSPALRARDQHHREQIVAAVEVTEQETKVPKK  
TVIIEETITTVVKSPPRRRQSPGKSPSRSPRRSASPRRPGLLAPERLYPPGTSPSRRLVEVEQGRKAPVPALY  
VTEAEVHAPASQSQPKWLEVEETIEVRVKKTGSRGASPVREMTSRGEGILFTLPGGIPGRDPNANNNSNKS  
QVYQARTWGPVVHVGEPFI FQVDSVGNVDWAASPEPEQVRASQKEENTERQEGCSDGDENTFLMEEPQD  
TDSLQGRDPKILTHNGRVLTADLEDYVPQEGETFQCGDSTPSTPDEPPCEVSVLQREI SEPTVQPVLLNVGRPPG  
TGATPSFFRPGSQVHSPESVSLFLLREAWSGPVSAAPWTSSFHHTHVQSSVDGSHGFSFKTEVSTQTVSFGAVGET  
VTLHIDPDGGEAPGPSQG\*

>rs50041364\_ENSMUSP00000158795\_c.4895:G>A\_p.W1632\*  
ENSMUST00000238536.2|Obscn-210|ENSMUSG00000061462|-|chr11:g.58994261:C>T  
MDHSFSGAPRFLTRPKAFVSVGKDATLSCQIVGNPTPHVSWEKDRQPVEAGARFLAQDGDVYRLTILDLAL  
GDSGQYVCRARNAIGEAFVAVGLRVDSEGTCAEQAPHLLRPTSIRVREGADATFRCRVGGSPQPAVSWSKDG  
RRLGPPDAPHVRVEEHGESSALRIRSARPRDGGTYEVRAENPLGSASAAAALVVDSDAEVAGPPGTSTATLLA  
HLQORREAMRAEGIPPSPPGAGTRTCTVTEGKHARLSCFVTGEPKPEVWKKDGLVTEGRRHVVEDEQENF  
VLKILFCKQSDRGLYTCTASNLVGTYSVSVLVVREPTVPFKKRLQDLEVREKESATFQCEVAQPAEAAWFK  
EETRLWASAKYDIEEGETERRLTVRNVSADDDAVYICETTEGSRVAELSVQGNLTKLPRKTAVRTGDTAIF  
WVELAVPEGPVWRVLRNQEEMVAGGRVAITAEGTCHTLTI FQCTLEDMGEVAFVSGGCRTTTQFCVSAPRRPPL  
YPPADPVVKAKTESVTLWSAPPHGDRPVTIDGYVLEAKRKLGAAYAWSRCHEAGLWATEFTITGVAEEGDFQ  
FRVSAINHFQGGQPYLEFPGMTMLVPLAVKTPKVAVEAGREGVEVTFVSDLTVASSGELWFLDGEALKASSIYVI  
RCDRTRHMLTIREVTPARLHGAQLKVFVANGIETS IQMVVRAALGLPSKLPAAAAAREVLAQLHHEAQLLAELSD  
QAAAAVTWLKDGRELSLGPKEYMQVSAGRRALLVRDVAQDDAGLYECVSRGSRRTAYQLLVQDITDGYRDWGPAG  
PQKHMCKCAGAKIARYLGSSCYRFLQYDKGVWHLEAALDTRQKGTSSCSLHEKPKLVFAKQQAHSEVKA  
AGNSATLSCEVTQAQTEVTWFKDGKLLSSSKVRMEASGCSRRLVQQAGKADAGEYSCEAGGQKLSFRLDVA

EPKLVFAKQQAHSEVKAEGASATLSCEVAQAQTEVTFWKDGKLLSSSSKVRMEASGCSRRLVVQQAGKADA  
GEYSCEAGGQKLSFRLDVAEPKMFVFAKEQQARSEVKAEGASATLSCEVAQAQTEVTFWKDGKLLSSSSKVRM  
EASGCSRRLVVQQAGKADAGEYSCEAGGQKLSFRLDVTEPKLVFAKEQQARSEVKAEGVNSATLSCEVAQAQ  
EVTWFKDGKLLSSSSKVRMEASGCSRRLVVQQAGKADAGEYSCEAGGQKLSFRLDVAEPKLVFAKEQQARSEV  
KAEAGNSATLSCEVAQAQTEVTFWKDGKLLSSSSKVRMEASGCSRRLVVQQAGKADAGEYSCEAGGQKLSFHL  
DVTEPKLVFAKEQQAHSEVKAEGASATLSCEVAQAQTEVTFWKDGKLLSSSSKVRMEASGCSRRLVVQQAGK  
ADAGEYSCEAGGQKLSFRLDVAEPKLVFAKEQQARSEVKAEGASATLSCEVAQAQTEVTFWKDGKLLSSSSK  
VRVEASGCSRRLVVQQAGKADAGEYSCEAGGQKLSFRLDVAEPKLVFAKEQQANSEVKAEGASATLSCEVAQA  
AQTEVTFWKDGKLLSSSSKVRVEASGCSRRLVVQQAGKADAGEYSCEAGGQKLSFRLDVAEPKLVFAKEQQAH  
SEVKAEGASATLSCEVAQAQTEVT\*FKDGKLLSSSSKVRVEASGCSRRLVVQQAGKADAGEYSCEAGGQKLS  
FRLDVAEPKLVFAKEQQAHSEVKAEGASATLSCEVAQAQTEVTFWKDGKLLSSSSKVRVEASGCSRRLVVQQ  
AGKADAGEYSCEAGGQKLSFRLDVAEPKLVFAKEQQAHSEVKAEGASATLSCEVAQAQTEVTFWKDGKLLSS  
SSKVRVEASGCSRRLVVQQAGKADAGEYSCEAGGQKLFRLDVAEPKLVFAKEQQAHSEVKAEGASATLSCE  
VAQAQTEVTFWKDGKLLSSSSKVRVEASGCSRRLVVQQAGKADAGEYSCEAGGQKLSFRLDVAEPKLVFAKEQ  
QAHSEVKAEGASATLSCEVAQAQTEVTFWKDGKLLSSSSKVRVEASGCSRRLVVQQVQKADAGEYSCEARGQ  
KLSFRLDVADTRLMFAKEQQARTEVKAEGNSATLSCEVAQAQTEVTFWKDGKLLSSSSKVRVEASGCSRRLV  
VQQAGKADAGEYSCEAGGQKLSFRLDVAEAEASQIPERPSRREPLVVKHEHETIILTATIAAPSVAAVTWLKDG  
VETIRRSKRHEATSLGDHTLTVRGAQVLDLSAIYSCRVGKEGQDFPVQVEEVAAKFSKPLEPVEGELGTVMLVC  
ELSPQAEVWRCGNTQLRPGKRFQMTSEGPRRTLTVSGLREDDAEYVCESRDDRTSARLTVKVPVVKFTS  
GLSAMVAEEGQEQATFQCVVSPSDAGVTWYKDGMLQPSKFMVESGASRSLTILGLTLEDAGQVTEAEGAS  
SSAALRVREAPVLFKKLEPQTEVEERTSVTLEVELTRPWPEVKWTRNAAVLTPSENVEIRAEGARHCLVLRV  
GFADRGFFGCETPDDKTQAKLNVEMRQVRLVRLGLQVEEAKEQGTASMDVELSHAEEVGSWTRDGLRLQPGPKC  
HLAVQGPVHILTLALSALQPQDSGLVAFRAEGVHTSARLIVTELPSFTRVLQDVVATQKEKVTLECELSRPVDV  
RWLKDGVLELRAGKAIIGIVAQGTCSRSLVIYRCETGDQGVYVCDALDAQTSASLRVQGRTYTLIFRVLAEADAGE  
VKFVAENAESRAHLRVKELPVTLLRPLRDKIAMEKHRGVLEQCQVSRASQVRWFKGGVLELQSGPKYEVVSDGL  
YRKLVINVDQPEDEDTYTCDAENVKTSAQFFVVEEQSITIVRGLKDMTVMEPAPAWFECETSIPSVRPPKWLGLG  
KTVLQAGGNVLEQDGTYVHRLTLHKTCSTMTGPHFTIGKSRSSAQLVVSDIPVVLTRPLEPKAGRELQSVVL  
SCDFRPAPKAVQWYKDDTPLSPSEKFKMALEGMALRILRLTPADAGVYRCQAGSAQSSAEVTEAREVTVI  
QPLQDAEAMEEGRVCFSCELSHKDEDEIWSLNGTPLYNDSFHEISHGCLHTLVLSVRQADTGTVCATSPKV  
SVSARLVVKGKPVVFLKALDDVSAEERGLTLTQCEVSDPEARVVRKDGVELGSPDKYDFLHKAGARGLTVHD  
LSHEDAGLYTCQVGSKETQSKVSVHDLHVGITKRLKTVEVLEGESECFEVLSHESPSDPAVWTVGGKTVGGS  
GHFHAVRQGRKYTLTVKDAALSDAGEVVFVSLGLTSKASLIRERPVDTKPLEDQRTTLGEDVMLSCELSRA  
GTSVRWLKDGKAIRKSQKYDLLSEGTRAVLVVRKASLKDSDGEYTCETEASKSTAKLCVEEKANRFTTEELADLQ  
VEEKGRAVFTCKTEHPASVVTWRKGLLELRASGKHVPSQEGTLKLTINALERTDSDTYTCDIGQARTQARLL  
VHGQKVRVIEDLEDTAVQEGSSAKFCRIAPADYGPVHWFLLDKTPLHSNELNEITVQPGGYHVLTLRQLALKD  
SGTVYFEAGDQRTSAALRVTEKPSIFSRPLTDVTVTEGEDLTLVCETTTVDSSVRWTKDGKTLRPSARCQLSH  
EGCQAQLLITATTPQDGGRYKCEIGGASSSSIVRVHALPVRFRESLKDVEVPEGKAATLRCVLSVAAPVEWR  
HGDDVLKSSNKYSLRQEGAVLELVIRDLQPDQSGQYSCSFGDQTTSATLTVKTSQAQFVGLRKNKEATEGTTV  
TLRCELTKAEAPVEWKKGTETLRNGDKYSLKQDGAVCELQICSLLVADAGEYSCVCGQEKTSATLTVKALLVHF  
VRLRSKEATEGDTTTLQCELSKAAPVEWRKGTETLRDGDYSLKQDGAVCELQIRSLTIADAGEYLCTCGQE  
KTSATLTVRALPAKFKDSLKNEEATEGTTATLSCELSKAAPVTWKKGPKTLQSGDKYVLRQDGAFCGLQIHGL  
TMADAGEYSCVCGQEKTSATLTVRGLPAKFIEDLRSQEATEGATAILRCELSKAAPVEWRKGSSETLKDGDYR  
LRQDGAFCGLQIRGLAVVDTGTYSLSLPTKFTTEGLRNEEATEGTMATLRCQMSKAAPVEWRKGSSETLRDGDYR  
LRQDGAFCGLQIRGLTIEDSGEYTCVCGQEKTSATLSVKALPSRFIEDLRSQEATEGTMATLRCQMSKTA  
PVEWKKGSETLRDGGRYSLRQDGPVCELQICDLAVEDAGEYSCVCGQEKTSATLSIKALPPRFIEDLRSQE  
ATEGTMATLRCQMSKAAPVEWRKGSSETLGDGGYSLRQNGAVCELQIHDLAVEDTGEYSCVCGQEKTSATL  
NVKALPPRFIEDLRSQEATEGTMATLRCQMSKAAPVEWRKGSSETLRDGGYSLRQDGAFCGLQIHDLVEDA  
GQYSCVCGQEKTSAVLTVDALPPKFTTEGLKKEEATEGTMVTLRCQMSKEATVEWRKGAKTLSDGGYSLRQD  
GAMCELQICGLAVEDAGEYSCVCGQEKTSATLSVKALPPRFIEDLRSQEATEGTMATLRCQMSKAAPVEWR  
KGSSETLRDGDYSLRQDGAFCGLQIRDLAVEDAGEYLCVCGQEKTSATLSVKALPPRFIEDLRSQEATEG  
TMATLRCQMSKAAPVEWRKGSSETLRDGDYSLRQDGAFCGLQICDLAVEDTGDYSCVCGQEKTSATLSV  
KALPPRFIEDLRSQEAREGTVATLRCRMSKAAPVEWRKGSSETLKDGDYSLRQEGNLCELQIRDLAVEDTEEY  
SCVCGQEKTSATLSVKALPAKFIEDLRSQEAPESSTVTLRCKLSKASVWKKGSETLRNGARYSLRQDGAFC  
LELIRDLRREDAGEYSCVCGQEKTSATLMVTAAPVRFLELQAQDVDEGATARLRCELSREAVSVEWRKGLQ  
LPCAKYQMVQEGTTAELLVHGVEQEDAGEYTCDAHTQSIARLSVRAPKPKFKTDLQSTEQEAGGTARLCC  
QLSEAEFGTPVQWLKEGVELHVGSKYEMRRQGAFCCELLIHGLEAKDTGEYACLVGGQKTLASLRVKEPEV  
TIVRGLVDMEVQADEDEFTCKVSAQATDVQWHLQGLPLQSNVTEVAVLADGCTHVLQKGVTLLEDAGTVS  
FHVGG

SSSAQLTVRVPEVTVLEPLKDVQLSEGDQAHFRCLRSRASGQEARWALGGVPLQCNEMNDITVEQGTLYLLTL  
HKVTLEDAGTITLQVGSSEEAQLKVTAKNTVLRGLENVDALEGGEALFECQLSQPEVAHAHTWLLDDEPVHTS  
EKVEVVYFENGLRHLLLLKLNKPKQDSCRVTFLAGDVVTSFAFLTVRGWRLEVLEPPHDASVKAGMQVRFTCILS  
EAVPVGEATWYINGAAIQPDDTDWTVTTDGSHHALTLNSAQPQHAGEVTFFAARDAVASARLSVLALPDPPEDA  
EYVGRSDHSVTLWSVAPMSDGGGGLCGYRVMKEASTGQWQLCHDLVPGPECVVDDLVPGKTYRFRVAAVGPA  
GAGEPVHLPQMVKIAPAPAPAPAPAPAPAPETRQAVVGEDICLELEVAADGGEVVWHKGTERRIQPGGHFEVLS  
RGQRQMLVIKGFRTEDQGEYRCGPIQGLPSSGAATFNVVMTSGSGDEVPAQPSLPPEAAQEGDLHLLWEALAR  
KRRMSREPTLDSISELPEEDSRVQHLRQEAETAPDLSEGYSTADELARTGEADLSHTSSDDESRACTPSLVT  
YLKKAAGPGISPLASKHEAQVTTSVKPKQKQEPVVPTCPPGDLAADMPSLDKAAVKIQAAAFKGYKVRKE  
MKQQEGPVFSRTFGDTEAQVGDVLRLECVLATKTDMRACWLKDGIELTDGRHYHIDQLKDGTCSSLVVTGLAPT  
DSGRYTCQVSTKSGRVSHSACVVVSGTESEAESSSGGELDDAFRAARRLHRLFRTKSPAELSEELFLSADE  
GPGEPEPADWQTYREDENFVCIRFESLAEARQAVTCFRNMFATMIGVEISLGEQGRGVEMRIGKVAPTVT  
PAVPLAKTPGLQTSDAAPVFLTELQNDQVDQDGYPMSFDCVVTGQPVPSVRWFKDGKLEEDDHVMINEDQGGG  
HQLIITAVVPADMVYRCLAENSMGVSSTKAELRVELTSTDYDTAADATETSSYFSAQGYLSSREQEGTESDE  
GQLPQVLEELKDLQVAPGTRRLAKFQLKVKGYPAKLYWFKDGGQPLTSDHIRMTDKKTLHTLEIVSVTREDSG  
QYAAYSNAVGAAYSSARLLVRGPSEPEEKPASDVHERLVPPRILEKFTPKKVKRGSSTIFSVKVEGHPAPSV  
HWLKEEAEGVWLWIGPDTPGYTMASSSKQHSVLVLDVGRQHOGTYTCIATNPAGQALCSASLHISGLAKEEEQ  
ERVKEALISSFLQGTSAVSAQMSSEAGFADLVGQSKGESLVAEEAHSHLSLAEVGTTEFFLQKLTQSIEMVS  
AKISQAKLQVPGGDSDEETKTPSASPRHGRSRPSSSVQESSSEEDGDSRGEIFDIYVVTADYLPLGAEQDAI  
ILREGQYVEVLDSAHPLRWLVRTKPTKSSPSRQGWVSPAYLDRKRLKLSPEWGPTEAPEFPGEAVSEDEYRTRL  
SSVIQELLSSEQAFVQELQFLESHHMKHLERSPRVPAAVASQKTVIFRNVQDISHFHSSFLKELQCGCTDDDV  
AMCFIKNQEAFAKEYLEFLVGRVQAESVVVSTPVQEFYKKYAEETLSAKDPTQPPPPPLQHYLEQPVERVQKYQ  
ALLKELIRNKARNRQNCALLEQAYAVVSALPQRAENKLVSLMENYPGTLEALGEPHQGHFIWEGAPGARM  
PWKGHNHRVFLFRNYLVICKPRRDSRTDTFSYVFRNMMKLSSIDLNDQVEGDDRAFEVWHEREDSVRKYLLQA  
RTVIKNSWVKEICIGIQRLAQPVWRPPEFEEELADCTAELGETVKLACRVTGTPKPIVSWYKDGKPVVEVDPH  
HILIEDPDGSCITLIDNLTGIDSGQYMCFAASAAGNASTLGIILVQVPPRFVNVKVRATPFVEGEDAQITCTVE  
GAPYPQIRWYKDGTLTLAGPNRYRMLNEPRSGVLVVIQAASKEDLGHYECELVNRLGTSRGGELQYMQSPALR  
ARDQHHREQIVAAVEDTSVEGSAHSAQDQADQQAASVLWRLLGSEALGSPSPGDLNTRQSEPPAFEEAASQIP  
GAASGTPEVSPQPGTHKLEQETTSSGSQGWTPVIRVEGTAWPGAGTGQLLLDVHSQVIMETTQRTYVCQAPDT  
GVTRAPSMQVTIEDVQVQVGDMAQFDAVIEGHPPPVTWYKGSTQLTSSARLSQRQDGTTYSLVLTVDVAPHDA  
GVYTCVANNAGGQVLCKAELLVHGGDKLDAENQVYRRKLHSFYDVQEEIGRGVFGFVKRVQHKGNMFCAAKF  
IPLRSKTRAQAYQERDILATLGHPLVTGLLDQFETRKTLLIILELCSSEELLDRLFKKGVVTEAEVKVYIQQL  
VEGLHYLHSHGILHLDIKPPNIMVHPAREDIKICDFGFAQKITPSEPQYSKYGSPEFVSPETIEQNPVSEGS  
DIWAMGVISYLSLTCSSPFAGESDRATLLNVLEGRVSWSSPTAAHLSSEDAKDFIKATLQRTPRARPSTSQCLA  
HPWFLKSMPAEEAHFINTKQLKFLARSRWQRSLMSYKSILVMRSIPPELLQGPDPSPSLGVARHLRGEASGAS  
SSSSSDNELAPFARAKSLPPSPVTHSPLLHPRGFLRPSASLPEETEASMPADAAVAVPASQSGAPPSPGCV  
PRHSVSISSLFYQQAGEGAERGNKTSGAKRHPARRRHLLKGGYIARALPGLREPLMEYSLLEEEAAREEQASLM  
TKTPSFETALRLPSSSVREVPGRSHSLDNPPVTTGSPPEACKEQLLFPSTGLTHETTAKDRGHKEGFLQESV  
PFPPMGSRSRPGKQEGSSQDSCRGKPASSCHSELGSGSQEGCPSQSLGSLPPQSLKKEKELSTSCGPLFSEQ  
PQAAPFPTQVSPLLGSEKEPQDGLSEGPVVPSSSPGSASQVDASLDTEGLSEAGDTCDFTPPPQRQEQAT  
TRKFSLESRGGYAGVAGYGTFAFGGDAGGMLGQGPLWARMWAVSQSSEEQDEAATESPQPLESGLPIAEASG  
VPLRTSPSLTPWEEVEQVSLVQIRDLSGDAEAADTISLDISEVDPAYLNLSDLYDIKYLPEFEMI FRRVPKPI  
EQPESPGSETEAGQGLADFLLEAAWPWPGELGLRAGLEITEEPEEPGDLEALLGEAAVGRKRKWSPSRGLFQF  
PGRCLSGEEPVELGLRQVRKASMAHISRILKGRPEPEREGPPRKKAGLASFRLSGLKGRDQELSDEAVVLGQ  
SVTLACQVLAQPTAATWASKDGVLESSGHLISSTLKNFQLLTIILVVKEEDLGTYTCCVSNPLGTAVTTGVL  
RKAERPSSSPREVEGELYKDAVLLVWKPVESCGPVTVIVQCCIEGGSWTTLASDISDCCYLTGKLSRGGMYIF  
RTACVSKAGMGPISSPSEQVLLGGPNHLASEEESRGRPAQLLPSTKTFQAFQMQIRRRGRFSVVRQCREKASGR  
ALAAKIVPYQPEDKTAVLREYEAALKRHLHPLHAQLHAAYLSPRHLVLIILELCSGPELLPSLAERESYSESDVK  
DYLWQMLSATQYLHAQHILHLDLRSENMMVTEYNLLKVIDLGNALDQEKVPAPENFKDYLETMAPELLEGQ  
GAVPQTDIWAIGVTAIFIMLSGEYPESSSEGRDLQKGLRKLIRLSRCYAGLSGGAVAFQSSLCAQPWGRPCA  
STCLQCGLWTEEGPTGSRPTVPTVPTVRLRAVFREREKRRALLYKKNLAQVR\*

>rs50041364\_ENSMUSP00000038264\_c.4619:G>A\_p.W1540\*

ENSMUST00000047441.14|Obscn-202|ENSMUSG00000061462|-|chr11:g.58994261:C>T  
MDHSFSGAPRFLTRPKAFVVSVGKDATLSCQIVGNPTPHVSWEKDRQFVEAGARFRLAQDGDVYRLTILDLAL  
GDSGQYVCRARNAIGEFAAVGLRVDSEGTCAEQAPHLLRPTSIRVREGADATFRCRVGGSPQPAVSWSKDG  
RRLGPPDAPHVRVEEHGESSALRIRSARPRDGGTYEVRAENPLGSASAAAALVVDSDAEVAGPPGTSTATLLA  
HLQORREAMRAEGIPSPPGAGTRTCTVTEGKHARLSCFVTGEPKPETVWKKDQGLVTEGRRHVVEDEQENF  
VLKILFCKQSDRGLYTCTASNLVGQTYSSVLVVVREPTVPFKKRLQDLEVREKESATFQCEVAQPAEAAWFK

EETRLWASAKYDIEEEGETERRLTVRNVSADDDAVYICETTEGSRRTVAELSVQGNLTKLPRKTAVRTGDTAIF  
WVELAVPEGPVRWLRNQEEMVAGGRVAITAEGTCHTLTI FQCTLEDMGEVAFVSGGCRTTTTQFCVSAPRRPPL  
YPPADPVVKAKTESSVTLWSAPPHGDRPVTIDGYVLEKRKLGAYAWSRCHEAGWLATTEFTITGVAAEGDFQ  
FRVSAINHFGQGPYLEFPGTMHLVPLAVKTPLKAVEAVEGGEVTFVSDTLTVASSGEWFLDGEALKASSIYVI  
RCDRTRHMLTIREV PARLHGAQLKFVANGIETS IQMVVRAALGLPS SKLPAAAAREVLAQLHHEAQLLAE LSD  
QAAA VTWLKDGRELSLGPKEYMQVSAGRRALLVRDVAQDDAGLYECVSRGSRTAYQLLVQDITDGYRDWGPAG  
PQKHMCKCAGAKIARYLGS SCYRFLQYDKGVWHWLEAALDTRQGKGTSSCSLHEKPKLVFAKQQAHSEVKA  
AGASATLSCEVAQAQTEVTFWKDGKLLSSSSKVRMEASGCSRRLVVQQAGKADAGEYSCEAGGQKLSFRLDVA  
EPKMVFAKEQQARSEVKAEGASATLSCEVAQAQTEVTFWKDGKLLSSSSKVRMEASGCSRRLVVQQAGKAD  
GEYSCEAGGQKLSFRLDVTEPKLVFAKEQQARSEVKAEGVNSATLSCEVAQAQTEVTFWKDGKLLSSSSKVRM  
EASGCSRRLVVQQAGKADAGEYSCEAGGQKLSFRLDVAEPKLVFAKEQQARSEVKAEGNSATLSCEVAQAQ  
EVTWTFKDGKLLSSSSKVRMEASGCSRRLVVQQAGKADAGEYSCEAGGQKLSFHLDVTEPKLVFAKEQQAHSEV  
KAEAGASATLSCEVAQAQTEVTFWKDGKLLSSSSKVRMEASGCSRRLVVQQAGKADAGEYSCEAGGQKLSFR  
LDVAEPKLVFAKEQQARSEVKAEGASATLSCEVAQAQTEVTFWKDGKLLSSSSKVRVEASGCSRRLVVQQAG  
ADAGEYSCEAGGQKLSFRLDVAEPKLVFAKEQQANSEVKAEGASATLSCEVAQAQTEVTFWKDGKLLSSSSK  
VRVEASGCSRRLVVQQAGKADAGEYSCEAGGQKLSFRLDVAEPKLVFAKEQQAHSEVKAEGASATLSCEVAQ  
AQTEVT\*FKDGKLLSSSSKVRVEASGCSRRLVVQQAGKADAGEYSCEAGGQKLSFRLDVAEPKLVFAKEQQAH  
SEVKAEGASATLSCEVAQAQTEVTFWKDGKLLSSSSKVRVEASGCSRRLVVQQAGKADAGEYSCEAGGQKLS  
FRLDVAEPKLVFAKEQQAHSEVKAEGASATLSCEVAQAQTEVTFWKDGKLLSSSSKVRVEASGCSRRLVVQQ  
AGKADAGEYSCEAGGQKLSFRLDVAEPKLVFAKEQQAHSEVKAEGASATLSCEVAQAQTEVTFWKDGKLLSS  
SSKVRVEASGCSRRLVVQQAGKADAGEYSCEAGGQKLSFRLDVAEAE S Q I P E R P S R R E P L V V K E H E T I I L T A T  
I A A P S V A A V T W L K D G V E I R R S K R H E A T S L G D T H T L T V R G A Q V L D S A I Y S C R V G K E G Q D F P V Q V E E V A A K F S K P  
L E P V E G E L G G T V M L V C E L S P E Q A E V V W R C G N T Q L R P G K R F Q M T S E G P R R T L T V S G L R E D D A E E Y V C E S R D D R T  
S A R L T V K V P R V V K F T S G L S A M V A E E G Q E A T F Q C V V S P S D A G V T W Y K D G M Q L Q P S E K F V M V E S G A S R S L T I L G L  
T L E D A G Q V T V E A E G A S S S A A L R V R E A P V L F K K K L E P Q T V E E R T S V T L E V E L T R P W P E V K W T R N A A V L T P S E N V  
E I R A E G A R H C L V L R S V G F A D R G F F G C E T P D D K T Q A K L N V E M R Q V R L V R G L Q E V E A K E Q T G A S M D V E L S H A E V E  
G S W T R D G L R L Q P G P K C H L A V Q G P V H I L T L S A L Q P D S G L V A F R A E G V H T S A R L I V T E L P V S F T R V L Q D V V A T Q  
K E K V T L E C E L S R P V D V R W L K D G V E L R A G K A I G I V A Q G T C R S L V I Y R C E T G D Q G V Y V C D A L D A Q T S A S L R V Q G R  
T Y T L I F R R V L A E D A G E V K F V A E N A E S R A H L R V K E L P V T L L R P L R D K I A M E K H R G V L E C Q V S R A S A Q V R W F K G G  
V E L Q S G P K Y E V V S D G L Y R K L V I N D V Q P E D E D T Y T C D A G N V K T S A Q F F V E E Q S I T I V R G L K D M T V M E P A P A W F E  
C E T S I P S V R P P K W L L G K T V L Q A G N V G L E Q D G T V H R L T L H K T C S T M T G P V H F T I G K S R S S A Q L V V S D I P V V L T  
R P L E P K A G R E L Q S V V L S C D F R P A P K A V Q W Y K D D T P L S P S E K F K M A L E G Q M A E L R I L R L T P A D A G V Y R C Q A G S A  
Q S S A E V T V E A R E V T V I Q P L Q D A E A M E E G R V C F S C E L S H K D E D I E W S L N G T P L Y N D S F H E I S H E G C L H T L V L K S  
V R Q A D T G T V C A T S P K V S V S A R L V V K G P V V F L K A L D D V S A E E R G T L T L Q C E V S D P E A R V V W R K D G V E L G P S D K  
Y D F L H K A G A R G L T V H D L S H E D A G L Y T C Q V G S K E T Q S K V S V H D L H V G I T K R L K T V E V L E G E S C S F E C V L S H E S P  
S D P A V W T V G G K T V G G S G H F H A V R Q G R K Y T L T V K D A A L S D A G E V V F S V L G L T S K A S L I I R E R P V D I T K P L E D Q R  
T T L G E D V M L S C E L S R A G T S V R W L K D G K A I R K S Q K Y D L L S E G T R A V L V V R K A S L K D S G E Y T C E T E A S K S T A K L C  
V E E K A N R F T E E L A D L Q V E E K G R A V F T C K T E H P A S V V T W R K G L L E L R A S G K H V P S Q E G L T L K L T I N A L E R T D S D  
T Y T C D I G Q A R T Q A R L L V H G Q K V R V I E D L E D T A V Q E G S S A K F C C R I A P A D Y G P V H W F L D K T P L H S N E L N E I T V Q  
P G G Y H V L T L R Q L A L K D S G T V Y F E A G D Q R T S A A L R V T E K P S I F S R P L T D V T V T E G E D L T L V C E T T T V D S S V R W T  
K D G K T L R P S A R C Q L S H E G C Q A Q L L I T A T T P Q D G G R Y K C E I G G A S S S I V R V H A L P V R F R E S L K D V E V P E G K A A  
T L R C V L S S V A A P V E W R H G D D V L K S S N K Y S L R Q E G A V L E L V I R D L Q P Q D S G Q Y S C S F G D Q T T S A T L T V K T S S A Q  
F V G K L R N K E A T E G T T V T L R C E L T K E A P V E W K K G T E T L R N G D K Y S L K Q D G A V C E L Q I C S L L V A D A G E Y S C V C G Q  
E K T S A T L T V K A L L V H F V R R L R S K E A T E G D T T T L Q C E L S K A A P V E W R K G T E T L R D G D R Y S L K Q D G A V C E L Q I R S  
L T I A D A G E Y L C T C G Q E K T S A T L T V R A L P A K F K D S L K N E E A T E G T T A T L S C E L S K A A P V T W K K G P K T L Q S G D K Y  
V L R Q D G A V C G L Q I H G L T M A D A G E Y S C V C G Q E K T S A T L T V R G L P A K F I E D L R S Q E A T E G A T A I L R C E L S K A A P V  
E W R K G S E T L K D G D R Y T L R Q D G A V C E L Q I R G L A V V D T G T Y S S L P T K F T E G L R N E E A T E G T M A T L R C Q M S K A A P V  
E W R K G S E T L R D G D R Y S L R Q D G A M C E L Q I R G L T I E D S G E Y T C V C G Q E K T S A T L S V K A L P P R F I E D L R S Q E A T E G  
T M A T L R C Q M S K A A P V E W R K G S E T L R D G G R Y S L R Q N G A V C E L Q I H D L A V E D T G E Y S C V C G Q E K T S A T L N V K A L P  
P R F I E D L R S Q E A T E G T M A T L R C Q M S K A A P V E W R K G S E T L R D G G R Y S L R Q D G A V C E L Q I H D L D V E D A G Q Y S C V C  
G Q E K T S A V L T V D A L P P K F T E G L K K E E A T E G T M V T L R C Q M S K E A T V E W R K G A K T L S D G G R Y S L R Q D G A M C E L Q I  
C G L A V E D A G E Y S C V C G Q E K T S A T L S V K A L P P R F I E D L R S Q E A T E G T M A T L R C Q M S K A A P V E W R K G S K T L R D G D  
R Y S L R Q D G A M C E L Q I C D L A V E D T G D Y S C V C G Q E K T S A T L S V K A P Q V V F Q Q P L Q N L Q A E E G S M A S L R C E L S V P N  
A A M V W S K G G L E L Q D G T R R E A R Q Q G C V A E L L L R D L R R E D A G E Y S C T C G S Q T T S A T L M V T A A P V R F L R E L Q A Q D V  
D E G A T A R L R C E L S R E A V S V E W R K G S L Q L F P C A K Y Q M V Q E G T T A E L L V H G V E Q E D A G E Y T A C D A G H T Q S I A R L S V  
R A P K P K F K T D L Q S T E Q E A G G T A R L C C Q L S E A E P G T P V Q W L K E G V E L H V G S K Y E M R R Q G A V C E L L I H G L E A K D T  
G E Y A C L V G G Q K T L A S L R V K E P E V T I V R G L V D M E V Q A D E D V E F T C K V S Q A G A T D V Q W H L Q G L P L Q S N E V T E V A V  
L A D G C T H V L Q L K G V T L E D A G T V S F H V G G L S S S A Q L T V R V P E V T V L E P L K D V Q L S E G Q D A H F R C R L S R A S G Q E A

RWALGGVPLQCNEMNDITVEQGTLYLLTLHKVTLLEDAGTITLQVGSSESQAQLKVTAKNTVLRGLENVDALEG  
GEALFECQLSQPEVAHAHTWLLDDEPVHTSEKVEVVYFENGLRHLLLLLKNLKPQDSCRVTFLAGDVVTS AFLTV  
RALPDPPEDAEVVGRSDHSVTLVSWVAPMSDGGGGLCGYRVMKEASTGQWQLCHDLVPGPECVDDLVPGKTY  
RFRVAAVGPAGAGEPVHLPQMVKIAPAPAPAPAPAPAPAPAPETRAVVGEDICLELEVAADGGEVVWHKTERI  
QPGGHFEVLSRGQRQMLVIKGFRTEDQGEYRCGPIQGLPSSGAATFNVMVMTSGSGDEVPAQPSLPEAAQEGD  
LHLLWEALARKRRMSREPTLDSISELPEEDSRVQHLRQEAETAPDLSEGYSTADELARTGEADLSHTSSDDE  
SRAGTPSLVTYLLKAGGPGISPLASKHEAQVTTSVKPKQKQPEVVPVTCPPPGDLSAADLMDPSLDKAAVKIQ  
AFKGYKVRKEMKQQEGPVFSRTFGDTEAQVGDVLRLECVLATKTDMRACWLKDGIELTDGRHYHIDQLKDGTC  
SLLVTLGLAPTDSGRYTCQVSTKSGRVSHSACVVVSGTESEAESSGGELDDAFRRAARRLHRLFRTKSPAELS  
EEELFLSADEGPEPEEPADWQTYREDENFVCIRFESLAEARQAVTCFRNMFATMGIGVEISLGEQGPGRVEM  
RIGKVAPTPTPAVPLAKTPGLQTSDAAPVFLTELQNDVQDGYPMSFDCVVTGQPVPSVRWFKDGKLLLEDDH  
YMINEDQQGGHQLIITAVVPADMGVYRCLAENSMGVSSTKAE LRVELTSTDYDTAADATETSSYFSAQGYLSS  
REQEGTESDEGQLPQVLEELKDLQVAPGTRLAKFQLKVKGYPAKLYWFKDGOPLTSDHIRMTDKKTLHTLE  
IVSVTREDSDGQYAAIYI SNAVGAAYSSARLLVRGPSEPEEKPASDVHERLVPPRILEKFTPKKVKRGSSTFSV  
KVEGHPAPSVHWLKEEAEGVWLVIGPDTPGYTMASSSKQHSLVLLDVGQRHQGTYTCTIATNPAGQALCSASLH  
ISGLAKEEEEQERVKEALISSFLQGTSAQVSAQMSESAFADLVGQSKGESLVAEEAHSHLSLAEVGTETEFLOK  
LTSQITEMVSAKISQAKLQVPGGDSDEETKTPSASPRHGRSRPSSSVQESSSEDEGDSRGEIFDIYVVVTADY  
LPLGAEQDAIILREGQYVEVLDSAHPLRWLVRTKPTKSSPSRQGWVSPAYLDKRLKLSPEWGPTEAPEFPGEA  
VSEDEYRTRLSSVIQELLSSEQAFVQFLESHHMKHLERSPRVPAAVASQKTVIFRNVQDISHFHSSFLKE  
LQCGCTDDDVAMCFIKNQEAFAKEYLEFLVGRVQAESVVVSTPVQEFYKKAEEETLSAKDPTQPPPPPLQHYLE  
QPVERVQKYQALLKELIRNKARNRQNCALLEQAYAVVSALPQRAENKLVSLMENYPGTLEALGEPPIRQGHFI  
VWEGAPGARMPPWKGNHRHVFLFRNYLVICKPRRDSRTDTFSYVFRNMMKLSSIDLNDQVEGDRAFEVWHERE  
DSVRKYLQARTVI IKNSWVKEICGIQORLAQPVWRPPEFEEELADCTAELGETVVKLACRVTGTPKPIVSWYK  
DGKPVVEVDPHHILIEDPDGSCSTLILDNLGTGIDSGQYMCFAASAAGNASTLGKILVQVPPRFVNVKVRATPFVEG  
EDAQITCTVEGAPYPQIRWYKDGTLAPGNRYRMLNEPRSGVLVLIQAASKEDLGHYCELVNRLGSTRGGG  
ELYMQSPALRRYDQHHREQIVAAVEGAPSMQVTEIDVQVQVGDMAQFDAVIEGHPPPVTWYKGSTQLTSSAR  
LSQRQDGLTDTYDAPHDAGVYTCVANNAGGVCLCAEELLVHGGDKLDAENQVYRRKLHSLFYDVQEEIGR  
GVFGVVKRVQHKGNMFCAAKFIPLRSKTRAQAYQERDILATLGHPLVTGLLDQFETRKTLLILELCSSEEL  
LDRLFKKGVVTEAEVKVYIQQLVEGLHYLHSHGILHLDIKPPNIMVHPAREDIKICDFGFAQKITPSEPOYS  
KYGSPFVVSPEIIEQNPNVSEGSDIWAMGVI SYLSLTCSSPFAGESDRATLLNVLEGRVSWSSPTAAHLSERDAK  
DFIKATLQRTPRARPSTSQC LAHPWFLKSMPAAEAHFINTKQLKFLARSRWQRSLMSYKSI LVMRSIPPELLQ  
GPPDSPSLGVARHLRGEASGASSSSSSSDNELAPFARAKSLPPSPVTHSPLLHPRGFLRPSASLPEETEASMP  
TADAAPVAPSPQASAGPPASPGCVPRHSVSISSLFYQQAGEGAERGNKTS GAKRHPARRRHLKGGYIARALPGLR  
EPLMEYSLLEEEAAREEQASLMTKTPSFETALRLPSSSVREVPGRSHSLDNPVTTGSPPEACKEQLLFPST  
GLTHEHTAKKDRGHKEGFLQESVFPFPMGDSRPGKQEGSSQDSCRGKPASSCHSELGSGSQEGCGPPSSQSLG  
SLPPQSLKKEKELSTSCGPLFSEQPQAAPFPTQVSPLLGSEKPEPQDGSLSSEGVPVPSPPSSPGSASQVDSLDTG  
LSEAGDTCDFTPPPQRPQEQATRKFSLERSGGYAGVAGYGTFAFGGDAGGMLGQGPLWARMWAVSQSSEEQ  
DEAATESPQPLESLGPIAEASGVPLRTSPSLTPWEEVEQVSLVQIRDLSDGAEAAADTISLDISEVDPAYLNL  
DLYDIKYLPPFEFMI FRRVPKPIEQPESPGSETEAGQGLADFLLEAAWPWPGEGLGLRAGLEITEPEEPGDLEA  
LLGAAVGRKRKWSPSRGLFQFPGRCLSGEEPVELGLRQRVKASMAHISRILKGRPEGPREGPPRKKAGLAS  
FRLSGLKGRDQELSDEAVVLGQSVTLACQVLAQPTAQTWSKDGVLLESSEGHLLISSTLKNFQLLTI LVVKEE  
DLGTYTCCVSNPLGTAVTGVLKRAERPSSSPRPEVGEYKDAVLLVWKPVESECGPVTYIVQCCIEGGSWTTL  
ASDISDCCYLTKLSRGGMYIFRTACVSKAGMGPYSSPSEQVLLGGPNHLASEEESSRGRPAQLLPSTKTFAF  
QMQIRRRGRFVVRQCREKASGRALAAKIVPYQPEDKTAVLREYEAALKRHLHHPHLAQLHAAYLSPRHLVLI LEL  
CSGPELLPSLAERESYSESDVKDYLWQMLSATQYLHAQHILHLDRSENMMVTEYNLLKVIDLGNAQSLDQEK  
VPAPENFKDYLETMAPELLEGGQAVPQTDIWAIGVTAIFIMLSGEYPESESETRDLQKGLRKLIRLSRCYAGL  
SGGAVAFLOSSLCAQPWGRPCASTCLQCGWLTEEGPTGSRPTVPTVPTVRLRAFVREKRRALLYKXHNLAQ  
VR\*

>rs50041364\_ENSMUSP00000049737\_c.4694:G>A\_p.W1565\*  
ENSMUST00000052872.15|Obscn-203|ENSMUSG00000061462|-|chr11:g.58994261:C>T  
MDHSFSGAPRFLTRPKAFVSVGKDATLSCQIVGNPTPHVSWEKDRQPVEAGARFLAQDGDVYRLTILDLAL  
GDSGQYVCRARNAIGEFAAVGLRVDSEGTCAEQAPHFLLRPTSIRVREGADATFRCRVGGSPQPAVSWSKDG  
RRLGPPADAMHVRVEEHGESSALRIR SARPRDGGTYEVRAENPLGSASAAAALVVDSDAEVAGPPGTSTATLLA  
HLQRRREAMRAEIQIPSPGAGTRTCTVTTEGKHARLSCFVTGEPKPETVWKKDGLVTEGRHVYVEDEQENF  
VLKILFCKQSDRGLYCTASNLVQTYSSVLVVVREPTVPFKKRLQDLEVREKESATFQCEVAQVATEAAWFK  
EETRLWASAKYDIEEGTERRLTVRNVSADDDAVYICETTEGSRVAELSVQGNLTKLPRKTAVRTGDTAIF  
WVELAVPEGPVRWRNQEEMVAGGRVAITAEGTCHTLTI FQCTLEDMGEVAFVSGGCRTTTQFCVSAPRRPPL  
YPPADPVVKAKTESSVTLWSAPPHGDRPVTIDGYVLEKRKLGAYAWSRCHEAGWLATTEFTITGVAAEEDGFQ

FRVSAINHFGQGPYLEFPGTMHLVPLAVKTPKAVEAVEGGEVTFVSDLTVASSGEWFLDGEALKASSIYVI  
RCDRTRHMLTIREVPARLHGAQLKVFVANGIETSIQMVVRAALGLPSSKLPAAAAREVLAQLHEEAQLLAELSD  
QAAAVTWLKDGRELSLGPKEYMQVSAGRRALLVRDVAQDDAGLYECVSRGSRRTAYQLLVQEPKLVFAKGOQAH  
SEVKAEAGNSATLSCEVTQAQTEVTFWFKDGKLLSSSSKVRMEASGCSRRLVVQQAGKADAGEYSCEAGGQKLS  
FRLDVAEPKLVFAKGOQAHSEVKAEAGASATLSCEVAQAQTEVTFWFKDGKLLSSSSKVRMEASGCSRRLVVQQ  
AGKADAGEYSCEAGGQKLSFRLDVAEPMVFQAEQQARSEVKAEAGASATLSCEVAQAQTEVTFWFKDGKLLSS  
SSKVRMEASGCSRRLVVQQAGKADAGEYSCEAGGQKLSFRLDVTEPKLVFAKEQQARSEVKAEVGNATLSCE  
VAQAQTEVTFWFKDGKLLSSSSKVRMEASGCSRRLVVQQAGKADAGEYSCEAGGQKLSFRLDVAEPKLVFAKEQ  
QARSEVKAEAGNSATLSCEVAQAQTEVTFWFKDGKLLSSSSKVRMEASGCSRRLVVQQAGKADAGEYSCEAGGQ  
KLSFHLDVTEPKLVFAKEQQAHSEVKAEAGASATLSCEVAQAQTEVTFWFKDGKLLSSSSKVRMEASGCSRRLV  
VQQAGKADAGEYSCEAGGQKLSFRLDVAEPMVFQAEQQARSEVKAEAGASATLSCEVAQAQTEVTFWFKDGK  
LSSSSKVRVEASGCSRRLVVQQAGKADAGEYSCEAGGQKLSFRLDVAEPMVFQAEQQANSEVKAEAGASATL  
SCEVAQAQTEVTFWFKDGKLLSSSSKVRVEASGCSRRLVVQQAGKADAGEYSCEAGGQKLSFRLDVAEPKLAFA  
KEQQAHSEVKAEAGASATLSCEVAQAQTEVT\*FKDGKLLSSSSKVRVEASGCSRRLVVQQAGKADAGEYSCEA  
GGQKLSFRLDVAEPKLAFAKEQQAHSEVKAEAGASATLSCEVAQAQTEVTFWFKDGKLLSSSSKVRVEASGCSR  
RLVVQQAGKADAGEYSCEAGGQKLSFRLDVAEPMVFQAEQQAHSEVKAEAGASATLSCEVAQAQTEVTFWFKD  
GKLLSSSSKVRVEASGCSRRLVVQQAGKADAGEYSCEAGGQKLFRLDVAEPMVFQAEQQAHSEVKAEAGAS  
ATLSCEVAQAQTEVTFWFKDGKLLSSSSKVRVEASGCSRRLVVQQAGKADAGEYSCEAGGQKLSFRLDVAEPK  
VFAKEQQAHSEVKAEAGASATLSCEVAQAQTEVTFWFKDGKLLSSSSKVRVEASGCSRRLVVQQVQKADAGEYS  
CEARGQKLSFRLDVADTRLMFAKEQQARTEVKAEAGNSATLSCEVAQAQTEVTFWFKDGKLLSSSSKVRVEASG  
CSRRLVVQQAGKADAGEYSCEAGGQKLSFRLDVAEAEESQIPERPSRREPLVVKEHETIILTATIAAPSVAAVT  
WLKDGVEIRRSKRHEATSLGDTHLTVRGAQVLDSAIYSCRVGKEGQDFPVQVEEVAAKFSKPLEPVEGELGG  
TVMLVCELSPQAEVWRCGNTQLRPGKRFQMTSEGPRLTLVSLREDDAEYVCESTRDRTSARLTVKVP  
VVKFTSGLSAMVAEEGQEAFTQC VVSPSDAGVTWYKDGMLQPSSEKFMVESGASRSLTILGLTLEDAGQVTV  
EAEGASSAALRVREAPVLFKLLKLEPQTVEERTSVTLEVELTRPWPVEVKWTRNAAVLTPSENVEIRAEGARHC  
LVLRSVGFADRGGFFGCETPDDKTQAKLNVEMRQVRLVRLQVEVAKEQGTASMDVELSHVAEVEGSWTRDGLRL  
QPGPKCHLAVRQGRKYTLTVKDAALSADAGEVVFVSLGLTSKASLIRERPDITKPLEDQRTTLGEDVMLS  
SRPVDVRWLKDGVELRAGKAI GIVAQGTCSRSLVIYRCETGDQGVYVCDALDAQTSASLRVQGRTYTLIFRRVL  
AEDAGEVKFVAENAESRAHLRVKELPVTLLRPLRDKIAMEKHRGVLECVSRASAQVRWFVGGVLEQSGPKYE  
VVS DGLYRKLVIN DVQPEDEDTYTC DAGNVKTS AQFFVEEQSITIVRGLKDMTVMEPAPAWFECETSIPSVRP  
PKWLLGKTVLQAGGNVLEQDGTVHRLTLHKTCSTMTGPVHFTIGKSRSSAQLVVSDIPVVLTRPLEPKAGRE  
LQSVVLSCDFRPAPKAVQWYKDDTPLSPSEKFKMALEGQMAELRILRLTPADAGVYRCQAGSAQSSAEVTVEA  
REVTVIQPLQDAEAMEEGRVCFSCELSHKDEDIEWLSLNGTPLYNDSFHEISHEGCLHTLVLSVRQADTGTVC  
ATSPKVS SARLVVKGKPVVFLKALDDVSAEERGTTLTQCEVSDPEARVVWRKDGVELGPSDKYDFLHKAGAR  
GLTVHDLSDHEDAGLYTCQVGSKETQSKVSVHDLHVGITKRLKTVEVLEGECSFECVLSHESPSDPVAVWTVGG  
KTVGSGHFHAVRQGRKYTLTVKDAALSADAGEVVFVSLGLTSKASLIRERPDITKPLEDQRTTLGEDVMLS  
CELSRAGTSVRWLKDGKAIKRSQKYDLLSEGTRAVLVVRKASLKDSGEYTCETEASKSTAKLCVVEEKANRFT  
ELADLQVEEKGRAVFTCKTEHPASVVTWRKGLLELRASGKHVPSQEGTLTKLTINALERTDSDTYTCDIGQAR  
TQARLLVHGQKVRVIEDLEDTAVQEGSSAKFCCRIAPADYGPVHWF LDKTPLHSNELNEITVQPGGYHVLT  
QLALKDSGTVYFEAGDQRTSAAALRVTEKPSIFSRPLTDVTVTEGEDTLVCETTTTVDSSVRWTKDGKTLRPSA  
RCQLSHEGCQAQLLITATTPQDGGRYKCEIGGASSSIVRVHALPVRFRESLKDVEVPEGKAATLRCVLSVA  
APVEWRHGDDVLKSSNKYSLRQEGAVLELVIRDLQPDQSGQYSCSFGDQTTSATLTVKTSQAQFVGKLRNKEA  
TEGTTVTLRCELTKEAPVEWKKGTETLRNGDKYSLKQDGA VCELQICSLLVADAGEYSCVCGQEKTSATLTVK  
ALLVHFVRRRLRSKEATEGDTTTLQCELSKAAPVEWRKGTETLRDGDRLYSLKQDGA VCELQIRSLTIADAGEYL  
CTCQGEKTSATLTVRALPAKFKDSLKNEEATEGTTATLSCELSKAAPVTWKKGPKTLQSGDKYVLRQDGA VCG  
LQIHGLTMADAGEYSCVCGQEKTSATLTVRGLPAKFIEDLRSQEATEGATAILRCELSKAAPVEWRKGS  
DGDRLYTLRQDGA VCELQIRGLAVVDGTYSLSLPTKFTEGLRNEEATEGTMATLRCQMSKAAPVEWRKGS  
DGDRLYSLRQDGA MCELQIRGLTIEDSGEYTCVCGQEKTSATLSVKALPSRFIEDLRSQEATEGTMATLRCQMS  
KTAPVEWKKGSETLRDGGRYSLRQDGPVCELQICDLAVEDAGEYSCVCGQEKTSATLSIKALPPRFIEDLRSQ  
EATEGTMATLRCQMSKAAPVEWRKGSSETLGDGGRYSLRQNGAVCELQIHDLAVEDTGEYSCVCGQEKTSATLN  
VKALPPRFIEDLRSQEATEGTMATLRCQMSKAAPVEWRKGSSETLRDGGRYSLRQDGA VCELQIHDLVDEDAGQ  
YSCVCGQEKTSAVLTVDALPPKFTEGLKKEEATEGTMVTLRQMSKEATVEWRKGA KTLSDGGRYSLRQDGA  
MCELQICGLAVEDAGEYSCVCGQEKTSATLSVKALPPRFIEDLRSQEATEGTMATLRCQMSKAAPVEWRKGS  
LRDGDRLYSLRQDGA VCELQIRDLAVEDAGEYLCVCGQEKTSATLSVKALPPRFIEDLRSQEATEGTMATLRCQ  
MSKAAPVEWRKGSSETLRDGDRLYSLRQDGA MCELQICDLAVEDTGDYSCVCGQEKTSATLSVKALPPRFIEDL  
SQEAREGTVATLRCMSKAAPVEWRKGSSETLKDGDRLYSLRQEGNLCELQIRDLAVEDTEEYSCVCGQEKTSAT  
LSVKALPAKFIEDLRSQEAPESSTVTLRCKLSKKASVVWKKGSETLRNGARYSLRQDGA VCELEIRDLTVEDT  
GEYSCTCGQERTSATLSIMAPQVVVQPLQNLQAEEGSMASLRCELSVPNAAMVWSKGGLELQGDTRREARQQ

GCVAEALLLRDLRREDAGEYSCTCGSQTTSATLMVTAAPVRFLELQAQDVDEGATARLRCELSREAVSVEWRK  
 GSIQLFPKAKYQMVQEGTTAELLVHGVEQEDAGEYTC DAGHTQS IARLSVRAPKPKFKTDLQSTEQEAGGTAR  
 LCCQLSEAEPTPVQWLKEGVELHVGSKYEMRRQGAVCELLIHGLEAKDTGEYACLVGQKTLASLRVKEPEV  
 TIVRGLVDMEVQADEDEVEFTCKVSQAGATDVQWHLQGLPLQSNEVTEVAVLADGCTHVLQKGVTLDEAGTVS  
 FHVGGSSSAQLTVRVPEVTVLEPLKDVQLSEGQDAHFRCRLSRASGQEARWALGGVPLQCNEMNDITVEQGT  
 LYLLTLHKVTLEAGTITLQVGSSESQAQKVTAKNTVLRGLENVDALEGGEALFECQLSQPEVAHAHTWLLDD  
 EPVHTSEKVEVVYFENGLRHLLLLKNLKPQDSCRVTFLAGDVVTSAFITVTRGWRLEVLEPPHDASVKAGMQVR  
 FTCLISEAVPVGEATWYINGAAIQPDDTDWTVTTDGSHHALTLNAQFQHAGEVTF AARDAVASARLSVLALP  
 DPPEDAEVVGRSDHSVTLRWSVAPMSDGGGLCGYRVEMKEASTGQWQLCHDLVPGPECVVDDLVPGKTYRFRV  
 AAVGPAGAGEPVHLPQMVKIAPAPAPAPAPAPAPAPETROAVVGEDICLELEVAADGGEVVWHKGTERTIQPGG  
 HFEVLSRGRQMLVIKGFRTEDQGEYRCGPIQGLPSSGAATFNVMVMTSGSGDEVPAQPSLPPEAAQEGDLHLL  
 WEALARKRRMSREPTLDSISELPEEDSRVQHLRQEAETAPDLSEGYSTADELARTGEADLSHTSSDDES RAG  
 TPLSVTYLKKAGGPGISPLASKHEAQVTTSVKPKQKQEPVPTCPPPGDLSAADLMDPSLDKAAVKIQAAFKG  
 YKVRKEMKQOEGPVFSRTFGDTEAQVGDVLRLECVLATKTDMRACWLKDGIELTDGRHYHIDQLKDGTC SLLV  
 TGLAPTDSGRYTCQVSTKSGRVSHSACVVVSGTESEAESSSGGELDDAFRRAARLHRLFRTKSPAELSEEEL  
 FLSADEGPEPEEPADWQTYREDENFVICRFESLAEARQAVTCFRNMFATMGIGVEISLGEQGPGRVEMRIGK  
 VAPTVPFAVPLAQTGLQTSDAAPVFLTELQNDVQDGYPMSFDCVVTGQPVPSVRWFKDGKLLLEEDDHYMIN  
 EDQQGGHQLIITAVVPADMGVYRCLAENSMGVSSTKAELRVELTSTDYDTAADATETSSYFSAQGLSSSREQE  
 GTESDEGQLPQVLEELKDLQVAPGTRLAKFQKLVKGYPAKLYWFKDGQPLTSDHIRMTDKKTLHTLEIVSV  
 TREDSGQYAAIYISNAVGAAYSSARLLVRGPSEPEEKPASDVHERLVPRILEKFTPKKVKRGSSTFSVKVEG  
 HPAPSVHWLKEEAKEGVLWIGPDTPGYTMASSSKQHSLVLLDVGQRHQGTYTCIATNPAGQALCSASLHISGL  
 AKEEEQERVKEALISSFLQGTSQAVSAQMSSESAGFADLVGQSKGESLVAEEAHSHLSLAEVGTTEFLQKLT SQ  
 ITEMVSAKISQAKLQVPGGDSDEETKTPSASPRHGRSRPSSSVQESSSESEDGDSRGEIFDIYVVTADYLP LG  
 AEQDAIILREGQYVEVLDSAHPLRWLVRTKPTKSSPSRQGWVSPAYLDKRLKLSPEWGPTEAPEFPGEAVSED  
 EYRTRLSSVIQELLSSEQAFVGELOFLESHHMKHLERSPRVPAAVASQKTVIFRNVQDISHFHSSFLKELQGC  
 GTDDDVAMCFIKNQAEFAKEYLEFLVGRVQAEVSVVSTPVQEFYKKAEEETLSAKDPTQPPPPPLQHYLEQVVE  
 RVQKYQALLKELIRNKARNRQNCALLEQAYAVVVALPQRAENKLVSLMENYPGTLEALGHEPIRQGHFVWEG  
 APGARMPWKGNHRHVFVFRNYLVICKPRRDSRTDFTSYVFRNMMKLSSIDLNDQVEGDRAFEVWHEREDESVR  
 KYLLQARTVIKNSWVKEICGIQQRLAQPVWRPPEFEEELADCTAELGETVKLACRVTGTPKPIVSWYKDGKP  
 VEVDPHHILIEDPDGSC TLI LDNLTGIDSGOYMCFAASAAGNASTLGKILVQVPPRFVNVKVRATPFVEGEDAQ  
 ITCTVEGAPYPQIRWYKDGTL LAPGNRYRMLNEPRSGVLV LVIQAASKEDLGHYECELVNRLGSTRGGGELYM  
 QSPALRARDQHHREQIVAAVEVTEQETKVPKKTVIEETITTVVKS PRGRRQSPGKSPSRSPRRSASPRRPG  
 LLAPERLYPPGTSPSRLEVEQGRKAPVPALYVTEAEVHAPASQSQPKWLEVEETIEVRVKKTGSRGASPVRE  
 MTSRGEGLFTLPGGIPGRDPNANNNSNKS SVYQEARWGPVAVHVGEPFI FQVDSVGNVDVVAASPEPEQVRA  
 SQKEENTERQEGCSDGENTFLMEEPQD TDSLQGRDPKILTHNGRVLTADLEDYVQEGETF GCGDSTPSTP  
 DEPPCEVSVLQREI SEPTVGQPVLLNVGRPPGTGATPSFFRPGSQVHSPESVSLFLREAWSGPVSAAPWTSS F  
 HTHVQSSVDGSHGSFKTEVSTQTVSFGAVGETVTLHIDPDGGEAPGPSQG\*  
 >rs50041364\_ENSMUSP00000020732\_c.4895:G>A\_p.W1632\*  
 ENSMUST00000020732.13|Obscn-201|ENSMUSG00000061462|-|chr11:g.58994261:C>T  
 MDHSFSGAPRFLTRPKAFVSVGKDATLSCQIVGNPTPHVSWEKDRQFVEAGARFRLAQDGDVYRLTILDLAL  
 GDSGQYVCRARNAIGEAFAAVGLRVDSEGTCAEQAPHLLRPTSIRVREGADATFRCRVGGSPQPAVSWSKDG  
 RRLGPPDAPHVRVEEHGESSALRIR SARPRDGGTYEVRAENPLGSASAAAALVVDSAEVAGPPGTSTATLLA  
 HLQORREAMRAEGIPSPPPGAGTRTCTVTEGKHARLSCFVTGEPKPEVWKKDGQLVTEGRRHVVEDEQENF  
 VLKILFCKQSDRGLYCTASNLVGGTYSSVLVVVREPTVPFKKRLQDLEVREKESATFQCEVAQAPATEAAWFK  
 EETRLWASAKYDIEEKGTERRLTVRNVSADDDAVYICETTEGSRVVAELSVQGNLTKLPRKTAVRTGDTAIF  
 WWELAVPEGPVRWLRNQEEMVAGGRVAITAEGTCHTLTI FQCTLEDMGEVAFVSGGCRTTTQFCVSAPRRPPL  
 YPPADPVVKAKTESSVTLWSAPPHGDRPVTIDGYVLEKRLKLGAYAWSRCHEAGWLATTEFTITGVAAEEGDFQ  
 FRVSAINHFGQGPYLEFPGMTMLVPLAVKTPKAVEAVEGGEVTFVSDLTVASSGEWFLDGEALKASSIYVI  
 RCDRTRHMLTIREV PARLHGAQLK FVANGIETS IQMVVRAALGLPSSKLPAAAAREVLAQLHEEAQLLAELSD  
 QAAAVTWLKDGRELSLGPKEYMQVSAGRRALLVRDVAQDDAGLYECVSRGSR TAYQLLVQDITDGYRDWGPAG  
 PQKHMCKCAGAKIARYLGSSCYRFLQYDKGVWHLEAALDTRQKGKTS SCSLHEKPKLVFAKQQAHSEVKA E  
 AGNSATLSCEVTQAQTEVTFWKDGKLLSSSSKVRMEASGCSRRLVVQQAGKADAGEYSCEAGGQKLSFRLDVA  
 EPKLVFAKQQAHSEVKA EAGASATLSCEVAQAQTEVTFWKDGKLLSSSSKVRMEASGCSRRLVVQQAGKADA  
 GEYSCEAGGQKLSFRLDVAEPKMFVFAKEQQARSEVKA EAGASATLSCEVAQAQTEVTFWKDGKLLSSSSKVRM  
 EASGCSRRLVVQQAGKADAGEYSCEAGGQKLSFRLDVTEPKLVFAKEQQARSEVKA EAGASATLSCEVAQAQ  
 EVTWFKDGKLLSSSSKVRMEASGCSRRLVVQQAGKADAGEYSCEAGGQKLSFRLDVAEPKLVFAKEQQARSEV  
 KAEAGNSATLSCEVAQAQTEVTFWKDGKLLSSSSKVRMEASGCSRRLVVQQAGKADAGEYSCEAGGQKLSFHL  
 DVTEPKLVFAKEQQAHSEVKA EAGASATLSCEVAQAQTEVTFWKDGKLLSSSSKVRMEASGCSRRLVVQQAGK

ADAGEYSCEAEGQKLSFRLDVAEPKLVFAKEQQARSEVKAEAGASATLSCEVAQAQTEVTFWKDGGKLSSSSK  
VRVEASGCSRRLVVQQAGKADAGEYSCEAGGQKLSFRLDVAEPKLVFAKEQQANSEVKAEAGASATLSCEVAQ  
AQTEVTFWKDGGKLSSSSKVRVEASGCSRRLVVQQAGKADAGEYSCEAGGQKLSFRLDVAEPKLVFAKEQQAH  
SEVKAEAGASATLSCEVAQAQTEVT\*FKDGGKLSSSSKVRVEASGCSRRLVVQQAGKADAGEYSCEAGGQKLS  
FRLDVAEPKLVFAKEQQAHSEVKAEAGASATLSCEVAQAQTEVTFWKDGGKLSSSSKVRVEASGCSRRLVVQQ  
AGKADAGEYSCEAGGQKLSFRLDVAEPKLVFAKEQQAHSEVKAEAGASATLSCEVAQAQTEVTFWKDGGKLS  
SSKVRVEASGCSRRLVVQQAGKADAGEYSCEAGGQKLFRLDVAEPKLMFAKEQQAHSEVKAEAGASATLSCE  
VAQAQTEVTFWKDGGKLSSSSKVRVEASGCSRRLVVQQAGKADAGEYSCEAGGQKLSFRLDVAEPKLVFAKEQ  
QAHSEVKAEAGASATLSCEVAQAQTEVTFWKDGGKLSSSSKVRVEASGCSRRLVVQQAGKADAGEYSCEAGGQ  
KLSFRLDVADTRLMFAKEQQARTEVKAEAGNSATLSCEVAQAQTEVTFWKDGGKLSSSSKVRVEASGCSRRLV  
VQQAGKADAGEYSCEAGGQKLSFRLDVAEAEESQIPERPSRREPLVVKEHETIILTATIAAPSVAAVTWLKDGV  
EIRRSKRHEATSLGDTHTLTVRGAQVLDIAIYSCRVGKEGQDFPVQVEEVAAKFSKPLEPVEGELGGTVMLVC  
ELSPQAEVWRCGNTQLRPGKRFQMTSEGPRRTLTVSGLREDDAEYVCESTRDDRTSARLTVKVPVVKFTS  
GLSAMVAEEGQEATFQCVVSPSDAGVTWYKDGMLQPSSEKFMVVEGASRSILTILGLTLEDAGQVTEAEGAS  
SSAALRVREAPVLFKKLEPQTEVEERTSVTLEVELTRPWPEVKWTRNAAVLTPSENVEIRAEGARHCLVLRV  
GFADRGGFFGCETPDDKTQAKLNVEMRQVRLVVRGLQVEEAKQGTASMDVELSHAEEVEGSWTRDGLRQLQPGPKC  
HLAVQGPVHILTLALQPDGLVAFRAEGVHTSARLIVTELPVSFTRVLQDQVVTQKEKVTLECELSRFPDV  
RWLKDGVLELRAGKAIGIVAQGTCSRSLVIYRCETGDQGVYVCDALDAQTSASLRVQGRTYTLIFRRLAEDAGE  
VKFVAENAESRAHLRVKELPVTLLRPLRDKIAMEKHRGVLECCQVSRASAQVRWFKGGVELQSGPKYEVVSDGL  
YRKLVINVDQPEDEDTYTCDAGNVKTSAQFFVEEQSITIVRGLKDMTVMEPAPAWFECETSIPSVRPPKWL  
KTVLQAGGNGVLEQDGTVHRLTLHKTCSTMTGPVHFTIGKSRSSAQLVSDIPVVLTRPLEPKAGRELQSVVL  
SCDFRPAPKAVQWYKDDTPLSPSEKFKMALEGGMAELRILRLTPADAGVYRCQAGSAQSSAEVTEAREVTVI  
QPLQDAEAMEEGRVCFSCELSHKDEDEIWSLNGTPLYNDSFHEISHGCLHTLVLSKVRQADTGTVCATSPKV  
SVSARLVVKGKPVVFLKALDDVSAEERGTTLTQCEVSDPEARVWVRKDGVELGSPDKYDFLHKAGARGLTVHD  
LSHEDAGLYTCQVGSKETQSKVSVHDLHVGITKRLKTVEVLEGESECSFECVLSHESPSDPAVWTVGGKTVGG  
GHFHAVRQGRKYTLTVKDAALSDAGEVVFVSLVGLTASKLIRERPVDTIKPLEDQRTTELEDVMLSCELSRA  
GTSVVRWLKDGKAGAIRVAQGTCSRSLVIYRCETGDQGVYVCDALDAQTSASLRVQGRTYTLIFRRLAEDAGE  
VEEKGRAVFTCKTEHPASVVTWRKGLLELRASGKHVPSQEGTLTKLTINALERTDSDTYTCDIGQARTQARLL  
VHGQKVRVIEDLEDTAVQEGSSAKFCRIAPADYGPVHWFLLDKTPLHSNELNEITVQPGGYHVLTLRQLALKD  
SGTVYFEAGDQRTSAALRVTEKPSIFSRPLTDVTVTEGEDTLVCEVTTVDSSVRWTKDGKTLRPSARCQLSH  
EGCQAQLLITATTPQDGGRYKCEIGGASSSSIVRVHALPVRFRESLKDVEVPEGKAATLRCVLSVAAPVEWR  
HGDDVLKSSNKYSLRQEGAVLELVIRDLPQDQSGQYSCSFGDQTSATLTVKTSQAQFVGLRNEKATEGTTV  
TLRCELTKAPVEWKKGTETLRNGDKYSLKQDGAVCCELQICSLLVADAGEYSCVCGQEKTSATLTVKALLVHF  
VRLRSKEATEGDTTLQCELSKAAPVEWRKGTETLRDGDYSLKQDGAVCCELQIRSLTIADAGEYLCTCGQE  
KTSATLTVRALPAKFKDSLKNEEATEGTTATLSCELSKAAPVWKKGPKTLQSGDKYVLRQDGAVCGLQIHGL  
TMADAGEYSCVCGQEKTSATLTVRGLPAKFIEDLRSQEATEGATAILRCELSKAAPVEWRKGTETLRDGDY  
LRQDGAVCCELQIRGLAVVDGTGYSLSLPTKFTTEGLRNEEATEGTMATLRCQMSKAAPVEWRKGTETLRD  
LRQDGAVCCELQIRGLTIEDSGEYTCVCGQEKTSATLSVKALPSRFIEDLRSQEATEGTMATLRCQMSKTA  
PVEWKKGSETLRDGGRYSLRQDGPVCELQICDLAVEDAGEYSCVCGQEKTSATLSIKALPPRFIEDLRSQE  
ATEGTMATLRCQMSKAAPVEWRKGTETLRDGGRYSLRQDGAVCCELQIHDLVEDAGQYSCVCGQEKTS  
AVLTVDALPPKFTTEGLKKEEATEGTMVTLRCQMSKATEVWRKGAKTLSDGGRYSLRQDGAVCCELQIC  
GLAVEDAGEYSCVCGQEKTSATLSVKALPPRFIEDLRSQEATEGTMATLRCQMSKAAPVEWRKGTETLRD  
GDRYSLRQDGAVCCELQIRDLAVEDAGEYLCVCGQEKTSATLSVKALPPRFIEDLRSQEATEGTMATLRCQ  
MSKAAPVEWRKGTETLRDGDYSLRQDGAVCCELQICDLAVEDTGDYSCVCGQEKTSATLSVKALPPRFIE  
DLRSQEAREGTVATLRCMSKAAPVEWRKGTETLRDGDYSLRQEGNLCELQIRDLAVEDTEEYSCVCGQEK  
TSATLSVKALPAKFIEDLRSQEAPESSTVTLRCKLSKKASVVWKKGSETLRNGARYSLRQDGAVCLEIRDL  
TVEDTGEYSCTCGQERTSATLSIMAPQVVFQQLQNLQAEEGSMASLRCELSVPNAAMVWSKGGLELQGDTR  
REARQQGCVAELLLRDLRREDAGEYSCTCGSQTTSATLMVTAAPVRFLRELQAQDVDEGATARLCELSRE  
AVSVEWRKGSLLQPCAKYQMVQEGTTAELLVHGVEQEDAGEYTCDAHTQSIARLSVRAPKPKFKTDLQST  
EQEAGGTARLCCQLSEAEPTPVQWLKEGVELHVGSKEYEMRRQGAVCCELLIHGLEAKDTGEYACLVGGQK  
TLASLRVKEPEVTIVRGLVDMEVQADEDEFTCKVQAGATDVQWHLQGLPLQSNVTEVAVLADGCTHV  
LQKGVTLLEDAGTVSFHVGGLSSAQLTVRVEPVTVLEPLKDVQLSEGQDAHFRCRLSRASGQEARWALGGV  
PLQCNEMNDITVEQGTLYLLTHKVTLEDAGTITLQVGSSEEAQLKVTAKNTVLRGLSNAVDALEGG  
EALFECQLSQPEVAHTWLLDDEPVTSEKVEVVYFENGLRHLLLLKLNLPQDSCRVTFLAGDVVTS  
AFLTVRGRWLEVLPPHDASVKAGMQVRFCTILSEAVPVGEATWYINGAAIQPDDTDWTVTTD  
GSHHALTLSNAQPQHAGEVTFAAARDAVASARLSVLALPDPPEDAEUVGRSDHSVTL  
SWVAPMSDGGGGLCGYRVMKEASTGQWQLCHDLVPGPECVDDLVPGKTYRFRVA  
AVGPA GAGEPVHLPQMVKIAPAPAPAPAPAPAPAPETRQAVVGEDICLELEVAADGG  
EVVWHKGTERRIQPGHFVLS



RGQRQMLVIKGFRTEDQGEYRCGPIQGLPSSGAATFNVMVMTSGSGDEVPAQPSLPPEAAQEGDLHLLWEALAR  
 KRRMSREPTLDSISELPEEDSRVQHLRQEAETAPDLSEGYSTADELARTGEADLSHTSSDDESAGTGPLSVT  
 YLKKAGGPGISPLASKHEAQVTSVKPQKQOQEPVVPTCPPGDLAADLMDPSLDKAAVKIQAAFQYKVRKE  
 MKQOQEGPVFSRTFGDTEAQVGDVLRLECVLATKTDMRACWLKDGIELTDGRHYHIDQLKDGTCSSLVTLGLAPT  
 DSGRYTCQVSTKSGRVSHSACVVVSGTESEAESSGGELDDAFRAARRLHRLFRTKSPAELSEEELFLSADE  
 GPGEPEEPADWQTYREDENFVCIRFESLAEARQAVTCFRNMFATMGIGVEISLGEQGGPRGVEMRIGKVAPTVT  
 PAVFLAKTPGLQTSDAAPVFLTELQNDVQDGYPMSFDCVVTGQVPVPSVRWFKDGKLEEDDHYMINEDQGG  
 HQLIITAVVPADMVGYRCLAENSMGVSSSTKAELRVELTSTDYDTAADATETSSYFSAQGYLSSREQEGTESDE  
 GQLPQVLEELKDLQVAPGTRLAKFQLKVKGYPAKLYWFKDQGLTTSDHIRMTDKKTLHTLEIVSVTREDSG  
 QYAAYSNAVGAAYSSARLLVRGPSEPEEKPASDVHERLVPPRILEKFTPKKVKRGSSITFSVKVEGHPAPSV  
 HWLKEEAKEKGLVWIGPDTPGYTMASSSKQHSVLVLDVGRQHQTGTYTCIATNPAGQALCSASLHISGLAKEEEQ  
 ERVKEALISSFLOGTSQAVSAQMSESAFADLVGQSKGESLVAEEAHSHLSLAEVGTTEEFLQKLTSTQITEMVS  
 AKISQAKLQVPGGDSDEETKTPSASPRHGRSRPSSSVQESSSESEDGDSRGEIFDIYVVTADYLPGLAEQDAI  
 ILREGQYVEVLDSAHPLRWLVRTKPTKSSPSRQGWVSPAYLDKRLKLSPEWGPTEAPEFPGEAVSEDEYRTRL  
 SSVIQEELLSSEQAFVQELQFLESHHMKHLERSPRVPAAVASQKTVIFRNVQDISHFHSSFLKELQCGCTDDDV  
 AMCFIKNQEAFAEKYLEFLVGRVQAESVVVSTPVQEFYKKAEEETLSAKDPTQPPPPLOHYLEQPVVERVQKYQ  
 ALLKELIRNKARNRNCALLEQAYAVVSALPQRAENKLVSLMENYPGTLEALGEPVIRQGHFVWEGAPGARM  
 PWKGHNHRHVFLFRNYLVICKPRRDSRTDTFSYVFRNMKLSIDLNDQVEGDRAFEVWHEREDSVRKYLLQA  
 RTVIKNSWVKEICGIQORLAQPVWRPPEFEEELADCTAELGETVKLACRVTGTPKPIVSWYKDGKPVVDPH  
 HILIEDPDGCTLILDNLGTIDSGQYMCFAASAAGNASTLGKILVQVPPRFVNVKVRATPFVEGEDAQITCTVE  
 GAPYPQIRWYKDGTLTLLAPGNRYRMLNEPRSGVLVVIQAASKEDLGHYECELVNRLGSTRGGGELYMOSPALR  
 ARDQHHREQIVAAVEERRPSP\*  
 >rs26971697\_ENSMUSP00000158795\_c.4806:C>T\_p.Q1603\*

ENSMUST00000238536.2|Obscn-210|ENSMUSG00000061462|-|chr11:g.58994350:G>A  
 MDHSFSGAPRFLTRPKAFVVSVGKDATLSCQIVGNPTPHVSWEKDRQFVEAGARFRLAQDGDVYRLTILDLAL  
 GDSGQYVPCARNAIIEGFAAVGLRVDSEGTCAEQAPHFLLRPTSIRVREGADATFRCRVGGSPQPAVSWSKDG  
 RRLGPPDACHRNRVVEEHGESSALRIRRSARPRDGGTYEYVRAENPLGSASAAAALVVDSDAEVAGPSTATLLA  
 HLQORREAMRAEGIPPSPPGAGTRTCTVTEGKHARLSCFVTGEPKPEVWKKDQGLVTEGRRHVVEDEQENF  
 VLKILFCKQSDRGLYTCTASNLVGQTYSSVLVVREPTVPFKKRLQDLEVREKESATFQCEVAQPATEAAWFK  
 EETRLWASAKYDIEEGTERRLTVRNVSADDDAVYICETTEGSRVVAELSVQGNLTKRKLPRKTAVRTGDTAIF  
 WVAVLAVPEGPVWRWRNQEEMVAGGRVAITAEGTCHTLTI FQCTLEDMGEVAFVSGGCRTTTQFCVSAAPRRPPL  
 YPADPVVKAKTSSVTLWSAPPHGDRPVTIDGYVLEKRLGAYAWSRCHEAGWLATTEFTITGVAAEGDFQ  
 FRVSAINHFGQGPYLEFPGTMHLVPLAVKTPKAVEAVEGGEVTFVSDLTVASSGEWFLDGEALKASSIYVI  
 RCDRTRHMLTIREVPARLHGAQLKVFVANGIETSIQMVVRAALGLPSSKLPAAAAREVLAQLHEEAQLLAEALS  
 QAAAVTWLKDRELKSLGPKYEMQVSAGRRALLVRDVAQDDAGLYECVSRGSRRTAYQLLVQDITDGYRWDGPA  
 POKHMCCKAGAKIARYLGSYCYRFLQYDKGVVHWEAALDTRQKGTSSCSLHEKPKLVFAKQQAHEVKA  
 AGNSATLSCEVTQAQTEVTFWFKDGKLLSSSSKVRMEASGCSRRLVVQQAGKADAGEYSCEAGGQKLSFRLDVA  
 EPKLVFAKQQAHEVKAEGASATLSCEVAQAQTEVTFWFKDGKLLSSSSKVRMEASGCSRRLVVQQAGKADA  
 GEYSCEAGGQKLSFRLDVAEPKLVFAKEQQARSEVKAEGASATLSCEVAQAQTEVTFWFKDGKLLSSSSKVRM  
 EASGCSRRLVVQQAGKADAGEYSCEAGGQKLSFRLDVTEPKLVFAKEQQARSEVKAEGVNSATLSCEVAQAQ  
 EVTFWFKDGKLLSSSSKVRMEASGCSRRLVVQQAGKADAGEYSCEAGGQKLSFRLDVAEPKLVFAKEQQARSEV  
 KAEAGNSATLSCEVAQAQTEVTFWFKDGKLLSSSSKVRMEASGCSRRLVVQQAGKADAGEYSCEAGGQKLSFHL  
 DVTEPKLVFAKEQQAHSEVKAEGASATLSCEVAQAQTEVTFWFKDGKLLSSSSKVRMEASGCSRRLVVQQAGK  
 ADAGEYSCEAEGQKLSFRLDVAEPKLVFAKEQQARSEVKAEGASATLSCEVAQAQTEVTFWFKDGKLLSSSSK  
 VRVEASGCSRRLVVQQAGKADAGEYSCEAGGQKLSFRLDVAEPKLVFAKEQQANSEVKAEGASATLSCEVAQ  
 AQTEVTFWFKDGKLLSSSSKVRVEASGCSRRLVVQQAGKADAGEYSCEAGGQKLSFRLDVAEPKLVFAKE\*QA  
 SEVKAEGASATLSCEVAQAQTEVTFWFKDGKLLSSSSKVRVEASGCSRRLVVQQAGKADAGEYSCEAGGQKLS  
 FRLDVAEPKLVFAKEQQAHSEVKAEGASATLSCEVAQAQTEVTFWFKDGKLLSSSSKVRVEASGCSRRLVVQQ  
 AGKADAGEYSCEAGGQKLSFRLDVAEPKLVFAKEQQAHSEVKAEGASATLSCEVAQAQTEVTFWFKDGKLLSS  
 SSKVRVEASGCSRRLVVQQAGKADAGEYSCEAGGQKLFRLDVAEPKLVFAKEQQAHSEVKAEGASATLSCE  
 VAQAQTEVTFWFKDGKLLSSSSKVRVEASGCSRRLVVQQAGKADAGEYSCEAGGQKLSFRLDVAEPKLVFAKEQ  
 QAHEVKAEGASATLSCEVAQAQTEVTFWFKDGKLLSSSSKVRVEASGCSRRLVVQQVQKADAGEYSCEARGQ  
 KLSFRLDVADATRLMFAKEQQARTEVKAEGASATLSCEVAQAQTEVTFWFKDGKLLSSSSKVRVEASGCSRRLV  
 VQQAGKADAGEYSCEAGGQKLSFRLDVAEAEASQIPERPSRREPLVVEKHETIILTATIAAPSVAAVWTKLDGV  
 EIRRSKRHEATS LGDHTLTVRGAQVLDLSAIYSCRVGKEGQDFPVQVEEVAAKFSKPLEPVEGELGTVMLVC  
 ELSPEQAQEVVWRCGNTQLRPGKRFQMTSEGPRRTLTVSGLREDDAEYVCESRDDRTSARLTVKVPVVKFTS  
 GLSAMVAEEGQEAFTQCVVSPSDAGVTWYKDGMLQLPSEKFMVESGASRSLTILGLTLEDAGQVTVAEAGAS  
 SSAALRVREAPVLFKKKLEPQTVVEERTSVTLEVELTRPWPEVKWTRNAAVLTPSENVEIRAEGARHCLVLRVSV

GFADRGFFGCETPDDKTQAKLNVEMRQVRLVVRGLQVEVEAKEQGTASMDVELSHAEVEGSWTRDGLRLQPGPKC
HLAVQGPVHILTLALSALQPQDSGLVAFRAEGVHTSARLIVTELPSVSTRVLQDVVATQKEKVTLECELSRPVDV
RWLKDGVLELRAGKAIGIVAQGTCSRSLVIYRCETGDQGVYVCDALDAQTSASLRVQGRTYTLIFRRVLAEDAGE
VKFVAENAESRAHLRVKELPVTLLRPLRDKIAMEKHRGVLECCVSRASQAQVRWFKGGVELQSGPKYEVVSDGL
YRKLVINADVQPEDEDTYTCDAENVKTSAQFFVVEEQSITIVRGLKDMTVMEPAPAWFECETSIPSVRFPKWLLG
KTVLQAGGNVGLQDGTVHRLTLHKTCSTMTGPVHFTIGKSRSSAQLVVSDIPVVLTRPLEPKAGRELQSVVL
SCDFRPAPKAVQWYKDDTPLSPSEKFKMALEGQMAELRILRLTPADAGVYRCQAGSAQSSAEVTEAREVTVI
QPLQDAEAMEEGRVCFSELSHKDEDEIEWSLNGTPLYNDSFHEISHEGCLHTLVLKSVRQADTGTVCATSPKV
SVSARLVVKGKPVVFLKALDDVSAEERGTTLTQCEVSDPEARVVWRKDGVELGSPDKYDFLHKAGARGLTVHD
LSHEDAGLYTCQVGSKETQSKVSVHDLHVGITKRLKTVEVLEGESECSFECVLSHESPSDPAVWTVGGKTVGGS
GHFHAVRQGRKYTLTVKDAALSDAGEVVSVLGLTSKASLIIRERPVDTKPLEDQRTTLGEDVMLSCELSRA
GTSVRWLKDGKAIRKSQKYDLLSEGTRAVLVVRKASLKDSGEYTCETEASKSTAKLCVEEKANRFTTELADLQ
VEEKGRAVFTCKTEHPASVVTWRKGLLELRASGKHVPSQEGTLKLTINALERTDSDTYTCDIGQARTQARLL
VHGQKVRVIEDLEDTAVQEGSSAKFCCRIAPADYGPVHWFLDKTPLHSNELNEITVQPGGYHVLTLRQLAKD
SGTVYFEAGDQRTSAAALRVTEKPSIFSRPLTDVTVTEGEDTLVCETTTVDSSVRWTKDGKTLRPSARCQLSH
EGCQAQLLITATTPQDGGRYKCEIGGASSSSIVRVHALPVRFRESLKDVEVPEGKAATLRCVLSVAAPVEWR
HGDDVLKSSNKYSLRQEGAVLELVIRDLQPDQSGQYSCSFGDQTTSATLTVKTSQAQFVGLRKNKEATEGTTV
TLRCELTKAEPVEWKKGTETLRNGDKYSLKQDGAVCELQICSLLVADAGEYSCVCGQEKTSATLTVKALLVHF
VRRLSKEATEGDTTTLQCELSKAAPVEWRKGTETLRDGDYSLKQDGAVCELQIRSLTIADAGEYLCTCGQE
KTSATLTVRALPAKFKDSLKNEEATEGTTATLSCELSKAAPVTWKKGPKTLQSGDKYVLRQDGAFCGLQIHGL
TMADAGEYSCVCGQEKTSATLTVRGLPAKFIEDLRSQEATEGATAILRCELSKAAPVEWRKGSSETLKDGDYR
LRQDGAFCGLQIRGLAVVDGTYSLSPTKFTTEGLRNEEATEGTMATLRCQMSKAAPVEWRKGSSETLRDGDYR
LRQDGAFCGLQIRGLTIEDSGEYTCVCGQEKTSATLSVKALPSRFIEDLRSQEATEGTMATLRCQMSKTAPVE
WKKGSETLRDGGYSLRQDGPVCELQICDLAVEDAGEYSCVCGQEKTSATLSIKALPPRFIEDLRSQEATEG
MATLRCQMSKAAPVEWRKGSSETLGDGGYSLRQNGAVCELQIHDLAVEDTGEYSCVCGQEKTSATLNVKALPP
RFIEDLRSQEATEGTMATLRCQMSKAAPVEWRKGSSETLRDGGYSLRQDGAFCGLQIHDLVEDAGQYSCVCG
QEKTSAVLTVDALPPKFTTEGLKKEEATEGTMVTLRQCMSKEATVEWRKGAKTLSDDGGYSLRQDGAFCGLQIC
GLAVEDAGEYSCVCGQEKTSATLSVKALPPRFIEDLRSQEATEGTMATLRCQMSKAAPVEWRKGSSETLRDGD
YSLRQDGAFCGLQIRDLAVEDAGEYLCVCGQEKTSATLSVKALPPRFIEDLRSQEATEGTMATLRCQMSKAAP
VEWRKGSSETLRDGDYSLRQDGAFCGLQICDLAVEDTGDYSCVCGQEKTSATLSVKALPPRFIEDLRSQEARE
GTVATLRCRMSKAAPVEWRKGSSETLKDGDYSLRQEGNLCELQIRDLAVEDTEEYSCVCGQEKTSATLSVKAL
PAKFIEDLRSQEAPESSTVTLRCKLSKASVVWKKGSETLRNGARYSLRQDGAFCLEIRDLTVEDTGEYSCT
CGQERTSATLSIMAPQVVFQQLQNLQAEEGSMASLRCELSVPAAMVWSKGGLELQGDTRREARQQGCVAEL
LLRDLRREDAGEYSCTCGSQTTSATLMVTAAPVRFLELQADVDEGATARLCELSREAVSVEWRKGSLSQLF
PCAKYQMVQEGTTAELLVHGVEQEDAGEYTCDAHTQSIARLSVRAPKPKFKTDLQSTEQEAGGTARLCCQLS
EABPGTPVQWLKEGVLEHVGSKYEMRRQGAFCGLQIHGLEAKDTGEYACLVGQKTLASLRVKEPEVTIVRGL
VDMEVQADEDEFTCKVSAQATDVQWHLQGLPLQSNVTEVAVLADGCTHVLQKGLVLEDAQTVSFHVGGL
SSSAQLTVRVPEVTVLEPLKDVQLSEGQDAHFRCLRSRASGQEARWALGGVPLQCNEMNDITVEQGTLYLLTL
HKVTLLEDAGTITLQVGSSEEAQLKVTAKNTVLRGLENVDALEGGEALFECQLSQPEVAHAHTWLLDDEPVHTS
EKVEVVYFENGLRHLLLLKLNKPKQDSCRVTFLAGDVVTSFAFLTVRGWRLEVLEPPHDASVKAGMQVRFTCILS
EAVPVGEATWYINGAAIQPDDTDWTVTTDGSHHALTLNAQPPHAGEVTFFAARDAVASARLSVLALPDPEDA
EAVGRSDHSVTLVSWVAPMSDGGGGLCGYRVMKEASTGQWQLCHDLVPGPECVVDLVPVKTYRFRVAAVGPA
GAGEPVHLPQMVKIAPAPAPAPAPAPAPAPETRAVVGEDICLELEVAADGGEVVWHKGTERRIQPGGHFEVLS
RGQRQMLVIKGFRTEDQGEYRCGPIQGLPSSGAATFNVVMTSGSGDEVPAQPSLPPEAAQEGDLHLLWEALAR
KRRMSREPTLDSISELPEEDSRVQHLRQEAETAPDLSEGYSTADELARTGEADLSHTSSDDESRACTPSLVT
YLKKAAGPGISPLASKHEAQVTTSVKPKQKQEPVPTCPGDLAADLMDPSLDKAAVKIQAAFQYKVRKE
MKQQEGPVFSRTFGDTEAQVGDVLRLECVLATKTDMRACWLKDGIELTDGRHYHIDQLKDGTCSSLVTLGLAPT
DSGRYTCQVSTKSGRVSHSACVVVSGTESEAESSSGGELDDAFRRAARRLHRLFRTKSPAELSEELFLSADE
GPGEPEEPADWQTYREDENFVCIRFESLAEARQAVTCFRNMFMGIGVEISLGEQGPVGVEMRIGKVAPTVT
PAVPLAKTPGLQTSDAAPVFLTELQNDVQDGYPMSFDCVVTGQVPSVRWFKDGKLEEDDHVMINEDQQGG
HQLIITAVVPADMGVYRCLAENSMGVSSTKAELRVELTSTDYDTAADATETSSYFSAQGYLSSREQEGTESDE
GQLPQVLEELKDLQVAPGTRLAKFQLKVKGYPAKLYWFKDGGQPLTSDHIRMTDKKTLHTLEIVSVTREDSG
QYAAYSNAVGAAYSSARLLVRGPSEPEEKPASDVHERLVPRILEKFTPKKVKRGSITSFVSKVEGHPAPSV
HWLKEEAEGVLLWIGPDTPGYTMASSSKHSLVLLDVGRRHQGTYTICATNPAGQALCSASLHISGLAKEEEQ
ERVKEALISSFLQGTSAQVSAQMSSEAGFADLVGQSKGESLVAAEAHSHLSLAEVGTTEEFLQKLTSQLITEMVS
AKISQAKLQVPGGDSDEETKTPSASPRHRSRSPSSSVQESSSESEDGDSRGEIFDIYVVTADYLPPLGAEQDAI
ILREGQYVEVLDSAHPLRWLVRTKPTKSSPSRQGWVSPAYLDRKRLKLSPEWGPTEAPEFPGEAVSEDEYRTRL
SSVIQELLSSEQAFVQELQFLESHHMKHLERSPRVPAAVASQKTVIFRNVQDISHFHSSFLKELQCGCTDDDDV

AMCFIKNQEAFEKYLEFLVGRVQAESVVVSTPVQEFYKKYAEETLSAKDPTQPPPPPLQHYLEQPVERVQKYQ  
 ALLKELIRNKARNRQNCALLEQAYAVVSALPQRAENKLVSLMENYPGTLEALGEPTRQGHFIVWEGAPGARM  
 PWKGNHRHVFLFRNYLVICKPRRDSRTDTFSYVFRNMMKLSSIDLNDQVEGDDRAFEVWHEREDSVRKYLLQA  
 RTVLIKNSWVKEICGIQQLAQPVWRPPEFEEELADCTAELGETVKLACRVTGTPKPIVSWYKDGKPVVEVDPH  
 HILIEDPDGSCTLILDNLTGIDSGQYMCFAASAAGNASTLGKILVQVPPRFVNVKVRATPFVEGEDAQITCTVE  
 GAPYPQIRWYKDGTLAPGNRYRMLNEPRSGVLVVIQAASKEDLGHYECELVNRGLGSTRGGGELYMQSPALR  
 ARDQHHREQIVAAVEDTSEVGSASADQDQAASVLRLLGSEALGSPGDLPNTRQSEPPAFEEAASQIP  
 GAASGTFEVSQPGTHKLEQETTSSGSQGWTVPIRVEGTAWPGAGTGQLLLDVHSQVIMETTQRTYVCOAPDT  
 GVTTRAPSMQVTIEDVQVQVGDMAQFDAVIEGHPPPPIVWYKGSTQLTSSARLSQRQDGLTTYSLVLTVDVAPDA  
 GVYTCVANNAGGQVLCKAELLVHGGDKLDAENQVYRRKLHSFYDVQEEIGRGVFGFVKRVQHKGNKMFCAAKF  
 IPLRSKTRAQAYQERDILATLGHPLVTGLLDQFETRKTLLILILELCSSEELLDRLFKKGVVTEAEVKVYIQQL  
 VEGHLHLHSHGILHLDIKPPNIMLVHPAREDIKICDFGFAQKITPSEPQYSKYGSPEFVSPEIIEQNPFVSEGS  
 DIWAMGVI SYLSLTCSSPFAGESDRATLLNVLEGRVSWSSPTAAHLSSEDAKDFIKATLQRTPRARPSTSQCLA  
 HPWFLLKSMPEAAHFINTKQLKFLARSRWRQSLMSYKSIIVMRSIPELLQGPPDSPSLGVARHLRGEASGAS  
 SSSSSSDNELAPFARAKSLPPSPVTHSPLLHPRGFLRPSASLPEETEASMTADAAVPASPQASAGPPASPGCV  
 PRHSVSISSLFYQQAGEGAERGNKTSGAKRHPARRRHLLKGGYIARALPGLREPLMEYSLLEEEAAREEQASLM  
 TKTPSFETALRLPSSSVREVPGRSHSLDNPPVTTGSPPEACKQLLFPSTGLTHETTAKDRGHKEGFLQESV  
 PFPMSGDSRPGKQEGSSQDSCRGKPASSCHSELGSGSQEGCGPPSSQSLGSLPPQSLKKELESTSCGPLFSEQ  
 PQAAPFPTQVSPLLGSEKEPQDGSLSSEGPVVPVSSSPGSASQVDASLDTEGLSEAGDTCDFTPPPQRPQEQAT  
 TRKFSLESRGGYAGVAGYGTFAFGGDAGGMLGQGPLWARMAWAVSQSSEEQDEAATESPQPLESIGPIAEASG  
 VPLRTPSPSLTPWEEVEQVSLVQIRDLSGDAEAADTISLDISEVDPAYLNLSLDYDIKYLPEFEMI FRRVPKPI  
 EQPESPGSETEAGQGLADFLLEAAWFWPGELGLRAGLEITTEPEEPGDLEALLGEEAVGRKRKWSPSRGLFQF  
 PGRCLSGEEPVELGLRQRVKASMAHISRIILKGRPEGPEREGPPRKKAGLASFRLSGLKGRDQELSDEAVVLGQ  
 SVTLACQVLAQPTAQATWSKDGVLLESSGHLLISSTLKNFQLLTIILVVKEEDLGTYTCCVSNPLGTAVTTGVL  
 RKAERPSSSRPEVGEELYKDAVLLVWKPVESECGPVYIVQCCIEGGSWTTLASDISDCCYLTGKLSRGGMYIF  
 RTACVSKAGMGPYSSPSEQVLLGGPNHLASEEISSRGRPAQLLPSTKTFQFQMQIRRRGRFSVVRQCREKASGR  
 ALAAKIVPYQPEDKTAVLRREYEAALKRHLHPLHAQLHAAYLSPRHLVLIILELCSGPELLPSLAERESYSES DVK  
 DYLWQMLSATQYLHAQHILHLDLRSENMMVTEYNLLKVIDLGNQSLDQEKVPAPENFKDYLETMAPELLEGGQ  
 GAVPQTDIWAIGVTAIFIMLSGEYPESEGTRDLQKGLRKLIRLSRCYAGLSGGAVAFLOSSLCAQPWGRPCA  
 STCLQCGLWTEEGPTGSRPTVPTFPTVRLRAFVREKRRALLYKKNLAQVR\*  
 >rs26971697\_ENSMUSP00000038264\_c.4530:C>T\_p.Q1511\*  
 ENSMUST00000047441.14|Obscn-202|ENSMUSG00000061462|-|chr11:g.58994350:G>A  
 MDHSFSGAPRFLTRPKAFVSVGKDATLSCQIVGNPTPHVSWEKDRQPVVEAGARFLAQDGDVYRLTILDLAL  
 GDSGQYVCRARNAIGEFAAVGLRVDSEGTCAEQAPHFLLRPTSIRVREGADATFRCRVGSGSPQPAVSWSKDG  
 RRLGPPDAPHVRVEEHGESSALRIR SARPRDGGTYEVRAENPLGSASAAAALVVDSDAEVAGPPGTSTATLLA  
 HLQQRREAMRAEGIPPSPPGAGTRTCTVTEGKHARLSCFVTGEPKPEPTVWKKDQGLVTEGRRHVVEDEQENF  
 VLKILFCQSDRGLYTCTASNLVGQTYSSVLVVVREPTVPFKKRLQDLEVREKESATFQCEVAQPATEAAWFK  
 EETRLWASAKYDIEEEGTERRLTVRNVSADDDAVYICETTEGSRVVAELSVQGNLTKLPRKTAVRTGDTAIF  
 WVAVLAVPEGPVWRWRNQEEMVAGGRVAITAEGTCHTLTI FQCTLEDMGEVAFVSGGCRTTTQFCVSAPRRPPL  
 YPPADPVVKAKTESSVTLSSWAPPHGDRPVTIDGYVLEKRKLGAYAWSRCHEAGWLATTEFTITGVAAEGDFQ  
 FRVSAINHFGQGPYLEFPGTMHLVPLAVKTPKAVEAVEGGEVTFVSDLTVASSGEWFLDGEALKASSIYVI  
 RCDRTRHMLTIREVPARLHGAQLKFVANGIETSIQMVVRAALGLPSSKLPAAAAREVLAQLHEEAQLLAE LSD  
 QAAA VTWLKDGRELSLGPKYEMQVSAGRRALLVRDVAQDDAGLYECVSRGSRRTAYQLLVQDITDGYRDWGPAG  
 PQKHMCKCAGAKIARYLGSSCYRFLQYDKGVWHWLEAALDTRQKGTSSCSLHEKPKLVFAKQQAHSEVKA  
 AGASATLSCEVAQAQTEVTFWKDGKLLSSSSSKVRMEASGCSRRLVVQQAGKADAGEYSCEAGGQKLSFRLDVA  
 EPKMVFAKEQQARSEVKAEGASATLSCEVAQAQTEVTFWKDGKLLSSSSKVRMEASGCSRRLVVQQAGKADA  
 GEYSCEAGGQKLSFRLDVTEPKLVFAKEQQARSEVKAEGVNSATLSCEVAQAQTEVTFWKDGKLLSSSSKVRM  
 EASGCSRRLVVQQAGKADAGEYSCEAGGQKLSFRLDVAEPKLVFAKEQQARSEVKAEGNSATLSCEVAQAQ  
 EVTWTFKDGKLLSSSSKVRMEASGCSRRLVVQQAGKADAGEYSCEAGGQKLSFHLDVTEPKLVFAKEQQAHSEV  
 KAEAGASATLSCEVAQAQTEVTFWKDGKLLSSSSKVRMEASGCSRRLVVQQAGKADAGEYSCEAGGQKLSFR  
 LDVAEPKLVFAKEQQARSEVKAEGASATLSCEVAQAQTEVTFWKDGKLLSSSSKVRMEASGCSRRLVVQQAGK  
 ADAGEYSCEAGGQKLSFRLDVAEPKLVFAKEQQANSEVKAEGASATLSCEVAQAQTEVTFWKDGKLLSSSSK  
 VRVEASGCSRRLVVQQAGKADAGEYSCEAGGQKLSFRLDVAEPKLAFAKE\*QAHSEVKAEGASATLSCEVAQA  
 QTEVTFWKDGKLLSSSSKVRMEASGCSRRLVVQQAGKADAGEYSCEAGGQKLSFRLDVAEPKLAFAKEQQAH  
 SEVKAEGASATLSCEVAQAQTEVTFWKDGKLLSSSSKVRMEASGCSRRLVVQQAGKADAGEYSCEAGGQKLS  
 FRLDVAEPKLAFAKEQQAHSEVKAEGASATLSCEVAQAQTEVTFWKDGKLLSSSSKVRMEASGCSRRLVVQQ  
 AGKADAGEYSCEAGGQKLSFRLDVAEPKLVFAKEQQAHSEVKAEGASATLSCEVAQAQTEVTFWKDGKLLSS  
 SSKVRMEASGCSRRLVVQQVQKADAGEYSCEARGQKLSFRLDVAEAEBSQIPERPSRREPLVVEKHETIILTAT

IAAPSVAAVTWLKDGV EIRRSKRHEATSLGDTHTLTVRGAQVLD SA IYSCRVGKEGQDFPVQVEEVAAKFSKP  
LEPVEGELGGTVMLVCELSPEQAEVWRCGNTQLRPGKRFQMTSEGPRTTLTVSGLREDDAEYVCESRDDRT  
SARLTVKVPRVVKFTSGLSAMVAEEGQEA TFQCVVSPSDAGVTWYKDMQLQPSEKFMVVESEGASRSLTILGL  
TLEDAGQVTVEAEGASSAALRVREAPVLFKKKLEPQTVEERTSVTLEVELTRPWPEVKWTRNAAVLTPSENV  
EIRAEGARHCLVLRVSVGFADRGGFCETPDDKTQAKLNVEMRQVRLVVRGLQEVEAKEQGTASMDVELSHA EVE  
GSWTRDGLRLQPGPKCHLAVQGPVHILTLSALQPQDSGLVAFRAEGVHTSARLIVTELPVSFTRVLQDVVATQ  
KEKVTLECELSRPVDVRWLKDGVELRAGKAI GIVAQGTCSRSLVIYRCETGDQGVVCDALDAQTSASLRVQGR  
TYTLIFRRVLAEDAGEV KFVAENAESRAHLRVKELPVTLLRPLRDKIAMEKHRGVLECCQVSRASAQVRWFKGG  
VELQSGPKYEVVSDGLYRKLVIN DVQPEDEDTYTCDAGNVKTSAQFFVEEQSITIVRGLKDMTVM EPAPAWFE  
CETSIPSVRPPKWL LGKTVLQAGGNVGL EQDGTVHRLTLHKTCSTMTGPHFTIGKSRSSAQLVVS DIPVVL T  
RPLEPKAGRELQSVVLSCDFRPAPKAVQWYKDDTPLSPSEKFKMALEGQMAELRILRLTPADAGVYRCQAGSA  
QSSAEVTV EAREVTVIQPLQDAEAMEEGRVCFSCELSHKDEDIEWSLNGTPLYNDSFHEISHEGCLHTLV LKS  
VRQADTGTVCATSPKVSVSARLVVKGKPVVFLKALDDVSAEERGTTLQCEVSDPEARVVWRKDGVELGPS DK  
YDFLHKAGARGLTVHDL SHEDAGLYTCQVGSKETQSKVSVHDLHVGITKRLKTVEVLEGE SC SFECVLSHESP  
SDPAVWTVGGKTVGGSGHFHAVRQGRKYTLTVKDAALSDAGEV VFSVLGLT SKASLIIRERPVDITKPLEDQR  
TTLGEDVMLSCELSRAGTSVRWLKDGKAI RKSQKYDLLSEGTRAVLVVRKASLKDSGEYTCETEASKSTAKLC  
VEEKANRFT EELADLQVEEKGRAVFTCKTEHPASVVTWRKGLLELRASGKHVPSQEGTLKLTINALERTDSD  
TYTCDIGQARTQARLLVHGQKVRVIEDLEDTAVQEGSSAKFCCR IAPADYGPVHWFLDKTPLHSNELNEITVQ  
PGGYHVLT LRQLALKDSGTVYFEAGDQRTSAALRVTEKPSIFSRPLTDVTVTEGEDLTLVCETTTVDSSVRWT  
KDGKTLRPSARCQLSHEGCQAQLLI TATTPQDGGRYKCEIGGASSSSIVRVHALPVRFRESLKDVEVPEGKAA  
TLRCVLS SVAAPVEWRHGDDVLKSSNKYSLRQEGAVLELVIRDLQPD SGQYSCSFGDQTT SATLTVKTS SAQ  
FVGKLRNKEATEGTTVTLRCEL TKEAPVWKKGTETLRNGDKYSLKQDGAVCELQIC SLLVADAGEYSCVCGQ  
EKTSATLTVKALLVHFVRR LRSKEATEGDTTTLQCELSKAAPVEWRKGTETLRDGD RYSLKQDGAVCELQIRS  
LT IADAGEYLCTCGQEKT SATLTVRALPAKFKDSLKNEEATEGTTATLSCELSKAAPVTWKKGPKTLQSGDKY  
VLRQDGAVCGLQIHGLTMADAGEYSCVCGQEKT SATLTVRGLPAKFIEDLRSQEATEGATAILRCELSKAAPV  
EWRKGETLKDGD RYTLRQDGAVCELQIRGLAVDVTGTYS SLP TKFTEGLRNEEATEGTMATLRQMSKAAPV  
EWRKGETL RLDGD RYTLRQDGAMCELQIRGLTIEDSGEYTCVCGQEKT SATLSVKALPPRFIEDLRSQEATEG  
TMATLRQMSKAAPVEWRKGETLGDGGRYSLRQNGAVCELQIHDLAVEDTGEYSCVCGQEKT SATLNVKALP  
PRFIEDLRSQEATEGTMATLRQMSKAAPVEWRKGETLRDGGRYSLRQDGAVCELQIHDL DVEDAGQYSCVC  
GQEKTSAVLTVDALPPKFTEGLKKEEATEGTMVTLRQMSKEATVEWRKGAKT LSDGGRYSLRQDGAMCELQI  
CGLAVEDAGEYSCVCGQEKT SATLSVKALPPRFIEDLRSQEATEGTMATLRQMSKAAPVEWRKGSKTLRDGD  
RYSLRQDGAMCELQICDLAVEDTGDYSCVCGQEKT SATLSVKAPQVVFQQPLQNLQAEEGSMASLRCELSVPN  
AAMVWSKGGLELQGDTRREARQQCVAELLLRDLRREDAGEYSC TCGSQTTSATLMVTAAPVRFRLRLQAQDV  
DEGATARLRCELSREAVSVEWRKGS LQLFPCA KYQMVQEGTTAE LLVHGVEQEDAGEYTC DAGHTQS IARLSV  
RAPKPKFKTDLQSTEQEAGGTARLCCQLSEAE PGTPVQWLKEGVELHVGSKYEMRRQGAVCELLIHGLEAKDT  
GEYACLVGQKTLASLRVKEPEVTIVRGLVDMEVQADEVEFTCKVVSQAGATDVQWHLQGLPLQSN E VTEVAV  
LADGCTHVLQ LKGV TLEDAGTVSFHVGGLSSAQLTVRVPEVTVLEPLKDVQLSEGD DAHFRCLRSRASGQEA  
RWALGGVPLQCNEMNDITVEQGTLYLLTLHKVTLEDAGTITLQVGS CSSEAQLKVTAKNTVLRGLENVDALEG  
GEALFECQLSQPEVA AHTWLLDDEPVHTSEKVEVVYFENGLRHLL LKLNKLPQDSCRVTFLAGDVVTS AFLTV  
RALPDPPEDAEVVGRSDHSVTL SWVAPMSDGGGGLCGYR VEMKEASTGQWQLCHDLVPGPECVDDLVPGKTY  
RFRVAAVGPAGAGEPVHLPQMVKIAPAPAPAPAPAPAPAPETRQAVVGEDICLELEVAADGGEVVWHKGTERRI  
QPGGHFEVLSRQQRQMLVIKGFRTEDQGEYRCGPIQGLPSSGAATFNVMVTS GSGDEVPAQPSLPPEAAQEGD  
LHLLWEALARKRRMSREPTLDSISELPEEDSRVQHLRQEAEETAPDLSEGYSTADELARTGEADLSHTSSDDE  
SRAGT PSLVTYLLKAGGPGISPLASKHEAQVTT SVKPKQKQEPVVP TCPPPGDLSAADLMDPSLDKAAVKIQ A  
AFKGYKVRKEMKQEGPVFSRTFGDTEAQVGDVLRLECVLATKTD MRACWLKDGIELTDGRHYHI DQLKDGTC  
SLLVTGLAPTDSGRYTCQVSTKSGRVSHSACVVVSGTESEAESSSGGELDDAFRRAARRLHRLFRTKSPAELS  
EEELFLSADEGPGEPEEPADWQTYREDEFV CIRFESLAEARQAVTCFRNM FATMGIGVEISLGEQGP RVEM  
RIGKVAPT VTPAVPLAKTPGLQTS DAAPVFLTELQNDVQDGYPMSFDCVVTGQPVPSVRWFKDGKLL EDDH  
YMINEDQQGGHQLIITAVVPADMGVYRCLAENSMGVSSTKAE LRVELTSTDYDTAADATETSSYFSAQGYLSS  
REQEGTESDEGQLPQVLEELKDLQVAPGTR LAKFQLKVKGYPAPKLYWFKDGQPLTSDHIRMTDKKTLHTLE  
IVSVTREDSGQYAAI SNAVGAAYSSARLLVRGPSEPEEK PASDVHERLVPPRI LEKFTPKKVKRGSSITFSV  
KVEGHPAPSVHWLKEEA EKGVLWIGPDPGYTMASSKQHSLVLLDVGRQHOGTYTCIATNPAGQALCSASLH  
ISGLAKEEEQERVKEALISSFLQGT SQAVSAQMSASAGFADLVGQSKGESLVAEAEHSHLSLAEVGT EEFLOK  
LTSQITEMVSAKISQAKLQVPGGDSDEETKTPSASPRHGRSRPSSSVQESSSESDGSRGEIFDIYVVVTADY  
LPLGAEQDAIILREGQYVEVLDSAHLRVLVVRTKPTKSSPSRQGWVSPAYLDKRLKLSPEWGPTEAPEFPGEA  
VSEDEYRTRLSSVIQELLSSEQAFV GELQFLESHHMKHLERSPRVPAAVASQKTVIFRNVQDISHFHSSFLKE  
LQCGCTDDDVAMCFIKNQEAFEKYLEFLVGRVQAESVVVSTPVQEFYKKYAEETLSAKDPTQPPPPLOHYLE  
QPVERVQKYQALLKELIRNKARNRQNCALLEQAYAVVSALPQRAENKLVSLMENYPGTLEALGEP IROGHFI

VWEGAPGARMWPKGHNHRVFLFRNYLVICKPRRDSRTDTFSYVFRNMMKLSSIDLNDQVEGDDRAFEVWHERE  
 DSVRKYLLQARTVI IKNSWVKEICGIQQRLAQPVWRPPEFEELADCTAELGETVKLACRVTGTPKPIVSWYK  
 DGKPVVEVDPHHILIEDPDGSCCTLIIDNLTGIDSGQYMCFAASAAGNASTLGKILVQVPPRFVNKVRATPFVEG  
 EDAQITCTVEGAPYPQIRWYKDGTLAPGNRYRMLNEPRSGVLVLIQAASKEDLGHYECELVNRLGSTRGGG  
 ELYMQSPALRARDQHHREQIVAAVEGAPSMQVTIEDVQVQVGDMAQFDAVIEGHPPPIVTWYKSTQLTSSAR  
 LSQRQDGTYSLVLTVDVAPHDAGVYTCVANNAGGQVLCKAELLVHGGDKLDAENQVYRRLKHSFYDVQEEIGR  
 GVFGFVKRVQHKGKGMFCAAKFIPLRSKTRAQAYQERDILATLGHPLVTGLLDQFETRKTLLILELCSSEEL  
 LDRLFKKGVVTEAEVKVYIQQLVEGLHYLHSHGILHLDIKPPNIMVHPAREDIKICDFGFAQKITPSEPQYS  
 KYGSPFVSPFIIEQNPVSEGSDIWAMGVI SYLSLTCSSPFAGESDRATLLNVLEGRVSWSSPTAAHLSERDAK  
 DFIKATLQRTPRARPSTSQC LAHPWFLKSMPEAAHFINTKQLKFLLRARSRWQRSLMSYKSI LVMRSIPELLQ  
 GPPDSPSLGVARHLRGEASGASSSSSSSDNELAPFARAKSLPPSPVTHSPLLHPRGFLRPSASLPEETEASMP  
 TADAAPVSPQASAGPPASPGCVPRHSVIVSSLFYQQAGEGAERGNKTS GAKRHPARRRHLLKGGYIARALPGLR  
 EPLMEYSLLEEEAAREEQASLMTKTPSFETALRLPSSSVREVPRGSHSLDNPPVTTGSPPEACKQLLFPST  
 GLTHETAKDRGHKEGFLQESVFPFPMMSGDSRPGKQEGSSQDSCRGKPASSCHSELGSGSQEGCGPPSSQSLG  
 SLPPQSLKKELESTSCGPLFSEQPQAAPFPTQVSPLLGSEKEPQDGSLSSEGPVVPVSSSPGSASQVDASLDETEG  
 LSEAGDTCDFTPPPQRPQEQATTRKFSLESRRGGYAGVAGYGTFAFGGDAGGMLGQGPLWARMAWAVSQSSEEQ  
 DEAAETSPQPLESLGPIAEASGVPLRTSPSLTPWEEVEQVSLVQIRDLSGDAEAADTISLDISEVDPAYLNL  
 DLYDIKYLPEFEMIFRRVPKPIEQPESPGSETEAGQGLADFLLEAAWPPWPGELGLRAGLEITEEPPEEPGDLEA  
 LLGEAAVGRKRKWSPSRGLFQFGRCLSGEPELVGLRQRVKASMAHISRILKGRPEGPEREGPPRKKAGLAS  
 FRLSGLKGRDQELSDEAVVLGQSVTLACQVLAQPTAQATWSKDGVLLESGHLLISSTLKNFQLLTLIVVKEE  
 DLGTYTCCVSNPLGTAVTTGVLKKAERPSSSPRPEVGEYKDAVLLVWKPVESECGPVTYIVQCCIEGGSWTTL  
 ASDISDCCYLTKLSRGGMYIFRTACVSKAGMGPYSSPSEQVLLGGPNHLASEEESSRGRPAQLLPSTKTFAF  
 QMQIRRRGRFSVVRQCREKASGRALAAKIVPYQPEDKTAVLREYEALKRLHHPHLAQLHAAYLSPRHLVILEL  
 CSGPELLPSLAERESYSESVDKDYLWQMSATQYLHAQHILHLDLRSENMMVTEYNLLKVIDLGNASLDQEK  
 VPAPENFKDYLETMAPELLEGQAVPQTDIWAIGVTAIFIMLSGEYPESEGETRDLQKGLRKLIRLSRCYAGL  
 SGGAVAFLLQSSSLCAQPWGRPCASTLQCGWLTEEGPTGSRPTPVTFTVRLRAFVREKRRRALLYKKNHQAQ  
 VR\*

>rs26971697\_ENSMUSP00000049737\_c.4605:C>T\_p.Q1536\*

ENSMUST00000052872.15|Obscn-203|ENSMUSG00000061462|-|chr11:g.58994350:G>A  
 MDHSFSGAPRFLTRPKAFVSVGKDATLSCQIVGNPTPHVSWEKDRQFVEAGARFRLAQDGDVYRLTILDLAL  
 GDGQYVCRARNAIGEFAAVGLRVDSEGTCAEQAPHLLRPTSIRVREGADATFRCRVGGSPQPAVSWSKDG  
 RRLGPPDAPHVRVEEHGESSALRIRSARPRDGGTYEVRAENPLGSASAAAALVVDSDAEVAGPPTSTATLLA  
 HLQORREAMRAEGIPPSPPGAGTRTCTVTEGKHARLSCFVTGEPKPKETVWKKDQGLVTEGRRHVVEDEQENF  
 VLKILFCCKQSDRGLYTCTASNVLVQTYSSVLVVVREPTVPFKKRLQDLEVREKESATFQCEVAQPAATEAAWFK  
 EETRLWASAKYDIEEGETERRLTVRNVSAADDAVYICETTEGSRVAELSVQGNLTKRLPRKTAVRTGDTAIF  
 WVLEAVPEGPVWRNLRNQEEMVAGGRVAITAEGTCHTLTI FQCTLEDMGEVAFVSGGCRTTTFVCSAPRRPPL  
 YPPADPVVKAKTESSVTLWSAPPHGDRPVTIDGYVLEKRLKLGAYAWSRCHEAGWLATTEFTITGVAAEGDFQ  
 FRVSAINHFGQGPYLEFPGTMHLVPLAVKTPKAVEAVEGGEVTFVSDLTVASSGEWFLDGEALKASSIYVI  
 RCDRTRHMLTIREVPARLHGAQLKVFANGIETSIQMVVRAALGLPSSKLPAAAAREVLAQLHEEAQLLAE LSD  
 QAAAVTWLKDGRELSLGPYEMQVSAGRRALLVRDVAQDDAGLYECVSRGSRRTAYQLLVQEPKLVFAKQQA  
 SEVKAEEAGNSATLSCEVTQAQTEVTWFKDGKLLSSSSKVRMEASGCSRRLLVVQQAGKADAGEYSCEAGGQKLS  
 FRLDVAEPKLVFAKQQAHEVKAEEAGASATLSCEVAQAQTEVTWFKDGKLLSSSSKVRMEASGCSRRLLVVQQ  
 AGKADAGEYSCEAGGQKLSFRLDVAEPKMFVFAKEQQARSEVKAEEAGASATLSCEVAQAQTEVTWFKDGKLLSS  
 SSKVRMEASGCSRRLLVVQQAGKADAGEYSCEAGGQKLSFRLDVTEPKLVFAKEQQARSEVKAEEVGNATLSCE  
 VAQAQTEVTWFKDGKLLSSSSKVRMEASGCSRRLLVVQQAGKADAGEYSCEAGGQKLSFRLDVAEPKLVFAKEQ  
 QARSEVKAEEAGNSATLSCEVAQAQTEVTWFKDGKLLSSSSKVRMEASGCSRRLLVVQQAGKADAGEYSCEAGGQ  
 KLSFHLDVTEPKLVFAKEQQAHSEVKAEEAGASATLSCEVAQAQTEVTWFKDGKLLSSSSKVRMEASGCSRRLV  
 VQQAGKADAGEYSCEAGGQKLSFRLDVAEPKLVFAKEQQARSEVKAEEAGASATLSCEVAQAQTEVTWFKDGK  
 LSSSSKVRVEASGCSRRLLVVQQAGKADAGEYSCEAGGQKLSFRLDVAEPKLVFAKEQQANSEVKAEEAGASATL  
 SCEVAQAQTEVTWFKDGKLLSSSSKVRVEASGCSRRLLVVQQAGKADAGEYSCEAGGQKLSFRLDVAEPKLAFA  
 KE\*QAHSEVKAEEAGASATLSCEVAQAQTEVTWFKDGKLLSSSSKVRVEASGCSRRLLVVQQAGKADAGEYSCEA  
 GGQKLSFRLDVAEPKLAFAKEQQAHSEVKAEEAGASATLSCEVAQAQTEVTWFKDGKLLSSSSKVRVEASGCSR  
 RLVVQQAGKADAGEYSCEAGGQKLSFRLDVAEPKLAFAKEQQAHSEVKAEEAGASATLSCEVAQAQTEVTWFKD  
 GKLLSSSSKVRVEASGCSRRLLVVQQAGKADAGEYSCEAGGQKLFRLDVAEPKLMFAKEQQAHSEVKAEEAGAS  
 ATLSCEVAQAQTEVTWFKDGKLLSSSSKVRVEASGCSRRLLVVQQAGKADAGEYSCEAGGQKLSFRLDVAEPK  
 VFAKEQQAHSEVKAEEAGASATLSCEVAQAQTEVTWFKDGKLLSSSSKVRVEASGCSRRLLVVQQVQKADAGEYS  
 CEARGQKLSFRLDVADTRLMFAKEQQARTEVKAEEAGNSATLSCEVAQAQTEVTWFKDGKLLSSSSKVRVEASG  
 CSRRLLVVQQAGKADAGEYSCEAGGQKLSFRLDVAEAEESQIPERPSRREPLVVKEHETIILTATIAAPSVAAVT

WLKDGVEIRRSKRHEATS LGDTHTLTVRGAQVLD SAIYSCRVGKEGQDFPVQVEEVA AKFSKPLEPVEGELGG  
TVMLVCELSPEQAEVWRCGNTQLRPGKRFQMTSEGPRTTLTVSGLREDDAEYVCE SRDDRTSARLTVKVPR  
VVKFTSGLSAMVAEEGQEATFQCVVSPSDAGVTWYKDGMLQLPSEKFMVVE S GASRSLTILGLTLEDAGQVTV  
EAEGASSAALRVREAPVLFKKKLEPQTVEERTSVTLEVELTRPWPEVKWTRNAAVLTPSENVEIRAEGARHC  
LVLRVSVGFADRGFFGCETPDDKTQAKLNVEMRQVRLVRGLQVEVEAKEQGTASMDVELSHAEVEGSWTRDGLRL  
QPGPKCHLAVQGPVHILTLALSALQPQDSGLVAFRAEGVHTSARLIVTELPVSFTRVLQDVVATQKEKVTLECEL  
SRPVDVRWLKDGVELRAGKAIGIVAQGTCSRSLVIYRCETGDQGVYVCDALDAQTSASLRVQGRTYTLIFRRVL  
AEDAGEVVKFVAENAESRAHLRVKELPVTLLRPLRDKIAMEKHRGVLECCQVSRASAQVRWFKGGVLEQSGPKYE  
VVSDGLYRKLIVINDVQPEDEDTYTC DAGNVKTSAQFFVEEQSITIVRGLKDMTVMEPAPAWFECETSIPSVRP  
PKWLLGKTVLQAGGNVLEQDGTVHRLTLHKTCSTMTGPVHFTIGKSRSSAQLVVS D I PVVLRTRPLEPKAGRE  
LQSVVLSCDFRPAPKAVQWYKDDTPLSPSEKFKMALEGQMAELRILRLTPADAGVYRCQAGSAQSSAEVTV EA  
REVTVIQPLQDAEAMEEGRVCFSCELSHKDEDI EWSLNGTPLYNDSFHEISHEGCLHTLVLSVRQADTGTVC  
ATSPKVSVSARLVVKGKPVVFLKALDDVSAEERGTLTLQCEVSDPEARVVWRKDGVELGPSDKYDFLHKAGAR  
GLTVHDLSDHEDAGLYTCQVGSKETQSKVSVHDLHVGITKRLKTVLEVLEGE SCSFECVLSHESPSDPAVWTVGG  
KTVGGSGHFHAVRQGRKYTLTVKDAALSDAGEVVSVLGLTSKASLIIRERPVDITKPLEDQRTTLGEDVMLS  
CELSRAGTSVRWLKDGKAIRKSQKYDLLSEGTRAVLVRKASLKDSGEYTCETEASKSTAKLCVEEKANRFTE  
ELADLQVEEKGRAVFTKTEHPASVVTWRKGLLELRASGKHVPSQEGTLKLTINALERTSDSITYCDI GQAR  
TQARLLVHGQKVRVIEDLEDTA VQEGSSAKFCCRIAPADYGPVHWF LDKTPLHSNELNEITVQPGGYHVLT LR  
QLALKDSGTVYFEAGDQRTS AALRVTEKPSIFSRPLTDVTVTEGEDLTLVCETTTVDSSVRWTKDGKTLRPSA  
RCQLSHEGCAQLLITATTPQDGGRYKCEIGGASSSSIVRVHALPVRFRESLKDVEVPEGKAATLRCVLS SVA  
APVEWRHGDDVLKSSNKYSLRQEGAVLELVIRDLQPDQSGQYSCSFGDQTTSATLTVKTS SAQFVGKLRNKEA  
TEGTVTVLRCELTKEAPVEWKKGTETLRNGDKYSLKQDGAVCELQICSLLVADAGEYSCVCGQEKT SATLTVK  
ALLVHFVRRRLRSKEATEGDTTLQCELSKAAPVEWRKGTETLRDGD RYSLKQDGAVCELQIRSLT IADAGEYL  
CTCGQEKT SATLTVRALPAKFKDSLKNEEATEGTTATLSCELSKAAPVTWKKGPKTLQSGDKYVLRQDGAVCG  
LQIHGLTMADAGEYSCVCGQEKT SATLTVRGLPAKFIEDLRSQEATEGATAILRCELSKAAPVEWRKGETL K  
DGD RYTLRQDGAVCELQIRGLAVVDGTYS SLPKTFTEGLRNEEATEGTMATLRCQMSKAAPVEWRKGETLR  
DGD RYTLRQDGAVCELQIRGLTIEDSGEYTCVCGQEKT SATLSVKALPSRFIEDLRSQEATEGTMATLRCQMS  
KTAPVEWKKGSETLRDGG RYSLRQDGPVCELQICDLAVEDAGEYSCVCGQEKT SATLSIKALPPRFIEDLRSQ  
EATEGTMATLRCQMSKAAPVEWRKGETLGDGG RYSLRQNGAVCELQIHDLAVEDTGEYSCVCGQEKT SATLN  
VKALPPRFIEDLRSQEATEGTMATLRCQMSKAAPVEWRKGETLRDGG RYSLRQDGAVCELQIHDL DVEDAGQ  
YSCVCGQEKTSAVLTVDALPPKFTEGLKKEEATEGTMVTLRCQMSKEATVEWRKGAKT LSDGG RYSLRQDGAM  
CELQICGLAVEDAGEYSCVCGQEKT SATLSVKALPPRFIEDLRSQEATEGTMATLRCQMSKAAPVEWRKGET  
LRDGD RYSLRQDGAVCELQIRDLAVEDAGEYLCVCGQEKT SATLSVKALPPRFIEDLRSQEATEGTMATLRCQ  
MSKAAPVEWRKGSKTLR DGD RYSLRQDGAMCELQICDLAVEDTGDYSCVCGQEKT SATLSVKALPPRFIEDLR  
SQEAREGTVATLRCRMSKAAPVEWRKGETLKDGD RYSLRQEGNLCELQIRDLAVEDTEEYSCVCGQEKT SAT  
LSVKALPAKFIEDLRSQEAPESSTVTLRCKLSKKASVVMKGETLNRGARYSLRQDGAVCELEIRDLTVEDT  
GEYSCTCGQERTSATLSIMAPQVVFQQPLQNLQAEEGSMASLRCELSVPNAAMVWSKGGLELQGDTRREARQQ  
GCVAELLLRDLRREDAGEYSC TCGSQTTSATLMVTAAPVRFLRELQAQDVDEGATARLRCELSREAVSVEWRK  
GSLQLFPCAKYQMVQEGTTAELLVHGVEQEDAGEYTC DAGHTQS IARLSVRAPKPKFKTDLQSTEQEAGGTAR  
LCCQLSEAEPTPVQWLKEGVELHV GSKYEMRRQGAVCELLIHGLEAKDTGEYACL VGGQKT LASLRVKEPEV  
TIVRGLVDMEVQADEDVEFTCKV SQAGATDVQWHLQGLPLQSNEVTEVAVLADGCTHVLQKGVTL EDAGTVS  
FHVGG LSSSAQLTVRVPEVTVLEPLKDVQLSEGQDAHFRCRLSRASGQEARWALGGVPLQCNE MNDITVEQGT  
LYLLTLHKVTLEDAGTITLQVGS CSSEAQLKVTAKNTVLRGLENVDALEGG EALFECQLSQPEVA AHTWLLDD  
EPVHTSEKVEVVYFENGLRHLL LKLNKLPQDSCRVTFLAGDVVTS AFLTVRGRWRLEVLEPPHDASVKAGMQVR  
FTCILSEAVPVGEATWYINGAAIQPDDTDWTVTTDGS HHALTLSNAQPQHAGEVTF AARDAVASARLSVLALP  
DPPEDAEVVGRSDHSVTLSSWVAPMSDGGGGLCGYRVMKEASTGQWQLCHDLVPGPECVDDLVPGKTYRFRV  
AAVGPAGAGEPVHLPQMVKIAPAPAPAPAPAPAPAPETRQAVVGEDI CLELEVAADGGEVVWHKGTERRIQPGG  
HFEVLSRGRQRLVIKGRFTEQGEYRCGPIQGLPSSGAATFNVMVMTSGSGDEVPAQPSLPPEAAQEGDLHLL  
WEALARKRRMSREPTLDSISELPEEDSRVQHLRQEA EETAPDLSEGYSTADELARTGEADLSHTSSDDES RAG  
TPSLVTYLKAGGPGI SPLASKHEAQVTT SVKPKQKQEPVPTCPPPGDLSAADLMDPSLDKAAVKIQAAFKG  
YKVRKEMKQOEGPVFSRTFGDTEAQVGDVLRLECVLATKTD MRACWLKDGIELTDGRHYHIDQLKDGTC SLLV  
TGLAPTDSGRYTCQVSTKSGRVSHSACVVVSGTESEAE SSSGGE LDDAFRRAARLHRLFRTKSPAELSEEEL  
FLSADEGPEPEEPADWQTYREDENFVCIRFESLAEARQAVTCFRNMFATMIGVEISLGEQGP RGVEMRIGK  
VAPTPTPAVPLAKT PGLQTS DAA PVFLTELQNDQDVQDGYPMSFDCVVVTGQVPVSRWFKDGLLEEDDHYMIN  
EDQGGHQLIITAVVPADMGVYRCLAENSMGVSSTKAELRVELTSTDYDTAADATETSSYFSAQGYLSSREQE  
GTESDEGQLPQVLEELKDLQVAPGTR LAKFQLKVKGY PAPKLYWFKDQPLTTS DHIRMTDKKTLHTLEIVSV  
TREDSGQYAAYSNAVGAAYSSARLLVRGPSEPEEK PASDVHERLVPPRI LEKFTPKKVKRGS S ITFSVKVEG  
HPAPSVHWLKEEA EKGV LWIGPDTPGYTMASSSKQHSLVLLDVG RQHOGTYTCIATNPAGQALCSASLHISGL

AKEEEQERVKEALISSFLQGTSAQVSAQMSEASAGFADLVGQSKGESLVAAEEAHSHLSLAIEVGTTEEFLOKLTSSQ  
 ITEMVSAKISQAKLQVPGGDSDEETKTPSASPRHGRSRPSSSVQESSSESEDGDSRGEIFDIYVVTADYLPLG  
 AEQDAIILREGQYVEVLDSAHPLRWLVRTKPTKSSPSRQGWVSPAYLDKRLKLSPEWGPTEAPEFPGEAVSED  
 EYRTRLSSVIQELLSSEQAFVGLQFLESHHMKHLERSPRVPAAVASQKTVIFRNVQDISHFHSSFLKELQGC  
 GTDDDVAMCFIKNQEAFEKYLEFLVGRVQAESVVVSTPVQEFYKKYAEETLSAKDPTQPPPPPLQHYLEQPVE  
 RVQKYQALLKELIRNKARNRQNCALLEQAYAVVSALPQRAENKLVSLMENYPGTLEALGEPVIRQGHFVWEG  
 APGARMPWKGNHRHVFLFRNYLVICKPRRDSRTDTFSYVFRNMMKLSIDLNDQVEGDRAFEVWHEREDSVR  
 KYLLQARTVI IKNSWVKEICGIQQRLAQPVWRPPEFEELADCTAELGETVKLACRVTGTPKPIVSWYKDGKP  
 VEVDPHHILIEDPDGCTLI LDNLTGIDSGQYMCFAASAAGNASTLGKILVQVPPRFVNKVRATPFVEGEDAQ  
 ITCTVEGAPYPQIRWYKDGTL LAPGNRYRMLNEPRSGVLV LVIQAASKEDLGHYECELVNRLGSTRGGGELYM  
 QSPALRARDQHHREQIVA AVEVTEQETKVPKKTVI I EETITTVVKS PRGRRQSPGKSPSRSPRRSASPRRPG  
 LLAPERLYPPGTSPSRRLVEVEQGRKAPVPALYVTEAEVHAPASQSPKWLEVEETIEVRVKKTGSRGASPVRE  
 MTSRGEGLIFTLPGGI PGRDPNANNNSNKS SVYQEARTWGPVAVHVGEFFIFQVDSVGNVDVWAASPEPEQVRA  
 SQKEENTERQEGCSGDENTFLMEEPQD TDSLQGRDKI LTHNGRVLTLADLEDYVPQEGETFCGCDSTPSTP  
 DEPPCEVSVLQREISEPTVGQPVLLNVGRPPGTGATPSFFRPGSQVHSPESVSFLLREAWSGPVSAAPWTSSS  
 HTHVQSSVDGSHGSFKTEVSTQTVSFGAVGETVTLHIDPDGGEAPGPSQG\*  
 >rs26971697\_ENSMUSP00000020732\_c.4806:C>T\_p.Q1603\*  
 ENSMUST00000020732.13|Obscn-201|ENSMUSG00000061462|-|chr11:g.58994350:G>A  
 MDHSFSGAPRFLTRPKAFVSVGKDATLSCQIVGNPTPHVSWEKDRQPVEAGARFRLAQDGDVYRLTILDLAL  
 GDSGQYVCRARNAIGEAFAAVGLRVDSEGTCAEQAPHFLLRPTSIRVREGADATFRCRVGGSPQPAVSWSKDG  
 RRLGPPDAPHVRVEEHGESSALRIRSARPRDGGTYEVRAENPLGSASAAAALVVDSDAEVAGPPGTSTATLLA  
 HLQQRREAMRAEGIPSPPGAGTRTCTVTEGKHARLSCFVTGEPKPEVWKKDGLVTEGRRHVVEDEQENF  
 VLKILFCKQSDRGLYTCTASNLVGQTYSSVLVVVREPTVPFKKRLQDLEVREKESATFQCEVAQPAEAAWFK  
 EETRLWASAKYDIEEEGTERRLTVRNVSADDDAVYICETTEGSRVVAELSVQGNLTKLPRKTAVRTGDTAIF  
 WVVELAVPEGPVWRWRNQEEMVAGGRVAITAEGTCHTLTI FQCTLEDMGEVAFVSGGCRTTTQFCVSAPRRPPL  
 YPADPVVKAKTESVTLWSAPPHGDRPVTIDGYVLEKRLKLGAYAWSRCHEAGLATTEFTITGVAEEGDFQ  
 FRVSAINHKTGQPYLEFPGTMHLVPLAVKTPLKVAEAVEGGEVTFVSDLTVASWGLEALKASSIYVI  
 RCDRTRHMLTIREVPARLHGAQLKFVANGIETSIQMVVRAALGLPSSKLPAAAAAREVLAQLHEEAQLLAE LSD  
 QAAA VTWLKDGRELSLGPKEYMQVSAGRRALLVRDVAQDDAGLYECVSRGSR TAYQLLVQDITDGYRDWGPAG  
 PQKHMCKCAGAKIARYLGSSCYRFLQYDKGVWHLEAALDTRQKGKTS SCSLHEKPKLVFAKQQAHSEVKA E  
 AGNSATLSCEVTQAQTEVTWFKDGKLLSSSSKVRMEASGCSRRLVVQQAGKADAGEYSCEAGGQKLSFRLDVA  
 EPKLVFAKQQAHSEVKA EAGASATLSCEVAQAQTEVTWFKDGKLLSSSSKVRMEASGCSRRLVVQQAGKADA  
 GEYSCEAGGQKLSFRLDVAEPKMFVFAKEQQARSEVKA EAGASATLSCEVAQAQTEVTWFKDGKLLSSSSKVRM  
 EASGCSRRLVVQQAGKADAGEYSCEAGGQKLSFRLDVTEPKLVFAKEQQARSEVKA EAGASATLSCEVAQAQ  
 EVTWFKDGKLLSSSSKVRMEASGCSRRLVVQQAGKADAGEYSCEAGGQKLSFRLDVAEPKLVFAKEQQARSEV  
 KAEAGNSATLSCEVAQAQTEVTWFKDGKLLSSSSKVRMEASGCSRRLVVQQAGKADAGEYSCEAGGQKLSFHL  
 DVTEPKLVFAKEQQAHSEVKA EAGASATLSCEVAQAQTEVTWFKDGKLLSSSSKVRMEASGCSRRLVVQQAGK  
 ADAGEYSCEAGGQKLSFRLDVAEPKLVFAKEQQARSEVKA EAGASATLSCEVAQAQTEVTWFKDGKLLSSSSK  
 VRVEASGCSRRLVVQQAGKADAGEYSCEAGGQKLSFRLDVAEPKLVFAKEQQANSEVKA EAGASATLSCEVAQ  
 AQTEVTWFKDGKLLSSSSKVRVEASGCSRRLVVQQAGKADAGEYSCEAGGQKLSFRLDVAEPKLAFAKE\*QAH  
 SEVKA EAGASATLSCEVAQAQTEVTWFKDGKLLSSSSKVRVEASGCSRRLVVQQAGKADAGEYSCEAGGQKLS  
 FRLDVAEPKLAFAKEQQAHSEVKA EAGASATLSCEVAQAQTEVTWFKDGKLLSSSSKVRVEASGCSRRLVVQQ  
 AGKADAGEYSCEAGGQKLSFRLDVAEPKLAFAKEQQAHSEVKA EAGASATLSCEVAQAQTEVTWFKDGKLLSS  
 SSKVRVEASGCSRRLVVQQAGKADAGEYSCEAGGQKLFRLDVAEPKLMFAKEQQAHSEVKA EAGASATLSCE  
 VAQAQTEVTWFKDGKLLSSSSKVRVEASGCSRRLVVQQAGKADAGEYSCEAGGQKLSFRLDVAEPKLVFAKEQ  
 QAHSEVKA EAGASATLSCEVAQAQTEVTWFKDGKLLSSSSKVRVEASGCSRRLVVQQVQKADAGEYSCEARGQ  
 KLSFRLDVADTRLMFAKEQQARTEVKA EAGNSATLSCEVAQAQTEVTWFKDGKLLSSSSKVRVEASGCSRRLV  
 VQQAGKADAGEYSCEAGGQKLSFRLDVAEAEESQIPERPSRREPLVVKEHETIILTATIAAPSVAAV TWLKDGV  
 EIRRSKRHEATSLGDHTLTVRGAQVLD SAIYSCRVGKEGQDFPVQVEEVA AKFSKPLEPVEGELGGTVMLVC  
 ELSPEQAEVWRCGNTQLRPGKRFQMTSEGPRRTLTVSGLREDDAE EYVCE SRDDRTSARLTVKVPVVKFTS  
 GLSAMVAEEGQEATFQCVVSPSDAGVTWYKDGMLQLPSEKFMVESGASRSLTILGLTLEDAGQVTEAEGAS  
 SSAALRVREAPVLFKKKLEPQTEVERTSVTLEVELTRPWPEVKWTRNAAVLTPSENVEIRAEGARHCLVLRV  
 GFADRGGFFGCETPDDKTQAKLNVEMRQVRLVRLGVEVEAKEQGTASMDVELSHA EVEGSWTRDGLRLQPGPKC  
 HLAVQGPVHILTL SALSALQPD SGLVAFRAEGLVHTSARLIVTELPVSFTRVLQDVVATQKEKVTLECELSRPVDV  
 RWLKDGVELRAGKAIGIVAQGTCSRSLVIYRCETGDQGVYVCDALDAQTSASLRVQGRTYTLIFRRVLAEDAGE  
 VKFVAENAESRAHLRVKELPVTLLRPLRDKIAMEKHRGVLECCQVSRASAVRWFKGGVELQSGPKYEVVSDGL  
 YRKLVINVDQPEDEDTYTC DAGNVKTS AQFFVEEQSITIVRGLKDMTVMEPAPAWFECETSIPSVRPPKWL LG  
 KTVLQAGGNVGL EQDGTVHRLTLHKTCSTMTGPVHFTIGKSRSSAQLVVSDIPVVLTRPLEPKAGRELQSVVL

SCDFRPAPKAVQWYKDDTPLSPSEKFKMALEGQMAELRILRLTPADAGVYRCQAGSAQSSAEVTVAREVTVI
QPLQDAEAMEEGRVCFSCELSHKDEDEIWSLNGTPLYNDSFHEISHEGCLHTLVLKSVRQADTGTVCATSPKV
SVSARLVVVKGKPVVFLKALDDVSAEERGTTLTQCEVSDPEARVVWRKDGVELGSPDKYDFLHKAGARGLTVHD
LSHEDAGLYTCQVGSKETQSKVSVHDLHVGITKRLKTVEVLEGESECSFECVLSHESPSDPAVWTVGGKTVGGS
GHFHAVRQGRKYTLTVKDAALSDAGEVVFVSVLGLTSKASLIIRERPVDTITKPLEDQRTTLGEDVMLSCELSRA
GTSVRWLKDGKAIRKSQKYDLLSEGTRAVLVVRKASLKDSGEYTCETEASKSTAKLCVEEKANRFTEELADLQ
VEEKGRAVFTCKTEHPASVVTWRKGLLELRASGKHVPSQEGTLTKLTINALERTDSDTYTCDIGQARTQARLL
VHGQKVRVIEDLEDTAVQEGSSAKFCRIAPADYGPVHWFLLDKTPLHSNELNEITVQPGGYHVLTLRQLALKD
SGTVYFEAGDQRTSAALRVTEKPSIFSRPLTDVTVTEGEDLTLVCETTTVDSSVRWTKDGKTLRPSARCQLSH
EGCQAQLLITATTPQDGGRYKCEIGGASSSSIVRVHALPVRFRRESLKDVEVPEGKAATLRCVLSVAAPVEWR
HGDDVLKSSNKYSLRQEGAVLELVIRDLQPDQSGQYSCSFGDQTTSATLTVKTSQAQFVGLRKNKEATEGTTV
TLRCELTKAPVEWKKGTETLRNGDKYSLKQDGAVCELQICSLLVADAGEYSCVCGQEKTSATLTVKALLVHF
VRLRSKEATEGDTTTLQCELSKAAPVEWRKGTETLRDGDYSLKQDGAVCELQIRSLTIADAGEYLCTCGQE
KTSATLTVRALPAKFKDSLKNEEATEGTTATLSCELSKAAPVWKKGPKTLQSGDKYVLRQDGAFCGLQIHGL
TMADAGEYSCVCGQEKTSATLTVRGLPAKFIEDLRSQEATEGATAILRCELSKAAPVEWRKGSSETLKDGDYR
LRQDGAVCELQIRGLAVVDGTYSLSLPTKFTTEGLRNEEATEGTMATLRCQMSKAAPVEWRKGSSETLRDGDYR
LRQDGAVCELQIRGLTIEDSGEYTCVCGQEKTSATLSVKALPSRFIEDLRSQEATEGTMATLRCQMSKTAPVE
WKKGSETLRDGGYSLRQDGPVCELQICDLAVEDAGEYSCVCGQEKTSATLSIKALPPRFIEDLRSQEATEG
MATLRCQMSKAAPVEWRKGSSETLGDGGYSLRQNGAVCELQIHDLAVEDTGEYSCVCGQEKTSATLNVKALPP
RFIEDLRSQEATEGTMATLRCQMSKAAPVEWRKGSSETLRDGGYSLRQDGAVCELQIHDLVEDAGQYSCVCG
QEKTSAVLTVDALPPKFTTEGLKKEEATEGTMVTLRCQMSKEATVEWRKGAKTLSDDGGYSLRQDGAFCGLQIC
GLAVEDAGEYSCVCGQEKTSATLSVKALPPRFIEDLRSQEATEGTMATLRCQMSKAAPVEWRKGSSETLRDGD
YSLRQDGAVCELQIRDLAVEDAGEYLCVCGQEKTSATLSVKALPPRFIEDLRSQEATEGTMATLRCQMSKAAP
VEWRKGSSETLRDGDYSLRQDGAFCGLQICDLAVEDTGDYSCVCGQEKTSATLSVKALPPRFIEDLRSQEARE
GTVATLRCRMSKAAPVEWRKGSSETLKDGDYSLRQEGNLCELQIRDLAVEDTEEYSCVCGQEKTSATLSVKAL
PAKFIEDLRSQEATEGTMVTLRCKLSKASVWKKGSETLRNGARYSLRQDGAFCGLQICDLAVEDTGEYSCV
CGQERTSATLSIMAPQVVFQQPLQNLQAEEGSMKRELSVNAAMVWSKGGLELQGDTRREARQQGCVAEL
LLRDLRREDAGEYSCVCGQEKTSATLMVTAAPVRFRLRELQAQDVDEGATARLRCELSREAVSVEWRKGSQQLF
PCAKYQMVQEGTTAELLVHGVEQEDAGEYTCDAHTQSIARLSVRAPKPKFKTDLQSTEQEAGGTARLCCQLS
EAEPGTPVQWLKEGVELHVGSKYEMRRQGAFCGLQICDLAVEDTGEYSCVCGQEKTSATLSVKALPPRFIEDLRS
VDMEVQADEDEFTCKVQAGATDVQWHLQGLPLQSNVTEVAVLADGCTHVLQKGVTLLEDAGTVSFHVGGL
SSSAQLTVRVPEVTVLEPLKDVQLSEGQDAHFRCRLSRASGQEARWALGGVPLQCNEMNDITVEQGTLYLLTL
HKVTLLEDAGTITLQVGSSESSEALQKVTAKNTVLRGLENVDALEGGEALFECQLSQPEVAHAHTWLLDDEPVHTS
EKVEVVYFENGLRHLLLLKNLKPQDSCRVTFLAGDVVTSFAFLTVRGWRLEVLPEPHDASVKAGMQVRFCTILS
EAVPVGEATWYINGAAIQPDDTDWTVTTDGSHHALTLNAQPHAGEVTFFAARDAVASARLSVLAALPDPPEDA
EAVGRSDHSVTLVSWVAPMSDGGGLCGYRVEVMEKASTQWQLCHDLVPGPECVVDDLVPGKTYRFRVAAVGPA
GAGEPVHLPQMVKIAPAPAPAPAPAPAPAPAPETRAVVGEDICLELEVAADGGEVVWHKGTERRIQGGHFEVLS
RGQRQMLVIKGFRTEDQGEYRCGPIQGLPSSGAATFNVMVMTSGSGDEVPAQPSLPPEAAQEGDLHLLWEALAR
KRRMSREPTLDSISELPEEDSRVQHLRQEAEEETAPDLSEGYSTADELARTGEADLSHTSSDDESRACTPSLVT
YLKAGGPGISPLASKHEAQVTSVKPQKQEPVPTCPPPGDLSAADLMDPSLDKAAVKIQAAFQYKVRKE
MKQQEGPVFSRTFGDTEAQVGDVLRLECVLATKTDMRACWLDKGIELTDGRHYHIDQLKDGTCSLLVTVGLAPT
DSGRYTCQVSTKSGRVSHSACVVVSGTESEAESSGGELDDAFRAARRLHRLFRTKSPAELSEELFLSADE
GPGEPEPADWQTYREDENFVCIRFESLAEARQAVTCFRNMFATMGIGVEISLGEQGRGVEMRIGKVAPTVT
PAVPLAKTPGLQTSDAAPVFLTELQNDVQDGYPMSFDCVVTGQVPVSVRWFKDGKLEEDDHVMINEDQQGG
HQLIITAVVPADMGVYRCLAENSMGVSSTKAELRVELTSTDYDTAADATETSSYFSAQGYLSSREQEGETESDE
GQLPQVLEELKDLQVAPGTRLAKFQLKVKGYPAKLYWFKDGGPLTSDHIRMTDKKTLHTLEIVSVTREDSG
QYAAYSNAVGAAYSSARLLVRGPSEPEEKPASDVHERLVPPRILEKFTPKKVKRGSSITFSVKVEGHPAPSV
HWLKEEAKEKGLWIGPDTPGYTMASSSKQHSVLVLDVGRQHGTYTTCIATNPAGQALCSASLHISGLAKEEEQ
ERVKEALISSFLQGTSAVSAQMSSESAGFADLVGQSKGESLVAEEAHSHLSLAEVGTTEEFLQKLTSTQITEMVS
AKISQAKLQVPGGDSDEETKTPSASPRHGRSRPSSSVQESSSEEDGDSRGEIFDIYVVTADYLPGLAEQDAI
ILREGQYVEVLDSAHPLRWLVRTPKTKSSPSRQGWVSPAYLDKRLKLSPEWGPTEAPEFPGEAVSEDEYRTRL
SSVIQELLSSEQAFVGLQFLESHEHMKHLERSPRVPAAVASQKTVIFRNVQDISHFHSSFLKELQCGCTDDDV
AMCFIKNQEAFAKEYLEFLVGRVQAESVVVSTPVQEFYKKYAEETLSAKDPTQPPPPPLQHYLEQPVVERQKYQ
ALLKELIRNKARNRQNCALLEQAYAVVSALPQRAENKHLVSLMENYPGTLEALGEPPIRQGHFIVWEGAPGARM
PWKGHNHRVFLFRNYLVIKPRRDSRTDTFSYVFRNMMKLSSIDLNDQVEGDDRAFEVWHEREDSVRKYLLQA
RTVIKNSWVKEICGIQQLAQPVWRPPEFEEELADCTAELGETVKLACRVTGTPKPIVSWYKDGKPVVDPH
HILIEDPDGSCTLILDNLTGIDSGQYMCFAASAAGNASTLGKILVQVPPRFVNVKVRATPFVEGEDAQITCTVE



GAPYPQIRWYKDGTLAPGNRYRMLNEPRSGVLVLIQAASKEDLGHYECELVNRLGSTRGGGELYMQSPALR  
ARDQHHREQIIVAAVEERRPSP\*  
>rs45807983\_ENSMUSP00000158795\_c.4536:G>T\_p.A1513S  
ENSMUST00000238536.2|Obscn-210|ENSMUSG00000061462|-|chr11:g.58997364:C>A  
MDHSFSGAPRFLTRPKAFVSVGKDATLSCQIVGNPTPHVSWEKDRQPVEAGARFRLAQDGDVYRLTILDLAL  
GDSGQYVCRARNAIGEAFVAVGLRVDSEGTCAEQAPHFLLRPTSIRVREGADATFRCRVGSGPQPAVSWSKDG  
RRLGPPDAPHVRVEEHGESSALRIRRSARPRDGGTYEVRAENPLGSASAAAAALVVDSDAEVAGPPGTSTATLLA  
HLQQRREAMRAEGIPSPPPGAGTRTCTVTTEGKHARLSCFVTGEPKPEVWKKDGLVTEGRRHVVEDEQENF  
VLKILFCKQSDRGLYTCTASNLVGQTYSSVLVVREPTVPFKKRLQDLEVREKESATFQCEVAQPAATEAAWFK  
EETRLWASAKYDIEEGTERRLTVRNVSADDDAVYICETTEGSRVVAELSVQGNLTKLPRKTAVRTGDTAIF  
WVELAVPEGPVWRWRNQEEMVAGGRVAITAEGTCHTLTI FQCTLEDMGEVAFVSGGCRTTTFQCVSAPRRPPL  
YPPADPVVKAKTESSVTLWSAPPHGDRPVTIDGYVLEKRKLGAYAWSRCHEAGWLATTEFTITGVAAEGDFQ  
FRVSAINHFGQGPYLEFPGMTMLVPLAVKTPKAVEAVEGGEVTFVSDTLTVASSGEWFLDGEALKASSIYVI  
RCDRTTRHMLTIREVPARLHGAQLKVFVANGIETS IQMVVRAALGLPSSKLPAAAAAREVLAQLHHEAQLLAE LSD  
QAAA VTWLKDGRELSLGPKEYMVSAGRRALLVRDVAQDDAGLYECVSRGSRTAYQLLVQDITDGYRDWGPAG  
PQKHMCKCAGAKIARYLGS SCYRFLQYDKGVWHLEAALDTRQKGTSSCSLHEKPKLVFAKQQAHSEVKA  
AGNSATLSCEVTQAQTEVTWFKDGKLLSSSSKVRMEASGCSRRLVVQQAGKADAGEYSCEAGGQKLSFRLDVA  
EPKLVFAKQQAHSEVKAEGASATLSCEVAQAQTEVTWFKDGKLLSSSSKVRMEASGCSRRLVVQQAGKADA  
GEYSCEAGGQKLSFRLDVAEPKMFVFAKEQQARSEVKAEGASATLSCEVAQAQTEVTWFKDGKLLSSSSKVRM  
EASGCSRRLVVQQAGKADAGEYSCEAGGQKLSFRLDVTEPKLVFAKEQQARSEVKAEGVNSATLSCEVAQAQ  
EVTWFKDGKLLSSSSKVRMEASGCSRRLVVQQAGKADAGEYSCEAGGQKLSFRLDVAEPKLVFAKEQQARSEV  
KAEAGNSATLSCEVAQAQTEVTWFKDGKLLSSSSKVRMEASGCSRRLVVQQAGKADAGEYSCEAGGQKLSFHL  
DVTEPKLVFAKEQQAHSEVKAEGASATLSCEVAQAQTEVTWFKDGKLLSSSSKVRMEASGCSRRLVVQQAGK  
ADAGEYSCEAGGQKLSFRLDVAEPKLVFAKEQQARSEVKAEGASATLSCEVAQAQTEVTWFKDGKLLSSSSK  
VRVEASGCSRRLVVQQAGKADAGEYSCEAGGQKLSFRLDVAEPKLVFAKEQQSNSEVKAEGASATLSCEVAQ  
AQTEVTWFKDGKLLSSSSKVRVEASGCSRRLVVQQAGKADAGEYSCEAGGQKLSFRLDVAEPKLVFAKEQQAH  
SEVKAEGASATLSCEVAQAQTEVTWFKDGKLLSSSSKVRVEASGCSRRLVVQQAGKADAGEYSCEAGGQKLS  
FRLDVAEPKLVFAKEQQAHSEVKAEGASATLSCEVAQAQTEVTWFKDGKLLSSSSKVRVEASGCSRRLVVQQ  
AGKADAGEYSCEAGGQKLSFRLDVAEPKLVFAKEQQAHSEVKAEGASATLSCEVAQAQTEVTWFKDGKLLSS  
SSKVRVEASGCSRRLVVQQAGKADAGEYSCEAGGQKLFRLDVAEPKLMFAKEQQAHSEVKAEGASATLSCE  
VAQAQTEVTWFKDGKLLSSSSKVRVEASGCSRRLVVQQAGKADAGEYSCEAGGQKLSFRLDVAEPKLVFAKEQ  
QAHSEVKAEGASATLSCEVAQAQTEVTWFKDGKLLSSSSKVRVEASGCSRRLVVQQVQKADAGEYSCEARGQ  
KLSFRLDVADTRLMFAKEQQARTEVKAEGNSATLSCEVAQAQTEVTWFKDGKLLSSSSKVRVEASGCSRRLV  
VQQAGKADAGEYSCEAGGQKLSFRLDVAEAE SQIPERPSRREPLVVKEHETIILTATIAAPSVAAVTWLKDG  
VEIRRSKRHEATSLDTHLTVRGAQVLD SAIYSRCVKGEGQDFPVQVEEVAAKFSKPLEPVEGELGGTVMLVC  
ELSP EQAEVWVRCGNTQLRPGKRFQMTSEGPRRTLTVSGLREDDAEYVCE SRDDRTSARLTVKVPVVKFTS  
GLSAMVAEEGQEATFQCVVSPSDAGVTWYKDGMLQLPSEKFMVVEGASRSILTILGLTLEDAGQVTEAEGAS  
SSAALRVREAPVLFKKLEPQTEVEERTSVTLEVELTRPWPEVKWTRNAAVLTPSENVEIRAEGARHCLVLRV  
GFADRGFVFCETPDDKTQAKLNVEMRQVRLVVRGLQVEVEAKEQGTASMDVELSHAEEVGSWTRDGLRLQPGPKC  
HLAVQGPVHILTL SALQPQD SGLVAFRAEGVHTSARLIVTEL PVSFTRVLQDVVATQKEKVTLECELSRPVDV  
RWLKDGVLELRAGKAIGIVAQGT CRSLVIYRCETGDQGVYVCDALDAQTSASLRVQGRTYTLIFRRLAEDAGE  
VKFVAENAESRAHLRVKELPVTLLRPLRDKIAMEKHGRVLECCVSRASAQVRWFKGGVELQSGPKYEVVSDGL  
YRKLVIN DVQPEDEDTYTC DAGNVKTS AQFFVEEQSITIVRGLKDMTVMEPAPAWFECETSIPSVRPPKWL  
KTVLQAGGNVGLQDGTVHRLTLHKTCSTMTGPVHFTIGKSRSSAQLVVSDIPVVLTRPLEPKAGRELQSVVL  
SCDFRPAPKAVQYKDDTPLSPSEKFKMALEGQMAELRILRLTPADAGVYRCQAGSAQSSAEVTVAREVTVI  
QPLQDAEAMEEGRVCFSCELSHKDEDIEWSLNGTPLYNDSFHEISHEGCLHTLVLSVSRQADTGTVCATSPKV  
SVSARLVVKGKPVVFLKALDDVSAEERGLTLTQCEVSDPEARVVRKDGVELGSPDKYDFLHKAGARGLTVHD  
LSHEDAGLYTCQVGSKETQSKVSVHDLHVGITKRLKTVVEVLEGE SCFECVLSHESPSDPAVWTVGGKTVGGS  
GHFHAVRQGRKYTLTVKDAALSDAGEVVFVSVLGLT SKASLIIRERPVDITKPLEDQRTTLGEDVMLSCELSRA  
GTSVRWLKDGKAIRKSQKYDLLSEGTRAVLVVRKASLKD SGEYTCETEASKSTAKLCVEEKANRTEELADLQ  
VEEKGRAVFTCKTEHPASVVTWRKGLLELRASGKHVPSQEGLTLKLTINALERTSDTYTCDIGQARTQARLL  
VHGQKVRVIEDLEDTAVQEGSSAKFCRIAPADYGPVHWF LDKTPLHSNELNEITVQPGGYHVLT LRQLALKD  
SGTVYFEAGDQRTSAAALRVTEKPSIFSRPLTDVTVTEGEDTLTVCE TTTVDSSVRWTKDGKTLRPSARCQLSH  
EGCQAQLLITATTPQDGGRYKCEIGGASSSIVRVHALPVRFRESLKDVEVPEGKAATLRCVLSVAAPVEWR  
HGDDVLKSNKYSRLRQEGAVLELVIRDLQPQD SGGYSCSFGDQTT SATLTVKTS SAQFVGLRNKEATEGTTV  
TLRCELTKAEVWKKGTETLRNGDKYSLKQD GAVCELQICSLLVADAGEYSCVCGQEKTSATLTVKALLVHF  
VRRLSKEATEGDTTTLQCELSKAAPVEWRKGTETLRDGD RYSLKQD GAVCELQIRSLTIADAGEYLCTCGQE  
KTSATLTVRALPAKFKDSLKNEEATEGTTATLSCELSKAAPVTWKKGPKTLQSGDKYVLRQD GAVCGLQIHGL

TMADAGEYSCVCGQEKTSATLTVRGLPAKFIEDLRSQEATEGATAILRCELSKAAPVEWRKGETLKDGDRTY  
 LRQDGA VCELQIRGLAVVDGTGYSLSLPTKFTTEGLRNEEATEGTMATLRCQMSKAAPVEWRKGETLDRDGRYS  
 LRQDGA MCELQIRGLTIEDSGEYTCVCGQEKTSATLSVKALPSRFIEDLRSQEATEGTMATLRCQMSKTAPVE  
 WKKGSETLRDGGRYSLRQDGPVCELQICDLAVEDAGEYSCVCGQEKTSATLSIKALPPRFIEDLRSQEATEGT  
 MATLRCQMSKAAPVEWRKGETLGDGGRYSLRQNGAVCELQIHDLAVEDTGEYSCVCGQEKTSATLNVKALPP  
 RFIEDLRSQEATEGTMATLRCQMSKAAPVEWRKGETLRDGGRYSLRQDGA VCELQIHDLVDVEDAGQYSCVCG  
 QEKTSAVLTVDALPPKFTEGLKKEEATEGTMVTLRCQMSKEATVEWRKGA KTLSDGGRYSLRQDGA MCELQIC  
 GLAVEDAGEYSCVCGQEKTSATLSVKALPPRFIEDLRSQEATEGTMATLRCQMSKAAPVEWRKGETLDRDGR  
 YSLRQDGA VCELQIRDLAVEDAGEYLCVCGQEKTSATLSVKALPPRFIEDLRSQEATEGTMATLRCQMSKAAP  
 VEWRKGSKTLRDGDRTYSLRQDGA MCELQICDLAVEDTGDYSCVCGQEKTSATLSVKALPPRFIEDLRSQEARE  
 GTVATLRCRMSKAAPVEWRKGETLKDGDRTYSLRQEGNLCELQIRDLAVEDTEEYSCVCGQEKTSATLSVKAL  
 PAKFIEDLRSQEAPESSTVTLRCKLSKASVVWKKGSETLRNGARYSLRQDGA VCELEIRDLTVEDTGEYSCT  
 CGQERTSATLSIMAPQVVFQQPLQNLQAEEGSMASLRCELSVFNAMVWSKGGLELQGDTRREARQQCVAAEL  
 LLRDLRREDAGEYSCTCGSQTTATLMVTAAPVRFLRELQAQDVDEGATARLRCELSREAVSVEWRKGS LQLF  
 PCAKYQMVQEGTTAELLVHGVEQEDAGEYTCDA GHTQSIARLSVRAPKPKFKTDLQSTEQEAGGTARLCCQLS  
 EAEPGTPVQWLKEGVELHVGSKYEMRRQGA VCELLIHGLEAKDTGEYACLVGGQKTLASLRVKEPEVTIVRGL  
 VDMEVQADEDEFTCKVSAQAGATDVQWHLQGLPLQSNVEVAVLADGCTHVLQKGVTLDEAGTVSFHVGG  
 SSSAQLTVRVPEVTVLEPLKDVQLSEGQDAHFRCRLSRASQGEARWALGGVPLQCNEMNDITVEQTFHYLLTL  
 HKVTLEDA GTITLQVGS SSEAQLKVTAKNTVLRGLENVDALEGG EALFECQLSQPEVA AHTWLLDDEPVHTS  
 EKVEVVYFENGLRHLLLLLKNLKPQDSCRVTFLAGDVVTS AFLTVRGRLEVLLEPPHDASVKAGMQVRFTCILS  
 EAVPVGEATWYINGAAIQPDDTDWTVTTDGS HHALTLSNAQPQHAGEVTF AARDAVASARLSVLALPDPEDA  
 EVVGRSDHSVTL SWVAPMSDGGGGLCGYRVMKEASTGQWQLCHDLVPGPECVDDLVPGKTYRFRVA AVGPA  
 GAGEPVHLPQMVKIAPAPAPAPAPAPAPETRQAVVGEDICLELEVAADGGEVVWHKGTERRIQPGHFVLS  
 RGQRQMLVIKGFRTEDQGEYRCGPIQGLPSSGAATFNVMVMTSGSGDEVPAQPSLPPEAAQEGDLHLLWEALAR  
 KRRMSREPTLDSISELPEEDSRVQHLRQEA EETAPDLSEGYSTADELARTGEADLSHTSSDDES RAGT PSLVT  
 YLKKAGPGISPLASKHEAQVTT SVKPKQKQEPVPTCP PPGDLSAADLMDPSLDKAAVKIQAAF KGYKVRKE  
 MKQEGGPVSRFTFGDTEAQVGVDLRLECVLAKTKTDMRACVWLKDGIELTDGRHYHIDQLKDGCTSLLVTLGLAPT  
 DSGRYTCQVSTKSGRVSHSACVVVSGTESEAESSGGELDDAFRAARRLHRLFRTKSPAELSEEELFLSADE  
 GPGEPEEPADWQTYREDENFVCIRFESLAEARQAVTCFRNMFATMGIGVEISLGEQGPGRVEMRIGKVAPTVT  
 PAVPLAKTPGLQTS DAAPVFLTELQNDVQDGYPMSFDCVVTGQPVPSVRWFKDGKLEEDDHVMINEDQGG  
 HQLIITAVVPADMGVYRCLAENSMGVSSTKAELRVELTSTDYDTAADATETSSYFSAQGYLSSREQEGTESDE  
 GQLPQVLEELKDLQVAPGTRLAKFQLKVKGYPA PKLYWFKDQGPLTTSDHIRMTDKKTLHTLEIVSVTREDSG  
 QYAAYSNAVGAAYSSARLLVRGPSEPEEK PASDVHERLVPPRI LEKFTPKKVKRGSSITFSVKVEGHPAPSV  
 HWLKEEA EKGVLWIGPDTPGYTMASSSKQHSVLVLDVGRQHOGTYTCIATNPAGQALCSASLHISGLAKEEQ  
 ERVKEALISSFLQGTSAVSAQMSESA GFADLVGQSKGESLVAEEAHSHLSLAEVGT EEFLOKLTSTQITEMVS  
 AKISQAKLQVPGGDSDEETKTPSASPRHGRSRPSSSVQESSSEEDGDSRGEIFDIYVVTADYLP LGAEQDAI  
 ILREGQYVEVLDSAHPLRWLVRTKPTKSSPSRQGWVSPAYLDRKRLKLSPEWGPTEAPEFPGEAVSEDEYRTRL  
 SSVIQELLSSEQAFV GELQFLESHHMKHLERSPRVPA AVASQKTVIFRNVQDISHFHSSFLKELQCGCTDDDV  
 AMCFIKNQEA FEKYLEFLVGRVQAESVVVSTPVQEFYKKYAEETLSAKDPTQPPPPLOHYLEQPVERVQKYQ  
 ALLKELIRNKARNRQNCALLEQAYAVVSALPQRAENKLVSLMENYPGTLEALGEP I RQGHFIVWEGAPGARM  
 PWKGHNHRVFLFRNYLVICPPRRDSRTDFTSYVFRNMMKLSSIDLNDQVEGD DRAFEVWHEREDSVRKYLLQA  
 RTVI IKNSWVKEICGIQQLAQPVWRPPEFEEELADCTAELGETVKLACRVTGT PKPIVSWYKDGKPV EVDPH  
 HILIEDPDG SCTLILDNLTGIDSGQYMCFAASAAGNASTLGKILVQVPPRFVNVKVRATPFVEGEDAQITCTVE  
 GAPYPQIRWYKDGTL L APGNRYRMLNEPRSGVLV LVIQAASKEDLGHYECELVNLRLGSTRGGGELYMQSPALR  
 ARDQHHREQIVAAVEDTSVEGSAHSAQDQADQQAASVLRLLGSEALGPS PGDLPNTRQSEPPAFEEAASQIP  
 GAASGTPEVSPGTHKLEQETSSSGSQGWTVPIRVEGTAWPGAGTGQLLLDVHSQVIMETTQRTYVCQAPDT  
 GVTRAPSMQVTIEDVQVQVGDMAQF DAVIEGHPPPIV TWYKGSTQLTSSARLSQRQDGT TYSLVLT DVAPHDA  
 GVYTCVANNAGGQVLCKAELLVHGDKLDAENQVYRRKLSHFYDVQEEIGRGVFGFVKRVQHKGNMFCAAKF  
 IPLRSKTRAQAYQERDILATLGHPLVTGLLDQFETRKT LILILELCSSEELLDRLFKKGVTAEAVKVYIQQL  
 VEGLHYLHSHGILHLDIKPPNILMVHPAREDIKICDFGFAQKITPSEPQYSKYGSPEFVSPEIIEQN PVSEGS  
 DIWAMGVISYLSLTCSSPFAGESDRATLLNVLEGRVSWSSPTAAHLS EDAKDFIKATLQRTPRARPSTSQCLA  
 HPWFLKSMPAEAAHFINTKQLKFL LARSWRQSLMSYKSI LVMRSIPELLQGPPDPSPLGVARHLRGEASGAS  
 SSSSSNDLAPFARAKELPPSPVTHSPLLHPRGFLRPSASLPEETEASMP TADA AVPAS PQSAGPPASPGCV  
 PRHSVISNLFYQQAGEAERGNKTS GAKRHPARRRHLLKGGYIARALPGLREPLMEYSLLEEEAAREEQASLM  
 TKTPSFETALRLPSSSVREVPGRSHSLDNPPVTTGSSPEACKQLLFPSTGLTHETTAKDRGHKEGFLOESV  
 PFPMSGDSRPGKQEGSSQDSCRGKPASSCHSELGSGSQEGC PPSQSLGSLPPQSLKELSTSCGPLFSEQ  
 PQAAPFPPTQVSPLLGSEKEPQDGS LSEGPVVPVSSSPGSASQVDASLDTEGLSEAGDTCDFTPPPQR PQEQAT  
 TRKFSLESRGGYAGVAGYGTFAFGGDAGGMLGQGPLWARMAWAVS QSSEEQDEAATESPQPLES LGPIAEASG

VPLRTPSPSLTPWEEVEQVSLVQIRDLSDGDAEAADTISLSDISEVDPAYLNLSLDYDIKYLPPFEFMI FRRVPKPI  
EQPESPGSETEAGQGLADFLLEAAWPWPGLGLRAGLEITEEPEEPGDLEALLGEAAVGRKRKWSPSRGLFQF  
PGRCLSGEEPVELGLRQRVKASMAHISRILKGRPEGPPEPRKKAGLASFRLSGLKGRDQELSDEAVVLGQ  
SVTLACQVLAQPTAQATWSKDGVLLESSGHLISSTLKNFQLLTILVVKEEDLGTYTCCVSNPLGTAVTGVL  
RKAERPSSSPRPEVGELYKDAVLLVWKPVESCGPVTYIVQCCIEGGSWTTLASDISDCCYLTGKLSRGGMYIF  
RTACVSKAGMGPISSPSEQVLLGGPNHLASEEESRRGRPAQLLPSTKTFAFQMQIRRRGRFSVVRQCREKASGR  
ALAAKIVPYQPEDKTAVLRREYEAALKRHLHPLHAQLHAAYLSRHLVLI LELCSGPELLPSLAERESYSESDVK  
DYLWQMSATQYLHAQHILHLDLRSNNMMVTEYNLLKVIDLGNQSLDQEKVPAPENFKDYLETMAPELLEGG  
GAVPQTDIWAIGVTAIFIMLSGEYPESESETRDLQKGLRKLIRLSRCYAGLSGGAVAFLOSSLCAQWPWRPCA  
STCLQCGLWTEEGPTGSRPTVTFPTVRLRAFVREKRRRALLYKKNLAQVR\*  
>rs45807983\_ENSMUSP00000038264\_c.4260:g>T\_p.A1421S  
ENSMUST00000047441.14|Obscn-202|ENSMUSG00000061462|-|chr11:g.58997364:C>A  
MDHSFSGAPRFLTRPKAFVSVGKDATLSCQIVGNPTPHVSWEKDRQVEAGARFRLAQDGDVYRLTILDLAL  
GDSGQYVCRARNAIGEFAAVGLRVDSEGTCAEQAPHLLRPTSIRVREGADATFRCRVGGSPPAVSWSKDG  
RRLGPPDAPHVRVEEHGESSALRIRSARPRDGGTYEVRAENPLGSASAAAALVVDSDAEVAGPPGTSTATLLA  
HLQORREAMRAEGIPSPGGAGTRTCTVTEGKHARLSCFVTGEPKPKETVWKKDGQLVTEGRRHVVEDEQENF  
VLKILFCKQSDRGLYTCTASNLVGQTYSSVLVVVREPTVPFKKRLQDLEVREKESATFQCEVAQPAATEAAWFK  
EETRLWASAKYDIEEGTERRLTVRNVSADDDAVYICETTEGSRVVAELSVQGNLTKLPRKTAVRTGDTAIF  
WVELAVPEGPVWRWRNQEEMVAGGRVAITAEGTCHTLTI FQCTLEDMGEVAFVSGGCRTTTQFCVSAPRRPPL  
YPPADPVVKAKTESSVTLWSAPPHGDRPVTIDGYVLEKRKLGAYAWSRCHEAGWLATTEFTITGVAAEGDFQ  
FRVSAINHFGQGPYLEFPGMTMLVPLAVKTPKAVEAVEGGEVTFVSDLTVASSGEWFLDGEALKASSIYVI  
RCDRTRHMLTIREVPARLHGAQLKVFVANGIETS IQMVVRAALGLPSSKLPAAAAREVLAQLHEEAQLLAE LSD  
QAAAVTWLKDGRELSLGPKEYMQVSAGRRALLVRDVAQDDAGLYECVSRGSRRTAYQLLVQDITDGYRDWGPAG  
PQKHMCKCAGAKIARYLGS SCYRFLQYDKGVWHWLEAALDTRQKGKTS SCSLHEKPKLVFAKQQAHSEVKA  
AGASATLSCEVAQAQTEVTWFKDGKLLSSSSKVRMEASGCSRRLVVQQAGKADAGEYSCEAGGQKLSFRLDVA  
EPKMVFAKEQQARSEVKAEGASATLSCEVAQAQTEVTWFKDGKLLSSSSKVRMEASGCSRRLVVQQAGKAD  
GEYSCEAGGQKLSFRLDVTEPKLVFAKEQQARSEVKAEGVNSATLSCEVAQAQTEVTWFKDGKLLSSSSKVRM  
EASGCSRRLVVQQAGKADAGEYSCEAGGQKLSFRLDVAEPKLVFAKEQQARSEVKAEGNSATLSCEVAQAQ  
EVTWFKDGKLLSSSSKVRMEASGCSRRLVVQQAGKADAGEYSCEAGGQKLSFRLDVTEPKLVFAKEQQAHSEV  
KAEAGASATLSCEVAQAQTEVTWFKDGKLLSSSSKVRMEASGCSRRLVVQQAGKADAGEYSCEAGGQKLSFRL  
DVAEPKLVFAKEQQARSEVKAEGASATLSCEVAQAQTEVTWFKDGKLLSSSSKVRVEASGCSRRLVVQQAGK  
ADAGEYSCEAGGQKLSFRLDVAEPKLVFAKEQQSNSEVKAEGASATLSCEVAQAQTEVTWFKDGKLLSSSSK  
VRVEASGCSRRLVVQQAGKADAGEYSCEAGGQKLSFRLDVAEPKLVFAKEQQAHSEVKAEGASATLSCEVAQ  
AQTEVTWFKDGKLLSSSSKVRVEASGCSRRLVVQQAGKADAGEYSCEAGGQKLSFRLDVAEPKLVFAKEQQAH  
SEVKAEGASATLSCEVAQAQTEVTWFKDGKLLSSSSKVRVEASGCSRRLVVQQAGKADAGEYSCEAGGQKLS  
FRLDVAEPKLVFAKEQQAHSEVKAEGASATLSCEVAQAQTEVTWFKDGKLLSSSSKVRVEASGCSRRLVVQQ  
AGKADAGEYSCEAGGQKLFRLDVAEPKLVFAKEQQAHSEVKAEGASATLSCEVAQAQTEVTWFKDGKLLSS  
SSKVRVEASGCSRRLVVQQVQKADAGEYSCEARGQKLSFRLDVAEAEESQIPERPSRREPLVVEKETIILTAT  
IAAPSVAAVTWLDGVEIRRSKRHEATSLGDHTLTVRGAQVLD SAIYSCRVGKEGQDFPVQVEEVAAKFSKP  
LEPVEGELGGTVMLVCELSPEQAEVWRCGNTQLRPGKRFQMTSEGPRTTLTVSGLREDDAEYVCESRDDRT  
SARLTVKVPVVKFTSGLSAMVAEEGQEATFQCVVSPSDAGVTWYKDGMLQPSSEKFMVVEGASRSILTILGL  
TLEDAGQVTVAEAGASSAALRVREAPVLFKKKLEPQTVEERTSVTLEVELTRPWPEVKWTRNAAVLTPSENV  
EIRAEGARHCLVLRVSGFADRGGFFGCETPDDKTQAKLNVEMRQVRLVVRGLQEVEAKEQGTASMDVELSHAEVE  
GSWTRDGLRLQPGPKCHLAVQGPVHILTL SALQPQDSGLVAFRAEGVHTSARLIVTELPVSTFTRVLQDVVATQ  
KEKVTLECELSRPVDVRLKDGVELRAGKAIGIVAQGTCSRSLVIYRCETGDQGVVCDALDAQTSASLRVQGR  
TYTLIFRRVLAEDAGEVKFVAENAESRAHLRVKELPVTLLRPLRDKIAMEKHRGVLECCQVSRASQVRWFKGG  
VELQSGPKYEVVSDGLYRKLVIN DVQPEDEDTYTC DAGNVKTS AQFFVEEQSITIVRGLKDMTVMEPAPAWFE  
CETSIPSVRPPKWL LGKTVLQAGGNVLEQDGTVHRLTLHKTCSTMTGPVHFTIGKSRSSAQLVSDIPVVL  
RPLEPKAGRELQSVVLSCDFRPAPKAVQWYKDDTPLSPSEKFKMALEGQMAELRILRLTPADAGVYRCQAGSA  
QSSAEVTVAEAREVTVIQPLQDAEAMEEGRVCFSCELSHKDEDIEWSLNGTPLYNDSFHEISHEGCLHTLVLKS  
VRQADTGTVCATSPKVSVSARLVVKGPVVF LKALDDVSAEERGTTLQCEVSDPEARVVWRKDGVELGPSDK  
YDFLHKAGARGLTVHDLSDHEDAGLYTCQVGSKETQSKVSVHDLHVGITKRLKTVEVLEGESECFEVLVSHESP  
SDPAVWTVGGKTVGGSGHFHAVRQGRKYTLTVKDAALSDAGEVVFVSVLGLT SKASLIRERPVDTKPLEDQR  
TTLGEDVMSCELSRAGTSVRWLKDGKAIKRSQKYDLSSEGTRAVLVVRKASLSDSGETCETEASKSTAKLC  
VEEKANRFTTEELADLQVEEKGRAVFTCKTEHPASVYVTRKGLLELRASGKHVPSQEGTLKLTINALERTDSD  
TYTCDIGQARTQARLLVHGQKVRVIEDLEDTAVQEGSSAKFCCRIPADYGPVHWFLDKTPLHSNELNEITVQ  
PGGYHVLT LRQLALKDSGTVYFEAGDQRTS AALRVTEKPSIFSRPLTDVTVTEGEDLTLVCE TTTVDSSVRWT  
KDGTKLRPSARCQLSHEGCAQLLITATTPQDGGRYKCEIGGASSSSIVRVHALPVRFRESLKDVEVEGKAA

TLRCVLSVAAPVEWRHGDDVLKSSNKYSLRQEGAVLELVIRDLQPQDSGQYSCSFGDQTTSATLTVKTSQAQ
FVGKLRNKEATEGTTVTLRCELTKKEAPVEWKGTETLRNGDKYSLKQDGAVCELQICSLLVADAGEYSCVCGQ
EKTSATLTVKALLVHFVRRRLRSKEATEGDTTTLQCELSKAAPVEWRKGTETLRDGDYSLKQDGAVCELQIRS
LTADAGEYLCTCGQEKSATLTVRALPAKFKDSLKNEEATEGTTATLSCELSKAAPVTWKKGPKTLQSGDKY
VLRQDGAVCGLQIHGLTMADAGEYSCVCGQEKSATLTVRGLPAKFIEDLRSQEATEGATAILRCEL SKAAPV
EWRKGTETLRDGDYSLRQDGAVCELQIRGLAVVDTGTYSLSLPTKFTTEGLRNEEATEGTMATLRCQMSKAAPV
EWRKGTETLRDGDYSLRQDGAMCELQIRGLTIEDSGEYTCVCGQEKSATLSVKALPPRFIEDLRSQEATEG
TMATLRCQMSKAAPVEWRKGTETLRDGGGRYSLRQNGAVCELQIHDLAVEDTGEYSCVCGQEKSATLNVKALP
PRFIEDLRSQEATEGTMATLRCQMSKAAPVEWRKGTETLRDGGGRYSLRQDGAVCELQIHDLVEDAGQYSCVC
GQEKSATLTVDALPPKFTTEGLKKEEATEGTMVTLRCQMSKEATVEWRKGAKTSLDGGGRYSLRQDGAMCELQI
CGLAVEDAGEYSCVCGQEKSATLSVKALPPRFIEDLRSQEATEGTMATLRCQMSKAAPVEWRKGTETLRDGD
RYSRQDGAMCELQICDLAVEDTGDYSCVCGQEKSATLSVKAPQVVFQQLQNLQAEEGSMASLRCELSVFN
AAMVWSKGGLELQGDTRREARQQGCVAELLLRDLRREDAGEYSCVCGSQTTSATLMVTAAPVRFRLRLQAQDV
DEGATARLRCELSREAVSVEWRKGSLLQFPKAKYQMVQEGTTAELLVHGVEQEDAGEYTC DAGHTQSIARLSV
RAPKPKFKTDLQSTEQEAGGTARLCCQLSEAEPTPVQWLKEGVELHVGSKYEMRRQGA VCELLIHGLEAKDT
GEYACLVGQKTLASLRVKEPEVTIVRGLVDMVEQADEDEVEFTCKVSQAGATDVQWHLQGLPLQSNVTEVAV
LADGCTHVLQKLVLEDAAGTVSFHVGLSSSAQLTVRVEVTVLEPLKDVQLSEGQDAHFRCRLSRASGQEA
RWALGGVPLQCNEMNDITVEQGTLYLLTLHKVTLEDAGTITLQVGCSSSEAQLKVTAKNTVLRGLLENVDALLEG
GEALFECQLSQPEVAHAHTWLLDDEPVHTSEKVEVVYFENGLRHLLLLLNKLPQDSCRVTFLAGDVVTSAF LTV
RALPDPPEAEVVRSDHSVTLVSWAPMSDGGGGLCGYRVMKEASTGQWQLCHDLVPGPECVDDLVPGKTY
RFRVAAVGPAGAGEPVHLPQMVKIAPAPAPAPAPAPAPAPETRQAVVGEDICLELEVAADGGEV VWHKGTERRI
QPGHFVLSRGRQMLVIKGFRTEDQGEYRCGPIQGLPSSGAATFNVMVMTSGSGDEVPAQPSLPPEAAQEGD
LHLLWEALARKRRMSREPTLDSISELPEEDSRVQHLRQEAEEETAPDLSEGYSSTADELARTGEADLSHTSSDDE
SRAGTPSLVTYLKKAGGPGISPLASKHEAQVTTSVKPKQKQEPVVPVTPCPPPGDLSAADLMDPSLDKAAVKIQA
AFKGYKVRKEMKQEGPVFSRTFGDTEAQVGDVLRLECVLATKTDMRACWLKDGIELTDGRHYHIDQLKDGTC
SLLVTGLAPTDSGRYTCQVSTKSGRVSHSACVVVSGTESEAESSSGGELDDAFRRAARRLHRLFRTKSPAELS
EEELFLSADEGPGEPEEPADWQTYREDENFVCFIRFESLAEARQAVTCFRNMFATMGIVGIEISLGEQGRGVEM
RIGKVAPTPTPAVPLAKTPGLQTSDAAPVFLTELQNDVQDGYPMSFDCVVTGQPVPSVRWFKDGKLLLEEDDH
YMINEDQQGGHQLIITAVVPADMGVYRCLAENSMGVSSTKAELRVELTSTDYD TAADATETSSYFSAQGYLSS
REQEGTESDEGQLPQVLEELKDLQVAPGTRLAKFQLKVKGYPAKLYWFKDGOPLTSDHIRMTDKKTLHTLE
IVSVTREDSGQYAAIYI SNAVGAAYSSARLLVRGPSEPEEKPASDVHERLVPPRILEKFTPKKVKRGSITFSV
KVEGHPAPSVHHLKEEAEGVLIWIGPDTPGYTMASSSKQHSVLVLDVGRQHOGTYTCIATNPAGQALCSASLH
ISGLAKEEEQERVKEALISSFLQGTSQAVSAQMSEAGFADLVGQSKGESLVAAEEAHSHLSLAEVGTETEEFLQK
LTSQITEMVSAKISQAKLVPPGGDSDEETKTPSASPRHGRSRPSSSVQESSSESEEDGDSRGEIFDIYVVTADY
LPLGAEQDAIILREGQYVEVLDSAHPLRWLVRTKTKSSPSRQGWVSPAYLDKRLKLSPEWGPTEAEPFPGA
VSEDEYRTRLSSVIQELLSSEQAFVVELQFLES SHMKHLERSPRVPAAVASQKTVI FRNVQDISHFHSSFLKE
LQCGCTDDDVAMCFIKNQEA FEKYLEFLVGRVQAESVVVSTPVQEFYKKYAEETLSAKDPTQPPPPPLQHYLE
QPVERVQKYQALLKELIRNKARNRQNCALLEQAYAVVSALPQRAENKLVSLMENYPGTLEALGEP IRQGHFI
VWEGAPGARMPPWKGNHRHVFLFRNYLVICKPRRDSRTDTFSYVFRNMMKLSSIDLNDQVEGDRAFEVWHERE
DSVRKYLQARTVI IKNSWVKEICGIQORLAQPVWRPPEFEELADCTAELGETVKLACRVTGTPKPIVSWYK
DGKPVVEVDPHHILIEDPDGSC TLI LDNLTGIDSGQYMCFAASAAGNASTLGKILVQVPPRFVNVKRATPFVEG
EDAQITCTVEGAPYPQIRWYKDGTL LAPGNRYRMLNEPRSGVLVVIQAASKEDLGHYECELVNRLGSTRGGG
ELYMQSPALRARDQHHREQIVAAVEGAPSMQVTIEDVQVQVGDMAQF DAVIEGHPPP IVTWYKGTSTQLTSSAR
LSQRQDGTYSLVLT DVAPHDAGVYTCVANNAGQVLCKAELLVHGGDKLDAENQVYRRLKHSFYDVQEEIGR
GVFGFVKRVQHKGKMFCAAKFIPLRSKTRAQAYQERDILATLGHPLVTGLLDQFETRKTLLIILELCSSEEL
LDRLFKKGVVTEAEVKVYIQQLVEGLHYLHSHGILHLDIKPPNII MVHPAREDIKICDFGFAQKI TPSEPQYS
KYGSPFVSP EII EQNPVSEGS DIWAMGVISYLSLTCSSPFAGESDRATLLNVLEGRVSWSSPTAAHLS EDAK
DFIKATLQRTPRARPSTSQC LAHPWFLKSMPAAEAHFINTKQLKFL LARSRWQRSLMSYKSI LVMRSIPELLQ
GPPDSPSLGVARHLRGEASGASSSSSSSDNELAPFARAKSLPPSPVTHSPLLHPRGFLRPSASLPEETEASMP
TADA AVPAS PQSAGPPASPGCVPRHSV ISSLFYQQAGEGAERGNKTS GAKRHPARRRHLLKGGYIARALPGLR
EPLMEYSLLEEEAAREEQASLMTKTPSFETALRLPSSSVREV PGRSHSLDNPPVTTGPSPEACKEQLLFPST
GLTHETAKDRGHKEGFLQESVFPFPMMSGDSRPGKQEGSSQDSCRGKPASSCHSELGSGSQEGCGPPSSQSLG
SLPPQSLKKELTSTCGPLFSEQPQAAPFPTQVSPLLGSEKEPQDGSLSSEGVPVPSSPGSASQVDA SLDTEG
LSEAGDTCDFLTPPPQRPQEATTRKFSLESRGGYAGVAGYGTFAFGDAGGMVLGQGPLWARMAWAVSQSSEEQ
DEAATESPQPLESGLPIAEASGVPLRTSPSLTPWEEVEQVSLVQIRDLSGDAEAADTISLDISEVDPAYLNLS
DLYDIKYL PFEFMI FRRVPKPIEQPESPGSETEAGQLADFL EEAAPWPWGPGLGLRAGLEITEEPEEPGDLEA
LLGEAAVGRKRKWSPSRGLFQFPGRCLSGEEPVELGLRQRVKASMAHISRILKGRPEGPEREPPRKKAGLAS
FRLSGLKGRDQELSDEAVVLGQSVTLACQVLAQPTAQTWSKDGVLLESSGHLLISSTLKNFQLLTI LVVKEE

DLGTYTCCVSNPLGTAVTTGVLKRAERPSSSPRPEVGEYKDAVLLVWKPVESECGPVTYIVQCCIEGGSWTTL  
ASDISDCCYLTKGLSRGGMYIFRTACVSKAGMPYSSPSEQVLLGGPNHLASEEESSRGRPAQLLPSTKTF  
QMQIRRRGRFSVVRQCREKASGRALAAKIVPYQPEDKTAVLREYEALKRLLHHPHLAQLHAAYLSRHLVLI  
LELCSGPELLPSLAERESYSESDVKDYLWQMLSATQYLHAQHILHLDLRSNNMMVTEYNLLKVIDLGN  
AQSLDQEKVPAPENFKDYLETMAPELLEGQAVPQTDIWAIGVTAIFIMLSGEYPESEGETRDLQKGLR  
KGLIRLSRCYAGLSGGAVAFLLQSSSLCAQPWGRPCASTCLQCGWLTEEGPTGSRPTVTFPTVRLRA  
FVREEREKRRALLYKXKHNLAQVR\*

>rs45807983\_ENSMUSP00000049737\_c.4335:G>T\_p.A1446S

ENSMUST00000052872.15|Obscn-203|ENSMUSG00000061462|-|chr11:g.58997364:C>A  
MDHSFSGAPRFLTRPKAFVSVGKDATLSCQIVGNPTPHVSWEKDRQPVEAGARFRLAQDGDVYRLTILDLAL  
GDSGQYVCRARNAIGEFAAVGLRVDSEGTCAEQAPHFLLRPTSIRVREGADATFRCRVGGSPQPAVSWSKDG  
RRLGPPDAPHVRVEEHGESSALRIRSARPRDGGTYEVRAENPLGSASAAAALVVDSDAEVAGPPGTSTATLLA  
HLQQRREAMRAEGIPPSPPGAGTRTCTVTEGKHARLSCFVTGEPKPEVWKKDQGLVTEGRRHVVEDEQENF  
VLKILFCKQSDRGLYCTASNLVQTYSSVLVVVREPTVPPFKKRLQDLEVREKESATFQCEVAQAPATEAAWFK  
EETRLWASAKYDIEEEGETERRLTVRNVSADDDAVYICETTEGSRVVAELSVQGNLTKLPRKTAVRTGDTAIF  
WVELAVPEGPVWRWRNQEEMVAGGRVAITAEGTCHTLTI FQCTLEDMGEVAFVSGGCRTTTQFCVSAPRRPPL  
YPPADFPVVKAKTESSVTLWSAPPHGDRPVTIDGYVLEKRLGAYAWSRCHEAGWLATTEFTITGVAEEGDFQ  
FRVSAINHFGQGPYLEFPGMTMLVPLAVKTPLKAVEAVEGGEVTFVSDLTVAASSGFLDGEALKASSIYVI  
RCDRTRHMLTIREVPARLHGAQLKFVANGIETSIQMVVRAALGLPSSKLPAAAAAREVLAQLHEEAQLLAE  
LSDQAAAVTWLKDGRELSLGPYEMQVSAGRRALLVRDVAQDDAGLYECVSRGSRATAYQLLVQEPKLVFAK  
GQQAHEVKAEGNSATLSCEVTQAQTEVTWFKDGKLLSSSSKVRMEASGCSRRLVVQQAGKADAGEYS  
CEAGGQKLSFRLDVAEPKLVFAKQQAHEVKAEGASATLSCEVAQAQTEVTWFKDGKLLSSSSKVRMEAS  
GCSRRLVVQQAGKADAGEYSCEAGGQKLSFRLDVAEPKLVFAKEQQARSEVKAEGASATLSCEVAQAQ  
TEVTWFKDGKLLSSSSKVRMEASGCSRRLVVQQAGKADAGEYSCEAGGQKLSFRLDVAEPKLVFAKEQ  
QARSEVKAEGNSATLSCEVAQAQTEVTWFKDGKLLSSSSKVRMEASGCSRRLVVQQAGKADAGEYS  
CEAGGQKLSFRLDVAEPKLVFAKEQQARSEVKAEGASATLSCEVAQAQTEVTWFKDGKLLSSSSKVR  
MEASGCSRRLVVQQAGKADAGEYSCEAGGQKLSFRLDVTEPKLVFAKEQQARSEVKAEGNSATLSCE  
VAQAQTEVTWFKDGKLLSSSSKVRMEASGCSRRLVVQQAGKADAGEYSCEAGGQKLSFRLDVAEPKLV  
FAKEQQARSEVKAEGNSATLSCEVAQAQTEVTWFKDGKLLSSSSKVRMEASGCSRRLVVQQAGKADAGE  
YSCEAGGQKLSFRLDVAEPKLVFAKEQQARSEVKAEGASATLSCEVAQAQTEVTWFKDGKLLSSSSK  
VRMEASGCSRRLVVQQAGKADAGEYSCEAGGQKLSFRLDVAEPKLVFAKEQQARSEVKAEGASATLS  
CEVAQAQTEVTWFKDGKLLSSSSKVRMEASGCSRRLVVQQAGKADAGEYSCEAGGQKLSFRLDVAEP  
KLVFAKEQQARSEVKAEGASATLSCEVAQAQTEVTWFKDGKLLSSSSKVRMEASGCSRRLVVQQAGK  
ADAGEYSCEAGGQKLSFRLDVAEPKLVFAKEQQARSEVKAEGASATLSCEVAQAQTEVTWFKDGKLL  
SSSSKVRMEASGCSRRLVVQQAGKADAGEYSCEAGGQKLSFRLDVAEPKLVFAKEQQARSEVKAEGAS  
ATLSCEVAQAQTEVTWFKDGKLLSSSSKVRMEASGCSRRLVVQQAGKADAGEYSCEAGGQKLSFRLD  
VAEPKLVFAKEQQARSEVKAEGASATLSCEVAQAQTEVTWFKDGKLLSSSSKVRMEASGCSRRLVV  
QQAGKADAGEYSCEAGGQKLSFRLDVAEPKLVFAKEQQARSEVKAEGASATLSCEVAQAQTEVTWFKD  
GKLLSSSSKVRMEASGCSRRLVVQQAGKADAGEYSCEAGGQKLFRLDVAEPKLVFAKEQQARSEV  
KAEGASATLSCEVAQAQTEVTWFKDGKLLSSSSKVRMEASGCSRRLVVQQAGKADAGEYSCEAGGQ  
KLSFRLDVAEPKLVFAKEQQARSEVKAEGASATLSCEVAQAQTEVTWFKDGKLLSSSSKVRMEASG  
CSRRLVVQQAGKADAGEYSCEAGGQKLSFRLDVAEPKLVFAKEQQARSEVKAEGASATLSCEVAQAQ  
TEVTWFKDGKLLSSSSKVRMEASGCSRRLVVQQAGKADAGEYSCEAGGQKLSFRLDVAEPKLVFAKE  
QQARSEVKAEGASATLSCEVAQAQTEVTWFKDGKLLSSSSKVRMEASGCSRRLVVQQAGKADAGEYS  
CEAGGQKLSFRLDVADTRLMFAKEQQARTEVKAEGNSATLSCEVAQAQTEVTWFKDGKLLSSSSKVR  
MEASGCSRRLVVQQAGKADAGEYSCEAGGQKLSFRLDVAEAEESQIPERPSRREPLVVKEHETIIL  
TATIAAPSVAAVTWLKDGVEIRRSKRHEATSLGDHTLTVRGAQVLDLSAIYSCRVGKEGQDFPVQVE  
EVAAKFKSKPLEPVEGELGGTVMLVCELSPEQAQEVVWRCGNTQLRPGKRFQMTSEGPRRTLTVSG  
LREDDAEYVCESTRDDRTSARLTVKVPVVKFTSGLSAMVAEEGQEATFQCVVSPSDAGVTWYKDG  
MQLQPEKFMVMSGASRSLTILGLTLEDAGQVTV EAEGASSAALRVREAPVLFKFKLEPQTVEERTS  
VTLELVTRPWPVEVKWTRNAAVLTPSENVEIRAEGARHCLVLRVSGFADRGFFGCETPDDKTQAK  
LNVEMRQVRLVVRGLQVEVAKEQGTASMDVELSHAEVEGSWTRDGLRQLPGPKCHLAVQGPVHIL  
TLSALQPQDSGLVAFRAEGVHTSARLIVTELPVSFTRVLQDQVATQKEKVTLECEL SRPVDVR  
WRLKDGVELRAGKAIIGIVAQGTCSRSLVIYRCETGDQGVYVCDALDAQTSASLRVQGRYTLIFRR  
VLAEDAGEVVFVAENAESRAHLRVKELPVTLRPLRDKIAMEKHRGVLECVSRASAVRWFVKG  
GVELQSGPKYEVVSDGLYRKLVINVDVQPEDEDYTCDAAGNVKTSAQFFVEEQSITIVRGLKDM  
TVMEPAPAWFECETSIPSVRPKWLLGKTVLQAGGNVGLQDGTVHRLTLHKTCSTMTGPVHFTI  
GKSRSSAQLVVSDIPVVLTRPLEPKAGRELQSVVLSCDFRPPAPKAVQWYKDDTPLSPSEKFK  
MALEGQMAELRILRLTPADAGVYRCQAGSAQSSAEVTVEARVTVIQPLQDAEAMEEGRVCF  
SCELSHKDEDI EWSLNGTPLYNDSFHEISHEGCLHTLVLSKVRQADTGTVCATSPKVS  
VSARLVVKGKPVVFLKALDDVSAEERGTLLTQCEVSDPEARVVWRKDGVELGPSDKYDFLH  
KAGARGLTVHDLSDHEDAGLYTCQVGSKETQSKVSVHDLHVGITKRLKTVEVLEGE  
SCSFCVLSHESPSDPVAVTVGGKTVGSGHFHAVRQGRKYTLTVKDAALSDAGEV  
VSVLGLTASKASLIRERPVDTIKPLEDQRTTLGEDVMLSCELSRAGTSVRWLRKDKA  
IRKSQKYDLLSEGTRAVLVVRKASLKDSEGYTCETEASKSTAKLCEVEKANRFTE  
ELADLQVEEKGRAVFTCKTEHPASVVTWRKGLLELRASGKHVPSQEGTLTKLTINALERT  
SDTYTCDIGQARTQARLLVHGQKVRVIEDLEDTAVQEGSSAKFCCRIAPADYGPVH  
WFLDKTPLHSNELNEITVQPGGYHVLTLRQLALKDSGTVYFEAGDQRTSAA  
LRVTEKPSIFSRPLTDVTVTEGEDTLVCETTTTVDSSVRWTKDGKTLRPSARC  
QLSHEGCAQLLITATTPQDGGRYKCEIGGASSSSIVRVHALPVRFRRESLKDVEV  
PEGKAATLRCVLSVA

APVEWRHGDDVLKSSNKYSLRQEGAVLELVIRDLQPQDSGQYSCSFGDQTTSATLTVKTSQAQVFGKLRNKEA  
TEGTTVTLRCELTKKEAPVEWKKGTETLRNGDKYSLKQDQAVCELQICSLLVADAGEYSCVCGQEKTSATLTVK  
ALLVHFVRRRLRSKEATEGDTTTLQCELSKAAPVEWRKGTETLRDGDYSLKQDQAVCELQIRSLTIADAGEYL  
CTCGQEKTSATLTVRALPAKFKDSLKNEEATEGTTATLSCELSKAAPVTWKKGPKTLQSGDKYVLRQDQAVCG  
LQIHGLTMADAGEYSCVCGQEKTSATLTVRGLPAKFIEDLRSQEATEGATAILRCELSKAAPVEWRKGTETL  
DGDYTLRQDQAVCELQIRGLAVVDTGTYSLPTKFTTEGLRNEEATEGTMATLRCQMSKAAPVEWRKGTETL  
DGDYSLRQDQAVCELQIRGLTIEDSGEYTCVCGQEKTSATLSVKALPSRFIEDLRSQEATEGTMATLRCQMS  
KTAPVEWKKGSETLRDGGYSLRQDQAVCELQICDLAVEDAGEYSCVCGQEKTSATLSIKALPPRFIEDLRSQ  
EATEGTMATLRCQMSKAAPVEWRKGTETLRDGGYSLRQDQAVCELQIHDLAVEDTGEYSCVCGQEKTSATLN  
VKALPPRFIEDLRSQEATEGTMATLRCQMSKAAPVEWRKGTETLRDGGYSLRQDQAVCELQIHDLVEDAGQ  
YSCVCGQEKTSAVLTVDALPPKFTTEGLKKEEATEGTMVTLRCQMSKEATVEWRKGAKTLSDDGGYSLRQDQAV  
CELQICGLAVEDAGEYSCVCGQEKTSATLSVKALPPRFIEDLRSQEATEGTMATLRCQMSKAAPVEWRKGTET  
LRDGDYSLRQDQAVCELQIRDLAVEDAGEYLCVCGQEKTSATLSVKALPPRFIEDLRSQEATEGTMATLRCQ  
MSKAAPVEWRKGTETLRDGGYSLRQDQAVCELQICDLAVEDTGDYSCVCGQEKTSATLSVKALPPRFIEDLR  
SQEAREGTVATLRCRMSKAAPVEWRKGTETLRDGGYSLRQDQAVCELQIRDLAVEDTEEYSCVCGQEKTSAT  
LSVKALPAKFIEDLRSQEAPESSTVTLRCKLSKASVWKKGSETLRNGARYSLRQDQAVCELEIRDLTVEDT  
GEYSCVCGQEKTSATLSIMAPQVVFQQLQNLQAEEGSMASLRCELSVPNAAMVWSKGGLELQGDTRREARQQ  
GCVAEALLRDLRREDAGEYSCVCGQEKTSATLMVTAAPVRFRLRLQAQDVDEGATARLRCLEASREAVSVEWRK  
GSLQLFPCAQYQMVQEGTAEALLVHGVEQEDAGEYTCDAHGHTQS IARLSVRAPKPKFKTDLQSTEQEAGGTAR  
LCCQLSEAEPTPVQWLKEGVELHVGSKYEMRRQAVCELLIHGLEAKDTGEYACLVGQKTLASLRVKEPEV  
TIVRGLVDMVEQADEDEFTCKVSAQATDVQWHLQGLPLQSNVTEVAVLADGCTHVLQKGVTLQDAGTVS  
FHVGLSSSAQLTVRVPEVTVLEPLKDVQLSEGQDAHFRCRLSRASQEARWALGGVPLQCNEMNDITVEQGT  
LYLLTLHKVTLQDAGTITLQVGSSEAEQLKVTAKNTVLRGLENVDALEGGALFECQLSQPEVAHTWLLDD  
EPVHTSEKVEVVYFENGLRHLLLLKLNKLPQDSCRVTFLAGDVVTS AFLTVRGWRLEVLPEPHDASVKAGMQR  
FTCILSEAVPVGEATWYINGAAIQPDDTWTVTDDGSHHALTSLNAQPHAGEVTF AARDAVASARLSVLALP  
DPPEDAEEVGRSDHSLVLSWVAPMSDGGGGLCGYRVEKMEASTGQWQLCHDLVPGPECVDDLVPGKTYRFRV  
AAVGPAGAGEPVHLQPMVKIAPAPAPAPAPAPAPAPAPETRQAVVGEDICLELEVAADGGEVWVKGTERIQPGG  
HFEVLSRGRQMLVIKGFRTEDQGEYRCGPIQGLPSSGAATFNVMVMTSGSGDEVPAQPSLPPPEAAQEGDLHLL  
WEALARKRRMSREPTLDSISELPEEDSRVQHLRQEAEEETAPDLSEGYSTADELARTGEADLSHTSSDDESRA  
TPSLVTVLKKAGGPGISPLASKHEAQVTTSVKPKQKQEPVPTCPPPGDLSAADLMDPSLDKAAVKIQAAFQK  
YKVRKEMKQQEGPVFSRTFGDTEAQVGDVLRLECVLATKTDMRACWLKDGIELTDGRHYHIDQLKDGTCSLLV  
TGLAPTDSGRYTCQVSTKSGRVSHSACVVVSGTESEAESSSGGELDDAFRRAARLHRLFRTKSPAELSEEEL  
FLSADEGPEPEEPADWQTYREDENFVICIRFESLAEARQAVTCFRNMFATMGIGVEISLGEQGPGRVEMRIGK  
VAPTVTAVPLAKTPGLQTS DAAPVFLTELQNDQVQDGYPMSFDCVVTGQPVPSVRWFKDGKLEEDDHMIN  
EDQQGGHQLIITAVVPADMGVYRCLAENSMGVSSTKAELRVELTSTDYDTAADATETSSYFSAQGYLSSREQE  
GTESDEGLPQVLEELKDLQVAPGTRLAKFQLKVKGYPAKLYWFKDQGPLTSDHIRMTDKKTLHTLEIVSV  
TREDSGQYAAIYISNAVGAAYSSARLLVRGPSEPEEKPASDVHERLVPRILEKFTPKKVKRGSSTIFSVKVEG  
HPAPSVHVLKEEAKEKGVWLGPDTPGYTMASSSKQHSVLVLDVGRHQGTYTIC IATNPAGQALCSASLHISGL  
AKEEEQERVKEALISSFLQTSQAVSAQMSSEAGFADLVGQSKGESLVAEEAHSHLSLAEVGTTEFLQKLT SQ  
ITEMVSAKISQAKLQVPGGDSDEETKTPSASPRHGRSRPSSSVQESSSESEDGDSRGEIFDIYVVTADYLPGL  
AEQDAIILREGQYVEVLDSAHPLRWLVRTKPTKSSPSRQGWVSPAYLDKRLKLSPEWGPTEAPEFPGEAVSED  
EYRTRLSSVIQELLSSEQAFVGELEQFLESHHMKHLERSPRVPAVASQKTVIFRNVQDISHFHSSFLKELQGC  
GTDDDVAMCFIKNQEA FEKYLEFLVGRVQAESVVVSTPVQEFYKKYAEETLSAKDPTQPPPPLOHYLEQVVE  
RVQKYQALLKELIRNKARNRQNCALLEQAYAVVSALPQRAENKLVHSLMENYPGTLEALGEP I RQGHFIVWEG  
APGARMFWKGNHRHVF LFRNYLVICKPRRDSRTDTFSYVFRNMMKLSSIDLNDQVEGDDRAFEVWHEREDESVR  
KYLQARTVI IKNSWVKEICGIQQLAQPVWRPPEFEELADCTAELGETVKLACRVTGTPKPIVSWYKDGKP  
VEVDPHHILIEDPDGSC TLI LDNLTGIDSGQYMCFAASAAGNASTLGKILVQVPPRFVNVKVRATPFVEGEDAQ  
ITCTVEGAPYPQIRWYKDGTL L APGNRYRMLNEPRSGVLV LVIQAASKEDLGHYECELVNRLGSTRGGGELYM  
QSPALRARDQHHREQIVAAVEVTEQETKVPKKTV I I EETITTVVKS PRGRRQSPGKSPSRSPRRSASPRRPG  
LLAPERLYPPGTS PSRRLEVEQGRKAPVPALYVTEAEVHAPASQSPKWLEVEETIEVRVKKTGSRGASPVRE  
MTRSREGILFTLPGGIPGRDPNANNNSNNSVYQEARWGPVAVHVGEFFIFQVDSVGNVDWVAASPEPEQVRA  
SQKEENTERQEGCSDGDENTFLMEEPQD TDSLQGRDPKILTHNGRVLTLADLEDYVPQEGETFGCGDSTPSTP  
DEPPCEVSVLQREI SEPTVGGQPVLLNVGRPPGTGATPSFFRPGSQVHSPESVVSFLLREAWSGPVSAAPWTSSF  
HTHVQSSVDGSHGSKFTEVSTQTVSFGAVGETVTLHIDPDGGEAPGPSQ\*

>rs45807983 ENSMUSP00000020732\_c.4536:G>T\_p.A1513S  
ENSMUST00000020732.13|Obscn-201|ENSMUSG00000061462|-|chr11:g.58997364:C>A  
MDHSFSGAPRFLTRPKAFVSVGKDATLSCQIVGNPTPHVSWEKDRQVPEAGARFRLAQDGDVYRLTILDLAL  
GDSGQYVCRARNAIGEAFVAVGLRVDSEGTCAEQAPHLLRPTSIRVREGADATFRCRVGGSPQPAVSWSKDG

RRLGPPDAPHVRVEEHGESSALRIRRSARPRDGGTYEVRAENPLGSASAAAAALVVDSDAEVAGPPGTSTATLLA
HLQORREAMRAEGIPSPPGAGTRTCTVTEGKHARLSCFVTGEPKPETVWKKDQGLVTEGRRHVVEDEQENF
VLKILFCKQSDRGLYTCTASNLVQTYSSVLVVVREPTVPFKKRLQDLEVREKESATFQCEVAQPATEAAWFK
EETRLWASAKYDIEEEGETERRLTVRNVSADDDAVYICETTEGSRVVAELSVQGNLTKRKLPRKTAVRTGDTAIF
WVELAVPEGPVRWLRNQEEMVAGGRVAITAEGTCHTLTI FQCTLEDMGEVAFVSGGCRTTTTQFCVSAPRRPPL
YPPADPVVKAKTESSVTLWSAPPHGDRPVTIDGYVLEKRKL GAYAWSRCHEAGWLATTEFTITGVAAEEDGFQ
FRVSAINHFGQGPYLEFPGTMHLVPLAVKTPKAVEAVEGGEVTFVSVDLTVASSGEWFLDGEALKASSIYVI
RCDRTRHMLTIREVPARLHGAQLKVFVANGIETS IQMVVRAALGLPSSKLPAAAAREVLAQLHEEAQLLAELSD
QAAAVTWLKDGRELSLGPKYEMQVSAGRRALLVRDVAQDDAGLYECVSRGSRRTAYQLLVQDITDGYRDWGPAG
PQKHMCKCAGAKIARYLGSSCYRFLQYDKGVWHLEAALDTRQGKGTSSCSLHEKPKLVFAKQQAHSEVKA
AGNSATLSCEVTQAQTEVTWFKDGKLLSSSSKVRMEASGCSRRLVVQQAGKADAGEYSCEAGGQKLSFRLDVA
EPKLVFAKQQAHSEVKAEGASATLSCEVAQAQTEVTWFKDGKLLSSSSKVRMEASGCSRRLVVQQAGKADA
GEYSCEAGGQKLSFRLDVAEPKMFVFAKEQQARSEVKAEGASATLSCEVAQAQTEVTWFKDGKLLSSSSKVRM
EASGCSRRLVVQQAGKADAGEYSCEAGGQKLSFRLDVTEPKLVFAKEQQARSEVKAEVGNSATLSCEVAQAQ
EVTWFKDGKLLSSSSKVRMEASGCSRRLVVQQAGKADAGEYSCEAGGQKLSFRLDVAEPKLVFAKEQQARSE
KAEAGNSATLSCEVAQAQTEVTWFKDGKLLSSSSKVRMEASGCSRRLVVQQAGKADAGEYSCEAGGQKLSFHL
DVTEPKLVFAKEQQAHSEVKAEGASATLSCEVAQAQTEVTWFKDGKLLSSSSKVRMEASGCSRRLVVQQAG
ADAGEYSCEAGGQKLSFRLDVAEPKLVFAKEQQARSEVKAEGASATLSCEVAQAQTEVTWFKDGKLLSSSS
VRVEASGCSRRLVVQQAGKADAGEYSCEAGGQKLSFRLDVAEPKLVFAKEQQSNSEVKAEGASATLSCEVAQ
AQTEVTWFKDGKLLSSSSKVRVEASGCSRRLVVQQAGKADAGEYSCEAGGQKLSFRLDVAEPKLAFAKEQQA
SEVKAEGASATLSCEVAQAQTEVTWFKDGKLLSSSSKVRVEASGCSRRLVVQQAGKADAGEYSCEAGGQKLS
FRLDVAEPKLAFAKEQQAHEVKAEGASATLSCEVAQAQTEVTWFKDGKLLSSSSKVRVEASGCSRRLVVQQ
AGKADAGEYSCEAGGQKLSFRLDVAEPKLAFAKEQQAHEVKAEGASATLSCEVAQAQTEVTWFKDGKLLSS
SSKVRVEASGCSRRLVVQQAGKADAGEYSCEAGGQKLFRLDVAEPKLMFAKEQQAHEVKAEGASATLSCE
VAQAQTEVTWFKDGKLLSSSSKVRVEASGCSRRLVVQQAGKADAGEYSCEAGGQKLSFRLDVAEPKLVFAKEQ
QAHEVKAEGASATLSCEVAQAQTEVTWFKDGKLLSSSSKVRVEASGCSRRLVVQQAGKADAGEYSCEARGQ
KLSFRLDVADTRMFAKEQQARTEVKAEGASATLSCEVAQAQTEVTWFKDGKLLSSSSKVRVEASGCSRRLV
VQQAGKADAGEYSCEAGGQKLSFRLDVAEAEESQIPERPSRREPLVVKEHETIILTATIAAPSVAAVTWLKDG
EIRRSKRHEATSLGDTHTLTVRGAQVLDSAIYSCRVGKEGQDFPVQVEEVAAKFSKPLEPVEGELGGTVMLVC
ELSPQAEVWRCGNTQLRPGKRFQMTSEGPRTTLTVSGLREDDAEYVCESRDDRTSARLTVKVPVVKFTS
GLSAMVAEEGQEAFTQCVVSPSDAGVTWYKDGMLQPSKFKVMVESGASRSLTILGLTLEDAGQVTVAEAGAS
SSAALRVREAPVLFKKLEPQTVERTSVTLEVELTRPWPEVKWTRNAAVLTPSENVEIRAEGARHCLVLRV
GFADRGGFFGCETPDDKTQAKLNVEMRQVRLVVRGLQVEVEAKEQGTASMDVELSHAEVEGSWTRDGLRLQF
HLAVQGPVHILTLALSALQPDQSGLVAFRAEGVHTSARLIVTELPVSFTRVLQDVVATQKEKVTLECELSRPV
RWLKDGVLELRAGKAIGIVAQGTCSRSLVIYRCETGDQGVYCDALDAQTSASLRVQGRYTYLIFRVLAEADAGE
VKEVAENAESRAHLRVKELPVTLLRPLRDKIAMEKHRGVLECGVSRASAQVRWFKGGVLELQSGPKYEVVSDGL
YRKLVINVDQPEDEDTYTCDAENVKTSAQFFVEEQSITIVRGLKDMTVMPEPAPAWFECETSIPSVRPPKWL
KTVLQAGGNVLEQDGTVHRLTLHKTCSTMTGPVHFTIGKSRSSAQLVSDIPVVLTRPLEPKAGRELQSVVL
SCDFRPAPKAVQWYKDDTPLSPSEKFKMALEGQMAELRILRLTPADAGVYRCQAGSAQSSAEVTVAREVTVI
QPLQDAEAMEEGRVCFSCELSHKDEDEIWSLNGTPLYNDSFHEISHEGCLHTLVLSVRQADTGTVCATSPKV
SVSARLVVKGKPVVFLKALDDVSAEERGTTLTQCEVSDPEARVVWRKDGVELGSDKYDFLHKAGARGLTVHD
LSHEDAGLYTCQVGSKETQSKVSVHDLHVGITKRLKTVEVLEGESECSFECVLSHESPSDPAVWTVGGKTVG
GHFHAVRQGRKYTLTVKDAALSDAGEVVSVLGLTSKASLIIRERPVDITKPLEDQRTTLGEDVMLSCELSRA
GTSVRWLKDGKAIRKSQKYDLLSEGTRAVLVVRKASLKDSGEYTCETEASKSTAKLCEVEKANRFTBELADLQ
VEEKGRAVFTCKTEHPASVVTWRKGLLELRASGKHVPSQEGTLKLTINALERTDSDTYTCDIGQARTQARLL
VHGQKVRVIEDLEDTAVQEGSSAKFCRIAPADYGPVHWFLDKTPLHSNELNEITVQPGGYHVLTLRQLAL
SGTVYFEAGDQRTSAALRVTEKPSIFSRPLTDVTVTEGEDTLVCEETTTVDSSVRWTKDGKTLRPSARCQLSH
EGCQALLITATTPQDGGRYKCEIGGASSSSIVRVHALPVRFRFRESLKDVEVPEGKAATLRCVLSVAAPVEWR
HGDDVLKSSNKYSLRQEGAVLELVIRDLQPDQSGQYSCSFGDQTTSATLTVKTSQAQFVGLKRNKEATEGTTV
TLRCELTKAEAPVEWKKGTETLRNGDKYSLKQDGAVCELQICSLVADAGEYSCVCGQEKTSATLTVKALLVHF
VRLRSKEATEGDTTLQCELSKAAPVEWRKGTETLRDGDYSLKQDGAVCELQIRSLTIADAGEYLCTCGQE
KTSATLTVRALPAKFKDSLKNEEATEGTTATLSCELSKAAPVWKKGPKTLQSGDKYVLRQDGAVCGLQIHGL
TMADAGEYSCVCGQEKTSATLTVRGLPAKFIEDLRSQEATEGATAILRCELSKAAPVEWRKGSSETLKDGDYR
LRQDGAVCELQIRGLAVVDGTYSLSLPTKFTTEGLRNEEATEGTMATLRCQMSKAAPVEWRKGSSETLRDGDY
LRQDGAMCELQIRGLTIEDSGEYTCVCGQEKTSATLSVKALPSRFIEDLRSQEATEGTMATLRCQMSKTPAVE
WKKGSETLRDGGYSLRQDGPVCELQICDLAVEDAGEYSCVCGQEKTSATLSIKALPPRFIEDLRSQEATEG
MATLRCQMSKAAPVEWRKGSSETLGDGGYSLRQNGAVCELQIHDLAVEDTGEYSCVCGQEKTSATLNVKALPP
RFIEDLRSQEATEGTMATLRCQMSKAAPVEWRKGSSETLRDGGYSLRQDGAVCELQIHDLVEDAGQYSCVCG

QEKTSAVLTVDALPPKFTEGLKKEEATEGTMVTLRCQMSKEATVEWRKGAKTSLSDGGRYSLRQDGAMCELQIC  
GLAVEDAGEYSCVCGQEKTSATLSVKALPPRFIEDLRSQEATEGTMATLRCQMSKAAPVEWRKGETLRDGD  
YSLRQDGAVCELQIRDLAVEDAGEYLCVCGQEKTSATLSVKALPPRFIEDLRSQEATEGTMATLRCQMSKAAP  
VEWRKGSKTLRDGDYSLRQDGAMCELQICDLAVEDTDYSCVCGQEKTSATLSVKALPPRFIEDLRSQEARE  
GTVATLRCRMSKAAPVEWRKGETLKDGDYSLRQEGNLCELQIRDLAVEDTEEYSCVCGQEKTSATLSVKAL  
PAKFIEDLRSQEAPESSTVTLRCKLSKKASVVWKKGSETLRNGARYSLRQDGAVCELEIRDLTVEEDTGEYSCT  
CGQERTSATLSIMAPQVVFQQPLQNLQAEEGSMASLRCELSVPNAAMVWSKGGLELQGDTRREARQQGCVAEL  
LLRDLRREEDAGEYSTCGSQTTSATLMVTAAPVRFLELQAQDVDEGATARLRCELSREAVSVEWRKGSLLQF  
PCAKYQMVQEGTTAELLVHGVQEEDAGEYTCDAAGHTQSIARLSVRAPKPKFKTDLQSTEQEAGGTARLCCQLS  
EAEPTGTPVQWLKEGVELHVGSKYEMRRQGAUCELLIHGLEAKDTGEYACLVGGQKTLASLRVKEPEVTIVRGL  
VDMEVQADEDEFTCKVSOAGATDVQWHLQGLPLQSNVTEVAVLADGCTHVLQKGVTLLEDAGTVSFHVGGL  
SSSAQLTVRVPEVTVLEPLKDVQLSEGQDAHFRCRLSRASGQEARWALGGVPLQCNEMNDITVEQGTLYLLTL  
HKVTLEDAGTITLQVGSSESQAQLKVTAKNTVLRGLENVDALEGGEALFECQLSQPEVAHAHTWLLDDEPVHTS  
EKVEVVYFENGLRHLLKLNKLPQDSCRVTFLAGDVVTSFAFLTVRGWRLEVLPEPHDASVKAGMQVRFCTILS  
EAVPVGEATWYINGAAIQPDDTDWTVTTDGSHHALTLSNAQPQHAGEVTFAAARDAVASARLSVLALPDPPEDA  
EUVGRSDHSVTLWSVAPMSDGGGGLCGYRVMKEASTGQWQLCHDLVPGPECVDDLVPGKTYRFRVAAVGPA  
GAGEPVHLQMVVIAAPAPAPAPAPAPAPAPAPETRAVGVEDICILEVAADGGEVWVKGTERIQPGGHFEVLS  
RQQRQMLVIKGFRTEDQGEYRCGPIQGLPSSGAATFNVMVMTSGSGDEVPAQPSLPPEAAQGERLHLLWEALAR  
KRRMSREPTLDSISELPEEDSRVQHLRQEAEEETAPDLSEGYSTADELARTGEADLSHTSSDDESAGTPSLVT  
YLKAGGPGISPLASKHEAQVTTSVKPKQKQEPVVPTCPPPGDLSAADLMDPSLDKAAVKIQAAPFKYKVRKE  
MKQQEGPVFSRTFGDTEAQVGDVLRLECVLATKTDMRACWLKDGIELTDGRHYHIDQLKDGTCSSLVTLGLAPT  
DSGRYTCQVSTKSGRVSHSACVVVSGTESEAESSGGELDDAFRAARRLHRLFRTKSPAELSEELFLSADE  
GPGPEEPADWQTYREDENFVCIRFESLAEARQAVTCFRNMFATMGIGVEISLGEQGPGRVEMRIKGVAPTVT  
PAVPLAKTPGLQTSDAAPVFLTELQNDVQDGYPMSFDCVVTGQPVPSVRWFKDGKLEEDDHYMINEDQQGG  
HQLIITAVVPADMGVYRCLAENSMGVSSTKAELRVELTSTDYDTAADATETSSYFSAQGYLSSREQEGTESDE  
GQLPQVLEELKDLQVAPGTRLAKFQLKVKGYPAKLYWFKDQGLTTSDDHIRMDDKTLHTEIVSVTREDPSG  
QYAAIYLSNAVWKEICGIQQRLAQPVWRPPEFEELADCTAELGETVVKLACRVTGTPKPIVSWYKDGKPEVDPH  
HWLKEEAKEKGLVWIGPDTPGYTMASSSKQHSVLVLDVGRQHQTGTYTCIATNPAGQALCSASLHISGLAKEEEQ  
ERVKEALISSFLQGTSAVSAQMSSESAGFADLVGQSKGESLVAEEAHSHLSLAEVGTTEFLQKLTSTITEMVS  
AKISQAKLQVPGGDSDEETKTPSASPRHGRSRPSSSVQESSESESDGDSRGEIFDIYVVTADYLPGLAEQDAI  
ILREGQYVEVLDSAHPLRVLVTRTKSPSRQGWVSPAYLDRKRLKLSPEWGPTEAPEFPGEAVSEDEYRTRL  
SSVIQELLSSEQAFVQELQFLESHHMKHLERSPRVPAAVASQKTVIFRNVQDISHFHSSFLKELQCGCTDDDDV  
AMCFIKNQEAFAKEYLEFLVGRVQAESVVVSTPVQEFYKKAEEETLSAKDPTQPPPPPLQHYLEQPVERVQKYQ  
ALLKELIRNKARNRQNCALLEQAYAVVSALPQRAENKLVSLMENYPGTLEALGEPHQGHFVWEGAPGARM  
PWKGNHRHVFLFRNYLVICKPRRDSRTDTFSYVFRNMMKLSSIDLNDQVEGDDRAFEVWHEREDSRKYLQ  
RTVILKNSWVKEICGIQQRLAQPVWRPPEFEELADCTAELGETVVKLACRVTGTPKPIVSWYKDGKPEVDPH  
HILIEDPDGCTLILDNLGTIDSGQYMCFAASAAGNASTLGKILVQVPPRFVNVKVRATPFVEGEDAQITCTVE  
GAPYPQIRWYKDGTLAPGNRYRMLNEPRSGVLVLIQAASKEDLGHYECELVNRLGSTRGGGELYMQSPALR  
ARDQHHREQIVAAVEERRPSP\*  
>rs45807983\_ENSMUSP00000151217\_c.4260:G>T\_p.A1421S

ENSMUST00000219084.3|Obscn-207|ENSMUSG00000061462|-|chr11:g.58997364:C>A  
MDHSFSGAPRFLTRPKAFVSVGKDATLSCQIVGNPTPHVSWEKDRQPVEAGARFLAQDGDVYRLTILDLAL  
GDSGQYVCRARNAIGEAFAAVGLRVDSEGTCAEQAPHFLLRPTSIRVREGADATFRCRVGGSPQPAVSWSKDG  
RRLGPPDAPHVRVEEHGESSALRIR SARPRDGGTYEVRANPLGSASAAAALVVDSDAEVAGPPGTSTATLLA  
HLQQRREAMRAEGIPSPPGAGTRTCTVTEGKHARLSCFVTGEPKPEVWKKDGLVTEGRRHVVEDEQENF  
VLKILFCKQSDRGLYTCTASNLVQGTYSVVLVVREPTVPFKKRLQDLEVREKESATFQCEVAQPATEAAWFK  
EETRLWASAKYDIEEGTERRLTVRNVSADDDAVYICETTEGSRVVAELSVQGNLTKLPRKTAVRTGDTAIF  
WVELAVPEGPVRWLRNQEEMVAGGRVAITAEGTCHTLTIFQCTLEDMGEVAFVSGGCRTTTQFCVSAAPRRPPL  
YPPADPVVKAKTESSVTLWSAPPHGDRPVTIDGYVLEKRKLGAYAWSRCHEAGWLATTEFTITGVAAEGDFQ  
FRVSAINHFGQGPYLEFPGTMHLVPLAVKTPKAVEAVEGGEVTFVSDLTVASSGEWFLDGEALKASSIYVI  
RCDRTRHMLTIREVPARLHGAQLKFVANGIETSIQMVVRAALGLPSSKLPAAAAAREVLAQLHEEAQLLAEALS  
QAAAVTWLKDGRELSLGPKEYMQVSAGRRALLVRDVAQDDAGLYECVSRGSRRTAYQLLVQDITDGYRDWGPAG  
PQKHMCKCAGAKIARYLGSSCYRFLQYDKGVWHWLEAALDTRQKGTSSCSLHEKPKLVFAKQQAHSEVKA  
AGNSATLSCEVTAQTEVTFWFKDGKLLSSSSKVRMEASGCSRRLLVVQQAGKADAGEYSCEAGGQKLSFRLDVA  
EPKLVFAKQQAHSEVKAAGASATLSCEVAQAQTEVTFWFKDGKLLSSSSKVRMEASGCSRRLLVVQQAGKADA  
GEYSCEAGGQKLSFRLDVAEPKMFVFAKEQQARSEVKAAGASATLSCEVAQAQTEVTFWFKDGKLLSSSSKVRM  
EASGCSRRLLVVQQAGKADAGEYSCEAGGQKLSFRLDVTEPKLVFAKEQQARSEVKAAGNSATLSCEVAQAQ  
EVTWFKDGKLLSSSSKVRMEASGCSRRLLVVQQAGKADAGEYSCEAGGQKLSFRLDVTEPKLVFAKEQQAHSEV



KAEAGASATLSCEVAQAQTEVTFWFKDGKLLSSSSKVRMEASGCSRRLVVQQAGKADAGEYSCEAEGQKLSFRL
DVAEPKLVFAKEQQARSEVKAEAGASATLSCEVAQAQTEVTFWFKDGKLLSSSSKVRVEASGCSRRLVVQQAGK
ADAGEYSCEAGGQKLSFRLDVAEPKLVFAKEQQSNSEVKAEAGASATLSCEVAQAQTEVTFWFKDGKLLSSSSK
VRVEASGCSRRLVVQQAGKADAGEYSCEAGGQKLSFRLDVAEPKLAFAKEQQAHSEVKAEAGASATLSCEVAQ
AQTEVTFWFKDGKLLSSSSKVRVEASGCSRRLVVQQAGKADAGEYSCEAGGQKLSFRLDVAEPKLVFAKEQQAH
SEVKAEAGASATLSCEVAQAQTEVTFWFKDGKLLSSSSKVRVEASGCSRRLVVQQVKGADAGEYSCEARGQKLS
FRLDVAEAEESQIPERPSRREPLVVKEHETIILTATIAAPSVAAVTWLKDGVETIRRSKRHEATSLGDHTLTVR
GAQVLDIAIYSCRVGKEGQDFPVQVEEVAAKFSKPLEPVEGELGGTVMLVCELSPEQAEVWRCGNTQLRPGK
RFQMTSEGPRTTLTVSGLREDDAEYVCESRDDRTSARLTVKVPVVKFTSGLSAMVAEEGQEATFQCVVSPS
DAGVTWYKDGMLQPSSEKFMVESGASRSLTILGLTLEDAGQVTVAEAGASSAALRVREAPVLFKFKLEPQT
VEERTSVTLEVELTRPWPEVKWTRNAAVLTPSENVEIRAEGARHCLVLRVSGFADRGFFGCETPDDKTQAKLN
VEMRQVRLVVRGLQEVEAKEQGTASMDVELSHAEVEGSWTRDGLRLQPGPKCHLAVQGPVHILTLTALQPDQSG
LVAFRAEGVHTSARLIVTELPVSFTRVLQDVVATQKEKVTLECELSRPVDVRWLKDGVELRAGKAI GIVAQGT
CRSLVIYRCETGDQGVYCDALDAQTSASLRVQGRYTLIFRRVLAEDAGEVKFVAENAESRAHLRVKELPVT
LLRPLRDKIAMEKHRGVLECVSRASAQVRWFKGGVELQSGPKYEVVSDGLYRKLVINDDVQPEDEDTYTC DAG
NVKTSAQFFVVEEQSITIVRGLKDMTVMEPAPAWFECETSIPSVRPPKWLKGKTVLQAGGNVLEQDGTVHRILT
LHKTCSTMTGPHFTIGKSRSSAQLVSDIPVVLTRPLEPKAGRELQSVVLSCDFRPAPKAVQWYKDDTPLSP
SEKFKMALEGQMAELRILRLTPADAGVYRCQAGSAQSSAEVTVAREVTVIQPLQDAEAMEEGRCVCFCELSH
KDEDIEWSLNGTPLYNDSFHEISHEGCLHTLVLKSVRQADTGTVCATSPKVSVSARLVVKGKPVVFLKALDDV
SAEERGTTLTQCEVSDPEARVVWRKDGVELGPSDKYDFLHKAGARGLTVHDLSHEDAGLYTCQVGSKETQSKV
SVHDLHVGITKRLKTVEVLEGESECFEVLSEHSPSPAVWTVGGKTVGGSGHFHAVRQGRKYTLTVKDAALS
DAGEVVSFVGLTSLKASLIIRERPVDTITKPLEDQRTTLGEDVMLSCELSRAGTSVRWLKDGKAIKRSQKYDLL
SEGTRAVLVVRKASLKDSGEYTCETEASKSTAKLCVEEKANRFTEELADLQVEEKGRAVFTCKTEHPASVVTW
RKGLLELRASGKHVPSQEGTLTKLTINALERTSDTYTCDIGQARTQARLLVHGQKVRVIEDLEDTAVQEGSS
AKFCCRIAPADYGPVHWFLDKTPHLSNELNEITVQPGGYHVLTLRQLALKDSGTVYFEAGDQRTSAAALRVTEK
PSIFSRPLTDVTVTEGEDTLVCETTTVDSVSRWTKDKGKTLRPSARCQLSHEGCAQLLITATTPQDGGRYKC
EIGGASSSSIVRVHALPVRFRESLKDVEVPKGAATLRCLVLSVAAPVVEWRHGDDVLSKSNKYSLRQCEAVLE
LVIRDLQPDQSGQYSCSFGDQTTSATLTVKTSQAQFVGLKRNKEATEGTTVTLRCELTKEAPVEWKKGTETLR
NGDKYSLKQDGA VCELQICSLLVADAGEYSCVCGQEKTSATLTVKALLVHFVRRLRSKEATEGDTTTLQCELS
KAAPVEWRKGTETLRDGDYSLKQDGA VCELQIRSLTIADAGEYLCTCGQEKTSATLTVRGLPAKFIEDLRSQ
EATEGATAILRCELSKAAPVEWRKGSSETLKDGDYTLRQDGA VCELQIRGLAVVDTGTYSLPTKFTTEGLRNE
EATEGTMATLRCQMSKAAPVEWRKGSSETLRDGDYSLRQDGA MCELQIRGLTIEDSGEYTCVCGQEKTSATLS
VKALPPRFIEDLRSQEATEGTMATLRCQMSKAAPVEWRKGSSETLGDGGYSLRQNGAVCELQIHDLAVEDTGE
YSCVCGQEKTSATLNVKALPPKFTTEGLKKEEATEGTMVTLRCQMSKEATVEWRKGAKTLSDGGYSLRQDGA
MCELQICGLAVEDAGEYSCVCGQEKTSATLSVKALPPRFIEDLRSQEATEGTMATLRCQMSKAAPVEWRKGS
SETLRDGDYSLRQDGA VCELQIRDLAVEDAGEYLCVCGQEKTSATLSVKALPPRFIEDLRSQEATEGTMATLRCQ
MSKAAPVEWRKGSKTLR DGDYSLRQDGA MCELQICDLAVEDTGDYSCVCGQEKTSATLSVKAPQVVFQQPLQ
NLQAEEGSMASLRCELSVPNAAMVWSKGGLELQGDTRREARQQGCVAELLLRDLRREDAGEYSCTCGSQTTSA
TLMVTAAPVRFRLRELQAQDVDEGATARLRCELSREAVSVEWRKGS LQFPKAKYQMVQEGTTAELLVHGVEQE
DAGEYTC DAGHTQSIARLSVRAPKPKFKTDLQSTEQEAGGTARLCCQLSEAEPGTPVQWLKEGVELHVGSKYE
MRRQGA VCELLIHGLEAKDTGEYACL VGGQKTLASLRVKEPEVTIVRGLVDMEVQADEDFEFTCKV SQAGATD
VQWHLQGLPLQSNEVTEVAVLADGCTHVLQLKGVTLLEDAGTVSFHVGGSSSAQLTVRVPEVTVLEPLKDVQL
SEGQDAHFRCLSRASGQEARWALGGVPLQCNEMNDITVEQGTLYLLTLHKVTLEDAGTITLQVGS CSSEAQL
KVTAKNTVLRGLENVDALLEGGEALFECQLSQPEVAHTWLLDDEPVHTSEKVEVVYFENGLRHLLLLKLNKLPQ
DSCRVTFLAGDVVTS AFLTVRGWRLEVLEPPHDASVKAGMQVRFTCILSEAVPVGEATWYINGAAIQPDDTDW
TVTTDGS HHALTLSNAQPQHAGEVTF AARDAVASARLSVLALPDPPEDAEVVGRSDHSVTL S WVA PMSDGGGG
LCGYR VEMKEASTGQWQLCHDLVPGPECVVDDLVP GKTYRFRVA AVGPAGAGEPVHLPQMVKIAPAPAPAPAP
APAPETROAVVGEDICLELEVAADGGEV VWHKGTERRIQPGGHFEVLSRGQRQMLVIKGFRTEDQGEYRCGPIQ
GLPSSGAATFNVMVMTSGSGDEVPAQPSLPPEAAQEGDLHLLWEALARKRRMSREPTLDSISELPEEDSRVQHL
RQEAETAPDLSEGYSTADELARTGEADLSHTSSDDESRAGTPSLVTYLKKAGGPGISPLASKHEAQVTT SVK
PQKQQEPVVP TCPPPGDLSAADLMDPSLDKAAVKIQAAF KGYKVRKEMKQQEGPVFSRTFGDTEAQVGDVLR
ECVLATKTD MRACWLKDGIELTDGRHYHIDQLKDGTC SLLVTGLAP TDSGRYTCQVSTKSGRVSHSACVVVSG
TESEAESSAGTELDLDAFRRAARRLHRLFRTKSPAELSEELFLSADEGPGEPEEPADWQTYREDENFVCIRFE
SLAEARQAVTCFRNMFATMIGVEISLGEQGPGRVEMRIGKVA PTVT PAVPLAKT PGLQTS DAAPVFLTELQN
QDVQDGYPMSFDCVVTGQPVPSVRWFKDGKLLLEEDDH YMINEDQQGGHQLIITAVVPADMGVYRCLAENSMGV
SSTKAELRVELTSTDYD TAADATETSSYFSAQGYLSSREQEGTESDEGQLPVLEELKDLQVAPGTRLAKFQL
KVKGY PAKLYWFKDGQPLTSDHIRMTDKKTLHTLEIVSVTREDSGQYAA YISNAVGAAYSSARLLVRGPSE
PEEK PASDVHERLVP PPRILEKFTPKKVKRGSSITFSVKVEGHPAPSVHWLKEEAEGVLWIGPDTPGYTMASS

SKQHSLVLLDVGRRHQGTTCIATNPAGQALCSASLHISGLAKEEEQERVKEALISSFLQGTSSQAVSAQMSES  
 AGFADLVGQSKGESLVAEEAHSHLSLAEVGTTEEFLQKLTSTIEMVSAKISQAKLQVPGGDSDEETKTPSASP  
 RHGRSRPSSSVQESSSESEDGDSRGEIFDIYVVVTADYLLPLGAEQDAIILREGQYVEVLDSAHPLRWLVRTKPT  
 KSSPSRQGWVSPAYLDKRLKLSPEWGPTEAPEFPGEAVSEDEYRTRLSSVIQELLSSEQAFVQELQFLESHHM  
 KHLERSPRVPAAVASQKTVI FRNVQDI SHFHSSFLKELQGCCTDDVAMCFIKNQEAFAEKYLEFLVGRVQAES  
 VVVSTPVQEFYKKYAEETLSAKDPTQPPPPPLQHYLEQPVERVQKYQALLKELIRNKARNRQNCALLEQAYAV  
 VSALPQRAENKLVSLMENYPGTLEALGEP I RQGHFIVWEGAPGARMPPWKGNHRHVFLFRNYLVI CKPRRDSR  
 TDTFSYVFRNMMKLSSIDLNDQVEGDDRAFEVWHEREDSVRKYLLQARTVI IKNSSWVKEICIGIQQRLAQPVWR  
 PPEFEEELADCTAELGETVKLACRVGTGPKPIVSWYKDGKPVVEVDPHHILIEDPDGSCSTLIIDLNLGTIDSGQY  
 MCFAASAAGNASTLGKILVQVPPRFVNVKVRATPFVEGEDAQITCTVEGAPYPQIRWYKDGTL LAPGNRYRMLN  
 EPRSGVLVLIQAASKEDLGHYECELVNRLGSTRGGGELYMQS PALRARDQHHREQIVA AVEVTEQETKVPKK  
 TVIIEETITTVVKS PRGRRQSPGKSPSRSPRRSASPRRPGLLAPERLYPPGTS PSRRLEVEQGRKAPVPALY  
 VTEAEVHAPASQS QPKWLEVEETIEVRVKKTGSRGASPVREMTSRGEGILFTLPGGIPGRDPNANNNSNKS SVY  
 QEARTWGP AVVHVGEFFI FQVDSVGNVDWAASPEPEQVRASQKEENTERQEGCSDGDENTFLMEEPQD TDSL  
 QGRDPKILTHNGRVLT LADLEDYVPQEGETF GCGDSTPSTPDEPPCEVSVLQREI SEPTVGGQPVLLNVGRPPG  
 TGATPSFFRPGSQVHSPESVFLLR EAWSGPVSAAPWTSSFHHTHVQSSVDGSHGFSFKTEVSTQTVSFGAVGET  
 VTLHIDPDGGEAPGPSQG\*

>rs26955766\_ENSMUSP00000158795\_c.3961:T>C\_p.L1321P  
 ENSMUST00000238536.2|Obscn-210|ENSMUSG00000061462|-|chr11:g.59003611:A>G  
 MDHSFSGAPRFLTRPKAFVSVGKDATLSCQIVGNPTPHVSWEKDRQPVEAGARFLAQDGDVYRLTILDLAL  
 GDSGQYVCRARNAIGEFAAVGLRVDSEGTCAEQAPHLLRPTSIRVREGADATFRCRVGGSPQPAVSWSKDG  
 RRLGPPDAPHVRVEEHGESSALRIR SARPRDGGTYEVRAENPLGSASAAAALVVDSDAEVAGPPGTSTATLLA  
 HLQQRREAMRAEGIPSPPGAGTRTCTVTEGKHARLSCFVTGEPKPKETVWKKDQQLVTEGRRHVYVEDEQENF  
 VLKILFCKQSDRGLYTCTASNLVGQTYSSVLVVVREPTVPFKKRLQDLEVREKESATFQCEVAQPAATEAAWFK  
 EETRLWASAKYDIEEGTERRLTVRNVSADDDAVYICETTEGSRVAELSVQGNLTKRKLPRKTAVRTGDTAIF  
 WVLEAVPEGPVRWLRNQEEMVAGGRVAITAEGTCHTLTI FQCTLEDMGEVAFVSGGCRATTTTCVCSAPRRPPL  
 YPPADPVVKAKTESVTLSSW SAPPHGDRPVTIDGYVLEKRLKLGAYAWSRCHEAGWLATTEFTITGVAAEEGDFQ  
 FRVSAINHFGQGPYLEFPGTMHLPMLAVKTPKAVEAVEGGEVTFVSDLTVASSGEWFLDGEALKASSIYVI  
 RCDRTRHMLTIREV PARLHGAQLKFVANGIETS IQMVVRAALGLPSSKLPAAAAREVLAQLHEEAQLLAE LSD  
 QAAA VTWLKDGRELSLGPKYEMQVSAGRRALLVRDVAQDDAGLYECVSRGSR TAYQLLVQDITDGYRDWGPAG  
 PQKHMCKCAGAKIARYLGSSCYRFLQYDKGVVHWEALDTRQKGTSSCSLHEKPKLVFAKQQAHSEVKA E  
 AGNSATLSCEVTQAQTEVTWFKDGKLLSSSSKVRMEASGCSRRLVVQQAGKADAGEYSCEAGGQKLSFR LDVA  
 EPKLVFAKQQAHSEVKA EAGASATLSCEVAQAQTEVTWFKDGKLLSSSSKVRMEASGCSRRLVVQQAGKADA  
 GEYSCEAGGQKLSFR LDVAEPKMFVFAKEQQARSEVKA EAGASATLSCEVAQAQTEVTWFKDGKLLSSSSKVRM  
 EASGCSRRLVVQQAGKADAGEYSCEAGGQKLSFR LDVTEPKLVFAKEQQARSEVKA EAGNSATLSCEVAQAQ  
 EVTWFKDGKLLSSSSKVRMEASGCSRRLVVQQAGKADAGEYSCEAGGQKLSFR LDVAEPKLVFAKEQQARSEV  
 KAEAGNSATLSCEVAQAQTEVTWFKDGKLLSSSSKVRMEASGCSRRLVVQQAGKADAGEYSCEAGGQKLSFHL  
 DVTEPKPVFAKEQQAHSEVKA EAGASATLSCEVAQAQTEVTWFKDGKLLSSSSKVRMEASGCSRRLVVQQAGK  
 ADAGEYSCEAGGQKLSFR LDVAEPKLVFAKEQQARSEVKA EAGASATLSCEVAQAQTEVTWFKDGKLLSSSSK  
 VRVEASGCSRRLVVQQAGKADAGEYSCEAGGQKLSFR LDVAEPKLVFAKEQQANSEVKA EAGASATLSCEVAQ  
 AQTEVTWFKDGKLLSSSSKVRVEASGCSRRLVVQQAGKADAGEYSCEAGGQKLSFR LDVAEPKLVFAKEQQAH  
 SEVKA EAGASATLSCEVAQAQTEVTWFKDGKLLSSSSKVRVEASGCSRRLVVQQAGKADAGEYSCEAGGQKLS  
 FR LDVAEPKLVFAKEQQAHSEVKA EAGASATLSCEVAQAQTEVTWFKDGKLLSSSSKVRVEASGCSRRLVVQQ  
 AGKADAGEYSCEAGGQKLSFR LDVAEPKLVFAKEQQAHSEVKA EAGASATLSCEVAQAQTEVTWFKDGKLLSS  
 SSKVRVEASGCSRRLVVQQAGKADAGEYSCEAGGQKLFRLDVAEPKLMFAKEQQAHSEVKA EAGASATLSCE  
 VAQAQTEVTWFKDGKLLSSSSKVRVEASGCSRRLVVQQAGKADAGEYSCEAGGQKLSFR LDVAEPKLVFAKEQ  
 QAHEVKA EAGASATLSCEVAQAQTEVTWFKDGKLLSSSSKVRVEASGCSRRLVVQQVQKADAGEYSCEARGQ  
 KLSFR LDVADTRLMFAKEQQARTEVKA EAGNSATLSCEVAQAQTEVTWFKDGKLLSSSSKVRVEASGCSRRLV  
 VQQAGKADAGEYSCEAGGQKLSFR LDVAEAE SQIPERPSRREPLVVKEHETIILTATIAAPSVAAV TWLKDGV  
 EIRRSKRHEATSLGDHTLTVRGAQVLDSAIYSCRVGKEGQDFPVQVEEVA AKFSKPLEPVEGELGGTVMLVC  
 ELSPEQA EVVWRCGNTQLRPGKRFQMTSEGPRRTLTVSGLREDDAE EYVCE SRDDRTSARLTVKVP RVV KFTS  
 GLSAMVAEEGQEATFQCVVSPSDAGVTWYKDGMLQLPSEKFMVMEVSGASRSLTILGLTLEDAGQVTEAEAGAS  
 SSAALRVREAPVLFKKKLEPQTV EERTSVTLEVELVRLTRPWPEVKWTRNAAVLTPSENVEIRAEGARHCLVLRV  
 GFADRGGFCETPDDKTQAKLVNEMRQVRLVRLGQLEVEA EQGTASMDVELSHAEVEGSWTRDGLRLQPGPKC  
 HLAVQGPVHILTL SALQPDSGLVA FRAEGVHTSARLIVTELPVSFTRVLQDVVATQKEKVTLECELSR PV DV  
 RWLKDGV ELRAGKAI GIVAQGTCSRSLVIYRCETGDQGVYVCDALDAQT SASLRVQGRTYTLIFRRVLAEDAGE  
 VKFVAENAESRAHLRVKELPVTLLRPLRDKIAMEKHRGVLECCQVSRASAVRWFKGGVELQSGPKYEVVSDGL  
 YRKLVIN DVQPEDEDTYTC DAGNVKTS AQFFVVEEQSITIVRGLKDMTVM EPAPAWFECETSIPSVRPPKWL LG

KTVLQAGGNVGLQDGTVHRLTLHKTCSTMTGPVHFTIGKSRSSAQLVVSIDI PVVLTRPLEPKAGRELQSVVL  
SCDFRPAPKAVQWYKDDTPLSPSEKFKMALEGQMAELRILRLTPADAGVYRCQAGSAQSSAEVTVAREVTVI  
QPLQDAEAMEEGRVCFSCELSHKDEDEIWSLNGTPLYNDSFHEISHEGCLHTLVLSVRQADTGTVCATSPKV  
SVSARLVVVGKGPVFLKALDDVSAEERGTTLQCEVSDPEARVVRKDGVELGSPDKYDFLHKAGARGLTVHD  
LSHEDAGLYTCQVGSKETQSKVSVHDLHVGITKRLKTVEVLEGECSFECVLSHESPSDPAVWTVGGKTVGGS  
GHFHAVRQGRKYTLTVKDAALSDAGEVVSFVLGLTSKASLIIRERPVDITKPLEDQRTTLGEDVMLSCELSRA  
GTSVRWLKDGKAIKRSQKYDLLSEGTRAVLVVRKASLKDSGEYTCETEASKSTAKLCVEEKANRFTEELADLQ  
VEEKGRAVFTCKTEHPASVVTWRKGLLELRASGKHVPSQEGTLTKLTINALERTDSDTYTCDIGQARTQARLL  
VHGQKVRVIEDLEDTAVQEGSSAKFCRIAPADYGPVHWFLDKTPLHSNELNEITVQPGGYHVLTLRQLAKD  
SGTVYFEAGDQRTSAALRVTEKPSIFSRPLTDVTVTEGEDTLVCETTTVDSVVRWTKDGKTLRPSARCQLSH  
EGCQAQLLITATTPQDGGRYKCEIGGASSSSIVRVHALPVRFRESLKDVEVPEGKAATLRCVLSVAAPVEWR  
HGDDVLKSSNKYSLRQEGAVLELVIRDLQPDQSGQYSCSFGDQTTSATLTVKTSQAQFVGLKRNKEATEGTTV  
TLRCELTKAPVEWKKGTETLRNGDKYSLKQDGAVCELQICSLVADAGEYSCVCGQEKTSATLTVKALLVHF  
VRLRSKEATEGDTTLQCELSKAAPVEWRKGTETLRDGDYSLKQDGAVCELQIRSLTIADAGEYLCTCGQE  
KTSATLTVRALPAKFKDSLKNEEATEGTTATLSCELSKAAPVWKKGPKTLQSGDKYVLRQDGAVCGLQIHGL  
TMADAGEYSCVCGQEKTSATLTVRGLPAKFIEDLRSQEATEGATAI LRCELSKAAPVEWRKGETLKDGDYR  
LRQDGAVCELQIRGLAVVDGTYSPLTKFTEGLRNEEATEGTMATLRCQMSKAAPVEWRKGETLRDGDYR  
LRQDGAVCELQIRGLTIEDSGEYTCVCGQEKTSATLSVKALPSRFIEDLRSQEATEGTMATLRCQMSKTAPVE  
WKKGSETLRDGGYSLRQDGPVCELQICDLAVEDAGEYSCVCGQEKTSATLSIKALPPRFIEDLRSQEATEG  
MATLRCQMSKAAPVEWRKGETLGDGGYSLRQNGAVCELQIHDLAVEDTGEYSCVCGQEKTSATLNVKALPP  
RFIEDLRSQEATEGTMATLRCQMSKAAPVEWRKGETLRDGGYSLRQDGAVCELQIHDLVEDAGQYSCVCG  
QEKTSAVLTVDALPPKFTEGLKKEEATEGTMVTLRCQMSKEATVEWRKGAKTLSDGGRYSLRQDGAMCELQIC  
GLAVEDAGEYSCVCGQEKTSATLSVKALPPRFIEDLRSQEATEGTMATLRCQMSKAAPVEWRKGETLRDGD  
YSLRQDGAVCELQIRDLAVEDAGEYLCVCGQEKTSATLSVKALPPRFIEDLRSQEATEGTMATLRCQMSKAAP  
VEWRKGETLRDGDYSLRQDGAMCELQICDLAVEDTGDYSCVCGQEKTSATLSVKALPPRFIEDLRSQEARE  
GTVATLRCMSKAAPVEWRKGETLKDGDYSLRQEGNLCELQIRDLAVEDTEEYSCVCGQEKTSATLSVKAL  
PAKFIEDLRSQEAPESSTVTLRCKLSKKASVWKKGSETLRNGARYSLRQDGAVCELEIRDLTVEDTGEYSCT  
CGQERTSATLSIMAPQVVFQQLQNLQAEEGSMASLRCELSVNAAMVWSKGGLELQGDTRREARQQGCVAEL  
LLRDLRREDAGEYSCTCGSQTTSATLMVTAAPVRFLRELQAQDVDEGATARLRCELSREAVSVEWRKGSQQLF  
PCAKYQMVQEGTTAELLVHGVEQEDAGEYTCDAHTQSIARLSVRAPKPKFKTDLQSTEQEAAGTARLCCQLS  
EAEPGTPVQWLKEGVELHVGSKYEMRRQAVCELLIHGLEAKDTGEYACLVGQKTLASLRVKEPEVTIVRGL  
VDMEVQADEDEFTCKVSQAGATDVQWHLQGLPLQSNVTEVAVLADGCTHVLQKGVTLLEDAGTVSFHVGGL  
SSSAQLTVRVPEVTVLEPLKDVQLSEGQDAHFRCRLSRASGQEARWALGGVPLQCNEMNDITVEQGTLYLLTL  
HKVTLEDAGTITLQVGSSESQAQLKVTAKNTVLRGLENVDALEGGEALFECQLSQPEVAHAHTWLLDDEPVHTS  
EKVEVVYFENGLRHLLLLKLNKPKQDSCRVTFLAGDVVTSFAFLTVRGWRLEVLEPPHDASVKAGMQVRFTCILS  
EAVPVGEATWYINGAAIQPDDTDWTVTTDGSHHALTLNSAQLPQHAGEVTFFAARDAVASARLSVLALPDPEDA  
EVVGRSDHSVTLVSWAPMSDGGGGLCGYRVMKEASTGQWQLCHDLVPGPECVDDLVPGKTYRFRVAAVGPA  
GAGEPVHLPQMVKIAPAPAPAPAPAPAPAPAPETRQAVVGEDICLELEVAADGGEVWHKGTERRIQPGHFVLS  
RGQRQMLVIKGFRTEDQGEYRCGPIQGLPSSGAATFNVVMTSGSGDEVPAQPSLPPEAAQEGDLHLLWEALAR  
KRRMSREPTLDSISELPEEDSRVQHLRQEAETAPDLSEGYSTADELARTGEADLSHTSSDDESAGTPSLVT  
YLKAGGPGISPLASKHEAQVTTSVKPKQKQEPVPTCP PPGDLAADMPSLDKAAVKIQAAFQYKVRKE  
MKQQEGPVFSRTFGDTEAQVGDVLRLECVLATKTDMRACWLKDGIELTDGRHYHIDQLKDGTCSSLVVTGLAPT  
DSGRYTCQVSTKSGRVSHSACVVVSGTESEAESSSGGELDDAFRAARRLHRLFRTKSPAELSEELFLSADE  
GPGEPEPADWQTYREDENFVCIRFESLAEARQAVTCFRNMFATMGI GVEISLGEQGRGVEMRIGKVAPTVT  
PAVPLAKTPGLQTSDAAPVFLTELQNDVQDGYPMSFDCVVTGQVPVSVRWFKDGKLEEDDHYMINEDQQGG  
HQLIITAVVPADMVYRCLAENSMGVSTKAELRVELTSTDYDTAADATETSSYFSAQGYLSSREQEGTESDE  
GQLPQVLEELKDLQVAPGTRLAKFQLKVKGYPAKLYWFKDGGPLTSDHIRMTDKKTLHTLEIVSVTREDSG  
QYAAYSNAVGAAYSSARLLVRGPSEPEEKPASDVHERLVPPRI LEKFTPKKVKRGSSITFSVKVEGHPAPSV  
HWLKEEAKEKGVLLWIGPDTPGYTMASSSKQHSLLVLDVGRQHGTYTTCIATNPAGQALCSASLHISGLAKEEEQ  
ERVKEALISSFLQGTSAQVSAQMSSEAGFADLVGQSKGESLVAEEAHSHLSLAEVGTEEFQKLTSTQITMVS  
AKISQAKLQVPGGDSDEETKTPSASPRHGRSRPSSSVQESSSESEDGDSRGEIFDIYVVVTADYLPGLAEQDAI  
ILREGQYVEVLDSAHPLRWLVRTKPTKSSPSRQGWVSPAYLDKRLKLSPEWGPTEAPEFPGEAVSEDEYRTRL  
SSVIQELLSSQAFVGLQFLESHEHMKHLERSPRVPAVASQKTVIFRNVQDISHFHSSFLKELQCGCTDDDV  
AMCFIKNQEAFAKEYLEFLVGRVQAESVVVSTPVQEFYKKAEEETLSAKDPTQPPPPPLQHYLEQVVERVQKYQ  
ALLKELIRNKARNRQNCALLEQAYAVVSALPQRAENKLVSLMENY PGTLEALGEPYRQGHFIWEGAPGARM  
PWKGHNHRVFLFRNYLVICKPRRDSRTDTFSYVFRNMMKLSSIDLNDQVEGDDRAFEVWHEREDESVRKYLLQA  
RTVVIKNSWVKEICGIQORLAQPVWRPPEFEEELADCTAELGETVKLACRVGTGPKPIVSWYKDGKPEVDPH  
HILIEDPDGSCTLILDNLTGIDSGQYMCFAASAAGNASTLGKILVQVPPRFVNVKVRATPFVEGEDAQITCTVE

GAPYPQIRWYKDGTLAPGNRYRMLNEPRSGVLVVIQAASKEDLGHYECELVNRLGSTRGGGELYMQSPALR  
ARDQHHREQIVAAVEDTSVEGSAHSAQDQADQQAASVLWRLLGSEALGSPSGDLNTRQSEPPAFEEAASQIP  
GAASGTPEVSPQPGTHKLEQETTSSGSQGWTPVIRVEGTAWPGAGTGQLLLDVHSQVIMETTQRTYVCQAPDT  
GVTRAPSMQVTIEDVQVQVGDMAQFDAVIEGHPPPIVITWYKGSTQLTSSARLSQRQDGTYSVLVTDVAPHDA  
GVYTCVANNAGGQVLCKAELLVHGGDKLDAENQVYRRKLHSFYDVQEEIGRGVFGFVKRVQHKGNKMFCAAKF  
IPLRSKTRAQAYQERDILATLGHPLVTGLLDQFETRKTLLILILELCSSEELLDRFLKKGVVTEAEVKVYIQQL  
VEGLHYLHSHGILHLDIKPPNIMLVHPAREDIKICDFGFAQKITPSEPQYSKYGSPEFVSPETIEQNPVSEGS  
DIWAMGVI SYLSLTCCSSPFAGESDRATLLNVLEGRVSWSSPTAAHLEDAKDFIKATLQRTPRARPSTSQCLA  
HPWFLKSMPEAAEHFINTKQLKFLARSRWQRSLMSYKSIILVMRSIPELLQGPPDSPSLGVARHLRGEASGAS  
SSSSSSDNELAPFARAKSLPPSPVTHSPLLHPRGFLRPSASLPEETEASMTADAAVPASPQASAGPPASPGCV  
PRHSVISSLFYQQAGEGAERGNKTSGAKRHPARRRHLLKGGYIARALPGLREPLMEYSLLEEEAAREEQASLM  
TKTPSFETALRLPSSSVREVPRGRSHSLDNPPVTTGPSPEACKEQLLFPSTGLTHETTAKDRGHKEGFLQESV  
PFPMSGDSRPGKQEGSSQDSCRKPASSCHSELGSGSQEGCGPPSSQSLGSLPPQSLKELSTSCGPLFSEQ  
PQAAPFPPTQVSPLLGEKEPQDGSLSSEGPVVPVSSSPGSASQVDASLDTEGLSEAGDTCDFTPPPQRPQEQAT  
TRKFSLESRGGYAGVAGYGTFAFGGDAGGMLGQGPLWARMAWAVSQQSSEEQDEAATESPQPLESGLPIAEASG  
VPLRTSPSLTPWEEVEQVSLVQIRDLSDGDAEAADTISLDISEVDPAYLNLSLDYDIKYLPEFEMI FRRVPKPI  
EQPESPGSETEAGQLADFLLEAAWPFWPGELGLRAGLEITTEPEEPGDLEALLGEAAVGRKRKWSPSRGLFQF  
PGRCLSGEEPVELGLRQVRKASMAHISRIKGRPEGEREGPPRKKAGLASFRLSGLKGRDQELSDAEVVLGQ  
SVTLACQVLAQPTAQATWSKDGVLLESSGHLISSTLKNFQLLTIILVVKEEDLGTYTCCVSNPLGTAVTTGVL  
RKAERPSSSPREVEGELYKDAVLLVWKPVESECGPVTYIVQCCIEGGSWTTLASDISDCCYLTGKLSRGGMYIF  
RTACVSKAGMGPYSSPSEQVLLGGPNHLASEEESRRGRPAQLLPSTKTFAFQMQIRRRGRFSVVRQCREKASGR  
ALAAKIVPYQPEDKTAVLREYEALKRHLHHPHLAQLHAAYLSPRHLVLI LELCSGPELLPSLAERESYSESDVK  
DYLWQMLSATQYLHAQHI LHLDLRSENMMVTEYNLLKVIDLGNQSLDQEKVPAPENFKDYLETMAPELLEGG  
GAVPQTDIWAIGVTA FIMLSGEY PESSSEGTRDLQKGLRKLIRLSRCYAGLSGGAVAFQSSSLCAQPWGRPCA  
STCLQCGLWTEEGPTGSRPTVTFPTVRLRAVFREREKRRALLYKKNLAQVR\*  
>rs26955766\_ENSMUSP00000038264\_c.3685:T>C\_p.L1229P  
ENSMUST00000047441.14|Obscn-202|ENSMUSG000000061462|-|chr11:g.59003611:A>G  
MDHSFSGAPRFLTRPKAFVSVGKDATLSCQIVGNPTPHVSWEKDRQPVEAGARFLAQDGDVYRLTILDLAL  
GDSGQYVCRARNAIGEAFVAVGLRVDSEGTCAEQAPHFLLRPTSIRVREGADATFRCRVGGSPQPAVSWSKDG  
RRLGPPDAPHVRVEEHGESSALRIRSARPRDGGTYEVRAENPLGSASAAAALVVDSDAEVAGPPGTSTATLLA  
HLQORREAMRAEGIPPSPPGAGTRTCTVTEGKHARLSCFVTGEPKPEVWKKDGQLVTEGRRHVVEDEQENF  
VLKILFCKQSDRGLYTCTASNLVGQTYSSVLVVVREPTVPFKKRLQDLEVREKESATFQCEVAQPAEEAAWFK  
EETRLWASAKYDIEEEGTERRLTVRNVSADDDAVYICETTEGSRVAELSVQGNLTKLPRKTAVRTGDTAIF  
WVELAVPEGPVWRWRNQEEMVAGGRVAITAEGTCHTLTI FQCTLEDMGEVAFVSGGCRTTTQFCVSAPRRPPL  
YPPADPVVKAKTESSVTLWSAPPHGDRPVTIDGYVLEKRKLGAAYAWSRCHEAGWLATFTITGVAEEGDFQ  
FRVSAINHFQGGPYLEFPGTMLHVPMLAVKTPLKAVEAVEGGEVTFVSDLTVAWSGEWFLDGEALKASSIYVI  
RCDRTRHMLTIREVPARLHGAQLKFVANGIETSIQMVVRAALGLPSSKLPAAAAAREVLAQLHEEAQLLAELSD  
QAAAAVTWLKDGRELSLGPKEYMQVSAGRRALLVRDVAQDDAGLYECVSRGSRAYQLLVQDITDGYRDWGPAG  
PQKHMCKCAGAKIARYLGSSCYRFLQYDKGVWHLEAALDTRQGKGTSSCSLHEKPKLVFAKQQAHSEVKA  
AGASATLSCEVAQAQTEVTFWKDGKLLSSSSKVRMEASGCSRRLVVQQAGKADAGEYSCEAGGQKLSFRLDVA  
EPKMVFAKEQQARSEVKAEGASATLSCEVAQAQTEVTFWKDGKLLSSSSKVRMEASGCSRRLVVQQAGKADA  
GEYSCEAGGQKLSFRLDVTEPKLVFAKEQQARSEVKAEGVNSATLSCEVAQAQTEVTFWKDGKLLSSSSKVRM  
EASGCSRRLVVQQAGKADAGEYSCEAGGQKLSFRLDVAEPKLVFAKEQQARSEVKAEGNSATLSCEVAQAQ  
EVTWFKDGKLLSSSSKVRMEASGCSRRLVVQQAGKADAGEYSCEAGGQKLSFHLDVTEPKPVFAKEQQAHSEV  
KAEAGASATLSCEVAQAQTEVTFWKDGKLLSSSSKVRMEASGCSRRLVVQQAGKADAGEYSCEAGGQKLSFR  
DVAEPKLVFAKEQQARSEVKAEGASATLSCEVAQAQTEVTFWKDGKLLSSSSKVRVEASGCSRRLVVQQAGK  
ADAGEYSCEAGGQKLSFRLDVAEPKLVFAKEQQANSEVKAEGASATLSCEVAQAQTEVTFWKDGKLLSSSSK  
VRVEASGCSRRLVVQQAGKADAGEYSCEAGGQKLSFRLDVAEPKLVFAKEQQAHSEVKAEGASATLSCEVAQ  
AQTEVTFWKDGKLLSSSSKVRVEASGCSRRLVVQQAGKADAGEYSCEAGGQKLSFRLDVAEPKLVFAKEQQAH  
SEVKAEGASATLSCEVAQAQTEVTFWKDGKLLSSSSKVRVEASGCSRRLVVQQAGKADAGEYSCEAGGQKLS  
FRLDVAEPKLVFAKEQQAHSEVKAEGASATLSCEVAQAQTEVTFWKDGKLLSSSSKVRVEASGCSRRLVVQQ  
AGKADAGEYSCEAGGQKLFRLDVAEPKLVFAKEQQAHSEVKAEGASATLSCEVAQAQTEVTFWKDGKLLSS  
SSKVRVEASGCSRRLVVQQGKADAGEYSCEAGGQKLSFRLDVAEAEBSQI PERPSRREPLVVKHEHETIILTAT  
IAAPSAAVTWLKDGEVIRRSKRHEATSLGDHTTLTVRQAQVLDSAIYSCRVKGEGDFPVQVEEVAAKFSK  
LEPVEGELGGTVMLVCELSPEQAEVWVRGNTQLRPGKRFQMTSEGPRRTLTVSGLREDDAEFYVCESRDRT  
SARLTVKVPVVKFTSGLSAMVAEEGQEA TFQCVVSPSDAGVTWYKDMQLQPSSEKFMVMEVSGASRSLTILGL  
TLEDAGQVTVEAEGASSAALRVREAPVLFKKKLEPQTVTEERTSVTLEVELTRPWPEVKWTRNAAVLTPSENV  
EIRAEGARHCLVLRVSVGFADRGFFGCETPDDKTQAKLVNEMRQVRLVRLGQVEVAKEQGTASMDVELSHAEVE

GSWTRDGLRLQPGPKCHLAVQGPVHILTLALSALQPQDSGLVAFRAEGVHTSARLIVTELPVVSFTRVLQDQVAVATQ  
KEKVTLECELSRPVDVRLWKDGVLELRAGKAI GIVAQGTCSRSLVIYRCETGDQGVYVCDALDAQTSASLRVQGR  
TYTTLIFRRVLAEDAGEVKFVAENAESRAHLRVKELPVTLLRPLRDKIAMEKHRGVLECCQVSRASAVRWFKGG  
VELQSGPKYEVVSDGLYRKLVINQVPEDEDTYTCDAGNVKTSAQFFVEEQSITIVRGLKDMTVMPEPAPAWFE  
CETSI PSVRPPKWLGLKTVLQAGGNVGLQDGTVHRLTLHKTCSMTGPFVHTIIGKSRSSAQLVVSIDI PVVLT  
RPLEPKAGRELQSVVLSCDFRPAPKAVQWYKDDTPLSPSEKFKMALEGQMAELRILRLTPADAGVYRCQAGSA  
QSSAEVTVEAREVTVIQPLQDAEAMEEGRVCFSCELSHKDEDIEWSLNGTPLYNDSFHEISHEGCLHTLVLSK  
VRQADTGTVCATSPKVSVSARLVVKGKPVVFLKALDDVSAEERGTTLQCEVSDPEARVVRKDGVELGSPDK  
YDFLHKAGARGLTVHDLSHEDAGLYTCQVGSKETQSKVSVHDLHVGITKRLKTVEVLEGESCSFCEVLSHESP  
SDPAVWTVGGKTVGGSGHFHAVRQGRKYTLTVKDAALSDAGEVVSFVGLGTSKASLIIRERPVDTKPLEDQR  
TTLGEDVMLSCELSRAGTSVRWLKDGKAIKRSQKYDLLSEGTRAVLVVRKASLKDSGEYTCETEASKSTAKLC  
VEEKANRFTEELADLQVEEKGRAVFTCKTEHPASVVTWRKGLLELRASGKHVPSQEGTLTKLTINALERTDSD  
TYTCDIGQARTQARLLVHGQKVRVIEDLEDTAVQEGSSAKFCCRIPADYGPVHWFLLDKTPLHSNELNEITVQ  
PGGYHVLTLRQLALKDSGTVYFEAGDQRTSAALRVTEKPSIFSRPLTDVTVTEGEDTLVCETTTVDSSVRWT  
KDGTLRPSARCQLSHEGCAQLLITATTPQDGGRYKCEIGGASSSSIVRVHALPVRFRESLKDVEVPEGKAA  
TLRCVLSVAAPVEWRHGDVLSKSSNKYSLRQEGAVLELVIRDLQPDQSGQYSCSFGDQTTSATLTVKTSAAQ  
FVGKLRNKEATEGTTVTLRCELTKAPVEWKKGTETLRNGDKYSLKQDGAVCELQICSLLVADAGEYSCVCGQ  
EKTSAATLTVKALLVHFVRLRSKEATEGDTTTLQCELSKAAPVEWRKGTETLRDGDYSLKQDGAVCELQIRS  
LTIADAGEYLCTCGQEKTSATLTVRALPAKFKDSLKNEEATEGTTATLSCELSKAAPVTWKKGPKTLQSGDKY  
VLRQDGAVCGLQIHGLTMADAGEYSCVCGQEKTSATLTVRGLPAKFIEDLRSQEATEGATAILRCELSKAAPV  
EWRKGETLKDGDYTLRQDGAVCELQIRGLAVVDTGTYSLSLPTKFTTEGLRNEEATEGTMATLRCQMSKAAPV  
EWRKGETLRDGDYSLRQDGAVCELQIRGLTIEDSGEYTCVCGQEKTSATLSVKALPPRFIEDLRSQEATEG  
TMATLRCQMSKAAPVEWRKGETLGDGGYSLRQNGAVCELQIHDLAVEDTGEYSCVCGQEKTSATLNVKALP  
PRFIEDLRSQEATEGTMATLRCQMSKAAPVEWRKGETLRDGGYSLRQDGAVCELQIHDLVEDAGQYSCVC  
GQEKTSAVLTVDALPPKFTTEGLKKEEATEGTMVTLRQMSKEATVEWRKGAKTLSGGYSLRQDGAVCELQI  
CGLAVEDAGEYSCVCGQEKTSATLSVKALPPRFIEDLRSQEATEGTMATLRCQMSKAAPVEWRKGAKTLSRQD  
RYSLRQDGAVCELQICDLAVEDTGDYSCVCGQEKTSATLSVKAPQVVFQQLQNLQAEEGSMASLRCELSVFN  
AAMVWSKGGLELQGDTRREARQQGCVAELLLRDLRREDAGEYSCVCGQEKTSATLNVKALP  
DEGATARLRCELSREAVSVEWRKGSLLQFPKAKYQMVQEGTTAEELLVHGVEQEDAGEYTCVCGQEKTSARLSV  
RAPKPKFKTDLQSTEQEAGGTARLCCQLSEAEPTPVQWLKEGVELHVGSKYEMRRQGAVCELLIHGLEAKDT  
GEYACLVGQKTLASLRVKEPEVTIVRGLVDMEVQADEDEFTCKVSOAGATDVQWHLQGLPLQSNEVTEVAV  
LADGCTHVLQKGVTLLEDAGTVSFHVGGSSSAQLTVRVPEVTLEPLKDVQLSEGQDAHFRCRLSRASGQEA  
RWALGGVPLQCNEMNDITVEQGTLYLLTLHKVTLEDAGTITLQVGSSESQAQLKVTAKNTVLRGLENVDALEG  
GEALFECQLSQPEVAHAHTWLLDDEPVHTSEKVEVVYFENGLRHLLLLKLNKLPQDSCRVTFLAGDVVTSAPLTV  
RALPDPPEAEVVGSRSDHSVTLVWVAPMSDGGGLCGYRVEMKEASTGQWQLCHDLVPGPEVCVDDLVPGKTY  
RFVVAAVGPAAGAGEPVHLPQMVKIAPAPAPAPAPAPAPAPAPAPAPAPAPAPAPAPAPAPAPAPAPAPAPAP  
QPGGHFEVLSRQQRMLVIKGFRTEDQGEYRCGPIQGLPSSGAATFNVMVTSVSGSDEVPAPQPSLPPEAAQEGD  
LHLLWEALARKRRMSREPTLDSISELPEEDSRVQHLRQEAEEETAPDLSEGYSTADELARTGEADLSHTSSDDE  
SRAGTPSLVTYLKKAGGPGISPLASKHEAQVTTSVKPKQKQEPVVPVTPPPGDLAADLMDPSLDKAAVKIQ  
AFKGYKVRKEMKQEGPVFSRTFGDTEAQVGDVLRLECVLATKTDMRACWLKDGIELTDGRHYHIDQLKDGTC  
SLLVTGLAPTDSGRYTCQVSTKSGRVSHSACVVVSGTESEAESSGGELDDAFRRAARLHRLFRTKSPAELS  
EEELFLSADEGPEPEPADWQTYREDENFVICRFESLAEARQAVTCFRNMFMATMGIGVEISLGEQGPGRVEM  
RIGKVAPTPTPAVPLAKTPGLQTSDAAPVFLTELQNDVQDGYPMSFDCVVTGQPVVPSVRWFKDGLLEEDDH  
YMINEDQGGHQLIITAVVPADMGVYRCLAENSMGVSSTKAE LRVELTSTDYDTAADATETSSYFSAQGYLSS  
REQEGTESDEGQLPVLEELKDLQVAPGTRLAKFQLKVKGYPAKLYWFKDQGPLTTSDHIRMTDKKTLHTLE  
IVSVTREDSGQYAAIISNAVGAAYSARLLVRGPSEPEEKPASDVHERLVPPRILEKFTPKKVKRGSSITFSV  
KVEGHPAPSVHWLKEEAEGVLIWIGPDTPGYTMASSSKQHSVLVLDVGRQHGGTYTCIATNPAGQALCSASLH  
ISGLAKEEEQERVKEALISSFLQGTSAVSAQMSSESAGFADLVGQSKGESLVAAEAHSHLSLAEVGTTEFLQK  
LTSQITEMVSAKISQAKLQVPGGDSDEETKTPSASPRHGRSRPSSSVQESSSESEDGDSRGEIFDIYVVVTADY  
LPLGAEQDAIILREGQYVEVLDSAHPLRWLVRTKPTKSSPSRQGWVSPAYLDKRLKLSPEWGPTEAPEFPGEA  
VSEDEYRTRLSSVIQELLSSEQAFVGELEQFLESHHMKHLERSPRVPAAVASQKTVIFRNVQDISHFHSSFLKE  
LQCGCTDDDVAMCFIKNQEAFAFEKYLEFLVGRVQAESVVVSTPVQEFYKKYAEETLSAKDPTQPPPPPLQHYLE  
QPVERVQKRYQALLKELIRNKARNRQNCALLEQAYAVRSDALPQRAENKLVSLMENYPGTLEALGEPPIRQGHFI  
VWEGAPGARMPKXGHNHVFVFRNYLVICPKRRDRSDTFSYVFRNMMLKSSIDLNDQVEGDDRAFEVWHERE  
DSVRKYLQARTVLIKNSWVKEICGIQORLAQPVWRPPEFEELADCTAELGETVKLACRVGTGPKPIVSWYK  
DGKPVVEVDPHHILIEDPDGSCSTLILDNLGTIGDSQYMCFAASAAGNASTLGKILVQVPPRFVNVKVRATPFVEG  
EDAQITCTVEGAPYPQIRWYKDGTLAPGNRYRMLNEPRSGVLVLIQAASKEDLGHYECELVNRLGSTRGGG  
ELYMOSPALRARDQHHREQIVAAVEGAPSMQVTTIEDVQVQVGDMAQFDAVIEGHPPPPIVTWYKGSTQLTSSAR

LSQRQDGTYSVLVTDVAPHDAGVYTCVANNAGQVLCKAELLVHGGDKLDAENQVYRRKLSFYDVQEEIGR
GVFGFVKRVQHKGNMFCFAKFIPLRSKTRAQAYQERDILATLGHPLVTGLLDQFETRKTLLILILELCSSEEL
LDRLFKKGVVTEAEVKVYIQQLVEGLHYLHSHGILHLDIKPPNIMLVHPAREDIKICDFGFAQKITPSEPOYS
KYGSPFVVSPEIIEQNPVSEGSDIWAMGVISYLSLTCSSPFAGESDRATLLNVLEGRVSWSSPTAAHLSSEDAK
DFIKATLQRTPRARPSTSQC LAHPWFLKSMPAEEAHFINTKQLKFLARSRWQRSLMSYKSIILVMRSIPELLQ
GPPDSPSLGVARHLRGEASGASSSSSSSDNELAPFARAKSLPPSPVTHSPLLHPRGFLRPSASLPEETEASMP
TADAAVPASPQASAGPPASPGCVPRHSVSISSLFYQQAGEGAERGNKTSGAKRHPARRRHLLKGGYIARALPGLR
EPLMEYSLLEEEAAREEQASLMTKTPSFETALRLPSSSVREVPGRSHSLDNPPVTTGSPPEACKEQLLFPST
GLTHEFTAKDRGHKEGFLQESVFPFMSGDSRPGKQEGSSQDSCRGKPASSCHSELGSGSQEGCGPPSSQSLG
SLPPQSLKKELESTSCGPLFSEQPQAAPFPTQVSPLLGSEKEPQDGSLSSEGPVVPVSSSPGSASQVDASLDTEG
LSEAGDTCDFTPPPQRPQEQATTRKFSLESRGGYAGVAGYGTFAFGGDAGGMLGQGPLWARMWAVSQSSEEQ
DEAATESPQPLESLGPIAEASGVPLRTPSLTPWEEVEQVSLVQIRDLSGDAEAADTISLDISEVDPAYLNLS
DLYDIKYLPFEFMI FRRVPKPIEQPESPGSETEAGQGLADFLLEEAAWPWPGEGLGLRAGLEITEEPEEPGDLEA
LLGEAAVGRKRKWSPSRGLFQFGRCLSGEEPVELGLRQRVKASMAHISRILKGRPEGPEREPPRKKAGLAS
FRLSGLKGRDQELSDEAVVLGQSVTLACQVLAQPTAQTWSKDGVLLESSGHLLISSTLKNFQLLTLILVVKEE
DLGTYTCCVSNPLGTAVTTGVLKRAERPSSSPRPEVGEYKDAVLLVWKPVESCGPVTYIVQCCIEGGSWTTL
ASDISDCCYLTKGLSRGGMYIFRTACVSKAGMGPYSSPSEQVLLGGPNHLASEEESSRRGRPAQLLPSTKTFAF
QMQIRRGFRFSVVRQCREKASGRALAAKIVPYQPEDKTAVLRREYEAALKRHLHHPHLAQLHAAYLSPRHLVILEL
CSGPELLPSLAERESYSESDVKDYLWQMSATQYLHAQHILHLDLRSENMMVTEYNLLKVIDLGNASLDQEK
VPAPENFKDYLETMAPELLEGQAVPQTDIWAIGVTAIFIMLSGEYPESEGETRDLQKGLRKLIRLSRCYAGL
SGGAVAFLOSSLCAQPWGRPCASTCLOCGWLTEEGPTGSRPTPVTFTVRLRAFVREREKRRALLYKXHNLAQ
VR\*

>rs26955766\_ENSMUSP00000049737\_c.3760:T>C\_p.L1254P
ENSMUST00000052872.15|Obscn-203|ENSMUSG00000061462|-|chr11:g.59003611:A>G
MDHSFSGAPRFLTRPKAFVVSVGKDATLSCQIVGNPTPHVSWEKDRQFVEAGARFRLAQDGDVYRLTILDLAL
GDSGQYVCRARNAIEGFAAVGLRVDSEGTCAEQAPHFLLRPTSIRVREGADATFRCRVGGSPQPAVSWSKDG
RRLGPPDAPHRVVEHEGESSALRIR SARPRDGGTYEVRAENPLGSASAAAALVVDSAEVAGVPGTSTATLLA
HLQORREAMRAEGIPPSPPGAGTRTCTVTEGKHARLSCFVTGEPKPEVWKKDGQLVTEGRRHVVEDEQENF
VLKILFCKQSDRGLYTCTASNLVGQTYSSVLVVREPTVPFKKRLQDLEVREKESATFQCEVAQPAEAAWFK
EETRLWASAKYDIEEGTERRLTVRNVSADDDAVYICETTEGSRVVAELSVQGNLTKLPRKTAVRTGDTAIF
WVELAVPEGPVWRWRNQEEMVAGGRVAITAEGTCHTLTI FQCTLEDMGEVAFVSGGCRTTTQFCVSAAPRRPPL
YPPADPVVKAKTESVTLWSAPPHGDRPVTIDGYVLEKRLKLGAYAWSRCHEAGWLATTEFTITGVAAEGDFQ
FRVSAINHFGQGPYLEFPGTMHLVPLAVKTPKAVEAVEGGEVTFVSDLTVASSGEWFLDGEALKASSIYVI
RCDRTRHMLTIREV PARLHGAQLKFVANGIETS IQMVVRAALGLPSSKLPAAAAREVLAQLHEEAQLLAE LSD
QAAA VTLKGDRELSLGP KYEMQVSAGRRALLVRDVAQDDAGLYECVSRGSR TAYQLLVQEPKLVFAKQQAH
SEVKAEAGNSATLSCEVTAQTEV TWFKDGKLLSSSSKVRMEASGCSRRLLVVQQAGKADAGEYSCEAGGQKLS
FRLDVAEPKLVFAKQQAHSEVKAEAGASATLSCEVAQAQTEV TWFKDGKLLSSSSKVRMEASGCSRRLLVVQQ
AGKADAGEYSCEAGGQKLSFRLDVAE PKMVFAKEQQARSEVKAEAGASATLSCEVAQAQTEV TWFKDGKLLSS
SSKVRMEASGCSRRLLVVQQAGKADAGEYSCEAGGQKLSFRLDVTEPKLVFAKEQQARSEVKAEVGN SATLSCE
VAQAQTEV TWFKDGKLLSSSSKVRMEASGCSRRLLVVQQAGKADAGEYSCEAGGQKLSFRLDVAEPKLVFAKEQ
QARSEVKAEAGNSATLSCEVAQAQTEV TWFKDGKLLSSSSKVRMEASGCSRRLLVVQQAGKADAGEYSCEAGGQ
KLSFHLDVTEPKPVFAKEQQAHSEVKAEAGASATLSCEVAQAQTEV TWFKDGKLLSSSSKVRMEASGCSRRLV
VQQAGKADAGEYSCEAEGQKLSFRLDVAEPKLVFAKEQQARSEVKAEAGASATLSCEVAQAQTEV TWFKDGK
LSSSSKVRVEASGCSRRLLVVQQAGKADAGEYSCEAGGQKLSFRLDVAEPKLVFAKEQQANSEVKAEAGASATL
SCEVAQAQTEV TWFKDGKLLSSSSKVRVEASGCSRRLLVVQQAGKADAGEYSCEAGGQKLSFRLDVAEPKLAFA
KEQQAHSEVKAEAGASATLSCEVAQAQTEV TWFKDGKLLSSSSKVRVEASGCSRRLLVVQQAGKADAGEYSCEA
GGQKLSFRLDVAEPKLAFAKEQQAHSEVKAEAGASATLSCEVAQAQTEV TWFKDGKLLSSSSKVRVEASGCSR
RLVVQQAGKADAGEYSCEAGGQKLSFRLDVAEPKLAFAKEQQAHSEVKAEAGASATLSCEVAQAQTEV TWFKD
GKLLSSSSKVRVEASGCSRRLLVVQQAGKADAGEYSCEAGGQKLFRLDVAEPKLMFAKEQQAHSEVKAEAGAS
ATLSCEVAQAQTEV TWFKDGKLLSSSSKVRVEASGCSRRLLVVQQAGKADAGEYSCEAGGQKLSFRLDVAEPK
LVFAKEQQAHSEVKAEAGASATLSCEVAQAQTEV TWFKDGKLLSSSSKVRVEASGCSRRLLVVQQV GKADAGEYS
CEARGQKLSFRLDVADTRLMFAKEQQARTEVKAEAGNSATLSCEVAQAQTEV TWFKDGKLLSSSSKVRVEASG
CSRRLLVVQQAGKADAGEYSCEAGGQKLSFRLDVAEASISQI PERPSRREPLVVKEHETIILTATIAAPSVAAVT
WLKDGEVIRRSKRHEATSLGDTHLTVRGAQVLDASAIYSICRVGKEGQDFPVQVEEVAAKFSKPLEPVEGELGG
TVMLVCELSPEQAEEVWRCGNTQLRPGKRFQMTSEGPRRTLTVSLGREDDAEYVCEASRDDRTSARLTVKVP
VVKFTSGLSAMVAEEGQEA TFQCVVSPSDAGVTWYKDGMLQPSSEKFMVVEGASRSLTILGLTLEDAGQVTV
EAEGASSSAALRVREAPVLFKKKLEPQTV EERTSVTLEVELTRPWPEVKWTRNAAVLTPSENVEIRAEGARHC
LVLSRVGFADRGFFGCETPDDKTQAKLNVEMRQVRLVRGLQEVEAKEQGTASMDVELSHAEVEGSWTRDGLRL

QPGPKCHLAVQGPVHILTLALSALQPQDSGLVAFRAEGVHTSARLIVTELPVSFTRVLQDQVAVATQKEKVTLECEL  
SRPVDVRLKDGVELRAGKAI GIVAQGTCSRSLVIYRCETGDQGVYVCDALDAQTSASLRVQGRTYTLIFRRVL  
AEDAGEVVFVAENAESRAHLRVKELPVTLLRPLRDKIAMEKHRGVLECVSRASAQVRWFVKGVELQSGPKYE  
VVDGLYRKLVINVDVQPEDEDTYTCDAGNVKTSAQFFVVEEQSITIVRGLKDMTVMPEPAPAWFECETSIPSVRP  
PKWLLGKTVLQAGGNVLEQDGTVHRLTLHKTCSTMTGPVHFTIGKSRSSAQLVVSIPVVLTRPLEPKAGRE  
LQSVVLSCDFRPAPKAVQWYKDDTPLSPSEKFKMALEGQMAELRILRLTPADAGVYRCQAGSAQSSAEVTVEA  
REVTVIQPLQDAEAMEEGRVCFSCLESHKDEDI EWSLNGTPLYNDSFHEISHEGCLHTLVLSVRQADTGTVC  
ATSPKVSVSARLVVKGKPVVFLKALDDVSAEERGTTLTQCEVSDPEARVVWRKDGVELGPSDKYDFLHKAGAR  
GLTVHDLSHEDAGLYTCQVGSKETQSKVSVHDLHVGITKRLKTVEVLEGE SCSFECVLSHESPSDPAVWTVGG  
KTVGGSGHFHAVRQGRKYTLTVKDAALSDAGEVVSFVGLTSSKASLIIRERPVDITKPLEDQRTTLGEDVMLS  
CELSRAGTSVRWLKDGKAIKRSQKYDLLSEGTRAVLVVRKASLKDSGEYTCETEASKSTAKLCVEEKANRFT  
ELADLQVEEKGRAVFTCKTEHPASVVTWRKGLLELRASGKHVPSQEGTLKLTINALERTDSDTYTCDIGQAR  
TQARLLVHGQKVRVIEDLEDTAVQEGSSAKFCCRIAPADYGPVHWFWDKTPHLSNELNEITVQPGGYHVLTLR  
QLALKDSGTVYFEAGDQRTSAAALRVTEKPSIFSRPLTDVTVTEGEDTLVCETTTVDSSVRWTKDGKTLRPSA  
RCQLSHEGCAQLLITATTPQDGGRYKCEIGGASSSSIVRVHALPVRFRESLKDVEVPEGKAATLRCVLSVA  
APVEWRHGDDVLKSSNKYSLRQEGAVLELVIDRLQPDQSGQYSCSFGDQTTSATLTVKTSQAQVFGKLRNKEA  
TEGTVTRRCELTKKEAPVEWKKGTETLRNGDKYSLKQDGAVCELQICSLLVADAGEYSCVCGQEKTSATLTVK  
ALLVHFVRRLSKEATEGDTTLQCELSKAAPVEWRKGTETLRDGDYSLKQDGAVCELQIRSLTADAGEYL  
CTCGQEKTSATLTVRALPAKFKDSLKNEEATEGTTATLSCELSKAAPVTWKKGPKTLQSGDKYVLRQDGAVCG  
LQIHGLTMADAGEYSCVCGQEKTSATLTVRGLPAKFIEDLRSQEATEGATAILRCLELSKAAPVEWRKGSSETL  
DGDRYTLRQDGAVCELQIRGLAVDGTYSLSLPTKFTTEGLRNEEATEGTMATLRCQMSKAAPVEWRKGSSETL  
DGDRYSLRQDGAMCELQIRGLTIEDSGEYTCVCGQEKTSATLSVKALPSRFIEDLRSQEATEGTMATLRCQMS  
KTAPVEWKKGSETLRDGGRYSLRQDGPVCELQICDLAVEDAGEYSCVCGQEKTSATLSIKALPPRFIEDLRSQ  
EATEGTMATLRCQMSKAAPVEWRKGSSETLGDGGRYSLRQNGAVCELQIHDLAVEDTGEYSCVCGQEKTSATLN  
VKALPPRFIEDLRSQEATEGTMATLRCQMSKAAPVEWRKGSSETLRDGGRYSLRQDGAVCELQIHDLVEDAG  
YSCVCGQEKTSATLTVDALPPKFTTEGLKKEEATEGTMVTLRQMSKEATVEWRKGAKTLSDDGGRYSLRQDG  
CELQICGLAVEDAGEYSCVCGQEKTSATLSVKALPPRFIEDLRSQEATEGTMATLRCQMSKAAPVEWRKGS  
LRDGDYSLRQDGAVCELQIRDLAVEDAGEYLCVCGQEKTSATLSVKALPPRFIEDLRSQEATEGTMATLRCQ  
MSKAAPVEWRKGSSETLRDGDYSLRQDGAMCELQICDLAVEDTGDYSCVCGQEKTSATLSVKALPPRFIEDL  
SQEAREGTVATLRCMSKAAPVEWRKGSSETLKDGDYSLRQEGNLCELQIRDLAVEDTEEYSCVCGQEKTSAT  
LSVKALPAKFIEDLRSQEAPESSTVTLRCKLSKKASVVWKKGSETLRNGARYSLRQDGAVCELEIRDLTVEDT  
GEYSCTCGQERTSATLSIMAPQVVFQQLQNLQAEEGSMASLRCELSPNAAMVWSKGGLELQGDTRREARQQ  
GCVAELLLRDLRREDAGEYSCCTCGSQTTSATLMVTAAPVRFRELAQDQVDEGATARLRCELSREAVSVEWRK  
GSLQLFPKAKYQMVQEGTTAELLVHGVEQEDAGEYTCDAHTQS IARLSVRAPKPKFKTDLQSTEQEAGGTAR  
LCCQLSEAEPTPVQWLKEGVELHVGSKYEMRRQAVCELLIHGLEAKDTGEYACLVGQKTLASLRVKEPEV  
TIVRGLVDMEVQADEDEFTCKVQAGATDVQWHLQGLPLQSNVTEVAVLADGCTHVLQKGVTLADAGTVS  
FHVGGLSSSAQLTVRVPEVTVLEPLKDVQLSEGDQDAHFRCLRSRASGQEARWALGGVPLQCNEMNDITVEQGT  
LYLLTLHKVTLLEDAGTITLQVGS SQAQLKVTAKNTVLRGLENVDALEGGEALFECQLSQPEVAHTWLLDD  
EPVHTSEKVEVVYFENGLRHLLLLKLNKLPQDSCRVTFLAGDVVTS AFLTVRGWRLEVLPPHDASVKAGMQR  
FTCILSEAVPVGEATWYINGAAIQPDDTDWTVTTDGS HHALTLSNAQPQHAGEVTF AARDAVASARLSVLALP  
DPEDAEEVGRSDHSVTLSSWVAPMSDGGGGLCGYRVMKEASTGQWQLCHDLVPGPECVDDLVPGKTYRFRV  
AAVGPAGAGEPVHLPQMVKIAPAPAPAPAPAPAPAPETRAVVGEDI CLELEVAADGGVEVWHKGTERRIQPGG  
HFEVLSRGRQMLVIKGFRTEDQGEYRCGPIQGLPSSGAATFNVMVTS GSGDEVPAQPSLPPEAAQEGDLHLL  
WEALARKRRMSREPTLDSISELPEEDSRVQHLRQEAETAPDLSEGYSTADELARTGEADLSHTSSDDES RAG  
TPSLVTYLKAGGPGISPLASKHEAQVTT SVKPQKQEPVVP TCPPPGDL SAADLMDPSLDKAAVKIQAAFKG  
YKVRKEMKQQEGPVFSRTFGDTEAQVGDVLRLECVLATKTD MRACWLKDGIELTDGRHYHIDQLKDGTC SLV  
TGLAPTDSGRYTCQVSTKSGRVSHSACVVVSGTESEAESSSGGELDDAFRAARRLHRLFRTKSPAELSEEEL  
FLSADEGPGEPEPADWQTYREDENFVCIRFESLAEARQAVTCFRNMFATMGIGVEISLGEQGPGRVEMRIGK  
VAPTVPAPVPLAKTPGLQTS DAAPVFLTELQNDQVQDGYPMSFDCVVTGQPVPSVRWFKDGKLEEDDHYMIN  
EDQQGGHQLIITAVVPADMGVYRCLAENSMGVSTKAELRVELTSTDYDTAADATETSSYFSAQGYLSSREQE  
GTESDEGQLPQVLEELKDLQVAPGTRLAKFQLKVKGYPAPKLYWFKDQGPLTSSDHIRMTDKKTLHTLEIVSV  
TREDSGQYAAIISNAVGAAYSSARLLVRGPSEPEEKPASDVHERLVPRI LEKFTPKKVKRGSSTF SVKVEG  
HPAPSVHWLKEEAEGFLWIGPDTPGYTMASSSKQFADLVLDVGRQHOGTYTCIATNPAGALCSASLHISGL  
AKEEEQERVKREALISSFLQGTSQAVSAQMSESAAGHSLVQSGKESLVAEEAHSHLSLAEVGTEEFQLKLTSSQ  
ITEMVSAKISQAKLQVPGGDSDEETKTPSASPRHGRSRPSSSVQESSSESEDGDSRGEIFDIYVVTADYLP  
AEQDAIILREGQYVEVLDSAHPLRWLVRTKPTKSSPSRQGWVSPAYLDKRLKLSPEWGPTEAPEFPGEAVSED  
EYRTRLSSVIQELLSSEQAFVGE LQFLESHHMKHLERSPRVPAAVASQKTVIFRNVQDISHFHSSFLKELQGC  
GTDDDVAMCFIKNQEA FEKYLEFLVGRVQAESVVVSTPVQEFYKKYAEETLSAKDPTQPPPPPLQHYLEQ PVE

RVQKYQALLKELIRNKARNRQNCALLEQAYAVVSALPQRAENKLVSLMENYPGTLEALGEPIRQGHFIVWEG  
 APGARMPWKGHNHRVFLFRNYLVICKPRRDSRTDTFSYVFRNMMKLSSIDLNDQVEGDDRAFEVWHEREDSVR  
 KYLLQARTVI IKNSWVKEICGIQORLAQPVWRPPEFEELADCTAELGETVKKLACRVGTGPKPIVSWYKDGKP  
 VEVDPHHILIEDPDGSCSTLILDNLTGIDSGQYMCFAASAAGNASTLGKILVQVPPRFVNVKVRATPFVEGEDAQ  
 ITCTVEGAPYPQIRWYKDGTLTLLAPGNRYRMLNEPRSGVLVLIQAASKEDLGHYECELVNRLGSTRGGGELYM  
 QSPALRARDQHHREQIVAAVEVTEQETKVPKKTVIIETITITTVKSPRGRRQSPGKSPSRSPRRSASPRRPG  
 LLAPERLYPPGTSPSRRLEVEQGRKAPVPALYVTEAEVHAPASQSQPKWLEVEETIEVRVKKTGSRGASPVRE  
 MTSRGEGLFLLTGGI PGRDPNANNNSNKSQVYQEAARTWGPVAVHVGEFFIFQVDSVGNVDWVAASPEPEQVRA  
 SQKEENTERQEGCSDGDENTFLMEEPQDTSLQGRDPKILTHNGRVLTLADLEDYVPQEGEFTFGCGDSTPSTP  
 DEPPCEVSVLQREISEPTVGQPVLLNVGRPPGTGATPSFFRPGSQVHSPESVSFLLREAWSGPVSAAPWTSSF  
 HTHVQSSVDGSHGSFKTEVSTQTVSFGAVGETVTLHIDPDGGEAPGPSQG\*  
 >rs26955766\_ENSMUSP00000020732\_c.3961:T>C\_p.L1321P  
 ENSMUST00000020732.13|Obscn-201|ENSMUSG00000061462|-|chr11:g.59003611:A>G  
 MDHSFSGAPRFLTRPKAFVSVGKDATLSCQIVGNPTPHVSWEKDRQPVEAGARFLAQDGDVYRLTILDLAL  
 GDSGQYVCRARNAIGEAFAAVGLRVDSEGTCAEQAPHLLRPTSIRVREGADATFRCRVGSGSPQPAVSWSKDG  
 RRLGPPDAPHVRVEEHGESSALRIRRSARPRDGGTYEVRAENPLGSASAAAAALVVDSDAEVAGPPGTSTATLLA  
 HLQORREAMRAEGIPSPPGAGTRTCTVTTEGKHARLSCFVTGEPKPEVTVWKKDGLVLEGRRHVVYEDEQENF  
 VLKILFCKQSDRGLYCTASNLVGTYSVSVLVVREPTVPFKKRLQDLEVREKESATFQCEVAQATEAAWFK  
 EETRLWASAKYDIEEEGTERRLTVRNVSADDDAVYICETTEGSRVVAELSVQGNLTKLPRKTAVRTGDTAIF  
 WVAVLAVPEGPVWRWRNQEEMVAGGRVAITAEGTCHTLTIFQCTLEDMGEVAFVSGGCRTTTFQFCVSAPRRPPL  
 YPPADPVVKAKTESSVTLWSAPPHGDRPVTIDGYVLEKRKLGAYAWSRCHEAGWLATTEFTITGVAAEGDFQ  
 FRVSAINHFQGGPYLEFPGTMHLVPLAVKTPKAVEAVEGGEVTFVSDTLTVASSGEWFLDGEALKASSIYVI  
 RCDRTRHMLTIREVPARLHGAQLKFVANGIETSIQMVVRAALGLPSSKLPAAAAAREVLAQLHHEAQLLAE LSD  
 QAAAVTWLKDGRELSLGPKEYMQVSAGRRALLVRDVAQDDAGLYECVSRGSRRTAYQLLVQDITDGYRDWGPAG  
 PQKHMCKCAGAKIARYLGSscyRFLQYDKGVWHWLEAALDTRQGKGTSSCSLHEKPKLVFAKQQAHSEVKA  
 AGNSATLSCEVTAQTEVTFWKDGKLLSSSSKVRMEASGCSRRLVVQQAGKADAGEYSCEAGGQKLSFRLDVA  
 EPKLVFAKQSAHSEVKAEGASATLSCEVAQAQTEVTFWKDGKLLSSSSKVRMEASGCSRRLVVQQAGKADA  
 GEYSCEAGGQKLSFRLDVAEPKMFVFAKEQQARSEVKAEGASATLSCEVAQAQTEVTFWKDGKLLSSSSKVRM  
 EASGCSRRLVVQQAGKADAGEYSCEAGGQKLSFRLDVTEPKLVFAKEQQARSEVKAEGVNSATLSCEVAQAQ  
 EVTWFKDGKLLSSSSKVRMEASGCSRRLVVQQAGKADAGEYSCEAGGQKLSFRLDVAEPKLVFAKEQQARSEV  
 KAEAGNSATLSCEVAQAQTEVTFWKDGKLLSSSSKVRMEASGCSRRLVVQQAGKADAGEYSCEAGGQKLSFHL  
 DVTEPKPVFAKEQQAHSEVKAEGASATLSCEVAQAQTEVTFWKDGKLLSSSSKVRMEASGCSRRLVVQQAGK  
 ADAGEYSCEAEGQKLSFRLDVAEPKLVFAKEQQARSEVKAEGASATLSCEVAQAQTEVTFWKDGKLLSSSSK  
 VRVEASGCSRRLVVQQAGKADAGEYSCEAGGQKLSFRLDVAEPKLVFAKEQQANSEVKAEGASATLSCEVAQ  
 AQTEVTFWKDGKLLSSSSKVRVEASGCSRRLVVQQAGKADAGEYSCEAGGQKLSFRLDVAEPKLVFAKEQQAH  
 SEVKAEGASATLSCEVAQAQTEVTFWKDGKLLSSSSKVRVEASGCSRRLVVQQAGKADAGEYSCEAGGQKLS  
 FRLDVAEPKLVFAKEQQAHSEVKAEGASATLSCEVAQAQTEVTFWKDGKLLSSSSKVRVEASGCSRRLVVQQ  
 AGKADAGEYSCEAGGQKLSFRLDVAEPKLVFAKEQQAHSEVKAEGASATLSCEVAQAQTEVTFWKDGKLLSS  
 SSKVRVEASGCSRRLVVQQAGKADAGEYSCEAGGQKLFRLDVAEPKLMFAKEQQAHSEVKAEGASATLSCE  
 VAQAQTEVTFWKDGKLLSSSSKVRVEASGCSRRLVVQQAGKADAGEYSCEAGGQKLSFRLDVAEPKLVFAKEQ  
 QAHSEVKAEGASATLSCEVAQAQTEVTFWKDGKLLSSSSKVRVEASGCSRRLVVQQVQKADAGEYSCEARGQ  
 KLSFRLDVADTRLMFAKEQQARTEVKAEGNSATLSCEVAQAQTEVTFWKDGKLLSSSSKVRVEASGCSRRLV  
 VQQAGKADAGEYSCEAGGQKLSFRLDVAEAEQI PERPSRREPLVVKEHETIILTATIAAPSVAAVTWLKDG  
 VEIRRSKRHEATSLGDTHTLTVRGAQVLDIAIYSCRVGKEGQDFPVQVEEVAAKFSKPLEPVEGELGCTVMLVC  
 ELSPEQAEVWRCGNTQLRPGKRFQMTSEGPRTTLTVSGLREDDAEYVCESTRDDRTSARLTVKVPVVKFTS  
 GLSAMVAEEGQEAATFQCVVSPSDAGVTWYKDGMLQPSKFKVMVESGASRSLTILGLTLEDAGQVTEAEGAS  
 SSAALRVREAPVLFKKKLEPQTEVEERTSVTLEVELTRPWPEVKWTRNAAVLTPSENVEIRAEGARHCLVRSV  
 GFADRGGFFGCETPDDKTQAKLNVEMRQVRLVVRGLQVEVEAKEQGTASMDVELSHAEEVGSWTRDGLRQLQPGPKC  
 HLAVQGPVHILTLTSLALQPQDGLVAFRAEGVHTSARLIVTELPVSFTRVLQDVVATQKEKVTLECELSRPVDV  
 RWLKDGVLELRAGKAIGIVAQGTCSLVIYRCETGDQGVYVCDALDAQTASALRVQGRTYTLIFRRLAEDAGE  
 VKFVAENAESRAHLRVKELPVTLLRPLRDKIAMEKHRGVLECCQVSRASAQVRWFKGGVELQSGPKYEVVSDGL  
 YRKLVINDEVQPEDEDTYTCDAENVKTSAQFFVEEQSITIVRGLKDMTVMPEPAPAWFECETSIPSVRPPKWL  
 LKTVLQAGGNVGLQYDGTVHRLTLHKTCSTMTGQVHFTIGKSRSSAQLVVS DI PVVLTTRPLEPKAGRELQSVV  
 LSCDFRPAPKAVQWYKDDTPLSPSEKFKMALEGGQMAELRILRLTPADAGVYRCQAGSAQSSAEVTVAREVTVI  
 QPLQDAEAMEEGRVCFSELSHKDEDEIWSLNGTPLYNDSFHEISHGCLHTLVLSVRQADTGTVCATSPKV  
 SVSARLVVKGKPVVFLKALDDVSAEERGLTLTQCEVSDPEARVVRKDGVELGSPDKYDFLHKAGARGLTVHD  
 LSHEDAGLYTCQVGSKETQSKVSVHDLHVGITKRLKTVEVLEGESECSFECVLSHESPSDPAVWTVGGKTVGGS  
 GHFHAVRQGRKYTLTVKDAALSDAGEVVSVLGLTSTKASLIIRERPVDITKPLEDQRTTLGEDVMLSCELSRA



GTSVRWLKDGKAIRKSQKYDLLSEGETRAVLVVRKASLKDSGEYTCETEASKSTAKLCVEEKANRFTEELADLQ  
VEEKGRAVFTCKTEHPASVVTWRKGLLELRASGKHVPSQEGLTLKLTINALERTDSDTYTCDIGQARTQARLL  
VHGQKVRVIEDLEDTAVQEGSSAKFCCRIAPADYGPVHWFLLDKTPLHSNELNEITVQPGGYHVLTLRQLALKD  
SGTVYFEAGDQRTSAALRVTEKPSIFSRPLTDVTVTEGEDTLVCESTTVVDSVVRWTKDGKTLRPSARCQLSH  
EGCQAQLLITATTPQDGGRYKCEIGGASSSSIVRVHALPVRFRRESLKDVEVPEGKAATLRCVLSVAAPVEWR  
HGDDVLKSSNKYSLRQEGAVLELVIRDLQPQDSGQYSCSFGDQTTSATLTVKTSQAQFVGLRKNKEATEGTTV  
TLRCELTKAPVEWKKGTETLRNGDKYSLKQDGAVCELQICSLLVADAGEYSCVCGQEKTSATLTVKALLVHF  
VRRLSKEATEGDTTTLQCELSKAAPVEWRKGTETLRDGRYSKQDGAVCELQIRSLTIADAGEYLCTCGQE  
KTSATLTVRALPAKFKDSLKNEEATEGTTATLSCELSKAAPVTWKKGPKTLQSGDKYVLRQDGAVCGLQIHGL  
TMADAGEYSCVCGQEKTSATLTVRGLPAKFIEDLRSQEATEGATAILRCELSKAAPVEWRKGSSETLKDGRYT  
LRQDGAVCCELQIRGLAVVDGTGYSLSLPTKFTTEGLRNEEATEGTMATLRCQMSKAAPVEWRKGSSETLRDGRYS  
LRQDGAVCCELQIRGLTIEDSGEYTCVCGQEKTSATLSVKALPSRFIEDLRSQEATEGTMATLRCQMSKTAPVE  
WKKGSETLRDGGRYSLRQDGPVCELQICDLAVEDAGEYSCVCGQEKTSATLSIKALPPRFIEDLRSQEATEGT  
MATLRCQMSKAAPVEWRKGSSETLGDGGRYSLRQNGAVCELQIHDLAVEDTGEYSCVCGQEKTSATLNVKALPP  
RFIEDLRSQEATEGTMATLRCQMSKAAPVEWRKGSSETLRDGGRYSLRQDGAVCCELQIHDLVEDAGQYSCVCG  
QEKTSAVLTVDALPPKFTTEGLKKEEATEGTMVTLRCQMSKEATVEWRKGAKTLSDDGGRYSLRQDGAVCCELQIC  
GLAVEDAGEYSCVCGQEKTSATLSVKALPPRFIEDLRSQEATEGTMATLRCQMSKAAPVEWRKGSSETLRDGRY  
YSLRQDGAVCCELQIRDLAVEDAGEYLCVCGQEKTSATLSVKALPPRFIEDLRSQEATEGTMATLRCQMSKAAP  
VEWRKGSSETLRDGRYSLRQDGAVCCELQICDLAVEDTGDYSCVCGQEKTSATLSVKALPPRFIEDLRSQEARE  
GTVATLRCRMSKAAPVEWRKGSSETLKDGRYSLRQEGNLCELQIRDLAVEDTEEYSCVCGQEKTSATLSVKAL  
PAKFIEDLRSQEAPESSTVTLRCKLSKASVWKKGSETLRNGARYSLRQDGAVCLEIRDLTVEDTGEYSCT  
CGQERTSATLSIMAPQVVFQQPLQNLQAEEGSMASLRCELSVNAAMVWSKGGLELQGDTRREARQQGCVAEL  
LLRDLRREDAGEYSCTCGSQTTATLMVTAAPVRFRELQAQDVEGATARLRCELSREAVSVEWRKGSLLQF  
PCAKYQMVQEGTTAELLVHGVEQEDAGEYTCDAHTQSIARLSVRAPKPKFKTDLQSTEQEAGGTARLCCQLS  
EAEFGTVPVQWLKEGTEFLVHVGSKYEMRRQGAVCCELLIHGLEAKDTGEYACLVGGQKTLASLRVKEPEVTIVRGL  
VDMEVQADEVEFTCKVSAQAGATDVQWHLQGLPLQSNVEVAVLADGCTHVLQKGVTLQKGTIVSFHVGG  
SSAQLTVRVPEVTVLEPLKDVQLSEGDQDAHFRCRLSRASGQEARWALGGVPLQCNEMNDITVEQGTLYLLTL  
HKVTLLEDAGTITLQVGSSESQAQLKVTAKNTVLRGLENVDALEGGALFECQLSQPEVAHAHTWLLDDEPVHTS  
EKVEVVYFENGLRHLLLLLKNLKPQDSCRVTFLAGDVVTSFAFLTVRGRLEVLLEPPHDASVKAGMQVRFTCILS  
EAVPVGEATWYINGAAIQPDDTDWTVTTDGSHHALTLSNAQPQHAGEVTFAAARDAVASARLSVLALPDPEDA  
EUVGRSDHSVTLVSWVAPMSDGGGGLCGYRVMKEASTGQWQLCHDLVPGPECVDDLVPGKTYRFRVAAVGPA  
GAGEPVHLPQMVKIAPAPAPAPAPAPAPAPETRAVAVGEDICLELEVAADGGEVVWHKGTERRIQPGGHFEVLS  
RGQRQMLVIKGFRTEDQGEYRCGPIQGLPSSGAATFNVVMTSGSGDEVPAQPSLPPEAAQEGDLHLLWEALAR  
KRRMSREPTLDSISELPEEDSRVQHLRQEAETAPDLSEGYSTADELARTGEADLSHTSSDDESAGTPLSVT  
YLLKAGPGISPLASKHEAQVTSVKPQKQPEVPTTCPPPGDLSAADLMDPSLDKAAVKIQAAFQYKVKRKE  
MKQQEGPVFSRTFGDTEAQVGLRLECVLATKTDMRACWLKDGIELTDGRHYHIDQLKDGCTSLVLTGLAPT  
DSGRYTCQVSTKSGRVSHSACVVVSGTESEAESSGGELDDAFRAARRLHRLFRTKSPAELSEELFLSADE  
GPGEPEEPADWQTYREDENFVCIRFESLAEARQAVTCFRNMFATMGIGVEISLGEQGRGVEMRIGKVAPTVT  
PAVPLAKTPGLQTSDAAPVFLTELQNDVQDGYPMSFDCVVTGQPVPSVRWFKDGKLEEDDHYMINEDQGG  
HQLIITAVVPADMGVYRCLAENSMGVSSTKAELRVELTSTDYDTAADATETSSYFSAQGYLSSREQEGTESDE  
GQLPQVLEELKDLQVAPGTRLAKFQLKVKGYPAKLYWFKDQGPLTSDHIRMTDKKTLHTLEIVSVTREDSG  
QYAAYSNAVGAAYSSARLLVRGPSEPEEKPASDVHERLVPPRILEKFTPKKVKRGSSITFSVKVEGHPAPSV  
HWLKEEAKEKGLVWIGPDTPGYTMASSSKQHSVLVLDVGRQHOGTYTCIATNPAGQALCSASLHISGLAKEEQ  
ERVKEALISSFLOQTSQAVSAQMSESAFADLVGQSKGESLVAEEAHSHLSLAEVGTTEFLQKLTSTQITEMVS  
AKISQAKLQVPGGDSDEETKTPSASPRHGRSRPSSSVQESSSESEEDGDSRGEIFDIYVVTADYPLGAEQDAI  
ILREGQYVEVLDSAHPLRWLVRTKPTKSSPSRQGWVSPAYLDRKRLKLSPEWGPTEAPEFPGEAVSEDEYRTRL  
SSVIQELLSSEQAFVQELQFLESHHMKHLERSPRVPAAVASQKTVIFRNVQDISHFHSSFLKELQCGCTDDDV  
AMCFIKNQEAFAKEYLEFLVGRVQAESVVVSTPVQEFYKKAETLSAKDPTQPPPPPLQHYLEQPVVERVQKYQ  
ALLKELIRNKARNRQNCALLEQAYAVVSALPQRAENKLVSLMENYPGTLEALGEPHQGHFIVWEGAPGARM  
PWKGHNHRVFLFRNYLVICKPRRDSRTDTFSYVFRNMMKLSIDLNDQVEGDDRAFEVWHEREDSVRKYLLQA  
RTVIKNSWVKEICGIQQLAQPVWRPPEFEEELADCTAELGETVKLACRVTGTGPKPIVSWYKDGKPVVDPH  
HILIEDPDGSCTLILDNLTGIDSGYMCFAASAAGNASTLGKILVQVPPRFVNVKVRATPFVEGEDAQITCTVE  
GAPYPQIRWYKDGTLAPGNRYRMLNEPRSGVLVLIQAASKEDLGHYECELVNLGSTRGGGELYMQSPALR  
ARDQHHREQIVAAVEERRPSP\*  
>rs26955766\_ENSMUSP00000151217\_c.3685:T>C\_p.L1229P  
ENSMUST00000219084.3|Obscn-207|ENSMUSG00000061462|-|chr11:g.59003611:A>G  
MDHSFSGAPRFLTRPKAFVSVGKDATLSCQIVGNPTPHVSWEKDRQVEAGARFRLAQDGDVYRLTILDLAL  
GDSGQYVCRARNAIGEFAAVGLRVDSEGTCAEQAPHLLRPTSIRVREGADATFRCRVGGSPQPAVSWSKDG

RRLLGPPDAPHVRVEEHGESSALRIRRSARPRDGGTYEVRAENPLGSASAAAAALVVDSDAEVAGPPGTSTATLLA
HLQQRRREAMRAEGIPPSPPGAGTRTCTVTEGKHARLSCFVTGEPKPEVWKKDGLVTEGRRHVVEDEQENF
VLKILFCKQSDRGLYTCTASNLVGGQTYSSVLVVVREPTVPFKKRLQDLEVREKESATFQCEVAQPATEAAWFK
EETRLWASAKYDIEEEGETERRLTVRNVSADDDAVYICETTEGSRVVAELSVQGNLTKRKLPRKTAVRTGDTAIF
WVELAVPEGPVRWLRNQEEMVAGGRVAITAEGTCHTLTI FQCTLEDMGEVAFVSGGCRTTTFQFCVSAPRRPPL
YPPADPVVKAKTESSVTLWSWAPPHGDRPVTIDGYVLEKRKLGAYAWSRCHEAGWLATTEFTITGVAAEEDGFQ
FRVSAINHFGQGPYLEFPGTMHLVPLAVKTPKAVEAVEGGEVTFVSDLTVASSGEWFLDGEALKASSIYVI
RCDRTRHMLTIREVPARLHGAQLKVFVANGIETS IQMVVRAALGLPSSKLPAAAAAREVLAQLHHEEAQLLAELSD
QAAAVTWLKDGRELSLGPKYEMQVSAGRRALLVRDVAQDDAGLYECVSRGSRRTAYQLLVQDITDGYRDWGPAG
PQKHMCKCAGAKIARYLGSscyRFLQYDKGVWHLEAALDTRQGKGTSSCSLHEKPKLVFAKQQAHSEVKA
AGNSATLSCEVTQAQTEVTFKDGKLLSSSSKVRMEASGCSRRLVVQQAGKADAGEYSCEAGGQKLSFRLDVA
EPKLVFAKQQAHSEVKAEGASATLSCEVAQAQTEVTFKDGKLLSSSSKVRMEASGCSRRLVVQQAGKADA
GEYSCEAGGQKLSFRLDVAEPKMFVFAKEQQARSEVKAEGASATLSCEVAQAQTEVTFKDGKLLSSSSKVRM
EASGCSRRLVVQQAGKADAGEYSCEAGGQKLSFRLDVTEPKLVFAKEQQARSEVKAEGNSATLSCEVAQAQ
EVTWFKDGKLLSSSSKVRMEASGCSRRLVVQQAGKADAGEYSCEAGGQKLSFHLDVTEPKPVFAKEQQAHSE
KAEAGASATLSCEVAQAQTEVTFKDGKLLSSSSKVRMEASGCSRRLVVQQAGKADAGEYSCEAGGQKLSFR
DVAEPKLVFAKEQQARSEVKAEGASATLSCEVAQAQTEVTFKDGKLLSSSSKVRMEASGCSRRLVVQQAG
ADAGEYSCEAGGQKLSFRLDVAEPKLVFAKEQQANSEVKAEGASATLSCEVAQAQTEVTFKDGKLLSSSSK
VRVEASGCSRRLVVQQAGKADAGEYSCEAGGQKLSFRLDVAEPKLVFAKEQQAHSEVKAEGASATLSCEVAQ
AQTEVTFKDGKLLSSSSKVRVEASGCSRRLVVQQAGKADAGEYSCEAGGQKLSFRLDVAEPKLVFAKEQQAH
SEVKAEGASATLSCEVAQAQTEVTFKDGKLLSSSSKVRVEASGCSRRLVVQQVKGADAGEYSCEARGQKLS
FRLDVAEAEESQIPERPSRREPLVVKHEHETIILTATIAAPSVAAVTWLKDGEIRRSKRHEATSLGDTHTLTVR
GAQVLD SAIYSCRVGKEGQDFPVQVEEVAAKFSKPLEPVEGELGGTVMLVCELSPEQAEVVRWCNTQLRPGK
RFQMTSEGPRRTLTVSGLREDDAEYVCESRDDRTSARLTVKVPVVKFTSGLSAMVAEEGQEAFTQCVVSPS
DAGVTWYKDGMLQLPSEKFMVVEGASRSLTILGLTLEDAGQVTEAEGASSAALRVREAPVLFKKKLEPQT
VEERTSVTLEQLTRPWPVEVKWTRNAAVLTPSENVEIRAEGARHCLVLRVSVGFADRGVFCETPDDKTQAKLN
VEMRQVRLVRGLQEVEAKEQGTASMDVELSHAEEVSGSWTRDGLRLQPGPKCHLAVQGGPVHILTL SALQDSDG
LVAFRAEGVHTSARLIVTELPVSFTRVLQDVVATQKEKVTLECELSRPVDVRWLKDGVELRAGKAIGIVAQGT
CRSLVIYRCETGDQGVYVCDALDAQTSASLRVQGRYTLIFRRVLAEDAGEVKFVAENAESRAHLRVKELPVT
LLRPLRDKIAMEKHRGVLECCQVSRASAQVRWFKGGVELQSGPKYEVVSDGLYRKLVINDDVQPEDEDTYTC DAG
NVKTSAQFFVEEQSITIVRGLKDMTVMEPAPAWFECETSIPSVRPPKWLKGKTVLQAGGNVLEQDGTVHRLT
LHKTCTMTGVPVHFTIGKSRSSAQLVVSDIPVVLTRPLEPKAGRELQSVVLSCDFRPAPKAVQWYKDDTPLSP
SEKFKMALEGQMAELRILRLTPADAGVYRCQAGSAQSSAEVTVAEAREVTVIQPLQDAEAMEEGRVCFSCELSH
KDEDIEWSLNGTPLYNDSFHEISHEGCLHTLVLKSVRQADTGTVCATSPKVSVSARLVVKGKPVVFLKALDDV
SAEERGTTLTQCEVSDPEARVVWRKDGVELGSPDKYDFLHKAGARGLTVHDLSHEDAGLYTCQVGSKETQSKV
SVHDLHVGITKRLKTTVELEGECSFECVLSHESPSDPVAVWTVGGKTVGGSGHFHAVRQGRKYTLTVKDAALS
DAGEVVSFVLGLTSKASLIIRERPVDITKPLEDQRTTLGEDVMLSCELSRAGTSVRWLKDGKAIKRSQKYDLL
SEGTRAVLVVRKASLKDSGEYTCETEASKSTAKLCVEEKANRFTTEELADLQVEEKGRAVFTCKTEHPASVVTW
RKGLLELRASGKHVPSQEGTLKLTINALERTSDTYTCDIGQARTQARLLVHGQKVRVIEDLEDTAVQEGSS
AKFCCRIPADYGPVHWFLLDKTPLHSNELNEITVQPGYHVLTLRQLALKDSGTVYFEAGDQRTSAAALRVTEK
PSIFSRPLTDVTVTEGEDTLVCETTTTVDSSVRWTKDGKTLRPSARCQLSHEGCAQLLITATTPQDGGRYKC
EIGGASSSSIVRVHALPVRFRESLKDVEVPEGKAATLRCVLSVAAPVEWRHGDDVLKSSNKYSLRQEGAVLE
LVIRDLPQDQSGQYSCSFGDQTTSATLTVKTSQAQFVGKLRNKEATEGTTVTLRCELTKEAPVEWKKGTETLR
NGDKYSLKQDGA VCELQICSLLVADAGEYSCVCGQEKTSATLTVKALLVHFVRRRLRSKEATEGDTTTLQCELS
KAAPVEWRKGTETLRDGDYSLKQDGA VCELQIRSLTIADAGEYLCTCGQEKTSATLTVRGLPAKFIEDLRSQ
EATEGATAILRCELSKAAPVEWRKGSSETLKDGDYTLRQDGA VCELQIRGLAVVDGTGYSSLPTKFTTEGLRNE
EATEGTMATLRCQMSKAAPVEWRKGSSETLRDGDYSLRQDGA MCELQIRGLTIEDSGEYTCVCGQEKTSATLS
VKALPPRFIEDLRSQEATEGTMATLRCQMSKAAPVEWRKGSSETLGDGGYSLRQNGAVCELQIHDLAVEDTGE
YSCVCGQEKTSATLNVKALPPKFTTEGLKKEEATEGTMVTLRCQMSKEATVEWRKGAKTSLDGGYSLRQDGA
MCELQICGLAVEDAGEYSCVCGQEKTSATLSVKALPPRFIEDLRSQEATEGTMATLRCQMSKAAPVEWRKGS
LRDGDYSLRQDGA VCELQIRDLAVEDAGEYLCVCGQEKTSATLSVKALPPRFIEDLRSQEATEGTMATLRCQ
MSKAAPVEWRKGSKTLRQDGDYSLRQDGA MCELQICDLAVEDTGDYSCVCGQEKTSATLSVKAPQVVFQQLQ
NLQAEEGSMARLRELSVPNAAMVWSKGGLELQGDTRREARQQGCVAELLLRDLRREDAGEYSCTCGSQTSA
TLMVTAAPVFLRLELQAQDVDEGATARLRCLELSREAVSEWRKGSLLQFPCKAYQMVQEGTTAELLVHGVEQE
DAGEYTC DAGHTQSIARLSVRAPKPKFKTDLQSTEQEAGGTARLCCQLSEAEPTPVQWLKEGVELHVGSKYE
MRRQGA VCELLIHGLEAKDTGEYACLVGQKTLASLRVKEPEVTIVRGLVDMEVQADEDEVEFTCKVVSQAGATD
VQWHLQGLPLQSNEVTEVAVLADGCTHVLLQKGVTLLEDAGTVSFHVGGSSSAQLTVRVPEVTVLEPLKDVQL
SEGQDAHFRCLSRASGQEARWALGGVPLQCNE MNDI TVEQGTLYLLTLHKVTLLEDAGTITLQVGSSEAQL

KVTAKNTVLRGLENVDALEGGEALFECQLSQPEVAHAHTWLLDDEPVHTSEKVEVVYFENGLRHLLLLLKNLKPQ  
DSCRVTFLAGDVVTSFALTVRGWRLEVLEPPHDASVKAGMQVRFTCILSEAVPVGEATWYINGAAIQPDDTDW  
TVTTDGGSHHALTLSNAQPQHAGEVTF AARDAVASARLSVLALPDPPEDAE VVGRSDHSVTLWSVAPMSDGGGG  
LCGYRVEMKEASTGQWQLCHDLVPGPECVVDDLVP GKTYRFRVA AVGPAGAGEPVHLPQMVKIAPAPAPAPAP  
APAPETRQAVVGEDICLELEVAADGGEV VWHKGTERRIQGGHFVLSRGRQMLVIKGFRTEDQGEYRCGPIQ  
GLPSSGAATFNVVMTSGSGDEVPAQPSLPPEAAQEGDLHLLWEALARKRRMSREPTLDSISELPEEDSRVQHL  
RQEAETAPDLSEGYSTADELARTGEADLSHTSSDDESRAGTPSLVTYLK KAGGPGISPLASKHEAQVTTSVK  
PQKQQEPVVPTCPPPGDL SAADLMDPSLDKA AVKIQAAF KGYKVRKEMKQQEGPVFSRTFGDTEAQVGDVLR  
ECVLATKTDMRACWLKDGIELTDGRHYHIDQLKDGTC SLLVTGLAPTDSGRYTCQVSTKSGRVSHSACVVVSG  
TESEAESSSGGELDDAFRRAARLHRLFRTKSPAELSEEEFLSADEGPGEPEEPADWQTYREDEFVCIRFE  
SLAEARQAVTCFRNMFMATMGIGVEISLGEQGPGRVEMRIGKVAPTVTPAVPLAKTPGLQTSDAAPVFLTELQN  
QDVQDGYPMSFDCVVTGQPVPSVRWFKDGKLL EEDDHYMINEDQQGGHQLIITAVVPADMGVYRCLAENSMGV  
SSTKAELRVELTSTDYDTAADATETSSYFSAQGYLSSREQEGTESDEGQLPQVLEELKDLQVAPGTRLAKFQL  
KVKGYPAKLYWFKDGQPLTTS DHIRMTDKKTLHTLEIVSVTREDSGQYAAAYISNAVGAAYSSARLLVGRPSE  
PEEKPASDVHERLVPPRILEKFTPKKVKRGSSITFSVKVEGHPAPSVHVLKKEEA EKGLWIGPDPGTYTMASS  
SKQHSVLVLDVGRQHOGTYTCIATNPAGQALCSASLHISGLAKEEEQERVKEALISSFLQGTSQAVSAQMSES  
AGFADLVGQSKGESLVAEEAHSHLSLAEVGT EEFLLQKLT SQITEMVSAKISQAKLQVPGGDSDEETKTPSASP  
RHGRSRPSSSVQESSSEEDGSRGEIFDIYVV TADYLP LGAEQDAIILREGQYVEVLDSAHPLRVLVTRTKPT  
KSSPSRQGWVSPAYLDKRLKLSPEWGPTEAPEFPGEAVSEDEYRTRLSSVIQELLSSEQAFVGGELQFLESHHM  
KHLERSPRVPAAVASQKT VIFRNVQDISHFHSSFLKELQGC GTDDDVAMCFIKNQEA FEKYLEFLVGRVQAES  
VVVSTPVQEFYKKYAETLSAKDPTQPPPPPLQHYLEQPVERVQKYQALLKELIRNKARNRQNCALLEQAYAV  
VSALPQRAENKLVSLMENYPGTLEALGEP I RQGHFIVWEGAPGARM PWKGNHRHVFLFRNYLVICPRRDSR  
TDTFSYVFRNMMKLSIDLNDQVEGD DRAFEVWHERE DSVRKYLLQARTVI IKNSWVKEICGIQQRLAQPVWR  
PPEFEEELADCTAELGETVKLACRVTGT PKPIVSWYKDGK PVEVDPHHILIEDPDGSC TLI LDNLGTIDSGQY  
MCFASAAGNASTLGKILVQVPPRFV NKVRATPFVEGEDAQITCTVEGAPYPQIRWYKDGTL LAPGNRYRMLN  
EPRISGVLVVLVIAASKEDLGHYEC ELVNLRLGSTRGGELYMQSPALRARDQHHREQIVAAVEVTEQETKVPKK  
TVII EETITTVVKS PRGRRQSPGKSPSRSPRRSARPRRPGLLAPERLYPPGTSPSRREVEVQGRKAPVALY  
VTEAEVHAPASQSQPKWLEVEETIEVRVKKTGSRGASPVREMTSRGEGILFTLPGGIPGRDPNANNNSNKS SVY  
QEARTWGP AVVHVGEFFIFQVDSVGNVDWVAASPEPEQVRASQKEENTERQEGCSDGDENTFLMEEPQD TDSL  
QGRDPKILTHNGRVLTLADLEDYVPQEGE TFGCGDSTPSTPDEPPCEVSVLQREI SEPTVQPVLLNVGRPPG  
TGATPSFFRPGSQVHSPESVSFLLREAWSGPVSAAPWTSSFH THVQSSVDGSHGSFKTEVSTQTVSFGAVGET  
VTLHIDPDGGEAPGPSQG\*

>rs50800163\_ENSMUSP00000158795\_c.3008:G>A\_p.M1003I  
ENSMUST00000238536.2|Obscn-210|ENSMUSG00000061462|-|chr11:g.59019004:c>T  
MDHSFSGARFLTRPKAFVSVGKDATLSCQIVGNPTPHVSWEKDRQPV EAGARFLAQDGDVYRLTILDLAL  
GDSGQYVCRARNAIGEAFAAVGLRVDSEGTCAEQAPHFLLRPTSIRVREGADATFRCRVGGSPQPAVSWSKDG  
RRLGPPDAPHVRVEEHGESSALRIRSARPRDGGTYEVRAENPLGSASAAAAALVVDSDAEVAGPPGTSTATLLA  
HLQORREAMRAEGIPPSPPGAGTRTCTVTEGKHARLSCFVTGEPKPE TVWKKDGQLVTEGRRHVVEDEQENF  
VLKILFCKQSDRGLYTCTASNLVGTYS SVLVVVREPTVPFKKRLQDLEVREKESATFQCEVAQ PATEAAWFK  
EETRLWASAKYDIEEGTERRLTVRNVSADDDAVYICETTEGSR TVAELSVQGNLTRKLPKRTAVRTGDTAIF  
WVELAVPEGPVRWLRNQEEMVAGGRVAITAEGTCHTLTI FQCTLEDMGEVAFVSGGCRTTTQFCVSAPRRPPL  
YPPADPVVKAKTESSVTL SWSAPPHGDRPVTIDGYVLEKRKLGAYAWSRCHEAGWLATTEFTITGVAAEEDGFQ  
FRVSAINHFGQGPYLEFPGMTMLVPLAVKTP LKAVEAVEGGEVTF SVDLTVASSGEWFLDGEALKASSIYVI  
RCDRTRHMLTIREV PARLHGAQLKFVANGIETS IQMVVRAALGLPSSKLPAAAAREVLAQLH EEAQLLAE LSD  
QAAAVTWLKDGRELSLGPKYEMQVSAGRRALLVRDVAQDDAGLYECVSRGSR TAYQLLVQDITDGYRDWGPAG  
PQKHMCKCAGAKIARYLGSSCYRFLQYDKGVWHWLEAALDTRQGKGTSSCSLHEKPKLVFAKQQAHSEVKA E  
AGNSATLSCEVTQAQTEVTWFKDGK KLSSSSKVRMEASGCSRRLV VQQAGKADAGEYSCEAGGQKLSFRLDVA  
EPKLVFAKQQAHSEVKA EAGASATLSCEVAQAQTEVTWFKDGK KLSSSSKVRIEASGCSRRLV VQQAGKADA  
GEYSCEAGGQKLSFRLDVAEPKMFVFAKEQQARSEVKA EAGASATLSCEVAQAQTEVTWFKDGK KLSSSSKVRM  
EASGCSRRLV VQQAGKADAGEYSCEAGGQKLSFRLDVTEPKLVFAKEQQARSEVKA EVGNSATLSCEVAQAQT  
EVTWFKDGK KLSSSSKVRMEASGCSRRLV VQQAGKADAGEYSCEAGGQKLSFRLDVAEPKLVFAKEQQARSEV  
KAEAGNSATLSCEVAQAQTEVTWFKDGK KLSSSSKVRMEASGCSRRLV VQQAGKADAGEYSCEAGGQKLSFHL  
DVTEPKLVFAKEQQAHSEVKA EAGASATLSCEVAQAQTEVTWFKDGK KLSSSSKVRMEASGCSRRLV VQQAGK  
ADAGEYSCEAGGQKLSFRLDVAEPKLVFAKEQQARSEVKA EAGASATLSCEVAQAQTEVTWFKDGK KLSSSSK  
VRVEASGCSRRLV VQQAGKADAGEYSCEAGGQKLSFRLDVAEPKLVFAKEQQANSEVKA EAGASATLSCEVAQ  
AQTEVTWFKDGK KLSSSSKVRVEASGCSRRLV VQQAGKADAGEYSCEAGGQKLSFRLDVAEPKLAFAKEQQAH  
SEVKA EAGASATLSCEVAQAQTEVTWFKDGK KLSSSSKVRVEASGCSRRLV VQQAGKADAGEYSCEAGGQKLS  
FRLDVAEPKLAFAKEQQAHSEVKA EAGASATLSCEVAQAQTEVTWFKDGK KLSSSSKVRVEASGCSRRLV VQQ

AGKADAGEYSCEAGGQKLSFRLDVAEPKLAFAKEQQAHSVEKAEAGASATLSCEVAQAQTEVTFWKDGKKLSS  
SSKVRVEASGCSRRLVVQQAQKADAGEYSCEAGGQKLFRLDVAEPKLMFAKEQQAHSVEKAEAGASATLSCE  
VAQAQTEVTFWKDGKKLSSSSKVRVEASGCSRRLVVQQAQKADAGEYSCEAGGQKLSFRLDVAEPKLVFAKEQ  
QAHSEVKAEEAGASATLSCEVAQAQTEVTFWKDGKKLSSSSKVRVEASGCSRRLVVQVQKADAGEYSCEARGQ  
KLSFRLDVADTRLMFAKEQQAARTVEVKAEAGNSATLSCEVAQAQTEVTFWKDGKKLSSSSKVRVEASGCSRRLV  
VQQAQKADAGEYSCEAGGQKLSFRLDVAEAEESQIPERPSRREPLVVKEHETIILTATIAAPSVAAVTLWKDGV  
EIRRSKRHEATSLGDTHTLTVRGAQVLDIAIYSCRVGKEGQDFPVQVEEVAAKFSKPLEPEVEGELGGTVMLVC  
ELSPFEQAEVVWRCGNTQLRPGKRFQMTSEGPRRTLTVSGLREDDAEYVCESTRDDRTSARLTVKVPRVVKFTS  
GLSAMVAEEGQEAFTQCVVSPSDAGVTWYKQDGMQLPSEKFMVVEGASRSILTILGLTLEDAGQVTVAEAGAS  
SSAALRVREAPVFLFKKLEPQVTEERTSVTLEVELTRPWPEVKWTRNAAVLTPSENVEIRAEGARHCLVLRV  
GFADRGGFFGCETPDDKTQAKLNVEMRQVRLVLRGLQEVEAKEQGTASMDVELSHAEEVGSWTRDGLRLQPGPKC  
HLAVQGPVHILTLALSALQPDGSLVAFRAEGVHTSARLIVTELPSFTRVLQDVVATQKEKVTLECELSRPVVD  
RWLKDGVLELRAGKAIGIVAQGTCSRSLVIYRCETGDQGVYVCDALDAQTSASLRVQGRTYTLIFRRLAEDAGE  
VKFVAENAESRAHLRVKELPVTLLRPLRDKIAMEKHRGVLECCQVSRASQVRWFVGGVELQSGPKYEVVSDGL  
YRKLVINDEVQPEDEDTYTCDAGNVKTSAQFFVEEQSITIVRGLKDMTVMPEPAPAWFECETSIPSVRPPKWL  
KTVLQAGGNVLEQDGTVHRLTLHKTCTMTGPHVFTIGKSRSSAQLVVSDIPVVLTRPLEPKAGRELQSVVL  
SCDFRPAPKAVQWYKDDTPLSPSEKFKMALEGGMAELRILRLTPADAGVYRCQAGSAQSSAEDTVEAREVTVI  
QPLQDAEAMEEGRVCFSELSHKDEDIWLSLNGTPLYNDSFHEISHGCLHTLVLSKRSRQADTGTVCATSPKV  
SVSARLVVKGKPVVFLKALDDVSAEERGLTLTQCEVSDPEARVVWRKDGVELGPKSDKYDFLHKAGARGLTVHD  
LSHEDAGLYTCQVGSKETQSKVSVHDLHVGITKRLKTVEVLEGESECSFECVLSHESPSDPAVWTVGGKTVGGS  
GHFHAVRQGRKYTLTVKDAALSDAGEVVFVGLGLTSSKASLIIRERPVDTIKPLEDQRTTLGEDVMLSCELSRA  
GTSVRWLKDGKAIRKSKYDLDLSEGTRAVLVVRKASLKDSGEYTCETEASKSTAKLKVEEKANRFTEELADLQ  
VEEKGRAVFTCKTEHPASVVTWRKGLLELRASGKHVPSQEGTLKLTINALERTSDTYTCDIGQARTQARLL  
VHGQKVRVIEDLEDTAVQEGSSAKFCRIAPADYGPVHWFLLDKTPLHSNELNEITVQPGGYHVLTLRQLALKD  
SGTVYFEAGDQRTSALRVTEKPSIFSRPLTDVTVTEGEDTLVCEETTVDSSVVRWTKDGKTLRPSARCQLSH  
EGCQAQLLITATTPDQDGGRYKCEIGGASSSSIVRVHALPVRFRRESLKDVEVPEGKAATLRCVLSVVAAPVSWR  
HGDDVLKSSNKYSRQLEAVLELVIRDLQPDGQVSCFVGDQTTSATLTVKTSAAQFVGLGRNKEATEGTTV  
TLRCELTKAPEVWKKGTETLRNGDKYSLKQDGAFCVCELQICSLLVADAGEYSCVCGQEKTSATLTVKALLVHF  
VRRLSKEATEGDTTLTQCELSKAAPVEWRKGTETLRDGDYSLKQDGAFCVCELQIRSLTIADAGEYLCTCGQE  
KTSATLTVRALPAKFKDSLKNEEATEGTTATLSCELSKAAPVTKKGPKTQSGDKYVLRQDGAFCVGLQIHGL  
TMADAGEYSCVCGQEKTSATLTVRGLPAKFIEDLRSQEATEGATAILRCELSKAAPVEWRKGSSETLKDGDYR  
LRQDGAFCVCELQIRGLAVVDTGTYSLSPTKFTTEGLRNEEATEGTMATLRCQMSKAAPVEWRKGSSETLRDGDYR  
LRQDGAFCVCELQIRGLTIEDSGEYTCVCGQEKTSATLSVKALPSRFIEDLRSQEATEGTMATLRCQMSKTAPVE  
WKKGSETLRDGGRYSLRQDGPVCELQICDLAVEDAGEYSCVCGQEKTSATLSIKALPPRFIEDLRSQEATEGT  
MATLRCQMSKAAPVEWRKGSSETLGDGGYSLRQNGAVCELQIHLAVEDTGEYSCVCGQEKTSATLNVKALPP  
RFIEDLRSQEATEGTMATLRCQMSKAAPVEWRKGSSETLRDGGYSLRQDGAFCVCELQIHLVEDAGQYSCVCG  
QEKTSAVLTVDALPPKFTTEGLKKEEATEGTMVTLRCQMSKAEATVWRKGAKTLSDGGYSLRQDGAFCVCELQI  
GLAVEDAGEYSCVCGQEKTSATLSVKALPPRFIEDLRSQEATEGTMATLRCQMSKAAPVEWRKGSSETLRDGD  
YSLRQDGAFCVCELQIRDLAVEDAGEYLCVCGQEKTSATLSVKALPPRFIEDLRSQEATEGTMATLRCQMSKAAP  
VEWRKGSKTLRDGDYSLRQDGAFCVCELQICDLAVEDTGDYSCVCGQEKTSATLSVKALPPRFIEDLRSQEARE  
GTVALTLRCRMSKAAPVEWRKGSSETLKDGDYSLRQEGNLCELQIRDLAVEDTEEYSCVCGQEKTSATLSVKAL  
PAKFIEDLRSQEAPESSTVTLRCKLSKKASVVKKGSSETLRNGARYSLRQDGAFCVCELEIRDLTVEDTGEYSCT  
CGQERTSATLSIMAPQVVFQQLQNLQAEESMASLRCLELVNAAVMWSKGGLELQGDTRREARQQGCVAEL  
LLRDLRREDAGEYSCTCGSQTTSATLMVTAAPVRFLRELQAQDVEGATARLRCLELSREAVSVEWRKGSLLQLF  
PCAKYQMVQEGTTAELLVHGVEQEDAGEYTCDAHTQSIARLSVRAPKPKFKTDLQSTEQEAGGTARLCCQLS  
EAEPGTPVQWLKEGVELHVGSKYEMRRQGAFCVCELLIHGLEAKDTGEYACLVGGQKTLASLRVKEPEVTVRGL  
VDMEVQADEDVEFTCKVSAQATDVQWHLQGLPLQSNVTEVAVLADGCTHVLQKGVTLLEDAGTVSFHVGG  
SSSAQLTVRVPEVTVLEPLKDVQLSEGDHAFRCRLSRASGQEARWALGGVPLQCNEMNDITVEQGTLYLLTL  
HKVTLLEDAGTITLQVGSSEQAQLKVTAKNTVLRGLENDVALEGGEALFECQLSQPEVAHAHTWLLDDEPVHTS  
EKVEVVYFENGLRHLLLLKNLKPQDSCRVTFLAGDVVTSAFLTVRGWRLEVLEPPHDASVKAGMQRFTCILS  
EAVPVGEATWYINGAAIQPDDTDWTVTTDGSHHALTLNSAQPQHAGEVTFFAARDAVASARLSVLAALPDPEDA  
EUVGRSDHSVTLVSWAPMSDGGGLCGYRVEKKEASTGQWQLCHDLVPGPECVVDDLVPGKTYRFRVAAVGPA  
GAGEPVHLPQMVKIAPAPAPAPAPAPAPAPAPAPAPAPAPAPAPAPAPAPAPAPAPAPAPAPAPAPAPAPAP  
RGRQMLVIKGFRTEDQGEYRCGPIQGLPSSGAATVNVMTSGSGDEVPAQPSLPPPEAAQEGDLHLLWEALAR  
KRRMSREPTLDSISELPEEDSRVQHLRQEAEETAPDLSEGYSTADELARTGEADLSHTSSDDESRACTPSLVT  
YLKKAAGGPGISPLASKHEAQVTVTSVKPQKQEPVVPTCPPPGDLSAADLMDPSLDKAAVKIQAQAFKGYKVRKE  
MKQQEGPVFSRTFGDTEAQVGDVLRLECVLATKTDMRACWLKDGIELTDGRHYHIDQLKDGTCSLLVTGLAPT  
DSGRYTCQVSTKSGRVSHSACVVVSGTESEAESSSGGELDDAFRRAARRLHRLFRTKSPAELSEELFLSADE

GPGEPEEPADWQTYREDENFVCIRFESLAEARQAVTCFRNMFATMGIGVEISLGEQGPGRVEMRIKGVAPTVT  
PAVPLAKTPGLQTSDAAPVFLTELQNDVQDGYPMSFDCVVTGQPVPSVRWFKDGKLEEDDHYMINEDQGGG  
HQLIITAVVPADMGVYRCLAENSMGVSSTKAELRVELTSTDYDTAADATETSSYFSAQGYLSSREQEGTESDE  
GQLPQVLEELKDLQVAPGTRLAKFQLKVKGYPAKLYWFKDQPLTSDHIRMTDKKTLHTLEIVSVTREDSDG  
QYAAYSNAVGAAYSARLLVRGPSEPEEKPASDVHERLVPPRILEKFTPKKVKRGSSITFSVKEGHPAPSV  
HWLKEEAKEKGVLWIGPDTPGYTMASSSKQHSVLVLDVGRQHOGTYTCIATNPAGQALCSASLHISGLAKEEEQ  
ERVKEALISSFLOQTSQAVSAQMSSESAGFADLVGQSKGESLVAEEAHSHLSLAEVGTTEFLQKLTSTQITEMVS  
AKISQAKLQVPGGDSDEETKTPSASPRHGRSRPSSSVQESSSESEDGDSRGEIFDIYVVVTADYPLGAEQDAI  
LLREGQYVEVLDLSDAHLRVLVTRKPTKSSPSRQGWVSPAYLDRKRLKLSPEWGPTEAPEFPGEAVSEDEYRTRL  
SSVIQELLSSEQAFVQELQFLESHHMKHLERSPRVPAAVASQKTVIFRNVQDISHFHSSFLKELQCGCTDDDV  
AMCFIKNQEAFAKEYLEFLVGRVQAESVVVSTPVQEFYKKAEEETLSAKDPTQPPPPPLQHYLEQPVVERVQKYQ  
ALLKELIRNKARNRQNCALLEQAYAVVSALPQRAENKLVSLMENYPGTLEALGEPIRQGHFIVWEGAPGARM  
PWKGHNHRVFLFRNYLVICKPRRDSRTDTFSYVFRNMMKLSSIDLNDQVEGDDRAFEVWHEREDSVRKYLLQA  
RTVIKNSWVKEICGIQQLAQVWRPPEFEEELADCTAELGETVKLACRVTGTPKPIVSWYKDGKPVVEVDPH  
HILIEDPDGSLTILDLNLTGIDSGQYMCFAASAAGNASTLGKILVQVPPRFVNVKVRATPFVEGEDAQITCTVE  
GAPYPQIRWYKDGTELLAPGNRYRMLNEPRSGVLVLIQAASKEDLGHYECELVNRLGSTRGGGELYMQSPALR  
ARDQHHREQIVAAVEDTVEGSAHSAQDQADQQAASVLWRLLGSEALGPSPGDLPNTRQSEPPAFEEAASQIP  
GAASGTPEVSPGTHKLEQETSSSGSQGWTVPIRVEGTAWPGAGTGQLLLDVHVSQVIMETTQRTYVVCQAPDT  
GVTRAPSMQVTIEDVQVQVGDMAQFDAVIEGHPPPIVTVWYKGSTQLTSSARLSQRQDGTYSVLVTDVAPHDA  
GVYTCVANNAGGQVLCKAELLVHGGDKLDAENQVYRRKLHSFYDVQEEIGRGVFGFVKRVQHKGNKMFCAAKF  
IPLRSKTRAQAYQERDILATLGHPLVTGLLDQFETRKTLLILILELCSSEELLDRLFKKGVVTEAEVKVYIQQL  
VEGLHYLHSHGILHLDIKPPNIMVHPAREDIKICDFGFAQKITPSEPQYSKYGSPEFVSPEIEQNFVSEGS  
DIWAMGVI SYLSLTCSPPFAGESDRATLLNVLEGRVSWSSPTAAHLSSEDAKDFIKATLQRTPRARPSTSQCLA  
HPWFLKSMPEAAHFINTKQLKFLARSRWQRSLMSYKSILVMRSIPELLQGPPDPSPLGVARHLRGEASGAS  
SSSSSSDNELAPFARAKSLPPSPVTHSPLLHPRGFLRPSALPEETEASMTADAAVPASPQASAGPPASPGCV  
PRHSVSSFLFYQQAGEAERGNKTSKAKRHPARRRHLKGGYIARALPGLREPLMEYSLLEEEAAREEQASLM  
TKTPSFETALRLPSSSVREVPGRSHSLDNPPVTTGSPPEACKEQLLFPSTGLTHETTAKDRGHEGFLQESV  
PFPMSGDSRPGKQEGSSQDSCRKPASSCHSELGSGSQEGCQPPSSQSLGSLPPQSLKELSTSCGPLFSEQ  
PQAAPFPTQVSPLLGSEKEPQDGSLEGPVVPSSSPGSASQVDASLDTEGLSEAGDTCDFTPPPQRPQEQAT  
TRKFSLESRGGYAGVAGYGTFAFGGDAGGMLGQGPLWARMAWAVSOSSEEQDEAATESPQPLESIGPIAEASG  
VPLRTSPSLTPWEEVEQVSLVQIRDLSGDAEAADTISLDISEVDPAYLNLSDLYDIKYLPEFEMI FRRVPKPI  
EQPESPGSETEAGQGLADFLLEAAWPWPGEGLGLRAGLEITTEPEEPGDLEALLGEEAVGRKRKWSPSRGLFQF  
PGRCLSGEEPVELGLRQVRKASMAHISRI LKGRPEGPEREGPPRKKAGLASFRLSGLKGRDQELSDEAVVLGQ  
SVTLACQVLAQPTAQATWSKDGVLLESSGHLIISSTLKNFQLLTILVVKEEDLGTYTCCVSNPLGTAVTTGVL  
RKAERPSSSRPEVGGELYKDAVLLVWKPVESECGPVTVQCCIEGGSWTTLASDISDCCYLTKLSRGGMYIF  
RTACVSKAGMPYSEQVLLGGPNHLASEEESRGRPAQLLPSTKTFAFQMQIRRRGRFVVRQCREKASGR  
ALAAKIVPYQPEDKTAVLREYEALKRHLHPLHAQLHAAYLSPRHLVLIILELCSGPELLPSLAEESYSESDVK  
DYLWQMLSATQYLHAQHILHLDLRSENMMVTEYNLLKVIDLGNQSLDQEKVPAPENFKDYLETMAPELLEGQ  
GAVPQTDIWAIGVTAIFIMLSGEYPESESETRDLQKGLRGLIRLSRCYAGLSGGAVAFLOSSLCAQPWGRPCA  
STCLQCGWLTEEGPTGSRPTPVTFTVRLRAFVREKRRALLYKKNLAQVR\*

>rs50800163\_ENSMUSP00000038264\_c.2732:G>A\_p.M911I  
ENSMUST00000047441.14|Obscn-202|ENSMUSG00000061462|-|chr11:g.59019004:C>T  
MDHSFSGAPRFLTRPKAFVSVGKDATLSCQIVGNPTPHVSWEKDRQPVVEAGARFRLAQDGDVYRLTILDLAL  
GDSGQYVCRARNAIGEAFAAVGLRVDSEGTCAEQAPHFLLRPTSIRVREGADATFRCRVGGSPQPAVSWSKDG  
RRLGPPDAPHVRVEEHGESSALRIRSARPRDGGTYEVRAENPLGSASAAAALVVDSDAEVAGPPGTSTATLLA  
HLQQRRREAMRAEGIPPSPPGAGTRTCTVTEGKHARLSCFVTGEPKPEVWKKDQQLVTEGRRHVVEDEQENF  
VLKILFCKQSDRGLYTCTASNLVGQTYSSVLVVVREPTVPFKKRLQDLEVREKESATFQCEVAQPATEAAWFK  
EETRLWASAKYDIEEGTERRLTVRNVSADDDAVYICETTEGSRVVAELSVQGNLTKLPRKTAVRTGDTAIF  
WVELAVPEGPVRWLRNQEEMVAGGRVAITAEGTCHTLTI FQCTLEDMGEVAFVSGGCRTTTQFCVSAAPRRPPL  
YPPADPVVKAKTSSVTLWSAPPHGDRPVTIDGYVLEKRLGAYAWSRCHEAGWLATTEFTITGVAAEGDFQ  
FRVSAINHFGQGPYLEFPGTMHLVPLAVKTPKAVEAVEGGEVTFVSDLTVASSGEWFLDGEALKASSIYVI  
RCDRTRHMLTIREVPARLHGAQLKVFANGIETSIQMVVRAALGLPSSKLPAAAAREVLAQLHEEAQLLAE LSD  
QAAAVTWLKDGRELSLGPKEYMQVSAGRALLVRDVAQDDAGLYECVSRGSRRTAYQLLVQDITDGYRDWGPAG  
PQKHMCKCAGAKIARYLGSscyRFLQYDKGVVWHLEAALDTRQKGTSSCSLHEKPKLVFAKQQQAHSEVKA  
AGASATLSCEVAQAQTEVTFWKDGKLLSSSSKVRIEASGCSRRLVVQQAGKADAGEYSCEAGGQKLSFRLDVA  
EPKMVFAKEQQARSEVKAEGASATLSCEVAQAQTEVTFWKDGKLLSSSSKVRMEASGCSRRLVVQQAGKADA  
GEYSCEAGGQKLSFRLDVTEPKLVFAKEQQARSEVKAEGNSATLSCEVAQAQTEVTFWKDGKLLSSSSKVRM  
EASGCSRRLVVQQAGKADAGEYSCEAGGQKLSFRLDVAEPKLVFAKEQQARSEVKAEGNSATLSCEVAQAQT

EVTWFKDGKKLSSSSKVRMEASGCSRRLVVQQAGKADAGEYSCEAGGQKLSFHLDVTEPKLVFAKEQQAHSEV
KAEAGASATLSCEVAQAQTEVTWFKDGKKLSSSSKVRMEASGCSRRLVVQQAGKADAGEYSCEAEGQKLSFRL
DVAEPKLVFAKEQQARSEVKAEAGASATLSCEVAQAQTEVTWFKDGKKLSSSSKVRVEASGCSRRLVVQQAGK
ADAGEYSCEAGGQKLSFRLDVAEPKLVFAKEQQANSEVKAEAGASATLSCEVAQAQTEVTWFKDGKKLSSSSK
VRVEASGCSRRLVVQQAGKADAGEYSCEAGGQKLSFRLDVAEPKLAFAKEQQAHSEVKAEAGASATLSCEVAQ
AQTEVTWFKDGKKLSSSSKVRVEASGCSRRLVVQQAGKADAGEYSCEAGGQKLSFRLDVAEPKLAFAKEQQAH
SEVKAEAGASATLSCEVAQAQTEVTWFKDGKKLSSSSKVRVEASGCSRRLVVQQAGKADAGEYSCEAGGQKLS
FRLDVAEPKLAFAKEQQAHSEVKAEAGASATLSCEVAQAQTEVTWFKDGKKLSSSSKVRVEASGCSRRLVVQQ
AGKADAGEYSCEAGGQKLFRLDVAEPKLVFAKEQQAHSEVKAEAGASATLSCEVAQAQTEVTWFKDGKKLSS
SSKVRVEASGCSRRLVVQQVQKADAGEYSCEARGQKLSFRLDVAEAEESQIPERPSRREPLVVEKHETIILTAT
IAAPSVAAVTWLKDGVEIRRSKRHEATSLGDHTLTVRGAQVLDIAIYSCRVGKEGQDFPVQVEEVAAKFSKP
LEPVEGELGGTVMLVCELSPEQAEVWRCGNTQLRPGKRFQMTSEGPRRTLTVSGLREDDAEYVCESRDDRT
SARLTVKVPVVKFTSGLSAMVAEEGQEQATFQCVVSPSDAGVTWYKDGMLQPSSEKFMVMEVSGASRSLTILGL
TLEDAGQVTVAEAGASSAALRVREAPVLFKKKLEPQTVEERTSVTLEVELTRPWPEVKWTRNAAVLTPSENV
EIRAEGARHCLVLRVSGFADRGGFFGCETPDDKTQAKLNVEMRQVRLVVRGLQEVEAKEQGTASMDVELSHAEVE
GSWTRDGLRQLQPGPKCHLAVQGPVHILTLALQPDQSGLVAFRAEGVHTSARLIVTELPVSVFTRVLQDVVATQ
KEKVTLECELSRPVDVRLKDGVELRAGKAIQVAGQTSRSLVIYRCETGDQGVYVCDALDAQTSASLRVQGR
TYTLIFRRVLAEDAGEVVFVAENAESRAHLRVKLEPVTLLRPLRDKIAMEKHARGVLECCVSRASQAQVRFKGG
VELQSGPKYEVVSDGLYRKLVINQVPEDEDTYTCDAAGNVKTSAQFFVEEQSITIVRGLKDMTVMEPAPAWFE
CETSIPSVRPPKWLKGTVLQAGGNVLEQDGTVHRLTLHKTCSTMTGPVHFTIGKSRSSAQLVVS DIPVVL
RPLEPKAGRELQSVVLSCDFRPAPKAVQWYKDDTPLSPSEKFKMALEGQMAELRILRLTPADAGVYRCQAGSA
QSSAEVTVAREVTVIQPLQDAEAMEEGRVCFSCELSHKDEDIEWSLNGTPLYNDSFHEISHEGLHTLVLKS
VRQADTGTVCATSPKVSVSARLVVKGKPVVFLKALDDVSAEERGTTLQCEVSDPEARVVWRKDGVELGPSDK
YDFLHKAGARGLTVHDLSDHEDAGLYTCQVGSKETQSKVSVHDLHVGITKRLKTVEVLEGESECSFECVLSHESP
SDPAVWTVGGKTVGGSGHFHAVRQGRKYTLTVKDAALSDAGEVVFVSVLGLTSSKASLIRERPVDTKPLEDQR
TTLGEDVMSCELSRAGTSVRWLKDGKAIKRSQKYDLLSEKTRAVLVRKASLKDSEGYTCETEASKSTAKLC
VEEKANRFTTEELADLQVEEKGRAVFTCKTEHPASVVTWRKGLLELRASGKHVPSQEGTLTKLTINALERTDSD
TYTCDIGQARTQARLLVHGQKVRVIEDLEDTAVQEGSSAKFCCRIPADYGPVHWFLLDKTPLHSNELNEITVQ
PGGYHVLTLRQLALKDSGTVYFEAGDQRTSAALRVTEKPSIFSRPLTDVTVTEGEDTLTVCETTTTVDSSVRWT
KDGKTLRPSARCQLSHEGCAQLLITATTPQDGGRYKCEIGGASSSSIVRVHALPVRFRESLKDVEVPEGKAA
TLRCVLSVAAPVEWRHGDDVLKSSNKYSLRQEGAVLELVIRDLQPDQSGQYSCSFGDQTTSATLTVKTSQAQ
FVGKLRNKEATEGTTVTLRCELTKAPVEWKKGTETLRNGDKYSLKQDGAVCELQICSLLVADAGEYSCVCGQ
EKTSATLTVKALLVHFVRRRLRSKEATEGDTTTLQCELSKAAPVEWRKGTETLRDGDYSLKQDGAVCELQIRS
LTADAGEYLCTCGQEKTSATLTVRALPAKFKDSLKNEEATEGTTATLSCELSKAAPVTWKKGPKTLQSGDKY
VLRQDGAVCGQLIHLTMADAGEYSCVCGQEKTSATLTVRGLPAKFIEDLRSQEATEGATAILRCELSKAAPV
EWRKGETLKDGDYTLRQDGAVCELQIRGLAVVDGTGLYSSSLPTKFTGLRNEEATEGTMATLRCQMSKAAPV
EWRKGETLDRDGYSLRQDGAMCELQIRGLTIEDSGEYTCVCGQEKTSATLSVKALPPRFIEDLRSQEATEG
TMATLRCQMSKAAPVEWRKGETLGDGGYSLRQNGAVCELQIHDLAVEDTGEYSCVCGQEKTSATLNVKALP
PRFIEDLRSQEATEGTMATLRCQMSKAAPVEWRKGETLDRGGYSLRQDGAVCELQIHDLDVEDAGQYSCVC
GQEKTSAVLTVDALPPKFTEGLKKEEATEGTMVTLRQMSKEATVEWRKGAKTSLDGGYSLRQDGAMCELQI
CGLAVEDAGEYSCVCGQEKTSATLSVKALPPRFIEDLRSQEATEGTMATLRCQMSKAAPVEWRKGSKTLRDGD
RYSRLRQDGAMCELQICDLAVEDTGDYSCVCGQEKTSATLSVKAPQVVFQQLQNLQAEEGSMASLRCELSVFN
AAMVWSKGGLELQGDTRREARQQGCVAEALLRDLRREDAGEYSCTCGSQTTSATLMVTAAPVRFRLQLAQDV
DEGATARLRCELSREAVSVEWRKGSLLQFPKAKYQMVQEGTTAELLVHGVEQEDAGEYTCDAHTQSIARLSV
RAPKPKFKTDLQSTEQAEAGGTARLCCQLSEAPGTPVQWLKEGVELHVGSKYEMRRQGAPELLIHGLEAKDT
GEYACLVGQKTLASLRVKEPEVTIVRGLVDMEVQADEDEFTCKVVSQAGATDVQWHLQGLPLQSNVEVAV
LADGCTHVQLKGVTLLEDAGTVSFHVGGLSSSAQLTVRVPEVTVLEPLKDVQLSEGQDAHFRCRLSRASGQEA
RWALGGVPLQCNEMNDITVEQGTLYLLTLHKVTLLEDAGTITLQVGSSESAQLKVTAKNTVLRGLENVDALEG
GEALFECQLSQPEVAHAHTWLLDDEPVHTSEKVEVVYFENGLRHLLLLKLNKPKQDSCRVTFLAGDVVTS AFLTV
RALPDPPEDAEVVGRSDHSVTLVWVAPMSDGGGGLCGYRVEMKEASTGQWQLCHDLVPGPECVVDDLVPKTY
RFRVAAVGPAGAGEPVHLPQMVKIAAPAPAPAPAPAPAPETRQAVVGEDICLELEVAADGGEVVWHKGTERRI
QPGGHFEVLSRGRQMLVIKGFRTEDQGEYRCGPIQGLPSSGAATFNVMVMTSGSGDEVPAQPSLPPEAAQEGD
LHLLWEALARKRRMSREPTLDSISELPEEDSRVQLHRQEAEBETAPDLSEGYSTADELARTGDEADLSHTSSDDE
SRAGTPSLVTYLKKAGGPGISPLASKHEAQVTSVVKPQKQEPVVPTCPPPPGLDSAADLMDPSLDKAAVKIQA
AFKGYKVRKEMQQEGPVFSRTFGDTEAQVGDVLRLECVLATKTDMRACWLKDGIELTDGRHYHIDQLKDGTC
SLLVTVGLAPTDSGRYTCQVSTKSGRVSHSACVVVSGTESEAESSSGGELDDAFRRAARLHRLFRTRKSPAELS
EELFLSADEGPGEPEPADWQTYREDEFVFCIRFESLAEARQAVTCFRNMFMATMGIGVEISLGEQGPVGVEM
RIGKVAPTPTPAVPLAKTPGLQTSDAAPVFLTELQNDQVQDGYPMSFDCVVVTGQPVPSVRWFKDGKLLLEDDH

YMINEDQQGGHQLIITAVVPADMGVYRCLAENSMGVSSSTKAELRVELTSTDYDTAADATETSSYFSAQGYLSS  
 REQEGTESDEGQLPQVLEELKDLQVAPGTRLAKFQKLVKGYAPKLYWFKDQPLTSDHIRMTDKKTLHTLE  
 IVSVTREDSDGQYAAIISNAVGAAYSARLLVVRGPEPEEKPASDVHERLVPPRILEKFTPKKVKRGSITFSV  
 KVEGHPAPSVHHLKEEAKEKGVLWIGPDTPGYTMASSSKQHSVLVLDVGRQHOGTYTCIATNPAGQALCSASLH  
 ISGLAKEEEQERVKEALISSFLQGTSAQVSAQMSESAGFADLVGQSKGESLVAAEEAHSHLSLAEVGTEEFLOK  
 LTSQITEMVSAKISQAKLQVPGGDSDEETKTPSASPRHGRSRPSSSVQESSSESEEDGDSRGEIFDIYVVTADY  
 LPLGAEQDAIILREGQYVEVLDSAHPLRWLVRTKPTKSSPSRQGWVSPAYLDKRLKLSPEWGPTEAPEFPGEA  
 VSEDEYRTRLSSVIEQLLSEQAQFVGELOFLESHHMKHLERSPRVPAAVASQKTVI FRNVQDISHFHSSFLKE  
 LQCGTDDDDVAMCFIKNQEAFEKYLEFLVGRVQAESVVVSTPVQEFYKKYAEETLSAKDPTQPPPPPLQHYLE  
 QPVERVQKYQALLKELIRNKARNRQNCALLEQAYAVVSALPQRAENKLVSLMENYPGTLEALGEPVIRQGHFI  
 VWEGAPGARMPPWKGNHRHVFVFRNYLVICKPRRDSRTDTFSYVFRNMMKLSSIDLNDQVEGDRAFEVWHERE  
 DSVRKYLLQARTVI IKNSWVKEICGIQQRLAQPVWRPPEFEEELADCTAELGETVKLACRVTGTPKPIVSWYK  
 DGKPVVEVDPHHILIEDPDGSC TLI LDNLTGIDSGQYMCFAASAAGNASTLGKILVQVPPRFVNVKVRATPFVEG  
 EDAQITCTVEGAPYQIRWYKDGTLAPGNRYRMLNEPRSGVLLVVIQAASKEDLGHYECELVNRLGSTRGGG  
 ELYMQSPALRARDQHHREQIVAAVEGAPSMQVTIEDVQVQVGDMAQFDAVIEGHPPPIVTWYKGTQLTSSAR  
 LSQRQDGTYSVLVTDVAPHDAGVYTCVANNAGGQVLCKAELLVHGGDKLDAENQVYRRLKHSFYDVQEEIGR  
 GVFGFVKRVQHKGNMFCAAKFIPLRSKTRAQAYQERDILATLGHPLVTGLLDQFETRKLTLILILELCSSEEL  
 LDRLFKKGVVTEAEVKVYIQQLVEGLHYLHSHGILHLDIKPPNII LMVHPAREDIKICDFGFAQKITPSEFPQYS  
 KYGSPEFVSPEIIEQNPNVSEGSDIWAMGVISYLSLTCSSPFAGESDRATLLNVLEGRVSWSSPTAAHLSEDAK  
 DFIKATLQRTPRARPSTSQC LAHPWFLKSMPAAEAAHFINTKQLKFL LARSRWQRSLMSYKSI LVMRSIPELLQ  
 GPPDPSLGVARHLRGEASGASSSSSSDNELAPFARAKSLPSPVTHSPLLHPRGFLRPSASLPEETEASMP  
 TADAAPVSPASQAGPPASPGCVPRHSVSSLFYQQAGEGAERGNKTS GAKRHPARRRHLLKGGYIARALPGLR  
 EPLMEYSLLEEEAAREEQASLMTKTPSFETALRLPSSSVREVPGRSHSLDNPPVTTGSPPEACKQLLFPST  
 GLTHETAKDRGHKEGFLQESVFPFPMMSGDSRPGKQEGSSQDSCRGKPASSCHSELGSGSQEGCGPPSSQSLG  
 SLPPQSLKKELTSCGPLFSEQPQAAPFPTQVSPLLGSAKEQPQDGLSEGPVVPVSSSPGSASQVDASLDTEG  
 LSEAGDTCDFTPPPQRPQEQATRKFSLSRGGYAGVAGYGTFAFGGDAGGMLGQGPLWARMAWAVSQSSEEQ  
 DEAAATESPQPLESLGPIAEASGVPLRTPSLTPWEEVEVYGLTVQIRDLSGDAEAADTISLDISEVDPAYLNL  
 DLYDIKYLPEFEMI FRRVPKPIEQPESPGSETEAGQGLADFLLEAAWPWPGEGLGLRAGLEITEEPEEPGDLEA  
 LLGEAAVGRKRKWSPSRGLFQFPGRCLSGEEPVELGLRQRVKASMAHISRILKGRPEGPEREPPRKKAGLAS  
 FRLSGLKGRDQELSDEAVVLGQSVTLACQVLAQPTAQATWSKDGVLLESSGHLLISSTLKNFQLLTLIVVKEE  
 DLGTYTCCVSNPLGTAVTTGVLKKAERPSSSPRPEVGEYKDAVLLVWKPVESECGPVTYIVQCCIEGGSWTTL  
 ASDISDCCYLTKGLSRGGMYIFRTACVSKAGMPYSSPSEQVLLGGPNHLASEEESRGRPAQLLPSTKTFAF  
 QMQIRGRFVSVRQCREKASGRALAAKIVPYQPEDKTAVLRREYEAALKRLLHHPHLAQLHAAYLSPRHLVILEL  
 CSGPELLPSLAERESYSESDVKDYLWQMSATQYLHAQHILHLDLRSENMMVTEYNLLKVIDLGNASLDQEK  
 VPAPENFKDYLETMAPELLEGQAVPQTDIWAIGVTAIFIMLSGEYEPESSEGETRDLQKGLRKLIRLSRCYAGL  
 SGGAVAFQLSSSLCAQPWGRPCASTCLQCGWLTEEGPTGSRPTPVTFPTVRLRAFVREKRRRALLYKKNHQAQ  
 VR\*

>rs50800163\_ENSMUSP00000049737\_c.2807:G>A\_p.M936I

ENSMUST00000052872.15|Obscn-203|ENSMUSG00000061462|-|chr11:g.59019004:C>T  
 MDHSFSGAPRFLTRPKAFVSVGKDATLSCQIVGNPTPHVSWEKDRQFVEAGARFRLAQDGDVYRLTILDLAL  
 GDSGQYVCRARNAIGEFAAVGLRVDSEGTCAEQAPHLLRPTSI RVREGADATFRCRVGGSPPAVSWSKDG  
 RRLGPPDAPHVRVEEHGESSALRIR SARPRDGGTYEVRAENPLGSASAAAALVVDSDAEVAGPPGTSTATLLA  
 HLQORREAMRAEGIPSPPPGAGTRTCTVTEGKHARLSCFVTGEPKPEVWKKDQGLVTEGRRHVVEDEQENF  
 VLKILFCKQSDRGLTYCTASNLVGQTYSSVLVVVREPTVFPKRLQDLEVREKESATFQCEVAQAPATEAAWFK  
 EETRLWASAKYDIEEGTERRLTVRNVSADDDAVYICETTEGSRVVAELSVQGNLTKLPRKTAVRTGDTAIF  
 WVELAVPEGPVRWLRNQEEMVAGGRVAITAEGTCHTLTI FQCTLEDMGEVAFVSGGCRTTTTQFCVSAPRRPPL  
 YPPADPVVKAKTESSVTLWSAPPHGDRPVTIDGYVLEKRKLGAYAWSRCHEAGWLATTEFTITGVAAEEDFQ  
 FRVSAINHFGQGPYLEFPGMTMLVPLAVKTPKAVEAVEGGEVTFVSDLTVASSGEWFLDGEALKASSIYVI  
 RCDRTRHMLTIREV PARLHGAQLK FVANGIETS IQMVVRAALGLPSSKLPAAAAREVLAQLHEEAQLLAELSD  
 QAAAVTWLKDGRELSLGPKEYMQVSAGRRALLVRDVAQDDAGLYECVSRGSR TAYQLLVQEPKLVFAKQQAH  
 SEVKAEAGNSATLSCEVTQAQTEVTFWFKDGKLLSSSSKVRMEASGCSRRLVVQQAGKADAGEYSCEAGGQKLS  
 FRLDVAEPKLVFAKQQAHSEVKAEAGASATLSCEVAQAQTEVTFWFKDGKLLSSSSKVRMEASGCSRRLVVQQ  
 AGKADAGEYSCEAGGQKLSFRLDVAEPKLVFAKEQARSEVKAEAGASATLSCEVAQAQTEVTFWFKDGKLLSS  
 SSKVRMEASGCSRRLVVQQAGKADAGEYSCEAGGQKLSFRLDVTEPKLVFAKEQARSEVKAEVGN SATLSCE  
 VAQAQTEVTFWFKDGKLLSSSSKVRMEASGCSRRLVVQQAGKADAGEYSCEAGGQKLSFRLDVAEPKLVFAKEQ  
 QARSEVKAEAGNSATLSCEVAQAQTEVTFWFKDGKLLSSSSKVRMEASGCSRRLVVQQAGKADAGEYSCEAGGQ  
 KLSFHLDVTEPKLVFAKEQAHSEVKAEAGASATLSCEVAQAQTEVTFWFKDGKLLSSSSKVRMEASGCSRRLV  
 VQQAGKADAGEYSCEAGGQKLSFRLDVAEPKLVFAKEQARSEVKAEAGASATLSCEVAQAQTEVTFWFKDGK

LSSSSKVRVEASGCSRRLVVQQAGKADAGEYSCEAGGQKLSFRLDVAEPKLVFAKEQQANSEVKAEEAGASATL  
SCEVAQAQTEVTWFKDGKKLSSSSKVRVEASGCSRRLVVQQAGKADAGEYSCEAGGQKLSFRLDVAEPKLAFA  
KEQQAHSEVKAEEAGASATLSCEVAQAQTEVTWFKDGKKLSSSSKVRVEASGCSRRLVVQQAGKADAGEYSCEA  
GGQKLSFRLDVAEPKLAFAKEQQAHSEVKAEEAGASATLSCEVAQAQTEVTWFKDGKKLSSSSKVRVEASGCSR  
RLVVQQAGKADAGEYSCEAGGQKLSFRLDVAEPKLAFAKEQQAHSEVKAEEAGASATLSCEVAQAQTEVTWFKD  
GKKLSSSSKVRVEASGCSRRLVVQQAGKADAGEYSCEAGGQKLFRLDVAEPKLMFAKEQQAHSEVKAEEAGAS  
ATLSCEVAQAQTEVTWFKDGKKLSSSSKVRVEASGCSRRLVVQQAGKADAGEYSCEAGGQKLSFRLDVAEPK  
VFAKEQQAHSEVKAEEAGASATLSCEVAQAQTEVTWFKDGKKLSSSSKVRVEASGCSRRLVVQQVKGADAGEYS  
CEARGQKLSFRLDVAEPKLMFAKEQQARTEVKAEAGNSATLSCEVAQAQTEVTWFKDGKKLSSSSKVRVEASG  
CSRRLVVQQAGKADAGEYSCEAGGQKLSFRLDVAEAEESQIPERPSRREPLVVKEHETIILTATIAAPSVAAVT  
WLKDGVEIRRSKRHEATS LGDTHLTVRGAQVLD SAIYSCRVGKEGQDFPVQVEEVAAKFSKPLEPVEGELGG  
TVMLVCELSPEQAEVWRCGNTQLRPGKRFQMTSEGPRRTLTVSGLREDDAEYVCESRDDRTSARLTVKVPR  
VVKFTSGLSAMVAEEGQEATFQCVVSPSDAGVTWYKDGMLQLPSEKFMVVESEGASRSLTILGLTLEDAGQVTV  
EAEGASSAALRVREAPVLFKKLEPQTVEERTSVTLEVELTRPWEVKWTRNAAVLTPSENVEIRAEGARHC  
LVLRVGFADRGFFGCETPDDKTQAKLNVEMRQVRLVVRGLQVEVAKEQGTASMDVELSHAEVEGSWTRDGLRL  
QPGPKCHLAVQGPVHILTLALSALQPQDSGLVAFRAEGVHTSARLIVTELPVSFTRVLQDVVATQKEKVTLECEL  
SRPVDVWRWLKDGVELRAGKAIGIVAQGTCSRSLVIYRCETGDQGVYVCDALDAQTSASLRVQGRTYTLIFRRVL  
AEDAGEVVFVAENAESRAHLRVKLEPVTLLRPLRDKIAMKHEKRGVLEECQVSRASAVRWFKGGVLEQSGPKYE  
VVSDGLYRKLVINVDVQPEDEDTYTCDAGNVKTSAQFFVVEEQSITIVRGLKDMTVMPEPAPAWFECETSIPSVRP  
PKWLLGKTVLQAGGNVLEQDGTVHRLTLHKTCSTMTGPVHFTIGKSRSSAQLVVS D I P V V L T R P L E P K A G R E  
LQSVVLSCDFRPAPKAVQWYKDDTPLSPSEKFKMALEGQMAELRILRLTPADAGVYRCQAGSAQSSAEVTVEA  
REVTVIQPLQDAEAMEEGRVCFSCELSHKDEDI EWSLNGTPLYNDSFHEISHEGCLHTLVLSVQRADTGTVC  
ATSPKVSVSARLVVKGKPVVFLKALDDVSAEERGTTLTQCEVSDPEARVVWRKDGVELGPSDKYDFLHKAGAR  
GLTVHDLSDHEDAGLYTCQVGSKETQSKVSVHDLHVGITKRLKTVEVLEGESECSFECVLSHESPSDPVAVTVGG  
KTVGGSGHFHAVRQGRKYTLTVKDAALSDAGEVVFVSLGLTSKASLIRERPVDTIKPLEDQRTTLGEDVMLS  
CELSRAGTSVRWLKDGKAIKRSQKYDLLSEGTRAVLVRKASLKDSGEYTCETEASKSTAKLCEVEKANRFT  
ELADLQVEEKGRVFTCKTEHPASVVTWRKGLLELRASGKHVPSQEGTLKLTINALERTSDSTYTCDIGQAR  
TQARLLVHGQKVRVIEDLEDTAVQEGSSAKFCCRIAPADYGPVHWF LDKTPLHSNELNEITVQPGGYHVLTLR  
QLALKDSGTVYFEAGDQRTSAAALRVTEKPSIFSRPLTDVTVTEGEDTLVLCETTTVDSSVRWTKDGKTLRPSA  
RCQLSHEGCAQLLITATTPQDGGRYKCEIGGASSSSIVRVHALPVRFRRESLKDVEVPEGKAATLRCVLSVA  
APVEWRHGDDVLKSSNKYSLRQEGAVLELVIRDLQPDGSGQYSCSFGDQTTSATLTVKTSQAQFVGKLRNKEA  
TEGTTVTLRCELTKAEAPVEWKKGTETLRNGDKYSLKQDGAVCELQICSLLVADAGEYSCVCGQEKTSATLTVK  
ALLVHFVRRRLRSKEATEGDTTTLQCELSKAAPVEWRKGTETLRDGDYSLKQDGAVCELQIRSLTIADAGEYL  
CTCGQEKTSATLTVRALPAKFKDSLKNEEATEGTTATLSCELSKAAPVTWKKGPKTLQSGDKYVLRQDGAVCG  
LQIHGLTMADAGEYSCVCGQEKTSATLTVRGLPAKFIEDLRSQEATEGATAILRCELSSKAAPVEWRKGS  
DGDYTLRQDGAVCELQIRGLAVVDGTGYSSSLPKTFTEGLRNEEATEGTMATLRCQMSKAAPVEWRKGS  
DGDYSLRQDGAMCELQIRGLTIEDSGEYTCVCGQEKTSATLSVKALPPRFIEDLRSQEATEGTMATLRCQMS  
KTAPVEWKKGSETLRDGGYSLRQDGPVCELQICDLAVEDAGEYSCVCGQEKTSATLSIKALPPRFIEDLRSQ  
EATEGTMATLRCQMSKAAPVEWRKGSSETLGDGGYSLRQNGAVCELQIHDLAVEDTGEYSCVCGQEKTSATLN  
VKALPPRFIEDLRSQEATEGTMATLRCQMSKAAPVEWRKGSSETLRDGGYSLRQDGAVCELQIHDLVEDAGQ  
YSCVCGQEKTSAVLTVDALPPKFTGLKKEEATEGTMVTLRCQMSKEATVEWRKGAKTLSDGGYSLRQDGAM  
CELQICGLAVEDAGEYSCVCGQEKTSATLSVKALPPRFIEDLRSQEATEGTMATLRCQMSKAAPVEWRKGS  
LRDGDYSLRQDGAVCELQIRDLAVEDAGEYLCVCGQEKTSATLSVKALPPRFIEDLRSQEATEGTMATLRCQ  
MSKAAPVEWRKGSKTLR DGDYSLRQDGAMCELQICDLAVEDTGDYSCVCGQEKTSATLSVKALPPRFIEDLR  
SQEAREGTVATLRCRMSKAAPVEWRKGSSETLKDGDYSLRQEGNLCELQIRDLAVEDTGEYSCVCGQEKTSAT  
LSVKALPAKFIEDLRSQEAPESSTVTLRCKLSKKASVWKKGSETLRNGARYSLRQDGAVCELEIRDLTVEDT  
GEYSCTCGQERTSATLSIMAPQVVFQQLQNLQAEEGSMASLRCELSVPNAAMVWSKGGLELQGDTRREARQQ  
GCVAELLLRDLRREDAGEYSCTCGSQTTSATLMVTAAPVRFLRELQAQDVDEGATARLRCELSREAVSVEWRK  
GSLQLFPCAKYQMVQEGTTAELLVHGVEQEDAGEYTC DAGHTQS IARLSVRAPKPKFKTDLQSTEQEAGGTAR  
LCCQLSEAEPTPVQWLKEGVELHVGSKYEMRRQGAVCELLIHGLEAKDTGEYACLVGQKTLASLRVKEPEV  
TIVRGLVDMEVQADEDEFTCKVSQAGATDVQWHLQGLPLQSNVTEVAVLADGCTHVLLQKGVTLLEDAGTVS  
FHVGGSSSAQLTTRVPEVTVLEPLKDVQLSEGQDAHFRCRLSRASGQEARWALGGVPLQCNEMNDITVEQGT  
LYLLTLHKVTELEDAGTITLQVGSSEAEQLKVTAKNTVLGRLENVDALEGGALFECQLSQPEVAHAHTWLLDD  
EPVHTSEKVEVVEFYENGLRHLKLNKLPQDSCRVTFLAGDVVTS AFLTVRGRWRLEVLPHDASVKAGMQVR  
FTCILSEAVPVGEATWYINGAATQPD DTDWTVTTDGS SHALTLSNAQPQHAGEVTF AARDAVASARLSVLALP  
DPPEDA EVVGRSDHSVTL SWVAPMSDGGGGLCGYRVMKEASTGQWQLCHDLVPGPECVDDLVPGKTYRFRV  
AAVGPAGAGEPVHLPQMVKIAPAPAPAPAPAPAPAPETRQAVVGEDICLELEVAADGGEVWVHKGTERIQPGG  
HFEVLSRGRQMLVIKGFRTEDQGEYRCGPIQGLPSSGAATFNVVMTSGSGDEVPAQPSLPPEAAQEGDLHLL



WEALARKRRMSREPTLDSISELPEEDSRVQHLRQEAETAPDLSEGYSTADELARTGEADLSHTSSDDESRA  
TPSLVTYLKKAGGPGISPLASKHEAQVTTSVKPKQKQEPVVPTCPPPGDLAADLMDPSLDKAAVKIQAAFKG  
YKVRKEMKQOEGPVFSRTFGDTEAQVGDVLRLECVLATKTDMRACWLKDGIELTDGRHYHIDQLKDGTC  
TGLAPTDSGRYTCQVSTKSGRVSHSACVVVSGTESEAESSGGELDDAFRRAARRLHRLFRTKSPAELSEEEL  
FLSADEGPEPEEPADWQTYREDENFVCIRFESLAEARQAVTCFRNMFATMIGVEISLGEQGPVEMRIGK  
VAPTPTPAVPLAKTPGLQTSDAAPVFLTELQNDVQDGYPMSFDCVVVTGQPVPSVRWFKDGLLEEDDHMIN  
EDQQGGHQLIITAVVPADMGVYRCLAENSMGVSSTKAELRVELTSTDYDTAADATETSSYFSAQGYLSSREQE  
GTESDEGQLPVLEELKDLQVAPGTRLAKFQLKVKGYPAKLYWFKDGOPLTTSDHIRMTDKKTLHTLEIVSV  
TREDSGQYAAAYISNAVGAAYSSARLLVRGPSEPEEKPASDVHERLVPRILEKFTPKKVKRGSITFSVKVEG  
HPAPSVHWLKEEAKEGVLWIGPDTPGYTMASSSKQHSVLVLLDVGQRHQGTYTTCIATNPAGQALCSASLHISGL  
AKEEEQERVKEALISSFLQGTSQAVSAQMSEAGFADLVGQSKGESLVAEEAHSHLSLAEVGTTEEFLQKLT  
SQITEMVSAKISQAKLQVPGGDSDEETKTPSASPRHGRSRPSSSVQESSSESEDGDSRGEIFDIYVVTADY  
LPLGAEQDAIILREGQYVEVLDSAHPLRVLVVRTKPTKSSPSRQGWVSPAYLDKRLKLSPEWGPTEAPEF  
PGEAVSEDEYRTRLSSVIQELLSSEQAFVGLQFLESHMKHLERSPRVPAAVASQKTVI FRNVQDI SHFHS  
FLKELQGC GTDDDVAMCFIKNQEAFAKEYLEFLVGRVQAESVVVSTPVQEFYKKYAEETLSAKDPTQ  
PPPPPLQHYLEQVREVQKYQALLKELIRNKARNRQNCALLEQAYAVVSALPQRAENKLVSLMENYPGTLEAL  
GEPVIRQGHFIVWEGAPGARMFWKGNHRHVF LFRNYLVICKPRRDSRTDTFSYVFRNMMKLSSIDLNDQ  
VEGDRAFEVWHEREDSVRKYLLQARTVI IKNSWVKEICGIQQLAQPVWRPPEFEELADCTAELGETVKLACR  
VGTGTPKPIVSWYKDGKPVVDPHHILIEDPDGSC TLI LDNL TGIDSGQYMCFAASAAGNASTLGKILVQ  
VPPRFVNVKVRATPFVEGEDAQITCTVEGAPYPQIRWYKDG TLLAPGNRYRMLNEPRSGVLV LVIQAASKE  
DLGHYECELVNRLGSTRGGGELYM QSPALRARDQHHREQIVAAVEVTEQETKVPKKTVI I EETITTVV  
KSPRGRRQSPGKSPSRSPRRSASPRRPG LLAPERLYPPGTSPSRRLVEVEQGRKAPVPALYVTEAEV  
HAPASQSPKWLEVEETIEVRVKKTGSRGASPVREMTSRGEGILFTLPGGI PGRDPNANNNSNKS  
SVYQEA RTWGPVAVHVGE PPI FQVDSVGNVDWVAASPEPEQVRA SQKEENTERQEGCSDG  
DENTFLMEEPQD TDSLQGRDPKILTHNGRVLTLADLEDYVPQEGETF GCGDSTPSTPDEPPCEV  
SVLQREI SEPTVGPVLLNVGRPPGTGATPSFFRPGSQVHSPESVSFLLREAWSGPVSAAPWTSS  
FHTHVQSSVDGSHGFSKTEVSTQTVSFGAVGETVTLHIDPDGGEAPGPSQ\*  
>rs50800163\_ENSMUSP00000020732\_c.3008:G>A\_p.M1003I  
ENSMUST00000020732.13|Obscn-201|ENSMUSG00000061462|-|chr11:g.59019004:C>T  
MDHSFSGAPRFLTRPKAFVSVGKDATLSCQIVGNPTPHVSWEKDRQPVEAGARFRLAQDGDVYRLTIL  
DLALGDSGQYVCRARNAIGEAFAAVGLRVDSEGTCAEQAPHLLRPTSIRVREGADATFRCRVGGSPQPAV  
SWSKDGRRLLGPPDAPHVRVEEHGESSALRIRSARPRDGGTYEVRAENPLGSASAAAALVVDSDAEVAG  
PPGTSTATLLAHLQQRREAMRAEGIPPSPPGAGTRTCTVTEGKHARLSCFVTGEPKPKETVWKKDQ  
LVTEGRRHVYVEDEQENFVLKILFCKQSDRGLYTCTASNLVGQTYSSVLVVVREPTVPFKKRLQDLE  
VREKESATFQCEVAQPA TEAAWFK EETRLWASAKYDIEEGTERRLTVRNVSADDDAVYICETTEGSR  
TVAELSVQGNLTKRLPRKTAVRTGDTAIFWVELAVPEGPVWRWLRNQEMVAGGRVAITAEGTCHTLTI  
FQCTLEDMGEVAFVSGGCRTTTTQFCVSAPRRPPLYPADPVVKAKTLSWSAPPHGDRPVTIDGY  
VLEKRLGAYAWSRCHAGWLATTEFTITGVAAEGDFQFRVSAINHFGQGPYLEFPGMTMLVPLAVK  
TPLKAVEAVEGGEVTFVSDLTVASSGEWFLDGEALKASSIYVIRCDRTRHMLTIREVPARLHGA  
QLKFVANGIETSIQMVVRAALGLPSSKLPAAAAREVLAQLHEEAQLLAELSDQAAA VTWLKDGR  
ELSLGPKYEMQVSAGRRALLVRDVAQDDAGLYECVSRGSR TAYQLLVQDITDGYRDWGPAGPQ  
KHMCKCAGAKIARYLGSSCYRFLQYDKGVWHWLEAALDTRQKGKTS SCSLHEKPKLVFAKQQA  
HSEVKA EAGNSATLSCEVTQAQTEVTWFKDGKLLSSSSKVRMEASGCSRRLVVQQAGKADAGEY  
SCEAGGQKLSFRLDVAEPKLVFAKQQA HSEVKA EAGASATLSCEVAQAQTEVTWFKDGKLLSS  
SSKVRMEASGCSRRLVVQQAGKADAGEYSCEAGGQKLSFRLDVAEPKLVFAKEQQARSEVKA  
EAGASATLSCEVAQAQTEVTWFKDGKLLSSSSKVRMEASGCSRRLVVQQAGKADAGEYSCEAGG  
QKLSFRLDVAEPKLVFAKEQQARSEVKA EAGASATLSCEVAQAQTEVTWFKDGKLLSSSSKVR  
MEASGCSRRLVVQQAGKADAGEYSCEAGGQKLSFRLDVAEPKLVFAKEQQANSEVKA EAGASAT  
LSCEVAQAQTEVTWFKDGKLLSSSSKVRMEASGCSRRLVVQQAGKADAGEYSCEAGGQKLS  
FRLDVAEPKLVFAKEQQAHSEVKA EAGASATLSCEVAQAQTEVTWFKDGKLLSSSSKVRMEAS  
GCSRRLVVQQAGKADAGEYSCEAGGQKLSFRLDVAEPKLVFAKEQQAHSEVKA EAGASATLSCE  
VAQAQTEVTWFKDGKLLSSSSKVRMEASGCSRRLVVQQAGKADAGEYSCEAGGQKLSFRLDVA  
EPKLVFAKEQQAHSEVKA EAGASATLSCEVAQAQTEVTWFKDGKLLSSSSKVRMEASGCSRRL  
VVQQAGKADAGEYSCEAGGQKLSFRLDVAEPKLVFAKEQQAHSEVKA EAGASATLSCEVAQAQ  
TEVTWFKDGKLLSSSSKVRMEASGCSRRLVVQQAGKADAGEYSCEAGGQKLSFRLDVAEPKLV  
FAKEQQAHSEVKA EAGASATLSCEVAQAQTEVTWFKDGKLLSSSSKVRMEASGCSRRLVVQQ  
AGKADAGEYSCEAGGQKLSFRLDVAEPKLVFAKEQQAHSEVKA EAGASATLSCEVAQAQTEVT  
WFKDGKLLSSSSKVRMEASGCSRRLVVQQAGKADAGEYSCEAGGQKLSFRLDVAEPKLVFAKEQ  
QA HSEVKA EAGASATLSCEVAQAQTEVTWFKDGKLLSSSSKVRMEASGCSRRLVVQQVQKAD  
AGEYSCEARGQKLSFRLDVADTRLMFAKEQQARTEVKA EAGNSATLSCEVAQAQTEVTWFKDG  
KLLSSSSKVRMEASGCSRRLVVQQAGKADAGEYSCEAGGQKLSFRLDVAEAEESQIPERPSRRE  
PLVVKEHETIILTATIAPSVAAVTWLKDG

EIRRSKRHEATSLGDTHTLTVRGAQVLD SAIYSCRVGKEGQDFPVQVEEVAAKFSKPLEPVEGELGGTVMLVC  
ELSPQEAEVWRCGNTQLRPGKRFQMTSEGPRTTLTVSGLREDDAEYVCE SRDDRTSARLTVKVPVVKFTS  
GLSAMVAEEGQEATFQCVVSPSDAGVTWYKDGMLQPSSEKFMVMEVSGASRSLTILGLTLEDAGQVTEAEGAS  
SSAALRVREAPVLFKKKLEPQTVEERTSVTLEVELTRPWPEVKWTRNAAVLTPSENVEIRAEGARHCLVLRV  
GFADRGFFGCETPDDKTQAKLNVEMRQVRLVVRGLQEVEAKEQGTASMDVELSHAEEVGSWTRDGLRLQPGPKC  
HLAVQGPVHILTLALSALQPQDSGLVAFRAEGVHTSARLIVTELPVSFTRVLQDVVATQKEKVTLECELSRPVDV  
RWLKDGVLELRAGKAIGIVAQGTCSRSLVIYRCETGDQGVYVCDALDAQTSASLRVQGRTYTLIFRRVLAEDAGE  
VKFVAENAESRAHLRVKELPVTLLRPLRDKIAMEKHRGVLECCQVSRASAQVRWFKGGVLELQSGPKYEVVSDGL  
YRKLVIN DVQPEDEDTYTC DAGNVKTSAQFFVEEQSITIVRGLKDMTVMEPAPAWFECETSIPSVRPPKWL LG  
KTVLQAGGNVGLQDGTVHRLTLHKTCSTMTGPVHFTIGKSRSSAQLVSDIPVVLTRPLEPKAGRELQSVVL  
SCDFRPAPKAVQWYKDDTPLSPSEKFKMALEGQMAELRILRLTPADAGVYRCQAGSAQSSAEVTEAREVTVI  
QPLQDAEAMEEGRVCFSCELSHKDEDIEWSLNGTPLYNDSFHEISHEGCLHTLVLSVRQADTGTVCATSPKV  
SVSARLVVKGKPVVFLKALDDVSAEERGTTLTQCEVSDPEARVVWRKDGVELGSPDKYDFLHKAGARGLTVHD  
LSHEDAGLYTCQVGSKETQSKVSVHDLHVGITKRLKTVLEVLEGECSFECVLSHESPSDPAVWTVGGKTVGGS  
GHFHAVRQGRKYTLTVKDAALSDAGEVVSVLGLTSKASLIIRERPVDITKPLEDQRTTLGEDVMLSCELSRA  
GTSVRWLKDGKAIRKSQKYDLLSEGTRAVLVVRKASLKDSGEYTCETEASKSTAKLCVEEKANRFTTEELADLQ  
VEEKGRAVFTCKTEHPASVVTWRKGLLELRASGKHVPSQEGTLTKLTINALERTSDSPTYTCIDIGQARTQARLL  
VHGQKVRVIEDLEDTAVQEGSSAKFCCRIAPADYGPVHWFLDKTPLHSNELNEITVQPGGYHVLTLRQLALKD  
SGTVYFEAGDQRTSAALRVTEKPSIFSRPLTDVTVTEGEDTLVCE TTTVDSSVRWTKDGKTLRPSARCQLSH  
EGCQAQLLITATTPQDGGRYKCEIGGASSSSIVRVHALPVRFRRESLKDVEVPEGKAATLRCVLSVAAPVEWR  
HGDDVLKSSNKYSLRQEGAVLELVIRDLQPDQSGQYSCSFGDQTTSATLTVKTSQAQFVGLRNKEATEGTTV  
TLRCELTKEAPVEWKKGTETLRNGDKYSLKQDGAVCELQICSLLVADAGEYSCVCGQEKTSATLTVKALLVHF  
VRRLRSKEATEGDTTTLQCELSKAAPVEWRKGTETLRDGDYSLKQDGAVCELQIRSLTIADAGEYLCTCGQE  
KTSATLTVRALPAKFKDSLKNEEATEGTTATLSCELSKAAPVWKKGPKTLQSGDKYVLRQDGAVCGLQIHGL  
TMADAGEYSCVCGQEKTSATLTVRGLPAKFIEDLRSQEATEGATAILRCELSKAAPVEWRKGETLKDGDYR  
LRQDGAVCELQIRGLAVDTGTYSPLTKFTEGLRNEEATEGTMATLRCQMSKAAPVEWRKGETLRDGDYR  
LRQDGAVCELQIRGLTIEDSGEYTCVCGQEKTSATLSVKALPSRFIEDLRSQEATEGTMATLRCQMSKAPVE  
WKKGSETLRDGGYSLRQDGPVCELQICDLAVEDAGEYSCVCGQEKTSATLSIKALPPRFIEDLRSQEATEGT  
MATLRCQMSKAAPVEWRKGETLGDGGYSLRQNGAVCELQIHDLAVEDTGEYSCVCGQEKTSATLNVKALPP  
RFIEDLRSQEATEGTMATLRCQMSKAAPVEWRKGETLRDGGYSLRQDGAVCELQIHDLDVEDAGQYSCVCG  
QEKTSAVLTVDALPPKFTEGLKKEEATEGTMVTLRCQMSKEATVEWRKGAKTLSDGGRYSLRQDGAMCELQIC  
GLAVEDAGEYSCVCGQEKTSATLSVKALPPRFIEDLRSQEATEGTMATLRCQMSKAAPVEWRKGETLRDGD  
YSLRQDGAVCELQIRDLAVEDAGEYLCVCGQEKTSATLSVKALPPRFIEDLRSQEATEGTMATLRCQMSKAAP  
VEWRKGSKTLRDGDYSLRQDGAMCELQICDLAVEDTGDYSCVCGQEKTSATLSVKALPPRFIEDLRSQEARE  
GTVATLRCRMSKAAPVEWRKGETLKDGDYSLRQEGNLCELQIRDLAVEDTEEYSCVCGQEKTSATLSVKAL  
PAKFIEDLRSQEAPESSTVTLRCKLSKKASVWVKGSETLRNGARYSLRQDGAVCELEIRDLTVEITGEYSCT  
CGQERTSATLSIMAPQVVFQQPLQNLQAEEGSMASLRCELSVNAAMVWSKGGLELQGDTRREARQQGCVAEL  
LLRDLRREDAGEYSCGQTTSATLMVTAAPVRFRLRELQAQDVDEGATARLRCELSREAVSVEWRKGSQQLF  
PCAKYQMVQEGTTAELLVHGVEQEDAGEYTC DAGHTQSIARLSVRAPKPKFKTDLQSTEQEAGGTARLCCQLS  
EAEPGTPVQWLKEGVELHVGSKYEMRRQGAVCELLIHGLEAKDTGEYACLVGGQKTLASLRVKEPEVTIVRGL  
VDMEVQADEDVEFTCKVSQAGATDVQWHLQGLPLQSNVTEVAVLADGCTHVLQLKGVTL EDAGTVSFHVGGL  
SSSAQLTVRVPEVTVLEPLKDVQLSEGQDAHFRCRLSRASGQEARWALGGVPLQCNEMNDITVEQGTLYLLTL  
HKVTLEDAGTITLQVGS CSSEALQKVTAKNTVLRGLENVDALEGG EALFECQLSQPEVA AHTWLLDDEPVHTS  
EKVEVVYFENGLRHLLLLKLNLPQDSCRVTFLAGDVVTS AFLTVRGWRLEVLEPPHDASVKAGMQVRFTCILS  
EAVPVGEATWYINGAAIQPDDTDWTVTTDGS HALTLSNAQPQHAGEVTF AARDAVASARLSVLALPDPEDA  
EAVGRSDHSVTL SWAPMSDGGGGLCGYRVMKEASTGQWQLCHDLVPGPECVDDLVPGKTYRFRVAAVGPA  
GAGEPVHLPQMVKIAPAPAPAPAPAPAPAPETRQAVVGEDICLELEVAADGGEVVWHKGTERRIQPGGHFEVLS  
RGQRQMLVIKGFRTEDQGEYRCGPIQGLPSSGAATFNVMVMTSGSGDEVPAQPSLPPEAAQEGDLHLLWEALAR  
KRRMSREPTLDSISELPEEDSRVQHLRQEAETAPDLSEGYSTADELARTGEADLSHTSSDDES RAGTPSLVT  
YLK KAGGPGISPLASKHEAQVTTSVKPKQKQEPVPTCP PPGDLSAADLMDPSLDKAAVKIQAAFQGYKVRKE  
MKQQEGPVFSRTFGDTEAQVGDVLRLECVLATKTD MRACWLKDGIELTDGRHYHIDQLKDGTCSSLVVTGLAPT  
DSGRYTCQVSTKSGRVSHSACVVVSGTESEAESSSGGELDDAFRAARRLHRLFRTKSPAELSEELFLSADE  
GPGEPEAPADWQTYREDEFNFCIRFESLAEARQAVTCFRNMVFMATMIGVEISLGEQGRGVEMRIGKVAPTVT  
PAVPLAKTPGLQTSDAAPVFLTELQNDVQDGYPMSFDCVVTGQVPVPSVRWFKDGKLEEDDHVMINEDDQGG  
HQLIITAVVPADMGVYRCLAENSMGVSSTKAELRVELTSTDYDTAADATETSSYFSAQGYLSRREQETESDE  
GQLPQVLEELKDLQVAPGTRLAKFQLKVKGYPAKLYWFKDGP LTTSDHIRMTDKKTLHTLEIVSVTREDSG  
QYAAYSNAVGAAYSSARLLVRGPSEPEEK PASDVHERLVPPRI LEKFTPKKVKRGSSITFSVKVEGHPAPSV  
HWLKEEAKEGVLWIGPDTPGYTMASSSKQHSVLVLLDVGRQHGT YTCIATNPAGQALCSASLHISGLAKEEQ



NGDKYSLKQDGAVCELQICSLLVADAGEYSCVCGQEKTSATLTVKALLVHFVRRRLRSKEATEGDTTTLQCELS  
KAAPVEWRKGTETLRDGDYSLKQDGAVCELQIRSLTIADAGEYLCTCGQEKTSATLTVRGLPAKFIEDLRSQ  
EATEGATAILRCELSKAAPVEWRKGSSETLKDGDYTLRQDGAVCELQIRGLAVVDTGTYSLPTKFTGLRNE  
EATEGTMATLRCQMSKAAPVEWRKGSSETLRDGDYSLRQDGAMCELQIRGLTIEDSGEYTCVCGQEKTSATLS  
VKALPPRFIEDLRSQEATEGTMATLRCQMSKAAPVEWRKGSSETLGDGGYSLRQNGAVCELQIHDLAVEDTGE  
YSCVCGQEKTSATLNVKALPPKFTTEGLKKEEATEGTMVTLRCQMSKEATVEWRKGAKTSLDGGYSLRQDGAM  
CELQICGLAVEDAGEYSCVCGQEKTSATLSVKALPPRFIEDLRSQEATEGTMATLRCQMSKAAPVEWRKGSSET  
LRDGDYSLRQDGAVCELQIRDLAVEDAGEYLCVCGQEKTSATLSVKALPPRFIEDLRSQEATEGTMATLRCQ  
MSKAAPVEWRKGSKTLRQDGAVCELQICDLAVEDTGDYSCVCGQEKTSATLSVKAPQVVFQOPLQ  
NLQAEEGSMASLRCELSVPAAMVWSKGGLELQGDTRREARQQGCVAELLLRDLRREDAGEYSCVCGSQTTS  
TLMVTAAPVRFRLRELQAQDVDEGATARLRCESREAVSVEWRKGSILQFPCAQYQMVQEGTTAELLVHGVEQE  
DAGEYTC DAGHTQSIARLSVRAPKPKFKTDLQSTEQEAGGTARLCCQLSEAEPTPVQWLKEGVELHVGSKYE  
MRRQGA VCELLIHGLEAKDTGEYACL VGGQKTLASLRVKEPEVTIVRGLVDMEVQADEDEFTCKVSOAGATD  
VQWHLQGLPLQSNEVTEVAVLADGCTHVLQLKGVTLDEAGTVSFHVGGSSSAQLTVRVPVTVLEPLKDVQL  
SEGQDAHFRCRLSRASGQEARWALGGVPLQCNEMNITVEQGTLYLLTLHKVTLDEAGTITLQVGSSESQAQL  
KVTAKNTVLRGLENDVALEGGALFECQLSQPEVAHTWLLDDEPVHTSEKVEVVYFENGLRHLLLLKLNKLPQ  
DSCRVTFLAGDVVTS AFLTVRGWRLEVLEPPHDASVKAGMQVRFTCILSEAVPVGEATWYINGAAIQPDDTDW  
TVTTDGS HHALTL SNAQPQHAGEVTF AARDAVASARLSV LALPDPPEDAEVVGRSDHSVTL SVKAPQVVFQOPLQ  
LCGYR VEMKEASTGQWQLCHDLVPGPECVVDDLVP GKTYRFRVA AVGPAGAGEPVHLPQMVKIAPAPAPAPAP  
APAPETRQAVVGEDICLELEVAADGGEV VWHKGTERRIQPGGHFEVLSRGRQMLVIKGFRTEDQGEYRCGPIQ  
GLPSSGAATFNVVMTSGSGDEVPAQPSLPPEAAQEGDLHLLWEALARKRRMSREPTLDSISELPEEDSRVQHL  
RQEABETAPDLSEGYSTADELARTGEADLSHTSSDDES RAGTPSLVTYLKKAGGPGISPLASKHEAQVTTSVK  
PQKQQEPVVPTCPPPGDLSAADLMDPSLDKAAVKIQAAF KGYKVRKEMKQOEGPVFSRTFGDTEAQVGDVLR  
ECVLATKTKDMRACWLKDGIELTDGRHYHIDQLKDGTC SLLVTGLAPTD SGRYTCQVSTKSGRVSHSACVVVSG  
TESEAESSSGGLED DAFRRARLRHLRFRTKSPAELSEELFLSADEGPGEPEEPADWQTYREDEFVCIRFE  
SLAEARQAVTCFRNMFATMGIGVEISLGEQGRGVMRIGKVA PTVTPAVPLAKT PGLQTS DAAPVFLTELQON  
QDVQDGYPMSFDCVVTGQPVPSVRWFKDGKLLLEDHEDDQGGHQLIITAVVPADMPVRC LAENSMGV  
SSTKAELRVELTSTDYDTAADATETSSYFSAQGYLSSREQEGTESDEGQLPQVLEELKDLQVAPGTRLAKFQL  
KVKGY PAKLYWFKDQGPLTTS DHIRMTDKKTLHTLEIVSVTREDSGQYAA YISNAVGAAYSSARLLVRGPSE  
PEEKPASDVHERLVP PPRILEKFTPKKVKRGSSITFSVKVEGHPAPSVHWLKEEA EKGLWIGPDTPGYTMAS  
SKQHSVLVLLDVG RQHGT YTCIATNPAGQALCSASLHISGLAKEEEQERVKEALISSFLQGTSQAVSAQMSSES  
AGFADLVGQSKGESLVAEEAHSLSLAEVGTEEF LKQLTSQITEMVSAKISQAKLQVPGGDSDEETKTPSASP  
RHGRSRPSSSVQESSSESEDGDSRGEIFDIYVV TADYLP LGAEQDAIILREGQYVEVLDSAHPLRVLRTKPT  
KSSPSRQGWVSPAYLDKRLKLSPEWGPTEAPEFPGEAVSEDEYRTRLSSV IQELLSSEQAFV GELQFLESHM  
KHLERSPRVPAVASQKTVIFRNVDI SHFHSSFLKELQCGCTDDDVAMCFIKNQEAF EKYLEFLVGRVQAES  
VVVSTPVQEFYKKYAEETLSAKDPTQPPPPPLQHYLEQPV ERVQKYQALLKELIRNKARNRQNCALLEQAYAV  
VSALPQRAENKLVSLMENYPGTLEALGEP IRQGHFIVWEGAPGARMPWKGNHRHVFLFRNYLVICKPRRDSR  
TDTFSYVFRNMMKLSSIDLNDQVEGDDRAFEVWHERE DSVRKYLLQARTV IKNSWVKEICGIQQRLAQPVWR  
PPEFEEELADCTAELGETVKLACRVGTGPKPIVSWYKDGK PVEVDPHHILIEDPDG SCTLILDNLTGIDSGQY  
MCF AASAAGNASTLGKILVQVPPRFV NKVRATPFVEGEDAQITCTVEGAPYPQIRWYKDG TLLAPGNRYRMLN  
EPRSGVLV LVIQAASKEDLGHYEC ELVNRLGSTRGGGEL YMQSPALRARDQHHRQI VAAVEVTEQETKVPKK  
TVIIEETITTVVKS PRGRRQSPGKSPSRSPRRSASPRR PGLLAPERLYPPGTS PSRRLEVEQGRKAPVPALY  
VTEAEVHAPASQS QPKWLEVEETIEVRVKKTGSRGASPVREMTSRGEGILFTLPGGIPGRDPNANN SNNKSVY  
QEARTWGP AVVHVGE PFI FQVDSVGNVDWVAASPEPEQVRASQKEENTERQEGCSDGDENTFLMEEPQD TDSL  
QGRDPKILTHNGRVLTLADLEDYV PQEGETFGCGDSTPSTPDEPPCEVSVLQREI SEPTVGPVLLN VGRPPG  
TGATPSFFRPGSQVHSPESVS FLLREAWSGPVSAAPWTSSFH THVQSSVDGSHGSFKTEVSTQTVSF GAVGET  
VTLHIDPDGGEAPGPSQG\*

>rs50033377\_ENSMUSP00000158795\_c.2637:A>G\_p.S880G  
ENSMUST00000238536.2|Obscn-210|ENSMUSG00000061462|-|chr11:g.59020606:T>C  
MDHSFSGAPRFLTRPKAFVSVGKDATLSCQIVGNPTPHVSWEKDRQPVEAGARFLAQDGDVYRLTILDLAL  
GDSGQYVCRARNAIGEAFAAVGLRVDSEGTCAEQAPHLLRPTSIRVREGADATFRCRVGGSPQPAVSWSKDG  
RRLGPPDAPHVRVEEHGESSALRIR SARPRDGGTYEVRAENPLGSASAAAAALVVDSDAEVAGPPGTSTATLLA  
HLQORREAMRAEGIPPSPPGAGTRTCTVTEGKHARLSCFVTGEPKPE TVWKKDGLVTEGRRHVVEDEQENF  
VLKILFCKQSDRGLTYTASNLVGTYSVVLVVVREPTVPFKKRLQDLEVRKEKESATFQCEVAQPA TEAAWFK  
EETRLWASAKYDIEEETERRLTVRNVSADDDAVYICETTEGSR TVAELSVQGNLTRKLRKTAVRTGD TAI F  
WVELAVPEGPVRWLRNQEEMVAGGRVAITAEGTCHTLTIFQCTLEDMGEVAFVSGGCRTTTQFCVSAPRRPPL  
YPPADPVVKAKTESSVTL SWSAPPHGDRPV TIDGYVLEKRKLGAYAWSRCHEAGWLATTEFTITGVAAEEDGFQ  
FRVSAINHFGQGPYLEFPGMTMLVPLAVKTP LKAVEAVEGGEVTF SVDLTVASSGEWFLDGEALKASSIYVI

RCDRTRHMLTIREVPARLHGAQLKVFVANGIETSIQMVVRAALGLPSSKLPAAAAAREVLAQLHEEAQLLAEELSD  
QAAAVTWLKDGRELSLGPKEYMQVSAGRRALLVRDVAQDDAGLYECVSRGSRRTAYQLLVQDITDGYRDWGPAG  
PQKHMCKCAGAKIARYLGSSCYRFLQYDKGVVHLEAALDTRQKGKTS SCSLHEKPKLVFAKQQAHSEVKA  
AGNGATLSCEVTQAQTEVTFWKDGKLLSSSSKVRMEASGCSRRLVVQQAGKADAGEYSCEAGGQKLSFRLDVA  
EPKLVFAKQQAHSEVKAEGASATLSCEVAQAQTEVTFWKDGKLLSSSSKVRMEASGCSRRLVVQQAGKADA  
GEYSCEAGGQKLSFRLDVAEPKMFVFAKEQQARSEVKAEGASATLSCEVAQAQTEVTFWKDGKLLSSSSKVRM  
EASGCSRRLVVQQAGKADAGEYSCEAGGQKLSFRLDVTEPKLVFAKEQQARSEVKAEGVNSATLSCEVAQAQ  
EVTWFKDGKLLSSSSKVRMEASGCSRRLVVQQAGKADAGEYSCEAGGQKLSFRLDVAEPKLVFAKEQQARSEV  
KAEAGNSATLSCEVAQAQTEVTFWKDGKLLSSSSKVRMEASGCSRRLVVQQAGKADAGEYSCEAGGQKLSFHL  
DVTEPKLVFAKEQQAHSEVKAEGASATLSCEVAQAQTEVTFWKDGKLLSSSSKVRMEASGCSRRLVVQQAGK  
ADAGEYSCEAGGQKLSFRLDVAEPKLVFAKEQQARSEVKAEGASATLSCEVAQAQTEVTFWKDGKLLSSSSK  
VRVEASGCSRRLVVQQAGKADAGEYSCEAGGQKLSFRLDVAEPKLVFAKEQQANSEVKAEGASATLSCEVAQ  
AQTEVTFWKDGKLLSSSSKVRVEASGCSRRLVVQQAGKADAGEYSCEAGGQKLSFRLDVAEPKLAFAKEQQAH  
SEVKAEGASATLSCEVAQAQTEVTFWKDGKLLSSSSKVRVEASGCSRRLVVQQAGKADAGEYSCEAGGQKLS  
FRLDVAEPKLAFAKEQQAHSEVKAEGASATLSCEVAQAQTEVTFWKDGKLLSSSSKVRVEASGCSRRLVVQQ  
AGKADAGEYSCEAGGQKLSFRLDVAEPKLAFAKEQQAHSEVKAEGASATLSCEVAQAQTEVTFWKDGKLLSS  
SSKVRVEASGCSRRLVVQQAGKADAGEYSCEAGGQKLFRLDVAEPKLMFAKEQQAHSEVKAEGASATLSCE  
VAQAQTEVTFWKDGKLLSSSSKVRVEASGCSRRLVVQQAGKADAGEYSCEAGGQKLSFRLDVAEPKLVFAKEQ  
QAHSEVKAEGASATLSCEVAQAQTEVTFWKDGKLLSSSSKVRVEASGCSRRLVVQQVQKADAGEYSCEARGQ  
KLSFRLDVADTRLMFAKEQQARTEVKAEGNSATLSCEVAQAQTEVTFWKDGKLLSSSSKVRVEASGCSRRLV  
VQQAGKADAGEYSCEAGGQKLSFRLDVAEAE SQIPERPSRREPLVVKEHETIILTATIAAPVAAVTWLKDG  
EIRRSKRHEATSLGDTHTLTVRGAQVLD SAIYSCRVGKEGQDFPVQVEEVAAKFSKPLEPVEGELGGTVMLVC  
ELSPQAEVWRCGNTQLRPGKRFQMTSEGPRRTLTVSGLREDDAEYVCE SRDDRTSARLTVKVPRVVKFTS  
GLSAMVAEEGQEATFQCVVSPSDAGVTWYKDGMLQPSKFKVMVESGASRSLTILGLTLEDAGQVTVAEAGAS  
SSAALRVREAPVLFKKKLEPQTEVEERTSVTLEVELTRPWPEVKWTRNAAVLTPSENVEIRAEGARHCLVLRV  
GFADRGGFFGCETPDDKTQAKLNVEMRQVRLVRLGVEVEAKEQGTASMDVELSHAEEVGSWTRDGLRLQFPGKC  
HLAVQGPVHILTLVKSALQPD SGLVAFRAEGVHTSARLIVTEL PVSFTRVLQDQVAVTQKEKVTLECELSR  
RVLKDGVELRAGKAIGIVAQGTCSRSLVIYRCETGDQGVYVCDALDAQTSASLRVQGRTYTLIFRRLAEDAGE  
VKFVAENAESRAHLRVKELPVTLLRPLRDKIAMEKHRGVLECCQVSRASQVRWFKGGVELQSGPKYEVVSDGL  
YRKLVINVDQPEDEDTYTC DAGNVKTSAQFFVEEQSITIVRGLKDMTVMEPAPAWFECETSIPSVRPPKWL  
KTVLQAGGNVGLQDGTVHRLTLHKTCSTMTGPVHFTIGKSRSSAQLVSDI PVVLRTRPLEPKAGRELQSVV  
SCDFRPAPKAVQWYKDDT PLSPEKFKMALEGGMAELRILRLTPADAGVYRCQAGSAQSSAEVTVAREVTVI  
QPLQDAEAMEEGRVCFSCELSHKDEDIEWLSLNGTPLYNDSFHEISHEGCLHTLVLSKSVRQADTGTVCATSPKV  
SVSARLVVKGKPVVFLKALDDVSAEERGTTLTQCEVSDPEARVWVRKDGVELGSPDKYDFLHKAGARGLTVHD  
LSHEDAGLYTCQVGSKETQSKVSVHDLHVGITKRLKTVEVLEGESECSFECVLSHESPSDPAVWTVGGKTVGS  
GHFAVRQGRKYTLTVKDAALS DAGEVVFVSLGLT SKASLIIRERPV DITKPLEDQRTTLGEDVMLSCEL  
GTSVRWLKDGKAIRKSQKYDLLSEGTRAVLVVRKASLKD SGEYTCETEASKSTAKLCVEEKANRFTTELADLQ  
VEEKGRAVFTCKTEHPASVVTWRKGLLELRASGKHVPSQEGTLTKLTINALERTSDTYTCDIGQARTQARLL  
VHGQKVRVIEDLED TAVQEGSSAKFCRIAPADYGPVHWF LDKTPLHSNELNEITVQPGGYHVLTLRQLAL  
SGTVYFEAGDQRTS AALRVTEKPSIFSRPLTDVTVTEGEDTLTVCE TTTVDSSVRWTKDGKTLRPSARCQL  
SH EGQAQLLITATTPQDGGRYKCEIGGASSSIVRVHALPVRFRESLKDVEVPEGKAATLRCVLSVAAPVEWR  
HGDDVLKSSNKYSLRQEGAVLELVIRDLQPDQSGQYSCSFGDQTT SATLTVKTS SAQFVGLRKNKEATEGTT  
TLRCELTK EAPVEWKKGTETLRNGDKYSLKQDGAVCELQICSLLVADAGEYSCVCGQEKT SATLTVKALLVHF  
VRRLSKEATEGDTTLTQCELSKAAPVEWRKGTETLRDGD RYSLKQDGAVCELQIRSLTIADAGEYLCTCGQE  
KTSATLTVRALPAKFKDSLKNEEATEGTTATLSCELSKAAPVWKKGPKTLQSGDKYVLRQDGA VCGGLQIHGL  
TMADAGEYSCVCGQEKT SATLTVRGLPAKFIEDLRSQEATEGATAILRCELSKAAPVEWRKGS ETLKDGDRY  
LRQDGA VCELQIRGLAVVDGTGYS LPTKFTEGLRNEEATEGTMATLRCQMSKAAPVEWRKGS ETLR  
LRQDGA MCELQIRGLTIEDSGEYTCVCGQEKT SATLSVKALPSRFIEDLRSQEATEGTMATLRCQMSK  
TAPVE WKKGSETLRDGGRYSLRQDGPVCELQICDLAVEDAGEYSCVCGQEKT SATLSIKALPPRFIEDLRS  
QEATEGTMATLRCQMSKAAPVEWRKGS ETLRNGDKYSLRQDGA VCELQIHDLVDV EDAQYSCVCG  
QEKTSAVLTVDALPPKFTEGLKKEEATEGTMVTLRQMSKEATVEWRKGAKT LSDGGRYSLRQDGA  
MCELQIC GLAVEDAGEYSCVCGQEKT SATLSVKALPPRFIEDLRSQEATEGTMATLRCQMSKAAPVEWR  
KGS ETLRQDGA VCELQIRDLAVEDAGEYLCVCGQEKT SATLSVKALPPRFIEDLRSQEATEGTMATLRCQ  
MSKAAP VEWRKGS ETLRQDGA MCELQICDLAVEDTGDYSCVCGQEKT SATLSVKALPPRFIEDLRS  
QEARE GTVATLRCRMSKAAPVEWRKGS ETLKDGDRYSLRQEGNLCELQIRDLAVEDTEEYSCVCGQEKT  
SATLSVKAL PAKFIEDLRSQEAPESSTVTLRCKLSKKASVWKKGSETLRNGARYSLRQDGA VCELEIRDL  
TVEDETG EYSCT CGQERTSATLSIMAPQVVFQQPLQNLQAEEGSMASLRCELSVPNAAMVWSKGGLELQ  
GDTRREARQQGCV AEL

LLRDLRREDAGEYSCTCGSQTTSATLMVTAAPVRFLELQAQDQVDEGATARLRCELSREAVSVEWRKGSQQLF  
 PCAKYQMVQEGTTAELLVHGVEQEDAGEYTCDAHTQSIARLSVRAPKPKFKTDLQSTEQEAGGTARLCCQLS  
 EAEPGTPVQWLKEGVELHVGSKYEMRRQGAUCELLIHGLEAKDTGEYACLVGGQKTLASLRVKEPEVTVRGL  
 VDMEVQADEDVEFTCKVSOAGATDVQWHLQGLPLQSNVTEVAVLADGCTHVLQKGVTLLEDAGTVSFHVGGL  
 SSSAQLTVRVPEVTVLEPLKDVQLSEGQDAHFRCRLSRASGQEARWALGGVPLQCNEMNDITVEQGTLYLLTL  
 HKVTLEDAGTITLQVGSSESQAQLKVTAKNTVLRGLENVDALEGGEALFECQLSQPEVAHAHTWLLDDEPVHTS  
 EKQEVVYFENGLRHLLLLKLNKPKQDSCRVTFLAGDVVTS AFLTVRGWRLEVLPEPHDASVKAGMQVRFCTILS  
 EAVPVGEATWYINGAAIQPDDTDWTVTTDGSHHALTLNAQPQHAGEVTF AARDAVASARLSVLALPDPPEDA  
 EVVGRSDHSVTL SWVAPMSDGGGGLCGYRVEMKEASTGQWQLCHDLVPGPECVDDLVPGKTYRFRVAAVGPA  
 GAGEPVHLPQMVKIAPAPAPAPAPAPAPAPAPETRQAVVGEDICLELEVAADGGGEVVWHKGTERTIQPGGHFEVLS  
 RGQRQMLVIKGFRTEDQGEYRCGPIQGLPSSGAATFNVMVMTSGSGDEVPAQPSLPPEAAQEGDLHLLWEALAR  
 KRRMSREPTLDSISELPEEDSRVQHLRQEAETAPDLSEGYSTADELARTGEADLSHTSSDDESRACTPSLVT  
 YLKKAGGPGISPLASKHEAQVTSVKPQKQEPVPTCP PPGDLSAADLMDPSLDKAAVKIQAAFQYKVKRKE  
 MKQQEGPVFSRTFGDTEAQVGDVLRLECVLATKTD MRACWLKDGIELTDGRHYHIDQLKDGTCSSLVVTGLAPT  
 DSGRYTCQVSTKSGRVSHSACVVVSGTESEAESSSGGELDDAFRAARRLHRLFRTKSPAELSEELFLSADE  
 GPGEPEPADWQTYREDENFVCIRFESLAEARQAVTCFRNMFATMGIGVEISLGEQGPGRVEMRIGKVAPTVT  
 PAVFLAKTPGLQTSDAAPVFLTELQNDVQDGYPMSFDCVVTGQVPVPSVRWFKDGKLEEDDHVMINEDQQGG  
 HQLLIITAVVPADMGVYRCLAENSMGVSSTKAELRVELTSTDYDTAADATETSSYFSAQGYLSSREQGTEGSE  
 GQLPQVLEELKDLQVAPGTRRLAKFQLKVKGYPAKLYWFKDGGQPLTSDHIRMTDKKTLHTLEIVSVTREDSG  
 QYAAYSNAVGAAYSSARLLVRGPSEPEEKPASDVHERLVPPRI LEKFTPKKVKRGSSITFSVKVEGHPAPSV  
 HWLKEEAKEKGV LWIGPDTPGYTMASSSKQHSVLVLDVGRQHGT YTCIATNPAGQALCSASLHISGLAKEEEQ  
 ERVKEALISSFLQGTSAQVSAQMSAESAGFADLVGQSKGESLVAEEAHSHLSLAEVGT EEFQKLTQSI TEMVS  
 AKISQAKLQVPGGDSDEETKTPSASPRHGRSRPSSSVQESSSEEDGDSRGEIFDIYVVTADYLP LGAEQDAI  
 ILREGQYVEVLDSAHPLRWLVRTKPKSSPSRQGWVSPAYLDKRLKLSPEWGPTEAPEFPGEAVSEDEYRTRL  
 SSVIQELLSSEQAFVGLQFLESHHMKHLERSPRVPAAVASQKTVIFRNVQDISHFHSSFLKELQCGCTDDD  
 AMCFIKNQAEFAKYLEFLVGRVQAESVVVSTPVQEFYKKYAEETLSAKDPTQPPPPPLQHYLEQPVVERQKYQ  
 ALLKELLRNKAARNRNCALLEQAYAVVSALPQRAENKLVSLMENYPGTLEALGEPFIVWEGAPGARM  
 PWKGNHRHVFLFRNYLVICPPRRDSDTDFSYVFRNMMKLSIDLNDQVEGDDRAFEVWHEREDESVRKYLLQA  
 RTVVIKNSWVKEICGIQQLRAQPVWRPPEFEEELADCTAELGETVKLACRVTGT PKPIVSWYKDGKPV EVDPH  
 HILIEDPDGSC TLI LDNLTGIDSGQYMCFAASAAGNASTLGKILVQVPPRFVNVKVRATPFVEGEDAQITCTVE  
 GAPYQIRWYKDGTL LAGPNRYRMLNEPRSGVLV LVIQAASKEDLGHYECELVNRLGSTRGGGELYMQSPALR  
 ARDQHHREQIVAAVEDTSVEGSAHSAQDQADQQAASVLWRLLGSEALGPS PGDLPNTRQSEPPAFEEAASQIP  
 GAASGTPEVSPQPGTHKGLEQETTSSGSQGWTPVIRVEGTAWPGAGTGQLLLDVHSQVIMETTQRTYVCQAPDT  
 GVTRAPSMQVTIEDVQVQVGDMAQF DAVIEGHPPP IVTWYKGSTQLTSSARLSQRQDGTYSLVLTDVAPHDA  
 GVTYCVANNAGGQVLCKAELLVHGGDKLDAENQVYRRLKLSHFYDVQEEIGRGVFGFVVRVHKGNMFC AAKF  
 IPLRSKTRAQAYQERDILATLGHPLVTGLLDQFETRKTLLIILELCSSEELLDRLFKKGVVTEAEVKVYIQQL  
 VEGHLHLHSHGILHLDIKPPNILMVHPAREDIKICDFGFAQKITPSEPQYSKYGSPEFVSPEIIEQNPVSEGS  
 DIWAMGVISYLSLTCSSPFAGESDRATLLNVLEGRVSWSSPTAAHLS EDAKDFIKATLQRTPRARPSTSQCLA  
 HPWFLKSMPAEAAHFINTKQLKFLARSRWQRSLMSYKSI LVMRSIPELLQGPPDSPSLGVARHLRGEASGAS  
 SSSSSSDNELAPFARAKSLPPSPVTHSPLLHPRGFLRPSASLPEETEASMP TADA AVPASQASAGPPASPGCV  
 PRHSVSISSLFYQQAGEGAERGNKTS GAKRHPARRRHLLKGGYIARALPGLREPLMEYSLLEEEAAREEQASIM  
 TKTPSFETALRLPSSSVREVPGRSHSLDNPPVT TGPSPEACKEQLLFPSTGLTHETTAKDRGHKEGFLQESV  
 PFPMSGDSRPGKQEGSSQDSCRGPASSCHSELGSGSQEGC PPSQSLGSLPPQSLKELSTSCGPLFSEQ  
 PQAAPFPPTQVSPLLGSEKEPQDGS LSEGPVVPSSSPGASQVDASLDTEGLSEAGDTCDFTPPPQRPEQAT  
 TRKFSLESRGGYAGVAGYGTFAFGGDAGGMLGQGPLWARMAWAVSQSSEEQDEAATESQPLES LGPIAEASG  
 VPLRTSPSLTPWEEVEQVSLVQIRDLSGDAEAADTISL DISEVDPAYLNLSDLYDIKYL PFEFMI FRRVPKPI  
 EQPESPGSETEAGQGLADFL EEAAWPWP GELGLRAGLEITEEPEEPGDLEALLGEAAVGRKRKWSPSRGLFQF  
 PGRCLSGEEPVELGLRQRVKASMAHISRILKGRPEGP EREGPPRKKAGLASFRLSGLKGRDQELSDEAVVLGQ  
 SVTLACQVLAQPTAQTWSKDGVLLESSGHLLISSTLKNFQLLTI LVVKEEDLGTYTCCVSNPLGTA VTTGVL  
 RKAERPSSSPREVGELYKDAVLLVWKPVESCGPVTYIVQCCIEGGSWTTLASDISDCCYLTGKLSRGGMYIF  
 RTACVSKAGMGPYSSPSEQVLLGGPNHLASEEESRGRPAQLLPSTKTF AFQMQIRRRGRFSVVRQCREKASGR  
 ALAAKIVPYQPEDKTAVLREYEAALKRHLHHPHLAQLHAAYLSPRHLVLIILELCSGPELLPSLAERESYSESDVK  
 DYLWQMSATAIQYLHAQHIHLDLRSENMMVTEYNLLKVIDLGN AQSLDQEKVPAPENFKDYLETMAPELLEGG  
 GAVPQTDIWAIGYTAGFIMLSGEY PESSSEGTRDLQKGLRKLIRLSRCYAGLSGGAVFLQSSLCAQWPGRPCA  
 STCLQCGWLTEEGPTAFSRPTPVTFPTVRLRAFVREKERKRALLYKHNLAQVR\*  
 >rs50033377\_ENSMUSP00000049737\_c.2436:A>G\_p.S813G  
 ENSMUST00000052872.15|Obscn-203|ENSMUSG00000061462|-|chr11:g.59020606:T>C

MDHSFSGAPRFLTRPKAFVSVGKDATLSCQIVGNPTPHVSWEKDRQPVEAGARFRLAQDGDVYRLTILDLAL
GDSGQYVCRARNAIGEFAAVGLRVDSEGTCAEQAPHFLLRPTSIRVREGADATFRCRVGGSPQPAVSWSKDG
RRLGPPDAPHVRVEEHGESSALRIR SARPRDGGTYEVRAENPLGSASAAAALVVDSDAEVAGPPGTSTATLLA
HLQQRRREAMRAEGIPSPPGAGTRTCTVTEGKHARLSCFVTGEPKPEVWKKDQQLVTEGRRHVVEDEQENF
VLKILFCKQSDRGLYTCTASNLVQTYSSVLVVVREPTVPFKKRLQDLEVREKESATFQCEVAQAPATEAAWFK
EETRLWASAKYDIEEEGETERRLTVRNVSADDDAVYICETTEGSRVVAELSVQGNLTKLPRKTAVRTGDTAIF
WVELAVPEGPVWRWRNQEEMVAGGRVAITAEGTCHTLTI FQCTLEDMGEVAFVSGGCRTTTQFCVSAPRRPPL
YPPADPVVKAKTESSVTLWSAPPHGDRPVTIDGYVLEKRRKLGAYAWSRCHEAGWLATTEFTITGVAAEEGDFQ
FRVSAINHFGQGPYLEFPGMTMLHVPMLAVKTPLKAVEAVEGGEVTFVSDLTVASSGEWFLDGEALKASSIYVI
RCDRTRHMLTIREV PARLHGAQLKFVANGIETSIQMVVRAALGLPSSKLPAAAAAREVLAQLHEEAQLLAE LSD
QAAA VTWLKDGRELSLGPYEMQVSAGRRALLVRDVAQDDAGLYECVSRGSR TAYQLLVQEPKLVFAKQQA H
SEVKAEAGNGATLSCEVTQAQTEVTWFKDGKLLSSSSKVRMEASGCSRRLVVQQAGKADAGEYSCEAGGQKLS
FRLDVAEPKLVFAKQQA HSEVKAEAGASATLSCEVAQAQTEVTWFKDGKLLSSSSKVRMEASGCSRRLVVQQ
AGKADAGEYSCEAGGQKLSFRLDVAEPMVFAKEQQARSEVKAEAGASATLSCEVAQAQTEVTWFKDGKLLSS
SSKVRMEASGCSRRLVVQQAGKADAGEYSCEAGGQKLSFRLDVTEPKLVFAKEQQARSEVKAEVGN SATLSCE
VAQAQTEVTWFKDGKLLSSSSKVRMEASGCSRRLVVQQAGKADAGEYSCEAGGQKLSFRLDVAEPKLVFAKEQ
QARSEVKAEAGNSATLSCEVAQAQTEVTWFKDGKLLSSSSKVRMEASGCSRRLVVQQAGKADAGEYSCEAGGQ
KLSFHLDVTEPKLVFAKEQQAHSEVKAEAGASATLSCEVAQAQTEVTWFKDGKLLSSSSKVRMEASGCSRRLV
VQQAGKADAGEYSCEAEGQKLSFRLDVAEPKLVFAKEQQARSEVKAEAGASATLSCEVAQAQTEVTWFKDGK
LSSSSKVRVEASGCSRRLVVQQAGKADAGEYSCEAGGQKLSFRLDVAEPKLVFAKEQQANSEVKAEAGASATL
SCEVAQAQTEVTWFKDGKLLSSSSKVRVEASGCSRRLVVQQAGKADAGEYSCEAGGQKLSFRLDVAEPKLAFA
KEQQAHSEVKAEAGASATLSCEVAQAQTEVTWFKDGKLLSSSSKVRVEASGCSRRLVVQQAGKADAGEYSCEA
GGQKLSFRLDVAEPKLAFAKEQQAHSEVKAEAGASATLSCEVAQAQTEVTWFKDGKLLSSSSKVRVEASGCSR
RLVVQQAGKADAGEYSCEAGGQKLSFRLDVAEPKLAFAKEQQAHSEVKAEAGASATLSCEVAQAQTEVTWFKD
GKLLSSSSKVRVEASGCSRRLVVQQAGKADAGEYSCEAGGQKLFRLDVAEPKLMFAKEQQAHSEVKAEAGAS
ATLSCEVAQAQTEVTWFKDGKLLSSSSKVRVEASGCSRRLVVQQAGKADAGEYSCEAGGQKLSFRLDVAEPK
L VFAKEQQAHSEVKAEAGASATLSCEVAQAQTEVTWFKDGKLLSSSSKVRVEASGCSRRLVVQQAGKADAGEYS
CEARGQKLSFRLDVADTRLMFAKEQQARTEVKAEAGNSATLSCEVAQAQTEVTWFKDGKLLSSSSKVRVEASG
CSRRLVVQQAGKADAGEYSCEAGGQKLSFRLDVAEAEESQIPERPSRREPLVVKEHETIILTATIAAPSVAAVT
WLKDGVEIRRSKRHEATS LGDHTLTVRGAQVLD SAIYSCRVGKEGQDFPVQVEEVAAKFSKPLEPVEGELGG
TVMLVCELSPEQAEVWRCGNTQLRPGKRFQMTSEGPRRTLT VSGLREDDAEYV CESRDDRTSARLTVKVPR
VVKFTSGLSAMVAEEGQEATFQC VVSPSDAGVTWYKDGMLQPSSEKFMVMSGASRSLTILGLTLEDAGQVTV
EAEGASSAALRVREAPVFLFKKLEPQTVEERTSVTLEVELTRPWPVEVKWTRNAAVLTPSENVEIRAEGARHC
LVLRSVGFADRGFFGCETPDDKTQAKLNVEMRQVRLVRGLQVEVAKEQGTASMDVELSHAEVEGSWTRDGLRL
QPGPKCHLAVQGPVHILTLALSALQPQDSGLVAFRAEGVHTSARLIVTELPVSFTRVLQDVVATQKEKVTLECEL
SRPVDVRWLKDGVELRAGKAI GIVAQGTCSRSLVIYRCETGQDQGVYVCDALDAQTSASLRVQGRTYTLFRRVL
AEDAGEVKFVAENAESRAHLRVKELPVTLLRPLRDKIAMEKHRGVLEQCQVSRASAQVRWFKGGVLEQSGPKYE
VVSDGLYRKLVIN DVQPEDEDYTC DAGNVKTS AQFFVVEQSITIVRGLKDMTVM EPAPAWFECETSIPSVRP
PKWLLGKTVLQAGGNVLEQDGT VHRLTLHKTCSTMTGPVHFTIGKSRSSAQLVVSDIPVVLTRPLEPKAGRE
LQSVVLSCDFRPAPKAVQWYKDDTPLSPSEKFKMALEGQMAELRILRLTPADAGVYRCQAGSAQSSAEVTEA
REVTVIQPLQDAEAMEEGRVCFSCELSHKDEDIEWSLNGTPLYNDSFHEISHEGCLHTLVLKSVRQADTGTVC
ATS PKVSV SARLVVKGKPVVFLKALDDVSAEERGTTLTQCEVSDPEARVVWRKDGVELGPSDKYDFLHKAGAR
GLTVHDLSDHEDAGLYTCQVGSKETQSKVSVHDLHVGITRRLKTVEVLEGE SCFECVLSHESPSDPAVWTVGG
KTVGSGGHFHAVRQRKYTLTVKDAALSDAGEVVFVSLGLTSKASLIRERPV DITKPLEDQRTTLGEDVMLS
CELSRAGTSVRWLKDGKAIRKSQYDLLSEGTRAVLVVRKASLKDSGEYTCETEASKSTAKLCEVEKANRFTE
ELADLQVEEKGRAVFTCKTEHPASVVTWRKGLLELRASGKHVPSQEGTLKLTINALERTSDSYTCDIGQAR
TQARLLVHGQKVRVIEDLED TAVQEGSSAKFCCRIAPADYGPVHWF LDKTPLHSNELNEITVQPGGYHVLT LR
QLALKDSGTVYFEAGDQRTS AALRVTEKPSIFSRPLTDVTVTEGEDLTLVCETTTVDSSVRWTKDGKTLRPSA
RCQLSHEGCAQLLITATTPQDGGRYKCEIGGASSSSIVRVHALPVRFRFRESLKDVEVPEGKAATLRCVLS SVA
APVEWRHGDDVLKSSNKYSLRQEGAVLELVIDRLQPQDSGQYSCSFGDQTT SATLTVKTS SAQFVGKLRNKEA
TEGTTVTLRCELTK EAPVEWKKGTETLRNGDKYSLKQDGAVCELQICSLLVADAGEYSCVCGQEKT SATLTVK
ALLVHFVRRRLRSKEATEGDTTTLQCELSKAAPVEWRKGTETLRDGD RYSLKQDGAVCELQIRSLTIADAGEYL
CTCGQEKT SATLTVRALPAKFKDSLKNEEATEGTTATLSCELSKAAPVTWKKGPKTLQSGDKYVLRQDGAVCG
LQIHGLTMADAGEYSCVCGQEKT SATLTVRGLPAKFIEDLRSQEATEGATAILRCELSKAAPVEWRKGTSETLK
DGDRYTLRQDGAVCELQIRGLAVVD TGTYS LPTKFT EGLRNEEATEGTMATLRCQMSKAAPVEWRKGTSETLR
DGDRYSLRQDGAMCELQIRGLTIEDSGEYTCVCGQEKT SATLSVKALPSRFIEDLRSQEATEGTMATLRCQMS
KTAPVEWKKGSETLRDGGRYSLRQDGPVCELQICDLAVEDAGEYSCVCGQEKT SATLSIKALPPRFIEDLRSQ
EATEGTMATLRCQMSKAAPVEWRKGTSETLGDGGRYSLRQNGAVCELQIHDLAVEDTGEYSCVCGQEKT SATLN

VKALPPRFIEDLRSQEATEGTMATLRCQMSKAAPVEWRKGSETLRDGGRYSLRQDGAVCELQIHDLVDVEDAGQ  
YSCVCGQEKTSVAVLTVDALPPKFTTEGLKKEEATEGTMVTLRCQMSKEATVEWRKGAKTLSDGGRYSLRQDGAM  
CELQICGLAVEDAGEYSCVCGQEKTSATLSVKALPPRFIEDLRSQEATEGTMATLRCQMSKAAPVEWRKGSET  
LRDGDYSLRQDGAVCELQIRDLAVEDAGEYLCVCGQEKTSATLSVKALPPRFIEDLRSQEATEGTMATLRCQ  
MSKAAPVEWRKSGKTLRDGDYSLRQDGAMCELQICDLAVEDTDYSCVCGQEKTSATLSVKALPPRFIEDLR  
SQEAREGTVATLRCRMSKAAPVEWRKGSETLKDGDYSLRQEGNLCELQIRDLAVEDTEEYSCVCGQEKTSAT  
LSVKALPAKFIEDLRSQEAPESSTVTLRCKLSKKASVWKKGSETLRNGARYSLRQDGAVCELEIRDLTVEDT  
GEYSCTCGQERTSATSIMAPQVVFPQPLQNLQAEEGSMASLRCELSVPNAAMVWSKGGLELQGDTRREARQQ  
GCVAELLRLRDLRREDAGEYSCTCGQTTSATLMVTAAPVRFRLRQLAQDQVDEGATARLRCELSREAVSVEWRK  
GSLQLFPCAQYQMVQEGTTAELLVHGVEQEDAGEYTC DAGHTQS IARLSVRAPKPKFKTDLQSTEQEAGGTAR  
LCCQLSEAEPTGTPVQWLKEGVELHVGSKYEMRRQGA VCELLIHGLEAKDTGEYACLVGGQKTLASLRVKEPEV  
TIVRGLVDMVEQADEDEFTCKVSQAGATDVQWHLQGLPLQSNVTEVAVLADGCTHVLQKGVTL EDAGTVS  
FHVGGSSSAQLTVRVPEVTVLEPLKDVQLSEGQDAHFRCRLSRASQGEARWALGGVPLQCNEMNDITVEQGT  
LYLLTLHKVTLEDAGTITLQVGSSEAEQLKVTAKNTVLRGLENVDALEGGEALFECQLSQPEVAHTWLLDD  
EPVHTSEKVEVVYFENGLRHLLLNKLPQDSCRVTFLAGDVVTS AFLTVRGWRLEVLEPPHDASVKAGMQVR  
FTCILSEAVPVGATWYINGAAIQPDDTDWTVTTDGS HALTSLNAQPQHAGEVTF AARDAVASARLSVLALP  
DPPEDA EVVGRSDHSVTL SWVAPMSDGGGGLCGYRVMKEASTGQWQLCHDLVPGPECVDDLVPGKTYRFRV  
A AVGPAGAGEPVHLPQMVKIAPAPAPAPAPAPAPAPETRQAVVGEDICLELEVAADGGEVVWHKGTERRIQPGG  
HFEVLSRQORQLVIKGFRTEDQGEYRCGPIQGLPSSGAATFNVMVMTSGSGDEVPAQPSLPPEAAQEGDLHLL  
WEALARKRRMSREPTLDSISELPEEDSRVQHLRQEA EETAPDLSEGYSTADELARTGEADLSHTSSDDES RAG  
TPSLVTYLKKAGGPGISPLASKHEAQVTTSVKPKQKQEPVVTCP PPGDL SAADLMDPSLDKAAVKIQAAFKG  
YKVRKEMKQQEGPVFSRTFGDTEAQVGDVLRLECVLATKTDMRACWLKDGIELTDGRHYHIDQLKDGTC SLLV  
TGLAPTDSGRYTQCQVSTKSGRVSHSACVVVS GTESEAESSGGELDDAFRAARRLHRLFRTKSPAELSEEEL  
FLSADEGPGEPEPADWQTYREDENFVICIRFESLAEARQAVTCFRNMFATMGIGVEISLGEQGPGRVEMRIGK  
VAPTVT PAVPLAKT PGLQTS DAAPVFLTE LQNDVQDGYPMS FDCVVTGQPVPSVRWFKDGKLEEDDHYMIN  
EDQQGGHQLIITAVVPADMGVYRCLAENSMGVSSTKAELRVELTSTDYDTAADATETSSYFSAQGYLSSRQE  
GTESEDEQLPQVLEELKDLQVAPGTR LAKFQLKVKGY PAPKLYWFKDGPQLTTS DHIRMTDKKTLHLEIVSV  
TREDSGQYAAIYISNAVGAAYSSARLLVRGPPSEPEEK PASDVHERLVPPRILEKFTPKKV KRGSSITFSVKVEG  
HPAPSVHWLKEEA EKGVLWIGPDTPGYTMASSSKQHSLVLLD VGRQH QGTYTCIATNPAGQALCSASLHISGL  
AKEEEQERVKEALISSFLQTSQAVSAQMS ESAGFADLVGQSKGESLVAAEEAHSHLSLAEVGT EEFLOKLT SQ  
ITEMVSAKISQAKLQVPGGDSDEETKTPSASPRHGRSRPSSSVQESSSESEDGDSRGEI FDIYVVTADYLPLG  
AEQDAIILREGQYVEVLDSAHPLRVLV RTKPTKSSPSRQGWVSPAYLDKRLKLSPEWGPTEAPEPFGEAVS E  
EYRTRLSSVIQELLSSEQAFVGE LQFLSHHMKHLERSPRVPAVASQKTVI FRNVQDISHFHSSFLKELQGC  
GTDDDVAMCFIKNQEA FEKYLEFLVGRVQAESVVVSTPVQEFYKKYAEETLSAKDPTQPPPPLOHYLEQ PVE  
RVQKYQALLKELIRNKARNRQNCALLEQAYAVV SALT PQR AENKLVSLMENYPGTLEALGEP IRQGHFIVWEG  
APGARMPWKGNRHRVFLFRNYLVICKPRRDSRTDTFSYVFRNMMKLS SIDLNDQVEGDDRAFEVWHEREDSVR  
KYLLQARTVI IKNSWVKEICGIQQR L AQPVWRPPEFEELADCTAELGETVKLACRVTGT PKPIVSWYKDGK P  
VEVDPHHILIEDPDG SCTLILDNLTGIDSGQYMCFAASAAGNASTLGKILVQVPPRFVNKVRATPFVEGEDAQ  
ITCTVEGAPYPQIRWYKDGTL LAPGNRYRMLNEPRSGVLV LVIQAASKEDLGHYECELVNR LGSTRGGGELYM  
QSPALRARDQHHREQIVAAVEVTEQETKV PKKTVI I EETITTVVKS PRGRRQSPGKSPSRSPRRSASPRRPG  
LLAPERLYPPGTS PSRRLEVEQGRKAPVPALYVTEAEV HAPASQSQPKWLEVEETIEVRV KKTGSRGASPVRE  
MTRSREGILFTLPGGIPGRDPNANN SNNKSVYQEARTWG PAVVHVGE PFI FQVDSVGNVDWVAASPEPEQVRA  
SQKEENTERQEGCSDG DENTFLMEEPQD TDSLQGRDPKIL THNGRVLTLADLEDYVPQEGE TFGCGDSTPSTP  
DEPPCEVSVLQREI SEPTVGGQPVLLNVGRPPGTGATPSFFRPGSQVHSPESVSFLLREAWSGPVSAAPWTSS F  
HTHVQSSVDGSHGSEFKTEVSTQTVSFGAVGETVTLH IDPDGGEAPGPSQG\*  
>rs50033377\_ENSMUSP00000020732\_c.2637:A>G\_p.S880G  
ENSMUST00000020732.13|Obscn-201|ENSMUSG00000061462|-|chr11:g.59020606:T>C  
MDHSFSGAPRFLTRPKAFVSVGKDATLSCQIVGNPTPHVSWEKDRQPVEAGARFRLAQDGDVYRLTILDLAL  
GDSGQYVCRARNAIGEAFAAVGLRVDSEGTCAEQAPHLLRPTSIRVREGADATFRCRVGGSPQPAVSWSKDG  
RRLGPPDAPHVRVEEHGESSALRIR SARPRDGGTYEVRAENPLG SASAAAALVVDSDAEVAGPPGTSTATLLA  
HLQQRRREAMRAEGIPPSPPGAGTRTCTVTEGKHARLS CFVTGEPKPE TVWKKDQGLVTEGRRHVVEDEQENF  
VLKILFCKQSDRGLYTCTASNLVGQTYSSVLVVVREPTVPFKKRLQDLEVREKESATFQCEVAQ PATEAAWFK  
EETRLWASAKYDIEEGETERRLTVRNVSADDDAVYICETTEGSRV AELSVQGNLTKRLPRKTAVRTGDTAIF  
WVELAVPEGPVRLWRNQEEMVAGGRVAITAEGTCHTTLIFQCTLEDMG EFAVFSVGGCRTTTQFCVSA PRRPL  
YPPADPVVKAKTESVTL SWSAPPHGDRPVTIDGYVLEKRKLGAYAWSRCHEAGWLATTEFTITGVAAEEGDFQ  
FRVSAINHFGQGPYLEFP GTMHLVPM LAVKTPLKAVEAVEGGEVTF SVDLTVASSGEWFLDGEALKASSIYVI  
RCDRTRHMLTIREV PARLHGAQLK FVANGIETS IQMVVRAALGLPSSKLPAAAAREVLAQLHEEAQLLAELSD  
QAAAVTWLKDGRELSLGP KYEMQVSAGRRALLVRDVAQDDAGLYECVSRGSR TAYQLLVQDITDGYRDWGPAG



PQKHMCKCAGAKIARYLGSSCYRFLQYDKGVWHLEAALDTRQGKGTSSCSLHEKPKLVFAKGQQAHSVEKAE  
 AGNGATLSCEVTQAQTEVTFWKDGKLLSSSSKVRMEASGCSRRLVVQQAGKADAGEYSCEAGGQKLSFRLDVA  
 EPKLVFAKGQQAHSVEKAEAGASATLSCEVAQAQTEVTFWKDGKLLSSSSKVRMEASGCSRRLVVQQAGKADA  
 GEYSCEAGGQKLSFRLDVAEPKMFVFAKEQQARSEVKAEGASATLSCEVAQAQTEVTFWKDGKLLSSSSKVRM  
 EASGCSRRLVVQQAGKADAGEYSCEAGGQKLSFRLDVTEPKLVFAKEQQARSEVKAEVGNSATLSCEVAQAQT  
 EVTFWKDGKLLSSSSKVRMEASGCSRRLVVQQAGKADAGEYSCEAGGQKLSFRLDVAEPKLVFAKEQQARSEV  
 KAEAGNSATLSCEVAQAQTEVTFWKDGKLLSSSSKVRMEASGCSRRLVVQQAGKADAGEYSCEAGGQKLSFHL  
 DVTEPKLVFAKEQQAHSEVKAEGASATLSCEVAQAQTEVTFWKDGKLLSSSSKVRMEASGCSRRLVVQQAGK  
 ADAGEYSCEAGGQKLSFRLDVAEPKLVFAKEQQARSEVKAEGASATLSCEVAQAQTEVTFWKDGKLLSSSSK  
 VRVEASGCSRRLVVQQAGKADAGEYSCEAGGQKLSFRLDVAEPKLVFAKEQQANSEVKAEGASATLSCEVAQ  
 AQTEVTFWKDGKLLSSSSKVRVEASGCSRRLVVQQAGKADAGEYSCEAGGQKLSFRLDVAEPKLAFAKEQQA  
 SEVKAEGASATLSCEVAQAQTEVTFWKDGKLLSSSSKVRVEASGCSRRLVVQQAGKADAGEYSCEAGGQKLS  
 FRLDVAEPKLAFAKEQQAHSVEKAEAGASATLSCEVAQAQTEVTFWKDGKLLSSSSKVRVEASGCSRRLVVQ  
 AGKADAGEYSCEAGGQKLSFRLDVAEPKLAFAKEQQAHSVEKAEAGASATLSCEVAQAQTEVTFWKDGKLLSS  
 SSKVRVEASGCSRRLVVQQAGKADAGEYSCEAGGQKLFRLDVAEPKLMFAKEQQAHSVEKAEAGASATLSCE  
 VAQAQTEVTFWKDGKLLSSSSKVRVEASGCSRRLVVQQAGKADAGEYSCEAGGQKLSFRLDVAEPKLVFAKEQ  
 QAHSVEKAEAGASATLSCEVAQAQTEVTFWKDGKLLSSSSKVRVEASGCSRRLVVQQAGKADAGEYSCEARGQ  
 KLSFRLDVADTRLMFAKEQQARTEVKAEGNSATLSCEVAQAQTEVTFWKDGKLLSSSSKVRVEASGCSRRLV  
 VQQAGKADAGEYSCEAGGQKLSFRLDVAEAEESQIPERPSRREPLVVKEHETIILTATIAAPSVAAVTWLKDG  
 EIRRSKRHEATSLGDTHTLTVRGAQVLDSAIYSCRVGKEGQDFPVQVEEVAAKFSKPLEPVEGELGGTVMLVC  
 ELSPEQAEVWRCGNTQLRPGKRFQMTSEGPRTTLTVSGLREDDAEYVCESRDDRTSARLTVKVPVVKFTS  
 GLSAMVAEEGQEQATFQCVVSPSDAGVTWYKDGMLQPSKFKVMVESGASRSLTILGLTLEDAGQVTVAEAGAS  
 SSAALRVREAPVLFKKLEPQTVERTSVTLEVELTRPWPEVKWTRNAAVLTPSENVEIRAEGARHCLVLRV  
 GFADRGGFFGCETPDDKTQAKLNVEMRQVRLVVRGLQVEVEAKEQGTASMDVELSHAEVEGSWTRDGLRQLQPGPK  
 HLAVQGPVHILTLALSALQPDQSGLVAFRAEGVHTSARLIVTELPVSFTRVLQDVVATQKEKVTLECELSRPV  
 RWLKDGVLELRAGKAIGIVAQGTCSRSLVIYRCETGDKQGVYCDALDAQTSASLRVQGVYTLIFRVLAEADAGE  
 VKFVAENAESRAHLRKLPTVLLRPLRDKIAMEKHRGVLECCQVSRASQVVRWFKGGVELQSGPKYEVVSDGL  
 YRKLVINVDQPEDEDTYTCDAENVKTSAQFFVEEQSITIVRGLKDMTVMPEPAPAWFECETSIPSVRPPKWL  
 LKTVLQAGGNVLEQDGTVHRLTLHKTCSTMTGPVHFTIGKSRSSAQLVSDIPVVLTRPLEPKAGRELQSVV  
 SCDFRPAPKAVQWYKDDTPLSPSEKFKMALEGGMAELRILRLTPADAGVYRCQAGSAQSSAEVTVAREVTVI  
 QPLQDAEAMEEGRVCFSCELSHKDEDIEWSLNGTPLYNDSFHEISHGCLHTLVLSVRQADTGTVCATSPKV  
 SVSARLVVKGKPVVFLKALDDVSAEERGTTLTQCEVSDPEARVVWRKDGVELGPSDKYDFLHKAGARGLTVH  
 DLSHEDAGLYTCQVGSKETQSKVSVHDLHVGITKRLKTVEVLEGESECSFECVLSHESPSDPAVWTVGGKTVGGS  
 GHFHAVRQGRKYTLTVKDAALSDAGEVVFVGLTSLKASLIIRERPVDITKPLEDQRTTLGEDVMLSCELSRA  
 GTSVRWLKDGKAIKRSKYDLSSEGTRAVLVVRKASLKDSGEYTCETEASKSTAKLCEVEKANRFTBELADLQ  
 VEEKGRAVFTCKTEHPASVVTWRKGLLELRASGKHVPSQGLTKLKTINALERTSDSTYTCDIGQARTQARLL  
 VHGGKVRVIEDLEDTAVQEGSSAKFCCRIAPADYGPVHWFLLDKTPLHSNELNEITVQPGGYHVLTRQLALKD  
 SGTVYFEAGDQRTSALRVTEKPSIFSRPLTDVTVTEGEDTLVCEETTVDSSVRWTKDGKTLRPSARCQLSH  
 EGCQAQLLITATTPQDGGRYKCEIGGASSSSIVRVHALPVRFRESLKDVEVPEGKAATLRCVLSVAAPVEWR  
 HGDDVLKSSNKYSLRQEGAVLELVIRDLQPDQSGQYSCSFGDQTTSATLTVKTSQAQFVGLRNKEATEGTTV  
 TLRCELTKEAPVEWKKGTETLRNGDKYSLKQDGAVCELQICSLLVADAGEYSCVCGQEKTSAITLVKALLVH  
 VRRLSKEATEGDTTLQCELSKAAPVEWRKGTETLRDGDYSLKQDGAVCELQIRSLTIADAGEYLCTCGQE  
 KTSATLTVRALPAKFKDSLKNEEATEGTTATLSCELSKAAPVWKKGPKTLQSGDKYVLRQDGAVCGLQIHGL  
 TMADAGEYSCVCGQEKTSAITLTVRGLPAKFIEDLRSQEATEGATAILRCELSKAAPVEWRKGSSETLKDGDYR  
 LRQDGAVCELQIRGLAVVDGTYSLSLPTKFTTEGLRNEEATEGTMATLRCQMSKAAPVEWRKGSSETLRDGDYR  
 LRQDGAMCELQIRGLTIEDSGEYTCVCGQEKTSAITLTVKALPSRFIEDLRSQEATEGTMATLRCQMSKTAPVE  
 WKKGSETLRDGGYSLRQDGPVCELQICDLAVEDAGEYSCVCGQEKTSAITLTVKALPPRFIEDLRSQEATEG  
 MATLRCQMSKAAPVEWRKGSSETLGDGGYSLRQNGAVCELQIHDLAVEDTGEYSCVCGQEKTSAITLTVKALPP  
 RFIEDLRSQEATEGTMATLRCQMSKAAPVEWRKGSSETLRDGGYSLRQDGAVCELQIHDLVEDAGQYSCVCG  
 QEKTSAVLTVDALPPKFTTEGLKKEEATEGTMVTLRCQMSKEATVEWRKGAKTLSDGGRYSLRQDGAMCELQIC  
 GLAVEDAGEYSCVCGQEKTSAITLTVKALPPRFIEDLRSQEATEGTMATLRCQMSKAAPVEWRKGSSETLRDGD  
 YSLRQDGAVCELQIRDLAVEDAGEYLCVCGQEKTSAITLTVKALPPRFIEDLRSQEATEGTMATLRCQMSKAAP  
 VEWRKGSSETLRDGDYSLRQDGAMCELQICDLAVEDTGDYSCVCGQEKTSAITLTVKALPPRFIEDLRSQEARE  
 GTVATLRCRMSKAAPVEWRKGSSETLKDGDYSLRQEGNLCELQIRDLAVEDTEEYSCVCGQEKTSAITLTVKAL  
 PAKFIEDLRSQEAPESSTVTLRCKLSKASVWVWKKGSETLRNGARYSLRQDGAVCELEIRDLTVEEDTGEYSCT  
 CGQERTSATLSIMAPQVVFQQLQNLQAEEGSMASLRCELSVPNAAMVWSKGGLELQGDTRREARQQGCVAEL  
 LLRDLRREDAGEYSCVCGQTTSATLMVTAAPVRFLELQAQDVDEGATARLRCELSREAVSVEWRKGSLLQF  
 PCAKYQMVQEGTTAELLVHGVEQEDAGEYTCDAHTQSIARLSVRAPKPKFKTDLQSTEQEGGTARLCCQLS

EAEPTGTPVQWLKEGVELHVGSKYEMRRQGA VCELLIHGLEAKDTGEYACLVGGQKTLASLRVKEPEVTIVRGL
VDMEVQADEDEFTCKVSOAGATDVQWHLQGLPLQSNVTEVAVLADGCTHVLQKGVTLLEDAGTVSFHVGG
SSSAQLTVRVPEVTVLEPLKDVQLSEGDQAHFRCRLSRASGQEARWALGGVPLQCNEMNDITVEQGTLYLLTL
HKVTLEDAGTITLQVGSCSSEAQLKVTAKNTVLRGLENVDALLEGGEALFECQLSQPEVAHAHTWLLDDEPVHTS
EKVEVVYFENGLRHLLLLKLNKLPQDSCRVTFLAGDVVTS AFLTVRGWRLEVLEPPHDASVKAGMQVRFTCILS
EAVPVGEATWYINGAAIQPDDTDWTVTTDGS SHAL TLSNAQPQHAGEVTF AARDAVASARLSVLALPDPPEDA
EUVGRSDHSVTL SWVAPMS DGGGGLCGYRVMKEASTGQWQLCHDLVPGPECVDDLVPGKTYRFRVA AVGPA
GAGEPVHL PQMVKIAPAPAPAPAPAPAPAPETRQAVVMGEDICLELEVAADGGEVVWHKGTERRIQPGGHFEVLS
RQQRQMLVIKGFRTEDQGEYRCGPIQGLPSSGAATFNVMVMTSGSGDEVPAQPSLPPEAAQEGDLHLLEALAR
KRRMSREPTLDSISELPEEDSRVQHLRQEAEEETAPDLSEGYSTADELARTGEADLSHTSSDDES RAGT PSLVT
YLK KAGGPGI SPLASKHEAQV TTSVKPQKQEPV VPTCPPPGDLSAADLMDPSLDKAAVKIQAAF KGYKVRKE
MKQQEGPVFSRTFGDTEAQVGDVLRLECVLATKTD MRACWLKDGIELTDGRHYHIDQLKDGTC SLLVTGLAPT
DSGRYTCQVSTKSGRVSHSACVVVSGTESEAESSSGGELDDAFRAARRLHRLFRTKSPAELSEEELFLSADE
GPGEPEEPADWQTYREDENFVCIRFESLAEARQAVTCFRNMFATMGIGVEISLGEQGPGRVEMRIKGVAPTVT
PAVPLAKTPGLQTS DAAPVFLTE LQNQDVQDGYPMSFDCVVTGQPVPVSVRWFKDGKLEEDDHYMINEDQQGG
HQLIITAVVPADMGVYRCLAENSMGVSSTKAELRVELTSTDYDTAADATETSSYFSAQGYLSSREQEGTESDE
GQLPQVLEELKDLQVAPGTR LAKFQLKVKGYPAKPLYWFKDGGQLTTS DHIRMTDKKTLHTEIIVSVTREDSG
QYAAIYISNAVGAAYSSARLLVRGPSEPEEKPASDVHERLVP PRLI LEKFTPKKVKRGSSITFSVKVEGHPAPSV
HWLKEEA EKGV LWIGPDTPGYTMASSSKQHSLVLLDVGRQHQTGTYTCIATNPAGQALCSASLHISGLAKEEEQ
ERVKEALISSFLQGT SQAVSAQMS ESAGFADLVGQSKGESLVAEEAHSHLSLAEVGT EEF LQKLT SQIT E MV S
AKISQAKLQVPGGDSDEETKTPSASPRHGRSRPSSSVQESSSEEDGDSRGEIFDIYVVTADYLP LGAEQDAI
ILREGQYVEVLD SAHPLR WLVRTKPTKSSPSRQGWVSPAYL DKRLKLSPEWGPTEAPEFPGEAVSEDEYRTRL
SSVIQELLSSEQAFV GELQFLESHHMKHLERSPRVPAAVASQKTVIFRNVQDISHFHSSFLKELQCGCTDDDDV
AMCFIKNQEA FEKYLEFLVGRVQAESVVVSTPVQEFYKKYAEETLSAKDPTQPPPPPLQHYLEQPVERVQKYQ
ALLKELIRNKARNRQNCALLEQAYAVVSALPQRAENKLVSLMENYPGTLEALGEP I RQGHFIVWEGAPGARM
PWKGNHRHVLFERNYL VICKPRRDSRTD TFSYVFRNMKLS IDLNDQVEGD DRAFEVWHEREDS VRKYLLQA
RTVILKNSWVKEICG IQRLAQPVWRPPEFEELADCTAELGETVKLACRVTGTPKPIVSWYKDGKPEVVDPH
HILIEDPDG SCTLILDNLTGIDSGQYMCFAASAAGNASTLGKILVQVPPRFVNVKVRATPFVEGEDAQITCTVE
GAPYPQIRWYKDG TLLAPGNRYRMLNEPRSGVLV LVIQAASKEDLGHYECELVNRLGSTRGGGELYMQSPALR
ARDQHHREQI VAAVEERRPSP\*
>rs50033377\_ENSMUSP00000151217\_c.2637:A>G\_p.S880G

ENSMUST00000219084.3|Obscn-207|ENSMUSG00000061462|-|chr11:g.59020606:T>C
MDHSFSGAPRFLTRPKAFVSVGKDATLSCQIVGNPTPHVSWEKDRQPV EAGARFLAQDGDVYRLTILDLAL
GDSGQYVCRARNAIGEFAAVGLRVDSEGTCAEQAPHFLLRPTSIRVREGADATFRCRVGSGSPQPAVSWSKDG
RRLGPPDAPHVRVEEHGESSALRIR SARPRDGGTYEVR AENPLGSASAAAALVVDSDAEVAGPPGTSTATLLA
HLQQRREAMRAEGIPPSPPGAGTRTCTVTEGKHARLSCFVTGEPKPEPTVWKKDQGLVTEGRRHVVEDEQENF
VLKILFCQSDRGLYTCTASNLVQGTYSSVLVVREPTVPFKKRLQDLEVREKESATFQCEVAQPATEAAWFK
EETRLWASAKYDIEEEGTERRLTVRNVSADDDAVYICETTEGSR TVAELSVQGNLTKLPRKTAVRTGDTAIF
WVELAVPEGPVRWLRNQ EEMVAGGRVAITAEGTCHTLTIFQCTLEDMGEVAFVSGGCRTTTQFCVSAPRRPPL
YPPADPVVKA KTES SVT LSW SAPPHGDRPVTIDGYVLEKRKLGAYAWSRCHEAGWLATTEFTITGV AEEGDFQ
FRVSAINHFGQGPYLEFPGTMHLVPM LAVKTP LKAVEAVEGGEVTF SVDLTVASSGEWFLDGEALKASSIYVI
RCDRTRHMLTIREV PARLHGAQLKFVANGIETS IQMVVRAALGLPSSKLPAAAAREVLAQLHEEAQLLAE LSD
QAAA VTWLKDGRELSLGP KYEMQVSAGRRALLVRDVAQDDAGLYECVSRGSR TAYQLLVQDITDGYRDWGPAG
PQKHMCKCAGAKIARYLGS SCYRFLQYDKGVWHWLEAALDTRQKGKTS SCSLHEKPKLVFAKQQAHSEVKA E
AGNATLSCEVTQAQTEVTWFKDGKLLSSSSKVRMEASGC SRRLVVQQAGKADAGEYSCEAGGQKLSFRLDVA
EPKLVFAKQQAHSEVKA EAGASATLSCEVAQAQTEVTWFKDGKLLSSSSKVRMEASGC SRRLVVQQAGKADA
GEYSCEAGGQKLSFRLDVAEPKMF AKEQQARSEVKA EAGASATLSCEVAQAQTEVTWFKDGKLLSSSSKVRM
EASGC SRRLVVQQAGKADAGEYSCEAGGQKLSFRLDVTEPKLVFAKEQQARSEVKA EAGNSATLSCEVAQAQ T
EVTWFKDGKLLSSSSKVRMEASGC SRRLVVQQAGKADAGEYSCEAGGQKLSFHL DVTEPKLVFAKEQQAHSEV
KAEAGASATLSCEVAQAQTEVTWFKDGKLLSSSSKVRMEASGC SRRLVVQQAGKADAGEYSCEAE GQKLSFR L
DVAEPKLVFAKEQQARSEVKA EAGASATLSCEVAQAQTEVTWFKDGKLLSSSSKVRVEASGC SRRLVVQQAGK
ADAGEYSCEAGGQKLSFRLDVAEPKLVFAKEQQANSEVKA EAGASATLSCEVAQAQTEVTWFKDGKLLSSSSK
VRVEASGC SRRLVVQQAGKADAGEYSCEAGGQKLSFRLDVAEPKLVFAKEQQAHSEVKA EAGASATLSCEVAQ
AQTEVTWFKDGKLLSSSSKVRVEASGC SRRLVVQQAGKADAGEYSCEAGGQKLSFRLDVAEPKLVFAKEQQAH
SEVKA EAGASATLSCEVAQAQTEVTWFKDGKLLSSSSKVRVEASGC SRRLVVQQVGVKADAGEYSCEARGQKLS
FRLDVAEAESQIPERPSRREPLVVKHEHETIILTATIAAPSVAAVTWLKDGV EIRRSKRHEATSLGDHTHTLTVR
GAQVLD SAIYSCR V GKEGQDFPVQVEEVA AKFSKPLEPVEGELGGTVMLVCELSPEQAEVWRCGN TQLRPGK
RFQMTSEGPRRTLTVSGLREDDAEYVCE SRDDRTSARLTVKVP RVVVKFTSGLS AMVAEEGQEATFQC VVSPS

DAGVTWYKDGMLQOPSEKFMVVEGASRSLTILGLTLEDAGQVTVAEAGASSAALRVREAPVLFKKKLEPQT
VEERTSVTLEVELTRPWPEVKWTRNAAVLTPSENVEIRAEGARHCLVLRVSGFADRGFFGCETPDDKTQAKLN
VEMRQVRLVVRGLQEVEAKEQGTASMDVELSHAEEVGSWTRDGLRLQPGPKCHLAVQGPVHILTLALSALQFQDSG
LVAFRAEGVHTSARLIVTELPVSFTRVLQDVVATQKEKVTLECELSRPVDVRWLKDGVELRAGKAIGIVAQGT
CRSLVIYRCETGDQGVYCDALDAQTSASLRVQGRYTLIFRRVLAEDAGEVKFVAENAESRAHLRVKELPVT
LLRPLRDKIAMEKHRGVLECVSRASAQVRWFKGGVELQSGPKYEVVSDGLYRKLVINDDVPEDEDTYTC DAG
NVKTSAQFFVEEQSITIVRGLKDMTVMEPAPAWFECETSIPSVRPPKWLLGKTVLQAGGNVGLQDGTVHRLT
LHKTCTMTGTPVHFTIGKSRSSAQLVVSIDI PVVLRTRPLEPKAGRELQSVVLSCDFRPAPKAVQWYKDDTFLSP
SEKFKMALEGQMAELRILRLTPADAGVYRCQAGSAQSSAEVTVAEAREVTVIQPLQDAEAMEEGRVCFSCELSH
KDEDIEWSLNGTPLYNDSFHEISHEGCLHTLVLKSVRQADTGTVCATSPKVSVSARLVVKGPVVFLLKALDDV
SAEERGTTLTQCEVSDPEARVVWRKDGVELGSPDKYDFLHKAGARGLTVHDLSHEDAGLYTCVQGSKETQSKV
SVHDLHVGITKRLKTVEVLEGESECFEVLSSHESPSDPAVWTVGGKTVGGSGHFHAVRQGRKYTLTVKDAALS
DAGEVVSFVGLTSLKASLIIRERPVDTITKPLEDQRTTLGEDVMLSCELSRAGTSVRWLKDGKAIKRSQKYDLL
SEGTRAVLVVRKASLKDSGEYTCETEASKSTAKLCVEEKANRFTEELADLQVEEKGRAVFTCKTEHPASVVTW
RKGLLELRASGKHVPSQEGTLTKLTINALERTSDTYTCDIGQARTQARLLVHGQKVRVIEDLEDTAVQEGSS
AKFCCRIAPADYGPVHWFLDKTPHLSNELNEITVQPGGYHVLTLRQLALKDSGTVYFEAGDQRTSAAALRVTEK
PSIFSRPLTDVTVTEGEDTLVCETTTVDSVSRWTKDGKTLRPSARCQLSHEGCAQLLITATTPQDGGRYKC
EIGGASSSSIVRVHALPVRFRESLKDVEVPEGKAATLRCVLSVAAPVVEWRHGDDVLKSSNKYSLRQEGAVLE
LVIRDLQFQDSGQYSCSFGDQTSATLTVKTSQAQFVGLKRNKEATEGTTVTLRCELTKEAPVEWKKGTETLR
NGDKYSLKQDGAVCELQICSLLVADAGEYSCVCGQEKTSATLTVKALLVHFVRRLRSKEATEGDTTTLQCELS
KAAPVEWRKGTETLRDGDYSLKQDGAVCELQIRSLTIADAGEYLCTCGQEKTSATLTVRGLPAKFIEDLRSQ
EATEGATAILRCELSKAAPVEWRKGSSETLKDGDYTLRQDGAVCELQIRGLAVVDTGTYSLPTKFTGLRNE
EATEGTMATLRCQMSKAAPVEWRKGSSETLRDGDYSLRQDGAMCELQIRGLTIEDSGEYTCVCGQEKTSATLS
VKALPPRFIEDLRSQEATEGTMATLRCQMSKAAPVEWRKGSSETLGDGGYSLRQNGAVCELQIHDLAVEDTGE
YSCVCGQEKTSATLNVKALPPKFTTEGLKKEEATEGTMVTLRQMSKEATVEWRKGAKTLSDDGGYSLRQDGAM
CELQICGLAVEDAGEYSCVCGQEKTSATLSVKALPPRFIEDLRSQEATEGTMATLRCQMSKAAPVEWRKGSSET
LRDGDYSLRQDGAVCELQIRDLAVEDAGEYLKQDGAVCELQIRGLTIEDSGEYTCVCGQEKTSATLRCQ
MSKAAPVEWRKGSSETLRDGDYSLRQDGAMCELQICDLAVEDTGDYSCVCGQEKTSATLSVKAPQVVFQQLQ
NLQAEEGSMASLRCELSVPNAAMVWSKGGLELQGDTRREARQQGCVAELLLRDLRREDAGEYSCVCGSQTSA
TLMVTAAPVRFRLRELQAQDVDEGATARLRCELSREAVSVEWRKGSLLQFPKAKYQMVQEGTTAELLVHGVEQE
DAGEYTC DAGHTQSIARLSVRAPKPKFKTDLQSTEQEAGGTARLCCQLSEAEPTPVQWLKEGVELHVGSKYE
MRRQGAVCELLIHGLEAKDTGEYACLVGGQKTLASLRVKEPEVTIVRGLVDMEVQADEDVEFTCKVQAGATD
VQWHLQGLPLQSNEVTEVAVLADGCTHVLQLKGVTLLEDAGTVSFHVGGSSSAQLTVRVPEVTVLEPLKDVQL
SEGQDAHFRCLSRASGQEARWALGGVPLQCNEMNDITVEQGTLYLLTLHKVTLLEDAGTITLQVGSSESAQL
KVTAKNTVLRGLNVDALLEGGEALFECQLSQPEVAHTWLLDDEPVHTSEKVEVVYFENGLRHLLLLKLNKLPQ
DSRVTFFLAGDVVTS AFLTVRGWRLEVLEPPHDASVKAGMQVRFTCILSEAVPVGEATWYINGAAIQPDDTDW
TVTTDGSHHALTLNAQPQHAGEVTFFAARDAVASARLSVLALPDPPEDAEVVGRSDHSVTLVSWVAPMSDGGGG
LCGYRVEMKEASTGQWQLCHDLVPGPECVVDDLVPKTYRFRVAAVGPAGAGEPVHLPQMVKIAPAPAPAPAP
APAPETROAVVGEDICLELEVAADGGEVWHKGTERRIQPGGHFEVLSRQQRQMLVIKGFRTEDQGEYRCGPIQ
GLPSSGAATFNVVMTSGSGDEVPAQPSLPPEAAQEGDLHLLWEALARKRRMSREPTLDSISELPEEDSRVQHL
RQEAETAPDLSEGYSTADELARTGEADLSHTSSDDESRAGTPSLVTYLKKAGGPGISPLASKHEAQVTTSVK
PQKQQEPVVPPTCPPPGDLSAADLMDPSLDKAAVKIQAAFQKGYKVRKEMKQQEGPVFSRTFGDTEAQVGDVLR
ECVLATKTDMRACWLKDGIELTDGRHYHIDQLKDGTC SLLVTGLAPTD SGRYTCQVSTKSGRVSHSACVVVSG
TESEAESSSGGELDDAFRRAARRLHRLFRTKSPAELSEELFLSADEGPGEPEEPADWQTYREDENFVCIRFE
SLAEARQAVTCFRNMFATMGI GVEISLGEQGPVEMRIGKVAPTVTPAVPLAKTPGLQTSDAAPVFLTELQN
QDVQDGYPMSFDCVVTGQPVPSVRWFKDGKLLLEDDHYMINEDQQGGHQLIITAVVPADMGVYRCLAENSMGV
SSTKAELRVELTSTDYD TAADATETSSYFSAQGYLSSREQEGTESDEGQLPVLEELKDLQVAPGTRLAKFQL
KVKGYPAKLYWFKDGQPLTSDHIRMTDKKTLHTLEIVSVTREDSGQYAAIISNAVGAAYSSARLLVVRGPSE
PEEKPASDVHERLVPPRILEKFTPKKVKRGSSITFSVKVEGHPAPSVHWLKEEAEGVLWIGPDTPGYTMAS
SKQHSVLVLLDVGQRHQGTYTIC IATNPAGQALCSASLHISGLAKEEEQERVKEALISSFLQGTSAQVSAQMS
AGFADLVGQSKGESLVAEEAHSHLSLAEVGT EEFLOKLT SQI TEMVSAKISQAKLQVPGGDSDEETKTPSASP
RHGRSRPSSSVQESSSEEDGDSRGEIFDIYVVTADYLP LGAEQDAIILREGQYVEVLDSAPHLRVLVTRKPT
KSSPSRQGVVSPAYLDKRLKLSPEWGPTEAPEFPEAVESEDEYRTRLSVVIQELLSSEQAFVQELQFLESHM
KHLERSPRVPAAVASQKTVIFRNVDI SHFHSSFLKELQVCEGDTDDVAMCFIKNQEAFAKEYLEFLVGRVQAES
VVVSTPVQEFYKKAETLSAKDPTQPPPPPLQHYLEQPVVERVQYQALLKELIRNKARNRNCALLEQAYAV
VSALPQRAENKLVSLMENYPGTLEALGEP I RQGHFIVWEGAPGARM PWKGNHRHVFLFRNYLVICP RRRDSR
TDTFSYVFRNMMKLSSIDLNDQVEGDDRAFEVWHERE DSVRKYLQARTV I IKNSWVKEICGIQORLAQPVWR
PPEFEEELADCTAELGETVKLACRVGTGPKPIVSWYKDGKPEVDPHHILIEDPDGSC TLI LDNLGTIDSGQY



SGTVYFEAGDQRTSAALRVTEKPSIFSRPLTDVTVTEGEDLTLCVCETTTVDSVVRWTKDGKTLRPSARCQLSH  
EGCQAQLLITATTPQDGGRYKCEIGGASSSSIVRVHALPVRFRRESLKDVEVPEGKAATLRCVLSVAAPVEWR  
HGDDVLKSSNKYSRQEGAVLELVIRDLQPDQSGQYSCSFGDQTTSATLTVKTSQAQFVQKLNKEATEGTTV  
TLRCELTKKEAPVEWKKGTETLRNGDKYSLKQDGAVCELQICSLLVADAGEYSCVCGQEKTSAITLVKALLVHF  
VRRLSKEATEGDTTTLQCELSKAAPVEWRKGTETLRDGDYSLKQDGAVCELQIRSLTIADAGEYLCTCGQE  
KTSATLTVRALPAKFKDSLKNEEATEGTTATLSCELSKAAPVWKKGPKTLQSGDKYVLRQDGAVCGLQIHGL  
TMADAGEYSCVCGQEKTSAITLVVRLPAKFIEDLRSQEATEGATAI LRCELSKAAPVEWRKGTETLRDGDYSL  
LRQDGAVCELQIRGLAVVDGTYSLSLPTKFTTEGLRNEEATEGTMATLRCQMSKAAPVEWRKGTETLRDGDYSL  
LRQDGAVCELQIRGLTIEDSGEYTCVCGQEKTSAITLVKALPSRFIEDLRSQEATEGTMATLRCQMSKTAPVE  
WKKGSETLRDGGYSLRQDGPVCELQICDLAVEDAGEYSCVCGQEKTSAITLVKALPPRFIEDLRSQEATEG  
MATLRCQMSKAAPVEWRKGTETLRDGGYSLRQNGAVCELQIHDLAVEDTGEYSCVCGQEKTSAITLVKALPP  
RFIEDLRSQEATEGTMATLRCQMSKAAPVEWRKGTETLRDGGYSLRQDGAVCELQIHDLVEDAGQYSCVCG  
QEKTSAVLTVDALPPKFTTEGLKKEEATEGTMVTLRCQMSKEATVEWRKGAKTLSDGGRYSLRQDGAVCELQIC  
GLAVEDAGEYSCVCGQEKTSAITLVKALPPRFIEDLRSQEATEGTMATLRCQMSKAAPVEWRKGTETLRDGD  
YSLRQDGAVCELQIRDLAVEDAGEYLCVCGQEKTSAITLVKALPPRFIEDLRSQEATEGTMATLRCQMSKAAP  
VEWRKGTETLRDGDYSLRQDGAVCELQICDLAVEDTGDYSCVCGQEKTSAITLVKALPPRFIEDLRSQEARE  
GTVATLRMRMSKAAPVEWRKGTETLRDGDYSLRQEGNLCELQIRDLAVEDTEEYSCVCGQEKTSAITLVKAL  
PAKFIEDLRSQEAPESSTVTLRCKLSKASVWKKGSETLRNGARYSLRQDGAVCELEIRDLTVEDTGEYSCT  
CGQERTSATLSIMAPQVVFQQLQNLQAEEGSMASLRCELSVNAAMVWSKGGLELQGDTRREARQQGCVAEL  
LLRDLRREDAGEYSCVCGQEKTSAITLVKALPPRFIEDLRSQEATEGTMATLRCQMSKAAPVEWRKGTETLRD  
PCAKYQMVQEGTTAELLVHGVEQEDAGEYTCDAHTQSIARLSVRAPKPKFKTDLQSTEQEAGGTARLCCQLS  
EAEFGTPVQWLKEGVELHVGSKYEMRRQGAVALLEHGLEAKDTGEYACLVGGQKTLASLRVKEPEVTVRGL  
VDMVQADEDEFTCKVQAGATDVQWHLQGLPLQSNVTEVAVLADGCTHVLQKGVTLQDAGTVSFHVGGL  
SSSAQLTVRVPEVTVLEPLKDVQLSEGQDAHFRCRLSRASGQEARWALGGVPLQCNEMNDITVEQGTLYLLTL  
HKVTLQDAGTITLQVGSSEEAQLKVTAKNTVLRGLENVDALEGGEALFECQLSQPEVAHTWLLDDEPVHTS  
EKVEVYFENGLRHLKLNKLPQDSCRVTFLAGDVTSAFLTVRGWRLEVLEPPHDASARVSKAGMQRVFTCILS  
EAVPVGEATYINGAAIQPDDTWTVTDDGSHHALTSLNAQPPQHAGEVTFFAARDAVASARLSVLLALPDPEDA  
EAVGRSDHVSVTLVSWVAPMSDGGGGLCGYRVMKEASTGQWQLCHDLVPGPECVDDLVPGKTYRFRVAAVGPA  
GAGEPVHLPQMVKIAPAPAPAPAPAPAPAPAPAPETRAVVGEDICLELEVAADGGEVVWHKGTERRIQPGHFVLS  
RGQRQMLVIKGFRTEDQGEYRCGPIQGLPSSGAATFNVVMTSGSGDEVPAQPSLPPEAAQEGDLHLLWEALAR  
KRRMSREPTLDSISELPEEDSRVQHLRQEAETAPDLSEGYSTADELARTGEADLSHTSSDDESAGTPSLVT  
YLKAGGPGISPLASKHEAQVTTSVKPKQKQEPVPTCP PPGDLAADMPSLDKAAVKIQAAFKGYKVRKE  
MKQQEGPVFSRTFGDTEAQVGDVLRLECVLATKTDMRACWLKDGIELTDGRHYHIDQLKDGTCSSLVVTGLAPT  
DSGRYTCQVSTKSGRVSHSACVVVSGTESEAESSSGGELDDAFRAARRLHRLFRTKSPAELSEELFLSADE  
GPGEPEPADWQTYREDENFVCIRFESLAEARQAVTCFRNMFATMGI GVEISLGEQGRGVEMRIGKVAPTVT  
PAVPLAKTPGLQTSDAAPVFLTELQNDVQDGYPMSFDCVVTGQVPSVVRWFKDGKLEEDHYMINEDQQGG  
HQLIITAVVPADMVYRCLAENSMGVSSKAELRVELTSTDYDTAADATETSSYFSAQGYLSSREQEGTESDE  
GQLPQVLEELKDLQVAPGTRLAKFQLKVKGYPAKLYWFKDGGPLTSDHIRMTDKKTLHTLEIVSVTREDSG  
QYAAYSNAVGAAYSSARLLVRGPSEPEEKPASDVHERLVPPRILEKFTPKKVKRGSSITFSVKVEGHPAPSV  
HWLKEEAKEGVLWIGPDTPGYTMASSSKQHSLLVLLDVGRHQGTYTICATNPAGQALCSASLHISGLAKEEEQ  
ERVKEALISSFLQGTSAQVSAQMSSEAGFADLVGQSKGESLVAEEAHSHLSLAEVGTEEFQKLTLSQITEMVS  
AKISQAKLQVPGGDSDEETKTPSASPRHRSRSPSSSVQESSSESEDGDSRGEIFDIYVVTADYLPGLAEQDAI  
ILREGQYVEVLDSAHPLRWLVRTKPTKSSPSRQGWVSPAYLDKRLKLSPEWGPTEAPEFPGEAVSEDEYRTRL  
SSVIQELLSSQAFVQVLELQFLESHHMKHLERSPRVPAVASQKTVIFRNVQDISHFHSSFLKELQCGCTDDDV  
AMCFIKNQEAFEKYLEFLVGRVQAESVVVSTPVQEFYKKYAEETLSAKDPTQPPPPPLQHYLEQVPERVQKYQ  
ALLKELIRNKARNRQNCALLEQAYAVVSALPQRAENKLVSLMENYPGTLEALGEPYRQGHFIWEGAPGARM  
PWKGHNHRVFLFRNYLVICKPRRDSRTDFTSYVFRNMMKLSSIDLNDQVEGDDRAFEVWHEREDSVRKYLLQA  
RTVVIKNSWVKEICGIQQLAQPVWRPPEFEEELADCTAELGETVKLACRVTGTPKPIVSWYKDGKPVVDPH  
HILIEDPDGCTLILDLNLTGIDSGQYMCFAASAAGNASTLGKILVQVPPRFVNVKVRATPFVEGEDAQITCTVE  
GAPYQIRWYKDGTLTLLAPGNRYRMLNEPRSGVLVVIQAASKEDLGHYECVNLVNLGSTRGGGELYMQSPALR  
ARDQHHREQIVAAVEDTSVEGSAHSAQDGADQQAASVLWRLGSEALGSPGDLPNTRQSEPPAFEEAASQIP  
GAASGTPEVSPQPGTHKGLEQETTSSGSQGWVPIRVEGTAWPGAGTGQLLLDVHSQVIMETTQRTYVCQAPDT  
GVTRAPMSQVTEIDVQVQVGDMAQFDAVIEGHPPYIVTWYKGSTQLTSSARLSQRQDGTYSVLVTDVAPHDA  
GVYTCVANNAGGQVLCQAEELLVHGGDKLDAENQVYRRLKHSFYDYVQEEIGRGVFGVYKRVQHKGNKMFCAAKF  
IPLRSKTRAQAYQERDILATLGHPLVTGLLDQFETRKTLLIILELCSSEELLDRLFKKGVVTEAEVKVYIQQL  
VEGLHYLHSHGILHLDIKPPNIMLVHPAREDIKICDFGFAQKITPSEPQYSKYGSPEFVSPEIEQNPVSEGS  
DIWAMGVISYLSLTCSSPFAGESDRATLLNVLEGRVSWSSPTAAHLSEDAKDFIKATLQRTPRARPSTSQCLA  
HPWFLKSMPAEEAHFINTKQLKFLARSRWQRSLMSYKSILVMRSIPPELLQGPDPSPSLGVARHLRGEASGAS

SSSSSSDNELAPFARAKSLPPSPVTHSPLLHPRGFLRPSASLPEETEASMPADAAVPASPQASAGPPASPGCV  
PRHSVISSLFYQQAGEGAERGNKTSGAKRHPARRRHLLKGGYIARALPGLREPLMEYSLLEEEAAREEQASLM  
TKTPSFETALRLPSSSVREVPGRSHSLDNPPVTTGPSPEACKEQLLFPSTGLTHETTAKDRGHKEGFLQESV  
PFPMSGDSRPGKQEGSSQDSCRKPASSCHSELGSGSQEGCGPPSSQSLGSLPPQSLKELSTSCGPLFSEQ  
PQAAPFPPTQVSPLLGESEKQDGSLSGEPVVPVSSSPGSASQVDASLDTEGLSEAGDTCDFTPPPQRPQEQAT  
TRKFSLESRGGYAGVAGYGTFAFGGDAGGMLGQGPLWARMMAVVSQSSEEQDEAATESPQPLES LGPIAEASG  
VPLRTSPSLTPWEEVEQVSLVQIRDLSDGAEAAADTISLDISEVDPAYLNLSLDYDIKYLPEFFMI FRRVPKPI  
EQPESPGSETEAGQGLADFLLEAAWPWPGELGLRAGLEITEEPEEPGDLEALLGEAAVGRKRKWSPSRGLFQF  
PGRCLSGEEPVELGLRQVRKASMAHISRILKGRPEGPEREGPPRRKAGLASFRLSGLKGRDQELSDAIVLGGQ  
SVTLACQVLAQPTAQATWSKDGVLLESSGHLISSTLKNFQLLTIILVVKEEDLGTYTCCVSNPLGTAVTTGVL  
RKAERPSSSPREVEGELYKDAVLLVWKPVESECGPVTYIVQCCIEGGSWTTLASDISDCCYLTGKLSRGGMYIF  
RTACVSKAGMGPISSPSEQVLLGGPNHLASEEESRRGRPAQLLPSTKTFQFQMQIRRRGRFSVVRQCREKASGR  
ALAAKIVPYQPEDKTAVLREYEALRHLHHPHLAQLHAAYLSPRHLVLI LELCSGPELLPSLAERESYSESDVK  
DYLWQMLSATQYLHAQHILHLDLRSENMMVTEYNLLKVIDLGNASLDQEKVPAPENFKDYLETMAPELLEGGQ  
GAVPQTDIWAIGVTAIFIMLSGEY PESSSEGRDLQKGLRKLIRLSRCYAGLSGGAVAFLOSSLCAQPWGRPCA  
STCLQCGLWTEEGPTGSRPTPVTFPTVRLRAVFREREKRALLYKKNLAQVR\*  
>rs262091051\_ENSMUSP00000038264\_c.1696:G>A\_p.W566\*  
ENSMUST00000047441.14|Obscn-202|ENSMUSG00000061462|-|chr11:g.59023972:c>T  
MDHSFSGAPRFLTRPKAFVSVGKDATLSCQIVGNPTPHVSWEKDRQPVEAGARFRLAQDGDVYRLTILDLAL  
GDSGQYVCRARNAIGEFAAVGLRVDSEGTCAEQAPHFLLRPTSIRVREGADATFRCRVGGSPQPAVSWSKDG  
RRLGPPDAPHVRVEEHGESSALRIRSARPRDGGTYEVRAENPLGSASAAAALVVDSDAEVAGPPGTSTATLLA  
HLQQRREAMRAEGIPPSPPGAGTRTCTVTEGKHARLSCFVTGEPKPEVWKKDQGLVTEGRRHVVEDEQENF  
VLKILFCKQSDRGLYTCTASNLVGQTYSSVLVVVREPTVPFKKRLQDLEVREKESATFQCEVAQPAEAAWFK  
EETRLWASAKYDIEEEGTERRLTVRNVSADDDAVYICETTEGSRVAELSVQGNLTKLPRKTAVRTGDTAIF  
WVELAVPEGPPVRLRNQEEVAGGRVAITAEGTCHTLTI FQCTLEDMGEVAFVSGGCRTTTQFCVSAPRRPPL  
YPPADPVVKKTESVTLWSAPPHGDRPVTIDGYVLEKRLGAYAWSRCHEAG\*LATTEFTITGVAEEGDFQ  
FRVSAINHFQGTLEFPGTMHLVPLAVKTLPLKAVEAVEGGEVTFVSDLTVASSGEWFLDGEALKASSIYVI  
RCDRTRHMLTIREVPARLHGAQLKFVANGIETSIQMVVRAALGLPSSKLPAAAAAREVLAQLHEEAQLLAELSD  
QAAAAVTWLKDGRELSLGPYEMQVSAGRRALLVRDVAQDDAGLYECVSRGSRRTAYQLLVQDITDGYRDWGPAG  
PQKHMCKCAGAKIARYLGSSCYRFLQYDKGVWHLEAALDTRQKGTSSCSLHEKPKLVFAKQQAHSEVKA  
AGASATLSCEVAQAQTEVTFWKDGKLLSSSSKVRMEASGCSRRLVVQQAGKADAGEYSCEAGGQKLSFRLDVA  
EPKMFVFAKEQQARSEVKAEGASATLSCEVAQAQTEVTFWKDGKLLSSSSKVRMEASGCSRRLVVQQAGKADA  
GEYSCEAGGQKLSFRLDVTEPKLVFAKEQQARSEVKAEGVNSATLSCEVAQAQTEVTFWKDGKLLSSSSKVRM  
EASGCSRRLVVQQAGKADAGEYSCEAGGQKLSFRLDVAEPKLVFAKEQQARSEVKAEGNSATLSCEVAQAQ  
EVTWTFKDGKLLSSSSKVRMEASGCSRRLVVQQAGKADAGEYSCEAGGQKLSFHLDVTEPKLVFAKEQQAHSEV  
KAEAGASATLSCEVAQAQTEVTFWKDGKLLSSSSKVRMEASGCSRRLVVQQAGKADAGEYSCEAGGQKLSFR  
DVAEPKLVFAKEQQARSEVKAEGASATLSCEVAQAQTEVTFWKDGKLLSSSSKVRVEASGCSRRLVVQQAGK  
ADAGEYSCEAGGQKLSFRLDVAEPKLVFAKEQQANSEVKAEGASATLSCEVAQAQTEVTFWKDGKLLSSSSK  
VRVEASGCSRRLVVQQAGKADAGEYSCEAGGQKLSFRLDVAEPKLAFAKEQQAHSEVKAEGASATLSCEVAQ  
AQTEVTFWKDGKLLSSSSKVRVEASGCSRRLVVQQAGKADAGEYSCEAGGQKLSFRLDVAEPKLAFAKEQQAH  
SEVKAEGASATLSCEVAQAQTEVTFWKDGKLLSSSSKVRVEASGCSRRLVVQQAGKADAGEYSCEAGGQKLS  
FRLDVAEPKLAFAKEQQAHSEVKAEGASATLSCEVAQAQTEVTFWKDGKLLSSSSKVRVEASGCSRRLVVQQ  
AGKADAGEYSCEAGGQKLFRLDVAEPKLVFAKEQQAHSEVKAEGASATLSCEVAQAQTEVTFWKDGKLLSS  
SSKVRVEASGCSRRLVVQQVQKADAGEYSCEARGQKLSFRLDVAEAEBSQIPERPSRREPLVVEKHETIILTAT  
IAAPSVAAVTVLKDGV EIRRSKRHEATSLGDTHTLTVRGAQVLD SAIYSCRVGKEGQDFPVQVEEVAAKFSK  
LEPVEGELGGTVMLVCELSPEQAEVVWRGNTQLRPGKRFQMTSEGPRRTLTVSGLREDDAEYVCESRDDRT  
SARLTVKVPVVKFTSGLSAMVAEEGQEATFQCVVSPSDAGVTWYKDGMLQPSSEKFMVMEVGASRSLTILGL  
TLEDAGQVTEAEGASSAALRVREAPVLFKKKLEPQTVEERTSVTLEVELTRPWPEVKWTRNAAVLTPSENV  
EIRAEGARHCLVLRVGFADRGFFGCETPDDKTQAKLNVEMRQVRLVRLGQVEEAKEQGTASMDVELSHAEVE  
GSWTRDGLRLQPGPKHLAVQGPVHILTL SALQPQDSGLVAFRAEGVHTSARLIVTEL PVSFTRVLQDVVATQ  
KEKVTLECELSRPVDVRLKDGVELRAGKAI GIVAQGTCSRSLVIYRCETGDQGVYVCDALDAQTSASLRVQGR  
TYTLIFRRVLAEDAGEVKFVAENAESRAHLRVKELPVTLLRPLRDKIAMEKHRGVLECVSRASAQVRWFKGG  
VELQSGPKYEVVSDGLYKRLVINDVQPEDEDYTCCHADGNVKTSAQFFVEEQSITIVRGLKDMTVMEPAPAWFE  
CETSIPSVRPPKWLGLYKTLVQAGGNVLEQDGTVTRDLTHKTCSTMTGPVHFTIGKSRSSAQLVSDIPVVL  
RPLEPKAGRELQSVVLSDFRPAKAVQWYKDDTPLSPSEKFKMALEGMALRILRLTPADAGVYRCQAGSA  
QSSAEVTVAREVTVIQPLQDAEAMEEGRVCFSCELSHKDEDI EWSLNGTPLYNDSFHEISHEGCLHTLVLKS  
VRQADTGTVCATSPKVSVSARLVVKGKPVVFLKALDDVSAEERGTLTLQCEVSDPEARVVWRKDGVELGSPDK  
YDFLHKAGARGLTVHDLSDHEDAGLYTCQVGSKETQSKVSVHDLHVGITKRLKTVEVLEGESECSFCVLSHESP

SDPAVWTVGGKTVGGSGHFHAVRQGRKYTLTVKDAALSDAGEVVSFVGLTSGKASLIIRERPVDTKPLEDQR  
TTLGEDVMLSCELSRAGTSVRWLKDGKAIKRSQKYDLLSEGTRAVLVVRKASLKDSGEYTCETEASKSTAKLC  
VEEKANRFTEELADLQVEEKGRAVFTCKTEHPASVVTWRKGLLELRASGKHVPSQEGTLTKLTINALERTDSD  
TYTCDIGQARTQARLLVHGQKVRVIEDLEDTAVQEGSSAKFCCRIAPADYGPVHWFLLDKTPLHSNELNEITVQ  
PGGYHVLTLRQLALKDSGTVYFEAGDQRTSAALRVTEKPSIFSRPLTDVTVTEGEDTLVCETTTVDSSVRWT  
KDGTKLRPSARCQLSHEGCQAQLLI TATTPQDGGRYKCEIGGASSSSIVRVHALPVRFRESLKDVEVPEGKAA  
TLRCVLSVAAPVEWRHGDDVLKSSNKYSLRQEGAVLELVIRDLQPQDSGQYSCSFGDQTTSATLTVKTSQAQ  
FVGKLRNKEATEGTTVTLRCELTKAPVEWKKGTETLRNGDKYSLKQDGAVCELQICSLLVADAGEYSCVCGQ  
EKT SATLTVKALLVHFVRRRLRSKEATEGDTTTLQCELSKAAPVEWRKGTETLRDGDYSLKQDGAVCELQIRS  
LTADAGEYLCTCGQEKTSATLTVRALPAKFKDSLKNEEATEGTTATLSCELSKAAPVTWKKGPKTLQSGDKY  
VLRQDGAVCGLQIHGLTMADAGEYSCVCGQEKTSATLTVRGLPAKFIEDLRSQEATEGATAILRCELSKAAPV  
EWRKGETLKDGDYTLRQDGAVCELQIRGLAVVDTGTYSPLTKFTEGLRNEEATEGTMATLRCQMSKAAPV  
EWRKGETLRDGDYSLRQDGAMCELQIRGLTIEDSGEYTCVCGQEKTSATLSVKALPPRFIEDLRSQEATEG  
TMATLRCQMSKAAPVEWRKGETLGDGGYSLRQNGAVCELQIHDLAVEDTGEYSCVCGQEKTSATLNVKALP  
PRFIEDLRSQEATEGTMATLRCQMSKAAPVEWRKGETLRDGGYSLRQDGAVCELQIHDLVEDAGQYSCVC  
GQEKTSAVLTVDALPPKFTEGLKKEEATEGTMVTLRCQMSKEATVEWRKGAKTLSGGRYSLRQDGAMCELQI  
CGLAVEDAGEYSCVCGQEKTSATLSVKALPPRFIEDLRSQEATEGTMATLRCQMSKAAPVEWRKGETLRDGD  
RYSLRQDGAMCELQICDLAVEDTGDYSCVCGQEKTSATLSVKAPQVVFQQPLQNLQAEEGSMASLRCELSDVPN  
AAMVWSKGGLELQGDTRREARQQGCVAELLLRDLRREDAGEYSCVCGSQTTSATLMVTAAPVRFRLRLQAQDV  
DEGATARLRCELSREAVSVEWRKGSLLFPKAKYQMVQEGTTAE LLVHGVEQEDAGEYTC DAGHTQS IARLSV  
RAPKPKFKTDLQSTEQEAGGTARLCCQLSEAEPTPVQWLKEGVELHVGSKYEMRRQGAVCELLIHGLEAKDT  
GEYACLVGQKTLASLRVKEPEVTIVRGLVDMEVQADEDEFTCKVSOAGATDVQWHLQGLPLQSNVEVAV  
LADGCTHVLQKGVTL EDAGTVSFHVGGSSSAQLTVRVPEVTLEPLKDVQLSEGQDAHFRCRLSRASGQEA  
RWALGGVPLQCNEMNDITVEQGTLYLLTLHKVTL EDAGTITLQVGS CSSEAQLKVTAKNTVLRGLENVDALEG  
GEALFECQDSQPEVAHTWLLDDEPVHTSEKVEVVYFENGLRHLLLLKLNKLPQDSCRVTFLAGDVVTS AFLTV  
RALPDPPELDAEVVGRSDHLSVTL SWVAPMSDGGGGLCGYRVMKEASTGQWQLCHDLVPGPEVCVDDLVPGKTY  
RFRVAAVGPAGAGEVPVHLPQMVK IAPAPAPAPAPAPAPAPAPETRQAVVGEDICLELEVAADGGEVWHKGTERRI  
QPGGHFEVLSRQQRQMLVIKGFRTEDQGEYRCGPIQGLPSSGAATFNVMVMTSGSGDEVPAQPSLPPEAAQEGD  
LHLLWEALARKRRMSREPTLDSISELPEEDSRVQHLRQEAEEAPDLSEGYSTADELARTGEADLSHTSSDDE  
SRAGT PSLVTYLKKAGGPGISPLASKHEAQVTT SVKPKQKQEPVVP TCPPPGDLSAADLMDPSLDKAAVKIQ A  
AFKGYKVRKEMKQQEGPVFSRTFGDTEAQVGDVLRLECVLATKTD MRACWLKDGIELTDGRHYHIDQLKDGTC  
SLLVVTGLAPTDSGRYTCQVSTKSGRVSHSACVVVSGTESEAESSGGELDDAFRRAARLHRLFRFKSPAELS  
EEELFLSADEGPGEPEPADWQTYREDENFVCIRFESLAEARQAVTCFRNMFMATMGIGVEISLGEQGPGRVEM  
RIGKVAPTVTPAVPLAKTPGLQTS DAAPVFLTELQNDVQDGYPMSFDCVVTGQPVPSVRWFKDGKLEEDDH  
YMINEDQQGHQLIITAVVPADMGVYRCLAENSMGVSSTKAE LRVELTSTDYDTAADATSETSSYFSAQGYLSS  
REQEGTESDEGQLPQVLEELKDLQVAPGTRLAKFQLKVKGYPA PKLYWFKDQGPLTSDHIRMTDKKTLHTLE  
IVSVTREDSGQYAAIISNAVGAAYS SARLLVRGPSEPEEK PASDVHERLVPPRILEKFTPKKVKRGSSITFSV  
KVEGHPAPSVHWLKEEAEGVLIWIGPDTPGYTMASSKQHS LVLVLDVGRQHGGTYTCIATNPAGQALCSASLH  
ISGLAKEEEQERVKEALISSFLQGT SQAVSAQMSE SAGFADLVGQSKGESLVAAEAHSHLSLAEVGT EEFLOK  
LTSQITEMVSAKISQAKLQVPGGDSDEETKTPSASPRHGRSRPSSSVQESSSESEDGDSRGEIFDIYVVTADY  
LPLGAEQDAIILREGQYVEVLDSAHPLRVLVVRTKPTKSSPSRQGWVSPAYLDKRLKLSPEWGPTEAPEFPGEA  
VSEDEYRTRLSSVIQELLSSEQAFV GELQFLESHHMKHLERSPRVPAAVASQKTVIFRNVQDISHFHSSFLKE  
LQCGCTDDDVAMCFIKNQEA FEKYLEFLVGRVQAESVVVSTPVQEFYKKYAEETLSAKDPTQPPPPLOHYLE  
QPVERVQKYQALLKELIRNKARNRQNCALLEQAYAVVSALPQRAENKLVSLMENYPGTLEALGEP I RQGHFI  
VWEGAPGARMPWKGNHRHVFLFRNYLVICPKRRDSRTDTFSYVFRNMMKLS SIDLNDQVEGD DRAFEVWHERE  
DSVRKYLQARTVIKNSWVKEICGIQORLAQPVWRPPEFEELADCTAELGETVKLACRVTGT PKPIVSWYK  
DGKPV EVDPHHILIEDPDGSC TLI LDNLTGIDSGQYMCFAASAAGNASTLGKILVQVPPRFVNVKVRATPFVEG  
EDAQITCTVEGAPYPQIRWYKDGTL LAPGNRYRMLNEPRSGVLVLIQAASKEDLGHYECELVNR LGSTRGGG  
ELYMQSPALRARDQHHR EQIVAAVEGAPSMQVTIEDVQVQVGDMAQF DAVIEGHPPP I V TWYKGSTQLTSSAR  
LSQRQDGTYSLVLT DVAPHDAGVYTCVANNAGQVLC KAELLVHGDKLDAENQVYRRLKHSFYDVQEEIGR  
GVFGFVKRVQHKGKMFCAAKFIP LRSKTRAQAYQERDILATLGHPLVTGLLDQFETRKTLLILILELCSSEEL  
LDRLF KKGVVTEAEVKVYIQQLVEGLHYLHSHGILHLDIKPPN ILMVHPAREDIKICDFGFAQKITPSEPOQS  
KYGSPELVQSPETIEQNPVSEGS DIWAMGVISYLSLTCSSPFAGESDRATLLNVLEGRVSSWSSPTAAHLSDEAK  
DFIKATLQRTPRARPSTSQCLAH PWF LKSMPEAE EHFINTKQLKFL LARSRWQRSLMSYKSI LVMRSIPELLQ  
GPDSPSLGVARHLRGEASGSSSSSSSDNELAPFARAKSLPPSPVTHSPLLHPRGF LRPASLPEETEASMP  
TADA AVPASPQASAGPPASPGCVPRHSV ISSLFYQQAGEGAERGNKTS GAKRHPARRRHL LKGGYIARALPGLR  
EPLMEYSLLEEEAAREEQASLMTKTPSFETALRLPSSSVREV PGRSHSLDNPPVTTGPSPEACKEQLLFPST  
GLTHETTAKDRGHKEGFLQESVPFPMSGDSRPGKQEGSSQDSCRGKPASSCHSELGSGSQEGCGPPSSQSLG

SLPPQSLKKELESTSCGPLFSEQPQAAPFPTQVSPLLGSEKEPQDGSLSSEGPVVPVSSSPGSASQVDASLDTEG  
LSEAGDTCDFTPPPQRPQEQATTRKFSLESRRGGYAGVAGYGTFAFGGDAGGMLGQGPLWARMWAVSOSSEEQ  
DEAATESPQPLESGLPIAEASGVPLRTPSLTPWEEVEQVSLVQIRDLSDGDAEAADTISLDISEVDPAYLNLS  
DLYDIKYLPEFEMI FRRVPKPIEQPESPGSETEAGQGLADFLLEEAAWPWPGEGLGLRAGLEITEEPEEPGDLEA  
LLGEAAVGRKRKWSPSRGLFQFPGRCLSGEEPVELGLRQVRKASMAHISRILKGRPEGPEREGPPRKKAGLAS  
FRLSGLKGRDQELSDEAVVLGQSVTLACQVLAQPTAQTWSKDGVLLESSEGHLLISSTLKNFQLLTLILVVKEE  
DLGTYTCCVSNPLGTAVTTGVLKKAERPSSSPRPEVGEELYKDAVLLVWKPVESECGPVTYIVQCCIEGGSWTTL  
ASDISDCCYLTKLSRGGMYIFRTACVSKAGMPYSSPSEQVLLGGPNHLASEEESRRRPAQLLPSTKTFAF  
QMQIRRRGRFSVVRQCREKASGRALAAKIVPYQPEDKTAVLREYEALKRRLHHPHLAQLHAAAYLSPRHLVILEL  
CSGPELLPSLAERESYSESDVKDYLWQMSATQYLHAQHILHLDLRSENMMVTEYNLLKVIDLGNASLDQEK  
VPAPENFKDYLETMAPELLEGQAVPQTDIWAIGVTAIFIMLSGEYPESEGETRDLQKGLRKLIRLSRCYAGL  
SGGAVAFLOSSLCAQPWGRPCASTCLOCGWLTEEGPTGSRPTPVTFTVRLRAFVREKRRALLYKXHNLAQ  
VR\*

>rs262091051\_ENSMUSP00000049737\_c.1696:G>A\_p.W566\*

ENSMUST00000052872.15|Obscn-203|ENSMUSG00000061462|-|chr11:g.59023972:C>T  
MDHSFSGAPRFLTRPKAFVSVGKDATLSCQIVGNPTPHVSWEKDRQPVVEAGARFRLAQDGDVYRLTILDLAL  
GDSGQYVCRARNAIGEAFVAVGLRVDSEGTCAEQPHFLLRPTSIRVREGADATFRCRVGGSPQPAVSWSKDG  
RRLGPPDAPHVRVEEHGESSALRIRSARPRDGGTYEVRAENPLGSASAAAALVVDSDAEVAGPPGTSTATLLA  
HLQORREAMRAEGIPPSPPGAGTRTCTVTEGKHARLSCFVTGEPKPEVWKKDGQLVTEGRRHVVEDEQENF  
VLKILFCKQSDRGLYTCTASNLVGQTYSSVLVVVREPTVPFKKRLQDLEVREKESATFQCEVAQPAEAAWFK  
EETRLWASAKYDIEEGTERRLTVRNVSADDDAVYICETTEGSRVVAELSVQGNLTKLPRKTAVRTGDTAIF  
WVELAVPEGPVWRWRNQEEMVAGGRVAITAEGTCHTLTI FQCTLEDMGEVAFVSGGCRTTTQFCVSAAPRRPPL  
YYPADPVVAKATESVTLWSAPPHGDRPVTIDGYVLEKRLKGLAYAWSRCHEAG\*LATTEFTITGVAAEGDFQ  
FRVSAINHFGQGPYLEFPGTMHLVPLAVKTPKAVEAVEGGEVTFVSDLTVASSGEWFLDGEALKASSIYVI  
RCDRTRHMLTIREVPARLHGAQLKVFANGIETSIQMVVRAALGLPSSKLPAAAAREVLAQLHHEEAQLLAEALS  
QAAAVTWLKDRELSLGPKYEMQVSAGRRALLVRDVAQDDAGLYECVSRGSRRTAYQLLVQEPKLVFAKGGQAH  
SEVKAEAGNSATLSEVTAQTEVTFWFKDGKLLSSSKVRMEASGCRRLLVVQQAGKADAGEYSCEAGGQKLS  
FRLDVAEPKLVFAKGGQAHSEVKAEAGASATLSEVAQAQTEVTFWFKDGKLLSSSKVRMEASGCRRLLVVQQ  
AGKADAGEYSCEAGGQKLSFRLDVAEPMVFVFAKEQQARSEVKAEAGASATLSEVAQAQTEVTFWFKDGKLLSS  
SSKVRMEASGCRRLLVVQQAGKADAGEYSCEAGGQKLSFRLDVTEPKLVFAKEQQARSEVKAEVGN SATLSCE  
VAQAQTEVTFWFKDGKLLSSSKVRMEASGCRRLLVVQQAGKADAGEYSCEAGGQKLSFRLDVAEPKLVFAKEQ  
QARSEVKAEAGNSATLSEVAQAQTEVTFWFKDGKLLSSSKVRMEASGCRRLLVVQQAGKADAGEYSCEAGGQ  
KLSFHLDVTEPKLVFAKEQQAHSEVKAEAGASATLSEVAQAQTEVTFWFKDGKLLSSSKVRMEASGCRRLLV  
VQQAGKADAGEYSCEAGGQKLSFRLDVAEPKLVFAKEQQARSEVKAEAGASATLSEVAQAQTEVTFWFKDGK  
LSSSKVRVEASGCRRLLVVQQAGKADAGEYSCEAGGQKLSFRLDVAEPKLVFAKEQQANSEVKAEAGASATL  
SEVAQAQTEVTFWFKDGKLLSSSKVRVEASGCRRLLVVQQAGKADAGEYSCEAGGQKLSFRLDVAEPKLAFA  
KEQQAHSEVKAEAGASATLSEVAQAQTEVTFWFKDGKLLSSSKVRVEASGCRRLLVVQQAGKADAGEYSCEA  
GGQKLSFRLDVAEPKLAFAKEQQAHSEVKAEAGASATLSEVAQAQTEVTFWFKDGKLLSSSKVRVEASGC  
RRLLVVQQAGKADAGEYSCEAGGQKLSFRLDVAEPKLAFAKEQQAHSEVKAEAGASATLSEVAQAQTEVTFWFK  
GKLLSSSKVRVEASGCRRLLVVQQAGKADAGEYSCEAGGQKLFRLDVAEPKLMFAKEQQAHSEVKAEAGAS  
ATLSEVAQAQTEVTFWFKDGKLLSSSKVRVEASGCRRLLVVQQAGKADAGEYSCEAGGQKLSFRLDVAEPK  
VFAKEQQAHSEVKAEAGASATLSEVAQAQTEVTFWFKDGKLLSSSKVRVEASGCRRLLVVQQVQKADAGEYS  
CEARGQKLSFRLDVADTRLMFAKEQQARTEVKAEAGNSATLSEVAQAQTEVTFWFKDGKLLSSSKVRVEASG  
CRRLLVVQQAGKADAGEYSCEAGGQKLSFRLDVAEAEESQIPERPSRREPLVVKHEHETIILTATIAAPSVAAVT  
WLKDGVEIRRSKRHEATSLGDTHLTVRGAQVLDSAIYSCRVGKEGQDFPVQVEEVAAKFSKPLEPVEGELGG  
TVMLVCELSPEQAEVWRCGNTQLRPGKRFQMTSEGPRRTLTVSGLREDDAEYVCESTRDDRTSARLTVKVP  
VVKFTSGLSAMVAEEGQEAFTQCVCVSPSDAGVTWYKDGMLQPSSEKFMVESGASRSLTILGLTLEDAGQVTV  
EAEGASSAALRVREAPVLFKKKLEPQTEVERTSVTLEVELTRPWPEVKWTRNAAVLTPSENVEIRAEGARHC  
LVLSRVGFADRGFFGCETPDDKTQAKLNVEMRQVRLVRLQVEVEAKEQGTASMDVELSHAEVEGSWTRDGLRL  
QPGPKCHLAVQGPVHILTLALSALQPQDSGLVAFRAEGVHTSARLIVTELPVSFTRVLQDVVATQKEKVTLECEL  
SRPVDVRWLKDGVELRAGKAIGIVAQGTCSRSLVIYRCETGDQGVYVCDALDAQTSASLRVQGRTYTLIFRRVL  
AEDAGEVKFVAENAESRAHLRVKELPVTLRPLRDKIAMEKHRGVLECVSRASAQVRFKGGVLELQSGPKYE  
VVS DGLYRKLVLINDVQPEDEDTYTC DAGNVKTSQFTFVEEQSITIVRGLKDMTVMPEPAPWFECETSIPSVRP  
PKWLLGKTVLQAGGNVLEQDGTVHRLTLHKTCSTMTGPVHFTIGKSRSSAQLVVSDIPVVLTRPLEPKAGRE  
LQSVVLSCDFRPAPKAVQWKDDTPLSPSEKFKMALEGQMAELRILRLTPADAGVYRCQAGSAQS SAEVTVEA  
REVTVIQPLQDAEAMEEGRVCFSCELSHKDEDIEWSLNGTPLYNDSFHEISHEGCLHTLVLSKSVRQADTGTVC  
ATSPKVSVSARLVVKGKPVVFLKALDDVSAEERGTLLTQCEVSDPEARVVWRKDGVELGPSKDYDFLHKAGAR  
GLTVHDLSDHEDAGLYTCQVGSKETQSKVSVHDLHVGITRRLKTVVEVLEGECSFECVLSHESPSDPAVWTVGG



KTVGGSGHFHAVRQGRKYTLTVKDAALSDAGEVVSFVGLTSSKASLIIRERPVDITKPLEDQRTTLGEDVMLS  
CELSRAGTSVRWLKDGKAIRKSQKYDLLSEGTRAVLVVRKASLKDSGEYTCETEASKSTAKLCVEEKANRFTE  
ELADLQVEEKGRAVFTCKTEHPASVVTWRKGLLELRASGKHVPSQEGTLKLTINALERTDSDTYTCDIGQAR  
TQARLLVHGQKVRVIEDLEDTAVQEGSSAKFCCRIAPADYGPVHWFLDKTPHLSNELNEITVQPGGYHVLTLR  
QLALKDSGTVYFEAGDQRTSAALRVTEKPSIFSRPLTDVTVTEGEDLTLVCETTTVDSSVRWTKDGKTLRPSA  
RCQLSHEGCAQLLITATTPQDGGRYKCEIGGASSSSIVRVHALPVRVFRESLKDVEVPEGKAATLRCVLSVA  
APVEWRHGDDVLKSSNKYSLRQEGAVLELVIRDLQPDQSGQYSCSFGDQTTSATLTVKTSQAQFVGLRNKEA  
TEGTTVTLRCELTKKEAPVEWKKGTETLRNGDKYSLKQDGA VCELQICSLLVADAGEYSCVCGQEKTSATLTVK  
ALLVHFVRRRLRSKEATEGDTTTLQCELSKAAPVEWRKGTETLRDGDYSLKQDGA VCELQIRSLTIADAGEYL  
CTCGQEKTSATLTVRALPAKFKDSLKNEEATEGTTATLSCELSKAAPVTWKKGPKTLQSGDKYVLRQDGA VCG  
LQIHGLTMADAGEYSCVCGQEKTSATLTVRGLPAKFIEDLRSQEATEGATAILRCELSKAAPVEWRKGETLK  
DGDYTLRQDGA VCELQIRGLAVVDGTYSLLPTKFTTEGLRNEEATEGTMATLRCQMSKAAPVEWRKGETLR  
DGDYSLRQDGA MCELQIRGLTIEDSGEYTCVCGQEKTSATLSVKALPSRFIEDLRSQEATEGTMATLRCQMS  
KTAPVEWKKGSETLRDGGYSLRQDGPVCELQICDLAVEDAGEYSCVCGQEKTSATLSIKALPPRFIEDLRSQ  
EATEGTMATLRCQMSKAAPVEWRKGETLGDGGYSLRQNGAVCELQIHDLAVEDTGEYSCVCGQEKTSATLN  
VKALPPRFIEDLRSQEATEGTMATLRCQMSKAAPVEWRKGETLRDGGYSLRQDGA VCELQIHDLVEDAGQ  
YSCVCGQEKTSAVLTVDALPPKFTEGLKKEEATEGTMVTLRQMSKEATVEWRKGA KTLSDGGYSLRQDGA M  
CELQICGLAVEDAGEYSCVCGQEKTSATLSVKALPPRFIEDLRSQEATEGTMATLRCQMSKAAPVEWRKGET  
LRDGDYSLRQDGA VCELQIRDLAVEDAGEYLCVCGQEKTSATLSVKALPPRFIEDLRSQEATEGTMATLRCQ  
MSKAAPVEWRKGSKTLRQDGDYSLRQDGA MCELQICDLAVEDTGDYSCVCGQEKTSATLSVKALPPRFIEDLR  
SQEAREGTVATLRCMSKAAPVEWRKGETLKDGDYSLRQEGNLCELQIRDLAVEDTEEYSCVCGQEKTSAT  
LSVKALPAKFIEDLRSQEAPESSTVTLRCKLSKKASVWKKGSETLRNGARYSLRQDGA VCELEIRDLTVEDT  
GEYSCTCGQERTSATLSIMAPQVVFQQPLQNLQAEEGSMASLRCELSVPNAAMVWSKGGLELQGDTRREARQQ  
GCVAELLLRDLRREDAGEYSCCTCGSQTTSATLMVTAAPVRFRELRQAQDVDEGATARLRCELSREAVSVEWRK  
GSLQLFPAKAYQMVQEGTTAELLVHGVEQEDAGEYTC DAGHTQS IARLSVRAPKPKFKTDLQSTEQEAGGTAR  
LCCQLSEAEPTQVWLKEGVELHVGSKYEMRRQGLVCELLIHGLEAKDTGEYACLGVGQKTLASLRVKEPEV  
TIVRGLVDMERVQADEDEFTCKVQAGATDVQAGHWLQAVCEPVVPTCPPPGDL SAADLMDPSLDKAAVKIQAAF  
YKVRKEMKQOEGPVFSRTFGDTEAQVGDVLRLECVLATKTD MRACWLKDGIELTDGRHYHIDQLKDGTC SLLV  
TGLAPTDSGRYTCQVSTKSGRVSHSACVVVSGTESEAESSSGGELDDAFRRAARRLHRLFRTKSPAELSEEEL  
FLSADEGPGEPEPADWQTYREDENFVCIRFESLAEARQAVTCFRNMFATMIGVEISLGEQGRGVEMRIGK  
VAPTVPAPVPLAKTPGLQTSDAAPVFLTELQNDQVQDGYPMSFDCVVTGQPVPSVRWFKDGKLEEDDHYMIN  
EDQQGGHQLIITAVVPADMGVYRCLAENSMGVSSTKAELRVELTSTDYDTAADATETSSYFSAQGYLSSRQE  
GTESDEGQLPQVLEELKDLQVAPGTRLAKFQKLVKGYPAKLYWFKDGOPLTSDHIRMTDKKTLHTLEIVSV  
TREDSGQYAAYSNAVGAAYSSARLLVRGPSEPEEKPASDVHERLVPPRILEKFTPKKVKRGSSTFVSVKEG  
HPAPSVHWLKEEAKEGVLWIGPDTPGYTMASSSKQHSLVLLDVGRQHOGTYTCIATNPAGVALCSASLHISGL  
AKEEEQERVKEALISSFLQGTSAVSAQMSEAGFADLVGQSKGESLVAEEAHSHLSLAEVGTTEFLQKLTSSQ  
ITEMVSAKISQAKLQVPGGDSDEETKTPSASPRHGRSRPSSSVQESSSESEDGDSRGEIFDIYVVTADYLP  
AEQDAIILREGQYVEVLDSAHPLRWLVRTKPTKSSPSRQGWVSPAYLDKRLKLSPEWGPTEAPEFPGEAVSED  
EYRTRLSSVIQELLSSEQAFVGELOFLESHHMKHLERSPRVPAAVASQKTVIFRNVQDISHFHSSFLKELQGC  
GTDDVAMCFIKNQEA FEKYLEFLVGRVQAESVVVSTPVQEFYKKYAETLSAKDPTQPPPPPLQHYLEQVPE  
RVQKYQALLKELIRNKARNRQNCALLEQAYAVVSALPQRAENKLVHSLMENYPGTLEALGPEIRQGHFIVWEG  
APGARMFWKGNHRVFLFRNYLVICKPRRDSRTDTFSYVFRNMMKLSSIDLNDQVEGDRAFEVWHEREDSVR  
KYLQARTVIKNSWVKEICGIQQLAQPVWRPPEFEELADCTAELGETVKLACRVTGTPKPIVSWYKDGK  
VEVDPHHILIEDPDGSCTLILDNLTGIDSGQYMCFAASAAGNASTLGKILVQVPPRFVNVKVRATPFVEGEDAQ  
ITCTVEGAPYPQIRWYKDGTLAPGNRYRMLNEPRSGVVLVLIQAASKEDLGHYECELVNRLGSTRGGGELYM  
QSPALRARDQHREQIVAAVEVTEQETKVPKKTVIEETITTVVKS PRGRRQSPGKSPRSRSPRRSASPRRPG  
LLAPERLYPPGTSPSRRLVEEQGRKAPVPALYVTEAEVHAPASQSPKWLEVEETIEVRVKKTGSRGASPVRE  
MTRSREGILFTLPGGIPGRDPNANNNSNKS SVYQEA RTWGPVAVHVGEFFIFQVDSVGNVDVWAASPEPEQVRA  
SQKEENTERQEGCSGDENTFLMEEPQD TDSLQGRDPKILTHNGRVLTLADLEDYVPQEGETFGCGDSTPSTP

DEPPCEVSVLQREI SEPTVGQP VLLNVGRPPGTGATPSFFRPGSQVHSPESVSFLLREAWSGPVSAAPWTSSSF  
HTHVQSSVDGSHGSFKTEVSTQTVSFGAVGETVTTLHIDPDGGEAPGPSQG\*  
>rs262091051\_ENSMUSP00000020732\_c.1696:G>A\_p.W566\*  
ENSMUST00000020732.13|Obscn-201|ENSMUSG00000061462|-|chr11:g.59023972:C>T  
MDHSFSGAPRFLTRPKAFVSVGKDATLSCQIVGNPTPHVSWEKDRQPVEAGARFRLAQDGDVYRLTILDLAL  
GDSGQYVCRARNAIGEAFVAVGLRVDSEGTCAEQAPHFLLRPTSIRVREGADATFRCRVGSGPQPAVSWSKDG  
RRLGPPDAPHVRVEEHGESSALRIR SARPRDGGTYEVRAENPLGSASAAAALVVDSDAEVAGPPGTSTATLLA  
HLQQRREAMRAEGIPSPPGAGTRTCTVTTEGKHARLSCFVTGEPKPEVTVWKKDGLVTEGRRHVVEDEQENF  
VLKILFCKQSDRGLYCTASNLVQTYSSVLVVREPTVPFKKRLQDLEVREKESATFQCEVAQPAATEAAWFK  
EETRLWASAKYDIEEEGTERRLTVRNVSADDDAVYICETTEGSRVVAELSVQGNLTKLPRKTAVRTGDTAIF  
WVELAVPEGPVWRWRNQEEMVAGGRVAITAEGTCHTLTI FQCTLEDMGEVAFVSGGCRTTTQFCVSAPRRPPL  
YPPADPVVKAKTESSVTLWSAPPHGDRPVTIDGYVLEKRKLGAYAWSRCHEAG\*LATTEFTITGVAAEGDFQ  
FRVSAINHFGQGPYLEFPGTMHLVPLAVKTPKAVEAVEGGEVTFVSDTLTVASSGGEVFLDGEALKASSIYVI  
RCDRTTRHMLTIREV PARLHGAQLK FVANGIETS IQMVVRAALGLPSKLPAAAAREVLAQLHHEAQLLAE LSD  
QAAA VTWLKDGRELSLGPKEYMQVSAGRRALLVRDVAQDDAGLYECVSRGSRTAYQLLVQDITDGYRDWGPAG  
PQKHMCKCAGAKIARYLGS SCYRFLQYDKGVWHLEAALDTRQKGTSSCSLHEKPKLVFAKQQAHSEVKA  
AGNSATLSCEVTQAQTEVTWFKDGKLLSSSSKVRMEASGCSRRLVQVQAGKADAGEYSCEAGGQKLSFRLDVA  
EPKLVFAKQQAHSEVKAEGASATLSCEVAQAQTEVTWFKDGKLLSSSSKVRMEASGCSRRLVQVQAGKAD  
GEYSCEAGGQKLSFRLDVAEPKMFVFAKEQQARSEVKAEGASATLSCEVAQAQTEVTWFKDGKLLSSSSKVRM  
EASGCSRRLVQVQAGKADAGEYSCEAGGQKLSFRLDVTEPKLVFAKEQQARSEVKAEGNSATLSCEVAQAQ  
EVTWFKDGKLLSSSSKVRMEASGCSRRLVQVQAGKADAGEYSCEAGGQKLSFRLDVAEPKLVFAKEQQARSEV  
KAEAGNSATLSCEVAQAQTEVTWFKDGKLLSSSSKVRMEASGCSRRLVQVQAGKADAGEYSCEAGGQKLSFHL  
DVTEPKLVFAKEQQAHSEVKAEGASATLSCEVAQAQTEVTWFKDGKLLSSSSKVRMEASGCSRRLVQVQAGK  
ADAGEYSCEAGGQKLSFRLDVAEPKLVFAKEQQARSEVKAEGASATLSCEVAQAQTEVTWFKDGKLLSSSSK  
VRVEASGCSRRLVQVQAGKADAGEYSCEAGGQKLSFRLDVAEPKLVFAKEQQANSEVKAEGASATLSCEVAQ  
AQTEVTWFKDGKLLSSSSKVRVEASGCSRRLVQVQAGKADAGEYSCEAGGQKLSFRLDVAEPKLVFAKEQQAH  
SEVKAEGASATLSCEVAQAQTEVTWFKDGKLLSSSSKVRVEASGCSRRLVQVQAGKADAGEYSCEAGGQKLS  
FRLDVAEPKLVFAKEQQAHSEVKAEGASATLSCEVAQAQTEVTWFKDGKLLSSSSKVRVEASGCSRRLVQVQ  
AGKADAGEYSCEAGGQKLSFRLDVAEPKLVFAKEQQAHSEVKAEGASATLSCEVAQAQTEVTWFKDGKLLSS  
SSKVRVEASGCSRRLVQVQAGKADAGEYSCEAGGQKLFRLDVAEPKLVFAKEQQAHSEVKAEGASATLSCE  
VAQAQTEVTWFKDGKLLSSSSKVRVEASGCSRRLVQVQAGKADAGEYSCEAGGQKLSFRLDVAEPKLVFAKEQ  
QAHSEVKAEGASATLSCEVAQAQTEVTWFKDGKLLSSSSKVRVEASGCSRRLVQVQVQKADAGEYSCEARGQ  
KLSFRLDVADTRLMFAKEQQARTEVKAEGNSATLSCEVAQAQTEVTWFKDGKLLSSSSKVRVEASGCSRRLV  
VQVQAGKADAGEYSCEAGGQKLSFRLDVAEAE SQIPERPSRREPLVVKEHETIILTATIAAPSVAAVTWLKDV  
EIRRSKRHEATSLGDTHLTVRGAQVLD SAIYSRCVKGEGQDFPVQVEEVAAKFSKPLEPVEGELGGTVMLVC  
ELSP EQAEVWRCGNTQLRPGKRFQMTSEGPRTLT VSGLE REDDAEYVCE SRDDRTSARLTVKVP RVVKFTS  
GLSAMVAEEGQEATFQCVVSPSDAGVTWYKDGMLQLPSEKFMV VESGASRSLTILGLTLEDAGQVTEAEGAS  
SSAALRVREAPVLFKKKLEPQTEVEERTSVTLEVELTRPWPEVKWTRNAAVLTPSENVEIRAEGARHCLVLRV  
GFADRGFVFCETPDDKTQAKLNVEMRQVRLVVRGLQVEVEAKEQGTASMDVELSHA EVEG SWTRDGLRLQPGPKC  
HLAVQGPVHILTL SALQPQD SGLVAFRAEGVHTSARLIVTEL PVSFTRVLQDVVATQKEKVTLECELSRPVDV  
RWLKDGV ELRAGKAIGIVAQGT CRSLVIYRCETGDQGVYVCDALDAQTSASLRVQGRTYTLIFRRVLAEDAGE  
VKFVAENAESRAHLRVKELPVTLLRPLRDKIAMEKHGRVLECCQVSRASAQVRWFKGGVELQSGPKYEVVSDGL  
YRKLVIN DVQPEDEDTYTC DAGNVKTS AQFFVEEQSITIVRGLKDMTVM EPAPAWFECETSIPSVRPPKWL  
KTVLQAGGNVGL EQDGT VHR LTLHKTCSTMTGPVHFTIGKSRSSAQLVVSDIPVVLTRPLEPKAGRELQSVVL  
SCDFRPAKAVQWYKDDT PLSPEKFKMALEGQMAELRILRLTPADAGVYRCQAGSAQSSAEVTVAEAREVTVI  
QPLQDAEAMEEGRVCFSCELSHKDEDIEWSLNGTPLYNDSFHEISH EGCLHTLVLSVSRQADTGTVCATSPKV  
SVSARLVVKGKPVVFLKALDDVSAEERGLTLTQCEVSDPEARVVRKDGVELG PSDKYDFLHKAGARGLTVHD  
LSHEDAGLYTCQVGSKETQSKVSVHDLHVGITKRLKTVEVLEGE SCFECVLSHESPSDPAVWTVGGKTVGGS  
GHFHAVRQGRKYTLTVKDAALSDAGEV VSVLGLT SKASLIIRERPV DITKPLEDQRTTLGEDVMLSCELSRA  
GTSVRWLKDGKAIRKSQYDLLSEGTRAVLVVRKASLKD SGEYTCETEASKSTAKLCVEEKANRTEELADLQ  
VEEKGRAVFTCKTEHPASVVTWRKGLLELRASGKHVPSQEGTLTKLTINALERTSDTYTCDIGQARTQARLL  
VHGQKVRVIEDLEDTAVQEGSSAKFCRIAPADYGPVHWF LDKTPLHSNELNEITVQPGGYHVLT LRQLALKD  
SGTVYFEAGDQRTS AALRVTEKPSIFSRPLTDVTVTEGEDLTLVCETTTVDSSVRWTKDGKTLRPSARCQLSH  
EGCQAQLLITATTPQDGGRYKCEIGGASSSIVRVHALPVRFRRESLKDVEVPEGKAATLRCVLSVAAPVEWR  
HGDDVLKSNKYSRLRQEGAVLELVIRDLQPQD SGGYSCSFGDQTT SATLTVKTS SAQFVGLRNKEATEGTTV  
TLRCELTK EAPVEWKKGTETLRNGDKYSLKQD GAVCELQICSLLVADAGEYSCVCGQEKTSATLTVKALLVHF  
VRRLSKEATEGDTTTLQCELSKAAPVEWRKGTETLRDGD RYSLKQD GAVCELQIRSLTIADAGEYLCTCGQE  
KTSATLTVRALPAKFKDSLKNEEATEGTTATLSCELSKAAPVTWKKGPKTLQSGDKYVLRQD GAVCGLQIHGL

TMADAGEYSCVCGQEKTSATLTVRGLPAKFIEDLRSQEATEGATAILRCELSKAAPVEWRKGETLKDGDYR  
 LRQDGA VCELQIRGLAVVDGTGYSLSPTKFTTEGLRNEEATEGTMATLRCQMSKAAPVEWRKGETL  
 LRQDGA MCELQIRGLTIEDSGEYTCVCGQEKTSATLSVKALPSRFIEDLRSQEATEGTMATLRCQMSK  
 TAPVE WKKGSETLRDGGRYSLRQDGPVCELQICDLAVEDAGEYSCVCGQEKTSATLSIKALPPRFIE  
 DLRSQEATEGTMATLRCQMSKAAPVEWRKGETLGDGGRYSLRQNGAVCELQIHDLAVEDTGEYSCV  
 CGQEKTSATLNVKALPPRFIEDLRSQEATEGTMATLRCQMSKAAPVEWRKGETLRDGGRYSLRQD  
 GAVCELQIHDLVEDAGQYSCVCGQEKTSAVLTVDALPPKFTEGLKKEEATEGTMVTLRCQMSKEA  
 TVEWRKGAKTLSDDGGRYSLRQDGA MCELQICGLAVEDAGEYSCVCGQEKTSATLSVKALPPRFIE  
 DLRSQEATEGTMATLRCQMSKAAPVEWRKGETLRDGGRYSLRQDGA MCELQICGLAVEDAGEYLCV  
 CGQEKTSATLSVKALPPRFIEDLRSQEATEGTMATLRCQMSKAAPVEWRKGETLRDGGRYSLRQD  
 GAVCELQICDLAVEDTGDYSCVCGQEKTSATLSVKALPPRFIEDLRSQEAREGTVATLRCRMSKA  
 APVEWRKGETLKDGDYRSLRQEGNLCELQIRDLAVEDTEEYSCVCGQEKTSATLSVKALPAKFIE  
 DLRSQEAPESSTVTLRCKLSKKASVWVWKKGSETLRNGARYSLRQDGA VCELEIRDLTVEDTGEY  
 SCTCGQERTSATLSIMAPQVVFPQLQNLQAEEGSMASLRCELSVFNAMVWVSKGGLELQGDTRR  
 EARQQGCVAELLLRDLRREDAGEYSCTCGSQTTSATLMVTAAPVRFRELQAQDVDEGATARLRCELS  
 REAVSVEWRKGS LQFPCA KYQMVQEGTTAELLVHGVEQEDAGEYTC DAGHTQSIARLSVRAPKPKFK  
 TDLQSTEQEAGGTARLCCQLSEAEFGTVPVQWLKEGVELHVGSKYEMRRQGA VCELLIHGLEAKDT  
 GEYACL VGGQKTLASLRVKEPEVTVIRGLVDMVEQADEDFEFTCKVSAQAGATDVQWHLQGLPLQ  
 SNEVTEVAVLADGCTHVLQ LKGVTLEDAGTVSFHVGGSSSAQLTVRVPEVTVLEPLKDVQLSE  
 GDADHFRCLSRASGQEARWALGGVPLQC NEMNDITVEQGTLYLLTLHKVTLEDAGTITLQVGS  
 CSSEALQKVTA KNTVLRGLENVDAL EGG EALFECQLSQPEVA AHTWLLDDEPVHTSEKVEV  
 VYFENGLRHLLLNKLPQDSCRVTFLAGDVVTS AFLTVRGWRLEVL EPPHDASVKAGMQVRFTCIL  
 SEAVPVGEATWYINGAAIQPDDTDWTVTTDGS HHALTLSNAQPQHAGEVTF AARDAVASARLS  
 VIALPDPPEDAE VVGRSDHSVTL SWVAPMSDGGGGLCGYR VEMKEASTGQWQLCHDLVPGPECV  
 VDDLVPGKTYRFRVA AVGPA GAGEPVHLPQMVKIAPAPAPAPAPAPAPETRQAVVGEDICLELEVA  
 ADGGEVVWHKGTERRIQPGHFVLSRGQRQMLVIKGFRTEDQGEYRCGP IQGLPSSGAATFNVM  
 TSGSGDEVPAQPSLPPEAAQEGDLHLLWEALAR KRRMSREPTLDSISELPEEDSRVQHLRQEA  
 EETAPDLSEGYSTADELARTGEADLSHTSSDDES RAGT PSLVTY LKKAAGPGI SPLASKHEA  
 QVTT SVKPKQKQEPVPTCP PPGDLSAADLMDPSLDKAAVKIQAAF KGYKVRKEMKQEGP  
 VFSRTFGDTEAQVGVDLRLRLECVLATAKTD MRACWLKDGIELTDGRHYHIDQLKDGTC SL  
 LVTLGLAPDSGRYTCQVSTKSGRVSHSACVVVSGTESEAESSGGELDDAFRRAARRLHRLFR  
 TKSPAELSEELFLSADEGPGEPEEPADWQTYRE DENFVCIRFESLAEARQAVTCFRNMFATM  
 GIGVEISLGEQGPGRVEMRIGKVAPT VTPAVPLAKTPGLQTSDAAPVFLTELQNDVQDGY  
 PMSFDCVVTGQPVPSVRWFKD GKLEEDDH YMINEDQGGHQLIITAVVPADMGVYRCLAENS  
 MGVSSTKAELRVELTSTDYDTAADATETSSYFSAQGYLSSREQEGTESDEGQLPQVLEEL  
 KDLQVAPGTR LAKFQLKVKGYPA PKLYWFKDGP LTTSDHIRMTDKKTLHTLEIVSVTR  
 EDSGQYAAYSNAVGAAYSSARLLVRGPSEPEEK PASDVHERLVPPRI LEKFTPKKVKRGS  
 SITFSVKVEGHPAPSVH WLKEEA EKGV LWIGPDTPGYTMASSSKQHS LVLVDVGRQHOGTY  
 TC IATNPAGQALCSASLHISGLAKEEEQ ERVKEALISSFLGQTSQAVSAQMSESA GFADLV  
 GSKGESLVAEEAHSHLSLAEVGT EEFLOKLT SQITEMVSAKISQAKLQVPGGDSDEETKTP  
 SASPRHGRSRPSSSVQESSSEEDGDSRGEIFDIYVVTADYLP LGAEQDAIILREGQYVEV  
 LDSAHLRVLRTKPTKSSPSRQGWVSPAYLDRKRLKLSPEWGPTEAPEFPGEAVSEDEYR  
 TRLSSVIQELLSSEQAFV GELQFLES HHMKHLERSPRVPA AVASQKT VIFRNVDI SHFHSS  
 FLKELQCGCTDDDVAMCFIKNQEA FEKYLEFLVGRVQAESVVVSTPVQEFYKKYAEETLSA  
 KDPTQPPPPLOHYLEQPVERVQKYQALLKELIRNKARNRQNCALLEQAYAVVSALPQRAEN  
 KLHVS LMENYPGTLEALGEP I RQGHFIVWEGAPGARM PWKGHNHRVFLFRNYLVIC  
 KPRRDSRTD TFSYVFRNMMKLSSIDLNDQVEGD DRAFEVWHEREDSVRKYLLQARTVI  
 IKNSWVKEICGIQQRLAQPVWRPPEFEELADCTAELGETVKLACRV TGT PKPIVSWYKDG  
 KPVEVDPHHILIEDPDGSCTLILDNLTGIDSGQYMCFAASAAGNASTLGKILVQVPPRFV  
 NKRATPFVEGEDAQITCTVEGAPYPQIRWYKDG TLLAPGNRYRMLNEPRSGVLV LVIQAAS  
 KEDLGHYECELVNRLGSTRGGGEL YMQSPALRARQHHREQI VA AVEERRPSP\*  
 >rs262091051\_ENSMUSP00000151217\_c.1696:G>A\_p.W566\*  
 ENSMUST00000219084.3|Obscn-207|ENSMUSG00000061462|-|chr11:g.59023972:C>T  
 MDHSFSGAPRFLTRPKAFVSVGKDATLSCQIVGNPTPHVSWEKDRQPV EAGARFRLAQDGDVYR  
 LTILD LALGDSGQYVCRARNAIGEAFAAVGLRVDSEGTC AEQAPHLLRPTSIRVREGADATFRCR  
 VGGSPQPAVSWSKDGRRLGPPDAPHVRVEEHGESSALRIRSARPRDGGTYEVRAENPLGSASAAA  
 ALVVDSAEVAGPPGTSTATILLAHLQORREAMRAEGIPPSPPGAGTRTCTVTEGKHARLSCFV  
 TGPEPKPETVWKKDQGLVTEGRRHVYVEDEQENFVLKILFCKQSDRGLYTCTASNLVGQTY  
 SSVLVVVREPTVPFKKRLQDLEVREKESATFQCEVAQ PATEAAWFK EETRLWASAKYDIEE  
 EGTEERRLTVRNVSADDDAVYICETTEGSR TVAELSVQGNLTKR LPRKTAVRTGDTAIF  
 WVLEAVPEGPVRWLRNQEEMVAGGRVAITAEGTCHTLIFQCTLED MGEVAFVSGGCR TTTQ  
 FCVSA PRPPLYPADPVVKAKTESVTL SWSAPPHGDRPVTIDGYVLEK RKLGA YAWSRCHEAG\*  
 LATTEFTITGV AEEGDFQFRVSAINHFGQGPYLEFPGMTMHLVPM LAVKTP LKAVEAVEGGEVTF  
 SVDLTVASSGEWFLDGEALKASSIYVIRCDRTRHMLTIREV PARLHGAQLKFVANGIETS  
 IQMVVRAALGLPSSKLPAAAAREVLAQLHEEAQLLAE LSDQAAA VTWLKDGRELSLGP  
 KYEMQVSAGRRALLVRDVAQDDAGLYECVSRGSR TAYQLLVQDITDGYRDWGPAG

PQKHMCKCAGAKIARYLGSSCYRFLQYDKGVWHWLEAALDTRQGKGTSSCSLHEKPKLVFAKQQAHSEVKAE  
AGNSATLSCEVTQAQTEVTFWKDGKLLSSSSKVRMEASGCSRRLVVQQAGKADAGEYSCEAGGQKLSFRDLVA  
EPKLVFAKQQAHSEVKAEAGASATLSCEVAQAQTEVTFWKDGKLLSSSSKVRMEASGCSRRLVVQQAGKADA  
GEYSCEAGGQKLSFRDLVAEPKMFVFAKEQQARSEVKAEAGASATLSCEVAQAQTEVTFWKDGKLLSSSSKVRM  
EASGCSRRLVVQQAGKADAGEYSCEAGGQKLSFRDLVTEPKLVFAKEQQARSEVKAEAGNSATLSCEVAQAQ  
EVTWFKDGKLLSSSSKVRMEASGCSRRLVVQQAGKADAGEYSCEAGGQKLSFHLVTEPKLVFAKEQQAHSEV  
KAEAGASATLSCEVAQAQTEVTFWKDGKLLSSSSKVRMEASGCSRRLVVQQAGKADAGEYSCEAGGQKLSFR  
DLVAEPKLVFAKEQQARSEVKAEAGASATLSCEVAQAQTEVTFWKDGKLLSSSSKVRVEASGCSRRLVVQQAG  
ADAGEYSCEAGGQKLSFRDLVAEPKLVFAKEQQANSEVKAEAGASATLSCEVAQAQTEVTFWKDGKLLSSSSK  
VRVEASGCSRRLVVQQAGKADAGEYSCEAGGQKLSFRDLVAEPKLAFAKEQQAHSEVKAEAGASATLSCEVAQ  
AQTEVTFWKDGKLLSSSSKVRVEASGCSRRLVVQQAGKADAGEYSCEAGGQKLSFRDLVAEPKLVFAKEQQAH  
SEVKAEAGASATLSCEVAQAQTEVTFWKDGKLLSSSSKVRVEASGCSRRLVVQQVKGADAGEYSCEARGQKLS  
FRDLVAEAESQIPERPSRREPLVVKHEHETIILTATIAAPSVAAVTWLKDGVERRSKRHEATSLGDTHLTVR  
GAQVLDIAISCRVKGEGQDFPVQVEEVAAKFSKPLEPVEGELGGTVMLVCELSPEQAEVVRWCNTQLRPGK  
RFQMTSEGPRRTLTVSGLREDDAEYVCESRDDRTSARLTVKVRVVKFTSGLSAMVAEEGQEAFTQCVVSPS  
DAGVTWYKDGMLQVPEKFMVVEGASRSLTILGLTLEDAGQVTEAEGASSAALRVREAPVLFKKKLEPQT  
VEERTSVTLEVELTRPWPEVKWTRNAAVLTPSENVEIRAEGARHCLVLRVSVGFADRGFFGCEPDDKTQAKLN  
VEMRQVRLVRLQVEVAKEQGTASMDVELSHAEEVGSWTRDGLRLQPGPKCHLAVQGPFVHILTLQALQVQDSG  
LVAFRAEGVHTSARLIVTELPVVFTRVLQDVVATQKEKVTLECELSRPVDVRWLKDGVELRAGKAIQVQGT  
CRSLVIYRCETGDQGVYVCDALDAQTSASLRVQGRYTLIFRRLVAEDAGEVKFVAENAESRAHLRVKELPVT  
LLRPLRDKIAMKHRGVLEQVSRASAQVRWFKGGVELQSGPKYEVVSDGLYRKLVIINDVQPEDEDYTC DAG  
NVKTSAQFFVVEEQSITIVRGLKDMTVMEPAPAWFECETSIPSVRPPKWLGLKTVLQAGGNVLEQDGTVHRLT  
LHKTCTMTGPVHFTIGKSRSSAQLVVSDIPVVLTRPLEPKAGRELQSVVLSCDFRPAPKAVQWYKDDTPLSP  
SEKFKMALEGQMAELRILRLTPADAGVYRCQAGSAQSSAEVTVAEAREVTVIQPLQDAEAMEEGRVCFSCELSH  
KDEDIEWSLNGTPLYNDSFHEISHGCLHTLVLKSVRQADTGTVCATSPKVSVSARLVVKGKPVVFLKALDDV  
SAERGTLLTQCEVSDPEARVVWRKDGVELGSPDQYDFLHKAGARGLTVHDLSHEDAGLTCQVGSKETQSKV  
SVHDLHVGITKRLKTVEVEKSEFCVLSHESPSDPVAVTVMGKTVGGSGHFHAVRQGRKYTLTVKDAALS  
DAGEVVFVSVLGLTSKASLIIRERPVDITKPLEDQRTTLGEDVMLSCELSRAGTSVRWLKDGKAIKRSQKYDLL  
SEGTRAVLVVRKASLKDSGEYTCETEASKSTAKLCVEEKANRFTEELADLQVEEKGRAVFTCKTEHPASVVTW  
RKGLLELRASGKHVPSQEGTLTKLTINALERTSDTYTCDIGQARTQARLLVHGQKVRVIEDLEDTAVQEGSS  
AKFCCRIPADYGPVHWFLLDKTPLHSNELNEITVQPGYHVLTLRQLALKDSGTVYFEAGDQRTSAAALRVTEK  
PSIFSRPLTDVTVTEGEDTLVCETTTVDSSVRWTKDGKTLRPSARCQLSHEGCAQLLITATTPQDGGRYKC  
EIGGASSSSIVRVHALPVRFRESLKDVEVPEGKAATLRCVLSVAAPVEWRHGDDVLKSSNKYSLRQEGAVLE  
LVIRDLQVQDSGQYSCSFGDQTTSATLTVKTSQAQFVGLKRNKEATEGTTVTLRCELTKAPVEWKKGTETLR  
NGDKYSLKQDGAVCLELQICSLLVADAGEYSCVCGQEKTSATLTVKALLVHFVRRRLSKEATEGDTTLQCELS  
KAAPVEWRKGTETLRDGDYSLKQDGAVCLELQIRSLTIADAGEYLCTCGQEKTSATLTVRGLPAKFIEDLRSQ  
EATEGATAILRCELSKAAPVEWRKGSSETLKDGDYTLRQDGAVCLELQIRGLAVVDTGTYSLPTKFTTEGLRNE  
EATEGTMATLRCQMSKAAPVEWRKGSSETLRDGDYSLRQDGAVCLELQIRGLTIEDSGEYTCVCGQEKTSATLS  
VKALPPRFIEDLRSQEATEGTMATLRCQMSKAAPVEWRKGSSETLGDGGYSLRQNGAVCELELQIHDLAVEDTGE  
YSCVCGQEKTSATLNVKALPPKFTEGLKKEEATEGTMVTLRQMSKEATVEWRKGAKTLSDGGRYSLRQDGA  
MCELQICGLAVEDAGEYSCVCGQEKTSATLSVKALPPRFIEDLRSQEATEGTMATLRCQMSKAAPVEWRKGS  
LRDGDYSLRQDGAVCLELQIRDLAVEDAGEYLCVCGQEKTSATLSVKALPPRFIEDLRSQEATEGTMATLRCQ  
MSKAAPVEWRKGSKTLRQDGDYSLRQDGAVCLELQICDLAVEDTGDYSCVCGQEKTSATLSVKAPQVVFQQPLQ  
NLQAEEGSMASLRCELSVNAAMVWSKGGLELQDTRREARQQGCVAELLLRDLRREDAGEYSCTCGSQTTSA  
TLMVTAAPVRFRLRELQAQDVDEGATARLRCELSREAVSVWRKGSLLQFPKAKYQMVQEGTTAELLVHGVEQE  
DAGEYTC DAGHTQSIARLSVRAPKPKFKTDLQSTEQEAAGTARLCCQLSEAEPTPVQWLKEGVELHVGSKYE  
MRRQGAVCLELQIHLGLEAKDTGEYACLVGQKTLASLRVKEPEVTIVRGLVDMVEVQADEDEFTCKVSVQAGATD  
VQWHLQGLPLQSNEVTEVAVLADGCTHVLQKGVTLLEDAGTVSFHVGGSSSAQLTVRVPEVTVLEPLKDVQL  
SEGQDAHFRCLSRASGQEARWALGGVPLQCNEMNDITVEQGTLYLLTLHKVTLEDAGTITLQVGSSEAQL  
KVTAKNTVLRGLENDVALEGGELFECQLSQPEVAHTWLLDDEPVHTSEKVEVVYFENGLRHLLLLKLNKLPQ  
DSCRVTFLAGDVVTSFALTVRGWRLEVLPPHDASVKAGMQVRFTCILSEAVPVGEATWYINGAAIQPDDTDW  
TVTDTDGSHALTLNSAQPQHAGEVTF AARDAVASARLSVLAALPDPPEDAEVVGRSDHSVTLVSWVAPMSDGGGG  
LCGYRVEMKEASTGQWQLCHDLVPGPECVVDDLVPKGYRFRVAAVGPAGAGEPVHLPQMVKIAPAPAPAPAP  
APAPETRAQAVNVEDICLEVAADGGEVVDHKLTERIQYRGGHFEVLSRQRQMLVIKGFRTEDQGEYRCGPIQ  
GLPSSGAATFNVVMTSGSGDEVPAQPSLPPPEAAQEGDLHLLWEALARKRRMSREPTLDSISELPEEDSRVQHL  
RQEAETAPDLSEGYSTADELARTGEADLSHTSSDDESRAGTPSLVTYLKKAGGPGISPLASKHEAQVTTSVK  
PQKQQEPVVPTCPPPGDLSAADLMDPSLDKAAVKIQAAFQYKVRKEMKQOEGPVSRTFGDTEAQVGDVLR  
ECVLATKTDMRACWLKDGIELTDGRHYHIDQLKDGTC SLVTLGLAPTDSGRYTCQVSTKSGRVSHSACVVVSG

TESEAESSSGGELDDAFRRAARLHRLFRTKSPAELSEELFLSADEGPGPEEPADWQTYREDEFVCIRFE
SLAEARQAVTCFRNMFATMGIGVEISLGEQGPRGVEMRIGKVAPTPTPAVPLAKTPGLQTSDAAPVFLTELQN
QDVQDGYPMFDCVVTGQPVPSVRWFKDGKLLLEDDHYMINEDQQGGHQLIITAVVPADMVYRCLAENSMGV
SSTKAELRVELTSTDYDTAADATETSSYFSAQGYLSSREQEGTESDEGQLPQVLEELKDLQVAPGTRLAKFQL
KVKGYPAKLYWFKDGQPLTSDHIRMTDKKTLHTLEIVSVTREDSDGQYAAAYISNAVGAAYSSARLLVVRGPSE
PEEKPASDVHERLVPRILEKFTPKVKRGSSITFSVKVEGHPAPSVHWLKEEAKEKGLWIGPDTPGYTMAS
SKQHSVLVLDVGRHQGTYTICATNPAGQALCSASLHISGLAKEEEQERVKEALISSFLOGTSQAVSAQMS
AGFADLVGQSKGESLVAEEAHSHLSLAEVGTEEFQKLTLSQITEMVSAKISQAKLQVPGGDSDEETKTPSASP
RHGRSRPSSSVQESSESEEDGDSRGEIFDIYVVTADYLPLGAEQDAIILREGQYVEVLDSAHPLRWLVRTKPT
KSSPSRQGWVSPAYLDKRLKLSPEWGPTEAPEFPGEAVSEDEYRTRLSSVIQELLSSEQAFVGGELQFLESHM
KHLERSPRVPAAVASQKTIVIFRNVQDISHFHSSFLKELQCGCTDDDVAMCFIKNQEAFKEYLEFLVGRVQAES
VVVSTPVQEFYKKYAETLSAKDPTQPPPPPLQHYLEQPVVERVQKYQALLKELIRNKARNRQNCALLEQAYAV
VSALPQRAENKLVSLMENYPGTLEALGEPPIRQGHFIVWEGAPGARMWPKGHNHRVFLFRNYLVICPRRDSR
TDTFSYVFRNMMKLSSIDLNDQVEGDDRAFEVWHEREVSRKYLQARTVIKNSWVKEICGIQQRLAQPVWR
PPEFEEELADCTAELGETVKLACRVGTGPKPIVSWYKDGKPEVDPHHILIEDPDGSCSTLIIDNLGTIDSGQY
MCFASAAGNASTLGLKILVQVPPRFVNVKVRATPFVEGEDAQITCTVEGAPYPQIRWYKDGTLTLLAPGNRYRMLN
EPRSGPVLVLIQAASKDLGHYCELVNRLGSTRGGELYMQSPALRARDQHHREQIVAAVEVTEQETKVPKK
TVLIEETITTVVKS PRGRRQSPGKSPSRSPSRSSASPRRPGLLAPERLYPPGTSPSRREVEQGRKAPVPALY
VTEAEVHAPASQSQPKWLEVEETIEVRVKKTGSRGASPVREMTSRGEGILFTLPGGIPGRDPNANNNSNKS
VYQEARWGPVAVHVGEFFIFQVDSVGNVDWAASPEPEQVRSQKEENTERQEGCSDGDENTFLMEEPQD
TDSLQGRDPKILTHNGRVLTLADLEDYVPQEGETFQCGDSTPSTPDEPPCEVSVLQREI
SEPTVQGPVLLNVGRPPGTGATPSFFRPGSQVHSPESVSFLLREAWSGPVSAAPWTSSFH
THVQSSVDGSHGSFKTEVSTQTVSFGAVGETVTLHIDPDGGEAPGPSQ\*

>rs50432310\_ENSMUSP00000158795\_c.1308:A>G\_p.I437V
ENSMUST00000238536.2|Obscn-210|ENSMUSG00000061462|-|chr11:g.59024730:T>C
MDHSFSGAPRFLTRPKAFVSVGKDATLSCQIVGNPTPHVSWEKDRQVVEAGARFLAQDGDVYRLTILDLAL
GDSGQYVCRARNAIGEAFAAVGLRVDSEGTCAEQAPHFLLRPTSIRVREGADATFRCRVGGSPQPAVSVSKDG
RRLGPPDAPHVRVEEHGESSALRIRSARPRDGGTYEVRAENPLGSASAAAAALVVDSDAEVAGPPGTSTATLLA
HLQORREAMRAEGIPPSPPGAGTRTCTVTEGKHARLSCFVTGEPKPEVWKKDGQLVTEGRRHVVEDEQENF
VLKILFCKQSDRGLYTCTASNLVGQTYSSVLVVREPTVPFKKRLQDLEVREKESATFQCEVAQPAEA
WFK EETRLWASAKYDIEEGETERRLTVRNVSADDDAVYICETTEGSRVVAELSVQGNLTKLPRKTA
VRTGDTAVFWVELAVPEGPVRWLRNQEEMVAGGRVAITAEGTCHTLTI FQCTLEDMGEVAFVSGGCR
TTTTQFCVSAPRRPPLYPPADPVVKAKTESSVTLWSAPPHGDRPVTIDGYVLEKRKLGAYAWSRCHEAG
WLATTEFTITGVAAEGDFQFRVSAINHFGQGPYLEFPGTMHLVPLAVKTPKAVEAVEGGEVTFVSDLT
VASSGEWFLDGEALKASSIYVIRCDRTRHMLTIREVPARLHGAQLKFVANGIETSIQMVRAALGLPSSKL
PAAAAREVLAQLHHEAQLLAE LSDQAAAVTWLKDGRELSLGPKYEMQVSAGRRALLVRDVAQDDAGLY
ECVSRGSRRTAYQLLVQDITDGYRDWGPAGPQKHMCKCAGAKIARYLGS SCYRFLQYDKGVWHLEAAL
DTRQKGKTS SCSLHEKPKLVFAKQQAHSEVKA EAGNSATLSCEVTQAQTEVTWFKDGKLLSSSSK
VRMEASGCSRRLVVQQAGKADAGEYSCEAGGQKLSFRLDVAEPKLVFAKQQAHSEVKA EAGASAT
LSCEVAQAQTEVTWFKDGKLLSSSSKVRMEASGCSRRLVVQQAGKADAGEYSCEAGGQKLSFRLD
VAEPKLVFAKEQQARSEVKA EAGASATLSCEVAQAQTEVTWFKDGKLLSSSSKVRMEASGCSRRL
VVQQAGKADAGEYSCEAGGQKLSFRLDVTEPKLVFAKEQQARSEVKA EVGNSATLSCEVAQAQT
EVTWFKDGKLLSSSSKVRMEASGCSRRLVVQQAGKADAGEYSCEAGGQKLSFRLDVAEPKLVFAKE
QQARSEVKA EAGNSATLSCEVAQAQTEVTWFKDGKLLSSSSKVRMEASGCSRRLVVQQAGKADAGE
YSCEAGGQKLSFHL DVTEPKLVFAKEQQAHSEVKA EAGASATLSCEVAQAQTEVTWFKDGKLLSS
SSKVRMEASGCSRRLVVQQAGKADAGEYSCEAGGQKLSFRLDVAEPKLVFAKEQQAHSEVKA EAG
ASATLSCEVAQAQTEVTWFKDGKLLSSSSKVRMEASGCSRRLVVQQAGKADAGEYSCEAGGQKLS
FRLDVAEPKLVFAKEQQAHSEVKA EAGASATLSCEVAQAQTEVTWFKDGKLLSSSSKVRMEASG
CSRRLVVQQAGKADAGEYSCEAGGQKLSFRLDVAEPKLVFAKEQQAHSEVKA EAGASATLSCEVA
QAQTEVTWFKDGKLLSSSSKVRMEASGCSRRLVVQQAGKADAGEYSCEAGGQKLSFRLDVAEPKLV
FAKEQQAHSEVKA EAGASATLSCEVAQAQTEVTWFKDGKLLSSSSKVRMEASGCSRRLVVQQAG
KADAGEYSCEAGGQKLSFRLDVAEPKLVFAKEQQAHSEVKA EAGASATLSCEVAQAQTEVTWFKD
GKLLSSSSKVRMEASGCSRRLVVQQAGKADAGEYSCEAGGQKLSFRLDVAEPKLVFAKEQQAHSE
VKA EAGASATLSCEVAQAQTEVTWFKDGKLLSSSSKVRMEASGCSRRLVVQQAGKADAGEYSCE
AGGQKLSFRLDVAEPKLVFAKEQQAHSEVKA EAGASATLSCEVAQAQTEVTWFKDGKLLSSSSK
VRMEASGCSRRLVVQQAGKADAGEYSCEAGGQKLSFRLDVAEPKLVFAKEQQAHSEVKA EAGASAT
LSCEVAQAQTEVTWFKDGKLLSSSSKVRMEASGCSRRLVVQQAGKADAGEYSCEAGGQKLSFRLD
VAEPKLVFAKEQQAHSEVKA EAGASATLSCEVAQAQTEVTWFKDGKLLSSSSKVRMEASGCSRRL
VVQQAGKADAGEYSCEAGGQKLSFRLDVAEAEASQIPERPSRREPLVVKEHETIILTATIAAPSVAA
VTWTKDGV EIRRSKRHEATSLGDTHTLTVRGAQVLDIAIYSCRVGKEGQDFPVQVEEVAAKFSKPLE
PVEGELGGTVMLVCELSPQAEVWRCGNTQLRPGKRFQMTSEGPRRTLTVSGLREDDAEYVCESRDDRT
SARLTVKVPVVKFTSGLSAMVAEEGQEATFQCVVSPSDAGVTWYKDGMLQLPSEKFMVESGASRSLT
ILGLTLEDAGQVTVAEAGAS

SSAALRVREAPVLFKKKLEPQTVVEERTSVTLEVELTRPWPEVKWTRNAAVLTPSENVEIRAEGARHCLVLRVSV  
GFADRGFFGCETPDDKTQAKLNVEMRQVRLVVRGLQVEVEAKEQGTASMDVELSHAEEVGSWTRDGLRLQPGPKC  
HLAVQGPVHILTLALSALQPQDSGLVAFRAEGVHTSARLIVTELVPVSTRVLQDVVATQKEKVTLECELSRPVVDV  
RWLKDGVLELRAGKAIGIVAQGTCSRSLVIYRCETGDQGVYVCDALDAQTSASLRVQGRTYTLIFRRLAEDAGE  
VKFVAENAESRAHLRVKELPVTLRPLRDKIAMEKHRGVLECVSRASAQVRWFKGGVELQSGPKYEVVSDGL  
YRKLVINVDVQPEDEDTYTCDAENVKTSAQFFVEEQSITIVRGLKDMTVMEPAPAWFECETSIPSVRPPKWLGL  
KTVLQAGGNVGLQDGTVHRLTLHKTCSTMTGPVHFTIGKSRSSAQLVVS DIPVVLTRPLEPKAGRELQSVVL  
SCDFRPAPKAVQWYKDDTPLSPSEKFKMALEGQMAELRILRLTPADAGVYRCQAGSAQSSAEVTVAREVTVI  
QPLQDAEAMEEGRVCFSELSHKDEDEIWSLNGTPLYNDSFHEISHEGCLHTLVLKSVRQADTGTVCATSPKV  
SVSARLVVKGKPVVFLKALDDVSAEERGLTLTQCEVSDPEARVVWRKDGVELGPDSDKYDFLHKAGARGLTVHD  
LSHEDAGLYTCQVGSKETQSKVSVHDLHVGITKRLKTVEVLEGESECFEVLSSHESPSDPAVWTVGGKTVGGS  
GHFHAVRQGRKYTLTVKDAALSDAGEVVSVLGLTSKASLIIRERPV DITKPLEDQRTTLGEDVMLSCELSRA  
GTSVRWLKDGKAIRKSQKYDLLSEGTRAVLVVRKASLKDSGEYTCETEASKSTAKLCVEEKANRFTBELADLQ  
VEEKGRAVFTCKTEHPASVVTWRKGLLELRASGKHVPSQEGTLTKLTINALERTSDTYTCDIGQARTQARLL  
VHGQKVRVIEDLEDTAVQEGSSAKFCRIAPADYGPVHWFLLDKTPLHSNELNEITVQPGGYHVLTLRQLALKD  
SGTVYFEAGDQRTSAAALRVTEKPSIFSRPLTDVTVTEGEDTLTVCE TTTVDSSVRWTKDGKTLRPSARCQLSH  
EGCQAQLLITATTPQDGGRYKCEIGGASSSSIVRVHALPVRFRRESLKDVEVPEGKAATLRCVLSVAAPVEWR  
HGDDVLKSSNKYSLRQEGAVLELVIRDLQPQDSGQYSCSFGDQTTSATLTVKTS SAQFVGKLRNKEATEGTTV  
TLRCELTKAPVEWKKGTETLRNGDKYSLKQDGA VCELQICSLLVADAGEYSCVCGQEKT SATLTVKALLVHF  
VRLRSKEATEGDTTTLQCELSKAAPVEWRKGTETLRDGD RYSLKQDGA VCELQIRSLTIADAGEYLCTCGQE  
KTSATLTVRALPAKFKDSLKNEEATEGTTATLSCELSKAAPVTWKKGPKTLQSGDKYVLRQDGA VCGLIHGL  
TMADAGEYSCVCGQEKT SATLTVRGLPAKFIEDLRSQEATEGATAILRCELSKAAPVEWRKGS ETLKDGD RYT  
LRQDGA VCELQIRGLAVVDGTYS SLPKTFTEGLRNEEATEGTMATLRCQMSKAAPVEWRKGS ETLRDGD RYS  
LRQDGA MCELQIRGLTIEDSGEYTCVCGQEKT SATLSVKALPSRFIEDLRSQEATEGTMATLRCQMSKTAPVE  
WKKGSETLRDGGRYSLRQDGPVCELQICDLAVEDAGEYSCVCGQEKT SATLSIKALPPRFIEDLRSQEATEG T  
MATLRCQMSKAAPVEWRKGS ETLGDGGRYSLRQDGA VCELQIHDLAVEDTGEYSCVCGQEKT SATLVNVA LPP  
RFIEDLRSQEATEGTMATLRCQMSKAAPVEWRKGS ETLRDGGRYSLRQDGA VCELQIHDLVEDAGYSCVCG  
QEKTSAVLTVDALPPKFTTEGLKKEEATEGTMVTLRCQMSKEATVEWRKGAKT LSKGGRYSLRQDGA MCELQIC  
GLAVEDAGEYSCVCGQEKT SATLSVKALPPRFIEDLRSQEATEGTMATLRCQMSKAAPVEWRKGS ETLRDGD R  
YSLRQDGA VCELQIRDLAVEDAGEYLCVCGQEKT SATLSVKALPPRFIEDLRSQEATEGTMATLRCQMSKAAP  
VEWRKGS KTLRDGD RYSLRQDGA MCELQICDLAVEDTGDYSCVCGQEKT SATLSVKALPPRFIEDLRSQEARE  
GTVATLRCRMSKAAPVEWRKGS ETLKDGD RYSLRQEGNLCELQIRDLAVEDTEEYSCVCGQEKT SATLSVKAL  
PAKFIEDLRSQEAPESSTVTLRCKLSKKASVVWKKGSETLRNGARYSLRQDGA VCELEIRDLTVEDTGEYSCT  
CGQERTSATLSIMAPQVVFQQPLQNLQAEEGSMASLRCELSVPNAAMVWSKGGLELQGDTRREARQQGCVAEL  
LLRDLRREDAGEYSCYTCGSQTT SATLMVTAAPVRFRLRELQAQDVDEGATARLRCELSREAVSVEWRKGS LQF  
PCAKYQMVQEGTTAELLVHGVEQEDAGEYTC DAGHTQSIARLSVRAPKPKFKTDLQSTEQEAGGTARLCCQLS  
EAEFGTPVQWLKEGVELHVGSKYEMRRQGA VCELLIHGLEAKDTGEYACLVGGQKT LASLRVKEPEVTIVRGL  
VDMEVQADEDVEFTCKV SQAGATDVQWHLQGLPLQSN EVTEVAVLADGCTHV LQLKGVTL EDAGTVSFHVGGL  
SSSAQLTVRVPEVTVLEPLKDVQLSEGQDAHFRCRLSRASGQEARWALGGVPLQCNEMNDITVEQGTLYLLTL  
HKVTL EDAGTITLQVGS CSSEAQLKVTAKNTVLRGLENDVALEGGEALFECQLSQPEVA AHTWLLDDEPVHTS  
EKVEVVYFENGLRHLLLLKNLKPQDSCRVTFLAGDVVTS AFLTVRGWRLEVLEPPHDASVKAGMQVRF TCILS  
EAVPVGEATWYINGAAIQPDDTDWTVTTDGS HHALTLSNAQPQHAGEVTF AARDAVASARLSVLA LDPDPEDA  
E VVGRSDHSVTL SWVAPMSDGGGGLCGYRVEMKEASTGQWQLCHDLVPGPECVVDDLVP GKTYRFRVA AVGPA  
GAGEPVHLPQMVKIAPAPAPAPAPAPAPAPETRAVVGEDICLELEVAADGGEVVWHKGTERRIQPGHFVLS  
RGQRMLVIKGFRTEDQGEYRCGPIQGLPSSGAATFNVMVTS GSGDEVPAQPSLPPEAAQEGLHLLWEALAR  
KRRMSREPTLDSISELPEEDSRVQHLRQEAEETAPDLSEGYSTADELARTGEADLSHTSSDDES RAGT PSLVT  
YLKKAGGPGISPLASKHEAQVTT SVKPQKQEPVVP TCPPPGDLSAADLMDPSLDKAAVKIQA AFKGYKVRKE  
MKQQEGPVFSRTFGDTEAQVGDVLRLECVLATKTDMRACWLKDGIELTDGRHYHIDQLKDGTC SLLVTGLAPT  
DSGRYTCQVSTKSGRVSHSACVVVSGTESEAE SSSGGELDDAFRAARRLHRLFR TKSPAELSEEELFLSADE  
GPGEPEEPADWQTYREDEFVCIREFESLAEARQAVTCFRNMFA TMGIGVEISLGEQGGPRGVEMRIKGVAPT VT  
PAVPLAKTPGLQTS DAAPVFLTELQNQDVQDGYPMSFDCVVTGQVPVPSVRWFKDGKLEEDDH YMINEDQQGG  
HQLIITAVVPADMGVYRCLAENSMGVSSTKAELRVELTSTDYDTAADATETSSYFSAQGYLSSREQEGTESDE  
GQLPQVLEAKLDLQVAPGTRLAKFQLKVKGYPA PKLYWFKDGPPLTSDHIRMTDKKTLHTLEIVSVTRED SG  
QYAAYSNAVGAAYSARLLVRGPSEPEEKASPDVHERLVPRI LEKFTPKKVKRGS SITFSVKVEGH PAPS V  
HWLKEEA EKGV LWIGPDTPGYTMAS SSKQHSVLVLDVGRQHQT YTCIATNPAGQALCSASLHISGLAKEEEEQ  
ERVKEALISSFLQGT SQAVSAQMSE SAGFADLVGQSKGESLVAE EAHSHLSLA EAVGTEEF LQKLT SQITEMVS  
AKISQAKLQVPGGDSDEETKTPSASPRHGRSRPSSSVQESSESESDGDSRGEIFDIYVVTADYLP LGAEQDAI  
ILREGQYVEVLD SAHPLRWLVRTKPTKSSPSRQGWVSPAYL DKRLKLSPEWGPTEAPEFPGEAVSEDEYRTRL

SSVIQELLSSEQAFVGELOFLESHHMKHLERSPRVPAAVASQKTVI FRNVQDISHFHSSFLKELQCGCTDDDDV  
AMCFIKNQEAFAKEYLEFLVGRVQAESVSTPVQEFYKKYAEETLSAKDPTQPPPPPLQHYLEQPVVERVQKYQ  
ALLKELIRNKARNRQNCALLEQAYAVVSALPQRAENKLVSLMENYPGTLEALGEPIRQGHFIVWEGAPGARM  
PWKGHNHRVFLFRNYLVICKPRRDSRTDTFSYVFRNMMKLSSIDLNDQVEGDDRAFEVWHEREDSVRKYLLQA  
RTVI IKNSVWKEICGIQQRLAQPVWRPPEFEEELADCTAELGETVKLACRVTGTGPKPIVSWYKDGKPVVEVDPH  
HILIEDPDGSCTLILDNLGTIDSGQYMCFAASAAGNASTLGKILVQVPPRFVNVKVRATPFVEGEDAQITCTVE  
GAPYPQIRWYKDGTLAPGNRYRMLNEPRSGVLVLIQAASKEDLGHYECELVNRLGSTRGGGELYMQSPALR  
ARDQHHREQIVAAVEDTSVEGSAHSAQDQQAASVLRLLGSEALGSPGDLPNTRQSEPPAFEEAASQIP  
GAASGTPEVSPGTHKGLEQETTSQSGQGWTVPIRVEGTAWPGAGTGQLLLDVHSQVIMETTQRTYVQCQAPDT  
GVTRAPSMQVTIEDVQVQVGDMAQFDAVIEGHPPPIVITWYKGSTQLTSSARLSQRQDGTYSVLVTDVAPHDA  
GVYTCVANNAGGQVLCKAELLVHGGDKLDAENQVYRRKLHSFYDVQEEIGRGVFGFVKRVQHKGNMFCAAKF  
IPLRSKTRAQAYQERDILATLGHPLVTGLLDQFETRKTLLILILELCSSEELLDRLFKKGVTAEAVKVIYIQQ  
VEGLHYLHSHGILHLDIKPPNILMVHPAREDIKICDFGFAQKITPSEPQYSKYGSPEFVSPETIEQNPFVSEGS  
DIWAMGVI SYLSLTCSSPFAGESDRATLLNVLEGRVSWSSPTAAHLSSEDAKDFIKATLQRTPRARPSTSQCLA  
HPWFLKSMPEAAHFINTKQLKFLARSRWQRSLMSYKSILVMRSIPELLQGPPDPSPLGVARHLRGEASGAS  
SSSSSSDNELAPFARAKSLPPSPVTHSPLLHPRGFLRPSASLPEETEASMTADAAVPASPQASAGPPASPGCV  
PRHSVISSLFYQQAGEGAERGNKTSKAKRHPARRRHLKGGYIARALPGLREPLMEYSLLEEEAAREEQASLM  
TKTPSFETALRPLSSSVREVPGRSHSLDNPPVTTGPSPEACKEQLLFPSTGLTHETTAKDRGHKEGFLQESV  
PFPPMSGDSRPGKQEGSSQDSCRKPASSCHSELGSGSQEGCGPPSSQSLGSLPPQSLKKEKELSTSCGPLFSEQ  
PQAAPFPTQVSPLLGSEKEPQDGSLEGPVVPVSSSPGSASQVDASLDTEGLSEAGDTCDFTPPPQRPQEQAT  
TRKFSLESRGGYAGVAGYGTFAFGGDAGGMLGQGPLWARMAWAVSQSSEEQDEAATESPQPLESIGPIAEASG  
VPLRTSPSLTPWEEVEQVSLVQIRDLSGDAEAADTISLIDISEVDPAYLNLSLDYDIKYLPEFEMI FRRVPKPI  
EQPESPGSETEAGQGLADFLLEAAWPWPGEGLGLRAGLEITTEPEEPGDLEALLGEEAVGRKRKWSPSRGLFQF  
PGRCLSGEEPVELGLRQVRKASMAHISRI LKGRPEGPEREPPRKKAGLASFRLSGLKGRDQELSDEAVVLGQ  
SVTLACQVLAQPTAQATWSKDGVLLESSGHLISSTLKNFQLLTI LVVKEEDLGTYTCCVSNPLGTAVTTGVL  
RKAERPSSSRPEVSSPEYKDAVLLVWKPVESECGPVTVIQVCEIEGGSWTTLASDISDCCYLTGKLSRGGMYIF  
RTACVSKAGMGPVSSPEQVLLGGPNHLASEEESRRGRPAQLLPSTKTFQFQMQIRRGYFVSVVRQCREKASGR  
ALAAKIVPYQPEDKTA VLREYEAALKRHLHPLAQLHAAYLSPRHLVLI LELCSGPELLPSLAERESYSESVDK  
DYLWQMLSATQYLHAQHILHLDLRSNNMMVTEYNLLKVIDLGNALDQEKVPAPENFKDYLETMAPELLEGG  
GAVPQTDIWAIGVTAFIMLSGEYPESESETRDLQKGLRGLIRLSRCYAGLSGGAVAFLOSSLCAQPWGRPCA  
STCLQCGWLTEEGPTGSRPTPVTFTVRLRAFVREKRRALLYKKNLAQVR\*  
>rs50432310\_ENSMUSP00000038264\_c.1308:A>G\_p.I437V  
ENSMUST00000047441.14|Obscn-202|ENSMUSG00000061462|-|chr11:g.59024730:T>C  
MDHSFSGAPRFLTRPKAFVSVGKDATLSCQIVGNPTPHVSWEKDRQPVVEAGARFRLAQDGDVYRLTILDLAL  
GDSGQYVCRARNAIGEFAAVGLRVDSEGTCAEQAPHFLLRPTSIRVREGADATFRCRVGSSPQPAVSWSKDG  
RRLGPPDAPHVRVEEHGESSALRIRSARPRDGGTYEVRAENPLGSASAAAALVVDSDAEVAGPPGTSTATLLA  
HLQQRRREAMRAEGIPPSPPGAGTRTCTVTEGKHARLSCFVTGEPKPEVWKKDGQLVTEGRRHVVEDEQENF  
VLKILFCKQSDRGLYTCTASNLVGQTYSSVLVVREPTVPFKKRLQDLEVREKESATFQCEVAQAPATEAAWFK  
EETRLWASAKYDIEEGTERRLTVRNVSADDDAVYICETTEGSRVVAELSVQGNLTKRKLPRKTAVRTGDTAVF  
WVELAVPEGPVRWLRNQEEMVAGGRVAITAEGTCHTLTI FQCTLEDMGEVAFVSGGCRTTTQFCVSAAPRRPPL  
YPPADPVVKAKTESSVTLWSAPPHGDRPVTIDGYVLEKRLGAYAWSRCHEAGWLATTEFTITGVAAEEGDFQ  
FRVSAINHFGQGPYLEFPGMTMLVPLAVKTPKAVEAVEGGEVTFVSDLTVASSGEWFLDGEALKASSIYVI  
RCDRTRHMLTIREVPARLHGAQLKVFANGIETSIQMVVRAALGLPSSKLPAAAAREVLAQLHHEEAQLLAE LSD  
QAAA VTWLKDGRELSLGPKYEMQVSAGRRALLVRDVAQDDAGLYECVSRGSRRTAYQLLVQDITDGYRDWGPAG  
PQKHMCKCAGAKIARYLGSRYFLQYDKGVVHWEALDTRQKGTSSCSLHEKPKLVFAKQQAHSEVKA  
AGASATLSCEVAQAQTEVTWFKDGKLLSSSSKVRMEASGCSRRLVVQQAGKADAGEYSCEAGGQKLSFRLDVA  
EPKMFVFAKEQQARSEVKAEGASATLSCEVAQAQTEVTWFKDGKLLSSSSKVRMEASGCSRRLVVQQAGKADA  
GEYSCEAGGQKLSFRLDVTEPKLVFAKEQQARSEVKAEGVNSATLSCEVAQAQTEVTWFKDGKLLSSSSKVRM  
EASGCSRRLVVQQAGKADAGEYSCEAGGQKLSFRLDVAEPKLVFAKEQQARSEVKAEGNSATLSCEVAQAQ  
EVTWFKDGKLLSSSSKVRMEASGCSRRLVVQQAGKADAGEYSCEAGGQKLSFHLVDVTEPKLVFAKEQQAHSEV  
KAEAGASATLSCEVAQAQTEVTWFKDGKLLSSSSKVRMEASGCSRRLVVQQAGKADAGEYSCEAGGQKLSFR  
DVAEPKLVFAKEQQARSEVKAEGASATLSCEVAQAQTEVTWFKDGKLLSSSSKVRVEASGCSRRLVVQQAGK  
ADAGEYSCEAGGQKLSFRLDVAEPKLVFAKEQQANSEVKAEGASATLSCEVAQAQTEVTWFKDGKLLSSSSK  
VRVEASGCSRRLVVQQAGKADAGEYSCEAGGQKLSFRLDVAEPKLVFAKEQQAHSEVKAEGASATLSCEVAQ  
AQTEVTWFKDGKLLSSSSKVRVEASGCSRRLVVQQAGKADAGEYSCEAGGQKLSFRLDVAEPKLVFAKEQQAH  
SEVKAEGASATLSCEVAQAQTEVTWFKDGKLLSSSSKVRVEASGCSRRLVVQQAGKADAGEYSCEAGGQKLS  
FRLDVAEPKLVFAKEQQAHSEVKAEGASATLSCEVAQAQTEVTWFKDGKLLSSSSKVRVEASGCSRRLVVQQ  
AGKADAGEYSCEAGGQKLFRLDVAEPKLVFAKEQQAHSEVKAEGASATLSCEVAQAQTEVTWFKDGKLLSS

SSKVRVEASGCSRRLLVVQQVGKADAGEYSCEARGQKLSFRLDVAEAEQSI PERPSRREPLVVKEHETI IILTAT  
IAAPSVAAVTWLKDGEIRRSKRHEATSLGDHTTLTVRGAQVLDIAIYSCRVGKEGQDFPVQVEEVAAKFSKP  
LEPVEGELGGTVMLVCELSPEQAEVWVRCGNTQLRPGKRFQMTSEGPRTTLTVSGLREDDAEYVCESRDDRT  
SARLTVKVPVVKFTSGLSAMVAEEGQEATFQCVVSPSDAGVTWYKDKGMQLQPSEKFMVMEVSGASRSLTILGL  
TLEDAGQVTVEAEGASSAALRVREAPVLFKKKLEPQTVEERTSVTLEVELTRPWPEVKWTRNAAVLTPSENV  
EIRAEGARHCLVLRVSGFADRGGFFGCETPDDKTQAKLNVEMRQVRLVVRGLQEVEAKEQGTASMDVELSHAEVE  
GSWTRDGLRLOPGPKCHLAVQGPVHILTLTALQPDSDGLVAFRAEGVHTSARLIVTELPVSTFRVLQDVVATQ  
KEKVTLECELSRPVDVRLKDGVELRAGKAI GIVAQGTCSRSLVIYRCETGDQGVYVCDALDAQTSASLRVQGR  
TYTLIFRRVLAEDAGEVKFVAENAE SRAHLRVKELPVTLLRPLRDKIAMEKHRGVLECVSRASQAQVRWFKGG  
VELQSGPKYEVVSDGLYRKLVIN DVQPEDEDTYTC DAGNVKTSAQFFVEEQSITIVRGLKDMTVMEPAPAWFE  
CETSIPSVRPPKWLKGKTVLQAGGNVLEQDGTVHRLTLHKTCSTMTGPHFTIGKSRSSAQLVVSDIPVVL  
RPLEPKAGRELQSVVLSCDFRPAPKAVQWYKDDTPLSPSEKFKMALEGQMAELRILRLTPADAGVYRCQAGSA  
QSSAEVTVAREVTVIQPLQDAEAMEEGRVCFSCELSHKDEDIEWSLNGTPLYNDSFHEISHEGLHTLVLS  
VRQADTGTVCATSPKVS SARLVVKGKPVVFLKALDDVSAEERGTTLTQCEVSDPEARVVWRKDGVELGPSDK  
YDFLHKAGARGLTVHDLSDHEDAGLYTCQVGSKETQSKVSVHDLHVGITKRLKTVEVLEGESECFVLSHESP  
SDPAVWTVGGKTVGGSGHFHAVRQGRKYTLTVKDAALSDAGEVVFVSVLGLT SKASLI IRERPVDTKPLEDQR  
TTLGEDVMLSCELSRAGTSVRWLKDGKAI RKSQKYDLLSEGTRAVLVRKASLKDSEGYTCETEASKSTAKLC  
VEEKANRFTLELADLQVEEKGRAVFTCKTEHPASVVTWRKGLLELRASGKHVPSQEGTLTKLTINALERTDSD  
TYTCDIGQARTQARLLVHGQKVRVIEDLEDTAVQEGSSAKFCCRIAPADYGPVHWF LDKTPLHSNELNEITVQ  
PGGYHVLT LRQLALKDSGT VYFEAGDQRTS AALRVTEKPSIFSRPLTDVTVTEGEDLTLCETTTVDSSVRWT  
KDGKTLRPSARCQLSHEGCQAQLLI TATTPQDGGRYKCEIGGASSSSIVRVHALPVRFRESLKDVEVPEGKAA  
TLRCVLSVAAPVEWRHGDDVLKSSNKYSLRQEGAVLELVIRDLQPDSDGQYSCSFGDQTTSATLTVKTSQAQ  
FVGKLRNKEATEGTTVTLRCELTK EAPVEWKKGTETLRNGDKYSLKQDGA VCELQICSLLVADAGEYSCVCGQ  
EKTSATLTVKALLVHFVRRLSKEATEGDTTTLQCELSKAAPVEWRKGTETLRDGD RYSLKQDGA VCELQIRS  
LTADAGEYLCTCGQEKTSATLTVRALPAKFKDSLKNEEATEGTTATLSCELSKAAPVTWKKGPKTLQSGDKY  
VLRQDGA VCELQIHLGLTMADAGEYSCVCGQEKTSATLTVRGLPAKFIEDLRSQEATEGATAILRCELSKAAPV  
EWRKGSSETLKDGD RYTLRQDGA VCELQIRGLAVVDGTGYSSLP TKFTEGLRNEEATEGTMATLRCQMSKAAPV  
EWRKGSSETLRDGD RYSLRQDGA MCELQIRGLTIEDSGEYTCVCGQEKTSATLSVKALPPRFIEDLRSQEATEG  
TMATLRCQMSKAAPVEWRKGSSETLGDGG RYSLRQNGAVCELQIHD LAVEDTGEYSCVCGQEKTSATLNVKALP  
PRFIEDLRSQEATEGTMATLRCQMSKAAPVEWRKGSSETLRDGG RYSLRQDGA VCELQIHDLDVEDAGQYSCVC  
GQEKTSAVLTVDALPPKFTEGLKKEEATEGTMVTLRQMSKEATVEWRKGAKTSLDGG RYSLRQDGA MCELQI  
CGLAVEDAGEYSCVCGQEKTSATLSVKALPPRFIEDLRSQEATEGTMATLRCQMSKAAPVEWRKGSKTLRDGD  
RYSLRQDGA MCELQICDLAVEDTGDYSCVCGQEKTSATLSVKAPQVVFQOPLQNLQAEEGSMASLRCELSVFN  
AAMVWSKGGLELQGDTRREARQQGCV AELLRLDRREDAGEYSC TCGSQTTSATLMVTAAPVRFRLQLAQDV  
DEGATARLRCELSREAVSVEWRKGS LQLFPKAKYQMVQEGTTAELLVHGVEQEDAGEYTC DAGHTQS IARLSV  
RAPKPKFTDLQSTEQEAGGTARLCCQLSEAE PGT PVQWLKEGVELHVGSKYEMRRQGVACELLHGLEAKDT  
GEYACLVGQKTLASLRVKEPEVTIVRGLVDMEVQADEDVEFTCKV SQAGATDVQWHLQGLPLQSNEVTEVAV  
LADGCTHVLQKGVTL EDAGTVSFHVGG LSSSAQLTVRVPEVTVLEPLKDVQLSEGD DAHFRCRLSRASGQEA  
RWALGGVPLQCNEMNDITVEQGTLYLLTLHKVTL EDAGTITLQVGS CSSEAQLKV TAKNTVLRGLENDVALEG  
GEALFECQLSQPEVA AHTWLLDDEPVHTSEKVEVVYFENGLRHLLLLKNLKPKQDSCRVTFLAGDVVTS AFLTV  
RALPDPPEDAEVVGRSDHSVTL SWVAPMSDGGG LCGYRVEMKEASTGQWQLCHDLVPGPECVVDLVP GKTY  
RFRVAAVGPAGAGEPVHLPQMVKIAPAPAPAPAPAPAPAPETRQAVVGEDIC LELEVAADGGEVVWHKGTERRI  
QPGGHFEVLSRGQRQMLVIKGFRTEDQGEYRCGPIQGLPSSGAATFNVMVMTSGSGDEVPAQPSLPPEAAQEGD  
LHLLWEALARKRRMSREPTLDSISELPEEDSRVQHLRQEAEETAPDLSEGYSTADELARTGEADLSHTSSDDE  
SRAGTPSLVTYLKKAGGPGISPLASKHEAQVTT SVKPKQKQEPVVPTCP PPPGDL SAADLMDPSLDKAAVKIQA  
AFKGYKVRKEMKQEGPVFSRTFGDTEAQVGDVLRLECVLATKTD MRACWLKDGIELTDGRHYHIDQLKDGTC  
SLLVTGLAPTDSGRYTCQVSTKSGRVSHSACVVVSGTESEAESSSGGELDDAFRRAARRLHRLFR TKSPAELS  
EELFLSADEGPGEPEPADWQTYREDEFVFCIRFESLAEARQAVTCFRNM FATMGIGVEISLGEQGP RVEM  
RIGKVAPT VTPAVPLAKTPGLQTS DAAPVFLTELQNDVQDGYPMSFDCVVTGQPVPSVRWFKDGKLL EEDDH  
YMINEDQQGGHQLIITAVVPADMGVYRCLAENSMGVSSTKAE LRVELTSTDYDTAADATETSSYFSAQGYLSS  
REQEGTESDEGQLPQVLEELKDLQVAPGTR LAKFQLKVKGYPAPKLYWFKDGQPLTSSDHIRMTDKKTLHTLE  
IVSVTREDSGQYAAI SNAVGAAYSSARLLVRGPSEPEEK PASDVHERLVPPRI LEKFTPKKVGRGSSITFSV  
KVEGHPAPSVHWLKEEA EKGVLWIGPDTPGYTMASSSKQHSLVLLDVG RQHOGTYTCIATNPAGQALCSASLH  
ISGLAKEEESQERVKEALISSFLQGT SQAVSAQMSASAGFADLVGQSKGESLVAEAEHSHLSLAEVGT EEFLOK  
LTSQITEMVSAKISQAKLQVPGGDSDEETKTPSASPRHGRSRPSSSVQESSSESEDGDSRGEI FDIYVVTADY  
LPLGAEQDAIILREGQYVEVLD SAHPLRWLVRTKPTKSSPSRQGWVSPAYLDKRLKLSPEWGPTEAPEFPGEA  
VSEDEYRTRLSSVIQELLSSEQAFV GELQFLESHHMKHLERSPRVPAAVASQKTVI FRNVQDISHFHSSFLKE  
LQCGCTDDDVAMCFIKNQEA FEKYLEFLVGRVQAESVVVSTPVQEFYKKYAEETLSAKDPTQPPPPLOHYLE



QPVERVQKYQALLKELIRNKARNRQNCALLEQAYAVVSALPQRAENKLVSLMENYPGTLEALGEPIRQGHFI  
VWEGAPGARMPWKGHNHRVFLFRNYLVICKPRRDSRTDTFSYVFRNMMKLSSIDLNDQVEGDRAFEVWHERE  
DSVRKYLLQARTVI IKNSWVKEICGIQQRLAQPVWRPPEFEEELADCTAELGETVKLACRVTGTPKPIVSWYK  
DGKPVVEVDPHHILIEDPDGSCSTLILDNLTGIDSGQYMCFAASAAGNASTLGKILVQVPPRFVNVKVRATPFVEG  
EDAQITCTVEGAPYPQIRWYKDGTLAPGNRYRMLNEPRSGVLVVIQAASKEDLGHYECELVNLGSTRGGG  
ELYMQSPALRARDQHHREQIVAAVEGAPSMQVTIEDVQVQVGDMAQFDAVIEGHPPPVTWYKGSTQLTSSAR  
LSQRQDGTYSVLVTDVAPHDAGVYTCVANNAGQVLCCKAELLVHGGDKLDAENQVYRRLKHSFYDVQEEIGR  
GVFGFVKRVQHKGNMFCFAAKFIPLRSKTRAQAYQERDILATLGHPLVTGLLDQFETRKTLLILILELCSSEEL  
LDRLFKKGVVTEAEVKVYIQQLVEGLHYLHSHGILHLDIKPPNILMVHPAREDIKICDFGFAQKITPSEFPQYS  
KYGSPFVVSPEIIEQNPNVSEGSDIWAMGVISYLSLTCSSPFAGESDRATLLNVLEGRVSWSSPTAAHLSERDAK  
DFIKATLQRTPRARPSTSQC LAHPWFLKSMPAAEAHFINTKQLKFLARSRWQRSLMSYKSI LVMRSIPELLQ  
GPPDSPSLGVARHLRGEASGASSSSSSSDNELAPFARAKSLPPSPVTHSPLLHPRGFLRPSASLPEETEASMP  
TADAAPVSPQASAGPPASPGCVPRHSVSISSLFYQQAGEGAERGNKTS GAKRHPARRRHLLKGGYIARALPGLR  
EPLMEYSLLLEEEAAREEQASLMTKTPSFETALRLPSSSVREVPGRSHSLDNPPVTTGSPPEACKQLLFPST  
GLTHETAKDRGHKEGFLQESVFPFPMMSGDSRPGKQEGSSQDSCRGKPASSCHSELGSGSQEGCGPPSSQSLG  
SLPPQSLKKELESTSCGPLFSEQPQAAPFPTQVSPLLGSEKEPQDGS LSEGVPVVPSSSPGSASQVDASLDT  
LSEAGDTCDFTPPPQRPEEQATTRKFSLESRGGYAGVAGYGTFAFGGDAGGMLGQGPLWARMAWAVSQSSEEQ  
DEAATESPQPLESLGPIAEASGVPLRTSPSLTPWEEVEQVSLVQIRDLSGDAEAADTISLDISEVDPAYLNL  
DLYDIKYLPEFEMI FRRVPKPIEQPESPGSETEAGQGLADFLLEAAWPWPGEGLRAGLEITEEPEEPGDLEA  
LLGEAAVGRKRKWSPSRGLFQFPGRCLSGEEPVELGLRQRVKASMAHISRILKGRPEGPEREPPRKKAGLAS  
FRLSGLKGRDQELSDEAVVLGQSVTLACQVLAQPTAQATWSKDGVLLESSGHLLISSTLKNFQLLTLIVVKEE  
DLGTYTCCVSNPLGTAVTTGVLKKAERPSSSPRPEVGEYKDAVLLVWKPVESECGPVTYIVQCCIEGGSWTTL  
ASDISDCCYLTKGLSRGGMYIFRTACVSKAGMPYSSPSEQVLLGGPNHLASEEESRGRPAQLLPSTKTF  
QMQIRRGFRSVVRQCREKASGRALAAKIVPYQPEDKTAVREYEALKRLHHPHLAQLHAAYLSPRHLVILEL  
CSGPELLPSLAERESYSESDVKDYLWQMSLQYLHAQHILHLDLRSENMMVTEYNLLKVIDLGNASLDQEK  
VPAPENFKDYLETMAPELLEGGAVPQTDIWAIGVTAIFIMLSGEYEPESSEGETRDLQKGLRKLIRLSRCYAGL  
SGGAVAFQLSSSLCAQPWGRPCASTCLQCGWLTEEGPTGSRPTPVTFPTVRLRAVFREREKRRALLYKKNH  
LAQVR\*

>rs50432310\_ENSMUSP00000049737\_c.1308:A>G\_p.I437V  
ENSMUST00000052872.15|Obscn-203|ENSMUSG00000061462|-|chr11:g.59024730:T>C  
MDHSFSGAPRFLTRPKAFVSVGKDATLSCQIVGNPTPHVSWEKDRQFVEAGARFRLAQDGDVYRLTILDLAL  
GDSGQYVCRARNAIGEFAAVGLRVDSEGTCAEQAPHLLRPTSIRVREGADATFRCRVGGSPPAVSWSKDG  
RRLGPPDAPHVRVEEHGESSALRIRSARPRDGGTYEVRAENPLGSASAAAAALVVDSDAEVAGPPGTSTATLLA  
HLQQREAMRAEGIPSPPGAGTRTCTVTEGKHARLSCFVTGEPKPEVWKKDQGLVTEGRRHVVEDEQENF  
VLKILFCKQSDRGLYTCTASNLVGQTYSSVLVVVREPTVPFKKRLQDLEVREKESATFQCEVAQAPATEAAWFK  
EETRLWASAKYDIEEGTERRLTVRNVSADDDAVYICETTEGSRVVAELSVQGNLTKLPRKTAVRTGDTAVF  
WVELAVPEGPVRWLRNQEEMVAGGRVAITAEGTCHTLTI FQCTLEDMGEVAFVSGGCRTTTQFCVSAPRRPPL  
YPPADPVVKAKTESSVTLWSAPPHGDRPVTIDGYVLEKRKLGAYAWSRCHEAGWLATTEFTITGVAAEEDFQ  
FRVSAINHFGQGPYLEFPGTMHLVPLAVKTPKAVEAVEGGEVTFVSDLTVASSGEWFLDGEALKASSIYVI  
RCDRTRHMLTIREVPARLHGAQLKRVANGIETS IQMVVRAALGLPSSKLPAAAAAREVLAQLHEEAQLLAELSD  
QAAAVTWLKDGRELSLGPKEYMQVSAGRRALLVRDVAQDDAGLYECVSRGSRRTAYQLLVQEPKLVFAKQQA  
SEVKAEAGNSATLSCEVTQAQTEVTFWFKDGKLLSSSSKVRMEASGCSRRLVVQQAGKADAGEYSCEAGGQKLS  
FRLDVAEPKLVFAKQQAHSSEVKAEAGASATLSCEVAQAQTEVTFWFKDGKLLSSSSKVRMEASGCSRRLVVQQ  
AGKADAGEYSCEAGGQKLSFRLDVAEPKMFVFAKEQQARSEVKAEAGASATLSCEVAQAQTEVTFWFKDGKLLS  
SSKVRMEASGCSRRLVVQQAGKADAGEYSCEAGGQKLSFRLDVTEPKLVFAKEQQARSEVKAEVGN SATLSCE  
VAQAQTEVTFWFKDGKLLSSSSKVRMEASGCSRRLVVQQAGKADAGEYSCEAGGQKLSFRLDVAEPKLVFAKEQ  
QARSEVKAEAGNSATLSCEVAQAQTEVTFWFKDGKLLSSSSKVRMEASGCSRRLVVQQAGKADAGEYSCEAGGQ  
KLSFHLDVTEPKLVFAKEQQAHSEVKAEAGASATLSCEVAQAQTEVTFWFKDGKLLSSSSKVRMEASGCSRRLV  
VQQAGKADAGEYSCEAGGQKLSFRLDVAEPKLVFAKEQQARSEVKAEAGASATLSCEVAQAQTEVTFWFKDGK  
LSSSSKVRVEASGCSRRLVVQQAGKADAGEYSCEAGGQKLSFRLDVAEPKLVFAKEQQANSEVKAEAGASATL  
SCEVAQAQTEVTFWFKDGKLLSSSSKVRVEASGCSRRLVVQQAGKADAGEYSCEAGGQKLSFRLDVAEPKLAFA  
KEQQAHSEVKAEAGASATLSCEVAQAQTEVTFWFKDGKLLSSSSKVRVEASGCSRRLVVQQAGKADAGEYSCEA  
GGQKLSFRLDVAEPKLAFAKEQQAHSEVKAEAGASATLSCEVAQAQTEVTFWFKDGKLLSSSSKVRVEASGCSR  
RLVVQQAGKADAGEYSCEAGGQKLSFRLDVAEPKLAFAKEQQAHSEVKAEAGASATLSCEVAQAQTEVTFWFKD  
GKLLSSSSKVRVEASGCSRRLVVQQAGKADAGEYSCEAGGQKLFRLDVAEPKLMFAKEQQAHSEVKAEAGAS  
ATLSCEVAQAQTEVTFWFKDGKLLSSSSKVRVEASGCSRRLVVQQAGKADAGEYSCEAGGQKLSFRLDVAEPK  
LVFAKEQQAHSEVKAEAGASATLSCEVAQAQTEVTFWFKDGKLLSSSSKVRVEASGCSRRLVVQQVQKADAGEYS  
CEARGQKLSFRLDVADTRLMFAKEQQARTEVKAEAGNSATLSCEVAQAQTEVTFWFKDGKLLSSSSKVRVEASG

CSRRLLVQQAGKADAGEYSCEAGGQKLSFRLDVAEAEESQIPERPSRREPLVVKEHETIILTATIAAPSVAAVT  
WLKDGVEIRRKRHEATS LGDHTLTVRGAQVLDSAIYSCRVGKEGQDFPVQVEEVAAKFSKPLEPVEGELGG  
TVMLVCELSPEQAEVWRCGNTQLRPGKRFQMTSEGPRRTLTVSGLREDDAEYVCESTRDDRTSARLTVKVPR  
VVKFTSGLSAMVAEEGQEATFQCVVSPSDAGVTWYKDGMLQPSSEKFMVVESEGASRSLTILGLTLEDAGQVTV  
EAEGASSAALRVREAPVLFKFKLEPQTVEERTSVTLEVELTRPWEVVKWTRNAAVLTPSENVEIRAEGARHC  
LVLRSVGFADRGGFFGCETPDDKTQAKLNVEMRQVRLVVRGLQEVEAKEQGTASMDVELSHAEEVEGSWTRDGLRL  
QPGPKCHLAVQGPVHILTLALSALQPDSSGLVAFRAEGVHTSARLIVTELPVSFTRVLQDVVATQKEKVTLECEL  
SRPVDVRWLKDGVELRAGKAIGIVAQGTCSRSLVIYRCETGDQGVVYCDALDAQTSASLRVQGRYTLIFRRVL  
AEDAGEVFKVAENAESRAHLRVKELPVTLRPLRDKIAMEKHRGVLECVSRASAQVRWFKGGVELQSGPKYE  
VVSDGLYRKLVINVDQPEDEDTYTCDAGNVKTSAQFFVVEEQSITIVRGLKDMTVMEPAPAWFECETSIPSVRP  
PKWLLGKTVLQAGGNVLEQDGTVHRLTLHKTCSTMTGPVHFTIGKSRSSAQLVVSDIPVVLTRPLEPKAGRE  
LQSVVLSCDFRPAPKAVQWYKDDTPLSPSEKFKMALEGQMAELRILRLTPADAGVYRCQAGSAQSSAEVTVEA  
REVTVIQPLQDAEAMEEGRVCFSCELSHKDEDIEWLSLNGTPLYNDSFHEISHEGCLHTLVLSVQRADTGTVC  
ATSPKVSVSARLVVKGKPVVFLKALDDVSAEERGTTLQCEVSDPEARVVWRKDGVELGSPDKYDFLHKAGAR  
GLTVHDLSDHEDAGLYTCQVGSKETQSKVSVHDLHVGITKRLKTVEVLEGESECSFECVLSHESPSDPVAVTVGG  
KTVGGSGHFHAVRQGRKYTLTVKDAALSDAGEVVSFVGLTSSKASLIRERPVDTIKPLEDQRTTLGEDVMLS  
CELSRAGTSVRWLKDGKAIRKSQKYDLLSEGTRAVLVRKASLKDSEYTCETEASKSTAKLCEVEKANRFTTE  
ELADLQVEEKGRAVFTCKTEHPASVVWTRKGLLELRASGKHVPSQEGTLKLTINALERTSDTYTCDIGQAR  
TQARLLVHGQKVRVIEDLEDTAVQEGSSAKFCCRIAPADYGPVHWFLDKTPHLSNELNEITVQPGGYHVLTLR  
QLALKDSGTVYFEAGDQRTSAAALRVTEKPSIFSRPLTDVTVTEGEDTLVCETTTTVDSSVRWTKDGKTLRPSA  
RCQLSHEGCAQLLITATTPQDGGRYKCEIGGASSSSIVRVHALPVRFRESLKDVEVEGKAATLRCVLSVA  
APVEWRHGDDVLKSSNKYSLRQEGAVLELVIRDLQPDQSGQYSCSFGDQTTSATLTVKTSQAQFVGLRNKEA  
TEGTTVTLRCELTKAEPVEWKKGTETLRNGDKYSLKQDGAVCELQICSLLVADAGEYSCVCGQEKTSATLTVK  
ALLVHFVRLRSKEATEGDTTLQCELSKAAPVEWRKGTETLRDGDYSLKQDGAVCELQIRSLTIADAGEYL  
CTCGQEKTSATLTVRALPAKFKDSLKNEEATEGTTATLSCELSKAAPVTWKKGPKTLQSGDKYVLRQDGAVCG  
LQIHGLTMADAGEYSCVCGQEKTSATLTVRGLPAKFIEDLRSQEATEGATAILRCELSKAAPVEWRKGSSETLK  
DGDYTLRQDGAVCELQIRGLAVVDGTYSLPTKFTTEGLRNEEATEGTMATLRCQMSKAAPVEWRKGSSETLR  
DGDYSLRQDGAMCELQIRGLTIEDSGEYTCVCGQEKTSATLSVKALPSRFIEDLRSQEATEGTMATLRCQMS  
KTAPVEWKKGSETLRDGGYSLRQDGPVCELQICDLAVEDAGEYSCVCGQEKTSATLSIKALPPRFIEDLRSQ  
EATEGTMATLRCQMSKAAPVEWRKGSSETLGDGGYSLRQNGAVCELQIHDLAVEDTGEYSCVCGQEKTSATLN  
VKALPPRFIEDLRSQEATEGTMATLRCQMSKAAPVEWRKGSSETLRDGGYSLRQDGAVCELQIHDLVEDAGQ  
YSCVCGQEKTSAVLTVDALPPKFTTEGLKKEEATEGTMVTLRCQMSKEATVEWRKGAKTSLDGGYSLRQDGAM  
CELQICGLAVEDAGEYSCVCGQEKTSATLSVKALPPRFIEDLRSQEATEGTMATLRCQMSKAAPVEWRKGSSET  
LRDGDYSLRQDGAVCELQIRDLAVEDAGEYLCVCGQEKTSATLSVKALPPRFIEDLRSQEATEGTMATLRCQ  
MSKAAPVEWRKGSSETLRDGDYSLRQDGAMCELQICDLAVEDTGDYSCVCGQEKTSATLSVKALPPRFIEDLR  
SQEAREGTVATLRCRMSKAAPVEWRKGSSETLKDGDYSLRQEGNLCCELQIRDLAVEDTEEYSCVCGQEKTSAT  
LSVKALPAKFIEDLRSQEAPESSTVTLRCKLSKASVVWKKGSETLRNGARYSLRQDGAVCELEIRDLTVEDT  
GEYSCTCGQERTSATLSIMAPQVVFQQLQNLQAEEGSMASLRCELSVPNAAMVWSKGGLELQGDTRREARQQ  
GCVAELLLRDLRREDAGEYSCVCGQEKTSATLMVTAAPVRFLELQAQDVDEGATARLRCELSREAVSVEWRK  
GSLQLFPKAKYQMVQEGTTAELLVHGVEQEDAGEYTCDAHTQS IARLSVRAPKPKFKTDLQSTEQEAGGTAR  
LCCQLSEAEPTPVQWLKEGVELHVGSKYEMRRQGAVCELLIHGLEAKDTGEYACLVGGQKTLASLRVKEPEV  
TIVRGLVDMEVQADEDFEFTCKVSQAGATDVQWHLQGLPLQSNVTEVAVLADGCTHVLLQKGVTLLEDAGTVS  
FHVGGSSSAQLTVRVPEVTVLEPLKDVQLSEGQDAHFRCRLSRASGQEARWALGGVPLQCNEMNDITVEQGT  
LYLLTLHKVTLLEDAGTITLQVGSSESAQLKVTAKNTVLRGLENVDALEGGALFECQLSQPEVAHAHTWLLDD  
EPVHTSEKVEVVYFENGLRHLLLLKLNKPKQDSCRVTFLAGDVVTS AFLTVRGRWLEVLPPHDASVWKAGMQVR  
FTCILLSEAVPVGEATWYINGAAIQPDDTDWTVTTDGSHHALTLSNAQPQHAGEVTF AARDAVASARLSVLALP  
DPPEDAEEVGRSDHSVTLVWVAPMSDGGGGLCGYRVMKEASTGQWQLCHDLVPGPECVDDLVPGKTYRFRV  
AAVGPAGAGEPVHLPQMVKIAPAPAPAPAPAPAPAPETRQAVVGEDICLELEVAADGGVEVWHKGTERTIQPGG  
HFEVLSRGRQMLVIKGFRTEDQGEYRCGPIQGLPSSGAATFNVVMTSGSGDEVPAQPSLPPEAAQEGDLHLL  
WEALARKRRMSREPTLDSISELPEEDSRVQHLRQEAETAPDLEGYSTADELARTGEADLSHTSSDDESRAG  
TPSLVTYLKKAGGPGISPLASKHEAQVTTSVKPKQKQEPVPTCPPPGDLSAADLMDPSLDKAAVKIQAAFKG  
YKVRKEMKQOEGPVFSRTFGDTEAQVGDVLRLECVLATKTDMRACWLKDGIELTDGRHYHIDQLKDGTCSLLV  
TGLAPTDSGRYTCQVSTKSGRVSHSACVVVSGTESEAEASSGGELDDAFRRRAARLHRLFRTKSPAELSEBEL  
FLSADEGPEPEEPADWQTYREDEFVCFIRFESLAEARQAVTCFRNMFATMGIGVEISLGEQGPGRVEMRIGK  
VAPTPTPAVPLAKTPGLQTSDAAPVFLTELQNDVQDQY PMSFDCVVTGQPVPSVRWFKDGLLEEDDHYMIN  
EDQQGGHQLIITAVVPADMGVYRCLAENSMGVSSTKAELRVELTSTDYDADAATETSSYFSAQGYLSSREQE  
GTESDEGQLPQVLEELKDLQVAPGTRLAKFQLKVKGYPAKLYWFKDQPLTTS DHIRMTDKKTLHTLEIVSV  
TREDSGQYAAIISNAVGAAYSSARLLVRGPSEPEEKPASDVHERLVPRILEKFTPKKVKRGSSITFSVKVEG

HPAPSVHWLKEEAKEGVLWIGPDTPGYTMASSSKQHSLLVLLDVGRQHOGTYTTCIATNPAGQALCSASLHISGL  
AKEEEEQERVKEALISSFLQGTSAQVSAQMSEASAGFADLVGQSKGESLVAEEAHSHLSLAIEVGTTEEFLQKLTSSQ  
ITEMVSAKISQAKLQVPGGDSDEETKTPSASPRHGRSRPSSSVQESSSESEDGDSRGEIFDIYVVTADYLPLG  
AEQDAIILREGQYVEVLDLSDAHLRVLVVRTKPTKSSPSRQGWVSPAYLDKRLKLSPEWGPTEAPEFPGEAVSED  
EYRTRLSSVIQELLSSEQAFVGLQFLESHHMKHLERSPRVPAAVASQKTVI FRNVQDI SHFHSSFLKELQGC  
GTDDDVAMCFIKNQEAFAKEYLEFLVGRVQAESVVVSTPVQEFYKKYAEETLSAKDPTQPPPPPLQHYLEQPVE  
RVQKYQALLKELIRNKARNRQNCALLEQAYAVVSALPQRAENKLVSLMENYPGTLEALGEPiRQGHFIVWEG  
APGARMPWKGNHRHVFLFRNYLVICKPRRDSRTDTFSYVFRNMMKLSIDLNDQVEGDDRAFEVWHEREDSVR  
KYLQARTVI IKNSWVKE ICGIQQLAQPVWRPPEFEELADCTAELGETVKLACRVGTGTPKPIVSVYKDGKP  
VEVDPHHILIEDPDGSCCTLILDNLTGIDSGQYMCFAASAAGNASTLGKILVQVPPRFVNVKVRATPFVEGEDAQ  
ITCTVEGAPYPQIRWYKDGTLAPGNRYRMLNEPRSGVLVLIQAASKEDLGHYECELVNRLGSTRGGGELYM  
QSPALRARDQHHREQIVAAVEVTEQETKVPKKTVI IETITTVVKS PRGRRQSPGKSPSRSPRRSASPRRPG  
LLAPERLYPPGTSPSRRLVEVEQGRKAPVPALYVTEAEVHAPASQSQPKWLEVEETIEVRVKKTGSRGASPVRE  
MTRSGEGILFTLPGGI PGRDPNANNNSNKS SVYQEARWGPVAVHVGEFPFI FQVDSVGNVDWVAASPEPEQVRA  
SQKEENTERQEGCSDGIDENTFLMEEPQDTSLQGRDPKILTHNGRVLTLADLEDYVPQEGETFGCGDSTPSTP  
DEPPCEVSVLQREI SEPTVGQPVLNVGRPPGTGATPSFFRPGSQVHSPESVSFLLREAWSGPVSAAPWTSSF  
HTHVQSSVDGSHGSEFKTEVSTQTVSFGAVGETVTLHIDPDGGEAPGPSQG\*

>rs50432310\_ENSMUSTP00000020732\_c.1308:A>G p.1437V  
ENSMUST00000020732.13|Obscn-201|ENSMUSG00000061462|-|chr11:g.59024730:T>C  
MDHSFSGAPRFLTRPKAFVSVGKDATLSCQIVGNPTPHVSWEKDRQVPEAGARFRLAQDGDVYRLTILDLAL  
GDSGQYVCRARNAIGEFAAVGLRVDSEGTCAEQAPHFLLRPTSIRVREGADATFRCRVGGSPQPAVSWSKDG  
RRLGPPDAPHVRVEEHGESSALRIR SARPRDGGTYEVRAENPLGSASAAAALVVDSDAEVAGPPGTSTATLLA  
HLQQRREAMRAEGIPSPPGAGTRTCTVTEGKHARLSCFVTGEPKPKETVWKKDQQLVTEGRRHVYVEDEQENF  
VLKILFCKQSDRGLYTCTASNLVGQTYSSVLVVVREPTVPFKKRLQDLEVREKESATFQCEVAQPAATEAAWFK  
EETRLWASAKYDIEEGTERRLTVRNVSADDDAVYICETTEGSRVVAELSVQGNLTKRKLPRKTAVRTGDTAVF  
WVELAVPEGPKVTRLNQEMVAGGRVAITAEGTCHTLTI FQCTLEDMGEVAFVSGGCRTTTTCTVSAAPRRPPL  
YPPADPVVKAKESSLWSAPPHGDRPVTIDGYVLEKRLKLGAYAWSRCHEAGWLATTEFTITVGAEEGDFQ  
FRVSAINHFGQGPYLEFPGTMHLVPLAVKTPKAVEAVEGGEVTFVSDLTVASSGEWFLDGEALKASSIYVI  
RCDRTRHMLTIREV PARLHGAQLKFVANGIETS IQMVVRAALGLPSSKLPAAAAREVLAQLHEEAQLLAELSD  
QAAA VTWLKDGRELSLGPKEYMQVSAGRRALLVRDVAQDDAGLYECVSRGSR TAYQLLVQDITDGYRDWGPAG  
PQKHMCKCAGAKIARYLGSSCYRFLQYDKGVWHWLEAALDTRQKGTSSCSLHEKPKLVFAKQQAHSEVKA  
AGNSATLSCEVTQAQTEVTWFKDGKLLSSSSKVRMEASGCSRRLVVQQAGKADAGEYSCEAGGQKLSFRLDVA  
EPKLVFAKQQAHSEVKAEGASATLSCEVAQAQTEVTWFKDGKLLSSSSKVRMEASGCSRRLVVQQAGKADA  
GEYSCEAGGQKLSFRLDVAEPKMFVFAKEQQARSEVKAEGASATLSCEVAQAQTEVTWFKDGKLLSSSSKVRM  
EASGCSRRLVVQQAGKADAGEYSCEAGGQKLSFRLDVTEPKLVFAKEQQARSEVKAEGNSATLSCEVAQAQ  
EVTWFKDGKLLSSSSKVRMEASGCSRRLVVQQAGKADAGEYSCEAGGQKLSFRLDVAEPKLVFAKEQQARSEV  
KAEAGNSATLSCEVAQAQTEVTWFKDGKLLSSSSKVRMEASGCSRRLVVQQAGKADAGEYSCEAGGQKLSFHL  
DVTEPKLVFAKEQQAHSEVKAEGASATLSCEVAQAQTEVTWFKDGKLLSSSSKVRMEASGCSRRLVVQQAGK  
ADAGEYSCEAEGQKLSFRLDVAEPKLVFAKEQQARSEVKAEGASATLSCEVAQAQTEVTWFKDGKLLSSSSK  
VRVEASGCSRRLVVQQAGKADAGEYSCEAGGQKLSFRLDVAEPKLVFAKEQQANSEVKAEGASATLSCEVAQ  
AQTEVTWFKDGKLLSSSSKVRVEASGCSRRLVVQQAGKADAGEYSCEAGGQKLSFRLDVAEPKLVFAKEQQAH  
SEVKAEGASATLSCEVAQAQTEVTWFKDGKLLSSSSKVRVEASGCSRRLVVQQAGKADAGEYSCEAGGQKLS  
FRLDVAEPKLVFAKEQQAHSEVKAEGASATLSCEVAQAQTEVTWFKDGKLLSSSSKVRVEASGCSRRLVVQQ  
AGKADAGEYSCEAGGQKLSFRLDVAEPKLVFAKEQQAHSEVKAEGASATLSCEVAQAQTEVTWFKDGKLLSS  
SSKVRVEASGCSRRLVVQQAGKADAGEYSCEAGGQKLFRLDVAEPKLMFAKEQQAHSEVKAEGASATLSCE  
VAQAQTEVTWFKDGKLLSSSSKVRVEASGCSRRLVVQQAGKADAGEYSCEAGGQKLSFRLDVAEPKLVFAKEQ  
QAHSEVKAEGASATLSCEVAQAQTEVTWFKDGKLLSSSSKVRVEASGCSRRLVVQQVQKADAGEYSCEARGQ  
KLSFRLDVADTRLMFAKEQQARTEVKAEGNSATLSCEVAQAQTEVTWFKDGKLLSSSSKVRVEASGCSRRLV  
VQQAGKADAGEYSCEAGGQKLSFRLDVAEAEESQIPERPSRREPLVVKEHETIILTATIAAPSVAAVTWLKDV  
EIRRSKRHEATSLGDTHTLTVRGAQVLDSAIYSCRVGKEGQDFPVQVEEVAAKFSKPLEPVEGELGGTVMLVC  
ELSPQAEVWRCGNTQLRPGKRFQMTSEGPRRTLTVSGLREDDAEYVCESRDDRTSARLTVKVPVVKFTS  
GLSAMVAEEGQEAFTQCVVSPSDAGVTWYKDGMLQPSKFKVMVESGASRSLTILGLTLEDAGQVTEAEAGAS  
SSAALRVREAPVLFKKLEPQTEVEERTSVTLLEVELRQVRLVLELQVEAEGQGTASMDVELSHAEVEGSWTRDGLRLQPGPKC  
HLAVQGPVHILTLTSLALQPDQSLVAFRAEGVHTSARLIVTELPVFSFTRVLQDVVATQKEKVTLECELSRPVDV  
RWLKDGVLELRAGKAI GIVAQGTCSRSLVIYRCETGDQGVYVCDALDAQT SASLRVQGRTYTLIFRRVLAEDAGE  
VKFVAENAESRAHLRVKELPVTLLRPLRDKIAMEKHRGVLECCQVSRASAVRWFKGGVELQSGPKYEVVSDGL  
YRKLVINVDVQPEDEDTYTC DAGNVKTS AQFFVVEQSITIVRGLKDMTVMPEPAPAWFECETSIPSVRPPKWLGLG

KTVLQAGGNVGLQDGTVHRLTLHKTCSTMTGPVHFTIGKSRSSAQLVVSDIPVVLTRPLEPKAGRELQSVVL  
 SCDFRPAPKAVQWYKDDTPLSPSEKFKMALEGQMAELRILRLTPADAGVYRCQAGSAQSSAEVTVAREVTVI  
 QPLQDAEAMEEGRVCFSCELSHKDEDEIWSLNGTPLYNDSFHEISHEGCLHTLVLSVRQADTGTVCATSPKV  
 SVSARLVVKGKPVVFLKALDDVSAEERGTTLQCEVSDPEARVVRKDGVELGSPDKYDFLHKAGARGLTVHD  
 LSHEDAGLYTCQVGSKETQSKVSVHDLHVGITKRLKTVEVLEGECSFEVLSHESPSDPAVWTVGGKTVGGS  
 GHFHAVRQGRKYTLTVKDAALSDAGEVVSFVGLTSSKASLIIRERPVDITKPLEDQRTTLGEDVMLSCELSRA  
 GTSVRWLKDGKAIKRSQKYDLLSEGTRAVLVVRKASLKDSGEYTCETEASKSTAKLCVEEKANRFTEELADLQ  
 VEEKGRAVFTCKTEHPASVVTWRKGLLELRASGKHVPSQEGELTKLTINALERTDSDTYTCDIGQARTQARLL  
 VHGQKVRVIEDLEDTAVQEGSSAKFCRIAPADYGPVHWFLLDKTPLHSNELNEITVQPGGYHVLTLRQLAKD  
 SGTVYFEAGDQRTSAALRVTEKPSIFSRPLTDVTVTEGEDTLVCEETTVDSSVRWTKDGKTLRPSARCQLSH  
 EGCQAQLLITATTPQDGGRYKCEIGGASSSSIVRVHALPVRFRSLKDVEVPEGKAATLRCVLSVAAPVEWR  
 HGDDVLKSSNKYSRQEGAVLELVIRDLQPDQSGQYSCSFGDQTTSATLTVKTSQAQFVGLRNKEATEGTTV  
 TLRCELTKAPVEWKKGTETLRNGDKYSLKQDGAVCELQICSLLVADAGEYSCVCGQEKTSATLTVKALLVHF  
 VRRLRSKEATEGDTTLQCELSKAAPVEWRKGTETLRDGDYSLKQDGAVCELQIRSLTIADAGEYLCTCGQE  
 KTSATLTVRALPAKFKDSLKNEEATEGTTATLSCELSKAAPVWKKGPKTLQSGDKYVLRQDGAVCGLQIHGL  
 TMADAGEYSCVCGQEKTSATLTVRGLPAKFIEDLRSQEATEGATAILRCELSKAAPVEWRKGSSETLKDGDYR  
 LRQDGAVCELQIRGLAVVDGTYSPLTKFTEGLRNEEATEGTMATLRCQMSKAAPVEWRKGSSETLRDGDYR  
 LRQDGAVCELQIRGLTIEDSGEYTCVCGQEKTSATLSVKALPSRFIEDLRSQEATEGTMATLRCQMSKTAPVE  
 WKKGSETLRDGGYSLRQDGPVCELQICDLAVEDAGEYSCVCGQEKTSATLSIKALPPRFIEDLRSQEATEG  
 MATLRCQMSKAAPVEWRKGSSETLGDGGYSLRQNGAVCELQIHDLAVEDTGEYSCVCGQEKTSATLNVKALPP  
 RFIEDLRSQEATEGTMATLRCQMSKAAPVEWRKGSSETLRDGGYSLRQDGAVCELQIHDLVEDAGQYSCVCG  
 QEKTSAVLTVDALPPKFTEGLKKEEATEGTMVTLRCQMSKEATVEWRKGAKTLSDGGRYSLRQDGAMCELQIC  
 GLAVEDAGEYSCVCGQEKTSATLSVKALPPRFIEDLRSQEATEGTMATLRCQMSKAAPVEWRKGSSETLRDGD  
 YSLRQDGAVCELQIRDLAVEDAGEYLCVCGQEKTSATLSVKALPPRFIEDLRSQEATEGTMATLRCQMSKAAP  
 VEWRKGSSETLRDGDYSLRQDGAMCELQICDLAVEDTGDYSCVCGQEKTSATLSVKALPPRFIEDLRSQEARE  
 GTVATLRCMSKAAPVEWRKGSSETLKDGDYSLRQEGNLCELQIRDLAVEDTEEYSCVCGQEKTSATLSVKAL  
 PAKFIEDLRSQEAPESSTVTLRCKLSKKASVWKKGSETLRNGARYSLRQDGAVCELEIRDLTVEDTGEYSCT  
 CGQERTSATLSIMAPQVVFQQLQNLQAEEGSMASLRCELSVNAAMVWSKGGLELQGDTRREARQQGCVAEL  
 LLRDLRREDAGEYSCTCGSQTTSATLMVTAAPVRFLRELQAQDVDEGATARLRCELSREAVSVEWRKGSQQLF  
 PCAKYQMVOEGTTAELLVHGVEQEDAGEYTCDAHTQSIARLSVRAPKPKFKTDLQSTEQEAGGTARLCCQLS  
 EAEPGTPVQWLKEGVELHVGSKYEMRRQAVCELLIHGLEAKDTGEYACLVGQKTLASLRVKEPEVTIVRGL  
 VDMEVQADEDVEFTCKVQAGATDVQWHLQGLPLQSNVEVAVLADGCTHVLQKGVTLLEDAGTVSFHVGGL  
 SSSAQLTVRVPEVTVLEPLKDVQLSEGQDAHFRCRLSRASGQEARWALGGVPLQCNEMNDITVEQGTLYLLTL  
 HKVTLEDAGTITLQVGSSESQAQLKVTAKNTVLRGLENVDALEGGEALFECQLSQPEVAHAHTWLLDDEPVHTS  
 EKVEVVYFENGLRHHLLLNKLPQDSCRVTFLAGDVVTSFAFLTVRGWRLEVLEPPHDASVKAGMQVRFTCILS  
 EAVPVGEATWYINGAAIQPDDTDWTVTTDGSHHALTLNSAQLPQHAGEVTFFAARDAVASARLSVLAALPDPEDA  
 EVVGRSDHSVTLVSWAPMSDGGGGLCGYRVMKEASTGQWQLCHDLVPGPECVDDLVPGKTYRFRVAAVGPA  
 GAGEPVHLPQMVKIAPAPAPAPAPAPAPAPAPETRAVVGEDICLELEVAADGGEVVVHKGTERIQPGGHFEVLS  
 RGQRQMLVIKGFRTEDQGEYRCGPIQGLPSSGAATFNVVMTSGSGDEVPAQPSLPPEAAQEGDLHLLWEALAR  
 KRRMSREPTLDSISELPEEDSRVQHLRQEAETAPDLSEGYSTADELARTGEADLSHTSSDDESAGTPSLVT  
 YLKKAGGPGISPLASKHEAQVTTSVKPKQKQEPVVPTCPGGDLAADMPSLKDAAVKIQAAFQYKVRKE  
 MKQQEGPVFSRTFGDTEAQVGDVLRLECVLATKTDMRACWLKDGIELTDGRHYHIDQLKDGTCSSLVVTGLAPT  
 DSGRYTCQVSTKSGRVSHSACVVVSGTESEAESSSGGELDDAFRAARLHRLFRTKSPAELSEELFLSADE  
 GPGEPEPADWQTYREDENFVCIRFESLAEARQAVTCFRNMFMATMIGVEISLGEQGRGVEMRIGKVAPTVT  
 PAVPLAKTPGLQTSDAAPVFLTELQNDVQDGYPMSFDCVVTGQVPVSVRWFKDGKLEEDDHYMINEDQGG  
 HQLIITAVVPADMVYRCLAENSMGVSSTKAELRVELTSTDYDTAADATETSSYFSAQGYLSSREQEGTESDE  
 GQLPQVLEELKDLQVAPGTRLAKFQLKVKGYPAKLYWFKDGGPLTSDHIRMTDKKTLHTLEIVSVTRESG  
 QYAAYSNAVGAAYSSARLLVRGPSEPEEKPASDVHERLVPPRILEKFTPKKVKRGSSITFSVKVEGHPAPSV  
 HWLKEEAKEKGLVLIWIPDTPGYTMASSSKQHSLLVLDVGRQHGTYTICATNPAGQALCSASLHISGLAKEEEQ  
 ERVKEALISSFLQGTSAQVSAQMSSEAGFADLVGQSKGESLVAEEAHSHLSLAEVGTEEFQKLTLSQITEMVS  
 AKISQAKLQVPGGDSDEETKTPSASPRHGRSRPSSSVQESSSESEDGDSRGEIFDIYVVVTADYLPLGAEQDAI  
 ILREGQYVEVLDSAHPLRWLVRTKTPKSSPSRQGWVSPAYLDKRLKLSPEWGPTEAPEFPGEAVSEDEYRTRL  
 SSVIQELLSSQAFVGLQFLESHEHMKHLERSPRVPAVASQKTVIFRNVQDISHFHSSFLKELQCGCTDDDV  
 AMCFIKNQEAFAFEKYLEFLVGRVQAESVVVSTPVQEPFYKKAEEETLSAKDPTQPPPPPLQHYLEQVVERVQKYQ  
 ALLKELIRNKARNRQNCALLEQAYAVVVSALPQRAENKLVSLMENYPGTLEALGEPYRQGHFVWEGAPGARM  
 PWKGHNHRVFLFRNYLVICKPRRDSRTDTFSYVFRNMMKLSSIDLNDQVEGDDRAFEVWHEREDESVRKYLLQA  
 RTVVIKNSWVKEICGIQORLAQPVWRPPEFEEELADCTAELGETVKLACRVGTGPKPIVSWYKDGKPEVVDPH  
 HILIEDPDGSCTLILDNLTGIDSGQYMCFAASAAGNASTLGKILVQVPPRFVNVKVRATPFVEGEDAQITCTVE

GAPYPQIRWYKDGTLAPGNRYRMLNEPRSGVLVVIQAASKEDLGHYECELVNRLGSTRGGGELYMQSPALR  
ARDQHHREQIIVAAVEERRPSP\*  
>rs50432310\_ENSMUSP00000151217\_c.1308:A>G\_p.I437V  
ENSMUST00000219084.3|Obscn-207|ENSMUSG00000061462|-|chr11:g.59024730:T>C  
MDHSFSGAPRFLTRPKAFVSVGKDATLSCQIVGNPTPHVSWEKDRQPVEAGARFRLAQDGDVYRLTILDLAL  
GDSGQYVCRARNAIGEAFVAVGLRVDSEGTCAEQAPHFLLRPTSIRVREGADATFRCRVGGSPQPAVSWSKDG  
RRLGPPDAPHVRVEEHGESSALRIRRSARPRDGGTYEVRAENPLGSASAAAAALVVDSDAEVAGPPGTSTATLLA  
HLQQRREAMRAEGIPSPPPGAGTRTCTVTTEGKHARLSCFVTGEPKPEVWKKDGLVTEGRRHVVEDEQENF  
VLKILFCQSDRGLYCTASNLVGQTYSSVLVVREPTVPFKKRLQDLEVREKESATFQCEVAQPAEAAWFK  
EETRLWASAKYDIEEGTERRLTVRNVSADDDAVYICETTEGSRVVAELSVQGNLTKLPRKTAVRTGDTAVF  
WVELAVPEGPVWRWRNQEEMVAGGRVAITAEGTCHTLTI FQCTLEDMGEVAFVSGGCRTTTFQCVSAPRRPPL  
YPPADPVVKAKTESSVTLWSAPPHGDRPVTIDGYVLEKRKLGAYAWSRCHEAGWLATTEFTITGVAAEGDFQ  
FRVSAINHFGQGPYLEFPGTMHLVPLAVKTPKAVEAVEGGEVTFVSDTLTVASSGEWFLDGEALKASSIYVI  
RCDRTRHMLTIREVPARLHGAQLKVFVANGIETS IQMVVRAALGLPSSKLPAAAAAREVLAQLHHEAQLLAE LSD  
QAAA VTWLKDGRELSLGPKEYMQVSAGRRALLVRDVAQDDAGLYECVSRGSRTAYQLLVQDITDGYRDWGPAG  
PQKHMCKCAGAKIARYLGS SCYRFLQYDKGVWHLEAALDTRQGKGTSSCSLHEKPKLVFAKQQAHSEVKA  
AGNSATLSCEVTQAQTEVTFWKDGKLLSSSSKVRMEASGCSRRLVVQQAGKADAGEYSCEAGGQKLSFRLDVA  
EPKLVFAKQQAHSEVKAEGASATLSCEVAQAQTEVTFWKDGKLLSSSSKVRMEASGCSRRLVVQQAGKADA  
GEYSCEAGGQKLSFRLDVAEPKMFVFAKEQQARSEVKAEGASATLSCEVAQAQTEVTFWKDGKLLSSSSKVRM  
EASGCSRRLVVQQAGKADAGEYSCEAGGQKLSFRLDVTEPKLVFAKEQQARSEVKAEGNSATLSCEVAQAQ  
EVTWTFKDGKLLSSSSKVRMEASGCSRRLVVQQAGKADAGEYSCEAGGQKLSFHLDVTEPKLVFAKEQQAHSEV  
KAEAGASATLSCEVAQAQTEVTFWKDGKLLSSSSKVRMEASGCSRRLVVQQAGKADAGEYSCEAGGQKLSFRL  
DVAEPKLVFAKEQQARSEVKAEGASATLSCEVAQAQTEVTFWKDGKLLSSSSKVRVEASGCSRRLVVQQAGK  
ADAGEYSCEAGGQKLSFRLDVAEPKLVFAKEQQANSEVKAEGASATLSCEVAQAQTEVTFWKDGKLLSSSSK  
VRVEASGCSRRLVVQQAGKADAGEYSCEAGGQKLSFRLDVAEPKLAFAKEQQAHSEVKAEGASATLSCEVAQ  
AQTEVTFWKDGKLLSSSSKVRVEASGCSRRLVVQQAGKADAGEYSCEAGGQKLSFRLDVAEPKLVFAKEQQAH  
SEVKAEGASATLSCEVAQAQTEVTFWKDGKLLSSSSKVRVEASGCSRRLVVQQVGVKADAGEYSCEARGQKLS  
FRLDVAEAESQIPERPSRREPLVVKHEHTIILTATIAAPSVAAVTWLKDGVERRSKRHEATSLGDHTLTVR  
GAQVLD SAIYSCRVGKEGQDFPVQVEEVAKF SKPLEPVEGELGGTVMLVCELSPEQAEVWRCGNTQLRPGK  
RFQMTSEGPRTTLTVSGLREDDAEYVCE SRDDRTSARLTVKVPVVKFTSGLSAMVAEEGQEA TFQCVVSPS  
DAGVTWYKDGMLQPSSEKFMVESGASRSLTILGLTLEDAGQVTEAEGASSAALRVREAPVLFKKKLEPQT  
VEERTSVTLEVELTRPWPEVKWTRNAAVLTPSENVEIRAEGARHCLVLRVSGFADRGGFCETPDDKTQAKLN  
VEMRQVRLVRGLQEVEAKEQGTASMDVELSHAEVEGSWTRDGLRLQPGPKCHLAVQGPVHILTL SALQPQDSG  
LVAFRAEGVHTSARLIVTELPVSFTRVLQDVVATQKEKVTLECELSRPVDVRLKDGVELRAGKAI GIVAQGT  
CRSLVIYRCETGDQGVYCDALDAQTSASLRVQGRYTLIFRRVLAEDAGEVKFVAENAESRAHLRVKELPVT  
LLRPLRDKIAMEKHRGVLECGVSRASAQVRWFKGVELQSGPKYEVVSDGLYRKLVIINDVQPEDETYTCDAG  
NVKTSAQFFVEEQSITIVRGLKDMTVMPPAPAWFECETSIPSVRPPKWLKGKTVLQAGGNVLEQDGTVHRLT  
LHKTCSTMTGVPVHFTIGKSRSSAQLVVDIPVVLTRPLEPKAGRELQSVVLSCDFRPAPKAVQWYKDDTPLSP  
SEKFKMALEGQMAELRILRLTPADAGVYRCQAGSAQSSAEVTVAREVTVIQPLQDAEAMEEGRVCFSCELSH  
KDEDIEWSLNGTPLYNDSFHEISHEGCLHTLVLKSVRQADTGTVCATSPKVSVSARLVVKGPVVFALKALDDV  
SAEERGTTLTQCEVSDPEARVVWRKDGVELGPSDKYDFLHKAGARGLTVHDL SHEDAGLYTCQVGSKETQSKV  
SVHDLHVGITKRLKTVEVLEGECSFECVLSHESPSDPAVWTVGGKTVGGSGHFHAVRQGRKYTLTVKDAALS  
DAGEVVFVSVLGLT SKASLIIRERPVDITKPLEDQRTTLGEDVMLSCELSRAGTSVRWLKDGKAIRKSQKYDLL  
SEGTRAVLVVRKASLKDSGEYTCETEASKSTAKLCVEKANRFTTELADLQVEEKGRAVFTCKTEHPASVVTV  
RKGLLELRASGKHVPSQEGTLTKLTINALERTSDSYTCDIGQARTQARLLVHGQKVRVIEDLED TAVQEGSS  
AKFCCRIPADYGPVHWF LDKTPLHSNELNEITVQPGGYHVLTLRQLALKDSGTVYFEAGDQRTSAAALRVTEK  
PSIFSRPLTDVTVTEGEDLTLVCETTTVDSSVRWTKDGKTLRPSARCQLSHEGCAQLLITATTPQDGGRYKC  
EIGGASSSSIVRVHALPVRFRESLKDVEVPEGKAATLRCVLSVAAPVEWRHGDDVLKSSNKYS LRQEGAVLE  
LVIRDLQPDGQYSCSFGDQTT SATLTVKTSQAQFVGLRNKEATEGTTVTLRCELTKEAPVEWKKGTETLR  
NGDKYSLKQDGAVCELQICSLLVADAGEYSCVCGQEKTSATLTVKALLVHFVRRLR SKEATEGDTTTLQCELS  
KAAPVEWRKGTETLRDGD RYSLKQDGAVCELQIRSLTIADAGEYLCTCGQEKTSATLTVRGLPAKFIEDLRSQ  
EATEGATAILRCELSKAAPVEWRKGS ETLKDGDRYTLRQDGAVCELQIRGLAVVDTGTYS LPTKFTTEGLRNE  
EATEGTMATLRCQMSKAAPVEWRKGS ETLRDKGADRYSLRQDGAMCELQIRGLTIEDSGEYTCVCGQEKTSATLS  
VKALPPRFIEDLRSQEATEGTMATLRCQMSKAAPVEWRKGS ETLRQDGGRYSLRQNGAVCELQIHDLAVEDTGE  
YSCVCGQEKTSATLNVKALPPKFTTEGLKKEEATEGTMVTLRQMSKEATVEWRKGAKTLS DGGRYSLRQDGAM  
CELQICGLAVEDAGEYSCVCGQEKTSATLSVKALPPRFIEDLRSQEATEGTMATLRCQMSKAAPVEWRKGS ETL  
LRDGD RYSLRQDGAVCELQIRDLAVEDAGEYLCVCGQEKTSATLSVKALPPRFIEDLRSQEATEGTMATLRCQ  
MSKAAPVEWRKGS KTLR DGD RYSLRQDGAMCELQICDLAVEDTGDYSCVCGQEKTSATLSVKAPQVVFQOPLQ

NLQAEEGSMASLRCELSVPNAAMVWSKGGLELQGDTRREARQQGCVAELLRLRDLRREDAGEYSCTCGSQTTSA  
TLMVTAAPVRFLRELQAQDVDEGATARLRCELSREAVSVEWRKGSILQFPCAKYQMVQEGTTAELLVHGVEQE  
DAGEYTC DAGHTQSIARLSVRAPKPKFKTDLQSTEQEAGGTARLCCQLSEAEPTVPQWLKEGVELHVGSKYE  
MRRQGA VCELLIHGLEAKDTGEYACL VGGQKTLASLRVKEPEVTIVRGLVDMEVQADEDVEFTCKVSOAGATD  
VQWHLQGLPLQSNEVTEVAVLADGCTHVLQLKGVTL EDAGTVSFHVGGSSSAQLTVRVPEVTVLEPLKDVQL  
SEGQDAHFRCRLSRASGQEARWALGGVPLQCNE MN DITVEQGTLYLLTLHKVTLE DAGTITLQVGS CSSEAQL  
KVTAKNTVLRGLENVDAL EGGEALFECQLSQPEVA AHTWLLDDEPVHTSEKVEVVYFENGLRHLLLLKLNKLPQ  
DSCRVTFLAGDVVTS AFLTVRGWRLEVLEPPHDASVKAGMQVRFTCILSEAVPVGEATWYINGAAIQPDDTDW  
TVTTDGS HHAL TLSNAQPQHAGEVTF AARDAVASARLSVLALPDPPEDAEVVGRSDHSVTLSWVAMP SDGGGG  
LCGYR VEMKEASTGQWQLCHDLVPGPECVVDDLVP GKTYRFRVA AVGPAGAGEPVHLPQMVKIAPAPAPAPAP  
APAPETRQAVVGEDIC LEVAADGGEVVWHKGT ERIQPGGHFEVLSRGQRQMLVIKGFRTEDQGEYRCGPIQ  
GLPSSGAATFNVVMTSGSGDEVPAQPSLPPEAAQEGDLHLLWEALARKRRMSREPTLDSISELPEEDSRVQHL  
RQEAEETAPD LSEG YSTADELARTGEADLSHTSSDDES RAGT PSLV TYLKKAGGPGISPLASKHEAQVTT SVK  
PQKQQEPVVPTCPPPGDLSAADLMDPSLDKAAVKIQAAF KGYKVRKEMKQQEGPVFSRTFGDTEAQVGDVLR  
ECVLATKTDMRACWLKDGIELTDGRHYHIDQLKDGTC SLLVTGLAPTDSGRYTCQVSTKSGRVSHSACVVVSG  
TESEAESSSGGLED DAFRRRAARRLHRLFR TKSPAELSEELFLSADEGPGPEPEPADWQTYREDENFV CIRFE  
SLAEARQAVTCFRNMFATMGIGVEISLGEQGRGVEMRIGKVA PTVTPAVPLAKTPGLQTS DAAPVLAFTELQN  
QDVQDGYPMSFDCVVTGQVPVSVRWFKDGKLL EEDDH YMINEDQQGGHQLIITAVVPADMGVYRCLAENSMGV  
SSTKAELRVELTSTDYDTAADATETSSYFSAQGYLSSREQEGTESDEGQLPQVLEELKDLQVAPGTRLAKFQL  
KVKGY PAKLYWFKD GQPLTTS DHIRMTDKKTLHTLEIVSVTREDSGQYAA YISNAVGAAYSSARLLVRGPSE  
PEEK PASDVHERLVP PRI LEKFTPKKVKRGS SITSV KVEGHPAPSVHWLKEEA EKVLWIGPDTPGYTM ASS  
SKQHS LVL LLDVGRQH QGT YTCIATNPAGQALCSASLHISGLAKEEEQERVKEALISSFLQGTSQAVSAQMS ES  
AGFADLVGQSKGESLVAAEAAHSHLSLAEVGT EEF LKQLTSQITEMVSAKISQAKLQVPGGDSDEETKTPSASP  
RHGRSRPSSSVQESSSESEDGDSRGEIFDIYVV TADYLP LGAEQDAIILREGQYVEVLDSAHPLRWLVRTKPT  
KSSPSRQGWVSPAYLDRKRLKLSPEWGPTEAPEFPGEAVSEDEYRTRLSSV IQELLSSEQAFV GELQFLESHM  
KHLERSPRVPAAVASQETVIFRNVDI SHFHSSFLKELQCGGTDDDVAMCFIKNQEAFAKEYLEFLVGRVQAES  
VVVSTPVQEFYKKYAKETLSAKDPTQPPPPPL QHLYLEQPVGRVQKYQALLKELIRNKARNRQNCALLEQYAV  
VSALPQRAENKLHVSLMENYPGTLEALGEP IRQGHFIVWEGAPGARMPWKGNHRHVFLFRNYLVICKPRRDSR  
TDTFSYVFRNMMKLSSIDLNDQVEGDDRAFEVWHERE DSVRKYL LQARTV IKN SWVKEICGIQQRLAQPVWR  
PPEFEEELADCTAELGETVKLACRVTGT PKPIVSWYKDGK PVEVDPHHILIEDPDG SCTLIDLNTGIDSGQY  
MCF AASAAGNASTLGKILVQVPPRFV NKVRATPFVEGEDAQITCTVEGAPYPQIRWYKDG TLLAPGNRYRMLN  
EPRSGVLVLV IQAASKEDLGHYEC ELVNRLGSTRGGGEL YMQSPALRARDQHHRQI VAAVEVTEQETKVPKK  
TVIIEETITTVVKS PRGRRQS PGKSPSRSPRRSASPRR PGLLAPERLYPPGTS PSRRLEVEQGRKAPVPALY  
VTEAEVHAPASQS QPKWLEVEETIEVRVKKTGSRGASPVREMTSRGEGILFTLPGGIPGRDPNANN SNNKSVY  
QEARTWGP AVVHVGE PFI FQVDSVGNVDWVAASPEPEQVRASQKEENTERQEGCSDG DENTFLMEEPQD TDSL  
QGRDPKILTHNGRVLT LADLEDYVPQEGETFGCGDSTPSTPDEPPCEVSVLQREI SEPTVQPVLLNVRPPG  
TGATPSFFRPGSQVHSPESVS FLLREAWSGPVSAAPWTSSFH THVQSSVDGSHGSFKTEVSTQTVSFGAVGET  
VTLHIDPDGGEAPGPSQG\*

>rs262160257\_ENSMUSP00000158795\_c.724:C>T\_p.T242M  
ENSMUST00000238536.2|Obscn-210|ENSMUSG00000061462|-|chr11:g.59026477:G>A  
MDHSFSGAPRFLTRPKAFVSVGKDATLSCQIVGNPTPHVSWEKDRQPVEAGARFRLAQDGDVYRLTILDLAL  
GDSGQYVCRARNAIGEAFAAVGLRVDSEGTCAEQAPHLLRPTSIRVREGADATFRCRVGGSPQPAVSWSKDG  
RRLGPPDAPHVRVEEHGESSALRIR SARPRDGGTYEVRAENPLGSASAAAALVVDSDAEVAGPPGTSTATLLA  
HLQORREAMRAEGIPSPPGAGMRTCTVTEGKHARLSCFVTGEPKPE TVWKKDGLVTEGRRHVVEDEQENF  
VLKILFCKQSDRGLYTCASNLVGQTYSSVLVVREPTVPFKKRLQDLEVREKESATFQCEVAQPA TEAAWFK  
EETRLWASAKYDIEEEGTERRLTVRNVSADDDAVYICETTEGSR TVAELSVQGNLTRKLPKRTAVRTGDTAIF  
WVELAVPEGPVRWLRNQEEMVAGGRVAITAEGTCHTLTIFQCTLEDMGEVAFVSGGCRTTTQFCVSAPRRPPL  
YPPADPVVKA KTESV TLSWSAPPHGDRPVTIDGYVLEKRKLGAYAWSRCHEAGWLATTEFTITGVAAEGDFQ  
FRVSAINHFGQGPYLEFPGTMHLVPLAVKTPLKAVEAVEGGEVTFVSDLTVASSGEWFLDGEALKASSIYVI  
RCDRTRHMLTIREV PARLHGAQLKFVANGIETS IQMVVRAALGLPS SKLPAAAAREVLAQLHEEAQLLAE LSD  
QAAA VTWLKDGRELSLGPKEYMQVSAGRRALLVRDVAQDDAGLYECVSRGSRTAYQLLVQDITDGYRDWGPAG  
PQKHMCKCAGAKIARYLGS SCYRFLQYDKGVWHWLEAALDTRQKGTSSCSLHEKPKLVFAKQQQAHSEVKA E  
AGNSATLSCEVTQAQTEVTWFKDGKLLSSSSKVRMEASGCSRRLLVVQQAGKADAGEYSCEAGGQKLSFRLDVA  
EPKLVFAKQQAHSEVKA EAGASATLSCEVAQAQTEVTWFKDGKLLSSSSKVRMEASGCSRRLLVVQQAGKADA  
GEYSCEAGGQKLSFRLDVAEPKMFVFAKEQQARSEVKA EAGASATLSCEVAQAQTEVTWFKDGKLLSSSSKVRM  
EASGCSRRLLVVQQAGKADAGEYSCEAGGQKLSFRLDVTEPKLVFAKEQQARSEVKA EVGN SATLSCEVAQAQ T  
EVTWFKDGKLLSSSSKVRMEASGCSRRLLVVQQAGKADAGEYSCEAGGQKLSFRLDVAEPKLVFAKEQQARSEV  
KAEAGNSATLSCEVAQAQTEVTWFKDGKLLSSSSKVRMEASGCSRRLLVVQQAGKADAGEYSCEAGGQKLSFHL

DVTEPKLVFAKEQQAHSEVKAEAGASATLSCEVAQAQTEVTFWKDGKKLSSSSKVRMEASGCSRRLVVQQAGK  
ADAGEYSCEAEGQKLSFRLDVAEPKLVFAKEQQARSEVKAEAGASATLSCEVAQAQTEVTFWKDGKKLSSSSK  
VRVEASGCSRRLVVQQAGKADAGEYSCEAGGQKLSFRLDVAEPKLVFAKEQQANSEVKAEAGASATLSCEVAQ  
AQTEVTFWKDGKKLSSSSKVRVEASGCSRRLVVQQAGKADAGEYSCEAGGQKLSFRLDVAEPKLAFAKEQQAH  
SEVKAEAGASATLSCEVAQAQTEVTFWKDGKKLSSSSKVRVEASGCSRRLVVQQAGKADAGEYSCEAGGQKLS  
FRLDVAEPKLAFAKEQQAHSEVKAEAGASATLSCEVAQAQTEVTFWKDGKKLSSSSKVRVEASGCSRRLVVQQ  
AGKADAGEYSCEAGGQKLSFRLDVAEPKLAFAKEQQAHSEVKAEAGASATLSCEVAQAQTEVTFWKDGKKLSS  
SSKVRVEASGCSRRLVVQQAGKADAGEYSCEAGGQKLFRLDVAEPKLMFAKEQQAHSEVKAEAGASATLSCE  
VAQAQTEVTFWKDGKKLSSSSKVRVEASGCSRRLVVQQAGKADAGEYSCEAGGQKLSFRLDVAEPKLVFAKEQ  
QAHSEVKAEAGASATLSCEVAQAQTEVTFWKDGKKLSSSSKVRVEASGCSRRLVVQQVQKADAGEYSCEARGQ  
KLSFRLDVADTRLMFAKEQQARTEVKAEAGNSATLSCEVAQAQTEVTFWKDGKKLSSSSKVRVEASGCSRRLV  
VQQAGKADAGEYSCEAGGQKLSFRLDVAEAEESQIPERPSRREPLVVKEHETIILTATIAAPSVAAVTWLKDG  
V EIRRSKRHEATSLGDTHTLTVRGAQVLD SAIYSCRVGKEGQDFPVQVEEVAAKFSKPLEPVEGELGGTVMLVC  
ELSPQAEVWRCGNTQLRPGKRFQMTSEGPRRTLT VSGLREDDAEYVCE SRDDRTSARLT VKVPRVVKFTS  
GLSAMVAEEGQEA TFCV VSPS DAGVTWYKDGMLQPSKFVMVESGASRSLTILGLTLEDAGQVTEAEGAS  
SSAALRVREAPVLFKKKLEPQTV EERTSVTLEVELTRPWPEVKWTRNAAVLTPSENVEIRAEGARHCLVLRV  
GFADRGGFFGCETPDDKTQAKLNVEMRQVRLVRLVGLQEVEAKEQGTASMDVELSHAEEVGSWTRDGLRLQPGPKC  
HLAVQGPVHILTL SALSALQPD SGLVAFRAEGVHTSARLIVTEL PVSFTRVLQDVVATQKEKLELCELSR  
RVLKDGVELRAGKAIGIVAQGTCSRSLVIYRCETGDQGVYVCDALDAQT SASLRVQGRTYTLIFRRLAEDAGE  
VKFVAENAESRAHLRVKELPVTLLRPLRDKIAMEKHRGVLECCVSRASAVRWFKGGVELQSGPKYEVVSDGL  
YRKLVINVDVQPEDEDTYTC DAGNVKTSAQFFVEEQSITIVRGLKDMTVM EPAPAWFECETSIPSVRPPKWL  
KTVLQAGGNVGLQDGT VHR LTLHKT CSTMTGPVHFTIGKSRSSAQLVVSDI PVVLRTRPLEPKAGRELQSV  
SCDFRPAPKAVQWYKDDT PLSPEKFKMALEGGMAELRI LRLTPADAGVYRCQAGSAQSSAEVTEAREVTVI  
QPLQDAEAMEEGRVCF SCEL SHKDEDIEWLSNGTPLYNDSFHEISHEGCLHTLVLSVSRQADTGTVCATSPKV  
SVSARLVVKGKPVVFLKALDDVSAEERGLTLTQCEVSDPEARVWVRKDGVELGPDSDKYDFLHKAGARGLTVHD  
LSHEDAGLYTCQVGTSTKVTQSKVSVHDLHVGITKRLKTVEVLEGESCSFECVLSHESPPDPAVWTVGGKT  
GHFHAVRQGRKTYLTSALQDSDAGEVVF SVLGLT SKASLI IRERPVDITKPLEDQRTTLGDEVMLSCELSRA  
GTSVRWLKDGKAIRKSQKYDLLSEGTRAVLVVRKASLKDSGEYTCETEASKSTAKLCEVEKANRFT EELADLQ  
VEEKGRAVFTCKTEHPASVVTWRKGLLELRASGKHVPSQEGTLTKLTINALERTSDTYTCDIGQARTQARLL  
VHGQKVRVIEDLEDTAVQEGSSAKFCRIAPADYGPVHWFLDKTPLHSNELNEITVQPGGYHVLTLRQLALKD  
SGTVYFEAGDQRTSAALRVTEKPSIFSRPLTDVTVTEGEDTLVCETTTVDSSVRWTKDGKTLRPSARCQLSH  
EGCQAQLLITATTPQDGGRYKCEIGGASSSSIVRVHALPVRFRESLKDVEVPEGKAATLRCVLSVAAPVEWR  
HGDDVLKSSNKYSLRQEGAVLELVIRDLPQDQSGQYSCSFGDQTTSATLT VTKTSSAQFVGLRKNKEATEGTT  
TLRCELTKEAPVEWKKGTETLRNGDKYSLKQDGA VCELQICSLLVADAGEYSCVCGQEKTSATLTVKALLVHF  
VRRLSKEATEGDTTTLQCELSKAAPVEWRKGTETLRDGDYSLKQDGA VCELQIRSLTIADAGEYLCTCGQE  
KTSATLTVRALPAKFKDSLKNEEATEGTTATLSCELSKAAPVTWKKGPKTLQSGDKYVLRQDGVAGLQIHGL  
TMADAGEYSCVCGQEKTSATLTVRGLPAKFIEDLRSQEATEGATAILRCELSKAAPVEWRKGSSETLRDGD  
RYT LRQDGA VCELQIRGLAVVDGTGYSSLPKTFTEGLRNEEATEGTMATLRCQMSKAAPVEWRKGS  
SETLRDGDYSLRQDGA MCELQIRGLTIEDSGEYTCVCGQEKTSATLSVKALPSRFIEDLRSQEATEGTM  
ATLRCQMSKTAPVE WKKGSETLRDGGRYSLRQDGPVCELQICDLAVEDAGEYSCVCGQEKTSATLSIKAL  
PPRFIEDLRSQEATEGTMATLRCQMSKAAPVEWRKGSSETLRDGGRYSLRQDGA VCELQIHDL  
DVEDAGQYSCVCG QEKTSAVLTVDALPPKFTTEGLKKEEATEGTMVTLRCQMSKEATVEWRKGA  
KTLSDGGRYSLRQDGA MCELQIC GLAVEDAGEYSCVCGQEKTSATLSVKALPPRFIEDLRSQEATEG  
TMATLRCQMSKAAPVEWRKGSSETLRDGDYSLRQDGA VCELQIRDLAVEDAGEYLCVCGQEKTSATLS  
VKALPPRFIEDLRSQEATEGTMATLRCQMSKAAPVEWRKGSSETLRDGDYSLRQDGA MCELQICDL  
AVEDTGDYSCVCGQEKTSATLSVKALPPRFIEDLRSQEARE GTVATLRCMSKAAPVEWRKGS  
SETLRDGDYSLRQEGNLCELQIRDLAVEDTEEYSCVCGQEKTSATLSVKAL PAKFIEDLRSQEAPES  
STVTLRCKLSKASVWKKGSETLRNGARYSLRQDGA VCELEIRDLTVEDTGEYSCTCGQERTSATLS  
IMAPQVVFPQLQNLQAEEGSMASLRCELSVPNAAMVWSKGGLELQGDTRREARQQGCVAEL  
LLRDLRREDAGEYSCTCGSQTTSATLMVTAAPVRFLRELQAQD VDEGATARLRCELSREAVSVEWRKGS  
LQLF PCAKYQMVQEGTTAELLVHGVEQEDAGEYTCDAHTQSIARLSVRAPKPKFKTDLQSTEQEAGG  
TARLCCQLS EAEPTFPVQWLKEGVELHVGSKYEMRRQGA VCELLIHGLEAKDTGEYACLVGGQKT  
LASLRVKEPEVTIVRGLVDMEVQADEVEFTCKV SQAGATDVQWHLQGLPLQSNVEVAVLADGCTH  
VLQKGMVTLEDAGTVSFHVGG LSSAQLTVRVPEVTVLEPLKDVQLSEGQDAHFRCRLSRASGQ  
EARWALGGVPLQCNEMNDITVEQGTLYLLTL HKVTLEDAGTITLQVGS CSSEAQLKVTAKNT  
VLRGLENVDALLEGGEALFECQLSQPEVAHAHTWLLDDEPVHTS EKVEVVYFENGLRHL  
LLLLKLNKLPQDSCRVTFLAGDVVTS AFLTVRGRVLELVLEPPHDASVKAGMQVRFTCILS  
EAVPVGEATWYINGAAIQPDDTDWTVTTDGS HHALTLSNAQPQHAGEVTF AARDAVASARLS  
VLALPDPPEDA EVVGRSDHSVTLSWVAPMSDGGGLCGYRVEMKEASTGQWQLCHDLVPGPECV  
DDLVPGKTYFRVAAVGA

GAGEPVHLPMVKIAPAPAPAPAPAPAPAPAPETROAVVGEDICLELEVAADGGGEVVVHKGTERIQPGGHFEVLS  
 RGQRQMLVIKGFRTEDQGEYRCGPIQGLPSSGAATFNVMVMTSGSGDEVPAQPSLPPEAAQEGDLHLLWEALAR  
 KRRMSREPTLDSISELPEEDSRVQHLRQEAETAPDLSEGYSTADELARTGEADLSHTSSDDESRACTPSLVT  
 YLKKAGGPGISPLASKHEAQVTTSVKPKQKQEPVVPTCPPPGDLAADLMDPSLDKAAVKIQAAFQKGYKVRKE  
 MKQQEGPVFSRTFGDTEAQVGDVLRLECVLATKTDMRACWLKDGIELTDGRHYHIDQLKDGTCSSLVVTGLAPT  
 DSGRYTCQVSTKSGRVSHSACVVVSGTESEAESSGGELDDAFRRAARRLHRLFRTKSPAELSEELFLSADE  
 GPGEPEEPADWQTYREDENFVCIRFESLAEARQAVTCFRNMFATMGIGVEISLGEQGRGVEMRIGKVAPTVT  
 PAVPLAKTPGLQTSDAAPVFLTEQLQNDVQDGYPMSFDCVVTGQVPSVRWFKDGKLEEDDHYMINEDQGG  
 HQLIIITAVVPADMGVYRCLAENSMGVSSTKAELRVELTSTDYDTAADATETSSYFSAQGYLSSREQEGETSDE  
 GQLPQVLEELKDLQVAPGTRLAKFQLKVKGYPAKLYWFKDGGPLTSDHIRMTDKKTLHTLEIVSVTREDSG  
 QYAAAYSNAVGAAYSSARLLVRGPSEPEEKPASDVHERLVPPRILEKFTPKKVKRGSSITFSVKVEGHPAPSV  
 HWLKEEAKEKGVLWIGPDTPGYTMASSSKQHSVLVLDVGRQHGTYTCTIATNPAGQALCSASLHISGLAKEEEQ  
 ERVKEALISSFLQGTSAQVSAQMSSEAGFADLVGQSKGESLVAEEAHSHLSLAEVGTTEEFLQKLTQITEMVS  
 AKISQAKLQVPGGDSDEETKTPSASPRHGRSRPSSSVQESSSEEDGDSRGEIFDIYVVTADYLPGLAEQDAI  
 ILREGQYVEVLDSAHPLRWLVRTKPKSSPSRQGWVSPAYLDKRLKLSPEWGPTEAPEFPGEAVSEDEYRTRL  
 SSVIQELLSSEQAFVGELOFLESHHMKHLERSPRVPAAVASQKTVIFRNVQDISHFHSSFLKELQCGCTDDDV  
 AMCFIKNQEAFAKYLEFLVGRVQAESVVVSTPVQEFYKKAEEETLSAKDPTQPPPPPLQHYLEQPVVERVQKYQ  
 ALLKELIRNKARNRNCALLEQAYAVVVSALPQRAENKLVHSLMENYPGTLEALGEPPIRQGHFIWVEGAPGARM  
 PWKGHNHRVFLFRNYLVICKPRRDSRTDTFSYVFRNMMKLSSIDLNDQVEGDDRAFEVWHEREDSVRKYLLQA  
 RTVIKNSWVKEICGIQQLRAQPVWRPPEFEEELADCTAELGETVKLACRVTGTPKPIVSWYKDGKPVVDPH  
 HILIEDPDGSCTLILDNLTGIDSGQYMCFAASAAGNASTLGKILVQVPPRFVNVKVRATPFVEGEDAQITCTVE  
 GAPYPQIRWYKDGTLTLLAPGNRYRMLNEPRSGVLVVIQAASKEDLGHYECELVNRLGSTRGGELYMQSALR  
 ARDQHHREQIVAAVEDTSVEGSAHSAQDQAAASVLWRLLGSEALGPSPGDLPNTRQSEPPAFEEAASQIP  
 GAASGTPEVSPQPGTHKGLEQETTSSGSQGWTVPIRVEGTAWPGAGTGQLLLDVHSQVIMETTQRTYVQCAPDT  
 GVTRAPSMQVITIEDVQVQVGDMAQFDAVIEGHPPPITVWYKGSTQLTSSARLSQRQDGTYSVLVTDVAPHA  
 GVTYCVANNAGGQVLCKAELLVHGDKLDAENQVYRRKLSHFYDVQEEIGRGVFGFVKRVVHKGNKMFCAAKF  
 IPLRSKTRAQAYQERDILATLGHPLVLTGLLDQFVTRKTLILILELCSSEELLDRLFKKGVVTEAEVKVYIQQL  
 VEGHLHLHSHGILHLDIKPPNIMLVHPAREDIKICDFGFAQKITPSEPQYSKYGSPEFVSPEIIEQNPVSEGS  
 DIWAMGVISYLSLTCSSPFAGESDRATLLNVLEGRVSWSSPTAAHLSSEDAKDFIKATLQRTPRARPSTSQCLA  
 HPWFLKSMPAEEAHFINTKQLKFLARSRWQRSLMSYKSILVMRSIPPELLQGPPDSPSLGVARHLRGEASGAS  
 SSSSSSDNELAPFARAKSLPPSPVTHSPLLHPRGFLRPSASLPEETEASMPPTADAAPASQASGPPASPGCV  
 PRHSVSISSLFYQQAGEGAERGNKTSGAKRHPARRRHLLKGGYIARALPGLREPLMEYSLEEEAAREEQASIM  
 TKTPSFETALRLPSSSVREVPGRSHSLDNPPVTGTPSPEACEQLLFPSTGLTHEHTAKDRGHKEGFLQESV  
 PFPMPGSDSRPGKQEGSSQDSRCRGKPASSCHSELGSGSQEGCGPPSSQSLGSLPPQSLKKELTSCGPLFSEQ  
 PQAAPFPPTQVSPLLGSEKEPQDGSLEGGVVPVSSSPGSASQVDASLDTEGLSEAGDTCDFTPPPQRPQEQAT  
 TRKFSLESRGGYAGVAGYGTFAFGDAGGMLQGGPLWARMWAVSQSSEEQDEAATESQPLESGLPIAEASG  
 VPLRTPSPSLTPWEEVEQVSLVQIRDLSGDAEAAADTISLIDISEVDPAYLNLSDLYDIKYLPEFEMI FRRVPKPI  
 EQPESPGETEAGQGLADFLLEAAWPWPGEGLGLRAGLEITEEPEEPGDLEALLGEAAVGRKRKWSPSRGLFQF  
 PGRCLSGEPEVELGLRQRVKASMAHISRIKGRPEGPEREGPPRKKAGLASFRLSGLKGRDQELSDEAVVLGQ  
 SVTLACQVLAQPTAQTWSKDGVLLESSGHLLISSTLKNFQLLTIILVVKEEDLGTYTCCVSNPLGTAVTTGVL  
 RKAERPSSSRPEVGEYKDAVLLVWKPVESCGPVTYIVQCCIEGGSWTTLASDISDCCYLTKLRSRGGMYIF  
 RTACVSKAGMGPISSPSEQVLLGGPNHLASEEESRGRPAQLLPSTKTFAFQMQIRRGRFSVVRQCREKASGR  
 ALAAKIVPYQPEDKTAVLREYEAALKRLHHPHLAQLHAAYLSRHLVLIILELCSGPELLPSLAERESYSES DVK  
 DYLWQMLSATQYLHAQHILHLDLRSNNMMVTEYNLLKVIDLGNASLDQEKVPAPENFKDYLETMAPELLEGG  
 GAVPQTDIWAIGVTAIFIMLSGEYPESESETRDLQKGLRKLIRLSRCYAGLSGGAVFLQSSSLCAQPWGRPCA  
 STCLQCGWLTEEGPTGSRPTPVTFPTVRLRAFAVREKRRRALLYKKNLAQVR\*  
 >rs262160257\_ENSMUSP00000038264\_c.724:c>T\_p.T242M  
 ENSMUST00000047441.14|Obscn-202|ENSMUSG00000061462|-|chr11:g.59026477:G>A  
 MDHSFSGAPRFLTRPKAFVSVGKDATLSCQIVGNPTPHVSWEKDRQFVEAGARFRLAQDGDVYRLTILDLAL  
 GDSGQYVCRARNAIGEFAAVGLRVDSEGTCAEQAPHLLRPTSIRVREGADATFRCRVGGSPPAVSWSKDG  
 RRLGPPDAPHVRVEEHGESSALRIRSARPRDGGTYEVRAENPLGSASAAAAALVVDSAEVAGPPGTSTATLLA  
 HLQORREAMRAEGIPSPPGAGMRTCTVTEGKHARLSCFVTGEPKPEVWKKDQGLVTEGRRHVVEDEQENF  
 VLKILFCKQSDRGLIETCTASNLVGQTYSSVLDVVVREIETVTFKKRLQDLEVREKESATFQCEVAQVAPATEAAWFK  
 EETRLWASAKYDIEEGCTERRLTVRNVASDDDAVYICETTEGSRVTAELSVQGNLTKRKLPRKTAVRTGDTAIF  
 WVELAVPEGPVRWLRNQEEMVAGGRVAITAEGTCHTLTI FQCTLEDMGEVAFVSGGCRTTTFQFCVSAPRRPPL  
 YPPADPVVKAKTESSVTLWSAPPHGDRPVTIDGYVLEKRLKLGAYAWSRCHEAGWLATTEFTITGVAAEEDGFQ  
 FRVSAINHFGQGPYLEFPGMTMHLVPLAVKTPLKAVEAVEGGEVTFVSDLTVASSGEWFLDGEALKASSIYVI  
 RCDRTRHMLTIREVPARLHGAQLKFVANGIETSIQMVVRAALGLPSSKLPAAAAREVLAQLHEEAQLLAE LSD



QAAA V TWLKD GREL S L G P K Y E M Q V S A G R R A L L V R D V A Q D D A G L Y E C V S R G S R T A Y Q L L V Q D I T D G Y R D W G P A G
P Q K H M C K C A G A K I A R Y L G S S C Y R F L Q Y D K G V W H W L E A A L D T R Q G K G T S S C S L H E K P K L V F A K G Q Q A H S E V K A E
A G A S A T L S C E V A Q A Q T E V T W F K D G K K L S S S S K V R M E A S G C S R R L V V Q Q A G K A D A G E Y S C E A G G Q K L S F R L D V A
E P K M V F A K E Q Q A R S E V K A E A G A S A T L S C E V A Q A Q T E V T W F K D G K K L S S S S K V R M E A S G C S R R L V V Q Q A G K A D A
G E Y S C E A G G Q K L S F R L D V T E P K L V F A K E Q Q A R S E V K A E V G N S A T L S C E V A Q A Q T E V T W F K D G K K L S S S S K V R M
E A S G C S R R L V V Q Q A G K A D A G E Y S C E A G G Q K L S F R L D V A E P K L V F A K E Q Q A R S E V K A E A G N S A T L S C E V A Q A Q T
E V T W F K D G K K L S S S S K V R M E A S G C S R R L V V Q Q A G K A D A G E Y S C E A G G Q K L S F H L D V T E P K L V F A K E Q Q A H S E V
K A E A G A S A T L S C E V A Q A Q T E V T W F K D G K K L S S S S K V R M E A S G C S R R L V V Q Q A G K A D A G E Y S C E A G G Q K L S F R L
D V A E P K L V F A K E Q Q A R S E V K A E A G A S A T L S C E V A Q A Q T E V T W F K D G K K L S S S S K V R M E A S G C S R R L V V Q Q A G K
A D A G E Y S C E A G G Q K L S F R L D V A E P K L V F A K E Q Q A N S E V K A E A G A S A T L S C E V A Q A Q T E V T W F K D G K K L S S S S K
V R V E A S G C S R R L V V Q Q A G K A D A G E Y S C E A G G Q K L S F R L D V A E P K L A F A K E Q Q A H S E V K A E A G A S A T L S C E V A Q
A Q T E V T W F K D G K K L S S S S K V R V E A S G C S R R L V V Q Q A G K A D A G E Y S C E A G G Q K L S F R L D V A E P K L A F A K E Q Q A H
S E V K A E A G A S A T L S C E V A Q A Q T E V T W F K D G K K L S S S S K V R V E A S G C S R R L V V Q Q A G K A D A G E Y S C E A G G Q K L S
F R L D V A E P K L A F A K E Q Q A H S E V K A E A G A S A T L S C E V A Q A Q T E V T W F K D G K K L S S S S K V R V E A S G C S R R L V V Q Q
A G K A D A G E Y S C E A G G Q K L F F R L D V A E P K L V F A K E Q Q A H S E V K A E A G A S A T L S C E V A Q A Q T E V T W F K D G K K L S S
S S K V R V E A S G C S R R L V V Q Q V G K A D A G E Y S C E A R G Q K L S F R L D V A E A E S Q I P E R P S R R E P L V V K E H E T I I L T A T
I A A P S V A A V T W L K D G V E I R R S K R H E A T S L G D T H T L T V R G A Q V L D S A I Y S C R V G K E G Q D F P V Q V E E V A A K F S K P
L E P V E G E L G G T V M L V C E L S P E Q A E V V W R C G N T Q L R P G K R F Q M T S E G P R R T L T V S G L R E D D A E E Y V C E S R D D R T
S A R L T V K V P R V V K F T S G L S A M V A E E G Q E A T F Q C V V S P S D A G V T W Y K D G M Q L Q P S E K F V M V E S G A S R S L T I L G L
T L E D A G Q V T V E A E G A S S S A A L R V R E A P V L F K K K L E P Q T V E E R T S V T L E V E L T R P W P E V K W T R N A A V L T P S E N V
E I R A E G A R H C L V L R S V G F A D R G F F G C E T P D D K T Q A K L N V E M R Q V R L V R G L Q E V E A K E Q G T A S M D V E L S H A E V E
G S W T R D G L R L Q P G P K C H L A V Q G P V H I L T L S A L Q P Q D S G L V A F R A E G V H T S A R L I V T E L P V S F T R V L Q D V V A T Q
K E K V T L E C E L S R P V D V R W L K D G V E L R A G K A I G I V A Q G T C R S L V I Y R C E T G D Q G V Y V C D A L D A Q T S A S L R V Q G R
T Y T L I F R R V L A E D A G E V K F V A E N A E S R A H L R V K E L P V T L L R P L R D K I A M E K H R G V L E C Q V S R A S A Q V R W F K G G
V E L Q S G P K Y E V V S D G L Y R K L V I N D V Q P E D E D T Y T C D A G N V K T S A Q F F V E E Q S I T I V R G L K D M T V M E P A P A W F E
C E T S I P S V R P P K W L L G K T V L Q A G N V G L E Q D G T V H R L T L H K T C S T M T G P V H F T I G K S R S S A Q L D V V S D I P V V L T
R P L E P K A G R E L Q Q V R S E V K A E A G A S A T L S C E V A Q A Q T E V T W F K D G K K L S S S S K V R M E A S G C S R R L V V Q Q A G K
Q S S A E V T V E A R E V T V I Q P L Q D A E A M E E G R V C F S C E L S H K D E D I E W S L N G T P L Y N D S F H E I S H E G C L H T L V L K S
V R Q A D T G T V C A T S P K V S V S A R L V V K G K P V V F L K A L D D V S A E E R G T L T L Q C E V S D P E A R V V W R K D G V E L G P S D K
Y D F L H K A G A R G L T V H D L S H E D A G L Y T C Q V G S K E T Q S K V S V H D L H V G I T K R L K T V E V L E G E S C S F E C V L S H E S P
S D P A V W T V G G K T V G G S G H F H A V R Q R K Y T L T V K D A A L S D A G E V V F S V L G L T S K A S L I I R E R P V D I T K P L E D Q R
T T L G E D V M L S C E L S R A G T S V R W L K D G K A I R K S Q K Y D L L S E G T R A V L V R K A S L K D S G E Y T C E T E A S K S T A K L C
V E E K A N R F T E E L A D L Q V E E K G R A V F T C K T E H P A S V V T W R K G L L E L R A S G K H V P S Q E G L T L K L T I N A L E R T D S D
T Y T C D I G Q A R T Q A R L L V H G Q K V R V I E D L E D T A V Q E G S S A K F C C R I A P A D Y G P V H W F L D K T P L H S N E L N E I T V Q
P G G Y H V L T L R Q L A L K D S G T V Y F E A G D Q R T S A A L R V T E K P S I F S R P L T D V T V T E G E D L T L V C E T T T V D S S V R W T
K D G K T L R P S A R C Q L S H E G C Q A Q L L I T A T T P Q D G G R Y K C E I G G A S S S I V R V H A L P V R F R E S L K D V E V P E G K A A
T L R C V L S S V A A P V E W R H G D D V L K S S N K Y S L R Q E G A V L E L V I R D L Q P Q D S G Q Y S C S F G D Q T T S A T L T V K T S S A Q
F V G K L R N K E A T E G T T V T L R C E L T K E A P V E W K K G T E T L R N G D K Y S L K Q D G A V C E L Q I C S L L V A D A G E Y S C V C G Q
E K T S A T L T V K A L L V H F V R R L S K E A T E G D T T T L Q C E L S K A A P V E W R K G T E T L R D G D R Y S L K Q D G A V C E L Q I R S
L T I A D A G E Y L C T C G Q E K T S A T L T V R A L P A K F K D S L K N E E A T E G T T A T L S C E L S K A A P V T W K K G P K T L Q S G D K Y
V L R Q D G A V C G L Q I H G L T M A D A G E Y S C V C G Q E K T S A T L T V R G L P A K F I E D L R S Q E A T E G A T A I L R C E L S K A A P V
E W R K G S E T L K D G D R Y T L R Q D G A V C E L Q I R G L A V V D T G T Y S S L P T K F T E G L R N E E A T E G T M A T L R C Q M S K A A P V
E W R K G S E T L R D G D R Y S L R Q D G A M C E L Q I R G L T I E D S G E Y T C V C G Q E K T S A T L S V K A L P P R F I E D L R S Q E A T E G
T M A T L R C Q M S K A A P V E W R K G S E T L G D G G R Y S L R Q N G A V C E L Q I H D L A V E D T G E Y S C V C G Q E K T S A T L N V K A L P
P R F I E D L R S Q E A T E G T M A T L R C Q M S K A A P V E W R K G S E T L R D G G R Y S L R Q D G A V C E L Q I H D L D V E D A G Q Y S C V C
G Q E K T S A V L T V D A L P P K F T E G L K K E E A T E G T M V T L R C Q M S K E A T V E W R K G A K T L S D G G R Y S L R Q D G A M C E L Q I
C G L A V E D A G E Y S C V C G Q E K T S A T L S V K A L P P R F I E D L R S Q E A T E G T M A T L R C Q M S K A A P V E W R K G S K T L R D G D
R Y S L R Q D G A M C E L Q I C D L A V E D T G D Y S C V C G Q E K T S A T L S V K A P Q V V F Q Q P L Q N L Q A E E G S M A S L R C E L S V P N
A A M V W S K G G L E L Q G D T R R E A R Q Q G C V A E L L L R D L R R E D A G E Y S C T C G S Q T T S A T L M V T A A P V R F L R E L Q A Q D V
D E G A T A R L R C E L S R E A V S V E W R K G S L Q L F P C A K Y Q M V Q E G T T A E L L V H G V E Q E D A G E Y T C D A G H T Q S I A R L S V
R A P K P K F K T D L Q S T E Q E A G G T A R L C C Q L S E A E P G T P V Q W L K E G V E L H V G S K Y E M R R Q G A V C E L L I H G L E A K D T
G E Y A C L V G G Q K T L A S L R V K E P E V T I V R G L V D M E V Q A D E D V E F T C K V S Q A G A T D V Q W H L Q G L P L Q S N E V T E V A V
L A D G C T H V L Q L K G V M T L E D A G T V S F H V G G L S S S A Q L T V R V P E V T V L E P L K D V Q L S E G Q D A H F R C R L S R A S G Q E A
R W A L G G V P L Q C N E M N D I T V E Q G T L Y L L T L H K V T L E D A G T I T L Q V G S C S S E A Q L K V T A K N T V L R G L E N V D A E G
G E A L F E C Q L S Q P E V A A H T W L L D D E P V H T S E K V E V V Y F E N G L R H L L L L K N L K P Q D S C R V T F L A G D V V T S A F L T V
R A L P D P P E D A E V V G R S D H S V T L S W A P M S D G G G L C G Y R V E M K E A S T G Q W Q L C H D L V P G P E C V D D L V P G K T Y
R F R V A A V G P A G A G E P V H L P Q M V K I A P A P A P A P A P A P A P E T R Q A V V G E D I C L E L E V A A D G G E V V W H K G T E R I
Q P G G H F E V L S R G Q R Q M L V I K G F R T E D Q G E Y R C G P I Q G L P S S G A A T F N V V M T S G S G D E V P A Q P S L P P E A A Q E G D

LHLLWEALARKRRMSREPTLDSISELPEEDSRVQHLRQEAEEETAPDLSEGYSTADELARTGEADLSHTSSDDE  
SRAGTPSLVTYLKKAGGPGISPLASKHEAQVTTSVKPKQKQEPVVPVTPPPPGDLAADLMDPSLDKAAVKIQA  
AFKGYKVRKEMKQOEGPVFSRTFGDTEAQVGDVLRLECVLATKTDMRACWLKDGIELTDGRHYHIDQLKDGTC  
SLLVTLGLAPTDSGRYTCQVSTKSGRVSHSACVVVSGTESEAESSSGGELDDAFRRAARRLHRLFRTKSPAELS  
EEELFLSADEGPGEPEPADWQTYREDENFVCIRFESLAEARQAVTCFRNMFATMGIGVEISLGEQGPGRVEM  
RIGKVAPTVTPAVPLAKTPGLQTSDAAPVFLTELQNDVQDGYPMSFDCVVTGQPVVPSVRWFKDGKLLLEDDH  
YMINEDQOQGGHQLIITAVVPADMGVYRCLAENSMGVSSSTKAELRVELTSTDYDTAADATETSSYFSAQGYLSS  
REQEGTESDEGQLPVLEELKDLQVAPGTRLAKFQKLVKGYPAKPLYWFKDQGPLTSDHIRMTDKKTLHTLE  
IVSVTREDSGQYAAAYISNAVGAAYSARLLVRGPSEPEEKPASDVHERLVPPRILEKFTPKKVKRGSSTIFS  
KVEGHPAPSVHWLKEEAKEKGLVWIGPDTPGYTMASSSKQHSVLVLLDVGQRHQGTYTCTIATNPAGQALCSASLH  
ISGLAKEEEQERVKEALISSFLQGTSAVSAQMSEAGFADLVGQSKGESLVAAEAHSHLSLAEVGTTEFLQK  
LTSQITEMVSAKISQAKLQVPGGDSDEETKTPSASPRHGRSRPSSSVQESSSESEDGDSRGEIFDIYVVTADY  
LPLGAEQDAIILREGQYVEVLDSAHPLRWLVRTKPTKSSPSRQGWVSPAYLDKRLKLSPEWGPTEAPEFPGEA  
VSEDEYRTRLSSVIQELLSSEQAFVQELQFLESHMKHLERSPRVPAAVASQKTVIFRNVQDISHFHSSFLKE  
LQCGCTDDDVAMCFIKNQEAFAFEKYLEFLVGRVQAESVVVSTPVQEFYKKYAEETLSAKDPTQPPPPPLQHYLE  
QPVERVQKYQALLKELIRNKARNRQNCALLEQAYAVVSALPQRAENKLVSLMENYPGTLEALGEPVIRQGHFI  
VWEGAPGARMPPWKGNRHVFLFRNYLVICPKRRDSRTDTSFYVFRNMMKLSIDLNDQVEGDDRAFEVWHERE  
DSVRKYLLQARTVVIKNSWVKEICGIQORLAQPVWRPPEFEELADCTAELGETVKLACRVGTGPKPIVSWYK  
DGKPVVDPHHLIEDPDGSCSTLILDNLGTIGDSQYMCFAASAAGNASTLGKILVQVPPRFVNVKVRATPFVEG  
EDAQITCTVEGAPYPQIRWYKDGTLAPGNRYRMLNEPRSGVLVLIQAASKEDLGHYECELVNRGSTRGGG  
ELYMOSPALRARDQHHREQIVAAVEGAPSMQVTTIEDVQVQVGDMAQFDAVIEGHPPPVTWYKSTQLTSSAR  
LSQRQDGTYSVLVLTVDVAPHDAGVYTCVANNAGGVLCCKAELLVHGGDKLDAENQVYRRKLSHFYDVQEEIGR  
GVFGFVKRVQHKGNMFCAAKFIPLRSKTRAQAYQERDILATLGHPLVTGLLDQFETRKTLLIILELCSSEEL  
LDRLFKKGVVTEAEVKVYIQQLVEGLHYLHSHGILHLDIKPPNIMVHPAREDIKICDFGFAQKITPSEPQYS  
KYGSPFVSPETIEQNPVSEGSIDIWAMGVISYLSLTCSSPFAGESDRATLLNVLEGRVSWSSPTAAHLSERDAK  
DFIKATLQRTPRARPSTQCLAHPWFLKSMPEAAEHFINTKQLKFLARSRWQRSLMSYKSILVMRSPELLQ  
GPPDSPSLGVARHLRGEASGSSSSSSSDNELAPFARAKSLPPSPVTHSPLLHPRGFLRPSASLPEETEASMP  
TADAAPVSPQASAGPPASPGCVPRHSVIVSSLFYQQAGEGAERGNKTSGAKRHPARRRHLKGGYIARALPGLR  
EPLMEYSLLEEEAAREEQASLMTKTTPSFETALRLPSSSVREVPGRSHSLDNPPVTTGSPPEACKEQLLFPST  
GLTHETTAKDRGHKEGFLQESVFPFPPMSGDSRPGKQEGSSQDSCRGKPASSCHSELGSGSQEGCGPPSSQSLG  
SLPPQSLKKELESTSCGPLFSEQPQAAPFTQVSPLLGSEKEPQDGSLESGPVPVPPSSSPGSASQVDAASLDTG  
LSEAGDTCDFTPPPQRPQEQATTRKFSLESRGGYAGVAGYGTFAFGGDAGGMLGQGPLWARMWAVVQSSEEQ  
DEAATESPQPLESLGPIAEASGVPLRTSPSLTPWEEVEQVSLVQIRDLSGDAEAADTISLDISEVDPAYLNL  
DLYDIKYLPPFEFMIFRVVKPIEQPESPGSETEAGQGLADFLLEAAWPWPGEGLGLRAGLEITEPEEPGDLEA  
LLGEAAVGRKRKWSPSRGLFQFPGRCLSGEEPVELGLRQRVKASMAHISRIKGRPEPEREGPPRKKAGLAS  
FRLSGLKGRDQELSDEAVVLGQSVTLACQVLAQPTAQATWSEKDGVLLESSGHLLISSTLKNFQLLTIIVVKEE  
DLGTYTCCVSNPLGTAVTTGVLKAERPSSSPRPEVGEYKDAVLLVWKPVESECGPVTYIVQCCIEGGSWTTL  
ASDISDCCYLTGKLSRGGMYIFRTACVSKAGMPYSSPSEQVLLGGPNHLASEEESSRGRPAQLLPSTKTFAF  
QMQIRRGFRFSVVRQCREKASGRALAAKIVPYQPEDKTAVREYEALKRLHHPHLAQLHAAYLSPRHLVLI  
CSGPELLPSLAERESYSESDVKDYLWQMLSATQYLHAQHILHLDLRSENMMVTEYNLLKVIDLGNASQLDQEK  
VPAPENFKDYLETMAPELLEGQGAVPQTDIWAIGVTAIFMLSGEYPESEGETRDLQKGLRKLIRLSRCYAGL  
SGGAVAFLOSSLCAQPWGRPCASTCLQCGWLTEEGPTGSRPTVPTVPTVRLRAFVREKRRALLYKKNHNAQ  
VR\*

>rs262160257\_ENSMUSP0000049737\_c.724:C>T\_p.T242M

ENSMUST0000052872.15|Obscn-203|ENSMUSG0000061462|-|chr11:g.59026477:G>A  
MDHSFSGAPRFLTRPKAFVSVGKDATLSCQIVGNPTPHVSWEKDRQPVEAGARFLAQDGDVYRLTILDIAL  
GDSGQYVCRARNAIGEFAAVGLRVDSEGTCAEQAPHLLRPTSIRVREGADATFRCRVGGSPQPAVSWSKDG  
RRLGPPDAPHVRVEEHGESSALRIRSARPRDGGTYEVRAENPLGSASAAAALVVDSDAEVAGPPGTSTATLLA  
HLQQRREAMRAEGIPPSPPGAGMRTCTVTEGKHARLSCFVTGEPKPEVWKKDQGLVTEGRRHVVEDEQENF  
VLKILFCKQSDRGLYTCTASNLVGQTYSSVLVVVREPTVPFKKRLQDLEVREKESATFQCEVAQPAEEAFAWFK  
EETRLWASAKYDIEEGETERRLTVRNVSADDDAVYICETTEGSRVVAELSVQGNLTKLPRKTAVRTGDTAIF  
WVELAVPEGPVWRWRNQEEMVAGGRVAITAEGTCHTLTIQCTLEDMGVAFVSGGCRTTTQFCVSAPRRPPL  
YPPADPVVKKAKTESVTLWSAPPHGDRPVTIDGYVLEKRLKLGAYAWSRCHEAGLWATTEFTITGVAEEGDFQ  
FRVSAINHFQGGPYLEFPGTMHLVPMIAVKTPLKAVEAVEGGEVTFVSDLTVASSGELWDLGELKASSIYVI  
RCDRTRHMLTIRVLEPARLHGAQLKVFVANGIETSIQMVVRAALGLPSKLPAAAAREVLAQLHHEAQLLAELSD  
QAAAAVTWLKDGRELSLGPKYEMQVSAGRRALLVRDVAQDDAGLYECVSRGSRTAYQLLVQEPKLVFAKQQA  
SEVKAEEAGNSATLSCEVTQAQTEVTWFKDGKLLSSSSKVRMEASGCSRRLVVQQAGKADAGEYSCEAGGQKLS  
FRLDVAEPKLVFAKQQAHEVKAEEAGASATLSCEVAQAQTEVTWFKDGKLLSSSSKVRMEASGCSRRLVVQQ

AGKADAGEYSCEAGGQKLSFRLDVAEPKMFVAKEQQARSEVKAEEAGASATLSCEVAQAQTEVTWFKDGGKLLSS
SSKVRMEASGCSRRLLVVQQAGKADAGEYSCEAGGQKLSFRLDVTEPKLVFAKEQQARSEVKAEEVNSATLSCE
VAQAQTEVTWFKDGGKLLSSSSKVRMEASGCSRRLLVVQQAGKADAGEYSCEAGGQKLSFRLDVAEPKLVFAKEQ
QARSEVKAEEAGNSATLSCEVAQAQTEVTWFKDGGKLLSSSSKVRMEASGCSRRLLVVQQAGKADAGEYSCEAGGQ
KLSFHLVDVTEPKLVFAKEQQAHSEVKAEEAGASATLSCEVAQAQTEVTWFKDGGKLLSSSSKVRMEASGCSRRLLV
VQQAGKADAGEYSCEAEGQKLSFRLDVAEPKLVFAKEQQARSEVKAEEAGASATLSCEVAQAQTEVTWFKDGGK
LSSSSKVRVEASGCSRRLLVVQQAGKADAGEYSCEAGGQKLSFRLDVAEPKLVFAKEQQANSEVKAEEAGASATL
SCEVAQAQTEVTWFKDGGKLLSSSSKVRVEASGCSRRLLVVQQAGKADAGEYSCEAGGQKLSFRLDVAEPKLAFA
KEQQAHSEVKAEEAGASATLSCEVAQAQTEVTWFKDGGKLLSSSSKVRVEASGCSRRLLVVQQAGKADAGEYSCEA
GGQKLSFRLDVAEPKLAFAKEQQAHSEVKAEEAGASATLSCEVAQAQTEVTWFKDGGKLLSSSSKVRVEASGCSR
RLVVQQAGKADAGEYSCEAGGQKLSFRLDVAEPKLAFAKEQQAHSEVKAEEAGASATLSCEVAQAQTEVTWFKD
GKKLSSSSKVRVEASGCSRRLLVVQQAGKADAGEYSCEAGGQKLFRLDVAEPKLMFAKEQQAHSEVKAEEAGAS
ATLSCEVAQAQTEVTWFKDGGKLLSSSSKVRVEASGCSRRLLVVQQAGKADAGEYSCEAGGQKLSFRLDVAEPKL
VFAKEQQAHSEVKAEEAGASATLSCEVAQAQTEVTWFKDGGKLLSSSSKVRVEASGCSRRLLVVQQVQAGKADAGEYS
CEARGQKLSFRLDVADTRLMFAKEQQARTEVKAEEAGNSATLSCEVAQAQTEVTWFKDGGKLLSSSSKVRVEASG
CSRRLLVVQQAGKADAGEYSCEAGGQKLSFRLDVAEAEESQI PERPSRREPLVVKEHETI I LTATIAAPSVAAVT
WLKDGVEIRRSKRHEATSLGDTHLTVRGAQVLD SAIYSCRVGKEGQDFPVQVEEVAAKFSKPLEPVEGELGG
TVMVLVCELSPEQAEEVWRCGNTQLRPGKRFQMTSEGRRTLT VSGLREDDAEYVCEASRDRTSARLTVKVP
VVKFTSGLSAMVAEEGQEA TFCVVS P SDAGVTWYK DGMQLQ PSEK FVMVESGASRSLT I LGLTLEDAGQVTV
EAEGASSAALRVREAPVLFKKKLEPQTEERTSVTLEVELTRPWPVKWTRNAAVLTPSENVEIRAEGARHC
LVLRSVGFADRGFFGCETPDDKTQAKLNVEMRQVRLVRGLQVEEAKQGTASMDVELSHAEVEGSWTRDGLRL
QPGPKCHLAVQGPVHILTL SALQPQDSGLVAFRAEGVHTSARLIVTEL PVSFTRVLQDVVATQKEKVTLECEL
SRPVDVRWLKDGVELRAGKAI GIVAQGTCSRSLVIYRCETGDQGVYVCDALDAQTSASLRVQGRTYTLIFRRVL
AEDAGEV KFVAENAESRAHLRVKELPVTLRPLRDKIAMEKHRGVLECVSRASAVRWFVKGGLVLSGPKYE
VVS DGLYRKLVIN DVQPEDEDYTC DAGNVKTS AQFFVEEQSITIVRGLKDMTVMPEPAPAWFECETSIPSVRP
PKWLLGKTVLQAGGNVLEQDGTVHRLTLHKTCSTMTGPVHFTIGKSRSSAQLVVSDI PVVLT RPLEPKAGRE
LQSVVLSCDFRPAKNAVQWYKDDTPLSPSEKFKMAELRILRLTPADAGVYRCQAGSAQSSAEVTVEA
REVTVIQPLQDAEAMEEGRVCFSCELSHKDEDIEWSLNGTPLYNDSFHEISHEGCLHTLVLSVRQADTGTVC
ATSPKVSVSARLVVKGKPVVFLKALDDVSAEERGTLLTQCEVSDPEARVVRKDGVELGSPDKYDFLHKAGAR
GLTVHDLSDHEDAGLYTCQVGSKETQSKVSVHDLHVGITRRLKTVLEVLEGECSFCVLSHESPSDPVWTVGG
KTVGGSGHFHAVRQGRKYTLTVKDAALSDAGEVVSVLGLTSKASLIIRERPVDITKPLEDQRTTLGEDVMLS
CELSRAGTSVRWLKDGKAIKRSQYDLLSEGTRAVLVVRKASLKDSGEYTCETEASKSTAKLCVEEKANRFT
ELADLQVEEKGRAVFTCKTEHPASVVTWRKGLLELRASGKHVPSQEGTLTKLTINALERTSDSYTCDIGQAR
TQARLLVHGQKVRVIEDLED TAVQEGSSAKFCRIAPADYGPVHWF LDKTPLHSNELNEITVQPGGYHVLT LR
QLALKDSGTVYFEAGDQRTS AALRVTEKPSIFSRPLTDVTVTEGEDTLVCETTTVDSSVRWTKDGKTLRPSA
RCQLSHEGCAQLLITATTPQDGGRYKCEIGGASSSIVRVHALPVRFRRESLKDVEVPKGAATLRCLVLSVA
APVEWRHGDDVLKSSNKYSLRQEGAVLELVRDLQPDQSGQYSCSFGDQTTSATLTVTKTSSAQFVGLRNKEA
TEGTTVTLRCELTK EAPVEWKKGTETLRNGDKYSLKQDGAVCELQICSLLVADAGEYSCVCGQEKT SATLTVK
ALLVHFVRRRLRSKEATEGDTTTLQCELSKAAPVEWRKGTETLRDGDRLYSLKQDGAVCELQIRSLTIADAGEYL
CTCGQEKT SATLTVRALPAKFKDSLKNEEATEGTTATLSCELSKAAPVTWKKGPKTLQSGDKYVLRQDGAVCG
LQIHGLTMADAGEYSCVCGQEKT SATLTVRGLPAKFIEDLRSQEATEGATAILRCELSKAAPVEWRKGETL
KDGDRYTLRQDGAVCELQIRGLAVVDGTYSLPTKFTTEGLRNEEATEGTMATLRCQMSKAAPVEWRKGETL
RQDGRYSLRQDGAMCELQIRGLTIEDSGEYTCVCGQEKT SATLSVKALPPRFIEDLRSQEATEGTMATLRCQMS
KTAPVEWKKGSETLRDGGRYSLRQDGPVCELQICDLAVEDAGEYSCVCGQEKT SATLSIKALPPRFIEDLRSQ
EATEGTMATLRCQMSKAAPVEWRKGETLGDGGRYSLRQNGAVCELQIHDLAVEDTGEYSCVCGQEKT SATLN
VKALPPRFIEDLRSQEATEGTMATLRCQMSKAAPVEWRKGETLRDGGRYSLRQDGAVCELQIHDLVDEDAGQ
YSCVCGQEKTSAVLTVDALPPKFTTEGLKKEEATEGTMVTLRQMSKEATVEWRKGAKT LSDGGRYSLRQDGAM
CELQICGLAVEDAGEYSCVCGQEKT SATLSVKALPPRFIEDLRSQEATEGTMATLRCQMSKAAPVEWRKGET
LRDGDRLYSLRQDGAVCELQIRDLAVEDAGEYLCVCGQEKT SATLSVKALPPRFIEDLRSQEATEGTMATLRCQ
MSKAAPVEWRKGSKTLRQDGRYSLRQDGAMCELQICDLAVEDTGDYSCVCGQEKT SATLSVKALPPRFIEDLR
SQEAREGTVATLRCRMSKAAPVEWRKGETLKDGRYSLRQEGNLCELQIRDLAVEDTEEYSCVCGQEKT SAT
LSVKALPAKFIEDLRSQEAPESSTVTLRCKLSKKASVWKKGSETLRNGARYSLRQDGAVCELEIRDLTVEDT
GEYSCTCGQRTSATLSIMAPQVVFQQPLQNLQAEEGSMASRLCELSVPNAAMVWSKGLLELQGDTRREARQQ
GCVAELLLRDLRREDAGEYSCTCGSQTT SATLMTAEPVFLRELQAQDVDEGATARLRCLELSREAVSVEWRK
GSLQLFPKAKYQMVQEGTTAE LLVHGVEQEDAGEYTC DAGHTQS IARLSVRAPKPKFKTDLQSTEQEAGGTAR
LCCQLSEAEPGTPVQWLKEGVELHVGSKYEMRRQGAVCELLIHGLEAKDTGEYACL VGGQKT LASLRVKEPEV
TIVRGLVDMEVQADEDEFTCKV SQAGATDVQWHLQGLPLOSNEVTEVAVLADGCTHV LQLKGVTL EDAGTVS
FHVGG LSSSAQLTVRVPEVTVLEPLKDVQLSEGQDAHFRCLSRASQGEARWALGGVPLQCNEMNDITVEQGT

LYLLTLHKVTLEDAGTITLQVGSSESQAQLKVTAKNTVLRGLENVDALEGGEALFECQLSQPEVAATHWLLDD  
 EPVHTSEKVEVVYFENGLRHLLLLKLNKLPQDSCRVTFLAGDVVTS AFLTVRGWRLEVLPPHDASVKAGMQVR  
 FTCILSEAVPVGEATWYINGAAIQPDDTDWTVTTDGSHHALTLSNAQFQHAGEVTF AARDAVASARLSVLALP  
 DPPEDAEVVGRSDHSVTLSSWVAPMSDGGGGLCGYRVMKEASTGQWQLCHDLVPGPECVVDLVP GKTYRFRV  
 AAVGPAGAGEPVHLPQMVKIAPAPAPAPAPAPAPAPETRQAVVGEDICLELEVAADGGEV VWHKGTERRIQPGG  
 HFEVLSRGRQMLVIKGFRTEDQGEYRCGPIQGLPSSGAATFNVMVTS GSGDEVPAQPSLPP EAAQEGDLHLL  
 WEALARKRRMSREPTLDSISELPEEDSRVQHLRQEAETAPDLSEGYSTADELARTGEADLSHTSSDDES RAG  
 TPSLVTYLKKAGGPGISPLASKHEAQVTT SVKPKQKQEPVPTCP PPGDL SAADLMDPSLDKAAVKIQAAFKG  
 YKVRKEMKQQEGPVFSRTFGDTEAQVGDVLRLECVLATKTD MRACWLKDGIELTDGRHYHIDQLKDGTC SLLV  
 TGLAPTDSGRYTCQVSTKSGRVSHSACVVVSGTESEAESSSGGELDDAFRRAARRLHRLFR TKSPAELSEEEL  
 FLSADEGPEPEEPADWQTYREDENFVCIRFESLAEARQAVTCFRNMFATMGIGVEISLGEQGP RGVEMRIGK  
 VAPTVPAPVPLAKTPGLQTS DAAPVFLTELQNDQVQDGYPMSFDCVVTGQPVPSVRWFKDGK LLEEDDHYMIN  
 EDQGGHQLIITAVVPADMGVYRCLAENSMGVSSTKAELRVELTSTDYDTAADATETSSYFSAQGYLSSREQE  
 GTESDEGQLPQVLEELKDLQVAPGTR LAKFQLKVKGY PAKLYWFKDGOPLTTS DHIRMTDKKTLHTLEIVSV  
 TREDSGQYAAYSNAVGAAYSSARLLVRGPSEPEEK PASDVHERLVPRI LEKFTPKKVKRGS S ITFSVKVEG  
 HPAPSVHWLKEEAKEGVLWIGPDTPGYTMASSSKQHSLVLLDVGRQHOGTYT CIATNPAGQALCSASLHISGL  
 AKEEEQERVKEALISSFLQGT SQAVSAQMSE SAGFADLVGQSKGESLVAEEAHSHLSLAEVTEEF LQKLT SQ  
 ITEMVSAKISQAKLQVPGGDSDEETKTPSASPRHGRSRPSSSVQESSSESDGDSRGEI FDIYVVTADYLP LG  
 AEQDAIILREGQYVEVLDSAHPLRWLVRTKPTKSSPSRQGWVSPAYLDKRLKLSPEWGPTEAPEFPGEAVSED  
 EYRTRLSSVIQELLSSEQAFVGE LQFLESHHMKHLERSPRVPAAVASQKTVI FRNVQDISHFHSSFLKELQGC  
 GTDDVAMCFIKNQEA FEKYLEFLVGRVQAESVVVSTPVQEFYKKYAEETLSAKDPTQPPPPLOHYLEQ PVE  
 RVQKYQALLKELIRNKARNRQNCALLEQAYAVVSALPQRAENKLVHSLMENYPGTLEALGEP IRQGHFIVWEG  
 APGAMPWKGNHRHVF LFRNVLVICKPRRDSRTDTFSYVFRNMMKLSIDLNDQVEGD DRAFEVWHEREDSVR  
 KYLLQARTVI IKNSWVKEICGIQQRLAQPVWRPPEFEEELADCTAELGETVKLACRVTGT PKPIVSWYKDGKP  
 VEVDPHHILIEDPDG SCTLILDNLTGIDSGQYMCFAASAAGNASTLGKILVQVPPRFVNVKVRATPFVEGEDAQ  
 ITCTVEGAPYPQIRWYKGTLLAPGNRYRMLNEPRSGVLLVVIQAASKEDLGHYECELVNR LSGTRGGGELYM  
 QSPALRARDQHREQIVAAVEVTEQETKVPKKTVI IETITTVVKS PRGRRQSPGKSPSRSPSRSSPRRPG  
 LLAPERLYPPGTSPSRLEVEQGRKAPVPALYVTEAEVHAPASQSQPKWLEVEETIEVRVKKTGSRGASPVRE  
 MTSRGEGLF LFTLPGGIPGRDPNANNNSNKS SVYQEARWGPVAVHVGE PFI FQVDSVGNVDWVAASPEPEQVRA  
 SQKEENTERQEGCS DG DENTFLMEEPQD TDSLQGRDPKILTHNGRVLTLADLE DYVPQEGE TFGCGDSTPSTP  
 DEPPCEVSVLQREI SEPTVGQPVLLNVGRPPGTGATPSFFRPGSQVHSPESVSFLLREAWSGPVS AAPWTSS F  
 HTHVQSSVDGSHGSFKTEVSTQTVSFGAVGETVTLHIDPDGGEAPGPSQ\*  
 >rs262160257\_ENSMUSP00000020732\_c.724:C>T\_p.T242M  
 ENSMUST00000020732.13|Obscn-201|ENSMUSG00000061462|-|chr11:g.59026477:G>A  
 MDHSFSGAPRFLTRPKAFVSVGKDATLSCQIVGNPTPHVSWEKDRQPVEAGARFLAQDGDVYRLTILDLAL  
 GDSGQYVCRARNAIGEAFAAVGLRVDSEGTCAEQAPHFLLRPTSIRVREGADATFRCRVGGSPQPAVSWSKDG  
 RRLGPPDAPHVRVEEHGESSALRIRSARPRDGGTYEVRAENPLGSASAAAAALVVDSDAEVAGPPGTSTATLLA  
 HLQORREAMRAEGIPSPPPGAGMRTCTVTEGKHARLSCFVTGEPKPE TVWKKDGLVTEGRRHVVEDEQENF  
 VLKILFCKQSDRGLYTCTASNLVGTYS SVLVVVREPTVPFKKRLQDLEVREKESATFQCEVAQ PATEAAWFK  
 EETRLWASAKYDIEEEGTERRLTVRNVSADDDAVYICETTEGSRVAELSVQGNLTKLPRKTAVRTGDTAIF  
 WVELAVPEGPVRWLRNQEEMVAGGRVAITAEGTCHTLTI FQCTLEDMGEVAFVSGGCRTTTQFCVSAPRRPPL  
 YPPADPVVKAKTESSVTLSSWAPPHGDRPVTIDGYVLEKRLKLGAYAWSRCHEAGWLATTEFTITGVAAEEDFQ  
 FRVSAINHFGQGPYLEFPGTMHLVPLAVKTPLKAVEAVEGGEVTFVSDLTVASSGEWFLDGEALKASSIYVI  
 RCDRTRHMLTIREV PARLHGAQLKFVANGIETS IQMVVRAALGLPSSKLPAAAAREVLAQLLHEEAQLLAE LSD  
 QAAAVTWLKDGRELSLGPKYEMQVSAGRRALLVRDVAQDDAGLYECVSRGSR TAYQLLVQDITDGYRDWGPAG  
 PQKHMCKCAGAKIARYLGSSCYRFLQYDKGVWHLEAALDTRQKGKTS SCSLHEKPKLVFAKGQQA HSEVKA E  
 AGNSATLSCEVTQAQTEVTWFKDGKLLSSSSKVRMEASGCSRRLVVQQAGKADAGEYSCEAGGQKLSFR LDVA  
 EPKLVFAKGQQA HSEVKA EAGASATLSCEVAQAQTEVTWFKDGKLLSSSSKVRMEASGCSRRLVVQQAGKADA  
 GEYSCEAGGQKLSFR LDVAEPKMFVFAKEQQARSEVKA EAGASATLSCEVAQAQTEVTWFKDGKLLSSSSKVRM  
 EASGCSRRLVVQQAGKADAGEYSCEAGGQKLSFR LDVTEPKLVFAKEQQARSEVKA EVGN SATLSCEVAQAQT  
 EVTWFKDGKLLSSSSKVRMEASGCSRRLVVQQAGKADAGEYSCEAGGQKLSFR LDVAEPKLVFAKEQQARSEV  
 KAEAGNSATLSCEVAQAQTEVTWFKDGKLLSSSSKVRMEASGCSRRLVVQQAGKADAGEYSCEAGGQKLSFHL  
 DVTEPKLVFAKEQQAHSEVKA EAGASATLSCEVAQAQTEVTWFKDGKLLSSSSKVRMEASGCSRRLVVQQAGK  
 ADAGEYSCEAGGQKLSFR LDVAEPKLVFAKEQQARSEVKA EAGASATLSCEVAQAQTEVTWFKDGKLLSSSSK  
 VRVEASGCSRRLVVQQAGKADAGEYSCEAGGQKLSFR LDVAEPKLVFAKEQQANSEVKA EAGASATLSCEVAQ  
 AQTEVTWFKDGKLLSSSSKVRVEASGCSRRLVVQQAGKADAGEYSCEAGGQKLSFR LDVAEPKLAFAKEQQA H  
 SEVKA EAGASATLSCEVAQAQTEVTWFKDGKLLSSSSKVRVEASGCSRRLVVQQAGKADAGEYSCEAGGQKLS  
 FR LDVAEPKLAFAKEQQA HSEVKA EAGASATLSCEVAQAQTEVTWFKDGKLLSSSSKVRVEASGCSRRLVVQQ

AGKADAGEYSCEAGGQKLSFRLDVAEPKLAFAKEQQAHSVEKAEAGASATLSCEVAQAQTEVTWFKDGKLLSS  
SSKVRVEASGCSRRLVVQQAQKADAGEYSCEAGGQKLFRLDVAEPKLMFAKEQQAHSVEKAEAGASATLSCE  
VAQAQTEVTWFKDGKLLSSSSKVRVEASGCSRRLVVQQAQKADAGEYSCEAGGQKLSFRLDVAEPKLVFAKEQ  
QAHSEVKAEAGASATLSCEVAQAQTEVTWFKDGKLLSSSSKVRVEASGCSRRLVVQQVQKADAGEYSCEARGQ  
KLSFRLDVADTRLMFAKEQQARTEVKAEAGNSATLSCEVAQAQTEVTWFKDGKLLSSSSKVRVEASGCSRRLV  
VQQAQKADAGEYSCEAGGQKLSFRLDVAEAEESQIPERPSRREPLVVKEHETIILTATIAPSAVAVTWTKDGV  
EIRRSKRHEATSLGDTHTLTVRGAQVLDIAIYSCRVGKEGQDFPVQVEEVAAKFSKPLEPEVEGELGGTVMLVC  
ELSPFEQAEVWRCGNTQLRPGKRFRQMTSEGRPTLTVSGLREDDAEYVCESTRDDRTSARLTVKVRVVKFTS  
GLSAMVAEEGQEQATFCVVSPSDAGVTWYKQDGMQLQPSKFMVVEGASRSILGLTLEDAGQVTVAEAGAS  
SSAALRVREAPVLFKPKLEPQTEVEERTSVTLEVELTRPWPEVKWTRNAAVLTPSENVEIRAEGARHCLVLRV  
GFADRGFFGCETPDDKTQAKLNVEMRQVRLVLRGLQVEVAKEQGTASMDVELSHAEEVEGVSWRDGLRQPGPKC  
HLAVQGPVHILTLALSALQPQDSGLVAFRAEGVHTSARLIVTELPVSFTRVLQDVVATQKEKVTLECELSRPVDV  
RWLKDGVLELRAGKAIGIVAQGTCSRSLVIYRCETGDQGVYVCDALDAQTSASLRVQGRYTLIFRRLAEDAGE  
VKFVAENAESRAHLRVKELPVTLLRPLRDKIAMEKHGKRVLEQCQVSRASQVRWFKGGVELQSGPKYEVVSDGL  
YRKLVINQVPEDEDTYTCDAQNVKTSAQFFVEEQSITIVRGLKDMTVMPEPAPAWFECETSIPSVRPPKWL  
KTVLQAGGNVLEQDGTVHRLTLHKTCSTMTGPVHFTIGKSRSSAQLVVDIPIVVLTRPLEPKAGRELQSVVL  
SCDFRPAPKAVQWYKDDTPLSPSEKFKMALEQGMALRI LR LTPADAGVYRCQAGSAQSSAEVTVAEAEVTVI  
QPLQDAEAMEEGRVCFSELSHKDEDIWLSLNGTPLYNDSFHEISHEGCLHTLVLSKVRQADTGTVCATSPKV  
SVSARLVVKGKPVVFLKALDDVSAEERGTTLTQCEVSDPEARVVRKDGVELGSPDKYDFLHKAGARGLTVHD  
LSHEDAGLYTCQVSGKETQSKVSVHDLHVGITKRLKTVLEVLEGESECFEVLSSHESPDPVAVTWGGKTVGG  
GHFHAVRQGRKYTLTVKDAALSDAGEVVSVLGLTSKASLIRERPVDTITKPLEDQRTTLGEDVMLSCELSRA  
GTSVRWLKDGKAIRKSQKYDLLSEGTRAVLVVRKASLKDSGEYTCETEASKSTAKLCEVEKANRFTTELADLQ  
VEEKGRAVFTCKTEHPASVVTWRKGLLELRASGKHVPSQEGTLKLTINALERTSDTYTCDIGQARTQARLL  
VHGQKVRVIEDLEDTAVQEGSSAKFCRIAPADYGPVHWFLDKTPLHSNELNEITVQPGGYHVLTLRQLAKD  
SGTVYFEAGDQRTSAAALRVTEKPSIFSRPLTDTVTVTEGEDTLVCEETTVVDSVVRWTKDGKTLRPSARCLSH  
EGCQALLITATTPDQGGRYKCEIGGASSSSIVRVHALPVRFRFRESLKDVEVPEGKAATLRCVLSVAAPVEWR  
HGDDVLKSSNKYSRQLEAVLELVIRDLQDQPSQVSGFVDQTTSATLTVKTSQAQFVGLLRNKEATEGTTV  
TLRCELTKAEAPVEWKKGTETLRNGDKYSLKQDQAVCELQICSLLVADAGEYSCVCGQEKTSATLTVKALLVHF  
VRRRSKAEATEGDTTLTQCELSKAAPVEWRKGTETLRDGDYSLKQDQAVCELQIRSLTIADAGEYLCTCGQE  
KTSATLTVRALPAKFKDSLKNEEATEGTTATLSCELSKAAPVTWKKGPKTLQSGDKYVLRQDQAVCGLQIHGL  
TMADAGEYSCVCGQEKTSATLTVRGLPAKFIEDLRSQEATEGATAILRCELSKAAPVEWRKGSSETLKDGDYR  
LRQDQAVCELQIRGLAVVDGTYSLSPTKFTEGLRNEEATEGTMATLRCQMSKAAPVEWRKGSSETLRDGDYR  
LRQDQAVCELQIRGLTIEDSGETVTCVCGQEKTSATLSVKALPSRFIEDLRSQEATEGTMATLRCQMSKTA  
PVEWKKGSETLRDGGYSLRQDGPVCELQICDLAVEDAGEYSCVCGQEKTSATLSIKALPPRFIEDLRSQEATEG  
MATLRCQMSKAAPVEWRKGSSETLGDGGYSLRQNGAVCELQIHDLAVEDTGEYSCVCGQEKTSATLNVKALPP  
RFIEDLRSQEATEGTMATLRCQMSKAAPVEWRKGSSETLRDGGYSLRQDQAVCELQIHDLVEDAGGYSCVCG  
QEKTSAVLTVDALPPKFTEGLKKEEATEGTMVTLRCQMSKAEATVEWRKGAKTSLDGGYSLRQDQAVCELQIC  
GLAVEDAGEYSCVCGQEKTSATLSVKALPPRFIEDLRSQEATEGTMATLRCQMSKAAPVEWRKGSSETLRDGD  
YSLRQDQAVCELQIRDLAVEDAGEYLCVCGQEKTSATLSVKALPPRFIEDLRSQEATEGTMATLRCQMSKAAP  
VEWRKGSKTLRDGDYSLRQDQAVCELQICDLAVEDTGDYSCVCGQEKTSATLSVKALPPRFIEDLRSQEA  
RGTVATLRCRMSKAAPVEWRKGSSETLKDGDYSLRQEGNLCELQIRDLAVEDTEEYSCVCGQEKTSATLSVKAL  
PAKFIEDLRSQEAPESSVTLRCKLSKASVVWKKGSETLRNGARYSLRQDQAVCELEIRDLTVEEDTGEYSCT  
CGQERTSATLSIMAPQVVFQQPLQNLQAEESMASLRCLESLVPNAAMVWSKGGLELQGDTRREARQQGCV  
AELLLRDLRREDAGEYSCTCGSQTTSATLMVTAAPVRFLRELQAVDVEGATARLRCLESLREAVSVEWRKGS  
LQFPCAQYQMVQEGTTAELLVHGVEQEDAGEYTCDAHTQSIARLSVRAPKPKFKTDLQSTEQEAGGTARLCC  
QLSEAEFGTPVQWLKEGVELHVGSKEYEMRRQAVCELLIHGLEAKDTGEYACLVGQKTASLRVKEPEVTIVRGL  
VDMEVQADEDEFTCKVVSQAGATDVQWHLQGLPLQSNVTEVAVLADGCTHVQLKGVTLQDAGTVSFHVGGL  
SSSAQLTVRVPEVTVLEPLKDVQLSEGQDAHFRCLRSRASGQEARWALGGVPLQCNEMNDITVEQGTLYLLTL  
HKVTLQDAGTITLQVGSSEEAQLKVTAKNTVLRGLENVDALEGGEALFECQLSQPEVAHAHTWLLDDEPVHTS  
EKVEVVYFENGLRHLLLLKNLKPQDSCRVTFLAGDVVTS AFLTVRGWRLEVLEPPHDASVKAGMQRVFTCILS  
EAVPVGEATWYINGAAIQPDDTDWTVTTDGS HHALTL SNAQPQHAGEVTF AARDAVASARLSVLALPDPPE  
DAEVVGRSDHSVTLSWVAPMSDGGGGLCGYRVEKKEASTGQWQLCHDLVPGPECVVDDLVPGKTYRFRVA  
AVGPA GAGEPVHL PQMVKIAPAPAPAPAPAPAPAPAPAEPTQAVVVEDICILEVAADGGVEVWHKGT  
ERIQPGHFEVLS RGQRQMLVIKGFRTEDQGEYRCGPIQGLPSSGAATFNVMVTS GSGDEVPAQPSLP  
PEAAQEGDLHLLWEALAR KRRMSREPTLDSISELPEEDSRVQHRLRQEAEETAPDLSEGYSTADELARTGEADL  
SHTSSDDESRACTPSLVT YLKKAGGPGISPLASKHEAQVTTSVKPQKQEPVPTCPPPGDLSAADLMDPS  
LDKAAVKIQAQAFKGYKVRKE MKQQEGPVFSRTFGDTEAQVGDVLRLECVLATKTD  
MRACWLKDGIELTDGRHYHIDQLKDGTCSSLVTLGLAPT DSGRYTCQVSTKSGRVSHSACVVVSGTE  
SEAESSSGGELDDAFRRAARRLHRLFRTKSPAELSEELFLSADE

GPGEPEEPADWQTYREDENFVCIRFESLAEARQAVTCFRNMFATMGIGVEISLGEQGPGRGVEMRIGKVAPTVT  
 PAVPLAKTPGLQTSDAAPVFLTELQNDVDQDGYPMSFDCVVTGQPVPSVRWFKDGKLEEDDHYMINEDQGGG  
 HQLIITAVVPADMGVYRCLAENSMGVSSSTKAELRVELTSTDYDTAADATETSSYFSAQGYLSSREQEGTESDE  
 GQLPQVLEELKDLQVAPGTRLAKFQLKVKGYPAKLYWFKDQPLTTSDHIRMDDKKTLLHLEIVSVTREDSDG  
 QYAAYSNAVGAAYSSARLLVRGPSEPEEKPASDVHERLVPPRILEKFTPKKVKRGSSITFSVKVEGHPAPSV  
 HWLKEEAKEKGVLWIGPDTPGYTMASSSKQHSLLVLLDVGRQHOGTYTCIATNPAGQALCSASLHISGLAKEEEQ  
 ERVKEALISSFLOGTSQAVSAQMSESAGFADLVGQSKGESLVAEEAHSHLSLAEVGTTEFLQKLTSTQITEMVS  
 AKISQAKLQVPGGDSDEETKTPSASPRHGRSRPSSSVQESSSESEDGDSRGEIFDIYVVTADYPLGAEQDAI  
 LLREGQYVEVLDSAPHLRRLVTRKPTKSSPSRQGWVSPAYLDKRLKLSPEWGPTEAPEFPGEAVSEDEYRTRL  
 SSVIQEELLSSEQAFVQELQFLESHHMKHLERSPRVPAAVASQKTVIFRNVQDISHFHSSFLKELQCGCTDDDV  
 AMCFIKNQEAFAKEYLEFLVGRVQAESVVVSTPVQEFYKKYAEETLSAKDPTQPPPPPLQHYLEQPVERVQKYQ  
 ALLKELIRNKARNRQNCALLEQAYAVVSALPQRAENKLVSLMENYPGTLEALGEPIRQGHFIVWEGAPGARM  
 PWKGHNHRVFLFRNYLVICKPRRDSRTDTFSYVFRNMMKLSIDLNDQVEGDDRAFEVWHEREDSVRKYLLQA  
 RTVI IKNSWVKEICGIQQLAQVWRPPEFEEELADCTAELGETVKLACRVTGTPKPIVSWYKDGKPVVEVDPH  
 HILIEDPDGSCTLILDNLTGIDSGQYMCFAASAAGNASTLGKILVQVPPRFVNVKVRATPFVEGEDAQITCTVE  
 GAPYPQIRWYKDGTLTLLAPGNRYRMLNEPRSGVLVLIQAASKEDLGHYECELVNRLGSTRGGGELYMQSPALR  
 ARDQHHREQIVAAVEERRRPPPP\*  
 >rs262160257\_ENSMUSP00000151217\_c.724:C>T\_p.T242M  
 ENSMUST00000219084.3|Obscn-207|ENSMUSG00000061462|-|chr11:g.59026477:G>A  
 MDHSFSGAPRFLTRPKAFVSVGKDATLSCQIVGNPTPHVSWEKDRQPVEAGARFRLAQDGDVYRLTILDLAL  
 GDSGQYVCRARNAIGEAFVAVGLRVDSEGTCAEQAPHFLLRPTSIRVREGADATFRCRVGGSQPAPVSWSKDG  
 RRLGPPDAPHVRVEEHGESSALRIR SARPRDGGTYEVRAENPLGSASAAAALVVDSDAEVAGPPGTSTATLLA  
 HLQQRREAMRAEGIPSPPGAGMRTCTVTEGKHARLSCFVTGEPKPKETVWKKDQQLVTEGRRHVVEDEQENF  
 VLKILFCKQSDRGLYTCTASNLVGQTYSSVLVVVREPTVPFKKRLQDLEVREKESATFQCEVAQAPATEAAWFK  
 EETRLWASAKYDIEEGTERRLTVRNVSADDDAVYICETTEGSRVAELSVQGNLTKRLPRKTAVRTGDTAIF  
 WVLEAVPEGPVRWLRNVEEMVAGGRVAITAEGTCHTLTI FQCTLEDMGEVAFVSGGCRTTTFQCVSAPRRPPL  
 YPPADPVVAKTSSVTLSSWAPPHGDRPVTIDGYVLEKRLKLGAYAWSRCHEAGWLATTEFTITGVAAEEDGFQ  
 FRVSAINHFGQGPYLEFPGTMHLPMLAVKTPLKAVEAVEGGEVTFVSDLTVASSGEWFLDGEALKASSIYVI  
 RCDRTRHMLTIREVPARLHGAQLKFVANGIETSIQMVVRAALGLPSSKLPAAAAREVLAQLHEEAQLLAELSD  
 QAAAVTWLKDGRELSLGPKYEMQVSAGRRALLVRDVAQDDAGLYECVSRGSRRTAYQLLVQDITDGYRDWGPAG  
 PQKHMCKCAGAKIARYLGSscyRFLQYDKGVWHWLEAALDTRQKGTSSCSLHEKPKLVFAKQQAHSEVKA  
 AGNSATLSCEVTQAQTEVTWFKDGKLLSSSSKVRMEASGCSRRLVVQQAGKADAGEYSCEAGGQKLSFRLDVA  
 EPKLVFAKQQAHSEVKAEGASATLSCEVAQAQTEVTWFKDGKLLSSSSKVRMEASGCSRRLVVQQAGKADA  
 GEYSCEAGGQKLSFRLDVAEPKMFVFAKEQQARSEVKAEGASATLSCEVAQAQTEVTWFKDGKLLSSSSKVRM  
 EASGCSRRLVVQQAGKADAGEYSCEAGGQKLSFRLDVTEPKLVFAKEQQARSEVKAEGNSATLSCEVAQAQ  
 EVTWFKDGKLLSSSSKVRMEASGCSRRLVVQQAGKADAGEYSCEAGGQKLSFHLDVTEPKLVFAKEQQAHSEV  
 KAEAGASATLSCEVAQAQTEVTWFKDGKLLSSSSKVRMEASGCSRRLVVQQAGKADAGEYSCEAGGQKLSFRL  
 DVAEPKLVFAKEQQARSEVKAEGASATLSCEVAQAQTEVTWFKDGKLLSSSSKVRVEASGCSRRLVVQQAGK  
 ADAGEYSCEAGGQKLSFRLDVAEPKLVFAKEQQANSEVKAEGASATLSCEVAQAQTEVTWFKDGKLLSSSSK  
 VRVEASGCSRRLVVQQAGKADAGEYSCEAGGQKLSFRLDVAEPKLVFAKEQQAHSEVKAEGASATLSCEVAQ  
 AQTEVTWFKDGKLLSSSSKVRVEASGCSRRLVVQQAGKADAGEYSCEAGGQKLSFRLDVAEPKLVFAKEQQAH  
 SEVKAEGASATLSCEVAQAQTEVTWFKDGKLLSSSSKVRVEASGCSRRLVVQQVQKADAGEYSCEARGQKLS  
 FRLDVAEAEQIIPERPSRREPLVVKHEHTIIL TATIAAPSVAAVTWLKDGV EIRRSKRHEATSLGDHTLTVR  
 GAQVLD SAIYSCRVGKEGQDFPVQVEEVAAKFSKPLEPVEGELGGTVMLVCELSPEQAEVWRCGNTQLRPGK  
 RFQMTSEGPRRTLTVSGLREDDAEYVCESRDDRTSARLTVKVPVVKFTSGLSAMVAEEGQEAFTQCVVSPS  
 DAGVTWYKDGMLQVSEKFMVVEGASRSLTILGLTLEDAGQVTVAEAGASSAALRVREAPVLFKFKKLEPQT  
 VEERTSVTLEVELTRPWPEVKWTRNAAVLTPSENVEIRAEGARHCLVLRVGFADRGFFGCETPDDKTQAKLN  
 VEMRQVRLVRGLQEVEAKEQGTASMDVELSHAEEVGSWTRDGLRLQPGPKCHLAVQGPVHILTL SALQPQDSG  
 LVAFRAEGVHTSARLIVTELPVSFTRVLQDVVATQKEKVTLECELSRPVDVRWLKDGVELRAGKAIGIVAQGT  
 CRSLVIYRCETGDQGVYVCDALDAQTSASLRVQGRYTLIFRRLAEDAGEVKFVAENAESRAHLRVKELPVT  
 LLRPLRDKIAMEKHRGVLECVSRASAQVRWFKGGVELQSGPKYEVVSDGLYRKLVIINDVQPEDEDTYTC DAG  
 NVKTSAQFFVVEEQSITIVRGLKDMTVMEPAPAWFECETSIPSVRPPKWLGLKTVLQAGGNVLEQDGTVHRLT  
 LHKTCSTMTGQPVHFTIGKSRSSAQLVVS DIPVVLTRPLEPKAGRELQSVVLSCDFRPAPKAVQWYKDDTPLSP  
 SEKFKMALEGQMAELRILRLTPADAGVYRCQAGSQAESA EVTVEAREVTVIQPLQDAEAMEEGRVCFSCELSH  
 KDEDIEWSLNGTPLYNDSFHEISHEGCLHTLVLKSVRQADTGTVCATSPKVSVSARLVVKGKPVVFLKALDDV  
 SAEERGTTLTQCEVSDPEARVVRKDGVELGSPDKYDFLHKAGARGLTVHDLSHEDAGLYTCQVGSKETQSKV  
 SVHDLHVGITKRLKTVEVLEGECSFECVLSHESPSDPAVWTVGGKTVGGSGHFHAVRQGRKYTLTVKDAALS  
 DAGEVVFVVLGLTSKASLIIRERPVDITKPLEDQRTTLGEDVMLSCELSRAGTSVRWLKDGKAIRKSKQYDLL

SEGTRAVLVVRKASLKDSGEYTCETEASKSTAKLCVEEKANRFTEELADLQVEEKGRAVFTCKTEHPASVVTW  
 RKGLLELRASGKHVPSQEGLTLKLTINALERTSDTYTCDIGQARTQARLLVHGQKVRVIEDLEDTAVQEGSS  
 AKFCCRIAPADYGPVHWFLDKTPHLSNELNEITVQPGGYHVLTLRQLALKDSGTVYFEAGDQRTSAAALRVTEK  
 PSIFSRPLTDVTVTEGEDLTLVCETTTVDSSVRWTKDGKTLRPSARCQLSHEGCAQQLLITATTPQDGGRYKC  
 EICGASSSSIVRVHALPVRFRESLKDVEVPEGKAATLRCVLSVAAPVEWRHGDDVLKSSNKYSLRQEGAVLE  
 LVIRDLQPQDSGQYSCSFGDQTTSATLTVKTSQAQFVGKLRNKEATEGTTVTLRCELTKPEVWKKGTETLR  
 NGDKYSLKQDGAVCELQICSLLVADAGEYSCVCGQEKTSATLTVKALLVHFVRRRLRSKEATEGDTTTLQCELS  
 KAAPVEWRKGTETLRDGDYSLKQDGAVCELQIRSLTIADAGEYLCTCGQEKTSATLTVRGLPAKFIEDLRSQ  
 EATEGATAILRCELSKAAPVEWRKGETLKDGDYTLRQDGAVCELQIRGLAVVDGTYSLPTKFTTEGLRNE  
 EATEGTMATLRCQMSKAAPVEWRKGETLRDGDYSLRQDGAMCELQIRGLTIEDSGEYTCVCGQEKTSATLS  
 VKALPPRFIEDLRSQEATEGTMATLRCQMSKAAPVEWRKGETLGDGGYSLRQNGAVCELQIHDLAVEDTGE  
 YSCVCGQEKTSATLNVKALPPKFTTEGLKKEEATEGTMVTLRQMSKEATVEWRKGAKTSLDGGYSLRQDGAM  
 CELQICGLAVEDAGEYSCVCGQEKTSATLSVKALPPRFIEDLRSQEATEGTMATLRCQMSKAAPVEWRKGET  
 LRDGDYSLRQDGAVCELQIRDLAVEDAGEYLCVCGQEKTSATLSVKALPPRFIEDLRSQEATEGTMATLRCQ  
 MSKAAPVEWRKGSKTLRQDGAMCELQICDLAVEDTGDYSCVCGQEKTSATLSVKAPQVVFQQPLQ  
 NLQAEEGSMASLRCELSVNAAMVWSKGGLELQGDTRREARQQGCVAELLLRDLRREDAGEYSCVCGSQTSA  
 TLMVTAAPVRFRLRELQAQDVEGATARLRCELSREAVSVEWRKGSQQLFPCAKYQMVQEGTTAELLVHGVEQE  
 DAGEYTC DAGHTQSIARLSVRAPKPKFKTDLQSTEQEAGGTARLCCQLSEAEPTVQWLKEGVELHVGSKYE  
 MRRQGA VCELLIHGLEAKDTGEYACL VGGQKTLASLRVKEPEVTIVRGLVDMEVQADEDVEFTCKVSQAGATD  
 VQWHLQGLPLQSNEVTEVAVLADGCTHVLQKGVLTLEDAGTVSFHVGLSSSAQLTVRVPEVTVLEPLKDVQL  
 SEGQDAHFRCRLSRASGQEARWALGGVPLQCNEMNDITVEQGTLYLLTLHKVTLEDAGTITLQVGSSESAQL  
 KVTAKNTVLRGLENVDALEGGEALFECQLSQPEVAHTWLLDDEPVHTSEKVEVVYFENGLRHLLLLKLNKPKQ  
 DSCRVTFLAGDVVTS AFLTVRGRWLEVLEPPHDASVKAGMQVRFTCILSEAVPVGEATWYINGAAIQPDDTDW  
 TVTTDGSHHALTLSNAQPQHAGEVTF AARDAVASARLSVLALPDPPEDAE VVGRSDHSVTL SVWVAPMSDGGGG  
 LCGYRVEMKEASTGQWQLCHDLVPGPECVVDDLVP GKTYRFRVAAVGPAGAGEPVHLPQMVKIAPAPAPAPAP  
 APAPETQAVVGEDICLELEVAADGGEV VWHKGTERTIQPGGHFEVLSRGQRQMLVIKGFRTEDQGEYRCGPIQ  
 GLPSSGAATFNVMVMTSGSGDEVPAQPSLPPEAAQEGDLHLLEALARKRRMSREPTLDSISELPEEDSRVQHL  
 RQEAETAPDLSEGYSTADELARTGEADLSHTSSDDESRAGTPSLVTYLKKAGGPGISPLASKHEAQTTSVK  
 PQKQQEPVVPTCPPPGDL SAADLMDPSLDKAAVKIQAAFKG YKVRKEMKQOEGPVFSRTFGDTEAQVGDVLR  
 ECVLATKTD MRACWLKDGIELTDGRHYHIDQLKDGTC SLLVTGLAPTDSGRYTCQVSTKSGRVSHSACVVVSG  
 TESEAESSSGGELDDAFRRARLRHLRFRTKSPAELSEEELFLSADEGPGEPEEPADWQTYREDEFVFCIRFE  
 SLAEARQAVTCFRNMFATMGIGVEISLGEQGPGRVEMRIGK VAPTVP PAVPLAKTPGLQTS DAAVFLTELQN  
 QDVQDGYPMSFDCVVTGQPVPSVRWFKDGKLEEDDH YMINEDQQGGHQLIITAVVPADMGVYRCLAENSMGV  
 SSTKAELRVELTSTDYDTAADATETSSYFSAQGYLSSREQEGTESDEGQLPQVLEELKDLQVAPGTRLAKFQL  
 KVKGYPA PKLYWFKDGPPLTSDHIRMTDKKTLHTLEIVS VTREDSGQYAAIISNAVGAA YSSARLLV RGPSE  
 PEEKPASDVHERLVPPRILEKFTPKKVKRGSSITFSVKVEGHPAPS VHWLKEEAEGV LWIGDPTPGYTMASS  
 SKQHSLVLLDVGRQHOGTYTCIATNPAGQALCSASLHISGLAKEEEQERVKEALISSFLQGT SQAVSAQMSES  
 AGFADLVGQSKGESLVAEEAHSHLSLAEVGT EEFLOKLT SQITEMVSAKISQAKLQVPGGDSDEETKTPSASP  
 RHGRSRPSSSVQESSSESEDGSRGEIFDIYVVTADY LPLGAEQDAIILREGQYVEVLDSAHPLRWRVTRKPT  
 KSSPSRQGWVSPAYLDKRLKLSPEWGPTEAPEFPGEAVSEDEYRTRLSSVIQELLSSEQAFV GELQFLES HHM  
 KHLERSPRVPAAVASQKTVIFRNVQDISHFHSSFLKELQCGTDDDVAMCFIKNQEAFEKYLEFLVGRVQAES  
 VVSTVPQEFYKKYAEETLSAKDPTQPPPPPLQHYLEQPVERVQKYQALLKELIRNKARNRQNCALLEQAYAV  
 VSALPQRAENKLVSLMENYPGTLEALGEP I RQGHFIVWEGAPGARMPWKGHNRHVFLFRNYLVIC KPRRDSR  
 TDTFSYVFRNMMKLSSIDLNDQVEGDDRAFEVWHEREDSVRKYLLQARTV I IKNSWVKEICGIQORLAQPVWR  
 PPEFEEELADCTAEELGETVKLACRVGTGTPKPIVSWYKDGKPV EVDPHHILIEDPDGSC TLIIDLNLGTIDSGQY  
 MCF AASAAGNASTLGKILVQVPPRFV NKVRATPFVEGEDAQITCTVEGAPYPQIRWYKDG TLLAPGNRYRMLN  
 EPRSGVLVLV IQAASKEDLGHYECELVNRLGSTRGGGEL YMQSPALRARDQHHREQIVA AAVEVTEQETKVPKK  
 TVIIETITTVVKS PRGRRQSPGKSPSRSPSRRSASPRRPGLLAPERLYPPGTSPSRRL EVEQGRKAPVPALY  
 VTEAEVHAPASQSQPKWLEVEETIEVRVKKTGSRGASPVREMTSRGEGILFTLPGGI PGRDPNANNNSNNKSVY  
 QEARTWGPVVHVGEFFIFQVDSVGNVDWAASPEPEQVRASQKEENTERQEGCSDGDENTFLMEFPQD TDSL  
 QGRDPKILTHNGRVLT LADLEDYVPQEGETF GCGDSTPSTPDEPPCEVSVLQREI SEPTVGGQPVLLNVGRPPG  
 TGATPSFFRPGSQVHSPESVSFLLREAWSGPVSAAPWTS SFHTHVQSSVDGSHG SFKTEVSTQTVSFGAVGET  
 VTLHIDPDGGEAPGPSQG\*

>rs29383483\_ENSMUSP00000158795\_c.604:C>A\_p.S202\*  
 ENSMUST00000238536.2|Obscn-210|ENSMUSG00000061462|-|chr11:g.59026597:G>T  
 MDHSFSGAPRFLTRPKAFVSVGKDATLSCQIVGNPTPHVSWEKDRQPVEAGARFLAQDGDVYRLTILDLAL  
 GDSGQYVCRARNAIGEAFVAVGLRVDSEGTCAEQAPHLLRPTSIRVREGADATFRCRVGGSPQPAVSWSKDG  
 RRLGPPDAPHVRVEEHGESSALRIRSARPRDGGTYEVRAENPLGSASAAAALVVD\*DAEVAGPPGTSTATLLA

HLQQRRREAMRAEGIPPSPPGAGTRTCTVTEGKHARLSCFVTGEPKPEVWKKDQGLVTEGRRHVVEDEQENF
VLKILFCQSDRGLYTCTASNLVGQTYSSVLVVVREPTVPFKKRLQDLEVREKESATFQCEVAQPATEAAWFK
EETRLWASAKYDIEEEGETERRLTVRNVSADDDAVYICETTEGSRVVAELSVQGNLTKRKLPRKTAVRTGDTAIF
WVELAVPEGPVWRWRNQEEMVAGGRVAITAEGTCHTLTI FQCTLEDMGEVAFVSGGCRTTTQFCVSAPRRPPL
YPPADPVVKAKTESVTLWSAPPHGDRPVTIDGYVLEKRKLGAWAYSRCHEAGWLATTEFTITGVAAEEDGFQ
FRVSAINHFGQGPYLEFPGTMHLVPLAVKTPKAVEAVEGGEVTFVSDLTVASSGEWFLDGEALKASSIYVI
RCDRTRHMLTIREVPARLHGAQLKVFANGIETSIQMVVRAALGLPSSKLPAAAAREVLAQLHHEEAQLLAE LSD
QAAAVTWLKDGRELSLGPKYEMQVSAGRRALLVRDVAQQDDAGLYECVSRGSRRTAYQLLVQDITDGYRDWGPAG
PQKHMCKCAGAKIARYLGSSCYRFLQYDKGVVHWEAALDTRQGKGTSSCSLHEKPKLVFAKGOQAHSEVKA
AGNSATLSCEVTQAQTEVTFWKDGKLLSSSSKVRMEASGCSRRLVVQQAGKADAGEYSCEAGGQKLSFRLDVA
EPKLVFAKGOQAHSEVKAEGASATLSCEVAQAQTEVTFWKDGKLLSSSSKVRMEASGCSRRLVVQQAGKADA
GEYSCEAGGQKLSFRLDVAEPKMFVFAKEQQARSEVKAEGASATLSCEVAQAQTEVTFWKDGKLLSSSSKVRM
EASGCSRRLVVQQAGKADAGEYSCEAGGQKLSFRLDVTEPKLVFAKEQQARSEVKAEGVNSATLSCEVAQAQ
EVTWTFKDGKLLSSSSKVRMEASGCSRRLVVQQAGKADAGEYSCEAGGQKLSFRLDVAEPKLVFAKEQQARSEV
KAEAGNSATLSCEVAQAQTEVTFWKDGKLLSSSSKVRMEASGCSRRLVVQQAGKADAGEYSCEAGGQKLSFHL
DVTEPKLVFAKEQQAHSEVKAEGASATLSCEVAQAQTEVTFWKDGKLLSSSSKVRMEASGCSRRLVVQQAGK
ADAGEYSCEAGGQKLSFRLDVAEPKLVFAKEQQARSEVKAEGASATLSCEVAQAQTEVTFWKDGKLLSSSSK
VRVEASGCSRRLVVQQAGKADAGEYSCEAGGQKLSFRLDVAEPKLVFAKEQQANSEVKAEGASATLSCEVAQ
AQTEVTFWKDGKLLSSSSKVRVEASGCSRRLVVQQAGKADAGEYSCEAGGQKLSFRLDVAEPKLAFAKEQQAH
SEVKAEGASATLSCEVAQAQTEVTFWKDGKLLSSSSKVRVEASGCSRRLVVQQAGKADAGEYSCEAGGQKLS
FRLDVAEPKLAFAKEQQAHSEVKAEGASATLSCEVAQAQTEVTFWKDGKLLSSSSKVRVEASGCSRRLVVQQ
AGKADAGEYSCEAGGQKLSFRLDVAEPKLAFAKEQQAHSEVKAEGASATLSCEVAQAQTEVTFWKDGKLLSS
SSKVRVEASGCSRRLVVQQAGKADAGEYSCEAGGQKLFRLDVAEPKLMFAKEQQAHSEVKAEGASATLSCE
VAQAQTEVTFWKDGKLLSSSSKVRVEASGCSRRLVVQQAGKADAGEYSCEAGGQKLSFRLDVAEPKLVFAKEQ
QAHSEVKAEGASATLSCEVAQAQTEVTFWKDGKLLSSSSKVRVEASGCSRRLVVQQVKGADAGEYSCEARGQ
KLSFRLDVADATRLMFAKEQQARTEVKAEGANSATLSCEVAQAQTEVTFWKDGKLLSSSSKVRVEASGCSRRLV
VQQAGKADAGEYSCEAGGQKLSFRLDVAEAEASQIPERPRREPLVVKHEHETIILTATIAAPSVAAVWTLKDG
V EIRRSKRHEATSLGDTHTLTVRGAQVLD SAIYSCRVGKEGQDFPVQVEEVAAKFSKPLEPVEGELGGTVMLVC
ELSPQAEVWRCGNTQLRPGKRFQMTSEGPRRTLTVSGLREDDAEYVCESRDDRTSARLTVKVPVVKFTS
GLSAMVAEEGQEQATFQCVVSPSDAGVTWYKDGMLQPSKFKVMVESGASRSLTILGLTLEDAGQVTEAEGAS
SSAALRVREAPVLFKKLEPQTVERTSVTLEVELTRPWPEVKWTRNAAVLTPSENVEIRAEGARHCLVLRV
GFADRGFFGCETPDDKTQAKLNVEMRQVRLVRGLQEVEAKEQGTASMDVELSHAEEVGSWTRDGLRQLQPGPK
HLAVQGPVHILTLALSALQPQDSGLVAFRAEGVHTSARLIVTELPSVSTRVLQDVVATQKEKVTLECELSRPVDV
RWLKDGVLELRAGKAIGIVAQGTCSRSLVIYRCETGDQGVYVCDALDAQTSASLRVQGRTYTLIFRRLAEDAGE
VKFVAENAESRAHLRVELPVTLLRPLRDKIAMEKHRGVLECCQVSRASAQVRWFKGGVELQSGPKYEVVSDGL
YRKLVINADVQPEDEDTYTCDAGNVKTSAQFFVEEQSITIVRGLKDMTVMPEPAPAWFECETSIPSVRPPKWL
KTVLQAGGNVLEQDGTVHRLTLHKTCSTMTGPVHFTIGKSRSSAQLVVSDIPVVLTRPLEPKAGRELQSVVL
SCDFRPAPKAVQWYKDDTPLSPSEKFKMALEGQMAELRILRLTPADAGVYRCQAGSAQSSAEVTEAREVTVI
QPLQDAEAMEEGRVCFSCELSHKDEDIEWSLNGTPLYNDSFHEISHEGCLHTLVLSVRQADTGTVCATSPKV
SVSARLVVKGKPVVFLKALDDVSAEERGTLLTQCEVSDPEARVVWRKDGVELGSPDKYDFLHKAGARGLTVHD
LSHEDAGLYTCQVGSKETQSKVSVHDLHVGITKRLKTVEVLEGECSFECVLSHESPSDPAVWTVGGKTVGGS
GHFHAVRQGRKYTLTVKDAALSDAGEVVSVLGLTSKASLIRERPVDTIKPLEDQRTTLGEDVMLSCELSRA
GTSVRWLKDGKAIRKSQKYDLLSEGTRAVLVVRKASLKDSSGEYTCETEASKSTAKLCVEEKANRFTEELADLQ
VEEKGRAVFTCKTEHPASVVTWRKGLLELRASGKHVPSQEGTLKLTINALERTDSDTYTCDIGQARTQARLL
VHGQKVRVIEDLEDTAVQEGSSAKFCRIAPADYGPVHWFLLDKTPLHSNELNEITVQPGYHVLTLRQLALKD
SGTVYFEAGDQRTSAAALRVTEKPSIFSRPLTDVTVTEGEDTLVCETTTTVDSVVRWTKDGKTLRPSARCQLSH
EGCQAQLLITATTPQDGGRYKCEIGGASSSSIVRVHALPVRFRRESLKDVEVPEGKAATLRCVLSVAAPVEWR
HGDDVLKSSNKYSLRQEGAVLELVIRDLQPDQSGQYSCSFGDQTTSATLTVKTSQAQFVGLKRNKEATEGTTV
TLRCELTKAEAPVEWKKGTETLRNGDKYSLKQDGAVCELQICSLLVADAGEYSCVCGQEKTSATLTVKALLVHF
VRLRSKEATEGDTTTLQCELSKAAPVEWRKGTETLRDGDYSLKQDGAVCELQIRSLTIADAGEYLCTCGQE
KTSATLTVRALPAKFKDSLKNEEATEGTTATLSCELSKAAPVWKKGPKTLQSGDKYVLRQDGAVCGLQIHGL
TMADAGEYSCVCGQEKTSATLTVRGLPAKFIEDLRSQEATEGATAILRCELSKAAPVEWRKGSSETLKDGDYR
LRQDGAVCELQIRGLAVDTGTYSLLPTKFTEGLRNEEATEGTMATLRCQMSKAAPVEWRKGSSETLRDGDYR
LRQDGAVCELQIRGLTIEDSGEYTCVCGQEKTSATLSVKALPSRFIEDLRSQEATEGTMATLRCQMSKATAPVE
WKKGSETLRDGGYSLRQDGPVCELQICDLAVEDAGEYSCVCGQEKTSATLSIKALPPRFIEDLRSQEATEG
MATLRCQMSKAAPVEWRKGSSETLGDGGYSLRQNGAVCELQIHDLAVEDTGEYSCVCGQEKTSATLNVKALPP
RFIEDLRSQEATEGTMATLRCQMSKAAPVEWRKGSSETLRDGGYSLRQDGAVCELQIHDLVEDAGQYSCVCG
QEKTSAVLTVDALPPKFTEGLKKEEATEGTMVTLRCQMSKAEATVEWRKGAKTLSDGGRYSLRQDGAMCELQIC



GLAVEDAGEYSCVCGQEKTSATLSVKALPPRFIEDLRSQEATEGTMATLRCQMSKAAPVEWRKGETLRDGD  
YSLRQDGAVCELQIRDLAVEDAGEYLCVCGQEKTSATLSVKALPPRFIEDLRSQEATEGTMATLRCQMSKAAP  
VEWRKGSKTLRDGDYSLRQDGAMCELQICDLAVEDTDYSCVCGQEKTSATLSVKALPPRFIEDLRSQEARE  
GTVATLRCRMSKAAPVEWRKGETLKDGDYSLRQEGNLCELQIRDLAVEDTEEYSCVCGQEKTSATLSVKAL  
PAKFIEDLRSQEAPESSTVTLRCKLSKKASVVWKKGSETLRNGARYSLRQDGAVCELEIRDLTVEDTGEYSCT  
CGQERTSATLSIMAPQVVFQQLQNLQAEEGSMASLRCELSVPNAAMVWSKGGLELQGDTRREARQQGCVAEL  
LLRDLRREDAGEYSCTCGSQTTSATLMVTAAPVRFLELQAQDVDEGATARLRCELSREAVSVEWRKGSLOLF  
PCAKYQMVQEGTTAELLVHGVEQEDAGEYTCDAGHTQSIARLSVRAPKPKFKTDLQSTEQEAGGTARLCCQLS  
EAEFGTPVQWLKEGVELHVGSKYEMRRQGAVCELLIHGLEAKDTGEYACLVGGQKTLASLRVKEPEVTIVRGL  
VDMEVQADEDVEFTCKVSOAGATDVQWHLQGLPLQSNVTEVAVLADGCTHVLQKGVTLLEDAGTVSFHVGGL  
SSSAQLTVRVPEVTVLEPLKDVQVLESEGQDAHFRCRLSRASGQEARWALGGVPLQCNEMNDITVEQGTLYLLTL  
HKVTLEDAGTITLQVGSSESQAQLKVTAKNTVLRGLENVDALEGGEALFECQLSQPEVAHAHTWLLDDEPVHTS  
EKVEVVYFENGLRHLLLLKLNKPKQDSCRVTFLAGDVVTSFAFLTVRGWRLEVLEPPHDASVKAGMQVRFCTILS  
EAVPVGEATWYINGAAIQPDDTDWVTVDGSHHALTLSNAQPQHAGEVTFFAARDAVASARLSVLLALPDPEDA  
EVVGRSDHSVTLWSVAPMSDGGGGLCGYRVMKEASTGQWQLCHDLVPGPECVVDLVPKTYRFRVAAVGPA  
GAGEPVHLPQMVKIAPAPAPAPAPAPAPAPETRAVVGEDICLELEVAADGGEVVWHKGTERRIQPGGHFEVLS  
RGQRQMLVIKGFRTEDQGEYRCGPIQGLPSSGAATFNVVMTSGSGDEVPAQPSLPPEAAQEGDLHLLWEALAR  
KRRMSREPTLDSISELPEEDSRVQHLRQEAETAPDLSEGYSTADELARTGEADLSHTSSDDESRAGTFLSVT  
YLKKAAGPGISPLASKHEAQVTTSVKPKQEQEPVVPTCPPPGDLSAADLMDPSLDKAAVKIQAAFKGYKVRKE  
MKQEQGPVFSRTFGDTEAQVGDVLRLECVLATKTDMRACWLKDGIELTDGRHYHIDQLKDGTCSLLVTLGLAPT  
DSGRYTCQVSTKSGRVSHSACVVVSGTESEAESSSGGELDDAFRAARRLHRLFRTKSPAELSEELFLSADE  
GPGEPEEPADWQTYREDENFVCIRFESLAEARQAVTCFRNMFMATMGIGVEISLGEQGPGRVEMRIGKVAPTVT  
PAVPLAKTPGLQTSDAAPVFLTELQNDVQDGYPMSFDCVVTGQVPVPSVRWFKDGKLEEDDHVMINEDQQGG  
HQLIITAVVPADMGVYRCLAENSMGVSSTKAELRVELTSTDYDTAADATETSSYFSAQGYLSSREQEGTESDE  
GQLPQVLEELKDLQVAPGTRLAKFQKLVKGYPAKLYWFKDGGQPLTSDHIRMTDKKTLHTLEIVSVTREDSG  
QYAAIISNAVGAALYISARLLVRGPSEPEEKSPASDVHERLVPPRILEKFTPKKVKRGSSTIFSVKVEGHPAPSV  
HWLKEEAEKGLWIGPDTPGYTMASSSKQHSVLLVDVGRHQGTYYTCIATNPAGQALCSASLHISGLAKEEEEQ  
ERVKEALISSFLQGTSAQVSAQMSSEAGFADLVGQSKGESLVAAEAHSHLSLAEVGTEEFQKLTSSQITEMVS  
AKISQAKLQVPGGDSDEETKTPSASPRHGRSRPSSSVQESSESEEDGDSRGEIFDIYVVTADYLPGLAEQDAI  
ILREGQYVEVLD SAHPLRWLVRTKPTKSSPSRQGWVSPAYLDRKRLKLSPEWGPTEAPEFPGEAVSEDEYRTRL  
SSVIQELLSSEQAFVQGLQFLESHHMKHLERSPRVPAAVASQKTVIFRNVQDISHFHSSFLKELQCGTDDDDV  
AMCFIKNQEAFAEKYLEFLVGRVQAESVVVSTPVQEFYKKYAEETLSAKDPTQPPPPPLQHYLEQVPERVQKYQ  
ALLKELIRNKARNRQNCALLEQAYAVVSALPQRAENKLHVSLMENYPGTLEALGEPHQGHFIVWEGAPGARM  
PWKGHNHRVFLFRNYLVICKPRRDSRTDFTSYVFRNMMKLSSIDLNDQVEGDDRAFEVWHEREDSVRKYLLQA  
RTVIKNSWVKEICIGIQRLAQPVWRPPEFEEELADCTAELGETVKLACRVTGTPKPIVSWYKDGKPEVVDPH  
HILLEDPDGSCSTLILDNLTGIDSGQYMCFAASAAGNASTLKGILVQVPPRFVNVKVRATPFVEGEDAQITCTVE  
GAPYPQIRWYKDGTLTLLAPGNRYRMLNEPRSGVLVLIQAASKEDLGHYECELVNRLGSTRGGGELYMQSPALR  
ARDQHHREQIVAAVEDTSVEGSAHSAQDQADQQAASVLWRLGSEALGPSPGDLNTRQSEPPAFEEAASQIP  
GAASGTPEVSPQPGTHKLEQETSSGSQGWTVPIRVEGTAWPGAGTGQLLDVHSQVIMETTQRTYVCQAPDT  
GVTRAPSMQVTIEDVQVQVGDMAQFDAVIEGHPPPIVTVYKGSTQLTSSARLSQRQDGTYSVLVTDVAPHDA  
GVYTCVANNAGGQVLCKAELLVHGDKLDAENQVYRRKLHSFYDVQEEIGRGVFGFVKRVQHKGNMFCAAKF  
IPLRSKTRAQAYQERDILATLGHPLVTGLLDQFETRKTLLILILELCSSEELLDRLFKKGVVTEAEVKVYIQQL  
VEGLHYLHSHGILHLDIKPPNIMLVHPAREDIKICDFGFAQKITPSEPQYSKYGSPEFVSPETIEQNPVSEGS  
DIWAMGVISYLSLTCSSPFAGESDRATLLNVLEGRVSWSSPTAAHLESDAKDFIKATLQRTPRARPSTSQCCLA  
HPWFLKSMPAAEEAHFINTKQLKFLARSRWQRSLMSYKSIIVMRSIPPELLQGPDPSPSLGVARHLRGEASGAS  
SSSSSSDNELAPFARAKSLPPSPVTHSPLLHPRGFLRPSASLPEETEASMPPTADAAVPASPQSAGPPASPGCV  
PRHSVISSLFYQQAGEGAERGNTSGAKRHPARRRHLLKGGYIARALPGLREPLMEYSLLEEEAAREEQASLM  
TKTPSFETALRLPSSSVREVPGRSHSLDNPPVTTGPSPEACKEQLLFPSTGLTHETTAKDRGHKEGFLQESV  
PFPMSGDSRPGKQEGSSQDSCRGKPASSCHSELGSGSQEGCGPPSSQSLGSLPPQSLKELSTSCGPLFSEQ  
PQAAPFPPTQVSPLLGSEKEPQDGSLSGEPVVPVSSPGSASQVDASLDTEGLSEAGDTCDFTPPPQRPQEQAT  
TRKFSLESRGGYAGVAGYGTFAFGGDAGGMLQGGLWARMMAVAVSSESSEQDEAATESPQPLES LGPIAEASG  
VPLRTSPSLTPWEEVEQVSLVQIRDLSDGAEAAADTISLDISEVDPAYLNLSDLYDIKYLPEFEMI FRRVPKPI  
EQPESPGSETEAGQGLADFLLEAAWPWPGELGRLEAGLEITTEPEEPGDLEALLGEAAVGRKRKWSPSRGLFQF  
PGRCLSGEETPELVGLRQVKASMAHISRILKGRPEGEREPGRKAGLASFRLSGLKGRDQELSDEAVVLLGQ  
SVTLACQVLAQPTAQATWSKDGVLLESSGHLISSTLKNFQLLTILVVKEEDLGTYTCCVSNPLGTAVTTGVL  
RKAERPSSSPREVGELYKDAVLLVWKPVESECGPVTVYIVQCCIEGGSWTTLASDISDCCYLTGKLSRGGMYIF  
RTACVSKAGMGPYSSPSEQVLLGGPNHLASEEESRGRPAQLLPSTKTFAFQMQIRRRGRFSVVRQCREKASGR  
ALAAKIVPYQPEDKTAVLREYEALKRLLHHPHLAQLHAAYLSPRHLVLIILELCSGPELLPSLAERESYSESDVK

DYLWQMLSATQYLHAQHILHLLDLRSENMMVTEYNLLKVIDLGNQAQSLDQEKVPAPENFKDYLETMAPELLEGO  
GAVPQTDIWAIGVTAIFIMLSGEYPESESETRDLQKGLRKLIRLSRCYAGLSGGAVAFLOSSLCAQPWGRPCA  
STCLQCQGWLTEEGPTGSRPTPVTFTVRLRAFVREKRRALLYKKNLAQVR\*  
>rs29383483\_ENSMUSP00000038264\_c.604:C>A\_p.S202\*  
ENSMUST00000047441.14|Obscn-202|ENSMUSG00000061462|-|chr11:g.59026597:G>T  
MDHSFSGAPRFLTRPKAFVSVGKDATLSCQIVGNPTPHVSWEKDRQFVEAGARFRLAQDGDVYRLTILDLAL  
GDSGQYVCRARNAIGEAFVAVGLRVDSEGTCAEQAPHFLLRPTSIRVREGADATFRCRVGSSPQPAVSWSKDG  
RRLGPPDAPHVRVEEHGESSALRIRSARPRDGGTYEVRAENPLGSASAAAALVVD\*DAEVAGPPGTSTATLLA  
HLQQRREAMRAEGIPPSPPGAGTRTCTVTGKHLRSCFVTGEPKPEVWKKDGLVTEGRRHVVEDEQENF  
VLKILFCKQSDRGLYTCTASNLVGGQTYSSVLVVVREPTVPFKKRLQDLEVREKESATFQCEVAQPATEAAWFK  
EETRLWASAKYDIEEGTERRLTVRNVSADDDAVYICETTEGSRVAELSVQGNLTKLPRKTAVRTGDTAIF  
WVELAVPEGPVWRWRNQEEMVAGGRVAITAEGTCHTLTI FQCTLEDMGEVAFVSGGCRTTTQFCVSAPRRPPL  
YPPADPVVKAKTESSVTLWSAPPHGDRPVTIDGYVLEKRKLGAYAWSRCHEAGWLATTEFTITGVAEEDGFQ  
FRVSAINHFGQGPYLEFPGMTMLVPLAVKTPKAVEAVEGGEVTFVSVDLTVASSGEWFLDGEALKASSIYVI  
RCDRTRHMLTIREVPARLHGAQLKFVANGIETSIQMVVRAALGLPSSKLPAAAAREVLAQLHEEAQLLAE LSD  
QAAA VTWLKDGRELSLGPKEYMQVSAGRRALLVRDVAQDDAGLYECVSRGSRRTAYQLLVQDITDGYRDWGPAG  
PQKHMCKCAGAKIARYLGS SCYRFLQYDKGVWHWLEAALDRQKGTSSCSLHEKPKLVFAKQQAHSEVKAE  
AGASATLSCEVAQAQTEVTWFKDGKLLSSSSKVRMEASGCSRRLLVVQQAGKADAGEYSCEAGGKLSFRLDVA  
EPKMVFAKEQQARSEVKAEGASATLSCEVAQAQTEVTWFKDGKLLSSSSKVRMEASGCSRRLLVVQQAGKADA  
GEYSCEAGGQKLSFRLDVTEPKLVFAKEQQARSEVKAEGVNSATLSCEVAQAQTEVTWFKDGKLLSSSSKVRM  
EASGCSRRLLVVQQAGKADAGEYSCEAGGQKLSFRLDVAEPKLVFAKEQQARSEVKAEGNSATLSCEVAQAQ  
EVTWFKDGKLLSSSSKVRMEASGCSRRLLVVQQAGKADAGEYSCEAGGQKLSFHLDVTEPKLVFAKEQQAHSEV  
KAEAGASATLSCEVAQAQTEVTWFKDGKLLSSSSKVRMEASGCSRRLLVVQQAGKADAGEYSCEAGGQKLSFR  
LDVAEPKLVFAKEQQARSEVKAEGASATLSCEVAQAQTEVTWFKDGKLLSSSSKVRVEASGCSRRLLVVQQAGK  
ADAGEYSCEAGGQKLSFRLDVAEPKLVFAKEQQANSEVKAEGASATLSCEVAQAQTEVTWFKDGKLLSSSSK  
VRVEASGCSRRLLVVQQAGKADAGEYSCEAGGQKLSFRLDVAEPKLVFAKEQQAHSEVKAEGASATLSCEVAQ  
AQTEVTWFKDGKLLSSSSKVRVEASGCSRRLLVVQQAGKADAGEYSCEAGGQKLSFRLDVAEPKLVFAKEQQAH  
SEVKAEGASATLSCEVAQAQTEVTWFKDGKLLSSSSKVRVEASGCSRRLLVVQQAGKADAGEYSCEAGGQKLS  
FRLDVAEPKLVFAKEQQAHSEVKAEGASATLSCEVAQAQTEVTWFKDGKLLSSSSKVRVEASGCSRRLLVVQQ  
AGKADAGEYSCEAGGQKLFRLDVAEPKLVFAKEQQAHSEVKAEGASATLSCEVAQAQTEVTWFKDGKLLSS  
SSKVRVEASGCSRRLLVVQQVQKADAGEYSCEARGQKLSFRLDVAEAEBSQI PERPSRREPLVVEKHETIILTAT  
IAAPSVAAVTWLKDGV EIRRSKRHEATSLGDTHLTVRGAQVLD SAIYSCRVGKEGQDFPVQVEEVAAKFSKP  
LEPVEGELGGTVMLVCELSPEQAEVWRCGNTQLRPGKRFQMTSEGPRRTLTVSGLREDDAEYVCESRDDRT  
SARLTVKVPVVKFTSGLSAMVAEEGQEA TFQCVVSPSDAGVTWYKDGMLQOPSEKFMVMEVGASRSLTILGL  
TLEDAGQVTVEAEGASSAALRVREAPVLFKKKLEPQTVTEERTSVTLEVELTRPWPEVKWTRNAAVLTPSENV  
EIRAEGARHCLVLRVSGFADRGGFCETPDDKTQAKLNVEMRQVRLVRLVRLQVEVEAKEQGTASMDVELSHA EVE  
GSWTRDGLRLQPGPKCHLAVQGPVHILTL SALQPQDSGLVAFRAEGVHTSARLIVTEL PVSFTRVLQDVVATQ  
KEKVTLECELSRPVDVRWLKDGVELRAGKAI GIVAQGTCSRSLVIYRCETGDQGVYVCDALDAQTSASLRVQGR  
TYTLIFRRVLAEDAGEVKFVAENAESRAHLRVKELPVTLLRPLRDKIAMEKHRGVLECVSRASAQVRWFKGG  
VELQSGPKYEVVSDGLYRKLVIN DVQPEDEDTYTCDAGNVKTSAQFFVEEQSITIVRGLKDMTVMEPAPAWFE  
CETSIPSVRPPKWL LGKTVLQAGGNVGLQDGTVHRLTLHKTCSTMTGPVHFTIGKSRSSAQLVVS DIPVVL  
RPLEPKAGRELQSVVLSCDFRPAPKAVQWYKDDTPLSPSEKFKMALEGQMAELRILRLTPADAGVYRCQAGSA  
QSSAEVTVEAREVTVIQPLQDAEAMEEGRVCFSCELSHKDEDI EWSLNGTPLYNDSFHEISHEGCLHTLVLKS  
VRQADTGTVCATSPKVSVSARL VVKGPVVF LKALDDVSAEERGTTLTQCEVSDPEARVVRWKDGVELGSPDK  
YDFLHKAGARGLTVHDL SHEDAGLYTCQVGSKETQSKVSVHDLHVGITKRLKTVEVLEGECSFCEVLSHESP  
SDPAVWTVGGKTVGGSGHFHAVRQGRKYTLTVKDAALSDAGEVVFVSVLGLTSKASLIIRERPVDITKPLEDQR  
TTLGEDVMLSCELSRAGTSVRWLKDGKAIKRSQKYDLLSEGTRAVLVVRKASLKDSGEYTCETEASKSTAKLC  
VEEKANRFTEELADLQVEEKGRAVFTCKTEHPASVVTWRKGLLELRASGKHVPSQEGTLTKLTINALERTDSD  
TYTCDIGQARTQARLLVHGQKVRVIEDLED TAVQEGSSAKFCCRIPADYGPVHWF LDKTPLHSNELNEITVQ  
PGYHVLT LRQLALKDSGTVYFEAGDQRTSAALRVTEKPSIFSRPLTDVTVTEGEDTLTV CETTTVDSSVRWT  
KDGTLRPSARCQLSHEGCAQLLITATTPQDGGRYKCEIGGASSSSIVRVHALPVRFRESLKDVEVPEGKAA  
TLRCVLSSVAAPVEWRHGDDVLKSSNKYSLRQEGAVLELVIRDLQPDGSGQYSCSFGDQTTSATLTVKTSQAQ  
FVGKLRNKEATEGTTVTLRCELTK EAPVEWKKGTETLRNGDKYSLKQDGA VCELQICSLLVADAGEYSCVCGQ  
EKTSATLTVKALLVHVRRLRSKEATEGDTTTLQCELSKAAPVEWRKGTETLRDGD RYSLKQDGA VCELQIRS  
LTADAGEYLC TCGQEKT SATLTVRALPAKFKDSLKNEEATEGTTATLSCELSKAAPVYTWKGP KTLQSGDKY  
VLRQDGA VCGLQIHGLTMADAGEYSCVCGQEKT SATLTVRGLPAKFIEDLRSQEATEGATAILRCELSKAAPV  
EWRKGETLKDGD RYTLRQDGA VCELQIRGLAVVDTGTYS SLP TKFTEGLRNEEATEGTMATLRCQMSKAAPV  
EWRKGETL RDGD RYSLRQDGA MCELQIRGLTIEDSGEYTCVCGQEKT SATLSVKALPPRFIEDLRSQEATEG

TMATLRCQMSKAAPVEWRKGSETLGDGGRYSLRQNGAVCELQIHDLAVEDTGEYSCVCGQEKTSA TLNVKALP  
PRFIEDLRSQEATEGTMATLRCQMSKAAPVEWRKGSETLRDGGGRYSLRQDGAVCELQIHDLDEDAGQYSCVC  
GQEKTSAVLTVDALPPKFTEGLKKEEATEGTMVTLRCQMSKEATVEWRKGAKTSLDGGGRYSLRQDGAMCELQI  
CGLAVEDAGEYSCVCGQEKTSA TLVSKALPPRFIEDLRSQEATEGTMATLRCQMSKAAPVEWRKGSKTLRDGD  
RYSLRQDGAMCELQICDLAVEDTGDYSCVCGQEKTSA TLVSKAPQVVFQQPLQNLQAEEGSMASLRCELSVPN  
AAMVWSKGGLELQGDTRREARQQGCVAELLLRDLRREDAGEYSC TCGSQTT SATLMVTAAPVRFRLRLQAQDV  
DEGATARLRCELSREAVSVEWRKGS LQ LFP CAKYQMVQEGTTAELLVHGVEQEDAGEYTC DAGHTQS IARLSV  
RAPKPKFKTDLQSTEQEAGGTARLCCQLSEAEPTPVQWLKEGVELHVGSKYEMRRQGAVCELLIHGLEAKDT  
GEYACLVGQKTLASLRVKEPEVTIVRGLVDMEVQADEDVEFTCKV SQAGATDVQWHLQGLPLQSNIEVTVAV  
LADGCTHVLQ LKGV TLEDAGTVSFHVGG LSSSAQLTVRVPVTVLEPLKDVQLSEGDQAHFRCLSRASGQEA  
RWALGGVPLQCNEMNDITVEQGTLYLLTLHKVTLEDAGTITLQVGS CSSEAQLKVTAKNTVLRGLENVDALEG  
GEALFECQLSQPEVA AHTWLLDDEPVHTSEKVEVVYFENGLRHLLLLKNLKPQDSCRVTFLAGDVVTS AFLTV  
RALPDPPEDA EVVGRSDHSVTL SWVAPMSDGGGGLCGYRVMKEASTGQWQLCHDLVPGPECVDDLVPGKTY  
RFRVA AVGPAGAGEPVHLPQMVKIAPAPAPAPAPAPAPAPETRQAVVGEDICLELEVAADGGEVVWHKGTERRI  
QPGGHFEVLSRGRQMLVIKGFRTEDQGEYRCGPIQGLPSSGAATFNVMVMTSGSGDEVPAQPSLPPEAAQEGD  
LHLLWEALARKRRMSREPTLDSISELPEEDSRVQHLRQEAETAPDLSEGYSTADELARTGEADLSHTSSDDE  
SRAGT PSLVTYLKKGAGGPGISPLASKHEAQVTT SVKPKQKQEPVVP TCPPPGDL SAADLMDPSLDKA AVKIQA  
AFKGYKVRKEMKQEGPVFSRTFGDTEAQVGDVLRLECVLATKTDMRACWLKDGIELTDGRHYHIDQLKDGTC  
SLLVVTGLAPTDSGRYTCQVSTKSGRVSHSACVVVSGTESEAESSSGGELDDAFRRAARRLHRLFRTRKSPAELS  
EEELFLSADEGPGEPEPADWQTYREDENFVCIRFESLAEARQAVTCFRNM FATMGIGVEISLGEQGPRGVEM  
RIGKVAPT VTPAVPLAKTPGLQTS DAAPVFLTE LQNDVQDGY PMSFDCVVTGQPVPSVRWFKDGKLL EDDH  
YMINEDQQGGHQLIITAVVPADMGVYRCLAENSMGVSSTKAELRVELTSTDYDTAADATETSSYFSAQGYLSS  
REQEGTESDEGQLPQVLEELKDLQVAPGTRLAKFQLKVKGYPAPKLYWFKDGOPLTSDHIRM TDKKT LHTLE  
IVSVTREDSGQYAAYSNAVGAAYSSARLLVRGPSEPEEK PASDVHERLVPPRI LEKFTPKKVGRGSSITFSV  
KVEGHPAPSVHWLKEEA EKGV LWIGPDTPGYTMASSSKQHSLVLLDVGRQHOGTYTCIATNPAGQALCSASLH  
ISGLAKEEEQERKEALISSFLQGT SQAVS AQMSSESAGFADLVGQSKGESLVAAEEAHSHLSLAEVGT EEFLOK  
LTSQITEMVSAKISQAKLQVPGGDSDEETKTPSASPRHGRSRPSSSVQESSSESESDHSHLIDQLKDGTC  
LPLGAEQDAIILREGQYVEVLDSAHPLRWLVRTKPTKSSPSRQGWVSPAYLDKRLKLSPEWGPTEAPEFPGEA  
VSEDEYRTRLSSVIQELLSSEQAFV GELQFLESHHMKHLERSPRVPAAVASQKTVIFRNVQDISHFHSSFLKE  
LQCGCTDDDVAMCFIKNQEA FEKYLEFLVGRVQAESVVVSTPVQEFYKKYAEETLSAKDPTQPPPPLOHYLE  
QPVERVQKYQALLKELIRNKARNRQNCALLEQAYAVVSALPQRAENKLHVSLMENYPGTLEALGEP IROGHFI  
VWEGAPGARMPWKGNHRHVF LFRNYLVICKPRRDSRTD TFSYVFRNMMKLSSIDLNDQVEGDDRAFEVWHERE  
DSVRKYLQARTVIKNSWVKEICGIQORLAQPVWRPPEFEEELADCTAELGETVKLACRVGTGPKPIVSWYK  
DGKPEVVDPHHILIEDPDGSC TLI LDNL TGIDSGQYMCFAASAAGNASTLGKILVQVPPRFVNKVRATPFVEG  
EDAQITCTVEGAPYPQIRWYKDG TLLAPGNRYRMLNE PRSGV LVLV IQAASKEDLGHYCELVNRLGSTRGGG  
ELYMQSPALRARDQHREQIVAAVEGAPSMQVTIEDVQVQVGDMAQF DAVIEGHPPP IVTWYKGSQLTSSAR  
LSQRQDGT TYSLVLT D VAPHDAGVYTCVANNAGQV LCKAELLVHGDKLDAENQVYRRKLHSFYDVQEEIGR  
GVFGFVKRVQHKGNMFCAAKFIPLRSKTRAQAYQERDILATLGHPLVTGLLDQFETRKTLLIILELCSSEEL  
LDRLF KKG VVTEAEVKVYIQQLVEGLHYLHSHGILHLDIKPPNIMVHPAREDIKICDFGFAQKITPSEPOYS  
KYGSP EFVSP EII EQNPVSEGS DIWAMGVISYLSLTCSSPFAGESDRATLLNVLEGRVSWSSPTAAHLS EDAK  
DFIKATLQRTPRARPSTSQC LAHPWFLKSMPAEEAHFINTKQLKFL LARSRWQRSLMSYKSI LVMRSIP ELLQ  
GPPDPSPLGVARHLRGEASGASSSSSSSDNELAPFARAKSLPPSPVTHSPLLHPRGFLRPSASLP EETEASMP  
TADA AVPAS PQSAGPPASPGCVPRHSV ISSLFYQQAGEGAERGNKTS GAKRHPARRRHL LKGGYIARALPGLR  
EPLMEYSLLEEEAAREEQASLMTKTPSFETALRLPSSSVREV PGRSHSLDNPPVTTGPSPEACKEQLLFPST  
GLTHETTAKDRGHKEGFLQESVFPFPMSGDSRPGKQEGSSQDSCRGKPASSCHSELGSGSQEGCGPPSSQLG  
SLPFPQSLKKELESTSCGPLFSEQPQAAPFTQVSP L LGSEKEPQDGS LSEGVPVPSSSPGSASQVDASLDTEG  
LSEAGDTCDFTPPPQRPEQATTRKFSLESRGGYAGVAGYGTFAFGGDAGGMLGQGPLWARM A VWSQSSEEQ  
DEAATESPQPLES LGPIAEASGVPLRTSPSLTPWEEVEQVSLVQIRDLSGDAEAADTISLDISEVDPAYLNL  
DLYDIKYLPFEFMI FRRV PKPIEQPESPGSETEAGQGLADFL EEAAWPWP GELGLRAGLEITEEP EEPGDLEA  
LLGEAAVGRKRKWSPSRGLFQFGRCLSGEEPVELGLRQRVKASMAHISRILKGRPEGPEREGP RPKKAGLAS  
FRLSGLKGRDQELSDEAVVLGQSVTLACQVLAQPTAQTATWSKDVLLLESSGHLLISSTLKNFQLLTLIVVKEE  
DLGTYTCCVSNPLGTAVTTGVL RKAERPSSSPRPEV GELYKDAVLLVWKPVESC GPVTVYVQCCIEGGSWTTL  
ASDISDCCYLTKGLSRGGMYIFRTACVSKAGMGPYSSPSEQVLLGPNHLASEEESSRGRPAQLLPSTKTF AF  
QMQRIRGRFSVVRKREKASGRALAAKIVPYQPEDKTAVLREYEALKRLRHHPLAQLHAAYLSRHLVLILEL  
CSGPELLPSLAERESYSES DVKDYLWQMLSATQYLHAQHIHLDLRSENMMVTEYNLLKVIDLGN AQSLDQEK  
VPAPENFKDYLETMAPELLEGQGAVPQTDIWAIGVTA FIMLSGEY P ESSEGETRDLQKGLRKLIRLSRCYAGL  
SGGAVAFLOSSLCAQPWGRPCASTCLQCGWLTEEGPTGSRPTPVTFPTVRLRAFVREREKRRALLYKKNLAQ  
VR\*

>rs29383483\_ENSMUSP00000049737\_c.604:C>A\_p.S202\*  
ENSMUST00000052872.15|Obscn-203|ENSMUSG00000061462|-|chr11:g.59026597:G>T  
MDHSFSGAPRFLTRPKAFVSVGKDATLSCQIVGNPTPHVSWEKDRQFVEAGARFRLAQDGDVYRLTILDIAL  
GDSGQYVCRARNAIGEFAAVGLRVDSEGTCAEQAPHFLLRPTSIRVREGADATFRCRVGGSPPAVSWSKDG  
RRLGPPDAPHVRVEEHGESSALRIRSARPRDGGTYEVRAENPLGSASAAAALVVD\*DAEVAGPPGTSTATLLA  
HLQQREAMRAEGIPPSPPGAGTRTCTVTEGKHARLSCFVTGEPKPEVWKKDGLVTEGRRHVVEDEQENF  
VLKILFCKQSDRGLYTCTASNLVGQTYSSVLVVVREPTVPFKKRLQDLEVREKESATFQCEVAQPAEEAAWFK  
EETRLWASAKYDIEEEGTERRLTVRNVSAADDVAVICETTEGSRVAELSVQGNLTKLPRKTAVRTGDTAIF  
WVELAVPEGPVRWLRNQEEMVAGGRVAITAEGTCHTLTI FQCTLEDMGEVAFVSGGCRTTTFQCVSAPRRPPL  
YPPADPVVKAKTESSVTLWSAPPHGDRPVTIDGYVLEKRKLGAYAWSRCHEAGWLATTEFTITGVAAEEDGFQ  
FRVSAINHFGQGPYLEFPGTMHLVPLAVKTPKAVEAVEGGEVTFVSDLTVASSGEWFLDGEALKASSIYVI  
RCDRTRHMLTIREVPARLHGAQLKRVANGIETS IQMVVRAALGLPSSKLPAAAAREVLAQLHEEAQLLAE LSD  
QAAA VTWLKDGRELSLGPKYEMQVSAGRRALLVRDVAQDDAGLYECVSRGSRRTAYQLLVQEPKLVFAKQQA  
SEVKAEEAGNSATLSCEVTQAQTEVTWFKDGKLLSSSSKVRMEASGCSRRLVVQQAGKADAGEYSCEAGGQKLS  
FRLDVAEPKLVFAKQQAHEVKAEEAGASATLSCEVAQAQTEVTWFKDGKLLSSSSKVRMEASGCSRRLVVQQ  
AGKADAGEYSCEAGGQKLSFRLDVAEPKLVFAKEQQARSEVKAEEAGASATLSCEVAQAQTEVTWFKDGKLLSS  
SSKVRMEASGCSRRLVVQQAGKADAGEYSCEAGGQKLSFRLDVTEPKLVFAKEQQARSEVKAEEAGNSATLSCE  
VAQAQTEVTWFKDGKLLSSSSKVRMEASGCSRRLVVQQAGKADAGEYSCEAGGQKLSFRLDVAEPKLVFAKEQ  
QARSEVKAEEAGNSATLSCEVAQAQTEVTWFKDGKLLSSSSKVRMEASGCSRRLVVQQAGKADAGEYSCEAGGQ  
KLSFHLDVTEPKLVFAKEQQAHSEVKAEEAGASATLSCEVAQAQTEVTWFKDGKLLSSSSKVRMEASGCSRRLV  
VQQAGKADAGEYSCEAGGQKLSFRLDVAEPKLVFAKEQQARSEVKAEEAGASATLSCEVAQAQTEVTWFKDGK  
LSSSSKVRVEASGCSRRLVVQQAGKADAGEYSCEAGGQKLSFRLDVAEPKLVFAKEQQANSEVKAEEAGASATL  
SCEVAQAQTEVTWFKDGKLLSSSSKVRVEASGCSRRLVVQQAGKADAGEYSCEAGGQKLSFRLDVAEPKLAFA  
KEQQAHSEVKAEEAGASATLSCEVAQAQTEVTWFKDGKLLSSSSKVRVEASGCSRRLVVQQAGKADAGEYSCEA  
GGQKLSFRLDVAEPKLAFAKEQQAHSEVKAEEAGASATLSCEVAQAQTEVTWFKDGKLLSSSSKVRVEASGCSR  
RLVVQQAGKADAGEYSCEAGGQKLSFRLDVAEPKLAFAKEQQAHSEVKAEEAGASATLSCEVAQAQTEVTWFKD  
GKLLSSSSKVRVEASGCSRRLVVQQAGKADAGEYSCEAGGQKLFRLDVAEPKLMFAKEQSHAEVGEVSWTRDGLRL  
ATLSCEVAQAQTEVTWFKDGKLLSSSSKVRVEASGCSRRLVVQQAGKADAGEYSCEAGGQKLSFRLDVAEPKLV  
FAKEQQAHSEVKAEEAGASATLSCEVAQAQTEVTWFKDGKLLSSSSKVRVEASGCSRRLVVQQVQKADAGEYS  
CEARGQKLSFRLDVADTRLMFAKEQQARTEVKAEEAGNSATLSCEVAQAQTEVTWFKDGKLLSSSSKVRVEASG  
CSRRLVVQQAGKADAGEYSCEAGGQKLSFRLDVAEAEESQIPERPSRREPLVVKEHETIILTATIAAPSVAAVT  
WLKDGVEIRRKRHEATS LGDTHLTVRGAQVLD SAIYSCRVGKEGQDFPVQVEEVAAKFSKPLEPVEGELGG  
TVMLVCELSPEQAEVWRCNGNTQLRPGKRFQMTSEGPRRTLTVSGLREDDAEYVCESRDDRTSARLTVKVPR  
VVKFTSGLSAMVAEEGQEA TFQCVVSPSDAGVTWYKDGMLQPSSEKFMVMEVGASRSLTILGLTLEDAGQVTV  
EAEGASSAALRVREAPVLFKKKLEPQTVEERTSVTLELVLETRPWPVEVKWTRNAAVLTPSENVEIRAEGARHC  
LVLRVSGFADRGFFGCETPDDKTQAKLNVEMRQVRLVRLVGLQEVEAKEQGTASMDVELSHAEEVGEVSWTRDGLRL  
QPGPKCHLAVQGPVHILTLALSALQPDQDGLVAFRAEGVHTSARLIVTELPVVFTRVLQDVVATQKEKVTLECEL  
SRPVDVRWLKDGVELRAGKAIGIVAQGTCSRSLVIYRCETGDQGVYVCDALDAQTSASLRVQGRTYTLIFRRVL  
AEDAGEVVFVAENAESAHLRVKELPVTLLRPLRDKIAMEKHRGVLECVSRASAQVRWFVGGVLELQSGPKYE  
VVDGLYRKLVINVDVQPEDEDTYTCDAGNVKTSAQFFVVEEQSITIVRGLKDMTVMPEPAPAWFECETSIPSVRP  
PKWLLGKTVLQAGGNVLEQDGTVHRLTLHKTCSTMTGPVHFTIGKSRSSAQLVSDIPVVLTRPLEPKAGRE  
LQSVVLSCDFRPAPKAVQWYKDDTPLSPSEKFKMALEGQMAELRILRLTPADAGVYRCQAGSAQSSAEVTVEA  
REVTVIQPLQDAEAMEEGRVCFSCELSHKDEDI EWLSLNGTPLYNDSFHEISHEGCLHTLVLSVRQADTGTVC  
ATSPKVSVSARLVVKGKPVVFLKALDDVSAEERGTLLTQCEVSDPEARVWVRKDGVELGSPDKYDFLHKAGAR  
GLTVHDLSHEDAGLYTCQVGSKETQSKVSVHDLHVGITKRLKTVEVLEGE.SCSFECVLSHESPSDPAVWTVGG  
KTVGGSGHFHAVRQGRKYTLTVKDAALSDAGEVVSFLGLTSKASLIIRERPVDITKPLEDQRTTLGEDVMLS  
CELSRAGTSVRWLKDGKAIRKSQKYDLLSEGTRAVLVVRKASLKDSGEYTCETEASKSTAKLCVEEKANRFTE  
ELADLQVEEKGRAVFTCKTEHPASVVTWRKGLLELRASGKHVPSQEGTLKLTINALERTDSDTYTCDIGQAR  
TQARLLVHGQKVRVIEDLED TAVQEGSSAKFCCRIAPADYGPVHWF LDKTPLHSNELNEITVQPGGYHVLTLR  
QLALKDSGTVYFEAGDQRTS AALRVTEKPSIFSRPLTDVTVTEGEDTLVLCETTTVDSSVRWTKDGKTLRPSA  
RCQLSHEGCAQLLITATTPQDGGRYKCEIGGASSSSIVRVHALPVRVFRESLKDVEVPEGKAATLRCVLSVA  
APVEWRHGDDVLKSSNKYSLRQEGAVLELVIRDLQPDQSGQYSCSFGDQTTSATLTVKTSQAQVFGKLRNKEA  
TEGTVTLRCELTKAEVWKKGTE TLNRNGDKPVYSLKQDGA VCELQICSLLVADAGEYSCVCGQEKTSATLTVK  
ALLVHFVRRRLRSKEATEGDTTLQCELSKAAPVEWRKGTETLRLDGDYRSLKQDGA VCELQIRSLTIADAGEYL  
CTCGQEKTSATLTVRALPAKFKDSLKNEEATEGTTATLSCELSKAAPVTVWKKGPKTLQSGDKYVLRQDGA VCG  
LQIHGLTMADAGEYSCVCGQEKTSATLTVRGLPAKFIEDLRSQEATEGATAILRCELSKAAPVEWRKGSSETLK  
DGDRYTLRQDGA VCELQIRGLAVVDGTYSLLPTKFTTEGLRNEEATEGTMATLRCQMSKAAPVEWRKGSSETLR  
DGDRYSLRQDGA MCELQIRGLTIEDSGEYTCVCGQEKTSATLSVKALPSRFIEDLRSQEATEGTMATLRCQMS

KTAPVEWKKGSETLRDGGGRYSLRQDGPVCELQICDLAVEDAGEYSCVCGQEKTSATLSIKALPPRFIEDLRSQ  
EATEGTMATLRCQMSKAAPVEWRKGETLGDGGGRYSLRQNGAVCELQIHDLAVEDTGEYSCVCGQEKTSATLN  
VKALPPRFIEDLRSQEATEGTMATLRCQMSKAAPVEWRKGETLRDGGGRYSLRQDGA VCELQIHDLVEDAGQ  
YSCVCGQEKTSAVLTVDALPPKFTTEGLKKEEATEGTMVTLRCQMSKEATVEWRKGAKTLSDGGRYSLRQDGA  
MCELQICGLAVEDAGEYSCVCGQEKTSATLSVKALPPRFIEDLRSQEATEGTMATLRCQMSKAAPVEWRKGET  
LRDGDGRYSLRQDGA VCELQIRDLAVEDAGEYLCVCGQEKTSATLSVKALPPRFIEDLRSQEATEGTMATLRCQ  
MSKAAPVEWRKGSKTLLRDGRYSLRQDGA MCELQICDLAVEDTGDYSCVCGQEKTSATLSVKALPPRFIEDLR  
SQEAREGTVATLRCRMSKAAPVEWRKGETLKDGDGRYSLRQEGNLCELQIRDLAVEDTEEYSCVCGQEKTSAT  
LSVKALPAKFIEDLRSQEAPESSTVTLRCKLSKKASVWKKGSETLRNGARYSLRQDGA VCELQIRDLTVEDT  
GEYSCTCGQERTSATLSIMAPQVVFQQPLQNLQAEEGSMASLRCELSVPNAAMVWSKGGLELQGDTRREARQQ  
GCVAELLLRDLRREDAGEYSCVCGQEKTSATLMVTAAPVRFLELQAQDVDEGATARLRCELSREAVSVEWRK  
GSLQLFPKAKYQMVQEGTAEALLVHGVEQEDAGEYTC DAGHTQS IARLSVRAPKPKFKTDLQSTEQEAGGTAR  
LCCQLSEAEPTPVQWLKEGVELHVGSKYEMRRQGAVCELLIHGLEAKDTGEYACLVGQKTLASLRVKEPEV  
TIVRGLVDMEVQADEDFEFTCKVSOAGATDVQWHLQGLPLQSNVTEVAVLADGCTHVLQKGVTLQDAGTVS  
FHVGGSSSAQLTVRVPEVTVLEPLKDVQLSEGQDAHFRCRLSRASGQEARWALGGVPLQCNEMNDITVEQGT  
LYLLTLHKVTLEDAGTITLQVGSSESQAQKVTAKNTVLRGLENVDALEGGALFECQLSQPEVAHAHTWLLDD  
EPVHTSEKVEVVYFENGLRHLRLLKLNKPKQDSCRVTFLAGDVVTSAFITVTRGWRLEVLPEPHDASVKAGMVQR  
FTCILLSEAVPVGEATWYINGAAIQPDDTDWTVTTDGSHHALTLSNAQPQHAGEVTF AARDVASARLSVLTALP  
DPPEDAEEVGRSDHSVTLVWVAPMSDGGGGLCGYRVMKEASTGQWQLCHDLVPGPECVVDDLVPGKTYRFRV  
AAVGPAGAGEPVHLPQMVKIAPAPAPAPAPAPAPAPETROAVVGEDICLELEVAADGGVEVWHKGTERTIQPGG  
HFEVLSRGRQRLVIGKFRTEQGEYRCGPIQGLPSSGAATFNVMVMTSGSGDEVPAQPSLPPEAAQEGDLHLL  
WEALARKRRMSREPTLDSISELPEEDSRVQHLRQEAETAPDLSEGYSTADELARTGEADLSHTSSDDESRAG  
TPSLVTYLKAGGPGI SPLASKHEAQVTT SVKPKQKQEPVVPTCPPPGDLSAADLMDPSLDKAAVKIQAAFKG  
YKVRKEMKQEGPVFSRTFGDTEAQVGDVLRLECVLATKTMRAWLDKGIELTDGRHYHIDQLKDGTCSSLLV  
TGLAPTDSGRYTCQVSTKSGRVSHSACVVVSGTESEAEASSGGELDDAFRRAARLHRLFRTKSPAELSEEL  
FLSADEGPGEPEEPADWQTYREDEFVCIREFSLAEARQAVTCFRNMFATMIGVEISLGEQGRPVEMRIGK  
VAPTVTPAVPLAKT PGLQTSDAAPVFLTELQNDVQDQVAVTMSFDCVVTGQPVPSVRWFKDGKLLLEDDHYMIN  
EDQQGGHQLIITAVVPADMGVYRCLAENSMGVSSTKAELRVELTSTDYDTAADATETSSYFSAQGYLSSREQE  
GTESDEGQLPQVLEELKDLQVAPGTRLAKFQLKVKGYPAKLYWFKDQGPLTSDHIRMTDKKTLHTLEIVSV  
TREDSGQYAAIYISNAVGAAYSSARLLVRGPSEPEEKPASDVHERLVPRILEKFTPKKVKRGSSTIFSVKVEG  
HPAPSVHWLKEEAEGVWLGPDTPGYTMASSSKQHSVLVDVGRQHOGTYTCIATNPAGQALCSASLHISGL  
AKEEEQERVKEALISSFLQGTSAVSAQMSEAGFADLVGQSKGESLVAAEAHSHLSLAEVGT EEFQLKLT SQ  
ITEMVSAKISQAKLQVPGGDSDEETKTPSASPRHGRSRPSSSVQESSSESEDGDSRGEIFDIYVVTADYLPGL  
AEQDAIILREGQYVEVLD SAHPLRWLVRTKPTKSSPSRQGWVSPAYLDKRLKLSPEWGPTEAPEFPGEAVSED  
EYRTRLSVVIQELLSSEQAFVGELOFLESHHMKHLERSPRVPAVASQKTVIFRNVDI SHFHSSFLKELQGC  
GTDDVAMCFIKNQEA FEKYLEFLVGRVQAESVVVSTPVQEFYKQYAEETLSAKDPTQPPPPPLQHYLEQVVE  
RVQKYQALLKELIRNKARNRQNCALLEQAYAVVSALPQRAENKLVSLMENYPGTLEALGEP IRQGHFIVWEG  
APGARMPWKGNHRHVF LFRNYLVICKPRRDSRTDTFSYVFRNMMKLSSIDLNDQVEGDDRAFEVWHERE SVR  
KYLQARTVI IKNSWVKEICGIQORLAQPVWRPPEFEELADCTAELGETVKLACRVTGTPKPIVSWYKDGKP  
VEVDPHHILIEDPDGSC TLIIDLNLTGIDSGQYMCFAASAAGNASTLGKILVQVPPRFVNVKVRATPFVEGEDAQ  
ITCTVEGAPYPQIRWYKDGTL LLAGPNRYRMLNEPRSGVLVLIQAASKEDLGHYECELVNRLGSTRGGGELYM  
QSPALRARDQHHREQIVAAVEVTEQETKVPKKTVIIEETITTVVKS PRGRRQSPGKSPSRSPRRSASPRRPG  
LLAPERLYPPGTSPSRRLVEEQGRKAPVPALYVTEAEVHAPASQSQPKWLEVEETIEVRVKKTGSRGASPVRE  
MTRSGEGILFTLPGGIPGRDPNANNNSNKS SVYQEARWGPVAVHVHVEGPFIFQVDSVGNVDVVAASPEPEQVRA  
SQKEENTERQEGCSDG DENTFLMEEPQD TDSLQGRDPKILTHNGRVLTLADLEDYVPQEGETFGCGDSTPSTP  
DEPPCEVSVLQREI SEPTVGQPVLLNVGRPPGTGATPSFFRPGSQVHSPESVSVFLLREAWSGPVS AAPWTSSF  
HTHVQSSVDGSHGSFKTEVSTQTVSFGAVGETVTLHIDPDGGEAPGPSQG\*

>rs29383483\_ENSMUSP00000020732\_c.604:C>A\_p.S202\*

ENSMUST00000020732.13|Obscn-201|ENSMUSG00000061462|-|chr11:g.59026597:G>T  
MDHSFSGAPRFLTRPKAFVSVGKDATLSCQIVGNPTPHVSWEKDRQPVEAGARFLAQDGDVYRLTILDLIAL  
GDSGQYVCRARNAIGEAFAAVGLRVDSEGTCAEQAPHFLLRPTSIRVREGADATFRCRVGGSPQPAVSWSKDG  
RRLGPPDAPHVRVEEHGESSALRIR SARPRDGGTYEVRAENPLGSASAAAAALVVD\*DAEVAGPPGTSTATLLA  
HLQORREAMRAEGIPSPPGAGTRTCTVTEGKHARLSCFVTEGPKPETVWKKDGLVTEGRRHVVEDEQENF  
VLKILFCKQSDRGLTYCTASNLVGQTYSSVLVVVREPTVPFKKRLQDLEVRKEKESATFQCEVAQAPATEAAWFK  
EETRLWASAKYDIEEGTERRLTVRNVSADDDAVYICETTEGSRVVAELSVQGNLTKLPRKTAVRTGDTAIF  
WVELAVPEGPVRWLRNQEEMVAGGRVAITAEGTCHTLTIFQCTLEDMGEVAFVSGGCRTTTQFCVSAPRRPPL  
YPPADPVVKAKTESSVTLWSAPPHGDRPVTIDGYVLEKRKLGAYAWSRCHEAGWLATTEFTITGVAAEGDFQ  
FRVSAINHFGQGPYLEFPGMTMLVPLAVKTPLKAVEAVEGGEVTFVSDLTVASSGEWFLDGEALKASSIYVI

RCDRTRHMLTIREVPARLHGAQLKVFVANGIETSIQMVVRAALGLPSSKLPAAAAAREVLAQLHEEAQLLAEELSD  
 QAAAVTWLKDGRELSLGPKEYMQVSAGRRALLVRDVAQDDAGLYECVSRGSRRTAYQLLVQDITDGYRDWGPAG  
 PQKHMCKCAGAKIARYLGSscyRFLQYDKGVVHLEAALDTRQKGKTS SCSLHEKPKLVFAKQQAHSEVKA  
 AGNSATLSCEVTQAQTEVTFWKDGKLLSSSSKVRMEASGCSRRLVVQQAGKADAGEYSCEAGGQKLSFRLDVA  
 EPKLVFAKQQAHSEVKAEGASATLSCEVAQAQTEVTFWKDGKLLSSSSKVRMEASGCSRRLVVQQAGKADA  
 GEYSCEAGGQKLSFRLDVAEPKMFVFAKEQQARSEVKAEGASATLSCEVAQAQTEVTFWKDGKLLSSSSKVRM  
 EASGCSRRLVVQQAGKADAGEYSCEAGGQKLSFRLDVTEPKLVFAKEQQARSEVKAEGVNSATLSCEVAQAQ  
 EVTWFKDGKLLSSSSKVRMEASGCSRRLVVQQAGKADAGEYSCEAGGQKLSFRLDVAEPKLVFAKEQQARSEV  
 KAEAGNSATLSCEVAQAQTEVTFWKDGKLLSSSSKVRMEASGCSRRLVVQQAGKADAGEYSCEAGGQKLSFHL  
 DVTEPKLVFAKEQQAHSEVKAEGASATLSCEVAQAQTEVTFWKDGKLLSSSSKVRMEASGCSRRLVVQQAGK  
 ADAGEYSCEAGGQKLSFRLDVAEPKLVFAKEQQARSEVKAEGASATLSCEVAQAQTEVTFWKDGKLLSSSSK  
 VRVEASGCSRRLVVQQAGKADAGEYSCEAGGQKLSFRLDVAEPKLVFAKEQQANSEVKAEGASATLSCEVAQ  
 AQTEVTFWKDGKLLSSSSKVRVEASGCSRRLVVQQAGKADAGEYSCEAGGQKLSFRLDVAEPKLAFAKEQQAH  
 SEVKAEGASATLSCEVAQAQTEVTFWKDGKLLSSSSKVRVEASGCSRRLVVQQAGKADAGEYSCEAGGQKLS  
 FRLDVAEPKLAFAKEQQAHSEVKAEGASATLSCEVAQAQTEVTFWKDGKLLSSSSKVRVEASGCSRRLVVQQ  
 AGKADAGEYSCEAGGQKLSFRLDVAEPKLAFAKEQQAHSEVKAEGASATLSCEVAQAQTEVTFWKDGKLLSS  
 SKVRVEASGCSRRLVVQQAGKADAGEYSCEAGGQKLFRLDVAEPKLMFAKEQQAHSEVKAEGASATLSCE  
 VAQAQTEVTFWKDGKLLSSSSKVRVEASGCSRRLVVQQAGKADAGEYSCEAGGQKLSFRLDVAEPKLVFAKEQ  
 QAHSEVKAEGASATLSCEVAQAQTEVTFWKDGKLLSSSSKVRVEASGCSRRLVVQQVQKADAGEYSCEARGQ  
 KLSFRLDVADTRLMFAKEQQARTEVKAEGNSATLSCEVAQAQTEVTFWKDGKLLSSSSKVRVEASGCSRRLV  
 VQQAGKADAGEYSCEAGGQKLSFRLDVAEAE SQIPERPSRREPLVVKHEHETIILTATIAAPVAAVTWLKDG  
 VEIRRSKRHEATSLGDTHTLTVRGAQVLD SAIYSCRVGKEGQDFPVQVEEVAAKFSKPLEPVEGELGGTVMLVC  
 ELSPEQAEVWRCGNTQLRPGKRFQMTSEGPRRTLTVSGLREDDAEYVCE SRDDRTSARLTVKVPRVVKFTS  
 GLSAMVAEEGQEATFQCVVSPSDAGVTWYKDGMLQPSKFKVMVESGASRSLTILGLTLEDAGQVTVAEAGAS  
 SSAALRVREAPVLFKKKLEPQTEVEERTSVTLEVELTRPWPEVKWTRNAAVLTPSENVEIRAEGARHCLVLRV  
 GFADRGGFFGCETPDDKTQAKLNVEMRQVRLVRLVGLVEVEAKEQGTASMDVELSHAEEVGSWTRDGLRLQFPGKC  
 HLAQVGPVHILTLVKSALQPD SGLVAFRAEGVHTSARLIVTEL PVSFTRVLQDQVAVTQKEKVTLECELSR  
 RVLKDGVELRAGKAIGIVAQGTCSRSLVIYRCETGDQGVYVCDALDAQTSASLRVQGRTYTLIFRRLAEDAGE  
 VKFVAENAESRAHLRVKELPVTLLRPLRDKIAMEKHRGVLECCQVSRASQVRWFKGGVELQSGPKYEVVSDGL  
 YRKLVINVDQPEDEDTYTC DAGNVKTSAQFFVEEQSITIVRGLKDMTVMEPAPAWFECETSIPSVRPPKWL  
 LGKTVLQAGGNVGLQDGTVHRLTLHKTCSTMTGPHVFTIGKSRSSAQLVSDIPVVLTRPLEPKAGRELQSVL  
 SCDFRPAPKAVQWYKDDTPLSPSEKFKMALEGGMAELRILRLTPADAGVYRCQAGSAQSSAEVTVAREVTVI  
 QPLQDAEAMEEGRVCFSCELSHKDEDIEWLSLNGTPLYNDSFHEISHGCLHTLVLSKSVRQADTGTVCATSPKV  
 SVSARLVVKGKPVVFLKALDDVSAEERGLTLTQCEVSDPEARVWVRKDGVELGSPDKYDFLHKAGARGLTVHD  
 LSHEDAGLYTCQVGSKETQSKVSVHDLHVGITKRLKTVEVLEGESECSFECVLSHESPSDPAVWTVGGKTVGG  
 GHFHAVRQGRKYTLTVKDAALS DAGEVVFVSLGLT SKASLIIRERPV DITKPLEDQRTTLGEDVMLSCEL  
 SRA GTSVRWLKDGKAIRKSQKYDLLSEGTRAVLVVRKASLKD SGEYTCETEASKSTAKLCVEEKANRFT  
 EELADLQ VEEKGRAVFTCKTEHPASVVTWRKGLLELRASGKHVPSQEGTLTKLTINALERTSDTYTCDIGQARTQARLL  
 VHGGKVRVIEDLED TAVQEGSSAKFCRIAPADYGPVHWF LDKTPLHSNELNEITVQPGGYHVLTLRQLAL  
 KDSGTVYFEAGDQRTS AALRVTEKPSIFSRPLTDVTVTEGEDTLTVCE TTTVDSSVRWTKDGKTLRPSAR  
 CQLSH EGQAQLLITATTPQDGGRYKCEIGGASSSIVRVHALPVRFRESLKDVEVPEGKAATLRCVLSVAAPV  
 EWR HGDVVLKSSNKYSLRQEGAVLELVIRLDLQPDQSGQYSCSFGDQTT SATLTVKTS SAQFVGLR  
 NKEATEGTTV TLRCELTKEAPVEWKKGTETLRNGDKYSLKQDGAVCELQICSLLVADAGEYSCVCGQEK  
 TSATLTVRALPAKFKDSLKNEEATEGTTATLSCELSKAAPVWKKGPKTLQSGDKYVLRQDGA  
 VCGLQIHGL TMADAGEYSCVCGQEKTSATLTVRGLPAKFIEDLRSQEATEGATAILRCELSKAAPV  
 EWRKGSSETLRDGD RYTLRQDGA VCELQIRGLAVVDTGTYS SLPTKFTEGLRNEEATEGTMATLRCQ  
 MSKAAPVEWRKGSSETLRDGD RYSLRQDGA MCELQIRGLTIEDSGEYTCVCGQEKTSATLSV  
 KALPSRFIEDLRSQEATEGTMATLRCQMSKTAPVE WKKGSETLRDGGRYSLRQDGPVCELQICD  
 LAVEDAGEYSCVCGQEKTSATLSIKALPPRFIEDLRSQEATEG TMATLRCQMSKAAPVEWRKGS  
 SETLRDGGRYSLRQDGA VCELQIHDLVDEDAGQYSCVCG QEKTSAVLTVDALPPKFTEGLKKEE  
 ATEGTMVTLRCQMSKEATVEWRKGAKT LSDGGRYSLRQDGA MCELQICGLAVEDAGEYSCVCG  
 QEKTSATLSVKALPPRFIEDLRSQEATEGTMATLRCQMSKAAPVEWRKGSSETLRDGD RYSLR  
 QDGA VCELQIRDLAVEDAGEYLCVCGQEKTSATLSVKALPPRFIEDLRSQEATEGTMATLRCQMS  
 KAAP VEWRKGSSETLRDGD RYSLRQDGA MCELQICDLAVEDTGDYSCVCGQEKTSATLSVKAL  
 PPRFIEDLRSQEARE GTVATLRCMSKAAPVEWRKGSSETLRDGD RYSLRQEGNLCELQIRDLA  
 VEDTEEYSCVCGQEKTSATLSVKAL PAKFIEDLRSQEAPESSTVTLRCKLSKKASVWKKGSET  
 LRNGARYSLRQDGA VCELEIRDLTVEDTGEYSCT CGQERTSATLSIMAPQVVFQQPLQNLQAE  
 EGSMASLRCELSVPNAAMVWSKGGLELQGDTRREARQQGCV AEL

LLRDLRREDAGEYSCTCGSQTTSATLMVTAAPVRFRLRELQAQDVDEGATARLRCELSREAVSVEWRKGSQQLF  
 PCAKYQMVQEGTTAELLVHGVEQEDAGEYTCDAHTQSIARLSVRAPKPKFKTDLQSTEQEAGGTARLCCQLS  
 EAEPGTPVQWLKEGVELHVGSKYEMRRQGAUCELLIHGLEAKDTGEYACLVGGQKTLASLRVKEPEVTVRGL  
 VDMEVQADEDVEFTCKVSOAGATDVQWHLQGLPLQSNVTEVAVLADGCTHVLQKGVTLLEDAGTVSFHVGGL  
 SSSAQLTVRVPEVTVLEPLKDVQLSEGQDAHFRCRLSRASGQEARWALGGVPLQCNEMNDITVEQGTLYLLTL  
 HKVTLEDAGTITLQVGSSESQAQLKVTAKNTVLRGLENVDALEGGEALFECQLSQPEVAHAHTWLLDDEPVHTS  
 EKQEVVYFENGLRHLLLLKLNKPKQDSCRVTFLAGDVVTS AFLTVRGWRLEVLEPPHDASVKAGMQVRFTCILS  
 EAVPVGEATWYINGAAIQPDDTDWTVTTDGSHHALTLNAQPQHAGEVTF AARDAVASARLSVLALPDPPEDA  
 EVVGRSDHSVTL SWVAPMSDGGGGLCGYRVMKEASTGQWQLCHDLVPGPECVDDLVPGKTYRFRVAAVGPA  
 GAGEPVHLPQMVKIAPAPAPAPAPAPAPAPAPETRQAVVGEDICLELEVAADGGGEVVWHKGTERRIQPGGHFEVLS  
 RGQRQMLVIKGFRTEDQGEYRCGPIQGLPSSGAATFNVMVMTSGSGDEVPAQPSLPPEAAQEGDLHLLWEALAR  
 KRRMSREPTLDSISELPEEDSRVQHLRQEAETAPDLSEGYSTADELARTGEADLSHTSSDDESAGT PSLVT  
 YLKKAGGPGISPLASKHEAQVTSVKPQKQEPVPTCP PPGDLSAADLMDPSLDKAAVKIQAAFQYKVRKE  
 MKQQEGPVFSRTFGDTEAQVGDVLRLECVLATKTD MRACWLKDGIELTDGRHYHIDQLKDGTC SLLVTGLAPT  
 DSGRYTCQVSTKSGRVSHSACVVVSGTESEAESSSGGELDDAFRAARRLHRLFRTKSPAELSEELFLSADE  
 GPGEPEPADWQTYREDENFVCIRFESLAEARQAVTCFRNMFATMGIGVEISLGEQGPGRVEMRIGKVAPTVT  
 PAVFLAKTPGLQTSDAAPVFLTELQNDVQDGYPMSFDCVVTGQVPVPSVRWFKDGKLEEDDHVMINEDQQGG  
 HQLLITAVVPADMGVYRCLAENSMGVSTKAELRVELTSTDYDTAADATETSSYFSAQYLSREQEGTESDE  
 GQLPQVLEELKDLQVAPGTRRLAKFQLKVKGYPAKLYWFKDGGPLTSDHIRMTDKKTLHTLEIVSVTREDSG  
 QYAAYSNAVGAAYSSARLLVRGPSEPEEKPASDVHERLVPPRI LEKFTPKKVKRGSSITFSVKVEGHPAPSV  
 HWLKEEAKEKGV LWIGPDTPGYTMASSSKQHSVLVLDVGRQHGT YTCIATNPAGQALCSASLHISGLAKEEEQ  
 ERVKEALISSFLQGTSAQVSAQMSAESAGFADLVGQSKGESLVAEEAHSHLSLAEVGT EEFQKLT SQITEMVS  
 AKISQAKLQVPGGDSDEETKTPSASPRHGRSRPSSSVQESSSEEDGDSRGEIFDIYVVTADYLP LGAEQDAI  
 ILREGQYVEVLDSAHPLRWLVRTKPTKSSPSRQGWVSPAYLDKRLKLSPEWGPTEAPEFPGEAVSEDEYRTRL  
 SSVIQELLSSEQAFVGLQLFLESHHMKHLERSPRVPAVASQKTVIFRNVQDISHFHSSFLKELQCGCTDDD  
 AMCFIKNQEAFAKYLEFLVGRVQAESVWVSTPVQEFYKKAETLSAKDPTQPPPPPLQHYLEQPVVERQKYQ  
 ALLKELLRNKARNRNCALLEQAYAVVSALPQRAENKLVHSLMENYPGTLEALGEPHQHFIWVAGVARGARM  
 PWKGNHRHVF LFRNYLVICKPRRDSRTDTFSYVFRNMMKLSIDLNDQVEGDDRAFEVWHEREDSVRKYLLQA  
 RTVI IKNSWVKEICGIQQLRAQPVWRPPEFEEELADCTAELGETVKLACRVTGT PKPIVSWYKDGKPV EVDPH  
 HILIEDPDG SCTLILDNLGTIDSGQYMCFAASAAGNASTLGKILVQVPPRFVNVKVRATPFVEGEDAQITCTVE  
 GAPYQIRWYKDG TLLAPGNRYRMLNEPRSGVLV LVIQAASKEDLGHYECELVNRLGSTRGGGELYMQSPALR  
 ARDQHHREQIVAAVEERRPSP\*  
 >rs29383483\_ENSMUSP00000151217\_c.604:C>A\_p.S202\*  
 ENSMUST00000219084.3|Obscn-207|ENSMUSG0000061462|-|chr11:g.59026597:G>T  
 MDHSFSGAPRFLTRPKAFVSVGKDATLSCQIVGNPTPHVSWEKDRQVVEAGARFLAQDGDVYRLTILDLAL  
 GDSGQYVCRARNAIGEAFAAVGLRVDSEGTCAEQAPHFLLRPTSIRVREGADATFRCRVGGSPQPAVSWSKDG  
 RRLGPPDAPHVRVEEHGESSALRIRSARPRDGGTYEVRAENPLGSASAAAALVVD\*DAEVAGPPTSTATLLA  
 HLQORREAMRAEGIPSPPGAGTRTCTVTEGKHARLSCFVTGEPKPEVWKKDGQLVTEGRRHVVEDEQENF  
 VLKILFCKQSDRGLYTCTASNLVGTYSVSVLVVREPTVPFKKRLQDLEVREKESATFQCEVAQPAEAAWFK  
 EETRLWASAKYDIEEGTERRLTVRNVSADDDAVYICETTEGSRTVAELSVQGNLTKLPRKTAVRTGDTAIF  
 WVELAVPEGPVRWLRNQEEMVAGGRVAITAEGTCHTLTI FQCTLEDMGEVAFVSGGCRTTTFQFCVSAPRRPPL  
 YPPADPVVKAKTESVTL SWSAPPHGDRPVTIDGYVLEKRLKLGAYAWSRCHEAGWLATTEFTITGVAAEGDFQ  
 FRVSAINHFGQGPYLEFPGTMHLVPLAVKTPKAVEAVEGGEVTFVSDLTVASSGEWFLDGEALKASSIYVI  
 RCDRTRHMLTIREV PARLHGAQLKFVANGIETS IQMVVRAALGLPSSKLPAAAAREVLAQLHHEAQLLAE LSD  
 QAAAVTWLKDGRELSLGPKYEMQVSAGRRALLVRDVAQDDAGLYECVSRGSR TAYQLLVQDITDGYRDWGPAG  
 PQKHMCKCAGAKIARYLGSSCYRFLQYDKGVWHLEAALDTRQKGTSSCSLHEKPKLVFAKQQAHSEVKA  
 AGNSATLSCEVTQAQTEVTFWKDGKLLSSSSKVRMEASGCSRRLVVQQAGKADAGEYSCEAGGQKLSFRLDVA  
 EPKLVFAKQQAHSEVKA EAGASATLSCEVAQAQTEVTFWKDGKLLSSSSKVRMEASGCSRRLVVQQAGKADA  
 GEYSCEAGGQKLSFRLDVAEPKMFVFAKEQQARSEVKA EAGASATLSCEVAQAQTEVTFWKDGKLLSSSSKVRM  
 EASGCSRRLVVQQAGKADAGEYSCEAGGQKLSFRLDVTEPKLVFAKEQQARSEVKA EAGNSATLSCEVAQAQ  
 EVTWFKDGKLLSSSSKVRMEASGCSRRLVVQQAGKADAGEYSCEAGGQKLSFHLDVTEPKLVFAKEQQAHSEV  
 KAEAGASATLSCEVAQAQTEVTFWKDGKLLSSSSKVRMEASGCSRRLVVQQAGKADAGEYSCEAGGQKLSFR  
 LVAEPKLVFAKEQQARSEVKA EAGASATLSCEVAQAQTEVTFWKDGKLLSSSSKVRVEASGCSRRLVVQQAG  
 ADAGEYSCEAGGQKLSFRLDVAEPKLVFAKEQQANSEVKA EAGASATLSCEVAQAQTEVTFWKDGKLLSSSSK  
 VRVEASGCSRRLVVQQAGKADAGEYSCEAGGQKLSFRLDVAEPKLVFAKEQQAHSEVKA EAGASATLSCEVAQ  
 AQTEVTFWKDGKLLSSSSKVRVEASGCSRRLVVQQAGKADAGEYSCEAGGQKLSFRLDVAEPKLVFAKEQQAH  
 SEVKA EAGASATLSCEVAQAQTEVTFWKDGKLLSSSSKVRVEASGCSRRLVVQQVQKADAGEYSCEARGQKLS  
 FRLDVAEAE SQIPERPSRREPLVVKHEHETIILTATIAAPSVAAVTWLKD GVEIRRSKRHEATSLGDHTLTVR

GAQVLD SAIYSCR V GKEGQDFPVQVEEVA AKFSKPLEPVEGELGGTVMLVCELSPEQAEV VWRGNTQLRPGK
RFQMTSEGP RR TLTVSGLREDDAE EYVCE SRDDRTSARLTVKVRPVVKFTSGLS AMVAEEGQEATFQCVVSPS
DAGVTWYKDGMLQPSEK FVMVESGASRSLTILGLTLEDAGQVTV EAE GASS SAALRVREAPVLFK KLEPQT
VEERTSVTLEVELTRPWPEVKWTRNA AVLTPSENVEIRAEGARHCLVLR SVGFADRGFFGCETPDDKTQAKLN
VEMRQVRLVRGLQEVEAKEQGTASMDVELSHA EVEG SWTRDGLRLQPGPKCHLAVQGGPVH I L T L S A L Q P Q D S G
LVA FRAEGVHTSARLIVTELPV SFTRVLQDVVATQKEKVTLECELSRPVDVRWLKDGVELRAGKAI GIVAQGT
CRSLVIYRCETGDQGVYVCDALDAQTSASLRVQGRYTLI FRRVLAEDAGEVKFVAENAESRAHLRVKELPVT
LLRPLRDKIAMEKHRGVL E C Q V S R S A Q V R W F K G G V E L Q S G P K Y E V V S D G L Y R K L V I N D V Q P E D E D T Y T C D A G
NVKTSAQFFVEEQSITIVRGLKDMTVM EPAPAWFECETS I P S V R P P K W L L G K T V L Q A G G N V G L E Q D G T V H R L T
LHKTCSTMTGVPVHFTIGKSRSSAQLVVS DIPVVLTRPLEPKAGRELQSVVLS CDFRPAPKAVQWYKDDT P L S P
SEKFKMALEGQMAELRILRLTPADAGVYRCQAGSAQSSAEVTVEAREVTVIQPLQDAEAMEEGRVCFSCELSH
KDEDIEWSLNGTPLYNDSFHEISHEGCLHTLVLKSVRQADTGTVCATSPKVSVSARLVVKGPVVF L K A L D D V
SAERGTTLTQCEVSDPEARV VWRKDGVELGPSDKYDFLHKAGARGLTVHDLSHEDAGLYTCQVGSKETQSKV
SVHDLHVGITKRKKTVEVLEGE SCSFECVLSHESPSDPAVWTVGGKTVGGSGHFHAVRQGRKYTLTVKDAALS
DAGEV V F S V L G L T S K A S L I I R E R P V D I T K P L E D Q R T T L G E D V M L S C E L S R A G T S V R W L K D G K A I R K S Q K Y D L L
SEGTRAVLVVRKASLKDSGEYTCETEASKSTAKLCEVEKANRFT EELADLQVEEKGRAVFTCKTEHPASVVTW
RKGLLELRASGKHVPSQEGTLKLTINALERTSDTYTCDIGQARTQARLLVHGQKVRVIEDLEDTAVQEGSS
AKFCCRIAPADYGPVHWFLDKTPLHSNELNEITVQPGYHVLT LRQLALKDSGT VYFEAGDQRTS AALRVTEK
PSIFSRPLTDVTVTEGEDLTLCETTTVDSSVRWTKDGKTLRPSARCQLSHEGCQAQLLITATTPQDGGRYKC
EIGGASSSSIVRVHALPVRFRESLKDVEVPEGKAATLRCVLSVAAPVEWRHGDDVLKSSNKYSLRQEGAVLE
LVIRDLQPDGSGQYSCSFGDQTTSATLTVKTSQAQFV GKLNRKEATEGTTVTLRCELTK EAPVEWKGTETLR
NGDKYSLKQDGAVCELQICSLLVADAGEYSCVCGQEKTSATLTVKALLVHFVRR LRSKEATEGDTTTLQCELS
KAAPVEWRKGTETLRDGD RYSLKQDGAVCELQIRSLTIADAGEYLCTCGQEKTSATLTVRGLPAKFIEDLRSQ
EATEGATAILRCELSKAAPVEWRK GSETLKDGD RYTLRQDGAVCELQIRGLAVVDGTGYSSLP TKFTEGLRNE
EATEGTMATLRCQMSKAAPVEWRK GSETLRDGD RYSLRQDGAMCELQIRGLTIEDSGEYTCVCGQEKTSATLS
VKALPPRFIEDLRSQEATEGTMATLRCQMSKAAPVEWRK GSETLGDGGRYSLRQNGAVCELQI HDLAVEDTGE
YSCVCGQEKTSATLNVKALPPKFTEGLKKEEATEGTMATLRCQMSKEATVEWRKGA KTLS DGGRYSLRQD G A M
CELQICGLAVEDAGEYSCVCGQEKTSATLSVKALPPRFIEDLRSQEATEGTMATLRCQMSKAAPVEWRK GSET
LRDGD RYSLRQDGAVCELQIRDLAVEDAGEYLCVCGQEKTSATLSVKALPPRFIEDLRSQEATEGTMATLRCQ
MSKAAPVEWRK GSKTLR DGD RYSLRQDGAMCELQICDLAVEDTGDYSCVCGQEKTSATLSVKAPQVVFQOPLQ
NLQAEEGSMASLRCELSVPNAAMVWSKGGLELQGDTRREARQQGCVAELLRLDLRREDAGEYSCTCGSQTTSA
TLMVTAAPVRFLRELQAQDVDEGATARLRCELSREAVSVEWRKGS LQ L F P C A K Y Q M V Q E G T T A E L L V H G V E Q E
DAGEYTC DAGHTQSIARLSVRAPKPKFKTDLQSTEQEAGGTARLCCQLSEAEPGTPVQWLKEGVELHVGSKYE
MRRQGAVCELLIHGLEAKDTGEYACL VGGQKTLASLRVKEPEVTIVRGLVDM EVQADE DVEFTCKV SQAGATD
VQWHLQGLPLQSN E V T E V A V L A D G C T H V L Q L K G V T L E D A G T V S F H V G L S S A Q L T V R V P E V T V L E P L K D V Q L
SEGQDAHFRCRLSRASGQEARWALGGVPLQCNEMNDITVEQGLTYLLTLHKVTLEDAGTITL T L S G C S S E A Q L
KVTA K N T V L R G L E N V D A L E G G E A L F E C Q L S Q P E V A A H T W L L D D E P V H T S E K V E V V Y F E N G L R H L L L L K N L K P Q
DSCRVTFLAGDVVTSAFLTVRGWRLEVLEPPHDASVKAGMQVRF TCILSEAVPVGEATWYINGAAIQPDDTDW
TVTTDGSHHALTLSNAQPQHAGEVTF AARDAVASARLSVLALPDPPEDAEVVGRSDHSVTL SWVAPMSDGGGG
LCGYRVEMKEASTGQWQLCHDLVPGPECVVDDLVP GKTYRFRVA AVGPAGAGEPVHLPQMVKIAPAPAPAPAP
APAPETRQAVVGEDICLELEVAADGGEV VWHKGT ERIQPGGHFEVL SRGQRQMLVIKGFRTEDQGEYRCGP IQ
GLPSSGAATFNVVMTSGSGDEVPAQPSLPPEAAQEGDLHLLWEALARKRRMSREPTLDSISELPEEDSRVQHL
RQEAETAPDLSEGYSTADELARTGEADLSHTSSDDESRAGT PSLV TYLKKAGGPGI S P L A S K H E A Q V T T S V K
PQKQEPVVP T C P P P G D L S A A D L M D P S L D K A A V K I Q A A F K G Y K V R K E M K Q Q E G P V F S R T F G D T E A Q V G D V L R L
ECVLATKTDMRACWLKDGIELTDGRHYHIDQLKDGTC SLV T G L A P T D S G R Y T C Q V S T K S G R V S H S A C V V V S G
TESEAESSSGELDDAFRRARRLHRLFRTKSPAELSEELF LSADEGPGEPEEPADWQTYREDEFVCIRFE
SLAEARQAVTCFRNM FATMGI GVEISLGEQGP RGVEMRIGKVAPTVTPAVPLAKTPGLQTSDAAPVFLTELQN
QDVQDGY PMSFDCVVTGQPVPSVRWFKDGKLEEDDH Y M I N E D Q Q G G H Q L I I T A V V P A D M G V Y R C L A E N S M G V
SSTKAELRVELTSTDYDTA ADATETSSYFSAQGYLSSREQEGTESDEGQLPQVLEELKDLQVAPGTRLAKFQL
KVKGY P A P K L Y W F K D G Q P L T T S D H I R M T D K K T L H T L E I V S V T R E D S G Q Y A A Y I S N A V G A A Y S S A R L L V R G P S E
PEEKPASDVHERLVPPRI LEKFTPKKVKRGS S I T F S V K V E G H P A P S V H W L K E E A E K G V L W I G P D T P G Y T M A S S
SKQHSVLVLLDVGRQH QGT Y T C I A T N P A G Q A L C E S A S L H I S G L A K E E E Q E R V K E A L I S S F L Q G T S Q A V S A Q M S E S
AGFADL RVSSQKSGESLVAEEAHSHLSLAEVGT EEF L Q K L T S Q I T E M V S A K I S Q A K L Q V P G G D S D E E T K T P S A S P
RHGRSRPSSSVQESSSEEDGSRGEIFDIYVVTADYLP LGAEQDAIILREGQYVEVLD SAHPLRWLVRTKPT
KSSPSRQGWVSPAYL DKRLKLSPEWGPTEAEPFGEAVSEDEYRTRLS SVIQELLSSEQAFVGLQFLES HHM
KHLERSPRVPAAVASQKTVIFRNVQDISHFHSSFLKELQCGCTDDDVAMCFIKNQEAFEKYLEFLVGRVQAES
VVVSTPVQEFYKKYAEETLSAKDPTQPPPPPLQHYLEQPVERVQKYQALLKELIRNKARNRQNCALLEQAYAV
VSALPQRAENKLVSLMENYPGTLEALGEP I R Q G H F I V W E G A P G A R M P W K G H N R H V F L F R N Y L V I C K P R R D S R



TDTFSYVFRNMMKLSSIDLNDQVEGDRAFEVWHEREEDSVRKYLLQARTVVIKNSWVKEICGIQQRLAQPVWR  
PPEFEEELADCTAELGETVKLACRVGTGPKPIVSWYKDGKPVVDPHILIEDPDGSCSTLILDLNLGTIDSGQY  
MCFASAAGNASTLGKILVQVPPRFVNVKVRATPFVEGEDAQITCTVEGAPYPQIRWYKDGTLAPGNRYRMLN  
EPRSGVLVLIQAASKEDLGHYECVLNRLGSTRGGGELYMQSPALRARDQHHREQIVAAVEVTEQETKVPKK  
TVII EETITTVVKS PRGRRQSPGKSPSRSPRRSASPRRPGLLAPERLYPPGTS PSRRLEVEQGRKAPVPALY  
VTEAEVHAPASQSQPKWLEVEETIEVRVKKTGSRGASPVREMTSRGEGILFTLPGGIPGRDPNANNSNKS SVY  
QEARTWGPVAVHVGEFFIFQVDSVGNVDWVAASPEPEQVRASQKEENTERQEGCSDGDENTFLMEEPQDSDL  
QGRDPKILTHNGRVLTLADLEDYVPOEGETFGCGDSTPSTPDEPPCEVSVLQREI SEPTVGGPVLNVGRPPG  
TGATPSFFRPGSQVHSPESVSLFLREAWSGPVSAAPWTSSFHTHVQSSVDGSHGSFKTEVSTQTVSFGAVGET  
VTLHIDPDGGEAPGPSQG\*

>rs244484851\_ENSMUSP00000158795\_c.594:G>C\_p.V199L  
ENSMUST00000238536.2|Obscn-210|ENSMUSG0000061462|-|chr11:g.59026607:C>G  
MDHSFSGAPRFLTRPKAFVSVGKDATLSCQIVGNPTPHVSWEKDRQVEAGARFRLAQDGDVYRLTILDLAL  
GDSGQYVCRARNAIGEFAAVGLRVDSEGTCAEQAPHLLRPTSIRVREGADATFRCRVGGSPPAVSWSKDG  
RRLGPPDAPHVRVEEHGESSALRIRSARPRDGGTYEVRAENPLGSASAAAALLVDSDAEVAGPPGTSTATLLA  
HLQORREAMRAEGIPSPPPGAGTRTCTVTEGKHARLSCFVTGEPKPEVWKKDGQLVTEGRRHVVEDEQENF  
VLKILFCQSDRGLYCTASNLVQGTYSSVLVVVREPTVPFKKRLQDLEVREKESATFQCEVAQAPATEAAWFK  
EETRLWASAKYDIEEGTERRLTVRNVSADDDAVYICETTEGSRVLAELSVQGNLTKLPRKTAVRTGDTAIF  
WVELAVPEGPVRWLRNQEEMVAGGRVAITAEGTCHTLTI FQCTLEDMGEVAFVSGGCRTTTQFCVSAPRRPPL  
YPPADPVVKAKTESSVTLWSAPPHGDRPVTIDGYVLEKRKLGAYAWSRCHEAGWLATTEFTITGVAAEGDFQ  
FRVSAINHFGQGPYLEFPGMTMLVPLAVKTPKAVEAVEGGEVTFVSDLTVASSGEWFLDGEALKASSIYVI  
RCDRTRHMLTIREV PARLHGAQLKFVANGIETS IQMVVRAALGLPSSKLPAAAAREVLAQLHEEAQLLAE LSD  
QAAAVTWLKDGRELSLGPKEYMQVSAGRRALLVRDVAQDDAGLYECVSRGSR TAYQLLVQDITDGYRDWGPAG  
PQKHMCKCAGAKIARYLGS SCYRFLQYDKGVWHWLEAALDTRQKGKTS SCSLHEKPKLVFAKQQAHSEVKA  
AGNSATLSCEVTQAQTEVTWFKDGKLLSSSSSKVRMEASGCSRRLVVQQAGKADAGEYSCEAGGQKLSFRLDVA  
EPKLVFAKQQAHSEVKAEGASATLSCEVAQAQTEVTWFKDGKLLSSSSSKVRMEASGCSRRLVVQQAGKAD  
GEYSCEAGGQKLSFRLDVAEPKLVFAKEQQARSEVKAEGASATLSCEVAQAQTEVTWFKDGKLLSSSSSKVRM  
EASGCSRRLVVQQAGKADAGEYSCEAGGQKLSFRLDVTEPKLVFAKEQQARSEVKAEGVNSATLSCEVAQAQ  
EVTWFKDGKLLSSSSSKVRMEASGCSRRLVVQQAGKADAGEYSCEAGGQKLSFRLDVAEPKLVFAKEQQARSEV  
KAEAGNSATLSCEVAQAQTEVTWFKDGKLLSSSSSKVRMEASGCSRRLVVQQAGKADAGEYSCEAGGQKLSFHL  
DVTEPKLVFAKEQQAHSEVKAEGASATLSCEVAQAQTEVTWFKDGKLLSSSSSKVRMEASGCSRRLVVQQAGK  
ADAGEYSCEAGGQKLSFRLDVAEPKLVFAKEQQARSEVKAEGASATLSCEVAQAQTEVTWFKDGKLLSSSSK  
VRVEASGCSRRLVVQQAGKADAGEYSCEAGGQKLSFRLDVAEPKLVFAKEQQANSEVKAEGASATLSCEVAQ  
AQTEVTWFKDGKLLSSSSSKVRVEASGCSRRLVVQQAGKADAGEYSCEAGGQKLSFRLDVAEPKLVFAKEQQAH  
SEVKAEGASATLSCEVAQAQTEVTWFKDGKLLSSSSSKVRVEASGCSRRLVVQQAGKADAGEYSCEAGGQKLS  
FRLDVAEPKLVFAKEQQAHSEVKAEGASATLSCEVAQAQTEVTWFKDGKLLSSSSSKVRVEASGCSRRLVVQQ  
AGKADAGEYSCEAGGQKLSFRLDVAEPKLVFAKEQQAHSEVKAEGASATLSCEVAQAQTEVTWFKDGKLLSS  
SSKVRVEASGCSRRLVVQQAGKADAGEYSCEAGGQKLFRLDVAEPKLVFAKEQQAHSEVKAEGASATLSCE  
VAQAQTEVTWFKDGKLLSSSSSKVRVEASGCSRRLVVQQAGKADAGEYSCEAGGQKLSFRLDVAEPKLVFAKEQ  
QAHSEVKAEGASATLSCEVAQAQTEVTWFKDGKLLSSSSSKVRVEASGCSRRLVVQQVQKADAGEYSCEARGQ  
KLSFRLDVADTRLMFAKEQQARTEVKAEAGNSATLSCEVAQAQTEVTWFKDGKLLSSSSSKVRVEASGCSRRLV  
VQQAGKADAGEYSCEAGGQKLSFRLDVAEAE SQIPERPSRREPLVVKEHETIILTATIAAPSVAAVTWLKDG  
EIRRSKRHEATSLGDTHTLTVRGAQVLD SAIYSCRVGKEGQDFPVQVEEVAAKFSKPLEPVEGELGGTVMLVC  
ELSPQAEVWRCNGTQLRPGKRFQMTSEGPRRTLTVSGLREDDAEYVCE SRDDRTSARLTVKVPVVKFTS  
GLSAMVAEEGQEA TFQCVVSPSDAGVTWYKDMQLPSEKFMVVEGASRSLTILGLTLEDAGQVTVAEAGAS  
SSAALRVREAPVLFKFKLEPQTVEERTSVTLEVELTRPWPEVKWTRNAAVLTPSENVEIRAEGARHCLVLRV  
GFADRGF FGCETPDDKTQAKLNVEMRQVRLVLRGLQEVEAKEQGTASMDVELSHAEVEG SWTRDGLRLQPGPKC  
HLAVQGPHVHILTL SALQPQDSGLVAFRAEGVHTSARLIVTEL PVSFTRVLQDVVATQKEKVTLECELSRPVDV  
RWLKDGVLELRAGKAIGIVAQGTCSLVIYRCETGDQGVYCDALDAQTSASLRVQGRTYTLIFRVLAE DAGE  
VKFVAENAESRAHLRVKELPVTLRPLRDKIAMEKHGVLQCVSRASAQVRWFKGGVQLQSGPKYEVVSDGL  
YRKLVIN DVQPEDEDTYTC DAGNVKTS AQFFVVEEQSITIVRGLKDMTVMPEPAPAWFECETSIPSVRPPKWL  
KTVLQAGGNVGLQDGTVHRLTLHKTCSTMTGPVHFTIGKSRSSAQLVVDI PVVLRPLEPKAGRELQSVVL  
SCDFRPAPKAVEQVYKDDTPLSPSEKFKMALENGTMAELRILRLTPADAGVYRCQAGSAQSSAEVTVAREVTVI  
QPLQDAEAMAEGRVCSCELSHKDEDI EWSLNGTPLYNDSFHEI SHEGCLHTLVLKSVRQADTGTVCATSPKV  
SVSARLVVKGKPVVFLKALDDVSAEERGTTLTQCEVSDPEARVVWRKDGVELGSPDKYDFLHKAGARGLTVHD  
LSHEDAGLYTCQVGSKETQSKVSVHDLHVGITKRLKTVLEVLEGE SCSFECVLSHESPSDPAVWTVGGKTVGGS  
GHFHAVRQGRKYTLTVKDAALSDAGEVVSVLGLT SKASLIIRERPVDITKPLEDQRTTLGEDVMLSCELSRA  
GTSVRWLKDGKAIRKSQYD LLS EGTAVLVVRKASLKD SGEYTCETEASKSTAKLCVEEKANRFT EELADLQ

VEEKGRAVFTCKTEHPASVVTWRKGLLELRASGKHVPSQEGTLTKLTINALERTDSDTYTCDIGQARTQARLL  
VHGQKVRVIEDLEDTAVQEGSSAKFCRIAPADYGPVHWFLLDKTPLHSNELNEITVQPGGYHVLTLRQLALKD  
SGTVYFEAGDQRTSAALRVTEKPSIFSRPLTDVTVTEGEDTLVCEFTTVDSVVRWTKDGKTLRPSARCQLSH  
EGCQAQLLITATTPQDGGRYKCEIGGASSSSIVRVHALPVRFRESLKDVEVPEGKAATLRCVLSVAAPVEWR  
HGDDVLKSSNKYSLRQEGAVLELVIRDLQPQDSGQYSCSFGDQTSATLTVKTSQAQFVQKLRNKEATEGTTV  
TLRCELTKAEPVEWKKGTETLRNGDKYSLKQDGAVCELQICSLLVADAGEYSCVCGQEKTSATLTVKALLVHF  
VRLRSKEATEGDTTTLQCELSKAAPVEWRKGTETLRDGDYSLKQDGAVCELQIRSLTIADAGEYLCTCGQE  
KTSATLTVRALPAKFKDSLKNEEATEGTTATLSCELSKAAPVTWKKGPKTLQSGDKYVLRQDGAVCGLQIHGL  
TMADAGEYSCVCGQEKTSATLTVRGLPAKFIEDLRSQEATEGATAILRCELSKAAPVEWRKSETLRDGDYR  
LRQDGAVCELQIRGLAVVDGTGYSSLPKFTTEGLRNEEATEGTMATLRCQMSKAAPVEWRKSETLRDGDYR  
LRQDGAMCELQIRGLTIEDSGEYTCVCGQEKTSATLSVKALPSRFIEDLRSQEATEGTMATLRCQMSKAPVE  
WKKGSETLRDGGYSLRQDGPVCELQICDLAVEDAGEYSCVCGQEKTSATLSIKALPPRFIEDLRSQEATEGT  
MATLRCQMSKAAPVEWRKSETLRDGGYSLRQNGAVCELQIHDLAVEDTGEYSCVCGQEKTSATLNVKALPP  
RFIEDLRSQEATEGTMATLRCQMSKAAPVEWRKSETLRDGGYSLRQDGAVCELQIHDLVEDAGQYSCVCG  
QEKTSAVLTVDALPPKFTTEGLKKEEATEGTMVTLRCQMSKEATVEWRKGAKTSLDGGYSLRQDGAMCELQIC  
GLAVEDAGEYSCVCGQEKTSATLSVKALPPRFIEDLRSQEATEGTMATLRCQMSKAAPVEWRKSETLRDGDYR  
YSLRQDGAVCELQIRDLAVEDAGEYLCVCGQEKTSATLSVKALPPRFIEDLRSQEATEGTMATLRCQMSKAAP  
VEWRKSKTLRDGDYSLRQDGAMCELQICDLAVEDTGDYSCVCGQEKTSATLSVKALPPRFIEDLRSQEARE  
GTVATLRCRMSKAAPVEWRKSETLRDGDYSLRQEGNLCELQIRDLAVEDTEEYSCVCGQEKTSATLSVKAL  
PAKFIEDLRSQEAPESSTVTLRCKLSKASVWKKGSETLRNGARYSLRQDGAVCELEIRDLTVEDETEYSCT  
CGQERTSATLSIMAPQVVFQQLQNLQAEEGSMASLRCELSVPNAAMVWSKGGLELQGDTRREARQQGCVAEL  
LLRDLRREDAGEYSCGSGQTSATLMVTAAPVRFLRELQAQDVDEGATARLRCELSREAVSVEWRKGLQLF  
PCAKYQMVQEGTTAELLVHGVEQEDAGEYTCDAHTQSIARLSVRAPKPKFKTDLQSTEQEAGGTARLCCQLS  
EAEPTGTPVQWLKEGVELHVGSKYEMRRQGAVALLEHGLEAKDTGEYACLVGGQKTLASLRVKEPEVTIVRGL  
VDMEVQADEVEFTCKVQAGATDVQWHLQGLPLQSNVTEVAVLADGCTHVLQKGVTLLEDAGTVSFHVGGL  
SSSAQLTVRVEFTVLEPLKDVQLSEGQDAHFRCRLSRASGQEARWALGGVPLQCNEMNDITVEQGTLYLLTL  
HKVTLEDAGTITLQVGSSEQAQLKVTAKNTVLRLENVDALLEGGEALFECQLSQVEAHTWLLDEPHTS  
EKVEVVFENGLRHLLLLKNLKPQDSCRVTFLAGDVVTSFAFLTVRGRLEVLPEPHDASVKAGMQVRFCTILS  
EAVPVGEATWYINGAAIQPDDTDWTVTTDGSHALTLSNAQPQHAGEVTFAAARDAVASARLSVLALPDPEDA  
EAVGRSDHSVTLVSWVAPMSDGGGGLCGYRVMKEASTGQWQLCHDLVPGPECVDDLVPGKTYRFRVAAVGPA  
GAGEPVHLPQMVKIAPAPAPAPAPAPAPAPETRQAVVGEDICLELEVAADGGEVWVKGTERIQPGHFVLS  
RGQRQMLVIKGFRTEDQGEYRCGPIQGLPSSGAATFNVMVMTSGSGDEVPAQPSLPPEAAQEGDLHLLWEALAR  
KRRMSREPTLDSISELPEEDSRVQHLRQEAEEETAPDLSEGYSTADELARTGEADLSHTSSDDESAGTPSLVT  
YLKAGGPGISPLASKHEAQVTTSVKPKQKQEPVPTCPGGLSAADLMDPSLDKAAVKIQAAFKGYKVRKE  
MKQQEGPVFSRTFGDTEAQVGDVLRLECVLATKTDMRACWLKDGIELTDGRHYHIDQLKDGTCSSLLVTLGLAPT  
DSGRYTCQVSTKSGRVSHSACVVVSGTESEAESSSGGELDDAFRAARRLHRLFRTKSPAELSEELFLSAD  
GPEPEEPADWQTYREDENFVCIRFESLAEARQAVTCFRNMFATMGIGVEISLGEQGRGVEMRIGKVAPTVT  
PAVPLAKTPGLQTSDAAPVFLTELQNDVQDGYPMSFDCVVTGQPVPSVRWFKDGKLEEDDHYMINEDQGG  
HQLIITAVVPADMGVYRCLAENSMGVSSTKAELRVELTSTDYDTAADATETSSYFSAQGYLSSREQEGTESDE  
GQLPQVLEELKDLQVAPGTRLAKFQLKVKGYPAKLYWFKDGGPLTSDHIRMTDKKTLHTLEIVSVTREDSG  
QYAAYSNAVGAAYSSARLLVRGPSEPEEKPASDVHERLVPPRILEKFTPKKVKRGSSITFSVKVEGHPAPSV  
HWLKEEAKEKGLVWIGPDTPGYTMASSSKQHSLVLLDVGRQHGGTYTCIATNPAGQALCSASLHISGLAKEEEQ  
ERVKEALISSFLOGTSQAVSAQMSSEAGFADLVGQSKGESLVAEEAHSLSLAEVGTTEFLQKLTSTITEMVS  
AKISQAKLQVPGGDSDEETKTPSASPRHGRSRPSSSVQESSSESEDGDSRGEIFDIYVVTADYLPAGAEQDAI  
ILREGQYVEVLDLSDAHLRVLVTRKPTKSSPSRQGWVSPAYLDKRLKLSPEWGPTEAPEFGEAVSEDEYRTRL  
SSVIQELLSSQAFVQELQFLESHHMKHLERSPRVPAAVASQKTVIFRNVQDISHFHSSFLKELQCCGTDV  
AMCFIKNQEAFAKEYLEFLVGRVQAESVVVSTPVQEFYKKAEEETLSAKDPTQPPPPPLQHYLEQPVERVQKYQ  
ALLKELIRNKARNRQNCALLEQAYAVVSALPQRAENKLVSLMENYPGTLEALGEPHQGHFIVWEGAPGARM  
PWKGHNHRVFLFRNYLVICKPRRDSRTDFTSYVFRNMMKLSSIDLNDQVEGDDRAFEVWHEREDSVRKYLLQA  
RTVILKNSWVKEICGIQQLAQPVWRPPEFEEELADCTAELGETVKLACRVTGTPKPIVSWYKDGKPEVDPH  
HILIEDPDGSCTLILDNLTGIDSGQYMCFAASAAGNASTLGKILVQVPPRFVNVKVRATPFVEGEDAQITCTVE  
GAPYPQIRWYKDGTLAPGNRYRMLNEPRSGVLVLIQAASKEDLGHYECELVNLGSTRGGGELYMQSPALR  
ARDQHHREQIVAAVEDTVEGSAHSAQDQADQAAVSLWRLLGSEALGPSPGDLPNTRQSEPPAFEEAASQIP  
GAASGTPEVSPQPGHTKGLEQETTSSGSQGWTVPIRVEGTAWPGAGTQQLLDVHVSQVIMETTQRTYVQAPDT  
GVTRAPMSQVTIEDVQVQVGDMAQFDAVIEGHPPPIVTVYKGSTQLTSSARLSQRQDGTYSVLVTDVAPHDA  
GVYTCVANNAGGQVLCKAELLVHGGDKLDAENQVYRRKLHSFYDVQEEIGRGVFGFVKRVQHKGNKMFCAAKF  
IPLRSKTRAQAYQERDILATLGHPLVTGLLDQFETRKTLLILILELCSSEELLDRLFKKGVVTEAEVKVYIQQL  
VEGLHYLHSHGILHLDIKPPNIMVHPAREDIKICDFGFAQKITPSEPQYSKYGSPEFVSPEIIEQNPFVSEGS

DIWAMGVI SYLSLTCSSPFAGESDRATLLNVLEGRVSWSSPTAAHLSSEDAKDFIKATLQRTPRARPSTSQCLA  
HPWFLKSMPEAAEHFINTKQLKFLARSRWQRSLMSYKSI LVMRSIPELLQGPPDPSPLGVARHLRGEASGAS  
SSSSSSDNELAPFARAKSLPPSPVTHSPLLHPRGFLRPSASLPEETEASMPPTADA AVPASPOSAGPPASPGCV  
PRHSVSISSLFYQQAGEGAERGNKTS GAKRHPARRRHLLKGGYIARALPGLREPLMEYSLLEEEAAREEQASLM  
TKTPSFETALRLPSSSVREVPGRSHSLDNPPVTTGPSPEACKEQLLEFPSTGLTHETTAKDRGHKEGFLQESV  
FFPPMSGDSRPGKQEGSSQDSRCRGPASSCHSELGSGSQEGCGPPSSQSLGSLPPQSLKKEKELSTSCGPLFSEQ  
PQAAPFPTQVSPLLGSEKEPQDGSLESGPVPVPPSSSPGSASQVDASLDTEGLSEAGDTCDFTPPPQRPQEQAT  
TRKFSLESRGGYAGVAGYGTFAFGGDAGGMLGQGPLWARMAWAVSQSSEEQDEAATESPQPLES LGPIAEASG  
VPLRTSPSLTPWEEVEQVSLVQIRDLSGDAEAADTISLDISEVDPAYLNLSDLYDIKYLPPFEFMI FRRVPKPI  
EQPESPGSETEAGQGLADFL EEAAWPWPGEGLGLRAGLEIT EEP EEPGDLEALLGEAAVGRKRKWSPSRGLFQF  
PGRCLSGEEPVELGLRQRVKASMAHISRILKGRPEGPEREPPRKKAGLASFRLSGLKGRDQELSDEAVVLGQ  
SVTLACQVLAQPTAQATWSKDGVLLESSGHLIISSTLKNFQLLTI LVVKEEDLGTYTCCVSNPLGTA VTTGVL  
RKAERPSSSPRPEVGELYKDAVLLVWKPVEESCGPVTYIVQCCIEGGSWTTLASDISDCCYLTGKLSRGGMYIF  
RTACVSKAGMGPYSSPSEQVLLGGPNHLASEEESRRRPAQLLPSTKTFAFQMQIRRRGRFSVVQRCREKASGR  
ALAAKIVPYQPEDKTA VLREYEAALKRHLHPLHAQLHAAYLSPRHLVLI LELCSGPELLPSLAERESYSESDVK  
DYLWQMLSATQYLHAQHILHLDLRSENMMVTEYNLLKVIDLGN AQSLDQEKVPAPENFKDYLETMAPELLEGO  
GAVPQTDIWAIGVTA FIMLSGEY PESSSEGRDLQGLRKLIRLSRCYAGLSGGAVAFLOSSLCAQPWGRPCA  
STCLQCGWLTEEGTGSRPTVTFPTVRLRAFVREREREKRRALLYKHNLAQVR\*  
>rs244484851\_ENSMUSP00000038264\_c.594:G>C\_p.V199L  
ENSMUST00000047441.14|Obscn-202|ENSMUSG00000061462|-|chr11:g.59026607:C>G  
MDHSFSGAPRFLTRPKAFVSVGKDATLSCQIVGNPTPHVSWEKDRQVEAGARFRLAQDGDVYRLTILDLAL  
GDSGQYVCRARNAIGEAFAAVGLRVDSEGTCAEQAPHLLRPTSIRVREGADATFRCRVGGSQP PAVSWSKDG  
RRLGPPDAPHVRVEEHGESSALRIRSARPRDGGTYEVRAENPLGSASAAAALLVDSDAEVAGPPGTSTATLLA  
HLQQRRREAMRAEGIPPSPPGAGTRTCTVTEGKHARLSCFVTGEPKPEPVVKKDQGLVTEGRRHVVEDEQENF  
VLKILFCCKQSDRGLYCTASNLVGGTYSSVLVVVREPTVPFKKRLQDLEVREKESATFQCEVAQ PATEAAWFK  
EETRLWASAKYDIEEETERRLTVRNVSADDDAVYICETTEGSRVAELSVQGNLPRKTA VRTGDTAIF  
WVELAVPEGPVRWLRNQEEMVAGGRVAITAEAGTHTLTI FQCTLEDMGEVAFVSGGCTTTTQFCVSA PRRRPPL  
YPPADPVVKAKTESSVTL SWSAPPHGDRPVITIDGYVLEKRKLGAYAWSRCHEAGWLATTEFTITGVAAEGDFQ  
FRVSAINHFGQGPYLEFPGMTMLVPLAVKTPKAVEAVEGGEVTFVSDLTVASSGEWFLDGEALKASSIYVI  
RCDRTRHMLTIREV PARLHGAQLKFVANGIETS IQMVVRAALGLPSSKLPAAAAREVLAQLHEEAQLLAE LSD  
QAAA VTWLKDGRELSLGPYEMQVSAGRRALLVRDVAQDDAGLYECVSRGSR TAYQLLVQDITDGYRDWGPAG  
PQKHMCKCAGAKIARYLGSSCYRFLQYDKGVWHLEAALDTRQKGKTS SCSLHEKPKLVFAKQQAHSEVKAE  
AGASATLSCEVAQAQTEVTWFKDGKLLSSSSKVRMEASGCSRRLVVQQAGKADAGEYSCEAGGQKLSFRLDVA  
EPKMFVFAKEQQARSEVKA EAGASATLSCEVAQAQTEVTWFKDGKLLSSSSKVRMEASGCSRRLVVQQAGKAD  
GEYSCEAGGQKLSFRLDVTEPKLVFAKEQQARSEVKA EAGASATLSCEVAQAQTEVTWFKDGKLLSSSSKVR  
EASGCSRRLVVQQAGKADAGEYSCEAGGQKLSFRLDVAEPKLVFAKEQQARSEVKA EAGASATLSCEVAQAQ  
EVTWFKDGKLLSSSSKVRMEASGCSRRLVVQQAGKADAGEYSCEAGGQKLSFHLVDVTEPKLVFAKEQQAHSEV  
KAEAGASATLSCEVAQAQTEVTWFKDGKLLSSSSKVRMEASGCSRRLVVQQAGKADAGEYSCEAGGQKLSFR  
DVAEPKLVFAKEQQARSEVKA EAGASATLSCEVAQAQTEVTWFKDGKLLSSSSKVRMEASGCSRRLVVQQAG  
ADAGEYSCEAGGQKLSFRLDVAEPKLVFAKEQQANSEVKA EAGASATLSCEVAQAQTEVTWFKDGKLLSSSSK  
VRVEASGCSRRLVVQQAGKADAGEYSCEAGGQKLSFRLDVAEPKLVFAKEQQAHSEVKA EAGASATLSCEVAQ  
AQTEVTWFKDGKLLSSSSKVRMEASGCSRRLVVQQAGKADAGEYSCEAGGQKLSFRLDVAEPKLVFAKEQQAH  
SEVKA EAGASATLSCEVAQAQTEVTWFKDGKLLSSSSKVRMEASGCSRRLVVQQAGKADAGEYSCEAGGQKLS  
FRLDVAEPKLVFAKEQQAHSEVKA EAGASATLSCEVAQAQTEVTWFKDGKLLSSSSKVRMEASGCSRRLVVQQ  
AGKADAGEYSCEAGGQKLSFRLDVAEPKLVFAKEQQAHSEVKA EAGASATLSCEVAQAQTEVTWFKDGKLLSS  
SSKVRMEASGCSRRLVVQQV GKADAGEYSCEARGQKLSFRLDVAEAEESQI PERPSRREPLVVEKHETIILTAT  
IAAPSVAAVTWLKDGEIRRSKRHEATSLGDHTLTVRGAQVLD SAIYSCRVGKEGQDFPVQVEEVA AKFSKP  
LEPVEGELGGTVMLVCELSPEQAEVVWRCGNTQLRPGKRFQMTSEGPRRTLTVSGLREDDAEYVCE SRDDRT  
SARLTVKVPRVVKFTSGLSAMVAEEGQ EATFQCVVSPSDAGVTWYKDGMLQ PSEKFMVME SGASRLTILGL  
TLEDAGQVTVEAEGASSAALRVREAPVLFKKKLEPQTVEERTSVTLEVELTRPWPEVKWTRNAAVLTPSENV  
EIRAEGARHCLVLRVGFADRGFFGCETPDDKTQAKLNVEMRQVRLVVRGLQEVEAKEQGTASMDVELSHAEVE  
GSWTRDGLRLQPGPKCHLAVQGPVHILTL SALQPQDSGLVAFRAEGVHTSARLIVTEL PVSFTRVLQDVVATQ  
KEKVTLECELSRPPVDVRLKDGVELRAGKAI GIVAQGTCSRSLVIYRCETGDQGVYVCDALDAQTSASLRVQGR  
TYTLIFRRVLAEDAGEVLFVAENAESRAHLRDKELPVTLLRPLRDKIAMEKHRGVLEKQVMSRASAQVRVFKGG  
VELQSGPKYEVVSDGLYRKLVIN DVQPEDEDTYTCDAGNVKTS AQFFVEEQSITIVRGLKDMTVM EPAPAWFE  
CETSIPSVRPPKWL LGKTVLQAGGNVLEQDGT VHRLTLHKTCSTMTGPVHFTIGKSRSSAQLVVS DIPVVL  
RPLEPKAGRELQSVVLSCDFRPAPKAVQWYKDDTPLSPSEKFKMALEGO MAELRILRLTPADAGVYRCQAGSA  
QSSAEVTV EAREVTVIQPLQDAEAMEEGRVCFSCELSHKDEDIEWSLNGTPLYNDSFHEISHEGCLHTLVLSK

VRQADTGTVCATSPKVSVSARLVVKGKPVVFLKALDDVSAEERGTTLTQCEVSDPEARVVWRKDGVELGSPDK
YDFLHKAGARGLTVHDLSDHEDAGLYTCQVGSKETQSKVSVHDLHVGITKRLKTVEVLEGESECSFECVLSHESP
SDPAVWTVGGKTVGGSGHFHAVRQGRKYTLTVKDAALSDAGEVVFVSVLGLTSKASLIIRERPVDITKPLEDQR
TTLGEDVMLSCELSRAGTSVRWLKDGKAIRKSQKYDLLSEGTRAVLVVRKASLKDSGEYTCETEASKSTAKLC
VEEKANRFTEELADLQVEEKGRAVFTCKTEHPASVVTWRKGLLELRASGKHVPSQEGTLTKLTINALERTDSD
TYTCDIGQARTQARLLVHGQKVRVIEDLEDTAVQEGSSAKFCCRIPADYGPVHWFLLDKTPLHSNELNEITVQ
PGGYHVLTLRQLALKDSGTVYFEAGDQRTSAALRVTEKPSIFSRPLTDVTVTEGEDTLTV CETTTVDSSVRWT
KDGKTLRPSARCQLSHEGCQAQLLI TATT PQDGGRYKCEIGGASSSSIVRVHALPVRFRFRESLKDVEVPEGKAA
TLRCVLSVVAAPVEWRHGDDVLSKNKYSLRQEGAVLELVIRDLQPQDSGQYSCSFGDQTTSATLTVKTSQAQ
FVGKLRNKEATEGTTVTLRCELTK EAPVEWKGTETLRNGDKYSLKQDGAVCELQICSLLVADAGEYSCVCGQ
EKTSATLTVKALLVHFVRRLSKEATEGDTTTLQCELSKAAPVEWRKGTETLRDGDYSLKQDGAVCELQIRS
LTADAGEYLCTCGQEKTSATLTVRALPAKFKDSLKNEEATEGTTATLSCELSKAAPVTWKKGPKTLQSGDKY
VLRQDGAVCGLQIHGLTMADAGEYSCVCGQEKTSATLTVRGLPAKFIEDLRSQEATEGATAILRCELSKAAPV
EWRKGSSETLKDGDYTLRQDGAVCELQIRGLAVVDTGTYSLPTKFTTEGLRNEEATEGTMATLRCQMSKAAPV
EWRKGSSETLRDGDYSLRQDGAMCELQIRGLTIEDSGEYTCVCGQEKTSATLSVKALPPRFIEDLRSQEATEG
TMATLRCQMSKAAPVEWRKGSSETLGDGGYSLRQNGAVCELQIHDLAVEDTGEYSCVCGQEKTSATLNVKALP
PRFIEDLRSQEATEGTMATLRCQMSKAAPVEWRKGSSETLRDGGYSLRQDGAVCELQIHDLVEDAGYSCVC
GQEKTSAVLTVDALPPKFTTEGLKKEEATEGTMVTLRQMSKEATVEWRKGAKTLS DGGYSLRQDGAMCELQI
CGLAVEDAGEYSCVCGQEKTSATLSVKALPPRFIEDLRSQEATEGTMATLRCQMSKAAPVEWRKGSKTLRDGD
RYSLRQDGAMCELQICDLAVEDTGDYSCVCGQEKTSATLSVKAPQVVFQQLQNLQAEEGSMASLRCELSVFN
AAMVWSKGGLELQGDTRREARQQGCVAELLLRDLRREDAGEYSC TCGSQTTSATLMVTAAPVRFRLRQAQDV
DEGATARLRCELSREAVSVEWRKGS LQLFPCAKYQMVQEGTTAELLVHGVEQEDAGEYTC DAGHTQS IARLSV
RAPKPKFKTDLQSTEQEAGGTARLCCQLSEAEPTPVQWLKEGVELHVGSKYEMRRQGAVCELLIHGLEAKDT
GEYACLVGQKTLASLRVKEPEVTIVRGLVDMEVQADEDEVEFTCKVSQAGATDVQWHLQGLPLQSNVTEVAV
LADGCTHVLQKGVTLLEDAGTVSFHVGGLSSSAQLTVRVPEVTVLEPLKDVQLSEGQDAHFRCLSRASGQEA
RWALGGVPLQCNEMNDITVEQGTLYLLTLHKVTLLEDAGTI TLQVGCSSSEAQLKVTAKNTVLRGLENVDAGE
GEALFECQLSQPEVAANTWLLDDEPVHTSEKVEVYFENGLRHLLLLKLNKLPQDSCRVTFLAGDVVTSFAFLTV
RALPDPPEDAEVVGRSDHSVTLVSWAPMSDGGGGLCGYRVMKEASTGQWQLCHDLVPGPECVDDLVPGKTY
RFRVAAVGPAGAGEPVHLPQMVKIAPAPAPAPAPAPAPAPETRQAVVGEDICLELEVAADGGVEVWHKGTERRI
QPGGHFEVLSRGRQMLVIKGFRTEDQGEYRCGPIQGLPSSGAATFNVMVMTSGSGDEVPAQPSLPPEAAQEGD
LHLLWEALARKRRMSREPTLDSISELPEEDSRVQHLRQEAEEETAPDLSEGYSTADELARTGEADLSHTSSDDE
SRAGTPSLVTYLKKAGGPGISPLASKHEAQVTTSVKPKQKQEPVVPTCP PPGDL SAADLMDPSLDKAAVKIQA
AFKGYKVRKEMKQOEGPVFSRTFGDTEAQVGDVLRLECVLATKTKDMRACWLKDGIELTDGRHYHIDQLKDGTC
SLLVTGLAPTDSGRYTCQVSTKSGRVSHSACVVVSGTESEAESSSGGELDDAFRRAARLRHLRFRTKSPAELS
EELFLSADEGPEPEEPADWQTYREDENFVCIRFESLAEARQAVTCFRNMFMATMIGVEISLGEQGRGVEM
RIGKVAPTPTPAVPLAKT PGLQTS DAAPVFLTELQNDVQDGYPMSFDCVVTGQPVGSVRWFKDGKLEEDDH
YMINEDQQGGHQLIITAVVPADMGVYRCLAENSMGVSSTKAELRVELTSTDYDTAADATETSSYFSAQGYLSS
REQEGTESDEGQLPQVLEELKDLQVAPGTRLAKFQLKVKGYPAKLYWFKDGQPLTSDHIRMTDKKTLHTLE
IVSVTREDSGQYAAIYI SNAVGAAYSSARLLVVRGPEPEEKPASDVHERLVPPRILEKFTPKKVKRGSITFSV
KVEGHPAPSVHHLKEEAKEGVLWIGPDTPGYTMASSSKQHSVLVLDVGRQHOGTYTCIATNPAGQALCSASLH
ISGLAKEEEEQERVKEALISSFLQGTSAQVSAQMSE SAGFADLVGQSKGESLVAAEEAHSHLSLAEVGT EEF LQK
LTSQITEMVSAKISQAKLQVPGGDSDEETKTPSASPRHGRSRPSSSVQESSSESEDGDSRGEIFDIYVVTADY
LPLGAEQDAIILREGQYVEVLDSAHPLRWLVRTKPTKSSPSRQGWVSPAYLDRKRLKLSPEWGPTEAPEFPGEA
VSEDEYRTRLSSVIQELLSSEQAFVGELOFLESHHMKHLERSPRVPAAVASQKTVI FRNVQDISHFHSSFLKE
LQCGCTDDDDVAMCFIKNQEA FEKYLEFLVGRVQAESVVVSTPVQEFYKKYAEETLSAKDPTQPPPPPLQHYLE
QPVERVQKYQALLKELIRNKARNRQNCALLEQAYAVVSALPQRAENKLVSLMENYPGTLEALGEP IRQGHFI
VWEGAPGARMPWKGNHRHVF LFRNYLVICKPRRDSRTDTFSYVFRNMMKLSSIDLNDQVEGDDRAFEVWHERE
DSVRKYLQARTVI IKNSWVKEICGIQORLAQPVWRPPEFEELADCTAELGETVKLACRVTGTPKPIVSWYK
DGKPVVEVDPHHILIEDPDGSCTLILDNLTGIDSGQYMCFAASAAGNASTLGKILVQVPPRFVNVKVRATPFVEG
EDAQITCTVEGAPYPQIRWYKDGTL LAPGNRYRMLNEPRSGVLVVIQAASKEDLGHYECELVNLRGSTRGGG
ELYMQSPALRARDQHHREQIVAAVEGAPSMQVTIEDVQVQVGDMAQF DAVIEGHPPP IVTWYKGTQLTSSAR
LSQRQDGTYSVLVTDVAPHDAGVYTCVANNAGGQVLCKAELLVHGGDKLDAENQVYRRKLHSFYDVQEEIGR
GVFGFVKRVVQHKGNKMFCAAKFIPLRSKTRAQAYQERDILATLGHPLVVTGLLDQFETRKTLLIILELCSSEEL
LDRLFKKGVVVHTEAKMVKVYIQQLVEGLHYLHSHGILHLDIKPPNIMVHPAREDIKICDFGFAQKIPSEFPQYS
KYGSPPEFVPEIIEQN PVSEGSDIWAMGVISYLSLTCSSPFAGESDRATLLNVLEGRVSWSSPTAAHLSYDAK
DFIKATLQRTPRARPSTSQC LAHPWFLKSMPAAEAAHFINTKQLKFL LARSRWQRSLMSYKSI LVMRSIPPELLQ
GPPDPSLGVARHLRGEASGASSSSSSSDNELAPFARAKSLPPSPVTHSPLLHPRGFLRPSASLP EETEASMP
TADA AVPAS PQSAGPPASPGCVPRHSVISSLFYQQAGEGAERGNKTS GAKRHPARRRHLLKGGYIARALPGLR

EPLMEYSLLEEEAAREEQASLMTKTPSFETALRLPSSSVREVPGRSHSLDNPPVTTGSPPEACKEQLLFPST  
GLTHETAKDRGHKEGFLQESVFPFPPMSGDSRPGKQEGSSQDSCRGKPASSCHSELGSGSQEGCGPPSSQSLG  
SLPPQSLKKELSTSCGPLFSEQPQAAPFPTQVSPLLGSEKEPQDGLSEGPVVPVSSSPGSASQVDAASLDTEG  
LSEAGDTCDFTPPPQRPQEQATTRKFSLESRRGGYAGVAGYGTFAFGDAGGMLGQGPLWARMWAVSQSSEEQ  
DEAATESPQPLESGLPIAEASGVPLRTSPSLTPWEEVEQVSLVQIRDLSGDAAEAADTISLDISEVDPAYLNLS  
DLYDIKYLFPFEMIFRRVPKPIEQPESPGSETEAGQGLADFLLEEAAWPWPGEGLGLRAGLEITEEPEEPGDLEA  
LLGEAAVGRKRKWSPSRGLFQFPGRCLSGEEPVELGLRQVRKASMAHISRILKGRPEGPEREGPPRKKAGLAS  
FRLSGLKGRDQELSDEAVVLGQSVTLACQVLAQPTAQATWSKDGVLLESSGHLLISSTLKNFQLLTI LVVKEE  
DLGTYTCCVSNPLGTAVTGTGLRKAERPSSSPRPEVVELYKDAVLLVWKPVEASCGPVYIVQCCIEGGSWTTL  
ASDISDCCYLTKLSRGGMYIFRTACVSKAGMPYSSPSEQVLLGGPNHLASEEESSRGRPAQLLPSTKTFAF  
QMQIRRGRFSVVRQCREKASGRALAAKIVPYQPEDKTAVREYEALKRLHHPHLAQLHAAYLSPRHLVLI LEL  
CSGPELLPSLAERESYSESDVKDYLWQMLSATQYLHAQHILHLDRSENMMVTEYNLLKVIDLQNAQSLDQEK  
VPAPENFKDYLETMAPELLEGQAVPQTDIWAIGVTAIFIMLSGEY PESSSETRDLQKGLRKLIRLSRCYAGL  
SGGAVAFLOSSLCAQPWGRPCASTCLQCGWLTEEGPTGSRPTPVTFPTVRLRAFVREKRRRALLYKKNHQAQ  
VR\*

>rs244484851\_ENSMUSP00000049737\_c.594:G>C\_p.V199L

ENSMUST00000052872.15|Obscn-203|ENSMUSG00000061462|-|chr11:g.59026607:C>G  
MDHSFSGAPRFLTRPKAFVSVGKDATLSCQIVGNPTPHVSWEKDRQPVEAGARFRLAQDGDVYRLTILDLAL  
GDSGQYVCRARNAIGEAFAAVGLRVDSEGTCAEQAPHFLLRPTSIRVREGADATFRCRVGGSPQPAVSWSKDG  
RRLGPPDAPHVRVEEHGESSALRIRSARPRDGGTYEVRAENPLGSASAAAALLVDSDAEVAGPPGTSTATLLA  
HLQORREAMRAEGIPPSPPGAGTRTCTVTEGKHARLSCFVTGEPKPEVWKKDGLVTEGRRHVVEDEQENF  
VLKILFCKQSDRGLYTCTASNLVGQTYSSVLVVVREPTVPFKKRLQDLEVREKESATFQCEVAQPAEAWFK  
EETRLWASAKYDIEEGETERRLTVRNVSADDDAVYICETTEGSRVAELSVQGNLTKLPRKTAVRTGDTAIF  
WVELAVPEGPVRLRNQEEVAGGRVAITAEGTCHTLTI FQCTLEDMGEVAFVSGGCRTTTQFCVSAPRRPPL  
YPPADPVVKAQTESSVTLWSAPPHGDRPVTIDGYVLEKRRKLGAYAWSRCHEAGWLATTEFTITGVAEEGDFQ  
FRVSAINHFGTQEPYLEFPGTMHLVPLAVKTKPLKAVEAVEGGEVTFVSDLTVASSGEVFLDGEALKASSIYVI  
RCDRTRHMLTIREVPARLHGAQLKVFVANGIETS IQMVRAALGLPSSSKLPAAAAREVLAQLHHEEAQLLAEVSD  
QAAAVTWLKDGRELSLGPKEYMVSAGRRALLVRDVAQDDAGLYECVSRGSRRTAYQLLVQEPKLVFAKQQAH  
SEVKAEEAGNSATLSCEVTQAQTEVTWFKDGKLLSSSSKVRMEASGCSRRLVVQQAGKADAGEYSCEAGGQKLS  
FRLDVAEPKLVFAKQQAHSEVKAEEAGASATLSCEVAQAQTEVTWFKDGKLLSSSSKVRMEASGCSRRLVVQQ  
AGKADAGEYSCEAGGQKLSFRLDVAEPKMFVFAKEQQARSEVKAEEAGASATLSCEVAQAQTEVTWFKDGKLLS  
SSKVRMEASGCSRRLVVQQAGKADAGEYSCEAGGQKLSFRLDVTEPKLVFAKEQQARSEVKAEEVNSATLSCE  
VAQAQTEVTWFKDGKLLSSSSKVRMEASGCSRRLVVQQAGKADAGEYSCEAGGQKLSFRLDVAEPKLVFAKEQ  
QARSEVKAEEAGNSATLSCEVAQAQTEVTWFKDGKLLSSSSKVRMEASGCSRRLVVQQAGKADAGEYSCEAGGQ  
KLSFHLDVTEPKLVFAKEQQAHSEVKAEEAGASATLSCEVAQAQTEVTWFKDGKLLSSSSKVRMEASGCSRRLV  
VQQAGKADAGEYSCEAGGQKLSFRLDVAEPKLVFAKEQQARSEVKAEEAGASATLSCEVAQAQTEVTWFKDGK  
LSSSSKVRVEASGCSRRLVVQQAGKADAGEYSCEAGGQKLSFRLDVAEPKLVFAKEQQANSEVKAEEAGASATL  
SCEVAQAQTEVTWFKDGKLLSSSSKVRVEASGCSRRLVVQQAGKADAGEYSCEAGGQKLSFRLDVAEPKLAFA  
KEQQAHSEVKAEEAGASATLSCEVAQAQTEVTWFKDGKLLSSSSKVRVEASGCSRRLVVQQAGKADAGEYSCEA  
GGQKLSFRLDVAEPKLAFAKEQQAHSEVKAEEAGASATLSCEVAQAQTEVTWFKDGKLLSSSSKVRVEASGCSR  
RLVVQQAGKADAGEYSCEAGGQKLSFRLDVAEPKLAFAKEQQAHSEVKAEEAGASATLSCEVAQAQTEVTWFKD  
GKLLSSSSKVRVEASGCSRRLVVQQAGKADAGEYSCEAGGQKLFRLDVAEPKLMFAKEQQAHSEVKAEEAGAS  
ATLSCEVAQAQTEVTWFKDGKLLSSSSKVRVEASGCSRRLVVQQAGKADAGEYSCEAGGQKLSFRLDVAEPKLV  
FAKEQQAHSEVKAEEAGASATLSCEVAQAQTEVTWFKDGKLLSSSSKVRVEASGCSRRLVVQQVQKADAGEYS  
CEARGQKLSFRLDVADTRLMFAKEQQARTEVKAEAGNSATLSCEVAQAQTEVTWFKDGKLLSSSSKVRVEASG  
CSRRLVVQQAGKADAGEYSCEAGGQKLSFRLDVAEAEESQIPERPSRREPLVVKEHETIILTATIAAPSVAAVT  
WLKDGVEIRRSKRHEATS LGDTHLTVRGAQVLD SAIYSCRVGKEGQDFPVQVEEVAAKFSKPLEPVEGELGG  
TVMLVCELSPEQAEVWRCGNTQLRPGKRFQMTSEGPRRTLVSGLREDDAEYVCESRDDRTSARLTVKVPR  
VVKFTSGLSAMVAEEGQEATFQCVVSPSDAGVTWYKDGMLQPSSEKFMVVEGASRSRLTILGLTLEDAGQVTV  
EAEGASSAALRVREAPVLFKLLKLEPQTVEERTSVTLEVELTRWPEVKWTRNAAVLTPSENVEIRAEGARHC  
LVLRVGFADRGFFGCETPDDKTQAKLVNEMRQVRLVVRGLQVEEAKEQGTASMDVELSHAEVEGSWTRDGLRL  
QPGPKCHLAVQGPVHILTLALSALQPQDSGLVAFRAEGVHTSARLIVTEL PVSFTRVLQDVVATQKEKVTLECEL  
SRPVDVRLKFDGNEVELRAGKAIGIVAQGTCSRSLVIYRCETGDQGVVYCDALDAQTSASLRVQGRTYTLIFRRVL  
AEDAGEVYKVAEENASRAHLRVKELPVTLLRPLRDKIAMEKHRGVLECCQVSRASAQVRWFKGGVLEQSGPKYE  
VVSDGLYRKLIVINDVQPEDEDTYTCDAGNVKTSAQFFVEEQSITIVRGLKDMTVMPEPAPAWFECE TSI PSVRP  
PKWLLGKTVLQAGGNVLEQDGTVHRLTLHKTCSTMTGPVHFTIGKSRSSAQLVVSDIPVVLTRPLEPKAGRE  
LQSVVLSCDFRPAPKAVQWYKDDTPLSPSEKFKMALEGQMAELRILRLTPADAGVYRCQAGSAQSSAEVTVEA  
REVTVIQPLQDAEAMEEGRVCFSCELSHKDEDI EWSLNGTPLYNDSFHEISHEGCLHTLVLSKSVRQADTGTVC

ATSPKVSVSARLVVKGKPVVFLKALDDVSAEERGLTLTQCEVSDPEARVVRKDGVELGPSDKYDFLHKAGAR  
GLTVHDLSDHEDAGLYTCQVGSKETQSKVSVHDLHVGITRRLKTVLEVLEGESECSFECVLSHESPSDPAVWTVGG  
KTVGGSGHFHAVRQGRKYTLTVKDAALSDAGEVVSFVGLTSSKASLIIRERPVDITKPLEDQRTTLGEDVMLS  
CELSRAGTSVRWLKDGKAIRKSQKYDLLSEGTRAVLVVRKASLKDSEYTCETEASKSTAKLCVEEKANRFTE  
ELADLQVEEKGRAVFTCKTEHPASVVTWRKGLLELRASGKHVPSQEGTLTKLTINALERTSDTYTCDIGQAR  
TQARLLVHGQKVRVIEDLEDTAVQEGSSAKFCCRIAPADYGPVHWFLDKTPHLSNELNEITVQPGGYHVLTLR  
QLALKDSGTVYFEAGDQRTSAAALRVTEKPSIFSRPLTDVTVTEGEDTLVLCETTTVDSSVRWTKDGKTLRPSA  
RCQLSHEGCGQAQLLITATTPQDGGRYKCEIGGASSSSIVRVHALPVRFRFRESLKDVEVPEGKAATLRCVLSVA  
APVEWRHGDDVLKSSNKYSLRQEGAVLELVIRDLQPQDSGQYSCSFGDQTTSATLTVKTSQAQFVQGLRNKEA  
TEGTTVTLRCELTKAPVEWKKGTETLRNGDKYSLKQDGAVALCELQICSLLVADAGEYSCVCGQEKTSATLTVK  
ALLVHVFVRRLSKEATEGDTTTLQCELSKAAPVEWRKGTETLRDGDYSLKQDGAVALCELQIRSLTIADAGEYL  
CTCGQEKTSATLTVRALPAKFKDSLKNEEATEGTTATLSCELSKAAPVWKKGPKTLQSGDKYVLRQDGAVAL  
LQIHGLTMADAGEYSCVCGQEKTSATLTVRGLPAKFIEDLRSQEATEGATAILRCELSKAAPVEWRKGSSETL  
DGDYTLRQDGAVALCELQIRGLAVVDTGTYSLSLPTKFTTEGLRNEEATEGTMATLRCQMSKAAPVEWRKGSSETL  
DGDYSLRQDGAVALCELQIRGLTIEDSGEYTCVCGQEKTSATLSVKALPSRFIEDLRSQEATEGTMATLRCQMS  
KTAPVEWKKGSETLRDGGYSLRQDGPVCELQICDLAVEDAGEYSCVCGQEKTSATLSIKALPPRFIEDLRSQ  
EATEGTMATLRCQMSKAAPVEWRKGSSETLRDGGYSLRQNGAVCELQIHDLAVEDTEYSCVCGQEKTSATLN  
VKALPPRFIEDLRSQEATEGTMATLRCQMSKAAPVEWRKGSSETLRDGGYSLRQDGAVALCELQIHDLVEDAGQ  
YSCVCGQEKTSAVLTVDALPPKFTTEGLKKEEATEGTMVTLRCQMSKEATVEWRKGAKTLSDGGYSLRQDGAVAL  
CELQICGLAVEDAGEYSCVCGQEKTSATLSVKALPPRFIEDLRSQEATEGTMATLRCQMSKAAPVEWRKGSSET  
LRDGDYSLRQDGAVALCELQIRDLAVEDAGEYLCVCGQEKTSATLSVKALPPRFIEDLRSQEATEGTMATLRCQ  
MSKAAPVEWRKGSSETLRDGDYSLRQDGAVALCELQICDLAVEDTGDYSCVCGQEKTSATLSVKALPPRFIEDL  
SQEAREGTVATLRCRMSKAAPVEWRKGSSETLKDGDYSLRQEGNLCELQIRDLAVEDTEEYSCVCGQEKTSAT  
LSVKALPAKFIEDLRSQEAPESSTVTLRCKLSKASVWKKGSETLRNGARYSLRQDGAVALCELEIRDLTVEDT  
GEYSCTCGQERTSATLSIMAPQVVFQQLQNLQAEESMASLRCELSVPNAAMVWSKGGLELQGDTRREARQQ  
GCVAELLRDLRREDAGEYSCVCGQEKTSATLTVTAAPVFLRELQAQDVEDGATARLCELSREAVSVEWRK  
GSLQLFPCAKYQMLVIKGFRTEDQGEYRCGPIQGLPSSGAATFNVVMTSGSGDEVPAQPSLPEAAQEGDLHLL  
WEALARKRRMSREPTLDSISELPEEDSRVQHLRQEAEEETAPDLSEGYSTADELARTGEADLSHTSSDDESRA  
TPSLVTYLKKAGGPGISPLASKHEAQVTTSVKPKQKQEPVPTCPPPGDLAADLMDPSLDKAAVKIQAAFKG  
YKVRKEMKQOEGPVFSRTFGDTEAQVGDVLRLECVLATKTDMRACWLKDGIELTDGRHYHIDQLKDGTCSSLL  
TGLAPTDSGRYTQCVSTKSGRVSHSACVVVSGTESEAESSSGGELDDAFRRAARRLHRLFRTKSPAELSEEEL  
FLSADEGPGEPEEPADWQTYREDENFVCIRFESLAEARQAVTCFRNMFATMGIGVEISLGEQGPVEMRIGK  
VAPTVPAPVPLAKTPGLQTSDAAPVFLTELQNDVQDGYPMSFDCVVTGQPVPSVRWFKDGKLEEDDHMIN  
EDQQGGHQLIITAVVPADMGVYRCLAENSMGVSSTKAELRVELTSTDYDTAADATETSSYFSAQGYLSSREQE  
GTESDEGQLPQVLEELKDLQVAPGTRLAKFQLKVKGYPAKLYWFKDGOPLTSSDHIRMTDKKTLHTLEIVSV  
TREDSGQYAAIYISNAVGAAYSSARLLVRGPSEPEEKPASDVHERLVPVPRILEKFTPKVKRGSSTFVSVKVEG  
HPAPSVHHLKEEAKEGVLWIGPDTPGYTMASSSKQHSVLVLDVGRQHGGTYTTCIATNPAGQALCSASLHISGL  
AKEEEQERVKEALISSFLQTSQAVSAQMSESAGFADLVGQSKGESLVAEEAHSHLSLAEVGTTEEFLQKLSQ  
ITEMVSAKISQAKLQVPGGDSDEETKTPSASPRHGRSRPSSSVQESSSESEDGDSRGEIFDIYVVTADYLPGL  
AEQDAIILREGQYVEVLDSAHPLRWLVRTKPTKSSPSRQGWVSPAYLDKRLKLSPEWGPTEAPEFPGEAVSED  
EYRTRLSSVIQELLSSEQAFVGLQFLESHHMKHLERSPRVPAAVASQKTVI FRNVQDISHFHSFLKELQGC  
GTDDDVAMCFIKNQEAFAKEYLEFLVGRVQAESVVVSTPVQEFYKKYAEETLSAKDPTQPPPPPLQHYLEQVPE  
RVQKYQALLKELIRNKARNRQNCALLEQAYAVVSALPQRAENKLVSLMENYPGTLEALGEPVIRQGHFVWEG  
APGARMPWKGHNHRVFLFRNYLVICKPRRDSRTDFTSYVFRNMMLSSIDLNDQVEGDDRAFVWHEREDSVR  
KYLQARTVI IKNSVWKEICGIQQRLAQPVWRPPEFEEELADCTAELGETVVKLACRVGTGPKPIVSWYKDGK  
VEVDPHHILIEDPDGSCSTLILDNLTGIDSGQYMCFAASAAGNASTLGKILVQVPPRFVNVKVRATPEVEGEDAQ  
ITCTVEGAPYPQIRWYKDGTLAPGNRYRMLNEPRSGVLVVIQAASKEDLGHYECELVNRLGSTRGGGELYM  
QSPALRARDQHHREQIVAAVEVTEQETKVPKKTVIIEETITTVVKS PRGRRQSPGKSPSRSPRRSASPRRPG  
LLAPERLYPPGTSPSRRLVEVEQGRKAPVPALYVTEAEVHAPASQSQPKWLEVEETIEVRVKKTGSRGASPVRE

MTSRGEGILFTLPGGIPGRDPNANNNSNKS SVYQEARTWGPVAVHVHVGEPFIFQVDSVGNVDWVAASPEPEQVRA  
SQKEENTERQEGCSDGDENTFLMEEPQD TDSLQGRDPKILTHNGRVLTLADLEDYVPQEGETFGCGDSTPSTP  
DEPPCEVSVLQREISEPTVGGPVLNNVGRPPGTGATPSFFRPGSQVHSPESVSFLLREAWSGPVS AAPWTSSSF  
HTHVQSSVDGSHGSFKTEVSTQTVSFGAVGETVTLHIDPDGGEAPGPSQG\*

>rs244484851\_ENSMUSP00000020732\_c.594:G>C\_p.V199L  
ENSMUST00000020732.13|Obscn-201|ENSMUSG00000061462|-|chr11:g.59026607:C>G  
MDHSFSGAPRFLTRPKAFVSVGKDATLSCQIVGNPTPHVSWEKDRQFVEAGARFRLAQDGDVYRLTILDLAL  
GDSGQYVCRARNAIGEFAAVGLRVDSEGTCAEQAPHFLLRPTSIRVREGADATFRCRVGGSPQPAVSWSKDG  
RRLGPPDAPHVRVEEHGESSALRIRSARPRDGGTYEVRAENPLGSASAAAALLVSDAEVAGPPGTSTATLLA  
HLQQRRREAMRAEGIPPSPPGAGTRTCTVTEGKHARLSCFVTGEPKPEVWKKDGQLVTEGRRHVVEDEQENF  
VLKILFCKQSDRGLYTCTASNLVGQTYSSVLVVVREPTVPFKKRLQDLEVREKESATFQCEVAQPAEAAWFK  
EETRLWASAKYDIEEEGTERRLTVRNVSADDDAVYICETTEGSRVVAELSVQGNLTKLPRKTAVRTGDTAIF  
WVELAVPEGPVRWLRNQEEMVAGGRVAITAEGTCHTLTI FQCTLEDMGEVAFVSGGCRTTTQFCVSA PRRPPL  
YYPADPVVKAKTESVTLWSAPPHGDRPVTIDGYVLEKRKLGA YAWSRCHEAGWLATTEFTITGVAAEEDGFQ  
FRVSAINHFGQGPYLEFPGTMHLVPLAVKTPKAVEAVEGGEVTFVSDLTVASSGEWFLDGEALKASSIYVI  
RCDRTRHMLTIREV PARLHGAQLKFVANGIETSIQMVVRAALGLPSSKLPAAAAREVLAQLHHEEAQLLAE LSD  
QAAA VTLKDGRELSLGPKYEMQVSAGRRALLVRDVAQDDAGLYECVSRGSR TAYQLLVQDITDGYRDWGPAG  
PQKHMCKCAGAKIARYLGSSCYRFLQYDKGVVHWEAALDRQKGTSSCSLHEKPKLVFAKQQAHSEVKA E  
AGNSATLSCEVTQAQTEVTFWKDGKLLSSSSKVRMEASGCSRRLVVQQAGKADAGEYSCEAGGQKLSFR LDVA  
EPKLVFAKQQAHSEVKA EAGASATLSCEVAQAQTEVTFWKDGKLLSSSSKVRMEASGCSRRLVVQQAGKADA  
GEYSCEAGGQKLSFR LDVAEPKMFVFAKEQQARSEVKA EAGASATLSCEVAQAQTEVTFWKDGKLLSSSSKVRM  
EASGCSRRLVVQQAGKADAGEYSCEAGGQKLSFR LDVTEPKLVFAKEQQARSEVKA EVGNSATLSCEVAQAQT  
EVTWFKDGKLLSSSSKVRMEASGCSRRLVVQQAGKADAGEYSCEAGGQKLSFR LDVAEPKLVFAKEQQARSEV  
KAEAGNSATLSCEVAQAQTEVTFWKDGKLLSSSSKVRMEASGCSRRLVVQQAGKADAGEYSCEAGGQKLSFHL  
DVTEPKLVFAKEQQAHSEVKA EAGASATLSCEVAQAQTEVTFWKDGKLLSSSSKVRMEASGCSRRLVVQQAGK  
ADAGEYSCEAGGQKLSFR LDVAEPKLVFAKEQQARSEVKA EAGASATLSCEVAQAQTEVTFWKDGKLLSSSSK  
VRVEASGCSRRLVVQQAGKADAGEYSCEAGGQKLSFR LDVAEPKLVFAKEQQANSEVKA EAGASATLSCEVAQ  
AQTEVTFWKDGKLLSSSSKVRVEASGCSRRLVVQQAGKADAGEYSCEAGGQKLSFR LDVAEPKLAFAKEQQAH  
SEVKA EAGASATLSCEVAQAQTEVTFWKDGKLLSSSSKVRVEASGCSRRLVVQQAGKADAGEYSCEAGGQKLS  
FR LDVAEPKLAFAKEQQAHSEVKA EAGASATLSCEVAQAQTEVTFWKDGKLLSSSSKVRVEASGCSRRLVVQQ  
AGKADAGEYSCEAGGQKLSFR LDVAEPKLAFAKEQQAHSEVKA EAGASATLSCEVAQAQTEVTFWKDGKLLSS  
SSKVRVEASGCSRRLVVQQAGKADAGEYSCEAGGQKLFRLDVAEPKLMFAKEQQAHSEVKA EAGASATLSCE  
VAQAQTEVTFWKDGKLLSSSSKVRVEASGCSRRLVVQQAGKADAGEYSCEAGGQKLSFR LDVAEPKLVFAKEQ  
QAHSEVKA EAGASATLSCEVAQAQTEVTFWKDGKLLSSSSKVRVEASGCSRRLVVQQVQKADAGEYSCEARGQ  
KLSFR LDVADTRLMFAKEQQARTEVKA EAGNSATLSCEVAQAQTEVTFWKDGKLLSSSSKVRVEASGCSRRLV  
VQQAGKADAGEYSCEAGGQKLSFR LDVAEAEASQI PERPSRREPLVVKHEHETIILTATIAAPSVAAVTLKDG V  
EIRRSKRHEATSLGDHTLTVRGAQVLD SAIYSCRVGKEGQDFPVQVEEVA AKFSKPLEPVEGELGGTVMLVC  
ELSPQAEVWRCGNTQLRPGKRFQMTSEGPRRTLTVSGLREDDAE EYVCE SRDDRTSARLTVKVP RVVKFTS  
GLSAMVAEEGQ EATFQCVVSPSDAGVTWYKDGMLQ PSEKFMVESGASRSLTILGLTLEDAGQVTEAEGAS  
SSAALRVREAPVLFKKLEPQTV EERTSVTLEVELTRPWPEVKWTRNAAVLTPSENVEIRAEGARHCLVLR SV  
GFADRGFFGCETPDDKTQAKLNVEMRQVRLVRGLQEVEAKEQGTASMDVELSHA EVEG SWTRDGLRLQPGPKC  
HLAVQGPVHILTL SALQPQDSGLVAFRAEGVHTSARLIVTELPVSFTRVLQDVVATQKEKVTLECELSRPVDV  
RWLKDGV ELRAGKAIGIVAQGTCSRSLVIYRCETGDQGVYVCDALDAQTSASLRVQGRTYTLIFRRVLAEDAGE  
VKFVAENAESRAHLRVKELPVTLLRPLRDKIAMEKHRGVLECCQVSRASAQVRWFKGGVELQSGPKYEVVSDGL  
YRKLVIN DVQPEDEDTYTCDAGNVKTS AQFFVEEQSITIVRGLKDMTVMEPAPAWFECETSIPSVRPPK WLLG  
KTVLQAGGNVGL EQDGTVHRLTLHKTCSTMTGPVHFTIGKSRSSAQLVVSDIPVVLTRPLEPKAGRELQSVVL  
SCDFRPAPKAVQWYKDDTPLSPSEKFKMALEGQMAELRILRLTPADAGVYRCQAGSAQSSAEVTEAREVTVI  
QPLQDAEAMEEGRVCFSCELSHKDEDIEWLSNGTPLYNDSFHEISHEGCLHTLVLSVRQADTGTVCATSPKV  
SVSARLVVKGKPVVFLKALDDVSAEERGTLTLQCEVSDPEARVVWRKDGVELG PSDKYDFLHKAGARGLTVHD  
LSHEDAGLYTCQVGSKETQSKVSVHDLHVGITKRLKTV E VLEGE SC SFECVLSHESPSDPAVWTVGGKTVGGS  
GHFHAVRQGRKYTLTVKDAALSDAGEV VFSVLGLT SKASLIIRERPVDITKPLEDQRTTLGEDVMLSCELSRA  
GTSVRWLKDGKAIRKSQKYDLLSEGTRAVLVVRKASLKDSGEYTCETEASKSTAKLCVEEKANRFTEELADLQ  
VEEKGRAVFTCKTEHPASVVTWRKGLLELRASGKHVPVSEGLTLKLTINALERTDSDTYTCDIGQARTQARLL  
VHGQKVRVIEDLEDTASVQEGSSAKFCCRIAPADYGVPHWF LDKTPLHSNELNEITVQPGGYHVLTLRQLAL KD  
SGTVYFEAGDQRTSAALRVTEKPSIFSRPLTDVTVTEGEDLTLVCETTTVDSSVRWTKDGKTLRPSARCQLSH  
EGCQAQLLITATTPQDGGRYKCEIGGASSSSIVRVHALPVRFRFRESLKDVEVPEGKAATLRCVLSVVAAPVEWR  
HGDDVLKSSNKYSLRQEGAVLELVIRDLQPDQSGQYSCSFGDQTTSATLTVKTS SAQFVGLRNKEATEGTTV  
TLRCELTK EAPVEWKKGTETLRNGDKYSLKQD GAVCELQICSLLVADAGEYSCVCGQEKTSATLTVKALLVHF

VRRLRSKEATEGDTTTLQCELSKAAPVEWRKGTETLRDGDYSLKQDQAVCELQIRSLTIADAGEYLCTCGQE  
KTSATLTVRALPAKFKDSLKNEEATEGTTATLSCELSKAAPVTWKKGPKTLQSGDKYVLRQDQAVCGLQIHGL  
TMADAGEYSCVCGQEKTSATLTVRGLPAKFIEDLRSQEATEGATAILRCELSKAAPVEWRKGSSETLKDGDYR  
LRQDQAVCELQIRGLAVVDGTYSLSPTKFTTEGLRNEEATEGTMATLRCQMSKAAPVEWRKGSSETLRDGDYR  
LRQDQAVCELQIRGLTIEDSGEYTCVCGQEKTSATLSVKALPSRFIEDLRSQEATEGTMATLRCQMSKTAPVE  
WKKGSETLRDGGYSLRQDGPVCELQICDLAVEDAGEYSCVCGQEKTSATLSIKALPPRFIEDLRSQEATEG  
MATLRCQMSKAAPVEWRKGSSETLGDGGYSLRQNGAVCELQIHDLAVEDTGEYSCVCGQEKTSATLNVKALPP  
RFIEDLRSQEATEGTMATLRCQMSKAAPVEWRKGSSETLRDGGYSLRQDQAVCELQIHDLVEDAGQYSCVCG  
QEKTSAVLTVDALPPKFTTEGLKKEEATEGTMVTLRCQMSKEATVEWRKGAKTLDGGYSLRQDQAVCELQIC  
GLAVEDAGEYSCVCGQEKTSATLSVKALPPRFIEDLRSQEATEGTMATLRCQMSKAAPVEWRKGSSETLRDGD  
YSLRQDQAVCELQIRDLAVEDAGEYLCVCGQEKTSATLSVKALPPRFIEDLRSQEATEGTMATLRCQMSKAAP  
VEWRKGSSETLRDGDYSLRQDQAVCELQICDLAVEDTGDYSCVCGQEKTSATLSVKALPPRFIEDLRSQEARE  
GTVATLRCRMSKAAPVEWRKGSSETLKDGDYSLRQEGNLCELQIRDLAVEDTEEYSCVCGQEKTSATLSVKAL  
PAKFIEDLRSQEAPESSTVTLRCKLSKKASVVWKKGSETLRNGARYSLRQDQAVCELEIRDLTVEEDTGEYSCT  
CGQERTSATLSIMAPQVVFQQLQNLQAEEGSMASLRCELSVPAAMVWSKGGLELQGDTRREARQQGCVAEL  
LLRDLRREDAGEYSCVCGQEKTSATLMVTAAPVRFLELQAVDVEGATARLRCELSREAVSVEWRKGSLSQLF  
PCAKYQMVQEGTTAELLVHGVEQEDAGEYTCDAHTQSIARLSVRAPKPKFKTDLQSTEQEAGGTARLCCQLS  
EABPGTPVQWLKEGVELHVGSKYEMRRQGAVERCELLIHGLEAKDTGEYACLVGQKTLASLRVKEPEVTI VRGL  
VDMEVQADEDEFTCKVSQAGATDVQWHLQGLPLQSNVTEVAVLADGCTHVLQKGVTLLEDAGTVSFHVGGL  
SSSAQLTVRVPEVTVLEPLKDVQVLESEGQDAHFRCLRSRAGQEARWALGGVPLQCNEMNDITVEQGTLYLLTL  
HKVTLLEDAGTITLQVGSSEEAQLKVTAKNTVLRGLENVDALEGGEALFECQLSQPEVAHAHTWLLDDEPVHTS  
EKVEVVYFENGLRHLLLLKLNKPKQDSCRVTFLAGDVVTS AFLTVRGWRLEVLEPPHDASVKAGMQVRFCTILS  
EAVPVGEATWYINGAAIQPDDTWTVTDDGSHHALTLSNAQPQHAGEVTF AARDAVASARLSVLALPDPEDA  
EAVGRSDHSVTLVSWVAPMSDGGGGLCGYRVMKEASTGQWQLCHDLVPGPECVVDDLVPGKTYRFRVAAVGPA  
GAGEPVHLPQMVKIAPAPAPAPAPAPAPAPETRAVAVGVEDICILELEVAADGGEVVWHKGTERRIQPGGHFEVLS  
RGQRQMLVIKGFRTEDQGEYRCGPIQGLPSSGAATFNVMVTS SSGSDEVPAQPSLPPEAAQEDLHLLWEALAR  
KRMSREPLTDSISELPEEDSRVQHLRQEAETAPDLSEGYSTADELARTGEADLSHTSSDDESAGTPELSVT  
YLKKAAGPGISPLASKHEAQVTTSVKPKQKQEPVPTCPPPGDLSAADLMDPSLDKAAVKIQAAFQYKVRKE  
MKQQEGPVFSRTFGDTEAQVGDVLRLECVLATKTD MRACWLKDGIELTDGRHYHIDQLKDGTCSSLVTLGLAPT  
DSGRYTCQVSTKSGRVSHSACVVVSGTESEAESSSGGELDDAFRRAARRLHRLFRTKSPAELSEELFLSADE  
GPGEPEEPADWQTYREDENFVCIRFESLAEARQAVTCFRNMFMATMIGVEISLGEQGPGRVEMRIGKVAPTVT  
PAVPLAKTPGLQTSDAAPVFLTELQNDVQDGYPMSFDCVVTGQVPSVRWFKDGKLEEDDHVMINEDQQGG  
HQLIITAVVPADMGVYRCLAENSMGVSSTKAELRVELTSTDYDTAADATETSSYFSAQGYLSSREQEGTESDE  
GQLPQVLEELKDLQVAPGTRLAKFQLKVKGYPAKLYWFKDGGQPLTSDHIRMTDKKTLHLEIVSVTREDSG  
QYAAI SNAVGAAYSSARLLVRGPSEPEEKPASDVHERLVPPRI LEKFTPKKVKRGSSTIFSVKVEGHPAPS  
HWLKEEAEGVWLWIGPDTPGYTMASSSKQHSVLVLDVGRQHQTGYTCIATNPAGQALCSASLHISGLAKEEEQ  
ERVKEALISSFLQGTSAQVSAQMSSEAGFADLVGQSKGESLVAAEAAHSHLSLAEVGTEEFQKLTSSQITEMVS  
AKISQAKLQVPGGDSDEETKTPSASPRHGRSRPSSSVQESSESESDGSRGEIFDIYVVTADYLP LGAEQDAI  
ILREGQYVEVLDSAHPLRWLVRTKPTKSSPSRQGWVSPAYLDRKRLKLSPEWGPTEAPEFPGEAVSEDEYRTRL  
SSVIQELLSSEQAFVQELQFLESHHMKHLERSPRVPAAVASQKTVIFRNVQDISHFHSSFLKELQCGTDDDDV  
AMCFIKNQEAFAEKYLEFLVGRVQAESVVVSTPVQEFYKKYAEETLSAKDPTQPPPPPLQHYLEQPVVERVQKYQ  
ALLKELIRNKARNRQNCALLEQAYAVVSALPQRAENKLVSLMENYPGTLEALGEPHQGHFIVWEGAPGARM  
PWKGHNHRVFLFRNYLVICKPRRDSRTDFTSYVFRNMMLSSIDLNDQVEGDDRAFEVWHEREDSVRKYLLQA  
RTVI IKNSWVKEICIGIQORLAQPVWRPPEFEEELADCTAELGETVKLACRVTGTPKPIVSWYKDGKPEVVDPH  
HILIEDPDGSLTILDNLTGIDSGYMCFAASAAGNASTLGKILVQVPPRFVNVKVRATPFVEGEDAQITCTVE  
GAPYPQIRWYKDGTLTLLAPGNRYRMLNEPRSGVLVVIQAASKEDLGHYECELVNRLGSTRGGGELYMQSPALR  
ARDQHHREQIVA AVEERRPSP\*

>rs244484851\_ENSMUSP00000151217\_c.594:G>C\_p.V199L  
ENSMUST00000219084.3|Obscn-207|ENSMUSG00000061462|-|chr11:g.59026607:C>G  
MDHSFSGAPRFLTRPKAFVSVGKDATLSCQIVGNPTPHVSWEKDRQPVEAGARFRLAQDGDVYRLTILDLAL  
GDSGQYVCRARNAIGEAFAAVGLRVDSEGTCAEQAPHFLLRPTSIRVREGADATFRCRVGGSPQPAVSWSKDG  
RRLGPPDAPHVRVEEHGESSALRIRRSARPRDGGTYEVRAENPLGSASAAAALLVDSAEVAGPPGTSTATLLA  
HLQORREAMRAEGIPSPPGAGTRTCTVTEGKHARLSCFVTGEPKPEVWKKDGLVTEGRRHVVEDEQENF  
VLKILFCKQSDRGLTYCTASNLVGQTYSSVLVVVREPTVPFKKRLQDLEVRKEKESATFQCEVAQAPATEAAWFK  
EETRLWASAKYDIEEETERRLTVRNVSADDDAVYICETTEGSRVVAELSVQGNLTKLPRKTAVRTGDTAIF  
WVELAVPEGPVWRWRNQEEMVAGGRVAITAEGTCHTLTIFQCTLEDMGEVAFVSGGCRTTTQFCVSAPRRPPL  
YPPADPVVKAKTESVTLVSWAPPHGDRPVTIDGYVLEKRLKLGAYAWSRCHEAGWLATTEFTITGVAAEEDGFQ  
FRVSAINHFGQGPYLEFPGMTMLVPLAVKTPKAVEAVEGGEVTFVSVDLTVASSGEWFLDGEALKASSIYVI



RCDRTRHMLTIREV PARLHGAQLK FVANGIETSIQMVVRAALGLPSSKLPAAAAREVLAQLHEEAQLLAELSD  
 QAAA V TWLKD GRELSLGP KYEMQVSAGRRALLVRDVAQDDAGLYECVSRGSR TAYQLLVQDITDGYR DWGPAG  
 PQKHMCKCAGAKIARYLGS SCYRFLQYDKGVVHWLEAALDTRQKGKTS SCSLHEKPKLVFAKQQAHSEVKA E  
 AGNSATLSCEVTQAQTEV TWFKDGKKLSSSSKVRMEASGCSRRLVVQQAGKADAGEYSCEAGGQKLSFRLDVA  
 EPKLVFAKQQAHSEVKA EAGASATLSCEVAQAQTEV TWFKDGKKLSSSSKVRMEASGCSRRLVVQQAGKADA  
 GEYSCEAGGQKLSFRLDVAEPKMVFAKEQQARSEVKA EAGASATLSCEVAQAQTEV TWFKDGKKLSSSSKVRM  
 EASGCSRRLVVQQAGKADAGEYSCEAGGQKLSFRLDVTEPKLVFAKEQQARSEVKA EAGNSATLSCEVAQAQ  
 EVTWFKDGKKLSSSSKVRMEASGCSRRLVVQQAGKADAGEYSCEAGGQKLSFHLVDVTEPKLVFAKEQQAHSEV  
 KAEAGASATLSCEVAQAQTEV TWFKDGKKLSSSSKVRMEASGCSRRLVVQQAGKADAGEYSCEAGGQKLSFR  
 DVAEPKLVFAKEQQARSEVKA EAGASATLSCEVAQAQTEV TWFKDGKKLSSSSKVRVEASGCSRRLVVQQAGK  
 ADAGEYSCEAGGQKLSFRLDVAEPKLVFAKEQQANSEVKA EAGASATLSCEVAQAQTEV TWFKDGKKLSSSSK  
 VRVEASGCSRRLVVQQAGKADAGEYSCEAGGQKLSFRLDVAEPKLAFAKEQQAHSEVKA EAGASATLSCEVAQ  
 AQTEV TWFKDGKKLSSSSKVRVEASGCSRRLVVQQAGKADAGEYSCEAGGQKLSFRLDVAEPKLVFAKEQQAH  
 SEVKA EAGASATLSCEVAQAQTEV TWFKDGKKLSSSSKVRVEASGCSRRLVVQQV GKADAGEYSCEARGQKLS  
 FRLDVAEAESQIPERPSRREPLVVEKHETIILTATIAAPSVAAVTWLKD GVEIRRSKRHEATSLGDTHLT LTVR  
 GAQVLD SAIYSCR V GKEGQDFPVQVEEVA AKFSKPLEPVEGELGGTVMLVCELSPEQAEVWRCGNTQLRPGK  
 RFQMTSEGPRRTLTVSGLREDDAEYVCE SRDDRTSARLTVK VPRVVKFTSGLS AMVAEEGQEA TFQCVVSPS  
 DAGVTWYKDGMLQLPSEK FVMVEGASRSLTILGLTLEDAGQVTVAEAGASSAALRVREAPVLFKKKLEPQT  
 VEERTSVTLEVELTRPWPVEVWTRNAAVLTPSENVEIRAEGARHCLVLR SVGFADRGFFGCETPDDKTQAKLN  
 VEMRQVRLV RGLQEVEAKEQGTASMDVELSHAEVEGSWTRDGLRLQPGPKCHLAVQGPVHIL TLSALQPQDSG  
 LVAFRAEGVHTSARLIVTELPVSFTRVLQDVVATQKEKVTLECELSRPVDVRWLDGVELRAGKAI GIVAQGT  
 CRSLVIYRCETGDQGVYCDALDAQTSASLRVQGRYTLIFRVLAE DAGEVKFVAENAESRAHLRVKELPVT  
 LLRPLRDKIAMEKHRGVLECCVSRASAQVRWFKGGVLEQSGPKYEVVSDGLYRKLVI NDVQPEDEDTYTC DAG  
 NVKTSAQFFVEEQSITIVRGLKDMTVM EPAPAWFECETSIPSVRPPKWL LKGTVLQAGGNVGLEQDGTVHRLT  
 LHKTCSTMTGVPVHFTIGKSRSSAQLV VSDIPVVLTRPLEPKAGRELQSVVLSCDFRPAPKAVQWYKDDTPLSP  
 SEKFKMAELGQMAELRILRLTPADAGVYRCQAGSAQVSAEVTVEAREVTVIQPLQDAEAMEEGRVCFSCELSH  
 KDEDIEWSLNGTPLYNDLFHEI SHEGCLHTLVLSKVRQADTGTVCATSPKVSVSARLVVKGKPVVFLKALDDV  
 SAEERGT LTLQCEVSDPEARVVRKDGVELG PSDKYDFLHKAGARGLTVHDLSHEDAGLYTCQVGSKETQSKV  
 SVHDLHVGITKRLKTVLEVLEGE SCSFECVLSHESPSDPAVWTVGGKTVGGSGHFHAVRQGRKYTLTVKDAALS  
 DAGEV VFSVLGLT SKASLIIRERPVDITKPLEDQRTTLGEDVMLSCELSRAGTSVRWLDGKAIRKSQKYDLL  
 SEGTRAVLVVRKASL KDSGEYTCETEASKSTAKLCVEEKANRFTBELADLQVEEKGRAVFTCKTEHPASVVTW  
 RGLLELRASGKHVPSQEG LTKLTINALERTSDTYTC DIGQARTQARLLVHGQKVRVIEDLEDTAVQEGSS  
 AKFCCR IAPADYGPVHWF LDKTPLHSNELNEITVQPGGYHVLTLRQLALKDSGTVYFEAGDQRTSAA LRVTEK  
 PSIFSRPLTDVTVTEGEDLTLVCETTTVDSSVRWTKDGKTLRPSARCQLSHEGCQAQLLITATTPQDGGRYKC  
 EIGGASSSSIVRVHALPVRFRESLKDVEVPEGKAATLRCVLSVAAPVEWRHGDDVLKSSNKYS LRQEGAVLE  
 LVIRDLQPQDSGQYSCSFGDQTT SATLTVKTSQAQFVGKLRNKEATEGTTVTLRCELTK EAPVEWKKGTETLR  
 NGDKYSLKQD GAVCELQICSLLVADAGEYSCVCGQEKTSATLTVKALLVHFVRR LRSKEATEGDTTTLQCELS  
 KAAPVEWRKGTETLRDGD RYSLKQD GAVCELQIRSLTIADAGEYLCTCGQEKTSATLTVRGLPAKFIEDLRSQ  
 EATEGATAILRCELSKAAPVEWRK GSETLRDGD RYTLRQD GAVCELQIRGLAVVDGTGYSSLPKTFTEGLRNE  
 EATEGTMATLRQMSKAAPVEWRK GSETLRDGD RYSLRQD GAVCELQIRGLTIEDSGEYTCVCGQEKT SATLS  
 VKALPPRFIEDLRSQEATEGTMATLRQMSKAAPVEWRK GSETLRDGDGRYSLRQNGAVCELQI HDLAVEDTGE  
 YSCVCGQEKT SATLNVKALPPKFTEGLKKEEATEGTMVTLRQMSKEATVEWRKGAKT LSDGGRYSLRQD GAV  
 CELQICGLAVEDAGEYSCVCGQEKT SATLSVKALPPRFIEDLRSQEATEGTMATLRQMSKAAPVEWRK GSET  
 LRDGD RYSLRQD GAVCELQIRDLAVEDAGEYLCVCGQEKT SATLSVKALPPRFIEDLRSQEATEGTMATLRQ  
 MSKAAPVEWRK GSKTLR DGD RYSLRQD GAVCELQICDLAVEDTGDYSCVCGQEKT SATLSVKAPQVVFQPLQ  
 NLQAEEGSMASLRCELSVPNAAMVWSKGGLELQGDTRREARQQGCVAELLLRDLRREDAGEYSCTCGSQTTSA  
 TLMVTAAPV RFLRELQAQDVDEGATARLRCELSREAVSVEWRK GSLQLFPKAKYQMVQEGTTAELLVHGVEQE  
 DAGEYTC DAGHTQSIARLSVRAPKPKFKTDLQSTEQEAGGTARLCCQLSEAEPGTPVQWLKEGVELHV GSKYE  
 MRRQ GAVCELLIHGLEAKDTGEYACL VGGQKTLASLRVKEPEVTIVRGLVDMEVQADEDEFTCKV SQAGATD  
 VQWHLQGLPLQSNEVTEVA VLADGCTHVLQLKGV TLEDAGTVSFHVGG LSSSAQLTVRVPEVTLEPLKDVQ L  
 SEGQDAHFRCRLSRASGQEARWALGGVPLQC NEMNDITVEQGTLYLLTLHKVTLEDA GTITLQVGS CSSEAQL  
 KVTAKNTVLRGLE NVDALEGG EALFECQLSQPEVAHTWLLDDEPVHTSEKVEVVYFENGLRHLLLLLKNLKPQ  
 DSCRVTFLAGDVVTS AFLTVRGRWLEVLEPPHDASVKAGMQVRFTCILSEAVPVGEATVYINGAAIQPDDTDW  
 TVTTD GSHHALT LSNAPQHAGEVTF AARDAVASARLSVLMALDPPEDAE VVGRSDHSVTLSWVAPMSDGGG  
 LCGYRVEMKEASTLNQQLCHDLVPGPECVVDDLVP GKTYRFRVAVG PAGAGEPVHLPQMVKIAPAPAPAP  
 APAPETRQAVVGEDICLELEVAADGGEV VWHKGTERRIQPGGHFEVLSRGRQMLVIKGFRTEDQGEYRCGP IQ  
 GLPSSGAATFNVMVMTSGSGDEVPAQPSLPPEAAQEGDLHLLWEALARKRRMSREPTLDSISELPEEDSRVQHL  
 RQEAEETAPDLSEG YSTADELARTGEADLSHTSSDDES RAGTPSLVTYLKKAGGPGISPLASKHEAQVTT SVK

PQKQQEFPVPTCPPPGDLSAADLMDPSLDKAAVKIQAQAFKGYKVRKEMKQQEGPVFSRSTFGDTEAQQVDVLRLECVLATKTDMMRACWLKDGIELTDGRHYHIDQLKDGTCSLLVGLAPTDSGRYTCQVSTKSGRVSHSACVVVSGTESEAESSSGGELDDAARRAARRLHRLFRTPKSPAELEEELFLSADEGPGEPEEPADWQTYREDENFVCIRFESLAEARQAVTCFRNMFMATMGI GVEISLGEQGPRGVEMRIGKVAPTPTPAVPLAKTPGLQTSDAAPVFLTELQNDVDQDGYPMSFDCVVTGQVPVPSVRWFKDGKLEEDDHVMINEDQQGGHQLIITAVVPADMGVYRCLAENSMGV SSTAELRVELTSTDYDADAATETSSYFSAQGYLSSREQEGTESDEGQLPQVLEELKDLQVAPGTRLAKFQLKVKGYPAPKLYWFKDQGQLTTSDBHIRMDDKTLHTLEIVSVTREDSGQYAAAYISNAVGAAAYSSARLLVGRPSEPEEKPASDVHERLVPPRI LEKFTPKKVGRSSITFSVKVEGHPAPSVHWLKEEAEKGVWLWIGPDTPGYTMASS SKQHSLVLLDVGRRHQGTYTCTIATNPAGQALCSASLHISGLAKEEEEQERVKELISSFLQGTSSQAVSAQMSESAGFADLVGQSKGESLVAAEAAHSHLSLAEVGTETEEFLQKLTSTIEMVSAKISQAKLQVPGGDSDEETKTPSASPRHGSRSPSSSSVQESSSESEDGDSRGEIFDIYVVTADYLPLGAEQDAIILREGQYVEVLDSAHPLRWLVRTPKPTKSSPSRQGWVSPAYLDKRLKLSPEWGPTAPEFPPEAVSEDEYRTRLSSVIQELLSSEQAFVGEQFLSHHMKHLERSRPRVPAAVASQKTVI FRNVQDISHFHSSFLKELQGCCTDDDAMCFIKNQEAFEKYLEFLVGRVQAESVWVSTPVQEFYKKAETLSAKDPTQPPPPPLQHYLEQPVERVQKYQALLKELIRNKARNRQNCCALLEQAYAVVSALPQRAENKLVSLMENYPTLEALGEPTRQGHFIVWEGAPGAMPWKGNRHFVFLFRNYLVI CKPRRDSRTDTSYSVFRNMMLKSSIDLNDQVEGDDRAFEVWHEREDESVRYLLQARTVIIKNSWVKEICIGIQORLAQPVWVRPPEFEELADCTAELGETVVKLACRVGTGPKPIVSWYKDGKPVVEVDPHILIEDPDGSCTLIDLNLGTIDSGQYMCFAASAAGNASTLQILVQVPPRFVNKVRATPFVEGEDAQITCTVEGAPYVQIRWKDGTLLAPGNRYRMLNEPRSGVLLVLIQAASKEDLGHYECELVNRLGSTRGGGELYMQSPALRRARDQHHREQIVAAVEVTEQETKVPKKTVIIETITTTVVKSPRRRQSPGKSPSRSPRRSASPRRPGLLAPERLYPPGTSPSRRLVEVEQGRKAPVPALYVTEAEVHPASQSQPKWLEVEETIEVVRVKKTGSRGASPVREMTSRGEGILFTLPGGIPGRDPNANNNSNKS SVYQEARTWGPAVVHVGEFFIFQVDSVGNVDWAASPEPEQVRASQKEENTERQEGCSDGDENTFLMEEPQDTSLQGRDPKILTHNGRVLTLADLEDYVQEGEFTFGCGDSTPSTPDEPPCEVSVLQREI SEPTVQGPVLLNVRPPTGATPSFFRPGSQVHSPESVSFLLEAWSGPVSAAWPTSSFHHTHVQSSVDGSHGSFKTEVSTQTVSFVAVGETVTLLHIDPDGGEAPGPSQG\*

>rs46635685\_ENSMUSP00000158795\_c.514:C>A\_p.S172\*

ENSMUST00000238536.2|Obscn-210|ENSMUSG00000061462|-|chr11:g.59026687:G>TMDHSFSGAPRFLTRPKAFVSVGKDATLSCQIVGNPTPHVSWEKDRQPVEAGARFRLAQDGDVYRLTILDLALGDSGQYVCRARNAIGEFAAVGLRVDSEGTCAEQAPHLLRPTSIRVREGADATFRCRVRGSGPQPAVSWSKDGRRLGPPDAPHVRVEEHGESSALRIR\*ARPRDGGTYEVRAENPLGSASAAAAALVVDSDAEVAGPPGTSTATLLAHLQRRREAMRAEGIPSPPGAGTRTCTVTEGKHARLSCFVTGPEPKPETVWKKDQGLVTEGRRHVVEDEQENFVLKILFCKQSDRGLYTCTASNLVGQTYSSVLVVRVREPTVPPFKRLQDLEVREKESATFQCEVAQPAEAAWFK EETRLWASAKYDIEEEGETERRLTVRNVSADDDAVYICETTEGSRVVAELSVQGNLTKLPRKTAVRTGDTAIFWVELAVPEGPVRWLRNQEEMVAGGRVAITAEGTCHTTLTIFQCTLEDMGEVAFVSGGCRTTTQFCVSAPRRPPL YPADPVVKAKTESSVTLWSAPPHGDRPVTIDGYVLEKRLKGAYAWSRCHEAGWLATTEFTITGVAEEDGFQFRVSAINHFGQGPYLEFPGTMHLVPLAVKTPLKAVEAVEGGEVTFVSDLTVAASSGEWFLDGEALKASSIYVIRCDRTRHMLTIREVPARLHGAQLKFVANGIETSIQMVVRAALGLPSSKLPAAAAAREVLAQLHEEAQLLAE LSDQAAAVTWLDGRELSPGKYEMQVSAGRRALLVRDVAQDDAGLYECVSRGSRTAYQLLVQDITDGYRDWGPAGPQKHMCKCAGAKIARYLGSSCYRFLQYDKGVWWHLEAALDTRQGKGTSSCSLHEKPKLVFAKQQAHSEVKAEGNSATLSCEVTQAQTEVTFWKDGGKLSSSSKVRMEASGCSRRLVVQAGKADAGEYSCEAGGQKLSFR LDVAEPKLVFAKQQAHSEVKAEEAGASATLSCEVAQAQTEVTFWKDGGKLSSSSKVRMEASGCSRRLVVQAGKADAGEYSCEAGGQKLSFR LDVAEPKLVFAKEQQARSEVKAEEAGASATLSCEVAQAQTEVTFWKDGGKLSSSSKVRMEASGCSRRLVVQAGKADAGEYSCEAGGQKLSFR LDVAEPKLVFAKEQQARSEVKAEEAGASATLSCEVAQAQTEVTFWKDGGKLSSSSKVRMEASGCSRRLVVQAGKADAGEYSCEAGGQKLSFR LDVAEPKLVFAKEQQANSEVKAEEAGASATLSCEVAQAQTEVTFWKDGGKLSSSSKVRMEASGCSRRLVVQAGKADAGEYSCEAGGQKLSFR LDVAEPKLAFKAEQQAHSEVKAEEAGASATLSCEVAQAQTEVTFWKDGGKLSSSSKVRMEASGCSRRLVVQAGKADAGEYSCEAGGQKLSFR LDVAEPKLAFKAEQQAHSEVKAEEAGASATLSCEVAQAQTEVTFWKDGGKLSSSSKVRMEASGCSRRLVVQAGKADAGEYSCEAGGQKLSFR LDVAEPKLAFKAEQQAHSEVKAEEAGASATLSCEVAQAQTEVTFWKDGGKLSSSSKVRMEASGCSRRLVVQAGKADAGEYSCEAGGQKLSFR LDVAEPKLMFAKEQQAHSEVKAEEAGASATLSCEVAQAQTEVTFWKDGGKLSSSSKVRMEASGCSRRLVVQAGKADAGEYSCEAGGQKLSFR LDVAEAESESQIPERPSRREPLVVKEHETIILTATIAPVAAVTWLDGVI RRSKRHEATSLGDTHTLTVRGAQVLDSDAIYSCRVGKEGQDFPVQVEEVAKF SKPLEPVEGELGGTVMLVC

ELSPEQAEVWRCGNTQLRPGKRFQMTSEGPRTTLTVSGLREDDAEYVCESTRDDRTSARLTVKVPVVKFTS  
GLSAMVAEEGQEATFQCVVSPSDAGVTWYKDGMLQPSSEKFMVVEGASRSLTILGLTLEDAGQVTEAEGAS  
SSAALRVREAPVLFKKKLEPQTVVEERTSVTLEVELTRPWPEVKWTRNAAVLTPSENVEIRAEGARHCLVLRV  
GFADRGFFGCETPDDKTQAKLNVEMRQVRLVVRGLQEVEAKEQGTASMDVELSHAEEVGSWTRDGLRLQPGPKC  
HLAVQGPVHILTLALSALQPQDSGLVAFRAEGVHTSARLIVTELPVSFTRVLQDQVATQKEKVTLECELSRPVDV  
RWLKDGVLELRAGKAIGIVAQGTCSRSLVIYRCETGDQGVYVCDALDAQTSASLRVQGRTYTLIFRRLAEDAGE  
VKFVAENAESRAHLRVKELPVTLLRPLRDKIAMEKHRGVLECCQVSRASAQVRWFKGGVELQSGPKYEVVSDGL  
YRKLVINVDVQPEDEDTYTCDAENVKTSAQFFVEEQSITIVRGLKDMTVMPEPAPAWFECETSIPSVRPPKWL  
KTVLQAGGNVGLQDGTVHRLTLHKTCTMTGPVHFTIGKSRSSAQLVVSADI PVVLRPLPEPKAGRELQSVV  
SCDFRPAPKAVQWYKDDTPLSPSEKFKMALEGQMAELRILRLTPADAGVYRCQAGSAQSSAEVTEAREVTVI  
QPLQDAEAMEEGRVCFSCELSHKDEDIEWSLNGTPLYNDSFHEISHGCLHTLVLSVRQADTGTVCATSPKV  
SVSARLVVKGKPVVFLKALDDVSAEERGLTLTQCEVSDPEARVVRKDGVELGSPDKYDFLHKAGARGLTVHD  
LSHEDAGLYTCQVGSKETQSKVSVHDLHVGITKRLKTVEVLEGECSFECVLSHESPSDPAVWTVGGKTVGGS  
GHFHAVRQGRKYTLTKDAALS DAGEVVFVSVLGLTSKASLI IRERPVDITKPLEDQRTTLGEDVMLSCELSRA  
GTSVRWLKDGKAIKRSQKYDLLSEGTRAVLVVRKASLKDSGEYTCETEASKSTAKLCVEEKANRFTTEELADLQ  
VEEKGRAVFTCKTEHPASVVTWRKGLLELRASGKHVPSQEGTLTKLTINALERTDSDTYTCDIGQARTQARLL  
VHGQKVRVIEDLEDTAVQEGSSAKFCRIAPADYGPVHWFLDKTPHLSNELNEITVQPGGYHVLTLRQLALKD  
SGTVYFEAGDQRTSAALRVTEKPSIFSRPLTDVTVTEGEDLTVLVCETTTVDSSVRWTKDGKTLRPSARQLSH  
EGCQAQLLITATTPQDGGRYKCEIGGASSSSIVRVHALPVRFRFRESLKDVEVPEGKAATLRCVLSVVAAPVEWR  
HGDDVLKSSNKYSLRQEGAVLELVIRDLQPDQSGQYSCSFGDQTTSATLTVKTSQAQFVGLKRNKEATEGTTV  
TLRCELTKAPVEWKKGTETLRNGDKYSLKQDGAVCELQICSLLVADAGEYSCVCGQEKT SATLTVKALLVHF  
VRLRSKEATEGDTTTLQCELSKAAPVEWRKGTETLRDGDYSLKQDGAVCELQIRSLTIADAGEYLCTCGQE  
KTSATLTVRALPAKFKDSLKNEEATEGTTATLSCELSKAAPVWKKGPKTLQSGDKYVLRQDGA VCGLIHGL  
TMADAGEYSCVCGQEKT SATLTVRGLPAKFIEDLRSQEATEGATAI LRCELSKAAPVEWRKGS ET LKDGDRYT  
LRQDGA VCELQIRGLAVVDGTYSLSLPTKFTTEGLRNEEATEGTMATLRCQMSKAAPVEWRKGS ET LRDGDRYS  
LRQDGA MCELQIRGLTIEDSGEYTCVCGQEKT SATLSVKALPSRFIEDLRSQEATEGTMATLRCQMSKTAPVE  
WKKGSETLRDGGRYSLRQDGPVCELQICDLAVEDAGEYSCVCGQEKT SATLSIKALPPRFIEDLRSQEATEG  
MATLRCQMSKAAPVEWRKGS ET LGDGGRYSLRQNGAVCELQIHDLAVEDTGEYSCVCGQEKT SATLNVKALPP  
RFIEDLRSQEATEGTMATLRCQMSKAAPVEWRKGS ET LRDGGRYSLRQDGA VCELQIHDLVEDAGQYSCVCG  
QEKTSAVLTVDALPPKFTEGLKKEEATEGTMVTLRCQMSKEATVEWRKGAKTLS DGGRYSLRQDGA MCELQIC  
GLAVEDAGEYSCVCGQEKT SATLSVKALPPRFIEDLRSQEATEGTMATLRCQMSKAAPVEWRKGS ET LRDGDR  
YSLRQDGA VCELQIRDLAVEDAGEYLCVCGQEKT SATLSVKALPPRFIEDLRSQEATEGTMATLRCQMSKAAP  
VEWRKGS KTLRDGDRYS LRQDGA MCELQICDLAVEDTGDYSCVCGQEKT SATLSVKALPPRFIEDLRSQEARE  
GTVATLRCRMSKAAPVEWRKGS ET LKDGDRYS LRQEGNLCELQIRDLAVEDTEEYSCVCGQEKT SATLSVKAL  
PAKFIEDLRSQEAPESSTVTLRCKLSKASVWKKGSETLRNGARYSLRQDGA VCELEIRDLTVEDTGEYSCT  
CGQERTSATLSIMAPQVVVQQLQNLQAEEGSMASLRCELSV PNAAMVWSKGGLELQGDTRREARQQGCVAEL  
LLRDLRREDAGEYSCTCGSQTTSATLMVTAAPVRFRLRELQAQDVDEGATARLRCELSREAVSVEWRKGS LQLF  
PCAKYQMVQEGTTAELLVHGVEQEDAGEYTCDAHTQSIARLSVRAPKPKFKTDLQSTEQEAAGGTARLCCQLS  
EAEPGTPVQWLKEGVELHVGSKYEMRRQGA VCELLIHGLEAKDTGEYACLVGGQKT LASLRVKEPEVTVRGL  
VDMEVQADEDEFTCKVQAGATDVQWHLQGLPLQSNVTEVAVLADGCTHVLQ LKGVTL EDAGTVSFHVGGL  
SSAQLTVRVPEVTVLEPLKDVQLSEGQDAHFRCRLSRASGQEARWALGGVPLQCNEMNDITVEQGTLYLLTL  
HKVTLEDAGTITLQVGS CSSEAQLKVTAKNTVLRGLENVDALEGG EALFECQLSQPEVA AHTWLLDDEPVHTS  
EKVEVVYFENGLRHLLLLLKNLKPQDSCRVTFLAGDVVTS AFLTVRGWRLEVLEPPHDASVKAGMQVRFTCILS  
EAVPVGEATWYINGAAIQPDDTDWTVTTDGS HHALTLSNAQPQHAGEVTF AARDAVASARLSVLALPDPPEDA  
EVRGRSDHSVTL SWVAPMSDGGGLCGYRVEMKEASTGQWQLCHDLVPGPECVVDDLVPKTYFRVAVAVGPA  
GAGEPVHLPQMVKIAPAPAPAPAPAPAPAPETRQAVVGEDICLELEVAADGGEV VWHKGTERRIQGGHFEVLS  
RGQRQMLVIKGFRTEDQGEYRCGPIQGLPSSGAATFNVMVMTSGSGDEVPAQPSLPPEAAQEGDLHLLWEALAR  
KRRMSREPTLDSISELPEEDSRVQHLRQEAEEETAPDLSEGYSTADELARTGEADLSHTSSDDES RAGT PSLVT  
YLK KAGGPGI SPLASKHEAQVTT SVKPKQKQEPVPTCPPPGDLSAADLMDPSLDKAAVKIQA AFKGYKVRKE  
MKQQEGPVFSRTFGDTEAQVGDVLRLECVLATKTD MRACWLKDGIELTDGRHYHIDQLKDGTC SLVVTGLAPT  
DSGRYTCQVSTKSGRVSHSACVVVSGTESEAESSGGELDDAFRAARRLHRLFRTKSPAELSEEELFLSADE  
GPGEPEEPADWQTYREDEFVFCIRFESLAEARQAVTCFRNMFATMIGIVEISLGEQGPGRVEMRIGKVAPTVT  
PAVPLAKTPGLQTS DAAPVFLTELQNDQVQDGYPMSFDCVVTGQPVPSVRWFKDGKLEEDDHYMINEDQQGG  
HQLIITAVVPADMGVYRCLAE NSMGV SSTKAEYRVELTSTDYDTAADATETSSYFSAQGYLSSREQEGTESDE  
GQLPQVLEELKDLQVAPGTRLAKFQLKVKYPAKPLYWFKDGGQPLTTS DHIRMTDKKTLHTLEIVSVTREDSG  
QYAAYSNAVGAAYSSARLLVRGPSEPEEK PASDVHERLVPPRI LEKFTPKKVKRGS SITFSVKVEGHPAPSV  
HWLKEEA EKGV LWIGPDTPGYTMASSSKQHSVLVLDVGRQHGT YTCIATNPAGQALCSASLHISGLAKEEEQ  
ERVKEALISSFLQGT SQAVSAQMSE SAGFADLVGQSKGESLVAEEAHSHLSLAEVGT EEF LQKLT SQI TEMVS

AKISQAKLQVPGGDSDEETKTPSASPRHGRSRPSSSVQESSSESEDGDSRGEIFDIYVVTADYLPPLGAEQDAI  
 ILREGQYVEVLDSAHPLRWLVRTKPTKSSPSRQGWVSPAYLDRKRLKLSPEWGPTEAPEFPGEAVSEDEYRTRL  
 SSVIQEELLSSEQAFVQELQFLESHHMKHLERSPRVPAAVASQKTVI FRNVQDISHFHSSFLKELQCGCTDDDV  
 AMCFIKNQEAFAKEYLEFLVGRVQAESVVVSTPVQEFYKKYAEETLSAKDPTQPPPPPLQHYLEQPVVERVQKYQ  
 ALLKELIRNKARNRQNCALLEQAYAVVSALPQRAENKLHVSLMENYPTLEALGEPYRQGHFIWEGAPGARM  
 PWKGNHRHVFLFRNYLVICKPRRDSRTDTFSYVFRNMMKLSSIDLNDQVEGDRAFEVWHEREDSVRKYLLQA  
 RTVI IKNSWVKEICGIQORLAQPVWRPPEFEEELADCTAELGETVKLACRVTGTPKPIVSWYKDGKPVVEVDPH  
 HILIEDPDSCTLILDNLTGIDSGQYMCFAASAAGNASTLGKILVQVPPRFVNVKVRATPFVEGEDAQITCTVE  
 GAPYQIRWYKDGTLAPGNRYRMLNEPRSGVLVVIQAASKEDLGHYECELVNRLGSTRGGGELYMQSPALR  
 ARDQHHREQIVAAVEDTSVEGSAHSAQDQADQQAASVLWRLLGSEALGSPSPGDLPNTRQSEPPAFEEAASQIP  
 GAASGTPEVSQPGTHKLEQETTSSGSQGWTPVIRVEGTAWPGAGTGQLLDVHSQVIMETTQRTYVCQAPDT  
 GVTRAPSMQVTIEDVQVQVGDMAQFDAVIEGHPPPIV TWYKGSTQLTSSARLSQRQDGTYSVLVTDVAPHDA  
 GVYTCVANNAGGQVLCKAELLVHGGDKLDAENQVYRRKLHSFYDVQEEIGRGVFGFVKRVQHKGNKMFCAAKF  
 IPLRSKTRAQAYQERDILATLGHPLVTGLLDQFETRKTLLI LILELCSSEELLDRLFKKGVVTEAEVKVYIQQL  
 VEGHLHLHSHGILHLDIKPPNIMVHPAREDIKICDFGFAQKITPSEPQYSKYGSPEFVSPEIIEQNPVSEGS  
 DIWAMGVISYLSLTCSSPFAGESDRATLLNVLEGRVSWSSPTAAHLSSEDAKDFIKATLQRTPRARPSTSQCLA  
 HPWFLLKSMPAEEAHFINTKQLKFLARSRWQRSLMSYKSI LVMRSIPPELLQGPDPSPSLGVARHLRGEASGAS  
 SSSSSDNELAPFARAKSLPPSPVTHSPLLHPRGFLRPSASLPEETEASMTADA AVPASQAGPPASPGCV  
 PRHSVSISSLFYQQAGEGAERGNTSGAKRHPARRRHLLKGGYIARALPGLREPLMEYSLLEEEAAREEQASLM  
 TKTPSFETALRLPSSSVREVPGRSHSLDNPPVTTGPSPEACKEQLLFPSTGLTHETTAKDRGHKEGFLQESV  
 PFPMSGDSRPGKQEGSSQDSCRGKPASSCHSELGSGSQEGCPSQSLGSLPPQSLKELSTSCGFLFSEQ  
 PQAAPFPPTQVSPLLGSEKEPQDGLSEGPVVPVSSSPGSASQVDASLDTEGLSEAGDTCDFTPPPQRQEQAT  
 TRKFSLESRGGYAGVAGYGTFAFGGDAGGMLQGGLWARMWAVVQSSEEQDEAATESQPPLSGLPIAEASG  
 VPLRTSPSLTPWEEVEQVSLVQIRDLSGDAEAADTISLDISEVDPAYLNLSDLYDIKYLPEFEMI FRRVPKPI  
 EQPESPGSETEAGQGLADFLLEAAWPWPGELGLRAGLEITEEPEEPGDLEALLGEAAVGRKRKWSPSRGLFQF  
 PGRCLSGEEPVELGLRQVRKASMAHISRI LKGRPEGERPPRKKAGLASFRLSGLKGRDQELSDEAVVLGQ  
 SVTLACQVLAQVTAQATWSKDGVLLESSGHLLISSTLKNFQLLTILVVKEDLGTYTCCVSNPLGTAVTTGVL  
 RKAERPSSSPRPEVGEYKDAVLLVWKPVESECGPVTYIVQCCIEGGSWTTLASDISDCCYLTGKLSRGGMYIF  
 RTACVSKAGMGPISSPSEQVLLGGPNHLASEEESSRGRPAQLLPSTKTFAFQMQIRRRGRFSVVRQCREKASGR  
 ALAAKIVPYQPEDKTAVLREYEAALKRLHHPHLAQLHAAYLSPRHLVLI LILELCSGPELLPSLAERESYSESDVK  
 DYLWQMLSATQYLHAQHILHLDLRSENMMVTEYNLLKVIDLGNQSLDQEKVPAPENFKDYLETMAPELLEGQ  
 GAVPQTDIWAIGVTAIFIMLSGEY PESSSEGTRDLQKGLRKLIRLSRCYAGLSGGAVAFQSSLCAQPWGRPCA  
 STCLQCGLWTEEGPTGSRPTVTFPTVRLRAFVREKRRALLYKKNLAQVR\*  
 >rs46635685\_ENSMUSP00000038264\_c.514:C>A\_p.S172\*  
 ENSMUST00000047441.14|Obscn-202|ENSMUSP00000061462|-|chr11:g.59026687:G>T  
 MDHSFSGAPRFLTRPKAFVVSVGKDATLSCQIVGNPTPHVSWEKDRQPVVEAGARFRLAQDGDVYRLTILDLAL  
 GDSGQYVCRARNAIGEAFAAVGLRVDSEGTCAEQAPHFLLRPTSIRVREGADATFRRCRVGGSPQPAVSWSKDG  
 RRLGPPDAPHVRVEEHGESSALRIR\*ARPRDGGTYEVRAENPLGSASAAAALVVDSDAEVAGPPGTSTATLLA  
 HLQORREAMRAEGIPSPPGAGTRTCTVTEGKHARLSCFVTGEPKPKETVWKKDGQLVTEGRRHVVEDEQENF  
 VLKILFCKQSDRGLYTCTASNLVGQTYSSVLVVVREPTVPFKKRLQDLEVREKESATFQCEVAQAPATEAAWFK  
 EETRLWASAKYDIEEEGTERRLTVRNVSADDDAVYICETTEGSRVVAELSVQGNLTKLPRKTAVRTGDTAIF  
 WVELAVPEGPVWRWRNQEEMVAGGRVAITAEGTCHTLTI FQCTLEDMGEVAFVSGGCRTTTQFCVSAPRRPPL  
 YPPADPVVKAKTESSVTLWSAPPHGDRPVTIDGYVLEKRRKLGAYAWSRCHEAGWLATTEFTITGVAAEEDGFQ  
 FRVSAINHFGQGPYLEFPGTMHLVPMPLAVKTPLKAVEAVEGGEVTFVSDLTVASSGEWFLDGEALKASSIYVI  
 RCDRTRHMLTIREVPARLHGAQLKFEVANGIETSIQMVVRAALGLPSSKLPAAAAREVLAQLHHEEAQLLAELSD  
 QAAAVTWLKDGRELSLGPKEYMVSAGRRALLVRDVAQDDAGLYECVSRGSRRTAYQLLVQDITDGYRDWGPAG  
 PQKHMCKCAGAKIARYLGSSCYRFLQYDKGVWHWLEAALDTRQGGKTS SCSLHEKPKLVFAKQQAHSEVKA  
 AGASATLSCEVAQAQTEVTWFKDGKLLSSSSKVRMEASGCSRRLVVQQAGKADAGEYSCEAGGQKLSFRLDVA  
 EPKMFVFAKEQQARSEVKAEGASATLSCEVAQAQTEVTWFKDGKLLSSSSKVRMEASGCSRRLVVQQAGKAD  
 GEYSCEAGGQKLSFRLDVTEPKLVFAKEQQARSEVKAEGNSATLSCEVAQAQTEVTWFKDGKLLSSSSKVRM  
 EASGCSRRLVVQQAGKADAGEYSCEAGGQKLSFRLDVAEPKLVFAKEQQARSEVKAEGNSATLSCEVAQAQ  
 EVTWFKDGKLLSSSSKVRMEASGCSRRLVVQQAGKADAGEYSCEAGGQKLSFRLDVTEPKLVFAKEQQAHSE  
 KAEAGASATLSCEVAQAQTEVTWFKDGKLLSSSSKVRMEASGCSRRLVVQQAGKADAGEYSCEAGGQKLSFRL  
 DVAEPKLVFAKEQQARSEVKAEGASATLSCEVAQAQTEVTWFKDGKLLSSSSKVRMEASGCSRRLVVQQAGK  
 ADAGEYSCEAGGQKLSFRLDVAEPKLVFAKEQQANSEVKAEGASATLSCEVAQAQTEVTWFKDGKLLSSSSK  
 VRVEASGCSRRLVVQQAGKADAGEYSCEAGGQKLSFRLDVAEPKLVFAKEQQAHSEVKAEGASATLSCEVAQ  
 AQTEVTWFKDGKLLSSSSKVRVEASGCSRRLVVQQAGKADAGEYSCEAGGQKLSFRLDVAEPKLVFAKEQQAH  
 SEVKAEGASATLSCEVAQAQTEVTWFKDGKLLSSSSKVRVEASGCSRRLVVQQAGKADAGEYSCEAGGQKLS

FRLDVAEPKLAFAKEQQAHSEVKAEGASATLSCEVAQAQTEVTFWKDGGKLSSSSKVRVEASGCSRRLVVQQ  
AGKADAGEYSCEAGGQKLFRLDVAEPKLVFAKEQQAHSEVKAEGASATLSCEVAQAQTEVTFWKDGGKLS  
SSKVRVEASGCSRRLVVQQVKGADAGEYSCEARGQKLSFRLDVAEAEESQIPERPSRREPLVVKHEHETIILTAT  
IAAPSVAAVTWLKDGVIEIRRSKRHEATSLGDTHTLTVRGAQVLDSAIYSCRVGKEGQDFPVQVEEVAAKFSKP  
LEPVEGELGGTVMLVCELSPEQAEVWRCNGTQLRPGKRFQMTSEGPRRTLTVSGLREDDAEYVCESRDDRT  
SARLTVKVPRVVKFTSGLSAMVAEEGQEATFQCVVSPSDAGVTWYKDGMLQVQSEKFMVMEVGASRSLTILGL  
TLEDAGQVTVAEAGASSAALRVREAPVLFKKKLEPQTVEERTSVTLEVELTRPWPEVKWTRNAAVLTPSENV  
EIRAEGARHCLVLRVSGFADRGGFCETPDDKTQAKLVNEMRQVRLVRLGLQEVEAKEQGTASMDVELSHAEVE  
GSWTRDGLRLQPGPKCHLAVQGPVHILTLTSAALQPDQDGLVAFRAEGVHTSARLIVTELPVSFTRVLQDQVATQ  
KEKVTLECELSRPVDVRLKDGVELRAGKAIIGIVAQGTCSRSLVIYRCETGDQGVYVCDALDAQTSASLRVQGR  
TYTLIFRRLAEDAGEVKFVAENAESRAHLRVKELPVTLLRPLRDKIAMEKHRGVLECVSRASAQVRWFKGG  
VELQSGPKYEVVSDGLYRKLVINOVQPEDEDTYTCDAGNVKTSAQFFVEEQSITIVRGLKDMTVMEPAPAWFE  
CETSI PSVRPPKWLKGKTVLQAGNVGLEQDGTVHRLTLHKTCSMTGPFVHFTIGKSRSSAQLVSDIPVVL  
RPLEPKAGRELQSVVLSDFRPAKAVQWYKDDTPLSPSEKFKMALEGQMAELRILRLTPADAGVYRCQAGSA  
QSSAEVTVAREVTVIQPLQDAEAMEEGRVCFSCELSHKDEDIEWSLNGTPLYNDSFHEISHEGLHTLVLKS  
VRQADTGTVCATSPKVSVSARLVVKGKPVVFLKALDDVSAEERGTLTLQCEVSDPEARVWVRKDGVELGSPDK  
YDFLHKAGARGLTVHDLSDHEDAGLYTCQVGSKETQSKVSVHDLHVGITKRLKTVEVLEGECSFCVLSHES  
SDPAVWTVGGKLVGGSGHFHAVRQGRKYTLTVKDAALSDAGEVVFVSVLGLTSKASLIRERPVDI TKPLEDQR  
TTLGEDVMLSCELSRAGTSVRWLKDGKAIKRSQKYDLLSEGTRAVLVVRKASLKDSGEYTCETEASKSTAKLC  
VEEKANRFTEELADLQVEEKGRAVFTCKTEHPASVVTWRKGLLELRASGKHVPSQEGTLTKLTINALERTDSD  
TYTCDIGQARTQARLLVHGQKVRVIEDLEDTAVQEGSSAKFCCRIPADYGPVHWFLDKTPLHSNELNEITVQ  
PGGYHVLTLRQLALKDSGTVYFEAGDQRTSALRVTEKPSIFSRPLTDVTVTEGEDTLTVCETTTVDSSVRWT  
KDGKTLRPSARCQLSHEGCAQLLITATTPQDGGRYKCEIGGASSSSIVRVHALPVRFRSLKDVVEVPEGKAA  
TLRCVLSSVAAPVEWRHGDDVLKSSNKYSLRQEGAVLELVIRDLQPDQSGQYSCSFGDQTTSATLTVKTSQAQ  
FVGKLRNKEATEGTTVTLRCELTKEAPVEWKKGTETLRNGDKYSLKQDGA VCELQICSLLVADAGEYSCVCGQ  
EKTSATLTVKALLVHFVRRRLRSKEATEGDTTLQCELSKAAPVEWRKGTETLRDGDYVSLKQDGA VCELQIR  
LTIADAGEYLCGCEKTSATLTVRALPAKFKDLSKNEEATEGTTATLSCELSKAAPVTVWKKGPKTLQSGDKY  
VLRQDGA VCGLQIHGLTMADAGEYSCVCGQEKTSATLTVRGLPAKFIEDLRSQEATEGATAILRCELSKAAPV  
EWRKGSSETLKDGDYTLRQDGA VCELQIRGLAVVDTGTYSLPTKFTTEGLRNEEATEGTMATLRCQMSKAAPV  
EWRKGSSETLRDGDYSLRQDGA MCELQIRGLTIEDSGEYTCVCGQEKTSATLSVKALPPRFIEDLRSQEATEG  
TMATLRCQMSKAAPVEWRKGSSETLGDGGYSLRQNGAVCELQIHDLAVEDTGEYSCVCGQEKTSATLNVKALP  
PRFIEDLRSQEATEGTMATLRCQMSKAAPVEWRKGSSETLRDGGYSLRQDGA VCELQIHDLVDV DAGYSCVC  
GQEKTSAVLTVDALPPKFTTEGLKKEEATEGTMVTLRCQMSKEATVEWRKGAKTSLDGGYSLRQDGA MCELQI  
CGLAVEDAGEYSCVCGQEKTSATLSVKALPPRFIEDLRSQEATEGTMATLRCQMSKAAPVEWRKGSKTLRQD  
RYSLRQDGA MCELQICDLAVEDTGDYSCVCGQEKTSATLSVKAPQVVFQQPLQNLQAEEGSMASLRCLELQSDV  
AAMVWVSKGGLELQGDTRREARQQGCVAELLLRDLRREDAGEYSCVCGQEKTSATLTVRGLPAKFIEDLRSQE  
DEGATARLRCELSREAVSVEWRKGSLLQFPKAKYQMVQEGTTAELLVHGVEQEDAGEYTC DAGHTQS IARLSV  
RAPKPKFKTDLQSTEQEAGGTARLCCQLSEAEPTPVQWLKEGVELHVGSKYEMRRQGA VCELLIHGLEAKDT  
GEYACLVGQKTLASLRVKEPEVTIVRGLVDMEVQADEDFEFTCKVSQAGATDVQWHLQGLPLQSNVTEVAV  
LADGCTHVLQKGVTLLEDAGTVSFHVGGLSSSAQLTVRVPEVTVLEPLKDVQLSEGQDAHFRCRLSRASGQEA  
RWALGGVPLQCNEMNDITVEQGTLYLLTLHKVTLEDAGTITLQVGSSESAQLKVTAKNTVLRGLNVDALEG  
GEALFECQLSQPEVAHAHTWLLDDEPVHTSEKVEVYFENGLRHLLLLLNKLPQDSCRVTFLAGDVVTS AFLTV  
RALPDPPEDAEVVGRSDHVSVTLVWVAPMSDGGGGLCGYRVEMKEASTGQWQLCHDLVPGPECVDDLVPGKTY  
RFRVAAVGPAGAGEPVHLPQMVKIAPAPAPAPAPAPAPAPETRQAVVGEDICLELEVAADGGEVVWHKGTERRI  
QPGGHFEVLSRGRQMLVIKGFRTEDQGEYRCGPIQGLPSSGAATFNVMVMTSGSGDEVPAQPSLPPEAAQEGD  
LHLLWEALARKRRMSREPTLDSISELPEEDSRVQHLRQEAEEETAPDLSEGYSTADELARTGEADLSHTSSDDE  
SRAGTPSLVTYLKKAGGPGISPLASKHEAQVTTSVKPKQKQEPVPTCPPPGDLAADLMDPSLDKAAVKIQA  
AFKGYKVRKEMKQOEGPVFSRTFGDTEAQVGDVLRLECVLATKTD MRACWLKDGIELTDGRHYHIDQLKDGTC  
SLLVTGLAPTDSGRYTCQVSTKSGRVSHSACVVVSGTESEAESSGGELDDAFRRAARRLHRLFRTKSPAELS  
EELFLSADEGPGEPEPADWQTYREDENFVICIRFESLAEARQAVTCFRNMFMATMGIGVEISLGEQGRGVEM  
RIGKVAPTVPAPVPLAKTPGLQTSDAAPVFLTELQNDVQDGYPMSFDCVVTGQPVPSVRWFKDGLLEEDDH  
YMINEDQQGGHQLIITAVVPADMGVYRCLAENSMGVSSTKAE LRVELTSTDYDTAADATETSSYFSAQGYLSS  
REQEGTESDEGQLPVLEELKDLQVAPGTRLAKFLKVKGY PAPKLYWFKDQPLTSDHIRM TDKKTLLTLE  
IVSVTREDSDGQYAAIY SNAVGAAYSSARLLVVRGPEPEEKPSADVHERLVPPRILEKFTPKVKRGSISITFSV  
KVEGHPAPSVHKLKEEAEGVLIWIGPDTPGYTMASSSKQHSLLVLLDVGRRHQGTYYTCIATNPAGQALCSASLH  
ISGLAKEEEQERVKEALISSFLQGTSAQVSAQMSESA GFADLVGQSKGESLVAAEEAHSHLSLAEVGTETEEFLQK  
LTSQITEMVSAKISQAKLQVPGGDSDEETKTPSASPRHGRSRPSSSVQESSSESEDGDSRGEIFDIYVVTADY  
LPLGAEQDAIILREGQYVEVLDSAHPLRVLVVRTKPTKSSPSRQGWVSPAYLDKRLKLSPEWGPTEAEPFPGA

VSEDEYRTRLSSVIQELLSSEQAFVGELOFLESHHMKHLERSPRVPAAVASQKTVIFRNVQDISHFHSSFLKE
LQCGCTDDDVAMCFIKNQEAFAFEKYLEFLVGRVQAESVVVSTPVQEFYKKYAEETLSAKDPTQPPPPLOHYLE
QPVERVQKYQALLKELIRNKARNRQNCALLEQAYAVVSALPQRAENKLVSLMENYPGTLEALGEPRIQGHFI
VWEGAPGARMPPWKGNHRHVFVFRNYLVICKPRRDSRTDTFSYVFRNMMKLSSIDLNDQVEGDRAFEVWHERE
DSVRKYLLQARTVIKNSWVKEICGIQORLAQPVWRPPEFEELADCTAELGETVKLACRVGTGPKPIVSWYK
DGKPEVEVDPHHILIEDPDGSCSTLILDNLGTGIDSGQYMCFAASAAGNASTLGKILVQVPPRFVNVKVRATPFVEG
EDAQITCTVEGAPYPQIRWYKDGTTLLAPGNRYRMLNEPRSGVVLVLIQAASKEDLGHYECELVNRIGSTRGGG
ELYMOSPALRARDQHHREQIVAAVEGAPSMQVTIEDVQVQVGDMAQFDAVIEGHPPPPIVTWYKGSTQLTSSAR
LSQRQDGTYSVLVTDVAPHDAGVYTCVANNAGGQVLCKAELLVHGGDKLDAENQVYRRKLSHFYDVQEEIGR
GVFGFVKRVQHKGKMFCAAKFIPLRSKTRAQAYQERDILATLGHPLVTGLLDQFETRKTLLILELCSSEEL
LDRLFKKGVVTEAEVKVYIQQLVEGLHYLHSHGILHLDIKPPNIMVHPAREDIKICDFGFAQKITPSEPOYS
KYGSPFVVSPEIIEQNPVSEGSDIWAMGVISYLSLTCSSPFAGESDRATLLNVLEGRVSWSSPTAAHLSEDA
DFIKATLQRTPRARPSTSQC LAHPWFLKSMPAAEAHFINTKQLKFLARSRWQRSLMSYKSI LVMRSIPELLQ
GPPDSPSLGVARHLRGEASGASSSSSSSDNELAPFARAKSLPPSPVTHSPLLHPRGFLRPSASLPEETEASMP
TADAAVPASPQASAGPPASPGCVPRHSVSISSLFYQQAGEGAERGNKTS GAKRHPARRRHLKGGYIARALPGLR
EPLMEYSLLEEEAAREEQASLMTKTPSFETALRLPSSSVREVPGRSHSLDNPVTTGSPPEACKEQLLFPST
GLTHETAKDRGHKEGFLQESVFPFPMGDSRPGKQEGSSQDSCRKGPASSCHSELGSGSQEGCGPPSSQSLG
SLPPQSLKELSTSCGPLFSEQPQAAPFPTQVSPLLGSEKEPQDGSLSSEGVPVPSSSPGSASQVDASLDTEG
LSEAGDTCDFTPPPQRPQEQATTRKFSLESRGGYAGVAGYGTFAFGGDAGGMLGQGPLWARMWAVSQSSEEQ
DEAATESPQPLESGLPIAEASGVPLRTSPSLTPWEEVEQVSLVQIRDLSGDAEAADTISLDISEVDPAYLNL
DLYDIKYLPFEFMIFRRVPKPIEQPESPGSETEAGQGLADFLLEAAWFPWPGELGLRAGLEITEEPEEPDLEA
LLGEAAVGRKRKWSPSRGLFQFPGRCLSGEEPVELGLRQRVKASMAHISRILKGRPEGPEREGPPRKKAGLAS
FRLSGLKGRDQELSDEAVVLGQSVTLACQVLAQPTAQATWSKDGVLLES SGHLLISSTLKNFQLLTIILVVKEE
DLGTYTCCVSNPLGTAVTTGVLKAERPSSSPRPEVGEYKDAVLLVWKPVESECGPVTYIVQCCIEGGSWTTL
ASDISDCCYLTKLSRGGMYIFRTACVSKAGMGPYSSPSEQVLLGGPNHLASEEESSRGRPAQLLPSTKTF
QMQIRRRGRFVVRQCREKASGRALAAKIVPYQPEDKTAHLREYEAALKRHLHHPHLAQLLHAYLSRHLVLI
CSGPELLPSLAERESYSESVDKDYLVQMLSATQYLAHQVILHLDLRSENMMVTEYNLLKVIDLNGAQS LDQEK
VPAPENFKDYLETMAPELLEGQAVPQTDIWAIGVTAIFIMLSGEYPESSEGETRDLQKGLRKLIRLSRCYAGL
SGGAVAFLQSSSLCAQPWGRPCASTCLQCGWLTEEGPTGSRPTVTFPTVRLRAFVREKRRALLYKKNLAQ
VR\*

>rs46635685\_ENSMUSP00000049737\_c.514:C>A\_p.S172\*
ENSMUST00000052872.15|Obscn-203|ENSMUSG00000061462|-|chr11:g.59026687:G>T
MDHSFSGAPRFLTRPKAFVVSVGKDATLSCQIVGNPTPHVSWEKDRQPVEAGARFLAQDGDVYRLTILDLAL
GDSGQYVCRARNAIGEFAAVGLRVDSEGTCAEQAPHFLLRPTSIRVREGADATFRCRVGSGSPQPAVSWSKDG
RRLGPPDAPHVRVEEHGESSALRIR\*ARPRDGGTYEVRANPLGSASAAAALVVDSDAEVAGPPGTSTATLLA
HLQQREAMRAEGI PPSPPGAGTRTCTVTEGKHARLSCFVTGEPKPEPTVWKKDQGLVTEGRRHVVEDEQENF
VLKILFCQSDRGLYTCTASNLVGQTYSSVLVVREPTVPFKKRLQDLEVREKESATFQCEVAQPAEEAAWFK
EETRLWASAKYDIEEGTERRLTVRNVSADDDAVYICETTEGSRVVAELSVQGNLTKLPRKTAVRTGDTAIF
WVELAVPEGPVWRWRNQEEMVAGGRVAITAEGTCHTLTI FQCTLEDMGEVAFVSGGCRTTTQFCVSAPRRPPL
YPPADPVVKAKTESSVTL SWSAPPHGDRPVTIDGYVLEKRKLGAYAWSRCHEAGWLATTEFTITGVAAEGDFQ
FRVSAINHFGQGPYLEFPGTMHLVPLAVKTPKAVEAVEGGEVTFVSDLTVASSGEWFLDGEALKASSIYVI
RCDRTRHMLTIREVPARLHGAQLKFVANGIETSIQMVVRAALGLPSSKLPAAAAREVLAQLHEEAQLLAE LSD
QAAA VTLKDGRELSLGPKEYMQVSAGRRALLVRDVAQDDAGLYECVSRGSRRTAYQLLVQEPKLVFAKQQAH
SEVKAEBAGNSATLSCEVTQAQTEVTWFKDGKLLSSSSKVRMEASGCSRRLVVQQAGKADAGEYSCEAGGQKLS
FRLDVAEPKLVFAKQQAHSEVKAEBAGASATLSCEVAQAQTEVTWFKDGKLLSSSSKVRMEASGCSRRLVVQQ
AGKADAGEYSCEAGGQKLSFRLDVAEPKLVFAKEQQARSEVKAEBAGASATLSCEVAQAQTEVTWFKDGKLLS
SSKVRMEASGCSRRLVVQQAGKADAGEYSCEAGGQKLSFRLDVTEPKLVFAKEQQARSEVKAEBGNSATLSCE
VAQAQTEVTWFKDGKLLSSSSKVRMEASGCSRRLVVQQAGKADAGEYSCEAGGQKLSFRLDVAEPKLVFAKEQ
QARSEVKAEBAGNSATLSCEVAQAQTEVTWFKDGKLLSSSSKVRMEASGCSRRLVVQQAGKADAGEYSCEAGGQ
KLSFHLDVTEPKLVFAKEQQAHSEVKAEBAGASATLSCEVAQAQTEVTWFKDGKLLSSSSKVRMEASGCSRRLV
VQQAGKADAGEYSCEAGGQKLSFRLDVAEPKLVFAKEQQARSEVKAEBAGASATLSCEVAQAQTEVTWFKDGK
LSSSSKVRVEASGCSRRLVVQQAGKADAGEYSCEAGGQKLSFRLDVAEPKLVFAKEQQANSEVKAEBAGASATL
SCEVAQAQTEVTWFKDGKLLSSSSKVRVEASGCSRRLVVQQAGKADAGEYSCEAGGQKLSFRLDVAEPKLAFA
KEQQAHSEVKAEBAGASATLSCEVAQAQTEVTWFKDGKLLSSSSKVRVEASGCSRRLVVQQAGKADAGEYSCEA
GGQKLSFRLDVAEPKLAFAKEQQAHSEVKAEBAGASATLSCEVAQAQTEVTWFKDGKLLSSSSKVRVEASGCSR
RLVVQQAGKADAGEYSCEAGGQKLSFRLDVAEPKLAFAKEQQAHSEVKAEBAGASATLSCEVAQAQTEVTWFKD
GKLLSSSSKVRVEASGCSRRLVVQQAGKADAGEYSCEAGGQKLFRLDVAEPKLMFAKEQQAHSEVKAEBAGAS
ATLSCEVAQAQTEVTWFKDGKLLSSSSKVRVEASGCSRRLVVQQAGKADAGEYSCEAGGQKLSFRLDVAEPKL

VFAKEQQAHSEVKAEAGASATLSCEVAQAQTEVTWFKDGKLLSSSSKVRVEASGCSRRLVVQQVQKADAGEYS  
CEARGQKLSFRLDVADTRLMFAKEQQARTEVKAEGNSATLSCEVAQAQTEVTWFKDGKLLSSSSKVRVEASG  
CSRRLVVQQAGKADAGEYSCEAGGQKLSFRLDVAEAEESQI PERPSRREPLVVKEHETI IILTATIAAPSVAAVT  
WLKDGVEIRRSKRHEATS LGDTHLTVRGAQVLD SAIYSCRVGKEGQDFPVQVEEVAAKFSKPLEPVEGELGG  
TVMLVCELSPEQAEEVWRCGNTQLRPGKRFQMTSEGPRRTLT VSGLREDDAEYVCESRDDRTSARLTVKVPR  
VVKFTSGLSAMVAEEGQEATFQCVVSPSDAGVTWYKDGMLQPSSEKFMVESGASRSLTILGLTLEDAGQVTV  
EAEGASSAALRVREAPVLFKKKLEPQTVEERTSVTLEVELTRPWPVEVKWTRNAAVLTPSENVEIRAEGARHC  
LVLRVSGFADRGGFFGCETPDDKTQAKLNVEMRQVRLVRGLQEVEAKEQGTASMDVELSHAEEVGSWTRDGLRL  
QPGPKCHLAVQGPVHILTL SALQPQDSGLVAFRAEGVHTSARLIVTELPVSFTRVLQDVVATQKEKVTLECEL  
SRPVDVRWLKDGVELRAGKAI GIVAQGTCSRSLVIYRCETGDQGVYVCDALDAQTSASLRVQGRTYTLIFRRVL  
AEDAGEVKFVAENAESRAHLRVKELPVTLLRPLRDKIAMEKHRGVLECVSRASAQVRWFKGGVLEQSGPKYE  
VVSDGLYRKLVIN DVQPEDEDTYTCDAGNVKTSAQFFVVEEQSITIVRGLKDMTVMPEPAPAWFECETSIPSVRP  
PKWLLGKTVLQAGGNVGLQDGTVHRLTLHKTCSTMTGPVHFTIGKSRSSAQLVVS DIPVVLTRPLEPKAGRE  
LQSVVLSCDFRPAPKAVQWKDTP LSPSEKFKMALEGQMAELRILRLTPADAGVYRCQAGSAQS SAEVTVEA  
REVTVIQPLQDAEAMEEGRVCFSCELSHKDEDIEWSLNGTPLYNDSFHEISHEGCLHTLVLSVRQADTGTVC  
ATSPKVSVSARLVVKGKPVVFLKALDDVSAEERGTLTLQCEVSDPEARVWVRKDGVELGSPDKYDFLHKAGAR  
GLTVHDLSHEDAGLYTCQVGSKETQSKVSVHDLHVGITKRLKTEVLEGECSFCVELSHESPSDPVAVWTVGG  
KTVGGSGHFHAVRQGRKYTLTVKDAALSDAGEVVF SVLGLT SKASLIIRERPVDITKPLEDQRTTLGEDVMLS  
CELSRAGTSVRWLKDGKAIRKSQKYDLLSEGTRAVLVVRKASLKDSGEYTCETEASKSTAKLCVVEEKANRFT  
ELADLQVEEKGRAVFTCKTEHPASVVTWRKGLLELRASGKHVPSQEGTLKLTINALERTDSDTYTCDIGQAR  
TQARLLVHGQKVRVIEDLEDTAVQEGSSAKFCCRIAPADYGPVHWF LDKTPLHSNELNEITVQPGGYHVLT LR  
QLALKDSGT VYFEAGDQRTS AALRVTEKPSIFSRPLTDVTVTEGEDTLVCETTTTVDSSVRWTKDGKTLRPSA  
RCQLSHEGCQAQLLITATTPQDGGRYKCEIGGASSSIVRVHALPVRFRRESLKDVEVPEGKAATLRVLSVA  
APVEWRHGDDVLKSSNKYS LRQEGAVLELVIRDLQPDQSGQYSCSFGDQTT SATLT VTKTSSAQFVGLKRNKEA  
TEGTTVTLRCELTK EAPVEWKGTETLRNGDKYSLKQDGA VCELQICSLLVADAGEYSCVCGQEKTSATLTVK  
ALLVHFVRRLRSKEATEGDTTTLQCELSKAAPVEWRKGTETLRDGD RYSLKQDGA VCELQIRSLT IADAGEYL  
CTCGQEKTSATLTVRALPAKFKDSLKNEEATEGTTSELCELSKAAPVTWKKGPKTLQSGDKYVLRQDGA VCG  
LQIHGLTMADAGEYSCVCGQEKTSATLTVRGLPAKFIEDLRSQEATEGATAILRCELSKAAPVEWRKGETL K  
DGDRYTLRQDGA VCELQIRGLAVVDGTYS SLPKTFTEGLRNEEATEGTMATLRCQMSKAAPVEWRKGETLR  
DGDRYSLRQDGA MCELQIRGLTIEDSGEYTCVCGQEKTSATLSVKALPSRFIEDLRSQEATEGTMATLRCQMS  
KTAPVEWKKGSETLRDGGRYSLRQDGPVCELQICDLAVEDAGEYSCVCGQEKTSATLSIKALPPRFIEDLRSQ  
EATEGTMATLRCQMSKAAPVEWRKGETLGDGGRYSLRQNGAVCELQIHDLAVEDTGEYSCVCGQEKTSATLN  
VKALPPRFIEDLRSQEATEGTMATLRCQMSKAAPVEWRKGETLRDGGRYSLRQDGA VCELQIHDL DVEDAGQ  
YSCVCGQEKTSAVLTVDALPPKFTEGLKKEEATEGTMVTLRQMSKEATVEWRKGAKT LSDGGRYSLRQDGA M  
CELQICGLAVEDAGEYSCVCGQEKTSATLSVKALPPRFIEDLRSQEATEGTMATLRCQMSKAAPVEWRKGET  
LRDGD RYSLRQDGA VCELQIRDLAVEDAGEYLCVCGQEKTSATLSVKALPPRFIEDLRSQEATEGTMATLRCQ  
MSKAAPVEWRKGSKTLR DGD RYSLRQDGA MCELQICDLAVEDTGDYSCVCGQEKTSATLSVKALPPRFIEDLR  
SQEAREGTVATLRCRMSKAAPVEWRKGETLKDGD RYSLRQEGNLCELQIRDLAVEDTEEYSCVCGQEKTSAT  
LSVKALPAKFIEDLRSQEAPESSTVTLRCKLSKKASVWKKGSETLRNGARYSLRQDGA VCELEIRDLTVEDT  
GEYSCTCGQERTSATLSIMAPQVVFQOPLQNLQAEEGSMASLRCELSVPNAAMVWSKGGLELQGDTRREARQQ  
GCVAE LLLRDLRREDAGEYSC TCGSQTTSATLMVTAAPVRFLRELQAQDVDEGATARLRCELSREAVSVEWRK  
GSLQLFPKAKYQMVQEGTTAE LLVHGVEQEDAGEYTC DAGHTQS IARLSVRAPKPKFKTDLQSTEQEAGGTAR  
LCCQLSEAEPGTPVQWLKEGVELHVGSKYEMRRQGA VCELLIHGLEAKDTGEYACL VGGQKT LASLRVKEPEV  
TIVRGLVDMEVQADEDEVEFTCKVSQAGATDVQWHLQGLPLQSN EVTEVA VLADGCTHVLQLKGVTL EDAGTVS  
FHVGG LSSSAQLTVRVPEVTVLEPLKDVQLSEGD AHFRCRLSRASGQEARWALGGVPLQC NEMNDITVEQGT  
LYLLTLHKVTL EDAGTITLQVGS CSSEAQLKVTA KNTVLRGL ENVDAL EGG EALFECQLSQPEVA AHTWLLDD  
EPVHTSEKVEVVYFENGLRH LLLLKNLKPQDSCRVTFLAGDVVTS AFLTVRGRWLEVLEPPHDASVKAGMQVR  
FTCILSEAVPVGEATWYINGAAIQPDDTDWTVTTDGS HALTLSNAQPQHAGEVTF AARDAVASARLSVLALP  
DPPEDAEVVGRSDHSVTLSWVAPMSDGGGGLCGYR VEMKEASTGQWQLCHDLVPGPECVDDLVPGKTYRFRV  
AAVGPAGAGEPVHL PQMVKIAPAPAPAPAPAPAPETRQAVVGEDIC LELEVAADGGEVVWHKGTERRIQPGG  
HFEVLSRGRQMLVIKGFRTEDQGEYRCGPIQGLPSSGAATFNVMVTS GSGDEVPAQPSLPPEAAQEGDLHLL  
WEALARKRRMSREPTLDSISELPEEDSRVQHLRQEA EETAPDLSEGYSTADELARTGEADLSHTSSDDES RAG  
TPSLVTYLLKKAGGPGISPLASKHEAQVTT SVKPQKQLEQEPVVP TCPPGDL SAADLMDPSLDKAAVKIQAAFKG  
YKVRKEMKQYEGPVSRTFGDTEAQVGDVLRLECVLQATKTD MRACWLKDGIELTDGRHYHIDQLKDGTC SLLV  
TGLAPTDSGRYTCQVSTKSGRVSHSACVVVSGTESEAESSGGELDDAFRRAARRLHRLFRTKSPAELSEEEL  
FLSADEGPGPEEPADWQTYREDENFVCIRFESLAEARQAVTCFRNM FATMIGVEISLGEQGP RGVEMRIGK  
VAPT VTPAVPLAKT PGLQTS DAAPVFLTELQNQDVQDGYPMS FDCVVTGQPVPSVRWFKDGKLL EEDDHYMIN  
EDQQGGHQLIITAVVPADMGVYRCLAENSMGVSSTKAELRVELTSTDYDTA ADATETSSYFSAQGYLSSREQE

GTESDEGQLPQVLEELKDLQVAPGTRLAKFQKLVKGYPAKLYWFKDQPLTTSDHIRMTDKKTLHTLEIVSV  
TREDSGQYAAIYISNAVGAAYSSARLLVVRGPSEPEEKPASDVHERLVPRILEKFTPKKVKRGSSITFSVKVEG  
HPAPSVHWLKEEAKEKGLVWIGPDTPGYTMASSSKQHSVLVLDVGRQHOGTYTCIATNPAGQALCSASLHISGL  
AKEEEQERVKEALISSFLQGTSQAVSAQMSESAGFADLVGQSKGESLVAEEAHSHLSLAEVGTTEEFLQKLT SQ  
ITEMVSAKISQAKLQVPGGDSDEETKTPSASPRHGRSRPSSSVQESSSESEDGDSRGEIFDIYVVTADYLP LG  
AEQDAIILREGQYVEVLDSAHPLRWLVRTKPTKSSPSRQGWVSPAYLDKRLKLSPEWGPTEAPEFPGEAVSED  
EYRTRLSSVIQELLSSEQAFVGELOFLESHHMKHLERSPRVPAAVASQKTVIFRNVQDISHFHSSFLKELQGC  
GTDDDVAMCFIKNQEA FEKYLEFLVGRVQAESVVVSTPVQEFYKKYAEETLSAKDPTQPPPPPLQHYLEQPV  
RVQKYQALLKELIRNKARNRQNCALLEQAYAVVSALPQRAENKLVSLMENYPGTLEALGEPHQGHFVWEG  
APGARMFWKGNHRHVF LFRNYLVICKPRRDSRTDTFSYVFRNMMKLSSIDLNDQVEGDDRAFEVWHEREDESVR  
KYLQARTVIKNSWVKEICGIQQRLAQPVWRPPEFEEELADCTAELGETVKLACRVTGTPKPIVSWYKDGKP  
VEVDPHHILIEDPDGSC TLI LDNL TGIDSGQYMCFAASAAGNASTLGKILVQVPPRFVNVKVRATPFVEGEDAQ  
ITCTVEGAPYPQIRWYKDGTL LAPGNRYRMLNEPRSGVLV LVIQAASKEDLGHYECELVNRLGSTRGGGELYM  
QSPALRARDQHHREQIVAAVEVTEQETKVPKKTVIEETITTVVKS PRGRRQSPGKSPSRSPRRSASPRRPG  
LLAPERLYPPGTSPSRRLVEVEQGRKAPVPALYVTEAEVHAPASQSQPKWLEVEETIEVRVKKTGSRGASPVRE  
MTRSGEGILFTLPGGIPGRDPNANNNSNKS SVYQEARWGPVAVHVGEFFIFQVDSVGNVDVVAASPEPEQVRA  
SQKEENTERQEGCSDGDENTFLMEEFQD TDSLQGRDPKILTHNGRVLTLADLEDYVQEGETF GCGDSTPSTP  
DEPPCEVSVLQREI SEPTVGQPVLLNVGRPPGTGATPSSFFRPGSQVHSPESVSFLLEAWSGPVSAAPWTSSF  
HTHVQSSVDGSHGSFKTEVSTQTVSFGAVGETVTLHIDPDGGEAPGPSQG\*  
>rs46635685\_ENSMUSP00000020732\_c.514:C>A\_p.S172\*  
ENSMUST00000020732.13|Obscn-201|ENSMUSG00000061462|-|chr11:g.59026687:G>T  
MDHSFSGAPRFLTRPKAFVSVGKDATLSCQIVGNPTPHVSWEKDRQVVEAGARFRLAQDGDVYRLTILDLAL  
GDSGQYVCRARNAIGEAFAAVGLRVDSEGTCAEQAPHLLRPTSIRVREGADATFRCRVGGSPPAVSWSKDG  
RRLGPPDAPHVRVEEHGESSALRIR\*ARPRDGGTYEVRAENPLGSASAAAAALVVDSDAEVAGPPGTSTATLLA  
HLQORREAMRAEGIPSPPGAGTRTCTVTEGKHARLSCFVTGEPKPEVWKKDGQLVTEGRRHVVEDEQENF  
VLKILFCKQSDRGLYCTASNLVGQTYSSVLVVVREPTVPFKKRLQDLEVREKESATFQCEVAQPAEAFAWFK  
EETRLWASAKYQLEIEEECTERRLLTVRNVSDADDAVYICETPTEGSRVVAELSVQGNLTKLPRKTAVRTGDTAIF  
WVELAVPEGPVRWLRNQEEMVAGGRVAITAEGTCHTLTI FQCTLEDMGEVAFVSGGCRTTTQFCVSAPRRPPL  
YPPADPVVKAKTESSVTLWSAPPHGDRPVTIDGYVLEKRLKLGAYAWSRCHEAGWLATTEFTITGVAAEEDFQ  
FRVSAINHFGQGPYLEFPGMTMLVPLAVKTPKAVEAVEGGEVTFVSDLTVASSGEWFLDGEALKASSIYVI  
RCDRTRHMLTIREV PARLHGAQLK FVANGIETS IQMVVRAALGLPSSKLPAAAAREVLAQLHEEAQLLAE LSD  
QAAAVTWLKDGRELSLGPKEYMQVSAGRRALLVRDVAQDDAGLYECVSRGSR TAYQLLVQDITDGYRDWGPAG  
PQKHMCKCAGAKIARYLGSSCYRFLQYDKGVWHWLEAALDTRQKGKTS SCSLHEKPKLVFAKQQAHSEVKA  
AGNSATLSCEVTQAQTEVTFWKDGKLLSSSSKVRMEASGCSRRLVVQQAGKADAGEYSCEAGGQKLSFRLDVA  
EPKLVFAKQQAHSEVKA EAGASATLSCEVAQAQTEVTFWKDGKLLSSSSKVRMEASGCSRRLVVQQAGKAD  
AGEYSCEAGGQKLSFRLDVAEPKLVFAKEQQARSEVKA EAGASATLSCEVAQAQTEVTFWKDGKLLSSSSKVRM  
EASGCSRRLVVQQAGKADAGEYSCEAGGQKLSFRLDVTEPKLVFAKEQQARSEVKA EAGASATLSCEVAQAQ  
EVTWFKDGKLLSSSSKVRMEASGCSRRLVVQQAGKADAGEYSCEAGGQKLSFRLDVAEPKLVFAKEQQARSEV  
KAEAGNSATLSCEVAQAQTEVTFWKDGKLLSSSSKVRMEASGCSRRLVVQQAGKADAGEYSCEAGGQKLSFHL  
DVTEPKLVFAKEQQAHSEVKA EAGASATLSCEVAQAQTEVTFWKDGKLLSSSSKVRMEASGCSRRLVVQQAGK  
ADAGEYSCEAGGQKLSFRLDVAEPKLVFAKEQQARSEVKA EAGASATLSCEVAQAQTEVTFWKDGKLLSSSSK  
VRVEASGCSRRLVVQQAGKADAGEYSCEAGGQKLSFRLDVAEPKLVFAKEQQANSEVKA EAGASATLSCEVAQ  
AQTEVTFWKDGKLLSSSSKVRVEASGCSRRLVVQQAGKADAGEYSCEAGGQKLSFRLDVAEPKLVFAKEQQAH  
SEVKA EAGASATLSCEVAQAQTEVTFWKDGKLLSSSSKVRVEASGCSRRLVVQQAGKADAGEYSCEAGGQKLS  
FRLDVAEPKLVFAKEQQAHSEVKA EAGASATLSCEVAQAQTEVTFWKDGKLLSSSSKVRVEASGCSRRLVVQQ  
AGKADAGEYSCEAGGQKLSFRLDVAEPKLVFAKEQQAHSEVKA EAGASATLSCEVAQAQTEVTFWKDGKLLSS  
SSKVRVEASGCSRRLVVQQAGKADAGEYSCEAGGQKLFRLDVAEPKLVFAKEQQAHSEVKA EAGASATLSCE  
VAQAQTEVTFWKDGKLLSSSSKVRVEASGCSRRLVVQQAGKADAGEYSCEAGGQKLSFRLDVAEPKLVFAKEQ  
QAHSEVKA EAGASATLSCEVAQAQTEVTFWKDGKLLSSSSKVRVEASGCSRRLVVQQVQKADAGEYSCEARGQ  
KLSFRLDVADTRLMFAKEQQARTEVKA EAGNSATLSCEVAQAQTEVTFWKDGKLLSSSSKVRVEASGCSRRLV  
VQQAGKADAGEYSCEAGGQKLSFRLDVAEAE SQIPERPSRREPLVVKEHETIILTATIAAPSVAAVTWLKDV  
EIRRSKRHEATSLGDTHTLTVRGAQVLD SAIYSCRVGKEGQDFPVQVEEVA AKFSKPLEPVEGELGGTVMLVC  
ELSPQAEVWQRCNTQLRPGKRFQMTSEGPRTLT VSGLE REDDAEYVCE SRDDRTSARLTVKVPVVKFTS  
GLSAMVAEEGGQEFATFQC VVSPSDAGVTWYKDMQLQPSKEFVMVESGASRSLTILGLTLEDAGQVTEAEGAS  
SSAALRVREAPQVLFKKLEPQTVVEERTSVTLEVELETRPWPEVWTRNAAVLTPSENVEIRAEGARHCLVLRV  
GFADRGGFFGCETPDDKTQAKLNVEMRQVRLVVRGLQVEVEAKEQGTASMDVELSHAEVEG SWTRDGLRLQPGPKC  
HLAVQGPVHILTL SALQPQDSGLVAFRAEGVHTSARLIVTELPVSFTRVLQDVVATQKEKVTLECELSRPVDV  
RWLKDGVLELRAGKAIGIVAQGTCSRLVIYRCETGDQGVYVCDALDAQTSASLRVQGRTYTLIFRRVLAEDAGE



VKFVAENAESRAHLRVKELPVTLLRPLRDKIAMEKHRGVLECCQVSRASAQVRWFKGGVELQSGPKYEVVSDGL  
YRKLVINVDQPEDEDTYTC DAGNVKTS AQFFVEEQSITIVRGLKDMTVME PAPA WFE CETS IPSVRPPKWL LG  
KTVLQAGGNGVLEQDGTVHRLTLHKTCSTMTGPVHFTIGKSRSSAQLVVSDIPVVLTRPLEPKAGRELQSVVL  
SCDFRPAPKAVQWYKDDTPLSPSEKFKMALEGQMAELRILRLTPADAGVYRCQAGSAQSSAEVTVEAREVTVI  
QPLQDAEAMEEGRVCFSCELSHKDEDEI EWSLNGTPLYNDSFHEI SHEGCLHTLVLSVSRQADTGTVCATSPKV  
SVSARLVVKGKPVVFLKALDDVSAEERGLTLTQCEVSDPEARVVRKDGVELGSPDKYDFLHKAGARGLTVHD  
LSHEDAGLYTCQVGSKETQSKVSVHDLHVGITKRLKTVEVLEGE SC SFECVLSHESPSDPAVWTVGGKT VGG S  
GHFHAVRQGRKYTLTVKDAALSDAGEVVFVSVLGLTSKASLIIRERPVDITKPLEDQRTTLGEDVMLSCELSRA  
GTSVRWLKDGKAIRKSQKYDLLSEGTAVLVVRKASLKDSGEYTCETEASKSTAKLCVEEKANRFEELADLQ  
VEEKGRAVFTCKTEHPASVVTWRKGLLELRASGKHVPSQEGTLTKLTINALERTSDTYTCDIGQARTQARLL  
VHGQKVRVIEDLEDTAVQEGSSAKFCCRIAPADYGPVHWF LDKTPLHSNELNEITVQPGGYHVLTLRQLALKD  
SGTVYFEAGDQRTSAALRVTEKPSIFSRPLTDVTVTEGEDTLTVCE TTTVDSSVRWTKDGKTLRPSARCQLSH  
EGCQAQLLITATTPQDGGRYKCEIGGASSSSIVRVHALPVRFRESLKDVEVPEGKAATLRCVLSVAAPVEWR  
HGDDVLKSSNKYSRQEGAVLELVIRDLQPQDSGQYSCSFGDQTSATLTVKTSQAQFVGLKRNKEATEGTTV  
TLRCELTKEAPVEWKKGTETLRNGDKYSLKQDGA VCELQICSLLVADAGEYSCVCGQEKT SATLTVKALLVHF  
VRRLSKEATEGDTTLQCELSKAAPVEWRKGTETLRDGD RYSLKQDGA VCELQIRSLTIADAGEYLCTCGQE  
KTSATLTVRALPAKFKDSLKNEEATEGTTATLSCELSKAAPVTWKKGPKTLSGDKYVLRQDGA VCGLQIHGL  
TMADAGEYSCVCGQEKT SATLTVRGLPAKFIEDLRSQEATEGATAILRCELSKAAPVEWRKGTETLRDGRYT  
LRQDGA VCELQIRGLAVVDGTGYSLPTKFTTEGLRNEEATEGTMATLRCQMSKAAPVEWRKGTETLRDGRYS  
LRQDGA MCELQIRGLTIEDSGEYTCVCGQEKT SATLSVKALPSRFIEDLRSQEATEGTMATLRCQMSKTAPVE  
WKKGSETLRDGGRYSLRQDGPVCELQICDLAVEDAGEYSCVCGQEKT SATLSIKALPPRFIEDLRSQEATEG  
MATLRCQMSKAAPVEWRKGTETLRDGGRYSLRQNGAVCELQIHDLAVEDTGEYSCVCGQEKT SATLNVKALPP  
RFIEDLRSQEATEGTMATLRCQMSKAAPVEWRKGTETLRDGGRYSLRQDGA VCELQIHDLVEDAGQYSCVCG  
QEKTSAVLTVDALPPKFTTEGLKKEEATEGTMVTLRCQMSKEATVEWRKGAKT LSGGGRYSLRQDGA MCELQIC  
GLAVEDAGEYSCVCGQEKT SATLSVKALPPRFIEDLRSQEATEGTMATLRCQMSKAAPVEWRKGTETLRDGR  
YSLRQDGA VCELQIRDLAVEDAGEYLCVCGQEKT SATLSVKALPPRFIEDLRSQEATEGTMATLRCQMSKAAP  
VEWRKGTETLRDGGRYSLRQDGA MCELQICDLAVEDTGDYSCVCGQEKT SATLSVKALPPRFIEDLRSQEARE  
GTVATLRCRMSKAAPVEWRKGTETLRDGD RYSLRQEGNLCELQIRDLAVEDT EYSCVCGQEKT SATLSVKAL  
PAKFIEDLRSQEAPESSTVTLRCKLSKKASVVWKKGSETLRNGARYSLRQDGA VCELEIRDLTVE DTGEYSCT  
CGQERTSATLSIMAPQVVFQQPLQNLQAEEGSMASLRCELSVPNAAMVWSKGGLELQGDTRREARQQGCVAEL  
LLRDLRREDAGEYSCTCGSQTT SATLMVTAAPVRFLRELQAQDVDEGATARLRCELSREAVSVEWRKGS LQLF  
PCAKYQMVQEGTTAELLVHGVEQEDAGEYTC DAGHTQSIARLSVRAPKPKFKTDLQSTEQEA GTARLCCQLS  
EAEPTGPVQWLKEGVELHVGSKYEMRRQGA VCELLIHGLEAKDTGEYACLVGGQKT LSLRVKEPEVTIVRGL  
VDMEVQADEDVEFTCKVSAQATDVQWHLQGLPLQSN E VTEVAVLADGCTHVLQLKGVTL E D A G T V S F H V G G L  
SSSAQLTVRVP E V T V L E P L K D V Q L S E G Q D A H F R C R L S R A S G Q E A R W A L G G V P L Q C N E M N D I T V E Q T L Y L L L T L  
HKVTLEDAGTITLQVGS CSSEAQLKVTAKNTVLRGL ENVDAL E G G E A L F E C Q L S Q P E V A A T W L L D E P V H T S  
EKVEVVYFENGLRHLLLLKNLKPDSCRVTFLAGDVVTS AFLTVRGRLEVL E P P H D A S V K A G M Q V R F T C I L S  
EAVPVGEATWYINGAAIQPDDTDWTVTTDGS H H A L T L S N A Q P Q H A G E V T F A A R D A V A S A R L S V L A L P D P P E D A  
E V V G R S D H S V T L S W V A P M S D G G G L C G Y R V E M K E A S T G Q W Q L C H D L V P G P E C V D D L V P G K Y R F R V A A V G P A  
G A G E P V H L P Q M V K I A P A P A P A P A P A P A P E T R Q A V V G E D I C L E L E V A A D G G E V V W H K G T E R I Q P G H F E V L S  
R G Q R Q M L V I K G F R T E D Q G E Y R C G P I Q G L P S S G A A T F N V V M T S G S G D E V P A Q P S L P P E A A Q E G D L H L L W E A L A R  
K R R M S R E P T L D S I S E L P E E D S R V Q H L R Q E A E E T A P D L S E G Y S T A D E L A R T G E A D L S H T S S D D E S R A G T P S L V T  
Y L K K A G G P G I S P L A S K H E A Q V T T S V K P Q K Q Q E P V V P T C P P P G D L S A A D L M D P S L D K A A V K I Q A A F K G Y K V R K E  
M K Q Q E G P V F S R T F G D T E A Q V G D V L R L E C V L A T K T D M R A C W L K D G I E L T D G R H Y H I D Q L K D G T C S L L V T G L A P T  
D S G R Y T C Q V S T K S G R V S H S A C V V V S G T E S E A E S S S G G E L D D A F R R A A R R L H R L F R T K S P A E L S E E L F L S A D E  
G P G E P E E P A D W Q T Y R E D E N F V C I R F E S L A E A R Q A V T C F R N M F A T M G I G V E I S L G E Q G P R G V E M R I G K V A P T V T  
P A V P L A K T P G L Q T S D A A P V F L T E L Q N Q D V Q D G Y P M S F D C V V T G Q P V P S V R W F K D G K L L E E D D H Y M I N E D Q Q G G  
H Q L I I T A V V P A D M G V Y R C L A E N S M G V S S T K A E L R V E L T S T D Y D T A A D A T E T S S Y F S A Q G Y L S S R E Q E G T E S D E  
G Q L P Q V L E E L K D L Q V A P G T R L A K F Q L K V K G Y P A P K L Y W F K D G Q P L T T S D H I R M T D K K T L H T L E I V S V T R E D S G  
Q Y A A Y I S N A V G A A Y S S A R L L V R G P S E P E E K P A S D V H E R L V P P R I L E K F T P K K V K R G S S I T F S V K V E G H P A P S V  
H W L K E E A E K G V L W I G P D T P G Y T M A S S S K Q H S L V L L D V G R Q H Q G T Y T C I A T N P A G Q A L C S A S L H I S G L A K E E E Q  
E R V K E A L I S S F L Q G T S Q A V S A Q M S E S A G F A D L V G Q S K G E S L V A E E A H S H L S L A E V G T E E F L Q K L T S Q I T E M V S  
A K I S Q A K L V P P G D S D E E T K T P S A S P R H G R S R P S S V S Q E S S E S S E D G D S R G E I F D I Y V V T A D Y L P L G A E Q D A I  
I L R E G Q Y V E V L D S A H P L R W L V R T K P T K S S P R Q G V V S P A Y L D K R L K L S P E W G P T E A P E F P G E A V S E D E Y R T R L  
S S V I Q E L L S S E Q A F V G E L Q F L E S H H M K H L E R S P R V P A A V A S Q K T V I F R N V Q D I S H F H S S F L K E L Q C C G T D D D V  
A M C F I K N Q E A F E K Y L E F L V G R V Q A E S V V V S T P V Q E F Y K K Y A E E T L S A K D P T Q P P P P L Q H Y L E Q P V E R V Q K Y Q  
A L L K E L I R N K A R N R Q N C A L L E Q A Y A V V S A L P Q R A E N K L H V S L M E N Y P G T L E A L G E P I R Q G H F I V W E G A P G A R M  
P W K G H N R H V F L F R N Y L V I C K P R R D S R T D T F S Y V F R N M M K L S S I D L N D Q V E G D D R A F E V W H E R E D S V R K Y L L Q A

RTVI IKNSWVKEICGIQQRLAQPVWRPPEFEEELADCTAELGETVVKLACRVTGTPKPIVSWYKDGKPVVEVDPH  
HILIEDPDGSCCTLLLDNLTGIDSGQYMCFAASAAGNASTLGKILVQVPPRFVNVKVRATPFVEGEDAQITCTVE  
GAPYPQIRWYKDGTLTLLAPGNRYRMLNEPRSGVLVVIQAASKEDLGHYECELVNRLGSTRGGGELYMOSPALR  
ARDQHHREQIVAAVEERRPSP\*  
>rs46635685\_ENSMUSP00000151217\_c.514:C>A\_p.S172\*  
ENSMUST00000219084.3|Obscn-207|ENSMUSG0000061462|-|chr11:g.59026687:G>T  
MDHSFSGAPRFLTRPKAFVSVGKDATLSCQIVGNPTPHVSWEKDRQFVEAGARFRLAQDGDVYRLTILDLAL  
GDSGQYVCRARNAIGEFAAVGLRVDSEGTCAEQAPHFLLRPTSIRVREGADATFRCRVGGSPQPAVSWSKDG  
RRLGPPDAPHVRVEEHGESSALRIR\*ARPRDGGTYEVRAENPLGSASAAAALVVDSDAEVAGPPGTSTATLLA  
HLQQRRREAMRAEGIPPSPPGAGTRTCTVTEGKHARLSCFVTGEPKPEVWKKDQGLVTEGRRHVVEDEQENF  
VLKILFCKQSDRGLYTCTASNLVGQTYSSVLVVVREPTVPFKKRLQDLEVREKESATFQCEVAQPAEAAWFK  
EETRLWASAKYDIEEEGETERRLTVRNVSADDDAVYICETTEGSRVVAELSVQGNLTKRKLPRKTAVRTGDTAIF  
WVELAVPEGPVWRWRNQEEMVAGGRVAITAEGTCHTLTI FQCTLEDMGEVAFVSGGCRTTTQFCVSAAPRRPPL  
YYPADPVVKAKTESVTLWSAPPHGDRPVTIDGYVLEKRKLGA YAWSRCHEAGWLATTEFTITGVAAEGDFQ  
FRVSAINHFGQGPYLEFPGTMHLVPLAVKTPKAVEAVEGGEVTFVSDLTVASSGEWFLDGEALKASSIYVI  
RCDRTRHMLTIREVPARLHGAQLKFVANGIETSIQMVVRAALGLPSSKLPAAAAREVLAQLHHEEAQLLAE LSD  
QAAAATWTKDRELSTLGPKYEMQVSAGRRALLVRDVAQDDAGLYECVSRGSRRTAYQLLVQDITDGYRWDWGPAG  
PQKHMCKCAGAKIARYLGSSEYRFLQYDKGVVHWLEAALDTRQKGTSSCSLHEKPKLVFAKGQQAHSVEKAE  
AGNSATLSCEVTQAQTEVTFWKDGGKLSSSSKVRMEASGCSRRLVVQQAGKADAGEYSCEAGGQKLSFRLDVA  
EPKLVFAKGQQAHSVEKAEAGASATLSCEVAQAQTEVTFWKDGGKLSSSSKVRMEASGCSRRLVVQQAGKADA  
GEYSCEAGGQKLSFRLDVAEPKMFVFAKEQQARSEVKAEGASATLSCEVAQAQTEVTFWKDGGKLSSSSKVRM  
EASGCSRRLVVQQAGKADAGEYSCEAGGQKLSFRLDVTEPKLVFAKEQQARSEVKAEGASATLSCEVAQAQ  
EVTWFKDGGKLSSSSKVRMEASGCSRRLVVQQAGKADAGEYSCEAGGQKLSFHLVDVTEPKLVFAKEQQAHSEV  
KAEAGASATLSCEVAQAQTEVTFWKDGGKLSSSSKVRMEASGCSRRLVVQQAGKADAGEYSCEAEAGQKLSFRL  
DVAEPKLVFAKEQQARSEVKAEGASATLSCEVAQAQTEVTFWKDGGKLSSSSKVRVEASGCSRRLVVQQAGK  
ADAGEYSCEAGGQKLSFRLDVAEPKLVFAKEQQANSEVKAEGASATLSCEVAQAQTEVTFWKDGGKLSSSSK  
VRVEASGCSRRLVVQQAGKADAGEYSCEAGGQKLSFRLDVAEPKLVFAKEQQAHSEVKAEGASATLSCEVAQ  
AQTEVTFWKDGGKLSSSSKVRVEASGCSRRLVVQQAGKADAGEYSCEAGGQKLSFRLDVAEPKLVFAKEQQAH  
SEVKAEGASATLSCEVAQAQTEVTFWKDGGKLSSSSKVRVEASGCSRRLVVQQVQKADAGEYSCEARGQKLS  
FRLDVAEAEESQIPERPSRREPLVVKHEHETIILTATIAAPSVAAVTWLKDGV EIRRSKRHEATSLGDHTLTVR  
GAQVLD SAIYSCRVGKEGQDFPVQVEEVAAKFSKPLEPVEGELGGTVMLVCELSPEQAEVWRCGNTQLRPGK  
RFQMTSEGPRRTLTVSGLREDDAEYVCE SRDDRTSARLTVKVPVVKFTSGLSAMVAEEGQEATFQCVVSPS  
DAGVTWYKDGMLQLPSEKFMVVESEGASRSLTILGLTLEDAGQVTVAEAGASSAALRVREAPVLFKFKLEPQT  
VEERTSVTLEVELTRPWPEVKWTRNAAVLTPSENVEIRAEGARHCLVLRVSGFADRGFFGCETPDDKTQAKLN  
VEMRQVRLVRLGQVEVAKEQGTASMDVELSHAEEVGSWTRDGLRLQPGPKCHLAVQGPVHILTLALQFQDSG  
LVAFRAEGVHTSARLIVTELPVSFTRVLQDVVATQKEKVTLECELSRPVDVWRWLKDGVELRAGKATGIVAQGT  
CRSLVIYRCETGDQGVYCDALDAQTSASLRVQGRYTLIFRRVLAEDAGEVKFVAENAESRAHLRVKELPVT  
LLRPLRDKIAMEKHRGVLECVSRASAQVRWFKGGVELQSGPKYEVVSDGLYRKLVIINDVQPEDEDTYTC DAG  
NVKTSAQFFVEEQSITIVRGLKDMTVMEPAPAWFECETSIPSVRPPKWL LGKTVLQAGGNVLEQDGTVHRLT  
LHKTCSTMTGVPVHFTIGKSRSSAQLVVS DIPVVLTRPLEPKAGRELQSVVLSCDFRPAPKAVQWYKDDTPLSP  
SEKFKMALEGQMAELRILRLTPADAGVYRCQAGSAQSSAEVTVAEAREVTVIQPLQDAEAMEEGRVCFSCELSH  
KDEDIEWSLNGTPLYNDSFHEISHEGCLHTLVLKSVRQADTGTVCATSPKVS SARLVVKGKPVVFLKALDDV  
SAEERGLTLTQCEVSDPEARVWVRKDGVELGSPDKYDFLHKAGARGLTVHDLSHEDAGLYTCQVGSKETQSKV  
SVHDLHVGITKRLKTVEVLEGECSFECVLSHESPSDPAVWTVGGKTVGGSGHFHAVRQGRKYTLTVKDAALS  
DAGEVVSVLGLTSKASLIIRERPVDITKPLEDQRTTLGEDVMLSCELSRAGTSVRWLKDGKAIRKSQKYDLL  
SEGTRAVLVVRKASLKDSGEYTCETEASKSTAKLCVEEKANRFTTELADLQVEEKGRAVFTCKTEHPASVVTW  
RKGLLELRASGKHVPSQEGLTLKLTINALERTSDTYTCDIGQARTQARLLVHGQKVRVIEDLEDTAVQEGSS  
AKFCCRIPADYGPVHWF LDKTPLHSNELNEITVQPGYHVLT LRQLALKDSGTVYFEAGDQRTSAAALRVTEK  
PSIFSRPLTDVTVTEGEDLTLVCETTTVDSSVRWTKDGKTLRPSARCQLSHEGCAQLLITATTPQDGGRYKC  
EIGGASSSSIVRVHALPVRFRESLKDVEVPEGKAATLRCVLSVAAPVEWRHGDDVLKSSNKYS LRQEGAVLE  
LVIRDLPQDQSGQYSCSFGDQTTSATLTVKTSQAQFVGKLRNKEATEGTTVTLRCELTKEAPVEWKKGTETLR  
NGDKYSLKQDGA VCELQICSLLVADAGEYSCVCGQEKTSATLTVKALLVHFVRRRLRSKEATEGDTTTLQCELS  
KAAPVEWRKGTETLRDGD RYSLKQDGA VCELQIRSLTIADAGEYLCTCGQEKTSATLTVRGLPAKFIEDLRSQ  
EATEGATAILRCELSKAAPVEWRKGSSETLKDGD RYTLRQDGA VCELQIRGLAVVDGTGTYSSLP TKFTEGRNE  
EATEGTMATLRCQMSKAAPVEWRKGSSETLRDGD RYSLRQDGA MCELQIRGLTIEDSGEYTCVCGQEKTSATLS  
VKALPPRFIEDLRSQEATEGTMATLRCQMSKAAPVEWRKGSSETLGDGGRYSLRQNGAVCELQIHDLAVEDTGE  
YSCVCGQEKTSATLNVKALPPKFTEGLKKEEATEGTMVTLRCQMSKEATVEWRKGAKT LSDGGRYSLRQDGA M  
CELQICGLAVEDAGEYSCVCGQEKTSATLSVKALPPRFIEDLRSQEATEGTMATLRCQMSKAAPVEWRKGSSET

LRDGDRLSLRQDGVAVCELQIRDLAVEDAGEYLCVCGQEKTSATLSVKALPPRFIEDLRSQEATEGTMATLRCQ  
MSKAAPVEWRKGSKTLRDGDRLSLRQDGVAVCELQICDLAVEDTGDYSCVCGQEKTSATLSVKAPQVVFQOPLQ  
NLQAEEGSMASLRCELSVNAAMVWSKGGLELQGDTRREARQQGCVAELLRLDLRREDAGEYSCTCGSQTTSA  
TLMVTAAPVRFRLRELQAQDVDEGATARLRCELSREAVSVEWRKGSQQLFPCAKYQMVQEGTTAELLVHGVEQE  
DAGEYTC DAGHTQS IARLSVRAPKPKFKTDLQSTEQEAGGTARLCCQLSEAEPGTPVQWLKEGVLELHVGSKYE  
MRRQGAVCELLIHGLEAKDTGEYACL VGGQKTLASLRVKEPEVTIVRGLVDMEVQADEDEVEFTCKVSQAGATD  
VQWHLQGLPLQSNEVTEVAVLADGCTHVQLQKGVLTLEDAGTVSFHVGGSSSAQLTVRVPEVTVLEPLKDVQL  
SEGQDAHFRCRLSRASGQEARWALGGVPLQCNEMNDITVEQGTLYLLTLHKVLTLEDAGTITLQVGSSESQAQ  
KVTAKNTVLRGLENVDALEGGEALFECQLSQPEVAHAHTWLLDDEPVHTSEKVEVVYFENGLRHLLLLKLNKLPQ  
DSCRVTFLAGDVVTS AFLTVRGWRLEVLPPHDASVKAGMQVRFTCILSEAVPVGEATWYINGAAIQPDDTDW  
TVTDTDGSHHALTSLNAQPQHAGEVTF AARDAVASARLSVLALPDPPEAEVVGSRSDHSVTLVSWVAPMSDGGGG  
LCGYRVEMKEASTGQWQLCHDLVPGPECVVDLVPKTYRFRVAAVGPAGAGEPVHLPQMVKIAPAPAPAPAP  
APAPETRQAVVGEDICLELEVAADGGEVWHKGTERRIQPGGHFEVLSRGQRQMLVIKGFRTEDQGEYRCGPIQ  
GLPSSGAATFNVVMTSGSGDEVPAQPSLPPEAAQEGDLHLLWEALARKRRMSREPTLDSISELPEEDSRVQHL  
RQEAETAPDLSEGYSTADELARTGEADLSHTSSDDES RAGTPSLVTYLKKAGGPGISPLASKHEAQVTTSVK  
PQKQQEPVVPTCPPPGDLAADMPSLDKAAVKIQAAFQKGYKVRKEMKQOEGPVFSRTFGDTEAQVGDVLRRL  
ECVLATKTD MRACWLKDGIELTDGRHYHIDQLKDGTC SLLVTGLAPTDSGRYTCQVSTKSGRVSHSACVVVSG  
TESEAESSSGGELDDAFRRAARLHRLFRTKSPAELSEEELFLSADEGPGPEEPADWQTYREDNFVCIRFE  
SLAEARQAVTCFRNMFATMGIVGVEISLGEQGPGRVEMRIGKVAPTVTPAVPLAKTPGLQTSDAAPVFLTELQN  
QDVQDGYPMSFDCVVTGQPVPSVRWFKDGKLEEDDHYMINEDQQGGHQLIITAVVPADMVYRCLAENSMGV  
SSTKAELRVELTSTDYDTAADATETSSYFSAQGYLSSREQEGTESDEGQLPQVLEELKDLQVAPGTRLAKFQL  
KVKGYPAKPLYWFKDGQPLTSDHIRMTDKKTLHTLEIVSVTREDSGQYAAIYISNAVGAAYSSARLLVGRPSE  
PEEKPASDVHERLVPRI LEKFTPKKVKRGS S ITFSVKVEGHPAPSVHWLKEEA EKGLVWIGPDPGYTMASS  
SKQHSVLVLDVGRQHOGTYTCIATNPAGQALCSASLHISGLAKEEEQERVKEALISSFLQGTSSQAVSAQMSES  
AGFADLVGQSKGESLVAEEAHSHLSLAEVGT EEFLOKLT SQI TEMVSAKISQAKLQVPGGDSDEETKTPSASP  
RHGRSRPSSSVQESSESEDGSRGEIFDIYVVTDYLP LPGAEQDAIILREGQYVEVLD SAHPLRWLVRTKPT  
KSSPSRQGVWSPAYLDRKRLKLSPEWGPTEAPEFPGEAVSEDEYRTRLS SVIQELLSSQAFVGLQLFLSHHM  
KHLERSPRVPAAVASQKTVI FRNVQDISHFHSSFLKELQCGCTDDVAMCFIKNQEA FEKYLEFLVGRVQAES  
VVVSTPVQEFYKKYAEETLSAKDPTQPPPPPLQHYLEQPVVERVQKYQALLKELIRNKARNRQNCALLEQAYAV  
VSALPQRAENKLVSLMENYPGTLEALGEP IROGHFIVWEGAPGARMPWKGHNHRVFLFRNYLVICKPRRDSR  
TDTFSYVFRNMMKLSSIDLNDQVEGDDRAFEVWHERE DSVRKYLLQARTVI IKNSWVKEICGIQQRLAQPVWR  
PEFEFEELADCTAELGETVKLACRVGTGPKPIVSWYKDGKPVVEVDPHHILIEDPDGSC TLI LDNLTGIDSGQY  
MCF AASAAGNASTLGKILVQVPPRFVNKVRATPFVEGEDAQITCTVEGAPYPQIRWYKDG TLLAPGNRYRMLN  
EPRSGVLV LVIQAASKEDLGHYECELVNRLGSTRGGGELYMQSPALRARDQHHRQI VAAVEVTEQETKVPKK  
TVIIEETITTVVKS PRGRRQSPGKSPSRSPRRSASPRRPGLLAPERLYPPGTSPSRRLEVEVQGRKAPVPALY  
VTEAEVHAPASQSPKWLVEETIEVRVKKTGSRGASPVREMTSRGEGILFTLPGGIPGRDPNANNNSNKS SVY  
QEARTWGP AVVHVGEFFIFQVDSVGNVDVAASPEPEQVRASQKEENTERQEGCSDGDENTFLMEEPQD TDSL  
QGRDPKILTHNGRVLT LADLEDYVPQEGETF GCGDSTPSTPDEPPCEVSVLQREI SEPTVGGQPVLLNVGRPPG  
TGATPSFFRPGSQVHSPESVSFLLREAWSGPVSAAPWTSSFHTHVQSSVDGSHG SFKTEVSTQTVSF GAVGET  
VTLHIDPDGGEAPGPSQG\*

>rs262337383\_ENSMUSP00000065882\_c.484:C>T\_p.T162I  
ENSMUST00000069631.3|Iba57-202|ENSMUSG00000049287|-|chr11:g.59052155:G>A  
MSHGRHPGCASYLHRALCLGPQPVKSEASGVIFKMGASALS LPPHF LERFRWLLLNCSAVASAVRQLAGLPSL  
QLWLVNCSAAAATTAVPPPLTSAVSAASFCYQPSPHYRKQEKKMERSLFSGLLLPHWGKAQESLPTTSLSEP  
SQPVCIAPERMFGPIIDLPIGNLRND\*

>rs50539781\_ENSMUSP00000065882\_c.37:T>C\_p.L13S  
ENSMUST00000069631.3|Iba57-202|ENSMUSG00000049287|-|chr11:g.59053933:A>G  
MSHGRHPGCASYSHRALCLGPQPVKSEASGVIFKMGASALS LPPHF LERFRWLLLNCSAVASAVRQLAGLPSL  
QLWLVNCSAAAATTAVPPPLTSAVSAASFCYQPSPHYRKQEKKMERSLFSGLLLPHWGKAQESLPTTSLSEP  
SQPVCIAPERMFGPIIDLPIGNLRND\*

>rs26955657\_ENSMUSP00000104421\_c.1096:T>C\_p.V366A  
ENSMUST00000108793.9|Gjc2-202|ENSMUSG00000043448|-|chr11:g.59067384:A>G  
MTNMSWFLTRLLVEIHNHSTFVGKVVLT VLVVFRIVLTVAGGESIYSDEQSKFTCNTRQPGCDNVCYDAFAP  
LSHVRVWFVQIVVISTPSVMYLGAVHRLARASEQGERRRALRRRPGTRRLPRAQLRPPPPGWPDTDLGAEAP  
ILALEEDED EEPGAPEGEDTEEERAEDVAASEGGGDKTVVTPGPAGQHDGRRRIQREGLMRVYVAQLVVR  
AAFEVAFLVGYLLYGFVPPFFACSRQPCPHVVD CFVSRPTEKTVFLLVMYVVSC LLLLNLCEMAHLGLGS  
AQDAVRGRRGASAAAGPGPTPRPPPCAFPAAGLACPPDYSLVVRAAERARAHDQNLANLALQALRDGA AVAA

ASADRDSPPCAGLNATSRGAPRVGGLASGTGSATSGGTVGEQSRPGAQEQQLATKPRAGSEKSGTGSRDGKATV  
WI\*  
>rs26955657\_ENSMUSP00000104418\_c.1096:T>C\_p.V366A  
ENSMUST00000108790.2|Gjc2-201|ENSMUSG00000043448|-|chr11:g.59067384:A>G  
MTNMSWSFLTRLLEEIHNHSTFVGKVVLTVLVVFRIVLTAVGGESIYSDEQSKFTCNTRQPGCDNVCYDAFAP  
LSHVRWFVWFQIVVISTPSVMYLYAVHRLARASEQERRRALRRRPGTRRLPRAQLPPPPPGWPDTTDLGEAEP  
ILALEEDEDDEEPGAPEGPGEDETEERAEDVAAKGGGGDGKTVVTPGPAGQHDGRRRIQREGLMRVYVAQLVVR  
AAFEVAFLVGQYLLYGFEVPPFFACSRQPCPHVVDCFVSRPTEKTVFLLVMYVVSCLELLNLCEMAHLGLGS  
AQDAVRGRRGASAAAGPGPTPRPPPCAFPAAAAAGLACPPDYSLVVRAAERARAHQNLANLALQALRDGAAVAA  
ASADRDSPPCAGLNATSRGAPRVGGLASGTGSATSGGTVGEQSRPGAQEQQLATKPRAGSEKSGTGSRDGKATV  
WI\*  
>rs262797552\_ENSMUSP00000104421\_c.651:G>A\_p.V218I  
ENSMUST00000108793.9|Gjc2-202|ENSMUSG00000043448|-|chr11:g.59067829:C>T  
MTNMSWSFLTRLLEEIHNHSTFVGKVVLTVLVVFRIVLTAVGGESIYSDEQSKFTCNTRQPGCDNVCYDAFAP  
LSHVRWFVWFQIVVISTPSVMYLYAVHRLARASEQERRRALRRRPGTRRLPRAQLPPPPPGWPDTTDLGEAEP  
ILALEEDEDDEEPGAPEGPGEDETEERAEDVAAKGGGGDGKTVVTPGPAGQHDGRRRIQREGLMRVYVAQLVIR  
AAFEVAFLVGQYLLYGFEVPPFFACSRQPCPHVVDCFVSRPTEKTVFLLVMYVVSCLELLNLCEMAHLGLGS  
AQDAVRGRRGASAAAGPGPTPRPPPCAFPAAAAAGLACPPDYSLVVRAAERARAHQNLANLALQALRDGAAVAA  
VSADRDSPPCAGLNATSRGAPRVGGLASGTGSATSGGTVGEQSRPGAQEQQLATKPRAGSEKSGTGSRDGKATV  
WI\*  
>rs262797552\_ENSMUSP00000104418\_c.651:G>A\_p.V218I  
ENSMUST00000108790.2|Gjc2-201|ENSMUSG00000043448|-|chr11:g.59067829:C>T  
MTNMSWSFLTRLLEEIHNHSTFVGKVVLTVLVVFRIVLTAVGGESIYSDEQSKFTCNTRQPGCDNVCYDAFAP  
LSHVRWFVWFQIVVISTPSVMYLYAVHRLARASEQERRRALRRRPGTRRLPRAQLPPPPPGWPDTTDLGEAEP  
ILALEEDEDDEEPGAPEGPGEDETEERAEDVAAKGGGGDGKTVVTPGPAGQHDGRRRIQREGLMRVYVAQLVIR  
AAFEVAFLVGQYLLYGFEVPPFFACSRQPCPHVVDCFVSRPTEKTVFLLVMYVVSCLELLNLCEMAHLGLGS  
AQDAVRGRRGASAAAGPGPTPRPPPCAFPAAAAAGLACPPDYSLVVRAAERARAHQNLANLALQALRDGAAVAA  
VSADRDSPPCAGLNATSRGAPRVGGLASGTGSATSGGTVGEQSRPGAQEQQLATKPRAGSEKSGTGSRDGKATV  
WI\*  
>rs46382342\_ENSMUSP00000104421\_c.210:T>C\_p.F71L  
ENSMUST00000108793.9|Gjc2-202|ENSMUSG00000043448|-|chr11:g.59068270:A>G  
MTNMSWSFLTRLLEEIHNHSTFVGKVVLTVLVVFRIVLTAVGGESIYSDEQSKFTCNTRQPGCDNVCYDALAP  
LSHVRWFVWFQIVVISTPSVMYLYAVHRLARASEQERRRALRRRPGTRRLPRAQLPPPPPGWPDTTDLGEAEP  
ILALEEDEDDEEPGAPEGPGEDETEERAEDVAAKGGGGDGKTVVTPGPAGQHDGRRRIQREGLMRVYVAQLVVR  
AAFEVAFLVGQYLLYGFEVPPFFACSRQPCPHVVDCFVSRPTEKTVFLLVMYVVSCLELLNLCEMAHLGLGS  
AQDAVRGRRGASAAAGPGPTPRPPPCAFPAAAAAGLACPPDYSLVVRAAERARAHQNLANLALQALRDGAAVAA  
VSADRDSPPCAGLNATSRGAPRVGGLASGTGSATSGGTVGEQSRPGAQEQQLATKPRAGSEKSGTGSRDGKATV  
WI\*  
>rs46382342\_ENSMUSP00000104418\_c.210:T>C\_p.F71L  
ENSMUST00000108790.2|Gjc2-201|ENSMUSG00000043448|-|chr11:g.59068270:A>G  
MTNMSWSFLTRLLEEIHNHSTFVGKVVLTVLVVFRIVLTAVGGESIYSDEQSKFTCNTRQPGCDNVCYDALAP  
LSHVRWFVWFQIVVISTPSVMYLYAVHRLARASEQERRRALRRRPGTRRLPRAQLPPPPPGWPDTTDLGEAEP  
ILALEEDEDDEEPGAPEGPGEDETEERAEDVAAKGGGGDGKTVVTPGPAGQHDGRRRIQREGLMRVYVAQLVVR  
AAFEVAFLVGQYLLYGFEVPPFFACSRQPCPHVVDCFVSRPTEKTVFLLVMYVVSCLELLNLCEMAHLGLGS  
AQDAVRGRRGASAAAGPGPTPRPPPCAFPAAAAAGLACPPDYSLVVRAAERARAHQNLANLALQALRDGAAVAA  
VSADRDSPPCAGLNATSRGAPRVGGLASGTGSATSGGTVGEQSRPGAQEQQLATKPRAGSEKSGTGSRDGKATV  
WI\*  
>rs48912348\_ENSMUSP00000127566\_c.152:C>A\_p.S51R  
ENSMUST00000170202.9|Guk1-204|ENSMUSG00000020444|-|chr11:g.59077622:G>T  
MLRRPLVGLAVAALGRVPADGMAGPRPVVLSGSPGAGKSTLLKLFQEHSRIFGFSVSHTRNPRPGEEDGKD  
YYFVTREMMQRDIAAGDFIEHAEFSGNLYGTSKEAVRAVQAMNRCVLDVLDLQGVRSIKKTDLCPIYIFVQPP  
SLDVLEQRLRLRNTETETESLAKRLAAARTDMESSKEPGLFDLVI INDDLKAYATLKQALSEEIKKAQGTGHA  
\*  
>rs48912348\_ENSMUSP00000130214\_c.116:C>A\_p.S39R  
ENSMUST00000170895.3|Guk1-205|ENSMUSG00000020444|-|chr11:g.59077622:G>T  
MEAAATHQVGMAGPRPVVLSGSPGAGKSTLLKLFQEHSRIFGFSVSHTRNPRPGEEDGKDYFVTREMMQRD  
IAAGDFIEHAEFSGNLYGTSKEAVRAVQAMNRCVLDVLDLQGVRSIKKTDLCPIYIFVQPPSLDVLEQRLRLR  
NTETETESLAKRLAAARTDMESSKEPGLFDLVI INDDLKAYATLKQALSEEIKKAQGTGHA\*

>rs48912348\_ENSMUSP00000134236\_c.89:C>A\_p.S30R ENSMUST00000172714.2|Guk1-206|ENSMUSG00000020444|-|chr11:g.59077622:G>T  
MAGPRPVVLSGSPGAGKSTLLKKLQEHRSI  
>ENSMUSP00000127566\_c.145:CA>TG\_p.H49L ENSMUST00000170202.9|Guk1-204|ENSMUSG00000020444|-|chr11:g.59077629:TG>CA  
MLRRPLVGLAVAALGRVPADGMAGPRPVVLSGSPGAGKSTLLKKLQELQQHLRLQRVSYKPTTW\*RRWQR  
LLLCDQGDAA\*YCSRGLH\*AC\*VLREPVRDKQGSCSGCAGHEPHLRARCRPTRCAQHQED\*SVSHLHLCAAS  
LAGRAGATTATAQH\*D\*GESGKAAGSCTDRHGEQQGAWLV\*PGDHQ\*RPG\*SLCNPEAGAL\*GNQESTGNWPR  
L  
>ENSMUSP00000130214\_c.109:CA>TG\_p.H37L ENSMUST00000170895.3|Guk1-205|ENSMUSG00000020444|-|chr11:g.59077629:TG>CA  
MEAATHQVGMAGPRPVVLSGSPGAGKSTLLKKLQELQQHLRLQRVSYKPTTW\*RRWQRLLLCDQGDAA\*  
YCSRGLH\*AC\*VLREPVRDKQGSCSGCAGHEPHLRARCRPTRCAQHQED\*SVSHLHLCAASLAGRAGATTATA  
QH\*D\*GESGKAAGSCTDRHGEQQGAWLV\*PGDHQ\*RPG\*SLCNPEAGAL\*GNQESTGNWPR  
L  
>ENSMUSP00000134236\_c.82:CA>TG\_p.H28L ENSMUST00000172714.2|Guk1-206|ENSMUSG00000020444|-|chr11:g.59077629:TG>CA  
MAGPRPVVLSGSPGAGKSTLLKKLQELQQH  
>rs45683162\_ENSMUSP00000127566\_c.126:A>G\_p.K43E  
ENSMUST00000170202.9|Guk1-204|ENSMUSG00000020444|-|chr11:g.59077648:T>C  
MLRRPLVGLAVAALGRVPADGMAGPRPVVLSGSPGAGKSTLLEKLFQEHSSIFGFSVSHHTTRNPRPGEEDGKD  
YYFVTREMMQRDIAAGDFIEHAEFSGNLYGTSKEAVRAVQAMNRCVLDVLDLQGVRSIKKTDLCPIYIFVQPP  
SLDVLEQRLRLRNTETEEESLAKRLAAARTDMESSKEPGLFDLVI INDDLKAYATLKQALSEEIKKAQGTGHA  
\*  
>rs45683162\_ENSMUSP00000130214\_c.90:A>G\_p.K31E ENSMUST00000170895.3|Guk1-205|ENSMUSG00000020444|-|chr11:g.59077648:T>C  
MEAATHQVGMAGPRPVVLSGSPGAGKSTLLEKLFQEHSSIFGFSVSHHTTRNPRPGEEDGKDYYFVTREMMQRD  
IAAGDFIEHAEFSGNLYGTSKEAVRAVQAMNRCVLDVLDLQGVRSIKKTDLCPIYIFVQPPSLDVLEQRLRLR  
NTETEEESLAKRLAAARTDMESSKEPGLFDLVI INDDLKAYATLKQALSEEIKKAQGTGHA\*  
>rs45683162\_ENSMUSP00000134236\_c.63:A>G\_p.K22E ENSMUST00000172714.2|Guk1-206|ENSMUSG00000020444|-|chr11:g.59077648:T>C  
MAGPRPVVLSGSPGAGKSTLLEKLFQEHSSI  
>rs6206862\_ENSMUSP00000020719\_c.444:A>G\_p.T149A  
ENSMUST00000020719.7|2310033P09Rik-  
201|ENSMUSG00000020441|+|chr11:g.59100024:A>G  
MFGSNRGGVRRGGQDFNWEDVKTQRENILGNLMAVPVGRWQKGRDLTWYAKDRAPCTGPSREEELAAVREA  
EREALLAALGYKNVRKQPTGLSKEDFVEICKREGGDPEEKGVDRLLGLGSASGSAGRVALSREDKEAAKLGSL  
VFAHHRVDSEGPSTAPTAPRKKPRAEDKVEPDAESHKSKKKEKKKKKKKKKKKKKKKDKHEKRAADSCSSSPS  
PPRPRHQHSDFSKCRKREHSQDSGRNPSRRRQDRSSDD\*  
>rs6223610\_ENSMUSP00000020719\_c.628:A>C\_p.E210A  
ENSMUST00000020719.7|2310033P09Rik-  
201|ENSMUSG00000020441|+|chr11:g.59100894:A>C  
MFGSNRGGVRRGGQDFNWEDVKTQRENILGNLMAVPVGRWQKGRDLTWYAKDRAPCTGPSREEELAAVREA  
EREALLAALGYKNVRKQPTGLSKEDFVEICKREGGDPEEKGVDRLLGLGSASGSAGRVALSREDKEAAKLGSL  
VFTHHRVDSEGPSTAPTAPRKKPRAEDKVEPDAESHKSKKKEKKKKKKKKKKKKKKKDKHEKRAADSCSSSPS  
PPRPRHQHSDFSKCRKREHSQDSGRNPSRRRQDRSSDD\*  
>rs49968039\_ENSMUSP00000079905\_c.249:A>C\_p.N84H  
ENSMUST00000061242.8|Arf1-201|ENSMUSG00000048076|-|chr11:g.59103978:T>G  
MGNIFANLFFKGLFGKKEMRIIMVGLDAAGKTTILYKLLKGEIVTTIPTIGFNVETVEYKNISFTVWVDVGGQDK  
IRPLWRHYFQHTQGLIFVVDNSDRERVNEAREELMRMLAEDELDRDAVLLVFANKQDLPNAMNAAEITDKLGLH  
SLRHRNWIQATCATSGDGLYEGLDWLSNQLRNQK\*  
>rs49968039\_ENSMUSP00000126120\_c.249:A>C\_p.N84H  
ENSMUST00000163300.8|Arf1-202|ENSMUSG00000048076|-|chr11:g.59103978:T>G  
MGNIFANLFFKGLFGKKEMRIIMVGLDAAGKTTILYKLLKGEIVTTIPTIGFNVETVEYKNISFTVWVDVGGQDK  
IRPLWRHYFQHTQGLIFVVDNSDRERVNEAREELMRMLAEDELDRDAVLLVFANKQDLPNAMNAAEITDKLGLH  
SLRHRNWIQATCATSGDGLYEGLDWLSNQLRNQK\*  
>rs50087235\_ENSMUSP00000079905\_c.30:G>A\_p.G11S ENSMUST00000061242.8|Arf1-201|ENSMUSG00000048076|-|chr11:g.59104283:C>T

MGNIFANLFLKSLFGKEMRILMVGLDAAGKTTILYKLLKGEIVTTIPTIGFNVETVEYKNISFTVWVDVGGQDK  
 IRPLWRHYFQNTQGLIFVVDSDNDRERVNEAREELMRMLAEDELDRDAVLLVFANKQDLPNAMNAAEITDKLGLH  
 SLRHRNWYIQATCATSGDGLYEGLDWLSNQLRNQK\*

>rs50087235\_ENSMUSP00000126120\_c.30:G>A\_p.G11S ENSMUST00000163300.8|Arf1-  
 202|ENSMUSG00000048076|-|chr11:g.59104283:C>T

MGNIFANLFLKSLFGKEMRILMVGLDAAGKTTILYKLLKGEIVTTIPTIGFNVETVEYKNISFTVWVDVGGQDK  
 IRPLWRHYFQNTQGLIFVVDSDNDRERVNEAREELMRMLAEDELDRDAVLLVFANKQDLPNAMNAAEITDKLGLH  
 SLRHRNWYIQATCATSGDGLYEGLDWLSNQLRNQK\*

>rs26955564\_ENSMUSP00000010044\_c.669:T>C\_p.F224L  
 ENSMUST00000010044.8|Wnt3a-201|ENSMUSG00000009900|-|chr11:g.59140845:A>G  
 MAPLGYLLVLCSLKQALGYSPIWWSLAVGPOYSSLSTQPILCASIPGLVPKQLRFRCRYVEIMPVSAEYVAGKAG  
 IQECQHQRFRGRWNCTTVSNSLAIFGPVLDKATRESAFVHAIASAGVAFVTRSCAEGSAAICGSSRLQGS  
 GEGWKWGGCSEDIIEFGGMVSREFADARENRPDARSAMNRHNEAGRQAIASHMHLKCKCHGLSGSCEVKTCCWW  
 SQPDLRTIGDFLKDKYDSASEMVVEKHRESRGWVETLRPRYTYFKVPTERDLVYYEASPNFCEPNPETGSFGT  
 RDRTCNVSSHGIDGCDLLCCGRGHNARTERRREKCHCVFHWCCYVSCQECTRVYDVHTCK\*

>rs52569485\_ENSMUSP00000071081\_c.1326:A>T\_p.K443\*  
 ENSMUST00000066330.15|Mrip-201|ENSMUSG00000005417|+|chr11:g.59640417:A>T  
 MSAAKENPCRKFQANIFNKSKCQNCFKPRESHLNDEDLTQAKPIYGGWLLLAPDGTDFDNPVHRSRKWQRRF  
 FLYEHGLLRYALDEMPTTLPQGTINMNQCTDVVDGEARTGQKFSLCILTPDKEHFIRAETKEIISGWLEMLM  
 VYPRTNKQNKKKRKEVPTPQEPGPAKMAVTSSSGSSGSSSSIPSAEKVPTTKSTLWQEMRAKDQPDGTS  
 LSPAQSPSQSPPAACTPREPGLESKEDESTISGDRVDGGRKVRVESGYFSLEKAKQDLRAEEQLPPLSPPS  
 PSTPHSRRSQVIEKFEALDIEKAEHMETNMLILTPSSDTRQGRSERRAI PRKRPDLLNFKKGWLTQYEDGQ  
 WKKHWFVLADQSLRYYRDSVAEEAADLDGEINLSTCYDVTEYPVQRNYGFQIHTKEGEFTLSAMTSGIRRNWI  
 QTIM\*HVLPAAPDVTSSLPPEGKKNKSTSFETCSRSTEKQEAEPGEPDPEQKKSRRARERRREGRSKTFDWAEFR  
 PIQALAQERASAVGSSSDGDPGCLAEPELELERARRRERKRFRGMLDTIDGPGMEDTALRMDIDRSPGL  
 LGTPDLKTQNVHVEIEQRWHQVETTPLEEKQVPIAPLHLSLEDRSERLSTHELTSLLEKELEQSQKEASDLL  
 EQNRLLDQDLRVALGREQSAREGYVLQTEVATSPSGAWQLRHRVNQDLQSELEAQCRREQELITQQIQTLLKHSY  
 GEAKDAIRHHEAEIQTLLQTRLGNAAAEALAIKEQALAKLKGELKMEQKQVREQLEEWQHSKAMLSGQLRASEQK  
 LRSTEARLLEKTQELRDLETQQALQRDRQKEVQRLQECIAELSQQLGTSEQAQRLMEKKLKRNYTLLLESCEQ  
 EKQALLQNLKEVEDKASAYEDQLQGHVQQVEALQKEKLESETCKGSEQVHKLEEELEAREASIRQLAHVQSLH  
 DERDLIKHQFQELMERVATSDGDVAELQEKLRGKEVDYQNLHSHHRVSVQLQSVRTLLREKEEELKHIKETH  
 ERVLEKKDQDLNEALVKMIALGSSLEETEIKLQEKEECLRRFVSDSPKDAKEPLSTTEPTEEGSGILPLGSVT  
 RVFPGFPHSQPEDEDPASAGLGEESGSSLSREENTILPKSADMPEREGHLQSTSKSDPGAPIKRPRIRFSTIQ  
 CQRYIHPEGCAKAWTSSTSSDTSQDQSPSEDSVSSEATPNTLPAAADAETYISIIHSLKLYVTEEKLKDV  
 VRLESQQGQSQEALLALHQWAGTEAQLREQLRASLLQASALASQLEQERQKATNIEHHPGELEDFQAKNSQ  
 ALTCLENCWKKLRSLPWADQEEGQDACAASLANIESMLVSAIKALQPWASPASRTQAEQEKEHPIESGMAAP  
 VQQPCQPILNEQEHRKLLSAQIVLEASLINQIADSLKNTTSDVYGVLCELTQSGEWPLKEESAAPSAGAPVEI  
 WAKKVLVNGEFWSQVESLSKHLGTLGEETACTSGDRQOHTPQSLADATWIRAELSYATQSVRELFFHRLQSIQ  
 ETLQGTQAALQOHKCMLEIILGAYQTPDFERVIQIILETLRHPTGREDQVQTSWDQNPGLGILRPGTDGSQEP  
 LQALHQSPPEVLAAIQDELAQQLEKASILEEISAALPVLPPTEPLGGCQRLRMSQHLSYESCLEGLGOYSSL  
 LVQDAIIQAQVCYAACRIRLEYEKELRFYKACQEAQGASGQKRAQAVGALKEEYEEELLHKQKSEYQKVITLI  
 EKENTELKAKVSMQDHQQRCLQEAENKHSESMFALQGRYEEERCMVEQLSHTENTLQAERSRVLSQLDASVK  
 DRQAMEQHVVQMKMLEDRFQLKQVRELQAVHQEELRALQEHYIWSLRGALSQYQPSHPDSSLAPGPSEPRAVP  
 AAKDEAESMSGLRERIELEAQMGMVREELGHKELEGDVAALQEKYQDFESLQKATCERGFAMEETHQKKIE  
 DLQRQHORELEKLRREKDRLLAEETAATISAIEMKNAREEMERELEKSQRSQISSINSIDIEALRRQYLEEL  
 QSVQRELEVLSEQYSQKCLENAHLAQALEAERQALRQCQRENQELNAHNQELNNRLAAEITRLRLLTGDGGG  
 ESTGLPLTQGKDAYELEVLLRVKESEIQYLKQEISSLKDELQTLALRDKKYASDKYKDIYTELSIAKAKADCDI  
 SRLKEQLKAATEALGKESPEGTTVSGYDIMKSKSNPDFLKKDRSCVTRQLRNIRSKSLKEGLTVQERLKLFE  
 RDLKKD\*

>rs52569485\_ENSMUSP00000104382\_c.1320:A>T\_p.K441\*  
 ENSMUST00000108751.8|Mrip-203|ENSMUSG00000005417|+|chr11:g.59640417:A>T  
 MSAAKENPCRKFQANIFNKSKCQNCFKPRESHLNDEDLTQAKPIYGGWLLLAPDGTDFDNPVHRSRKWQRRF  
 FLYEHGLLRYALDEMPTTLPQGTINMNQCTDVVDGEARTGQKFSLCILTPDKEHFIRAETKEIISGWLEMLM  
 VYPRTNKQNKKKRKEVPTPQEPGPAKMAVTSSSGSSGSSSSIPSAEKVPTTKSTLWQEMRAKDQPDGTS  
 GGRKVRVESGYFSLEKAKQDLRAEEQLPPLSPPS PSTPHSRRSQVIEKFEALDIEKAEHMETNMLILTPSS  
 DTRQGRSERRAI PRKRDFASEAPTAPLSDACPLSPHRRAKSLDRRSTESSMTPDLLNFKKGWLTQYEDGQWK  
 KHWFVLADQSLRYYRDSVAEEAADLDGEINLSTCYDVTEYYPVQRNYGFQIHTKEGEFTLSAMTSGIRRNWIQT  
 IM\*HVLPAAPDVTSSLPPEGKKNKSTSFETCSRSTEKQEAEPGEPDPEQKKSRRARERRREGRSKTFDWAEFRPI

QQALAQERASAVGSSSDSGDPCLEAEPGELERERARRREERRKFRGMLDITDGPDMEDTALRMDIDRSPGLLG  
TPDLKTQNVHVEIEQRWHQVETTPLEEKQVPIAPLHLSLEDRSERLSTHELTSLLEKELEQSQKEASDLLEQ  
NRLLDQDLRVALGREQSAREGYVLQATCERGFAMEETHQKKIEDLQRQHORELEKLRREEKDRLLAEETAATI  
SAIEAMKNAHREEMERELEKSQRSQISSINSDIEALRRQYLEELQSVQRELEVLSQYSQKCLENAHLAQALE  
AERQALRQCQRENQELNAHNQELNNRLAAEITRLRTLLTGDGGGESTGLPLTQGKDAYELEVLLRVKESI QY  
LKQEISSLKDELQALDRDKKYASDKYKDIYTELSIAKAKADCDISRLKEQLKAATEALGEKSPEGTTVSGYDI  
MKSNSNPDLKDRSCVTRQLRNIRSKSVIEQVSWDN\*

>rs52569485\_ENSMUSP00000112072\_c.1434:A>T\_p.K479\*  
ENSMUST00000116371.8|Mrip-204|ENSMUSG00000005417|+|chr11:g.59640417:A>T  
MSAAKENPCRKFQANIFNKSKCQNCFKPRESHLNDEDLTQAKPIYGGWLLLAPDGTDFDNPVHRSRKWQRRF  
FILIYEHGLLRVALDEMPTTLPQGTINMNQCTDVVDGEARTGQKFSLCILTPDKEHFIRAETKEIISGWLEMLM  
VYPRTNKQNKKKRQVPEPTPQEPGPAKMAVTSSSGSSGSSSSIPSAEKVPTTKSTLWQEEMRAKDQPDGTS  
LSPAQSPSQSPPAACTPREPGLESKEDESTISGDRVDGGRKVRVESGYFSLEKAKQDLRAEEQLPPLLSPPS  
PSTPHSRRSQVIEKFEALDIEKAEHMETNMLILTPSSDTRQGRSERRAI PRKRDFASEAPTAPLSDACPLSP  
HRAKSLDRRSTESSMTPDLLNFKKGWLTKQYEDGQWKKHWFVLADQSLRYRDSVAEEAADLDGEINLSTCY  
DVTEYPVQRNYGFQIHTKEGEFTLSAMTSGIRRNWIQTIM\*HVL PASAPDVTSSLPEGKKNKSTSFETCSRSTE  
KQEAEPGEPDPEQKSRARERRREGSKTFDWAEFRPIQQALAQERASAVGSSSDSGDPCLEAEPGELERER  
RRREERRKFRGMLDITDGPDMEDTALRMDIDRSPGLLGTDLKTQNVHVEIEQRWHQVETTPLEEKQVPIAP  
LHLSLEDRSERLSTHELTSLLEKELEQSQKEASDLLEQNRLLDQDLRVALGREQSAREGYVLQATCERGFAM  
EETHQKKIEDLQRQHORELEKLRREEKDRLLAEETAATISAIEAMKNAHREEMERELEKSQRSQISSINSDIEA  
LRRQYLEELQSVQRELEVLSQYSQKCLENAHLAQALEAERQALRQCQRENQELNAHNQELNNRLAAEITRLR  
TLLTGDGGGESTGLPLTQGKDAYELEVLLRVKESI QY LKQEISSLKDELQALDRDKKYASDKYKDIYTELSI  
AKAKADCDISRLKEQLKAATEALGEKSPEGTTVSGYDIMKSNSNPDLKDRSCVTRQLRNIRSKSVIEQVSW  
DN\*

>rs52569485\_ENSMUSP00000119562\_c.1392:A>T\_p.K465\*  
ENSMUST00000133861.8|Mrip-206|ENSMUSG00000005417|+|chr11:g.59640417:A>T  
ETKEIISGWLEMLMVYPRTNKQNKKKRQVPEPTPQEPGPAKMAVTSSSGSSGSSSSIPSAEKVPTTKSTLW  
QEEMRAKDQPDGTSLSPAQSPSQSPPAACTPREPGLESKEDESTISGDRVDGGRKVRVESGYFSLEKAKQDL  
RAEEQLPPLLSPPSPSTPHSRYGCPGSPSQELSHPLHSPGLPAPSRMVYSICPASLGEASRSPNHMDSSSAGG  
WGTEILGSTFAFKASRQYAALADVPKAIRISHREAFQVERRRLEHRTRARSPGEEVARLFGNERRRSQVIEK  
FEALDIEKAEHMETNMLILTPSSDTRQGRSERRAI PRKRDFASEAPTAPLSDACPLSPHRAKSLDRRSTES  
SMTDLLNFKKGWLTKQYEDGQWKKHWFVLADQSLRYRDSVAEEAADLDGEINLSTCYDVTEYPVQRNYGFQ  
IHTKEGEFTLSAMTSGIRRNWIQTIM\*HVL PASAPDVTSSLPEGKKNKSTSFETCSRSTEKQEAEPGEPDPEQK  
KSRARERRREGSKTFDWAEFRPIQQALAQERASAVGSSSDSGDPCLEAEPGELERERARRREERRKFRGMLD  
TIDGPDMEDTALRMDIDRSPGLLGTDLKTQNVHVEIEQRWHQVETTPLEEKQVPIAPLHLSLEDRSERLST  
HELTSLLEKELEQSQKEASDLLEQNRLLDQDLRVALGREQSAREGYVLQATCERGFAMEETHQKKIEDLQRQ  
HQRELEKLRREEKDRLLAEETAATISAIEAMKNAHREEMERELEKSQRSQISSINSDIEALRRQYLEELQSVQR  
ELEVLSQYSQKCLENAHLAQALEAERQALRQCQRENQELNAHNQELNNRLAAEITRLRTLLTGDGGGESTGL  
PLTQGKDAYELEVLLRVKESI QY LKQEISSLKDELQALDRDKKYASDKYKDIYTELSIAKAKADCDISRLKE  
QLKAATEALGEKSPEGTTVSGYDIMKSNSNPDLKDRSCVTRQLRNIRSKSVIEQVSWDN\*

>rs52569485\_ENSMUSP00000119422\_c.867:A>T\_p.K290\*  
ENSMUST00000132620.8|Mrip-205|ENSMUSG00000005417|+|chr11:g.59640417:A>T  
XNQKKRQVPEPTPQEPGPAKMAVTSSSGSSGSSSSIPSAEKVPTTKSTLWQEEMRAKDQPDGTSLSPAQSP  
SQSPPAACTPREPGLESKEDESTISGDRVDGGRKVRVESGYFSLEKAKQDLRAEEQLPPLLSPPSPSTPHSR  
RSQVIEKFEALDIEKAEHMETNMLILTPSSDTRQGRSERRAI PRKRDPDLLNFKKGWLTKQYEDGQWKKHWFV  
LADQSLRYRDSVAEEAADLDGEINLSTCYDVTEYPVQRNYGFQIHTKEGEFTLSAMTSGIRRNWIQTIM\*HV  
LPASAPDVTSSLPEGKKNKSTSFETCSRSTEKQEAEPGEPDPEQKSRARERRREGSKTFDWAEFRPIQQALA  
QERASAVGSSSDSGDPCLEAEPGELERERARRREERRKFRGMLDITDGPDMEDTALRMDIDRSPGLLGTDLK  
TQNVHVEIEQRWHQVETTPLEEKQVPIAPLHLSLEDRSERLSTHELTSLLEKELEQSQKEASDLLEQNRLLDQ  
DLRVALGREQSAREGYVLQATCERGFAMEETHQKKIEDLQRQHORELEKLRREEKDRLLAEETAATISAIEA  
MNAHREEMERELEKSQRSQISSINSDIEALRRQYLEELQSVQRELEVLSQYSQKCLENAHLAQALEAERQA  
LRQCQRENQELNAHNQELNNRLAAEITRLRTLLTGDGGGESTGLPLTQGKDAYELEVLLRVKESI QY LKQEI  
SSLKDELQALDRDKKYASDKYKDIYTELSIAKAKADCDISRLKEQLKAATEALGEKSPEGTTVSGYDIMKSNS  
NPDLKDRSCVTRQLRNIRSKSLKEGLTVQERLKLFESEDLKDD\*

>rs52569485\_ENSMUSP00000071914\_c.1434:A>T\_p.K479\*  
ENSMUST00000072031.13|Mrip-202|ENSMUSG00000005417|+|chr11:g.59640417:A>T  
MSAAKENPCRKFQANIFNKSKCQNCFKPRESHLNDEDLTQAKPIYGGWLLLAPDGTDFDNPVHRSRKWQRRF  
FILIYEHGLLRVALDEMPTTLPQGTINMNQCTDVVDGEARTGQKFSLCILTPDKEHFIRAETKEIISGWLEMLM

VYPRTNKQNKKKRKEVPTTQEPGPAKMAVTSSSGSSGSSSSSIPSAEKVPTTKSTLWQEEMRAKDQPDGTS  
LSPAQSPSQSQPPAACTPREPGLESKEDESTISGDRVDGGRKVRVESGYFSLEKAKQDLRAEEQLPPLLSPPS  
PSTPHSRSSQVIEKFEALDIEKAHEMETNMLILTTSSDTRQGRSERRAI PRKRDFASEAPTAPLSDACPLSP  
HRAKSLDRRSTESSMTPDLLNFKKGWLTKQYEDGQWKKHWFVLADQSLRYRDSVAEEAADLDGEINLSTCY  
DVTEYPVQRNYGFQIHTKEGEFTLSAMTSGIRRNWIQTIM\*HVL PASAPDVTSSLPEGKKNKSTS FETCSRSTE  
KQEAEPGEPEQKKSRRERREGRSRTFDWAEFRPIQQALA QERASAVGSSSDSGDPGCLEAEPGELERERA  
RRREERRKRFGMLDITDGP MEDTALRMDIDRS PGLLGT PDLKTQNVHVEIEQRWHQVETTPLEEKQVPIAP  
LHLSLEDRSERLSTHELTSLLEKELEQSQKEASDLLEQNRLLQDQLRVALGREQSAREGYVLQATCERGFAM  
EETHQKKIEDLQRQHRELEKLREEKDRLLAEETAATISAIEAMKNAHREEMERELEKSQRSQSSINSIDIEA  
LRRQYLEELQSVQRELEVLSQKCLENAHLAQALEAERQALRQCQRENQELNAHNQELNRLAAEITRLR  
TLLTGDDGGESTGLPLTQGKDAYELEVLLRVKESIEIQLKQEISSLKDELQALRDKKYASDKYKDIYELSI  
AKAKADCDISRLKEQLKAATEALGEKSPGGTTVSGYDIMKSKSNPDLKDRSCVTRQLRNIRSKSLKEGLTV  
QERLKLFE SRDLKDD\*

>rs26957343\_ENSMUSP00000018568\_c.759:G>A\_p.E254K  
ENSMUST00000018568.4|Drq2-201|ENSMUSG00000020537|+|chr11:g.60353414:G>A  
MGILEKISEIEKEIARTQKNKATEYHLGLLKAKLAKYRAQLLEPSKSASSKGEFDMVMSGDARVALIGFSPS  
GKSTFSLSLMTSTASEAASYEFTTLTCIPGVIEYKGANIQLLDLPGEI EGAAQGRGRGRQVI AVARTADVMM  
LDATKGDVQRSLLEKELESVGI RL NKHKPNIFYFKPKGGGISFNSTVTLTQCSEKLVQLILHEYKIFNAEVLF  
REDCSPDDFDIVIVGNRVYMPCLYVYNKIDQISMKEVDRLARKPNSVVISCGMKNLDYLLEMLWEYLALTCI  
YTKKRQRDPDFTAII LRK GASVEHVCHR IHRSLASQFYALVWGTSTKYSPQRVGLTHTMEHEDVIQIVKK\*  
>rs26942560\_ENSMUSP00000071777\_c.97:T>C\_p.L33P  
ENSMUST00000071880.9|Myo15-201|ENSMUSG00000042678|+|chr11:g.60367339:T>C  
MADEEKKAKKGGKKGAPEPEKPKRSKLGTSRPFMGFRDRTPKISKKGQFRSASAFFWGLHTGPKTKRKKKA  
RTVLKSTSKLMTQMRVGGKKRAMKGGKPSFMVIRFPGRRGYRRLRPAQSLSKASTAINWLTKKFLLKKAES  
GSEQATVDAWLQRSSRVSRSRKLFPFSGAEILRHGGRLRFRPRSHSIYSSGEPVGFPLPFDEAPFRHAGSRKS  
LYGLGEQDLDGEYYDYHREGDDYDQQS L YHYEEQEPYLA EFGGYS PAWPPYDDYGPYPDPYNYHYHDPDYGD  
TLYPGYAYGYGYYDDFPEPPYAPPSGYSSPYSHQSFSEAYPYSYLDPYATHMPYPYDPYDTPYDIPIY  
FDPYGVYPYAEVYGGGAETIYPPGMPYVYPEEPAFMYPWVPPIMSPHNPYAHMDDIAELEPEETGEERQS  
TSFRLPSAAFFEQGMDKPARSKLSLRKFRLLFPQPVKLFGEKLEVPPLPSLDIPLPLGDAEGEEEEEMP  
PVPTMPYTHPYWFSFLTQRNLQRALSAGFARQGLGFGPEFGHPTPRPATSLARFLKKTLEKPIPRLRGSQ  
KARGRPPVREAAKRFYKLAGMDPDRPNTPIVLRSSQPQARNNNNSHGPPSPRAPRALTHWSALISPPMP  
APSPPASPLTPPFSPTFSRPPRLASPYGSLRQHPPWAAPAHVFPFPQANWWGFAEPPGTSPEVAPDLAFA  
VPRPSFRASRSRRAAAYGFPSLSLIGSRRRPHLPSPPSLRSRSLPGQGYHSPLGPLSPQLSLRRGPFQPPFP  
PPRRPQSLREAFSLRRASGRGLGPPRSPVLGSPRPPSPPLLKHGPRHRSNLPSRLPRTWRRLSEPPTRAVKP  
WVHRAYLPPPSAGPWGASTGALEQQENQREAEADSETPWTVPPLAPSVDVMDPPTQRPSPWPPEGIGSLRGS  
PPVPENPLLEHTSPECEPQSEDRVSNLTGIFLGHHDGPGQLTKSADPSLEKPEEVVTLGDPPPAEPEAL  
NPTPENKNVVSERKVLRLSASYPLVTCKQARATWPQWHRWKTVSRTPAPLAPTRAPGPLLKAGEQPRAEPGRF  
AVVMPQVRGVSSFRPKGPAPVQPEHPDQDPEQGPAPQACSLRWPRLPPTDAHCLWSRIRTYSSQSHLRGHG  
GDCHKSLWKKTRPQSWQNMHSIRNLPSMRSREQHREDGVEDMTQLEDLQETTIVLANLKRFRERNLIYTYIGS  
ILVSNVNYRMFAIYGEVQVQYSGRALGENPHLFAIANLAFKMLDAKQNCV IISGESGSGKTEATKLI LR  
CLAAMNQRDVMQQIKILEATP LLEAFGNAKTVRNDNSSRFGKFEIFLEGGVICGAI TSQYLLKSRIVFQA  
KNERNYHI FYELLAGLPAQLRQA FSLQEAE TYYYYLNQGGNCEIAGKSDADDFRLLAAEVLGFTSEDQDSIF  
RILASILHLGNVYFEKHETDAQEVASVVSAREIQAVAELLQVSPEGLQKAITFKVTETIREKIFTPLTVESAV  
DARDAIAKVL YALLFGWLITRVNALVSPKQDTLSIAILDIYGFEDLSFNSFEQLCINYANENLQYLFNKIVFQ  
EEQEYIREQMDWREIAFADNQPCINLISLKPYGILRILDDQCCFPQATDHTFLQKCHYHGANPLYSKPKMP  
LPEFTIKHYAGKVTYQVHKFLDNHDQVRQDVLDLFDVHSTRVVAHLFSSHAAQTAPPRLGKSSSITRLYKAH  
TVAAKFQSSLDLVEKMERCNPLFVRCLKPNHKKEPGLFEPDVMMQQLRYSGVLETVRIRKEGFPVRLFPQVF  
IDRYRCLVALKLNVPADGDMCVSLLSRLCTVTPDMYRVGISKFLKEHLHQLLESMRERVQNRAALTQRYLR  
GFFIQRHFRSLRRKIIILLQSRARGFLARQRYQMRQSLLKFRSLVHTYVNRRRYLKLRAEQRRRAQEAWLREQ  
EELSKREVVPVRHLEVP AEVAGLLQAAAGLKLSSGPRVAVVRAPRLQAEP CVTLPLDINNYPMAKFI RCHFKE  
PSFGMLTVPLKMP LTRLPVEHHAETISVFKLILRFMGDPHLHGTEMI LGNYIVHQGLVEPALRDEILAQLAN  
QVWRNPNAYN SKRGWLLLAACLSGFAPSPHLDFLLKFVSDYGQNGFQAVCQHRLLQAMGSGAARTFPPTQLE  
WTAIQEKASMDLDFVSCFYFIVGAEGLAGRGDTRGVAGNICLWDRSDDEPTPRPQPDHVAKMPDLGDGYCSHKEDGT  
NGETE AQRWTSNRQAVDSIGESTVPPRELDGYLDLSLFDVPLACGDADLEKPTAIAYRMKGGGGGGGSDTSE  
DTSRRPPEPKLKIPLGLDASTLALQQA F IHRQAVLLAREMTLQALALQQQPLSATSRPQLPERPLAPEARPKT  
VVGTGPPAKPVLVRPTPQSWAPGSAKAPKIPSKPVAVPILA QDWTAPESISASPELVRYSTLNSEHFPOPTQ  
QIRSI IKQYKQPPWAGHPEARTRDGGKVFRRPPDPHEALMILKGGKTQLAVVPGTQVSREAVAMVKPVTSAP



RPCMGPTPVQPSRSLEPPEDPVQTLHRLVNPNFYGYQDIPWRIFLRKEVFYPKDNYSHPVQLDLLFRQILHDTFSEACLRISIEDERLQMKALFAQNQLDTRPLVTESVKRAAISMARDSWEIYFSRFLFPAMGSVGTGVQILAVSHTGIKLLQMVKGSKEASRRRLRVLCAYSFADILFVTMPSQNMLEFNLSNEKLILFSARAQQVKTLDVDFILELKDSDYVVAVRNFLSEDPELLSFHKGDI IHLQSLEPTRVGY SAGCVVRKKLVYLEELRRRGPDFGWRFGAVHGRVGRFPSELVQPAAPDFLQLPAEPGRGAAAVAAVASAAAAQEVGRRREGPPVRARSADSGEDSIALPPSTMLEFAQKYFRDPRRRPRDGLKLSKEDRESKTLEDVLCFTKVP IQESLIELSDSNLNKMAVDMFVAVMRFMGDA PLKGQSELDVLTLLKLCGDHEVMRDECYQCIVKQITDNSSPKQDSCQRGWRLLY IMAAAYSCSEVFYPIRLRFLQHVSWTPGLPFQGI AKACEQNLQKTLRFGRLEFP SNMELRAMLAGRSSKRQLFLLPGGLERHLKIKTCTVALDVIEGLCTEMALTRPEAFDEYVIFVVTNRGQHVCP LSCRAYILDVASEMEQVDGGYTLLWFRRLVWDQPLKFENELYVTMHNQVLPDYLGKLFSSVVARQPTQQQLQVSKLASLQHRAKDHFYLP SVREVQEYI PAQLYHTTAGDTWLNLVSQHRQQTQALS PHQARAQFLGLLSAFPLFGSSFFF IQSCSNVLPAPC I LAVNHNGLNLFSTKTHELIVKIPLKEIQSTWTQOPTANSYPYVEISLGDVAAQRTMQLQLEQGLELCRVVAVHVESMLSAREERLTL PSEITLL\*

>rs26942560\_ENSMUSP00000091686\_c.97:T>C\_p.L33P

ENSMUST00000094135.9|Myo15-203|ENSMUSG00000042678|+|chr11:g.60367339:T>CMADEEKKAKKGGKKAPEPEKPKRSLKGT SRPFMGFRDRTPKISKKGQFRSASAFFWGLHTGPQKTKRKKKARTVLKSTSKLMTQMRVGGKKRAMKGGKPSFMVIRFPGRRGYGRLRPRAQSLSKASTAINWLTKKFLLKKAESGSEQATVDAWLQRSSSRVGSRKLPFP SGAEILRHGGRLRRFPRSHSIYSSGEPVGFLEAPFRHAGSRKSLYGLEGFQDLGEYYDYHREGDDYDQQSLYHYEEQEPEYLAEFFGGYSPA WPPYDDYGYPPGDPYNYHPDYGD TLYPGYAYGYGYDDFEPPYAPPSGYSSPYSYHDSFESEAYPYSYLDPYATHHMPYPPYDFPYDTPYDIPYFDPYGVPYAEGVYGGGAEAIYPPGMPYVYPEEPAFMYPWVPPIMSPHNPHYAHPMDDIAELEPEETGEERQSTSFRLPSAAFFEQQGM DKPARSKLSLIRKFRFLFRPQVKLFGKEKLEVPLPPLSLDIPLPLGD AE GEEEEEMP PVPTMPYTHPYWSFLT PRQRNLQRALS AFGARQGLFGFPEFGHPTPRPATSLARFLKKT LSEK KPI PRLRGSQKARGGRPPVREAA YKRFYKLAGMDPDRPNTPIVLRRSQPQARNNNSHGPPSPRPAPRALTHWSALISPPMPAPSPPASPLTPPFSPTFSRPPRLASPYGSLRQHPPWAA PAHVFPFPQANWWGFAEPPGTSPEVAPDLLAFPVRRPFRASRRSRRRAAYGFPPSPSLIGSRRRPHLPSPPSLRSLPGQGYHSP LGLPQLSRRRGPFPFPFP PRRRQSLREAFSLRRASGR LGPPRSFVLGSPRPPSPPLLLKHGPRHRSNLPLSRLSPRTWRRLESEPTRAVKPVWHRAYPPPPSAGPWGASTGALEQQENQREAE DSETPWTV PPLAPSVDVMPPTQRPPSPWPEGIGSLRGFSR PPPVPENP LLEHTSPSCEPQSEDRVSNLTGIFLQGHHDPGGQLTKSADPSLEKPEEVVTLGDQP PAEPEALNPTPPNKNVVSERKVLRLSASYPLVTCKQARATWPQWHRWKTVSRTPAPLAPTRAPG PLLKAGEQ PRAEPGRFAVVMPQVRGVSSFRPKGPAPVQPEHPDQDPEQGPAPQACSLRWPRLWPPTDAHCLWSRIRTYSSQSHLRGHG GDCHKSLWKKTRPQSWQNKMH S I RNLP SMRSREQHRE DGVEDMTQLEDLQETT V L ANL KTRFERNL IYTYIGS I LVSVN PYRMFAIYGPEQVQQYSGRALGENP PHLFAIANLAF AKMLDAKQNCV I ISGESGSGKTEATKLI LR CLAAMNQRRDVMQQIKILEATP LLEAFGNAKTVRNDNSSRFGKFVEIFLEGGVICGAITSQYLLEKSRI VFQAKNERNYHIFYELLAGLPAQLRQAFSLQEAEYTYLNLQGGNCEIAGKSDADDFRLLAAMEVLFGT SEDQDSIFRILASILHLGNVYFEKHETDAQE VASVVSAREIQAVAELLQVSP EGLQKAITFKVTETIREKI FTPLT VESAVDARDAIAKVLYALLFGWLITRVNALVSPKQDTLSIAILDIYGFEDLSFNSFEQLCINYANENLQYLFNKIVFQEEQEEYIREQMDWREIAFADNQP CINLISLKPYGILRILDDQCCFPQATDHTFLQKCHYHGANPLYSKPKMP LPEFTIKHYAGKVTYQVHKFLDKNHQVRQDVLDL FVHSRTRVVAHLFSSHAAQTAPPRLGKSSSITRLYKAHTVAAKFQO SLLDLVEKMERCNPLFVRCLKPNHKKEPGLFEPDVMMAQLRYSGVLETVRIRKEGFPVRLFPQVFI DRYRCLVALKLNVPADGDMCVSLLSRLCTVTPDMYRVGISKLF LKEHLHQLLES MRERVQNRAALTLQRYLRGFFIQRHFRSLRKKI ILLQSRARGFLARQRYQQMRQSLLKFRSLVHTYVNRRRYLKELSKREVVPVRHLEVPA EVAGLLQAAAGLKLSSGPRVAVVRAPRLQAEPCVTLP LDINNY PMAKFI RCHFKEPSFGMLTVPLKMPLTRLP VEHHAEBASVFKLILRFMGDPHLHG TQEMILGN YIVHQGLVEPALRDEILAQLANQVWRNP NAYNSKRGWLLL AACLSGFAPSPHLDFLLKFVSDYQNGFQAVCQHRL LQAMGSGAARTFPPTQLEWTAIQEKASMALDVSCFNGDQFSCPVHTWSTGEAVAGDI LKHRGLADGWRGWTVMKNGVQWAE LAGHDYVLDLVS DLELLRDFRQKSYFIVGAEGPLAGRGDTRGVFGNCWDSDEDTPTRPQPQDHVAKMPDL DGYCSHKEDGTNGETE AQRWTSNRQAVDSIGESTVPPRELDGYLDSLFDPV LACGDADLEKPTAIAYRMKGGGQPGGGG GSTSEDT SRRPPEPKLKI PGLDASTLALQQA F IHRQAVLLAREMTLQALALQQQPLSATSRPQLPERPLAPEARPKTVVGTGPPAKPVLRPTPQSWAPGSVAKAPKIPSKPVAVPILAQDWTAPESISASPELVRYSTLNSEHFQPTQQIRSI IKYKQP PWAGHP EARRTDGGKVFRRPPDPHEEALMILKGQKTQLAVVPGTQVSREAVAMVKPVT SAPRPCMGPTPVQPSRSLEPPEDPVQTLHRLVNPNFYGYQDIPWRIFLRKEVFYPKDNYSHPVQLDLLFRQILHDTFSEACLRISIEDERLQMKALFAQNQLDTRPLVTESVKRAAISMARDSWEIYFSRFLFPAMGSVGTGVQILAVSHTGIKLLQMVKGSKEASRRRLRVLCAYSFADILFVTMPSQNMLEFNLSNEKLILFSARAQQVKTLDVDFILELKKDSYVVAVRNFLSEDPELLSFHKGDI IHLQSLEPTRVGY SAGCVVRKKLVYLEELRRRGPDFGWRFGAVHGRVGRFPSELVQPAAPDFLQLPAEPGRGAAAVAAVASAAAAQEVGRRREGPPVRARSADSGEDSIALPPSTMLEFAQKYFRDPRRRPRDGLKLSKEDRESKTLEDVLCFTKVP IQESLIELSDSNLNKMAVDMFVAVMRFMGDA PLKGQSELDVLTLLKLCGDHEVMRDECYQCIVKQITDNSSPKQDSCQRGWRLLY IMAAAYSCSEVFYPIRLRFLQHVSWTPGLPFQGI AK

ACEQNLQKTLRFGGRLFPSPNMELRAMLGRSSKRQLFLLPGGLERHLKIKTCTVALDVIEGLCTEMALTRPE  
 AFDEYVIVVVTNRGQHVCPLSCRAYILDVASEMEQVDGGYTLWFRVLWDQPLKFENELYVTMHYNQVLPDYL  
 KGLFSSVPARQPTEQQLOQVSKLASLQHRAKDHFYLPVREVQEYIPAQLYHTTAGDTWLNLSQHRQQTQAL  
 SPHQARAQFLGLLSAFPLFGSSFFFIQSCSNVLVPAPCILAVNHNGLNFLSTKTHELIVKIPLKEIQSTWTQQ  
 PTANSSYPYVEISLGDVAAQRTMQLQLEQGLELCRVVAVHVESMLSAREERLTLPPSEITLL\*  
 >rs51923482\_ENSMUSP00000071777\_c.3663:G>T\_p.V1222L  
 ENSMUST00000071880.9|Myo15-201|ENSMUSG00000042678|+|chr11:g.60373141:G>T  
 MADEEKKAKKGGKKKAPEPEKPKRSLKGT SRLFMGFRDRTPKI SKKGFQFRSASAFFWGLHTGPQKTKRKKKA  
 RTVLKSTSKLMTQMRVGGKKRAMKGGKPSFMVIRFPGRRGYRLRPRAQSLSKASTAINWLTKKFLLKKAEEES  
 GSEQATVDAWLQRSSSRVGSRKLPFPAGAEILRHGGRLRRFPSSHISYSSGEPVGFPLFEDEAPFRHAGSRKS  
 LYGLEGFQDLGEYYDYHREGDDYDQQSLYHYEEQEPYLAEFFGGYSPAWPPYDDYGYPPGDPYNYHPDYDGD  
 TLYPGYAYGYGYDDFEPYAPPSGYSSPYSYHDSFESEAYPYSYLLDPYATHMPYPPYDFPYDTPYDIPY  
 FDPYGVVYAEVYGGGAEAIYPPGMPYVYPEEPAFMYPWVPPPIMSPHNYPYAHMDDIAELEEEPEETGEERQS  
 TSFRLPSAAFFEQQGMKPARSKLSLIRKFRFLFRPQVKLFGKEKLEVPPLPSLDIPLPLGDAEGEEEEEMP  
 PVPTMPYTHPYWSFLTQRNLQRALSFAFGARQGLGFGPEFGHPTPRPATSLARFLKKTLESEKPIPRLRGSQ  
 KARGGRPPVREAAKRFYKLAGMDPDRPNTPIVLRSSQPQARNNNNSHGPPSPRPAPRALTHWSALISPPMP  
 APSPSPASPLTPPFSPTFSRPPRLASPYGSLRQHPPWAAPAHVFPFPQANWWGFAEPPGTSPEVAPDLLAFP  
 VPRPSFRASRSRRAAYGFPSPLIGSRRRPHLPSQPPLSLRSLPGQGYHSPGLPLSQLSLRGPFQPPFP  
 PPRRQSLREAFSLRRASGRGLGPPRSPVLGSPRPPSPPLLLKHGPRHRSNLPSRLPRTWRRLSEPPTRAVKP  
 WVHRAYP PPPSAGPWGASTGALEQQENQREAEADSETPWTVPPLAPSWDVMPTQRPSPWPPEGIGSLRGFSR  
 PPPVFNPLEHTSPSCEPQSEDRVSNLTGIFLQHHDPGGQLTKSADPSLEKPEEVTLGDPQPPAEPEAL  
 NPPTPNKNVVSERKVLRLSASYPLVTCKQARATWPQWHRWKTVSRTPAPLAPTRAPGPLLKAGEQRAEPGRF  
 AVVMPQVRGVSSFRPKGPAVQPEHPDQDPEQGPAPQACSLRWPRLWPPTDAHCLWSRIRTYSSQSHLRGHG  
 GDCHKSLWKKTRPQSWQNMHSIRNLPSMRSREQHREDGVEDMTQLEDLQETTLANLKRFRERNLIYTYIGS  
 IILVSNPYRMFAIYGPEVQVQYSGRALGENPHLFAIANLAFKMLDAKQNCV IISGESGSGKTEATKILIR  
 CLAAMNQRRDVMQIKILEATPLLEAFGNKTYRNDNSRFGKFEIFLEGGVICGAIISQYLLEKSRIVFQA  
 KNERNYHI FYELLAGLPAQLRQAFSLQEAETYYLNGGNC EIAGKSDADDFRRLLAAMEVLGFTSEDQDSIF  
 RILASILHLGNVYFEKHETDAQEVASVVSAREIQAVAELLQVSEGLQKAITFKVTETIREKI FTPLTVESAV  
 DARDAIAKVLVYALLFGWLITRVNALVSPKQDLSIAILDIYGFEDLSFNSFEQLCINYANENLQYLFNKIVFQ  
 EEQEYIREQMDWREIAFADNQPCINLISLKPYGILRILDDQCCFPQATDHTFLOKCHYHGANPLYSKPKMP  
 LPEFTIKHYAGKVTYQVHKFLDKNHQVRQDVLDFVHSRTRVVAHLFSSHAAQTAPPRLGKSSSITRLYKAH  
 TVAAKFQQLLDLVEKMERCNPLFVRCLKPNHKKEPGLFEPDVMMAQLRYSVLETVRIRKEGFPVRLFPQVF  
 IDRYRCLVALKLNVPADGDMCVSLLSRLCTVTPDMYRVGISKFLKEHLHQLLES MRERVQNRAALTQRYLR  
 GFFIQRHFRSLRKKIILLQSRARGLARQRYQMRQSLKFRSLVHTYVNRRLYLKLRAEQRRRAQEAWLREQ  
 EELSKREVVPVRHLRPAEVAGLLQAAAGLKLSSGPRVAVRAPRLQAEPCVTLPLDINNYPMAKFI RCHFKE  
 PSFGMLTVPLKMPLTRLPVEHHAELSVFKLILRFMGDPHLHGTEMLGNIVHQLVEPALRDEILAQLAN  
 QVWRNPAYNSKRGWLLLAACLSGFAPSPHLDFLLKFKVSDYDQNGFQAVCQHRLQLQAMGSGAARTFPPTQLE  
 WTAIQEKASMALDVSCFNGDQFSCPVHTWSTGEAVAGDILKHRGLADGWRGWTAMKNGVQWAE LAGHDYVLD  
 LVSDLELLRDFPRQKSYFIVGAEGLAGRGDTRGVFGNCWSDSDTPTRPQPDHVAKMPDLGYSCHKEDGT  
 NGETEQRWTSNRQAVDSIGESTVPPRELDGYLDSLDFPVLACGDADLEKPTAIAYRMKGGGQPGGGGGSTSE  
 DTSRRPPEPKLKPI PGLDASTLALQQAFIHRQAVLLAREMTLQALALQQQPLSATSRPQLPERPLAPEARPKT  
 VVGTGPPAKPVLVRPTQSWAPGSAKAPKIPSKPVAVPILAQDWTAPESISASPELVRYSTLNSEHFPOPTQ  
 QIRSI IKQYKQPPWAGHPEARRTDGGKVFRRPPDPHEEALMI LKGQKTQLAVVPGTQVSREAVAMVKPVTSAP  
 RPCMGPTPVQPSRSLPEPDPVQTLHRLVNPNFYGYQDI PWRIFLRKEVFYPKDNYSHPVQLDLLFRQILHD  
 TFSEACLRI SEDERLQMKALFAQNQLDTRPLVTESVKRAAISMRDSWEIYFSRLFPAMGSVGTGVQILAVS  
 HTGIKLLQMVKSKEASRRLRVLCAYSFADILFVTMP SQNMLEFNLSNEKLI LFSARAQQVKTLVDTFI LELK  
 KDSYVAVRNFLESDPELLSFHKGDI IHLQSLEPTRVGY SAGCVVRKKLVYLEELRRRGPDFGWRFGAVHGR  
 VGRFPSELVQPAAPDFLQLP AEPGRGRAAAVAAVASAAAAQEVGRRREGPPVRARSADSGEDSIALPPSTM  
 LEFAQKYFRDPRRRPRDGLKLSKEDRESKTLEDVLCFTKVP IQESLIELSDSNLNKMAVDMFVAVMRFMGDA  
 PLKGQSELDVLC TLLKLCGDHEVMRDECYQIVKQITDNSSPKQDSCQRGWRLLY IMAAYYSCSEVFYPLYIR  
 FLQHVSWTPGLPFQGIKACEQNLQKTLRFGGRLFPSPNMELRAMLGRSSKRQLFLLPGGLERHLKIKTCTV  
 ALDVIEGLCTEMALTRPEAFDEYVIVVVTNRGQHVCPLSCRAYILDVASEMEQVDGGYTLWFRVLWDQPLKF  
 ENELYVTMHYNQVLPDYL KGLFSSVPARQPTEQQLOQVSKLASLQHRAKDHFYLPVREVQEYIPAQLYHTTA  
 GDTWLNLSQHRQQTQALSPHQARAQFLGLLSAFPLFGSSFFFIQSCSNVLVPAPCILAVNHNGLNFLSTKTH  
 ELIVKIPLKEIQSTWTQQPTANSSYPYVEISLGDVAAQRTMQLQLEQGLELCRVVAVHVESMLSAREERLTL  
 PSEITLL\*  
 >rs51923482\_ENSMUSP00000080507\_c.102:G>T\_p.V35L  
 ENSMUST00000081823.12|Myo15-202|ENSMUSG00000042678|+|chr11:g.60373141:G>T

MHSIRNLPMSRSREQHREDGVEDMTQLEDLQETTLLANLKTFRERNLIYTYIGSILVSNPYRMFAIYGPEQV  
 QQYSGRALGENPPLLFAIANLAFKMLDAKQNCV IISGESGSGKTEATKILIRCLAAMNQRDVMQKIKILE  
 ATPLLEAFGNAKTVRNDNSSRFGKFVEIFLEGGVICGAI TSQYLLEKSRI VFQAKNERNYHIFYELLAGLPAQ  
 LRQAFSLQEAETYYL NQGGNCEIAGKSDADDFRLLAAMEVLGFTSEDQDSIFRILASILHLGNVYFEKHET  
 DAQEVASVVSAREIQAVAELLQV SPEGLQKAITFKVTETIREKI FTPLTVESAVDARDAIAKVL YALLFGWLI  
 TRVNALVSPKQD TLSIAI LD IYGFEDLSFNSFEQLCIN YANENLQYLFNKIVFQEEQEEYIREQMDWREIAFA  
 DNQPCINLISLKPYGILRILDDQCCFPQATDHTFLQKCHYHGANPLYSKPKMPLPEFTIKHYAGKVTYQVHK  
 FLDKNHDQVRQDVLDFVHSRTRVVAHLFSSHAAQTAPPRLGKSS ITRLYKAHTVAAKFQOSLDDLVEKMER  
 CNPLFVRCLKPNHKKEPGLFEPDVMAQLRYSGLVIRLETVRIRKEGFPVRLPFQVVIDRYRCLVALKLNVPADGD  
 MCVSLLSRLCTVTPDMYRVGISKLFLEKHLHQLLES MRERVQNRAALTQRYLRGFFIQRHFRSLRRKIILLQ  
 SRARGFLARQRYQOMRQSLLKFRSLVHTYVNRRLYLKELSKREVVPVRHLEVPAEVAGLLQAAAGLKLSSGPR  
 VAVVRAPRLQAEPCVTLPDINNYMAKFI RCHFKEPSFGMLTVPLKMP LTRLPVEHHAEAISVFKLILRFMG  
 DPHLHGTQEMILGN YIVHQGLVEPALRDEILAQLANQVWRNP NAYNSKRGWLLLAACL SGFAPS PHLDKFLK  
 FVSDYQNGFQAVCQHRL LQAMGSGAARTFPPTQLEWTAIQEKASMALDVSCFNGDQFSCP VHTWSTGEAVAG  
 DILKHRGLADGWRGWTVMKNGVQWAE LAGHDYVLDLVS DLELLRDFPRQKSYFIVGAEGPLAGRGDTRGVFG  
 NCWDSDEDTPTRPQPQDHVAKMPDL DGYCSHKEDGTNGETEAQRWTSNRQAVDSIGESTVPPRELDGYLDSLF  
 DPVLACGDADLEKPTAIAYRMKGGGQPGGGGGS TSEDTSRRPPEPKLKPI PGLDASTLALQQAFIHRQAVLLA  
 REMTLQALALQQQLSATS RPQLPERPLAPEARPKTVVGTGPPAKPVLVRPTPQSWAPGSVAKAPKIPSKPVA  
 VPILAQDWTAPESISASPELVRYSTLNSEHFQPTQQIRSI IKQYKQPPWAGHPEARRTDGGKVFRPPDPHE  
 EALMILKQKQTQLAVVPGTQVSREAVAMVKPVT SAPRPCMGPTPVQPSRSLEPPEDPVQ TQLHRLVNP NFYGY  
 QDIPWRI FLRKEVFYPKDNYSHPVQLDLLFRQILHDTFSEACLRIS EDERLQMKALFAQNQLDTRQLVTE SV  
 KRAAISMARDSWEIYFSR LFPAMGSVGTGVQILAVSHTGIKLLQMVKGSKEASRRLRVLCAYSFADILFVTMP  
 SQNMLEFNLSNEKLILFSARAQQVKTLVDTF ILELKKDSDYVVAVRNF LSEDPELLSFHKGDIHLQSL EPT  
 VGYSAGCVVRKLVYLEELRRRGPDFGWRFGAVHGRVGRFPSELVQPAAPDFLQLPAEPGRGAAA VAAAA  
 SAAAAQEVGRRREGPPVARSADSGEDSIALP PSTMLEFAQKYFRDPRRRPRDGLKLSKEDRESKTLEDVLC  
 FTKVPIQESLIELSDSNLNM AVMDFVAVMRFMG DAPLQHSQSELDVLC TLLKLCGDHEVMRDECYQIVKQIT  
 DNSSPKQDSCQRWRLLY IMAAYYSCSEVFYPYLI RFLQHVSWT PGLPFQGI AKACEQN LKTLRFGRLEFP  
 SNMELRAMLAGRSSKRQLFLLPGGLERHLKI KTCTVALDVIEGLCTEMALTRPEAFDEYVIFVVTNRGHVCP  
 LSCRAYILDVASEMEQVDGGYTLWFRRLVDQPLKFENEL YVTMHNQVLPDY LKGLFSSV PARQPTEQQLQQ  
 VSKLASLQHRADHFYLP SVREVQEYI PAQLYHTTAGDTWLN LVSQHRQQTQALS PHQARAQFLGLLSAFFLF  
 GSSFFFIQSCSNVLPAPC I LAVNHNLNFLSTKTHELIVKI PLKEIQSTWTQOPTANSSYPYVEISLGDVAA  
 QRTMQLQLEQGLELCRVVAVHVESMLSAREERLTL PPS EITLL\*

>rs51923482\_ENSMUSP00000091686\_c.3663:G>T\_p.V1222L  
 ENSMUST00000094135.9|Myo15-203|ENSMUSG00000042678|+|chr11:g.60373141:G>T  
 MADEEKKAKKGGKKAPEPEKPKRSLKGT SRLFMGFRDRTPKISKKGQFRSASAFFWGLHTGPQKTKRKKKA  
 RTVLKSTSKLMTQMRVGGKKRAMKGGKPSFMVIRFPGRRGYGR LRPRAQSLSKASTAINWLTKKFL LKKAES  
 GSEQATVDAWLQRSSSRVGSRKLPFP SGAEILRHGGRLLRRFP RSHSIYSSGEPVGF LFPFEDEAPFRHAGSRKS  
 LYGLEGFQDLGEYYDYHREGDDYDQQSLYHYEEQEPYLA EFGGYS PAWPPYDDYGYPPGDPYNY YHPDYGD  
 TLYPGYAYGYGYDDFEPPYAPPSGYSSPYSYHDSFESEAYPYSYLDPYATHHMPYPPYDFPYDTPYDI PY  
 FDPYGVPYAEGVYGGGAEAIYPPGMPYVYPEEPAFMYPWVPPP IMSPHNYPYAHPMDDIAELEPEEETGEERQS  
 TSFRLPSAAFFEQQGMDKPARSKLSLIRKFR LFRPQVKLFGKEKLEVPLPPSLDIPLPLGDAEGEEEEEMP  
 PVPTMPYTHPYWSFLT PRQRNLQRALSAFGARQGLGFGPEFGHPTPRPATSLARFLKKT LSEKPI PRLRGSQ  
 KARGGRPPVREAA YKRFYKLAGMDPDRPNTPIVLRRSQPQARNNNNSHGPPSPRPAPRAL THWSALISPPMP  
 APSPSPASPLTPPFSPTFSRPPRLASPYGSLRQHPPWAA PAHVFPFPQANWWGFAEPPGTSPEVAPDLLAFP  
 VPRPSFRASRSRRAAYGFPSPLIGSRRRPHLSPQPSLRSLPGQGYHSP LGLPLSPQLSLRRGFQPPFP  
 PRRRQSLREAFSLRRASGR LGPPRSPVLGSPRPPSPPL LKHGPRHRSNLPSRLPRTWRRLSEPPTRAVKP  
 WVHRAYP PPSAGPWGASTGALEQQENQREAE DSETPWTV PPLAPSVDVMPPTQRPPSPWPPEGIGSLRGFSR  
 PPPVPENP LLEHTSPSCEPQSEDRVSNLTGIFLGQHHDPGPGQLTKSADPSLEKPEEVVTLGDPQPPAEPEAL  
 NP TFPNKNVVSERKVLRLSASYPLVTCKQARATWPQWHRWKT VSRTPAPLAPTRAPGPLLKAGEQPRAE PGRF  
 AVVMPQVRGVSSFRPKGPAPVQPEHPDQDPEQGPAPQACSLRW PRLWPPTDAHCLWSRIRTYSSQSHLRGHG  
 GDCHKSLWKKTRPQSWQNKMHSIRNLPMSRSREQHREDGVEDMTQLEDLQETTLLANLKTFRERNLIYTYIGS  
 ILVSNPYRMFAIYGPEQVQQYSGRALGENPPLLFAIANLAFKMLDAKQNCV IISGESGSGKTEATKILIR  
 CLAAMNQRDVMQKIKILEATPLLEAFGNAKTVRNDNSSRFGKFVEIFLEGGVICGAI TSQYLLEKSRI VFQAK  
 KNERNYHIFYELLAGLPAQLRQAFSLQEAETYYL NQGGNCEIAGKSDADDFRLLAAMEVLGFTSEDQDSIF  
 RILASILHLGNVYFEKHETDAQEVASVVSAREIQAVAELLQV SPEGLQKAITFKVTETIREKI FTPLTVESAV  
 DARDAIAKVL YALLFGWLI TRVNALVSPKQD TLSIAI LD IYGFEDLSFNSFEQLCIN YANENLQYLFNKIVFQ  
 EEQEEYIREQMDWREIAFADNQPCINLISLKPYGILRILDDQCCFPQATDHTFLQKCHYHGANPLYSKPKMP  
 LPEFTIKHYAGKVTYQVHKFLDKNHDQVRQDVLDFVHSRTRVVAHLFSSHAAQTAPPRLGKSS ITRLYKAH

TVAAKFQQSLDLVEKMERCNPLFVRCCLKPNHKKPEGLFEPDVMMAQLRYSGVLETVRIKKEGFPVRLPFQVF  
IDRYRCLVALKLNVPADGDMCVSLLSRLCTVTPDMYRVGISKFLKEHLHQLLES MRERVQNRAALTQRYLR  
GFFIQRHFRSLRRKIILLQSRARGFLARQRYQOMRQSLLKFRSLVHTYVNRNRRYLKELSKREVVPVRHLEVPA  
EVAGLLQAAAGLKLSSGPRVAVVRAPRLQAEPCVTLPDINNYPMAKFI RCHFKEPSFGMLTVPLKMPLTRLP  
VEHHAETAI SVFKLILRFMGDPHLHGTQEMILGNIVHQGLVEPALRDEILAQLANQVWRNPNAYSKRGWLLL  
AACLSGFAPSPHLDKFLLKFVSDYQNGFQAVCQHRLQAMGSGAARTFPPTQLEWTAIQEKASMALDVSCFN  
GDQFSCPVTWSTGEAVAGDILKHRGLADGWRGWTVMKNGVQWAE LAGHDYVLDLVSDELLRDFPRQKSYF  
IVGAEGPLAGRGDTRGVFGNCWDSDEDTPTRPQPQDHVAKMPDLGVC SHKEDGTNGETEAQRWTSNRQAVDS  
IGESTVPPRELDGYLDSLFDPLVACGDADLEKPTAIAYRMKGGGQPGGGGGSTSEDTSTRPPEPKLKP I PGLD  
ASTLALQQAFIHRQAVLLAREMTLQALALQQQPLSATSRPQLPERPLAPEARPKTVVGTGPPAKPVLVRPTPQ  
SWAPGSVAKAPKIPSKPVAVPILAQDWTAPESISASPELVRYSTLNSEHFPPQPTQQIRSI IKQYKQPPWAGHP  
EARRTDGGKVFRRPPDPHEEALMILKGQKTQLAVVPGTQVSREAVAMVKPVT SAPRPCMGPTPVQPSRSLEPP  
EDPVQTLHRLVNPNFYGYQDIPWRI FLRKEVFYPKDNYSHPVQLDLLFRQILHDTFSEACLRI SEDERLQMK  
ALFAQNQLDTRPLVTESVKRAAISMARDSWEIYFSRFLPAMGSGVTGVQILAVSHTGIKLLQMVKGSKEASR  
RLRVLCAYSFADILFVTMPSQNMLEFNLSNEKLILFSARAQQVKTLDVDTFILELKKDSDYVAVRNFLSEDPE  
LLSFHKGDI IHLQSLEPTRVGY SAGCVVRKLLVYLEELRRRGPDFGWRFGAVHGRVGRFPSELVQAAAADFL  
QLPAEPGRGAAA VAAVASAAAAQEVGRRREGPPVRARSADSGEDSIALPPSTMLEFAQKYFRDPRRRPRDG  
LKLKSKEDRESKTLEDVLCFTKVP IQESLIELSDSNLNKMAVDMFVAVMRFMGDAPLKGQSELDVLTLLKLC  
GDHEVMRDECYQIVKQITDNSSPKQDSCQRGWRLLY IMAAYYSCSEVFYPYLIRFLQHVSWTPGLPFQGI AK  
ACEQNLQKTLRFGRLEFP SNMELRAMLAGRSSKRQLFLLPGGLERHLKIKTCTVALDVIEGLCTEMALTRPE  
AFDEYVIFVVTNRGQHVCPLSCRAYILDVASEMEQVDGGYTLWFRVLWDQPLKFENELYVTMHNQVLPDYL  
KGLFSSVPARQPTQQQLQVSKLASLQHRAKDHFYLPVREVQEYI PAQLYHTTAGDTWLNLSVSHRQQTQAL  
SPHQARAQFLGLLSAFPLFGSSFFF IQSCSNVLVPAPCI LAVNHGILNFLSTKTHELIVKI PLKEIQSTWTQQ  
PTANSSYPYVEISLGDVAAQRTMQLQLEQGLELCRVVAVHVESMLSAREERLTLPPSEITLL\*  
>rs51923482\_ENSMUSP00000120839\_c.165:G>T\_p.V56L  
ENSMUS00000126522.4|Myo15-205|ENSMUSG00000042678|+|chr11:g.60373141:G>T  
XGGDCHKSLWKKTRPSWQNKMHISIRNLP SMRSREQHRELDGVEDMTQLEDLQETTLANLKRFRERNLIYTYI  
GSILVSNPYRMFAIYGPEQVQQYSGRALGENPPLHFAIANLAFKMLDAKQNCV IISGESGSGKTEATKLI  
LRCLAAMNQRDVMQQI LEATPLLEAFGNAKTVRNDNSSRFGKFVEIFLEGGVICGAITSQYLLEKSRI VFQA  
KNERNYHIFYELLAGLPAQLRQAFSLQEAETYYL NQGGNCEIAGKSDADDFRLLAAMEVLGFTSEDQDSIF  
RILASILHLGNVYFEKHETDAQEVASVVSAREIQAVAELLQVSPEGLQKAITFKVTETIREKI FTPLTVESAV  
DARDAIAKVLYALLFGWLITRVNALVSPKQDTLSIAILDIYGFEDLSFNSEQLCINYANENLQYLFNKIVFQ  
EEQEEYIREQMDWREIAFADNQPCINLISLKPYGILRILDDQCCFPQATDHTFLQKCHYHGANPLYSKPKMP  
LPEFTIKHYAGKVTYQVHKFLDKNHDQVRQDVLDFVHSTRTRVVAHLFSSHAAQTAPPRLGKSSSITRLYKAH  
TVAAKFQQSLDLVEKMERCNPLFVRCCLKPNHKKPEGLFEPDVMMAQLRYSGVLETVRIKKEGFPVRLPFQVF  
IDRYRCLVALKLNVPADGDMCVSLLSRLCTVTPDMYRVGISKFLKEHLHQLLES MRERVQNRAALTQRYLR  
GFFIQRHFRSLRRKIILLQSRARGFLARQRYQOMRQSLLKFRSLVHTYVNRNRRYLKELSKREVVPVRHLEVPA  
EVAGLLQAAAGLKLSSGPRVAVVRAPRLQAEPCVTLPDINNYPMAKFI RCHFKEPSFGMLTVPLKMPLTRLP  
VEHHAETAI SVFKLILRFMGDPHLHGTQEMILGNIVHQGLVEPALRDEILAQLANQVWRNPNAYSKRGWLLL  
AACLSGFAPSPHLDKFLLKFVSDYQNGFQAVCQHRLQAMGSGAARTFPPTQLEWTAIQEKASMALDVSCFN  
GDQFSCPVTWSTGEAVAGDILKHRGLADGWRGWTVMKNGVQWAE LAGHDYVLDLVSDELLRDFPRQKSYF  
IVGAEGPLAGRGDTRGVFGNCWDSDEDTPTRPQPQDHVAKMPDLGVC SHKEDGTNGETEAQRWTSNRQAVDS  
IGESTVPPRELDGYLDSLFDPLVACGDADLEKPTAIAYRMKGGGQPGGGGGSTSEDTSTRPPEPKLKP I PGLD  
ASTLALQQAFIHRQAVLLAREMTLQALALQQQPLSATSRPQLPERPLAPEARPKTVVGTGPPAKPVLVRPTPQ  
SWAPGSVAKAPKIPSKPVAVPILAQDWTAPESISASPELVRYSTLNSEHFPPQPTQQIRSI IKQYKQPPWAGHP  
EARRTDGGKVFRRPPDPHEEALMILKGQKTQLAVVPGTQVSREAVAMVKPVT SAPRPCMGPTPVQPSRSLEPP  
EDPVQTLHRLVNPNFYGYQDIPWRI FLRKEVFYPKDNYSHPVQLDLLFRQILHDTFSEACLRI SEDERLQMK  
ALFAQNQLDTRPLVTESVKRAAISMARDSWEIYFSRFLPAMGSGVTGVQILAVSHTGIKLLQMVKGSKEASR  
RLRVLCAYSFADILFVTMPSQNMLEFNLSNEKLILFSARAQQVKTLDVDTFILELKKDSDYVAVRNFLSEDPE  
LLSFHKGDI IHLQSLEPTRVGY SAGCVVRKLLVYLEELRRRGPDFGWRFGAVHGRVGRFPSELVQAAAADFL  
QLPAEPGRGAAA VAAVASAAAAQEVGRRRE  
>rs241240387\_ENSMUSP00000071777\_c.8937:G>GCT\_p.D2980ins-fs  
ENSMUST00000071880.9|Myo15-  
201|ENSMUSG00000042678|+|chr11:g.60400785:G>GCT  
MADEEKKAKKGGKGGKKAPEPEKPKRSLKGT SRLFMGFRDRTPKISKKGQFRSASAFFWGLHTGPKTKRKKKA  
RTVLKSTSKLMTQMRVGGKKRAMKGGKPSFMVIRFPGRRGYGRLRPRAQSLSKASTAINWLTKKFLKKA EES  
GSEQATVDAWLQRSSSRVGSRKLPFSGAEILRHGGRLRRFP RSHSIYSSGEPVGF LFPFEDEAPFRHAGSRKS  
LYGLEGFQDLGEYYDYHREGDDYDQOSLYHYEEQEPYLA EFGGYS PAWPPYDDYGYPPGDPYNYHPDYD

TLYPGYAYGYGYDDFEPPYAPPSGYSSPYSYHDSFESEAYPYSYLLDPYATHHMPYPPYDFPYDTPYDI PY  
 FDPYGVVYAEVYGGGAEAIYPPGMPYVYPEEPAFMYPWVPPPIMSPHNPYAHMDDIAELEEPEETGEERQS  
 TSFRLPSAAFFEQQGMKPARSKLSLIRKFRFLFRPQVKLFGKEKLEVPLPPSLDIPPLGDAEGEEEEEEMP  
 PVPTMPYTHPYWSFLTFRQRNLQRALSAFGARQGLGFGPEFGHPTPRPATSLARFLKKTLEKPIPRLRGSQ  
 KARGGRPPVREAAAYKRFYKLAGMDPRPNTPIVLRSSQPQARNNNNSHGPPSPRPAPRALTHWSALISPPMP  
 APSPPASPLTPPFSPTFSRPPRLASPYGSLRQHPPWAAPAHVFPFPQANWWGFAEPPGTSPEVAPDLLAFP  
 VPRPSFRASRSRRAAYGFPPSLIGSRRRPHLPSQPQSLRSLPGQYHSPLGPLSPQLSLRRGPFQPPFP  
 PPRRQSLREAFSLRRASGRGPPRSPVLSRPPSPPLKKGPRHRSNLPSRLPRTWRRLSEPPTRAVKP  
 WVHRAYPSPSAGPWGASTGALEQQENQREAEDETPWTVPLPAPSWDVMPTQRPSPWEGIGSLRGSR  
 PPPVPEPPLLEHTSPSCEPQSEDRVSNLTGIFLQGHHDGPGQLTKSADPSLEKPEEVVTLGDQPPEPEAL  
 NPTPPNKNVVSERKVLRLSASYPLVTCKQARATWQWHRWKTVSRTPAPLAPTRAPGPLLKAGEQPAEPGRF  
 AVVMPQVRGVSSFRPKGPAPVQPEHPDQDPEQGPAPQACSLRWPRLWPPPTDAHCLWSRIRTYSSQSHLRGHG  
 GDCHKSLWKKTRPQSWQNKMHSIRNLPSMRSREQHREDGVEDMTQLEDLQETTTLANLKTFRERNLIYTYIGS  
 ILVSVNRYMFAIYGPEQVQYSGRALGENPPLHFAIANLAFKMLDAKQNCV IISGESGSGKTEATKLI LR  
 CLAAMNQRDVMQQIKILEATPLLEAFGNAKTVRNDNSSRFGKFEVIFLEGGVICGAITSQYLLEKSRI VFQA  
 KNERNYHIFYELLAGLPAQLRQAFSLQEAETYYLQGGNCEIAGKSDADDFRLLAAMEVLGFTSEDQDSIF  
 RILASILHLGNVYFEKHETDAQEVASVVSAREIQAVAELLQVSEGLQKAITFKVTETIREKI FTPLTVESAV  
 DARDATAKVLVYALLFGWLITRVNALVSPKQDTLSTIAILDIYGFEDLSFNSEQLCINYANENLQYLFNKIVFQ  
 EEQEEYIREQMDWREIAFADNQCINLISLKPYGILRILDDQCCFPQATDHTFLQKCHYHHGANPLYSKPKMP  
 LPEFTIKHYAGKVTYQVHKFLDKNHDQVRQDVLDFVHSRTRVVAHLFSSHAAQTAPPRLGKSSSITRKYKAH  
 TVAAKFQOQLDLVEKMERCNPLFVRCLKPNHKKEPGLFEPDVMMAQLRYSGVLETVIRKEGFPVRLPFQVF  
 IDRYRCLVALKLNVPADGDMCVSLLSRLCTVTPDMYRVGISKFLKEHLHQLLES MRERVQNRRAALTQRYLR  
 GFFIQRHFRSLRKKIILLQSRARGFLARQRYQOMRQSLKFRSLVHTYVNRNRYLKLRAEQRRRAQEAWLREQ  
 EELSKREVVPVRHLEVPAEVAGLLQAAAGLKLSSGPRVAVVRAPRLQAEPCVTLPLDINNYMAKFI RCHFK  
 PSFGMLTVPLKMP LTRLPVEHHAEAISVFKLILRFMGDPHLHGTEMI LGNYIVHQGLVEPALRDEILAQLAN  
 QVWRNPNAYNSKRGWLLLAACLSGFAPSPHLDKFLLK FVSDYQNGFQAVCQHRLQAMGSGAARTFPPTQLE  
 WTAIQEKASMLDVSCFNGDQFSCPVHTWSTGEAVAGDILKHRGLADGWRGWTVMKNGVQWAE LAGHDYVLD  
 LVSDLELLRDFPRQKSYFIVGAEGPLAGRGDTRGVFGNCWDSDEDTPTRPQPQDHVAKMPDLGDYCSHKEDGT  
 NGETEQRWTSNRQAVDSIGESTVPPRELDGYLDSLFDVPLACGDADLEKPTAIAYRMKGGGQPGGGGGSTSE  
 DTSRRPPEPKLKIPLGLDASTLALQQAFTIHRQAVLLAREMTLQALALQQQPLSATSRLPQLPERPLAPEARPKT  
 VVGTGPPAKPVLVRPTQSWAPGSVAKAPKIPSKPVAVPI LAQDWTAPESISASPELVRYSTLNSEHFPOPTQ  
 QIRSI IKQYKQPWAGHPEARRTDGGKVFRRPPDPHEALMI LKQKQTLAVVPGTQVSREAVAMVKPVT SAP  
 RPCMGP TPVQPSRSLEPPEDPVQTQLHRLVNPNFYGYQDIPWRI FLRKEVFYPKDNYSHPVQLDLLFRQILHD  
 TFSEACLRI SEDERLQMKALFAQNQLDTRPLVTE SVKRAAISMA RDSWEIYFSRFLPAMGSVGTGVQILAVS  
 HTGIKLLQMVKGSKEASRRRLRVLCAYSFADILFVTPMSQNMLEFNLSNEKILIF SARAAQVKTLDVDFILELK  
 KDSYVVAVRNLSEDPILLSFHKGDI IHLQSLFLEPTRVGYSAGCVVRKKLVYLEELRRRGDFGWRFGAVHGR  
 VGRFPSELVQPAAPDFLQLPAPGRGRAAAVAAVASAAAAQEVGRRREGPPVRARSATAERIP  
 >rs241240387\_ENSMUSP00000080507\_c.5322:G>GCT\_p.D1775ins-fs  
 ENSMUST00000081823.12|Myo15-  
 202|ENSMUSG00000042678|+|chr11:g.60400785:G>GCT  
 MHSIRNLPSMRSREQHREDGVEDMTQLEDLQETTTLANLKTFRERNLIYTYIGSILVSVNRYMFAIYGPEQV  
 QQYSGRALGENPPLHFAIANLAFKMLDAKQNCV IISGESGSGKTEATKLI LRCLAAMNQRDVMQQIKILE  
 ATPLLEAFGNAKTVRNDNSSRFGKFEVIFLEGGVICGAITSQYLLEKSRI VFQAKNERNYHIFYELLAGLPAQ  
 LRQAFSLQEAETYYLQGGNCEIAGKSDADDFRLLAAMEVLGFTSEDQDSIFRILASILHLGNVYFEKHET  
 DAQEVASVVSAREIQAVAELLQVSEGLQKAITFKVTETIREKI FTPLTVESAVDARDAIAKVLVYALLFGWLI  
 TRVNALVSPKQDTLSTIAILDIYGFEDLSFNSEQLCINYANENLQYLFNKIVFQEEQEEYIREQMDWREIAFA  
 DNQPCINLISLKPYGILRILDDQCCFPQATDHTFLQKCHYHHGANPLYSKPKMPLPEFTIKHYAGKVTYQVHK  
 FLDKNHDQVRQDVLDFVHSRTRVVAHLFSSHAAQTAPPRLGKSSSITRKYKAHTVAAKFQOQLDLVEKMER  
 CNPLFVRCLKPNHKKEPGLFEPDVMMAQLRYSGVLETVIRKEGFPVRLPFQVFIDRYRCLVALKLNVPADGD  
 MCVSLLSRLCTVTPDMYRVGISKFLKEHLHQLLES MRERVQNRRAALTQRYLRGFFIQRHFRSLRKKIILLQ  
 SRARGFLARQRYQOMRQSLKFRSLVHTYVNRNRYLKELSKREVVPVRHLEVPAEVAGLLQAAAGLKLSSGPR  
 VAVVRAPRLQAEPCVTLPLDINNYMAKFI RCHFKEPSFGMLTVPLKMP LTRLPVEHHAEAISVFKLILRFMG  
 DPHLHGTEMI LGNYIVHQGLVEPALRDEILAQLANQVWRNPNAYNSKRGWLLLAACLSGFAPSPHLDKFLLK  
 FVSDYQNGFQAVCQHRLQAMGSGAARTFPPTQLEWTAIQEKASMLDVSCFNGDQFSCPVHTWSTGEAVAG  
 DILKHRGLADGWRGWTVMKNGVQWAE LAGHDYVLDLVSDLELLRDFPRQKSYFIVGAEGPLAGRGDTRGVFG  
 NCWDSDEDTPTRPQPQDHVAKMPDLGDYCSHKEDGTNGETEQRWTSNRQAVDSIGESTVPPRELDGYLDSLFD  
 VPLACGDADLEKPTAIAYRMKGGGQPGGGGGSTSEDTTSRRPPEPKLKIPLGLDASTLALQQAFTIHRQAVLLA  
 REMTLQALALQQQPLSATSRLPQLPERPLAPEARPKTVVGTGPPAKPVLVRPTQSWAPGSVAKAPKIPSKPVA

VPILAQDWTAPESISASPELVRYSTLNSEHFPOPTQQIRSIKQYKQPPWAGHPEARRTDGGKVFRRPPDPHE  
EALMILKGQKTQLAVVPGTQVSREAVAMVKPVTSAAPRPMGPTPVQPSRSLEPPDPVQOTQLHRLVNPVNYGY  
QDIPWRIFLRKEVFYPKDNYSHPVQLDLLFRQILHDTFSEACLRISEDERLQMKALFAQNQLDTRPLVTEVS  
KRAAISMARDSWEIYFSRLFPAMGSVGTGVQILAVSHTGIKLLQMVKGSKEASRRRLRVLCAYSFADILFVTMP  
SQNMLEFNLSNEKLILFSARAQQVKTLVDTFILELKKDSYVAVRNFLSEDPELLSFHKGDI IHLQSLPTR  
VGYSAGCVVRKLLVYLEELRRRGPDFGWRFGAVHGRVGRFPSELVQPAAPDFLQLPAPPEGRGAAAAVA  
SAAAAQEVGRRREGPPVRRARSATAERIP  
>rs241240387\_ENSMUSP00000091686\_c.8883:G>GCT\_p.D2962ins-fs  
ENSMUST00000094135.9|Myo15-  
203|ENSMUSG00000042678|+|chr11:g.60400785:G>GCT  
MADEEKKAKKGGKKAPEPEKPKRSLKGTSLRFLMGFRDRTPKISKKGQFRSASAFFWGLHTGPQKTKRKKKA  
RTVLKSTSKLMTQMRVGGKKRAMKGGKPSFMVIRFPGRRGYGRRLRPAQSLSKASTAINWLTKKFLKKAES  
GSEQATVDAWLQRSSSRVGSRLPFPAGAEILRHGGRLRRFPSSHISYSSGEPVGFLLPFDEAPFRHAGSRKS  
LYGLEGFQDLGEYYDYHREGDDYDQQSLYHYEEQEPYLAFFGGYSPAWPYDDYGYPPGDPYNYYPDYD  
TLYPGYAYGYGYDDFEPYAPPSGYSSPYSYHDSFESEAYPYSYLLDPYATHHMPYPPYDFPYDTPYDIPY  
FDPYGVFYAEGVYGGGAIAIYPPGMPYVYPEEPAFMYPWVPPPIMSPHNYPYAHMDDIAELEPEETGEERQS  
TSFRLPSAAFFEQGMDKPARSKLSLIRKFRLLFPQVFLGKEKLEVPLPPLSLDIPPLGDAEGEHEEEEMP  
PVPTMPYTHPYWSFLTQRQNLQRALSAGARQGLGFGEFGHPTRPATSLARFLKKTLEKPIPRLRGSQ  
KARGGRPPVREAAKRFYKLAGMDPDRPNTPIVLRSSQPQARNNNNSHGPPSPRPAAPRALTHWSALISPPMP  
APSPSPASPLTPPFSPTFSRPPRLASPYGSLRQHPPWAAAHVFPFPQANWGFAPPGTSPVAPDLLAFP  
VPRPSFRASRSRRAAYGFPSLIGSRRRPHLPSPQPSLRLPGQGYHSPGLPLSPQLSLRRGPFQPPFP  
PPRRPQSLREAFSLRRASGRGPRSPVLGSPRPPSPPLLKHGPRHRSNLPSRLPRTWRRLSEPPTRAVKP  
WVHRAYPSPSAGPWGASTGALEQQENQREAESETPWTVPPLAPSWDVMPTQRPSPWPPEGIGSLRGFSR  
PPVPENPLEHTSPSCEPQSEDRVSNLTGIFLGQHHDPGPGQLTKSADPSLEKPEEVVTLGDPQPPAEPEAL  
NPTPPNKNVVSERKVLRLSASYPLVTCQARATWQWHRWKTVSRTPAPLAPTRAPGPLLKAGEQPRAEPGRF  
AVVMPQVRGVSFRPKGPAPVQPEHPDQDPEQGPAPQACSLRWPRLPPTDAHCLWSRIRTYSSQSHLRGHG  
GDCHKSLWKKTRPQSWQNMHSIRNLPMSRSREQHRDGEDMTQLEDLQETTVLANLKRFRERNLIYTYIGS  
ILVSNPYRMFAIYGPEQVQYSGRALGENPHLFAIANLAFKMLDAKQNCVVISGEGSGKTEATKILR  
CLAAMNQRRDVMQIKILEATPLLEAFNAKTVRNDNSSRFGKFEIFLEGGVICGAITSQYLLEKSRIVFQA  
KNERNYHIFYELLAGLPAQLRQAFSLQEAETYYLNLQGGNCEIAGKSDADDFRLLAAMEVLGFTSEDQDSIF  
RILASILHLGNVYFEKHETDAQEVASVVSAREIQAVAELLQVSPEGLQKAITFKVTETIREKI FTPLTVESAV  
DARDAIAKVLIALYLLFGWLITRVNALVSPKQDTLSIAILDIYGFEDLSFNSFEQLCINYANENLQYLFNKIVFQ  
EEQEEYIREQMDWREIAFADNQPCINLISLKPYGILRILDDQCCFPQATDHTFLQKCHYHGANPLYSKPKMP  
LPEFTIKHYAGKVITYQVHKFLDKNHDQVRQDVLDFVHSRTRVVAHLFSSHAAQTAPPRLGKSSSITRLYKAH  
TVAAKFQQLDLVLEKMERCNPLFVRCLKPNHKKPEGLFEDVMMQALRYSGVLETVRIKEGFPVRLPFQVF  
IDRYRCLVALKLNVPADGDMCVSLLSRLCTVTPDMYRVGISKLFLEKHLHQLLESMRERVQNRAALTLQRYLR  
GFFIQRHRFSLRRKIILLQSRARGFLARQRYQMRQSLKFRSLVHTYVNRRLYLKELSKREVVPVRHLEVPA  
EVAGLLQAAAGLKLSSGPRVAVVRAPRLQAEPCVTLPLDINNYPMAKFI RCHFKEPSFGMLTVPLKMP LTRLP  
VEHHAEAISVFKLILRFMGDPHLHGTQEMILGNYIVHQGLVEPALRDEILAQLANQVWRNPNAYSKRGWLLL  
AACLSGFAPSPHLDFLLKVFSDYQNGFQAVCQHRLQAMGSGAARTFPPTQLEWTAIQEKASMALDVSCFN  
GDQFSCPVHTWSTGEAVAGDILKHRGLADGWRGWTAMKNGVQWAE LAGHDYVLDLVSDELLRDFPRQKSYF  
IVGAEGPLAGRGDTRGVFGNWCWSDDEDTPTRPQPQDHVAKMPDLGYSKHKEDGTNGETEAQRWTSNRQAVDS  
IGESTVPPRELDGYLDSLFDPLVACGDADLEKPTAIAYRMKGGGQPGGGGSTSEDTSTRPPEPKLKP I PGLD  
ASTLALQQA F IHRQAVLLAREMTLQALALQQQLSATSRPQLPERPLAPEARPKTVVGTGPPAKPVLRPTPQ  
SWAPGSVAKAPKIPSKPVAVPILAQDWTAPESISASPELVRYSTLNSEHFPOPTQQIRSIKQYKQPPWAGH  
PEARRTDGGKVFRRPPDPHEEALMILKGQKTQLAVVPGTQVSREAVAMVKPVTSAAPRPMGPTPVQPSRSLEPP  
EDPVQOTQLHRLVNPVNYGYQDIPWRIFLRKEVFYPKDNYSHPVQLDLLFRQILHDTFSEACLRISEDERLQMK  
ALFAQNQLDTRPLVTESVKRAAISMARDSWEIYFSRLFPAMGSVGTGVQILAVSHTGIKLLQMVKGSKEASR  
RLRVLCAYSFADILFVTMP SQNMLEFNLSNEKLILFSARAQQVKTLVDTFILELKKDSYVAVRNFLSEDPE  
LLSFHKGDI IHLQSLPTRVGYSAGCVVRKLLVYLEELRRRGPDFGWRFGAVHGRVGRFPSELVQPAAPDFL  
QLPAEPGRGAAAAVAASAAAAQEVGRRREGPPVRRARSATAERIP  
>rs217883643\_ENSMUSP00000071777\_c.9370:C>T\_p.A3124V  
ENSMUST00000071880.9|Myo15-201|ENSMUSG00000042678|+|chr11:g.60405766:C>T  
MADEEKKAKKGGKKAPEPEKPKRSLKGTSLRFLMGFRDRTPKISKKGQFRSASAFFWGLHTGPQKTKRKKKA  
RTVLKSTSKLMTQMRVGGKKRAMKGGKPSFMVIRFPGRRGYGRRLRPAQSLSKASTAINWLTKKFLKKAES  
GSEQATVDAWLQRSSSRVGSRLPFPAGAEILRHGGRLRRFPSSHISYSSGEPVGFLLPFDEAPFRHAGSRKS  
LYGLEGFQDLGEYYDYHREGDDYDQQSLYHYEEQEPYLAFFGGYSPAWPYDDYGYPPGDPYNYYPDYD  
TLYPGYAYGYGYDDFEPYAPPSGYSSPYSYHDSFESEAYPYSYLLDPYATHHMPYPPYDFPYDTPYDIPY

FDPYGVVYAEVYGGGAEAIYPPGMPYVYPEEPAFMYPWVPPPIMSPHNPYAHPMDDIAELEEPEETGEERQS  
 TSFRLPSAAFFEQQGMKPARSKLSLIRKFRLLFRPQVKLFGKEKLEVPLPPSLDIPPLGDAEGEEEEEMP  
 FVPTMPYTHPYWSFLTTPRQRNLQRALSAFGARQGLGFGPEFGHPTPRPATSLARFLKKTLEKKPIRRLRGSQ  
 KARGRPPVREAAAYKRFYKLAGMDPDRPNTPIVLRSSQPQARNNNNSHGPPSPRPAPRALTHWSALISPPMP  
 APSPPASPLTPPFSPTFSRPPRLASPYGSLRQHPPPWAAPAHVFPFPQANWWGFAEPPGTSPEVAPDLLAFP  
 VPRPSFRASRSRRAAYGFPSLSIGSRRRPHLPSPPQSLRSLPGQGYHSPLGPLSPQLSLRRGPFQPPFP  
 PRRPQSLREAFSLRRASGRLLGPPRSPVLGSRPPSPPLKKGPRHRSNLPSRLPRTWRRLSEPPTRAVKP  
 WVHRAYPPPPSAGPWGASTGALEQQENQREAEADSETPWTVPPLAPSWDMDPPTQRPPSPWPEGIGSLRGFSR  
 PPPVPENPLLEHTSPSCEPQSEDRVSNLTGIFLGQHHDPGPGQLTKSADPSLEKPEEVVTLGDPQPPAEPEAL  
 NPTPPNKNVVSERKVLRLSASYPLVTCKQARATWPQWHRWKTVSRTAPAPLAPTRAPGPLLKAGEQAPRAEPGRF  
 AVVMPQVRGVSSFRPKGPAPVQPPEHPDQDPEQGPAPQACSLRWPRLWPPTDAHCLWSRIRTYSSQSHLRGHG  
 GDCHKSLWKKTRPQSWQNKMH SIRNLPSMRSREQHREDDGVEDMTQLEDLQETTTLANLKTFRERNLIYTYIGS  
 ILVSVNRYMFAIYGPQVQYSGRALGENPPHLFAIANLAFKMLDAKQNCV IISGESGSGKTEATKLIILR  
 CLAAMNQRDVMQQIKILEATPLLEAFGNAKTVRNDNSSRFGKFVEIFLEGGVICGAITSQYLLEKSRIVQFA  
 KNERNYHIFYELLAGLPAQLRQAFSLQEAETYYLQGGNCEIAGKSDADDFRLLAAMEVLGFTSEDQDSIF  
 RILASILHLGNVYFEKHETDAQEASVVSAREIQAVAELLQVSPPEGLQKAITFKVTETIREKIFTPLTVESAV  
 DARDAIAKVLVYALLFGWLI TRVNALVSPKQDTLSIAILDIYGFEDLSFNSFEQLCINYANENLQYLFNKIVFQ  
 EEQEYIREQMDWREIAFADNQPCINLISLKPYGILRILDDQCCFPQATDHTFLQKCHYHHGANPLYSKPKMPL  
 LPEFTIKHYAGKVTYQVHKFLDKNHDQVRQDVLDFVHSRTRVVAHLFSSHAAQTAPPRLGKSSSITRLYKAH  
 TVAAKFQQLDLVEKMERCNPLFVRCLKPNHKKPEGLFEPDVMMAQLRYSGVLETVRIRKEGFPVRLPFQVF  
 IDRYRCLVALKLNVPADGDMCVSLLSRLCTVTPDMYRVGISKFLKEHLHQLES MRERVQNRRAALTQRYLR  
 GFFIQRHFRSLRRKIILLQSRARGFLARQRYQMRQSLKFRSLVHTYVNRRLYLKLRAEQRRRAQEAWLREQ  
 EELSKREVVPVRHLEVPAEVAGLLQAAAGLKLSSGPRVAVVRAPRLQAEPCVTLPLDINNYPMAKFI RCHFKE  
 PSFGMLTVPLKMPLTRLPVEHHAEAISVFKLILRFMGDPHLHGTEMI LGNYIVHQGLVEPALRDEILAQLAN  
 QVWRNPNAYNKRGWLLLAACLSGFAPSPHLDFLLKFVSDYQNGFQAVCQHRLQAMGSGAARTFPPTQLE  
 WTAIQEKASMALDVSCFNGDQFSCPVHTWSTGEAVAGDILKHRGLADGWRGWTVMKNGVQWAE LAGHDYVLD  
 LVSDLELLRDFPRKSYFIVGAEGLAGRGDTRGVFNDCWDSDEDTPTRPQPQDHWAKMPDLDDGYCSHKEDGT  
 NGETEQRWTSNRQAVDSIGESTVPPRELDGYLDSLDFPVLACGDADLEKPTAIAYRMKGGGQPGGGGGSTSE  
 DTSRRPPEPKLKPIPLGDASTLALQQA F IHRQAVLLAREMTLQALALQQPLSATSRPQLPERPLAPEARPKT  
 VVGTGPPAKPVLVRPTPQSWAPGSVAKAPKIPSKPVAVPILAQDWTAPESISASPELVRYSTLNSEHFPOPTQ  
 QIRSIKQYKQPPWAGHPEARTRDGGKVFRRPPDPHEEALMI LKGQKTQLAVVPGTQVSREAVAMVKPVTSAP  
 RPCMGPVPQPSRSLPEPDPVQTLHRLVNPNFYGYQDI PWRIFLRKEVFYPKDNYSHPVQLDLLFRQILHD  
 TFSEACLRI SEDERLQMKALFAQNQLDTQRPLVTE SVKRAAISMARDSWEIYFSRFLFPAMGSVGTGVQILAVS  
 HTGIKLLQMVKGSKEASRRLRVLCAYSFADILFVTMPSQNMLEFNLSNEKLI LFSARAQQVKTLVDTFILELK  
 KDSDYVAVARNFLSEDPILLSFHKGDI IHLQSLPETRVGY SAGCVVRKKLVYLEELRRRRGPDFGWRFGAVHGR  
 VGRFVSELVQPAAPDFLQLP AEPGRGRAAAVAAVASAAAAQEVGRRRREGPPVARSADSGEDSIALPSTM  
 LEFAQKYFRDPRRRPRDGLKLSKEDRESKTLEDVLCFTKVP IQESLIELSDSNLNKMAVDMFVAVMRFMGDA  
 PLKGQSEL DVLCTLLKLCGDHEVMRDECYQIVKQITDNSSPKQDSCQRGWRLLYIMVAYYSCSEVFYPYLIR  
 FLQHVSWTPGLPFQGI AKACEQNLQKTLRFGGRLFP SNMELRAMLAGRSSKRQLFLLPGGLERHLKIKTCTV  
 ALDVEGLCTEMALTRPEAFDEYVIFVVTNRGQHVCP LSCRAYILDVASEMEQVDGGYTLWFRRVLWDQPLKF  
 ENELYVTMHNQVLPDY LKGLFSSVPARQPTQQQLQVSKLASLQHRAKDHFYLP SVREVQEYI PAQLYHTTA  
 GDTWNLNVSQHRQQTQALS PHQARAQFLGLLSAFLFGSSFFF IQSCSNVLPAPCILA VNHNGLNFLSTKTH  
 ELIVKIPLKEIQSTWTQQPTANSSYPYVEISLGDVAAQRTMQLQLEQGLELCRVVAVHVESMLSAREERLTL  
 PSEITLL\*

>rs217883643\_ENSMUSP00000080507\_c.5755:C>T\_p.A1919V  
 ENSMUST00000081823.12|Myo15-202|ENSMUSG00000042678|+|chr11:g.60405766:C>T  
 MHSIRNLPSMRSREQHREDDGVEDMTQLEDLQETTTLANLKTFRERNLIYTYIGSILVSVNRYMFAIYGPQV  
 QQYSGRALGENPPHLFAIANLAFKMLDAKQNCV IISGESGSGKTEATKLIILRCLAAMNQRDVMQQIKILE  
 ATPLLEAFGNAKTVRNDNSSRFGKFVEIFLEGGVICGAITSQYLLEKSRIVQFAKNERNYHIFYELLAGLPAQ  
 LRQAFSLQEAETYYLQGGNCEIAGKSDADDFRLLAAMEVLGFTSEDQDSIFRILASILHLGNVYFEKHET  
 DAQEASVVSAREIQAVAELLQVSPPEGLQKAITFKVTETIREKIFTPLTVESAVDARDAIAKVLVYALLFGWLI  
 TRVNALVSPKQDTLSIAILDIYGFEDLSFNSFEQLCINYANENLQYLFNKIVFQEEQEYIREQMDWREIAFA  
 DNQPCINLISLKPYGILRILDDQCCFPQATDHTFLQKCHYHHGANPLYSKPKMPLPEFTIKHYAGKVTYQVHK  
 FLDKNHDQVRQDVLDFVHSRTRVVAHLFSSHAAQTAPPRLGKSSSITRLYKAHTVAAKFQQLDLVEKMER  
 CNPLFVRCLKPNHKKPEGLFEPDVMMAQLRYSGVLETVRIRKEGFPVRLPFQVFIDRYRCLVALKLNVPADGD  
 MCVSLLSRLCTVTPDMYRVGISKFLKEHLHQLES MRERVQNRRAALTQRYLRGFFIQRHFRSLRRKIILLQ  
 SRARGFLARQRYQMRQSLKFRSLVHTYVNRRLYLKELSKREVVPVRHLEVPAEVAGLLQAAAGLKLSSGPR  
 VAVVRAPRLQAEPCVTLPLDINNYPMAKFI RCHFKEPSFGMLTVPLKMPLTRLPVEHHAEAISVFKLILRFMG

DPHLHGTOEMILGNIVHOGQGLVEPALRDEILAQLANQVWRNPAYNSKRGWLLLAACLSGFAPSPHLDFLLK  
FVSDYGQNGFQAVCQHRLQLAMGSGAARTFPPTQLEWTAIQEKASMALDVSCFNGDQFSCPVTHTWSTGEAVAG  
DILKHRGLADGWRGWTAMKNGVQWAEFLAGHDYVLDLVSDELLRDFPRQKSYFIVGAEGPLAGRGDTRGVFG  
NCWDSDEDTPTRPQPQDHVAKMPDLGDCYSHKEDGTNGETEAQRWTSNRQAVDSIGESTVPPRELDGYLDSLF  
DPVLACGDADLEKPTAIAYRMKGGGQPGGGGGSTSEDTSTRPPEPKLKIPLGLDASTLALQQAIFHRQAVLLA  
REMTLQALALQQQPLSATSRLPERPLAPEARPKTVVGTGPPAKPVLVLRPTPQSWAPGSAKAPKIPSKPVA  
VPI LAQDWTAPESISASPELVRYSTLNSEHFPOPTQQIRSIKQYKQPPWAGHPEARRTDGGKVFRRPPDPHE  
EALMILKGQKTQLAVVPGTQVSREAVAMVKPVTAPRPCMGPPTVQPSRSLEPPDPVQTLHRLVNPVNFYGY  
QDIPWRIFLRKEVFYPKDNYSHPVQLDLLFRQILHDTFSEACLRISEDRLQMKALFAQNQLDTPRPLVTSV  
KRAAISMARDSWEIYFSRLFPAMGVSQVILAVSHTGIKLLQMVKSKEASRRLRVLCAYSFADILFVTMP  
SQNMLEFNLSNEKLILFSARAQQVKTLDVTFIILELKKDSYVAVRNFVLSDEPELLSFHKGDIHILQSLPTR  
VGYSAGCVVRKLVYLEELRRRGPDPGWRFGAVHGRVGRFPSELVQAAAAPDFLQPAEPGRGAAAVAAVA  
SAAAAQEVGRRREGPPVRARSADSGEDSIALPPSTMLEFAQKYFRDPRRRPRDGLKLSKEDRESKTLLEDVLC  
FTKVP IQESLIELSDSNLKNMVDVAVMRFMGDAPLKGQSELVLCITLLKLCGDHEVMRDECYQCIVKQIT  
DNSSPKQDSCQRGWRLLYIMVAYYSCSEVFYPIRFLQHVSWTPGLPFQGIKACEQNLKTLRFGRLEFP  
SNMELRAMLAGRSSKRQLFLLPGGLERHLKIKTCTVALDVIEGLCTEMALTRPEAFDEYVIFVVTNRGQHVCP  
LSCRAYILDVASEMEQVDGGYTLWFRRLVLDQPLKFENELVVMHYNQVLPDYLGKLFSSVPARQPTEQQLQQ  
VSKLASLQHRAKDFYLPVSVREVQEYIPAQLYHTTAGDWTWLNLVSQHRQQTQALSHPHQAQFLGSSAFPLF  
GSSFFFIQSCSNVLPAPCILA VNHNGLNFLSTKTHELIVKIPLKEIQSTWTQQPTANSSYPYVEISLGDVAA  
QRTMQLQLEQGLELCRVVAVHVESMLSAREERLTLPPSEITLL\*  
>rs217883643\_ENSMUSP00000091686\_c.9316:C>T\_p.A3106V  
ENSMUST00000094135.9|Myo15-203|ENSMUSG00000042678|+|chr11:g.60405766:C>T  
MADEEKKAKKGGKKAPEPEKPKRSLKGT SRLFMGFRDRTPKISKKGQFRSASAFFWGLHTGPKTKRKKKA  
RTVLKSTSKLMTQMRVGGKKRAMKGGKPSFMVIRFPGRRGYGRLRPRAQSLSKASTAINWLTKKFLKKAEEES  
GSEQATVDAWLQRSSRVGSRKLPFPGAELRHGGRLRRFPRSHSIYSSGEPVGFLLPFDEAPFRHAGSRKS  
LYGLEGFQDLGEYYDYHREGDDYDQQSLYHYEEQEPYLAEFGGYSPAWPPYDDYGPYDPYNYHPDYDYG  
TLYPGYAYGYYGDDFPPYAPPSGYSSPYSYHDSFESEAYPYSYLDYATHHMPYPPYDYPTDYDIPIY  
FDPYGVVYAEVYGGGAEAIYPPGMPYVYPEEPAFMYPWVPPIMSPHNPYAHPMDDIAELEPEETGEERQS  
TSFRLPSAAFFEQGMDKPARSKLSLIRKFRFPQVFLGKEKLEVPPLPSLDIPLPLGDAGEEEEEEMP  
PVPTMPYTHPYWFSFLTQRNLQALSFAFGARQGLGFGPEFGHPTPRPATSLARFLKKTLEKKIPRLRGSQ  
KARGRPPVREAAKRFYKLAGMDPDRPNTPIVLRSSQPQARNNNNSHGPPSPRPAALRTHWSALISPPMP  
APSPSPASPLTPPFSPTFSRPPRLASPYGSLRQHPPWAAAHVFPFPQANWWGFAEPPGTSPEVAPDLAFAF  
VPRPSFRASRSRRAAYGFPSPLIGSRRRPHLPSPQPSLRSPLPGQYHSPLGPLSPQLSLRRGPFQPPFP  
PPRRPQSLREAFSLRRASGRLLGPPRSPVLGSPRPPSPPLKKGPRHRSNLNPSRLPRTWRRLSEPPTRAVKP  
WVHRAYPPPSAGPWGASTGALEQQENQREAEADSETPWTVPPLAPSVDVMPPTQRPPSPWGEDIGSLRGFSR  
PPVPEPPLLEHTSPQSEDRVSNLTGIFLQGHDPGPGQLTKSADPSLEKPEEVVTLGDFPQPAEPEAL  
NPTPNKNVVSERKVLRLSASYPLVTCQARATWPQWHRWKTVSRTPAPLAPTRAPGPLLKAGEQPRAEPGRF  
AVVMPQVRGVSSFRPKGPAPVQPEHPDQDPEQGPAPQACSLRWPRLPPTDAHCLWSRIRTYSSQSHLRGHG  
GDCHKSLWKKTRPQSWQNMHSIRNLPMSRSREQHREDGVEDMTQLEDLQETTTLANLKRFRERNLIYTYIGS  
ILVSNVNYRMFAIYGPEQVQYSGRALGENPPLFAIANLAFKMLDAKQNCVIIISGESGSGKTEATKLIILR  
CLAAMNQRRDVMQIKILEATPLLEAFGNAKTVRNDNSSRFGKVEIFLEGGVICGAIYSQYLLEKSRIVFQA  
KNERNYHI FYELLAGLPAQLRQAFSLQEAETYYLNLQGGNCEIAGKSDADDFRLLAAMEVLGFTSEDQDSIF  
RILASILHLGNVYFEKHETDAQEVASVVSAREIQAVAELLQVSPPEGLQKAITFKVTETIREKIFTPLTVESAV  
DARDAIAKVLYALLFGWLITRVNALVSPKQDTLSAIALDIYGFEDLSFNSFEQLCINYANENLQYLFNKIVFQ  
EEQEYIREQMDWREIAFADNQPCINLISLKPYHILRILDDQCCFPQATDHTFLQKCHYHGANPLYSKPKMP  
LPEFTIKHYAGKVYQVHKFLDKNHDQVRQDVLDFVHSRTRVVAHLFSSHAAQTAPRRLGKSSSITRLYKAH  
TVAAKFQQLDLVEMERCNPLFVRCLKPNHKKPEGLFEPDVMMAQLRYSGVLETVIRKEGFPVRLFPQVF  
IDRYRCLVALKLVNVPADGDMCVSLLSRLCTVTPDMYRVGISKFLKEHLHQLLES MRERVQNRAALTQRYLR  
GFFIQRHFRSLRRKIIILLQSRARGFLARQRYQMRQSLKFRSLVHTYVNRRLYLKELSKREVVPVRHLEVPA  
EVAGLLQAAAGLKLSSGPRVAVVRAPRLQAEPCVTPLDINNYPMAKFI RCHFKEPSFGMLTVP LKMP LTRLP  
VEHHAEEAISVFKLILRFMGDPHLHGTOEMILGNIVHOGQGLVEPALRDEILAQLANQVWRNPAYNSKRGWLL  
AACLSGFAPSPHLDFLLK FVSDYGQNGFQAVCQHRLQLAMGSGAARTFPPTQLEWTAIQEKASMALDVSCFN  
GDQFSCPVTHTWSTGEAVAGDILKHRGLADGWRGWTAMKNGVQWAEFLAGHDYVLDLVSDELLRDFPRQKSYF  
IVGAEGPLAGRGDTRGVFGNCWDSDEDTPTRPQPQDHVAKMPDLGDCYSHKEDGTNGETEAQRWTSNRQAVDS  
IGESTVPPRELDGYLDSLFDPVLACGDADLEKPTAIAYRMKGGGQPGGGGGSTSEDTSTRPPEPKLKIPLGLD  
ASTLALQQAIFHRQAVLLAREMTLQALALQQQPLSATSRLPERPLAPEARPKTVVGTGPPAKPVLVLRPTPQ  
SWAPGSAKAPKIPSKPVAVPI LAQDWTAPESISASPELVRYSTLNSEHFPOPTQQIRSIKQYKQPPWAGHP  
EARRTDGGKVFRRPPDPHEEALMILKGQKTQLAVVPGTQVSREAVAMVKPVTAPRPCMGPPTVQPSRSLEPP



EDPVQTLHRLVNPNFYGYQDI PWRI FLRKEVFYPKDNYSHPVQLDLLFRQILHDTFSEACLRI SEDERLQMK  
ALFAQNQLDTRPLVTVESVKRAAISMARDSWEIYFSRLFPAMGVSQVGTGVQILAVSHTGIKLLQMVKGSKEASR  
RLRVLCAYSFADILFVTPMPSQNMLEFNLSNEKLILFSARAQQVKTLDVTFI LELKKDSDYVAVRNFLSEDPE  
LLSFHKGDI IHLQSLEPTRVGY SAGCVVRKLVYLEELRRRGPDFGWRFGAVHGRVGRFPSELVQPAAPDFL  
QLPAEPGRGAAAVAAVASAAAQEVGRRREGPPVRARSADSGEDSIALPPSTMLEFAQKYFRDRRRRPRDG  
LKLKSKEDRESKTLEDVLCFTKVP IQESLIELSDSNLNMVAVDMFVAVMRFMGDAPLKGQSELDVLC TLLKLC  
GDHEVMRDECYQIVKQITDNSSPKQDSCQRGWRLLYIMVAYYSCSEVFYPIRLRFLQHVSWTPGLPFQGI AK  
ACEQNLOKTLRFGGRLFFPSNMELRAMLAGRSSKRQLFLLPGGLERHLKIKTCTVALDVIEGLCTEMALTRPE  
AFDEYVIFVVTNRGQHVCP LSCRAY ILDVASEMEQVDGGYTLWFRVRLWDQPLKFENELVYTMHYNQVLPDYL  
KGLFSSVPARQPTQQQLQVSKLASLQHRAKDHFYLPVREVQEI PAQLYHTTAGDWTWNLVLSQHRQQTQAL  
SPHQARAQFLGLLSAFPLFGSSFFI QSCSNVLPAPC I LAVNHNLNLFSTKTHELIVKIPLKEIQSTWTQQ  
PTANSSYPVEISLGDVAAQRTMQLQLEQGLELCRVVAVHVESMLSAREERLTLPPSEITLL\*  
>ENSMUSP00000060749\_c.1965:A>C\_p.K656Q ENSMUST00000052346.10|L1g11-  
201|ENSMUSG00000020536|+|chr11:g.60600871:A>C  
MMKFRFRRQGADPQREKQELFAFHKTVEHGFPNQPSALAFDPELRIMAIGTRSGAVKIYGAPGVEFTGLHR  
DAATVTQMHLFPGQGRLLTLLDDSSHLWEI IHHNGCAHLEEGLSFHPPSRPSFDNASFPASLTRVTVLLVA  
GNTAALGTESGSIFFLDVATLALLEGQTLSPDVVLRSPDDYRCGKALGPVESLQGHLDPSKILIGYSRGLL  
VIEWSQATQSVDNVFLGNQLES LCWGRDGSIISSHSDGSYAIWSTDTGSPPTLQPTVVTTPYGFPCAKINK  
ILWRSCESGDHFI I FSGGMPRASYGDRHCVSVLRAETLVTLDFTSRVIDFFTVHSTQPEDECDNPQALAVLLE  
EELVVLDLQTPGWPAVPAPYLAPLHSSAITCSAHVANVPSKLVARIVSAGEQQSPQPASSALSWPITGGRNLA  
QEPSQRGLLLTGHEGDTVRFWDASGVALRPLYKLTAGLFTDCEHADSLAQAVEDDWPFPKRVGCFDPYSDD  
PRLGIQKVALCKYTAQMVVAGTAGQVLVLELSEVPAEHAVSVANVDLLQDREGFTWKGHERLNPHTGLLPWPA  
GFQPRMLIQCLPPAAVTAVTLHAEWSLVAFGTSHGFGLFDYQRKSPVLARCTLHPNDSLAMEGPLSRVKS LQK  
SLRQSFRRIRKSRVSGKKRTPAASSKLQEANAQLAEQTC PHDLEMTVPQRRIEPRSADDSLSGVVRCLYFADT  
FLRDATHHGPTMWAGTNSGVSFAYALEVPAATAGGEKRPEQAVEAVLGKEVQLMHRAPVVAIAVLDGRGRPLP  
EPYEASRDLAQAPDMQGGHAVLIASEEQFKVFTL PKVSAKTKFKLTAHEGCRVRKVALATFASVMSDYAETC  
LACLTLNLDGVHVFVSPGLRPQVHYSCIRKEDISGIASCVFTRHGQGFYLI SPSEFERFSLSARNITEPLCSLD  
ISWPQ NATQPRLQESPKLSQANGTRDI ILAPESCEGSPSSAHSKRADTMEPPEAALSPVSI DSAASGDTMLDT  
TGDVTVEYVKDFLGSPEDSEKNLRNLEADDACRAYTLLIK\*  
>ENSMUSP00000104359\_c.1965:A>C\_p.K656Q ENSMUST00000108719.4|L1g11-  
202|ENSMUSG00000020536|+|chr11:g.60600871:A>C  
MMKFRFRRQGADPQREKQELFAFHKTVEHGFPNQPSALAFDPELRIMAIGTRSGAVKIYGAPGVEFTGLHR  
DAATVTQMHLFPGQGRLLTLLDDSSHLWEI IHHNGCAHLEEGLSFHPPSRPSFDNASFPASLTRVTVLLVA  
GNTAALGTESGSIFFLDVATLALLEGQTLSPDVVLRSPDDYRCGKALGPVESLQGHLDPSKILIGYSRGLL  
VIEWSQATQSVDNVFLGNQLES LCWGRDGSIISSHSDGSYAIWSTDTGSPPTLQPTVVTTPYGFPCAKINK  
ILWRSCESGDHFI I FSGGMPRASYGDRHCVSVLRAETLVTLDFTSRVIDFFTVHSTQPEDECDNPQALAVLLE  
EELVVLDLQTPGWPAVPAPYLAPLHSSAITCSAHVANVPSKLVARIVSAGEQQSPQPASSALSWPITGGRNLA  
QEPSQRGLLLTGHEGDTVRFWDASGVALRPLYKLTAGLFTDCEHADSLAQAVEDDWPFPKRVGCFDPYSDD  
PRLGIQKVALCKYTAQMVVAGTAGQVLVLELSEVPAEHAVSVANVDLLQDREGFTWKGHERLNPHTGLLPWPA  
GFQPRMLIQCLPPAAVTAVTLHAEWSLVAFGTSHGFGLFDYQRKSPVLARCTLHPNDSLAMEGPLSRVKS LQK  
SLRQSFRRIRKSRVSGKKRTPAASSKLQEANAQLAEQTC PHDLEMTVPQRRIEPRSADDSLSGVVRCLYFADT  
FLRDATHHGPTMWAGTNSGVSFAYALEVPAATAGGEKRPEQAVEAVLGKEVQLMHRAPVVAIAVLDGRGRPLP  
EPYEASRDLAQAPDMQGGHAVLIASEEQFKVFTL PKVSAKTKFKLTAHEGCRVRKVALATFASVMSDYAETC  
LACLTLNLDGVHVFVSPGLRPQVHYSCIRKEDISGIASCVFTRHGQGFYLI SPSEFERFSLSARNITEPLCSLD  
ISWPQ NATQPRLQESPKLSQANGTRDI ILAPESCEGSPSSAHSKRADTMEPPEAALSPVSI DSAASGDTMLDT  
TGDVTVEYVKDFLG\*

>ENSMUSP00000002891\_c.2872:AA>GC\_p.K958S ENSMUST00000002891.11|Top3a-  
201|ENSMUSG00000002814|-|chr11:g.60631488:TT>GC  
MIFPVTL LAFQWHRPGRALSRAMEVAFRGVRKVLCAEKNDAAKGIADLLSNGRMRRKEGLSKFNKIYEF  
DYHLYGQNVMTMIMTSVSGHLLAHDFQMQRKQWQSCNPLVLF EAEIEKYCPENFIDIKKTLERETHHCQALVIW  
TDCDREGENIGFEI IHVCKAVKPNLRVLRARFSEITPHAVRTACENLTPDQRVSDAVDVRQELDLRIGAAFT  
RFQTLRLQRI FPEVLAEQLISYGSCQFP T LGFVVERFKAIQAFVPEVFHKIKVTHDHKDGTFEFNWKRYR LFN  
HTACLVLVQLCMEDPMATVVEVRSKPKSKWRPQALDVELEKLSRKLRI NAKETMRIA EKLYTQGYI SYPR T  
ETNIFPKLDNLVALVEQQTVDPHWGAFAQTILERGGPTPRNGSKSDQAHPPIHPTKYTSGLQGD DRRLYEFIV  
RHF LACCSQDAQGVETTVEIDIAQERFVAHGLI ILARNYLDVYPYDHWSDKLLPVYEQGSHFQPS TVEMVDGE  
TSP PQLLTEADLIALMEKHGIGTDATHAEHIETIKARMYVGLTSDKRFLPGHLMGLVEGYDSMGYEMSKPDL  
RAELEADLKLICEGKKDKFQVLRQQVQKYKQVFIEAVAKAKKLEALSQYLGERTEMAQQEEIYPAMP E PVRK  
CPQC NKDMVLKTKKSGGFYLS CMGFPECRS AVWFPDSVLEASRDNSVCSVCQPPPVYRLK LKFKRGLSPAMP

LEFVGCIGGCDETLKEIFGLRFPRALPRASQPSGHLQASQALNRMDSSQHNLSQLPLVNRHTRPSKTVAQALLP  
PTTAGESNSVTCNCGREAVLLTVRKQGPNGRHFYKCSNGDCNFFLWADSSHSTGGGTPTSASGPPGSSVGC  
SSVSGSHMDGFGSLGSDSDGGTPCLCGQPAVTRTVQKDGPNKGRQFHTCAKPREQQCGFFQWVDENVAPGSFAA  
PAWPGGRGSSPETRGCKQKTKSWFLRCRVHSHKASEM\*PLSPAETHPNLLSSEQM  
>ENSMUSP00000002891\_c.2151:T>G\_p.L718V ENSMUST00000002891.11|Top3a-  
201|ENSMUSG00000002814|-|chr11:g.60633943:A>C  
MIFPVTLLAFQWHRPPGGRALSRAAMEVAFRGVRKVLCAEKNDAAKGIADLLSNGRMRRKEGLSKFNKIYEF  
DYHLYGQNVMTMIMTSVSGHLLAHDFQMQRKQWQSCNPLVLFEAIEKYCPENFIDIKKTLERETHHCQALVIW  
TDCDREGENIGFEIIHVCKAVKPNLRVLRARFSEITPHAVRTACENLTPDQRVSDAVDVRQELDLRIGAAFT  
RFQTLRLQRIFFPEVLAEQLISYGSCQFPPTLGFVVERFKAIQAFVPEVVFHAIKVTTHDKDGTVEFNWKRYRLFN  
HTACLVLVYQLCMEDPMATVVEVRSKPKSKWRPQALDVELEKLSRKLINAKETMRIAIEKLYTQGYISYPRT  
ETNIFPKDLNLVALVEQQTVDPHWGAFQITILERGGPTPRNGSKSDQAHPPIHPTKYTSGLQGDDRRLYEFIV  
RHFLACCSQDAQGQETTVEIDIAQERFVAHGLIILARNYLDVYPYDHWSDKLLPVYEQGSHFQPSVTEMVDGE  
TSPQQLLEADLIALMEKHGIGTDATHAEHIETIKARMYVGLTSDKRFLPGHLMGLVEGYDSMGYEMSKPDL  
RAELEADLKLICEGKKDKFQVLRQQVQKYQVFIKAVAKAKLDEALSQYLGERTEMAQEEIYPAMPEPVRK  
CPQCNKDMVLKTKKSGGFYLSMGMFPECRSAVWFPDSVLEASRDNSVCSVCQPPPVYRLKVKFKRGLPAMP  
LEFVGCIGGCDETLKEIFGLRFPRALPRASQPSGHLQASQALNRMDSSQHNLSQLPLVNRHTRPSKTVAQALLP  
PTTAGESNSVTCNCGREAVLLTVRKQGPNGRHFYKCSNGDCNFFLWADSSHSTGGGTPTSASGPPGSSVGC  
SSVSGSHMDGFGSLGSDSDGGTPCLCGQPAVTRTVQKDGPNKGRQFHTCAKPREQQCGFFQWVDENVAPGSFAA  
PAWPGGRGKAQRPEAASKRPRAGSSDAGSTVKKPRKCSLCHQPGHTRTFCPQNR\*  
>ENSMUSP00000113057\_c.2076:T>G\_p.L693V ENSMUST00000117743.8|Top3a-  
203|ENSMUSG00000002814|-|chr11:g.60633943:A>C  
MEVAFRGVRKVLCAEKNDAAKGIADLLSNGRMRRKEGLSKFNKIYEFDYHLYGQNVMTMIMTSVSGHLLAHDF  
QMQRKQWQSCNPLVLFEAIEKYCPENFIDIKKTLERETHHCQALVIWTDREGENIGFEIIHVCKAVKPNL  
RVLRARFSEITPHAVRTACENLTPDQRVSDAVDVRQELDLRIGAAFTRFQTLRLQRIFFPEVLAEQLISYGSC  
QFPPTLGFVVERFKAIQAFVPEVVFHAIKVTTHDKDGTVEFNWKRYRLFNHTACLVLVYQLCMEDPMATVVEVRSK  
PKSKWRPQALDVELEKLSRKLINAKETMRIAIEKLYTQGYISYPRTETNIFPKDLNLVALVEQQTVDPHWG  
AFAQITILERGGPTPRNGSKSDQAHPPIHPTKYTSGLQGDDRRLYEFIVRHFLACCSQDAQGQETTVEIDIAQ  
RFVAHGLIILARNYLDVYPYDHWSDKLLPVYEQGSHFQPSVTEMVDGETSPPQQLLEADLIALMEKHGIGTDA  
THAEHIETIKARMYVGLTSDKRFLPGHLMGLVEGYDSMGYEMSKPDLRAELEADLKLICEGKKDKFQVLRQQ  
VQKYQVFIKAVAKAKLDEALSQYLGERTEMAQEEIYPAMPEPVRKCPQCNKDMVLKTKKSGGFYLSMGMF  
PECRSAVWFPDSVLEASRDNSVCSVCQPPPVYRLKVKFKRGLPAMPLEFVGCIGGCDETLKEIFGLRFPR  
LPRAASKRPRAGSSDAGSTVKKPRKCSLCHQPGHTRTFCPQNR\*  
>ENSMUSP00000099729\_c.2151:T>G\_p.L718V ENSMUST00000102668.10|Top3a-  
202|ENSMUSG00000002814|-|chr11:g.60633943:A>C  
MIFPVTLLAFQWHRPPGGRALSRAAMEVAFRGVRKVLCAEKNDAAKGIADLLSNGRMRRKEGLSKFNKIYEF  
DYHLYGQNVMTMIMTSVSGHLLAHDFQMQRKQWQSCNPLVLFEAIEKYCPENFIDIKKTLERETHHCQALVIW  
TDCDREGENIGFEIIHVCKAVKPNLRVLRARFSEITPHAVRTACENLTPDQRVSDAVDVRQELDLRIGAAFT  
RFQTLRLQRIFFPEVLAEQLISYGSCQFPPTLGFVVERFKAIQAFVPEVVFHAIKVTTHDKDGTVEFNWKRYRLFN  
HTACLVLVYQLCMEDPMATVVEVRSKPKSKWRPQALDVELEKLSRKLINAKETMRIAIEKLYTQGYISYPRT  
ETNIFPKDLNLVALVEQQTVDPHWGAFQITILERGGPTPRNGSKSDQAHPPIHPTKYTSGLQGDDRRLYEFIV  
RHFLACCSQDAQGQETTVEIDIAQERFVAHGLIILARNYLDVYPYDHWSDKLLPVYEQGSHFQPSVTEMVDGE  
TSPQQLLEADLIALMEKHGIGTDATHAEHIETIKARMYVGLTSDKRFLPGHLMGLVEGYDSMGYEMSKPDL  
RAELEADLKLICEGKKDKFQVLRQQVQKYQVFIKAVAKAKLDEALSQYLGERTEMAQEEIYPAMPEPVRK  
CPQCNKDMVLKTKKSGGFYLSMGMFPECRSAVWFPDSVLEASRDNSVCSVCQPPPVYRLKVKFKRGLPAMP  
LEFVGCIGGCDETLKEIFGLRFPRALPRASQPSGHLQASQALNRMDSSQHNLSQLPLVNRHTRPSKTVAQALLP  
PTTAGESNSVTCNCGREAVLLTVRKQGPNGRHFYKCSNGDCNFFLWADSSHSTGGGTPTSASGPPGSSVGC  
SSVSGSHMDGFGSLGSDSDGGTPCLCGQPAVTRTVQKDGPNKGRQFHTCAKPREQQCGFFQWVDENVAPGEAAG  
QGIST\*  
>ENSMUSP00000002891\_c.1920:A>C\_p.M641L ENSMUST00000002891.11|Top3a-  
201|ENSMUSG00000002814|-|chr11:g.60636743:T>G  
MIFPVTLLAFQWHRPPGGRALSRAAMEVAFRGVRKVLCAEKNDAAKGIADLLSNGRMRRKEGLSKFNKIYEF  
DYHLYGQNVMTMIMTSVSGHLLAHDFQMQRKQWQSCNPLVLFEAIEKYCPENFIDIKKTLERETHHCQALVIW  
TDCDREGENIGFEIIHVCKAVKPNLRVLRARFSEITPHAVRTACENLTPDQRVSDAVDVRQELDLRIGAAFT  
RFQTLRLQRIFFPEVLAEQLISYGSCQFPPTLGFVVERFKAIQAFVPEVVFHAIKVTTHDKDGTVEFNWKRYRLFN  
HTACLVLVYQLCMEDPMATVVEVRSKPKSKWRPQALDVELEKLSRKLINAKETMRIAIEKLYTQGYISYPRT  
ETNIFPKDLNLVALVEQQTVDPHWGAFQITILERGGPTPRNGSKSDQAHPPIHPTKYTSGLQGDDRRLYEFIV  
RHFLACCSQDAQGQETTVEIDIAQERFVAHGLIILARNYLDVYPYDHWSDKLLPVYEQGSHFQPSVTEMVDGE

TSPQQLLTEADLIALMEKHGIGTDATHAEHIETIKARMYVGLTSDKRFLPGHLMGLVEGYDSMGYEMSKPDL  
RAELEADLKLICEGKKDKFQVLRQQVQKYKQVFI EAVAKAKKLDEALSQYLGERTELAQQEEIYPAMPEPVRK  
CPQCNKDMVLKTKKSGGFYLSMGMFPECRSVAVWFPDSVLEASRDNSVCSVCQPPPVYRLKLFKRGSLPPAMP  
LEFVGCIGGCDETLKEIFGLRFPRALPRASQPSGHLQASQALNRMDSSQHNSLQPLVNRHTRPSKTVAQALLP  
PTTAGESNSVTCNCGREAVLLTVRKQGNQGRHFYKCSNGDCNFFLWADSSHSTGGGTPTSASGPPGSSVGC  
SSVGSMDGFGSLGSDSDGGTPCLCGQPAVTRTVQKDGPNKGRQFHTCAKPREQQCGFFQWVDENVAPGSFAA  
PAWPGGRGKAQRPEAASKRPRAGSSDAGSTVKKPRKCSLCHQPGHTRTFCPQNR\*

>ENSMUSP00000113057\_c.1845:A>C\_p.M616L ENSMUST00000117743.8|Top3a-  
203|ENSMUSG00000002814|-|chr11:g.60636743:T>G  
MEVAFRGRVVKVLCVAEKNDAAKGIADLLSNGRMRRKEGLSKFNKIYEFDYHLYGQNVMTMIMTSVSGHLLAHDF  
QMQRKQWQSCNPLVLFEAIEIKYCPENFIDIKKTLERETHHCQALVIWTDREGENIGFEIIHVCKAVKPNL  
RVLRARFSEITPHAVRTACENLTPDQRVSDAVDVRQELDLRIGAAFTRFQTLRLQRIFFPEVLAEQLISYGSC  
QFPTLGFVVERFKAIQAFVPEVFHFIKVTHDHDGTVFENWKRYRFLNHTACLVLVLYQLCMEDPMATVVEVRSK  
PKSKWRPQALDVELEKLSRKLINAKETMRIA EKLYTQGYISYPRTEETNIFPKDLNLVALVEQQTVDPHWG  
AFAQTILERGGPTPRNGSKSDQAHPPIHPTKYTSGLQGD RRLYEFIVRHFLACCSQDAQGQETTVEIDIAQE  
RFVAHGLIILARNYLDVYPYDHWSDKLLPVYEQGSHFQPSVTEMVDGETSPPQLLTEADLIALMEKHGIGTD  
ATHAEHIETIKARMYVGLTSDKRFLPGHLMGLVEGYDSMGYEMSKPDLRAELEADLKLICEGKKDKFQVLRQQ  
VQKYKQVFI EAVAKAKKLDEALSQYLGERTELAQQEEIYPAMPEPVRKCPQCNKDMVLKTKKSGGFYLSMGMF  
PECRSVAVWFPDSVLEASRDNSVCSVCQPPPVYRLKLFKRGSLPPAMPLEFVGCIGGCDETLKEIFGLRFPRA  
LPRAASKRPRAGSSDAGSTVKKPRKCSLCHQPGHTRTFCPQNR\*

>ENSMUSP00000099729\_c.1920:A>C\_p.M641L ENSMUST00000102668.10|Top3a-  
202|ENSMUSG00000002814|-|chr11:g.60636743:T>G  
MIFPVTLLAFQWHRPGRALSRAMEVAFRGRVVKVLCVAEKNDAAKGIADLLSNGRMRRKEGLSKFNKIYEF  
DYHLYGQNVMTMIMTSVSGHLLAHDFQMQRKQWQSCNPLVLFEAIEIKYCPENFIDIKKTLERETHHCQALVIW  
TDCDREGENIGFEIIHVCKAVKPNL RVLRARFSEITPHAVRTACENLTPDQRVSDAVDVRQELDLRIGAAFT  
RFQTLRLQRIFFPEVLAEQLISYGSCQFPTLGFVVERFKAIQAFVPEVFHFIKVTHDHDGTVFENWKRYRFLN  
HTACLVLVLYQLCMEDPMATVVEVRSKPKSKWRPQALDVELEKLSRKLINAKETMRIA EKLYTQGYISYPRTE  
ETNIFPKDLNLVALVEQQTVDPHWGAFQAQTILERGGPTPRNGSKSDQAHPPIHPTKYTSGLQGD RRLYEFIV  
RHFLACCSQDAQGQETTVEIDIAQERFVAHGLIILARNYLDVYPYDHWSDKLLPVYEQGSHFQPSVTEMVDGE  
TSPQQLLTEADLIALMEKHGIGTDATHAEHIETIKARMYVGLTSDKRFLPGHLMGLVEGYDSMGYEMSKPDL  
RAELEADLKLICEGKKDKFQVLRQQVQKYKQVFI EAVAKAKKLDEALSQYLGERTELAQQEEIYPAMPEPVRK  
CPQCNKDMVLKTKKSGGFYLSMGMFPECRSVAVWFPDSVLEASRDNSVCSVCQPPPVYRLKLFKRGSLPPAMP  
LEFVGCIGGCDETLKEIFGLRFPRALPRASQPSGHLQASQALNRMDSSQHNSLQPLVNRHTRPSKTVAQALLP  
PTTAGESNSVTCNCGREAVLLTVRKQGNQGRHFYKCSNGDCNFFLWADSSHSTGGGTPTSASGPPGSSVGC  
SSVGSMDGFGSLGSDSDGGTPCLCGQPAVTRTVQKDGPNKGRQFHTCAKPREQQCGFFQWVDENVAPGEAAG  
QGIST\*

>ENSMUSP00000113653\_c.1845:A>C\_p.M616L ENSMUST00000120417.8|Top3a-  
204|ENSMUSG00000002814|-|chr11:g.60636743:T>G  
MEVAFRGRVVKVLCVAEKNDAAKGIADLLSNGRMRRKEGLSKFNKIYEFDYHLYGQNVMTMIMTSVSGHLLAHDF  
QMQRKQWQSCNPLVLFEAIEIKYCPENFIDIKKTLERETHHCQALVIWTDREGENIGFEIIHVCKAVKPNL  
RVLRARFSEITPHAVRTACENLTPDQRVSDAVDVRQELDLRIGAAFTRFQTLRLQRIFFPEVLAEQLISYGSC  
QFPTLGFVVERFKAIQAFVPEVFHFIKVTHDHDGTVFENWKRYRFLNHTACLVLVLYQLCMEDPMATVVEVRSK  
PKSKWRPQALDVELEKLSRKLINAKETMRIA EKLYTQGYISYPRTEETNIFPKDLNLVALVEQQTVDPHWG  
AFAQTILERGGPTPRNGSKSDQAHPPIHPTKYTSGLQGD RRLYEFIVRHFLACCSQDAQGQETTVEIDIAQE  
RFVAHGLIILARNYLDVYPYDHWSDKLLPVYEQGSHFQPSVTEMVDGETSPPQLLTEADLIALMEKHGIGTD  
ATHAEHIETIKARMYVGLTSDKRFLPGHLMGLVEGYDSMGYEMSKPDLRAELEADLKLICEGKKDKFQVLRQQ  
VQKYKQVFI EAVAKAKKLDEALSQYLGERTELAQQEEIYPAMPEPVRKCPQCNKDMVLKTKKSGGFYLSMGMF  
PECRALRCLFPCC\*

>ENSMUSP00000002891\_c.1131:G>C\_p.A378P ENSMUST00000002891.11|Top3a-  
201|ENSMUSG00000002814|-|chr11:g.60641551:C>G  
MIFPVTLLAFQWHRPGRALSRAMEVAFRGRVVKVLCVAEKNDAAKGIADLLSNGRMRRKEGLSKFNKIYEF  
DYHLYGQNVMTMIMTSVSGHLLAHDFQMQRKQWQSCNPLVLFEAIEIKYCPENFIDIKKTLERETHHCQALVIW  
TDCDREGENIGFEIIHVCKAVKPNL RVLRARFSEITPHAVRTACENLTPDQRVSDAVDVRQELDLRIGAAFT  
RFQTLRLQRIFFPEVLAEQLISYGSCQFPTLGFVVERFKAIQAFVPEVFHFIKVTHDHDGTVFENWKRYRFLN  
HTACLVLVLYQLCMEDPMATVVEVRSKPKSKWRPQALDVELEKLSRKLINAKETMRIA EKLYTQGYISYPRTE  
ETNIFPKDLNLVPLVEQQTVDPHWGAFQAQTILERGGPTPRNGSKSDQAHPPIHPTKYTSGLQGD RRLYEFIV  
RHFLACCSQDAQGQETTVEIDIAQERFVAHGLIILARNYLDVYPYDHWSDKLLPVYEQGSHFQPSVTEMVDGE  
TSPQQLLTEADLIALMEKHGIGTDATHAEHIETIKARMYVGLTSDKRFLPGHLMGLVEGYDSMGYEMSKPDL

RAELEADLKLICEGKKDKFQVLRQQVQKYKQVFI EAVAKAKKLDEALSQYLGERTEMAQEEIYPAMPEPVRK  
CPQCNKDMVLKTKKSGGFYLSMGMGFPECRSAVWFPDSVLEASRDNSVCSVCQPPPVYRLKLFKRGSLPPAMP  
LEFVGCIGGCDETLKEIFGLRFPRALPRASQPSGHLQASQALNRMDSSQHNSLQPLVNRHTRPSKTVAQALLP  
PTTAGESNSVTCNCGREAVLLTVRKQGNQGRHFYKCSNGDCNFFLWADSSHSTGGGTPTSASGPPGSSVGC  
SSVGSMDGFGSLGSDSDGGTPCLCGQPAVTRTVQKDGPNKGRQFHTCAKPREQQCGFFQWVDENVAPGSFAA  
PAWPGGRGKAQRPEAASKRPRAGSSDAGSTVKKPRKCSLCHQPGHTRTFCPQNR\*

>ENSMUSP00000113057\_c.1056:G>C\_p.A353P ENSMUST00000117743.8|Top3a-  
203|ENSMUSG00000002814|-|chr11:g.60641551:C>G

MEVAFRGVRKVLCAEKNDAAKGIADLLSNGRMRRKEGLSKFNKIYEFDYHLYGQNVMTMIMTSVSGHLLAHDF  
QMQRKQWQSCNPLVLFEAIEKYCPENFIDIKKTLERETHHCQALVIWTDREGENIGFEIIHVCKAVKPNL  
RVLRARFSEITPHAVRTACENLTPDQRVSDAVDVRQELDLRIGAAFTRFQTLRLQRIFFPEVLAEQLISYGSC  
QFPTLGFVVERFKAIQAFVPEVFHKKVTHDHDGTVFENWKRYRFLNHTACLVLVYQLCMEDPMATVVEVRSK  
PKSKWRPQALDTVELEKLASRKLINAKETMRIA EKLYTQGYISYPRTEETNIFPKDLNLVPLVEQQTVDPHWG  
AFAQTILERGGPTPRNGSKSDQAHPPIHPTKYTSGLQGDDRRLYEFIVRHFLACCSQDAQGQETTVEIDIAQE  
RFVAHGLIILARNYLDVYPYDHWSDKLLPVYEQGSHFQPSVTEMVDGETSPPQLL TEADLIALMEKHGIGTDA  
THAEHIETIKARMYVGLTSDKRFLPGHLMGLVEGYDSMGYEMSKPDLRAELEADLKLICEGKKDKFQVLRQQ  
VQKYKQVFI EAVAKAKKLDEALSQYLGERTEMAQEEIYPAMPEPVRKCPQCNKDMVLKTKKSGGFYLSMGMGF  
PECRSAVWFPDSVLEASRDNSVCSVCQPPPVYRLKLFKRGSLPPAMPLEFVGCIGGCDETLKEIFGLRFPRA  
LPRAASKRPRAGSSDAGSTVKKPRKCSLCHQPGHTRTFCPQNR\*

>ENSMUSP00000099729\_c.1131:G>C\_p.A378P ENSMUST00000102668.10|Top3a-  
202|ENSMUSG00000002814|-|chr11:g.60641551:C>G

MIFFVTLALAFQWHRPGRALSRAMEVAFRGVRKVLCAEKNDAAKGIADLLSNGRMRRKEGLSKFNKIYEF  
DYHLYGQNVMTMIMTSVSGHLLAHDFQMQRKQWQSCNPLVLFEAIEKYCPENFIDIKKTLERETHHCQALVIW  
TDCDREGENIGFEIIHVCKAVKPNLRVLRARFSEITPHAVRTACENLTPDQRVSDAVDVRQELDLRIGAAFT  
RFQTLRLQRIFFPEVLAEQLISYGSCQFPTLGFVVERFKAIQAFVPEVFHKKVTHDHDGTVFENWKRYRFLN  
HTACLVLVYQLCMEDPMATVVEVRSKPKSKWRPQALDTVELEKLASRKLINAKETMRIA EKLYTQGYISYPRTE  
ETNIFPKDLNLVPLVEQQTVDPHWGAFQTI LERGGPTPRNGSKSDQAHPPIHPTKYTSGLQGDDRRLYEFIV  
RHFLACCSQDAQGQETTVEIDIAQERFVAHGLIILARNYLDVYPYDHWSDKLLPVYEQGSHFQPSVTEMVDGE  
TSPPQLL TEADLIALMEKHGIGTDATHAEHIETIKARMYVGLTSDKRFLPGHLMGLVEGYDSMGYEMSKPDL  
RAELEADLKLICEGKKDKFQVLRQQVQKYKQVFI EAVAKAKKLDEALSQYLGERTEMAQEEIYPAMPEPVRK  
CPQCNKDMVLKTKKSGGFYLSMGMGFPECRSAVWFPDSVLEASRDNSVCSVCQPPPVYRLKLFKRGSLPPAMP  
LEFVGCIGGCDETLKEIFGLRFPRALPRASQPSGHLQASQALNRMDSSQHNSLQPLVNRHTRPSKTVAQALLP  
PTTAGESNSVTCNCGREAVLLTVRKQGNQGRHFYKCSNGDCNFFLWADSSHSTGGGTPTSASGPPGSSVGC  
SSVGSMDGFGSLGSDSDGGTPCLCGQPAVTRTVQKDGPNKGRQFHTCAKPREQQCGFFQWVDENVAPGEAAG  
QGIST\*

>ENSMUSP00000113653\_c.1056:G>C\_p.A353P ENSMUST00000120417.8|Top3a-  
204|ENSMUSG00000002814|-|chr11:g.60641551:C>G

MEVAFRGVRKVLCAEKNDAAKGIADLLSNGRMRRKEGLSKFNKIYEFDYHLYGQNVMTMIMTSVSGHLLAHDF  
QMQRKQWQSCNPLVLFEAIEKYCPENFIDIKKTLERETHHCQALVIWTDREGENIGFEIIHVCKAVKPNL  
RVLRARFSEITPHAVRTACENLTPDQRVSDAVDVRQELDLRIGAAFTRFQTLRLQRIFFPEVLAEQLISYGSC  
QFPTLGFVVERFKAIQAFVPEVFHKKVTHDHDGTVFENWKRYRFLNHTACLVLVYQLCMEDPMATVVEVRSK  
PKSKWRPQALDTVELEKLASRKLINAKETMRIA EKLYTQGYISYPRTEETNIFPKDLNLVPLVEQQTVDPHWG  
AFAQTILERGGPTPRNGSKSDQAHPPIHPTKYTSGLQGDDRRLYEFIVRHFLACCSQDAQGQETTVEIDIAQE  
RFVAHGLIILARNYLDVYPYDHWSDKLLPVYEQGSHFQPSVTEMVDGETSPPQLL TEADLIALMEKHGIGTDA  
THAEHIETIKARMYVGLTSDKRFLPGHLMGLVEGYDSMGYEMSKPDLRAELEADLKLICEGKKDKFQVLRQQ  
VQKYKQVFI EAVAKAKKLDEALSQYLGERTEMAQEEIYPAMPEPVRKCPQCNKDMVLKTKKSGGFYLSMGMGF  
PECRALRCLFPCC\*

>ENSMUSP00000002891\_c.1123:A>G\_p.N375S ENSMUST00000002891.11|Top3a-  
201|ENSMUSG00000002814|-|chr11:g.60641559:T>C

MIFFVTLALAFQWHRPGRALSRAMEVAFRGVRKVLCAEKNDAAKGIADLLSNGRMRRKEGLSKFNKIYEF  
DYHLYGQNVMTMIMTSVSGHLLAHDFQMQRKQWQSCNPLVLFEAIEKYCPENFIDIKKTLERETHHCQALVIW  
TDCDREGENIGFEIIHVCKAVKPNLRVLRARFSEITPHAVRTACENLTPDQRVSDAVDVRQELDLRIGAAFT  
RFQTLRLQRIFFPEVLAEQLISYGSCQFPTLGFVVERFKAIQAFVPEVFHKKVTHDHDGTVFENWKRYRFLN  
HTACLVLVYQLCMEDPMATVVEVRSKPKSKWRPQALDTVELEKLASRKLINAKETMRIA EKLYTQGYISYPRTE  
ETNIFPKDLSLVALVEQQTVDPHWGAFQTI LERGGPTPRNGSKSDQAHPPIHPTKYTSGLQGDDRRLYEFIV  
RHFLACCSQDAQGQETTVEIDIAQERFVAHGLIILARNYLDVYPYDHWSDKLLPVYEQGSHFQPSVTEMVDGE  
TSPPQLL TEADLIALMEKHGIGTDATHAEHIETIKARMYVGLTSDKRFLPGHLMGLVEGYDSMGYEMSKPDL  
RAELEADLKLICEGKKDKFQVLRQQVQKYKQVFI EAVAKAKKLDEALSQYLGERTEMAQEEIYPAMPEPVRK

CPQCNDKMDVLKTKKSGGFYLSMCMGFPECRSAVWFPDSVLEASRDNSVCSVCQPPPVYRLKLFKRGSLPPAMP  
LEFVGCIGGCDETLKEIFGLRFPRALPRASQPSGHLQASQALNRMDSQHNLSQPLVNRHTRPSKTVQALLP  
PTTAGESNSVTCNCGREAVLLTVRKQGNQGRHFYKCSNGDCNFFLWADSSHSTGGGTPTSASGPPGSSVGC  
SSVGSMDGFGSLGSDSDGGTPCLCGQPAVTRTVQKDGPNKGRQFHTCAKPREQQCGFFQWVDENVAPGSFAA  
PAWPGGRGKAQRPEAASKRPRAGSSDAGSTVKKPRKCSLCHQPGHTRTFPCQNR\*

>ENSMUSP00000113057\_c.1048:A>G\_p.N350S ENSMUST00000117743.8|Top3a-  
203|ENSMUSG00000002814|-|chr11:g.60641559:T>C  
MEVAFRGVRKVLCAEKNDAAKGIADLLSNGRMRRKEGLSKFNKIYEFDYHLYGQNVMTMIMTSVSGHLLAHDF  
QMQRKQWQSCNPLVLFEAIEKYCPENFIDIKKTLERETHHCQALVIWTDREGENIGFEIIHVCKAVKPNL  
RVLRARFSEITPHAVRTACENLTPDQRVSDAVDVRQELDLRIGAAFTRFQTLRLQRIFFPEVLAEQLISYGSC  
QFPTLGFVVERFKAIQAFVPEVFHKIKVTHDHDGTVFENWKRYRFLNHTACLVLVYQLCMEDPMTVVEVRSK  
PKSKWRPQALDVELEKLASRKLINAKETMRIAELKLYTQGYISYPRTEETNIFPKDLSLVALVEQQTVDPHWG  
AFAQTILERGGPTPRNGSKSDQAHPPIHPTKYTSGLQGGDRRLYEFIVRHFLACCSQDAQQGETTVEIDIAQE  
RFVAHGLIILARNYLDVYPYDHWSDKLLPVYEQGSHFQPSVTEMVDGETSPPQLLTHEADLIALMEKHGIGTDA  
THAEHIETIKARMYVGLTSDKRFLPGHLMGLVEGYDSMGYEMSKPDLRAELEADLKLICGKDKFQVLRQQ  
VQKYQVFIKAVAKAKKLEALSQYLGERTEMAQEEIYPAMPEPVRKCPQCNDKMDVLKTKKSGGFYLSMCMGF  
PECRSAVWFPDSVLEASRDNSVCSVCQPPPVYRLKLFKRGSLPPAMPLEFVGCIGGCDETLKEIFGLRFPRA  
LPRAASKRPRAGSSDAGSTVKKPRKCSLCHQPGHTRTFPCQNR\*

>ENSMUSP00000099729\_c.1123:A>G\_p.N375S ENSMUST00000102668.10|Top3a-  
202|ENSMUSG00000002814|-|chr11:g.60641559:T>C  
MIFPVTLAFQWHRPGRALSRAAMEVAFRGVRKVLCAEKNDAAKGIADLLSNGRMRRKEGLSKFNKIYEF  
DYHLYGQNVMTMIMTSVSGHLLAHDFQMQRKQWQSCNPLVLFEAIEKYCPENFIDIKKTLERETHHCQALVIW  
TDCDREGENIGFEIIHVCKAVKPNLRVLRARFSEITPHAVRTACENLTPDQRVSDAVDVRQELDLRIGAAFT  
RFQTLRLQRIFFPEVLAEQLISYGSCQFPTLGFVVERFKAIQAFVPEVFHKIKVTHDHDGTVFENWKRYRFLN  
HTACLVLVYQLCMEDPMTVVEVRSKPKSKWRPQALDVELEKLASRKLINAKETMRIAELKLYTQGYISYPRTE  
ETNIFPKDLSLVALVEQQTVDPHWGAFQAQTILERGGPTPRNGSKSDQAHPPIHPTKYTSGLQGGDRRLYEFIV  
RHFLLACCSQDAQQGETTVEIDIAQERFVAHGLIILARNYLDVYPYDHWSDKLLPVYEQGSHFQPSVTEMVDGE  
TSPPQLLTHEADLIALMEKHGIGTDA THAEHIETIKARMYVGLTSDKRFLPGHLMGLVEGYDSMGYEMSKPDL  
RAELEADLKLICGKDKFQVLRQQVQKYQVFIKAVAKAKKLEALSQYLGERTEMAQEEIYPAMPEPVRK  
CPQCNDKMDVLKTKKSGGFYLSMCMGFPECRSAVWFPDSVLEASRDNSVCSVCQPPPVYRLKLFKRGSLPPAMP  
LEFVGCIGGCDETLKEIFGLRFPRALPRASQPSGHLQASQALNRMDSQHNLSQPLVNRHTRPSKTVQALLP  
PTTAGESNSVTCNCGREAVLLTVRKQGNQGRHFYKCSNGDCNFFLWADSSHSTGGGTPTSASGPPGSSVGC  
SSVGSMDGFGSLGSDSDGGTPCLCGQPAVTRTVQKDGPNKGRQFHTCAKPREQQCGFFQWVDENVAPGEAAG  
QGIST\*

>ENSMUSP00000113653\_c.1048:A>G\_p.N350S ENSMUST00000120417.8|Top3a-  
204|ENSMUSG00000002814|-|chr11:g.60641559:T>C  
MEVAFRGVRKVLCAEKNDAAKGIADLLSNGRMRRKEGLSKFNKIYEFDYHLYGQNVMTMIMTSVSGHLLAHDF  
QMQRKQWQSCNPLVLFEAIEKYCPENFIDIKKTLERETHHCQALVIWTDREGENIGFEIIHVCKAVKPNL  
RVLRARFSEITPHAVRTACENLTPDQRVSDAVDVRQELDLRIGAAFTRFQTLRLQRIFFPEVLAEQLISYGSC  
QFPTLGFVVERFKAIQAFVPEVFHKIKVTHDHDGTVFENWKRYRFLNHTACLVLVYQLCMEDPMTVVEVRSK  
PKSKWRPQALDVELEKLASRKLINAKETMRIAELKLYTQGYISYPRTEETNIFPKDLSLVALVEQQTVDPHWG  
AFAQTILERGGPTPRNGSKSDQAHPPIHPTKYTSGLQGGDRRLYEFIVRHFLACCSQDAQQGETTVEIDIAQE  
RFVAHGLIILARNYLDVYPYDHWSDKLLPVYEQGSHFQPSVTEMVDGETSPPQLLTHEADLIALMEKHGIGTDA  
THAEHIETIKARMYVGLTSDKRFLPGHLMGLVEGYDSMGYEMSKPDLRAELEADLKLICGKDKFQVLRQQ  
VQKYQVFIKAVAKAKKLEALSQYLGERTEMAQEEIYPAMPEPVRKCPQCNDKMDVLKTKKSGGFYLSMCMGF  
PECRALRCLFPCC\*

>rs52242570\_ENSMUSP00000018744\_c.525:A>C\_p.N176H  
ENSMUST00000018744.15|Shmt1-201|ENSMUSG00000020534|-|chr11:g.60689477:T>G  
MADRDATLWASHEKMLSQPLKSDAEVYSIIKKESNRQVRGLELIIASENFASRAVLEALGSCLNKYSSEGYPG  
QRYGGTEFIDELEMLCQKRALQAYHLDPCQGWVNVQPYSGSPANFAVYTALVEPHGRIMGLDLPDGGHLLTHG  
FMTDKKISATSIFFESEMPYKVPETGYIHYDQLEENASLFHPKLI IAGTSCYSRNLDYARLRKIADDNGAYL  
MADMAHISGLVAAGVVPSPFEHCHVVTTHKTLRGCRAGMIFYRKGVRSDPKTGKETYYELESINSVAVFP  
GLQGGPHNHAIIAGVAVALKQAMTTEFKIYQLQVLANCRALSALTELGYKIVTGGSDNHLIIMDLRSKGTG  
RAEKVLEACSIACNKNTCPGDKSALRPSGLRLGLTPALTSRGLLEEDFQKVAHFHRGIELTLQIQSHMATKAT  
LKEFKELAGDEKIQSAVATLREEVENFASNFSLPGLPDF\*

>rs52242570\_ENSMUSP00000134318\_c.525:A>C\_p.N176H  
ENSMUST00000174719.8|Shmt1-211|ENSMUSG00000020534|-|chr11:g.60689477:T>G

XADRDATLWASHEKMLSQPLKSDAEVYSIIKKESNRQVRGLELIAENFASRAVLEALGSCLNKYSEGYPG  
QRYGGTEFIDELEMLCQKRALQAYHLDPOCWGVNVQPYSGSPANFAVYTALVEPHGRIMGLDLPDGGHLTHG  
FMTDKKKISATSIFFESMPYKVYPETGYIHYDQLEENASLFHPKLI IAGTSCYSRNLDYARLRKIADDNGAYL  
MADMAHISGLVAAGVVPSPFEHCHVVTTTTTHKTLRGCRAGMI FYRKGVAVALKQAMTTEFKIYQLQVLANCRA  
LSDALTELGYKIVTGGSDNHLI LMDLRSGKTDGGRAEKVLEACS IACNKNTCPGDKSALRPSGLRLGTPALTS  
RGLLEEDFQKVAHFHIRGIELTLQIQSHMATKATLKEFKEKLAGDEKIQSAVATLREEVENFASNFSLPGLPD  
F\*

>rs52242570\_ENSMUSP00000134269\_c.525:A>C\_p.N176H  
ENSMUST00000174214.2|Shmt1-210|ENSMUSG00000020534|-|chr11:g.60689477:T>G  
XADRDATLWASHEKMLSQPLKSDAEVYSIIKKESNRQVRGLELIAENFASRAVLEALGSCLNKYSEGYPG  
QRYGGTEFIDELEMLCQKRALQAYHLDPOCWGVNVQPYSGSPANFAVYTALVEPHGRIMGLDLPDGGHLTHG  
FMTDKKKISATSIFFESMPYKVYPETGYIHYDQLEENASLFHPKLI IAGTSCYSRNLDYARLRKIADDNGAYL  
MADMAHISGLVAAGVVPSPFEHCHVVTTTTTHKTLRGCRAGMI FYRKGVRSVDPKTKETTYELESINSVAVFP  
GLQGGPHNHA IAGVAVALKQAMTTEFKIYQLQVLANCRALS DALTELGYKIVTGGSDNHLI LMDLRSGKTDGG  
RAEKVLEACS IACNKNTCPGIELTLQIQSHMATKATLKEFKEKLAGDEKIQSAVATLREEVENFASNFSLPGL  
PDF\*

>ENSMUSP00000086588\_c.43:C>T\_p.S15L ENSMUST00000089184.11|Kcnj12-  
202|ENSMUSG00000042529|+|chr11:g.60960053:C>T  
MTAASRANPYSIVSLEEDGLHLVTMSGANGFGNGKVHTRRRRCRNFVKKNGQCNI EFANMDEKSQRYLADMFT  
TCVDIRWRMYLLIFSLAFLASWLLFGIIFWVIAVAHGDLEPAEGRGRTPCVLQVHGFMAAFLFSIETQTTIGY  
GLRCVTEECPVAVFMVVAQSIVGCIIDSFMIGAIMAKMARPKKRAQTLLFSHNAVVALRDGKLCIMWRVGNLR  
KSHIVEAHVRAQLIKPRVTEEGEYIPLDQIDIDVGFDKGLDRIFLVSPITILHEIDEASPLFGISRQDLETD  
FEIVVILEGMVEATAMTTQARSSYLANEILWGHRFEPVLFEEKNQYKIDYSHFHKTYEVPSTPRCSAKDLVEN  
KFULLPSANSFCYENELAFLSRDEEDEVATDRDGRSPQPEHDFDRLQASSAALERPYRRESEI\*

>ENSMUSP00000041696\_c.349:C>T\_p.S117L ENSMUST00000041944.9|Kcnj12-  
201|ENSMUSG00000042529|+|chr11:g.60960053:C>T  
MTRWTSLKASRPHKPGSWDLAASPRRLSTPTLATFPWKAQEPGAEMSSQNAPRVPQPRQPSASWPRQKQHPPL  
QPQASAKQAHEVPPPGVSLGAGQPPDPGMTAASRANPYSIVSLEEDGLHLVTMSGANGFGNGKVHTRRRRCRNF  
RFVKKNGQCNI EFANMDEKSQRYLADMFTTCVDIRWRMYLLIFSLAFLASWLLFGIIFWVIAVAHGDLEPAEG  
RGRTPCVLQVHGFMAAFLFSIETQTTIGYGLRCVTEECPVAVFMVVAQSIVGCIIDSFMIGAIMAKMARPKK  
AQTLLFSHNAVVALRDGKLCIMWRVGNLRKSHIVEAHVRAQLIKPRVTEEGEYIPLDQIDIDVGFDKGLDRIF  
LVSPITILHEIDEASPLFGISRQDLETDDEIVVILEGMVEATAMTTQARSSYLANEILWGHRFEPVLFEEKN  
QYKIDYSHFHKTYEVPSTPRCSAKDLVENKFULLPSANSFCYENELAFLSRDEEDEVATDRDGRSPQPEHDFDR  
LQASSAALERPYRRESEI\*

>ENSMUSP00000104357\_c.43:C>T\_p.S15L ENSMUST00000108717.3|Kcnj12-  
203|ENSMUSG00000042529|+|chr11:g.60960053:C>T  
MTAASRANPYSIVSLEEDGLHLVTMSGANGFGNGKVHTRRRRCRNFVKKNGQCNI EFANMDEKSQRYLADMFT  
TCVDIRWRMYLLIFSLAFLASWLLFGIIFWVIAVAHGDLEPAEGRGRTPCVLQVHGFMAAFLFSIETQTTIGY  
GLRCVTEECPVAVFMVVAQSIVGCIIDSFMIGAIMAKMARPKKRAQTLLFSHNAVVALRDGKLCIMWRVGNLR  
KSHIVEAHVRAQLIKPRVTEEGEYIPLDQIDIDVGFDKGLDRIFLVSPITILHEIDEASPLFGISRQDLETD  
FEIVVILEGMVEATAMTTQARSSYLANEILWGHRFEPVLFEEKNQYKIDYSHFHKTYEVPSTPRCSAKDLVEN  
KFULLPSANSFCYENELAFLSRDEEDEVATDRDGRSPQPEHDFDRLQASSAALERPYRRESEI\*

>rs247867498\_ENSMUSP00000104356\_c.660:A>T\_p.K221\*  
ENSMUST00000108716.8|Aldh3a1-  
202|ENSMUSG00000019102|+|chr11:g.61105556:A>T  
MSNISSIVNRARDAFN SGKTRPLQFRVEQLEALQRMINENLKGISKALASNLKNEWTSYEEVAHVLD EIDF  
TIKGLSDWAEDEPVAKTRQTQEDDLYIHSEPLGVVLVIGAWNYPFNLTIQPMVGAIAGNAVVLKPEVSDHM  
ADLLSTLIPQYMDKDLYPVIKGGVPETTELLKEKFDHIMYTGSTAVGKIVMAAAKHLTPVTLELGGKSPCYV  
D\*DCDLDVACRRIAWGKFMNSGQTCVAPDYILCDPSIQNEIVEKLLKSLKDFYGEDAKQSHDYGRI INDRHFQ  
RVINLIDSKKVAHGGTWDQPSRYIAPTILVDVDPQSPVMQEEIFGVPMPVICVRSLEAIKF INQREKPLALY  
VFSNNDKVIKMI AETSSGGVTANDVIVHITVPTL PFGG VNGSGMGAYHGKKS FETFSHRRSCLVRS LRNEEA  
NKARYPPSPAKMPRH\*

>rs247867498\_ENSMUSP0000019246\_c.660:A>T\_p.K221\*  
ENSMUST00000019246.4|Aldh3a1-  
201|ENSMUSG00000019102|+|chr11:g.61105556:A>T  
MSNISSIVNRARDAFN SGKTRPLQFRVEQLEALQRMINENLKGISKALASNLKNEWTSYEEVAHVLD EIDF  
TIKGLSDWAEDEPVAKTRQTQEDDLYIHSEPLGVVLVIGAWNYPFNLTIQPMVGAIAGNAVVLKPEVSDHM  
ADLLSTLIPQYMDKDLYPVIKGGVPETTELLKEKFDHIMYTGSTAVGKIVMAAAKHLTPVTLELGGKSPCYV

D\*DCDLDVACRRIAWGKFMNSGQTCVAPDYILCDPSIQNEIVEKLLKSLKDFYGEDAKQSHDYGRI INDRHFQ  
RVINLIDSKKVAHGGTWDQPSRYIAPTILVDVDPQSPVMQEEIFGPMPIVCVRSLEAIKFINQREKPLALY  
VFSNNDKVIKKMIAETSSGGVTANDVIVHITVPTLPGGGVNGSMGAYHGKKS FETFSHRRSCLVRS LRNEEA  
NKARYPPSPAKMPRH\*

>rs46423086\_ENSMUSP00000004959\_c.513:C>G\_p.Q172E  
ENSMUST00000004959.3|Grap-201|ENSMUSG00000004837|+|chr11:g.61562544:C>G  
MESVALYSFQATESDELA FNKGDTLKI LNMEDDQNWYKAELRGAEGFV PKNYIRVKPHWPYSGRISRQLAEET  
LMKRNLHGAFLIRESESSPGFEFSVSVNYGDQVQHFVKVLRASGKYFLWEEKFNLSNELVDFYRTTTIAKRRQI  
FLCDEQPLIKPSRACFAQAQFDFSAEDPSQLSLRRGDIVFVVEREDPHWWRGRAGGRLGFFPRSYVQPVHL\*  
>ENSMUSP00000090697\_c.476:G>GAGGAAGGA\_p.P159ins-fs  
ENSMUST00000093019.6|Fam83g-  
202|ENSMUSG00000042377|+|chr11:g.61575836:G>GAGGAAGGA  
MAFSQVQCLDDNHVNWRSSSESKPEFFYSEEQRLALEALVARGRDAFYEV LKRENIRDFLSELELSRIVEAIEV  
YDPGSEDP RVSGRRPEPQDNGGADASEETSAAGGPPATETLPSLEYW POKSDRSIPQLDLGW PDIAYRGVTR  
ASVYMOPP IDGQPRKDTSRKWCARWSARRR  
>ENSMUSP00000090697\_c.1895:C>A\_p.H632Q\_ENSMUST00000093019.6|Fam83g-  
202|ENSMUSG00000042377|+|chr11:g.61594363:C>A  
MAFSQVQCLDDNHVNWRSSSESKPEFFYSEEQRLALEALVARGRDAFYEV LKRENIRDFLSELELSRIVEAIEV  
YDPGSEDP RVSGRRPEPQDNGGADASEETSAAGGPPATETLPSLEYW POKSDRSIPQLDLGW PDIAYRGVTR  
ASVYMOPP IDGQPHIKEVVRKMVSQAQKVI AVVMDMFTDVIDFKDLLDAGFKRKVAVYIIVDES NVKYFLHMC  
ERARMHLGHLK NLRVRSSGGTEFFTRSATKFKGVLAQKFMFVDGDRAVCGSYSFTWSAARTDRNVI SVLSGQV  
VEMFDRQFQELYLMSQSVSLKDI PMEKEPEPEPIVLPVSVPLVPTGTMAKKLVNPKYALVKAKS VDEIAKSSS  
DKQEVTRPPGLRGP AVAERPGLSELLPPVHPGLLNLERANMFEYLP TWVEPDPEPGSDILGYINI IDPNIWN  
PQPNQMNR IKIRDTAHAS AQHLWKQS QGARPCPAPCPPAPRDSQGVVPAENGFPPQGNPEPQAPVPKPRTPV  
VASVLARDGSDIGWALDTPEKETPQNGIDPRLPSTASESEVPQQHSSMTQDDPDGLERGLPNGLDEDEDDDD  
DYVTLSDQDLSGSSGPGPHRRPSVASSMSDEYFEVRRERSVPLQRRQSEQMANGPGHPRRQLSAPHVTRGT  
FGGPLSSPLW AQGRSVAAIHPSLEIPMLIPKEKPPITVVGDVGGRIAIIVDDIIDDVDSFLAAETLKERGAYK  
AGPHHWQPKGSPTPRMLPDPGSPRPTRNTRLRAELRATEEHASPFGIPYSKLSQSKHLKARAGGSQWAPSDSK  
RRARDHKEP\*

>rs108194317\_ENSMUSP00000004955\_c.426:A>G\_p.I143V  
ENSMUST00000004955.14|Prpsap2-201|ENSMUSG00000020528|-  
|chr11:g.61635872:T>C  
MFCVAPPELETKMNITKGGVLVLF SANSNSSCMELSKKIAERLGVEMGKVQVYQEPNRETRVQIQESVRGKDVF  
IIQTISKDVNTTIMELLIMVYACKTSCAKSIIIGVIPPYFPYSKQCKMRKRGSI VSKLLASMMCKAGLTHLVTMD  
LHQKEIQGFFNIPVDNLRAS PFLQYIQEEIPDYRNAVIVAKSPASAKRAQSFAERLRLGIAVIHGEAQDAES  
DLVDGRHSPPMVRSVAAIHPSLEIPMLIPKEKPPITVVGDVGGRIAIIVDDIIDDVDSFLAAETLKERGAYK  
IFVMATHGLLSSDAPRLIEESAIDEVVVTNTIPHEIQKLQCPKIKTVDISMILSEAIRRIHNGESMSYLF RNI  
GLDD\*

>rs108194317\_ENSMUSP00000126274\_c.426:A>G\_p.I143V  
ENSMUST00000168115.8|Prpsap2-204|ENSMUSG00000020528|-  
|chr11:g.61635872:T>C  
MFCVAPPELETKMNITKGGVLVLF SANSNSSCMELSKKIAERLGVEMGKVQVYQEPNRETRVQIQESVRGKDVF  
IIQTISKDVNTTIMELLIMVYACKTSCAKSIIIGVIPPYFPYSKQCKMRKRGSI VSKLLASMMCKAGLTHLVTMD  
LHQKEIQGFFNIPVDNLRAS PFLQYIQEEIPDYRNAVIVAKSPASAKRAQSFAERLRLGIAVIHGEAQDAES  
DLVDGRHSPPMVRSVAAIHPSLEIPMLIPKEKPPITVVGDVGGRIAIIVDDIIDDVDSFLAAETLKERGAYK  
IFVMATHGLLSSDAPRLIEESAIDEVVVTNTIPHEIQKLQCPKIKTVDISMILSEAIRRIHNGESMSYLF RNI  
GLDD\*

>rs47320288\_ENSMUSP00000004920\_c.2977:A>G\_p.Y993C  
ENSMUST00000004920.4|Ulk2-201|ENSMUSG00000004798|-|chr11:g.61670577:T>C  
MEVVGDFFEYCKRDLVGHGAFV VFRGRHRQKTDWEVAIKSINKKNLSKSKQILLGKEIKILKELQHENIVALYD  
VQELPNSVFLVMEYCNGGDLADYLQAKGTLSEDTIRVFLHQIAAAMRILHSGKGIHRDLKPQNILLSYANRRK  
SNVSGIRIKIADFGFARYLHSNTMAATLCGSPMYMAPEVIMSQHYDAKADLWSIGTVIYQCLVKGKPPFQANSP  
QDLRMFYEKNRSLMPSI PRETSPYLANLLGLLQRNQKDRMDFEAF FSHPFLEQVVPVKKSCPVPVPVYSGPVP  
GSSCSSSPSCRFASSPPLDMQH IQEENLSSPPLGPPNYLQVSKDSASNSKNSCSDTDDFVLVPHN I SSDHS  
YDMPMGT TARRASNEFFMCGGQCQPTVSPHSETAPIPVPTQVRNYQRIEQNLISTASSGTNPHGSPRS AVVRR  
SNTSPMGFLRVGSCSPVPGDTVQTGGRRLLSTGSSRPYSPSPVLVGTIPEQFSQCCCGHPQGHEARSRHSSGSPV  
PQTQAPQSLLLGARLQSAPTLDIYQNKQKLRKQHS DPVCP SHAGAGYSYSPQPSRPGSLGTSPTKHTGSSPR  
NSDWF FKTPLPTIIIGSPTKT TAPFKIPKTQASSNLLALVTRHGPAESQSKDGNDPRECSHCLSVQGSERHRSE

QQQSKAVFGRSVSTGKLEQQVKAPLGGHQGSTDSLNTERPMDVAPAGACGVMMLALPAGTAASARAVLFTVGS  
PPHSATAPTCTHMLVLRTRTTSVGSSSSSGGSLCSASGRVCGVSPGPGGLGSSPPGAEGAPSLRYVYPYASPPSL  
EGLITFEAPELPEETLMEREHTDTRLRHLNMMMLMFTTECVLDLTAVRGGNPELCTSAVSLSYQIQESVVVDQISQL  
SKDWGRVEQLVLYMKAQAQLLAASLHLAKAQVKSGLKSPMAVKQVVKLNERNERYKFCITMCKKLTEKLNRRFFSD  
KQRFIDEINSVTAEKLIYNCAVEMVQSAALDEMFOQTEDIVYRCHKAALLLEGLSKILQDPTDVENVHKYKCS  
IERRLSALCCSTATV\*

>rs6201756\_ENSMUSP00000004920\_c.2610:G>A\_p.D871N

ENSMUST00000004920.4|Ulk2-201|ENSMUSG00000004798|-|chr11:g.61674394:C>T  
MEVVGDFEYCKRDLVGHGAFVFRGRHRQKTDWEVAIKSINKKNLSKSKQILLGKEIKILKELQHENIVALYD  
VQELPNSVFLVMEYCNGGDLADYLAQAGTLESDTIRVFLHQIAAAMRILHSGKGIHRDLKPQNILLSYANRRK  
SNVSGIRIKIADFGFARYLHSNTMAATLCGSPMYMAPEVIMSQHYDAKADLWSIGTVIYQCLVGKPPFQANSP  
QDLRMFYEKNRSLMPSIPRETSPLYLANLLGLLQRNQKDRMDFEAFSSHFFLEQVPVKKSCPVPVPVYSGPVP  
GSSCSPSPSCRFASPPSLPDMQHIQEENLSSPPLGPPNYLQVSKDSASNSKNSSCDTDDFVLVPHNISSDHS  
YDMPMGTTARRASNEFFMCGGQCQPTVSPHSETAPIPVPTQVRNYQRIEQNLISTASSGTNPFGSPRSVAVRR  
SNTSPMGFLRVGSCSPVPGDVTQGTGRRRLSTGSSRPYSPSPPLVGTIPEQFSQCCCGHPQGHEARSRHSSGSPV  
PQTQAPQSLLLGARLQSAPTLTDIYQNKQKLRKQHS DPVCP SHAGAGYSYSPQPSRPGSLGTSPTKHTGSSPR  
NSDWFFKTPLPTIIGSPTKTTAPFKIPKTQASSNLLALVTRHGPAESQSKDGNPRECSHCLSVQGSERHRSE  
QQQSKAVFGRSVSTGKLEQQVKAPLGGHQGSTDSLNTERPMDVAPAGACGVMMLALPAGTAASARAVLFTVGS  
PPHSATAPTCTHMLVLRTRTTSVGSSSSSGGSLCSASGRVCGVSPGPGGLGSSPPGAEGAPSLRYVYPYASPPSL  
EGLITFEAPELPEETLMEREHTDTRLRHLNMMMLMFTTECVLDLTAVRGGNPELCTSAVSLSYQIQESVVVNQISQL  
SKDWGRVEQLVLYMKAQAQLLAASLHLAKAQVKSGLKSPMAVKQVVKLNERNERYKFCITMCKKLTEKLNRRFFSD  
KQRFIDEINSVTAEKLIYNCAVEMVQSAALDEMFOQTEDIVYRCHKAALLLEGLSKILQDPTDVENVHKYKCS  
IERRLSALCCSTATV\*

>rs6201768\_ENSMUSP00000004920\_c.2604:G>A\_p.V869I

ENSMUST00000004920.4|Ulk2-201|ENSMUSG00000004798|-|chr11:g.61674400:C>T  
MEVVGDFEYCKRDLVGHGAFVFRGRHRQKTDWEVAIKSINKKNLSKSKQILLGKEIKILKELQHENIVALYD  
VQELPNSVFLVMEYCNGGDLADYLAQAGTLESDTIRVFLHQIAAAMRILHSGKGIHRDLKPQNILLSYANRRK  
SNVSGIRIKIADFGFARYLHSNTMAATLCGSPMYMAPEVIMSQHYDAKADLWSIGTVIYQCLVGKPPFQANSP  
QDLRMFYEKNRSLMPSIPRETSPLYLANLLGLLQRNQKDRMDFEAFSSHFFLEQVPVKKSCPVPVPVYSGPVP  
GSSCSPSPSCRFASPPSLPDMQHIQEENLSSPPLGPPNYLQVSKDSASNSKNSSCDTDDFVLVPHNISSDHS  
YDMPMGTTARRASNEFFMCGGQCQPTVSPHSETAPIPVPTQVRNYQRIEQNLISTASSGTNPFGSPRSVAVRR  
SNTSPMGFLRVGSCSPVPGDVTQGTGRRRLSTGSSRPYSPSPPLVGTIPEQFSQCCCGHPQGHEARSRHSSGSPV  
PQTQAPQSLLLGARLQSAPTLTDIYQNKQKLRKQHS DPVCP SHAGAGYSYSPQPSRPGSLGTSPTKHTGSSPR  
NSDWFFKTPLPTIIGSPTKTTAPFKIPKTQASSNLLALVTRHGPAESQSKDGNPRECSHCLSVQGSERHRSE  
QQQSKAVFGRSVSTGKLEQQVKAPLGGHQGSTDSLNTERPMDVAPAGACGVMMLALPAGTAASARAVLFTVGS  
PPHSATAPTCTHMLVLRTRTTSVGSSSSSGGSLCSASGRVCGVSPGPGGLGSSPPGAEGAPSLRYVYPYASPPSL  
EGLITFEAPELPEETLMEREHTDTRLRHLNMMMLMFTTECVLDLTAVRGGNPELCTSAVSLSYQIQESVIVDQISQL  
SKDWGRVEQLVLYMKAQAQLLAASLHLAKAQVKSGLKSPMAVKQVVKLNERNERYKFCITMCKKLTEKLNRRFFSD  
KQRFIDEINSVTAEKLIYNCAVEMVQSAALDEMFOQTEDIVYRCHKAALLLEGLSKILQDPTDVENVHKYKCS  
IERRLSALCCSTATV\*

>rs30579133\_ENSMUSP00000004920\_c.262:G>A\_p.C88Y

ENSMUST00000004920.4|Ulk2-201|ENSMUSG00000004798|-|chr11:g.61730968:C>T  
MEVVGDFEYCKRDLVGHGAFVFRGRHRQKTDWEVAIKSINKKNLSKSKQILLGKEIKILKELQHENIVALYD  
VQELPNSVFLVMEYNGGDLADYLAQAGTLESDTIRVFLHQIAAAMRILHSGKGIHRDLKPQNILLSYANRRK  
SNVSGIRIKIADFGFARYLHSNTMAATLCGSPMYMAPEVIMSQHYDAKADLWSIGTVIYQCLVGKPPFQANSP  
QDLRMFYEKNRSLMPSIPRETSPLYLANLLGLLQRNQKDRMDFEAFSSHFFLEQVPVKKSCPVPVPVYSGPVP  
GSSCSPSPSCRFASPPSLPDMQHIQEENLSSPPLGPPNYLQVSKDSASNSKNSSCDTDDFVLVPHNISSDHS  
YDMPMGTTARRASNEFFMCGGQCQPTVSPHSETAPIPVPTQVRNYQRIEQNLISTASSGTNPFGSPRSVAVRR  
SNTSPMGFLRVGSCSPVPGDVTQGTGRRRLSTGSSRPYSPSPPLVGTIPEQFSQCCCGHPQGHEARSRHSSGSPV  
PQTQAPQSLLLGARLQSAPTLTDIYQNKQKLRKQHS DPVCP SHAGAGYSYSPQPSRPGSLGTSPTKHTGSSPR  
NSDWFFKTPLPTIIGSPTKTTAPFKIPKTQASSNLLALVTRHGPAESQSKDGNPRECSHCLSVQGSERHRSE  
QQQSKAVFGRSVSTGKLEQQVKAPLGGHQGSTDSLNTERPMDVAPAGACGVMMLALPAGTAASARAVLFTVGS  
PPHSATAPTCTHMLVLRTRTTSVGSSSSSGGSLCSASGRVCGVSPGPGGLGSSPPGAEGAPSLRYVYPYASPPSL  
EGLITFEAPELPEETLMEREHTDTRLRHLNMMMLMFTTECVLDLTAVRGGNPELCTSAVSLSYQIQESVVVDQISQL  
SKDWGRVEQLVLYMKAQAQLLAASLHLAKAQVKSGLKSPMAVKQVVKLNERNERYKFCITMCKKLTEKLNRRFFSD  
KQRFIDEINSVTAEKLIYNCAVEMVQSAALDEMFOQTEDIVYRCHKAALLLEGLSKILQDPTDVENVHKYKCS  
IERRLSALCCSTATV\*



>rs48205108\_ENSMUSP00000018644\_c.706:T>G\_p.L236R  
ENSMUST00000018644.3|Adora2b-  
201|ENSMUSG00000018500|+|chr11:g.62156259:T>G  
MQLETDQDALYVALELVIAALAVAGNVLVCAAVGASSALQTPNTNYFLVSLATADVAVGLFAIPFAITISLGFCT  
DFHGCLFLACFVLVLTQSSIFSLAVAVDRYLAIRVPLRYKGLVTGTRARGIIAVLWVLAFFLGLTPFLGWNS  
KDSATSNCTELGDGIANKSCCPVTCLEFENVVPMYFNFVFFGCVLPPLLMVYIKIFMVACKQLQRMELM  
DHSRTTLQREIHAAKSRAMIVGIFALCWLVPVHAINCITLTFHPALAKDKPKWVMNVAILLSHANSVNVPIVYAY  
RNRDFRYSFHKIIISRYVLCQAETKGGSGQAGAQTSLSLGL\*  
>rs26968332\_ENSMUSP00000018644\_c.880:A>G\_p.N294S  
ENSMUST00000018644.3|Adora2b-  
201|ENSMUSG00000018500|+|chr11:g.62156433:A>G  
MQLETDQDALYVALELVIAALAVAGNVLVCAAVGASSALQTPNTNYFLVSLATADVAVGLFAIPFAITISLGFCT  
DFHGCLFLACFVLVLTQSSIFSLAVAVDRYLAIRVPLRYKGLVTGTRARGIIAVLWVLAFFLGLTPFLGWNS  
KDSATSNCTELGDGIANKSCCPVTCLEFENVVPMYFNFVFFGCVLPPLLMVYIKIFMVACKQLQRMELM  
DHSRTTLQREIHAAKSLAMIVGIFALCWLVPVHAINCITLTFHPALAKDKPKWVMNVAILLSHANSVNVPIVYAY  
RSRDFRYSFHKIIISRYVLCQAETKGGSGQAGAQTSLSLGL\*  
>rs29388399\_ENSMUSP00000018645\_c.7317:C>T\_p.P2440S  
ENSMUST00000018645.13|Ncor1-201|ENSMUSG00000018501|-|chr11:g.62208716:G>A  
MSSSGYPPNQGFSTEQSRYPESHVQYTFPSTRHQQEFVAVPDYRSSHIEVQSASQLLQQQQQQQQQLRRRPSLL  
SEFHPGSDRPPQERRTGQEYQFHSGPSPVDHDSLESKRPRLEPVSDAHFQRVSAAVLPLVHSLPEGLRSSADAKK  
DSAFGSKHEAPSSPLAQPCGDDQNASPSKLSKEELIQSMRDVREIAKVEQQILKLLKQQQLEEEEAAPPE  
PEKPVSPPPVEQKHRSIVQIIYDENRKKAEAEAHKIFEGLGPKVELPLYNQPSDTKVYHENIKTNQVMRKKLIL  
FFKRRNHARKQREQKICQRYDQIMEAWEKVDRIEENPRRKAKEKTKREYYEKQFPEIRKQREQQERFORVGQ  
RGAGLSATIARSEHEISEIIDGLSEQENNEKQMRQLSVIPMMFDAEQRRVKFINMNGLMEDPMKVYKDRQFM  
NVWTDHEKEIFKDKFQHPKNFGLIASYLERKSVPCVLYYYYLTKKNENYKALVRRNYGRRGRNQIARPSQ  
EEKVEEKEDKAEKTEKKEEEKKDEEKDKESKTEKTEKDRTEATAEEPEEREQVTGRKRTANSQGRKKG  
RVTRSMTEASAAAANAATAEPPPLPPPPEPISETTEPVETSRWTEEMEVAKKGLVEHGRNWAATAKVMGTK  
SEAQCKNFYFNYKRRHNDLNLQQHKQKASRKPREERDVSQCESVASTVSAQEDEDIAEASNEEENPEDSEGAE  
NSSDTEASPSPVAAKSSSEDSSENAASRGNTPEVALEATDPAFCASPSSAVPTTKPAERESVVAQVTDSD  
ASAETAEPMDVDHEECGAEGSSVLDPPAPTKADSVDPPEMVPENTASKGEGDAKERDLESTSEKTEARDEDVV  
VAEQIERPEPQSDDDSSATCSADEGVDGEPEPQRVFPMDAKPSLLTPPGSILISSPIKPNPLDLPQLQHRAAV  
IPMVSTPCNIPIGTPVSGYALYQRHIKAMHESALLEEQRQREQVLECRSSTSPCSTSKSNREWEVLQP  
APHQVITNLPEGVRLPTTRTPRPPPLIPSSKTTVASEKPSFIMGGSSISQGTPTGLYSSSHQAYPQEAAPKPSV  
GSISLGLPRQOESTKAAPLYIKQEEFSRPNQNSQPEGLLVRAQHHEGVVRGTAGAVQEGSITRGTPASKISVE  
TISSLRGSIQTGTPALPQAGIPTALVKGPVSRMPEIESSPEKVREAAASKGHVIEYEGKSGHILSYDNINKNAR  
EGTRSPRTAHMSLKRSYEAVEGSIKQGMRESVPSAPLEGLICRALPRGSPHSDLKERTVLSYDIIQGTPTP  
ATAESFEDGLKYPKQIKRESPPIRAFEGAITKGKPYDGIITTIKEMGRSIIHEIIPRQDILTQESRKTPPEVVQSTR  
PIIEGSIQGTPIKFDNNSGQSAIKHNVKSLITGPKLRGMLEIVPENIKVVERGKYEVDKAGEPVRARHTS  
VVSSGSPVLRSTLHEAPKAQLSPGLYDDSSARPTVSYQNTISRGSPMMNRTSDVSSSKSASHERKSTLTPTQ  
RESIPAKSPVPGVDPVSHSPFDPHRRSSAAGEVYRSHLPLHLDPAMFFHRALDPAAYLQLRQLSPTPGYPS  
YQYLYAMENTRQTILNDYITSQQMQVNLDPVTRGLSPREQLGLPYPATRGIIDL TNMPPTILVPHAGGTST  
PPMDRITYIPGTQVTFPPRPNAAASLSPGHPTHLAAAASAEREREREREREKERERERERERERERERERERER  
LFLRPGSEQPGRPGSHGYVRSPPSVVQETILQORPVSFQGTNGTSTVITPLDPTAQLRIMPLPSGGPSISQG  
LPASRYNTAADALAALVDAASAPQMDVSKTKESKHEAARLEENLRSAAVSEQQQLEQKNLEVEKRSVQCV  
CTSSALPSPGKAQPHASVVYSEAGDKGPPPKSRYEELRTRGKTTITANFIDVIITRQIASDKDARERGSQS  
SDSSSSLSSHRYETASDAIEVISPASSAPPQEKQAYQPDVMKANQAENESTRQYEGPLHHYRSQQESPSPQ  
QQPPLPPSSQSEGMQVPRTHRLLITLADHICQIITQDFARNQVPSQPSTSTFQTSPTSALSSTPVRTKTSSRYS  
PESQSQTVLHPRPGRVSPENLVDKSRGRSPGKSPERSHIPSEPEYPI SPPQGPVHEKQDSMLLSQRGVDP  
AEQSDRSRSPGISISYLPFFTKLESTSPMVKSKKQEI FRKLNSGGGSDMAAAQPGTEIFNLPVAVTSGAVS  
SRSHSFADPASNLGLEDIRKALMGSFDDKVEDHGVMVHPVIMPVGSASTSVVTSSEARRDEGEPSPHAGVC  
KPKLINKSNSRKSISPIPGQSYLGTERRSSVSSHSEGDYHRQTPGWAWEDRPSSTGSTQFPYNP LTRMLSS  
TPPTQIACAPSAITQAAPHQQRNIWEREPASLLSAQYETLSDDSDD\*  
>rs29388399\_ENSMUSP00000122654\_c.5127:C>T\_p.P1710S  
ENSMUST00000155712.9|Ncor1-213|ENSMUSG00000018501|-|chr11:g.62208716:G>A  
KASRKPREERDVSQCESVASTVSAQEDEDIAEASNEEENPEDSEGAEENSSDTEASPSPVAAKSSSEDSSENA  
ASRGNTPEVALEATDPAFCASPSSAVPTTKPAERESVVAQVTDSDASAETAEPMDVDHEECGAEGSSVLDPP  
APTKADSVDPPEMVPENTASKGEGDAKERDLESTSEKTEARDEDVVVAEQIERPEPQSDDDSSATCSADEGVD  
GEPERQRVFPMDAKPSLLTPPGSILISSPIKPNPLDLPQLQHRAAVIPMVSTPCNIPIGTPVSGYALYQRH



SEAQCKNFYFNYKRRHNLNLLQQHKQKVSRAVVASRKPREEVDVSVQCESVASTVSAQEDEDIASNEEENPE  
DSEAVPTTKPAERESVEAQVTDASAEAEAPMDVDHEECGAEGSSVLDPPAPTKADSVDPQVVPENTASKGE  
GDAKERDLESTSEKTEARDEDVVAEQIERPEPQSDDDSSATCSADEGVDGEPERQRVFPMDAKPSLLTTPPGS  
ILISSPIKPNPLDLPQLQHRAAVIPPMVSVCTPCNIPIGTPVSGYALYQRHIKAMHESALLEEQRQRQEQVDLE  
CRSSTSPCSTSKSPNREWEVLQAPHQVITNLPEGVRLPTTRPTRPPPLIPSSKTTVASEKPSFIMGGSISQ  
GTPGTYLSSHQAYPQEQAPKPSVGSISLGLPRQOESTKAAPLTYIKQEEFSPRSQNSQPEGLLVRAQHEGHTAG  
AVQEGSITRGTASKISVETISSLRGSIQTGTPALPQAGIPTALVKGPVSRMPIEESSEPEKVVREEAASKGHV  
IYEGKSGHILSYDNIKNAEGTRSPRTAHEMSLKRSEYEAVEGSIKQGLICRALPRGSPHSDLKERTVLSGSI  
QGTFRATAESFEDGLKYPKQIKRESPPIRAFEGAITKGPYDGIITTIKEMGRSIEIIPRQDILTQESRKTPEV  
VQSTRPIIEGSIQGTPIKFDNNSGQSAIKHNKSLITGPKLPRGMLEIVPENIKVVERGKYEDVKAGEPVR  
ARHTSVVSSGSPVLRSTLHEAPKAQLSPGLYDDSSARRTPVSYQNTISRGSPMMNRTSDVSSSKSASHERKST  
LTPTQRESIPAKSPVPGVDPVVSHSPFDPHRRSSAAGEVYRSHLPHLDPAMPFHRALDPAAAAYLLQRQLSP  
TPGYPSQYQLYAMENTRQTIILNDYITSQQMVNLRPDVTRGLSPREQLGLPYPATRGIIDLTNMPPTILVPH  
AGGTSTPMDRITYIPGTQVTFPPRPYNAASLSPGHPTHAAAAAERERERERERERERERERERERERERERER  
AAAPADLYLRPGSEQPGRPGSHGYVRSVSPSVRTQETILQQRPSVFQGTNGTSVITPLDPTAQLRIMPLPSGG  
PSISQGLPASRYNTAADALAAALVDAASAPQMDVSKTKEKHEAARLEENLRSRRAAVSEQQQLEQKNLEVEK  
RSVQCVCVTSALPSGKAQPHASVVYSEAGKDKGPPPKSRYEEELRTRGKTTITAANFIDVIITRQIASDKDAR  
ERGSQSSDSSSSLSHRYETASDAIEVISPASSPAPPQEKPYQYQPDVMKANQAENESTRQYEGPLHHYRSQQ  
ESPSQQQPPPLPSSQSEGMQVPRTHRLITLADHICQIITQDFARNQVPSQPSTSTFTQTSPSALSSTPVRTK  
TSSRYSPESSQSTVLHPRPGPRVSPENLVDKSRGRPGKSPERSHIPSEPEYEPISPPQGPVAVHEKQDSMLLSQ  
RGVDPAEQRSDRSRPGSISYLPFFTKLESTSPMVSKKQEI FRKLNSSGGGSDMAAAQPGTEIFNLPAVTT  
SGAVSSRSFSFADPASNLGLEDIRKALMGSFDDKVEDHGVVMSHPVGMIPGSASTSVVTSSEARRDEGEPSP  
HAGVCKPKLINKSNSRKSPIPGQSYLGTTERPSSVSVHSEGDYHRQTPGWAWEDRPSSTGSTQFPYNPLTI  
RMLSSTPPTQIACAPSAITQAAPHQQNRIWEREPASLLSAQYETLSDSD\*  
>rs29388399\_ENSMUSP00000098627\_c.7317:c>T\_p.P2440S  
ENSMUST0000101066.10|Ncor1-204|ENSMUSG00000018501|-|chr11:g.62208716:G>A  
MSSSGYPPNQGAFFSTEQSRYPSHSVQYTFPSTRHQEFVAVPDYRSSHIEVVSQASQLLQOQQQQQLRRRPSLL  
SEFHPGSDRQERRTGYEQFHSGSPVDHDSLESKRPRLEPVSDAHFQRVSAAVLPLVHSLPEGLRSSADAKK  
DSAFGSKHEAPSSPLAGQPCGDDQNASPSKLSKEELIQSMDRVDREIAKVEQQILKLLKKKQQQLEEEAAKPE  
PEKPVSPPPVEQKHSIVQIIYDENRKAEEAHKIFEGLGPKVELPLYNQPSDTKVYHENIKTNQVMRKKLIL  
FFKRRNHARKQREQKICQRYDQLMEAWKVDRIENNPRRKAKESKTREYYEKQFPEIRKQREQQERFORVGQ  
RGAGLSATIARSEHEISEIIDGLSEQENNEKQMRQLSVIPMMFDAQRRVKFINMNGLMEDPMKVYKDRQFM  
NVWTDHEKEIFKDKFIQHPKNFGLIASYLERKSVPCVLYYYLTCKNENYKALVRRNYGKRRGRNQIARPSQ  
EEKVEEKEDKAEKTEKKEEKDDEEKDDKEDSKETTKEKDRTEATAEPEEREQVTPRGRKTANSQGRKRG  
RVTRSMNTSEAAAANAATAEPPPPPLPPPEPISTEPVETSRTWTEEMEVAKKGLVEHGRNWAAIAKMVGTK  
SEAQCKNFYFNYKRRHNLNLLQQHKQKASRKPREEVDVSVQCESVASTVSAQEDEDIASNEEENPEDSEGAE  
NSSDTEAPSPSPVEAAKSSSENAASRGNTEPVAELEATTDPAPCASPSAVPTTKPAERESVEAQVTD  
ASAETAEPMDVDHEECGAEGSSVLDPPAPTKADSVDPQVVPENTASKGEGDAKERDLESTSEKTEARDEDV  
VAEQIERPEPQSDDDSSATCSADEGVDGEPERQRVFPMDAKPSLLTTPPGSILISSPIKPNPLDLPQLQHRAAV  
IPPMVSVCTPCNIPIGTPVSGYALYQRHIKAMHESALLEEQRQRQEQVDLECRSSTSPCSTSKSPNREWEVLQ  
APHQVITNLPEGVRLPTTRPTRPPPLIPSSKTTVASEKPSFIMGGSISQGTGTYLSSHQAYPQEQAPKPSV  
GSISLGLPRQOESTKAAPLTYIKQEEFSPRSQNSQPEGLLVRAQHEGVVGTAGAVQEGSITRGTASKISVE  
TISSLRGSIQTGTPALPQAGIPTALVKGPVSRMPIEESSEPEKVVREEAASKGHV IYEGKSGHILSYDNIKNA  
EGTRSPRTAHEMSLKRSEYEAVEGSIKQGMSPRESVPSAPLEGLICRALPRGSPHSDLKERTVLSGSI  
QGTFRATAESFEDGLKYPKQIKRESPPIRAFEGAITKGPYDGIITTIKEMGRSIEIIPRQDILTQESRKTPEV  
VQSTRPIIEGSIQGTPIKFDNNSGQSAIKHNKSLITGPKLPRGMLEIVPENIKVVERGKYEDVKAGEPVRARHTS  
VVSSGSPVLRSTLHEAPKAQLSPGLYDDSSARRTPVSYQNTISRGSPMMNRTSDVSSSKSASHERKSTLTPTQ  
RESIPAKSPVPGVDPVVSHSPFDPHRRSSAAGEVYRSHLPHLDPAMPFHRALDPAAAAYLLQRQLSPTPGYPS  
QYQLYAMENTRQTIILNDYITSQQMVNLRPDVTRGLSPREQLGLPYPATRGIIDLTNMPPTILVPHAGGTST  
PMDRITYIPGTQVTFPPRPYNAASLSPGHPTHAAAAAERERERERERERERERERERERERERERERERER  
LYLRPGSEQPGRPGSHGYVRSVSPSVRTQETILQQRPSVFQGTNGTSVITPLDPTAQLRIMPLPSGGGPSISQ  
LPASRYNTAADALAAALVDAASAPQMDVSKTKEKHEAARLEENLRSRRAAVSEQQQLEQKNLEVEKRSVQC  
VTSALPSGKAQPHASVVYSEAGKDKGPPPKSRYEEELRTRGKTTITAANFIDVIITRQIASDKDARERGSQ  
SDSSSSLSHRYETASDAIEVISPASSPAPPQEKPYQYQPDVMKANQAENESTRQYEGPLHHYRSQQESPSQ  
QQPPLPSSQSEGMQVPRTHRLITLADHICQIITQDFARNQVPSQPSTSTFTQTSPSALSSTPVRTKTSSRYS  
PESQSQSTVLHPRPGPRVSPENLVDKSRGRPGKSPERSHIPSEPEYEPISPPQGPVAVHEKQDSMLLSQRGVDP  
AEQRSDRSRPGSISYLPFFTKLESTSPMVSKKQEI FRKLNSSGGGSDMAAAQPGTEIFNLPAVTTSGAVS  
RSFSFADPASNLGLEDIRKALMGSFDDKVEDHGVVMSHPVGMIPGSASTSVVTSSEARRDEGEPSPHAGVC

KPKLINKNSNRKSKSPIPGQSYLGTERTSSSVHSEGDYHRQTPGWAWEDRPSSTGSTQFPYNPLTIRMLSS  
 TPPTQIACAPSAITQAAPHQQNRWEREPASLLSAQYETLSDSDD\*  
 >rs29388399\_ENSMUSP00000038900\_c.4152:C>T\_p.P1385S  
 ENSMUST00000037575.15|Ncor1-202|ENSMUSG00000018501|-|chr11:g.62208716:G>A  
 MSAARYSVPPVLPAPHQVITNLEPVGRLPSTRPRTTRPPPPLIPSSKTTVASEKPSFIMGGSISQGTPTGTYLSS  
 HNQAYPQEAPKPSVGSISLGLPRQQUESTKAAPLYIKQEEFSPRSQNSQPEGLLVRAQHEGVVRGTAGAVQEG  
 SITRGTFAKISKVETISSLRGSIHQGTAPALPQAGIPTALVKGPVSRMPIEESSEPKVREEAASKGHHVYIEGK  
 SGHILSYDSLICRALPRGSPHSDLKERTVLSGSIMQGTTPRATAESFEDGLKYPKQIKRESPPIRAFEGAITKG  
 KPYDGIITTIKEMGRSIEHIEIPRQDILTQESRKTEPQQSTRPIEIGSISQGTPIKFDNNSGQSAIKHNKSLIT  
 GPSKLRPMLIEVPIENIKVVERGKYEDVKAGEPVRARHTSVVSSGSPVLRSTLHEAPKAQLSPGLYDDSSARR  
 TPVSYQNTISRGSPMMNRTSDVSSSSKASHERKSTLTPTQRESIPAKSPVPGVDPVVSHPFDPHRRSSAAGE  
 VYRSHLPTHLDPAMPFHRALDPAAYLLQRQLSPTPGYPSQYQLYAMENTRQTIILNDYIITSQQMVNLRPDV  
 TRGLSPREQLGLPYPATRGIIDLTPMPTIILVPHAGGTSTPMDRITYIIPGTQVTFPPRYNAASLSPGHPT  
 HAAAAAERERERERERERERERERERERERIAAAPADLYLRPGSEQPGRPGSHGYVRSPPSPVTRTQETI  
 LQQRPSVVFQGTNGTTSVITPLDPTAQLRIMPLPSGGPSSISQGLPASRYNTAADALALVDAASAPQMDVSKTK  
 ESKHEAARLEENLRSAASVSEQQQLEQKNLEVEKRSVQCVCTSSALPSGKAPHASVVYSEAGKDKGPPPKS  
 RYEEELRTRGKTTITAAANFIDVIITRQIASDKDARERGSQSSSSSLSSHRYETASDAIEVISPASPAPPQ  
 EKQAYQPMVKANQAENESTRQYEGPLHHYRSQESPSPPQPPPPSSQSEGMGQVPRTHRLITLADHICQ  
 IITQDFARNQVPSQPSTSTFTQTSALSSSTPVRTKTSSRYSSESQSVTLHPRPGPRVSPENLVDKSRGRPGK  
 SPERSHIPSEPYEPIPPQGPAVHEKQDSMLLLSQRGVDPAEQRSRSPGSIYLSFFTKLESTSPMVKSK  
 KQEIFRKLNSGGGSDMAAAQPGETIFNLPAVTTSGAVSSRSHSFADPASNLGLEDIRKALMGSFDDKVED  
 HGVVMSHPVGIIMPASSTSVVTSSEARRDEGEPSPHAGVCKPKLINKNSNRKSKSPIPGQSYLGTERTSSSVS  
 VHSEGDYHRQTPGWAWEDRPSSTGSTQFPYNPLTIRMLSSTPPTQIACAPSAITQAAPHQQNRWEREPASLL  
 SAQYETLSDSDD\*  
 >rs29483194\_ENSMUSP00000018645\_c.5656:A>T\_p.K1886I  
 ENSMUST00000018645.13|Ncor1-201|ENSMUSG00000018501|-|chr11:g.6224764:T>A  
 MSSSGYPNQGAFSTEQSRYPHSVQYTFPSTRHQEFVAVDPYRSSHIEVSQLQLQQQQQQQLRRRPSLL  
 SEFHGSDRPPQERRTGIEQFHSGSPVDHDSLESKRPRLEPVSDAHFQRVSAAVLPLVHSLPEGLRSSADAKK  
 DSAFQSKHEAPSSPLAQPCGDDQNASPKLSKEELIQSMDRVDREIAKVEQQILKLLKKQQQLEEEAAKPPE  
 PEKPVSPVPVEQKHSIVQIIYDENRKAEEAHKIFEGLGPKVELPLYNQPSDKVYHENIKTNQVMRKKLIL  
 FFKRRNHARKQREQKICQRYDQLMEAWEKVDRIENNPRKAKESKTREYYEKQFPEIRKQREQQERFORVGQ  
 RGAGLSATIARSEHEISEIIDGLSEQENNEKQMRQLSVIPMMFDAEQRRVKFINMNGLMEDPMKVYKDRQFM  
 NVWTDHEKEIFKDKFIQHPKFNFLIASYLERKSVPCVLVLYLTKKNNYKALVRRNYGKRRGRNQIARPSQ  
 EEKVEEKEDKAEKTEKKEEKKDDEEKDDKEDSKETTKEKDRTEATAEPEEREQVTPRGRKTANSQGRKQ  
 RVTRSMTSEAAAAANAATAEPPPPPLPPPPEPISTEPVETSRWTEEMEVAKKGLVEHGRNWAAIAKVMGTQ  
 SEAQCKNFYFNKRRHNDLNLQQHKKASRKPREERDVSQCESVASTVSAQEDEDIASNEENPEDSEGAE  
 NSSDTEAPSPSPVEAAKSSSEDSSENAASRGNTEPVAELEATTDPAPCASPSAVPTTKPAERESVEAQVTD  
 ASAEATAEPMVDHDECAGSSVLDPPAPTAKADSVDPMPQVNTASKGEGDAKERDLESTSEKTEARDEDVV  
 VAEQIERPEPQSDDDSSATCSADEGVDGEPERQRFVMDAKPSSLTPPGSILISSPIKPNPLDLPLQHRAAV  
 IPPMVCTPCNIPIGTPVSGYALYQRHIKAMHESALLEEQRQREQVDLECRSSTSPCSTSKSPNREWEVLQP  
 APHQVITNLEPVGRLPSTRPRTTRPPPPLIPSSKTTVASEKPSFIMGGSISQGTPTGTYLSSHQAYPQEAPKPSV  
 GSISLGLPRQQUESTKAAPLYIKQEEFSPRSQNSQPEGLLVRAQHEGVVRGTAGAVQEGSITRGTFAKISKV  
 TISSLRGSIHQGTAPALPQAGIPTALVKGPVSRMPIEESSEPKVREEAASKGHHVYIEGKSGHILSYDNIKNAR  
 EGTRSPRTAHEMSLKRSYEAVEGSIKQGMSPRESVPVSALEGLICRALPRGSPHSDLKERTVLSGSIMQGTPT  
 ATAESFEDGLKYPKQIKRESPPIRAFEGAITKGKPYDGIITTIKEMGRSIEHIEIPRQDILTQESRKTEPQQSTR  
 PIEIGSISQGTPIKFDNNSGQSAIKHNKSLITGPSKLRPMLIEVPIENIKVVERGKYEDVKAGEPVRARHTS  
 VVSSGSPVLRSTLHEAPKAQLSPGLYDDSSARRTPVSYQNTISRGSPMMNRTSDVSSSSKASHERKSTLTPTQ  
 RESIPAKSPVPGVDPVVSHPFDPHRRSSAAGEVYRSHLPTHLDPAMPFHRALDPAAYLLQRQLSPTPGYPS  
 QYQLYAMENTRQTIILNDYIITSQQMVNLRPDVTRGLSPREQLGLPYPATRGIIDLTPMPTIILVPHAGGTST  
 PMDRITYIIPGTQVTFPPRYNAASLSPGHPTHLAAAAAERERERERERERERERERERERERIAAAPAD  
 LYLRPGSEQPGRPGSHGYVRSPPSPVTRTQETILQQRPSVVFQGTNGTTSVITPLDPTAQLRIMPLPSGGPSSISQ  
 LPASRYNTAADALALVDAASAPQMDVSKTKEKHEAARLEENLRSAASVSEQQQLEQINLEVEKRSVQCV  
 CTSSALPSGKAPHASVVYSEAGKDKGPPPKSRYEEELRTRGKTTITAAANFIDVIITRQIASDKDARERGSQ  
 SDSSSSSLSSHRYETASDAIEVISPASPAPPQEKQAYQPDMMVKANQAENESTRQYEGPLHHYRSQESPSPPQ  
 QPPLPSSQSEGMGQVPRTHRLITLADHICQIITQDFARNQVPSQPSTSTFTQTSALSSSTPVRTKTSSRYS  
 PESQSVTLHPRPGPRVSPENLVDKSRGRPGKSPERSHIPSEPYEPIPPQGPAVHEKQDSMLLLSQRGVDP  
 AEQRSRSRSPGSIYLSFFTKLESTSPMVKSKKQEIFRKLNSGGGSDMAAAQPGETIFNLPAVTTSGAVS  
 SRSHSFADPASNLGLEDIRKALMGSFDDKVEDHGVVMSHPVGIIMPASSTSVVTSSEARRDEGEPSPHAGVC

KPKLINKSNSRKSXSPIPGQSYLGTTERPSSVSSVHSEGDYHRQTPGWAWEDRPSSTGSTQFPYNPLTIRMLSS  
 TPPTQIACAPSAITQAAPHQQNRWEREPAPLLSAQYETLSDSD\*  
 >rs29483194\_ENSMUSP00000122654\_c.3466:A>T\_p.K1156I  
 ENSMUST00000155712.9|Ncor1-213|ENSMUSG00000018501|-|chr11:g.62224764:T>A  
 KASRKPREERDVSQCESVASTVSAQEDEDIEASNEEENPEDSEGAENSSDTEAPSPSPVEAAKSEDSSENA  
 ASRGNTEPVAELEATDPAPCASPSSAVPTTKPAERESVEAQVTDASASAETAEPMDVDHEECGAEGSSVLDPP  
 APTKADSVDPQVPEMVPENTASKGEGDAKERDLESTSEKTEARDEDVVVAEQIERPEPQSDDDSSATCSADEGVD  
 GEPERQRFVPMADAKPSLLTPPGSILISSPIKPNPLDLPQLQHRAAVIPPMVSCCTPCNIPIGTPVSGYALYQRH  
 IKAMHESALLEEQRQREQVDLECRSSTSPCSTSKSPNREWEVLQPAPHQVITNLPEGVRLPTTRPTRPPPL  
 IPSSKTTVASEKPSFIMGGSISQGTPTGTYLSSHNOAYPQEAPKPSVGSISLGLPRQQUESTKAAPLTYIKQEEF  
 SPRSQNSQPEGLLVRAQHEGVVRGTAGAVQEGSITRGTTPASKISVETISSLRGSITQGTALPQAGIPTEALV  
 KGPVSRMPIEESSPEKVVREAAASKGHVIEGKSGHILSYDSLICRALPRGSPHSDLKERTVLSGSIMQGT  
 PRATAESFEDGLKYPKQIKRESPIRAFEGAITKPKPYDGITTIKEMGRSIEHEIPRQDILTQESRKTPEVVQSTRP  
 IIEGSIQGTPIKFDNNSGQSAIKHNVKSLITGPKLPRGMLIEVPENIKVVVERGKYEDVKAGEPVRARHTSV  
 VSSGPSVLRSTLHEAPKAQLSPGLYDDSSARPTVSYQNTISRGSPPMNRSTDVSSSKSASHERKSTLTPTQR  
 ESIPAKSPVPGVDPVSHSPFDPHHRSSAAGEVYRSHLPHLDPAMPFHRALDPAAYLLQRQLSPTPGYPS  
 QYQLYAMENTRQITLNDYITSQQMVNLRPDVTRGLSPREQPLGLPYPATRGIIDLTMNPPTILVPHAGGTST  
 PPMDRITYIPGTQVTFPPRPNYAASLSPGHPTHAAAAASAERERERERERERERERERERERERERERERER  
 IAAAPADLYLRPGSEQPGRPGSHGYVRSPPSPVTRQETILQQRPSVFGTNGTTSVITPLDPTAQLRIMPLPSGGPSISQ  
 GPASRYNTAADALAALVDAASAPQMDVSKTKESKHEAARLEENLRSRRAAVSEQQQLEQINLEVEKRSVQCV  
 CTSSALPSGKAQPHASVVYSEAGKDKGPPPKSRYEEELRTRGKTTITAAAFIDVITRQIASDKDARERGSQS  
 SDSSSSLSHRYETASDAIEVISPASSPAPPQEKQAYQPDVVKANQAENESTRQYEGPLHHYRSQQESPSQ  
 QPPLPSSQSEGMPVPRTHRLITLADHICQIITQDFARNQVPSQPSTSTFTQTSALSSTPVRTKTSRYS  
 PESQSQTVLHPRPGPRVSPENLVDKSRGRPKSPERSHIPSEYEPISPPQGPVHEKQDSMLLSQRGVDP  
 AEQRSDRSRSPGISYLSFFTKLESTSPMVKSKKQEIFRKLNSGGGSDMAAAQPGTEIFNLPAVTTSGAVS  
 SRSHSFADPASNLGLEDIRKALMGSFDDKVEDHGVVMSHPVIMPASASTSVVTSSEARRDEGEPSPHAGVC  
 KPKLINKSNSRKSXSPIPGQSYLGTTERPSSVSSVHSEGDYHRQTPGWAWEDRPSSTGSTQFPYNPLTIRMLSS  
 TPPTQIACAPSAITQAAPHQQNRWEREPAPLLSAQYETLSDSD\*  
 >rs29483194\_ENSMUSP00000125458\_c.2464:A>T\_p.K822I  
 ENSMUST00000156740.9|Ncor1-214|ENSMUSG00000018501|-|chr11:g.62224764:T>A  
 XLQPAPHQVITNLPEGVRLPTTRPTRPPPLIPSSKTTVASEKPSFIMGGSISQGTPTGTYLSSHNOAYPQEAP  
 KPSVGSISLGLPRQQUESTKAAPLTYIKQEEFSPRSQNSQPEGLLVRAQHEGVVRGTAGAVQEGSITRGT  
 PASKISVETISSLRGSITQGTALPQAGIPTEALVKGPSVSRMPIEESSPEKVVREAAASKGHVIEGKSGHILSYDSL  
 ICRALPRGSPHSDLKERTVLSGSIMQGTPRATAESFEDGLKYPKQIKRESPIRAFEGAITKPKPYDGITTIK  
 EMGRSIEHEIPRQDILTQESRKTPEVVQSTRPIIEGSIQGTPIKFDNNSGQSAIKHNVKSLITGPKLPRGML  
 EIVPENIKVVVERGKYEDVKAGEPVRARHTSVVSSGSPVLRSTLHEAPKAQLSPGLYDDSSARPTVSYQNTIS  
 RGSPPMNRSTDVSSSKSASHERKSTLTPTQRESIPAKSPVPGVDPVSHSPFDPHHRSSAAGEVYRSHLPHL  
 DPAMPFHRALDPAAYLLQRQLSPTPGYPSQYQLYAMENTRQITLNDYITSQQMVNLRPDVTRGLSPREQ  
 PLGLPYPATRGIIDLTMNPPTILVPHAGGTSTPPMDRITYIPGTQVTFPPRPNYAASLSPGHPTHAAAAASAER  
 ERERERERERERERERERERERERERERERERERERERERERERERERERERERERERERERERERERER  
 IAAAPADLYLRPGSEQPGRPGSHGYVRSPPSPVTRQETILQQRPSVFGTNGTTSVITPLDPTAQLRIMPLPSGGPSISQ  
 GLPASRYNTAADALAALVDAASAPQMDVSKTKESKHEAARLEENLRSRRAAVSEQQQLEQINLEVEKRSVQCV  
 CTSSALPSGKAQPHASVVYSEAGKDKGPPPKSRYEEELRTRGKTTITAAAFIDVITRQIASDKDARERGSQS  
 SDSSSSLSHRYETASDAIEVISPASSPAPPQEKQAYQPDVVKANQAENESTRQYEGPLHHYRSQQESPSQ  
 QPPLPSSQSEGMPVPRTHRLITLADHICQIITQDFARNQVPSQPSTSTFTQTSALSSTPVRTKTSRYS  
 PYEPI SPPQGPVHEKQDSMLLSQRGVDPAEQRSDRSRSPGISYLSFFTKLESTSPMVKSKKQEIFRKLNS  
 SGGGSDMAAAQPGTEIFNLPAVTTSGAVSSRSHSFADPASNLGLEDIRKALMGSFDDKVEDHGVVMSHPV  
 IMPASASTSVVTSSEARRDEGEPSPHAGVCCKPKLINKSNSRKSXSPIPGQSYLGTTERPSSVSSVHSEGDYHRQ  
 TPGWAWEDRPSSTGSTQFPYNPLTIRMLSSTPPTQIACAPSAITQAAPHQQNRWEREPAPLLSAQYETLSDS  
 DD\*  
 >rs29483194\_ENSMUSP00000098628\_c.5455:A>T\_p.K1819I  
 ENSMUST00000101067.10|Ncor1-205|ENSMUSG00000018501|-|chr11:g.62224764:T>A  
 MSSSGYPPNQGFASTEQSRYPSSHVQYTFPSTRHQEFVAVPDRSSHIEVSAQQLLQQQQQQQLRRRPSLL  
 SEFHGSDRPPQERRTGYEQFHSGPSFVDHDSLESKRPRLEPVSDAHFQRVSAAVLPLVHSLPEGLRSSADAKK  
 DSAFGSKHEAPSSPLAGQPCGDDQNASPSKLSKEELIQSMDRVREIAKVEQQILKLLKKKQQQLEEEAAKPP  
 PEKPVSPPPVEQKHSIVQIIYDENRKAEEAHKIFEGLGPKVELPLYNQPSDTKVYHENIKTNQVMRKKLIL  
 FFKRRNHARKQREQKICQRYDQLMEAWKQVDRINENPRRKAKEKSTREYYEKQFPEIRKQREQERFQRVGQ  
 RGAGLSATIARSEHEISEIIDGLSEQENNEKQMRQLSVIPMMFDAEQRRVKFINMNGLMEDPMKVYKDRQFM

NVWTDHEKEIFKDKFIQHPKNFGLIASYLERKSVPCVLYYYLTCKKNENYKALVRRNYGKRRGRNQIARPSQ  
 EEKVEEKEEDKAEKTEKKEEEEKDDDEEKDDKEDSKETTKEKDRTEATAEPEEREQVTPRGRKTANSQGRKKG  
 RVTRSMTSEAAAAANAAAAATEEPPPLPPPEPISTEPVETSRWTEEMEVAKKGLVEHGRNWAAIAKMGVTK  
 SEAQCKNFYFNYKRRHNLNLLQQHKQKVSRAVVASRKPREEERDVSQCESVASTVSAQEDEDIAEASNEEENPE  
 DSEAVPTTKPAERESVEAQVTDSASAETAEPMDVDHEECGAEGSSVLDPPAPTKADSVDPMQVPENTASKGE  
 GDAKERDLESTSEKTEARDEDVVAEQIERPEPQSDDDSSATCSADEGVDGEPERQRVFPMDAKPSLLTPPGS  
 ILISSPIKPNPLDLPQLQHRAAVIPPMVCTPCNIPIGTPVSGYALYQRHIKAMHESALLEEQRQRQEQVDLE  
 CRSSTSPCSTSKSPNREWEVLQAPHQVITNLPEGVRLPTTRPTRPPPLIPSSKTTVASEKPSFIMGGSISQ  
 GTPGTYLSSHNQAYPQEAPKPSVGSISLGLPRQESTKAAPLTYIKQEEFSPRSQNSQPEGLLVRAQHEGTAG  
 AVQEGSITRGTASKISVETISSLRGSITQGTALPQAGIPTEALVKGVPVSRMPIEESPEKVVREEAASKGHV  
 IYEGKSGHILSYDNIKNAREGTRSPRTAHEMSLKRSEAVEGSIKQGLICRALPRGSPHSDLKERTVLSGSIM  
 QGTPRATAESFEDGLKYPKQIKRESPIRAFEGAITKGKPYDGIITTIKEMGRSIEHEIPRODILTQESRKTPEV  
 VQSTRPIIEGSIQGTPIKFDNNSGQSAIKHNKSLITGPKLPRGMLIEVPENIKVVERGKYEDVKAGEPVR  
 ARHTSVVSSGSPVLRSTLHEAPKAQLSPGLYDDSSARRTPVSYQNTISRGSPMMNRTSDVSSSKSASHERKST  
 LTPTQRESIPAKSPVPGVDPVSHSPFDPHRRSSAAGEVYRSHLPTHLDPAMPFHRALDPAAYLLQRLQSP  
 TPGYPSQYQLYAMENTRQTIINDYITSQQMVNLRPDVTRGLSPREQLGLPYPATRGIIDLNTMPPITLVPH  
 AGGTSTPPMDRITYIPGTQVTFPPRPYNAASLSPGHPTHAAAAAERERERERERERERERERERERERERER  
 AAAPADLYLRPGSEQPGRPGSHGYVRSVSPSVRTQETILQQRPSVVFQGTNGTSVITPLDPTAQLRIMPLPSGG  
 PSISQGLPASRYNTAADALAAALVDAASAPQMDVSKTKESKHEAARLEENLRSRRAAVSEQQQLEQINLEVEK  
 RSVQCVCTSSALPSGKAQPHASVVYSEAGKDKGPPPKSRYEEELRTRGKTTITAAANFIDVITRQIASDKDAR  
 ERGSQSDSSSSSLSHRYETASDAIEVISPASSPAPPQEKQAYQPDVMKANQAENESTRQYEGPLHHYRSQQ  
 ESPSPQQPPLPSSSQSEGMQVPRTHRLITLADHICQIITQDFARNQVPSQPSTSTFTQTSALSSTPVRTK  
 TSSRYSPESQSQTVLHPRPGPRVSPENLVDKSRGRPGKSPERSHIPSEYEPISPPQGPVAVHEKQDSMLLSQ  
 RGVDPAEQRSDSRSPGSI SYLPSFFTKLESTSPMVKSKKQEIFRKLNSGGGSDMAAAQPGTEIFNLPAVTT  
 SGAVSSRSHSFADPASNLGLEDIRKALMGSFDDKVEDHGVMSHPVGMIPGASASTSVVTSSEARRDEGEPS  
 HAGVCKPKLINKSNRSKSPPIPGQSYLGTERRPSSVSSVHSEGDIYHRQTPGWAWEDRPSSTGSTQFPYNPLTI  
 RMLSTPPTQIACAPSAITQAAPHQQRNIWEREPAPLLSAQYETLSDSD\*  
 >rs29483194\_ENSMUSP00000098627\_c.5656:A>T\_p.K1886I  
 ENSMUST00000101066.10|Ncor1-204|ENSMUSG00000018501|-|chr11:g.62224764:T>A  
 MSSSGYPPNQAFSTEQSRYPESHVQYTFPSTRHQQEFVAVPDYRSSHIEVSQASQLLQQQQQQQLRRRPSLL  
 SEFHFGSDRQERRTGYEQFHSGSPVDHDSLESKRPRLEPVSDAHFQRVSAAVLPLVHSLPEGLRSSADAKK  
 DSFAFGSKHEAPSSPLAGQPCGDDQNASPKLSKEELIQSMDRVREIAKVEQQIILKLLKQQQLEEEAAKPE  
 PEKPVSPPPVEQKHSIVQIIYDENRKAEEAHKIFEGLGPKVELPLYNQPSDTKVYHENIKTNQVMRKKLIL  
 FFKRRNHARKQREQKICQRYDQLEAWEKKVDRIENNRKAKESKTREYYEKQFPFEIRKQREQQERFQRVGQ  
 RGAGLSATIAESEHEISEIIDGLSEQENNEKQMRQLSVIPMMFDAEQRRVKFINMNGLMEDPMKVYKDRQFM  
 NVWTDHEKEIFKDKFIQHPKNFGLIASYLERKSVPCVLYYYLTCKKNENYKALVRRNYGKRRGRNQIARPSQ  
 EEKVEEKEEDKAEKTEKKEEEEKDDDEEKDDKEDSKETTKEKDRTEATAEPEEREQVTPRGRKTANSQGRKKG  
 RVTRSMTSEAAAAANAAAAATEEPPPLPPPEPISTEPVETSRWTEEMEVAKKGLVEHGRNWAAIAKMGVTK  
 SEAQCKNFYFNYKRRHNLNLLQQHKQKASRKPREEERDVSQCESVASTVSAQEDEDIAEASNEEENPEDSEGAE  
 NSSDTEASAPSPVEAAKSSSEDSSENAASRGNTEPVAELEATDPAPCASPSSAVPTTKPAERESVEAQVTDS  
 ASAETAEPMDVDHEECGAEGSSVLDPPAPTKADSVDPMQVPENTASKGEGDAKERDLESTSEKTEARDEDV  
 VAEQIERPEPQSDDDSSATCSADEGVDGEPERQRVFPMDAKPSLLTPPGSILISSPIKPNPLDLPQLQHRAAV  
 IPPMVCTPCNIPIGTPVSGYALYQRHIKAMHESALLEEQRQRQEQVDLECRSSTSPCSTSKSPNREWEVLQ  
 APHQVITNLPEGVRLPTTRPTRPPPLIPSSKTTVASEKPSFIMGGSISQGTGTYLSSHNQAYPQEAPKPSV  
 GSISLGLPRQESTKAAPLTYIKQEEFSPRSQNSQPEGLLVRAQHEGVVVRGTAGAVQEGSITRGTASKISVE  
 TISSLRGSITQGTALPQAGIPTEALVKGVPVSRMPIEESPEKVVREEAASKGHV IYEGKSGHILSYDNIKNAR  
 EGTRSPRTAHEMSLKRSEAVEGSIKQGMRESVPSAPLEGLICRALPRGSPHSDLKERTVLSGSIMQGT  
 PRATAESFEDGLKYPKQIKRESPIRAFEGAITKGKPYDGIITTIKEMGRSIEHEIPRODILTQESRKTPEV  
 VQSTRPIIEGSIQGTPIKFDNNSGQSAIKHNKSLITGPKLPRGMLIEVPENIKVVERGKYEDVKAGEPVRARHTS  
 VVSSGSPVLRSTLHEAPKAQLSPGLYDDSSARRTPVSYQNTISRGSPMMNRTSDVSSSKSASHERKSTLTPTQ  
 RESIPAKSPVPGVDPVSHSPFDPHRRSSAAGEVYRSHLPTHLDPAMPFHRALDPAAYLLQRLQSPTPGYPS  
 QYQLYAMENTRQTIINDYITSQQMVNLRPDVTRGLSPREQLGLPYPATRGIIDLNTMPPITLVPHAGGTST  
 PPMDRITYIPGTQVTFPPRPYNAASLSPGHPTHAAAAAERERERERERERERERERERERERERERERERER  
 LYLRLPGSEQPGRPGSHGYVRSVSPSVRTQETILQQRPSVVFQGTNGTSVITPLDPTAQLRIMPLPSGGPSISQ  
 LPASRYNTAADALAAALVDAASAPQMDVSKTKESKHEAARLEENLRSRRAAVSEQQQLEQINLEVEKRSVQCV  
 CTSSALPSGKAQPHASVVYSEAGKDKGPPPKSRYEEELRTRGKTTITAAANFIDVITRQIASDKDARERGSQ  
 SDSSSSSLSHRYETASDAIEVISPASSPAPPQEKQAYQPDVMKANQAENESTRQYEGPLHHYRSQQESPSPQ  
 QQPPLPSSSQSEGMQVPRTHRLITLADHICQIITQDFARNQVPSQPSTSTFTQTSALSSTPVRTKTSRYS

PESQSQTVLHPRPGPRVSPENLVDKSRGSRPGKSPERSHIPSEPYEPI SPPQGPVHEKQDSMLLLSQRGVDP  
 AEQRSDSRSPGSI SYLPSFFTKLESTSPMVKSKKQEI FRKLNSSGGGSDMAAAQPGTEIFNLPAVTTSGAVS  
 SRSHSFADPASNLGLEDI IRKALMGSFDDKVEDHGVVMSHPVGI MPGSASTSVVTSSEARRDEGEPS PHAGVC  
 KPKLINKSNSRKS KSPI PGQSYLGTERTPSSVSSVHSEGDYHRQTPGWAWEDRPSSTGSTQFPYNPLTIRMLSS  
 TPPTQIACAPSAITQAAPHQQNRWEREPAPLLSAQYETLSDSDD\*  
 >rs29483194\_ENSMUSP00000038900\_c.2494:A>T\_p.K832I  
 ENSMUST00000037575.15|Ncor1-202|ENSMUSG00000018501|-|chr11:g.62224764:T>A  
 MSAARYSVPPVLPQAPHQVITNLP EGVRLPTTRPTTRPPPPLIPSSKTTVASEKPSFIMGGSISQGTPTGTYLSS  
 HNQAYPQAEAPKPSVGSISLGLPRQQUESTKAAPLTYIKQEEFS PRSQNSQPEGLLVRAQHEGVVRGTAGAVQEG  
 SITRGTTPASKISVETISSLRGSI TQGT PALPQAGI PTEALVKGPVSRMPIE ESSPEKVVREEAASKGHV IYEGK  
 SGHILSYDSLICRALPRGSPHSDLKERTVLSGSI MQGT PRATAESFEDGLKYPKQIKRESPIRAFEGAITKG  
 KPYDGITTIKEMGRS IHEI PRQDILTQESRKTPEVVQSTRPI IEGSISQGTPIKFDNNSGQSAIKHNVKSLIT  
 GPSKLP RGMLEIVPENIKVVERGKYEDVKAGEPVRARHTSVVSSGSPVLRSTLHEAPKAQLSPGLYDDSSARR  
 TPVSYQNTISRGSPMMNRTSDVSSSKSASHERKSTLTPTQRESI PAKSPVPGVDPVVSHPFDPHRRSSAAGE  
 VYRSHLP THLDPAMPFHRALDPAAAAAYLLQRQLSPTPGYPSQYQLYAMENRQTILNDYITSQQMQVNLRPDV  
 TRGLSPREQLGLPYPATRGI IDLTNMPPTILVPHAGGTSTPPMDRITYIPGTQVTFPPRPYNAASLSPGHPT  
 HLAASAERERERERERERERERERERERERERERERERERERERERERERERERERERERERERERERERER  
 LQQRPSVFGTNGTSVITPLDPTAQLRIMPLPSGGPSSISQGLPASRYNTAADALAAALVDAASAAPQMDVSKTK  
 ESKHEAARLEENLRSR SAAVSEQQQLEQINLEVEKRSVQCVCTSSALPSGKAQPHASVVYSEAGKDKGPPPKS  
 RYEEELRTRGKTTITAA NFIDVI ITRQIASDKDARERGSQSSDSSSSLSHRYETASDAIEVISPASSPAPPQ  
 EKPQAYQPDVMKANQAENESTRQYEGPLHHRYSQQESPSPQQQPLPSSQSEGGMQVPRTHRLITLADHICQ  
 IITQDFARNQVPSQPSTSTFQTS PSALSSTPVRTKTSSRYS PESQSQTVLHPRPGPRVSPENLVDKSRGRPGK  
 SPERSHIPSEPYEPI SPPQGPVHEKQDSMLLLSQRGVDPAEQRSDSRSPGSI SYLPSFFTKLESTSPMVKSK  
 KQEI FRKLNSSGGGSDMAAAQPGTEIFNLPAVTTSGAVSSRSHSFADPASNLGLEDI IRKALMGSFDDKVED  
 HGVVMSHPVGI MPGSASTSVVTSSEARRDEGEPS PHAGVCKPKLINKSNSRKS KSPI PGQSYLGTERTPSSVSS  
 VHSEGDYHRQTPGWAWEDRPSSTGSTQFPYNPLTIRMLSS TPPTQIACAPSAITQAAPHQQNRWEREPAPLL  
 SAQYETLSDSDD\*  
 >rs26968161\_ENSMUSP00000018645\_c.5334:A>G\_p.R1779G  
 ENSMUST00000018645.13|Ncor1-201|ENSMUSG00000018501|-|chr11:g.62225425:T>C  
 MSSSGYPPNQGFSTEQSRYP SHSVQYTFPSTRHQQEF AVPDYRSSHIEVSQASQLLQQQQQQQLRRRPSLL  
 SEFHFGSDR PQERRTG YEQFHSGSPVDHDSLESKRPRLEPVSDAHFQRVSAAVLPLVHSLPEGLRSSADAKK  
 DSAFSGKHEAPSSPLAGQPCGDDQNASPSKLSKEELIQSMDRVDREIAKVEQQIILKLLKQQQLEEEEAAPPE  
 PEKPVSPPPVEQKHRSIVQIIYDENRKAEEAHKIFEGLGPKVELPLYNQPSDTKVYHENIKTNQVMRKKLIL  
 FFKRRNHARKQREQKICQRYDQ LMEAWEKKVDR IENNRKAKE SKTREY YEKQFP EIRKQREQQERFQRVGQ  
 RGAGLSATIARSEHEISEI IDGLSEQENNEKQMRQLSVI PPMFDAEQRRVKFINMNGLMEDPMKVYKDRQFM  
 NWWTDHEKEIFKDKFIQHPKNFGLIASYLERKSVDPDCVLYYLT KKNENYKALVRRNYGKRRGRNQIARPSQ  
 EEKVEEKEEDKA EKTEKKEEKKDDEEKDDKEDSKETTKEKDRTEATAEPEEREQVTPRGRKTANSQGRKRG  
 RVTRSMTSEAAAAANA AAAATEEPPPLPPPEPI STEPVETS RWTEEMEVAKKGLVEHGRNWAAIAKMGTK  
 SEAQCKNFYFNYKRRHNL DNLLQ QHKQKASRKP REERDV SQCESVASTVSAQEDEDIEASNEENPEDSEGAE  
 NSSDTE SAPSPVEAAKSS EDSSENAASRGNTEPVAELEATDPAPCAS PSSAVPTTKPAERESVEAQVTD S  
 ASAETAEPMDVDHEECGAEGSVLDPPAPTKADSVDP EMQVPENTASKGEGDAKERDLESTSEKTEARDEDVV  
 VAEQIERPEPQSDDDSSATCSADEGVDGEPERQRVFPMDAKPSLLTPPGSILISSPIKPNPLDLPLQLQHRAAV  
 IPPMV SCTPCNIPIGTPVSGYALYQRHIKAMHESALLEEQRQREQVDLECRSSTSPCSTSKSPNREWEVLQP  
 APHQVITNLP EGVRLPTTRPTTRPPPPLIPSSKTTVASEKPSFIMGGSISQGTPTGTYLSSHNQAYPQAEAPKPSV  
 GSISLGLPRQQUESTKAAPLTYIKQEEFS PRSQNSQPEGLLVRAQHEGVVRGTAGAVQEGSITRGT PASKISVE  
 TISSLRGSI TQGT PALPQAGI PTEALVKGPVSRMPIE ESSPEKVVREEAASKGHV IYEGKSGHILSYDN IKNAR  
 EGTRSPRTAHEMSLKR SYEAVEGSIKQGM SMRESPVSAPLEGLICRALPRGSPHSDLKERTVLSGSI MQGT PR  
 ATAESFEDGLKYPKQIKRESPIRAFEGAITKGKPYDGITTIKEMGRS IHEI PRQDILTQESRKTPEVVQSTR  
 PI IEGSISQGTPIKFDNNSGQSAIKHNVKSLITGPSKLP RGMLEIVPENIKVVERGKYEDVKAGEPVRARHTS  
 VVSSGSPVLRSTLHEAPKAQLSPGLYDDSSARRTPVSYQNTISRGSPMMNRTSDVSSSKSASHERKSTLTPTQ  
 RESI PAKSPVPGVDPVVSHPFDPHRRSSAAGEVYRSHLP THLDPAMPFHRALDPAAAAAYLLQRQLSPTPGYPS  
 QYQLYAMENRQTILNDYITSQQMQVNLRPDVTRGLSPREQLGLPYPATRGI IDLTNMPPTILVPHAGGTST  
 PPMDRITYIPGTQVTFPPRPYNAASLSPGHPTHLAAAASAERERERERERERERERERERERERERERERERERERERER  
 LYLRPGSEQPGRPGSHGYVRS PPSVGTQETILQQRPSVFGTNGTSVITPLDPTAQLRIMPLPSGGPSSISQGL  
 LPASRYNTAADALAAALVDAASAAPQMDVSKTKESKHEAARLEENLRSR SAAVSEQQQLEQKNLEVEKRSVQCV  
 CTSSALPSGKAQPHASVVYSEAGKDKGPPPKSR YEEELRTRGKTTITAA NFIDVI ITRQIASDKDARERGSQS  
 SDSSSSLSHRYETASDAIEVISPASSPAPPQEKQAYQPDVMKANQAENESTRQYEGPLHHRYSQQESPSPQ  
 QQPLPSSQSEGGMQVPRTHRLITLADHICQIITQDFARNQVPSQPSTSTFQTS PSALSSTPVRTKTSSRYS





PEKPVSPPPVEQKHSIVQIIYDENRKKAEAAHAKIFEGLGPKVELPLYNQPSDTKVYHENIKTNQVMRKKLIL  
FFKRRNHARKQREQKICQRYDQLMEAWKVDRIENNRKAKEKSTREYYEKQFPEIRKQREQQERFQRVGQ  
RGAGLSATIARSEHEISEIIDGLSEQENNEKQMRQLSVIPMMFDAEQRRVKFINMNGLMEDPMKVYKDRQFM  
NVWTDHEKEIFKDKFIQHPKNFGLIASYLERKSVPCVLYYYLTKKKNENYKALVRRNYGKRRGRNQIARPSQ  
EEKVEEKEDKAEKTEKKEEEKDDEEKDDKEDSKETTKEKDRTEATAEPEEREQVTPRGRKTANSQGRKRG  
RVTRSMTSEAAAAANAAAAATEEPPPLPPPEPISTEPVETSRWTEEMEVAKKGLVEHGRNWAAIAKMGVTK  
SEAQCKNFYFNYKRRHNLNLLQQHKQKVSRAVVASRKPREEERDVSQCESVASTVSAQEDEDIAEASNEEENPE  
DSEAVPTTKPAERESVEAQVTDASAETAEPMDVDHEECGAEGSSVLDPPAPTAKADSVDPMQVPENTASKGE  
GDAKERDLESTSEKTEARDEDVVVAEQIERPEPQSDDDSSATCSADEGVDGEPERQRVFPMDAKPSSLTTPPGS  
ILISSPIKPNPLDLPQLQHRAAVIPPMVCTPCNIPIGTPVSGYALYQRHIKAMHESALLEEQRQREQVDLE  
CRSSTSPCSTSKSPNREWEVLQPAHQVITNLPEGVRLPTTRPTRPPPPLIPSSKTTVASEKPSFIMGGSISQ  
GTPGTYLSSHQAYPQEAQKPSVGSISLGLPRQOESTKAAPLTYIKQEEFSPRSQNSQPEGLLVRAQHEGTAQ  
AVQEGSITRGTASKISVETISSLRGSITQGTALPQAGIPTEALVKGPVSRMPIEESSEKVRREEAASKGHV  
IYEGKSGHILSYDNIKNAREGTRSPRTAHMSLKRSEYAEVSGIKQGLICRALPRGSPHSDLKERTVLSGSI  
QGTPRATAESFEDGLKYPKQIKRESPIRAFEGAITKGKPYDGIITTIKEMGRSIEIIPRODILTQESRKTPEV  
VQSTRPIIEGSIQGTPIKFDNNSGQSAIKHNKSLITGPKLPRGMLEIVPENIKVVERGKYEDVKAGEPVR  
ARHTSVVSSGVSRLRSTLHEAPKAQLSPGLYDDSSARTPVSYQNTISRGSPMMNRTSDVSSKASHERKST  
LTPTRQRESIPAKSPVPGVDPVSHSPFDPHRRSSAAGEVYRSHLPTHLDPAMPFHRALDPAAYLLQRQLSP  
TPGYPSQYQLYAMENTRQITILNDYITSQQMQVNLRPDVTGRGLSPREQLGLPYPATRGIIDLTMNPPTILVPH  
AGGTSTPPMDRITYIPGTQVTFPPRPYNAASLSPGHPTHAAAAASAEREREREREKERERERERERERERERER  
AAAPADLYLRPGSEQPGRPGSHGYVRSPPSVGTQETILQORPSVFGTNGTSVITPLDPTAQLRIMPLPSGG  
PSISQGLPASRYNTAADALAAALVDAASAPQMDVSKTKESKHEAARLEENLRSRSAAVSEQQQLEQKNLEVEK  
RSVQCVCTSSALPSGKAQPHASVVYSEAGKDKGPPKSRYEELRTRGKTTITAAFIIDVIITRQIASDKDAR  
ERGSQSSDSSSSLSHRYETASDAIEVISPASSAPPQEKQAYQPDVMKANQAENESTROYEGLHHYRSQQ  
ESPSPQQPPLPSSQSEGMGQVPRTHRLITLADHICQIITQDFARNQVPSQPSTSTFTQTSALSSTPVRTK  
TSSRYSPESSQSTVLHPRPGPRVSPENLVDKSRGRPGKSPERSHIPSEPYEPISPQQGPAVHEKQDSMLLSQ  
RGVDPAEQRSDSRSPGSIYLPSTFKLESTSPMVSKKQEIIFRKLNSGGGSDMAAAYLQPGTEIFNLPAVTT  
SGAVSSRSHSFADPASNLGLEDIRKALMGSFDDKVEDHGVVMSHPVGMPSASTSVVTSSEARRDEGEPS  
HAGVCKPKLINKSNRKSXSPIPGQSYLGTERTPSSVSVHSEGDYHRQTPGWAWEDRPSSTGSTQFPYNPLTI  
RMLSSPTPTQIACAPSAITQAAPHQQNRIWEREPAPLLSAQYETLSDSD\*  
>rs26968161\_ENSMUSP0000098627\_c.5334:A>G\_p.R1779G  
ENSMUST00000101066.10|Ncor1-204|ENSMUSG0000018501|-|chr11:g.62225425:T>C  
MSSSGYPPNQGFASTEQSRYPSHSVYQTFPSTRHQQEFVAVPDYRSSHIEVVSQASQLLQQQQQQQLRRRPSLL  
SEFHPGSDRPOERRTGYEQFHSGSPVDHDSLESKRPRLEPVSDAHFQVSAAVLPLVHSLPEGLRSSADAKK  
DSAFGSKHEAPSSPLAGQPCGDDQNASPKLSKEELIQMDRVDREIAKVEQILKLLKQQQLEEEAAKPE  
PEKPVSPPPVEQKHSIVQIIYDENRKKAEAAHAKIFEGLGPKVELPLYNQPSDTKVYHENIKTNQVMRKKLIL  
FFKRRNHARKQREQKICQRYDQLMEAWKVDRIENNRKAKEKSTREYYEKQFPEIRKQREQQERFQRVGQ  
RGAGLSATIARSEHEISEIIDGLSEQENNEKQMRQLSVIPMMFDAEQRRVKFINMNGLMEDPMKVYKDRQFM  
NVWTDHEKEIFKDKFIQHPKNFGLIASYLERKSVPCVLYYYLTKKKNENYKALVRRNYGKRRGRNQIARPSQ  
EEKVEEKEDKAEKTEKKEEEKDDEEKDDKEDSKETTKEKDRTEATAEPEEREQVTPRGRKTANSQGRKRG  
RVTRSMTSEAAAAANAAAAATEEPPPLPPPEPISTEPVETSRWTEEMEVAKKGLVEHGRNWAAIAKMGVTK  
SEAQCKNFYFNYKRRHNLNLLQQHKQKASRKPREEERDVSQCESVASTVSAQEDEDIAEASNEEENPEDSEGAE  
NSSDTEAPSPSPVEAAKSSSEDSSENAASRGNTEPVAELEATDPAFCASPSSAVPTTKPAERESVEAQVTD  
ASAETAEPMDVDHEECGAEGSSVLDPPAPTAKADSVDPMQVPENTASKGEGDAKERDLESTSEKTEARDEDVV  
VAEQIERPEPQSDDDSSATCSADEGVDGEPERQRVFPMDAKPSSLTTPPGSILISSPIKPNPLDLPQLQHRAAV  
IPPMVCTPCNIPIGTPVSGYALYQRHIKAMHESALLEEQRQREQVDLECRSSTSPCSTSKSPNREWEVLQ  
PAHQVITNLPEGVRLPTTRPTRPPPPLIPSSKTTVASEKPSFIMGGSISQGTGTYLSSHQAYPQEAQKPSV  
GSISLGLPRQOESTKAAPLTYIKQEEFSPRSQNSQPEGLLVRAQHEGVVVRGTAGAVQEGSITRGTASKISVE  
TISSLRGSITQGTALPQAGIPTEALVKGPVSRMPIEESSEKVRREEAASKGHV IYEGKSGHILSYDNIKNAR  
EGTRSPRTAHMSLKRSEYAEVSGIKQGMRESVPSAPLEGLICRALPRGSPHSDLKERTVLSGSIQGT  
PRATAESFEDGLKYPKQIKRESPIRAFEGAITKGKPYDGIITTIKEMGRSIEIIPRODILTQESRKTPEVVQSTR  
PIIEGSIQGTPIKFDNNSGQSAIKHNKSLITGPKLPRGMLEIVPENIKVVERGKYEDVKAGEPVRARHTS  
VVSSGVSRLRSTLHEAPKAQLSPGLYDDSSARTPVSYQNTISRGSPMMNRTSDVSSKASHERKSTLTP  
TQRESIPAKSPVPGVDPVSHSPFDPHRRSSAAGEVYRSHLPTHLDPAMPFHRALDPAAYLLQRQLSP  
TPGYPSQYQLYAMENTRQITILNDYITSQQMQVNLRPDVTGRGLSPREQLGLPYPATRGIIDLTMNPPTILVPH  
AGGTSTPPMDRITYIPGTQVTFPPRPYNAASLSPGHPTHAAAAASAEREREREREKERERERERERERERERER  
LYLRPGSEQPGRPGSHGYVRSPPSVGTQETILQORPSVFGTNGTSVITPLDPTAQLRIMPLPSGGPSISQ  
LPASRYNTAADALAAALVDAASAPQMDVSKTKESKHEAARLEENLRSRSAAVSEQQQLEQKNLEVEKRSVQCV

CTSSALPSGKAQPHASVVYSEAGKDKGPPPKSRYEEELRTRGKTTITAA NFIDVITRQIASDKDARERGSQS  
SDSSSSLSHRYETASDAIEVISPASSPAPPQEKQAYQPD MVKANQAENESTRQYEGPLHHYRSQQESPSPQ  
QQPPLPSSSQSEGMGQVPRTHR LITLADHICQIITQDFARNQVPSQPSTSTFQTSPSALSSTPVRTKTSRYS  
PESQSQT V LHPRPGPRVSPENLVDKSRGSRPGKSPERSHIPSEPYEPI SPPQGP AVHEKQDSMLLSQRGVDP  
AEQRSDSRSPGISISYLP SFFTKLESTSPMVKS KQEI FRKLNS SGGGDS DMAA AQP GTEIFNLPAVTTSGAVS  
SRSHSFADPASNLGLEDI IRKALMG SFDDKVEDHGVM SHPVGIMPGSASTSVVTSSEARRDEGEPSPHAGVC  
KPKLINKSNRKS KSPIPGQSYL GTERPSSVSSVHSEGDYHRQTPGWAWEDRPSSTGSTQFPYNPLTIRMLSS  
TPPTQIACAPSAITQAAPHQQNRIWEREPAPLLSAQYETLSDSD\*  
>rs26968161\_ENSMUSP00000038900\_c.2172:A>G\_p.R725G  
ENSMUST00000037575.15|Ncor1-202|ENSMUSG00000018501|-|chr11:g.62225425:T>C  
MSAARYSVPPVLPAPHQVITNLPEGVRLPTTRPTRPPPPLIPSSKTTVASEKPSFIMGGSISQGTPTYLSS  
HNQAYPQEA PKPSVGSISLGLPRQQUESTKAAPLTIKQEEFSPRSQNSQPEGLLVRAQHEGVVRGTAGAVQEG  
SITRGT PASKISVETISSLRGSI TQGTPALPQAGI PTEALVKGPVSRMPIE ESSPEK VREEAASKGHV IYEGK  
SGHILSYDSLICRALPRGSPHSDLKERTVLSGSIMQGT PRATAESFEDGLKYPKQIKRESPPIRAFEGAITKG  
KPYDGIITTIKEMGRS IHEIPRQDILTQESRKTPEVVQSTRPIIEGSISQGTPIKFDNNSGQSAIKHNVKSLIT  
GPSKLRPGLMEIVPENIKVVERGKYEDVKAGEPVRARHTSVSSSGPSVLRSTLHEAPKAQLSPGLYDDSSARR  
TPVSYQNTISRGSPMMNR TSDVSSKSASHERKSTLPTQRESIPAKSPVPGVDPVVSHPDFDPHHRSSAAGE  
VYRSHLP THLDPAMPFHRALDPAAAAYLLQRQLSPTPGYPSQYQLYAMEN TRQTI LNDYITSQQMVNLRPDV  
TRGLSPREQLGLPYPATRGIIDL TNMPPTILVPHAGGTSTPMDRITYIPGTQVTFPPRPYNAASLSPGHPT  
HLAAAAAERERERERERERERERERERERERERERIAAAPADLYLRPGSEQPGRPGSHGYVRS PPSVGTQETI  
LQQRPSVFGQTNGT SVITPLDPTAQLRIMPLPSGGPSISQGLPASRYNTAADALALVDAAASAPQMDVSKTK  
ESKHEAARLEENLRSRSA AVSEQQLEQKNLEVEKRSVQCCTSSALPSGKAQPHASVVYSEAGKDKGPPPKS  
RYEEELRTRGKTTITAA NFIDVITRQIASDKDARERGSQS SDSSSSLSHRYETASDAIEVISPASSPAPPQ  
EKQAYQPD MVKANQAENESTRQYEGPLHHYRSQQESPSPQQPPLPSSSQSEGMGQVPRTHR LITLADHICQ  
IITQDFARNQVPSQPSTSTFQTSPSALSSTPVRTKTSRYS PESQSQT V LHPRPGPRVSPENLVDKSRGRPGK  
SPERSHIPSEPYEPI SPPQGP AVHEKQDSMLLSQRGVDPAEQRSDSRSPGISISYLP SFFTKLESTSPMVKS  
KQEIFRKLNS SGGGDS DMAA AQP GTEIFNLPAVTTSGAVSRSHSFADPASNLGLEDI IRKALMG SFDDKVED  
HGVM SHPVGIMPGSASTSVVTSSEARRDEGEPSPHAGVCKPKLINKSNRKS KSPIPGQSYL GTERPSSVSS  
VHSEGDYHRQTPGWAWEDRPSSTGSTQFPYNPLTIRMLSSSTPPTQIACAPSAITQAAPHQQNRIWEREPAPLL  
SAQYETLSDSD\*  
>rs48818441\_ENSMUSP00000014389\_c.691:T>C\_p.L231P  
ENSMUST00000014389.6|Pig1-201|ENSMUSG00000014245|+|chr11:g.62403761:T>C  
MELVGF LCVAVAVLTWGF LRVWNSAERMRSPEQAGLPGAGSRALVVIAHPDDEAMFFAPTMLGLARLEQQVSL  
LCFSSGNYNQEIRK KELLQSCAVLGIPPSRVMIIDKRDFPDPEVQWDEL VASTLLQHIHANGTDLVVTF  
DAEGVSGHSNHIALYKAVRALHSGGKLPKGC SVLTQLQSVNALRKYAFLLDLPWTL LSPQDVLVFLTSKEVAQA  
KKAMSHRSQLPWFRLYVLF SRYMRINSLRFL\*  
>rs249859215\_ENSMUSP00000019649\_c.867:C>T\_p.Q290\*  
ENSMUST00000019649.4|Ubb-201|ENSMUSG00000019505|+|chr11:g.62443839:C>T  
MQIFVKT LTGKTIT LEVEPSDTIENVKAKIQDKEGIPPDQQR LIFAGKQLEDGRTLSDYNIQKESTLHLVLR  
RGMQIFVKT LTGKTIT LEVEPSDTIENVKAKIQDKEGIPPDQQR LIFAGKQLEDGRTLSDYNIQKESTLHLV  
LRLRGMQIFVKT LTGKTIT LEVEPSDTIENVKAKIQDKEGIPPDQQR LIFAGKQLEDGRTLSDYNIQKESTL  
HLVLR RGMQIFVKT LTGKTIT LEVEPSDTIENVKAKIQDKEGIPPDQQR LIFAGKQLEDGRTLSDYNI\*KE  
STLHLVLR RGGY\*  
>rs47199713\_ENSMUSP00000048844\_c.133:A>G\_p.K45R  
ENSMUST00000035854.4|Cdr4-201|ENSMUSG00000042200|+|chr11:g.62883433:A>G  
MISRPESSLSGLESSQEVQKKTWNPRNYSARLTENIGLPLILLERHNPWPAYVAYISP AVTRITEKWARDLE  
YIYAAEKNGKPVKRSKHS AVLLKRRKPSKPS ELMMLKETLSETMLPTWECSTIYVSPTFVPEPAQLQMDVREGP  
TSNYNKIIFSKRPAMRKL PFGLLQASKEMHTKD\*  
>rs46810827\_ENSMUSP00000048844\_c.249:C>T\_p.P84S  
ENSMUST00000035854.4|Cdr4-201|ENSMUSG00000042200|+|chr11:g.62883549:C>T  
MISRPESSLSGLESSQEVQKKTWNPRNYSARLTENIGLPLILLERHNPWPAYVAYISP AVTRITEKWARDLE  
YIYAAEKNGKSVKRSKHS AVLLKRRKPSKPS ELMMLKETLSETMLPTWECSTIYVSPTFVPEPAQLQMDVREGP  
TSNYNKIIFSKRPAMRKL PFGLLQASKEMHTKD\*  
>rs49588466\_ENSMUSP00000048844\_c.273:G>A\_p.A92T  
ENSMUST00000035854.4|Cdr4-201|ENSMUSG00000042200|+|chr11:g.62883573:G>A  
MISRPESSLSGLESSQEVQKKTWNPRNYSARLTENIGLPLILLERHNPWPAYVAYISP AVTRITEKWARDLE  
YIYAAEKNGKPVKRSKHS AVLLKRRKPSKPS ELMMLKETLSETMLPTWECSTIYVSPTFVPEPAQLQMDVREGP  
TSNYNKIIFSKRPAMRKL PFGLLQASKEMHTKD\*

>rs45844362\_ENSMUSP00000048844\_c.390:T>C\_p.F131L  
ENSMUST00000035854.4|Cdr4-201|ENSMUSG00000042200|+|chr11:g.62883690:T>C  
MISRPESSLSGLESSQEVQKKTWNPRNYSARLTENIGLPLILLEKHNFPWPAYVAYISPAVTRITEKWARDLE  
YIYAAEKNGKPVKRSKHSVLLKRRKPSKPSSELMMLKETLSETMLPTWECSTIYVSPTLVPEPAQLQMDVREGP  
TSNYNKIIFSKRPAMRKLPGFLLQASKEMHTKD\*

>rs26940990\_ENSMUSP00000048844\_c.450:A>G\_p.N151D  
ENSMUST00000035854.4|Cdr4-201|ENSMUSG00000042200|+|chr11:g.62883750:A>G  
MISRPESSLSGLESSQEVQKKTWNPRNYSARLTENIGLPLILLEKHNFPWPAYVAYISPAVTRITEKWARDLE  
YIYAAEKNGKPVKRSKHSVLLKRRKPSKPSSELMMLKETLSETMLPTWECSTIYVSPTFVPEPAQLQMDVREGP  
TSNYDKIIFSKRPAMRKLPGFLLQASKEMHTKD\*

>rs253908463\_ENSMUSP00000042063\_c.139:G>A\_p.S47N  
ENSMUST00000035732.5|Tekt3-201|ENSMUSG00000042189|+|chr11:g.62960972:G>A  
MELLGSTLTATYAHPPPASASFLPAIGTITSSYKDRFPHRNLTHSLNLPWRPNTYYKTAYNYPTLAPYSSRSQ  
RVCESTMLPFVSNRTTFFTRYTPDDWYRSNLVFSQESNSSRHNSERLRVDTSRLIQDKYQQIRKTAHSTQNL  
GERVNDLAFWKSEITHELDEMIGETNALTDIKRRLERGLIETEGPLQVSRECLFHREKRMGIDLHVHDEAEKEL  
LAEVDITLCCQERMRQHLDKANAQLASDRSAQHELEKDLSDKQALRIDDKCQHLRNTSEGVSYFRGVERVDA  
TVSVPETWAKFTDDNVLRSSQSERAAASAKLREETENLLIVTANEMWNQFNKVNLAFTNRIAETVDAKNKIHTHL  
TKTLQEIFQIEMTIESIKKAIKEKSAFLKVAQTRLDERTRRPNVVELCRDMAQLRRLVNEVYEVDETIQTLQQR  
RDESEDTLQSLAHTKATLEHDLAVKANTLYIDQEKCMSMRNSYPSTLRLVGYC\*

>rs49442878\_ENSMUSP00000042063\_c.316:G>A\_p.S106N  
ENSMUST00000035732.5|Tekt3-201|ENSMUSG00000042189|+|chr11:g.62961149:G>A  
MELLGSTLTATYAHPPPASASFLPAIGTITSSYKDRFPHRNLTHSLSLPWRPNTYYKTAYNYPTLAPYSSRSQ  
RVCESTMLPFVSNRTTFFTRYTPDDWYRSNLVNFQESNSSRHNSERLRVDTSRLIQDKYQQIRKTAHSTQNL  
GERVNDLAFWKSEITHELDEMIGETNALTDIKRRLERGLIETEGPLQVSRECLFHREKRMGIDLHVHDEAEKEL  
LAEVDITLCCQERMRQHLDKANAQLASDRSAQHELEKDLSDKQALRIDDKCQHLRNTSEGVSYFRGVERVDA  
TVSVPETWAKFTDDNVLRSSQSERAAASAKLREETENLLIVTANEMWNQFNKVNLAFTNRIAETVDAKNKIHTHL  
TKTLQEIFQIEMTIESIKKAIKEKSAFLKVAQTRLDERTRRPNVVELCRDMAQLRRLVNEVYEVDETIQTLQQR  
RDESEDTLQSLAHTKATLEHDLAVKANTLYIDQEKCMSMRNSYPSTLRLVGYC\*

>rs50972714\_ENSMUSP00000099695\_c.2554:A>G\_p.E852G  
ENSMUST00000102635.10|Myocd-202|ENSMUSG00000020542|-|chr11:g.65069524:T>C  
MTLLGSEHSLLRKFRSVLQRLQRRTOEQLANQGLIPPLKGPTEFHDPRKQLDSAKTEDSLRRKGRNRS  
RASLVTMHILQASTAERSIPTAQMKLKRARLADDLNEKIALRPGPLELVEKNILPMDSSVKEAIKGEVSLSK  
AADAFAFEDDSSRDGLSPDQARSEDPOGSGTSTPDIKSTEAPLDTIQDLTPGSESDKNDAAASQPGNQSDPGKQ  
VLGPLSTPIPVHTAVKSKSLGDSKNRHKPKDPKPKVKKLKYHQYIPPDQKAEKSPPMDSAYARLLQQQLF  
LQLQILSQQQQQQQQQQQQQQQQQQQQQQRFSPYGMHQTHLKEPNEQMARNPNPSSSTPLSNTPLSPVKNSISGQ  
TGVSSSLKPGPLPPNLDLKVSELRQQLRIRGLPVSGTKTALVDRLRPFQDCAGNPVNFVDITVTFVPTPNT  
LPSYQSSPTGFYHFGSTSSSPPISSPASSDLAAGSLPDTFTDASPGFGLHASVPVACTDESLLSSLNNGSGPS  
EPDGLDSEKDKMLVEKQKVINQLTWKLRQEQRQVEELRMQLQKQKSSCSDQKPLPFLATTIKQEDVSSCPFAP  
QQASGKGQGHSSDSSPPACETAQLLPHCVESGQTHVLSSTFLSPQCSPQHSPLGGLKSPQHSISLPPSPNNHY  
FLASSSSGAQRENHGVSSPSSSQGCAQMTGLQSSDKVGPTFSIPSPPTFSKSSSAVSDITQPPSYEDAVKQOMTR  
SQQMDELDDVLIESGEMPADAREDHSCLOKIPKIPGSSCSPTAIPPKPSASFEQASSGGQMAFDHYANDSDEH  
LEVLLNSHSPIGKVSVDVTLKIGSEPPFDSIMDGFPGKAAEDLFSAGHLLPGPLSPMHAQLSPSPVDSGLQ  
LSFTESPWETMEWLDLTPSSSTPGFSNLTSAGPSIFNIDFLDVTDLNLSNPMDLHLQW\*

>rs50972714\_ENSMUSP00000098603\_c.2314:A>G\_p.E772G  
ENSMUST00000101042.9|Myocd-201|ENSMUSG00000020542|-|chr11:g.65069524:T>C  
MDSSVKEAIKGEVSLSKAADAFAFEDDSSRDGLSPDQARSEDPOGSGTSTPDIKSTEAPLDTIQDLTPGSES  
DKNDAAASQPGNQSDPGKQVLGPLSTPIPVHTAVKSKSLGDSKNRHKPKDPKPKVKKLKYHQYIPPDQKAEK  
PPMDSAYARLLQQQLFLQLQILSQQQQQQQQQQQQQQQQQQQQQQRFSPYGMHQTHLKEPNEQMARNPNPSS  
TPLSNTPLSPVKNSISGQTGVSSSLKPGPLPPNLDLKVSELRQQLRIRGLPVSGTKTALVDRLRPFQDCAGNP  
VNFVDITVTFVPTPNTLPSYQSSPTGFYHFGSTSSSPPISSPASSDLAAGSLPDTFTDASPGFGLHASVPV  
ACTDESLLSSLNNGSGPSEPDGLDSEKDKMLVEKQKVINQLTWKLRQEQRQVEELRMQLQKQKSSCSDQKPLP  
FLATTIKQEDVSSCPFAPQQASGKGQGHSSDSSPPACETAQLLPHCVESGQTHVLSSTFLSPQCSPQHSPLG  
GLKSPQHISLPPSPNNHYFLASSSSGAQRENHGVSSPSSSQGCAQNSGAHEGHSSSFSSPASSLHQPFSGTQAD  
SSHSAQNLNCPKPSIPHKMTGLQSSDKVGPTFSIPSPPTFSKSSSAVSDITQPPSYEDAVKQOMTRSQQMDEL  
LDVLIESGEMPADAREDHSCLOKIPKIPGSSCSPTAIPPKPSASFEQASSGGQMAFDHYANDSDEHLEVLLNS  
HSPIGKVSVDVTLKIGSEPPFDSIMDGFPGKAAEDLFSAGHLLPGPLSPMHAQLSPSPVDSGLQLSFTESP  
WETMEWLDLTPSSSTPGFSNLTSAGPSIFNIDFLDVTDLNLSNPMDLHLQW\*

>rs50972714\_ENSMUSP00000104335\_c.2698:A>G\_p.E900G  
ENSMUST00000108695.9|Myocd-203|ENSMUSG00000020542|-|chr11:g.65069524:T>C  
MTLLGSEHSLIRRKFRSVLQRLRQRRRTQEQLANQGLI PPLKGPTEFHDPRKQLDSAKTEDSLRRKGRNRSD  
RASLVTMHILQASTAERSIPTAQMKLKRARLADDLNEKIALRPGPLELVEKNILPMDSSVKEAIKGTVEVLSK  
AADAFAFEDDSSRDGLSPDQARSED PQGSTGSTPDIKSTEAPLDTIQDLTPGSESDKNDAAASQPGNQSDPGKQ  
VLGPLSTPIPVHTAVKSKSLGDSKNRHHKPKDPKPKVKKLKYHQYIPPDQKAEKSPPPMDSAYARLLQQQQLF  
LQLQILSQQQQQQQQQQQQQQQQQQQQQRFSSYPGMHQTHLKEPNEQMARNPNPSSSTPLSNTPLSPVKNSISGQ  
TGVSSSLKPGPLPPNLDLKVSELRQQLRIRGLPVSQTKTALVDRLRPFQDCAGNPVPNFGDITTVTFVPTPNT  
LPSYQSSPTGFYHFGSTSSSPPISPASSDLAAGSLPDTFTDASPGFGLHASVPACTDESLLSSLNNGSGPS  
EPDGLDSEKDKMLVEKQKVINQLTWKLRQEQRQVEELRMQLQKQKSSCSQKPLPFLATTIKQEDVSSCPFPAP  
QQASGKGQGHSSSDSPACETAQLLPHCVESGQTHVLSSTFLSPQCSPQHSPLGGLKSPQHISLPPSPNNHY  
FLASSSGAQRENHGVSSPSSSQGCAQNSGAHEGHSSSFSSPASSLHQPFSGTQADSSHSAGLNPCPKSPSIHP  
KMTGLQSSDKVGPTFSIPSPTFKSSSAVSDITQPPSYEDAVKQMQMTRSQQMDEL LDVLIESGEMPADAREDH  
SCLQKIPKIPGSSCSPTAIPPKPSASFEQASSGGQMAFDHYANDSDEHLEVLLNSHSPIGKVS DVTLLKIGSE  
EPPFDSIMDGFPGKAAEDLFSAHGLLPGPLSPMHAQLSPPSVDS SGLQLSFTESPWETMEWLDLTPPSSTPGF  
SNLTSSGSPSIFNIDFLDVTDLNLS PMDLHLQQW\*

>rs241577521\_ENSMUSP00000099695\_c.592:G>A\_p.G198D  
ENSMUST00000102635.10|Myocd-202|ENSMUSG00000020542|-|chr11:g.65091732:C>T  
MTLLGSEHSLIRRKFRSVLQRLRQRRRTQEQLANQGLI PPLKGPTEFHDPRKQLDSAKTEDSLRRKGRNRSD  
RASLVTMHILQASTAERSIPTAQMKLKRARLADDLNEKIALRPGPLELVEKNILPMDSSVKEAIKGTVEVLSK  
AADAFAFEDDSSRDGLSPDQARSED PQGSTGSTPDIKSTEAPLDTIQDLTPDSESDKNDAAASQPGNQSDPGKQ  
VLGPLSTPIPVHTAVKSKSLGDSKNRHHKPKDPKPKVKKLKYHQYIPPDQKAEKSPPPMDSAYARLLQQQQLF  
LQLQILSQQQQQQQQQQQQQQQQQQQQQRFSSYPGMHQTHLKEPNEQMARNPNPSSSTPLSNTPLSPVKNSISGQ  
TGVSSSLKPGPLPPNLDLKVSELRQQLRIRGLPVSQTKTALVDRLRPFQDCAGNPVPNFGDITTVTFVPTPNT  
LPSYQSSPTGFYHFGSTSSSPPISPASSDLAAGSLPDTFTDASPGFGLHASVPACTDESLLSSLNNGSGPS  
EPDGLDSEKDKMLVEKQKVINQLTWKLRQEQRQVEELRMQLQKQKSSCSQKPLPFLATTIKQEDVSSCPFPAP  
QQASGKGQGHSSSDSPACETAQLLPHCVESGQTHVLSSTFLSPQCSPQHSPLGGLKSPQHISLPPSPNNHY  
FLASSSGAQRENHGVSSPSSSQGCAQMTGLQSSDKVGPTFSIPSPTFKSSSAVSDITQPPSYEDAVKQMQMTR  
SQQMDEL LDVLIESGEMPADAREDH SCLQKIPKIPGSSCSPTAIPPKPSASFEQASSGGQMAFDHYANDSDEH  
LEVLLNSHSPIGKVS DVTLLKIGSE EPPFDSIMDGFPGKAAEDLFSAHGLLPGPLSPMHAQLSPPSVDS SGLQ  
LSFTESPWETMEWLDLTPPSSTPGF SNLTSSGSPSIFNIDFLDVTDLNLS PMDLHLQQW\*

>rs241577521\_ENSMUSP00000098603\_c.208:G>A\_p.G70D  
ENSMUST00000101042.9|Myocd-201|ENSMUSG00000020542|-|chr11:g.65091732:C>T  
MDSSVKEAIKGTVEVLSKAADAFAFEDDSSRDGLSPDQARSED PQGSTGSTPDIKSTEAPLDTIQDLTPDSES  
DKNDAAASQPGNQSDPGKQVLGPLSTPIPVHTAVKSKSLGDSKNRHHKPKDPKPKVKKLKYHQYIPPDQKAEKS  
PPMDSAYARLLQQQQLF LQLQILSQQQQQQQQQQQQQQQQQQQQQRFSSYPGMHQTHLKEPNEQMARNPNPSS  
TPLSNTPLSPVKNSISGQTGVSSSLKPGPLPPNLDLKVSELRQQLRIRGLPVSQTKTALVDRLRPFQDCAGNP  
VPNFGDITTVTFVPTPNTLPSYQSSPTGFYHFGSTSSSPPISPASSDLAAGSLPDTFTDASPGFGLHASVP  
ACTDESLLSSLNNGSGPSEPDGLDSEKDKMLVEKQKVINQLTWKLRQEQRQVEELRMQLQKQKSSCSQKPLP  
FLATTIKQEDVSSCPFPAPQQASGKGQGHSSSDSPACETAQLLPHCVESGQTHVLSSTFLSPQCSPQHSPLG  
GLKSPQHISLPPSPNNHYFLASSSGAQRENHGVSSPSSSQGCAQNSGAHEGHSSSFSSPASSLHQPFSGTQAD  
SSHSAGLNPCPKSPSIHPKMTGLQSSDKVGPTFSIPSPTFKSSSAVSDITQPPSYEDAVKQMQMTRSQQMDEL  
LDVLIESGEMPADAREDH SCLQKIPKIPGSSCSPTAIPPKPSASFEQASSGGQMAFDHYANDSDEHLEVLLNS  
HSPIGKVS DVTLLKIGSE EPPFDSIMDGFPGKAAEDLFSAHGLLPGPLSPMHAQLSPPSVDS SGLQLSFTESP  
WETMEWLDLTPPSSTPGF SNLTSSGSPSIFNIDFLDVTDLNLS PMDLHLQQW\*

>rs241577521\_ENSMUSP00000115572\_c.217:G>A\_p.G73D  
ENSMUST00000144399.3|Myocd-204|ENSMUSG00000020542|-|chr11:g.65091732:C>T  
XFLPTPHSLRHGHGTEVLSLSKAADAFAFEDDSSRDGLSPDQARSED PQGSTGSTPDIKSTEAPLDTIQDLTPD  
SESDKNDAAASQPGNQSDPGKQVLGPLSTPIPVHTAVKSKSLGDSKNRHHKPKDPKPKVKKLKYHQYIPPDQKA  
EKSPPPMDSAYARLLQQQQLF LQLQILSQQQQQQQQQQQQQQQQQQQQQRFSSYPGMHQTHL

>rs241577521\_ENSMUSP00000104335\_c.592:G>A\_p.G198D  
ENSMUST00000108695.9|Myocd-203|ENSMUSG00000020542|-|chr11:g.65091732:C>T  
MTLLGSEHSLIRRKFRSVLQRLRQRRRTQEQLANQGLI PPLKGPTEFHDPRKQLDSAKTEDSLRRKGRNRSD  
RASLVTMHILQASTAERSIPTAQMKLKRARLADDLNEKIALRPGPLELVEKNILPMDSSVKEAIKGTVEVLSK  
AADAFAFEDDSSRDGLSPDQARSED PQGSTGSTPDIKSTEAPLDTIQDLTPDSESDKNDAAASQPGNQSDPGKQ  
VLGPLSTPIPVHTAVKSKSLGDSKNRHHKPKDPKPKVKKLKYHQYIPPDQKAEKSPPPMDSAYARLLQQQQLF  
LQLQILSQQQQQQQQQQQQQQQQQQQQQRFSSYPGMHQTHLKEPNEQMARNPNPSSSTPLSNTPLSPVKNSISGQ  
TGVSSSLKPGPLPPNLDLKVSELRQQLRIRGLPVSQTKTALVDRLRPFQDCAGNPVPNFGDITTVTFVPTPNT

LPSYQSSPTGFYHFGSTSSSPPI SPASSDLSAAGSLPDTFTDASPGFGLHASVPVACTDESLLSSLNNGSGSPS  
EPDGLDSEKDKMLVEKQKVINQLTWKLRQEQRQVEELRMQLQKQKSSCSQKPLPFLATTIKQEDVSSCPFAP  
QQASGKGQGHSSSDSPACETAQLLPHCVESGQTHVLSSTFLSPQCSPQHSPLGGLKSPQHSISLPPSPNNHY  
FLASSSSGAQRENHGVSSPSSSQGCAQNSGAHEGHSSSFSSPASSLHQPFSGTQADSSHSAGLNPCPKSPSIHP  
KMTGLQSSDKVGPTFSIPSPTFKSSSAVSDITQPPSYEDAVKQOMTRSQQMDELLDVLIESGEMPADAREDH  
SCLQKIPKIPGSSCSPTAIPPKPSASFEQASSGGQMAFDHYANDSDEHLEVLLNSHSPIGKVSVDVTLKIGSE  
EPPFDSIMDGFPGKAAEDLFSHELLPGLSPMHAQLSPSPVSDSSGLQLSFTESPWETMEWLDLTPPSSTPGF  
SNLTSSGSPSIFNIDFLDVTDLNLSFMDLHLQQW\*

>rs29427208\_ENSMUSP00000019625\_c.3615:C>T\_p.L1206F  
ENSMUST00000019625.12|Myh8-201|ENSMUSG00000055775|+|chr11:g.67189441:C>T  
MSAGSDAEMAI FGEAAPYLKSEKERIEAQNKPFDAKTSVFVAEPKESYVKSVIQSKDGGKVTVKTESGATLT  
VKEDQVFPMPNPKYDKIEDMAMMTHLHEPGVLYNLKERYAAWMIYTYSGLFCVTVNPKWLPVYNPEVVAAYR  
GKKRQEAPPHIFSI SDNAYQFMLTDRENQSILITGESGAGKTVNTRKVIQYFATIAVTGDKKKEESGKMQGT  
EDQIISANPLLEAFGNAKTVRNDNSRFGKFI RHFHGTGKLASADIETYLLEKSRVTFQLKAERSYHIFYQI  
TSNKKPELIEMLLITNPNYDYAFVSQGEITVPSIDDEELMATDSAIIDILGFSPEEKVSIYKLTGAVMHYGNM  
KFKQKQREEQAEPDGTVEADKAAAYLQCLNSADLLKALCYPRVKVGNVYVTKGQTVQVYNAV GALAKAVYEK  
FLWMVTRINQQLDTKQPRQYFIGVLDIAGFEIFDFNSLEQLCINFTNEKLQOFFNHHMFVLEQEEYKKEGIEW  
TFIDFGMDLAACIELIEKPLGIFSI LEEECMFPKATDTSFKNKLYDQHLGKSNNFQKPKPTKGKAEAHFSLVH  
YAGTVDYNITGWLDKNKDPLNDTVVGLYQKSAMKTLASLSTYASAEADGGAKKGAKKKGSSFQTVSALFREN  
LNKLMTNLRSTHPPHFVRCIIPNETKTPGAMEHELVLHQLRCNGVLEGI RIRKGFPSRILYGDFKQRYKVLNA  
SAIPEGQFIDSKKASEKLLGSDIDHTQYKFGHTKVFVKAGLLGLEEMRDEKLAQIITRTQAVCRGYLMRVE  
YQKMLLRRESIFCIQYNVRAF MNVKHWPWMKLFKIKPLLKSAETEKEMATMKEEFQKTKDELAKSEAKRKEL  
EEKMVTLLKEKNLQLQVQSEADSLADAEERCEQLIKNKIQLEAKI KEVTERAEDEEEINAELTAKRKLDE  
CSELKDDIDLELTLAKVEKEKHATENKVNKLT EEMAGLDENIAKLTKEKKALQEAHQQTLDLQAEEDKVNT  
LTKAKTKLEQQVDDLEGSLEQEKKLRMDLERAKRKLGDGLKLAQESTMDIENDKQQLDEKLLKKEFEISNLIS  
KIEDEQAVEIQLQKKIKELQARIEELEEIEAERASRAKAEKQRSDSLRELEEISERLEEAGGATSAQVEMNK  
KRETEFQKLRRDLEEATLQHEATAAALRKKHADSVAEFGEQIDNLQRVKQKLEKEKSELKMEIDDLSSNAEAI  
AKAKGNLEKMCRTLEDQVSELKSKEEEQORLINELTAQRARLQTEAGEYSRQLDEKDALVSQLSRSKQASTQQ  
IEELKRQLEEEETKAKNALAHALQSSRHDCDLLREQYEEEQEGKAE LQRALSKANSEVAQWRKYETDAIQRTE  
ELEEAKKKLAQRLQAAEEHVEAVNAKASLEKTKQRLQNEVEDLMDIVERTNAACAALDKKQRFNDKVLSEWR  
QKYBETQAELESCQKESRTLSTELFKVKNAYEESLDHLETLRRENKNLQOEISDLTEQIAEGGKHIHELEKIK  
KQVEQEKCEIQAALEEAEEASLEHEEGKILRIQLELNQVKSEIDRKIAEKDEEIDQLKRNVVVTMQRSTLDA  
EIRSRNDALRVKKKMEGDLNEMEQLNHANRLAAESLRNYRNTQGI LKDTQLHLDDALRGQEDLKEQLAIVER  
RANLLQAEIEELRATLEQTERSRIAEQELLDASERVQLLHTQNTSLINTKKKLENDVSQLQSEVEEVIQESR  
NAEEKAKKAITDAAMMAEELKKEQDTS AHLERMKNMEQTVKDLQHLRDEAEQLALGGKKQIQKLEARVREL  
EGEVENEQKRNAEAVKGLRKHERRVKELTYQTEEDRKNVRLQDLVDKLAQKVKSYKRQAEAEAEQSNANLAK  
FRKLQHELEEAERADIAESQVNKL RVKSREVHTKISAE\*

>rs247358899\_ENSMUSP00000019625\_c.5374:C>CT\_p.T1792ins-fs  
ENSMUST00000019625.12|Myh8-201|ENSMUSG00000055775|+|chr11:g.67196743:C>CT  
MSAGSDAEMAI FGEAAPYLKSEKERIEAQNKPFDAKTSVFVAEPKESYVKSVIQSKDGGKVTVKTESGATLT  
VKEDQVFPMPNPKYDKIEDMAMMTHLHEPGVLYNLKERYAAWMIYTYSGLFCVTVNPKWLPVYNPEVVAAYR  
GKKRQEAPPHIFSI SDNAYQFMLTDRENQSILITGESGAGKTVNTRKVIQYFATIAVTGDKKKEESGKMQGT  
EDQIISANPLLEAFGNAKTVRNDNSRFGKFI RHFHGTGKLASADIETYLLEKSRVTFQLKAERSYHIFYQI  
TSNKKPELIEMLLITNPNYDYAFVSQGEITVPSIDDEELMATDSAIIDILGFSPEEKVSIYKLTGAVMHYGNM  
KFKQKQREEQAEPDGTVEADKAAAYLQCLNSADLLKALCYPRVKVGNVYVTKGQTVQVYNAV GALAKAVYEK  
FLWMVTRINQQLDTKQPRQYFIGVLDIAGFEIFDFNSLEQLCINFTNEKLQOFFNHHMFVLEQEEYKKEGIEW  
TFIDFGMDLAACIELIEKPLGIFSI LEEECMFPKATDTSFKNKLYDQHLGKSNNFQKPKPTKGKAEAHFSLVH  
YAGTVDYNITGWLDKNKDPLNDTVVGLYQKSAMKTLASLSTYASAEADGGAKKGAKKKGSSFQTVSALFREN  
LNKLMTNLRSTHPPHFVRCIIPNETKTPGAMEHELVLHQLRCNGVLEGI RIRKGFPSRILYGDFKQRYKVLNA  
SAIPEGQFIDSKKASEKLLGSDIDHTQYKFGHTKVFVKAGLLGLEEMRDEKLAQIITRTQAVCRGYLMRVE  
YQKMLLRRESIFCIQYNVRAF MNVKHWPWMKLFKIKPLLKSAETEKEMATMKEEFQKTKDELAKSEAKRKEL  
EEKMVTLLKEKNLQLQVQSEADSLADAEERCEQLIKNKIQLEAKI KEVTERAEDEEEINAELTAKRKLDE  
CSELKDDIDLELTLAKVEKEKHATENKVNKLT EEMAGLDENIAKLTKEKKALQEAHQQTLDLQAEEDKVNT  
LTKAKTKLEQQVDDLEGSLEQEKKLRMDLERAKRKLGDGLKLAQESTMDIENDKQQLDEKLLKKEFEISNLIS  
KIEDEQAVEIQLQKKIKELQARIEELEEIEAERASRAKAEKQRSDSLRELEEISERLEEAGGATSAQVEMNK  
KRETEFQKLRRDLEEATLQHEATAAALRKKHADSVAEFGEQIDNLQRVKQKLEKEKSELKMEIDDLSSNAEAI  
AKAKGNLEKMCRTLEDQVSELKSKEEEQORLINELTAQRARLQTEAGEYSRQLDEKDALVSQLSRSKQASTQQ  
IEELKRQLEEEETKAKNALAHALQSSRHDCDLLREQYEEEQEGKAE LQRALSKANSEVAQWRKYETDAIQRTE

ELEEAKKKLAQRLQAAEEHVEAVNAKASLEKTKQRLQNEVEDLMI DVERTNAACAALDKKQRNFDKVLSEWR  
 QKYEETQAELESCQKESRTLS TELFKVKNAYEESLDHLET LRRENKNLQOEI SDLTEQIAEGGKHIHELEKIK  
 KQVEQEKCEIQAALEEAEEASLEHEEGKILRIQLELNQVKSEIDRKIAEKDEEIDQLKRNHVRVETMQLTDA  
 EIRSRNDALRVKKKMEGDLNEMEIQLNHANRLAAESLRNYRNTQGI LKDTQLHLDDALRGQEDLKEQLAIVER  
 RANLLQAEIEELRATLEQTERSRIAEQELLDASERVQLLHTQNTSLINTKKKLENDVSQLQSEVEEVIQESR  
 NAEKAKKAITDAAMMAEELKKEQD TSAHLERMKNMEQTGEGPAAPSGRG  
 >rs52024280\_ENSMUSP00000104324\_c.910:T>C\_p.L304P  
 ENSMUST00000108684.8|Myh13-202|ENSMUSG00000060180|+|chr11:g.67225734:T>C  
 MSSDAEMAI FGEAAPYLKPKERIEAQNRPFDSKKACFAVDDKEMYVKGMIQSRENDKVI VKTLDRELTN  
 SDQVFPMPNPPKFDKIEDMAMMTHLHEPAVLYNLKERYAAMMI YTYSGLFCVTVNPKWLPVYNPEVVAAYRGK  
 KRQEAPPHIFISISDNAYQFMLTDRDNQSILITGESGAGKTVNTRKVIQYFATIAVTGDKKKEQQPGKMQGTLE  
 DQIIQANPLLEAFGNAKTVRNDNSSRFGKFI RIFHGATGKLASADIETYLLKSRVTFQLSSERSYHIFYQIM  
 SNKKPELIDLLPISTNPFDFPFVVSQGEVTVASIDDSEELLATDNAIDILGFSPEEKVGIYKLTGAVMHYGNMK  
 FKQKQREEQAEPDGTVEADKAGYLMGLNSAEMLKGLCCPRVKVGNVYVTKGQNVQVTVNSV GALAKAVYEKMF  
 LWMVTRINQQLDTKQPRQYFIGVLDIAGFEIFDFNSLEQLCINFNEKLQOFFNHHMFVLEQEEYKKEGIEWE  
 FIDFGMDLAACIELIEKPMGIFSI LEEECMF PKATDTSFKNKLYDQHLGKSNNFQKPKPTKGKAEAHFSLVHY  
 AGTVDYNIAGWLDKNDPLNETVVGLYQKSSLLKLSFLFSNYAGAEAGDSAGGKGGKGGSSSQTVSAVFRE  
 NLNKLMTNLRSTHPPHFVRCLIPNETKTPGVMDHYLVMHQLRCNGVLEGI RICKRGFPSTRILYADFKQRYRILN  
 ASAIPEGQFIDSKNASEKLLNSIDVDREQFRFGHTKVFVKAGLLGLLEEMRDEKLVTLMTRTQAVCRGYLMRV  
 EFKKMMERRESIFCIQYNVRSFMNVKHWPWMLFFKIKPLLSAEAEKEMATMKEDFERAKEDLARSEARRKE  
 LEEKMVSLLEKNDLQVQSE TENLMDAEEERCEGLIKSKIQLEAKVKELNERLEEEEMNSELVAKRNLED  
 KCSSLKRDIDDLLETLTKVEKEKHATENKVKNLSEEMTALEETISKLTKEKKSLEAHQQTLDLQVEEDKVN  
 GLIKINVKLEQQTDDLEGSLEQEKKLRADLERVVRKLEGLDKMSQESIMDLENDTQQLEEKLKKKEFEMSQLO  
 TRIDDEQVLSLQLOKKIKELQARTEEELEEIEAEHTVRAKIEKQRSDLARELEEISERLEEASGATSQIEMN  
 KKRESEFQKLRDRLEEATLQHEATAATLRKKHADTVAEELGEQIDNLQRVKQKLEKEKSELKMEIDDMASNIET  
 VSKSKNMRMCRSVEDQFNEIKAKDDQQTQLIHDLNMQKARLQTQNGELSHQVEEKESLVSQLTKSKQALTQ  
 QLEELKRQLEEEETKAKNALAHALQSSRHCDLLREQYEEEQEGKAE LQRALSKANSEVAQWRTKYETDAI QRT  
 EELEEAKKKLAQRLQEAEEENTEASNSKASLEKTKQRLQGEVDDLMLDLERANTACATLDKKQRNFDKVLAEW  
 KQKLDSESQAELEAAQKESRSLSTEIFKMRNAYEEVVDQLET LRRENKNLQOEI SDLTEQIAETGKNLQEV EKT  
 KKQVEQEKSDLAALAEVEGSLEHEESKILRVQLELSQVKESELDKRVTEKDEEIEQIKRNSQRAVEAMQSVLD  
 AEIRSRNDALRLKKKMEGDLNEMEIQLSHANRQVAETQKHLRTVQGLKDSQLHLDDAQRSNEDLKEQLAIVE  
 RRNGLLQEELEEMKVALEQTERRLSEQELLDSSDRVQLLHSQNTSLINTKKKLEADLAQCQAEVENS IQES  
 RNAEEKAKKAITDAAMMAEELKKEQD TSAHLERMKNLEQTVKDLQHRLDAAEQALKGGKKQIQKLEARVRE  
 LESELDAAEQRGAEALGHAHYERKVKEMTYQAEEDRKNILRLQDLVDKLOAKVKS YKRQAEAEAEQANTQLS  
 RRRVQHELEEAERADIAESQVNLKRAKSRDVGQKMEE\*  
 >rs52024280\_ENSMUSP00000137731\_c.910:T>C\_p.L304P  
 ENSMUST00000180845.8|Myh13-203|ENSMUSG00000060180|+|chr11:g.67225734:T>C  
 MSSDAEMAI FGEAAPYLKPKERIEAQNRPFDSKKACFAVDDKEMYVKGMIQSRENDKVI VKTLDRELTN  
 SDQVFPMPNPPKFDKIEDMAMMTHLHEPAVLYNLKERYAAMMI YTYSGLFCVTVNPKWLPVYNPEVVAAYRGK  
 KRQEAPPHIFISISDNAYQFMLTDRDNQSILITGESGAGKTVNTRKVIQYFATIAVTGDKKKEQQPGKMQGTLE  
 DQIIQANPLLEAFGNAKTVRNDNSSRFGKFI RIFHGATGKLASADIETYLLKSRVTFQLSSERSYHIFYQIM  
 SNKKPELIDLLPISTNPFDFPFVVSQGEVTVASIDDSEELLATDNAIDILGFSPEEKVGIYKLTGAVMHYGNMK  
 FKQKQREEQAEPDGTVEADKAGYLMGLNSAEMLKGLCCPRVKVGNVYVTKGQNVQVTVNSV GALAKAVYEKMF  
 LWMVTRINQQLDTKQPRQYFIGVLDIAGFEIFDFNSLEQLCINFNEKLQOFFNHHMFVLEQEEYKKEGIEWE  
 FIDFGMDLAACIELIEKPMGIFSI LEEECMF PKATDTSFKNKLYDQHLGKSNNFQKPKPTKGKAEAHFSLVHY  
 AGTVDYNIAGWLDKNDPLNETVVGLYQKSSLLKLSFLFSNYAGAEAGDSAGGKGGKGGSSSQTVSAVFRE  
 NLNKLMTNLRSTHPPHFVRCLIPNETKTPGVMDHYLVMHQLRCNGVLEGI RICKRGFPSTRILYADFKQRYRILN  
 ASAIPEGQFIDSKNASEKLLNSIDVDREQFRFGHTKVFVKAGLLGLLEEMRDEKLVTLMTRTQAVCRGYLMRV  
 EFKKMMERRESIFCIQYNVRSFMNVKHWPWMLFFKIKPLLSAEAEKEMATMKEDFERAKEDLARSEARRKE  
 LEEKMVSLLEKNDLQVQSE TENLMDAEEERCEGLIKSKIQLEAKVKELNERLEEEEMNSELVAKRNLED  
 KCSSLKRDIDDLLETLTKVEKEKHATENKVKNLSEEMTALEETISKLTKEKKSLEAHQQTLDLQVEEDKVN  
 GLIKINVKLEQQTDDLEGSLEQEKKLRADLERVVRKLEGLDKMSQESIMDLENDTQQLEEKLKKKEFEMSQLO  
 TRIDDEQVLSLQLOKKIKELQARTEEELEEIEAEHTVRAKIEKQRSDLARELEEISERLEEASGATSQIEMN  
 KKRESEFQKLRDRLEEATLQHEATAATLRKKHADTVAEELGEQIDNLQRVKQKLEKEKSELKMEIDDMASNIET  
 VSKSKNMRMCRSVEDQFNEIKAKDDQQTQLIHDLNMQKARLQTQNGELSHQVEEKESLVSQLTKSKQALTQ  
 QLEELKRQLEEEETKAKNALAHALQSSRHCDLLREQYEEEQEGKAE LQRALSKANSEVAQWRTKYETDAI QRT  
 EELEEAKKKLAQRLQEAEEENTEASNSKASLEKTKQRLQGEVDDLMLDLERANTACATLDKKQRNFDKVLAEW  
 KQKLDSESQAELEAAQKESRSLSTEIFKMRNAYEEVVDQLET LRRENKNLQOEI SDLTEQIAETGKNLQEV EKT

KKQVEQEKSDLQAALAEVEGSLHEEESKILRVQLELSQVKSELDRKVTEKDEEIEQIKRNSQRAVEAMQSVLD  
AEIRSRNDALRLKKKMEGDLNEMEIQLSHANRQVAETQKHLRVTQVQGLKDSQLHLDDAQRSNEDLKEQLAIVE  
RRNGLLQEELEEMKVALEQTERTRRLSEQELLDSSDRVQLLHSONTSLINTKKKLEADLAQCQAEVENS IQES  
RNAEEKAKKAITDAAMMAEELKKEQDTS AHLERMKKNLEQTVKDLQHRLEAEQLALKGGKKQIQKLEARVRE  
LESELDAEQKRGAEALKGAHKYERKVKEMTYQAEEDRKNILRLQDLVDKLOAKVKS YKRQAEAEAEQANTQLS  
RCRRVQHELEEAERADIAESQVNLKRAKSRDVGQKMEE\*  
>rs52024280\_ENSMUSP00000080584\_c.910:T>C\_p.L304P  
ENSMUST00000081911.12|Myh13-201|ENSMUSG00000060180|+|chr11:g.67225734:T>C  
MSSDAEMAI FGEAAPYLKPEKERIEAQNRPFDSKKACFAVDDKEMYVKGMIQSRENDKVI VKTLDRELTN  
SDQVFPMPNPPKFDKIEDMAMMTHLHEPAVLYNLKERYAAMMIYTYSGLFCVTVNPKWLPVYNPEVVAAYRGK  
KRQEAPPHIFISISDNAYQFMLTDRDNQSILITGESGAGKTVNTRKVIQYFATIAVTGDKKKEQQPGKMQGTLE  
DQIIQANPLLEAFGNAKTVRNDNSSRFGKFI RIFHGATGKLASADIETYLLKSRVTFQLSSERSYHIFYQIM  
SNKKPELIDLLPISTNPFDFPFVVSQGEVTVASIDDSEELLATDNAIDILGFSPEEKVGIYKLTGAVMHYGNMK  
FKQKQREEQAEPDGTVEADKAGYLMGLNSAEMLKGLCCPRVKVGNVYVTKGQNVQVTVNSVGALAKAVYEKMF  
LWMVTRINQQLDTKQPRQYFIGVLDIAGFEIFDFNSLEQLCINFNEKLQOFFNHHMFVLEQEEYKKEGIEWE  
FIDFGMDLAACIELIEKPMGIFSI LEEECMF PKATDTSFKNKLYDQHLGKSNNFQKPKPTKGKAEAHFSLVHY  
AGTVDYNIAGWLDKNDPLNETVVGLYQKSSLLKLSFLFSNYAGAEAGDSAGGKGGKGGKSSFFQTVSAVFRE  
NLNKLMTNLRSTHHPFVRCLIPNETKTPGVMDHYLVMHQLRCNGVLEGI RICKRGFPSRILYADFKQRYRILN  
ASAIPEGQFIDSKNASEKLLNSIDVDREQFRFGHTKVFVKAGLLGLLEEMRDEKLVTLMTRTQAVCRGYLMRV  
EFKKMMERRESIFCIQYNVRSFMNVKHWPWMLFFKIKPLLSAEAEKEMATMKEDFERAKEDLARSEARRKE  
LEEKMVSLLEQEKNDLQVQSE TENLMDAEERCEGLIKSKIQLEAKVKELNERLEEEEMNSELVAKKRNLED  
KCSSLKRDI DDLELTLTKVEKEKHATENKVKNLSEEMTALEETISKLTKEKKSLEAHQQTLDLQVEEDKVN  
GLIKINVKLEQQTDDLEGSLEQEKLRADLERVVRKLEGLDKMSQESIMDLENDTQQLEEKLKKKEFEMS QLO  
TRIDDEQVLSLQLOKKIKELQARTEEELEEIEAEHTVRAKIEKQRS DLARELEEISERLEEASGATS AQIEMN  
KKRESEFQKLRDRLEEATLQHEATAATLRKKHADTV AELGEQIDNLQRVKQKLEKEKSELKMEIDDMASNIET  
VSKSKNMRMCRSVEDQFNEIKAKDDQQTQLIHDLNMQKARLQTQNGELSHQVEEKESLVSQLTKSKQAL TQ  
QLEELKRQLEEEETKAKNALAHALQSSRHCDLLREQYEEEQEGKAE LQRALSKANSEVAQWRTKYETDAI QRT  
EELEEAKKLAQRLQEAEE NTEASNSKASLEKTKQRLQGEVDDLMLDLERANTACATLDKKQRNF DKVLAEW  
KQKLDSESQAELEAAQKESRSLSTEIFKMRNAYEEVVDQLET LRRENKNLQEEISDLTEQIAETGKNLQEV EKT  
KKQVEQEKSDLQAALAEVEGSLHEEESKILRVQLELSQVKSELDRKVTEKDEEIEQIKRNSQRAVEAMQSVLD  
AEIRSRNDALRLKKKMEGDLNEMEIQLSHANRQVAETQKHLRVTQVQGLKDSQLHLDDAQRSNEDLKEQLAIVE  
RRNGLLQEELEEMKVALEQTERTRRLSEQELLDSSDRVQLLHSONTSLINTKKKLEADLAQCQAEVENS IQES  
RNAEEKAKKAITDAAMMAEELKKEQDTS AHLERMKKNLEQTVKDLQHRLEAEQLALKGGKKQIQKLEARVRE  
LESELDAEQKRGAEALKGAHKYERKVKEMTYQAEEDRKNILRLQDLVDKLOAKVKS YKRQAEAEAEQANTQLS  
RCRRVQHELEEAERADIAESQVNLKRAKSRDVGQKMEE\*  
>rs29409817\_ENSMUSP00000104324\_c.1147:C>T\_p.A383V  
ENSMUST00000108684.8|Myh13-202|ENSMUSG00000060180|+|chr11:g.67231152:C>T  
MSSDAEMAI FGEAAPYLKPEKERIEAQNRPFDSKKACFAVDDKEMYVKGMIQSRENDKVI VKTLDRELTN  
SDQVFPMPNPPKFDKIEDMAMMTHLHEPAVLYNLKERYAAMMIYTYSGLFCVTVNPKWLPVYNPEVVAAYRGK  
KRQEAPPHIFISISDNAYQFMLTDRDNQSILITGESGAGKTVNTRKVIQYFATIAVTGDKKKEQQPGKMQGTLE  
DQIIQANPLLEAFGNAKTVRNDNSSRFGKFI RIFHGATGKLASADIETYLLKSRVTFQLSSERSYHIFYQIM  
SNKKPELIDLLL ISTNPFDFPFVVSQGEVTVASIDDSEELLATDNAIDILGFSPEEKVGIYKLTGAVMHYGNMK  
FKQKQREEQAEPDGTVEVVDKAGYLMGLNSAEMLKGLCCPRVKVGNVYVTKGQNVQVTVNSVGALAKAVYEKMF  
LWMVTRINQQLDTKQPRQYFIGVLDIAGFEIFDFNSLEQLCINFNEKLQOFFNHHMFVLEQEEYKKEGIEWE  
FIDFGMDLAACIELIEKPMGIFSI LEEECMF PKATDTSFKNKLYDQHLGKSNNFQKPKPTKGKAEAHFSLVHY  
AGTVDYNIAGWLDKNDPLNETVVGLYQKSSLLKLSFLFSNYAGAEAGDSAGGKGGKGGKSSFFQTVSAVFRE  
NLNKLMTNLRSTHHPFVRCLIPNETKTPGVMDHYLVMHQLRCNGVLEGI RICKRGFPSRILYADFKQRYRILN  
ASAIPEGQFIDSKNASEKLLNSIDVDREQFRFGHTKVFVKAGLLGLLEEMRDEKLVTLMTRTQAVCRGYLMRV  
EFKKMMERRESIFCIQYNVRSFMNVKHWPWMLFFKIKPLLSAEAEKEMATMKEDFERAKEDLARSEARRKE  
LEEKMVSLLEQEKNDLQVQSE TENLMDAEERCEGLIKSKIQLEAKVKELNERLEEEEMNSELVAKKRNLED  
KCSSLKRDI DDLELTLTKVEKEKHATENKVKNLSEEMTALEETISKLTKEKKSLEAHQQTLDLQVEEDKVN  
GLIKINVKLEQQTDDLEGSLEQEKLRADLERVVRKLEGLDKMSQESIMDLENDTQQLEEKLKKKEFEMS QLO  
TRIDDEQVLSLQLOKKIKELQARTEEELEEIEAEHTVRAKIEKQRS DLARELEEISERLEEASGATS AQIEMN  
KKRESEFQKLRDRLEEATLQHEATAATLRKKHADTV AELGEQIDNLQRVKQKLEKEKSELKMEIDDMASNIET  
VSKSKNMRMCRSVEDQFNEIKAKDDQQTQLIHDLNMQKARLQTQNGELSHQVEEKESLVSQLTKSKQAL TQ  
QLEELKRQLEEEETKAKNALAHALQSSRHCDLLREQYEEEQEGKAE LQRALSKANSEVAQWRTKYETDAI QRT  
EELEEAKKLAQRLQEAEE NTEASNSKASLEKTKQRLQGEVDDLMLDLERANTACATLDKKQRNF DKVLAEW  
KQKLDSESQAELEAAQKESRSLSTEIFKMRNAYEEVVDQLET LRRENKNLQEEISDLTEQIAETGKNLQEV EKT

KKQVEQEKSDLQAALEVEEGSLEHEESKILRVQLELSQVKSELDRKVTEKDEEIEQIKRNSQRAVEAMQSVLD  
AEIRSRNDALRLKKKMEGDLNEMEIQLSHANRQVAETQKHLRVTQGGQLKDSQLHLDDAQRSNEDLKEQLAIVE  
RRNGLLQEELEEMKVALEQTERTRRLSEQELLDSSDRVQLLHSQNTSLINTKKKLEADLAQCQAEVENS IQES  
RNAEEKAKKAITDAAMMAEELKKEQDTS AHLERMKKNLEQTVKDLQHRLEAEQLALKGGKKQIQKLEARVRE  
LESELD AEQKRGAEALKGAHKYERKVKEMTYQAEEDRKNILRLQDLVDKLOAKVKS YKRQAEAEAEQANTQLS  
RCRRVQHELEEAERADIAESQVNLKRAKSRDVGQKMEE\*  
>rs29409817\_ENSMUSP00000137731\_c.1147:C>T\_p.A383V  
ENSMUST00000180845.8|Myh13-203|ENSMUSG00000060180|+|chr11:g.67231152:C>T  
MSSDAEMAI FGEAAPYLKPEKERIEAQNRPFDSKKACFAVDDKEMYVKGMIQSRENDKVI VKTLDRELTN  
SDQVFPMPNPKFKDIEDMAMMTHLHEPAVLYNLKERYAAMMIYTYSGLFCVTVNPKWLPVYNPEVVAAYRGK  
KRQEAPPHIFISISDNAYQFMLTDRDNQSILITGESGAGKTVNTRKVIQYFATIAVTGDKKKEQQPGKMQGTLE  
DQIIQANPLLEAFGNAKTVRNDNSSRFGKFI RIFHGATGKLASADIETYLLKSRVTFQLSSERSYHIFYQIM  
SNKKPELIDLLL ISTNPFDFPFVVSQGEVTVASIDDSEELLATDNAIDILGFSPEEKVGIYKLTGAVMHYGNMK  
FKQKQREEQAEPDGTVEVDKAGYLMGLNSAEMLKGLCCPRVKVGN EYVTKGQNVQVTVNSV GALAKAVYEKMF  
LWMVTRINQQLDTKQPRQYFIGVLDIAGFEIFDFNSLEQLCINF TNEKLQOFFNHHMFVLEQEEYKKEGIEWE  
FIDFGMDLAACIELIEKPMGIFSI LEEECMF PKATDTSFKNKLYDQHLGKSNNFQKPKPTKGKAEAHFSLVHY  
AGTVDYNIAGWLDKNKDP LNETVVGLYQKSSLLKLSFLFSNYAGAEAGDSAGGKGGKGGKSSFFQTVSAVFRE  
NLNKLMTNLRSTHPHFVRCLIPNETKTPGVMDHYLVMHQLRCNGVLEGI RICKRGFPSRILYADFQRYRILN  
ASAIPEGQFIDSKNASEKLLNSIDVDREQFRFGHTKVFVKAGLLGLLEEMRDEKLVTLMTRTQAVCRGYLMRV  
EFKKMMERRESIFCIQYNVRSFMNVKHWPWMLFFKIKPLLSAEAEKEMATMKEDFERAKEDLARSEARRKE  
LEEKMVSL LQEKNDLQVQSE TENLMDAEERCEGLIKSKIQL EAKVKELNERLEEEEEEMNSELVAKRNLED  
KCSSLKRDI DDLELTLTKVEKEKHATENKVKNLSEEMTALEETISKLTKEKKS LQEAHQQTLDLQVEEDKVN  
GLIKINVKLEQQTDDLEGSLEQEKKLRADLERVVRKLEGLDKMSQESIMDLENDTQQLEEK LKKKEFEMS QLO  
TRIDDEQVLSLQ LQKKIKELQARTEEELEEEIEAEHTVRAKIEKQRS DLARELEEISERLEEASGATS AQIEMN  
KKRESEFQKLRDRLEEATLQHEATAATLRKKHADTV AELGEQIDNLQRVKQKLEKEKSELKMEIDDMASNIET  
VSKSKNMRMERRSV EDQFNEIKAKDDQQTQLIHDLNMQKARLQTQNGELSHQVEEKE SLVSQLTKSKQALTQ  
QLEELKRQLEEEETKAKNALAHALQSSRHCDLLREQYEEEQEGKAE LQRALSKANSEVAQWRTKYETDAI QRT  
EELEEAKK KLAQRLQEA EENTEASNSK CASLEKTKQRLQGEVDDMLDLERANTACATLDKKQRNF DKVLAEW  
KQKLDESQAELEAAQKESRSLSTEIFKMRNAYEEVVDQLET LRRENKNLQEEISDLTEQIAETGKNLQEV EKT  
KKQVEQEKSDLQAALEVEEGSLEHEESKILRVQLELSQVKSELDRKVTEKDEEIEQIKRNSQRAVEAMQSVLD  
AEIRSRNDALRLKKKMEGDLNEMEIQLSHANRQVAETQKHLRVTQGGQLKDSQLHLDDAQRSNEDLKEQLAIVE  
RRNGLLQEELEEMKVALEQTERTRRLSEQELLDSSDRVQLLHSQNTSLINTKKKLEADLAQCQAEVENS IQES  
RNAEEKAKKAITDAAMMAEELKKEQDTS AHLERMKKNLEQTVKDLQHRLEAEQLALKGGKKQIQKLEARVRE  
LESELD AEQKRGAEALKGAHKYERKVKEMTYQAEEDRKNILRLQDLVDKLOAKVKS YKRQAEAEAEQANTQLS  
RCRRVQHELEEAERADIAESQVNLKRAKSRDVGQKMEE\*  
>rs29409817\_ENSMUSP00000080584\_c.1147:C>T\_p.A383V  
ENSMUST00000081911.12|Myh13-201|ENSMUSG00000060180|+|chr11:g.67231152:C>T  
MSSDAEMAI FGEAAPYLKPEKERIEAQNRPFDSKKACFAVDDKEMYVKGMIQSRENDKVI VKTLDRELTN  
SDQVFPMPNPKFKDIEDMAMMTHLHEPAVLYNLKERYAAMMIYTYSGLFCVTVNPKWLPVYNPEVVAAYRGK  
KRQEAPPHIFISISDNAYQFMLTDRDNQSILITGESGAGKTVNTRKVIQYFATIAVTGDKKKEQQPGKMQGTLE  
DQIIQANPLLEAFGNAKTVRNDNSSRFGKFI RIFHGATGKLASADIETYLLKSRVTFQLSSERSYHIFYQIM  
SNKKPELIDLLL ISTNPFDFPFVVSQGEVTVASIDDSEELLATDNAIDILGFSPEEKVGIYKLTGAVMHYGNMK  
FKQKQREEQAEPDGTVEVDKAGYLMGLNSAEMLKGLCCPRVKVGN EYVTKGQNVQVTVNSV GALAKAVYEKMF  
LWMVTRINQQLDTKQPRQYFIGVLDIAGFEIFDFNSLEQLCINF TNEKLQOFFNHHMFVLEQEEYKKEGIEWE  
FIDFGMDLAACIELIEKPMGIFSI LEEECMF PKATDTSFKNKLYDQHLGKSNNFQKPKPTKGKAEAHFSLVHY  
AGTVDYNIAGWLDKNKDP LNETVVGLYQKSSLLKLSFLFSNYAGAEAGDSAGGKGGKGGKSSFFQTVSAVFRE  
NLNKLMTNLRSTHPHFVRCLIPNETKTPGVMDHYLVMHQLRCNGVLEGI RICKRGFPSRILYADFQRYRILN  
ASAIPEGQFIDSKNASEKLLNSIDVDREQFRFGHTKVFVKAGLLGLLEEMRDEKLVTLMTRTQAVCRGYLMRV  
EFKKMMERRESIFCIQYNVRSFMNVKHWPWMLFFKIKPLLSAEAEKEMATMKEDFERAKEDLARSEARRKE  
LEEKMVSL LQEKNDLQVQSE TENLMDAEERCEGLIKSKIQL EAKVKELNERLEEEEEEMNSELVAKRNLED  
KCSSLKRDI DDLELTLTKVEKEKHATENKVKNLSEEMTALEETISKLTKEKKS LQEAHQQTLDLQVEEDKVN  
GLIKINVKLEQQTDDLEGSLEQEKKLRADLERVVRKLEGLDKMSQESIMDLENDTQQLEEK LKKKEFEMS QLO  
TRIDDEQVLSLQ LQKKIKELQARTEEELEEEIEAEHTVRAKIEKQRS DLARELEEISERLEEASGATS AQIEMN  
KKRESEFQKLRDRLEEATLQHEATAATLRKKHADTV AELGEQIDNLQRVKQKLEKEKSELKMEIDDMASNIET  
VSKSKNMRMERRSV EDQFNEIKAKDDQQTQLIHDLNMQKARLQTQNGELSHQVEEKE SLVSQLTKSKQALTQ  
QLEELKRQLEEEETKAKNALAHALQSSRHCDLLREQYEEEQEGKAE LQRALSKANSEVAQWRTKYETDAI QRT  
EELEEAKK KLAQRLQEA EENTEASNSK CASLEKTKQRLQGEVDDMLDLERANTACATLDKKQRNF DKVLAEW  
KQKLDESQAELEAAQKESRSLSTEIFKMRNAYEEVVDQLET LRRENKNLQEEISDLTEQIAETGKNLQEV EKT



KKQVEQEKSDLQAALAEVEGSLHEEESKILRVQLELSQVKSELDRKVTEKDEEIEQIKRNSQRAVEAMQSVLD  
AEIRSRNDALRLKKKMEGDLNEMEIQLSHANRQVAETQKHLRVTQVQGLKDSQLHLDDAQRSNEDLKEQLAIVE  
RRNGLLQEELEEMKVALEQTERTRRLSEQELLDSSDRVQLLHSONTSLINTKKKLEADLAQCQAEVENS IQES  
RNAEEKAKKAITDAAMMAEELKKEQDTS AHLERMKKNLEQTVKDLQHRLEAEQLALKGGKKQIQKLEARVRE  
LESELD AEQKRGAEALKG AHKYERKVKEMTYQAEEDRKNILRLQDLVDK LQAKVKS YKRQAEAEAEQANTQLS  
RCRRVQHELEEAERADIAESQVNLRAKSRDVGQKMEE\*  
>rs46409593\_ENSMUSP00000104324\_c.1708:C>A\_p.P570H  
ENSMUST00000108684.8|Myh13-202|ENSMUSG00000060180|+|chr11:g.67233191:C>A  
MSSDAEMAI FGEAAPYLKPEKERIEAQNRPFDSKKACFAVDDKEMYVKGMIQSRENDKVI VKTLDRELTN  
SDQVFPMPNPPKFDKIEDMAMMTHLHEPAVLYNLKERYAAMMIYTYSGLFCVTVNPKWLPVYNPEVVAAYRGK  
KRQEAPPHIFISISDNAYQFMLTDRDNQSILITGESGAGKTVNTRKVIQYFATIAVTGDKKKEQQPGKMQGTLE  
DQIIQANPLLEAFGNAKTVRNDNSSRFGKFI R IHFGATGKLASADIETYLLEKSRVTFQLSSERSYHIFYQIM  
SNKKPELIDLLL ISTNPFDFPFVVSQGEVTVASIDDSEELLATDNAIDILGFSPEEKVGIYKLTGAVMHYGNMK  
FKQKQREEQAEPDGEVADKAGYLMGLNSAEMLKGLCCPRVKVGN EYVTKGQNVQVTVNSV GALAKAVYEKMF  
LWMVTRINQQLDTKQPRQYFIGVLDIAGFEIFDFNSLEQLCINF TNEKLQOFFNHHMFVLEQEEYKKEGIEWE  
FIDFGMDLAACIELIEKPMGIFSI LEEECMF PKATDTSFKNKLYDQHLGKSNNFQPKKHTKGKAEAHFSLVHY  
AGTVDYNIAGWLDKNKDP LNETVVGLYQKSSLLKLSFLFSNYAGAEAGDSAGGKGGKGGKSSFFQTVSAVFRE  
NLNKLMTNLRSTHPHFVRCLIPNETKTPGVMDHYLVMHQLRCNGVLEGI R ICRKGFPSRILYADFKQRYRILN  
ASAIPEGQFIDSKNASEKLLNSIDVDREQFRFGHTKVF FFKAGLLGLLEEMRDEKLVTLMTRTQAVCRGYLMRV  
EFKKMMERRESIFCIQYNVRSFMNVKHWPMNLFKIKPLLSAEAEKEMATMKEDFERAKEDLARSEARRKE  
LEEKMVSL LQEKNDLQVQSE TENLMDAEERCEGLIKSKIQL EAKVKELNERLEEEEMNSELVAKRNLED  
KCSSLKRDI DDLELTLTKVEKEKHATENKVKNLSEEMTALEETISKLTKEKKS LQEAHQQTLDLQVEEDKVN  
GLIKINVKLEQQTDDLEGSLEQEKKLRADLERVVRKLEGLDKMSQESIMDLENDTQQLEEK LKKKEFEMS QLO  
TRIDDEQVLSLQ LQKKIKELQARTEEELEEIEAEHTVRAKIEKQRSDLARELEEISERLEEASGATS AQIEMN  
KKRESEFQKLRDL EEA TLQHEATAATLRKKHADTV AELGEQIDNLQRVKQKLEKEKSELKMEIDDMASNIET  
VSKSKNMRMERCSVEDQFNEIKAKDDQQTQLIHDLNMQKARLQTQNGELSHQVEEKESLVSQ LTKSKQALTQ  
QLEELKRQLEEEETKAKNALAHALQSSRHCDLLREQYEEEEEQEGKAE LQRALSKANSEVAQWRTKYETDAI QRT  
EELEEAKK KLAQRLQEA EENTEASNSK CASLEKTKQRLQGEVDDLMLDLERANTACATLDKKQRNF DKVLAEW  
KQKLD ESQAELEAAQKESRSLSTEIFKMRNAYEEVVDQLET LRRENKNLQEEISDLTEQIAETGKNLQEV EKT  
KKQVEQEKSDLQAALAEVEGSLHEEESKILRVQLELSQVKSELDRKVTEKDEEIEQIKRNSQRAVEAMQSVLD  
AEIRSRNDALRLKKKMEGDLNEMEIQLSHANRQVAETQKHLRVTQVQGLKDSQLHLDDAQRSNEDLKEQLAIVE  
RRNGLLQEELEEMKVALEQTERTRRLSEQELLDSSDRVQLLHSONTSLINTKKKLEADLAQCQAEVENS IQES  
RNAEEKAKKAITDAAMMAEELKKEQDTS AHLERMKKNLEQTVKDLQHRLEAEQLALKGGKKQIQKLEARVRE  
LESELD AEQKRGAEALKG AHKYERKVKEMTYQAEEDRKNILRLQDLVDK LQAKVKS YKRQAEAEAEQANTQLS  
RCRRVQHELEEAERADIAESQVNLRAKSRDVGQKMEE\*  
>rs46409593\_ENSMUSP00000137731\_c.1708:C>A\_p.P570H  
ENSMUST00000180845.8|Myh13-203|ENSMUSG00000060180|+|chr11:g.67233191:C>A  
MSSDAEMAI FGEAAPYLKPEKERIEAQNRPFDSKKACFAVDDKEMYVKGMIQSRENDKVI VKTLDRELTN  
SDQVFPMPNPPKFDKIEDMAMMTHLHEPAVLYNLKERYAAMMIYTYSGLFCVTVNPKWLPVYNPEVVAAYRGK  
KRQEAPPHIFISISDNAYQFMLTDRDNQSILITGESGAGKTVNTRKVIQYFATIAVTGDKKKEQQPGKMQGTLE  
DQIIQANPLLEAFGNAKTVRNDNSSRFGKFI R IHFGATGKLASADIETYLLEKSRVTFQLSSERSYHIFYQIM  
SNKKPELIDLLL ISTNPFDFPFVVSQGEVTVASIDDSEELLATDNAIDILGFSPEEKVGIYKLTGAVMHYGNMK  
FKQKQREEQAEPDGEVADKAGYLMGLNSAEMLKGLCCPRVKVGN EYVTKGQNVQVTVNSV GALAKAVYEKMF  
LWMVTRINQQLDTKQPRQYFIGVLDIAGFEIFDFNSLEQLCINF TNEKLQOFFNHHMFVLEQEEYKKEGIEWE  
FIDFGMDLAACIELIEKPMGIFSI LEEECMF PKATDTSFKNKLYDQHLGKSNNFQPKKHTKGKAEAHFSLVHY  
AGTVDYNIAGWLDKNKDP LNETVVGLYQKSSLLKLSFLFSNYAGAEAGDSAGGKGGKGGKSSFFQTVSAVFRE  
NLNKLMTNLRSTHPHFVRCLIPNETKTPGVMDHYLVMHQLRCNGVLEGI R ICRKGFPSRILYADFKQRYRILN  
ASAIPEGQFIDSKNASEKLLNSIDVDREQFRFGHTKVF FFKAGLLGLLEEMRDEKLVTLMTRTQAVCRGYLMRV  
EFKKMMERRESIFCIQYNVRSFMNVKHWPMNLFKIKPLLSAEAEKEMATMKEDFERAKEDLARSEARRKE  
LEEKMVSL LQEKNDLQVQSE TENLMDAEERCEGLIKSKIQL EAKVKELNERLEEEEMNSELVAKRNLED  
KCSSLKRDI DDLELTLTKVEKEKHATENKVKNLSEEMTALEETISKLTKEKKS LQEAHQQTLDLQVEEDKVN  
GLIKINVKLEQQTDDLEGSLEQEKKLRADLERVVRKLEGLDKMSQESIMDLENDTQQLEEK LKKKEFEMS QLO  
TRIDDEQVLSLQ LQKKIKELQARTEEELEEIEAEHTVRAKIEKQRSDLARELEEISERLEEASGATS AQIEMN  
KKRESEFQKLRDL EEA TLQHEATAATLRKKHADTV AELGEQIDNLQRVKQKLEKEKSELKMEIDDMASNIET  
VSKSKNMRMERCSVEDQFNEIKAKDDQQTQLIHDLNMQKARLQTQNGELSHQVEEKESLVSQ LTKSKQALTQ  
QLEELKRQLEEEETKAKNALAHALQSSRHCDLLREQYEEEEEQEGKAE LQRALSKANSEVAQWRTKYETDAI QRT  
EELEEAKK KLAQRLQEA EENTEASNSK CASLEKTKQRLQGEVDDLMLDLERANTACATLDKKQRNF DKVLAEW  
KQKLD ESQAELEAAQKESRSLSTEIFKMRNAYEEVVDQLET LRRENKNLQEEISDLTEQIAETGKNLQEV EKT

KKQVEQEKSDLQAALAEVEGSLHEEESKILRVQLELSQVKSSELDRKVTEKDEEIEQIKRNSQRAVEAMQSVLD  
AEIRSRNDALRLKKKMEGDLNEMEIQLSHANRQVAETQKHLRVTQGGQLKDSQLHLDDAQRSNEDLKEQLAIVE  
RRNGLLQEELEEMKVALEQTERTRRLSEQELLDSSDRVQLLHSQNTSLINTKKKLEADLAQCQAEVENS IQES  
RNAEEKAKKAITDAAMMAEELKKEQDTS AHLERMKKNLEQTVKDLQHRLEAEQLALKGGKKQIQKLEARVRE  
LESELD AEQKRGAEALKG AHKYERKVKEMTYQAEEDRKNILRLQDLVDK LQAKVKS YKRQAEAEAEQANTQLS  
RCRRVQHELEEAERADIAESQVNLKRAKSRDVGQKMEE\*  
>rs46409593\_ENSMUSP00000080584\_c.1708:C>A\_p.P570H  
ENSMUST00000081911.12|Myh13-201|ENSMUSG00000060180|+|chr11:g.67233191:C>A  
MSSDAEMAI FGEAAPYLRKPEKERIEAQNRPFDSKKACFAVDDKEMYVKGMIQSRENDKVI VKTLDRELT LN  
SDQVFPMPNPPKFDKIEDMAMMTHLHEPAVLYNLKERYAAMMIYTYSGLFCVTVNPKWLPVYNPEVVAAYRGK  
KRQEAPPHIFISISDNAYQFMLTDRDNQSILITGESGAGKTVNTRKVIQYFATIAVTGDKKKEQQPGKMQGTLE  
DQIIQANPLLEAFGNAKTVRNDNSSRFGKFIRIHFGATGKLASADIETYLLKSRVTFQLSSERSYHIFYQIM  
SNKKPELIDLLL ISTNPFDFPFVVSQGEVTVASIDDSEELLATDNAIDILGFSPEEKVGIYKLTGAVMHYGNMK  
FKQKQREEQAEPDGT EADKAGYLMGLNSAEMLKGLCCPRVKVGN EYVTKGQNVQVTVNSVGALAKAVYEKMF  
LWMVTRINQQLDTKQPRQYFIGVLDIAGFEIFDFNSLEQLCINF TNEKLQOFFNHHMFVLEQEEYKKEGIEWE  
FIDFGMDLAACIELIEKPMGIFSI LEEECMF PKATDTSFKNKLYDQHLGKSNNFQKPKHTKGAEAHFSLVHY  
AGTVDYNIAGWLDKNDPLNETVVGLYQKSSLLKLSFLFSNYAGAEAGDSAGGKGGKGGSSFFQTVSAVFRE  
NLNKLMTNLRSTHPHFVRCLIPNETKTPGVMDHYLVMHQLRCNGVLEGI RICKRGFPSRILYADFQRIRILN  
ASAIPEGQFIDSKNASEKLLNSIDVDREQFRFGHTKVFVKAGLLGLLEEMRDEKLVTLMTRTQAVCRGYLMRV  
EFKKMMERRESIFCIQYNVRSFMNVKHWPWMLFFKIKPLLSAEAEKEMATMKEDFERAKEDLARSEARRKE  
LEEKMVSLLOEKNDLQVQSE TENLMDAEERCEGLIKSKIQLEAKVKELNERLEEEEMNSELVAKKRLED  
KCSSLKRDI DDLELTLTKVEKEKHATENKVKNLSEEMTALEETISKLTKEKKS LQEAHQQT LDDLQVEEDKVN  
GLIKINVKLEQQTDDLEGSLEQEKLRADLERVVRKLEGLDKMSQESIMDLENDTQQLEEK LKKKEFEMS QLQ  
TRIDDEQVLSLQ LQKKIKELQARTEEELEEIEAEHTVRAKIEKQRS DLARELEEISERLEEASGATS AQIEMN  
KKRESEFQKLRDRLEEATLQHEATAATLRKKHADTVAELGEQIDNLQRVKQKLEKEKSELKMEIDDMASNIET  
VSKSKSNMERMCRSVDEQFNEIKAKDDQQTQLIHDLNMQKARLQTQNGELSHQVEEKESLVSQ LTKSKQALTO  
QLEELKRQLEEEETKAKNALAHALQSSRHDCDLLREQYEEEQEGKAELQRALSKANSEVAQWRTKYETDAIQRT  
EELEEAKKLAQRLQEAEE NTEASNSK CASLEKTKQRLQGEVDDLMLDLERANTACATLDKKQRNF DKVLAEW  
KQKLD ESQAELEAAQKESRSLSTEIFKMRNAYEEVVDQLET LRRENKNLQEEISDLTEQIAETGKNLQEV EKT  
KKQVEQEKSDLQAALAEVEGSLHEEESKILRVQLELSQVKSSELDRKVTEKDEEIEQIKRNSQRAVEAMQSVLD  
AEIRSRNDALRLKKKMEGDLNEMEIQLSHANRQVAETQKHLRVTQGGQLKDSQLHLDDAQRSNEDLKEQLAIVE  
RRNGLLQEELEEMKVALEQTERTRRLSEQELLDSSDRVQLLHSQNTSLINTKKKLEADLAQCQAEVENS IQES  
RNAEEKAKKAITDAAMMAEELKKEQDTS AHLERMKKNLEQTVKDLQHRLEAEQLALKGGKKQIQKLEARVRE  
LESELD AEQKRGAEALKG AHKYERKVKEMTYQAEEDRKNILRLQDLVDK LQAKVKS YKRQAEAEAEQANTQLS  
RCRRVQHELEEAERADIAESQVNLKRAKSRDVGQKMEE\*  
>rs212817599\_ENSMUSP00000104324\_c.1712:CA>C\_p.T571del-fs  
ENSMUST00000108684.8|Myh13-202|ENSMUSG00000060180|+|chr11:g.67233195:CA>C  
MSSDAEMAI FGEAAPYLRKPEKERIEAQNRPFDSKKACFAVDDKEMYVKGMIQSRENDKVI VKTLDRELT LN  
SDQVFPMPNPPKFDKIEDMAMMTHLHEPAVLYNLKERYAAMMIYTYSGLFCVTVNPKWLPVYNPEVVAAYRGK  
KRQEAPPHIFISISDNAYQFMLTDRDNQSILITGESGAGKTVNTRKVIQYFATIAVTGDKKKEQQPGKMQGTLE  
DQIIQANPLLEAFGNAKTVRNDNSSRFGKFIRIHFGATGKLASADIETYLLKSRVTFQLSSERSYHIFYQIM  
SNKKPELIDLLL ISTNPFDFPFVVSQGEVTVASIDDSEELLATDNAIDILGFSPEEKVGIYKLTGAVMHYGNMK  
FKQKQREEQAEPDGT EADKAGYLMGLNSAEMLKGLCCPRVKVGN EYVTKGQNVQVTVNSVGALAKAVYEKMF  
LWMVTRINQQLDTKQPRQYFIGVLDIAGFEIFDFNSLEQLCINF TNEKLQOFFNHHMFVLEQEEYKKEGIEWE  
FIDFGMDLAACIELIEKPMGIFSI LEEECMF PKATDTSFKNKLYDQHLGKSNNFQKPKPTKARPKPTSPWCTM  
RALWITTS LAGWIRTRTH  
>rs212817599\_ENSMUSP00000137731\_c.1712:CA>C\_p.T571del-fs  
ENSMUST00000108045.8|Myh13-203|ENSMUSG00000060180|+|chr11:g.67233195:CA>C  
MSSDAEMAI FGEAAPYLRKPEKERIEAQNRPFDSKKACFAVDDKEMYVKGMIQSRENDKVI VKTLDRELT LN  
SDQVFPMPNPPKFDKIEDMAMMTHLHEPAVLYNLKERYAAMMIYTYSGLFCVTVNPKWLPVYNPEVVAAYRGK  
KRQEAPPHIFISISDNAYQFMLTDRDNQSILITGESGAGKTVNTRKVIQYFATIAVTGDKKKEQQPGKMQGTLE  
DQIIQANPLLEAFGNAKTVRNDNSSRFGKFIRIHFGATGKLASADIETYLLKSRVTFQLSSERSYHIFYQIM  
SNKKPELIDLLL ISTNPFDFPFVVSQGEVTVASIDDSEELLATDNAIDILGFSPEEKVGIYKLTGAVMHYGNMK  
FKQKQREEQAEPDGT EADKAGYLMGLNSAEMLKGLCCPRVKVGN EYVTKGQNVQVTVNSVGALAKAVYEKMF  
LWMVTRINQQLDTKQPRQYFIGVLDIAGFEIFDFNSLEQLCINF TNEKLQOFFNHHMFVLEQEEYKKEGIEWE  
FIDFGMDLAACIELIEKPMGIFSI LEEECMF PKATDTSFKNKLYDQHLGKSNNFQKPKPTKARPKPTSPWCTM  
RALWITTS LAGWIRTRTH

```

>rs212817599_ENSMUSP00000080584_c.1712:CA>C_p.T571del-fs
ENSMUST00000081911.12|Myh13-
201|ENSMUSG00000060180|+|chr11:g.67233195:CA>C
MSSDAEMAI FGEAAPYL RKP EKERIEAQNRPFDSKKACFAVDDKEMYVKGMIQSRENDKVI VKTLD DRELTLN
SDQVFPMNPPKFDKIEDMAMMTHLHEPAVLYNLKERYAAWMIYTYSGLFCVTVNPKWLPVYNPEVVAAYRGK
KRQEAPPHIFSI SDNAYQFMLTDRDNQSILITGESGAGKTVNTRKVIQYFATIAVTGDKKKEQQPGKMQGTLE
DQIIQANPLLEAFGNAKTVRNDNSSRFGKFI RIFHGATGKLASADIETYLLKSRVTFQLSSERSYHIFYQIM
SNKKPELIDLLL ISTNPFDFPFVVSQGEVTVASIDDSEELLATDNAIDILGFSPEEKVGIYKLTGAVMHYGNMK
FKQKQREEQAEPDGTEVADKAGYLMGLNSAEMLKGLCCPRVKVGN EYVTKGQNVQVTVNSVGALAKAVYEKMF
LWMVTRINQQLD TKQPRQYF IGVLDIAGFEIFDFNSLEQLCINF TNEKLQOFFNHHMFVLEQEEYKKEGIEWE
FIDFGMDLAACIELIEKPMGIFSI LEEECMF PKATDTSFKNKLYDQHLGKSNNFQKPKPTKARPKPTSPWCTM
RALWITTSLAGWIRTRTH
>rs51090810_ENSMUSP00000104324_c.1779:G>T_p.G594C
ENSMUST00000108684.8|Myh13-202|ENSMUSG00000060180|+|chr11:g.67233262:G>T
MSSDAEMAI FGEAAPYL RKP EKERIEAQNRPFDSKKACFAVDDKEMYVKGMIQSRENDKVI VKTLD DRELTLN
SDQVFPMNPPKFDKIEDMAMMTHLHEPAVLYNLKERYAAWMIYTYSGLFCVTVNPKWLPVYNPEVVAAYRGK
KRQEAPPHIFSI SDNAYQFMLTDRDNQSILITGESGAGKTVNTRKVIQYFATIAVTGDKKKEQQPGKMQGTLE
DQIIQANPLLEAFGNAKTVRNDNSSRFGKFI RIFHGATGKLASADIETYLLKSRVTFQLSSERSYHIFYQIM
SNKKPELIDLLL ISTNPFDFPFVVSQGEVTVASIDDSEELLATDNAIDILGFSPEEKVGIYKLTGAVMHYGNMK
FKQKQREEQAEPDGTEVADKAGYLMGLNSAEMLKGLCCPRVKVGN EYVTKGQNVQVTVNSVGALAKAVYEKMF
LWMVTRINQQLD TKQPRQYF IGVLDIAGFEIFDFNSLEQLCINF TNEKLQOFFNHHMFVLEQEEYKKEGIEWE
FIDFGMDLAACIELIEKPMGIFSI LEEECMF PKATDTSFKNKLYDQHLGKSNNFQKPKPTKGAEAHFSLVHY
AGTVDYNIACWLDKNKDP LNETVVGLYQKSS LKLLSFLFSNYAGAEAGDSAGGKKGKGGKSS FQTVSAVFRE
NLNKLMTNLRSTHPHFVRCLIPNETKTPGVMDHYLVMHQ LRCNGVLEGI R ICRKGFPSRILYADFKQRYRILN
ASAIPEGQFIDSKNASEKLLNSIDVDREQFRFGHTKVFFKAGLLGLLEEMRDEKLVTLMTRTQAVCRGYLMRV
EFKKMMERRESIFCIQYNVRSFMNVKHWPMNLF FFKIKPLLSABAEKEMATMKEDFERAKEDLARSEARRKE
LEEKMVSL LQEKNDLQVQSE TENLMDAEERCEGLIKSKIQL EAKVKELNERLEEEEMNSELVAKKRNL E D
KCSSLKRDI DDLELTLTKVEKEKHATENKVKNLSEEMTALEETISKLTKEKKS LQEAHQQTLD DLQVEEDKVN
GLIKINVKLEQQTDDLEGSLEQEKKLRADLERV KRKLEGLKMSQESIMDLENDTQQLEEK LKKKEFEMS Q LQ
TRIDDEQVLSLQ LQKKIKELQARTELEEEIEAEHTVRAKIEKQRS DLARELEEISERLEEASGATS AQIEMN
KKRESEFQKLRRDLEEATLQHEATAATLRKKHADTV AELGEQIDNLQRVKQKLEKEKSELKMEIDDMASNIET
VSKSKSNMERMCRSVEDQFNEIKAKDDQQTQLIHDLNMQKARLQTQNGELSHQVEEKE S LVSQ LTKSKQALTQ
QLEELKRQLEEEETKAKNALAHALQSSRHDCDLLREQYEEEQEGKAE LQRALSKANSEVAQWRTKYETDAI QRT
EELEEAKK KLAQRLQEA EENTEASNSK CASLEKTKQRLQGEVDDLMLDLERANTACATLDKKQRNF DKVLAEW
KQKLDESQAEEAAQKESRSLSTEIFKMRNAYEEVVDQLET LRRENKNLQEEISDLTEQIAETGKNLQEV EKT
KKQVEQEKSDLQA ALEEVESLEHEESKILRVQLELSQVKSELDRKVTEKDEEIEQIKRNSQRAVEAMQSVLD
AEIRSRNDALRLK KMEGDLNEMEIQLSHANRQVAETQKHLRTVQGGQLKDSQLHLDDAQRSNEDLKEQLAIVE
RRNGLLQEELEEMKVALEQTERTRRLSEQELLDSSDRVQLLHSQNTSLINTKKKLEADLAQCQAEVENS IQES
RNAEEKAKKAITDAAMMAEELKKEQD TSAHLERMKNLEQTVKDLQHRLD EAEQLALKGGKKQIQKLEARVRE
LESELDAEQKRGAEALKG AHKYERKVKEMTYQAEEDRKNILRLQDLVDK LQAKVKSYKRQAE EAEQANTQLS
RCRRVQHELEEAERADIAESQVNKLRAKSRDVGQK MEE*
>rs51090810_ENSMUSP00000137731_c.1779:G>T_p.G594C
ENSMUST00000180845.8|Myh13-203|ENSMUSG00000060180|+|chr11:g.67233262:G>T
MSSDAEMAI FGEAAPYL RKP EKERIEAQNRPFDSKKACFAVDDKEMYVKGMIQSRENDKVI VKTLD DRELTLN
SDQVFPMNPPKFDKIEDMAMMTHLHEPAVLYNLKERYAAWMIYTYSGLFCVTVNPKWLPVYNPEVVAAYRGK
KRQEAPPHIFSI SDNAYQFMLTDRDNQSILITGESGAGKTVNTRKVIQYFATIAVTGDKKKEQQPGKMQGTLE
DQIIQANPLLEAFGNAKTVRNDNSSRFGKFI RIFHGATGKLASADIETYLLKSRVTFQLSSERSYHIFYQIM
SNKKPELIDLLL ISTNPFDFPFVVSQGEVTVASIDDSEELLATDNAIDILGFSPEEKVGIYKLTGAVMHYGNMK
FKQKQREEQAEPDGTEVADKAGYLMGLNSAEMLKGLCCPRVKVGN EYVTKGQNVQVTVNSVGALAKAVYEKMF
LWMVTRINQQLD TKQPRQYF IGVLDIAGFEIFDFNSLEQLCINF TNEKLQOFFNHHMFVLEQEEYKKEGIEWE
FIDFGMDLAACIELIEKPMGIFSI LEEECMF PKATDTSFKNKLYDQHLGKSNNFQKPKPTKGAEAHFSLVHY
AGTVDYNIACWLDKNKDP LNETVVGLYQKSS LKLLSFLFSNYAGAEAGDSAGGKKGKGGKSS FQTVSAVFRE
NLNKLMTNLRSTHPHFVRCLIPNETKTPGVMDHYLVMHQ LRCNGVLEGI R ICRKGFPSRILYADFKQRYRILN
ASAIPEGQFIDSKNASEKLLNSIDVDREQFRFGHTKVFFKAGLLGLLEEMRDEKLVTLMTRTQAVCRGYLMRV
EFKKMMERRESIFCIQYNVRSFMNVKHWPMNLF FFKIKPLLSABAEKEMATMKEDFERAKEDLARSEARRKE
LEEKMVSL LQEKNDLQVQSE TENLMDAEERCEGLIKSKIQL EAKVKELNERLEEEEMNSELVAKKRNL E D
KCSSLKRDI DDLELTLTKVEKEKHATENKVKNLSEEMTALEETISKLTKEKKS LQEAHQQTLD DLQVEEDKVN
GLIKINVKLEQQTDDLEGSLEQEKKLRADLERV KRKLEGLKMSQESIMDLENDTQQLEEK LKKKEFEMS Q LQ

```

TRIDDEQVLSLQLOKKIKELQARTEEELEEIEAEHTVRAKIEKQRSDLARELEEISERLEEASGATSAQIEMN  
KKRESEFQKLRRDLEEATLQHEATAATLRKKHADTVAEELGEQIDNLQRVKQKLEKEKSELKMEIDDMASNIET  
VSKSKSNMERMCRSVEDQFNEIKAKDDQQTQLIHDLNMQKARLQTQNGELSHQVEEKESSLVSQLTKSKQALTO  
QLEELKRQLEEEETKAKNALAHALQSSRHDCDLLREQYEEEQEGKAEQALRALSKANSEVAQWRTKYETDAIQRT  
EELEEAKKLAQRLQEAEEENTEASNSKSCASLEKTKQRLQGEVDDMLDLERANTACATLDKKQRNFDKVLAEW  
KQKLDSEQAEEAAQKESRSLSTEIFKMRNAYEEVVDQLETLRRENKNLQEEISDLTEQIAETGKNLQEVVEKT  
KKQVEQEKSDLQAALAEVEGSLHEEESKILRVQLELSQVKSELDRKVTEKDEEIEQIKRNSQRAVEAMQSVLD  
AEIRSRNDALRLKKKMEGDLNEMEIQLSHANRQVAETQKHLRTVQGGQLKDSQLHLDDAQRSNEDLKEQLAIVE  
RRNGLLQEELEEMKVALEQTERTRRLSEQELLDSSDRVQLLHSQNTSLINTKKKLEADLAQCCQAEVENSIQES  
RNAEEKAKKAITDAAMMAEELKKEQDTS AHLERMKNLEQTVKDLQHRLEAEQLALKGGKKQIQKLEARVRE  
LESELDAEQKRGAEALKGAKHYERKVKEMTYQAEEDRKNILRLQDLVDKLOAKVKS YKRQAEAEAEQANTQLS  
RCRRVQHELEEAERADIAESQVNLRAKSRDVGQKMEE\*

>rs51090810\_ENSMUSP00000080584\_c.1779:G>T\_p.G594C

ENSMUST00000081911.12|Myh13-201|ENSMUSG00000060180|+|chr11:g.67233262:G>T  
MSSDAEMAI FGEAAPYLKPEKERIEAQNRPFDSKKACFAVDDKEMYVKGMIQSRENDKVI VKTLDRELTN  
SDQVFPMPNPPKFDKIEDMAMMTHLHEPAVLYNLKERYAAMIYTYSGLFCVTVNPKWLPVYNPEVVAAYRGK  
KRQEAPPHIFSI SDNAYQFMLTDRDNQSILITGESGAGKTVNTRKVIQYFATIAVTGDKKKEQQPGKMGTLE  
DQI IQANPLLEAFGNAKTVRNDNSSRFGKFI RIFHGATGKLASADIETYLLEKSRVTFQLSSERSYHIFYQIM  
SNKKPELIDLLL ISTNPFDFPFVVSQGEVTVASIDDSEELLATDNAIDILGFSPEEKVGIYKLTGAVMHYGNMK  
FKQKQREEQAEPDGTEVADKAGYLMGLNSAEMLKGLCCPRVKVGNVYVTKGQNVQVTVNSV GALAKAVYEKMF  
LWMVTRINQQLDTKQPRQYFIGVLDIAGFEIFDFNSLEQLCINF TNEKLQOFFNHHMFVLEQEEYKKEGIEWE  
FIDFGMDLAACIELIEKPMGIFSI LEEECMF PKATDTSFKNKLYDQHLGKSNNFQKPKPTKGKAEAHFSLVHY  
AGTVDYNIACWLDKNKDP LNETVVGLYQKSS LKLSFLFSNYAGAEAGDSAGGKKGKGGKSS FQTVSAVFRE  
NLNKLMTNLRSTH P FVRCLIPNETKTPGVMDHYLVMHQLR CNGVLEGIRICRKGFP SRI LYADFKQRYRILN  
ASAIPEGQFIDSKNASEKLLNSIDVDREQFRFGHTKVF KAGLLGLLEEMRDEKLVTLMTRTQAVCRGYLMRV  
EFKMMERRESIFCIQYNVRSFMNVKHW PWNLF FFKIKPLLKSABAEKEMATMKEDFERAKEDLARSEARRKE  
LEEKMVSL LQEKNDLQVQSE TENLMDAEERCEGLIKSKIQL EAKVKELNERLEEEEMNSELVAKKRNL  
KCSSLKRDID DLELTLTKVEKEKHATENKVKNLSEEMTALEETISKLTKEKKS LQEAHQQTLDLQVEEDKVN  
GLIKINVKLEQQTDDLEGSLEQEKKLRADLERV KRKLEGLKMSQESIMDLENDTQQLEEK LKKKEFEMS QLO  
TRIDDEQVLSLQLOKKIKELQARTEEELEEIEAEHTVRAKIEKQRSDLARELEEISERLEEASGATSAQIEMN  
KKRESEFQKLRRDLEEATLQHEATAATLRKKHADTVAEELGEQIDNLQRVKQKLEKEKSELKMEIDDMASNIET  
VSKSKSNMERMCRSVEDQFNEIKAKDDQQTQLIHDLNMQKARLQTQNGELSHQVEEKESSLVSQLTKSKQALTO  
QLEELKRQLEEEETKAKNALAHALQSSRHDCDLLREQYEEEQEGKAEQALRALSKANSEVAQWRTKYETDAIQRT  
EELEEAKKLAQRLQEAEEENTEASNSKSCASLEKTKQRLQGEVDDMLDLERANTACATLDKKQRNFDKVLAEW  
KQKLDSEQAEEAAQKESRSLSTEIFKMRNAYEEVVDQLETLRRENKNLQEEISDLTEQIAETGKNLQEVVEKT  
KKQVEQEKSDLQAALAEVEGSLHEEESKILRVQLELSQVKSELDRKVTEKDEEIEQIKRNSQRAVEAMQSVLD  
AEIRSRNDALRLKKKMEGDLNEMEIQLSHANRQVAETQKHLRTVQGGQLKDSQLHLDDAQRSNEDLKEQLAIVE  
RRNGLLQEELEEMKVALEQTERTRRLSEQELLDSSDRVQLLHSQNTSLINTKKKLEADLAQCCQAEVENS IQES  
RNAEEKAKKAITDAAMMAEELKKEQDTS AHLERMKNLEQTVKDLQHRLEAEQLALKGGKKQIQKLEARVRE  
LESELDAEQKRGAEALKGAKHYERKVKEMTYQAEEDRKNILRLQDLVDKLOAKVKS YKRQAEAEAEQANTQLS  
RCRRVQHELEEAERADIAESQVNLRAKSRDVGQKMEE\*

>rs29389516\_ENSMUSP00000104324\_c.5735:G>T\_p.E1912D

ENSMUST00000108684.8|Myh13-202|ENSMUSG00000060180|+|chr11:g.67261814:G>T  
MSSDAEMAI FGEAAPYLKPEKERIEAQNRPFDSKKACFAVDDKEMYVKGMIQSRENDKVI VKTLDRELTN  
SDQVFPMPNPPKFDKIEDMAMMTHLHEPAVLYNLKERYAAMIYTYSGLFCVTVNPKWLPVYNPEVVAAYRGK  
KRQEAPPHIFSI SDNAYQFMLTDRDNQSILITGESGAGKTVNTRKVIQYFATIAVTGDKKKEQQPGKMGTLE  
DQI IQANPLLEAFGNAKTVRNDNSSRFGKFI RIFHGATGKLASADIETYLLEKSRVTFQLSSERSYHIFYQIM  
SNKKPELIDLLL ISTNPFDFPFVVSQGEVTVASIDDSEELLATDNAIDILGFSPEEKVGIYKLTGAVMHYGNMK  
FKQKQREEQAEPDGTEVADKAGYLMGLNSAEMLKGLCCPRVKVGNVYVTKGQNVQVTVNSV GALAKAVYEKMF  
LWMVTRINQQLDTKQPRQYFIGVLDIAGFEIFDFNSLEQLCINF TNEKLQOFFNHHMFVLEQEEYKKEGIEWE  
FIDFGMDLAACIELIEKPMGIFSI LEEECMF PKATDTSFKNKLYDQHLGKSNNFQKPKPTKGKAEAHFSLVHY  
AGTVDYNIAGWLDKNKDP LNETVVGLYQKSS LKLSFLFSNYAGAEAGDSAGGKKGKGGKSS FQTVSAVFRE  
NLNKLMTNLRSTH P FVRCLIPNETKTPGVMDHYLVMHQLR CNGVLEGIRICRKGFP SRI LYADFKQRYRILN  
ASAIPEGQFIDSKNASEKLLNSIDVDREQFRFGHTKVF KAGLLGLLEEMRDEKLVTLMTRTQAVCRGYLMRV  
EFKMMERRESIFCIQYNVRSFMNVKHW PWNLF FFKIKPLLKSABAEKEMATMKEDFERAKEDLARSEARRKE  
LEEKMVSL LQEKNDLQVQSE TENLMDAEERCEGLIKSKIQL EAKVKELNERLEEEEMNSELVAKKRNL  
KCSSLKRDID DLELTLTKVEKEKHATENKVKNLSEEMTALEETISKLTKEKKS LQEAHQQTLDLQVEEDKVN  
GLIKINVKLEQQTDDLEGSLEQEKKLRADLERV KRKLEGLKMSQESIMDLENDTQQLEEK LKKKEFEMS QLO

TRIDDEQVLSLQLOKKIKELQARTEEELEEIEAEHTVRAKIEKQRSDLARELEEISERLEEASGATSAQIEMN  
KKRESEFQKLRRDLEEATLQHEATAATLRKKHADTVAEELGEQIDNLQRVKQKLEKEKSELKMEIDDMASNIET  
VSKSKSNMERMCRSVEDQFNEIKAKDDQQTQLIHDLNMQKARLQTQNGELSHQVEEKESSLVSQLTKSKQALTO  
QLEELKRQLEEEETKAKNALAHALQSSRHDCDLLREQYEEEQEGKAELQRALSKANSEVAQWRTKYETDAIQRT  
EELEEAKKLAQRLQEAENTEASNSKSCASLEKTKQRLQGEVDDMLDLERANTACATLDKKQRNFQVLAEW  
KQKLDSEQAEEAAQKESRSLSTEIFKMRNAYEEVVDQLETLRRENKNLQEEISDLTEQIAETGKNLQEVKKT  
KKQVEQEKSDLQAALAEVEGSLHEEESKILRVQLELSQVKSELDRKVTEKDEEIEQIKRNSQRAVEAMQSVLD  
AEIRSRNDALRLKKKMEGDLNEMEIQLSHANRQVAETQKHLRTVQGQLKDSQLHLDDAQRSNEDLKEQLAIVE  
RRNGLLQEELEEMKVALEQTERTRRLSEQELLDSSDRVQLLHSQNTSLINTKKKLEADLAQCCQAEVENS IQES  
RNAEEKAKKAITDAAMMAEELKKEQDTS AHLERMKNLEQTVKDLQHRLDAAEQALALGGKKQIQKLEARVRE  
LESELDAEQKRGAEALGGAHKYERKVKEMTYQAEEDRKNILRLQDLVDKQAKVKS YKQAEAEAEQANTQLS  
RCRRVQHELEEAEDRADI AESQVNLRAKSRDVGQKMEE\*

>rs29389516\_ENSMUSP00000137731\_c.5735:G>T\_p.E1912D  
ENSMUST00000180845.8|Myh13-203|ENSMUSG00000060180|+|chr11:g.67261814:G>T  
MSSDAEMAI FGEAAPYLKPEKERIEAQNRPFDSKKACFAVDDKEMYVKGMIQSRENDKVI VKTLDRELTN  
SDQVFPMPNPPKFDKIEDMAMMTHLHEPAVLYNLKERYAAWMIYYSGLFCVTVNPKWLPVYNPEVVAAYRGK  
KRQEAPPHIFSI SDNAYQFMLTDRDNQSILITGESGAGKTVNTRKVIQYFATIAVTGDKKKEQQPGKMQGTLE  
DQIIQANPLLEAFGNAKTVRNDNSSRFGKFI R IHFGATGKLASADIETYLLKSRVTFQLSSERSYHIFYQIM  
SNKKPELIDLLL ISTNPFDFPFVVSQGEVTVASIDDSEELLATDNAIDILGFSPEEKVGIYKLTGAVMHYGNMK  
FKQKQREEQAEPDGTEVADKAGYLMGLNSAEMLKGLCCPRVKVGNVYVTKQNVQVQVTVNSVGLAKAVYKMF  
LWMVTRINQQLDQTKQPRQYFIGVLDIAGFEIFDFNSLEQLCINF TNEKLQOFFNHHMFVLEQEEYKKEGIEWE  
FIDFGMDLAACIELIEKPMGIFSI LEEECMF PKATDTSFKNKLYDQHLGKSNFQKPKPTKGKAEAHFSLVHY  
AGTVDYNIAGWLDKNKDP LNETVVGLYQKSS LKLSFLFSNYAGAEAGDSAGGKGGKGGKSS FQTVSAVFRE  
NLNKLMTNLRSTH P HVRC LI PNETKTPGVMDHYLVMHQ LRCNGVLEGI R ICRKGFPSRILYADFKQRYRILN  
ASAIPEGQFIDSKNASEKLLNSIDVDREQFRFGHTKVFVKAGLLGLLEEMRDEKLVTLMTRTQAVCRGYLMRV  
EFKKMMERRESIFCIQYNVRSFMNVKHWPMNLFKIKPLLKSAEAEKEMATMKEDFERAKEDLARSEARRKE  
LEEKMVSL LQEKNDLQVQSE TENLMDAEERCEGLIKSKIQL EAKVKELNERLEEEEEE MNS ELVAKKRNL ED  
KCSSLKRDI DDLELTLTKVEKEKHATENKVKNLSEEMTALEETISKLTKEKKS LQEAHQQTLDLQVEEDKVN  
GLIKINVKLEQQTDDLEGSLEQEKKLRADLERVVRKRLKGLKMSQESIMDLENDTQQLEEKLKKKEFEMS QLO  
TRIDDEQVLSLQLOKKIKELQARTEEELEEIEAEHTVRAKIEKQRSDLARELEEISERLEEASGATSAQIEMN  
KKRESEFQKLRRDLEEATLQHEATAATLRKKHADTVAEELGEQIDNLQRVKQKLEKEKSELKMEIDDMASNIET  
VSKSKSNMERMCRSVEDQFNEIKAKDDQQTQLIHDLNMQKARLQTQNGELSHQVEEKESSLVSQLTKSKQALTO  
QLEELKRQLEEEETKAKNALAHALQSSRHDCDLLREQYEEEQEGKAELQRALSKANSEVAQWRTKYETDAIQRT  
EELEEAKKLAQRLQEAENTEASNSKSCASLEKTKQRLQGEVDDMLDLERANTACATLDKKQRNFQVLAEW  
KQKLDSEQAEEAAQKESRSLSTEIFKMRNAYEEVVDQLETLRRENKNLQEEISDLTEQIAETGKNLQEVKKT  
KKQVEQEKSDLQAALAEVEGSLHEEESKILRVQLELSQVKSELDRKVTEKDEEIEQIKRNSQRAVEAMQSVLD  
AEIRSRNDALRLKKKMEGDLNEMEIQLSHANRQVAETQKHLRTVQGQLKDSQLHLDDAQRSNEDLKEQLAIVE  
RRNGLLQEELEEMKVALEQTERTRRLSEQELLDSSDRVQLLHSQNTSLINTKKKLEADLAQCCQAEVENS IQES  
RNAEEKAKKAITDAAMMAEELKKEQDTS AHLERMKNLEQTVKDLQHRLDAAEQALALGGKKQIQKLEARVRE  
LESELDAEQKRGAEALGGAHKYERKVKEMTYQAEEDRKNILRLQDLVDKQAKVKS YKQAEAEAEQANTQLS  
RCRRVQHELEEAEDRADI AESQVNLRAKSRDVGQKMEE\*

>rs29389516\_ENSMUSP00000080584\_c.5735:G>T\_p.E1912D  
ENSMUST00000081911.12|Myh13-201|ENSMUSG00000060180|+|chr11:g.67261814:G>T  
MSSDAEMAI FGEAAPYLKPEKERIEAQNRPFDSKKACFAVDDKEMYVKGMIQSRENDKVI VKTLDRELTN  
SDQVFPMPNPPKFDKIEDMAMMTHLHEPAVLYNLKERYAAWMIYYSGLFCVTVNPKWLPVYNPEVVAAYRGK  
KRQEAPPHIFSI SDNAYQFMLTDRDNQSILITGESGAGKTVNTRKVIQYFATIAVTGDKKKEQQPGKMQGTLE  
DQIIQANPLLEAFGNAKTVRNDNSSRFGKFI R IHFGATGKLASADIETYLLKSRVTFQLSSERSYHIFYQIM  
SNKKPELIDLLL ISTNPFDFPFVVSQGEVTVASIDDSEELLATDNAIDILGFSPEEKVGIYKLTGAVMHYGNMK  
FKQKQREEQAEPDGTEVADKAGYLMGLNSAEMLKGLCCPRVKVGNVYVTKQNVQVQVTVNSVGLAKAVYKMF  
LWMVTRINQQLDQTKQPRQYFIGVLDIAGFEIFDFNSLEQLCINF TNEKLQOFFNHHMFVLEQEEYKKEGIEWE  
FIDFGMDLAACIELIEKPMGIFSI LEEECMF PKATDTSFKNKLYDQHLGKSNFQKPKPTKGKAEAHFSLVHY  
AGTVDYNIAGWLDKNKDP LNETVVGLYQKSS LKLSFLFSNYAGAEAGDSAGGKGGKGGKSS FQTVSAVFRE  
NLNKLMTNLRSTH P HVRC LI PNETKTPGVMDHYLVMHQ LRCNGVLEGI R ICRKGFPSRILYADFKQRYRILN  
ASAIPEGQFIDSKNASEKLLNSIDVDREQFRFGHTKVFVKAGLLGLLEEMRDEKLVTLMTRTQAVCRGYLMRV  
EFKKMMERRESIFCIQYNVRSFMNVKHWPMNLFKIKPLLKSAEAEKEMATMKEDFERAKEDLARSEARRKE  
LEEKMVSL LQEKNDLQVQSE TENLMDAEERCEGLIKSKIQL EAKVKELNERLEEEEEE MNS ELVAKKRNL ED  
KCSSLKRDI DDLELTLTKVEKEKHATENKVKNLSEEMTALEETISKLTKEKKS LQEAHQQTLDLQVEEDKVN  
GLIKINVKLEQQTDDLEGSLEQEKKLRADLERVVRKRLKGLKMSQESIMDLENDTQQLEEKLKKKEFEMS QLO

TRIDDEQVLSLQLOKKIKELQARTEEELEEIEAEHTVRAKIEKQRSDLARELEEISERLEEASGATSAQIEMN  
KKRESEFQKLRRDLEEATLQHEATAATLRKKHADTVAEELGEQIDNLQRVKQKLEKEKSELKMEIDDMASNIET  
VSKSKSNMERMCRSVEDQFNEIKAKDDQQTQLIHDLNMQKARLQTONGELSHQVEEKESLVSQTLTKSQALTO  
QLEELKRQLEEETKAKNALAHALQSSRHDCDLLREQYEEEQEGKAEQORALSKANSEVAQWRTKYETDAIQRT  
EELEEAKKKLAQRLQEAEEENTEASNSKSCASLEKTKQRLQGEVDDMLDLERANTACATLDKKQRNFDKVLAEW  
KQKLDSEQAEELEAAQKESRSLSTEIFKMRNAYEEVVDQLETLLRRENKNLQEEISDLTEQIAETGKNLQVEVEKT  
KKQVEQEKSDLQAALEEVEGSLHEEESKILRVQLELSQVKSELDKRVTEKDEEIEQIKRNSQRAVEAMQSVLD  
AEIRSRNDALRLKKKMEGDLNEMEIQLSHANRQVAETQKHLRRTVQGGQLKDSQLHLDDAQRSNEDLKEQLAIVE  
RRNGLLQEELEEMKVALEQTERTRRLSEQELLDSSDRVQLLHSQNTSLINTKKKLEADLAQCQAEVENSIQES  
RNAEEKAKKAITDAAMMAEELKKEQDTS AHLERMKNLEQTVKDLQHRLEDAEQALKGGKKQIQKLEARVRE  
LESELDAEQKRGAEALKGAHKYERKVKEMTYQAEEDRKNILRLQDLVDKLQAKVKS YKROAEEAEEQANTQLS  
RCRRVQHELEEAEDRADIAESQVNKLRAKSRDVGQKMEE\*

>rs29473020\_ENSMUSP00000137895\_c.694:A>G\_p.Q232R  
ENSMUST00000181566.2|Gsg112-202|ENSMUSG00000097886|+|chr11:g.67680261:A>G  
MDRARWQRMLTLLPICLALAFSLTAMGSSHWCEGIRRMTKPLCQDLLGGLNCIHFSRSSSSTGSKHDDSQAVQ  
YIWETGDDKFIQRRFHAGLWQSCSESLNSTGERCRCFLGIVPAEQGVWLWSIGAEVLDFLIITGVILLGFS  
MSCYSSGCSWLNVDASVAIILMVLAGLLGMVAHMYTTSFQITVNLGPEWDWRPQTWDYDGSYCLAWGSFALCMA  
VSVATMSRYTTARAIEVPRAQKGGYPQHNTPPQPGPSRKVWQTGATPHFVGHIFTNVPGHPPPGTGKVKSMC\*

>rs29446266\_ENSMUSP00000130924\_c.162:C>G\_p.R55G  
ENSMUST00000168612.8|Dhrs7c-205|ENSMUSG00000033044|+|chr11:g.67700617:C>G  
MGLMAVLMPLLLLLGISGLLFIYQEA SRLWSKSAVQNKVVITDAISGLGKECAGVFHAGGARLVLCGNWEG  
LESYATLTSVADPSKTFTPKLVLLDLSDISCVQDVAKEVLDCYGCVDILINNASVKVKGPAHKISLELDKKI  
MDANYFGPITLTKVLLPNMISRRTGQIVLVNNIQAKFGIPFRTYAASKHAVMGFFDCLRAEVEEYDVVVSTV  
SPTFIRSYRASPEQRNWEETSICKFFCRKLAYGVHPVEVAEEVMRTVRRKKQEVFMANPVPKAAVFI RTFFPEF  
FFAVVACGVKEKLNVPPEG\*

>rs50129546\_ENSMUSP00000021288\_c.2518:G>A\_p.R840K  
ENSMUST00000021288.10|Usp43-201|ENSMUSG00000020905|-|chr11:g.67747187:C>T  
MDPGVGNALGEGPPAPRRRRSLRLLNRLLALGSRSRSGDSPRRPPAQPSPYDGDGEGGFACAPGPAPAS  
AGSPGPDRPPGSQPQISSGDGARPPGAQGLKNHGNTCFMNAVVCLSNTDLLAEFLALGRYRAAPGRAEVTEQ  
LAALVRALWTREYTPQLSAEFKNAVSKYGSQFQGN SQHDALEFLLWLLDRVHEDLEGSAGHLVSEQLPPEVSK  
ISEDLRPSAAPTSLGSPFVQSHFQAQYRSSLTCPHCLKQSNTFDFPFCVSLPIPLRQTRFLSVTLVFPKSKQR  
FLRVGLAVPILSTVAALRKMVAEEGGVPAEEVILVELYPNGFQRSFFDEEDLNTIAEGDNVYAFQVPPSPGLG  
TLSAHPGSLSVSPRLPVRDSQRFSGPLHSEN RVVFLFCNLVSGSQQASRFGPPFLIREDRTISWAQLQCCILS  
KVRCLMRSEVSAQDLGTLF SIRVVGLSLACS YLSPKDNRP LCHWAVDRALHLRRPGGPPHVKLAVEW DSSVTE  
RLFGLQEEERVQDADSVWRQQAHQQP SCTLDECFQSYTKEEQLAQDDAWKCPHCQVLCQGVVVKLSLWTL PDI  
LI IHLKRFCQVGERRNKLSTLVKFPLSGLNMAPHVARRSTNSKAGPGPWSSWKQPICLPTTYPLDFLYDLYAV  
CNHHGSLQGGHYTAYCRNSLDGQWYSYDDSTVEALREDEVNTRGAYILFYQKRNSIPPWSASSMRGSTSSSL  
SDHWLMRLGSLNNSTRGSLLSWSSAPCPSMARVPD SPVFTNGVCHQDKGGVETRPLVRGVGGRSISMKASPAS  
RSRHGPFKTMPLRWSFGHREKRP GASVELVEYLESRKRPRSTSQSIVPLLTRAAGGEETSASPRSDGTLPAKS  
EDSGRAIGQTTGVPLSSCHLNHPALGSLDSDLHTARTRTGNVSQDIRLPK KFDLPLTVMP SVGDEKPARPE  
GQKMPWKSSQVGSQSSPPSPSTGLLRNFKDSGPGTLPKMKSKAAMEERAPDKDRGQGTFTLLKSVFWKKEH  
KRTV RTESSPPAPPISLGSDRLSPAAMNEQALRIRESPAKGLGNHMERDIRSAPSSHLPRKASRPPRASTAG  
TSQRTIPGEQISYGT LQRVKYHTLSLGRKKSLPESSF\*

>rs50129546\_ENSMUSP00000104317\_c.2503:G>A\_p.R835K  
ENSMUST00000108677.2|Usp43-202|ENSMUSG00000020905|-|chr11:g.67747187:C>T  
MDPGVGNALGEGPPAPRRRRSLRLLNRLLALGSRSRSGDSPRRPPAQPSPYDGDGEGGFACAPGPAPAS  
AGSPGPDRPPGSQPQISSGDGARPPGAQGLKNHGNTCFMNAVVCLSNTDLLAEFLALGRYRAAPGRAEVTEQ  
LAALVRALWTREYTPQLSAEFKNAVSKYGSQFQGN SQHDALEFLLWLLDRVHEDLEGSAGHLVSEQLPPEVSK  
ISEDLRPSAAPTSLGSPFVQSHFQAQYRSSLTCPHCLKQSNTFDFPFCVSLPIPLRQTRFLSVTLVFPKSKQR  
FLRVGLAVPILSTVAALRKMVAEEGGVPAEEVILVELYPNGFQRSFFDEEDLNTIAEGDNVYAFQVPPSPGLG  
TLSAHPGSLSVSPRLPVRDSQRFSGPLHSEN RVVFLFCNLVSGSQQASRFGPPFLIREDRTISWAQLQCCILS  
KVRCLMRSEVSAQDLGTLF SIRVVGLSLACS YLSPKDNRP LCHWAVDRALHLRRPGGPPHVKLAVEW DSSVTE  
RLFGLQEEERVQDADSVWRQQAHQQP SCTLDECFQSYTKEEQLAQDDAWKCPHCQVLCQGVVVKLSLWTL PDI  
LI IHLKRFCQVGERRNKLSTLVKFPLSGLNMAPHVARRSTNSKAGPGPWSSWKQPICLPTTYPLDFLYDLYAV  
CNHHGSLQAYCRNSLDGQWYSYDDSTVEALREDEVNTRGAYILFYQKRNSIPPWSASSMRGSTSSSLSDHWL  
MRLGSLNNSTRGSLLSWSSAPCPSMARVPD SPVFTNGVCHQDKGGVETRPLVRGVGGRSISMKASPASRSRHG  
PFKTMPLRWSFGHREKRP GASVELVEYLESRKRPRSTSQSIVPLLTRAAGGEETSASPRSDGTLPAKSEDSGR  
AIGQTTGVPLSSCHLNHPALGSLDSDLHTARTRTGNVSQDIRLPK KFDLPLTVMP SVGDEKPARPEGQKMT

PWKGSSQVGSQSSPPSPSTGLLRNFKDSGPGTLPKMKSKAAMEERAPDKDRGQGTFTLLKSVFWKKEHKRTVR  
 TESSPPAPPISLGSDRLSPAAMNEQALRIRESAPKGLGNHMERDIRSAPSSLHLPRKASRPPRASTAGTSQRT  
 IPGEQISYGTLLQRVKYHTLSLGRKKSLPESSF\*  
 >rs47734460\_ENSMUSP00000021288\_c.2199:T>C\_p.W734R  
 ENSMUST00000021288.10|Usp43-201|ENSMUSG00000020905|-|chr11:g.67766224:A>G  
 MDPGVGNALGEGPPAPRPRRRRSLRRLNRFLLALGSRSRSGDSPRPPAQPSPYDGDGEGGFACAPGPAPAS  
 AGSPGPDPPGSPQPISSGDGARPPGAQGLKNHGNCTCFMNAVVCLSNTDLLAEFLALGRYRAAPGRAEVTEQ  
 LAALVRALWTREYTPQLSAEFKNAVSKYGSQFQGNHQHDALEFLLWLLDRVHEDLEGSAGHLVSEQLPPEVSK  
 ISEDLRPSAAPTSLGSPFVQSHFQAQYRSSLTCHPCLKQSNTPDFPFCVSLPIPLRQTRFLSVTLVFPKSKQR  
 FLRVGLAVPILSTVAALRKMVAEEGGVPAEEVILVELYPNGFQRSFFDEEDLNTIAEGDNVYAFQVPPSPGLG  
 TLSAHPGSLSVSPRLPVRDSQRFSGPLHSENRVVFLFCNLVSGGQASRFGPPFLIREDRTISWAQLQCCILS  
 KVRCLMRSEVSAQDLGTLF SIRVVGLSLACSYLSPKDNRP LCHWAVDRALHLRRPGGPPHVKLAVEWDSVTE  
 RLFGLSQEERVQDADSVWRQQQAHQQPSCTLDECFQSYTKEEQLAQDDAWKCPHCQVLQGGVVKLSLWTLDPDI  
 LI IHLKRFQVGERNKLSLTKVFP LSGLNMAPHVARRSTNSKAGPGPWSWKQPICLPTTYPLDFLYDLYAV  
 CNHHGSLQGGHYTAYCRNSLDGQWYSYDDSTVEALREDEVNTRGAYILFYQKRNSIPPWSASSSMRGSTSSSL  
 SDHRLMRLGSLNNSRTRGSLLSWSAPCPSMARVPDSPVFTNGVCHQDKGGVETRPLVRGVGGRSISMKASPAS  
 RSRHGPFKTMPLRWSFGHREKRP GASVELVEYLESRRRPRSTQSIVPLLTRAAGGEETSASPRSDGTLPAKS  
 EDSGRAIGQGTGTVPLSSCHLNHPALGSLDSDLHTARTRTGNVSDIRLPPKFDLPLTVMPVSGDEKPARPE  
 GQKMPWKGSSQVGSQSSPPSPSTGLLRNFKDSGPGTLPKMKSKAAMEERAPDKDRGQGTFTLLKSVFWKKEH  
 KRTVRTESSPPAPPISLGSDRLSPAAMNEQALRIRESAPKGLGNHMERDIRSAPSSLHLPRKASRPPRASTAG  
 TSQRTIPGEQISYGTLLQRVKYHTLSLGRKKSLPESSF\*  
 >rs47734460\_ENSMUSP00000104317\_c.2184:T>C\_p.W729R  
 ENSMUST00000108677.2|Usp43-202|ENSMUSG00000020905|-|chr11:g.67766224:A>G  
 MDPGVGNALGEGPPAPRPRRRRSLRRLNRFLLALGSRSRSGDSPRPPAQPSPYDGDGEGGFACAPGPAPAS  
 AGSPGPDPPGSPQPISSGDGARPPGAQGLKNHGNCTCFMNAVVCLSNTDLLAEFLALGRYRAAPGRAEVTEQ  
 LAALVRALWTREYTPQLSAEFKNAVSKYGSQFQGNHQHDALEFLLWLLDRVHEDLEGSAGHLVSEQLPPEVSK  
 ISEDLRPSAAPTSLGSPFVQSHFQAQYRSSLTCHPCLKQSNTPDFPFCVSLPIPLRQTRFLSVTLVFPKSKQR  
 FLRVGLAVPILSTVAALRKMVAEEGGVPAEEVILVELYPNGFQRSFFDEEDLNTIAEGDNVYAFQVPPSPGLG  
 TLSAHPGSLSVSPRLPVRDSQRFSGPLHSENRVVFLFCNLVSGGQASRFGPPFLIREDRTISWAQLQCCILS  
 KVRCLMRSEVSAQDLGTLF SIRVVGLSLACSYLSPKDNRP LCHWAVDRALHLRRPGGPPHVKLAVEWDSVTE  
 RLFGLSQEERVQDADSVWRQQQAHQQPSCTLDECFQSYTKEEQLAQDDAWKCPHCQVLQGGVVKLSLWTLDPDI  
 LI IHLKRFQVGERNKLSLTKVFP LSGLNMAPHVARRSTNSKAGPGPWSWKQPICLPTTYPLDFLYDLYAV  
 CNHHGSLQAYCRNSLDGQWYSYDDSTVEALREDEVNTRGAYILFYQKRNSIPPWSASSSMRGSTSSSLSDHRL  
 MRLGSLNNSRTRGSLLSWSAPCPSMARVPDSPVFTNGVCHQDKGGVETRPLVRGVGGRSISMKASPASRSRHG  
 PFKTMPLRWSFGHREKRP GASVELVEYLESRRRPRSTQSIVPLLTRAAGGEETSASPRSDGTLPAKSEDSGR  
 AIGQGTGTVPLSSCHLNHPALGSLDSDLHTARTRTGNVSDIRLPPKFDLPLTVMPVSGDEKPARPEGQKMT  
 PWKGSSQVGSQSSPPSPSTGLLRNFKDSGPGTLPKMKSKAAMEERAPDKDRGQGTFTLLKSVFWKKEHKRTVR  
 TESSPPAPPISLGSDRLSPAAMNEQALRIRESAPKGLGNHMERDIRSAPSSLHLPRKASRPPRASTAGTSQRT  
 IPGEQISYGTLLQRVKYHTLSLGRKKSLPESSF\*  
 >rs29401189\_ENSMUSP00000021288\_c.1796:G>T\_p.R599S  
 ENSMUST00000021288.10|Usp43-201|ENSMUSG00000020905|-|chr11:g.67770836:C>A  
 MDPGVGNALGEGPPAPRPRRRRSLRRLNRFLLALGSRSRSGDSPRPPAQPSPYDGDGEGGFACAPGPAPAS  
 AGSPGPDPPGSPQPISSGDGARPPGAQGLKNHGNCTCFMNAVVCLSNTDLLAEFLALGRYRAAPGRAEVTEQ  
 LAALVRALWTREYTPQLSAEFKNAVSKYGSQFQGNHQHDALEFLLWLLDRVHEDLEGSAGHLVSEQLPPEVSK  
 ISEDLRPSAAPTSLGSPFVQSHFQAQYRSSLTCHPCLKQSNTPDFPFCVSLPIPLRQTRFLSVTLVFPKSKQR  
 FLRVGLAVPILSTVAALRKMVAEEGGVPAEEVILVELYPNGFQRSFFDEEDLNTIAEGDNVYAFQVPPSPGLG  
 TLSAHPGSLSVSPRLPVRDSQRFSGPLHSENRVVFLFCNLVSGGQASRFGPPFLIREDRTISWAQLQCCILS  
 KVRCLMRSEVSAQDLGTLF SIRVVGLSLACSYLSPKDNRP LCHWAVDRALHLRRPGGPPHVKLAVEWDSVTE  
 RLFGLSQEERVQDADSVWRQQQAHQQPSCTLDECFQSYTKEEQLAQDDAWKCPHCQVLQGGVVKLSLWTLDPDI  
 LI IHLKRFQVGERNKLSLTKVFP LSGLNMAPHVARRSTNSKAGPGPWSWKQPICLPTTYPLDFLYDLYAV  
 CNHHGSLQGGHYTAYCRNSLDGQWYSYDDSTVEALREDEVNTRGAYILFYQKRNSIPPWSASSSMRGSTSSSL  
 SDHWMRLGSLNNSRTRGSLLSWSAPCPSMARVPDSPVFTNGVCHQDKGGVETRPLVRGVGGRSISMKASPAS  
 RSRHGPFKTMPLRWSFGHREKRP GASVELVEYLESRRRPRSTQSIVPLLTRAAGGEETSASPRSDGTLPAKS  
 EDSGRAIGQGTGTVPLSSCHLNHPALGSLDSDLHTARTRTGNVSDIRLPPKFDLPLTVMPVSGDEKPARPE  
 GQKMPWKGSSQVGSQSSPPSPSTGLLRNFKDSGPGTLPKMKSKAAMEERAPDKDRGQGTFTLLKSVFWKKEH  
 KRTVRTESSPPAPPISLGSDRLSPAAMNEQALRIRESAPKGLGNHMERDIRSAPSSLHLPRKASRPPRASTAG  
 TSQRTIPGEQISYGTLLQRVKYHTLSLGRKKSLPESSF\*

>rs29401189\_ENSMUSP00000104317\_c.1796:G>T\_p.R599S  
ENSMUST00000108677.2|Usp43-202|ENSMUSG00000020905|-|chr11:g.67770836:C>A  
MDPGVGNALGEGPPAPRRRRSLRRLNRFLLALGSRSRSGDSPRRPPAQPSPYDGDGEGGFACAPGPAPAS  
AGSPGPDPPPQSQPQISSGDGARPPGAQGLKNHGNTCFMNAVVCLSNTDLLAEFLALGRYRAAPGRAEVTEQ  
LAALVRALWLTREYTPQLSAEFKNAVSKYGSQFQGN SQHDALEFLLWLLDRVHEDLEGSAGHLVSEQLPPEVSK  
ISEDLRPSAAPTSLGPFVQSHFQAQYRSSLTCPHCLKQSNFDFPFLCVSLPIPLRQTRFLSVTLVFPKSKQR  
FLRVGLAVPILSTVAALRKMVAEEGGVPAEEVILVELYPNGFQORSFDEEDLNTIAEGDNVYAFQVPPSPGLG  
TLSAHPSSGLSVSPRLPVRDSQRFSGPLHSEN RVVFLFCNLVSGSQASRFQPPFLIREDRITISWAQLQQCILS  
KVRCLMRSEVSAQDLGTLFSIRVVGLSLACSYLSPKDNRP LCHWAVDRALHLRRPGGPPHVKLAVEWDSVTE  
RLFGSLQEERVDADSVWRQQQAHQQPSC TLDCECFQSYTKEEQLAQDDAWKCPHCQVLQQGVVKSLSWTL PDI  
LI IHLKRFQV GERSNKLSTLVKFP LSGLNMAPHVARRSTNSKAGPGPWSWKQPICLPTTYPLDFLYDYAV  
CNHHGSLQAYCRNSLDGQWYSYDDSTVEALREDEVNTRGAYILFYQKRNSIPPWSASSSMRGSTSSSLSDHWL  
MRLGSLNSTRGSLLSWSSAPCPSPMARVPD SPVFTNGVCHQDKGGVETRPLVRGVGGRSISMKASPASRSRHG  
PFKTMPLRWSFGHREKRP GASVELVEYLESRRRPRSTQSIVPLLTRAAGGEETSASPRSDGTLPAKSEDSGR  
AIGQGTGVP LSSCHLNHPALGSLD DDLHTARTRTG NVSQDIRLPKFKDLPLTVMP SVGDEKPARPEGQKMT  
PWKGSSQVGSQSSPPSPSTGLLRNFKDSGPGTLPKMKSKAAMEERAPDKDRGQGTFTLLKSVFWKKEHKRTVR  
TESSPPAPPI SLGSDRSLSPAMNEQALRIRESPAKGLGNHMERDIRSAPSSLHLPRKASRPPRASTAGTSQRT  
IPGEQISYGT LQRVKYHTLSLGRKKS LPSSSF\*  
>rs29466030\_ENSMUSP00000021286\_c.339:T>A\_p.S114T  
ENSMUST00000021286.11|Stx8-202|ENSMUSG00000020903|+|chr11:g.67877167:T>A  
MAPDPWFSTYDSTCQIAQEAIEAQIERNQCERRGEKTPKLT LTRTLKLNKLVKIDLLKDLLLRAVSTRQITQ  
LEGDRRQNLDDLVTRERLLLASFKNEGAEPDLISLGISVTL YLSPVPAEHQWQHLG\*  
>rs29407333\_ENSMUSP00000099671\_c.3764:G>T\_p.K1255N  
ENSMUST00000102611.10|Myh10-203|ENSMUSG00000020900|+|chr11:g.68689189:G>T  
MAQRTGLEDPERYL FVDRAVIYNPATQADWTA KKLWVIPSERHGF EAASIKEERGDEVMVLAENGGKAMVNK  
DDIQKMNP PKFSKVEDMAELTCLNEASV LHNLDKDRYYSGLIY TYSGLFCVVINPYKNLPIYSENI IEMYRGKK  
RHEMPPHIYAI SEAYRCMLQDREDQSILCTGESGAGKTENTKKVIQYLAHVASSHKGRKDHNI PQESPKPVK  
QGELELRQLLQANPILESFGNAKT VKNDNSSRFGKFIRINFDV TGYIVGANIETYLLEKSRAVRQAKDERTFH  
FIYQLLSGAG EHLKSDLLLEGFNNYRFLSNGYIPIPGQD KDNFQETMEAMHIMGFSHEE ILSMLKVVSSVLQFGN  
ISFKKER NTDQASMPENTVAQKLC HLLGMNVMEFTRAILTPRIKVG RYDVQKAQTKEQADFAVEALAKATYERL  
FRWLHV RINKALDRTKRQGASFIGILD IAGFEIFELNSFEQLCIN YTNEKQLQLFNHTMFILEQE EYQREGI  
EWNFIDF GLDLQPCIDLIERP ANPPGV LALLDEECWFPKATDKT FVEKLVQE QGSHSKFQKPRQLKDKADFC  
IIHYAGKV DYKADEWLKMNMDPLNDNVATLLHQSSDRFVAELWKD VDRI VGLDQVTGMTETA FGSAYKTKKGM  
FRTVQG LY KESLTKLMATLRNTNPNFVRCIIPNHEKRAGKLD PHLVLDQLRCNGVLEGI RIRICRQGF  
PNRIVFQEFQR YEILTPNAIPKGFMDGKQACERMIRALELDPNL YRIGQSKIFFRAGVLAHLEEEERDLKITDI  
IFFQAVCRGYLAR KAFAKKQQLSALKV LQRNCAAYLKL RHQWWRVFTKVKPLLQVTRQEEELQAKDEELLK  
VKEKQTKVEGELE EMERKHQQLL EKNILAEQLQAE TELFAEAEMRARLA AKKQEELEEILHDLES RVEE  
EERNQIILQNEK KKMQAHIQDLEEQLDEE EGARQKLQLEKVTA EAKIKKMEEEVLLLEDQNSKFIKEK  
KLMEDRIAECSSQLAE EEEKA KNLAKIRNKQEVMI SDLEERLKKEEKTROELEKAKRKL DGETTDLQDQ  
IAELQAQVDELKVQLTKKEEELQGA LARGDDET LHKNNALKVARELQAQIAELQEDFESEKASRNKAEK  
QRDLSEELEALKTELED TLDTAAQQEL RTKREQEVAELKKALEDETKNHEAQIQDMRQRHATALEEL  
SEQLQAKRFKANLEKNKQGLETDNKELACEVK VLQQVKAESEHKRNKLD AQVQELHAKVSEGDRLR  
VELAEKANKLQNELDNVSTLLEEA EKKGIFAKDAAGLE S QLQDTQELLQEETRQKLNLSRIRQLE  
EEKNSLQEQEEEEEARKNLEKQV LALQSQLADTKKKVDDDLGTI ESLEEAKKKLLKDV EALSQRLEEK  
VLAYDKLEKTKNRLQEQELDDLTVDLDHQRQIVSNLEKQK KFDQLLAE EKGISARYAEERDRAEA  
EAAREKETKALS LARALEEALEAKEEFERQNKQLRADMEDLMSKDDVGNVHELEKS KRALEQQVE  
EMRTQLEEELEDELQATEDAKLRLEVNMQAMKAQFERDLQTRDEQNEEK RLLLKQVRELEAELE  
DERKQRALAVASKKMEIDLKDLEAQIEAANKARDEVIKQLRKLQAQMKDYQRELEEARASRDEIFAQSK  
ESE KKLKLSLEAEI LQLEELASSERARRHAEQERDELADE IANSASGKSALLDEKRRLEARIAQLEEE  
LEEEQSNM ELLNDRFRKTTLQVDTLNTE LAEERSAAQKSDNARQQLERQNKELKAKLQELEGA VKS  
KFKATISALEAKIGQ LEEQLEQEAKERAAANKLVR RTEKKLKEIFMQVEDERRHADQYKEQMEKANARM  
KQLKRQLEEAEEEA TRANA SRRKLQRELDDATEANEGLSREVSTLKNRLRRGGPISFSSSRSGRRQLHIE  
GASLELSDDDTESKTS DVNDTQ PPQSE\*

>rs29407333\_ENSMUSP00000018887\_c.3857:G>T\_p.K1286N  
ENSMUST00000018887.15|Myh10-201|ENSMUSG00000020900|+|chr11:g.68689189:G>T  
MAQRTGLEDPERYL FVDRAVIYNPATQADWTA KKLWVIPSERHGF EAASIKEERGDEVMVLAENGGKAMVNK  
DDIQKMNP PKFSKVEDMAELTCLNEASV LHNLDKDRYYSGLIY TYSGLFCVVINPYKNLPIYSENI IEMYRGKK  
RHEMPPHIYAI SEAYRCMLQDREDQSILCTGESGAGKTENTKKVIQYLAHVASSHKGRKDHNI PQESPKPVK  
QGELELRQLLQANPILESFGNAKT VKNDNSSRFGKFIRINFDV TGYIVGANIETYLLEKSRAVRQAKDERTFH



IFYQLLSGAGEHLKSDLLLEGFNRYRFLSNGYIPIPGQQDKDNFQETMEAMHIMGFSHEEILSMLKVVSSVLQ  
 FGNISFKKERNTDQASMPENTVAQKLCHELLGMNVMEFTRAILTPRIKVGDRDYVQKAQTKEQADFAVEALAKAT  
 YERLFRWLVRINKALDRTRKQGFASFIGILDIAGFEIFELNSFEQLCINYTNEKLOQLFNHTMFIHQEYQRE  
 EGIEWNFIDFGLDLQPCIDLIERPANPPGVLALLDDEECWFPKATDKTFVEKLVQEQGSHSKFQKPRQLKDKAD  
 FCIIHYAGKVDYKADEWLMKNMDPLNDNVATLLHQSSDRFVAELWKDEIQTIQRASFYDSVSGLHEPPVDRIV  
 GLDQVTGMTETAFGSAYKTKKGMFRTVQGLYKESLTKLMATLRNTNPNFVRCIIPNHEKRAGKLDPHLVDLQ  
 RCNGVLEGIIRICRQGFPNRIVFQEFQRQYEILTPNAIPKGFMDGKQACERMIRALELDPNLYRIGQSKIFFRA  
 GVLAHLEEEERDLKITDIIFFQAVCRGYLARKAFKQQLSALKVLRNCAAYLKLRLHWQWVRVFTKVKPLL  
 QVTRQEEELQAKDEELLKVKEKQTKVEGELEEMERKHQQLLEEKNI LAEQLQAE TELFAEAEEMRARLAACKQ  
 ELEEILHDLESRVEEEERNQILQNEKKKMQAHIQDLEEQLDEEEGARQKLQLEKVTAEAKIKKMEEEVLLLE  
 DQNSKFIKEKKLMEDRIAECSSQLAEEEKAKNLAKIRNKQEVMI SDLEERLKKEEKTRQELEKAKRKLGET  
 TDLQDQIAELQAQVDELKVQLTKKEEELQGALARGDDET LHKNNALKVARELQAQIAELQEDFESEKASRNKA  
 EKQKRDLEEELEALKTELEDTLDTTAAQQLRTRKREQEVAE LKKALEDETKNHEAQIQDMRQRHATALEELSE  
 QLEQAKRFKANLEKNKQGLETDNKELACEVKVLQVKAESEHKRNKLDQVQELHAKVSEGDRRLVLAEKAN  
 KLQNELDNVSTLLEEAEEKGKIFAKDAAGLESQLODTQELLQEE TRQKLNLSRIRQLEEEKNLSLQEQE  
 EARKNLEKQVLALQSQLADTKKKVDDDLGTIESLEEAKKLLKDV EALSQRLEEKVLAYDKLEKTKNRLQOEL  
 DDLTVLDLHQQRQIVSNLEKKQKFDQLLAEKGISARYAEERDRAEAEAREKETKALSARALEEALAEKEEF  
 ERQNKQLRADMEDLMSKDDVGKNVHELEKSKRALEQQVEEMRTQLEEELEDELQATEDAKLRLEVNMQAMKAQ  
 FERDLQTRDEQNEEKRLLLKQVRELEAELEDERKQRALAVASKKKMEIDLKDLAEQIEAANKARDEVIKQLR  
 KLQAQMKDYQRELEEARASRDEIFAQSKSEKKLKSLAEIILQLQEELASSERARRHAEQERDELAD EIANSA  
 SGKSALLDEKRRLEARIAQLEEELEEEQSNMELLNDRFRKTTLQVDTLNTELA AERSAAQKSDNARQQLERQN  
 KELKAKLQELEGA VKSKFKATISALEAKIGQLEEQLQEAKERAANKLVRRTEKKLKEIFMQVEDERRHADQ  
 YKQMEKANARMKQLKRQLEEAEEEA TRANASRRKLQRELD DATEANEGLSREVSTLKNRLRRGGPISFSSSR  
 SGRRLHIEGASLELSDDDTESKTSVDNTPPPQSE\*

>rs29407333\_ENSMUSP00000090661\_c.3875:G>T\_p.K1292N  
 ENSMUST00000092984.6|Myh10-202|ENSMUSG00000020900|+|chr11:g.68689189:G>T  
 MRMEIWGWGCRDQLLVALDPWKRGVGRGNVFWLLFTMAQRTGLEDPERYL FVDRAVIYNPATQADWTAKKLV  
 WIPSERHGFEEAASIKEERGDEVMVELAENGKKAMVNKDDIQKMNPPKFSKVEDMAELTCLNEASVLHNLKDRY  
 YSGLIYTYSGLFCVVINPYKNLPIYSENI IEMYRGKKRHEMPPHIYAISESAYRCMLQDREDQSIILCTGESGA  
 GKTENTKKVIQYLAHVASSHKGRKDHNI PGELE RQLLQANPILESFGNAKTVKNDNSSRFGK FIRINFDVDTGY  
 IVGANIETYLLEKSRAVRQAKDERTFHI FYQLLSGAGEHLKSDLLLEGFNRYRFLSNGYIPIPGQQDKDNFQ  
 TMEAMHIMGFSHEEILSMLKVVSSVLQFGNISFKKERNTDQASMPENTVAQKLCHELLGMNVMEFTRAILTPRI  
 KVGRDYVQKAQTKEQADFAVEALAKATYERLFRWLVRINKALDRTRKQGFASFIGILDIAGFEIFELNSFEQL  
 CINYTNEKLOQLFNHTMFIHQEYQREGIEWNFIDFGLDLQPCIDLIERPANPPGVLALLDDEECWFPKATDK  
 TFVEKLVQEQGSHSKFQKPRQLKDKADFCIIHYAGKVDYKADEWLMKNMDPLNDNVATLLHQSSDRFVAELWK  
 DVDRIVGLDQVTGMTETAFGSAYKTKKGMFRTVQGLYKESLTKLMATLRNTNPNFVRCIIPNHEKRAGKLDPH  
 LVLQDLRCNGVLEGIIRICRQGFPNRIVFQEFQRQYEILTPNAIPKGFMDGKQACERMIRALELDPNLYRIGQS  
 KIFFRAGVLAHLEEEERDLKITDIIFFQAVCRGYLARKAFKQQLSALKVLRNCAAYLKLRLHWQWVRVFT  
 KVKPLLQVTRQEEELQAKDEELLKVKEKQTKVEGELEEMERKHQQLLEEKNI LAEQLQAE TELFAEAEEMRAR  
 LAACKQEELEEILHDLESRVEEEERNQILQNEKKKMQAHIQDLEEQLDEEEGARQKLQLEKVTAEAKIKKME  
 EVLLLEDQNSKFIKEKKLMEDRIAECSSQLAEEEKAKNLAKIRNKQEVMI SDLEERLKKEEKTRQELEKAKR  
 KLDGETTDLQDQIAELQAQVDELKVQLTKKEEELQGALARGDDET LHKNNALKVARELQAQIAELQEDFESEK  
 ASRNKA EKQKRDLEEELEALKTELEDTLDTTAAQQLRTRKREQEVAE LKKALEDETKNHEAQIQDMRQRHATA  
 LEELSEQLEQAKRFKANLEKNKQGLETDNKELACEVKVLQVKAESEHKRNKLDQVQELHAKVSEGDRRLV  
 LAEKANKLQNELDNVSTLLEEAEEKGKIFAKDAAGLESQLODTQELLQEE TRQKLNLSRIRQLEEEKNLSLQ  
 QEEEEE EARKNLEKQVLALQSQLADTKKKVDDDLGTIESLEEAKKLLKDV EALSQRLEEKVLAYDKLEKTKN  
 RLQOELDDLTVDLHQQRQIVSNLEKKQKFDQLLAEKGISARYAEERDRAEAEAREKETKALSARALEEAL  
 EAKEEFERQNKQLRADMEDLMSKDDVGKNVHELEKSKRALEQQVEEMRTQLEEELEDELQATEDAKLRLEVNM  
 QAMKAQFERDLQTRDEQNEEKRLLLKQVRELEAELEDERKQRALAVASKKKMEIDLKDLAEQIEAANKARDE  
 VIKQLRKLQAQMKDYQRELEEARASRDEIFAQSKSEKKLKSLAEIILQLQEELASSERARRHAEQERDELAD  
 EIANSSGKSALLDEKRRLEARIAQLEEELEEEQSNMELLNDRFRKTTLQVDTLNTELA AERSAAQKSDNARQ  
 QLERQNKELKAKLQELEGA VKSKFKATISALEAKIGQLEEQLQEAKERAANKLVRRTEKKLKEIFMQVEDE  
 RRHADQYKQMEKANARMKQLKRQLEEAEEEA TRANASRRKLQRELD DATEANEGLSREVSTLKNRLRRGGPI  
 SFSSSRGRRQLHIEGASLELSDDDTESKTSVDNTPPPQSE\*

>rs29397979\_ENSMUSP00000040050\_c.739:G>A\_p.G247E  
 ENSMUST00000038932.14|odf4-201|ENSMUSG00000032921|-|chr11:g.68812917:C>T  
 MEPDLNEEESERIRTSRNRSLHRRNSLLPFQWKATNNSRWMAQVVASEFSLVAFLLLLVMVFSKWKLYPSK  
 SRFHQRYPQNVTKRVYTSIHSMTGLLYICVSKSCPSSDNGEDNFKMWTIHPVFGVAKISFTLAIGLGFVLT

```

WLHLPYLPCLQRMPPFFGLIGIILSFCEVTLIIFLTLFFPVNLWIYELRKNISVPIGWSYFIGWLVLILYFTCG
IILCYLNHNKYNWSLIMSSTTINTACSSLEPESLVSPSQTTPSSQENSQESPKDDQKPSPPDKVVSPPQPDTTG*
>rs239199948_ENSMUSP00000021262_c.2017:A>G_p.N673S
ENSMUST00000021262.10|Alox8-201|ENSMUSG00000020891|-|chr11:g.69075932:T>C
MAKCRVRVSTGEACGAGTWDKVSIVGTHGESPLVPLDHLGKEFSAGAEEDFEVTLTPQDVGTVMMLRVHKAP
PEVSLPLMSFRSDAWFCRWFEELEWLPGAALHFPCYQWLEGAGELVLRREGAAKVSQDHHPTLQDQRQKELESR
QKMYSWKTYIEGWPRCLDHEVTKDLDLNIKYSAMKNAKLFFKAHSAYTELKVKGLLDRTGLWRSIREMRRFLN
FRKTPAAEYVFAHWQEDAFFASQFLNGLNINPVLIRRCHSLPNNFPVTDEMVAAPVLPVLPVLPVLPVLPVLPVLPV
HGILSGVHTNINLNGKPQFSAAPMTLLHQSSGSGPLLPVIAIQLKQTPGPDNPIFLPSDDTWDWLLAKTWVRNSE
FYIHEAVTHLLHAHLIPEVFALATLRQLRCHPLFKLLIPIRIRYTLHINTLARELLVAPGKLIDKSTGLGTGG
FSDLIKRNMEQLNYSVLCLPEDIRARGVEDIPGYRRDDGMIWGAIKSFVSEIVSIYYPSTSVQDDQELQA
WVREIFSEGFLGRESSGMPSLDREALVQYITMVIFTCSAKHAHVSSGQFDSCVWMPNLPPTMQLPPTPTSKG
QARPESFIATLPAVNSSSYHI IALWLLSAEPGDQRPLGHYPDEHFTEDAPRRSVAAAFQRKLIQISKGI RERNR
GLALPYTYLDPPLIESSVSI*
>rs239199948_ENSMUSP00000091621_c.1930:A>G_p.N644S
ENSMUST00000094078.4|Alox8-202|ENSMUSG00000020891|-|chr11:g.69075932:T>C
MAKCRVRVSTGEACGAGTWDKVSIVGTHGESPLVPLDHLGKEFSAGAEEDFEVTLTPQDVGTVMMLRVHKAP
PEVSLPLMSFRSDAWFCRWFEELEWLPGAALHFPCYQWLEGAGELVLRREGAAKVSQDHHPTLQDQRQKELESR
QKMYSWKTYIEGWPRCLDHEVTKDLDLNIKYSAMKNAKLFFKAHSAYTELKVKGLLDRTGLWRSIREMRRFLN
FRKTPAAEYVFAHWQEDAFFASQFLNGLNINPVLIRRCHSLPNNFPVTDEMVAAPVLPVLPVLPVLPVLPVLPV
HGILSGVHTNINLNGKPQFSAAPMTLLHQSSGSGPLLPVIAIQLKQTPGPDNPIFLPSDDTWDWLLAKTWVRNSE
FYIHEAVTHLLHAHLIPEVFALATLRQLRCHPLFKSTGLGTGGFSDLIKRNMEQLNYSVLCLPEDIRARGVE
DIPGYRRDDGMIWGAIKSFVSEIVSIYYPSTSVQDDQELQAWVREIFSEGFLGRESSGMPSLDREALV
QYITMVIFTCSAKHAHVSSGQFDSCVWMPNLPPTMQLPPTPTSKGQARPESFIATLPAVNSSSYHI IALWLLSA
EPGDQRPLGHYPDEHFTEDAPRRSVAAAFQRKLIQISKGI RERNRGLALPYTYLDPPLIESSVSI*
>rs29401028_ENSMUSP00000021262_c.735:G>A_p.G246S
ENSMUST00000021262.10|Alox8-201|ENSMUSG00000020891|-|chr11:g.69079551:C>T
MAKCRVRVSTGEACGAGTWDKVSIVGTHGESPLVPLDHLGKEFSAGAEEDFEVTLTPQDVGTVMMLRVHKAP
PEVSLPLMSFRSDAWFCRWFEELEWLPGAALHFPCYQWLEGAGELVLRREGAAKVSQDHHPTLQDQRQKELESR
QKMYSWKTYIEGWPRCLDHEVTKDLDLNIKYSAMKNAKLFFKAHSAYTELKVKGLLDRTGLWRSIREMRRFLN
FRKTPAAEYVFAHWQEDAFFASQFLNSINPVLIRRCHSLPNNFPVTDEMVAAPVLPVLPVLPVLPVLPVLPV
HGILSGVHTNINLNGKPQFSAAPMTLLHQSSGSGPLLPVIAIQLKQTPGPDNPIFLPSDDTWDWLLAKTWVRNSE
FYIHEAVTHLLHAHLIPEVFALATLRQLRCHPLFKSTGLGTGGFSDLIKRNMEQLNYSVLCLPEDIRARGVE
DIPGYRRDDGMIWGAIKSFVSEIVSIYYPSTSVQDDQELQAWVREIFSEGFLGRESSGMPSLDREALV
QYITMVIFTCSAKHAHVSSGQFDSCVWMPNLPPTMQLPPTPTSKGQARPESFIATLPAVNSSSYHI IALWLLSA
EPGDQRPLGHYPDEHFTEDAPRRSVAAAFQRKLIQISKGI RERNRGLALPYTYLDPPLIENS VSI*
>rs29401028_ENSMUSP00000091621_c.735:G>A_p.G246S
ENSMUST00000094078.4|Alox8-202|ENSMUSG00000020891|-|chr11:g.69079551:C>T
MAKCRVRVSTGEACGAGTWDKVSIVGTHGESPLVPLDHLGKEFSAGAEEDFEVTLTPQDVGTVMMLRVHKAP
PEVSLPLMSFRSDAWFCRWFEELEWLPGAALHFPCYQWLEGAGELVLRREGAAKVSQDHHPTLQDQRQKELESR
QKMYSWKTYIEGWPRCLDHEVTKDLDLNIKYSAMKNAKLFFKAHSAYTELKVKGLLDRTGLWRSIREMRRFLN
FRKTPAAEYVFAHWQEDAFFASQFLNSINPVLIRRCHSLPNNFPVTDEMVAAPVLPVLPVLPVLPVLPVLPV
HGILSGVHTNINLNGKPQFSAAPMTLLHQSSGSGPLLPVIAIQLKQTPGPDNPIFLPSDDTWDWLLAKTWVRNSE
FYIHEAVTHLLHAHLIPEVFALATLRQLRCHPLFKSTGLGTGGFSDLIKRNMEQLNYSVLCLPEDIRARGVE
DIPGYRRDDGMIWGAIKSFVSEIVSIYYPSTSVQDDQELQAWVREIFSEGFLGRESSGMPSLDREALV
QYITMVIFTCSAKHAHVSSGQFDSCVWMPNLPPTMQLPPTPTSKGQARPESFIATLPAVNSSSYHI IALWLLSA
EPGDQRPLGHYPDEHFTEDAPRRSVAAAFQRKLIQISKGI RERNRGLALPYTYLDPPLIENS VSI*
>rs47105448_ENSMUSP00000021262_c.541:A>G_p.K181R
ENSMUST00000021262.10|Alox8-201|ENSMUSG00000020891|-|chr11:g.69082383:T>C
MAKCRVRVSTGEACGAGTWDKVSIVGTHGESPLVPLDHLGKEFSAGAEEDFEVTLTPQDVGTVMMLRVHKAP
PEVSLPLMSFRSDAWFCRWFEELEWLPGAALHFPCYQWLEGAGELVLRREGAAKVSQDHHPTLQDQRQKELESR
QKMYSWKTYIEGWPRCLDHEVTKDLDLNIKYSAMRANKLFFKAHSAYTELKVKGLLDRTGLWRSIREMRRFLN
FRKTPAAEYVFAHWQEDAFFASQFLNGLNINPVLIRRCHSLPNNFPVTDEMVAAPVLPVLPVLPVLPVLPVLPV
HGILSGVHTNINLNGKPQFSAAPMTLLHQSSGSGPLLPVIAIQLKQTPGPDNPIFLPSDDTWDWLLAKTWVRNSE
FYIHEAVTHLLHAHLIPEVFALATLRQLRCHPLFKLLIPIRIRYTLHINTLARELLVAPGKLIDKSTGLGTGG
FSDLIKRNMEQLNYSVLCLPEDIRARGVEDIPGYRRDDGMIWGAIKSFVSEIVSIYYPSTSVQDDQELQA
WVREIFSEGFLGRESSGMPSLDREALVQYITMVIFTCSAKHAHVSSGQFDSCVWMPNLPPTMQLPPTPTSKG

```

QARPESFIATLPAVNSSSYHI IALWLLSAEPGDQRPLGHYPDEHFTEDAPRRSVAAFQKLIQISKGIRERNR  
GLALPYTYLDPPLIENSVSI\*  
>rs47105448\_ENSMUSP00000091621\_c.541:A>G\_p.K181R  
ENSMUST00000094078.4|Alox8-202|ENSMUSG00000020891|-|chr11:g.69082383:T>C  
MAKCRVRVSTGEACGAGTWDKVSIVGTHGESPLVPLDHLGKEFSAGAEEDFEVTLPODVGTVMLLRVHKAP  
PEVSLPLMSFRSDAWFCRWFEELEWLPGAALHFPCYQWLEGAGELVLRREGAAKVSQDHHPTLQDQRQKELESR  
QKMYSWKTYIEGWPRCLDHETVKDLDLNIKYSAMRNAKLFFKAHSAYTELKVKGLLDRTGLWRSIREMRRLFN  
FRKTPAAEYVFAHWQEDAFFASQFLNGINPVLIRRCHSLPNNFPVTDEMVAAPVLGPGTSLQAELEKGSFLVD  
HGILSGVHTNINLNGKQFSAAPMTLLHQSSGSGPLLPPIAIQLKQTPGPDNPIFLPSDDTWDWLLAKTWVRNSE  
FYIHEAVTHLLHAHLIPEVFALATLRQLRCHPLFKSTGLGTGGFSDLIKRNMEQLNYSVLCLEPIDIRARGVE  
DIPGYYRDDGMQIWGAIKSFVSEIVSIYYPSTSVQDDQELQAWVREIFSEGFLGRESSGMPSLDREALV  
QYITMVI FTCSAKHAAVSSGQFDSCVWMPNLPPTMQLPPTPTSKGQARPESFIATLPAVNSSSYHI IALWLLSA  
EPGDQRPLGHYPDEHFTEDAPRRSVAAFQKLIQISKGIRERNRGLALPYTYLDPPLIENSVSI\*  
>rs222383104\_ENSMUSP00000021262\_c.324:C>T\_p.Q109\*  
ENSMUST00000021262.10|Alox8-201|ENSMUSG00000020891|-|chr11:g.69088224:G>A  
MAKCRVRVSTGEACGAGTWDKVSIVGTHGESPLVPLDHLGKEFSAGAEEDFEVTLPODVGTVMLLRVHKAP  
PEVSLPLMSFRSDAWFCRWFEELEWLPGAALHFPCY\*WLEGAGELVLRREGAAKVSQDHHPTLQDQRQKELESR  
QKMYSWKTYIEGWPRCLDHETVKDLDLNIKYSAMRNAKLFFKAHSAYTELKVKGLLDRTGLWRSIREMRRLFN  
FRKTPAAEYVFAHWQEDAFFASQFLNGINPVLIRRCHSLPNNFPVTDEMVAAPVLGPGTSLQAELEKGSFLVD  
HGILSGVHTNINLNGKQFSAAPMTLLHQSSGSGPLLPPIAIQLKQTPGPDNPIFLPSDDTWDWLLAKTWVRNSE  
FYIHEAVTHLLHAHLIPEVFALATLRQLRCHPLFKLLIPIHRYTLHINTLARELLVAPGKLIKSTGLGTGG  
FSDLIKRNMEQLNYSVLCLEPIDIRARGVEDIPGYYRDDGMQIWGAIKSFVSEIVSIYYPSTSVQDDQELQA  
WVREIFSEGFLGRESSGMPSLDREALVQYITMVI FTCSAKHAAVSSGQFDSCVWMPNLPPTMQLPPTPTSKG  
QARPESFIATLPAVNSSSYHI IALWLLSAEPGDQRPLGHYPDEHFTEDAPRRSVAAFQKLIQISKGIRERNR  
GLALPYTYLDPPLIENSVSI\*  
>rs222383104\_ENSMUSP00000091621\_c.324:C>T\_p.Q109\*  
ENSMUST00000094078.4|Alox8-202|ENSMUSG00000020891|-|chr11:g.69088224:G>A  
MAKCRVRVSTGEACGAGTWDKVSIVGTHGESPLVPLDHLGKEFSAGAEEDFEVTLPODVGTVMLLRVHKAP  
PEVSLPLMSFRSDAWFCRWFEELEWLPGAALHFPCY\*WLEGAGELVLRREGAAKVSQDHHPTLQDQRQKELESR  
QKMYSWKTYIEGWPRCLDHETVKDLDLNIKYSAMRNAKLFFKAHSAYTELKVKGLLDRTGLWRSIREMRRLFN  
FRKTPAAEYVFAHWQEDAFFASQFLNGINPVLIRRCHSLPNNFPVTDEMVAAPVLGPGTSLQAELEKGSFLVD  
HGILSGVHTNINLNGKQFSAAPMTLLHQSSGSGPLLPPIAIQLKQTPGPDNPIFLPSDDTWDWLLAKTWVRNSE  
FYIHEAVTHLLHAHLIPEVFALATLRQLRCHPLFKSTGLGTGGFSDLIKRNMEQLNYSVLCLEPIDIRARGVE  
DIPGYYRDDGMQIWGAIKSFVSEIVSIYYPSTSVQDDQELQAWVREIFSEGFLGRESSGMPSLDREALV  
QYITMVI FTCSAKHAAVSSGQFDSCVWMPNLPPTMQLPPTPTSKGQARPESFIATLPAVNSSSYHI IALWLLSA  
EPGDQRPLGHYPDEHFTEDAPRRSVAAFQKLIQISKGIRERNRGLALPYTYLDPPLIENSVSI\*  
>rs52051157\_ENSMUSP00000104305\_c.3071:C>G\_p.N1024K  
ENSMUST00000108665.8|Gucy2e-203|ENSMUSG00000020890|-|chr11:g.69114456:G>C  
MSAWLLPAGGLPGAGFCVPARQSPSSFSRVLWRPRLPGLLLLLLLPSPSALS AVFKVGLGPWACDPI FAR  
ARPDLAARLANRLNRD FALDGGPRFEVALLPEPCLTPGSLGAVSSALSRSVSGLVGPVNPAACRPAELLAQEA  
GVALVPWGPCPTAAGTTAPAVTPAADALYVLLRAFRWARVALITAPQDLWVEAGRALSTALRARGLPVALVT  
SMETS DRSGAREALGRIRDGPRVRVIMVMH SVLLGGEEQRYLLEAAEELALTDGSLVFLPFDTLHYALSPGP  
EALAAFVNSSQLRRAHDAVLT LRRCPPGGVSDSLRRAQEHQELPLDLNLKQVSPLFGTIYDAVFLLAGGVK  
RARTAVGGGWVSGASVARQVREAQVSGFCVGLGRTEEPSFVLLD TDASGEQLFATHLLDPVLGSLRSAGTPMH  
FPRGGPAPGDPDPCWFD PDVICNGVPEPLVFGVFLLVIGMGLTGAFLAHYLRHRLHMQMASGPNKI ILTLE  
DVTF LHPGSSRKVVQGSRS SLATRSASDIRSVSPQPQESTNVGLYEGDWVWLKFKPGEHMAIRPATKTAF  
SKLREL RHENVALYLGLFLAGTADSPATPGE GILAVVSEHCARGSLHDL LAQREIKLDWMFKSSLLLDLIKGM  
RYLHHRGVAHGRLKSRNCVVDGRFVLKVDHGHGRLL EAQRVLEPPSAEDQLWTAPELLRDP SLERRGTLAG  
DVFS LAIIMQEVVCRSTPYAMLELTP EEVIQRVRSPPPLCRPLVSMQAPMECIQLMTQCWAEHP ELRPSMDL  
TFDLFKSINKGRKTNI I D SMLRMLEQYSSNLEDLIRERTEELEQEKQKTDRLLTQMLPPSVAEALKMGT SVEP  
EYFEEVTLYFSDIVGFTTISAMSEPIEVVDLLNDLYTLFDAIIGAHDVYK VETIGDAYMVASGLPQRNGQRHA  
AEIANMSLDILSAVGSFRMRHMEVVPVIRIRIGLHSGPCVAGVGLTMPRYCLFGDVTNTASRMESTGLPYRIH  
VKMSTVIRALRALDQGFQMECRGRT ELKKGIEDTYWLVRGLGFNKPIPKPPDLQPGASNHG I S LQEI PPERRK  
KLEKARPGQFTGK\*  
>rs52051157\_ENSMUSP00000104304\_c.3071:C>G\_p.N1024K  
ENSMUST00000108664.2|Gucy2e-202|ENSMUSG00000020890|-|chr11:g.69114456:G>C  
MSAWLLPAGGLPGAGFCVPARQSPSSFSRVLWRPRLPGLLLLLLLPSPSALS AVFKVGLGPWACDPI FAR  
ARPDLAARLANRLNRD FALDGGPRFEVALLPEPCLTPGSLGAVSSALSRSVSGLVGPVNPAACRPAELLAQEA

GVALVPWGPCGTRAAGTTAPAVTPAADALYVLLRAFRWARVALITAPQDLWEAGRALSTALRARGLPVALVT  
SMETSDRSGAREALGRIRDGPRVRVVMVMSVLLGGEEQRYLLEAAEELALTDGSLVFLPFDTLHYALSPGP  
EALAAFVNSSQLRRAHDAVLTLTRRCPGGSVQDSLRAQEHQELPLDLNLKQVSPFLGTIYDAVFLLAGGVK  
RARTAVGGGWVSGASVARQVREAQVSGFCGVLGRTEEPSFVLLD TDASGEQLFATHLLDPVLGSLRSAGTPMH  
FPRGGPAPGPDPCWFDPDVICNGGVEPGLVFGVLLVIGMGLTGAF LAHYLRHRLHMQMASGPNKIILTLE  
DVTFLHPPGGSSRKVVQGSRS SLATRSASDIRSVSPQPQESTNVGLYEGDWVWLKFKFGEHHMAIRPATKTAF  
SKLREL RHENVALYLGLFLAGTADSPATPGEGLAVVSEHCARGSLHDLAQREIKLDWMFKSLLLDLIKGM  
RYLHHRGVAHGRLKSRNCVVDGRFVLKVTDHGHGRLLLEAQRVLEPPSAEDQLWTAPELLRDP SLERRGTLAG  
DVFS LAIIMQEVVCRSTPYAMLELTPEEVIQRVRSPPPLCRPLVSMQAPMECIQLMTQCWAEHPEL RPSMDL  
TFDLFKSINKGRKTNIIDSMLRMLQYSSNLEDLIRERTEELEQEKQKTDRLLTQMLPPSVAEALKMGT SVEP  
EYFEEVTLYFS DIVGFTTISAMSEPIEVVDLNDLYTLFDAIIGAHDVYKVETIGDAYMVASGLPQRNGQRHA  
AEIANMSLDILSAVGSFRMRHMEVPVRIIRIGLHSGPCVAGVVGLTMPRYCLFGDTVNTASRMESTGLPYRIH  
VKMSTVRILRALDQGFQMECRGRTTELKKGIEDTYWLVGRLGFNKPIPKPPDLQPGASNHGISLQEIPPERRK  
KLEKARPGQFTGK\*

>rs52051157\_ENSMUSP00000021259\_c.3071:C>G\_p.N1024K

ENSMUST00000021259.9|Gucy2e-201|ENSMUSG00000020890|-|chr11:g.69114456:G>C  
MSAWLLPAGGLPGAGFCV PARQSPSSFSRVLRWPRPGLPGLLLLLLPSALS AVFKVGLGPWACDPIFAR  
ARPD LAARLANRNLNDFALDGGPRFEVALLPEPCLTPGSLGAVSSALSRVSGLVGPVNPAACRPAELLAQEA  
GVALVPWGPCGTRAAGTTAPAVTPAADALYVLLRAFRWARVALITAPQDLWEAGRALSTALRARGLPVALVT  
SMETSDRSGAREALGRIRDGPRVRVVMVMSVLLGGEEQRYLLEAAEELALTDGSLVFLPFDTLHYALSPGP  
EALAAFVNSSQLRRAHDAVLTLTRRCPGGSVQDSLRAQEHQELPLDLNLKQVSPFLGTIYDAVFLLAGGVK  
RARTAVGGGWVSGASVARQVREAQVSGFCGVLGRTEEPSFVLLD TDASGEQLFATHLLDPVLGSLRSAGTPMH  
FPRGGPAPGPDPCWFDPDVICNGGVEPGLVFGVLLVIGMGLTGAF LAHYLRHRLHMQMASGPNKIILTLE  
DVTFLHPPGGSSRKVVQGSRS SLATRSASDIRSVSPQPQESTNVGLYEGDWVWLKFKFGEHHMAIRPATKTAF  
SKLREL RHENVALYLGLFLAGTADSPATPGEGLAVVSEHCARGSLHDLAQREIKLDWMFKSLLLDLIKGM  
RYLHHRGVAHGRLKSRNCVVDGRFVLKVTDHGHGRLLLEAQRVLEPPSAEDQLWTAPELLRDP SLERRGTLAG  
DVFS LAIIMQEVVCRSTPYAMLELTPEEVIQRVRSPPPLCRPLVSMQAPMECIQLMTQCWAEHPEL RPSMDL  
TFDLFKSINKGRKTNIIDSMLRMLQYSSNLEDLIRERTEELEQEKQKTDRLLTQMLPPSVAEALKMGT SVEP  
EYFEEVTLYFS DIVGFTTISAMSEPIEVVDLNDLYTLFDAIIGAHDVYKVETIGDAYMVASGLPQRNGQRHA  
AEIANMSLDILSAVGSFRMRHMEVPVRIIRIGLHSGPCVAGVVGLTMPRYCLFGDTVNTASRMESTGLPYRIH  
VKMSTVRILRALDQGFQMECRGRTTELKKGIEDTYWLVGRLGFNKPIPKPPDLQPGASNHGISLQEIPPERRK  
KLEKARPGQFTGK\*

>rs45683389\_ENSMUSP00000104305\_c.3033:A>G\_p.M1012V

ENSMUST00000108665.8|Gucy2e-203|ENSMUSG00000020890|-|chr11:g.69114613:T>C  
MSAWLLPAGGLPGAGFCV PARQSPSSFSRVLRWPRPGLPGLLLLLLPSALS AVFKVGLGPWACDPIFAR  
ARPD LAARLANRNLNDFALDGGPRFEVALLPEPCLTPGSLGAVSSALSRVSGLVGPVNPAACRPAELLAQEA  
GVALVPWGPCGTRAAGTTAPAVTPAADALYVLLRAFRWARVALITAPQDLWEAGRALSTALRARGLPVALVT  
SMETSDRSGAREALGRIRDGPRVRVVMVMSVLLGGEEQRYLLEAAEELALTDGSLVFLPFDTLHYALSPGP  
EALAAFVNSSQLRRAHDAVLTLTRRCPGGSVQDSLRAQEHQELPLDLNLKQVSPFLGTIYDAVFLLAGGVK  
RARTAVGGGWVSGASVARQVREAQVSGFCGVLGRTEEPSFVLLD TDASGEQLFATHLLDPVLGSLRSAGTPMH  
FPRGGPAPGPDPCWFDPDVICNGGVEPGLVFGVLLVIGMGLTGAF LAHYLRHRLHMQMASGPNKIILTLE  
DVTFLHPPGGSSRKVVQGSRS SLATRSASDIRSVSPQPQESTNVGLYEGDWVWLKFKFGEHHMAIRPATKTAF  
SKLREL RHENVALYLGLFLAGTADSPATPGEGLAVVSEHCARGSLHDLAQREIKLDWMFKSLLLDLIKGM  
RYLHHRGVAHGRLKSRNCVVDGRFVLKVTDHGHGRLLLEAQRVLEPPSAEDQLWTAPELLRDP SLERRGTLAG  
DVFS LAIIMQEVVCRSTPYAMLELTPEEVIQRVRSPPPLCRPLVSMQAPMECIQLMTQCWAEHPEL RPSMDL  
TFDLFKSINKGRKTNIIDSMLRMLQYSSNLEDLIRERTEELEQEKQKTDRLLTQMLPPSVAEALKMGT SVEP  
EYFEEVTLYFS DIVGFTTISAMSEPIEVVDLNDLYTLFDAIIGAHDVYKVETIGDAYMVASGLPQRNGQRHA  
AEIANMSLDILSAVGSFRMRHMEVPVRIIRIGLHSGPCVAGVVGLTMPRYCLFGDTVNTASRMESTGLPYRIH  
VNMSTVRILRALDQGFQMECRGRTTELKKGIEDTYWLVGRLGFNKPIPKPPDLQPGASNHGISLQEIPPERRK  
KLEKARPGQFTGK\*

>rs45683389\_ENSMUSP00000104304\_c.3033:A>G\_p.M1012V

ENSMUST00000108664.2|Gucy2e-202|ENSMUSG00000020890|-|chr11:g.69114613:T>C  
MSAWLLPAGGLPGAGFCV PARQSPSSFSRVLRWPRPGLPGLLLLLLPSALS AVFKVGLGPWACDPIFAR  
ARPD LAARLANRNLNDFALDGGPRFEVALLPEPCLTPGSLGAVSSALSRVSGLVGPVNPAACRPAELLAQEA  
GVALVPWGPCGTRAAGTTAPAVTPAADALYVLLRAFRWARVALITAPQDLWEAGRALSTALRARGLPVALVT  
SMETSDRSGAREALGRIRDGPRVRVVMVMSVLLGGEEQRYLLEAAEELALTDGSLVFLPFDTLHYALSPGP  
EALAAFVNSSQLRRAHDAVLTLTRRCPGGSVQDSLRAQEHQELPLDLNLKQVSPFLGTIYDAVFLLAGGVK  
RARTAVGGGWVSGASVARQVREAQVSGFCGVLGRTEEPSFVLLD TDASGEQLFATHLLDPVLGSLRSAGTPMH

FPRGGPAPGPDPCWFDPDVICNGGVEPGLVFGVGLLVIGMGLTGAFLAHYLRHRLHMQMASGPNKIILTLE
DVTFLHPPGGSSRKVVQGSRSLSLATRSASDIRSVSPQPQESTNVGLYEGDWVWLKFKFGEHHMAIRPATKTAF
SKLREL RHENVALYLGLFLAGTADSPATPGEGLAVVSEHCARGSLHDLLAQREIKLDWMFKSLLLDLIKGM
RYLHHRGVAHGRLKSRNCVVDGRFVLKVTDHGHGRLLEAQRVLEPPSAEDQLWTAPELLRDPSSLERRGTLAG
DVFSLAIIMQEVVCRSTPYAMLELTPPEEVIQRVRSPPPLCRPLVSMQAPMECIQLMTQCWAEHPPELRPSMDL
TFDLFKSINKGRKTNIIDSMLRMLEQYSSNLEDLIRERTEEELEQEKQKTDRLLTQMLPPSVAEALKMGTSVPEP
EYFEEVTLYFSDIVGFTTISAMSEPIEVVDLLNDLYTLFDAIIGAHDVYKQVETIGDAYMVASGLPQRNGQRHA
AEIANMSLDILSAVGSFRMRHMPEVPVRIIRIGLHSGPCVAGVVGLTMPRYCLFGDTVNTASRVESTGLPYRIH
VNMSTVRILRALDQGFQMECRGRTELKKGKIEDTYWLVGRLGFNKPIPKPPDLQPGASNHGISLQEI PPERRK
KLEKARPGQFTGK\*

>rs45683389\_ENSMUSP00000021259\_c.3033:A>G\_p.M1012V

ENSMUST00000021259.9|Gucy2e-201|ENSMUSG00000020890|-|chr11:g.69114613:T>C
MSAWLLPAGGLPGAGFCVPARQSPSSFSRVLRWPRPGLPGLLLLLLLPSPSALS AVFKVGLGPWACDPI FAR
ARPDLAARLANRNLNDFALDGGPRFEVALLPEPCLTPGSLGAVSSALSRVSGLVGPNPAACRPAELLAQEA
GVALVPWGPCGPTRAAGTTAPAVTPAADALYVLLRAFRWARVALITAPQDLWVEAGRALSTALRARGLPVALVT
SMETSDRSGAREALGRIRDGPRVRVVMVMSVLLGGEEQRYLLEAAEELALTDGSLVFLPFDTLHYALSPGP
EALAAFVNSSQLRRAHDAVLTLTRCPCPPGGSVQDSLRAAQEHQELPLDLNLKQVSPFLGTIYDAVFLLAGGVK
RARTAVGGGWVSGASVARQVREAQVSGFCVGLGRTEEPSFVLLD TDASGEQLFATHLLDPVLGSLRSAGTPMH
FPRGGPAPGPDPCWFDPDVICNGGVEPGLVFGVGLLVIGMGLTGAFLAHYLRHRLHMQMASGPNKIILTLE
DVTFLHPPGGSSRKVVQGSRSLSLATRSASDIRSVSPQPQESTNVGLYEGDWVWLKFKFGEHHMAIRPATKTAF
SKLREL RHENVALYLGLFLAGTADSPATPGEGLAVVSEHCARGSLHDLLAQREIKLDWMFKSLLLDLIKGM
RYLHHRGVAHGRLKSRNCVVDGRFVLKVTDHGHGRLLEAQRVLEPPSAEDQLWTAPELLRDPSSLERRGTLAG
DVFSLAIIMQEVVCRSTPYAMLELTPPEEVIQRVRSPPPLCRPLVSMQAPMECIQLMTQCWAEHPPELRPSMDL
TFDLFKSINKGRKTNIIDSMLRMLEQYSSNLEDLIRERTEEELEQEKQKTDRLLTQMLPPSVAEALKMGTSVPEP
EYFEEVTLYFSDIVGFTTISAMSEPIEVVDLLNDLYTLFDAIIGAHDVYKQVETIGDAYMVASGLPQRNGQRHA
AEIANMSLDILSAVGSFRMRHMPEVPVRIIRIGLHSGPCVAGVVGLTMPRYCLFGDTVNTASRVESTGLPYRIH
VNMSTVRILRALDQGFQMECRGRTELKKGKIEDTYWLVGRLGFNKPIPKPPDLQPGASNHGISLQEI PPERRK
KLEKARPGQFTGK\*

>rs48904557\_ENSMUSP00000104305\_c.2221:A>G\_p.E741G

ENSMUST00000108665.8|Gucy2e-203|ENSMUSG00000020890|-|chr11:g.69118363:T>C
MSAWLLPAGGLPGAGFCVPARQSPSSFSRVLRWPRPGLPGLLLLLLLPSPSALS AVFKVGLGPWACDPI FAR
ARPDLAARLANRNLNDFALDGGPRFEVALLPEPCLTPGSLGAVSSALSRVSGLVGPNPAACRPAELLAQEA
GVALVPWGPCGPTRAAGTTAPAVTPAADALYVLLRAFRWARVALITAPQDLWVEAGRALSTALRARGLPVALVT
SMETSDRSGAREALGRIRDGPRVRVVMVMSVLLGGEEQRYLLEAAEELALTDGSLVFLPFDTLHYALSPGP
EALAAFVNSSQLRRAHDAVLTLTRCPCPPGGSVQDSLRAAQEHQELPLDLNLKQVSPFLGTIYDAVFLLAGGVK
RARTAVGGGWVSGASVARQVREAQVSGFCVGLGRTEEPSFVLLD TDASGEQLFATHLLDPVLGSLRSAGTPMH
FPRGGPAPGPDPCWFDPDVICNGGVEPGLVFGVGLLVIGMGLTGAFLAHYLRHRLHMQMASGPNKIILTLE
DVTFLHPPGGSSRKVVQGSRSLSLATRSASDIRSVSPQPQESTNVGLYEGDWVWLKFKFGEHHMAIRPATKTAF
SKLREL RHENVALYLGLFLAGTADSPATPGEGLAVVSEHCARGSLHDLLAQREIKLDWMFKSLLLDLIKGM
RYLHHRGVAHGRLKSRNCVVDGRFVLKVTDHGHGRLLEAQRVLEPPSAEDQLWTAPELLRDPSSLERRGTLAG
DVFSLAIIMQGVVCRSTPYAMLELTPPEEVIQRVRSPPPLCRPLVSMQAPMECIQLMTQCWAEHPPELRPSMDL
TFDLFKSINKGRKTNIIDSMLRMLEQYSSNLEDLIRERTEEELEQEKQKTDRLLTQMLPPSVAEALKMGTSVPEP
EYFEEVTLYFSDIVGFTTISAMSEPIEVVDLLNDLYTLFDAIIGAHDVYKQVETIGDAYMVASGLPQRNGQRHA
AEIANMSLDILSAVGSFRMRHMPEVPVRIIRIGLHSGPCVAGVVGLTMPRYCLFGDTVNTASRMESTGLPYRIH
VNMSTVRILRALDQGFQMECRGRTELKKGKIEDTYWLVGRLGFNKPIPKPPDLQPGASNHGISLQEI PPERRK
KLEKARPGQFTGK\*

>rs48904557\_ENSMUSP00000104304\_c.2221:A>G\_p.E741G

ENSMUST00000108664.2|Gucy2e-202|ENSMUSG00000020890|-|chr11:g.69118363:T>C
MSAWLLPAGGLPGAGFCVPARQSPSSFSRVLRWPRPGLPGLLLLLLLPSPSALS AVFKVGLGPWACDPI FAR
ARPDLAARLANRNLNDFALDGGPRFEVALLPEPCLTPGSLGAVSSALSRVSGLVGPNPAACRPAELLAQEA
GVALVPWGPCGPTRAAGTTAPAVTPAADALYVLLRAFRWARVALITAPQDLWVEAGRALSTALRARGLPVALVT
SMETSDRSGAREALGRIRDGPRVRVVMVMSVLLGGEEQRYLLEAAEELALTDGSLVFLPFDTLHYALSPGP
EALAAFVNSSQLRRAHDAVLTLTRCPCPPGGSVQDSLRAAQEHQELPLDLNLKQVSPFLGTIYDAVFLLAGGVK
RARTAVGGGWVSGASVARQVREAQVSGFCVGLGRTEEPSFVLLD TDASGEQLFATHLLDPVLGSLRSAGTPMH
FPRGGPAPGPDPCWFDPDVICNGGVEPGLVFGVGLLVIGMGLTGAFLAHYLRHRLHMQMASGPNKIILTLE
DVTFLHPPGGSSRKVVQGSRSLSLATRSASDIRSVSPQPQESTNVGLYEGDWVWLKFKFGEHHMAIRPATKTAF
SKLREL RHENVALYLGLFLAGTADSPATPGEGLAVVSEHCARGSLHDLLAQREIKLDWMFKSLLLDLIKGM
RYLHHRGVAHGRLKSRNCVVDGRFVLKVTDHGHGRLLEAQRVLEPPSAEDQLWTAPELLRDPSSLERRGTLAG

DVFSLAIIMQGVVCRSTPYAMLELTPEEVIQVRVSPPLCRPLVSMQAPMECIQLMTQCWAEHPPELRPSMDL  
TFDLFKSINKGRKTNIIDSMLRMLEQYSSNLEDLIRERTEEELEQEKQKTDRLLTQMLPPSVAEALKMGTSV  
EYFEEVTLYFSDIVGFTTISAMSEPIEVVDLLNDLYTLFDAIIGAHDVYKQVETIGDAYMVASGLPQRNGORHA  
AEIANMSLDILSAVGSFRMRHMPEVPVRIRIRIGLHSGPCVAGVVGLTMPRYCLFGDVTNTASRMESTGLPYRIH  
VNMSTVRILRALDQGFQMECRGRTTELKKGKIEDTYWLVGRLGFNKPIPKPPDLQPGASNHGISLQEIPEPERRK  
KLEKARPGQFTGK\*

>rs48904557\_ENSMUSP00000021259\_c.2221:A>G\_p.E741G

ENSMUST00000021259.9|Gucy2e-201|ENSMUSG00000020890|-|chr11:g.69118363:T>C  
MSAWLLPAGGLPGAGFCVPARQSPSSFSRVLRWPRPGLPGLLLLLLLPSPSALSASVFKVGVLPWACDPIFAR  
ARPDLAARLAANRLNRDFAIDGGPRFEVALLPEPCLTPGSLGAVSSALSRVSGLVGPNPAACRPAELLAQEA  
GVALVPWGPCPGTRAAGTTAPAVTPAADALYVLLRAFRWARVALITAPQDLWEAGRALSTALRARGLPVALVT  
SMETSDRSGAREALGRIRDGPRVRVIMVMHVSLLGGEEQRYLLEAAEELALTDGSLVFLPFDTLHYALSPGP  
EALAAFVNSSQLRRAHDAVLTLTRCPCPPGGSVQDSLRAAQEHQELPLDLNLKQVSPLFGTIYDAVFLLAGGVK  
RARTAVGGGWVSGASVARQVREAVQVSGFCVGLGRTEEPSFVLLD TDASGEQLFATHLLDPVLGSLRSAGTPMH  
FPRGGPAPGPDPCWFDPDVICNGGVEPGLVFGVGLLVI GMLTGAF LAHYLRHRLHMQMASGPNKIILTLE  
DVTFLHPPGGSSRKVVQGSRS SLATRSASDIRSVSPQPESTNVGLYEGDWVWLKFFPGEHMAIRPATKTAF  
SKLREL RHENVALYLGFLAGTADSPATPGE GILAVVSEHCARGSLHDLLAQREIKLDWMFKSSLLLDLIKGM  
RYLHHRGVAHGRLKSRNCVVDGRFVLKVTDHGHGRLLLEAQRVLEPPSAEDQLWTAPELLRDP SLERRGTLAG  
DVFSLAIIMQGVVCRSTPYAMLELTPEEVIQVRVSPPLCRPLVSMQAPMECIQLMTQCWAEHPPELRPSMDL  
TFDLFKSINKGRKTNIIDSMLRMLEQYSSNLEDLIRERTEEELEQEKQKTDRLLTQMLPPSVAEALKMGTSV  
EYFEEVTLYFSDIVGFTTISAMSEPIEVVDLLNDLYTLFDAIIGAHDVYKQVETIGDAYMVASGLPQRNGORHA  
AEIANMSLDILSAVGSFRMRHMPEVPVRIRIRIGLHSGPCVAGVVGLTMPRYCLFGDVTNTASRMESTGLPYRIH  
VNMSTVRILRALDQGFQMECRGRTTELKKGKIEDTYWLVGRLGFNKPIPKPPDLQPGASNHGISLQEIPEPERRK  
KLEKARPGQFTGK\*

>rs51261336\_ENSMUSP00000104305\_c.2216:G>T\_p.M739I

ENSMUST00000108665.8|Gucy2e-203|ENSMUSG00000020890|-|chr11:g.69118368:C>A  
MSAWLLPAGGLPGAGFCVPARQSPSSFSRVLRWPRPGLPGLLLLLLLPSPSALSASVFKVGVLPWACDPIFAR  
ARPDLAARLAANRLNRDFAIDGGPRFEVALLPEPCLTPGSLGAVSSALSRVSGLVGPNPAACRPAELLAQEA  
GVALVPWGPCPGTRAAGTTAPAVTPAADALYVLLRAFRWARVALITAPQDLWEAGRALSTALRARGLPVALVT  
SMETSDRSGAREALGRIRDGPRVRVIMVMHVSLLGGEEQRYLLEAAEELALTDGSLVFLPFDTLHYALSPGP  
EALAAFVNSSQLRRAHDAVLTLTRCPCPPGGSVQDSLRAAQEHQELPLDLNLKQVSPLFGTIYDAVFLLAGGVK  
RARTAVGGGWVSGASVARQVREAVQVSGFCVGLGRTEEPSFVLLD TDASGEQLFATHLLDPVLGSLRSAGTPMH  
FPRGGPAPGPDPCWFDPDVICNGGVEPGLVFGVGLLVI GMLTGAF LAHYLRHRLHMQMASGPNKIILTLE  
DVTFLHPPGGSSRKVVQGSRS SLATRSASDIRSVSPQPESTNVGLYEGDWVWLKFFPGEHMAIRPATKTAF  
SKLREL RHENVALYLGFLAGTADSPATPGE GILAVVSEHCARGSLHDLLAQREIKLDWMFKSSLLLDLIKGM  
RYLHHRGVAHGRLKSRNCVVDGRFVLKVTDHGHGRLLLEAQRVLEPPSAEDQLWTAPELLRDP SLERRGTLAG  
DVFSLAIIMQGVVCRSTPYAMLELTPEEVIQVRVSPPLCRPLVSMQAPMECIQLMTQCWAEHPPELRPSMDL  
TFDLFKSINKGRKTNIIDSMLRMLEQYSSNLEDLIRERTEEELEQEKQKTDRLLTQMLPPSVAEALKMGTSV  
EYFEEVTLYFSDIVGFTTISAMSEPIEVVDLLNDLYTLFDAIIGAHDVYKQVETIGDAYMVASGLPQRNGORHA  
AEIANMSLDILSAVGSFRMRHMPEVPVRIRIRIGLHSGPCVAGVVGLTMPRYCLFGDVTNTASRMESTGLPYRIH  
VNMSTVRILRALDQGFQMECRGRTTELKKGKIEDTYWLVGRLGFNKPIPKPPDLQPGASNHGISLQEIPEPERRK  
KLEKARPGQFTGK\*

>rs51261336\_ENSMUSP00000104304\_c.2216:G>T\_p.M739I

ENSMUST00000108664.2|Gucy2e-202|ENSMUSG00000020890|-|chr11:g.69118368:C>A  
MSAWLLPAGGLPGAGFCVPARQSPSSFSRVLRWPRPGLPGLLLLLLLPSPSALSASVFKVGVLPWACDPIFAR  
ARPDLAARLAANRLNRDFAIDGGPRFEVALLPEPCLTPGSLGAVSSALSRVSGLVGPNPAACRPAELLAQEA  
GVALVPWGPCPGTRAAGTTAPAVTPAADALYVLLRAFRWARVALITAPQDLWEAGRALSTALRARGLPVALVT  
SMETSDRSGAREALGRIRDGPRVRVIMVMHVSLLGGEEQRYLLEAAEELALTDGSLVFLPFDTLHYALSPGP  
EALAAFVNSSQLRRAHDAVLTLTRCPCPPGGSVQDSLRAAQEHQELPLDLNLKQVSPLFGTIYDAVFLLAGGVK  
RARTAVGGGWVSGASVARQVREAVQVSGFCVGLGRTEEPSFVLLD TDASGEQLFATHLLDPVLGSLRSAGTPMH  
FPRGGPAPGPDPCWFDPDVICNGGVEPGLVFGVGLLVI GMLTGAF LAHYLRHRLHMQMASGPNKIILTLE  
DVTFLHPPGGSSRKVVQGSRS SLATRSASDIRSVSPQPESTNVGLYEGDWVWLKFFPGEHMAIRPATKTAF  
SKLREL RHENVALYLGFLAGTADSPATPGE GILAVVSEHCARGSLHDLLAQREIKLDWMFKSSLLLDLIKGM  
RYLHHRGVAHGRLKSRNCVVDGRFVLKVTDHGHGRLLLEAQRVLEPPSAEDQLWTAPELLRDP SLERRGTLAG  
DVFSLAIIMQGVVCRSTPYAMLELTPEEVIQVRVSPPLCRPLVSMQAPMECIQLMTQCWAEHPPELRPSMDL  
TFDLFKSINKGRKTNIIDSMLRMLEQYSSNLEDLIRERTEEELEQEKQKTDRLLTQMLPPSVAEALKMGTSV  
EYFEEVTLYFSDIVGFTTISAMSEPIEVVDLLNDLYTLFDAIIGAHDVYKQVETIGDAYMVASGLPQRNGORHA  
AEIANMSLDILSAVGSFRMRHMPEVPVRIRIRIGLHSGPCVAGVVGLTMPRYCLFGDVTNTASRMESTGLPYRIH

```
VNMSTVRILRALDQGFQMECRGRTELKKGKIEDTYWLVGRLGFNKPIPKPPDLQPGASNHGISLQEIPERRK
KLEKARPGQFTGK*
>rs51261336_ENSMUSP00000021259_c.2216:G>T_p.M739I
ENSMUST00000021259.9|Gucy2e-201|ENSMUSG00000020890|-|chr11:g.69118368:C>A
MSAWLLPAGGLPGAGFCVPARQSPSSFSRVLRWPRPGLPGLLLLLLLPSPSALS AVFKVGLGPWACDPI FAR
ARPDLAARLAANRLNRDFALDGGPRFEVALLPEPCLTPGSLGAVSSALSRSVGLVGPVNPAACRPAELLAQEA
GVALVPWGPCPGTRAAGTTAPAVTPAADALYVLLRAFRWARVALITAPQDLWVEAGRALSTALRARGLPVALVT
SMETSDRSGAREALGRIRDGPRVRVVMVMHVSLLGGEEQRYLLEAAEELALTDGSLVFLPFDTLHYALSPGP
EALAAFVNSSQLRRAHDVLTTLTRCPCPGGSVQDSLRRRAQEHQELPLDLNLKQVSPFLGTIYDAVFLLAGGVK
RARTAVGGGWVSGASVARQVREAQVSGFCVGLGRTEEPSFVLLD TDASGEQLFATHLLDPVLSRSAGTPMH
FPRGGPAGPDPSCWFDPDVICNGGVEPGLVFGVGLLIGMGLTGAF LAHYLRHRLHMQMASGPNKIILTLE
DVTFLHPPGGSSRKVVQGSRS SLATRSASDIRSVSPQPQESTNVGLYEGDWVWLKFKPGEHHMAIRPATKTAF
SKLREL RHENVALYLGLFLAGTADSPATPPEGILAVVSEHCARGSLHDLLAQREIKLDW MFKSSLLLDLIKGM
RYLHHRGV AHGRLKSRNCVVDGRFVLKVTDHGHGRLL EAQRVLEPPSAEDQLWTAPELLRDP SLERRGTLAG
DVFS LAII IQEVVCRSTPYAMLELTPEEVIQVRVSPPLCRPLVSM DQAPMECIQLMTQCWAEHP ELRPSMDL
TFDLFKSINKGRKTNIIDSMLRMLEQYSSNLEDLIRERTEEELEQEKQKTDRLLTQMLPPSVAEALKMGT SVEP
EYFEEVTLYFSDIVGFTTISAMSEPIEVVDLLNDLYTLFDAI GAHDVYK VETIGDAYMVASGLPQRNGQRHA
AEIANMSLDILSAVGSFRMRHMPEVPVRIRIGLHSGPCVAGVVGLTMPRYCLFGDTVNTASRMESTGLPYRIH
VNMSTVRILRALDQGFQMECRGRTELKKGKIEDTYWLVGRLGFNKPIPKPPDLQPGASNHGISLQEIPERRK
KLEKARPGQFTGK*
>rs45916145_ENSMUSP00000104305_c.735:A>G_p.I246V
ENSMUST00000108665.8|Gucy2e-203|ENSMUSG00000020890|-|chr11:g.69126643:T>C
MSAWLLPAGGLPGAGFCVPARQSPSSFSRVLRWPRPGLPGLLLLLLLPSPSALS AVFKVGLGPWACDPI FAR
ARPDLAARLAANRLNRDFALDGGPRFEVALLPEPCLTPGSLGAVSSALSRSVGLVGPVNPAACRPAELLAQEA
GVALVPWGPCPGTRAAGTTAPAVTPAADALYVLLRAFRWARVALITAPQDLWVEAGRALSTALRARGLPVALVT
SMETSDRSGAREALGRIRDGPRVRVVMVMHVSLLGGEEQRYLLEAAEELALTDGSLVFLPFDTLHYALSPGP
EALAAFVNSSQLRRAHDVLTTLTRCPCPGGSVQDSLRRRAQEHQELPLDLNLKQVSPFLGTIYDAVFLLAGGVK
RARTAVGGGWVSGASVARQVREAQVSGFCVGLGRTEEPSFVLLD TDASGEQLFATHLLDPVLSRSAGTPMH
FPRGGPAGPDPSCWFDPDVICNGGVEPGLVFGVGLLIGMGLTGAF LAHYLRHRLHMQMASGPNKIILTLE
DVTFLHPPGGSSRKVVQGSRS SLATRSASDIRSVSPQPQESTNVGLYEGDWVWLKFKPGEHHMAIRPATKTAF
SKLREL RHENVALYLGLFLAGTADSPATPPEGILAVVSEHCARGSLHDLLAQREIKLDW MFKSSLLLDLIKGM
RYLHHRGV AHGRLKSRNCVVDGRFVLKVTDHGHGRLL EAQRVLEPPSAEDQLWTAPELLRDP SLERRGTLAG
DVFS LAII IQEVVCRSTPYAMLELTPEEVIQVRVSPPLCRPLVSM DQAPMECIQLMTQCWAEHP ELRPSMDL
TFDLFKSINKGRKTNIIDSMLRMLEQYSSNLEDLIRERTEEELEQEKQKTDRLLTQMLPPSVAEALKMGT SVEP
EYFEEVTLYFSDIVGFTTISAMSEPIEVVDLLNDLYTLFDAI GAHDVYK VETIGDAYMVASGLPQRNGQRHA
AEIANMSLDILSAVGSFRMRHMPEVPVRIRIGLHSGPCVAGVVGLTMPRYCLFGDTVNTASRMESTGLPYRIH
VNMSTVRILRALDQGFQMECRGRTELKKGKIEDTYWLVGRLGFNKPIPKPPDLQPGASNHGISLQEIPERRK
KLEKARPGQFTGK*
>rs45916145_ENSMUSP00000104304_c.735:A>G_p.I246V
ENSMUST00000108664.2|Gucy2e-202|ENSMUSG00000020890|-|chr11:g.69126643:T>C
MSAWLLPAGGLPGAGFCVPARQSPSSFSRVLRWPRPGLPGLLLLLLLPSPSALS AVFKVGLGPWACDPI FAR
ARPDLAARLAANRLNRDFALDGGPRFEVALLPEPCLTPGSLGAVSSALSRSVGLVGPVNPAACRPAELLAQEA
GVALVPWGPCPGTRAAGTTAPAVTPAADALYVLLRAFRWARVALITAPQDLWVEAGRALSTALRARGLPVALVT
SMETSDRSGAREALGRIRDGPRVRVVMVMHVSLLGGEEQRYLLEAAEELALTDGSLVFLPFDTLHYALSPGP
EALAAFVNSSQLRRAHDVLTTLTRCPCPGGSVQDSLRRRAQEHQELPLDLNLKQVSPFLGTIYDAVFLLAGGVK
RARTAVGGGWVSGASVARQVREAQVSGFCVGLGRTEEPSFVLLD TDASGEQLFATHLLDPVLSRSAGTPMH
FPRGGPAGPDPSCWFDPDVICNGGVEPGLVFGVGLLIGMGLTGAF LAHYLRHRLHMQMASGPNKIILTLE
DVTFLHPPGGSSRKVVQGSRS SLATRSASDIRSVSPQPQESTNVGLYEGDWVWLKFKPGEHHMAIRPATKTAF
SKLREL RHENVALYLGLFLAGTADSPATPPEGILAVVSEHCARGSLHDLLAQREIKLDW MFKSSLLLDLIKGM
RYLHHRGV AHGRLKSRNCVVDGRFVLKVTDHGHGRLL EAQRVLEPPSAEDQLWTAPELLRDP SLERRGTLAG
DVFS LAII IQEVVCRSTPYAMLELTPEEVIQVRVSPPLCRPLVSM DQAPMECIQLMTQCWAEHP ELRPSMDL
TFDLFKSINKGRKTNIIDSMLRMLEQYSSNLEDLIRERTEEELEQEKQKTDRLLTQMLPPSVAEALKMGT SVEP
EYFEEVTLYFSDIVGFTTISAMSEPIEVVDLLNDLYTLFDAI GAHDVYK VETIGDAYMVASGLPQRNGQRHA
AEIANMSLDILSAVGSFRMRHMPEVPVRIRIGLHSGPCVAGVVGLTMPRYCLFGDTVNTASRMESTGLPYRIH
VNMSTVRILRALDQGFQMECRGRTELKKGKIEDTYWLVGRLGFNKPIPKPPDLQPGASNHGISLQEIPERRK
KLEKARPGQFTGK*
>rs45916145_ENSMUSP00000021259_c.735:A>G_p.I246V
ENSMUST00000021259.9|Gucy2e-201|ENSMUSG00000020890|-|chr11:g.69126643:T>C
```

MSAWLLPAGGLPGAGFCVPARQSPSSFSRVLRWPRPGLPGLLLLLLLLLLPSALSASAVFKVGLGPWACDPIFAR  
 ARPDLAARLAANRLNRDFAIDGGPRFEVALLPEPCLTPGSLGAVSSALSRVSGLVGPNPAACRPAELLAQEA  
 GVALVPWDCPGTRAAGTTAPAVTPAADALYVLLRAFRWARVALITAPQDLWEAGRALSTALRARGLPVALVT  
 SMETSDRSGAREALGRIRDGPRVRVVMVMSVLLGGEEQRYLLEAAEELALTDGSLVFLPFDTLHYALSPGP  
 EALAAFVNSSLRRAHDAVLTTLTRCPCPGGSVQDSLRRRAQEHQELPLDLNLKQVSPLFGTTIYDAVFLLAGGVK  
 RARTAVGGGWVSGASVARQVREAQVSGFCVGLGRTEEPSFVLLD TDASGEQLFATHLLDPVLGSLRSAGTPMH  
 FPRGGPAGGPDPCWFDPDVICNGGVEPGLVFGVGLLIGMGLTGAF LAHYLRHLLHMOMASGPNKIILTLE  
 DVTFLHPPGGSSRKVVQGSRS SLATRSASDIRSVSPQPESTNVGLYEGDWVWLKFFPGEHHMAIRPATKTAF  
 SKLRELRLHENVALYLGLFLAGTADSPATPGE GILAVVSEHCARGSLHDLLAQREIKLDWMFKSSLLLDLIKGM  
 RYLHHRGVVAHGR LKSRNCVVDGRFVLKVTDHGHGRLL EAQRVLPEPPSAEDQLWTAPELLRDP SLERRGTLAG  
 DVFSLAIIMQEVVCRSTPYAMLELTPEEVIQRVRSPPPLCRPLVSMQAPMECIQLMTQCWAEHP ELRPSMDL  
 TFDLFSKINKGRKTNIIDSMLRMLQYSSNLEDLIRERTEELEQEKQKTDRLLTQMLPPSVAEALKMGT SVEP  
 EYFEEVTLYFSDIVGFTTISAMSEPIEVVDLLNDLYTLFDAIIGAHDVYK VETIGDAYMVASGLPQRNGORHA  
 AEIANMSLDILSAVGSFRMRHMEVVPVIRIRIGLHSGPCVAGVVGLTMPRYCLFGDVTNTASRMESTGLPYRIH  
 VMNSTVRILRALDQGFQMECRGRTELKKGKIEDTYWL VGRGLGFNKPIPKPPDLQPGASNHGISLQEI PPERRK  
 KLEKARPGQFTGK\*

>rs29470592\_ENSMUSP00000104305\_c.460:G>A\_p.G154D

ENSMUST00000108665.8|Gucy2e-203|ENSMUSG00000020890|-|chr11:g.69127011:C>T  
 MSAWLLPAGGLPGAGFCVPARQSPSSFSRVLRWPRPGLPGLLLLLLLLLLPSALSASAVFKVGLGPWACDPIFAR  
 ARPDLAARLAANRLNRDFAIDGGPRFEVALLPEPCLTPGSLGAVSSALSRVSGLVGPNPAACRPAELLAQEA  
 GVALVPWDCPGTRAAGTTAPAVTPAADALYVLLRAFRWARVALITAPQDLWEAGRALSTALRARGLPVALVT  
 SMETSDRSGAREALGRIRDGPRVRVVMVMSVLLGGEEQRYLLEAAEELALTDGSLVFLPFDTLHYALSPGP  
 EALAAFVNSSLRRAHDAVLTTLTRCPCPGGSVQDSLRRRAQEHQELPLDLNLKQVSPLFGTTIYDAVFLLAGGVK  
 RARTAVGGGWVSGASVARQVREAQVSGFCVGLGRTEEPSFVLLD TDASGEQLFATHLLDPVLGSLRSAGTPMH  
 FPRGGPAGGPDPCWFDPDVICNGGVEPGLVFGVGLLIGMGLTGAF LAHYLRHLLHMOMASGPNKIILTLE  
 DVTFLHPPGGSSRKVVQGSRS SLATRSASDIRSVSPQPESTNVGLYEGDWVWLKFFPGEHHMAIRPATKTAF  
 SKLRELRLHENVALYLGLFLAGTADSPATPGE GILAVVSEHCARGSLHDLLAQREIKLDWMFKSSLLLDLIKGM  
 RYLHHRGVVAHGR LKSRNCVVDGRFVLKVTDHGHGRLL EAQRVLPEPPSAEDQLWTAPELLRDP SLERRGTLAG  
 DVFSLAIIMQEVVCRSTPYAMLELTPEEVIQRVRSPPPLCRPLVSMQAPMECIQLMTQCWAEHP ELRPSMDL  
 TFDLFSKINKGRKTNIIDSMLRMLQYSSNLEDLIRERTEELEQEKQKTDRLLTQMLPPSVAEALKMGT SVEP  
 EYFEEVTLYFSDIVGFTTISAMSEPIEVVDLLNDLYTLFDAIIGAHDVYK VETIGDAYMVASGLPQRNGORHA  
 AEIANMSLDILSAVGSFRMRHMEVVPVIRIRIGLHSGPCVAGVVGLTMPRYCLFGDVTNTASRMESTGLPYRIH  
 VMNSTVRILRALDQGFQMECRGRTELKKGKIEDTYWL VGRGLGFNKPIPKPPDLQPGASNHGISLQEI PPERRK  
 KLEKARPGQFTGK\*

>rs29470592\_ENSMUSP00000104304\_c.460:G>A\_p.G154D

ENSMUST00000108664.2|Gucy2e-202|ENSMUSG00000020890|-|chr11:g.69127011:C>T  
 MSAWLLPAGGLPGAGFCVPARQSPSSFSRVLRWPRPGLPGLLLLLLLLLLPSALSASAVFKVGLGPWACDPIFAR  
 ARPDLAARLAANRLNRDFAIDGGPRFEVALLPEPCLTPGSLGAVSSALSRVSGLVGPNPAACRPAELLAQEA  
 GVALVPWDCPGTRAAGTTAPAVTPAADALYVLLRAFRWARVALITAPQDLWEAGRALSTALRARGLPVALVT  
 SMETSDRSGAREALGRIRDGPRVRVVMVMSVLLGGEEQRYLLEAAEELALTDGSLVFLPFDTLHYALSPGP  
 EALAAFVNSSLRRAHDAVLTTLTRCPCPGGSVQDSLRRRAQEHQELPLDLNLKQVSPLFGTTIYDAVFLLAGGVK  
 RARTAVGGGWVSGASVARQVREAQVSGFCVGLGRTEEPSFVLLD TDASGEQLFATHLLDPVLGSLRSAGTPMH  
 FPRGGPAGGPDPCWFDPDVICNGGVEPGLVFGVGLLIGMGLTGAF LAHYLRHLLHMOMASGPNKIILTLE  
 DVTFLHPPGGSSRKVVQGSRS SLATRSASDIRSVSPQPESTNVGLYEGDWVWLKFFPGEHHMAIRPATKTAF  
 SKLRELRLHENVALYLGLFLAGTADSPATPGE GILAVVSEHCARGSLHDLLAQREIKLDWMFKSSLLLDLIKGM  
 RYLHHRGVVAHGR LKSRNCVVDGRFVLKVTDHGHGRLL EAQRVLPEPPSAEDQLWTAPELLRDP SLERRGTLAG  
 DVFSLAIIMQEVVCRSTPYAMLELTPEEVIQRVRSPPPLCRPLVSMQAPMECIQLMTQCWAEHP ELRPSMDL  
 TFDLFSKINKGRKTNIIDSMLRMLQYSSNLEDLIRERTEELEQEKQKTDRLLTQMLPPSVAEALKMGT SVEP  
 EYFEEVTLYFSDIVGFTTISAMSEPIEVVDLLNDLYTLFDAIIGAHDVYK VETIGDAYMVASGLPQRNGORHA  
 AEIANMSLDILSAVGSFRMRHMEVVPVIRIRIGLHSGPCVAGVVGLTMPRYCLFGDVTNTASRMESTGLPYRIH  
 VMNSTVRILRALDQGFQMECRGRTELKKGKIEDTYWL VGRGLGFNKPIPKPPDLQPGASNHGISLQEI PPERRK  
 KLEKARPGQFTGK\*

>rs29470592\_ENSMUSP00000021259\_c.460:G>A\_p.G154D

ENSMUST00000021259.9|Gucy2e-201|ENSMUSG00000020890|-|chr11:g.69127011:C>T  
 MSAWLLPAGGLPGAGFCVPARQSPSSFSRVLRWPRPGLPGLLLLLLLLLLPSALSASAVFKVGLGPWACDPIFAR  
 ARPDLAARLAANRLNRDFAIDGGPRFEVALLPEPCLTPGSLGAVSSALSRVSGLVGPNPAACRPAELLAQEA  
 GVALVPWDCPGTRAAGTTAPAVTPAADALYVLLRAFRWARVALITAPQDLWEAGRALSTALRARGLPVALVT  
 SMETSDRSGAREALGRIRDGPRVRVVMVMSVLLGGEEQRYLLEAAEELALTDGSLVFLPFDTLHYALSPGP



EALAAFVNSSQLRRAHDAVLTTLTRRCPPGGSVQDSLRRRAQEHQELPLDLNLKQVSPFLFGTIYDAVFLLAGGVK  
RARTAVGGGWVSGASVARQVREAQVSGFCVGLGRTEEPSFVLLD TDASGEQLFATHLLDPVLGSLRSAGTPMH  
FPRGGPAPGPDPCWFDPDVICNGGVEPGLVFGVGLLIVIGMGLTGAF LAHYLRHRLHMQMASGPNKI ILLTLE  
DVTFLHPPGGSSRKVVQGSRS SLATRSASDIRSVSPSQPQESTNVGLYEGDWVWLKFKFPGEHHMAIRPATKTAF  
SKLREL RHENVALYLGLFLAGTADSPATPGE GILAVVSEHCARGSLHDLLAQREIKLDW MFKSSLLLDLIKGM  
RYLHHRGVAHGRLKSRNCVVDGRFVLKVTDHGHGRLL EAQRVLPPEPPSAEDQLWTAPELLRDP SLERRGTLAG  
DVFS LAIIMQEVVCRSTPYAMLELTPEEVIQRVRSPPPLCRPLVSM DQAPMECIQLMTQCWAEHP ELRPSMDL  
TFDLFKSINKGRKTNIIDSMLRMLEQYSSNLEDLIRERTEELEQEKQKTDRLLTQMLPPSVAEALKMGT SVEP  
EYFEEVTLYFSDIVGFTTISAMSEPIEVVDLLNDLYTLFD AIIGAHDVYK VETIGDAYMVASGLPQRNGQRHA  
AEIANMSLDILSAVGSFRMRHMEVVPVRIRIGLHSGPCVAGVVGLTMPRYCLFGD TVNTASRMESTGLPYRIH  
VNMSTVRILRALDQGFQMECRGRTELKKGIEDTYWLVGRLGFNKPIPKPPDLQPGASNHGISLQEIPPERRK  
KLEKARPGQFTGK\*

>rs29447827\_ENSMUSP00000104305\_c.429:C>T\_p.Q144\*

ENSMUST00000108665.8|Gucy2e-203|ENSMUSG00000020890|-|chr11:g.69127042:G>A  
MSAWLLPAGGLPGAGFCV PARQSPSSFSRVLRWPRPGLPGLLLLLLLPSPSALS AVFKVGLGPWACDPI FAR  
ARPDLAARLANRLNRDFALDGGPRFEVALLPEPCLTPGSLGAVSSALS RVSGLVGPNPAACRPAELLA\*EA  
GVALVPWGC PGTRAAGTTAPAVT PAADALYVLLRAFRWARVALI TAPQDLWEAGRALSTALRARGLPVALVT  
SMETS DRSGAREALGRIRDGPRVRVIMVMH SVLLGGEEQRYLLEAAEELALTDGSLVFLPFD TLHYALSPGP  
EALAAFVNSSQLRRAHDAVLTTLTRRCPPGGSVQDSLRRRAQEHQELPLDLNLKQVSPFLFGTIYDAVFLLAGGVK  
RARTAVGGGWVSGASVARQVREAQVSGFCVGLGRTEEPSFVLLD TDASGEQLFATHLLDPVLGSLRSAGTPMH  
FPRGGPAPGPDPCWFDPDVICNGGVEPGLVFGVGLLIVIGMGLTGAF LAHYLRHRLHMQMASGPNKI ILLTLE  
DVTFLHPPGGSSRKVVQGSRS SLATRSASDIRSVSPSQPQESTNVGLYEGDWVWLKFKFPGEHHMAIRPATKTAF  
SKLREL RHENVALYLGLFLAGTADSPATPGE GILAVVSEHCARGSLHDLLAQREIKLDW MFKSSLLLDLIKGM  
RYLHHRGVAHGRLKSRNCVVDGRFVLKVTDHGHGRLL EAQRVLPPEPPSAEDQLWTAPELLRDP SLERRGTLAG  
DVFS LAIIMQEVVCRSTPYAMLELTPEEVIQRVRSPPPLCRPLVSM DQAPMECIQLMTQCWAEHP ELRPSMDL  
TFDLFKSINKGRKTNIIDSMLRMLEQYSSNLEDLIRERTEELEQEKQKTDRLLTQMLPPSVAEALKMGT SVEP  
EYFEEVTLYFSDIVGFTTISAMSEPIEVVDLLNDLYTLFD AIIGAHDVYK VETIGDAYMVASGLPQRNGQRHA  
AEIANMSLDILSAVGSFRMRHMEVVPVRIRIGLHSGPCVAGVVGLTMPRYCLFGD TVNTASRMESTGLPYRIH  
VNMSTVRILRALDQGFQMECRGRTELKKGIEDTYWLVGRLGFNKPIPKPPDLQPGASNHGISLQEIPPERRK  
KLEKARPGQFTGK\*

>rs29447827\_ENSMUSP00000104304\_c.429:C>T\_p.Q144\*

ENSMUST00000108664.2|Gucy2e-202|ENSMUSG00000020890|-|chr11:g.69127042:G>A  
MSAWLLPAGGLPGAGFCV PARQSPSSFSRVLRWPRPGLPGLLLLLLLPSPSALS AVFKVGLGPWACDPI FAR  
ARPDLAARLANRLNRDFALDGGPRFEVALLPEPCLTPGSLGAVSSALS RVSGLVGPNPAACRPAELLA\*EA  
GVALVPWGC PGTRAAGTTAPAVT PAADALYVLLRAFRWARVALI TAPQDLWEAGRALSTALRARGLPVALVT  
SMETS DRSGAREALGRIRDGPRVRVIMVMH SVLLGGEEQRYLLEAAEELALTDGSLVFLPFD TLHYALSPGP  
EALAAFVNSSQLRRAHDAVLTTLTRRCPPGGSVQDSLRRRAQEHQELPLDLNLKQVSPFLFGTIYDAVFLLAGGVK  
RARTAVGGGWVSGASVARQVREAQVSGFCVGLGRTEEPSFVLLD TDASGEQLFATHLLDPVLGSLRSAGTPMH  
FPRGGPAPGPDPCWFDPDVICNGGVEPGLVFGVGLLIVIGMGLTGAF LAHYLRHRLHMQMASGPNKI ILLTLE  
DVTFLHPPGGSSRKVVQGSRS SLATRSASDIRSVSPSQPQESTNVGLYEGDWVWLKFKFPGEHHMAIRPATKTAF  
SKLREL RHENVALYLGLFLAGTADSPATPGE GILAVVSEHCARGSLHDLLAQREIKLDW MFKSSLLLDLIKGM  
RYLHHRGVAHGRLKSRNCVVDGRFVLKVTDHGHGRLL EAQRVLPPEPPSAEDQLWTAPELLRDP SLERRGTLAG  
DVFS LAIIMQEVVCRSTPYAMLELTPEEVIQRVRSPPPLCRPLVSM DQAPMECIQLMTQCWAEHP ELRPSMDL  
TFDLFKSINKGRKTNIIDSMLRMLEQYSSNLEDLIRERTEELEQEKQKTDRLLTQMLPPSVAEALKMGT SVEP  
EYFEEVTLYFSDIVGFTTISAMSEPIEVVDLLNDLYTLFD AIIGAHDVYK VETIGDAYMVASGLPQRNGQRHA  
AEIANMSLDILSAVGSFRMRHMEVVPVRIRIGLHSGPCVAGVVGLTMPRYCLFGD TVNTASRMESTGLPYRIH  
VNMSTVRILRALDQGFQMECRGRTELKKGIEDTYWLVGRLGFNKPIPKPPDLQPGASNHGISLQEIPPERRK  
KLEKARPGQFTGK\*

>rs29447827\_ENSMUSP00000021259\_c.429:C>T\_p.Q144\*

ENSMUST00000021259.9|Gucy2e-201|ENSMUSG00000020890|-|chr11:g.69127042:G>A  
MSAWLLPAGGLPGAGFCV PARQSPSSFSRVLRWPRPGLPGLLLLLLLPSPSALS AVFKVGLGPWACDPI FAR  
ARPDLAARLANRLNRDFALDGGPRFEVALLPEPCLTPGSLGAVSSALS RVSGLVGPNPAACRPAELLA\*EA  
GVALVPWGC PGTRAAGTTAPAVT PAADALYVLLRAFRWARVALI TAPQDLWEAGRALSTALRARGLPVALVT  
SMETS DRSGAREALGRIRDGPRVRVIMVMH SVLLGGEEQRYLLEAAEELALTDGSLVFLPFD TLHYALSPGP  
EALAAFVNSSQLRRAHDAVLTTLTRRCPPGGSVQDSLRRRAQEHQELPLDLNLKQVSPFLFGTIYDAVFLLAGGVK  
RARTAVGGGWVSGASVARQVREAQVSGFCVGLGRTEEPSFVLLD TDASGEQLFATHLLDPVLGSLRSAGTPMH  
FPRGGPAPGPDPCWFDPDVICNGGVEPGLVFGVGLLIVIGMGLTGAF LAHYLRHRLHMQMASGPNKI ILLTLE  
DVTFLHPPGGSSRKVVQGSRS SLATRSASDIRSVSPSQPQESTNVGLYEGDWVWLKFKFPGEHHMAIRPATKTAF

SKLRELHREVALYLGFLAGTADSPATPGEGLAVVSEHCARGSLHDLAQQREIKLDWMFKSLLLDLIKGM  
RYLHHRGVAHGRKLSRNCVVDGRFVLKVTDHGHGRLLAQRVLEPPSAEDQLWTAPELLRDPSELRERRGLAG  
DVFSLAIIMQEVVCRSTPYAMLELTPPEEVIQVRVSPPLCRPLVSMQAPMECIQLMTQCWAEHPPELRPMSDL  
TFDLFKSINKGRKTNIIDSMLRMLEQYSSNLEDLIRERTEEELEQEKQKTDRLLTQMLPPSVAEALKMGTSVPEP  
EYFEEVTLYFSDIVGFTTISAMSEPIEVVDLNDLYTLFDALIGAHVDYKVTETIGDAYMVASGLPQRNGQRHA  
AEIANMSLDILSAVGSFRMRHMEVFPVIRIRIGLHSGPCVAGVVGLTMPRYCLFGDVTNTASRMESTGLPYRIH  
VNMTSVRILRALDQGFQMECRGRTELKKGIEDTYWLVGRGLGFNKPIPKPPDLQPGASNHGISLQEI PPERRK  
KLEKARPGQFTGK\*

>rs26890046\_ENSMUSP00000090651\_c.1221:C>T\_p.R408W  
ENSMUST00000092973.6|Cntrob-201|ENSMUSG00000032782|-|chr11:g.69205611:G>A  
MATAAPSPSSPLRPEDLLSDSSEPPGLNQVSSEVTSQLYTSLHLSRQAEATARAQLYLAPTSSPPNEGLDLSLA  
QELSRSLSVGLENNLKKKDGSKHIFEMESVRGQLQTMHTSRDTAYRTGSRERREEDSFSDSTATLLNTRPLQ  
DLSPSSAPALEELFPRYTSLRPGPPTNPPDFQGLRDALDAELTRRKHCHERHIQSLQTRVLELQQQLAVAVAA  
DHKKDLMIQDLKTLARVVEGWNRHEAERTEVLRGLQEERQAAELTRSKQOQETVTRLEQSLSEAMEALSREQE  
GARLQOREKEALEEERQALTLRLEVEQQQCRTLQEERDEARAGQLSEHRKLEALQVALQEERQAWIKQEHQLK  
ERLQALQEEGQAQLEREKGNQREAAQAAWETQQQFALLQTEVVRLEGLDLDTVRRERDALQLEMSLVQARYESQ  
RIQMESELAVQLEQRVTERLAEAQENSLRQAASLRDHRKQLQELSGQHQQELAAQLAQFKVEMADREERQQQ  
VAQDYELRLAREQARVRDLKSGNQQLLEEQRaelVERLQAMLQAHWEEANQLLSTLLPPNPQAPLAEPPSSPGP  
LEPEKGERRTWAMPMAVALKPVLQQSREVKGDVPGAPSVLCSTSPDLSLLGPPFQNFQNSFPLEPKPDVTP  
PTAGPFSALEAFTDDHRAERPFPEEDPGSDGDARLPPASQLEGLKNFLQQLLETAPQSNGNPSADLLLPKAGS  
RAVSSWEEAPQVPRLLPPPVKTKVPLAMASSLFRVHGLPSTNLQSGSLSTGSPKDGDLNLDVSELLRLYQAR  
GWGALPAEDLLLYLKRLEHSGTDGQGELVPRRNTDSRLGETTRKEIPSQAVPRRLASVPKTEKPKARKKSGHPG  
PSMRSRGGIWR\*

>rs50969537\_ENSMUSP00000090651\_c.309:C>T\_p.R104W  
ENSMUST00000092973.6|Cntrob-201|ENSMUSG00000032782|-|chr11:g.69212723:G>A  
MATAAPSPSSPLRPEDLLSDSSEPPGLNQVSSEVTSQLYTSLHLSRQAEATARAQLYLAPTSSPPNEGLDLSLA  
QELSRSLSVGLENNLKKKDGSKHIFEMESVWGQLQTMHTSRDTAYRTGSRERREEDSFSDSTATLLNTRPLQ  
DLSPSSAPALEELFPRYTSLRPGPPTNPPDFQGLRDALDAELTRRKHCHERHIQSLQTRVLELQQQLAVAVAA  
DHKKDLMIQDLKTLARVVEGWNRHEAERTEVLRGLQEERQAAELTRSKQOQETVTRLEQSLSEAMEALSREQE  
GARLQOREKEALEEERQALTLRLEVEQQQCRTLQEERDEARAGQLSEHRKLEALQVALQEERQAWIKQEHQLK  
ERLQALQEEGQAQLEREKGNQREAAQAAWETQQQFALLQTEVVRLEGLDLDTVRRERDALQLEMSLVQARYESQ  
RIQMESELAVQLEQRVTERLAEAQENSLRQAASLRDHRKQLQELSGQHQQELAAQLAQFKVEMADREERQQQ  
VAQDYELRLAREQARVRDLKSGNQQLLEEQRaelVERLQAMLQAHWEEANQLLSTLLPPNPQAPLAEPPSSPGP  
LEPEKGERRTWAMPMAVALKPVLQQSREVKGDVPGAPSVLCSTSPDLSLLGPPFQNFQNSFPLEPKPDVTP  
PTAGPFSALEAFTDDHRAERPFPEEDPGSDGDARLPPASQLEGLKNFLQQLLETAPQSNGNPSADLLLPKAGS  
RAVSSWEEAPQVPRLLPPPVKTKVPLAMASSLFRVHGLPSTNLQSGSLSTGSPKDGDLNLDVSELLRLYQAR  
GWGALPAEDLLLYLKRLEHSGTDGQGELVPRRNTDSRLGETTRKEIPSQAVPRRLASVPKTEKPKARKKSGHPG  
PSMRSRGGIWR\*

>rs218677001\_ENSMUSP00000122205\_c.16:C>T\_p.P6L  
ENSMUST00000123176.8|Cntrob-202|ENSMUSG00000032782|-|chr11:g.69213772:G>A  
MATAALSPSSPLRPEDLLSDSSEPPGLNQVSSEVTSQLYTSLHLSRQAEATARAQLYLAPTSSPPNEGLDLSLA  
QELSRSLSVGLENNLKKKELVQRDGRKTPVTIAQLPCSTPGLCKTCLHPALPRHWKSCFPATLAFGPAPPPT  
PQIFRG\*

>rs218677001\_ENSMUSP00000090651\_c.16:C>T\_p.P6L  
ENSMUST00000092973.6|Cntrob-201|ENSMUSG00000032782|-|chr11:g.69213772:G>A  
MATAALSPSSPLRPEDLLSDSSEPPGLNQVSSEVTSQLYTSLHLSRQAEATARAQLYLAPTSSPPNEGLDLSLA  
QELSRSLSVGLENNLKKKDGSKHIFEMESVRGQLQTMHTSRDTAYRTGSRERREEDSFSDSTATLLNTRPLQ  
DLSPSSAPALEELFPRYTSLRPGPPTNPPDFQGLRDALDAELTRRKHCHERHIQSLQTRVLELQQQLAVAVAA  
DHKKDLMIQDLKTLARVVEGWNRHEAERTEVLRGLQEERQAAELTRSKQOQETVTRLEQSLSEAMEALSREQE  
GARLQOREKEALEEERQALTLRLEVEQQQCRTLQEERDEARAGQLSEHRKLEALQVALQEERQAWIKQEHQLK  
ERLQALQEEGQAQLEREKGNQREAAQAAWETQQQFALLQTEVVRLEGLDLDTVRRERDALQLEMSLVQARYESQ  
RIQMESELAVQLEQRVTERLAEAQENSLRQAASLRDHRKQLQELSGQHQQELAAQLAQFKVEMADREERQQQ  
VAQDYELRLAREQARVRDLKSGNQQLLEEQRaelVERLQAMLQAHWEEANQLLSTLLPPNPQAPLAEPPSSPGP  
LEPEKGERRTWAMPMAVALKPVLQQSREVKGDVPGAPSVLCSTSPDLSLLGPPFQNFQNSFPLEPKPDVTP  
PTAGPFSALEAFTDDHRAERPFPEEDPGSDGDARLPPASQLEGLKNFLQQLLETAPQSNGNPSADLLLPKAGS  
RAVSSWEEAPQVPRLLPPPVKTKVPLAMASSLFRVHGLPSTNLQSGSLSTGSPKDGDLNLDVSELLRLYQAR  
GWGALPAEDLLLYLKRLEHSGTDGQGELVPRRNTDSRLGETTRKEIPSQAVPRRLASVPKTEKPKARKKSGHPG  
PSMRSRGGIWR\*

>rs218161138\_ENSMUSP00000099662\_c.418:T>TATA\_p.F140LY-ins  
 ENSMUST00000102602.8|Trappc1-  
 203|ENSMUSG00000049299|+|chr11:g.69216374:T>TATA  
 MTVHNLYLFDNRNGVCLHYSEWHRKKQAGIPKEEEYKLMYGMLFSIRSFVSKMSPLDMKDGFLSFQTSRYKLHY  
 YETPTGIKVVMMNTDLGVGPIRDVLHHIYSALYVEFVVKNPCLPLGQTVQSELFRSRLDSYVRSPLPFLYSARAG  
 \*

>rs218161138\_ENSMUSP00000099661\_c.418:T>TATA\_p.F140LY-ins  
 ENSMUST00000102601.10|Trappc1-  
 202|ENSMUSG00000049299|+|chr11:g.69216374:T>TATA  
 MTVHNLYLFDNRNGVCLHYSEWHRKKQAGIPKEEEYKLMYGMLFSIRSFVSKMSPLDMKDGFLSFQTSRYKLHY  
 YETPTGIKVVMMNTDLGVGPIRDVLHHIYSALYVEFVVKNPCLPLGQTVQSELFRSRLDSYVRSPLPFLYSARAG  
 \*

>rs218161138\_ENSMUSP00000104302\_c.388:T>TATA\_p.F130LY-ins  
 ENSMUST00000108662.2|Trappc1-  
 204|ENSMUSG00000049299|+|chr11:g.69216374:T>TATA  
 MTVHNLYLFDNRNGVCLHYSEWHRKKQAGIPKEEEYKLMYGMLFSIRSFVSKMSPLDIRYKLHYETPTGIKVV  
 MNTDLGVGPIRDVLHHIYSALYVEFVVKNPCLPLGQTVQSELFRSRLDSYVRSPLPFLYSARAG\*  
 >rs48005324\_ENSMUSP00000050153\_c.318:A>G\_p.K107E  
 ENSMUST00000060956.13|Trappc1-  
 201|ENSMUSG00000049299|+|chr11:g.69216393:A>G  
 MTVHNLYLFDNRNGVCLHYSEWHRKKQAGIPKEEEYKLMYGMLFSIRSFVSKMSPLDMKDGFLSFQTSRYKLHY  
 YETPTGIKVVMMNTDLGVGPIRDVLHHIYSASWLEHLPHPSEEPVTAWAHLTCYIESPSIYLSPRAFPRRPTTH  
 CLQVIRMKLTGVYASFIPA\*  
 >rs233255388\_ENSMUSP00000050153\_c.412:C>CGG\_p.A138ins-fs  
 ENSMUST00000060956.13|Trappc1-  
 201|ENSMUSG00000049299|+|chr11:g.69216487:C>CGG  
 MTVHNLYLFDNRNGVCLHYSEWHRKKQAGIPKEEEYKLMYGMLFSIRSFVSKMSPLDMKDGFLSFQTSRYKLHY  
 YETPTGIKVVMMNTDLGVGPIRDVLHHIYSASWLKHLPHPSEEPVTAWAHLTCYIESPSIYLSPRAVSPPEGLPP  
 TAFKS  
 >rs258894734\_ENSMUSP00000146712\_c.64:T>TC\_p.F22ins-fs  
 ENSMUST00000129321.2|Rnf227-  
 201|ENSMUSG00000043419|+|chr11:g.69231432:T>TC  
 MQLLMRVPSPPELGEIDCNICFPTLQPRGPCAPPPAWHGARPLRPHAVHSLPARAGSAGRRQPHGRARGAPAP  
 RCHVPVLPRAFPAPARRRHGDRARPCLVVTTAGGKSPG  
 >rs29405757\_ENSMUSP00000146712\_c.69:C>T\_p.P24S  
 ENSMUST00000129321.2|Rnf227-201|ENSMUSG00000043419|+|chr11:g.69231437:C>T  
 MQLLMRVPSPPELGEIDCNICFRSYNLGARAPRRLPGTARARCGHTLCTACLRELAARGDGSRTAARVVRLRR  
 AVTCPFRCRAPSPLPRGGVTEIALDPVLWSRLEEKARAEREGDPMGSPAKDSGEDGEDDDGEAESEKAGAPPSA  
 GWRALRRILDRVLAPARRLRPLPSNVLYCPEVKDIAHMTRCTL\*  
 >rs26889931\_ENSMUSP00000104301\_c.2979:G>A\_p.E994K  
 ENSMUST00000108661.8|Chd3-202|ENSMUSG0000018474|-|chr11:g.69247187:C>T  
 MASPLRDEEEEEEMVVEEEEEEEEGDEEEEEVEAAEDDEEEDDEEGVLGRGPGHRSRDRHSPPSCHLFP  
 PPPPLPPPPPPDKDDIRLLPSALGVKKRKRGPKKQKENKPGKPRKRKLDSEEEFGSERDEYREKSES  
 YGTGPRKRRRKHREKKEKTKRRKRGEEDGGHKQVEQKSSATLLLTWGLEDEVEHVVFSEEDYHTLTNYKAFS  
 FMRPLIAKKNPKIPMSKMMTILGAKWREFSANNPFKGSAAAVAAAAAATAVAEQVSAAVSSATPIAPSGPP  
 PALPPPPAPEIQPPPIIRAKTKEGKPGHKRRNKSPRVPDGRKKLRGKKMAPLKIKLGLLGGKRRKAGSCAFQ  
 SEEGHEPEAEESDLDSGSVHSASGWPDPVRAKLRGRPRGRKKKVLGCPAVTGEVEVDGYETDHDQDYCEVC  
 QQGGIEIILCDTCPRAYHLVCLDPELDRAPEGKWSCPHCEKEGVQWEAKEEEEEEEYEEEGEEGEEKEEEDDHMEYC  
 RVCKDGGELLCCDACISSYHIHCLNPPLPDI PNGEWLCPRCTCPVLKGRVQKILHWRWGEPPVAVPAPQOQADG  
 NPDVPPPRPLQGRSEREFFVKWVGLSYWHCSWAKELQLEIFHLVMYRNYQRKNDMDEPPPLDYGSGEDDGKSD  
 KRKVKDPHYAEMEEKYRFGIKPEWMTVHRIINHSMDDKGNHYLVKWKDLDPYDQSTWEEDEMNIPYDDHKQ  
 SYWRHRELIMGEDPAQPRKYKKKKELQGDGPPSSPTNDPTVKYETQPRFITATGGTLHMYQLEGLNWLRFWS  
 AQGTDITLADENGLGKTIQTIIVFLYSLYKEGHTKGFPLVSAPLSTIINWEREFQMWAPKFYVVTYTGDKDSRA  
 IIRENEFSFEDNAIKGGKAFKMKREAQVKFHVLLTSYELITIDQAALGSIRWACLVDDEAHLKNNQSKFFR  
 VLNGYKIDHKLLLTGTPLQNNLEELFHLNFLTPERFNNLEGFLEFADISKEDQIKKLHDLGPHMLRRLKA  
 DVFKNMPAKTELIVRVELSPMQKYYKYILTRNFREALNSRGGGNQVSLNIMMDLKKCCNHPYLFVVAAMESP  
 KLPSGAYEGGALIKSSGKLLLLQKMLRKLKEQGHVLIIFSQMTKMLDLLEDFLDYEGYKYERIDGGITGALRQ  
 EAIDRFNAPGAQQFCFLSTRAGGLGINLATADTVIIFDSWDNPHNDIQAFSRAHRIGQANKVMIYRFVTRAS

VEERITQVAKRKMMLTHLVVRPGLGSKAGSMSKQELDDILKFGTEELFKDENEGENKEEDSSVIHYDNEAIAR  
LLDRNQDATEDTDVQNMNEYLSSFKVAQYVVREEDKIEEIEREIIKQENVDPDYWEKLLRRHHYEQQEDLAR  
NLGKGRVRKQVNYNDAAQEDQDNQSEYSVGSEEEDEDFDERPEGRRQSKRQLRNEKDKPLPPLLARVGGNIE  
VLGFNTRQRKAFLNAVMRWGMPPQDAFTTQWLVRDLRGKTEKEFKAYVSLFMRHLCEPGADGSETFADGVPRE  
GLSRQQVLTRIGVMSLVKKKQVEFEHINGRWSMPELMPDPSAESKRSSRASPTKTSPTTPEASTTNSPCTSK  
PATPAPSEKGDGVRTPLDKDDTENQEEKPEKNSKVGEKMAEVDSPSPAPSLGERLEHRKILLEDEAPGVPGE  
TEPEPGYRGDREKSASEPTPGERGEEKPLDVQEHRETEGETGDLGKREDVKADRELRLGPPRDEPRPNGRRE  
EKVEKPRFMFNIADGGFTELHTLWQNEERAAISSGKLEIWHRRHDYWLLAGIVLHGYARWQDIQNDQAQFAI  
NEPFKTEANKGNFLEMKNKFLARRFKLLEQALVIEEQLRRAAYLNLSQLPAHPAMALHARFAEAELAESHQH  
LSKESLAGNKPANAVLHKVLNQLLELLSDMKADVTRLPATLSRIPIAARLQMSERSILSRLASKGTEPHPTP  
AFPPGYPATPPGYGAAFSAAPVGALAAAGANYSQMPAGSFITATTTNGPPVLVKKEKEMVVALVSDGLGLDRKE  
PRAGEVICIDD\*

>rs26889931\_ENSMUSP00000122137\_c.2700:G>A\_p.E901K  
ENSMUST00000128981.8|Chd3-204|ENSMUSG00000018474|-|chr11:g.69247187:C>T  
XSALGVKRRKRGPKKQKENKPKPRKRKLDSEEEFGSERDEYREKSESGSEYGTGPRKRRRKHREKKEKK  
TKRRKRGEEDGGHKQVEQKSSATLLLTWGLEDEHVVFSEEDYHTLTNYKAFSQFMRPLIAKKNPKIPMSKMMT  
ILGAKWREFSANNPFKGSAAAVAAAAAAAVAEQVSAAVSSATPIAPSGPPPAPAIQPPPPIRRAK  
TEGKGGPGHKRRNKS PRVPDGRKLRGKMAPLKI KLGLLGGKRRKAGSCAFQSEEGHEPEAEESDLDSSGVH  
SASGWPDPVRAKLRGRPRGKRRKVLGCPAVTGEEDVGYETDHQDYCEVCQQGGEIILCDTDCPRAYHLVC  
LDPELDRAPEGKWSCPHCEKEGVQWEAKEEEEEEEYEEGEEGEEKEEEDDHMEYCRVCKDGGELLCCDACISSYH  
IHCLNPPLPDIPNGEWLCPRCTCPVLKGRVQKILHWRWGEPPVAVPAPQQADGNPDVPPRPLQGRSEREFFV  
KWVGLSYWHCSWAKELQLEIFHLVMYRNYQRKNDMDEPPPLDYSGGEDDGKSDKRKVKDPHYAEMEEKYRFG  
IKPEWMTVHRIINHSMDDKGNHYLVKWKDLPYDQSTWEEDEMNIPEYDDHKQSYWRHRELIMGEDPAQPRKY  
KKKKKELQGDGPPSSPTNDPTVKYETQPRFITATGGTLHMYQLEGLNWLRFWSWAQGTDTILADEMGLGKTIQT  
IVFLYSLYKEGHTKGFVLSAPLSTIINWEREFQMWAPKFYVVTYTGDKDSRAIIRENEFSFEDNAIKGGKKA  
FKMKREAQVKFHVLLTSYELITIDQAALGSIRWACLIVDEAHRKLNQSKFFRVNLNGYKIDHKLTLTGTPLQN  
NLEELFHLNFLTPERFNNLEGFLEKFADISKEDQIKKLDLGHMLRRLKADVFNMPAKTELIVRVELSP  
MQKKYKYILTRNFEALNSRGGGNQVSLNIMMDLKKCCNHPYLFVPAAMESPKLPSGAYEGGALIKSSGKLL  
LLQKMLRKLKEQGHRVLIIFSQMTKMLDLEDFLDYEGYKYERIDGGITGALRQEAIDRFNAPGAQQFCFLST  
RAGGLGINLATADTVIIFDSDWNPHNDIQAFSRAHRIGQANKVMIYRFVTRASVEERITQVAKRKMMLTHLVV  
RPGLGSKAGSMSKQELDDILKFGTEELFKDENEGENKEEDSSVIHYDNEAIARLLDRNQDATEDTDVQNMNEY  
LSSFKVAQYVVREEDKIEEIEREIIKQENVDPDYWEKLLRRHHYEQQEDLARNLNGKGRVRKQVNYNDAAQE  
DQDNQSEYSVGSEEEDEDFDERPEGRRQSKRQLRNEKDKPLPPLLARVGGNIEVLGFNTRQRKAFLNAVMRW  
MPPQDAFTTQWLVRDLRGKTEKEFKAYVSLFMRHLCEPGADGSETFADGVPREGLSRQQVLTRIGVMSLVKKK  
QVEFEHINGRWSMPELMPDPSAESKRSSRASPTKTSPTTPEASTTNSPCTSKPATPAPSEKGDGVRTPLDKD  
DTENQEEKPEKNSKVGEKMAEVDSPSPAPSLGERLEHRKILLEDEAPGVPGETEPEPGYRGDREKSEEDVKAD  
RELRLGPPRDEPRPNGRREEKVEKPRFMFNIADGGFTELHTLWQNEERAAISSGKLEIWHRRHDYWLLAGIV  
LHGYARWQDIQNDQAQFAINEPFKTEANKGNFLEMKNKFLARRFKLLEQALVIEEQLRRAAYLNLSQLPAHPA  
MALHARFAEAELAESHQHLSKESLAGNKPANAVLHKVLNQLLELLSDMKADVTRLPATLSRIPIAARLQMS  
ERSILSRLASKGTEPHPTPAFPFGYPATPPGYGAAFSAAPVGALAAAGANYSQMPAGSFIT

>rs26889931\_ENSMUSP00000118172\_c.96:G>A\_p.E33K ENSMUST00000151436.2|Chd3-  
209|ENSMUSG00000018474|-|chr11:g.69247187:C>T  
XTGTPLQNNLEELFHLNFLTPERFNNLEGFLEKFADISKEDQIKKLDLGHMLRRLKADVFNMPAKTEL  
IVRVELSPMQKLLFYSLLYIPTLVFRKYKYILTRNFEALNSRGGGNQVSLNIMMDLKKCCNHPYLFVPA  
MESPKLPSGAYEGGALIKSSGKLLLLQKMLRKLKEQGHRVLIIFSQMTKMLD

>rs26889931\_ENSMUSP00000090649\_c.2979:G>A\_p.E994K  
ENSMUST00000092971.13|Chd3-201|ENSMUSG00000018474|-|chr11:g.69247187:C>T  
MASPLRDEEEEEEMVSEEEEEEEEGDEEEEEVEAADEDEEEDDEEGLVLRGPGHRSRDRHSPSCHLFP  
PPPPPLPPPPPPDKDDIRLLPSALGVKRRKRGPKKQKENKPKPRKRKLDSEEEFGSERDEYREKSESGSE  
YGTGPRKRRRKHREKKEKTKRRKRGEEDGGHKQVEQKSSATLLLTWGLEDEHVVFSEEDYHTLTNYKAFSQ  
FMRPLIAKKNPKIPMSKMMTILGAKWREFSANNPFKGSAAAVAAAAAAAVAEQVSAAVSSATPIAPSGPP  
PALPPPAPAIQPPPPIRRAKTEGKGGPGHKRRNKS PRVPDGRKLRGKMAPLKI KLGLLGGKRRKAGSCAFQ  
SEEGHEPEAEESDLDSSGVHSAAGWPDPVRAKLRGRPRGKRRKVLGCPAVTGEEDVGYETDHQDYCEVC  
QQGGEIILCDTDCPRAYHLVCLDPELDRAPEGKWSCPHCEKEGVQWEAKEEEEEEEYEEGEEGEEKEEEDDHMEYC  
RVCKDGGELLCCDACISSYHIHCLNPPLPDIPNGEWLCPRCTCPVLKGRVQKILHWRWGEPPVAVPAPQQADG  
NPDVPPRPLQGRSEREFFVWVGLSYWHCSWAKELQLEIFHLVMYRNYQRKNDMDEPPPLDYSGGEDDGKSD  
KRKVKDPHYAEMEEKYRFGIKPEWMTVHRIINHSMDDKGNHYLVKWKDLPYDQSTWEEDEMNIPEYDDHKQ  
SYWRHRELIMGEDPAQPRKYKKKKKELQGDGPPSSPTNDPTVKYETQPRFITATGGTLHMYQLEGLNWLRFWS

AQGTDTILADEMGLGKTIQTIIVFLYSLYKEGHTKGPFLVSAPLSTI INWEREFQMWAPKFYVVTYTGDKDSRA  
I IRENEFSFEDNAIKGGKAFKMKREAQVKFHVLLTSYELITIDQAALGSI RWACLVDVAHRLKNNQSKFFR  
VLNGYKIDHKLLLTGTPLQNNLEELFHLNFLTPERFNNLEGFLEEFADISKEDQIKKLDLGLPHMLRRLKA  
DVFKNMPAKTELIVRVELSPMQKYYKYILTRNFALNSRGGGNQVSLNIMMDLKKCCNHPYLFVVAAMESP  
KLPSPGAYEGGALIKSSGKLLLLQKMLRKLKEQGHRVLI F SQMTKMLDLLEDFLDYEGYKYERIDGGITGALRQ  
EAIDRFNAPGAQQFCFLSTRAGGLGINLATADTVIIFDSDWNPHNDIQAFSRAHRIGQANKVMIYRFVTRAS  
VEERITQVAKRKMMLTHLVVRPGLGSKAGSMSKQELDDILKFGTEELFKDENEGENKEEDSSVIHYDNEAIAR  
LLDRNQDATEDTDVQNMNEYLSSEFKVAQYVVREEDKIEEIEREIIKQENVDPDYWEKLLRHHYEQQQEDLAR  
NLGKGRVRKQVNYNDAAQEDQDNQSEYSVGSSEEEDEDFDERPEGRRQSKRQLRNEKDKPLPPLLARVGGNIE  
VLGFNTRQRKAFLNAVMRWGMPPQDAFTTQWLVRDLRGKTEKEFKAYVSLFMRHLCEPGADGSETFADGVPRE  
GLSRQQLVTRIGVMSLVKKKQVEFEHINGRWSMPELMPDPSAESKRSSRASPTKTSPTTPEASTTNSPCTSK  
PATPAPSEKGDGVRTPLDKDDTENQEEKPEKNSKVGEKMEAEVDSPPAPSLGERLEHRKILLEDEAPGVPGE  
TEPEPGYRGDREKSEVDKADRELRLGPPRDEPRPNGRREEKVEKPRFMFNIADGGFTELHTLWQNEERAAISS  
GKLNIEIWHRRHDYWLLAGIVLHGYPARWQDIQNDAAQFAI INEPFKTEANKGNFLEMKNKFLARRFKLLEQALVI  
EEQLRRAAYLNLNSQEPAPAMALHARFAEAECLEASHQHLSKESLAGNKPANAVLHKVLNQLLEELSDMKADV  
TRLPATLSRIPIAARLQMSERSILSRASKGTEPHPTPAFPFGPYATPPGYGAAFSAAPVGAALAAAGANYSQ  
MPAGSFITATTNGPPVLVKKKEKEMVGVSDGLDRKEPRAGEVICIDD\*

>ENSMUSP00000104301\_c.2679:A>TCACACACACGCACACACA\_p.K894SHTRTHK-ins  
ENSMUST00000108661.8|Chd3-202|ENSMUSG00000018474|-  
|chr11:g.69248211:T>TGTGTGTGCGTGTGTGTGA  
MASPLRDEEEEEEMVSEEEEEEEEGDEEEEEVEAAEDDEEEDEEGVLGRGPGHDSRDRHSPPSCHLFP  
PPPPPLPPPPPPDKDDIRLLPSALGVKKRKRKGRPKKQENKPKGPRKRKLDSEEEFGSERDEYREKSESGGSE  
YGTGPGKRRRKHREKKEKTKRRKRGEEDGGHKQVEQKSSATLLLTWGLEDEHVSEEDYHTLTNYKAFSQ  
FMRPLIAKKNPKIPMSKMMTILGAKWREFSANNPFKGSAAAVAAAAA AVAEQVSAAVSSATPIAPSGPP  
PALPPPPAPEIQPPPIRRRAKTKEGKGPGRKRRNKS PRVPDGRKLLRGKKMAPLKI KLGLLGGKRRKAGSCAFQ  
SEEGHEPEAEESDLDSGSVHSASGWPDPVRAKLLKRRGRPKRKKKVLGCPAVTGEEEVDGYETDHQDYCEVC  
QQGGEIILCDTCPRAYHLVCLDPELDRAPGKWSCPHCEKEGVQWEAKEEEEEEEYEEGEEGEKEEEDDHMEYC  
RVCKDGGELLCCDACISSYHIHCLNPLPDI PNGEWLCPCTCPVLKGRVQKILHWRWGEPPVAVPAPQQADG  
NPDVPPRPLQGRSREFFVKWVGLSYWHCSWAKELQLEIFHLVMYRNYQRKNDMDEPPPLDYSGGEDDGKSD  
KRKVKDPHYAEMEEKYYRFGIKPEWMTVHRIINHSMDDKGNHYLVKWKDLPYDQSTWEEDEMNIPEYDDHKQ  
SYWRHRELIMGEDPAQPRKYKKKKELQGDGPPSSPTNDPTVKYETQPRFITATGGTLHMYQLEGLNWLRFWS  
AQGTDTILADEMGLGKTIQTIIVFLYSLYKEGHTKGPFLVSAPLSTI INWEREFQMWAPKFYVVTYTGDKDSRA  
I IRENEFSFEDNAIKGGSHTRTHKAFKMKREAQVKFHVLLTSYELITIDQAALGSI RWACLVDVAHRLKNN  
QSKFFRVLNGYKIDHKLLLTGTPLQNNLEELFHLNFLTPERFNNLEGFLEEFADISKEDQIKKLDLGLPHM  
LRLKADVFNMPAKTELIVRVELSPMQKYYKYILTRNFALNSRGGGNQVSLNIMMDLKKCCNHPYLFV  
AAMESPKLPSPGAYEGGALIKSSGKLLLLQKMLRKLKEQGHRVLI F SQMTKMLDLLEDFLDYEGYKYERIDGGI  
TGALRQEAIDRFNAPGAQQFCFLSTRAGGLGINLATADTVIIFDSDWNPHNDIQAFSRAHRIGQANKVMIYR  
FVTRASVEERITQVAKRKMMLTHLVVRPGLGSKAGSMSKQELDDILKFGTEELFKDENEGENKEEDSSVIHYD  
NEAIARLLDRNQDATEDTDVQNMNEYLSSEFKVAQYVVREEDKIEEIEREIIKQENVDPDYWEKLLRHHYEQQ  
QEDLARNLGKGRVRKQVNYNDAAQEDQDNQSEYSVGSSEEEDEDFDERPEGRRQSKRQLRNEKDKPLPPLLAR  
VGGNIEVLGFNTRQRKAFLNAVMRWGMPPQDAFTTQWLVRDLRGKTEKEFKAYVSLFMRHLCEPGADGSETFA  
DGVPREGLSRQQLVTRIGVMSLVKKKQVEFEHINGRWSMPELMPDPSAESKRSSRASPTKTSPTTPEASTTN  
SPCTSKPATPAPSEKGDGVRTPLDKDDTENQEEKPEKNSKVGEKMEAEVDSPPAPSLGERLEHRKILLEDEA  
PGVPGETEPEPEPGYRGDREKSEASEPTPGERGEEKPLDVQEHRETEGETDLGKREDVKADRELRLGPPRDEPR  
PNGRREEKVEKPRFMFNIADGGFTELHTLWQNEERAAISSGKLNIEIWHRRHDYWLLAGIVLHGYPARWQDIQND  
AQFAI INEPFKTEANKGNFLEMKNKFLARRFKLLEQALVIEEQLRRAAYLNLNSQEPAPAMALHARFAEAECLE  
ASHQHLSKESLAGNKPANAVLHKVLNQLLEELSDMKADVTRLPATLSRIPIAARLQMSERSILSRASKGT  
EPHPTPAFPFGPYATPPGYGAAFSAAPVGAALAAAGANYSQMPAGSFITATTNGPPVLVKKKEKEMVGVSDGL  
GLDRKEPRAGEVICIDD\*

>ENSMUSP00000122137\_c.2400:A>TCACACACACGCACACACA\_p.K801SHTRTHK-ins  
ENSMUST00000128981.8|Chd3-204|ENSMUSG00000018474|-  
|chr11:g.69248211:T>TGTGTGTGCGTGTGTGTGA  
XSALGVKKRKRKGRPKKQENKPKGPRKRKLDSEEEFGSERDEYREKSESGGSEYGTGPRKRRRKHREKKEKK  
TKRRKRGEEDGGHKQVEQKSSATLLLTWGLEDEHVSEEDYHTLTNYKAFSQFMRPLIAKKNPKIPMSKMMT  
ILGAKWREFSANNPFKGSAAAVAAAAA AVAEQVSAAVSSATPIAPSGPPPALPPPPAPEIQPPPIRRRAK  
TKEGKGPGRKRRNKS PRVPDGRKLLRGKKMAPLKI KLGLLGGKRRKAGSCAFQSEEGHEPEAEESDLDSGSVH  
SASGWPDPVRAKLLKRRGRPKRKKKVLGCPAVTGEEEVDGYETDHQDYCEVCQQGGEIILCDTCPRAYHLVCL  
DPELDRAPGKWSCPHCEKEGVQWEAKEEEEEEEYEEGEEGEKEEEDDHMEYCRVCKDGGELLCCDACISSYH

IHCLNPPLPDI PNGEWLCPRCTCPVLKGRVQKILHWRWGEPPVAVPAPQQADGNPDVPPRPLQGRSEREFFV  
KWVGLSYWHCSWAKELQLEIFHLVMYRNYQRKNDMDEPPPLDYSGGEDDGKSDKRKVKDPHYAEMEEKYRFG  
IKPEWMTVHRIINHSMDDKGNHYLVKWKDLPYDQSTWEEDEMNIPEYDDHKQSYWRHRELIMGEDPAQPRKY  
KKKKKELQGDGPPSSPTNDPTVKYETQPRFITATGGTLHMYQLEGLNWLRFWSAQGTDTILADEMGLGKTIQT  
IVFLYSLYKEGHTKGPFLVSAPLSTIINWEREFQMWAPKFYVVTYTGDKDSRAIIRENEFSFEDNAIKGGSHT  
RTHKKAFAKMKREAQVKFHVLLTSYELITIDQAALGSIRWACLVDVAHRLKNNQSKFFRVLNQYKIDHKLKLLT  
GTPLOQNNLEELFHLNFLTPERFNNLEGFLEEFADISKEDQIKKLDLHLLGPHMLRRLKADVFNKMPAKTELIV  
RVELSPMQKYYKYILTRNFEALNSRGGGNQVSLNIMMDLKKCCNHPYLFPPVAAMESPKLPSGAYEGGALIK  
SSGKLLLLQKMLRKLKEQGHRVLIIFSQMTKMLDLLEDFLDYEGYKYERIDGGITGALRQEAIDRFNAPGAQQF  
CFLLSTRAGGLGINLATADTVIIFDSDWNPHNDIQAFSRAHRIGQANKVMIYRFVTRASVEERITQVAKRMM  
LTHLVVRPGLGSKAGSMSKQELDDILKFGTEELFKDENEGENKEEDSSVIHYDNEAIARLLDRNQDATEDTDV  
QNMNEYLSSFKVAQYVVEDKIEEIEREIIKQEENVDPDYWEKLLRHHYEQQEDLARNLGKGRVVKQVNY  
NDAAQEDQDNQSEYSVGSEEEDEDFDERPEGRRQSKRQLRNEKDKPLPPLLARVGGNIEVLGFNTRQRKAFLN  
AVMRWGMPPQDAFTTQWLVRDLRGKTEKEFKAYVSLFMRHLCEPGADGSETFADGVPREGLSRQQVLTRIGVM  
SLVKKKQVEFEHINGRWSMPELMPDPSAESKRSSRASSPTKTSPTTPEASTTNSPCTSKPATPAPSEKGDGVR  
TPLDKDDTENQEEKPEKNSKVGEKMAEVDSPSPAPSLGERLEHRKILLEDEAPGVPGETEPEPEGYRGDREKS  
EDVKADRELRLGPPRDEPRPNGRREEKVEKPRFMFNADGGFTELHTLWQNEERAAISSGKLEIWHRRHDIW  
LLAGIVLHGYARWQDIQNDQAQFAINEPFKTEANKGNFLEMKNKFLARRFKLLEQALVIEEQLRRAAYLNLSQ  
EPAHPAMALHARFAEAECLEASHQHLSKESLAGNKPANAVLHKVNLQLEELLSDMKADVTRLPATLSRIPIIA  
ARLQMSERSILSRLASKGTEPHPTPAFPFPGPYATPPGYGAAFSAAPVGALAAAGANYSQMPAGSFIT  
>ENSMUSP00000090649\_c.2679:A>TCACACACACGCACACACA\_p.K894SHTRTHK-ins  
ENSMUST00000092971.13|Chd3-201|ENSMUSG00000018474|-  
|chr11:g.69248211:T>TGTGTGTGCGTGTGTGTA  
MASPLRDEEEEEEMVSEEEEEEEEGDEEEEEVEAAEDDEEEDEEGVLGRGPGHDSRDRHSPPSCHLFP  
PPPPPLPPPPPKDDIRLLPSALGVKKRKRGPKKQKENKPKGPKRKRKLDSEEEFGSERDEYREKSES  
YGTGPGRRRRKHREKKEKTKRKRKRGEGDGGHKQVEQKSSATLLLTWGLEDEHVFSEEDYHTLTNYKAFS  
FMRPLIAKKNPKIPMSKMMTILGAKWREFSANNPFKGSAAAVAAAAAIAVAEQVSAVSSATPIAPSGPP  
PALPPPPAPEIQPPPIIRAKTKEGKPGHKKRRNKS PRVPDGRKKLRGKKMAPLKI KLGLLGGKRRKAGSCAFQ  
SEEGHEPEAEESDLDGSGVHSASGWPDPVRAKLRGRPRGKRRKVLGCPAVTGEEVVDGYETHDQDYCEVC  
QQGGEIILCDTTPRAYHLVCLDPELDRAPEGKWSCPHCEKEGVQWEAKEEEEEEEYEEEGEEGEKEEEDHMEYC  
RVCKDGGELLCCDACISSYHIHCLNPPLPDI PNGEWLCPRCTCPVLKGRVQKILHWRWGEPPVAVPAPQQADG  
NDVPPRPLQGRSEREFFVWVGLSYWHCSWAKELQLEIFHLVMYRNYQRKNDMDEPPPLDYSGGEDDGKSD  
KRKVKDPHYAEMEEKYRFGIKPEWMTVHRIINHSMDDKGNHYLVKWKDLPYDQSTWEEDEMNIPEYDDHKQ  
SYWRHRELIMGEDPAQPRKYKKKKKELQGDGPPSSPTNDPTVKYETQPRFITATGGTLHMYQLEGLNWLRFWS  
AQGTDTILADEMGLGKTIQTIVFLYSLYKEGHTKGPFLVSAPLSTIINWEREFQMWAPKFYVVTYTGDKDSRA  
IIRENEFSFEDNAIKGGSHTRTHKKAFAKMKREAQVKFHVLLTSYELITIDQAALGSIRWACLVDVAHRLKNN  
QSKFFRVLNQYKIDHKLKLLTGTPLQNNLEELFHLNFLTPERFNNLEGFLEEFADISKEDQIKKLDLHLLGPHM  
LRLKADVFNKMPAKTELIVRVELSPMQKYYKYILTRNFEALNSRGGGNQVSLNIMMDLKKCCNHPYLFPPV  
AAMESPKLPSGAYEGGALIKSSGKLLLLQKMLRKLKEQGHRVLIIFSQMTKMLDLLEDFLDYEGYKYERIDGGI  
TGALRQEAIDRFNAPGAQQFCFLLSTRAGGLGINLATADTVIIFDSDWNPHNDIQAFSRAHRIGQANKVMIYR  
FVTRASVEERITQVAKRMMMLTHLVVRPGLGSKAGSMSKQELDDILKFGTEELFKDENEGENKEEDSSVIHYD  
NEAIARLLDRNQDATEDTDVQNMNEYLSSFKVAQYVVEDKIEEIEREIIKQEENVDPDYWEKLLRHHYEQQ  
QEDLARNLGKGRVVKQVNYNDAAQEDQDNQSEYSVGSEEEDEDFDERPEGRRQSKRQLRNEKDKPLPPLLAR  
VGGNIEVLGFNTRQRKAFLNAVMRWGMPPQDAFTTQWLVRDLRGKTEKEFKAYVSLFMRHLCEPGADGSETFA  
DGPVREGLSRQQVLTRIGVMSLVKKKQVEFEHINGRWSMPELMPDPSAESKRSSRASSPTKTSPTTPEASTT  
NSPCTSKPATPAPSEKGDGVRTPLDKDDTENQEEKPEKNSKVGEKMAEVDSPSPAPSLGERLEHRKILLEDEA  
PGVPGETEPEPEGYRGDREKSEDKADRELRLGPPRDEPRPNGRREEKVEKPRFMFNADGGFTELHTLWQNEE  
RAAIISSGKLEIWHRRHDIWLLAGIVLHGYARWQDIQNDQAQFAINEPFKTEANKGNFLEMKNKFLARRFKL  
EQALVIEEQLRRAAYLNLSQEPAPAMALHARFAEAECLEASHQHLSKESLAGNKPANAVLHKVNLQLEELLS  
DMKADVTRLPATLSRIPIIAARLQMSERSILSRLASKGTEPHPTPAFPFPGPYATPPGYGAAFSAAPVGALAAA  
GANYSQMPAGSFITATTTNGPPVLVKKKEKEMVGVSDGLGLDRKEPRAGEVICIDD\*  
>rs46291748\_ENSMUSP00000104301\_c.910:A>G\_p.Q304R  
ENSMUST00000108661.8|Chd3-202|ENSMUSG00000018474|-|chr11:g.69252903:T>C  
MASPLRDEEEEEEMVSEEEEEEEEGDEEEEEVEAAEDDEEEDEEGVLGRGPGHDSRDRHSPPSCHLFP  
PPPPPLPPPPPKDDIRLLPSALGVKKRKRGPKKQKENKPKGPKRKRKLDSEEEFGSERDEYREKSES  
YGTGPGRRRRKHREKKEKTKRKRKRGEGDGGHKQVEQKSSATLLLTWGLEDEHVFSEEDYHTLTNYKAFS  
FMRPLIAKKNPKIPMSKMMTILGAKWREFSANNPFKGSAAAVAAAAAIAVAEQVSAVSSATPIAPSGPP  
PALPPPPAPEIRPPPIIRAKTKEGKPGHKKRRNKS PRVPDGRKKLRGKKMAPLKI KLGLLGGKRRKAGSCAFQ

SEEGHEPEAEESDLDSSGVSASGWPDPVRAKLLKRGPRGRKKKKVLGCPAVTGEEEVDGYETDHQDYCEVC
QQGGEIILCDTCPRAYHLVCLDPELDRAPGKWSCPHCEKEGVQWEAKEEEEEEEEEEGEEGEEKEEEDDHMEYC
RVCKDGGELLCCDACISSYHIHCLNPPPLPDI PNGEWLCPRCTCPVLKGRVQKILHWRWGEPPVAVPAPQQADG
NPDVPPPRPLQGRSREFFVKWVGLSYWHCSWAKELQLEIFHLVMYRNYQRKNDMDEPPPLDYSGGEDDGKSD
KRVKDPHYAEMEEKYRFGIKPEWMTVHRIINHSMDDKGNHYLVKWKDLPYDQSTWEEDEMNIPEYDDHKQ
SYWRHRELIMGEDPAQPRKYKKKKKELQGDGPPSSPTNDPTVKYETQPRFITATGGTLHMYQLEGLNWLRFWS
AQGTDITLADEMGLKGTIQTIVFLYSLYKEGHTKGFVLSAPLSTIINWEREFQMWAPKFYVVTYTGDKDSRA
IIRENEFSFEDNAIKGGKKAFFMKREAVKVFHVLTSYELITIDQAALGSIWACLVDVAHRLKNNQSKFFR
VLNGYKIDHKLLLTGTPLQNNLEELFHLNFLTPERFNNLEGFLEEFADISKEDQIKKLDLGHMLRRLKA
DVFKNMPAKTELIVRVELSPMQKYYKYILTRNFEALNSRGGGNQVSLNIMMDLKKCCNHPYLPFVAAMESP
KLPSGAYEGGALIKSSGKLLLLQKMLRKLKEQGHRVLI FSQMTKMLDLEDFLDYEGYKYERIDGGITGALRQ
EAI DRFNAPGAQQFCFLSTRAGGLGINLATADTVIIFDSDWNPNDIQAFSRAHRIGQANKVMIYRFVTRAS
VEERITQVAKRMMMLTHLVVRPGLGSKAGSMSKQELDDILKFGTEELFKDENEGENKEEDSSVIHYDNEAIAR
LLDRNQDATEDTDVQNMNEYLSFKVAQYVVREEDKIEEIEREIKQEENVDPDYWEKLLRHHYEQQEDLAR
NLGKGRVRKQVNYNDAAQEDQDNQSEYSVGSSEEEDEDFDERPEGRRQSKRQLRNEKDKPLPPLLARVGGNIE
VLGFNTRQRKAFLNAVMRWGMPPQDAFTTQWLVRDLRGKTEKEFKAYVSLFMRHLCEPGADGSETFADGVPRE
GLSRQQVLRIGVMSLVKVKVQEFEHINGRWSMPELMPDPSAESKRSSRASSPTKTSPTTPEASTNSPCTSK
PATPAPSEKGDGVRTPLDKDDTENQEEKPEKNSKVGEKMEAEVDSPPAPSLGERLEHRKILLEDEAPGVPGE
TEPEPGYRGDREKSASEPTPGERGEEKPLDVQEHRETEGETDGLGKREDVKADRELRLGPPRDEPRPNGRRE
EKVEKPRFMFNIADGGFTELHTLWQNEERAAISSGKLEIWHRRHDYWLLAGIVLHGYARWQDIQNDAQFAII
NEPFKTEANKGNFLEMKNKFLARRFKLLEQALVIEEQLRRAAYLNLSEQEPAHPAMALHARFAEAECLAESHQH
LSKESLAGNKPANAVLHKVNLQLEELLSDMKADVTRLPATLSRIPIAARLQMSERSILSRLASKGTEPHPTP
AFPPGPYATPPGYGAAFSAAPV GALAAAAGANYSQMPAGSFITAT TNGPPVLVKKKEMV GALVSDGLGLDRKE
PRAGEVICIDD\*

>rs46291748\_ENSMUSP00000122137\_c.631:A>G\_p.Q211R
ENSMUST00000128981.8|Chd3-204|ENSMUSG0000018474|-|chr11:g.69252903:T>C
XSALGVKRRKRGPKKQKENKPGKPRKRKLDSEEEFGSERDEYREKSESGGSEYGTGPRKRRRHREKKEKK
TKRRKRGEEDGGHKQVEQKSSATLLLTWGLEDEHVFSEEDYHTLTNYKAFSQFMRPLIAKKNPKIPMSKMMT
ILGAKWREFSANNPFKGSAAAVAAAAA AVAEQVSAAVSSATPIAPSGPPPALPPPPAPEIRPPP IRRAK
TKEGKPGHKKRNRKSPRPVDPGRKKLRGKKMAPLKIKLGLLGGKRRKAGSCAFQSEEGHEPEAEESDLDSSGVS
SASGWPDPVRAKLLKRGPRGRKKKKVLGCPAVTGEEEVDGYETDHQDYCEVCQQGGEIILCDTCPRAYHLV
LDPELDRAPGKWSCPHCEKEGVQWEAKEEEEEEEEEEGEEGEEKEEEDDHMEYCRVCKDGGELLCCDACISSY
IHCLNPPPLPDI PNGEWLCPRCTCPVLKGRVQKILHWRWGEPPVAVPAPQQADGNPDVPPPRPLQGRSREFFV
KWVGLSYWHCSWAKELQLEIFHLVMYRNYQRKNDMDEPPPLDYSGGEDDGKSDKRVKDPHYAEMEEKYRFG
IKPEWMTVHRIINHSMDDKGNHYLVKWKDLPYDQSTWEEDEMNIPEYDDHKQSYWRHRELIMGEDPAQPRKY
KKKKELQGDGPPSSPTNDPTVKYETQPRFITATGGTLHMYQLEGLNWLRFWSAQGTDITLADEMGLKGTIQT
IVFLYSLYKEGHTKGFVLSAPLSTIINWEREFQMWAPKFYVVTYTGDKDSRAIIRENEFSFEDNAIKGGKKA
FKMKREAVKVFHVLTSYELITIDQAALGSIWACLVDVAHRLKNNQSKFFRVLNGYKIDHKLLLTGTPLQN
NLEELFHLNFLTPERFNNLEGFLEEFADISKEDQIKKLDLGHMLRRLKADVFKNMPAKTELIVRVELSP
MQKYYKYILTRNFEALNSRGGGNQVSLNIMMDLKKCCNHPYLPFVAAMESPKLPSGAYEGGALIKSSGKLL
LLQKMLRKLKEQGHRVLI FSQMTKMLDLEDFLDYEGYKYERIDGGITGALRQEAIDRFNAPGAQQFCFLST
RAGGLGINLATADTVIIFDSDWNPNDIQAFSRAHRIGQANKVMIYRFVTRASVEERITQVAKRMMMLTHLVV
RPGLGSKAGSMSKQELDDILKFGTEELFKDENEGENKEEDSSVIHYDNEAIARLLDRNQDATEDTDVQNMNEY
LSFKVAQYVVREEDKIEEIEREIKQEENVDPDYWEKLLRHHYEQQEDLARNLGKGRVRKQVNYNDAAQED
QDNQSEYSVGSSEEEDEDFDERPEGRRQSKRQLRNEKDKPLPPLLARVGGNIEVLGFNTRQRKAFLNAVMRW
MPPQDAFTTQWLVRDLRGKTEKEFKAYVSLFMRHLCEPGADGSETFADGVPREGLSRQQVLRIGVMSLVKVK
VQEFEHINGRWSMPELMPDPSAESKRSSRASSPTKTSPTTPEASTNSPCTSKPATPAPSEKGDGVRTPLDKD
DTENQEEKPEKNSKVGEKMEAEVDSPPAPSLGERLEHRKILLEDEAPGVPGETEPEPEPGYRGDREKSDVKAD
RELRLGPPRDEPRPNGRREKVEKPRFMFNIADGGFTELHTLWQNEERAAISSGKLEIWHRRHDYWLLAGIV
LHGYARWQDIQNDAQFAIINEPFKTEANKGNFLEMKNKFLARRFKLLEQALVIEEQLRRAAYLNLSEQEPAHPA
MALHARFAEAECLAESHQHLSKESLAGNKPANAVLHKVNLQLEELLSDMKADVTRLPATLSRIPIAARLQMS
ERSILSRLASKGTEPHPTPAFPPGPYATPPGYGAAFSAAPV GALAAAAGANYSQMPAGSFIT

>rs46291748\_ENSMUSP0000090649\_c.910:A>G\_p.Q304R
ENSMUST0000092971.13|Chd3-201|ENSMUSG0000018474|-|chr11:g.69252903:T>C
MASPLRDEEEEEEMVSEEEEEEEEGDEEEEEEVAADEDDEEEDDEEGVLGRGPGHDRSRDRHSPSCHLFP
PPPPPLPPPPPKDDIRLLPSALGVKRRKRGPKKQKENKPGKPRKRKLDSEEEFGSERDEYREKSESGGSE
YGTGPRKRRRHREKKEKTKRRKRGEEDGGHKQVEQKSSATLLLTWGLEDEHVFSEEDYHTLTNYKAFSQ
FMRPLIAKKNPKIPMSKMMTILGAKWREFSANNPFKGSAAAVAAAAA AVAEQVSAAVSSATPIAPSGPP

PALPPPPAPEIRPPPIIRAKTKEGKGGPKHRRNKSPRVPDGRKKLRGKKMAPLKIKLGLLGGKRKKAGSCAFQ  
 SEEGHEPEAEESDLDGSGSVHSASGWPDGPVRAKLRGRPRGRKKKVLGCPAVTGEEVDGYETHDQDYCEVC  
 QQGGIILCDTDCPRAYHLVCLDPELDRAPEGKWSCPHCEKEGVQWEAKEEEEEEEEEEGEEGEKEEEDDHMEYC  
 RVCKDGGELLCCDACISSYHIHCLNPLPDI PNGEWLCPRCTCPVLKGRVQKILHWRWGEPPVAVPAQQADG  
 NPDVPPRPLQGRSEREFFVKWVGLSYWHCSWAKELQLEIFHLVYRNYQRKNDMEPPPLDYSGGEDDGKSD  
 KRKVKDPHYAEMEEKYRFGIKPEWMTVHRI INHSMDDKKNYHYLVKWKDLPYDQSTWEEDEMNIPEYDDHKQ  
 SYWRHRELIMGEDPAQPRKYKKKKELQGDGPPSSPTNDPTVKYETQPRFITATGGTLHMYQLEGLNWLRFWS  
 AQGTDITLADEMGLKTIQTIIVFLYSLYKEGHTKGFVLSAPLSTI INWEREFQMWAPKFVYVVTYTGDKDSRA  
 IIRENEFSFEDNAIKGGKKAFAKMKREAVQVVFHVLVLLTSYELITIDQAALGSIRWACLVVDEAHLKNNQSKFFR  
 VLNGYKIDHKLTLTGTPLQNNLEELFHLNFLTPERFNNLEGFLEEFADISKEDQIKKLHDLGPHMLRRLKA  
 DVFKNMPAKTELIVRVELSPMQKYYKYILTRNFREALNSRGGGNQVSLNIMMDLKKCCNHPYLPVVAAMESP  
 KLPSGAYEGGALIKSSGKLLLQKMLRKLKEQGHVLIIFSQMTKMLDLEDFLDYEGYKYERIDGGITGALRQ  
 EADRNFAPGAQQFCFLSTRAGGLGINLATADTVIIFDSWDNPHNDIQAFSRAHRIGQANKVMIYRFVTRAS  
 VEERITQVAKRKMMLTHLVVRPLGSKAGSMSKQELDDILKFGTEELFKDENEGENKEEDSSVIHYDNEAIAAR  
 LLDRNQDATEDTDVQNMNEYLSSFKVAQYVVREEDKIEEIEREIKQEENVDPDYWEKLLRRHHEQQQEDLAR  
 NLGKGRVVRKQVNYNDAAQEDQDNQSEYSVSGSEEEDEDFDERPEGRQSKRQLRNEKDKPLPPLLARVGGNIE  
 VLGFNTRQRKAFNLAVMRWGMPPQDAFTTQWLVRDLRGKTEKFKAYVSLFMRHLCEPGADGSETFADGVPRE  
 GLSRQVLRTRIGVMSLVKKKQVQEFHNGRWSMPELMPDPSAESKRSSRASPTKTSPTTPEASTNSPCTSK  
 PATPAPSEKGDGVRTPLDKDDTENQEEKPEKNSKVGEKMAEAVDSSPAPSLGERLEHRKILLEDEAPGVPE  
 TEPEPGYRGDREKSEVKADELRLGPPRDEPRPNGRREEKVEKPRFMFNADGGFTELHTLWQNEERAAISS  
 GKLNEIWHRRHDYWLLAGIVLHG YARWQDIQNDQAQFAINEPFKTEANKGNFLEMKNKFLARRFKLLEQALVI  
 EEQLRRAAYLNLQSPEPAHPAMALHARFAEAECLAESHQHLKESLAGNKPANAVLHKVLNQLLEELSDMKADV  
 TRLPATLSRIPIAARLQMSERSILSRLASKGTEPHPTPAFFPGPYATPPGYGAAFSAAPVGLAAGANYSQ  
 MPAGSFITATTNGPPVLVKKKEKEMVGVSDGLGLDRKEPRAGEVICIDD\*

>rs51556817\_ENSMUSP00000104300\_c.421:T>A\_p.I141N  
 ENSMUST00000108660.8|Cyb5d1-202|ENSMUSG00000044795|-|chr11:g.69285488:A>T  
 MPRRGLVAGPDLDFNQRRYFTPSEVAEHNQLEDLWVSYLGFVYNLTPLVVEEFKGDLLKPILEVAGQDISHWF  
 DPQTRDIRKHIDPLTGCMRYRTPRGRFVHI PPPLPRSDWANDFGVPWWKGANYQVGRLSARTRNIRINNTLAT  
 QEHTLQLHMEIRWEEFEHGSNPGKRDPG\*

>rs51556817\_ENSMUSP00000059709\_c.421:T>A\_p.I141N  
 ENSMUST00000051620.5|Cyb5d1-201|ENSMUSG00000044795|-|chr11:g.69285488:A>T  
 MPRRGLVAGPDLDFNQRRYFTPSEVAEHNQLEDLWVSYLGFVYNLTPLVVEEFKGDLLKPILEVAGQDISHWF  
 DPQTRDIRKHIDPLTGCMRYRTPRGRFVHI PPPLPRSDWANDFGVPWWKGANYQVGRLSARTRNIRINNTLAT  
 QEHTLQVGAQESMWEILHRYLPYNAHAASYTWKYDGKNLMDQTLLEENGIRDEEEEFDYLNMDGKLT PAILL  
 YFNDDLTEL\*

>rs29390830\_ENSMUSP00000055528\_c.123:A>G\_p.N42D  
 ENSMUST00000050140.6|Tmem88-201|ENSMUSG00000045377|-|chr11:g.69288928:T>C  
 MAEVPGAQRVPLAGGPEPRDPLDCWACAVLVTAQNLLVAVFDLLLLLALVLGTILLPAVIMLGFGLCHSQFLR  
 SQAPLCTSHLRDPGFTALLVTGFLLLVPLLVLALATYRRLCLRLRLADCLVPYSRALYRRRRIPQPKQIPVSP  
 GRSVPTPGKVWV\*

>rs29384625\_ENSMUSP00000047329\_c.6046:C>T\_p.A2016V  
 ENSMUST00000035539.12|Dnah2-201|ENSMUSG00000005237|-|chr11:g.69364589:G>A  
 MASKAEKKRKVAGRGGARAGRVRAPQSTAGPGATEASLLPDGQEPPEPESGKEDSVLGLQAFASWRLTPALHG  
 EANTPPTLLHPQPLFHRRLTTLNLILSCSRAGTRDLALKPFLLSRTMLTGLADATWTGEHDMVLEHFVQDPAV  
 PALTIIFIDPVFGLKLELGMPVQTQNIQIVYFIRQAPVPIPTPENFEETVQYGTVRGAYIPALLRLLSGVYVPPQIF  
 MNKSWPESIRNHFVSHLHRFLASLTDTRYKLEGHTVLYIPAEAVQMDPEVVVKDELQVQRLETSMIHWTRQIK  
 EVLSAQESVETGENLGPLLEEIEFWHNRCMDLSSISKQLVKKGVKHIESILFLAKSSYLTPFRKLAQQIQDGSR  
 QAQSNLTFLSILREPYQELAFMKPKDISEKLPKLI SLIRI I WVNSPHYNTRERLTALFRKVCECQYHFARWED  
 GKQGPLPCFFGAQGPQITRNLEIEDIFHKNLQTLRAVGGI LDVKNTSWHEDYNKFRGGIKDLEVMTQNLIT  
 SAFELVRDVEHGVLLLDTFHRLATREAIMRTYEEKAVDLYMLFNSELALVNRELNKKWPYLEPYMTQYSGQAH  
 WVRILRRRIDRVMNCLSGAHFLPHIGTGEESIHTYQQAQAI DEMVRKTFQEWATLTKDCIRRLDMSLLRIS  
 QEKVGMLDVNFDKTLLILFAEIDYWERLLFETPHYVMVAERAEDLRI LRENLLLVARDYNRI I AMLSPEQA  
 LFKERIRFLDKKIHPGLKKNWALKGASAFFITECRMHASKVQMI V NDFKASTLTIGWKAQEMSELLLVHITG  
 KQVYRDLSEFEAEQREHRMAAQQKLVKLHQDVNIMTNSYEVFKNDGPEIQQQWLLYTI RLDHMMEDALRLNVK  
 WSLLELSKAINGDGKTTNPPLFRVLVILQNDVRRGGSQVEFSPTLQTLASVVNDIGSHLFATISVFRHLPDIL  
 TKRKMNREPIYVVERDEDIRKIQAQISSGMTNNASLLQNYLKTWDMYREIWEINKDSFIRRYQLNPPVSSF  
 DADIARYTEVANNVQKEETVNLIQFVMLDCSHLKFSLVQHCNEWQNKFTTLKEMAAGRLADLHSLYKDNAEK  
 ISHPQTLEELGVSLQLMDTLQHDLPNLETQIPPIHEQFTILEKYEVPVDPDTVLEMLES LNGEWLTFOQILLD



SEQMLKHKHEKFKTGLIHAADDFKKAHNLEDFEFKGFPTSTVGHATAALDQIAQMRAMLAMRDEENNLRSN  
LGIFKIEQPVSKDLQILEKELDALQQVWEITRDWEESWNQWKMGCFQTLQTEAMESMAHGLFRRLTRLAKEYK  
DRNWEI IETTRSKEIEQFKRTMPLISDLRNPALRERHWDQVKEEVQREFDQESSESFTLEQIVKLGMDQHVEKIA  
EISASATKELAIEVGLQNIKTWDSSTQLDIVPYKDKGHHRLRGTEEVFQALEDNQVALSTMKASRFVKAFEKD  
VDHWERCLSLILEVIEMVLTVQRQWYLENIFLGEDIRKQLPNEALFDQVNNNWKAIMDRMNKDNNALRSTH  
YPGLETLEIEMNAILEDIQKSLDMYLETKRHIFPRFYFLSNDDLLEILGQSRNPEAVQPHLKKCFDNIKLLKI  
QKVGSSSSKWEAVGMFSGDGEYIDFLHPVLLGEPVESWLGDEVERAMRMTLRDLLRNCRVALKKFLNKRDKWVK  
DWAGQVITASQIQWTADVTKCLMTAKERSDKKILKVSILNKYSEAIRGNLTKIMRLKIVALVTIEIHARDVL  
EKLYKSGLMDVSSFDWLSQLRFYWEKDVDDCIIRQTNTQFQYGYEYLGNSGRVITPLTDRCYMTLTALHLH  
RGGSPKGPAGTGTETVKDLGKALGIYVIVVNCSEGLDYKSMGRMYSGLAQSGAWGCFDEFNRINIEVLSVVA  
QQILSILSALTANLTRYFEGFEINLVWSCGIFITMNPYAGRTELPENLKSMPFIAMVVPDSTLIAEIIILF  
GEGFGNCKILAKKVYTYLSLAVQQLSRQDHYDFGLRALTSLLRYVGKRRRLQPDLSDEEVLLSMRDMNIAKL  
TSVDVPLFNAIVQDLFPNIELPVIDYGKLRDTIEQEIREMGLQITPFTLTQVLYETKNSRHSTMIVGGTGS  
SKTTSWKILQASLTSCLRAGEPNYNIVREFPLNPKALSGLGELYGEYDLNTNEWTGILSSVMRACADEKPE  
KWILFDGVPDVLWIESMNSVMDDNKVLTILINGERIAMPEQVSLLEFEVENLAVASPATVSRGCMVYTDYVDLW  
KPYVQSWLEKRPKTEVEPLQRMFEKFINKILSFKKDNCELVPVPEYSGIIISLCKLYTVLATPENGVPADAE  
NYSFMVEMTFVFSMIWSVCASVDEDGRKKIDSYLREIEGSGFNKDTVYEEYVNPKMRTWTSFEEKLPKSWRYP  
PNAPFYKIMVPTVDTVRYNYLVSTLVANQNPVLLVGPVGTGKTSIAQSVLQSLPSSQSVLVNMSAQTSSNN  
VQSIIESRVEKRTKGVYVYVPGGKSMITFMDDLNPAPKDMFGSQPPLELIRLWIDYGFWDYRVKQSIKHIRDMF  
LMAAMGPPGGRTVISPRLQSRFNIINMTFPTESQIIRIFGTMINQKLQDFEEEVKPIGNVVTATLDVYNTV  
VQRFLPTPAKIHVFNLRDISKVFQGLRANKDFHDTKASITRLWIHECFRVFSDRLVDTADMEAFMGILSDK  
LGTFFDLTFHHLCPNKRPIIFGDFLKEPKVYEDLVDLTVLKTAMETALNEYNLSPSVVPMQLVLFREAIHIT  
RIVRVIGQPRGNMLLVGIGGSGRQSLARLASSICDYNTFQIEVTKHYRKQEFRDDIKRLYRQAGVELQTTSTFL  
FVDTQIADESFLDINNILLSSGEVFNLYKSDEFEEIQNHIIIDQARAEQIPESSDSLFAYLIERVRNNLHIVLC  
LSPVGDFFRNWIRYYPALVNCCTINWFSEWPREALLEVAEKYIIGVDLGTQENIHRKVAQIFVTMHSVAQYS  
QKMLLELRRYNYVTPTYLELVSGYKLLGEKREQLLDQANKLRTGLFKIDETREKVEVMSLELEDKAKKVAE  
FQKQCEEYLVIVVQKREADEQQKAVTANSEKIAIEEVKQCALADNAQKDLLEALPALEEAMRALESLNKKDI  
GEIKSYGRPPAQVEIVMQAVMILRGNEPTWAEAKRQLGEQNFIKSLINFDKDNI SDKVLKKIGAYCAQPDFQP  
DIIGRVSLAAKSLCMWVRAMELYGRLYRVVEPKRIRMNAMAQIQEKQAALAEAEQEKLEVAEKLEMLKKQYD  
EKLAQKEELRKKSEEMELKLERAGMLVSGLAGEKARWEETVQGLEEDLGYLVGDCLIAAFLSYMGPFLTNYR  
DEIINQIWIWKIRELQVPCSPRAIDNFLTNPQKVRDWNIIQGLPDAFSTENGIIVTRGNRWALMIDPQQAL  
KWIKNMEGNQGLKIIDLQMHYLRVLEHAIQFGFVLLQNVQEYLDPTLNPVLNKSVARIGGRMLRIGDKEV  
EYNPNFRFYLTTKLSNPHYNPETSAKTTIVNFAVKEQGLEAQLLGIIVRKRERPELEEQKDSLVINIAAGKRKL  
KELEDEILRLLNEATGSLDDVQLVNTLQTSKITATEVTEQLETSETTEINIDLAREAYRPAQRASVLFVFL  
NDMGRIDPMYQFSLDAYIGLFIILSDKSHRSNKLEDRIEYLYNDYHTYAVYRYTCRTLFRHKLKLSFHMC  
AKILETSGLKNMDEYNFFLRGGVLDREGQMDNPCTSWLADAYWNI TELDKLTFNHGLMNSFEQYPRDWHLWYTN  
SSPEKAMPLPEWENACNEMQRMLIVRSLRQDRVAFVTSFIVSNLGSRFIEPPVLNKMKSVMEDSTPRSPVFI  
LSPGVDPTSALLQLAEHTGMAHRFHALS LGQGQAPIAARLLREGVNGHWVFLANCHLSLSWMPNLDKLVQ  
QVEDPHPSFRLWLSSSPHPDFPISILQASIKMTTEPPKGLKANMTRLYQLMTEAQFTHCSKPAKYKLLFALC  
FFHSILLERKKFLQLGWNIIYGFNDSDFEVSLENLLSLYLDEYEEETPDALKYLIAGVNYGGHVTDDWRLLT  
TYINDYFCDLSLTPFYRLSVLDTYYIPKDGSLASYKEYISMLPMDPPEAFGQHPNADVASTEARTLFET  
LLSLQFPQITPTRVGGQSREEKVLELAADVQKIPEMIDYEGTRKLLALDPSPLNVVLLQEIQRYNKLMKTI  
LFTDLEKGIQGLIVMSTSLLEIFNCFDAHVPLWGVYPSQKPLASWTRDLAVRVEQFETWASRARPPVLFW  
LSGFTFPTGFLTAVLQSAARQNNISVDSLSEWEIFVSTVDDSNLVYPPKDGWVVRGLYLEGAGWDRKNSCLVEA  
EPMQLVCLMPTIIFRPAESRKKSAKGMYS CPCYYYPNRAGSTDRASFVIGIDLRSGSMTSDHWIKRGTALLMS  
LDS\*

>rs29384625\_ENSMUSP00000104299\_c.6064:C>T\_p.A2022V  
ENSMUST00000108659.2|Dnah2-202|ENSMUSG00000005237|-|chr11:g.69364589:G>A  
MASKAEKKRKKVAGRGGARAGRVRAPQSTAGPGATEASLLPDGQEPPEPESGKEDSVLGLQAFASWRLTPALHG  
EANTPPTLLHPQPLFHRRLTTLNLILSCSRAGTRDLALKPFFLSRTMLTGLADATWTGEHDMVLEHVFQDPAV  
PALTI FIDPVFGLKLELGMVPVQTQNIQIVYFIRQAPVPIITPENFEETVQYGTVRGAYIPALLRLLSGVYVQIF  
MNKSWPESIRNHVSVHLHRFLASLTDTRYKLEGHTVLYIPAEAVQMDPEVVVKDELVQRLETSMIHWTRQIK  
EVLSAQESVETGENLGPLEEIEFWHNR CMDLSSISKQLVKKGVKHIESILFLAKSSYLTPFRKLAQQIQDGSR  
QAQSNLTFLSILREPYQELAFMKPKDISEKLPKLSLIRIIVWNSPHYNTRERLTALFRKVCCEQYH FARWED  
GKQGPLPCFFGAQGPQITRNLEIEDIFHKNLQTLRAVRGGILDVKNTSWHEDYKNKFRGGIKDLEVTQNLIT  
SAFELVRDVEHGVL LLDTFHRLATREAIMRTYEKKAVDLYMLFNSELALVNRELNKKWPYLEPYMTQYSGQAH  
WVRI LRRRIDRVMNCLSGAHFLPHIGTGEESIHTYQMAQAI DEMVRKTFQEWATLTKDCIRRLDMSLLRIS  
QEKVGLMDVNFDKTLLILFAEIDYWERLLFETPHYVMVAERAEDLRILRENLLLVARDYNRI IAMLSPDEQA

LFKERIRFLDKKIHPGLKKNLWALKGASAFFITECRMHASKVQMI V NDFKASTLTIGWKAQEMSELLLVHITG  
KQVYRDLEFEEAQREHRMAAQKLVKLVHLDV V NIMTNSYEVFKNDGPEIQQQWLLYTIRLDHMMEDALRLNVK  
WSLLELSKAINGDGKTTPNPLFRVLVILQNDVRGGGSQVEFSPTLQTLASVVNDIGSHLFATISVFRHLPDIL  
TKRKMNRPEIYV LVERDEDIRKIQAQISSGMTNNASLLQNYLKTWDMYREIWEINKDSFIRRYQRLNPPVSSF  
DADIARYTEVANNVQKEETV LNIQFVMLDCSHLKFSLVQHCNEWQNKFTLLKEMAAGRLADLH SYLKDNAEK  
ISHPPQTLEELGVSLQ LMDTLQHDLPNLETQIPPIHEQFTILEKYEVPVPD TVLEMLES LNGEWLTFOQILLD  
SEQMLKKHKEKFKTGLIHAADDFKKKAHNLEDFEFKGPFTSTVGH TAALDQIAQMRAML MAMRDEENNLRSN  
LGI F KIEQPVSKDLQILEKELDALQQVWEITRDWEESWNQWKMGCFO TLQTEAMESMAHGLFRRLTRLAKEYK  
DRNWEI IETTRSKIEQFKRTMPLISDLRNPALRERHWDQVKEEVQREFDQESSEFTLVEQIVKLGMDQHVEKIA  
EISASATKELAEVGLQNI AKTWDSTQLDIVPYKDKGHHRLRGTEEVFQALEDNQVALSTMKASRFVKA FEKD  
VDHWERCLSLILEVIEMVLT VQRQWMYLENI FLGEDIRKQLPNESALFDQVNNNWKAIMDRMNKDNALRSTH  
YPG LLET LIEMNAILEDIQS LDMYLETKRHIFPRFYFLSNDDLEILGQSRNPEAVQPHLKKCFDNIKLLKI  
QKVGSSSSKWEAVGMFSGDGEYIDFLHPV LLEGPVESWLG DVERAMRMTLRDLLRNCRVALKKFLNKRDKWVK  
DWAGQVVI TASQIQWTADVT KCLMTAKERSDKKILKVMKKKQVSI LNKYSEAIRGNLTKIMRLKIVALVTIEI  
HARDVLEKLYKSG LMDVSSFDWLSQLRFYWEKDVDDCIIRQTNTQFQYGYEYLGNSGRLVITPLTDRCYMTLT  
TALHLHRGGSPKGPAGTGTETVKDLGKALGIYVIVVNCSEGLDYKSMGRMYSGLAQSGAWGCFDEFNRINIE  
VLSVVAQQILSILSALTANLTRFYFEGFEINLVWSCGIFITMNPYAGRTEL PENLKSMPFRPIAMVVPDSTLI  
AEIILFGEFGNCKILAKKVYTYLSLAVQQLSRQDHYDFGLRALTSLLRYVGGKRRQLPDLSD EEVLLSMDR  
MNI AKLTSVDVPLFNAIVQDLFPNIELPVIDY GKL RDTIEQEIREMGLQITPFTLT KVLYETKNSRHSTMI  
VGGTGS SKTTSWKILQASLTS LCRAGEPNYNIVREFPLNPKALSIGELYGEYDLNTNEWT DGI LSSVMRVACA  
DEKPDEKWI LFDGPVDTLWIESMNSVMDDNKVLT LINGERIAMPEQV SLLFEVENLAVAS PATVSRGMYVTD  
YVDL GWKPYVQSWLEKRPKTEVEPLQRMFEKFKINKILSFKKDN CNELVPVPEYSGIISLCKLYTVLATPENG  
VPADAENYSFMVEMTFVFSMIWVCASVDEDGRKKIDSYLREIEG SFPNKDTVY EYVNPKMRTWTSFEEKLP  
KSWRYPPNAPFYKIMVPTVDTVRYNV LSTLVANQN PVLVGPVGTGKTSIAQSVLQSLPSSQWSVLVNNMSA  
QTTSNNVQSIIESRVEKRTKGVYVFPFGGKSMITFMDDL NMPAKDMFGSQPPELIRLWIDYGFWDVVKQSIK  
HIRDMFLMAAGMPGGGRTVISPRLQSRFNIINMTFPTESQIIRIFGTMINQKLD FEEVVKPIGNVVTEATL  
DVYNTVVFQALPTPAKIH YLFNLRDISKVFQGMRLRANKDHFDTKASITRLWIHECFRVFSDRLVDTADMEAFM  
GILSDKLGTFFDLT FHHLCPNKRPPIFGDFLKEPKVYEDLV DLT V LKTAMETALNEYNLSPSVPMQLVLFRE  
AIEHITRIVRVIGQPRGNMLLVGIGGSGRQSLARLASSICDYNTFQIEVTKHYRQKQEFRDDIKRLYRQAGVEL  
QTTSFLVDTQI ADES FLEDINNILSSGEV PNLKYSDEFEEIQNHIDQARAEQIPESSDSLFAYLIERVRNN  
LHIVLCLSPVGD PFRNWIRQY PALVNCTTINWFSEWPREALLEVAEKYIIGVDLGTQENIHRKVAQIFVTMHW  
SVAQYSQKMLLELRRYNYVTPTNYLELVSGYKLLGEKRQELLDQANKLRTGLFKIDETREKVEVMSLELEDA  
KKKVAEFQKQCEEYLVIVVQKREADEQQKAVTANSEKIAIEEVK CQALADNAQKDLEALPALEEAMRALES  
LNK KDI GEIKSYGRPPAQVEIVMQAVMILRGNEPTWAEAKRQLGEQNF I KSLINFDKDNISDKVLK KIGAYCA  
QPDFQPD IIGRVSLA AKSLCMWVRAMELYGRLYRVVEPKRIRMNAAQAQLQEKQAALAEAEQKLEVAEKLEM  
LKKQYDEKLAQKEELRKKSEEMELKLERAGMLVSLGSLAGEKARWEETVQGLEEDLGYLVGDCLIAAFLSYMG  
FLTNYRDEIINQIWI R KIRELQVPCSPRFAIDNFLTNP TKVRDWN IQGLPSDAFSTENGIIVTRGNR WALMID  
PQQQALKWIKNMEGNQGLKIIDLQMHYLRVLEHAIQFGFPVLLQNVQEYLDPTLNPV LNKSVARIGGRMLIR  
IGDKEVEYNPNFRFYLT T KLSNPHYNPETS AKTTIVNFAVKEQGLEAQLLGI VVRKERPELEE QKDSLVINIA  
AGKRKLELEDEILRLLNEATGSLDDVQLVNTLQTSKITATEVTEQLETSETTEINIDLAREAYRCAQRAS  
VLFFVLNDMGRIDPMYQFSLDAYIGLFI LSIDKSHRSNKLEDRIEYLN DYHTYAVYRYTCRTL FERHKL LFSF  
HMC AKI LETSGKLNMD EY NFFLRGGVVDREGQMDN PCTSWLADAYWDNI TELDKLTNFHGLMNSFEQYPRDW  
HLWYTNSSPEKAMLPGEWENACNEMQRMLIVRSLRQDRVAF CVTSFIVSNLGSRFIEPPV LNMKSVMEDSTPR  
SPLVFI LSPGVDPT SALLQLAEHTGMAHRFH ALSLGQQAPIAARLLREGV NQGHVFLANCHLSLSWMPNLD  
KLVEQLQVEDPHPSFRLWLS SSPHPDFPISILQASIKMTTEPPKGLKANMTRLYQLMTEAQFTHCSKPAKYK  
LLFALCFFHSILLERKKFLQLGWNIIYGFNDSDFEVSENLLS LYLDEYEETPWDALKYLIAGVNYGGHVTDW  
DRRLTTYINDYFCDSLSTT P FYR LSVLDTYYIIPKDGSLASYKEYISMLPSMDPPEAFGQHPNADVASQITEA  
RTL FETLLSLQPQITPTRVGGQSREEKVLELAADV KQKIPEMIDYEGTRKLLALDPSPLNVLLQEIQRYNKL  
MKTILFSLTDLEKGIQGLIVMSTSLEEIFNCIFDAHV PPLWGKVYPSQKPLASWTRDLAVRVEQFETWASRAR  
PPVLFWLSGFTFPTGFLTAVLQSAARQNNISVDSLSWEFIVSTVDDSNLVYPPKDG VVVRGLYLEGAGWDRKN  
SCLVEAEPMLVCLMPTI HFRPAESRKKSAKGMYS CPCYYYPNRAGSTDRAS FVIGIDLRS G SMTSDHWIKRG  
TALLMSLDS\*

>rs48439754\_ENSMUSP00000047329\_c.3583:C>T\_p.A1195V  
ENSMUST00000035539.12|Dnah2-201|ENSMUSG00000005237|-|chr11:g.69382978:G>A  
MASKA EKRRK VAGRGGARAGRVVRAPQSTAGPGATEASLLPDGQEP EPESGKEDSVLGLQAFASWRLTPALHG  
EANTPPTLLHPQPLFHRLTTLNLI LSCSRAGTRDLALKPFFLSRTMLTGLADATWTGEHDMVLEHFVQDPAV  
PALTI FIDPVFGLKLELGMPVQTQ NQIVYFIRQAPVPITPENFEETVQYGTVRGAYIPALLRLLSGVYVPQIF  
MNKSWPESIRNHVSHLHRFLASLTDTRYKLEGHTVLYIPAEAVQMDPEVVVKDELVQRLETSMIHWTRQIK

EVLSAQESVETGENLGPLLEEIEFWHNRCMDLSSISKQLVKKGVKHIESILFLAKSSYLTPFRKLAQQIQDGSR  
 QAQSNLTFLSILREPYQELAFMKPKDISEKLPKLI SLIRI IWVNSPHYNTRERLTALFRKVCCEQYHFARWED  
 GKQGPLPCFFGAQGPQITRNLEIEDIFHKNLQTLRAVRGGILDVKNTSWHEDYKNKFRGGIKDLEVMTQNLIT  
 SAFELVRDVEHGVLLLDLTFHRLATREAIMRTYEKKAVDLYMLFNSELALVNRELNKKWPYLEPYMTQYSGQAH  
 WVRI LRRRIDRVMNCLSGAHFLPHIGTGEESIHTYQQMAQAI DEMVRKTFQEWTATLDKDCIRRLDMSLLRIS  
 QEKVGLMDVNFDKTLLILFAEIDYWERLLFETPHYVMNVAERAEDLRILRENLLLVARDYNRI IAMLSPDEQA  
 LFKERIRFLDKKIHPGLKKNWALKGASAFFITECRMHASKVQMI VNFDFKASTLTIGWKAQEMSELLLVHITG  
 KQVYRDLEFEEAQREHRMAAQKLVKLHQDVVNIMTNSYEVFKNDGPEIQQQWLLYTI RLDHMMEDALRLNVK  
 WSLLELSKAINGDGKTTNPLFRVLVILQNDVVRGGGSQVEFSPTLQTLASVVNDIGSHLFATISVFRHLDPIL  
 TKRKMNREPIYV LVERDEDIRKIQAQISSGMTNNASLLQNYLKTWDMYREIWEINKDSFIRRYQRLNPPVSSF  
 DADIARYTEVANNVQKEETV LNIQFVMLDCSHLKFSLVQHCNEWQNKFTTLKEMAAGRLADLH SYLKDNAEK  
 ISHPQOTLEELGVSLQ LMDTLQHDLPNLETQI PPIHEQFTILEKYEVPV PDTVLEMLES LNGEWLTFQQILLD  
 SEQMLKKHKEKFKTGLIHAADDFKKVHNLLDFEFKGPFTSTVGH TAALDQIAQMRAMLAMRDEENNLRSN  
 LGIFKIEQPVSKDLQILEKELDALQQVWEITRDWEESWNQWKMGCFTLQTEAMESMAHGLFRRLTRLAKEYK  
 DRNWEI IETTRSKIEQFKRTMPLISDLRNPALRERHWDQVKEEVQREFDQESSEFTLEQIVKLGMDQHVEKIA  
 EISASATKELAI EVGLQNI AKTW DSTQLDIVPYKDKGHHRLRGTEEVFQALEDNQVALSTMKASRFVKA FEKD  
 VDHWERCLSLILEVIEMLTVQRQW MYLENI FLGEDI RQLPNESALFDQVNNNWKAIMDRMNKDNALRSTH  
 YPGLLETLIEMNAILEDIQKSLDMYLETKRHI FPRFYFLSNDDLEILGQSRNPEAVQPHLKKCFDNIKLLKI  
 QKVGSSSKWEAVGMFSGDGEYIDFLHPV LLEGPVESWLGDVERAMRMTLRD LLRNCRVALKKFLNKRDKWVK  
 DWAGQVVITASQIQWTADVTKCLMTAKERSDKKILKVSILNKYSEAIRGNLTKIMRLKIVALVTIEIHARDVL  
 EKLYKSGLMDVSSFDWLSQLRFYWEKDVDDCIIRQTNTQFQYGYEYLGNSGRLVITPLTDRCYMTLTALHLH  
 RGGSPKGPAGTGKTETVKDLGKALGIYVIVVNCSEGLDYKSMGRMYSGLAQSGAWGCFDEFNRINIEVLSVVA  
 QQILSILSALTANLTRYFEGFEINLVWSCGIFITMNPYAGRTEL PENLKSMPFIAMVVPDSTLIAEII LF  
 GEGFGNCKILAKKVYTYLSLAVQQLSRQDHYDFGLRALTSLLRYAGKKRRLQPDLSDEEVLLSMRDMNIAKL  
 TSVDPVLFNAIVQDLFPNIELPVIDYGLRDTIEQEIREMGLQITPFTLTQVLYETKNSRHSTMI VGGTGS  
 SKTTSWKILQASLTS CRAGEPNYNIVREFPLNPKALSGLVGEYDLNTNEWTDGILSSVMRVACADEKPD  
 KWILFDGPDVTLWIESMNSVMDNKVLT LINGERIAMPEQVSLLEFEVENLAVASPATVSRCGMVYTDYVDLGW  
 KPYVQSWLEKRPKTEVEPLQRMFEKFINKILSFKKDNCNELVPVPEYSGIISLCKLYTVLATPENG VNPADAE  
 NYSFMVEMTFVFSMIWSVCASVDEDGRKKIDSYLREIEGSFPNKDTVY EYVNPKMRTWTSFEEKLPKSWRYP  
 PNAPFYKIMVPTVDTVRYNYLVSTLVANQNPVLLVGPVGTGKTSIAQSVLQSLPSSQSVLVVNMSAQTT SNN  
 VQSIIESRVEKRTKGVYVPFGGKSMITFMDDL NMPAKDMFGSQPPELIRLWIDYGFWDYRVKQSIKHIRD MF  
 LMAAMGPPGGGRTVISPRLQSRFNIINMTFPTESQIIRIFGTMINQKLQDFEEVEVKPIGNVVTEATLDVYNTV  
 VQRFLETPAKIHYLFNLRDISKVFQGLMRANKDFHDTKASITRLWIHECFRVFSDRLVDTADMEAFMGILSDK  
 LGTFFDLTFHHLCPNKRPIIFGDFLKEPKVYEDLVLTVLKTAMETALNEYNLSPSVPMQVLVLFREAI EHT  
 RIVRVIQPRGNMLLVGIGGSGRQSLARLASSICDNYTQFIEVTKHYRKQEFRRDDIKRLRYQAGVELQTT SFL  
 FVDTQIADSFLEINNILLSGVEPNLYKSDEFEEIQNHIIDQARAEQIPESSDSLFAYLIERVNNLHIVLC  
 LSPVGDPPFRNWIRQYPALVNCTTINWFSEWPREALLEVAEKYIIGVDLGTQENIHRKVAQIFVTMHWSVAQYS  
 QKMLLELRRYNYVTPNTNYLELVSGYKLLGEKQELLDQANKLRTGLFKI DETREKVEVMSLELEDAKKKVAE  
 FQKQCEEYLVIVQQKREADEQQKAVTANSEKIAIEEVKQCALADNAQKDLEEALPALEAMRALES LNKKDI  
 GEIKSYGRPPAQVEIVMQAVMILRGNEPTWAEAKRQLGEQNFIKSLINFDKDNI SDKVLKKIGAYCAQPDFQP  
 DIIGRVSLAAKSLCMWVRAMELYGRLYRVVEPKRIRMNAAMAQLQEKAALAEAEQEKLEVAEKLEMLKKQYD  
 EKLAQKEELRKKSEEMELKLERAGMLVSGLAGEKARWEETVQGLEEDLGYLVGDCLIAAFLSYMGPFLTNYR  
 DEIINQIWI R KIRELQVPCSPRFAIDNFLTNP TKVRDWNIQGLPSDAFSTENGIIVTRGNRWALMIDPQGQAL  
 KWIKNMEGNQGLKIDLQMH DYLRVLEHAIQFGFPVLLQNVQEYLDPTLNPVLNKSVARIGRMLIRIGDKEV  
 EYNPNFRFYLTTKLSNPHYNPETS AKTTIVNFAVKEQGLEAQLLGLVVRKERPELEE QKDSLVINIAAGKRKL  
 KELEDEILRLLNEATGSLDDVQLVNTLQTSKITATEVTEQLETSETTEINIDLAREAYRPCAQRASVLFVFL  
 NDMGRIDPMYQFSLDAYIGLFILSIDKSHRSNKLEDRIEYLN DYHTYAVYRYTCRTL FERHKL LFSFHMCAKI  
 LETSGKLNMEYNNFFLRGGVLDREGQMDNPTSWLADAYWDNITELDKLTNFHGLMNSFEQYPRDWHLWYTN  
 SSP EKAMLPGEWENACNEMQRMLIVRSLRQDRVAFCVTSFIVSNLGSRFIEPPVLNMSVMEDSTPRSPLVFI  
 LSPGVDPT SALLQLAEHTGMARFHALSLGQGQAPIAARLLREGVNGHWFVLANCHLSLSWMPNLDKLVEQL  
 QVEDPHPSFRLWLSSSPHPDFPISILQASIKMTEPPKGLKANMTRLYQLMTEAQFTHCSKPAKYKLLFALC  
 FFHSILLERKKFLQLGWNIIYGFNDSDFEVSENLLS LYLDEYEE TPWDALKYLIAGVNYGGHVTDDWRLLT  
 TYINDYFCDLSLTPFYRLSVLDTYYIPKDGLSAYKEYI SMLPSMDPPEAFGQHPNADVASQITEARTLFET  
 LLSLQPQITP TRVGGQSR EKKVLELAADV KQKIPEMIDYEGTRKLLALDPSPLNVVLLQEIQRYNKLMKTI LF  
 SLTDLEKGIQGLIVMSTSL EEFNCIFDAHV PPLWGKVYPSQKPLASWTRDLAVRVEQFETWASRARPPVLFW  
 LSGFTFPTGFLTAVLQSAARQNNISVDSLSEFIVSTVDDSNLVYPPKDGWVRGLYLEGAGWDRKNSCLVEA  
 EPMQLVCLMPTIHRPAESRKKSAKGMYS CPCYYYPNRAGSTDRASFVIGIDLRS GSMTSDHWIKRGTALLMS  
 LDS\*

>rs48439754\_ENSMUSP00000104299\_c.3583:C>T\_p.A1195V  
ENSMUST00000108659.2|Dnah2-202|ENSMUSG00000005237|-|chr11:g.69382978:G>A  
MASHAEKKRKKVAGRGGARAGRVVRAPOSTAGPGATEASLLPDGQEPPEPESGKEDSVLGLQAFASWRLTPALHG  
EANTPPTLLHPQPLFHRRLLTTLNLILSCSRAGTRDLALKPFLLSRTMLTGLADATWTGEHDMVLEHFVQDPAV  
PALTIFIDPVFGLKLELGMPVQTNQIVYFIRQAPVPIPTPENFEETVQYGTVRGAYIPALLRLLSGVYVPQIF  
MNKSWPESIRNHVSHLHRFLASLTDTRYKLEGHTVLYIPAEAVQMDPEVVVKDELVQRLETSMIHWTRQIK  
EVLSAQESVETGENLGPLLEEIEFWHNRCMDLSSISKQLVKKGVKHIESILFLAKSSYLTPFRKLAQQIQDGSR  
QAQSNLTFLSILREPYQELAFMKPKDISEKLPKLI SLIRI IWNVSPHYNTRERLTALFRKVCCEQYHFARWED  
GKQGPLPCFFGAQGPQITRNLEIEDIFHKNLQTLRAVRGGILDVKNTSWHEDYKNFRGGIKDLEVMTQNLIT  
SAFELVRDVEHGVLLDFTFHRLATREAIMRTYEKKAVDLYMLFNSELALVNRELNKKWYPYLYMTQYSGQAH  
WVRI LRRRIDRVMNCLSGAHFLPHIGTGEESIHTYQQAQAI DEMVRKTFQEWATLTKDCIRRLDMSLLRIS  
QEKVGLMDVNFDKTLLILFAEIDYWERLLFETPHYVMVAERAEDLRILRENLLLVARDYNRI IAMLSPDEQA  
LFKERIRFLDKKIHPGLKKNLWALKGASAFFITECRMHASKVQMI VDNDFKASTLTIGWKAQEMSELLLVHITG  
KQVYRDLEFEEAQREHRMAAQKLVKLVHLDVNVIMTNSYEVFKNDGPEIQQQWLLYTI RLDHMMEDALRLNVK  
WSLLELSKAINGDGKTPNPLFRVLVILQNDVRGGGSQVEFSPTLQTLASVVNDIGSHLFATISVFRHLPDIL  
TKRKMNREPIYVVERDEDIRKIQAQISSGMTNNASLLQNYLKTWDMYREIWEINKDSFIRRYQRLNPPVSSF  
DADIARYTEVANNVQKEETVLNIQFVMLDCSHLKFSLVQHCNEWQNKFTLLKEMAAGRDLHSHYLKDNAEK  
ISHPPQTLEELGVSLQMLDTLQHDLPLNETQIPPIHEQFTILEKEYEVPVDPDTVLEMLESLNGEWLTFFQILLD  
SEQMLKKHKEKFKTGLIHAADDFFKKVHNLLDFEFKGPFTSTVGHATAALDQIAQMRAMLAMRDEENNLRSN  
LGIFKIEQPVSKDLQILEKELDALQVWEITRDWEESWNQWKMGCFQTLQTEAMESMAHGLFRRLTRLAKEYK  
DRNWEI IETTRSKIEQFKRTMPLISDLRNPALRERHWDQVKEEVQREFDQESSEFTLEQIVKLGMDQHVEKIA  
EISASATKELAEVGLQNI AKTWDSTQLDIVPYKDKGHHRLRGTEEVFQALEDNQVALSTMKASRFVKAFEKD  
VDHWERCLSLILEVIEMVLTVQRQWYLENIFLGEDIRKQLPNE SALFDQVNNNWKAIMDRMNKDNALRSTH  
YPGLETLEIEMNAILEDIQKSLDMYLETKRHIFPRFYFLSNDDLEILGQSRNPEAVQPHLKKCFDNIKLLKI  
QKVGSSSKWEAVGMFSGDGEYIDFLHPVLLGEPVSWLGDVERAMRMTLRDLRLNCRVALKKFLNKRDKWVK  
DWAGQVVI TASQIQWTDVTKCLMTAKERSDKKILKVMKKQVSI LNKYSEAIRGNLTKIMRKLIVALVTIEI  
HARDVLEKLYKSGMLDVSSFDWLSQLRFYWEKDVDDCIRQNTQFQYGYEYLGNSGRLVITPLTRCYMTLT  
TALHLHRGGSPKGPAGTGKTE TVKDLGKALGIYVIVVNCSEGLDYKSMGRMYSGLAQSGAWGCFDEFNRINIE  
VLSVVAQQILSILSALTANLTRFYFEGFEINLVWSCGIFITMNPYAGRTEL PENLKSMPFPIAMVVPDSTLI  
AEIILFGEFGNCKILAKKVYTYLSLAVQQLSRQDHYDFGLRALTSLLRYAGKKRRLQPDLSDEEVLVLLSMRD  
MNI AKLTSVDVPLFNAIVQDLFPNIELPVIDYGLRDTIEQEIREMGLQITPFTLTKVLYETKNSRHSTMI  
VGGTGSSKTT SWKILQASLTS LCRAGEPNYNIVREFPLNPKALSLGELYGEYDLNTNEWT DGI LSSVMRVACA  
DEKPDEKWILFDGVPD TLWIESMNSVMDDNKVLT LINGERIAMPEQVSLLEFEVENLAVASPATVSRCGMVYTD  
YVDLGWKPYVQSWLEKRPKTEVEPLQRMFEKFINKILSFKKDNCELVPVPEYSGIISLCKLYTVLATPENGV  
NPADAENYSFMVEMTFVFSMIWSVCASVDEDGRKNI DSYLREIEGSFPNKDTVY EYVNPKMTWTSFEEKLP  
KSWRYPPNAPFYKIMVPTVDTVRYNLVSTLVANQNPVLLVGPVGTGKTSIAQSVLQSLPSSQVSVLVVNMISA  
QTTSNNVQSI IESRVEKRKTKGVYVFPFGGKSMITFMDDL NMPAKDMFGSQPPELIRLWIDYGFYDRVKQSIK  
HIRDMFLMAAMGPPGGRTVISPRLQSRFNI INMTFPTESQIIRIFGTMINQKLQDFEEVEKPIGNVVTEATL  
DVYNTVVQRFLPTPAKIHVFNLRDISKVFQGM L RANKDFHDTKASITRLWIHECFRVFSDRLVDTADMEAFM  
GILSDKLGTFDFLTFHHLCPNKRPIFGDFLKEPKVYEDLVDLTVLKTAMETALNEYNLSPSVVPMQLVLFRE  
AIEHITRIVRVIGQPRGNMLLVGIGGSGRQSLARLASSICDYNFTQIEVTKHYRKQEFRDDIKRLYRQAGVEL  
QTTSFLFVDTQIADESFL EDINNILSSGEVPNLYKSDEFEEIQNHIIDQARAEQIPESSDSL FAYLIERVRNN  
LHIVLCLSPVGD PFRNWIRQYPALVNCTTINWFSEWPREALLEVAEKYIIGVDLGTQENIHRKVAQIFVTMHW  
SVAQYSQKMLLELRRYNYVPTNYLELVSGYKLLGKQRQELLDQANKLRTGLFKIDETREKVEVMSLELEDA  
KKKVAEFQKCEEYLVIVVQKREADEQQKAVTANSEKIAIEEVKQALADNAQKDLEALPALEAMRALES  
LNKKDIGEIKSYGRPPAQVEIVMQAVMILRGNEPTWAEAKRQLGEQNFIKSLINFDKDNI SDKVLKKGAYCA  
QPDPFQPDIGRVS LAAKSLCMWVRAMELYGRLYRVVEPKRIRMNAMAQLQEKQAALAEAEKLEREVAEKLEM  
LKKQYDEKLAQKEELRKKSEEMELKLERAGMLVSGLAGEKARWEETVQGLEEDLGYLVGDCLIAAAF LSYMGP  
FLTNYRDEIINQIWIWKIRELQVPCSPRFAIDNFLTNP TKVRDWNIQGLPSDAFSTENGIIVTRGNRWALMID  
PQQQALKWIKNMEGNQGLKIIDLQMHYLRVLEHAIQFGFPVLLQNVQYELDPTLNPVLNKSVARIGGRMLIR  
IGDKEVEYNPNFRFYLTTKLSNPHYNPETS AKTTIVNFAVKEQGLEAQLLGIVVRKERPELEE QKDSLVINIA  
AGKRKLELEDEILRLLNEATGSLDDVQLVNTLQTSKITATEVTEQLETSETTEINIDLAREAYRCAQRAS  
VLFFVLDNMGRIDPMYQFSLDAYIGLFI LSIKSHRSNKLEDRIEYLNDYHTYAVYRYTCRTLFRHKLLFSF  
HMCALILETSGKLNMDYENFFLRGGVVDLREGQMDNPTSWLADAYWDNI TELDKLNTFHMNSFEQYPRDW  
HLWYTNSSPEKAMLPGEWENACNEMQRMLIVRSLRQDRVAFVCTSFIVSNLGSRFIEPPVLMKSVMEDSTPR  
SPLVFI LSPGVDPTSALLQLAEHTGMAHRFHALS LGQGQAPIAARLLREGVNGHVVFLANCHLSLSWMPNLD  
KLVEQLQVEDPHPSFRLWLSSSPHPDFPISILQASIKMTTEPPKGLKANMTRLYQLMTEAQFTHCSKPAKYKK  
LLFALCFFHSSILLERKKFLQLGWNIIYGFNDSDFEVSENLLS LYLDEYEETPWDALKYLIAGVNYGGHVTDW

DRRLTTYINDYFCDLSLTPFYRLSVLDTYIIPKDGSLASYKEYISMLPSMDPPEAFGQHPNADVASQITEA  
 RTLFETLLSLQPQITPTRVGGQSREEKVLLEAADVQKIPEMIDYEGTRKLLALDPSPLNVVLLQEIQRYNKL  
 MKTILFSLTDLEKGIQGLIVMSTSLLEIFNCIFDAHVPLWGKVPYPSQKPLASWTRDLAVRVEQFETWASRAR  
 PPVLFWLSGFTFPTGFLTAVLQSAARQNNISVDSLSWEFIVSTVDDSNLVYPPKDGWVVRGLYLEGAGWDRKN  
 SCLVEAEPMLVCLMPTIHFRAESRKKSAKGMYS CPCYYYPNRAGSTDRASFVIGIDLRSGMTSDHWIKRG  
 TALLMSLDS\*

>rs262313948\_ENSMUSP00000051204\_c.1187:T>ATGT\_p.R396C-ins  
 ENSMUST00000056941.3|Spem2-201|ENSMUSG00000044084|-  
 |chr11:g.69707776:A>ACAT  
 MENQLWQNTLRCCQYQESPQDAENILFLLLGLIILVNISINVATAMWQGLQNAIDKMI FWMNQKTEVVQVTE  
 CPPKEPQANVQDVHIHCILDVQVKMAQPTQCSSSSSHYFCKRSNDRSRRRYGYQQGNLQIHQSSQQQGCL  
 SHQQLRNRPLSRGYPPFRKQPQGHKMSQMRPMPFFDME DRDSLPEGHSCPHAKQPRRGWGS LCKPVRLASNV  
 GLWGRQGGILASLPLPSLYLSPELRRLPKRVEAKSELRLQGFPHYQSRIWGTVEAEQWASSPPPPRLLPN  
 PSWTVVGYSSFPSSGGHIPYDARDQWRRGTEGCEPPAFVPRNPREVQGYRDHNSQAHRQNFSSHTSQPNHSP  
 PQSMGHVGYSSRESHEVRRRAPDWIEVFP SRCHPLTSTSLTALGEASYQRAPPASSGLMIPHSSQRLAEVQI  
 SDPTPPPTTFVPLSRNPGGNATYQVYDSLELKRQVQENRGRASSLPPSTASRPSLHRSTGKLN\*

>rs48684437\_ENSMUSP00000072389\_c.208:T>C\_p.L70P  
 ENSMUST00000072581.9|Gps2-202|ENSMUSG00000023170|+|chr11:g.69805763:T>C  
 MPALLERPKLSNAMARALHRHIMMERERKRQEEEEVDKMMEQKMKEEQERRKKKEMEERMSLEETKEQIPKLQ  
 EKLSALQEEKHQLFLQLKVKVLEEEKRRRKEQSDLTTLTSAAYQQSLTVHTGTHLLSMQGS PGGHNRPGTLMA  
 ADRAKQMFQVQLTTRHYVGSAAAFAGTPEHGQFQGS PGGAYGTAQPPPHYGPTQPAYSPSQQLRAPSAFPAV  
 QYLSQPQPQPYAVHGHFQPTQTGFLQPGSTLSLQKQMEHANQQT SFSDSSSLRPMHPQALHPAPGLLASPQLP  
 VQIQAAAGKSGFATTSQPGPRLPFIQHSQNPRFYHK\*

>rs48684437\_ENSMUSP00000054072\_c.208:T>C\_p.L70P  
 ENSMUST00000057884.6|Gps2-201|ENSMUSG00000023170|+|chr11:g.69805763:T>C  
 MPALLERPKLSNAMARALHRHIMMERERKRQEEEEVDKMMEQKMKEEQERRKKKEMEERMSLEETKEQIPKLQ  
 EKLSALQEEKHQLFLQLKVKVLEEEKRRRKEQSDLTTLTSAAYQQSLTVHTGTHLLSMQGS PGGHNRPGTLMA  
 ADRAKQMFQVQLTTRHYVGSAAAFAGTPEHGQFQGS PGGAYGTAQPPPHYGPTQPAYSPSQQLRAPSAFPAV  
 QYLSQPQPQPYAVHGHFQPTQTGFLQPGSTLSLQKQMEHANQQT SFSDSSSLRPMHPQALHPAPGLLASPQLP  
 VQIQAAAGKSGFATTSQPGPRLPFIQHSQNPRFYHK\*

>rs48684437\_ENSMUSP00000112062\_c.208:T>C\_p.L70P  
 ENSMUST00000116358.8|Gps2-203|ENSMUSG00000023170|+|chr11:g.69805763:T>C  
 MPALLERPKLSNAMARALHRHIMMERERKRQEEEEVDKMMEQKMKEEQERRKKKEMEERMSLEETKEQIPKLQ  
 EKLSALQEEKHQLFLQLKVKVLEEEKRRRKEQSDLTTLTSAAYQQSLTVHTGTHLLSMQGS PGGHNRPGTLMA  
 ADRAKQMFQVQLTTRHYVGSAAAFAGTPEHGQFQGS PGGAYGTAQPPPHYGPTQPAYSPSQQLRAPSAFPAV  
 QYLSQPQPQPYAVHGHFQPTQTGFLQPGSTLSLQKQMEHANQQT SFSDSSSLRPMHPQALHPAPGLLASPQLP  
 VQIQAAAGKSGFATTSQPGPRLPFIQHSQNPRFYHK\*

>rs52043377\_ENSMUSP00000072389\_c.934:G>A\_p.R312Q  
 ENSMUST00000072581.9|Gps2-202|ENSMUSG00000023170|+|chr11:g.69807280:G>A  
 MPALLERPKLSNAMARALHRHIMMERERKRQEEEEVDKMMEQKMKEEQERRKKKEMEERMSLEETKEQILKLQ  
 EKLSALQEEKHQLFLQLKVKVLEEEKRRRKEQSDLTTLTSAAYQQSLTVHTGTHLLSMQGS PGGHNRPGTLMA  
 ADRAKQMFQVQLTTRHYVGSAAAFAGTPEHGQFQGS PGGAYGTAQPPPHYGPTQPAYSPSQQLRAPSAFPAV  
 QYLSQPQPQPYAVHGHFQPTQTGFLQPGSTLSLQKQMEHANQQT SFSDSSSLRPMHPQALHPAPGLLASPQLP  
 VQIQAAAGKSGFATTSQPGPQLPFIQHSQNPRFYHK\*

>rs52043377\_ENSMUSP00000054072\_c.934:G>A\_p.R312Q  
 ENSMUST00000057884.6|Gps2-201|ENSMUSG00000023170|+|chr11:g.69807280:G>A  
 MPALLERPKLSNAMARALHRHIMMERERKRQEEEEVDKMMEQKMKEEQERRKKKEMEERMSLEETKEQILKLQ  
 EKLSALQEEKHQLFLQLKVKVLEEEKRRRKEQSDLTTLTSAAYQQSLTVHTGTHLLSMQGS PGGHNRPGTLMA  
 ADRAKQMFQVQLTTRHYVGSAAAFAGTPEHGQFQGS PGGAYGTAQPPPHYGPTQPAYSPSQQLRAPSAFPAV  
 QYLSQPQPQPYAVHGHFQPTQTGFLQPGSTLSLQKQMEHANQQT SFSDSSSLRPMHPQALHPAPGLLASPQLP  
 VQIQAAAGKSGFATTSQPGPQLPFIQHSQNPRFYHK\*

>rs52043377\_ENSMUSP00000112062\_c.934:G>A\_p.R312Q  
 ENSMUST00000116358.8|Gps2-203|ENSMUSG00000023170|+|chr11:g.69807280:G>A  
 MPALLERPKLSNAMARALHRHIMMERERKRQEEEEVDKMMEQKMKEEQERRKKKEMEERMSLEETKEQILKLQ  
 EKLSALQEEKHQLFLQLKVKVLEEEKRRRKEQSDLTTLTSAAYQQSLTVHTGTHLLSMQGS PGGHNRPGTLMA  
 ADRAKQMFQVQLTTRHYVGSAAAFAGTPEHGQFQGS PGGAYGTAQPPPHYGPTQPAYSPSQQLRAPSAFPAV  
 QYLSQPQPQPYAVHGHFQPTQTGFLQPGSTLSLQKQMEHANQQT SFSDSSSLRPMHPQALHPAPGLLASPQLP  
 VQIQAAAGKSGFATTSQPGPQLPFIQHSQNPRFYHK\*

>rs217925426\_ENSMUSP00000104250\_c.391:A>GTTTA\_p.E131ins-fs  
ENSMUST00000108610.8|Eif5a-207|ENSMUSG00000078812|-  
|chr11:g.69808433:T>TAAAC  
MADDLDFETGDAGASATFFPMQCSALRKNGFVVLKGRPCKIVEMSTSKTGKHHGAKVHLVGIDIFTGKKYEDIC  
PSTHNMDVPNIKRNDQFLIGIQDGYLSLLQDSGEVREDLRLPEGDLGKEIEQKYDCGGLRDPDHSVCHDRGG  
SCCNQGHGKI  
>rs217925426\_ENSMUSP00000104252\_c.391:A>GTTTA\_p.E131ins-fs  
ENSMUST00000108612.8|Eif5a-209|ENSMUSG00000078812|-  
|chr11:g.69808433:T>TAAAC  
MADDLDFETGDAGASATFFPMQCSALRKNGFVVLKGRPCKIVEMSTSKTGKHHGAKVHLVGIDIFTGKKYEDIC  
PSTHNMDVPNIKRNDQFLIGIQDGYLSLLQDSGEVREDLRLPEGDLGKEIEQKYDCGGLRDPDHSVCHDRGG  
SCCNQGHGKI  
>rs217925426\_ENSMUSP00000104251\_c.391:A>GTTTA\_p.E131ins-fs  
ENSMUST00000108611.8|Eif5a-208|ENSMUSG00000078812|-  
|chr11:g.69808433:T>TAAAC  
MADDLDFETGDAGASATFFPMQCSALRKNGFVVLKGRPCKIVEMSTSKTGKHHGAKVHLVGIDIFTGKKYEDIC  
PSTHNMDVPNIKRNDQFLIGIQDGYLSLLQDSGEVREDLRLPEGDLGKEIEQKYDCGGLRDPDHSVCHDRGG  
SCCNQGHGKI  
>rs217925426\_ENSMUSP00000104253\_c.391:A>GTTTA\_p.E131ins-fs  
ENSMUST00000108613.10|Eif5a-210|ENSMUSG00000078812|-  
|chr11:g.69808433:T>TAAAC  
MADDLDFETGDAGASATFFPMQCSALRKNGFVVLKGRPCKIVEMSTSKTGKHHGAKVHLVGIDIFTGKKYEDIC  
PSTHNMDVPNIKRNDQFLIGIQDGYLSLLQDSGEVREDLRLPEGDLGKEIEQKYDCGGLRDPDHSVCHDRGG  
SCCNQGHGKI  
>rs217925426\_ENSMUSP00000047008\_c.391:A>GTTTA\_p.E131ins-fs  
ENSMUST00000043419.10|Eif5a-201|ENSMUSG00000078812|-  
|chr11:g.69808433:T>TAAAC  
MADDLDFETGDAGASATFFPMQCSALRKNGFVVLKGRPCKIVEMSTSKTGKHHGAKVHLVGIDIFTGKKYEDIC  
PSTHNMDVPNIKRNDQFLIGIQDGYLSLLQDSGEVREDLRLPEGDLGKEIEQKYDCGGLRDPDHSVCHDRGG  
SCCNQGHGKI  
>rs217925426\_ENSMUSP00000067077\_c.391:A>GTTTA\_p.E131ins-fs  
ENSMUST00000070996.11|Eif5a-202|ENSMUSG00000078812|-  
|chr11:g.69808433:T>TAAAC  
MADDLDFETGDAGASATFFPMQCSALRKNGFVVLKGRPCKIVEMSTSKTGKHHGAKVHLVGIDIFTGKKYEDIC  
PSTHNMDVPNIKRNDQFLIGIQDGYLSLLQDSGEVREDLRLPEGDLGKEIEQKYDCGGLRDPDHSVCHDRGG  
SCCNQGHGKI  
>rs217925426\_ENSMUSP00000068651\_c.391:A>GTTTA\_p.E131ins-fs  
ENSMUST00000071026.10|Eif5a-203|ENSMUSG00000078812|-  
|chr11:g.69808433:T>TAAAC  
MADDLDFETGDAGASATFFPMQCSALRKNGFVVLKGRPCKIVEMSTSKTGKHHGAKVHLVGIDIFTGKKYEDIC  
PSTHNMDVPNIKRNDQFLIGIQDGYLSLLQDSGEVREDLRLPEGDLGKEIEQKYDCGGLRDPDHSVCHDRGG  
SCCNQGHGKI  
>rs217925426\_ENSMUSP00000104249\_c.391:A>GTTTA\_p.E131ins-fs  
ENSMUST00000108609.8|Eif5a-206|ENSMUSG00000078812|-  
|chr11:g.69808433:T>TAAAC  
MADDLDFETGDAGASATFFPMQCSALRKNGFVVLKGRPCKIVEMSTSKTGKHHGAKVHLVGIDIFTGKKYEDIC  
PSTHNMDVPNIKRNDQFLIGIQDGYLSLLQDSGEVREDLRLPEGDLGKEIEQKYDCGGLRDPDHSVCHDRGG  
SCCNQGHGKI  
>rs217925426\_ENSMUSP00000104248\_c.391:A>GTTTA\_p.E131ins-fs  
ENSMUST00000108608.8|Eif5a-205|ENSMUSG00000078812|-  
|chr11:g.69808433:T>TAAAC  
MADDLDFETGDAGASATFFPMQCSALRKNGFVVLKGRPCKIVEMSTSKTGKHHGAKVHLVGIDIFTGKKYEDIC  
PSTHNMDVPNIKRNDQFLIGIQDGYLSLLQDSGEVREDLRLPEGDLGKEIEQKYDCGGLRDPDHSVCHDRGG  
SCCNQGHGKI  
>rs217925426\_ENSMUSP00000104247\_c.391:A>GTTTA\_p.E131ins-fs  
ENSMUST00000108607.8|Eif5a-204|ENSMUSG00000078812|-  
|chr11:g.69808433:T>TAAAC

MADDLDFETGDAGASATFPMQCSALRKNQFVVLKGRPCKIVEMSTSKTGKHGKAVHLVGDIDIFTGKKYEDIC  
PSTHNDVFNKRNDFQLIGIQDGYLSLLQDSGEVREDLRLPEGDLGKEIEQKYDCGGLRDPDHSVCHDRGG  
SCCNQGHGKI  
>rs217925426\_ENSMUSP00000137459\_c.157:A>GTTTA\_p.E53ins-fs  
ENSMUST00000153652.8|Eif5a-212|ENSMUSG00000078812|-  
|chr11:g.69808433:T>TAAAC  
MDVFNKRNDFQLIGIQDGYLSLLQDSGEVREDLRLPEGDLGKEIEQKYDCGGLRDPDHSVCHDRGGSCCNQ  
GHGKI  
>rs217925426\_ENSMUSP00000123402\_c.391:A>GTTTA\_p.E131ins-fs  
ENSMUST00000152589.2|Eif5a-211|ENSMUSG00000078812|-  
|chr11:g.69808433:T>TAAAC  
MADDLDFETGDAGASATFPMQCSALRKNQFVVLKGRPCKIVEMSTSKTGKHGKAVHLVGDIDIFTGKKYEDIC  
PSTHNDVFNKRNDFQLIGIQDGYLSLLQDSGEVREDLRLPEGDLGKEIEQKYDCGGLRDPDHSVCHDRGG  
SCCN  
>rs217925426\_ENSMUSP00000132717\_c.391:A>GTTTA\_p.E131ins-fs  
ENSMUST00000164359.8|Eif5a-213|ENSMUSG00000078812|-  
|chr11:g.69808433:T>TAAAC  
MADDLDFETGDAGASATFPMQCSALRKNQFVVLKGRPCKIVEMSTSKTGKHGKAVHLVGDIDIFTGKKYEDIC  
PSTHNDVFNKRNDFQLIGIQDGYLSLLQDSGEVREDLRLPEGDLGKEIEQKYDCGGLRDPDHSVCHDRGG  
SCCNQGHGKI  
>rs46539509\_ENSMUSP0000018711\_c.197:G>T\_p.K66N  
ENSMUST0000018711.15|Gabarap-  
201|ENSMUSG0000018567|+|chr11:g.69883436:G>T  
MKFVYKEEHPFEKRRSEGEKIRKKYPDRVPVIVEKAPKARIGDLDKPKYLVPDLDLTVGQFYFLIRNRIHLRAE  
DALFFFVNNVIPPTSATMGQLYQEHHEEDFFLYIAYSDESVMYGL\*  
>ENSMUSP0000019362\_c.245:T>G\_p.N82K ENSMUST0000019362.15|Dv12-  
201|ENSMUSG0000020888|+|chr11:g.69895682:T>G  
MAGSSAGGGVGETKVIYHLDEEETPYLVKIPVPAERITLGDVFKSVLQRPAGAKYFFKSMDQDFGVVKEEISD  
DNARLPCFKGRVSVLWVSSDTPQPEVAPPAHESRTELVPPPPPLPPLPPERTSGIGDSRPPSFHPNVSSSHEN  
LEPETETESVSVLRRDRPRRRDSSEHGAGGHRPGGSPRLERHLAGYESSSTLMTSELESTSLGDSDEDDTMSR  
FSSSTEQSSASRLLKRHRRRRKQRPFRMERTSSFSVTDSTMSLNIITVTLNMEKYNFLGISIVGQSNERGDG  
GIYIGSIMKGGAVAADGRIEPEGDMLLQVNDMNFENMSNDDAVRVLRLDIVHKPGPIVLTVAKCWDPSQAYFTL  
PRNEPIQPIDPAAWVSHSAALTGAFPAYPGSSSMSTITSGSSLPDGCEGRGLSVHMDMASVTKAMAAPESGLE  
VRDRMWLKITIPNAFLGSDVVDWLYHHVEGFPERREARKYASGLLKAGLIRHTVNKITFSEQCYVFGDLGG  
CESYLVNLSLNDNDGSSGASDQDTLAPLPGATPWLLPTFSYQYPAPHPYSPQPPPYHELSSYTYGGGSASSQ  
HSEGRSSGSTRSDGGAGRTGRPEERAPESKSGSGSESELSSRGGSLRRGGEPPGTGDDGPPPSRGSTGAPPN  
LRALPGLHPYGAPSGMALPYNPMMVMMPPPPPPVSTAVQPPGAPPVVDLGSVPPPELTASRQSFHMAMGNPSE  
FFVDVM\*  
>ENSMUSP00000099635\_c.245:T>G\_p.N82K ENSMUST00000102575.9|Dv12-  
202|ENSMUSG0000020888|+|chr11:g.69895682:T>G  
MAGSSAGGGVGETKVIYHLDEEETPYLVKIPVPAERITLGDVFKSVLQRPAGAKYFFKSMDQDFGVVKEEISD  
DNARLPCFKGRVSVLWVSSDTPQPEVAPPAHESRTELVPPPPPLPPLPPERTSGIGDSRPPSFHPNVSSSHEN  
LEPETETESVSVLRRDRPRRRDSSEHGAGGHRPGGSPRLERHLAGYESSSTLMTSELESTSLGDSDEDDTMSR  
FSSSTEQSSASRLLKRHRRRRKQRPFRMERTSSFSVTDSTMSLNIITVTLNMEKYNFLGISIVGQSNERGDG  
GIYIGSIMKGGAVAADGRIEPEGDMLLQVNDMNFENMSNDDAVRVLRLDIVHKPGPIVLTVAKCWDPSQAYFTL  
PRNEPIQPIDPAAWVSHSAALTGAFPAYPGSSSMSTITSGSSLPDGCEGRGLSVHMDMASVTKAMAAPESGLE  
VRDRMWLKITIPNAFLGSDVVDWLYHHVEGFPERREARKYASGLLKAGLIRHTVNKITFSEQCYVFGDLGG  
CESYLVNLSLNDNDGSSGASDQDTLAPLPGATPWLLPTFSYQYPAPHPYSPQPPPYHELSSYTYGGGSASSQ  
HSEGRSSGSTRSDGGAGRTGRPEERAPESKSGSGSESELSSRGGSLRRGGEPPGTGDDGPPPSRGSTGAPPN  
LRALPGLHPYGAPSGMALPYNPMMVMMPPPPPPVSTAVQPPGAPPVVDLGSVPPPELTASRQSFHMAMGNPSE  
FFVDVM\*  
>ENSMUSP00000140073\_c.245:T>G\_p.N82K ENSMUST00000190940.2|Dv12-  
207|ENSMUSG0000020888|+|chr11:g.69895682:T>G  
MAGSSAGGGVGETKVIYHLDEEETPYLVKIPVPAERITLGDVFKSVLQRPAGAKYFFKSMDQDFGVVKEEISD  
DNARLPCFKGRVSVLWVSSDTPQPEVAPPAHESRTELVPPPPPLPPLPPERTSGIGDSRPPSFHPNVSSSHEN  
LEPETETESVSVLRRDRPRRRDSSEHGAGGHRPGGSPRLERHLAGYESSSTLMTSELESTSLGDSDEDDTMSR  
FSSSTEQSSASRLLKRHRRRRKQRPFRMERTSSFSVTDSTMSLNIITVTLNMEKYNFLGISIVGQSNERGDG  
GIYIGSIMKGGAVAADGRIEPEGDMLLQVNDMNFENMSNDDAVRVLRLDIVHKPGPIVLTVAKCWDPSQAYFTL

PRNEPIQPIDPAAWVSHSAALTGAFPAYPGSSSMSTITSGSSLPDGCEGRGLSVHMDMASVTKAMAAPESGLE  
VRDRMWLKITIPNAFLGSDVVDWLYHHVEGFPERREARKYASGLLKAGLRHTVKNKITFSEQCYVFGDLSGG  
CESYLVNLSLNDNDGSSGASDQDTLAPLPGATPWPLLPFTFSYQYPAPHPYSPQPPPYHELSSYTYGGSSASSQ  
HSEGRSSGSTRSDGGAGRTGRPEERAPESKSGSGSESELSSRGGSLRRGGEPGGTGDGGPPPSRGSTGAPPN  
LRALPGLHPYGAPSGMALPYNPMMVMMPPPPPPVSTAVQPPGAPPVRDLGSPPELTASRQSFHMAMGNPSE  
FFVDVM\*

>ENSMUSP00000155973\_c.603:A>T\_p.K202\* ENSMUST00000231506.2|D1g4-  
217|ENSMUSG00000020886|+|chr11:g.69922063:A>T

MSQRPRAPRSALWLLAPPLLRWAPLLTLVHSDLFQALLDILDYIEACISESQKYRYQDEDTPPLEHSPAHL  
NQANSPPVIVNTDTLEAPGYVNGTEGEMEYEEITLERGNSGLGFSIAGGTDNPHIGDDPSIFITKIIPGGAAA  
QDGRRLRVNDSILFVNEVDVREVTHSAAVEALKEAGSIVRLYVMRRKPPAEKIIIEI\*LIKGPKGLGFSIAGG  
VGNQHIPGDNSIYVTKIIEGGAHKDGRQLQIGDKILAVNSVGLDVMHEDAVAALKNTYDVVYLKVAKPSNAYLS  
DSYAPPDITTSYSQHLNEISHSSYLGTDYPTAMTPTSPRRYSPVAKDLLGEEDIIPREPRRIVIHRSSTGLGF  
NIVGGEDGEGIFISFILAGGPADLSGELRKGQDILSVNGVDLRNASHEQAAIALKNAGQTVTIIAQYKPEEYS  
RFEAKIHDRLREQLMNSSLGSGTASLRSNPKRGFYIRALFDYDKTKDCGFLSQALSFFHFGDVLHVIDASDEE  
WQARRVHSDSETDDIGFIPSKRRVERREWSRLKAKDWGSSSGSQGREDSVLSYETVTQMEVHYARPIIILGPTK  
DRANDDLLSEFPDKFGSCVPHTTRPKREYEIDGRDYHFVSSREKMEKDIQAHKFIEAGQYNHLYGTSVQSVR  
EVAEQGKHCILDVSNANAVRRLQAAHLHPIAIFIRPRLENVLEINKRITEEQARKAFDRATKLEQEFTECFSA  
IVEGDSFEEIYHKVKRVIEDLSGPYIWPAPERL\*

>ENSMUSP00000134545\_c.612:A>T\_p.K205\* ENSMUST00000123687.3|D1g4-  
205|ENSMUSG00000020886|+|chr11:g.69922063:A>T

MSQRPRAPRSALWLLAPPLLRWAPLLTLVHSDLFQALLDILDYIEACISESQKYRYQDEDTPPLEHSPAHL  
NQANSPPVIVNTDTLEAPGYELQVNGTEGEMEYEEITLERGNSGLGFSIAGGTDNPHIGDDPSIFITKIIPGG  
AAAQDGRRLRVNDSILFVNEVDVREVTHSAAVEALKEAGSIVRLYVMRRKPPAEKIIIEI\*LIKGPKGLGFSIAG  
GVGNQHIPGDNSIYVTKIIEGGAHKDGRQLQIGDKILAVNSVGLDVMHEDAVAALKNTYDVVYLKVAKPSNA  
YLSDSYAPPDITTSYSQHLNEISHSSYLGTDYPTAMTPTSPRRYSPVAKDLLGEEDIIPREPRRIVIHRSSTG  
LGFNIVGGEDGEGIFISFILAGGPADLSGELRKGQDILSVNGVDLRNASHEQAAIALKNAGQTVTIIAQYKPE  
EYSRFEAKIHDRLREQLMNSSLGSGTASLRSNPKRGFYIRALFDYDKTKDCGFLSQALSFFHFGDVLHVIDASDE  
EWWQARRVHSDSETDDIGFIPSKRRVERREWSRLKAKDWGSSSGSQGREDSVLSYETVTQMEVHYARPIIILG  
PTKDRANDDLLSEFPDKFGSCVPHTTRPKREYEIDGRDYHFVSSREKMEKDIQAHKFIEAGQYNHLYGTSVQ  
SVREVAEQRDQ\*

>ENSMUSP00000104230\_c.612:A>T\_p.K205\* ENSMUST00000108589.10|D1g4-  
204|ENSMUSG00000020886|+|chr11:g.69922063:A>T

MSQRPRAPRSALWLLAPPLLRWAPLLTLVHSDLFQALLDILDYIEACISESQKYRYQDEDTPPLEHSPAHL  
NQANSPPVIVNTDTLEAPGYELQVNGTEGEMEYEEITLERGNSGLGFSIAGGTDNPHIGDDPSIFITKIIPGG  
AAAQDGRRLRVNDSILFVNEVDVREVTHSAAVEALKEAGSIVRLYVMRRKPPAEKIIIEI\*LIKGPKGLGFSIAG  
GVGNQHIPGDNSIYVTKIIEGGAHKDGRQLQIGDKILAVNSVGLDVMHEDAVAALKNTYDVVYLKVAKPSNA  
YLSDSYAPPDITTSYSQHLNEISHSSYLGTDYPTAMTPTSPRRYSPVAKDLLGEEDIIPREPRRIVIHRSSTG  
LGFNIVGGEDGEGIFISFILAGGPADLSGELRKGQDILSVNGVDLRNASHEQAAIALKNAGQTVTIIAQYKPE  
EYSRFEAKIHDRLREQLMNSSLGSGTASLRSNPKRGFYIRALFDYDKTKDCGFLSQALSFFHFGDVLHVIDASDE  
EWWQARRVHSDSETDDIGFIPSKRRVERREWSRLKAKDWGSSSGSQGREDSVLSYETVTQMEVHYARPIIILG  
PTKDRANDDLLSEFPDKFGSCVPHTTRPKREYEIDGRDYHFVSSREKMEKDIQAHKFIEAGQYNHLYGTSVQ  
SVREVAEQGKHCILDVSNANAVRRLQAAHLHPIAIFIRPRLENVLEINKRITEEQARKAFDRATKLEQEFTEC  
FSAIVEGDSFEEIYHKVKRVIEDLSGPYIWPAPERL\*

>ENSMUSP00000156345\_c.474:A>T\_p.K159\* ENSMUST00000231415.2|D1g4-  
215|ENSMUSG00000020886|+|chr11:g.69922063:A>T

MDCLCIVTTKKYRYQDEDTPPLEHSPAHLPNQANSPPVIVNTDTLEAPGYVNGTEGEMEYEEITLERGNSGLG  
FSIAGGTDNPHIGDDPSIFITKIIPGGAAAQDGRRLRVNDSILFVNEVDVREVTHSAAVEALKEAGSIVRLYV  
MRRKPPAEKIIIEI\*LIKGPKGLGFSIAGGVGNQHIPGDNSIYVTKIIEGGAHKDGRQLQIGDKILAVNSVGLD  
VMHEDAVAALKNTYDVVYLKVAKPSNAYLSDSYAPPDITTSYSQHLNEISHSSYLGTDYPTAMTPTSPRRYS  
PVAKDLLGEEDIIPREPRRIVIHRSSTGLGFNIVGGEDGEGIFISFILAGGPADLSGELRKGQDILSVNGV  
DLRNASHEQAAIALKNAGQTVTIIAQYKPEEYSRFEAKIHDRLREQLMNSSLGSGTASLRSNPKRGFYIRAL  
FDYDKTKDCGFLSQALSFFHFGDVLHVIDASDEEWWQARRVHSDSETDDIGFIPSKRRVERREWSRLKAK  
DWGSSSGSQGREDSVLSYETVTQMEVHYARPIIILGPTKDRANDDLLSEFPDKFGSCVPHTTRPKREYE  
IDGRDYHFVSSREKMEKDIQAHKFIEAGQYNHLYGTSVQSVREVAEQGKHCILDVSNANAVRRLQAAHL  
HPIAIFIRPRLENVLEINKRITEEQARKAFDRATKLEQEFTECFSAIVEGDSFEEIYHKVKRVIEDLSGP  
YIWPAPERL\*

>ENSMUSP00000104229\_c.483:A>T\_p.K162\* ENSMUST00000108588.9|D1g4-  
203|ENSMUSG00000020886|+|chr11:g.69922063:A>T



MDCLCIVTTKKYRYQDEDTPPLEHSPAHLPNQANSPPVIVNTDTLEAPGYELQVNGTEGEMEYEEITLERGNS  
 GLGFSIAGGTDNPHIGDDPSIFITKIIPGGAAAQDGRRLVNDLSILFVNEVDVREVTHSAAVEALKEAGSIVRL  
 YVMRRKPPAEKIIIEI\*LIKGPKGLGFSIAGGVGNQHIPGDNSIYVTKIEGGAAHKDGRLLQIGDKILAVNSVG  
 LEDVMHEDAVAALKNTYDVVYLKVAKPSNAYLSDSYAPPDITTSYSQHLNEISHSSYLGTDYPTAMTPTSPR  
 RYSPVAKDLLGEEDI PREPRRIVIHGSGTGLGFNIVGGEDGEGIFISFILAGGPADLSGELRKGQILSVNGV  
 DLRNASHEQAAIALKNAGQVTVIIAQYKPEEYSRFEAKIHDLREQLMNSSLGSGTASLRSNPKRGFYIRALFD  
 YDKTKDCGFLSQALSFFHFGDVLHVIDASDEEWWQARRVHSDSETDDIGFIPSKRRVERREWSRLKAKDWGSSS  
 GSQGREDSVLSYETVTQMEVHYARPIIILGPTKDRANDDLLSEFPDKFGSCVPHTTRPKREYEIDGRDYHFVS  
 SREKMEKDIQAHKFI EAGQYNHLYGTSVQSVREVAEQGKHCILDVSANAVRRLQAAHLHPAIAIFIRPRLEN  
 VLEINKRITEEQARKAFDRATKLEQEFTECFSAIVEGDSFEEIYHKVKRVIDLSGPYIWPARERL\*  
 >ENSMUSP00000156019\_c.417:A>T\_p.K140\* ENSMUST00000232002.2|D1g4-  
 219|ENSMUSG00000020886|+|chr11:g.69922063:A>T

MDCLCIVTTKANSPPVIVNTDTLEAPGYELQVNGTEGEMEYEEITLERGNSGLGFSIAGGTDNPHIGDDPSIF  
 ITKIIPGGAAAQDGRRLVNDLSILFVNEVDVREVTHSAAVEALKEAGSIVRLYVMRRKPPAEKIIIEI\*LIKGPK  
 GLGFSIAGGVGNQHIPGDNSIYVTKIEGGAAHKDGRLLQIGDKILAVNSVGLLEDVMHEDAVAALKNTYDVVYL  
 KVAKPSNAYLSDSYAPPDITTCESPPNLKAPPDPP\*  
 >ENSMUSP00000115206\_c.573:A>T\_p.K192\* ENSMUST00000134376.10|D1g4-  
 210|ENSMUSG00000020886|+|chr11:g.69922063:A>T

MDCLCIVTTKKYRYQDEDTPPLEHSPAHLPNQVNAPELVHVAERNLSHLEAVHGVVGHAAHLSSLKANSPPVIV  
 NDTLEAPGYVNGTEGEMEYEEITLERGNSGLGFSIAGGTDNPHIGDDPSIFITKIIPGGAAAQDGRRLVNDLS  
 ILFVNEVDVREVTHSAAVEALKEAGSIVRLYVMRRKPPAEKIIIEI\*LIKGPKGLGFSIAGGVGNQHIPGDNSI  
 YVTKIEGGAAHKDGRLLQI  
 >ENSMUSP00000155975\_c.474:A>T\_p.K159\* ENSMUST00000231221.2|D1g4-  
 214|ENSMUSG00000020886|+|chr11:g.69922063:A>T

MDCLCIVTTKKYRYQDEDTPPLEHSPAHLPNQANSPPVIVNTDTLEAPGYVNGTEGEMEYEEITLERGNSGLG  
 FSIAGGTDNPHIGDDPSIFITKIIPGGAAAQDGRRLVNDLSILFVNEVDVREVTHSAAVEALKEAGSIVRLYVM  
 RRPKPPAEKIIIEI\*LIKGPKGLGFSIAGGVGNQHIPGDNSIYVTKIEGGAAHKDGRLLQIGDKILAVNSVGL  
 VMHEDAVAALKNTYDVVYLKVAKPSNAYLSDSYAPPDITTCESPPNLKAPPDPP\*  
 >ENSMUSP00000155942\_c.303:A>T\_p.K102\* ENSMUST00000231452.2|D1g4-  
 216|ENSMUSG00000020886|+|chr11:g.69922063:A>T

MEYEEITLERGNSGLGFSIAGGTDNPHIGDDPSIFITKIIPGGAAAQDGRRLVNDLSILFVNEVDVREVTHSAA  
 VEALKEAGSIVRLYVMRRKPPAEKIIIEI\*LIKGPKGLGFSIAGGVGNQHIPGDNSIYVTKIEGGAAHKDGRLL  
 QIGDKILAVNSVGLLEDVMHEDAVAALKNTYDVVYLKVAKPSNAYLSDSYAPPDITTSYSQHLNEISHSSYL  
 TDYPTAMTPTSPRRYSPVAKDLLGEEDI PREPRRIVIHGSGTGLGFNIVGGEDGEGIFISFILAGGPADLSGE  
 LRKGDQILSVNGVDLRNASHEQAAIALKNAGQVTVIIAQYKPEEYSRFEAKIHDLREQLMNSSLGSGTASLR  
 NPKRGFYIRALFDYDKTKDCGFLSQALSFFHFGDVLHVIDASDEEWWQARRVHSDSETDDIGFIPSKRRVERRE  
 WSRLKAKDWGSSSSGSQGREDSVLSYETVTQMEVHYARPIIILGPTKDRANDDLLSEFPDKFGSCVPHTTRPKR  
 EYEIDGRDYHFVSSREKMEKDIQAHKFI EAGQYNHLYGTSVQSVREVAEQGKHCILDVSANAVRRLQAAHLH  
 PIAIAIFIRPRLENVLEINKRITEEQARKAFDRATKLEQEFTECFSAIVEGDSFEEIYHKVKRVIDLSGPYI  
 WPARERL\*  
 >ENSMUSP00000156059\_c.303:A>T\_p.K102\* ENSMUST00000231628.2|D1g4-  
 218|ENSMUSG00000020886|+|chr11:g.69922063:A>T

MEYEEITLERGNSGLGFSIAGGTDNPHIGDDPSIFITKIIPGGAAAQDGRRLVNDLSILFVNEVDVREVTHSAA  
 VEALKEAGSIVRLYVMRRKPPAEKIIIEI\*LIKGPKGLGFSIAGGVGNQHIPGDNSIYVTKIEGGAAHKDGRLL  
 QIGDKILAVNSVGLLEDVMHEDAVAALKNTYDVVYLKVAKPSNAYLSDSYAPPDITTSYSQHLNEISHSSYL  
 TDYPTAMTPTSPRRYSPVAKDLLGEEDI PREPRRIVIHGSGTGLGFNIVGGEDGEGIFISFILAGGPADLSGE  
 LRKGDQILSVNGVDLRNASHEQAAIALKNAGQVTVIIAQYKPEEYSRFEAKIHDLREQLMNSSLGSGTASLR  
 NPKRGFYIRALFDYDKTKDCGFLSQALSFFHFGDVLHVIDASDEEWWQARRVHSDSETDDIGFIPSKRRVERRE  
 WSRLKAKDWGSSSSGSQGREDSVLSYETVTQMEVHYARPIIILGPTKDRANDDLLSEFPDKFGSCVPHTTRPKR  
 EYEIDGRDYHFVSSREKMEKDIQAHKFI EAGQYNHLYGTSVQSVREVAEQGKHCILDVSANAVRRLQAAHLH  
 PIAIAIFIRPRLENVLEINKRITEEQARKAFDRATKLEQEFTECFSAIVEGDSFEEIYHKVKRVIDLSGPYI  
 WPARERL\*  
 >ENSMUSP00000018700\_c.303:A>T\_p.K102\* ENSMUST00000018700.14|D1g4-  
 201|ENSMUSG00000020886|+|chr11:g.69922063:A>T

MEYEEITLERGNSGLGFSIAGGTDNPHIGDDPSIFITKIIPGGAAAQDGRRLVNDLSILFVNEVDVREVTHSAA  
 VEALKEAGSIVRLYVMRRKPPAEKIIIEI\*LIKGPKGLGFSIAGGVGNQHIPGDNSIYVTKIEGGAAHKDGRLL  
 QIGDKILAVNSVGLLEDVMHEDAVAALKNTYDVVYLKVAKPSNAYLSDSYAPPDITTSYSQHLNEISHSSYL  
 TDYPTAMTPTSPRRYSPVAKDLLGEEDI PREPRRIVIHGSGTGLGFNIVGGEDGEGIFISFILAGGPADLSGE

LRKGDQILSVNGVDLRNASHEQAAIALKNAGQTVTIIAQYKPEEYSRFEAKIHDLREQLMNSSLGSGTASLRS  
 NPKRGFYIRALFDYDKTKDCGFLSQALS FHF GDV LHV IDASDEEWWQARRVHSDSETDDIGFIPSKRRVERRE  
 WSRLKAKDWGSSSSGSGRED SVLSYETVTQMEVHYARPIIILGPTKDRANDDLLSEFPDKFGSCVPHTTRPKR  
 EYEIDGRDYHFVSSREKMEKDIQAHKFIEAGQYN SHLYGTSVQSVREVAEQGKHCILDV SANAVRRLQAAHLH  
 PIAIFIRPRSL ENVLEINKRIT EEQARKAFDRATKLEQEFTECFSAIVEGDSFEEIYHKVKRVI EDLSGPYI W  
 VPARERL\*

>ENSMUSP00000156189\_c.390:A>T\_p.K131\* ENSMUST00000232266.2|D1g4-  
 221|ENSMUSG00000020886|+|chr11:g.69922063:A>T  
 MYAKANSPPVIVNTDTLEAPGYVNGTEGEMEYEEITLERGN SGLGFSIAGGTDNPHIGDDPSIFITKIIPGGA  
 AAQDGRRLRVNDSILFVNEVDVREVTHSAAVEALKEAGSIVRLYVMRRKPPAEKIIIEI\*LIKGP KGLGFSIAGG  
 VGNQHIPGDNSIYVTKIIEGGA AHKDGRLQIGDKILAVNSVGL EDVMHEDAVAALKNTY  
 >ENSMUSP00000114165\_c.399:A>T\_p.K134\* ENSMUST00000132597.5|D1g4-  
 208|ENSMUSG00000020886|+|chr11:g.69922063:A>T  
 MYAKANSPPVIVNTDTLEAPGYELQVNGTEGEMEYEEITLERGN SGLGFSIAGGTDNPHIGDDPSIFITKIIP  
 GGAAAQDGRRLRVNDSILFVNEVDVREVTHSAAVEALKEAGSIVRLYVMRRKPPAEKIIIEI\*LIKGP KGLGFSI  
 AGGVGNQHIPGDNSIYVTKIIEGGA AHKDGRLQIGDKILAVNSVGL EDVMHEDAVAALKNTYDVVYLKVAKPS  
 NAYLSDSYAPPDITTSYSQHLDN  
 >ENSMUSP00000136419\_c.303:A>T\_p.K102\* ENSMUST00000143920.4|D1g4-  
 213|ENSMUSG00000020886|+|chr11:g.69922063:A>T  
 MEYEEITLERGN SGLGFSIAGGTDNPHIGDDPSIFITKIIPGGA AAQDGRRLRVNDSILFVNEVDVREVTHSAA  
 VEALKEAGSIVRLYVMRRKPPAEKIIIEI\*LIKGP KGLGFSIA  
 >ENSMUSP00000156246\_c.303:A>T\_p.K102\* ENSMUST00000232115.2|D1g4-  
 220|ENSMUSG00000020886|+|chr11:g.69922063:A>T  
 MEYEEITLERGN SGLGFSIAGGTDNPHIGDDPSIFITKIIPGGA AAQDGRRLRVNDSILFVNEVDVREVTHSAA  
 VEALKEAGSIVRLYVMRRKPPAEKIIIEI\*LIKGP KGLGFSIAGGVGNQHIPGDNSIYVTKIIEGGA AHKDGRL  
 QIGDKILAVNSVGL EDVMHEDAVAALKNTYDVVYLKVAKPSNAYLSDSYAPP  
 >ENSMUSP00000121842\_c.197:G>GC\_p.R66ins-fs ENSMUST00000146411.9|Asgr1-  
 205|ENSMUSG00000020884|+|chr11:g.69947076:G>GC  
 MTKDYQDFQHLDNDNDH HQLRRGPPPTPRLLQRLCSGSRLLLLSSLSILLLVVVCVITSQNSQLRRRSAGSK  
 AEFQQPHCEH  
 >ENSMUSP00000104226\_c.197:G>GC\_p.R66ins-fs ENSMUST00000108585.9|Asgr1-  
 203|ENSMUSG00000020884|+|chr11:g.69947076:G>GC  
 MTKDYQDFQHLDNDNDH HQLRRGPPPTPRLLQRLCSGSRLLLLSSLSILLLVVVCVITSQNSQLRRRSAGSK  
 AEFQQPHCEH  
 >ENSMUSP00000018699\_c.197:G>GC\_p.R66ins-fs ENSMUST00000018699.13|Asgr1-  
 201|ENSMUSG00000020884|+|chr11:g.69947076:G>GC  
 MTKDYQDFQHLDNDNDH HQLRRGPPPTPRLLQRLCSGSRLLLLSSLSILLLVVVCVITSQNSQLRRRSAGSK  
 AEFQQPHCEH  
 >ENSMUSP00000090637\_c.197:G>GC\_p.R66ins-fs ENSMUST00000092959.11|Asgr1-  
 202|ENSMUSG00000020884|+|chr11:g.69947076:G>GC  
 MTKDYQDFQHLDNDNDH HQLRRGPPPTPRLLQRLCSGSRLLLLSSLSILLLVVVCVITSQNSQLRRRSAGSK  
 AEFQQPHCEH  
 >ENSMUSP00000104037\_c.1578:A>C\_p.K527Q ENSMUST00000108400.8|Efcab5-  
 201|ENSMUSG00000050944|-|chr11:g.77028159:T>G  
 MLMQVEKKKLLSQADIP TKFDPINYLGEYLMRHNTHYIKDPGVSQYQRMKEITEELKTHVPD TINNRISKMK  
 EKVKREKREQREYISTVKVKVAGMRKQALEEQFNEWVLNPKGMPIVVYISSYITDLKSEVFEEFLKHLCHSAE  
 EFREIILTD MRRQMF AELFLQCDSGKVMALDRQRTLALLEAFYDQCSSTTRSLLRNPRQWPFVEFEEI E LIEF  
 WGDMDIKKH IYEDFDALLKMNMLVAEKLAGKLAENKDL PQQQRDQELSSDSTTEPETATQ L TSQQRSRRVSL  
 TGQGQKGPRKTSASKQGASRGVSAEQGSRSSSGVNQTQQRGVSAEQGSRSSSAVEQTQQRGVSAEQGSRSS  
 TVEQTRQRGVSAEQGSRSSSTVEQTQRRGSAEQGSRSSSGVNQTQQRGVSAEQGSRSSSAVEQTQQRGVSAE  
 QGSRSSSAMEQEPQTAQDPNSDSLPEQESHRSITEGSHRSISEPGQRRASVTGQRRKSSVDDSGSAGSRRG  
 SGTDQGQHRSVQQRQGSGERKMSASEYGP HQESITEEPLTASEPGPQIDTIQELDEDSTPQLEDD SALKESK  
 TSELTKIETQEEKPLLLINEEQVPRDSKQPEVPTSSKKERPSGSPKKGRLSGTSKRDSQKDKACEPKPQHVEG  
 KKSWEFLICDWKIKHVKSEEEEEQAKLICDDTRFTDLHATIRNFQTYKGIKGRSAFNGVSLD L LQFVQLLET F  
 VGDTSFSLSKDLASFQKNYSETKQEKIKALEQARQNSRIRRRILLQAI FEKWDNDGSGFLDLNEVDLLY  
 TYKEGMERESMKKAKLHINFPEPSPGHEVKLSSKQFQRYIELVSELRGNEDEVLESVVEFLMGS LERSHVEG  
 L RNCARRKWLHQIQYAAETS GVSLEPVYTETFRVLTQDAEAHGNK K I SAHISLLEENVFLPERGHVLLRN VAC  
 TLD DAPFV LNKVLYRDMKGISFTVVDEGKPIHVPQVQH HGN I FFWNSFRSKNEYNGSFLALPLQDAYM RIFGV

LAVDTLRDPHEINIFLPHHEIKFYQGVANAFSTAYHHVHSREHVLHSMVTGIRWLFVSVTSGITTTITTCFIEPSS  
EQEDYVLRNMVTDCLGLAEIHTDPPTITRNACIFRDFLFKCTDTSEVILASSGGETHIAIPLRQRTKEAMGI  
LDVNI GRSRMLLYQEYKDLQKMKMIQNVSYEILGEFSGEIEKTMVIEMESAGEVVKRAGILFFRTMLQELQEC  
LCLLDSMDFVSLLLLYEHKYHVDSLQDITLQEVANVALVHDVHLKGVILFSQREKDSLSLDEEWEKWKFKHINK  
YLVEEICVLDPTASNVEVNVVELVTSYIQAHSRTEVWNFRNIVIELLYHWINICLTLIELNMRQDVSII PPLPK  
KSATSIYAISSEERSIREKL\*

>ENSMUSP00000118152\_c.1170:A>C\_p.K391Q ENSMUST00000130901.2|Efcab5-  
202|ENSMUSG00000050944|-|chr11:g.77028159:T>G  
FLKHLCHSAEEFREIILTDMRQMFALFLQCDGSKVMALDRQRTLALLEAFYDQCSSTTRSLRNPRQWPFV  
EFEEIELEIEFWGDMDIKKHIIYEDFDALLLKMMLVAEKLKLAGKLAENKDLFQQQRDQELSSDSTTEPETATQLT  
SQQRSRRVSLTGQGQKGRKTSASKQGASRGVVAEQGRRSSGVNQTQQRGSVAEQGRRSSSAVEQTQQRGS  
VAEQGRRSSSTVEQTRQGSVAEQGRRSSSTVEQTRQGSVAEQGRRSSGVNQTQQRGSVAEQGRRSSSAVE  
QTQQRGSVAEQGRRSSAMEQEPQTAQDPNSDSLPEQESHRSITTEGSHRGSISEPGQRRASVTGQRRKSSVD  
DSGSAGSRRSGTDQGQHRGSVGGQQRGSGERKMSASEYGPHEQESITTEEPLTASEPGPQIDITIQELDEDDSTPQL  
EDDSALKESKTSSELTKIETQEEKPLLLINEEQVPRDSKQPEVPTSSKKERPSGSPKKGRLSGTSKRDSQKDKA  
CEPKPQHVEGKKWSGEFLICDWIKHVKSEEEEEQAKLICDDTRFDTLHATIRNFQTYKGIKGRSAFNGVSLDL  
LQFVQLLETFVGEDTSFSLSKDLASFFQKNYSETKQEIKALEQARQNSRI RRRILLQAI FEKWDNDGSGFL  
DLNEVDDLLTYTYKEGHERESMKKAKLHINFPEPSPGHEVKLSKQFQRYIELVVSELRGNEDEVLVSVVEFLM  
GSLERSHVEGLRNCARRKWLHQIQYAAETSGVSLPEVYETEFRVLTQDAEAHGNKKISAHISLLEENVFLPER  
GHVLLRNACTLDDAPFVNLKVLRYRDMKGISFTVVDEGKPIHVPQVQHHGNIFFWNSFRSKNEYNGSFLALPL  
QDAYMRIFGVLAVDTLRDPHEINIFLPHHEIKFYQGVANAFSTAYHHVHSREHVLHSMVTGIRWLFVSVTSGITTT  
ITTCFIEPSSQLLILGLKSGISGTLNLSNCITG\*

>ENSMUSP00000119345\_c.542:A>C\_p.R181S ENSMUST00000142739.8|Nlk-  
201|ENSMUSG00000017376|-|chr11:g.78517448:T>G  
MSLCGTRANAKMMAAYNGGTSAAAAGHHHHHHHHLPHLPPPHLHHHHHPQHHLHPGSAAAHVHPVQHTSSAAA  
AAAAAAAAMNLNPGQQPYFSPAPGQAPGPAAPAAQVQAAAAATVKAHHHQHSHHPQQQLDIEPDRPIGY  
GAFGVVSVTDPRDGRVVALKMPNVFQNLVSKSVFRELKMLCFKHDNVL SALDILQPPHIDYFEEIYVVVT  
ELMQSDLHKIIVSPQPLSSDHVKVFLYQILRGLKYLHSAAGILHRDIKPGNLLVNSNCVVKICDFGLARVEELD  
ESRHMTQEVVTVYYRAPEILMGRSRHYSNAIDIVSVGCIFAELLGRRILFQAQSPIQQLDLITDLLGTPSLEAM  
RTACEGAKAHILRGPHKQPSLPVLYTLSSQATHEAVHLLCRMLVDFPSKRISAKDALAHPYLDEGRRLRYHTCM  
CKCCFSTSTGRVYTSDFEPVTPNPKFDDTFEKNLSSVRQVKEI I HQFILEQQKGNRVPLCINPQSAAFKSFISS  
TVAQPSEMPPSPLVWE\*

>ENSMUSP00000041732\_c.1776:CA>AG\_p.Q593R ENSMUST00000038696.12|Ppp1r9b-  
201|ENSMUSG00000038976|+|chr11:g.94892091:CA>AG  
MMKTEPRGPGGLRSASPHRSAYEAGIQALKPPDAPGPDEAPKAAHHKKYGSNVHRIKSMFLQMGTTAGPPGE  
AGGGAGMAEAPRASDRGVRLSPLRASSLNENVDHSALLKLTGTSVSEVSRFRDPSKAPSAQAPPPPPPSRLQE  
TRKLFERSVPAASGGDKEAVARLLRQERAGLQDRKLDVVVRFNGSTEALDKLDADAVSPTVSQLSAVFEKAD  
SRTGLHRAPGPPRAAGAPQVNSKLVTKRSRVFQPPPPPPAPSGDGATEKERGGPQQPPQHRVAPARPPPKPR  
EVKIKPVEVEESGESEAEAPGEVIQAEVTVHAALENGSTPATTASPAPEEPKAEAVPEEAAAASVATLERG  
VDNGRAPDMAPEEVDSEKKEDEFSEADLVDSAYSGLGEDSGGSALEEDDEEDEDGEPPYEPESGCVIEPGLS  
EEEDPAPSRKIHFSTAPIQVFTYSNEDYDRRNEDVDPMAASAEYELEKRVERLELFPVELEKDEGLGISII  
GMGAGADMGLEKLGIFVKTVTEGGAAHRDGRIQVNDLLVEVDGTSLVGVTQSFAASVLRNNTKGRVRFMIGRER  
PGEQSEVARANSADLGAGAMAAGDDGAEIRPVWRG\*\*GDRRVCHRRR\*RTEPNVPRG\*NGH\*GV\*TSRERGCA  
VPRGDGARKAGAQQVQAPDQACCH\*SGNPAAETEVAESGAGERALAGREGPAGAERGGE\*GADGEARGLLG\*G  
PEVPVPGCG\*APAGDPGPVSGPGAQVQQGQASHQGLPAKGDRVPEKRDS PASGTGRV GASQEGGNGQTSGQDLR  
TGRKPADTEELQFYL

>ENSMUSP00000103377\_c.504:CA>AG\_p.Q169R ENSMUST00000107748.2|Ppp1r9b-  
202|ENSMUSG00000038976|+|chr11:g.94892091:CA>AG  
MDTGLHATQLAQGPSPANVLLPSYGPLRTAPPQVFSTYSNEDYDRRNEDVDPMAASAEYELEKRVERLELFPV  
ELEKDESEGLGISII GMGAGADMGLEKLGIFVKTVTEGGAAHRDGRIQVNDLLVEVDGTSLVGVTQSFAASVLR  
NTKGRVRFMIGRERPGEQSEVARANSADLGAGAMAAGDDGAEIRPVWRG\*\*GDRRVCHRRR\*RTEPNVPRG\*N  
GH\*GV\*TSRERGCAPRGDGARKAGAQQVQAPDQACCH\*SGNPAAETEVAESGAGERALAGREGPAGAERGGE  
\*GADGEARGLLG\*GPEVPVPGCG\*APAGDPGPVSGPGAQVQQGQASHQGLPAKGDRVPEKRDS PASGTGRV GAS  
QEGGNGQTSQDLRTGRKPADTEELQFYL

>ENSMUSP00000103222\_c.336:A>C\_p.T113P ENSMUST00000107596.9|Srcin1-  
203|ENSMUSG00000038453|-|chr11:g.97439792:T>G  
MGNAPSQDPERSSPPMLSADDAEYPREYRTLGGGGGGSGGRRFSNVGLVHTSERRHTVIAAQSLAALSGLQK  
ADADRKRDAFMDHLKSKYPQHALLALRGQDRMREQVGGWVDPVCLLSSSLCSHLHG DSTPSGAGQPAQQPNYW

SFKTRSSRHTQGAQPGLADQAAKLSYASAESLETMSEAEPLGFSRMRFRQSLPLSRSASQTKLRS PGVLF L  
 QFGEETRRVHITHEVSSLDTLHALIAHMFPQKLTMGMLKSPNTAILIKDEARNVFYELEDVRDIQDRSIIKIY  
 RKEPLYAAFP GSHLTNGDLRREMVYASRESSPTRRLNNSPASHLASSPPPGPLPSGLPSGLPSGSPSRRLS  
 YAGGRPPSYAGSPVHHAERLGGAPTQGVSPSPSAILERRDVKPDEDLAGKAGGMVLVKGEGLYADPYGLLH  
 EGRLSLAAAAGDPFAYPGAGGLYKRGSVRSLSTYSAAALQSDLEDSLYKAGAGGPLYGDGYGFRLPPSSPQKL  
 ADVSAPSGGPPPHSPYSGPPSRGSPVRQSF RKDSGSSSVFAESP GGKARSTGSASTAGAPPSELEFP GPGERS  
 LVGF GPPVPAKDTETREMEAMEKQIASLTGLVQSALLRGSEPETPSEKVEGSNGAATPSAPVCGSGSKSSGA  
 TPVSGPPPPSASSTPAGQPTAVSR LQMQLHLRGLQNSASDLRGQLQQLRKLQLQONQESVRALLKRTEAELSMR  
 VSEAARRQEDPLQRQRTLVEEERLRYLNDEELITQQLNDLEKSVKIQRDVAHNHRLVPGPELEEKALVLKQL  
 GETLTELKAHFPGLSKMRVVL RVEVEAVKFLKEEPPQRLDGLLKRRCRGVTDTLAQIRRVQDEGMWPPPNLLN  
 QSPKKVAAETDFSKGLDFEIPPPSPPLNLHELSPGAEPTPLPKSTNPTKGLDASSKRNTDKAVSVEAAERDW  
 EEKRAALTQYSAKDINRLLEETQAE LLKAI PDLCASKTHPGPAPT PDHKPPKAPHGQKAAPRTEPSGRRGSD  
 ELTVPRYRTEKPSKSPPPPPRRSFPSSHGLTTTTRTGEVVVTSKKDSVFIKKAESSELEVQKPQVKLRRAVSE  
 VVRPASTPPIMASAIKDEDEERI IAELESGSSVPPMKVVT PGASRLKAAQGPAGSPDKGKHGKQRT EYMRI  
 QQQQATKPSKEVSGPNETSSPGSEKPSGSRTSIPVLT SFGARNSSISF\*

>ENSMUSP00000116444\_c.438:A>C\_p.T147P ENSMUST00000126287.2|Srcin1-  
 204|ENSMUSG00000038453|-|chr11:g.97439792:T>G  
 MQPWQCLRRFALAWWERTAEGRARSPREEVGPDRDPGGRGEPDPERS SPPMLSADDAEYPREYRTLGGGGGGGS  
 GRRF SNVGLVHTSERRHTVIAAQSLEALSGLQKADADRKRDAFMDHLKSKYPQHALALRGQQDRMREQVGGW  
 PVDPVCLLSSLC SHLHGDSTPSGAGQPAQTRSSRHTQGAQPGLADQAAKLSYASAESLETMSEAEPLGFSRMR  
 NRFRQSLPLSRSASQTKLRS PGVLF LQFGEETRRVHITHEVSSLDTLHALIAHMFPQKLTMGMLKSPNTAILI  
 KDEARNVFYELEDVRDIQDRSIIKIYRKEPLYAAFP GSHLTNGDLRREMVYASRESSPTRRLNNSPASHLAS  
 SSPPPGLPSGLPSGLPSGSPSRRLSYAGGRPPSYAGSPVHHAERLGGAPTQGVSPSPSAILERRDVKPDE  
 DLAGKAGGMVLVKGEGLYADPYGLLHEGRLSLAAA

>ENSMUSP00000121919\_c.1239:A>G\_p.S414G ENSMUST00000138977.8|Marchf10-  
 204|ENSMUSG00000078627|-|chr11:g.105281044:T>C  
 MLHETDRDRQK FVSDVQYL RDMQHKVDSEYQACLKRQENKKEPNKKEQEQLVWRDTSDRSRFSSGSSCKQSSCE  
 EDSRSEARLSTKTSSAKCEPRLPAIDQASVKQKHKGTM TLKKSEKVS P SKSPVAPKILSRKRPNLGR LTVS  
 PEMHSPRASAERSRQK PQLSTKASGLLGADPVVQ QESLLCANETK LKKPARERRK LAPSSQLMRTAGKPREKQ  
 KKGDL SAHPQNEPHTALSQTFQPMNGS QMLNESLGP SLLPATVVGPRRTPFRFHDEDFYSAISLNNEQESYDT  
 EEETHMEEELLSGMRSPPSYKRSRFLGTSTAQNRNVEENAENLRGNSLRWSESPSGSPRKTSTTEPATKQPS  
 PGQRMLQDTRL PSELAKENPSGDQDEKTPVLGDAKSDGVIQVSAD DVSGGGTVEDRS AVQNHEDWQHYYSGS  
 RTSFDCLLSGRPTAPRSMNPPYSAHGSLLSALIDDI PANLSMSSILVPSSDLEENLRFNVRRPLSPIRNRN  
 PLAAAEGRSDEAQTQEMASTSHIQEPPLADLPNPQSSVALGDS PSSPTRRHLQGHFYMPGSLQENIPFTFF  
 AVSDFANQNDNGT TTVRVSGVMDEKATEIKADPEKLRKLQESLLEEDSEEEEGDLCRICQIAGGSPANPLLEPC  
 GCVGSLQFVHQECLKKWLVK VITSGADLGT VKTCCEMCKQGLLVDLDDFNMT E F YHKKHQQSRAQSEL MNSGLYL  
 VLLLHLYEQRFAELMALNYRRASRERLSRNYPPRPEENESS ESGDGNASNIYPGRVI\*

>ENSMUSP00000063198\_c.1239:A>G\_p.S414G ENSMUST00000049995.10|Marchf10-  
 201|ENSMUSG00000078627|-|chr11:g.105281044:T>C  
 MLHETDRDRQK FVSDVQYL RDMQHKVDSEYQACLKRQENKKEPNKKEQEQLVWRDTSDRSRFSSGSSCKQSSCE  
 EDSRSEARLSTKTSSAKCEPRLPAIDQASVKQKHKGTM TLKKSEKVS P SKSPVAPKILSRKRPNLGR LTVS  
 PEMHSPRASAERSRQK PQLSTKASGLLGADPVVQ QESLLCANETK LKKPARERRK LAPSSQLMRTAGKPREKQ  
 KKGDL SAHPQNEPHTALSQTFQPMNGS QMLNESLGP SLLPATVVGPRRTPFRFHDEDFYSAISLNNEQESYDT  
 EEETHMEEELLSGMRSPPSYKRSRFLGTSTAQNRNVEENAENLRGNSLRWSESPSGSPRKTSTTEPATKQPS  
 PGQRMLQDTRL PSELAKENPSGDQDEKTPVLGDAKSDGVIQVSAD DVSGGGTVEDRS AVQNHEDWQHYYSGS  
 RTSFDCLLSGRPTAPRSMNPPYSAHGSLLSALIDDI PANLSMSSILVPSSDLEENLRFNVRRPLSPIRNRN  
 PLAAAEGRSDEAQTQEMASTSHIQEPPLADLPNPQSSVALGDS PSSPTRRHLQGHFYMPGSLQENIPFTFF  
 AVSDFANQNDNGT TTVRVSGVMDEKATEIKADPEKLRKLQESLLEEDSEEEEGDLCRICQIAGGSPANPLLEPC  
 GCVGSLQFVHQECLKKWLVK VITSGADLGT VKTCCEMCKQGLLVDLDDFNMT E F YHKKHQQSRAQSEL MNSGLYL  
 VLLLHLYEQRFAELMALNYRRASRERLSRNYPPRPEENESS ESGDGNASNIYPGRVI\*

>ENSMUSP00000138742\_c.322:G>T\_p.R108M ENSMUST00000147326.9|Milr1-  
 203|ENSMUSG00000040528|+|chr11:g.106645782:G>T  
 MGDGDS PMCLSAVSFKGIRCWLDKLLWALTISITLQNAAVDCTRVENNELPSPNLNSMNVVRMGQNVSLSC  
 STKNTSDVITYSLFWGTYLESKRRRGGAVDFHLMISNANESGPYKCKVNVSNLMKYSQDFNFTMAKDESCPS  
 CRLSLLLPGLLLGILVIVLVLAYLIHLKYKGGKKTQREDQSKGSGDAPAQDELYVNACKTQTEQPQEIHYATP  
 VFKEMAPMEEEGGTDGKADYIYSELTH\*

>ENSMUSP00000138617\_c.322:G>T\_p.R108M ENSMUST00000182896.8|Milr1-  
 206|ENSMUSG00000040528|+|chr11:g.106645782:G>T

MGDGDSPMCLSAVSFKGIRCWLDKLLWALTISITLQNAAVDCTRVENNELPSPNLNSSMNVVRMGQNVLSLSC  
 STKNTSVDITYSLFWGTYKYLESKRRRGGAVDFHLMISNANESGPYKCKVNVSNLMKYSQDFNFTMARGRHKTQ  
 TNGSQAVPAVVKDTSTVWRKARHEEGTTWERRLRERTSPRVLEMRLHRTSCMSTPARLRQSNPRRYTMPLQSS  
 RRWHPWKKKVVVRMEKLITSTLNSPTEV\*

>ENSMUSP00000138678\_c.322:G>T\_p.R108M ENSMUST00000182908.8|Milr1-  
 207|ENSMUSG00000040528|+|chr11:g.106645782:G>T

MGDGDSPMCLSAVSFKGIRCWLDKLLWALTISITLQNAAVDCTRVENNELPSPNLNSSMNVVRMGQNVLSLSC  
 STKNTSVDITYSLFWGTYKYLESKRRRGGAVDFHLMISNANESGPYKCKVNVSNLMKYSQDFNFTMARKKTQRE  
 DQSKGSGDAPAQDELYVNACKTQTEQPQEIHYATPVFKEMAPMEEEGGTDGKADYIYSELTH\*

>ENSMUSP00000083538\_c.322:G>T\_p.R108M ENSMUST00000086353.11|Milr1-  
 201|ENSMUSG00000040528|+|chr11:g.106645782:G>T

MGDGDSPMCLSAVSFKGIRCWLDKLLWALTISITLQNAAVDCTRVENNELPSPNLNSSMNVVRMGQNVLSLSC  
 STKNTSVDITYSLFWGTYKYLESKRRRGGAVDFHLMISNANESGPYKCKVNVSNLMKYSQDFNFTMAKDESCPS  
 CRLSLLLPLGLLLGILVIVLVLAYLIHLKYKKGKKTQREDQSKGSGDAPAQDELYVNACKTQTEQPQEIHYATP  
 VFKEMAPMEEEGGTDGKADYIYSELTH\*

>ENSMUSP00000138513\_c.322:G>T\_p.R108M ENSMUST00000183111.8|Milr1-  
 208|ENSMUSG00000040528|+|chr11:g.106645782:G>T

MGDGDSPMCLSAVSFKGIRCWLDKLLWALTISITLQNAAVDCTRVENNELPSPNLNSSMNVVRMGQNVLSLSC  
 STKNTSVDITYSLFWGTYKYLESKRRRGGAVDFHLMISNANESGPYKCKVNVSNLMKYSQDFNFTMARKKTQRE  
 DQSKGSGDAPAQDELYVNACKTQTEQPQEIHYATPVFKEMAPMEEEGGTDGKADYIYSELTH\*

>ENSMUSP00000102406\_c.322:G>T\_p.R108M ENSMUST00000106794.9|Milr1-  
 202|ENSMUSG00000040528|+|chr11:g.106645782:G>T

MGDGDSPMCLSAVSFKGIRCWLDKLLWALTISITLQNAAVDCTRVENNELPSPNLNSSMNVVRMGQNVLSLSC  
 STKNTSVDITYSLFWGTYKYLESKRRRGGAVDFHLMISNANESGPYKCKVNVSNLMKYSQDFNFTMANESCPSC  
 RLSLLLPLGLLLGILVIVLVLAYLIHLKYKKGKKTQREDQSKGSGDAPAQDELYVNACKTQTEQPQEIHYATPV  
 FKEMAPMEEEGGTDGKADYIYSELTH\*

>ENSMUSP00000138286\_c.322:G>T\_p.R108M ENSMUST00000182023.2|Milr1-  
 204|ENSMUSG00000040528|+|chr11:g.106645782:G>T

MGDGDSPMCLSAVSFKGIRCWLDKLLWALTISITLQNAAVDCTRVENNELPSPNLNSSMNVVRMGQNVLSLSC  
 STKNTSVDITYSLFWGTYKYLESKRRRGGAVDFHLMISNANESGPYKCKVNVSNLMKYSQDFNFTMARGRHKTQ  
 TNGSQAVPAVVKDTSTVWRKARHEEGTTWVRR\*

>ENSMUSP00000138386\_c.13:G>T\_p.R5M ENSMUST00000182479.2|Milr1-  
 205|ENSMUSG00000040528|+|chr11:g.106645782:G>T

DFHLMISNANESGPYKCKVNVSNLMKYSQDFNFTMAKDESCPSCRLSLLLPLGLLLGILVIVLVLAYLIHLKYK  
 KGKKTQREDQSKGSGDAPAQDELYVNACKTQTEQPQEIHYATPVFKEMAPMEEEGGTDGKADYIYSELTH\*

>ENSMUSP00000062392\_c.1818:A>T\_p.N607Y ENSMUST00000059595.11|Prkca-  
 201|ENSMUSG00000050965|-|chr11:g.107842327:T>A

MADVYPANDSTASQDVANRFARKGALRQKNVHEVVDKHFIFARFFKQPTFCSHCTDFIWFGFGKQGFQCVCCFV  
 VHRCHEFVTFSCPGADKGPDTDDPRSKHKFKIHTYGSPTFCDHCGSLLYGLIHQGMKCDTCDMNVHKQCVIN  
 VPSLCGMDHTEKRGRIYLKAEVTDEKLHVTVRDAKNLIPMDPNGLSDPYVVKLKLIPDPKNESKQKTKTIRSTL  
 NPQWNESTFKLKPDKDRRLSVEIWDWDRTRNDFMGSLSGVSELMKMPASGWYKLLNQEEGEYYNVPIPE  
 GDEEGNMELRQKFEKAKLGPAGNKVISPSEDRKQPSNNLDRVKLTDNFNLMVLGKGSFGKVMADRKGTEELY  
 AIKILKKDVVIQDDDVECTMVEKRVLALLDKPPFLTQLHSCFQTVDRLYFVMEYVNGGDLMYHIQQVGFKEP  
 QAVFYAAEISIGLFFLHKRGIYRDLKLDNVMLDSEGHIKIADFGMCKEHMMDGVTTRTFCGTPDYIAPEIIA  
 YQPYGKSDVWWAYGVLLYEMLAGQPPFDGEDEDELFSIMEHNVSYPKSLSKEAVSICKGLMTKHPAKRLGCG  
 PEGERDVREHAFFRRIDWEKLEYREIQPPFKPKVCGKGAENFDKFFTRGQPVLTTPDQLVIANIDQSDFEFGS  
 YVNPQFVHPILQSAV\*

>ENSMUSP00000097875\_c.546:A>T\_p.N183Y ENSMUST00000100302.4|Prkca-  
 202|ENSMUSG00000050965|-|chr11:g.107842327:T>A

MKRQVQMQSQLWKAREGFYAAEISIGLFFLHKRGIYRDLKLDNVMLDSEGHIKIADFGMCKEHMMDGVTTRT  
 FCGTPDYIAPEIIAYQPYGKSDVWWAYGVLLYEMLAGQPPFDGEDEDELFSIMEHNVSYPKSLSKEAVSICK  
 GLMTKHPAKRLGCGPEGERDVREHAFFRRIDWEKLEYREIQPPFKPKVCGKGAENFDKFFTRGQPVLTTPDQL  
 VIANIDQSDFEFGSYVNPQFVHPILQSAV\*

>ENSMUSP00000036338\_c.4384:T>G\_p.I1462S ENSMUST00000044850.4|Abca9-  
 201|ENSMUSG00000041797|-|chr11:g.109998402:A>C

MRKRHLRLGQQMALLCKNWLKFRMRRETLLEWLFSLLLILFVYQLSSNLHQVHDAPEMSVDLGRVDNFND  
 SNYMMVFAPSEATHEIMNKVASAPFMKGRITIVACPDEKSMNELDLNYSIDAVRVIFKDTFSYHLKFSWGQRI  
 PKTKEHKDHSAPCEPLNNKMICENSAFWEKGFVAFQAAINAGI IEMITNHSVMEELMSVIGSNMKMPFFIAQG

GVATDFFIIFFCVISFSSLIYYLSVNIQTQERQYMTTLMAMMGLRESAFWLSWSLMYAGFILVAVLMSLIVKSA  
 QVVVLTGFMVVFLFLFYGLSLITLSFLMSVLIKKPFLTGLAIFILTVFWGSLGFTALYKHLPAFVEWTLCLFL  
 SPFAFTTGMAQLIHLDDYVNSNVNLNSPNSYLIIMATLFLMLVLDALLYLVLALYFDKITLSKYGHQSRPLFFL  
 KSSYWFKRRGASHVVLENEIDSDPSLNDLSLEPVSPFEFQGKEAIRIKNLKKEYSGKHGKVEALRGLGFDIYEGQ  
 ITALLGHSGAGKTTLINTLSGLSPPTTGSVTIYNQTVSEMDDSDAVLTIITGVCPQSNVQFGFLTRENLRIFA  
 KIKGILPHEVEQEVEVQVLQDLEMENIQDILAQNLSGGQKRKLTGLIAILGDPQVLLLDDEPTAGLDPLSRHRIW  
 NLLKERRAGRIVFSTQFMDEADILADRKFVINSNRLKACAGSSFLKKKWIGYHLSLHLNEACDEPETSILV  
 KKHISDARLTTQSEERLVYILPLERTNKFPDLYRDLDRCSNQGIEDYGVSMTTLNEVFLKLEGKSMADESDVG  
 ICGRLQSDGARDMESLVELEQVLSLDSGSSVSGMALWRQQLCAVAKVRFKLNKNERKSLMTVLLLFGISFVP  
 QLEHLVYKVYHKSYSWGLSPSPMYFLSPGQPPQDPLTHLLVINRTGSSIDNFVHALRQQGIALDLDALGTRNG  
 TEEALYNGAITVLGEEKALRFSVACNAKRLNCFPVLMDIISNGLLGFNSERIQTDRSTVFEEHMLYEGFM  
 SNAFFWIPVAASLTPYIAMGSI SDHKKKVLSQLWTSGLYPSAYWCGQALVDIPIYFLILFLMQIMDSVFSSEE  
 FISVMESLLIQIPCSIGYASSLIFMTYVIFSIFRNGRKNKSGIWSFFFLIVTIFFIATDINEYGFLELLICTF  
 LVPPFTLIGSLLIFSEVSYDSVDYLGTSSEQLVFLALLIPYLHFLFFFIILRCLERYLRKSLRVDPVFRISP  
 RSCPAVNPPEEPGEEDVQMERVRTTGAMATLQTDKPVIIASCLRKEYIGRTKRCFSKMKKKIATRNI SFC  
 VKKGEVLGLLGHNGAGKSTTISMITGDTIPTAGQVFLKGGGGAALGFLGYCPQENVLWPNLTVKEHLELYAA  
 VKGLKKKDAVVTTITRLVNALKLQDHLKALVRTLSEGVKRLKCFVLSILGNPPVLLDEPSTGMDPEGQQMWQ  
 ASRATFTNTERGALLTTHYMAEAEAVCDRVAIMVSGRLRCIGSIQHLKSKFGKDYLLKMKVTPSQVEPLNTE  
 IMRLFPQAARQERYSSLMVYKLPVEDVDRPLSEAFFKLERLKENFDLEEYSLSQSTLEQVFLELSKEQELDDDFG  
 EEANSSVKWKLPPQEEL\*

>ENSMUSP00000036338\_c.3688:C>A\_p.S1230\* ENSMUST00000044850.4|Abca9-201|ENSMUSG00000041797|-|chr11:g.110007909:G>T

MRKRHLRLGQQMWALLCKNWLKFRMRRETLLLEWLFSLLLILFVYQLSSNLHQVHDAPEMSVVDLGRVDNFND  
 SNYMMVFAPSEATHEIMNKVASAPFMKGRITIVACPDEKSMNELDLNYSIDAVRVI FKDTFSYHLKFSWGQRI  
 PKTKEHKDHSAPCEPLNNKMICENSAFWEKGFVAFQAAINAGI IEMITNHSVMEELMSVIGSNMKMPFFIAQG  
 GVATDFFIIFFCVISFSSLIYYLSVNIQTQERQYMTTLMAMMGLRESAFWLSWSLMYAGFILVAVLMSLIVKSA  
 QVVVLTGFMVVFLFLFYGLSLITLSFLMSVLIKKPFLTGLAIFILTVFWGSLGFTALYKHLPAFVEWTLCLFL  
 SPFAFTTGMAQLIHLDDYVNSNVNLNSPNSYLIIMATLFLMLVLDALLYLVLALYFDKITLSKYGHQSRPLFFL  
 KSSYWFKRRGASHVVLENEIDSDPSLNDLSLEPVSPFEFQGKEAIRIKNLKKEYSGKHGKVEALRGLGFDIYEGQ  
 ITALLGHSGAGKTTLINTLSGLSPPTTGSVTIYNQTVSEMDDSDAVLTIITGVCPQSNVQFGFLTRENLRIFA  
 KIKGILPHEVEQEVEVQVLQDLEMENIQDILAQNLSGGQKRKLTGLIAILGDPQVLLLDDEPTAGLDPLSRHRIW  
 NLLKERRAGRIVFSTQFMDEADILADRKFVINSNRLKACAGSSFLKKKWIGYHLSLHLNEACDEPETSILV  
 KKHISDARLTTQSEERLVYILPLERTNKFPDLYRDLDRCSNQGIEDYGVSMTTLNEVFLKLEGKSMADESDVG  
 ICGRLQSDGARDMESLVELEQVLSLDSGSSVSGMALWRQQLCAVAKVRFKLNKNERKSLMTVLLLFGISFVP  
 QLEHLVYKVYHKSYSWGLSPSPMYFLSPGQPPQDPLTHLLVINRTGSSIDNFVHALRQQGIALDLDALGTRNG  
 TEEALYNGAITVLGEEKALRFSVACNAKRLNCFPVLMDIISNGLLGFNSERIQTDRSTVFEEHMLYEGFM  
 SNAFFWIPVAASLTPYIAMGSI SDHKKKVLSQLWTSGLYPSAYWCGQALVDIPIYFLILFLMQIMDSVFSSEE  
 FISVMESLLIQIPCSIGYASSLIFMTYVIFSIFRNGRKNKSGIWSFFFLIVTIFFIATDINEYGFLELLICTF  
 LVPPFTLIGSLLIFSEVSYDSVDYLGTSSEQLVFLALLIPYLHFLFFFIILRCLERYLRK\*LRVDPVFRISP  
 RSCPAVNPPEEPGEEDVQMERVRTTGAMATLQTDKPVIIASCLRKEYIGRTKRCFSKMKKKIATRNI SFC  
 VKKGEVLGLLGHNGAGKSTTISMITGDTIPTAGQVFLKGGGGAALGFLGYCPQENVLWPNLTVKEHLELYAA  
 VKGLKKKDAVVTTITRLVNALKLQDHLKALVRTLSEGVKRLKCFVLSILGNPPVLLDEPSTGMDPEGQQMWQ  
 AIRATFTNTERGALLTTHYMAEAEAVCDRVAIMVSGRLRCIGSIQHLKSKFGKDYLLKMKVTPSQVEPLNTE  
 IMRLFPQAARQERYSSLMVYKLPVEDVDRPLSEAFFKLERLKENFDLEEYSLSQSTLEQVFLELSKEQELDDDFG  
 EEANSSVKWKLPPQEEL\*

>rs242693285\_ENSMUSP00000036338\_c.1181:AC>C\_p.N394del-fs ENSMUST00000044850.4|Abca9-201|ENSMUSG00000041797|-|chr11:g.110042866:GT>G

MRKRHLRLGQQMWALLCKNWLKFRMRRETLLLEWLFSLLLILFVYQLSSNLHQVHDAPEMSVVDLGRVDNFND  
 SNYMMVFAPSEATHEIMNKVASAPFMKGRITIVACPDEKSMNELDLNYSIDAVRVI FKDTFSYHLKFSWGQRI  
 PKTKEHKDHSAPCEPLNNKMICENSAFWEKGFVAFQAAINAGI IEMITNHSVMEELMSVIGSNMKMPFFIAQG  
 GVATDFFIIFFCVISFSSLIYYLSVNIQTQERQYMTTLMAMMGLRESAFWLSWSLMYAGFILVAVLMSLIVKSA  
 QVVVLTGFMVVFLFLFYGLSLITLSFLMSVLIKKPFLTGLAIFILTVFWGSLGFTALYKHLPAFVEWTLCLFL  
 SPFAFTTGMAQLIHLDDYVNSNVNLNSPPTT

>ENSMUST00000035458\_c.4273:C>A\_p.T1425N ENSMUST00000044003.14|Abca6-201|ENSMUSG00000044749|-|chr11:g.110073860:G>T

MKELSVHVRQQTRALLHKILLKWRKRESLLEWSIPIIIGLHMGLFSYLARNIQVLEVPQDLGSLNEFNFS  
 SLVVVYTPISNITQQIMNKTTFAPTMKGTRIIGVPSIEDLDEVLLHNI PDALGVIFNDSFSYQLKVLRMYGNP

FLKEDLLAHCWDTHSQAFCSLSKYWERGFVALQTA INAGI IEVTTNHSVMEELMSIDGINMKTL PFI PRDLS D
YE I F I L F C L L Y F S S F I Y F A S S N V T K E R K Q C K E V M K V M G L Q D S A F W L S W G L I Y V G F I F I I S I F I A I I I T S T Q I I
M M T G F L V I F T L F F L Y G L S L I A V T F L M A V L L Q K A V L T N L I V L F F T L F W G C V G F T V L H K E L P P S L E W V L S I F S P F
A F T S G M A K V I F Q D Y N L G V V F P D P S G E S Y V M I A V F F I L A F D S L L Y L V L A L Y F D K I L L Y G A E H R S A P L F F L N P T
S C F R K T A N R N K V I E R D L D P E L P S D E Y F E P V D P E Y Q G K E A I R I R N I K K E Y K G K S G K V K A L K G L F L D I Y E S Q I T A
I L G H S G A G K S S L L N I L S G L Y V P T A G S V T V Y N K N L S D M Q D L K E I R K A I G V C P Q H N V Q F D A L T V K E N L T L F A K I K
G I L P Q D V E Q E V Q Q I L S E L D M Q N I R D D L A E H L S E G Q K R K L T F G I A T V G D P Q I L L L D E P T V G L D P F S R Q R I W G F L
K E R R A D H V I L F S T Q F M D E A D I L A D R K V L I A N G A L K C T G S S V F L K R K W G L G Y H L S L F M D E T C D S E R L T S F I N H H
I P Y A K L K A K T K E K L V Y I L P L E R T S E F P E F F S D L D K Y S G Q L M S Y E V S M S T L N D V F L N L E G E P S T K Q D F E K R E T
A T D S E S L N D M E V A Y P S L S Q V Q E T V S T M S L W R M Q V C A I A R L R I L K L K R E R K A F L I I L L L L G I A L L P L V I E Y V A N
A L L E V K N N W E F K T D L Y F L S P G Q L P Q G L R T S L L V I N N T E S N I E D F L Q S L K H Q N I V L E V D D F E N R N A T N S L S Y N G
A I I V S G R Q K D Y R F S A V C N T K R L H C F P I L M N V I S N G I L H M L N H T Q Y I R I K E D I F S P F I V L V W T G I Q E T C L F I L C
V I C S L S P H I A M S S V S D Y K K K A D S Q L W I S G L Y P S A Y W C G Q A V V D I S L F S G M L L T S Y F T S Y T S K L L N I D M T S E I V
F S V I V L A L G C A A S L V F L T Y V I S F V F G K R K K N S T L W S I C F L L V I A I T F E K V A N G P F N E A L V I S A T M L V P S F A L N
G L L V V L E M R A Y Q Y Y I E F E E I K H G L S A V D L L L C L I P Y I H T L L F I F V L R C L E L K Y G K N V V R R D P I F R I A P Q S L K A
Q P N P E E P I D E D E N V Q A E R L R T S D A L S T P N L D E K P V I I A S C L H K E Y A G Q K K H C C S R R T R N M A V R N V S F C V N K G E
I L G L L G P D G A G K S S S I R M I A G I T K P T A G Q V E L K R L S S A V G H Q D S R A E F G Y C P Q E N G L W P N L T V K E H L E L Y A A
V K G L R K E D A V V A I S R L V N A L K L H D Q L N V Q V Q N L V A G A N R K L C F V L S I L G N S P V L I L D E P S T G L D V S G K H Q V W Q
A I Q A V V K D N E K G V L L S T H D L A E A E A L C D R A A I M V S G R L R C I G P I Q H L K R K F G Q D Y V L E L R V K D V S Q E P L V H R E
I L K L F P Q A A R Q D R C F S L L T Y K L P V T D V H P L S Q A F H K L E A V K H G F D L E D Y S L S Q C T L D R V I L E L S K E Q E L G T V Y
E E A D M T L G R K L L P P S D E L \*

>ENSMUSP00000053033\_c.162:G>A\_p.V55M ENSMUST00000058109.9|Mrps7-
201|ENSMUSG00000046756|+|chr11:g.115495626:G>A
MAAPALRAPLRW SGLALGVRC AVWNLPGLTQVRGSR YAPEFREPLIDKEYYRKPM AELTEEEKYDQELKKTQF
IKAAAATETSSVFADPVISKFTNMMMKGGNKVLARSLMAQTLEAVKRKQFEKYRAASAE EQATIERNPYRIFH
EALKNCEPVI GLVPILKGGHFYQVPVPLADRRRRFLAMK WMI TECRENKPRRTLMP EKL SHELLEAFHN RGPV
IKRKHNMKMAE ANRALAHYRWW \*

>ENSMUSP00000091439\_c.1544:G>T\_p.R515S ENSMUST00000093911.11|Myo15b-
202|ENSMUSG00000034427|+|chr11:g.115750776:G>T
MGRSKGKAPHRRPRPGR PASAELESGSASADCAPSPDRRPARSKARKNK PATEHEATGGKGTAGGQRKHTGEG
NHRCRTSQETQERQSSSQRLRHGPTESRDSGDCGEHTEEQGIPREEVRTGKRGRRRRRGKDRGPLTRRGHGET
PGRDGDTSGGDGGSSCLDSEAREAQDSSSQGGGAPERPPKMEPSDPRSEGAPIRGPSSTQVQKCPGNSHPGS
EGHALELQSKEGSSGTGPQRASDDSRDTDTSSPGWAGHRHL P Q K I P G T S S G I P E S Q E I E L G R E A A A S S V P R G S
Q S P Q D S S A I V D T S D V G A Q P K A E L L G T E P E T A G A P G A Q L L Q V G E V T R K A L V V A G E S D A G A R E R S R A G D P G P R D R
T P L A A L V R L R L R P R P P A G A S P Q F A G G I R V G L K A R L Q R V A R A L G F L R W L R L R V E R R R T E A R A A S P R E C K E R G R
E R A L E A R G R V P G P R R W L A R L R L A C R L V G L R G T P R A L P G G G P S P P Q A L S S S V S N D A S I E D P A D P D K F A V V F P R I
H K A S K E S G S S S G T S A G A P T A G A A E D R E E Q E A N G E G V A R A C Q V P S F F P S A R N G T P P N E N R S Q A E P E T L E A K T G
V H W A Q D S N P S E D P E L G A D T L L P Q L T L E T R L R Q N S P C R S P R E R W E P E D D T E A A L E R D L E L S L Q R N L E M P P F L G A
K T G S L P E S L E D I E D L A R L R L V C D S S V L L C L K R F H L G R I Y T F G G P L L L A L N P H R S L P L F S S E V L A S Y H P R K A P
N T T P H I F A I G A A A Y S L S Q S T G Q D S C I L L G G H S G S G K T E G A K K I L E F L S S L G Q K P M E A N L A Q L E D I L P V L G S F G
H A K T I L N A N A S R F G Q E I R L C L Q Q G L I V G A S V S H Y L L E T S R V V F Q A Q A E R S F H V F Y E L L A G L D P T E R E Q L S L Q G
P E A Y Y Y L N Q G G A C R L Q G K E D A Q D F K E L M K A L R G L G L C A E E L T A V W A V L A T I L H L G N I C F S S S E R E S Q E V A A V S
S W A E I H L A A R L L Q V P P E R L E G A V T K R V M D T P Y G P V S R P L P V E G A I D A R D A L A K T L Y T R L F T W L L K H I N A R L S P
P R E A D S V A T I A V V D A F G F E A L R V N G L E Q L C S N L A S E R L Q L F S S Q K L L A Q E E E V C Q Q E L L K W V P I P Q P P R Q S C L
D L L V G Q P H S L L N I L D T Q T W L S Q A T D H T F L Q K C H Y H H G D H P S Y A K P Q L P L P I F T V R H Y A G T V T Y Q V H K F I N R N R
G H L D P A V L E M L R Q S Q L Q L M G S L F Q E A E P Q A G T E Q N K P T L A S R F Q Q T L G D L L A R L G R G H V Y I H C L N P T P G K I P
G L L D V G H V A E Q L R Q A G I L E I I G T R S T H F P V R V S F Q V F L A R F H A L G S G R Q K A A S D Q E R C G A I L S E V L G A E S P L Y
H L G V T Q V L L Q E Q G W Q Q L E Q L W A Q R R S Q A L L T L H R G L R A C I T R Q R L R L L P R M Q A R V R G L Q A R K R Y L Q R R S A L G Q
L N T I L L V A R P L L R R R Q K L R C A P G P H S G E P W G K V S N M D L G R L E I P A Q L A T L L E R A E G H Q A L L T G S I T E S L P P E V
P A R P S L T L P P D I D Q F P F S S F V S T S F Q K P F L P R P G Q P L D E P L T R L D G E N P Q Q A L E I N R V M L R L L G E G S L Q S W Q E
Q T M G T F L V Q Q A Q R R P G L R D E L F S Q L V A Q L W R N P D E Q Q N Q R G W A L M V I L L S S F A P T P A L E K P L L K F V S D Q A P S G
M A A L C Q H K L L G A L E Q T P L A P M A S R S H P P T Q L E W K A G L R R G R M A L D V F T F N E E S Y S A E V E S W T T G E Q F A G W I L Q
S R G L E A P P R G W S V S L H S G D A W R D L P G C D F V L D L I G E P A T E D L G D P A G P H N Y P I T P L G L A E S I P P A P G V Q A P S L P P
G L P P G P A P I L A S S R I P P G E A S K P E N L D G F V D H L F E P A L A G P S D L E Q G W A L S R R M K G G S V G P T Q Q G Y P M V Y P G
M V Q A P S Y Q P A M I P A P M P V M P A M G A V P T M P A M L V P P Q P Q P L V P S L D S R Q L A L Q Q Q N F I N Q Q A M I L A Q Q M T T Q A M
S L S L E Q Q N Q R H Q H Q A Q T S G A T S Q P P P S T T A P K A K K P P A P Q E K P E S N L E P S G V G L R E D T P E E A E S K P Q R P K S F Q
Q K R D Y F Q K M G Q E P I R V K T V K P P A K V Q I P Q E E M E E T E E E E E T A E L S P P P P P P V V K K P L K A S R P K A V K E D E A E
P A Q E E V P T Q G E D P P V H S S N A P Q H P K P S R V P P V Q S S N A P P R P Q P S R E I R N I I R M Y Q S R P G P V A V P V Q P T R P I

KTFQKKNPKDEALAKLGINGVHPLPLSTSPNQKSSPPAVVPRPKARPRLEPSLSIQEKQGPLRDLFGPCSPN  
 PPTAPAPPPPPALPPPLSGEPKTPSVESHALTEPMEDKNI STKLLVPSGVSVCFSYANAPWKFLRKEVFYPRE  
 NFSHPYCLSLLCQQILRDTFTESCTRI SQDERHKMKGLLDGDEVLETLDIVEDSIKKRIVVAARDNWNANYFS  
 RIFPVSGESGSDVQLLGVSHRGLRLLKVTQSPSFHLDQLKTLCSY SYAEVLT VQCRGRSTLESLKNEQLILH  
 TAWARAIKAMVDLFLSELRKDSGYVIALRSYITDDNSLLSFHRGDLIRLLPVTALEPGWQFGSAGGRSGLFPD  
 DVVQPAAPDLFSFLGKRNSWQRKSKLGPQERPTHPRKQEPSEDESEATSFTTYSLSADPHNYTMQEFALRY  
 FRKPHTWLTQMSRDTKEKAANLIQYTKDPIQESLTSFCNGDTNSKAVAGFKALMQFMGDQPKPRGKDELSLL  
 YELLKLCQDDLRDEMYCQVIKQVTGHPQPKHCALGWSVLSLFTGFFAPSTTLMPYVTKFLQDSSPSEELARRS  
 QENLQRTVVKYGGRRQLPLPGEMNAFLKQAVRLLLIHLPGGVYRTNSQFTTVAGEVLEELCGQMGITDLEEV  
 QEFALFLIKGEGELVRPLSPHEY INNVTVDQDMSLHSRRLGWETPLHFDHSTYETETHYQVLRDYLQGKLIVS  
 TQAEALLAQLAAFQHFDTGTSSPSEQELLSYIPKPLQWQVNTANIKSLVTQELRQMQGYSKQRAQIGFIES  
 TAQLPLFGYTVYVVLVRSKLALPGPGLLGLNRQHLVLM DPSSQELCCSVMLKDLKQLHLLSPLQEDGPPGLEL  
 NYGSVDNPQTIWLELPAQELQHTIIFLLGSMSTQWPGLL\*  
 >ENSMUSP0000005173\_c.1102:A>C\_p.H368P ENSMUST0000005173.11|Sgsh-  
 201|ENSMUSG0000005043|-|chr11:g.119237510:T>G  
 MHCPLGACCTILLVLGLCGAHSRNVLLIVADDGGFESGVYNNTAIATPHLDALSRSLSIFRNAFTSVSSCSPS  
 RASLLTGLPQHONGMYGLHQDVHFFNSFDKVVSLPLLLNQAGVRTGIIGKKHVGPETVYPFDFAFTEENSSVM  
 QVGRNITRIKQLVQKFLQTQDDRPFFLYVAFHDPHRCGHSQPYGTFCFKFNGESGMGYIPDWTPQIYDQD  
 VMVYFVVPDTPAARADLAAQYTTIGRMDQGVGLVQLQELRGAGVLDNTLIIFTSDNGI PFPSGRNTLYWPGTAE  
 PLLVSSPEHPQRWGVSDAYVSLDLTPTILDWFSIPYPSYAFGSKTIQLTGRSLLPALEAEPLWATVFSQ  
 SHPEVTMSYPMRSVYHQNFRLIHNLSFKMPFPIDQDFYVSPFTQDLLNRRTTGRPTGWYKDLHRYYYRERWEL  
 YDISRDPRETRNLAADPDLAQVLEMLKAQLVKWQWETHDPWVCAPDGVLEEKLTQPQCRPLHNEL\*  
 >ENSMUSP00000047445\_c.2473:C>T\_p.A825V ENSMUST00000045664.7|Atad2b-  
 201|ENSMUSG00000052812|+|chr12:g.5056619:C>T  
 MVNTRKSSLRLLGSKSPGPGPGGAGAGAEFGATGGSSHFISSTRSSKTRAASCPAAKAGGSGGALDEARKA  
 EVDGSLSDSHVSPPAKRTLKQPDVCKDKSKSRSTQGREWNIPSGQTRLTSQPGATLPNGHSSLSLRSHPLR  
 GEKKGDGDLSCINGDIEVRKSCRSRKNRFESVNSQLLFDQLVNSTAEAVLQEMDNINIRNRNRSGEVERLRMW  
 TDTEFENMDMYSRVKRRRKS LRNSYGIQNHHEVSTEGEEEEEQEEDGDI EVEEAEGEENDRPYNLRQRKTVD  
 RYQAPPVPAHQKKRENTLFDIHRSPARRSHIRKKHAIHSSDTSSEERFERRKS KSMARARNRCLPMNFR  
 AEDLASGILRERVKVGASLADVDPMNIDKSVRFDSIGGLSHHIALKEMVVFPLLYPEIFEKFKIQPPRGCLF  
 YGPPGTGKTLVARALANEC SQGDKKVAFFMRKGADCLSKWVGESERQLRLLFDQAYLMRPSIIFDEIDGLAP  
 VRSSRDQIHSIVSTLLALMDGLDNRGEIVVIGATNRLDSIDPALRRPGRFDREFLNLDPQARAKHILQIH  
 TRDWNPKLSDAFLGELAEKCVGYCGADIKALCTEAALTALRRRYPQIYASSHKLQLDVTSIVLSAHDYHAMQ  
 NIVPASQRAVMSSGQALSPIIRPLERSFNNILAVLQKIFPHAETSQNFVAGSDLNCPSLEISSDYEETSIP  
 VKSSGKCFGLGKCLCSKDSQGSTFVHLNFMNMAFGPTSYRPRLLS GERGSGQTSHLAPALLHLERFSVHRDL  
 PALYSVSAKTPEESCAQIFREVRRTVPSIVYMPHIGDWDVAVSDTVRATFLLQDIPSFSPIFLLSTSETMY  
 SELPEEVKICIFRIQYEEVLYIQRP I EEDRRKFFQELILHQASMAPRRKHTALRAMEVLPALPSPPRQLSES  
 EKNRMEDQEENTLRELRLFLRDVTKRLATDKRFNIFSKPVDIEEVS DYLEVIKEPMDLSTVITKIDKHNYLTA  
 KDFLQDIDLICSNALYNPDKDPGDKIRHRACTLKDTAHAI IAAELDPEFNKLCEEI KEARIKRGLSVTAEQ  
 ITPHGAGARKTETRVEEAFRHKQRNPMDAWHNSANKCAFRVRRKSRRSQWGKGI IKRKRVNLLKDEEDTKF  
 TDYDHTEDRKLL ENGEFEVSTDCHEENGEETGDL SMTNDESSCDIMDMDQQRNLNSGAGTKENFASTEEESSN  
 ESLLVHSSSSLNPEQTSKKEPFLKGTCLNGEASTDSSEGI PVLECCQNGRVLEV VPLPDGGEKSSSEQKIALEE  
 QLKDKPETWENENRGDAAEKLEVLECSSEKPEPGPDAEGKETELDREGASKVKYRKLLEQAKPTNLELVPE  
 EPSEPAPPLVVDHERLQKLLDLLVDKSNNLTVDQLERLYSLLSQSIYRHRKDYDKSQLVEEMERTVHM FETFL  
 \*  
 >ENSMUSP00000132778\_c.2865:G>C\_p.D956H ENSMUST00000169088.8|Lamb1-  
 205|ENSMUSG00000002900|+|chr12:g.31355777:G>C  
 MGLLQVFAFGVLALWGTRVCAQEPEFYSYCAEGSCYPATGDL LIGRAQKLSVTSTCGLHKPEPYCIVSHLQED  
 KKCFICDSRDPYHETLNPDSHLIENVVTTFAPNRLKIWWQSENGVENVTIQLDLEAEFHFTHLIMTFKTFRPA  
 AMLIERSSDFGKAWGVYRYFAYDCESSFPGISTGPMKKVDDIICDSRYSDIEPSTEGEVI FRALDPAFKIEDP  
 YSPRIQNLKITNLRIKFVKLHTLGDNLLDSRMEIREKYYYAVYDMVVRGNCFCYGHASECAPVDGVNEEVEG  
 MVHGHCMCRHNTKGLNCELCMDFYHDL PWRPAEGRNSNACKKCNCEHSSSCHFDMAVFLATGNVSGGVCDCN  
 QHNTMGRNCEQCKPFYFQHPERDIRDPNLCPECTCDPAGESENGICDGYTDFSVGLIAGQCRCRKLHVEGERCD  
 VCKEFGYDLSAEDPYGKSCACNPLGTIPGGNCPDSETGYCYCKRLVTGQRCDQCLPQHGWLSNDLDGCRPCD  
 CDLGGALNNSCEDSGQCSCLPHMIGRQCNEVESPLYFTTLDHYIYEAEANLGPVIVVERQYIQDRI PSWT  
 GPGFVRVPEGAYLEFFIDNIPYSMEYEILIRYEPQLPDHWEKAVITVQRPGKIPASSRCGNTVPDDDNQVVS  
 SPGSRVVLP RPVC FEKGMNYTVRLELPQYTAGSDVESPYTFIDSLVLMPYCKSLDIFTVGGSGDGEVNTNSA  
 WETFRYRCLENSRSVVKTPMTDVCRNII FSI SALIHQ TGLACECDPQGSLSVCDPNGGQCQCRPNVVGRTC



NRCAPGTFGFGPNGCKPCDCHLQGSASAFCDAITGQCHCFQGIYARQCDRCLPGYWGFPSQCPCQCNHALDC  
 DTVTGECLSCQDYTTGHNCRCLAGYYGDP IIGSGDHCRCPCPCPDGPDGRQFARSCYQDPVTLQLACVCDPG  
 YIGSRCHDCASGFFGNPSPDFGGSCQPCQCHHNI DTTDPEACDKETGRCLKCLYHTEGDHCQCLCQYGYGDALR  
 QDCRKCVCNYLGTVKEHCNGSDCHCDKATGQCSCLPNVIGQNCDCRCPNTWQLASGTGCGPCNCNAAHSFGPS  
 CNEFTGQCQCMPGFGGRTCESECQELFWGDPDVECRACDCDPRGIETPQCDQSTGQCVCVEGVEGPRCDKCTRG  
 YSGVFPDCTPCHQCFALWDAIIGELTNRTHKFLEKAKALKISGVIGPYRETVDVSEKVVNEIKDILAQSPAEE  
 PLKNIGILFEEAEKLT KDVT EKMAQVEVKLTDTASQSNSTAGELGALQAEAESL DKT VKELAEQLEFIKNSDI  
 QGALDSITKYFQMSLEAEKRVNASTTDPNSTVEQSSALTRDRVEDLMLERESPFKEQQEEQARLDELDELAKLQS  
 LDLSAVAQMT CGT PPGADCSESECGGPNCR TDEGEKKCGGPGCGGLVTVAHSAWQKAMDFDRDVL SALAEVEQ  
 LSKMVSEAKVRADEAKQNAQDVLKTNATKEKVDKSNEDLRNLIKQIRNFLTEDSADLDSIEAVANEVLKMEM  
 PSTPQQLQNLTEDIRERVETLSQVEVILQQAADIARAELLLLEEAKRASKSATDVKVTADMVKEALEEAEKAQ  
 VAAEKAIKQADEDIQGTQNLTSIESETAASEETLTNASQRISKLERNVEELKRKAAQNSGEAEYIEKVVYSV  
 KQNAADDVKKTLDELGEDEKYYKVESLIAQKTEESADARRKAELLQNEAKTLLAQANSKLQLEDELKERKYEDNQK  
 YLEDKAQELVRLEGEVRSLLKDISEKVAVYSTCL\*  
 >ENSMUSP00000002979\_c.2865:G>C\_p.D956H ENSMUST00000002979.16|Lamb1-  
 201|ENSMUSG00000002900|+|chr12:g.31355777:G>C  
 MGLLQVFAFGVLALWGTRVCAQEPEFYSYGCAEGSCYPATGDLIGRAQKLSVTSTCGLHKPEPYCIVSHLQED  
 KKCFCICDSRDPYHETLNPDSHLIENVVTTAFAPNRLKIWWQSENGVENVTIQLDLEAEFHFTHLIMTFKTRPA  
 AMLIERSSDFGKAWGVYRYFAYDCESSFPGISTGPMKKVDDIICDSRYSDIEPSTEGEVIFRALDPAFKIEDP  
 YSPRIQNLK I TNLRIKFVKLHTLGDNLLDSRMEIREKYYYAVYDMVVRGNCFCYGHASECAPVDGVNEEVEG  
 MVHGHCMCRHNTKGLNCELMDFYHDL PWRPAEGRNSNACKKCNENHSSSCHFDMAVFLATGNVSGGVCDCNC  
 QHNTMGRNCEQCKPFYFQHPERDIRDPNLCEPCTCDPAGSENGGICDGYTDFSVGLIAGQCRCKLHVEGERCD  
 VCKEGFYDLSAEDPYGCKSCACNPLGTIPGGNPCDSETGYCYCKRLVTVGQRCDQCLPQHWGLSNDLDGCRPCD  
 CDLGGALNNSCEDSGQCSCLPHMIGRQCNEVESGYYFTTLDHYIYEAEEANLPGVIVVERQYIQDRIPSWT  
 GPGFVRVPEGAYLEFFIDNIPYSMEYEILIRYEQPLPDHWEKAVITVQRPGKIPASSRCGNTVPDDDNQVVSLS  
 SPGSRVYVLP RPVCFEKGMYNVTVRLELPQYTAGSDVESPYTFIDSLVLMYPYCKSLDITVGGSGDGEVNTNSA  
 WETFQRYRCLENSRSVVKTPMTDVCRNII FSI SALIHQTGLACECDPQGSLSVCDPNGGQCQCRPNVVGRT  
 NRCAPGTFGFGPNGCKPCDCHLQGSASAFCDAITGQCHCFQGIYARQCDRCLPGYWGFPSQCPCQCNHALDC  
 DTVTGECLSCQDYTTGHNCRCLAGYYGDP IIGSGDHCRCPCPCPDGPDGRQFARSCYQDPVTLQLACVCDPG  
 YIGSRCHDCASGFFGNPSPDFGGSCQPCQCHHNI DTTDPEACDKETGRCLKCLYHTEGDHCQCLCQYGYGDALR  
 QDCRKCVCNYLGTVKEHCNGSDCHCDKATGQCSCLPNVIGQNCDCRCPNTWQLASGTGCGPCNCNAAHSFGPS  
 CNEFTGQCQCMPGFGGRTCESECQELFWGDPDVECRACDCDPRGIETPQCDQSTGQCVCVEGVEGPRCDKCTRG  
 YSGVFPDCTPCHQCFALWDAIIGELTNRTHKFLEKAKALKISGVIGPYRETVDVSEKVVNEIKDILAQSPAEE  
 PLKNIGILFEEAEKLT KDVT EKMAQVEVKLTDTASQSNSTAGELGALQAEAESL DKT VKELAEQLEFIKNSDI  
 QGALDSITKYFQMSLEAEKRVNASTTDPNSTVEQSSALTRDRVEDLMLERESPFKEQQEEQARLDELDELAKLQS  
 LDLSAVAQMT CGT PPGADCSESECGGPNCR TDEGEKKCGGPGCGGLVTVAHSAWQKAMDFDRDVL SALAEVEQ  
 LSKMVSEAKVRADEAKQNAQDVLKTNATKEKVDKSNEDLRNLIKQIRNFLTEDSADLDSIEAVANEVLKMEM  
 PSTPQQLQNLTEDIRERVETLSQVEVILQQAADIARAELLLLEEAKRASKSATDVKVTADMVKEALEEAEKAQ  
 VAAEKAIKQADEDIQGTQNLTSIESETAASEETLTNASQRISKLERNVEELKRKAAQNSGEAEYIEKVVYSV  
 KQNAADDVKKTLDELGEDEKYYKVESLIAQKTEESADARRKAELLQNEAKTLLAQANSKLQLEDELKERKYEDNQK  
 YLEDKAQELVRLEGEVRSLLKDISEKVAVYSTCL\*  
 >ENSMUSP00000159366\_c.3009:G>C\_p.D1004H ENSMUST00000239496.2|Lamb1-  
 208|ENSMUSG00000002900|+|chr12:g.31355777:G>C  
 MEGPLSSLP TFAFSPRYLSRKEDPKKRQAACLLRPPSRAASPRLRGLDMGLLQVFAFGVLALWGTRVCAQEPE  
 FSYGCAEGSCYPATGDLIGRAQKLSVTSTCGLHKPEPYCIVSHLQEDKKCFCICDSRDPYHETLNPDSHLIEN  
 VVTTAFAPNRLKIWWQSENGVENVTIQLDLEAEFHFTHLIMTFKTRPAAMLIERSDFGKAWGVYRYFAYDCE  
 SSFPGISTGPMKKVDDIICDSRYSDIEPSTEGEVIFRALDPAFKIEDPYSPRIQNLK I TNLRIKFVKLHTL  
 DNLLDSRMEIREKYYYAVYDMVVRGNCFCYGHASECAPVDGVNEEVEGMVHGHCMCRHNTKGLNCELMDFYH  
 DLPWRPAEGRNSNACKKCNENHSSSCHFDMAVFLATGNVSGGVCDCNCQHNTMGRNCEQCKPFYFQHPERDIR  
 DPNLCEPCTCDPAGSENGGICDGYTDFSVGLIAGQCRCKLHVEGERCDVCKEGFYDLSAEDPYGCKSCACNPL  
 GTIPGGNPCDSETGYCYCKRLVTVGQRCDQCLPQHWGLSNDLDGCRPCDCDLGGALNNSCEDSGQCSCLPHMI  
 GRQCNEVESGYYFTTLDHYIYEAEEANLPGVIVVERQYIQDRIPSWTGPGFVRVPEGAYLEFFIDNIPYSME  
 YEILIRYEQPLPDHWEKAVITVQRPGKIPASSRCGNTVPDDDNQVVSLSPGSRVYVLP RPVCFEKGMYNVT  
 VRL ELPQYTAGSDVESPYTFIDSLVLMYPYCKSLDITVGGSGDGEVNTNSAWETFQRYRCLENSRSVVKTPMTDVC  
 RNII FSI SALIHQTGLACECDPQGSLSVCDPNGGQCQCRPNVVGRTCNRCAPGTFGFGPNGCKPCDCHLQGS  
 ASAFCDAITGQCHCFQGIYARQCDRCLPGYWGFPSQCPCQCNHALDCDTVTGECLSCQDYTTGHNCRCLAG  
 YYGDP IIGSGDHCRCPCPCPDGPDGRQFARSCYQDPVTLQLACVCDPGYIGSRCHDCASGFFGNPSPDFGGSCQ  
 PCQCHHNI DTTDPEACDKETGRCLKCLYHTEGDHCQCLCQYGYGDALRQDCRKCVCNYLGTVKEHCNGSDCHC

DKATGQCSCLPNVIGQNCDCRCPNTWQLASGTGCGPCNCNAAHSFGPSCNEFTGQCQCMPGFGGRTCSECQEL  
 FWGDPDVECRACDCDPRGIETPQCDQSTGQCVCVEGVEGPRCDKCTRGYSGVFPDCTPCHQCFCALWDAIIGEL  
 TNRTHKFLEKAKALKISGVIGPYRETVDSVEKVVNEIKDILAQSPAAPLKNIGILFEEAEKLTQDVTAKMAQ  
 VEVKLTDTASQSNSTAGELGALQAEAEESLDKTVKELAEQLEFIKNSDIQGALDSITKYFQMSLEAEKRVNAST  
 TDPNSTVEQSALTRDRVEDMLERESPFKEQQEEQARLLDELAKGLQSLDLSAVAQMTCTGTPPGADCSESECG  
 GPNCRDTDEGEKKCGGPGCGGLVTVVAHSAWQKAMDFDRDVLVSALAEVEQLSKMVSEAKVRADEAKQNAQDVLK  
 TNATKEKVDKSNEDLRNLKQIRNFLTEDSADLDSIEAVANEVLKMEMPTPQQLQNLTEDIRERVETLSQVE  
 VILQQSAADIARAELLLEEAKRASKSATDVKVTADMVKEALEEAEKAQVAAEKAQKQADEDIQGTQNLTSIE  
 SETAASEETLTNASQRISKLERNVVELKRAAQNSEAEYIEKVYVSVKQNAADDVKKTLTDGELDEKYKQVSESL  
 IAQKTEESADARRKAELLQNEAKTLLAQANSKLQLEDLERKYEDNQKYLEDKAQELVRLEGEVRSLLKDI SE  
 KVAVYSTCL\*

>ENSMUSP00000044866\_c.2175:A>C\_p.K726Q ENSMUST00000035773.14|Sos2-  
 201|ENSMUSG00000034801|-|chr12:g.69654172:T>G

MQQAPQPYEFFSEENSPKWRGLLVPALRKVQEQVHPTLSANEESLYYIEELIFQLLNKLCMAQPRTVQDVEER  
 VQKTFPHPIDKWAIAADAQSAIEKRKRRNPLLLPVDKIHPSLKEVLGYKVDYHVSIVAVLEYISADILKLAG  
 NYVFNIRHYEISQQDIKVMCADKVLMDMFDQDDDIGLVSLCEDEPCSSGELNYYDLVRTEIAEERQYLRELN  
 MIKVFREAFLLDRKLFKPEIEKIFSNISDIHELTVKLLGLIEDTVEMTDESSPHPLAGSCFEDLAEQAFD  
 PYETLSQDILAPEFNDHFSKLMARPAVALHFQSIADGFKEAVRYVLPRLMLVPVYHCWHYFELLKQKACSEEQ  
 EDKECLNQAITALMNLQGSMDRIYKQHSRRRPGDPVCLFYNRQLRSKHLAIKMMNEIQKNIDGWEGKDIGQC  
 CNEFIMEGPLTRIGAKHERHIFLFDGLMISCKPNHGQTRLPGYSSAEYRLKEKFMVIRKIQICDKEDACEYRHA  
 FELVSKDENSVIFAAKSAEKNWMAALISLHYRSTLDRMLDSVLLKEENEQPLRLPSPDMYRFVVTDSEENI  
 VFEDNLQSRSGIPIIKGGTVVKLIERLTYHMYADPNFVRTFLT TYRSFCKPQELNLLIERFEIPEPEPTAD  
 KLALAEKGEQPIASADLKRFRKEYVQPVQLRVLNVFRHWVEHHYYDFERDLELLERLESFISVVRGKAMKQWVES  
 IAKIKRKKQAQANGISHNITFESSPPVWEWHISRTGQFETFDLMTLHPHIEIARQLTLLES DLYRKVQVSELV  
 GSVWTKEDKEINSPNLLKMRHTTNLTLWFKEKIVEAENFEERVAVLSRIVEILQVFDLNNFNGVLEIVSAV  
 NSVSVYRLDHTFEALQERKRRILDDAVELSQDHFKKYLVLKLSINPCVPFFGIYLTNLIKTEEGNSDFLKRK  
 GKDLINFSKRRKVAEITGEIQYQNPYCLRTEPEMRRFFENLPMGILSEKEFTDYLFNKSLIEPRNCKQ  
 PPRFPRKSTFSLKSPGIRPNAGRHGSTSGTLRGHPTPLEREPYKISFSRIAETELESTVSAPTSPNTPSTPPVS  
 ASSDHSVFLDVLNSSCGSNTIFAPVLLPHSKTFFSSCGSLHKLSEEPLIPPLPPRKKFDHDLNLSKGA VKS  
 DDDPPAIPPRQPPPKVKPRVPVLMGTFDGPVPSPPPPPPRDPDLPDTPPPVPLRPPEHFINCPFNLPQPPPLGH  
 PHRDPDWLRDVTCPNSPSTPPTTSPRI PRSCHLLSSSHSLAHL PAPPVPPRQNSSPLLKPLPKTYKREL  
 SHPPLYRLPLENAETPQ\*

>ENSMUSP00000138793\_c.2178:A>C\_p.K727Q ENSMUST00000183277.8|Sos2-  
 206|ENSMUSG00000034801|-|chr12:g.69654172:T>G

MQQAPQPYEFFSEENSPKWRGLLVPALRKVQEQVHPTLSANEESLYYIEELIFQLLNKLCMAQPRTVQDVEER  
 VQKTFPHPIDKWAIAADAQSAIEKRKRRNPLLLPVDKIHPSLKEVLGYKVDYHVSIVAVLEYISADILKLAG  
 NYVFNIRHYEISQQDIKVMCADKVLMDMFDQDDDIGLVSLCEDEPCSSGELNYYDLVRTEIAEERQYLRELN  
 MIKVFREAFLLDRKLFKPEIEKIFSNISDIHELTVKLLGLIEDTVEMTDESSPHPLAGSCFEDLAEQAFD  
 PYETLSQDILAPEFNDHFSKLMARPAVALHFQSIADGFKEAVRYVLPRLMLVPVYHCWHYFELLKQKACSEEQ  
 QEDKECLNQAITALMNLQGSMDRIYKQHSRRRPGDPVCLFYNRQLRSKHLAIKMMNEIQKNIDGWEGKDIGQ  
 CCNEFIMEGPLTRIGAKHERHIFLFDGLMISCKPNHGQTRLPGYSSAEYRLKEKFMVIRKIQICDKEDACEYRH  
 AFELVSKDENSVIFAAKSAEKNWMAALISLHYRSTLDRMLDSVLLKEENEQPLRLPSPDMYRFVVTDSEEN  
 IVFEDNLQSRSGIPIIKGGTVVKLIERLTYHMYADPNFVRTFLT TYRSFCKPQELNLLIERFEIPEPEPTAD  
 DKLALAEKGEQPIASADLKRFRKEYVQPVQLRVLNVFRHWVEHHYYDFERDLELLERLESFISVVRGKAMKQWVE  
 SIAKIKRKKQAQANGISHNITFESSPPVWEWHISRTGQFETFDLMTLHPHIEIARQLTLLES DLYRKVQVSEL  
 VGSVWTKEDKEINSPNLLKMRHTTNLTLWFKEKIVEAENFEERVAVLSRIVEILQVFDLNNFNGVLEIVSA  
 VNSVSVYRLDHTFEALQERKRRILDDAVELSQDHFKKYLVLKLSINPCVPFFGIYLTNLIKTEEGNSDFLKR  
 KGDLINFSKRRKVAEITGEIQYQNPYCLRTEPEMRRFFENLPMGILSEKEFTDYLFNKSLIEPRNCKQ  
 PPRFPRKSTFSLKSPGIRPNAGRHGSTSGTLRGHPTPLEREPYKISFSRIAETELESTVSAPTSPNTPSTPPV  
 SASDHSVFLDVLNSSCGSNTIFAPVLLPHSKTFFSSCGSLHKLSEEPLIPPLPPRKKFDHDLNLSKGA VKS  
 SDDPPAIPPRQPPPKVKPRVPVLMGTFDGPVPSPPPPPPRDPDLPDTPPPVPLRPPEHFINCPFNLPQPPPLG  
 HHRDPDWLRDVTCPNSPSTPPTTSPRI PRSCHLLSSSHSLAHL PAPPVPPRQNSSPLLKPLPKTYKRE  
 LSHPPLYRLPLENAETPQ\*

>ENSMUSP00000138589\_c.2079:A>C\_p.K694Q ENSMUST00000182396.2|Sos2-  
 203|ENSMUSG00000034801|-|chr12:g.69654172:T>G

MQQAPQPYEFFSEENSPKWRGLLVPALRKVQEQVHPTLSANEESLYYIEELIFQLLNKLCMAQPRTVQDVEER  
 VQKTFPHPIDKWAIAADAQSAIEKRKRRNPLLLPVDKIHPSLKEVLGYKVDYHVSIVAVLEYISADILKLAG  
 NYVFNIRHYEISQQDIKVMCADKVLMDMFDQDDDIGLVSLCEDEPCSSGELNYYDLVRTEIAEERQYLRELN

MI IKVFREAFLDRKLFKPSIEIKI FSNISDIHELTVKLLGLIEDTVEMTDESSPHPLAGSCFEDLAEQAFD  
PYETLSQDILAPEFNDHFSKLMARPAVALHFQQLKACSEEQEDKECLNQAITALMNLQGSMDRIYKQHSRRR  
PGDPVCLFYNRQLRSKHLAIKKMNEIQKNIDGWEGKDIGQCCNEFIMEGPLTRIGAKHERHIFLFDGLMISCK  
PNHGQTRLPGYSSAEYRLKEKFMVKIQICDKEDACEYRHAFELVSKDENSVI FAKSAEEKNNWMAALISLH  
YRSTLDRMLDSVLLKEENEQPLRLSPDMYRFVVTDEENIVFEDNLQSRSGIPIIKGGTVVKLIERLTYHMY  
ADPNFVRTFLTTYRSFCKPQELNLLIERFEIPEPEPTADKLALEKGEQPI SADLKRFRKEYVQPVQLRVLN  
VFRHWVEHHYDFERDLELLERLESFISSVRGKAMKQWVESIAKIKRKKQAQANGISHNITFESSPPVVEWH  
ISRTGQFETFDLMTLHPHIEIARQLTLLSDLYRKVQPSSELVGSVWTKEDKEINSPNLLKMI RHTTNLTLWFEK  
CIVEAENFEERVAVLSRIVEILQVFDLNNFNGVLEIVSAVNSVSVYRLDHTFEALQERKRRI LDDAVELSDQ  
HFKKYLVLKLSINPPCVPPFGIYLTNLIKTEEGNSDFLKRKGKDLINFSKRRKVAEITGEIQQYQNPYCLRT  
EPEMRRFFENLNPNGILSEKEFTDYLFNKSLIEPRNCKQPPRFPRKSTFSLKSPGIRPNAGRHGSTSGTLRG  
HPTPLEREPYKISFSRIAETELESTVSAPTSNPSTPPVSASSDHSVFLDVLNSSCGSNTIFAPVLLPHSK  
TFSSCGSLHKLSEEPLIPPLPRKKFDHDALNSKGAVKSDDDPPAIPPRQPPPKVKPRVPVLMGTDFGPV  
PSPPPPPRDPLPDTPPPVLRRPEHFINCPFNLPPLGHPHRDPDWRDVTCPNSPSTPPTTPSPRI PRS  
CHLLSSSHSLAHL PAPPVPPRQNSSPLLKLPKTYKRELSHPPLYRLPLENAETPQ\*  
>ENSMUSP00000021458\_c.4720:c>A\_p.A1574D ENSMUST00000021458.13|Sptb-  
201|ENSMUSG00000021061|-|chr12:g.76653141:G>T  
MTSATEFENVGNQPPFSRINARWDAPDDELNDNNSARLFERSRIKALADEREVVQKKTFTKWNVNSHLARVSC  
RISDLYKDLRDGRMLIKLLEVLSGEMLPRPTKGMRIHCLENVDKALQFLKEQRVHLENMGSHDIVDGNHRLV  
LGLIWTIILRFQIQDIVVQTQEGRETRSAKDALLLWCQMKTAGYPHVNTNFTSSWKDGLAFNALIHKHRPDL  
IDFDKLDKSNARHNLEHAFDVAERQLGIIPLLDPEDVFTENPDEKSIITYVVAFYHYFSKMKVLAVEGKRVGK  
VIDHAIETEKMIKYSGLASDLLTWIEQTI SVLNSRKFANSLSGVQQQLQAFSTYRTVEKPPKFQEKGNLEVL  
LFTIQSRMRANNQKVYTPHDGKLVSDINRAWESLEEAEYQRELALRSELIRQEKLEQLARRFDRKAAMRETWL  
NENQRLVTDQDNFGYDLAAVEAAKKKHEAIETDTAAYEERVKALEDLAQELEKENYHDQKRI IARKDNILRLWS  
YLQELLRSRRQLEATLALQKLFQDMLHSIDWMDIEKAHILSAEFGKHLLEVEDLLQKHKLEADIAIQGDKV  
KAITAATLQFAEGKGYQPCDPQVIQDRVSHLEQCFSSELSMAAGRKAQLEQSKRLWKF FWMDEAESWIKEKE  
QIYSSLDYQKDLT SVLILQRKHKA FEDELRLDHLKQIFQEADDMVAQKQFGHPQIETRVKVESVQADWLHKE  
LAAFRKKDLQDAENFFQFGDADDLKAWLQDAHRLLSGEDVGGQDEGATRALGKHKHEFLEELEESRGMVMEHLE  
HQAQGFPEEFRDSDPVTNRLQALRKLQYQVLTQAEALRGHKLQEAALDLYTVFGESDACE LWMTEKGKWLQMDI  
PNTLEDLEVVQHRFDILDQEMKTLMAQIDGVNLAANNLVE SGHPRSSEVVKQYQDRLNKRWQAFQAVVSEQREA  
VDSALRVNNYCVDCETSKWIMDKTKVVESTKDLGQDLAGVIAIQRKL SGLERDVLAIRDRVSALERESQYLM  
ESHPEQKEDIQORQADVEKLVKGLQDALQGQELSLGEASKLQAFIQDLDDFKAWLSMAQKAVASEDMPE SLPE  
AEQLLQQHAAIKEEIDAHRDDYHRVKASGEKVI EGQTDPDYQLLQGRLEGLD TDWDALRRMWESRGNTLTQCL  
GFQEFQKDAKQAEAILSNQEYTLAHLEPPDSLAAA EAGIRKFEDFLVSMENNRDKILSPVDSGNKLVAEGNLY  
SNKIMEKVQLIEDRHKKNEKAQEATVLLKDNLELQNF LQNCKELTLWINDKLLTSPDVS YDEARNLHNKWMK  
HQA FMAELASHQGWLENI DAEGRQLMAEKPFKDVV SERLEALHKLWEELQSTAKAKAEQLSAARSDDLRLQT  
HADLNKWI GAMEDQLRSDDL GKDLTTVNRMLAKLKRVEEQVNL RKEELEELFADAPSLGAEAGDTDMSIEKRF  
LDLLEPLGRKKQLELSKAKLQISRDLEDETLWVEERLPLAQSADYGTNLQTVQLFMKKNQTLQNEILGHAPR  
VEDVLRGQELVKA AEIDCQDIEERLGH LQSSWDTLREAADGR LQRLRDAHEAQYYLDAGEAEAWI SEQELY  
VFSDEPPKDEEGAIVMLKRHLRQQRVVEEYGRNIKQLAGRAQSLLSAGHPGEQIIRLQGVQDKQYAGLKDMA  
EERRRRLENMYHLFQLKREADDLEQWITEKEMVASSQEMGQDFDHTMLRDKFRDFARETGAIQERVDNVNT  
I IERLIDAGHSEAAIAEWKDG LNDMWADLLELIDTRMQLLAASYDLHRYFYTGTEILGLIDEKHREL PEDVG  
LDASTAESFHRVHTAFERELHLLGVQVQQFQDVATRLQTAYAGEKADAIQSKEQEVSAAWQALLDACAGRAQ  
LVDTADKFRFFSMVRDLLSWMESIRQIETQERPRDVSSVELLLKYHQGIKAEINTRAKNFSTCLELGE SLLQ  
RQHQASDEIREKLQVVISRRQEMNDKWEARS DRHLMLLEVCQFSRDASVAEAWLIAQEPY LASRDFGHTVDSV  
EKLIKRRHEAFEKSTASWAERFAALEKPTTLELKERQTPERPTEEPGPQEEEGETAGEAPQVHHAATERTSPGE  
ERGPWPQDLQPPPLPGHKKDEQEKS VGDERPATEPLFKVLDTP LSEGDEPTTLPAQRDLGHTVQMEGYLGRKH  
DLEGNPKKASNRSWNNLYCVLRNSQLTFYKDAKNLALGVPYHGEEPLALRHAI CEI AVNYKKKKHVFKLR LSN  
GSEWLFHGKDEEEMLMWLQSMSTAINESQSIRVKAQSLPLPSLAGPDASVGGKKEKRF SFFPKKK\*  
>ENSMUSP00000129782\_c.4720:c>A\_p.A1574D ENSMUST00000166101.2|Sptb-  
202|ENSMUSG00000021061|-|chr12:g.76653141:G>T  
MTSATEFENVGNQPPFSRINARWDAPDDELNDNNSARLFERSRIKALADEREVVQKKTFTKWNVNSHLARVSC  
RISDLYKDLRDGRMLIKLLEVLSGEMLPRPTKGMRIHCLENVDKALQFLKEQRVHLENMGSHDIVDGNHRLV  
LGLIWTIILRFQIQDIVVQTQEGRETRSAKDALLLWCQMKTAGYPHVNTNFTSSWKDGLAFNALIHKHRPDL  
IDFDKLDKSNARHNLEHAFDVAERQLGIIPLLDPEDVFTENPDEKSIITYVVAFYHYFSKMKVLAVEGKRVGK  
VIDHAIETEKMIKYSGLASDLLTWIEQTI SVLNSRKFANSLSGVQQQLQAFSTYRTVEKPPKFQEKGNLEVL  
LFTIQSRMRANNQKVYTPHDGKLVSDINRAWESLEEAEYQRELALRSELIRQEKLEQLARRFDRKAAMRETWL  
NENQRLVTDQDNFGYDLAAVEAAKKKHEAIETDTAAYEERVKALEDLAQELEKENYHDQKRI IARKDNILRLWS

YLQELLRSRRQRLEATLALQKLFQDMLHS IDWMDEIKAHILSAEFGKHLLEVEDLLQKHKLMEADIAIQGDKV  
KAITAATLQFAEGKGYQPCDPQVIQDRVSHLEQCFSELSNMAAGRKAQLEQSKRLWKFFWEMDEAESWIKEKE  
QIYSSLDYGDLDLTSVLILQRKHKAFEDLRGLDAHLKQIFQEADDMVAQKQFGHPQIETRVKEVSAQWDHLKE  
LAAFRRKDLQDAENFFQFQGDADDLKAWLQDAHRLLSGEDVQGDEGATRALGKKHKEFLEELEESRGMVMEHLE  
HQAQGFPEEFRDSDVVTNRLQALRKLQYQVLTQAEELRGHKLQEAALDLYTVFVGFSDACELWMTTEKGLWLDQMDI  
PNTLEDLEVVQHRFDILDQEMKTLMAQIDGVNLAANNLVESEGHPRSGEVKQYQDRLNKRWQAFQAVVSEQREA  
VDSALRVNNYCVDCDEETSKWIMDKTKVVESTKDLGQDLGAVIAIQRKLSGLERDVLAI RDRVSALERESQYLM  
ESHPEQKEDIQRQADVEKLVKGLQDALQGQELSLGEASKLQAFQDLDDFKAWLSMAQKAVASEDMPEESLPE  
AEQLLQQHAAIKKEEIDAHRDDYHRVKASGEKVIQEGQTDPDYQLLQQRLEGLDLDWDALRRMWESRGNLTQCL  
GFQEFQKDAKQAEAILSNQEYTLAHLEPPDSLAAAEAGIRKFEFDFVSMENNRDKILSPVDSGNKLVAEGLY  
SNKIMEKVQLIEDRHKKNNKAQEATVLLKDNLELQNFQNLCKELTLWINDKLLTSPDVSDEARNLHNKWMK  
HQAFMAELASHQGWLENI DAEGRQLMAEKPOFKDVSERLEALHKLWEELQSTAKAKAEQLSAARSSDLRLQT  
HADLNKWI GAMEDQLRSDDLKGLDITVNRMLAKLKALEEQVNLKKEEELFADAPSLGAEAGDTMSIEKRF  
LDLLEPLGRRKQLELSKAKLQISRDLEDETLWVEERLPLAQASADYGTNLQTVQVLFMKNQTLQNEILGHAPR  
VEDVLRGQELVKAEEIDCQDIEERLGHQLSSWDTLREAADGRLQRLRDAHEAQYYLDAGEAEAWISEQELY  
VFSDEPPKDEEGAIVMLKRHLRQRTVEEYGRNIKQLAGRAQSLLSAGHPPEGEQIIRLQGGVQKQYAGLKDMA  
EERRRLENMYHLFQLKREADDLEQWITEKEMVASSQEMGQDFDHTMLRDKFRDFARETGAIGQERVDNVNT  
IERLIDAGHSEAATIAEWDKGLNDMWADLLELIDTRMQLLAASYDLHRYFYTGTEILGLIDEKHRELPELVG  
LDASTAESFHRVHTAFERELHLLGVQVQFQDVATRLQTAAYAGEKADAIQSKEQEVSAAWQALLDACAGRRAQ  
LVDTADKFRFFSMVRDLLSWMESIRQIETQERPRDVSSVELLLKYHQGIKAEINTRAKNFSTCLELGESELLQ  
RQHQASDEIREKLQQVISRRQEMNDKWEARSDRHLMLLEVCQFSRDASVAEAWLIAQEPYLASRDFGHTVDSV  
EKLKRHEAFEKSTASWAERFAALEKPTTLELKERQTPERPTEEPGQEEGETAGEAPQVHHAATERTSPVS  
FMSRLSSSWESLLPEPAHPF\*

>ENSMUSP00000137146\_c.423:G>A\_p.D142N ENSMUST00000180053.2|Eif1ad14-  
201|ENSMUSG00000096619|-|chr12:g.87886204:C>T

MPKNKGKGGKNRRRGNENESKRELVFKEYGQEYAAQVTKMLGCGRLEAMCFDGVRRCLNIRGKLRKKVWINT  
SDIILIGLRDYQDNKADVILKYNQDEARSLKAYGELPEHAKINETDFTFGAGDDDEIVFDDIGDEDEDINDI\*

>rs236684668\_ENSMUSP00000137146\_c.358:C>A\_p.T120K  
ENSMUST00000180053.2|Eif1ad14-201|ENSMUSG00000096619|-  
|chr12:g.87886269:G>T

MPKNKGKGGKNRRRGNENESKRELVFKEYGQEYAAQVTKMLGCGRLEAMCFDGVRRCLNIRGKLRKKVWINT  
SDIILIGLRDYQDNKADVILKYNQDEARSLKAYGELPEHAKINETDKFGAGDDDEIVFDDIGDEDEDIDDI\*

>ENSMUSP00000082190\_c.282:C>A\_p.P95T ENSMUST00000085109.10|Ttc8-  
202|ENSMUSG00000021013|+|chr12:g.98909609:C>A

MGSEMEPLLRASVYFRRRKFQLCADLCTQMLEKSPYDQEAWIILKARALTEMVYIDEIDVDQEGIAEMILDENA  
IAQVPRPGTSLKLPGTNQTGGTTQAVRPITQAGRPITGFLRPSTQSGRPGTMEQAIRTPRTAYTARPITSSSG  
RFVRLGTASMLTSPDGPFFINLSRLNLTKYSQKPKLAKALFEYILHHENDVKMALDLASLSTEYSQYKDWKVV  
QIGKCYRRLGMYREAEKQFKSALKQQEMVDTFLYLAKVYIILDQPVTALNLFKQGLDKFPGEVTLGCIARIY  
EEMNNSSSAAEYKVLKQDNTHVEAIAACIGSNHFYSQPEVALRFYRRLQMGVYNCQLFNNLGLCCFYAQQ  
YDMTTLTSFERALS LAENEEEAADVWYNLGHIAVIGDITNLAHQCFRLALVHNNHAEAYNNLAVLEMRRKHVE  
QARALLQTASSLAPHMYEPHFNFATVSDKIGDLQRSYVAAQKSEVAFPEHVDTQHLLIKQLKQHFAML\*

>ENSMUSP00000078148\_c.312:C>A\_p.P105T ENSMUST00000079146.13|Ttc8-  
201|ENSMUSG00000021013|+|chr12:g.98909609:C>A

MGSEMEPLLRASVYFRRRKFQLCADLCTQMLEKSPYDQEPAPDLPVSAWILKARALTEMVYIDEIDVDQEG  
IAEMILDENAIQVPRPGTSLKLPGTNQTGGTTQAVRPITQAGRPITGFLRPSTQSGRPGTMEQAIRTPRTAY  
TARPITSSSGRFVRLGTASMLTSPDGPFFINLSRLNLTKYSQKPKLAKALFEYILHHENDVKMALDLASLSTEY  
SQYKDWKVVQIGKCYRRLGMYREAEKQFKSALKQQEMVDTFLYLAKVYIILDQPVTALNLFKQGLDKFPGEV  
TLGCIARIYEEMNNSSSAAEYKVLKQDNTHVEAIAACIGSNHFYSQPEVALRFYRRLQMGVYNCQLFNN  
LGLCCFYAQQYDMTTLTSFERALS LAENEEEAADVWYNLGHIAVIGDITNLAHQCFRLALVHNNHAEAYNNLA  
VLEMRRKHVEQARALLQTASSLAPHMYEPHFNFATVSDKIGDLQRSYVAAQKSEVAFPEHVDTQHLLIKQLKQH  
FAML\*

>ENSMUSP00000115828\_c.132:C>A\_p.P45T ENSMUST00000132878.2|Ttc8-  
204|ENSMUSG00000021013|+|chr12:g.98909609:C>A

MVYIDEIDVDQEGIAEMILDENAIQVPRPGTSLKLPGTNQTGGTTQAVRPITQAGRPITGFLRPSTQSGRPG  
TMEQAIRTPRTAYTARPITSSSGRFVRLGTASMLTSPDGPFFINLSRLNLTKYSQKPKLAKALFEYILHHENDV  
KMALDLASLSTEYSQYKDWKVVQIGKCYRRLGMYREAEKQFKSALKQQEMVDTFLYLAKV

>ENSMUSP00000116004\_c.1024:A>T\_p.K342M  
ENSMUST00000141572.8|D130043K22Rik-  
202|ENSMUSG00000006711|+|chr13:g.25046624:A>T  
MVSPPGVLSSLLLLAAMAGGSSQQCSEGRYSDAIISPNPETIRIMRVSQTFVSGDCTAACDLLTCDLAWWF  
EGSCYLVKCMRSENCEPRTTGPIRSYLTFFVRRPVQRPGQLLDYGMMLSRGSPSGAWGDSLEDLRKDLFFLGK  
DGGPEETTEYSDEYKDLERGLLQPSNQDPRGSAEYPDWSLLPSNEGGFNATATGDNSAASMEKLDQDTPHPL  
DQEQQLQALNESTWSPTPGHSSISSVWPSSASPLPTEEGLEGEETLQEQPSNSSGKEVPMPSHNPSASLES  
SPATTEKNSNFTVTPRSRKHSTPTFPTSTVLTGLTPPPWPLSPTASRTVMALAVSAGDNLVLTLPDREAELKA  
SVEPAPPADTTYSEWLSMHPVDFQGKIKQENKPTLHLSQLSVGLYAFRVAVSSENAFGEYVNVTVMPAAR  
VNQPPVAVVSPQTQELSVPLTSALIDGSQSTDDTEIVSYHWEEDVGPFLGEEFPADTPI LRSLNLPVGNVYTFR  
LTIITDSDGATNSTTASLVIRDAVDYPPVANAGPNQITITLQNTIILNGNQSSDDHQIVLYEWFAGPGGESKEM  
VMQGAQTPYLHLSELQEGEYTFQLMVTDSGQSTALVAVTVQAENNAQAPVAVAGPDKELVFPVQASATLDGSR  
SSDDHGIVCYHWEHIRGPSAVEMENVDKAIATVTGLQVGIYHFRLTVRDQQGLSSTSTLTAVKKENNSPPRA  
QAGGRHVLILPNNSITLDGSRSTDDRGIVSYLWIRDGQSPAAGTPRRMAWWS\*  
>ENSMUSP00000006893\_c.1024:A>T\_p.K342M  
ENSMUST00000006893.9|D130043K22Rik-  
201|ENSMUSG00000006711|+|chr13:g.25046624:A>T  
MVSPPGVLSSLLLLAAMAGGSSQQCSEGRYSDAIISPNPETIRIMRVSQTFVSGDCTAACDLLTCDLAWWF  
EGSCYLVKCMRSENCEPRTTGPIRSYLTFFVRRPVQRPGQLLDYGMMLSRGSPSGAWGDSLEDLRKDLFFLGK  
DGGPEETTEYSDEYKDLERGLLQPSNQDPRGSAEYPDWSLLPSNEGGFNATATGDNSAASMEKLDQDTPHPL  
DQEQQLQALNESTWSPTPGHSSISSVWPSSASPLPTEEGLEGEETLQEQPSNSSGKEVPMPSHNPSASLES  
SPATTEKNSNFTVTPRSRKHSTPTFPTSTVLTGLTPPPWPLSPTASRTVMALAVSAGDNLVLTLPDREAELKA  
SVEPAPPADTTYSEWLSMHPVDFQGKIKQENKPTLHLSQLSVGLYAFRVAVSSENAFGEYVNVTVMPAAR  
VNQPPVAVVSPQTQELSVPLTSALIDGSQSTDDTEIVSYHWEEDVGPFLGEEFPADTPI LRSLNLPVGNVYTFR  
LTIITDSDGATNSTTASLVIRDAVDYPPVANAGPNQITITLQNTIILNGNQSSDDHQIVLYEWFAGPGGESKEM  
VMQGAQTPYLHLSELQEGEYTFQLMVTDSGQSTALVAVTVQAENNAQAPVAVAGPDKELVFPVQASATLDGSR  
SSDDHGIVCYHWEHIRGPSAVEMENVDKAIATVTGLQVGIYHFRLTVRDQQGLSSTSTLTAVKKENNSPPRA  
QAGGRHVLILPNNSITLDGSRSTDDRGIVSYLWIRDGQSPAAGDVI GGS DHRAALQLTNLVEGVYTFHLLVTD  
SQGASDSDAATVEVLPDPKKDGLVELILQVGVEQLTEQQKETLVRQLAVLLNVLDSDVKVVKIQAHTDVSTVI  
VFYVQSGSPFKVLRAAAVARNLHKRLSKEKEAFLFKVLRVDTAGCLLKCSGHGHCDPITKRCICSQWLMENL  
IQRYMWDGESNCEWSVFYVAALALTLTLLTGAVSWLCICCCRRRKRKTKIRKKT KYTILDSMDEQERMELRPKY  
GIKHRSTEHNSSLMVSESEFESDQDTLFSRERMERGVKGS LNCARNGVSFGYYSKDR\*  
>ENSMUSP00000115062\_c.1111:G>T\_p.S371I ENSMUST00000124830.3|Dsp-  
201|ENSMUSG000000054889|+|chr13:g.38361194:G>T  
MSCNGGSHPRINTLGRMTRAESGPDRLRYEMTYSGGGGGGGGGGGGT SRTFYSHSRRCTVNDQNSDGYCQTGT  
MSRHQNQNTIQEMLQNCSDCLMRAELIAQPELKFEGMQLAWNRELD EYFTQANDQMEIIDGLIREMRQMGQP  
CDAYQKRLQLQEQMRALYKAI SVPRVRRASSKAGGYTCQSGSGWDEF TKRLTGECLGWMRQQREEMDLMAW  
GVDAGSVEQHINSHRSIHNTIGDYRWQLDKIKADLREKSAIYQLEEEYENLLKASFERMHLRQLQNI IQATS  
REIMWINDCEEEELLYDWSKNTNIAQKQEA FSI RMSQLEVKEKELNKLKQESDQLVLNQH PASDKIEAYMDT  
LQTQWIWILQITKCIDVHLKENAAYFQFFEEAQSTEAYLKG LQDSIRKKYPCDKNMPLQHLLEQIKELEKERE  
KII EYKRQVQNLVNKSKKIVQLKPRNPDYRSNKPIILRALCDYKQDQKIVHKGDECILKDN NERSK WYVTGPG  
GVDMLVPSVGLIIPPPNPLAVDL SCKIEQY YEA I LALWNQLYINMKSLSVSWHYCMIDIEKIRAMTIAKLK TMR  
QEDYMKTI EDLELHYQDFIKNSQGSEMF GDDDKRRMQS QFTDAQKH YQTLV IQLPGHPQHQT VTKTEITHLGT  
CQDVNHNKVIETNRENDKQETWLLMELQKIRRQMEHCEARMTLKNLLLAEQGSTHHITVKINELKSVQND SQA  
LAEVHLNQLKDMLANFRGSEKYCYLQNEIFGLFQKLENI NGVSDGYLNSLC SVRALLQAILQTEDMLKVYEARL  
TEEETVCLDLDKVEAYRCGLKKIKNDLNLKKSLLATMKTELQKQQIHSQSSQQYPLYDLDLKGFTKVTQLT  
DRWQKIDKQIDFRLWDLEKQIKQLRNYRDNYQS FCKWLYDAKRRQDSLES MKFGDSNTVMRFLNEQKNLHSEI  
SGKRDKSEEVHKIAELCANSIKDYELQLAS YTSGL ETLLNIPIKRTMVQSPSGVILQEAADIHARYIELLTRS  
GDYRFLSEMLKSLEDLKLKNTKIEVLEEEELRLARDANSENCNKNKFLDQNLQKYQAEC SQFKAKLVSLLEELK  
RQAE LDGKSAQNLDKCYGQIKELNEKI TRLTYEIEDEKRRRKTVE DRFDQ QKNDYDQLQKARQCEKENLSWQ  
KLESEKAIKEKEYEIERLRVLLQEEGARKREYENELAKVRNHYNEEMSNLRNKYETEINITKTTIKEISMQKE  
DDSKNLRNQMDRLSRENRLKDEIVRLNDSILQATEQRRRAEENALQQKACGSETMQKKQRLEIELKQVIQQR  
SEDNARHKQSELEAAKTIQDNKKEIERLKA EYQEEAKRWEYENELSKVRNSYDEEIIISLKNQFETEINITKT  
TIHQLTMQKEEDTSGYRAQIDNLTRENRS LCEEVKRLKNTLAQTENLRRVEENAQQKATGSEMSQRKQOLE  
IELRQVTQMRTEESMRYKQSLDDAAKTIQDNKKEIERLQKLVDKETNERKCLEDENSKLQRVQYDLQKANN SA  
TEAMSKLKVQEQELTRLRIDYERVSQERTVKDQDITRIQSS LKDLQLQKQAE EELSRLKRTASDESSKRKML  
EEELEAMRRSLKEQAVKITNL TQOLEQASIVKKRSEDDL RQQRDVLDGHVREKQRTQEELRRLSLDVEALRRQ  
LVQEQENVKQAHLRNEHFQKAI EDKSRSLNESKIEIERLQSLTENLTKEHLMLEELRNLRL EYDDLRRGRSE

ADSDKNSTISELRSQLOISNNRTLELQGLINDLQRERENLRQEIIEKFQKQALEASNRIQESKSQCTQVVQERE  
 SLLVKIKVLEQDKARLQRLLEDELNRAKATLEAESRVKQRLECEKQIQNDLNQWKTQYSRKEETIRKIESERE  
 KSEREKNSLRSEIERLQAEIKRIEERCRRKLEDSSRETQSQLESERCRLQKEIEKLRQRPYGSRETQTEYEW  
 TVDSSKLVFDGLRKKVTAMQLYECQLIDKTTLDKLLKGGKSVVEEVASEIQPFLRGAGAIAGASASPKEKYSLV  
 EAKRKKFITPESTVMLLEAQAATGGIIDPHRNEKLTVDNAVARDLIDFDDRQOIYTAEKAITGFDDPFSGKTV  
 SVSEAIKKNLIDRETGMRLLEAQLASGGVDPVNSVFLPKDVALARGLIDRDLYRSLNDPRDSQKNFVDPITK  
 KKVSYMQLRERCRIEPTHTGLLLSVQKRSMSFQGIQPVTVTELVDGILRPSTVNELESGQISYDEVGERIK  
 DFLQSSCIAGIYNETTKQKLGIEAMKIGLVRPGTALELLEAQAATGFIVDPVSNLRLPVEEAYKRGLVIGIE  
 FKEKLLSAERAFTGYNDPETGNIISLQFQAMNKELIEKGHGIRLLEAQIATGGIIDPKESHRLPVDMAKRGYF  
 NEELSEILSDPSDDTKGFFDPNTEENLTYLQKERCIDDEETGLCLLPLKEKKKQVQTSQKNTLRKRRVVID  
 PETNKEMSVQEAAYKGLIDYDTFKELCEQECEWEEITITGSDGSTRVVLVDRKTSQYDIQDAIDKGLVDRKF  
 FDQYRSGSLSTQFADMI SLKNGVGNSSGLGGSVNDDVFSRRHDSVSKI STISSVRNLTIRSSSLSDPLEES  
 SPIAAIFD TENLEKISIAEGIERGIVDSITGQRLLEAQAATGGI IHPTTGQKLSLQDAVNQGLIDQDMATRLK  
 PAQKAFIGFEGVKGKKMSAAEAVKEKWLPEYAGQRFLEFQFLTGGLVDPVHGRISTEEAIRKGFIDGRAAQ  
 RLQDISSYAKILTCPKTKLISYKDAMNRSVEDITGLRLLLEAASVSSKGLPSPYNMSAPGSRSGSRSGSRSG  
 SRSGSRSGSRSGSFDATGNSSYSYSFSSSSIGGY\*

>ENSMUSP00000117252\_c.1111:G>T\_p.S371I ENSMUST00000127906.8|Dsp-  
 202|ENSMUSG00000054889|+|chr13:g.38361194:G>T  
 MSCNGGSHPRINTLGRMTRAESGPDLYEMTYSGGGGGGGGGGGTSTRFYSHSRCTVNDQNSDGYCQTGT  
 MSRHQNQNTIQEMLQNCSDCLMRAELIAQPELKFEGMQLAWNRELDEYFTQANDQMEIIDGLIREMRQMGQP  
 CDAYQKRLQLQEQMRALYKAISVPRVRRASSKGGAGGYTCQSGSGWDEFKRLTGECLGWMRQOREMDLMAW  
 GVDAGSVEQHINSHRSIHNTIGDYRWQLDKIKADLREKSAIYQLEEEYENLLKASFERMDHLRQLQNI IQATS  
 REIMWINDCEEEELLYDWSKNTNIAQKQEAFAIRMSQLEVKEKELNKLKQESDQLVLNQHHPASDKIEAYMDT  
 LQTQWIIWILQITKCIDVHLKENAAYFOFFEEAQSTEAYLQGLQDSIRKKYPCDKNMPLQHLLEQIKELEKERE  
 KIEYKRVQNLVNSKSKIVQLKPRNPYRSNKPIILRALCDYKQDQKIVHKGDECILKDNNSKSWYVTGPG  
 GVDMLVPSVGLIIPPPNLAVDLSCKIEQYEAIALALWNQYIINMKSLSVSWHYCMIDIEKIRAMTIAKLTMR  
 QEDYMKTIEDLELHYDFIKNSQSEMFGDDDKRRMQSFLTDAQKHQTLVIQLPGHPQHRLPVDMAKRGYF  
 CQDVNHNKVIETNRENDKQETWLLMELQKIRRQMEHCEARMTLKNLLLAEQGSTHHTVTKINELKSVQNSQA  
 LAEVLNQLKDMLANFRGSEKCYLQNEIFGLFQKLENGVSDGYLNSLCSVRALLQAILQTEDMLKVYEARL  
 TEEETVCLDLKVEAYRCGLKKIKNDLNLKKSLLATMKTELQKAQIHSQSSQOYPLYDLDLGKFTKVTQLT  
 DRWQKIDKQIDFRLWDLEKQIKQLRNYRDNYQSFCWLYDAKRRQDSLESKMGFGDSNTVMRFLNEQKNLHSEI  
 SGKRDKSEEVHKIAELCANSIKDYELQLASYSGLTLLNIPKRTMVQSPSGVILQEAADIHARYIELLTRS  
 GDYYRFLSEMLKSLEDLKLKNTKIEVLEELRLARDANSENCNKNKFLDQNLQKYQAEC SQFKAKLVSLLEELK  
 RQAE LDGKSAQNLDKCYGQIKELNEKITRLTYEIEDEKRRRKTVEDRFDQKNDYDQLQKARQCEKENLSWQ  
 KLESEKAIKEKEYEIERLRVLLQEEGARKREYENELAKASNR IQESKSQCTQVVQERESLLVKIKVLEQDKAR  
 LQRLLEDELNRAKATLEAESRVKQRLECEKQIQNDLNQWKTQYSRKEETIRKIESEREKNSLRSEIER  
 LQAEIKRIEERCRRKLEDSSRETQSQLESERCRLQKEIEKLRQRPYGSRETQTEYEWTVDSSKLVFDGLRKK  
 VTAMQLYECQLIDKTTLDKLLKGGKSVVEEVASEIQPFLRGAGAIAGASASPKEKYSLV EAKRKKFITPESTV  
 MLEAQAATGGIIDPHRNEKLTVDNAVARDLIDFDDRQOIYTAEKAITGFDDPFSGKTVSVSEAIKKNLIDRET  
 GMRLLEAQLASGGVDPVNSVFLPKDVALARGLIDRDLYRSLNDPRDSQKNFVDPITK KKVSYMQLRERCRIE  
 PHTG LLLSVQKRSMSFQGIQPVTVTELVDGILRPSTVNELESGQISYDEVGERIKDFLQSSCIAGIYNE  
 TTKQKLGIEAMKIGLVRPGTALELLEAQAATGFIVDPVSNLRLPVEEAYKRGLVIGIEFKEKLLSAERAFTGY  
 NDPETGNIISLQFQAMNKELIEKGHGIRLLEAQIATGGIIDPKESHRLPVDMAKRGYFNEELSEILSDPSDDT  
 KGFFDPNTEENLTYLQKERCIDDEETGLCLLPLKEKKKQVQTSQKNTLRKRRVVIDPETNKEMSVQEAAYK  
 GLIDYDTFKELCEQECEWEEITITGSDGSTRVVLVDRKTSQYDIQDAIDKGLVDRKFFDQYRSGSLSTQFA  
 DMISLKNGVGNSSGLGGSVNDDVFSRRHDSVSKI STISSVRNLTIRSSSLSDPLEESSPIAAIFD TENLEKI  
 SIAEGIERGIVDSITGQRLLEAQAATGGI IHPTTGQKLSLQDAVNQGLIDQDMATRLKPAQKAFIGFEGVKG  
 KKMSAAEAVKEKWLPEYAGQRFLEFQFLTGGLVDPVHGRISTEEAIRKGFIDGRAAQRLQDISSYAKILTCP  
 KTKLISYKDAMNRSVEDITGLRLLLEAASVSSKGLPSPYNMSAPGSRSGSRSGSRSGSRSGSRSGSFD  
 ATGNSSYSYSFSSSSIGGY\*

>ENSMUSP00000115062\_c.8172:G>A\_p.V2725I ENSMUST00000124830.3|Dsp-  
 201|ENSMUSG00000054889|+|chr13:g.38381429:G>A  
 MSCNGGSHPRINTLGRMTRAESGPDLYEMTYSGGGGGGGGGGGTSTRFYSHSRCTVNDQNSDGYCQTGT  
 MSRHQNQNTIQEMLQNCSDCLMRAELIAQPELKFEGMQLAWNRELDEYFTQANDQMEIIDGLIREMRQMGQP  
 CDAYQKRLQLQEQMRALYKAISVPRVRRASSKGGAGGYTCQSGSGWDEFKRLTGECLGWMRQOREMDLMAW  
 GVDAGSVEQHINSHRSIHNTIGDYRWQLDKIKADLREKSAIYQLEEEYENLLKASFERMDHLRQLQNI IQATS  
 REIMWINDCEEEELLYDWSKNTNIAQKQEAFAIRMSQLEVKEKELNKLKQESDQLVLNQHHPASDKIEAYMDT  
 LQTQWIIWILQITKCIDVHLKENAAYFOFFEEAQSTEAYLQGLQDSIRKKYPCDKNMPLQHLLEQIKELEKERE

KIIEYKRQVQNLVNSKSKIVQLKPRNPDYRSNKPIILRALCDYKQDQKIVHKGDECILKDNNSKSWYVTGPG  
 GVDMLVPSVGLIIPPPNPLAVDLSCKIEQYEAIALALWNQLYINMKSLVSWHYCMIDIEKIRAMTIAKLKTMR  
 QEDYMKTIEDLELHYQDFIKNSQGSEMGDDDKRRMQSQFTDAQKHQTLVIQLPGHPQHQTIVTKTEITHLGT  
 CQDVNHNKVIETNRENDKQETWLLMELQKIRRQMEHCEARMTLKNLLLAEQGSTHHTVTKINELKSVQNSQA  
 LAEVLNQLKDMLANFRGSEKYCYLQNEIFGLFQKLENIINGVSDGYLNSLCSVRALLQAILQTEDMLKVYEARL  
 TEEETVCLDLKVEAYRCGLKKIKNDLNLKKSLLATMKTELQKAQQIHSQSSQQYPLYDLDLGKFTKVTQLT  
 DRWQKIDKQIDFRLWDLEKQIKQLRNYRDNYQSFCWKLYDAKRRQDSLESMTKFGDSNTVMRFLNEQKNLHSEI  
 SGKRDKSEEVHKIAELCANSIKDYELQLASYSGLTLLNIPKRTMVQSPSGVILQEAADIHARYIELLTRS  
 GDYRFLSEMLKSLLEDLKLKNTKIEVLEELRLARDANSENCNKNKFLDQNLQKYQAECSTQFKAKLVSLLEELK  
 RQAEILDGKSAKQNLKCYGQIKELNEKITRLTYEIEDEKRRRKTVEDRFDQKNDYDQLQKARQCEKENLSWQ  
 KLESEKAIKEKEYEIERLRVLLQEEGARKREYENELAKVRNHYNEEMSNLRNKYETEINITKTTIKEISMQKE  
 DDSKNLRNQMDRLSRENRLKDEIVRLNDSILQATEQRRRAENALQQKACGSETMQKKORLEIELKQVIQOR  
 SEDNARHKQSLEEAAKTIQDKNKEIERLKAQYQEEAKRRWEYENELSKVRNSYDEEIIISLKNQFETEINITKT  
 TIHQLTMQKEEDTSGYRAQIDNLTRENRLSCEEVRLKNTLAQTENLRRVEENAQQQKATGSEMQRKQOLE  
 IELRQVTQMRTEESMRKQSLDDAAKTIQDKNKEIERLQKLVKDETNERKCLEDENSKLQRVQYDLQKANNSA  
 TEAMSCLKVQEQELTRLRIDYERVSQERTVKDQDITRIQSSSLKDLQLQKQAEELSRKRTASDESSKRKML  
 EEELEAMRRSLKQAVKITNLQQLQEQASIVKKRSEDDLRQQRDVLDGHVREKQRTQEEELRRLSLDVEALRRQ  
 LVQEQENVKQAHLRNEHFQKAIEDKSRSLNESKIEIERLQSLTENLTKHELMLEELRNLRLRYDLELRRGRSE  
 ADSDKNSTISELRSQLOISNNRTLELQGLINDLQRERENLRQEIIEKFQKQALEASNRIQESKSQCTQVVQERE  
 SLLVKIKVLEQDKARLQRLDELELNRAKATLEAESRVKQRLCEKQIQNDLNQWKTQYSRKEETIRKIESERE  
 KSEREKNSLRSEIERLQAEIKRIEERCRRKLEDSSTRETQSQLESECRLOKEIEKLRQRPYGSHTRETQTEYEW  
 TVDSSKLVFDGLRKKVTAMQLYECQLIDKTTLDKLLKGGKSVVEEVAEIQPFLRGAGAIAGASASPKEKYSLV  
 EAKRKKFITPESTVMLLEAQAATGGIIDPHRNEKLTVDNAVARDLIDFDDRQOIYTAEKAITGFDDPFSGKTV  
 SVSEAIKKNLIDRETGMRLLEAQLASGGVDPVNSVFLPKDVALARGLIDRDLYRSLNDPRDSQKNFVDPITK  
 KKVSYMQLRERCRIEPTGLLLLLSVQKRSMSFQGIQPVTVTELVDGILRPSTVNELESGQISYDEVGERIK  
 DFLQSSCIAGIYNETTKQKLGIEYAMKIGLVRPGTALELLEAQAATGFIVDPVSNLRLPVEEAYKRLVGIIE  
 FKEKLLSAERAVTGNPETGNIISLFQAMNKELIEKGHGIRLLEAQAATGGIIDPKESHRLPVDMAKRYGIF  
 NEELSEILSDPSDDTKGFFDPNTEENLTYLQKERICKDEETGLCLLPLKEKKKQVQTSQKNLTKRRRVIVD  
 PETNKEMSVQEAAYKGLIDYDTFKELCEQECEWEEITITGSDGSTRVVLVDRKTSQYDIQDAIDKGLVDRKF  
 FDQYRSGSLSTQFADMI SLKNGVGNSSGLGGSVNDDVFSRRHDSVSKIISTISSVRNLTIRSSSLDPLEES  
 SPIAAIFDTEENLEKISIAEGIERGIVDSITGQRLLEAQAATGGIIPHTTGQKLSLQDAVNQGLIDQDMATRLK  
 PAQKAFIGFEGVKGKKMSAAEAIEKWLPEYAGQRFLEFQFLTGGLVDPEVHGRISTEAIKRGFIDGRAAQ  
 RLQDISSYAKILTCKPKTKKISYKDAMNRSVEDITGLRLLLEAASVSSKGLPSPYNMSAPGSRSGSRSGSRSG  
 SRSGSRSGSRSGSFDATGNSSYSYSYSFSSSSSIGGY\*

>ENSMUSP00000117252\_c.6375:G>A\_p.V2126I ENSMUST00000127906.8|Dsp-  
 202|ENSMUSG00000054889|+|chr13:g.38381429:G>A

MSCNGGSHPRINTLGRMTRAESGPDLYEMTYSGGGGGGGGGGGGTSRTFYSHSRRCTVNDQNSDGYCQTGT  
 MSRHQNQNTIQEMLQNCSDCLMRAELIAQPELKFEGEGMLAWNRELDEYFTQANDQMEIIDGLIREMRQMGQP  
 CDAYQKRLQLQEQMRALYKAISVPRVRRASSKGGAGGYTCQSGSGWDEFTKRLTGECLGWMRQOREMDLMAW  
 GVDAGSVEQHINSHRSIHNTIGDYRWQLDKIKADLREKSAIYQLEEBEYENLLKASFERMDHLRQLQNI IQATS  
 REIMWINDCEEEELLYDWSKNTNIAQKQEAIFSIRMSQLEVKEKELNKLKQESDQLVLNQHHPASDKIEAYMDT  
 LQTQWSWILQITKCIDVHLKENAAYFQFFEEAQSTEAYLKGQLDSIRKKYPCDKNMPLQHLLLEQIKELEKERE  
 KIIEYKRQVQNLVNSKSKIVQLKPRNPDYRSNKPIILRALCDYKQDQKIVHKGDECILKDNNSKSWYVTGPG  
 GVDMLVPSVGLIIPPPNPLAVDLSCKIEQYEAIALALWNQLYINMKSLVSWHYCMIDIEKIRAMTIAKLKTMR  
 QEDYMKTIEDLELHYQDFIKNSQGSEMGDDDKRRMQSQFTDAQKHQTLVIQLPGHPQHQTIVTKTEITHLGT  
 CQDVNHNKVIETNRENDKQETWLLMELQKIRRQMEHCEARMTLKNLLLAEQGSTHHTVTKINELKSVQNSQA  
 LAEVLNQLKDMLANFRGSEKYCYLQNEIFGLFQKLENIINGVSDGYLNSLCSVRALLQAILQTEDMLKVYEARL  
 TEEETVCLDLKVEAYRCGLKKIKNDLNLKKSLLATMKTELQKAQQIHSQSSQQYPLYDLDLGKFTKVTQLT  
 DRWQKIDKQIDFRLWDLEKQIKQLRNYRDNYQSFCWKLYDAKRRQDSLESMTKFGDSNTVMRFLNEQKNLHSEI  
 SGKRDKSEEVHKIAELCANSIKDYELQLASYSGLTLLNIPKRTMVQSPSGVILQEAADIHARYIELLTRS  
 GDYRFLSEMLKSLLEDLKLKNTKIEVLEELRLARDANSENCNKNKFLDQNLQKYQAECSTQFKAKLVSLLEELK  
 RQAEILDGKSAKQNLKCYGQIKELNEKITRLTYEIEDEKRRRKTVEDRFDQKNDYDQLQKARQCEKENLSWQ  
 KLESEKAIKEKEYEIERLRVLLQEEGARKREYENELAKASNR IQESKSQCTQVVQERESLLVKIKVLEQDKAR  
 LQRLDELELNRAKATLEAESRVKQRLCEKQIQNDLNQWKTQYSRKEETIRKIESEREKSEREKNSLRSEIER  
 LQAEIKRIEERCRRKLEDSSTRETQSQLESECRLOKEIEKLRQRPYGSHTRETQTEYEWTVDSSKLVFDGLRKK  
 VTAMQLYECQLIDKTTLDKLLKGGKSVVEEVAEIQPFLRGAGAIAGASASPKEKYSLV EAKRKKFITPESTV  
 MLEAQAATGGIIDPHRNEKLTVDNAVARDLIDFDDRQOIYTAEKAITGFDDPFSGKTVSVSEAIKKNLIDRET  
 GMRLLEAQLASGGVDPVNSVFLPKDVALARGLIDRDLYRSLNDPRDSQKNFVDPITK KKVSYMQLRERCRIE

PHTGLLLLSVQKRSMFQGIRQPVTVTELVDSGILRPSTVNELESGQISYDEVGERIKDFLQSSCIAGIYNE  
TTKQKLGIEYAMKIGLVRPGTALELLEQAATGFIVDPVSNLRLPVVEEAYKRGLVGFIEFKEKLLSAERAVTGY  
NDPETGNIISLQAMNKELIEKGGHGRILLEAQIATGGIIDPKESHRLPVDMAKRGYFNEELSEILSDPSSDDT  
KGFDPNTEENLTYLQKERICDEETGLCLLPLKEKQVQTSQKNTLRKRRVVIVDPETNKEMSVQEAAYKK  
GLIDYDTFKELCEQECEWEEITITGSDGSTRVVLVDRKTGSQYDIQDAIDKGLVDRKFFDQYRSGSLSLTQFA  
DMISLKNVGNSGLGGSVNDDVFSRRHDSVSKISTISSVRNLTIRSSSLSDPLEESSPIAIFDTENLEKI  
SIAEGIERGIVDSITGQRLLAQACTGGIIHPTTQKLSLQDAVNQGLIDQDMATRLKPAQKAFIFGEGVKGK  
KKMSAAEAIKEKWLPEAGQRFLEFQFLTGGLDVPEVHGRISTEEAIRKGFIDGRAAQRLQDISSYAKILTCP  
KTKLKI SYKDAMNRSMVEDITGLRLLEAASVSSKGLPSPYNSAPGSRSGSRSGSRSGSRSGSRSGSRSGRGSFD  
ATGNSSYSYSFSSSSIGGY\*

>ENSMUSP00000021930\_c.906:C>A\_p.Q303K ENSMUST00000021930.10|sfxn1-  
201|ENSMUSG00000021474|+|chr13:g.54260560:C>A  
MSGEVPPNINIKEPRWDQSTFIGRASHFFTVTDPRNILLTNEQLENARKVVDHYRQGIVPAGLTENELWRACY  
AYDSAFHPDTGEMKTLIGRMSAQVPMNMTITGCMFTFYRTPAVLFWQWINSFNNAVNYTNRSGDAPLTVNE  
LGTAYVSATTGAVATALGLNALTKRVSPLIGRFVPAFAVAANNCINIPLMRQRELKVGIPVTDENGTRELGEST  
NAAKQAITQVVISRILMAAPGMAIPPFIMNTLEKKAFLKRFPMWMAPIQVTLVGFLVCFATPLCCALFPQKSS  
MSVTSLLEDEKASIQRTHPEIRRVYFNKGL\*

>ENSMUSP00000022036\_c.202:A>C\_p.D68A ENSMUST00000022036.14|Slc28a3-  
201|ENSMUSG00000021553|-|chr13:g.58730512:T>G  
MSRADPGKNSPESKMSLELRPTAPSDLGRSNEAFQDEDLERQNTPGNSTVRNRVVSQGEQGHAQADRQIT  
IEQEPLGNKEDPEDDSEDEHQKGFLEKRYDTICEFCRKHVRVLRSTIWAVLLTGFLALVIAACAINFHRALPL  
FVITLVTIFFVIWDHLMAYEQRIDDFLSPGRRLDRHWFWLKWVWSSLLILAILLWLSLDTAKLQQNLVVSF  
GGLIMYLILLFLFSKHPTRVYWRPVFWGIGLQFLGLLI LRTRGFVAFDWMGRQVQTFLGYTDTGARFVFG  
KYTDHFFAFKILPIVFFSTVMSMLYLLGLMQWIIKRVGWLMLVMTGSSPIESVVAAGNIFIGQTESPLLQV  
YLPHTKSELHTIMTAGFATIAGSVLGAYISFGVSSTHLLTASVMSAPAALAVAKLFWPETEKPKITLKSAMK  
MENGDRSNLEAASQGASSIPLVANIAANLIAFLALLSFVNSALSWSFGSMFNYPELSFELICYSIFMPFVSM  
MGVDWQDSFMAKLGKTYTFNNEFVAYDHLKSLINLRKAAGPKFVNGVQYMSIRSETIATYALCGFANFGSL  
GIVIGGLTSIAPSRKRDIASGAMRALIAGTIACFMTACIAGILSDTPVDINCHHVLENGRVLNNTTEVVSCQ  
NLFNSTVAKGPNDDVPPGGNFSLYALKSCCNLLKPPTLNLCNWI PNKL\*

>ENSMUSP00000097048\_c.642:A>C\_p.K215Q ENSMUST00000099449.4|Zfp808-  
201|ENSMUSG00000074867|+|chr13:g.62319415:A>C  
MNAVTYRQVHVNFTEQEWALLDPSQKLYKDVMLETYRNLNAIGFNWEAQNIEEHCQSSRRRHRRCERSQSAEK  
PSEYTORQDRAKAFALRAHSHAQRHERIHTEKIPSEDIHCVEDVLPYTSLQVHKRQTGTGQKPYECKQCGKGFAPK  
HLKRHERFHTVEQPFCINECEDEVFSFKHHLQTHIRVHTGKPFKCNLQDKSFSKHNHLQSHRRTHTGEQPYKC  
DQCDKAFSEKCNLQTHIRIHTGKPYKCDQCDKTFSEKCHLQKHIRIHTGKPYKCNQCDKAFSQYSTLQTHR  
RHTHTGKPYKCNQCDKAFSQYGNLQTHRRHTHTGKPFKCNQCDKAFSQYSTLQTHRRHTHTGKPYKCNQCDK  
FSEKCSLQRHIRIHTGKPYKCNQCNKAFSHNYHLHIHRRHTHTGKPYKCNQCDKAFSIFHPLQNHKRHTHTGE  
KPYKCNQCDKAFSEKCHLQNHIRIHTGKPYKCNQCDKAFSQYFSLQTHRRHTHTGKPFKCNQCDKAFSQYST  
LQTHRRHTHTGKPFKCNQCDKAFSKHSTLQSHRRHTSHTGKPFKCSQCDKAFSQYNTLQAHRRHTSHTGKPFK  
QCDKAFSEKCNLQKHIRIHTGKPYKCNQCDKAFSQYNTLQTHRRHTHTGKPFKCNQCDKAFSRHSTLQTHRR  
THTGKPFKCNQCDKVFSQYNSLQTHRRHTHTGKPYKCDQCDKAFSMKCNLQNHVRIHTGKPYKCNQCDKAF  
FQYSNLHIHRKTHHTGQKPYKCNQ\*

>ENSMUSP00000119114\_c.1692:T>A\_p.S565T ENSMUST00000126879.8|Zfp369-  
202|ENSMUSG00000021514|+|chr13:g.65444551:T>A  
MDPGEGRSAFCLLPLENTEDSMASLTPTTWPHEVSVKFDVSLRFTEEWALLDRQKCLYREIMMENLNMIS  
VEHHFSKANVMPQLEEVDCWPMQREIPQDTLPECSGHS LDPENMSFPAESPLMKIKVVEVLTLNKDMAGPRN  
ALIQSLYPESGEDLNPNGLKPAQQPSKHLTDTEASRQKFRHFQYEEASAGPQKSVSQRKLRKLCHQWLQVSTRSKK  
QILELLVLEQFLNALPEKLRVWVESQHPEDCKAVVALLENMTSVSKDDAWLACSSEATDELKEKRKDVATLPV  
TVPPEAPVTFQDVAVDFSQEELQGLGPMQRTKYHDMLETLGNLVSQGWEPVTLGNRELTDPDSPIPVVKPIHDP  
NPKDLRSRNTQSTLFESISPDEVQGRHTIESNPVGLLQEKGHPPQKLSESSKSNQTCIDKSQCSLNEVLPN  
HVKVKQKGTGKGGKGRNTISM TGGLRIRNQKDSVEWRDRSGSTPVTHGSSIKNQQLGSEQGTQTSRDPITL  
AVPAEFYQEATGSEGRFRNSNAMAADAPPKIHQKGPWEHKAAGKSNNSMLQGTSAQNHQMGSRAGRARDNSI  
LTHVKIHQKGYKEGKIQGNNNYKLVKVPKQKSGKERLRELSTCQKHVPYVKQHLKTSRGRGKRKINASIKCG  
PYIKTYRGSVDGRLRRANNCRAISRHAQQISFIKIHKGSQICQCECGKMFNRNARYFVSHKKIHTGERPYM  
CMSCGKAFVQSSSLTQHLRIHSGERPFECSECGRTFSDRSAASQHLRHTHTGAKPYQCQCHGKAFRQS SHLTRH  
VRIHTGERPYVCTKCGKAFTQSSNLIHQKTHRKKFKKQPKL\*

>ENSMUSP00000019572\_c.249:A>TA\_p.N84ins-fs ENSMUST00000019572.9|Zfp874b-  
201|ENSMUSG00000059839|-|chr13:g.67623047:T>TA



MEEMLSFRDVAIDFSPEERDYLGAQWDLYRDVMLENYSHLVFLGLAVAKPYLVTFLEQNQGSSGVKSHAAAT  
IPGTTGNEFN  
>ENSMUSP00000153242\_c.261:A>TA\_p.N88ins-fs ENSMUST00000223868.2|Zfp874b-  
203|ENSMUSG00000059839|-|chr13:g.67623047:T>TA  
MESLFFQEMLSFRDVAIDFSPEERDYLGAQWDLYRDVMLENYSHLVFLGLAVAKPYLVTFLEQNQGSSGVKSH  
AAATIPGTTGNEFN  
>ENSMUSP00000022100\_c.672:C>T\_p.Q225\* ENSMUST00000022100.7|slc6a3-  
201|ENSMUSG00000021609|+|chr13:g.73705183:C>T  
MSKSKCSVGPMSVAPAKEPNAVGPREVLELILVKEQNGVQLTNSSTLINPPQTPVEVQERETWSKKIDFLLSV  
IGFAVDLANVWRFYPYLCYKNGGGAFVLPYLLFMVIAGMPLFYMELALGQFNREGAAGVWKICPVLKGVGFTVI  
LISFYVGFYFNVI IAWALHYFFSSFTMDLPWIHCNNTWNSPNCSDAHSNSSDGLGLNDFTFGTTPAAEYFERG  
VLHLH\*SRGIDDLGPPRWQLTACLVLVIVLLYFSLWKGVKTSKGVVWITATMPYVVL TALLRGTLP GAMDG  
IRAYLSVDFYRLCEASVWIDAATQVCFSLGVGFGVLIASFSSYNKFTNNCYRDAI ITTSINSLTSFSSGFVVS  
FLGYMAQKHNVPIRDVATDGPGLIF I IYPEAIATLPLSSAWAAVFFLMLLTLGIDSAMGGMESVI TGLVDFEQ  
LLHRHRELFTLGIVLATFLLSLFCVTNGGIYVFTLLDHFAAGTSLFVGLIEAIGVAWFYGVQQFSDDIKQMT  
GQRPNLYWRLCWKLVSFCLLYVVVVSIVTFRPPHYGAYIFPDWANALGWIIATSSMAMVPIYATYKFCSLPG  
SFREKLAYAITPEKDRQLVDRGEVRQFTLRHWLLV\*  
>ENSMUSP00000050408\_c.10162:T>A\_p.V3388E ENSMUST00000062122.4|Cmya5-  
201|ENSMUSG00000047419|-|chr13:g.93201798:A>T  
MESGDSGLAAQGFGLGWGADEEVAQELETEEESEGEGETAAESEEPPDARLSDEDEEGKTKQECIVSDPSFSM  
VAVQREDSGITWETNSSRSSTPWASGESQTSIGCSLEGSALTSPPGSVSFIMDEVKTRTRKRTQKSKRGSPSLR  
RKGSKKRNSLESQDVL TNQEDGPSISESPVLNIENKSSIGTYDKTRRKTASNTTPITGAIYKEHKPLVLKP  
VYIGTVQYKIKMFNSVKEELI PLQFYGTLPKGYVIKE IHYRRGKDS S I SLEPDLNNGGSI V PQRKLAQSP  
DKVRELAPPWRGALS KGSRTS LFSHEEQKKT YADSNLNVPSSTEHAFSSARNDTADQEEENLSLPQMPPQPA  
DESKTRMEPPSI PATMVLERAKEELEQNAQKESSEDDASVLTGSADDVQOEGLVSVNHSMPWEAEKESLET  
GPPRPAPAIQEKPEPDMEGLEPI STEKTEQASEYVTSSEPIVHREEEHAP EPIVHREEEHAP EPIVHREEEHA  
PEPIVHREEEHAPESIVHREEEHAPESIVQREEEHAPESIVHREEEHAPGPVPIVHREEEHVPELESIVHR  
GEEHAP EPIVHRDEGHAP EPIVHREEEHVPEPIVHRDEGHAP EPIVHREEEHVPEPESIVHREEEHAP EPMVL  
RKAQLERGVETSTPITD TTEPEDSSLEEE I IELDY P ESPLASKETS P S PLSPEVEHRKEPI LPTQMTFTPERI  
TLSEEREENESVSTDSAFVSEY SVLQDLNHTPEKLEVEAVSVSDVKSSNEPAVFS EDD EERESYSPAMTSVS  
EQSLSPSTTEKTSAIQSPLFSTVSPVLSGDEASESVCHSPESESAAEYSVPAHAQELLLKTGDHKLPLKSQRV  
SEPI IQAEDEKEDI GLLPPAALSQAVLSEDESLGSGSFASDSKLPFKPSVSQNATRESPQKTIDDMPQFKPRG  
LSDPATLLEEEKEAIGVGLSSNEVS AVECALPPQTTELLSESHAPPPWAISSEQV VQSEEGSRDQQRGFS  
TPELGHTSPLLLK GASSPTGLSEQQEEDNIGPLSPDSAFASEFSFSPYPTQELEKRELGRDSPCLCTSPSEQ  
TVLSD EDETEADL FSPDSASQVSI P PYRIAETE QNKVPEDELLPRRSAPDY P YFSEADEEEAGSSVVTVPPEH  
SEPSQEREESPCRPVFEDLSLLPSADKTGQAE TMSDVPTISTVSEYLILAQQEKTQASLEPEAE DLVPPPT  
SGWEKRDAKSSLPAVTIAASSSALS SVVKEETTSVLPTSQPSVSP ESTCVLKPEQEPTAPLTLTSADEQMALP  
RVGREKAVLDSQEATAHKSQDQTPEPRLPNVPGSGMKYSVLSDLGDEPKADVKNLAPTVTSELEQRMLSKNE  
PEVAKPHSPPEETSISGPKVLSAVKTEVKQESKITRELPAASSGRERGAEHSPPAPPALPALMEEMGKDTEAS  
SSATTVPVTKLDSNSTKLGRDEVLTDP SLASPV EHPGLKGVGKSELGSGLP LPSMSTSEVLRPEPKLPVNSGV  
EVEREDNEPPPLQVSPTS KPTVPNDKHEEITRSPDSENVVSDDLAPTLLALRHEMNRQAEETSSVPVGSF LSG  
EQELIKLPPEPEKHKQLSEVPTAGSELIDSRDRDRSLGIEPVKPIGTEPGPSILEKGAELQRRGKEQEENRK  
LPVPASAPLETASFDLPIEQKEPKRTLHEGQAVEVPDESSSSADKPELGVKQLAEKKENLEQPKPFVTERAS  
V TGSKVKESLISPKDNTWMLEKPDGLVNVQHEDRKPGTGQLESSESTDLMSEKLGAAPLDTHDHTSETRNQETS  
APVSGEKLSDQEP RRVS KAVDDSEGRK L ASGNVEVLTQSKSVPAVKAKATPQPPEPTPEVTQKPKSEKSLVTEQ  
GLPAEKGKKGISSFKSWMSLLFGSSIPDSKVS DNEDLETRPGPSVEKAVPAIEPKGTVPAEVNIAEKPAVHS  
LPEVTVKLAEEPKGVSVKSSISQDLKEKLTFLSNEDVLKQPKNSSENYGQKELPGFSEGMGESLATS VGD KHP  
GIHPCSPMGEKVMEEAQNMAPLHITESQRRQKPEVSSPSMWNISARKEEPS SDHKETWLS S SDVDRMPQKP  
KSAQSAFTRMNSEEPASMI LPVESKGSLSDLGEDRLRQEMPKPTSL EHC EEEVERPTEEKDGWETRSFSLAGK  
RGLAEKQEI MAPLELRENEAVGELQRMPE SRPFKLEESKAAERLEQRISPT EKLMEKPSKTLALDRREKEVQE  
WVFSEGEKQEYPPAAMPVPGASAVSLDKAQPHLLAKPTPVVEKPEHIVTEVYPEIRERKAAETQPHPQEEGKT  
LVEKTKVSRVESPHGEETDGHSITQEGNLELEKSGESRVDLKEERRRFVMPELS LGASVA AEDGVSQPRPLSK  
DAARVSDMTDET KHLGTPPTQPSAVEPQTLVLGTSVEHTVKKQETWSDRPTVHTFQTSKDYTEMLKQSVLIS  
KHHLEAVD VHRNEPPSSAASNYTQFMLSASEI SADGVP PMGGTAQEPEGT SVKDEEF SVT SKPAGLSEDDQKS  
AFSII SEGCEILNIHAPAFI PSVDQEESEQM QDKLQYLEEKASFKSI SVHDEKKA AASHKTQKSKLEV PDRKI  
TSLKENETKETHKTKEEIATDSGMGDFTP IQPTVSGEEDYFEKYTLIDYNLSPGSGKQKSTVEESSE EATKTL  
TSFPESAEQALDHEYNLVKLDSEFYGPEKDDSKLSHAEMQKSLAIQKPPDRNAPKGISRDVDSRSPGMPLFD  
VEEGLVSKRQIFPTTPKAVNPELLEPPALSFFYKDL YEGAGGEKNEGETASEGDSVDSETSFP RRS DTDG

PGMYFEKYILKDDILHDETVTQEDQGGLEEKPVGEEESQQLRVAEREIRRKPETSFWEKNLEE QHKVVGREG  
EPTGHMETLDEAAMQQKAPITEQVRAVTQKMSYAVPFQDTRCVLESEPSQGNEAGNASPDVNLNVVQESFP  
EEESAAGATYAPEVLQERLVPVSREERLHNTPVQDEYDFVGSINQEAASQAILPEEPGSESSPKEVLSQSGSE  
SFEHIREQELTSEGEPRMSASQEVWDRTEQDQSAESVTAKTQKEPKKTQAESYCYTCKSLVSEMDKALDIHKD  
HEVSALDTAISAVKVQLGEFLENLQEKSLRIEAFVSEIESFFNTIEEKCSKNEKRLEMONEEMMKRVLAQYDE  
KAQSFEEVKKKKMEFLHDQMVHFLQSMDTAKDTLETIVREAEELDETVFLASFEEINERLLSAMESASTLENM  
PAAFSLFEHYDDSSARSQMLKQVAVPQPRLPEQEPSSATSTTIAVYWSVNKEDVVDVSFQVYCVVEEPQDDQE  
INELVEEYRLTVKESCCI FEDLEPDRCYQEWVMVAVNFTGCSLPSERAI FRTAPSTAVIHVEDCTVCWNTATVR  
WRPANPEATETTYTLEYCRQHSPEGELRSFSGIKGLQLKVNLPNDNYFFYVRATNASGTSEQSEAAALISTRG  
TRFLLLRETAHPALQISANGTVISFSERRRLTEIPSVLGEELPACGQHYWETTAVDSPAAYRLGICTSSAVRAG  
ALGQGETSWYMHCSSEPQRYTFFYSGIVSEVHATERPARVGI LLDYTNQRLLFINAESGQLLFIVRHRFNEGVB  
PAFALEKPKGRCTLHLGLEPPDSVRHK\*

>ENSMUSP0000022197\_c.273:G>T\_p.E92\* ENSMUST0000022197.15|Scamp1-  
201|ENSMUSG0000021687|-|chr13:g.94368649:C>A  
MSDFDSNPFADPDLNPNFKDPSVTQVTRNVPPGLDEYNPFSDSRTPPPGSVKMPNVPNTQPAIMKPTEEHPAY  
TQITKEHALAQAE LLKQ\*ELERKAAELDRREREMQNLSQHGRKNNWPPLPSNFPVGPFCFYQDFSVDI PVEFQ  
KTVKLMYYLWMFHAVTLFLNIFGCLAWFCVDSSRAVD FGLSILWFLLFTPCS FVCWYRPLYGAFRSDSSFRFF  
VFFFVYICQFAVHVLQAAGFHNWNGCGWISSLTGLNKNI PVGIMMI IIAALFTASAVISLVMFKKVHGLYRRT  
GASF EKAQQEFATGVM SNKTVQTAAANAASTAATSAAQNAFKGNQM\*

>ENSMUSP00000123135\_c.117:G>T\_p.E40\* ENSMUST00000152555.8|Scamp1-  
203|ENSMUSG0000021687|-|chr13:g.94368649:C>A  
MPNVNTPQPAIMKPTEEHPAYTQITKEHALAQAE LLKQ\*ELERKAAELDRREREMQNLSQHGRKNNWPPLPS  
NFPVGPFCFYQDFSVDI PVEFQKTVKLMYYLWMFHAVTLFLNIFGCLAWFCVDSSRAVD FGLSILWFLLFTPCS  
FVCWYRPLYGAFRSDSSFRFFVFFFVYICQFAVHVLQAAGFHNWNGCGWISSLTGLNKNI PVGIMMI IIAALF  
TASAVISLVMFKKVHGLYRRTGASF EKAQQEFATGVM SNKTVQTAAANAASTAATSAAQNAFKGNQM\*

>ENSMUSP00000120053\_c.117:G>T\_p.E40\* ENSMUST00000153558.8|Scamp1-  
204|ENSMUSG0000021687|-|chr13:g.94368649:C>A  
MPNVNTPQPAIMKPTEEHPAYTQITKEHALAQAE LLKQ\*ELERKAAELDRREREMQNLSQHGRKNNWPPLPS  
NFPVGPFCFYQDFSVDI PVEFQKTVKLMYYLWMFHAVTLFLNIFGCLAWFCVDSSRAVD FGLSILWFLLFTPCS  
FVCWYRPLYGAFRSDSSFRFFVFFFVYICQFAVHVLQAAGFHNWNGCGWISSLTGLNKNI PVGIMMI IIAALF  
TASAVISLVMFKKVHGLYRRTGASF EKAQQEFATGVM SNKTVQTAAANAASTAATSAAQNAFKGNQM\*

>ENSMUSP00000121039\_c.117:G>T\_p.E40\* ENSMUST00000138255.2|Scamp1-  
202|ENSMUSG0000021687|-|chr13:g.94368649:C>A  
MPNVNTPQPAIMKPTEEHPAYTQITKEHALAQAE LLKQ\*ELERKAAELDRREREMQNLSQHGRKNNWPPLPS  
NFPVGPFCFYQDFSVDI PVEFQKTVKLMYYLWMFHAVTLFLNIF

>ENSMUSP00000104890\_c.717:C>T\_p.P240S ENSMUST00000109267.9|Map3k1-  
201|ENSMUSG0000021754|-|chr13:g.111909231:G>A  
MAAAAGDRASSSGFPGAAAASPEAGGGGGGGALQSGGAPAGAAGLLREPGSAGRERADWRRRQLRKVRSVE  
LDQLPEQPLFLAAASPPCPSTSPSEPADAAAGASRFQPAAGPPPPGAASRCGSHSAELAAARDSGARSPAGA  
EPPSAAAPSGREMNKETLKLGHKMEDRPEERMIREKLKATCMPAWKHEWLERRRNRGPPVVKPIPIKGDGSE  
MNNLAAEPQEGQAGSAPASKGRRSPSPGSSPSGRSVKPESPGVRRKRVSPVPFQSGRITPPRRAPSPDGF  
PYSPEETSRRVNVKVMRARLYLLQQIGPNSFLIGGDS PDNKYRVF IGPNQSCGRGAFCIHLLFVMLRVFQLEP  
SDPMLWRKTLKNFVEVSLFQKYHSRRSSRIKAPSRNTIQKFVSRMSNCHTLSSSSTSTSSSENSIKDEEQMC  
PICLLGMLDEESLTVCEGDCRNLHHHCMSIWAEECRNRNREPLICPLCRSKWRSHDFYSHELSSPVESPTSLR  
AVQPPSSPQQPVAGSQRRNQESSFNLTHTFGTQQIPSAKDLAEPWIQVFGMELVGLFSRNWNVREMLRRLS  
HDVSGALLLANGESTGNSGGGSGSLSAGAASGSSQPSISGDVVEACCSVLSIVCADPVYKVYVAALKTLRAM  
LVYTPCHSLAERIKLQRLLRPVVDITLVKCADANSRSTQLSISTVLELQKQAGELAVGREILKAGSIGVGGV  
DYVLSICILGNQAESNNWQELLGRCLIDRLLLEFPAEFYPHIVSTDVSOAEPVEIRYKLLSLLTFALQSIDN  
SHSMVGKLSRRIYLSSARMVTAVPAVFSKLVTMLNASGSTHFTMRRLMAIADEVEIAEVIQLGVEDTVDGH  
QDSLQVLAPASCLENSSLEHTVHREKTGKGLSATRLSASSEDISDRLAGVSVGLPSTTTTEQPKPAVQTKGRP  
HSQCLNSSPLSHAQLMFPAPSAPCSSAPSVPDISKHRPQAFVPCKIPASAPQTQRKFSLQFQRNCSEHRDSDQ  
LSPVFTQSRPPSSNIHRPKPSRPVPGSTSKLGDATKSSMTLDLGSASRCDDSFSGGGNSGNAVIPSEETVFT  
PVEDKARLDVNSQDALP IVPQLQVENGEDII IQQDTPETLPGHTKAKQPYREDAEWLKGQQIGLGAFFSSCYQA  
QDVGTGTLMAVKQVTVYVRNTSSEQEEVVEALREIIRMMGHLNHPNIIRMLGATCEKSNYNLFIEWMAGGSVAH  
LLSKYGAFKESVINYTEQLLRGLSYLHENQIIHRDVKGANLLIDSTGQRLRIADFGAAARLASKGTGAGEFQ  
GQLLGTIAFMAPEVLRGQQYGRSCDVWSVGCAT IEMACAKPPWNAEKHSNHLALIFKIASATTAPSI PSHLSP  
GLRDVALRCLELQPD RPPSRELLKHPVFRRTTW\*

>ENSMUSP00000117863\_c.243:C>T\_p.P82S ENSMUST00000145055.2|Map3k1-204|ENSMUSG00000021754|-|chr13:g.111909231:G>A  
MENKETLKGHLKEMDRPEERMIREKLIKATCMPAWKHEWLERNRNRGPFVVVKPIPIKGDGSEMNNLAAEPQEGEG  
QAGSAAPASKGRRSPSPGSSPSGRSVKPESPGVRKRKRVSPVPFQSGRITPPRRAPSPDGFSPYSPEETSRRVN  
KVMRARLYLLQQIGPNSFLIGGDSFDNKYRVFIGPQNCSCGRGAFICHLFLVMLRVFQLEPSDPLMWRKTLKN  
FEVESLQKYHSRRSSRIKAPSRNTIQKFVSRMSNCHTLSSSST  
>ENSMUSP00000026519\_c.27:G>T\_p.V10L ENSMUST00000026519.10|4833420G17Rik-201|ENSMUSG00000062822|+|chr13:g.119602667:G>T  
MGMAAEVRMLLYEDDSVQVHYACGSTLQLSPCGSEFLFEKALPPSTHPLEQPERIRQRTHFVISNYREQLQRA  
LDFRNSATCPFLSESIIPPERKKHIFIDFSEVEWPSLDRDDCIMYSESGVVKITSLDGHAYLCLPRSQHEFT  
VHFLCKVSRPDSSGILSETQNQDPKNKLVKTRKVCRCGNLSEQTLRNKENEPYQILKSKNASVNTCCVND  
SEGRGELPSLGTNRHCYAWVKQAWSVAACPEAWKHPLSLALRFYNKVRAASEIDADFPASSIVTSDCPEERG  
TEVSVLPRALLLSCPAPHMHRWTFCDLLQRPDAEDFSYPELVKVVWYKGVTYRLTHKNVNSIEIFPGDGSV  
FKSEGAHFNGNYFTYPSQEESEKREEKTYSVNNLPPDRPGNFFSVRSLIKQATRILQHCAKIRLSLHSHNYRVC  
CWKMAPGVSVSTILPVLLKESLIPGVGRFLAYSDDKVHAVFLDGVTVTLNWHLSSSAEKKQVDQGLSFGWCRL  
TFPDGQDQLIPTEHPGAYERYVTSVISWCRGLTQTSRQVPTHLSPALKENWSVASELEKIQKFNWLLNSGV  
LNLTSKNEQCSCGHCKSGSSETLLEATNEERVSVALKRTSEILQDIDRLLSLSRK\*  
>ENSMUSP00000153079\_c.27:G>T\_p.V10L ENSMUST00000225186.2|4833420G17Rik-204|ENSMUSG00000062822|+|chr13:g.119602667:G>T  
MGMAAEVRMLLYEDDSVQVHYACGSTLQLSPCGSEFLFEKALPPSTHPLEQPERIRQRTHFVISNYREQLQRA  
LDFRNSATCPFLSESIIPPERKKHIFIDFSEVEWPSLDRDDCIMYSESGVVKITSLDGHAYLCLPRSQHEFT  
VHFLCKVSRPDSSGILSETQNQDPKNKLVKTRKVCRCGNLSEQTLRNKENEPYQILKSKNASVNTCCVND  
SEGRGELPSLGTNRHCYAWVKQAWSVAACPEAWKHPLSLALRFYNKVRAASEIDADFPASSIVTSDCPEERG  
TEVSVLPRALLLSCPAPHMHRWTFCDLLQRPDAEDFSYPELVKVVWYKGVTYRLTHKNVNSIEIFPGDGSV  
FKSEGAHFNGNYFTYPSQEESEKREEKTYSVNNLPPDRPGNFFSVRSLIKQATRILQHCAKIRLSLHSHNYRVC  
CWKMAPGVSVSTILPVLLKESLIPGVGRFLAYSDDKVHAVFLDGVTVTLNWHLSSSAEKKQVDQGLSFGWCRL  
TFPDGQDQLIPTEHPGAYERYVTSVISWCRGLTQTSRQVPTHLSPALKENWSVASELEKIQKFNWLLNSGV  
LNLTSKNEQCSCGHCKSGSSETLLEATNEERVSVALKRTSEILQDIDRLLSLSRK\*  
>ENSMUSP00000153273\_c.27:G>T\_p.V10L ENSMUST00000224081.2|4833420G17Rik-202|ENSMUSG00000062822|+|chr13:g.119602667:G>T  
MGMAAEVRMLLYEDDSVQVHYACGSTLQLSPCGSEFLFEKALPPSTHPLEQPERIRQRTHFVISNYREQLQRA  
LDFRNSATCPFLSESIIPPERKKHIFIDFSEVEWPSLDRDDCIMYSESGVVKITSLDGHAYLCLPRSQHEFT  
VHFLCKVSRPDSSGILSETQNQDPKNKLVKTRKVCRCGNLSEQTLRNKENEP  
>ENSMUSP00000153338\_c.27:G>T\_p.V10L ENSMUST00000225726.2|4833420G17Rik-206|ENSMUSG00000062822|+|chr13:g.119602667:G>T  
MGMAAEVRMLLYEDDSVQVHYACGSTLQLSPCGSEFLFEKALPPSTHPLEQPERIRQRTHFVISNYREQLQRA  
LDFRNSATCPFLSESIIPPERKKHIFIDFSEVEWPSLDRDDCIMYSESGVVKITSLDGHAYLCLPRSQHEFT  
VHFLCKVSRPDSSGILSETQNQDPKNKLVKTRKVCRCGNLSEQTLRNKENEPYQILKSKNASVNTCCVND  
SEGRGELPSLGTNRHCYAWVKQAWSVAACPEAWKHPLSLALRFYNKVRAASEIDADFPASSIVTSDCPEERG  
TEVSVLPRALLLSCPAPHMHRWTFCDLLQRPDAEDFSYPELVKVVWYKGVTYRLTHKNVNSIEIFPGDGSV  
FKSEGAHFNGNYFTYPSQEESEKVS\*  
>ENSMUSP00000153150\_c.27:G>T\_p.V10L ENSMUST00000224312.2|4833420G17Rik-203|ENSMUSG00000062822|+|chr13:g.119602667:G>T  
MGMAAEVRMLLYEDDSVQVHYACGSTLQLSPCGSEFLFEKALPPSTHPLEQPERIRQRTHFVISNYREQLQRA  
LDFRNSATCPFLSESIIPPERKKHIFIDFSEVEWPSLDRDDCIMYSESGVVKITSLDGHAYLCLPRSQHEFT  
VHFLCKVSRPDSSGILSETQNQDPKNKLVKTRKVCRCGNLSEQTLRNKENEPYQILKSKNASVNTCCVND  
SEGRGELPSLGTNRHCYAWVKQAWSVAACPEAWKHPLSLALRFYNKVRAASEIDADFPASSIVTSDCPEERG  
TEVSVLPRALLLSCPAPHMHRWTFCDLLQRPDAEDFSYPELVKVVWYKGVTYRLTHKNVNSIEIFPGDGSV  
FKSEGAHFNGNYFTYPSQEESEKREEKTYSVNNLPPDRPGNFFSVRSLIKQATRILQHCAKIRLSLHSHNYRVC  
CWKMAPGVSVSTILPVLLKESLIPGVGRFLAYSDDKVHAVFLDGVTVTLNWHLSSSAEKKQVDQGLSFGWCRL  
TFPDGQDQLIPTEHPGAYERYVTSVISWCRGLTQTSRQVPTHLSPALKENWSVASELEKIQKFNWLLNSGV  
LNLTSKNEQCSCGHCKSGSSETLLEATNEERVSVALKRTSEILQDIDRLLSLSRK\*  
>ENSMUSP00000026519\_c.61:A>G\_p.Y21C ENSMUST00000026519.10|4833420G17Rik-201|ENSMUSG00000062822|+|chr13:g.119602701:A>G  
MGMAAEVRMLLYEDDSVQVHYACGSTLQLSPCGSEFLFEKALPPSTHPLEQPERIRQRTHFVISNYREQLQRA  
LDFRNSATCPFLSESIIPPERKKHIFIDFSEVEWPSLDRDDCIMYSESGVVKITSLDGHAYLCLPRSQHEFT  
VHFLCKVSRPDSSGILSETQNQDPKNKLVKTRKVCRCGNLSEQTLRNKENEPYQILKSKNASVNTCCVND  
SEGRGELPSLGTNRHCYAWVKQAWSVAACPEAWKHPLSLALRFYNKVRAASEIDADFPASSIVTSDCPEERG

TEVSVLPRALLLSCPAPHMHRWTFCDSSLQRPDAEDFSYPELVKVVWYKGVTYRLTHKNVNSIEIFPGDGSV  
FKSEGAHFGNYFTYYPQSESEKREKTYSVNNLPPDRPGNFFSVRSLIKQATRILQHCAKIRLSLHSHNYRVC  
CWKMAPGVSVSTILPVLLKESLIPGVGRFLAYSDDKVHAVFLDGVTVTLNWHLSSSAEKKQVDQGLSFGWCRL  
TFPDGQDQLIPTEHPGAYERVYVTSVISWCRGLTQTSRQVPTHLSPALKENWSVASELEKIQKFNWLLNSGV  
LNLTSKNEQCSCGHCKSGSSETLLEATNEERVSVALKRTSEILQDIDRLLSLSRK\*

>ENSMUSP00000153079\_c.61:A>G\_p.Y21C ENSMUST00000225186.2|4833420G17Rik-  
204|ENSMUSG00000062822|+|chr13:g.119602701:A>G

MGMAAEVRMVLVEDDSVQVHCACGSTLQLSPCGSEFLFEKALPPSTHPLEQPERIRQRTHFVISNYREQLQRA  
LDFRNSSATCPFLSESIIPPERKKHIFIDFSEVEWPSLDRDDCIMYSESGVVKITSLDGHAYLCLPRSQHEFT  
VHFLCKVSRPDSSGILSETQNQDPKNKLVKTRKVCRCGNLSEQTLRNKENEPYQILKSKNASVNTCCVND  
SEGRGELPSLGTNRHCYVAVKQAWSVAACPEAWKHPLSLALRFYKVVRAASEIDADFPASSIVTSDCPEERG  
TEVSVLPRALLLSCPAPHMHRWTFCDSSLQRPDAEDFSYPELVKVVWYKGVTYRLTHKNVNSIEIFPGDGSV  
FKSEGAHFGNYFTYYPQSESEKREKTYSVNNLPPDRPGNFFSVRSLIKQATRILQHCAKIRLSLHSHNYRVC  
CWKMAPGVSVSTILPVLLKESLIPGVGRFLAYSDDKVHAVFLDGVTVTLNWHLSSSAEKKQVDQGLSFGWCRL  
TFPDGQDQLIPTEHPGAYERVYVTSVISWCRGLTQTSRQVPTHLSPALKENWSVASELEKIQKFNWLLNSGV  
LNLTSKNEQCSCGHCKSGSSETLLEATNEERVSVALKRTSEILQDIDRLLSLSRK\*

>ENSMUSP00000153273\_c.61:A>G\_p.Y21C ENSMUST00000224081.2|4833420G17Rik-  
202|ENSMUSG00000062822|+|chr13:g.119602701:A>G

MGMAAEVRMVLVEDDSVQVHCACGSTLQLSPCGSEFLFEKALPPSTHPLEQPERIRQRTHFVISNYREQLQRA  
LDFRNSSATCPFLSESIIPPERKKHIFIDFSEVEWPSLDRDDCIMYSESGVVKITSLDGHAYLCLPRSQHEFT  
VHFLCKVSRPDSSGILSETQNQDPKNKLVKTRKVCRCGNLSEQTLRNKENEP

>ENSMUSP00000153338\_c.61:A>G\_p.Y21C ENSMUST00000225726.2|4833420G17Rik-  
206|ENSMUSG00000062822|+|chr13:g.119602701:A>G

MGMAAEVRMVLVEDDSVQVHCACGSTLQLSPCGSEFLFEKALPPSTHPLEQPERIRQRTHFVISNYREQLQRA  
LDFRNSSATCPFLSESIIPPERKKHIFIDFSEVEWPSLDRDDCIMYSESGVVKITSLDGHAYLCLPRSQHEFT  
VHFLCKVSRPDSSGILSETQNQDPKNKLVKTRKVCRCGNLSEQTLRNKENEPYQILKSKNASVNTCCVND  
SEGRGELPSLGTNRHCYVAVKQAWSVAACPEAWKHPLSLALRFYKVVRAASEIDADFPASSIVTSDCPEERG  
TEVSVLPRALLLSCPAPHMHRWTFCDSSLQRPDAEDFSYPELVKVVWYKGVTYRLTHKNVNSIEIFPGDGSV  
FKSEGAHFGNYFTYYPQSESEKVS\*

>ENSMUSP00000153150\_c.61:A>G\_p.Y21C ENSMUST00000224312.2|4833420G17Rik-  
203|ENSMUSG00000062822|+|chr13:g.119602701:A>G

MGMAAEVRMVLVEDDSVQVHCACGSTLQLSPCGSEFLFEKALPPSTHPLEQPERIRQRTHFVISNYREQLQRA  
LDFRNSSATCPFLSESIIPPERKKHIFIDFSEVEWPSLDRDDCIMYSESGVVKITSLDGHAYLCLPRSQHEFT  
VHFLCKVSRPDSSGILSETQNQDPKNKLVKTRKVCRCGNLSEQTLRNKENEPYQILKSKNASVNTCCVND  
SEGRGELPSLGTNRHCYVAVKQAWSVAACPEAWKHPLSLALRFYKVVRAASEIDADFPASSIVTSDCPEERG  
TEVSVLPRALLLSCPAPHMHRWTFCDSSLQRPDAEDFSYPELVKVVWYKGVTYRLTHKNVNSIEIFPGDGSV  
FKSEGAHFGNYFTYYPQSESEKREKTYSVNNLPPDRPGNFFSVRSLIKQATRILQHCAKIRLSLHSHNYRVC  
CWKMAPGVSVSTILPVLLKESLIPGVGRFLAYSDDKVHAVFLDGVTVTLNWHLSSSAEKKQVDQGLSFGWCRL  
TFPDGQDQLIPTEHPGAYERVYVTSVISWCRGLTQTSRQVPTHLSPALKENWSVASELEKIQKFNWLLNSGV  
LNLTSKNEQCSCGHCKSGSSETLLEATNEERVSVALKRTSEILQDIDRLLSLSRK\*

>ENSMUSP00000026519\_c.123:C>G\_p.L42V ENSMUST00000026519.10|4833420G17Rik-  
201|ENSMUSG00000062822|+|chr13:g.119602763:C>G

MGMAAEVRMVLVEDDSVQVHYACGSTLQLSPCGSEFLFEKAVPPSTHPLEQPERIRQRTHFVISNYREQLQRA  
LDFRNSSATCPFLSESIIPPERKKHIFIDFSEVEWPSLDRDDCIMYSESGVVKITSLDGHAYLCLPRSQHEFT  
VHFLCKVSRPDSSGILSETQNQDPKNKLVKTRKVCRCGNLSEQTLRNKENEPYQILKSKNASVNTCCVND  
SEGRGELPSLGTNRHCYVAVKQAWSVAACPEAWKHPLSLALRFYKVVRAASEIDADFPASSIVTSDCPEERG  
TEVSVLPRALLLSCPAPHMHRWTFCDSSLQRPDAEDFSYPELVKVVWYKGVTYRLTHKNVNSIEIFPGDGSV  
FKSEGAHFGNYFTYYPQSESEKREKTYSVNNLPPDRPGNFFSVRSLIKQATRILQHCAKIRLSLHSHNYRVC  
CWKMAPGVSVSTILPVLLKESLIPGVGRFLAYSDDKVHAVFLDGVTVTLNWHLSSSAEKKQVDQGLSFGWCRL  
TFPDGQDQLIPTEHPGAYERVYVTSVISWCRGLTQTSRQVPTHLSPALKENWSVASELEKIQKFNWLLNSGV  
LNLTSKNEQCSCGHCKSGSSETLLEATNEERVSVALKRTSEILQDIDRLLSLSRK\*

>ENSMUSP00000153079\_c.123:C>G\_p.L42V ENSMUST00000225186.2|4833420G17Rik-  
204|ENSMUSG00000062822|+|chr13:g.119602763:C>G

MGMAAEVRMVLVEDDSVQVHYACGSTLQLSPCGSEFLFEKAVPPSTHPLEQPERIRQRTHFVISNYREQLQRA  
LDFRNSSATCPFLSESIIPPERKKHIFIDFSEVEWPSLDRDDCIMYSESGVVKITSLDGHAYLCLPRSQHEFT  
VHFLCKVSRPDSSGILSETQNQDPKNKLVKTRKVCRCGNLSEQTLRNKENEPYQILKSKNASVNTCCVND  
SEGRGELPSLGTNRHCYVAVKQAWSVAACPEAWKHPLSLALRFYKVVRAASEIDADFPASSIVTSDCPEERG  
TEVSVLPRALLLSCPAPHMHRWTFCDSSLQRPDAEDFSYPELVKVVWYKGVTYRLTHKNVNSIEIFPGDGSV

FKSEGAHFGNYFTYYPSQEESEKREEKTYSVNNLPPDRPGNFFSVRSLIKQATRILQHCAKIRLSLSHNYRVC  
CWKMAPGVSSTILPVLLKESLIPGVRFLAYSDDKVHAVFLDGVTVTLNWHLSSSAEKKQVDQGLSFGWCRL  
TFPDGQDLIPTEHPGAYERVTSVISWCRGLTQTSRQVPHTLSPALKENWSVASELEKIQKFNWLLSENSGV  
LNLTSKNEQCSCGHCKSGSSETLLEATNEERVSVALKRTSEILQDIDRLLSLSRK\*  
>ENSMUSP00000153273\_c.123:C>G\_p.L42V ENSMUST00000224081.2|4833420G17Rik-  
202|ENSMUSG00000062822|+|chr13:g.119602763:C>G  
MGMAAEVRMVLYEDDSVQVHYACGSTLQLSPCGSEFLFEKAVPPSTHPLEQPERIRQRTHFVISNYREQLQRA  
LDFRNSATCPFLSESIIPPERKKHIFIDFSEVEWPSLDRDDCIMYSESGVVKITSLDGHAYLCLPRSQHEFT  
VHFLCKVSRPDSGILSETQNQDPKNKLVKTRKVCRCGNLSEQTLRNKENEP  
>ENSMUSP00000153338\_c.123:C>G\_p.L42V ENSMUST00000225726.2|4833420G17Rik-  
206|ENSMUSG00000062822|+|chr13:g.119602763:C>G  
MGMAAEVRMVLYEDDSVQVHYACGSTLQLSPCGSEFLFEKAVPPSTHPLEQPERIRQRTHFVISNYREQLQRA  
LDFRNSATCPFLSESIIPPERKKHIFIDFSEVEWPSLDRDDCIMYSESGVVKITSLDGHAYLCLPRSQHEFT  
VHFLCKVSRPDSGILSETQNQDPKNKLVKTRKVCRCGNLSEQTLRNKENEPYQILKSKNASVNTCCVND  
SEGRGELPSLGTNRHCYAWVKQAWSVAACEPAWKHPLSLALRFYNKVRASEIDADFPASSIVTSDCPEERG  
TEVSVLPRALLLSCPAPMHHRWTFCDLSLLQRQDAEDFSYPELVKVVWYKGVTYRLTHKNVNSIEIFPGDGSV  
FKSEGAHFGNYFTYYPSQEESEKVS\*  
>ENSMUSP00000153150\_c.123:C>G\_p.L42V ENSMUST00000224312.2|4833420G17Rik-  
203|ENSMUSG00000062822|+|chr13:g.119602763:C>G  
MGMAAEVRMVLYEDDSVQVHYACGSTLQLSPCGSEFLFEKAVPPSTHPLEQPERIRQRTHFVISNYREQLQRA  
LDFRNSATCPFLSESIIPPERKKHIFIDFSEVEWPSLDRDDCIMYSESGVVKITSLDGHAYLCLPRSQHEFT  
VHFLCKVSRPDSGILSETQNQDPKNKLVKTRKVCRCGNLSEQTLRNKENEPYQILKSKNASVNTCCVND  
SEGRGELPSLGTNRHCYAWVKQAWSVAACEPAWKHPLSLALRFYNKVRASEIDADFPASSIVTSDCPEERG  
TEVSVLPRALLLSCPAPMHHRWTFCDLSLLQRQDAEDFSYPELVKVVWYKGVTYRLTHKNVNSIEIFPGDGSV  
FKSEGAHFGNYFTYYPSQEESEKREEKTYSVNNLPPDRPGNFFSVRSLIKQATRILQHCAKIRLSLSHNYRVC  
CWKMAPGVSSTILPVLLKESLIPGVRFLAYSDDKVHAVFLDGVTVTLNWHLSSSAEKKQVDQGLSFGWCRL  
TFPDGQDLIPTEHPGAYERVTSVISWCRGLTQTSRQVPHTLSPALKENWSVASELEKIQKFNWLLSENSGV  
LNLTSKNEQCSCGHCKSGSSETLLEATNEERVSVALKRTSEILQDIDRLLSLSRK\*  
>ENSMUSP00000026519\_c.221:A>AAAATATAT\_p.L74ins-fs  
ENSMUST00000026519.10|4833420G17Rik-  
201|ENSMUSG00000062822|+|chr13:g.119603423:A>AAAATATAT  
MGMAAEVRMVLYEDDSVQVHYACGSTLQLSPCGSEFLFEKALPPSTHPLEQPERIRQRTHFVISNYREQLQRA  
LKYMIFETLQLHALFYLKASYLLKEKSISSLSRK  
>ENSMUSP00000153079\_c.221:A>AAAATATAT\_p.L74ins-fs  
ENSMUST000000225186.2|4833420G17Rik-  
204|ENSMUSG00000062822|+|chr13:g.119603423:A>AAAATATAT  
MGMAAEVRMVLYEDDSVQVHYACGSTLQLSPCGSEFLFEKALPPSTHPLEQPERIRQRTHFVISNYREQLQRA  
LKYMIFETLQLHALFYLKASYLLKEKSISSLSRK  
>ENSMUSP00000153273\_c.221:A>AAAATATAT\_p.L74ins-fs  
ENSMUST00000224081.2|4833420G17Rik-  
202|ENSMUSG00000062822|+|chr13:g.119603423:A>AAAATATAT  
MGMAAEVRMVLYEDDSVQVHYACGSTLQLSPCGSEFLFEKALPPSTHPLEQPERIRQRTHFVISNYREQLQRA  
LKYMIFETLQLHALFYLKASYLLKEKSISSLSRK  
>ENSMUSP00000153338\_c.221:A>AAAATATAT\_p.L74ins-fs  
ENSMUST00000225726.2|4833420G17Rik-  
206|ENSMUSG00000062822|+|chr13:g.119603423:A>AAAATATAT  
MGMAAEVRMVLYEDDSVQVHYACGSTLQLSPCGSEFLFEKALPPSTHPLEQPERIRQRTHFVISNYREQLQRA  
LKYMIFETLQLHALFYLKASYLLKEKSISSLSRK  
>ENSMUSP00000153150\_c.221:A>AAAATATAT\_p.L74ins-fs  
ENSMUST00000224312.2|4833420G17Rik-  
203|ENSMUSG00000062822|+|chr13:g.119603423:A>AAAATATAT  
MGMAAEVRMVLYEDDSVQVHYACGSTLQLSPCGSEFLFEKALPPSTHPLEQPERIRQRTHFVISNYREQLQRA  
LKYMIFETLQLHALFYLKASYLLKEKSISSLSRK  
>ENSMUSP00000026519\_c.227:TC>AA\_p.F76L  
ENSMUST00000026519.10|4833420G17Rik-  
201|ENSMUSG00000062822|+|chr13:g.119603429:TC>AA  
MGMAAEVRMVLYEDDSVQVHYACGSTLQLSPCGSEFLFEKALPPSTHPLEQPERIRQRTHFVISNYREQLQRA  
LDLTKLFSYMPFFI\*KHHTS\*KKKAYLH\*FLGSRMAQP\*QR\*LHHVLGEWRGEDNIPGWTRVPLSAQISA\* IY

STFFV\*SEPEARFIWHTIRNTESGPQK\*TS\*EDQKSLQMWKFIRTNVKE\*RKRTSLPDLEI\*KRFSEHMLCE\*  
Q\*GERGASFPGHKSQMCVVMGKAGLVCCRLSRGVETPSVFSTSF\*QSSCCI\*N\*CRFPCE\*HCDF\*LS\*RKR  
NGGFCPSQGLVTLPCPTHQVVDLL\*LTSTETARCRLFLS\*ACEGGVV\*GCIYIQAYP\*KCKLNRDFSWRRIG  
FQVRRGSFW\*LFYILSKSRRIRKERRENLLCK\*PSSRQTRKFLLCAFSD\*TGNQNSSTLCQDKAFPKPQLQSV  
LLENGTWSKC\*HYPARASEGIPHRERGEIPCLLR\*QSPCCFLGWRHSNTELASQLLC\*EETSRSRAQLRLVQI  
NFS\*WTGSVNSN\*TPWSV\*KICDISNIMVQRTNTD\*PKTGAHTSLTCSQRKLVCCF\*A\*ENTEI\*LAVGKQWC  
PQPNF\*QE\*AVFWSL\*IRIFRNLAGSNQ\*REGIGSIEKNF\*NPPGY\*PSSVTL\*KV  
>ENSMUST00000153079\_c.227:TC>AA\_p.F76L  
ENSMUST00000225186.2|4833420G17Rik-  
204|ENSMUSG00000062822|+|chr13:g.119603429:TC>AA  
MGMAAEVRMVLIEDDSVQVHYACGSLQSLPCGSEFLFEKALPPSTHPLQPERIRQRTHFVISNYREQLQRA  
LDLTKLFSYMPFFI\*KHHTS\*KKKAYLH\*FLGSRMAQP\*QR\*LHHVLGEWRGEDNIPGWTRVPLSAQISA\* IY  
STFFV\*SEPEARFIWHTIRNTESGPQK\*TS\*EDQKSLQMWKFIRTNVKE\*RKRTSLPDLEI\*KRFSEHMLCE\*  
Q\*GERGASFPGHKSQMCVVMGKAGLVCCRLSRGVETPSVFSTSF\*QSSCCI\*N\*CRFPCE\*HCDF\*LS\*RKR  
NGGFCPSQGLVTLPCPTHQVVDLL\*LTSTETARCRLFLS\*ACEGGVV\*GCIYIQAYP\*KCKLNRDFSWRRIG  
FQVRRGSFW\*LFYILSKSRRIRKERRENLLCK\*PSSRQTRKFLLCAFSD\*TGNQNSSTLCQDKAFPKPQLQSV  
LLENGTWSKC\*HYPARASEGIPHRERGEIPCLLR\*QSPCCFLGWRHSNTELASQLLC\*EETSRSRAQLRLVQI  
NFS\*WTGSVNSN\*TPWSV\*KICDISNIMVQRTNTD\*PKTGAHTSLTCSQRKLVCCF\*A\*ENTEI\*LAVGKQWC  
PQPNF\*QE\*AVFWSL\*IRIFRNLAGSNQ\*REGIGSIEKNF\*NPPGY\*PSSVTL\*KV  
>ENSMUSP00000153273\_c.227:TC>AA\_p.F76L  
ENSMUST00000224081.2|4833420G17Rik-  
202|ENSMUSG00000062822|+|chr13:g.119603429:TC>AA  
MGMAAEVRMVLIEDDSVQVHYACGSLQSLPCGSEFLFEKALPPSTHPLQPERIRQRTHFVISNYREQLQRA  
LDLTKLFSYMPFFI\*KHHTS\*KKKAYLH\*FLGSRMAQP\*QR\*LHHVLGEWRGEDNIPGWTRVPLSAQISA\* IY  
STFFV\*SEPEARFIWHTIRNTESGPQK\*TS\*EDQKSLQMWKFIRTNVKE\*RKRTS  
>ENSMUSP00000153338\_c.227:TC>AA\_p.F76L  
ENSMUST00000225726.2|4833420G17Rik-  
206|ENSMUSG00000062822|+|chr13:g.119603429:TC>AA  
MGMAAEVRMVLIEDDSVQVHYACGSLQSLPCGSEFLFEKALPPSTHPLQPERIRQRTHFVISNYREQLQRA  
LDLTKLFSYMPFFI\*KHHTS\*KKKAYLH\*FLGSRMAQP\*QR\*LHHVLGEWRGEDNIPGWTRVPLSAQISA\* IY  
STFFV\*SEPEARFIWHTIRNTESGPQK\*TS\*EDQKSLQMWKFIRTNVKE\*RKRTSLPDLEI\*KRFSEHMLCE\*  
Q\*GERGASFPGHKSQMCVVMGKAGLVCCRLSRGVETPSVFSTSF\*QSSCCI\*N\*CRFPCE\*HCDF\*LS\*RKR  
NGGFCPSQGLVTLPCPTHQVVDLL\*LTSTETARCRLFLS\*ACEGGVV\*GCIYIQAYP\*KCKLNRDFSWRRIG  
FQVRRGSFW\*LFYILSKSRRIRKGL  
>ENSMUSP00000153150\_c.227:TC>AA\_p.F76L  
ENSMUST00000224312.2|4833420G17Rik-  
203|ENSMUSG00000062822|+|chr13:g.119603429:TC>AA  
MGMAAEVRMVLIEDDSVQVHYACGSLQSLPCGSEFLFEKALPPSTHPLQPERIRQRTHFVISNYREQLQRA  
LDLTKLFSYMPFFI\*KHHTS\*KKKAYLH\*FLGSRMAQP\*QR\*LHHVLGEWRGEDNIPGWTRVPLSAQISA\* IY  
STFFV\*SEPEARFIWHTIRNTESGPQK\*TS\*EDQKSLQMWKFIRTNVKE\*RKRTSLPDLEI\*KRFSEHMLCE\*  
Q\*GERGASFPGHKSQMCVVMGKAGLVCCRLSRGVETPSVFSTSF\*QSSCCI\*N\*CRFPCE\*HCDF\*LS\*RKR  
NGGFCPSQGLVTLPCPTHQVVDLL\*LTSTETARCRLFLS\*ACEGGVV\*GCIYIQAYP\*KCKLNRDFSWRRIG  
FQVRRGSFW\*LFYILSKSRRIRKERRENLLCK\*PSSRQTRKFLLCAFSD\*TGNQNSSTLCQDKAFPKPQLQSV  
LLENGTWSKC\*HYPARASEGIPHRERGEIPCLLR\*QSPCCFLGWRHSNTELASQLLC\*EETSRSRAQLRLVQI  
NFS\*WTGSVNSN\*TPWSV\*KICDISNIMVQRTNTD\*PKTGAHTSLTCSQRKLVCCF\*A\*ENTEI\*LAVGKQWC  
PQPNF\*QE\*AVFWSL\*IRIFRNLAGSNQ\*REGIGSIEKNF\*NPPGY\*PSSVTL\*KV  
>ENSMUSP00000026519\_c.234:T>C\_p.S79P ENSMUST00000026519.10|4833420G17Rik-  
201|ENSMUSG00000062822|+|chr13:g.119603436:T>C  
MGMAAEVRMVLIEDDSVQVHYACGSLQSLPCGSEFLFEKALPPSTHPLQPERIRQRTHFVISNYREQLQRA  
LDFRNPSATCPFLSESIIPPERKKHIFIDFSEVEWPSLDRDDCIMYSESGVVKITSLDGHAYLCLPRSQHEFT  
VHFLCKVSRPDSSGILSETQNDPKNKLVKTRKVCRCGNLSEQLTRNKENEPPYQILKSKNASVNTCCVND  
SEGRGELPSLGTNHRVCYAWVKQAWSVAACEPAWKHPLSLALRFYNKVRAASEIDADFPASSIVTSDCPEERG  
TEVSVLPRALLLSCPAPHMHRWTFCDLQRPDAEDFSYPELVKVVVYKGVTYRLTHKNVNSIEIFPGDGSV  
FKSEGAHFNYYFTYPSQEESKREKTYSVNNLPPDRPGNFVRSVSLIKQATRILQHC AKIRLSLSHNYRVC  
CWMAPGVSVSTILPVLLKESLIPGVGRFLAYSDDKVHAVFLDGVTVTLNWHLSSSAEKKQVDQGLSFGWCRL  
TFPDGDQDLIPTEHPGAYERYVTSVISWCRGLTQTSRQVPHLSPALKENWSVASELEKIQKFNWLLNSGV  
LNLTSKNEQCSGHCKSGSSETLLEATNEERVSVALKRTSEILQDIDRLLSLSRK\*

>ENSMUSP00000153079\_c.234:T>C\_p.S79P ENSMUST00000225186.2|4833420G17Rik-204|ENSMUSG00000062822|+|chr13:g.119603436:T>C  
 MGMAAEVRMVLIEDDSVQVHYACGSTLQLSPCGSEFLFEKALPPSTHPLEQPERIRQRTHFVISNYREQLQRALDFRNPSATCPFLSESIIPPERKKHIFIDFSEVEWPSLDRDDCIMYSESGVVKITSLDGHAYLCLPRSQHEFTVHFLCKVSRPDSSGILSETQNQDPKNKLVKTRKVCRCGNLSEQTLRNKENEPPYQILKSKNASVNTCCVNDSEGRGELPSLGTNHRCVYAWVKQAWSVAACPEAWKHPLSLALRFYNKVRAASEIDADFPASSIVTSDCPEERGTEVSVLPRALLLSCPAPMHWRWTFCDLLQRPDAEDFSYPELVKVVWYKGVTYRLTHKNVNSIEIFPGDGSVFKSEGAHFNGNYFTYYPSQEESEKREKTYSVNNLPPDRPGNFFSVRSLIKQATRILQHCAKIRLSLSHNYRVCWKMAPGVSVSTILPVLLKESLIPGVGRFLAYSDDKVHAVFLDGVTVTLNWHLSSSAEKKQVDQGLSFGWCRLTFPDGQDQLIPTEHPGAYERYVTSVISWCRGLTQTSRQVPVTHLSPALKENWSVASELEKIQKFNWLLLENSGVLNLTSSKNEQCSGHCKSGSSETLLEATNEERVSVALKRTSEILQDIDRLLSLSRK\*

>ENSMUSP00000153273\_c.234:T>C\_p.S79P ENSMUST00000224081.2|4833420G17Rik-202|ENSMUSG00000062822|+|chr13:g.119603436:T>C  
 MGMAAEVRMVLIEDDSVQVHYACGSTLQLSPCGSEFLFEKALPPSTHPLEQPERIRQRTHFVISNYREQLQRALDFRNPSATCPFLSESIIPPERKKHIFIDFSEVEWPSLDRDDCIMYSESGVVKITSLDGHAYLCLPRSQHEFTVHFLCKVSRPDSSGILSETQNQDPKNKLVKTRKVCRCGNLSEQTLRNKENEPPYQILKSKNASVNTCCVNDSEGRGELPSLGTNHRCVYAWVKQAWSVAACPEAWKHPLSLALRFYNKVRAASEIDADFPASSIVTSDCPEERGTEVSVLPRALLLSCPAPMHWRWTFCDLLQRPDAEDFSYPELVKVVWYKGVTYRLTHKNVNSIEIFPGDGSVFKSEGAHFNGNYFTYYPSQEESEKREKTYSVNNLPPDRPGNFFSVRSLIKQATRILQHCAKIRLSLSHNYRVCWKMAPGVSVSTILPVLLKESLIPGVGRFLAYSDDKVHAVFLDGVTVTLNWHLSSSAEKKQVDQGLSFGWCRLTFPDGQDQLIPTEHPGAYERYVTSVISWCRGLTQTSRQVPVTHLSPALKENWSVASELEKIQKFNWLLLENSGVLNLTSSKNEQCSGHCKSGSSETLLEATNEERVSVALKRTSEILQDIDRLLSLSRK\*

>ENSMUSP00000153338\_c.234:T>C\_p.S79P ENSMUST00000225726.2|4833420G17Rik-206|ENSMUSG00000062822|+|chr13:g.119603436:T>C  
 MGMAAEVRMVLIEDDSVQVHYACGSTLQLSPCGSEFLFEKALPPSTHPLEQPERIRQRTHFVISNYREQLQRALDFRNPSATCPFLSESIIPPERKKHIFIDFSEVEWPSLDRDDCIMYSESGVVKITSLDGHAYLCLPRSQHEFTVHFLCKVSRPDSSGILSETQNQDPKNKLVKTRKVCRCGNLSEQTLRNKENEPPYQILKSKNASVNTCCVNDSEGRGELPSLGTNHRCVYAWVKQAWSVAACPEAWKHPLSLALRFYNKVRAASEIDADFPASSIVTSDCPEERGTEVSVLPRALLLSCPAPMHWRWTFCDLLQRPDAEDFSYPELVKVVWYKGVTYRLTHKNVNSIEIFPGDGSVFKSEGAHFNGNYFTYYPSQEESEKREKTYSVNNLPPDRPGNFFSVRSLIKQATRILQHCAKIRLSLSHNYRVCWKMAPGVSVSTILPVLLKESLIPGVGRFLAYSDDKVHAVFLDGVTVTLNWHLSSSAEKKQVDQGLSFGWCRLTFPDGQDQLIPTEHPGAYERYVTSVISWCRGLTQTSRQVPVTHLSPALKENWSVASELEKIQKFNWLLLENSGVLNLTSSKNEQCSGHCKSGSSETLLEATNEERVSVALKRTSEILQDIDRLLSLSRK\*

>ENSMUSP00000153150\_c.234:T>C\_p.S79P ENSMUST00000224312.2|4833420G17Rik-203|ENSMUSG00000062822|+|chr13:g.119603436:T>C  
 MGMAAEVRMVLIEDDSVQVHYACGSTLQLSPCGSEFLFEKALPPSTHPLEQPERIRQRTHFVISNYREQLQRALDFRNPSATCPFLSESIIPPERKKHIFIDFSEVEWPSLDRDDCIMYSESGVVKITSLDGHAYLCLPRSQHEFTVHFLCKVSRPDSSGILSETQNQDPKNKLVKTRKVCRCGNLSEQTLRNKENEPPYQILKSKNASVNTCCVNDSEGRGELPSLGTNHRCVYAWVKQAWSVAACPEAWKHPLSLALRFYNKVRAASEIDADFPASSIVTSDCPEERGTEVSVLPRALLLSCPAPMHWRWTFCDLLQRPDAEDFSYPELVKVVWYKGVTYRLTHKNVNSIEIFPGDGSVFKSEGAHFNGNYFTYYPSQEESEKREKTYSVNNLPPDRPGNFFSVRSLIKQATRILQHCAKIRLSLSHNYRVCWKMAPGVSVSTILPVLLKESLIPGVGRFLAYSDDKVHAVFLDGVTVTLNWHLSSSAEKKQVDQGLSFGWCRLTFPDGQDQLIPTEHPGAYERYVTSVISWCRGLTQTSRQVPVTHLSPALKENWSVASELEKIQKFNWLLLENSGVLNLTSSKNEQCSGHCKSGSSETLLEATNEERVSVALKRTSEILQDIDRLLSLSRK\*

>ENSMUSP00000041199\_c.393:C>A\_p.H132N ENSMUST00000038956.12|Lrrc18-201|ENSMUSG00000041673|+|chr14:g.32730856:C>A  
 MAKGGKPKGKKITLNVAKNCIKITFDGRKRLDLSKMGITTFPKCILRLSDIDELEDLDRNMIRKIPDSIAKFQNLRWLDLHSNYIDKLPESIGQMTSLLFLNVSNNRLTTNGLPVELNQLKNIIRTVNLGLNNLDSVPTTLGALKELHEVGLHDNLLTTIPASIAKLPKLLKLNKRNPPNADESEMFDVSIKRENLNLYLVEEKDMCSSCLQRCQQARDKLNKIKSMAPSAPRKALFSLNLSVSPNSTAKDAQEWR\*  
 >ENSMUSP00000113608\_c.393:C>A\_p.H132N ENSMUST00000120866.8|Lrrc18-203|ENSMUSG00000041673|+|chr14:g.32730856:C>A  
 MAKGGKPKGKKITLNVAKNCIKITFDGRKRLDLSKMGITTFPKCILRLSDIDELEDLDRNMIRKIPDSIAKFQNLRWLDLHSNYIDKLPESIGQMTSLLFLNVSNNRLTTNGLPVELNQLKNIIRTVNLGLNNLDSVPTTLGALKELHEVGLHDNLLTTIPASIAKLPKLLKLNKRNPPNADESEMFDVSIKRENLNLYLVEEKDMCSSCLQRCQQARDKLNKIKSMAPSAPRKALFSLNLSVSPNSTAKDAQEWR\*

>ENSMUSP00000113965\_c.393:C>A\_p.H132N ENSMUST00000120951.2|Lrrc18-204|ENSMUSG00000041673|+|chr14:g.32730856:C>A  
 MAKGGKPKGKKITLNVAKNCIKITFDGRKRLDLSKMGITTFPKCILRLSDIDELEDLDRNMIRKIPDSIAKFQNLRWLDLHSNYIDKLPESIGQMTSLLFLNVSNNRLTTNGLPVELNQLKNIIRTVNLGLNNLDSVPTTLGALKELHEVGLHDNLLTTIPASIAKLPKLLKLNKRNPPNADESEMFDVSIKRENLNLYLVEEKDMCSSCLQRCQQARDKLNKIKSMAPSAPRKALFSLNLSVSPNSTAKDAQEWSVLRQKRLRAQCCLDILGMVCMRTQSVTSELPEGVMMVASFQNCTVTTLTIHLL\*

>ENSMUSP00000153580\_c.612:G>A\_p.D205N ENSMUST00000224730.2|Gm7929-202|ENSMUSG00000091740|-|chr14:g.41469265:C>T

XRYSWVPKQACCPSSGYFREKIEYTQTPDQGRRRPTAHGGKQETTGRGEGCAGEASIQAPTINEQEKRHE  
 RLEKLRKRELQNIKNARDELQGILANYTNKDLNDRINFETFMLEMQHDQVMTDLKRMPODISEALSKCKQLTKE  
 NQFYCFRNCQLLIESNLIQHVKRMLRKENRQRLREQIALEECNIETKTLTNEGSQKIKNHHTKQQQV\*  
 >ENSMUSP00000136129\_c.597:G>A\_p.D200N ENSMUST00000178711.2|Gm7929-  
 201|ENSMUSG00000091740|-|chr14:g.41469265:C>T  
 QAGMLSMMLLRVQRENRIHTDTRPRQKEADRPSSWWRARNNSWRRHRCAGEASIQAPTINEQEKRHERLEKL  
 KRELQNIKNARDELQGILANYTNKDLNDRINFETFMLEMQHDQVMTDLKRMPODISEALSKCKQLTKENQFYC  
 FRNCQLLIESNLIQHVKRMLRKENRQRLREQIALEECNIETKTLTNEGSQKIKNHHTKQQQV  
 >ENSMUSP00000153580\_c.606:A>G\_p.I203V ENSMUST00000224730.2|Gm7929-  
 202|ENSMUSG00000091740|-|chr14:g.41469271:T>C  
 XRYSWVPKQACCPSSGYFREKIEYTQTPDQGRRRPTAHGGKQETTGRGEGCAGEASIQAPTINEQEKRHE  
 RLEKLRKRELQNIKNARDELQGILANYTNKDLNDRINFETFMLEMQHDQVMTDLKRMPODISEALSKCKQLTKE  
 NQFYCFRNCQLLIESNLIQHVKRMLRKENRQRLREQIALEECNIETKTLTNEGSQKIKNHHTKQQQV\*  
 >ENSMUSP00000136129\_c.591:A>G\_p.I198V ENSMUST00000178711.2|Gm7929-  
 201|ENSMUSG00000091740|-|chr14:g.41469271:T>C  
 QAGMLSMMLLRVQRENRIHTDTRPRQKEADRPSSWWRARNNSWRRHRCAGEASIQAPTINEQEKRHERLEKL  
 KRELQNIKNARDELQGILANYTNKDLNDRINFETFMLEMQHDQVMTDLKRMPODISEALSKCKQLTKENQFYC  
 FRNCQLLIESNLIQHVKRMLRKENRQRLREQIALEECNIETKTLTNEGSQKIKNHHTKQQQV  
 >ENSMUSP00000044675\_c.2217:A>G\_p.S740G ENSMUST00000043112.9|Fbxo34-  
 201|ENSMUSG00000037536|+|chr14:g.47768706:A>G  
 MGFASVGLRRSALSSWSASVSGSEGLPPPRAAAAPGQALARQKHRASVMHLKLYWKLQKKERPLEVSRDT  
 LRTPMSHGKANGDVKARASYMKPTVLPASLVKASSRKPFGILSPNVLCMSGKSPVENS LNVAKKNVLSAA  
 VHQSEEGLPGTWAIIVKPGNTKEKIAFFAAHQYSNRIGSMKIKSSWDIDGRATKRKKSGDLKAKLQLEMMRE  
 INSQCYQSEPFVCGVEHCSVHYMSDSGDGVCARPLSVIQMVAFLQKATALLASCTKNCTNSPAIVKISGQS  
 RGIPPAPEPFSAPETCEEPKEQENPETGRSQGEPVRLDMVARLESECLKHQGGQREPGSLSRNNSFRNVGRV  
 LLTNGSQASDKSEEGSADTADPQENPLQPVSVGEEPSVTEHHSVGEQAWDGTSSQSCPSLPATVVSFHMSTDL  
 PGQQTAMKSCSRDDVEMVEEFDELPTDAVRRIRRELVTVTKHSPEQRQDPLCISITVCTVEKDRPAALDSLEE  
 PLPGMLFFLSSGQDQQAHPQLREHPAPEASEASQPQDAAEGSSAGEEKDASVEPLLPAASPGGSTSQVLEAAT  
 CKKQVSQDFLETRFKIQQLLEPQQYMACLPHHIIVKIFRLLPTLSLAILKCTCRYFKSII EYYNIRPADSRWV  
 RDPYREDPCKQCKKKYVKGDVSLCRWHPKPYCQALPYGPGYWMCCHQSQKGFPGCKLGLHDNHWPACHSFN  
 RAIHKKTRGGETEETEEY\*  
 >ENSMUSP00000132271\_c.2064:A>G\_p.S689G ENSMUST00000168833.9|Fbxo34-  
 205|ENSMUSG00000037536|+|chr14:g.47768706:A>G  
 MHLKLYWKLQKKERPLEVSRDTLRTPMSHGKANGDVKARASYMKPTVLPASLVKASSRKPFGILSPNVLCMS  
 SGKSPVENS LNVAKKNVLSAAVHQSEEGLPGTWAIIVKPGNTKEKIAFFAAHQYSNRIGSMKIKSSWDIDGRA  
 TKRRKSGDLKAKLQLEMMREINSQCYQSEPFVCGVEHCSVHYMSDSGDGVCARPLSVIQMVAFLQKATA  
 LLASCTKNCTNSPAIVKISGQSRGIPPAPEPFSAPETCEEPKEQENPETGRSQGEPVRLDMVARLESECLKH  
 QGQREPGSLSRNNSFRNVGRVLLTNGSQASDKSEEGSADTADPQENPLQPVSVGEEPSVTEHHSVGEQAWD  
 TSQSCPSLPATVVSFHMSTDLPGQQTAMKSCSRDDVEMVEEFDELPTDAVRRIRRELVTVTKHSPEQRQDPL  
 CISITVCTVEKDRPAALDSLEEPLPGMLFFLSSGQDQQAHPQLREHPAPEASEASQPQDAAEGSSAGEEKDAS  
 VEPLLPAASPGGSTSQVLEAATCKKQVSQDFLETRFKIQQLLEPQQYMACLPHHIIVKIFRLLPTLSLAILK  
 TCRYFKSII EYYNIRPADSRWVRDPYREDPCKQCKKKYVKGDVSLCRWHPKPYCQALPYGPGYWMCCHQSQK  
 GFPGCKLGLHDNHWPACHSFNRAIHKKTRGGETEETEEY\*  
 >ENSMUSP00000093634\_c.2064:A>G\_p.S689G ENSMUST00000095941.9|Fbxo34-  
 202|ENSMUSG00000037536|+|chr14:g.47768706:A>G  
 MHLKLYWKLQKKERPLEVSRDTLRTPMSHGKANGDVKARASYMKPTVLPASLVKASSRKPFGILSPNVLCMS  
 SGKSPVENS LNVAKKNVLSAAVHQSEEGLPGTWAIIVKPGNTKEKIAFFAAHQYSNRIGSMKIKSSWDIDGRA  
 TKRRKSGDLKAKLQLEMMREINSQCYQSEPFVCGVEHCSVHYMSDSGDGVCARPLSVIQMVAFLQKATA  
 LLASCTKNCTNSPAIVKISGQSRGIPPAPEPFSAPETCEEPKEQENPETGRSQGEPVRLDMVARLESECLKH  
 QGQREPGSLSRNNSFRNVGRVLLTNGSQASDKSEEGSADTADPQENPLQPVSVGEEPSVTEHHSVGEQAWD  
 TSQSCPSLPATVVSFHMSTDLPGQQTAMKSCSRDDVEMVEEFDELPTDAVRRIRRELVTVTKHSPEQRQDPL  
 CISITVCTVEKDRPAALDSLEEPLPGMLFFLSSGQDQQAHPQLREHPAPEASEASQPQDAAEGSSAGEEKDAS  
 VEPLLPAASPGGSTSQVLEAATCKKQVSQDFLETRFKIQQLLEPQQYMACLPHHIIVKIFRLLPTLSLAILK  
 TCRYFKSII EYYNIRPADSRWVRDPYREDPCKQCKKKYVKGDVSLCRWHPKPYCQALPYGPGYWMCCHQSQK  
 GFPGCKLGLHDNHWPACHSFNRAIHKKTRGGETEETEEY\*  
 >ENSMUSP00000131708\_c.2064:A>G\_p.S689G ENSMUST00000163324.8|Fbxo34-  
 203|ENSMUSG00000037536|+|chr14:g.47768706:A>G



MHLKLYWKLQKKERPLEVSRDTRLRTPMSHGKANGDVKARASYMKPTVLPASLVKASSRKPFGILSPNVLCSM  
SGKSPVENSLNVKAKKNVLSAAVHQSEGLPGTWAIVKPGNTKEKIAFFAAHQYSNRIGSMKIKSSWDIDGRA  
TKRRKKSGLKAKLQLEMMREINSQCYQSEPFVCGVEHCSVHYMSDSGDGVCAARPLSVIQMVAFLQKATA  
LLASCTKNCTNSPAIVKISGQSRGIPPAPEPFSAPETCEEPKEQENPETGRSQGEPVRLDMVARLESECLKH  
QQQREPGSLSRNNSFRNVGRVLLTNGSQASDKSEEGSADTADPQENPLQPVSVGEEPSVTEHHSVGEQAWDG  
TSQSCPSLPATVFSHMDSTDLEPGQQTAMKSCSRDDVEMVEEFDELPTDAVRRIRRELVTVTKHSPEQRDPL  
CISITVCTVEKDRPAALDSLEELPGMLFFLSSGDQQAHPQLREHPAPEASEASQPQDAAEGSSAGEEKDAS  
VEPLLPAAASPGGSTSQVLEAATCKKQVSQDFLETRFKIQQLLEPQQYMACLPHHIIVKIFRLLPTLSLAILKC  
TCRYFKSIEYYNIRPADSRWVRDPYREDPCKQCKKKYVKGDVSLCRWHPKPYCQALPYGPGYMWCCHQSQK  
GFPGCKLGLHDNHWPACHSFNRAIHKKTRGGETEETEEY\*

>ENSMUSP00000130036\_c.2064:A>G\_p.S689G ENSMUST00000165714.2|Fbxo34-  
204|ENSMUSG00000037536|+|chr14:g.47768706:A>G

MHLKLYWKLQKKERPLEVSRDTRLRTPMSHGKANGDVKARASYMKPTVLPASLVKASSRKPFGILSPNVLCSM  
SGKSPVENSLNVKAKKNVLSAAVHQSEGLPGTWAIVKPGNTKEKIAFFAAHQYSNRIGSMKIKSSWDIDGRA  
TKRRKKSGLKAKLQLEMMREINSQCYQSEPFVCGVEHCSVHYMSDSGDGVCAARPLSVIQMVAFLQKATA  
LLASCTKNCTNSPAIVKISGQSRGIPPAPEPFSAPETCEEPKEQENPETGRSQGEPVRLDMVARLESECLKH  
QQQREPGSLSRNNSFRNVGRVLLTNGSQASDKSEEGSADTADPQENPLQPVSVGEEPSVTEHHSVGEQAWDG  
TSQSCPSLPATVFSHMDSTDLEPGQQTAMKSCSRDDVEMVEEFDELPTDAVRRIRRELVTVTKHSPEQRDPL  
CISITVCTVEKDRPAALDSLEELPGMLFFLSSGDQQAHPQLREHPAPEASEASQPQDAAEGSSAGEEKDAS  
VEPLLPAAASPGGSTSQVLEAATCKKQVSQDFLETRFKIQQLLEPQQYMACLPHHIIVKIFRLLPTLSLAILKC  
TCRYFKSIEYYNIRPADSRWVRDPYREDPCKQCKKKYVKGDVSLCRWHPKPYCQALPYGPGYMWCCHQSQK  
GFPGCKLGLHDNHWPACHSFNRAIHKKTRGGETEETEEY\*

>ENSMUSP00000137214\_c.10:T>G\_p.L4R ENSMUST00000180359.8|Abhd4-  
202|ENSMUSG00000040997|+|chr14:g.54499142:T>G

MSQRKNVEARILQCLQNKFLARYVSLPNQNKIWTVTVSPEQKDRTPLMVMHGFGGVGLWILNMDLSARRTL  
HTFDLLGFGRRSRPTFPRDPEGAEDEFFVASIETWRETMGIPTMILLGHSLGGFLATSYSIKYPERVKHLILVD  
PWGFPLRPTDPSEIRAPPTWVKAVASVLRNSPLAVLRVAGPWGPGLVQFRFRPDFKRKFADFFEDDTISEYIY  
HCNAQNPSGETAFKAMMESFGWARRPMLERIHILIRKDVPIITMIYGANTWIDTSTGKKVKMQRPDYSYVRDMEIE  
GASHHVVADQPHIFNAVVEEICNSVD\*

>ENSMUSP00000044134\_c.82:T>G\_p.L28R ENSMUST00000041197.13|Abhd4-  
201|ENSMUSG00000040997|+|chr14:g.54499142:T>G

MADDLEQQPQGWLSSWLPTWRPTSMSQRKNVEARILQCLQNKFLARYVSLPNQNKIWTVTVSPEQKDRTPLMV  
VHGFGGVGLWILNMDLSARRTLHTFDLLGFGRRSRPTFPRDPEGAEDEFFVASIETWRETMGIPTMILLGH  
LGGFLATSYSIKYPERVKHLILVDPWGFPLRPTDPSEIRAPPTWVKAVASVLRNSPLAVLRVAGPWGPGLVQ  
RFRPDFKRKFADFFEDDTISEYIYHCNAQNPSGETAFKAMMESFGWARRPMLERIHILIRKDVPIITMIYGANT  
IDTSTGKKVKMQRPDYSYVRDMEIEGASHHVVADQPHIFNAVVEEICNSVD\*

>ENSMUSP00000143121\_c.82:T>G\_p.L28R ENSMUST00000196699.3|Abhd4-  
203|ENSMUSG00000040997|+|chr14:g.54499142:T>G

MADDLEQQPQGWLSSWLPTWRPTSMSQRKNVEARILQCLQNKFLARYVSLPNQNKIWTVTVSPEQKDRTPLMV  
LKANIPKGRRS\*

>ENSMUSP00000142722\_c.10:T>G\_p.L4R ENSMUST00000197605.3|Abhd4-  
204|ENSMUSG00000040997|+|chr14:g.54499142:T>G

MSQRKNVEARILQCLQNKFLARYVSLPNQNKIWTVTVSPEQKDRTPLMVMHGFGGVGLWILNMDLSARRTL  
HTFDLLGFGRRSRPTFPRDPEGAEDEFFVASIETWRETMGIPTMILLGHSLGGFLATSYSIKYPERVKHLILVD  
PWGFPLRPTDPSEIRAPPTWVKAVASVLRNSPLAVLRVAGPW

>ENSMUSP00000159351\_c.121:T>G\_p.L41R ENSMUST00000239403.2|Abhd4-  
209|ENSMUSG00000040997|+|chr14:g.54499142:T>G

MGWLSSTRQGLFTMADDLEQQPQGWLSSWLPTWRPTSMSQRKNVEARILQCLQNKFLARYVSLPNQNKIWTVT  
VSPEQKDRTPLMVMHGFGGVGLWILNMDLSARRTLHTFDLLGFGRRSRPTFPRDPEGAEDEFFVASIETWRE  
TMGIPTMILLGHSLGGFLATSYSIKYPERVKHLILVDPWGFPLRPTDPSEIRAPPTWVKAVASVLRNSPLAV  
LRVAGPWGPGLVQFRFRPDFKRKFADFFEDDTISEYIYHCNAQNPSGETAFKAMMESFGWARRPMLERIHILIRK  
DVPIITMIYGANTWIDTSTGKKVKMQRPDYSYVRDMEIEGASHHVVADQPHIFNAVVEEICNSVD\*

>rs245458704\_ENSMUSP00000061834\_c.145:A>G\_p.D49G  
ENSMUST00000058240.14|9930012K11Rik-201|ENSMUSG00000044551|-  
|chr14:g.70395007:T>C

MLSRRRVFAVERLGGRDGAFEDLAQGCVVPGVTCTYRRI PDNTHECSLGFREGQNELRGLERQMPLLKLASQD  
SGMEMVVGDSLATLSGLSQDSLNLPEMGSPELPPAQLDRLLARQKLEEVLEERSREFPSSAQRGPIQLLNKP  
VDGVPIFAGEQESTEADTELEAGLEEAKEVGNMESAACCTCLPGQGLRYLEHLCLVLEQMVRLQQLYLQLQTOR

PSRDPEEEVLAPALSSSHIPDNRVQEHREELSQTkdPEGAEAAASLPEVGVLVTSpsRLPEALLEPTHILPPSQ  
EPKQDLSHWDKVKVLLNRLRWRSPRLPEPPVPPDGSGSRMEFRNLSDRTPCHSQRKTFIPALVVKKPRAKNLS  
V\*

>rs245458704\_ENSMUSP00000122309\_c.145:A>G\_p.D49G  
ENSMUST00000153871.2|9930012K11Rik-205|ENSMUSG00000044551|-  
|chr14:g.70395007:T>C  
MLSRRRVFAVERLGGRDGAFFEDLAQGCVVPGVTCTYRRI PDNTHECSLGFREGQNELRGLERQMPLLKLASQD  
SGMEMVVGDSSSLATLSGLSQDSLNLPEPMGSPPELPPAQLDRLLARQKLEEVLEERSREFPSSLSAQRGPLQLLNKP  
VDGVPIFAGEQESTEADTELEAGLEEAKVGNMESAACCTCLPGQGLRYLEHLCLVLEQMVRLQQLYLQLQQTQR  
PSRDPEEEVLAPALSSSHIPDNRVQEHREELSQTkdPEGAEAAASLPEVGVLVTSpsRLPEALLEPTHILPPSQ  
EPKDLSHWDKVKVLLNRLRWRSPRLPEPPVPPDGSGSRMEFRNLSDRTPCHSQRKTFIPALVVKKPRAKNLSV  
\*

>ENSMUSP00000086411\_c.69:C>T\_p.P24S ENSMUST00000089017.12|Fndc3a-  
201|ENSMUSG00000033487|-|chr14:g.72921103:G>A  
MAEHPPLLDTAQILSSDISLLSASIVSADGTQQVILVQVNPGEAFTIRREDGQFQCITGPAQVPMMSPNGSVP  
PIYVPPGYAPQVIEDNGVRRVVPVQSPPEFHGGHTVIHRSHPPLPGFI PVPTMMPPPPRHMYSPVTGAGDM  
ATQYMPQYQSSQVYADVDAHSTHGRSNFRDERSKTYERLQKKLKDRQGTQKDKMSSPPSPQKCPSPISEHN  
GLIKGNASGGNTGSARNRSGRGRSCTQVDPEMEEKDEETKAFAEAFLSNIVKPVASDIQARTVLLTWSPPSSS  
INGEVNETAVPELNFYEVLVSSSTGKEGKYRSVYIGEETSVTLNDLKPATDYHAKVQAESNSIKGIPSEAESFT  
TLCSEPDPPNAPRIANRTKNSLTLQWKAPSDNGSKIQSFILEWDEGKNGEFCQCYMGSQKQFKITKLSPAMG  
CKFRLSAKNDYGVSDFSEEVLVYTSGCAPSVPASPVLTKAGVTWLSLQWTKPSGTPSDEGISYILEMEEETSG  
YGFKPKYDGEDLAYTVKNLRRSTKYKFKVIAYNSEGKSNPSEVVEFSTCPDKPGVPVKPSVKGIHSHGFKIT  
WDPFKDNGGAPINKYVVEMAEGSNGNKWMIYSGTTREHLCDRLTPGCYRRLRVYCI SDGGQS AVSESLLVQT  
PAVPPGCLPRLQGRPKAKEIQLRWGPPQVDGGSPI SCYAVEMTPADKDEPRDVYQGSEVECTVGSLLPGKT  
YSFRLRANRIGFGPFSEKYDITTAGPPDQCRPPQVTCRSATCAQVNWEIPLSNGTDVTEYRLEWGGVEGSM  
QMCYCGPGLSCELKGLSPATYYCRVQAMS SVVAGAGPSEVAVCVTPPSVPAIVTCLQEISDDIEYPHYSPT  
CLAISWKEPYDHSGLILAYSIDLGDQPLTVGKMTSYIIDSLQPDPTTYRIRIQALNSLQAGPFSSHITIKLTKP  
LPPDPPRLECVAFNHQNLKLGEGTPKTLSTDAVQYHLQMEDRNGRFVSLYRGPCHTYKVRLESTSYKFC  
IQACNEAGEGPLSQEYVFTTPKSLPAALKAPKIEKINDHICEITWEYLQPMKGDPIYNLQVMVGKDFEFKQI  
YKGPDTSFYSSSLQLNCEYFRVCAIRQCQDPTGHQDLVGPYSTTVFFISQRTEPPASSNKDSVDSARTRRTL  
SDEQCAAVILVVFAFFSILIAFIIQYFVIK\*

>ENSMUSP00000124637\_c.69:C>T\_p.P24S ENSMUST00000162478.8|Fndc3a-  
204|ENSMUSG00000033487|-|chr14:g.72921103:G>A  
MAEHPPLLDTAQILSSDISLLSASIVSADGTQQVILVQVNPGEAFTIRREDGQFQCITGPAQVPMMSPNGSVP  
PIYVPPGYAPQVIEDNGVRRVVPVQSPPEFHGGHTVIHRSHPPLPGFI PVPTMMPPPPRHMYSPVTGAGDM  
ATQYMPQYQSSQVYADVDAHSTHGRSNFRDERSKTYERLQKKLKDRQGTQKDKMSSPPSPQKCPSPISEHN  
GLIKGNASGGNTGSARNRSGRGRSCTQVDPEMEEKDEETKAFAEAFLSNIVKPVASDIQARTVLLTWSPPSSS  
INGEVNETAVPELNFYEVLVSSSTGKEGKYRSVYIGEETSVTLNDLKPATDYHAKVQAESNSIKGIPSEAESFT  
TLCSEPDPPNAPRIANRTKNSLTLQWKAPSDNGSKIQSFILEWDEGKNGEFCQCYMGSQKQFKITKLSPAMG  
CKFRLSAKNDYGVSDFSEEVLVYTSGCAPSVPASPVLTKAGVTWLSLQWTKPSGTPSDEGISYILEMEEETSG  
YGFKPKYDGEDLAYTVKNLRRSTKYKFKV

>ENSMUSP00000131542\_c.1812:G>A\_p.A605T ENSMUST00000169504.8|Tdrd3-  
203|ENSMUSG00000022019|+|chr14:g.87743866:G>A  
MAEVSGAALSQAGWYLSDEGVEACTSSPGKGSINDIILIALNTDLRTIGKKFLPSDINGGKVEKLEGPCVLQI  
QKVRNVAAPKDNEESQAAPRMLRVQMTDGHTSCTAVEFSYISKISLNTPPGKVKLSGTVDIKNGFLLS  
TTLVGGVEVHLIDKQWALQRSLLKHNRSNIGAEAGPPFPFLPGQKASNVQVDSRELDRRKTLQVSLPAK  
NDEFKQRTAAIAEVAKSKEKTFGGGGGARSNLNIGAGHRNREVLQKEKASKSESKNEGVYRELVDKAL  
KHITEMGFSKEASRQALMDNANNLEAALNVLLNSSKQKPAVGGPPARGRGRGRGRSEDEEDLGTARPSAPST  
LDFLFSKMGTLNVPEPKSQPHLHQGHQHRGWNAEQNGMKDGTQSRHLPRNDTRQPRNERPPRFQKDTPTS  
TVENSVLSRNRGSRPSSSSGSDVWAEERIKCDRYPYSRYDRTKDASHPLGLQHNDGAFKKRENSMQNRPRGR  
LYAEAKENPLPPEFVDYNNQRRGRRENQGTGHPDHCYERKPRMTNSEAVSGLKIEKHFSVNTDYPRPVQSN  
VNPGETAPPLKGRRVGPIKSTGPVTAVPYDDKIFYNNGPKRRSGPIKPEKVIESSIPVEYAKVWPKGDECFAL  
YWEDNKFYRAVEEALHSSGMTAVVKFTDYGNVEVLLSNIKPVQTEAWVRDPNSVQRLL\*

>ENSMUSP00000129019\_c.1812:G>A\_p.A605T ENSMUST00000168275.9|Tdrd3-  
202|ENSMUSG00000022019|+|chr14:g.87743866:G>A  
MAEVSGAALSQAGWYLSDEGVEACTSSPGKGSINDIILIALNTDLRTIGKKFLPSDINGGKVEKLEGPCVLQI  
QKVRNVAAPKDNEESQAAPRMLRVQMTDGHTSCTAVEFSYISKISLNTPPGKVKLSGTVDIKNGFLLS  
TTLVGGVEVHLIDKQWALQRSLLKHNRSNIGAEAGPPFPFLPGQKASNVQVDSRELDRRKTLQVSLPAK  
NDEFKQRTAAIAEVAKSKEKTFGGGGGARSNLNIGAGHRNREVLQKEKASKSESKNEGVYRELVDKAL  
KHITEMGFSKEASRQALMDNANNLEAALNVLLNSSKQKPAVGGPPARGRGRGRGRSEDEEDLGTARPSAPST  
LDFLFSKMGTLNVPEPKSQPHLHQGHQHRGWNAEQNGMKDGTQSRHLPRNDTRQPRNERPPRFQKDTPTS  
TVENSVLSRNRGSRPSSSSGSDVWAEERIKCDRYPYSRYDRTKDASHPLGLQHNDGAFKKRENSMQNRPRGR  
LYAEAKENPLPPEFVDYNNQRRGRRENQGTGHPDHCYERKPRMTNSEAVSGLKIEKHFSVNTDYPRPVQSN  
VNPGETAPPLKGRRVGPIKSTGPVTAVPYDDKIFYNNGPKRRSGPIKPEKVIESSIPVEYAKVWPKGDECFAL  
YWEDNKFYRAVEEALHSSGMTAVVKFTDYGNVEVLLSNIKPVQTEAWVRDPNSVQRLL\*

NDEFEKQRTAAIAEVAKSKETKTFGGGGGGARSNLNIGAAGHRNREVLQKEKASKSESKNEGVIYRELVDKAL  
KHITEMGFSKEASRQALMDNANNLEAALNVLNLSKQKPAVGGPPARGRGKGRGRGRSEDEEDLGTARPSAPST  
LFDLFLESKMGTNLNVEEPKSPQHLLHQGHQHRGWNAEQNGMKDGTQSRHLPRNDTRQPRNERPPRFQKDTPTS  
TVENSVLSRNRGSRPSSSSGSDVWAEERIKCDRYPYSRYDRTKDASHPLGLQHNDGAFKKRENSMQNRPGRGP  
LYAEAKENPLPPEFVDYNNQRRGRRENQGTGHPDHCYERKPRMTNSEAVSGLKIEKHFVNTDYPRPVQSNLSG  
VPNGETAPPLKGRRVGPIKSTGPVAVPYDDKIFYNSGPKRRSGPIKPEKVIESSIPVEYAKVWPKGDECFA  
YWEDNKFYRAEVEALHSSGMTAVVKFTDYGNYEEVLLSNIKPVQTEAWEEEGTYDHTIEFRGGDQPPRRSTR  
PTQQFYQPPRARN\*

>ENSMUSP00000126189\_c.1794:G>A\_p.A599T ENSMUST00000170865.8|Tdrd3-  
205|ENSMUSG00000022019|+|chr14:g.87743866:G>A  
MLFIFLFRNRYLSDEGVEACTSSPGKGSINDIILIALNTDLRTIGKKFLPSDINGGKVEKLEGPCVLQIQKVRNV  
AAPKDNEESQAAPRMLRVQMTDGHSTCTAVEFSYISKISLNTPPGTQVKSLSGTVDIKNGFLLSNTTVLGG  
EVEHLIDKQALQSRLLKHNRSNIGAEGGPPFPFPGQKCSANVQVDSRELDRRKTLQVSLPAKPANDNDEFEK  
QRTAAIAEVAKSKETKTFGGGGGGARSNLNIGAAGHRNREVLQKEKASKSESKNEGVIYRELVDKALKHITEM  
GFSKEASRQALMDNANNLEAALNVLNLSKQKPAVGGPPARGRGKGRGRGRSEDEEDLGTARPSAPSTLFDLFLE  
SKMGTNLNVEEPKSPQHLLHQGHQHRGWNAEQNGMKDGTQSRHLPRNDTRQPRNERPPRFQKDTPTSSTVENS  
LSRNRGSRPSSSSGSDVWAEERIKCDRYPYSRYDRTKDASHPLGLQHNDGAFKKRENSMQNRPGRGP  
ENLPLPEFVDYNNQRRGRRENQGTGHPDHCYERKPRMTNSEAVSGLKIEKHFVNTDYPRPVQSNLSGVPNGE  
TAPPLKGRRVGPIKSTGPVAVPYDDKIFYNSGPKRRSGPIKPEKVIESSIPVEYAKVWPKGDECFA  
LYWEDNKFYRAEVEALHSSGMTAVVKFTDYGNYEEVLLSNIKPVQTEAWEEEGTYDHTIEFRGGDQPPRRSTR  
PTQQFYQPPRARN\*

>ENSMUSP00000051809\_c.2266:T>G\_p.V756G ENSMUST00000061656.8|Rictor-  
201|ENSMUSG00000050310|+|chr15:g.6807499:T>G  
MAAIGRGRSLKNLRIRGRNDSGEENVPLDLTREPNDLREILQNVAKLQGVSNMRKLGHLNFTKLLCDIGHS  
EEKLGFNYEDIICLRLLALLEAKEVRAAGLRALRYLIQDSSILQKVLKLVLDYLIARCIDIQSNEVERTQA  
LRLVRKMITVNASLFPSSVANSIAVGNLQERDRMVRACIAICELALQNEPVVALRGGGLNTILKNVIDCQ  
LSRINEALITTLHLNHPKTRQYVRADVELERILAPYDFHYRHSPTAEGQLKEDREARFLASKMGIATF  
RSWAGIINLCKPGNSGIQSLIGVLCIPNMEIRRGLLEVLYDIFRPLPVPVTDDEFIEALLSVDPRGFQDSWRLS  
DGFVAEAKTILPHRARSRPDLMDNYLALILSAFIRNGLLEGLVEVITNSDDHISVRATILLGELLHMANTIL  
PHSHSHHLHCLPTLMNMAASFDIPKEKRLRASAALNLRNFHEMKKRGPKPYSLHLDHIQKAIATHHKRDQY  
LRVQKIDIFVLKDTTEALLINLRDSQVLQHKENLDWDWNLIGTILKWPVNLNRNYKDEQLHRFVRRLLYFYKPS  
SKLYASLDLDAKSKQLTVVGCQFTEFLESEEDGQGYLEDLVKDIVQWLNASSGVKPERSLQNNGLLTTLSQ  
HYFLFIGTSLCHPHGVKMLEKCSVFCQLLNLCSLKNQDHLIKLTVSSLDYSRDGLARVILSKIILTAATDACRL  
YATKHLRVLLRANVEFFNNGIELLGTQLHDKNKTISSEALDILDEACEDKANLHALIQMKPALSHLGDKGLL  
LLRFLSIPKGFSYLNERGYVAKQLEKWHKEYNSKYVDLIEEQLNEALTTYRKPIDGDNVRRSNQRLQRPV  
YLPVHLYGQLVHHKTGCHLLEVQSIITELCHNVRTPDLKWEDEIKKLLKASLWALGNIGSSNWGLNLLQENVI  
PDILKLAQCEVLSIRGTCVYVGLIAKTKQGCILKCHSWDSVRHSRKHLPVVPDVEQLCNELSSVPSTL  
SLNSESTSSRHNSESESAPSSMFLEDDRFSTSTSTFFLDINEDAEPAFYDRPGPIKDKNSFPFFGSSKLVK  
NRILNSLTLPTKHKRSSSDPKGGKLSSENKTSNRRIRTLTEPSVDLNHSEDFTSSSAQKSLQLEPSFVGNKHL  
EDAGSTPSIGENDLKFPKSFGTETHRENTSRERLVVEGSASSHIKIRSQSFNTDTTTSGISMSSSPSRETVA  
VDPTAMDTDCGSLSTVVSTKTVKTSHYLTPQSNHLSLSKNSVSLVPPGSSHTLPRRAQSLKAPS IATIKSLA  
DCNFSYTSRDAFGYATLKRLLQQRMHPSLSHSEALASPAKDVLFDTITMKANSFESRLTPSRFMKALS  
YASLDKEDLLSPINHNLTQRSSSVRSMVSSATYGGSDDYIGLALPVDINDIFQIKDVYPYFQSKHVPPDDRGAR  
MFDGAGLSSGAGGLVKNSFHLLRQMSLTEIMNSVHSDASLFLESTEDTGLQEHTDDNCLYCVCIELLG  
FQPSNQLSSICSHSDLQDIPYSDWCEQTIHNPLEVVPKFSGISGSDGASQEEGSASSTKSTELLGVTI  
IPDDPTMCRILLRKEVLRLLVNLSSSVSTKCHETGLLTIKEKYPQTFDDICLYSEVSHLLSHCTFRLQCR  
RFIQELFQDVQFLQMHEEAVALAIPPIQPIVDESAES\*

>ENSMUSP00000106087\_c.3401:T>G\_p.S1134R ENSMUST00000110457.8|Myo10-  
202|ENSMUSG00000022272|+|chr15:g.25781908:T>G  
MDSFFPEGARVWLRENGQHFPSTVNSCAEGVVVFQTDYGVFTYKQSTITNQKV TAMHPLHEEGVDDMASLAE  
LHGGSIMYNLFQRYKRNQIYTYIGSIIASVNPYQPIAGLYERATMEEYSRCHLGELPPHIFAIANECYRCLWK  
RHDNQCVLISGESGAGKTESTKLILKFLSVISQQTLDLGLQEKTSSEVQAILQSSPIMEAFGNAKT  
VYNNNSSRFGKRVQNLICQGGNIQGGRIVDYLLEKNRVVRNPGERNYHIFYALLAGLDQGEREEFYLSL  
PENYHYLNQSGCTEDKTI SDQESFRQVITAMEVMQFSKEEVREVLRLLAGILHLGNIEFITAGGAQIPFKTALGRSADLLGLD  
PTQLTDALTRQSMILRGEIILTPLSVQQAVDSRDSLAMALYARCFEWWIKKINSRIKGGDDFKSIGILDI  
FGFENFEVNHFEQFNINYANEKLEQYFNKHFISLEQLEYSREGLVWEDIDWIDNGECLDLIEKKLGLL  
LALINEESHFPQATDSTLLEKLSQHANNHFYVKPRVAVNNFGVKHYAGEVQYDVRGILEKNRDTFRD  
DLLNLLRESRFDIYDLFEHVSSRNNQDTLCKGSKHRRPTVSSQFKDSLHSLMATLSSSNPFFVRCIKPNTQKMPDQFQV  
VVLNQL

RYSGMLETVRIRKAGYAVRRPFQDFYKRYKVLMRNLALPDDIRGKCTVLLQVYDASNSEWQLGKTKVFLRESL  
 EQKLEKRREEEIDRAAMVIRAHILGYLARKQYRKVLCGVVTIQKNYRAFLARKKFLHLKKAIVFQKQLRGQL  
 ARRVYRQLLAEKRELEEKRRREEEKKREEEERERERERAQREADLLRAHQEAETRRQOELEALQKSQREADLTRE  
 LEKQRENKQVEEILRLEKEIEDLQRMKERQELSLTEASLQKLQQLRDEELRRLEDEACRAAQEFLESLNFDEI  
 DECVRNIERSLSVGSEISGEELSELAESASGEKPNFNFSQPYPAEEEVDEGFEADDDAFKDSPNPSEHGHSQ  
 RTSGIRTSDDSSSEEDPYMNYTVVPTSPSADSTVLLAASMQDSASLHNSSSGESTYCMPPQNNGDLPSDPGDYDY  
 DQDDYEDGAIITSGSSVTFNSYGSQWSPDYRYSVGTYNRSAYRFSSEGAQSSFEDESEDFDSRFDTDDELSY  
 RRDVSVYSCVTLPLYFHSFLYMKGGLMNSWKRRWCVLKDETFWFRSKQEALKQGWLHKKGGSSSTLSRRNWKKR  
 WFVLRQSKLMYFENDSEELKGTVEVRTAKEIIDNTSKENGIDIIADRTFHLIAESPEDASQWFSVLSQVHSS  
 STDQEIEMHDEQANPQNAVGLTDVGLIDSVCASDSPDRPNSFVITANRVLHCNADTPEEMHHWITLLQRSK  
 GDTRVEGQEFIVRGWLHKEVKNSPKMSSLKLLKRWVFLTHNSLDYKSSSEKNALKGLTLVNLVSLCSVVPDEK  
 IFKETGYWNVTVYGRKHCHYRLYTKLLNEATRWSAIONVTDTKAPIDTPTQQLIQDIKENCLNSDVVEQIYKR  
 NPILRYTHHPLHSPLLPLPYGDINLNLKDKGYTTLQDEAIKIFNSLQQLLESMSDPIPIIQGILQTHDLRPL  
 RDELYCQLIKQTNKVPHPGSGVNLVSWQILTCLSCFTLPSRGIKYLKFLKRIREQFPGTEMEKYALFIYES  
 LKKTCKREFVPSRDEIEALHRQEMTSTVYCHGGGSKITINSHTTAGEVVEKLIRGLAMEDSRNMFALFEYN  
 GQVDKAIERTIVADVLAKEFLAATSEAGDAPWKFYFKLYCFLDTSMPKDSVEFAFMFEQAHEAVIHGHP  
 APEESLQVLAALRLQYLQGDYTPHTSIPPLEEVYSVQRLRARIQSSTKTFTPYERLEKRRTSFLEGLTRRSFR  
 TGSVVRQKAEQQMLDMWIKEEVCARTSIIIDKWKKLQGMNQEQAMAKYMALIKWPGYGSTLFDVECKEGGF  
 PQELWLGVSADAVSVYKRGEKPLEVFQYEHILSFGAPLANTYKIVVDERELLFETSEVVDVAKLMKAYISMI  
 VKKRYSTTRSVSSQSSR\*

>ENSMUSP00000022882\_c.1163:T>G\_p.S388R ENSMUST00000022882.12|Myo10-  
 201|ENSMUSG0000002272|+|chr15:g.25781908:T>G

MVIRAHILGYLARKQYRKVLCGVVTIQKNYRAFLARKKFLHLKKAIVFQKQLRGQLARRVYRQLLAEKRELE  
 EKKRREEEKKREEEERERERAQREADLLRAHQEAETRRQOELEALQKSQREADLTRELEKQRENKQVEEILRL  
 EKEIEDLQRMKERQELSLTEASLQKLQQLRDEELRRLEDEACRAAQEFLESLNFDEIDECVRNIERSLSVGSE  
 ISGEELSELAESASGEKPNFNFSQPYPAEEEVDEGFEADDDAFKDSPNPSEHGHSQRTSGIRTSDDSSSEEDP  
 YMNYTVVPTSPSADSTVLLAASMQDSASLHNSSSGESTYCMPPQNNGDLPSDPGDYDYDQDDYEDGAIITSGSSV  
 TFSNSYGSQWSPDYRYSVGTYNRSAYRFSSEGAQSSFEDESEDFDSRFDTDDELSYRRDVSVCVTLPLYFHS  
 FLYMKGGLMNSWKRRWCVLKDETFWFRSKQEALKQGWLHKKGGSSSTLSRRNWKKRWVLRQSKLMYFENDS  
 EEKLGTVVEVRTAKEIIDNTSKENGIDIIADRTFHLIAESPEDASQWFSVLSQVHSSSTDQEIEMHDEQANP  
 QNAVGLTDVGLIDSVCASDSPDRPNSFVITANRVLHCNADTPEEMHHWITLLQRSKGDTRVEGQEFIVRGWL  
 HKEVKNSPKMSSLKLLKRWVFLTHNSLDYKSSSEKNALKGLTLVNLVSLCSVVPDEKIFKETGYWNVTVYGRK  
 HCHYRLYTKLLNEATRWSAIONVTDTKAPIDTPTQQLIQDIKENCLNSDVVEQIYKRNPILRYTHHPLHSPLL  
 PLPYGDINLNLKDKGYTTLQDEAIKIFNSLQQLLESMSDPIPIIQGILQTHDLRPLRDELYCQLIKQTNKVP  
 HPGSGVNLVSWQILTCLSCFTLPSRGIKYLKFLKRIREQFPGTEMEKYALFIYESLKKTCKREFVPSRDEI  
 EALHRQEMTSTVYCHGGGSKITINSHTTAGEVVEKLIRGLAMEDSRNMFALFEYNGQVDKAIERTIVADV  
 LAKFEKLAATSEAGDAPWKFYFKLYCFLDTSMPKDSVEFAFMFEQAHEAVIHGHPAPEESLQVLAALRLQY  
 LQGDYTPHTSIPPLEEVYSVQRLRARIQSSTKTFTPYERLEKRRTSFLEGLTRRSFRTGSVVRQKAEQQMLD  
 MWIKEEVCARTSIIIDKWKKLQGMNQEQAMAKYMALIKWPGYGSTLFDVECKEGGFQELWLGVSADAVSVY  
 KRGEKPLEVFQYEHILSFGAPLANTYKIVVDERELLFETSEVVDVAKLMKAYISMIVKKRYSTTRSVSSQGS  
 SR\*

>ENSMUSP0000002603\_c.528:G>A\_p.E177K ENSMUST0000002603.12|Scrib-  
 201|ENSMUSG00000022568|-|chr15:g.75938881:C>T

MLKCIPLWRCNRHVESVDKRHCSLQVVPPEEIIYRYSRSLLELLLDANQLRELKPKFFRLLNLRKLGSLDNEIQR  
 LPPEVANFMQLVELDVSNDIPEIPESIKFKCALEIADFSGNPLSRLPDGFTQLRSLAHLALNDVSLQALPGD  
 VGNLANLVTLLELRENLLKSLPASLSFLVKLQDLGGNDLEVLDPDTLGALPNLRELWLDRNQLSALPPELGNL  
 RRLVCLDVSENREELPVELGGLALLTDLLLSQNLQRLPEGIGQLKQLSILKVDQNRLECEVTEAIGDCENLS  
 ELILTENLLTALPHSLGKLTCLTNLNVDRNHLEVLPEIGGCVALSVLSLRDNRLAVLPPELAHTAELHVLVDV  
 AGNRLRSLPFALHNLKALWLAENQAQPMLRFQTEDDAQTGEKVLTCYLLPQQPLPSLEDAGQQSSPSESCS  
 DAPLSRVSVIQFEDTLEGEEDAEEAAAERKGLQRRATPHPSSELKVMKRGIEERRNEAFVCKPDPSPPSPSEEE  
 KRLSAESALSQSVSPASTASEGEPEILPAEVQGLGQHEAMPAQEYTEDDYNEPTVHFAEDTLIPREDGESE  
 EGQPEAAWPLPSGRQRLIRKDTPHYKHKFKISKLPQPEAVVALLQGVQTDREGPTAGWHNGPHTPWAPRAHEE  
 EEEEEENRDEEGEATTEEDDKEEAVASAPSVGKVSFVQANLLIEPARIEEEELTLTIVRQTGGLGISIAG  
 GKGSTPYKGDDEEFIGATSRVSEEGPAARAGVRVGDKLELVNGVALQDAEHHEAVEALRGAGAAVQMRVWRMVB  
 EPENAVTITPLRPEDDYSPREWRGGGLRPLLPQPETPVSLRQRHAACLVRSEKGLGFSIAGGKSTPYRAGDG  
 GIFISRIAEGGAHRAGTLQVGDVRLSINGVDMTEARHDHAVSLTAAASPTISLLERETGGTYPPSPPHSS  
 PTPAATVAATVSTAVPGEPLPRLSPSLLATALEGYPVEEICLPRAGGPLGLSIVGGSDHSSHPFGVQDPGV  
 FISKVLPRGLAARCGLRVGDRILAVNGQDVREATHQEAVSALLRPCLELCLLVRRDPPPPGMRELCTQKAPGE

KLGISIRGGAKGHAGNPCDPTDEGIFISKVSPGTAAGRDRGLRVGLRLLLEVNQQSLLGLTHAEAVQLLRSVGD  
 TLTVLVCDGFDSTTTTAALEVSPGVIANPFAAGLGHRSLESISSIDRELSPEGPGKEKELASQALPWESESAE  
 TTGRNLEPLKLDYRALAALPSAGSLQRGPSATTGGKTTEAPCSPGSGQTKPGVIQPLAQAWPRNSPAPRGRGG  
 PCSPPSPDEL PANVKQAYRAFAAVPTVHPPENSATQPPTPGPAASPEQLSFRERQKYFELEVRVPPAEGPPKR  
 VSLVGADDLRKMQEEEEARKLQKRAQMLREEAVTSGPDMGLASDRESRDDQAEQWAVPSHAGGSSPSSPP  
 PLGGNAPVRTAKAERRHQRERLRMQSPPELPAERALS PAERRALEAEKRALWRAARMKSLEQDALRAQMVLKSKS  
 QEGRGKRGP LERLAEAPSAPTSPPTPLEDFGLQTSASPGRLPLSGKKFDYRAFAALPSSRPVYDIQSPDFVE  
 ELRTEASPSPGSQEEDGEVALVLLGRPSPGAVGPEDMTLCSRRSVRPGRRGLGPVPS\*  
 >ENSMUSP00000068056\_c.528:G>A\_p.E177K ENSMUST00000063747.12|Scrib-  
 202|ENSMUSG00000022568|-|chr15:g.75938881:C>T  
 MLKCIPLWRCNRHVESVDKRHCSLQVVPPEE IYRYSRSL EELLDDANQLREL PKPFFRLLNLRKLG LSDNEIQR  
 LPPEVANFMQLVELDVSRNDIPEIPESIKFCKALEIADFSGNPLSRLPDGFTQLRSLAHLALNDVSLQALPGD  
 VGNLANLVTLLELRENLLKSLPASLSFLVKLKLQDLGGNDLEVL PDTLGALPNLRELWLDRNQLSALPPELGNL  
 RRLVCLDVSENRL EELPVELGGLALLTDLLLSQNL LQRLPEGIGQLKQLSILKVDQNLCEVTEAIGDCENLS  
 ELILTENLLTALPHSLGKLT KLTNLNVDRNHLEVL PPEIGGCVALSVLSLRDNRLAVLPPELAHTAELHVL DV  
 AGNRLRSLPFAL THLNLKALWLAENQAQPM LRFQTEDDAQTGEKVLTCYLLPQQPLPSLEDAGQQSSPSESCS  
 DAPLSRVSVIQFEDTLEGEEDAEEAAA EKRLQRRATPHPSELKVMKRGIEERRNEAFVCKPDPSPSPSEEE  
 KRLSAESALS GGSVPSASTASEGEPEILPAEVQGLGQHEAMPAQE EYTEDDYNEPTVHFAEDTLIPREDGESE  
 EGQPEAAWPLPSGRQRLIRKDTPHYKHKFKI SKLPQPEAVVALLQGVQTDREGPTAGWHNGPHTPWAPRAHEE  
 EEEEEENRDEEEGEATTEEDDKEEAVASAPSVKGV SFDQANLLIEPARIEEEELTLTIVRQTGGLGIS IAG  
 GKGSTPYKGDDEGIFISRVSEEGPAARAGVRVGD KLLLEVNGVALQDAEHHEAVEALRGAGA AVQMRVWRERMV  
 EPENAVTITPLRPEDDYS PREWRGGGLRLPL LQPETPVSLRQRHAACLRSEKGLGFSIAGGKSTPYRAGDG  
 GIFI SRIAEGGAHRAGTLQV GDRVLSINGVDMTEAR HDHAVSL LTAASPTISLLLERETGGTYPPSPPHSS  
 PTPAATVAATVSTAVPGEPLLR LSPSLLATALEGPYPVEE ICLPRAGGPLGLSIVGGS DSHSHPFVQDPGV  
 FISKVLPRGLAAR CGLRVGDRILAVNGQDVREATHQEAVS ALLRPCLELCLLVRRDPPPPGMREL CIQKAPGE  
 KLGISIRGGAKGHAGNPCDPTDEGIFISKVSPGTAAGRDRGLRVGLRLLLEVNQQSLLGLTHAEAVQLLRSVGD  
 TLTVLVCDGFDSTTTTAALEVSPGVIANPFAAGLGHRSLESISSIDRELSPEGPGKEKELASQALPWESESAE  
 TTGRNLEPLKLDYRALAALPSAGSLQRGPSATTGGKTTEAPCSPGSGQPPSPDEL PANVKQAYRAFAAVPTVH  
 PPENSATQPPTPGPAASPEQLSFRERQKYFELEVRVPPAEGPPKR VSLVGADDLRKMQEEEEARKLQKRAQML  
 REEAVTSGPDMGLASDRESRDDQAEQWAVPSHAGGSSPSSPPPLGGNAPVRTAKAERRHQRERLRMQSPPEL  
 PAPERALS PAERRALEAEKRALWRAARMKSLEQDALRAQMVLKSKSQEGRGKRGP LERLAEAPSAPTSPPTPL  
 EDFGLQTSASPGRLSPDFVEELRTEASPSPGSQEEDGEVALVLLGRPSPGAVGPEDMTLCSRRSVRPGRR  
 LGPVPS\*  
 >ENSMUSP00000105572\_c.528:G>A\_p.E177K ENSMUST00000109946.9|Scrib-  
 203|ENSMUSG00000022568|-|chr15:g.75938881:C>T  
 MLKCIPLWRCNRHVESVDKRHCSLQVVPPEE IYRYSRSL EELLDDANQLREL PKPFFRLLNLRKLG LSDNEIQR  
 LPPEVANFMQLVELDVSRNDIPEIPESIKFCKALEIADFSGNPLSRLPDGFTQLRSLAHLALNDVSLQALPGD  
 VGNLANLVTLLELRENLLKSLPASLSFLVKLKLQDLGGNDLEVL PDTLGALPNLRELWLDRNQLSALPPELGNL  
 RRLVCLDVSENRL EELPVELGGLALLTDLLLSQNL LQRLPEGIGQLKQLSILKVDQNLCEVTEAIGDCENLS  
 ELILTENLLTALPHSLGKLT KLTNLNVDRNHLEVL PPEIGGCVALSVLSLRDNRLAVLPPELAHTAELHVL DV  
 AGNRLRSLPFAL THLNLKALWLAENQAQPM LRFQTEDDAQTGEKVLTCYLLPQQPLPSLEDAGQQSSPSESCS  
 DAPLSRVSVIQFEDTLEGEEDAEEAAA EKRLQRRATPHPSELKVMKRGIEERRNEAFVCKPDPSPSPSEEE  
 KRLSAESALS GGSVPSASTASEGEPEILPAEVQGLGQHEAMPAQE EYTEDDYNEPTVHFAEDTLIPREDGESE  
 EGQPEAAWPLPSGRQRLIRKDTPHYKHKFKI SKLPQPEAVVALLQGVQTDREGPTAGWHNGPHTPWAPRAHEE  
 EEEEEENRDEEEGEATTEEDDKEEAVASAPSVKGV SFDQANLLIEPARIEEEELTLTIVRQTGGLGIS IAG  
 GKGSTPYKGDDEGIFISRVSEEGPAARAGVRVGD KLLLEVNGVALQDAEHHEAVEALRGAGA AVQMRVWRERMV  
 EPENAVTITPLRPEDDYS PREWRGGGLRLPL LQPETPVSLRQRHAACLRSEKGLGFSIAGGKSTPYRAGDG  
 GIFI SRIAEGGAHRAGTLQV GDRVLSINGVDMTEAR HDHAVSL LTAASPTISLLLERETGGTYPPSPPHSS  
 PTPAATVAATVSTAVPGEPLLR LSPSLLATALEGPYPVEE ICLPRAGGPLGLSIVGGS DSHSHPFVQDPGV  
 FISKVLPRGLAAR CGLRVGDRILAVNGQDVREATHQEAVS ALLRPCLELCLLVRRDPPPPGMREL CIQKAPGE  
 KLGISIRGGAKGHAGNPCDPTDEGIFISKVSPGTAAGRDRGLRVGLRLLLEVNQQSLLGLTHAEAVQLLRSVGD  
 TLTVLVCDGFDSTTTTAALEVSPGVIANPFAAGLGHRSLESISSIDRELSPEGPGKEKELASQALPWESESAE  
 TTGRNLEPLKLDYRALAALPSAGSLQRGPSATTGGKTTEAPCSPGSGQPPSPDEL PANVKQAYRAFAAVPTVH  
 PPENSATQPPTPGPAASPEQLSFRERQKYFELEVRVPPAEGPPKR VSLVGADDLRKMQEEEEARKLQKRAQML  
 REEAVTSGPDMGLASDRESRDDQAEQWAVPSHAGGSSPSSPPPLGGNAPVRTAKAERRHQRERLRMQSPPEL  
 PAPERALS PAERRALEAEKRALWRAARMKSLEQDALRAQMVLKSKSQEGRGKRGP LERLAEAPSAPTSPPTPL  
 EDFGLQTSASPGRLPLSGKKFDYRAFAALPSSRPVYDIQSPDFVEELRTEASPSPGSQEEDGEVALVLLGRP  
 SPGAVGPEDMTLCSRRSVRPGRRGLGPVPS\*

>ENSMUSP00000094084\_c.484:C>A\_p.P162Q ENSMUST00000096357.12|Ncf4-201|ENSMUSG00000071715|+|chr15:g.78139666:C>A  
 MALAQQLRSESDFEQLPDDVAVSANIADIEEKRGFTSHFVVFVIEVKTGGSKYLIYRRYRQFYALQSKLEERF  
 GPESKNSPFTCSLPTLPKAVYMGAKQEIATRIIPALNAYMKNLLSLPVCVLMDDPVDVRIFFYQSAYDAEQVPQA  
 LRRLRPRTKIKIGVSQQGAIMDRMEAPRAEALFDFTGNSKLELSFKAGDVI FLLSKINKDWLEGT SQGATGIF  
 PGSFVKILKDFPEDEDTTNWLRCYFYEDTGKTIKDIAVEEDLSSTPLFKDLLALMRREFQREDIALSYQDAEG  
 DLVRLSDEDEVGLMVKQARGLPSQKRLFPWKLHVTKQDNYSVYNTVP\*  
 >ENSMUSP00000121191\_c.484:C>A\_p.P162Q ENSMUST00000133618.3|Ncf4-203|ENSMUSG00000071715|+|chr15:g.78139666:C>A  
 MALAQQLRSESDFEQLPDDVAVSANIADIEEKRGFTSHFVVFVIEVKTGGSKYLIYRRYRQFYALQSKLEERF  
 GPESKNSPFTCSLPTLPKAVYMGAKQEIATRIIPALNAYMKNLLSLPVCVLMDDPVDVRIFFYQSAYDAEQVPQA  
 LRRLRPRTKIKIGVSQQGAIMDRMEAPRAEALFDFTGNSKLELSFKAGDVI FLLSKINKDWLEGT SQGATGIF  
 PGSFVKILKDFPEDEDTTNWLRCYFYEDTGKTI  
 >rs231005795\_ENSMUSP00000113341\_c.808:G>A\_p.R270H  
 ENSMUST00000117786.9|Csnk1e-201|ENSMUSG00000022433|-|chr15:g.79309116:C>T  
 MELRVGNKYRLGRKIGSGSFGDIYLGANIASGEEVAIKLECVKTKHPQLHIESKFKYKMMQGGVGIPIKWCGA  
 EGDYVNMVMEELLGSPLEDFNFCSRKFSKLTVLLADQMISRIEYIHSKNFIHRDVKPDNFMGLGKKNLVY  
 IIDFGLAKKYRDARTHQHI PYRENKNTGTARYASINTHLGIEQSRDDLES LGYVLMYFNLGSLPWQGLKAA  
 TKRQKYERISEKKMSTPIEVLCKGYPSEFSTYLNFCRSLRFDDKPDYSYLHQLFRNLFRHQGFSYDYVFDWNM  
 LKFGAARNPEDVDREHEREEREERMQLRGSATRALPPGPPTGATANRLRSAAEPVASTPASRIQQTGNTSPR  
 AISRADREKRVSMRLHRGAPANVSSDLTGRQEVSRLAASQTSVFPDHLGK\*  
 >rs231005795\_ENSMUSP00000113975\_c.808:G>A\_p.R270H  
 ENSMUST00000120859.9|Csnk1e-202|ENSMUSG00000022433|-|chr15:g.79309116:C>T  
 MELRVGNKYRLGRKIGSGSFGDIYLGANIASGEEVAIKLECVKTKHPQLHIESKFKYKMMQGGVGIPIKWCGA  
 EGDYVNMVMEELLGSPLEDFNFCSRKFSKLTVLLADQMISRIEYIHSKNFIHRDVKPDNFMGLGKKNLVY  
 IIDFGLAKKYRDARTHQHI PYRENKNTGTARYASINTHLGIEQSRDDLES LGYVLMYFNLGSLPWQGLKAA  
 TKRQKYERISEKKMSTPIEVLCKGYPSEFSTYLNFCRSLRFDDKPDYSYLHQLFRNLFRHQGFSYDYVFDWNM  
 LKFGAARNPEDVDREHEREEREERMQLRGSATRALPPGPPTGATANRLRSAAEPVASTPASRIQQTGNTSPR  
 AISRADREKRVSMRLHRGAPANVSSDLTGRQEVSRLAASQTSVFPDHLGK\*  
 >rs231005795\_ENSMUSP00000113096\_c.808:G>A\_p.R270H  
 ENSMUST00000122044.8|Csnk1e-203|ENSMUSG00000022433|-|chr15:g.79309116:C>T  
 MELRVGNKYRLGRKIGSGSFGDIYLGANIASGEEVAIKLECVKTKHPQLHIESKFKYKMMQGGVGIPIKWCGA  
 EGDYVNMVMEELLGSPLEDFNFCSRKFSKLTVLLADQMISRIEYIHSKNFIHRDVKPDNFMGLGKKNLVY  
 IIDFGLAKKYRDARTHQHI PYRENKNTGTARYASINTHLGIEQSRDDLES LGYVLMYFNLGSLPWQGLKAA  
 TKRQKYERISEKKMSTPIEVLCKGYPSEFSTYLNFCRSLRFDDKPDYSYLHQLFRNLFRHQGFSYDYVFDWNM  
 LKFGASSQAQPRDNEALAPPCPRPWPCAGPAYSPYWCAPPLGTQGPDRPVEEEVEQLPPQRYWVWVTPG  
 PQF\*  
 >rs231005795\_ENSMUSP00000159272\_c.430:G>A\_p.R144H  
 ENSMUST00000156513.3|Csnk1e-210|ENSMUSG00000022433|-|chr15:g.79309116:C>T  
 XDVKPDNFMGLGKKNLVYIIDFGLAKKYRDARTHQHI PYRENKNTGTARYASINTHLGIEQSRDDLES  
 GYVLMYFNLGSLPWQGLKAATKRQKYERISEKKMSTPIEVLCKGYPSEFSTYLNFCRSLRFDDKPDYSYLHQL  
 FRNLFRHQGFSYDYVFDWNMLKFVSHRQAKAGLDWTGQALHTKARVTWWAGLPLNGRYELDTVNDVTGVPE  
 PLVSSHLDIDRACRHGGQGPGEAPPARWERTWCGLSLCTCGKWMALAGPSAALIAVCILLFLLCVSQVVA  
 LSEASLASLDPVRVASLFLVIGPWVLLGSCSVSLF\*  
 >ENSMUSP00000105007\_c.2289:C>A\_p.P764T ENSMUST00000109381.9|Brd1-203|ENSMUSG00000022387|-|chr15:g.88591306:G>T  
 MRRKGRCHRGSAARHPSSPCSIKHSPTRETLTYAQAQRMVEIEIEGRLHRISIFDPLEIILEDLTAQEMSEC  
 NSNKENSERPPVCLRTKRHKNNRVKKNVLPSTHGT PASASALPEPKVRIVEYSPPSAPRRPPVYKFKIEKS  
 AEELDNEVEYDMDEEDYAWLEI INEKRKGDVSAVSQNMFEFLMDRFEKESYCNQKQGEQSLI DEHAVCCI  
 CMDGECQNSNVILFCDMCNLAHVHQCYGVPIPEGQWLCRHCLQSRARPADCVLCPNKGGAFKKTDDDRWGHV  
 VCALWIPEVGFANTVFIEPIDGVRNIPPARWKLTCYLCKQKGVGACIQCHKANCYTA FHVTCAQKAGLYMKME  
 PVKELTGGSATFSVRKTAYCDVHTPPGCTRRPLNIYGDVEMKNGVCRKESVKTVRSTSKVRKKAKKAKKTLA  
 EPCAVLPTVCAPYI PPQRLNR IANQVAIQKKQFVERAHSYLLKRLSRNGAPLLRRLQSSLSQSRNTQOREN  
 DEEMKAAKEKLYWQRLRHDLERARLLIELLRKREKLRKREQVKEQMAMELRLTPLTVLLRSVLEQLQEKDPA  
 KIFAQPVSLKEVPDYLDHIKHPMDFATMRKRLEAQGYKLNLFHAFEEFNLI VDNCKMYNAKDTVFYRAAVRLRD  
 QGGVVLQARREVESIGLEEASGMHLPERPIAAPRRPFSWEEVDRLDPANRAHMSLEEQLRELLDKLDLTC  
 MKSSGSRSKRAKLLKKEIALLRNKLSSQHSQAPTTGAGTGGFEDEAAPLAPDTAEEGANSPPKLEPSDALPLP  
 SNSETNSEPPTLNPVELHPEQSKLFRVTFDNESHSTCTQSALVSGHPPEPTLASSGDVPAASAAVAEPSSD

VNRRTSVLFCCKSVSPPKSAKNTETQPTSPQLGKTFLSVLPRLETLLOPRKRSRSTCGDSEVEEESPGKR  
LDTGLTNGFGGARSEQEPGGGPRKAAPRRRCASESSICSSNSPLCDSSFSTPKCGRGKPALVRRHTLEDRSE  
LISCIENGYAKAARIAAEVQSNMWISTDAAASVLEPLKVVWAKCSGYPSYPALI IDPKMPRVPGHHNGVTI  
PAPPLDVLKIGEHMQTKSEEKFLVLVFFDNKRSWQWLPKSKMVPLGVDETI DKLKMMMEGRNSSIRKAVRIAFD  
RAMNHLSRVHGEASDLSDDID\*

>ENSMUSP00000105006\_c.2289:C>A\_p.P764T ENSMUST00000109380.8|Brd1-  
202|ENSMUSG00000022387|-|chr15:g.88591306:G>T

MRRKGRCHRGSAAARHSSPCS IKHSPTRETLYTAQAQRMVEIEIEGR LHRSISIFDPLEIILEDLTAQEMSEC  
NSNKENSERPPVCLRTKRHKNNRVKKNVLPSTHGT PASASALPEPKVRIVEYSPPSAPRRPPVYKFKIEKS  
AEELDNEVEYDMDEEDYAWLEI INEKRKGDVSAVSQNMFEFLMDRFEKESYCNQKQGEQQSLIDEDAVCCI  
CMDGECQNSNVILFCMDCNLAHVHQCVCYGVPIPEGQWLCRHCLQSRARPADCVLCPNKGGAFKKTDDDRWGHV  
VCALWIPEVGFANTVFIEPIDGVRNIPPARWKLTCYLCKQKQGVGACIQCHKANCYTAHFVTCQAQKAGLYMKME  
PVKELTGGSATFSVRKTAYCDVHTPPGCTRRPLNIYGDVEMKNGVCRKESSVKTVRSTSKVRKKAKKAKKTILA  
EPCAVLPTVCAPYIPQRLNRIANQVAIQRKKQFVERAHSYWLKRLSRNGAPLLRRLQSSLQSQRNTQQRN  
DEEMKAAKEKLKYWQRLRHLERARLLIELLRKREKLKREQVKVEQMAMELRLLPTLVLLRSVLEQLQEKDPA  
KIFAQPVSLKEVPDYLDHIKHPMDFATMRKRLEAQGYKNLHAFEEFDNLIVDNCMKYNAKDTVFYRAAVRLRD  
QGGVLRQARREVESIGLEEASGMHLPERPIAAPRRPFSWEEVDRLDPANRAHMSLEEQLRELLDKDLTCS  
MKS SGRSRKRAKLLKKEIALLRNKLSQQHSQAPTGTAGTGGFEDAEAPLAPDTAEVLPRLLETLLQPRKRSRS  
TCGDSEVEEESPGKRDLTGLTNGFGGARSEQEPGGGPRKAAPRRRCASESSICSSNSPLCDSSFSTPKCGRG  
KPALVRRHTLEDRSELISCIENGYAKAARIAAEVQSNMWISTDAAASVLEPLKVVWAKCSGYPSYPALI ID  
PKMPRVPGHHNGVTIPAPPLDVLKIGEHMQTKSEEKFLVLVFFDNKRSWQWLPKSKMVPLGVDETI DKLKMM  
GRNSSIRKAVRIAFDRAMNHLSRVHGEASDLSDDID\*

>ENSMUSP00000040548\_c.877:T>G\_p.F293C ENSMUST00000041415.5|Kcnh3-  
201|ENSMUSG00000037579|+|chr15:g.99126994:T>G

MPAMRGLLAPQNTFLDTIATRFDGHSTNSFVGNQAQVAGLFPVVCSDGFCDLTGFSRAEVMQRGCACSFYLYGP  
DTSELVRQQIRKALDEHKEFKAEELIYRKSGLPFWCLLDVPIKNEKGEVALFLVSHKDISETKNRGGPDNWK  
ERGGRRRYGRAGSKGFNANRRRSRAVLYHLGHLQKPKGKHLKLNKGVFGEKPNLPEYKVAAIRKSPFILLH  
CGALRATWDGFILLATLYAVTVPYSVCVSTAREPSAARGPPSVCDLAVEVLFILDIVLNFRTTFVSKSQV  
CAPKSI CLHYVTWFLLDVIAALPFDLLHAFKVNVIYGAHLLKTVRLRLRLRLPRLDYRSQYSAVVLTLMA  
VFALLAHWVACVWFYIGQOEIESESSELPEIGWLQELARRLETPTYLVSRSPDGGNSSGQSENCSSSSSSSGS  
GGGRGSEANGTGLELLGGPSLSAYITSLYFALSSLT SVGFGNVSAANTDTEKIFSICTMLIGALMHAVVFGNV  
TAI IQRM YARRFLYHSRTRDLRDIIRIHRIPKPLKQRMLEYFQATWAVNNGIDTTELLQSLPDEL RADIAMHL  
HKEVQLPLFEAASRGCLRALSLALRPAFCTPGEYLIHQGDALQALYFVCSGSMEVLKGGTVLAI LGKGDIG  
CELPQREQVVKANADVGLTYCVLQCLQLAGLHESLALYPEFAPRFSRGLRGELSYNL GAGGVS AEVDTSLS  
GDNTLMSTLEEKETDGEQHTVSPAPADEPSSPLSPGCTSSSSAAKLLSPRRTAPRRLGGRGRPSRAGVLK  
PEAGPSAHPRS LDGLQLPMPWNVPDLSPRVVDGIEDGCS SDQPKFSFRVQGSGPECSSSPGTE SGLLTV  
PLGPSEARNTDTLDKLRQAVMELSEQVLMREGLQSLRQAVQLLILV PQGEGQCPRGS GEEPCPATASGLLQPL  
RVDTGASSYCLQPPAGSVLSGTWPHPRPGQPPLMAPWPGPPASQSSPWPRATALWTSTSDSEPPGSGDLCS  
EPSTPASPPPSEEGARTGTPAPVSQAEATSTGEP PPPGGRALPWPDPHSLEMVLIGCHGPGTVQWTQEEGTG  
\*

>ENSMUSP00000035400\_c.1491:G>A\_p.V498M ENSMUST00000047405.9|Nckap11-  
201|ENSMUSG00000022488|+|chr15:g.103382492:G>A

MSLTSAYQLKLAEKLTILNDRGQVGLIRMYNIKKTCSDSKSKPPFLEKSMESCLKYINKKFPNIDVRNSTQH  
LGPVHREKAEIIRFLTNYYSQFVDVMEFRDHVYELLNTIDACQCHF DINLNFDFTRSYLDLIVTYT SVILL  
RIEDRRILIGMYNCAHEMLHGHS DPSFARLGMVLEQYDHPLKLT EEFGPHTKAVSGALLSHFLFVRNQA  
EQWRS AQLLSLISSPPAMINPANS DTMACEYLSVEVMERWIIIGFLLCHGCLNSNSQCQLWKLCEGLSYIT  
LIREADVQVHKVTEDLFSSSLKGYSKRVADIKESKEHAITNSGQFHCQRRQFLRTAVKELETV LNDEPGLLGP  
ALFAFMALS FIRDEVTWLV RHTENVTKTTPEDYADSSIAELFLLEEIRALVRRHIKVIQYHYLQY LARFDV  
LVLSDI IQNLSVCPEEESVIMSSFVSILSSNLKQVDNEEFDFSGRLRDWFRLOAYT SMSKAPLHLHENPDL  
AKVMNLI IFHSQMLDSVEKMLVETSDLSTFCFHLRTFEKMFATLLEPTMLRYTIAFPLICAHFVHVMC  
EYPHLKNHGLHHCNSFLEDLAKQTSNCVLEICA EQRNLEQLLPKHCATTISKAKNKKSMKQRQAPRKGPE  
RDKPGAESHKRNRLSVTNMDKLHLNLTALAMNHVHFSVFEHTIFPSEYLSHLEARLNRAIVTLAGYNAT  
TQEILRPSSELLAGV KAYISFIQSLAQFLGADASRIRVNALELLQQTQPLDSSGEQTVTTLTYVLESLLRQASS  
GAVLS PAMQAFISLPRDGEQNFSAEEFSDISEMRALAEILGPYGMKFLSENLMWHVTSTQIVLEKLVLVNM  
ILVQIRSNFSKPELMSALLPQLTGAENVLKRMTIIGVILSFRAMAQEGLEQEVFSAHCFPLMGP IECLKEFVTP  
DTDIKVTLVSFELACAAGVSCDIDPALVAAIANLKADNSSPEEYKVACLLLIFLAVSLPLLATDPSSFFSIE  
KDGYNNIHCLTKAIIQVSAALFTLYNKNIEHLKFLVASVSLQLGQETDKLKRNRRESISLLMRLVVEE  
SPFLTLDMLESCFPYVLLRNAYREVSRAFYLNRLPASSH\*

>ENSMUSP00000113498\_c.3840:T>G\_p.L1281V ENSMUST00000117801.8|Adcy9-202|ENSMUSG00000005580|-|chr16:g.4105983:A>C  
MASSPHQQLLHHHSTEVSCDSSGDSNSVRVKINPKQLSSNTHPKHKYSISSSCSSSGDSSGGLPRRVGGGGRL  
RRQKKLPQLFERASSRWWDPKFDMSNLEEAELERCFFPQTQRRFRYALFYVGFACLLWSIYFAVHMKSKVIVMV  
VPALCFLVVCVGFLLFTFTTKLYARHYAWTSLALTLVLFALTLAAQFQVWTPLSGRVDSSNHTLTATPADTCLS  
QVGSFSICIEVLLLLLYTVMQLPLYLSLFLGVVYSVLFETFGYHFRNEDCYPSPGPGALHWELLSRALLHVCIH  
AIGIHLFVMSQVRSRSTFLKVGQSIMHGKDLEVEKALKERMIHVSMPRIIADDLMKQGDEESENSVKRHATSS  
PKNRKKKSSIQKAPIAFRPFKMQQIEEVSILFADIVGFTKMSANKSAHALVGLLNDLFGFRDRLCEQTKCEKI  
STLGDCYYCVAGCPEPRADHAYCCIEMGLGMKAIEQFCQEKEMVMNRVGVHTGTVLCGILGMRRFKFDVWS  
NDVNLANLMEQLGVAGKVHISEATAKYLDDRYEMEDGRVIERLQGSVVADQLKGLKTYLISGQRAKESHCSA  
EALLSGFEVIDDSRESSGPRGQGTASPGSVSDLAQTVKTFDNLKTCPCGITFAPKSEAGAEGGTVQNGCQDE  
PKTSTKASGGPNSKTQNGLLSPPAEKLTNSQTSLSCEILQEKGRWAGVSLDQSALLPLRFKNIREKTDHFVD  
VIKEDSLMKDYFFKPPINQFSLNFLDQELERSYRTSYQEEVIKNSPVKTFASATFSSLLDVFLSTTVFLILSI  
TCFLKYGATATPPPPAALAVFGADLLLEVL SLIVSIRMVFFLEDVMTCTKWLEWIAGWLP RHCIGAILVSLP  
ALAVYSHITSEFETNIHVTFMFTGSAVLVAVVHYCNFCQLSSWMRSSLATIVGAGLLLLLHISLCQDSSIVMSP  
LDSAQNFSAQRNPNCSVLDGRRPASLIGKELILTFFLLLLLVWFLNREFEVSYRLHYHGDVEADLHRTKIQ  
SMRDQADWLLRNIIPYHVAEQLKVSQTYSKNHDSSGGVIFASIVNFSEFYEENYEGGKECYRVLNELIGDFDEL  
LSKPDYNSIEKIKTIGATYMAASGLNTAQCEGGHPQEHLRILFEFAKEMMRVDDFNNNMLWFNFKLRVGFN  
HGPLTAGVIGTTKLLYDIWGDVTNIASRMDTTGVECRIQVSEESYRVLSKMGYDFDYRGTVNVKKGQMKTYL  
YPKCTDNGVVPQHQLSISPDIRVQVDGSIGRSPTDEIANVVPVQYSDKASLGSDDSTQAKEARLSSKRSWRE  
PVKAERFFPGKAIEKDSCEDIGVEEASELSKLNVSXSV\*

>ENSMUSP00000113421\_c.3129:T>G\_p.L1044V ENSMUST00000120080.8|Adcy9-203|ENSMUSG00000005580|-|chr16:g.4105983:A>C  
MQLPLYLSLFLGVVYSVLFETFGYHFRNEDCYPSPGPGALHWELLSRALLHVCIIHAIGIHLFVMSQVRSRSTF  
LKVGGQSIMHGKDLEVEKALKERMIHVSMPRIIADDLMKQGDEESENSVKRHATSSPKNRKKKSSIQKAPIAFR  
PFKMQQIEEVSILFADIVGFTKMSANKSAHALVGLLNDLFGFRDRLCEQTKCEKISTLGDCYYCVAGCPEPR  
ADHAYCCIEMGLGMKAIEQFCQEKEMVMNRVGVHTGTVLCGILGMRRFKFDVWSNDVNLANLMEQLGVAGKV  
HISEATAKYLDDRYEMEDGRVIERLQGSVVADQLKGLKTYLISGQRAKESHCSAEALLSGFEVIDDSRESSG  
PRGQGTASPGSVSDLAQTVKTFDNLKTCPCGITFAPKSEAGAEGGTVQNGCQDEPKTSTKASGGPNSKTQNG  
LLSPPAEKLTNSQTSLSCEILQEKGRWAGVSLDQSALLPLRFKNIREKTDHFVDVIKEDSLMKDYFFKPPIN  
QFSLNFLDQELERSYRTSYQEEVIKNSPVKTFASATFSSLLDVFLSTTVFLILSITCFLKYGATATPPPPAAL  
AVFGADLLLEVL SLIVSIRMVFFLEDVMTCTKWLEWIAGWLP RHCIGAILVSLPALAVYSHITSEFETNIHV  
TMFTGSAVLVAVVHYCNFCQLSSWMRSSLATIVGAGLLLLLHISLCQDSSIVMSP LDSAQNFSAQRNPNCSV  
LDGRRPASLIGKELILTFFLLLLLVWFLNREFEVSYRLHYHGDVEADLHRTKIQSMRDQADWLLRNIIPYHV  
AEQLKVSQTYSKNHDSSGGVIFASIVNFSEFYEENYEGGKECYRVLNELIGDFDELLSKPDYNSIEKIKTIGAT  
YMAASGLNTAQCEGGHPQEHLRILFEFAKEMMRVDDFNNNMLWFNFKLRVGFNHGPLTAGVIGTTKLLYDI  
WGDVTNIASRMDTTGVECRIQVSEESYRVLSKMGYDFDYRGTVNVKKGQMKTYLYPKCTDNGVVPQHQLSIS  
PDIRVQVDGSIGRSPTDEIANVVPVQYSDKASLGSDDSTQAKEARLSSKRSWREPVAERFFPGKAIEKDS  
CEDIGVEEASELSKLNVSXSV\*

>ENSMUSP00000005719\_c.3840:T>G\_p.L1281V ENSMUST00000005719.4|Adcy9-201|ENSMUSG00000005580|-|chr16:g.4105983:A>C  
MASSPHQQLLHHHSTEVSCDSSGDSNSVRVKINPKQLSSNTHPKHKYSISSSCSSSGDSSGGLPRRVGGGGRL  
RRQKKLPQLFERASSRWWDPKFDMSNLEEAELERCFFPQTQRRFRYALFYVGFACLLWSIYFAVHMKSKVIVMV  
VPALCFLVVCVGFLLFTFTTKLYARHYAWTSLALTLVLFALTLAAQFQVWTPLSGRVDSSNHTLTATPADTCLS  
QVGSFSICIEVLLLLLYTVMQLPLYLSLFLGVVYSVLFETFGYHFRNEDCYPSPGPGALHWELLSRALLHVCIH  
AIGIHLFVMSQVRSRSTFLKVGQSIMHGKDLEVEKALKERMIHVSMPRIIADDLMKQGDEESENSVKRHATSS  
PKNRKKKSSIQKAPIAFRPFKMQQIEEVSILFADIVGFTKMSANKSAHALVGLLNDLFGFRDRLCEQTKCEKI  
STLGDCYYCVAGCPEPRADHAYCCIEMGLGMKAIEQFCQEKEMVMNRVGVHTGTVLCGILGMRRFKFDVWS  
NDVNLANLMEQLGVAGKVHISEATAKYLDDRYEMEDGRVIERLQGSVVADQLKGLKTYLISGQRAKESHCSA  
EALLSGFEVIDDSRESSGPRGQGTASPGSVSDLAQTVKTFDNLKTCPCGITFAPKSEAGAEGGTVQNGCQDE  
PKTSTKASGGPNSKTQNGLLSPPAEKLTNSQTSLSCEILQEKGRWAGVSLDQSALLPLRFKNIREKTDHFVD  
VIKEDSLMKDYFFKPPINQFSLNFLDQELERSYRTSYQEEVIKNSPVKTFASATFSSLLDVFLSTTVFLILSI  
TCFLKYGATATPPPPAALAVFGADLLLEVL SLIVSIRMVFFLEDVMTCTKWLEWIAGWLP RHCIGAILVSLP  
ALAVYSHITSEFETNIHVTFMFTGSAVLVAVVHYCNFCQLSSWMRSSLATIVGAGLLLLLHISLCQDSSIVMSP  
LDSAQNFSAQRNPNCSVLDGRRPASLIGKELILTFFLLLLLVWFLNREFEVSYRLHYHGDVEADLHRTKIQ  
SMRDQADWLLRNIIPYHVAEQLKVSQTYSKNHDSSGGVIFASIVNFSEFYEENYEGGKECYRVLNELIGDFDEL  
LSKPDYNSIEKIKTIGATYMAASGLNTAQCEGGHPQEHLRILFEFAKEMMRVDDFNNNMLWFNFKLRVGFN  
HGPLTAGVIGTTKLLYDIWGDVTNIASRMDTTGVECRIQVSEESYRVLSKMGYDFDYRGTVNVKKGQMKTYL



YPKCTDNGVVPQHQLSISPDIRVQVDGSIGRSPTDEIANVVPVSVQYSDKASLGSDDSTQAKEARLSSKRSWRE  
PVKAEERFPFGKAIEKDSCEDIGVEEASELSKLNVSXSV\*  
>ENSMUSP00000148509\_c.163:T>C\_p.I55T ENSMUST00000202157.2|Gm5767-  
202|ENSMUSG00000107252|+|chr16:g.8501498:T>C  
MPTSIPVQAVCPYCGNRIMTVTYTPGLLTWLLCSGLFVFGSPSLLLPRNRGLSTALSPAENCQPRTETHAE  
V\*

>ENSMUSP00000055969\_c.1294:A>G\_p.D432G ENSMUST00000058884.10|Parn-  
201|ENSMUSG00000022685|-|chr16:g.13425117:T>C  
MEIIRSNFKINLHKVYQAIEEADFFAIDGEGFSGISNGPSVTALTSGFDTPEERYQKLLKXSMDFLLFQFGLCA  
FKYDHTDSKHVTKSFNFYVFPKPFSSRSPDVKFVQCSSSIDFLASQGFDFNKFVFCSGIPYLNQEEERQLREQF  
DEKRSQANGAGALAKCPVTIPEDQKKFIDQVIEKIEDFLQSEEKRSLELDPCTGFQRKLIYQTLNWKYPKGIH  
VETLETDKKERHIVISKVDEEERKRREQEKYTKQEELNDAVGFSRVIAHAIANSGLLVGHNMLLDVMHTIHQ  
FYCPLPADLNEFKEMAICVFPRLDTKLMASQPFKDIINNTSLAELEKRLKETPFDPKVESAEAGFPYSDTA  
SEQLHEAGYDAYITGLCFISMANYLGSLLSPPKMCVSARSKLIBPFNKLFLMRVMDIPYLNLEGPGLQPKRD  
HVLHVTFPKWKTSDLYQLFSAFGNIQISWIDDTSAFVLSQPEQVQIAVNTSKYAESYRIQTYAEYVGGKQK  
GKQVKRWKTESDWEKVDKRPKPHMQGPCYHSNSFTAAGMLGKRTLSPDPREAALEDRESEEVSDSELEQTDSC  
DPLPEGRKSKKLRMKKELSLAGSVSDSPAFLFVDPDW\*

>ENSMUSP00000036162\_c.5278:A>G\_p.E1760G ENSMUST00000036161.12|Pi4ka-  
201|ENSMUSG00000041720|-|chr16:g.17102319:T>C  
MCPVDFHGFQDLERRRDAVIALGIFLIESDLQHKDCVVPYLLRLLRGLPKVYVVEESTARKGRGNLPVAESF  
SFCLVTLSDVACRDPPLRDEILEAILQVLHVLLGMCQALEIQEKEYLCKYAI PCLIGISRSFGRYSNSEESL  
LSKLFKPVSPHSLRIPEELEGVRRRSFNDFRSILPSNLLTVCQEGTLKRKTSVSSISQVSPERGI PPPSSPG  
GSAFHYFEASCLPDGTALEPEYFSTISSFSISPLFNNGITYKEFCI PLEMLRELLNLVKKIVEEPVLKSLDA  
IVAGVMEANPSADLYTTFSDPYLYLTMFKMLRDTLYMKDLPTS FVKEIHDFVLEQFNMSQGELQKILHDADR  
IHSEMSPLKLRCAANAACVDMVWAVKDEQGAENLCIKLSEKLSKTSKVI IAHPLLLICCLQGLGRLCERF  
PVVVHVSPTSLRDFLVI PPSVLVKLYKYHSQYHTVAGSDIKISVTNEHSESTLNVLPGKKNQPSMYEQLRDIA  
IDNICRCLKAGLTVDPVIVEAFLASLSNRLYISQESDKDAHLIPDHTIRALGHIAVALRDTPKVMPEILQILQ  
QKFCQPPSPDLVLIIDQLGCLVITGNQYIYQEVWNLFQQISVKASSVVYSATKDYKDHGHRHCSLAVINALAN  
IAANIQEEHLVDELLMNLLELFVQLGLEGKRASERASEKGPALKASSSAGNLGVLIPVIAVLRRLRPPIKEAK  
PRLQKLFDFWLYSVLMGFAVEGSLWPEEWYEGVCEIATKSPLLTFPSKEPLRSVLQYNSAMKNDTVPAPL  
SELRSTIINLLDPPPEVSALINKLDFAMSTYLLSVYRLEYMRVLRSTDPDRFQVMFCYFEDKAIQKDKSGMMQ  
CVIADVADKVFDAFLNMAEKAKTKENEELERHAQFLLVFNHIIHKRIRRVADKYL SGLVDKFPHLLWSGTVL  
KTMLDILQTLSSLSADIHKDQPYDIPDAPYRITVPDITYEARESIVKDFAAARCGMILQEAMKWAPT VTKSHL  
QEYLNKHQNWVSGLSQHTGLAMATESILHFAGYNKQNTTLGATQLTERPACVKKDYSNFMASLNLNRNRYAGEV  
HGMIRFSGATGQMSDLNKMVQDLITALDHSHPQHYTQAMFKLTAMLISSKDCDPQLLHLLCWGPLRMFNEHG  
METALACWEWLLAGKNGVEVPPFMREMAGAWHMTVEQKFLGFSVETKEADPLAASEASQPRCPPEVTPHYIWI  
DFLVQRFEIAKYCSSDQVEIFSSLLQRSMSLNI GGARGSMNRHVAAIGPRFKLLTLGLSLLHADVVPNATIRN  
VLREKIYSTAFDYFSCPPKFPPTQGEKRLREDISIMIKFWTAMFSDKYL TASFVLPDPNDQDTRSNLDITVGSR  
QQATQGWINTYPLSSGMSTISKSGMSKKTNRGSQLHKYMKRRTLLLSLLATEIERLITWYNPLSAPELELD  
QAGENSVANWRSKYISLSEKQWKDNVNLAWSISPYLAVQLPARFKNTEAIGNEVTRLVRLDPGAVSDVPEAIK  
FLVTWHTIDADAPELSHVLCWAPTDPPTGLSYFSSMYPPHPLTAQYGVKVLRSFPDAIFLYIPIQIVQALRYD  
KMGYVREYILWAAAKSOLLAHQFIWNMKTNIYLDEEGHQKDPDIDGDLLEQLVEEITGSLSGPAKDFYQREFDF  
FNKITNVSAILKPYPKGDERKKACL SALSSEVKVQPGCYLPSNPEAIVLDIDYKSGTPMQSAAKAPYLAKFKVK  
RCGVSELGKEGLQCRSDAEDECF SQEADGKKICWQAAIFKVGDDCRQDMLALQIIDLFKNI FQLVGLDLFVFP  
YRVVATAPGCGVIECIPDCTSRDQLGRQTD FGMYYDFTRQYGDDESTLAFQQARYNFIRSMAAYSLLFLFLQIK  
DRHNGNIMLDKKGHIHIDFGFMFESSPGGNLWEPDIKLTDEMVMIMGGKMEATPFKWFMEMCVRGYLAVRP  
YMDAVVSLVTLMLDGTGLPCFRGQTIKLLKHRFSPNMTEREANFIMKVIQNCFLSNRSRTYDMIQYQNDIPY  
\*

>ENSMUSP00000156049\_c.5278:A>G\_p.E1760G ENSMUST00000232232.2|Pi4ka-  
209|ENSMUSG00000041720|-|chr16:g.17102319:T>C  
MCPVDFHGFQDLERRRDAVIALGIFLIESDLQHKDCVVPYLLRLLRGLPKVYVVEESTARKGRGNLPVAESF  
SFCLVTLSDVACRDPPLRDEILEAILQVLHVLLGMCQALEIQEKEYLCKYAI PCLIGISRSFGRYSNSEESL  
LSKLFKPVSPHSLRIPEELEGVRRRSFNDFRSILPSNLLTVCQEGTLKRKTSVSSISQVSPERGI PPPSSPG  
GSAFHYFEASCLPDGTALEPEYFSTISSFSISPLFNNGITYKEFCI PLEMLRELLNLVKKIVEEPVLKSLDA  
IVAGVMEANPSADLYTTFSDPYLYLTMFKMLRDTLYMKDLPTS FVKEIHDFVLEQFNMSQGELQKILHDADR  
IHSEMSPLKLRCAANAACVDMVWAVKDEQGAENLCIKLSEKLSKTSKVI IAHPLLLICCLQGLGRLCERF  
PVVVHVSPTSLRDFLVI PPSVLVKLYKYHSQYHTVAGSDIKISVTNEHSESTLNVLPGKKNQPSMYEQLRDIA  
IDNICRCLKAGLTVDPVIVEAFLASLSNRLYISQESDKDAHLIPDHTIRALGHIAVALRDTPKVMPEILQILQ

QKFCQPPSPDLVLIIDQLGCLVITGNQYIYQEVWNLFQQISVKASSVVYSATKDYKDHGHRHCSLAVINALAN  
IAANIQEEHLVDELLMNLLELFLVQLGLEGKRASERASEKGPALKASSSAGNLGVLPVIAVLRRLPPIKEAK  
PRLQKLFDRDFWLYSVLMGFAVEGSLWPEEWYEGVCEIATKSPLLTFPSKEPLRSVLQYNSAMKNDVTTPAEL  
SELRSTIINLLDPPPEVSALINKLDFAMSTYLLSVYRLEYMRVLRSTDPDRFQVMFCYFEDKAIQKDKSGMMQ  
CVIAVADKVFDAFLNMMAEKAKTKENEEELERHAQFLLVNFNHHKRIRRVADKYLSSGLVDKFPHLLWSGTVL  
KTMLDILQTLSSLSADIHKDQPYDIPDAPYRITVPDITYEARESIVKDFAAARCGMILQEAMKWAPTVTKSHL  
QEYLNKHQNWVSGLSQHTGLAMATESILHFAGYNKQNTTTLGATQLTERPACVKKDYSNFMASLNLNRNRYAGEV  
HGMIRFSGATGQMSDLNKMMVQDLITALDHSHPQHMYTQAMFKLTAMLISSKDCDPQLLHHLWCWGPLRMFNEHG  
METALACWEWLLAGKNGVEVPMREMAGAWHMTVEQKFLFSVETKEADPLAASEASQPRPCPEEPTPHYIWI  
DFLVQRFEIAKYCSSDQVEIFSSLLQRSMNLNIGGARGSMNRHVAAIGPRFKLLTLGLSLLHADVVPNATIRN  
VLREKIYSTAFDYFSCPPKFPPTQGEKRLREDISIMIKFWTAMFSDKKYLTASQLVPPDNQDTRSNLDITVGSR  
QQATQGWINTYPLSSGMSTISKKSMSKKTNRGSQLHKYMKRRRLLLSLLATEIERLITWYNPLSAPELELD  
QAGENSVANWRSKYISLSEKQWKDNVNLAWSISPYLAVQLPARFKNTEAIGNEVTRLVRLDPGAVSDVPEAIK  
FLVTWHTIDADAPELSHVLCWAPTDPPTGLSYFSSMYPPHPLTAQYGVKVLRSFPDAIFLYIPIQIVQALRYD  
KMGYVREYILWAAAKSOLLAHQFIWNMKTNIYLDEEGHQKDPDIDGDLLEQLVEEITGSLSGPAKDFYQREFDF  
FNKITNVSAILKPYPKGDERKKAACLSALSEVKVQPGCYLPSNPEAIVLDIDYKSGTPMQSAAKAPYLAKFKVK  
RCGVSELGKEGLQCRSDAEDECFSEQEADGKKICWQAAIFKVGDDCRQDMLALQIIDLTKNIQVLVGLDLFVFP  
YRVVATAPGCGVIECIPDCTSRDQLGRQTDGFMYYDFTRQYGDSTLAFQQARYNFIRSMAYSLLELFLQIK  
DRHNGNIMLDKKGHIHIDFGFMFESSPGGNLWEPDIKLTDEMVMIMGGKMEATPFKWFMEMCVRGYLAVRP  
YMDAVVSLVTLMLDGTGLPCFRGQTIKLLKHRFSPNMTEREANFIMKVIQNCFLSNRSRTYDMIQYQNDIPY  
\*

>ENSMUSP00000087506\_c.2193:A>T\_p.N732Y ENSMUST00000090052.11|Yeats2-  
201|ENSMUSG00000041215|+|chr16:g.20024986:A>T  
MKNKEHEIDVIDQRLIEARRMMDKLRACIVANYASAGLLKLVSEGLKTFDPMFANHPAIAKKFLESPPSRSSSPT  
NQRSETPSANHSESDLSQHNDFLSDKDNNNSVDVEERPPSTGEQRPSRKAGRDTSSISGSHKRELRNADLTG  
DETSRFLVKKTIIVGNVSKYIIPDKREENDQSTHKWVYVGRSRREPSINHFKVKKVWFFLHPSYKPNDLVEVR  
EPPFHLTRRGWGEFPVRVQVHFKDSQNKRIDIIHNLKLDRTYTGQTLGAETVVVDVELHRHSLGEDSVYYPQSS  
ESDVCDAPPPTLTLPAAVKASAVAQSPPEAAAAPVGEFPEPTEAERHSTFYSLPSSLERTPTKVTTAQKVTF  
SSHGNSAFQPIASSCKIVPQSQVNPESPGKSFQPIITMSCKIVSGSPISTPSPSPLPRTPTSTPVHLKQGTAS  
SGVSNPHVIVDKPGQVIGASTPSTGSPSTKLPVASQASQGTGSPIPKIHGSSFLTSTVKQEESELFASMPPLCP  
IGSHPKVQSPKAVTGGLGAFTKVIKQEPGEAPHVSTTGAASQSAFPQYVTVKGGHMIAVSPQKQVISAGEGT  
TQSPKIAPSKVGVVPGSALPSTVKQAVAISSGQILVAKASSVTKAVGPKQVVTQGVAKAIVSGGGGTIVAQ  
PVQTLTKTQVTAAGPQKSGSQGSMATLQLPATNLANLANLPPGTKLYLTNNSKNPSGKGLLLIPQGAILRA  
TYNANLQSGSAAAGGSGSSGAGGGSGGGGGSGAGGTPSTSGPGGGPQHLTYTSYILKQTPQGTFLVGGPSPQT  
PGKQLTTASVVQTLGVSSSSAQGQQLKVISGQKTTLFTQAATAGQASLLKLPDNTLKSVPAAAPQLAKPGTT  
MLRVAGGVIITAAPSPAVAFSANGAVHQSEGSTPVSSSVGSIKTPGQPQVCVSQATMATCKGPAAVAGTAASL  
VSAPSSISGKATVSGLLKLVHSAQSSPQAVLTIPSQLKPLSINTSGGVQTVLMPVNKVVQSFSTSKLPTTVLP  
ISVFNQAAPSSAPVAIAKVTEPETPGPNCISQENQVAVKTEESSELSNYVIKVDHLETIQQLLTAVVKKIPL  
ITAKGDDASCFSAKSLEQYYGWNIGKRRAAEWQRAMTVRKLQEIILEKNPRFHHLTPLKTKHIAHWCRCHGYT  
PPDPESLRHDGDSIEDVLTQIDSEPECLSSSFSTADDLCKRLEDLQFQKREPENEEVDILSLSEPLKTNIKK  
EQEEKQEEMRFYLPPTPGSGFVGDITQKIGITLQPVALHRNMYASVVEDMILKATEQLVSDILRQALAVGYQT  
ASPNRIPKEITVSNIHQAICNIPFLDFTLNKHMGRNLNEDQ\*

>ENSMUSP00000111222\_c.2352:A>T\_p.N785Y ENSMUST00000115560.4|Yeats2-  
202|ENSMUSG00000041215|+|chr16:g.20024986:A>T  
MSGIKRTIKETDPDYEDVSVALPNKRHKAIESSARDAAVQKIETIIKEQFALEMKNKEHEIDVIDQRLIEARR  
MMDKLRACIVANYASAGLLKLVSEGLKTFDPMFANHPAIAKKFLESPPSRSSSPTNQRSETPSANHSESDLSQ  
HNDLSDKDNNNSVDVEERPPSTGEQRPSRKAGRDTSSISGSHKRELRNADLTGDETSRFLVKKTIIVGNVSKY  
IIPDKREENDQSTHKWVYVGRSRREPSINHFKVKKVWFFLHPSYKPNDLVEVREPPFHLTRRGWGEFPVRVQV  
HFKDSQNKRIDIIHNLKLDRTYTGQTLGAETVVVDVELHRHSLGEDSVYYPQSSSESDVCDAPPPTLTLPAAVKA  
SAVAQSPPEAAAAPVGEFPEPTEAERHSTFYSLPSSLERTPTKVTTAQKVTFSSHGNSAFQPIASSCKIVPQ  
SQVNPESPGKSFQPIITMSCKIVSGSPISTPSPSPLPRTPTSTPVHLKQGTASSGVSNPHVIVDKPGQVIGAS  
TPSTGSPSTKLPVASQASQGTGSPIPKIHGSSFLTSTVKQEESELFASMPPLCPIGSHPKVQSPKAVTGGLGAF  
TKVIKQEPGEAPHVSTTGAASQSAFPQYVTVKGGHMIAVSPQKQVISAGEGTTQSPKIAPSKVGVVPGSAL  
PSTVKQAVAISSGQILVAKASSVTKAVGPKQVVTQGVAKAIVSGGGGTIVAQPVTTLTKTQVTAAGPQKSGS  
QGSVMATLQLPATNLANLANLPPGTKLYLTNNSKNPSGKGLLLIPQGAILRATYNANLQSGSAAAGGSGSSG  
AGGGSGGGGGSGAGGTPSTSGPGGGPQHLTYTSYILKQTPQGTFLVGGPSPQTPGKQLTTASVVQTLGVSSS  
SAQGQQLKVISGQKTTLFTQAATAGQASLLKLPDNTLKSVPAAAPQLAKPGTTMLRVAGGVIITAAPSPAVAFS  
ANGAVHQSEGSTPVSSSVGSIKTPGQPQVCVSQATMATCKGPAAVAGTAASLVSAAPSSISGKATVSGLLKLVH

SAQSSPQQAVLTIPSQKPLSINTSGGVQTVLMPVNVKVVQSFSTSKLPTTVLPIVSNQAAPSSAPVAIAKVK  
TEPETPGPNCISQENQVAVKTEESSELSNYVIKVDHLETIQQLLTAVVKKIPLITAKGDDASCFSAKSLEQYY  
GWNIGKRRAAEWQRAMTVRKVLQEI LEKNPRFHHLTPLKTKHIAHWCRCHGYTPPDPESLRHDGDSIEDVLTQ  
IDSEPECLSSFSTADDLCKRLEDLQQFQKREPENEEVDILSLSEPLKTNIKKEQEEKQEEMRFYLPPTPGSG  
FVGDITQKIGITLQPVALHRNMYASVVEDMILKATEQLVSDILRQALAVGYQTASPNRI PKEITVSNIHQAIC  
NIPFLDFTLNKHMGRNLNEDQ\*

>ENSMUSP00000155891\_c.2184:A>T\_p.N729Y ENSMUST00000232338.2|Yeats2-  
212|ENSMUSG00000041215|+|chr16:g.20024986:A>T  
MKNKEHEIDVIDQRLIEARRMMDKLRACIVANYASAGLLKVVSEGLKTFDPMFVNHPAIKKFLESPSRSSSPT  
NQRSETPSANHSESDLSQHNDFLSDKDNNSNV DVEERPPSTGEQRPSRKDTSSISGSHKRELRNADLTGDET  
SRLFVKKTI VVGNSKYI PPKREENDQSTHKWVMVYVGRSRREPSINHFKVWVFFLHPSYKPNLDLVEVREPP  
FHLTRRGWGEFVVRVQVHFVKDSQNKRIDIIHNLKLDRTYTGLOTLGAETVVDVDELHRHSLGEDSVYQSSSED  
VCDAPPPTLTLPAAVKASAVAQSPPEAAAAPVGEFPEPTEAERHSTFYSLPSSLETPTKVTTAQKVTFFSSH  
GNSAFQPIASSCKIVPQSQVNPPESPGKSFQPIITMSCKIVSGSPISTPSPSPLPRTPTSTPVHLKQGTASSGV  
SNPHVIVDKPGQVIGASTPSTGSPSTSKLPVASQASQGTGSP I PKIHGSSFLTSTVKQEEESLFASMPPLCPIGS  
HPKVQSPKAVTGGLGAFTKVI IKQEPGEAPHVSTTGAASQSAFPQYVTVKGGHMI AVSPQKQVISAGEGTTQS  
PKIAPSKVVGVPVGSALPSTVKQAVAISSGQILVAKASSSVTKAVGPKQVVTQGVAKAIVSGGGGTIVAQPVQ  
TLTKTQVTAAGPQKSGSQGSMATLQLPATNLANLANLPPGTCLYLTNTSKNPSGKGLLLI PQGAILRATYN  
ARYIFSWPTITPNTWKTDDYICIGSRNTGSQFI ICTGTDTESHLEWTFVYTGSHCWAGIAAEVTRQHPEV  
SASSSTARQAWDHDASSGRGGDHSCSLPCSGLLSKWCCTPV\*

>ENSMUSP00000155892\_c.2238:A>T\_p.N747Y ENSMUST00000232019.2|Yeats2-  
208|ENSMUSG00000041215|+|chr16:g.20024986:A>T  
RDAAVQKIETIIKEQFALEMKNKEHEIDVIDQRLIEARRMMDKLRACIVANYASAGLLKVVSEGLKTFDPMFV  
NHPAIKKFLESPSRSSSPTNQRSETPSANHSESDLSQHNDFLSDKDNNSNV DVEERPPSTGEQRPSRKDTSS  
ISGSHKRELRNADLTGDETSRLFVKKTI VVGNSKYI PPKREENDQSTHKWVMVYVGRSRREPSINHFKVWV  
FFLHPSYKPNLDLVEVREPPFHLTRRGWGEFVVRVQVHFVKDSQNKRIDIIHNLKLDRTYTGLOTLGAETVVDV  
LHRHSLGEDSVYQSSSEDVCDAPPPTLTLPAAVKASAVAQSPPEAAAAPVGEFPEPTEAERHSTFYSLPSS  
LETPTKVTTAQKVTFFSHGNSAFQPIASSCKIVPQSQVNPPESPGKSFQPIITMSCKIVSGSPISTPSPSPLP  
RTPPTSTPVHLKQGTASSGVSNPHVIVDKPGQVIGASTPSTGSPSTSKLPVASQASQGTGSP I PKIHGSSFLTST  
VKEESLFASMPPLCPIGSHPKVQSPKAVTGGLGAFTKVI IKQEPGEAPHVSTTGAASQSAFPQYVTVKGGHMI  
AVSPQKQVISAGEGTTQS PKIAPSKVVGVPVGSALPSTVKQAVAISSGQILVAKASSSVTKAVGPKQVVTQGV  
AKAIVSGGGGTIVAQPVQTLTKTQVTAAGPQKSGSQGSMATLQLPATNLANLANLPPGTCLYLTNTSKNPSG  
KGLLLI PQGAILRATYNANLQSGSAAAGGSGSSGAGGSGGGGGSGAGGTPSTSGPGGGPQHLYTYSYILKQ  
TPQGTFLVQPSPTPGKQLTTASVVQGLTGVSSSSAQGGQTLKVISGQKTLFTQAATAGQASLLKLPDNTL  
KSVPAAPQLAKPGTMTLRVAGGVITAAPSPAVAFSANGAVHQSEGSTPVSSSVGSI IKTPGQPQVCVSQATMA  
TCKGPAAVAGTAASLVSAPSSISGKATVSGLLKVHSAQSSPQQAVLTIPSQKPLSINTSGGVQTVLMPVNVK  
VQSFSTSKLPTTVLPIVSNQAAPSSAPVAIAKVKTEPETPGPNCISQENQVAVKTEESSELSNYVIKVDHLE  
TIQQLLTAVVKKIPLITAKGDDASCFSAKSLEQYYGWNIGKRRAAEWQRAMTVRKVLQEI LEKNPRFHHLTPL  
KTKHIAHWCRCHGYTPPDPESLRHDGDSIEDVLTQIDSEPECLSSFSTADDLCKRLEDLQQFQKREPENEEV  
DILSLSEPLKTNIKKEQEEKQEEMRFYLPPTPGSGFVGDITQKIGITLQPVALHRNMYASVVEDMILKATEQL  
VSDILRQALAVGYQTASPNRI PKEITVSNIHQAICNIPFLDFTLNKHMGRNLNEDQ\*

>ENSMUSP00000023599\_c.419:T>A\_p.N140K ENSMUST00000023599.13|Eif4a2-  
201|ENSMUSG00000022884|+|chr16:g.22928806:T>A  
MSGGSADYNREHGGPEGMDPDGVIESNWNEIVDNFDDMNLKESLLRGIYAYGFEEKPSAIQQRAIIPCIKGYDV  
IAQAQSGTGKTATFAISILQOLEIEFKETQALVLAPTRELAQQIQKVILALGDYMGATCHACIGGTVKVRNEMQ  
KLQAEAPHIVVGTGPRVFDMLNRRYLSPKWIKMFVLDEADEMLSRGFKDQIYEIFQKLNYSIQVLLSATMPT  
DVLEVTKKFMRDPIRILVKKKEELTLEGIKQFYINVEREEWKLDLTDLYETLTITQAVIFLNTRRKVDWLTEK  
MHARDFTVSALHGDMDQKERVIMREFRSGSSRVLITDLDLARGIDVQVSLVINYDLPTNRENYIHRIGRGG  
RFGRKGVAINFVTEEDKRILRDIETFYNTTVEEMPMNVADLI\*

>ENSMUSP00000121745\_c.279:T>A\_p.C94S ENSMUST00000147117.8|Eif4a2-  
216|ENSMUSG00000022884|+|chr16:g.22928806:T>A  
MSGGSADYNREHGGPEGMDPDGVIESNWNEIVDNFDDMNLKESLLRGIYAYGFEEKPSAIQQRAIIPCIKDPKG  
NFGSWRLYGSNLSCLHWRNKSSK\*

>ENSMUSP00000156170\_c.422:T>A\_p.N141K ENSMUST00000232287.2|Eif4a2-  
224|ENSMUSG00000022884|+|chr16:g.22928806:T>A  
MSGGSADYNSREHGGPEGMDPDGVIESNWNEIVDNFDDMNLKESLLRGIYAYGFEEKPSAIQQRAIIPCIKGYD  
VIAQAQSGTGKTATFAISILQOLEIEFKETQALVLAPTRELAQQIQKVILALGDYMGATCHACIGGTVKVRNEM  
QKLQAEAPHIVVGTGPRVFDMLNRRYLSPKWIKMFVLDEADEMLSRGFKDQIYEIFQKLNYSIQVLLSATMP

TDVLEVTKKFMRDPIRILVKKKEELTLEGIKQFYINVEREEWKLDTLCDLYETLTITQAVIFLNTRRKVDWLTE  
 KMHARDFTVSALHGDMQKERDVIMREFRS  
 >ENSMUSP00000090876\_c.419:T>A\_p.N140K ENSMUST00000077605.12|Eif4a2-  
 202|ENSMUSG00000022884|+|chr16:g.22928806:T>A  
 MSGGSADYNREHGGPEGMDPDGVIESNWNEIVDNFDDMNLKESLLRGIYAYGFKEKPSAIQQRAIIPCIKGYDV  
 IAQAQSGTGKTATFAISILQQLEIEFKETQALVLAAPTRELAQQIQKVLALGDYMGATCHACIGGTVKRNEMQ  
 KLQAEAPHIVVGTGPRVFDMLNRRYLSPKWKMFVLDEADEMLSRGFKDQIYEIFQKLNNTSIQVLLSATMPT  
 DVLEVTKKFMRDPIRILVKKKEELTLEGIKQFYINVEREEWKLDTLCDLYETLTITQAVIFLNTRRKVDWLTEK  
 MHARDFTVSALHGDMQKERDVIMREFRSRVLITDILLARGIDVQQVSLVINYLPTNRENYIHRSR\*  
 >ENSMUSP00000115649\_c.419:T>A\_p.N140K ENSMUST00000123413.8|Eif4a2-  
 203|ENSMUSG00000022884|+|chr16:g.22928806:T>A  
 MSGGSADYNREHGGPEGMDPDGVIESNWNEIVDNFDDMNLKESLLRGIYAYGFKEKPSAIQQRAIIPCIKGYDV  
 IAQAQSGTGKTATFAISILQQLEIEFKETQALVLAAPTRELAQQIQKVLALGDYMGATCHACIGGTVKRNEMQ  
 KLQAEAPHIVVGTGPRVFDMLNRRYLSPKWKMFVLDEADEMLSRGFKDQIYEIFQKLNNTSIQVLLSATMPT  
 DVLEVTKKFMRDPIRILVKKKEELTLEGIKQFYINVEREEWKLDTLCDLYETLTITQAVIFLNTRRKVDWLTEK  
 MHARDFTVSALHGDMQKERDVIMREFRSRVLITDILLARGIDVQQVSLVINYLPTNRENYIHRSR\*  
 >ENSMUSP00000118141\_c.282:T>A\_p.C95S ENSMUST00000131871.8|Eif4a2-  
 209|ENSMUSG00000022884|+|chr16:g.22928806:T>A  
 MSGGSADYNSREHGGPEGMDPDGVIESNWNEIVDNFDDMNLKESLLRGIYAYGFKEKPSAIQQRAIIPCIKDPK  
 GNFGSWRLYGSNLSCLHWRNKSSK\*  
 >ENSMUSP00000127030\_c.134:T>A\_p.N45K ENSMUST00000168891.8|Eif4a2-  
 222|ENSMUSG00000022884|+|chr16:g.22928806:T>A  
 MHMVLRLSLQLFSKELLSVLKIQKVLALGDYMGATCHACIGGTVKRNEMQKLQAEAPHIVVGTGPRVFDMLN  
 RRYLSPKWKMFVLDEADEMLSRGFKDQIYEIFQKLNNTSIQVLLSATMPTDVLEVTKKFMRDPIRILVKKEE  
 LTLEGIKQFYINVEREEWKLDTLCDLYETLTITQAVIFLNTRRKVDWLTEKMHARDFTVSALHGDMQKERDV  
 IMREFRSRVLITDILLARGIDVQQVSLVINYLPTNRENYIHRIGRGRFGRKGVAINFVTEEDKRILRD  
 IETFYNTTVEEMPNNVADLI\*  
 >ENSMUSP00000140809\_c.419:T>A\_p.N140K ENSMUST00000187168.7|Eif4a2-  
 223|ENSMUSG00000022884|+|chr16:g.22928806:T>A  
 MSGGSADYNREHGGPEGMDPDGVIESNWNEIVDNFDDMNLKESLLRGIYAYGFKEKPSAIQQRAIIPCIKGYDV  
 IAQAQSGTGKTATFAISILQQLEIEFKETQALVLAAPTRELAQQIQKVLALGDYMGATCHACIGGTVKRNEMQ  
 KLQAEAPHIVVGTGPRVFDMLNRRYLSPKWKMFVLDEADEMLSRGFKDQIYEIFQKLNNTSIQVLLSATMPT  
 DVLEVTKKFMRDPIRILVKKKEELTLEGIKQFYINVEREEWKLDTLCDLYETLTITQAVIFLNTRRKVDWLTEK  
 MHARDFTVSALHGDMQKERDVIMREFRSRVLITDILLARGIDVQQVSLVINYLPTNRENYIHRSR\*  
 >ENSMUSP00000067445\_c.187:T>A\_p.I63K ENSMUST00000068182.3|Stfa3-  
 201|ENSMUSG00000054905|-|chr16:g.36271095:A>T  
 MSQENLKIKGGLSEARPATPEIQMIADKVRPLLEEQTNEKYEFKFEAVEYKQVAVAGQNLFIKDKVNGCFLHM  
 KVFRGLSGEDDLKLGQYQTNKTKTDELTSM\*  
 >ENSMUSP00000113908\_c.2427:G>A\_p.G810R ENSMUST00000120049.8|Cfap44-  
 202|ENSMUSG00000071550|+|chr16:g.44252320:G>A  
 MKEPDDQDTS DGGRSRNEGKLAHKSILKSSQDTTADS YTDGEE SYLGDDLDDMD ESSHSSQEYVQAPAP  
 SQEPPVEVKEEPEADVKKVLSETFYYDPELVSIPIVVSSEERIPLYFLTLNHSFGYDCRKRANLQLLDSNTLL  
 YVAGNQMVLLDFKDKTQIYLQSSSGQIGAIQVHPPKTYFAVAEKGSFPKIIIEYPSLKPYPRIIRDGAEKAY  
 AYVDFNNEGNLLASVGCHPDYTITIWGWKEEQPIRLTKAFSQDVFVTFNPDNDEQLTSSGSGHIKFWEMAFT  
 FTGLKQLQSGSLGRFGKTSSTSDIEGYAELPDGKVLSGSEWGNLLWEGSLIKVELCRTGMKSCSHSGSINQIMLDE  
 GEVITAGSDGVSRIWDFETIDTADVDDTGLLEIEPINELHIDKSVNLFSMIKMNEVGNFVLAQDANGAIWK  
 LDLSFSNITQDPECLFSFHS GPAAALAVSPLTYLMATTAMDCSVRVYDFSSKNPLVHMKFKQGGTSLIWAPRS  
 VSVSASQIVVGFQDGVVRVLELFDPKGLTVYAGRKKIPDAELHLKYVFKPHTDEVTALAYERDGDILATGSED  
 KTVFFFVDEVEKEYKPIGFFNTPGPICQLMWSPASHPEKTLIIICENGYILESCLPTIKDVDDQNVITFAIPNVF  
 LRCFHFTSVKSKILRFLEVQRREQQKMLKEKEKLERMKLAEEERAFGEEIPEEETSEEGEEEEPLPEIFM  
 PPTPSPILCGFYSEPGKFWVSLGNVDAGFLYHCQFPSYLHNSDFQKQENEPDFRVLNTEEDNP IRNITFSND  
 QTMMFCRMTNGAIRVYVLSNDPFLVSLQHYWHFNVDNNGYSIKSITSSFDDQYLLTAGEDGNIFVFDIFSE  
 FIVPKGIAKAVPSPRFGIESEAAPEDIEDPKAYS IENARKKREHDKLMKKVEELKAHKHREQIKILRNEFWKLL  
 ELNKELPAMHQFQRTDFNIDAKIHAEIHKKTSLKIEQVEKELAWEKQKHELGLKLLQDRFREPLES DTVVYA  
 TQSDHQIASYRLVKPSKYSKLRPSQSERRQSKMERLEKEGPGKESQRDTGGSISLQEEVSLEKGGKFRPRT  
 LSEIMVENQIEKTKKLIQQAERAQFKILQRKKEWEELYKSKPDDDYEDPKDVQAIKEAQTYMGDFNLKTAPDY  
 KIPHEMRINA AKKEELGYLDTMAHGKKRYMNCILSLRDLKLAVIEEIQCLVQELKNIQSSIPASKHMP IPQ  
 VPQIYPEEVPERRFQYDEETLLRFQRKQKRRQDKSSSKQSGTSGSGSAGGGLVGLKLSGKEGDLTTRDSLS

RSSKASALLELPKPVEFEKAEPDAELEIMKRDEVKHLVMQQLFCNRINELTVTFDAELHLLRHQKLLDTKM  
KLSLDLHLLTLFQEMLLLNFEKQENILQERVNSLDKKEQDMQWKINETLKEMEEKKNEITKLQDQEKALYAGF  
QAALGENNKFANFLMKVLKIKRAKKEVEGDADEDEESESEESSESSLESDEDEDASGSEDDVFDSDICPTNC  
DVSLEFELALQLREKRLDIEEALVEEKKIVDNLKKEYDTISKKVKVATNLNAAEEALEAYQREKQRLNELLV  
VIPLKLHQIEYMEFGEVPELDSGTLVFSNHSLDRLQERIVQLQEENAKQKLNKECRERRKLLIREKREMAKT  
ISKMEETVRELMISKFRVIDLEALQTLVNTTLEELKIKKLRKELSNAKELRMWEEKIAQVRWDLMMKTKEH  
TKKLHQMNLDLCLEKKKLSRLNLTQNGQNAFQGLRKADIVAKQKVTQLEKITALKEEIEELLRKKGGGL  
LLPPIITPKPKNEMKPMDT\*

>ENSMUSP00000097331\_c.2427:G>A\_p.G810R ENSMUST00000099742.9|Cfap44-  
201|ENSMUSG00000071550|+|chr16:g.44252320:G>A

MKEPDDQDTS DGGSRGSRNEGKLAHKSILKSSQDTTADS YTDGEESYLGDDLDDMDDESSHSSQEVYQAPAP  
SQEPPEVKEEPEADVKKVLESETFYDYPELVSIPIVVSSEERIPLYFLTLNHSFGYDCRKRANLQLLDSNTLL  
YVAGNQMVLLDFKDKTQIYLQSSSGQIGAIQVHPKTYFAVAEKGSFPKIIIEYPSLKPYPYRILRDGAEKAY  
AYVDFNNEGNLLASVGCHPDYTTITWGWKEEQPILRTKAFSQDVFKVTFNPDNDEQLTSSGSGHIKFWEMAFT  
FTGLKLGQSLGRFGKTSTSDIEGYAELPDGKVLGSEWGNLLWEGSLIKVELCRTGMKSCHSGSINQIMLDE  
GEVITAGSDGVSRIWDFETIDTADVIDDTGLEIEPINELHIDKSVNLFMSIKMNEVGNFWLAQDANGAIWK  
LDLSFENITQDPECLFSFHSGPIAALAVSPLTYLMATTAMDCSVRVYDFSSKNPLVHMFKFGGTLIWAPRS  
VSVSASQIVVGFQDGVVRVLELDFPKGLTVYAGRKKIPDAELHLLKLVFKPHTDEVTALEYERDGLLATGSED  
KTVFFFVDEKEYKPIGFFNTPGPICQLMWSPASHPEKTLIIICENGYILESCLPTIKDQVDDQNVITFAIPNVF  
LRCFHFTSVKSKILRFLEVRREQQKMLKEKEKLERMMLAEEREAFGEEIPEEETSEEGEEEEPLPEIFM  
PPTPSPILCGFYSEPGKFWVSLGNYDAGFLYHCQFP SYLHNSDFQKQENEPDFRVLNTEEDNPIRNIITFSND  
QTMMFRCRMTNGAIRVYVLSNDPFLVSLQHYWHFNVDHNNYGSIKSITSSFDQYLLTAGEDGNI FVFDIFSE  
FIVPKGIKAKVSPRFGIESEAAPEIDEDPKAYS IENARKKREHDKLMKKVEELKAHKREQIKILRNEFWKLL  
ELNKELPAHMQFQRTDFNIDAKIHAEIHKKTS LKIEQVEKELAWEKQKHELGLKLLQDRFREPLESDTIVVYA  
TQSDHQIASYRLVKPSKYSKLRPSQSERRQSKMERLEKEGPGKESQRDTGGISLQEEVLEKGGKFRPRT  
LSEIMVENQIEKTKKLIQQAERAQFKILQRKKWEELLYKSKPDDDYEDPKDVQAIKEAQTYMGDFNLKTAPDY  
KIPEHMRINAAKKEEELGYLDTMAHGKRYMKNKILSLRDLKLAIVIEEIQCLVQELKNIQSSIPASKHMPIPQ  
VPQIYPEEVPERRFQYDEETLLRFQRKQKQRQDKSSSKQSGTSGSGSAGGGLVGFLLKSSGKEGDLTTRDSLS  
RSSKASALLELPKPVEFEKAEPDAELEIMKRDEVKHLVMQQLFCNRINELTVTFDAELHLLRHQKLLDTKM  
KLSLDLHLLTLFQEMLLLNFEKQENILQERVNSLDKKEQDMQWKINETLKEMEEKKNEITKLQDQEKALYAGF  
QAALGENNKFANFLMKVLKIKRAKKEVEGDADEDEESESEESSESSLESDEDEDASGSEDDVFDSDICPTNC  
DVSLEFELALQLREKRLDIEEALVEEKKIVDNLKKEYDTISKKVKVATNLNAAEEALEAYQREKQRLNELLV  
VIPLKLHQIEYMEFGEVPELDSGTLVFSNHSLDRLQERIVQLQEENAKQKLNKECRERRKLLIREKREMAKT  
ISKMEETVRELMISKFRVIDLEALQTLVNTTLEELKIKKLRKELSNAKELRMWEEKIAQVRWDLMMKTKEH  
TKKLHQMNLDLCLEKKKLSRLNLTQNGQNAFQGLRKADIVAKQKVTQLEKITALKEEIEELLRKKGGGL  
LLPPIITPKPKNEMKPMDT\*

>ENSMUSP00000097097\_c.1825:A>T\_p.K609M ENSMUST00000099498.10|Ccdc80-  
202|ENSMUSG00000022665|+|chr16:g.44917071:A>T

MMWKMGPHTTLLAMWLVCGSASHSPALDSDSHTGRKVPLVSPISRSARYLRHTGRSGGVEKSTQEEPNPQP  
FQRRKSVPLRLAHPTRPPSPGINGVVRPEVRPIARSSAREMVRDEGSSARTRMLRFPSSSPNIIASF  
GKNRVWVISAHPASEGYRLMMSLLKDDVYCELAERHIQQIVLFHQAGEEGGKVRITNEGQILEQPLDPNLI  
PKLMSFLKLEKGFMSVLLKKTQVEERYYPVRLAEMYEVIDQGP IRRIEKIRQKGFVQCKKASGIEGHVVQ  
EGNEGGGAGGTGLGGDKRKEPRRTQVHPTREAPRQATSKAATPQPPTPRATTLPPAPVTTATRATSRVV  
TIAARPTTTTAYPATQRPWTSRLHPFSVSHRPPATAEVTTARGPSVSEQLYPLPRKEQQREKQATRPRSKAT  
NYGSAFTATPPPTLWEVSARVVGTSRFRDNRDTRKREHGHQDPNAVPGPHKPVKGLPKKDRILSNEYEDKYDL  
SQPTSSQGEERQVDSVPSQNAKESKLEKLEKPEKEKSKKSAKQDKLLKSEKQAKKAEKTKQEKDKNKK  
KKAGKTEQDDNQKPTAKHLAPS PKMSVADLLGSFEGKRLLLLITTPKAENMYVQQRDEYLESFCKMATRRIS  
VVTIFGPVNNSSMKIDHFDLNEKPMRVVDDDLVDQHLISELRKEYGMTYDDFFMVLTLDVLRVKQYEVPI  
AMKSVFDLIDTFQSRIKMEKQKKEGIACKEDKRQSLNENFLSRFRWRRLLVISA PNDEDWAYSQQLSALNGQ  
ACNFGRLRHITILKLLGVGEEVGVLELFPINGSSIVEREDVPAHLVKDIRNYFQVSP EYFMSLLVGVKDG NVKS  
WYPSMWSMVIVYDLIDSMQLRRQEMAIQQSLGMRCPEDEYAGYGYHSYHQYQDGYQDDYRHHESYHHGYPY  
\*

>ENSMUSP00000058752\_c.1825:A>T\_p.K609M ENSMUST00000061050.6|Ccdc80-  
201|ENSMUSG00000022665|+|chr16:g.44917071:A>T

MMWKMGPHTTLLAMWLVCGSASHSPALDSDSHTGRKVPLVSPISRSARYLRHTGRSGGVEKSTQEEPNPQP  
FQRRKSVPLRLAHPTRPPSPGINGVVRPEVRPIARSSAREMVRDEGSSARTRMLRFPSSSPNIIASF  
GKNRVWVISAHPASEGYRLMMSLLKDDVYCELAERHIQQIVLFHQAGEEGGKVRITNEGQILEQPLDPNLI  
PKLMSFLKLEKGFMSVLLKKTQVEERYYPVRLAEMYEVIDQGP IRRIEKIRQKGFVQCKKASGIEGHVVQ

EGNEGGGGAGGTGLGGDKRKEDPRRTQVHPTREAPRKQATSKAATPQPPTPRATTLPPAPVTTATRATSRVV  
TIAARPTTTTAYPATQRPWTSRLHPFSVSHRPPATAEVTTARGPSVSEQLYPLPRKEQQREKQATRPRPSKAT  
NYGSFTATPPPTLWEVSARVVGTSRFRDNRTDKREHGHQDPNAVPGPHKPVKGLPKKKDRILSNEYEDKYDL  
SQPTSSQGEERQVDSVPSQNAKESKKLEKLEKPEKEKKEKGGKSAKQDKLLKSEKQAKKAEKKTQEKDKNKK  
KKAGKTEQDDNQKPTAKHLAPSPKMSVADLLGSFEGKRLLLIITPKAENNMVYVQRDEYLESFCMATRRIS  
VVTIFGPVNNSSMKIDHFDLNEKPMRVVDDDDLDVQHLISELRKEYGMTYDDFFMVLTLDVLRVKQYVEVPI  
AMKSVFDLIDTFQSRIKMEKQKKEGIACKEDKRSLENFLSRFRWRRRLVVISAPNDEDWAYSQQLSALNGQ  
ACNFGRLRHITILKLLGVGEEVGGVLELFPINGSSIVEREDVPAHLVKDIRNYFQVSPPEYFMSMLLVGKDGNVKS  
WYSPMWSMVIVYDLIDSMQLRRQEMAIQQSLGMRCPEDEYAGYGYHSYHQGYQDGYQDDYRHHSYHHGYPY  
\*

>ENSMUSP00000155928\_c.495:G>A\_p.G166R ENSMUST00000232600.2|Gm17783-  
201|ENSMUSG00000116542|-|chr16:g.45348040:C>T  
MDFLLHCILHLLMLPPCAQESGSLQRIRHKNYETAVLGRNVTLFCNFSSLANVLIQITWQKIQGSPLPHNIGTYS  
HTYGEKILPPYVNRQLCKTLEPSASFMTIQGVTFEDEACYKCLFNI FPRGSHGGQTCLTILTVSELVTELQSA  
PGSEDLHSLCSAVGKPPAPRISIYPSQVTVQAPQEYFVQANANATVTVTKIYNISLKTARSLGLQNLVSMTHP  
VRNEEKIVHLPVNVQGGTTNPNCLNWMITAIAFIILFFVSCIISAVLYIYFQKKRSEKVPKPSPTQDPYKTSTLM  
PPPPSTESENLIHTTRQILEVYMFLCH\*

>ENSMUSP00000124179\_c.1884:G>GAAAAA\_p.E629EKK-ins  
ENSMUST00000159816.8|Filip11-  
203|ENSMUSG00000043336|+|chr16:g.57391298:G>GAAAAA  
MRSRSSNAEGSAPKQIPRHSKFQDSIQDMKHRTHKKDPSCSEGVLPVSEKSHGKHHTEDLSRDDLLFL  
LSILEGELQARDEVIGILRAEKIDLALLEAQYGFVTPKKVLEALQRDAFQAKSAPWQEDIYKPMNELDKVVE  
KHKESHRRILEQLLMVERSHRQTIMEMEEKRRKHKEYMKKSEDEFINLLEQECERLKKLIDQETASQEKKEQEK  
EKRIKTLKEELTKLKSFALMVVDEQQRRLTAQLALQRQKIQUALTTSAKETQGGKALAEARAQEEEEQKATRLEKE  
LQTQTTEFHONQDKIMAKLTNEDSQNRQLRQKLAALSQIDELEETNRSLRKAEEELQDIKDKINKGEYGNNG  
IMDEVDELKRKRLVDMEGKDEELIKMEEQCRDLNKRLEKETVQSKDFKLEVDKLSVRITALEKLEDALDKSKQE  
CYSLKCNLEKEMTTKQLSEELSLNARIKELEAIESRLEKTEITLKDDLTKLKTTLTVMLVDERKTMSEKLLQ  
TEDKQLSTTSQLQAEQNKVTTVTEKLIETKRALSKTDAAEKMYSVTKERDDLNRKLAEEEEKGDHLLSKVT  
ILKNRQLSLEAIEKDFVKNLNQDSSKSTAALHQENNKIKELSQEKVENLKLKDKMKAIEDDLMKTEDEYE  
TLERRYANERDKAQFLSQELEHAKMELAKYKLAEKTESSEHQWLFRRLOEEEEAKSGHLSREVDALKEKHEYM  
ATEDLICHLQGDHSLQKLNQENNRDLGREIENLTKELEERYRHFSSKSLRPSLNERRISDPQVFSKEVQTE  
AADSEPPDYKSLIPLERAVINGQFYEENEDQDDDPNEEESVLSFRCSQSSSLPMNRKLWI PVMKSKEGHPQNG  
KIQTKSNGNFVQPGDLVLSHTPGQPLHIKVTDPHIQNTATLEITSPTTESPHSYTSTAVIPNCGTPKQRITIL  
QNASITPIKSKSSTESLMNLEQSMSPVTMATFARAQTPESCGVSPTPERTMSPIQVLAMTGPSPEQGCSEPEP  
IEISAKHAI FRVSPDRQSSWQFQRSNSNSSSSVITTEDNKIHIHLGSPYMQAVAGPMPRPASPSAPLQDNRTQGL  
TNGALNKTNNKVTSSITITPTATPLPRQSQITVSNIIYN\*

>ENSMUSP00000124069\_c.1170:G>GAAAAA\_p.E391EKK-ins  
ENSMUST00000159414.2|Filip11-  
202|ENSMUSG00000043336|+|chr16:g.57391298:G>GAAAAA  
MVDDEQQRRLTAQLALQRQKIQUALTTSAKETQGGKALAEARAQEEEEQKATRLEKELQQTTEFHONQDKIMAKL  
TNEDSQNRQLRQKLAALSQIDELEETNRSLRKAEEELQDIKDKINKGEYGNNGIMDEVDELKRKRLVDMEGKD  
EELIKMEEQCRDLNKRLEKETVQSKDFKLEVDKLSVRITALEKLEDALDKSKQECYSLKCNLEKEMTTKQLS  
EELESLNARIKELEAIESRLEKTEITLKDDLTKLKTTLTVMLVDERKTMSEKLLKQTEDKQLSTTSQLQAEQNKV  
TTVTEKLIETKRALSKTDAAEKMYSVTKERDDLNRKLAEEEEKGDHLLSKVTILKNRQLSLEAIEKDFVKN  
KLNQDSSKSTAALHQENNKIKELSQEKVENLKLKDKMKAIEDDLMKTEDEYETLERRYANERDKAQFLSQE  
LEHAKMELAKYKLAEKTESSEHQWLFRRLOEEEEAKSGHLSREVDALKEKHEYMATEDLICHLQGDHSLQK  
LNQENNRDLGREIENLTKELEERYRHFSSKSLRPSLNERRISDPQVFSKEVQTEAADSEPPDYKSLIPLERAV  
INGQFYEENEDQDDDPNEEESVLSFRCSQSSSLPMNRKLWI PVMKSKEGHPQNGKIQTKSNGNFVQPGDLVLS  
HTPGQPLHIKVTDPHIQNTATLEITSPTTESPHSYTSTAVIPNCGTPKQRITILQNASITPIKSKSSTESLMN  
LEQSMSPVTMATFARAQTPESCGVSPTPERTMSPIQVLAMTGPSPEQGCSEPEPIEISAKHAI FRVSPDRQSS  
WQFQRSNSNSSSSVITTEDNKIHIHLGSPYMQAVAGPMPRPASPSAPLQDNRTQGLTNGALNKTNNKVTSSITIT  
PTATPLPRQSQITVSNIIYN\*

>ENSMUSP00000124179\_c.1884:G>GGAAAA\_p.E629ins-fs  
ENSMUST00000159816.8|Filip11-  
203|ENSMUSG00000043336|+|chr16:g.57391298:G>GGAAAA  
MRSRSSNAEGSAPKQIPRHSKFQDSIQDMKHRTHKKDPSCSEGVLPVSEKSHGKHHTEDLSRDDLLFL  
LSILEGELQARDEVIGILRAEKIDLALLEAQYGFVTPKKVLEALQRDAFQAKSAPWQEDIYKPMNELDKVVE  
KHKESHRRILEQLLMVERSHRQTIMEMEEKRRKHKEYMKKSEDEFINLLEQECERLKKLIDQETASQEKKEQEK

EKRKIKTLKEELTKLKSFALMVVDEQQRLTAQLALQRQKIQUALTTSAKETQGKLALAEARAQEEEEQKATRLEKE  
LQTQTTEFHONQDKIMAKLTNEDSQNRQLRQKLAALSQIDELEETNRSRKAEEELQDIKDKINKGEYGN  
IMDEVDELRRVLDMEGKDEELIKMEEQCRDLNKRLEKETVQSKDFKLEVDKLSVRITALEKLEDALDKSKQE  
CYSLKCNLEKEKMTTKQLSEELESLNARIKELEAIESRLEKTEITLKDDLTKLKTTLVMLVDERKTMSEK  
LQTEDKLSQSTTSQQAQEQNKVTTVTEKLIETTKRALSKTDAEEKMYSVTKERDDLNRNKLKAEKGGHDL  
LSSKVTILKNRQSLQSLAEIEKDFVKNKLNQDSSKSTAALHQENNIKELSQGKKWKI  
>ENSMUSP00000124069\_c.1170:G>GGAAA\_p.E391ins-fs  
ENSMUST00000159414.2|Filip11-  
202|ENSMUSG00000043336|+|chr16:g.57391298:G>GGAAA  
MVVDEQQRLTAQLALQRQKIQUALTTSAKETQGKLALAEARAQEEEEQKATRLEKELQQTTEFHONQDK  
IMAKLTNEDSQNRQLRQKLAALSQIDELEETNRSRKAEEELQDIKDKINKGEYGN  
IMDEVDELRRVLDMEGKDEELIKMEEQCRDLNKRLEKETVQSKDFKLEVDKLSVRITALEKLEDALDKSKQE  
CYSLKCNLEKEKMTTKQLSEELESLNARIKELEAIESRLEKTEITLKDDLTKLKTTLVMLVDERKTMSEK  
LQTEDKLSQSTTSQQAQEQNKVTTVTEKLIETTKRALSKTDAEEKMYSVTKERDDLNRNKLKAEKGGHDL  
LSSKVTILKNRQSLQSLAEIEKDFVKNKLNQDSSKSTAALHQENNIKELSQGKKWKI  
>ENSMUSP00000124179\_c.1884:G>GGAAA\_p.E629ins-fs  
ENSMUST00000159816.8|Filip11-  
203|ENSMUSG00000043336|+|chr16:g.57391298:G>GGAAA  
MRSRSSNAEGSAPKQIPRHSKFQDSIQDMKHRTHKKDPSCSESEGLPRPVSEKSHTGKGHHTEDLSRDDLLFL  
LSILEGELQARDEVIGILRAEKIDLALLEAQYGFVTPKKVLEALQRDAFQAQSAAPWQEDIYEKPMNELDKVVE  
KHKESHRRILEQLLMVERSHRQTIMEMEEKRRKHKEYMKKSEDEFINLLEQECERLKKLIDQETASQEKKEQEK  
EKRKIKTLKEELTKLKSFALMVVDEQQRLTAQLALQRQKIQUALTTSAKETQGKLALAEARAQEEEEQKATRLEKE  
LQTQTTEFHONQDKIMAKLTNEDSQNRQLRQKLAALSQIDELEETNRSRKAEEELQDIKDKINKGEYGN  
IMDEVDELRRVLDMEGKDEELIKMEEQCRDLNKRLEKETVQSKDFKLEVDKLSVRITALEKLEDALDKSKQE  
CYSLKCNLEKEKMTTKQLSEELESLNARIKELEAIESRLEKTEITLKDDLTKLKTTLVMLVDERKTMSEK  
LQTEDKLSQSTTSQQAQEQNKVTTVTEKLIETTKRALSKTDAEEKMYSVTKERDDLNRNKLKAEKGGHDL  
LSSKVTILKNRQSLQSLAEIEKDFVKNKLNQDSSKSTAALHQENNIKELSQGKSGKSETAEAKGYESH  
>ENSMUSP00000124069\_c.1170:G>GGAAA\_p.E391ins-fs  
ENSMUST00000159414.2|Filip11-  
202|ENSMUSG00000043336|+|chr16:g.57391298:G>GGAAA  
MVVDEQQRLTAQLALQRQKIQUALTTSAKETQGKLALAEARAQEEEEQKATRLEKELQQTTEFHONQDKIMAKL  
TNEDSQNRQLRQKLAALSQIDELEETNRSRKAEEELQDIKDKINKGEYGN  
IMDEVDELRRVLDMEGKDEELIKMEEQCRDLNKRLEKETVQSKDFKLEVDKLSVRITALEKLEDALDKSKQE  
CYSLKCNLEKEKMTTKQLSEELESLNARIKELEAIESRLEKTEITLKDDLTKLKTTLVMLVDERKTMSEK  
LQTEDKLSQSTTSQQAQEQNKVTTVTEKLIETTKRALSKTDAEEKMYSVTKERDDLNRNKLKAEKGGHDL  
LSSKVTILKNRQSLQSLAEIEKDFVKNKLNQDSSKSTAALHQENNIKELSQGKSGKSETAEAKGYESH  
>ENSMUSP00000149646\_c.70:T>C\_p.V24A ENSMUST00000213228.2|Olfr194-  
202|ENSMUSG00000063020|-|chr16:g.58940361:A>G  
MEVNRSQVSDFVLKGITDHTTELQAPLFLFFFIYVTTMVGNLGLIFLIWKDPHLHTPMYYFLGSLAFADACTS  
SSVTPRMLVNILDNGKMISLSECMAQYVFGSSATTECFLLVAMAYDRYVAICNPLLYLVMSNRVCTCLISG  
SYIIGFLHPLIHVGLLFRFLTFCCKSNIIDHIFYCEILPLYTISCTDPSINAFVVFIFSAVIQAVTFMSIAVSYAH  
VLFSLKTKSERGRRKAFSTCSAHLSSVSLFYGTFFMYVSPGSGPSKYKNKMYSLFYTTIVIPLLNPFYISLR  
NKEVLGALRKIIKS\*  
>ENSMUSP00000149379\_c.70:T>C\_p.V24A ENSMUST00000216519.2|Olfr194-  
203|ENSMUSG00000063020|-|chr16:g.58940361:A>G  
MEVNRSQVSDFVLKGITDHTTELQAPLFLFFFIYVTTMVGNLGLIFLIWKDPHLHTPMYYFLGSLAFADACTS  
SSVTPRMLVNILDNGKMISLSECMAQYVFGSSATTECFLLVAMAYDRYVAICNPLLYLVMSNRVCTCLISG  
SYIIGFLHPLIHVGLLFRFLTFCCKSNIIDHIFYCEILPLYTISCTDPSINAFVVFIFSAVIQAVTFMSIAVSYAH  
VLFSLKTKSERGRRKAFSTCSAHLSSVSLFYGTFFMYVSPGSGPSKYKNKMYSLFYTTIVIPLLNPFYISLR  
NKEVLGALRKIIKS\*  
>ENSMUSP00000072407\_c.70:T>C\_p.V24A ENSMUST00000072608.2|Olfr194-  
201|ENSMUSG00000063020|-|chr16:g.58940361:A>G  
MEVNRSQVSDFVLKGITDHTTELQAPLFLFFFIYVTTMVGNLGLIFLIWKDPHLHTPMYYFLGSLAFADACTS  
SSVTPRMLVNILDNGKMISLSECMAQYVFGSSATTECFLLVAMAYDRYVAICNPLLYLVMSNRVCTCLISG  
SYIIGFLHPLIHVGLLFRFLTFCCKSNIIDHIFYCEILPLYTISCTDPSINAFVVFIFSAVIQAVTFMSIAVSYAH  
VLFSLKTKSERGRRKAFSTCSAHLSSVSLFYGTFFMYVSPGSGPSKYKNKMYSLFYTTIVIPLLNPFYISLR  
NKEVLGALRKIIKS\*

>ENSMUSP00000156047\_c.2337:G>T\_p.A780S ENSMUST00000172910.3|Crybg3-205|ENSMUSG00000022723|-|chr16:g.59378915:C>A  
MSGRRRGSAPWHSFRRFFAPRNPSRDKEEEEEEEKPGTGQPAGVSRSAASVENEPVSTSQKKENALSSEAVKI  
PQAEARRNHAEQPAILPMVDDLKPKDLDPDSTPEAKTGESDRQPKESFFQFLGNLFNISGKSSLGEVKQSSFK  
DDQEKPEKDPQTPWGPPEEGSQREEEAAASHPARTQVLLGGQQUESTSSELSDAFSLDSTQDSEQETTEMPKKDT  
VGKPEKPSVTYATYRGATQIRKYLQQQPVLETMNHLDGEDGSSDSSPQAHAGRSRIRDTVTVPLSTDSKDVAT  
KGYLLGGPLEASGYSQINTNRESHQESVPLQDIASSKCILNKNSHGGLRSSWASPSSVSNPSYVVGEPDSQT  
ESVLCSSVFRGSKSSQGPCPEFQRKTPTDSPPRVNSSAVTDGLPSVPGEEPARPQRPSVDFSRKSDGSDT  
TKMESTNLSSPHKSI RHEDARLPEHKCGDKPAVDNPSRRTVNHACIMALQGHAVTDSELVNEGKKLPARDSQK  
NMVSEILKETECASGREPTTLSHVRTPEVRIESLPKETEPPEPPCETETKRLGLELHVKTPEMGMKTQEDPGS  
VKGVSDSVVVACTESETAHELKSELNRNPTSESPFLENSQQGGVASDAEAPLHLDCKTSDYSASPPTLASRI  
NRLGQLGFSGLGKERSSSSKTGQKVFSHPNECQEEGVGTHSEATDRENPPALYLGHASSTLESKEFLPHGK  
CQSPSGPETAGTQLAGVALNFEHGDTSEDLNSVPSHGPKKEELMSSNAKSRKSTVEKSDSFPLETQTAKMLGK  
GEVCDQSSFPVSESSGRRKALSTPSVQAEPDVPQCNISSSQVTVAEKLAETVLSLNYLGMEKDEDVQPV  
RKEIKQLCFSGGFKENHQTGISPASEHHGGQETEMNTPDRSAAVLTSNLPGILPLPPEEESTRHRPQNCEAST  
CLITPSLAICVTKKSSSISETEGLSLDNIFFPKFQETDNRVYTSFLSSDAHLEKNVFAPEGSSSLTVPSLLGL  
EKEASSRRDNAYFQAGTGNTPSPFCHTKGESTAVNSHDLPSNFESLKVTVNLTCEGASVIDPLGHNSFYLLAL  
DTPSPKEAEVTSLQCGVGTHTRKACLDSPPTAYFDNLKMAETGTVAGAPVSVNRSQCQCSEASADTDSRRRA  
RDPLLLRSGLPKRADTLTEEILSSVREELKSKHTVGTQCEHLAQEDVMNPGTVKEAIPSEVVLAGIQLKESLD  
EKGVDSMSGVKEEETS SVSSAVGETSLLFDFDRGNSSWMLERARELVNEVIYAAQENLIRDAFDEIEDTRVS  
EPQANTSKNWNNGSGGNPHAVVREFLVSEQAVNQSTCEISENEVLSKLSVSVYLVSGTESIKGREIVPYQEC  
DFGSGAGQSASVKLETLETVFQGEVPRTRLDKAVKTGLVSEDIKKVAETECVDNHKMAAADTRTLVNLNFN  
PFARDDIHVPSTSKNSFSDSLVICSEKSFPGHNKSTPLAMSDLGKAHKNDNEVNVGKMALTPSMLIEIGKTNKR  
DVELNIMKHEAAPLMPHREKACKVDPELNSMKAPEANVFARGSVYQMDAQMYVEKPEELPITLGMKAKFKTD  
SEGDIGKAEVMPAMSELKTVHLKDAEGAIVKTEVAPISIEMESFYQKRAEGDVGKAGVASVMPEVEIFYQSDG  
VGSASEAEATTVTLMGEDTYQKDEESTVAETDVIDMVPAALEMESIYPKDEGDTDSISEGMPAKLDVVNAYQ  
KYSDRVTAETRIPLRDAEDVLGNAETVPFVLDVKETYQETVYPLDILEKRIQRDTEESNGTTEPVPSKI  
EMEVMAPEDESSTENRELLPMEVAMERTNGTTPGVTIMQTDALGPAFENTKDPREYMEKSIGEIEEPPGEVK  
KGLILHDDRLASHFRGYEPTLSKDYEGYPASAIIPDVQEEDTVVRLKIMSVVVDKRRNLDCREEKEESNL  
AFVSDQEQDSSSFTILYEEPLQEDRYTSAELRGSQSLLFPDTSMPGLACERSESRDLVHHEFEKGLGEA  
FDGDNSEMFLSVEAKRYKIYPLALSPIYEDDSSQEDVLSSEVSPGHGSSKSRSANQPSSVLSLLQSVSERL  
QRNFDGDDRQEAEEEEEEAVASGKDWRTKREHVTFHLDPDPSIPFYPEDNQEHAGIFKSYVEFSEPTSSLQH  
GRWSEKELFLQKSDMTSKLHSSLSAYHQYLQTSRTHSSETGTRFGGTLQEPVSKYFRVQDHAGRLSPYVENV  
DKQTLKCNPRPGKMIIDYDLHGSKYKQEVYCNIPDATTWSPNGALIKVVRGCWILYKPHFQGGQKCVLEEGE  
VLDRDWLLQNRKHPERNFVLGSIKRVLKDCSIPVIELCPKTDPGCSPYIHRVSNVEELNPKSTSVTVKSG  
VWLAYPDIHFKGQATILEEDQGLFEISAAEMKSLHPLQMGGLKVEMPMNLKVILYKPHFLGHTKEFSHIDS  
VPTFLKSDKDFHIGSIRVIGGVVWVAYEKEHFKGQQFLLEEGDFEDSSACGALS GPIMSFYRLQANFIESSIT  
LFESSHLESGKFIDITNQEISDLEEIGFGSETRSIHVKSGVWVAYHQKFFCGDQYILEKGYKCFDWDGSSN  
TILSIRPIQLEPLGINEPTHLLKAFSKAGFQGECIDFVKECADLTSFTPASFKVLRGCWLLLYQEDGFYHQ  
VLEEGLYVDLTS CGCPSARIRALQPIDYVFEEPSISLFALEHCEGRELHLEDVNSVLNKDLHFYQTSVWIKS  
GLWIAYESNFLGRQIILLTPKEIPNWTAFSGWKTIGSVRPMKQPAVYIRIRNRAQDEYLTVTGNPADARTMSV  
CISPYSGKDTQIWHYCRGLFKSKASHTCLDVIGGRDTPGAKVALWTEHGQLRQKWRMSRNGTISSYLSDELVL  
DVKGGNYDKTHVIVNQPLEGEETQKWDIEIL\*

>ENSMUSP00000049394\_c.25:T>C\_p.L9P ENSMUST00000039659.9|Cbr1-201|ENSMUSG00000051483|+|chr16:g.93404879:T>C  
MSSSRPVAPVTGANKGIGFAITRDLCKRFSGDVVLAARDEERGQTAVQKLQAEGLSPRFHQDLIDNPPQSIRAL  
RDFLLKEYGGDLVNVNAGIAFKVNDTDPFHIAEVTMKTNFFGTRDVCKELLPLIKPQGRVVNVSSMVSLRA  
LKNCRLELQOKFRSETITEEELVGLMNKFVEDTKKGVHAEEGWPNSAYGVTKIGVTVLSRILARKLNEQRRGD  
KILLNACCPGWVRTDMAGPKATKSPEEGAETPVYLLALLPPDAEGPHGQFVQDKKVEPW\*

>ENSMUSP00000155872\_c.25:T>C\_p.L9P ENSMUST00000231762.2|Cbr1-203|ENSMUSG00000051483|+|chr16:g.93404879:T>C  
MSSSRPVAPVTGANKGIGFAITRDLCKRFSGDVVLAARDEERGQTAVQKLQAEGLSPRFHQDLIDNPPQSIRAL  
RDFLLKEYGGDLVNVNAGIAFKVNDTDPFHIAEVTMKTNFFGTRDVCKELLPLIKPQEW\*

>ENSMUSP00000159158\_c.204:C>G\_p.Q69E ENSMUST00000238835.2|Smok2a-202|ENSMUSG00000073458|+|chr17:g.13444689:C>G  
MENFHAQYEMLGTIGHGGSTKVKLARHRLTGTHVAVKMI PKREYWKPLMSEAEELMMADHPNIISSLEVIET  
KKKVYLIMELCEGKSLSYQHIRNAGYLQEDEARALFKQLLSAINYCHNQIGVHRDLKPDNIMVEKDGVRKIIDF  
GLGIQVKPGQKLNLF CGTYPFSAPEVLLSRPYDGPKIDVWTLGVVLYFMVVTGKIPFDAASIEKLRKQIVAGKY



SVPCRLSVKHLHLITLLMTDNPELRPTVAEVMHPVWTKGSGVFPDPCCEEQIPLKPDPAIVKAMGHIGFQAQD  
IEDSLRQRKFNETMASYCLLKKQILKECDRPIRAQPMNPSVTPFPPLVDTPTFHLGLRRRETEPTSLRLSANR  
QMSVCGRSTSKKRDRSFSWPGVLSRPINITPTMDQHTCTRSVPCINSNFCIIHPNSSDESTEGHTSASAEDK  
PVRSRGWPRGIGWTSKIGNAMRKLCCCI PSNETSHLGQRRVSPKK\*  
>ENSMUSP00000094432\_c.264:C>G\_p.Q89E ENSMUST00000080647.5|Smok2a-  
201|ENSMUSG00000073458|+|chr17:g.13444689:C>G  
MGSGSQKSEKLRSKPPFSEMFHAQYEMLGTIGHGGSTKVKLARHRLTGTHVAVKMIKREYWKPLMSEA  
ELLMADHPNIIISLLEVIETKKKVVYLIMELCEGKSLYQHIRNAGYLQEDEARALFKQLLSAINYCHNQGIVHR  
DLKPDNIMVEKDGRVKIIDFGLGIQVKPGQKLNLFSGTYPFSAPEVLLSRPYDGPKIDVWTLGVVLYFMVTGK  
IPFDDAASIEKLRKQIVAGKYSVPCRLSVKHLHLITLLMTDNPELRPTVAEVMHPVWTKGSGVFPDPCCEEQIP  
LKPDPVAIVKAMGHIGFQAQDIEDSLRQRKFNETMASYCLLKKQILKECDRPIRAQPMNPSVTPFPPLVDTPTF  
HLGLRRRETEPTSLRLSANRQMSVCGRSTSKKRDRSFSWPGVLSRPINITPTMDQHTCTRSVPCINSNFCII  
HPNSSDESTEGHTSASAEDKPVRSRGWPRGIGWTSKIGNAMRKLCCCI PSNETSHLGQRRVSPKK\*  
>ENSMUSP00000095015\_c.1081:C>T\_p.T361I ENSMUST00000097403.4|Tcpl0c-  
201|ENSMUSG00000052469|+|chr17:g.13590485:C>T  
MHEPSSLQPESSLVTVWRLNSQQRQAMLEDLSQGGKSNHKKRKMESTAQITEEDSKLDEVVGLQKQICDLGTEL  
TRQSSWWCVAHKDLQSQIDALIKENQEIIRAEHLKTLKKQDAEATKACIGSPTSARASNTLPVYIKIEGIDSSERT  
TSWDERDELSGSPPNRSTMATGGTDSQDERLSFTSVDEKPVYIKIEGIDSSERTTSWDERDELSGSPPNRSTMA  
TGGTDSQDERLSFTSVDEKVIHMSKFLQRSFGRMSPEPLSDSTFLDTESLADIWSSNSETSDGELLLHAQAS  
RVIPCFSPNALWVQVERMLSDGRTIITFPNGTRKEISADKKTTLIRFFNGDMKIKSDQKAIYYADAQIMHTT  
YPDGVEVVQFPNKWTEKFYDPGSKETVFPDGTGTVKQKLDGCEETVFPDGTFTVTKRNGDKTIMFSNGEKEIHTA  
RFKRKEFPDGTTKTVYCNQCQETKYASGRVVRVKDEKGTVILDWK\*  
>ENSMUSP00000095015\_c.1129:A>G\_p.N377S ENSMUST00000097403.4|Tcpl0c-  
201|ENSMUSG00000052469|+|chr17:g.13590533:A>G  
MHEPSSLQPESSLVTVWRLNSQQRQAMLEDLSQGGKSNHKKRKMESTAQITEEDSKLDEVVGLQKQICDLGTEL  
TRQSSWWCVAHKDLQSQIDALIKENQEIIRAEHLKTLKKQDAEATKACIGSPTSARASNTLPVYIKIEGIDSSERT  
TSWDERDELSGSPPNRSTMATGGTDSQDERLSFTSVDEKPVYIKIEGIDSSERTTSWDERDELSGSPPNRSTMA  
TGGTDSQDERLSFTSVDEKVIHMSKFLQRSFGRMSPEPLSDSTFLDTESLADIWSSNSETSDGELLLHAQAS  
RVIPCFSPNALWVQVERMLSDGRTIITFPNGTRKEISADKKTTLIRFFNGDMKIKSDQKAIYYADAQIMHTT  
YPDGVEVVQFPNKWTEKFYDPGSKETVFPDGTGTVKQKLDGCEETVFPDGTFTVTKRNGDKTIMFSNGEKEIHTA  
RFKRKEFPDGTTKTVYCNQCQETKYASGRVVRVKDEKGTVILDWK\*  
>ENSMUSP00000156686\_c.522:A>G\_p.K175E ENSMUST00000232810.2|Vmn1r229-  
202|ENSMUSG00000117148|+|chr17:g.21035279:A>G  
MDFGNLAMGIVLSLQSLGILGNFSLFYLVLYNKERTLKIIDIILIHVFTSNLSLIIFSKGLPEVLAVFGWN  
DLFDDVGCKLIMYVRRVSRMSISMTCLLSVFQAITISTRNSCWKEFKQAKFMGLFISLCWILFMLVNMLF  
PVYVSTNRNSKNKTQKKDIEFCHSVGRDEMVDIMYAFVFPPEVLFSLIVSSSTTMIVILYGHKKRVQHILH  
THASPR TSAENRATQTILILVCTFLAFYTLSSVVLQGYVALSHDPSWVWMNITTIISMGFPAIGPFVMSRDFTV  
SRFCFTCIGNLKL\*  
>ENSMUSP00000156596\_c.522:A>G\_p.K175E ENSMUST00000233712.2|Vmn1r229-  
205|ENSMUSG00000117148|+|chr17:g.21035279:A>G  
MDFGNLAMGIVLSLQSLGILGNFSLFYLVLYNKERTLKIIDIILIHVFTSNLSLIIFSKGLPEVLAVFGWN  
DLFDDVGCKLIMYVRRVSRMSISMTCLLSVFQAITISTRNSCWKEFKQAKFMGLFISLCWILFMLVNMLF  
PVYVSTNRNSKNKTQKKDIEFCHSVGRDEMVDIMYAFVFPPEVLFSLIVSSSTTMIVILYGHKKRVQHILH  
THASPR TSAENRATQTILILVCTFLAFYTLSSVVLQGYVALSHDPSWVWMNITTIISMGFPAIGPFVMSRDFTV  
SRFCFTCIGNLKL\*  
>ENSMUSP00000156964\_c.522:A>G\_p.K175E ENSMUST00000232852.2|Vmn1r229-  
203|ENSMUSG00000117148|+|chr17:g.21035279:A>G  
MDFGNLAMGIVLSLQSLGILGNFSLFYLVLYNKERTLKIIDIILIHVFTSNLSLIIFSKGLPEVLAVFGWN  
DLFDDVGCKLIMYVRRVSRMSISMTCLLSVFQAITISTRNSCWKEFKQAKFMGLFISLCWILFMLVNMLF  
PVYVSTNRNSKNKTQKKDIEFCHSVGRDEMVDIMYAFVFPPEVLFSLIVSSSTTMIVILYGHKKRVQHILH  
THASPR TSAENRATQTILILVCTFLAFYTLSSVVLQGYVALSHDPSWVWMNITTIISMGFPAIGPFVMSRDFTV  
SRFCFTCIGNLKL\*  
>ENSMUSP00000076045\_c.522:A>G\_p.K175E ENSMUST00000076759.3|Vmn1r229-  
201|ENSMUSG00000117148|+|chr17:g.21035279:A>G  
MDFGNLAMGIVLSLQSLGILGNFSLFYLVLYNKERTLKIIDIILIHVFTSNLSLIIFSKGLPEVLAVFGWN  
DLFDDVGCKLIMYVRRVSRMSISMTCLLSVFQAITISTRNSCWKEFKQAKFMGLFISLCWILFMLVNMLF  
PVYVSTNRNSKNKTQKKDIEFCHSVGRDEMVDIMYAFVFPPEVLFSLIVSSSTTMIVILYGHKKRVQHILH

THASPRSAENRATQTILILVCTFLAFYTLSSVVLQGYVALSHDPSWVWMNITTIISMGFPAIGPFVMSRDFTV  
SRFCFTCIGNLKL\*  
>ENSMUSP00000135186\_c.1564:T>C\_p.F522S ENSMUST00000175853.3|Vmn2r130-  
201|ENSMUSG00000095658|+|chr17:g.23293560:T>C  
MFTLILLFLLLNIPLIVADFIYSRCFWRIKQNKDKDGNLGSICALFIQAVQWPVEKEYFSPILNTQTYTENYK  
YILVFMFSINEVNRNSDLLPNMSLIFFTSALSCNESQLKSFHLSLQDHDYFPNYICNDYICGVALVGLKWET  
TLTYLILNFMSSHQFLFLNYGPFHPAMSDHEEFPIYQMAEEDTSLALAMVSFIIHFSWNWVGLAISDNDEG  
IQFLSHLRREMEKNTVCFVSMIPVNMHLYMTRTEVYVYQIMTSSTNVVVIYGDSTDSTLAVSFRMWESLDIK  
RIWVPTSQWDIITSKKDFTFNLYGTFAFGHHHEIGSGKFNQVQTLDDLKFSDEYLVKLEWMYFNCEDSAPKC  
KTLKNCSSNHLEWLMVTRFDMAFTEGSYAIYNAVYVAHALHELTFQKFDNLRPDNVKQKYACNKLGSFLR  
KIHFVTPVGDVRNMNRNKLQENYDIFYVWNFPQGLRLKVKIGIFSPYFINGQQLHLSSEDMLEWARGSTQMLT  
SVCSADCGPGSRKFRNRGMPACCFDCRCPENEISNETNVELCVPCPEDQYANTEQNNCIQRAVIFLTYKDPL  
GMALSLMALCFSFTAFAVLLVFKHHSTPIVKANNRNLTYILLISLIFCFLCPLLFIGHPNVSVTCVQLQVTFG  
VAFTVAVPTVLAKTITIVLAFRVTAPQRMMKYFLVSGASIYIPICTLIQVIVCAVWLGAAPPVSDIDARSEH  
GHIIIVCNKGSVSAFYCVLGLYLAFLAFSGFTLAFSLRNLPTFNEAKSITFSMLVFCVWVTFPLPVYHSTKKG  
VMVAVEIFSTLASGAGMLICIFVPKCYIILFMPDRNSLQMIKKSSSHALS\*  
>ENSMUSP00000049296\_c.5775:G>T\_p.V1926L ENSMUST00000035565.5|Pkd1-  
201|ENSMUSG00000032855|+|chr17:g.24794090:G>T  
MPLGAPALLALALGLLWLGALAGDPGRGCGPCPLPCFCGPAPDAACRVNCSGRWLQTLGPSLRIPADATLALD  
LSHNLQTLIDIGLLVNLALVELDLNSNRISTLEEGVFANLNLSEINLSGNPFECNCGLAWLPRWAKEHQVH  
VVQSEATTCRGPPIPLAGQPLLSIPLLDNACGEEYVACLDPNDSGAVAAVFFYFAHEGPLETEACSAFCFSAGE  
GLAALSEQNQCCLCGAGQASNSAACSWSWSSISLSLNSACGGPTLLQHTFPASPGATLVGPHGPLASGQPADF  
HITSSLPISSTRWNFGDGSPEVDMASPAATHFYVLPGSYHMTVVLALGAGSALLETEVQVEATPTVLELVCPS  
FVHSNESLELGIHRHGGSALEVTYSIALALDKEPAQVHPLCLDTEIFPGNGHCYRLVAEKAPWLQAQEQCRT  
WAGAALAMVDSPAIQHFLVSKVTRSLDVWIGFSSVEGTEGLDPRGEAFSLESCQNWLPGEHPATAEHCVRLG  
PAGQNTDLCASAPHSYCELPRGGPVWDTENFVMGMSGGGLSGPLHPLAQOETVQGPLRPEVVMVFPGLSPSR  
EAFLLTAAEFSTQKLEEPAQMRLQVYRPSGGAAAVPEGSPEPNRTEPAPKCVPEELWPCGANVCIFFDASCNS  
HVCINGSVSRGLSRASYTLWKEFFFSVPAGPPTQYLVTLHSDVPMPLPGDLIGLQHDAGPGTLLQCPLASSC  
PGQALYLSTNASDWMNTLNVHLEEAWAGPVCSLQLLLVTERTLPLLLGLGNPGLQHPGHYEVTRATVGNVSRQ  
NLSCSFSVVSPIAGLRVIHPIPLDGHYVPTNGSVLVLQVDSGANATATAQWFGGNI SAPFEDACPEVDFLK  
QDCTEEANGTLFSVLMPLRLKEGDHTEIVAQNGASQANLSLRVTAEPEICGLRAVPSPEARVLQGI LVRYS  
MVEAGSDVAFRWTIDDKQSLTFHNTVFVNIYQSAAIKFLSLTASNHVSNITVNYNVTVERMNMHGLWVSAVP  
TVLPPNATLALTGGVLVDSAVEVAFLWNFGDGEQVLRQFKPPYDESFOVDPDTVAQVLEHNTHTIYTPGEY  
NLTVLVSNTYENLTQQVTVSVRTPVLPNVAIGMSSNVLVAGQPIITFSYPLPSTDGVLYTWFDFGDSVPLIQSQ  
PVLNHTYSMTGAYRITLEVNNTVSSVTAHADIRVQELHGLTVYLSPSVEQGAPMVVSASVESGDNI TWT  
GDTVFTGPEATVQHVLRAQNFVTVEAANPAGHLSQSLHVQVFLVLEVLHIEPSTCIPTQPSAQLMAHVTGD  
PVHYLFDWTFDGDSSNVTVHGHPSVTHNFTSRGIFPLALVLSHVNKAHYFTSICVEPEIRNITLQPERQFVK  
LGDEARLVAYSWPPFPYRYTWFDTEDTHTQTGGSEVKFIYREPGSYLVIVTVSNNISSTNDSAFVEVQEPV  
LVTGIRINGSHVLELQQPYLLSAMGSGPATYLLWELGDGSGQSEGPEVTHIYSSSTGDFTVRVSNGWNEVSRSEAQ  
LNIITVKQRVRLTINASRTVPLNGSVSSTLLEVGSDVHYSWVLCDRCTPIPGGPTISYTFRSVGTFNIIVT  
AENEVGSQAQDSIFIYVLQFIEGLQVAGGDNGCCFPTNYTLQLQAAVRDGTNISYSWTAQQEGSLITLFGSGKC  
FSLTSLKASTYYVHLRATNMLGSAANRTIDFVEPVESLILSASPNAAVNMSLTLCAELAGGSGVVYTWYLE  
EGLSWKTSMPSTHTTFAAPGLHLVRVTAENQLGVSVNATVEVAIQVPVGGLSIRTSEPDSIFVAAGSTLPFWGQ  
LAEGTNVTWCWTLPGGSKDSQYIAVRFSTAGSFLQLNASNAVSWVSAMYNLTVVEPIVNLMLWASSKVVAPG  
QPVHFEILLAAGSALTFRLQVGGSVPELLPSPHFSHFVFRVGDHLVNVQAEHNVSHAQAQVRIVLVEAVVGLQ  
VPNCCEPGMATGTEKNFTARVQRGSRVAYAWYFSLQKQVQDLSVILSGRDVYTPVAAGLLEIHVRAFNELGG  
VNLTLMVEVQDIIQYVTLQSGRCFTNRSARFEAATSPSPRRVYHWDGDFGDTPVQKTEEFWADHYLRPGDYH  
VEVNATNLVSFFVAQATVTVQVLACREPEVEVALPLQVLMRRSQRNYLEAHVDLRCVSYQTEYRWEIYRTAS  
CQRPRMAQMVLPVGDVSRPQLVVPRLALPVGHYCFVFFVVSFGDTPLARSIQANVTVAERLVIIEGGSYRV  
WSDTQDLVLDGSKSYDPNLEDGQTPLNHFHWACVASTQSETGGCVLNFGRGSSVVTIPLERLEAGVEYTFNL  
IVWKAGRKEEATNQTVLIRSGRVPVIVSLECVSCKAQAVYEVSRSSYVYLEGHCHNCSRGYKQGCWAARTFSNK  
TLVLNETTTSTGSTGMNLVVRP GALRDGEGYIFTTLVLGHSGEEEGCASIRLSPNRPLGGSCRLFPDLSVRG  
LTTKVHFECTGWRDAEDGGAPLVYALLLKRCSRQSYACENFCIYKGSLSYTGAVLPPGFQPLFVVS LAVVVQDL  
GAAVVALNRSLTIVLPEPSGNPADLVPLWHLSTLASVPLGLLKQADPQHVIEYSLALITVLNEYEQAPDVSEPN  
VEQQRAQMRKNITETLISLRVNTVDDIQQITAAALQCMVSSRELMCRSCLKMLQKLEGMRI LQAETTEGT  
LTPTTIADSI LNITGDLIHLASLDMQGPQPLELGVPEPPLMVASKAYNLSSALMRLMRSRVLNNEEPLTLAGE  
EIVALGKRSDPLSLLCYGKALGPSCHFSIPEAFSGALSNLSDVVQLIFLVDSNPFPGYISNYTVSTKVASMA  
FQTQTGTQIPIEQLAERAITVKVPNNSDQAAQSSHPVGGSTIVQPQTSVSAVVTADNSNPQAGLHLRITYTV

LNERYLAEPEPYLAVYLHSVSPNEYNCSASRRISLEVLEGADHRLYTFFFIAPGTGTLDRSYYLNLTSHFHW  
 SALEVSVGLYTSCLQYFSEEMMMWRTEGIVPLEETSQAVCLTRHLTAFGASLFPVPPSHVQFIFPEPSASIN  
 YIVLLTCVICLVYVVMAMILRKLQDLVSRVRVIFPCGKGRFKYELVKTGWSRSGSTTAHVIMLYGEDN  
 RSGHRHLDGDRAFHRNSLDIFQIATPHSLGVSVKIRVWHDNKGLSPAFLQHIIVRDLQ SARSTFFLVNDWLS  
 VETEANGGLVEKEVLAANEALWQFQRLLVAEALQGRFFDKHIWLSIWRP PRSRFTRVQRVTCCVLLLCFLA  
 ANAVWYGVRDRTTYSMGPVSSLSISPGVDTVAIGLVSSVVVYPVYLAVLFLFRMSRSKVSQDQNPPTGQQALD  
 VDSYLDPSVLDSSLLTSLGLEAFAGQVKNDFLEDAKSLVCWPSSEGLTSLWPDLLSDPSVVSSTLQRLTQGR  
 PGCMLGSEEDGASLVSPSLPAKYLSASDEDLIHQVLADGANNLPTQDTLLETDLTSLSSVPEKTEFLILQ  
 TVGEERPASMGLSWEQSPVTRLSRTGLVGEFQKRLLPACPLAHGLSLLLVAVAVAVSVGWIGASFPPSVSM  
 WLLSSSSSFLASFLGWEPLKVLLEALYFSLVAKRLHPDEDDTLVESPAVTPVSEVRVPRVPPHGFALFLAKEE  
 ARKVKRLHDMKRLLVYMLFLLVTLANYGDASCHGHAYRLQSAIKQELDSQAFLAITRSEDFWPWMSHVFLP  
 YVHGNQSSPELGPRLRQVRLQEAFCPDPSSSEHMCSAAGSLSTSDYGIWQSVVQNGSETWAYSAPDLLGAW  
 YWGYCAVYDSGGYIQELGLSLEESRARLGFLQLHNWLD SRSRAVFVELTRYSPAVGLHAAVTLRLEFPVAGHA  
 LAAFVSRPFALRRLSTGLSLPLLT SVCLLLFALYFSMAEVQTRKDGCACTARPDTWARCLLIVILTAATGLVR  
 LAQLGIADRQWTHFVQDHPRHFTSFQVAQLGVSARGLAASLLFLLLVKAAQQLRFVVRQWSVFGKTLCRALPE  
 IMGATLGLVLLGVAYAQAAILLISSGADTLYNMARAFLVLCPGARVPTLCPSESWYLSPLLCVGLWALRVWGA  
 LRLGAILLRWRHYHALRGELYRPAWEPQDYEMVELFLRRLRLWGMGFSKVKEFRHKVRFEGMDPLPSR SRGSKS  
 SPVVLPPSSGSEASHPSTSSSQPDGPSASLSRSTLKLPEPEPSRLHAVFESLLVQFDRLNQATEDVYQLEQQLO  
 SLQGHGHNPPSSPSPGCFPGSQPALPSRLSRASQGLDQTVGPNRVSLWPNKVVHPSST\*  
 >ENSMUSP00000078426\_c.3924:A>G\_p.N1309D ENSMUST00000079461.15|wdr90-  
 201|ENSMUSG00000073434|-|chr17:g.26068551:T>C  
 MAGGSGARETRCRQGSRPGSPGSEVPAASVTGPRAEARPAGGGGSRRAAPDRCSGGVPSAAWQHHPFLNVFRH  
 FRVDEWKRSSKEGDVAVVTDKVLKSAVYRIRGSVSASNYIQLPRTSTQSLGLTG RYLYVLFVRPVP TKHFVIHL  
 DVSTEDGQVIRVFSNFLKFKFSSTTWLQFPFVFETKTPRRGGDIWSKRDGLNEGLKRDDLAGVALPRARWTC  
 LQLDLRDIIMFYLG RHYSHLKSIRLCASLLVRNLYTSDLCFDPAVTVTEARRAKLSVNPMPREMAFFVPKGES  
 WHDNYIHVRFPSDCSKVPDEQDEKSCSPPEAVFLGRMSRHLPHPGVLGKPLLSSKSPVAQCSSALPCQVLSA  
 SURLPEVSRPTRYRVEVSSVSASSIQSRPSVRDEVPDAHTVSGERHVLADRSSGVPALEDIGSCLFLPDPV  
 LRLKGVIGFGHSTQWALWTKDGVAVVYPCHAVIIVLQIDTGGQRRFFLGHTDKVSALALNGSDTLLASAQVQP  
 PSMVRLWDFQTGSCLSLFRSPLHTICSLFSFGSGALLCGVGKDRHGRTVVVAWSTEQAGLGGEVVVLAHVHTD  
 FDIRAFQVAFFDETRMASCGRGSVRLWRLRGGVLRSCAVDLGEYCSLELTDLAFQAALDGHCAPSAGTLFVCS  
 HSGHILEIDHQ RMSVQHVRRLPARSPGAPLAEKQNFVSGSGIAISSLSVSTATCAVGSSEDGYLRWPLDFSS  
 VLEAEHDGVPVSVSFSFDGLRVLSTTTSGHLGFLDVPSREYTVLARSHMAPVLALSTEPNRGMATVSLDHT  
 VRIWDLATLQQLYDFSSSEDTPCAVAFHTMPNFFCGFSSGAVRSFSLESSGVLVEHTRHRGAI TSLVITLDG  
 RFLFSSCSQGLSNQYSCADSQCVCVLRVANMVCQDGRPNPNI LAVSGDSCRLAFVGP SKCMVTIVESASLDEL  
 LRVDVSTLNLSNHLDWAVAI CFSFGNSGHLVSTSSNKVVLDVAVSGHTLRELSVRSRACCSLASEDAHL  
 LLAATDRTITVWDYPTQANPSCQVYIGHSEPVHVAFTPDQVLQVLSVGD AIFLWDILATPERDGGDEAPPGH  
 EAGSSSQGLDDLASGASGLPRQQVPIPFQALPPLSSHDRLLDGGSTGTFSTSDDEEGLCEENHVSEALLQQQAP  
 TPHVLVDREASGAGDAPRETAGSSWTPAERPSPHSHMSEWSLRSGKAGLPTRPDSYKHFTPRYKTS PRVKSVY  
 FPPIGRERLRLKAI VGYNGN GRANMVWRPDTGFFAYTCGRLVVVEDLHSGTQRHWLGHQSQEISTLALDQDGOI  
 LASASCCGNTAARCQIRIWDVPKGLCRHLLSHHDTAVQALAFSPDDEFVLVTLGDYADRNLALWSMATYELLSS  
 TRLLEPVHGVAFNPWDANELICVGTNAITFWLLQHHGADTCFQVHREPIPEELGASELTS LCYGASPLLYCGS  
 SSGQVCVWDTGTGHCFLAWEADDGEIGVLLCSGSR LISGSNTKRLRLWAVGVVPELRRKGS SARSSSVFMERE  
 LTLDGAVVSASFDSGMDMGVGTAGTIWYISWTEGTSTRLISGHRTKVNEVVFSPGESHCATCGEDG SVRVW  
 SLASMELVIQFQVLNQSC LCLAWTPPSCLEPEQQQVAGYSDGTLRVFVSI SRTAMELKMHPHRTALTAIAFST  
 DGQTIILSGDKDLVAISHPC TGMTFRVLSDRH GAPISAIQST SKEYGDLGVEGVELWLAASGDQ RVS I WVS DW  
 LRDRCELLEWLSFPAPAVSEAPGLLPPSLAAFCPWDKAILVCVGLGAHEEVI FYSRLRQKQVIQKTPLPFFFAMS  
 LSLSPGSQLMVVGFAECMMRLLDCASGTAQDLEGHDDSVHLCRFTPSGRLLFTA AHNEILVWEVTD P\*  
 >ENSMUSP00000135420\_c.3870:A>G\_p.N1291D ENSMUST00000176923.9|wdr90-  
 205|ENSMUSG00000073434|-|chr17:g.26068551:T>C  
 MAGGSGARETRCRQGSRPGSPGSEVPAASVTGPRAEARPAGGGGSRRAAPDRCSGGVPSAAWQHHPFLNVFRH  
 FRVDEWKRSSKEGDVAVVTDKVLKSAVYRIRGSVSASNYIQLPRTSTQSLGLTG RYLYVLFVRPVP TKHFVIHL  
 DVSTEDGQVIRVFSNFLKFKFSSTTWLQFPFVFETKTPRRDLAGVALPRARWTC LQLDLRDIIMFYLG RHYSHLKS  
 HLKSIRLCASLLVRNLYTSDLCFDPAVTVTEARRAKLSVNPMPREMAFFVPKGES WHDNYIHVRFPSDCSKVP  
 DEQDEKSCSPPEAVFLGRMSRHLPHPGVLGKPLLSSKSPVAQCSSALPCQVLSASSR LPEVSRTRYRVEVSS  
 VSASSIQSRPSVRDEVPDAHTVSGERHVLADRSSGVPALEDIGSCLFLPDPVLRKGVIGFGHSTQWAL  
 WTKDGVAVVYPCHAVIIVLQIDTGGQRRFFLGHTDKVSALALNGSDTLLASAQVQPPSMVRLWDFQTGSCLSLFR  
 RSPLHTICSLFSFGSGALLCGVGKDRHGRTVVVAWSTEQAGLGGEVVVLAHVHTDFDIRAFQVAFFDETRMAS  
 CGRGSVRLWRLRGGVLRSCAVDLGEYCSLELTDLAFQAALDGHCAPSAGTLFVCSHSGHILEIDHQ RMSVQH V

RRLLPARSPGAPLAEKQNFVSGVSGIAISSLSVSTATCAVGSSEGYLRLWPLDFSSVLEAEHDPVSSVSFSP  
DGLRVLSTTTSGHLGFLDVPREYTVLARSHMAPVLALSTEPNRRGMATVSLDHTVRIWDLATLQQLYDFSSS  
EDTPCAVAFHPTMPNFFCGFSSGAVRSFSLESSGVLEHTRHRGAI TSLVITLDGRFLFSSCSQGSIVQYSCA  
DSQCCVLRVAANMVCQDGRPNPNILAVSGDSCRLAFVGP SKCMVTIVESASLDELRLVDVSTLNLASNHL DWA  
VAICFSPGNSGHLVSTSSNKVVVLDVAVSGHTLRELSSVRSRACCSLALSED AHLLLAATDRITVWDYPTQA  
NPSCQVYIGHSEPVHAVAFTPDQLQVISVGD AIFLWDILATPERDGGDHEAPPGHEAGSSSGQLDDLASGASG  
LPRQQVPIPFQALPPLSSSHDRLLDGTGTFTSDEEGLCEENHVSEALLOQQAPT PHVLVDREASGAGDAPR  
ETAGSSWTPAERPSPHSHMSEWSLRSGKAGLPTRPDSYKHFTPRYKTS PRVKSVYFPP IGRERLR LKAIVGYN  
GNGRANMVWRPDTGFFAYTCGRLVVVEDLHSGTQRHHLGHSQEISTLALDQDQILASASCCGNTAARCQIRI  
WDVPGKGLCRHLLSHHDTAVQALAFSPDDEFLVTLGDYADRNLALWSMATYELLSSTRLLEPVHGVAFNPWDAN  
ELICVGTNAITFWLLQHHGADTCFQVHREPIPEELGASELTS LCYGASPLLYCGSSSGQVCVWDTGTGHCFLA  
WEADDGEIGVLLCSGSR LISGNTKRLRLWAVGVVPELRRKGS SARSSVFMERELTLDGAVVSASFDSGMDM  
GVVGT TAGTIWYISWTEGTSTR LISGHRTKVNEVVFSPGESH CATCGEDG SVRVWSLAMELVIQFQVLNQSC  
LCLAWTPPSCPELPEQQQVAVGYS DGTLRVFSISRTAMELKMHPHRTALTAIAFSTDGQ TILSGDKDGLVAISH  
PCTGMTFRVLSDRHGAPISAIQSTSKEYGDLGVEGVELWLAASGDQRVSIWVSDWLRDRCELLEWLSFPAPAV  
SEAPGLLPPLA AFCPWDKAILVCVGLGAHEEVI FYSLRQKQVIQKTPLPFFAMSLSLSPGSQLMVVGFAECM  
MRLLD CASGTAQDLEGHDDSVHL CRFTPSGRLLFTA AHNEILVWEVTD P\*

>ENSMUSP00000156959\_c.517:G>A\_p.C173Y ENSMUST00000232862.2|Lhfp15-  
202|ENSMUSG00000062252|+|chr17:g.28799010:G>A  
MVKLLPAQEAAKIYHTNYVRNSRAVGMWGTLTICF SVLVMALFIQPYWIGDSVSTPQAGYFGLFSYCVGNVL  
SSELICKGGPLDFSSIPSAFKTAMFFVALAMFLIIGS IICFSLFFVCNTATVYKICAWMQLAAATGLMIGCL  
VYPDGWDSSEVRRMCGEQTGKYTLGHYTIRWAFMLA ILSIGDALILSFLAFVLGYRQDKLLPDDYKADGNEEV  
\*

>ENSMUSP00000079598\_c.517:G>A\_p.C173Y ENSMUST00000080780.8|Lhfp15-  
201|ENSMUSG00000062252|+|chr17:g.28799010:G>A  
MVKLLPAQEAAKIYHTNYVRNSRAVGMWGTLTICF SVLVMALFIQPYWIGDSVSTPQAGYFGLFSYCVGNVL  
SSELICKGGPLDFSSIPSAFKTAMFFVALAMFLIIGS IICFSLFFVCNTATVYKICAWMQLAAATGLMIGCL  
VYPDGWDSSEVRRMCGEQTGKYTLGHYTIRWAFMLA ILSIGDALILSFLAFVLGYRQDKLLPDDYKADGNEEV  
\*

>ENSMUSP00000156557\_c.517:G>A\_p.C173Y ENSMUST00000232974.2|Lhfp15-  
203|ENSMUSG00000062252|+|chr17:g.28799010:G>A  
MVKLLPAQEAAKIYHTNYVRNSRAVGMWGTLTICF SVLVMALFIQPYWIGDSVSTPQAGYFGLFSYCVGNVL  
SSELICKGGPLDFSSIPSAFKTAMFFVALAMFLIIGS IICFSLFFVCNTATVYKICAWMQLAAATGLMIGCL  
VYPDGWDSSEVRRMCGEQTGKYTLGHYTIRWAFMLA ILSIGDALILSFLAFVLGYRQDKLLPDDYKADGNEEV  
\*

>rs228620946\_ENSMUSP00000050123\_c.1636:A>C\_p.H546P  
ENSMUST00000056866.8|Pnpla1-201|ENSMUSG00000043286|+|chr17:g.29104582:A>C  
MDEQVFKGDPDTPHSISFSGSGFLSYQAGAVDALRDLAPRMLDTAHRFAGTSAGAVIAALVCGIEMEKEYLR  
VLNMGLAEVKKFFLGLPLSPCKMVQMMRQFLYDVLPEDSYKFATGKLVSLTRVTDGENVVVSEYRSKEELIE  
ALYCSCFVPVYCGFIPPTYRGERYIDGGFTSMQPCSFWTD SITITISTFSSQQDICPRDCPTIFHDFRMFNFSFQ  
FSL ENITRMTALFPDLVILQEYYRYRGYND AVSYLRRLNAA YLDSPSKRVI FPRVEVYCQIEVALGHEPPPP  
SLQNL PALRRSPADSSQTHAQGSPKKDRKDSHSSAAPS VQTPESGCKESVESPVSLRVSISKQPSVSP LSPAQ  
PVPVMRPTGPRDSCPINVQTPNPERGVK GALDSATERGMKDALASATDEQSTTTLPVLLPAADSRGSKTGSS  
VPIGSPESPRLLLRSSQGATASRATLGLPPLSPSTPPAGPPVEDLGP ERPTATGSPALSQLTGSAAPGTGKKA  
PHKPLLVEGPGEDSNTAKTMFKRKQKT NATRECFPRNAQSKKPASKLKSAPCPLNFPVLPKR VVWV TYKPHPSR  
IQDYSYPEGVSGQNS\*

>ENSMUSP00000050123\_c.1770:C>G\_p.P591A ENSMUST00000056866.8|Pnpla1-  
201|ENSMUSG00000043286|+|chr17:g.29105917:C>G  
MDEQVFKGDPDTPHSISFSGSGFLSYQAGAVDALRDLAPRMLDTAHRFAGTSAGAVIAALVCGIEMEKEYLR  
VLNMGLAEVKKFFLGLPLSPCKMVQMMRQFLYDVLPEDSYKFATGKLVSLTRVTDGENVVVSEYRSKEELIE  
ALYCSCFVPVYCGFIPPTYRGERYIDGGFTSMQPCSFWTD SITITISTFSSQQDICPRDCPTIFHDFRMFNFSFQ  
FSL ENITRMTALFPDLVILQEYYRYRGYND AVSYLRRLNAA YLDSPSKRVI FPRVEVYCQIEVALGHEPPPP  
SLQNL PALRRSPADSSQTHAQGSPKKDRKDSHSSAAPS VQTPESGCKESVESPVSLRVSISKQPSVSP LSPAQ  
PVPVMRPTGPRDSCPINVQTPNPERGVK GALDSATERGMKDALASATDEQSTTTLPVLLPAADSRGSKTGSS  
VPIGSPESPRLLLRSSQGATASRATLGLPPLSPSTPPAGPPVEDLGP ERPTATGSPALSQLTGSAAPGTGKKA  
PHKPLLVEGPGEDSNTAKTMFKRKQKT NATRECFHRNAQSKKPASKLKSAPCPLNFPVLPKR VVWV TYKPHPSR  
IQDYSYAEGVSGQNS\*

>ENSMUSP00000093077\_c.493:C>A\_p.T165N ENSMUST00000095427.12|Mtch1-  
201|ENSMUSG00000024012|-|chr17:g.29559784:G>T  
MGASDPEVAPWAPGGAAGMAGAGAGARGGAPAGVEARARDPPPAHRAHPRHPRPAAQPSARRMDGGPGAPG  
SGDNAPTTEALFVALGAGVTALSHPLLYVKLLIQVGHEPMPPTLGTNVLGRKVLVYLPSSFFTYAKYIVQVDGKI  
GLFRGLSPRLMSNALSTVNRGSMKKVFPDMEQVSNKDDMKTSLKKVVKETS YEEMMQCVSRMLAHPLHVIS  
MRCMVQFVGREAKYSGVLSSIGKIFKEEGLLGFVGLIPHLLGDVVFLWGCNLLAHFINAYLVDDSVSDTPGG  
LGNDQNPQSQFSQALAIRSYTKFVMGIAVSMLTYPFLLVGDLMVNNCGLRAGLPPYSPVFKSWIHCWKYLSV  
QGQLFRGSSLLFRRVSSGSCFALE\*

>ENSMUSP00000157010\_c.157:C>A\_p.T53N ENSMUST00000234507.2|Mtch1-  
211|ENSMUSG00000024012|-|chr17:g.29559784:G>T  
MPPTLGTNVLGRKVLVYLPSSFFTYAKYIVQVDGKIGLFRGLSPRLMSNALSTVNRGSMKKVFPDMEQVSNKD  
DMKTSLKKVVKETS YEEMMQCVSRMLAHPLHVISMRCMVQFVGREAKYSGVLSSIGKIFKEEGLLGFVGLIP  
HLLGDVVFLWGCNLLAHFINAYLVDDSVSDTPGGGLGNDQNPQSQFSQALAIRSYTKFVMGIAVSMLTYPFLLV  
GDLMVNNCGLRAGLPPYSPVFKSWIHCWKYLSVQGQLFRGSSLLFRRVSSGSCFALE\*

>ENSMUSP00000157094\_c.157:C>A\_p.T53N ENSMUST00000235088.2|Mtch1-  
217|ENSMUSG00000024012|-|chr17:g.29559784:G>T  
MPPTLGTNVLGRKVLVYLPSSFFTYAKYIVQVDGKIGLFRGLSPRLMSNALSTVNRGSMKKVFPDMEQVSNKD  
DMKTSLKKVVKETS YEEMMQCVSRMLAHPLHVISMRCMVQFVGREAKYSGVLSSIGKIFKEEGLLGFVGLIP  
HLLGDVVFLWGCNLLAHFINAYLVDDSVSDTPGGGLGNDQNPQSQFSQALAIRSYTKFVMGIAVSMLTYPFLLV  
GDLMVNNCGLRAGLPPYSPVFKSWIHCWKYLSVQGQLFRGSSLLFRRVSSGSCFALE\*

>ENSMUSP00000157218\_c.223:C>A\_p.T75N ENSMUST00000235021.2|Mtch1-  
216|ENSMUSG00000024012|-|chr17:g.29559784:G>T  
XVTALSHPLLYVKLLIQVGHEPMPPTLGTNVLGRKVLVYLPSSFFTYAKYIVQVDGKIGLFRGLSPRLMSNALST  
VNRGSMKKVFPDMEQVSNKDDMKTSLKKVVKETS YEEMMQCVSRMLAHPLHVISMRCMVQFVGREAKYSGV  
LSSIGKIFKEEGLLGFVGLIPHLLGDVVFLWGCNLLAHFINAYLVDDSVSDTPGGGLGNDQNPQSQFSQALAI  
RSYTKFVMGIAVSMLTYPFLLVGDLMVNNCGLRAGLPPYSPVFKSWIHCWKYLSVQGQLFRGSSLLFRRVSS  
GSCFALE\*

>ENSMUSP00000115027\_c.259:C>A\_p.T87N ENSMUST00000153658.3|Mtch1-  
207|ENSMUSG00000024012|-|chr17:g.29559784:G>T  
XTTEALFVALGAGVTALSHPLLYVKLLIQVGHEPMPPTLGTNVLGRKVLVYLPSSFFTYAKYIVQVDGKIGLFRG  
LSPRLMSNALSTVNRGSMKKVFPDMEQVSNKDDMKTSLKKVVKETS YEEMMQCVSRMLAHPLHVISMRCMV  
QFVGREAKYSGVLSSIGKIFKEEGLLGFVGLIPHLLGDVVFLWGCNLLAHFINAYLVDDSVSDTPGGGLGNDQ  
NPQSQFSQALAIRSYTKFVMGIAVSMLTYPFLLVGDLMVNNCGLRAGLPPYSPVFKSWIHCWKYLSVQGQLFRGSSLLFRRVSSGSCFA  
LE\*

>ENSMUSP00000157035\_c.259:C>A\_p.T87N ENSMUST00000234129.2|Mtch1-  
208|ENSMUSG00000024012|-|chr17:g.29559784:G>T  
XTTEALFVALGAGVTALSHPLLYVKLLIQVGHEPMPPTLGTNVLGRKVLVYLPSSFFTYAKYIVQVDGKIGLFRG  
LSPRLMSNALSTVNRGSMKKVFPDMEQVSNKDDMKTSLKKVVKETS YEEMMQCVSRMLAHPLHVISMRCMV  
QFVGREAKYSGVLSSIGKIFKEEGLLGFVGLIPHLLGDVVFLWGCNLLAHFINAYLVDDSVSDTPGGGLGNDQ  
NPQSQFSQALAIRSYTKFVMGIAVSMLTYPFLLVGDLMVNNCGLRAGLPPYSPVFKSWIHCWKYLSVQGQLFRGSSLLFRRVSSGSCFA  
LE\*

>ENSMUSP00000113021\_c.493:C>A\_p.T165N ENSMUST00000118366.9|Mtch1-  
202|ENSMUSG00000024012|-|chr17:g.29559784:G>T  
MGASDPEVAPWAPGGAAGMAGAGAGARGGAPAGVEARARDPPPAHRAHPRHPRPAAQPSARRMDGGPGAPG  
SGDNAPTTEALFVALGAGVTALSHPLLYVKLLIQVGHEPMPPTLGTNVLGRKVLVYLPSSFFTYAKYIVQVDGKI  
GLFRGLSPRLMSNALSTVNRGSMKKVFPDMEQVSNKDDMKTSLKKVVKETS YEEMMQCVSRMLAHPLHVIS  
MRCMVQFVGREAKYSGVLSSIGKIFKEEGLLGFVGLIPHLLGDVVFLWGCNLLAHFINAYLVDDSVSDTPGG  
LGNDQNPQSQFSQALAIRSYTKFVMGIAVSMLTYPFLLVGDLMVNNCGLRAGLPPYSPVFKSWIHCWKYLSVQGQLFRGSSLLFRRVSS  
GSCFALE\*

>ENSMUSP00000157469\_c.2584:A>G\_p.K862R ENSMUST00000236140.2|Dnah8-  
210|ENSMUSG00000033826|+|chr17:g.30896172:A>G  
MESEEGNAEPPPPSEEAPPVVEEAPPPLPPEDTAPPPEEQAPPPEGDAAPPPTGDAFQLTVEGEAPHPEDP  
KLLSEQGPATSVTDYRSLIPSDDEEVTLPEDDEESGQARVARHRTPRPAQSVLSDGISQSSRRPSKFRRSMTGIP  
NLQETLKEKQARFREARENRMKIGPSHKYIFEVLGKELGLDLVTVVEELILDPCSLDPFTSFFEKGGCKTLKF  
LYQEGEVPGFECGRITIGVPKGGKMMRIYVDNAAPDKLGLCLFVRCRNDVAINSKTIHEDVLFSLDASKG  
LLEGIKHMLKSIFLPAI LATSNGALNQSKQGESEKHIF IETIHRYLASLDDATISIEGTVMKKVDNIDFSK  
LHTFEEVTAASSEM VHQLEEVLMVWYKQIEQVLI ESEQMRKEADDSGPLTELEHWKMSAKFNFI EIQIKG  
SNCKAVINVLNVAHSKLLKNWRDL DARITDSANESKDNVRYLYTLEKVCQPLYNYDLVSMAHGIQNLINAI RM

IHSVSRYYNTSERMTSLFIKVTNQMV TACKAYITDGGTNHVWDQETPAVLKKIQDCIFLFFKEYQASFHKTRKQ
ILESSGEKSFEVSEMYIFGKFEAFCKRLEKITEMITIVQTYALSNSSTIEGIDILGKFKNIYQGIIKKNQYDI
LDRPRTEFDTDFTEFMGKINILEIQIQAFMNSTFGKILSSQQALQLLQRFQKLNIPCLHLEINHTIERILQCY
VAELEFTKKLYLSQKDDPPLARNMPP IAGKILWVRQLFRRINEP INYFFKNSDILSSTEGKAVIRQYNRIAYV
LVEFEVAYHTAWFKEVSQLQYALQATL FVRHPETGKLLVNFDPKILEVVRETCKMIKMRLDVPEQAKNLLKLE
SKLKADKLYLQGLLQYYDDLQCEVPSVFNLMTPKMKKVESVLRQGLTVL TWSSLMLESFFKEVESVLDMFNQ
LLKKNVDLCEMHIDTVLKEIAKTL LLSLSDSGTTKVEDMLTLNETYTKECADILNHKSRHVEEAVKELILIFE
QIYEVKYTGKAASVKEQRKR VVFGSEAEETEGLD FSGSTTMEVDTNDKEDEFKKECKEVEYAFFSHQLLDSLQK
ATRLSLDTMKRRIFVGSQGRRRSEDI VSFIKTEVHLAI PNVVMVPSLDDIQQAINRMIQLTLANGVSRGVAHWGQ
QQVRQIKSFQNNRSGSDQPPASGKPLKKEERSFEETI PARKLKNFYPGVAEHKDISKLVLLLLSSSVNSLRKAA
TEALQDFQKYKTLWIEDRHVKVKEFLANNPSL TEIRSEILHYATLEQEI KELKPIIVVGSLELHTEPMKLALS
IEAKAWKMLLCRYLNEEYK KMSDMI TFINEYLK KLSRPIRDLDDVRFAMEALSCIRDNEIQMDMTLGP IEEA
YGI LNRFEVVKVTKEESEGVDTL RYSFNKLQSKAVSVQGELVKVQPKFKSNLLESVKVFCEDVINFT EAYETEG
PMVFNIP PQEASNRLQIFQANFDLWRKFV TYSSGEQLFGLPVTDYEV LHKTRKELNLLQKLYGLYD TVMGS I
SGYYEILWGDVDIEKINAELQEFQNR CRKLPRALKDWQAF LLDLKKRIDDFSESCPLEMMTNKAMQRHWDR I
SELTGTPFDVESDTFCLRNIMEAPLLKNKDDIEDICISAIKEKDEAKLTQVIENWTYQNSLFAAFKKGK GELL
LKGTESGEIITLMEDSLMVLGSLLSNRYNTPFKKNIQNWVFKLSTSSDIIEEWLIVQNLWVYLEAVFVGGDIA
KQLSQEAKRFQNI DKSWKIMQRAHENPNV I SCCVGDETMGQLLPHLHEQLEVCQKSLTGYLEKRLLPFRFF
FVSDPVLLEILGQASDSHTIQPHLPAVSDNINEVTFHAKDYDRMTAVI SREGEKIMLDT PVMAGPVEIWL LD
LLKVQMSSLHNIIRSAFYQISDSGFLLLPFLNHFP AQVGLLGIQMLWTHDSEALNNAKDDRIMQITNQKFL
DILNLTLSQTT HDLTKFDRVKFETLITIHVHQ RDI FDDLVKMHIKSVTDFEWLQSRFYFKEDLDQTVVSI TD
VDFIYQNEFLGCTDRLVITPLTDRCYITLAQALGMNMGGAPAGPAGTGKTETTTKDMGRCLGKYVVVFNCS DQM
DFRGLGRIFKGLAQSGSWGCFDEFNRIELPVL SVAQQIYIVL TARKERKKQFIFSDGDCVDL NPEFGI FLTM
NPGYAGRQELPENLKI QFRTVAMMVPDRQIIMRVKLASC GFLENVILAQKFYVLYKLC EEQLTKQVHYDFGLR
NILSVLRTLGSQNRKRPEDSELSTVMRGLRDMNLSKLVDEDEPLFSLINDLFPGLQLDSSTYAE LQSAVDNQ
VNLEGLINHPPWNKLVLQLYETS LVRHGLM TLGSPSGKTTVITILMKS LTECGRPHREMRMNPKAITAPQMF
GRLDTATNDKRRIFVGSQGRRRSEDI VSFIKTEVHLAI PNVVMVPSLDDIQQAINRMIQLTLANGVSRGVAHWGQ
LFEVHN IENAS PATVSRMGMYI SSSALS WRPILQAWLKKRSQQEASVFLS LDKVFE DAYTYMKLSLNPKMQ
LLECNYIMQSLN LLEGLIPSKEEGGVSSGDHLHKL FVFGLMWSLGALLELDSREKLEVFLRGHGSKLNLP EIP
KGSQQTMYEFYVTDYGDWEHWNKRIQPYFYPTDSIPEYSSILV PNVNIRTNFLIDTIAKQHKAVLLTGEQGT
AKTVMVKAYLKKYDPEVQLSKSLNFSSATEPMMFQRTIESYVDKRMG STYGP PGGRKMTVFIDDI NMPVIN EW
GDQITNEIVRQMMEMEGMYS LDKPGDFTTIVDVQLIAAMIHPGGGRNDIPQRLKRQFTVFNCTLP SNTSIDKI
FGIIGCGYFDPCRKFRPEICDMVGNLVSVSRVLWQWTKVKMLPTPSKFHYIFNL RDLRSRIWQGM LTVKAE ECS
SIPILLSLFKHECNRV IADRFITPDDEQWFNSQLIRAVEENISPEVAANILPEPYFVDFLRDMPEPTGDEPED
TMFEVPK IYELVPSFEFLSEKLQFYQRQFNEIIRGTSLDLVFFKDAMTHLVKISRIRTS CGNALLVGVGGSG
KQLSKSLASFIAGYQIFQITL TRSYNVSNLIEDLNLYK VAGAEKGITTFIFTDNEIKDEAFLEYLNNLLSSG
EISNLFARDEMDEITQGLISVMKRELPRHPPTFDNLYEYFITRSRKNLHVVLCFSPVGEKFRARS LKFPGLIS
GCTMDWFSRWPKEALIAVASYFLLDYNI VCS IETKRHVVETMGLFHD MVSESCENYFQRYRRRAHVTPKSYLS
FINGYKSIYTDKVKYINEQAERMNIGLDKLM EASEVAKLSQDLAVKEKELAVASIKADEVLA ETVTSAQASA
KVKNEVQEVKDKAQKIVDEIDSEKVKAE TKLEAAKPALEEAEALNTIKPNDIATVRKLAKP PHLIMRIMDCV
LLLFQKKIDPVTMDPEKPCCKPSWGESLKLMSATGFLFSLQQFPKDTINEETVELLQPYFNMDDYTFESAKKV
CGNVAGLLSWTLAMVIFYGINREVLPLKANLAKQEGRLAVANVELGKAQALLDEKQAE LDKVQAKFDAAMKEK
MDLLNDADMCRKKMQAAS TLIDGLS GEKVRWTTQSKFQKQINRLVGDVLLCTGFLSYLGP FNQIFRNYLLKD
QWEL ELKARKIPFTENLNLIAMLVDPPTI GEWGLQGLPGD DLSIQNGIIVTKATRYPLLI DPQTQGTWIKSK
EKENDLQV TSLNHKYFRTHLEDSLSLGRPLLI EDIREELDPALDNVLEKNFIKSGTAFKVKGDK ECDIMDTF
KLYITTKLPNPAFTPEINAKTSVIDFTVTMKGLENQLLRRVILTEKQELESERVKLLEDVTFNKRKMELEDN
LLYKLSATKGLVDDES LIGVLRITKQTAAEVSEKLVHAAETEIKINTAQEEFRPAATRGSILYFLIT EMSM
NIMYQTS LAQFLK LFDQSMARSEKSP LPQKRITNIEYLT YEVFTYSVRGLYENHKFLVLLMTLKI DLQRT
VKHKEFQALIKGGAALDLKACPPKFRWILDMT WLNVLVLSKLPQFAEIMNQISRNEKGWKNWFDKDAPEEEI
IPDGYNDSLDTCRKLLIIRSWCPDRTVFQARKYIADSLEEKYTEPVI LNLEKTWEESDTH TPLICFLSMGSDP
TIQIDALAKKLEKERTISMGQQEVHARKLIQLSMQGGWVLLQ NCHLGLFMEELLEMLMVTETTEDSFRV
WITTEPHDRFPITLLQTSIKFTNEPPQGV RAGLKRTFAGINQD LLDISNLP MWKPMPLYTVAFLHSTVQERRKF
GPLGWNIPYEFNSADFSASVQFIQNH LDECDIKKGVSVSTVRYMIGEVQYGGRVTD DFKRLLNCFARVWFSE
KMFEPNSFCYTYGKIPICKTLDQYFEFIQSLPSLDNPEVFTGLHPNADITYQNTASDVLETITNIQPKESGGG
VGETREAI VYRLSEDMLSKLP PNYVPHEV KARLMKMGHLNSMNI FLRQEI DRMQKVISILRSSLS DLKLAIEG
TIIMSENLRDALDNMYDARI PQLWKRVS WDSSTLGFWFTELLERNAQFSTWIFEGRPNVFWMTGF FNPQGF LT
AMRQEVTRAHKGWALDVTVIHNEVLRQTKEE IITPPAEGVYIYGLYMDGASWDRRNGKLT ESTPKVLF TQLPV
LHIFAINSTAPKDPKLYVCP IYKKPRRTDLTFITVVYLRTVLS PDHWILRGVALLCDIK\*

>ENSMUSP00000158051\_c.2584:A>G\_p.K862R ENSMUST00000235390.2|Dnah8-  
205|ENSMUSG00000033826|+|chr17:g.30896172:A>G  
MESEEGNAEPPPPSEEAPPVVVEEAPPPLPPEDTAPPPPEEQAPPEGDAAPPPTGDAFQLTVEGEAPHPEDP  
KLLSEQGPATSVTDYRSLIPSDVEEVTLPEDDEESGQARVRARHTPRPAQSVLSDGISQSSRRPSKFRRSMTGIP  
NLQETLKEKQARFREARENRMKIGPSHKYIFEVLGKGLGLDLVTVVEELILDPCSLDPFTSFFFEKGGCKTLKF  
LYQEGEVPGFECGRITITGVPKGGKMMRIYVDNAAPDKLGLCLFFVRCRNDVAINSKTIHEDVLFSLDASKG  
LLEGIKHMLKSIIFLPAILATSNWALNQSQKGESEKHIFETIHRYLASLDDATISIEGTVMKKVDNIDFSK  
LHTFEEVTAASSEMVMHQLLEEVLMVWYKQIEQVLIIESEQMRKEADDSGPLTELEHWKRMSAKFNFIIEQIKG  
SNCKAVINVLNVAHSLKLNWRDLARITDSANESKDNVRYLYTLEKVCQPLYNVDLVSMAGIQNLINAIARM  
IHSVSRYYNTSERMTSLFIKVTNQMTACKAYITDGGTNHVWDQETPAVLKKIQDCIFLFKEYQASFHKTRKQ  
ILESSGKSFVSEMYIFGKFEAFCKRLEKITEMITIVQTYALSNSSTIEGIDILGKFKNIYQGIIKKNQYDI  
LDPRRTEFDTDFTEFMGKINILEIQIQAFMNSTFGKILSSQALQLLQRFQKLNIPCLHLEINHTIERILQCY  
VAELEFTKKLYLSQKDDPPLARNMPPIAGKILWVRQLFRRINEPINYFFKNSDILSSTEGKAVIRQYNRIAYV  
LVEFEVAYHTAWFKEVSQLQYALQATLFRVHPETGKLLVNFDPKILEVVRETCKMIKMRDLVPEQAKNLLKLE  
SKLKADKLYLQGLLQYYDDLQCEVPSVFNLMTPKMKKVESVLRQGLTVLTVSSLMLESFFKEVESVLDMFNQ  
LLKKNVDLCEMHIDTVLKEIAKTLILSLSDSGTTKVEDMLTLNETYTKCADILNHKSRHVEEAVKELILIFE  
QIYEVKTYTGKAASVKEQRKRVRVFGSEAEETGLDFESTTMEVDTNDKEDEFKKECKEVEYAFFSHQLLDSLQK  
ATRLSLDTMKRRIIFVGSQGRRRSEDIVSFIKTEVHLAIPNVVMVPSLDDIQQAINRMIQLTLEVSRGVAHWGQ  
QQVRQIKSFQNNRSGSDQPPASGKPLKKEERSFEETIPARKLKNFYPGVAEHKDISKLVLLLSSSVNSLRKAA  
TEALQDFQKYKTLWIEDRHVKVKEFLANNPSLTEIRSEILHYATLEQEKELKPIIVVGSLELHTEPMKLALS  
IEAKAWKMLLCRYLNEEYKMKSDMITFINEYLKLSRPIRDLDDVRFAMEALSCIRDNEIQMDMTLGPTEEA  
YGI LNRFVVKVTKEESEGVDTLRYSFNKLQSKAVSVQGELVKVQPKFKSNLLESVKVFCEDVINFTAYETEG  
PMVNI PPQEAASNLQIFQANFDDLWRKFVITYSSGEQLFGLPVTDYEVHLKTRKELNLLQKLYGLYDVTVMGSI  
SGYYEILWGDVDIEKINAELQEFQNRCKLPRALKDWQAFLLDKKRIDDSESCPLEMMTNKAMQRHWDR  
SELTGTPFDVESDTFCLRNIMEAPLLKNKDDIEDICISAIKEKDEAKLTQVIENWYQNLVFAAFKGGKELL  
LKGTESEGIITLMDLSMLVGLSLLSNRYNTPFKKNIQNWVFKLSTSSDIIEEWLIVQNLVYLEAVFVGGDIA  
KQLPQEAQRKIFMEDSKWIKIMQRAHENPNVISCCVGDTEMGQLLPHLHEQLEVCQKSLTGYLEKRLLPFRFF  
FVSDPVLLEILGQASDSHTIQPHLPAVSDNINEVTFHAKDYDRMTAVISREGEKIMLDTPVMAKGPVEIWLDD  
LLKVQMSLHNIIRSAFYQISDSGFLLLPFLNHFPQVGLLGIQMLWTHDSEALNNAKDDRIMQITNQKFL  
DILNLTLSQTTDHLTKFDRVKFETLITIHVHQDIFDDLVKMHIKSVTDFEWLQSRFYFKEDLDQTVVSI TD  
VDFIYQNEFLGCTDRLVITPLTDRCYITLAQALGMNMGAPAGPAGTGKTETTKDMGRCLGKYVVVFNCSQDQ  
DFRGLGRIFKGLAQSGSWGCFDEFNRIELPVLVAAQQIYIVLTARKERKKQFIFSDGDCVDLNEPFGIFLTM  
NPGYAGRQELPENLKIQFRVAMMVPDRQIMRVKLASCGLFENVILAQKFYVLYKLCSEEQLTKQVHYDFGLR  
NILSVLRTLGSQKRARPEDELSVTMRGLRDMNLSKLVDEDEPLFSLINDLFPGLQLDSSTYAELOSQAVDNQ  
VNLEGLINHPWNLLKVLQLYETSLSVRHGLMTLGPSSGKTTVITILMKSLETECGRPHREMRMNPKAITAPQMF  
GRLDTATNDWTDGIFSTLWRKTLKAKKGENIFLILDGVPDAIWIENLNSVLDDNKTLTLANGDRI PMAPTCKL  
LFEVHNIENASPATVSRMGMYI SSSALSWRPILQAWLKKRSQQEASVFLSLYDKVFEFDAYTYMKLSLNPKMQ  
LLECNYIMQSLNLEGLIPSKKEGGVSSGDHLHKL FVFGMLWSLGALLELDSREKLEVFRLRHGSKLNLP EIP  
KGSQQTMYEFYVTDYGDWEHWNKRIQPYFYPTDSIPEYSSILVNVNIRTNFLIDTIAKQHKAVLLTGEQGT  
AKTVMVKAYLKKYDPEVQLSKSLNFSSATEPMMFQRTIESYVDKRMGSTYGPGRKMTVFIDDINMPVINW  
GDQITNEIVRQMMEMEGMYSLDKPGDFTTIVDVQLIAAMIHPGGGRNDIPQRLKRQFTVFNCTLPNNTSIDKI  
FGIIGCGYFDPCRKFRPEICDMVGNLVSRSRVLWQWTKVKMLPTPSKFHYIFNLRDLSRIWQGM LTVKAECS  
SIPILLSLFKHECNRVIADRFITPDDEQWFNSQLIRAVEENISPEVAANILPEPYFVDFLRDMPEPTGDEPED  
TMFEVPKIYELVPSFEFLSEKLQFYQRQFNEIIRGTSLDLVFFKDAMTHLVKISRIIRTSCGNALLVGVGGSG  
KQSLSKLASFIAGYQIFQITLTRYNVSNLIEDLNKLYKVGAEKGTTFIFTDNEIKDEAFLEYLNNLLSSG  
EISNLFARDEMEITQGLISVMKRELPRHPPTFDNLYEYFITRSRKNLHVVLCFSPVGEKFRARS LKFPGLIS  
GCTMDWFSRWPKEALIAVASYFLLDYNI VCS IETKRHVETMGLFHDVSESCENYFQYRRRAHVTPKSYLS  
FINGYKSIYTDKVKYINEQAERMNIGLDKLM EASESVAKLSQDLAVKEKELAVASIKADEVLA E VTSQAQASA  
KVKNEVQEVKDKAQKIVDEIDSEKVKAE TKLEAAKPALEEAEALNTIKPNDIATVRKLAKPHLIMRIMDCV  
LLLFQKKIDPVTMDPEKPCCKPSWGESLKLMSATGFLFSLQFPKDTINEETVELLQPYFNMDYTFESAKKV  
CGNVAGLLSWTLAMVI FYGINREVLPLKANLAKQEGRLAVANVELGKAQALLDEKQAE LDKVQAKFDAAMKEK  
MDLLNDADMCRKKMQAAS TLIDGLS GEKVRWTQOSKEFKTQINRLVGDVLLCTGFLSYLGPFNQIFRNYLLKD  
QWELELKARKIPFTENLNLIAMLVDPPTIGEWGLQGLPGDLSIQNGIIVTKATRYPLLI DPQTQGTWIKSK  
EKENDLQVTSLNHKYFRTHLEDSLSLGRPLLI EDIREELDPALDNVLEKNFIKSGTAFKVKVGDKECDIMDTF  
KLYITTKLPNPAFTPEINAKTSVIDFTVTMKGLENQLRRVILTEKQELESERVKLLEDVTFNKRKMKELDN  
LLYKLSATKGLVDDES LIGVLRITKQTAAEVSEKLVHAAETEIKINTAQEEFRPAATRGSILYFLITEMSMV  
NIMYQTS LAQFLKLFQDSMARSEKSPLPQKRITNIEYLYEYVFTYSVRGLYENHKFLVLLMTLKI DLQRT  
VKHKEFQALIKGGAALDLKACPPKFRWILDMTWNLVELSKLPQFAEIMNQISRNEKGWKNWFDKDAPEEEI

IPDGYNDSLDTCRKLLLRWCPCDRTVFQARKYIADSLEEKYTEPVI LNLEKTWEESDTHTP LICFLSMGSDP  
TIQIDALAKKLEKERTISMGQGGQEVHARKLIQLSMQGGWVLLQNLCHLGLFMEELLEMLMVTETTEDSFRV  
WITTEPHDRFPITLLQTSIKFTNEPPOGVRAGLKRTRFAGINQDLLDI SNLPMWKPMLYTVAFHSTVQERRKF  
GPLGWNIPYEFNSADFSASVQFIQNLHLEDCIKKGVSWSTVRYMIGEVQYGGRTVDDFDKRLNCFARVWFSE  
KMFEPSCFYTYGKIPICKTLDQYFEFIQSLPSLDNPEVFGFLHPNADITYQSNASDVLETITNIQPKESGGG  
VGETREAIYVRLSEDMLSKLPNYPVPEVKARLMKMGHLNSMNI FLRQEI DRMQKVISILRSSSLDKLAIIEG  
TIIMSENLRDALDNMYDARI PQLWKRVSWSSTLGFWFTELLERNAQFSTWIFEGRPNVFVMTGFFNPQGF LT  
AMRQEVTRAHKGWALDVTVIHNEVLRQTKEEII TTPAEGVYIYGLYMDGASWDRRNGKLTTESTPKVLF TQLPV  
LHIFAINSTAPKDPKLYVCPIYKPRRTDLTFITVVYLRVTVLSPDHWILRGVALLCDIK\*  
>ENSMUSP00000127878\_c.2584:A>G\_p.K862R ENSMUST00000170651.2|Dnah8-  
201|ENSMUSG00000033826|+|chr17:g.30896172:A>G  
MESEEGNAEPPPPSEEAPPVVEEAPPPLPPEDTAPPPPEEQAPPEGDAAPPPTGDAFQLTVEGEAPHPEDP  
KLLSEQGPATSVTDYRSLIP SDEEVTLPEDDEESGQARVRARHTPRPAQSVLSDGISQSSRRPSKFRRSMTGIP  
NLQETLKEKQARFREARENRMKIGPSHKYIFEVLGEKLGDLVTVVEELI LDPCSLDPFTSFFEKGGCKTLKF  
LYQEGEVPGFECGRITITGVPKGGKMMRIYVDNAAPDKLGLCLFFVRCRNDVAINSKTIHEDVLF SFLDASKG  
LLEGIKHMLKSI FLPAI LATSNGALNQSQKGESEKHIF IETI HRYLASLDDATISIEGTVM LKKVDNIDFSK  
LHTFEEVTAASSEMVMHQLEEVLMVWYKQIEQVLI ESEQMRKEADDSGPLETELEHWKRMSAKFNFI IEQIKG  
SNCKAVINVLNVASHKLLKNWRDL DARI TDSANESKDNVRYLYLEKVCQPLYNLDLVSMAGHICQNLINAIMR  
IHSVSRYYNTSERMTSLFIKVTNQMTACKAYITDGGTNHVWDQETPAVLKKI QDCIFL FKEYQASFHKTRKQ  
ILESSGEKSFEVSEMYIFGKFEAFCKRLEKITEMITIVQTYALSNSSTIEGIDILGKFKNIYQGIKKNQYDI  
LDPRRTEFDTDFTEFMGKINILEIQIQAFMNSTFGKILSSQALQLLQRFQKLNIPCLHLEINHTIERILQCY  
VAELEFTKKLYLSQKDDPPLARNMPP IAGKILWVRQLFRRINEP INYFFKNSDILSSTEGKAVIRQYNRIAYV  
LVEFEVAYHTAWFKEVSQLQYALQATL FVRHPETGKLLVNFDPKILEVVRETCKMIKMRLDVPEQAKNLLKLE  
SKLKADKLYLQGLLQYYDDLQCEVPSVFNLMTPKMKKVESVLRQGLTVL TWSSLMLESFFKEVESVLDMFNQ  
LLKKNVDLCEMHIDTVLKEIAKTL LLSLSDSGTTKVEDMLTLNETYTKECADILNHKSRHVEEAVKELILIFE  
QIYEVKYDTGKAAKSVKEQRKR RVVFGSEAEETGLDFESTMEVDTNDKEDEFKKECKEYAFVFSHQLLDSLQK  
ATRLSLDNTMKRRI FVSGQRRRSEDI VSFIKTEVHLAIPNVVMVPSLDDIQQAINRMIQLTLEVSRGVAHWGQ  
QQVRQIKSFQNNRSGSDQPPASGKPLKKEERSFEETI PARKLKNFYPGVAEHKDISKLVLLLSSSVNSLRKAA  
TEALQDFQKYKTLWIEDRHVKVKEFLANNPSL TEIRSEILHYATLEQEIKELKPIIVVGSLELHTEPMKLALS  
IEAKAWKMLLCRYLNEEYKMKSDMITF INEYLKLSRPIRDLDDVRFAMEALSCIRDNEIQMDMTLGP IEEA  
YGI LNRFEVVKVTKEESEGVDTLRY SFNKLQSKAVSVQGELVKVQPKFKSNLLESVKVFCEDVINFTAYETEG  
PMVNI PPQEA SNRLQIFQANFDDLWRKFV TYSSGQLFGLPVTDYEV LHKTRKELNLLQKLYGLYDTVMGSI  
SGYYEILWGDVDIEKINAELQEFQNRCKLPRALKDWQAF LDKKRIDDSESCPLEMMTNKAMQRHWDR I  
SELTGTPFDVESDTFCLRNIMEAPLLKNKDDIEDICISAIKEKDEAKLTQVIENWTYQNL SFAAFKKGK GELL  
LKGTESEGEIITLMEDSLMVLGSLLSNRYNTPFKKNIQNWVFKLSTSSDIIEEWLIVQNLWVYLEAVFVGGDIA  
KQLPQEA KRFWIKIMQRAHENPNVISCCVGDETMGQLLPHLHEQLEVCQKSLTWYLEKKRLLFP RFF  
FVSDPVLEILGQASDSHTIQPHLPAVSDNINEVTFHAKDYDRMTAVISREGEKIMLDT PVMAGPVEIWLLD  
LLKVQMSSLHNIIRSAFYQISDSGFLLLPFLNHFP AQVGLLGIQMLWTHDSEALNNAKDDRIMQITNQKFL  
DILNTLISQTT HDLTKFDRVKFETLITIHVHQ RDI FDDLVMHIKSVTDFEWLQSRFYFKEDLDQTVVSI TD  
VDFIYQNEFLGCTDRLVITPLTDRCYITLAQALGMNMGGAPAGPAGTGKTETTTKDMGRCLGKYVVVFNCS DQM  
DFRGLGRI FKGLAQSGSWGCFDEFNRIELPVLSVAAQIYIVLTARKERKKQFIFSDGDCVDLNPEFGIFLTM  
NPGYAGRQELPENLKI QFRTVAMMVPDRQIMRVKLA SCGFLENVILAQKFYVLYKLCEEQLTKQVHYDFGLR  
NILSVLRTLGSQKRARPEDESEL TVMRGLRDMNLSKLVDEDEPLF LSLINDLFPGLQLDSSTYAE LQSAVDNQ  
VNLEGLINHPWNLKLVLQLYETS LVRHGLMTLGP SSGKTTVITILMKS LTECGRPHREMRMNPKAITAPQMF  
GRLDTATNDWTDGIFSTLWRKTLKAKKGENIFLILDGPVDAIWIENLNSVLDNKNLTLT LANGDRI PMAPTCKL  
LFEVHNIENAS PATVSRMGMVYISSALS WRPILQAWLKKRSQQEASVFLS LDKVFE DAYTYMKLSLNPKMQ  
LLECNYIMQSLNLEGLIPSKEEGGVSSGDHLHKL FVFGLMWSLGALLELDSREKLEVF LRGHGSKLNLP EIP  
KGSQQTMYEFYVTDYGDWEHWNKRIQPYFYPTDSIPEYSSILV PNVNIRTNFLIDTIAKQHKAVLLTGEQGT  
AKTVMVKAYLKKYDPEVQLSKSLNFSSATEPMMFQRTIESYVDKRMGSTYGP PGRKMTVFIDDINMPVIN EW  
GDQITNEIVRQMMEMEGMYS LDKPGDFTTIVDVQLIAAMIHPGGGRNDIPQRLKRQFTVFNCTLP SNTSIDKI  
FGIIGCGYFDPCRKFRPEICDMVGNLVSVSRVLWQWTKVKMLPTPSKFHYIFNLRLSRIWQGM LTVKAE ECS  
SIPILLSLFKHECNRVIADRFITPDDEQWFNSQLIRAVEENISPEVAANILPEPYFVDFLRDMPEPTGDEPED  
TMFEVPKIYELVPSFEFLSEKLQFYQRQFNEIIRGTSLDLVFFKDAMTHLVKISRIIRTS CGNALLVGVGGSG  
KQSLSKLASFIAGYQIFQITLTRSYNVSNLIEDLNKLYK VAGAEKGITFI FTDNEIKDEAFLEYLNLLSSG  
EISNLFARDEMEITQGLISVMKRELPRHPPTFDNLYEYFITRSRKNLHVVLCFSPVGEKFRARS LKFPGLIS  
GCTMDWFSRWPKEALIAVAS YFLLDYNI VCS IETKRHVETMGLFHD MVSESCENYFQRYRRRAHVTPKSYLS  
FINGYKSIYTDKVKYINEQAERMNIGLDKLMEASESVAKLSQDLAVKEKELAVASIKADEVLAEVTVSAQASA  
KVKNEVQEVKDKAQKIVDEIDSEKVKAE TKLEAAKPALEEAEALNTIKPNDIATVRKLAKP PHLIMRIMDCV



LLLFQKKIDPVTMDPEKPCCKPSWGESLKLMSATGFLFSLQQFPKDTINEETVELLQPYFNMDDYTFESAKKV  
 CGNVAGLLSWTLAMVIFYGINREVLPLKANLAKQEGRLAVANVELGKAQALLDEKQAELEDKVKQAKFDAAMKEK  
 MDLLNDADMCRRKMQAASSTLIDGLSGEKVRWTQOSKEFKTQINRLVGDVLLCTGFLSYLGFNFQIFRNYLLKD  
 QWELELKARKIPFTENLNLIAMLVDPPTIGEWGLQGLPGDDLSIQNGIIVTKATRYPLLDIPQTQGKTWIKSK  
 EKENDLQVTSLNHKYFRTHLEDSLSLGRPLLIEDIREDLDPALDNVLEKNFIKSGTAFKVKVGDKECDIMDTF  
 KLYITTKLPNPAFTPEINAKTSVIDFTVTMKGLENQLLRVILTEKQELESERVKLLEDVTFNKRKMKLEEDN  
 LLYKLSATKGLVDDESLIGVLRITKQTAAEVSEKLVHAAETEIKINTAQEEFRPAATRGSILYFLITEMSMV  
 NIMYQTSLAQFLKLFQSMARSEKSPFPQKRITNIEYLTVEVFTYSVRGLYENHKFLFVLLMTLKI DLQRT  
 VKHKEFQALIKGGAALDLKACPPKPFRIWLDMTWLNVLVSKLPQFAEIMNQISRNEKGWKNWFDKDAPEEEI  
 IPDGYNDSLDTCRKLLLRWCPRDRTVFQARKYIADSLEEKYTEPVI LNLEKTWEESDTHTP LICFLSMGSDP  
 TIQIDALAKKLEKCRITISMGQGEVHARKLIQLSMQGGWVLLQNLCHLGLFMEELLEMLMVTETTEDSFRV  
 WITTEPHDRFPITLLQTSIKFTNEPPQGVRAGLKRTFAGINQDILLISNLP MWKPMPLYTVAFLHSTVQERRKF  
 GPLGWNIPYEFNSADFSASVQFIQNLHLEDCIKKGVSWSTVRYMIGEVQYGGVRTDDDFKRLNLCFARVWFSE  
 KMFEPSCFYTYGKIPICKTLDQYFEFIQSLPSLDNPEVFGHLHPNADITYQSN TASDVLETITNIQPKESGGG  
 VGETREAI VYRLSEDMLSKLPNYPVHEVKARLMKMGHLNSMNI FLRQEI DRMQKVISILRSSLSDLKLAIEG  
 TIIMSENLRDALDNMYDARI PQLWKRVSWSSTLGFWFTELLERNAQFSTWIFEGRPNVFWMGTGFNPQGF LT  
 AMRQEVTRAHKGWALDVTIHNELRQTKEEITTPPAEGVYIYGLYMDGASWDRRNGKLTTESTPKVLF TQLPV  
 LHFIFAINSTAPKDPKLYCPIYKPRRTDLTFITVVYLRVTLSPDHWILRGVALLCDIK\*  
 >ENSMUSP00000157469\_c.2584:A>T\_p.K862M ENSMUST00000236140.2|Dnah8-  
 210|ENSMUSG00000033826|+|chr17:g.30896172:A>T  
 MESEEGNAEPPPPSEEAPPVVEEAPPPLPPEDTAPPPPEEQAPPEGDAAPPPTGDAFQLTVEGEAPHPEDP  
 KLLSEQGPATSVTDYRSLIP SDEEVTLPEDDEESGARVRARHTPRPAQSVLSDGISQSSRRPSKFRRSMTGIP  
 NLQETLKEKQARFREARENKMKIGPSHKYIFEVLGEKLGDLVTVVEELI LDCPSLDPFTSFFFEKGGCKTLKF  
 LYQEGEVPGFECGRITITGVPKGGKMMRIYVDNAAPDKLGLCLFFVRCRNDVAINSKTIHEDVLF SFLDASKG  
 LLEGIKHMLKSI FLPAI LATS NWGALNQS KQGESEKHIF IETIHRYLASLDDATISIEGTVM LKKVDNIDFSK  
 LHTFEVTAANASSSEM VHQLEEVLMVWYKQIEQVLI ESEQMRKEADDSGPLTELEHWKRMSAKNFNIEIQK  
 SNCKAVINVLNVAHSKLLKNWRDLDARITDSANESKDNVRYLYLEKVCQPLYNLDVSMAGIQLNINAIRM  
 IHSVSRYYNTSERMTSLFIKVTNQMTACKAYITDGGTNHVWDQETPAVLKKI QDCIFLFKEYQAS FHKTRKQ  
 ILESSGEKSFEVSEMYIFGKFEAFCKRLEKITEMITIVQTYALS NSTIEGIDILGIFKNIYQGIKKNQYDI  
 LDPRRTEFD TDFTEFMGKINILEIQIQAFMNSTFGKILSSQQALQLLQRFQKLNIPCLHLEINHTIERILQCY  
 VAELEFTKKLYLSQKDDPPLARNMPP IAGKILWVRQLFRRINEP INYFFKNSDILSSTEGKAVIRQYNRIAYV  
 LVEFEVAYHTAWFKEVSQLQYALQATL FVRHPETGKLLVNFDPKILEVVRETCKMIKMMLDVPEQAKNLLKLE  
 SKLKADKLYLQGLLQYYDDLQCEVPSVFNLMTPKMKKVESVLRQGLTVL TWSSLMLESFFKEVESVLDMFNQ  
 LLKKNVDLCEMHIDTVLKEIAKTL LLSLSDSGTTKVEDMLTLNETYTKECADILNHKSRHVEEAVKELILIFE  
 QIYEVKYTGKAASVKEQRKR VVFGSEAEETEGLDFESTMEVDTNDKEDEFKKECKEYVAFFSHQLLDSLQK  
 ATRLSDLTMRRI FVGSQGRRRSEDI VSFIKTEVHLAI PNVVMVPSLDDIQQAINRMIQLTLEVSRGVAHWGQ  
 QQVRQIKSFQNNRSGSDQPPASGKPLKKEERSFEETI PARKLKNFYPGVAEHKDISKLVLLLSSSVNSLRKAA  
 TEALQDFQKYKTLWIEDRHVKVKEFLANNPSL TEIRSEILHYATLEQEIKELKPIIVVGSLELHTEPMLKALS  
 IEAKAWKMLLCRYLNEEYK KMSDMI TFINEYLK KLSRPI RDLDDVRFAMEALSCIRDNEIQMDMTLGP IEEA  
 YGILNRFVVKVTKEESEGVDTLRY SFNKLQSKAVSVQGELVKVQPKFKSNLLESVKVFCEDVINFT EAYETEG  
 PMVNI PPQEASNRLQIFQANFDDLWRKFVTYSSGEQLFGLPVTDYEV LHKTRKELNLLQKLYGLYDTVMGSI  
 SGYYEILWGDVDIEKINAELQEFQNR CRKLPRALKDWQAF LLDLKKRIDDFSESCPLEMMTNKAMQRHWDR I  
 SELTGTPFDVESDTFCLRNIMEAPLLKNKDDIEDICISAIKEKDIEAKLTQVIENWTYQNL SFAAFKGGK GELL  
 LKGTESGEIITLMEDSLMVLGSLLSNRYNTPFKKNIQNWVFKLSTSSDIIEEWLIVQNLWVYLEAVFVGGDIA  
 KQLPQEA KRFNIDKSWIKIMQRAHENPNVISCCVGDNMGQLLPHLHEQLEVCQKSLTGYLEKKRLLFPRFF  
 FVSDPVLLEILGQASDSHTIQPHLPAVSDNINEVTFHAKDYDRMTAVISREGEKIMLDT PVMAGPVEIWL LD  
 LLKVQMSSLHNIIRSAFYQISDSGFLLLPFLNHFP AQVGLLGIQMLWTHDSEALNNAKDDR KIMQITNQKFL  
 DILNTLISQTT HDLTKFDRVKFETLITIHVHQ RDI FDDLVKMH IKSVDTFEWLKQSRFYFKEDLDQTVV SITD  
 VDFIYQNEFLGCTDRLVITPLTDRCYITLAQALGMNMGGAPAGPAGTGKTETTKDMGRCLGKYVVVFNCS DQM  
 DFRGLGRI FKGLAQSGSWGCFDEFNRIELPVL SVAQQIYIVL TARKERKKQFIFSDGDCVDLNEPFGIFLTM  
 NPGYAGRQELPENLKI QFRTVAMMVPDRQIMRVKLA SCGFLENVILAQKFYVLYKLC EEQLTKQVHYDFGLR  
 NILSVLRTLGSQKRARPEDSELSTVMRGLRDMNLSKLVDEDEPLFSLINDLFPGLQLDSSTYAE LQSAVDNQ  
 VNLEGLINHPWNLLKVLQLYETS LVRHGLMTLFLGPSGSDKTTVITILMKS LTECGRPHREMRMNPKAITAPQMF  
 GRLDTATNDWTDGIFSTLWRKTLKAKKGENIFLILDGPVDAIWIENLNSVLDNKTLLT LANGDRI PMAPTKCL  
 LFEVHN IENASPATVSRMGMVYISSSALS WRPI LQAWLKKRSQQEASVFLS LYDKVFEDAYTYMKLSINPKMQ  
 LLECNYIMQSLNLEGLIPSKEEGGVSSGDHLHKL FVFGLMWSLGALLELDSREKLEVF LRGHGSKLNLP EIP  
 KGSQQTMYEFYVTDYGDWEHWNKRIQPYFYPTDSIPEYSSILV PNVNIRTNFLIDTIAKQHKAVLLTGEQGT  
 AKTVMVKAYLKKYDPEVQLSKSLNFSSATEPMMFQRTIESYVDKRMGSTYGP PGRKMTVFID DINMPVINEW

GDQITNEIVRQMMEMEGMYSLDKPGDFTTIVDVQLIAAMIHPGGGRNDIPQRLKRQFTVFNCTLPSNTSIDKI  
FGIIGCGYFDPCRKRFRPEICDMVGNLVSRSRVLWQWTKVKMLPTPSKFHYIFNLRDLSRIWQGM LTVKAECS  
SIPILLSLFKHECNRVIADRFITPDDEQWFNSQLIRAVEENISPEVAANILPEPYFVDFLRDMPEPTGDEPED  
TMFEVPKIYELVPSFEFLSEKLFYQRFNEIIRGTSLDLVFFKDAMTHLVKISRIIRTSCGNALLVGVGGSG  
KQSLSKLASFIAGYQIFQITLRSYNVSNLIEDLKNLYKVAGAEKGITTFIFTDNEIKDEAFLEYLNNLLSSG  
EISNLFARDEMDEITQGLISVMKRELPRHPPTFDNLYEYFITRSRKNLHVVLFCFSPVGEKFRARSLKFPGLIS  
GCTMDWFSRWPKEALIAVASYFLLDYNIVCSIETKRHVETMGLFHDVSESCENYFQRYRRRAHVTPKSYLS  
FINGYKSIYTDKVKYINEQAERMNIGLDKLEMEASESVAKLSQDLAVKEKELAVASIKADEVLAEVTVSAQASA  
KVKNEVQEVKDKAQKIVDEIDSEKVKAEKLEAAKPALEEAALNTIKPNDIATVRKLAQPPHLMRIMDCV  
LLLFQKKIDPVTMDPEKPCCKPSWGESLKLMSATGFLFSLQQFPKDTINEETVELLQPYFNMDDYTFESAKKV  
CGNVAGLLSWTLAMVIFYGINREVLPLKANLAKQEGRLAVANVELGKAQALLDEKQAEKLVQAKFDAAMKEK  
MDLLNDADMCRKKMQAAS TLIDGLSGEKVRWTQOSKEFKTQINRLVGDVLLCTGFLSYLGFNFQIFRNYLLKD  
QWELELKARKIPFTENLNLIAMLVDPPTIGEWGLQGLPGDDLSIQNGIIVTKATRYPLLDIPQTQGTWIKSK  
EKENDLQVTSLNHKYFRTHLEDSLGRPLIEDIREELDPALDNVLEKNFIKSGTAFKVKVGDKECDIMDTF  
KLYITTKLPNPAFTPEINAKTSVIDFTVTMKGLENQLLRVILTEKQELESERVKLEEDVTFNKRKMELEDN  
LLYKLSATKGLVDDESLIGVLRITKQTAAEVSEKLVHVAETEIKINTAQEEFRPAATRGSILYFLITMSMV  
NIMYQTSLAQFLKLFQSMARSEKSPFPQKRITNIIEYLTYEVFTYSVRGLYENHKFLFVLLMTLKI DLQRGT  
VKHKEFQALIKGGAALDLKACPPKPFWRWILDMTWLNVLVELSKLPQFAEIMNQISRNEKGVKNWFDKDAPEEEI  
IPDGYNDSLDTCRKLLLRWCPCDRTVFQARKYIADSLEEKYTEPVI LNLEKTWEESDHTHTPLICFLSMGSDP  
TIQIDALAKKLEKCRITISMGQGEVHARKLIQLSMQGGWVLLQNLCHLGFMEELLEMLMVTETTEDSFRV  
WITTEPHDRFPITLLQTSIKFTNEPQGVRAGLKRTFAGINQDLDLISNLP MWKPMPLYTVAFLHSTVQERRKF  
GPLGWNIPYEFNSADFSASVQFIQNLHDECDIKKGVSWSTVR YMIGEVQYGGVRTDDFDKRLNLCFARVWFSE  
KMFEPSCFYTGKIPICKTLDQYFEFIQSLPSLDNPEVFGHLNADITYQSNTASDVLETITNIQPKESGGG  
VGETREAI VYRLSEDMLSKLPNYPVPEVKARLMKMGHLNSMNI FLRQEI DRMQKVISILRSSLSDLKLAIEG  
TIIMSENLRDALDNMYDARI PQLWKRVSWSSTLGFWFTELLERNAQFSTWIFEGRPNVFWMGTGFNPQGF LT  
AMRQEVINSTRAHKGDALDVTI HNEVLRQTKEEITPPAEVYIYGLYMDGASWDRRNGKLETESTPKVLF TQLPV  
LHIFAINSTAPKDPKLYVCPIYKPRRTDLTFITVYLRVTLSPDHWILRGVALLCDIK\*

>ENSMUSP00000158051\_c.2584:A>T\_p.K862M ENSMUST00000235390.2|Dnah8-  
205|ENSMUSG00000033826|+|chr17:g.30896172:A>T

MESEEGNAEPPPPSEEAPPVVEEAPPPLPPEDTAPPPPEEQAPPPEGDAAPPPTGD AFQLTVEGEAPHPEDP  
KLLSEQGPATSVTDYRSLIPSD EEVTLPEDEESGARVRARHTPRPAQSVLSDGISQSSRRPSKFRRSMTGIP  
NLQETLKEKQARFREARENKMKIGPSHKYIFEVLGEKGLDLVTV EELILDCPSLDPFTSFFFEKGGCKTLKF  
LYQEGEVPGFECGRITITGVKGGKMMRIYVDNAAPDKLGLCLFFVRCRNDVAINSKTIHEDVLF SFLDASKG  
LLEGIKHMLKSI FLPAI LATS NWGALNQS KQGESEKHIF IETIHRYLASLDDATISIEGTVM LKKVDNIDFSK  
LHTFEEVTAASSEMVMHQLEEVLMVWYKQIEQVLI ESEQMRKEADDSGPLTELEHWKRMSAKFNFI IEQIKG  
SNCKAVINVLNVASHKLLKNWRDLDARITDSANESKDNVRYLYLEKVCQPLYN YDLVSMAGHIQNLINAIRM  
IHSVSRYYNTSERMTSLFIKVTNQMTACKAYITDGGTNHVWDQETPAVLKKI QDCIFL FKEYQASFHKTRKQ  
ILESSGEKSFEVSEMYIFGKFEAFCKRLEKITEMITIVQTY SALSNSTIEGIDILG IKFKNIYQGIKKNQYDI  
LDRRTEFD TDFTEFMGKINILEIQIQA FMNSTFGKILSSQQALQLLQRFQKLNIPCLHLEINHTIERILQCY  
VAELEFTKKLYLSQKDDPPLARNMPPIAGKILWVRQLFR RINEP INYFFKNSDILSSTEGKAVIRQYNR IAYV  
LVEFEVAYHTAWFKEVSQLQYALQATL FVRHPETGKLLVNFDPKILEVVRET KCMIKMMLDVPEQAKNLLKLE  
SKLKADKLYLQGLLQY YDDLQCEVPSVFNLMTPKMKKVESVLRQGLTVL TWSSLMLESFFKEVESVLD MFNQ  
LLKKVNDLCEMHIDTVLKEIAKTL LISLSDSGTTKVEDMLTLNETYTKCADILNHKSRHVEEAVKELILIFE  
QIYEVKYTGKAAKSVKEQRKR VVFGSEAEETEGLDFESTMEVDTNDKED EFKKECKEYVAF FSHQLLDSLQK  
ATRLSLDTMKRRIFVGSQGRRRSEDI VSFIKTEVHLAIPNVVMVPSLDDIQQAINRMIQLTLEVSRGV AHWGQ  
QQVRQIKSFQNNRSGSDQPPASGKPLKKEERSFEETI PARKLKNFYPGVAEHKDISKLVLLSSSVNSLRKAA  
TEALQDFQKYKTLWIEDRHVKVKEFLANNPSL TEIRSEILHYATLEQEI KELKPIIVVGSLELHTEPMKLALS  
IEAKAWKMLLCRYLNEEYK KMSDMI TFINEYLK KLSRPIRDLDDVRFAMEALSCIRDNEIQMDMTLGP IEEA  
YGILNRFVVKVTKEESEGVDTLRY SFNKLQSKAVSVQGELVKVQPKFKSNLLESVKVFCEDVINFT EAYETEG  
PMVNI PPQEASNLQIFQANFDDLWRKFV TYSSGEQLFGLPVTDYEV LHKTRKELNLLQKLYGLYD TVMGS I  
SGYYEILWGDVDIEKINAELQEFQNR CRKLPRALKDWQAF LDKKRIDD FSESCPLEMMTNKAMQRHWDR I  
SELTGTPFDVESDTFCLRNIMEAPLLKNKDDIEDICISAIKEK D IEAKLTQVIENWTYQNL SFAAFKKG GELL  
LKGTESEGIITLMEDSLMVLGSLSNRYNTPFKCNQINQWVFKLSTSSDIIEEWLIVQNLWVYLEAVFVGGDIA  
KQLPQEA KRQNI DKS WIKIMQRAHENPNVISCCVGD ETMGQLLPHLHEQLEVCQKSLTGYLEKKRLLFPRFF  
FVSDPVLLEILGQASDSHTIQPHLPAVSDNINEVTFHAKDYDRMTAVI SREGKIMLDTPVMAKGPVEIWL LD  
LLKVQMSLSLHNIIRSAFYQISDSGFLLLPFLNHFP AQVGLLGIQMLWTHDSEALNNAKDDR KIMQITNQKFL  
DILNTLISQTT HDLTKFDRVKFETLITIHVHQ RDI FDDLVKMH IKSVDTFEWLKQSRFYFKEDLDQTVV SITD  
VDFIYQNEFLGCTDRLVITPLTDRCYITLAQALGMNMGGAPAGPAGTGKTETTKDMGRCLGKYVVVFNCS DQM

DFRGLGRI FKGLAQSGSWGCFDEFNRIELPVLVSAQQIYIVLTARKERKKQFIFSDGDCVDLNPFGIFLTM  
 NPGYAGRQELPENLKIQFRTVAMMVPDRQIIMRVKLASCGLFENVILAQKFYVLYKLCEEQLTKQVHYDFGLR  
 NILSVLRTLGSQKRARPEDSELSTVMRGLRDMNLSKLVDEDEPLFSLINDLFPGLQLDSSTYAELOQSAVDNQ  
 VNLEGLINHPPWNLKLVQLYETSLVRHGLMTLGPSSGSKTTVITILMKSLTECGRPHREMRMNPKAITAPQMF  
 GRLDATANDWTGIFSTLWRKTLKAKKGENIFLILDGPVDAIWIENLNSVLDNKTTLTLANGDRI PMAPTCKL  
 LFEVHNINENASPATVSRMGMYISSALSWRPILQAWLKKRSQQEASVFLSLYDKVFEDAYTYMKLSLNPQM  
 LLECNYIMQSLNLEGLIPSKKEGGVSSGDHLHKLFFVGLMWSLGALELDSREKLEVFRLRGHSGKLNLP  
 KGSQQTMIEFYVTDYGDWEHWNKRIQPYFYPTDSIPEYSSILVNVNIRTNFLIDTIAKQHKAVLLTGEQGT  
 AKTVMVKAYLKKYDPEVQLSKSLNFSSATEPMMFQRTIESYVDKRMGSTYGPPEGGRKMTVFIDINMPVIN  
 GDQITNEIVRQMEMEGMYSLDKPGDFTTIVDVQLIAAMIHPGGGRNDIPQRLKRQFTVFNCTLPSNTS  
 IDKIFGIIGCGYFDPCRKFRPEICDMVGNLVSRSRVLWQWTKVKMLPTPSKFHYIFNLRDLRSRIWQGLTVKAE  
 ECSIPILLSLFKHECNRVIAADRFTIPDDEQWFNSQLIRAVEENISPEVAANILPEPYFVDFLRDMPEPTG  
 DEPEDTMFEVPKIYELVPSFEFLSEKLFYQRFNEIIRGTSLDLVFFKDAMTHLVKISRIIRTSCGNALLVGV  
 GSGKQSLSKLASFIAGYQIFQITLRSYNVSNLIEDLKNLYKVAGAEKGITFTIFTDNEIKDEAFLEYLNNL  
 SSGEISNLFARDEMDEITQGLISVMKRELPRHPPTFDNLYEYFITRSRKNLHVVLCSFVPEKFRARS  
 LKFPGLISGCTMDWFSRWPKEALIAVASYFLLDYNIVCSIETKRHVETMGLFHDVSESCENYFQRYRRRA  
 HVTPKSYLSFINGYKSIYTDKVKYINEQAERMNIGLDKLEMEASESVAKLSQDLAVKEKELAVASIKADE  
 VLAEVTVSAQASAKVKNVEVQEVKDKAQKIVDEIDSEKVKAEKPALEAEALNTIKPNDIATVRKLAKP  
 PHLIMRIMDCVLLLFQKKIDPVTMDPEKPCCKPSWGESLKLMSATGFLFSLQQFPKDTINEETVELLQPY  
 FNMDDYTFESAKKVCGNVAGLLSWTLAMVIYFGINREVLPLKANLAKQEGRLAVANVELGKAQALLDEK  
 QAEKLVQAKFDAAMKEKMDLLNDADMCRKKMQAASTLIDGLSGEKVRWTQOSKEFKTQINRLVGDVLL  
 CTGFLSYLGFNFQIFRNYLLKDWELLELKARKIPFTENLNLIAMLVDPPTIGEWGLQGLPGD  
 DLSIQNGIIVTKATRYPLLDIPQTQGTWIKSEKENDLQVTSLNHKYFRTHLEDSLGRPL  
 LIEDIREELDPALDNVLEKNFIKSGTAFKVKVGDKECDIMDTFKLYITTKLPNPAFTPEINAKT  
 SVIDFTVTMKGLENQLLRVILTEKQELESERVKLEEDVTFNKRKMELEDNLLYKLSATGLVDD  
 ESLIGVLRITKQTAAEVSEKLVHAAETEIKINTAQEEFRPAATRGSILYFLITMSMVNIMYQTS  
 LAQFLKLDQSMARSEKSLPQKRITNIIEYLTYEVFTYSVRGLYENHKFLVLLMTLKIIDLQGT  
 VKHKEFQALIKGGAALDLKACPPKPFRWILDMTWNLVELSKLPQFAEIMNQISRNEKWKVNF  
 DKDAPEEEIIPDGYNDSLDTCRKLLLRWCPRDRTVFQARKYIADSLEEKYTEPVIILNLEKTWEES  
 DTHTPLICFLSMGSDPTIQIDALAKKLEKCRTISMGQGEVHARKLIQLSMQGGWVLLQ  
 NCHLGLFMEELLEMLMVTETTEDSFRVWITTEPHDRFPITLLQTSIKFTNEPPQGV  
 RAGLRKRTFAGINQDLLDISNLPMMWKPMPLYTVAFLHSTVQERRKFGPLGWNIPYEFNS  
 ADFSASVQFIQNLHDECIDIKKGVSWSTVRMYIGEVQYGGRVTD DFDKRLNCFARVWFSE  
 KMFEPSCFYTGKIPICKTLDQYFEFIQSLPSLDNPEVFLGHPNADITYQSN TASDVLETITNI  
 QPKESGGGVGETREAIYVRLSEDMLSKLPNYPVPEVKARLMKMGHLNSMNI FLRQEI  
 DRMQKVISILRSSLSDLKLAIEGTIIMS ENLRDALDNMYDARI PQLWKRVS  
 WDSSTLGFWFTELLERNAQFSTWIFEGRPNVFWMTGFFNPQGF LTAMRQEV  
 TRAHKGWALDVTIHNELVRQTKEEITTPVAEGVYIYGLYMDGASWDRRNGKLT  
 ESTPKVLFTQLPVLHIFAINSTAPKDPKLYVCPIYKPRRTDLTFITVYLRVTLVSPDH  
 WILRGVALLCDIK\*  
 >ENSMUSP00000127878\_c.2584:A>T\_p.K862M ENSMUST00000170651.2|Dnah8-  
 201|ENSMUSG00000033826|+|chr17:g.30896172:A>T  
 MESEEGNAEPPPPSEEAPPVVEEAPPPLPPEDTAPPPPEEQAPPPEGDAAPPPTGDAFQ  
 LTVGEAPHPEDPKLLSEQGPATSVTDYRSLIPSD EEVTLPEDEESGARVRARHTPRPAQSVLSDG  
 ISQSSRRPSKFRRSMTGIPNLQETLKEKQARFREARENKMKIGPSHKYIFEVLGEKLG  
 LDVTVVEELIILDCPSLDPFTSFFEKGGCKTLKFLYQEGEVPGFECGRITITGV  
 PKGGKMMRIYVDNAAPDKLGLCLFFVRCRNDVAINSKTIEDHVLFSFLDASKG  
 LLEGIKHMLKSIIFLPAI LATSNGALNQSQGESEKHIF IETIHRYLASLDDATISIEGT  
 VMLKKVDNIDFSKLHTFEEVTA AASSSEM VHQLEEVLMVWYKQIEQVLI ESEQMRKEADDS  
 GPLTELEHWKRM SAKFNFIIEQIKG SNCKAVINVLNVAHSKLLKNWRDL  
 DARI TDSANESKDNVRYLYTLEKVCQPLYN YDLVSMAHGIQNLINAI RM  
 IHSVSRYYNTSERMTSLFIKVTNQMTACKAYITDGGTNHVWQETPAVLK  
 KIQDCIFL FKEYQASFHKTRKQI LESSGEKSFEVSEMYIFGKFEAFCKRLEK  
 ITEMITIVQTYALS NSTIEGIDILGIFKNIYQGIKKNQYDILDPRRTEFD  
 TDFTEFMGKINILEIQIQAFMNSTFGKILSSQQALQLLQRFQKLNIPCLH  
 LEINHTIERILQCYVAELEFTTKKLYLSQKDDPPLARNMPP IAGKILWVRQ  
 LFRRINEPINYFFKNSDILSSTEGKAVIRQYNRIAYVLVEFEVAYHTAWFKE  
 VSQLQYALQATL FVRHPETGKLLVNFDPKILEVVRETCKMIKMMLD  
 VPEQAKNLLKLESKLKADKLYLQGLLQYYDDLQCEVPSVFNLMTPKM  
 KKVESVLRQGLTVL TWSSLMLESFFKEVESVLD MFNQLLKKVNDLCE  
 MHIDTVLKEIAKTL LLSLSDSGTTKVEDMLTLNETYTKCADILNHKSRH  
 VEEAVKELILIFEQIYEVKYDTGKA AKSVQQRKR VVFGSEAEETEG  
 LDFESTMVEVD TNDKEDEFKKECKEYVAF FSHQLLDSLQKATRL  
 SLDTMKRRI FVSGRRRSEDIVSFIKTEVHLAIPNVVMVPSLDDIQQAIN  
 RMIQTLTEVSRGVAHWGQQQVRLQIKSFQNNRSRGSQPPASGKPLKKEERS  
 FEETIPARKLKNFYPGVAEHKDISKLVLLSSSVNSLRKAA TEALQDFQ  
 KYKTLWIEDRHVKVKEFLANNPSL TEIRSEILHYATLEQEI  
 KELKPIIVVGSLELHTEPMKLALS IEAKAWKMLLCRYLNEEYK  
 KMSDMITFINEYLK KLSRPIRDLDDVRFAMEALS CIR  
 DNEIQMDMTLGP IEEAYGILNRFVVKVTKEESEGVDTLRY  
 SFNKLQSKAVSVQGELVKVQPKFKSNLLESVKVFCEDVIN  
 FTEAYETEG

PMVFNIPPEASNLQIFQANFDDLWRKFVITYSSGEQLFGLPVTDYEVHLHKTRKELNLLQKLYGLYDVTMGSIS  
 SGYYEILWGDVDIEKINAELQEFQNRCKLPRALKDWQAFDLKKRIDDFSESCPLEMMTNKAMKQRHWDRI  
 SELTGTFFDVESDTFCLRNIMEAPLLKNKDDIEDICISAIKEKDEAKLTQVIENWYQNLNSFAAFKKGKCELL  
 LKGTESGEIITLMEDSLMVLGSLLSNRYNTPFKKNIQNWVFKLSTSSDIIEEWLIVQNLWVYLEAVFVGGDIA  
 KQLPQEAQRFNIDKSWIKIMQRAHENPNVISCVGDETMGQLLPHLHEQLEVCQKSLTGYLEKKRLLFPRFF  
 FVSDPVLLEILGQASDSHTIQPHLPAVSDNINEVTFHAKDYDRMTAVISREGEKIMLDTPVMAGPVEIWLDD  
 LLKVQMSLSLHNIIRSAFYQISDSGFLLLPFLNHFFPAQVGLLGIQMLWTHDSEEALNNAKDDRIMQITNQKFL  
 DILNLTISQTTHTDLTKFDRVKFETLITIHVHQDIFDDLKMHKISVTDFEWLKQSRFYFKEDLDQTVVVSITD  
 VDFIYQNEFLGCTDRLVITPLTDRCYITLAQALGMNMGGAPAGPAGTGKTETTKDMGRCLGKYVVVFNCSQDM  
 DFRGLGRIFKGLAQSGSWGCFDEFNRIELPVLVSAQQIYIVLTARKERKKQFIFSDGDCVDLNPFGIFLTM  
 NPGYAGRQELPENLKIQFRTVAMVPDRQIMRVKLASCGLFENVILAQKFYVLYKLCEEQLTKQVHYDFGLR  
 NILSVLRTLGSQKRARPEDSELSTVMRGLRDMNLSKLVDEDEPLFSLINDLFPGLQLDSSTYAELOSAVDNQ  
 VNLEGLINHPWNKLKLVQLYETSLVRHGLMTLGPSSGSKTTVITILMKSLTECGRPHREMRMNPKAITAPQMF  
 GRLDATANDWTGDFSTLWRKTLKAKKGENIFLILDGPVDAIWIENLNSVLDDNKTLTLANGDRI PMAPTCKL  
 LFEVHNINENASPATVSRMGMYISSALSWRPILQAWLKKRSQQEASVFLSLYDKVFEDAYTYMKLSLNPKMQ  
 LLECNYIMQSLNLEGLIPSKKEGGVSSGDHLHKLFFVGLMWSLGALELDSREKLEVFRLRGHSGKLNLP EIP  
 KGSQQTMYEFYVTDYGDWEHWNKRIQPYFYPTDSIPEYSSILVNVNDNIRTNFLIDTIAKQHKAVLLTGEQGT  
 AKTVMVKAYLKKYDPEVQLSKSLNFSATEPMMFQRTIESYVDRKMGSTYGPGRKMTVFIDINMPVINEW  
 GDQITNEIVRQMEMEGMYSLDKPGDFTTIVDVQLIAAMIHPGGGRNDIPQRLKRQFTVFNCTLPSNTSIDKI  
 FGIIGCGYFDPCRKFRPEICDMVGNLVSRSRVLWQWTKVKMLPTPSKFHYIFNLRDLSRIWQGLTVKAECS  
 SIPILLSLFKHECNRVIA DRFITPDEQWFNSQLIRAVEENISPEVAANILPEPYFVDFLRDMPEPTGDEPED  
 TMFEVPKIYELVPSFEFLSEKLFYQRFNEIIRGTSLDLVFFKDAMTHLVKISRIIRTSCGNALLVGVGGSG  
 KQSLSKLASFIAGYQIFQITLRSYNVSNLIEDLKNLYKVAGAEKGITTFITDNEIKDEAFLEYLNNLLSSG  
 EISNLFARDEMDEITQGLISVMKRELPRHPPTFDNLYEYFITRSRKNLHVVLFCFSPVGEKFRARSLKFPGLIS  
 GCTMDWFSRWPKEALIAVASYFLLDYNI VCS IETKRHVVEVMGLFHDVSESCENYFQYRRRAHVTPKSYLS  
 FINGYKSIYTDKVKYINEQAERMNIGLDKLEASESVAKLSQDLAVKEKELAVASIKADEVLAEVTVSAQASA  
 KVKNEVQEVKDKAKYI VDEIDSEKVKAEKLEAAKPALEAEAAALNTIKPNDIATVRKLAAPHLIMRIMDCV  
 LLLFQKKIDPVTMDPEKPCCKPSWGESLKLMSATGFLFSLQQFPKDTINEETVELLQPYFNMDDYTFESAKKV  
 CGNVAGLLSWTLAMVIFYGINREVLPLKANLAKQEGRLAVANVELGKAQALLDEKQAEKLVQAKFDAAMKEK  
 MDLLNDADMCRRKMQAAS TLIDGLS GEKVRWTOQSKEFKTQINRLVGDVLLCTGFLSYLGPFNQIFRNYLLKD  
 QWELELKARKIPFTENLNLIAMLVDPPTIGEWGLQGLPGDDLSIQNGIIVTKATRYPLLDIPQTQGTWIKSK  
 EKENDLQVTSLNHKYFRTHLEDSLSLGRPLLI EDIREELDPALDNVLEKNFIKSGTAFKVKVGDKECDIMDTF  
 KLYITTKLPNPAFTPEINAKTSVIDFTVTMKGLENQLLRVILTEKQELESERVKLEEDVTFNKRKMELEDN  
 LLYKLSATKGLVDDESLIGVLRITKQTAAEVSEKLVHAAETEIKINTAQEEFRPAATRGSILYFLITMSMV  
 NIMYQTSLAQFLKLFQDSMARSEKSLPQKRITNIEYLTYEVFTYSVRGLYENHKFLVLLMTLKIIDLQRGT  
 VKHKEFQALIKGGAALDLKACPPKPFRWILDMTWLNLEVELSKLPPQFAEIMNQISRNEKGWKNWFDKDAPEEEI  
 IPDGYNDSLDTCRKLLLRISWCPRDRTVFQARKYIADSLEEKYTEPVILNLEKTWEESDHTHTPLICFLSMGSDP  
 TIQIDALAKKLEKCR TISMGGQEVHARKLIQLSMQGGWVLLQNLCHLGFMEELLEMLMVTETTEDSFRV  
 WITTEPHDRFPITLLQTSIKFTNEPPQGVRAGLKRTFAGINQDLLDISNLPWKPMPLYTVAFLHSTVQERRKF  
 GPLGWNIPYEFNSADFSASVQFIQNLHDECDIKKGVSWSTVR YMIGEVQYGGRTDDFDKRLNLCFARVWFSE  
 KMFEPSPFCFYTGKIPICKTLDQYFEFIQSLPSLDNPEVFLGHPNADITYQSN TASDVLETITNIQPKESGGG  
 VGETREAI VYRLSEDMLSKLPNYPHEVKARLMKMGHLNSMNI FLRQEI DRMQKVISILRSSLSDLKLAIEG  
 TIIMSENLRDALDNMYDARI PQLWKRVSWSSTLGFWFTELLERNAQFSTWIFEGRPNVFVMTGFNPPQGF LT  
 AMRQEVTRAHKGWALDVTVIHNEVLRQTKEEITTPAEGVYIYGLYMDGASWDRRNGKLTTESTPKVLFTQLPV  
 LHI FAINSTAPKDPKLYVCPIYKKPRRTDLTFTITVYLRVTLVSPDHWILRGVALLCDIK\*

>ENSMUSP00000110202\_c.1950:G>T\_p.G651\* ENSMUST00000114555.3|Umod11-  
 203|ENSMUSG00000054134|+|chr17:g.31205357:G>T

MMSRTVRLVLLALACTVDLSQASGFTENGLSLLSYQLCSYPVTRSVQKLQAVQTSHTAYVYCGGWIPWKKCPK  
 TVYRTQYLAMDVPESRNVTDCCAGFEQLGLYCVLSLNRSREFASRPGVCPTAEAEPLSPSCSLDTC SGLQKC  
 CSWPGGRHCVSPTPTGTEKSMVSWYNVTVLVKVGFEDLQREDPGLRNHTRLLYSLVTSALQPLNPAVHYLTST  
 GSKDTFTTVSWLLMGFPRMLTVANVSVMLDDMVNRVYEVVSIQVQDVNECLHSELQACSVREQCRNLEGSYQC  
 VSSQRLNHTDEDCPPIRD FVALNVTSSSFHVSWSLNSTQNYNFHIQVYKGEILRS AWTRGHTMAVSDLEAGV  
 LYRVRTSYLGGCANV SATLVVKTDAQVFQVTIRIGMNRNLTPEQLDCSSGEFWNFSRQLFHEVQNSFPQAI S DL  
 YRQGRMLQIVSLQAGSLVTLRLTLQDPDFSVGVHTLTPMLPVLVSVSNVQVQDQRTFVQDWDECAHSSEHD  
 CHPSARCINLEGSYTCQCLTARDASPSRAGRVC EGMV IPTGDELSVTTKVTVPAASTGITTFGPETLTESLS  
 SKHPRSTPARSQTWTPVPPSVRDGGSIVRQDRNSTGQGMVNPVTPNLGKTHRSTSGVTSVWPAP\*QTHGTH  
 QGTTDAPLHTTRESQELITKDPFLTATTTGYVVVHSSPTWKT PPNSTRLQNE DPRS SFPGPSAPT DVTPE  
 SPACVPGPIGKVTVSNVTSTSFSL EWPADIRLSPAFHLLTVSPRGPAMTETQNNNVTLSGLEWGTLYLVEIV

AKVCGKEGARTQLKVRTVAQKLAGNVRITSMQYSESFNLTSSREHREFVELFFRTVRDSLDPATLRQHMDAGRI  
RVDI INITNGSIVVEFNLLMTADLDVREVSAGFLNALQNTSMLEVVVRGKTFMQDYNECDMKEDDCAPGTCRNT  
FGSFTCSDEGGPDSQVEYSGRSCDGDPSGNMTQTPGSEWSPTPAGTRGVVPPIASSTAQDLPLRLNLMDAVS  
VSCEIETVITITIQKRFLQQAAP EASLYLGEPCSNVRSNSTHVFLVAGWGECGTILQSNMTTTVVTTTLRNN  
LSPEGVIIHHPQFLSPIHCAFQNDVLTSSGYTPQWGVYTVIEDLHGTGNFVTEMQLYIGDSPIPQNYSVSASDE  
IKIEVGLHRQKSSSLKVVLTECWATPSSNAKDPVTF SFINNSCPVNTYTSVIQNGHSSKAQFKLRIFSFINNS  
IVYLHCKLRVCMENPRNSCRISCNDFRSLRSSEALHQMTWGPLHRTEGAQACTKPVLTGYIIILLAAAALLVV  
AGATLLILRYQVRVQKYNLRIQTDDFSYQVFSQ\*

>ENSMUSP0000067443\_c.1950:G>T\_p.G651\* ENSMUST0000066554.13|Umod11-  
201|ENSMUSG00000054134|+|chr17:g.31205357:G>T  
MMSRTVRLVLLALACTVDLSQASGFTENGLSLLSYQLCSYPVTRSVQKLQAVQTSHTAYVYCGGWIPWKKCPK  
TVYRTOYLAMDVPESRNVTDCCAGFEQLGLYCVLSLNRSEFASRPGVCPTAEAEPLSPSCSLDTCSSGLQKC  
CSWPGRHCVSPTPTGTEKSMVSWYNVTVLVKGVFEDLQREDPGLRNHTRLLYSLVTSALQPLNPAVHYLTST  
GGKDTFTTVSWLLMGFPRMLMTVANVSVMLDDMVNRVYEVVSIQVQDVNECLHSELQACSVREQCRLNLEGSYQC  
VSSQRLNHTDEDCCPIIRDVFNVTSSSFHVSWSLNSTQNYNFHIQVYKGEILRSAWTRGHTMAVSDLEAGV  
LYRVRTSYLGGGANVSATLVVKTDAQVFQVTIRIMDRNLTEQILDCSSGEFWNFSRQLFHEVQNSFPQAI SDL  
YRQGRLRMQIVSLQAGSLVTLRLTLQDPDFSVGVHTLTPMLPVLSVSNVQVDQRTFVQDWDECAHSSEHD  
CHPSARCINLEGSYTCQCLTARDASPSRAGRVCEDMVIPTGDELSVTTKVTVPAASTGITTFGPETLLESLS  
SKHPRSTPARSQTWTVPVPPSVRDGGSIVRQDRNSTGQGMVNPVTPNLGKTHRSTSGVTSSVPWAP\*QTHGTH  
QGTDDAPLHTTRESQELITKDPFLTATTTGYVVVHSSPTWKTTPNSTRLQNEDEPRSSSFPGPSAPT DVTPE  
SPACVPGPIGKVTVSNVTSTSFSLWEPADIRLSPAFHLLVSPRGPAMTETQNNNVTLSGLEWGTLYLVEIV  
AKVCGKEGARTQLKVRTVAQKLAGNVRITSMQYSESFNLTSSREHREFVELFFRTVRDSLDPATLRQHMDAGRI  
RVDI INITNGSIVVEFNLLMTADLDVREVSAGFLNALQNTSMLEVVVRGKTFMQDYNECDMKEDDCAPGTCRNT  
FGSFTCSDEGGPDSQVEYSGRSCDGDPSGNMTQTPGSEWSPTPAGTRGVVPPIASSTAQDLPLRLNLMDAVS  
VSCEIETVITITIQKRFLQQAAP EASLYLGEPCSNVRSNSTHVFLVAGWGECGTILQSNMTTTVVTTTLRNN  
LSPEGVIIHHPQFLSPIHCAFQNDVLTSSGYTPQWGVYTVIEDLHGTGNFVTEMQLYIGDSPIPQNYSVSASDE  
IKIEVGLHRQKSSSLKVVLTECWATPSSNAKDPVTF SFINNSCPVNTYTSVIQNGHSSKAQFKLRIFSFINNS  
IVYLHCKLRVCMENPRNSCRISCNDFRSLRSSEALHQMTWGPLHRTEGAQACTKPVLTGYIIILLAAAALLVV  
AGATLLILRYQVRVQKYNLRIQTDDFSYQVFSQ\*

>ENSMUSP0000085013\_c.398:C>A\_p.C133\* ENSMUST0000087721.10|Ephx3-  
201|ENSMUSG00000037577|-|chr17:g.32408024:G>T  
MRGGSICPSRASVSSTGPVDSSTVESQNKGGGLLAPAPLAQSPDHGGSVVVPERKDMPEFVVTALLAPSRLS  
LKLRLALVMSLVYLAALVAAFVYSCIALTHVMCRPRRGCCGRQLSPPECLRDPTLGEH\*FLTLRVSVPPVKS  
SGLRLHYVSAGHGNGPLMLFLHGFENWFSWRYQLREFQSHFHVAVDMRGYSPSDAPKEVDCYTI D L L L D D I  
KDTILGLGYSKCILVSHDWGASLAWEF SIYPSLVERMVVANGPPMSV IQEYSIHHIGQIFRSNYMFLFQLPW  
LPEKLLSMSDFQILKDTFTHRKNGIPGLTPSELEAFLYHFSQPGCLTGPINYYRNVFRNFPLEPKKLSPTLL  
LWGEKDFAFQQLVEAIGRHFVPGRLESHILPGSGHWIPQSHPQEMHQYMWAF LQD L L G \*  
>ENSMUSP00000124600\_c.398:C>A\_p.C133\* ENSMUST00000162117.3|Ephx3-  
202|ENSMUSG00000037577|-|chr17:g.32408024:G>T  
MRGGSICPSRASVSSTGPVDSSTVESQNKGGGLLAPAPLAQSPDHGGSVVVPERKDMPEFVVTALLAPSRLS  
LKLRLALVMSLVYLAALVAAFVYSCIALTHVMCRPRRGCCGRQLSPPECLRDPTLGEH\*FLTLRSSGLRLHY  
VSAGHGNGPLMLFLHGFENWFSWRYQLREFQSHFHVAVDMRGYSPSDAPKEVDCYTI D L L L D D I K D T I L G L  
GYSKCILVSHDWGASLAWEF SIYPSLVERMVVANGPPMSV IQEYSIHHIGQIFRSNYMFLFQLPWLPEKLLS  
MSDFQILKDTFTHRKNGIPGLTPSELEAFLYHFSQPGCLTGPINYYRNVFRNFPLEPKKLSPTLL L L L W G E K D F  
AFQQLVEAIGRHFVPGRLESHILPGSGHWIPQSHPQEMHQYMWAF LQD L L G \*  
>ENSMUSP00000134026\_c.303:A>C\_p.N102H ENSMUST00000172934.8|Marchf2-  
204|ENSMUSG00000079557|-|chr17:g.33922055:T>G  
MTTGDCCHLPGSLCDCSSSPAFSKVVEATGLGPPQYVAQVTSRDGRLLSTVIRALDSQSDCPFCRICHEGANG  
ENLLSPCGCTGTLGAVHKSCLEKWLSSSHTSYCELCHTEFAVEKRPRPLTEWLKDPGRTEKRTLCCDMVCFV  
FITPLAAISGWLCLRGAQDHLRLHSRLEAVGLIALTIALFTIYVLWTL L Q R F S P L S L R Q E H G S I Q G G M V Q V E L  
RVLHLRLKEASGR LTPRH LGQVH\*  
>ENSMUSP0000065225\_c.303:A>C\_p.N102H ENSMUST0000066121.13|Marchf2-  
201|ENSMUSG00000079557|-|chr17:g.33922055:T>G  
MTTGDCCHLPGSLCDCSSSPAFSKVVEATGLGPPQYVAQVTSRDGRLLSTVIRALDSQSDCPFCRICHEGANG  
ENLLSPCGCTGTLGAVHKSCLEKWLSSSHTSYCELCHTEFAVEKRPRPLTEWLKDPGRTEKRTLCCDMVCFV  
FITPLAAISGWLCLRGAQDHLRLHSRLEAVGLIALTIALFTIYVLWTLVSVFRYHCQLYSEWRKTNQKVR L K I R  
EADGSEDPHHSLLATGLLKKLQRFSPLSLRQEHGSIQGGMVQVELRVLHLRLKEASGR LTPRH LGQVH\*

>ENSMUSP00000127601\_c.303:A>C\_p.N102H ENSMUST00000167611.8|Marchf2-202|ENSMUSG00000079557|-|chr17:g.33922055:T>G  
 MTTGDCCHLPGSLCDCSSSPAFSKVVEATGLGPPQYVAQVTSRDGRLLSTVIRALDSQSDCPFCRICHEGANG  
 ENLLSPCGCTGTLGAVHKSCLEKWLSSSHTSYCELCHTEFAVEKRRPRPLTEWLKDPGPRTEKRTLCCDMVCFV  
 FITPLAAISGWLCLRGAQDHLRLHSRLEAVGLIALTIALFTIYVLWTLVSVFRYHCQLYSEWRKTNQKVRKIR  
 EADGSEDPHHSLLATGLLKKLQRFSPLSLRQEHGSIQGGMVQVELRVLHLRLKEASGRLLTPRHLLGQVH\*

>ENSMUSP00000133802\_c.303:A>C\_p.N102H ENSMUST00000173015.8|Marchf2-205|ENSMUSG00000079557|-|chr17:g.33922055:T>G  
 MTTGDCCHLPGSLCDCSSSPAFSKVVEATGLGPPQYVAQVTSRDGRLLSTVIRALDSQSDCPFCRICHEGANG  
 ENLLSPCGCTGTLGAVHKSCLEKWLSSSHTSYCELCHTEFAVEKRRPRPLTEWLKDPGPRTEKRTLCCDMVCFV  
 FITPLAAISGWLCLRGAQDHLRLHSRLEAVGLIALTIALFTIYVLWTLGGGLSLPPHPLQDCPRRSLSDTIAS  
 CTRNGGRQIRKSA\*

>ENSMUSP00000134220\_c.303:A>C\_p.N102H ENSMUST00000172767.9|Marchf2-203|ENSMUSG00000079557|-|chr17:g.33922055:T>G  
 MTTGDCCHLPGSLCDCSSSPAFSKVVEATGLGPPQYVAQVTSRDGRLLSTVIRALDSQSDCPFCRICHEGANG  
 ENLLSPCGCTGTLGAVHKSCLEKWLSSSHTSYCELCHTEFAVEKRRPRPLTEWLKDPGPRTEKRTLCCDMVCFV  
 FITPLAAISGWLCLRGAQDHLRLHSRLEAVGLIALTIALFTIYVLWTLVSVFRYHCQLYSEWRKTNQKVRKIR  
 EADGSEDPHHSLLATGLLKKVAEETPV\*

>ENSMUSP00000133940\_c.120:A>C\_p.N41H ENSMUST00000173454.2|Marchf2-208|ENSMUSG00000079557|-|chr17:g.33922055:T>G  
 PFCRICHEGANGENLLSPCGCTGTLGAVHKSCLEKWLSSSHTSYCELCHTEFAVEKRRPRPLTEWLKDPGPRTE  
 KRTLCCDMVCFVFITPLAAISGWLCLRGAQDHLRLHSRLEAVGLIALTIALFTIYVLWTLVSEWRKTNQKVR  
 LKIREADGSEDPHHSLLATGLLKKVAEETPV\*

>ENSMUSP00000133825\_c.303:A>C\_p.N102H ENSMUST00000173329.8|Marchf2-206|ENSMUSG00000079557|-|chr17:g.33922055:T>G  
 MTTGDCCHLPGSLCDCSSSPAFSKVVEATGLGPPQYVAQVTSRDGRLLSTVIRALDSQSDCPFCRICHEGANG  
 ENLLSPCGCTGTLGAVHKSCLEKWLSSSHTSYCELCHTEFAVEKRRPRPLTEWLKDPGPRTEKRTLCCDMVCFV  
 FITPLAAISGWLCLRGAQDHLRLHSRLEAVGLIALTIALFTIYVLWTLVSG\*

>ENSMUSP00000134437\_c.363:A>C\_p.N122H ENSMUST00000174040.2|Marchf2-209|ENSMUSG00000079557|-|chr17:g.33922055:T>G  
 MCMFLGPWASGPEDRRRLPVAMTTGDCCHLPGSLCDCSSSPAFSKVVEATGLGPPQYVAQVTSRDGRLLSTVIR  
 ALDSQSDCPFCRICHEGANGENLLSPCGCTGTLGAVHKSCLEKWLSSSHTSYCELCHTEFAVEKRRPRPLTEWL  
 KDPGPRTEKRTLCCDMVCFVFITPLAAISGWLCLRGAQDHLRLHSRLEAVGLIALTIALFTIYVLWTLVSG

>ENSMUSP00000139724\_c.303:A>C\_p.N102H ENSMUST00000186022.7|Marchf2-210|ENSMUSG00000079557|-|chr17:g.33922055:T>G  
 MTTGDCCHLPGSLCDCSSSPAFSKVVEATGLGPPQYVAQVTSRDGRLLSTVIRALDSQSDCPFCRICHEGANG  
 ENLLSPCGCTGTLGAVHKSCLEKWLSSSHTSYCELCHTEFAVEKRRPRPLTEWLKDPGPRTEKRTLCCDMVCFV  
 FITPLAAISGWLCLRGAQDHLRLHSRLEAVGLIALTIALFTIYVLWTLVSVFRYHCQLYSEWRKTNQKVRKIR  
 EADGSEDPHHSLLATGLLKKLQRFSPLSLRQEHGSIQGGMVQVELRVLHLRLKEASGRLLTPRHLLGQVH\*

>ENSMUSP00000025266\_c.142:T>G\_p.L48R ENSMUST00000025266.6|Lta-201|ENSMUSG00000024402|-|chr17:g.35423404:A>C  
 MTLGLRLHLLRVLGTPPVFLLGLLALPLGAQGLSGVRFSAARTAHPRPQKHLTHGILKPAAHLVGYPSKQNS  
 LLWRASDRAFLRHGFSLNNSLLIPTSGLYFVYSQVVFSGESCPRAIPTPIYLAHEVQLFSSQYPFHVPLL  
 SAQKSVYVPLGQGPWVRSMYQGAFFLLSKGDQLSTHTDGIHSHLHFSPPSSVFFGAFAL\*

>rs265087281\_ENSMUSP00000136148\_c.45:C>CG\_p.P16ins-fs  
 ENSMUST00000178037.2|Esp16-201|ENSMUSG00000096345|+|chr17:g.39848753:C>CG  
 MASFPLMYFLIFLVFRNNTS

>ENSMUSP00000049206\_c.261:G>T\_p.E88\* ENSMUST00000039366.11|Kcnh8-201|ENSMUSG00000035580|+|chr17:g.53032976:G>T  
 MPVMKGLLAPQNTFLDTIATRFDGTHSNFILANAQVAKGFPIVYCSDFCELAFARTEVMQKSCCKFLFGV  
 ETNEQLMLQIEKSL\*EKVEFKGEIMFYKKNAGAPFWCLLDIVPIKNEKGDVVLFLASFKDITDTKVKITSEDKK  
 EDRTKGRSRAGSHFDSARRRSRAVLYHISGHLQRREKNKLNINNVFVDKPAFPEYKVSADAKSKFILLHFST  
 FKAGWDWILLATFIYVAVTVPYNVCFIGNEDLSTRSTTVSDIAVEILFIIDIILNFRHTTVYSKSGQVIFEAR  
 SICIHYVTTFWFIIDLIAALPFDLLYAFNVTVVSLVHLKTVDRLLRLLRLLQKLDKDRYSIAHSTIVLTLMSMFAL  
 LAHWMACIWIYVIGKMEREDNSLLKWEVWGLHELKGRLESPYGNNTLGGPSIRSAYIAALYFTLSLTSVGF  
 NVSANTDAEKIFSICTMLIGALMHALVFGNVTAI IQRMYSRWSLYHTRTKDLKDFIRVHLLPQQLKQRMLEYF  
 QTTWSVNNGIDSNELLKDFPDELRS DITMHLNKEILQLSLFECASRGCLRSLSLHIKTSFCAPGEYLLRQGD  
 LQAIYFVCSGSMVFLKDSMVLAILGKGDILIGANLSIKDQVIKTNADV KALTYCDLQCIILKGLFEVLGLYPEY

AHKFVEDIQHDLTYNLREGHESDVISRLSNKSTVSOAEPKNGSINKRLPSIVEDEEEEEVEEEEETSLSPIY  
TRGSSVSHSKKTGSNKTYLGLSLKQLASGTVPFHSPIRVSSANS PKTKQEADPPNHGRKKEKNLKVQLSSLGS  
AGTPELSPRIVDGIEDGNSNEETQTFDFGSEQIRPEPRISPLAESEIGAAFLFIKAEETKQKQINKLNSEVTT  
LTQEVSQLGRDMRSIMQLEENILSPQQPSQFCSLHPTMPCPSRESLQTRVSWSAHQPCLLHQAGGAHLYHGNV  
ASGIWSVDPSLVGSSPQRTEAHEQNPADELHHSPLNDYSPSHCQVIOEGHLQFLRCISPHSDTTLTPLQSI S  
ATLSSSVCSSETSLHLVLP SRSEEGSITHGPVSSFSLENLPGSWDREQMMSASSERLENFPVEVVTSTADVK  
DSKAINV\*  
>ENSMUSP00000011623\_c.183:C>G\_p.P62A ENSMUST00000011623.9|Dennd1c-  
201|ENSMUSG00000002668|-|chr17:g.57382481:G>C  
MGSTETRHPAMFDWFFFEAGCPNSLEEDPPILRQFPDFQEQEAMQVPRFCFPFDIEREPASPAVQHFTFAL  
TDLVGNRRFGFCRLRAGARSCILSHFPWFVEVFKILNNVGDLLAQNVAAEAEELLQNLQHPHLLGPRFSGR  
SEMDSSITVRSECGILPPALGNSKLLSCFVAPDAASLPSIPENRNLTLLVAVTDENIVGLFAALLAERRVLL  
TASKLSTLTACVHASCALLYPMRWEHVLIPTLPPHLLDYCCAMPYLVGVHGLAERVREKALEDVVVLNADS  
NTLETFFDDVQALPPDVVSLRLRLRKLVALSPGEGVSRFLKQVALLFGGYRDALVCI PGQPVTFSEEAFLAQ  
KPGAPLQAFHKKAVHLQFLKQFIESRLEKLNAGEGFSDDQFEQEI IACRGASSGTLRSYQLWVDSLKKGSDALL  
HSMKTKTQPAVRNMYRSGDSLQEYCAKAKSGLKGMQNLTLTKDGDGSLQRGGLRTPSLTSRSDRLQQLRPI  
SQHFQQRPLRPSRRLKTEEGPSEPLRERSPTLSPGDTQNPWAEDTLDGSLGSGEELDLSEILDSLVNVEK  
SGDLQRASQSLDCCQRGAASESCSSLPDIPVGLPWQLEEDKRSQDPQPSLPGDLSLLQDTPFSEVVSYSKNS  
CSQFPQQSPSPSGDPPSLSKLDPRPSQSPCKLLRVPTRHSPPEPQLLVSTEPNSDAVQRLQSISSPSCSH  
SAENPRNQPPQVLLGQACVQPLEELGAPTYVSHVSTQQRPDQKQPRVADLKKCFEN\*  
>rs253959868\_ENSMUSP00000024858\_c.1648:C>T\_p.S550L  
ENSMUST00000024858.12|Galnt14-201|ENSMUSG00000024064|-  
|chr17:g.73801172:G>A  
MRRLTRRLALPIFGVLWITVLLFFWVTKRKLEVP LGPEVQTPKPSDADWDDLWEQFDERRYLNAKKWRVGGDP  
YKLYAFNQRESERISSNRAVPDTRHKRCSLLVYCTDLPPTSIIITFHNEARSTLLRTIRSVLNRTPMHLIQEI  
ILVDDFNSDPEDCKQLIKLPVKCLRNNERQGLVRSRMRGADIAQGTTLTFLDSHCEVNRDWLQPLLHRVKED  
YTRVVCVIDIINLDTFNIESASELRGGFDWSLHFQWEQLSLEQKALRLDPTPIRTPI IAGGLFVIDKAWF  
DYLKGYDVMIDIWGGENFEISFRVWMC GGLEIIPCSRVGHVFRKHPYVFPDGNANTYIKNTRKTAEVWMD  
YKQYAAARPFALERPFNGNIENRNLNRKNLHCQTFKWYLENVYPELVRVPPDSSIQKGNIRQRKCLE SQKQK  
QEILRLSPCAKVKGDGAKSQVWAFYTYQIIQEELCLSVVTLFPGAPVVLALCKNGDERQLWTKTGARIEHIA  
SHLCLDMDMGDSTEDGKEVVVNPCSSLMSSHWDIVSL\*  
>ENSMUSP00000039628\_c.100:T>TAAAAA\_p.I34ins-fs  
ENSMUST00000047206.7|Plekhh2-  
201|ENSMUSG00000040852|+|chr17:g.84829231:T>TAAAAA  
MEEPSEPEGLIDWKERCVALEAQLMKFRVQASKIKTASS  
>ENSMUSP00000069495\_c.1500:G>T\_p.G501\* ENSMUST00000066175.10|Abcg5-  
201|ENSMUSG00000040505|-|chr17:g.84972271:C>A  
MGELPFLSPEGARGPHINRGSLSLEQGSVTGTEARHSLGVLHVSYSVSNRVGPWWNIKSCQQKQWDRQILKDV  
SLYIESGQIMCILGSSGSGKTTLLDAISGRLRRTGTLEGEVFNVCCELRRDQFQDCFSYVLQSDVFLSSLTVR  
ETLRYTAMLALCRSSADFYNNKVEAVMTELSLSHVADQMIGSYNFGGISSGERRRVSIAAQLLQDPKVMMLDE  
PTGLDCMTANQIVLLLAELARRDRIVVTIHQPRSELFQHFDKIAILTYGELVFCGTPPEMLGFFNCCGYPC  
PEHSNPFDFYMDLTSVDTQSREREIETYKRVQMLECAFKESDIYHKILENIERARYLKTLPVFPKTKDPPGM  
FGKLGVLRRVTRNLMRNKQAVIMRLVQNLIMGLFLIFYLLRVQNNLTKGAVQDRVGLLYQLVGATPYTGMLN  
AVNLFPMRLRAVSDQESQDGLYHKWQMLLAYVLLVLPFSVIATVIFSSVCYWTGLGLYPEVARF\*YFSAALLAPH  
LIGEFLLVLLGIVQNPINIVNSIVALLSISGLLIGSGFIRNIQEMPIPLKILGYFTFQKYCEILVNEFYGL  
NFTCCGSNTSMLNHPMCAITQGVQFIEKTCPGATSRTANFLILYGFIPALVILGIVIFKVRDY LISR\*  
>ENSMUSP00000130783\_c.984:G>T\_p.G329\* ENSMUST00000163375.2|Abcg5-  
202|ENSMUSG00000040505|-|chr17:g.84972271:C>A  
MCILGSSGSGKTTLLDAISGRLRRTGTLEGEVFNVCCELRRDQFQDCFSYVLQSDVFLSSLTVRETLRYTAML  
ALCRSSADFYNNKVEAVMTELSLSHVADQMIGSYNFGGISSGERRRVSIAAQLLQDPMDLTSVDTQSREREIE  
TYKRVQMLECAFKESDIYHKILENIERARYLKTLPVFPKTKDPPGMFGKLGVLRRVTRNLMRNKQAVIMRL  
VQNLIMGLFLIFYLLRVQNNLTKGAVQDRVGLLYQLVGATPYTGMLNAVNLFPMLRAVSDQESQDGLYHKWQ  
MLLAYVLLVLPFSVIATVIFSSVCYWTGLGLYPEVARF\*YFSAALLAPHLIGEFLLVLLGIVQNPINIVNSIVAL  
LSISGLLIGSGFIRNIQEMPIPLKILGYFTFQKYCEILVNEFYGLNFTCCGSNTSMLNHPMCAITQGVQFI  
EKTCPGATSRTANFLILYGFIPALVILGIVIFKVRDY LISR\*  
>rs107598382\_ENSMUSP00000129804\_c.309:G>C\_p.V104L  
ENSMUST00000165255.3|Vmn1r238-201|ENSMUSG00000091539|-  
|chr18:g.3123103:C>G

MKMDPGNFAIETFLFCQITVGMFGNSSILFYFIFLIFTEKHLTPKVLI IEHLTFANYLTVILRGFPQTMSYFG  
 FKNFLDDMECKLIVYISRITRGVSLYAMCLLSCFQAITISPNNRWIKLKYRATKYIGPSCSVSWLVHLLLN  
 LTPLRSEGTNYKKNATNRLSYGYCSLFASDSVATTLYISLVCFSDFVCLGLMACSSISMVSILYRHKRQVKHN  
 HSAQHFLKVPEDRATQTILILLCTFVISYSFSSIVAIIRTYLNYPVIWGVNIFTSLIEIFFPMFCPFVLITNM  
 RSSNLFLPCLGKR\*

>ENSMUSP00000129804\_c.283:G>A\_p.G95E ENSMUST00000165255.3|Vmn1r238-  
 201|ENSMUSG00000091539|-|chr18:g.3123129:C>T

MKMDPGNFAIETFLFCQITVGMFGNSSILFYFIFLIFTEKHLTPKVLI IEHLTFANYLTVILRGFPQTMSYFG  
 FKNFLDDMECKLIVYISRITRGVSLYAMCLVSCFQAITISPNNRWIKLKYRATKYIGPSCSVSWLVHLLLN  
 LTPLRSEGTNYKKNATNRLSYGYCSLFASDSVATTLYISLVCFSDFVCLGLMACSSISMVSILYRHKRQVKHN  
 HSAQHFLKVPEDRATQTILILLCTFVISYSFSSIVAIIRTYLNYPVIWGVNIFTSLIEIFFPMFCPFVLITNM  
 RSSNLFLPCLGKR\*

>rs108088649\_ENSMUSP00000129804\_c.244:A>G\_p.E82G  
 ENSMUST00000165255.3|Vmn1r238-201|ENSMUSG00000091539|-  
 |chr18:g.3123168:T>C

MKMDPGNFAIETFLFCQITVGMFGNSSILFYFIFLIFTEKHLTPKVLI IEHLTFANYLTVILRGFPQTMSYFG  
 FKNFLDDMGCKLIVYISRITRGVSLYAMCLVSCFQAITISPNNRWIKLKYRATKYIGPSCSVSWLVHLLLN  
 LTPLRSEGTNYKKNATNRLSYGYCSLFASDSVATTLYISLVCFSDFVCLGLMACSSISMVSILYRHKRQVKHN  
 HSAQHFLKVPEDRATQTILILLCTFVISYSFSSIVAIIRTYLNYPVIWGVNIFTSLIEIFFPMFCPFVLITNM  
 RSSNLFLPCLGKR\*

>ENSMUSP00000025073\_c.988:T>C\_p.L330P ENSMUST00000025073.12|Cu12-  
 201|ENSMUSG00000024231|+|chr18:g.3423580:T>C

MSLKPRVDFDETWKLLTTIKAVVMLEYVERATWNRFSDIYALCVAYPEPLGERLYAETKIFLESHVRHLY  
 KRVLESEEQVLVVMYHRYWEEYSKGADYMDCLYRNLNTQYIKKNKLT EADIQYGYGGVDMNEPLMEIGELALDM  
 WRKLMVEPLQNILIRMLLREIKNDRGGEDPNQKVIHGVSINSFVHVEQYKKKFP LKQYQIFVSPFLTETGEYY  
 KQEASNLLQESNCSQYMEKVLGRLKDEEIRCRKYLHPSSYTKVIHECQQRMVADHLQFLHSECHSIIQQERKN  
 DMANMYVLLRAVSSGLPHMIEELQKHIHDEGLRATSNPTQEHMPTLFVESVLEVHGKQFVQLINTVNLGDQHF  
 SALDKALTSVVNYREP KSVCKAPELLAKYCDNLLKKSAGMTENEVEDKLT SFITVFKYIDDKDVFQKQFYARM  
 LAKRLIHGLSMSMDSEAMINKLKQACGYEFTSKLHRMYTDM SVSADLNNKFNNFIRNQD TVIDLGISFQIYV  
 LQAGAWPLTQAPSSTFAIPQELEKSVQMFELFYSQHFSGRKLTLWHLCTGEVKMNYLGKPYVAMVTTYQMAV  
 LLAFNNSETVSYKELQDSTQ MNEKELTKTIKSLLDVKMINHDSEKEDI DAESSFSLNMSFSSKRKTKFKITTS  
 QKDTFQVISO SRARFNPSISMIKKCIEVLIDKQYIERSQASADEYSYVA\*

>ENSMUSP00000125403\_c.988:T>C\_p.L330P ENSMUST00000162301.8|Cu12-  
 205|ENSMUSG00000024231|+|chr18:g.3423580:T>C

MSLKPRVDFDETWKLLTTIKAVVMLEYVERATWNRFSDIYALCVAYPEPLGERLYAETKIFLESHVRHLY  
 KRVLESEEQVLVVMYHRYWEEYSKGADYMDCLYRNLNTQYIKKNKLT EADIQYGYGGVDMNEPLMEIGELALDM  
 WRKLMVEPLQNILIRMLLREIKNDRGGEDPNQKVIHGVSINSFVHVEQYKKKFP LKQYQIFVSPFLTETGEYY  
 KQEASNLLQESNCSQYMEKVLGRLKDEEIRCRKYLHPSSYTKVIHECQQRMVADHLQFLHSECHSIIQQERKN  
 DMANMYVLLRAVSSGLPHMIEELQKHIHDEGLRATSNPTQEHMPTLFVESVLEVHGKQFVQLINTVNLGDQHF  
 SALDKALTSVVNYREP KSVCKAPELLAKYCDNLLKKSAGMTENEVEDKLT SFITVFKYIDDKDVFQKQFYARM  
 LAKRLIHGLSMSMDSEAMINKLKQACGYEFTSKLHRMYTDM SVSADLNNKFNNFIRNQD TVIDLGISFQIYV  
 LQAGAWPLTQAPSSTFAIPQELEKSVQMFELFYSQHFSGRKLTLWHLCTGEVKMNYLGKPYVAMVTTYQMAV  
 LLAFNNSETVSYKELQDSTQ MNEKELTKTIKSLLDVKMINHDSEKEDI DAESSFSLNMSFSSKRKTKFKITTS  
 QKDTFQELEQTRSAVEDRKMYLQAAIVRIMKARKVLRHNALIQEVISQSRARFNPSISMIKKCIEVLIDKQY  
 IERSQASADEYSYVA\*

>ENSMUSP00000123903\_c.799:T>C\_p.L267P ENSMUST00000161317.2|Cu12-  
 204|ENSMUSG00000024231|+|chr18:g.3423580:T>C

MSLKPRVDFDETWKLLTTIKAVVMLEYVERATWNRFSDIYALCVAYPEPLGERLYAETKIFLESHVRHLY  
 KRVLESEEQVLVVMYHRYWEEYSKGADYMDCLYSDRGGEDPNQKVIHGVSINSFVHVEQYKKKFP LKQYQIFV  
 PFLTETGEYYKQEASNLLQESNCSQYMEKVLGRLKDEEIRCRKYLHPSSYTKVIHECQQRMVADHLQFLHSEC  
 HSIQQERKNDMANMYVLLRAVSSGLPHMIEELQKHIHDEGLRATSNPTQEHMPTLFVESVLEVHGKQFVQLIN  
 TVNLGDQHFMSALDKALTSVVNYREP KSVCKAPELLAKYCDNLLKKSAGMTENEVEDKLT SFITVFKYIDDK  
 DVFQKQFYARMLAKRLIHGLSMSMDSEAMINKLKQACGYEFTSKLHRMYTDM SVSADLNNKFNNFIRNQD TVI  
 DLGISFQIYV LQAGAWPLTQAPSSTFAIPQELEKSVQMFELFYSQHFSGRKLTLWHLCTGEVKMNYLGKPYV  
 AMVTTYQMAVLLAFNNSETVSYKELQDSTQ MNEKELTKTIKSLLDVKMINHDSEKEDI DAESSFSLNMSF  
 S

>ENSMUSP00000094326\_c.27:A>T\_p.I10F ENSMUST00000096575.5|Map3k2-  
 201|ENSMUSG00000024383|+|chr18:g.32329916:A>T



MDDQQALNSFMQDLAVLHKASRPALSLOETRAKAKPSSPKKQNDVVRVKFEHRGEKRILQVTRPVKLEDLRSKSK  
IAFGQSMDLHYTNNELVIPLTTQDDLDKAVELLDRSIHMKSLKILLVNGSTQATNLEPSPSPEDLNNTPLGA  
ERKKRLSVVGGPPNRDRSSPPPGYIPDELHQIARNGSFTSINSEGEFIPESMDQMLDPLSLSSPENSNGSGCPS  
LDSPLDGE.SYPKSRMPRAQSYPDNHQEFETYDNPIFEKFGKGGTYPRRYHVSYHHQYENDGRKTFPRARRTQG  
TSFRSPVFSPTDHSLSSTSSGSSVFTPEYDSDRIRRRGSDIDNPTLTVTDISPPSRSPRAPTNWRLGKLLGQG  
AFGRVYLCYDVDGTRELAVKQVQFNPEPETSKEVNALECEIQLLKNLLHERIVQYYGCLRDPQEKTLISIFME  
YMPGGSIKDQLKAYGALTENVTRKYTRQILEGVHYLHNSMIVHRDIKGANILRDSTGNIKLDFGASKRLQTI  
CLSGTGMKSVTGTPTYWMSPEVISGEGYGRKADIWSVACTVVEMLTEKPPWAEFEAMAAIFKIATQPTNPKLPP  
HVS DYTRDFLKRIFVEAKLRPSAEELLRHMFVHYH\*  
>ENSMUSP00000053326\_c.93:A>G\_p.R32G ENSMUST00000059571.7|Pcdhb19-  
201|ENSMUSG00000043313|+|chr18:g.37630300:A>G  
MENQEGLYLQTRQVLLLFVFLGMSQAHSEAGGLSVVEEMLSGALVGNLVKDLGLQVDELSAREAQVASSDNKL  
PLQLNINTGDLLESEPLDREELCGSTPCVLHFQVLLKNPLKILQAEQVTDVNDNSPVFLEKEMVLEIPENS  
PVGAVFLLSAIDLVDGINAVKSYEISQNSHFHVTMRVNDGRKYPELVLDKALDYEEQHELRLILTALDGGT  
PPRSGTALVRVEVIDINDNSPEFDHMFYEVTVPENSMGLSLLITASAWDLDSGINGEVSYAFSHASEDIRKTF  
AINEHSGEIRLKGYLDFETTESYSIIKATDRGGFLGKSTVRIQVMDVNDNFPEIIVSSFISPIPENTAETLV  
MIFSIKDKDSGENGKVMCTIPEGLPFVLKSSIIENYHLETDGALDRESIAEYNITISVTDLGTPLRTQHTII  
VQVADINDNAPAFQTQTSYTMFFHENNSPALHIGTISATDS DAGSNAHITYSLMSAQDLQMLSLISINADNG  
QLFALRALDYEVQLAFEFQVGATDRGSPALSSQALVRVVLDNDNAPFVLYPMQNASAPCTELLPRAAEPGY  
LVTKVAVDRDSGNAWLSFQLLKATEPGLFSVWAHNGEVTRTRLLSERDAPKHRLLLLVKNDGDPPRSASVT  
LHVLVVDGFSQPYLPLPEVARNPAHEEDALTYLVTALASVSSLFLLSVMLFVGVRLCRRARAASLGCTVPE  
GHFPDHLMGINSAGTLSQSYQYEVCLMGGSGTNEFRFLKPVSPNLQPPGKEIEESSTLRNSFGLFRDCN\*  
>ENSMUSP00000125576\_c.709:A>C\_p.Q237P ENSMUST00000161701.3|Pcdh1-  
204|ENSMUSG00000051375|-|chr18:g.38332292:T>G  
NDNTPNFASPVITLAI PENTNIGSLFPIPLATDRDAGPNGVASVELQAGPEAQELFGLQVAEDQEEKQPQLIV  
MGNLDRERWDSYDLTIKVDGNGNPPRASSALLRVTVLDTNDNAPKFERPTYEAELSENSPIGHSVIQVKANDS  
DQGANAEDIDYTFHQAPEVVRLLRLDRNTGLITVQGPVDREDLSTLRFVSLAKDRGATPKSARAQVVVTVKDM  
NDNAPTIEIRGIGLVTHPDGMANISEDVAEETAVALVQVSDRDEGENAAVTCVVAGDVPPQLRQASETGSDSK  
KKYFLQTTTPLDYEKVKDYTIEIVAVDSGNPPLSSTNSLKVQVVDVNDNAPVFTQSITEVAF PENNKPGEVVA  
EVTASDADSGSNAELVYSLEPEPAAQGLFTISPENGEIRVKTSLDREQRDSYELKVVAADRGS PSLQGTATVL  
VNVLDNDNDPKFMLS GYNFVSMENMPALSPVGMVTVIDGDKGENARVQLSVEQDNGDFVIQNGTGTILSSLS  
FDREQQSTYTFQLKAVDGGVPPRSAYVGVTVINVL DENDNAPFITAPSNTSHRLLTPQTRLGETVSVQVTAEDID  
SGINAELTYSIAGGNPYGLFQIGSHSGAITLEKEIERRHHGLHRLVVKVSDRGKPPRYGTALVHLYVNETLAN  
RTLLETLLVHSLDTPLDIDIADGPEYERSKQRGNILFGVVAGVVAVALLIALAVLVRYCRQREAKSGYQAGKK  
ETKDLYAPKPSGKAAGSKSKGKSKSPKPKVKEDEDDTGLQKSLKFNLMSDAPGDSPRIHLPLNYPGSPD  
LGRHYRSNSPLPSIQLPQSPSASKKHQVVDLPPANTFVGTGDTTSTGSEQYSDYSRTNPPKYPSKQLPHR  
RVTF SATSQAQELQDPSQHSYD SGLEESETPSSKSSSGPRLGPLALPEDHYERTTPDGSIGEMEHENDLRP  
LPDVAMTGTCTRECSEFGHSDTCWMPGQSSPSRRTKSSALKLSTFVVPYQDRGGQEPAGAGSPSPPEDRNTKTA  
PVRLLPYSYSAFSSSHDCKDSATLEEIPLTQTSDFPPTATPASAQTAAKREIYL\*  
>ENSMUSP00000055199\_c.1126:A>C\_p.Q376P ENSMUST00000057185.13|Pcdh1-  
201|ENSMUSG00000051375|-|chr18:g.38332292:T>G  
MGPLRPSPPGGQRLLLP LLLLALLLLLAPSASHTTQVVYKVPPEEQPNTLIGSLAADYGLPDVGHLYKLEVG  
APYL RVDGKTGDI FTTETSIDREGLRECQNQIPGNPCILEFEV SITDLVQNGSPRLLEGQIEVQDINDNTPNF  
RWDSDYDLTIKVDGNGNPPRASSALLRVTVLDTNDNAPKFERPTYEAELSENSPIGHSVIQVKANDSDQANA  
IDYTFHQAPEVVRLLRLDRNTGLITVQGPVDREDLSTLRFVSLAKDRGATPKSARAQVVVTVKDMNDNAPTIE  
EIRGIGLVTHPDGMANISEDVAEETAVALVQVSDRDEGENAAVTCVVAGDVPPQLRQASETGSDSKKYYFLQ  
TTPLDY EKVKDYTIEIVAVDSGNPPLSSTNSLKVQVVDVNDNAPVFTQSITEVAF PENNKPGEVVAEVTASDA  
DSGSNAELVYSLEPEPAAQGLFTISPENGEIRVKTSLDREQRDSYELKVVAADRGS PSLQGTATVLNVLDN  
DNDPKFMLS GYNFVSMENMPALSPVGMVTVIDGDKGENARVQLSVEQDNGDFVIQNGTGTILSSLSFDREQQS  
TYTFQLKAVDGGVPPRSAYVGVTVINVL DENDNAPFITAPSNTSHRLLTPQTRLGETVSVQVTAEDIDSGINAEL  
TYSIAGGNPYGLFQIGSHSGAITLEKEIERRHHGLHRLVVKVSDRGKPPRYGTALVHLYVNETLANRTLLET  
LVHSLDTPLDIDIADGPEYERSKQRGNILFGVVAGVVAVALLIALAVLVRYCRQREAKSGYQAGKKE TKDLYA  
PKPSGKAAGSKSKGKSKSPKPKVKEDEDDTGLQKSLKFNLMSDAPGDSPRIHLPLNYPGSPDLGRHYRS  
NSPLPSIQLPQSPSASKKHQVVDLPPANTFVGTGDTTSTGSEQYSDYSRTNPPKYPSKQVQGPFRLLSTPQ  
PPHPYHGAIWTEVWE\*  
>ENSMUSP00000125309\_c.1126:A>C\_p.Q376P ENSMUST00000159405.3|Pcdh1-  
202|ENSMUSG00000051375|-|chr18:g.38332292:T>G

MGPLRPSPPGGQRLLLPPLLLALLLLLAPSASHTTQVVYKVPPEEQPPNTLIGSLAADYGLPDVGHLYKLEVG  
 APYLVRVDGKTGDIFFTETSIDREGLRECQNQIPGNPCILEFEVSI TDLVQNGSPRLLEGQIEVQDINDNTPNF  
 ASPVITLAI PENTNIGSLFPI PLATDRDAGPNGVASVELQAGPEAQELFGLQVAEDQEEKQPQLI VMGNLDRE  
 RWDSYDLTIKVDGGNPPRASSALLRVTVLDTNDNAPKFERPTYEAELSENSPIGHSVIQVKANDSDQGANAE  
 IDYTFHQAPEVVRLLRLDRNTGLITVQGPVDREDLSTLRFVSLAKDRGATPKSARAQVVVTVKDMNDNAPT I  
 EIRGIGLVTHPDGMANISEDVAEETAVALVQVSDRDEGENAAVTCVVGADVPFQLRQASETGSDSKKKYFLQT  
 TTPLDYEKVKDYTIEIVA VDSGNPPLSSTNSLKVQVVDVNDNAPVFTQSI TEVAF PENNK PGEVVAEVTASDA  
 DSGSNAELVYSLEPEPAAQGLFTISPENGEIRVKTSLDREQRDSYELKVVAADRGSPSLQGTATVLVNVLDN  
 DNDPKFMLS GYNFV MENMPALSPVGMVTVIDGDKGENARVQLSVEQDNGDFVIQNGTGTILSSLSFDREQQS  
 TYTFQLKAVDGGVPPRSAYVGVTVINVL DENDNAPFITAPSNTSHRLLTPQTRLGETVSVQVTAEDIDSGINAEL  
 TYSIAGGNPYGLFQIGSHSGAITLEKEIERRHHGLHRLVVKVSDRGKPPRYGTALVHLYVNETLANRTLLETL  
 LVHSLDTPLDIDIAGDPEYERSKQRGNILFGVVAGVVAALLIALAVLVRYCRQREAKSGYQAGKKE TKDLYA  
 PKPSGKAAGKSKGKSKGKSKPKPVKVEDEDDTGLQKSLKFNLMSDAPGDSPRIHLPLNYPGSPDLGRHYRS  
 NSPLPSIQLPQSPSASKKHQVVQDLP PANTFVGTGDTTSTGSEQYSDYSYRTNPPKYPSPKQVQGFRLSTPQ  
 PPPHPYHGAIWTEVWE\*  
 >ENSMUSP00000133372\_c.533:C>TC\_p.A178ins-fs ENSMUST00000174518.8|Aldh7a1-  
 208|ENSMUSG00000053644|-|chr18:g.56681551:G>GA  
 MSTLLIHHPQYAWLQDLGLREDNEGVYNGSWGGRGEVITTYCPANNEPIARVRQASLKDYEETIGKAKKAWNI  
 WADIPAPKRGEIVRKIGDAFREKIQLLGRVLSLEMGIKILVEGIGEVQEVVDVCDYAAGLSRMIGGPTLP SERP  
 GHALIEMWNPLGLVGIITAFNFPVAVFGWNAHSSDHRECLPLERSTDYVPR  
 >ENSMUSP00000134192\_c.617:C>TC\_p.A206ins-fs ENSMUST00000172734.8|Aldh7a1-  
 206|ENSMUSG00000053644|-|chr18:g.56681551:G>GA  
 MWRVPRRLCVQSVKTSKLSGPWSRPAAHMSTLLIHHPQYAWLQDLGLREDNEGVYNGSWGGRGEVITTYCPAN  
 NEPIARVRQASLKDYEETIGKAKKAWNIWADIPAPKRGEIVRKIGDAFREKIQLLGRVLSLEMGIKILVEGIGE  
 VQEVVDVCDYAAGLSRMIGGPTLP SERPGHALIEMWNPLGLVGIITAFNFPVAVFGWNAHSSDHRECLPLER  
 STDYVPR  
 >ENSMUSP00000065089\_c.617:C>TC\_p.A206ins-fs  
 ENSMUST00000066208.13|Aldh7a1-201|ENSMUSG00000053644|-  
 |chr18:g.56681551:G>GA  
 MWRVPRRLCVQSVKTSKLSGPWSRPAAHMSTLLIHHPQYAWLQDLGLREDNEGVYNGSWGGRGEVITTYCPAN  
 NEPIARVRQASLKDYEETIGKAKKAWNIWADIPAPKRGEIVRKIGDAFREKIQLLGRVLSLEMGIKILVEGIGE  
 VQEVVDVCDYAAGLSRMIGGPTLP SERPGHALIEMWNPLGLVGIITAFNFPVAVFGWNAHSSDHRECLPLER  
 STDYVPR  
 >ENSMUSP00000133970\_c.611:C>TC\_p.A204ins-fs ENSMUST00000174704.8|Aldh7a1-  
 209|ENSMUSG00000053644|-|chr18:g.56681551:G>GA  
 RVPRRLCVQSVKTSKLSGPWSRPAAHMSTLLIHHPQYAWLQDLGLREDNEGVYNGSWGGRGEVITTYCPANNE  
 PIARVRQASLKDYEETIGKAKKAWNIWADIPAPKRGEIVRKIGDAFREKIQLLGRVLSLEMGIKILVEGIGEVQ  
 EYVDVCDYAAGLSRMIGGPTLP SERPGHALIEMWNPLGLVGIITAFNFPVAVFGWNAHSSDHRECLPLERST  
 DYVPR  
 >ENSMUSP00000075174\_c.3438:G>C\_p.E1147Q ENSMUST00000075770.13|Megf10-  
 201|ENSMUSG00000024593|+|chr18:g.57427122:G>C  
 MAISSSSCLGLICSLCHWVGTASSLNLEDPNVC SHWESYSVTVQESYPHPFDQIYYTSTCTDILNWFKCTRHR  
 ISYRTAYRHGEKTM YRRKSQCCPGFYESRDMCVPHCADKCVHGRCIAPNTCQCEPGWGGTNCSSACDGDHWGP  
 HCSSRCQCKNRALCNPI TGACHCAAGYRGWRCEDRCEQGT YGNDCHQRCQCQNGATCDHITGECRCSPGYTGA  
 FCEDLCPGKHGPHCEQRCPCQNGGVCHHVTGECSCPSGWMGTVCQQPCPEGRFGKNCSEQCCHNGGTCDDAA  
 TGQCHCSPGYTGERCQDECPVGSYGVRC AEACRCVNGGKCYHVS GTCLCEAGFSGELCEARLCP EGLYGIKCD  
 KRCPCHLDNTHSCHPMSGEGCKPGWSGLYCNETCSPGFYGEACQQICSCQNGADCDSVTGRCACAPGFKGTD  
 CSTPCPLGRYGINCSSRCGCKND AVCS PVDGSCICKAGWHGVDCSIRCPSGTWGFGCNLTQCCLNGGACNTLD  
 GTCTCAPGWRGAKCEFPQDGT YGLNCAERCDCSHADGCHPTTGHCRCLPGWSGVHCD SVCAEGRWGPNC SLP  
 CYCKNGASCSPDDGICECAPGFRGTTCQRICSPGFYGHRCSTQCPCQCVHSSG PCHHITGLCDCLPGFTGALCN  
 EVCPSGRFGKNCAGVCTCTNNGTCNPIDRSCQCYPGWIGSDCSQPCPPAHWGPNCIHTCNCHNGAFCSAYDGE  
 CKCTPGWTGLYCTQRCPLGFYKDCALICQCNQNGADC DHISGQCTCRTGFMGRHCEQKCPAGTYGYGCRQICD  
 CLNSTCDHITGTCTCYCPGWKGARCDQAGVIVGNLNSLRSRTALP ADSYQIGAIAGIIVLVLVVFLFLLALF  
 IIRHKQKRKESM PAVTYTPAMRVINADY TIAETLPHSNLNGNANSHYFTNPSYHTLSQCATS PHVNNRDRMT  
 IAKSKNNQLFVN LKNVNPGRGTLVDCTGTL PADWKQGGYLNELGAFGLDRSYMGKSLKDLGKNSEYNSSTCS  
 LSSSENPYATIKDPPALLPKSSECGYVEMKSPARRDSPYAEINNSTPANRNVYEVEPTVSVVQGVFSNSGHVT  
 QDPYDLPKNSHIPCHYDLLPVRDSSSSPKREDGGGSNSTSSNSTSSSSSSSQ\*

>ENSMUSP00000025497\_c.516:A>C\_p.T173P ENSMUST00000025497.8|Fbn2-201|ENSMUSG00000024598|-|chr18:g.58333697:T>G  
MGRRRRLCLQPYFVWLGCVALWAQGTGQPPPPKTLRQPQQVVRPAVAGSEGGFMGPEYRDEGAVAASR  
VRRRGGQIEILRGNVCGSRFHSYCCPGWKTLPGGNQCIVPICRNSCGDGFCSRPNMCTCSSGQISPTCGAKSI  
QQCSVRCMNGGTCAADHCCQKGYIGPYCGQPVCENGCCQNGGRCIGPNRCACVYGFTGPQCERDYRTGPCFTQ  
VNNQMCQGLTGIVCTKTLCCATIGRAWGHPCEMCPAQPPCRRGFIPNIIRTGACQDVDECQAIPLGCQGGNC  
INTVGSFECRCPAGHKQSETTQKCEDIDECSVIPGVCEGTDCSNTVGSYFCLCPRGFVSTSDGSRCIDQRAGT  
CFSGLVNGRCAQELPGRMAKAQCCCEPGRCSWISGTIPEACPVRGSEYRRLCLDGLPMGGIPGSSVSRPGGTG  
STNGYGGPGGTGFLPIPGDNGFSPGVGGAGVAGGQGPITGLTILNQTIDICKHHANLCLNGRCIPTVSSYR  
CECNMGYKQDANGDCIDVDECTSNPCSNGDVNTPGSYCKCHAGFQRTPTKQACIDIDECIQNGVLCKNGRC  
VNTDGSFQICINAGFELTDDGKNCVDHDECTTTNMCLNGMCINEDGSFKCVCKPGFILAPNGRYCTDDECQT  
PGICMNGHCINNEGSFRCDPCPPGLAVGVDGRVCDVTHMRSTCYGEIKKGVVVRPFGAVTKSECCANPDYGF  
GEPCCPCPAKNSAEFHGLCSSGIGITVDGRDINECALDPDICANGICENLRGSYRCNCSNGYEPDASGRNCID  
IDDECLVNRLLCDNGLCRNTPGSYSCTCPPGYVFRTEETETCEDVNECESNPCVNGACRNLLGSFHCECSPGSKL  
SSTGLICIDSLKGTCLWLNIDNRCEVNINGATLKSECCATLGAAGWSPCERCELDAACPRGFARIKGVTCEDEV  
NECEVFPVGVCPNGRVCNSKGSFHCECEGLTLDGTGRVCLDIRMEHCFKWEDECIHPVPGKFRMDACCAV  
GAAWGTECEECPKPGTKEYETLCPRGPGFANRGDILTRPFYKIDINECKAFPMGCTYKCRNIGSFKRCRNN  
GFALDMEERNCTDIDECRISPDLCGSGICVNTPGSFECECFEGYESGFMMMKNCMDIDECERNPLLCRGGTCV  
NTEGSFQDCPLGHELSPSREDCVDINECSLSDNLCRNGKCVNMIGTYQCSCNPGYQATPDRQGTIDIDECMI  
MNGGCDTQCTNSEGSYECSCSEGYALMPDGRSCADIDECENNPDICDGGQCTNIPGEYRCLCYDGFMASMDMK  
TCIDVNECDLNPNICMFGECENTKGSFICHQQLGYSVKKGTGTCTDVDECEIGAHNCDMHASCLNVPGSFKCS  
CREGWVNGIKCIDLDECANGTHQCSINAQCVNTPGSYRCACSEGF TGDGFTCSDVDECAENTNLCENGQCLN  
VPGAYRCECEMGFTPASDSRSCQDIDECSFQNICVFGTCNNLPGMFHCICDDGYELDRGTGGNCTDIDECADPI  
NCVNGLCVNTPGRYECNCPDFQLNPTGVGCVDNRVGNCYLKFGPRGDGSLSCNTEVGVGVSRSSCCSLGKA  
WGNPCETCPPVNSTEYITLCPGGEGFRPNPITILELIDECQELPGLCQGGNCINTFGSFQCECPQGYLSEE  
TRICEDIDECFAHSTYVCGPGTCTYNTLGNITCICPEYMQVNGHNCMDMRKSFCYRSYNGTTCENELPFNVTK  
RMCCCTYNVKGAWNKPCPEPCPTPGTADFKTICGNI PGFTFDIHTGKAVDI DECKEIPGICANGVCINQIGSFR  
CECPTGFSYNDLLLVCEDIDECNSGDNLCQRNADCINSPGSYRCECAAGFKLSPNGACVDRNECLEIPNVCSH  
GLCVDLQGSYQICCNNGFKASQDQTMCMVDDECERHPCNGTCKNTVGSYNCLCYPGFELTHNNDCLDIDEC  
SFFGQVCRNGRCFNEIGSFKCLCNEGYELTPDGKNCIDTNECVLPGSCSPGTCQNLGSGFRICPPGYEVRS  
ENCIDINECEDDPNICLFGSCTNTPGGFQICPPGFVLSDNGRCFDTRQSFCTNFENGKCSVPKAFNTTKA  
KCCCSKMPGEGWGDPELCPKDEVAFAQDLCPYGHGTVPSLHDTREDVNECLESPGICSNQGCINTDGSFRCE  
CPMGYNLDYTGVRVDTDECSIGNPCNGTCTNVI GSFECTCNEGFEPGPMNCEIDINECAQNPLLCAFRCMN  
TFGSYECTCPVGYALREDQMKCKDLDECAEGLHDCESRGMMCKNLIGTFMCI CPPGMARRPDGEGCVDENECR  
TKPGICENGRCVNIIGSYRCECNEGFQSSSSGTECLDNRQGLCAEVLQTMCMASSRNLVTKSECCDGGGR  
GWGHQCELCPLPGTAQYKKIKCPHGPGYATDGRDIDECKVMPSLCTNGQCVNTMGSFRFCFKVGYTTDISGTAC  
VDLDECSQSPKPCNFICKNTKGSYQCSCPRGYVLQEDGKTCCKDLDECQTKQHNCQFLCVNTLGGFTCKCPPGF  
TQHHTACIDNNECGSQPSLCGAKGICQNTPGSFSCECQRGFSLDASGLNCEVDVDECDGNHRCQHGCQNLGGY  
RCGCPQGYVQHYQWNQCVDENECNPGACGSASCYNTLGSYKACPSGFSFDQFSSACHDVNECSSSKNPCS  
GCSNTEGGYLCGCPPGYFRVQGHCVSGMGFNKGQYLSVDAEAEEDENALSPEACYECKINGYTKKDGRRKRS  
AQEPEPASAEQISLESVAMDSPVNMKFNL SGLGSKEHILELVAIEPLNNHIRYVISQGNEDGVFRIHQRNG  
LSYLHTAKKKLAPGTYTLEITSIPLYGKKELRKLEEHNEDDYLLGVLGEALRMRLQIQLY\*

>ENSMUSP00000025468\_c.2129:T>G\_p.I710M ENSMUST00000025468.15|Pde6a-201|ENSMUSG00000024575|+|chr18:g.61398131:T>G  
MGEVTAEEVEKFLDSNIGFAKQYYNFHYRGKVISDLLGAKEAAVDFSNYHDVNSVEESEIIFDLLRDVQENLQ  
AEKCTFNVMKKLCFLLRADRM SLFMYRTRNGIAELATRLFNHVKDAVLEDCLVMPDSEIVFPLDMGVVGHVAH  
SKKIANVPNTEEDEHFCDVDNLTEYQTKNILASPI MNGKDVVAIIMAVNKIDEPHFTKRDEEILLKYLNFVN  
LIMKVFHLSYLHNCETRGGQILLWSGSKVFEELTDIERQFHKALYTVRAFLNCDRYSVGLLDMTKQKEFFDVW  
PVLMEAPAYSGPRTPDGREINFYKVIDYILHGKEDIKVI PNPPADHWALVSGLPITYVAQNGLICNIMNAPAE  
DFFEFAQKEPLDESGWMIKNVLSMPIVNKKEEIVGVATFYNRKDGKPFDDMDETLMESLTQFLGWSVLNPDTYE  
SMNKLENRKDIFQDIVKYHVKCDNEEIQKILKTREYVYKPEWECEEEELAEILQGELPDAESYEINKFHFSDL  
PLTELELVKCGIOMYYELRVVDFHIFQEAALVRFMYSLSKGYRRITYHNWRHGFVNGQTMFSLLVVTGKLRYP  
TDLEALAMVTAAFCHDIDHRGTNNLYQMKSQNPLAKLHGSSILERHHLEFGKTLRDESLNIFQNLNRRQHEH  
AIHMDIAIATDLALYFKKRTMFQKIVDQSKTYESTQEWYQYMMLEQTRKEMVMAMMMTACDL SAI TKPWEV  
QSKVALLVAEEFWEQGDLERTVLQQNPIMPMDRNKADEL PKLQVGFIDFVCTFVYKEFSRFHEITPMLDGIT  
NNRKEWKALADEYEAKMKALEEEKQKQAAKQAASGNQPGGNPTPGGAPASKSCCIQ\*

>ENSMUSP00000025468\_c.2134:T>G\_p.M712R ENSMUST00000025468.15|Pde6a-201|ENSMUSG00000024575|+|chr18:g.61398136:T>G

MGEVTAEEVEKFLDSNIGFAKQYYNFHYRGKVISDLLGAKEAAVDFSNYHDVNSVEESEIIFDLLRDVQENLQ  
 AEKCTFNVMMKCLCFLLRADRMSLFMYRTRNGIAELATRLFNVHKDAVLEDCLVMPDSEIVFPLDMGVVGHVAH  
 SKKIANVPNTEEDEHFCDFVDNLTQTKNILASPIMNGKDVVAIIMAVNKIDEPHFTKRDEEILLKYLNFNVN  
 LIMKVFHLSYLHNCETRGGQILLWSGSKVFEELTDIERQFHKALYTVRAFLNCDRYSVGLLDMTKQKEFFDVW  
 PVLMEAPAYSGPRTPDGREINFYKVIDYILHGKEDIKVINPPADHWALVSGLPYVAQNGLICNIMNAPAE  
 DFFEFQKEPLDESGWMIKNVLSMPIVNKKEEIVGVATFYNRKDGKPFDDMETLMESLTQFLGWSVLNPDTYE  
 SMNKLENRKDIFQDIVKYHVKCDNEEIQKILKTREYVYKPEWCEEEELAEILQGELPDAESYEINKFHFSDL  
 PLTELELVKCGIQMYEYLRVVDKFIHQEALVRFMYSLSKGYRRTIYHNWRHGFVNGQTMFSLVLTGKLRYP  
 TDLEALAMVTAAFCHDIDHRGTNNLYQMKSQNPLAKLHGSSILERHHLEFGKTLRDESLNIFQNLNRRQHEH  
 AIHMDIAIIATDLALYFKKRTMFQKIVDQSKTYESTQEWQYMMLEQTRKEIVRAMMTACDLSAITKPWEV  
 QSKVALLVAAEFWEQGDLETLVQQNPIPMMDRNKADELPLKLVGFIDFVCTFVYKEFSRFHEEITPMLDGIT  
 NNRKEWKALADEYEAKMKALEEKKQKQAAKQAASGNQPGGNPTPGGAPASKSCCIQ\*  
 >ENSMUSP00000135692\_c.1082:T>TATAC\_p.V361ins-fs  
 ENSMUST00000175965.10|OneCut2-  
 201|ENSMUSG00000045991|+|chr18:g.64474533:T>TATAC  
 MKAAYTAYRCLTKDLEGCAMNPELTMESLGLHGPVGGSGGGGGGGGGGGGGGGGGGHEQELLASPSPHHAGRG  
 AAGSLRGGPPPTAHQELGTAAAAAASRSAMVTSMASILDGSDYRPELSIPLHHAMSMSCDSSPPGMGMSNT  
 YTLTLPQLPPISTVSDKFHHPHHPHHPHHPHHPHHPHHPHHPHHPHHPHHPHHPHHPHHPHHPHHPHHPHHPH  
 SMSQSLSPLAATPLGNGLGGLHNAQQSLPNYGPFGHDKMLSPNFDAHHTAMLTRGEQHLRSLGTPPAAMMSH  
 LNLGHHPGHTQSHGPVLAPSRERPPSSSSGSQVATSGQLEEINTKEVAQRITAEALKRYSIPQAIFAQRVIPMP  
 VSGDSLRLPAPESQTLLE  
 >ENSMUSP00000025856\_c.3376:T>C\_p.F1126S ENSMUST00000025856.17|Lrp5-  
 201|ENSMUSG00000024913|-|chr19:g.3654049:A>G  
 METAPTRAPPPPPPLLLLLLVYCSLVPAAASPLLLFANRRDVRVLDAGGVKLESTIVASGLEDAAAVDFQFSK  
 GAVYWTDVSEEAIKQTYLNLQGTAAAQNIIVISGLVSPDGLACDWDVGGKLYWTDSETNRIEVANLNGTSRKVLFW  
 QDLDDQRAIALDPAHGMYWTDWGEAPRIERAGMDGSTRKIIVDSDIYWPNGLTIDLEEQKLYWADAKLSFIH  
 RANLDGFSRFQKVVEGSLTHPFALTLSGDTLYWTDWQTRS IHACNKWTGEQRKEILSALYSPMDIQVLSQERQP  
 PFHTPCEEDNGGCSHLCLLSPREPFYSCACPTGVQLQDNGKTKCTGAEVLLLLARRTDLRRISLDTPDFTDIV  
 LQVGDIRHAIADIDYDPLEGYVYWTDDEVRAIRRAYLDGSGAQTLVNTIINDPDGIAVDWVARNLYWTDGTDR  
 IEVTRLNGTSRKILVSEDLDEPRAIVLHPVMGLMYWTDWGENPKIECANLDGRDRHVLVNTSLGWPNGLALDL  
 QEGKLYWGDAKTDKIEVINIDGTRKKTLEDKLPHIFGFTLLGDFIYWTDWQRRSIERVHKVKASRDVIIDQL  
 PDLMLGKAVNVAKVVGTPCADNGGCSHLCFPTPRATKCGCPIGLELLSDMKTCIIEPAFLVFTSRATIHRI  
 SLETNNNDVAIPLTGVKEASALDFDVSNNHIYWTDVSLKTIISRAFNMNGSSVEHVIEFGLDYPEGMAVDWMGKN  
 LYWADTGTNRIEVARLDGQFRQVLVWRDLNPRSLALDPTKGYIYWTEWGGKPRIVRAFMDGTNCMTLVDKVG  
 RANDLTIYDADQRLYWTDLDTNMIESSNMLGQERMVIADDLPPYFGLTQYSDYIYWTDWNLHSIERADKTSGR  
 NRTLITQGHLDVMDILVFHSSRQDGLNDCVHNSNGCQGLCLAIPGGHRCGCASHYTLDPSSRNCSPPSTFLLF  
 SQKFAISRMI PDDQLSPDLVLPVHGLRNVKAINYDPLDKFIYWVDGRQNIKRAKDDGTQPSMLTSPSLSLSPD  
 RQPHDLSIDIYSRTLFWTCEATNTINVHRLDGDAMGVVLRGDRDKPRAI AVNAERGYMYFTNMQDHAAKIERA  
 SLDGTEREVLFTTGLIRPVALVVDNALGKLSWVDADLKRIESCDSLGANRLTLEDANIVQPVGLTVLGRHLYW  
 IDRQQMIERVEKTTGDKRTRVQGRVTHLTGIIHAVEEVSLEEFSAHPCARDNGGCSHICIAKGDGTPRCSCP  
 HLVLQNLTCGEPPTCS PDQFACTTGEIDCIPGAWRCDGFPECADQSDDEEGCPVCSASQFPCARGQCVDLRL  
 RCDGEADCQDRSDEANCDAVCLPNQFRCTSGQCVLIKQCCDSFPDCADGSDDELMCEINKPPSDDI PAHSSAIG  
 PVIGIILSLFVMGGVYFVCQRVMCQRYTGASGPFPEHYVGGAPHVPLNFIAPGGSQHGPFPGIPCSKSVMSM  
 SLVGGRGVSPLYDRNHVTGASSSSSSSTKATLYPPIPNPPSPATDPSLYNVDFVYSSGIPATARPYRYPVIR  
 GMAPPTPCSTDVDCSDYSTSRWKSSKYLDLNSDSDPYPPPTPHSQYLSAEDSCPPSPGTERS YCHLFPPP  
 PSPCTDSS\*  
 >ENSMUSP00000138475\_c.1212:C>A\_p.L405I ENSMUST00000182102.8|Slc22a27-  
 202|ENSMUSG00000067656|-|chr19:g.7843165:G>T  
 MSFQELLNQVGLGRFQILQIVFLLLNIAIVVPHIAMENFTAAPNHRCWVPI LDNDTASDNGSRILSQD DLL  
 RISIPLDSNLRPEKCRFAQPQWHLLHNGTFSNVSEPDTEPCVDGWYDRSNFLSTIVTEWDLVCE SQALNS  
 VTKFSFMIGLFIGGIICGHLSDRWLSEARWLIVTNKPKQGLKELRKVAHMNGMKNSGDLTMEIVRTSMKAEL  
 EAAKTKPSLRDLFHTSILRKRICVLSFMRLFFTVSIFGLAVHLQHLSSNIILLQFLISALAILVSVIGPFVNLN  
 HIGRRITYLVLMSLRGIFILIAVFPQEMQTLRIIMATLAEGISSLCVGVSRRLHTNELLPTTLRATAVGVIGF  
 FGNSGFSYLSPLFMLLATYYANMPWIFYGGFSIFNAFTVFILPETKNQPLPDSTHDVGNWDKESRKGKEDPII  
 KVTRF\*  
 >ENSMUSP00000093991\_c.1536:C>A\_p.L513I ENSMUST00000075619.5|Slc22a27-  
 201|ENSMUSG00000067656|-|chr19:g.7843165:G>T

MSFQELLNQVGLGRFQILQIVFLLLLLNAIVVPHIAMENFTAAPNHRCWVPILDNDTASDNRSRILSQDDLL  
RISIPLDSNLRPEKCRRAFPQWHLHLNGTFSNVSEPDTEPCVDGWVYDRSNFLSTIVTEWDLVCEQALNS  
VTKFSFMIGLFIGGIICGHLSDRLGRKFILTCALLQFAITETCVAFAPSFYICSLRFLAGLSVEPILVNSHL  
LMLEWTSKPKFLTMAALLSCAPNIGYMSAGLAFRLFRIWHLQLTMSVPIFFFLILTRWLSSESARWLIVTNKP  
QKGLKELRKVAHMNGMKNSGDLTMEIVRTSMKAELEAAKTKPSLRDLFHTSILRKRICVLSFMRLFFTVSIFG  
LAVHLQHLSSNIILLQFLISALAILVSVIGPFVNLHIGRRITYLVLMSLRGI FILIAVFPQEMQTLRIIMAT  
LAEGISSLCVGVSRRLHTNELLP TTLRATAVGVIGFFGNSGFSPLFMLLATYYANMPWIFYGGFSIFNAFTV  
FILPETKNQPLPDSTHDVGNWKEKSRKGGKEDPIIKVTRF\*

>ENSMUSP00000026045\_c.2055:C>G\_p.P686A ENSMUST00000026045.14|Co117a1-  
201|ENSMUSG00000025064|-|chr19:g.47652829:G>C

MDVTKKSKRDGTEVTERIVTETVTRTLTSLPPKGSTSNGYAKTGSLLGGSRLEKQSLTHGSSGYINSSGSIRG  
NASTSSYRRTHSPASTLPNSPGSTFERKAHMTRHGTYEGSSSGNSSPEYPRKELASSSTRGRSQTRESEIRVR  
LQASASPSTRWTELDEVKRLKGRSASASPTRNTSNTLPIPKKGTVETKTVTASSHSVSGTYDSAILDNTNFP  
HMWSSTLPAGSSLGTYQNNITAQSTSLNNTNAYSTGSVFGVNNMASCPTLHPGLSSCSSVFGMQNNLAPSS  
SVLSHGTTTASTAYGAKKNVQPPTVTSTGVSTSATCTTSVQSDDLLHKDCKFLILEKDNTPAKKEMELLIMT  
KDSGKVFTASPATISSTSFSEDTLKKEKQAAAYAADTCLKADVNGDLNVTSTKSKMTSAENHGVDGSGGGGRGK  
GGAGGGGGGGGASGGGAWGAAAPAWCPCGSCCSWKKWLLGLLLTWLLLLLGLLFLGLIALAEVVRKLRARVEEL  
EKTkVLYHDVQMDKSNRDLQAEAPSLGPGLGKAEALDGYEQEAIWLFVRNKLMTQENGNLRGSPGPKGDMGS  
QGPKGDRGLPGTPIPGPLGHPGPEGPKGQKGSIGDPMGEGPIGQRGLAGPMGPRGEPGPPGSGEKDGRGIAG  
EQGPQGLPGVPGPPGLRGHSGSPGPQGPAGAVGPQGLRGDVGVLPGVKGDGKGLMPPGPKGDQGEKGRPLTGE  
PGIRGLPGAVGEPGAKGAMGPAGADGQQGSRGEQGLTGMPGTRGPPGAGDPGKPLTGPQGPQGLPGSPGRP  
GKGEPPGAPGRVMTSEGSSTITVPGPPGPPGAMGPPGPPGTPGPAGPAGLPGQQGPRGEPGLAGDSFLSSGSS  
ISEVLSAQGVDLRGPVPGPPGPRGPPGPSIPGPPGPRGPPGEGVPGPPGPPGSLTDSETFFTGPPGPPGPPG  
KGDQGDVPGVPGTPISSGSLSHGASSSTLYMQGPPGPPGPPGPPGSLSSSGQDIQHYIAEYMQSDNIRTYLSGV  
QGPVPGPPGPPGPPVITITGETFDYSQLASQVVSYLRSYAGLSSASSSEDI LAMLRNDVWQYLRQNLVGGP  
GPPGPPGVSGDGLSLSDYGEISRHILNYMSSSGISFGHPGPPGPPGPPGLPGTSEYELLTMLRGSYRNIIGPPG  
PPGPPGPRGPPGVSAAALSTYAAENSDFRSELI SYLTPDVRSFIVGPPGPPGPPGPPGPPGPPGPPGPPGPPG  
TSPDVRSFIVGPPGPPGPPGPPGPPGPPGPPGPPGPPGPPGPPGPPGPPGPPGPPGPPGPPGPPGPPGPPG  
GTDIGPPGGYGAAAGGGIYGTNGDSFRDGFTGDLTDYNKLAVRVSESMQRQGLLQGMAYTVQGPVPGPPGIS  
RVFSAYSNTVQDLMDFFQTYGTIPGPPGQKGDVGTGPKGDRGPAGPRGPPGPPGPPGPPGPPGPPGPPGPPG  
RRKRSIAIKP\*

>ENSMUSP00000084141\_c.2055:C>G\_p.P686A ENSMUST00000086923.6|Co117a1-  
202|ENSMUSG00000025064|-|chr19:g.47652829:G>C

MDVTKKSKRDGTEVTERIVTETVTRTLTSLPPKGSTSNGYAKTGSLLGGSRLEKQSLTHGSSGYINSSGSIRG  
NASTSSYRRTHSPASTLPNSPGSTFERKAHMTRHGTYEGSSSGNSSPEYPRKELASSSTRGRSQTRESEIRVR  
LQASASPSTRWTELDEVKRLKGRSASASPTRNTSNTLPIPKKGTVETKTVTASSHSVSGTYDSAILDNTNFP  
HMWSSTLPAGSSLGTYQNNITAQSTSLNNTNAYSTGSVFGVNNMASCPTLHPGLSSCSSVFGMQNNLAPSS  
SVLSHGTTTASTAYGAKKNVQPPTVTSTGVSTSATCTTSVQSDDLLHKDCKFLILEKDNTPAKKEMELLIMT  
KDSGKVFTASPATISSTSFSEDTLKKEKQAAAYAADTCLKADVNGDLNVTSTKSKMTSAENHGVDGSGGGGRGK  
GGGAGGGGGGGGASGGGAWGAAAPAWCPCGSCCSWKKWLLGLLLTWLLLLLGLLFLGLIALAEVVRKLRARVEEL  
EKTkVLYHDVQMDKSNRDLQAEAPSLGPGLGKAEALDGYEQEAIWLFVRNKLMTQENGNLRGSPGPKGDMGS  
QGPKGDRGLPGTPIPGPLGHPGPEGPKGQKGSIGDPMGEGPIGQRGLAGPMGPRGEPGPPGSGEKDGRGIAG  
EQGPQGLPGVPGPPGLRGHSGSPGPQGPAGAVGPQGLRGDVGVLPGVKGDGKGLMPPGPKGDQGEKGRPLTGE  
PGIRGLPGAVGEPGAKGAMGPAGADGQQGSRGEQGLTGMPGTRGPPGAGDPGKPLTGPQGPQGLPGSPGRP  
GKGEPPGAPGRVMTSEGSSTITVPGPPGPPGAMGPPGPPGTPGPAGPAGLPGQQGPRGEPGLAGDSFLSSGSS  
ISEVLSAQGVDLRGPVPGPPGPRGPPGPSIPGPPGPRGPPGEGVPGPPGPPGSLTDSETFFTGPPGPPGPPG  
KGDQGDVPGVPGTPISSGSLSHGASSSTLYMQGPPGPPGPPGPPGPPGPPGPPGPPGPPGPPGPPGPPG  
QGPVPGPPGPPGPPVITITGETFDYSQLASQVVSYLRSYAGLSSASSSEDI LAMLRNDVWQYLRQNLVGGP  
GPPGPPGVSGDGLSLSDYGEISRHILNYMSSSGISFGHPGPPGPPGPPGPPGLPGTSEYELLTMLRAAGLSSIPGPPG  
PPGPPGPRGPPGVSAAALSTYAAENSDFRSELI SYLTPDVRSFIVGPPGPPGPPGPPGPPGPPGPPGPPGPPG  
SARRGTSYSSSTGTGGTNGGSLGEGGAYGAGDGGPYGTDIGPPGGYGAAAGGGIYGTNGDSFRDGFTGDLTDYN  
KLAVRVSESMQRQGLLQGMAYTVQGPVPGPPGPPGPPGPPGPPGPPGPPGPPGPPGPPGPPGPPGPPG  
PKGDRGPAGPRGPPGPPGPPGPPGPPGPPGPPGPPGPPGPPGPPGPPGPPGPPGPPGPPGPPGPPGPPG  
RRKRSIAIKP\*

>ENSMUSP00000141118\_c.316:T>A\_p.V106E ENSMUST00000185755.2|Btd35f16-  
201|ENSMUSG00000101381|-|chrX:g.3861626:A>T

MGLLVSRVLRCDSSLLPEQPEAIAGASYIPGSRKRKRNSLEELATSSNVHGPQNQGMYPHQLVNIYWKRVK  
ISSNDAYQNLFLDGHSDIKIRALGKTWCLHKEFLCQSGYFANILKGTWRESHHGVINLI IKNEDIDTRSLLF  
VFGALYTDADLSITPLEVPQVLAACLRLVDRVIQQCEGIMKETINRNTVCSYLAETRYLKAVKTRCFEWL

LCNLMVHPSVALYKEVDLKLMLYLLALSSDLLVMQKEIDVYTTLKIWMFLYLNPCWNGTMKQLLQHANNWLSTH  
MAYVDNISFLESEEGLIHQPVFKKLRFHIIICDLTSTTILEQDRILPMAWLSPIYKQQWLTLLRTQYEGVIGP  
QVINEQELEEECTMRCGTMI PKDGRYTWKWSVGRLLGFPLRVTFTRQCVILRQRCQRCDCGSACHNHIRNVIFRIT  
LVCFDSNKRVTFRKTTGYKILTFEYKKEEQIVMKLDSVDLNFPMCFICNFVNLGNAENK\*  
>ENSMUSP00000064516\_c.1215:C>A\_p.L406M ENSMUST00000069763.3|Lanc13-  
201|ENSMUSG00000047344|+|chrX:g.9131877:C>A  
MDTKRCFANRFDDYQGSLLAGQCEEAVAPLVSTTIERILQELPPLGGGAEARGATGAGSSCQGGLYSGVAGVA  
YMLYHVSQSPLFAAARERYLRFKRLIDACLRAEEWGETDADTRAAFLGGAGVYAVATLVYHALGRPDYVQP  
LGFALCAVCAPVSFLDCGSDLEFVGRAGYLCAALVLKQKLAQEVLTPTQIKAICQAILDSGKQYALKKRKP  
FPLMYSYYGTEYLGAAHGLSSILQMLLSYQEHLKPSDRELWQSVDFLMEQEONCNWPPPELGETIERENELVH  
WCHGAPGIAYLFAKAYLISKPKQYLDTCIRCGELTQWKGLLKPGICHGVAGSAYVFLLLYRLTGNSKYIYR  
AQRFAQFLFTEEFKSGSRVLESIYSLYEGFSGTVCFLIDLMPNQAEFFPLFSVVFV\*  
>ENSMUSP00000111021\_c.1242:G>T\_p.G415W ENSMUST00000115364.8|Cdk16-  
202|ENSMUSG00000031065|+|chrX:g.20563422:G>T  
MYTNGYDEEIIYYIGKRVFLTPKAWPFPLPTPEIVHEDMKMGSDGESDQASATSSDEVQSPVRVVRMRNHPPRK  
ISTEDINKRLSLPADIRLPEGYLEKLTNLNSPIFDKPLSRRLRRVSLSEIGFGKLETYIKLTKLGEGETYATVYK  
GSKLTDNLVALKEIRLEHEEGAPCTAIREVSLKDLKHANIVTLHDIHTEKSLTLVFEYLDKDLKQYLDCC  
GNVINMHNKLVFLFQLLRGLAYCHRQKVLHRDLKPNLLINERGELKLADFLARAKSIPTKTYSEVVTWLY  
RPPDILLGSTDYDSTQIDMWGVGCI FYEMATGRPLFPSTVEEQHLHFIFRILGTPTEETWPGILSNEEFRTYNY  
PKYRAEALLSHAPRLSDGADLLTKLLQFEGRNRISAEDARKHPFFLSLWERIHKLPDTSIFALKEVQLQKE  
ANIRSTSMPDSGRPAFRVVDTEF\*  
>ENSMUSP00000033380\_c.1347:G>T\_p.G450W ENSMUST00000033380.7|Cdk16-  
201|ENSMUSG00000031065|+|chrX:g.20563422:G>T  
MDRMKKIKRQLSMTLRGGRGIDKTNVPEQIGLDESGGGGSDLGEAPTRIPAGELRSVRGPLSSAPEIVHED  
MKMGSDGESDQASATSSDEVQSPVRVVRMRNHPPRKISTEDINKRLSLPADIRLPEGYLEKLTNLNSPIFDKPLS  
RRLRRVSLSEIGFGKLETYIKLTKLGEGETYATVYKSKLTDNLVALKEIRLEHEEGAPCTAIREVSLKDLK  
HANIVTLHDIHTEKSLTLVFEYLDKDLKQYLDCCGNVINMHNKLVFLFQLLRGLAYCHRQKVLHRDLKPNL  
LINERGELKLADFLARAKSIPTKTYSEVVTWLYRPPDILLGSTDYDSTQIDMWGVGCI FYEMATGRPLFPST  
VVEEQHLHFIFRILGTPTEETWPGILSNEEFRTYNYPKYRAEALLSHAPRLSDGADLLTKLLQFEGRNRISAE  
DARKHPFFLSLWERIHKLPDTSIFALKEVQLQKEANIRSTSMPDSGRPAFRVVDTEF\*  
>ENSMUSP00000158732\_c.655:T>TG\_p.L219ins-fs  
ENSMUST00000238528.2|Btbd35f22-  
201|ENSMUSG00000118402|+|chrX:g.31609251:T>TG  
MGLLVSRVLRCDSSSLLPEQPEAIAGASYIPGSRKRKRNLSLEELATSSNVHGPQNQGMYPHQVNLNIIYWKRVK  
ISSNDAYQNLFLDGHSDIKIRALGRTWCLHKVFLCQSGYFANILKGTWRESHHGVINLI IKNEDIDTRSLHF  
VFGALYTDADLSITPLEVPPQVLAACLLRVDRVIQQCEGIMKETINRNTVCSYLLAAETRYLKA VKTRCFEWL  
SLQFDGTSKCGTLQGSRYEVDVSSSTVF  
>ENSMUSP00000100634\_c.102:A>G\_p.K35E ENSMUST00000105017.5|Btbd35f21-  
201|ENSMUSG00000099711|+|chrX:g.32237063:A>G  
MGLLVSRVLRCDSSSLLPEQPEAIAGASYIPGSRKRKRNLSLEELATSSNVHGPQNQGMYPHQVNLNIIYWKRVK  
ISSNDAYQNLFLDGHSDIKIRALGRTWCLHKVFLCQSGYFANILKGTWRESHHGVINLI IKNEDIDTRSLHF  
VFGALYTDADLSITPLEVPPQVLAACLLRVDRVIQQCEGIMKETINRNTVCSYLLAAETRYLKA VKTRCFEWL  
LCNLMVHPSVALYKEVDMKMLYLLALSSDLLVMQKEIDVYTTLKIWMILYLNPCWNGTMKQLLQHANNWLSTH  
MAYIDNISFLESEEGLIHQPVFKKLRFHIIICDLTSTTILEQDRILPMAWLSPIYKQQWLTLLRTQYEGVIGP  
QVINEQELEEECTMRCGTMI PKDGRYTWKWSVGRLLGFPLRVTFTRQCVILRQRCQRCDCGSACHNHIRNVIFRIT  
LVCFDSNKRVTFRKTTGYKILTFEYNEEQIVMKLDSVDLTFPMCFICNFVNLGNAENK\*  
>ENSMUSP00000100634\_c.231:G>A\_p.D78N ENSMUST00000105017.5|Btbd35f21-  
201|ENSMUSG00000099711|+|chrX:g.32237192:G>A  
MGLLVSRVLRCDSSSLLPEQPEAIAGASYIPGSRKRKRNLSLEELATSSNVHGPQNQGMYPHQVNLNIIYWKRVK  
ISSNNAYQNLFLDGHSDIKIRALGRTWCLHKVFLCQSGYFANILKGTWRESHHGVINLI IKNEDIDTRSLHF  
VFGALYTDADLSITPLEVPPQVLAACLLRVDRVIQQCEGIMKETINRNTVCSYLLAAETRYLKA VKTRCFEWL  
LCNLMVHPSVALYKEVDMKMLYLLALSSDLLVMQKEIDVYTTLKIWMILYLNPCWNGTMKQLLQHANNWLSTH  
MAYIDNISFLESEEGLIHQPVFKKLRFHIIICDLTSTTILEQDRILPMAWLSPIYKQQWLTLLRTQYEGVIGP  
QVINEQELEEECTMRCGTMI PKDGRYTWKWSVGRLLGFPLRVTFTRQCVILRQRCQRCDCGSACHNHIRNVIFRIT  
LVCFDSNKRVTFRKTTGYKILTFEYNEEQIVMKLDSVDLTFPMCFICNFVNLGNAENK\*  
>ENSMUSP00000110908\_c.319:A>T\_p.D107V ENSMUST00000115253.3|Gm6268-  
201|ENSMUSG00000079642|+|chrX:g.35665573:A>T

MSTTSDDQPAIESRDNPLTLEGEWVQEALESQAVDLGSSATTESEEIVVDCPREVEDVAGSPSEEEGDRGDS  
VDVEEDSEIEAVTEEEEEEGEEVGLGRQNVVVVAHHFPMAGFRFMFLDLVHAILNRVYYNDHILARDPRNEM  
DTPNTSESDNSSERQTSPEPI PSTVRASEYEHQGPDLPEVISTFPELEEPAAFEEAADHYLQETTAGAAGQAI  
EEMAAAAAEVAAEASEEEIAKEIEQAVASEGENRCARQYEEDETI DEGEKKGEEKKNEEALDEMDDAANY  
TNKFS\*

>ENSMUSP00000134224\_c.330:G>A\_p.A111T ENSMUST00000173574.2|RhoX2c-  
202|ENSMUSG00000079637|+|chrX:g.36651186:G>A  
XVADLMDNSNQEDLGATGCDQEKEKQPEEPVDPDSMGDLENVVKRVSGPWSTVNPVRVLVPKFRHWQQSFNVLQ  
LQELLESIFQC�HYISTKEANRLARSMGVSEATVQGINTEGH\*

>ENSMUSP00000052929\_c.66:A>C\_p.T23P ENSMUST00000054147.11|RhoX11-  
201|ENSMUSG00000051038|-|chrX:g.37173788:T>G  
MSRKYFYFDYDYYGMSFCEEEIPTEPEEKVAYTNSGGFADEVGTGPKEGHQSSIGEHSCVMPNTQDTGREEP  
EETSQVAETSEQSLFRIPRKAYRTPGQLWELQAVFVENQYPDALKRKELAGLLNVDEQKIKDWFNNKRAKYR  
KIQRREILGGKNITPTQEELRMKTLVESKIIIFQEQEGDGLFWEHQNIDTQNSPLSLLFS\*

>ENSMUSP00000035379\_c.1083:T>A\_p.Y362N ENSMUST00000039374.9|Ints61-  
201|ENSMUSG00000035967|+|chrX:g.55534390:T>A  
MPILLFLIDTSASMNQRTDLGTSYLDIAKGAVELFLKLRARDPASRGDRYMLVTYDEPPYCIKAGWKENHATF  
MNELKNLQASGLTTLGQALRSSFDLLNLNRLISGIDNYGQGRNPFFLEPSILITITDGNKLTSTASVQEELHL  
PLNSPLPGSELTKPEFRWDQRLFALVLRPLPGVASTEPEQLGVSVPDESATQMCVETGGRSYCVRTQRMNLQ  
LESVLQKVQSGVVINFEKTGPDPLVGEDTLMELCRPSNLFAAQPWHSCHKLIYVRPNSKTGVPVGHWP  
IPESFWPEQNLPSLPPRTSHPVVRFSVDCPEMVIDKLPFDKYELEPSPLTQYILERKSPHTCWQVFTSSSKNNEL  
GYPFYGLKASTTTLTCVNLVMPYNYPVLLPLDDDLFKVHKLKPNLKWQAFDSYKTLPPYYLITKLES  
DQILASVGGKPPQIEGKIKVKNHSACGLPLAHNKSFRKLLKEIIGESAPRLTELNPKEFAGFQVGLLNKDLK  
PQTYRDAYDIPRRGLLDQLTRMRSNLLQTRKFIVGQDEDSLHVPVVAQMGNYQYELKMLASPLRELD  
PDPKRLHTFGNPFKQDKKGMIDEADEFVVGPNKVKRPGEPNSPMSSKRRRSMSSLLRRAQTAPT  
VTNHNHVGKGPLSASWFFSPCPSLVKHTFGHPDTTVIHDTHEEKMENGQSPDGFLKSA  
PAEFMNVSGESFISQDLSLDDFTGLRKDGFIHKPGNILLGGAKTCSLSVADQKITMASALE  
TVPNMQITPAMAQGINADIKHQLMKEVRKFGRYERIFILL EEVQGPLETEKQFVEFTI  
KEAARFKRRVLIQYLEKLVLEKIDSHHLLNNVNHINSRSSC\*

>ENSMUSP00000099089\_c.1083:T>A\_p.Y362N ENSMUST00000101553.9|Ints61-  
202|ENSMUSG00000035967|+|chrX:g.55534390:T>A  
MPILLFLIDTSASMNQRTDLGTSYLDIAKGAVELFLKLRARDPASRGDRYMLVTYDEPPYCIKAGWKENHATF  
MNELKNLQASGLTTLGQALRSSFDLLNLNRLISGIDNYGQGRNPFFLEPSILITITDGNKLTSTASVQEELHL  
PLNSPLPGSELTKPEFRWDQRLFALVLRPLPGVASTEPEQLGVSVPDESATQMCVETGGRSYCVRTQRMNLQ  
LESVLQKVQSGVVINFEKTGPDPLVGEDTLMELCRPSNLFAAQPWHSCHKLIYVRPNSKTGVPVGHWP  
IPESFWPEQNLPSLPPRTSHPVVRFSVDCPEMVIDKLPFDKYELEPSPLTQYILERKSPHTCWQVFTSSSKNNEL  
GYPFYGLKASTTTLTCVNLVMPYNYPVLLPLDDDLFKVHKLKPNLKWQAFDSYKTLPPYYLITKLES  
DQILASVGGKPPQIEGKIKVKNHSACGLPLAHNKSFRKLLKEIIGESAPRLTELNPKEFAGFQVGLLNKDLK  
PQTYRDAYDIPRRGLLDQLTRMRSNLLQTRKFIVGQDEDSLHVPVVAQMGNYQYELKMLASPLRELD  
PDPKRLHTFGNPFKQDKKGMIDEADEFVVGPNKVKRPGEPNSPMSSKRRRSMSSLLRRAQTAPT  
VTNHNHVGKGPLSASWFFSPCPSLVKHTFGHPDTTVIHDTHEEKMENGQSPDGFLKSA  
PAEFMNVSGESFISQDLSLDDFTGLRKDGFIHKPGNILLGGAKTCSLSVADQKITMASALE  
TVPNMQITPAMAQGINADIKHQLMKEVRKFGRYERIFILL EEVQGPLETEKQFVEFTI  
KEAARFKRRVLIQYLEKLVLEKIDSHHLLNNVNHINSRSSC\*

>ENSMUSP00000138630\_c.1083:T>A\_p.Y362N ENSMUST00000132428.8|Ints61-  
203|ENSMUSG00000035967|+|chrX:g.55534390:T>A  
MPILLFLIDTSASMNQRTDLGTSYLDIAKGAVELFLKLRARDPASRGDRYMLVTYDEPPYCIKAGWKENHATF  
MNELKNLQASGLTTLGQALRSSFDLLNLNRLISGIDNYGQGRNPFFLEPSILITITDGNKLTSTASVQEELHL  
PLNSPLPGSELTKPEFRWDQRLFALVLRPLPGVASTEPEQLGVSVPDESATQMCVETGGRSYCVRTQRMNLQ  
LESVLQKVQSGVVINFEKTGPDPLVGEDTLMELCRPSNLFAAQPWHSCHKLIYVRPNSKTGVPVGHWP  
IPESFWPEQNLPSLPPRTSHPVVRFSVDCPEMVIDKLPFDKYELEPSPLTQYILERKSPHTCWQVFTSSSKNNEL  
GYPFYGLKASTTTLTCVNLVMPYNYPVLLPLDDDLFKVHKLKPNLKWQAFDSYKTLPPYYLITKLES  
DQILASVGGKPPQIEGKIKVKNHSACGLPLAHNKSFRKLLKEIIGESAPRLTELNPKEFAGFQVGLLNKDLK  
PQTYRDAYDIPRRGLLDQLTRMRSNLLQTRKFIVGQDEDSLHVPVVAQMGNYQYELKMLASPLRELD  
PDPKRLHTFGNPFKQDKKGMIDEADEFVVGPNKVKRPGEPNSPMSSKRRRSMSSLLRRAQTAPT  
VTNHNHVGKGPLSASWFFSPCPSLVKHTFGHPDTTVIHDTHEEKMENGQSPDGFLKSA  
PAEFMNVSGESFISQDLSLDDFTGLRKDGFIHKPGNILLGGAKTCSLSVADQKITMASALE  
TVPNMQITPAMAQGINADIKHQLMKEVRKFGRYERIFILL EEVQGPLETEKQFVEFTI  
KEAARFKRRVLIQYLEKLVLEKIDSHHLLNNVNHINSRSSC\*

>ENSMUSP00000118865\_c.303:T>A\_p.Y102N ENSMUST00000143142.8|Ints61-  
206|ENSMUSG00000035967|+|chrX:g.55534390:T>A  
XAQPWHSCHKLIYVRPNSKTGVPVGHWPIPEFWPEQNLPSLPPRTSHPVVRFSVDCPEMVIDKLPFDKYEL  
EPSPLTQYILERKSPHTCWQVFTSSSKNNELGYPFYGLKASTTTLTCVNLVMPYNYPVLLPLDDDLFKVHKL  
KPNLKWQAFDSYKTLPPYYLITKLESQILASVGGKPPQIEGKIKVKNHSACGLPLAHNKSFRKLLKEIIGESAPRLTELNPKEFAGFQVGLLNKDLK  
PQTYRDAYDIPRRGLLDQLTRMRSNLLQTRKFIVGQDEDSLHVPVVAQMGNYQYELKMLASPLRELD  
PDPKRLHTFGNPFKQDKKGMIDEADEFVVGPNKVKRPGEPNSPMSSKRRRSMSSLLRRAQTAPT  
VTNHNHVGKGPLSASWFFSPCPSLVKHTFGHPDTTVIHDTHEEKMENGQSPDGFLKSA  
PAEFMNVSGESFISQDLSLDDFTGLRKDGFIHKPGNILLGGAKTCSLSVADQKITMASALE  
TVPNMQITPAMAQGINADIKHQLMKEVRKFGRYERIFILL EEVQGPLETEKQFVEFTI  
KEAARFKRRVLIQYLEKLVLEKIDSHHLLNNVNHINSRSSC\*

DKKGMIDEADEFVVVGPQNKVKRPGEPNSPMSSKRRRSMSLLLRRRAQTAPTVTNHHVGGKGPLSASWFPSCPSL  
VKHTFGHPDPTTVIHDTHEEKMENGQSPDGLLKSAPAEFMNVSGESFISSQLDLSDDFTGLRKDGFHFKPG  
NNILLGGAKTCSLSVADQKITMASALETVPNMQITPAMAQGINADIKHQMLKEVRKFRKYERIFILLLEEVQ  
GPLETKKQFVEFTIKEAARFKRRVLIQYLEKVLEKIDSHHLLNNVNHINSRSSC\*

>ENSMUSP00000139507\_c.1083:T>A\_p.Y362N ENSMUST00000186445.7|Ints61-  
207|ENSMUSG00000035967|+|chrX:g.55534390:T>A  
MPIILLFLIDTSASMNQRTDLGTSYLDIAKGAVELFLKLRARDPASRGDRYMLVTYDEPPYCIKAGWKENHATF  
MNELKNLQASGLTTLGQALRSSFDLLNLNRLISGIDNYGQGRNPFLEPSILITITDGNKLTSTASVQEELHL  
PLNSPLPGSELTKEPFRWDQRLFALVLRPLPGVASTEPEQLGSVPSDESAITQMCEVTGGRSYCVRTQRMNLQC  
LESLVQKVQSGVVINFECTGPDPLVGEDTLMELCRPSNLFAPWHSCHKLIYVRPNKSGVVPVGHWPPIPES  
FWPEQNLPSLPPRTSHPVVRFSVDCPEMVIDKLPFDKYELEPSPLTQYILERKSPHTCWQVFTVSSKNNEL  
GYPFGYLKASTTTLTCVNLVMPYNYVLLPLLDLDFKVKHLKPNLKWQAFDSYKLTLPYYLITKLESQIL  
ASVGKPPQEIGIKVKNHSACGLPLAHNKSFRKLLKEIIGESAPRLTELNPKEFAGFQVGLLNKDLKPQTYRN  
AYDIPRRGLLDQLTRMRSNLLQTRKFIVGQDEDSLHSPVAQMGNYQEYKMLASPLRELDPDQPKRLHTFGN  
PFKQDKKGMIDEADEFVVVGPQNKVKRPGEPNSPMSSKRRRSMSLLLRRRAQTAPTVTNHHVGGKGPLSASWFP  
CPSLVKHTFGHPDPTTVIHDTHEEKMENGQSPDGLLKSAPAEFMNVSGESFISSQLDLSDDFTGLRKDGFH  
HKPGNILLGGAKTCSLSVADQKITMASALETVPNMQITPAMAQGINADIKHQMLKEVRKFRKYERIFILL  
EEVQGPLETEKQFVEFTIKEAARFKRRVLIQYLEKVLEKIDSHHLLNNVNHINSRSSC\*

>ENSMUSP00000002080\_c.1866:C>A\_p.P623T ENSMUST00000002080.12|Pdzd4-  
201|ENSMUSG00000002006|-|chrX:g.72838440:G>T  
MGCNMCVVQKPEEQYKVMLQVNGKELSKLSQEQTLEALRASKEPLVIQVLRSPRLRGDSSCHDLQIVDSGTQ  
TDITFEHIMALGKLRPPTPPMGIPEYVLSLPPISHEYYDPAEFMEGGPQEAERMDELEYEEVELCKNSHQD  
KGLMVCYRTDEEEDLGIYVGEVNPNSIAAKDGRIREGDRIQINGMDVQNREEAVAILSQEENTNISLLVAR  
PESQLAKRWKDSDRDDFLDDFGSENEGDLRARKLKSPVQOIGNDEKQAPDGGPGLNNSQDLDSGVGRTDEST  
RNEESSEHDLGDEPPSTTNTPGSLRKFGLQGDALQSRDFHFSMDSLLAEGAGLGGADLPLGTDEEYERYREL  
LEIKCHLENGNQLGIFFSRASSGNSALDVNRNESLGHMAMLEELRHLEFKCRNILRAQKMQQLRERCMAKAW  
LLEESLYDLAASEPKKHELSDISELPEKSDKDSSTAYNTGESCRSTPLLVEPLPESPLKRSAGNSNLNRT  
SGPPVTTHLKGAPSPGSPAKFRSLSRDPEVGRRQHTTEERVRRSTKTSVTLERVGPEGSPYLSRRHRGQIEQY  
HSCVQLAPPRTLEDLGHGSLSLASGPRVGGVAAAAVEATRMEWKVVRSDGTRYVAKRPVRDRLLKARALKIR  
EERSGMTTDDDAVSEMKGGRYWSKEERKQHLIRAREQRKRREFMMQSRLECLREQQNGDSEKPELNI IALSHR  
TMKRNKILDNWITIQEMLAHGARSADGKRIYNPLLSVTTV\*

>ENSMUSP00000110081\_c.1521:C>A\_p.P508T ENSMUST00000114438.3|Pdzd4-  
202|ENSMUSG00000002006|-|chrX:g.72838440:G>T  
MGCNMCVVQKPEEQYKVMLQVEVELCKNSHQDKLGLMVCYRTDEEEDLGIYVGEVNPNSIAAKDGRIREGDR I  
QINGMDVQNREEAVAILSQEENTNISLLVARPESQLAKRWKDSDRDDFLDDFGSENEGDLRARKLKSPVQO I  
GNDEKQAPDGGPGLNNSQDLDSGVGRTDESTRESEHDLGDEPPSTTNTPGSLRKFGLQGDALQSRDFH F  
SMDSLLAEGAGLGGADLPLGTDEEYERYRELLEIKCHLENGNQLGIFFSRASSGNSALDVNRNESLGHMAM L  
EEELRHLEFKCRNILRAQKMQQLRERCMAKAWLLEESLYDLAASEPKKHELSDISELPEKSDKDSSTAYNTGE  
SCRSTPLLVEPLPESPLKRSAGNSNLNRTPSGPPVTTHLKGAPSPGSPAKFRSLSRDPEVGRRQHTTEERVRR  
STKTSVTLERVGPEGSPYLSRRHRGQIEQYHSCVQLAPPRTLEDLGHGSLSLASGPRVGGVAAAAVEATRME  
WKVVRSDGTRYVAKRPVRDRLLKARALKIREERSGMTTDDDAVSEMKGGRYWSKEERKQHLIRAREQRKRRE  
FMMQSRLECLREQQNGDSEKPELNI IALSHRKTMKRNKILDNWITIQEMLAHGARSADGKRIYNPLLSVTTV  
\*

>ENSMUSP00000109649\_c.996:G>A\_p.E333K ENSMUST00000114016.10|Mageb16-  
202|ENSMUSG00000046942|-|chrX:g.78667388:C>T  
MSQSSECAADQGTCEETQKLQVAAAASIDVEEPCSSPHLMATSLKDQTSSEETQVSKDVEEPCSSSQLLMASD  
QDDSEDETASTSSDLQHPYDSSSESTEDLDDQEVQGSPIPPDQSDSTDLPVMTVDGKVDVFLVNYMLKYQVK  
EVMSMNDIMTLIVREDEDRFHEILMRASERMEMVFGLDVKEVDPINHCYALFIKLGITYDGMRNDEYSFPKTG  
LLILILGVVFMKGNRATEEEIWEVNLNPMGIYAGMTHFMFGDPRELITDEFVREQYLEYQPIANSDFIQEYVW  
GLRAKAETSKMRVLEFVAKVHGS DPTVFLSQYEEALIEEEKRTLTMLEHADSSSTSGESSSDTSSNFSQV\*

>ENSMUSP00000087292\_c.996:G>A\_p.E333K ENSMUST00000052283.7|Mageb16-  
201|ENSMUSG00000046942|-|chrX:g.78667388:C>T  
MSQSSECAADQGTCEETQKLQVAAAASIDVEEPCSSPHLMATSLKDQTSSEETQVSKDVEEPCSSSQLLMASD  
QDDSEDETASTSSDLQHPYDSSSESTEDLDDQEVQGSPIPPDQSDSTDLPVMTVDGKVDVFLVNYMLKYQVK  
EVMSMNDIMTLIVREDEDRFHEILMRASERMEMVFGLDVKEVDPINHCYALFIKLGITYDGMRNDEYSFPKTG  
LLILILGVVFMKGNRATEEEIWEVNLNPMGIYAGMTHFMFGDPRELITDEFVREQYLEYQPIANSDFIQEYVW  
GLRAKAETSKMRVLEFVAKVHGS DPTVFLSQYEEALIEEEKRTLTMLEHADSSSTSGESSSDTSSNFSQV\*



>ENSMUSP00000109649\_c.992:A>T\_p.E331D ENSMUST00000114016.10|Mageb16-  
202|ENSMUSG00000046942|-|chrX:g.78667392:T>A  
MSQSSEECADQGTCEETQKLQVAAASIDVEEPCSSPHLMATSLKDQTSEETQVSKDVVEEPCSSSQLLMASD  
QDDSEDETASTSSDLQHPYDSSSESTEDLDDQEVQGSPIPPDQSDSTDLPVMTVDGKVDLNVNMLYKYQVK  
EVMNMNDIMTLIVREDEDRFHEILMRASERMEMVFGLDVKEVDPINHCYALFIKLGTYDGMRNDEYSFPKGTG  
LLILILGVVFMKGNRATEEEIWEVLNPMGIYAGMTHFMFGDPRELITDEFVREQYLEYQPIANSDP IQEYEVW  
GLRAKAETSKMRVLEFVAKVHGS DPTVFLSQYEEALIEDEERTLTMLLEHADSSSTS GESSSDTSSNFSQV\*  
>ENSMUSP00000087292\_c.992:A>T\_p.E331D ENSMUST00000052283.7|Mageb16-  
201|ENSMUSG00000046942|-|chrX:g.78667392:T>A  
MSQSSEECADQGTCEETQKLQVAAASIDVEEPCSSPHLMATSLKDQTSEETQVSKDVVEEPCSSSQLLMASD  
QDDSEDETASTSSDLQHPYDSSSESTEDLDDQEVQGSPIPPDQSDSTDLPVMTVDGKVDLNVNMLYKYQVK  
EVMNMNDIMTLIVREDEDRFHEILMRASERMEMVFGLDVKEVDPINHCYALFIKLGTYDGMRNDEYSFPKGTG  
LLILILGVVFMKGNRATEEEIWEVLNPMGIYAGMTHFMFGDPRELITDEFVREQYLEYQPIANSDP IQEYEVW  
GLRAKAETSKMRVLEFVAKVHGS DPTVFLSQYEEALIEDEERTLTMLLEHADSSSTS GESSSDTSSNFSQV\*  
>ENSMUSP00000109633\_c.957:C>G\_p.P320A ENSMUST00000114000.8|Dmd-  
203|ENSMUSG00000045103|+|chrX:g.82672296:C>G  
MLWVEEVEDCYEREDVQKKTFTKWINAQFSKFGKQHIDNLFSDLQDGKRLDLLLEGLTGQKLPKEKGSTRVHA  
LNNVNKALRVLQKNNVDLVNIGSTDIVDGNHKLTLGLIWNILHWQVKNVMKTIMAGLQQTNSEKILLSWVRQ  
STRNYPQVNVINFTSSWS DGLALNALIHSRHPDLFDWNSVVSQHSATQRLEHAFNIAKQCQLGIEKLLDPEDVA  
TTYDPDKKSILMYITSLFQVLPQQVSI EAIQEVEMLPRTSSKVTREEHFQLHHQMHSYQQITVSLAQGYEQTSS  
SPKPRFKSYAFTQAAYVATS DSTQSPYASQHL EAPRDKSLDSSLMETE VNLDSYQTALEEVLSWLLSAEDTLR  
AQGEISNDVEEVKEQFHAHEGFMMDLTS HQGLVGNVQLGSQLVKGKGLSEDEEA EVQEOMNLLNSRWECLRV  
ASMEKQSKLHKVLMDLQNQKLELDDWLT KTEERTKKMEEEPFGPDLEDLKCQVQKHVQLQEDLEQE QVRVNS  
LTHMVVVVDESSGDHATAALEEQ LKVLGDRWANICRWTE DRWIVLQDILLKWQHFTEEQCLFSTWLSEKEDAM  
KNIQTS GFKDQNE MSSLHKISTL KIDLEKKKPTMEKLS SLNQDLLSALKNKSVTQKMEIWMENFAQRWDNLT  
QKLEKSSAQISQAVTTTQPSLTQTVMETVTMVT TREQIMVKHAQEELPPPPQKQRQITV DSELRKRLDVDI  
TELHSWITRSEAVLQSSEFAVYRKEGNISDLQEKVNAIAREKA EKFRKLQDASRSAQALVEQMANEGVNAESI  
RQASEQLNSRWTEFCQLLSERVNWLEYQTNITTFYNQLQQLEQMTT TAENLLKTQSTTLSEPTA IKSQKICK  
DEVNRLSALQPQIEQLKIQSLQLKEKGQGMFLDADFVAFTNHFNHIFDGVRAKEKELQTI FDTLPPMRYQET  
MSSIRTWIQQSESKLSVPYLSVTEYEIMEERLGKQLALQSSLKEQQNGFNYS DTVKEMAKKAPSEICQK YLS  
EFEEIEGHWKKLSSQLVESCQKLEEHMKNLRKFQNHIKTLQK WMAEVDVFLKEEWPALGDAEILKKQLKQCRL  
LVGDIQTIQPSLNSVNEGGQKIKSEAELEFASRLETELELNTQWDHICRQVYTRKEALKAGLDKTVSLQKDL  
SEMHEWMTQAE EYLERDFEYKTPDELQTA VEEMKRAKEEALQKETKVKLLTETVNSVIAHAPPSAQEALKE  
LETTLTNYQWLCTRLNGKCKTLEEVWACWHELLSYLEKANKWLNEVELK LKTMENVPAGPEEITEVLESLENL  
MHHSEENPNQIRLLAQTLDGGVMDLEINEELET FNSRWRELHEEA VRKQKLLQESIQSAQIEKSLHLIQES  
LEFIDKQLAAYITDKVDAAQMPQEAQKI QSDLTSHEISLEEMKKNHNGKQDANQRVLSQIDVAQKQLQVSMKF  
RLFQK PANFEQRLEESKMILDEVKMHLPAL ETKSVEQEV IQSLSHCVNLYKSLSEVKSEVEMV IKTGRQIVQ  
KKQ TENPKELDERVTALKLHYNELGAKVTERKQ QLEKCLKLSRMRKEMNVLTEWLAATDTELTKRS AVEGMP  
SNLDSEVAVGKATQKEIEKQKAHLKSVTELGESLKMVLGK KETLVEDKLSLLNSNWI AVTSRVEEWNLLLEY  
QKHMETFDQNI EQITKWI IHADELLEDESEKKKPPQKEDI LKRLKAEMNDMRPKVDSTRDQA AKLMANRGDHC  
KVVPEQI SELNRRFAAISHR IKTGKASIP LKELEQFN SDIQKLEPLEAEIQQGVNLKEEDFNKDMSEDNEGT  
VNELLQRGDNLQQRITDERKREEIKIKQQLLQTKHNA LKDLRSQRRKALEISHQWYQYKRQADDLLKCLDEI  
EKKLASLPEPRDERKLEIDRELQK KKEELNAVRRQA EGLSENGAAMAVEPTQIQLSKRWRQIESNFAQFRRL  
NFAQIHTLHEETMVVTTEDMPLDVS YVPSTYLTEISHILQALSEVDHLLNTPELCAKDFEDL FKQEE SLKNIK  
DNLQQISGRIDI IHKKKTAALQSATSMEKVKVQEA VAOQMDQFQGEKLRMYKERQGRFDRSVEKWRHFHYDMKV  
FNQWLNEVEQFFKKTQNPENWEHAKYKWLKELQD GIGQRQAVVRTLNATGEEI IQQSSKTDVNI LQEKLGSL  
SLRWHDICKELAERRKRIEEQKNV LSEFQRDLNEFVLWLEEADNIAITPLGDEQQLEQLEQV KLLAEELPLR  
QGILKQLNETGGAVLVSAPIRPEEQDKLEKKLQTNLQWIKVSRALPEKQGELEVHLKDFRQLEEQLDHLLW  
LSPIRNQLEIYNQPSQAGPFDIKEIEVTVHGKQADVERLLSKGQHLYKEKPSTQPVKRKLEDLRSEWAVNHL  
LRELRTKQPDRA PGLSTTGASASQTVTLVTQSVVTKETVISKLEMPSSLLLEVPALADFNRAWTELT DWLSLL  
DRVIKSQRVMVG DLEDINEMIKQKATLQDLEQRRPQLEELITAAQN LKNKTSNQEARTIITDRIERI QIQWD  
EVQEQQLQNRQQLNEMLKDSTQWLEAKEEAEQVIGQVRGKLD SWKEGPHTVDAIQKKITETKQLAKDLRQRI  
SVDVANLALAKLRDY SADDTRKVHMI TENINTSWGNIH KRVSQEAALEETHRLLQQFPDLLEKFLSWITEA  
ETTANVLQDASRKEKLED SRGVR ELMKWPQDLQGEIETHTDIYHNL DENGQKILRSLEGSDEAPLLQRRLDN  
MNFKWSLQKSLNIRSHLEASDQWKRHLSLQELLVWLQKDEL SRQAPIGGDFPAVQKQNDI HRAFKRE  
LKTKEPVMSTLETVRIFL TEQPLEGLEKLYQEPREL PPEERAQNVTRLLRKQAE EVNAEWDKLNLRSA DWQR  
KIDEALERLQELQEA ADEL DLKLRQAEVIKGSWQPVGDLLIDSLQDHLEKVKALRGEIAPLKENVNRVNDLAH  
QLTTLGIQLSPYNLSTLEDL NTRWRLLQVAVEDRVRQLHEAHRDFGPASQHFLSTSVQGPWERAISP NKVPPY

INHETQTTCDWHPKMTELYQS LADLNNVRFSA YRTAMKLRRLQKALCLDLLSLSAACDALDQHNLKQNDQPM D  
 I LQI INCLTTIYDRLEQEHNNLVNPLCVDMLNLLNVYDTGRTGRIRVLSFKTGIISLCKAHLEDKYRYLF  
 KQVASSSTGFCDQRRLLGLLLHDSIQIPRQLGEVASFGGSNIEPSVRS CFQFANNKPEIEAALFDWMLRLEPQSM  
 VWLPLVLRVAAAETA KHQAKCNICKECPIIGFRYRSLKHFNYDICQSCFFSGRVAKGHKMHYPMVEYCTPTTS  
 GEDVRDFAKVLKNKFRTRKRYFAKHPRMGYLPVQTVLEGDNMETPVTLINFWPVD SAPASSPQLSHDDTHSRIE  
 HYASRLAEMENSNGSYLND SISPNESIDDEHLLIQHYCQSLNQDSPLSQPRSPAQILISLESEERGERELILA  
 DLEEENRNLOAEYDR LKQOHEHKGLSPLPSPPEMMPTSPQSPRDAELIAEAKLLRQHKGRLEARMQILEDH NK  
 QLESQ LHRRLRQLLEQPQAEAKVNGTTVSSPSTSLQRS DSSQPMLLRVVG SQTSESMGEEDLLSP PQDTSTGLE  
 EVMEQLNNSFPSSRGRNAPGKPMREDTM\*  
 >rs237452396\_ENSMUSP00000080820\_c.1095:T>A\_p.C366S  
 ENSMUST00000082183.8|zc3h12b-201|ENSMUSG00000035045|+|chrX:g.94970164:T>A  
 MTATAAVETPKMEKSASKEEKQQPKQEDSTDRGNADPEEWANSESDPEQMCKSGHTSYQATDIQLKKKEMPS  
 KPHRPLCRSPCLDRPSFSQSSILQDGKLDLEKEYQAKMDFALKLGYAEEQIQSVLNKLGPESLINDVLAELVR  
 LGNKGDSEAQVNL SLLLPRGASSREIASPELSLEDEIDNSDNLRPIVIDG SNVAMSHGNKEEFSCRGIQLA VD  
 WFLDKGHK DITVFPVPAWRKEQSRPDAPITDQDILRKLEKEKILVFTPSRRVQGRRVV CYDDRFIVKLA FDS DG  
 IIVSNDNYRDLQVEKPEWKKFIEERLLMYSFVNDKFMPPDDPLGRHG PLENFLRKR PVVPEHKKQPCPYGKK  
 STYGHKCKYYHPERANQPQRSVADELRI SAKLSTVKIMSEDTLAKCGAGMSTAKGEITSEIKRVASKRQSDPS  
 I RSVAVEPEE WLSIARKPEASSVPSLVTALS VPTIPPPKSHAVGALNTRSASSPVPGSSHPHQKASLEHMVS  
 MQYYPILVTNSHGTPINYTEQYPKFETMGDHDYYSVLSDFSKLS INN MHNHEYYMAEANQGVYVRN PGLCTDS  
 HMSHTRNDNYSSYN NLYLAVADAHPEGTLKLRHSASHNHLQPF SHGYHEALARVQSYGSEDSKQAPHKQSVPH  
 LAVHTQNPATGAHSSCPGDYTMPPSIHPVGPSQPGRALVMTRMDSISDSRLYDSNPMRQR RPPLCREQHASWD  
 PLPCTADSYGYHSYPLGNSLMQPCYEPVMVRSMP EKMEQLWRNPWVGMCNDSREHMIPEHQYQTYKNLCNIFP  
 SNIVLAVMEKNPHTADAQQLAALIVAKLRAAR\*  
 >ENSMUSP00000080820\_c.1365:C>T\_p.P456S ENSMUST00000082183.8|zc3h12b-  
 201|ENSMUSG00000035045|+|chrX:g.94970434:C>T  
 MTATAAVETPKMEKSASKEEKQQPKQEDSTDRGNADPEEWANSESDPEQMCKSGHTSYQATDIQLKKKEMPS  
 KPHRPLCRSPCLDRPSFSQSSILQDGKLDLEKEYQAKMDFALKLGYAEEQIQSVLNKLGPESLINDVLAELVR  
 LGNKGDSEAQVNL SLLLPRGASSREIASPELSLEDEIDNSDNLRPIVIDG SNVAMSHGNKEEFSCRGIQLA VD  
 WFLDKGHK DITVFPVPAWRKEQSRPDAPITDQDILRKLEKEKILVFTPSRRVQGRRVV CYDDRFIVKLA FDS DG  
 IIVSNDNYRDLQVEKPEWKKFIEERLLMYSFVNDKFMPPDDPLGRHG PLENFLRKR PVVPEHKKQPCPYGKK  
 CTYGHKCKYYHPERANQPQRSVADELRI SAKLSTVKIMSEDTLAKCGAGMSTAKGEITSEIKRVASKRQSDPS  
 I RSVAVEPEE WLSIARKSEASSVPSLVTALS VPTIPPPKSHAVGALNTRSASSPVPGSSHPHQKASLEHMVS  
 MQYYPILVTNSHGTPINYTEQYPKFETMGDHDYYSVLSDFSKLS INN MHNHEYYMAEANQGVYVRN PGLCTDS  
 HMSHTRNDNYSSYN NLYLAVADAHPEGTLKLRHSASHNHLQPF SHGYHEALARVQSYGSEDSKQAPHKQSVPH  
 LAVHTQNPATGAHSSCPGDYTMPPSIHPVGPSQPGRALVMTRMDSISDSRLYDSNPMRQR RPPLCREQHASWD  
 PLPCTADSYGYHSYPLGNSLMQPCYEPVMVRSMP EKMEQLWRNPWVGMCNDSREHMIPEHQYQTYKNLCNIFP  
 SNIVLAVMEKNPHTADAQQLAALIVAKLRAAR\*  
 >ENSMUSP00000080820\_c.1508:G>T\_p.K503N ENSMUST00000082183.8|zc3h12b-  
 201|ENSMUSG00000035045|+|chrX:g.94970577:G>T  
 MTATAAVETPKMEKSASKEEKQQPKQEDSTDRGNADPEEWANSESDPEQMCKSGHTSYQATDIQLKKKEMPS  
 KPHRPLCRSPCLDRPSFSQSSILQDGKLDLEKEYQAKMDFALKLGYAEEQIQSVLNKLGPESLINDVLAELVR  
 LGNKGDSEAQVNL SLLLPRGASSREIASPELSLEDEIDNSDNLRPIVIDG SNVAMSHGNKEEFSCRGIQLA VD  
 WFLDKGHK DITVFPVPAWRKEQSRPDAPITDQDILRKLEKEKILVFTPSRRVQGRRVV CYDDRFIVKLA FDS DG  
 IIVSNDNYRDLQVEKPEWKKFIEERLLMYSFVNDKFMPPDDPLGRHG PLENFLRKR PVVPEHKKQPCPYGKK  
 CTYGHKCKYYHPERANQPQRSVADELRI SAKLSTVKIMSEDTLAKCGAGMSTAKGEITSEIKRVASKRQSDPS  
 I RSVAVEPEE WLSIARKPEASSVPSLVTALS VPTIPPPKSHAVGALNTRSASSPVPGSSHPHQNASLEHMVS  
 MQYYPILVTNSHGTPINYTEQYPKFETMGDHDYYSVLSDFSKLS INN MHNHEYYMAEANQGVYVRN PGLCTDS  
 HMSHTRNDNYSSYN NLYLAVADAHPEGTLKLRHSASHNHLQPF SHGYHEALARVQSYGSEDSKQAPHKQSVPH  
 LAVHTQNPATGAHSSCPGDYTMPPSIHPVGPSQPGRALVMTRMDSISDSRLYDSNPMRQR RPPLCREQHASWD  
 PLPCTADSYGYHSYPLGNSLMQPCYEPVMVRSMP EKMEQLWRNPWVGMCNDSREHMIPEHQYQTYKNLCNIFP  
 SNIVLAVMEKNPHTADAQQLAALIVAKLRAAR\*  
 >rs52152841\_ENSMUSP00000080820\_c.1597:A>T\_p.Y533F  
 ENSMUST00000082183.8|zc3h12b-201|ENSMUSG00000035045|+|chrX:g.94970666:A>T  
 MTATAAVETPKMEKSASKEEKQQPKQEDSTDRGNADPEEWANSESDPEQMCKSGHTSYQATDIQLKKKEMPS  
 KPHRPLCRSPCLDRPSFSQSSILQDGKLDLEKEYQAKMDFALKLGYAEEQIQSVLNKLGPESLINDVLAELVR  
 LGNKGDSEAQVNL SLLLPRGASSREIASPELSLEDEIDNSDNLRPIVIDG SNVAMSHGNKEEFSCRGIQLA VD  
 WFLDKGHK DITVFPVPAWRKEQSRPDAPITDQDILRKLEKEKILVFTPSRRVQGRRVV CYDDRFIVKLA FDS DG  
 IIVSNDNYRDLQVEKPEWKKFIEERLLMYSFVNDKFMPPDDPLGRHG PLENFLRKR PVVPEHKKQPCPYGKK

CTYGHKCKYYHPERANQPQRSVADELRI SAKLSTVKIMSEDTLAKCGAGMSTAKGEITSEIKRVASKRQSDPS  
 IRSAVEPEEWL SIARKPEASSVPSLVTALSVP TIPP KSHAVGALNTRSASSPVPGSSSHFP HQASLEHMVS  
 MQYPPILVTNSHGTPINYTEQY PKFETMGDHDY SVLSDFSKLS INN MNHNHEYYMAEANQGVYVRN PGLCTDS  
 HMSHTRNDNYSSYN NLYLAVADAHPEGTLK LHR SASHNHLQPF SHGYHEALARVQSYGSEDSKQAPHKQSVPH  
 LAVHTQNPATGAHSSCPGDYTMPPSIHPV GSPQGRALVMTRMDSISDSRLYDSNPMRQRRPPLCREQHASWD  
 PLPCTADS YGYHSYPLGN SLMQPCYEPVMVRSMPEKMEQLWRNPWVGMCNDSREHMIPEHQYQTYKNLCNIFP  
 SNIVLAVMEKNPHTADAQQLAALIVAKLRAAR\*  
 >rs108555986\_ENSMUSP00000080820\_c.1704:G>C\_p.A569P  
 ENSMUST00000082183.8|zc3h12b-201|ENSMUSG00000035045|+|chrX:g.94970773:G>C  
 MTATAAVETPKMEKSASKEEKQQPKQEDSTDRGNADPEEWANSESDPEQMCKSGHTSYQATDIQLKKKEMPS  
 KPHRPLCRSPCLDRPSFQS S I LQDGKLDLEKEYQAKMDFALKLGYAEEQIQSVLNKLGPESELINDVLAELVR  
 LGNKGDSEAQVNL S L L L P R G A S S R E I A S P E L S L E D E I D N S D N L R P I V I D G S N V A M S H G N K E E F S C R G I Q L A V D  
 WFLDKGHKDI TVFVPAWRKEQSRDAPITDQDILRKLEKEKILVFTPSRRVQGRRVVCYDDRFIVKLAFDSDG  
 IIVSNDNYRDLQVEKPEWKKFIEERLLMYSFVNDKFMPPDDPLGRHGPSLENFLRKRVPVPEHKKQPCPYGKK  
 CTYGHKCKYYHPERANQPQRSVADELRI SAKLSTVKIMSEDTLAKCGAGMSTAKGEITSEIKRVASKRQSDPS  
 IRSAVEPEEWL SIARKPEASSVPSLVTALSVP TIPP KSHAVGALNTRSASSPVPGSSSHFP HQASLEHMVS  
 MQYPPILVTNSHGTPINYTEQY PKFETMGDHDY SVLSDFSKLS INN MNHNHEYYMAEPNQGVYVRN PGLCTDS  
 HMSHTRNDNYSSYN NLYLAVADAHPEGTLK LHR SASHNHLQPF SHGYHEALARVQSYGSEDSKQAPHKQSVPH  
 LAVHTQNPATGAHSSCPGDYTMPPSIHPV GSPQGRALVMTRMDSISDSRLYDSNPMRQRRPPLCREQHASWD  
 PLPCTADS YGYHSYPLGN SLMQPCYEPVMVRSMPEKMEQLWRNPWVGMCNDSREHMIPEHQYQTYKNLCNIFP  
 SNIVLAVMEKNPHTADAQQLAALIVAKLRAAR\*  
 >ENSMUSP00000080820\_c.1781:T>A\_p.Y594\* ENSMUST00000082183.8|zc3h12b-  
 201|ENSMUSG00000035045|+|chrX:g.94970850:T>A  
 MTATAAVETPKMEKSASKEEKQQPKQEDSTDRGNADPEEWANSESDPEQMCKSGHTSYQATDIQLKKKEMPS  
 KPHRPLCRSPCLDRPSFQS S I LQDGKLDLEKEYQAKMDFALKLGYAEEQIQSVLNKLGPESELINDVLAELVR  
 LGNKGDSEAQVNL S L L L P R G A S S R E I A S P E L S L E D E I D N S D N L R P I V I D G S N V A M S H G N K E E F S C R G I Q L A V D  
 WFLDKGHKDI TVFVPAWRKEQSRDAPITDQDILRKLEKEKILVFTPSRRVQGRRVVCYDDRFIVKLAFDSDG  
 IIVSNDNYRDLQVEKPEWKKFIEERLLMYSFVNDKFMPPDDPLGRHGPSLENFLRKRVPVPEHKKQPCPYGKK  
 CTYGHKCKYYHPERANQPQRSVADELRI SAKLSTVKIMSEDTLAKCGAGMSTAKGEITSEIKRVASKRQSDPS  
 IRSAVEPEEWL SIARKPEASSVPSLVTALSVP TIPP KSHAVGALNTRSASSPVPGSSSHFP HQASLEHMVS  
 MQYPPILVTNSHGTPINYTEQY PKFETMGDHDY SVLSDFSKLS INN MNHNHEYYMAEANQGVYVRN PGLCTDS  
 HMSHTRNDN\*SSYN NLYLAVADAHPEGTLK LHR SASHNHLQPF SHGYHEALARVQSYGSEDSKQAPHKQSVPH  
 LAVHTQNPATGAHSSCPGDYTMPPSIHPV GSPQGRALVMTRMDSISDSRLYDSNPMRQRRPPLCREQHASWD  
 PLPCTADS YGYHSYPLGN SLMQPCYEPVMVRSMPEKMEQLWRNPWVGMCNDSREHMIPEHQYQTYKNLCNIFP  
 SNIVLAVMEKNPHTADAQQLAALIVAKLRAAR\*  
 >ENSMUSP00000080820\_c.1855:C>A\_p.A619E ENSMUST00000082183.8|zc3h12b-  
 201|ENSMUSG00000035045|+|chrX:g.94970924:C>A  
 MTATAAVETPKMEKSASKEEKQQPKQEDSTDRGNADPEEWANSESDPEQMCKSGHTSYQATDIQLKKKEMPS  
 KPHRPLCRSPCLDRPSFQS S I LQDGKLDLEKEYQAKMDFALKLGYAEEQIQSVLNKLGPESELINDVLAELVR  
 LGNKGDSEAQVNL S L L L P R G A S S R E I A S P E L S L E D E I D N S D N L R P I V I D G S N V A M S H G N K E E F S C R G I Q L A V D  
 WFLDKGHKDI TVFVPAWRKEQSRDAPITDQDILRKLEKEKILVFTPSRRVQGRRVVCYDDRFIVKLAFDSDG  
 IIVSNDNYRDLQVEKPEWKKFIEERLLMYSFVNDKFMPPDDPLGRHGPSLENFLRKRVPVPEHKKQPCPYGKK  
 CTYGHKCKYYHPERANQPQRSVADELRI SAKLSTVKIMSEDTLAKCGAGMSTAKGEITSEIKRVASKRQSDPS  
 IRSAVEPEEWL SIARKPEASSVPSLVTALSVP TIPP KSHAVGALNTRSASSPVPGSSSHFP HQASLEHMVS  
 MQYPPILVTNSHGTPINYTEQY PKFETMGDHDY SVLSDFSKLS INN MNHNHEYYMAEANQGVYVRN PGLCTDS  
 HMSHTRNDNYSSYN NLYLAVADAHPEGTLK LHR SESHNHLQPF SHGYHEALARVQSYGSEDSKQAPHKQSVPH  
 LAVHTQNPATGAHSSCPGDYTMPPSIHPV GSPQGRALVMTRMDSISDSRLYDSNPMRQRRPPLCREQHASWD  
 PLPCTADS YGYHSYPLGN SLMQPCYEPVMVRSMPEKMEQLWRNPWVGMCNDSREHMIPEHQYQTYKNLCNIFP  
 SNIVLAVMEKNPHTADAQQLAALIVAKLRAAR\*  
 >rs223327872\_ENSMUSP00000108408\_c.64:A>C\_p.E22A  
 ENSMUST00000112788.4|Gm15114-  
 201|ENSMUSG00000079395|+|chrX:g.147281450:A>C  
 MENHEDEIRQLRRLYEANSEAYNEENDIQSESSRGQAFFPGHPRGRGHRDRSRGRNGHFFRQRF SANHP L L H  
 LTRQVNLESLTRRNGNQSEERQLQQERIQLFFRSLHGLSQSHDHHIGRSHGHDSRRSRNRFRRAPVHSERSHV  
 YSGRTNNYTD RPHHDLSDRPHNQLSVRPHPDLSGRPLHDYSGRPHQNHAVRLQHGHSDRYHLTHTERVLPNNS  
 GIAHPGHTERDNQVQRGRAHDNQSGLAHHNH DGRSHHDHSGRAYHG HARRAHNNQSWRS DNNQSWRDLKQSWR  
 GQNNQSQRGHNDQSQRGHNDQSQRGHNDQSWRAHNIRSRDRYHTSLRSSSIQSWMLHERERYHGPRGRNGPR  
 DASPPGSEPEIDRSSAIRERTDYLWVQEHRRNETVELNVALEDGYSSAEESDESFDRLTCS SMLD TLY\*

>rs29276208\_ENSMUSP00000108408\_c.213:C>T\_p.L72F  
ENSMUST00000112788.4|Gm15114-  
201|ENSMUSG00000079395|+|chrX:g.147282319:C>T  
MENHEDEIRQLRYLEAANSEEEYNEENDIQSESSRGQAFFPGHPRGRGRHRRDSRGRNGHFFRQRFSANHPLFH  
LTRQVNLESLTRRNGNQSEERLQQERIQLFRRSLHGLSQSHDHHIGRSHGHDSRRSRNRFRRAPVHSEERSHV  
YSGRTNNYTDRPHHDLSDRPHNQLSVRPHPLDSGRPLHDYSGRPHQNHAVRLQHGHSDDRYHLHTHTERVLPNNS  
GIAHPGHTERDNQVQRGRAHDNQSLAHNNHDGRSHHDHSGRAYHGHARRAHNNQSWRSDNNQSWRDLKQSWR  
GQNNQSQRGHDNQSRGHNDQSWRAHNIRSRDRYHTSLRSSSIQSWMLHERERYHGPRGRNGPR  
DASPPGSEPEIDRSSAIRERTDYLWVQEHRRNETVELNVALEDGYSSAEESDESFDRLTCCSSMLDLY\*

>rs227496273\_ENSMUSP00000056888\_c.69:G>GC\_p.A24ins-fs  
ENSMUST00000060714.10|Ubqln2-  
201|ENSMUSG00000050148|+|chrX:g.152281519:G>GC  
MAENGESSGPPRPSRGPAAAPGAAQPAGRAQNHQSHCEDPQREGGVRGAREQHRAAVQGSDFQTLQIADRSAR  
ADFRKDPERSRYLDAAWHP  
>ENSMUSP00000043215\_c.16:C>A\_p.A6D ENSMUST00000037928.9|Siah1b-  
201|ENSMUSG00000040749|-|chrX:g.162855062:G>T  
MSRQADTALSTGTSTKCPPSQRPALDTTASNNDLASLFECPCFDYVLPPIILQCQSGHLVCSNCRPKLTCCP  
TCRGPLGSIRNLAMEKVANSVLFPCYSASGCEITLPHTKKAEHEELCEFRPYSCPCPGASCKWQGSGLDAVMP  
HLMHQHKSITTLQGEDIVFLATDINLPGAVDWMMQSCFGFHFMLVLEKQEKYDGHQOQFFAIVQLIGTRKQAE  
NFAYRLELNHRRRLTWEATPRSIHEGIATAIMNSDCLVFDTSIAQLFAENGLGINVTISM\*

>ENSMUSP00000071592\_c.16:C>A\_p.A6D ENSMUST00000071667.9|Siah1b-  
202|ENSMUSG00000040749|-|chrX:g.162855062:G>T  
MSRQADTALSTGTSTKCPPSQRPALDTTASNNDLASLFECPCFDYVLPPIILQCQSGHLVCSNCRPKLTCCP  
TCRGPLGSIRNLAMEKVANSVLFPCYSASGCEITLPHTKKAEHEELCEFRPYSCPCPGASCKWQGSGLDAVMP  
HLMHQHKSITTLQGEDIVFLATDINLPGAVDWMMQSCFGFHFMLVLEKQEKYDGHQOQFFAIVQLIGTRKQAE  
NFAYRLELNHRRRLTWEATPRSIHEGIATAIMNSDCLVFDTSIAQLFAENGLGINVTISM\*

>ENSMUSP00000114867\_c.16:C>A\_p.A6D ENSMUST00000134272.2|Siah1b-  
203|ENSMUSG00000040749|-|chrX:g.162855062:G>T  
MSRQADTALSTGTSTKCPPSQRPALDTTASNNDLASLFECPCFDYVLPPIILQCQSGHLVCSNCR  
>ENSMUSP00000136023\_c.228:T>G\_p.F77V ENSMUST00000179056.2|Gm21820-  
201|ENSMUSG00000095693|-|chrY:g.5249213:A>C  
MSQRPSLSAQGVLETSISSQSLTENSLFPQEPGPGCLEKKALGYSPSNPEDLGLSDSSQDTLETRACMQNSAE  
IPPVTQEVIESLSATQDSPKLPASSPLSPEAEPLTYTQSSIKSSSESVPGTPEALASVLGSLCLLKPNEGAMG  
PLVSEQGILRTTAFPPQESLELSQPAKGPLKVPSPQETVGNFSFTEFKGLSLCAEGDIPTTPHEDGRRNSSY  
LKSPRRFKNRILKHPVPEPEDIYCLSELDAKLISSAESLTSKYAEKSSPTSTPQRSISPLKSSQL  
SFRSSILCKRGLSHSPPPGDCPTPSKLRKTRPSPSCVDQEGGLKSVCSKHEGWIHCHSSKMWVRACKSKK

>ENSMUSP00000154142\_c.840:C>T\_p.P281S ENSMUST00000226198.2|Vmn1r2-  
202|ENSMUSG00000115072|+|chr4:g.3172923:C>T  
MKMDPGNFAIETFLFCQITVGMFGNSSILFYIILIFTEKHLTSKDLIEHLTFANYLTVILRGFPQTMSYFG  
FKNFLDDMGCKLIVYISRITRGVSLYALCLLSCFQAITTSNNRWIKLYRATKYIGPSCSVSLVHLLLNI  
LTPLRSGTNYKKNATNRLSYGYCSLFASDSVATTLYISLVCFSDFVCLGLMACSSISMVSIYRHRQVKHI  
HSAQYFLKVYPEDRATQTILILLCTFVISYSFSSIVAIIRTYLNYPVIWGVNIFTSLEIFFSMFCPFVLITNM  
RSSNLFLPCLGKR\*

>ENSMUSP00000100791\_c.840:C>T\_p.P281S ENSMUST00000105160.5|Vmn1r2-  
201|ENSMUSG00000115072|+|chr4:g.3172923:C>T  
MKMDPGNFAIETFLFCQITVGMFGNSSILFYIILIFTEKHLTSKDLIEHLTFANYLTVILRGFPQTMSYFG  
FKNFLDDMGCKLIVYISRITRGVSLYALCLLSCFQAITTSNNRWIKLYRATKYIGPSCSVSLVHLLLNI  
LTPLRSGTNYKKNATNRLSYGYCSLFASDSVATTLYISLVCFSDFVCLGLMACSSISMVSIYRHRQVKHI  
HSAQYFLKVYPEDRATQTILILLCTFVISYSFSSIVAIIRTYLNYPVIWGVNIFTSLEIFFSMFCPFVLITNM  
RSSNLFLPCLGKR\*

>ENSMUSP00000100790\_c.840:C>T\_p.P281S ENSMUST00000105159.5|Vmn1r3-  
201|ENSMUSG00000115466|-|chr4:g.3184465:G>A  
MKMGPGNFAIETFLFCQITVGMFGNSSIPFYIILIFTEKHLTPKDLIEHLTFANYLTVILRGFPQTMSYFG  
FKNFLDDMGCKLIVYISRITRGVSLYAMCLLSCFQAITTSNNRWIKLYRATKYIGPSCSVSLVHLLLNI  
LTPLRSGTNYKKNATNRLSYGYCSLFASDSVATTLYISLVCFSDFVCLGLMACSSISMVSIYRHRQVKHI  
HSAQHFLKVSPEDRATQTILILLCTFVISYSFSSIVAIIRTYLNYPVIWGVNIFTSLEIFFSMFCPFVLITNM  
RSSNLFLPCLGKR\*

>ENSMUSP00000100790\_c.531:G>A\_p.V178I ENSMUST00000105159.5|Vmn1r3-  
201|ENSMUSG00000115466|-|chr4:g.3184774:C>T  
MKMGPGNFAIETFLFCQITVGMFGNSSIPFYIILIFTEKHLTPKDLIEHLLTFANYLTVILRGFPQMSYFG  
FKNFLDDMGCKLLVYISRITRGVSLYAMCLLSCFQAITTSPNNSRWIKLKYRATKYIGPSCSVSCLVHLLLLNI  
LTPLRSEGTNYKKNATNRLSYGYCSLFASDSIATTLYISLVCFSDFVCLGLMACSSISMVSILYRHKRQVKHI  
HSAQHFLKVSPEDRATQTILILLCTFVISYSFSSIVAIIRTYLNYPVIWGVNIFTSLEIFFPMFCPFVLITNM  
RSSSNLFLPCLGKR\*

>ENSMUSP00000100790\_c.283:G>A\_p.G95E ENSMUST00000105159.5|Vmn1r3-  
201|ENSMUSG00000115466|-|chr4:g.3185022:C>T  
MKMGPGNFAIETFLFCQITVGMFGNSSIPFYIILIFTEKHLTPKDLIEHLLTFANYLTVILRGFPQMSYFG  
FKNFLDDMGCKLLVYISRITREVSLYAMCLLSCFQAITTSPNNSRWIKLKYRATKYIGPSCSVSCLVHLLLLNI  
LTPLRSEGTNYKKNATNRLSYGYCSLFASDSVATTLYISLVCFSDFVCLGLMACSSISMVSILYRHKRQVKHI  
HSAQHFLKVSPEDRATQTILILLCTFVISYSFSSIVAIIRTYLNYPVIWGVNIFTSLEIFFPMFCPFVLITNM  
RSSSNLFLPCLGKR\*

>ENSMUSP00000062039\_c.547:G>A\_p.G183D ENSMUST00000058183.9|Ndufaf6-  
201|ENSMUSG00000050323|-|chr4:g.11062082:C>T  
MATSMGLGSVRGPRPFLANLFRQPPRDAWERVRRLLPGPSAVRRSVAASGPGIPGSHLYCLELLRKRKYDYESY  
LCSELLFPAECQRSASALRAFNVELAQVKDSVSEKTIGLMRMQFWKKAVEDMYCDNPPHQVPAIELWKAVKKNH  
LTKRWLMRIIDEREKNLDDKAYRSMQELENYAENTQDSSLYLTLEVLGVKDLHADHAASHIGKAQGIVTCLRA  
TPYHSSRRQVFLPMDVCVQHGVSQEDFLRRNQDKNVRDVYDIASQAHLHLKHARSFHRSVPAEAFPAFLQTV  
SLEDYLLKKIQRVDFDIFHPSLQQKNMLLPLSLYIQSWRKRY\*

>ENSMUSP00000115154\_c.267:A>G\_p.N90D ENSMUST00000131145.9|Tmem67-  
203|ENSMUSG00000049488|-|chr4:g.12085959:T>C  
XMVTRTRPVAAMAVRSRSSSRTGTAYLLLVLCEVSWAQIFSFPPFRPETCDFNQYFDISALSCAPCGANQRRD  
ALGTSCVCLPGYHMISDNNGGPSICKKCPENMKGVTKDGWDCISCPGLTAEGKCHCPTGHILVERNVSGLL  
AQATCELCEDESENSFTKANALGTRCVRCEPTFVNTSRSCSCSEPHTLVVDYVSATQGFIFINV\*

>ENSMUSP00000103928\_c.471:A>G\_p.N158D ENSMUST00000108293.3|Tmem67-  
202|ENSMUSG00000049488|-|chr4:g.12085959:T>C  
METTLPSGPDKPMHRLSAHAQSRPNQPPLGALNARAQTYCFGYSDWRVSADSPRLLGWSRLRQTQDMGMTMVT  
TRPVAAMAVRSRSSSRTGTAYLLLVLCEVSWAQIFSFPPFRPETCDFNQYFDISALSCAPCGANQRRDALGTS  
CVCLPGYHMISDNNGGPSICKKCPENMKGVTKDGWDCISCPGLTAEGKCHCPTGHILVERNVSGLLQAQATC  
ELCEDESENSFTKANALGTRCVRCEPTFVNTSRSCSCSEPHTLTGGLCFSTNTGNFHQRVISTARYGELGMSLNS  
EWFAYLQATAAACWTHANLTSCQALGNMCMVMNMSYDSTTLDACRLFHYIFESTAGLISVHVSVPFWRQNL  
LPWLFYGDQPLAPQVLSTTPLPTNFSFKGQNLKQFVAASYDIRGNFIKWQPLEGGVLQQLCPDTERRLDAAAFGT  
TYQQNCEISLSKLLVDFSSPVFYDVYLEYTDDEEQHRYLWPIPVLNLLQHNKLFVNQDSSSSKWLTRRIFL  
VDAVSGRENDLGNQPRVIRVATQISLSIRLVPNTKNGNIYTPLLTIAYSDDIDIKNAHSQSAKISFVSKYEMNQ  
DASVHTDIALGVLGGLAVLSSLLKTAGWKRRIGSPMIDLQTVMKFLLYAGDLANVFFIITVGTGLYWLIFFK  
AQKSVSVLLPMPVQEEERFVTVYGCAFAMKALQFLHKFISQISIDIFFIDWERPKGKVLKAVEGEGGVSATVP  
VSIWRTYFVANEWNEIQTVRKINPLFQVLTTLFFLEVVGFKNLALMDSSSSLSRNPSDYTAPYSRILRYAVAT  
AIWLVIIGIIQVVFFAAFYERFIEDKIRQFVDLCSMSNVSVFLLSHRCFGYYIHGRSVHGHADTNMEEMNMLK  
REAENLCSQRGLVPNTDGQTFQIAVSSQMRQHYDRIHETLTRRNGPARLLSSSGSTFEQSIKAYHAMNKFLGS  
FIDHVKEMDYFIKDKLLLERILGMEFMPEKSI FYNDEGHFSFSSVLYYGNEATLLIFDLLLLFCVVDLACQD  
FVLASFLTYLQOEIFRFIRNTVGQKNLATKTLVDERFLI\*

>ENSMUSP00000052644\_c.273:A>G\_p.N92D ENSMUST00000050686.10|Tmem67-  
201|ENSMUSG00000049488|-|chr4:g.12085959:T>C  
MGTMVTRTRPVAAMAVRSRSSSRTGTAYLLLVLCEVSWAQIFSFPPFRPETCDFNQYFDISALSCAPCGANQ  
RDALGTSCVCLPGYHMISDNNGGPSICKKCPENMKGVTKDGWDCISCPGLTAEGKCHCPTGHILVERNVS  
GLLQAQATCELCEDESENSFTKANALGTRCVRCEPTFVNTSRSCSCSEPHTLTGGLCFSTNTGNFHQRVISTARYG  
ELGMSLNSEWFAYLQATAAACWTHANLTSCQALGNMCMVMNMSYDSTTLDACRLFHYIFESTAGLISVHVSVP  
FWRQNLPLWLFYGDQPLAPQVLSTTPLPTNFSFKGQNLKQFVAASYDIRGNFIKWQPLEGGVLQQLCPDTER  
RLDAAAFGTTYQQNCEISLSKLLVDFSSPVFYDVYLEYTDDEEQHRYLWPIPVLNLLQHNKLFVNQDSSSSK  
WLLTRRIFLVDAVSGRENDLGNQPRVIRVATQISLSIRLVPNTKNGNIYTPLLTIAYSDDIDIKNAHSQSAKIS  
FSV KYEMNQDASVHTDIALGVLGGLAVLSSLLKTAGWKRRIGSPMIDLQTVMKFLLYAGDLANVFFIITVGT  
GLYWLIFFKAQKSVSVLLPMPVQEEERFVTVYGCAFAMKALQFLHKFISQISIDIFFIDWERPKGKVLKAVEG  
EGG VRSATVPVSIWRTYFVANEWNEIQTVRKINPLFQVLTTLFFLEVVGFKNLALMDSSSSLSRNPSDYTAPYS  
RILRYAVATAIWLVIIGIIQVVFFAAFYERFIEDKIRQFVDLCSMSNVSVFLLSHRCFGYYIHGRSVHGHAD  
TNMEEMNMLKREAENLCSQRGLVPNTDGQTFQIAVSSQMRQHYDRIHETLTRRNGPARLLSSSGSTFEQSIKAY  
HA

MNKFLGSGFIDHVKEMDYFIKDKLLLERILGMEFMPEKSI FYNDEGHSFSSVLYYGNEATLLIFDLLFFCV  
VDLACQDFVLASFLTYLQOEI FRFIRNTV GQKNLTKTLVDERFLI\*  
>ENSMUSP00000041789\_c.217:C>G\_p.S73C ENSMUST00000042221.14|Slc26a7-  
201|ENSMUSG00000040569|-|chr4:g.14593896:G>C  
MTGAKRKKRSVLWGKMHTPHREDIKQWCKRRLPILEWAPQYNLKENLLPDTVSGIMLAVQQVAQGLSFAMLSC  
VHPVFGLYGSFLPAIIYAI FGMGRHVATGTFALTSLISANAVERLVPQSSRNLTQSNSSVLGLSEFELQRIG  
VAAAVSFLGGVIQLVMFVLQLSATFLLTEPVISAMTTGAATHVVT SQVKYLLGKMPYISGPLGFFYIYAYV  
FENIKSVQLEALLFSLLSIIIVLVLVKELNEQFKRKIKVVLVLDLVLIIAASFACYCTNMENTYGLEVVGHIPN  
GIPPPRAPPMNILSAVLTEAFGVALVGYVASLALAQGSACKFKYSVDDNQEF LAHGLSNVIPSFLFCIPSA  
MGRTAGLYSTGAKTQVACLISCFVLIVIIYAIGPLLYWLP MCVLASSIIVVGLKGM LIQFRDLKKYWNVDKIDW  
GIWISTYIFTICFAANVGLLFGVICTIAIVLGRFPRAKTL SITDMKEMELKVKTEMHDETSQQIKIISINNPL  
VFLNAKKFSADLMKIIILKESDSNQPLDDVSKCEQNTLLSSLSNGNCNEEASQPCSSSEKCSLVLNCSGLTFFDY  
TGVSTLVELYLDCKRSRVDVFLANCTASLIKAMTYGDLDEKPIFFDSVPA AISIIQSNKNLSKASDHSEV\*  
>ENSMUSP00000116157\_c.217:C>G\_p.S73C ENSMUST00000149633.2|Slc26a7-  
204|ENSMUSG00000040569|-|chr4:g.14593896:G>C  
MTGAKRKKRSVLWGKMHTPHREDIKQWCKRRLPILEWAPQYNLKENLLPDTVSGIMLAVQQVAQGLSFAMLSC  
VHPVFGLYGSFLPAIIYAI FGMGRHVATGTFALTSLISANAVERLVPQSSRNLTQSNSSVLGLSEFELQRIG  
VAAAVSFLGGVIQLVMFVLQLSATFLLTEPVISAMTTGAATHVVT SQVKYLLG  
>ENSMUSP00000122870\_c.217:C>G\_p.S73C ENSMUST00000143105.2|Slc26a7-  
203|ENSMUSG00000040569|-|chr4:g.14593896:G>C  
MTGAKRKKRSVLWGKMHTPHREDIKQWCKRRLPILEWAPQYNLKENLLPDTVSGIMLAVQQVAQGLSFAMLSC  
VHPVFGLYGSFLPAIIYAI FGMGRHV  
>ENSMUSP00000055293\_c.105:C>T\_p.R36C ENSMUST00000054538.13|Arhgef39-  
201|ENSMUSG00000051517|-|chr4:g.43499502:G>A  
MESSGSAACCPVLQQRARWERKRVCTARELLETERCYQEQLGLVATYFLRILKAKGTLRPPPELQTLFGTWELI  
YAASLELLPYLEEGQWGLGLQGFPHLELYAQFAANAERSQTTLQAQLKKNKRFRFRVVKLQEGRPEFRGLQLQ  
DLLPLPLQRLQENVALAENTV PNSPDYQQLTAARLVSETAQKVHAIQSQKNDQHLLRVQALLSGRKA  
KGLTSGRWFLRQGWLLVVPPTGEPRPRMFFLFS DVLLMAKPRPPLHLLKSGTFVCRALYPMSQCHLSRVFGHS  
GGPCGGLLSLSPHEKLLMST DQEELS QWHHSLTLAIRS QKSSTHRSVTAT\*  
>ENSMUSP00000103497\_c.324:C>A\_p.H109N ENSMUST00000107865.9|Tmem8b-  
202|ENSMUSG00000078716|+|chr4:g.43685342:C>A  
MNMFQSLGTQPLPPEPPSLGTPIEGSGAIAPTEHCWPVRPTLRNELDTFSVHFYIFFGPSVALPPERPAVFAL  
RLLPVLD SGGVLSLELQLNASSLRQENVTVFGLTNEVPLSLGDAAVTC SKESLAGFLLSVSATS RVARLRIP  
FPQTGTWFLTLRSLCGVGRFVRCRNATAEVR LR TFLSPCVDDCGPYGQCKLLRTHNYLYAACECKAGWRGWG  
CTDSADALTYGFQLLSTLLCLSNLMFLPPVVLAI RSRVLEAAVYTF TMFFSTFYHACDQPGI VVFCIMDYD  
VLQFCDFLGSLSMSVWVTVIAMARLQPVIKQVLYLLGAMLLSMALQLDRHGLWNLLG PSLFALGILATAWTVRS  
VRRRHCPPTWRRWLFYLCPGSLIAGSAVLLYAFVETRDNYFYIHSIWHMLIAGSVGFLLP PRAKTRRRVPSG  
ARARGCGYQLCINEQEELGLVGPGGTTVSSICVS\*  
>ENSMUSP00000129760\_c.324:C>A\_p.H109N ENSMUST00000167153.8|Tmem8b-  
209|ENSMUSG00000078716|+|chr4:g.43685342:C>A  
MNMFQSLGTQPLPPEPPSLGTPIEGSGAIAPTEHCWPVRPTLRNELDTFSVHFYIFFGPSVALPPERPAVFAL  
RLLPVLD SGGVLSLELQLNASSLRQENVTVFGLTNEVPLSLGDAAVTC SKESLAGFLLSVSATS RVARLRIP  
FPQTGTWFLTLRSLCGVGRFVRCRNATAEVR LR TFLSPCVDDCGPYGQCKLLRTHNYLYAACECKAGWRGWG  
CTDSADALTYGFQLLSTLLCLSNLMFLPPVVLAI RSRVLEAAVYTF TMFFSTFYHACDQPGI VVFCIMDYD  
VLQFCDFLGSLSMSVWVTVIAMARLQPVIKQVLYLLGAMLLSMALQLDRHGLWNLLG PSLFALGILATAWTVRS  
VRRRHCPPTWRRWLFYLCPGSLIAGSAVLLYAFVETRDNYFYIHSIWHMLIAGSVGFLLP PRAKTRRRVPSG  
ARARGCGYQLCINEQEELGLVGPGGTTVSSICVS\*  
>ENSMUSP00000103496\_c.324:C>A\_p.H109N ENSMUST00000107864.8|Tmem8b-  
201|ENSMUSG00000078716|+|chr4:g.43685342:C>A  
MNMFQSLGTQPLPPEPPSLGTPIEGSGAIAPTEHCWPVRPTLRNELDTFSVHFYIFFGPSVALPPERPAVFAL  
RLLPVLD SGGVLSLELQLNASSLRQENVTVFGLTNEVPLSLGDAAVTC SKESLAGFLLSVSATS RVARLRIP  
FPQTGTWFLTLRSLCGVGRFVRCRNATAEVR LR TFLSPCVDDCGPYGQCKLLRTHNYLYAACECKAGWRGWG  
CTDSADALTYGFQLLSTLLCLSNLMFLPPVVLAI RSRVLEAAVYTF TMFFSTFYHACDQPGI VVFCIMDYD  
VLQFCDFLGSLSMSVWVTVIAMARLQPVIKQVLYLLGAMLLSMALQLDRHGLWNLLG PSLFALGILATAWTVRS  
VRRRHCPPTWRRWLFYLCPGSLIAGSAVLLYAFVETRDNYFYIHSIWHMLIAGSVGFLLP PRAKTRRRVPSG  
ARARGCGYQLCINEQEELGLVGPGGTTVSSICVS\*  
>ENSMUSP00000103498\_c.1701:C>A\_p.H568N ENSMUST00000107866.9|Tmem8b-  
203|ENSMUSG00000078716|+|chr4:g.43685342:C>A

MAQPLSRPLILSQFQPWPPATPSPRFPNLSRPRPVSQRMSRSRSLQPRSLPPAWPLSPPRPLFHPLSQFPAQ  
HLTSLHSPRLLKPLAQPLLQSPSHPLLPSSHLLPLFEPRCSVQRHPKKAQSLPPSLCLPKSLPLGPRLSHTL  
PLSQPRLRSLGLQLPALLLLLLFSVLGPGAGGLFLTDYSTCSPRKLSPFRSFASTELFHFHVPEDTF LAVWNL  
IIFKEQGGTFGDHCPDQSVTVYFRSGAPPVINPLHTHFPADTAVPGVFSLTLSWTLPNRTSGIFNVSSPLPGD  
WFLAAHLPAQAHGHSVKGLQDECQYLLQPQLIVRRLLDVAVLVGRPSEQTLSSHNRSAKYKVFVPSFTYRVS  
AQLVCVGGRGASVCPLTLRLRPKAPPLHNSSSVACGGASVCQLELALPPWGHVWVYRVETPSRGPRTISFQL  
CVRLQECQPQSLSRALVPGAAMNPQSLGTQPLPEPPSLGTPIEGSGAIAPTEHCWPVRPTLRNELDTFSVH  
FYIFFGPSVALPPERPAVFALRLLPVLDSGGVLSLELQLNASSLRQENVTVFGCLTNEVPLSLGDAAVTCSKE  
SLAGFLLSVSATSARVARLRI PFPQTGTWFLTLRSLCGVGRFVRCRNATAEVRLRFTLSPCVDDCGPYGQCKL  
LRTHNYLYAAACECKAGWRGWGCTDSADALTYGFQLLSTLLCLSNLMFLPPVVLAIRSRYVLEAAVYFTTMFF  
STFYHACDQPGIVVFCIMDYDVLQFCDFLGLSLSVWVTVIAMARLQPVIKQVLYLLGAMLLSMALQLDRHGLW  
NLLGPSLFALGILATAWTVRSVRRRHCCYPTWRRLWFLYLCPGSLIAGSAVLLYAFVETRDNYFYIHSIWHMLI  
AGSVGFLLPRAKTRRRVPSGARARGCGYQLCINEQEELGLVGPGGTTVSSICVS\*  
>ENSMUSP00000130133\_c.324:C>A\_p.H109N ENSMUST00000143339.8|Tmem8b-  
206|ENSMUSG00000078716|+|chr4:g.43685342:C>A  
MNMPQSLGTQPLPEPPSLGTPIEGSGAIAPTEHCWPVRPTLRNELDTFSVHFYIFFGPSVALPPERPAVFAL  
RLLPVLDSGGVLSLELQLNASSLRQENVTVFGCLTNEVPLSLGDAAVTCSKVPGRPLPSLGQCHLQSGQASNPI  
PTDGDLPV  
>ENSMUSP00000158111\_c.547:T>C\_p.F183S ENSMUST00000202355.2|Vmn1r261-  
201|ENSMUSG00000106893|-|chr6:g.3143954:A>G  
MFGNSSILFYIILIFTEKHLTPKDLIEHLTFANYLTVILRGFPQTMSYFGFKNFLDDMGCKLIVYIS\*ITR  
GVSLYAMCLLSCFQAITTSNNRSRWIKLKYRATKYIGPSCSVSWLVHLLLNILTPRESGTNYKKNATNRLSY  
GYGLFASDSVATTLYISLVCFSDFVCLGLMACSSISMVSIYRHKRQVKHIHSAQHFLKVSPEDRATQTILI  
LLCTFVISYSFSSIVAIIRTYLNYPIWGVNIFTSLEIFFFPFCPFVLITNMRSSSNLFLPCLGKR\*  
>ENSMUSP00000135076\_c.862:C>A\_p.P288Q ENSMUST00000176551.3|Peg10-  
203|ENSMUSG00000092035|+|chr6:g.4756288:C>A  
MLQIHMPGRPTLFFVRAMIDSGASGNFIDQDFVIQNAIPLRIKDWPMVEAIDGHPIASGPIILETHHLIVDLG  
DHREILSFDVTQSPFFPIVLGIRWLSTHDPHITWSTRSIVFNSDYCRLRCRMFAQIPSNLLFTVPQPNLHPLYL  
LHHVHPHVHPHMHQHLHQHLHQFLHPDPHQYHPDPHYHHHQADMQHQLQOYLYQYLYHYLHPVMHHHLPPD  
QHEHLHEYLHQYLYHQYLYHQYLYLHQLHHLHPDLHQYLYQYLYLHNHMNPDPHHHHPDPDPDPHPPHQPDPHQ  
DPHQPDPHQDPDPHQPDPHQPDPHQPDPHQPDPHQPDPHQPDPHQPDPHQPDPHQPDPHQPDPHQPDPHQPDPHQP  
HPQPQHPQHPNHPQPPFFYHMAGFRIYHPVRYYYIQNVYTPVDEHVYPGHRVVDNPIEMI PGAHSLPSGH  
LYSMSESEMNALRNFDVDRNVKDGMLTPTVAPNGAQVLQVVRGWKLQVTYNCRAPQSGTIQNQYLRLMSLPMGD  
PAHLASYGEFVQVPGYPYPAYVYYTSPHMMTAWYPVGRDVGRIIVVPVITWSQNTNRQPPVPQYPPPPQPP  
PPPPPPPPPPASSCSAA\*  
>ENSMUSP00000127306\_c.2065:C>A\_p.P689Q ENSMUST00000166678.2|Peg10-  
201|ENSMUSG00000092035|+|chr6:g.4756288:C>A  
MAAAGSSNCPPIPPPPPPPPNNNNNNNTPKSPGVPDAEDDDERRHDELPEIDNNFDEDMNRQFENMNLDDQVEL  
LAQSYSLDDHLDLDDFDDDDDEDDDFDEPDQDELPEYSDDDDLQGAAPIPNFFSDDDCLELPEKFDGNPD  
MLGPFMYQCQLFMEKSTRDFSVDRIRVCFVTSMILIGRAARWATAKLQRCTYLMHNYTAFMMELKHVFEDPQRR  
EAAKRKIRRLRQGGPGPVVDYSNAFQMIADLDWTEPALMDQFQEGLNPDIRAELSRQEAPKTLAALITACIHI  
ERRLARDAAAKPDPSPRALVMPNSQTDPTPEVGGARMRLSKEEKERRRKMNLCLYCGNGGHFADTCPAKASK  
NSPPGLPGPAVGGPSATGPERIRSPSEASTQHLQVMLQIHMPGRPTLFFVRAMIDSGASGNFIDQDFVIQNAI  
PLRIKDWPMVEAIDGHPIASGPIILETHHLIVDLGDHREILSFDVTQSPFFPIVLGIRWLSTHDPHITWSTR  
SIVFNSDYCRLRCRMFAQIPSNLLFTVPQPNLHPLYLHHPHVHPHMHQHLHQHLHQFLHPDPHQYHPDPH  
YHHHQADMQHQLQOYLYQYLYHYLHPVMHHHLPPDQHEHLHEYLHQYLYHQYLYLHQLHHLHPDLHQYLYQYL  
HNHMNPDPHHHHPDPDPDPHPPHQPDPHQPDPHQPDPHQPDPHQPDPHQPDPHQPDPHQPDPHQPDPHQPDPHQP  
HQDAHQHDQDPHQPDAHQDPHQPDPHQPDPHQPDPHQPDPHQPDPHQPDPHQPDPHQPDPHQPDPHQPDPHQPDPHQP  
QVVRGWKLQVTYNCRAPQSGTIQNQYLRLMSLPMGDPAHLASYGEFVQVPGYPYPAYVYYTSPHMMTAWYPV  
RDVHGRIIVVPVITWSQNTNRQPPVPQYPPPPQPPPPPPPPPPPPPPPPPPPPPPASSCSAA\*  
>ENSMUSP00000132394\_c.216:A>G\_p.M73V ENSMUST00000151376.3|Gm10722-  
201|ENSMUSG00000091028|+|chr9:g.3001142:A>G  
SCHIPCPTVDISFPFVSFLAIFHVLKCVFLIFRDFQFYRQIPGPTVCIFHISRFSVILSFFKLSTACFSFSV  
IFSFLAIFHVLQWTFNLFPFVSFLAIFHVLKCVFLIFSDFLFSRHIPGPTVCISHFSRFSVISSFFKLSSGC  
FSFSMIFSLAIFHVLQWTFNLFPFSSIFSPYSRSYSVHFSFFTFSSDFVIFQVVKWMFLIFHDFQFSC  
>ENSMUSP00000137273\_c.373:A>T\_p.Q125L ENSMUST00000178348.2|Gm11168-  
203|ENSMUSG00000096385|+|chr9:g.3004834:A>T

MFLIFNDFHFSCHIPRPIVDISFPPFSVFFAIFHVPKCVFLIFRDFQFPRHIPGPTVCISHFSRFSVSISSFFK  
SSSGCFSFSMIFSLAIFHVLQWTFNLNFPFVSFLAIFHVLKCVFLIYRDFLQFSCYIPSPPTVCISHFSRFSLI  
LSLFLKSTACFSFSMIFSLAIFHVLQWKFLYFPTFSVSPYSRSYSVHFSFPTFFSDFVIFQVVKWMFLIFLD  
FQFSC  
>ENSMUSP00000137273\_c.535:T>C\_p.F179S ENSMUST00000178348.2|Gm11168-  
203|ENSMUSG00000096385|+|chr9:g.3004996:T>C  
MFLIFNDFHFSCHIPRPIVDISFPPFSVFFAIFHVPKCVFLIFRDFQFPRHIPGPTVCISHFSRFSVSISSFFK  
SSSGCFSFSMIFSLAIFHVLQWTFNLNFPFVSFLAIFHVLKCVFLIYRDFQFSCYIPSPPTVCISHFSRFSLI  
LSLFLKSTACFSFSMIFSLAIFHVLQWKFLYFPTFSVSPYSRSYSVHFSFPTFFSDFVIFQVVKWMFLIFLD  
FQFSC  
>ENSMUSP00000136598\_c.617:T>G\_p.S206R ENSMUST00000177722.8|Gm11168-  
201|ENSMUSG00000096385|+|chr9:g.3005128:T>G  
MFLIFHDFQFSCHIPCPTVDISFPPFSVFLAIFHVLKCVFLIFSDQFSRHIPGPTVCISHFSRFSVILSFFK  
LSSGCFSFSLIIFSFLAIFHVLQWTFNLNFPFVSFLAIFHVLKCVFLIFRDFQFPRHIPGPTVCISHFSRFSV  
ISSFFKSSSGCFSFSMIFSLAIFHVLQWTFNLNFPFSSYSFSPYSRSYSVHFSFPTFFRDFVIFQVVKWMFL  
IFLDFQFSC  
>ENSMUSP00000136761\_c.617:T>G\_p.S206R ENSMUST00000178077.2|Gm11168-  
202|ENSMUSG00000096385|+|chr9:g.3005128:T>G  
MFLIFLDFQFSCHIPCPTVDISFPPFSVFLAIFHVLKCVFLIFSDQFSRHIPGPTVCISHFFRFFMISFFFT  
LSSGCFSFSIIIFTFLAIFHVLQWTFNLNFPFVSFLAIFHILKCCVFLIFRDFQFPRHIPGPTVCISHFSRFSV  
ISSFFKSSSGCFSFSMIFSLAIFHVLQWTFNLNFPFSSYSFSPYSRSYSVHFSFPTFFRDFVIFQVVKWMFL  
IFLDFQFSC  
>ENSMUSP00000137273\_c.605:T>G\_p.S202R ENSMUST00000178348.2|Gm11168-  
203|ENSMUSG00000096385|+|chr9:g.3005128:T>G  
MFLIFNDFHFSCHIPRPIVDISFPPFSVFFAIFHVPKCVFLIFRDFQFPRHIPGPTVCISHFSRFSVSISSFFK  
SSSGCFSFSMIFSLAIFHVLQWTFNLNFPFVSFLAIFHVLKCVFLIYRDFQFSCYIPSPPTVCISHFSRFSLI  
LSLFLKSTACFSFSMIFSLAIFHVLQWKFLYFPTFSVSPYSRSYSVHFSFPTFFRDFVIFQVVKWMFLIFLD  
FQFSC  
>ENSMUSP00000136541\_c.165:A>T\_p.T56S ENSMUST00000179881.2|Gm11168-  
204|ENSMUSG00000096385|+|chr9:g.3005328:A>T  
MFLIFLDFQFSCHIPCPTVDISFPPFSVFLAIFHVLKCVFLIFSDQFSRNIPGPSVCISHFFRFFMILSFFK  
LSTACFSFSMIFSLAIFHVLQWTFNLNFPFVSFLAIFHVLKCVFLIFSDFLFSRHIPGPTVCISNFSRFSVI  
SSFFKLSSGCFSFSMIFSLAIFHVLQWTFNLNFPFTSIFPYFTSFSVHFSFPTFFSDFVIFQVVNCMFLIFHD  
FQFSC  
>ENSMUSP00000136541\_c.571:A>T\_p.Y191F ENSMUST00000179881.2|Gm11168-  
204|ENSMUSG00000096385|+|chr9:g.3006848:A>T  
MFLIFLDFQFSCHIPCPTVDISFPPFSVFLAIFHVLKCVFLIFSDQFSRNIPGPTVCISHFFRFFMILSFFK  
LSTACFSFSMIFSLAIFHVLQWTFNLNFPFVSFLAIFHVLKCVFLIFSDFLFSRHIPGPTVCISNFSRFSVI  
SSFFKLSSGCFSFSMIFSLAIFHVLQWTFNLNFPFTSIFPYFTSFSVHFSFPTFFSDFVIFQVVNCMFLIFHD  
FQFSC  
>ENSMUSP00000136541\_c.660:C>A\_p.Q221K ENSMUST00000179881.2|Gm11168-  
204|ENSMUSG00000096385|+|chr9:g.3006937:C>A  
MFLIFLDFQFSCHIPCPTVDISFPPFSVFLAIFHVLKCVFLIFSDQFSRNIPGPTVCISHFFRFFMILSFFK  
LSTACFSFSMIFSLAIFHVLQWTFNLNFPFVSFLAIFHVLKCVFLIFSDFLFSRHIPGPTVCISNFSRFSVI  
SSFFKLSSGCFSFSMIFSLAIFHVLQWTFNLNFPFTSIFPYFTSFSVHFSFPTFFSDFVIFQVVNCMFLIFHD  
FKFSC  
>ENSMUSP00000137330\_c.14:C>A\_p.F5L ENSMUST00000143083.3|Gm10721-  
201|ENSMUSG00000096519|+|chr9:g.3013154:C>A  
LFLILHDFQFSCHIPCPTLDISFPPFSVFLAIFHVLKCVFLIFRDFQFSCHIPGPTVCISHFSRFSVILSFFK  
LSTACFSFSMIFSLAIFHVLQWKFLNFPFVSFLAIFHVLKCVFLIFRDFQFSRHIPGPTVCISHFSRFSVI  
SSFFKSSSGCFSFSMIFSLAIFHVLQWTFNLNFPFSPYSRSYSVHFSFPTFFSDFVIFQVVKWMFLIFHDF  
QFSC  
>ENSMUSP00000137330\_c.15:C>T\_p.H6Y ENSMUST00000143083.3|Gm10721-  
201|ENSMUSG00000096519|+|chr9:g.3013155:C>T  
LFLIFYDFQFSCHIPCPTLDISFPPFSVFLAIFHVLKCVFLIFRDFQFSCHIPGPTVCISHFSRFSVILSFFK  
LSTACFSFSMIFSLAIFHVLQWKFLNFPFVSFLAIFHVLKCVFLIFRDFQFSRHIPGPTVCISHFSRFSVI  
SSFFKSSSGCFSFSMIFSLAIFHVLQWTFNLNFPFSPYSRSYSVHFSFPTFFSDFVIFQVVKWMFLIFHDF  
QFSC



>ENSMUSP00000137330\_c.36:C>A\_p.H13N ENSMUST00000143083.3|Gm10721-  
201|ENSMUSG00000096519|+|chr9:g.3013176:C>A  
LFLIFHDFQFSCNIPCPPTLDISFPPFSVFLAIFHVLKCVFLIFRDFQFSCHIPGPTVCISHFSRFSVILSFFK  
LSTACFSFSMIFSFLAIFHVLQWKFLNFPFVSFLAIFHVLKCVFLIFRDFQFSRHIPGPTVCISHFSGFSVI  
SSFFKSSSGCFSFSMIFSFLAIFHVLQWTFNLNFPFSPYSRSYSVHFSFSTFFSDFVIFQVVKWMFLIFHDF  
QFSC  
>ENSMUSP00000137330\_c.491:T>A\_p.S164R ENSMUST00000143083.3|Gm10721-  
201|ENSMUSG00000096519|+|chr9:g.3014102:T>A  
LFLIFHDFQFSCHIPCPPTLDISFPPFSVFLAIFHVLKCVFLIFRDFQFSCHIPGPTVCISHFSRFSVILSFFK  
LSTACFSFSMIFSFLAIFHVLQWKFLNFPFVSFLAIFHVLKCVFLIFRDFQFSRHIPGPTVCISHFSGFSVI  
SSFFKSSSGCFSFSMIFRFLAIFHVLQWTFNLNFPFSPYSRSYSVHFSFSTFFSDFVIFQVVKWMFLIFHDF  
QFSC  
>ENSMUSP00000096649\_c.90:G>T\_p.A31S ENSMUST00000099050.4|Gm10720-  
201|ENSMUSG00000074564|+|chr9:g.3015748:G>T  
MFLIFNDFHFSCHIPCPPTVDISKFPFSVFLSIFHVLKCVFLIFSDQFSRHIPGPTVCISHFSRFSVILSFFK  
LSSGCFSSFLIFSFLAIFHVLQWTFNLNFPFVSFLAIFHVLKCVFLIFSDQFSRHIPGPTVCISHFFRFFMI  
SSFFTLSSGCFSFSMIFTFLLAIFHVLQWTFNLNFPFPLPYSRSYSVHFSFSTFFSDFVIFQVVKWMFLIFHDF  
QFSR  
>ENSMUSP00000096649\_c.439:C>T\_p.S147L ENSMUST00000099050.4|Gm10720-  
201|ENSMUSG00000074564|+|chr9:g.3016916:C>T  
MFLIFNDFHFSCHIPCPPTVDISKFPFSVFLAIFHVLKCVFLIFSDQFSRHIPGPTVCISHFSRFSVILSFFK  
LSSGCFSSFLIFSFLAIFHVLQWTFNLNFPFVSFLAIFHVLKCVFLIFSDQFSRHIPGPTVCISHFFRFFMI  
LSFFTLSSGCFSFSMIFTFLLAIFHVLQWTFNLNFPFPLPYSRSYSVHFSFSTFFSDFVIFQVVKWMFLIFHDF  
QFSR  
>ENSMUSP00000096648\_c.16:A>G\_p.N6S ENSMUST00000099049.4|Gm10719-  
202|ENSMUSG00000095547|+|chr9:g.3017424:A>G  
MFLIFSDHFHFSCHIPCPPTVDISFPPFSVFLAIFHVLKCVFLIFRDFQFSRHIPGPTVCISHFFRFFMISSTFT  
LSSGCFSSMIFTFLAIFHVLQWTFNLNFPFVSFLAIFHILKCVFLIFRDFQFSCHIPGPTVCISHFSRFSVI  
SSFFKSSSGCFSFSMIFSFLAIFQVLQTLTFLNFPFLSFSYRSYSVHFSFSTFFSDFVIFQVVKWLFLIFL  
DFQFSC  
>ENSMUSP00000096648\_c.430:C>T\_p.S144L ENSMUST00000099049.4|Gm10719-  
202|ENSMUSG00000095547|+|chr9:g.3018018:C>T  
MFLIFNDFHFSCHIPCPPTVDISFPPFSVFLAIFHVLKCVFLIFRDFQFSRHIPGPTVCISHFFRFFMISSTFT  
LSSGCFSSMIFTFLAIFHVLQWTFNLNFPFVSFLAIFHILKCVFLIFRDFQFSCHIPGPTVCISHFSRFLVI  
SSFFKSSSGCFSFSMIFSFLAIFQVLQTLTFLNFPFLSFSYRSYSVHFSFSTFFSDFVIFQVVKWLFLIFL  
DFQFSC  
>ENSMUSP00000096648\_c.533:T>A\_p.N178K ENSMUST00000099049.4|Gm10719-  
202|ENSMUSG00000095547|+|chr9:g.3018121:T>A  
MFLIFNDFHFSCHIPCPPTVDISFPPFSVFLAIFHVLKCVFLIFRDFQFSRHIPGPTVCISHFFRFFMISSTFT  
LSSGCFSSMIFTFLAIFHVLQWTFNLNFPFVSFLAIFHILKCVFLIFRDFQFSCHIPGPTVCISHFSRFSVI  
SSFFKSSSGCFSFSMIFSFLAIFQVLQTLTFLNFPFLSFSYRSYSVHFSFSTFFSDFVIFQVVKWLFLIFL  
DFQFSC  
>ENSMUSP00000096648\_c.574:A>T\_p.Y192F ENSMUST00000099049.4|Gm10719-  
202|ENSMUSG00000095547|+|chr9:g.3018922:A>T  
MFLIFNDFHFSCHIPCPPTVDISFPPFSVFLAIFHVLKCVFLIFRDFQFSRHIPGPTVCISHFFRFFMISSTFT  
LSSGCFSSMIFTFLAIFHVLQWTFNLNFPFVSFLAIFHILKCVFLIFRDFQFSCHIPGPTVCISHFSRFSVI  
SSFFKSSSGCFSFSMIFSFLAIFQVLQTLTFLNFPFLSFSYRSRSVHFSFSTFFSDFVIFQVVKWLFLIFL  
DFQFSC  
>ENSMUSP00000136170\_c.165:A>T\_p.T56S ENSMUST00000179272.2|Gm10719-  
203|ENSMUSG00000095547|+|chr9:g.3018922:A>T  
MFLIFHDFQFSCHIPCPPTVEISFPTFSVFLAIFHVLKCVFLIFRVFQVSRHIPGPSVCISHFSRFSVILSFFK  
LSSGCFSSFLIFSFLAIFHVLQWTFNLNFPFVSFLAIFHVLKCCVFLIFRDFQFSRHIPSPPTVCISHFSRFSV  
ISSFFKLSSGCFSFSMIFSFLAIFKVLQWTFNLNFRPLSFSYRSYSVHFSFSTFFSDFVVFQVVKWMFLIFH  
DFQFSC  
>ENSMUSP00000136170\_c.526:C>A\_p.T176K ENSMUST00000179272.2|Gm10719-  
203|ENSMUSG00000095547|+|chr9:g.3020681:C>A  
MFLIFHDFQFSCHIPCPPTVEISFPTFSVFLAIFHVLKCVFLIFRVFQVSRHIPGPTVCISHFSRFSVILSFFK  
LSSGCFSSFLIFSFLAIFHVLQWTFNLNFPFVSFLAIFHVLKCCVFLIFRDFQFSRHIPSPPTVCISHFSRFSV

ISSFFKLSSGCFSSMIFSLAIFKVLQWKFLNFRPLSFSPPYSRSYSVHFSFFRFFSDFVFFQVVKWMFLIFH  
DFQFSC  
>ENSMUSP00000136170\_c.541:G>A\_p.R181Q ENSMUST00000179272.2|Gm10719-  
203|ENSMUSG00000095547|+|chr9:g.3020696:G>A  
MFLIFHDFQFSCHIPCPTVEISFPFVSFLAIFHVLKCVFLIFRDFQVSRHIPGPTVCISHFSRFSVILSFFK  
LSSGCFSSFLIFSLAIFHVLWTFLNFPFVSFLAIFHVLKCCVFLIFRDFQFSRHIPSPPTVCISHFSRFSV  
ISSFFKLSSGCFSSMIFSLAIFKVLQWTFLNFPFVSFLAIFHVLKCVFLIFRDFQFSRHIPGPTVCISHFSRFSV  
DFQFSC  
>ENSMUSP00000096646\_c.553:A>T\_p.Y185F ENSMUST00000099047.4|Gm10719-  
201|ENSMUSG00000095547|+|chr9:g.3021259:A>T  
MFLIFHDFQFSCHIPCPTMDISFPFVSFLAIFHVLKCVFLIFRDFQFSRHIPGPTVCISHFSRFSVILSFFK  
SSSGCFSSMIFSLAIFHVLQWTFLNFPFVSFLAIFHVLKCVFLIFRDFQFSRHIPGPTVCISHFSRFSVI  
SSFFKLSSGCFSSMIFSLAIFHVLQWTFLNFPFVSFLAIFHVLKCVFLIFRDFQFSRHIPGPTVCISHFSRFSVI  
FLDFQFSC  
>ENSMUSP00000096645\_c.159:G>C\_p.G54R ENSMUST00000099046.4|Gm10718-  
201|ENSMUSG00000095186|+|chr9:g.3023710:G>C  
MFLIFHDFQFSCHIPCPTVDISFPFVSFLAIFHVLKCVFLIFRDFQFSCHIPRPTVCISHFSRFSLILSFFK  
LSTACFSFSMIFSLAIFHVLQWKFLNFPFVSFLAIFHVLKCVFLIFRDFQFSRHIPGPTVCISHFSRFSVI  
SSFFKSSSGCFSSMIFSLAIFHVLQWTFLNFPFVSFLAIFHVLKCVFLIFRDFQFSRHIPGPTVCISHFSRFSVI  
FHDFQLSC  
>ENSMUSP00000096645\_c.165:A>T\_p.T56S ENSMUST00000099046.4|Gm10718-  
201|ENSMUSG00000095186|+|chr9:g.3023716:A>T  
MFLIFHDFQFSCHIPCPTVDISFPFVSFLAIFHVLKCVFLIFRDFQFSCHIPGPTVCISHFSRFSLILSFFK  
LSTACFSFSMIFSLAIFHVLQWKFLNFPFVSFLAIFHVLKCVFLIFRDFQFSRHIPGPTVCISHFSRFSVI  
SSFFKSSSGCFSSMIFSLAIFHVLQWTFLNFPFVSFLAIFHVLKCVFLIFRDFQFSRHIPGPTVCISHFSRFSVI  
FHDFQLSC  
>ENSMUSP00000096645\_c.339:C>A\_p.L114M ENSMUST00000099046.4|Gm10718-  
201|ENSMUSG00000095186|+|chr9:g.3023890:C>A  
MFLIFHDFQFSCHIPCPTVDISFPFVSFLAIFHVLKCVFLIFRDFQFSCHIPGPTVCISHFSRFSLILSFFK  
LSTACFSFSMIFSLAIFHVLQWKFLNFPFVSFLAIFHVMKCVFLIFRDFQFSRHIPGPTVCISHFSRFSVI  
SSFFKSSSGCFSSMIFSLAIFHVLQWTFLNFPFVSFLAIFHVLKCVFLIFRDFQFSRHIPGPTVCISHFSRFSVI  
FHDFQLSC  
>ENSMUSP00000096645\_c.399:A>T\_p.T134S ENSMUST00000099046.4|Gm10718-  
201|ENSMUSG00000095186|+|chr9:g.3024417:A>T  
MFLIFHDFQFSCHIPCPTVDISFPFVSFLAIFHVLKCVFLIFRDFQFSCHIPGPTVCISHFSRFSLILSFFK  
LSTACFSFSMIFSLAIFHVLQWKFLNFPFVSFLAIFHVLKCVFLIFRDFQFSRHIPGPTVCISHFSRFSVI  
SSFFKSSSGCFSSMIFSLAIFHVLQWTFLNFPFVSFLAIFHVLKCVFLIFRDFQFSRHIPGPTVCISHFSRFSVI  
FHDFQLSC  
>ENSMUSP00000096645\_c.430:C>T\_p.S144L ENSMUST00000099046.4|Gm10718-  
201|ENSMUSG00000095186|+|chr9:g.3024448:C>T  
MFLIFHDFQFSCHIPCPTVDISFPFVSFLAIFHVLKCVFLIFRDFQFSCHIPGPTVCISHFSRFSLILSFFK  
LSTACFSFSMIFSLAIFHVLQWKFLNFPFVSFLAIFHVLKCVFLIFRDFQFSRHIPGPTVCISHFSRFLVI  
SSFFKSSSGCFSSMIFSLAIFHVLQWTFLNFPFVSFLAIFHVLKCVFLIFRDFQFSRHIPGPTVCISHFSRFLVI  
FHDFQLSC  
>ENSMUSP00000096645\_c.580:A>T\_p.Y194F ENSMUST00000099046.4|Gm10718-  
201|ENSMUSG00000095186|+|chr9:g.3025118:A>T  
MFLIFHDFQFSCHIPCPTVDISFPFVSFLAIFHVLKCVFLIFRDFQFSCHIPGPTVCISHFSRFSLILSFFK  
LSTACFSFSMIFSLAIFHVLQWKFLNFPFVSFLAIFHVLKCVFLIFRDFQFSRHIPGPTVCISHFSRFSVI  
SSFFKSSSGCFSSMIFSLAIFHVLQWTFLNFPFVSFLAIFHVLKCVFLIFRDFQFSRHIPGPTVCISHFSRFSVI  
FHDFQLSC  
>ENSMUSP00000096644\_c.0:A>C\_p.M1L ENSMUST00000075573.7|Gm10717-  
201|ENSMUSG00000095891|+|chr9:g.3025417:A>C  
LFLIFHDFQFSCHIPCPTVEICKFPFVSFLAIFHVLKYVFLIFRDFQFSRHIPGPTVCISHFSRFSVILSFF  
KFSSGCFSSFLIFSLAIFHVLQWTFLNFPFVSFLAIFHVLKCVFLIFRDFQFSRHIPGPTVCISHFSRFSV  
ISSFFKVSSGCFSSMIFSLAIFHVLQWTFLNFPFVSFLAIFHVLKCVFLIFRDFQFSRHIPGPTVCISHFSRFSV  
IFLDFQFSC  
>ENSMUSP00000096644\_c.143:G>C\_p.Q48H ENSMUST00000075573.7|Gm10717-  
201|ENSMUSG00000095891|+|chr9:g.3025560:G>C

MFLIFHDFQFSCHIPCPTVEICKFPPFSVFLAIFHVLKYVFLIFRDFHFSRHIPGPTVCISHFSRFSVILSFF  
KFSSGCFSSFLIFSFLAIFHVLQWTFLNFPFSSVFLAIFHVLKCVFLIFSDQFSRHIPGPTVCISHFSRFSV  
ISSFFKVSSGCFSSMIFSFLAIFHVLQWTFLNFPFSSYSFSPYSRSYSVHFSFSTFFSDFVIFQVFKWMFL  
IFLDFQFSC  
>ENSMUSP00000096644\_c.168:A>T\_p.T57S ENSMUST00000075573.7|Gm10717-  
201|ENSMUSG00000095891|+|chr9:g.3025585:A>T  
MFLIFHDFQFSCHIPCPTVEICKFPPFSVFLAIFHVLKYVFLIFRDFQFSRHIPGPTVCISHFSRFSVILSFF  
KFSSGCFSSFLIFSFLAIFHVLQWTFLNFPFSSVFLAIFHVLKCVFLIFSDQFSRHIPGPTVCISHFSRFSV  
ISSFFKVSSGCFSSMIFSFLAIFHVLQWTFLNFPFSSYSFSPYSRSYSVHFSFSTFFSDFVIFQVFKWMFL  
IFLDFQFSC  
>ENSMUSP00000096644\_c.202:T>G\_p.V68G ENSMUST00000075573.7|Gm10717-  
201|ENSMUSG00000095891|+|chr9:g.3025619:T>G  
MFLIFHDFQFSCHIPCPTVEICKFPPFSVFLAIFHVLKYVFLIFRDFQFSRHIPGPTVCISHFSRFSGILSFF  
KFSSGCFSSFLIFSFLAIFHVLQWTFLNFPFSSVFLAIFHVLKCVFLIFSDQFSRHIPGPTVCISHFSRFSV  
ISSFFKVSSGCFSSMIFSFLAIFHVLQWTFLNFPFSSYSFSPYSRSYSVHFSFSTFFSDFVIFQVFKWMFL  
IFLDFQFSC  
>ENSMUSP00000136365\_c.348:G>A\_p.V117I ENSMUST00000179982.2|Gm10717-  
209|ENSMUSG00000095891|+|chr9:g.3027875:G>A  
MFLIFHDFQFSCHIPCPTVDISFPFSSVFLAIFHVLKCVFLIFRDFQFSCHIPGPTVCISHFSRFSVILSFFN  
LSTACFSFSIIFSFLAIFHVLQWTFLNFPFSSVFLAIFHVLKCVFLIFRDFQFSCHIPGPTVCISHFSRFSV  
LSFFNLSTACFSFSMIFSFLAIFHVLQWTFLNFPFSSYSFSPYSRSYSVHFSFSTFFSDFVIFQVVKWFLI  
FHDFQLSS  
>ENSMUSP00000137419\_c.366:C>T\_p.R123C ENSMUST00000177875.8|Gm10717-  
206|ENSMUSG00000095891|+|chr9:g.3028826:C>T  
MFLIFHDFQFSCHIPCPTVDISFPFSSVFLAIFHVLKCVFLIFRDFQFSCHIPGPTVCISHFSRFSVILSFFN  
LSTACFSFSIIFSFLAIFHVLQWTFLNFPFSSVFLAIFHVLKCVFLIFCDFSCHIPGPTVCISHFSRFSV  
ILSFFNLSTACFSFSMIFSFLAIFHVLQWTFLNFPFSSVSPYSRSYSVHFSFSTFFSDFVIFQVVKWMPFI  
FLDFQFSY  
>ENSMUSP00000137419\_c.367:G>A\_p.R123H ENSMUST00000177875.8|Gm10717-  
206|ENSMUSG00000095891|+|chr9:g.3028827:G>A  
MFLIFHDFQFSCHIPCPTVDISFPFSSVFLAIFHVLKCVFLIFRDFQFSCHIPGPTVCISHFSRFSVILSFFN  
LSTACFSFSIIFSFLAIFHVLQWTFLNFPFSSVFLAIFHVLKCVFLIFHDFQFSCHIPGPTVCISHFSRFSV  
ILSFFNLSTACFSFSMIFSFLAIFHVLQWTFLNFPFSSVSPYSRSYSVHFSFSTFFSDFVIFQVVKWMPFI  
FLDFQFSY  
>ENSMUSP00000137419\_c.384:T>C\_p.C129R ENSMUST00000177875.8|Gm10717-  
206|ENSMUSG00000095891|+|chr9:g.3028844:T>C  
MFLIFHDFQFSCHIPCPTVDISFPFSSVFLAIFHVLKCVFLIFRDFQFSCHIPGPTVCISHFSRFSVILSFFN  
LSTACFSFSIIFSFLAIFHVLQWTFLNFPFSSVFLAIFHVLKCVFLIFRDFQFSRHIPGPTVCISHFSRFSV  
ILSFFNLSTACFSFSMIFSFLAIFHVLQWTFLNFPFSSVSPYSRSYSVHFSFSTFFSDFVIFQVVKWMPFI  
FLDFQFSY  
>ENSMUSP00000137419\_c.396:G>C\_p.G133R ENSMUST00000177875.8|Gm10717-  
206|ENSMUSG00000095891|+|chr9:g.3028856:G>C  
MFLIFHDFQFSCHIPCPTVDISFPFSSVFLAIFHVLKCVFLIFRDFQFSCHIPGPTVCISHFSRFSVILSFFN  
LSTACFSFSIIFSFLAIFHVLQWTFLNFPFSSVFLAIFHVLKCVFLIFRDFQFSCHIPRPTVCISHFSRFSV  
ILSFFNLSTACFSFSMIFSFLAIFHVLQWTFLNFPFSSVSPYSRSYSVHFSFSTFFSDFVIFQVVKWMPFI  
FLDFQFSY  
>ENSMUSP00000137419\_c.402:A>T\_p.T135S ENSMUST00000177875.8|Gm10717-  
206|ENSMUSG00000095891|+|chr9:g.3028862:A>T  
MFLIFHDFQFSCHIPCPTVDISFPFSSVFLAIFHVLKCVFLIFRDFQFSCHIPGPTVCISHFSRFSVILSFFN  
LSTACFSFSIIFSFLAIFHVLQWTFLNFPFSSVFLAIFHVLKCVFLIFRDFQFSCHIPGPTVCISHFSRFSV  
ILSFFNLSTACFSFSMIFSFLAIFHVLQWTFLNFPFSSVSPYSRSYSVHFSFSTFFSDFVIFQVVKWMPFI  
FLDFQFSY  
>ENSMUSP00000137419\_c.426:C>T\_p.R143C ENSMUST00000177875.8|Gm10717-  
206|ENSMUSG00000095891|+|chr9:g.3028886:C>T  
MFLIFHDFQFSCHIPCPTVDISFPFSSVFLAIFHVLKCVFLIFRDFQFSCHIPGPTVCISHFSRFSVILSFFN  
LSTACFSFSIIFSFLAIFHVLQWTFLNFPFSSVFLAIFHVLKCVFLIFRDFQFSCHIPGPTVCISHFSRFSV  
ILSFFNLSTACFSFSMIFSFLAIFHVLQWTFLNFPFSSVSPYSRSYSVHFSFSTFFSDFVIFQVVKWMPFI  
FLDFQFSY

>ENSMUSP00000137419\_c.436:T>G\_p.V146G ENSMUST00000177875.8|Gm10717-206|ENSMUSG00000095891|+|chr9:g.3028896:T>G  
MFLIFHDFQFSCHIPCPTVDISFPFVSFLAIFHVLKCVFLIFRDFQFSCHIPGPTVCISHFSRFSVILSFFN  
LSTACFSFSIIIFSFLAIFHVLQWTFNLNFPFVSFLAIFHVLKCCVFLIFRDFQFSCHIPGPTVCISHFSRFSG  
ILSFFNLSTACFSFSMIFSFLAIFHVLQWKFLNFPFVSVPYSRSYSVHFSFSTFFSDFVIFQVVKWMFLIFLDFQFSY

>ENSMUSP00000096640\_c.449:T>G\_p.N150K ENSMUST00000099042.4|Gm10717-202|ENSMUSG00000095891|+|chr9:g.3030790:T>G  
FLIFHDFQLSSHIPGPTVDISFRPLSVFLAIFHVPKCVFLIFHDFQFPRHIPGPTVCISHFSRFSVISSFFKT  
SSGCFSSFFMIFSFLAIFHVLQWTFNLNFPFVSFLAIFHVLKCVFLIFRDFQFSCHIPGPTVCISHFSRFSVIL  
SFFKLSTACFSFSMIFSFLAIFHVLQWTFNLNFPFVSVPYSRSYSVHFSFSTFFSDFVIFQVVKWMFLIFLDF  
HFSC

>ENSMUSP00000137451\_c.218:T>G\_p.N73K ENSMUST00000179264.2|Gm10717-207|ENSMUSG00000095891|+|chr9:g.3030790:T>G  
MFLIFHDFQFSCHIPCPTVDISFPFVSFLAIFHVLKCVFLIFRDFQFSCHIPGPTVCISHFSRFSVILSFFK  
LSTACFSFSMIFSFLAIFHVLQWTFNLNFPFVSFLAIFHVLKCVFLIFRVFQFPRHIPGPTVCIIYHFSRFSVI  
SSFFKTSSGCFSSFFMIFSFLAIFHVLQWTFNLNFPFVSVPYSRSYSVHFSFSTFFSDFVIFQVVKWMFLIFLD  
FHSC

>ENSMUSP00000096640\_c.537:C>A\_p.P180T ENSMUST00000099042.4|Gm10717-202|ENSMUSG00000095891|+|chr9:g.3030878:C>A  
FLIFHDFQLSSHIPGPTVDISFRPLSVFLAIFHVPKCVFLIFHDFQFPRHIPGPTVCISHFSRFSVISSFFKT  
SSGCFSSFFMIFSFLAIFHVLQWTFNLNFPFVSFLAIFHVLKCVFLIFRDFQFSCHIPGPTVCISHFSRFSVIL  
SFFNLSTACFSFSMIFSFLAIFHVLQWTFNLNFTFSVPYSRSYSVHFSFSTFFSDFVIFQVVKWMFLIFLDF  
HFSC

>ENSMUSP00000137451\_c.306:C>A\_p.P103T ENSMUST00000179264.2|Gm10717-207|ENSMUSG00000095891|+|chr9:g.3030878:C>A  
MFLIFHDFQFSCHIPCPTVDISFPFVSFLAIFHVLKCVFLIFRDFQFSCHIPGPTVCISHFSRFSVILSFFN  
LSTACFSFSMIFSFLAIFHVLQWTFNLNFTFSVFLAIFHVLKCVFLIFRVFQFPRHIPGPTVCIIYHFSRFSVI  
SSFFKTSSGCFSSFFMIFSFLAIFHVLQWTFNLNFPFVSVPYSRSYSVHFSFSTFFSDFVIFQVVKWMFLIFLD  
FHSC

>ENSMUSP00000096650\_c.559:T>C\_p.F187S ENSMUST00000099051.11|Gm10717-203|ENSMUSG00000095891|+|chr9:g.3030992:T>C  
CHIPCPTVEISFPFVSFLAIFHVLKCVFLIFRVFQVSRHIPGPTVCISHFSRFSVILSFFKLSSGCFPFSLI  
FSFLTIFHVLQWTFNLNFPFVSFLAIFHVLKCVFLIFSDQFPRHIPGPTVCISHFSRFSVISSFFKTSSGCF  
SFFMIFSFLAIFHVLQWTFNLNFPFVSVPYSRSYSVHFSFSTFFSDFVIFQVVKWMFLIFLDFHFSC

>ENSMUSP00000096640\_c.589:T>C\_p.F197S ENSMUST00000099042.4|Gm10717-202|ENSMUSG00000095891|+|chr9:g.3030992:T>C  
FLIFHDFQLSSHIPGPTVDISFRPLSVFLAIFHVPKCVFLIFHDFQFPRHIPGPTVCISHFSRFSVISSFFKT  
SSGCFSSFFMIFSFLAIFHVLQWTFNLNFPFVSFLAIFHVLKCVFLIFRDFQFSCHIPGPTVCISHFSRFSVIL  
SFFNLSTACFSFSMIFSFLAIFHVLQWTFNLNFPFVSVPYSRSYSVHFSFSTFFSDFVIFQVVKWMFLIFLDF  
HFSC

>ENSMUSP00000137451\_c.389:T>G\_p.I130M ENSMUST00000179264.2|Gm10717-207|ENSMUSG00000095891|+|chr9:g.3032010:T>G  
MFLIFHDFQFSCHIPCPTVDISFPFVSFLAIFHVLKCVFLIFRDFQFSCHIPGPTVCISHFSRFSVILSFFN  
LSTACFSFSMIFSFLAIFHVLQWTFNLNFPFVSFLAIFHVLKCVFLIFRVFQFPRHMPGPTVCIIYHFSRFSVI  
SSFFKTSSGCFSSFFMIFSFLAIFHVLQWTFNLNFPFVSVPYSRSYSVHFSFSTFFSDFVIFQVVKWMFLIFLD  
FHSC

>ENSMUSP00000137451\_c.399:A>T\_p.T134S ENSMUST00000179264.2|Gm10717-207|ENSMUSG00000095891|+|chr9:g.3032020:A>T  
MFLIFHDFQFSCHIPCPTVDISFPFVSFLAIFHVLKCVFLIFRDFQFSCHIPGPTVCISHFSRFSVILSFFN  
LSTACFSFSMIFSFLAIFHVLQWTFNLNFPFVSFLAIFHVLKCVFLIFRVFQFPRHIPGPTVCIIYHFSRFSVI  
SSFFKTSSGCFSSFFMIFSFLAIFHVLQWTFNLNFPFVSVPYSRSYSVHFSFSTFFSDFVIFQVVKWMFLIFLD  
FHSC

>ENSMUSP00000137451\_c.406:G>A\_p.C136Y ENSMUST00000179264.2|Gm10717-207|ENSMUSG00000095891|+|chr9:g.3032027:G>A  
MFLIFHDFQFSCHIPCPTVDISFPFVSFLAIFHVLKCVFLIFRDFQFSCHIPGPTVCISHFSRFSVILSFFN  
LSTACFSFSMIFSFLAIFHVLQWTFNLNFPFVSFLAIFHVLKCVFLIFRVFQFPRHIPGPTVYIYHFSRFSVI

SSFFKTSSGCFSFFMIFSFLAIFHVLQWTFNLNPPFSVSPYSRSYSVHFSFSTFFSDFVIFQVVKWMFLIFLD  
FHFSC  
>ENSMUSP00000137451\_c.605:T>G\_p.S202R ENSMUST00000179264.2|Gm10717-  
207|ENSMUSG00000095891|+|chr9:g.3032522:T>G  
MFLIFHDFQFSCHIPCPTVDISFPPFSVFLAIFHVLKCVFLIFRDFQFSCHIPGPTVCISHFSRFSVILSFFN  
LSTACFSFSMIFSFLAIFHVLQWTFNLNPPFSVFLAIFHVLKCVFLIFRVFQFPRHIPGPTVCIIYHFSRFSVI  
SSFFKTSSGCFSFFMIFSFLAIFHVLQWTFNLNPPFSVSPYSRSYSVHFSFSTFFRDFVIFQVVKWMFLIFLD  
FHFSC  
>ENSMUSP00000136837\_c.433:T>G\_p.V145G ENSMUST00000179839.8|Gm10717-  
208|ENSMUSG00000095891|+|chr9:g.3032522:T>G  
MFLIFHDFQFSCHIPCPTVDISFPPFSVFLAIFHVLKCVFLIFRDFQFSCHIPGPTVCISHFSRFSVILSFFK  
LSSGCFSSSLIFTFLAIFHVLQWTFLYFPPFSVFLAIFHVLKCVFLIFRDFQVSRHIPGPTVCISHFSRFSGI  
LSFFKLSSGCFSFSLIFTFLAIFHVLQWTFNLNPPFSVLYFSPYSKSYSVHFSFSTFFSDFVIFQVVKWMFLI  
FHDFQLSC  
>ENSMUSP00000096655\_c.433:T>G\_p.V145G ENSMUST00000099056.4|Gm10717-  
204|ENSMUSG00000095891|+|chr9:g.3032522:T>G  
MFLIFHDFQFSCHIPCPTVDISFPPFSVFLAIFHVLKCVFLIFRDFQFSCHIPGPTVCISHFSRFSVILSFFK  
LSSGCFSSSLIFTFLAIFHVLQWTFLYFPPFSVFLAIFHVLKCVFLIFRDFQVSRHIPGPTVCISHFSRFSGI  
LSFFKLSSGCFSFSLIFTFLAIFHVLQWTFNLNPPFFLPYSRSYSVHFSFSTFFSDFVIFQVVKWMFLI  
FHDFQLSC  
>ENSMUSP00000096655\_c.602:T>G\_p.S201R ENSMUST00000099056.4|Gm10717-  
204|ENSMUSG00000095891|+|chr9:g.3032756:T>G  
MFLIFHDFQFSCHIPCPTVDISFPPFSVFLAIFHVLKCVFLIFRDFQFSCHIPGPTVCISHFSRFSVILSFFK  
LSSGCFSSSLIFTFLAIFHVLQWTFLYFPPFSVFLAIFHVLKCVFLIFRDFQVSRHIPGPTVCISHFSRFSVI  
LSFFKLSSGCFSFSLIFTFLAIFHVLQWTFNLNPPFFLPYSRSYSVHFSFSTFFRDFVIFQVVKWMFLIFYDF  
QFSC  
>ENSMUSP00000135988\_c.16:A>G\_p.H6R ENSMUST00000178641.2|Gm17535-  
201|ENSMUSG00000096736|+|chr9:g.3034615:A>G  
MFLIFRDFQFSCHIPCPTVDISFPPFSVFLAIFHVLKCVFLIFRVFQVSRHIPGPTVCISHFSRFSVILSFFK  
LSSGCFSSSLIFTFLAIFHVLQWTFNLNPPFSVFLAIFHVLKCVFLIFSDQFSRHIPGPTVCISHFSRFSVI  
SSFFKTSSGCFSFSMIFSFLAIFHVLQWTFNLNPPFSVSPYSRSYSVHFSFSTFFCDFVIFQVVKWMFLIFLD  
FQFSY  
>ENSMUSP00000135988\_c.573:A>C\_p.S192R ENSMUST00000178641.2|Gm17535-  
201|ENSMUSG00000096736|+|chr9:g.3035707:A>C  
MFLIFHDFQFSCHIPCPTVDISFPPFSVFLAIFHVLKCVFLIFRVFQVSRHIPGPTVCISHFSRFSVILSFFK  
LSSGCFSSSLIFTFLAIFHVLQWTFNLNPPFSVFLAIFHVLKCVFLIFSDQFSRHIPGPTVCISHFSRFSVI  
SSFFKTSSGCFSFSMIFSFLAIFHVLQWTFNLNPPFSVSPYSRSYSRVHFSFSTFFCDFVIFQVVKWMFLIFLD  
FQFSY  
>ENSMUSP00000135988\_c.592:T>C\_p.F198S ENSMUST00000178641.2|Gm17535-  
201|ENSMUSG00000096736|+|chr9:g.3035726:T>C  
MFLIFHDFQFSCHIPCPTVDISFPPFSVFLAIFHVLKCVFLIFRVFQVSRHIPGPTVCISHFSRFSVILSFFK  
LSSGCFSSSLIFTFLAIFHVLQWTFNLNPPFSVFLAIFHVLKCVFLIFSDQFSRHIPGPTVCISHFSRFSVI  
SSFFKTSSGCFSFSMIFSFLAIFHVLQWTFNLNPPFSVSPYSRSYSVHFSFSTFFCDFVIFQVVKWMFLIFLD  
FQFSY  
>ENSMUSP00000135988\_c.661:A>T\_p.Q221L ENSMUST00000178641.2|Gm17535-  
201|ENSMUSG00000096736|+|chr9:g.3035795:A>T  
MFLIFHDFQFSCHIPCPTVDISFPPFSVFLAIFHVLKCVFLIFRVFQVSRHIPGPTVCISHFSRFSVILSFFK  
LSSGCFSSSLIFTFLAIFHVLQWTFNLNPPFSVFLAIFHVLKCVFLIFSDQFSRHIPGPTVCISHFSRFSVI  
SSFFKTSSGCFSFSMIFSFLAIFHVLQWTFNLNPPFSVSPYSRSYSVHFSFSTFFCDFVIFQVVKWMFLIFLD  
FLFSY  
>ENSMUSP00000136448\_c.166:C>A\_p.T56K ENSMUST00000155807.3|Gm10715-  
201|ENSMUSG00000096201|+|chr9:g.3037047:C>A  
MFLIFNDFHFSCLIPRPIVDISFPPFSVFLAIFHVPKCVFLIFHDFQFPRHIPGPKVCISHFSRFSVISSFFK  
TSSGCFSSFFMIFSFLAIFPVLQWTFNLNPPFSVFLAIFHVLKCVFLIFRDFQFSRQIPGPTVCISHFSRFSVI  
LSFFNLSTACFSLSMIFSFLAIFHVLQWTFNLNPPFSFSPYFTSYSVHFSFSTFFSDFVFFQDVVKWMFLIFH  
DFQFSC  
>ENSMUSP00000136448\_c.171:T>G\_p.C58G ENSMUST00000155807.3|Gm10715-  
201|ENSMUSG00000096201|+|chr9:g.3037052:T>G

MFLIFNDFHFHFSCLIPRPIVDISFPPFSVFLAIFHVPKCVFLIFHDFQFPRHIPGPTVGIHSHFSRFSVSSFFK  
TSSGCFSSFFMIFSLAIFPVLQWTFLNFPFVSFLAIFHVLKCVFLIFRDFQFSRQIPGPTVCISHFSRFSVI  
LSFFNLSTACFSLSMIFSFLAIFHVLQWTFLNFPFVSFFSPYFTSYSVHFSFFTFSSDFVFFQDVKWMFLIFH  
DFQFSC  
>ENSMUSP00000136448\_c.399:A>T\_p.T134S ENSMUST00000155807.3|Gm10715-  
201|ENSMUSG00000096201|+|chr9:g.3037280:A>T  
MFLIFNDFHFHFSCLIPRPIVDISFPPFSVFLAIFHVPKCVFLIFHDFQFPRHIPGPTVCISHFSRFSVSSFFK  
TSSGCFSSFFMIFSLAIFPVLQWTFLNFPFVSFLAIFHVLKCVFLIFRDFQFSRQIPGPTVCISHFSRFSVI  
LSFFNLSTACFSLSMIFSFLAIFHVLQWTFLNFPFVSFFSPYFTSYSVHFSFFTFSSDFVFFQDVKWMFLIFH  
DFQFSC  
>ENSMUSP00000137129\_c.165:A>T\_p.T56S ENSMUST00000177969.2|Gm10715-  
202|ENSMUSG00000096201|+|chr9:g.3037280:A>T  
MFLIFHDFQFSCHIPCPTVDISFPPFSVFLAIFHVLKCVFLIFRDFQFSRQIPGPTVCISHFSRFSVILSFFN  
LSTACFSLSMIFSFLAIFHVLQWTFLNFPFVSFLAIFHVLKCVFLIFRVFQFPRHIPGPTVCISHFSRFSVI  
SSFFKTSSGCFSSFFMIFSFLAIFPVLQWTFLNFPFSSSIFLPSYRSYSVHFSFFTFSSDFVIFQVVKWFLI  
FHDFQLSS  
>ENSMUSP00000136448\_c.433:T>G\_p.V145G ENSMUST00000155807.3|Gm10715-  
201|ENSMUSG00000096201|+|chr9:g.3037314:T>G  
MFLIFNDFHFHFSCLIPRPIVDISFPPFSVFLAIFHVPKCVFLIFHDFQFPRHIPGPTVCISHFSRFSVSSFFK  
TSSGCFSSFFMIFSLAIFPVLQWTFLNFPFVSFLAIFHVLKCVFLIFRDFQFSRQIPGPTVCISHFSRFSGI  
LSFFNLSTACFSLSMIFSFLAIFHVLQWTFLNFPFVSFFSPYFTSYSVHFSFFTFSSDFVFFQDVKWMFLIFH  
DFQFSC  
>ENSMUSP00000137129\_c.199:T>G\_p.V67G ENSMUST00000177969.2|Gm10715-  
202|ENSMUSG00000096201|+|chr9:g.3037314:T>G  
MFLIFHDFQFSCHIPCPTVDISFPPFSVFLAIFHVLKCVFLIFRDFQFSRQIPGPTVCISHFSRFSGILSFFN  
LSTACFSLSMIFSFLAIFHVLQWTFLNFPFVSFLAIFHVLKCVFLIFRVFQFPRHIPGPTVCISHFSRFSVI  
SSFFKTSSGCFSSFFMIFSFLAIFPVLQWTFLNFPFSSSIFLPSYRSYSVHFSFFTFSSDFVIFQVVKWFLI  
FHDFQLSS  
>ENSMUSP00000137129\_c.580:A>T\_p.Y194F ENSMUST00000177969.2|Gm10715-  
202|ENSMUSG00000096201|+|chr9:g.3038216:A>T  
MFLIFHDFQFSCHIPCPTVDISFPPFSVFLAIFHVLKCVFLIFRDFQFSRQIPGPTVCISHFSRFSVILSFFN  
LSTACFSLSMIFSFLAIFHVLQWTFLNFPFVSFLAIFHVLKCVFLIFRVFQFPRHIPGPTVCISHFSRFSVI  
SSFFKTSSGCFSSFFMIFSFLAIFPVLQWTFLNFPFSSSIFLPSYRSYSVHFSFFTFSSDFVIFQVVKWFLI  
FHDFQLSS  
>ENSMUSP00000129804\_c.283:G>A\_p.G95E ENSMUST00000165255.3|Vmn1r238-  
201|ENSMUSG00000091539|-|chr18:g.3123129:C>T  
MKMDPGNFAIETFLFCQITVGMFGNSSILFYFILIFTEKHLTPKVLII EHLTFANYLTVILRGFPQTMSYFG  
FKNFLDDMECKLIVYISRITREVSLEYAMCLVSCFQAITISPNNSRWIKLYRATKYIGPSCSVSWLVHLLLN  
LTPLRSGTNYKKNATNRLSYGYCSLFASDSVATTLYISLVCFSDFVCLGLMACSSISMVSILYRHKRQVKHN  
HSAQHFLKVPEDRATQTILILLCTFVISYSFSSIVAIIRTYLNYPVIWGNIFTSLIEIFFMFCPFVLITNM  
RSSNLFLPCLGKR\*  
>ENSMUSP00000025073\_c.988:T>C\_p.L330P ENSMUST00000025073.12|Cu12-  
201|ENSMUSG00000024231|+|chr18:g.3423580:T>C  
MSLKPRVVDDEFTWKNLLTTIKAVVMLEYVERATWNRDFS DIYALCVAYPEPLGERLYAETKIFLHSHVRHLY  
KRVLESEEQVLVMYHRYWEEYSKGADYMDCLYRYLNTQYIKKNKLTEADIQYGYGGVDMNEPLMEIGELALDM  
WRKLMVEPLQNILIRMLLREIKNDRGGEDPNQKVIHGVSINSFVHVEQYKKKFPLKFYQGIFVSPFLTETGEYY  
KQEASNLLQESNCSQYMEKVLGRLKDEEIRCRKYLHPSYTKVIHECQQRMVADHLQFLHSECHSIIQQERKN  
DMANMYVLLRAVSSGLPHMIEELQKHIHDEGLRATSNPTQEHMPTLFVESVLEVHGKVFQVLINTVNLGDQHF  
SALDKALTSVVNYREP KSVCKAPELLAKYCDNLLKKSAGMTENEVEDKLT SFITVFKYIDDKDVFQKFYARM  
LAKRLIHGLSMSMDSEAMINKLKQACGYEFTSKLHRMYTDMVSADLNNKFNNFIRNQD TVIDLGISFQIYV  
LQAGAWPLTQAPSSTFAIPQELEKSVQMFELFY SQHFSGRKLTLWLHYLCTGEVKMNYLGKPYVAMVTTYQMAV  
LLAFNNSETVSYKELQDSTQMNEKELTKTIKSLLDVKMINHDSEKEDI DAESSFSLNMSFSSKRKTKFKITTS  
MQDTPQVISQSRARFNPSISMIKKCIEVLIDKQYIERSQASADEYSVA\*  
>ENSMUSP00000125403\_c.988:T>C\_p.L330P ENSMUST00000162301.8|Cu12-  
205|ENSMUSG00000024231|+|chr18:g.3423580:T>C  
MSLKPRVVDDEFTWKNLLTTIKAVVMLEYVERATWNRDFS DIYALCVAYPEPLGERLYAETKIFLHSHVRHLY  
KRVLESEEQVLVMYHRYWEEYSKGADYMDCLYRYLNTQYIKKNKLTEADIQYGYGGVDMNEPLMEIGELALDM  
WRKLMVEPLQNILIRMLLREIKNDRGGEDPNQKVIHGVSINSFVHVEQYKKKFPLKFYQGIFVSPFLTETGEYY

KQEASNLLQESNCSQYMEKVLGRLKDEEIRCRKYLHPSSYTKVIHECQORMVADHLQFLHSECHSI IQQERKN  
 DMANMYVLLRAVSSGLPHMIEELQKHIHDEGLRATSNPTQEHMPTLFVESVLEVHGKQVQLINTVNLNGDQHFM  
 SALDKALTSVVNYREPKSVCKAPELLAKYCDNLLKKSAGMTENEVEDKLTSFITVFKYIDDKDVFQKQFYARM  
 LAKRLIHGLSMSMDSEEAMINKLKQACGYEFTSKLHRMYTDMSSVADLNNKFNNFIRNQDTVIDLGISFQIYV  
 LQAGAWPLTQAPSSTFAIQELEKSVQMFELFYSQHFSGRKLTLWHLCTGEVKMNYLGKPYVAMVTYQMAV  
 LLAFNNSETVSYKELQDSTQMNEKELTKTIKSLLDVKMINHDSEKEDI DAESSFSLNMSFSSKRKTKFKITTSM  
 QKDTPQELEQTRS AVDEDRKMYLQAAIVRIMKARKVLRHNALIQEVISQSRARFNPSISMIKKCIEVLIDKQY  
 IERSQASADEYSYVA\*

>ENSMUSP00000123903\_c.799:T>C\_p.L267P ENSMUST00000161317.2|Cu12-  
 204|ENSMUSG00000024231|+|chr18:g.3423580:T>C  
 MSLKPRVDFDETWKLLTTIKAVVMLEYVERATWNRFSDIYALCVAYPEPLGERLYAETKIFLESHVRHLY  
 KRVLESEEQVLVVMYHRYWEEYSKGADYMDCLYSDRGGEDPNQKVIHGVIINSFVHVEQYKPKFKFYQGI FVS  
 PFLTETGEYKQEASNLLQESNCSQYMEKVLGRLKDEEIRCRKYLHPSSYTKVIHECQORMVADHLQFLHSEC  
 HSI IQQERKNDMANMYVLLRAVSSGLPHMIEELQKHIHDEGLRATSNPTQEHMPTLFVESVLEVHGKQVQLIN  
 TVNLNGDQHFM SALDKALTSVVNYREPKSVCKAPELLAKYCDNLLKKSAGMTENEVEDKLTSFITVFKYIDDK  
 DVFQKQFYARMLAKRLIHGLSMSMDSEEAMINKLKQACGYEFTSKLHRMYTDMSSVADLNNKFNNFIRNQDTVI  
 DLGISFQIYV LQAGAWPLTQAPSSTFAIQELEKSVQMFELFYSQHFSGRKLTLWHLCTGEVKMNYLGKPYV  
 AMVTYQMAVLLAFNNSETVSYKELQDSTQMNEKELTKTIKSLLDVKMINHDSEKEDI DAESSFSLNMSFS  
 >ENSMUSP00000002080\_c.1866:C>A\_p.P623T ENSMUST00000002080.12|Pdzd4-  
 201|ENSMUSG00000002006|-|chrX:g.72838440:G>T  
 MGCNMCVVQKPEEQYKVMLQVNGKELSKLSQEQTLEALRASKEPLVIQVLRSPRLRGDSSCHDLQLVDSGTQ  
 TDITFEHIMALGKLRPPTPPMGI LEPYVLSLPPISHEYYDPAEFMEGGPQEAERMDELEYEEVELCKNSHQD  
 KGLMVCYRTDEEEDLGIYVGEVNPNSIAAKDGRIREGDRI IQINGMDVQNREEAVAILSQEENTNISLLVAR  
 PESQLAKRWKDSDRDDFLDDFGSENEGDLRARKLKSPVQQIGNDEKQAPDGGPGLNNSQDLDSGVGRTDEST  
 RNEESSEHDLGDEPPSTTNTPGSLRKFLQGDALQSRDFHFHSMDSLLAEGAGLGGADLPGLTDEEYERYREL  
 LEIKCHLENGNQLGIFFSRASSGNSALDVNRNESLGHEMAMLEEELRHLEFKCRNILRAQKMQQLRERCMKAW  
 LLEESLYDLAASEPKKHELSDISELPEKSDKDST SAYNTGESCRSTPLLVEPLPESPLKRSAGNSNLNRT  
 SGPPVTTHLKGAPSPGSPAKFRSLSRDPEVGRRQHTTEERVRRSTKTSVTLERVGPEGSPYLSRRHRGQEI EQY  
 HSCVQLAPPRTLEDLGHGSLSLASGPRVGGVAAA AVEATRMEWKVVRSDGTRYVAKRPVRDRLLKARALKIR  
 EERSGMTTDDDAVSEMKGRYWSKEERKQHLIRAREQRKRRE FMMQSRLECLREQQNGD SKPELNI IALSHRK  
 TMKRNKKILDNWTIQEMLAHGARSADGKRIYNPLLSVTTV\*

>ENSMUSP00000110081\_c.1521:C>A\_p.P508T ENSMUST00000114438.3|Pdzd4-  
 202|ENSMUSG00000002006|-|chrX:g.72838440:G>T  
 MGCNMCVVQKPEEQYKVMLQVEVELCKNSHQDKLGLMVCYRTDEEEDLGIYVGEVNPNSIAAKDGRIREGDRI I  
 QINGMDVQNREEAVAILSQEENTNISLLVARPESQLAKRWKDSDRDDFLDDFGSENEGDLRARKLKSPVQQI  
 GNDEKQAPDGGPGLNNSQDLDSGVGRTDESTRNEESSEHDLGDEPPSTTNTPGSLRKFLQGDALQSRDFHF  
 SMDSLLAEGAGLGGADLPGLTDEEYERYRELLEIKCHLENGNQLGIFFSRASSGNSALDVNRNESLGHEMAM  
 LLEESLYDLAASEPKKHELSDISELPEKSDKDST SAYNTGESCRSTPLLVEPLPESPLKRSAGNSNLNRT  
 SCRSTPLLVEPLPESPLKRSAGNSNLNRTPSGPPVTTHLKGAPSPGSPAKFRSLSRDPEVGRRQHTTEERVRR  
 STKTSVTLERVGPEGSPYLSRRHRGQEI EQYHSCVQLAPPRTLEDLGHGSLSLASGPRVGGVAAA AVEATRME  
 WKVVRSDGTRYVAKRPVRDRLLKARALKIREERSGMTTDDDAVSEMKGRYWSKEERKQHLIRAREQRKRRE  
 FMMQSRLECLREQQNGD SKPELNI IALSHRKTMKRNKKILDNWTIQEMLAHGARSADGKRIYNPLLSVTTV  
 \*
