# Supplementary material for: FAK suppresses antigen processing and presentation to promote immune evasion in pancreatic cancer
Source: PubMed Central journal article supplement (PMC10715489; doi:10.1136/gutjnl-2022-327927), 2023-03-28
Supplement: gutjnl-2022-327927supp020.pdf [file gutjnl-2022-327927supp020.pdf]

| Sample         | Kras: chr6:145246771 C>T<br>c.35G>A p.Gly12Asp |     |       |        | Trp53: chr11:69588512 G>A<br>c.506G>A p.Arg172His |     |       |        |
|----------------|------------------------------------------------|-----|-------|--------|---------------------------------------------------|-----|-------|--------|
|                | Ref                                            | Alt | Total | Alt AF | Ref                                               | Alt | Total | Alt AF |
| FAK-/-         | 17                                             | 44  | 61    | 0.72   | 0                                                 | 44  | 44    | 1.00   |
| 47_4_3_FAK-/-  | 14                                             | 20  | 34    | 0.59   | 0                                                 | 42  | 42    | 1.00   |
| 47_6_11_FAK-/- | 21                                             | 36  | 57    | 0.63   | 0                                                 | 37  | 37    | 1.00   |
| 117_4_7_FAK-/- | 15                                             | 58  | 73    | 0.79   | 0                                                 | 44  | 44    | 1.00   |
| 117_6_4_FAK-/- | 17                                             | 38  | 55    | 0.69   | 0                                                 | 37  | 37    | 1.00   |
| 117_6_9_FAK-/- | 24                                             | 68  | 92    | 0.74   | 0                                                 | 41  | 41    | 1.00   |

**Supplementary Table 10. Kras and Trp53 mutational status of pancreatic cell lines.**
