# Supplementary material for: FAK suppresses antigen processing and presentation to promote immune evasion in pancreatic cancer
Source: HighWire-hosted journal article supplement (doi:10.1136/gutjnl-2022-327927), 2023-03-28
Supplement: gutjnl-2022-327927supp021_data_supplement.pdf [file gutjnl-2022-327927supp021_data_supplement.pdf]

| <b>Antigen</b>  | <b>Fluorophore</b> | <b>Clone</b> | <b>Supplier</b> |
|-----------------|--------------------|--------------|-----------------|
| CD45            | Alexa700           | 30-F11       | Biolegend       |
| MHC-I           | PE                 | 34-1-2S      | Invitrogen      |
| IFN $\gamma$    | PE-Cy7             | XMG1.2       | Biolegend       |
| CD3             | BV412              | KT3.1.1      | Biolegend       |
| CD8             | BUV737             | 53-6.7       | BD Biosciences  |
| CD44            | BV605              | IM7          | Biolegend       |
| CD62L           | BUV395             | MEL-14       | BD Biosciences  |
| PD-1            | APC                | J43          | eBioscience     |
| IFN $\gamma$ R1 | PE                 | 200          | eBioscience     |
| IFN $\gamma$ R2 | PE                 | MOB-47       | Biolegend       |
| Live/Dead       | Zombie NIR         |              | Biolegend       |

**Supplementary Table 11. Flow cytometry antibodies.**
