# Supplementary material for: FAK suppresses antigen processing and presentation to promote immune evasion in pancreatic cancer
Source: PubMed Central journal article supplement (PMC10715489; doi:10.1136/gutjnl-2022-327927), 2023-03-28
Supplement: gutjnl-2022-327927supp022.pdf [file gutjnl-2022-327927supp022.pdf]

| <b>Antibody</b>                   | <b>Supplier</b>             | <b>Cat. No.</b> |
|-----------------------------------|-----------------------------|-----------------|
| FAK clone 4.47                    | Merck-Millipore             | 05-537          |
| phosphoTyr397 FAK                 | Cell Signaling Technologies | 3283            |
| FAK clone 4.47 agarose conjugated | Merck-Millipore             | 16-173          |
| PSMB9                             | Abcam                       | ab184172        |
| PSMB10                            | Abcam                       | ab183506        |
| phosphoTyr701 STAT1               | Cell Signaling Technologies | 7649            |
| STAT1                             | Cell Signaling Technologies | 9172            |
| phosphoTyr705 STAT3               | Cell Signaling Technologies | 4113            |
| STAT3                             | Cell Signaling Technologies | 9139            |
| tubulin                           | Cell Signaling Technologies | 2144            |
| HNF1A                             | Cell Signaling Technologies | 89670           |
| GATA6                             | Cell Signaling Technologies | 5851            |
| HNF4A                             | Abcam                       | ab181604        |
| FOXA2                             | Cell Signaling Technologies | 8186            |
| PDX1                              | Cell Signaling Technologies | 5679            |
| IRF1                              | Cell Signaling Technologies | 8478            |
| Pyk2                              | BD                          | 610549          |
| Pyk2 pY402                        | Cell Signaling Technologies | 3291            |
| GAPDH                             | Cell Signaling Technologies | 5174            |
| CD8                               | Cell Signaling Technologies | 98941           |
| Granzyme B                        | Cell Signaling Technologies | 46890           |

**Supplementary Table 12. IP / Western blotting and immunohistochemistry antibodies.**
