# Supplementary material for: FAK suppresses antigen processing and presentation to promote immune evasion in pancreatic cancer
Source: HighWire-hosted journal article supplement (doi:10.1136/gutjnl-2022-327927), 2023-03-28
Supplement: gutjnl-2022-327927supp023_data_supplement.pdf [file gutjnl-2022-327927supp023_data_supplement.pdf]

| gFAK oligo | Sample         | Chr   | Pos      | Ref                                                 | Alt | Depth | Alt depth | Alt AF |
|------------|----------------|-------|----------|-----------------------------------------------------|-----|-------|-----------|--------|
| 4          | 117_4_7_FAK-/- | chr15 | 73320799 | TTC                                                 | T   | 50    | 36        | *0.72  |
| 6          | 117_6_4_FAK-/- | chr15 | 73320774 | CTCTAATACTTCATAGTTGGACTTCTTCT<br>CTAGGGCATTACCCCTCA | C   | 51    | 12        | 0.24   |
| 6          | 117_6_4_FAK-/- | chr15 | 73320786 | A                                                   | AT  | 34    | 32        | *0.94  |
| 6          | 117_6_9_FAK-/- | chr15 | 73320786 | AT                                                  | A   | 16    | 16        | *1.00  |
| 4          | FAK-/-         | chr15 | 73320759 | CACGTGCAGTACTTACTCTAATACTTCA<br>TAGTTGG             | C   | 32    | 9         | 0.28   |
| 4          | FAK-/-         | chr15 | 73320786 | AT                                                  | A   | 14    | 14        | *1.00  |
| 4          | 47_4_3_FAK-/-  | chr15 | 73320785 | CA                                                  | C   | 41    | 17        | *0.41  |
| 4          | 47_4_3_FAK-/-  | chr15 | 73320785 | CAT                                                 | C   | 41    | 12        | 0.29   |
| 4          | 47_4_3_FAK-/-  | chr15 | 73320787 | T                                                   | TA  | 39    | 12        | 0.31   |

**Supplementary Table 13. FAK indels detected in pancreatic cell lines following CRISPR.**
