# Supplementary figures and images for: FAK suppresses antigen processing and presentation to promote immune evasion in pancreatic cancer
Source: HighWire-hosted journal article supplement (doi:10.1136/gutjnl-2022-327927), 2023-03-28

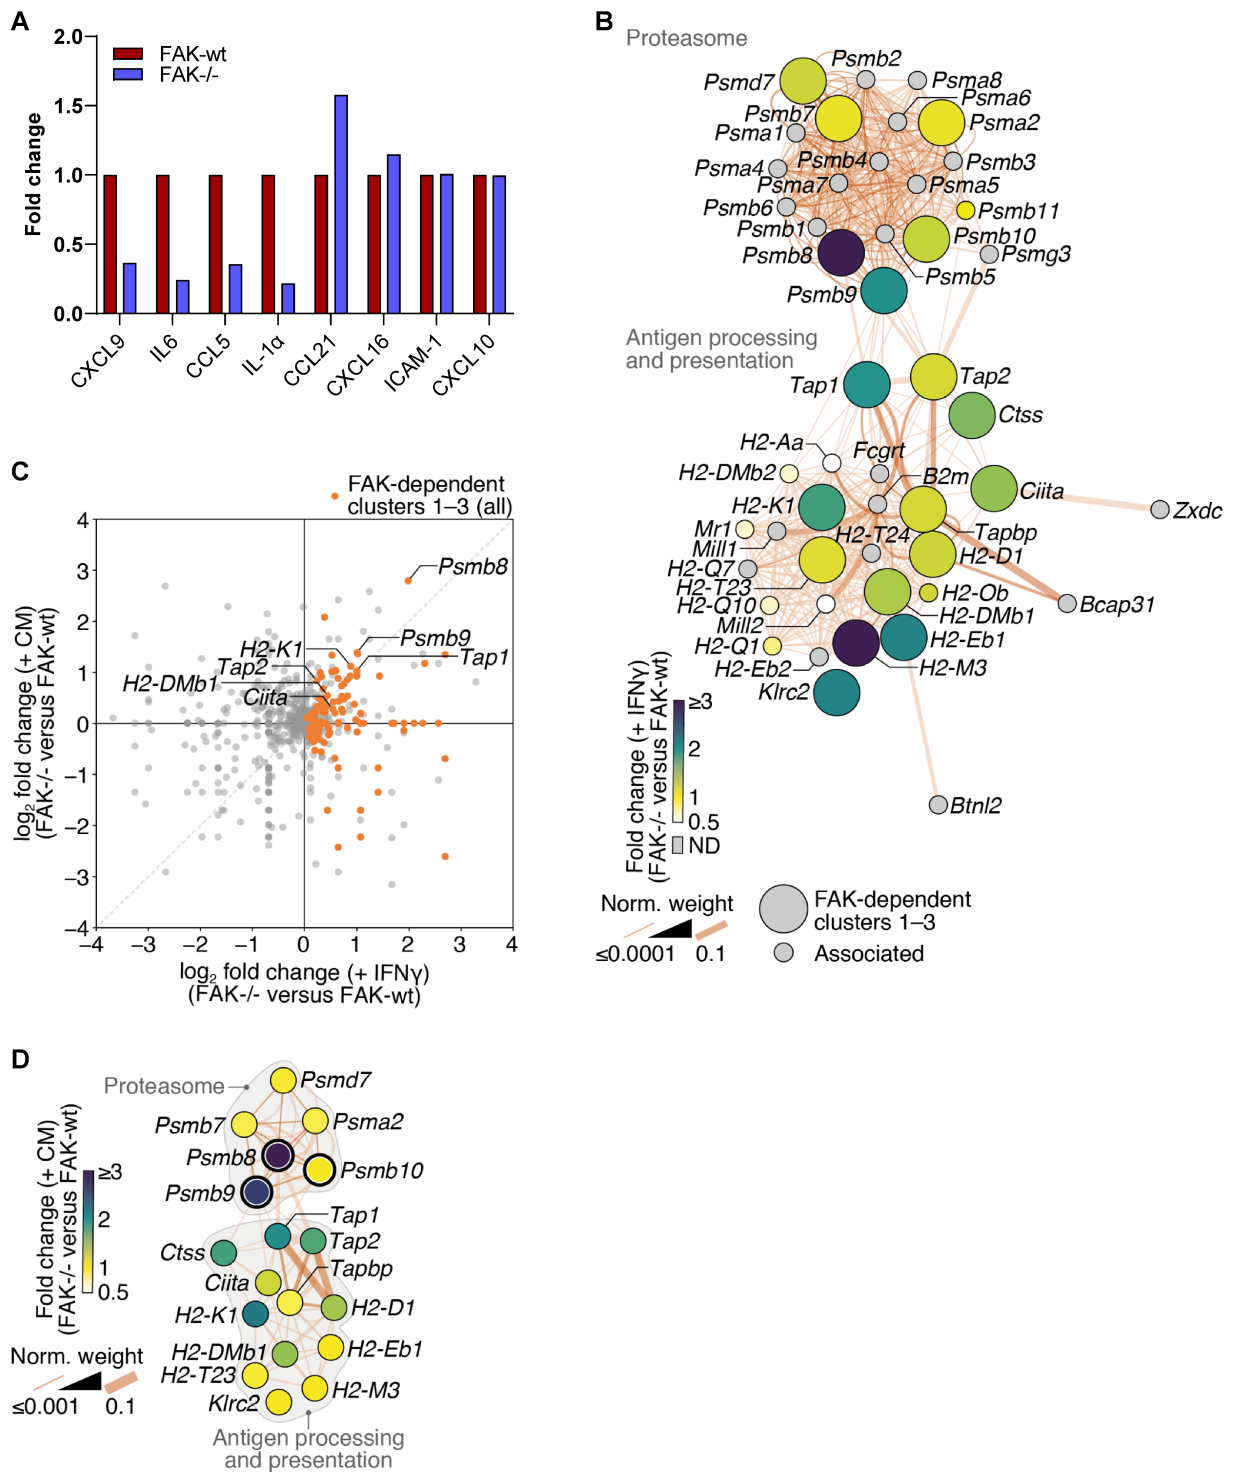

Supplementary Figure 1. FAK regulates the type-II interferon response.

Supplement: gutjnl-2022-327927supp001_data_supplement.pdf [file gutjnl-2022-327927supp001_data_supplement.pdf]

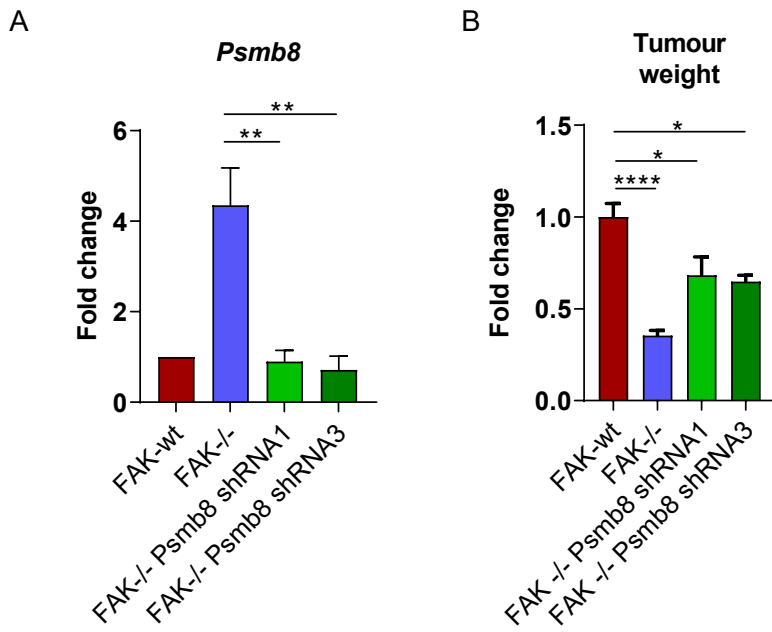

**Supplementary Figure 2. *Psmb8* depletion promotes growth of Panc47 FAK<sup>-/-</sup> tumours.**

Supplement: gutjnl-2022-327927supp002_data_supplement.pdf [file gutjnl-2022-327927supp002_data_supplement.pdf]

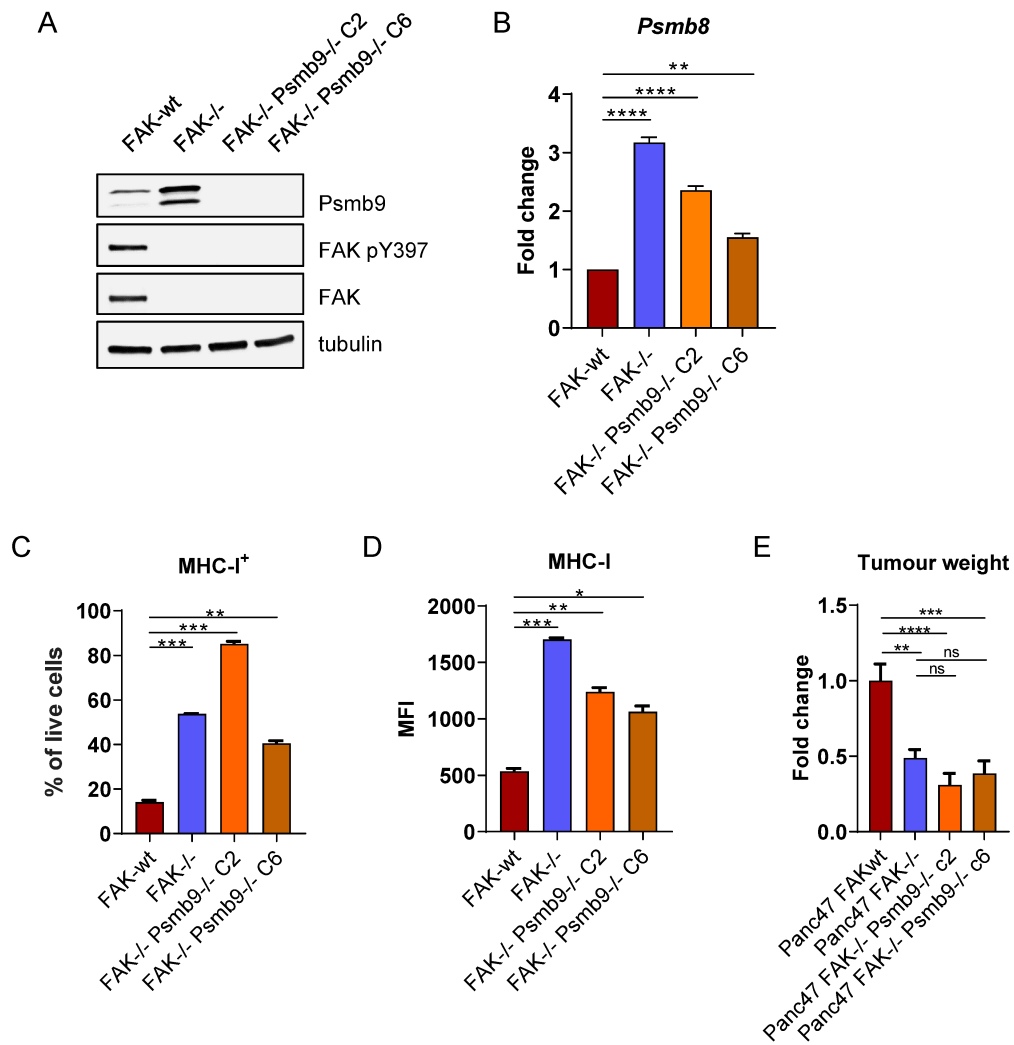

**Supplementary Figure 3. Psmb9 deletion has no effect on the growth of Panc47 FAK<sup>-/-</sup> tumours.**

Supplement: gutjnl-2022-327927supp003_data_supplement.pdf [file gutjnl-2022-327927supp003_data_supplement.pdf]

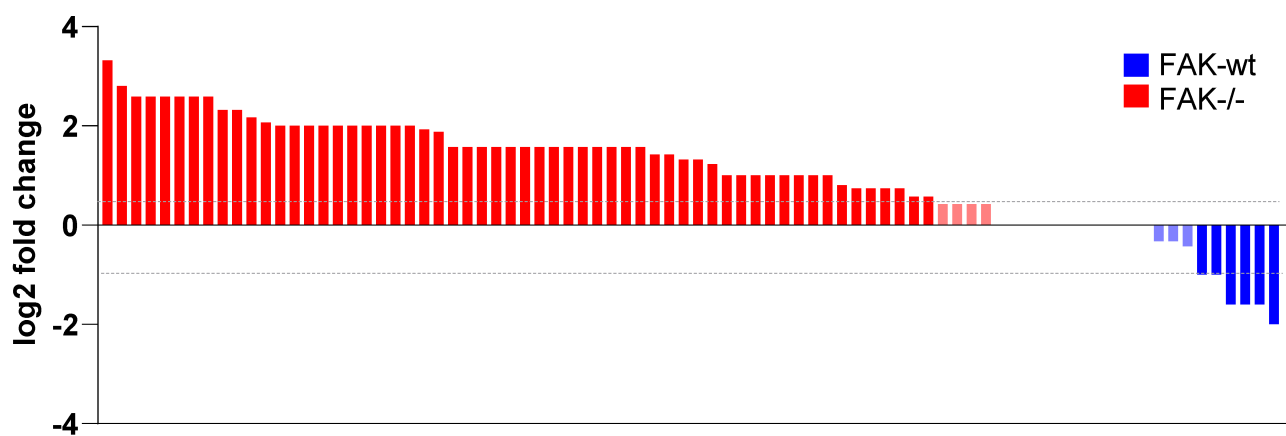

Supplementary Figure 5. Expression of peptide antigens common to FAK-wt and FAK<sup>-/-</sup> cells.

Supplement: gutjnl-2022-327927supp005_data_supplement.pdf [file gutjnl-2022-327927supp005_data_supplement.pdf]

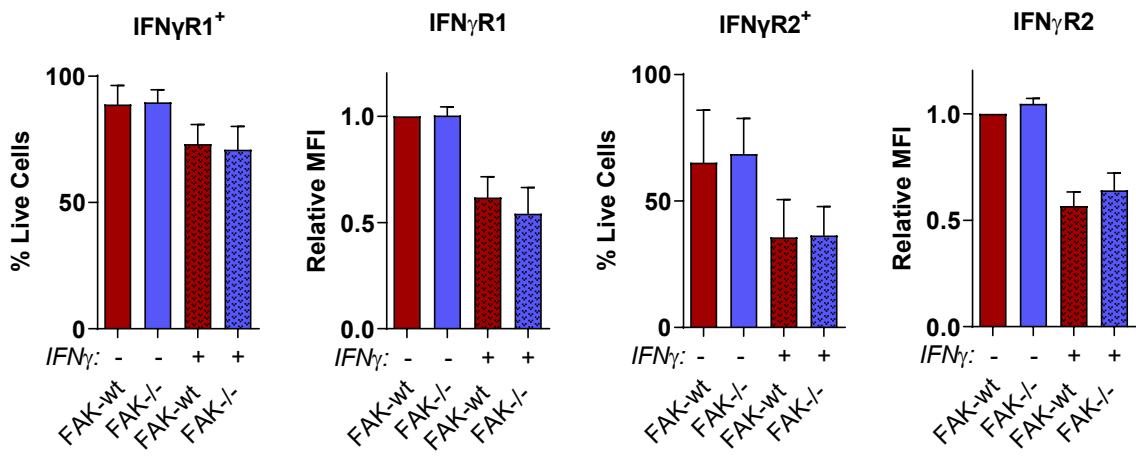

Supplementary Figure 6. FAK does not regulate surface expression of the IFN $\gamma$  receptors.

Supplement: gutjnl-2022-327927supp006_data_supplement.pdf [file gutjnl-2022-327927supp006_data_supplement.pdf]

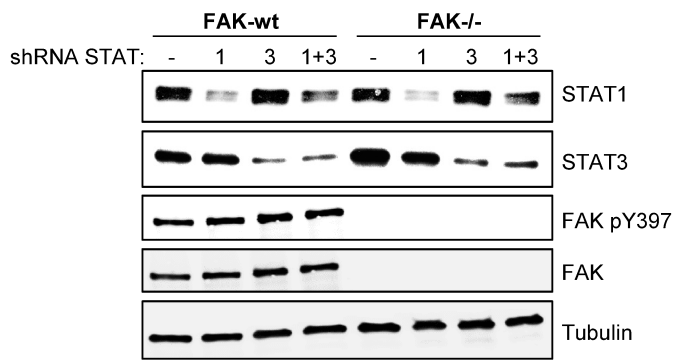

**Supplementary Figure 7. STAT1 and STAT3 shRNA in FAK-wt and FAK-/- cells.**

Supplement: gutjnl-2022-327927supp007_data_supplement.pdf [file gutjnl-2022-327927supp007_data_supplement.pdf]

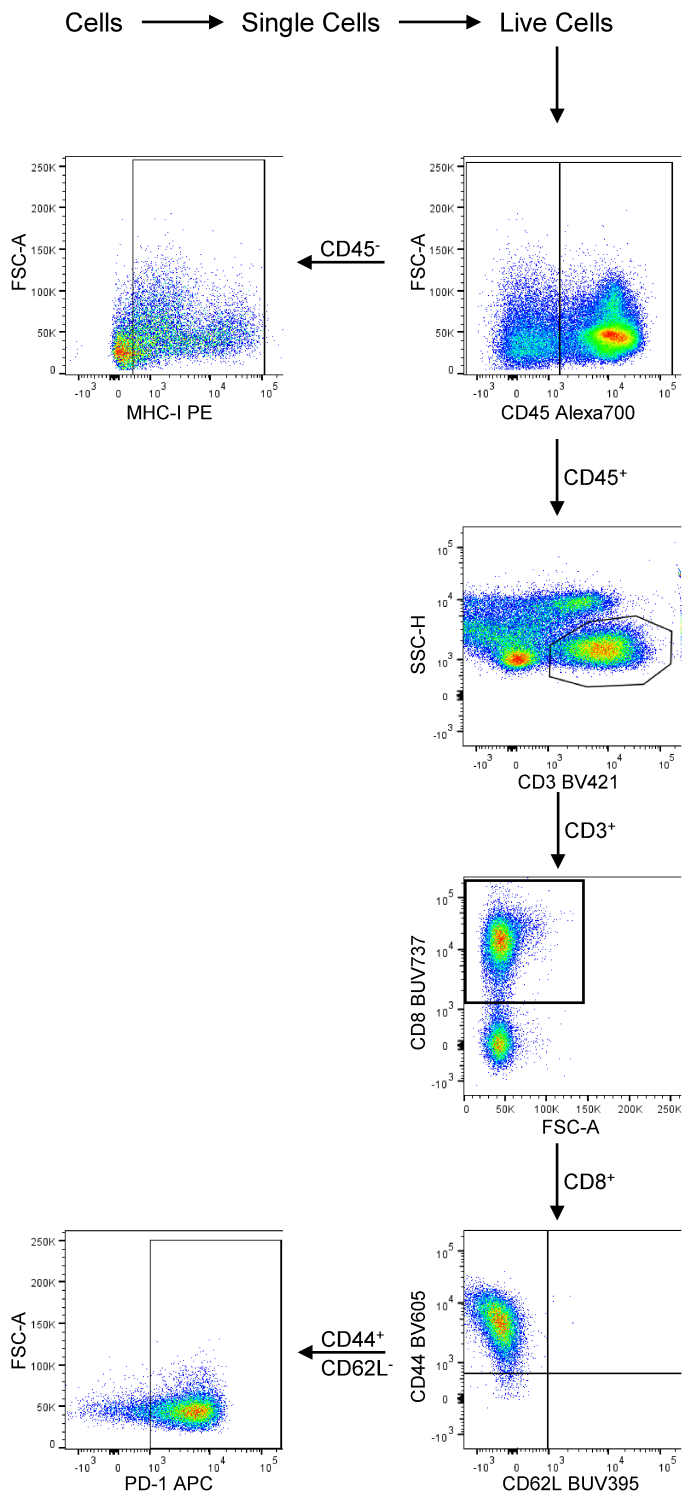

Supplementary Figure 8. Flow cytometry gating strategy for data in Figure 5.

Supplement: gutjnl-2022-327927supp008_data_supplement.pdf [file gutjnl-2022-327927supp008_data_supplement.pdf]

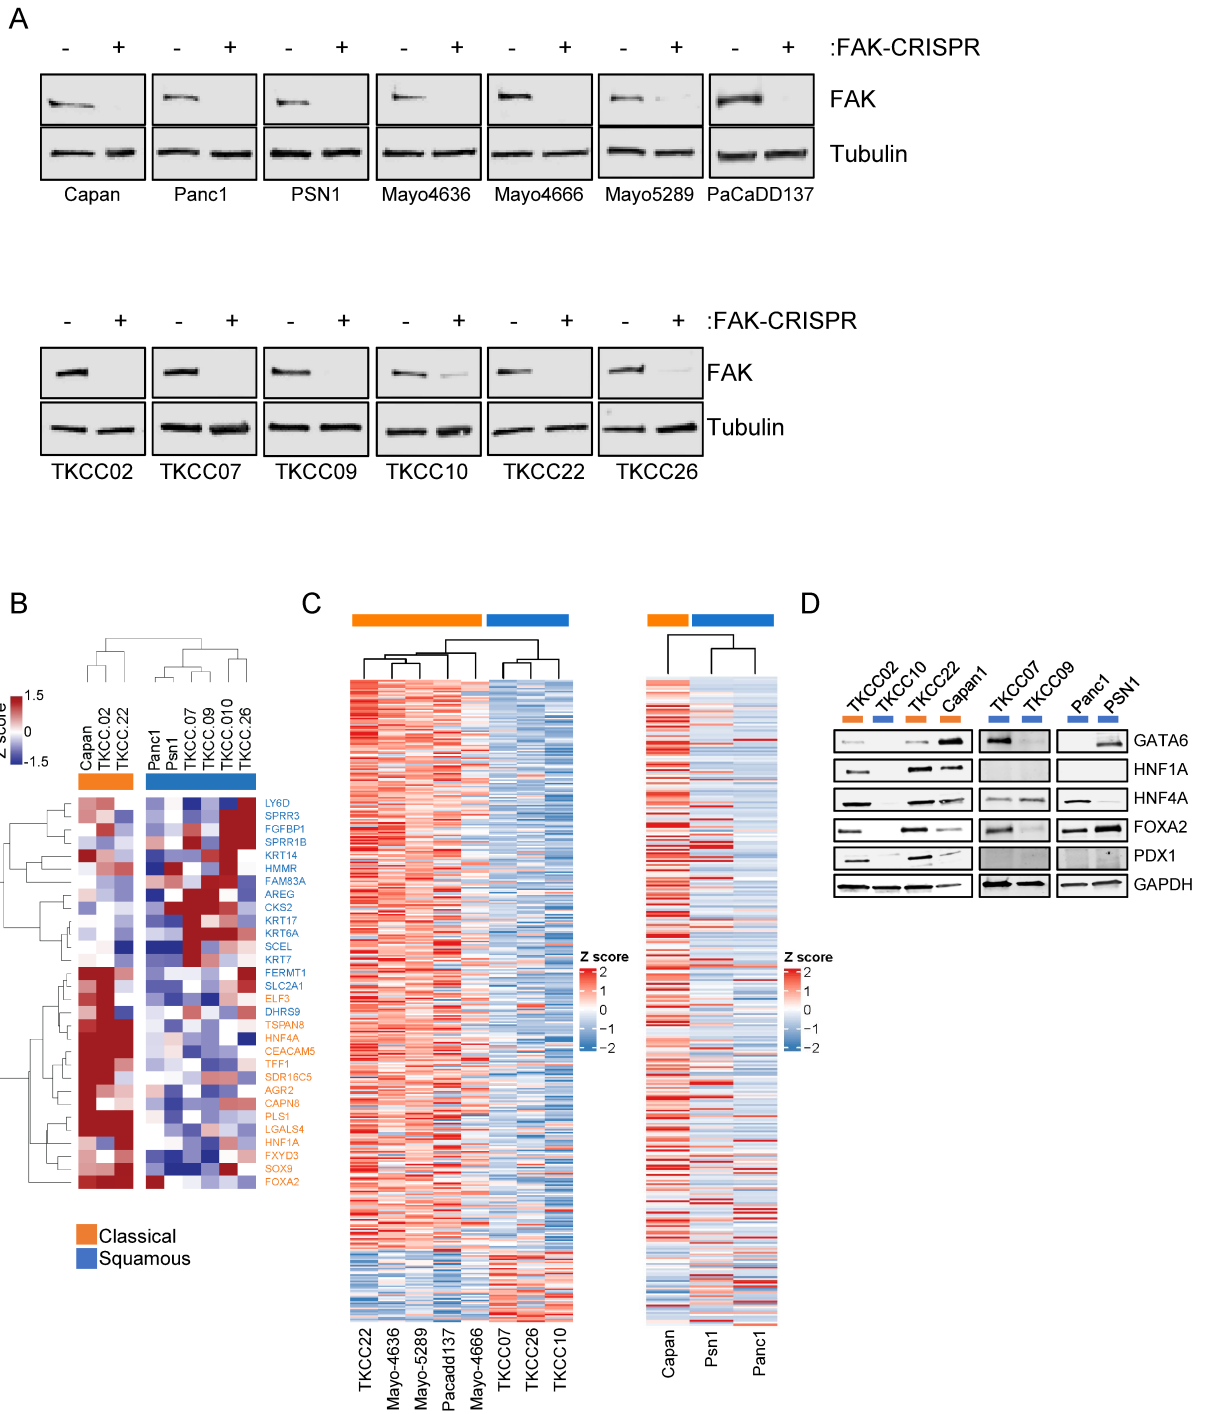

Supplementary Figure 10. Proteomic analysis of FAK function in human PDCLs.

Supplement: gutjnl-2022-327927supp010_data_supplement.pdf [file gutjnl-2022-327927supp010_data_supplement.pdf]
